# Supplementary material for: Bayesian inference of kinetic schemes for ion channels by Kalman filtering
Source: eLife journal article supplement (doi:10.7554/elife.62714), 2022-05-04
Supplement: fig1-data1 [file 1_Sim_N_1000_Fluor_MW.xlsx]

## Sheet: Tabelle1
0.1	0
0.2	0
0.3	0
0.4	0
0.5	0
0.6	0
0.7	0
0.8	0
0.9	0
1	0
1.1	0
1.2	0
1.3	0
1.4	0
1.5	0
1.6	0
1.7	0
1.8	0
1.9	0
2	0
2.1	0
2.2	0
2.3	0
2.4	0
2.5	0
2.6	0
2.7	0
2.8	0
2.9	0
3	0
3.1	0
3.2	0
3.3	0
3.4	0
3.5	0
3.6	0
3.7	0
3.8	0
3.9	0
4	0
4.1	0
4.2	0
4.3	0
4.4	0
4.5	0
4.6	0
4.7	0
4.8	0
4.9	0
5	0
5.1	0
5.2	0
5.3	0
5.4	0
5.5	0
5.6	0
5.7	0
5.8	0
5.9	0
6	0
6.1	0
6.2	0
6.3	0
6.4	0
6.5	0
6.6	0
6.7	0
6.8	0
6.9	0
7	0
7.1	0
7.2	0
7.3	0
7.4	0
7.5	0
7.6	0
7.7	0
7.8	0
7.9	0
8	0
8.1	0
8.2	0
8.3	0
8.4	0
8.5	0
8.6	0
8.7	0
8.8	0
8.9	0
9	0
9.1	0
9.2	0
9.3	0
9.4	0
9.5	0
9.6	0
9.7	0
9.8	0
9.9	0
10	0
10.1	0
10.2	0
10.3	0
10.4	0
10.5	0
10.6	0
10.7	0
10.8	0
10.9	0
11	0
11.1	0
11.2	0
11.3	0
11.4	0
11.5	0
11.6	0
11.7	0
11.8	0
11.9	0
12	0
12.1	0
12.2	0
12.3	0
12.4	0
12.5	0
12.6	0
12.7	0
12.8	0
12.9	0
13	0
13.1	0
13.2	0
13.3	0
13.4	0
13.5	0
13.6	0
13.7	0
13.8	0
13.9	0
14	0
14.1	0
14.2	0
14.3	0
14.4	0
14.5	0
14.6	0
14.7	0
14.8	0
14.9	0
15	0
15.1	0
15.2	0
15.3	0
15.4	0
15.5	0
15.6	0
15.7	0
15.8	0
15.9	0
16	0
16.1	0
16.2	0
16.3	0
16.4	0
16.5	0
16.6	0
16.7	0
16.8	0
16.9	0
17	0
17.1	0
17.2	0
17.3	0
17.4	0
17.5	0
17.6	0
17.7	0
17.8	0
17.9	0
18	0
18.1	0
18.2	0
18.3	0
18.4	0
18.5	0
18.6	0
18.7	0
18.8	0
18.9	0
19	0
19.1	0
19.2	0
19.3	0
19.4	0
19.5	0
19.6	0
19.7	0
19.8	0
19.9	0
20	0
20.1	0
20.2	0
20.3	0
20.4	0
20.5	0
20.6	0
20.7	0
20.8	0
20.9	0
21	0
21.1	0
21.2	0
21.3	0
21.4	0
21.5	0
21.6	0
21.7	0
21.8	0
21.9	0
22	0
22.1	0
22.2	0
22.3	0
22.4	0
22.5	0
22.6	0
22.7	0
22.8	0
22.9	0
23	0
23.1	0
23.2	0
23.3	0
23.4	0
23.5	0
23.6	0
23.7	0
23.8	0
23.9	0
24	0
24.1	0
24.2	0
24.3	0
24.4	0
24.5	0
24.6	0
24.7	0
24.8	0
24.9	0
25	0
25.1	0
25.2	0
25.3	0
25.4	0
25.5	0
25.6	0
25.7	0
25.8	0
25.9	0
26	0
26.1	0
26.2	0
26.3	0
26.4	0
26.5	0
26.6	0
26.7	0
26.8	0
26.9	0
27	0
27.1	0
27.2	0
27.3	0
27.4	0
27.5	0
27.6	0
27.7	0
27.8	0
27.9	0
28	0
28.1	0
28.2	0
28.3	0
28.4	0
28.5	0
28.6	0
28.7	0
28.8	0
28.9	0
29	0
29.1	0
29.2	0
29.3	0
29.4	0
29.5	0
29.6	0
29.7	0
29.8	0
29.9	0
30	0
30.1	0
30.2	0
30.3	0
30.4	0
30.5	0
30.6	0
30.7	0
30.8	0
30.9	0
31	0
31.1	0
31.2	0
31.3	0
31.4	0
31.5	0
31.6	0
31.7	0
31.8	0
31.9	0
32	0
32.1	0
32.2	0
32.3	0
32.4	0
32.5	0
32.6	0
32.7	0
32.8	0
32.9	0
33	0
33.1	0
33.2	0
33.3	0
33.4	0
33.5	0
33.6	0
33.7	0
33.8	0
33.9	0
34	0
34.1	0
34.2	0
34.3	0
34.4	0
34.5	0
34.6	0
34.7	0
34.8	0
34.9	0
35	0
35.1	0
35.2	0
35.3	0
35.4	0
35.5	0
35.6	0
35.7	0
35.8	0
35.9	0
36	0
36.1	0
36.2	0
36.3	0
36.4	0
36.5	0
36.6	0
36.7	0
36.8	0
36.9	0
37	0
37.1	0
37.2	0
37.3	0
37.4	0
37.5	0
37.6	0
37.7	0
37.8	0
37.9	0
38	0
38.1	0
38.2	0
38.3	0
38.4	0
38.5	0
38.6	0
38.7	0
38.8	0
38.9	0
39	0
39.1	0
39.2	0
39.3	0
39.4	0
39.5	0
39.6	0
39.7	0
39.8	0
39.9	0
40	0
40.1	0
40.2	0
40.3	0
40.4	0
40.5	0
40.6	0
40.7	0
40.8	0
40.9	0
41	0
41.1	0
41.2	0
41.3	0
41.4	0
41.5	0
41.6	0
41.7	0
41.8	0
41.9	0
42	0
42.1	0
42.2	0
42.3	0
42.4	0
42.5	0
42.6	0
42.7	0
42.8	0
42.9	0
43	0
43.1	0
43.2	0
43.3	0
43.4	0
43.5	0
43.6	0
43.7	0
43.8	0
43.9	0
44	0
44.1	0
44.2	0
44.3	0
44.4	0
44.5	0
44.6	0
44.7	0
44.8	0
44.9	0
45	0
45.1	0
45.2	0
45.3	0
45.4	0
45.5	0
45.6	0
45.7	0
45.8	0
45.9	0
46	0
46.1	0
46.2	0
46.3	0
46.4	0
46.5	0
46.6	0
46.7	0
46.8	0
46.9	0
47	0
47.1	0
47.2	0
47.3	0
47.4	0
47.5	0
47.6	0
47.7	0
47.8	0
47.9	0
48	0
48.1	0
48.2	0
48.3	0
48.4	0
48.5	0
48.6	0
48.7	0
48.8	0
48.9	0
49	0
49.1	0
49.2	0
49.3	0
49.4	0
49.5	0
49.6	0
49.7	0
49.8	0
49.9	0
50	0
50.1	0
50.2	0
50.3	0
50.4	0
50.5	0
50.6	0
50.7	0
50.8	0
50.9	0
51	0
51.1	0
51.2	0
51.3	0
51.4	0
51.5	0
51.6	0
51.7	0
51.8	0
51.9	0
52	0
52.1	0
52.2	0
52.3	0
52.4	0
52.5	0
52.6	0
52.7	0
52.8	0
52.9	0
53	0
53.1	0
53.2	0
53.3	0
53.4	0
53.5	0
53.6	0
53.7	0
53.8	0
53.9	0
54	0
54.1	0
54.2	0
54.3	0
54.4	0
54.5	0
54.6	0
54.7	0
54.8	0
54.9	0
55	0
55.1	0
55.2	0
55.3	0
55.4	0
55.5	0
55.6	0
55.7	0
55.8	0
55.9	0
56	0
56.1	0
56.2	0
56.3	0
56.4	0
56.5	0
56.6	0
56.7	0
56.8	0
56.9	0
57	0
57.1	0
57.2	0
57.3	0
57.4	0
57.5	0
57.6	0
57.7	0
57.8	0
57.9	0
58	0
58.1	0
58.2	0
58.3	0
58.4	0
58.5	0
58.6	0
58.7	0
58.8	0
58.9	0
59	0
59.1	0
59.2	0
59.3	0
59.4	0
59.5	0
59.6	0
59.7	0
59.8	0
59.9	0
60	0
60.1	0
60.2	0
60.3	0
60.4	0
60.5	0
60.6	0
60.7	0
60.8	0
60.9	0
61	0
61.1	0
61.2	0
61.3	0
61.4	0
61.5	0
61.6	0
61.7	0
61.8	0
61.9	0
62	0
62.1	0
62.2	0
62.3	0
62.4	0
62.5	0
62.6	0
62.7	0
62.8	0
62.9	0
63	0
63.1	0
63.2	0
63.3	0
63.4	0
63.5	0
63.6	0
63.7	0
63.8	0
63.9	0
64	0
64.1	0
64.2	0
64.3	0
64.4	0
64.5	0
64.6	0
64.7	0
64.8	0
64.9	0
65	0
65.1	0
65.2	0
65.3	0
65.4	0
65.5	0
65.6	0
65.7	0
65.8	0
65.9	0
66	0
66.1	0
66.2	0
66.3	0
66.4	0
66.5	0
66.6	0
66.7	0
66.8	0
66.9	0
67	0
67.1	0
67.2	0
67.3	0
67.4	0
67.5	0
67.6	0
67.7	0
67.8	0
67.9	0
68	0
68.1	0
68.2	0
68.3	0
68.4	0
68.5	0
68.6	0
68.7	0
68.8	0
68.9	0
69	0
69.1	0
69.2	0
69.3	0
69.4	0
69.5	0
69.6	0
69.7	0
69.8	0
69.9	0
70	0
70.1	0
70.2	0
70.3	0
70.4	0
70.5	0
70.6	0
70.7	0
70.8	0
70.9	0
71	0
71.1	0
71.2	0
71.3	0
71.4	0
71.5	0
71.6	0
71.7	0
71.8	0
71.9	0
72	0
72.1	0
72.2	0
72.3	0
72.4	0
72.5	0
72.6	0
72.7	0
72.8	0
72.9	0
73	0
73.1	0
73.2	0
73.3	0
73.4	0
73.5	0
73.6	0
73.7	0
73.8	0
73.9	0
74	0
74.1	0
74.2	0
74.3	0
74.4	0
74.5	0
74.6	0
74.7	0
74.8	0
74.9	0
75	0
75.1	0
75.2	0
75.3	0
75.4	0
75.5	0
75.6	0
75.7	0
75.8	0
75.9	0
76	0
76.1	0
76.2	0
76.3	0
76.4	0
76.5	0
76.6	0
76.7	0
76.8	0
76.9	0
77	0
77.1	0
77.2	0
77.3	0
77.4	0
77.5	0
77.6	0
77.7	0
77.8	0
77.9	0
78	0
78.1	0
78.2	0
78.3	0
78.4	0
78.5	0
78.6	0
78.7	0
78.8	0
78.9	0
79	0
79.1	0
79.2	0
79.3	0
79.4	0
79.5	0
79.6	0
79.7	0
79.8	0
79.9	0
80	0
80.1	0
80.2	0
80.3	0
80.4	0
80.5	0
80.6	0
80.7	0
80.8	0
80.9	0
81	0
81.1	0
81.2	0
81.3	0
81.4	0
81.5	0
81.6	0
81.7	0
81.8	0
81.9	0
82	0
82.1	0
82.2	0
82.3	0
82.4	0
82.5	0
82.6	0
82.7	0
82.8	0
82.9	0
83	0
83.1	0
83.2	0
83.3	0
83.4	0
83.5	0
83.6	0
83.7	0
83.8	0
83.9	0
84	0
84.1	0
84.2	0
84.3	0
84.4	0
84.5	0
84.6	0
84.7	0
84.8	0
84.9	0
85	0
85.1	0
85.2	0
85.3	0
85.4	0
85.5	0
85.6	0
85.7	0
85.8	0
85.9	0
86	0
86.1	0
86.2	0
86.3	0
86.4	0
86.5	0
86.6	0
86.7	0
86.8	0
86.9	0
87	0
87.1	0
87.2	0
87.3	0
87.4	0
87.5	0
87.6	0
87.7	0
87.8	0
87.9	0
88	0
88.1	0
88.2	0
88.3	0
88.4	0
88.5	0
88.6	0
88.7	0
88.8	0
88.9	0
89	0
89.1	0
89.2	0
89.3	0
89.4	0
89.5	0
89.6	0
89.7	0
89.8	0
89.9	0
90	0
90.1	0
90.2	0
90.3	0
90.4	0
90.5	0
90.6	0
90.7	0
90.8	0
90.9	0
91	0
91.1	0
91.2	0
91.3	0
91.4	0
91.5	0
91.6	0
91.7	0
91.8	0
91.9	0
92	0
92.1	0
92.2	0
92.3	0
92.4	0
92.5	0
92.6	0
92.7	0
92.8	0
92.9	0
93	0
93.1	0
93.2	0
93.3	0
93.4	0
93.5	0
93.6	0
93.7	0
93.8	0
93.9	0
94	0
94.1	0
94.2	0
94.3	0
94.4	0
94.5	0
94.6	0
94.7	0
94.8	0
94.9	0
95	0
95.1	0
95.2	0
95.3	0
95.4	0
95.5	0
95.6	0
95.7	0
95.8	0
95.9	0
96	0
96.1	0
96.2	0
96.3	0
96.4	0
96.5	0
96.6	0
96.7	0
96.8	0
96.9	0
97	0
97.1	0
97.2	0
97.3	0
97.4	0
97.5	0
97.6	0
97.7	0
97.8	0
97.9	0
98	0
98.1	0
98.2	0
98.3	0
98.4	0
98.5	0
98.6	0
98.7	0
98.8	0
98.9	0
99	0
99.1	0
99.2	0
99.3	0
99.4	0
99.5	0
99.6	0
99.7	0
99.8	0
99.9	0
100	0
100.1	0.056
100.2	0.117
100.3	0.1635
100.4	0.2045
100.5	0.2475
100.6	0.286
100.7	0.3185
100.8	0.344
100.9	0.3655
101	0.3955
101.1	0.414
101.2	0.4385
101.3	0.458
101.4	0.472
101.5	0.4895
101.6	0.5015
101.7	0.5125
101.8	0.5215
101.9	0.535
102	0.5395
102.1	0.547
102.2	0.5595
102.3	0.5695
102.4	0.574
102.5	0.587
102.6	0.6
102.7	0.603
102.8	0.6095
102.9	0.6165
103	0.615
103.1	0.62
103.2	0.623
103.3	0.629
103.4	0.6265
103.5	0.6305
103.6	0.6325
103.7	0.6325
103.8	0.628
103.9	0.633
104	0.633
104.1	0.6325
104.2	0.632
104.3	0.6315
104.4	0.6385
104.5	0.64
104.6	0.643
104.7	0.6465
104.8	0.6455
104.9	0.644
105	0.6465
105.1	0.6485
105.2	0.6505
105.3	0.647
105.4	0.647
105.5	0.6495
105.6	0.6505
105.7	0.652
105.8	0.6555
105.9	0.657
106	0.658
106.1	0.6575
106.2	0.6655
106.3	0.668
106.4	0.669
106.5	0.669
106.6	0.668
106.7	0.666
106.8	0.6695
106.9	0.6725
107	0.673
107.1	0.6705
107.2	0.668
107.3	0.671
107.4	0.6695
107.5	0.669
107.6	0.664
107.7	0.666
107.8	0.667
107.9	0.673
108	0.675
108.1	0.674
108.2	0.6725
108.3	0.674
108.4	0.675
108.5	0.6745
108.6	0.6785
108.7	0.6795
108.8	0.6825
108.9	0.6825
109	0.6835
109.1	0.688
109.2	0.6895
109.3	0.6855
109.4	0.691
109.5	0.6875
109.6	0.692
109.7	0.691
109.8	0.696
109.9	0.695
110	0.701
110.1	0.7015
110.2	0.701
110.3	0.701
110.4	0.697
110.5	0.699
110.6	0.698
110.7	0.7045
110.8	0.7035
110.9	0.7015
111	0.7025
111.1	0.705
111.2	0.708
111.3	0.71
111.4	0.7115
111.5	0.704
111.6	0.7075
111.7	0.712
111.8	0.7145
111.9	0.714
112	0.718
112.1	0.7155
112.2	0.721
112.3	0.715
112.4	0.7125
112.5	0.715
112.6	0.7115
112.7	0.7135
112.8	0.7075
112.9	0.7045
113	0.709
113.1	0.709
113.2	0.7075
113.3	0.7035
113.4	0.7055
113.5	0.707
113.6	0.704
113.7	0.7035
113.8	0.7045
113.9	0.711
114	0.703
114.1	0.705
114.2	0.708
114.3	0.709
114.4	0.7095
114.5	0.7115
114.6	0.713
114.7	0.7145
114.8	0.714
114.9	0.7155
115	0.7155
115.1	0.7235
115.2	0.721
115.3	0.7185
115.4	0.7165
115.5	0.7185
115.6	0.7185
115.7	0.716
115.8	0.716
115.9	0.7195
116	0.7155
116.1	0.713
116.2	0.719
116.3	0.7105
116.4	0.711
116.5	0.713
116.6	0.715
116.7	0.722
116.8	0.7225
116.9	0.7265
117	0.7255
117.1	0.723
117.2	0.7265
117.3	0.7255
117.4	0.721
117.5	0.7225
117.6	0.7275
117.7	0.727
117.8	0.729
117.9	0.7315
118	0.73
118.1	0.7255
118.2	0.7235
118.3	0.725
118.4	0.722
118.5	0.722
118.6	0.724
118.7	0.728
118.8	0.7275
118.9	0.731
119	0.734
119.1	0.7335
119.2	0.734
119.3	0.7365
119.4	0.7365
119.5	0.74
119.6	0.7395
119.7	0.742
119.8	0.745
119.9	0.7425
120	0.7425
120.1	0.7465
120.2	0.7435
120.3	0.74
120.4	0.738
120.5	0.7385
120.6	0.744
120.7	0.7455
120.8	0.7495
120.9	0.7535
121	0.754
121.1	0.757
121.2	0.76
121.3	0.7615
121.4	0.764
121.5	0.7635
121.6	0.7625
121.7	0.7605
121.8	0.7605
121.9	0.76
122	0.757
122.1	0.7535
122.2	0.7525
122.3	0.7505
122.4	0.752
122.5	0.753
122.6	0.7555
122.7	0.757
122.8	0.753
122.9	0.7555
123	0.755
123.1	0.7575
123.2	0.7565
123.3	0.757
123.4	0.756
123.5	0.7595
123.6	0.756
123.7	0.7585
123.8	0.756
123.9	0.7605
124	0.7655
124.1	0.768
124.2	0.769
124.3	0.772
124.4	0.768
124.5	0.769
124.6	0.7705
124.7	0.77
124.8	0.7725
124.9	0.775
125	0.774
125.1	0.7735
125.2	0.768
125.3	0.773
125.4	0.778
125.5	0.7765
125.6	0.779
125.7	0.779
125.8	0.7775
125.9	0.777
126	0.775
126.1	0.772
126.2	0.7705
126.3	0.7715
126.4	0.7725
126.5	0.7695
126.6	0.774
126.7	0.7725
126.8	0.775
126.9	0.777
127	0.78
127.1	0.78
127.2	0.7775
127.3	0.776
127.4	0.776
127.5	0.774
127.6	0.7705
127.7	0.771
127.8	0.7705
127.9	0.7695
128	0.7755
128.1	0.7715
128.2	0.7715
128.3	0.771
128.4	0.769
128.5	0.772
128.6	0.772
128.7	0.7675
128.8	0.772
128.9	0.774
129	0.7755
129.1	0.7735
129.2	0.776
129.3	0.771
129.4	0.776
129.5	0.7775
129.6	0.781
129.7	0.7775
129.8	0.778
129.9	0.7795
130	0.782
130.1	0.784
130.2	0.7765
130.3	0.7805
130.4	0.78
130.5	0.7755
130.6	0.772
130.7	0.774
130.8	0.771
130.9	0.7745
131	0.773
131.1	0.771
131.2	0.7715
131.3	0.7695
131.4	0.765
131.5	0.766
131.6	0.774
131.7	0.7715
131.8	0.773
131.9	0.773
132	0.7755
132.1	0.775
132.2	0.7745
132.3	0.7735
132.4	0.7725
132.5	0.7745
132.6	0.776
132.7	0.7745
132.8	0.775
132.9	0.775
133	0.778
133.1	0.7755
133.2	0.7765
133.3	0.779
133.4	0.7785
133.5	0.776
133.6	0.774
133.7	0.7805
133.8	0.7775
133.9	0.781
134	0.779
134.1	0.7805
134.2	0.7795
134.3	0.7825
134.4	0.785
134.5	0.7815
134.6	0.784
134.7	0.7845
134.8	0.7875
134.9	0.7875
135	0.7855
135.1	0.786
135.2	0.786
135.3	0.789
135.4	0.7855
135.5	0.7835
135.6	0.7845
135.7	0.784
135.8	0.782
135.9	0.7855
136	0.784
136.1	0.784
136.2	0.7865
136.3	0.788
136.4	0.7875
136.5	0.788
136.6	0.7875
136.7	0.7885
136.8	0.786
136.9	0.783
137	0.7805
137.1	0.781
137.2	0.7795
137.3	0.7805
137.4	0.783
137.5	0.787
137.6	0.7895
137.7	0.785
137.8	0.79
137.9	0.7895
138	0.7925
138.1	0.795
138.2	0.7965
138.3	0.7955
138.4	0.7935
138.5	0.792
138.6	0.7895
138.7	0.7935
138.8	0.7915
138.9	0.7865
139	0.7865
139.1	0.786
139.2	0.788
139.3	0.7835
139.4	0.7895
139.5	0.79
139.6	0.7925
139.7	0.7945
139.8	0.794
139.9	0.797
140	0.7995
140.1	0.8025
140.2	0.798
140.3	0.7935
140.4	0.7915
140.5	0.791
140.6	0.7915
140.7	0.7935
140.8	0.791
140.9	0.7905
141	0.7865
141.1	0.7905
141.2	0.7925
141.3	0.7895
141.4	0.791
141.5	0.793
141.6	0.797
141.7	0.7965
141.8	0.796
141.9	0.7975
142	0.7935
142.1	0.794
142.2	0.7905
142.3	0.7955
142.4	0.7985
142.5	0.7945
142.6	0.796
142.7	0.7975
142.8	0.7985
142.9	0.803
143	0.8025
143.1	0.805
143.2	0.803
143.3	0.803
143.4	0.8035
143.5	0.801
143.6	0.798
143.7	0.802
143.8	0.8
143.9	0.8015
144	0.801
144.1	0.8015
144.2	0.8005
144.3	0.7975
144.4	0.7975
144.5	0.7995
144.6	0.8045
144.7	0.8055
144.8	0.805
144.9	0.8075
145	0.805
145.1	0.8095
145.2	0.81
145.3	0.8085
145.4	0.8155
145.5	0.81
145.6	0.81
145.7	0.8115
145.8	0.809
145.9	0.811
146	0.8145
146.1	0.813
146.2	0.816
146.3	0.815
146.4	0.8165
146.5	0.8145
146.6	0.811
146.7	0.8105
146.8	0.8115
146.9	0.8085
147	0.8035
147.1	0.8005
147.2	0.7985
147.3	0.801
147.4	0.8005
147.5	0.798
147.6	0.8025
147.7	0.8035
147.8	0.806
147.9	0.807
148	0.806
148.1	0.806
148.2	0.8105
148.3	0.813
148.4	0.8145
148.5	0.8145
148.6	0.8195
148.7	0.8145
148.8	0.8105
148.9	0.811
149	0.8145
149.1	0.8125
149.2	0.8145
149.3	0.8135
149.4	0.815
149.5	0.817
149.6	0.818
149.7	0.815
149.8	0.817
149.9	0.82
150	0.8235
150.1	0.817
150.2	0.8165
150.3	0.8195
150.4	0.82
150.5	0.8185
150.6	0.817
150.7	0.8165
150.8	0.8175
150.9	0.821
151	0.822
151.1	0.8205
151.2	0.8225
151.3	0.82
151.4	0.82
151.5	0.823
151.6	0.8195
151.7	0.816
151.8	0.8175
151.9	0.8215
152	0.8185
152.1	0.815
152.2	0.8135
152.3	0.8155
152.4	0.8165
152.5	0.8155
152.6	0.8175
152.7	0.8165
152.8	0.813
152.9	0.8165
153	0.8145
153.1	0.8155
153.2	0.816
153.3	0.816
153.4	0.8185
153.5	0.8205
153.6	0.817
153.7	0.8185
153.8	0.824
153.9	0.8235
154	0.828
154.1	0.829
154.2	0.831
154.3	0.8325
154.4	0.834
154.5	0.8355
154.6	0.8365
154.7	0.8345
154.8	0.8325
154.9	0.8325
155	0.833
155.1	0.831
155.2	0.8285
155.3	0.827
155.4	0.827
155.5	0.828
155.6	0.8275
155.7	0.8285
155.8	0.8315
155.9	0.831
156	0.829
156.1	0.826
156.2	0.831
156.3	0.8315
156.4	0.832
156.5	0.8285
156.6	0.8275
156.7	0.83
156.8	0.8325
156.9	0.8345
157	0.836
157.1	0.832
157.2	0.831
157.3	0.8305
157.4	0.8315
157.5	0.831
157.6	0.827
157.7	0.8275
157.8	0.8295
157.9	0.828
158	0.8305
158.1	0.8285
158.2	0.829
158.3	0.828
158.4	0.8275
158.5	0.8315
158.6	0.8315
158.7	0.83
158.8	0.829
158.9	0.8275
159	0.827
159.1	0.832
159.2	0.835
159.3	0.836
159.4	0.836
159.5	0.8325
159.6	0.829
159.7	0.8285
159.8	0.8295
159.9	0.826
160	0.8255
160.1	0.8255
160.2	0.824
160.3	0.8265
160.4	0.8305
160.5	0.8305
160.6	0.831
160.7	0.832
160.8	0.833
160.9	0.8345
161	0.833
161.1	0.8295
161.2	0.831
161.3	0.8335
161.4	0.835
161.5	0.8375
161.6	0.8365
161.7	0.8325
161.8	0.8355
161.9	0.834
162	0.834
162.1	0.831
162.2	0.8305
162.3	0.832
162.4	0.833
162.5	0.8345
162.6	0.836
162.7	0.835
162.8	0.836
162.9	0.8365
163	0.832
163.1	0.8315
163.2	0.829
163.3	0.8295
163.4	0.8305
163.5	0.8305
163.6	0.8315
163.7	0.8375
163.8	0.8385
163.9	0.834
164	0.835
164.1	0.8355
164.2	0.8375
164.3	0.836
164.4	0.836
164.5	0.839
164.6	0.8375
164.7	0.838
164.8	0.84
164.9	0.8425
165	0.8435
165.1	0.842
165.2	0.8415
165.3	0.8425
165.4	0.844
165.5	0.8425
165.6	0.8425
165.7	0.8385
165.8	0.8405
165.9	0.837
166	0.8395
166.1	0.8415
166.2	0.839
166.3	0.8405
166.4	0.8375
166.5	0.834
166.6	0.832
166.7	0.8335
166.8	0.8355
166.9	0.8305
167	0.8285
167.1	0.83
167.2	0.8305
167.3	0.8365
167.4	0.8365
167.5	0.838
167.6	0.84
167.7	0.843
167.8	0.837
167.9	0.841
168	0.8435
168.1	0.839
168.2	0.838
168.3	0.837
168.4	0.838
168.5	0.837
168.6	0.8355
168.7	0.8355
168.8	0.8395
168.9	0.842
169	0.8385
169.1	0.8365
169.2	0.835
169.3	0.834
169.4	0.834
169.5	0.833
169.6	0.8335
169.7	0.834
169.8	0.833
169.9	0.834
170	0.8335
170.1	0.8375
170.2	0.8375
170.3	0.8335
170.4	0.834
170.5	0.8325
170.6	0.8355
170.7	0.8345
170.8	0.8325
170.9	0.8305
171	0.8315
171.1	0.8325
171.2	0.8305
171.3	0.832
171.4	0.8335
171.5	0.8335
171.6	0.8365
171.7	0.8395
171.8	0.842
171.9	0.842
172	0.841
172.1	0.8415
172.2	0.843
172.3	0.841
172.4	0.84
172.5	0.8405
172.6	0.8405
172.7	0.8415
172.8	0.844
172.9	0.8475
173	0.85
173.1	0.8495
173.2	0.848
173.3	0.85
173.4	0.8525
173.5	0.852
173.6	0.855
173.7	0.8535
173.8	0.8505
173.9	0.85
174	0.8505
174.1	0.8515
174.2	0.8525
174.3	0.8545
174.4	0.8585
174.5	0.853
174.6	0.851
174.7	0.8555
174.8	0.857
174.9	0.859
175	0.8565
175.1	0.8595
175.2	0.86
175.3	0.857
175.4	0.8595
175.5	0.858
175.6	0.856
175.7	0.8565
175.8	0.855
175.9	0.8545
176	0.855
176.1	0.8515
176.2	0.8505
176.3	0.851
176.4	0.846
176.5	0.842
176.6	0.843
176.7	0.8455
176.8	0.844
176.9	0.8475
177	0.85
177.1	0.852
177.2	0.8485
177.3	0.8485
177.4	0.846
177.5	0.845
177.6	0.846
177.7	0.849
177.8	0.849
177.9	0.851
178	0.852
178.1	0.85
178.2	0.85
178.3	0.8515
178.4	0.8515
178.5	0.85
178.6	0.847
178.7	0.85
178.8	0.8505
178.9	0.8505
179	0.8505
179.1	0.8525
179.2	0.8495
179.3	0.8465
179.4	0.847
179.5	0.851
179.6	0.8495
179.7	0.847
179.8	0.8445
179.9	0.848
180	0.845
180.1	0.844
180.2	0.845
180.3	0.8495
180.4	0.85
180.5	0.8505
180.6	0.8505
180.7	0.8505
180.8	0.85
180.9	0.85
181	0.851
181.1	0.849
181.2	0.846
181.3	0.8405
181.4	0.8405
181.5	0.8395
181.6	0.845
181.7	0.8465
181.8	0.844
181.9	0.8455
182	0.842
182.1	0.8425
182.2	0.8395
182.3	0.8425
182.4	0.8425
182.5	0.8465
182.6	0.846
182.7	0.8485
182.8	0.8525
182.9	0.851
183	0.853
183.1	0.8545
183.2	0.8555
183.3	0.8545
183.4	0.856
183.5	0.8535
183.6	0.8535
183.7	0.8525
183.8	0.852
183.9	0.8545
184	0.856
184.1	0.856
184.2	0.853
184.3	0.8545
184.4	0.8525
184.5	0.851
184.6	0.851
184.7	0.8505
184.8	0.851
184.9	0.85
185	0.851
185.1	0.8495
185.2	0.851
185.3	0.8505
185.4	0.85
185.5	0.852
185.6	0.852
185.7	0.8495
185.8	0.846
185.9	0.848
186	0.8505
186.1	0.851
186.2	0.852
186.3	0.853
186.4	0.856
186.5	0.855
186.6	0.8535
186.7	0.8525
186.8	0.853
186.9	0.8525
187	0.8515
187.1	0.8525
187.2	0.854
187.3	0.853
187.4	0.854
187.5	0.8555
187.6	0.855
187.7	0.8525
187.8	0.8505
187.9	0.852
188	0.85
188.1	0.85
188.2	0.8515
188.3	0.8485
188.4	0.8475
188.5	0.852
188.6	0.8525
188.7	0.852
188.8	0.8555
188.9	0.86
189	0.8615
189.1	0.861
189.2	0.8635
189.3	0.8645
189.4	0.862
189.5	0.864
189.6	0.8625
189.7	0.8625
189.8	0.863
189.9	0.861
190	0.8645
190.1	0.8655
190.2	0.8665
190.3	0.8675
190.4	0.8675
190.5	0.868
190.6	0.8695
190.7	0.868
190.8	0.8645
190.9	0.8645
191	0.8645
191.1	0.864
191.2	0.8655
191.3	0.8635
191.4	0.8635
191.5	0.862
191.6	0.864
191.7	0.865
191.8	0.8665
191.9	0.8655
192	0.867
192.1	0.8695
192.2	0.87
192.3	0.87
192.4	0.87
192.5	0.8705
192.6	0.87
192.7	0.8695
192.8	0.866
192.9	0.8665
193	0.868
193.1	0.869
193.2	0.871
193.3	0.8705
193.4	0.87
193.5	0.8715
193.6	0.874
193.7	0.8705
193.8	0.8695
193.9	0.8665
194	0.8655
194.1	0.862
194.2	0.865
194.3	0.8665
194.4	0.8635
194.5	0.863
194.6	0.865
194.7	0.8655
194.8	0.864
194.9	0.863
195	0.8645
195.1	0.8635
195.2	0.8625
195.3	0.8625
195.4	0.863
195.5	0.8635
195.6	0.8615
195.7	0.8625
195.8	0.861
195.9	0.8595
196	0.86
196.1	0.8615
196.2	0.8615
196.3	0.8635
196.4	0.864
196.5	0.864
196.6	0.867
196.7	0.867
196.8	0.866
196.9	0.865
197	0.8645
197.1	0.8625
197.2	0.8605
197.3	0.8615
197.4	0.8635
197.5	0.8635
197.6	0.8655
197.7	0.869
197.8	0.868
197.9	0.866
198	0.8645
198.1	0.861
198.2	0.861
198.3	0.8595
198.4	0.8605
198.5	0.8595
198.6	0.8585
198.7	0.858
198.8	0.8585
198.9	0.859
199	0.86
199.1	0.861
199.2	0.8635
199.3	0.8655
199.4	0.8705
199.5	0.871
199.6	0.874
199.7	0.8745
199.8	0.878
199.9	0.879
200	0.8765
[truncated: 14,000 more rows]
