# Supplementary material for: Bayesian inference of kinetic schemes for ion channels by Kalman filtering
Source: eLife journal article supplement (doi:10.7554/elife.62714), 2022-05-04
Supplement: fig1-data1 [file 1_Sim_N_1000_Strom_MW.xlsx]

## Sheet: Tabelle1
0.1	0
0.2	0
0.3	0
0.4	0
0.5	0
0.6	0
0.7	0
0.8	0
0.9	0
1	0
1.1	0
1.2	0
1.3	0
1.4	0
1.5	0
1.6	0
1.7	0
1.8	0
1.9	0
2	0
2.1	0
2.2	0
2.3	0
2.4	0
2.5	0
2.6	0
2.7	0
2.8	0
2.9	0
3	0
3.1	0
3.2	0
3.3	0
3.4	0
3.5	0
3.6	0
3.7	0
3.8	0
3.9	0
4	0
4.1	0
4.2	0
4.3	0
4.4	0
4.5	0
4.6	0
4.7	0
4.8	0
4.9	0
5	0
5.1	0
5.2	0
5.3	0
5.4	0
5.5	0
5.6	0
5.7	0
5.8	0
5.9	0
6	0
6.1	0
6.2	0
6.3	0
6.4	0
6.5	0
6.6	0
6.7	0
6.8	0
6.9	0
7	0
7.1	0
7.2	0
7.3	0
7.4	0
7.5	0
7.6	0
7.7	0
7.8	0
7.9	0
8	0
8.1	0
8.2	0
8.3	0
8.4	0
8.5	0
8.6	0
8.7	0
8.8	0
8.9	0
9	0
9.1	0
9.2	0
9.3	0
9.4	0
9.5	0
9.6	0
9.7	0
9.8	0
9.9	0
10	0
10.1	0
10.2	0
10.3	0
10.4	0
10.5	0
10.6	0
10.7	0
10.8	0
10.9	0
11	0
11.1	0
11.2	0
11.3	0
11.4	0
11.5	0
11.6	0
11.7	0
11.8	0
11.9	0
12	0
12.1	0
12.2	0
12.3	0
12.4	0
12.5	0
12.6	0
12.7	0
12.8	0
12.9	0
13	0
13.1	0
13.2	0
13.3	0
13.4	0
13.5	0
13.6	0
13.7	0
13.8	0
13.9	0
14	0
14.1	0
14.2	0
14.3	0
14.4	0
14.5	0
14.6	0
14.7	0
14.8	0
14.9	0
15	0
15.1	0
15.2	0
15.3	0
15.4	0
15.5	0
15.6	0
15.7	0
15.8	0
15.9	0
16	0
16.1	0
16.2	0
16.3	0
16.4	0
16.5	0
16.6	0
16.7	0
16.8	0
16.9	0
17	0
17.1	0
17.2	0
17.3	0
17.4	0
17.5	0
17.6	0
17.7	0
17.8	0
17.9	0
18	0
18.1	0
18.2	0
18.3	0
18.4	0
18.5	0
18.6	0
18.7	0
18.8	0
18.9	0
19	0
19.1	0
19.2	0
19.3	0
19.4	0
19.5	0
19.6	0
19.7	0
19.8	0
19.9	0
20	0
20.1	0
20.2	0
20.3	0
20.4	0
20.5	0
20.6	0
20.7	0
20.8	0
20.9	0
21	0
21.1	0
21.2	0
21.3	0
21.4	0
21.5	0
21.6	0
21.7	0
21.8	0
21.9	0
22	0
22.1	0
22.2	0
22.3	0
22.4	0
22.5	0
22.6	0
22.7	0
22.8	0
22.9	0
23	0
23.1	0
23.2	0
23.3	0
23.4	0
23.5	0
23.6	0
23.7	0
23.8	0
23.9	0
24	0
24.1	0
24.2	0
24.3	0
24.4	0
24.5	0
24.6	0
24.7	0
24.8	0
24.9	0
25	0
25.1	0
25.2	0
25.3	0
25.4	0
25.5	0
25.6	0
25.7	0
25.8	0
25.9	0
26	0
26.1	0
26.2	0
26.3	0
26.4	0
26.5	0
26.6	0
26.7	0
26.8	0
26.9	0
27	0
27.1	0
27.2	0
27.3	0
27.4	0
27.5	0
27.6	0
27.7	0
27.8	0
27.9	0
28	0
28.1	0
28.2	0
28.3	0
28.4	0
28.5	0
28.6	0
28.7	0
28.8	0
28.9	0
29	0
29.1	0
29.2	0
29.3	0
29.4	0
29.5	0
29.6	0
29.7	0
29.8	0
29.9	0
30	0
30.1	0
30.2	0
30.3	0
30.4	0
30.5	0
30.6	0
30.7	0
30.8	0
30.9	0
31	0
31.1	0
31.2	0
31.3	0
31.4	0
31.5	0
31.6	0
31.7	0
31.8	0
31.9	0
32	0
32.1	0
32.2	0
32.3	0
32.4	0
32.5	0
32.6	0
32.7	0
32.8	0
32.9	0
33	0
33.1	0
33.2	0
33.3	0
33.4	0
33.5	0
33.6	0
33.7	0
33.8	0
33.9	0
34	0
34.1	0
34.2	0
34.3	0
34.4	0
34.5	0
34.6	0
34.7	0
34.8	0
34.9	0
35	0
35.1	0
35.2	0
35.3	0
35.4	0
35.5	0
35.6	0
35.7	0
35.8	0
35.9	0
36	0
36.1	0
36.2	0
36.3	0
36.4	0
36.5	0
36.6	0
36.7	0
36.8	0
36.9	0
37	0
37.1	0
37.2	0
37.3	0
37.4	0
37.5	0
37.6	0
37.7	0
37.8	0
37.9	0
38	0
38.1	0
38.2	0
38.3	0
38.4	0
38.5	0
38.6	0
38.7	0
38.8	0
38.9	0
39	0
39.1	0
39.2	0
39.3	0
39.4	0
39.5	0
39.6	0
39.7	0
39.8	0
39.9	0
40	0
40.1	0
40.2	0
40.3	0
40.4	0
40.5	0
40.6	0
40.7	0
40.8	0
40.9	0
41	0
41.1	0
41.2	0
41.3	0
41.4	0
41.5	0
41.6	0
41.7	0
41.8	0
41.9	0
42	0
42.1	0
42.2	0
42.3	0
42.4	0
42.5	0
42.6	0
42.7	0
42.8	0
42.9	0
43	0
43.1	0
43.2	0
43.3	0
43.4	0
43.5	0
43.6	0
43.7	0
43.8	0
43.9	0
44	0
44.1	0
44.2	0
44.3	0
44.4	0
44.5	0
44.6	0
44.7	0
44.8	0
44.9	0
45	0
45.1	0
45.2	0
45.3	0
45.4	0
45.5	0
45.6	0
45.7	0
45.8	0
45.9	0
46	0
46.1	0
46.2	0
46.3	0
46.4	0
46.5	0
46.6	0
46.7	0
46.8	0
46.9	0
47	0
47.1	0
47.2	0
47.3	0
47.4	0
47.5	0
47.6	0
47.7	0
47.8	0
47.9	0
48	0
48.1	0
48.2	0
48.3	0
48.4	0
48.5	0
48.6	0
48.7	0
48.8	0
48.9	0
49	0
49.1	0
49.2	0
49.3	0
49.4	0
49.5	0
49.6	0
49.7	0
49.8	0
49.9	0
50	0
50.1	0
50.2	0
50.3	0
50.4	0
50.5	0
50.6	0
50.7	0
50.8	0
50.9	0
51	0
51.1	0
51.2	0
51.3	0
51.4	0
51.5	0
51.6	0
51.7	0
51.8	0
51.9	0
52	0
52.1	0
52.2	0
52.3	0
52.4	0
52.5	0
52.6	0
52.7	0
52.8	0
52.9	0
53	0
53.1	0
53.2	0
53.3	0
53.4	0
53.5	0
53.6	0
53.7	0
53.8	0
53.9	0
54	0
54.1	0
54.2	0
54.3	0
54.4	0
54.5	0
54.6	0
54.7	0
54.8	0
54.9	0
55	0
55.1	0
55.2	0
55.3	0
55.4	0
55.5	0
55.6	0
55.7	0
55.8	0
55.9	0
56	0
56.1	0
56.2	0
56.3	0
56.4	0
56.5	0
56.6	0
56.7	0
56.8	0
56.9	0
57	0
57.1	0
57.2	0
57.3	0
57.4	0
57.5	0
57.6	0
57.7	0
57.8	0
57.9	0
58	0
58.1	0
58.2	0
58.3	0
58.4	0
58.5	0
58.6	0
58.7	0
58.8	0
58.9	0
59	0
59.1	0
59.2	0
59.3	0
59.4	0
59.5	0
59.6	0
59.7	0
59.8	0
59.9	0
60	0
60.1	0
60.2	0
60.3	0
60.4	0
60.5	0
60.6	0
60.7	0
60.8	0
60.9	0
61	0
61.1	0
61.2	0
61.3	0
61.4	0
61.5	0
61.6	0
61.7	0
61.8	0
61.9	0
62	0
62.1	0
62.2	0
62.3	0
62.4	0
62.5	0
62.6	0
62.7	0
62.8	0
62.9	0
63	0
63.1	0
63.2	0
63.3	0
63.4	0
63.5	0
63.6	0
63.7	0
63.8	0
63.9	0
64	0
64.1	0
64.2	0
64.3	0
64.4	0
64.5	0
64.6	0
64.7	0
64.8	0
64.9	0
65	0
65.1	0
65.2	0
65.3	0
65.4	0
65.5	0
65.6	0
65.7	0
65.8	0
65.9	0
66	0
66.1	0
66.2	0
66.3	0
66.4	0
66.5	0
66.6	0
66.7	0
66.8	0
66.9	0
67	0
67.1	0
67.2	0
67.3	0
67.4	0
67.5	0
67.6	0
67.7	0
67.8	0
67.9	0
68	0
68.1	0
68.2	0
68.3	0
68.4	0
68.5	0
68.6	0
68.7	0
68.8	0
68.9	0
69	0
69.1	0
69.2	0
69.3	0
69.4	0
69.5	0
69.6	0
69.7	0
69.8	0
69.9	0
70	0
70.1	0
70.2	0
70.3	0
70.4	0
70.5	0
70.6	0
70.7	0
70.8	0
70.9	0
71	0
71.1	0
71.2	0
71.3	0
71.4	0
71.5	0
71.6	0
71.7	0
71.8	0
71.9	0
72	0
72.1	0
72.2	0
72.3	0
72.4	0
72.5	0
72.6	0
72.7	0
72.8	0
72.9	0
73	0
73.1	0
73.2	0
73.3	0
73.4	0
73.5	0
73.6	0
73.7	0
73.8	0
73.9	0
74	0
74.1	0
74.2	0
74.3	0
74.4	0
74.5	0
74.6	0
74.7	0
74.8	0
74.9	0
75	0
75.1	0
75.2	0
75.3	0
75.4	0
75.5	0
75.6	0
75.7	0
75.8	0
75.9	0
76	0
76.1	0
76.2	0
76.3	0
76.4	0
76.5	0
76.6	0
76.7	0
76.8	0
76.9	0
77	0
77.1	0
77.2	0
77.3	0
77.4	0
77.5	0
77.6	0
77.7	0
77.8	0
77.9	0
78	0
78.1	0
78.2	0
78.3	0
78.4	0
78.5	0
78.6	0
78.7	0
78.8	0
78.9	0
79	0
79.1	0
79.2	0
79.3	0
79.4	0
79.5	0
79.6	0
79.7	0
79.8	0
79.9	0
80	0
80.1	0
80.2	0
80.3	0
80.4	0
80.5	0
80.6	0
80.7	0
80.8	0
80.9	0
81	0
81.1	0
81.2	0
81.3	0
81.4	0
81.5	0
81.6	0
81.7	0
81.8	0
81.9	0
82	0
82.1	0
82.2	0
82.3	0
82.4	0
82.5	0
82.6	0
82.7	0
82.8	0
82.9	0
83	0
83.1	0
83.2	0
83.3	0
83.4	0
83.5	0
83.6	0
83.7	0
83.8	0
83.9	0
84	0
84.1	0
84.2	0
84.3	0
84.4	0
84.5	0
84.6	0
84.7	0
84.8	0
84.9	0
85	0
85.1	0
85.2	0
85.3	0
85.4	0
85.5	0
85.6	0
85.7	0
85.8	0
85.9	0
86	0
86.1	0
86.2	0
86.3	0
86.4	0
86.5	0
86.6	0
86.7	0
86.8	0
86.9	0
87	0
87.1	0
87.2	0
87.3	0
87.4	0
87.5	0
87.6	0
87.7	0
87.8	0
87.9	0
88	0
88.1	0
88.2	0
88.3	0
88.4	0
88.5	0
88.6	0
88.7	0
88.8	0
88.9	0
89	0
89.1	0
89.2	0
89.3	0
89.4	0
89.5	0
89.6	0
89.7	0
89.8	0
89.9	0
90	0
90.1	0
90.2	0
90.3	0
90.4	0
90.5	0
90.6	0
90.7	0
90.8	0
90.9	0
91	0
91.1	0
91.2	0
91.3	0
91.4	0
91.5	0
91.6	0
91.7	0
91.8	0
91.9	0
92	0
92.1	0
92.2	0
92.3	0
92.4	0
92.5	0
92.6	0
92.7	0
92.8	0
92.9	0
93	0
93.1	0
93.2	0
93.3	0
93.4	0
93.5	0
93.6	0
93.7	0
93.8	0
93.9	0
94	0
94.1	0
94.2	0
94.3	0
94.4	0
94.5	0
94.6	0
94.7	0
94.8	0
94.9	0
95	0
95.1	0
95.2	0
95.3	0
95.4	0
95.5	0
95.6	0
95.7	0
95.8	0
95.9	0
96	0
96.1	0
96.2	0
96.3	0
96.4	0
96.5	0
96.6	0
96.7	0
96.8	0
96.9	0
97	0
97.1	0
97.2	0
97.3	0
97.4	0
97.5	0
97.6	0
97.7	0
97.8	0
97.9	0
98	0
98.1	0
98.2	0
98.3	0
98.4	0
98.5	0
98.6	0
98.7	0
98.8	0
98.9	0
99	0
99.1	0
99.2	0
99.3	0
99.4	0
99.5	0
99.6	0
99.7	0
99.8	0
99.9	0
100	0
100.1	0
100.2	0
100.3	0
100.4	0.001
100.5	0.002
100.6	0.002
100.7	0.003
100.8	0.003
100.9	0.004
101	0.005
101.1	0.005
101.2	0.005
101.3	0.005
101.4	0.005
101.5	0.006
101.6	0.006
101.7	0.007
101.8	0.009
101.9	0.009
102	0.011
102.1	0.013
102.2	0.013
102.3	0.016
102.4	0.016
102.5	0.018
102.6	0.018
102.7	0.02
102.8	0.02
102.9	0.02
103	0.021
103.1	0.022
103.2	0.024
103.3	0.024
103.4	0.026
103.5	0.026
103.6	0.029
103.7	0.03
103.8	0.03
103.9	0.032
104	0.034
104.1	0.035
104.2	0.037
104.3	0.04
104.4	0.04
104.5	0.041
104.6	0.042
104.7	0.044
104.8	0.046
104.9	0.049
105	0.051
105.1	0.052
105.2	0.054
105.3	0.055
105.4	0.056
105.5	0.057
105.6	0.057
105.7	0.057
105.8	0.058
105.9	0.058
106	0.061
106.1	0.063
106.2	0.063
106.3	0.065
106.4	0.068
106.5	0.069
106.6	0.069
106.7	0.069
106.8	0.069
106.9	0.069
107	0.07
107.1	0.073
107.2	0.075
107.3	0.076
107.4	0.081
107.5	0.082
107.6	0.082
107.7	0.083
107.8	0.083
107.9	0.084
108	0.088
108.1	0.09
108.2	0.093
108.3	0.093
108.4	0.094
108.5	0.095
108.6	0.096
108.7	0.098
108.8	0.1
108.9	0.101
109	0.105
109.1	0.105
109.2	0.105
109.3	0.106
109.4	0.107
109.5	0.107
109.6	0.11
109.7	0.111
109.8	0.112
109.9	0.112
110	0.112
110.1	0.116
110.2	0.117
110.3	0.121
110.4	0.121
110.5	0.123
110.6	0.125
110.7	0.126
110.8	0.127
110.9	0.128
111	0.13
111.1	0.13
111.2	0.132
111.3	0.134
111.4	0.134
111.5	0.14
111.6	0.144
111.7	0.145
111.8	0.145
111.9	0.148
112	0.149
112.1	0.151
112.2	0.151
112.3	0.154
112.4	0.156
112.5	0.159
112.6	0.161
112.7	0.163
112.8	0.165
112.9	0.168
113	0.169
113.1	0.169
113.2	0.169
113.3	0.17
113.4	0.172
113.5	0.173
113.6	0.173
113.7	0.175
113.8	0.175
113.9	0.176
114	0.178
114.1	0.18
114.2	0.182
114.3	0.185
114.4	0.185
114.5	0.186
114.6	0.188
114.7	0.189
114.8	0.191
114.9	0.192
115	0.194
115.1	0.199
115.2	0.2
115.3	0.201
115.4	0.201
115.5	0.202
115.6	0.202
115.7	0.205
115.8	0.205
115.9	0.209
116	0.212
116.1	0.216
116.2	0.219
116.3	0.22
116.4	0.22
116.5	0.22
116.6	0.221
116.7	0.22
116.8	0.22
116.9	0.22
117	0.22
117.1	0.22
117.2	0.222
117.3	0.223
117.4	0.223
117.5	0.225
117.6	0.225
117.7	0.228
117.8	0.231
117.9	0.233
118	0.235
118.1	0.234
118.2	0.235
118.3	0.238
118.4	0.239
118.5	0.243
118.6	0.243
118.7	0.243
118.8	0.244
118.9	0.246
119	0.246
119.1	0.247
119.2	0.25
119.3	0.252
119.4	0.253
119.5	0.254
119.6	0.254
119.7	0.254
119.8	0.257
119.9	0.258
120	0.26
120.1	0.26
120.2	0.261
120.3	0.262
120.4	0.263
120.5	0.264
120.6	0.267
120.7	0.269
120.8	0.271
120.9	0.271
121	0.272
121.1	0.273
121.2	0.274
121.3	0.275
121.4	0.274
121.5	0.276
121.6	0.277
121.7	0.278
121.8	0.28
121.9	0.281
122	0.281
122.1	0.28
122.2	0.281
122.3	0.283
122.4	0.283
122.5	0.284
122.6	0.285
122.7	0.287
122.8	0.288
122.9	0.288
123	0.289
123.1	0.29
123.2	0.293
123.3	0.294
123.4	0.295
123.5	0.297
123.6	0.297
123.7	0.298
123.8	0.299
123.9	0.3
124	0.3
124.1	0.302
124.2	0.304
124.3	0.306
124.4	0.306
124.5	0.307
124.6	0.307
124.7	0.308
124.8	0.31
124.9	0.313
125	0.314
125.1	0.313
125.2	0.311
125.3	0.312
125.4	0.313
125.5	0.315
125.6	0.316
125.7	0.316
125.8	0.318
125.9	0.32
126	0.321
126.1	0.321
126.2	0.32
126.3	0.32
126.4	0.319
126.5	0.319
126.6	0.319
126.7	0.319
126.8	0.319
126.9	0.32
127	0.322
127.1	0.322
127.2	0.322
127.3	0.322
127.4	0.325
127.5	0.326
127.6	0.325
127.7	0.325
127.8	0.326
127.9	0.327
128	0.328
128.1	0.328
128.2	0.329
128.3	0.333
128.4	0.336
128.5	0.337
128.6	0.338
128.7	0.336
128.8	0.336
128.9	0.337
129	0.34
129.1	0.343
129.2	0.345
129.3	0.346
129.4	0.348
129.5	0.349
129.6	0.35
129.7	0.35
129.8	0.349
129.9	0.35
130	0.353
130.1	0.354
130.2	0.354
130.3	0.354
130.4	0.356
130.5	0.357
130.6	0.358
130.7	0.362
130.8	0.362
130.9	0.361
131	0.364
131.1	0.365
131.2	0.367
131.3	0.367
131.4	0.368
131.5	0.369
131.6	0.372
131.7	0.372
131.8	0.372
131.9	0.371
132	0.371
132.1	0.371
132.2	0.371
132.3	0.37
132.4	0.372
132.5	0.372
132.6	0.374
132.7	0.373
132.8	0.374
132.9	0.375
133	0.375
133.1	0.374
133.2	0.375
133.3	0.375
133.4	0.375
133.5	0.374
133.6	0.373
133.7	0.373
133.8	0.375
133.9	0.375
134	0.376
134.1	0.376
134.2	0.376
134.3	0.378
134.4	0.378
134.5	0.378
134.6	0.379
134.7	0.381
134.8	0.381
134.9	0.381
135	0.381
135.1	0.383
135.2	0.384
135.3	0.384
135.4	0.385
135.5	0.385
135.6	0.385
135.7	0.386
135.8	0.387
135.9	0.387
136	0.391
136.1	0.392
136.2	0.391
136.3	0.391
136.4	0.393
136.5	0.393
136.6	0.395
136.7	0.396
136.8	0.4
136.9	0.4
137	0.4
137.1	0.398
137.2	0.397
137.3	0.397
137.4	0.397
137.5	0.398
137.6	0.395
137.7	0.397
137.8	0.397
137.9	0.401
138	0.401
138.1	0.403
138.2	0.402
138.3	0.404
138.4	0.404
138.5	0.404
138.6	0.405
138.7	0.405
138.8	0.406
138.9	0.406
139	0.409
139.1	0.409
139.2	0.411
139.3	0.413
139.4	0.415
139.5	0.416
139.6	0.417
139.7	0.416
139.8	0.417
139.9	0.418
140	0.419
140.1	0.418
140.2	0.419
140.3	0.416
140.4	0.415
140.5	0.414
140.6	0.415
140.7	0.414
140.8	0.414
140.9	0.414
141	0.413
141.1	0.414
141.2	0.413
141.3	0.412
141.4	0.415
141.5	0.416
141.6	0.417
141.7	0.418
141.8	0.421
141.9	0.421
142	0.421
142.1	0.422
142.2	0.425
142.3	0.425
142.4	0.426
142.5	0.426
142.6	0.425
142.7	0.424
142.8	0.425
142.9	0.425
143	0.424
143.1	0.427
143.2	0.428
143.3	0.43
143.4	0.431
143.5	0.432
143.6	0.434
143.7	0.434
143.8	0.435
143.9	0.436
144	0.436
144.1	0.435
144.2	0.437
144.3	0.438
144.4	0.437
144.5	0.437
144.6	0.44
144.7	0.44
144.8	0.441
144.9	0.441
145	0.443
145.1	0.443
145.2	0.445
145.3	0.445
145.4	0.445
145.5	0.444
145.6	0.445
145.7	0.446
145.8	0.446
145.9	0.447
146	0.448
146.1	0.446
146.2	0.448
146.3	0.449
146.4	0.448
146.5	0.448
146.6	0.45
146.7	0.449
146.8	0.447
146.9	0.449
147	0.449
147.1	0.45
147.2	0.45
147.3	0.45
147.4	0.452
147.5	0.451
147.6	0.45
147.7	0.45
147.8	0.45
147.9	0.45
148	0.451
148.1	0.452
148.2	0.452
148.3	0.452
148.4	0.452
148.5	0.452
148.6	0.451
148.7	0.452
148.8	0.453
148.9	0.454
149	0.453
149.1	0.456
149.2	0.454
149.3	0.454
149.4	0.455
149.5	0.455
149.6	0.457
149.7	0.456
149.8	0.456
149.9	0.457
150	0.457
150.1	0.458
150.2	0.458
150.3	0.458
150.4	0.459
150.5	0.46
150.6	0.461
150.7	0.462
150.8	0.463
150.9	0.465
151	0.465
151.1	0.467
151.2	0.468
151.3	0.467
151.4	0.467
151.5	0.466
151.6	0.466
151.7	0.467
151.8	0.468
151.9	0.47
152	0.469
152.1	0.47
152.2	0.469
152.3	0.472
152.4	0.471
152.5	0.471
152.6	0.472
152.7	0.472
152.8	0.471
152.9	0.471
153	0.472
153.1	0.471
153.2	0.471
153.3	0.474
153.4	0.475
153.5	0.475
153.6	0.476
153.7	0.476
153.8	0.479
153.9	0.478
154	0.479
154.1	0.482
154.2	0.482
154.3	0.483
154.4	0.483
154.5	0.486
154.6	0.488
154.7	0.489
154.8	0.49
154.9	0.488
155	0.488
155.1	0.488
155.2	0.488
155.3	0.488
155.4	0.487
155.5	0.486
155.6	0.488
155.7	0.487
155.8	0.487
155.9	0.487
156	0.487
156.1	0.489
156.2	0.489
156.3	0.488
156.4	0.489
156.5	0.489
156.6	0.491
156.7	0.491
156.8	0.491
156.9	0.491
157	0.492
157.1	0.494
157.2	0.495
157.3	0.497
157.4	0.497
157.5	0.499
157.6	0.501
157.7	0.501
157.8	0.501
157.9	0.501
158	0.5
158.1	0.502
158.2	0.501
158.3	0.503
158.4	0.504
158.5	0.501
158.6	0.501
158.7	0.502
158.8	0.502
158.9	0.502
159	0.5
159.1	0.5
159.2	0.499
159.3	0.499
159.4	0.499
159.5	0.497
159.6	0.497
159.7	0.498
159.8	0.498
159.9	0.499
160	0.5
160.1	0.501
160.2	0.502
160.3	0.502
160.4	0.503
160.5	0.502
160.6	0.503
160.7	0.504
160.8	0.504
160.9	0.504
161	0.505
161.1	0.505
161.2	0.505
161.3	0.506
161.4	0.508
161.5	0.509
161.6	0.509
161.7	0.51
161.8	0.511
161.9	0.513
162	0.512
162.1	0.513
162.2	0.513
162.3	0.513
162.4	0.514
162.5	0.514
162.6	0.515
162.7	0.517
162.8	0.518
162.9	0.517
163	0.517
163.1	0.519
163.2	0.521
163.3	0.522
163.4	0.522
163.5	0.522
163.6	0.523
163.7	0.523
163.8	0.522
163.9	0.521
164	0.522
164.1	0.524
164.2	0.526
164.3	0.527
164.4	0.53
164.5	0.53
164.6	0.53
164.7	0.529
164.8	0.53
164.9	0.531
165	0.529
165.1	0.529
165.2	0.529
165.3	0.53
165.4	0.531
165.5	0.532
165.6	0.534
165.7	0.534
165.8	0.533
165.9	0.534
166	0.533
166.1	0.53
166.2	0.529
166.3	0.532
166.4	0.532
166.5	0.532
166.6	0.531
166.7	0.53
166.8	0.531
166.9	0.534
167	0.535
167.1	0.535
167.2	0.535
167.3	0.535
167.4	0.535
167.5	0.536
167.6	0.539
167.7	0.54
167.8	0.541
167.9	0.541
168	0.541
168.1	0.541
168.2	0.54
168.3	0.54
168.4	0.54
168.5	0.541
168.6	0.541
168.7	0.543
168.8	0.544
168.9	0.545
169	0.545
169.1	0.545
169.2	0.545
169.3	0.545
169.4	0.547
169.5	0.549
169.6	0.548
169.7	0.549
169.8	0.549
169.9	0.549
170	0.547
170.1	0.548
170.2	0.549
170.3	0.55
170.4	0.549
170.5	0.55
170.6	0.55
170.7	0.55
170.8	0.55
170.9	0.55
171	0.55
171.1	0.549
171.2	0.55
171.3	0.551
171.4	0.552
171.5	0.553
171.6	0.554
171.7	0.552
171.8	0.552
171.9	0.552
172	0.552
172.1	0.552
172.2	0.552
172.3	0.554
172.4	0.554
172.5	0.554
172.6	0.556
172.7	0.556
172.8	0.557
172.9	0.556
173	0.556
173.1	0.556
173.2	0.557
173.3	0.559
173.4	0.558
173.5	0.557
173.6	0.558
173.7	0.559
173.8	0.56
173.9	0.56
174	0.56
174.1	0.56
174.2	0.558
174.3	0.558
174.4	0.556
174.5	0.557
174.6	0.556
174.7	0.556
174.8	0.557
174.9	0.558
175	0.557
175.1	0.557
175.2	0.556
175.3	0.554
175.4	0.555
175.5	0.556
175.6	0.556
175.7	0.556
175.8	0.556
175.9	0.558
176	0.558
176.1	0.558
176.2	0.558
176.3	0.559
176.4	0.559
176.5	0.559
176.6	0.559
176.7	0.56
176.8	0.561
176.9	0.562
177	0.561
177.1	0.562
177.2	0.561
177.3	0.561
177.4	0.563
177.5	0.565
177.6	0.564
177.7	0.563
177.8	0.563
177.9	0.564
178	0.563
178.1	0.565
178.2	0.566
178.3	0.564
178.4	0.565
178.5	0.567
178.6	0.566
178.7	0.567
178.8	0.568
178.9	0.568
179	0.567
179.1	0.568
179.2	0.569
179.3	0.569
179.4	0.57
179.5	0.571
179.6	0.571
179.7	0.572
179.8	0.571
179.9	0.571
180	0.571
180.1	0.571
180.2	0.571
180.3	0.572
180.4	0.571
180.5	0.571
180.6	0.572
180.7	0.573
180.8	0.572
180.9	0.574
181	0.574
181.1	0.574
181.2	0.574
181.3	0.574
181.4	0.575
181.5	0.575
181.6	0.576
181.7	0.576
181.8	0.574
181.9	0.574
182	0.574
182.1	0.576
182.2	0.576
182.3	0.576
182.4	0.575
182.5	0.575
182.6	0.574
182.7	0.574
182.8	0.575
182.9	0.575
183	0.575
183.1	0.576
183.2	0.577
183.3	0.577
183.4	0.578
183.5	0.577
183.6	0.578
183.7	0.576
183.8	0.576
183.9	0.575
184	0.576
184.1	0.576
184.2	0.576
184.3	0.576
184.4	0.574
184.5	0.574
184.6	0.576
184.7	0.575
184.8	0.575
184.9	0.574
185	0.577
185.1	0.575
185.2	0.575
185.3	0.574
185.4	0.578
185.5	0.578
185.6	0.577
185.7	0.577
185.8	0.577
185.9	0.575
186	0.577
186.1	0.577
186.2	0.579
186.3	0.579
186.4	0.579
186.5	0.58
186.6	0.581
186.7	0.583
186.8	0.583
186.9	0.582
187	0.583
187.1	0.584
187.2	0.584
187.3	0.583
187.4	0.584
187.5	0.584
187.6	0.584
187.7	0.584
187.8	0.585
187.9	0.587
188	0.588
188.1	0.586
188.2	0.587
188.3	0.587
188.4	0.588
188.5	0.587
188.6	0.587
188.7	0.588
188.8	0.59
188.9	0.592
189	0.593
189.1	0.594
189.2	0.597
189.3	0.597
189.4	0.597
189.5	0.599
189.6	0.599
189.7	0.599
189.8	0.599
189.9	0.6
190	0.599
190.1	0.599
190.2	0.598
190.3	0.598
190.4	0.599
190.5	0.599
190.6	0.601
190.7	0.602
190.8	0.603
190.9	0.604
191	0.605
191.1	0.606
191.2	0.606
191.3	0.608
191.4	0.609
191.5	0.607
191.6	0.607
191.7	0.606
191.8	0.606
191.9	0.606
192	0.607
192.1	0.608
192.2	0.607
192.3	0.607
192.4	0.606
192.5	0.606
192.6	0.606
192.7	0.609
192.8	0.608
192.9	0.61
193	0.608
193.1	0.606
193.2	0.604
193.3	0.605
193.4	0.605
193.5	0.606
193.6	0.607
193.7	0.609
193.8	0.609
193.9	0.609
194	0.609
194.1	0.609
194.2	0.61
194.3	0.61
194.4	0.61
194.5	0.61
194.6	0.61
194.7	0.61
194.8	0.611
194.9	0.611
195	0.612
195.1	0.611
195.2	0.609
195.3	0.609
195.4	0.61
195.5	0.609
195.6	0.609
195.7	0.608
195.8	0.607
195.9	0.606
196	0.607
196.1	0.608
196.2	0.606
196.3	0.606
196.4	0.605
196.5	0.605
196.6	0.606
196.7	0.607
196.8	0.607
196.9	0.608
197	0.609
197.1	0.609
197.2	0.609
197.3	0.609
197.4	0.609
197.5	0.608
197.6	0.609
197.7	0.612
197.8	0.61
197.9	0.61
198	0.612
198.1	0.612
198.2	0.611
198.3	0.609
198.4	0.61
198.5	0.609
198.6	0.61
198.7	0.611
198.8	0.609
198.9	0.61
199	0.608
199.1	0.608
199.2	0.609
199.3	0.609
199.4	0.609
199.5	0.609
199.6	0.609
199.7	0.609
199.8	0.607
199.9	0.607
200	0.607
[truncated: 14,000 more rows]
