# Supplementary material for: Bayesian inference of kinetic schemes for ion channels by Kalman filtering
Source: eLife journal article supplement (doi:10.7554/elife.62714), 2022-05-04
Supplement: fig1-data1 [file 2_Sim_N_1000_Fluor_MW.xlsx]

## Sheet: Tabelle1
0.1	0
0.2	0
0.3	0
0.4	0
0.5	0
0.6	0
0.7	0
0.8	0
0.9	0
1	0
1.1	0
1.2	0
1.3	0
1.4	0
1.5	0
1.6	0
1.7	0
1.8	0
1.9	0
2	0
2.1	0
2.2	0
2.3	0
2.4	0
2.5	0
2.6	0
2.7	0
2.8	0
2.9	0
3	0
3.1	0
3.2	0
3.3	0
3.4	0
3.5	0
3.6	0
3.7	0
3.8	0
3.9	0
4	0
4.1	0
4.2	0
4.3	0
4.4	0
4.5	0
4.6	0
4.7	0
4.8	0
4.9	0
5	0
5.1	0
5.2	0
5.3	0
5.4	0
5.5	0
5.6	0
5.7	0
5.8	0
5.9	0
6	0
6.1	0
6.2	0
6.3	0
6.4	0
6.5	0
6.6	0
6.7	0
6.8	0
6.9	0
7	0
7.1	0
7.2	0
7.3	0
7.4	0
7.5	0
7.6	0
7.7	0
7.8	0
7.9	0
8	0
8.1	0
8.2	0
8.3	0
8.4	0
8.5	0
8.6	0
8.7	0
8.8	0
8.9	0
9	0
9.1	0
9.2	0
9.3	0
9.4	0
9.5	0
9.6	0
9.7	0
9.8	0
9.9	0
10	0
10.1	0
10.2	0
10.3	0
10.4	0
10.5	0
10.6	0
10.7	0
10.8	0
10.9	0
11	0
11.1	0
11.2	0
11.3	0
11.4	0
11.5	0
11.6	0
11.7	0
11.8	0
11.9	0
12	0
12.1	0
12.2	0
12.3	0
12.4	0
12.5	0
12.6	0
12.7	0
12.8	0
12.9	0
13	0
13.1	0
13.2	0
13.3	0
13.4	0
13.5	0
13.6	0
13.7	0
13.8	0
13.9	0
14	0
14.1	0
14.2	0
14.3	0
14.4	0
14.5	0
14.6	0
14.7	0
14.8	0
14.9	0
15	0
15.1	0
15.2	0
15.3	0
15.4	0
15.5	0
15.6	0
15.7	0
15.8	0
15.9	0
16	0
16.1	0
16.2	0
16.3	0
16.4	0
16.5	0
16.6	0
16.7	0
16.8	0
16.9	0
17	0
17.1	0
17.2	0
17.3	0
17.4	0
17.5	0
17.6	0
17.7	0
17.8	0
17.9	0
18	0
18.1	0
18.2	0
18.3	0
18.4	0
18.5	0
18.6	0
18.7	0
18.8	0
18.9	0
19	0
19.1	0
19.2	0
19.3	0
19.4	0
19.5	0
19.6	0
19.7	0
19.8	0
19.9	0
20	0
20.1	0
20.2	0
20.3	0
20.4	0
20.5	0
20.6	0
20.7	0
20.8	0
20.9	0
21	0
21.1	0
21.2	0
21.3	0
21.4	0
21.5	0
21.6	0
21.7	0
21.8	0
21.9	0
22	0
22.1	0
22.2	0
22.3	0
22.4	0
22.5	0
22.6	0
22.7	0
22.8	0
22.9	0
23	0
23.1	0
23.2	0
23.3	0
23.4	0
23.5	0
23.6	0
23.7	0
23.8	0
23.9	0
24	0
24.1	0
24.2	0
24.3	0
24.4	0
24.5	0
24.6	0
24.7	0
24.8	0
24.9	0
25	0
25.1	0
25.2	0
25.3	0
25.4	0
25.5	0
25.6	0
25.7	0
25.8	0
25.9	0
26	0
26.1	0
26.2	0
26.3	0
26.4	0
26.5	0
26.6	0
26.7	0
26.8	0
26.9	0
27	0
27.1	0
27.2	0
27.3	0
27.4	0
27.5	0
27.6	0
27.7	0
27.8	0
27.9	0
28	0
28.1	0
28.2	0
28.3	0
28.4	0
28.5	0
28.6	0
28.7	0
28.8	0
28.9	0
29	0
29.1	0
29.2	0
29.3	0
29.4	0
29.5	0
29.6	0
29.7	0
29.8	0
29.9	0
30	0
30.1	0
30.2	0
30.3	0
30.4	0
30.5	0
30.6	0
30.7	0
30.8	0
30.9	0
31	0
31.1	0
31.2	0
31.3	0
31.4	0
31.5	0
31.6	0
31.7	0
31.8	0
31.9	0
32	0
32.1	0
32.2	0
32.3	0
32.4	0
32.5	0
32.6	0
32.7	0
32.8	0
32.9	0
33	0
33.1	0
33.2	0
33.3	0
33.4	0
33.5	0
33.6	0
33.7	0
33.8	0
33.9	0
34	0
34.1	0
34.2	0
34.3	0
34.4	0
34.5	0
34.6	0
34.7	0
34.8	0
34.9	0
35	0
35.1	0
35.2	0
35.3	0
35.4	0
35.5	0
35.6	0
35.7	0
35.8	0
35.9	0
36	0
36.1	0
36.2	0
36.3	0
36.4	0
36.5	0
36.6	0
36.7	0
36.8	0
36.9	0
37	0
37.1	0
37.2	0
37.3	0
37.4	0
37.5	0
37.6	0
37.7	0
37.8	0
37.9	0
38	0
38.1	0
38.2	0
38.3	0
38.4	0
38.5	0
38.6	0
38.7	0
38.8	0
38.9	0
39	0
39.1	0
39.2	0
39.3	0
39.4	0
39.5	0
39.6	0
39.7	0
39.8	0
39.9	0
40	0
40.1	0
40.2	0
40.3	0
40.4	0
40.5	0
40.6	0
40.7	0
40.8	0
40.9	0
41	0
41.1	0
41.2	0
41.3	0
41.4	0
41.5	0
41.6	0
41.7	0
41.8	0
41.9	0
42	0
42.1	0
42.2	0
42.3	0
42.4	0
42.5	0
42.6	0
42.7	0
42.8	0
42.9	0
43	0
43.1	0
43.2	0
43.3	0
43.4	0
43.5	0
43.6	0
43.7	0
43.8	0
43.9	0
44	0
44.1	0
44.2	0
44.3	0
44.4	0
44.5	0
44.6	0
44.7	0
44.8	0
44.9	0
45	0
45.1	0
45.2	0
45.3	0
45.4	0
45.5	0
45.6	0
45.7	0
45.8	0
45.9	0
46	0
46.1	0
46.2	0
46.3	0
46.4	0
46.5	0
46.6	0
46.7	0
46.8	0
46.9	0
47	0
47.1	0
47.2	0
47.3	0
47.4	0
47.5	0
47.6	0
47.7	0
47.8	0
47.9	0
48	0
48.1	0
48.2	0
48.3	0
48.4	0
48.5	0
48.6	0
48.7	0
48.8	0
48.9	0
49	0
49.1	0
49.2	0
49.3	0
49.4	0
49.5	0
49.6	0
49.7	0
49.8	0
49.9	0
50	0
50.1	0
50.2	0
50.3	0
50.4	0
50.5	0
50.6	0
50.7	0
50.8	0
50.9	0
51	0
51.1	0
51.2	0
51.3	0
51.4	0
51.5	0
51.6	0
51.7	0
51.8	0
51.9	0
52	0
52.1	0
52.2	0
52.3	0
52.4	0
52.5	0
52.6	0
52.7	0
52.8	0
52.9	0
53	0
53.1	0
53.2	0
53.3	0
53.4	0
53.5	0
53.6	0
53.7	0
53.8	0
53.9	0
54	0
54.1	0
54.2	0
54.3	0
54.4	0
54.5	0
54.6	0
54.7	0
54.8	0
54.9	0
55	0
55.1	0
55.2	0
55.3	0
55.4	0
55.5	0
55.6	0
55.7	0
55.8	0
55.9	0
56	0
56.1	0
56.2	0
56.3	0
56.4	0
56.5	0
56.6	0
56.7	0
56.8	0
56.9	0
57	0
57.1	0
57.2	0
57.3	0
57.4	0
57.5	0
57.6	0
57.7	0
57.8	0
57.9	0
58	0
58.1	0
58.2	0
58.3	0
58.4	0
58.5	0
58.6	0
58.7	0
58.8	0
58.9	0
59	0
59.1	0
59.2	0
59.3	0
59.4	0
59.5	0
59.6	0
59.7	0
59.8	0
59.9	0
60	0
60.1	0
60.2	0
60.3	0
60.4	0
60.5	0
60.6	0
60.7	0
60.8	0
60.9	0
61	0
61.1	0
61.2	0
61.3	0
61.4	0
61.5	0
61.6	0
61.7	0
61.8	0
61.9	0
62	0
62.1	0
62.2	0
62.3	0
62.4	0
62.5	0
62.6	0
62.7	0
62.8	0
62.9	0
63	0
63.1	0
63.2	0
63.3	0
63.4	0
63.5	0
63.6	0
63.7	0
63.8	0
63.9	0
64	0
64.1	0
64.2	0
64.3	0
64.4	0
64.5	0
64.6	0
64.7	0
64.8	0
64.9	0
65	0
65.1	0
65.2	0
65.3	0
65.4	0
65.5	0
65.6	0
65.7	0
65.8	0
65.9	0
66	0
66.1	0
66.2	0
66.3	0
66.4	0
66.5	0
66.6	0
66.7	0
66.8	0
66.9	0
67	0
67.1	0
67.2	0
67.3	0
67.4	0
67.5	0
67.6	0
67.7	0
67.8	0
67.9	0
68	0
68.1	0
68.2	0
68.3	0
68.4	0
68.5	0
68.6	0
68.7	0
68.8	0
68.9	0
69	0
69.1	0
69.2	0
69.3	0
69.4	0
69.5	0
69.6	0
69.7	0
69.8	0
69.9	0
70	0
70.1	0
70.2	0
70.3	0
70.4	0
70.5	0
70.6	0
70.7	0
70.8	0
70.9	0
71	0
71.1	0
71.2	0
71.3	0
71.4	0
71.5	0
71.6	0
71.7	0
71.8	0
71.9	0
72	0
72.1	0
72.2	0
72.3	0
72.4	0
72.5	0
72.6	0
72.7	0
72.8	0
72.9	0
73	0
73.1	0
73.2	0
73.3	0
73.4	0
73.5	0
73.6	0
73.7	0
73.8	0
73.9	0
74	0
74.1	0
74.2	0
74.3	0
74.4	0
74.5	0
74.6	0
74.7	0
74.8	0
74.9	0
75	0
75.1	0
75.2	0
75.3	0
75.4	0
75.5	0
75.6	0
75.7	0
75.8	0
75.9	0
76	0
76.1	0
76.2	0
76.3	0
76.4	0
76.5	0
76.6	0
76.7	0
76.8	0
76.9	0
77	0
77.1	0
77.2	0
77.3	0
77.4	0
77.5	0
77.6	0
77.7	0
77.8	0
77.9	0
78	0
78.1	0
78.2	0
78.3	0
78.4	0
78.5	0
78.6	0
78.7	0
78.8	0
78.9	0
79	0
79.1	0
79.2	0
79.3	0
79.4	0
79.5	0
79.6	0
79.7	0
79.8	0
79.9	0
80	0
80.1	0
80.2	0
80.3	0
80.4	0
80.5	0
80.6	0
80.7	0
80.8	0
80.9	0
81	0
81.1	0
81.2	0
81.3	0
81.4	0
81.5	0
81.6	0
81.7	0
81.8	0
81.9	0
82	0
82.1	0
82.2	0
82.3	0
82.4	0
82.5	0
82.6	0
82.7	0
82.8	0
82.9	0
83	0
83.1	0
83.2	0
83.3	0
83.4	0
83.5	0
83.6	0
83.7	0
83.8	0
83.9	0
84	0
84.1	0
84.2	0
84.3	0
84.4	0
84.5	0
84.6	0
84.7	0
84.8	0
84.9	0
85	0
85.1	0
85.2	0
85.3	0
85.4	0
85.5	0
85.6	0
85.7	0
85.8	0
85.9	0
86	0
86.1	0
86.2	0
86.3	0
86.4	0
86.5	0
86.6	0
86.7	0
86.8	0
86.9	0
87	0
87.1	0
87.2	0
87.3	0
87.4	0
87.5	0
87.6	0
87.7	0
87.8	0
87.9	0
88	0
88.1	0
88.2	0
88.3	0
88.4	0
88.5	0
88.6	0
88.7	0
88.8	0
88.9	0
89	0
89.1	0
89.2	0
89.3	0
89.4	0
89.5	0
89.6	0
89.7	0
89.8	0
89.9	0
90	0
90.1	0
90.2	0
90.3	0
90.4	0
90.5	0
90.6	0
90.7	0
90.8	0
90.9	0
91	0
91.1	0
91.2	0
91.3	0
91.4	0
91.5	0
91.6	0
91.7	0
91.8	0
91.9	0
92	0
92.1	0
92.2	0
92.3	0
92.4	0
92.5	0
92.6	0
92.7	0
92.8	0
92.9	0
93	0
93.1	0
93.2	0
93.3	0
93.4	0
93.5	0
93.6	0
93.7	0
93.8	0
93.9	0
94	0
94.1	0
94.2	0
94.3	0
94.4	0
94.5	0
94.6	0
94.7	0
94.8	0
94.9	0
95	0
95.1	0
95.2	0
95.3	0
95.4	0
95.5	0
95.6	0
95.7	0
95.8	0
95.9	0
96	0
96.1	0
96.2	0
96.3	0
96.4	0
96.5	0
96.6	0
96.7	0
96.8	0
96.9	0
97	0
97.1	0
97.2	0
97.3	0
97.4	0
97.5	0
97.6	0
97.7	0
97.8	0
97.9	0
98	0
98.1	0
98.2	0
98.3	0
98.4	0
98.5	0
98.6	0
98.7	0
98.8	0
98.9	0
99	0
99.1	0
99.2	0
99.3	0
99.4	0
99.5	0
99.6	0
99.7	0
99.8	0
99.9	0
100	0
100.1	0.1135
100.2	0.205
100.3	0.2735
100.4	0.3305
100.5	0.3815
100.6	0.4245
100.7	0.4685
100.8	0.505
100.9	0.539
101	0.5655
101.1	0.584
101.2	0.6105
101.3	0.6265
101.4	0.6375
101.5	0.646
101.6	0.655
101.7	0.6685
101.8	0.6765
101.9	0.688
102	0.6935
102.1	0.7
102.2	0.7045
102.3	0.7085
102.4	0.7155
102.5	0.7235
102.6	0.7245
102.7	0.726
102.8	0.73
102.9	0.7395
103	0.744
103.1	0.7445
103.2	0.751
103.3	0.7495
103.4	0.7565
103.5	0.755
103.6	0.7525
103.7	0.755
103.8	0.7555
103.9	0.7505
104	0.7495
104.1	0.755
104.2	0.767
104.3	0.762
104.4	0.7585
104.5	0.7595
104.6	0.7565
104.7	0.7565
104.8	0.7545
104.9	0.7555
105	0.7545
105.1	0.756
105.2	0.759
105.3	0.759
105.4	0.7695
105.5	0.7675
105.6	0.7645
105.7	0.765
105.8	0.7615
105.9	0.766
106	0.766
106.1	0.7705
106.2	0.767
106.3	0.7695
106.4	0.772
106.5	0.777
106.6	0.7765
106.7	0.777
106.8	0.776
106.9	0.779
107	0.779
107.1	0.7875
107.2	0.7865
107.3	0.7875
107.4	0.7885
107.5	0.7885
107.6	0.7885
107.7	0.7945
107.8	0.7925
107.9	0.7895
108	0.7865
108.1	0.7835
108.2	0.7795
108.3	0.782
108.4	0.7825
108.5	0.778
108.6	0.7745
108.7	0.7725
108.8	0.7855
108.9	0.7895
109	0.793
109.1	0.7985
109.2	0.791
109.3	0.7925
109.4	0.792
109.5	0.7905
109.6	0.7935
109.7	0.7915
109.8	0.792
109.9	0.7935
110	0.7935
110.1	0.794
110.2	0.7965
110.3	0.801
110.4	0.8085
110.5	0.806
110.6	0.8045
110.7	0.804
110.8	0.81
110.9	0.8135
111	0.813
111.1	0.8125
111.2	0.8165
111.3	0.8165
111.4	0.8235
111.5	0.819
111.6	0.8215
111.7	0.8135
111.8	0.814
111.9	0.815
112	0.8135
112.1	0.818
112.2	0.8135
112.3	0.812
112.4	0.816
112.5	0.812
112.6	0.81
112.7	0.814
112.8	0.8185
112.9	0.818
113	0.815
113.1	0.8195
113.2	0.8165
113.3	0.818
113.4	0.811
113.5	0.81
113.6	0.8115
113.7	0.812
113.8	0.812
113.9	0.819
114	0.8165
114.1	0.8125
114.2	0.816
114.3	0.8165
114.4	0.8145
114.5	0.808
114.6	0.8065
114.7	0.8095
114.8	0.8085
114.9	0.8125
115	0.805
115.1	0.8065
115.2	0.8115
115.3	0.812
115.4	0.817
115.5	0.819
115.6	0.815
115.7	0.8165
115.8	0.815
115.9	0.8215
116	0.8225
116.1	0.8265
116.2	0.824
116.3	0.821
116.4	0.824
116.5	0.825
116.6	0.8285
116.7	0.832
116.8	0.834
116.9	0.832
117	0.83
117.1	0.828
117.2	0.822
117.3	0.8235
117.4	0.8275
117.5	0.83
117.6	0.827
117.7	0.8195
117.8	0.8195
117.9	0.826
118	0.828
118.1	0.834
118.2	0.8315
118.3	0.8335
118.4	0.832
118.5	0.8285
118.6	0.834
118.7	0.8355
118.8	0.8395
118.9	0.844
119	0.85
119.1	0.8475
119.2	0.8475
119.3	0.8455
119.4	0.85
119.5	0.847
119.6	0.848
119.7	0.8475
119.8	0.848
119.9	0.846
120	0.846
120.1	0.841
120.2	0.8405
120.3	0.8425
120.4	0.845
120.5	0.8435
120.6	0.8455
120.7	0.851
120.8	0.849
120.9	0.8495
121	0.8465
121.1	0.8415
121.2	0.846
121.3	0.8495
121.4	0.8545
121.5	0.855
121.6	0.855
121.7	0.8535
121.8	0.8545
121.9	0.86
122	0.8595
122.1	0.86
122.2	0.852
122.3	0.848
122.4	0.8445
122.5	0.843
122.6	0.8465
122.7	0.846
122.8	0.8535
122.9	0.857
123	0.8625
123.1	0.86
123.2	0.8625
123.3	0.8595
123.4	0.858
123.5	0.8555
123.6	0.8565
123.7	0.862
123.8	0.862
123.9	0.857
124	0.8585
124.1	0.86
124.2	0.852
124.3	0.848
124.4	0.85
124.5	0.848
124.6	0.852
124.7	0.852
124.8	0.853
124.9	0.849
125	0.849
125.1	0.852
125.2	0.8525
125.3	0.8545
125.4	0.851
125.5	0.854
125.6	0.854
125.7	0.85
125.8	0.851
125.9	0.85
126	0.8485
126.1	0.8505
126.2	0.857
126.3	0.8535
126.4	0.8485
126.5	0.8475
126.6	0.8455
126.7	0.8465
126.8	0.8525
126.9	0.8545
127	0.849
127.1	0.8515
127.2	0.851
127.3	0.859
127.4	0.8625
127.5	0.864
127.6	0.867
127.7	0.8675
127.8	0.866
127.9	0.864
128	0.866
128.1	0.862
128.2	0.8605
128.3	0.8585
128.4	0.8615
128.5	0.8625
128.6	0.861
128.7	0.8675
128.8	0.8735
128.9	0.875
129	0.874
129.1	0.875
129.2	0.872
129.3	0.8755
129.4	0.8765
129.5	0.8765
129.6	0.8755
129.7	0.876
129.8	0.878
129.9	0.8785
130	0.882
130.1	0.8785
130.2	0.88
130.3	0.8775
130.4	0.8785
130.5	0.8835
130.6	0.882
130.7	0.883
130.8	0.88
130.9	0.88
131	0.8765
131.1	0.8775
131.2	0.8795
131.3	0.88
131.4	0.8765
131.5	0.8765
131.6	0.876
131.7	0.8755
131.8	0.88
131.9	0.882
132	0.8815
132.1	0.883
132.2	0.883
132.3	0.8855
132.4	0.8835
132.5	0.883
132.6	0.881
132.7	0.885
132.8	0.88
132.9	0.8825
133	0.884
133.1	0.8805
133.2	0.8795
133.3	0.8825
133.4	0.8815
133.5	0.8805
133.6	0.8835
133.7	0.8875
133.8	0.887
133.9	0.893
134	0.8945
134.1	0.896
134.2	0.898
134.3	0.9005
134.4	0.901
134.5	0.8995
134.6	0.8925
134.7	0.8865
134.8	0.887
134.9	0.8865
135	0.887
135.1	0.885
135.2	0.8835
135.3	0.886
135.4	0.8845
135.5	0.876
135.6	0.874
135.7	0.8775
135.8	0.8765
135.9	0.8765
136	0.8755
136.1	0.8755
136.2	0.876
136.3	0.8765
136.4	0.8745
136.5	0.8755
136.6	0.8775
136.7	0.8775
136.8	0.8805
136.9	0.881
137	0.8825
137.1	0.8795
137.2	0.876
137.3	0.877
137.4	0.8765
137.5	0.878
137.6	0.88
137.7	0.881
137.8	0.8825
137.9	0.8825
138	0.879
138.1	0.8815
138.2	0.885
138.3	0.8875
138.4	0.8825
138.5	0.882
138.6	0.881
138.7	0.8775
138.8	0.8755
138.9	0.88
139	0.882
139.1	0.8855
139.2	0.8835
139.3	0.8825
139.4	0.8855
139.5	0.883
139.6	0.8855
139.7	0.8855
139.8	0.8855
139.9	0.884
140	0.883
140.1	0.887
140.2	0.889
140.3	0.8885
140.4	0.8875
140.5	0.887
140.6	0.889
140.7	0.8895
140.8	0.8875
140.9	0.8885
141	0.888
141.1	0.888
141.2	0.8825
141.3	0.885
141.4	0.885
141.5	0.89
141.6	0.892
141.7	0.894
141.8	0.893
141.9	0.896
142	0.895
142.1	0.8955
142.2	0.8945
142.3	0.8975
142.4	0.8965
142.5	0.8965
142.6	0.897
142.7	0.901
142.8	0.899
142.9	0.897
143	0.8975
143.1	0.895
143.2	0.8975
143.3	0.9005
143.4	0.9025
143.5	0.899
143.6	0.897
143.7	0.8955
143.8	0.8975
143.9	0.8985
144	0.8975
144.1	0.896
144.2	0.8945
144.3	0.893
144.4	0.892
144.5	0.897
144.6	0.8975
144.7	0.896
144.8	0.8955
144.9	0.8975
145	0.897
145.1	0.9005
145.2	0.8995
145.3	0.8975
145.4	0.902
145.5	0.9045
145.6	0.9075
145.7	0.9085
145.8	0.908
145.9	0.905
146	0.9045
146.1	0.904
146.2	0.9005
146.3	0.902
146.4	0.9005
146.5	0.9
146.6	0.897
146.7	0.898
146.8	0.902
146.9	0.901
147	0.8995
147.1	0.9005
147.2	0.904
147.3	0.9015
147.4	0.899
147.5	0.9035
147.6	0.9005
147.7	0.9
147.8	0.9
147.9	0.899
148	0.8995
148.1	0.902
148.2	0.9035
148.3	0.9075
148.4	0.9045
148.5	0.9075
148.6	0.908
148.7	0.9095
148.8	0.9085
148.9	0.9085
149	0.9085
149.1	0.9105
149.2	0.9115
149.3	0.9095
149.4	0.91
149.5	0.911
149.6	0.9095
149.7	0.907
149.8	0.908
149.9	0.91
150	0.911
150.1	0.909
150.2	0.9105
150.3	0.9155
150.4	0.913
150.5	0.9115
150.6	0.91
150.7	0.9095
150.8	0.906
150.9	0.906
151	0.9095
151.1	0.91
151.2	0.91
151.3	0.9105
151.4	0.915
151.5	0.9145
151.6	0.9125
151.7	0.9145
151.8	0.9165
151.9	0.9155
152	0.918
152.1	0.9185
152.2	0.9195
152.3	0.917
152.4	0.917
152.5	0.9175
152.6	0.915
152.7	0.9135
152.8	0.914
152.9	0.913
153	0.9135
153.1	0.9165
153.2	0.9175
153.3	0.9155
153.4	0.916
153.5	0.92
153.6	0.923
153.7	0.92
153.8	0.919
153.9	0.918
154	0.9155
154.1	0.917
154.2	0.921
154.3	0.921
154.4	0.9235
154.5	0.923
154.6	0.923
154.7	0.925
154.8	0.9245
154.9	0.922
155	0.9175
155.1	0.9135
155.2	0.9145
155.3	0.9145
155.4	0.9165
155.5	0.9155
155.6	0.9165
155.7	0.916
155.8	0.914
155.9	0.916
156	0.9185
156.1	0.9195
156.2	0.9195
156.3	0.921
156.4	0.922
156.5	0.923
156.6	0.917
156.7	0.919
156.8	0.9165
156.9	0.9155
157	0.919
157.1	0.9155
157.2	0.919
157.3	0.9215
157.4	0.9225
157.5	0.923
157.6	0.919
157.7	0.922
157.8	0.9235
157.9	0.922
158	0.9225
158.1	0.9195
158.2	0.918
158.3	0.9155
158.4	0.915
158.5	0.915
158.6	0.914
158.7	0.9165
158.8	0.9185
158.9	0.923
159	0.9185
159.1	0.9175
159.2	0.921
159.3	0.9195
159.4	0.919
159.5	0.916
159.6	0.918
159.7	0.917
159.8	0.9175
159.9	0.9185
160	0.9205
160.1	0.919
160.2	0.9185
160.3	0.9175
160.4	0.921
160.5	0.9215
160.6	0.9195
160.7	0.9205
160.8	0.92
160.9	0.9215
161	0.919
161.1	0.9195
161.2	0.9205
161.3	0.9205
161.4	0.923
161.5	0.9225
161.6	0.922
161.7	0.925
161.8	0.9255
161.9	0.9255
162	0.9265
162.1	0.9255
162.2	0.926
162.3	0.925
162.4	0.923
162.5	0.9255
162.6	0.9265
162.7	0.926
162.8	0.9235
162.9	0.923
163	0.923
163.1	0.9205
163.2	0.919
163.3	0.917
163.4	0.916
163.5	0.9165
163.6	0.915
163.7	0.917
163.8	0.915
163.9	0.916
164	0.918
164.1	0.918
164.2	0.9185
164.3	0.919
164.4	0.918
164.5	0.917
164.6	0.917
164.7	0.914
164.8	0.9165
164.9	0.917
165	0.917
165.1	0.9145
165.2	0.913
165.3	0.912
165.4	0.913
165.5	0.9145
165.6	0.913
165.7	0.9125
165.8	0.914
165.9	0.913
166	0.9165
166.1	0.9195
166.2	0.9195
166.3	0.922
166.4	0.922
166.5	0.922
166.6	0.924
166.7	0.9235
166.8	0.924
166.9	0.9245
167	0.926
167.1	0.9245
167.2	0.9275
167.3	0.929
167.4	0.928
167.5	0.9245
167.6	0.9245
167.7	0.927
167.8	0.923
167.9	0.9275
168	0.9255
168.1	0.923
168.2	0.9205
168.3	0.923
168.4	0.9255
168.5	0.926
168.6	0.93
168.7	0.9305
168.8	0.926
168.9	0.9275
169	0.928
169.1	0.93
169.2	0.929
169.3	0.9285
169.4	0.928
169.5	0.925
169.6	0.9245
169.7	0.9245
169.8	0.925
169.9	0.931
170	0.9275
170.1	0.9255
170.2	0.9275
170.3	0.9225
170.4	0.9205
170.5	0.92
170.6	0.9195
170.7	0.9205
170.8	0.915
170.9	0.919
171	0.92
171.1	0.921
171.2	0.9245
171.3	0.9255
171.4	0.9225
171.5	0.9225
171.6	0.921
171.7	0.924
171.8	0.9225
171.9	0.9215
172	0.9205
172.1	0.919
172.2	0.923
172.3	0.9205
172.4	0.9195
172.5	0.9225
172.6	0.925
172.7	0.927
172.8	0.928
172.9	0.9265
173	0.929
173.1	0.9315
173.2	0.928
173.3	0.926
173.4	0.9265
173.5	0.9295
173.6	0.929
173.7	0.9295
173.8	0.927
173.9	0.927
174	0.9265
174.1	0.9265
174.2	0.93
174.3	0.9285
174.4	0.926
174.5	0.9245
174.6	0.9255
174.7	0.927
174.8	0.925
174.9	0.924
175	0.9235
175.1	0.9215
175.2	0.922
175.3	0.92
175.4	0.9195
175.5	0.92
175.6	0.923
175.7	0.9215
175.8	0.922
175.9	0.9225
176	0.925
176.1	0.9275
176.2	0.926
176.3	0.9285
176.4	0.925
176.5	0.923
176.6	0.918
176.7	0.92
176.8	0.922
176.9	0.921
177	0.9225
177.1	0.9245
177.2	0.9255
177.3	0.925
177.4	0.9255
177.5	0.925
177.6	0.927
177.7	0.928
177.8	0.9305
177.9	0.9285
178	0.9305
178.1	0.9285
178.2	0.929
178.3	0.93
178.4	0.9295
178.5	0.927
178.6	0.9275
178.7	0.924
178.8	0.922
178.9	0.9215
179	0.923
179.1	0.9235
179.2	0.9225
179.3	0.9215
179.4	0.923
179.5	0.9265
179.6	0.925
179.7	0.9235
179.8	0.9245
179.9	0.9265
180	0.9275
180.1	0.926
180.2	0.922
180.3	0.9235
180.4	0.926
180.5	0.9255
180.6	0.9255
180.7	0.925
180.8	0.9265
180.9	0.9285
181	0.927
181.1	0.9265
181.2	0.927
181.3	0.928
181.4	0.932
181.5	0.932
181.6	0.935
181.7	0.935
181.8	0.9375
181.9	0.9385
182	0.9335
182.1	0.93
182.2	0.929
182.3	0.93
182.4	0.931
182.5	0.93
182.6	0.9275
182.7	0.926
182.8	0.926
182.9	0.926
183	0.9255
183.1	0.9235
183.2	0.9235
183.3	0.927
183.4	0.9265
183.5	0.926
183.6	0.924
183.7	0.9225
183.8	0.924
183.9	0.9245
184	0.922
184.1	0.9195
184.2	0.9235
184.3	0.9235
184.4	0.9235
184.5	0.9225
184.6	0.9225
184.7	0.9245
184.8	0.9275
184.9	0.9255
185	0.927
185.1	0.929
185.2	0.929
185.3	0.9275
185.4	0.9275
185.5	0.928
185.6	0.929
185.7	0.93
185.8	0.9245
185.9	0.9245
186	0.927
186.1	0.929
186.2	0.9275
186.3	0.925
186.4	0.925
186.5	0.926
186.6	0.927
186.7	0.926
186.8	0.9265
186.9	0.9265
187	0.928
187.1	0.929
187.2	0.9305
187.3	0.929
187.4	0.9295
187.5	0.9315
187.6	0.9345
187.7	0.9325
187.8	0.934
187.9	0.9325
188	0.9325
188.1	0.9285
188.2	0.927
188.3	0.9275
188.4	0.9275
188.5	0.927
188.6	0.925
188.7	0.9255
188.8	0.923
188.9	0.9245
189	0.9255
189.1	0.924
189.2	0.9225
189.3	0.922
189.4	0.9245
189.5	0.924
189.6	0.923
189.7	0.922
189.8	0.9185
189.9	0.922
190	0.9215
190.1	0.9245
190.2	0.926
190.3	0.927
190.4	0.9265
190.5	0.9265
190.6	0.9275
190.7	0.9265
190.8	0.928
190.9	0.9285
191	0.931
191.1	0.931
191.2	0.931
191.3	0.9325
191.4	0.933
191.5	0.933
191.6	0.9365
191.7	0.9385
191.8	0.938
191.9	0.9345
192	0.9325
192.1	0.936
192.2	0.9355
192.3	0.9365
192.4	0.9345
192.5	0.935
192.6	0.9345
192.7	0.938
192.8	0.9355
192.9	0.9345
193	0.93
193.1	0.93
193.2	0.9295
193.3	0.9275
193.4	0.93
193.5	0.9315
193.6	0.933
193.7	0.9305
193.8	0.93
193.9	0.9295
194	0.93
194.1	0.9335
194.2	0.934
194.3	0.932
194.4	0.935
194.5	0.934
194.6	0.936
194.7	0.9345
194.8	0.9345
194.9	0.9335
195	0.9335
195.1	0.931
195.2	0.932
195.3	0.93
195.4	0.9295
195.5	0.9315
195.6	0.9295
195.7	0.928
195.8	0.928
195.9	0.928
196	0.928
196.1	0.9275
196.2	0.9265
196.3	0.9275
196.4	0.927
196.5	0.925
196.6	0.925
196.7	0.9225
196.8	0.924
196.9	0.9245
197	0.924
197.1	0.9255
197.2	0.926
197.3	0.9245
197.4	0.923
197.5	0.924
197.6	0.9235
197.7	0.9245
197.8	0.9255
197.9	0.9275
198	0.9285
198.1	0.931
198.2	0.9355
198.3	0.9355
198.4	0.937
198.5	0.935
198.6	0.9325
198.7	0.9335
198.8	0.9325
198.9	0.9325
199	0.9305
199.1	0.928
199.2	0.9325
199.3	0.933
199.4	0.931
199.5	0.928
199.6	0.9305
199.7	0.928
199.8	0.9265
199.9	0.929
200	0.9315
[truncated: 14,000 more rows]
