# Supplementary material for: Bayesian inference of kinetic schemes for ion channels by Kalman filtering
Source: eLife journal article supplement (doi:10.7554/elife.62714), 2022-05-04
Supplement: fig1-data1 [file 2_Sim_N_1000_Strom_MW.xlsx]

## Sheet: Tabelle1
0.1	0
0.2	0
0.3	0
0.4	0
0.5	0
0.6	0
0.7	0
0.8	0
0.9	0
1	0
1.1	0
1.2	0
1.3	0
1.4	0
1.5	0
1.6	0
1.7	0
1.8	0
1.9	0
2	0
2.1	0
2.2	0
2.3	0
2.4	0
2.5	0
2.6	0
2.7	0
2.8	0
2.9	0
3	0
3.1	0
3.2	0
3.3	0
3.4	0
3.5	0
3.6	0
3.7	0
3.8	0
3.9	0
4	0
4.1	0
4.2	0
4.3	0
4.4	0
4.5	0
4.6	0
4.7	0
4.8	0
4.9	0
5	0
5.1	0
5.2	0
5.3	0
5.4	0
5.5	0
5.6	0
5.7	0
5.8	0
5.9	0
6	0
6.1	0
6.2	0
6.3	0
6.4	0
6.5	0
6.6	0
6.7	0
6.8	0
6.9	0
7	0
7.1	0
7.2	0
7.3	0
7.4	0
7.5	0
7.6	0
7.7	0
7.8	0
7.9	0
8	0
8.1	0
8.2	0
8.3	0
8.4	0
8.5	0
8.6	0
8.7	0
8.8	0
8.9	0
9	0
9.1	0
9.2	0
9.3	0
9.4	0
9.5	0
9.6	0
9.7	0
9.8	0
9.9	0
10	0
10.1	0
10.2	0
10.3	0
10.4	0
10.5	0
10.6	0
10.7	0
10.8	0
10.9	0
11	0
11.1	0
11.2	0
11.3	0
11.4	0
11.5	0
11.6	0
11.7	0
11.8	0
11.9	0
12	0
12.1	0
12.2	0
12.3	0
12.4	0
12.5	0
12.6	0
12.7	0
12.8	0
12.9	0
13	0
13.1	0
13.2	0
13.3	0
13.4	0
13.5	0
13.6	0
13.7	0
13.8	0
13.9	0
14	0
14.1	0
14.2	0
14.3	0
14.4	0
14.5	0
14.6	0
14.7	0
14.8	0
14.9	0
15	0
15.1	0
15.2	0
15.3	0
15.4	0
15.5	0
15.6	0
15.7	0
15.8	0
15.9	0
16	0
16.1	0
16.2	0
16.3	0
16.4	0
16.5	0
16.6	0
16.7	0
16.8	0
16.9	0
17	0
17.1	0
17.2	0
17.3	0
17.4	0
17.5	0
17.6	0
17.7	0
17.8	0
17.9	0
18	0
18.1	0
18.2	0
18.3	0
18.4	0
18.5	0
18.6	0
18.7	0
18.8	0
18.9	0
19	0
19.1	0
19.2	0
19.3	0
19.4	0
19.5	0
19.6	0
19.7	0
19.8	0
19.9	0
20	0
20.1	0
20.2	0
20.3	0
20.4	0
20.5	0
20.6	0
20.7	0
20.8	0
20.9	0
21	0
21.1	0
21.2	0
21.3	0
21.4	0
21.5	0
21.6	0
21.7	0
21.8	0
21.9	0
22	0
22.1	0
22.2	0
22.3	0
22.4	0
22.5	0
22.6	0
22.7	0
22.8	0
22.9	0
23	0
23.1	0
23.2	0
23.3	0
23.4	0
23.5	0
23.6	0
23.7	0
23.8	0
23.9	0
24	0
24.1	0
24.2	0
24.3	0
24.4	0
24.5	0
24.6	0
24.7	0
24.8	0
24.9	0
25	0
25.1	0
25.2	0
25.3	0
25.4	0
25.5	0
25.6	0
25.7	0
25.8	0
25.9	0
26	0
26.1	0
26.2	0
26.3	0
26.4	0
26.5	0
26.6	0
26.7	0
26.8	0
26.9	0
27	0
27.1	0
27.2	0
27.3	0
27.4	0
27.5	0
27.6	0
27.7	0
27.8	0
27.9	0
28	0
28.1	0
28.2	0
28.3	0
28.4	0
28.5	0
28.6	0
28.7	0
28.8	0
28.9	0
29	0
29.1	0
29.2	0
29.3	0
29.4	0
29.5	0
29.6	0
29.7	0
29.8	0
29.9	0
30	0
30.1	0
30.2	0
30.3	0
30.4	0
30.5	0
30.6	0
30.7	0
30.8	0
30.9	0
31	0
31.1	0
31.2	0
31.3	0
31.4	0
31.5	0
31.6	0
31.7	0
31.8	0
31.9	0
32	0
32.1	0
32.2	0
32.3	0
32.4	0
32.5	0
32.6	0
32.7	0
32.8	0
32.9	0
33	0
33.1	0
33.2	0
33.3	0
33.4	0
33.5	0
33.6	0
33.7	0
33.8	0
33.9	0
34	0
34.1	0
34.2	0
34.3	0
34.4	0
34.5	0
34.6	0
34.7	0
34.8	0
34.9	0
35	0
35.1	0
35.2	0
35.3	0
35.4	0
35.5	0
35.6	0
35.7	0
35.8	0
35.9	0
36	0
36.1	0
36.2	0
36.3	0
36.4	0
36.5	0
36.6	0
36.7	0
36.8	0
36.9	0
37	0
37.1	0
37.2	0
37.3	0
37.4	0
37.5	0
37.6	0
37.7	0
37.8	0
37.9	0
38	0
38.1	0
38.2	0
38.3	0
38.4	0
38.5	0
38.6	0
38.7	0
38.8	0
38.9	0
39	0
39.1	0
39.2	0
39.3	0
39.4	0
39.5	0
39.6	0
39.7	0
39.8	0
39.9	0
40	0
40.1	0
40.2	0
40.3	0
40.4	0
40.5	0
40.6	0
40.7	0
40.8	0
40.9	0
41	0
41.1	0
41.2	0
41.3	0
41.4	0
41.5	0
41.6	0
41.7	0
41.8	0
41.9	0
42	0
42.1	0
42.2	0
42.3	0
42.4	0
42.5	0
42.6	0
42.7	0
42.8	0
42.9	0
43	0
43.1	0
43.2	0
43.3	0
43.4	0
43.5	0
43.6	0
43.7	0
43.8	0
43.9	0
44	0
44.1	0
44.2	0
44.3	0
44.4	0
44.5	0
44.6	0
44.7	0
44.8	0
44.9	0
45	0
45.1	0
45.2	0
45.3	0
45.4	0
45.5	0
45.6	0
45.7	0
45.8	0
45.9	0
46	0
46.1	0
46.2	0
46.3	0
46.4	0
46.5	0
46.6	0
46.7	0
46.8	0
46.9	0
47	0
47.1	0
47.2	0
47.3	0
47.4	0
47.5	0
47.6	0
47.7	0
47.8	0
47.9	0
48	0
48.1	0
48.2	0
48.3	0
48.4	0
48.5	0
48.6	0
48.7	0
48.8	0
48.9	0
49	0
49.1	0
49.2	0
49.3	0
49.4	0
49.5	0
49.6	0
49.7	0
49.8	0
49.9	0
50	0
50.1	0
50.2	0
50.3	0
50.4	0
50.5	0
50.6	0
50.7	0
50.8	0
50.9	0
51	0
51.1	0
51.2	0
51.3	0
51.4	0
51.5	0
51.6	0
51.7	0
51.8	0
51.9	0
52	0
52.1	0
52.2	0
52.3	0
52.4	0
52.5	0
52.6	0
52.7	0
52.8	0
52.9	0
53	0
53.1	0
53.2	0
53.3	0
53.4	0
53.5	0
53.6	0
53.7	0
53.8	0
53.9	0
54	0
54.1	0
54.2	0
54.3	0
54.4	0
54.5	0
54.6	0
54.7	0
54.8	0
54.9	0
55	0
55.1	0
55.2	0
55.3	0
55.4	0
55.5	0
55.6	0
55.7	0
55.8	0
55.9	0
56	0
56.1	0
56.2	0
56.3	0
56.4	0
56.5	0
56.6	0
56.7	0
56.8	0
56.9	0
57	0
57.1	0
57.2	0
57.3	0
57.4	0
57.5	0
57.6	0
57.7	0
57.8	0
57.9	0
58	0
58.1	0
58.2	0
58.3	0
58.4	0
58.5	0
58.6	0
58.7	0
58.8	0
58.9	0
59	0
59.1	0
59.2	0
59.3	0
59.4	0
59.5	0
59.6	0
59.7	0
59.8	0
59.9	0
60	0
60.1	0
60.2	0
60.3	0
60.4	0
60.5	0
60.6	0
60.7	0
60.8	0
60.9	0
61	0
61.1	0
61.2	0
61.3	0
61.4	0
61.5	0
61.6	0
61.7	0
61.8	0
61.9	0
62	0
62.1	0
62.2	0
62.3	0
62.4	0
62.5	0
62.6	0
62.7	0
62.8	0
62.9	0
63	0
63.1	0
63.2	0
63.3	0
63.4	0
63.5	0
63.6	0
63.7	0
63.8	0
63.9	0
64	0
64.1	0
64.2	0
64.3	0
64.4	0
64.5	0
64.6	0
64.7	0
64.8	0
64.9	0
65	0
65.1	0
65.2	0
65.3	0
65.4	0
65.5	0
65.6	0
65.7	0
65.8	0
65.9	0
66	0
66.1	0
66.2	0
66.3	0
66.4	0
66.5	0
66.6	0
66.7	0
66.8	0
66.9	0
67	0
67.1	0
67.2	0
67.3	0
67.4	0
67.5	0
67.6	0
67.7	0
67.8	0
67.9	0
68	0
68.1	0
68.2	0
68.3	0
68.4	0
68.5	0
68.6	0
68.7	0
68.8	0
68.9	0
69	0
69.1	0
69.2	0
69.3	0
69.4	0
69.5	0
69.6	0
69.7	0
69.8	0
69.9	0
70	0
70.1	0
70.2	0
70.3	0
70.4	0
70.5	0
70.6	0
70.7	0
70.8	0
70.9	0
71	0
71.1	0
71.2	0
71.3	0
71.4	0
71.5	0
71.6	0
71.7	0
71.8	0
71.9	0
72	0
72.1	0
72.2	0
72.3	0
72.4	0
72.5	0
72.6	0
72.7	0
72.8	0
72.9	0
73	0
73.1	0
73.2	0
73.3	0
73.4	0
73.5	0
73.6	0
73.7	0
73.8	0
73.9	0
74	0
74.1	0
74.2	0
74.3	0
74.4	0
74.5	0
74.6	0
74.7	0
74.8	0
74.9	0
75	0
75.1	0
75.2	0
75.3	0
75.4	0
75.5	0
75.6	0
75.7	0
75.8	0
75.9	0
76	0
76.1	0
76.2	0
76.3	0
76.4	0
76.5	0
76.6	0
76.7	0
76.8	0
76.9	0
77	0
77.1	0
77.2	0
77.3	0
77.4	0
77.5	0
77.6	0
77.7	0
77.8	0
77.9	0
78	0
78.1	0
78.2	0
78.3	0
78.4	0
78.5	0
78.6	0
78.7	0
78.8	0
78.9	0
79	0
79.1	0
79.2	0
79.3	0
79.4	0
79.5	0
79.6	0
79.7	0
79.8	0
79.9	0
80	0
80.1	0
80.2	0
80.3	0
80.4	0
80.5	0
80.6	0
80.7	0
80.8	0
80.9	0
81	0
81.1	0
81.2	0
81.3	0
81.4	0
81.5	0
81.6	0
81.7	0
81.8	0
81.9	0
82	0
82.1	0
82.2	0
82.3	0
82.4	0
82.5	0
82.6	0
82.7	0
82.8	0
82.9	0
83	0
83.1	0
83.2	0
83.3	0
83.4	0
83.5	0
83.6	0
83.7	0
83.8	0
83.9	0
84	0
84.1	0
84.2	0
84.3	0
84.4	0
84.5	0
84.6	0
84.7	0
84.8	0
84.9	0
85	0
85.1	0
85.2	0
85.3	0
85.4	0
85.5	0
85.6	0
85.7	0
85.8	0
85.9	0
86	0
86.1	0
86.2	0
86.3	0
86.4	0
86.5	0
86.6	0
86.7	0
86.8	0
86.9	0
87	0
87.1	0
87.2	0
87.3	0
87.4	0
87.5	0
87.6	0
87.7	0
87.8	0
87.9	0
88	0
88.1	0
88.2	0
88.3	0
88.4	0
88.5	0
88.6	0
88.7	0
88.8	0
88.9	0
89	0
89.1	0
89.2	0
89.3	0
89.4	0
89.5	0
89.6	0
89.7	0
89.8	0
89.9	0
90	0
90.1	0
90.2	0
90.3	0
90.4	0
90.5	0
90.6	0
90.7	0
90.8	0
90.9	0
91	0
91.1	0
91.2	0
91.3	0
91.4	0
91.5	0
91.6	0
91.7	0
91.8	0
91.9	0
92	0
92.1	0
92.2	0
92.3	0
92.4	0
92.5	0
92.6	0
92.7	0
92.8	0
92.9	0
93	0
93.1	0
93.2	0
93.3	0
93.4	0
93.5	0
93.6	0
93.7	0
93.8	0
93.9	0
94	0
94.1	0
94.2	0
94.3	0
94.4	0
94.5	0
94.6	0
94.7	0
94.8	0
94.9	0
95	0
95.1	0
95.2	0
95.3	0
95.4	0
95.5	0
95.6	0
95.7	0
95.8	0
95.9	0
96	0
96.1	0
96.2	0
96.3	0
96.4	0
96.5	0
96.6	0
96.7	0
96.8	0
96.9	0
97	0
97.1	0
97.2	0
97.3	0
97.4	0
97.5	0
97.6	0
97.7	0
97.8	0
97.9	0
98	0
98.1	0
98.2	0
98.3	0
98.4	0
98.5	0
98.6	0
98.7	0
98.8	0
98.9	0
99	0
99.1	0
99.2	0
99.3	0
99.4	0
99.5	0
99.6	0
99.7	0
99.8	0
99.9	0
100	0
100.1	0
100.2	0
100.3	0
100.4	0
100.5	0
100.6	0
100.7	0
100.8	0.001
100.9	0.003
101	0.005
101.1	0.007
101.2	0.009
101.3	0.01
101.4	0.011
101.5	0.012
101.6	0.013
101.7	0.015
101.8	0.017
101.9	0.019
102	0.021
102.1	0.022
102.2	0.023
102.3	0.024
102.4	0.029
102.5	0.031
102.6	0.039
102.7	0.039
102.8	0.039
102.9	0.04
103	0.045
103.1	0.048
103.2	0.05
103.3	0.051
103.4	0.051
103.5	0.055
103.6	0.058
103.7	0.062
103.8	0.062
103.9	0.064
104	0.065
104.1	0.069
104.2	0.073
104.3	0.076
104.4	0.078
104.5	0.079
104.6	0.081
104.7	0.082
104.8	0.084
104.9	0.085
105	0.088
105.1	0.093
105.2	0.095
105.3	0.097
105.4	0.099
105.5	0.1
105.6	0.104
105.7	0.109
105.8	0.113
105.9	0.113
106	0.115
106.1	0.119
106.2	0.125
106.3	0.126
106.4	0.128
106.5	0.128
106.6	0.129
106.7	0.13
106.8	0.132
106.9	0.133
107	0.137
107.1	0.139
107.2	0.142
107.3	0.142
107.4	0.142
107.5	0.145
107.6	0.149
107.7	0.151
107.8	0.153
107.9	0.156
108	0.159
108.1	0.16
108.2	0.162
108.3	0.163
108.4	0.169
108.5	0.17
108.6	0.172
108.7	0.175
108.8	0.177
108.9	0.178
109	0.178
109.1	0.182
109.2	0.185
109.3	0.189
109.4	0.192
109.5	0.193
109.6	0.196
109.7	0.198
109.8	0.198
109.9	0.201
110	0.203
110.1	0.208
110.2	0.211
110.3	0.212
110.4	0.213
110.5	0.213
110.6	0.215
110.7	0.217
110.8	0.218
110.9	0.222
111	0.223
111.1	0.224
111.2	0.226
111.3	0.225
111.4	0.226
111.5	0.228
111.6	0.229
111.7	0.23
111.8	0.231
111.9	0.231
112	0.235
112.1	0.236
112.2	0.238
112.3	0.239
112.4	0.243
112.5	0.247
112.6	0.247
112.7	0.248
112.8	0.25
112.9	0.253
113	0.256
113.1	0.256
113.2	0.259
113.3	0.262
113.4	0.265
113.5	0.266
113.6	0.269
113.7	0.274
113.8	0.275
113.9	0.277
114	0.277
114.1	0.278
114.2	0.279
114.3	0.28
114.4	0.281
114.5	0.282
114.6	0.283
114.7	0.283
114.8	0.285
114.9	0.284
115	0.284
115.1	0.286
115.2	0.286
115.3	0.287
115.4	0.288
115.5	0.29
115.6	0.294
115.7	0.294
115.8	0.295
115.9	0.297
116	0.297
116.1	0.298
116.2	0.298
116.3	0.298
116.4	0.3
116.5	0.304
116.6	0.307
116.7	0.309
116.8	0.31
116.9	0.311
117	0.314
117.1	0.315
117.2	0.314
117.3	0.316
117.4	0.317
117.5	0.319
117.6	0.321
117.7	0.322
117.8	0.322
117.9	0.325
118	0.324
118.1	0.326
118.2	0.327
118.3	0.329
118.4	0.328
118.5	0.329
118.6	0.334
118.7	0.336
118.8	0.336
118.9	0.337
119	0.34
119.1	0.345
119.2	0.344
119.3	0.345
119.4	0.346
119.5	0.349
119.6	0.352
119.7	0.352
119.8	0.356
119.9	0.358
120	0.36
120.1	0.361
120.2	0.362
120.3	0.36
120.4	0.361
120.5	0.364
120.6	0.366
120.7	0.367
120.8	0.37
120.9	0.373
121	0.375
121.1	0.381
121.2	0.382
121.3	0.383
121.4	0.385
121.5	0.388
121.6	0.388
121.7	0.388
121.8	0.389
121.9	0.39
122	0.39
122.1	0.39
122.2	0.391
122.3	0.392
122.4	0.394
122.5	0.394
122.6	0.395
122.7	0.394
122.8	0.398
122.9	0.399
123	0.399
123.1	0.399
123.2	0.401
123.3	0.404
123.4	0.404
123.5	0.403
123.6	0.405
123.7	0.405
123.8	0.409
123.9	0.411
124	0.413
124.1	0.416
124.2	0.416
124.3	0.417
124.4	0.416
124.5	0.421
124.6	0.421
124.7	0.421
124.8	0.423
124.9	0.426
125	0.429
125.1	0.43
125.2	0.433
125.3	0.433
125.4	0.433
125.5	0.435
125.6	0.436
125.7	0.436
125.8	0.437
125.9	0.437
126	0.437
126.1	0.439
126.2	0.439
126.3	0.44
126.4	0.439
126.5	0.442
126.6	0.442
126.7	0.444
126.8	0.446
126.9	0.446
127	0.449
127.1	0.449
127.2	0.45
127.3	0.452
127.4	0.456
127.5	0.456
127.6	0.455
127.7	0.46
127.8	0.46
127.9	0.46
128	0.46
128.1	0.46
128.2	0.463
128.3	0.463
128.4	0.465
128.5	0.467
128.6	0.468
128.7	0.469
128.8	0.47
128.9	0.472
129	0.473
129.1	0.476
129.2	0.475
129.3	0.476
129.4	0.475
129.5	0.475
129.6	0.476
129.7	0.476
129.8	0.478
129.9	0.481
130	0.482
130.1	0.482
130.2	0.483
130.3	0.486
130.4	0.486
130.5	0.487
130.6	0.486
130.7	0.488
130.8	0.488
130.9	0.49
131	0.494
131.1	0.496
131.2	0.497
131.3	0.496
131.4	0.496
131.5	0.496
131.6	0.499
131.7	0.502
131.8	0.505
131.9	0.504
132	0.504
132.1	0.505
132.2	0.507
132.3	0.509
132.4	0.509
132.5	0.508
132.6	0.508
132.7	0.508
132.8	0.508
132.9	0.507
133	0.507
133.1	0.506
133.2	0.507
133.3	0.506
133.4	0.507
133.5	0.507
133.6	0.509
133.7	0.509
133.8	0.511
133.9	0.51
134	0.512
134.1	0.51
134.2	0.51
134.3	0.51
134.4	0.51
134.5	0.51
134.6	0.512
134.7	0.512
134.8	0.513
134.9	0.513
135	0.514
135.1	0.513
135.2	0.515
135.3	0.516
135.4	0.516
135.5	0.517
135.6	0.518
135.7	0.518
135.8	0.517
135.9	0.518
136	0.518
136.1	0.52
136.2	0.522
136.3	0.52
136.4	0.52
136.5	0.523
136.6	0.523
136.7	0.522
136.8	0.522
136.9	0.524
137	0.528
137.1	0.529
137.2	0.53
137.3	0.529
137.4	0.531
137.5	0.53
137.6	0.532
137.7	0.534
137.8	0.535
137.9	0.535
138	0.535
138.1	0.535
138.2	0.538
138.3	0.539
138.4	0.539
138.5	0.541
138.6	0.541
138.7	0.544
138.8	0.544
138.9	0.543
139	0.544
139.1	0.545
139.2	0.544
139.3	0.544
139.4	0.545
139.5	0.546
139.6	0.548
139.7	0.55
139.8	0.551
139.9	0.552
140	0.551
140.1	0.551
140.2	0.555
140.3	0.557
140.4	0.557
140.5	0.553
140.6	0.553
140.7	0.553
140.8	0.551
140.9	0.552
141	0.553
141.1	0.554
141.2	0.552
141.3	0.554
141.4	0.555
141.5	0.558
141.6	0.561
141.7	0.561
141.8	0.561
141.9	0.559
142	0.56
142.1	0.56
142.2	0.558
142.3	0.56
142.4	0.561
142.5	0.562
142.6	0.563
142.7	0.563
142.8	0.562
142.9	0.561
143	0.561
143.1	0.561
143.2	0.561
143.3	0.56
143.4	0.563
143.5	0.564
143.6	0.566
143.7	0.568
143.8	0.569
143.9	0.569
144	0.569
144.1	0.567
144.2	0.568
144.3	0.567
144.4	0.568
144.5	0.569
144.6	0.569
144.7	0.571
144.8	0.572
144.9	0.575
145	0.577
145.1	0.578
145.2	0.578
145.3	0.578
145.4	0.579
145.5	0.582
145.6	0.583
145.7	0.585
145.8	0.587
145.9	0.587
146	0.589
146.1	0.589
146.2	0.589
146.3	0.593
146.4	0.596
146.5	0.596
146.6	0.599
146.7	0.6
146.8	0.6
146.9	0.599
147	0.6
147.1	0.599
147.2	0.599
147.3	0.6
147.4	0.602
147.5	0.605
147.6	0.606
147.7	0.607
147.8	0.606
147.9	0.608
148	0.609
148.1	0.609
148.2	0.611
148.3	0.613
148.4	0.613
148.5	0.613
148.6	0.612
148.7	0.612
148.8	0.612
148.9	0.613
149	0.613
149.1	0.614
149.2	0.615
149.3	0.616
149.4	0.616
149.5	0.615
149.6	0.617
149.7	0.617
149.8	0.619
149.9	0.618
150	0.617
150.1	0.617
150.2	0.621
150.3	0.621
150.4	0.623
150.5	0.623
150.6	0.624
150.7	0.626
150.8	0.627
150.9	0.627
151	0.63
151.1	0.63
151.2	0.63
151.3	0.63
151.4	0.63
151.5	0.633
151.6	0.634
151.7	0.635
151.8	0.638
151.9	0.638
152	0.638
152.1	0.639
152.2	0.638
152.3	0.637
152.4	0.635
152.5	0.635
152.6	0.633
152.7	0.632
152.8	0.632
152.9	0.631
153	0.631
153.1	0.632
153.2	0.634
153.3	0.634
153.4	0.634
153.5	0.637
153.6	0.639
153.7	0.641
153.8	0.643
153.9	0.644
154	0.645
154.1	0.645
154.2	0.644
154.3	0.645
154.4	0.644
154.5	0.647
154.6	0.648
154.7	0.649
154.8	0.649
154.9	0.651
155	0.647
155.1	0.646
155.2	0.648
155.3	0.648
155.4	0.65
155.5	0.654
155.6	0.654
155.7	0.655
155.8	0.654
155.9	0.652
156	0.651
156.1	0.652
156.2	0.653
156.3	0.653
156.4	0.653
156.5	0.653
156.6	0.651
156.7	0.652
156.8	0.651
156.9	0.65
157	0.65
157.1	0.65
157.2	0.65
157.3	0.649
157.4	0.647
157.5	0.647
157.6	0.651
157.7	0.652
157.8	0.651
157.9	0.654
158	0.653
158.1	0.653
158.2	0.654
158.3	0.654
158.4	0.654
158.5	0.656
158.6	0.657
158.7	0.66
158.8	0.659
158.9	0.659
159	0.659
159.1	0.66
159.2	0.662
159.3	0.663
159.4	0.664
159.5	0.663
159.6	0.663
159.7	0.661
159.8	0.663
159.9	0.663
160	0.663
160.1	0.662
160.2	0.661
160.3	0.661
160.4	0.662
160.5	0.661
160.6	0.662
160.7	0.661
160.8	0.662
160.9	0.663
161	0.665
161.1	0.664
161.2	0.665
161.3	0.664
161.4	0.667
161.5	0.668
161.6	0.667
161.7	0.667
161.8	0.667
161.9	0.669
162	0.669
162.1	0.669
162.2	0.67
162.3	0.669
162.4	0.67
162.5	0.668
162.6	0.667
162.7	0.667
162.8	0.665
162.9	0.666
163	0.667
163.1	0.668
163.2	0.668
163.3	0.665
163.4	0.665
163.5	0.667
163.6	0.666
163.7	0.667
163.8	0.668
163.9	0.666
164	0.669
164.1	0.669
164.2	0.671
164.3	0.671
164.4	0.671
164.5	0.672
164.6	0.674
164.7	0.674
164.8	0.671
164.9	0.672
165	0.671
165.1	0.672
165.2	0.674
165.3	0.676
165.4	0.677
165.5	0.677
165.6	0.68
165.7	0.68
165.8	0.679
165.9	0.681
166	0.682
166.1	0.683
166.2	0.681
166.3	0.683
166.4	0.681
166.5	0.68
166.6	0.68
166.7	0.681
166.8	0.68
166.9	0.683
167	0.683
167.1	0.684
167.2	0.686
167.3	0.687
167.4	0.685
167.5	0.684
167.6	0.685
167.7	0.685
167.8	0.686
167.9	0.684
168	0.684
168.1	0.685
168.2	0.684
168.3	0.686
168.4	0.687
168.5	0.686
168.6	0.687
168.7	0.688
168.8	0.688
168.9	0.686
169	0.685
169.1	0.685
169.2	0.689
169.3	0.69
169.4	0.69
169.5	0.688
169.6	0.686
169.7	0.688
169.8	0.688
169.9	0.689
170	0.688
170.1	0.689
170.2	0.687
170.3	0.688
170.4	0.689
170.5	0.688
170.6	0.687
170.7	0.686
170.8	0.685
170.9	0.69
171	0.691
171.1	0.692
171.2	0.692
171.3	0.693
171.4	0.694
171.5	0.693
171.6	0.694
171.7	0.694
171.8	0.694
171.9	0.694
172	0.694
172.1	0.694
172.2	0.694
172.3	0.693
172.4	0.693
172.5	0.693
172.6	0.693
172.7	0.694
172.8	0.694
172.9	0.695
173	0.696
173.1	0.694
173.2	0.695
173.3	0.697
173.4	0.698
173.5	0.698
173.6	0.699
173.7	0.7
173.8	0.7
173.9	0.702
174	0.704
174.1	0.703
174.2	0.702
174.3	0.704
174.4	0.702
174.5	0.701
174.6	0.702
174.7	0.703
174.8	0.703
174.9	0.702
175	0.703
175.1	0.703
175.2	0.703
175.3	0.705
175.4	0.705
175.5	0.705
175.6	0.707
175.7	0.704
175.8	0.705
175.9	0.703
176	0.702
176.1	0.705
176.2	0.704
176.3	0.703
176.4	0.701
176.5	0.702
176.6	0.701
176.7	0.7
176.8	0.702
176.9	0.701
177	0.7
177.1	0.701
177.2	0.703
177.3	0.702
177.4	0.702
177.5	0.701
177.6	0.701
177.7	0.701
177.8	0.701
177.9	0.701
178	0.703
178.1	0.703
178.2	0.704
178.3	0.704
178.4	0.704
178.5	0.703
178.6	0.704
178.7	0.703
178.8	0.699
178.9	0.699
179	0.701
179.1	0.701
179.2	0.702
179.3	0.702
179.4	0.699
179.5	0.699
179.6	0.698
179.7	0.699
179.8	0.696
179.9	0.696
180	0.696
180.1	0.698
180.2	0.7
180.3	0.7
180.4	0.7
180.5	0.7
180.6	0.7
180.7	0.701
180.8	0.701
180.9	0.701
181	0.701
181.1	0.702
181.2	0.702
181.3	0.702
181.4	0.702
181.5	0.702
181.6	0.702
181.7	0.702
181.8	0.703
181.9	0.704
182	0.705
182.1	0.704
182.2	0.706
182.3	0.709
182.4	0.711
182.5	0.708
182.6	0.706
182.7	0.705
182.8	0.705
182.9	0.706
183	0.705
183.1	0.705
183.2	0.704
183.3	0.703
183.4	0.702
183.5	0.702
183.6	0.705
183.7	0.706
183.8	0.705
183.9	0.704
184	0.705
184.1	0.703
184.2	0.703
184.3	0.703
184.4	0.703
184.5	0.705
184.6	0.705
184.7	0.705
184.8	0.704
184.9	0.704
185	0.705
185.1	0.705
185.2	0.705
185.3	0.706
185.4	0.707
185.5	0.708
185.6	0.707
185.7	0.709
185.8	0.709
185.9	0.708
186	0.707
186.1	0.708
186.2	0.707
186.3	0.707
186.4	0.707
186.5	0.709
186.6	0.71
186.7	0.712
186.8	0.709
186.9	0.709
187	0.709
187.1	0.709
187.2	0.708
187.3	0.708
187.4	0.708
187.5	0.707
187.6	0.709
187.7	0.707
187.8	0.708
187.9	0.706
188	0.707
188.1	0.706
188.2	0.703
188.3	0.704
188.4	0.705
188.5	0.704
188.6	0.706
188.7	0.706
188.8	0.706
188.9	0.705
189	0.705
189.1	0.707
189.2	0.71
189.3	0.711
189.4	0.712
189.5	0.713
189.6	0.712
189.7	0.712
189.8	0.714
189.9	0.712
190	0.713
190.1	0.714
190.2	0.713
190.3	0.712
190.4	0.712
190.5	0.712
190.6	0.712
190.7	0.711
190.8	0.711
190.9	0.71
191	0.707
191.1	0.709
191.2	0.709
191.3	0.709
191.4	0.709
191.5	0.707
191.6	0.707
191.7	0.707
191.8	0.707
191.9	0.708
192	0.707
192.1	0.705
192.2	0.706
192.3	0.707
192.4	0.708
192.5	0.708
192.6	0.708
192.7	0.708
192.8	0.706
192.9	0.705
193	0.706
193.1	0.707
193.2	0.709
193.3	0.708
193.4	0.709
193.5	0.709
193.6	0.71
193.7	0.711
193.8	0.711
193.9	0.71
194	0.71
194.1	0.712
194.2	0.711
194.3	0.711
194.4	0.71
194.5	0.71
194.6	0.712
194.7	0.71
194.8	0.71
194.9	0.71
195	0.707
195.1	0.707
195.2	0.707
195.3	0.708
195.4	0.706
195.5	0.708
195.6	0.708
195.7	0.706
195.8	0.706
195.9	0.705
196	0.707
196.1	0.707
196.2	0.709
196.3	0.706
196.4	0.707
196.5	0.708
196.6	0.708
196.7	0.71
196.8	0.713
196.9	0.713
197	0.712
197.1	0.714
197.2	0.714
197.3	0.714
197.4	0.716
197.5	0.718
197.6	0.717
197.7	0.716
197.8	0.716
197.9	0.714
198	0.713
198.1	0.712
198.2	0.711
198.3	0.71
198.4	0.711
198.5	0.711
198.6	0.712
198.7	0.71
198.8	0.71
198.9	0.71
199	0.709
199.1	0.71
199.2	0.71
199.3	0.711
199.4	0.708
199.5	0.708
199.6	0.708
199.7	0.709
199.8	0.709
199.9	0.708
200	0.708
[truncated: 14,000 more rows]
