# Supplementary material for: Bayesian inference of kinetic schemes for ion channels by Kalman filtering
Source: eLife journal article supplement (doi:10.7554/elife.62714), 2022-05-04
Supplement: fig1-data1 [file 4_Sim_N_1000_Fluor_MW.xlsx]

## Sheet: Tabelle1
0.1	0
0.2	0
0.3	0
0.4	0
0.5	0
0.6	0
0.7	0
0.8	0
0.9	0
1	0
1.1	0
1.2	0
1.3	0
1.4	0
1.5	0
1.6	0
1.7	0
1.8	0
1.9	0
2	0
2.1	0
2.2	0
2.3	0
2.4	0
2.5	0
2.6	0
2.7	0
2.8	0
2.9	0
3	0
3.1	0
3.2	0
3.3	0
3.4	0
3.5	0
3.6	0
3.7	0
3.8	0
3.9	0
4	0
4.1	0
4.2	0
4.3	0
4.4	0
4.5	0
4.6	0
4.7	0
4.8	0
4.9	0
5	0
5.1	0
5.2	0
5.3	0
5.4	0
5.5	0
5.6	0
5.7	0
5.8	0
5.9	0
6	0
6.1	0
6.2	0
6.3	0
6.4	0
6.5	0
6.6	0
6.7	0
6.8	0
6.9	0
7	0
7.1	0
7.2	0
7.3	0
7.4	0
7.5	0
7.6	0
7.7	0
7.8	0
7.9	0
8	0
8.1	0
8.2	0
8.3	0
8.4	0
8.5	0
8.6	0
8.7	0
8.8	0
8.9	0
9	0
9.1	0
9.2	0
9.3	0
9.4	0
9.5	0
9.6	0
9.7	0
9.8	0
9.9	0
10	0
10.1	0
10.2	0
10.3	0
10.4	0
10.5	0
10.6	0
10.7	0
10.8	0
10.9	0
11	0
11.1	0
11.2	0
11.3	0
11.4	0
11.5	0
11.6	0
11.7	0
11.8	0
11.9	0
12	0
12.1	0
12.2	0
12.3	0
12.4	0
12.5	0
12.6	0
12.7	0
12.8	0
12.9	0
13	0
13.1	0
13.2	0
13.3	0
13.4	0
13.5	0
13.6	0
13.7	0
13.8	0
13.9	0
14	0
14.1	0
14.2	0
14.3	0
14.4	0
14.5	0
14.6	0
14.7	0
14.8	0
14.9	0
15	0
15.1	0
15.2	0
15.3	0
15.4	0
15.5	0
15.6	0
15.7	0
15.8	0
15.9	0
16	0
16.1	0
16.2	0
16.3	0
16.4	0
16.5	0
16.6	0
16.7	0
16.8	0
16.9	0
17	0
17.1	0
17.2	0
17.3	0
17.4	0
17.5	0
17.6	0
17.7	0
17.8	0
17.9	0
18	0
18.1	0
18.2	0
18.3	0
18.4	0
18.5	0
18.6	0
18.7	0
18.8	0
18.9	0
19	0
19.1	0
19.2	0
19.3	0
19.4	0
19.5	0
19.6	0
19.7	0
19.8	0
19.9	0
20	0
20.1	0
20.2	0
20.3	0
20.4	0
20.5	0
20.6	0
20.7	0
20.8	0
20.9	0
21	0
21.1	0
21.2	0
21.3	0
21.4	0
21.5	0
21.6	0
21.7	0
21.8	0
21.9	0
22	0
22.1	0
22.2	0
22.3	0
22.4	0
22.5	0
22.6	0
22.7	0
22.8	0
22.9	0
23	0
23.1	0
23.2	0
23.3	0
23.4	0
23.5	0
23.6	0
23.7	0
23.8	0
23.9	0
24	0
24.1	0
24.2	0
24.3	0
24.4	0
24.5	0
24.6	0
24.7	0
24.8	0
24.9	0
25	0
25.1	0
25.2	0
25.3	0
25.4	0
25.5	0
25.6	0
25.7	0
25.8	0
25.9	0
26	0
26.1	0
26.2	0
26.3	0
26.4	0
26.5	0
26.6	0
26.7	0
26.8	0
26.9	0
27	0
27.1	0
27.2	0
27.3	0
27.4	0
27.5	0
27.6	0
27.7	0
27.8	0
27.9	0
28	0
28.1	0
28.2	0
28.3	0
28.4	0
28.5	0
28.6	0
28.7	0
28.8	0
28.9	0
29	0
29.1	0
29.2	0
29.3	0
29.4	0
29.5	0
29.6	0
29.7	0
29.8	0
29.9	0
30	0
30.1	0
30.2	0
30.3	0
30.4	0
30.5	0
30.6	0
30.7	0
30.8	0
30.9	0
31	0
31.1	0
31.2	0
31.3	0
31.4	0
31.5	0
31.6	0
31.7	0
31.8	0
31.9	0
32	0
32.1	0
32.2	0
32.3	0
32.4	0
32.5	0
32.6	0
32.7	0
32.8	0
32.9	0
33	0
33.1	0
33.2	0
33.3	0
33.4	0
33.5	0
33.6	0
33.7	0
33.8	0
33.9	0
34	0
34.1	0
34.2	0
34.3	0
34.4	0
34.5	0
34.6	0
34.7	0
34.8	0
34.9	0
35	0
35.1	0
35.2	0
35.3	0
35.4	0
35.5	0
35.6	0
35.7	0
35.8	0
35.9	0
36	0
36.1	0
36.2	0
36.3	0
36.4	0
36.5	0
36.6	0
36.7	0
36.8	0
36.9	0
37	0
37.1	0
37.2	0
37.3	0
37.4	0
37.5	0
37.6	0
37.7	0
37.8	0
37.9	0
38	0
38.1	0
38.2	0
38.3	0
38.4	0
38.5	0
38.6	0
38.7	0
38.8	0
38.9	0
39	0
39.1	0
39.2	0
39.3	0
39.4	0
39.5	0
39.6	0
39.7	0
39.8	0
39.9	0
40	0
40.1	0
40.2	0
40.3	0
40.4	0
40.5	0
40.6	0
40.7	0
40.8	0
40.9	0
41	0
41.1	0
41.2	0
41.3	0
41.4	0
41.5	0
41.6	0
41.7	0
41.8	0
41.9	0
42	0
42.1	0
42.2	0
42.3	0
42.4	0
42.5	0
42.6	0
42.7	0
42.8	0
42.9	0
43	0
43.1	0
43.2	0
43.3	0
43.4	0
43.5	0
43.6	0
43.7	0
43.8	0
43.9	0
44	0
44.1	0
44.2	0
44.3	0
44.4	0
44.5	0
44.6	0
44.7	0
44.8	0
44.9	0
45	0
45.1	0
45.2	0
45.3	0
45.4	0
45.5	0
45.6	0
45.7	0
45.8	0
45.9	0
46	0
46.1	0
46.2	0
46.3	0
46.4	0
46.5	0
46.6	0
46.7	0
46.8	0
46.9	0
47	0
47.1	0
47.2	0
47.3	0
47.4	0
47.5	0
47.6	0
47.7	0
47.8	0
47.9	0
48	0
48.1	0
48.2	0
48.3	0
48.4	0
48.5	0
48.6	0
48.7	0
48.8	0
48.9	0
49	0
49.1	0
49.2	0
49.3	0
49.4	0
49.5	0
49.6	0
49.7	0
49.8	0
49.9	0
50	0
50.1	0
50.2	0
50.3	0
50.4	0
50.5	0
50.6	0
50.7	0
50.8	0
50.9	0
51	0
51.1	0
51.2	0
51.3	0
51.4	0
51.5	0
51.6	0
51.7	0
51.8	0
51.9	0
52	0
52.1	0
52.2	0
52.3	0
52.4	0
52.5	0
52.6	0
52.7	0
52.8	0
52.9	0
53	0
53.1	0
53.2	0
53.3	0
53.4	0
53.5	0
53.6	0
53.7	0
53.8	0
53.9	0
54	0
54.1	0
54.2	0
54.3	0
54.4	0
54.5	0
54.6	0
54.7	0
54.8	0
54.9	0
55	0
55.1	0
55.2	0
55.3	0
55.4	0
55.5	0
55.6	0
55.7	0
55.8	0
55.9	0
56	0
56.1	0
56.2	0
56.3	0
56.4	0
56.5	0
56.6	0
56.7	0
56.8	0
56.9	0
57	0
57.1	0
57.2	0
57.3	0
57.4	0
57.5	0
57.6	0
57.7	0
57.8	0
57.9	0
58	0
58.1	0
58.2	0
58.3	0
58.4	0
58.5	0
58.6	0
58.7	0
58.8	0
58.9	0
59	0
59.1	0
59.2	0
59.3	0
59.4	0
59.5	0
59.6	0
59.7	0
59.8	0
59.9	0
60	0
60.1	0
60.2	0
60.3	0
60.4	0
60.5	0
60.6	0
60.7	0
60.8	0
60.9	0
61	0
61.1	0
61.2	0
61.3	0
61.4	0
61.5	0
61.6	0
61.7	0
61.8	0
61.9	0
62	0
62.1	0
62.2	0
62.3	0
62.4	0
62.5	0
62.6	0
62.7	0
62.8	0
62.9	0
63	0
63.1	0
63.2	0
63.3	0
63.4	0
63.5	0
63.6	0
63.7	0
63.8	0
63.9	0
64	0
64.1	0
64.2	0
64.3	0
64.4	0
64.5	0
64.6	0
64.7	0
64.8	0
64.9	0
65	0
65.1	0
65.2	0
65.3	0
65.4	0
65.5	0
65.6	0
65.7	0
65.8	0
65.9	0
66	0
66.1	0
66.2	0
66.3	0
66.4	0
66.5	0
66.6	0
66.7	0
66.8	0
66.9	0
67	0
67.1	0
67.2	0
67.3	0
67.4	0
67.5	0
67.6	0
67.7	0
67.8	0
67.9	0
68	0
68.1	0
68.2	0
68.3	0
68.4	0
68.5	0
68.6	0
68.7	0
68.8	0
68.9	0
69	0
69.1	0
69.2	0
69.3	0
69.4	0
69.5	0
69.6	0
69.7	0
69.8	0
69.9	0
70	0
70.1	0
70.2	0
70.3	0
70.4	0
70.5	0
70.6	0
70.7	0
70.8	0
70.9	0
71	0
71.1	0
71.2	0
71.3	0
71.4	0
71.5	0
71.6	0
71.7	0
71.8	0
71.9	0
72	0
72.1	0
72.2	0
72.3	0
72.4	0
72.5	0
72.6	0
72.7	0
72.8	0
72.9	0
73	0
73.1	0
73.2	0
73.3	0
73.4	0
73.5	0
73.6	0
73.7	0
73.8	0
73.9	0
74	0
74.1	0
74.2	0
74.3	0
74.4	0
74.5	0
74.6	0
74.7	0
74.8	0
74.9	0
75	0
75.1	0
75.2	0
75.3	0
75.4	0
75.5	0
75.6	0
75.7	0
75.8	0
75.9	0
76	0
76.1	0
76.2	0
76.3	0
76.4	0
76.5	0
76.6	0
76.7	0
76.8	0
76.9	0
77	0
77.1	0
77.2	0
77.3	0
77.4	0
77.5	0
77.6	0
77.7	0
77.8	0
77.9	0
78	0
78.1	0
78.2	0
78.3	0
78.4	0
78.5	0
78.6	0
78.7	0
78.8	0
78.9	0
79	0
79.1	0
79.2	0
79.3	0
79.4	0
79.5	0
79.6	0
79.7	0
79.8	0
79.9	0
80	0
80.1	0
80.2	0
80.3	0
80.4	0
80.5	0
80.6	0
80.7	0
80.8	0
80.9	0
81	0
81.1	0
81.2	0
81.3	0
81.4	0
81.5	0
81.6	0
81.7	0
81.8	0
81.9	0
82	0
82.1	0
82.2	0
82.3	0
82.4	0
82.5	0
82.6	0
82.7	0
82.8	0
82.9	0
83	0
83.1	0
83.2	0
83.3	0
83.4	0
83.5	0
83.6	0
83.7	0
83.8	0
83.9	0
84	0
84.1	0
84.2	0
84.3	0
84.4	0
84.5	0
84.6	0
84.7	0
84.8	0
84.9	0
85	0
85.1	0
85.2	0
85.3	0
85.4	0
85.5	0
85.6	0
85.7	0
85.8	0
85.9	0
86	0
86.1	0
86.2	0
86.3	0
86.4	0
86.5	0
86.6	0
86.7	0
86.8	0
86.9	0
87	0
87.1	0
87.2	0
87.3	0
87.4	0
87.5	0
87.6	0
87.7	0
87.8	0
87.9	0
88	0
88.1	0
88.2	0
88.3	0
88.4	0
88.5	0
88.6	0
88.7	0
88.8	0
88.9	0
89	0
89.1	0
89.2	0
89.3	0
89.4	0
89.5	0
89.6	0
89.7	0
89.8	0
89.9	0
90	0
90.1	0
90.2	0
90.3	0
90.4	0
90.5	0
90.6	0
90.7	0
90.8	0
90.9	0
91	0
91.1	0
91.2	0
91.3	0
91.4	0
91.5	0
91.6	0
91.7	0
91.8	0
91.9	0
92	0
92.1	0
92.2	0
92.3	0
92.4	0
92.5	0
92.6	0
92.7	0
92.8	0
92.9	0
93	0
93.1	0
93.2	0
93.3	0
93.4	0
93.5	0
93.6	0
93.7	0
93.8	0
93.9	0
94	0
94.1	0
94.2	0
94.3	0
94.4	0
94.5	0
94.6	0
94.7	0
94.8	0
94.9	0
95	0
95.1	0
95.2	0
95.3	0
95.4	0
95.5	0
95.6	0
95.7	0
95.8	0
95.9	0
96	0
96.1	0
96.2	0
96.3	0
96.4	0
96.5	0
96.6	0
96.7	0
96.8	0
96.9	0
97	0
97.1	0
97.2	0
97.3	0
97.4	0
97.5	0
97.6	0
97.7	0
97.8	0
97.9	0
98	0
98.1	0
98.2	0
98.3	0
98.4	0
98.5	0
98.6	0
98.7	0
98.8	0
98.9	0
99	0
99.1	0
99.2	0
99.3	0
99.4	0
99.5	0
99.6	0
99.7	0
99.8	0
99.9	0
100	0
100.1	0.1955
100.2	0.3315
100.3	0.431
100.4	0.509
100.5	0.58
100.6	0.63
100.7	0.67
100.8	0.6965
100.9	0.7255
101	0.7395
101.1	0.758
101.2	0.771
101.3	0.7835
101.4	0.799
101.5	0.8085
101.6	0.8135
101.7	0.8145
101.8	0.8205
101.9	0.825
102	0.8225
102.1	0.8245
102.2	0.8315
102.3	0.8395
102.4	0.8425
102.5	0.8475
102.6	0.8435
102.7	0.848
102.8	0.848
102.9	0.853
103	0.8515
103.1	0.853
103.2	0.8515
103.3	0.8525
103.4	0.852
103.5	0.8545
103.6	0.8555
103.7	0.85
103.8	0.858
103.9	0.86
104	0.86
104.1	0.852
104.2	0.849
104.3	0.851
104.4	0.8525
104.5	0.8525
104.6	0.851
104.7	0.8535
104.8	0.8605
104.9	0.861
105	0.8625
105.1	0.86
105.2	0.859
105.3	0.856
105.4	0.8595
105.5	0.8585
105.6	0.863
105.7	0.8665
105.8	0.8675
105.9	0.865
106	0.8655
106.1	0.869
106.2	0.865
106.3	0.87
106.4	0.871
106.5	0.866
106.6	0.8725
106.7	0.8695
106.8	0.873
106.9	0.8715
107	0.8745
107.1	0.8765
107.2	0.88
107.3	0.878
107.4	0.88
107.5	0.8805
107.6	0.8775
107.7	0.8775
107.8	0.879
107.9	0.8785
108	0.8795
108.1	0.8765
108.2	0.883
108.3	0.883
108.4	0.8845
108.5	0.881
108.6	0.885
108.7	0.8885
108.8	0.8865
108.9	0.8845
109	0.879
109.1	0.884
109.2	0.881
109.3	0.881
109.4	0.883
109.5	0.883
109.6	0.8835
109.7	0.886
109.8	0.8795
109.9	0.8755
110	0.874
110.1	0.877
110.2	0.877
110.3	0.885
110.4	0.886
110.5	0.878
110.6	0.8805
110.7	0.8855
110.8	0.8855
110.9	0.882
111	0.8845
111.1	0.8865
111.2	0.8875
111.3	0.8865
111.4	0.8875
111.5	0.892
111.6	0.8965
111.7	0.891
111.8	0.8875
111.9	0.884
112	0.887
112.1	0.89
112.2	0.8955
112.3	0.8945
112.4	0.8995
112.5	0.904
112.6	0.904
112.7	0.9065
112.8	0.896
112.9	0.89
113	0.888
113.1	0.8895
113.2	0.8855
113.3	0.8865
113.4	0.888
113.5	0.8835
113.6	0.894
113.7	0.8905
113.8	0.886
113.9	0.886
114	0.882
114.1	0.888
114.2	0.8855
114.3	0.8955
114.4	0.8935
114.5	0.894
114.6	0.8935
114.7	0.895
114.8	0.899
114.9	0.8975
115	0.9045
115.1	0.899
115.2	0.901
115.3	0.9005
115.4	0.9065
115.5	0.9075
115.6	0.906
115.7	0.907
115.8	0.907
115.9	0.9085
116	0.9075
116.1	0.91
116.2	0.908
116.3	0.905
116.4	0.905
116.5	0.904
116.6	0.9015
116.7	0.901
116.8	0.903
116.9	0.8985
117	0.903
117.1	0.9
117.2	0.9025
117.3	0.903
117.4	0.901
117.5	0.902
117.6	0.9035
117.7	0.904
117.8	0.9005
117.9	0.9045
118	0.897
118.1	0.8995
118.2	0.9045
118.3	0.904
118.4	0.898
118.5	0.8965
118.6	0.901
118.7	0.903
118.8	0.908
118.9	0.9085
119	0.9075
119.1	0.911
119.2	0.909
119.3	0.913
119.4	0.9125
119.5	0.9115
119.6	0.9075
119.7	0.9095
119.8	0.908
119.9	0.9115
120	0.909
120.1	0.9115
120.2	0.909
120.3	0.911
120.4	0.9105
120.5	0.9135
120.6	0.917
120.7	0.915
120.8	0.918
120.9	0.92
121	0.9175
121.1	0.9175
121.2	0.917
121.3	0.9185
121.4	0.9195
121.5	0.9185
121.6	0.9205
121.7	0.9225
121.8	0.92
121.9	0.919
122	0.919
122.1	0.92
122.2	0.918
122.3	0.922
122.4	0.9205
122.5	0.916
122.6	0.9215
122.7	0.9205
122.8	0.9185
122.9	0.9175
123	0.921
123.1	0.9205
123.2	0.924
123.3	0.9235
123.4	0.925
123.5	0.921
123.6	0.919
123.7	0.9175
123.8	0.9165
123.9	0.9165
124	0.918
124.1	0.919
124.2	0.9165
124.3	0.918
124.4	0.918
124.5	0.916
124.6	0.916
124.7	0.916
124.8	0.92
124.9	0.922
125	0.9235
125.1	0.9215
125.2	0.918
125.3	0.914
125.4	0.9145
125.5	0.918
125.6	0.9195
125.7	0.926
125.8	0.9205
125.9	0.9195
126	0.924
126.1	0.9295
126.2	0.928
126.3	0.9265
126.4	0.9305
126.5	0.931
126.6	0.9305
126.7	0.931
126.8	0.9315
126.9	0.9315
127	0.929
127.1	0.9285
127.2	0.929
127.3	0.9265
127.4	0.9265
127.5	0.922
127.6	0.9285
127.7	0.9275
127.8	0.929
127.9	0.9285
128	0.922
128.1	0.923
128.2	0.9265
128.3	0.9285
128.4	0.925
128.5	0.9255
128.6	0.9225
128.7	0.9245
128.8	0.9235
128.9	0.9265
129	0.927
129.1	0.9275
129.2	0.926
129.3	0.9265
129.4	0.9265
129.5	0.9275
129.6	0.9285
129.7	0.927
129.8	0.927
129.9	0.931
130	0.9335
130.1	0.932
130.2	0.93
130.3	0.927
130.4	0.923
130.5	0.924
130.6	0.92
130.7	0.922
130.8	0.9275
130.9	0.9225
131	0.9245
131.1	0.9325
131.2	0.9345
131.3	0.934
131.4	0.9305
131.5	0.934
131.6	0.9345
131.7	0.93
131.8	0.933
131.9	0.9305
132	0.934
132.1	0.9345
132.2	0.932
132.3	0.934
132.4	0.934
132.5	0.9325
132.6	0.9325
132.7	0.931
132.8	0.9315
132.9	0.933
133	0.9315
133.1	0.929
133.2	0.931
133.3	0.928
133.4	0.9315
133.5	0.931
133.6	0.931
133.7	0.933
133.8	0.932
133.9	0.935
134	0.9385
134.1	0.9395
134.2	0.9385
134.3	0.934
134.4	0.936
134.5	0.9355
134.6	0.935
134.7	0.937
134.8	0.9385
134.9	0.9395
135	0.9395
135.1	0.942
135.2	0.942
135.3	0.942
135.4	0.9435
135.5	0.9445
135.6	0.9465
135.7	0.945
135.8	0.9395
135.9	0.942
136	0.9405
136.1	0.939
136.2	0.9385
136.3	0.936
136.4	0.9375
136.5	0.934
136.6	0.9355
136.7	0.938
136.8	0.942
136.9	0.941
137	0.942
137.1	0.9425
137.2	0.941
137.3	0.9405
137.4	0.942
137.5	0.9395
137.6	0.938
137.7	0.939
137.8	0.9385
137.9	0.9445
138	0.9435
138.1	0.944
138.2	0.9465
138.3	0.947
138.4	0.945
138.5	0.9485
138.6	0.9435
138.7	0.9435
138.8	0.9455
138.9	0.9445
139	0.9455
139.1	0.9445
139.2	0.943
139.3	0.94
139.4	0.947
139.5	0.9465
139.6	0.9445
139.7	0.9455
139.8	0.943
139.9	0.941
140	0.9415
140.1	0.945
140.2	0.953
140.3	0.9495
140.4	0.948
140.5	0.9505
140.6	0.947
140.7	0.9415
140.8	0.9405
140.9	0.944
141	0.9455
141.1	0.9445
141.2	0.947
141.3	0.948
141.4	0.949
141.5	0.9505
141.6	0.9495
141.7	0.9465
141.8	0.948
141.9	0.949
142	0.9465
142.1	0.9445
142.2	0.946
142.3	0.9465
142.4	0.941
142.5	0.94
142.6	0.9445
142.7	0.9425
142.8	0.941
142.9	0.9435
143	0.9455
143.1	0.9455
143.2	0.9475
143.3	0.948
143.4	0.948
143.5	0.95
143.6	0.948
143.7	0.9485
143.8	0.9445
143.9	0.9475
144	0.947
144.1	0.9455
144.2	0.9425
144.3	0.9445
144.4	0.942
144.5	0.9415
144.6	0.9445
144.7	0.9435
144.8	0.9445
144.9	0.9475
145	0.9475
145.1	0.9475
145.2	0.953
145.3	0.9495
145.4	0.9465
145.5	0.945
145.6	0.9405
145.7	0.9425
145.8	0.9435
145.9	0.9485
146	0.949
146.1	0.946
146.2	0.941
146.3	0.945
146.4	0.9455
146.5	0.9455
146.6	0.9485
146.7	0.9515
146.8	0.952
146.9	0.95
147	0.9495
147.1	0.953
147.2	0.9525
147.3	0.9505
147.4	0.953
147.5	0.9535
147.6	0.953
147.7	0.955
147.8	0.951
147.9	0.951
148	0.9495
148.1	0.9545
148.2	0.9565
148.3	0.9545
148.4	0.954
148.5	0.955
148.6	0.955
148.7	0.9565
148.8	0.958
148.9	0.9545
149	0.9575
149.1	0.9565
149.2	0.958
149.3	0.9595
149.4	0.9585
149.5	0.961
149.6	0.9625
149.7	0.96
149.8	0.955
149.9	0.955
150	0.9525
150.1	0.9555
150.2	0.9585
150.3	0.957
150.4	0.9545
150.5	0.9545
150.6	0.953
150.7	0.9545
150.8	0.954
150.9	0.95
151	0.952
151.1	0.954
151.2	0.95
151.3	0.9515
151.4	0.956
151.5	0.953
151.6	0.955
151.7	0.955
151.8	0.956
151.9	0.957
152	0.954
152.1	0.9515
152.2	0.951
152.3	0.9515
152.4	0.956
152.5	0.96
152.6	0.961
152.7	0.96
152.8	0.958
152.9	0.9585
153	0.958
153.1	0.956
153.2	0.955
153.3	0.9555
153.4	0.956
153.5	0.954
153.6	0.9545
153.7	0.958
153.8	0.956
153.9	0.954
154	0.954
154.1	0.9525
154.2	0.9515
154.3	0.9535
154.4	0.951
154.5	0.953
154.6	0.9525
154.7	0.955
154.8	0.9495
154.9	0.9495
155	0.949
155.1	0.949
155.2	0.9495
155.3	0.95
155.4	0.9535
155.5	0.9535
155.6	0.9555
155.7	0.952
155.8	0.9555
155.9	0.958
156	0.957
156.1	0.9565
156.2	0.9555
156.3	0.951
156.4	0.9505
156.5	0.946
156.6	0.9475
156.7	0.9515
156.8	0.9525
156.9	0.946
157	0.9495
157.1	0.955
157.2	0.956
157.3	0.9535
157.4	0.9545
157.5	0.9555
157.6	0.955
157.7	0.953
157.8	0.954
157.9	0.9515
158	0.952
158.1	0.9505
158.2	0.949
158.3	0.9445
158.4	0.9435
158.5	0.9465
158.6	0.949
158.7	0.951
158.8	0.946
158.9	0.948
159	0.9475
159.1	0.945
159.2	0.9485
159.3	0.9485
159.4	0.9485
159.5	0.9505
159.6	0.9515
159.7	0.953
159.8	0.955
159.9	0.954
160	0.954
160.1	0.952
160.2	0.954
160.3	0.9555
160.4	0.9575
160.5	0.9585
160.6	0.9565
160.7	0.9555
160.8	0.953
160.9	0.953
161	0.9495
161.1	0.953
161.2	0.952
161.3	0.9525
161.4	0.952
161.5	0.9545
161.6	0.955
161.7	0.9565
161.8	0.956
161.9	0.9535
162	0.9535
162.1	0.9555
162.2	0.955
162.3	0.9555
162.4	0.953
162.5	0.955
162.6	0.9535
162.7	0.9535
162.8	0.954
162.9	0.951
163	0.9505
163.1	0.95
163.2	0.9515
163.3	0.952
163.4	0.954
163.5	0.954
163.6	0.9545
163.7	0.9545
163.8	0.9525
163.9	0.953
164	0.956
164.1	0.956
164.2	0.9545
164.3	0.9545
164.4	0.953
164.5	0.9535
164.6	0.9515
164.7	0.951
164.8	0.95
164.9	0.9505
165	0.9565
165.1	0.958
165.2	0.96
165.3	0.961
165.4	0.962
165.5	0.9605
165.6	0.959
165.7	0.9605
165.8	0.9605
165.9	0.959
166	0.958
166.1	0.955
166.2	0.9535
166.3	0.9525
166.4	0.958
166.5	0.9565
166.6	0.9585
166.7	0.96
166.8	0.959
166.9	0.96
167	0.962
167.1	0.9615
167.2	0.9585
167.3	0.9595
167.4	0.961
167.5	0.9605
167.6	0.9585
167.7	0.958
167.8	0.957
167.9	0.962
168	0.961
168.1	0.9565
168.2	0.958
168.3	0.958
168.4	0.96
168.5	0.9605
168.6	0.959
168.7	0.956
168.8	0.9595
168.9	0.961
169	0.963
169.1	0.963
169.2	0.9645
169.3	0.9625
169.4	0.9615
169.5	0.961
169.6	0.962
169.7	0.961
169.8	0.9585
169.9	0.961
170	0.962
170.1	0.9605
170.2	0.9575
170.3	0.9595
170.4	0.959
170.5	0.9585
170.6	0.956
170.7	0.957
170.8	0.957
170.9	0.961
171	0.9595
171.1	0.9585
171.2	0.958
171.3	0.957
171.4	0.9585
171.5	0.9565
171.6	0.9535
171.7	0.9545
171.8	0.9545
171.9	0.9545
172	0.956
172.1	0.9555
172.2	0.9535
172.3	0.954
172.4	0.9565
172.5	0.9595
172.6	0.9615
172.7	0.9625
172.8	0.96
172.9	0.958
173	0.955
173.1	0.953
173.2	0.9535
173.3	0.953
173.4	0.9535
173.5	0.954
173.6	0.9565
173.7	0.957
173.8	0.9595
173.9	0.96
174	0.9595
174.1	0.9595
174.2	0.9615
174.3	0.9585
174.4	0.9615
174.5	0.961
174.6	0.962
174.7	0.962
174.8	0.959
174.9	0.959
175	0.9595
175.1	0.96
175.2	0.96
175.3	0.9575
175.4	0.9555
175.5	0.9565
175.6	0.9565
175.7	0.957
175.8	0.9585
175.9	0.962
176	0.9615
176.1	0.9595
176.2	0.9605
176.3	0.9645
176.4	0.9645
176.5	0.9625
176.6	0.962
176.7	0.966
176.8	0.969
176.9	0.9685
177	0.9675
177.1	0.9685
177.2	0.9665
177.3	0.9705
177.4	0.9695
177.5	0.9685
177.6	0.9665
177.7	0.9655
177.8	0.965
177.9	0.9675
178	0.9685
178.1	0.964
178.2	0.965
178.3	0.9655
178.4	0.9645
178.5	0.967
178.6	0.9695
178.7	0.9685
178.8	0.9675
178.9	0.967
179	0.965
179.1	0.9665
179.2	0.97
179.3	0.968
179.4	0.9685
179.5	0.969
179.6	0.9675
179.7	0.967
179.8	0.9685
179.9	0.965
180	0.966
180.1	0.964
180.2	0.9615
180.3	0.965
180.4	0.965
180.5	0.968
180.6	0.969
180.7	0.967
180.8	0.967
180.9	0.964
181	0.959
181.1	0.9585
181.2	0.959
181.3	0.9615
181.4	0.9625
181.5	0.9595
181.6	0.958
181.7	0.9605
181.8	0.964
181.9	0.9635
182	0.9615
182.1	0.963
182.2	0.9655
182.3	0.963
182.4	0.961
182.5	0.9615
182.6	0.9615
182.7	0.96
182.8	0.963
182.9	0.9645
183	0.967
183.1	0.9685
183.2	0.966
183.3	0.9625
183.4	0.9675
183.5	0.9685
183.6	0.965
183.7	0.962
183.8	0.961
183.9	0.957
184	0.955
184.1	0.9545
184.2	0.96
184.3	0.959
184.4	0.9615
184.5	0.9595
184.6	0.9605
184.7	0.9575
184.8	0.959
184.9	0.9585
185	0.9595
185.1	0.9585
185.2	0.959
185.3	0.9625
185.4	0.961
185.5	0.965
185.6	0.9655
185.7	0.9675
185.8	0.964
185.9	0.964
186	0.965
186.1	0.966
186.2	0.9635
186.3	0.9645
186.4	0.9645
186.5	0.9685
186.6	0.969
186.7	0.967
186.8	0.9635
186.9	0.9605
187	0.9635
187.1	0.965
187.2	0.9655
187.3	0.9665
187.4	0.9665
187.5	0.9665
187.6	0.9635
187.7	0.963
187.8	0.9645
187.9	0.9645
188	0.9655
188.1	0.967
188.2	0.965
188.3	0.967
188.4	0.967
188.5	0.969
188.6	0.966
188.7	0.969
188.8	0.9705
188.9	0.969
189	0.9725
189.1	0.97
189.2	0.969
189.3	0.9685
189.4	0.966
189.5	0.968
189.6	0.9665
189.7	0.9655
189.8	0.9655
189.9	0.9665
190	0.9665
190.1	0.966
190.2	0.967
190.3	0.966
190.4	0.9675
190.5	0.967
190.6	0.9675
190.7	0.9665
190.8	0.965
190.9	0.966
191	0.964
191.1	0.9605
191.2	0.963
191.3	0.964
191.4	0.9635
191.5	0.963
191.6	0.966
191.7	0.967
191.8	0.9675
191.9	0.965
192	0.9635
192.1	0.966
192.2	0.9635
192.3	0.961
192.4	0.9615
192.5	0.9625
192.6	0.964
192.7	0.962
192.8	0.964
192.9	0.9625
193	0.9605
193.1	0.959
193.2	0.9595
193.3	0.9605
193.4	0.9575
193.5	0.96
193.6	0.9605
193.7	0.961
193.8	0.961
193.9	0.959
194	0.96
194.1	0.959
194.2	0.9585
194.3	0.9625
194.4	0.9615
194.5	0.9635
194.6	0.9605
194.7	0.9615
194.8	0.9605
194.9	0.961
195	0.963
195.1	0.9675
195.2	0.9675
195.3	0.964
195.4	0.965
195.5	0.964
195.6	0.9645
195.7	0.9645
195.8	0.966
195.9	0.968
196	0.968
196.1	0.9675
196.2	0.9675
196.3	0.9665
196.4	0.9665
196.5	0.966
196.6	0.9705
196.7	0.967
196.8	0.97
196.9	0.9675
197	0.9615
197.1	0.9625
197.2	0.9635
197.3	0.9645
197.4	0.9655
197.5	0.962
197.6	0.9605
197.7	0.9605
197.8	0.964
197.9	0.967
198	0.967
198.1	0.965
198.2	0.9675
198.3	0.97
198.4	0.9735
198.5	0.974
198.6	0.972
198.7	0.97
198.8	0.971
198.9	0.968
199	0.965
199.1	0.9615
199.2	0.963
199.3	0.967
199.4	0.9695
199.5	0.9695
199.6	0.9675
199.7	0.9675
199.8	0.968
199.9	0.9695
200	0.9675
[truncated: 14,000 more rows]
