# Supplementary material for: Bayesian inference of kinetic schemes for ion channels by Kalman filtering
Source: eLife journal article supplement (doi:10.7554/elife.62714), 2022-05-04
Supplement: fig1-data1 [file 4_Sim_N_1000_Strom_MW.xlsx]

## Sheet: Tabelle1
0.1	0
0.2	0
0.3	0
0.4	0
0.5	0
0.6	0
0.7	0
0.8	0
0.9	0
1	0
1.1	0
1.2	0
1.3	0
1.4	0
1.5	0
1.6	0
1.7	0
1.8	0
1.9	0
2	0
2.1	0
2.2	0
2.3	0
2.4	0
2.5	0
2.6	0
2.7	0
2.8	0
2.9	0
3	0
3.1	0
3.2	0
3.3	0
3.4	0
3.5	0
3.6	0
3.7	0
3.8	0
3.9	0
4	0
4.1	0
4.2	0
4.3	0
4.4	0
4.5	0
4.6	0
4.7	0
4.8	0
4.9	0
5	0
5.1	0
5.2	0
5.3	0
5.4	0
5.5	0
5.6	0
5.7	0
5.8	0
5.9	0
6	0
6.1	0
6.2	0
6.3	0
6.4	0
6.5	0
6.6	0
6.7	0
6.8	0
6.9	0
7	0
7.1	0
7.2	0
7.3	0
7.4	0
7.5	0
7.6	0
7.7	0
7.8	0
7.9	0
8	0
8.1	0
8.2	0
8.3	0
8.4	0
8.5	0
8.6	0
8.7	0
8.8	0
8.9	0
9	0
9.1	0
9.2	0
9.3	0
9.4	0
9.5	0
9.6	0
9.7	0
9.8	0
9.9	0
10	0
10.1	0
10.2	0
10.3	0
10.4	0
10.5	0
10.6	0
10.7	0
10.8	0
10.9	0
11	0
11.1	0
11.2	0
11.3	0
11.4	0
11.5	0
11.6	0
11.7	0
11.8	0
11.9	0
12	0
12.1	0
12.2	0
12.3	0
12.4	0
12.5	0
12.6	0
12.7	0
12.8	0
12.9	0
13	0
13.1	0
13.2	0
13.3	0
13.4	0
13.5	0
13.6	0
13.7	0
13.8	0
13.9	0
14	0
14.1	0
14.2	0
14.3	0
14.4	0
14.5	0
14.6	0
14.7	0
14.8	0
14.9	0
15	0
15.1	0
15.2	0
15.3	0
15.4	0
15.5	0
15.6	0
15.7	0
15.8	0
15.9	0
16	0
16.1	0
16.2	0
16.3	0
16.4	0
16.5	0
16.6	0
16.7	0
16.8	0
16.9	0
17	0
17.1	0
17.2	0
17.3	0
17.4	0
17.5	0
17.6	0
17.7	0
17.8	0
17.9	0
18	0
18.1	0
18.2	0
18.3	0
18.4	0
18.5	0
18.6	0
18.7	0
18.8	0
18.9	0
19	0
19.1	0
19.2	0
19.3	0
19.4	0
19.5	0
19.6	0
19.7	0
19.8	0
19.9	0
20	0
20.1	0
20.2	0
20.3	0
20.4	0
20.5	0
20.6	0
20.7	0
20.8	0
20.9	0
21	0
21.1	0
21.2	0
21.3	0
21.4	0
21.5	0
21.6	0
21.7	0
21.8	0
21.9	0
22	0
22.1	0
22.2	0
22.3	0
22.4	0
22.5	0
22.6	0
22.7	0
22.8	0
22.9	0
23	0
23.1	0
23.2	0
23.3	0
23.4	0
23.5	0
23.6	0
23.7	0
23.8	0
23.9	0
24	0
24.1	0
24.2	0
24.3	0
24.4	0
24.5	0
24.6	0
24.7	0
24.8	0
24.9	0
25	0
25.1	0
25.2	0
25.3	0
25.4	0
25.5	0
25.6	0
25.7	0
25.8	0
25.9	0
26	0
26.1	0
26.2	0
26.3	0
26.4	0
26.5	0
26.6	0
26.7	0
26.8	0
26.9	0
27	0
27.1	0
27.2	0
27.3	0
27.4	0
27.5	0
27.6	0
27.7	0
27.8	0
27.9	0
28	0
28.1	0
28.2	0
28.3	0
28.4	0
28.5	0
28.6	0
28.7	0
28.8	0
28.9	0
29	0
29.1	0
29.2	0
29.3	0
29.4	0
29.5	0
29.6	0
29.7	0
29.8	0
29.9	0
30	0
30.1	0
30.2	0
30.3	0
30.4	0
30.5	0
30.6	0
30.7	0
30.8	0
30.9	0
31	0
31.1	0
31.2	0
31.3	0
31.4	0
31.5	0
31.6	0
31.7	0
31.8	0
31.9	0
32	0
32.1	0
32.2	0
32.3	0
32.4	0
32.5	0
32.6	0
32.7	0
32.8	0
32.9	0
33	0
33.1	0
33.2	0
33.3	0
33.4	0
33.5	0
33.6	0
33.7	0
33.8	0
33.9	0
34	0
34.1	0
34.2	0
34.3	0
34.4	0
34.5	0
34.6	0
34.7	0
34.8	0
34.9	0
35	0
35.1	0
35.2	0
35.3	0
35.4	0
35.5	0
35.6	0
35.7	0
35.8	0
35.9	0
36	0
36.1	0
36.2	0
36.3	0
36.4	0
36.5	0
36.6	0
36.7	0
36.8	0
36.9	0
37	0
37.1	0
37.2	0
37.3	0
37.4	0
37.5	0
37.6	0
37.7	0
37.8	0
37.9	0
38	0
38.1	0
38.2	0
38.3	0
38.4	0
38.5	0
38.6	0
38.7	0
38.8	0
38.9	0
39	0
39.1	0
39.2	0
39.3	0
39.4	0
39.5	0
39.6	0
39.7	0
39.8	0
39.9	0
40	0
40.1	0
40.2	0
40.3	0
40.4	0
40.5	0
40.6	0
40.7	0
40.8	0
40.9	0
41	0
41.1	0
41.2	0
41.3	0
41.4	0
41.5	0
41.6	0
41.7	0
41.8	0
41.9	0
42	0
42.1	0
42.2	0
42.3	0
42.4	0
42.5	0
42.6	0
42.7	0
42.8	0
42.9	0
43	0
43.1	0
43.2	0
43.3	0
43.4	0
43.5	0
43.6	0
43.7	0
43.8	0
43.9	0
44	0
44.1	0
44.2	0
44.3	0
44.4	0
44.5	0
44.6	0
44.7	0
44.8	0
44.9	0
45	0
45.1	0
45.2	0
45.3	0
45.4	0
45.5	0
45.6	0
45.7	0
45.8	0
45.9	0
46	0
46.1	0
46.2	0
46.3	0
46.4	0
46.5	0
46.6	0
46.7	0
46.8	0
46.9	0
47	0
47.1	0
47.2	0
47.3	0
47.4	0
47.5	0
47.6	0
47.7	0
47.8	0
47.9	0
48	0
48.1	0
48.2	0
48.3	0
48.4	0
48.5	0
48.6	0
48.7	0
48.8	0
48.9	0
49	0
49.1	0
49.2	0
49.3	0
49.4	0
49.5	0
49.6	0
49.7	0
49.8	0
49.9	0
50	0
50.1	0
50.2	0
50.3	0
50.4	0
50.5	0
50.6	0
50.7	0
50.8	0
50.9	0
51	0
51.1	0
51.2	0
51.3	0
51.4	0
51.5	0
51.6	0
51.7	0
51.8	0
51.9	0
52	0
52.1	0
52.2	0
52.3	0
52.4	0
52.5	0
52.6	0
52.7	0
52.8	0
52.9	0
53	0
53.1	0
53.2	0
53.3	0
53.4	0
53.5	0
53.6	0
53.7	0
53.8	0
53.9	0
54	0
54.1	0
54.2	0
54.3	0
54.4	0
54.5	0
54.6	0
54.7	0
54.8	0
54.9	0
55	0
55.1	0
55.2	0
55.3	0
55.4	0
55.5	0
55.6	0
55.7	0
55.8	0
55.9	0
56	0
56.1	0
56.2	0
56.3	0
56.4	0
56.5	0
56.6	0
56.7	0
56.8	0
56.9	0
57	0
57.1	0
57.2	0
57.3	0
57.4	0
57.5	0
57.6	0
57.7	0
57.8	0
57.9	0
58	0
58.1	0
58.2	0
58.3	0
58.4	0
58.5	0
58.6	0
58.7	0
58.8	0
58.9	0
59	0
59.1	0
59.2	0
59.3	0
59.4	0
59.5	0
59.6	0
59.7	0
59.8	0
59.9	0
60	0
60.1	0
60.2	0
60.3	0
60.4	0
60.5	0
60.6	0
60.7	0
60.8	0
60.9	0
61	0
61.1	0
61.2	0
61.3	0
61.4	0
61.5	0
61.6	0
61.7	0
61.8	0
61.9	0
62	0
62.1	0
62.2	0
62.3	0
62.4	0
62.5	0
62.6	0
62.7	0
62.8	0
62.9	0
63	0
63.1	0
63.2	0
63.3	0
63.4	0
63.5	0
63.6	0
63.7	0
63.8	0
63.9	0
64	0
64.1	0
64.2	0
64.3	0
64.4	0
64.5	0
64.6	0
64.7	0
64.8	0
64.9	0
65	0
65.1	0
65.2	0
65.3	0
65.4	0
65.5	0
65.6	0
65.7	0
65.8	0
65.9	0
66	0
66.1	0
66.2	0
66.3	0
66.4	0
66.5	0
66.6	0
66.7	0
66.8	0
66.9	0
67	0
67.1	0
67.2	0
67.3	0
67.4	0
67.5	0
67.6	0
67.7	0
67.8	0
67.9	0
68	0
68.1	0
68.2	0
68.3	0
68.4	0
68.5	0
68.6	0
68.7	0
68.8	0
68.9	0
69	0
69.1	0
69.2	0
69.3	0
69.4	0
69.5	0
69.6	0
69.7	0
69.8	0
69.9	0
70	0
70.1	0
70.2	0
70.3	0
70.4	0
70.5	0
70.6	0
70.7	0
70.8	0
70.9	0
71	0
71.1	0
71.2	0
71.3	0
71.4	0
71.5	0
71.6	0
71.7	0
71.8	0
71.9	0
72	0
72.1	0
72.2	0
72.3	0
72.4	0
72.5	0
72.6	0
72.7	0
72.8	0
72.9	0
73	0
73.1	0
73.2	0
73.3	0
73.4	0
73.5	0
73.6	0
73.7	0
73.8	0
73.9	0
74	0
74.1	0
74.2	0
74.3	0
74.4	0
74.5	0
74.6	0
74.7	0
74.8	0
74.9	0
75	0
75.1	0
75.2	0
75.3	0
75.4	0
75.5	0
75.6	0
75.7	0
75.8	0
75.9	0
76	0
76.1	0
76.2	0
76.3	0
76.4	0
76.5	0
76.6	0
76.7	0
76.8	0
76.9	0
77	0
77.1	0
77.2	0
77.3	0
77.4	0
77.5	0
77.6	0
77.7	0
77.8	0
77.9	0
78	0
78.1	0
78.2	0
78.3	0
78.4	0
78.5	0
78.6	0
78.7	0
78.8	0
78.9	0
79	0
79.1	0
79.2	0
79.3	0
79.4	0
79.5	0
79.6	0
79.7	0
79.8	0
79.9	0
80	0
80.1	0
80.2	0
80.3	0
80.4	0
80.5	0
80.6	0
80.7	0
80.8	0
80.9	0
81	0
81.1	0
81.2	0
81.3	0
81.4	0
81.5	0
81.6	0
81.7	0
81.8	0
81.9	0
82	0
82.1	0
82.2	0
82.3	0
82.4	0
82.5	0
82.6	0
82.7	0
82.8	0
82.9	0
83	0
83.1	0
83.2	0
83.3	0
83.4	0
83.5	0
83.6	0
83.7	0
83.8	0
83.9	0
84	0
84.1	0
84.2	0
84.3	0
84.4	0
84.5	0
84.6	0
84.7	0
84.8	0
84.9	0
85	0
85.1	0
85.2	0
85.3	0
85.4	0
85.5	0
85.6	0
85.7	0
85.8	0
85.9	0
86	0
86.1	0
86.2	0
86.3	0
86.4	0
86.5	0
86.6	0
86.7	0
86.8	0
86.9	0
87	0
87.1	0
87.2	0
87.3	0
87.4	0
87.5	0
87.6	0
87.7	0
87.8	0
87.9	0
88	0
88.1	0
88.2	0
88.3	0
88.4	0
88.5	0
88.6	0
88.7	0
88.8	0
88.9	0
89	0
89.1	0
89.2	0
89.3	0
89.4	0
89.5	0
89.6	0
89.7	0
89.8	0
89.9	0
90	0
90.1	0
90.2	0
90.3	0
90.4	0
90.5	0
90.6	0
90.7	0
90.8	0
90.9	0
91	0
91.1	0
91.2	0
91.3	0
91.4	0
91.5	0
91.6	0
91.7	0
91.8	0
91.9	0
92	0
92.1	0
92.2	0
92.3	0
92.4	0
92.5	0
92.6	0
92.7	0
92.8	0
92.9	0
93	0
93.1	0
93.2	0
93.3	0
93.4	0
93.5	0
93.6	0
93.7	0
93.8	0
93.9	0
94	0
94.1	0
94.2	0
94.3	0
94.4	0
94.5	0
94.6	0
94.7	0
94.8	0
94.9	0
95	0
95.1	0
95.2	0
95.3	0
95.4	0
95.5	0
95.6	0
95.7	0
95.8	0
95.9	0
96	0
96.1	0
96.2	0
96.3	0
96.4	0
96.5	0
96.6	0
96.7	0
96.8	0
96.9	0
97	0
97.1	0
97.2	0
97.3	0
97.4	0
97.5	0
97.6	0
97.7	0
97.8	0
97.9	0
98	0
98.1	0
98.2	0
98.3	0
98.4	0
98.5	0
98.6	0
98.7	0
98.8	0
98.9	0
99	0
99.1	0
99.2	0
99.3	0
99.4	0
99.5	0
99.6	0
99.7	0
99.8	0
99.9	0
100	0
100.1	0
100.2	0.001
100.3	0.001
100.4	0.002
100.5	0.004
100.6	0.006
100.7	0.008
100.8	0.012
100.9	0.014
101	0.017
101.1	0.019
101.2	0.02
101.3	0.022
101.4	0.025
101.5	0.027
101.6	0.029
101.7	0.03
101.8	0.032
101.9	0.036
102	0.039
102.1	0.043
102.2	0.044
102.3	0.048
102.4	0.048
102.5	0.05
102.6	0.052
102.7	0.059
102.8	0.062
102.9	0.063
103	0.066
103.1	0.068
103.2	0.07
103.3	0.073
103.4	0.075
103.5	0.078
103.6	0.081
103.7	0.082
103.8	0.087
103.9	0.088
104	0.091
104.1	0.096
104.2	0.104
104.3	0.105
104.4	0.108
104.5	0.116
104.6	0.118
104.7	0.12
104.8	0.125
104.9	0.129
105	0.131
105.1	0.134
105.2	0.136
105.3	0.138
105.4	0.142
105.5	0.145
105.6	0.148
105.7	0.148
105.8	0.151
105.9	0.153
106	0.154
106.1	0.154
106.2	0.159
106.3	0.162
106.4	0.163
106.5	0.165
106.6	0.167
106.7	0.168
106.8	0.171
106.9	0.173
107	0.175
107.1	0.179
107.2	0.18
107.3	0.181
107.4	0.186
107.5	0.19
107.6	0.199
107.7	0.203
107.8	0.203
107.9	0.206
108	0.209
108.1	0.212
108.2	0.217
108.3	0.22
108.4	0.222
108.5	0.224
108.6	0.225
108.7	0.231
108.8	0.232
108.9	0.235
109	0.238
109.1	0.241
109.2	0.242
109.3	0.243
109.4	0.244
109.5	0.246
109.6	0.251
109.7	0.252
109.8	0.254
109.9	0.256
110	0.255
110.1	0.259
110.2	0.262
110.3	0.26
110.4	0.262
110.5	0.262
110.6	0.265
110.7	0.266
110.8	0.268
110.9	0.272
111	0.274
111.1	0.275
111.2	0.276
111.3	0.281
111.4	0.283
111.5	0.283
111.6	0.285
111.7	0.287
111.8	0.291
111.9	0.294
112	0.295
112.1	0.299
112.2	0.299
112.3	0.3
112.4	0.305
112.5	0.307
112.6	0.31
112.7	0.314
112.8	0.316
112.9	0.319
113	0.319
113.1	0.321
113.2	0.322
113.3	0.322
113.4	0.326
113.5	0.331
113.6	0.332
113.7	0.334
113.8	0.336
113.9	0.338
114	0.339
114.1	0.34
114.2	0.342
114.3	0.344
114.4	0.343
114.5	0.343
114.6	0.345
114.7	0.345
114.8	0.344
114.9	0.347
115	0.348
115.1	0.352
115.2	0.353
115.3	0.354
115.4	0.353
115.5	0.353
115.6	0.356
115.7	0.36
115.8	0.361
115.9	0.361
116	0.365
116.1	0.367
116.2	0.367
116.3	0.369
116.4	0.37
116.5	0.373
116.6	0.375
116.7	0.377
116.8	0.378
116.9	0.38
117	0.382
117.1	0.385
117.2	0.388
117.3	0.388
117.4	0.389
117.5	0.39
117.6	0.391
117.7	0.391
117.8	0.392
117.9	0.393
118	0.398
118.1	0.4
118.2	0.404
118.3	0.404
118.4	0.404
118.5	0.405
118.6	0.409
118.7	0.412
118.8	0.414
118.9	0.417
119	0.419
119.1	0.421
119.2	0.423
119.3	0.426
119.4	0.43
119.5	0.43
119.6	0.432
119.7	0.435
119.8	0.434
119.9	0.435
120	0.436
120.1	0.438
120.2	0.441
120.3	0.446
120.4	0.446
120.5	0.449
120.6	0.452
120.7	0.453
120.8	0.455
120.9	0.459
121	0.462
121.1	0.464
121.2	0.464
121.3	0.466
121.4	0.466
121.5	0.466
121.6	0.47
121.7	0.472
121.8	0.472
121.9	0.475
122	0.474
122.1	0.475
122.2	0.476
122.3	0.478
122.4	0.482
122.5	0.481
122.6	0.482
122.7	0.484
122.8	0.483
122.9	0.484
123	0.485
123.1	0.485
123.2	0.488
123.3	0.489
123.4	0.492
123.5	0.495
123.6	0.496
123.7	0.497
123.8	0.499
123.9	0.499
124	0.502
124.1	0.506
124.2	0.508
124.3	0.51
124.4	0.509
124.5	0.513
124.6	0.515
124.7	0.516
124.8	0.516
124.9	0.517
125	0.516
125.1	0.518
125.2	0.518
125.3	0.519
125.4	0.52
125.5	0.522
125.6	0.521
125.7	0.524
125.8	0.523
125.9	0.522
126	0.526
126.1	0.526
126.2	0.527
126.3	0.528
126.4	0.53
126.5	0.532
126.6	0.534
126.7	0.537
126.8	0.538
126.9	0.538
127	0.537
127.1	0.54
127.2	0.542
127.3	0.543
127.4	0.543
127.5	0.545
127.6	0.545
127.7	0.546
127.8	0.547
127.9	0.549
128	0.553
128.1	0.551
128.2	0.551
128.3	0.552
128.4	0.555
128.5	0.555
128.6	0.556
128.7	0.557
128.8	0.559
128.9	0.562
129	0.559
129.1	0.559
129.2	0.562
129.3	0.562
129.4	0.563
129.5	0.566
129.6	0.566
129.7	0.565
129.8	0.564
129.9	0.566
130	0.567
130.1	0.567
130.2	0.566
130.3	0.567
130.4	0.568
130.5	0.57
130.6	0.572
130.7	0.573
130.8	0.573
130.9	0.574
131	0.571
131.1	0.571
131.2	0.572
131.3	0.571
131.4	0.569
131.5	0.573
131.6	0.573
131.7	0.574
131.8	0.576
131.9	0.575
132	0.576
132.1	0.577
132.2	0.579
132.3	0.578
132.4	0.581
132.5	0.582
132.6	0.582
132.7	0.584
132.8	0.585
132.9	0.587
133	0.584
133.1	0.583
133.2	0.585
133.3	0.587
133.4	0.589
133.5	0.589
133.6	0.59
133.7	0.59
133.8	0.592
133.9	0.594
134	0.595
134.1	0.597
134.2	0.597
134.3	0.6
134.4	0.604
134.5	0.605
134.6	0.603
134.7	0.603
134.8	0.602
134.9	0.602
135	0.606
135.1	0.608
135.2	0.609
135.3	0.61
135.4	0.611
135.5	0.61
135.6	0.612
135.7	0.613
135.8	0.614
135.9	0.613
136	0.613
136.1	0.614
136.2	0.614
136.3	0.614
136.4	0.615
136.5	0.616
136.6	0.615
136.7	0.613
136.8	0.61
136.9	0.609
137	0.611
137.1	0.611
137.2	0.611
137.3	0.612
137.4	0.612
137.5	0.611
137.6	0.614
137.7	0.614
137.8	0.614
137.9	0.615
138	0.618
138.1	0.619
138.2	0.619
138.3	0.619
138.4	0.619
138.5	0.621
138.6	0.622
138.7	0.622
138.8	0.622
138.9	0.623
139	0.622
139.1	0.623
139.2	0.624
139.3	0.625
139.4	0.627
139.5	0.627
139.6	0.628
139.7	0.631
139.8	0.632
139.9	0.631
140	0.631
140.1	0.631
140.2	0.631
140.3	0.631
140.4	0.632
140.5	0.631
140.6	0.631
140.7	0.633
140.8	0.635
140.9	0.637
141	0.64
141.1	0.64
141.2	0.64
141.3	0.639
141.4	0.639
141.5	0.641
141.6	0.641
141.7	0.639
141.8	0.639
141.9	0.638
142	0.636
142.1	0.636
142.2	0.638
142.3	0.639
142.4	0.64
142.5	0.64
142.6	0.638
142.7	0.639
142.8	0.644
142.9	0.645
143	0.645
143.1	0.645
143.2	0.646
143.3	0.647
143.4	0.648
143.5	0.65
143.6	0.651
143.7	0.653
143.8	0.651
143.9	0.651
144	0.653
144.1	0.653
144.2	0.652
144.3	0.653
144.4	0.653
144.5	0.655
144.6	0.655
144.7	0.658
144.8	0.658
144.9	0.658
145	0.66
145.1	0.661
145.2	0.663
145.3	0.663
145.4	0.665
145.5	0.665
145.6	0.665
145.7	0.666
145.8	0.666
145.9	0.668
146	0.667
146.1	0.669
146.2	0.669
146.3	0.671
146.4	0.674
146.5	0.675
146.6	0.674
146.7	0.676
146.8	0.678
146.9	0.679
147	0.677
147.1	0.676
147.2	0.677
147.3	0.679
147.4	0.677
147.5	0.681
147.6	0.681
147.7	0.682
147.8	0.683
147.9	0.682
148	0.684
148.1	0.686
148.2	0.685
148.3	0.685
148.4	0.684
148.5	0.683
148.6	0.683
148.7	0.685
148.8	0.686
148.9	0.689
149	0.689
149.1	0.69
149.2	0.689
149.3	0.69
149.4	0.692
149.5	0.693
149.6	0.694
149.7	0.695
149.8	0.696
149.9	0.697
150	0.696
150.1	0.695
150.2	0.695
150.3	0.697
150.4	0.698
150.5	0.697
150.6	0.696
150.7	0.696
150.8	0.696
150.9	0.697
151	0.697
151.1	0.699
151.2	0.697
151.3	0.697
151.4	0.695
151.5	0.697
151.6	0.697
151.7	0.7
151.8	0.7
151.9	0.7
152	0.701
152.1	0.702
152.2	0.701
152.3	0.701
152.4	0.7
152.5	0.699
152.6	0.698
152.7	0.698
152.8	0.697
152.9	0.697
153	0.696
153.1	0.697
153.2	0.697
153.3	0.697
153.4	0.697
153.5	0.696
153.6	0.696
153.7	0.696
153.8	0.693
153.9	0.693
154	0.693
154.1	0.693
154.2	0.693
154.3	0.694
154.4	0.692
154.5	0.691
154.6	0.691
154.7	0.692
154.8	0.693
154.9	0.692
155	0.691
155.1	0.691
155.2	0.689
155.3	0.692
155.4	0.693
155.5	0.693
155.6	0.695
155.7	0.696
155.8	0.696
155.9	0.697
156	0.698
156.1	0.697
156.2	0.698
156.3	0.699
156.4	0.701
156.5	0.701
156.6	0.702
156.7	0.7
156.8	0.7
156.9	0.7
157	0.7
157.1	0.701
157.2	0.702
157.3	0.702
157.4	0.703
157.5	0.701
157.6	0.702
157.7	0.702
157.8	0.701
157.9	0.701
158	0.702
158.1	0.7
158.2	0.7
158.3	0.699
158.4	0.699
158.5	0.698
158.6	0.697
158.7	0.7
158.8	0.7
158.9	0.701
159	0.699
159.1	0.698
159.2	0.698
159.3	0.699
159.4	0.699
159.5	0.697
159.6	0.698
159.7	0.699
159.8	0.698
159.9	0.697
160	0.698
160.1	0.699
160.2	0.698
160.3	0.698
160.4	0.697
160.5	0.697
160.6	0.698
160.7	0.7
160.8	0.699
160.9	0.699
161	0.697
161.1	0.698
161.2	0.697
161.3	0.696
161.4	0.696
161.5	0.698
161.6	0.697
161.7	0.698
161.8	0.698
161.9	0.697
162	0.695
162.1	0.695
162.2	0.696
162.3	0.698
162.4	0.696
162.5	0.696
162.6	0.695
162.7	0.696
162.8	0.697
162.9	0.697
163	0.697
163.1	0.696
163.2	0.697
163.3	0.699
163.4	0.7
163.5	0.7
163.6	0.701
163.7	0.703
163.8	0.704
163.9	0.704
164	0.704
164.1	0.705
164.2	0.705
164.3	0.704
164.4	0.705
164.5	0.705
164.6	0.704
164.7	0.704
164.8	0.703
164.9	0.702
165	0.701
165.1	0.703
165.2	0.703
165.3	0.7
165.4	0.701
165.5	0.702
165.6	0.701
165.7	0.702
165.8	0.702
165.9	0.703
166	0.703
166.1	0.703
166.2	0.705
166.3	0.705
166.4	0.705
166.5	0.706
166.6	0.706
166.7	0.708
166.8	0.711
166.9	0.713
167	0.714
167.1	0.715
167.2	0.716
167.3	0.715
167.4	0.715
167.5	0.716
167.6	0.718
167.7	0.718
167.8	0.722
167.9	0.722
168	0.72
168.1	0.719
168.2	0.717
168.3	0.718
168.4	0.721
168.5	0.721
168.6	0.726
168.7	0.726
168.8	0.727
168.9	0.726
169	0.727
169.1	0.728
169.2	0.728
169.3	0.73
169.4	0.73
169.5	0.731
169.6	0.731
169.7	0.732
169.8	0.732
169.9	0.731
170	0.729
170.1	0.727
170.2	0.728
170.3	0.728
170.4	0.729
170.5	0.729
170.6	0.731
170.7	0.731
170.8	0.734
170.9	0.735
171	0.738
171.1	0.739
171.2	0.738
171.3	0.735
171.4	0.735
171.5	0.733
171.6	0.732
171.7	0.732
171.8	0.733
171.9	0.733
172	0.734
172.1	0.732
172.2	0.73
172.3	0.729
172.4	0.73
172.5	0.728
172.6	0.727
172.7	0.727
172.8	0.727
172.9	0.727
173	0.727
173.1	0.728
173.2	0.727
173.3	0.726
173.4	0.727
173.5	0.726
173.6	0.726
173.7	0.728
173.8	0.727
173.9	0.727
174	0.726
174.1	0.727
174.2	0.726
174.3	0.727
174.4	0.729
174.5	0.728
174.6	0.727
174.7	0.729
174.8	0.731
174.9	0.732
175	0.733
175.1	0.733
175.2	0.732
175.3	0.733
175.4	0.736
175.5	0.737
175.6	0.74
175.7	0.738
175.8	0.74
175.9	0.74
176	0.74
176.1	0.74
176.2	0.74
176.3	0.74
176.4	0.74
176.5	0.74
176.6	0.74
176.7	0.742
176.8	0.742
176.9	0.744
177	0.745
177.1	0.745
177.2	0.747
177.3	0.746
177.4	0.746
177.5	0.745
177.6	0.745
177.7	0.745
177.8	0.745
177.9	0.745
178	0.746
178.1	0.747
178.2	0.751
178.3	0.75
178.4	0.752
178.5	0.751
178.6	0.751
178.7	0.753
178.8	0.75
178.9	0.75
179	0.752
179.1	0.752
179.2	0.753
179.3	0.752
179.4	0.753
179.5	0.753
179.6	0.755
179.7	0.757
179.8	0.757
179.9	0.757
180	0.756
180.1	0.756
180.2	0.759
180.3	0.76
180.4	0.758
180.5	0.759
180.6	0.757
180.7	0.757
180.8	0.758
180.9	0.756
181	0.755
181.1	0.755
181.2	0.755
181.3	0.756
181.4	0.755
181.5	0.755
181.6	0.756
181.7	0.757
181.8	0.757
181.9	0.755
182	0.756
182.1	0.756
182.2	0.755
182.3	0.755
182.4	0.755
182.5	0.755
182.6	0.753
182.7	0.754
182.8	0.756
182.9	0.756
183	0.755
183.1	0.758
183.2	0.757
183.3	0.757
183.4	0.758
183.5	0.758
183.6	0.759
183.7	0.759
183.8	0.758
183.9	0.761
184	0.761
184.1	0.76
184.2	0.76
184.3	0.759
184.4	0.76
184.5	0.76
184.6	0.76
184.7	0.758
184.8	0.76
184.9	0.76
185	0.76
185.1	0.76
185.2	0.761
185.3	0.76
185.4	0.76
185.5	0.76
185.6	0.76
185.7	0.76
185.8	0.758
185.9	0.757
186	0.758
186.1	0.758
186.2	0.758
186.3	0.758
186.4	0.759
186.5	0.759
186.6	0.762
186.7	0.764
186.8	0.763
186.9	0.762
187	0.764
187.1	0.764
187.2	0.764
187.3	0.765
187.4	0.766
187.5	0.765
187.6	0.765
187.7	0.766
187.8	0.766
187.9	0.767
188	0.765
188.1	0.764
188.2	0.763
188.3	0.763
188.4	0.763
188.5	0.764
188.6	0.765
188.7	0.767
188.8	0.767
188.9	0.767
189	0.765
189.1	0.765
189.2	0.765
189.3	0.765
189.4	0.763
189.5	0.763
189.6	0.764
189.7	0.765
189.8	0.765
189.9	0.762
190	0.761
190.1	0.761
190.2	0.759
190.3	0.758
190.4	0.758
190.5	0.758
190.6	0.761
190.7	0.764
190.8	0.765
190.9	0.763
191	0.762
191.1	0.762
191.2	0.762
191.3	0.764
191.4	0.765
191.5	0.765
191.6	0.768
191.7	0.767
191.8	0.764
191.9	0.764
192	0.766
192.1	0.765
192.2	0.767
192.3	0.767
192.4	0.768
192.5	0.766
192.6	0.765
192.7	0.765
192.8	0.766
192.9	0.765
193	0.764
193.1	0.762
193.2	0.763
193.3	0.763
193.4	0.763
193.5	0.762
193.6	0.763
193.7	0.763
193.8	0.762
193.9	0.762
194	0.761
194.1	0.762
194.2	0.767
194.3	0.768
194.4	0.769
194.5	0.769
194.6	0.769
194.7	0.77
194.8	0.768
194.9	0.769
195	0.768
195.1	0.771
195.2	0.772
195.3	0.773
195.4	0.774
195.5	0.776
195.6	0.775
195.7	0.774
195.8	0.775
195.9	0.775
196	0.773
196.1	0.773
196.2	0.773
196.3	0.772
196.4	0.771
196.5	0.772
196.6	0.772
196.7	0.773
196.8	0.775
196.9	0.773
197	0.773
197.1	0.773
197.2	0.773
197.3	0.773
197.4	0.778
197.5	0.779
197.6	0.779
197.7	0.782
197.8	0.782
197.9	0.783
198	0.786
198.1	0.786
198.2	0.785
198.3	0.783
198.4	0.784
198.5	0.784
198.6	0.783
198.7	0.783
198.8	0.782
198.9	0.781
199	0.781
199.1	0.78
199.2	0.781
199.3	0.781
199.4	0.782
199.5	0.784
199.6	0.784
199.7	0.786
199.8	0.787
199.9	0.787
200	0.787
[truncated: 14,000 more rows]
