# Supplementary material for: Bayesian inference of kinetic schemes for ion channels by Kalman filtering
Source: eLife journal article supplement (doi:10.7554/elife.62714), 2022-05-04
Supplement: fig1-data1 [file 05_Sim_N_1000_Fluor_MW.xlsx]

## Sheet: Tabelle1
0.1	0
0.2	0
0.3	0
0.4	0
0.5	0
0.6	0
0.7	0
0.8	0
0.9	0
1	0
1.1	0
1.2	0
1.3	0
1.4	0
1.5	0
1.6	0
1.7	0
1.8	0
1.9	0
2	0
2.1	0
2.2	0
2.3	0
2.4	0
2.5	0
2.6	0
2.7	0
2.8	0
2.9	0
3	0
3.1	0
3.2	0
3.3	0
3.4	0
3.5	0
3.6	0
3.7	0
3.8	0
3.9	0
4	0
4.1	0
4.2	0
4.3	0
4.4	0
4.5	0
4.6	0
4.7	0
4.8	0
4.9	0
5	0
5.1	0
5.2	0
5.3	0
5.4	0
5.5	0
5.6	0
5.7	0
5.8	0
5.9	0
6	0
6.1	0
6.2	0
6.3	0
6.4	0
6.5	0
6.6	0
6.7	0
6.8	0
6.9	0
7	0
7.1	0
7.2	0
7.3	0
7.4	0
7.5	0
7.6	0
7.7	0
7.8	0
7.9	0
8	0
8.1	0
8.2	0
8.3	0
8.4	0
8.5	0
8.6	0
8.7	0
8.8	0
8.9	0
9	0
9.1	0
9.2	0
9.3	0
9.4	0
9.5	0
9.6	0
9.7	0
9.8	0
9.9	0
10	0
10.1	0
10.2	0
10.3	0
10.4	0
10.5	0
10.6	0
10.7	0
10.8	0
10.9	0
11	0
11.1	0
11.2	0
11.3	0
11.4	0
11.5	0
11.6	0
11.7	0
11.8	0
11.9	0
12	0
12.1	0
12.2	0
12.3	0
12.4	0
12.5	0
12.6	0
12.7	0
12.8	0
12.9	0
13	0
13.1	0
13.2	0
13.3	0
13.4	0
13.5	0
13.6	0
13.7	0
13.8	0
13.9	0
14	0
14.1	0
14.2	0
14.3	0
14.4	0
14.5	0
14.6	0
14.7	0
14.8	0
14.9	0
15	0
15.1	0
15.2	0
15.3	0
15.4	0
15.5	0
15.6	0
15.7	0
15.8	0
15.9	0
16	0
16.1	0
16.2	0
16.3	0
16.4	0
16.5	0
16.6	0
16.7	0
16.8	0
16.9	0
17	0
17.1	0
17.2	0
17.3	0
17.4	0
17.5	0
17.6	0
17.7	0
17.8	0
17.9	0
18	0
18.1	0
18.2	0
18.3	0
18.4	0
18.5	0
18.6	0
18.7	0
18.8	0
18.9	0
19	0
19.1	0
19.2	0
19.3	0
19.4	0
19.5	0
19.6	0
19.7	0
19.8	0
19.9	0
20	0
20.1	0
20.2	0
20.3	0
20.4	0
20.5	0
20.6	0
20.7	0
20.8	0
20.9	0
21	0
21.1	0
21.2	0
21.3	0
21.4	0
21.5	0
21.6	0
21.7	0
21.8	0
21.9	0
22	0
22.1	0
22.2	0
22.3	0
22.4	0
22.5	0
22.6	0
22.7	0
22.8	0
22.9	0
23	0
23.1	0
23.2	0
23.3	0
23.4	0
23.5	0
23.6	0
23.7	0
23.8	0
23.9	0
24	0
24.1	0
24.2	0
24.3	0
24.4	0
24.5	0
24.6	0
24.7	0
24.8	0
24.9	0
25	0
25.1	0
25.2	0
25.3	0
25.4	0
25.5	0
25.6	0
25.7	0
25.8	0
25.9	0
26	0
26.1	0
26.2	0
26.3	0
26.4	0
26.5	0
26.6	0
26.7	0
26.8	0
26.9	0
27	0
27.1	0
27.2	0
27.3	0
27.4	0
27.5	0
27.6	0
27.7	0
27.8	0
27.9	0
28	0
28.1	0
28.2	0
28.3	0
28.4	0
28.5	0
28.6	0
28.7	0
28.8	0
28.9	0
29	0
29.1	0
29.2	0
29.3	0
29.4	0
29.5	0
29.6	0
29.7	0
29.8	0
29.9	0
30	0
30.1	0
30.2	0
30.3	0
30.4	0
30.5	0
30.6	0
30.7	0
30.8	0
30.9	0
31	0
31.1	0
31.2	0
31.3	0
31.4	0
31.5	0
31.6	0
31.7	0
31.8	0
31.9	0
32	0
32.1	0
32.2	0
32.3	0
32.4	0
32.5	0
32.6	0
32.7	0
32.8	0
32.9	0
33	0
33.1	0
33.2	0
33.3	0
33.4	0
33.5	0
33.6	0
33.7	0
33.8	0
33.9	0
34	0
34.1	0
34.2	0
34.3	0
34.4	0
34.5	0
34.6	0
34.7	0
34.8	0
34.9	0
35	0
35.1	0
35.2	0
35.3	0
35.4	0
35.5	0
35.6	0
35.7	0
35.8	0
35.9	0
36	0
36.1	0
36.2	0
36.3	0
36.4	0
36.5	0
36.6	0
36.7	0
36.8	0
36.9	0
37	0
37.1	0
37.2	0
37.3	0
37.4	0
37.5	0
37.6	0
37.7	0
37.8	0
37.9	0
38	0
38.1	0
38.2	0
38.3	0
38.4	0
38.5	0
38.6	0
38.7	0
38.8	0
38.9	0
39	0
39.1	0
39.2	0
39.3	0
39.4	0
39.5	0
39.6	0
39.7	0
39.8	0
39.9	0
40	0
40.1	0
40.2	0
40.3	0
40.4	0
40.5	0
40.6	0
40.7	0
40.8	0
40.9	0
41	0
41.1	0
41.2	0
41.3	0
41.4	0
41.5	0
41.6	0
41.7	0
41.8	0
41.9	0
42	0
42.1	0
42.2	0
42.3	0
42.4	0
42.5	0
42.6	0
42.7	0
42.8	0
42.9	0
43	0
43.1	0
43.2	0
43.3	0
43.4	0
43.5	0
43.6	0
43.7	0
43.8	0
43.9	0
44	0
44.1	0
44.2	0
44.3	0
44.4	0
44.5	0
44.6	0
44.7	0
44.8	0
44.9	0
45	0
45.1	0
45.2	0
45.3	0
45.4	0
45.5	0
45.6	0
45.7	0
45.8	0
45.9	0
46	0
46.1	0
46.2	0
46.3	0
46.4	0
46.5	0
46.6	0
46.7	0
46.8	0
46.9	0
47	0
47.1	0
47.2	0
47.3	0
47.4	0
47.5	0
47.6	0
47.7	0
47.8	0
47.9	0
48	0
48.1	0
48.2	0
48.3	0
48.4	0
48.5	0
48.6	0
48.7	0
48.8	0
48.9	0
49	0
49.1	0
49.2	0
49.3	0
49.4	0
49.5	0
49.6	0
49.7	0
49.8	0
49.9	0
50	0
50.1	0
50.2	0
50.3	0
50.4	0
50.5	0
50.6	0
50.7	0
50.8	0
50.9	0
51	0
51.1	0
51.2	0
51.3	0
51.4	0
51.5	0
51.6	0
51.7	0
51.8	0
51.9	0
52	0
52.1	0
52.2	0
52.3	0
52.4	0
52.5	0
52.6	0
52.7	0
52.8	0
52.9	0
53	0
53.1	0
53.2	0
53.3	0
53.4	0
53.5	0
53.6	0
53.7	0
53.8	0
53.9	0
54	0
54.1	0
54.2	0
54.3	0
54.4	0
54.5	0
54.6	0
54.7	0
54.8	0
54.9	0
55	0
55.1	0
55.2	0
55.3	0
55.4	0
55.5	0
55.6	0
55.7	0
55.8	0
55.9	0
56	0
56.1	0
56.2	0
56.3	0
56.4	0
56.5	0
56.6	0
56.7	0
56.8	0
56.9	0
57	0
57.1	0
57.2	0
57.3	0
57.4	0
57.5	0
57.6	0
57.7	0
57.8	0
57.9	0
58	0
58.1	0
58.2	0
58.3	0
58.4	0
58.5	0
58.6	0
58.7	0
58.8	0
58.9	0
59	0
59.1	0
59.2	0
59.3	0
59.4	0
59.5	0
59.6	0
59.7	0
59.8	0
59.9	0
60	0
60.1	0
60.2	0
60.3	0
60.4	0
60.5	0
60.6	0
60.7	0
60.8	0
60.9	0
61	0
61.1	0
61.2	0
61.3	0
61.4	0
61.5	0
61.6	0
61.7	0
61.8	0
61.9	0
62	0
62.1	0
62.2	0
62.3	0
62.4	0
62.5	0
62.6	0
62.7	0
62.8	0
62.9	0
63	0
63.1	0
63.2	0
63.3	0
63.4	0
63.5	0
63.6	0
63.7	0
63.8	0
63.9	0
64	0
64.1	0
64.2	0
64.3	0
64.4	0
64.5	0
64.6	0
64.7	0
64.8	0
64.9	0
65	0
65.1	0
65.2	0
65.3	0
65.4	0
65.5	0
65.6	0
65.7	0
65.8	0
65.9	0
66	0
66.1	0
66.2	0
66.3	0
66.4	0
66.5	0
66.6	0
66.7	0
66.8	0
66.9	0
67	0
67.1	0
67.2	0
67.3	0
67.4	0
67.5	0
67.6	0
67.7	0
67.8	0
67.9	0
68	0
68.1	0
68.2	0
68.3	0
68.4	0
68.5	0
68.6	0
68.7	0
68.8	0
68.9	0
69	0
69.1	0
69.2	0
69.3	0
69.4	0
69.5	0
69.6	0
69.7	0
69.8	0
69.9	0
70	0
70.1	0
70.2	0
70.3	0
70.4	0
70.5	0
70.6	0
70.7	0
70.8	0
70.9	0
71	0
71.1	0
71.2	0
71.3	0
71.4	0
71.5	0
71.6	0
71.7	0
71.8	0
71.9	0
72	0
72.1	0
72.2	0
72.3	0
72.4	0
72.5	0
72.6	0
72.7	0
72.8	0
72.9	0
73	0
73.1	0
73.2	0
73.3	0
73.4	0
73.5	0
73.6	0
73.7	0
73.8	0
73.9	0
74	0
74.1	0
74.2	0
74.3	0
74.4	0
74.5	0
74.6	0
74.7	0
74.8	0
74.9	0
75	0
75.1	0
75.2	0
75.3	0
75.4	0
75.5	0
75.6	0
75.7	0
75.8	0
75.9	0
76	0
76.1	0
76.2	0
76.3	0
76.4	0
76.5	0
76.6	0
76.7	0
76.8	0
76.9	0
77	0
77.1	0
77.2	0
77.3	0
77.4	0
77.5	0
77.6	0
77.7	0
77.8	0
77.9	0
78	0
78.1	0
78.2	0
78.3	0
78.4	0
78.5	0
78.6	0
78.7	0
78.8	0
78.9	0
79	0
79.1	0
79.2	0
79.3	0
79.4	0
79.5	0
79.6	0
79.7	0
79.8	0
79.9	0
80	0
80.1	0
80.2	0
80.3	0
80.4	0
80.5	0
80.6	0
80.7	0
80.8	0
80.9	0
81	0
81.1	0
81.2	0
81.3	0
81.4	0
81.5	0
81.6	0
81.7	0
81.8	0
81.9	0
82	0
82.1	0
82.2	0
82.3	0
82.4	0
82.5	0
82.6	0
82.7	0
82.8	0
82.9	0
83	0
83.1	0
83.2	0
83.3	0
83.4	0
83.5	0
83.6	0
83.7	0
83.8	0
83.9	0
84	0
84.1	0
84.2	0
84.3	0
84.4	0
84.5	0
84.6	0
84.7	0
84.8	0
84.9	0
85	0
85.1	0
85.2	0
85.3	0
85.4	0
85.5	0
85.6	0
85.7	0
85.8	0
85.9	0
86	0
86.1	0
86.2	0
86.3	0
86.4	0
86.5	0
86.6	0
86.7	0
86.8	0
86.9	0
87	0
87.1	0
87.2	0
87.3	0
87.4	0
87.5	0
87.6	0
87.7	0
87.8	0
87.9	0
88	0
88.1	0
88.2	0
88.3	0
88.4	0
88.5	0
88.6	0
88.7	0
88.8	0
88.9	0
89	0
89.1	0
89.2	0
89.3	0
89.4	0
89.5	0
89.6	0
89.7	0
89.8	0
89.9	0
90	0
90.1	0
90.2	0
90.3	0
90.4	0
90.5	0
90.6	0
90.7	0
90.8	0
90.9	0
91	0
91.1	0
91.2	0
91.3	0
91.4	0
91.5	0
91.6	0
91.7	0
91.8	0
91.9	0
92	0
92.1	0
92.2	0
92.3	0
92.4	0
92.5	0
92.6	0
92.7	0
92.8	0
92.9	0
93	0
93.1	0
93.2	0
93.3	0
93.4	0
93.5	0
93.6	0
93.7	0
93.8	0
93.9	0
94	0
94.1	0
94.2	0
94.3	0
94.4	0
94.5	0
94.6	0
94.7	0
94.8	0
94.9	0
95	0
95.1	0
95.2	0
95.3	0
95.4	0
95.5	0
95.6	0
95.7	0
95.8	0
95.9	0
96	0
96.1	0
96.2	0
96.3	0
96.4	0
96.5	0
96.6	0
96.7	0
96.8	0
96.9	0
97	0
97.1	0
97.2	0
97.3	0
97.4	0
97.5	0
97.6	0
97.7	0
97.8	0
97.9	0
98	0
98.1	0
98.2	0
98.3	0
98.4	0
98.5	0
98.6	0
98.7	0
98.8	0
98.9	0
99	0
99.1	0
99.2	0
99.3	0
99.4	0
99.5	0
99.6	0
99.7	0
99.8	0
99.9	0
100	0
100.1	0.03
100.2	0.051
100.3	0.077
100.4	0.1095
100.5	0.131
100.6	0.154
100.7	0.168
100.8	0.1905
100.9	0.206
101	0.2275
101.1	0.2445
101.2	0.259
101.3	0.272
101.4	0.29
101.5	0.3095
101.6	0.318
101.7	0.326
101.8	0.3425
101.9	0.3535
102	0.367
102.1	0.382
102.2	0.3905
102.3	0.4045
102.4	0.41
102.5	0.422
102.6	0.4245
102.7	0.4335
102.8	0.4345
102.9	0.438
103	0.446
103.1	0.452
103.2	0.457
103.3	0.467
103.4	0.467
103.5	0.468
103.6	0.473
103.7	0.4805
103.8	0.4835
103.9	0.488
104	0.492
104.1	0.498
104.2	0.502
104.3	0.5045
104.4	0.5045
104.5	0.506
104.6	0.5055
104.7	0.507
104.8	0.511
104.9	0.508
105	0.511
105.1	0.5165
105.2	0.517
105.3	0.5185
105.4	0.5195
105.5	0.5195
105.6	0.5205
105.7	0.522
105.8	0.52
105.9	0.52
106	0.5225
106.1	0.526
106.2	0.533
106.3	0.535
106.4	0.537
106.5	0.5405
106.6	0.5415
106.7	0.5405
106.8	0.538
106.9	0.547
107	0.5455
107.1	0.5495
107.2	0.5485
107.3	0.544
107.4	0.544
107.5	0.5405
107.6	0.5375
107.7	0.534
107.8	0.538
107.9	0.542
108	0.5455
108.1	0.547
108.2	0.5515
108.3	0.5555
108.4	0.5575
108.5	0.56
108.6	0.558
108.7	0.5565
108.8	0.5625
108.9	0.558
109	0.5585
109.1	0.5545
109.2	0.558
109.3	0.556
109.4	0.5575
109.5	0.558
109.6	0.559
109.7	0.562
109.8	0.5595
109.9	0.5595
110	0.5625
110.1	0.5675
110.2	0.567
110.3	0.5755
110.4	0.574
110.5	0.5735
110.6	0.5735
110.7	0.577
110.8	0.575
110.9	0.5815
111	0.5775
111.1	0.5785
111.2	0.578
111.3	0.5775
111.4	0.5755
111.5	0.5695
111.6	0.569
111.7	0.5725
111.8	0.576
111.9	0.5775
112	0.575
112.1	0.5795
112.2	0.5815
112.3	0.5835
112.4	0.581
112.5	0.579
112.6	0.5785
112.7	0.5785
112.8	0.574
112.9	0.5755
113	0.575
113.1	0.579
113.2	0.5805
113.3	0.5835
113.4	0.5875
113.5	0.586
113.6	0.5845
113.7	0.5855
113.8	0.5835
113.9	0.5845
114	0.585
114.1	0.586
114.2	0.589
114.3	0.59
114.4	0.59
114.5	0.5905
114.6	0.5895
114.7	0.584
114.8	0.586
114.9	0.588
115	0.5905
115.1	0.5955
115.2	0.59
115.3	0.588
115.4	0.585
115.5	0.582
115.6	0.582
115.7	0.588
115.8	0.5875
115.9	0.589
116	0.5895
116.1	0.592
116.2	0.59
116.3	0.588
116.4	0.587
116.5	0.586
116.6	0.5865
116.7	0.5845
116.8	0.587
116.9	0.586
117	0.5865
117.1	0.5835
117.2	0.582
117.3	0.5825
117.4	0.5875
117.5	0.5855
117.6	0.583
117.7	0.5845
117.8	0.5815
117.9	0.585
118	0.5845
118.1	0.584
118.2	0.5835
118.3	0.583
118.4	0.5835
118.5	0.59
118.6	0.5895
118.7	0.587
118.8	0.587
118.9	0.5855
119	0.5855
119.1	0.5835
119.2	0.586
119.3	0.5835
119.4	0.5865
119.5	0.5875
119.6	0.588
119.7	0.588
119.8	0.586
119.9	0.5875
120	0.5865
120.1	0.589
120.2	0.587
120.3	0.5875
120.4	0.5885
120.5	0.5885
120.6	0.585
120.7	0.5875
120.8	0.593
120.9	0.5935
121	0.5935
121.1	0.5965
121.2	0.5995
121.3	0.6025
121.4	0.603
121.5	0.6035
121.6	0.603
121.7	0.6055
121.8	0.6075
121.9	0.6085
122	0.6105
122.1	0.61
122.2	0.613
122.3	0.611
122.4	0.6145
122.5	0.617
122.6	0.6175
122.7	0.6205
122.8	0.622
122.9	0.6275
123	0.629
123.1	0.6295
123.2	0.63
123.3	0.6315
123.4	0.634
123.5	0.6315
123.6	0.629
123.7	0.629
123.8	0.624
123.9	0.625
124	0.622
124.1	0.618
124.2	0.6165
124.3	0.6145
124.4	0.62
124.5	0.62
124.6	0.6205
124.7	0.6235
124.8	0.6225
124.9	0.622
125	0.624
125.1	0.6245
125.2	0.628
125.3	0.627
125.4	0.63
125.5	0.631
125.6	0.6315
125.7	0.628
125.8	0.634
125.9	0.632
126	0.631
126.1	0.634
126.2	0.636
126.3	0.635
126.4	0.638
126.5	0.6395
126.6	0.639
126.7	0.641
126.8	0.6435
126.9	0.6455
127	0.645
127.1	0.6455
127.2	0.6485
127.3	0.645
127.4	0.6445
127.5	0.6455
127.6	0.644
127.7	0.6395
127.8	0.6375
127.9	0.638
128	0.637
128.1	0.6365
128.2	0.6335
128.3	0.6315
128.4	0.632
128.5	0.631
128.6	0.63
128.7	0.6335
128.8	0.633
128.9	0.6375
129	0.6345
129.1	0.6375
129.2	0.635
129.3	0.6405
129.4	0.638
129.5	0.6425
129.6	0.646
129.7	0.652
129.8	0.655
129.9	0.651
130	0.654
130.1	0.6525
130.2	0.6555
130.3	0.659
130.4	0.653
130.5	0.652
130.6	0.6535
130.7	0.6515
130.8	0.6515
130.9	0.65
131	0.6465
131.1	0.648
131.2	0.646
131.3	0.6455
131.4	0.6445
131.5	0.643
131.6	0.6455
131.7	0.6425
131.8	0.643
131.9	0.6445
132	0.645
132.1	0.644
132.2	0.6445
132.3	0.646
132.4	0.645
132.5	0.6475
132.6	0.6445
132.7	0.6445
132.8	0.643
132.9	0.6385
133	0.6405
133.1	0.6455
133.2	0.643
133.3	0.6365
133.4	0.639
133.5	0.637
133.6	0.6395
133.7	0.644
133.8	0.644
133.9	0.6405
134	0.642
134.1	0.644
134.2	0.6485
134.3	0.6445
134.4	0.6415
134.5	0.642
134.6	0.641
134.7	0.637
134.8	0.6335
134.9	0.6365
135	0.6375
135.1	0.64
135.2	0.637
135.3	0.6375
135.4	0.636
135.5	0.6355
135.6	0.6355
135.7	0.6375
135.8	0.639
135.9	0.6375
136	0.638
136.1	0.6405
136.2	0.6375
136.3	0.6375
136.4	0.639
136.5	0.642
136.6	0.645
136.7	0.6445
136.8	0.6465
136.9	0.6455
137	0.646
137.1	0.6495
137.2	0.648
137.3	0.6475
137.4	0.647
137.5	0.647
137.6	0.6475
137.7	0.6465
137.8	0.645
137.9	0.644
138	0.641
138.1	0.638
138.2	0.6375
138.3	0.6395
138.4	0.6355
138.5	0.6385
138.6	0.6385
138.7	0.643
138.8	0.645
138.9	0.644
139	0.6395
139.1	0.6425
139.2	0.644
139.3	0.6445
139.4	0.644
139.5	0.6415
139.6	0.642
139.7	0.641
139.8	0.6445
139.9	0.6425
140	0.646
140.1	0.649
140.2	0.64
140.3	0.641
140.4	0.644
140.5	0.6455
140.6	0.648
140.7	0.6485
140.8	0.6505
140.9	0.647
141	0.651
141.1	0.651
141.2	0.6525
141.3	0.655
141.4	0.6525
141.5	0.652
141.6	0.6515
141.7	0.655
141.8	0.658
141.9	0.656
142	0.656
142.1	0.658
142.2	0.654
142.3	0.657
142.4	0.656
142.5	0.6615
142.6	0.6625
142.7	0.6595
142.8	0.662
142.9	0.6605
143	0.663
143.1	0.6645
143.2	0.6665
143.3	0.667
143.4	0.67
143.5	0.6685
143.6	0.667
143.7	0.663
143.8	0.6645
143.9	0.6665
144	0.663
144.1	0.665
144.2	0.6635
144.3	0.663
144.4	0.6655
144.5	0.6595
144.6	0.6595
144.7	0.6585
144.8	0.6555
144.9	0.6605
145	0.6635
145.1	0.6615
145.2	0.661
145.3	0.6625
145.4	0.6595
145.5	0.661
145.6	0.6615
145.7	0.6645
145.8	0.6655
145.9	0.668
146	0.6665
146.1	0.665
146.2	0.666
146.3	0.668
146.4	0.667
146.5	0.67
146.6	0.6635
146.7	0.6675
146.8	0.6695
146.9	0.6705
147	0.6705
147.1	0.6695
147.2	0.672
147.3	0.669
147.4	0.674
147.5	0.6745
147.6	0.6755
147.7	0.6755
147.8	0.677
147.9	0.6725
148	0.67
148.1	0.6715
148.2	0.671
148.3	0.6695
148.4	0.6705
148.5	0.672
148.6	0.674
148.7	0.6725
148.8	0.6745
148.9	0.675
149	0.673
149.1	0.6745
149.2	0.6765
149.3	0.6795
149.4	0.6835
149.5	0.6835
149.6	0.6835
149.7	0.685
149.8	0.6845
149.9	0.689
150	0.688
150.1	0.688
150.2	0.685
150.3	0.682
150.4	0.6815
150.5	0.6835
150.6	0.6895
150.7	0.691
150.8	0.6865
150.9	0.6875
151	0.69
151.1	0.685
151.2	0.685
151.3	0.685
151.4	0.682
151.5	0.681
151.6	0.682
151.7	0.6845
151.8	0.6865
151.9	0.6865
152	0.684
152.1	0.68
152.2	0.6825
152.3	0.6825
152.4	0.6845
152.5	0.6845
152.6	0.6855
152.7	0.688
152.8	0.6865
152.9	0.688
153	0.6905
153.1	0.688
153.2	0.687
153.3	0.6855
153.4	0.6855
153.5	0.687
153.6	0.686
153.7	0.692
153.8	0.6985
153.9	0.699
154	0.6995
154.1	0.703
154.2	0.703
154.3	0.701
154.4	0.698
154.5	0.701
154.6	0.698
154.7	0.697
154.8	0.698
154.9	0.697
155	0.702
155.1	0.703
155.2	0.703
155.3	0.7025
155.4	0.703
155.5	0.703
155.6	0.702
155.7	0.7015
155.8	0.7005
155.9	0.7
156	0.6985
156.1	0.702
156.2	0.702
156.3	0.7025
156.4	0.699
156.5	0.6995
156.6	0.7
156.7	0.699
156.8	0.699
156.9	0.7
157	0.7
157.1	0.6995
157.2	0.7015
157.3	0.7
157.4	0.6955
157.5	0.6945
157.6	0.691
157.7	0.6885
157.8	0.691
157.9	0.692
158	0.6895
158.1	0.6905
158.2	0.6875
158.3	0.688
158.4	0.691
158.5	0.69
158.6	0.693
158.7	0.6905
158.8	0.688
158.9	0.689
159	0.6905
159.1	0.692
159.2	0.696
159.3	0.694
159.4	0.6935
159.5	0.6955
159.6	0.694
159.7	0.6945
159.8	0.695
159.9	0.6945
160	0.694
160.1	0.694
160.2	0.6945
160.3	0.6955
160.4	0.695
160.5	0.696
160.6	0.696
160.7	0.697
160.8	0.697
160.9	0.6955
161	0.694
161.1	0.696
161.2	0.6945
161.3	0.697
161.4	0.701
161.5	0.701
161.6	0.6995
161.7	0.705
161.8	0.703
161.9	0.708
162	0.7085
162.1	0.7095
162.2	0.711
162.3	0.7075
162.4	0.7065
162.5	0.7085
162.6	0.7035
162.7	0.7
162.8	0.7005
162.9	0.6975
163	0.692
163.1	0.6945
163.2	0.697
163.3	0.6965
163.4	0.695
163.5	0.693
163.6	0.6955
163.7	0.6945
163.8	0.6975
163.9	0.694
164	0.697
164.1	0.696
164.2	0.693
164.3	0.693
164.4	0.693
164.5	0.695
164.6	0.695
164.7	0.693
164.8	0.692
164.9	0.695
165	0.6975
165.1	0.702
165.2	0.7025
165.3	0.7005
165.4	0.701
165.5	0.702
165.6	0.701
165.7	0.702
165.8	0.702
165.9	0.7055
166	0.705
166.1	0.705
166.2	0.705
166.3	0.706
166.4	0.705
166.5	0.7085
166.6	0.7085
166.7	0.7035
166.8	0.705
166.9	0.707
167	0.707
167.1	0.7065
167.2	0.707
167.3	0.713
167.4	0.7135
167.5	0.7095
167.6	0.7085
167.7	0.7075
167.8	0.7065
167.9	0.7035
168	0.703
168.1	0.701
168.2	0.705
168.3	0.7045
168.4	0.706
168.5	0.71
168.6	0.7085
168.7	0.7075
168.8	0.709
168.9	0.7085
169	0.7105
169.1	0.711
169.2	0.71
169.3	0.7125
169.4	0.71
169.5	0.71
169.6	0.7095
169.7	0.708
169.8	0.706
169.9	0.7045
170	0.708
170.1	0.708
170.2	0.7045
170.3	0.708
170.4	0.705
170.5	0.706
170.6	0.7085
170.7	0.709
170.8	0.707
170.9	0.7075
171	0.7075
171.1	0.7125
171.2	0.712
171.3	0.713
171.4	0.7125
171.5	0.7125
171.6	0.7165
171.7	0.713
171.8	0.7135
171.9	0.7165
172	0.7135
172.1	0.712
172.2	0.7155
172.3	0.712
172.4	0.714
172.5	0.715
172.6	0.7165
172.7	0.716
172.8	0.7125
172.9	0.715
173	0.7145
173.1	0.7155
173.2	0.7155
173.3	0.716
173.4	0.721
173.5	0.7205
173.6	0.7235
173.7	0.7225
173.8	0.7205
173.9	0.7215
174	0.7185
174.1	0.7175
174.2	0.7145
174.3	0.712
174.4	0.711
174.5	0.714
174.6	0.711
174.7	0.707
174.8	0.705
174.9	0.705
175	0.7025
175.1	0.7025
175.2	0.702
175.3	0.703
175.4	0.706
175.5	0.707
175.6	0.704
175.7	0.7035
175.8	0.7035
175.9	0.703
176	0.698
176.1	0.6955
176.2	0.695
176.3	0.6995
176.4	0.695
176.5	0.6985
176.6	0.6975
176.7	0.6975
176.8	0.6985
176.9	0.702
177	0.7045
177.1	0.705
177.2	0.706
177.3	0.7085
177.4	0.7105
177.5	0.7095
177.6	0.713
177.7	0.7115
177.8	0.712
177.9	0.715
178	0.7165
178.1	0.714
178.2	0.7145
178.3	0.714
178.4	0.7135
178.5	0.714
178.6	0.716
178.7	0.7165
178.8	0.7145
178.9	0.714
179	0.7125
179.1	0.7135
179.2	0.7105
179.3	0.7085
179.4	0.7115
179.5	0.7105
179.6	0.713
179.7	0.7165
179.8	0.7155
179.9	0.714
180	0.714
180.1	0.7135
180.2	0.7135
180.3	0.7155
180.4	0.7165
180.5	0.7165
180.6	0.7165
180.7	0.7185
180.8	0.7185
180.9	0.714
181	0.712
181.1	0.714
181.2	0.7145
181.3	0.717
181.4	0.7165
181.5	0.7135
181.6	0.717
181.7	0.7185
181.8	0.717
181.9	0.7185
182	0.721
182.1	0.7225
182.2	0.7255
182.3	0.7225
182.4	0.721
182.5	0.72
182.6	0.7195
182.7	0.7175
182.8	0.7155
182.9	0.7175
183	0.7205
183.1	0.7235
183.2	0.7235
183.3	0.719
183.4	0.718
183.5	0.7185
183.6	0.721
183.7	0.719
183.8	0.7185
183.9	0.72
184	0.719
184.1	0.7145
184.2	0.7175
184.3	0.718
184.4	0.718
184.5	0.7155
184.6	0.719
184.7	0.719
184.8	0.72
184.9	0.726
185	0.7255
185.1	0.7235
185.2	0.725
185.3	0.721
185.4	0.7205
185.5	0.72
185.6	0.7205
185.7	0.723
185.8	0.7255
185.9	0.7265
186	0.727
186.1	0.7255
186.2	0.7235
186.3	0.725
186.4	0.7245
186.5	0.7265
186.6	0.727
186.7	0.727
186.8	0.729
186.9	0.7275
187	0.725
187.1	0.728
187.2	0.73
187.3	0.7295
187.4	0.7275
187.5	0.723
187.6	0.72
187.7	0.721
187.8	0.7235
187.9	0.725
188	0.723
188.1	0.723
188.2	0.723
188.3	0.725
188.4	0.7265
188.5	0.7295
188.6	0.73
188.7	0.7305
188.8	0.7295
188.9	0.7235
189	0.7225
189.1	0.721
189.2	0.7205
189.3	0.7235
189.4	0.724
189.5	0.7235
189.6	0.7255
189.7	0.727
189.8	0.728
189.9	0.7245
190	0.7245
190.1	0.7265
190.2	0.7255
190.3	0.7245
190.4	0.724
190.5	0.729
190.6	0.7285
190.7	0.73
190.8	0.7325
190.9	0.734
191	0.7355
191.1	0.7365
191.2	0.7345
191.3	0.7325
191.4	0.733
191.5	0.732
191.6	0.736
191.7	0.736
191.8	0.739
191.9	0.738
192	0.7375
192.1	0.7365
192.2	0.736
192.3	0.7365
192.4	0.735
192.5	0.74
192.6	0.74
192.7	0.741
192.8	0.74
192.9	0.7415
193	0.736
193.1	0.737
193.2	0.737
193.3	0.737
193.4	0.7365
193.5	0.7385
193.6	0.741
193.7	0.743
193.8	0.7365
193.9	0.7375
194	0.7355
194.1	0.732
194.2	0.734
194.3	0.737
194.4	0.7365
194.5	0.739
194.6	0.739
194.7	0.7375
194.8	0.738
194.9	0.742
195	0.7405
195.1	0.739
195.2	0.736
195.3	0.7355
195.4	0.7385
195.5	0.739
195.6	0.736
195.7	0.7405
195.8	0.7405
195.9	0.7425
196	0.7415
196.1	0.74
196.2	0.7405
196.3	0.7435
196.4	0.745
196.5	0.7455
196.6	0.7475
196.7	0.7455
196.8	0.744
196.9	0.745
197	0.744
197.1	0.7455
197.2	0.744
197.3	0.74
197.4	0.739
197.5	0.739
197.6	0.738
197.7	0.739
197.8	0.7405
197.9	0.7365
198	0.7365
198.1	0.736
198.2	0.737
198.3	0.736
198.4	0.738
198.5	0.7395
198.6	0.736
198.7	0.7345
198.8	0.7375
198.9	0.7385
199	0.7375
199.1	0.735
199.2	0.741
199.3	0.746
199.4	0.7435
199.5	0.7465
199.6	0.744
199.7	0.743
199.8	0.743
199.9	0.744
200	0.7455
[truncated: 14,000 more rows]
