# Supplementary material for: Bayesian inference of kinetic schemes for ion channels by Kalman filtering
Source: eLife journal article supplement (doi:10.7554/elife.62714), 2022-05-04
Supplement: fig1-data1 [file 05_Sim_N_1000_Strom_MW.xlsx]

## Sheet: Tabelle1
0.1	0
0.2	0
0.3	0
0.4	0
0.5	0
0.6	0
0.7	0
0.8	0
0.9	0
1	0
1.1	0
1.2	0
1.3	0
1.4	0
1.5	0
1.6	0
1.7	0
1.8	0
1.9	0
2	0
2.1	0
2.2	0
2.3	0
2.4	0
2.5	0
2.6	0
2.7	0
2.8	0
2.9	0
3	0
3.1	0
3.2	0
3.3	0
3.4	0
3.5	0
3.6	0
3.7	0
3.8	0
3.9	0
4	0
4.1	0
4.2	0
4.3	0
4.4	0
4.5	0
4.6	0
4.7	0
4.8	0
4.9	0
5	0
5.1	0
5.2	0
5.3	0
5.4	0
5.5	0
5.6	0
5.7	0
5.8	0
5.9	0
6	0
6.1	0
6.2	0
6.3	0
6.4	0
6.5	0
6.6	0
6.7	0
6.8	0
6.9	0
7	0
7.1	0
7.2	0
7.3	0
7.4	0
7.5	0
7.6	0
7.7	0
7.8	0
7.9	0
8	0
8.1	0
8.2	0
8.3	0
8.4	0
8.5	0
8.6	0
8.7	0
8.8	0
8.9	0
9	0
9.1	0
9.2	0
9.3	0
9.4	0
9.5	0
9.6	0
9.7	0
9.8	0
9.9	0
10	0
10.1	0
10.2	0
10.3	0
10.4	0
10.5	0
10.6	0
10.7	0
10.8	0
10.9	0
11	0
11.1	0
11.2	0
11.3	0
11.4	0
11.5	0
11.6	0
11.7	0
11.8	0
11.9	0
12	0
12.1	0
12.2	0
12.3	0
12.4	0
12.5	0
12.6	0
12.7	0
12.8	0
12.9	0
13	0
13.1	0
13.2	0
13.3	0
13.4	0
13.5	0
13.6	0
13.7	0
13.8	0
13.9	0
14	0
14.1	0
14.2	0
14.3	0
14.4	0
14.5	0
14.6	0
14.7	0
14.8	0
14.9	0
15	0
15.1	0
15.2	0
15.3	0
15.4	0
15.5	0
15.6	0
15.7	0
15.8	0
15.9	0
16	0
16.1	0
16.2	0
16.3	0
16.4	0
16.5	0
16.6	0
16.7	0
16.8	0
16.9	0
17	0
17.1	0
17.2	0
17.3	0
17.4	0
17.5	0
17.6	0
17.7	0
17.8	0
17.9	0
18	0
18.1	0
18.2	0
18.3	0
18.4	0
18.5	0
18.6	0
18.7	0
18.8	0
18.9	0
19	0
19.1	0
19.2	0
19.3	0
19.4	0
19.5	0
19.6	0
19.7	0
19.8	0
19.9	0
20	0
20.1	0
20.2	0
20.3	0
20.4	0
20.5	0
20.6	0
20.7	0
20.8	0
20.9	0
21	0
21.1	0
21.2	0
21.3	0
21.4	0
21.5	0
21.6	0
21.7	0
21.8	0
21.9	0
22	0
22.1	0
22.2	0
22.3	0
22.4	0
22.5	0
22.6	0
22.7	0
22.8	0
22.9	0
23	0
23.1	0
23.2	0
23.3	0
23.4	0
23.5	0
23.6	0
23.7	0
23.8	0
23.9	0
24	0
24.1	0
24.2	0
24.3	0
24.4	0
24.5	0
24.6	0
24.7	0
24.8	0
24.9	0
25	0
25.1	0
25.2	0
25.3	0
25.4	0
25.5	0
25.6	0
25.7	0
25.8	0
25.9	0
26	0
26.1	0
26.2	0
26.3	0
26.4	0
26.5	0
26.6	0
26.7	0
26.8	0
26.9	0
27	0
27.1	0
27.2	0
27.3	0
27.4	0
27.5	0
27.6	0
27.7	0
27.8	0
27.9	0
28	0
28.1	0
28.2	0
28.3	0
28.4	0
28.5	0
28.6	0
28.7	0
28.8	0
28.9	0
29	0
29.1	0
29.2	0
29.3	0
29.4	0
29.5	0
29.6	0
29.7	0
29.8	0
29.9	0
30	0
30.1	0
30.2	0
30.3	0
30.4	0
30.5	0
30.6	0
30.7	0
30.8	0
30.9	0
31	0
31.1	0
31.2	0
31.3	0
31.4	0
31.5	0
31.6	0
31.7	0
31.8	0
31.9	0
32	0
32.1	0
32.2	0
32.3	0
32.4	0
32.5	0
32.6	0
32.7	0
32.8	0
32.9	0
33	0
33.1	0
33.2	0
33.3	0
33.4	0
33.5	0
33.6	0
33.7	0
33.8	0
33.9	0
34	0
34.1	0
34.2	0
34.3	0
34.4	0
34.5	0
34.6	0
34.7	0
34.8	0
34.9	0
35	0
35.1	0
35.2	0
35.3	0
35.4	0
35.5	0
35.6	0
35.7	0
35.8	0
35.9	0
36	0
36.1	0
36.2	0
36.3	0
36.4	0
36.5	0
36.6	0
36.7	0
36.8	0
36.9	0
37	0
37.1	0
37.2	0
37.3	0
37.4	0
37.5	0
37.6	0
37.7	0
37.8	0
37.9	0
38	0
38.1	0
38.2	0
38.3	0
38.4	0
38.5	0
38.6	0
38.7	0
38.8	0
38.9	0
39	0
39.1	0
39.2	0
39.3	0
39.4	0
39.5	0
39.6	0
39.7	0
39.8	0
39.9	0
40	0
40.1	0
40.2	0
40.3	0
40.4	0
40.5	0
40.6	0
40.7	0
40.8	0
40.9	0
41	0
41.1	0
41.2	0
41.3	0
41.4	0
41.5	0
41.6	0
41.7	0
41.8	0
41.9	0
42	0
42.1	0
42.2	0
42.3	0
42.4	0
42.5	0
42.6	0
42.7	0
42.8	0
42.9	0
43	0
43.1	0
43.2	0
43.3	0
43.4	0
43.5	0
43.6	0
43.7	0
43.8	0
43.9	0
44	0
44.1	0
44.2	0
44.3	0
44.4	0
44.5	0
44.6	0
44.7	0
44.8	0
44.9	0
45	0
45.1	0
45.2	0
45.3	0
45.4	0
45.5	0
45.6	0
45.7	0
45.8	0
45.9	0
46	0
46.1	0
46.2	0
46.3	0
46.4	0
46.5	0
46.6	0
46.7	0
46.8	0
46.9	0
47	0
47.1	0
47.2	0
47.3	0
47.4	0
47.5	0
47.6	0
47.7	0
47.8	0
47.9	0
48	0
48.1	0
48.2	0
48.3	0
48.4	0
48.5	0
48.6	0
48.7	0
48.8	0
48.9	0
49	0
49.1	0
49.2	0
49.3	0
49.4	0
49.5	0
49.6	0
49.7	0
49.8	0
49.9	0
50	0
50.1	0
50.2	0
50.3	0
50.4	0
50.5	0
50.6	0
50.7	0
50.8	0
50.9	0
51	0
51.1	0
51.2	0
51.3	0
51.4	0
51.5	0
51.6	0
51.7	0
51.8	0
51.9	0
52	0
52.1	0
52.2	0
52.3	0
52.4	0
52.5	0
52.6	0
52.7	0
52.8	0
52.9	0
53	0
53.1	0
53.2	0
53.3	0
53.4	0
53.5	0
53.6	0
53.7	0
53.8	0
53.9	0
54	0
54.1	0
54.2	0
54.3	0
54.4	0
54.5	0
54.6	0
54.7	0
54.8	0
54.9	0
55	0
55.1	0
55.2	0
55.3	0
55.4	0
55.5	0
55.6	0
55.7	0
55.8	0
55.9	0
56	0
56.1	0
56.2	0
56.3	0
56.4	0
56.5	0
56.6	0
56.7	0
56.8	0
56.9	0
57	0
57.1	0
57.2	0
57.3	0
57.4	0
57.5	0
57.6	0
57.7	0
57.8	0
57.9	0
58	0
58.1	0
58.2	0
58.3	0
58.4	0
58.5	0
58.6	0
58.7	0
58.8	0
58.9	0
59	0
59.1	0
59.2	0
59.3	0
59.4	0
59.5	0
59.6	0
59.7	0
59.8	0
59.9	0
60	0
60.1	0
60.2	0
60.3	0
60.4	0
60.5	0
60.6	0
60.7	0
60.8	0
60.9	0
61	0
61.1	0
61.2	0
61.3	0
61.4	0
61.5	0
61.6	0
61.7	0
61.8	0
61.9	0
62	0
62.1	0
62.2	0
62.3	0
62.4	0
62.5	0
62.6	0
62.7	0
62.8	0
62.9	0
63	0
63.1	0
63.2	0
63.3	0
63.4	0
63.5	0
63.6	0
63.7	0
63.8	0
63.9	0
64	0
64.1	0
64.2	0
64.3	0
64.4	0
64.5	0
64.6	0
64.7	0
64.8	0
64.9	0
65	0
65.1	0
65.2	0
65.3	0
65.4	0
65.5	0
65.6	0
65.7	0
65.8	0
65.9	0
66	0
66.1	0
66.2	0
66.3	0
66.4	0
66.5	0
66.6	0
66.7	0
66.8	0
66.9	0
67	0
67.1	0
67.2	0
67.3	0
67.4	0
67.5	0
67.6	0
67.7	0
67.8	0
67.9	0
68	0
68.1	0
68.2	0
68.3	0
68.4	0
68.5	0
68.6	0
68.7	0
68.8	0
68.9	0
69	0
69.1	0
69.2	0
69.3	0
69.4	0
69.5	0
69.6	0
69.7	0
69.8	0
69.9	0
70	0
70.1	0
70.2	0
70.3	0
70.4	0
70.5	0
70.6	0
70.7	0
70.8	0
70.9	0
71	0
71.1	0
71.2	0
71.3	0
71.4	0
71.5	0
71.6	0
71.7	0
71.8	0
71.9	0
72	0
72.1	0
72.2	0
72.3	0
72.4	0
72.5	0
72.6	0
72.7	0
72.8	0
72.9	0
73	0
73.1	0
73.2	0
73.3	0
73.4	0
73.5	0
73.6	0
73.7	0
73.8	0
73.9	0
74	0
74.1	0
74.2	0
74.3	0
74.4	0
74.5	0
74.6	0
74.7	0
74.8	0
74.9	0
75	0
75.1	0
75.2	0
75.3	0
75.4	0
75.5	0
75.6	0
75.7	0
75.8	0
75.9	0
76	0
76.1	0
76.2	0
76.3	0
76.4	0
76.5	0
76.6	0
76.7	0
76.8	0
76.9	0
77	0
77.1	0
77.2	0
77.3	0
77.4	0
77.5	0
77.6	0
77.7	0
77.8	0
77.9	0
78	0
78.1	0
78.2	0
78.3	0
78.4	0
78.5	0
78.6	0
78.7	0
78.8	0
78.9	0
79	0
79.1	0
79.2	0
79.3	0
79.4	0
79.5	0
79.6	0
79.7	0
79.8	0
79.9	0
80	0
80.1	0
80.2	0
80.3	0
80.4	0
80.5	0
80.6	0
80.7	0
80.8	0
80.9	0
81	0
81.1	0
81.2	0
81.3	0
81.4	0
81.5	0
81.6	0
81.7	0
81.8	0
81.9	0
82	0
82.1	0
82.2	0
82.3	0
82.4	0
82.5	0
82.6	0
82.7	0
82.8	0
82.9	0
83	0
83.1	0
83.2	0
83.3	0
83.4	0
83.5	0
83.6	0
83.7	0
83.8	0
83.9	0
84	0
84.1	0
84.2	0
84.3	0
84.4	0
84.5	0
84.6	0
84.7	0
84.8	0
84.9	0
85	0
85.1	0
85.2	0
85.3	0
85.4	0
85.5	0
85.6	0
85.7	0
85.8	0
85.9	0
86	0
86.1	0
86.2	0
86.3	0
86.4	0
86.5	0
86.6	0
86.7	0
86.8	0
86.9	0
87	0
87.1	0
87.2	0
87.3	0
87.4	0
87.5	0
87.6	0
87.7	0
87.8	0
87.9	0
88	0
88.1	0
88.2	0
88.3	0
88.4	0
88.5	0
88.6	0
88.7	0
88.8	0
88.9	0
89	0
89.1	0
89.2	0
89.3	0
89.4	0
89.5	0
89.6	0
89.7	0
89.8	0
89.9	0
90	0
90.1	0
90.2	0
90.3	0
90.4	0
90.5	0
90.6	0
90.7	0
90.8	0
90.9	0
91	0
91.1	0
91.2	0
91.3	0
91.4	0
91.5	0
91.6	0
91.7	0
91.8	0
91.9	0
92	0
92.1	0
92.2	0
92.3	0
92.4	0
92.5	0
92.6	0
92.7	0
92.8	0
92.9	0
93	0
93.1	0
93.2	0
93.3	0
93.4	0
93.5	0
93.6	0
93.7	0
93.8	0
93.9	0
94	0
94.1	0
94.2	0
94.3	0
94.4	0
94.5	0
94.6	0
94.7	0
94.8	0
94.9	0
95	0
95.1	0
95.2	0
95.3	0
95.4	0
95.5	0
95.6	0
95.7	0
95.8	0
95.9	0
96	0
96.1	0
96.2	0
96.3	0
96.4	0
96.5	0
96.6	0
96.7	0
96.8	0
96.9	0
97	0
97.1	0
97.2	0
97.3	0
97.4	0
97.5	0
97.6	0
97.7	0
97.8	0
97.9	0
98	0
98.1	0
98.2	0
98.3	0
98.4	0
98.5	0
98.6	0
98.7	0
98.8	0
98.9	0
99	0
99.1	0
99.2	0
99.3	0
99.4	0
99.5	0
99.6	0
99.7	0
99.8	0
99.9	0
100	0
100.1	0
100.2	0
100.3	0
100.4	0
100.5	0
100.6	0
100.7	0
100.8	0
100.9	0
101	0
101.1	0.001
101.2	0.003
101.3	0.003
101.4	0.003
101.5	0.003
101.6	0.003
101.7	0.004
101.8	0.004
101.9	0.004
102	0.004
102.1	0.005
102.2	0.005
102.3	0.005
102.4	0.005
102.5	0.006
102.6	0.007
102.7	0.007
102.8	0.007
102.9	0.007
103	0.009
103.1	0.011
103.2	0.011
103.3	0.011
103.4	0.013
103.5	0.015
103.6	0.015
103.7	0.016
103.8	0.016
103.9	0.017
104	0.017
104.1	0.017
104.2	0.017
104.3	0.017
104.4	0.018
104.5	0.019
104.6	0.019
104.7	0.02
104.8	0.02
104.9	0.02
105	0.02
105.1	0.023
105.2	0.023
105.3	0.022
105.4	0.021
105.5	0.021
105.6	0.021
105.7	0.022
105.8	0.022
105.9	0.025
106	0.026
106.1	0.027
106.2	0.028
106.3	0.028
106.4	0.028
106.5	0.028
106.6	0.031
106.7	0.032
106.8	0.032
106.9	0.033
107	0.035
107.1	0.035
107.2	0.035
107.3	0.036
107.4	0.037
107.5	0.04
107.6	0.04
107.7	0.045
107.8	0.045
107.9	0.045
108	0.046
108.1	0.047
108.2	0.048
108.3	0.049
108.4	0.051
108.5	0.052
108.6	0.054
108.7	0.054
108.8	0.054
108.9	0.054
109	0.054
109.1	0.056
109.2	0.057
109.3	0.057
109.4	0.057
109.5	0.057
109.6	0.057
109.7	0.057
109.8	0.057
109.9	0.059
110	0.061
110.1	0.06
110.2	0.061
110.3	0.062
110.4	0.062
110.5	0.062
110.6	0.064
110.7	0.065
110.8	0.069
110.9	0.07
111	0.069
111.1	0.07
111.2	0.07
111.3	0.073
111.4	0.074
111.5	0.074
111.6	0.074
111.7	0.073
111.8	0.073
111.9	0.073
112	0.074
112.1	0.077
112.2	0.077
112.3	0.077
112.4	0.077
112.5	0.078
112.6	0.081
112.7	0.083
112.8	0.085
112.9	0.087
113	0.088
113.1	0.088
113.2	0.089
113.3	0.091
113.4	0.091
113.5	0.092
113.6	0.092
113.7	0.094
113.8	0.094
113.9	0.094
114	0.095
114.1	0.096
114.2	0.097
114.3	0.097
114.4	0.098
114.5	0.101
114.6	0.101
114.7	0.101
114.8	0.101
114.9	0.101
115	0.102
115.1	0.103
115.2	0.104
115.3	0.105
115.4	0.105
115.5	0.105
115.6	0.105
115.7	0.106
115.8	0.108
115.9	0.11
116	0.111
116.1	0.112
116.2	0.113
116.3	0.113
116.4	0.113
116.5	0.114
116.6	0.115
116.7	0.114
116.8	0.114
116.9	0.118
117	0.12
117.1	0.12
117.2	0.121
117.3	0.122
117.4	0.122
117.5	0.122
117.6	0.122
117.7	0.122
117.8	0.122
117.9	0.122
118	0.123
118.1	0.124
118.2	0.124
118.3	0.124
118.4	0.126
118.5	0.125
118.6	0.125
118.7	0.128
118.8	0.129
118.9	0.13
119	0.131
119.1	0.132
119.2	0.133
119.3	0.133
119.4	0.134
119.5	0.134
119.6	0.134
119.7	0.134
119.8	0.134
119.9	0.136
120	0.137
120.1	0.14
120.2	0.14
120.3	0.141
120.4	0.142
120.5	0.142
120.6	0.142
120.7	0.141
120.8	0.141
120.9	0.141
121	0.142
121.1	0.142
121.2	0.142
121.3	0.146
121.4	0.146
121.5	0.147
121.6	0.149
121.7	0.15
121.8	0.15
121.9	0.149
122	0.151
122.1	0.154
122.2	0.155
122.3	0.155
122.4	0.156
122.5	0.157
122.6	0.157
122.7	0.158
122.8	0.159
122.9	0.159
123	0.159
123.1	0.159
123.2	0.16
123.3	0.16
123.4	0.161
123.5	0.16
123.6	0.16
123.7	0.161
123.8	0.162
123.9	0.163
124	0.165
124.1	0.165
124.2	0.165
124.3	0.165
124.4	0.167
124.5	0.168
124.6	0.168
124.7	0.168
124.8	0.168
124.9	0.169
125	0.168
125.1	0.17
125.2	0.171
125.3	0.172
125.4	0.174
125.5	0.175
125.6	0.176
125.7	0.176
125.8	0.178
125.9	0.178
126	0.178
126.1	0.18
126.2	0.18
126.3	0.182
126.4	0.181
126.5	0.181
126.6	0.183
126.7	0.184
126.8	0.184
126.9	0.184
127	0.185
127.1	0.185
127.2	0.186
127.3	0.186
127.4	0.187
127.5	0.188
127.6	0.19
127.7	0.189
127.8	0.19
127.9	0.19
128	0.19
128.1	0.19
128.2	0.191
128.3	0.191
128.4	0.192
128.5	0.192
128.6	0.191
128.7	0.192
128.8	0.192
128.9	0.195
129	0.195
129.1	0.195
129.2	0.195
129.3	0.196
129.4	0.196
129.5	0.198
129.6	0.2
129.7	0.2
129.8	0.2
129.9	0.201
130	0.2
130.1	0.202
130.2	0.202
130.3	0.202
130.4	0.203
130.5	0.203
130.6	0.204
130.7	0.204
130.8	0.204
130.9	0.205
131	0.204
131.1	0.204
131.2	0.204
131.3	0.203
131.4	0.207
131.5	0.208
131.6	0.209
131.7	0.209
131.8	0.209
131.9	0.211
132	0.211
132.1	0.211
132.2	0.213
132.3	0.214
132.4	0.213
132.5	0.214
132.6	0.214
132.7	0.213
132.8	0.214
132.9	0.214
133	0.213
133.1	0.213
133.2	0.215
133.3	0.216
133.4	0.216
133.5	0.218
133.6	0.219
133.7	0.219
133.8	0.219
133.9	0.219
134	0.219
134.1	0.22
134.2	0.221
134.3	0.221
134.4	0.222
134.5	0.221
134.6	0.221
134.7	0.221
134.8	0.223
134.9	0.223
135	0.224
135.1	0.224
135.2	0.225
135.3	0.227
135.4	0.226
135.5	0.225
135.6	0.224
135.7	0.225
135.8	0.227
135.9	0.227
136	0.227
136.1	0.229
136.2	0.229
136.3	0.231
136.4	0.233
136.5	0.234
136.6	0.234
136.7	0.234
136.8	0.233
136.9	0.233
137	0.234
137.1	0.232
137.2	0.233
137.3	0.234
137.4	0.234
137.5	0.234
137.6	0.234
137.7	0.234
137.8	0.237
137.9	0.236
138	0.235
138.1	0.235
138.2	0.237
138.3	0.239
138.4	0.239
138.5	0.24
138.6	0.24
138.7	0.241
138.8	0.241
138.9	0.241
139	0.241
139.1	0.241
139.2	0.241
139.3	0.243
139.4	0.243
139.5	0.243
139.6	0.244
139.7	0.244
139.8	0.243
139.9	0.244
140	0.244
140.1	0.244
140.2	0.244
140.3	0.244
140.4	0.244
140.5	0.244
140.6	0.245
140.7	0.246
140.8	0.246
140.9	0.246
141	0.246
141.1	0.246
141.2	0.246
141.3	0.246
141.4	0.246
141.5	0.248
141.6	0.247
141.7	0.247
141.8	0.249
141.9	0.251
142	0.25
142.1	0.253
142.2	0.253
142.3	0.253
142.4	0.253
142.5	0.252
142.6	0.254
142.7	0.256
142.8	0.256
142.9	0.258
143	0.258
143.1	0.258
143.2	0.258
143.3	0.26
143.4	0.26
143.5	0.261
143.6	0.259
143.7	0.259
143.8	0.258
143.9	0.259
144	0.263
144.1	0.263
144.2	0.263
144.3	0.263
144.4	0.264
144.5	0.264
144.6	0.266
144.7	0.267
144.8	0.268
144.9	0.268
145	0.271
145.1	0.271
145.2	0.271
145.3	0.27
145.4	0.271
145.5	0.272
145.6	0.274
145.7	0.277
145.8	0.276
145.9	0.274
146	0.274
146.1	0.276
146.2	0.276
146.3	0.277
146.4	0.276
146.5	0.277
146.6	0.278
146.7	0.278
146.8	0.281
146.9	0.282
147	0.282
147.1	0.282
147.2	0.281
147.3	0.283
147.4	0.283
147.5	0.285
147.6	0.286
147.7	0.288
147.8	0.288
147.9	0.289
148	0.289
148.1	0.289
148.2	0.29
148.3	0.29
148.4	0.29
148.5	0.293
148.6	0.294
148.7	0.296
148.8	0.297
148.9	0.3
149	0.299
149.1	0.299
149.2	0.3
149.3	0.302
149.4	0.304
149.5	0.305
149.6	0.305
149.7	0.304
149.8	0.304
149.9	0.307
150	0.307
150.1	0.306
150.2	0.307
150.3	0.307
150.4	0.307
150.5	0.307
150.6	0.307
150.7	0.307
150.8	0.31
150.9	0.31
151	0.311
151.1	0.313
151.2	0.313
151.3	0.314
151.4	0.313
151.5	0.315
151.6	0.316
151.7	0.316
151.8	0.316
151.9	0.317
152	0.315
152.1	0.315
152.2	0.315
152.3	0.317
152.4	0.317
152.5	0.319
152.6	0.32
152.7	0.32
152.8	0.32
152.9	0.32
153	0.32
153.1	0.32
153.2	0.319
153.3	0.319
153.4	0.32
153.5	0.32
153.6	0.321
153.7	0.321
153.8	0.322
153.9	0.322
154	0.322
154.1	0.322
154.2	0.322
154.3	0.322
154.4	0.322
154.5	0.322
154.6	0.321
154.7	0.323
154.8	0.323
154.9	0.326
155	0.326
155.1	0.326
155.2	0.326
155.3	0.326
155.4	0.328
155.5	0.328
155.6	0.326
155.7	0.329
155.8	0.33
155.9	0.329
156	0.331
156.1	0.33
156.2	0.331
156.3	0.331
156.4	0.332
156.5	0.332
156.6	0.333
156.7	0.333
156.8	0.333
156.9	0.333
157	0.332
157.1	0.332
157.2	0.332
157.3	0.331
157.4	0.331
157.5	0.331
157.6	0.331
157.7	0.333
157.8	0.333
157.9	0.335
158	0.335
158.1	0.335
158.2	0.336
158.3	0.335
158.4	0.336
158.5	0.336
158.6	0.337
158.7	0.339
158.8	0.342
158.9	0.343
159	0.343
159.1	0.343
159.2	0.344
159.3	0.344
159.4	0.344
159.5	0.344
159.6	0.346
159.7	0.348
159.8	0.348
159.9	0.348
160	0.348
160.1	0.349
160.2	0.347
160.3	0.346
160.4	0.346
160.5	0.346
160.6	0.348
160.7	0.347
160.8	0.347
160.9	0.348
161	0.348
161.1	0.347
161.2	0.347
161.3	0.347
161.4	0.347
161.5	0.348
161.6	0.348
161.7	0.348
161.8	0.347
161.9	0.346
162	0.348
162.1	0.348
162.2	0.348
162.3	0.35
162.4	0.348
162.5	0.347
162.6	0.347
162.7	0.348
162.8	0.346
162.9	0.347
163	0.347
163.1	0.347
163.2	0.348
163.3	0.348
163.4	0.347
163.5	0.347
163.6	0.348
163.7	0.348
163.8	0.348
163.9	0.349
164	0.349
164.1	0.349
164.2	0.349
164.3	0.349
164.4	0.349
164.5	0.35
164.6	0.351
164.7	0.351
164.8	0.351
164.9	0.351
165	0.35
165.1	0.351
165.2	0.351
165.3	0.351
165.4	0.351
165.5	0.353
165.6	0.355
165.7	0.354
165.8	0.354
165.9	0.356
166	0.357
166.1	0.358
166.2	0.357
166.3	0.355
166.4	0.355
166.5	0.354
166.6	0.355
166.7	0.355
166.8	0.355
166.9	0.356
167	0.353
167.1	0.354
167.2	0.354
167.3	0.355
167.4	0.355
167.5	0.356
167.6	0.356
167.7	0.358
167.8	0.359
167.9	0.36
168	0.361
168.1	0.364
168.2	0.364
168.3	0.366
168.4	0.366
168.5	0.367
168.6	0.367
168.7	0.367
168.8	0.368
168.9	0.369
169	0.369
169.1	0.369
169.2	0.369
169.3	0.368
169.4	0.37
169.5	0.369
169.6	0.369
169.7	0.372
169.8	0.373
169.9	0.373
170	0.375
170.1	0.374
170.2	0.374
170.3	0.374
170.4	0.374
170.5	0.376
170.6	0.377
170.7	0.377
170.8	0.376
170.9	0.376
171	0.374
171.1	0.374
171.2	0.373
171.3	0.374
171.4	0.374
171.5	0.374
171.6	0.374
171.7	0.374
171.8	0.374
171.9	0.374
172	0.374
172.1	0.372
172.2	0.373
172.3	0.375
172.4	0.375
172.5	0.374
172.6	0.374
172.7	0.374
172.8	0.374
172.9	0.374
173	0.371
173.1	0.371
173.2	0.371
173.3	0.37
173.4	0.37
173.5	0.371
173.6	0.371
173.7	0.372
173.8	0.372
173.9	0.372
174	0.371
174.1	0.37
174.2	0.371
174.3	0.371
174.4	0.372
174.5	0.372
174.6	0.372
174.7	0.37
174.8	0.369
174.9	0.37
175	0.372
175.1	0.371
175.2	0.37
175.3	0.37
175.4	0.369
175.5	0.369
175.6	0.369
175.7	0.369
175.8	0.37
175.9	0.37
176	0.371
176.1	0.369
176.2	0.369
176.3	0.369
176.4	0.368
176.5	0.369
176.6	0.369
176.7	0.367
176.8	0.368
176.9	0.367
177	0.367
177.1	0.366
177.2	0.368
177.3	0.369
177.4	0.37
177.5	0.371
177.6	0.371
177.7	0.371
177.8	0.372
177.9	0.372
178	0.372
178.1	0.372
178.2	0.371
178.3	0.372
178.4	0.372
178.5	0.372
178.6	0.373
178.7	0.373
178.8	0.373
178.9	0.375
179	0.376
179.1	0.377
179.2	0.376
179.3	0.377
179.4	0.377
179.5	0.377
179.6	0.376
179.7	0.375
179.8	0.375
179.9	0.374
180	0.377
180.1	0.379
180.2	0.377
180.3	0.377
180.4	0.375
180.5	0.377
180.6	0.377
180.7	0.378
180.8	0.379
180.9	0.38
181	0.38
181.1	0.381
181.2	0.382
181.3	0.382
181.4	0.382
181.5	0.382
181.6	0.383
181.7	0.384
181.8	0.383
181.9	0.383
182	0.385
182.1	0.386
182.2	0.385
182.3	0.384
182.4	0.385
182.5	0.385
182.6	0.385
182.7	0.385
182.8	0.385
182.9	0.385
183	0.385
183.1	0.386
183.2	0.387
183.3	0.387
183.4	0.387
183.5	0.387
183.6	0.387
183.7	0.388
183.8	0.39
183.9	0.39
184	0.39
184.1	0.389
184.2	0.389
184.3	0.39
184.4	0.39
184.5	0.389
184.6	0.39
184.7	0.389
184.8	0.389
184.9	0.388
185	0.39
185.1	0.39
185.2	0.391
185.3	0.391
185.4	0.391
185.5	0.391
185.6	0.391
185.7	0.392
185.8	0.392
185.9	0.391
186	0.39
186.1	0.39
186.2	0.391
186.3	0.393
186.4	0.395
186.5	0.396
186.6	0.396
186.7	0.395
186.8	0.4
186.9	0.398
187	0.4
187.1	0.4
187.2	0.401
187.3	0.402
187.4	0.402
187.5	0.402
187.6	0.402
187.7	0.403
187.8	0.403
187.9	0.403
188	0.403
188.1	0.403
188.2	0.399
188.3	0.4
188.4	0.399
188.5	0.399
188.6	0.4
188.7	0.399
188.8	0.399
188.9	0.399
189	0.399
189.1	0.398
189.2	0.398
189.3	0.399
189.4	0.399
189.5	0.4
189.6	0.401
189.7	0.401
189.8	0.401
189.9	0.403
190	0.403
190.1	0.403
190.2	0.404
190.3	0.404
190.4	0.406
190.5	0.406
190.6	0.406
190.7	0.407
190.8	0.409
190.9	0.41
191	0.411
191.1	0.41
191.2	0.41
191.3	0.41
191.4	0.41
191.5	0.409
191.6	0.409
191.7	0.414
191.8	0.415
191.9	0.415
192	0.414
192.1	0.416
192.2	0.417
192.3	0.415
192.4	0.416
192.5	0.416
192.6	0.415
192.7	0.415
192.8	0.415
192.9	0.415
193	0.415
193.1	0.416
193.2	0.417
193.3	0.417
193.4	0.417
193.5	0.418
193.6	0.419
193.7	0.42
193.8	0.421
193.9	0.42
194	0.421
194.1	0.422
194.2	0.422
194.3	0.423
194.4	0.423
194.5	0.422
194.6	0.423
194.7	0.424
194.8	0.427
194.9	0.427
195	0.427
195.1	0.427
195.2	0.428
195.3	0.43
195.4	0.432
195.5	0.432
195.6	0.435
195.7	0.435
195.8	0.436
195.9	0.435
196	0.436
196.1	0.437
196.2	0.436
196.3	0.436
196.4	0.438
196.5	0.438
196.6	0.438
196.7	0.438
196.8	0.438
196.9	0.437
197	0.436
197.1	0.438
197.2	0.439
197.3	0.438
197.4	0.438
197.5	0.439
197.6	0.44
197.7	0.441
197.8	0.44
197.9	0.439
198	0.439
198.1	0.439
198.2	0.439
198.3	0.439
198.4	0.44
198.5	0.44
198.6	0.44
198.7	0.439
198.8	0.439
198.9	0.439
199	0.439
199.1	0.438
199.2	0.439
199.3	0.437
199.4	0.437
199.5	0.437
199.6	0.437
199.7	0.437
199.8	0.437
199.9	0.437
200	0.437
[truncated: 14,000 more rows]
