# Supplementary material for: Bayesian inference of kinetic schemes for ion channels by Kalman filtering
Source: eLife journal article supplement (doi:10.7554/elife.62714), 2022-05-04
Supplement: fig1-data1 [file 8_Sim_N_1000_Fluor_MW.xlsx]

## Sheet: Tabelle1
0.1	0
0.2	0
0.3	0
0.4	0
0.5	0
0.6	0
0.7	0
0.8	0
0.9	0
1	0
1.1	0
1.2	0
1.3	0
1.4	0
1.5	0
1.6	0
1.7	0
1.8	0
1.9	0
2	0
2.1	0
2.2	0
2.3	0
2.4	0
2.5	0
2.6	0
2.7	0
2.8	0
2.9	0
3	0
3.1	0
3.2	0
3.3	0
3.4	0
3.5	0
3.6	0
3.7	0
3.8	0
3.9	0
4	0
4.1	0
4.2	0
4.3	0
4.4	0
4.5	0
4.6	0
4.7	0
4.8	0
4.9	0
5	0
5.1	0
5.2	0
5.3	0
5.4	0
5.5	0
5.6	0
5.7	0
5.8	0
5.9	0
6	0
6.1	0
6.2	0
6.3	0
6.4	0
6.5	0
6.6	0
6.7	0
6.8	0
6.9	0
7	0
7.1	0
7.2	0
7.3	0
7.4	0
7.5	0
7.6	0
7.7	0
7.8	0
7.9	0
8	0
8.1	0
8.2	0
8.3	0
8.4	0
8.5	0
8.6	0
8.7	0
8.8	0
8.9	0
9	0
9.1	0
9.2	0
9.3	0
9.4	0
9.5	0
9.6	0
9.7	0
9.8	0
9.9	0
10	0
10.1	0
10.2	0
10.3	0
10.4	0
10.5	0
10.6	0
10.7	0
10.8	0
10.9	0
11	0
11.1	0
11.2	0
11.3	0
11.4	0
11.5	0
11.6	0
11.7	0
11.8	0
11.9	0
12	0
12.1	0
12.2	0
12.3	0
12.4	0
12.5	0
12.6	0
12.7	0
12.8	0
12.9	0
13	0
13.1	0
13.2	0
13.3	0
13.4	0
13.5	0
13.6	0
13.7	0
13.8	0
13.9	0
14	0
14.1	0
14.2	0
14.3	0
14.4	0
14.5	0
14.6	0
14.7	0
14.8	0
14.9	0
15	0
15.1	0
15.2	0
15.3	0
15.4	0
15.5	0
15.6	0
15.7	0
15.8	0
15.9	0
16	0
16.1	0
16.2	0
16.3	0
16.4	0
16.5	0
16.6	0
16.7	0
16.8	0
16.9	0
17	0
17.1	0
17.2	0
17.3	0
17.4	0
17.5	0
17.6	0
17.7	0
17.8	0
17.9	0
18	0
18.1	0
18.2	0
18.3	0
18.4	0
18.5	0
18.6	0
18.7	0
18.8	0
18.9	0
19	0
19.1	0
19.2	0
19.3	0
19.4	0
19.5	0
19.6	0
19.7	0
19.8	0
19.9	0
20	0
20.1	0
20.2	0
20.3	0
20.4	0
20.5	0
20.6	0
20.7	0
20.8	0
20.9	0
21	0
21.1	0
21.2	0
21.3	0
21.4	0
21.5	0
21.6	0
21.7	0
21.8	0
21.9	0
22	0
22.1	0
22.2	0
22.3	0
22.4	0
22.5	0
22.6	0
22.7	0
22.8	0
22.9	0
23	0
23.1	0
23.2	0
23.3	0
23.4	0
23.5	0
23.6	0
23.7	0
23.8	0
23.9	0
24	0
24.1	0
24.2	0
24.3	0
24.4	0
24.5	0
24.6	0
24.7	0
24.8	0
24.9	0
25	0
25.1	0
25.2	0
25.3	0
25.4	0
25.5	0
25.6	0
25.7	0
25.8	0
25.9	0
26	0
26.1	0
26.2	0
26.3	0
26.4	0
26.5	0
26.6	0
26.7	0
26.8	0
26.9	0
27	0
27.1	0
27.2	0
27.3	0
27.4	0
27.5	0
27.6	0
27.7	0
27.8	0
27.9	0
28	0
28.1	0
28.2	0
28.3	0
28.4	0
28.5	0
28.6	0
28.7	0
28.8	0
28.9	0
29	0
29.1	0
29.2	0
29.3	0
29.4	0
29.5	0
29.6	0
29.7	0
29.8	0
29.9	0
30	0
30.1	0
30.2	0
30.3	0
30.4	0
30.5	0
30.6	0
30.7	0
30.8	0
30.9	0
31	0
31.1	0
31.2	0
31.3	0
31.4	0
31.5	0
31.6	0
31.7	0
31.8	0
31.9	0
32	0
32.1	0
32.2	0
32.3	0
32.4	0
32.5	0
32.6	0
32.7	0
32.8	0
32.9	0
33	0
33.1	0
33.2	0
33.3	0
33.4	0
33.5	0
33.6	0
33.7	0
33.8	0
33.9	0
34	0
34.1	0
34.2	0
34.3	0
34.4	0
34.5	0
34.6	0
34.7	0
34.8	0
34.9	0
35	0
35.1	0
35.2	0
35.3	0
35.4	0
35.5	0
35.6	0
35.7	0
35.8	0
35.9	0
36	0
36.1	0
36.2	0
36.3	0
36.4	0
36.5	0
36.6	0
36.7	0
36.8	0
36.9	0
37	0
37.1	0
37.2	0
37.3	0
37.4	0
37.5	0
37.6	0
37.7	0
37.8	0
37.9	0
38	0
38.1	0
38.2	0
38.3	0
38.4	0
38.5	0
38.6	0
38.7	0
38.8	0
38.9	0
39	0
39.1	0
39.2	0
39.3	0
39.4	0
39.5	0
39.6	0
39.7	0
39.8	0
39.9	0
40	0
40.1	0
40.2	0
40.3	0
40.4	0
40.5	0
40.6	0
40.7	0
40.8	0
40.9	0
41	0
41.1	0
41.2	0
41.3	0
41.4	0
41.5	0
41.6	0
41.7	0
41.8	0
41.9	0
42	0
42.1	0
42.2	0
42.3	0
42.4	0
42.5	0
42.6	0
42.7	0
42.8	0
42.9	0
43	0
43.1	0
43.2	0
43.3	0
43.4	0
43.5	0
43.6	0
43.7	0
43.8	0
43.9	0
44	0
44.1	0
44.2	0
44.3	0
44.4	0
44.5	0
44.6	0
44.7	0
44.8	0
44.9	0
45	0
45.1	0
45.2	0
45.3	0
45.4	0
45.5	0
45.6	0
45.7	0
45.8	0
45.9	0
46	0
46.1	0
46.2	0
46.3	0
46.4	0
46.5	0
46.6	0
46.7	0
46.8	0
46.9	0
47	0
47.1	0
47.2	0
47.3	0
47.4	0
47.5	0
47.6	0
47.7	0
47.8	0
47.9	0
48	0
48.1	0
48.2	0
48.3	0
48.4	0
48.5	0
48.6	0
48.7	0
48.8	0
48.9	0
49	0
49.1	0
49.2	0
49.3	0
49.4	0
49.5	0
49.6	0
49.7	0
49.8	0
49.9	0
50	0
50.1	0
50.2	0
50.3	0
50.4	0
50.5	0
50.6	0
50.7	0
50.8	0
50.9	0
51	0
51.1	0
51.2	0
51.3	0
51.4	0
51.5	0
51.6	0
51.7	0
51.8	0
51.9	0
52	0
52.1	0
52.2	0
52.3	0
52.4	0
52.5	0
52.6	0
52.7	0
52.8	0
52.9	0
53	0
53.1	0
53.2	0
53.3	0
53.4	0
53.5	0
53.6	0
53.7	0
53.8	0
53.9	0
54	0
54.1	0
54.2	0
54.3	0
54.4	0
54.5	0
54.6	0
54.7	0
54.8	0
54.9	0
55	0
55.1	0
55.2	0
55.3	0
55.4	0
55.5	0
55.6	0
55.7	0
55.8	0
55.9	0
56	0
56.1	0
56.2	0
56.3	0
56.4	0
56.5	0
56.6	0
56.7	0
56.8	0
56.9	0
57	0
57.1	0
57.2	0
57.3	0
57.4	0
57.5	0
57.6	0
57.7	0
57.8	0
57.9	0
58	0
58.1	0
58.2	0
58.3	0
58.4	0
58.5	0
58.6	0
58.7	0
58.8	0
58.9	0
59	0
59.1	0
59.2	0
59.3	0
59.4	0
59.5	0
59.6	0
59.7	0
59.8	0
59.9	0
60	0
60.1	0
60.2	0
60.3	0
60.4	0
60.5	0
60.6	0
60.7	0
60.8	0
60.9	0
61	0
61.1	0
61.2	0
61.3	0
61.4	0
61.5	0
61.6	0
61.7	0
61.8	0
61.9	0
62	0
62.1	0
62.2	0
62.3	0
62.4	0
62.5	0
62.6	0
62.7	0
62.8	0
62.9	0
63	0
63.1	0
63.2	0
63.3	0
63.4	0
63.5	0
63.6	0
63.7	0
63.8	0
63.9	0
64	0
64.1	0
64.2	0
64.3	0
64.4	0
64.5	0
64.6	0
64.7	0
64.8	0
64.9	0
65	0
65.1	0
65.2	0
65.3	0
65.4	0
65.5	0
65.6	0
65.7	0
65.8	0
65.9	0
66	0
66.1	0
66.2	0
66.3	0
66.4	0
66.5	0
66.6	0
66.7	0
66.8	0
66.9	0
67	0
67.1	0
67.2	0
67.3	0
67.4	0
67.5	0
67.6	0
67.7	0
67.8	0
67.9	0
68	0
68.1	0
68.2	0
68.3	0
68.4	0
68.5	0
68.6	0
68.7	0
68.8	0
68.9	0
69	0
69.1	0
69.2	0
69.3	0
69.4	0
69.5	0
69.6	0
69.7	0
69.8	0
69.9	0
70	0
70.1	0
70.2	0
70.3	0
70.4	0
70.5	0
70.6	0
70.7	0
70.8	0
70.9	0
71	0
71.1	0
71.2	0
71.3	0
71.4	0
71.5	0
71.6	0
71.7	0
71.8	0
71.9	0
72	0
72.1	0
72.2	0
72.3	0
72.4	0
72.5	0
72.6	0
72.7	0
72.8	0
72.9	0
73	0
73.1	0
73.2	0
73.3	0
73.4	0
73.5	0
73.6	0
73.7	0
73.8	0
73.9	0
74	0
74.1	0
74.2	0
74.3	0
74.4	0
74.5	0
74.6	0
74.7	0
74.8	0
74.9	0
75	0
75.1	0
75.2	0
75.3	0
75.4	0
75.5	0
75.6	0
75.7	0
75.8	0
75.9	0
76	0
76.1	0
76.2	0
76.3	0
76.4	0
76.5	0
76.6	0
76.7	0
76.8	0
76.9	0
77	0
77.1	0
77.2	0
77.3	0
77.4	0
77.5	0
77.6	0
77.7	0
77.8	0
77.9	0
78	0
78.1	0
78.2	0
78.3	0
78.4	0
78.5	0
78.6	0
78.7	0
78.8	0
78.9	0
79	0
79.1	0
79.2	0
79.3	0
79.4	0
79.5	0
79.6	0
79.7	0
79.8	0
79.9	0
80	0
80.1	0
80.2	0
80.3	0
80.4	0
80.5	0
80.6	0
80.7	0
80.8	0
80.9	0
81	0
81.1	0
81.2	0
81.3	0
81.4	0
81.5	0
81.6	0
81.7	0
81.8	0
81.9	0
82	0
82.1	0
82.2	0
82.3	0
82.4	0
82.5	0
82.6	0
82.7	0
82.8	0
82.9	0
83	0
83.1	0
83.2	0
83.3	0
83.4	0
83.5	0
83.6	0
83.7	0
83.8	0
83.9	0
84	0
84.1	0
84.2	0
84.3	0
84.4	0
84.5	0
84.6	0
84.7	0
84.8	0
84.9	0
85	0
85.1	0
85.2	0
85.3	0
85.4	0
85.5	0
85.6	0
85.7	0
85.8	0
85.9	0
86	0
86.1	0
86.2	0
86.3	0
86.4	0
86.5	0
86.6	0
86.7	0
86.8	0
86.9	0
87	0
87.1	0
87.2	0
87.3	0
87.4	0
87.5	0
87.6	0
87.7	0
87.8	0
87.9	0
88	0
88.1	0
88.2	0
88.3	0
88.4	0
88.5	0
88.6	0
88.7	0
88.8	0
88.9	0
89	0
89.1	0
89.2	0
89.3	0
89.4	0
89.5	0
89.6	0
89.7	0
89.8	0
89.9	0
90	0
90.1	0
90.2	0
90.3	0
90.4	0
90.5	0
90.6	0
90.7	0
90.8	0
90.9	0
91	0
91.1	0
91.2	0
91.3	0
91.4	0
91.5	0
91.6	0
91.7	0
91.8	0
91.9	0
92	0
92.1	0
92.2	0
92.3	0
92.4	0
92.5	0
92.6	0
92.7	0
92.8	0
92.9	0
93	0
93.1	0
93.2	0
93.3	0
93.4	0
93.5	0
93.6	0
93.7	0
93.8	0
93.9	0
94	0
94.1	0
94.2	0
94.3	0
94.4	0
94.5	0
94.6	0
94.7	0
94.8	0
94.9	0
95	0
95.1	0
95.2	0
95.3	0
95.4	0
95.5	0
95.6	0
95.7	0
95.8	0
95.9	0
96	0
96.1	0
96.2	0
96.3	0
96.4	0
96.5	0
96.6	0
96.7	0
96.8	0
96.9	0
97	0
97.1	0
97.2	0
97.3	0
97.4	0
97.5	0
97.6	0
97.7	0
97.8	0
97.9	0
98	0
98.1	0
98.2	0
98.3	0
98.4	0
98.5	0
98.6	0
98.7	0
98.8	0
98.9	0
99	0
99.1	0
99.2	0
99.3	0
99.4	0
99.5	0
99.6	0
99.7	0
99.8	0
99.9	0
100	0
100.1	0.3415
100.2	0.529
100.3	0.641
100.4	0.7155
100.5	0.7655
100.6	0.7985
100.7	0.825
100.8	0.847
100.9	0.866
101	0.8685
101.1	0.873
101.2	0.887
101.3	0.89
101.4	0.904
101.5	0.9085
101.6	0.908
101.7	0.9065
101.8	0.9125
101.9	0.912
102	0.915
102.1	0.9175
102.2	0.9135
102.3	0.9145
102.4	0.9145
102.5	0.9185
102.6	0.918
102.7	0.924
102.8	0.9285
102.9	0.9205
103	0.922
103.1	0.918
103.2	0.9095
103.3	0.912
103.4	0.914
103.5	0.914
103.6	0.9225
103.7	0.924
103.8	0.915
103.9	0.9125
104	0.91
104.1	0.9055
104.2	0.91
104.3	0.915
104.4	0.9155
104.5	0.9185
104.6	0.926
104.7	0.9265
104.8	0.9255
104.9	0.928
105	0.9295
105.1	0.93
105.2	0.925
105.3	0.9275
105.4	0.925
105.5	0.922
105.6	0.925
105.7	0.927
105.8	0.9275
105.9	0.931
106	0.928
106.1	0.933
106.2	0.9245
106.3	0.926
106.4	0.929
106.5	0.9295
106.6	0.9355
106.7	0.9285
106.8	0.9295
106.9	0.926
107	0.9235
107.1	0.928
107.2	0.932
107.3	0.93
107.4	0.9275
107.5	0.9315
107.6	0.928
107.7	0.926
107.8	0.9215
107.9	0.928
108	0.937
108.1	0.935
108.2	0.9375
108.3	0.928
108.4	0.9335
108.5	0.931
108.6	0.9325
108.7	0.9345
108.8	0.933
108.9	0.9335
109	0.93
109.1	0.929
109.2	0.9325
109.3	0.931
109.4	0.93
109.5	0.936
109.6	0.9395
109.7	0.939
109.8	0.9385
109.9	0.935
110	0.943
110.1	0.9385
110.2	0.942
110.3	0.94
110.4	0.9435
110.5	0.94
110.6	0.936
110.7	0.939
110.8	0.936
110.9	0.936
111	0.939
111.1	0.9385
111.2	0.9385
111.3	0.939
111.4	0.941
111.5	0.9395
111.6	0.9385
111.7	0.9375
111.8	0.9405
111.9	0.942
112	0.9425
112.1	0.9425
112.2	0.9495
112.3	0.949
112.4	0.9425
112.5	0.9445
112.6	0.9475
112.7	0.949
112.8	0.9525
112.9	0.951
113	0.944
113.1	0.9425
113.2	0.948
113.3	0.954
113.4	0.9575
113.5	0.9535
113.6	0.953
113.7	0.954
113.8	0.9505
113.9	0.951
114	0.9445
114.1	0.944
114.2	0.947
114.3	0.9435
114.4	0.9445
114.5	0.949
114.6	0.949
114.7	0.949
114.8	0.9435
114.9	0.9495
115	0.9475
115.1	0.953
115.2	0.952
115.3	0.9505
115.4	0.951
115.5	0.9525
115.6	0.9575
115.7	0.9555
115.8	0.9555
115.9	0.9535
116	0.953
116.1	0.95
116.2	0.9505
116.3	0.9515
116.4	0.9475
116.5	0.948
116.6	0.9525
116.7	0.9545
116.8	0.9505
116.9	0.9525
117	0.9525
117.1	0.952
117.2	0.9555
117.3	0.951
117.4	0.9455
117.5	0.9435
117.6	0.949
117.7	0.9485
117.8	0.952
117.9	0.951
118	0.9525
118.1	0.9515
118.2	0.956
118.3	0.955
118.4	0.958
118.5	0.954
118.6	0.95
118.7	0.9565
118.8	0.9565
118.9	0.9565
119	0.9565
119.1	0.9585
119.2	0.9565
119.3	0.9515
119.4	0.9545
119.5	0.955
119.6	0.954
119.7	0.951
119.8	0.9535
119.9	0.9535
120	0.9535
120.1	0.957
120.2	0.9515
120.3	0.956
120.4	0.9545
120.5	0.9525
120.6	0.954
120.7	0.956
120.8	0.953
120.9	0.955
121	0.959
121.1	0.958
121.2	0.957
121.3	0.955
121.4	0.955
121.5	0.9575
121.6	0.9585
121.7	0.962
121.8	0.9615
121.9	0.9575
122	0.954
122.1	0.9585
122.2	0.9605
122.3	0.961
122.4	0.955
122.5	0.955
122.6	0.9525
122.7	0.9505
122.8	0.9535
122.9	0.9545
123	0.9505
123.1	0.954
123.2	0.9515
123.3	0.9555
123.4	0.957
123.5	0.958
123.6	0.9605
123.7	0.9575
123.8	0.955
123.9	0.956
124	0.9585
124.1	0.958
124.2	0.959
124.3	0.957
124.4	0.9645
124.5	0.962
124.6	0.9625
124.7	0.9605
124.8	0.958
124.9	0.961
125	0.9615
125.1	0.963
125.2	0.9625
125.3	0.9665
125.4	0.961
125.5	0.9575
125.6	0.958
125.7	0.9605
125.8	0.956
125.9	0.958
126	0.9545
126.1	0.96
126.2	0.963
126.3	0.9625
126.4	0.9585
126.5	0.9615
126.6	0.965
126.7	0.966
126.8	0.97
126.9	0.9705
127	0.965
127.1	0.9635
127.2	0.9625
127.3	0.962
127.4	0.963
127.5	0.965
127.6	0.9655
127.7	0.9645
127.8	0.962
127.9	0.9635
128	0.9635
128.1	0.9655
128.2	0.9635
128.3	0.9655
128.4	0.9645
128.5	0.9675
128.6	0.9675
128.7	0.9685
128.8	0.968
128.9	0.9675
129	0.967
129.1	0.9685
129.2	0.972
129.3	0.9705
129.4	0.9685
129.5	0.968
129.6	0.9675
129.7	0.9675
129.8	0.969
129.9	0.9665
130	0.9685
130.1	0.971
130.2	0.972
130.3	0.9715
130.4	0.9715
130.5	0.9695
130.6	0.968
130.7	0.9685
130.8	0.9675
130.9	0.965
131	0.967
131.1	0.966
131.2	0.966
131.3	0.967
131.4	0.965
131.5	0.9675
131.6	0.974
131.7	0.975
131.8	0.9765
131.9	0.9745
132	0.9725
132.1	0.9705
132.2	0.9715
132.3	0.9695
132.4	0.969
132.5	0.966
132.6	0.9695
132.7	0.97
132.8	0.9695
132.9	0.97
133	0.971
133.1	0.971
133.2	0.972
133.3	0.9715
133.4	0.9705
133.5	0.968
133.6	0.9685
133.7	0.97
133.8	0.972
133.9	0.972
134	0.9695
134.1	0.972
134.2	0.969
134.3	0.97
134.4	0.9685
134.5	0.972
134.6	0.972
134.7	0.9715
134.8	0.9735
134.9	0.9745
135	0.9725
135.1	0.9715
135.2	0.97
135.3	0.9735
135.4	0.9725
135.5	0.973
135.6	0.974
135.7	0.975
135.8	0.975
135.9	0.976
136	0.973
136.1	0.972
136.2	0.972
136.3	0.9715
136.4	0.972
136.5	0.9735
136.6	0.975
136.7	0.974
136.8	0.971
136.9	0.9685
137	0.9725
137.1	0.973
137.2	0.9745
137.3	0.9725
137.4	0.9745
137.5	0.976
137.6	0.976
137.7	0.9725
137.8	0.975
137.9	0.975
138	0.975
138.1	0.975
138.2	0.973
138.3	0.9755
138.4	0.973
138.5	0.9705
138.6	0.9705
138.7	0.969
138.8	0.965
138.9	0.9675
139	0.9705
139.1	0.973
139.2	0.9725
139.3	0.9745
139.4	0.973
139.5	0.975
139.6	0.977
139.7	0.9795
139.8	0.978
139.9	0.978
140	0.9785
140.1	0.9775
140.2	0.976
140.3	0.971
140.4	0.9745
140.5	0.9705
140.6	0.971
140.7	0.971
140.8	0.972
140.9	0.97
141	0.97
141.1	0.9735
141.2	0.974
141.3	0.9735
141.4	0.9745
141.5	0.976
141.6	0.978
141.7	0.981
141.8	0.979
141.9	0.98
142	0.9755
142.1	0.971
142.2	0.9705
142.3	0.972
142.4	0.9685
142.5	0.974
142.6	0.9725
142.7	0.9725
142.8	0.9715
142.9	0.9725
143	0.9715
143.1	0.975
143.2	0.975
143.3	0.974
143.4	0.981
143.5	0.98
143.6	0.9745
143.7	0.971
143.8	0.971
143.9	0.974
144	0.975
144.1	0.9775
144.2	0.975
144.3	0.9765
144.4	0.975
144.5	0.974
144.6	0.9785
144.7	0.9775
144.8	0.9715
144.9	0.9715
145	0.973
145.1	0.971
145.2	0.9735
145.3	0.9735
145.4	0.972
145.5	0.9725
145.6	0.971
145.7	0.9715
145.8	0.9765
145.9	0.9795
146	0.98
146.1	0.981
146.2	0.977
146.3	0.976
146.4	0.976
146.5	0.972
146.6	0.9725
146.7	0.971
146.8	0.9695
146.9	0.971
147	0.9745
147.1	0.977
147.2	0.977
147.3	0.9785
147.4	0.9775
147.5	0.978
147.6	0.9775
147.7	0.9765
147.8	0.9765
147.9	0.975
148	0.9785
148.1	0.98
148.2	0.976
148.3	0.9745
148.4	0.979
148.5	0.9795
148.6	0.9815
148.7	0.981
148.8	0.979
148.9	0.98
149	0.981
149.1	0.979
149.2	0.9805
149.3	0.9815
149.4	0.9765
149.5	0.976
149.6	0.974
149.7	0.9735
149.8	0.974
149.9	0.977
150	0.9765
150.1	0.977
150.2	0.9805
150.3	0.9785
150.4	0.982
150.5	0.9785
150.6	0.9805
150.7	0.9785
150.8	0.9765
150.9	0.981
151	0.9775
151.1	0.976
151.2	0.979
151.3	0.9805
151.4	0.979
151.5	0.9775
151.6	0.982
151.7	0.986
151.8	0.981
151.9	0.9795
152	0.978
152.1	0.9785
152.2	0.9775
152.3	0.977
152.4	0.975
152.5	0.972
152.6	0.978
152.7	0.977
152.8	0.979
152.9	0.975
153	0.976
153.1	0.9745
153.2	0.973
153.3	0.9745
153.4	0.975
153.5	0.9755
153.6	0.978
153.7	0.9815
153.8	0.978
153.9	0.979
154	0.981
154.1	0.981
154.2	0.981
154.3	0.981
154.4	0.9825
154.5	0.9805
154.6	0.98
154.7	0.9775
154.8	0.98
154.9	0.9815
155	0.9815
155.1	0.979
155.2	0.979
155.3	0.979
155.4	0.9785
155.5	0.9755
155.6	0.9765
155.7	0.9745
155.8	0.9775
155.9	0.977
156	0.9805
156.1	0.9775
156.2	0.976
156.3	0.9745
156.4	0.9735
156.5	0.977
156.6	0.9755
156.7	0.974
156.8	0.971
156.9	0.9735
157	0.976
157.1	0.974
157.2	0.975
157.3	0.9765
157.4	0.9785
157.5	0.982
157.6	0.98
157.7	0.984
157.8	0.9835
157.9	0.9815
158	0.983
158.1	0.981
158.2	0.9785
158.3	0.976
158.4	0.9795
158.5	0.9735
158.6	0.978
158.7	0.9735
158.8	0.976
158.9	0.98
159	0.9775
159.1	0.979
159.2	0.9805
159.3	0.9795
159.4	0.98
159.5	0.9795
159.6	0.9785
159.7	0.979
159.8	0.98
159.9	0.9785
160	0.9785
160.1	0.9785
160.2	0.9785
160.3	0.978
160.4	0.9795
160.5	0.976
160.6	0.9755
160.7	0.978
160.8	0.978
160.9	0.9785
161	0.9815
161.1	0.9805
161.2	0.98
161.3	0.9755
161.4	0.974
161.5	0.977
161.6	0.9795
161.7	0.9785
161.8	0.976
161.9	0.977
162	0.979
162.1	0.977
162.2	0.9775
162.3	0.978
162.4	0.9775
162.5	0.9795
162.6	0.9815
162.7	0.9785
162.8	0.9745
162.9	0.9725
163	0.9745
163.1	0.977
163.2	0.9805
163.3	0.9815
163.4	0.981
163.5	0.976
163.6	0.9775
163.7	0.9765
163.8	0.9755
163.9	0.974
164	0.975
164.1	0.9765
164.2	0.977
164.3	0.9785
164.4	0.98
164.5	0.977
164.6	0.9735
164.7	0.973
164.8	0.9765
164.9	0.972
165	0.976
165.1	0.977
165.2	0.98
165.3	0.976
165.4	0.9755
165.5	0.9745
165.6	0.9745
165.7	0.9775
165.8	0.977
165.9	0.9785
166	0.9785
166.1	0.9765
166.2	0.979
166.3	0.9795
166.4	0.981
166.5	0.9815
166.6	0.9775
166.7	0.976
166.8	0.978
166.9	0.976
167	0.9745
167.1	0.978
167.2	0.9805
167.3	0.977
167.4	0.977
167.5	0.98
167.6	0.976
167.7	0.9755
167.8	0.9785
167.9	0.9785
168	0.9785
168.1	0.977
168.2	0.977
168.3	0.9785
168.4	0.98
168.5	0.9815
168.6	0.981
168.7	0.9835
168.8	0.987
168.9	0.9865
169	0.9835
169.1	0.98
169.2	0.9795
169.3	0.9795
169.4	0.981
169.5	0.9805
169.6	0.9795
169.7	0.9785
169.8	0.9815
169.9	0.9825
170	0.9795
170.1	0.98
170.2	0.9765
170.3	0.978
170.4	0.976
170.5	0.979
170.6	0.9755
170.7	0.9725
170.8	0.9745
170.9	0.9755
171	0.9765
171.1	0.977
171.2	0.9785
171.3	0.9775
171.4	0.9785
171.5	0.9795
171.6	0.978
171.7	0.9745
171.8	0.975
171.9	0.976
172	0.976
172.1	0.9735
172.2	0.975
172.3	0.9765
172.4	0.9805
172.5	0.983
172.6	0.983
172.7	0.984
172.8	0.982
172.9	0.981
173	0.9825
173.1	0.979
173.2	0.9785
173.3	0.979
173.4	0.9795
173.5	0.979
173.6	0.9805
173.7	0.982
173.8	0.978
173.9	0.975
174	0.98
174.1	0.9815
174.2	0.982
174.3	0.982
174.4	0.9805
174.5	0.98
174.6	0.9795
174.7	0.9765
174.8	0.977
174.9	0.976
175	0.9735
175.1	0.976
175.2	0.978
175.3	0.9785
175.4	0.9785
175.5	0.979
175.6	0.98
175.7	0.98
175.8	0.9755
175.9	0.977
176	0.973
176.1	0.972
176.2	0.973
176.3	0.971
176.4	0.9695
176.5	0.972
176.6	0.9715
176.7	0.9745
176.8	0.975
176.9	0.9785
177	0.9805
177.1	0.9815
177.2	0.982
177.3	0.979
177.4	0.979
177.5	0.9795
177.6	0.981
177.7	0.9795
177.8	0.981
177.9	0.9795
178	0.9805
178.1	0.982
178.2	0.9805
178.3	0.979
178.4	0.98
178.5	0.98
178.6	0.976
178.7	0.98
178.8	0.98
178.9	0.9835
179	0.9855
179.1	0.985
179.2	0.983
179.3	0.978
179.4	0.9755
179.5	0.971
179.6	0.97
179.7	0.9695
179.8	0.9715
179.9	0.972
180	0.973
180.1	0.975
180.2	0.9795
180.3	0.9795
180.4	0.981
180.5	0.9815
180.6	0.982
180.7	0.982
180.8	0.98
180.9	0.979
181	0.9805
181.1	0.977
181.2	0.9765
181.3	0.9755
181.4	0.977
181.5	0.98
181.6	0.976
181.7	0.9745
181.8	0.9765
181.9	0.9775
182	0.9775
182.1	0.9775
182.2	0.9765
182.3	0.977
182.4	0.9775
182.5	0.9755
182.6	0.9755
182.7	0.976
182.8	0.9775
182.9	0.9785
183	0.979
183.1	0.978
183.2	0.9795
183.3	0.9795
183.4	0.979
183.5	0.981
183.6	0.98
183.7	0.9795
183.8	0.9825
183.9	0.981
184	0.982
184.1	0.981
184.2	0.984
184.3	0.986
184.4	0.984
184.5	0.9835
184.6	0.9855
184.7	0.983
184.8	0.9795
184.9	0.983
185	0.9835
185.1	0.9825
185.2	0.981
185.3	0.9805
185.4	0.977
185.5	0.976
185.6	0.9765
185.7	0.9775
185.8	0.978
185.9	0.978
186	0.9765
186.1	0.977
186.2	0.975
186.3	0.9755
186.4	0.9765
186.5	0.9805
186.6	0.979
186.7	0.982
186.8	0.9815
186.9	0.979
187	0.978
187.1	0.9785
187.2	0.9785
187.3	0.9815
187.4	0.982
187.5	0.9795
187.6	0.979
187.7	0.9755
187.8	0.974
187.9	0.9785
188	0.9815
188.1	0.9835
188.2	0.9795
188.3	0.98
188.4	0.974
188.5	0.9775
188.6	0.9805
188.7	0.981
188.8	0.985
188.9	0.98
189	0.9785
189.1	0.978
189.2	0.9795
189.3	0.98
189.4	0.9775
189.5	0.979
189.6	0.9795
189.7	0.982
189.8	0.98
189.9	0.982
190	0.9815
190.1	0.98
190.2	0.9745
190.3	0.979
190.4	0.9795
190.5	0.9775
190.6	0.9745
190.7	0.9765
190.8	0.9785
190.9	0.9785
191	0.9765
191.1	0.9805
191.2	0.981
191.3	0.9805
191.4	0.9815
191.5	0.9785
191.6	0.9775
191.7	0.9775
191.8	0.9815
191.9	0.979
192	0.9765
192.1	0.976
192.2	0.979
192.3	0.979
192.4	0.977
192.5	0.9795
192.6	0.98
192.7	0.9815
192.8	0.98
192.9	0.979
193	0.9765
193.1	0.9725
193.2	0.974
193.3	0.977
193.4	0.9765
193.5	0.977
193.6	0.975
193.7	0.973
193.8	0.9725
193.9	0.971
194	0.97
194.1	0.9745
194.2	0.975
194.3	0.9765
194.4	0.9805
194.5	0.981
194.6	0.9785
194.7	0.978
194.8	0.98
194.9	0.978
195	0.9795
195.1	0.9815
195.2	0.98
195.3	0.9775
195.4	0.9775
195.5	0.9765
195.6	0.976
195.7	0.979
195.8	0.981
195.9	0.9825
196	0.9835
196.1	0.986
196.2	0.9835
196.3	0.982
196.4	0.9805
196.5	0.9795
196.6	0.9785
196.7	0.9815
196.8	0.982
196.9	0.982
197	0.9815
197.1	0.9815
197.2	0.9805
197.3	0.98
197.4	0.98
197.5	0.9815
197.6	0.9815
197.7	0.9805
197.8	0.979
197.9	0.977
198	0.978
198.1	0.9775
198.2	0.9765
198.3	0.98
198.4	0.9825
198.5	0.9845
198.6	0.9825
198.7	0.9825
198.8	0.9815
198.9	0.9795
199	0.9775
199.1	0.978
199.2	0.981
199.3	0.9785
199.4	0.979
199.5	0.9795
199.6	0.9785
199.7	0.977
199.8	0.9785
199.9	0.9795
200	0.975
[truncated: 14,000 more rows]
