# Supplementary material for: Bayesian inference of kinetic schemes for ion channels by Kalman filtering
Source: eLife journal article supplement (doi:10.7554/elife.62714), 2022-05-04
Supplement: fig1-data1 [file 8_Sim_N_1000_Strom_MW.xlsx]

## Sheet: Tabelle1
0.1	0
0.2	0
0.3	0
0.4	0
0.5	0
0.6	0
0.7	0
0.8	0
0.9	0
1	0
1.1	0
1.2	0
1.3	0
1.4	0
1.5	0
1.6	0
1.7	0
1.8	0
1.9	0
2	0
2.1	0
2.2	0
2.3	0
2.4	0
2.5	0
2.6	0
2.7	0
2.8	0
2.9	0
3	0
3.1	0
3.2	0
3.3	0
3.4	0
3.5	0
3.6	0
3.7	0
3.8	0
3.9	0
4	0
4.1	0
4.2	0
4.3	0
4.4	0
4.5	0
4.6	0
4.7	0
4.8	0
4.9	0
5	0
5.1	0
5.2	0
5.3	0
5.4	0
5.5	0
5.6	0
5.7	0
5.8	0
5.9	0
6	0
6.1	0
6.2	0
6.3	0
6.4	0
6.5	0
6.6	0
6.7	0
6.8	0
6.9	0
7	0
7.1	0
7.2	0
7.3	0
7.4	0
7.5	0
7.6	0
7.7	0
7.8	0
7.9	0
8	0
8.1	0
8.2	0
8.3	0
8.4	0
8.5	0
8.6	0
8.7	0
8.8	0
8.9	0
9	0
9.1	0
9.2	0
9.3	0
9.4	0
9.5	0
9.6	0
9.7	0
9.8	0
9.9	0
10	0
10.1	0
10.2	0
10.3	0
10.4	0
10.5	0
10.6	0
10.7	0
10.8	0
10.9	0
11	0
11.1	0
11.2	0
11.3	0
11.4	0
11.5	0
11.6	0
11.7	0
11.8	0
11.9	0
12	0
12.1	0
12.2	0
12.3	0
12.4	0
12.5	0
12.6	0
12.7	0
12.8	0
12.9	0
13	0
13.1	0
13.2	0
13.3	0
13.4	0
13.5	0
13.6	0
13.7	0
13.8	0
13.9	0
14	0
14.1	0
14.2	0
14.3	0
14.4	0
14.5	0
14.6	0
14.7	0
14.8	0
14.9	0
15	0
15.1	0
15.2	0
15.3	0
15.4	0
15.5	0
15.6	0
15.7	0
15.8	0
15.9	0
16	0
16.1	0
16.2	0
16.3	0
16.4	0
16.5	0
16.6	0
16.7	0
16.8	0
16.9	0
17	0
17.1	0
17.2	0
17.3	0
17.4	0
17.5	0
17.6	0
17.7	0
17.8	0
17.9	0
18	0
18.1	0
18.2	0
18.3	0
18.4	0
18.5	0
18.6	0
18.7	0
18.8	0
18.9	0
19	0
19.1	0
19.2	0
19.3	0
19.4	0
19.5	0
19.6	0
19.7	0
19.8	0
19.9	0
20	0
20.1	0
20.2	0
20.3	0
20.4	0
20.5	0
20.6	0
20.7	0
20.8	0
20.9	0
21	0
21.1	0
21.2	0
21.3	0
21.4	0
21.5	0
21.6	0
21.7	0
21.8	0
21.9	0
22	0
22.1	0
22.2	0
22.3	0
22.4	0
22.5	0
22.6	0
22.7	0
22.8	0
22.9	0
23	0
23.1	0
23.2	0
23.3	0
23.4	0
23.5	0
23.6	0
23.7	0
23.8	0
23.9	0
24	0
24.1	0
24.2	0
24.3	0
24.4	0
24.5	0
24.6	0
24.7	0
24.8	0
24.9	0
25	0
25.1	0
25.2	0
25.3	0
25.4	0
25.5	0
25.6	0
25.7	0
25.8	0
25.9	0
26	0
26.1	0
26.2	0
26.3	0
26.4	0
26.5	0
26.6	0
26.7	0
26.8	0
26.9	0
27	0
27.1	0
27.2	0
27.3	0
27.4	0
27.5	0
27.6	0
27.7	0
27.8	0
27.9	0
28	0
28.1	0
28.2	0
28.3	0
28.4	0
28.5	0
28.6	0
28.7	0
28.8	0
28.9	0
29	0
29.1	0
29.2	0
29.3	0
29.4	0
29.5	0
29.6	0
29.7	0
29.8	0
29.9	0
30	0
30.1	0
30.2	0
30.3	0
30.4	0
30.5	0
30.6	0
30.7	0
30.8	0
30.9	0
31	0
31.1	0
31.2	0
31.3	0
31.4	0
31.5	0
31.6	0
31.7	0
31.8	0
31.9	0
32	0
32.1	0
32.2	0
32.3	0
32.4	0
32.5	0
32.6	0
32.7	0
32.8	0
32.9	0
33	0
33.1	0
33.2	0
33.3	0
33.4	0
33.5	0
33.6	0
33.7	0
33.8	0
33.9	0
34	0
34.1	0
34.2	0
34.3	0
34.4	0
34.5	0
34.6	0
34.7	0
34.8	0
34.9	0
35	0
35.1	0
35.2	0
35.3	0
35.4	0
35.5	0
35.6	0
35.7	0
35.8	0
35.9	0
36	0
36.1	0
36.2	0
36.3	0
36.4	0
36.5	0
36.6	0
36.7	0
36.8	0
36.9	0
37	0
37.1	0
37.2	0
37.3	0
37.4	0
37.5	0
37.6	0
37.7	0
37.8	0
37.9	0
38	0
38.1	0
38.2	0
38.3	0
38.4	0
38.5	0
38.6	0
38.7	0
38.8	0
38.9	0
39	0
39.1	0
39.2	0
39.3	0
39.4	0
39.5	0
39.6	0
39.7	0
39.8	0
39.9	0
40	0
40.1	0
40.2	0
40.3	0
40.4	0
40.5	0
40.6	0
40.7	0
40.8	0
40.9	0
41	0
41.1	0
41.2	0
41.3	0
41.4	0
41.5	0
41.6	0
41.7	0
41.8	0
41.9	0
42	0
42.1	0
42.2	0
42.3	0
42.4	0
42.5	0
42.6	0
42.7	0
42.8	0
42.9	0
43	0
43.1	0
43.2	0
43.3	0
43.4	0
43.5	0
43.6	0
43.7	0
43.8	0
43.9	0
44	0
44.1	0
44.2	0
44.3	0
44.4	0
44.5	0
44.6	0
44.7	0
44.8	0
44.9	0
45	0
45.1	0
45.2	0
45.3	0
45.4	0
45.5	0
45.6	0
45.7	0
45.8	0
45.9	0
46	0
46.1	0
46.2	0
46.3	0
46.4	0
46.5	0
46.6	0
46.7	0
46.8	0
46.9	0
47	0
47.1	0
47.2	0
47.3	0
47.4	0
47.5	0
47.6	0
47.7	0
47.8	0
47.9	0
48	0
48.1	0
48.2	0
48.3	0
48.4	0
48.5	0
48.6	0
48.7	0
48.8	0
48.9	0
49	0
49.1	0
49.2	0
49.3	0
49.4	0
49.5	0
49.6	0
49.7	0
49.8	0
49.9	0
50	0
50.1	0
50.2	0
50.3	0
50.4	0
50.5	0
50.6	0
50.7	0
50.8	0
50.9	0
51	0
51.1	0
51.2	0
51.3	0
51.4	0
51.5	0
51.6	0
51.7	0
51.8	0
51.9	0
52	0
52.1	0
52.2	0
52.3	0
52.4	0
52.5	0
52.6	0
52.7	0
52.8	0
52.9	0
53	0
53.1	0
53.2	0
53.3	0
53.4	0
53.5	0
53.6	0
53.7	0
53.8	0
53.9	0
54	0
54.1	0
54.2	0
54.3	0
54.4	0
54.5	0
54.6	0
54.7	0
54.8	0
54.9	0
55	0
55.1	0
55.2	0
55.3	0
55.4	0
55.5	0
55.6	0
55.7	0
55.8	0
55.9	0
56	0
56.1	0
56.2	0
56.3	0
56.4	0
56.5	0
56.6	0
56.7	0
56.8	0
56.9	0
57	0
57.1	0
57.2	0
57.3	0
57.4	0
57.5	0
57.6	0
57.7	0
57.8	0
57.9	0
58	0
58.1	0
58.2	0
58.3	0
58.4	0
58.5	0
58.6	0
58.7	0
58.8	0
58.9	0
59	0
59.1	0
59.2	0
59.3	0
59.4	0
59.5	0
59.6	0
59.7	0
59.8	0
59.9	0
60	0
60.1	0
60.2	0
60.3	0
60.4	0
60.5	0
60.6	0
60.7	0
60.8	0
60.9	0
61	0
61.1	0
61.2	0
61.3	0
61.4	0
61.5	0
61.6	0
61.7	0
61.8	0
61.9	0
62	0
62.1	0
62.2	0
62.3	0
62.4	0
62.5	0
62.6	0
62.7	0
62.8	0
62.9	0
63	0
63.1	0
63.2	0
63.3	0
63.4	0
63.5	0
63.6	0
63.7	0
63.8	0
63.9	0
64	0
64.1	0
64.2	0
64.3	0
64.4	0
64.5	0
64.6	0
64.7	0
64.8	0
64.9	0
65	0
65.1	0
65.2	0
65.3	0
65.4	0
65.5	0
65.6	0
65.7	0
65.8	0
65.9	0
66	0
66.1	0
66.2	0
66.3	0
66.4	0
66.5	0
66.6	0
66.7	0
66.8	0
66.9	0
67	0
67.1	0
67.2	0
67.3	0
67.4	0
67.5	0
67.6	0
67.7	0
67.8	0
67.9	0
68	0
68.1	0
68.2	0
68.3	0
68.4	0
68.5	0
68.6	0
68.7	0
68.8	0
68.9	0
69	0
69.1	0
69.2	0
69.3	0
69.4	0
69.5	0
69.6	0
69.7	0
69.8	0
69.9	0
70	0
70.1	0
70.2	0
70.3	0
70.4	0
70.5	0
70.6	0
70.7	0
70.8	0
70.9	0
71	0
71.1	0
71.2	0
71.3	0
71.4	0
71.5	0
71.6	0
71.7	0
71.8	0
71.9	0
72	0
72.1	0
72.2	0
72.3	0
72.4	0
72.5	0
72.6	0
72.7	0
72.8	0
72.9	0
73	0
73.1	0
73.2	0
73.3	0
73.4	0
73.5	0
73.6	0
73.7	0
73.8	0
73.9	0
74	0
74.1	0
74.2	0
74.3	0
74.4	0
74.5	0
74.6	0
74.7	0
74.8	0
74.9	0
75	0
75.1	0
75.2	0
75.3	0
75.4	0
75.5	0
75.6	0
75.7	0
75.8	0
75.9	0
76	0
76.1	0
76.2	0
76.3	0
76.4	0
76.5	0
76.6	0
76.7	0
76.8	0
76.9	0
77	0
77.1	0
77.2	0
77.3	0
77.4	0
77.5	0
77.6	0
77.7	0
77.8	0
77.9	0
78	0
78.1	0
78.2	0
78.3	0
78.4	0
78.5	0
78.6	0
78.7	0
78.8	0
78.9	0
79	0
79.1	0
79.2	0
79.3	0
79.4	0
79.5	0
79.6	0
79.7	0
79.8	0
79.9	0
80	0
80.1	0
80.2	0
80.3	0
80.4	0
80.5	0
80.6	0
80.7	0
80.8	0
80.9	0
81	0
81.1	0
81.2	0
81.3	0
81.4	0
81.5	0
81.6	0
81.7	0
81.8	0
81.9	0
82	0
82.1	0
82.2	0
82.3	0
82.4	0
82.5	0
82.6	0
82.7	0
82.8	0
82.9	0
83	0
83.1	0
83.2	0
83.3	0
83.4	0
83.5	0
83.6	0
83.7	0
83.8	0
83.9	0
84	0
84.1	0
84.2	0
84.3	0
84.4	0
84.5	0
84.6	0
84.7	0
84.8	0
84.9	0
85	0
85.1	0
85.2	0
85.3	0
85.4	0
85.5	0
85.6	0
85.7	0
85.8	0
85.9	0
86	0
86.1	0
86.2	0
86.3	0
86.4	0
86.5	0
86.6	0
86.7	0
86.8	0
86.9	0
87	0
87.1	0
87.2	0
87.3	0
87.4	0
87.5	0
87.6	0
87.7	0
87.8	0
87.9	0
88	0
88.1	0
88.2	0
88.3	0
88.4	0
88.5	0
88.6	0
88.7	0
88.8	0
88.9	0
89	0
89.1	0
89.2	0
89.3	0
89.4	0
89.5	0
89.6	0
89.7	0
89.8	0
89.9	0
90	0
90.1	0
90.2	0
90.3	0
90.4	0
90.5	0
90.6	0
90.7	0
90.8	0
90.9	0
91	0
91.1	0
91.2	0
91.3	0
91.4	0
91.5	0
91.6	0
91.7	0
91.8	0
91.9	0
92	0
92.1	0
92.2	0
92.3	0
92.4	0
92.5	0
92.6	0
92.7	0
92.8	0
92.9	0
93	0
93.1	0
93.2	0
93.3	0
93.4	0
93.5	0
93.6	0
93.7	0
93.8	0
93.9	0
94	0
94.1	0
94.2	0
94.3	0
94.4	0
94.5	0
94.6	0
94.7	0
94.8	0
94.9	0
95	0
95.1	0
95.2	0
95.3	0
95.4	0
95.5	0
95.6	0
95.7	0
95.8	0
95.9	0
96	0
96.1	0
96.2	0
96.3	0
96.4	0
96.5	0
96.6	0
96.7	0
96.8	0
96.9	0
97	0
97.1	0
97.2	0
97.3	0
97.4	0
97.5	0
97.6	0
97.7	0
97.8	0
97.9	0
98	0
98.1	0
98.2	0
98.3	0
98.4	0
98.5	0
98.6	0
98.7	0
98.8	0
98.9	0
99	0
99.1	0
99.2	0
99.3	0
99.4	0
99.5	0
99.6	0
99.7	0
99.8	0
99.9	0
100	0
100.1	0
100.2	0
100.3	0.001
100.4	0.001
100.5	0.003
100.6	0.005
100.7	0.006
100.8	0.009
100.9	0.01
101	0.014
101.1	0.018
101.2	0.022
101.3	0.028
101.4	0.03
101.5	0.037
101.6	0.042
101.7	0.046
101.8	0.051
101.9	0.052
102	0.056
102.1	0.059
102.2	0.061
102.3	0.066
102.4	0.07
102.5	0.075
102.6	0.08
102.7	0.084
102.8	0.092
102.9	0.094
103	0.099
103.1	0.103
103.2	0.108
103.3	0.112
103.4	0.116
103.5	0.119
103.6	0.122
103.7	0.126
103.8	0.127
103.9	0.13
104	0.133
104.1	0.137
104.2	0.14
104.3	0.142
104.4	0.15
104.5	0.155
104.6	0.158
104.7	0.163
104.8	0.163
104.9	0.171
105	0.172
105.1	0.174
105.2	0.181
105.3	0.183
105.4	0.185
105.5	0.187
105.6	0.195
105.7	0.199
105.8	0.202
105.9	0.205
106	0.21
106.1	0.214
106.2	0.22
106.3	0.221
106.4	0.224
106.5	0.227
106.6	0.232
106.7	0.237
106.8	0.237
106.9	0.238
107	0.237
107.1	0.239
107.2	0.24
107.3	0.24
107.4	0.242
107.5	0.245
107.6	0.246
107.7	0.247
107.8	0.247
107.9	0.251
108	0.255
108.1	0.259
108.2	0.262
108.3	0.265
108.4	0.268
108.5	0.271
108.6	0.276
108.7	0.279
108.8	0.282
108.9	0.285
109	0.286
109.1	0.287
109.2	0.29
109.3	0.29
109.4	0.295
109.5	0.299
109.6	0.302
109.7	0.306
109.8	0.306
109.9	0.309
110	0.312
110.1	0.314
110.2	0.316
110.3	0.315
110.4	0.321
110.5	0.324
110.6	0.324
110.7	0.325
110.8	0.326
110.9	0.331
111	0.334
111.1	0.337
111.2	0.337
111.3	0.342
111.4	0.345
111.5	0.346
111.6	0.349
111.7	0.351
111.8	0.354
111.9	0.356
112	0.359
112.1	0.362
112.2	0.363
112.3	0.365
112.4	0.366
112.5	0.367
112.6	0.369
112.7	0.372
112.8	0.375
112.9	0.376
113	0.377
113.1	0.38
113.2	0.383
113.3	0.386
113.4	0.387
113.5	0.391
113.6	0.393
113.7	0.394
113.8	0.398
113.9	0.399
114	0.401
114.1	0.401
114.2	0.401
114.3	0.405
114.4	0.406
114.5	0.405
114.6	0.407
114.7	0.406
114.8	0.407
114.9	0.411
115	0.411
115.1	0.412
115.2	0.415
115.3	0.417
115.4	0.419
115.5	0.421
115.6	0.423
115.7	0.423
115.8	0.426
115.9	0.428
116	0.43
116.1	0.433
116.2	0.435
116.3	0.439
116.4	0.439
116.5	0.446
116.6	0.447
116.7	0.447
116.8	0.448
116.9	0.448
117	0.449
117.1	0.451
117.2	0.452
117.3	0.455
117.4	0.456
117.5	0.457
117.6	0.457
117.7	0.46
117.8	0.46
117.9	0.46
118	0.461
118.1	0.461
118.2	0.462
118.3	0.466
118.4	0.469
118.5	0.471
118.6	0.475
118.7	0.476
118.8	0.479
118.9	0.481
119	0.484
119.1	0.489
119.2	0.494
119.3	0.498
119.4	0.5
119.5	0.503
119.6	0.505
119.7	0.508
119.8	0.509
119.9	0.512
120	0.51
120.1	0.512
120.2	0.514
120.3	0.516
120.4	0.516
120.5	0.517
120.6	0.518
120.7	0.52
120.8	0.522
120.9	0.522
121	0.523
121.1	0.525
121.2	0.526
121.3	0.528
121.4	0.531
121.5	0.532
121.6	0.536
121.7	0.537
121.8	0.536
121.9	0.538
122	0.541
122.1	0.543
122.2	0.544
122.3	0.547
122.4	0.549
122.5	0.551
122.6	0.554
122.7	0.555
122.8	0.558
122.9	0.559
123	0.559
123.1	0.561
123.2	0.563
123.3	0.566
123.4	0.566
123.5	0.565
123.6	0.563
123.7	0.564
123.8	0.565
123.9	0.568
124	0.57
124.1	0.57
124.2	0.573
124.3	0.575
124.4	0.575
124.5	0.575
124.6	0.575
124.7	0.573
124.8	0.574
124.9	0.575
125	0.576
125.1	0.578
125.2	0.576
125.3	0.576
125.4	0.578
125.5	0.578
125.6	0.578
125.7	0.579
125.8	0.58
125.9	0.581
126	0.581
126.1	0.583
126.2	0.583
126.3	0.585
126.4	0.585
126.5	0.587
126.6	0.587
126.7	0.588
126.8	0.59
126.9	0.59
127	0.592
127.1	0.593
127.2	0.594
127.3	0.596
127.4	0.599
127.5	0.601
127.6	0.602
127.7	0.604
127.8	0.604
127.9	0.603
128	0.603
128.1	0.605
128.2	0.606
128.3	0.605
128.4	0.608
128.5	0.61
128.6	0.613
128.7	0.614
128.8	0.615
128.9	0.616
129	0.618
129.1	0.618
129.2	0.619
129.3	0.62
129.4	0.621
129.5	0.624
129.6	0.626
129.7	0.627
129.8	0.627
129.9	0.628
130	0.628
130.1	0.629
130.2	0.627
130.3	0.63
130.4	0.632
130.5	0.634
130.6	0.633
130.7	0.634
130.8	0.636
130.9	0.639
131	0.642
131.1	0.645
131.2	0.646
131.3	0.645
131.4	0.645
131.5	0.644
131.6	0.644
131.7	0.642
131.8	0.645
131.9	0.646
132	0.646
132.1	0.647
132.2	0.648
132.3	0.648
132.4	0.649
132.5	0.647
132.6	0.646
132.7	0.649
132.8	0.651
132.9	0.653
133	0.654
133.1	0.657
133.2	0.659
133.3	0.659
133.4	0.659
133.5	0.661
133.6	0.661
133.7	0.663
133.8	0.664
133.9	0.663
134	0.662
134.1	0.662
134.2	0.663
134.3	0.662
134.4	0.662
134.5	0.665
134.6	0.665
134.7	0.666
134.8	0.666
134.9	0.665
135	0.663
135.1	0.664
135.2	0.664
135.3	0.664
135.4	0.665
135.5	0.665
135.6	0.665
135.7	0.667
135.8	0.669
135.9	0.67
136	0.67
136.1	0.669
136.2	0.669
136.3	0.669
136.4	0.669
136.5	0.671
136.6	0.672
136.7	0.672
136.8	0.672
136.9	0.672
137	0.673
137.1	0.673
137.2	0.674
137.3	0.676
137.4	0.676
137.5	0.678
137.6	0.675
137.7	0.675
137.8	0.676
137.9	0.679
138	0.677
138.1	0.679
138.2	0.68
138.3	0.677
138.4	0.679
138.5	0.682
138.6	0.684
138.7	0.686
138.8	0.685
138.9	0.684
139	0.689
139.1	0.687
139.2	0.687
139.3	0.69
139.4	0.691
139.5	0.693
139.6	0.693
139.7	0.694
139.8	0.694
139.9	0.698
140	0.699
140.1	0.704
140.2	0.707
140.3	0.708
140.4	0.71
140.5	0.714
140.6	0.713
140.7	0.712
140.8	0.712
140.9	0.713
141	0.712
141.1	0.71
141.2	0.711
141.3	0.71
141.4	0.711
141.5	0.709
141.6	0.708
141.7	0.708
141.8	0.708
141.9	0.708
142	0.707
142.1	0.707
142.2	0.705
142.3	0.705
142.4	0.706
142.5	0.707
142.6	0.707
142.7	0.706
142.8	0.707
142.9	0.707
143	0.707
143.1	0.707
143.2	0.707
143.3	0.706
143.4	0.705
143.5	0.706
143.6	0.707
143.7	0.707
143.8	0.707
143.9	0.71
144	0.711
144.1	0.711
144.2	0.71
144.3	0.711
144.4	0.712
144.5	0.711
144.6	0.711
144.7	0.714
144.8	0.714
144.9	0.716
145	0.719
145.1	0.721
145.2	0.721
145.3	0.721
145.4	0.721
145.5	0.721
145.6	0.721
145.7	0.722
145.8	0.722
145.9	0.723
146	0.724
146.1	0.723
146.2	0.723
146.3	0.726
146.4	0.725
146.5	0.724
146.6	0.727
146.7	0.727
146.8	0.728
146.9	0.729
147	0.727
147.1	0.729
147.2	0.73
147.3	0.731
147.4	0.73
147.5	0.729
147.6	0.731
147.7	0.732
147.8	0.732
147.9	0.733
148	0.733
148.1	0.735
148.2	0.735
148.3	0.732
148.4	0.733
148.5	0.733
148.6	0.733
148.7	0.734
148.8	0.733
148.9	0.734
149	0.733
149.1	0.734
149.2	0.735
149.3	0.736
149.4	0.737
149.5	0.738
149.6	0.738
149.7	0.74
149.8	0.74
149.9	0.741
150	0.742
150.1	0.744
150.2	0.745
150.3	0.746
150.4	0.747
150.5	0.748
150.6	0.751
150.7	0.752
150.8	0.752
150.9	0.753
151	0.754
151.1	0.756
151.2	0.752
151.3	0.751
151.4	0.751
151.5	0.75
151.6	0.75
151.7	0.749
151.8	0.749
151.9	0.748
152	0.749
152.1	0.75
152.2	0.749
152.3	0.75
152.4	0.75
152.5	0.751
152.6	0.751
152.7	0.751
152.8	0.75
152.9	0.748
153	0.748
153.1	0.751
153.2	0.751
153.3	0.75
153.4	0.753
153.5	0.754
153.6	0.754
153.7	0.751
153.8	0.75
153.9	0.751
154	0.753
154.1	0.753
154.2	0.752
154.3	0.751
154.4	0.751
154.5	0.751
154.6	0.75
154.7	0.752
154.8	0.75
154.9	0.75
155	0.748
155.1	0.747
155.2	0.749
155.3	0.751
155.4	0.751
155.5	0.751
155.6	0.751
155.7	0.75
155.8	0.75
155.9	0.748
156	0.748
156.1	0.748
156.2	0.75
156.3	0.749
156.4	0.749
156.5	0.749
156.6	0.749
156.7	0.749
156.8	0.746
156.9	0.745
157	0.745
157.1	0.745
157.2	0.747
157.3	0.75
157.4	0.75
157.5	0.75
157.6	0.748
157.7	0.747
157.8	0.748
157.9	0.748
158	0.748
158.1	0.749
158.2	0.748
158.3	0.749
158.4	0.748
158.5	0.75
158.6	0.751
158.7	0.751
158.8	0.755
158.9	0.756
159	0.754
159.1	0.753
159.2	0.752
159.3	0.753
159.4	0.753
159.5	0.754
159.6	0.756
159.7	0.756
159.8	0.755
159.9	0.755
160	0.756
160.1	0.756
160.2	0.758
160.3	0.758
160.4	0.758
160.5	0.757
160.6	0.756
160.7	0.756
160.8	0.756
160.9	0.758
161	0.76
161.1	0.759
161.2	0.758
161.3	0.759
161.4	0.759
161.5	0.758
161.6	0.757
161.7	0.761
161.8	0.761
161.9	0.762
162	0.762
162.1	0.763
162.2	0.761
162.3	0.761
162.4	0.759
162.5	0.759
162.6	0.76
162.7	0.758
162.8	0.759
162.9	0.759
163	0.759
163.1	0.76
163.2	0.761
163.3	0.764
163.4	0.763
163.5	0.762
163.6	0.762
163.7	0.759
163.8	0.759
163.9	0.758
164	0.758
164.1	0.757
164.2	0.757
164.3	0.759
164.4	0.759
164.5	0.759
164.6	0.761
164.7	0.759
164.8	0.759
164.9	0.758
165	0.758
165.1	0.758
165.2	0.758
165.3	0.758
165.4	0.757
165.5	0.758
165.6	0.758
165.7	0.754
165.8	0.754
165.9	0.754
166	0.754
166.1	0.752
166.2	0.753
166.3	0.753
166.4	0.755
166.5	0.755
166.6	0.756
166.7	0.755
166.8	0.756
166.9	0.757
167	0.756
167.1	0.756
167.2	0.756
167.3	0.756
167.4	0.756
167.5	0.755
167.6	0.757
167.7	0.758
167.8	0.758
167.9	0.757
168	0.759
168.1	0.759
168.2	0.759
168.3	0.757
168.4	0.758
168.5	0.759
168.6	0.759
168.7	0.761
168.8	0.764
168.9	0.763
169	0.763
169.1	0.764
169.2	0.765
169.3	0.763
169.4	0.762
169.5	0.762
169.6	0.763
169.7	0.766
169.8	0.764
169.9	0.764
170	0.763
170.1	0.765
170.2	0.764
170.3	0.766
170.4	0.764
170.5	0.761
170.6	0.761
170.7	0.763
170.8	0.763
170.9	0.763
171	0.763
171.1	0.762
171.2	0.761
171.3	0.76
171.4	0.758
171.5	0.758
171.6	0.759
171.7	0.76
171.8	0.76
171.9	0.759
172	0.76
172.1	0.761
172.2	0.762
172.3	0.762
172.4	0.763
172.5	0.761
172.6	0.76
172.7	0.76
172.8	0.761
172.9	0.762
173	0.765
173.1	0.765
173.2	0.766
173.3	0.766
173.4	0.767
173.5	0.764
173.6	0.763
173.7	0.765
173.8	0.763
173.9	0.763
174	0.763
174.1	0.765
174.2	0.765
174.3	0.765
174.4	0.765
174.5	0.765
174.6	0.766
174.7	0.766
174.8	0.766
174.9	0.765
175	0.765
175.1	0.765
175.2	0.765
175.3	0.766
175.4	0.766
175.5	0.766
175.6	0.765
175.7	0.767
175.8	0.764
175.9	0.77
176	0.769
176.1	0.769
176.2	0.769
176.3	0.768
176.4	0.767
176.5	0.768
176.6	0.768
176.7	0.767
176.8	0.768
176.9	0.768
177	0.768
177.1	0.767
177.2	0.766
177.3	0.766
177.4	0.765
177.5	0.765
177.6	0.764
177.7	0.765
177.8	0.764
177.9	0.763
178	0.763
178.1	0.763
178.2	0.762
178.3	0.763
178.4	0.764
178.5	0.764
178.6	0.764
178.7	0.765
178.8	0.764
178.9	0.764
179	0.766
179.1	0.766
179.2	0.766
179.3	0.766
179.4	0.766
179.5	0.765
179.6	0.764
179.7	0.764
179.8	0.764
179.9	0.765
180	0.764
180.1	0.764
180.2	0.765
180.3	0.764
180.4	0.764
180.5	0.766
180.6	0.765
180.7	0.765
180.8	0.764
180.9	0.764
181	0.763
181.1	0.762
181.2	0.762
181.3	0.763
181.4	0.762
181.5	0.763
181.6	0.759
181.7	0.759
181.8	0.76
181.9	0.762
182	0.762
182.1	0.762
182.2	0.763
182.3	0.762
182.4	0.762
182.5	0.763
182.6	0.763
182.7	0.762
182.8	0.761
182.9	0.763
183	0.763
183.1	0.765
183.2	0.764
183.3	0.765
183.4	0.764
183.5	0.764
183.6	0.763
183.7	0.763
183.8	0.763
183.9	0.765
184	0.765
184.1	0.765
184.2	0.768
184.3	0.768
184.4	0.768
184.5	0.768
184.6	0.769
184.7	0.771
184.8	0.772
184.9	0.772
185	0.771
185.1	0.771
185.2	0.772
185.3	0.771
185.4	0.772
185.5	0.772
185.6	0.772
185.7	0.772
185.8	0.774
185.9	0.774
186	0.774
186.1	0.773
186.2	0.773
186.3	0.774
186.4	0.774
186.5	0.774
186.6	0.776
186.7	0.776
186.8	0.775
186.9	0.775
187	0.773
187.1	0.772
187.2	0.769
187.3	0.768
187.4	0.766
187.5	0.765
187.6	0.765
187.7	0.765
187.8	0.765
187.9	0.764
188	0.764
188.1	0.763
188.2	0.763
188.3	0.763
188.4	0.763
188.5	0.762
188.6	0.762
188.7	0.761
188.8	0.763
188.9	0.762
189	0.762
189.1	0.761
189.2	0.763
189.3	0.765
189.4	0.765
189.5	0.765
189.6	0.764
189.7	0.765
189.8	0.765
189.9	0.763
190	0.765
190.1	0.765
190.2	0.765
190.3	0.763
190.4	0.768
190.5	0.767
190.6	0.767
190.7	0.767
190.8	0.767
190.9	0.766
191	0.767
191.1	0.767
191.2	0.766
191.3	0.766
191.4	0.766
191.5	0.767
191.6	0.767
191.7	0.766
191.8	0.767
191.9	0.765
192	0.764
192.1	0.764
192.2	0.762
192.3	0.76
192.4	0.761
192.5	0.761
192.6	0.764
192.7	0.767
192.8	0.767
192.9	0.77
193	0.771
193.1	0.772
193.2	0.773
193.3	0.772
193.4	0.771
193.5	0.769
193.6	0.769
193.7	0.768
193.8	0.769
193.9	0.768
194	0.772
194.1	0.772
194.2	0.772
194.3	0.772
194.4	0.773
194.5	0.773
194.6	0.772
194.7	0.772
194.8	0.772
194.9	0.77
195	0.769
195.1	0.773
195.2	0.773
195.3	0.774
195.4	0.774
195.5	0.777
195.6	0.778
195.7	0.776
195.8	0.775
195.9	0.776
196	0.778
196.1	0.777
196.2	0.776
196.3	0.774
196.4	0.772
196.5	0.771
196.6	0.77
196.7	0.771
196.8	0.771
196.9	0.771
197	0.77
197.1	0.769
197.2	0.77
197.3	0.77
197.4	0.769
197.5	0.769
197.6	0.77
197.7	0.77
197.8	0.772
197.9	0.773
198	0.775
198.1	0.774
198.2	0.775
198.3	0.776
198.4	0.774
198.5	0.775
198.6	0.775
198.7	0.775
198.8	0.775
198.9	0.777
199	0.775
199.1	0.774
199.2	0.773
199.3	0.772
199.4	0.772
199.5	0.775
199.6	0.773
199.7	0.774
199.8	0.775
199.9	0.775
200	0.776
[truncated: 14,000 more rows]
