# Supplementary material for: Bayesian inference of kinetic schemes for ion channels by Kalman filtering
Source: eLife journal article supplement (doi:10.7554/elife.62714), 2022-05-04
Supplement: fig1-data1 [file 16_Sim_N_1000_Fluor_MW.xlsx]

## Sheet: Tabelle1
0.1	0
0.2	0
0.3	0
0.4	0
0.5	0
0.6	0
0.7	0
0.8	0
0.9	0
1	0
1.1	0
1.2	0
1.3	0
1.4	0
1.5	0
1.6	0
1.7	0
1.8	0
1.9	0
2	0
2.1	0
2.2	0
2.3	0
2.4	0
2.5	0
2.6	0
2.7	0
2.8	0
2.9	0
3	0
3.1	0
3.2	0
3.3	0
3.4	0
3.5	0
3.6	0
3.7	0
3.8	0
3.9	0
4	0
4.1	0
4.2	0
4.3	0
4.4	0
4.5	0
4.6	0
4.7	0
4.8	0
4.9	0
5	0
5.1	0
5.2	0
5.3	0
5.4	0
5.5	0
5.6	0
5.7	0
5.8	0
5.9	0
6	0
6.1	0
6.2	0
6.3	0
6.4	0
6.5	0
6.6	0
6.7	0
6.8	0
6.9	0
7	0
7.1	0
7.2	0
7.3	0
7.4	0
7.5	0
7.6	0
7.7	0
7.8	0
7.9	0
8	0
8.1	0
8.2	0
8.3	0
8.4	0
8.5	0
8.6	0
8.7	0
8.8	0
8.9	0
9	0
9.1	0
9.2	0
9.3	0
9.4	0
9.5	0
9.6	0
9.7	0
9.8	0
9.9	0
10	0
10.1	0
10.2	0
10.3	0
10.4	0
10.5	0
10.6	0
10.7	0
10.8	0
10.9	0
11	0
11.1	0
11.2	0
11.3	0
11.4	0
11.5	0
11.6	0
11.7	0
11.8	0
11.9	0
12	0
12.1	0
12.2	0
12.3	0
12.4	0
12.5	0
12.6	0
12.7	0
12.8	0
12.9	0
13	0
13.1	0
13.2	0
13.3	0
13.4	0
13.5	0
13.6	0
13.7	0
13.8	0
13.9	0
14	0
14.1	0
14.2	0
14.3	0
14.4	0
14.5	0
14.6	0
14.7	0
14.8	0
14.9	0
15	0
15.1	0
15.2	0
15.3	0
15.4	0
15.5	0
15.6	0
15.7	0
15.8	0
15.9	0
16	0
16.1	0
16.2	0
16.3	0
16.4	0
16.5	0
16.6	0
16.7	0
16.8	0
16.9	0
17	0
17.1	0
17.2	0
17.3	0
17.4	0
17.5	0
17.6	0
17.7	0
17.8	0
17.9	0
18	0
18.1	0
18.2	0
18.3	0
18.4	0
18.5	0
18.6	0
18.7	0
18.8	0
18.9	0
19	0
19.1	0
19.2	0
19.3	0
19.4	0
19.5	0
19.6	0
19.7	0
19.8	0
19.9	0
20	0
20.1	0
20.2	0
20.3	0
20.4	0
20.5	0
20.6	0
20.7	0
20.8	0
20.9	0
21	0
21.1	0
21.2	0
21.3	0
21.4	0
21.5	0
21.6	0
21.7	0
21.8	0
21.9	0
22	0
22.1	0
22.2	0
22.3	0
22.4	0
22.5	0
22.6	0
22.7	0
22.8	0
22.9	0
23	0
23.1	0
23.2	0
23.3	0
23.4	0
23.5	0
23.6	0
23.7	0
23.8	0
23.9	0
24	0
24.1	0
24.2	0
24.3	0
24.4	0
24.5	0
24.6	0
24.7	0
24.8	0
24.9	0
25	0
25.1	0
25.2	0
25.3	0
25.4	0
25.5	0
25.6	0
25.7	0
25.8	0
25.9	0
26	0
26.1	0
26.2	0
26.3	0
26.4	0
26.5	0
26.6	0
26.7	0
26.8	0
26.9	0
27	0
27.1	0
27.2	0
27.3	0
27.4	0
27.5	0
27.6	0
27.7	0
27.8	0
27.9	0
28	0
28.1	0
28.2	0
28.3	0
28.4	0
28.5	0
28.6	0
28.7	0
28.8	0
28.9	0
29	0
29.1	0
29.2	0
29.3	0
29.4	0
29.5	0
29.6	0
29.7	0
29.8	0
29.9	0
30	0
30.1	0
30.2	0
30.3	0
30.4	0
30.5	0
30.6	0
30.7	0
30.8	0
30.9	0
31	0
31.1	0
31.2	0
31.3	0
31.4	0
31.5	0
31.6	0
31.7	0
31.8	0
31.9	0
32	0
32.1	0
32.2	0
32.3	0
32.4	0
32.5	0
32.6	0
32.7	0
32.8	0
32.9	0
33	0
33.1	0
33.2	0
33.3	0
33.4	0
33.5	0
33.6	0
33.7	0
33.8	0
33.9	0
34	0
34.1	0
34.2	0
34.3	0
34.4	0
34.5	0
34.6	0
34.7	0
34.8	0
34.9	0
35	0
35.1	0
35.2	0
35.3	0
35.4	0
35.5	0
35.6	0
35.7	0
35.8	0
35.9	0
36	0
36.1	0
36.2	0
36.3	0
36.4	0
36.5	0
36.6	0
36.7	0
36.8	0
36.9	0
37	0
37.1	0
37.2	0
37.3	0
37.4	0
37.5	0
37.6	0
37.7	0
37.8	0
37.9	0
38	0
38.1	0
38.2	0
38.3	0
38.4	0
38.5	0
38.6	0
38.7	0
38.8	0
38.9	0
39	0
39.1	0
39.2	0
39.3	0
39.4	0
39.5	0
39.6	0
39.7	0
39.8	0
39.9	0
40	0
40.1	0
40.2	0
40.3	0
40.4	0
40.5	0
40.6	0
40.7	0
40.8	0
40.9	0
41	0
41.1	0
41.2	0
41.3	0
41.4	0
41.5	0
41.6	0
41.7	0
41.8	0
41.9	0
42	0
42.1	0
42.2	0
42.3	0
42.4	0
42.5	0
42.6	0
42.7	0
42.8	0
42.9	0
43	0
43.1	0
43.2	0
43.3	0
43.4	0
43.5	0
43.6	0
43.7	0
43.8	0
43.9	0
44	0
44.1	0
44.2	0
44.3	0
44.4	0
44.5	0
44.6	0
44.7	0
44.8	0
44.9	0
45	0
45.1	0
45.2	0
45.3	0
45.4	0
45.5	0
45.6	0
45.7	0
45.8	0
45.9	0
46	0
46.1	0
46.2	0
46.3	0
46.4	0
46.5	0
46.6	0
46.7	0
46.8	0
46.9	0
47	0
47.1	0
47.2	0
47.3	0
47.4	0
47.5	0
47.6	0
47.7	0
47.8	0
47.9	0
48	0
48.1	0
48.2	0
48.3	0
48.4	0
48.5	0
48.6	0
48.7	0
48.8	0
48.9	0
49	0
49.1	0
49.2	0
49.3	0
49.4	0
49.5	0
49.6	0
49.7	0
49.8	0
49.9	0
50	0
50.1	0
50.2	0
50.3	0
50.4	0
50.5	0
50.6	0
50.7	0
50.8	0
50.9	0
51	0
51.1	0
51.2	0
51.3	0
51.4	0
51.5	0
51.6	0
51.7	0
51.8	0
51.9	0
52	0
52.1	0
52.2	0
52.3	0
52.4	0
52.5	0
52.6	0
52.7	0
52.8	0
52.9	0
53	0
53.1	0
53.2	0
53.3	0
53.4	0
53.5	0
53.6	0
53.7	0
53.8	0
53.9	0
54	0
54.1	0
54.2	0
54.3	0
54.4	0
54.5	0
54.6	0
54.7	0
54.8	0
54.9	0
55	0
55.1	0
55.2	0
55.3	0
55.4	0
55.5	0
55.6	0
55.7	0
55.8	0
55.9	0
56	0
56.1	0
56.2	0
56.3	0
56.4	0
56.5	0
56.6	0
56.7	0
56.8	0
56.9	0
57	0
57.1	0
57.2	0
57.3	0
57.4	0
57.5	0
57.6	0
57.7	0
57.8	0
57.9	0
58	0
58.1	0
58.2	0
58.3	0
58.4	0
58.5	0
58.6	0
58.7	0
58.8	0
58.9	0
59	0
59.1	0
59.2	0
59.3	0
59.4	0
59.5	0
59.6	0
59.7	0
59.8	0
59.9	0
60	0
60.1	0
60.2	0
60.3	0
60.4	0
60.5	0
60.6	0
60.7	0
60.8	0
60.9	0
61	0
61.1	0
61.2	0
61.3	0
61.4	0
61.5	0
61.6	0
61.7	0
61.8	0
61.9	0
62	0
62.1	0
62.2	0
62.3	0
62.4	0
62.5	0
62.6	0
62.7	0
62.8	0
62.9	0
63	0
63.1	0
63.2	0
63.3	0
63.4	0
63.5	0
63.6	0
63.7	0
63.8	0
63.9	0
64	0
64.1	0
64.2	0
64.3	0
64.4	0
64.5	0
64.6	0
64.7	0
64.8	0
64.9	0
65	0
65.1	0
65.2	0
65.3	0
65.4	0
65.5	0
65.6	0
65.7	0
65.8	0
65.9	0
66	0
66.1	0
66.2	0
66.3	0
66.4	0
66.5	0
66.6	0
66.7	0
66.8	0
66.9	0
67	0
67.1	0
67.2	0
67.3	0
67.4	0
67.5	0
67.6	0
67.7	0
67.8	0
67.9	0
68	0
68.1	0
68.2	0
68.3	0
68.4	0
68.5	0
68.6	0
68.7	0
68.8	0
68.9	0
69	0
69.1	0
69.2	0
69.3	0
69.4	0
69.5	0
69.6	0
69.7	0
69.8	0
69.9	0
70	0
70.1	0
70.2	0
70.3	0
70.4	0
70.5	0
70.6	0
70.7	0
70.8	0
70.9	0
71	0
71.1	0
71.2	0
71.3	0
71.4	0
71.5	0
71.6	0
71.7	0
71.8	0
71.9	0
72	0
72.1	0
72.2	0
72.3	0
72.4	0
72.5	0
72.6	0
72.7	0
72.8	0
72.9	0
73	0
73.1	0
73.2	0
73.3	0
73.4	0
73.5	0
73.6	0
73.7	0
73.8	0
73.9	0
74	0
74.1	0
74.2	0
74.3	0
74.4	0
74.5	0
74.6	0
74.7	0
74.8	0
74.9	0
75	0
75.1	0
75.2	0
75.3	0
75.4	0
75.5	0
75.6	0
75.7	0
75.8	0
75.9	0
76	0
76.1	0
76.2	0
76.3	0
76.4	0
76.5	0
76.6	0
76.7	0
76.8	0
76.9	0
77	0
77.1	0
77.2	0
77.3	0
77.4	0
77.5	0
77.6	0
77.7	0
77.8	0
77.9	0
78	0
78.1	0
78.2	0
78.3	0
78.4	0
78.5	0
78.6	0
78.7	0
78.8	0
78.9	0
79	0
79.1	0
79.2	0
79.3	0
79.4	0
79.5	0
79.6	0
79.7	0
79.8	0
79.9	0
80	0
80.1	0
80.2	0
80.3	0
80.4	0
80.5	0
80.6	0
80.7	0
80.8	0
80.9	0
81	0
81.1	0
81.2	0
81.3	0
81.4	0
81.5	0
81.6	0
81.7	0
81.8	0
81.9	0
82	0
82.1	0
82.2	0
82.3	0
82.4	0
82.5	0
82.6	0
82.7	0
82.8	0
82.9	0
83	0
83.1	0
83.2	0
83.3	0
83.4	0
83.5	0
83.6	0
83.7	0
83.8	0
83.9	0
84	0
84.1	0
84.2	0
84.3	0
84.4	0
84.5	0
84.6	0
84.7	0
84.8	0
84.9	0
85	0
85.1	0
85.2	0
85.3	0
85.4	0
85.5	0
85.6	0
85.7	0
85.8	0
85.9	0
86	0
86.1	0
86.2	0
86.3	0
86.4	0
86.5	0
86.6	0
86.7	0
86.8	0
86.9	0
87	0
87.1	0
87.2	0
87.3	0
87.4	0
87.5	0
87.6	0
87.7	0
87.8	0
87.9	0
88	0
88.1	0
88.2	0
88.3	0
88.4	0
88.5	0
88.6	0
88.7	0
88.8	0
88.9	0
89	0
89.1	0
89.2	0
89.3	0
89.4	0
89.5	0
89.6	0
89.7	0
89.8	0
89.9	0
90	0
90.1	0
90.2	0
90.3	0
90.4	0
90.5	0
90.6	0
90.7	0
90.8	0
90.9	0
91	0
91.1	0
91.2	0
91.3	0
91.4	0
91.5	0
91.6	0
91.7	0
91.8	0
91.9	0
92	0
92.1	0
92.2	0
92.3	0
92.4	0
92.5	0
92.6	0
92.7	0
92.8	0
92.9	0
93	0
93.1	0
93.2	0
93.3	0
93.4	0
93.5	0
93.6	0
93.7	0
93.8	0
93.9	0
94	0
94.1	0
94.2	0
94.3	0
94.4	0
94.5	0
94.6	0
94.7	0
94.8	0
94.9	0
95	0
95.1	0
95.2	0
95.3	0
95.4	0
95.5	0
95.6	0
95.7	0
95.8	0
95.9	0
96	0
96.1	0
96.2	0
96.3	0
96.4	0
96.5	0
96.6	0
96.7	0
96.8	0
96.9	0
97	0
97.1	0
97.2	0
97.3	0
97.4	0
97.5	0
97.6	0
97.7	0
97.8	0
97.9	0
98	0
98.1	0
98.2	0
98.3	0
98.4	0
98.5	0
98.6	0
98.7	0
98.8	0
98.9	0
99	0
99.1	0
99.2	0
99.3	0
99.4	0
99.5	0
99.6	0
99.7	0
99.8	0
99.9	0
100	0
100.1	0.5485
100.2	0.7265
100.3	0.8325
100.4	0.88
100.5	0.918
100.6	0.937
100.7	0.945
100.8	0.9435
100.9	0.947
101	0.953
101.1	0.9555
101.2	0.9595
101.3	0.9585
101.4	0.954
101.5	0.953
101.6	0.956
101.7	0.9505
101.8	0.9535
101.9	0.9545
102	0.957
102.1	0.952
102.2	0.954
102.3	0.957
102.4	0.9605
102.5	0.959
102.6	0.9535
102.7	0.9535
102.8	0.956
102.9	0.9605
103	0.954
103.1	0.951
103.2	0.953
103.3	0.9515
103.4	0.9545
103.5	0.9525
103.6	0.957
103.7	0.9495
103.8	0.959
103.9	0.958
104	0.959
104.1	0.9585
104.2	0.957
104.3	0.96
104.4	0.9585
104.5	0.9645
104.6	0.963
104.7	0.9665
104.8	0.972
104.9	0.9725
105	0.969
105.1	0.969
105.2	0.965
105.3	0.957
105.4	0.956
105.5	0.9595
105.6	0.966
105.7	0.9675
105.8	0.9655
105.9	0.973
106	0.9675
106.1	0.9615
106.2	0.966
106.3	0.961
106.4	0.962
106.5	0.9645
106.6	0.9635
106.7	0.967
106.8	0.9685
106.9	0.963
107	0.9685
107.1	0.974
107.2	0.9665
107.3	0.963
107.4	0.96
107.5	0.9675
107.6	0.969
107.7	0.9665
107.8	0.9645
107.9	0.966
108	0.9655
108.1	0.9655
108.2	0.9645
108.3	0.972
108.4	0.971
108.5	0.9685
108.6	0.973
108.7	0.97
108.8	0.97
108.9	0.972
109	0.9755
109.1	0.969
109.2	0.9625
109.3	0.965
109.4	0.962
109.5	0.966
109.6	0.967
109.7	0.971
109.8	0.975
109.9	0.97
110	0.969
110.1	0.971
110.2	0.968
110.3	0.967
110.4	0.9685
110.5	0.969
110.6	0.967
110.7	0.97
110.8	0.9715
110.9	0.973
111	0.9675
111.1	0.968
111.2	0.967
111.3	0.968
111.4	0.969
111.5	0.964
111.6	0.9675
111.7	0.9715
111.8	0.969
111.9	0.9745
112	0.973
112.1	0.9705
112.2	0.9695
112.3	0.9695
112.4	0.968
112.5	0.966
112.6	0.9685
112.7	0.969
112.8	0.968
112.9	0.968
113	0.966
113.1	0.971
113.2	0.9765
113.3	0.9725
113.4	0.9725
113.5	0.972
113.6	0.972
113.7	0.9735
113.8	0.9695
113.9	0.9695
114	0.9715
114.1	0.975
114.2	0.9715
114.3	0.969
114.4	0.9715
114.5	0.9685
114.6	0.971
114.7	0.9735
114.8	0.9765
114.9	0.975
115	0.9765
115.1	0.9735
115.2	0.98
115.3	0.979
115.4	0.98
115.5	0.979
115.6	0.975
115.7	0.9775
115.8	0.9745
115.9	0.979
116	0.9825
116.1	0.978
116.2	0.978
116.3	0.977
116.4	0.975
116.5	0.9765
116.6	0.9735
116.7	0.971
116.8	0.9695
116.9	0.976
117	0.9795
117.1	0.978
117.2	0.973
117.3	0.975
117.4	0.979
117.5	0.9795
117.6	0.9755
117.7	0.9755
117.8	0.975
117.9	0.9725
118	0.975
118.1	0.9795
118.2	0.9805
118.3	0.98
118.4	0.9795
118.5	0.9805
118.6	0.981
118.7	0.9795
118.8	0.981
118.9	0.9755
119	0.977
119.1	0.976
119.2	0.9755
119.3	0.9735
119.4	0.977
119.5	0.976
119.6	0.9775
119.7	0.978
119.8	0.981
119.9	0.981
120	0.9825
120.1	0.9835
120.2	0.9815
120.3	0.978
120.4	0.976
120.5	0.979
120.6	0.977
120.7	0.9795
120.8	0.9815
120.9	0.9835
121	0.98
121.1	0.9825
121.2	0.9815
121.3	0.981
121.4	0.9775
121.5	0.9745
121.6	0.981
121.7	0.9815
121.8	0.978
121.9	0.9745
122	0.9715
122.1	0.98
122.2	0.98
122.3	0.9795
122.4	0.98
122.5	0.9755
122.6	0.9775
122.7	0.9785
122.8	0.9835
122.9	0.9805
123	0.9825
123.1	0.982
123.2	0.981
123.3	0.9775
123.4	0.98
123.5	0.9785
123.6	0.978
123.7	0.9795
123.8	0.9805
123.9	0.9845
124	0.985
124.1	0.981
124.2	0.9805
124.3	0.981
124.4	0.9815
124.5	0.9805
124.6	0.98
124.7	0.98
124.8	0.9815
124.9	0.983
125	0.98
125.1	0.9855
125.2	0.9875
125.3	0.981
125.4	0.9785
125.5	0.98
125.6	0.976
125.7	0.9775
125.8	0.981
125.9	0.976
126	0.978
126.1	0.983
126.2	0.9845
126.3	0.9875
126.4	0.985
126.5	0.986
126.6	0.99
126.7	0.986
126.8	0.987
126.9	0.9845
127	0.985
127.1	0.982
127.2	0.9815
127.3	0.9805
127.4	0.985
127.5	0.987
127.6	0.9885
127.7	0.986
127.8	0.986
127.9	0.9905
128	0.988
128.1	0.987
128.2	0.984
128.3	0.985
128.4	0.984
128.5	0.983
128.6	0.9825
128.7	0.979
128.8	0.9825
128.9	0.9865
129	0.981
129.1	0.9805
129.2	0.985
129.3	0.9845
129.4	0.986
129.5	0.986
129.6	0.985
129.7	0.989
129.8	0.9855
129.9	0.9865
130	0.9825
130.1	0.9845
130.2	0.987
130.3	0.9855
130.4	0.9815
130.5	0.982
130.6	0.983
130.7	0.981
130.8	0.9805
130.9	0.985
131	0.9855
131.1	0.983
131.2	0.984
131.3	0.9865
131.4	0.987
131.5	0.987
131.6	0.9875
131.7	0.984
131.8	0.9825
131.9	0.9815
132	0.9825
132.1	0.9855
132.2	0.9865
132.3	0.9835
132.4	0.986
132.5	0.985
132.6	0.983
132.7	0.983
132.8	0.9875
132.9	0.988
133	0.9855
133.1	0.983
133.2	0.985
133.3	0.982
133.4	0.982
133.5	0.9815
133.6	0.9835
133.7	0.9855
133.8	0.985
133.9	0.984
134	0.989
134.1	0.986
134.2	0.986
134.3	0.985
134.4	0.9815
134.5	0.978
134.6	0.983
134.7	0.985
134.8	0.9865
134.9	0.985
135	0.987
135.1	0.991
135.2	0.986
135.3	0.987
135.4	0.987
135.5	0.985
135.6	0.988
135.7	0.988
135.8	0.987
135.9	0.985
136	0.988
136.1	0.9885
136.2	0.985
136.3	0.987
136.4	0.9905
136.5	0.991
136.6	0.9885
136.7	0.9905
136.8	0.99
136.9	0.9895
137	0.992
137.1	0.9895
137.2	0.9885
137.3	0.989
137.4	0.988
137.5	0.99
137.6	0.993
137.7	0.991
137.8	0.9905
137.9	0.988
138	0.9875
138.1	0.9895
138.2	0.99
138.3	0.9885
138.4	0.987
138.5	0.9855
138.6	0.986
138.7	0.988
138.8	0.9885
138.9	0.987
139	0.9905
139.1	0.9915
139.2	0.9905
139.3	0.983
139.4	0.9815
139.5	0.9815
139.6	0.9845
139.7	0.9845
139.8	0.9865
139.9	0.9855
140	0.9845
140.1	0.988
140.2	0.9835
140.3	0.988
140.4	0.988
140.5	0.99
140.6	0.987
140.7	0.9855
140.8	0.9875
140.9	0.9885
141	0.9855
141.1	0.984
141.2	0.983
141.3	0.9865
141.4	0.992
141.5	0.99
141.6	0.991
141.7	0.9915
141.8	0.991
141.9	0.988
142	0.989
142.1	0.9895
142.2	0.988
142.3	0.9855
142.4	0.9835
142.5	0.9875
142.6	0.9905
142.7	0.988
142.8	0.9845
142.9	0.9845
143	0.987
143.1	0.9875
143.2	0.989
143.3	0.9905
143.4	0.989
143.5	0.9865
143.6	0.9865
143.7	0.9875
143.8	0.9875
143.9	0.989
144	0.9855
144.1	0.987
144.2	0.988
144.3	0.9915
144.4	0.99
144.5	0.9865
144.6	0.9865
144.7	0.989
144.8	0.989
144.9	0.99
145	0.99
145.1	0.987
145.2	0.9895
145.3	0.987
145.4	0.99
145.5	0.9875
145.6	0.9895
145.7	0.987
145.8	0.9855
145.9	0.9885
146	0.99
146.1	0.989
146.2	0.9885
146.3	0.987
146.4	0.99
146.5	0.9915
146.6	0.9905
146.7	0.9895
146.8	0.9895
146.9	0.991
147	0.99
147.1	0.991
147.2	0.99
147.3	0.99
147.4	0.991
147.5	0.9875
147.6	0.988
147.7	0.992
147.8	0.991
147.9	0.9945
148	0.993
148.1	0.991
148.2	0.9885
148.3	0.989
148.4	0.991
148.5	0.9925
148.6	0.9915
148.7	0.99
148.8	0.9875
148.9	0.9885
149	0.9895
149.1	0.987
149.2	0.9865
149.3	0.9855
149.4	0.9855
149.5	0.9905
149.6	0.9895
149.7	0.989
149.8	0.9915
149.9	0.9895
150	0.987
150.1	0.9885
150.2	0.99
150.3	0.989
150.4	0.9865
150.5	0.9875
150.6	0.99
150.7	0.9905
150.8	0.989
150.9	0.9905
151	0.99
151.1	0.9885
151.2	0.9895
151.3	0.9915
151.4	0.994
151.5	0.993
151.6	0.9945
151.7	0.995
151.8	0.9945
151.9	0.993
152	0.9905
152.1	0.994
152.2	0.9945
152.3	0.992
152.4	0.9915
152.5	0.989
152.6	0.989
152.7	0.988
152.8	0.9915
152.9	0.9915
153	0.9885
153.1	0.991
153.2	0.9935
153.3	0.993
153.4	0.9925
153.5	0.991
153.6	0.99
153.7	0.9905
153.8	0.9885
153.9	0.9885
154	0.9865
154.1	0.986
154.2	0.988
154.3	0.991
154.4	0.9935
154.5	0.993
154.6	0.9895
154.7	0.988
154.8	0.987
154.9	0.989
155	0.99
155.1	0.9935
155.2	0.9915
155.3	0.988
155.4	0.989
155.5	0.99
155.6	0.9875
155.7	0.987
155.8	0.988
155.9	0.9905
156	0.9905
156.1	0.99
156.2	0.9925
156.3	0.993
156.4	0.9925
156.5	0.9935
156.6	0.9915
156.7	0.991
156.8	0.99
156.9	0.99
157	0.9885
157.1	0.988
157.2	0.9905
157.3	0.9895
157.4	0.992
157.5	0.993
157.6	0.991
157.7	0.9895
157.8	0.9895
157.9	0.9915
158	0.989
158.1	0.987
158.2	0.9895
158.3	0.986
158.4	0.985
158.5	0.986
158.6	0.9855
158.7	0.988
158.8	0.991
158.9	0.991
159	0.9915
159.1	0.992
159.2	0.9925
159.3	0.992
159.4	0.992
159.5	0.9935
159.6	0.9885
159.7	0.9885
159.8	0.987
159.9	0.99
160	0.991
160.1	0.9905
160.2	0.9915
160.3	0.9875
160.4	0.993
160.5	0.9935
160.6	0.9885
160.7	0.994
160.8	0.991
160.9	0.9915
161	0.9895
161.1	0.989
161.2	0.9895
161.3	0.9895
161.4	0.9885
161.5	0.992
161.6	0.9915
161.7	0.991
161.8	0.9885
161.9	0.991
162	0.991
162.1	0.9915
162.2	0.992
162.3	0.9905
162.4	0.9905
162.5	0.992
162.6	0.9915
162.7	0.992
162.8	0.9875
162.9	0.987
163	0.9865
163.1	0.987
163.2	0.9885
163.3	0.987
163.4	0.9855
163.5	0.99
163.6	0.989
163.7	0.99
163.8	0.9885
163.9	0.9885
164	0.989
164.1	0.9885
164.2	0.988
164.3	0.986
164.4	0.988
164.5	0.99
164.6	0.9855
164.7	0.9885
164.8	0.988
164.9	0.99
165	0.9905
165.1	0.9915
165.2	0.994
165.3	0.992
165.4	0.991
165.5	0.99
165.6	0.9915
165.7	0.991
165.8	0.991
165.9	0.99
166	0.987
166.1	0.9865
166.2	0.989
166.3	0.9895
166.4	0.989
166.5	0.9895
166.6	0.9855
166.7	0.987
166.8	0.9875
166.9	0.99
167	0.9885
167.1	0.9875
167.2	0.9915
167.3	0.992
167.4	0.992
167.5	0.99
167.6	0.9905
167.7	0.988
167.8	0.991
167.9	0.991
168	0.9935
168.1	0.9915
168.2	0.9895
168.3	0.9895
168.4	0.9885
168.5	0.9895
168.6	0.989
168.7	0.9875
168.8	0.989
168.9	0.99
169	0.9935
169.1	0.9915
169.2	0.989
169.3	0.988
169.4	0.9865
169.5	0.989
169.6	0.99
169.7	0.9925
169.8	0.989
169.9	0.9885
170	0.99
170.1	0.9945
170.2	0.9925
170.3	0.9915
170.4	0.9905
170.5	0.995
170.6	0.992
170.7	0.991
170.8	0.99
170.9	0.991
171	0.9895
171.1	0.9915
171.2	0.9915
171.3	0.9925
171.4	0.9885
171.5	0.986
171.6	0.9885
171.7	0.9915
171.8	0.993
171.9	0.9925
172	0.9945
172.1	0.993
172.2	0.994
172.3	0.991
172.4	0.993
172.5	0.9935
172.6	0.9905
172.7	0.9925
172.8	0.9915
172.9	0.9935
173	0.9925
173.1	0.9895
173.2	0.9885
173.3	0.9895
173.4	0.9905
173.5	0.99
173.6	0.9895
173.7	0.9895
173.8	0.991
173.9	0.991
174	0.992
174.1	0.9895
174.2	0.9865
174.3	0.988
174.4	0.9905
174.5	0.9895
174.6	0.993
174.7	0.989
174.8	0.989
174.9	0.988
175	0.99
175.1	0.9895
175.2	0.9895
175.3	0.989
175.4	0.988
175.5	0.992
175.6	0.987
175.7	0.9885
175.8	0.986
175.9	0.9905
176	0.9915
176.1	0.989
176.2	0.989
176.3	0.9905
176.4	0.987
176.5	0.9895
176.6	0.9905
176.7	0.991
176.8	0.991
176.9	0.9935
177	0.992
177.1	0.992
177.2	0.993
177.3	0.9935
177.4	0.9935
177.5	0.993
177.6	0.993
177.7	0.9905
177.8	0.991
177.9	0.99
178	0.991
178.1	0.992
178.2	0.9905
178.3	0.986
178.4	0.9875
178.5	0.9915
178.6	0.989
178.7	0.987
178.8	0.9875
178.9	0.9905
179	0.992
179.1	0.9935
179.2	0.9925
179.3	0.9885
179.4	0.9895
179.5	0.9855
179.6	0.987
179.7	0.987
179.8	0.987
179.9	0.988
180	0.987
180.1	0.9925
180.2	0.99
180.3	0.99
180.4	0.9895
180.5	0.9905
180.6	0.9925
180.7	0.996
180.8	0.995
180.9	0.9945
181	0.9945
181.1	0.9925
181.2	0.9915
181.3	0.992
181.4	0.9885
181.5	0.9905
181.6	0.9905
181.7	0.989
181.8	0.992
181.9	0.994
182	0.9915
182.1	0.99
182.2	0.989
182.3	0.992
182.4	0.99
182.5	0.99
182.6	0.989
182.7	0.9905
182.8	0.99
182.9	0.99
183	0.9885
183.1	0.9885
183.2	0.9905
183.3	0.992
183.4	0.99
183.5	0.9875
183.6	0.99
183.7	0.989
183.8	0.9895
183.9	0.9915
184	0.9915
184.1	0.9925
184.2	0.9915
184.3	0.9915
184.4	0.99
184.5	0.99
184.6	0.9885
184.7	0.988
184.8	0.99
184.9	0.992
185	0.9915
185.1	0.99
185.2	0.99
185.3	0.989
185.4	0.9885
185.5	0.9885
185.6	0.988
185.7	0.989
185.8	0.9885
185.9	0.991
186	0.9935
186.1	0.9915
186.2	0.9925
186.3	0.9925
186.4	0.9915
186.5	0.9915
186.6	0.9915
186.7	0.9925
186.8	0.993
186.9	0.99
187	0.9895
187.1	0.989
187.2	0.99
187.3	0.9895
187.4	0.991
187.5	0.9925
187.6	0.991
187.7	0.992
187.8	0.9945
187.9	0.995
188	0.994
188.1	0.992
188.2	0.9925
188.3	0.99
188.4	0.991
188.5	0.989
188.6	0.9885
188.7	0.991
188.8	0.991
188.9	0.992
189	0.9935
189.1	0.994
189.2	0.99
189.3	0.99
189.4	0.9915
189.5	0.989
189.6	0.9905
189.7	0.994
189.8	0.9935
189.9	0.9915
190	0.9895
190.1	0.989
190.2	0.9885
190.3	0.99
190.4	0.991
190.5	0.9925
190.6	0.991
190.7	0.991
190.8	0.9925
190.9	0.99
191	0.9905
191.1	0.992
191.2	0.9905
191.3	0.9935
191.4	0.9945
191.5	0.993
191.6	0.9925
191.7	0.9935
191.8	0.9935
191.9	0.9925
192	0.992
192.1	0.99
192.2	0.9905
192.3	0.9905
192.4	0.99
192.5	0.994
192.6	0.995
192.7	0.991
192.8	0.9895
192.9	0.99
193	0.9895
193.1	0.991
193.2	0.9935
193.3	0.9935
193.4	0.9905
193.5	0.9885
193.6	0.9925
193.7	0.9915
193.8	0.992
193.9	0.9885
194	0.9885
194.1	0.9895
194.2	0.989
194.3	0.9925
194.4	0.9945
194.5	0.9915
194.6	0.9925
194.7	0.9915
194.8	0.992
194.9	0.992
195	0.9945
195.1	0.993
195.2	0.9935
195.3	0.995
195.4	0.9945
195.5	0.9895
195.6	0.9875
195.7	0.99
195.8	0.9895
195.9	0.9885
196	0.992
196.1	0.9935
196.2	0.9915
196.3	0.991
196.4	0.9895
196.5	0.9905
196.6	0.992
196.7	0.991
196.8	0.9885
196.9	0.988
197	0.9895
197.1	0.983
197.2	0.9865
197.3	0.988
197.4	0.9895
197.5	0.988
197.6	0.985
197.7	0.987
197.8	0.9915
197.9	0.9915
198	0.991
198.1	0.992
198.2	0.993
198.3	0.993
198.4	0.993
198.5	0.9895
198.6	0.9895
198.7	0.988
198.8	0.988
198.9	0.993
199	0.993
199.1	0.991
199.2	0.994
199.3	0.9925
199.4	0.992
199.5	0.9925
199.6	0.994
199.7	0.994
199.8	0.9955
199.9	0.9955
200	0.993
[truncated: 14,000 more rows]
