# Supplementary material for: Bayesian inference of kinetic schemes for ion channels by Kalman filtering
Source: eLife journal article supplement (doi:10.7554/elife.62714), 2022-05-04
Supplement: fig1-data1 [file 16_Sim_N_1000_Strom_MW.xlsx]

## Sheet: Tabelle1
0.1	0
0.2	0
0.3	0
0.4	0
0.5	0
0.6	0
0.7	0
0.8	0
0.9	0
1	0
1.1	0
1.2	0
1.3	0
1.4	0
1.5	0
1.6	0
1.7	0
1.8	0
1.9	0
2	0
2.1	0
2.2	0
2.3	0
2.4	0
2.5	0
2.6	0
2.7	0
2.8	0
2.9	0
3	0
3.1	0
3.2	0
3.3	0
3.4	0
3.5	0
3.6	0
3.7	0
3.8	0
3.9	0
4	0
4.1	0
4.2	0
4.3	0
4.4	0
4.5	0
4.6	0
4.7	0
4.8	0
4.9	0
5	0
5.1	0
5.2	0
5.3	0
5.4	0
5.5	0
5.6	0
5.7	0
5.8	0
5.9	0
6	0
6.1	0
6.2	0
6.3	0
6.4	0
6.5	0
6.6	0
6.7	0
6.8	0
6.9	0
7	0
7.1	0
7.2	0
7.3	0
7.4	0
7.5	0
7.6	0
7.7	0
7.8	0
7.9	0
8	0
8.1	0
8.2	0
8.3	0
8.4	0
8.5	0
8.6	0
8.7	0
8.8	0
8.9	0
9	0
9.1	0
9.2	0
9.3	0
9.4	0
9.5	0
9.6	0
9.7	0
9.8	0
9.9	0
10	0
10.1	0
10.2	0
10.3	0
10.4	0
10.5	0
10.6	0
10.7	0
10.8	0
10.9	0
11	0
11.1	0
11.2	0
11.3	0
11.4	0
11.5	0
11.6	0
11.7	0
11.8	0
11.9	0
12	0
12.1	0
12.2	0
12.3	0
12.4	0
12.5	0
12.6	0
12.7	0
12.8	0
12.9	0
13	0
13.1	0
13.2	0
13.3	0
13.4	0
13.5	0
13.6	0
13.7	0
13.8	0
13.9	0
14	0
14.1	0
14.2	0
14.3	0
14.4	0
14.5	0
14.6	0
14.7	0
14.8	0
14.9	0
15	0
15.1	0
15.2	0
15.3	0
15.4	0
15.5	0
15.6	0
15.7	0
15.8	0
15.9	0
16	0
16.1	0
16.2	0
16.3	0
16.4	0
16.5	0
16.6	0
16.7	0
16.8	0
16.9	0
17	0
17.1	0
17.2	0
17.3	0
17.4	0
17.5	0
17.6	0
17.7	0
17.8	0
17.9	0
18	0
18.1	0
18.2	0
18.3	0
18.4	0
18.5	0
18.6	0
18.7	0
18.8	0
18.9	0
19	0
19.1	0
19.2	0
19.3	0
19.4	0
19.5	0
19.6	0
19.7	0
19.8	0
19.9	0
20	0
20.1	0
20.2	0
20.3	0
20.4	0
20.5	0
20.6	0
20.7	0
20.8	0
20.9	0
21	0
21.1	0
21.2	0
21.3	0
21.4	0
21.5	0
21.6	0
21.7	0
21.8	0
21.9	0
22	0
22.1	0
22.2	0
22.3	0
22.4	0
22.5	0
22.6	0
22.7	0
22.8	0
22.9	0
23	0
23.1	0
23.2	0
23.3	0
23.4	0
23.5	0
23.6	0
23.7	0
23.8	0
23.9	0
24	0
24.1	0
24.2	0
24.3	0
24.4	0
24.5	0
24.6	0
24.7	0
24.8	0
24.9	0
25	0
25.1	0
25.2	0
25.3	0
25.4	0
25.5	0
25.6	0
25.7	0
25.8	0
25.9	0
26	0
26.1	0
26.2	0
26.3	0
26.4	0
26.5	0
26.6	0
26.7	0
26.8	0
26.9	0
27	0
27.1	0
27.2	0
27.3	0
27.4	0
27.5	0
27.6	0
27.7	0
27.8	0
27.9	0
28	0
28.1	0
28.2	0
28.3	0
28.4	0
28.5	0
28.6	0
28.7	0
28.8	0
28.9	0
29	0
29.1	0
29.2	0
29.3	0
29.4	0
29.5	0
29.6	0
29.7	0
29.8	0
29.9	0
30	0
30.1	0
30.2	0
30.3	0
30.4	0
30.5	0
30.6	0
30.7	0
30.8	0
30.9	0
31	0
31.1	0
31.2	0
31.3	0
31.4	0
31.5	0
31.6	0
31.7	0
31.8	0
31.9	0
32	0
32.1	0
32.2	0
32.3	0
32.4	0
32.5	0
32.6	0
32.7	0
32.8	0
32.9	0
33	0
33.1	0
33.2	0
33.3	0
33.4	0
33.5	0
33.6	0
33.7	0
33.8	0
33.9	0
34	0
34.1	0
34.2	0
34.3	0
34.4	0
34.5	0
34.6	0
34.7	0
34.8	0
34.9	0
35	0
35.1	0
35.2	0
35.3	0
35.4	0
35.5	0
35.6	0
35.7	0
35.8	0
35.9	0
36	0
36.1	0
36.2	0
36.3	0
36.4	0
36.5	0
36.6	0
36.7	0
36.8	0
36.9	0
37	0
37.1	0
37.2	0
37.3	0
37.4	0
37.5	0
37.6	0
37.7	0
37.8	0
37.9	0
38	0
38.1	0
38.2	0
38.3	0
38.4	0
38.5	0
38.6	0
38.7	0
38.8	0
38.9	0
39	0
39.1	0
39.2	0
39.3	0
39.4	0
39.5	0
39.6	0
39.7	0
39.8	0
39.9	0
40	0
40.1	0
40.2	0
40.3	0
40.4	0
40.5	0
40.6	0
40.7	0
40.8	0
40.9	0
41	0
41.1	0
41.2	0
41.3	0
41.4	0
41.5	0
41.6	0
41.7	0
41.8	0
41.9	0
42	0
42.1	0
42.2	0
42.3	0
42.4	0
42.5	0
42.6	0
42.7	0
42.8	0
42.9	0
43	0
43.1	0
43.2	0
43.3	0
43.4	0
43.5	0
43.6	0
43.7	0
43.8	0
43.9	0
44	0
44.1	0
44.2	0
44.3	0
44.4	0
44.5	0
44.6	0
44.7	0
44.8	0
44.9	0
45	0
45.1	0
45.2	0
45.3	0
45.4	0
45.5	0
45.6	0
45.7	0
45.8	0
45.9	0
46	0
46.1	0
46.2	0
46.3	0
46.4	0
46.5	0
46.6	0
46.7	0
46.8	0
46.9	0
47	0
47.1	0
47.2	0
47.3	0
47.4	0
47.5	0
47.6	0
47.7	0
47.8	0
47.9	0
48	0
48.1	0
48.2	0
48.3	0
48.4	0
48.5	0
48.6	0
48.7	0
48.8	0
48.9	0
49	0
49.1	0
49.2	0
49.3	0
49.4	0
49.5	0
49.6	0
49.7	0
49.8	0
49.9	0
50	0
50.1	0
50.2	0
50.3	0
50.4	0
50.5	0
50.6	0
50.7	0
50.8	0
50.9	0
51	0
51.1	0
51.2	0
51.3	0
51.4	0
51.5	0
51.6	0
51.7	0
51.8	0
51.9	0
52	0
52.1	0
52.2	0
52.3	0
52.4	0
52.5	0
52.6	0
52.7	0
52.8	0
52.9	0
53	0
53.1	0
53.2	0
53.3	0
53.4	0
53.5	0
53.6	0
53.7	0
53.8	0
53.9	0
54	0
54.1	0
54.2	0
54.3	0
54.4	0
54.5	0
54.6	0
54.7	0
54.8	0
54.9	0
55	0
55.1	0
55.2	0
55.3	0
55.4	0
55.5	0
55.6	0
55.7	0
55.8	0
55.9	0
56	0
56.1	0
56.2	0
56.3	0
56.4	0
56.5	0
56.6	0
56.7	0
56.8	0
56.9	0
57	0
57.1	0
57.2	0
57.3	0
57.4	0
57.5	0
57.6	0
57.7	0
57.8	0
57.9	0
58	0
58.1	0
58.2	0
58.3	0
58.4	0
58.5	0
58.6	0
58.7	0
58.8	0
58.9	0
59	0
59.1	0
59.2	0
59.3	0
59.4	0
59.5	0
59.6	0
59.7	0
59.8	0
59.9	0
60	0
60.1	0
60.2	0
60.3	0
60.4	0
60.5	0
60.6	0
60.7	0
60.8	0
60.9	0
61	0
61.1	0
61.2	0
61.3	0
61.4	0
61.5	0
61.6	0
61.7	0
61.8	0
61.9	0
62	0
62.1	0
62.2	0
62.3	0
62.4	0
62.5	0
62.6	0
62.7	0
62.8	0
62.9	0
63	0
63.1	0
63.2	0
63.3	0
63.4	0
63.5	0
63.6	0
63.7	0
63.8	0
63.9	0
64	0
64.1	0
64.2	0
64.3	0
64.4	0
64.5	0
64.6	0
64.7	0
64.8	0
64.9	0
65	0
65.1	0
65.2	0
65.3	0
65.4	0
65.5	0
65.6	0
65.7	0
65.8	0
65.9	0
66	0
66.1	0
66.2	0
66.3	0
66.4	0
66.5	0
66.6	0
66.7	0
66.8	0
66.9	0
67	0
67.1	0
67.2	0
67.3	0
67.4	0
67.5	0
67.6	0
67.7	0
67.8	0
67.9	0
68	0
68.1	0
68.2	0
68.3	0
68.4	0
68.5	0
68.6	0
68.7	0
68.8	0
68.9	0
69	0
69.1	0
69.2	0
69.3	0
69.4	0
69.5	0
69.6	0
69.7	0
69.8	0
69.9	0
70	0
70.1	0
70.2	0
70.3	0
70.4	0
70.5	0
70.6	0
70.7	0
70.8	0
70.9	0
71	0
71.1	0
71.2	0
71.3	0
71.4	0
71.5	0
71.6	0
71.7	0
71.8	0
71.9	0
72	0
72.1	0
72.2	0
72.3	0
72.4	0
72.5	0
72.6	0
72.7	0
72.8	0
72.9	0
73	0
73.1	0
73.2	0
73.3	0
73.4	0
73.5	0
73.6	0
73.7	0
73.8	0
73.9	0
74	0
74.1	0
74.2	0
74.3	0
74.4	0
74.5	0
74.6	0
74.7	0
74.8	0
74.9	0
75	0
75.1	0
75.2	0
75.3	0
75.4	0
75.5	0
75.6	0
75.7	0
75.8	0
75.9	0
76	0
76.1	0
76.2	0
76.3	0
76.4	0
76.5	0
76.6	0
76.7	0
76.8	0
76.9	0
77	0
77.1	0
77.2	0
77.3	0
77.4	0
77.5	0
77.6	0
77.7	0
77.8	0
77.9	0
78	0
78.1	0
78.2	0
78.3	0
78.4	0
78.5	0
78.6	0
78.7	0
78.8	0
78.9	0
79	0
79.1	0
79.2	0
79.3	0
79.4	0
79.5	0
79.6	0
79.7	0
79.8	0
79.9	0
80	0
80.1	0
80.2	0
80.3	0
80.4	0
80.5	0
80.6	0
80.7	0
80.8	0
80.9	0
81	0
81.1	0
81.2	0
81.3	0
81.4	0
81.5	0
81.6	0
81.7	0
81.8	0
81.9	0
82	0
82.1	0
82.2	0
82.3	0
82.4	0
82.5	0
82.6	0
82.7	0
82.8	0
82.9	0
83	0
83.1	0
83.2	0
83.3	0
83.4	0
83.5	0
83.6	0
83.7	0
83.8	0
83.9	0
84	0
84.1	0
84.2	0
84.3	0
84.4	0
84.5	0
84.6	0
84.7	0
84.8	0
84.9	0
85	0
85.1	0
85.2	0
85.3	0
85.4	0
85.5	0
85.6	0
85.7	0
85.8	0
85.9	0
86	0
86.1	0
86.2	0
86.3	0
86.4	0
86.5	0
86.6	0
86.7	0
86.8	0
86.9	0
87	0
87.1	0
87.2	0
87.3	0
87.4	0
87.5	0
87.6	0
87.7	0
87.8	0
87.9	0
88	0
88.1	0
88.2	0
88.3	0
88.4	0
88.5	0
88.6	0
88.7	0
88.8	0
88.9	0
89	0
89.1	0
89.2	0
89.3	0
89.4	0
89.5	0
89.6	0
89.7	0
89.8	0
89.9	0
90	0
90.1	0
90.2	0
90.3	0
90.4	0
90.5	0
90.6	0
90.7	0
90.8	0
90.9	0
91	0
91.1	0
91.2	0
91.3	0
91.4	0
91.5	0
91.6	0
91.7	0
91.8	0
91.9	0
92	0
92.1	0
92.2	0
92.3	0
92.4	0
92.5	0
92.6	0
92.7	0
92.8	0
92.9	0
93	0
93.1	0
93.2	0
93.3	0
93.4	0
93.5	0
93.6	0
93.7	0
93.8	0
93.9	0
94	0
94.1	0
94.2	0
94.3	0
94.4	0
94.5	0
94.6	0
94.7	0
94.8	0
94.9	0
95	0
95.1	0
95.2	0
95.3	0
95.4	0
95.5	0
95.6	0
95.7	0
95.8	0
95.9	0
96	0
96.1	0
96.2	0
96.3	0
96.4	0
96.5	0
96.6	0
96.7	0
96.8	0
96.9	0
97	0
97.1	0
97.2	0
97.3	0
97.4	0
97.5	0
97.6	0
97.7	0
97.8	0
97.9	0
98	0
98.1	0
98.2	0
98.3	0
98.4	0
98.5	0
98.6	0
98.7	0
98.8	0
98.9	0
99	0
99.1	0
99.2	0
99.3	0
99.4	0
99.5	0
99.6	0
99.7	0
99.8	0
99.9	0
100	0
100.1	0
100.2	0
100.3	0
100.4	0.005
100.5	0.007
100.6	0.01
100.7	0.012
100.8	0.015
100.9	0.018
101	0.026
101.1	0.03
101.2	0.034
101.3	0.036
101.4	0.04
101.5	0.045
101.6	0.05
101.7	0.056
101.8	0.06
101.9	0.065
102	0.067
102.1	0.072
102.2	0.077
102.3	0.081
102.4	0.086
102.5	0.087
102.6	0.09
102.7	0.094
102.8	0.097
102.9	0.1
103	0.107
103.1	0.111
103.2	0.115
103.3	0.119
103.4	0.125
103.5	0.128
103.6	0.13
103.7	0.132
103.8	0.135
103.9	0.14
104	0.144
104.1	0.152
104.2	0.155
104.3	0.157
104.4	0.169
104.5	0.172
104.6	0.172
104.7	0.177
104.8	0.18
104.9	0.183
105	0.185
105.1	0.191
105.2	0.194
105.3	0.196
105.4	0.201
105.5	0.202
105.6	0.205
105.7	0.209
105.8	0.214
105.9	0.216
106	0.222
106.1	0.225
106.2	0.225
106.3	0.231
106.4	0.235
106.5	0.235
106.6	0.24
106.7	0.244
106.8	0.245
106.9	0.247
107	0.249
107.1	0.254
107.2	0.259
107.3	0.267
107.4	0.272
107.5	0.277
107.6	0.281
107.7	0.284
107.8	0.29
107.9	0.293
108	0.295
108.1	0.3
108.2	0.299
108.3	0.301
108.4	0.303
108.5	0.304
108.6	0.312
108.7	0.318
108.8	0.321
108.9	0.322
109	0.328
109.1	0.332
109.2	0.335
109.3	0.336
109.4	0.34
109.5	0.343
109.6	0.343
109.7	0.345
109.8	0.349
109.9	0.351
110	0.354
110.1	0.36
110.2	0.363
110.3	0.363
110.4	0.369
110.5	0.37
110.6	0.375
110.7	0.382
110.8	0.385
110.9	0.389
111	0.391
111.1	0.394
111.2	0.395
111.3	0.402
111.4	0.402
111.5	0.402
111.6	0.404
111.7	0.403
111.8	0.407
111.9	0.41
112	0.412
112.1	0.413
112.2	0.414
112.3	0.419
112.4	0.42
112.5	0.422
112.6	0.423
112.7	0.425
112.8	0.429
112.9	0.431
113	0.433
113.1	0.436
113.2	0.442
113.3	0.445
113.4	0.447
113.5	0.449
113.6	0.452
113.7	0.454
113.8	0.456
113.9	0.459
114	0.462
114.1	0.464
114.2	0.465
114.3	0.465
114.4	0.467
114.5	0.471
114.6	0.475
114.7	0.476
114.8	0.477
114.9	0.477
115	0.478
115.1	0.48
115.2	0.482
115.3	0.484
115.4	0.485
115.5	0.487
115.6	0.488
115.7	0.491
115.8	0.493
115.9	0.493
116	0.495
116.1	0.496
116.2	0.496
116.3	0.5
116.4	0.499
116.5	0.499
116.6	0.501
116.7	0.502
116.8	0.502
116.9	0.501
117	0.501
117.1	0.504
117.2	0.505
117.3	0.509
117.4	0.511
117.5	0.513
117.6	0.515
117.7	0.519
117.8	0.519
117.9	0.522
118	0.523
118.1	0.522
118.2	0.524
118.3	0.526
118.4	0.527
118.5	0.528
118.6	0.532
118.7	0.533
118.8	0.533
118.9	0.538
119	0.538
119.1	0.537
119.2	0.538
119.3	0.538
119.4	0.543
119.5	0.548
119.6	0.55
119.7	0.553
119.8	0.556
119.9	0.558
120	0.558
120.1	0.56
120.2	0.563
120.3	0.566
120.4	0.566
120.5	0.566
120.6	0.566
120.7	0.567
120.8	0.57
120.9	0.576
121	0.575
121.1	0.574
121.2	0.575
121.3	0.575
121.4	0.576
121.5	0.576
121.6	0.577
121.7	0.582
121.8	0.581
121.9	0.58
122	0.581
122.1	0.581
122.2	0.588
122.3	0.588
122.4	0.59
122.5	0.591
122.6	0.592
122.7	0.592
122.8	0.595
122.9	0.599
123	0.601
123.1	0.604
123.2	0.605
123.3	0.606
123.4	0.604
123.5	0.607
123.6	0.608
123.7	0.61
123.8	0.612
123.9	0.612
124	0.614
124.1	0.617
124.2	0.618
124.3	0.619
124.4	0.622
124.5	0.621
124.6	0.621
124.7	0.62
124.8	0.623
124.9	0.621
125	0.624
125.1	0.624
125.2	0.621
125.3	0.622
125.4	0.623
125.5	0.626
125.6	0.628
125.7	0.628
125.8	0.63
125.9	0.632
126	0.632
126.1	0.632
126.2	0.634
126.3	0.638
126.4	0.64
126.5	0.64
126.6	0.64
126.7	0.643
126.8	0.645
126.9	0.643
127	0.645
127.1	0.645
127.2	0.648
127.3	0.649
127.4	0.652
127.5	0.651
127.6	0.651
127.7	0.651
127.8	0.652
127.9	0.652
128	0.654
128.1	0.653
128.2	0.656
128.3	0.655
128.4	0.658
128.5	0.658
128.6	0.66
128.7	0.663
128.8	0.663
128.9	0.661
129	0.66
129.1	0.662
129.2	0.66
129.3	0.66
129.4	0.66
129.5	0.661
129.6	0.663
129.7	0.666
129.8	0.667
129.9	0.668
130	0.667
130.1	0.668
130.2	0.67
130.3	0.669
130.4	0.671
130.5	0.674
130.6	0.672
130.7	0.675
130.8	0.676
130.9	0.677
131	0.678
131.1	0.677
131.2	0.679
131.3	0.682
131.4	0.684
131.5	0.683
131.6	0.682
131.7	0.681
131.8	0.681
131.9	0.679
132	0.679
132.1	0.68
132.2	0.68
132.3	0.683
132.4	0.684
132.5	0.684
132.6	0.684
132.7	0.685
132.8	0.686
132.9	0.686
133	0.688
133.1	0.688
133.2	0.687
133.3	0.688
133.4	0.687
133.5	0.689
133.6	0.687
133.7	0.685
133.8	0.686
133.9	0.686
134	0.687
134.1	0.688
134.2	0.688
134.3	0.689
134.4	0.691
134.5	0.691
134.6	0.692
134.7	0.693
134.8	0.694
134.9	0.694
135	0.698
135.1	0.7
135.2	0.705
135.3	0.704
135.4	0.704
135.5	0.706
135.6	0.705
135.7	0.706
135.8	0.707
135.9	0.707
136	0.709
136.1	0.709
136.2	0.712
136.3	0.712
136.4	0.712
136.5	0.714
136.6	0.715
136.7	0.717
136.8	0.719
136.9	0.72
137	0.72
137.1	0.724
137.2	0.725
137.3	0.727
137.4	0.729
137.5	0.729
137.6	0.732
137.7	0.733
137.8	0.733
137.9	0.735
138	0.734
138.1	0.734
138.2	0.733
138.3	0.732
138.4	0.733
138.5	0.734
138.6	0.735
138.7	0.739
138.8	0.741
138.9	0.741
139	0.74
139.1	0.743
139.2	0.747
139.3	0.747
139.4	0.748
139.5	0.749
139.6	0.749
139.7	0.75
139.8	0.75
139.9	0.75
140	0.751
140.1	0.75
140.2	0.747
140.3	0.75
140.4	0.751
140.5	0.752
140.6	0.752
140.7	0.755
140.8	0.755
140.9	0.756
141	0.756
141.1	0.756
141.2	0.756
141.3	0.755
141.4	0.757
141.5	0.757
141.6	0.757
141.7	0.756
141.8	0.757
141.9	0.758
142	0.756
142.1	0.757
142.2	0.757
142.3	0.758
142.4	0.756
142.5	0.756
142.6	0.758
142.7	0.757
142.8	0.756
142.9	0.757
143	0.757
143.1	0.757
143.2	0.755
143.3	0.755
143.4	0.755
143.5	0.754
143.6	0.754
143.7	0.753
143.8	0.755
143.9	0.755
144	0.756
144.1	0.756
144.2	0.755
144.3	0.753
144.4	0.757
144.5	0.758
144.6	0.758
144.7	0.761
144.8	0.763
144.9	0.765
145	0.764
145.1	0.764
145.2	0.766
145.3	0.768
145.4	0.769
145.5	0.771
145.6	0.771
145.7	0.771
145.8	0.772
145.9	0.775
146	0.775
146.1	0.775
146.2	0.773
146.3	0.773
146.4	0.774
146.5	0.776
146.6	0.777
146.7	0.775
146.8	0.774
146.9	0.773
147	0.775
147.1	0.775
147.2	0.775
147.3	0.775
147.4	0.777
147.5	0.777
147.6	0.775
147.7	0.776
147.8	0.775
147.9	0.775
148	0.774
148.1	0.774
148.2	0.773
148.3	0.774
148.4	0.774
148.5	0.774
148.6	0.774
148.7	0.777
148.8	0.776
148.9	0.776
149	0.775
149.1	0.775
149.2	0.775
149.3	0.777
149.4	0.778
149.5	0.776
149.6	0.776
149.7	0.778
149.8	0.78
149.9	0.778
150	0.776
150.1	0.776
150.2	0.775
150.3	0.775
150.4	0.775
150.5	0.777
150.6	0.778
150.7	0.779
150.8	0.78
150.9	0.782
151	0.78
151.1	0.781
151.2	0.781
151.3	0.783
151.4	0.784
151.5	0.784
151.6	0.783
151.7	0.784
151.8	0.783
151.9	0.784
152	0.785
152.1	0.786
152.2	0.787
152.3	0.787
152.4	0.787
152.5	0.786
152.6	0.786
152.7	0.786
152.8	0.786
152.9	0.786
153	0.786
153.1	0.783
153.2	0.781
153.3	0.781
153.4	0.781
153.5	0.779
153.6	0.779
153.7	0.78
153.8	0.781
153.9	0.781
154	0.78
154.1	0.78
154.2	0.782
154.3	0.782
154.4	0.781
154.5	0.78
154.6	0.782
154.7	0.78
154.8	0.781
154.9	0.782
155	0.783
155.1	0.784
155.2	0.783
155.3	0.784
155.4	0.782
155.5	0.782
155.6	0.783
155.7	0.783
155.8	0.783
155.9	0.782
156	0.782
156.1	0.782
156.2	0.78
156.3	0.782
156.4	0.784
156.5	0.785
156.6	0.786
156.7	0.786
156.8	0.786
156.9	0.788
157	0.787
157.1	0.786
157.2	0.787
157.3	0.79
157.4	0.792
157.5	0.793
157.6	0.792
157.7	0.795
157.8	0.794
157.9	0.792
158	0.792
158.1	0.791
158.2	0.791
158.3	0.791
158.4	0.792
158.5	0.792
158.6	0.79
158.7	0.789
158.8	0.79
158.9	0.789
159	0.787
159.1	0.787
159.2	0.787
159.3	0.788
159.4	0.784
159.5	0.783
159.6	0.784
159.7	0.784
159.8	0.784
159.9	0.782
160	0.784
160.1	0.786
160.2	0.786
160.3	0.785
160.4	0.784
160.5	0.784
160.6	0.784
160.7	0.783
160.8	0.784
160.9	0.783
161	0.784
161.1	0.782
161.2	0.783
161.3	0.785
161.4	0.786
161.5	0.786
161.6	0.785
161.7	0.786
161.8	0.784
161.9	0.783
162	0.782
162.1	0.781
162.2	0.782
162.3	0.783
162.4	0.781
162.5	0.782
162.6	0.781
162.7	0.778
162.8	0.782
162.9	0.784
163	0.784
163.1	0.785
163.2	0.787
163.3	0.786
163.4	0.786
163.5	0.785
163.6	0.784
163.7	0.784
163.8	0.787
163.9	0.787
164	0.788
164.1	0.788
164.2	0.789
164.3	0.789
164.4	0.788
164.5	0.787
164.6	0.787
164.7	0.79
164.8	0.792
164.9	0.792
165	0.791
165.1	0.79
165.2	0.789
165.3	0.789
165.4	0.79
165.5	0.788
165.6	0.789
165.7	0.789
165.8	0.788
165.9	0.79
166	0.79
166.1	0.79
166.2	0.789
166.3	0.789
166.4	0.788
166.5	0.789
166.6	0.788
166.7	0.791
166.8	0.792
166.9	0.792
167	0.791
167.1	0.79
167.2	0.791
167.3	0.792
167.4	0.791
167.5	0.792
167.6	0.79
167.7	0.79
167.8	0.79
167.9	0.79
168	0.788
168.1	0.788
168.2	0.788
168.3	0.788
168.4	0.789
168.5	0.79
168.6	0.791
168.7	0.791
168.8	0.788
168.9	0.789
169	0.79
169.1	0.791
169.2	0.791
169.3	0.791
169.4	0.79
169.5	0.789
169.6	0.788
169.7	0.79
169.8	0.788
169.9	0.789
170	0.79
170.1	0.79
170.2	0.789
170.3	0.789
170.4	0.791
170.5	0.792
170.6	0.793
170.7	0.791
170.8	0.792
170.9	0.792
171	0.792
171.1	0.792
171.2	0.795
171.3	0.794
171.4	0.794
171.5	0.794
171.6	0.793
171.7	0.793
171.8	0.792
171.9	0.795
172	0.795
172.1	0.796
172.2	0.796
172.3	0.795
172.4	0.792
172.5	0.793
172.6	0.794
172.7	0.794
172.8	0.794
172.9	0.792
173	0.79
173.1	0.791
173.2	0.791
173.3	0.792
173.4	0.794
173.5	0.792
173.6	0.791
173.7	0.79
173.8	0.789
173.9	0.788
174	0.788
174.1	0.788
174.2	0.788
174.3	0.789
174.4	0.789
174.5	0.788
174.6	0.788
174.7	0.789
174.8	0.789
174.9	0.789
175	0.789
175.1	0.791
175.2	0.791
175.3	0.792
175.4	0.791
175.5	0.792
175.6	0.794
175.7	0.796
175.8	0.797
175.9	0.795
176	0.797
176.1	0.798
176.2	0.798
176.3	0.798
176.4	0.797
176.5	0.796
176.6	0.797
176.7	0.796
176.8	0.798
176.9	0.8
177	0.8
177.1	0.802
177.2	0.803
177.3	0.801
177.4	0.8
177.5	0.801
177.6	0.801
177.7	0.802
177.8	0.803
177.9	0.803
178	0.803
178.1	0.804
178.2	0.803
178.3	0.805
178.4	0.805
178.5	0.803
178.6	0.803
178.7	0.801
178.8	0.801
178.9	0.802
179	0.801
179.1	0.803
179.2	0.801
179.3	0.8
179.4	0.798
179.5	0.797
179.6	0.796
179.7	0.795
179.8	0.796
179.9	0.797
180	0.797
180.1	0.8
180.2	0.801
180.3	0.804
180.4	0.805
180.5	0.805
180.6	0.804
180.7	0.802
180.8	0.802
180.9	0.802
181	0.803
181.1	0.803
181.2	0.804
181.3	0.805
181.4	0.804
181.5	0.804
181.6	0.805
181.7	0.804
181.8	0.804
181.9	0.803
182	0.804
182.1	0.805
182.2	0.804
182.3	0.805
182.4	0.805
182.5	0.808
182.6	0.809
182.7	0.811
182.8	0.812
182.9	0.812
183	0.812
183.1	0.814
183.2	0.811
183.3	0.809
183.4	0.808
183.5	0.806
183.6	0.808
183.7	0.809
183.8	0.809
183.9	0.809
184	0.81
184.1	0.81
184.2	0.811
184.3	0.812
184.4	0.809
184.5	0.809
184.6	0.806
184.7	0.804
184.8	0.803
184.9	0.803
185	0.806
185.1	0.806
185.2	0.807
185.3	0.806
185.4	0.806
185.5	0.806
185.6	0.805
185.7	0.805
185.8	0.807
185.9	0.809
186	0.81
186.1	0.808
186.2	0.809
186.3	0.811
186.4	0.811
186.5	0.811
186.6	0.811
186.7	0.811
186.8	0.814
186.9	0.813
187	0.812
187.1	0.812
187.2	0.812
187.3	0.813
187.4	0.813
187.5	0.812
187.6	0.811
187.7	0.81
187.8	0.81
187.9	0.811
188	0.812
188.1	0.812
188.2	0.814
188.3	0.812
188.4	0.81
188.5	0.806
188.6	0.805
188.7	0.806
188.8	0.805
188.9	0.803
189	0.804
189.1	0.804
189.2	0.804
189.3	0.802
189.4	0.805
189.5	0.806
189.6	0.807
189.7	0.808
189.8	0.808
189.9	0.809
190	0.807
190.1	0.806
190.2	0.805
190.3	0.804
190.4	0.804
190.5	0.804
190.6	0.804
190.7	0.806
190.8	0.805
190.9	0.805
191	0.802
191.1	0.803
191.2	0.804
191.3	0.803
191.4	0.805
191.5	0.804
191.6	0.802
191.7	0.802
191.8	0.802
191.9	0.802
192	0.803
192.1	0.804
192.2	0.801
192.3	0.802
192.4	0.801
192.5	0.802
192.6	0.802
192.7	0.803
192.8	0.803
192.9	0.803
193	0.805
193.1	0.805
193.2	0.805
193.3	0.804
193.4	0.804
193.5	0.803
193.6	0.803
193.7	0.802
193.8	0.802
193.9	0.801
194	0.801
194.1	0.801
194.2	0.801
194.3	0.803
194.4	0.803
194.5	0.803
194.6	0.804
194.7	0.806
194.8	0.804
194.9	0.804
195	0.805
195.1	0.805
195.2	0.805
195.3	0.804
195.4	0.804
195.5	0.805
195.6	0.801
195.7	0.801
195.8	0.801
195.9	0.802
196	0.802
196.1	0.804
196.2	0.805
196.3	0.805
196.4	0.805
196.5	0.806
196.6	0.806
196.7	0.806
196.8	0.805
196.9	0.805
197	0.805
197.1	0.807
197.2	0.808
197.3	0.805
197.4	0.804
197.5	0.804
197.6	0.805
197.7	0.805
197.8	0.805
197.9	0.807
198	0.807
198.1	0.81
198.2	0.81
198.3	0.809
198.4	0.809
198.5	0.809
198.6	0.809
198.7	0.81
198.8	0.81
198.9	0.809
199	0.809
199.1	0.81
199.2	0.813
199.3	0.812
199.4	0.811
199.5	0.812
199.6	0.813
199.7	0.814
199.8	0.814
199.9	0.815
200	0.815
[truncated: 14,000 more rows]
