# Supplementary material for: Bayesian inference of kinetic schemes for ion channels by Kalman filtering
Source: eLife journal article supplement (doi:10.7554/elife.62714), 2022-05-04
Supplement: fig1-data1 [file 025_Sim_N_1000_Fluor_MW.xlsx]

## Sheet: Tabelle1
0.1	0
0.2	0
0.3	0
0.4	0
0.5	0
0.6	0
0.7	0
0.8	0
0.9	0
1	0
1.1	0
1.2	0
1.3	0
1.4	0
1.5	0
1.6	0
1.7	0
1.8	0
1.9	0
2	0
2.1	0
2.2	0
2.3	0
2.4	0
2.5	0
2.6	0
2.7	0
2.8	0
2.9	0
3	0
3.1	0
3.2	0
3.3	0
3.4	0
3.5	0
3.6	0
3.7	0
3.8	0
3.9	0
4	0
4.1	0
4.2	0
4.3	0
4.4	0
4.5	0
4.6	0
4.7	0
4.8	0
4.9	0
5	0
5.1	0
5.2	0
5.3	0
5.4	0
5.5	0
5.6	0
5.7	0
5.8	0
5.9	0
6	0
6.1	0
6.2	0
6.3	0
6.4	0
6.5	0
6.6	0
6.7	0
6.8	0
6.9	0
7	0
7.1	0
7.2	0
7.3	0
7.4	0
7.5	0
7.6	0
7.7	0
7.8	0
7.9	0
8	0
8.1	0
8.2	0
8.3	0
8.4	0
8.5	0
8.6	0
8.7	0
8.8	0
8.9	0
9	0
9.1	0
9.2	0
9.3	0
9.4	0
9.5	0
9.6	0
9.7	0
9.8	0
9.9	0
10	0
10.1	0
10.2	0
10.3	0
10.4	0
10.5	0
10.6	0
10.7	0
10.8	0
10.9	0
11	0
11.1	0
11.2	0
11.3	0
11.4	0
11.5	0
11.6	0
11.7	0
11.8	0
11.9	0
12	0
12.1	0
12.2	0
12.3	0
12.4	0
12.5	0
12.6	0
12.7	0
12.8	0
12.9	0
13	0
13.1	0
13.2	0
13.3	0
13.4	0
13.5	0
13.6	0
13.7	0
13.8	0
13.9	0
14	0
14.1	0
14.2	0
14.3	0
14.4	0
14.5	0
14.6	0
14.7	0
14.8	0
14.9	0
15	0
15.1	0
15.2	0
15.3	0
15.4	0
15.5	0
15.6	0
15.7	0
15.8	0
15.9	0
16	0
16.1	0
16.2	0
16.3	0
16.4	0
16.5	0
16.6	0
16.7	0
16.8	0
16.9	0
17	0
17.1	0
17.2	0
17.3	0
17.4	0
17.5	0
17.6	0
17.7	0
17.8	0
17.9	0
18	0
18.1	0
18.2	0
18.3	0
18.4	0
18.5	0
18.6	0
18.7	0
18.8	0
18.9	0
19	0
19.1	0
19.2	0
19.3	0
19.4	0
19.5	0
19.6	0
19.7	0
19.8	0
19.9	0
20	0
20.1	0
20.2	0
20.3	0
20.4	0
20.5	0
20.6	0
20.7	0
20.8	0
20.9	0
21	0
21.1	0
21.2	0
21.3	0
21.4	0
21.5	0
21.6	0
21.7	0
21.8	0
21.9	0
22	0
22.1	0
22.2	0
22.3	0
22.4	0
22.5	0
22.6	0
22.7	0
22.8	0
22.9	0
23	0
23.1	0
23.2	0
23.3	0
23.4	0
23.5	0
23.6	0
23.7	0
23.8	0
23.9	0
24	0
24.1	0
24.2	0
24.3	0
24.4	0
24.5	0
24.6	0
24.7	0
24.8	0
24.9	0
25	0
25.1	0
25.2	0
25.3	0
25.4	0
25.5	0
25.6	0
25.7	0
25.8	0
25.9	0
26	0
26.1	0
26.2	0
26.3	0
26.4	0
26.5	0
26.6	0
26.7	0
26.8	0
26.9	0
27	0
27.1	0
27.2	0
27.3	0
27.4	0
27.5	0
27.6	0
27.7	0
27.8	0
27.9	0
28	0
28.1	0
28.2	0
28.3	0
28.4	0
28.5	0
28.6	0
28.7	0
28.8	0
28.9	0
29	0
29.1	0
29.2	0
29.3	0
29.4	0
29.5	0
29.6	0
29.7	0
29.8	0
29.9	0
30	0
30.1	0
30.2	0
30.3	0
30.4	0
30.5	0
30.6	0
30.7	0
30.8	0
30.9	0
31	0
31.1	0
31.2	0
31.3	0
31.4	0
31.5	0
31.6	0
31.7	0
31.8	0
31.9	0
32	0
32.1	0
32.2	0
32.3	0
32.4	0
32.5	0
32.6	0
32.7	0
32.8	0
32.9	0
33	0
33.1	0
33.2	0
33.3	0
33.4	0
33.5	0
33.6	0
33.7	0
33.8	0
33.9	0
34	0
34.1	0
34.2	0
34.3	0
34.4	0
34.5	0
34.6	0
34.7	0
34.8	0
34.9	0
35	0
35.1	0
35.2	0
35.3	0
35.4	0
35.5	0
35.6	0
35.7	0
35.8	0
35.9	0
36	0
36.1	0
36.2	0
36.3	0
36.4	0
36.5	0
36.6	0
36.7	0
36.8	0
36.9	0
37	0
37.1	0
37.2	0
37.3	0
37.4	0
37.5	0
37.6	0
37.7	0
37.8	0
37.9	0
38	0
38.1	0
38.2	0
38.3	0
38.4	0
38.5	0
38.6	0
38.7	0
38.8	0
38.9	0
39	0
39.1	0
39.2	0
39.3	0
39.4	0
39.5	0
39.6	0
39.7	0
39.8	0
39.9	0
40	0
40.1	0
40.2	0
40.3	0
40.4	0
40.5	0
40.6	0
40.7	0
40.8	0
40.9	0
41	0
41.1	0
41.2	0
41.3	0
41.4	0
41.5	0
41.6	0
41.7	0
41.8	0
41.9	0
42	0
42.1	0
42.2	0
42.3	0
42.4	0
42.5	0
42.6	0
42.7	0
42.8	0
42.9	0
43	0
43.1	0
43.2	0
43.3	0
43.4	0
43.5	0
43.6	0
43.7	0
43.8	0
43.9	0
44	0
44.1	0
44.2	0
44.3	0
44.4	0
44.5	0
44.6	0
44.7	0
44.8	0
44.9	0
45	0
45.1	0
45.2	0
45.3	0
45.4	0
45.5	0
45.6	0
45.7	0
45.8	0
45.9	0
46	0
46.1	0
46.2	0
46.3	0
46.4	0
46.5	0
46.6	0
46.7	0
46.8	0
46.9	0
47	0
47.1	0
47.2	0
47.3	0
47.4	0
47.5	0
47.6	0
47.7	0
47.8	0
47.9	0
48	0
48.1	0
48.2	0
48.3	0
48.4	0
48.5	0
48.6	0
48.7	0
48.8	0
48.9	0
49	0
49.1	0
49.2	0
49.3	0
49.4	0
49.5	0
49.6	0
49.7	0
49.8	0
49.9	0
50	0
50.1	0
50.2	0
50.3	0
50.4	0
50.5	0
50.6	0
50.7	0
50.8	0
50.9	0
51	0
51.1	0
51.2	0
51.3	0
51.4	0
51.5	0
51.6	0
51.7	0
51.8	0
51.9	0
52	0
52.1	0
52.2	0
52.3	0
52.4	0
52.5	0
52.6	0
52.7	0
52.8	0
52.9	0
53	0
53.1	0
53.2	0
53.3	0
53.4	0
53.5	0
53.6	0
53.7	0
53.8	0
53.9	0
54	0
54.1	0
54.2	0
54.3	0
54.4	0
54.5	0
54.6	0
54.7	0
54.8	0
54.9	0
55	0
55.1	0
55.2	0
55.3	0
55.4	0
55.5	0
55.6	0
55.7	0
55.8	0
55.9	0
56	0
56.1	0
56.2	0
56.3	0
56.4	0
56.5	0
56.6	0
56.7	0
56.8	0
56.9	0
57	0
57.1	0
57.2	0
57.3	0
57.4	0
57.5	0
57.6	0
57.7	0
57.8	0
57.9	0
58	0
58.1	0
58.2	0
58.3	0
58.4	0
58.5	0
58.6	0
58.7	0
58.8	0
58.9	0
59	0
59.1	0
59.2	0
59.3	0
59.4	0
59.5	0
59.6	0
59.7	0
59.8	0
59.9	0
60	0
60.1	0
60.2	0
60.3	0
60.4	0
60.5	0
60.6	0
60.7	0
60.8	0
60.9	0
61	0
61.1	0
61.2	0
61.3	0
61.4	0
61.5	0
61.6	0
61.7	0
61.8	0
61.9	0
62	0
62.1	0
62.2	0
62.3	0
62.4	0
62.5	0
62.6	0
62.7	0
62.8	0
62.9	0
63	0
63.1	0
63.2	0
63.3	0
63.4	0
63.5	0
63.6	0
63.7	0
63.8	0
63.9	0
64	0
64.1	0
64.2	0
64.3	0
64.4	0
64.5	0
64.6	0
64.7	0
64.8	0
64.9	0
65	0
65.1	0
65.2	0
65.3	0
65.4	0
65.5	0
65.6	0
65.7	0
65.8	0
65.9	0
66	0
66.1	0
66.2	0
66.3	0
66.4	0
66.5	0
66.6	0
66.7	0
66.8	0
66.9	0
67	0
67.1	0
67.2	0
67.3	0
67.4	0
67.5	0
67.6	0
67.7	0
67.8	0
67.9	0
68	0
68.1	0
68.2	0
68.3	0
68.4	0
68.5	0
68.6	0
68.7	0
68.8	0
68.9	0
69	0
69.1	0
69.2	0
69.3	0
69.4	0
69.5	0
69.6	0
69.7	0
69.8	0
69.9	0
70	0
70.1	0
70.2	0
70.3	0
70.4	0
70.5	0
70.6	0
70.7	0
70.8	0
70.9	0
71	0
71.1	0
71.2	0
71.3	0
71.4	0
71.5	0
71.6	0
71.7	0
71.8	0
71.9	0
72	0
72.1	0
72.2	0
72.3	0
72.4	0
72.5	0
72.6	0
72.7	0
72.8	0
72.9	0
73	0
73.1	0
73.2	0
73.3	0
73.4	0
73.5	0
73.6	0
73.7	0
73.8	0
73.9	0
74	0
74.1	0
74.2	0
74.3	0
74.4	0
74.5	0
74.6	0
74.7	0
74.8	0
74.9	0
75	0
75.1	0
75.2	0
75.3	0
75.4	0
75.5	0
75.6	0
75.7	0
75.8	0
75.9	0
76	0
76.1	0
76.2	0
76.3	0
76.4	0
76.5	0
76.6	0
76.7	0
76.8	0
76.9	0
77	0
77.1	0
77.2	0
77.3	0
77.4	0
77.5	0
77.6	0
77.7	0
77.8	0
77.9	0
78	0
78.1	0
78.2	0
78.3	0
78.4	0
78.5	0
78.6	0
78.7	0
78.8	0
78.9	0
79	0
79.1	0
79.2	0
79.3	0
79.4	0
79.5	0
79.6	0
79.7	0
79.8	0
79.9	0
80	0
80.1	0
80.2	0
80.3	0
80.4	0
80.5	0
80.6	0
80.7	0
80.8	0
80.9	0
81	0
81.1	0
81.2	0
81.3	0
81.4	0
81.5	0
81.6	0
81.7	0
81.8	0
81.9	0
82	0
82.1	0
82.2	0
82.3	0
82.4	0
82.5	0
82.6	0
82.7	0
82.8	0
82.9	0
83	0
83.1	0
83.2	0
83.3	0
83.4	0
83.5	0
83.6	0
83.7	0
83.8	0
83.9	0
84	0
84.1	0
84.2	0
84.3	0
84.4	0
84.5	0
84.6	0
84.7	0
84.8	0
84.9	0
85	0
85.1	0
85.2	0
85.3	0
85.4	0
85.5	0
85.6	0
85.7	0
85.8	0
85.9	0
86	0
86.1	0
86.2	0
86.3	0
86.4	0
86.5	0
86.6	0
86.7	0
86.8	0
86.9	0
87	0
87.1	0
87.2	0
87.3	0
87.4	0
87.5	0
87.6	0
87.7	0
87.8	0
87.9	0
88	0
88.1	0
88.2	0
88.3	0
88.4	0
88.5	0
88.6	0
88.7	0
88.8	0
88.9	0
89	0
89.1	0
89.2	0
89.3	0
89.4	0
89.5	0
89.6	0
89.7	0
89.8	0
89.9	0
90	0
90.1	0
90.2	0
90.3	0
90.4	0
90.5	0
90.6	0
90.7	0
90.8	0
90.9	0
91	0
91.1	0
91.2	0
91.3	0
91.4	0
91.5	0
91.6	0
91.7	0
91.8	0
91.9	0
92	0
92.1	0
92.2	0
92.3	0
92.4	0
92.5	0
92.6	0
92.7	0
92.8	0
92.9	0
93	0
93.1	0
93.2	0
93.3	0
93.4	0
93.5	0
93.6	0
93.7	0
93.8	0
93.9	0
94	0
94.1	0
94.2	0
94.3	0
94.4	0
94.5	0
94.6	0
94.7	0
94.8	0
94.9	0
95	0
95.1	0
95.2	0
95.3	0
95.4	0
95.5	0
95.6	0
95.7	0
95.8	0
95.9	0
96	0
96.1	0
96.2	0
96.3	0
96.4	0
96.5	0
96.6	0
96.7	0
96.8	0
96.9	0
97	0
97.1	0
97.2	0
97.3	0
97.4	0
97.5	0
97.6	0
97.7	0
97.8	0
97.9	0
98	0
98.1	0
98.2	0
98.3	0
98.4	0
98.5	0
98.6	0
98.7	0
98.8	0
98.9	0
99	0
99.1	0
99.2	0
99.3	0
99.4	0
99.5	0
99.6	0
99.7	0
99.8	0
99.9	0
100	0
100.1	0.013
100.2	0.0305
100.3	0.036
100.4	0.0475
100.5	0.063
100.6	0.0725
100.7	0.088
100.8	0.1005
100.9	0.113
101	0.128
101.1	0.1355
101.2	0.148
101.3	0.1545
101.4	0.167
101.5	0.175
101.6	0.186
101.7	0.192
101.8	0.1965
101.9	0.203
102	0.2105
102.1	0.2145
102.2	0.2215
102.3	0.23
102.4	0.2345
102.5	0.24
102.6	0.2485
102.7	0.261
102.8	0.267
102.9	0.277
103	0.2835
103.1	0.29
103.2	0.293
103.3	0.298
103.4	0.304
103.5	0.303
103.6	0.3095
103.7	0.314
103.8	0.318
103.9	0.324
104	0.3255
104.1	0.328
104.2	0.332
104.3	0.3355
104.4	0.3405
104.5	0.3455
104.6	0.3465
104.7	0.3505
104.8	0.3525
104.9	0.3565
105	0.359
105.1	0.3625
105.2	0.364
105.3	0.366
105.4	0.3695
105.5	0.372
105.6	0.376
105.7	0.3815
105.8	0.3845
105.9	0.3855
106	0.3865
106.1	0.3885
106.2	0.3905
106.3	0.3915
106.4	0.392
106.5	0.396
106.6	0.401
106.7	0.402
106.8	0.405
106.9	0.407
107	0.409
107.1	0.4075
107.2	0.406
107.3	0.4065
107.4	0.411
107.5	0.4155
107.6	0.42
107.7	0.422
107.8	0.429
107.9	0.431
108	0.4305
108.1	0.4305
108.2	0.4285
108.3	0.432
108.4	0.43
108.5	0.4295
108.6	0.428
108.7	0.43
108.8	0.4315
108.9	0.435
109	0.435
109.1	0.4325
109.2	0.4315
109.3	0.4335
109.4	0.4325
109.5	0.4335
109.6	0.435
109.7	0.4335
109.8	0.438
109.9	0.4385
110	0.436
110.1	0.439
110.2	0.441
110.3	0.442
110.4	0.4435
110.5	0.44
110.6	0.443
110.7	0.443
110.8	0.4425
110.9	0.444
111	0.441
111.1	0.4435
111.2	0.4485
111.3	0.447
111.4	0.447
111.5	0.4455
111.6	0.446
111.7	0.443
111.8	0.4455
111.9	0.448
112	0.448
112.1	0.4485
112.2	0.448
112.3	0.4485
112.4	0.447
112.5	0.4425
112.6	0.4445
112.7	0.447
112.8	0.4455
112.9	0.445
113	0.444
113.1	0.444
113.2	0.444
113.3	0.4435
113.4	0.4425
113.5	0.4425
113.6	0.4415
113.7	0.444
113.8	0.443
113.9	0.44
114	0.442
114.1	0.443
114.2	0.442
114.3	0.4405
114.4	0.4395
114.5	0.439
114.6	0.439
114.7	0.4435
114.8	0.4395
114.9	0.442
115	0.444
115.1	0.443
115.2	0.444
115.3	0.446
115.4	0.4425
115.5	0.4495
115.6	0.453
115.7	0.4555
115.8	0.458
115.9	0.459
116	0.459
116.1	0.461
116.2	0.457
116.3	0.4545
116.4	0.4525
116.5	0.4555
116.6	0.4545
116.7	0.4535
116.8	0.453
116.9	0.4555
117	0.454
117.1	0.4505
117.2	0.449
117.3	0.45
117.4	0.4495
117.5	0.4515
117.6	0.4485
117.7	0.4495
117.8	0.4515
117.9	0.4565
118	0.458
118.1	0.462
118.2	0.4595
118.3	0.4605
118.4	0.462
118.5	0.465
118.6	0.4645
118.7	0.4675
118.8	0.468
118.9	0.4705
119	0.472
119.1	0.4725
119.2	0.4725
119.3	0.4735
119.4	0.4745
119.5	0.478
119.6	0.4785
119.7	0.4815
119.8	0.4795
119.9	0.4785
120	0.4775
120.1	0.4755
120.2	0.48
120.3	0.478
120.4	0.4785
120.5	0.472
120.6	0.4715
120.7	0.477
120.8	0.477
120.9	0.479
121	0.481
121.1	0.4805
121.2	0.481
121.3	0.48
121.4	0.472
121.5	0.4725
121.6	0.4745
121.7	0.474
121.8	0.475
121.9	0.474
122	0.4775
122.1	0.478
122.2	0.4805
122.3	0.48
122.4	0.4825
122.5	0.4835
122.6	0.483
122.7	0.4835
122.8	0.4815
122.9	0.4795
123	0.4785
123.1	0.479
123.2	0.479
123.3	0.4785
123.4	0.48
123.5	0.4775
123.6	0.4795
123.7	0.482
123.8	0.4845
123.9	0.4825
124	0.4845
124.1	0.4815
124.2	0.479
124.3	0.4755
124.4	0.473
124.5	0.474
124.6	0.4795
124.7	0.4795
124.8	0.4775
124.9	0.478
125	0.481
125.1	0.484
125.2	0.483
125.3	0.4885
125.4	0.486
125.5	0.4855
125.6	0.486
125.7	0.4875
125.8	0.485
125.9	0.4875
126	0.485
126.1	0.4855
126.2	0.487
126.3	0.4855
126.4	0.487
126.5	0.489
126.6	0.4915
126.7	0.495
126.8	0.494
126.9	0.491
127	0.4925
127.1	0.4915
127.2	0.4915
127.3	0.4895
127.4	0.489
127.5	0.4865
127.6	0.4895
127.7	0.49
127.8	0.4885
127.9	0.491
128	0.492
128.1	0.493
128.2	0.492
128.3	0.491
128.4	0.492
128.5	0.489
128.6	0.4905
128.7	0.4895
128.8	0.492
128.9	0.4895
129	0.488
129.1	0.4885
129.2	0.4885
129.3	0.4895
129.4	0.4865
129.5	0.4885
129.6	0.491
129.7	0.493
129.8	0.4885
129.9	0.4875
130	0.4895
130.1	0.4895
130.2	0.4895
130.3	0.491
130.4	0.4895
130.5	0.492
130.6	0.4895
130.7	0.4925
130.8	0.4895
130.9	0.488
131	0.4885
131.1	0.4915
131.2	0.492
131.3	0.4915
131.4	0.494
131.5	0.4925
131.6	0.496
131.7	0.497
131.8	0.4975
131.9	0.4945
132	0.496
132.1	0.494
132.2	0.494
132.3	0.495
132.4	0.495
132.5	0.4985
132.6	0.5
132.7	0.4995
132.8	0.5025
132.9	0.5035
133	0.5085
133.1	0.5105
133.2	0.509
133.3	0.507
133.4	0.509
133.5	0.512
133.6	0.5065
133.7	0.509
133.8	0.51
133.9	0.511
134	0.513
134.1	0.513
134.2	0.5135
134.3	0.5125
134.4	0.511
134.5	0.5145
134.6	0.5185
134.7	0.5145
134.8	0.5155
134.9	0.5155
135	0.5185
135.1	0.519
135.2	0.5155
135.3	0.51
135.4	0.511
135.5	0.514
135.6	0.509
135.7	0.508
135.8	0.51
135.9	0.5045
136	0.5035
136.1	0.503
136.2	0.5025
136.3	0.5045
136.4	0.504
136.5	0.504
136.6	0.5055
136.7	0.5025
136.8	0.5015
136.9	0.5
137	0.5025
137.1	0.5025
137.2	0.5025
137.3	0.504
137.4	0.504
137.5	0.503
137.6	0.504
137.7	0.5065
137.8	0.506
137.9	0.506
138	0.506
138.1	0.504
138.2	0.504
138.3	0.503
138.4	0.5035
138.5	0.5035
138.6	0.5015
138.7	0.5035
138.8	0.5015
138.9	0.5045
139	0.504
139.1	0.5035
139.2	0.5015
139.3	0.502
139.4	0.5045
139.5	0.507
139.6	0.503
139.7	0.502
139.8	0.5
139.9	0.5
140	0.5
140.1	0.5025
140.2	0.5015
140.3	0.502
140.4	0.5065
140.5	0.5105
140.6	0.5075
140.7	0.51
140.8	0.5115
140.9	0.5125
141	0.514
141.1	0.516
141.2	0.5185
141.3	0.515
141.4	0.516
141.5	0.516
141.6	0.516
141.7	0.519
141.8	0.5215
141.9	0.5215
142	0.5215
142.1	0.5185
142.2	0.518
142.3	0.52
142.4	0.5185
142.5	0.5225
142.6	0.5225
142.7	0.5235
142.8	0.52
142.9	0.5245
143	0.5295
143.1	0.531
143.2	0.526
143.3	0.5255
143.4	0.528
143.5	0.528
143.6	0.528
143.7	0.528
143.8	0.528
143.9	0.5265
144	0.529
144.1	0.531
144.2	0.533
144.3	0.5305
144.4	0.5315
144.5	0.53
144.6	0.531
144.7	0.5285
144.8	0.528
144.9	0.5285
145	0.526
145.1	0.5245
145.2	0.525
145.3	0.524
145.4	0.524
145.5	0.5225
145.6	0.522
145.7	0.5215
145.8	0.526
145.9	0.523
146	0.526
146.1	0.524
146.2	0.521
146.3	0.52
146.4	0.5175
146.5	0.519
146.6	0.522
146.7	0.519
146.8	0.5215
146.9	0.5205
147	0.522
147.1	0.523
147.2	0.5245
147.3	0.5225
147.4	0.522
147.5	0.5205
147.6	0.5235
147.7	0.5255
147.8	0.5225
147.9	0.5215
148	0.5205
148.1	0.5185
148.2	0.5205
148.3	0.519
148.4	0.5205
148.5	0.5195
148.6	0.5205
148.7	0.5215
148.8	0.518
148.9	0.5175
149	0.5215
149.1	0.524
149.2	0.5185
149.3	0.5195
149.4	0.5165
149.5	0.517
149.6	0.5195
149.7	0.523
149.8	0.5255
149.9	0.527
150	0.531
150.1	0.528
150.2	0.5275
150.3	0.5295
150.4	0.531
150.5	0.528
150.6	0.527
150.7	0.526
150.8	0.5255
150.9	0.5265
151	0.5255
151.1	0.5285
151.2	0.529
151.3	0.5305
151.4	0.532
151.5	0.5305
151.6	0.5295
151.7	0.5295
151.8	0.5295
151.9	0.5295
152	0.5325
152.1	0.534
152.2	0.5335
152.3	0.536
152.4	0.5345
152.5	0.535
152.6	0.5345
152.7	0.533
152.8	0.532
152.9	0.531
153	0.5285
153.1	0.5325
153.2	0.529
153.3	0.522
153.4	0.526
153.5	0.531
153.6	0.531
153.7	0.5315
153.8	0.5325
153.9	0.534
154	0.533
154.1	0.5345
154.2	0.5345
154.3	0.536
154.4	0.538
154.5	0.5315
154.6	0.531
154.7	0.528
154.8	0.5305
154.9	0.533
155	0.536
155.1	0.5355
155.2	0.534
155.3	0.5305
155.4	0.5335
155.5	0.533
155.6	0.534
155.7	0.5345
155.8	0.5355
155.9	0.538
156	0.5385
156.1	0.5385
156.2	0.5415
156.3	0.542
156.4	0.543
156.5	0.54
156.6	0.537
156.7	0.5365
156.8	0.538
156.9	0.539
157	0.5425
157.1	0.5435
157.2	0.54
157.3	0.543
157.4	0.5415
157.5	0.5445
157.6	0.543
157.7	0.5415
157.8	0.54
157.9	0.5415
158	0.5415
158.1	0.5415
158.2	0.5415
158.3	0.5425
158.4	0.54
158.5	0.543
158.6	0.5425
158.7	0.5385
158.8	0.535
158.9	0.5305
159	0.5295
159.1	0.527
159.2	0.527
159.3	0.529
159.4	0.5305
159.5	0.5345
159.6	0.5325
159.7	0.534
159.8	0.5335
159.9	0.5305
160	0.5295
160.1	0.5325
160.2	0.536
160.3	0.536
160.4	0.535
160.5	0.5345
160.6	0.5335
160.7	0.5345
160.8	0.5355
160.9	0.538
161	0.537
161.1	0.5355
161.2	0.5355
161.3	0.5355
161.4	0.537
161.5	0.5365
161.6	0.5405
161.7	0.546
161.8	0.548
161.9	0.546
162	0.5455
162.1	0.55
162.2	0.5485
162.3	0.5485
162.4	0.5475
162.5	0.5485
162.6	0.549
162.7	0.553
162.8	0.553
162.9	0.5505
163	0.55
163.1	0.5495
163.2	0.549
163.3	0.548
163.4	0.5475
163.5	0.546
163.6	0.5455
163.7	0.545
163.8	0.5445
163.9	0.5465
164	0.5445
164.1	0.544
164.2	0.546
164.3	0.547
164.4	0.5505
164.5	0.552
164.6	0.551
164.7	0.5485
164.8	0.5465
164.9	0.545
165	0.5405
165.1	0.5415
165.2	0.5425
165.3	0.5455
165.4	0.544
165.5	0.546
165.6	0.5455
165.7	0.5475
165.8	0.547
165.9	0.547
166	0.5465
166.1	0.547
166.2	0.5475
166.3	0.5465
166.4	0.551
166.5	0.552
166.6	0.5495
166.7	0.552
166.8	0.5505
166.9	0.551
167	0.549
167.1	0.55
167.2	0.5525
167.3	0.551
167.4	0.5485
167.5	0.548
167.6	0.5485
167.7	0.5485
167.8	0.5475
167.9	0.5465
168	0.5485
168.1	0.548
168.2	0.5475
168.3	0.548
168.4	0.5455
168.5	0.5475
168.6	0.5445
168.7	0.5485
168.8	0.546
168.9	0.546
169	0.549
169.1	0.552
169.2	0.5535
169.3	0.555
169.4	0.5535
169.5	0.5565
169.6	0.558
169.7	0.561
169.8	0.5625
169.9	0.5605
170	0.561
170.1	0.564
170.2	0.5645
170.3	0.5645
170.4	0.566
170.5	0.5665
170.6	0.564
170.7	0.5615
170.8	0.5595
170.9	0.558
171	0.5585
171.1	0.562
171.2	0.561
171.3	0.561
171.4	0.56
171.5	0.558
171.6	0.5555
171.7	0.557
171.8	0.5545
171.9	0.555
172	0.555
172.1	0.5575
172.2	0.555
172.3	0.555
172.4	0.5525
172.5	0.5545
172.6	0.5565
172.7	0.556
172.8	0.5555
172.9	0.558
173	0.558
173.1	0.5595
173.2	0.561
173.3	0.5635
173.4	0.561
173.5	0.563
173.6	0.564
173.7	0.5645
173.8	0.5635
173.9	0.562
174	0.567
174.1	0.566
174.2	0.564
174.3	0.5645
174.4	0.5635
174.5	0.5675
174.6	0.5705
174.7	0.571
174.8	0.572
174.9	0.5755
175	0.575
175.1	0.5715
175.2	0.568
175.3	0.5665
175.4	0.567
175.5	0.567
175.6	0.5675
175.7	0.566
175.8	0.565
175.9	0.561
176	0.5615
176.1	0.563
176.2	0.5655
176.3	0.5625
176.4	0.561
176.5	0.563
176.6	0.564
176.7	0.563
176.8	0.5645
176.9	0.5695
177	0.5675
177.1	0.5645
177.2	0.5665
177.3	0.5655
177.4	0.5655
177.5	0.567
177.6	0.567
177.7	0.572
177.8	0.5735
177.9	0.573
178	0.5685
178.1	0.5665
178.2	0.5635
178.3	0.562
178.4	0.5635
178.5	0.5655
178.6	0.5655
178.7	0.5655
178.8	0.564
178.9	0.5645
179	0.563
179.1	0.563
179.2	0.559
179.3	0.5575
179.4	0.56
179.5	0.561
179.6	0.5615
179.7	0.564
179.8	0.563
179.9	0.5625
180	0.5625
180.1	0.565
180.2	0.566
180.3	0.567
180.4	0.5695
180.5	0.568
180.6	0.5655
180.7	0.562
180.8	0.5595
180.9	0.5605
181	0.559
181.1	0.562
181.2	0.566
181.3	0.568
181.4	0.5715
181.5	0.5745
181.6	0.574
181.7	0.576
181.8	0.5735
181.9	0.5745
182	0.5755
182.1	0.5725
182.2	0.5735
182.3	0.5735
182.4	0.572
182.5	0.5735
182.6	0.5735
182.7	0.579
182.8	0.579
182.9	0.577
183	0.5755
183.1	0.574
183.2	0.572
183.3	0.572
183.4	0.57
183.5	0.573
183.6	0.5745
183.7	0.573
183.8	0.5745
183.9	0.578
184	0.5755
184.1	0.573
184.2	0.5725
184.3	0.5745
184.4	0.574
184.5	0.574
184.6	0.57
184.7	0.574
184.8	0.573
184.9	0.5715
185	0.5715
185.1	0.573
185.2	0.57
185.3	0.573
185.4	0.5715
185.5	0.57
185.6	0.568
185.7	0.5705
185.8	0.5685
185.9	0.567
186	0.567
186.1	0.567
186.2	0.567
186.3	0.569
186.4	0.568
186.5	0.569
186.6	0.5715
186.7	0.5675
186.8	0.5695
186.9	0.5685
187	0.5695
187.1	0.5725
187.2	0.5755
187.3	0.577
187.4	0.578
187.5	0.58
187.6	0.5825
187.7	0.579
187.8	0.582
187.9	0.5835
188	0.5845
188.1	0.5855
188.2	0.5835
188.3	0.588
188.4	0.588
188.5	0.588
188.6	0.589
188.7	0.589
188.8	0.5875
188.9	0.5895
189	0.59
189.1	0.588
189.2	0.586
189.3	0.5855
189.4	0.588
189.5	0.588
189.6	0.584
189.7	0.582
189.8	0.58
189.9	0.5805
190	0.5785
190.1	0.5785
190.2	0.576
190.3	0.579
190.4	0.5765
190.5	0.5775
190.6	0.5795
190.7	0.579
190.8	0.579
190.9	0.5795
191	0.5775
191.1	0.574
191.2	0.575
191.3	0.575
191.4	0.578
191.5	0.58
191.6	0.5825
191.7	0.584
191.8	0.581
191.9	0.5805
192	0.584
192.1	0.5865
192.2	0.586
192.3	0.586
192.4	0.5845
192.5	0.5835
192.6	0.5835
192.7	0.579
192.8	0.5785
192.9	0.575
193	0.5775
193.1	0.5755
193.2	0.574
193.3	0.576
193.4	0.578
193.5	0.576
193.6	0.573
193.7	0.574
193.8	0.5725
193.9	0.5745
194	0.575
194.1	0.5775
194.2	0.577
194.3	0.5765
194.4	0.5785
194.5	0.5745
194.6	0.578
194.7	0.577
194.8	0.579
194.9	0.581
195	0.5805
195.1	0.5845
195.2	0.5865
195.3	0.5855
195.4	0.5865
195.5	0.5905
195.6	0.5865
195.7	0.586
195.8	0.59
195.9	0.589
196	0.586
196.1	0.5925
196.2	0.5915
196.3	0.5915
196.4	0.592
196.5	0.593
196.6	0.5905
196.7	0.5915
196.8	0.5845
196.9	0.584
197	0.584
197.1	0.5825
197.2	0.5825
197.3	0.582
197.4	0.578
197.5	0.58
197.6	0.576
197.7	0.5755
197.8	0.5755
197.9	0.575
198	0.573
198.1	0.574
198.2	0.5745
198.3	0.576
198.4	0.5815
198.5	0.5825
198.6	0.584
198.7	0.5815
198.8	0.583
198.9	0.5815
199	0.582
199.1	0.577
199.2	0.575
199.3	0.5725
199.4	0.5755
199.5	0.5745
199.6	0.573
199.7	0.572
199.8	0.574
199.9	0.5745
200	0.5755
[truncated: 14,000 more rows]
