# Supplementary material for: Bayesian inference of kinetic schemes for ion channels by Kalman filtering
Source: eLife journal article supplement (doi:10.7554/elife.62714), 2022-05-04
Supplement: fig1-data1 [file 025_Sim_N_1000_Strom_MW.xlsx]

## Sheet: Tabelle1
0.1	0
0.2	0
0.3	0
0.4	0
0.5	0
0.6	0
0.7	0
0.8	0
0.9	0
1	0
1.1	0
1.2	0
1.3	0
1.4	0
1.5	0
1.6	0
1.7	0
1.8	0
1.9	0
2	0
2.1	0
2.2	0
2.3	0
2.4	0
2.5	0
2.6	0
2.7	0
2.8	0
2.9	0
3	0
3.1	0
3.2	0
3.3	0
3.4	0
3.5	0
3.6	0
3.7	0
3.8	0
3.9	0
4	0
4.1	0
4.2	0
4.3	0
4.4	0
4.5	0
4.6	0
4.7	0
4.8	0
4.9	0
5	0
5.1	0
5.2	0
5.3	0
5.4	0
5.5	0
5.6	0
5.7	0
5.8	0
5.9	0
6	0
6.1	0
6.2	0
6.3	0
6.4	0
6.5	0
6.6	0
6.7	0
6.8	0
6.9	0
7	0
7.1	0
7.2	0
7.3	0
7.4	0
7.5	0
7.6	0
7.7	0
7.8	0
7.9	0
8	0
8.1	0
8.2	0
8.3	0
8.4	0
8.5	0
8.6	0
8.7	0
8.8	0
8.9	0
9	0
9.1	0
9.2	0
9.3	0
9.4	0
9.5	0
9.6	0
9.7	0
9.8	0
9.9	0
10	0
10.1	0
10.2	0
10.3	0
10.4	0
10.5	0
10.6	0
10.7	0
10.8	0
10.9	0
11	0
11.1	0
11.2	0
11.3	0
11.4	0
11.5	0
11.6	0
11.7	0
11.8	0
11.9	0
12	0
12.1	0
12.2	0
12.3	0
12.4	0
12.5	0
12.6	0
12.7	0
12.8	0
12.9	0
13	0
13.1	0
13.2	0
13.3	0
13.4	0
13.5	0
13.6	0
13.7	0
13.8	0
13.9	0
14	0
14.1	0
14.2	0
14.3	0
14.4	0
14.5	0
14.6	0
14.7	0
14.8	0
14.9	0
15	0
15.1	0
15.2	0
15.3	0
15.4	0
15.5	0
15.6	0
15.7	0
15.8	0
15.9	0
16	0
16.1	0
16.2	0
16.3	0
16.4	0
16.5	0
16.6	0
16.7	0
16.8	0
16.9	0
17	0
17.1	0
17.2	0
17.3	0
17.4	0
17.5	0
17.6	0
17.7	0
17.8	0
17.9	0
18	0
18.1	0
18.2	0
18.3	0
18.4	0
18.5	0
18.6	0
18.7	0
18.8	0
18.9	0
19	0
19.1	0
19.2	0
19.3	0
19.4	0
19.5	0
19.6	0
19.7	0
19.8	0
19.9	0
20	0
20.1	0
20.2	0
20.3	0
20.4	0
20.5	0
20.6	0
20.7	0
20.8	0
20.9	0
21	0
21.1	0
21.2	0
21.3	0
21.4	0
21.5	0
21.6	0
21.7	0
21.8	0
21.9	0
22	0
22.1	0
22.2	0
22.3	0
22.4	0
22.5	0
22.6	0
22.7	0
22.8	0
22.9	0
23	0
23.1	0
23.2	0
23.3	0
23.4	0
23.5	0
23.6	0
23.7	0
23.8	0
23.9	0
24	0
24.1	0
24.2	0
24.3	0
24.4	0
24.5	0
24.6	0
24.7	0
24.8	0
24.9	0
25	0
25.1	0
25.2	0
25.3	0
25.4	0
25.5	0
25.6	0
25.7	0
25.8	0
25.9	0
26	0
26.1	0
26.2	0
26.3	0
26.4	0
26.5	0
26.6	0
26.7	0
26.8	0
26.9	0
27	0
27.1	0
27.2	0
27.3	0
27.4	0
27.5	0
27.6	0
27.7	0
27.8	0
27.9	0
28	0
28.1	0
28.2	0
28.3	0
28.4	0
28.5	0
28.6	0
28.7	0
28.8	0
28.9	0
29	0
29.1	0
29.2	0
29.3	0
29.4	0
29.5	0
29.6	0
29.7	0
29.8	0
29.9	0
30	0
30.1	0
30.2	0
30.3	0
30.4	0
30.5	0
30.6	0
30.7	0
30.8	0
30.9	0
31	0
31.1	0
31.2	0
31.3	0
31.4	0
31.5	0
31.6	0
31.7	0
31.8	0
31.9	0
32	0
32.1	0
32.2	0
32.3	0
32.4	0
32.5	0
32.6	0
32.7	0
32.8	0
32.9	0
33	0
33.1	0
33.2	0
33.3	0
33.4	0
33.5	0
33.6	0
33.7	0
33.8	0
33.9	0
34	0
34.1	0
34.2	0
34.3	0
34.4	0
34.5	0
34.6	0
34.7	0
34.8	0
34.9	0
35	0
35.1	0
35.2	0
35.3	0
35.4	0
35.5	0
35.6	0
35.7	0
35.8	0
35.9	0
36	0
36.1	0
36.2	0
36.3	0
36.4	0
36.5	0
36.6	0
36.7	0
36.8	0
36.9	0
37	0
37.1	0
37.2	0
37.3	0
37.4	0
37.5	0
37.6	0
37.7	0
37.8	0
37.9	0
38	0
38.1	0
38.2	0
38.3	0
38.4	0
38.5	0
38.6	0
38.7	0
38.8	0
38.9	0
39	0
39.1	0
39.2	0
39.3	0
39.4	0
39.5	0
39.6	0
39.7	0
39.8	0
39.9	0
40	0
40.1	0
40.2	0
40.3	0
40.4	0
40.5	0
40.6	0
40.7	0
40.8	0
40.9	0
41	0
41.1	0
41.2	0
41.3	0
41.4	0
41.5	0
41.6	0
41.7	0
41.8	0
41.9	0
42	0
42.1	0
42.2	0
42.3	0
42.4	0
42.5	0
42.6	0
42.7	0
42.8	0
42.9	0
43	0
43.1	0
43.2	0
43.3	0
43.4	0
43.5	0
43.6	0
43.7	0
43.8	0
43.9	0
44	0
44.1	0
44.2	0
44.3	0
44.4	0
44.5	0
44.6	0
44.7	0
44.8	0
44.9	0
45	0
45.1	0
45.2	0
45.3	0
45.4	0
45.5	0
45.6	0
45.7	0
45.8	0
45.9	0
46	0
46.1	0
46.2	0
46.3	0
46.4	0
46.5	0
46.6	0
46.7	0
46.8	0
46.9	0
47	0
47.1	0
47.2	0
47.3	0
47.4	0
47.5	0
47.6	0
47.7	0
47.8	0
47.9	0
48	0
48.1	0
48.2	0
48.3	0
48.4	0
48.5	0
48.6	0
48.7	0
48.8	0
48.9	0
49	0
49.1	0
49.2	0
49.3	0
49.4	0
49.5	0
49.6	0
49.7	0
49.8	0
49.9	0
50	0
50.1	0
50.2	0
50.3	0
50.4	0
50.5	0
50.6	0
50.7	0
50.8	0
50.9	0
51	0
51.1	0
51.2	0
51.3	0
51.4	0
51.5	0
51.6	0
51.7	0
51.8	0
51.9	0
52	0
52.1	0
52.2	0
52.3	0
52.4	0
52.5	0
52.6	0
52.7	0
52.8	0
52.9	0
53	0
53.1	0
53.2	0
53.3	0
53.4	0
53.5	0
53.6	0
53.7	0
53.8	0
53.9	0
54	0
54.1	0
54.2	0
54.3	0
54.4	0
54.5	0
54.6	0
54.7	0
54.8	0
54.9	0
55	0
55.1	0
55.2	0
55.3	0
55.4	0
55.5	0
55.6	0
55.7	0
55.8	0
55.9	0
56	0
56.1	0
56.2	0
56.3	0
56.4	0
56.5	0
56.6	0
56.7	0
56.8	0
56.9	0
57	0
57.1	0
57.2	0
57.3	0
57.4	0
57.5	0
57.6	0
57.7	0
57.8	0
57.9	0
58	0
58.1	0
58.2	0
58.3	0
58.4	0
58.5	0
58.6	0
58.7	0
58.8	0
58.9	0
59	0
59.1	0
59.2	0
59.3	0
59.4	0
59.5	0
59.6	0
59.7	0
59.8	0
59.9	0
60	0
60.1	0
60.2	0
60.3	0
60.4	0
60.5	0
60.6	0
60.7	0
60.8	0
60.9	0
61	0
61.1	0
61.2	0
61.3	0
61.4	0
61.5	0
61.6	0
61.7	0
61.8	0
61.9	0
62	0
62.1	0
62.2	0
62.3	0
62.4	0
62.5	0
62.6	0
62.7	0
62.8	0
62.9	0
63	0
63.1	0
63.2	0
63.3	0
63.4	0
63.5	0
63.6	0
63.7	0
63.8	0
63.9	0
64	0
64.1	0
64.2	0
64.3	0
64.4	0
64.5	0
64.6	0
64.7	0
64.8	0
64.9	0
65	0
65.1	0
65.2	0
65.3	0
65.4	0
65.5	0
65.6	0
65.7	0
65.8	0
65.9	0
66	0
66.1	0
66.2	0
66.3	0
66.4	0
66.5	0
66.6	0
66.7	0
66.8	0
66.9	0
67	0
67.1	0
67.2	0
67.3	0
67.4	0
67.5	0
67.6	0
67.7	0
67.8	0
67.9	0
68	0
68.1	0
68.2	0
68.3	0
68.4	0
68.5	0
68.6	0
68.7	0
68.8	0
68.9	0
69	0
69.1	0
69.2	0
69.3	0
69.4	0
69.5	0
69.6	0
69.7	0
69.8	0
69.9	0
70	0
70.1	0
70.2	0
70.3	0
70.4	0
70.5	0
70.6	0
70.7	0
70.8	0
70.9	0
71	0
71.1	0
71.2	0
71.3	0
71.4	0
71.5	0
71.6	0
71.7	0
71.8	0
71.9	0
72	0
72.1	0
72.2	0
72.3	0
72.4	0
72.5	0
72.6	0
72.7	0
72.8	0
72.9	0
73	0
73.1	0
73.2	0
73.3	0
73.4	0
73.5	0
73.6	0
73.7	0
73.8	0
73.9	0
74	0
74.1	0
74.2	0
74.3	0
74.4	0
74.5	0
74.6	0
74.7	0
74.8	0
74.9	0
75	0
75.1	0
75.2	0
75.3	0
75.4	0
75.5	0
75.6	0
75.7	0
75.8	0
75.9	0
76	0
76.1	0
76.2	0
76.3	0
76.4	0
76.5	0
76.6	0
76.7	0
76.8	0
76.9	0
77	0
77.1	0
77.2	0
77.3	0
77.4	0
77.5	0
77.6	0
77.7	0
77.8	0
77.9	0
78	0
78.1	0
78.2	0
78.3	0
78.4	0
78.5	0
78.6	0
78.7	0
78.8	0
78.9	0
79	0
79.1	0
79.2	0
79.3	0
79.4	0
79.5	0
79.6	0
79.7	0
79.8	0
79.9	0
80	0
80.1	0
80.2	0
80.3	0
80.4	0
80.5	0
80.6	0
80.7	0
80.8	0
80.9	0
81	0
81.1	0
81.2	0
81.3	0
81.4	0
81.5	0
81.6	0
81.7	0
81.8	0
81.9	0
82	0
82.1	0
82.2	0
82.3	0
82.4	0
82.5	0
82.6	0
82.7	0
82.8	0
82.9	0
83	0
83.1	0
83.2	0
83.3	0
83.4	0
83.5	0
83.6	0
83.7	0
83.8	0
83.9	0
84	0
84.1	0
84.2	0
84.3	0
84.4	0
84.5	0
84.6	0
84.7	0
84.8	0
84.9	0
85	0
85.1	0
85.2	0
85.3	0
85.4	0
85.5	0
85.6	0
85.7	0
85.8	0
85.9	0
86	0
86.1	0
86.2	0
86.3	0
86.4	0
86.5	0
86.6	0
86.7	0
86.8	0
86.9	0
87	0
87.1	0
87.2	0
87.3	0
87.4	0
87.5	0
87.6	0
87.7	0
87.8	0
87.9	0
88	0
88.1	0
88.2	0
88.3	0
88.4	0
88.5	0
88.6	0
88.7	0
88.8	0
88.9	0
89	0
89.1	0
89.2	0
89.3	0
89.4	0
89.5	0
89.6	0
89.7	0
89.8	0
89.9	0
90	0
90.1	0
90.2	0
90.3	0
90.4	0
90.5	0
90.6	0
90.7	0
90.8	0
90.9	0
91	0
91.1	0
91.2	0
91.3	0
91.4	0
91.5	0
91.6	0
91.7	0
91.8	0
91.9	0
92	0
92.1	0
92.2	0
92.3	0
92.4	0
92.5	0
92.6	0
92.7	0
92.8	0
92.9	0
93	0
93.1	0
93.2	0
93.3	0
93.4	0
93.5	0
93.6	0
93.7	0
93.8	0
93.9	0
94	0
94.1	0
94.2	0
94.3	0
94.4	0
94.5	0
94.6	0
94.7	0
94.8	0
94.9	0
95	0
95.1	0
95.2	0
95.3	0
95.4	0
95.5	0
95.6	0
95.7	0
95.8	0
95.9	0
96	0
96.1	0
96.2	0
96.3	0
96.4	0
96.5	0
96.6	0
96.7	0
96.8	0
96.9	0
97	0
97.1	0
97.2	0
97.3	0
97.4	0
97.5	0
97.6	0
97.7	0
97.8	0
97.9	0
98	0
98.1	0
98.2	0
98.3	0
98.4	0
98.5	0
98.6	0
98.7	0
98.8	0
98.9	0
99	0
99.1	0
99.2	0
99.3	0
99.4	0
99.5	0
99.6	0
99.7	0
99.8	0
99.9	0
100	0
100.1	0
100.2	0
100.3	0
100.4	0
100.5	0
100.6	0
100.7	0
100.8	0
100.9	0
101	0
101.1	0
101.2	0
101.3	0
101.4	0
101.5	0
101.6	0.001
101.7	0.001
101.8	0.001
101.9	0.001
102	0.001
102.1	0.001
102.2	0.002
102.3	0.002
102.4	0.002
102.5	0.002
102.6	0.002
102.7	0.002
102.8	0.002
102.9	0.002
103	0.002
103.1	0.003
103.2	0.003
103.3	0.003
103.4	0.003
103.5	0.003
103.6	0.003
103.7	0.003
103.8	0.003
103.9	0.003
104	0.004
104.1	0.004
104.2	0.004
104.3	0.004
104.4	0.004
104.5	0.004
104.6	0.004
104.7	0.004
104.8	0.004
104.9	0.005
105	0.005
105.1	0.005
105.2	0.005
105.3	0.005
105.4	0.005
105.5	0.005
105.6	0.006
105.7	0.006
105.8	0.006
105.9	0.007
106	0.007
106.1	0.009
106.2	0.009
106.3	0.01
106.4	0.01
106.5	0.01
106.6	0.01
106.7	0.01
106.8	0.011
106.9	0.011
107	0.011
107.1	0.011
107.2	0.011
107.3	0.011
107.4	0.011
107.5	0.012
107.6	0.012
107.7	0.012
107.8	0.012
107.9	0.014
108	0.014
108.1	0.016
108.2	0.016
108.3	0.02
108.4	0.02
108.5	0.02
108.6	0.021
108.7	0.021
108.8	0.021
108.9	0.021
109	0.021
109.1	0.021
109.2	0.021
109.3	0.022
109.4	0.022
109.5	0.023
109.6	0.025
109.7	0.025
109.8	0.026
109.9	0.026
110	0.027
110.1	0.028
110.2	0.028
110.3	0.028
110.4	0.028
110.5	0.028
110.6	0.029
110.7	0.029
110.8	0.031
110.9	0.032
111	0.032
111.1	0.033
111.2	0.032
111.3	0.032
111.4	0.032
111.5	0.033
111.6	0.033
111.7	0.034
111.8	0.035
111.9	0.035
112	0.036
112.1	0.037
112.2	0.037
112.3	0.037
112.4	0.039
112.5	0.039
112.6	0.04
112.7	0.041
112.8	0.041
112.9	0.041
113	0.041
113.1	0.041
113.2	0.041
113.3	0.041
113.4	0.042
113.5	0.042
113.6	0.042
113.7	0.042
113.8	0.042
113.9	0.042
114	0.042
114.1	0.043
114.2	0.044
114.3	0.044
114.4	0.044
114.5	0.044
114.6	0.044
114.7	0.044
114.8	0.044
114.9	0.045
115	0.046
115.1	0.046
115.2	0.047
115.3	0.048
115.4	0.048
115.5	0.049
115.6	0.049
115.7	0.049
115.8	0.049
115.9	0.05
116	0.05
116.1	0.05
116.2	0.051
116.3	0.051
116.4	0.051
116.5	0.051
116.6	0.051
116.7	0.052
116.8	0.052
116.9	0.053
117	0.053
117.1	0.053
117.2	0.053
117.3	0.053
117.4	0.053
117.5	0.053
117.6	0.053
117.7	0.053
117.8	0.052
117.9	0.055
118	0.055
118.1	0.055
118.2	0.056
118.3	0.058
118.4	0.058
118.5	0.058
118.6	0.059
118.7	0.059
118.8	0.061
118.9	0.061
119	0.062
119.1	0.063
119.2	0.063
119.3	0.064
119.4	0.065
119.5	0.065
119.6	0.064
119.7	0.064
119.8	0.065
119.9	0.065
120	0.065
120.1	0.065
120.2	0.065
120.3	0.067
120.4	0.068
120.5	0.068
120.6	0.068
120.7	0.068
120.8	0.069
120.9	0.069
121	0.069
121.1	0.068
121.2	0.069
121.3	0.07
121.4	0.07
121.5	0.069
121.6	0.07
121.7	0.07
121.8	0.072
121.9	0.074
122	0.074
122.1	0.075
122.2	0.075
122.3	0.075
122.4	0.075
122.5	0.075
122.6	0.075
122.7	0.075
122.8	0.077
122.9	0.077
123	0.077
123.1	0.078
123.2	0.078
123.3	0.079
123.4	0.08
123.5	0.08
123.6	0.08
123.7	0.08
123.8	0.081
123.9	0.081
124	0.081
124.1	0.081
124.2	0.082
124.3	0.082
124.4	0.082
124.5	0.083
124.6	0.083
124.7	0.083
124.8	0.083
124.9	0.084
125	0.085
125.1	0.085
125.2	0.086
125.3	0.086
125.4	0.088
125.5	0.088
125.6	0.089
125.7	0.089
125.8	0.09
125.9	0.09
126	0.09
126.1	0.092
126.2	0.092
126.3	0.094
126.4	0.093
126.5	0.094
126.6	0.094
126.7	0.095
126.8	0.095
126.9	0.096
127	0.098
127.1	0.098
127.2	0.099
127.3	0.098
127.4	0.098
127.5	0.099
127.6	0.099
127.7	0.098
127.8	0.099
127.9	0.1
128	0.1
128.1	0.101
128.2	0.101
128.3	0.102
128.4	0.102
128.5	0.102
128.6	0.102
128.7	0.102
128.8	0.103
128.9	0.103
129	0.103
129.1	0.103
129.2	0.103
129.3	0.102
129.4	0.103
129.5	0.104
129.6	0.104
129.7	0.105
129.8	0.105
129.9	0.105
130	0.105
130.1	0.105
130.2	0.105
130.3	0.107
130.4	0.109
130.5	0.11
130.6	0.11
130.7	0.11
130.8	0.11
130.9	0.111
131	0.112
131.1	0.113
131.2	0.114
131.3	0.113
131.4	0.114
131.5	0.114
131.6	0.114
131.7	0.114
131.8	0.114
131.9	0.114
132	0.114
132.1	0.114
132.2	0.115
132.3	0.115
132.4	0.115
132.5	0.115
132.6	0.115
132.7	0.115
132.8	0.115
132.9	0.115
133	0.115
133.1	0.116
133.2	0.116
133.3	0.116
133.4	0.116
133.5	0.116
133.6	0.116
133.7	0.116
133.8	0.116
133.9	0.116
134	0.116
134.1	0.116
134.2	0.116
134.3	0.116
134.4	0.116
134.5	0.117
134.6	0.117
134.7	0.117
134.8	0.12
134.9	0.12
135	0.121
135.1	0.12
135.2	0.12
135.3	0.121
135.4	0.121
135.5	0.121
135.6	0.122
135.7	0.122
135.8	0.123
135.9	0.123
136	0.123
136.1	0.123
136.2	0.123
136.3	0.123
136.4	0.125
136.5	0.125
136.6	0.125
136.7	0.127
136.8	0.126
136.9	0.126
137	0.126
137.1	0.126
137.2	0.126
137.3	0.127
137.4	0.129
137.5	0.129
137.6	0.128
137.7	0.128
137.8	0.128
137.9	0.128
138	0.129
138.1	0.129
138.2	0.129
138.3	0.129
138.4	0.13
138.5	0.13
138.6	0.13
138.7	0.132
138.8	0.132
138.9	0.132
139	0.132
139.1	0.132
139.2	0.134
139.3	0.134
139.4	0.134
139.5	0.134
139.6	0.134
139.7	0.134
139.8	0.134
139.9	0.135
140	0.135
140.1	0.135
140.2	0.135
140.3	0.135
140.4	0.135
140.5	0.136
140.6	0.136
140.7	0.137
140.8	0.138
140.9	0.138
141	0.138
141.1	0.138
141.2	0.138
141.3	0.138
141.4	0.138
141.5	0.137
141.6	0.137
141.7	0.137
141.8	0.137
141.9	0.137
142	0.137
142.1	0.138
142.2	0.14
142.3	0.142
142.4	0.142
142.5	0.142
142.6	0.142
142.7	0.142
142.8	0.142
142.9	0.142
143	0.142
143.1	0.142
143.2	0.142
143.3	0.142
143.4	0.143
143.5	0.143
143.6	0.143
143.7	0.143
143.8	0.143
143.9	0.143
144	0.145
144.1	0.144
144.2	0.145
144.3	0.146
144.4	0.146
144.5	0.147
144.6	0.148
144.7	0.149
144.8	0.15
144.9	0.15
145	0.15
145.1	0.151
145.2	0.15
145.3	0.151
145.4	0.151
145.5	0.152
145.6	0.152
145.7	0.152
145.8	0.152
145.9	0.151
146	0.151
146.1	0.151
146.2	0.152
146.3	0.152
146.4	0.153
146.5	0.154
146.6	0.155
146.7	0.156
146.8	0.157
146.9	0.157
147	0.157
147.1	0.158
147.2	0.159
147.3	0.159
147.4	0.159
147.5	0.159
147.6	0.159
147.7	0.16
147.8	0.16
147.9	0.161
148	0.162
148.1	0.161
148.2	0.163
148.3	0.164
148.4	0.164
148.5	0.164
148.6	0.163
148.7	0.163
148.8	0.163
148.9	0.163
149	0.163
149.1	0.163
149.2	0.164
149.3	0.164
149.4	0.166
149.5	0.168
149.6	0.168
149.7	0.168
149.8	0.167
149.9	0.166
150	0.168
150.1	0.168
150.2	0.168
150.3	0.168
150.4	0.168
150.5	0.168
150.6	0.168
150.7	0.168
150.8	0.168
150.9	0.168
151	0.167
151.1	0.167
151.2	0.168
151.3	0.169
151.4	0.169
151.5	0.168
151.6	0.168
151.7	0.168
151.8	0.168
151.9	0.168
152	0.168
152.1	0.169
152.2	0.168
152.3	0.166
152.4	0.166
152.5	0.166
152.6	0.167
152.7	0.168
152.8	0.169
152.9	0.169
153	0.169
153.1	0.17
153.2	0.17
153.3	0.171
153.4	0.171
153.5	0.171
153.6	0.171
153.7	0.171
153.8	0.172
153.9	0.172
154	0.172
154.1	0.172
154.2	0.172
154.3	0.171
154.4	0.172
154.5	0.171
154.6	0.172
154.7	0.174
154.8	0.174
154.9	0.174
155	0.174
155.1	0.174
155.2	0.175
155.3	0.174
155.4	0.174
155.5	0.174
155.6	0.175
155.7	0.175
155.8	0.175
155.9	0.176
156	0.176
156.1	0.175
156.2	0.177
156.3	0.177
156.4	0.178
156.5	0.177
156.6	0.178
156.7	0.178
156.8	0.18
156.9	0.18
157	0.18
157.1	0.18
157.2	0.179
157.3	0.179
157.4	0.18
157.5	0.181
157.6	0.181
157.7	0.181
157.8	0.181
157.9	0.181
158	0.18
158.1	0.182
158.2	0.182
158.3	0.181
158.4	0.182
158.5	0.181
158.6	0.183
158.7	0.183
158.8	0.184
158.9	0.184
159	0.184
159.1	0.183
159.2	0.183
159.3	0.183
159.4	0.184
159.5	0.184
159.6	0.184
159.7	0.184
159.8	0.183
159.9	0.183
160	0.184
160.1	0.185
160.2	0.186
160.3	0.185
160.4	0.186
160.5	0.187
160.6	0.187
160.7	0.187
160.8	0.188
160.9	0.188
161	0.188
161.1	0.188
161.2	0.188
161.3	0.188
161.4	0.19
161.5	0.19
161.6	0.19
161.7	0.19
161.8	0.19
161.9	0.19
162	0.189
162.1	0.189
162.2	0.191
162.3	0.191
162.4	0.191
162.5	0.191
162.6	0.191
162.7	0.192
162.8	0.193
162.9	0.194
163	0.194
163.1	0.194
163.2	0.194
163.3	0.195
163.4	0.195
163.5	0.195
163.6	0.196
163.7	0.196
163.8	0.195
163.9	0.194
164	0.195
164.1	0.197
164.2	0.198
164.3	0.198
164.4	0.198
164.5	0.198
164.6	0.198
164.7	0.2
164.8	0.199
164.9	0.2
165	0.199
165.1	0.198
165.2	0.199
165.3	0.2
165.4	0.2
165.5	0.2
165.6	0.2
165.7	0.201
165.8	0.202
165.9	0.202
166	0.202
166.1	0.202
166.2	0.203
166.3	0.204
166.4	0.205
166.5	0.205
166.6	0.205
166.7	0.205
166.8	0.205
166.9	0.205
167	0.208
167.1	0.209
167.2	0.21
167.3	0.21
167.4	0.209
167.5	0.208
167.6	0.207
167.7	0.205
167.8	0.205
167.9	0.205
168	0.205
168.1	0.205
168.2	0.206
168.3	0.206
168.4	0.206
168.5	0.206
168.6	0.206
168.7	0.206
168.8	0.207
168.9	0.208
169	0.208
169.1	0.206
169.2	0.208
169.3	0.208
169.4	0.208
169.5	0.208
169.6	0.208
169.7	0.208
169.8	0.207
169.9	0.209
170	0.21
170.1	0.21
170.2	0.211
170.3	0.211
170.4	0.211
170.5	0.213
170.6	0.213
170.7	0.213
170.8	0.213
170.9	0.214
171	0.214
171.1	0.214
171.2	0.214
171.3	0.214
171.4	0.214
171.5	0.214
171.6	0.214
171.7	0.215
171.8	0.215
171.9	0.215
172	0.215
172.1	0.217
172.2	0.217
172.3	0.219
172.4	0.22
172.5	0.22
172.6	0.22
172.7	0.22
172.8	0.22
172.9	0.22
173	0.22
173.1	0.22
173.2	0.221
173.3	0.221
173.4	0.221
173.5	0.221
173.6	0.222
173.7	0.221
173.8	0.22
173.9	0.22
174	0.218
174.1	0.219
174.2	0.218
174.3	0.218
174.4	0.219
174.5	0.219
174.6	0.22
174.7	0.22
174.8	0.221
174.9	0.222
175	0.221
175.1	0.222
175.2	0.223
175.3	0.222
175.4	0.222
175.5	0.222
175.6	0.222
175.7	0.223
175.8	0.224
175.9	0.223
176	0.223
176.1	0.223
176.2	0.224
176.3	0.225
176.4	0.225
176.5	0.227
176.6	0.227
176.7	0.227
176.8	0.227
176.9	0.227
177	0.23
177.1	0.229
177.2	0.228
177.3	0.228
177.4	0.229
177.5	0.229
177.6	0.229
177.7	0.228
177.8	0.229
177.9	0.229
178	0.229
178.1	0.229
178.2	0.229
178.3	0.229
178.4	0.229
178.5	0.229
178.6	0.229
178.7	0.228
178.8	0.228
178.9	0.228
179	0.229
179.1	0.229
179.2	0.229
179.3	0.23
179.4	0.231
179.5	0.229
179.6	0.23
179.7	0.231
179.8	0.231
179.9	0.231
180	0.23
180.1	0.231
180.2	0.231
180.3	0.231
180.4	0.232
180.5	0.232
180.6	0.233
180.7	0.233
180.8	0.234
180.9	0.234
181	0.234
181.1	0.234
181.2	0.234
181.3	0.234
181.4	0.234
181.5	0.235
181.6	0.235
181.7	0.235
181.8	0.235
181.9	0.235
182	0.234
182.1	0.234
182.2	0.235
182.3	0.236
182.4	0.236
182.5	0.236
182.6	0.236
182.7	0.235
182.8	0.236
182.9	0.236
183	0.236
183.1	0.235
183.2	0.236
183.3	0.236
183.4	0.236
183.5	0.236
183.6	0.236
183.7	0.236
183.8	0.239
183.9	0.24
184	0.241
184.1	0.241
184.2	0.242
184.3	0.241
184.4	0.241
184.5	0.241
184.6	0.241
184.7	0.241
184.8	0.242
184.9	0.242
185	0.243
185.1	0.242
185.2	0.242
185.3	0.242
185.4	0.242
185.5	0.244
185.6	0.244
185.7	0.244
185.8	0.244
185.9	0.244
186	0.244
186.1	0.244
186.2	0.244
186.3	0.244
186.4	0.244
186.5	0.245
186.6	0.245
186.7	0.245
186.8	0.246
186.9	0.245
187	0.244
187.1	0.245
187.2	0.245
187.3	0.245
187.4	0.245
187.5	0.246
187.6	0.247
187.7	0.247
187.8	0.249
187.9	0.251
188	0.25
188.1	0.25
188.2	0.249
188.3	0.249
188.4	0.249
188.5	0.25
188.6	0.25
188.7	0.25
188.8	0.25
188.9	0.25
189	0.251
189.1	0.252
189.2	0.251
189.3	0.252
189.4	0.252
189.5	0.252
189.6	0.252
189.7	0.252
189.8	0.253
189.9	0.253
190	0.253
190.1	0.253
190.2	0.253
190.3	0.252
190.4	0.252
190.5	0.252
190.6	0.252
190.7	0.252
190.8	0.252
190.9	0.253
191	0.252
191.1	0.252
191.2	0.251
191.3	0.251
191.4	0.252
191.5	0.252
191.6	0.251
191.7	0.251
191.8	0.251
191.9	0.252
192	0.252
192.1	0.253
192.2	0.253
192.3	0.253
192.4	0.253
192.5	0.253
192.6	0.253
192.7	0.252
192.8	0.252
192.9	0.251
193	0.251
193.1	0.252
193.2	0.252
193.3	0.252
193.4	0.252
193.5	0.253
193.6	0.253
193.7	0.253
193.8	0.253
193.9	0.253
194	0.255
194.1	0.256
194.2	0.256
194.3	0.256
194.4	0.256
194.5	0.256
194.6	0.256
194.7	0.257
194.8	0.256
194.9	0.256
195	0.256
195.1	0.256
195.2	0.257
195.3	0.257
195.4	0.258
195.5	0.258
195.6	0.257
195.7	0.257
195.8	0.257
195.9	0.257
196	0.258
196.1	0.258
196.2	0.258
196.3	0.258
196.4	0.259
196.5	0.259
196.6	0.26
196.7	0.26
196.8	0.26
196.9	0.26
197	0.259
197.1	0.259
197.2	0.259
197.3	0.259
197.4	0.259
197.5	0.259
197.6	0.259
197.7	0.259
197.8	0.259
197.9	0.259
198	0.259
198.1	0.258
198.2	0.258
198.3	0.258
198.4	0.257
198.5	0.257
198.6	0.257
198.7	0.259
198.8	0.259
198.9	0.259
199	0.259
199.1	0.26
199.2	0.26
199.3	0.26
199.4	0.26
199.5	0.26
199.6	0.259
199.7	0.26
199.8	0.26
199.9	0.26
200	0.26
[truncated: 14,000 more rows]
