# Supplementary material for: Bayesian inference of kinetic schemes for ion channels by Kalman filtering
Source: eLife journal article supplement (doi:10.7554/elife.62714), 2022-05-04
Supplement: fig1-data1 [file 64_Sim_N_1000_Fluor_MW.xlsx]

## Sheet: Tabelle1
0.1	0
0.2	0
0.3	0
0.4	0
0.5	0
0.6	0
0.7	0
0.8	0
0.9	0
1	0
1.1	0
1.2	0
1.3	0
1.4	0
1.5	0
1.6	0
1.7	0
1.8	0
1.9	0
2	0
2.1	0
2.2	0
2.3	0
2.4	0
2.5	0
2.6	0
2.7	0
2.8	0
2.9	0
3	0
3.1	0
3.2	0
3.3	0
3.4	0
3.5	0
3.6	0
3.7	0
3.8	0
3.9	0
4	0
4.1	0
4.2	0
4.3	0
4.4	0
4.5	0
4.6	0
4.7	0
4.8	0
4.9	0
5	0
5.1	0
5.2	0
5.3	0
5.4	0
5.5	0
5.6	0
5.7	0
5.8	0
5.9	0
6	0
6.1	0
6.2	0
6.3	0
6.4	0
6.5	0
6.6	0
6.7	0
6.8	0
6.9	0
7	0
7.1	0
7.2	0
7.3	0
7.4	0
7.5	0
7.6	0
7.7	0
7.8	0
7.9	0
8	0
8.1	0
8.2	0
8.3	0
8.4	0
8.5	0
8.6	0
8.7	0
8.8	0
8.9	0
9	0
9.1	0
9.2	0
9.3	0
9.4	0
9.5	0
9.6	0
9.7	0
9.8	0
9.9	0
10	0
10.1	0
10.2	0
10.3	0
10.4	0
10.5	0
10.6	0
10.7	0
10.8	0
10.9	0
11	0
11.1	0
11.2	0
11.3	0
11.4	0
11.5	0
11.6	0
11.7	0
11.8	0
11.9	0
12	0
12.1	0
12.2	0
12.3	0
12.4	0
12.5	0
12.6	0
12.7	0
12.8	0
12.9	0
13	0
13.1	0
13.2	0
13.3	0
13.4	0
13.5	0
13.6	0
13.7	0
13.8	0
13.9	0
14	0
14.1	0
14.2	0
14.3	0
14.4	0
14.5	0
14.6	0
14.7	0
14.8	0
14.9	0
15	0
15.1	0
15.2	0
15.3	0
15.4	0
15.5	0
15.6	0
15.7	0
15.8	0
15.9	0
16	0
16.1	0
16.2	0
16.3	0
16.4	0
16.5	0
16.6	0
16.7	0
16.8	0
16.9	0
17	0
17.1	0
17.2	0
17.3	0
17.4	0
17.5	0
17.6	0
17.7	0
17.8	0
17.9	0
18	0
18.1	0
18.2	0
18.3	0
18.4	0
18.5	0
18.6	0
18.7	0
18.8	0
18.9	0
19	0
19.1	0
19.2	0
19.3	0
19.4	0
19.5	0
19.6	0
19.7	0
19.8	0
19.9	0
20	0
20.1	0
20.2	0
20.3	0
20.4	0
20.5	0
20.6	0
20.7	0
20.8	0
20.9	0
21	0
21.1	0
21.2	0
21.3	0
21.4	0
21.5	0
21.6	0
21.7	0
21.8	0
21.9	0
22	0
22.1	0
22.2	0
22.3	0
22.4	0
22.5	0
22.6	0
22.7	0
22.8	0
22.9	0
23	0
23.1	0
23.2	0
23.3	0
23.4	0
23.5	0
23.6	0
23.7	0
23.8	0
23.9	0
24	0
24.1	0
24.2	0
24.3	0
24.4	0
24.5	0
24.6	0
24.7	0
24.8	0
24.9	0
25	0
25.1	0
25.2	0
25.3	0
25.4	0
25.5	0
25.6	0
25.7	0
25.8	0
25.9	0
26	0
26.1	0
26.2	0
26.3	0
26.4	0
26.5	0
26.6	0
26.7	0
26.8	0
26.9	0
27	0
27.1	0
27.2	0
27.3	0
27.4	0
27.5	0
27.6	0
27.7	0
27.8	0
27.9	0
28	0
28.1	0
28.2	0
28.3	0
28.4	0
28.5	0
28.6	0
28.7	0
28.8	0
28.9	0
29	0
29.1	0
29.2	0
29.3	0
29.4	0
29.5	0
29.6	0
29.7	0
29.8	0
29.9	0
30	0
30.1	0
30.2	0
30.3	0
30.4	0
30.5	0
30.6	0
30.7	0
30.8	0
30.9	0
31	0
31.1	0
31.2	0
31.3	0
31.4	0
31.5	0
31.6	0
31.7	0
31.8	0
31.9	0
32	0
32.1	0
32.2	0
32.3	0
32.4	0
32.5	0
32.6	0
32.7	0
32.8	0
32.9	0
33	0
33.1	0
33.2	0
33.3	0
33.4	0
33.5	0
33.6	0
33.7	0
33.8	0
33.9	0
34	0
34.1	0
34.2	0
34.3	0
34.4	0
34.5	0
34.6	0
34.7	0
34.8	0
34.9	0
35	0
35.1	0
35.2	0
35.3	0
35.4	0
35.5	0
35.6	0
35.7	0
35.8	0
35.9	0
36	0
36.1	0
36.2	0
36.3	0
36.4	0
36.5	0
36.6	0
36.7	0
36.8	0
36.9	0
37	0
37.1	0
37.2	0
37.3	0
37.4	0
37.5	0
37.6	0
37.7	0
37.8	0
37.9	0
38	0
38.1	0
38.2	0
38.3	0
38.4	0
38.5	0
38.6	0
38.7	0
38.8	0
38.9	0
39	0
39.1	0
39.2	0
39.3	0
39.4	0
39.5	0
39.6	0
39.7	0
39.8	0
39.9	0
40	0
40.1	0
40.2	0
40.3	0
40.4	0
40.5	0
40.6	0
40.7	0
40.8	0
40.9	0
41	0
41.1	0
41.2	0
41.3	0
41.4	0
41.5	0
41.6	0
41.7	0
41.8	0
41.9	0
42	0
42.1	0
42.2	0
42.3	0
42.4	0
42.5	0
42.6	0
42.7	0
42.8	0
42.9	0
43	0
43.1	0
43.2	0
43.3	0
43.4	0
43.5	0
43.6	0
43.7	0
43.8	0
43.9	0
44	0
44.1	0
44.2	0
44.3	0
44.4	0
44.5	0
44.6	0
44.7	0
44.8	0
44.9	0
45	0
45.1	0
45.2	0
45.3	0
45.4	0
45.5	0
45.6	0
45.7	0
45.8	0
45.9	0
46	0
46.1	0
46.2	0
46.3	0
46.4	0
46.5	0
46.6	0
46.7	0
46.8	0
46.9	0
47	0
47.1	0
47.2	0
47.3	0
47.4	0
47.5	0
47.6	0
47.7	0
47.8	0
47.9	0
48	0
48.1	0
48.2	0
48.3	0
48.4	0
48.5	0
48.6	0
48.7	0
48.8	0
48.9	0
49	0
49.1	0
49.2	0
49.3	0
49.4	0
49.5	0
49.6	0
49.7	0
49.8	0
49.9	0
50	0
50.1	0
50.2	0
50.3	0
50.4	0
50.5	0
50.6	0
50.7	0
50.8	0
50.9	0
51	0
51.1	0
51.2	0
51.3	0
51.4	0
51.5	0
51.6	0
51.7	0
51.8	0
51.9	0
52	0
52.1	0
52.2	0
52.3	0
52.4	0
52.5	0
52.6	0
52.7	0
52.8	0
52.9	0
53	0
53.1	0
53.2	0
53.3	0
53.4	0
53.5	0
53.6	0
53.7	0
53.8	0
53.9	0
54	0
54.1	0
54.2	0
54.3	0
54.4	0
54.5	0
54.6	0
54.7	0
54.8	0
54.9	0
55	0
55.1	0
55.2	0
55.3	0
55.4	0
55.5	0
55.6	0
55.7	0
55.8	0
55.9	0
56	0
56.1	0
56.2	0
56.3	0
56.4	0
56.5	0
56.6	0
56.7	0
56.8	0
56.9	0
57	0
57.1	0
57.2	0
57.3	0
57.4	0
57.5	0
57.6	0
57.7	0
57.8	0
57.9	0
58	0
58.1	0
58.2	0
58.3	0
58.4	0
58.5	0
58.6	0
58.7	0
58.8	0
58.9	0
59	0
59.1	0
59.2	0
59.3	0
59.4	0
59.5	0
59.6	0
59.7	0
59.8	0
59.9	0
60	0
60.1	0
60.2	0
60.3	0
60.4	0
60.5	0
60.6	0
60.7	0
60.8	0
60.9	0
61	0
61.1	0
61.2	0
61.3	0
61.4	0
61.5	0
61.6	0
61.7	0
61.8	0
61.9	0
62	0
62.1	0
62.2	0
62.3	0
62.4	0
62.5	0
62.6	0
62.7	0
62.8	0
62.9	0
63	0
63.1	0
63.2	0
63.3	0
63.4	0
63.5	0
63.6	0
63.7	0
63.8	0
63.9	0
64	0
64.1	0
64.2	0
64.3	0
64.4	0
64.5	0
64.6	0
64.7	0
64.8	0
64.9	0
65	0
65.1	0
65.2	0
65.3	0
65.4	0
65.5	0
65.6	0
65.7	0
65.8	0
65.9	0
66	0
66.1	0
66.2	0
66.3	0
66.4	0
66.5	0
66.6	0
66.7	0
66.8	0
66.9	0
67	0
67.1	0
67.2	0
67.3	0
67.4	0
67.5	0
67.6	0
67.7	0
67.8	0
67.9	0
68	0
68.1	0
68.2	0
68.3	0
68.4	0
68.5	0
68.6	0
68.7	0
68.8	0
68.9	0
69	0
69.1	0
69.2	0
69.3	0
69.4	0
69.5	0
69.6	0
69.7	0
69.8	0
69.9	0
70	0
70.1	0
70.2	0
70.3	0
70.4	0
70.5	0
70.6	0
70.7	0
70.8	0
70.9	0
71	0
71.1	0
71.2	0
71.3	0
71.4	0
71.5	0
71.6	0
71.7	0
71.8	0
71.9	0
72	0
72.1	0
72.2	0
72.3	0
72.4	0
72.5	0
72.6	0
72.7	0
72.8	0
72.9	0
73	0
73.1	0
73.2	0
73.3	0
73.4	0
73.5	0
73.6	0
73.7	0
73.8	0
73.9	0
74	0
74.1	0
74.2	0
74.3	0
74.4	0
74.5	0
74.6	0
74.7	0
74.8	0
74.9	0
75	0
75.1	0
75.2	0
75.3	0
75.4	0
75.5	0
75.6	0
75.7	0
75.8	0
75.9	0
76	0
76.1	0
76.2	0
76.3	0
76.4	0
76.5	0
76.6	0
76.7	0
76.8	0
76.9	0
77	0
77.1	0
77.2	0
77.3	0
77.4	0
77.5	0
77.6	0
77.7	0
77.8	0
77.9	0
78	0
78.1	0
78.2	0
78.3	0
78.4	0
78.5	0
78.6	0
78.7	0
78.8	0
78.9	0
79	0
79.1	0
79.2	0
79.3	0
79.4	0
79.5	0
79.6	0
79.7	0
79.8	0
79.9	0
80	0
80.1	0
80.2	0
80.3	0
80.4	0
80.5	0
80.6	0
80.7	0
80.8	0
80.9	0
81	0
81.1	0
81.2	0
81.3	0
81.4	0
81.5	0
81.6	0
81.7	0
81.8	0
81.9	0
82	0
82.1	0
82.2	0
82.3	0
82.4	0
82.5	0
82.6	0
82.7	0
82.8	0
82.9	0
83	0
83.1	0
83.2	0
83.3	0
83.4	0
83.5	0
83.6	0
83.7	0
83.8	0
83.9	0
84	0
84.1	0
84.2	0
84.3	0
84.4	0
84.5	0
84.6	0
84.7	0
84.8	0
84.9	0
85	0
85.1	0
85.2	0
85.3	0
85.4	0
85.5	0
85.6	0
85.7	0
85.8	0
85.9	0
86	0
86.1	0
86.2	0
86.3	0
86.4	0
86.5	0
86.6	0
86.7	0
86.8	0
86.9	0
87	0
87.1	0
87.2	0
87.3	0
87.4	0
87.5	0
87.6	0
87.7	0
87.8	0
87.9	0
88	0
88.1	0
88.2	0
88.3	0
88.4	0
88.5	0
88.6	0
88.7	0
88.8	0
88.9	0
89	0
89.1	0
89.2	0
89.3	0
89.4	0
89.5	0
89.6	0
89.7	0
89.8	0
89.9	0
90	0
90.1	0
90.2	0
90.3	0
90.4	0
90.5	0
90.6	0
90.7	0
90.8	0
90.9	0
91	0
91.1	0
91.2	0
91.3	0
91.4	0
91.5	0
91.6	0
91.7	0
91.8	0
91.9	0
92	0
92.1	0
92.2	0
92.3	0
92.4	0
92.5	0
92.6	0
92.7	0
92.8	0
92.9	0
93	0
93.1	0
93.2	0
93.3	0
93.4	0
93.5	0
93.6	0
93.7	0
93.8	0
93.9	0
94	0
94.1	0
94.2	0
94.3	0
94.4	0
94.5	0
94.6	0
94.7	0
94.8	0
94.9	0
95	0
95.1	0
95.2	0
95.3	0
95.4	0
95.5	0
95.6	0
95.7	0
95.8	0
95.9	0
96	0
96.1	0
96.2	0
96.3	0
96.4	0
96.5	0
96.6	0
96.7	0
96.8	0
96.9	0
97	0
97.1	0
97.2	0
97.3	0
97.4	0
97.5	0
97.6	0
97.7	0
97.8	0
97.9	0
98	0
98.1	0
98.2	0
98.3	0
98.4	0
98.5	0
98.6	0
98.7	0
98.8	0
98.9	0
99	0
99.1	0
99.2	0
99.3	0
99.4	0
99.5	0
99.6	0
99.7	0
99.8	0
99.9	0
100	0
100.1	0.9055
100.2	0.978
100.3	0.984
100.4	0.9875
100.5	0.99
100.6	0.988
100.7	0.984
100.8	0.9875
100.9	0.9845
101	0.9895
101.1	0.987
101.2	0.9865
101.3	0.9865
101.4	0.9875
101.5	0.987
101.6	0.9875
101.7	0.988
101.8	0.988
101.9	0.988
102	0.9905
102.1	0.9825
102.2	0.9855
102.3	0.995
102.4	0.9925
102.5	0.9895
102.6	0.988
102.7	0.9885
102.8	0.9895
102.9	0.9845
103	0.9905
103.1	0.989
103.2	0.9895
103.3	0.991
103.4	0.9905
103.5	0.989
103.6	0.987
103.7	0.9895
103.8	0.9865
103.9	0.99
104	0.986
104.1	0.9845
104.2	0.9845
104.3	0.9895
104.4	0.9905
104.5	0.9895
104.6	0.9915
104.7	0.985
104.8	0.9925
104.9	0.9895
105	0.9905
105.1	0.9865
105.2	0.991
105.3	0.99
105.4	0.994
105.5	0.9925
105.6	0.991
105.7	0.99
105.8	0.993
105.9	0.9925
106	0.9855
106.1	0.986
106.2	0.9865
106.3	0.9895
106.4	0.992
106.5	0.9865
106.6	0.9915
106.7	0.9955
106.8	0.992
106.9	0.99
107	0.995
107.1	0.995
107.2	0.9895
107.3	0.9905
107.4	0.992
107.5	0.989
107.6	0.987
107.7	0.99
107.8	0.9915
107.9	0.991
108	0.99
108.1	0.989
108.2	0.989
108.3	0.9925
108.4	0.991
108.5	0.9905
108.6	0.992
108.7	0.9925
108.8	0.9955
108.9	0.993
109	0.991
109.1	0.991
109.2	0.9895
109.3	0.991
109.4	0.989
109.5	0.9915
109.6	0.9905
109.7	0.994
109.8	0.994
109.9	0.9915
110	0.99
110.1	0.99
110.2	0.995
110.3	0.995
110.4	0.9915
110.5	0.9905
110.6	0.989
110.7	0.99
110.8	0.993
110.9	0.989
111	0.994
111.1	0.9935
111.2	0.99
111.3	0.9925
111.4	0.9955
111.5	0.9955
111.6	0.9905
111.7	0.993
111.8	0.9925
111.9	0.9945
112	0.9925
112.1	0.9915
112.2	0.9925
112.3	0.99
112.4	0.991
112.5	0.9915
112.6	0.991
112.7	0.99
112.8	0.99
112.9	0.994
113	0.9945
113.1	0.993
113.2	0.992
113.3	0.992
113.4	0.9935
113.5	0.991
113.6	0.9895
113.7	0.992
113.8	0.9935
113.9	0.993
114	0.994
114.1	0.9925
114.2	0.9975
114.3	0.99
114.4	0.9895
114.5	0.9915
114.6	0.995
114.7	0.9935
114.8	0.9925
114.9	0.9905
115	0.996
115.1	0.9955
115.2	0.993
115.3	0.9965
115.4	0.994
115.5	0.9935
115.6	0.993
115.7	0.994
115.8	0.9965
115.9	0.9915
116	0.993
116.1	0.9945
116.2	0.994
116.3	0.993
116.4	0.991
116.5	0.99
116.6	0.9935
116.7	0.9905
116.8	0.996
116.9	0.9925
117	0.9955
117.1	0.9935
117.2	0.9915
117.3	0.9965
117.4	0.9945
117.5	0.9955
117.6	0.995
117.7	0.9955
117.8	0.995
117.9	0.996
118	0.9925
118.1	0.9955
118.2	0.993
118.3	0.994
118.4	0.992
118.5	0.9955
118.6	0.995
118.7	0.995
118.8	0.9935
118.9	0.9965
119	0.9945
119.1	0.996
119.2	0.994
119.3	0.9965
119.4	0.9935
119.5	0.9955
119.6	0.9935
119.7	0.9955
119.8	0.993
119.9	0.993
120	0.9915
120.1	0.995
120.2	0.995
120.3	0.9935
120.4	0.995
120.5	0.994
120.6	0.9945
120.7	0.9945
120.8	0.995
120.9	0.996
121	0.9935
121.1	0.9955
121.2	0.9935
121.3	0.997
121.4	0.9925
121.5	0.9925
121.6	0.9955
121.7	0.9935
121.8	0.995
121.9	0.993
122	0.997
122.1	0.997
122.2	0.9955
122.3	0.994
122.4	0.9965
122.5	0.9945
122.6	0.998
122.7	0.996
122.8	0.993
122.9	0.9935
123	0.9965
123.1	0.9925
123.2	0.995
123.3	0.9925
123.4	0.9955
123.5	0.99
123.6	0.992
123.7	0.9935
123.8	0.992
123.9	0.995
124	0.994
124.1	0.9955
124.2	0.9965
124.3	0.9945
124.4	0.9935
124.5	0.9965
124.6	0.9945
124.7	0.996
124.8	0.993
124.9	0.995
125	0.9935
125.1	0.993
125.2	0.9945
125.3	0.996
125.4	0.9955
125.5	0.9945
125.6	0.9965
125.7	0.996
125.8	0.9975
125.9	0.9945
126	0.9955
126.1	0.9955
126.2	0.9975
126.3	0.9965
126.4	0.9975
126.5	0.9975
126.6	0.9975
126.7	0.9955
126.8	0.9975
126.9	0.9975
127	0.9955
127.1	0.998
127.2	0.998
127.3	0.995
127.4	0.9975
127.5	0.997
127.6	0.996
127.7	0.998
127.8	0.997
127.9	0.996
128	0.995
128.1	0.997
128.2	0.9965
128.3	0.9945
128.4	0.9945
128.5	0.997
128.6	0.9965
128.7	0.9975
128.8	0.9965
128.9	0.9965
129	0.997
129.1	0.9965
129.2	0.995
129.3	0.9965
129.4	0.995
129.5	0.997
129.6	0.9955
129.7	0.9945
129.8	0.9955
129.9	0.9965
130	0.993
130.1	0.9945
130.2	0.997
130.3	0.995
130.4	0.997
130.5	0.997
130.6	0.9965
130.7	0.9985
130.8	0.995
130.9	0.9965
131	0.9955
131.1	0.9975
131.2	0.997
131.3	0.997
131.4	0.996
131.5	0.996
131.6	0.9995
131.7	0.996
131.8	0.997
131.9	0.999
132	0.995
132.1	0.996
132.2	0.995
132.3	0.995
132.4	0.9975
132.5	0.9985
132.6	0.9975
132.7	0.9965
132.8	0.9955
132.9	0.9985
133	0.997
133.1	0.997
133.2	0.996
133.3	0.9955
133.4	0.9975
133.5	0.9935
133.6	0.995
133.7	0.9945
133.8	0.997
133.9	0.9975
134	0.997
134.1	0.997
134.2	0.9945
134.3	0.999
134.4	0.9985
134.5	0.9965
134.6	0.997
134.7	0.998
134.8	0.9955
134.9	0.996
135	0.9975
135.1	0.997
135.2	0.996
135.3	0.997
135.4	0.995
135.5	0.9955
135.6	0.998
135.7	0.9955
135.8	0.9965
135.9	0.995
136	0.994
136.1	0.993
136.2	0.9935
136.3	0.997
136.4	0.9965
136.5	0.996
136.6	0.9925
136.7	0.994
136.8	0.9985
136.9	0.9955
137	0.997
137.1	0.9965
137.2	0.9985
137.3	0.9985
137.4	0.9975
137.5	0.996
137.6	0.9985
137.7	0.996
137.8	0.9975
137.9	0.9945
138	0.9955
138.1	0.9955
138.2	0.9985
138.3	0.999
138.4	0.996
138.5	0.997
138.6	0.998
138.7	0.995
138.8	0.997
138.9	0.9975
139	0.996
139.1	0.9955
139.2	0.9945
139.3	0.997
139.4	0.997
139.5	0.997
139.6	0.997
139.7	0.9945
139.8	0.994
139.9	0.998
140	0.996
140.1	0.995
140.2	0.9955
140.3	0.994
140.4	0.9955
140.5	0.9965
140.6	0.998
140.7	0.998
140.8	0.9975
140.9	0.999
141	0.999
141.1	0.999
141.2	0.997
141.3	0.9955
141.4	0.997
141.5	0.9975
141.6	0.9955
141.7	0.9975
141.8	0.997
141.9	0.998
142	0.998
142.1	0.9985
142.2	0.9985
142.3	0.9945
142.4	0.9965
142.5	0.997
142.6	0.9945
142.7	0.996
142.8	0.9955
142.9	0.9985
143	0.996
143.1	0.9965
143.2	0.997
143.3	0.999
143.4	0.995
143.5	0.9985
143.6	0.996
143.7	0.9965
143.8	0.9985
143.9	0.9965
144	0.9955
144.1	0.9975
144.2	0.997
144.3	0.9975
144.4	0.996
144.5	0.9975
144.6	0.997
144.7	0.9975
144.8	0.9975
144.9	0.9965
145	0.9985
145.1	0.999
145.2	0.998
145.3	0.997
145.4	0.9975
145.5	0.997
145.6	0.9965
145.7	0.9965
145.8	0.999
145.9	0.998
146	0.996
146.1	0.9965
146.2	0.998
146.3	0.993
146.4	0.9925
146.5	0.9985
146.6	0.9985
146.7	0.999
146.8	0.996
146.9	0.9995
147	0.998
147.1	0.9955
147.2	0.9925
147.3	0.9955
147.4	0.997
147.5	0.998
147.6	0.9975
147.7	0.9965
147.8	0.9965
147.9	0.997
148	0.9995
148.1	0.998
148.2	0.999
148.3	0.998
148.4	0.996
148.5	0.997
148.6	0.997
148.7	0.9965
148.8	0.995
148.9	0.997
149	0.9985
149.1	0.9985
149.2	0.998
149.3	0.9985
149.4	0.9985
149.5	0.997
149.6	0.999
149.7	0.995
149.8	0.9955
149.9	0.9965
150	0.998
150.1	0.9955
150.2	0.9965
150.3	0.998
150.4	0.998
150.5	0.9975
150.6	0.997
150.7	0.997
150.8	0.9965
150.9	0.9945
151	0.997
151.1	0.9975
151.2	0.995
151.3	0.9975
151.4	0.9985
151.5	0.997
151.6	0.9965
151.7	0.994
151.8	0.9935
151.9	0.9975
152	0.998
152.1	0.9995
152.2	0.9965
152.3	0.997
152.4	0.996
152.5	0.997
152.6	0.997
152.7	0.9975
152.8	0.997
152.9	0.997
153	0.9965
153.1	0.9955
153.2	0.997
153.3	0.9945
153.4	0.998
153.5	0.9975
153.6	0.9975
153.7	0.9985
153.8	0.9975
153.9	0.998
154	0.999
154.1	0.9985
154.2	0.999
154.3	0.997
154.4	0.9975
154.5	0.998
154.6	0.996
154.7	0.997
154.8	0.996
154.9	0.997
155	0.997
155.1	0.997
155.2	0.9985
155.3	0.9975
155.4	0.997
155.5	0.998
155.6	0.9975
155.7	0.999
155.8	0.9945
155.9	0.9975
156	0.998
156.1	0.997
156.2	0.997
156.3	0.997
156.4	0.997
156.5	0.9955
156.6	0.9975
156.7	0.997
156.8	0.996
156.9	0.9965
157	0.9975
157.1	0.997
157.2	0.998
157.3	0.999
157.4	0.999
157.5	0.998
157.6	0.997
157.7	0.9965
157.8	0.9975
157.9	0.999
158	0.9985
158.1	0.998
158.2	0.998
158.3	0.998
158.4	0.9975
158.5	0.9975
158.6	0.9965
158.7	0.999
158.8	0.998
158.9	0.9995
159	0.9985
159.1	0.9965
159.2	0.995
159.3	0.998
159.4	0.9975
159.5	0.999
159.6	0.9975
159.7	0.998
159.8	0.998
159.9	0.997
160	0.9985
160.1	0.9995
160.2	0.997
160.3	0.9995
160.4	0.999
160.5	0.9985
160.6	0.998
160.7	0.998
160.8	0.997
160.9	0.9985
161	0.997
161.1	0.997
161.2	0.997
161.3	0.9985
161.4	0.9985
161.5	0.9985
161.6	0.9955
161.7	0.997
161.8	0.9975
161.9	0.9985
162	0.9975
162.1	0.998
162.2	0.996
162.3	0.9955
162.4	0.9955
162.5	0.997
162.6	0.998
162.7	0.997
162.8	0.997
162.9	0.9975
163	0.9965
163.1	0.9975
163.2	0.999
163.3	0.998
163.4	0.998
163.5	0.998
163.6	0.9985
163.7	0.9975
163.8	0.998
163.9	0.998
164	0.997
164.1	0.999
164.2	0.9975
164.3	0.997
164.4	0.998
164.5	0.9975
164.6	0.9985
164.7	0.999
164.8	0.997
164.9	0.9995
165	0.9995
165.1	0.9995
165.2	0.997
165.3	0.998
165.4	0.998
165.5	0.9975
165.6	0.9985
165.7	0.998
165.8	0.997
165.9	0.9975
166	0.999
166.1	0.9975
166.2	0.9995
166.3	0.996
166.4	0.9975
166.5	0.996
166.6	0.998
166.7	0.9985
166.8	0.997
166.9	0.9995
167	0.997
167.1	0.998
167.2	0.9975
167.3	0.9965
167.4	0.9965
167.5	0.9965
167.6	0.998
167.7	0.9995
167.8	0.9965
167.9	0.998
168	0.9965
168.1	0.998
168.2	0.9975
168.3	0.999
168.4	0.9965
168.5	0.998
168.6	0.9985
168.7	0.9975
168.8	0.997
168.9	0.999
169	0.998
169.1	0.9965
169.2	0.9955
169.3	0.9985
169.4	0.9985
169.5	0.9985
169.6	0.998
169.7	0.998
169.8	0.9965
169.9	0.9985
170	0.999
170.1	0.9985
170.2	0.9985
170.3	0.997
170.4	0.9975
170.5	0.997
170.6	0.9965
170.7	0.998
170.8	0.9985
170.9	0.998
171	0.998
171.1	0.999
171.2	0.9985
171.3	0.9975
171.4	0.996
171.5	0.997
171.6	0.9975
171.7	0.9975
171.8	0.998
171.9	0.997
172	0.9975
172.1	0.999
172.2	0.9975
172.3	0.9975
172.4	0.9985
172.5	0.9995
172.6	0.9985
172.7	0.997
172.8	0.9985
172.9	0.9975
173	0.997
173.1	0.999
173.2	0.9985
173.3	0.9985
173.4	0.9975
173.5	0.9965
173.6	0.9965
173.7	0.998
173.8	0.998
173.9	0.998
174	0.9975
174.1	0.9975
174.2	0.997
174.3	1
174.4	0.9985
174.5	0.999
174.6	0.9965
174.7	0.9985
174.8	0.9985
174.9	0.9985
175	0.998
175.1	0.998
175.2	0.9995
175.3	0.9975
175.4	0.997
175.5	0.9975
175.6	0.9965
175.7	0.998
175.8	0.999
175.9	0.9985
176	0.9995
176.1	0.9985
176.2	0.9995
176.3	0.995
176.4	0.998
176.5	0.996
176.6	0.997
176.7	0.9995
176.8	0.998
176.9	0.9975
177	0.998
177.1	0.998
177.2	0.9965
177.3	0.9975
177.4	0.997
177.5	0.9985
177.6	0.998
177.7	0.999
177.8	0.997
177.9	0.9955
178	0.9975
178.1	0.996
178.2	0.9965
178.3	0.9985
178.4	0.9975
178.5	0.9975
178.6	0.9965
178.7	0.9985
178.8	0.9985
178.9	0.997
179	0.9985
179.1	0.998
179.2	0.9965
179.3	0.9985
179.4	0.998
179.5	0.9995
179.6	0.9995
179.7	0.9985
179.8	0.997
179.9	0.9975
180	0.998
180.1	0.9985
180.2	0.9975
180.3	0.998
180.4	0.998
180.5	0.997
180.6	0.9965
180.7	0.999
180.8	0.9975
180.9	0.9985
181	0.9995
181.1	0.9965
181.2	0.9965
181.3	0.999
181.4	0.9995
181.5	0.999
181.6	0.997
181.7	0.998
181.8	0.999
181.9	0.999
182	0.997
182.1	0.9975
182.2	0.999
182.3	0.9985
182.4	0.999
182.5	0.997
182.6	0.9985
182.7	0.997
182.8	0.9985
182.9	0.9985
183	0.998
183.1	0.999
183.2	0.999
183.3	0.9975
183.4	0.999
183.5	0.998
183.6	0.9975
183.7	0.998
183.8	0.999
183.9	0.998
184	0.998
184.1	0.999
184.2	0.9985
184.3	0.997
184.4	0.996
184.5	0.998
184.6	0.9975
184.7	0.999
184.8	0.999
184.9	0.9995
185	0.999
185.1	0.997
185.2	0.9975
185.3	0.998
185.4	0.9975
185.5	0.9985
185.6	0.996
185.7	0.9955
185.8	0.998
185.9	0.9985
186	0.998
186.1	0.9975
186.2	0.9985
186.3	0.9965
186.4	0.9975
186.5	0.9985
186.6	0.9975
186.7	0.9965
186.8	0.998
186.9	0.9985
187	0.9965
187.1	0.999
187.2	0.9965
187.3	0.9975
187.4	0.9975
187.5	0.9975
187.6	0.9985
187.7	1
187.8	0.9995
187.9	0.9975
188	0.9975
188.1	0.9995
188.2	0.998
188.3	0.9995
188.4	0.9985
188.5	0.997
188.6	0.9975
188.7	0.9985
188.8	0.9985
188.9	0.998
189	0.998
189.1	0.998
189.2	0.999
189.3	0.999
189.4	0.998
189.5	0.9985
189.6	0.9985
189.7	0.9985
189.8	0.999
189.9	0.998
190	0.9985
190.1	0.999
190.2	0.998
190.3	0.998
190.4	0.997
190.5	0.998
190.6	0.997
190.7	0.9985
190.8	0.9975
190.9	0.998
191	0.9975
191.1	0.9985
191.2	0.998
191.3	0.997
191.4	0.9975
191.5	0.9985
191.6	0.998
191.7	0.997
191.8	0.9985
191.9	0.999
192	0.998
192.1	0.9995
192.2	0.9955
192.3	0.9975
192.4	0.999
192.5	1
192.6	0.9975
192.7	0.9955
192.8	0.9985
192.9	0.999
193	0.9985
193.1	0.997
193.2	0.9965
193.3	0.998
193.4	0.997
193.5	0.997
193.6	0.9985
193.7	0.9965
193.8	0.995
193.9	0.998
194	0.9975
194.1	0.9985
194.2	0.997
194.3	0.998
194.4	0.9975
194.5	0.997
194.6	0.9975
194.7	0.9995
194.8	0.998
194.9	0.9995
195	0.999
195.1	0.997
195.2	0.9975
195.3	0.999
195.4	0.997
195.5	0.997
195.6	0.999
195.7	0.9985
195.8	0.9975
195.9	0.998
196	0.998
196.1	0.998
196.2	0.999
196.3	0.997
196.4	0.996
196.5	0.9985
196.6	0.9985
196.7	1
196.8	0.998
196.9	0.9975
197	0.998
197.1	0.999
197.2	0.998
197.3	0.998
197.4	0.9965
197.5	0.9985
197.6	0.9975
197.7	0.9985
197.8	0.998
197.9	0.999
198	0.9965
198.1	0.998
198.2	0.996
198.3	0.9975
198.4	0.9995
198.5	0.9975
198.6	0.9975
198.7	0.9985
198.8	0.9985
198.9	0.999
199	0.9985
199.1	0.997
199.2	0.996
199.3	0.998
199.4	0.9975
199.5	0.997
199.6	0.999
199.7	0.998
199.8	0.9995
199.9	0.9985
200	0.9985
[truncated: 14,000 more rows]
