# Supplementary material for: Bayesian inference of kinetic schemes for ion channels by Kalman filtering
Source: eLife journal article supplement (doi:10.7554/elife.62714), 2022-05-04
Supplement: fig1-data1 [file 64_Sim_N_1000_Strom_MW.xlsx]

## Sheet: Tabelle1
0.1	0
0.2	0
0.3	0
0.4	0
0.5	0
0.6	0
0.7	0
0.8	0
0.9	0
1	0
1.1	0
1.2	0
1.3	0
1.4	0
1.5	0
1.6	0
1.7	0
1.8	0
1.9	0
2	0
2.1	0
2.2	0
2.3	0
2.4	0
2.5	0
2.6	0
2.7	0
2.8	0
2.9	0
3	0
3.1	0
3.2	0
3.3	0
3.4	0
3.5	0
3.6	0
3.7	0
3.8	0
3.9	0
4	0
4.1	0
4.2	0
4.3	0
4.4	0
4.5	0
4.6	0
4.7	0
4.8	0
4.9	0
5	0
5.1	0
5.2	0
5.3	0
5.4	0
5.5	0
5.6	0
5.7	0
5.8	0
5.9	0
6	0
6.1	0
6.2	0
6.3	0
6.4	0
6.5	0
6.6	0
6.7	0
6.8	0
6.9	0
7	0
7.1	0
7.2	0
7.3	0
7.4	0
7.5	0
7.6	0
7.7	0
7.8	0
7.9	0
8	0
8.1	0
8.2	0
8.3	0
8.4	0
8.5	0
8.6	0
8.7	0
8.8	0
8.9	0
9	0
9.1	0
9.2	0
9.3	0
9.4	0
9.5	0
9.6	0
9.7	0
9.8	0
9.9	0
10	0
10.1	0
10.2	0
10.3	0
10.4	0
10.5	0
10.6	0
10.7	0
10.8	0
10.9	0
11	0
11.1	0
11.2	0
11.3	0
11.4	0
11.5	0
11.6	0
11.7	0
11.8	0
11.9	0
12	0
12.1	0
12.2	0
12.3	0
12.4	0
12.5	0
12.6	0
12.7	0
12.8	0
12.9	0
13	0
13.1	0
13.2	0
13.3	0
13.4	0
13.5	0
13.6	0
13.7	0
13.8	0
13.9	0
14	0
14.1	0
14.2	0
14.3	0
14.4	0
14.5	0
14.6	0
14.7	0
14.8	0
14.9	0
15	0
15.1	0
15.2	0
15.3	0
15.4	0
15.5	0
15.6	0
15.7	0
15.8	0
15.9	0
16	0
16.1	0
16.2	0
16.3	0
16.4	0
16.5	0
16.6	0
16.7	0
16.8	0
16.9	0
17	0
17.1	0
17.2	0
17.3	0
17.4	0
17.5	0
17.6	0
17.7	0
17.8	0
17.9	0
18	0
18.1	0
18.2	0
18.3	0
18.4	0
18.5	0
18.6	0
18.7	0
18.8	0
18.9	0
19	0
19.1	0
19.2	0
19.3	0
19.4	0
19.5	0
19.6	0
19.7	0
19.8	0
19.9	0
20	0
20.1	0
20.2	0
20.3	0
20.4	0
20.5	0
20.6	0
20.7	0
20.8	0
20.9	0
21	0
21.1	0
21.2	0
21.3	0
21.4	0
21.5	0
21.6	0
21.7	0
21.8	0
21.9	0
22	0
22.1	0
22.2	0
22.3	0
22.4	0
22.5	0
22.6	0
22.7	0
22.8	0
22.9	0
23	0
23.1	0
23.2	0
23.3	0
23.4	0
23.5	0
23.6	0
23.7	0
23.8	0
23.9	0
24	0
24.1	0
24.2	0
24.3	0
24.4	0
24.5	0
24.6	0
24.7	0
24.8	0
24.9	0
25	0
25.1	0
25.2	0
25.3	0
25.4	0
25.5	0
25.6	0
25.7	0
25.8	0
25.9	0
26	0
26.1	0
26.2	0
26.3	0
26.4	0
26.5	0
26.6	0
26.7	0
26.8	0
26.9	0
27	0
27.1	0
27.2	0
27.3	0
27.4	0
27.5	0
27.6	0
27.7	0
27.8	0
27.9	0
28	0
28.1	0
28.2	0
28.3	0
28.4	0
28.5	0
28.6	0
28.7	0
28.8	0
28.9	0
29	0
29.1	0
29.2	0
29.3	0
29.4	0
29.5	0
29.6	0
29.7	0
29.8	0
29.9	0
30	0
30.1	0
30.2	0
30.3	0
30.4	0
30.5	0
30.6	0
30.7	0
30.8	0
30.9	0
31	0
31.1	0
31.2	0
31.3	0
31.4	0
31.5	0
31.6	0
31.7	0
31.8	0
31.9	0
32	0
32.1	0
32.2	0
32.3	0
32.4	0
32.5	0
32.6	0
32.7	0
32.8	0
32.9	0
33	0
33.1	0
33.2	0
33.3	0
33.4	0
33.5	0
33.6	0
33.7	0
33.8	0
33.9	0
34	0
34.1	0
34.2	0
34.3	0
34.4	0
34.5	0
34.6	0
34.7	0
34.8	0
34.9	0
35	0
35.1	0
35.2	0
35.3	0
35.4	0
35.5	0
35.6	0
35.7	0
35.8	0
35.9	0
36	0
36.1	0
36.2	0
36.3	0
36.4	0
36.5	0
36.6	0
36.7	0
36.8	0
36.9	0
37	0
37.1	0
37.2	0
37.3	0
37.4	0
37.5	0
37.6	0
37.7	0
37.8	0
37.9	0
38	0
38.1	0
38.2	0
38.3	0
38.4	0
38.5	0
38.6	0
38.7	0
38.8	0
38.9	0
39	0
39.1	0
39.2	0
39.3	0
39.4	0
39.5	0
39.6	0
39.7	0
39.8	0
39.9	0
40	0
40.1	0
40.2	0
40.3	0
40.4	0
40.5	0
40.6	0
40.7	0
40.8	0
40.9	0
41	0
41.1	0
41.2	0
41.3	0
41.4	0
41.5	0
41.6	0
41.7	0
41.8	0
41.9	0
42	0
42.1	0
42.2	0
42.3	0
42.4	0
42.5	0
42.6	0
42.7	0
42.8	0
42.9	0
43	0
43.1	0
43.2	0
43.3	0
43.4	0
43.5	0
43.6	0
43.7	0
43.8	0
43.9	0
44	0
44.1	0
44.2	0
44.3	0
44.4	0
44.5	0
44.6	0
44.7	0
44.8	0
44.9	0
45	0
45.1	0
45.2	0
45.3	0
45.4	0
45.5	0
45.6	0
45.7	0
45.8	0
45.9	0
46	0
46.1	0
46.2	0
46.3	0
46.4	0
46.5	0
46.6	0
46.7	0
46.8	0
46.9	0
47	0
47.1	0
47.2	0
47.3	0
47.4	0
47.5	0
47.6	0
47.7	0
47.8	0
47.9	0
48	0
48.1	0
48.2	0
48.3	0
48.4	0
48.5	0
48.6	0
48.7	0
48.8	0
48.9	0
49	0
49.1	0
49.2	0
49.3	0
49.4	0
49.5	0
49.6	0
49.7	0
49.8	0
49.9	0
50	0
50.1	0
50.2	0
50.3	0
50.4	0
50.5	0
50.6	0
50.7	0
50.8	0
50.9	0
51	0
51.1	0
51.2	0
51.3	0
51.4	0
51.5	0
51.6	0
51.7	0
51.8	0
51.9	0
52	0
52.1	0
52.2	0
52.3	0
52.4	0
52.5	0
52.6	0
52.7	0
52.8	0
52.9	0
53	0
53.1	0
53.2	0
53.3	0
53.4	0
53.5	0
53.6	0
53.7	0
53.8	0
53.9	0
54	0
54.1	0
54.2	0
54.3	0
54.4	0
54.5	0
54.6	0
54.7	0
54.8	0
54.9	0
55	0
55.1	0
55.2	0
55.3	0
55.4	0
55.5	0
55.6	0
55.7	0
55.8	0
55.9	0
56	0
56.1	0
56.2	0
56.3	0
56.4	0
56.5	0
56.6	0
56.7	0
56.8	0
56.9	0
57	0
57.1	0
57.2	0
57.3	0
57.4	0
57.5	0
57.6	0
57.7	0
57.8	0
57.9	0
58	0
58.1	0
58.2	0
58.3	0
58.4	0
58.5	0
58.6	0
58.7	0
58.8	0
58.9	0
59	0
59.1	0
59.2	0
59.3	0
59.4	0
59.5	0
59.6	0
59.7	0
59.8	0
59.9	0
60	0
60.1	0
60.2	0
60.3	0
60.4	0
60.5	0
60.6	0
60.7	0
60.8	0
60.9	0
61	0
61.1	0
61.2	0
61.3	0
61.4	0
61.5	0
61.6	0
61.7	0
61.8	0
61.9	0
62	0
62.1	0
62.2	0
62.3	0
62.4	0
62.5	0
62.6	0
62.7	0
62.8	0
62.9	0
63	0
63.1	0
63.2	0
63.3	0
63.4	0
63.5	0
63.6	0
63.7	0
63.8	0
63.9	0
64	0
64.1	0
64.2	0
64.3	0
64.4	0
64.5	0
64.6	0
64.7	0
64.8	0
64.9	0
65	0
65.1	0
65.2	0
65.3	0
65.4	0
65.5	0
65.6	0
65.7	0
65.8	0
65.9	0
66	0
66.1	0
66.2	0
66.3	0
66.4	0
66.5	0
66.6	0
66.7	0
66.8	0
66.9	0
67	0
67.1	0
67.2	0
67.3	0
67.4	0
67.5	0
67.6	0
67.7	0
67.8	0
67.9	0
68	0
68.1	0
68.2	0
68.3	0
68.4	0
68.5	0
68.6	0
68.7	0
68.8	0
68.9	0
69	0
69.1	0
69.2	0
69.3	0
69.4	0
69.5	0
69.6	0
69.7	0
69.8	0
69.9	0
70	0
70.1	0
70.2	0
70.3	0
70.4	0
70.5	0
70.6	0
70.7	0
70.8	0
70.9	0
71	0
71.1	0
71.2	0
71.3	0
71.4	0
71.5	0
71.6	0
71.7	0
71.8	0
71.9	0
72	0
72.1	0
72.2	0
72.3	0
72.4	0
72.5	0
72.6	0
72.7	0
72.8	0
72.9	0
73	0
73.1	0
73.2	0
73.3	0
73.4	0
73.5	0
73.6	0
73.7	0
73.8	0
73.9	0
74	0
74.1	0
74.2	0
74.3	0
74.4	0
74.5	0
74.6	0
74.7	0
74.8	0
74.9	0
75	0
75.1	0
75.2	0
75.3	0
75.4	0
75.5	0
75.6	0
75.7	0
75.8	0
75.9	0
76	0
76.1	0
76.2	0
76.3	0
76.4	0
76.5	0
76.6	0
76.7	0
76.8	0
76.9	0
77	0
77.1	0
77.2	0
77.3	0
77.4	0
77.5	0
77.6	0
77.7	0
77.8	0
77.9	0
78	0
78.1	0
78.2	0
78.3	0
78.4	0
78.5	0
78.6	0
78.7	0
78.8	0
78.9	0
79	0
79.1	0
79.2	0
79.3	0
79.4	0
79.5	0
79.6	0
79.7	0
79.8	0
79.9	0
80	0
80.1	0
80.2	0
80.3	0
80.4	0
80.5	0
80.6	0
80.7	0
80.8	0
80.9	0
81	0
81.1	0
81.2	0
81.3	0
81.4	0
81.5	0
81.6	0
81.7	0
81.8	0
81.9	0
82	0
82.1	0
82.2	0
82.3	0
82.4	0
82.5	0
82.6	0
82.7	0
82.8	0
82.9	0
83	0
83.1	0
83.2	0
83.3	0
83.4	0
83.5	0
83.6	0
83.7	0
83.8	0
83.9	0
84	0
84.1	0
84.2	0
84.3	0
84.4	0
84.5	0
84.6	0
84.7	0
84.8	0
84.9	0
85	0
85.1	0
85.2	0
85.3	0
85.4	0
85.5	0
85.6	0
85.7	0
85.8	0
85.9	0
86	0
86.1	0
86.2	0
86.3	0
86.4	0
86.5	0
86.6	0
86.7	0
86.8	0
86.9	0
87	0
87.1	0
87.2	0
87.3	0
87.4	0
87.5	0
87.6	0
87.7	0
87.8	0
87.9	0
88	0
88.1	0
88.2	0
88.3	0
88.4	0
88.5	0
88.6	0
88.7	0
88.8	0
88.9	0
89	0
89.1	0
89.2	0
89.3	0
89.4	0
89.5	0
89.6	0
89.7	0
89.8	0
89.9	0
90	0
90.1	0
90.2	0
90.3	0
90.4	0
90.5	0
90.6	0
90.7	0
90.8	0
90.9	0
91	0
91.1	0
91.2	0
91.3	0
91.4	0
91.5	0
91.6	0
91.7	0
91.8	0
91.9	0
92	0
92.1	0
92.2	0
92.3	0
92.4	0
92.5	0
92.6	0
92.7	0
92.8	0
92.9	0
93	0
93.1	0
93.2	0
93.3	0
93.4	0
93.5	0
93.6	0
93.7	0
93.8	0
93.9	0
94	0
94.1	0
94.2	0
94.3	0
94.4	0
94.5	0
94.6	0
94.7	0
94.8	0
94.9	0
95	0
95.1	0
95.2	0
95.3	0
95.4	0
95.5	0
95.6	0
95.7	0
95.8	0
95.9	0
96	0
96.1	0
96.2	0
96.3	0
96.4	0
96.5	0
96.6	0
96.7	0
96.8	0
96.9	0
97	0
97.1	0
97.2	0
97.3	0
97.4	0
97.5	0
97.6	0
97.7	0
97.8	0
97.9	0
98	0
98.1	0
98.2	0
98.3	0
98.4	0
98.5	0
98.6	0
98.7	0
98.8	0
98.9	0
99	0
99.1	0
99.2	0
99.3	0
99.4	0
99.5	0
99.6	0
99.7	0
99.8	0
99.9	0
100	0
100.1	0.003
100.2	0.004
100.3	0.006
100.4	0.012
100.5	0.014
100.6	0.017
100.7	0.026
100.8	0.028
100.9	0.037
101	0.038
101.1	0.045
101.2	0.047
101.3	0.052
101.4	0.055
101.5	0.06
101.6	0.063
101.7	0.068
101.8	0.07
101.9	0.076
102	0.081
102.1	0.084
102.2	0.086
102.3	0.092
102.4	0.093
102.5	0.094
102.6	0.098
102.7	0.1
102.8	0.102
102.9	0.107
103	0.112
103.1	0.115
103.2	0.119
103.3	0.121
103.4	0.123
103.5	0.126
103.6	0.131
103.7	0.134
103.8	0.138
103.9	0.141
104	0.141
104.1	0.145
104.2	0.152
104.3	0.155
104.4	0.157
104.5	0.159
104.6	0.167
104.7	0.171
104.8	0.174
104.9	0.176
105	0.181
105.1	0.185
105.2	0.189
105.3	0.194
105.4	0.196
105.5	0.199
105.6	0.203
105.7	0.206
105.8	0.212
105.9	0.212
106	0.215
106.1	0.219
106.2	0.221
106.3	0.221
106.4	0.226
106.5	0.23
106.6	0.234
106.7	0.238
106.8	0.243
106.9	0.248
107	0.253
107.1	0.256
107.2	0.258
107.3	0.263
107.4	0.264
107.5	0.265
107.6	0.27
107.7	0.273
107.8	0.275
107.9	0.278
108	0.281
108.1	0.283
108.2	0.286
108.3	0.287
108.4	0.288
108.5	0.293
108.6	0.297
108.7	0.3
108.8	0.306
108.9	0.307
109	0.31
109.1	0.313
109.2	0.315
109.3	0.316
109.4	0.32
109.5	0.324
109.6	0.331
109.7	0.335
109.8	0.342
109.9	0.345
110	0.347
110.1	0.348
110.2	0.349
110.3	0.351
110.4	0.355
110.5	0.359
110.6	0.361
110.7	0.362
110.8	0.367
110.9	0.368
111	0.374
111.1	0.376
111.2	0.381
111.3	0.383
111.4	0.384
111.5	0.386
111.6	0.387
111.7	0.389
111.8	0.391
111.9	0.394
112	0.395
112.1	0.397
112.2	0.397
112.3	0.402
112.4	0.402
112.5	0.404
112.6	0.405
112.7	0.407
112.8	0.41
112.9	0.415
113	0.42
113.1	0.424
113.2	0.43
113.3	0.434
113.4	0.439
113.5	0.442
113.6	0.446
113.7	0.447
113.8	0.452
113.9	0.455
114	0.456
114.1	0.459
114.2	0.461
114.3	0.462
114.4	0.462
114.5	0.464
114.6	0.465
114.7	0.468
114.8	0.469
114.9	0.469
115	0.471
115.1	0.473
115.2	0.474
115.3	0.477
115.4	0.478
115.5	0.48
115.6	0.484
115.7	0.486
115.8	0.486
115.9	0.488
116	0.491
116.1	0.49
116.2	0.492
116.3	0.494
116.4	0.496
116.5	0.499
116.6	0.5
116.7	0.5
116.8	0.499
116.9	0.501
117	0.501
117.1	0.5
117.2	0.501
117.3	0.503
117.4	0.506
117.5	0.507
117.6	0.513
117.7	0.515
117.8	0.518
117.9	0.518
118	0.52
118.1	0.517
118.2	0.521
118.3	0.526
118.4	0.529
118.5	0.529
118.6	0.53
118.7	0.532
118.8	0.536
118.9	0.537
119	0.538
119.1	0.538
119.2	0.541
119.3	0.544
119.4	0.545
119.5	0.548
119.6	0.548
119.7	0.55
119.8	0.549
119.9	0.551
120	0.551
120.1	0.555
120.2	0.555
120.3	0.559
120.4	0.56
120.5	0.561
120.6	0.563
120.7	0.563
120.8	0.564
120.9	0.566
121	0.568
121.1	0.57
121.2	0.571
121.3	0.571
121.4	0.575
121.5	0.578
121.6	0.579
121.7	0.58
121.8	0.581
121.9	0.581
122	0.587
122.1	0.589
122.2	0.59
122.3	0.593
122.4	0.594
122.5	0.595
122.6	0.597
122.7	0.597
122.8	0.602
122.9	0.604
123	0.605
123.1	0.605
123.2	0.607
123.3	0.608
123.4	0.609
123.5	0.611
123.6	0.611
123.7	0.613
123.8	0.614
123.9	0.614
124	0.615
124.1	0.617
124.2	0.617
124.3	0.62
124.4	0.621
124.5	0.621
124.6	0.623
124.7	0.628
124.8	0.631
124.9	0.632
125	0.632
125.1	0.633
125.2	0.636
125.3	0.635
125.4	0.634
125.5	0.635
125.6	0.638
125.7	0.64
125.8	0.645
125.9	0.648
126	0.649
126.1	0.65
126.2	0.653
126.3	0.653
126.4	0.653
126.5	0.657
126.6	0.659
126.7	0.661
126.8	0.661
126.9	0.664
127	0.665
127.1	0.665
127.2	0.669
127.3	0.67
127.4	0.673
127.5	0.677
127.6	0.679
127.7	0.681
127.8	0.682
127.9	0.684
128	0.685
128.1	0.686
128.2	0.689
128.3	0.689
128.4	0.691
128.5	0.691
128.6	0.692
128.7	0.695
128.8	0.698
128.9	0.698
129	0.697
129.1	0.698
129.2	0.698
129.3	0.7
129.4	0.701
129.5	0.7
129.6	0.702
129.7	0.703
129.8	0.704
129.9	0.704
130	0.706
130.1	0.707
130.2	0.707
130.3	0.705
130.4	0.705
130.5	0.706
130.6	0.706
130.7	0.705
130.8	0.706
130.9	0.705
131	0.704
131.1	0.705
131.2	0.706
131.3	0.71
131.4	0.712
131.5	0.712
131.6	0.713
131.7	0.712
131.8	0.711
131.9	0.708
132	0.71
132.1	0.709
132.2	0.711
132.3	0.711
132.4	0.709
132.5	0.709
132.6	0.709
132.7	0.712
132.8	0.712
132.9	0.712
133	0.712
133.1	0.713
133.2	0.714
133.3	0.715
133.4	0.715
133.5	0.715
133.6	0.716
133.7	0.716
133.8	0.714
133.9	0.715
134	0.716
134.1	0.718
134.2	0.715
134.3	0.716
134.4	0.719
134.5	0.719
134.6	0.72
134.7	0.723
134.8	0.724
134.9	0.724
135	0.724
135.1	0.727
135.2	0.726
135.3	0.726
135.4	0.726
135.5	0.728
135.6	0.729
135.7	0.727
135.8	0.725
135.9	0.725
136	0.723
136.1	0.724
136.2	0.725
136.3	0.727
136.4	0.728
136.5	0.732
136.6	0.732
136.7	0.734
136.8	0.735
136.9	0.733
137	0.733
137.1	0.732
137.2	0.731
137.3	0.733
137.4	0.732
137.5	0.733
137.6	0.733
137.7	0.733
137.8	0.733
137.9	0.735
138	0.736
138.1	0.737
138.2	0.738
138.3	0.74
138.4	0.74
138.5	0.74
138.6	0.741
138.7	0.74
138.8	0.742
138.9	0.744
139	0.745
139.1	0.745
139.2	0.743
139.3	0.744
139.4	0.742
139.5	0.743
139.6	0.742
139.7	0.742
139.8	0.742
139.9	0.743
140	0.742
140.1	0.742
140.2	0.743
140.3	0.744
140.4	0.745
140.5	0.744
140.6	0.749
140.7	0.75
140.8	0.75
140.9	0.749
141	0.75
141.1	0.752
141.2	0.751
141.3	0.751
141.4	0.75
141.5	0.75
141.6	0.751
141.7	0.752
141.8	0.753
141.9	0.755
142	0.755
142.1	0.755
142.2	0.755
142.3	0.757
142.4	0.758
142.5	0.758
142.6	0.757
142.7	0.755
142.8	0.754
142.9	0.752
143	0.751
143.1	0.751
143.2	0.752
143.3	0.751
143.4	0.752
143.5	0.75
143.6	0.75
143.7	0.751
143.8	0.753
143.9	0.753
144	0.755
144.1	0.755
144.2	0.754
144.3	0.756
144.4	0.755
144.5	0.755
144.6	0.756
144.7	0.756
144.8	0.757
144.9	0.757
145	0.758
145.1	0.758
145.2	0.758
145.3	0.759
145.4	0.759
145.5	0.758
145.6	0.758
145.7	0.758
145.8	0.76
145.9	0.763
146	0.764
146.1	0.765
146.2	0.767
146.3	0.768
146.4	0.769
146.5	0.769
146.6	0.772
146.7	0.768
146.8	0.766
146.9	0.767
147	0.766
147.1	0.766
147.2	0.766
147.3	0.766
147.4	0.767
147.5	0.767
147.6	0.767
147.7	0.77
147.8	0.77
147.9	0.771
148	0.772
148.1	0.773
148.2	0.772
148.3	0.774
148.4	0.777
148.5	0.776
148.6	0.774
148.7	0.774
148.8	0.776
148.9	0.776
149	0.778
149.1	0.778
149.2	0.78
149.3	0.781
149.4	0.784
149.5	0.785
149.6	0.785
149.7	0.784
149.8	0.784
149.9	0.785
150	0.784
150.1	0.784
150.2	0.784
150.3	0.784
150.4	0.783
150.5	0.786
150.6	0.787
150.7	0.786
150.8	0.788
150.9	0.79
151	0.79
151.1	0.792
151.2	0.792
151.3	0.792
151.4	0.792
151.5	0.79
151.6	0.792
151.7	0.794
151.8	0.797
151.9	0.797
152	0.795
152.1	0.797
152.2	0.798
152.3	0.798
152.4	0.797
152.5	0.795
152.6	0.795
152.7	0.795
152.8	0.795
152.9	0.796
153	0.799
153.1	0.796
153.2	0.797
153.3	0.795
153.4	0.795
153.5	0.796
153.6	0.798
153.7	0.798
153.8	0.798
153.9	0.797
154	0.798
154.1	0.8
154.2	0.802
154.3	0.799
154.4	0.8
154.5	0.801
154.6	0.799
154.7	0.8
154.8	0.798
154.9	0.797
155	0.799
155.1	0.8
155.2	0.801
155.3	0.801
155.4	0.802
155.5	0.802
155.6	0.802
155.7	0.801
155.8	0.8
155.9	0.798
156	0.799
156.1	0.798
156.2	0.799
156.3	0.799
156.4	0.799
156.5	0.8
156.6	0.801
156.7	0.802
156.8	0.803
156.9	0.804
157	0.807
157.1	0.806
157.2	0.805
157.3	0.805
157.4	0.802
157.5	0.801
157.6	0.804
157.7	0.806
157.8	0.807
157.9	0.806
158	0.809
158.1	0.809
158.2	0.807
158.3	0.809
158.4	0.807
158.5	0.806
158.6	0.805
158.7	0.806
158.8	0.806
158.9	0.807
159	0.807
159.1	0.807
159.2	0.811
159.3	0.812
159.4	0.812
159.5	0.812
159.6	0.812
159.7	0.812
159.8	0.812
159.9	0.813
160	0.815
160.1	0.818
160.2	0.816
160.3	0.816
160.4	0.816
160.5	0.814
160.6	0.811
160.7	0.812
160.8	0.81
160.9	0.811
161	0.81
161.1	0.812
161.2	0.813
161.3	0.814
161.4	0.814
161.5	0.814
161.6	0.816
161.7	0.815
161.8	0.815
161.9	0.817
162	0.819
162.1	0.818
162.2	0.818
162.3	0.817
162.4	0.816
162.5	0.816
162.6	0.816
162.7	0.817
162.8	0.816
162.9	0.816
163	0.816
163.1	0.817
163.2	0.817
163.3	0.817
163.4	0.817
163.5	0.817
163.6	0.817
163.7	0.817
163.8	0.815
163.9	0.815
164	0.816
164.1	0.816
164.2	0.815
164.3	0.815
164.4	0.816
164.5	0.815
164.6	0.815
164.7	0.815
164.8	0.816
164.9	0.816
165	0.811
165.1	0.811
165.2	0.81
165.3	0.81
165.4	0.811
165.5	0.813
165.6	0.812
165.7	0.812
165.8	0.813
165.9	0.813
166	0.813
166.1	0.813
166.2	0.81
166.3	0.812
166.4	0.811
166.5	0.81
166.6	0.812
166.7	0.813
166.8	0.814
166.9	0.814
167	0.813
167.1	0.814
167.2	0.814
167.3	0.815
167.4	0.815
167.5	0.817
167.6	0.819
167.7	0.82
167.8	0.822
167.9	0.824
168	0.825
168.1	0.827
168.2	0.826
168.3	0.827
168.4	0.827
168.5	0.827
168.6	0.828
168.7	0.832
168.8	0.832
168.9	0.831
169	0.831
169.1	0.831
169.2	0.833
169.3	0.834
169.4	0.835
169.5	0.835
169.6	0.835
169.7	0.834
169.8	0.832
169.9	0.832
170	0.832
170.1	0.834
170.2	0.834
170.3	0.836
170.4	0.836
170.5	0.836
170.6	0.837
170.7	0.837
170.8	0.838
170.9	0.838
171	0.836
171.1	0.836
171.2	0.834
171.3	0.833
171.4	0.833
171.5	0.832
171.6	0.832
171.7	0.832
171.8	0.831
171.9	0.831
172	0.832
172.1	0.832
172.2	0.832
172.3	0.831
172.4	0.831
172.5	0.831
172.6	0.831
172.7	0.831
172.8	0.832
172.9	0.83
173	0.829
173.1	0.83
173.2	0.832
173.3	0.831
173.4	0.829
173.5	0.828
173.6	0.826
173.7	0.826
173.8	0.825
173.9	0.825
174	0.824
174.1	0.826
174.2	0.826
174.3	0.828
174.4	0.829
174.5	0.829
174.6	0.828
174.7	0.828
174.8	0.828
174.9	0.827
175	0.826
175.1	0.826
175.2	0.826
175.3	0.826
175.4	0.827
175.5	0.828
175.6	0.828
175.7	0.827
175.8	0.826
175.9	0.826
176	0.826
176.1	0.825
176.2	0.827
176.3	0.826
176.4	0.828
176.5	0.828
176.6	0.828
176.7	0.827
176.8	0.827
176.9	0.826
177	0.826
177.1	0.826
177.2	0.826
177.3	0.827
177.4	0.825
177.5	0.826
177.6	0.828
177.7	0.829
177.8	0.827
177.9	0.825
178	0.825
178.1	0.826
178.2	0.827
178.3	0.828
178.4	0.83
178.5	0.83
178.6	0.829
178.7	0.829
178.8	0.828
178.9	0.829
179	0.829
179.1	0.829
179.2	0.827
179.3	0.828
179.4	0.827
179.5	0.828
179.6	0.83
179.7	0.832
179.8	0.831
179.9	0.829
180	0.83
180.1	0.829
180.2	0.828
180.3	0.83
180.4	0.829
180.5	0.828
180.6	0.829
180.7	0.83
180.8	0.829
180.9	0.828
181	0.829
181.1	0.829
181.2	0.829
181.3	0.829
181.4	0.829
181.5	0.828
181.6	0.828
181.7	0.828
181.8	0.83
181.9	0.826
182	0.826
182.1	0.827
182.2	0.827
182.3	0.827
182.4	0.826
182.5	0.83
182.6	0.832
182.7	0.833
182.8	0.833
182.9	0.833
183	0.832
183.1	0.833
183.2	0.833
183.3	0.833
183.4	0.831
183.5	0.832
183.6	0.833
183.7	0.834
183.8	0.835
183.9	0.835
184	0.835
184.1	0.834
184.2	0.835
184.3	0.836
184.4	0.836
184.5	0.837
184.6	0.836
184.7	0.838
184.8	0.838
184.9	0.839
185	0.839
185.1	0.839
185.2	0.838
185.3	0.836
185.4	0.837
185.5	0.839
185.6	0.839
185.7	0.839
185.8	0.839
185.9	0.837
186	0.837
186.1	0.839
186.2	0.838
186.3	0.838
186.4	0.836
186.5	0.836
186.6	0.838
186.7	0.838
186.8	0.836
186.9	0.837
187	0.838
187.1	0.837
187.2	0.837
187.3	0.837
187.4	0.838
187.5	0.838
187.6	0.839
187.7	0.838
187.8	0.839
187.9	0.84
188	0.84
188.1	0.839
188.2	0.84
188.3	0.84
188.4	0.84
188.5	0.841
188.6	0.84
188.7	0.841
188.8	0.841
188.9	0.841
189	0.841
189.1	0.841
189.2	0.841
189.3	0.844
189.4	0.847
189.5	0.847
189.6	0.845
189.7	0.843
189.8	0.843
189.9	0.842
190	0.84
190.1	0.839
190.2	0.84
190.3	0.841
190.4	0.841
190.5	0.841
190.6	0.841
190.7	0.84
190.8	0.841
190.9	0.84
191	0.841
191.1	0.841
191.2	0.843
191.3	0.844
191.4	0.844
191.5	0.844
191.6	0.845
191.7	0.844
191.8	0.843
191.9	0.845
192	0.845
192.1	0.845
192.2	0.845
192.3	0.846
192.4	0.846
192.5	0.844
192.6	0.844
192.7	0.843
192.8	0.842
192.9	0.84
193	0.842
193.1	0.842
193.2	0.843
193.3	0.843
193.4	0.843
193.5	0.843
193.6	0.844
193.7	0.844
193.8	0.844
193.9	0.845
194	0.845
194.1	0.845
194.2	0.845
194.3	0.844
194.4	0.844
194.5	0.845
194.6	0.847
194.7	0.847
194.8	0.849
194.9	0.848
195	0.849
195.1	0.85
195.2	0.848
195.3	0.848
195.4	0.846
195.5	0.846
195.6	0.843
195.7	0.844
195.8	0.845
195.9	0.844
196	0.844
196.1	0.845
196.2	0.846
196.3	0.845
196.4	0.846
196.5	0.845
196.6	0.844
196.7	0.844
196.8	0.844
196.9	0.842
197	0.844
197.1	0.843
197.2	0.843
197.3	0.841
197.4	0.841
197.5	0.839
197.6	0.841
197.7	0.842
197.8	0.843
197.9	0.843
198	0.842
198.1	0.841
198.2	0.842
198.3	0.842
198.4	0.843
198.5	0.843
198.6	0.841
198.7	0.841
198.8	0.843
198.9	0.843
199	0.843
199.1	0.84
199.2	0.841
199.3	0.84
199.4	0.84
199.5	0.839
199.6	0.839
199.7	0.838
199.8	0.837
199.9	0.839
200	0.838
[truncated: 14,000 more rows]
