# Supplementary material for: Bayesian inference of kinetic schemes for ion channels by Kalman filtering
Source: eLife journal article supplement (doi:10.7554/elife.62714), 2022-05-04
Supplement: fig1-data1 [file 0125_Sim_N_1000_Fluor_MW.xlsx]

## Sheet: Tabelle1
0.1	0
0.2	0
0.3	0
0.4	0
0.5	0
0.6	0
0.7	0
0.8	0
0.9	0
1	0
1.1	0
1.2	0
1.3	0
1.4	0
1.5	0
1.6	0
1.7	0
1.8	0
1.9	0
2	0
2.1	0
2.2	0
2.3	0
2.4	0
2.5	0
2.6	0
2.7	0
2.8	0
2.9	0
3	0
3.1	0
3.2	0
3.3	0
3.4	0
3.5	0
3.6	0
3.7	0
3.8	0
3.9	0
4	0
4.1	0
4.2	0
4.3	0
4.4	0
4.5	0
4.6	0
4.7	0
4.8	0
4.9	0
5	0
5.1	0
5.2	0
5.3	0
5.4	0
5.5	0
5.6	0
5.7	0
5.8	0
5.9	0
6	0
6.1	0
6.2	0
6.3	0
6.4	0
6.5	0
6.6	0
6.7	0
6.8	0
6.9	0
7	0
7.1	0
7.2	0
7.3	0
7.4	0
7.5	0
7.6	0
7.7	0
7.8	0
7.9	0
8	0
8.1	0
8.2	0
8.3	0
8.4	0
8.5	0
8.6	0
8.7	0
8.8	0
8.9	0
9	0
9.1	0
9.2	0
9.3	0
9.4	0
9.5	0
9.6	0
9.7	0
9.8	0
9.9	0
10	0
10.1	0
10.2	0
10.3	0
10.4	0
10.5	0
10.6	0
10.7	0
10.8	0
10.9	0
11	0
11.1	0
11.2	0
11.3	0
11.4	0
11.5	0
11.6	0
11.7	0
11.8	0
11.9	0
12	0
12.1	0
12.2	0
12.3	0
12.4	0
12.5	0
12.6	0
12.7	0
12.8	0
12.9	0
13	0
13.1	0
13.2	0
13.3	0
13.4	0
13.5	0
13.6	0
13.7	0
13.8	0
13.9	0
14	0
14.1	0
14.2	0
14.3	0
14.4	0
14.5	0
14.6	0
14.7	0
14.8	0
14.9	0
15	0
15.1	0
15.2	0
15.3	0
15.4	0
15.5	0
15.6	0
15.7	0
15.8	0
15.9	0
16	0
16.1	0
16.2	0
16.3	0
16.4	0
16.5	0
16.6	0
16.7	0
16.8	0
16.9	0
17	0
17.1	0
17.2	0
17.3	0
17.4	0
17.5	0
17.6	0
17.7	0
17.8	0
17.9	0
18	0
18.1	0
18.2	0
18.3	0
18.4	0
18.5	0
18.6	0
18.7	0
18.8	0
18.9	0
19	0
19.1	0
19.2	0
19.3	0
19.4	0
19.5	0
19.6	0
19.7	0
19.8	0
19.9	0
20	0
20.1	0
20.2	0
20.3	0
20.4	0
20.5	0
20.6	0
20.7	0
20.8	0
20.9	0
21	0
21.1	0
21.2	0
21.3	0
21.4	0
21.5	0
21.6	0
21.7	0
21.8	0
21.9	0
22	0
22.1	0
22.2	0
22.3	0
22.4	0
22.5	0
22.6	0
22.7	0
22.8	0
22.9	0
23	0
23.1	0
23.2	0
23.3	0
23.4	0
23.5	0
23.6	0
23.7	0
23.8	0
23.9	0
24	0
24.1	0
24.2	0
24.3	0
24.4	0
24.5	0
24.6	0
24.7	0
24.8	0
24.9	0
25	0
25.1	0
25.2	0
25.3	0
25.4	0
25.5	0
25.6	0
25.7	0
25.8	0
25.9	0
26	0
26.1	0
26.2	0
26.3	0
26.4	0
26.5	0
26.6	0
26.7	0
26.8	0
26.9	0
27	0
27.1	0
27.2	0
27.3	0
27.4	0
27.5	0
27.6	0
27.7	0
27.8	0
27.9	0
28	0
28.1	0
28.2	0
28.3	0
28.4	0
28.5	0
28.6	0
28.7	0
28.8	0
28.9	0
29	0
29.1	0
29.2	0
29.3	0
29.4	0
29.5	0
29.6	0
29.7	0
29.8	0
29.9	0
30	0
30.1	0
30.2	0
30.3	0
30.4	0
30.5	0
30.6	0
30.7	0
30.8	0
30.9	0
31	0
31.1	0
31.2	0
31.3	0
31.4	0
31.5	0
31.6	0
31.7	0
31.8	0
31.9	0
32	0
32.1	0
32.2	0
32.3	0
32.4	0
32.5	0
32.6	0
32.7	0
32.8	0
32.9	0
33	0
33.1	0
33.2	0
33.3	0
33.4	0
33.5	0
33.6	0
33.7	0
33.8	0
33.9	0
34	0
34.1	0
34.2	0
34.3	0
34.4	0
34.5	0
34.6	0
34.7	0
34.8	0
34.9	0
35	0
35.1	0
35.2	0
35.3	0
35.4	0
35.5	0
35.6	0
35.7	0
35.8	0
35.9	0
36	0
36.1	0
36.2	0
36.3	0
36.4	0
36.5	0
36.6	0
36.7	0
36.8	0
36.9	0
37	0
37.1	0
37.2	0
37.3	0
37.4	0
37.5	0
37.6	0
37.7	0
37.8	0
37.9	0
38	0
38.1	0
38.2	0
38.3	0
38.4	0
38.5	0
38.6	0
38.7	0
38.8	0
38.9	0
39	0
39.1	0
39.2	0
39.3	0
39.4	0
39.5	0
39.6	0
39.7	0
39.8	0
39.9	0
40	0
40.1	0
40.2	0
40.3	0
40.4	0
40.5	0
40.6	0
40.7	0
40.8	0
40.9	0
41	0
41.1	0
41.2	0
41.3	0
41.4	0
41.5	0
41.6	0
41.7	0
41.8	0
41.9	0
42	0
42.1	0
42.2	0
42.3	0
42.4	0
42.5	0
42.6	0
42.7	0
42.8	0
42.9	0
43	0
43.1	0
43.2	0
43.3	0
43.4	0
43.5	0
43.6	0
43.7	0
43.8	0
43.9	0
44	0
44.1	0
44.2	0
44.3	0
44.4	0
44.5	0
44.6	0
44.7	0
44.8	0
44.9	0
45	0
45.1	0
45.2	0
45.3	0
45.4	0
45.5	0
45.6	0
45.7	0
45.8	0
45.9	0
46	0
46.1	0
46.2	0
46.3	0
46.4	0
46.5	0
46.6	0
46.7	0
46.8	0
46.9	0
47	0
47.1	0
47.2	0
47.3	0
47.4	0
47.5	0
47.6	0
47.7	0
47.8	0
47.9	0
48	0
48.1	0
48.2	0
48.3	0
48.4	0
48.5	0
48.6	0
48.7	0
48.8	0
48.9	0
49	0
49.1	0
49.2	0
49.3	0
49.4	0
49.5	0
49.6	0
49.7	0
49.8	0
49.9	0
50	0
50.1	0
50.2	0
50.3	0
50.4	0
50.5	0
50.6	0
50.7	0
50.8	0
50.9	0
51	0
51.1	0
51.2	0
51.3	0
51.4	0
51.5	0
51.6	0
51.7	0
51.8	0
51.9	0
52	0
52.1	0
52.2	0
52.3	0
52.4	0
52.5	0
52.6	0
52.7	0
52.8	0
52.9	0
53	0
53.1	0
53.2	0
53.3	0
53.4	0
53.5	0
53.6	0
53.7	0
53.8	0
53.9	0
54	0
54.1	0
54.2	0
54.3	0
54.4	0
54.5	0
54.6	0
54.7	0
54.8	0
54.9	0
55	0
55.1	0
55.2	0
55.3	0
55.4	0
55.5	0
55.6	0
55.7	0
55.8	0
55.9	0
56	0
56.1	0
56.2	0
56.3	0
56.4	0
56.5	0
56.6	0
56.7	0
56.8	0
56.9	0
57	0
57.1	0
57.2	0
57.3	0
57.4	0
57.5	0
57.6	0
57.7	0
57.8	0
57.9	0
58	0
58.1	0
58.2	0
58.3	0
58.4	0
58.5	0
58.6	0
58.7	0
58.8	0
58.9	0
59	0
59.1	0
59.2	0
59.3	0
59.4	0
59.5	0
59.6	0
59.7	0
59.8	0
59.9	0
60	0
60.1	0
60.2	0
60.3	0
60.4	0
60.5	0
60.6	0
60.7	0
60.8	0
60.9	0
61	0
61.1	0
61.2	0
61.3	0
61.4	0
61.5	0
61.6	0
61.7	0
61.8	0
61.9	0
62	0
62.1	0
62.2	0
62.3	0
62.4	0
62.5	0
62.6	0
62.7	0
62.8	0
62.9	0
63	0
63.1	0
63.2	0
63.3	0
63.4	0
63.5	0
63.6	0
63.7	0
63.8	0
63.9	0
64	0
64.1	0
64.2	0
64.3	0
64.4	0
64.5	0
64.6	0
64.7	0
64.8	0
64.9	0
65	0
65.1	0
65.2	0
65.3	0
65.4	0
65.5	0
65.6	0
65.7	0
65.8	0
65.9	0
66	0
66.1	0
66.2	0
66.3	0
66.4	0
66.5	0
66.6	0
66.7	0
66.8	0
66.9	0
67	0
67.1	0
67.2	0
67.3	0
67.4	0
67.5	0
67.6	0
67.7	0
67.8	0
67.9	0
68	0
68.1	0
68.2	0
68.3	0
68.4	0
68.5	0
68.6	0
68.7	0
68.8	0
68.9	0
69	0
69.1	0
69.2	0
69.3	0
69.4	0
69.5	0
69.6	0
69.7	0
69.8	0
69.9	0
70	0
70.1	0
70.2	0
70.3	0
70.4	0
70.5	0
70.6	0
70.7	0
70.8	0
70.9	0
71	0
71.1	0
71.2	0
71.3	0
71.4	0
71.5	0
71.6	0
71.7	0
71.8	0
71.9	0
72	0
72.1	0
72.2	0
72.3	0
72.4	0
72.5	0
72.6	0
72.7	0
72.8	0
72.9	0
73	0
73.1	0
73.2	0
73.3	0
73.4	0
73.5	0
73.6	0
73.7	0
73.8	0
73.9	0
74	0
74.1	0
74.2	0
74.3	0
74.4	0
74.5	0
74.6	0
74.7	0
74.8	0
74.9	0
75	0
75.1	0
75.2	0
75.3	0
75.4	0
75.5	0
75.6	0
75.7	0
75.8	0
75.9	0
76	0
76.1	0
76.2	0
76.3	0
76.4	0
76.5	0
76.6	0
76.7	0
76.8	0
76.9	0
77	0
77.1	0
77.2	0
77.3	0
77.4	0
77.5	0
77.6	0
77.7	0
77.8	0
77.9	0
78	0
78.1	0
78.2	0
78.3	0
78.4	0
78.5	0
78.6	0
78.7	0
78.8	0
78.9	0
79	0
79.1	0
79.2	0
79.3	0
79.4	0
79.5	0
79.6	0
79.7	0
79.8	0
79.9	0
80	0
80.1	0
80.2	0
80.3	0
80.4	0
80.5	0
80.6	0
80.7	0
80.8	0
80.9	0
81	0
81.1	0
81.2	0
81.3	0
81.4	0
81.5	0
81.6	0
81.7	0
81.8	0
81.9	0
82	0
82.1	0
82.2	0
82.3	0
82.4	0
82.5	0
82.6	0
82.7	0
82.8	0
82.9	0
83	0
83.1	0
83.2	0
83.3	0
83.4	0
83.5	0
83.6	0
83.7	0
83.8	0
83.9	0
84	0
84.1	0
84.2	0
84.3	0
84.4	0
84.5	0
84.6	0
84.7	0
84.8	0
84.9	0
85	0
85.1	0
85.2	0
85.3	0
85.4	0
85.5	0
85.6	0
85.7	0
85.8	0
85.9	0
86	0
86.1	0
86.2	0
86.3	0
86.4	0
86.5	0
86.6	0
86.7	0
86.8	0
86.9	0
87	0
87.1	0
87.2	0
87.3	0
87.4	0
87.5	0
87.6	0
87.7	0
87.8	0
87.9	0
88	0
88.1	0
88.2	0
88.3	0
88.4	0
88.5	0
88.6	0
88.7	0
88.8	0
88.9	0
89	0
89.1	0
89.2	0
89.3	0
89.4	0
89.5	0
89.6	0
89.7	0
89.8	0
89.9	0
90	0
90.1	0
90.2	0
90.3	0
90.4	0
90.5	0
90.6	0
90.7	0
90.8	0
90.9	0
91	0
91.1	0
91.2	0
91.3	0
91.4	0
91.5	0
91.6	0
91.7	0
91.8	0
91.9	0
92	0
92.1	0
92.2	0
92.3	0
92.4	0
92.5	0
92.6	0
92.7	0
92.8	0
92.9	0
93	0
93.1	0
93.2	0
93.3	0
93.4	0
93.5	0
93.6	0
93.7	0
93.8	0
93.9	0
94	0
94.1	0
94.2	0
94.3	0
94.4	0
94.5	0
94.6	0
94.7	0
94.8	0
94.9	0
95	0
95.1	0
95.2	0
95.3	0
95.4	0
95.5	0
95.6	0
95.7	0
95.8	0
95.9	0
96	0
96.1	0
96.2	0
96.3	0
96.4	0
96.5	0
96.6	0
96.7	0
96.8	0
96.9	0
97	0
97.1	0
97.2	0
97.3	0
97.4	0
97.5	0
97.6	0
97.7	0
97.8	0
97.9	0
98	0
98.1	0
98.2	0
98.3	0
98.4	0
98.5	0
98.6	0
98.7	0
98.8	0
98.9	0
99	0
99.1	0
99.2	0
99.3	0
99.4	0
99.5	0
99.6	0
99.7	0
99.8	0
99.9	0
100	0
100.1	0.009
100.2	0.015
100.3	0.022
100.4	0.03
100.5	0.0375
100.6	0.0425
100.7	0.049
100.8	0.056
100.9	0.062
101	0.0705
101.1	0.078
101.2	0.0845
101.3	0.0935
101.4	0.0965
101.5	0.104
101.6	0.1065
101.7	0.1115
101.8	0.117
101.9	0.119
102	0.1245
102.1	0.1295
102.2	0.134
102.3	0.14
102.4	0.1445
102.5	0.1475
102.6	0.152
102.7	0.1565
102.8	0.16
102.9	0.1675
103	0.171
103.1	0.1755
103.2	0.1785
103.3	0.186
103.4	0.191
103.5	0.1955
103.6	0.201
103.7	0.203
103.8	0.207
103.9	0.2105
104	0.215
104.1	0.216
104.2	0.2155
104.3	0.2175
104.4	0.2195
104.5	0.2195
104.6	0.223
104.7	0.2245
104.8	0.2255
104.9	0.2275
105	0.2305
105.1	0.234
105.2	0.236
105.3	0.2375
105.4	0.2385
105.5	0.241
105.6	0.246
105.7	0.2485
105.8	0.2525
105.9	0.256
106	0.2555
106.1	0.258
106.2	0.2625
106.3	0.2685
106.4	0.267
106.5	0.269
106.6	0.2715
106.7	0.271
106.8	0.2715
106.9	0.2745
107	0.2745
107.1	0.2755
107.2	0.275
107.3	0.279
107.4	0.279
107.5	0.281
107.6	0.2815
107.7	0.285
107.8	0.285
107.9	0.2845
108	0.2875
108.1	0.2905
108.2	0.2915
108.3	0.2925
108.4	0.2945
108.5	0.293
108.6	0.2935
108.7	0.2945
108.8	0.295
108.9	0.2945
109	0.296
109.1	0.2955
109.2	0.2955
109.3	0.2965
109.4	0.2955
109.5	0.2955
109.6	0.297
109.7	0.301
109.8	0.3025
109.9	0.3045
110	0.304
110.1	0.305
110.2	0.307
110.3	0.3105
110.4	0.311
110.5	0.312
110.6	0.3135
110.7	0.314
110.8	0.3115
110.9	0.31
111	0.312
111.1	0.316
111.2	0.3155
111.3	0.3175
111.4	0.321
111.5	0.3205
111.6	0.3195
111.7	0.3235
111.8	0.323
111.9	0.326
112	0.329
112.1	0.3305
112.2	0.331
112.3	0.3295
112.4	0.3325
112.5	0.3345
112.6	0.336
112.7	0.3365
112.8	0.3375
112.9	0.3345
113	0.334
113.1	0.3305
113.2	0.3305
113.3	0.3335
113.4	0.335
113.5	0.334
113.6	0.3335
113.7	0.3345
113.8	0.335
113.9	0.336
114	0.3345
114.1	0.334
114.2	0.336
114.3	0.3325
114.4	0.335
114.5	0.334
114.6	0.336
114.7	0.3375
114.8	0.337
114.9	0.338
115	0.3375
115.1	0.337
115.2	0.3365
115.3	0.3375
115.4	0.334
115.5	0.335
115.6	0.3335
115.7	0.334
115.8	0.332
115.9	0.3305
116	0.3305
116.1	0.331
116.2	0.3315
116.3	0.329
116.4	0.3325
116.5	0.329
116.6	0.3285
116.7	0.3305
116.8	0.3305
116.9	0.3295
117	0.3285
117.1	0.3315
117.2	0.33
117.3	0.328
117.4	0.3305
117.5	0.332
117.6	0.33
117.7	0.3295
117.8	0.3275
117.9	0.3265
118	0.3315
118.1	0.3335
118.2	0.3335
118.3	0.3375
118.4	0.3355
118.5	0.333
118.6	0.3345
118.7	0.334
118.8	0.3345
118.9	0.331
119	0.33
119.1	0.328
119.2	0.327
119.3	0.326
119.4	0.3255
119.5	0.327
119.6	0.3255
119.7	0.323
119.8	0.3235
119.9	0.323
120	0.3235
120.1	0.3235
120.2	0.324
120.3	0.322
120.4	0.3205
120.5	0.319
120.6	0.319
120.7	0.322
120.8	0.3235
120.9	0.3255
121	0.3265
121.1	0.3265
121.2	0.3245
121.3	0.3265
121.4	0.3275
121.5	0.326
121.6	0.3255
121.7	0.325
121.8	0.3255
121.9	0.3265
122	0.3285
122.1	0.328
122.2	0.3265
122.3	0.3305
122.4	0.328
122.5	0.328
122.6	0.33
122.7	0.329
122.8	0.3325
122.9	0.331
123	0.3285
123.1	0.3295
123.2	0.3295
123.3	0.334
123.4	0.3345
123.5	0.336
123.6	0.3365
123.7	0.334
123.8	0.3335
123.9	0.332
124	0.3305
124.1	0.331
124.2	0.333
124.3	0.3305
124.4	0.33
124.5	0.326
124.6	0.3275
124.7	0.3265
124.8	0.3275
124.9	0.328
125	0.329
125.1	0.329
125.2	0.33
125.3	0.3315
125.4	0.3345
125.5	0.335
125.6	0.3355
125.7	0.335
125.8	0.334
125.9	0.3335
126	0.336
126.1	0.3345
126.2	0.3345
126.3	0.336
126.4	0.336
126.5	0.334
126.6	0.334
126.7	0.334
126.8	0.3355
126.9	0.336
127	0.3365
127.1	0.3375
127.2	0.339
127.3	0.342
127.4	0.337
127.5	0.342
127.6	0.3425
127.7	0.3455
127.8	0.3435
127.9	0.3435
128	0.3455
128.1	0.343
128.2	0.3415
128.3	0.343
128.4	0.3455
128.5	0.348
128.6	0.3525
128.7	0.3495
128.8	0.3485
128.9	0.347
129	0.346
129.1	0.3465
129.2	0.3455
129.3	0.344
129.4	0.342
129.5	0.342
129.6	0.344
129.7	0.342
129.8	0.3435
129.9	0.343
130	0.3435
130.1	0.343
130.2	0.3435
130.3	0.343
130.4	0.3475
130.5	0.3495
130.6	0.351
130.7	0.351
130.8	0.3515
130.9	0.3535
131	0.354
131.1	0.351
131.2	0.353
131.3	0.351
131.4	0.3515
131.5	0.3515
131.6	0.3515
131.7	0.35
131.8	0.35
131.9	0.348
132	0.3475
132.1	0.348
132.2	0.3485
132.3	0.348
132.4	0.3475
132.5	0.349
132.6	0.347
132.7	0.3485
132.8	0.3525
132.9	0.351
133	0.351
133.1	0.3535
133.2	0.356
133.3	0.355
133.4	0.3535
133.5	0.3525
133.6	0.3545
133.7	0.3575
133.8	0.3585
133.9	0.359
134	0.3595
134.1	0.359
134.2	0.362
134.3	0.3635
134.4	0.3635
134.5	0.363
134.6	0.364
134.7	0.363
134.8	0.3645
134.9	0.366
135	0.365
135.1	0.3605
135.2	0.3605
135.3	0.3605
135.4	0.357
135.5	0.3565
135.6	0.3575
135.7	0.3595
135.8	0.36
135.9	0.361
136	0.36
136.1	0.362
136.2	0.366
136.3	0.3675
136.4	0.3665
136.5	0.365
136.6	0.362
136.7	0.3645
136.8	0.3665
136.9	0.3685
137	0.3695
137.1	0.369
137.2	0.3685
137.3	0.373
137.4	0.3725
137.5	0.371
137.6	0.371
137.7	0.3745
137.8	0.3735
137.9	0.374
138	0.374
138.1	0.372
138.2	0.369
138.3	0.367
138.4	0.368
138.5	0.3685
138.6	0.37
138.7	0.3705
138.8	0.371
138.9	0.3735
139	0.377
139.1	0.374
139.2	0.3725
139.3	0.3735
139.4	0.376
139.5	0.3775
139.6	0.376
139.7	0.377
139.8	0.3765
139.9	0.3775
140	0.3745
140.1	0.372
140.2	0.3695
140.3	0.3695
140.4	0.369
140.5	0.3715
140.6	0.3735
140.7	0.3705
140.8	0.3695
140.9	0.3715
141	0.372
141.1	0.3715
141.2	0.372
141.3	0.3715
141.4	0.3715
141.5	0.374
141.6	0.3755
141.7	0.375
141.8	0.3765
141.9	0.376
142	0.373
142.1	0.374
142.2	0.3745
142.3	0.3765
142.4	0.373
142.5	0.3695
142.6	0.3705
142.7	0.3715
142.8	0.372
142.9	0.371
143	0.369
143.1	0.3675
143.2	0.368
143.3	0.3695
143.4	0.3705
143.5	0.372
143.6	0.3735
143.7	0.3705
143.8	0.369
143.9	0.3695
144	0.372
144.1	0.3715
144.2	0.374
144.3	0.3705
144.4	0.374
144.5	0.371
144.6	0.373
144.7	0.3735
144.8	0.3755
144.9	0.378
145	0.379
145.1	0.378
145.2	0.3785
145.3	0.3795
145.4	0.3795
145.5	0.3835
145.6	0.3825
145.7	0.383
145.8	0.3815
145.9	0.3825
146	0.38
146.1	0.3805
146.2	0.383
146.3	0.382
146.4	0.378
146.5	0.378
146.6	0.3765
146.7	0.3765
146.8	0.3755
146.9	0.374
147	0.3745
147.1	0.374
147.2	0.3785
147.3	0.377
147.4	0.375
147.5	0.3785
147.6	0.3785
147.7	0.377
147.8	0.377
147.9	0.3775
148	0.3755
148.1	0.3755
148.2	0.3785
148.3	0.3795
148.4	0.3795
148.5	0.377
148.6	0.3775
148.7	0.3785
148.8	0.379
148.9	0.3785
149	0.3775
149.1	0.373
149.2	0.372
149.3	0.372
149.4	0.373
149.5	0.37
149.6	0.372
149.7	0.3735
149.8	0.3765
149.9	0.375
150	0.3715
150.1	0.369
150.2	0.37
150.3	0.3675
150.4	0.3715
150.5	0.3705
150.6	0.3695
150.7	0.3705
150.8	0.37
150.9	0.3715
151	0.3705
151.1	0.369
151.2	0.366
151.3	0.3695
151.4	0.371
151.5	0.3705
151.6	0.368
151.7	0.37
151.8	0.3675
151.9	0.3645
152	0.363
152.1	0.362
152.2	0.3635
152.3	0.364
152.4	0.3635
152.5	0.364
152.6	0.363
152.7	0.3625
152.8	0.364
152.9	0.366
153	0.3675
153.1	0.367
153.2	0.369
153.3	0.37
153.4	0.37
153.5	0.3695
153.6	0.3705
153.7	0.3735
153.8	0.3715
153.9	0.3725
154	0.374
154.1	0.373
154.2	0.372
154.3	0.372
154.4	0.3725
154.5	0.3735
154.6	0.3705
154.7	0.3755
154.8	0.372
154.9	0.3715
155	0.371
155.1	0.3685
155.2	0.3685
155.3	0.367
155.4	0.367
155.5	0.3675
155.6	0.3675
155.7	0.366
155.8	0.3685
155.9	0.367
156	0.3675
156.1	0.366
156.2	0.367
156.3	0.37
156.4	0.369
156.5	0.3695
156.6	0.3715
156.7	0.371
156.8	0.3715
156.9	0.37
157	0.3695
157.1	0.375
157.2	0.3755
157.3	0.3745
157.4	0.3765
157.5	0.379
157.6	0.378
157.7	0.379
157.8	0.377
157.9	0.3765
158	0.375
158.1	0.375
158.2	0.377
158.3	0.376
158.4	0.3775
158.5	0.379
158.6	0.379
158.7	0.381
158.8	0.382
158.9	0.3835
159	0.3795
159.1	0.378
159.2	0.379
159.3	0.381
159.4	0.3825
159.5	0.3815
159.6	0.3815
159.7	0.378
159.8	0.3785
159.9	0.377
160	0.3775
160.1	0.377
160.2	0.3765
160.3	0.376
160.4	0.3765
160.5	0.375
160.6	0.3755
160.7	0.3755
160.8	0.375
160.9	0.3765
161	0.3745
161.1	0.3745
161.2	0.3745
161.3	0.373
161.4	0.3715
161.5	0.371
161.6	0.3705
161.7	0.369
161.8	0.3675
161.9	0.365
162	0.368
162.1	0.3665
162.2	0.3675
162.3	0.367
162.4	0.3665
162.5	0.3665
162.6	0.367
162.7	0.369
162.8	0.369
162.9	0.366
163	0.366
163.1	0.368
163.2	0.369
163.3	0.3725
163.4	0.3745
163.5	0.374
163.6	0.3735
163.7	0.376
163.8	0.376
163.9	0.3785
164	0.3805
164.1	0.3825
164.2	0.383
164.3	0.383
164.4	0.382
164.5	0.3825
164.6	0.383
164.7	0.3815
164.8	0.381
164.9	0.3765
165	0.3765
165.1	0.374
165.2	0.3735
165.3	0.376
165.4	0.376
165.5	0.3775
165.6	0.3785
165.7	0.379
165.8	0.382
165.9	0.3815
166	0.381
166.1	0.3805
166.2	0.3805
166.3	0.3815
166.4	0.378
166.5	0.381
166.6	0.3805
166.7	0.3825
166.8	0.385
166.9	0.387
167	0.3845
167.1	0.3855
167.2	0.3835
167.3	0.3855
167.4	0.3865
167.5	0.391
167.6	0.39
167.7	0.3895
167.8	0.3905
167.9	0.39
168	0.389
168.1	0.387
168.2	0.3885
168.3	0.389
168.4	0.387
168.5	0.3885
168.6	0.389
168.7	0.3845
168.8	0.385
168.9	0.384
169	0.384
169.1	0.3855
169.2	0.385
169.3	0.3855
169.4	0.387
169.5	0.389
169.6	0.391
169.7	0.3915
169.8	0.39
169.9	0.3915
170	0.3925
170.1	0.388
170.2	0.386
170.3	0.3885
170.4	0.389
170.5	0.39
170.6	0.393
170.7	0.3905
170.8	0.389
170.9	0.3855
171	0.38
171.1	0.3815
171.2	0.384
171.3	0.3815
171.4	0.3835
171.5	0.3835
171.6	0.3855
171.7	0.3845
171.8	0.3815
171.9	0.3845
172	0.38
172.1	0.378
172.2	0.3765
172.3	0.3765
172.4	0.378
172.5	0.377
172.6	0.377
172.7	0.3775
172.8	0.38
172.9	0.382
173	0.3835
173.1	0.3825
173.2	0.3795
173.3	0.3805
173.4	0.3795
173.5	0.381
173.6	0.3795
173.7	0.3795
173.8	0.382
173.9	0.385
174	0.384
174.1	0.382
174.2	0.382
174.3	0.382
174.4	0.3825
174.5	0.384
174.6	0.383
174.7	0.3825
174.8	0.3825
174.9	0.3815
175	0.38
175.1	0.3845
175.2	0.384
175.3	0.3845
175.4	0.385
175.5	0.3855
175.6	0.3845
175.7	0.3835
175.8	0.382
175.9	0.38
176	0.3795
176.1	0.3815
176.2	0.3805
176.3	0.3775
176.4	0.376
176.5	0.378
176.6	0.3775
176.7	0.381
176.8	0.382
176.9	0.383
177	0.3815
177.1	0.379
177.2	0.377
177.3	0.3745
177.4	0.373
177.5	0.374
177.6	0.374
177.7	0.3755
177.8	0.3745
177.9	0.372
178	0.373
178.1	0.3705
178.2	0.371
178.3	0.3725
178.4	0.3755
178.5	0.3755
178.6	0.3755
178.7	0.377
178.8	0.377
178.9	0.3765
179	0.378
179.1	0.378
179.2	0.3765
179.3	0.376
179.4	0.375
179.5	0.376
179.6	0.376
179.7	0.377
179.8	0.378
179.9	0.374
180	0.374
180.1	0.3715
180.2	0.372
180.3	0.372
180.4	0.372
180.5	0.373
180.6	0.371
180.7	0.371
180.8	0.371
180.9	0.371
181	0.37
181.1	0.371
181.2	0.3725
181.3	0.3765
181.4	0.3755
181.5	0.375
181.6	0.379
181.7	0.3805
181.8	0.381
181.9	0.378
182	0.379
182.1	0.378
182.2	0.377
182.3	0.3755
182.4	0.377
182.5	0.3775
182.6	0.373
182.7	0.371
182.8	0.3725
182.9	0.374
183	0.3735
183.1	0.375
183.2	0.375
183.3	0.377
183.4	0.378
183.5	0.377
183.6	0.379
183.7	0.382
183.8	0.3845
183.9	0.386
184	0.3905
184.1	0.3885
184.2	0.386
184.3	0.3885
184.4	0.3915
184.5	0.393
184.6	0.3925
184.7	0.394
184.8	0.394
184.9	0.3915
185	0.3955
185.1	0.3945
185.2	0.391
185.3	0.391
185.4	0.39
185.5	0.3885
185.6	0.3915
185.7	0.389
185.8	0.3885
185.9	0.3875
186	0.3905
186.1	0.39
186.2	0.3905
186.3	0.388
186.4	0.3865
186.5	0.388
186.6	0.3895
186.7	0.385
186.8	0.382
186.9	0.3795
187	0.378
187.1	0.3805
187.2	0.3835
187.3	0.381
187.4	0.3825
187.5	0.3835
187.6	0.381
187.7	0.38
187.8	0.379
187.9	0.379
188	0.3755
188.1	0.3755
188.2	0.376
188.3	0.379
188.4	0.3805
188.5	0.3795
188.6	0.38
188.7	0.378
188.8	0.381
188.9	0.381
189	0.38
189.1	0.379
189.2	0.381
189.3	0.381
189.4	0.3825
189.5	0.382
189.6	0.382
189.7	0.383
189.8	0.386
189.9	0.3885
190	0.3875
190.1	0.3905
190.2	0.3915
190.3	0.392
190.4	0.3915
190.5	0.393
190.6	0.3935
190.7	0.3935
190.8	0.3945
190.9	0.394
191	0.393
191.1	0.3945
191.2	0.396
191.3	0.396
191.4	0.398
191.5	0.3995
191.6	0.398
191.7	0.396
191.8	0.3925
191.9	0.39
192	0.3895
192.1	0.3835
192.2	0.3815
192.3	0.3855
192.4	0.385
192.5	0.385
192.6	0.3845
192.7	0.3855
192.8	0.387
192.9	0.387
193	0.3845
193.1	0.3845
193.2	0.382
193.3	0.3795
193.4	0.3835
193.5	0.383
193.6	0.385
193.7	0.3825
193.8	0.382
193.9	0.3865
194	0.39
194.1	0.3895
194.2	0.39
194.3	0.39
194.4	0.3905
194.5	0.3925
194.6	0.395
194.7	0.3945
194.8	0.393
194.9	0.3925
195	0.393
195.1	0.3945
195.2	0.3945
195.3	0.3935
195.4	0.3925
195.5	0.3945
195.6	0.3945
195.7	0.393
195.8	0.3895
195.9	0.389
196	0.39
196.1	0.391
196.2	0.3935
196.3	0.3915
196.4	0.392
196.5	0.3905
196.6	0.392
196.7	0.3935
196.8	0.3935
196.9	0.3945
197	0.395
197.1	0.398
197.2	0.3985
197.3	0.398
197.4	0.3995
197.5	0.4005
197.6	0.401
197.7	0.3975
197.8	0.398
197.9	0.401
198	0.396
198.1	0.396
198.2	0.396
198.3	0.3985
198.4	0.401
198.5	0.407
198.6	0.4065
198.7	0.405
198.8	0.408
198.9	0.41
199	0.41
199.1	0.4095
199.2	0.4095
199.3	0.411
199.4	0.408
199.5	0.408
199.6	0.4065
199.7	0.4055
199.8	0.405
199.9	0.403
200	0.404
[truncated: 14,000 more rows]
