# Supplementary material for: Bayesian inference of kinetic schemes for ion channels by Kalman filtering
Source: eLife journal article supplement (doi:10.7554/elife.62714), 2022-05-04
Supplement: fig1-data1 [file 0125_Sim_N_1000_Strom_MW.xlsx]

## Sheet: Tabelle1
0.1	0
0.2	0
0.3	0
0.4	0
0.5	0
0.6	0
0.7	0
0.8	0
0.9	0
1	0
1.1	0
1.2	0
1.3	0
1.4	0
1.5	0
1.6	0
1.7	0
1.8	0
1.9	0
2	0
2.1	0
2.2	0
2.3	0
2.4	0
2.5	0
2.6	0
2.7	0
2.8	0
2.9	0
3	0
3.1	0
3.2	0
3.3	0
3.4	0
3.5	0
3.6	0
3.7	0
3.8	0
3.9	0
4	0
4.1	0
4.2	0
4.3	0
4.4	0
4.5	0
4.6	0
4.7	0
4.8	0
4.9	0
5	0
5.1	0
5.2	0
5.3	0
5.4	0
5.5	0
5.6	0
5.7	0
5.8	0
5.9	0
6	0
6.1	0
6.2	0
6.3	0
6.4	0
6.5	0
6.6	0
6.7	0
6.8	0
6.9	0
7	0
7.1	0
7.2	0
7.3	0
7.4	0
7.5	0
7.6	0
7.7	0
7.8	0
7.9	0
8	0
8.1	0
8.2	0
8.3	0
8.4	0
8.5	0
8.6	0
8.7	0
8.8	0
8.9	0
9	0
9.1	0
9.2	0
9.3	0
9.4	0
9.5	0
9.6	0
9.7	0
9.8	0
9.9	0
10	0
10.1	0
10.2	0
10.3	0
10.4	0
10.5	0
10.6	0
10.7	0
10.8	0
10.9	0
11	0
11.1	0
11.2	0
11.3	0
11.4	0
11.5	0
11.6	0
11.7	0
11.8	0
11.9	0
12	0
12.1	0
12.2	0
12.3	0
12.4	0
12.5	0
12.6	0
12.7	0
12.8	0
12.9	0
13	0
13.1	0
13.2	0
13.3	0
13.4	0
13.5	0
13.6	0
13.7	0
13.8	0
13.9	0
14	0
14.1	0
14.2	0
14.3	0
14.4	0
14.5	0
14.6	0
14.7	0
14.8	0
14.9	0
15	0
15.1	0
15.2	0
15.3	0
15.4	0
15.5	0
15.6	0
15.7	0
15.8	0
15.9	0
16	0
16.1	0
16.2	0
16.3	0
16.4	0
16.5	0
16.6	0
16.7	0
16.8	0
16.9	0
17	0
17.1	0
17.2	0
17.3	0
17.4	0
17.5	0
17.6	0
17.7	0
17.8	0
17.9	0
18	0
18.1	0
18.2	0
18.3	0
18.4	0
18.5	0
18.6	0
18.7	0
18.8	0
18.9	0
19	0
19.1	0
19.2	0
19.3	0
19.4	0
19.5	0
19.6	0
19.7	0
19.8	0
19.9	0
20	0
20.1	0
20.2	0
20.3	0
20.4	0
20.5	0
20.6	0
20.7	0
20.8	0
20.9	0
21	0
21.1	0
21.2	0
21.3	0
21.4	0
21.5	0
21.6	0
21.7	0
21.8	0
21.9	0
22	0
22.1	0
22.2	0
22.3	0
22.4	0
22.5	0
22.6	0
22.7	0
22.8	0
22.9	0
23	0
23.1	0
23.2	0
23.3	0
23.4	0
23.5	0
23.6	0
23.7	0
23.8	0
23.9	0
24	0
24.1	0
24.2	0
24.3	0
24.4	0
24.5	0
24.6	0
24.7	0
24.8	0
24.9	0
25	0
25.1	0
25.2	0
25.3	0
25.4	0
25.5	0
25.6	0
25.7	0
25.8	0
25.9	0
26	0
26.1	0
26.2	0
26.3	0
26.4	0
26.5	0
26.6	0
26.7	0
26.8	0
26.9	0
27	0
27.1	0
27.2	0
27.3	0
27.4	0
27.5	0
27.6	0
27.7	0
27.8	0
27.9	0
28	0
28.1	0
28.2	0
28.3	0
28.4	0
28.5	0
28.6	0
28.7	0
28.8	0
28.9	0
29	0
29.1	0
29.2	0
29.3	0
29.4	0
29.5	0
29.6	0
29.7	0
29.8	0
29.9	0
30	0
30.1	0
30.2	0
30.3	0
30.4	0
30.5	0
30.6	0
30.7	0
30.8	0
30.9	0
31	0
31.1	0
31.2	0
31.3	0
31.4	0
31.5	0
31.6	0
31.7	0
31.8	0
31.9	0
32	0
32.1	0
32.2	0
32.3	0
32.4	0
32.5	0
32.6	0
32.7	0
32.8	0
32.9	0
33	0
33.1	0
33.2	0
33.3	0
33.4	0
33.5	0
33.6	0
33.7	0
33.8	0
33.9	0
34	0
34.1	0
34.2	0
34.3	0
34.4	0
34.5	0
34.6	0
34.7	0
34.8	0
34.9	0
35	0
35.1	0
35.2	0
35.3	0
35.4	0
35.5	0
35.6	0
35.7	0
35.8	0
35.9	0
36	0
36.1	0
36.2	0
36.3	0
36.4	0
36.5	0
36.6	0
36.7	0
36.8	0
36.9	0
37	0
37.1	0
37.2	0
37.3	0
37.4	0
37.5	0
37.6	0
37.7	0
37.8	0
37.9	0
38	0
38.1	0
38.2	0
38.3	0
38.4	0
38.5	0
38.6	0
38.7	0
38.8	0
38.9	0
39	0
39.1	0
39.2	0
39.3	0
39.4	0
39.5	0
39.6	0
39.7	0
39.8	0
39.9	0
40	0
40.1	0
40.2	0
40.3	0
40.4	0
40.5	0
40.6	0
40.7	0
40.8	0
40.9	0
41	0
41.1	0
41.2	0
41.3	0
41.4	0
41.5	0
41.6	0
41.7	0
41.8	0
41.9	0
42	0
42.1	0
42.2	0
42.3	0
42.4	0
42.5	0
42.6	0
42.7	0
42.8	0
42.9	0
43	0
43.1	0
43.2	0
43.3	0
43.4	0
43.5	0
43.6	0
43.7	0
43.8	0
43.9	0
44	0
44.1	0
44.2	0
44.3	0
44.4	0
44.5	0
44.6	0
44.7	0
44.8	0
44.9	0
45	0
45.1	0
45.2	0
45.3	0
45.4	0
45.5	0
45.6	0
45.7	0
45.8	0
45.9	0
46	0
46.1	0
46.2	0
46.3	0
46.4	0
46.5	0
46.6	0
46.7	0
46.8	0
46.9	0
47	0
47.1	0
47.2	0
47.3	0
47.4	0
47.5	0
47.6	0
47.7	0
47.8	0
47.9	0
48	0
48.1	0
48.2	0
48.3	0
48.4	0
48.5	0
48.6	0
48.7	0
48.8	0
48.9	0
49	0
49.1	0
49.2	0
49.3	0
49.4	0
49.5	0
49.6	0
49.7	0
49.8	0
49.9	0
50	0
50.1	0
50.2	0
50.3	0
50.4	0
50.5	0
50.6	0
50.7	0
50.8	0
50.9	0
51	0
51.1	0
51.2	0
51.3	0
51.4	0
51.5	0
51.6	0
51.7	0
51.8	0
51.9	0
52	0
52.1	0
52.2	0
52.3	0
52.4	0
52.5	0
52.6	0
52.7	0
52.8	0
52.9	0
53	0
53.1	0
53.2	0
53.3	0
53.4	0
53.5	0
53.6	0
53.7	0
53.8	0
53.9	0
54	0
54.1	0
54.2	0
54.3	0
54.4	0
54.5	0
54.6	0
54.7	0
54.8	0
54.9	0
55	0
55.1	0
55.2	0
55.3	0
55.4	0
55.5	0
55.6	0
55.7	0
55.8	0
55.9	0
56	0
56.1	0
56.2	0
56.3	0
56.4	0
56.5	0
56.6	0
56.7	0
56.8	0
56.9	0
57	0
57.1	0
57.2	0
57.3	0
57.4	0
57.5	0
57.6	0
57.7	0
57.8	0
57.9	0
58	0
58.1	0
58.2	0
58.3	0
58.4	0
58.5	0
58.6	0
58.7	0
58.8	0
58.9	0
59	0
59.1	0
59.2	0
59.3	0
59.4	0
59.5	0
59.6	0
59.7	0
59.8	0
59.9	0
60	0
60.1	0
60.2	0
60.3	0
60.4	0
60.5	0
60.6	0
60.7	0
60.8	0
60.9	0
61	0
61.1	0
61.2	0
61.3	0
61.4	0
61.5	0
61.6	0
61.7	0
61.8	0
61.9	0
62	0
62.1	0
62.2	0
62.3	0
62.4	0
62.5	0
62.6	0
62.7	0
62.8	0
62.9	0
63	0
63.1	0
63.2	0
63.3	0
63.4	0
63.5	0
63.6	0
63.7	0
63.8	0
63.9	0
64	0
64.1	0
64.2	0
64.3	0
64.4	0
64.5	0
64.6	0
64.7	0
64.8	0
64.9	0
65	0
65.1	0
65.2	0
65.3	0
65.4	0
65.5	0
65.6	0
65.7	0
65.8	0
65.9	0
66	0
66.1	0
66.2	0
66.3	0
66.4	0
66.5	0
66.6	0
66.7	0
66.8	0
66.9	0
67	0
67.1	0
67.2	0
67.3	0
67.4	0
67.5	0
67.6	0
67.7	0
67.8	0
67.9	0
68	0
68.1	0
68.2	0
68.3	0
68.4	0
68.5	0
68.6	0
68.7	0
68.8	0
68.9	0
69	0
69.1	0
69.2	0
69.3	0
69.4	0
69.5	0
69.6	0
69.7	0
69.8	0
69.9	0
70	0
70.1	0
70.2	0
70.3	0
70.4	0
70.5	0
70.6	0
70.7	0
70.8	0
70.9	0
71	0
71.1	0
71.2	0
71.3	0
71.4	0
71.5	0
71.6	0
71.7	0
71.8	0
71.9	0
72	0
72.1	0
72.2	0
72.3	0
72.4	0
72.5	0
72.6	0
72.7	0
72.8	0
72.9	0
73	0
73.1	0
73.2	0
73.3	0
73.4	0
73.5	0
73.6	0
73.7	0
73.8	0
73.9	0
74	0
74.1	0
74.2	0
74.3	0
74.4	0
74.5	0
74.6	0
74.7	0
74.8	0
74.9	0
75	0
75.1	0
75.2	0
75.3	0
75.4	0
75.5	0
75.6	0
75.7	0
75.8	0
75.9	0
76	0
76.1	0
76.2	0
76.3	0
76.4	0
76.5	0
76.6	0
76.7	0
76.8	0
76.9	0
77	0
77.1	0
77.2	0
77.3	0
77.4	0
77.5	0
77.6	0
77.7	0
77.8	0
77.9	0
78	0
78.1	0
78.2	0
78.3	0
78.4	0
78.5	0
78.6	0
78.7	0
78.8	0
78.9	0
79	0
79.1	0
79.2	0
79.3	0
79.4	0
79.5	0
79.6	0
79.7	0
79.8	0
79.9	0
80	0
80.1	0
80.2	0
80.3	0
80.4	0
80.5	0
80.6	0
80.7	0
80.8	0
80.9	0
81	0
81.1	0
81.2	0
81.3	0
81.4	0
81.5	0
81.6	0
81.7	0
81.8	0
81.9	0
82	0
82.1	0
82.2	0
82.3	0
82.4	0
82.5	0
82.6	0
82.7	0
82.8	0
82.9	0
83	0
83.1	0
83.2	0
83.3	0
83.4	0
83.5	0
83.6	0
83.7	0
83.8	0
83.9	0
84	0
84.1	0
84.2	0
84.3	0
84.4	0
84.5	0
84.6	0
84.7	0
84.8	0
84.9	0
85	0
85.1	0
85.2	0
85.3	0
85.4	0
85.5	0
85.6	0
85.7	0
85.8	0
85.9	0
86	0
86.1	0
86.2	0
86.3	0
86.4	0
86.5	0
86.6	0
86.7	0
86.8	0
86.9	0
87	0
87.1	0
87.2	0
87.3	0
87.4	0
87.5	0
87.6	0
87.7	0
87.8	0
87.9	0
88	0
88.1	0
88.2	0
88.3	0
88.4	0
88.5	0
88.6	0
88.7	0
88.8	0
88.9	0
89	0
89.1	0
89.2	0
89.3	0
89.4	0
89.5	0
89.6	0
89.7	0
89.8	0
89.9	0
90	0
90.1	0
90.2	0
90.3	0
90.4	0
90.5	0
90.6	0
90.7	0
90.8	0
90.9	0
91	0
91.1	0
91.2	0
91.3	0
91.4	0
91.5	0
91.6	0
91.7	0
91.8	0
91.9	0
92	0
92.1	0
92.2	0
92.3	0
92.4	0
92.5	0
92.6	0
92.7	0
92.8	0
92.9	0
93	0
93.1	0
93.2	0
93.3	0
93.4	0
93.5	0
93.6	0
93.7	0
93.8	0
93.9	0
94	0
94.1	0
94.2	0
94.3	0
94.4	0
94.5	0
94.6	0
94.7	0
94.8	0
94.9	0
95	0
95.1	0
95.2	0
95.3	0
95.4	0
95.5	0
95.6	0
95.7	0
95.8	0
95.9	0
96	0
96.1	0
96.2	0
96.3	0
96.4	0
96.5	0
96.6	0
96.7	0
96.8	0
96.9	0
97	0
97.1	0
97.2	0
97.3	0
97.4	0
97.5	0
97.6	0
97.7	0
97.8	0
97.9	0
98	0
98.1	0
98.2	0
98.3	0
98.4	0
98.5	0
98.6	0
98.7	0
98.8	0
98.9	0
99	0
99.1	0
99.2	0
99.3	0
99.4	0
99.5	0
99.6	0
99.7	0
99.8	0
99.9	0
100	0
100.1	0
100.2	0
100.3	0
100.4	0
100.5	0
100.6	0
100.7	0
100.8	0
100.9	0
101	0
101.1	0
101.2	0
101.3	0
101.4	0
101.5	0
101.6	0.001
101.7	0.001
101.8	0.001
101.9	0.001
102	0.001
102.1	0.001
102.2	0.001
102.3	0.001
102.4	0.001
102.5	0.001
102.6	0.001
102.7	0.001
102.8	0.001
102.9	0.001
103	0.002
103.1	0.002
103.2	0.002
103.3	0.002
103.4	0.002
103.5	0.002
103.6	0.002
103.7	0.002
103.8	0.002
103.9	0.002
104	0.003
104.1	0.004
104.2	0.004
104.3	0.004
104.4	0.004
104.5	0.004
104.6	0.004
104.7	0.004
104.8	0.004
104.9	0.004
105	0.004
105.1	0.004
105.2	0.004
105.3	0.004
105.4	0.004
105.5	0.004
105.6	0.004
105.7	0.004
105.8	0.005
105.9	0.005
106	0.005
106.1	0.005
106.2	0.005
106.3	0.005
106.4	0.005
106.5	0.006
106.6	0.007
106.7	0.007
106.8	0.007
106.9	0.007
107	0.007
107.1	0.007
107.2	0.007
107.3	0.007
107.4	0.007
107.5	0.007
107.6	0.008
107.7	0.008
107.8	0.009
107.9	0.009
108	0.01
108.1	0.01
108.2	0.01
108.3	0.01
108.4	0.01
108.5	0.01
108.6	0.01
108.7	0.01
108.8	0.01
108.9	0.011
109	0.011
109.1	0.011
109.2	0.011
109.3	0.011
109.4	0.011
109.5	0.011
109.6	0.011
109.7	0.011
109.8	0.011
109.9	0.011
110	0.01
110.1	0.01
110.2	0.01
110.3	0.01
110.4	0.012
110.5	0.012
110.6	0.012
110.7	0.012
110.8	0.012
110.9	0.012
111	0.012
111.1	0.012
111.2	0.012
111.3	0.012
111.4	0.013
111.5	0.013
111.6	0.013
111.7	0.013
111.8	0.013
111.9	0.013
112	0.013
112.1	0.013
112.2	0.013
112.3	0.013
112.4	0.013
112.5	0.013
112.6	0.013
112.7	0.013
112.8	0.013
112.9	0.013
113	0.013
113.1	0.013
113.2	0.013
113.3	0.013
113.4	0.013
113.5	0.013
113.6	0.013
113.7	0.013
113.8	0.015
113.9	0.015
114	0.015
114.1	0.015
114.2	0.015
114.3	0.015
114.4	0.015
114.5	0.015
114.6	0.015
114.7	0.015
114.8	0.015
114.9	0.015
115	0.015
115.1	0.015
115.2	0.015
115.3	0.017
115.4	0.017
115.5	0.017
115.6	0.017
115.7	0.017
115.8	0.017
115.9	0.017
116	0.017
116.1	0.017
116.2	0.017
116.3	0.017
116.4	0.018
116.5	0.018
116.6	0.018
116.7	0.018
116.8	0.018
116.9	0.018
117	0.018
117.1	0.018
117.2	0.018
117.3	0.017
117.4	0.017
117.5	0.017
117.6	0.017
117.7	0.017
117.8	0.017
117.9	0.017
118	0.018
118.1	0.018
118.2	0.018
118.3	0.019
118.4	0.019
118.5	0.019
118.6	0.019
118.7	0.019
118.8	0.019
118.9	0.019
119	0.019
119.1	0.019
119.2	0.019
119.3	0.019
119.4	0.019
119.5	0.019
119.6	0.019
119.7	0.019
119.8	0.019
119.9	0.018
120	0.018
120.1	0.018
120.2	0.018
120.3	0.018
120.4	0.018
120.5	0.018
120.6	0.018
120.7	0.018
120.8	0.019
120.9	0.019
121	0.019
121.1	0.02
121.2	0.02
121.3	0.02
121.4	0.02
121.5	0.02
121.6	0.02
121.7	0.02
121.8	0.02
121.9	0.02
122	0.02
122.1	0.02
122.2	0.02
122.3	0.02
122.4	0.02
122.5	0.02
122.6	0.02
122.7	0.02
122.8	0.02
122.9	0.021
123	0.022
123.1	0.022
123.2	0.022
123.3	0.022
123.4	0.022
123.5	0.023
123.6	0.023
123.7	0.024
123.8	0.024
123.9	0.024
124	0.025
124.1	0.025
124.2	0.025
124.3	0.025
124.4	0.025
124.5	0.025
124.6	0.025
124.7	0.025
124.8	0.025
124.9	0.025
125	0.025
125.1	0.026
125.2	0.026
125.3	0.027
125.4	0.027
125.5	0.027
125.6	0.027
125.7	0.027
125.8	0.027
125.9	0.027
126	0.027
126.1	0.027
126.2	0.027
126.3	0.027
126.4	0.029
126.5	0.029
126.6	0.028
126.7	0.028
126.8	0.027
126.9	0.027
127	0.027
127.1	0.029
127.2	0.029
127.3	0.029
127.4	0.029
127.5	0.029
127.6	0.029
127.7	0.029
127.8	0.029
127.9	0.03
128	0.031
128.1	0.031
128.2	0.032
128.3	0.032
128.4	0.032
128.5	0.033
128.6	0.034
128.7	0.034
128.8	0.034
128.9	0.034
129	0.034
129.1	0.034
129.2	0.034
129.3	0.034
129.4	0.034
129.5	0.034
129.6	0.033
129.7	0.033
129.8	0.033
129.9	0.034
130	0.033
130.1	0.034
130.2	0.034
130.3	0.034
130.4	0.034
130.5	0.034
130.6	0.034
130.7	0.034
130.8	0.034
130.9	0.034
131	0.034
131.1	0.034
131.2	0.036
131.3	0.036
131.4	0.036
131.5	0.036
131.6	0.036
131.7	0.036
131.8	0.036
131.9	0.036
132	0.036
132.1	0.036
132.2	0.036
132.3	0.036
132.4	0.036
132.5	0.036
132.6	0.036
132.7	0.036
132.8	0.036
132.9	0.036
133	0.037
133.1	0.037
133.2	0.037
133.3	0.038
133.4	0.038
133.5	0.038
133.6	0.038
133.7	0.038
133.8	0.038
133.9	0.038
134	0.038
134.1	0.038
134.2	0.038
134.3	0.038
134.4	0.038
134.5	0.038
134.6	0.038
134.7	0.038
134.8	0.038
134.9	0.038
135	0.039
135.1	0.039
135.2	0.039
135.3	0.039
135.4	0.039
135.5	0.04
135.6	0.04
135.7	0.04
135.8	0.04
135.9	0.04
136	0.041
136.1	0.042
136.2	0.042
136.3	0.043
136.4	0.044
136.5	0.044
136.6	0.044
136.7	0.045
136.8	0.046
136.9	0.046
137	0.046
137.1	0.046
137.2	0.046
137.3	0.047
137.4	0.047
137.5	0.047
137.6	0.047
137.7	0.047
137.8	0.047
137.9	0.049
138	0.049
138.1	0.049
138.2	0.049
138.3	0.049
138.4	0.048
138.5	0.048
138.6	0.048
138.7	0.048
138.8	0.048
138.9	0.049
139	0.05
139.1	0.05
139.2	0.05
139.3	0.05
139.4	0.05
139.5	0.05
139.6	0.051
139.7	0.051
139.8	0.051
139.9	0.05
140	0.051
140.1	0.051
140.2	0.051
140.3	0.051
140.4	0.052
140.5	0.052
140.6	0.052
140.7	0.052
140.8	0.052
140.9	0.052
141	0.054
141.1	0.054
141.2	0.054
141.3	0.054
141.4	0.055
141.5	0.055
141.6	0.055
141.7	0.055
141.8	0.055
141.9	0.056
142	0.056
142.1	0.056
142.2	0.056
142.3	0.056
142.4	0.056
142.5	0.056
142.6	0.056
142.7	0.056
142.8	0.056
142.9	0.057
143	0.057
143.1	0.057
143.2	0.057
143.3	0.057
143.4	0.057
143.5	0.057
143.6	0.057
143.7	0.057
143.8	0.058
143.9	0.058
144	0.059
144.1	0.059
144.2	0.059
144.3	0.059
144.4	0.06
144.5	0.06
144.6	0.06
144.7	0.062
144.8	0.063
144.9	0.064
145	0.065
145.1	0.066
145.2	0.066
145.3	0.066
145.4	0.066
145.5	0.066
145.6	0.066
145.7	0.067
145.8	0.067
145.9	0.067
146	0.067
146.1	0.066
146.2	0.066
146.3	0.066
146.4	0.066
146.5	0.066
146.6	0.066
146.7	0.066
146.8	0.066
146.9	0.066
147	0.066
147.1	0.066
147.2	0.066
147.3	0.066
147.4	0.066
147.5	0.066
147.6	0.065
147.7	0.065
147.8	0.065
147.9	0.064
148	0.064
148.1	0.065
148.2	0.066
148.3	0.066
148.4	0.066
148.5	0.066
148.6	0.066
148.7	0.065
148.8	0.065
148.9	0.064
149	0.063
149.1	0.063
149.2	0.063
149.3	0.063
149.4	0.063
149.5	0.062
149.6	0.062
149.7	0.062
149.8	0.062
149.9	0.062
150	0.062
150.1	0.063
150.2	0.063
150.3	0.063
150.4	0.063
150.5	0.064
150.6	0.064
150.7	0.064
150.8	0.064
150.9	0.064
151	0.064
151.1	0.064
151.2	0.064
151.3	0.064
151.4	0.064
151.5	0.064
151.6	0.064
151.7	0.064
151.8	0.063
151.9	0.063
152	0.063
152.1	0.063
152.2	0.063
152.3	0.063
152.4	0.064
152.5	0.064
152.6	0.064
152.7	0.064
152.8	0.064
152.9	0.064
153	0.064
153.1	0.064
153.2	0.065
153.3	0.065
153.4	0.065
153.5	0.065
153.6	0.065
153.7	0.065
153.8	0.066
153.9	0.066
154	0.066
154.1	0.066
154.2	0.066
154.3	0.066
154.4	0.066
154.5	0.066
154.6	0.066
154.7	0.066
154.8	0.067
154.9	0.067
155	0.067
155.1	0.067
155.2	0.068
155.3	0.068
155.4	0.069
155.5	0.069
155.6	0.068
155.7	0.068
155.8	0.068
155.9	0.068
156	0.068
156.1	0.068
156.2	0.068
156.3	0.068
156.4	0.068
156.5	0.068
156.6	0.069
156.7	0.069
156.8	0.069
156.9	0.069
157	0.069
157.1	0.07
157.2	0.07
157.3	0.07
157.4	0.07
157.5	0.07
157.6	0.07
157.7	0.07
157.8	0.07
157.9	0.07
158	0.07
158.1	0.07
158.2	0.07
158.3	0.07
158.4	0.07
158.5	0.071
158.6	0.072
158.7	0.072
158.8	0.072
158.9	0.072
159	0.072
159.1	0.072
159.2	0.072
159.3	0.073
159.4	0.073
159.5	0.073
159.6	0.073
159.7	0.073
159.8	0.073
159.9	0.073
160	0.073
160.1	0.073
160.2	0.073
160.3	0.073
160.4	0.074
160.5	0.074
160.6	0.074
160.7	0.074
160.8	0.074
160.9	0.074
161	0.074
161.1	0.073
161.2	0.073
161.3	0.073
161.4	0.073
161.5	0.073
161.6	0.074
161.7	0.074
161.8	0.074
161.9	0.074
162	0.074
162.1	0.076
162.2	0.076
162.3	0.077
162.4	0.077
162.5	0.076
162.6	0.078
162.7	0.078
162.8	0.078
162.9	0.078
163	0.078
163.1	0.078
163.2	0.078
163.3	0.078
163.4	0.078
163.5	0.077
163.6	0.077
163.7	0.078
163.8	0.078
163.9	0.078
164	0.078
164.1	0.078
164.2	0.078
164.3	0.079
164.4	0.079
164.5	0.079
164.6	0.079
164.7	0.079
164.8	0.079
164.9	0.078
165	0.079
165.1	0.079
165.2	0.079
165.3	0.078
165.4	0.078
165.5	0.078
165.6	0.078
165.7	0.078
165.8	0.078
165.9	0.078
166	0.079
166.1	0.079
166.2	0.079
166.3	0.079
166.4	0.079
166.5	0.079
166.6	0.079
166.7	0.079
166.8	0.079
166.9	0.079
167	0.079
167.1	0.079
167.2	0.079
167.3	0.081
167.4	0.081
167.5	0.081
167.6	0.082
167.7	0.082
167.8	0.082
167.9	0.082
168	0.081
168.1	0.082
168.2	0.082
168.3	0.082
168.4	0.082
168.5	0.082
168.6	0.082
168.7	0.082
168.8	0.082
168.9	0.082
169	0.082
169.1	0.082
169.2	0.081
169.3	0.08
169.4	0.079
169.5	0.079
169.6	0.079
169.7	0.079
169.8	0.079
169.9	0.079
170	0.079
170.1	0.079
170.2	0.08
170.3	0.08
170.4	0.081
170.5	0.083
170.6	0.083
170.7	0.083
170.8	0.083
170.9	0.083
171	0.082
171.1	0.082
171.2	0.082
171.3	0.082
171.4	0.082
171.5	0.083
171.6	0.083
171.7	0.083
171.8	0.083
171.9	0.083
172	0.082
172.1	0.082
172.2	0.082
172.3	0.082
172.4	0.082
172.5	0.082
172.6	0.082
172.7	0.082
172.8	0.082
172.9	0.082
173	0.083
173.1	0.083
173.2	0.083
173.3	0.083
173.4	0.083
173.5	0.083
173.6	0.083
173.7	0.083
173.8	0.083
173.9	0.083
174	0.083
174.1	0.083
174.2	0.083
174.3	0.083
174.4	0.083
174.5	0.084
174.6	0.084
174.7	0.084
174.8	0.084
174.9	0.084
175	0.084
175.1	0.084
175.2	0.085
175.3	0.085
175.4	0.085
175.5	0.085
175.6	0.085
175.7	0.085
175.8	0.085
175.9	0.085
176	0.085
176.1	0.085
176.2	0.085
176.3	0.085
176.4	0.084
176.5	0.084
176.6	0.084
176.7	0.085
176.8	0.085
176.9	0.085
177	0.085
177.1	0.085
177.2	0.084
177.3	0.084
177.4	0.084
177.5	0.084
177.6	0.084
177.7	0.085
177.8	0.085
177.9	0.085
178	0.086
178.1	0.086
178.2	0.086
178.3	0.086
178.4	0.086
178.5	0.087
178.6	0.087
178.7	0.087
178.8	0.087
178.9	0.087
179	0.087
179.1	0.087
179.2	0.087
179.3	0.087
179.4	0.087
179.5	0.087
179.6	0.087
179.7	0.088
179.8	0.088
179.9	0.088
180	0.088
180.1	0.089
180.2	0.089
180.3	0.089
180.4	0.089
180.5	0.089
180.6	0.088
180.7	0.088
180.8	0.088
180.9	0.088
181	0.088
181.1	0.088
181.2	0.088
181.3	0.088
181.4	0.088
181.5	0.089
181.6	0.089
181.7	0.089
181.8	0.088
181.9	0.089
182	0.089
182.1	0.09
182.2	0.09
182.3	0.09
182.4	0.09
182.5	0.09
182.6	0.09
182.7	0.09
182.8	0.091
182.9	0.091
183	0.091
183.1	0.091
183.2	0.091
183.3	0.092
183.4	0.092
183.5	0.091
183.6	0.091
183.7	0.091
183.8	0.091
183.9	0.092
184	0.092
184.1	0.092
184.2	0.092
184.3	0.092
184.4	0.092
184.5	0.093
184.6	0.093
184.7	0.093
184.8	0.093
184.9	0.092
185	0.092
185.1	0.092
185.2	0.091
185.3	0.091
185.4	0.091
185.5	0.091
185.6	0.091
185.7	0.091
185.8	0.091
185.9	0.091
186	0.091
186.1	0.091
186.2	0.091
186.3	0.091
186.4	0.091
186.5	0.091
186.6	0.091
186.7	0.091
186.8	0.091
186.9	0.091
187	0.091
187.1	0.091
187.2	0.091
187.3	0.091
187.4	0.091
187.5	0.091
187.6	0.091
187.7	0.091
187.8	0.091
187.9	0.091
188	0.091
188.1	0.091
188.2	0.092
188.3	0.092
188.4	0.091
188.5	0.09
188.6	0.089
188.7	0.089
188.8	0.089
188.9	0.089
189	0.089
189.1	0.089
189.2	0.089
189.3	0.089
189.4	0.089
189.5	0.09
189.6	0.09
189.7	0.09
189.8	0.09
189.9	0.09
190	0.09
190.1	0.09
190.2	0.09
190.3	0.09
190.4	0.09
190.5	0.09
190.6	0.09
190.7	0.09
190.8	0.09
190.9	0.09
191	0.09
191.1	0.091
191.2	0.092
191.3	0.092
191.4	0.093
191.5	0.093
191.6	0.093
191.7	0.092
191.8	0.092
191.9	0.092
192	0.092
192.1	0.092
192.2	0.092
192.3	0.093
192.4	0.093
192.5	0.093
192.6	0.093
192.7	0.094
192.8	0.094
192.9	0.095
193	0.095
193.1	0.095
193.2	0.095
193.3	0.096
193.4	0.096
193.5	0.096
193.6	0.096
193.7	0.096
193.8	0.096
193.9	0.096
194	0.096
194.1	0.096
194.2	0.096
194.3	0.097
194.4	0.098
194.5	0.098
194.6	0.098
194.7	0.099
194.8	0.099
194.9	0.099
195	0.099
195.1	0.099
195.2	0.099
195.3	0.099
195.4	0.1
195.5	0.1
195.6	0.1
195.7	0.1
195.8	0.1
195.9	0.1
196	0.1
196.1	0.101
196.2	0.101
196.3	0.101
196.4	0.101
196.5	0.101
196.6	0.101
196.7	0.101
196.8	0.101
196.9	0.101
197	0.101
197.1	0.101
197.2	0.101
197.3	0.101
197.4	0.101
197.5	0.102
197.6	0.102
197.7	0.102
197.8	0.102
197.9	0.102
198	0.102
198.1	0.101
198.2	0.101
198.3	0.101
198.4	0.101
198.5	0.101
198.6	0.102
198.7	0.102
198.8	0.103
198.9	0.103
199	0.103
199.1	0.103
199.2	0.103
199.3	0.103
199.4	0.103
199.5	0.103
199.6	0.103
199.7	0.103
199.8	0.103
199.9	0.103
200	0.103
[truncated: 14,000 more rows]
