# Supplementary material for: Bayesian inference of kinetic schemes for ion channels by Kalman filtering
Source: eLife journal article supplement (doi:10.7554/elife.62714), 2022-05-04
Supplement: fig1-data1 [file 00625_Sim_N_1000_Fluor_MW.xlsx]

## Sheet: Tabelle1
0.1	0
0.2	0
0.3	0
0.4	0
0.5	0
0.6	0
0.7	0
0.8	0
0.9	0
1	0
1.1	0
1.2	0
1.3	0
1.4	0
1.5	0
1.6	0
1.7	0
1.8	0
1.9	0
2	0
2.1	0
2.2	0
2.3	0
2.4	0
2.5	0
2.6	0
2.7	0
2.8	0
2.9	0
3	0
3.1	0
3.2	0
3.3	0
3.4	0
3.5	0
3.6	0
3.7	0
3.8	0
3.9	0
4	0
4.1	0
4.2	0
4.3	0
4.4	0
4.5	0
4.6	0
4.7	0
4.8	0
4.9	0
5	0
5.1	0
5.2	0
5.3	0
5.4	0
5.5	0
5.6	0
5.7	0
5.8	0
5.9	0
6	0
6.1	0
6.2	0
6.3	0
6.4	0
6.5	0
6.6	0
6.7	0
6.8	0
6.9	0
7	0
7.1	0
7.2	0
7.3	0
7.4	0
7.5	0
7.6	0
7.7	0
7.8	0
7.9	0
8	0
8.1	0
8.2	0
8.3	0
8.4	0
8.5	0
8.6	0
8.7	0
8.8	0
8.9	0
9	0
9.1	0
9.2	0
9.3	0
9.4	0
9.5	0
9.6	0
9.7	0
9.8	0
9.9	0
10	0
10.1	0
10.2	0
10.3	0
10.4	0
10.5	0
10.6	0
10.7	0
10.8	0
10.9	0
11	0
11.1	0
11.2	0
11.3	0
11.4	0
11.5	0
11.6	0
11.7	0
11.8	0
11.9	0
12	0
12.1	0
12.2	0
12.3	0
12.4	0
12.5	0
12.6	0
12.7	0
12.8	0
12.9	0
13	0
13.1	0
13.2	0
13.3	0
13.4	0
13.5	0
13.6	0
13.7	0
13.8	0
13.9	0
14	0
14.1	0
14.2	0
14.3	0
14.4	0
14.5	0
14.6	0
14.7	0
14.8	0
14.9	0
15	0
15.1	0
15.2	0
15.3	0
15.4	0
15.5	0
15.6	0
15.7	0
15.8	0
15.9	0
16	0
16.1	0
16.2	0
16.3	0
16.4	0
16.5	0
16.6	0
16.7	0
16.8	0
16.9	0
17	0
17.1	0
17.2	0
17.3	0
17.4	0
17.5	0
17.6	0
17.7	0
17.8	0
17.9	0
18	0
18.1	0
18.2	0
18.3	0
18.4	0
18.5	0
18.6	0
18.7	0
18.8	0
18.9	0
19	0
19.1	0
19.2	0
19.3	0
19.4	0
19.5	0
19.6	0
19.7	0
19.8	0
19.9	0
20	0
20.1	0
20.2	0
20.3	0
20.4	0
20.5	0
20.6	0
20.7	0
20.8	0
20.9	0
21	0
21.1	0
21.2	0
21.3	0
21.4	0
21.5	0
21.6	0
21.7	0
21.8	0
21.9	0
22	0
22.1	0
22.2	0
22.3	0
22.4	0
22.5	0
22.6	0
22.7	0
22.8	0
22.9	0
23	0
23.1	0
23.2	0
23.3	0
23.4	0
23.5	0
23.6	0
23.7	0
23.8	0
23.9	0
24	0
24.1	0
24.2	0
24.3	0
24.4	0
24.5	0
24.6	0
24.7	0
24.8	0
24.9	0
25	0
25.1	0
25.2	0
25.3	0
25.4	0
25.5	0
25.6	0
25.7	0
25.8	0
25.9	0
26	0
26.1	0
26.2	0
26.3	0
26.4	0
26.5	0
26.6	0
26.7	0
26.8	0
26.9	0
27	0
27.1	0
27.2	0
27.3	0
27.4	0
27.5	0
27.6	0
27.7	0
27.8	0
27.9	0
28	0
28.1	0
28.2	0
28.3	0
28.4	0
28.5	0
28.6	0
28.7	0
28.8	0
28.9	0
29	0
29.1	0
29.2	0
29.3	0
29.4	0
29.5	0
29.6	0
29.7	0
29.8	0
29.9	0
30	0
30.1	0
30.2	0
30.3	0
30.4	0
30.5	0
30.6	0
30.7	0
30.8	0
30.9	0
31	0
31.1	0
31.2	0
31.3	0
31.4	0
31.5	0
31.6	0
31.7	0
31.8	0
31.9	0
32	0
32.1	0
32.2	0
32.3	0
32.4	0
32.5	0
32.6	0
32.7	0
32.8	0
32.9	0
33	0
33.1	0
33.2	0
33.3	0
33.4	0
33.5	0
33.6	0
33.7	0
33.8	0
33.9	0
34	0
34.1	0
34.2	0
34.3	0
34.4	0
34.5	0
34.6	0
34.7	0
34.8	0
34.9	0
35	0
35.1	0
35.2	0
35.3	0
35.4	0
35.5	0
35.6	0
35.7	0
35.8	0
35.9	0
36	0
36.1	0
36.2	0
36.3	0
36.4	0
36.5	0
36.6	0
36.7	0
36.8	0
36.9	0
37	0
37.1	0
37.2	0
37.3	0
37.4	0
37.5	0
37.6	0
37.7	0
37.8	0
37.9	0
38	0
38.1	0
38.2	0
38.3	0
38.4	0
38.5	0
38.6	0
38.7	0
38.8	0
38.9	0
39	0
39.1	0
39.2	0
39.3	0
39.4	0
39.5	0
39.6	0
39.7	0
39.8	0
39.9	0
40	0
40.1	0
40.2	0
40.3	0
40.4	0
40.5	0
40.6	0
40.7	0
40.8	0
40.9	0
41	0
41.1	0
41.2	0
41.3	0
41.4	0
41.5	0
41.6	0
41.7	0
41.8	0
41.9	0
42	0
42.1	0
42.2	0
42.3	0
42.4	0
42.5	0
42.6	0
42.7	0
42.8	0
42.9	0
43	0
43.1	0
43.2	0
43.3	0
43.4	0
43.5	0
43.6	0
43.7	0
43.8	0
43.9	0
44	0
44.1	0
44.2	0
44.3	0
44.4	0
44.5	0
44.6	0
44.7	0
44.8	0
44.9	0
45	0
45.1	0
45.2	0
45.3	0
45.4	0
45.5	0
45.6	0
45.7	0
45.8	0
45.9	0
46	0
46.1	0
46.2	0
46.3	0
46.4	0
46.5	0
46.6	0
46.7	0
46.8	0
46.9	0
47	0
47.1	0
47.2	0
47.3	0
47.4	0
47.5	0
47.6	0
47.7	0
47.8	0
47.9	0
48	0
48.1	0
48.2	0
48.3	0
48.4	0
48.5	0
48.6	0
48.7	0
48.8	0
48.9	0
49	0
49.1	0
49.2	0
49.3	0
49.4	0
49.5	0
49.6	0
49.7	0
49.8	0
49.9	0
50	0
50.1	0
50.2	0
50.3	0
50.4	0
50.5	0
50.6	0
50.7	0
50.8	0
50.9	0
51	0
51.1	0
51.2	0
51.3	0
51.4	0
51.5	0
51.6	0
51.7	0
51.8	0
51.9	0
52	0
52.1	0
52.2	0
52.3	0
52.4	0
52.5	0
52.6	0
52.7	0
52.8	0
52.9	0
53	0
53.1	0
53.2	0
53.3	0
53.4	0
53.5	0
53.6	0
53.7	0
53.8	0
53.9	0
54	0
54.1	0
54.2	0
54.3	0
54.4	0
54.5	0
54.6	0
54.7	0
54.8	0
54.9	0
55	0
55.1	0
55.2	0
55.3	0
55.4	0
55.5	0
55.6	0
55.7	0
55.8	0
55.9	0
56	0
56.1	0
56.2	0
56.3	0
56.4	0
56.5	0
56.6	0
56.7	0
56.8	0
56.9	0
57	0
57.1	0
57.2	0
57.3	0
57.4	0
57.5	0
57.6	0
57.7	0
57.8	0
57.9	0
58	0
58.1	0
58.2	0
58.3	0
58.4	0
58.5	0
58.6	0
58.7	0
58.8	0
58.9	0
59	0
59.1	0
59.2	0
59.3	0
59.4	0
59.5	0
59.6	0
59.7	0
59.8	0
59.9	0
60	0
60.1	0
60.2	0
60.3	0
60.4	0
60.5	0
60.6	0
60.7	0
60.8	0
60.9	0
61	0
61.1	0
61.2	0
61.3	0
61.4	0
61.5	0
61.6	0
61.7	0
61.8	0
61.9	0
62	0
62.1	0
62.2	0
62.3	0
62.4	0
62.5	0
62.6	0
62.7	0
62.8	0
62.9	0
63	0
63.1	0
63.2	0
63.3	0
63.4	0
63.5	0
63.6	0
63.7	0
63.8	0
63.9	0
64	0
64.1	0
64.2	0
64.3	0
64.4	0
64.5	0
64.6	0
64.7	0
64.8	0
64.9	0
65	0
65.1	0
65.2	0
65.3	0
65.4	0
65.5	0
65.6	0
65.7	0
65.8	0
65.9	0
66	0
66.1	0
66.2	0
66.3	0
66.4	0
66.5	0
66.6	0
66.7	0
66.8	0
66.9	0
67	0
67.1	0
67.2	0
67.3	0
67.4	0
67.5	0
67.6	0
67.7	0
67.8	0
67.9	0
68	0
68.1	0
68.2	0
68.3	0
68.4	0
68.5	0
68.6	0
68.7	0
68.8	0
68.9	0
69	0
69.1	0
69.2	0
69.3	0
69.4	0
69.5	0
69.6	0
69.7	0
69.8	0
69.9	0
70	0
70.1	0
70.2	0
70.3	0
70.4	0
70.5	0
70.6	0
70.7	0
70.8	0
70.9	0
71	0
71.1	0
71.2	0
71.3	0
71.4	0
71.5	0
71.6	0
71.7	0
71.8	0
71.9	0
72	0
72.1	0
72.2	0
72.3	0
72.4	0
72.5	0
72.6	0
72.7	0
72.8	0
72.9	0
73	0
73.1	0
73.2	0
73.3	0
73.4	0
73.5	0
73.6	0
73.7	0
73.8	0
73.9	0
74	0
74.1	0
74.2	0
74.3	0
74.4	0
74.5	0
74.6	0
74.7	0
74.8	0
74.9	0
75	0
75.1	0
75.2	0
75.3	0
75.4	0
75.5	0
75.6	0
75.7	0
75.8	0
75.9	0
76	0
76.1	0
76.2	0
76.3	0
76.4	0
76.5	0
76.6	0
76.7	0
76.8	0
76.9	0
77	0
77.1	0
77.2	0
77.3	0
77.4	0
77.5	0
77.6	0
77.7	0
77.8	0
77.9	0
78	0
78.1	0
78.2	0
78.3	0
78.4	0
78.5	0
78.6	0
78.7	0
78.8	0
78.9	0
79	0
79.1	0
79.2	0
79.3	0
79.4	0
79.5	0
79.6	0
79.7	0
79.8	0
79.9	0
80	0
80.1	0
80.2	0
80.3	0
80.4	0
80.5	0
80.6	0
80.7	0
80.8	0
80.9	0
81	0
81.1	0
81.2	0
81.3	0
81.4	0
81.5	0
81.6	0
81.7	0
81.8	0
81.9	0
82	0
82.1	0
82.2	0
82.3	0
82.4	0
82.5	0
82.6	0
82.7	0
82.8	0
82.9	0
83	0
83.1	0
83.2	0
83.3	0
83.4	0
83.5	0
83.6	0
83.7	0
83.8	0
83.9	0
84	0
84.1	0
84.2	0
84.3	0
84.4	0
84.5	0
84.6	0
84.7	0
84.8	0
84.9	0
85	0
85.1	0
85.2	0
85.3	0
85.4	0
85.5	0
85.6	0
85.7	0
85.8	0
85.9	0
86	0
86.1	0
86.2	0
86.3	0
86.4	0
86.5	0
86.6	0
86.7	0
86.8	0
86.9	0
87	0
87.1	0
87.2	0
87.3	0
87.4	0
87.5	0
87.6	0
87.7	0
87.8	0
87.9	0
88	0
88.1	0
88.2	0
88.3	0
88.4	0
88.5	0
88.6	0
88.7	0
88.8	0
88.9	0
89	0
89.1	0
89.2	0
89.3	0
89.4	0
89.5	0
89.6	0
89.7	0
89.8	0
89.9	0
90	0
90.1	0
90.2	0
90.3	0
90.4	0
90.5	0
90.6	0
90.7	0
90.8	0
90.9	0
91	0
91.1	0
91.2	0
91.3	0
91.4	0
91.5	0
91.6	0
91.7	0
91.8	0
91.9	0
92	0
92.1	0
92.2	0
92.3	0
92.4	0
92.5	0
92.6	0
92.7	0
92.8	0
92.9	0
93	0
93.1	0
93.2	0
93.3	0
93.4	0
93.5	0
93.6	0
93.7	0
93.8	0
93.9	0
94	0
94.1	0
94.2	0
94.3	0
94.4	0
94.5	0
94.6	0
94.7	0
94.8	0
94.9	0
95	0
95.1	0
95.2	0
95.3	0
95.4	0
95.5	0
95.6	0
95.7	0
95.8	0
95.9	0
96	0
96.1	0
96.2	0
96.3	0
96.4	0
96.5	0
96.6	0
96.7	0
96.8	0
96.9	0
97	0
97.1	0
97.2	0
97.3	0
97.4	0
97.5	0
97.6	0
97.7	0
97.8	0
97.9	0
98	0
98.1	0
98.2	0
98.3	0
98.4	0
98.5	0
98.6	0
98.7	0
98.8	0
98.9	0
99	0
99.1	0
99.2	0
99.3	0
99.4	0
99.5	0
99.6	0
99.7	0
99.8	0
99.9	0
100	0
100.1	0.0035
100.2	0.0095
100.3	0.0125
100.4	0.0155
100.5	0.0185
100.6	0.022
100.7	0.0255
100.8	0.029
100.9	0.0315
101	0.034
101.1	0.0375
101.2	0.039
101.3	0.0415
101.4	0.047
101.5	0.0475
101.6	0.0505
101.7	0.0535
101.8	0.058
101.9	0.0595
102	0.0625
102.1	0.0675
102.2	0.0695
102.3	0.073
102.4	0.075
102.5	0.08
102.6	0.0855
102.7	0.0885
102.8	0.0905
102.9	0.0935
103	0.0955
103.1	0.096
103.2	0.101
103.3	0.1035
103.4	0.1055
103.5	0.107
103.6	0.1095
103.7	0.1115
103.8	0.1125
103.9	0.114
104	0.1185
104.1	0.1205
104.2	0.124
104.3	0.1265
104.4	0.128
104.5	0.1285
104.6	0.129
104.7	0.131
104.8	0.1335
104.9	0.1345
105	0.1355
105.1	0.14
105.2	0.142
105.3	0.1405
105.4	0.1415
105.5	0.1425
105.6	0.143
105.7	0.145
105.8	0.1465
105.9	0.147
106	0.1505
106.1	0.152
106.2	0.1525
106.3	0.155
106.4	0.157
106.5	0.159
106.6	0.162
106.7	0.164
106.8	0.164
106.9	0.165
107	0.167
107.1	0.168
107.2	0.168
107.3	0.171
107.4	0.1735
107.5	0.1755
107.6	0.177
107.7	0.1815
107.8	0.184
107.9	0.183
108	0.1865
108.1	0.1865
108.2	0.1895
108.3	0.1905
108.4	0.1905
108.5	0.1885
108.6	0.1915
108.7	0.1905
108.8	0.19
108.9	0.191
109	0.19
109.1	0.19
109.2	0.1895
109.3	0.1945
109.4	0.197
109.5	0.202
109.6	0.203
109.7	0.204
109.8	0.203
109.9	0.207
110	0.2075
110.1	0.2105
110.2	0.2095
110.3	0.208
110.4	0.2045
110.5	0.205
110.6	0.2065
110.7	0.208
110.8	0.207
110.9	0.208
111	0.2075
111.1	0.2105
111.2	0.2105
111.3	0.2115
111.4	0.2125
111.5	0.2135
111.6	0.2135
111.7	0.213
111.8	0.214
111.9	0.2155
112	0.2155
112.1	0.217
112.2	0.2195
112.3	0.223
112.4	0.2225
112.5	0.223
112.6	0.2215
112.7	0.2195
112.8	0.22
112.9	0.221
113	0.221
113.1	0.22
113.2	0.2205
113.3	0.2205
113.4	0.2205
113.5	0.22
113.6	0.219
113.7	0.22
113.8	0.2205
113.9	0.22
114	0.2195
114.1	0.2185
114.2	0.2215
114.3	0.2195
114.4	0.217
114.5	0.2175
114.6	0.2205
114.7	0.2205
114.8	0.222
114.9	0.2225
115	0.2195
115.1	0.216
115.2	0.215
115.3	0.2155
115.4	0.2165
115.5	0.2185
115.6	0.2195
115.7	0.2195
115.8	0.2205
115.9	0.2225
116	0.221
116.1	0.2235
116.2	0.222
116.3	0.2215
116.4	0.2185
116.5	0.219
116.6	0.22
116.7	0.219
116.8	0.2185
116.9	0.216
117	0.2155
117.1	0.214
117.2	0.214
117.3	0.2135
117.4	0.215
117.5	0.215
117.6	0.2145
117.7	0.2185
117.8	0.2165
117.9	0.216
118	0.215
118.1	0.217
118.2	0.2185
118.3	0.219
118.4	0.2185
118.5	0.218
118.6	0.2205
118.7	0.2195
118.8	0.2215
118.9	0.2215
119	0.22
119.1	0.22
119.2	0.2195
119.3	0.219
119.4	0.2185
119.5	0.2195
119.6	0.22
119.7	0.221
119.8	0.2195
119.9	0.2185
120	0.2195
120.1	0.22
120.2	0.2185
120.3	0.2175
120.4	0.2195
120.5	0.219
120.6	0.2175
120.7	0.219
120.8	0.218
120.9	0.2155
121	0.214
121.1	0.2145
121.2	0.2135
121.3	0.2125
121.4	0.215
121.5	0.2185
121.6	0.217
121.7	0.219
121.8	0.2185
121.9	0.2175
122	0.2165
122.1	0.219
122.2	0.2165
122.3	0.216
122.4	0.215
122.5	0.216
122.6	0.2165
122.7	0.2165
122.8	0.2165
122.9	0.2165
123	0.216
123.1	0.215
123.2	0.215
123.3	0.217
123.4	0.219
123.5	0.2215
123.6	0.2205
123.7	0.2215
123.8	0.221
123.9	0.2215
124	0.222
124.1	0.2225
124.2	0.2225
124.3	0.223
124.4	0.2245
124.5	0.2245
124.6	0.223
124.7	0.221
124.8	0.22
124.9	0.2235
125	0.2245
125.1	0.2245
125.2	0.2255
125.3	0.227
125.4	0.225
125.5	0.2265
125.6	0.224
125.7	0.2255
125.8	0.2275
125.9	0.2285
126	0.2305
126.1	0.2315
126.2	0.232
126.3	0.2265
126.4	0.2255
126.5	0.226
126.6	0.2285
126.7	0.2295
126.8	0.2295
126.9	0.232
127	0.232
127.1	0.2325
127.2	0.232
127.3	0.2325
127.4	0.2335
127.5	0.235
127.6	0.235
127.7	0.2355
127.8	0.2365
127.9	0.237
128	0.2365
128.1	0.238
128.2	0.2365
128.3	0.233
128.4	0.231
128.5	0.2325
128.6	0.234
128.7	0.231
128.8	0.23
128.9	0.2315
129	0.2305
129.1	0.23
129.2	0.23
129.3	0.2275
129.4	0.229
129.5	0.2305
129.6	0.231
129.7	0.2325
129.8	0.233
129.9	0.2315
130	0.2305
130.1	0.229
130.2	0.229
130.3	0.23
130.4	0.2295
130.5	0.2285
130.6	0.229
130.7	0.23
130.8	0.229
130.9	0.23
131	0.232
131.1	0.232
131.2	0.231
131.3	0.232
131.4	0.232
131.5	0.2345
131.6	0.234
131.7	0.2365
131.8	0.236
131.9	0.236
132	0.238
132.1	0.238
132.2	0.2395
132.3	0.237
132.4	0.239
132.5	0.2375
132.6	0.237
132.7	0.239
132.8	0.2405
132.9	0.2415
133	0.245
133.1	0.2425
133.2	0.2405
133.3	0.2435
133.4	0.245
133.5	0.2465
133.6	0.2475
133.7	0.247
133.8	0.2465
133.9	0.247
134	0.2475
134.1	0.251
134.2	0.2495
134.3	0.2465
134.4	0.247
134.5	0.249
134.6	0.251
134.7	0.2555
134.8	0.2545
134.9	0.2525
135	0.2535
135.1	0.2525
135.2	0.254
135.3	0.2575
135.4	0.26
135.5	0.259
135.6	0.259
135.7	0.2585
135.8	0.26
135.9	0.2625
136	0.262
136.1	0.264
136.2	0.264
136.3	0.2635
136.4	0.2615
136.5	0.261
136.6	0.2595
136.7	0.257
136.8	0.2605
136.9	0.2585
137	0.261
137.1	0.2595
137.2	0.2605
137.3	0.261
137.4	0.259
137.5	0.2605
137.6	0.2605
137.7	0.258
137.8	0.259
137.9	0.261
138	0.2625
138.1	0.2595
138.2	0.259
138.3	0.2575
138.4	0.2575
138.5	0.2565
138.6	0.255
138.7	0.252
138.8	0.253
138.9	0.2525
139	0.2515
139.1	0.249
139.2	0.2525
139.3	0.2525
139.4	0.253
139.5	0.2535
139.6	0.255
139.7	0.2555
139.8	0.255
139.9	0.2525
140	0.254
140.1	0.253
140.2	0.255
140.3	0.256
140.4	0.2565
140.5	0.257
140.6	0.258
140.7	0.26
140.8	0.2575
140.9	0.2595
141	0.259
141.1	0.2595
141.2	0.2625
141.3	0.265
141.4	0.2655
141.5	0.265
141.6	0.266
141.7	0.2645
141.8	0.264
141.9	0.262
142	0.2615
142.1	0.2615
142.2	0.2615
142.3	0.2615
142.4	0.261
142.5	0.2625
142.6	0.262
142.7	0.261
142.8	0.2615
142.9	0.261
143	0.2625
143.1	0.2625
143.2	0.2635
143.3	0.2605
143.4	0.259
143.5	0.26
143.6	0.257
143.7	0.257
143.8	0.256
143.9	0.2575
144	0.2595
144.1	0.2555
144.2	0.2555
144.3	0.2535
144.4	0.254
144.5	0.254
144.6	0.253
144.7	0.2555
144.8	0.258
144.9	0.2615
145	0.2605
145.1	0.262
145.2	0.2605
145.3	0.257
145.4	0.258
145.5	0.2575
145.6	0.2565
145.7	0.255
145.8	0.254
145.9	0.2535
146	0.252
146.1	0.2535
146.2	0.253
146.3	0.2515
146.4	0.251
146.5	0.249
146.6	0.249
146.7	0.247
146.8	0.247
146.9	0.2455
147	0.2465
147.1	0.2485
147.2	0.2495
147.3	0.251
147.4	0.2515
147.5	0.2535
147.6	0.2515
147.7	0.253
147.8	0.2515
147.9	0.2515
148	0.2515
148.1	0.251
148.2	0.2535
148.3	0.2545
148.4	0.2545
148.5	0.257
148.6	0.2555
148.7	0.256
148.8	0.255
148.9	0.256
149	0.2555
149.1	0.256
149.2	0.255
149.3	0.2535
149.4	0.2575
149.5	0.2565
149.6	0.258
149.7	0.259
149.8	0.258
149.9	0.256
150	0.256
150.1	0.2575
150.2	0.259
150.3	0.257
150.4	0.258
150.5	0.262
150.6	0.263
150.7	0.2615
150.8	0.2625
150.9	0.262
151	0.2635
151.1	0.2635
151.2	0.261
151.3	0.26
151.4	0.2605
151.5	0.262
151.6	0.263
151.7	0.2625
151.8	0.26
151.9	0.2585
152	0.2595
152.1	0.261
152.2	0.264
152.3	0.2625
152.4	0.2615
152.5	0.2615
152.6	0.262
152.7	0.2645
152.8	0.2635
152.9	0.263
153	0.2615
153.1	0.2615
153.2	0.2605
153.3	0.2595
153.4	0.26
153.5	0.26
153.6	0.2595
153.7	0.263
153.8	0.2635
153.9	0.264
154	0.264
154.1	0.263
154.2	0.261
154.3	0.2595
154.4	0.26
154.5	0.259
154.6	0.2595
154.7	0.2605
154.8	0.261
154.9	0.2615
155	0.2615
155.1	0.2625
155.2	0.262
155.3	0.263
155.4	0.265
155.5	0.2665
155.6	0.268
155.7	0.27
155.8	0.2685
155.9	0.2665
156	0.264
156.1	0.264
156.2	0.263
156.3	0.2635
156.4	0.2625
156.5	0.2605
156.6	0.2615
156.7	0.26
156.8	0.2595
156.9	0.26
157	0.261
157.1	0.2635
157.2	0.265
157.3	0.2665
157.4	0.266
157.5	0.265
157.6	0.2645
157.7	0.2665
157.8	0.2645
157.9	0.2665
158	0.265
158.1	0.264
158.2	0.2645
158.3	0.267
158.4	0.268
158.5	0.274
158.6	0.275
158.7	0.2745
158.8	0.272
158.9	0.2735
159	0.2715
159.1	0.271
159.2	0.268
159.3	0.266
159.4	0.2675
159.5	0.2695
159.6	0.269
159.7	0.2695
159.8	0.271
159.9	0.2715
160	0.272
160.1	0.2725
160.2	0.2725
160.3	0.273
160.4	0.2735
160.5	0.274
160.6	0.274
160.7	0.2745
160.8	0.2725
160.9	0.274
161	0.275
161.1	0.2745
161.2	0.2725
161.3	0.274
161.4	0.2715
161.5	0.273
161.6	0.274
161.7	0.2745
161.8	0.2755
161.9	0.275
162	0.274
162.1	0.273
162.2	0.2735
162.3	0.2715
162.4	0.2735
162.5	0.2735
162.6	0.273
162.7	0.273
162.8	0.2715
162.9	0.2705
163	0.269
163.1	0.27
163.2	0.2705
163.3	0.2725
163.4	0.2705
163.5	0.2735
163.6	0.275
163.7	0.274
163.8	0.2765
163.9	0.2755
164	0.2735
164.1	0.2715
164.2	0.2705
164.3	0.269
164.4	0.267
164.5	0.265
164.6	0.2665
164.7	0.264
164.8	0.263
164.9	0.261
165	0.2625
165.1	0.2605
165.2	0.26
165.3	0.261
165.4	0.2645
165.5	0.264
165.6	0.2595
165.7	0.258
165.8	0.258
165.9	0.2575
166	0.257
166.1	0.257
166.2	0.259
166.3	0.259
166.4	0.2595
166.5	0.2595
166.6	0.259
166.7	0.258
166.8	0.256
166.9	0.255
167	0.2545
167.1	0.2555
167.2	0.256
167.3	0.256
167.4	0.255
167.5	0.2565
167.6	0.2545
167.7	0.257
167.8	0.2565
167.9	0.256
168	0.256
168.1	0.26
168.2	0.258
168.3	0.256
168.4	0.256
168.5	0.2555
168.6	0.2545
168.7	0.2545
168.8	0.2505
168.9	0.2515
169	0.253
169.1	0.254
169.2	0.253
169.3	0.252
169.4	0.252
169.5	0.247
169.6	0.2465
169.7	0.2465
169.8	0.2465
169.9	0.2455
170	0.2455
170.1	0.244
170.2	0.243
170.3	0.245
170.4	0.246
170.5	0.2465
170.6	0.243
170.7	0.2395
170.8	0.2405
170.9	0.2395
171	0.239
171.1	0.243
171.2	0.2425
171.3	0.2405
171.4	0.241
171.5	0.2415
171.6	0.241
171.7	0.243
171.8	0.245
171.9	0.2475
172	0.247
172.1	0.2475
172.2	0.251
172.3	0.252
172.4	0.251
172.5	0.252
172.6	0.2545
172.7	0.2555
172.8	0.255
172.9	0.255
173	0.255
173.1	0.253
173.2	0.2515
173.3	0.2515
173.4	0.2545
173.5	0.2545
173.6	0.2545
173.7	0.2545
173.8	0.2545
173.9	0.2535
174	0.2555
174.1	0.2605
174.2	0.261
174.3	0.261
174.4	0.261
174.5	0.2595
174.6	0.259
174.7	0.2625
174.8	0.263
174.9	0.262
175	0.262
175.1	0.2625
175.2	0.2615
175.3	0.261
175.4	0.259
175.5	0.2585
175.6	0.258
175.7	0.257
175.8	0.257
175.9	0.258
176	0.258
176.1	0.257
176.2	0.258
176.3	0.259
176.4	0.2575
176.5	0.255
176.6	0.255
176.7	0.253
176.8	0.2535
176.9	0.253
177	0.256
177.1	0.2585
177.2	0.2595
177.3	0.26
177.4	0.2595
177.5	0.2595
177.6	0.26
177.7	0.2595
177.8	0.258
177.9	0.2605
178	0.262
178.1	0.2575
178.2	0.257
178.3	0.257
178.4	0.261
178.5	0.26
178.6	0.257
178.7	0.255
178.8	0.2575
178.9	0.2545
179	0.253
179.1	0.254
179.2	0.2535
179.3	0.2525
179.4	0.2515
179.5	0.2515
179.6	0.2505
179.7	0.2495
179.8	0.2505
179.9	0.2525
180	0.252
180.1	0.2515
180.2	0.2505
180.3	0.2505
180.4	0.2505
180.5	0.249
180.6	0.2485
180.7	0.248
180.8	0.247
180.9	0.2495
181	0.251
181.1	0.2525
181.2	0.2495
181.3	0.2495
181.4	0.251
181.5	0.252
181.6	0.253
181.7	0.253
181.8	0.252
181.9	0.2535
182	0.2555
182.1	0.2555
182.2	0.2565
182.3	0.253
182.4	0.251
182.5	0.251
182.6	0.254
182.7	0.255
182.8	0.2525
182.9	0.253
183	0.254
183.1	0.2535
183.2	0.254
183.3	0.257
183.4	0.256
183.5	0.2565
183.6	0.2565
183.7	0.256
183.8	0.2565
183.9	0.2585
184	0.259
184.1	0.258
184.2	0.257
184.3	0.2585
184.4	0.2585
184.5	0.257
184.6	0.2565
184.7	0.257
184.8	0.2585
184.9	0.259
185	0.2595
185.1	0.259
185.2	0.2585
185.3	0.259
185.4	0.2585
185.5	0.259
185.6	0.26
185.7	0.2605
185.8	0.261
185.9	0.2605
186	0.2605
186.1	0.261
186.2	0.261
186.3	0.262
186.4	0.259
186.5	0.259
186.6	0.2615
186.7	0.26
186.8	0.26
186.9	0.2625
187	0.265
187.1	0.2625
187.2	0.2625
187.3	0.2605
187.4	0.262
187.5	0.261
187.6	0.2615
187.7	0.263
187.8	0.2635
187.9	0.264
188	0.2635
188.1	0.262
188.2	0.262
188.3	0.26
188.4	0.26
188.5	0.2605
188.6	0.264
188.7	0.265
188.8	0.262
188.9	0.2625
189	0.2625
189.1	0.263
189.2	0.259
189.3	0.2595
189.4	0.259
189.5	0.261
189.6	0.264
189.7	0.2645
189.8	0.265
189.9	0.266
190	0.2675
190.1	0.268
190.2	0.2675
190.3	0.2675
190.4	0.269
190.5	0.2655
190.6	0.265
190.7	0.2645
190.8	0.264
190.9	0.264
191	0.2635
191.1	0.2635
191.2	0.2635
191.3	0.266
191.4	0.2645
191.5	0.263
191.6	0.2625
191.7	0.263
191.8	0.2625
191.9	0.266
192	0.2675
192.1	0.2655
192.2	0.2635
192.3	0.2655
192.4	0.2675
192.5	0.2685
192.6	0.266
192.7	0.2685
192.8	0.272
192.9	0.2725
193	0.2755
193.1	0.275
193.2	0.278
193.3	0.2785
193.4	0.2765
193.5	0.2775
193.6	0.276
193.7	0.2785
193.8	0.2765
193.9	0.278
194	0.276
194.1	0.275
194.2	0.2745
194.3	0.2765
194.4	0.2805
194.5	0.281
194.6	0.2835
194.7	0.281
194.8	0.2795
194.9	0.277
195	0.277
195.1	0.2785
195.2	0.28
195.3	0.281
195.4	0.2815
195.5	0.2835
195.6	0.283
195.7	0.283
195.8	0.2825
195.9	0.2805
196	0.2765
196.1	0.2775
196.2	0.2775
196.3	0.2785
196.4	0.2785
196.5	0.277
196.6	0.2765
196.7	0.275
196.8	0.2755
196.9	0.276
197	0.2765
197.1	0.2765
197.2	0.2785
197.3	0.277
197.4	0.276
197.5	0.275
197.6	0.277
197.7	0.277
197.8	0.2785
197.9	0.278
198	0.2775
198.1	0.2765
198.2	0.276
198.3	0.2785
198.4	0.276
198.5	0.2745
198.6	0.2755
198.7	0.276
198.8	0.275
198.9	0.2745
199	0.2745
199.1	0.276
199.2	0.276
199.3	0.2745
199.4	0.2755
199.5	0.271
199.6	0.272
199.7	0.273
199.8	0.275
199.9	0.273
200	0.274
[truncated: 14,000 more rows]
