# Supplementary material for: Bayesian inference of kinetic schemes for ion channels by Kalman filtering
Source: eLife journal article supplement (doi:10.7554/elife.62714), 2022-05-04
Supplement: fig1-data1 [file 00625_Sim_N_1000_Strom_MW.xlsx]

## Sheet: Tabelle1
0.1	0
0.2	0
0.3	0
0.4	0
0.5	0
0.6	0
0.7	0
0.8	0
0.9	0
1	0
1.1	0
1.2	0
1.3	0
1.4	0
1.5	0
1.6	0
1.7	0
1.8	0
1.9	0
2	0
2.1	0
2.2	0
2.3	0
2.4	0
2.5	0
2.6	0
2.7	0
2.8	0
2.9	0
3	0
3.1	0
3.2	0
3.3	0
3.4	0
3.5	0
3.6	0
3.7	0
3.8	0
3.9	0
4	0
4.1	0
4.2	0
4.3	0
4.4	0
4.5	0
4.6	0
4.7	0
4.8	0
4.9	0
5	0
5.1	0
5.2	0
5.3	0
5.4	0
5.5	0
5.6	0
5.7	0
5.8	0
5.9	0
6	0
6.1	0
6.2	0
6.3	0
6.4	0
6.5	0
6.6	0
6.7	0
6.8	0
6.9	0
7	0
7.1	0
7.2	0
7.3	0
7.4	0
7.5	0
7.6	0
7.7	0
7.8	0
7.9	0
8	0
8.1	0
8.2	0
8.3	0
8.4	0
8.5	0
8.6	0
8.7	0
8.8	0
8.9	0
9	0
9.1	0
9.2	0
9.3	0
9.4	0
9.5	0
9.6	0
9.7	0
9.8	0
9.9	0
10	0
10.1	0
10.2	0
10.3	0
10.4	0
10.5	0
10.6	0
10.7	0
10.8	0
10.9	0
11	0
11.1	0
11.2	0
11.3	0
11.4	0
11.5	0
11.6	0
11.7	0
11.8	0
11.9	0
12	0
12.1	0
12.2	0
12.3	0
12.4	0
12.5	0
12.6	0
12.7	0
12.8	0
12.9	0
13	0
13.1	0
13.2	0
13.3	0
13.4	0
13.5	0
13.6	0
13.7	0
13.8	0
13.9	0
14	0
14.1	0
14.2	0
14.3	0
14.4	0
14.5	0
14.6	0
14.7	0
14.8	0
14.9	0
15	0
15.1	0
15.2	0
15.3	0
15.4	0
15.5	0
15.6	0
15.7	0
15.8	0
15.9	0
16	0
16.1	0
16.2	0
16.3	0
16.4	0
16.5	0
16.6	0
16.7	0
16.8	0
16.9	0
17	0
17.1	0
17.2	0
17.3	0
17.4	0
17.5	0
17.6	0
17.7	0
17.8	0
17.9	0
18	0
18.1	0
18.2	0
18.3	0
18.4	0
18.5	0
18.6	0
18.7	0
18.8	0
18.9	0
19	0
19.1	0
19.2	0
19.3	0
19.4	0
19.5	0
19.6	0
19.7	0
19.8	0
19.9	0
20	0
20.1	0
20.2	0
20.3	0
20.4	0
20.5	0
20.6	0
20.7	0
20.8	0
20.9	0
21	0
21.1	0
21.2	0
21.3	0
21.4	0
21.5	0
21.6	0
21.7	0
21.8	0
21.9	0
22	0
22.1	0
22.2	0
22.3	0
22.4	0
22.5	0
22.6	0
22.7	0
22.8	0
22.9	0
23	0
23.1	0
23.2	0
23.3	0
23.4	0
23.5	0
23.6	0
23.7	0
23.8	0
23.9	0
24	0
24.1	0
24.2	0
24.3	0
24.4	0
24.5	0
24.6	0
24.7	0
24.8	0
24.9	0
25	0
25.1	0
25.2	0
25.3	0
25.4	0
25.5	0
25.6	0
25.7	0
25.8	0
25.9	0
26	0
26.1	0
26.2	0
26.3	0
26.4	0
26.5	0
26.6	0
26.7	0
26.8	0
26.9	0
27	0
27.1	0
27.2	0
27.3	0
27.4	0
27.5	0
27.6	0
27.7	0
27.8	0
27.9	0
28	0
28.1	0
28.2	0
28.3	0
28.4	0
28.5	0
28.6	0
28.7	0
28.8	0
28.9	0
29	0
29.1	0
29.2	0
29.3	0
29.4	0
29.5	0
29.6	0
29.7	0
29.8	0
29.9	0
30	0
30.1	0
30.2	0
30.3	0
30.4	0
30.5	0
30.6	0
30.7	0
30.8	0
30.9	0
31	0
31.1	0
31.2	0
31.3	0
31.4	0
31.5	0
31.6	0
31.7	0
31.8	0
31.9	0
32	0
32.1	0
32.2	0
32.3	0
32.4	0
32.5	0
32.6	0
32.7	0
32.8	0
32.9	0
33	0
33.1	0
33.2	0
33.3	0
33.4	0
33.5	0
33.6	0
33.7	0
33.8	0
33.9	0
34	0
34.1	0
34.2	0
34.3	0
34.4	0
34.5	0
34.6	0
34.7	0
34.8	0
34.9	0
35	0
35.1	0
35.2	0
35.3	0
35.4	0
35.5	0
35.6	0
35.7	0
35.8	0
35.9	0
36	0
36.1	0
36.2	0
36.3	0
36.4	0
36.5	0
36.6	0
36.7	0
36.8	0
36.9	0
37	0
37.1	0
37.2	0
37.3	0
37.4	0
37.5	0
37.6	0
37.7	0
37.8	0
37.9	0
38	0
38.1	0
38.2	0
38.3	0
38.4	0
38.5	0
38.6	0
38.7	0
38.8	0
38.9	0
39	0
39.1	0
39.2	0
39.3	0
39.4	0
39.5	0
39.6	0
39.7	0
39.8	0
39.9	0
40	0
40.1	0
40.2	0
40.3	0
40.4	0
40.5	0
40.6	0
40.7	0
40.8	0
40.9	0
41	0
41.1	0
41.2	0
41.3	0
41.4	0
41.5	0
41.6	0
41.7	0
41.8	0
41.9	0
42	0
42.1	0
42.2	0
42.3	0
42.4	0
42.5	0
42.6	0
42.7	0
42.8	0
42.9	0
43	0
43.1	0
43.2	0
43.3	0
43.4	0
43.5	0
43.6	0
43.7	0
43.8	0
43.9	0
44	0
44.1	0
44.2	0
44.3	0
44.4	0
44.5	0
44.6	0
44.7	0
44.8	0
44.9	0
45	0
45.1	0
45.2	0
45.3	0
45.4	0
45.5	0
45.6	0
45.7	0
45.8	0
45.9	0
46	0
46.1	0
46.2	0
46.3	0
46.4	0
46.5	0
46.6	0
46.7	0
46.8	0
46.9	0
47	0
47.1	0
47.2	0
47.3	0
47.4	0
47.5	0
47.6	0
47.7	0
47.8	0
47.9	0
48	0
48.1	0
48.2	0
48.3	0
48.4	0
48.5	0
48.6	0
48.7	0
48.8	0
48.9	0
49	0
49.1	0
49.2	0
49.3	0
49.4	0
49.5	0
49.6	0
49.7	0
49.8	0
49.9	0
50	0
50.1	0
50.2	0
50.3	0
50.4	0
50.5	0
50.6	0
50.7	0
50.8	0
50.9	0
51	0
51.1	0
51.2	0
51.3	0
51.4	0
51.5	0
51.6	0
51.7	0
51.8	0
51.9	0
52	0
52.1	0
52.2	0
52.3	0
52.4	0
52.5	0
52.6	0
52.7	0
52.8	0
52.9	0
53	0
53.1	0
53.2	0
53.3	0
53.4	0
53.5	0
53.6	0
53.7	0
53.8	0
53.9	0
54	0
54.1	0
54.2	0
54.3	0
54.4	0
54.5	0
54.6	0
54.7	0
54.8	0
54.9	0
55	0
55.1	0
55.2	0
55.3	0
55.4	0
55.5	0
55.6	0
55.7	0
55.8	0
55.9	0
56	0
56.1	0
56.2	0
56.3	0
56.4	0
56.5	0
56.6	0
56.7	0
56.8	0
56.9	0
57	0
57.1	0
57.2	0
57.3	0
57.4	0
57.5	0
57.6	0
57.7	0
57.8	0
57.9	0
58	0
58.1	0
58.2	0
58.3	0
58.4	0
58.5	0
58.6	0
58.7	0
58.8	0
58.9	0
59	0
59.1	0
59.2	0
59.3	0
59.4	0
59.5	0
59.6	0
59.7	0
59.8	0
59.9	0
60	0
60.1	0
60.2	0
60.3	0
60.4	0
60.5	0
60.6	0
60.7	0
60.8	0
60.9	0
61	0
61.1	0
61.2	0
61.3	0
61.4	0
61.5	0
61.6	0
61.7	0
61.8	0
61.9	0
62	0
62.1	0
62.2	0
62.3	0
62.4	0
62.5	0
62.6	0
62.7	0
62.8	0
62.9	0
63	0
63.1	0
63.2	0
63.3	0
63.4	0
63.5	0
63.6	0
63.7	0
63.8	0
63.9	0
64	0
64.1	0
64.2	0
64.3	0
64.4	0
64.5	0
64.6	0
64.7	0
64.8	0
64.9	0
65	0
65.1	0
65.2	0
65.3	0
65.4	0
65.5	0
65.6	0
65.7	0
65.8	0
65.9	0
66	0
66.1	0
66.2	0
66.3	0
66.4	0
66.5	0
66.6	0
66.7	0
66.8	0
66.9	0
67	0
67.1	0
67.2	0
67.3	0
67.4	0
67.5	0
67.6	0
67.7	0
67.8	0
67.9	0
68	0
68.1	0
68.2	0
68.3	0
68.4	0
68.5	0
68.6	0
68.7	0
68.8	0
68.9	0
69	0
69.1	0
69.2	0
69.3	0
69.4	0
69.5	0
69.6	0
69.7	0
69.8	0
69.9	0
70	0
70.1	0
70.2	0
70.3	0
70.4	0
70.5	0
70.6	0
70.7	0
70.8	0
70.9	0
71	0
71.1	0
71.2	0
71.3	0
71.4	0
71.5	0
71.6	0
71.7	0
71.8	0
71.9	0
72	0
72.1	0
72.2	0
72.3	0
72.4	0
72.5	0
72.6	0
72.7	0
72.8	0
72.9	0
73	0
73.1	0
73.2	0
73.3	0
73.4	0
73.5	0
73.6	0
73.7	0
73.8	0
73.9	0
74	0
74.1	0
74.2	0
74.3	0
74.4	0
74.5	0
74.6	0
74.7	0
74.8	0
74.9	0
75	0
75.1	0
75.2	0
75.3	0
75.4	0
75.5	0
75.6	0
75.7	0
75.8	0
75.9	0
76	0
76.1	0
76.2	0
76.3	0
76.4	0
76.5	0
76.6	0
76.7	0
76.8	0
76.9	0
77	0
77.1	0
77.2	0
77.3	0
77.4	0
77.5	0
77.6	0
77.7	0
77.8	0
77.9	0
78	0
78.1	0
78.2	0
78.3	0
78.4	0
78.5	0
78.6	0
78.7	0
78.8	0
78.9	0
79	0
79.1	0
79.2	0
79.3	0
79.4	0
79.5	0
79.6	0
79.7	0
79.8	0
79.9	0
80	0
80.1	0
80.2	0
80.3	0
80.4	0
80.5	0
80.6	0
80.7	0
80.8	0
80.9	0
81	0
81.1	0
81.2	0
81.3	0
81.4	0
81.5	0
81.6	0
81.7	0
81.8	0
81.9	0
82	0
82.1	0
82.2	0
82.3	0
82.4	0
82.5	0
82.6	0
82.7	0
82.8	0
82.9	0
83	0
83.1	0
83.2	0
83.3	0
83.4	0
83.5	0
83.6	0
83.7	0
83.8	0
83.9	0
84	0
84.1	0
84.2	0
84.3	0
84.4	0
84.5	0
84.6	0
84.7	0
84.8	0
84.9	0
85	0
85.1	0
85.2	0
85.3	0
85.4	0
85.5	0
85.6	0
85.7	0
85.8	0
85.9	0
86	0
86.1	0
86.2	0
86.3	0
86.4	0
86.5	0
86.6	0
86.7	0
86.8	0
86.9	0
87	0
87.1	0
87.2	0
87.3	0
87.4	0
87.5	0
87.6	0
87.7	0
87.8	0
87.9	0
88	0
88.1	0
88.2	0
88.3	0
88.4	0
88.5	0
88.6	0
88.7	0
88.8	0
88.9	0
89	0
89.1	0
89.2	0
89.3	0
89.4	0
89.5	0
89.6	0
89.7	0
89.8	0
89.9	0
90	0
90.1	0
90.2	0
90.3	0
90.4	0
90.5	0
90.6	0
90.7	0
90.8	0
90.9	0
91	0
91.1	0
91.2	0
91.3	0
91.4	0
91.5	0
91.6	0
91.7	0
91.8	0
91.9	0
92	0
92.1	0
92.2	0
92.3	0
92.4	0
92.5	0
92.6	0
92.7	0
92.8	0
92.9	0
93	0
93.1	0
93.2	0
93.3	0
93.4	0
93.5	0
93.6	0
93.7	0
93.8	0
93.9	0
94	0
94.1	0
94.2	0
94.3	0
94.4	0
94.5	0
94.6	0
94.7	0
94.8	0
94.9	0
95	0
95.1	0
95.2	0
95.3	0
95.4	0
95.5	0
95.6	0
95.7	0
95.8	0
95.9	0
96	0
96.1	0
96.2	0
96.3	0
96.4	0
96.5	0
96.6	0
96.7	0
96.8	0
96.9	0
97	0
97.1	0
97.2	0
97.3	0
97.4	0
97.5	0
97.6	0
97.7	0
97.8	0
97.9	0
98	0
98.1	0
98.2	0
98.3	0
98.4	0
98.5	0
98.6	0
98.7	0
98.8	0
98.9	0
99	0
99.1	0
99.2	0
99.3	0
99.4	0
99.5	0
99.6	0
99.7	0
99.8	0
99.9	0
100	0
100.1	0
100.2	0
100.3	0
100.4	0
100.5	0
100.6	0
100.7	0
100.8	0
100.9	0
101	0
101.1	0
101.2	0
101.3	0
101.4	0
101.5	0
101.6	0
101.7	0
101.8	0
101.9	0
102	0
102.1	0
102.2	0
102.3	0
102.4	0
102.5	0
102.6	0
102.7	0
102.8	0
102.9	0
103	0
103.1	0
103.2	0
103.3	0
103.4	0
103.5	0
103.6	0
103.7	0
103.8	0
103.9	0
104	0
104.1	0
104.2	0
104.3	0
104.4	0
104.5	0
104.6	0.001
104.7	0.001
104.8	0.001
104.9	0.001
105	0.001
105.1	0.001
105.2	0.001
105.3	0.001
105.4	0.001
105.5	0.001
105.6	0.001
105.7	0.001
105.8	0.001
105.9	0.001
106	0.001
106.1	0.001
106.2	0.001
106.3	0.001
106.4	0.001
106.5	0.001
106.6	0.001
106.7	0.001
106.8	0.001
106.9	0.001
107	0.001
107.1	0.001
107.2	0.001
107.3	0.001
107.4	0.001
107.5	0.001
107.6	0.002
107.7	0.002
107.8	0.002
107.9	0.002
108	0.002
108.1	0.002
108.2	0.002
108.3	0.002
108.4	0.002
108.5	0.002
108.6	0.002
108.7	0.002
108.8	0.002
108.9	0.002
109	0.002
109.1	0.002
109.2	0.002
109.3	0.002
109.4	0.002
109.5	0.002
109.6	0.002
109.7	0.002
109.8	0.002
109.9	0.002
110	0.002
110.1	0.002
110.2	0.002
110.3	0.002
110.4	0.002
110.5	0.002
110.6	0.002
110.7	0.003
110.8	0.003
110.9	0.003
111	0.003
111.1	0.003
111.2	0.003
111.3	0.003
111.4	0.004
111.5	0.004
111.6	0.004
111.7	0.004
111.8	0.004
111.9	0.004
112	0.004
112.1	0.004
112.2	0.004
112.3	0.004
112.4	0.004
112.5	0.004
112.6	0.004
112.7	0.004
112.8	0.004
112.9	0.004
113	0.004
113.1	0.004
113.2	0.004
113.3	0.004
113.4	0.004
113.5	0.004
113.6	0.004
113.7	0.004
113.8	0.004
113.9	0.004
114	0.004
114.1	0.004
114.2	0.004
114.3	0.004
114.4	0.005
114.5	0.005
114.6	0.005
114.7	0.005
114.8	0.005
114.9	0.005
115	0.005
115.1	0.005
115.2	0.006
115.3	0.006
115.4	0.006
115.5	0.006
115.6	0.006
115.7	0.006
115.8	0.006
115.9	0.006
116	0.006
116.1	0.006
116.2	0.006
116.3	0.006
116.4	0.006
116.5	0.006
116.6	0.006
116.7	0.006
116.8	0.006
116.9	0.006
117	0.006
117.1	0.006
117.2	0.006
117.3	0.006
117.4	0.007
117.5	0.007
117.6	0.007
117.7	0.007
117.8	0.007
117.9	0.008
118	0.008
118.1	0.008
118.2	0.008
118.3	0.008
118.4	0.008
118.5	0.008
118.6	0.008
118.7	0.008
118.8	0.008
118.9	0.008
119	0.008
119.1	0.008
119.2	0.008
119.3	0.008
119.4	0.008
119.5	0.008
119.6	0.009
119.7	0.009
119.8	0.009
119.9	0.009
120	0.009
120.1	0.009
120.2	0.009
120.3	0.009
120.4	0.009
120.5	0.009
120.6	0.009
120.7	0.009
120.8	0.009
120.9	0.009
121	0.009
121.1	0.009
121.2	0.009
121.3	0.009
121.4	0.009
121.5	0.009
121.6	0.009
121.7	0.009
121.8	0.009
121.9	0.009
122	0.009
122.1	0.01
122.2	0.01
122.3	0.011
122.4	0.011
122.5	0.011
122.6	0.011
122.7	0.01
122.8	0.01
122.9	0.01
123	0.01
123.1	0.01
123.2	0.01
123.3	0.01
123.4	0.01
123.5	0.01
123.6	0.01
123.7	0.01
123.8	0.01
123.9	0.011
124	0.011
124.1	0.011
124.2	0.011
124.3	0.011
124.4	0.011
124.5	0.011
124.6	0.011
124.7	0.012
124.8	0.012
124.9	0.012
125	0.012
125.1	0.012
125.2	0.012
125.3	0.012
125.4	0.012
125.5	0.012
125.6	0.012
125.7	0.012
125.8	0.012
125.9	0.012
126	0.012
126.1	0.012
126.2	0.012
126.3	0.012
126.4	0.012
126.5	0.012
126.6	0.012
126.7	0.012
126.8	0.011
126.9	0.011
127	0.011
127.1	0.011
127.2	0.011
127.3	0.011
127.4	0.011
127.5	0.011
127.6	0.011
127.7	0.011
127.8	0.011
127.9	0.011
128	0.011
128.1	0.011
128.2	0.011
128.3	0.011
128.4	0.011
128.5	0.011
128.6	0.012
128.7	0.012
128.8	0.012
128.9	0.013
129	0.013
129.1	0.013
129.2	0.013
129.3	0.013
129.4	0.013
129.5	0.013
129.6	0.013
129.7	0.013
129.8	0.013
129.9	0.013
130	0.013
130.1	0.013
130.2	0.013
130.3	0.013
130.4	0.013
130.5	0.013
130.6	0.013
130.7	0.013
130.8	0.013
130.9	0.013
131	0.013
131.1	0.013
131.2	0.013
131.3	0.013
131.4	0.013
131.5	0.013
131.6	0.013
131.7	0.013
131.8	0.014
131.9	0.014
132	0.014
132.1	0.014
132.2	0.015
132.3	0.016
132.4	0.016
132.5	0.016
132.6	0.016
132.7	0.016
132.8	0.016
132.9	0.016
133	0.016
133.1	0.016
133.2	0.016
133.3	0.016
133.4	0.016
133.5	0.016
133.6	0.016
133.7	0.016
133.8	0.016
133.9	0.016
134	0.016
134.1	0.016
134.2	0.016
134.3	0.016
134.4	0.016
134.5	0.016
134.6	0.016
134.7	0.016
134.8	0.016
134.9	0.016
135	0.016
135.1	0.016
135.2	0.016
135.3	0.016
135.4	0.016
135.5	0.016
135.6	0.016
135.7	0.016
135.8	0.016
135.9	0.016
136	0.016
136.1	0.016
136.2	0.016
136.3	0.016
136.4	0.016
136.5	0.017
136.6	0.018
136.7	0.018
136.8	0.018
136.9	0.019
137	0.02
137.1	0.021
137.2	0.021
137.3	0.022
137.4	0.022
137.5	0.022
137.6	0.022
137.7	0.022
137.8	0.022
137.9	0.022
138	0.022
138.1	0.022
138.2	0.023
138.3	0.023
138.4	0.023
138.5	0.024
138.6	0.024
138.7	0.026
138.8	0.026
138.9	0.026
139	0.026
139.1	0.026
139.2	0.026
139.3	0.026
139.4	0.026
139.5	0.026
139.6	0.026
139.7	0.026
139.8	0.027
139.9	0.027
140	0.027
140.1	0.027
140.2	0.027
140.3	0.027
140.4	0.026
140.5	0.026
140.6	0.026
140.7	0.026
140.8	0.026
140.9	0.026
141	0.026
141.1	0.026
141.2	0.026
141.3	0.027
141.4	0.027
141.5	0.027
141.6	0.027
141.7	0.027
141.8	0.027
141.9	0.027
142	0.027
142.1	0.027
142.2	0.027
142.3	0.027
142.4	0.027
142.5	0.027
142.6	0.027
142.7	0.027
142.8	0.026
142.9	0.026
143	0.026
143.1	0.027
143.2	0.027
143.3	0.027
143.4	0.027
143.5	0.027
143.6	0.027
143.7	0.027
143.8	0.027
143.9	0.027
144	0.027
144.1	0.027
144.2	0.027
144.3	0.027
144.4	0.027
144.5	0.028
144.6	0.028
144.7	0.029
144.8	0.029
144.9	0.029
145	0.029
145.1	0.03
145.2	0.03
145.3	0.03
145.4	0.03
145.5	0.031
145.6	0.031
145.7	0.031
145.8	0.031
145.9	0.031
146	0.031
146.1	0.031
146.2	0.031
146.3	0.031
146.4	0.031
146.5	0.031
146.6	0.031
146.7	0.031
146.8	0.031
146.9	0.031
147	0.031
147.1	0.031
147.2	0.031
147.3	0.031
147.4	0.031
147.5	0.031
147.6	0.031
147.7	0.031
147.8	0.031
147.9	0.031
148	0.031
148.1	0.031
148.2	0.031
148.3	0.031
148.4	0.031
148.5	0.031
148.6	0.031
148.7	0.031
148.8	0.031
148.9	0.031
149	0.031
149.1	0.031
149.2	0.031
149.3	0.031
149.4	0.031
149.5	0.031
149.6	0.031
149.7	0.031
149.8	0.031
149.9	0.031
150	0.031
150.1	0.031
150.2	0.031
150.3	0.03
150.4	0.03
150.5	0.031
150.6	0.031
150.7	0.031
150.8	0.031
150.9	0.031
151	0.032
151.1	0.033
151.2	0.033
151.3	0.033
151.4	0.033
151.5	0.033
151.6	0.033
151.7	0.033
151.8	0.033
151.9	0.033
152	0.033
152.1	0.033
152.2	0.033
152.3	0.033
152.4	0.033
152.5	0.033
152.6	0.033
152.7	0.033
152.8	0.033
152.9	0.033
153	0.033
153.1	0.033
153.2	0.033
153.3	0.032
153.4	0.032
153.5	0.032
153.6	0.032
153.7	0.032
153.8	0.031
153.9	0.031
154	0.031
154.1	0.031
154.2	0.031
154.3	0.031
154.4	0.031
154.5	0.031
154.6	0.031
154.7	0.031
154.8	0.031
154.9	0.031
155	0.031
155.1	0.031
155.2	0.031
155.3	0.031
155.4	0.031
155.5	0.031
155.6	0.031
155.7	0.031
155.8	0.031
155.9	0.031
156	0.031
156.1	0.031
156.2	0.031
156.3	0.031
156.4	0.031
156.5	0.03
156.6	0.03
156.7	0.03
156.8	0.03
156.9	0.03
157	0.03
157.1	0.03
157.2	0.03
157.3	0.029
157.4	0.03
157.5	0.03
157.6	0.03
157.7	0.03
157.8	0.03
157.9	0.03
158	0.03
158.1	0.03
158.2	0.03
158.3	0.031
158.4	0.031
158.5	0.031
158.6	0.031
158.7	0.031
158.8	0.031
158.9	0.031
159	0.031
159.1	0.031
159.2	0.031
159.3	0.031
159.4	0.031
159.5	0.031
159.6	0.031
159.7	0.032
159.8	0.031
159.9	0.031
160	0.031
160.1	0.031
160.2	0.031
160.3	0.031
160.4	0.031
160.5	0.032
160.6	0.032
160.7	0.032
160.8	0.032
160.9	0.032
161	0.033
161.1	0.033
161.2	0.033
161.3	0.033
161.4	0.033
161.5	0.033
161.6	0.033
161.7	0.033
161.8	0.033
161.9	0.033
162	0.033
162.1	0.033
162.2	0.033
162.3	0.033
162.4	0.033
162.5	0.033
162.6	0.033
162.7	0.033
162.8	0.033
162.9	0.034
163	0.034
163.1	0.034
163.2	0.035
163.3	0.035
163.4	0.035
163.5	0.035
163.6	0.035
163.7	0.035
163.8	0.035
163.9	0.035
164	0.034
164.1	0.033
164.2	0.033
164.3	0.033
164.4	0.034
164.5	0.034
164.6	0.034
164.7	0.034
164.8	0.034
164.9	0.034
165	0.034
165.1	0.034
165.2	0.035
165.3	0.036
165.4	0.036
165.5	0.036
165.6	0.036
165.7	0.036
165.8	0.036
165.9	0.036
166	0.036
166.1	0.036
166.2	0.036
166.3	0.035
166.4	0.035
166.5	0.035
166.6	0.035
166.7	0.035
166.8	0.035
166.9	0.035
167	0.035
167.1	0.035
167.2	0.035
167.3	0.035
167.4	0.036
167.5	0.036
167.6	0.036
167.7	0.036
167.8	0.036
167.9	0.036
168	0.036
168.1	0.036
168.2	0.037
168.3	0.037
168.4	0.036
168.5	0.036
168.6	0.036
168.7	0.036
168.8	0.036
168.9	0.036
169	0.037
169.1	0.037
169.2	0.037
169.3	0.036
169.4	0.036
169.5	0.036
169.6	0.036
169.7	0.037
169.8	0.037
169.9	0.037
170	0.037
170.1	0.037
170.2	0.037
170.3	0.037
170.4	0.037
170.5	0.037
170.6	0.037
170.7	0.037
170.8	0.037
170.9	0.037
171	0.037
171.1	0.037
171.2	0.038
171.3	0.038
171.4	0.038
171.5	0.038
171.6	0.039
171.7	0.039
171.8	0.039
171.9	0.04
172	0.04
172.1	0.04
172.2	0.04
172.3	0.04
172.4	0.04
172.5	0.04
172.6	0.04
172.7	0.04
172.8	0.04
172.9	0.04
173	0.04
173.1	0.04
173.2	0.04
173.3	0.04
173.4	0.04
173.5	0.04
173.6	0.04
173.7	0.041
173.8	0.041
173.9	0.041
174	0.041
174.1	0.041
174.2	0.041
174.3	0.041
174.4	0.041
174.5	0.041
174.6	0.041
174.7	0.041
174.8	0.041
174.9	0.041
175	0.041
175.1	0.041
175.2	0.041
175.3	0.041
175.4	0.041
175.5	0.041
175.6	0.041
175.7	0.041
175.8	0.041
175.9	0.041
176	0.042
176.1	0.042
176.2	0.042
176.3	0.042
176.4	0.042
176.5	0.042
176.6	0.042
176.7	0.042
176.8	0.042
176.9	0.042
177	0.042
177.1	0.042
177.2	0.042
177.3	0.042
177.4	0.042
177.5	0.042
177.6	0.043
177.7	0.043
177.8	0.043
177.9	0.043
178	0.043
178.1	0.043
178.2	0.043
178.3	0.043
178.4	0.043
178.5	0.043
178.6	0.044
178.7	0.044
178.8	0.044
178.9	0.044
179	0.044
179.1	0.044
179.2	0.043
179.3	0.043
179.4	0.042
179.5	0.042
179.6	0.042
179.7	0.042
179.8	0.042
179.9	0.042
180	0.042
180.1	0.042
180.2	0.042
180.3	0.042
180.4	0.042
180.5	0.042
180.6	0.042
180.7	0.042
180.8	0.042
180.9	0.042
181	0.042
181.1	0.042
181.2	0.042
181.3	0.042
181.4	0.042
181.5	0.042
181.6	0.041
181.7	0.041
181.8	0.041
181.9	0.04
182	0.04
182.1	0.04
182.2	0.04
182.3	0.041
182.4	0.041
182.5	0.041
182.6	0.041
182.7	0.04
182.8	0.04
182.9	0.04
183	0.04
183.1	0.04
183.2	0.039
183.3	0.039
183.4	0.039
183.5	0.039
183.6	0.039
183.7	0.039
183.8	0.04
183.9	0.04
184	0.04
184.1	0.04
184.2	0.04
184.3	0.04
184.4	0.04
184.5	0.04
184.6	0.04
184.7	0.04
184.8	0.04
184.9	0.04
185	0.04
185.1	0.04
185.2	0.04
185.3	0.04
185.4	0.04
185.5	0.04
185.6	0.04
185.7	0.04
185.8	0.041
185.9	0.041
186	0.041
186.1	0.041
186.2	0.041
186.3	0.041
186.4	0.041
186.5	0.041
186.6	0.041
186.7	0.041
186.8	0.041
186.9	0.041
187	0.041
187.1	0.041
187.2	0.041
187.3	0.041
187.4	0.04
187.5	0.04
187.6	0.04
187.7	0.04
187.8	0.04
187.9	0.041
188	0.041
188.1	0.041
188.2	0.041
188.3	0.041
188.4	0.041
188.5	0.041
188.6	0.041
188.7	0.041
188.8	0.041
188.9	0.041
189	0.041
189.1	0.041
189.2	0.041
189.3	0.041
189.4	0.041
189.5	0.041
189.6	0.041
189.7	0.042
189.8	0.042
189.9	0.042
190	0.042
190.1	0.042
190.2	0.043
190.3	0.043
190.4	0.043
190.5	0.043
190.6	0.043
190.7	0.043
190.8	0.043
190.9	0.043
191	0.043
191.1	0.043
191.2	0.043
191.3	0.043
191.4	0.043
191.5	0.043
191.6	0.043
191.7	0.043
191.8	0.043
191.9	0.043
192	0.043
192.1	0.043
192.2	0.043
192.3	0.043
192.4	0.043
192.5	0.044
192.6	0.043
192.7	0.042
192.8	0.042
192.9	0.043
193	0.043
193.1	0.043
193.2	0.043
193.3	0.043
193.4	0.044
193.5	0.044
193.6	0.044
193.7	0.044
193.8	0.044
193.9	0.045
194	0.045
194.1	0.045
194.2	0.045
194.3	0.045
194.4	0.045
194.5	0.046
194.6	0.045
194.7	0.045
194.8	0.045
194.9	0.045
195	0.045
195.1	0.045
195.2	0.045
195.3	0.045
195.4	0.045
195.5	0.045
195.6	0.045
195.7	0.045
195.8	0.046
195.9	0.046
196	0.046
196.1	0.046
196.2	0.046
196.3	0.046
196.4	0.047
196.5	0.047
196.6	0.047
196.7	0.047
196.8	0.047
196.9	0.047
197	0.047
197.1	0.047
197.2	0.047
197.3	0.047
197.4	0.047
197.5	0.046
197.6	0.046
197.7	0.046
197.8	0.046
197.9	0.046
198	0.046
198.1	0.046
198.2	0.045
198.3	0.045
198.4	0.045
198.5	0.045
198.6	0.045
198.7	0.045
198.8	0.045
198.9	0.045
199	0.045
199.1	0.045
199.2	0.045
199.3	0.045
199.4	0.045
199.5	0.045
199.6	0.044
199.7	0.044
199.8	0.045
199.9	0.045
200	0.045
[truncated: 14,000 more rows]
