# Supplementary material for: Bayesian inference of kinetic schemes for ion channels by Kalman filtering
Source: eLife journal article supplement (doi:10.7554/elife.62714), 2022-05-04
Supplement: fig1-data1 [file 003125_Sim_N_1000_Fluor_MW.xlsx]

## Sheet: Tabelle1
0.1	0
0.2	0
0.3	0
0.4	0
0.5	0
0.6	0
0.7	0
0.8	0
0.9	0
1	0
1.1	0
1.2	0
1.3	0
1.4	0
1.5	0
1.6	0
1.7	0
1.8	0
1.9	0
2	0
2.1	0
2.2	0
2.3	0
2.4	0
2.5	0
2.6	0
2.7	0
2.8	0
2.9	0
3	0
3.1	0
3.2	0
3.3	0
3.4	0
3.5	0
3.6	0
3.7	0
3.8	0
3.9	0
4	0
4.1	0
4.2	0
4.3	0
4.4	0
4.5	0
4.6	0
4.7	0
4.8	0
4.9	0
5	0
5.1	0
5.2	0
5.3	0
5.4	0
5.5	0
5.6	0
5.7	0
5.8	0
5.9	0
6	0
6.1	0
6.2	0
6.3	0
6.4	0
6.5	0
6.6	0
6.7	0
6.8	0
6.9	0
7	0
7.1	0
7.2	0
7.3	0
7.4	0
7.5	0
7.6	0
7.7	0
7.8	0
7.9	0
8	0
8.1	0
8.2	0
8.3	0
8.4	0
8.5	0
8.6	0
8.7	0
8.8	0
8.9	0
9	0
9.1	0
9.2	0
9.3	0
9.4	0
9.5	0
9.6	0
9.7	0
9.8	0
9.9	0
10	0
10.1	0
10.2	0
10.3	0
10.4	0
10.5	0
10.6	0
10.7	0
10.8	0
10.9	0
11	0
11.1	0
11.2	0
11.3	0
11.4	0
11.5	0
11.6	0
11.7	0
11.8	0
11.9	0
12	0
12.1	0
12.2	0
12.3	0
12.4	0
12.5	0
12.6	0
12.7	0
12.8	0
12.9	0
13	0
13.1	0
13.2	0
13.3	0
13.4	0
13.5	0
13.6	0
13.7	0
13.8	0
13.9	0
14	0
14.1	0
14.2	0
14.3	0
14.4	0
14.5	0
14.6	0
14.7	0
14.8	0
14.9	0
15	0
15.1	0
15.2	0
15.3	0
15.4	0
15.5	0
15.6	0
15.7	0
15.8	0
15.9	0
16	0
16.1	0
16.2	0
16.3	0
16.4	0
16.5	0
16.6	0
16.7	0
16.8	0
16.9	0
17	0
17.1	0
17.2	0
17.3	0
17.4	0
17.5	0
17.6	0
17.7	0
17.8	0
17.9	0
18	0
18.1	0
18.2	0
18.3	0
18.4	0
18.5	0
18.6	0
18.7	0
18.8	0
18.9	0
19	0
19.1	0
19.2	0
19.3	0
19.4	0
19.5	0
19.6	0
19.7	0
19.8	0
19.9	0
20	0
20.1	0
20.2	0
20.3	0
20.4	0
20.5	0
20.6	0
20.7	0
20.8	0
20.9	0
21	0
21.1	0
21.2	0
21.3	0
21.4	0
21.5	0
21.6	0
21.7	0
21.8	0
21.9	0
22	0
22.1	0
22.2	0
22.3	0
22.4	0
22.5	0
22.6	0
22.7	0
22.8	0
22.9	0
23	0
23.1	0
23.2	0
23.3	0
23.4	0
23.5	0
23.6	0
23.7	0
23.8	0
23.9	0
24	0
24.1	0
24.2	0
24.3	0
24.4	0
24.5	0
24.6	0
24.7	0
24.8	0
24.9	0
25	0
25.1	0
25.2	0
25.3	0
25.4	0
25.5	0
25.6	0
25.7	0
25.8	0
25.9	0
26	0
26.1	0
26.2	0
26.3	0
26.4	0
26.5	0
26.6	0
26.7	0
26.8	0
26.9	0
27	0
27.1	0
27.2	0
27.3	0
27.4	0
27.5	0
27.6	0
27.7	0
27.8	0
27.9	0
28	0
28.1	0
28.2	0
28.3	0
28.4	0
28.5	0
28.6	0
28.7	0
28.8	0
28.9	0
29	0
29.1	0
29.2	0
29.3	0
29.4	0
29.5	0
29.6	0
29.7	0
29.8	0
29.9	0
30	0
30.1	0
30.2	0
30.3	0
30.4	0
30.5	0
30.6	0
30.7	0
30.8	0
30.9	0
31	0
31.1	0
31.2	0
31.3	0
31.4	0
31.5	0
31.6	0
31.7	0
31.8	0
31.9	0
32	0
32.1	0
32.2	0
32.3	0
32.4	0
32.5	0
32.6	0
32.7	0
32.8	0
32.9	0
33	0
33.1	0
33.2	0
33.3	0
33.4	0
33.5	0
33.6	0
33.7	0
33.8	0
33.9	0
34	0
34.1	0
34.2	0
34.3	0
34.4	0
34.5	0
34.6	0
34.7	0
34.8	0
34.9	0
35	0
35.1	0
35.2	0
35.3	0
35.4	0
35.5	0
35.6	0
35.7	0
35.8	0
35.9	0
36	0
36.1	0
36.2	0
36.3	0
36.4	0
36.5	0
36.6	0
36.7	0
36.8	0
36.9	0
37	0
37.1	0
37.2	0
37.3	0
37.4	0
37.5	0
37.6	0
37.7	0
37.8	0
37.9	0
38	0
38.1	0
38.2	0
38.3	0
38.4	0
38.5	0
38.6	0
38.7	0
38.8	0
38.9	0
39	0
39.1	0
39.2	0
39.3	0
39.4	0
39.5	0
39.6	0
39.7	0
39.8	0
39.9	0
40	0
40.1	0
40.2	0
40.3	0
40.4	0
40.5	0
40.6	0
40.7	0
40.8	0
40.9	0
41	0
41.1	0
41.2	0
41.3	0
41.4	0
41.5	0
41.6	0
41.7	0
41.8	0
41.9	0
42	0
42.1	0
42.2	0
42.3	0
42.4	0
42.5	0
42.6	0
42.7	0
42.8	0
42.9	0
43	0
43.1	0
43.2	0
43.3	0
43.4	0
43.5	0
43.6	0
43.7	0
43.8	0
43.9	0
44	0
44.1	0
44.2	0
44.3	0
44.4	0
44.5	0
44.6	0
44.7	0
44.8	0
44.9	0
45	0
45.1	0
45.2	0
45.3	0
45.4	0
45.5	0
45.6	0
45.7	0
45.8	0
45.9	0
46	0
46.1	0
46.2	0
46.3	0
46.4	0
46.5	0
46.6	0
46.7	0
46.8	0
46.9	0
47	0
47.1	0
47.2	0
47.3	0
47.4	0
47.5	0
47.6	0
47.7	0
47.8	0
47.9	0
48	0
48.1	0
48.2	0
48.3	0
48.4	0
48.5	0
48.6	0
48.7	0
48.8	0
48.9	0
49	0
49.1	0
49.2	0
49.3	0
49.4	0
49.5	0
49.6	0
49.7	0
49.8	0
49.9	0
50	0
50.1	0
50.2	0
50.3	0
50.4	0
50.5	0
50.6	0
50.7	0
50.8	0
50.9	0
51	0
51.1	0
51.2	0
51.3	0
51.4	0
51.5	0
51.6	0
51.7	0
51.8	0
51.9	0
52	0
52.1	0
52.2	0
52.3	0
52.4	0
52.5	0
52.6	0
52.7	0
52.8	0
52.9	0
53	0
53.1	0
53.2	0
53.3	0
53.4	0
53.5	0
53.6	0
53.7	0
53.8	0
53.9	0
54	0
54.1	0
54.2	0
54.3	0
54.4	0
54.5	0
54.6	0
54.7	0
54.8	0
54.9	0
55	0
55.1	0
55.2	0
55.3	0
55.4	0
55.5	0
55.6	0
55.7	0
55.8	0
55.9	0
56	0
56.1	0
56.2	0
56.3	0
56.4	0
56.5	0
56.6	0
56.7	0
56.8	0
56.9	0
57	0
57.1	0
57.2	0
57.3	0
57.4	0
57.5	0
57.6	0
57.7	0
57.8	0
57.9	0
58	0
58.1	0
58.2	0
58.3	0
58.4	0
58.5	0
58.6	0
58.7	0
58.8	0
58.9	0
59	0
59.1	0
59.2	0
59.3	0
59.4	0
59.5	0
59.6	0
59.7	0
59.8	0
59.9	0
60	0
60.1	0
60.2	0
60.3	0
60.4	0
60.5	0
60.6	0
60.7	0
60.8	0
60.9	0
61	0
61.1	0
61.2	0
61.3	0
61.4	0
61.5	0
61.6	0
61.7	0
61.8	0
61.9	0
62	0
62.1	0
62.2	0
62.3	0
62.4	0
62.5	0
62.6	0
62.7	0
62.8	0
62.9	0
63	0
63.1	0
63.2	0
63.3	0
63.4	0
63.5	0
63.6	0
63.7	0
63.8	0
63.9	0
64	0
64.1	0
64.2	0
64.3	0
64.4	0
64.5	0
64.6	0
64.7	0
64.8	0
64.9	0
65	0
65.1	0
65.2	0
65.3	0
65.4	0
65.5	0
65.6	0
65.7	0
65.8	0
65.9	0
66	0
66.1	0
66.2	0
66.3	0
66.4	0
66.5	0
66.6	0
66.7	0
66.8	0
66.9	0
67	0
67.1	0
67.2	0
67.3	0
67.4	0
67.5	0
67.6	0
67.7	0
67.8	0
67.9	0
68	0
68.1	0
68.2	0
68.3	0
68.4	0
68.5	0
68.6	0
68.7	0
68.8	0
68.9	0
69	0
69.1	0
69.2	0
69.3	0
69.4	0
69.5	0
69.6	0
69.7	0
69.8	0
69.9	0
70	0
70.1	0
70.2	0
70.3	0
70.4	0
70.5	0
70.6	0
70.7	0
70.8	0
70.9	0
71	0
71.1	0
71.2	0
71.3	0
71.4	0
71.5	0
71.6	0
71.7	0
71.8	0
71.9	0
72	0
72.1	0
72.2	0
72.3	0
72.4	0
72.5	0
72.6	0
72.7	0
72.8	0
72.9	0
73	0
73.1	0
73.2	0
73.3	0
73.4	0
73.5	0
73.6	0
73.7	0
73.8	0
73.9	0
74	0
74.1	0
74.2	0
74.3	0
74.4	0
74.5	0
74.6	0
74.7	0
74.8	0
74.9	0
75	0
75.1	0
75.2	0
75.3	0
75.4	0
75.5	0
75.6	0
75.7	0
75.8	0
75.9	0
76	0
76.1	0
76.2	0
76.3	0
76.4	0
76.5	0
76.6	0
76.7	0
76.8	0
76.9	0
77	0
77.1	0
77.2	0
77.3	0
77.4	0
77.5	0
77.6	0
77.7	0
77.8	0
77.9	0
78	0
78.1	0
78.2	0
78.3	0
78.4	0
78.5	0
78.6	0
78.7	0
78.8	0
78.9	0
79	0
79.1	0
79.2	0
79.3	0
79.4	0
79.5	0
79.6	0
79.7	0
79.8	0
79.9	0
80	0
80.1	0
80.2	0
80.3	0
80.4	0
80.5	0
80.6	0
80.7	0
80.8	0
80.9	0
81	0
81.1	0
81.2	0
81.3	0
81.4	0
81.5	0
81.6	0
81.7	0
81.8	0
81.9	0
82	0
82.1	0
82.2	0
82.3	0
82.4	0
82.5	0
82.6	0
82.7	0
82.8	0
82.9	0
83	0
83.1	0
83.2	0
83.3	0
83.4	0
83.5	0
83.6	0
83.7	0
83.8	0
83.9	0
84	0
84.1	0
84.2	0
84.3	0
84.4	0
84.5	0
84.6	0
84.7	0
84.8	0
84.9	0
85	0
85.1	0
85.2	0
85.3	0
85.4	0
85.5	0
85.6	0
85.7	0
85.8	0
85.9	0
86	0
86.1	0
86.2	0
86.3	0
86.4	0
86.5	0
86.6	0
86.7	0
86.8	0
86.9	0
87	0
87.1	0
87.2	0
87.3	0
87.4	0
87.5	0
87.6	0
87.7	0
87.8	0
87.9	0
88	0
88.1	0
88.2	0
88.3	0
88.4	0
88.5	0
88.6	0
88.7	0
88.8	0
88.9	0
89	0
89.1	0
89.2	0
89.3	0
89.4	0
89.5	0
89.6	0
89.7	0
89.8	0
89.9	0
90	0
90.1	0
90.2	0
90.3	0
90.4	0
90.5	0
90.6	0
90.7	0
90.8	0
90.9	0
91	0
91.1	0
91.2	0
91.3	0
91.4	0
91.5	0
91.6	0
91.7	0
91.8	0
91.9	0
92	0
92.1	0
92.2	0
92.3	0
92.4	0
92.5	0
92.6	0
92.7	0
92.8	0
92.9	0
93	0
93.1	0
93.2	0
93.3	0
93.4	0
93.5	0
93.6	0
93.7	0
93.8	0
93.9	0
94	0
94.1	0
94.2	0
94.3	0
94.4	0
94.5	0
94.6	0
94.7	0
94.8	0
94.9	0
95	0
95.1	0
95.2	0
95.3	0
95.4	0
95.5	0
95.6	0
95.7	0
95.8	0
95.9	0
96	0
96.1	0
96.2	0
96.3	0
96.4	0
96.5	0
96.6	0
96.7	0
96.8	0
96.9	0
97	0
97.1	0
97.2	0
97.3	0
97.4	0
97.5	0
97.6	0
97.7	0
97.8	0
97.9	0
98	0
98.1	0
98.2	0
98.3	0
98.4	0
98.5	0
98.6	0
98.7	0
98.8	0
98.9	0
99	0
99.1	0
99.2	0
99.3	0
99.4	0
99.5	0
99.6	0
99.7	0
99.8	0
99.9	0
100	0
100.1	0.0025
100.2	0.0055
100.3	0.0075
100.4	0.011
100.5	0.0135
100.6	0.0155
100.7	0.0175
100.8	0.018
100.9	0.022
101	0.0245
101.1	0.026
101.2	0.0275
101.3	0.0305
101.4	0.032
101.5	0.0325
101.6	0.034
101.7	0.0355
101.8	0.0365
101.9	0.0365
102	0.0395
102.1	0.0395
102.2	0.041
102.3	0.0425
102.4	0.0435
102.5	0.046
102.6	0.046
102.7	0.0475
102.8	0.047
102.9	0.0505
103	0.0525
103.1	0.053
103.2	0.0565
103.3	0.0545
103.4	0.0575
103.5	0.058
103.6	0.0575
103.7	0.0595
103.8	0.06
103.9	0.0615
104	0.0625
104.1	0.062
104.2	0.0635
104.3	0.064
104.4	0.0645
104.5	0.066
104.6	0.066
104.7	0.0655
104.8	0.0665
104.9	0.067
105	0.068
105.1	0.0695
105.2	0.071
105.3	0.0715
105.4	0.071
105.5	0.073
105.6	0.074
105.7	0.075
105.8	0.0745
105.9	0.0755
106	0.0775
106.1	0.0785
106.2	0.0785
106.3	0.0795
106.4	0.081
106.5	0.081
106.6	0.082
106.7	0.083
106.8	0.0835
106.9	0.0845
107	0.0855
107.1	0.086
107.2	0.0875
107.3	0.0885
107.4	0.0905
107.5	0.0895
107.6	0.0895
107.7	0.0895
107.8	0.0895
107.9	0.0895
108	0.0905
108.1	0.0915
108.2	0.093
108.3	0.0935
108.4	0.0925
108.5	0.0955
108.6	0.0965
108.7	0.097
108.8	0.096
108.9	0.097
109	0.0955
109.1	0.096
109.2	0.096
109.3	0.0955
109.4	0.096
109.5	0.095
109.6	0.096
109.7	0.094
109.8	0.0945
109.9	0.0935
110	0.095
110.1	0.0965
110.2	0.098
110.3	0.097
110.4	0.0965
110.5	0.096
110.6	0.099
110.7	0.099
110.8	0.1
110.9	0.1015
111	0.1
111.1	0.1
111.2	0.101
111.3	0.1015
111.4	0.1035
111.5	0.104
111.6	0.1055
111.7	0.1075
111.8	0.1095
111.9	0.111
112	0.1115
112.1	0.112
112.2	0.114
112.3	0.114
112.4	0.112
112.5	0.111
112.6	0.1105
112.7	0.1115
112.8	0.1115
112.9	0.112
113	0.1125
113.1	0.114
113.2	0.115
113.3	0.1155
113.4	0.1155
113.5	0.1145
113.6	0.115
113.7	0.1145
113.8	0.114
113.9	0.114
114	0.115
114.1	0.114
114.2	0.115
114.3	0.117
114.4	0.1175
114.5	0.118
114.6	0.116
114.7	0.1165
114.8	0.1155
114.9	0.1155
115	0.117
115.1	0.117
115.2	0.117
115.3	0.116
115.4	0.1155
115.5	0.1155
115.6	0.116
115.7	0.1155
115.8	0.1165
115.9	0.1175
116	0.1195
116.1	0.1195
116.2	0.1195
116.3	0.12
116.4	0.1215
116.5	0.1215
116.6	0.122
116.7	0.1235
116.8	0.1235
116.9	0.124
117	0.125
117.1	0.124
117.2	0.1245
117.3	0.126
117.4	0.127
117.5	0.128
117.6	0.1275
117.7	0.1255
117.8	0.124
117.9	0.1225
118	0.1255
118.1	0.126
118.2	0.126
118.3	0.1255
118.4	0.1245
118.5	0.125
118.6	0.1235
118.7	0.1265
118.8	0.1275
118.9	0.128
119	0.1285
119.1	0.1295
119.2	0.129
119.3	0.13
119.4	0.131
119.5	0.1345
119.6	0.135
119.7	0.1355
119.8	0.137
119.9	0.1365
120	0.1385
120.1	0.139
120.2	0.1365
120.3	0.135
120.4	0.134
120.5	0.1325
120.6	0.1325
120.7	0.1315
120.8	0.1305
120.9	0.1295
121	0.128
121.1	0.128
121.2	0.1275
121.3	0.126
121.4	0.1275
121.5	0.128
121.6	0.129
121.7	0.1275
121.8	0.1285
121.9	0.1275
122	0.1275
122.1	0.1275
122.2	0.1265
122.3	0.1275
122.4	0.128
122.5	0.1275
122.6	0.1275
122.7	0.128
122.8	0.1265
122.9	0.1275
123	0.1275
123.1	0.128
123.2	0.1275
123.3	0.1275
123.4	0.127
123.5	0.1295
123.6	0.132
123.7	0.131
123.8	0.131
123.9	0.1335
124	0.136
124.1	0.136
124.2	0.1345
124.3	0.134
124.4	0.1345
124.5	0.135
124.6	0.1355
124.7	0.135
124.8	0.134
124.9	0.135
125	0.133
125.1	0.134
125.2	0.1355
125.3	0.1355
125.4	0.1365
125.5	0.1355
125.6	0.1345
125.7	0.1355
125.8	0.134
125.9	0.135
126	0.135
126.1	0.136
126.2	0.1355
126.3	0.1365
126.4	0.1355
126.5	0.135
126.6	0.137
126.7	0.1365
126.8	0.136
126.9	0.137
127	0.137
127.1	0.137
127.2	0.1385
127.3	0.137
127.4	0.138
127.5	0.1385
127.6	0.1395
127.7	0.139
127.8	0.139
127.9	0.1395
128	0.1415
128.1	0.1415
128.2	0.1415
128.3	0.141
128.4	0.142
128.5	0.142
128.6	0.1425
128.7	0.1425
128.8	0.143
128.9	0.143
129	0.143
129.1	0.1435
129.2	0.1445
129.3	0.1455
129.4	0.1455
129.5	0.1455
129.6	0.1445
129.7	0.1435
129.8	0.143
129.9	0.1415
130	0.141
130.1	0.1395
130.2	0.1395
130.3	0.139
130.4	0.1385
130.5	0.139
130.6	0.139
130.7	0.139
130.8	0.1395
130.9	0.14
131	0.138
131.1	0.1375
131.2	0.137
131.3	0.1365
131.4	0.1365
131.5	0.1365
131.6	0.1375
131.7	0.136
131.8	0.1335
131.9	0.1345
132	0.134
132.1	0.133
132.2	0.132
132.3	0.132
132.4	0.1325
132.5	0.1335
132.6	0.134
132.7	0.1335
132.8	0.1335
132.9	0.1335
133	0.1345
133.1	0.136
133.2	0.135
133.3	0.1365
133.4	0.135
133.5	0.134
133.6	0.1335
133.7	0.134
133.8	0.134
133.9	0.135
134	0.1345
134.1	0.1335
134.2	0.134
134.3	0.133
134.4	0.1335
134.5	0.1345
134.6	0.1335
134.7	0.133
134.8	0.1335
134.9	0.1345
135	0.134
135.1	0.133
135.2	0.1335
135.3	0.1335
135.4	0.1345
135.5	0.1335
135.6	0.1335
135.7	0.133
135.8	0.133
135.9	0.134
136	0.135
136.1	0.1375
136.2	0.1385
136.3	0.1415
136.4	0.142
136.5	0.1445
136.6	0.1455
136.7	0.1465
136.8	0.1465
136.9	0.145
137	0.144
137.1	0.145
137.2	0.1445
137.3	0.1455
137.4	0.1455
137.5	0.1445
137.6	0.144
137.7	0.145
137.8	0.144
137.9	0.1435
138	0.141
138.1	0.142
138.2	0.141
138.3	0.1405
138.4	0.141
138.5	0.139
138.6	0.14
138.7	0.1405
138.8	0.142
138.9	0.143
139	0.144
139.1	0.147
139.2	0.1475
139.3	0.148
139.4	0.149
139.5	0.1505
139.6	0.1505
139.7	0.151
139.8	0.151
139.9	0.15
140	0.1495
140.1	0.1505
140.2	0.149
140.3	0.147
140.4	0.1465
140.5	0.146
140.6	0.1455
140.7	0.145
140.8	0.146
140.9	0.145
141	0.144
141.1	0.1435
141.2	0.1445
141.3	0.1445
141.4	0.1445
141.5	0.143
141.6	0.142
141.7	0.1425
141.8	0.142
141.9	0.1435
142	0.145
142.1	0.144
142.2	0.1445
142.3	0.145
142.4	0.145
142.5	0.1435
142.6	0.143
142.7	0.1445
142.8	0.144
142.9	0.144
143	0.146
143.1	0.146
143.2	0.147
143.3	0.146
143.4	0.1445
143.5	0.1455
143.6	0.1455
143.7	0.1455
143.8	0.1455
143.9	0.1465
144	0.1465
144.1	0.1465
144.2	0.146
144.3	0.147
144.4	0.1485
144.5	0.1485
144.6	0.1475
144.7	0.147
144.8	0.1475
144.9	0.149
145	0.15
145.1	0.15
145.2	0.1515
145.3	0.1525
145.4	0.1535
145.5	0.155
145.6	0.1545
145.7	0.157
145.8	0.156
145.9	0.155
146	0.1555
146.1	0.1565
146.2	0.1565
146.3	0.154
146.4	0.1545
146.5	0.155
146.6	0.154
146.7	0.156
146.8	0.1555
146.9	0.157
147	0.1565
147.1	0.1545
147.2	0.1535
147.3	0.1545
147.4	0.1525
147.5	0.153
147.6	0.152
147.7	0.1515
147.8	0.15
147.9	0.1515
148	0.1535
148.1	0.151
148.2	0.151
148.3	0.1485
148.4	0.149
148.5	0.1495
148.6	0.1495
148.7	0.149
148.8	0.15
148.9	0.1505
149	0.15
149.1	0.152
149.2	0.1515
149.3	0.151
149.4	0.1535
149.5	0.1525
149.6	0.1525
149.7	0.152
149.8	0.1525
149.9	0.1525
150	0.154
150.1	0.1525
150.2	0.152
150.3	0.1525
150.4	0.15
150.5	0.1525
150.6	0.1525
150.7	0.153
150.8	0.153
150.9	0.1525
151	0.153
151.1	0.1515
151.2	0.152
151.3	0.151
151.4	0.151
151.5	0.1505
151.6	0.1505
151.7	0.151
151.8	0.1505
151.9	0.1505
152	0.152
152.1	0.1515
152.2	0.1525
152.3	0.151
152.4	0.1515
152.5	0.151
152.6	0.1525
152.7	0.151
152.8	0.1515
152.9	0.15
153	0.1515
153.1	0.153
153.2	0.153
153.3	0.152
153.4	0.1525
153.5	0.1525
153.6	0.15
153.7	0.149
153.8	0.148
153.9	0.1485
154	0.1485
154.1	0.148
154.2	0.1505
154.3	0.1525
154.4	0.1535
154.5	0.154
154.6	0.155
154.7	0.157
154.8	0.1585
154.9	0.1595
155	0.159
155.1	0.159
155.2	0.159
155.3	0.1585
155.4	0.158
155.5	0.1595
155.6	0.16
155.7	0.1625
155.8	0.164
155.9	0.1635
156	0.1625
156.1	0.1635
156.2	0.1625
156.3	0.161
156.4	0.16
156.5	0.1595
156.6	0.1585
156.7	0.1575
156.8	0.156
156.9	0.154
157	0.1555
157.1	0.152
157.2	0.1515
157.3	0.1525
157.4	0.1515
157.5	0.151
157.6	0.152
157.7	0.152
157.8	0.152
157.9	0.1525
158	0.154
158.1	0.154
158.2	0.1535
158.3	0.154
158.4	0.1535
158.5	0.154
158.6	0.1545
158.7	0.1565
158.8	0.1575
158.9	0.1585
159	0.159
159.1	0.158
159.2	0.157
159.3	0.157
159.4	0.1575
159.5	0.1565
159.6	0.156
159.7	0.1555
159.8	0.155
159.9	0.154
160	0.1545
160.1	0.155
160.2	0.154
160.3	0.154
160.4	0.153
160.5	0.152
160.6	0.153
160.7	0.1555
160.8	0.1545
160.9	0.1555
161	0.1535
161.1	0.1545
161.2	0.1525
161.3	0.152
161.4	0.1545
161.5	0.1545
161.6	0.1555
161.7	0.1555
161.8	0.1565
161.9	0.16
162	0.161
162.1	0.1605
162.2	0.1585
162.3	0.1575
162.4	0.157
162.5	0.157
162.6	0.156
162.7	0.1555
162.8	0.155
162.9	0.154
163	0.155
163.1	0.1555
163.2	0.1545
163.3	0.1535
163.4	0.154
163.5	0.154
163.6	0.153
163.7	0.153
163.8	0.153
163.9	0.1535
164	0.1535
164.1	0.154
164.2	0.155
164.3	0.1555
164.4	0.1535
164.5	0.155
164.6	0.1555
164.7	0.155
164.8	0.1545
164.9	0.1535
165	0.1525
165.1	0.153
165.2	0.152
165.3	0.152
165.4	0.153
165.5	0.1545
165.6	0.155
165.7	0.1545
165.8	0.1545
165.9	0.1535
166	0.1565
166.1	0.1565
166.2	0.1555
166.3	0.157
166.4	0.1565
166.5	0.1575
166.6	0.1575
166.7	0.1585
166.8	0.159
166.9	0.1585
167	0.1595
167.1	0.159
167.2	0.1575
167.3	0.158
167.4	0.158
167.5	0.159
167.6	0.158
167.7	0.1575
167.8	0.158
167.9	0.1595
168	0.1595
168.1	0.159
168.2	0.1575
168.3	0.158
168.4	0.1595
168.5	0.1605
168.6	0.1585
168.7	0.158
168.8	0.158
168.9	0.1575
169	0.158
169.1	0.1575
169.2	0.1575
169.3	0.1575
169.4	0.1575
169.5	0.156
169.6	0.1575
169.7	0.156
169.8	0.1565
169.9	0.157
170	0.159
170.1	0.1595
170.2	0.16
170.3	0.158
170.4	0.1575
170.5	0.158
170.6	0.1545
170.7	0.153
170.8	0.155
170.9	0.157
171	0.156
171.1	0.155
171.2	0.158
171.3	0.1575
171.4	0.158
171.5	0.158
171.6	0.158
171.7	0.1565
171.8	0.156
171.9	0.156
172	0.1545
172.1	0.1545
172.2	0.157
172.3	0.1595
172.4	0.159
172.5	0.1595
172.6	0.1595
172.7	0.1625
172.8	0.163
172.9	0.163
173	0.1615
173.1	0.1625
173.2	0.1615
173.3	0.16
173.4	0.161
173.5	0.16
173.6	0.1595
173.7	0.1585
173.8	0.159
173.9	0.1625
174	0.161
174.1	0.1615
174.2	0.163
174.3	0.162
174.4	0.16
174.5	0.16
174.6	0.1595
174.7	0.1585
174.8	0.158
174.9	0.159
175	0.159
175.1	0.1585
175.2	0.16
175.3	0.1605
175.4	0.1605
175.5	0.1595
175.6	0.1595
175.7	0.157
175.8	0.1575
175.9	0.1565
176	0.157
176.1	0.157
176.2	0.158
176.3	0.1585
176.4	0.1585
176.5	0.159
176.6	0.159
176.7	0.1585
176.8	0.159
176.9	0.1585
177	0.156
177.1	0.1565
177.2	0.155
177.3	0.1555
177.4	0.155
177.5	0.154
177.6	0.1545
177.7	0.1555
177.8	0.1535
177.9	0.153
178	0.1525
178.1	0.153
178.2	0.152
178.3	0.1535
178.4	0.1525
178.5	0.1535
178.6	0.153
178.7	0.152
178.8	0.1495
178.9	0.15
179	0.1525
179.1	0.153
179.2	0.1535
179.3	0.1525
179.4	0.152
179.5	0.1505
179.6	0.152
179.7	0.152
179.8	0.153
179.9	0.152
180	0.152
180.1	0.1525
180.2	0.1515
180.3	0.151
180.4	0.151
180.5	0.1515
180.6	0.151
180.7	0.15
180.8	0.1475
180.9	0.146
181	0.1445
181.1	0.144
181.2	0.1445
181.3	0.146
181.4	0.147
181.5	0.147
181.6	0.1465
181.7	0.145
181.8	0.145
181.9	0.1445
182	0.1435
182.1	0.1445
182.2	0.1455
182.3	0.145
182.4	0.143
182.5	0.1425
182.6	0.1425
182.7	0.142
182.8	0.1415
182.9	0.142
183	0.1435
183.1	0.1435
183.2	0.1455
183.3	0.1465
183.4	0.149
183.5	0.147
183.6	0.147
183.7	0.146
183.8	0.1475
183.9	0.1475
184	0.148
184.1	0.1475
184.2	0.1455
184.3	0.146
184.4	0.145
184.5	0.146
184.6	0.147
184.7	0.1465
184.8	0.1475
184.9	0.148
185	0.148
185.1	0.1485
185.2	0.15
185.3	0.1495
185.4	0.1485
185.5	0.149
185.6	0.1505
185.7	0.15
185.8	0.15
185.9	0.147
186	0.1475
186.1	0.146
186.2	0.1465
186.3	0.1455
186.4	0.147
186.5	0.148
186.6	0.15
186.7	0.151
186.8	0.15
186.9	0.1495
187	0.15
187.1	0.15
187.2	0.149
187.3	0.1475
187.4	0.149
187.5	0.146
187.6	0.1475
187.7	0.1485
187.8	0.1475
187.9	0.1485
188	0.1475
188.1	0.1465
188.2	0.1465
188.3	0.146
188.4	0.146
188.5	0.145
188.6	0.145
188.7	0.145
188.8	0.147
188.9	0.1475
189	0.148
189.1	0.145
189.2	0.1465
189.3	0.145
189.4	0.146
189.5	0.146
189.6	0.1475
189.7	0.1485
189.8	0.1485
189.9	0.1485
190	0.1495
190.1	0.1505
190.2	0.151
190.3	0.15
190.4	0.152
190.5	0.1525
190.6	0.154
190.7	0.1525
190.8	0.15
190.9	0.148
191	0.149
191.1	0.149
191.2	0.1495
191.3	0.149
191.4	0.149
191.5	0.148
191.6	0.1475
191.7	0.1485
191.8	0.1475
191.9	0.1465
192	0.1475
192.1	0.1475
192.2	0.15
192.3	0.149
192.4	0.1475
192.5	0.15
192.6	0.1495
192.7	0.1495
192.8	0.151
192.9	0.1515
193	0.151
193.1	0.1535
193.2	0.154
193.3	0.154
193.4	0.1525
193.5	0.1525
193.6	0.153
193.7	0.154
193.8	0.1545
193.9	0.1535
194	0.152
194.1	0.1495
194.2	0.1515
194.3	0.149
194.4	0.1505
194.5	0.1515
194.6	0.151
194.7	0.151
194.8	0.1505
194.9	0.15
195	0.1505
195.1	0.1505
195.2	0.1495
195.3	0.15
195.4	0.1525
195.5	0.154
195.6	0.1545
195.7	0.155
195.8	0.1545
195.9	0.154
196	0.153
196.1	0.153
196.2	0.153
196.3	0.154
196.4	0.1555
196.5	0.1545
196.6	0.154
196.7	0.154
196.8	0.1525
196.9	0.1515
197	0.1505
197.1	0.1505
197.2	0.151
197.3	0.151
197.4	0.154
197.5	0.1535
197.6	0.154
197.7	0.1555
197.8	0.1555
197.9	0.1555
198	0.155
198.1	0.1545
198.2	0.154
198.3	0.153
198.4	0.1545
198.5	0.156
198.6	0.156
198.7	0.155
198.8	0.1535
198.9	0.1555
199	0.1535
199.1	0.153
199.2	0.1545
199.3	0.1545
199.4	0.1525
199.5	0.152
199.6	0.1535
199.7	0.155
199.8	0.1555
199.9	0.153
200	0.1525
[truncated: 14,000 more rows]
