# Supplementary material for: Bayesian inference of kinetic schemes for ion channels by Kalman filtering
Source: eLife journal article supplement (doi:10.7554/elife.62714), 2022-05-04
Supplement: fig1-data1 [file 003125_Sim_N_1000_Strom_MW.xlsx]

## Sheet: Tabelle1
0.1	0
0.2	0
0.3	0
0.4	0
0.5	0
0.6	0
0.7	0
0.8	0
0.9	0
1	0
1.1	0
1.2	0
1.3	0
1.4	0
1.5	0
1.6	0
1.7	0
1.8	0
1.9	0
2	0
2.1	0
2.2	0
2.3	0
2.4	0
2.5	0
2.6	0
2.7	0
2.8	0
2.9	0
3	0
3.1	0
3.2	0
3.3	0
3.4	0
3.5	0
3.6	0
3.7	0
3.8	0
3.9	0
4	0
4.1	0
4.2	0
4.3	0
4.4	0
4.5	0
4.6	0
4.7	0
4.8	0
4.9	0
5	0
5.1	0
5.2	0
5.3	0
5.4	0
5.5	0
5.6	0
5.7	0
5.8	0
5.9	0
6	0
6.1	0
6.2	0
6.3	0
6.4	0
6.5	0
6.6	0
6.7	0
6.8	0
6.9	0
7	0
7.1	0
7.2	0
7.3	0
7.4	0
7.5	0
7.6	0
7.7	0
7.8	0
7.9	0
8	0
8.1	0
8.2	0
8.3	0
8.4	0
8.5	0
8.6	0
8.7	0
8.8	0
8.9	0
9	0
9.1	0
9.2	0
9.3	0
9.4	0
9.5	0
9.6	0
9.7	0
9.8	0
9.9	0
10	0
10.1	0
10.2	0
10.3	0
10.4	0
10.5	0
10.6	0
10.7	0
10.8	0
10.9	0
11	0
11.1	0
11.2	0
11.3	0
11.4	0
11.5	0
11.6	0
11.7	0
11.8	0
11.9	0
12	0
12.1	0
12.2	0
12.3	0
12.4	0
12.5	0
12.6	0
12.7	0
12.8	0
12.9	0
13	0
13.1	0
13.2	0
13.3	0
13.4	0
13.5	0
13.6	0
13.7	0
13.8	0
13.9	0
14	0
14.1	0
14.2	0
14.3	0
14.4	0
14.5	0
14.6	0
14.7	0
14.8	0
14.9	0
15	0
15.1	0
15.2	0
15.3	0
15.4	0
15.5	0
15.6	0
15.7	0
15.8	0
15.9	0
16	0
16.1	0
16.2	0
16.3	0
16.4	0
16.5	0
16.6	0
16.7	0
16.8	0
16.9	0
17	0
17.1	0
17.2	0
17.3	0
17.4	0
17.5	0
17.6	0
17.7	0
17.8	0
17.9	0
18	0
18.1	0
18.2	0
18.3	0
18.4	0
18.5	0
18.6	0
18.7	0
18.8	0
18.9	0
19	0
19.1	0
19.2	0
19.3	0
19.4	0
19.5	0
19.6	0
19.7	0
19.8	0
19.9	0
20	0
20.1	0
20.2	0
20.3	0
20.4	0
20.5	0
20.6	0
20.7	0
20.8	0
20.9	0
21	0
21.1	0
21.2	0
21.3	0
21.4	0
21.5	0
21.6	0
21.7	0
21.8	0
21.9	0
22	0
22.1	0
22.2	0
22.3	0
22.4	0
22.5	0
22.6	0
22.7	0
22.8	0
22.9	0
23	0
23.1	0
23.2	0
23.3	0
23.4	0
23.5	0
23.6	0
23.7	0
23.8	0
23.9	0
24	0
24.1	0
24.2	0
24.3	0
24.4	0
24.5	0
24.6	0
24.7	0
24.8	0
24.9	0
25	0
25.1	0
25.2	0
25.3	0
25.4	0
25.5	0
25.6	0
25.7	0
25.8	0
25.9	0
26	0
26.1	0
26.2	0
26.3	0
26.4	0
26.5	0
26.6	0
26.7	0
26.8	0
26.9	0
27	0
27.1	0
27.2	0
27.3	0
27.4	0
27.5	0
27.6	0
27.7	0
27.8	0
27.9	0
28	0
28.1	0
28.2	0
28.3	0
28.4	0
28.5	0
28.6	0
28.7	0
28.8	0
28.9	0
29	0
29.1	0
29.2	0
29.3	0
29.4	0
29.5	0
29.6	0
29.7	0
29.8	0
29.9	0
30	0
30.1	0
30.2	0
30.3	0
30.4	0
30.5	0
30.6	0
30.7	0
30.8	0
30.9	0
31	0
31.1	0
31.2	0
31.3	0
31.4	0
31.5	0
31.6	0
31.7	0
31.8	0
31.9	0
32	0
32.1	0
32.2	0
32.3	0
32.4	0
32.5	0
32.6	0
32.7	0
32.8	0
32.9	0
33	0
33.1	0
33.2	0
33.3	0
33.4	0
33.5	0
33.6	0
33.7	0
33.8	0
33.9	0
34	0
34.1	0
34.2	0
34.3	0
34.4	0
34.5	0
34.6	0
34.7	0
34.8	0
34.9	0
35	0
35.1	0
35.2	0
35.3	0
35.4	0
35.5	0
35.6	0
35.7	0
35.8	0
35.9	0
36	0
36.1	0
36.2	0
36.3	0
36.4	0
36.5	0
36.6	0
36.7	0
36.8	0
36.9	0
37	0
37.1	0
37.2	0
37.3	0
37.4	0
37.5	0
37.6	0
37.7	0
37.8	0
37.9	0
38	0
38.1	0
38.2	0
38.3	0
38.4	0
38.5	0
38.6	0
38.7	0
38.8	0
38.9	0
39	0
39.1	0
39.2	0
39.3	0
39.4	0
39.5	0
39.6	0
39.7	0
39.8	0
39.9	0
40	0
40.1	0
40.2	0
40.3	0
40.4	0
40.5	0
40.6	0
40.7	0
40.8	0
40.9	0
41	0
41.1	0
41.2	0
41.3	0
41.4	0
41.5	0
41.6	0
41.7	0
41.8	0
41.9	0
42	0
42.1	0
42.2	0
42.3	0
42.4	0
42.5	0
42.6	0
42.7	0
42.8	0
42.9	0
43	0
43.1	0
43.2	0
43.3	0
43.4	0
43.5	0
43.6	0
43.7	0
43.8	0
43.9	0
44	0
44.1	0
44.2	0
44.3	0
44.4	0
44.5	0
44.6	0
44.7	0
44.8	0
44.9	0
45	0
45.1	0
45.2	0
45.3	0
45.4	0
45.5	0
45.6	0
45.7	0
45.8	0
45.9	0
46	0
46.1	0
46.2	0
46.3	0
46.4	0
46.5	0
46.6	0
46.7	0
46.8	0
46.9	0
47	0
47.1	0
47.2	0
47.3	0
47.4	0
47.5	0
47.6	0
47.7	0
47.8	0
47.9	0
48	0
48.1	0
48.2	0
48.3	0
48.4	0
48.5	0
48.6	0
48.7	0
48.8	0
48.9	0
49	0
49.1	0
49.2	0
49.3	0
49.4	0
49.5	0
49.6	0
49.7	0
49.8	0
49.9	0
50	0
50.1	0
50.2	0
50.3	0
50.4	0
50.5	0
50.6	0
50.7	0
50.8	0
50.9	0
51	0
51.1	0
51.2	0
51.3	0
51.4	0
51.5	0
51.6	0
51.7	0
51.8	0
51.9	0
52	0
52.1	0
52.2	0
52.3	0
52.4	0
52.5	0
52.6	0
52.7	0
52.8	0
52.9	0
53	0
53.1	0
53.2	0
53.3	0
53.4	0
53.5	0
53.6	0
53.7	0
53.8	0
53.9	0
54	0
54.1	0
54.2	0
54.3	0
54.4	0
54.5	0
54.6	0
54.7	0
54.8	0
54.9	0
55	0
55.1	0
55.2	0
55.3	0
55.4	0
55.5	0
55.6	0
55.7	0
55.8	0
55.9	0
56	0
56.1	0
56.2	0
56.3	0
56.4	0
56.5	0
56.6	0
56.7	0
56.8	0
56.9	0
57	0
57.1	0
57.2	0
57.3	0
57.4	0
57.5	0
57.6	0
57.7	0
57.8	0
57.9	0
58	0
58.1	0
58.2	0
58.3	0
58.4	0
58.5	0
58.6	0
58.7	0
58.8	0
58.9	0
59	0
59.1	0
59.2	0
59.3	0
59.4	0
59.5	0
59.6	0
59.7	0
59.8	0
59.9	0
60	0
60.1	0
60.2	0
60.3	0
60.4	0
60.5	0
60.6	0
60.7	0
60.8	0
60.9	0
61	0
61.1	0
61.2	0
61.3	0
61.4	0
61.5	0
61.6	0
61.7	0
61.8	0
61.9	0
62	0
62.1	0
62.2	0
62.3	0
62.4	0
62.5	0
62.6	0
62.7	0
62.8	0
62.9	0
63	0
63.1	0
63.2	0
63.3	0
63.4	0
63.5	0
63.6	0
63.7	0
63.8	0
63.9	0
64	0
64.1	0
64.2	0
64.3	0
64.4	0
64.5	0
64.6	0
64.7	0
64.8	0
64.9	0
65	0
65.1	0
65.2	0
65.3	0
65.4	0
65.5	0
65.6	0
65.7	0
65.8	0
65.9	0
66	0
66.1	0
66.2	0
66.3	0
66.4	0
66.5	0
66.6	0
66.7	0
66.8	0
66.9	0
67	0
67.1	0
67.2	0
67.3	0
67.4	0
67.5	0
67.6	0
67.7	0
67.8	0
67.9	0
68	0
68.1	0
68.2	0
68.3	0
68.4	0
68.5	0
68.6	0
68.7	0
68.8	0
68.9	0
69	0
69.1	0
69.2	0
69.3	0
69.4	0
69.5	0
69.6	0
69.7	0
69.8	0
69.9	0
70	0
70.1	0
70.2	0
70.3	0
70.4	0
70.5	0
70.6	0
70.7	0
70.8	0
70.9	0
71	0
71.1	0
71.2	0
71.3	0
71.4	0
71.5	0
71.6	0
71.7	0
71.8	0
71.9	0
72	0
72.1	0
72.2	0
72.3	0
72.4	0
72.5	0
72.6	0
72.7	0
72.8	0
72.9	0
73	0
73.1	0
73.2	0
73.3	0
73.4	0
73.5	0
73.6	0
73.7	0
73.8	0
73.9	0
74	0
74.1	0
74.2	0
74.3	0
74.4	0
74.5	0
74.6	0
74.7	0
74.8	0
74.9	0
75	0
75.1	0
75.2	0
75.3	0
75.4	0
75.5	0
75.6	0
75.7	0
75.8	0
75.9	0
76	0
76.1	0
76.2	0
76.3	0
76.4	0
76.5	0
76.6	0
76.7	0
76.8	0
76.9	0
77	0
77.1	0
77.2	0
77.3	0
77.4	0
77.5	0
77.6	0
77.7	0
77.8	0
77.9	0
78	0
78.1	0
78.2	0
78.3	0
78.4	0
78.5	0
78.6	0
78.7	0
78.8	0
78.9	0
79	0
79.1	0
79.2	0
79.3	0
79.4	0
79.5	0
79.6	0
79.7	0
79.8	0
79.9	0
80	0
80.1	0
80.2	0
80.3	0
80.4	0
80.5	0
80.6	0
80.7	0
80.8	0
80.9	0
81	0
81.1	0
81.2	0
81.3	0
81.4	0
81.5	0
81.6	0
81.7	0
81.8	0
81.9	0
82	0
82.1	0
82.2	0
82.3	0
82.4	0
82.5	0
82.6	0
82.7	0
82.8	0
82.9	0
83	0
83.1	0
83.2	0
83.3	0
83.4	0
83.5	0
83.6	0
83.7	0
83.8	0
83.9	0
84	0
84.1	0
84.2	0
84.3	0
84.4	0
84.5	0
84.6	0
84.7	0
84.8	0
84.9	0
85	0
85.1	0
85.2	0
85.3	0
85.4	0
85.5	0
85.6	0
85.7	0
85.8	0
85.9	0
86	0
86.1	0
86.2	0
86.3	0
86.4	0
86.5	0
86.6	0
86.7	0
86.8	0
86.9	0
87	0
87.1	0
87.2	0
87.3	0
87.4	0
87.5	0
87.6	0
87.7	0
87.8	0
87.9	0
88	0
88.1	0
88.2	0
88.3	0
88.4	0
88.5	0
88.6	0
88.7	0
88.8	0
88.9	0
89	0
89.1	0
89.2	0
89.3	0
89.4	0
89.5	0
89.6	0
89.7	0
89.8	0
89.9	0
90	0
90.1	0
90.2	0
90.3	0
90.4	0
90.5	0
90.6	0
90.7	0
90.8	0
90.9	0
91	0
91.1	0
91.2	0
91.3	0
91.4	0
91.5	0
91.6	0
91.7	0
91.8	0
91.9	0
92	0
92.1	0
92.2	0
92.3	0
92.4	0
92.5	0
92.6	0
92.7	0
92.8	0
92.9	0
93	0
93.1	0
93.2	0
93.3	0
93.4	0
93.5	0
93.6	0
93.7	0
93.8	0
93.9	0
94	0
94.1	0
94.2	0
94.3	0
94.4	0
94.5	0
94.6	0
94.7	0
94.8	0
94.9	0
95	0
95.1	0
95.2	0
95.3	0
95.4	0
95.5	0
95.6	0
95.7	0
95.8	0
95.9	0
96	0
96.1	0
96.2	0
96.3	0
96.4	0
96.5	0
96.6	0
96.7	0
96.8	0
96.9	0
97	0
97.1	0
97.2	0
97.3	0
97.4	0
97.5	0
97.6	0
97.7	0
97.8	0
97.9	0
98	0
98.1	0
98.2	0
98.3	0
98.4	0
98.5	0
98.6	0
98.7	0
98.8	0
98.9	0
99	0
99.1	0
99.2	0
99.3	0
99.4	0
99.5	0
99.6	0
99.7	0
99.8	0
99.9	0
100	0
100.1	0
100.2	0
100.3	0
100.4	0
100.5	0
100.6	0
100.7	0
100.8	0
100.9	0
101	0
101.1	0
101.2	0
101.3	0
101.4	0
101.5	0
101.6	0
101.7	0
101.8	0
101.9	0
102	0
102.1	0
102.2	0
102.3	0
102.4	0
102.5	0
102.6	0
102.7	0
102.8	0
102.9	0
103	0
103.1	0
103.2	0
103.3	0
103.4	0
103.5	0
103.6	0
103.7	0
103.8	0
103.9	0
104	0
104.1	0
104.2	0
104.3	0
104.4	0
104.5	0
104.6	0
104.7	0
104.8	0
104.9	0
105	0
105.1	0
105.2	0
105.3	0
105.4	0
105.5	0
105.6	0
105.7	0
105.8	0
105.9	0
106	0
106.1	0
106.2	0
106.3	0
106.4	0
106.5	0
106.6	0
106.7	0
106.8	0
106.9	0
107	0
107.1	0
107.2	0
107.3	0
107.4	0
107.5	0
107.6	0
107.7	0
107.8	0
107.9	0
108	0
108.1	0
108.2	0
108.3	0
108.4	0
108.5	0
108.6	0
108.7	0
108.8	0
108.9	0
109	0
109.1	0
109.2	0
109.3	0
109.4	0
109.5	0
109.6	0
109.7	0
109.8	0
109.9	0
110	0
110.1	0
110.2	0
110.3	0
110.4	0
110.5	0
110.6	0
110.7	0
110.8	0
110.9	0
111	0
111.1	0
111.2	0
111.3	0
111.4	0
111.5	0
111.6	0
111.7	0
111.8	0
111.9	0
112	0.001
112.1	0.001
112.2	0.001
112.3	0.001
112.4	0.001
112.5	0.001
112.6	0.001
112.7	0.001
112.8	0.001
112.9	0.001
113	0.001
113.1	0.001
113.2	0.001
113.3	0.001
113.4	0.001
113.5	0.001
113.6	0.001
113.7	0.001
113.8	0.001
113.9	0.001
114	0.001
114.1	0.001
114.2	0.001
114.3	0.001
114.4	0.001
114.5	0.001
114.6	0.001
114.7	0.001
114.8	0.001
114.9	0.001
115	0.001
115.1	0.001
115.2	0.001
115.3	0.001
115.4	0.001
115.5	0.001
115.6	0.001
115.7	0.001
115.8	0.001
115.9	0.001
116	0.001
116.1	0.001
116.2	0.001
116.3	0.001
116.4	0.001
116.5	0.001
116.6	0.001
116.7	0.001
116.8	0.001
116.9	0.002
117	0.002
117.1	0.002
117.2	0.002
117.3	0.002
117.4	0.002
117.5	0.002
117.6	0.002
117.7	0.002
117.8	0.002
117.9	0.002
118	0.002
118.1	0.002
118.2	0.002
118.3	0.002
118.4	0.002
118.5	0.002
118.6	0.002
118.7	0.002
118.8	0.002
118.9	0.002
119	0.002
119.1	0.002
119.2	0.002
119.3	0.002
119.4	0.002
119.5	0.002
119.6	0.002
119.7	0.002
119.8	0.002
119.9	0.002
120	0.002
120.1	0.002
120.2	0.002
120.3	0.002
120.4	0.002
120.5	0.002
120.6	0.002
120.7	0.002
120.8	0.002
120.9	0.002
121	0.002
121.1	0.002
121.2	0.002
121.3	0.002
121.4	0.002
121.5	0.002
121.6	0.002
121.7	0.002
121.8	0.002
121.9	0.002
122	0.002
122.1	0.002
122.2	0.002
122.3	0.002
122.4	0.002
122.5	0.002
122.6	0.002
122.7	0.002
122.8	0.002
122.9	0.002
123	0.002
123.1	0.002
123.2	0.002
123.3	0.002
123.4	0.002
123.5	0.002
123.6	0.002
123.7	0.002
123.8	0.002
123.9	0.002
124	0.002
124.1	0.002
124.2	0.002
124.3	0.002
124.4	0.002
124.5	0.002
124.6	0.002
124.7	0.002
124.8	0.002
124.9	0.002
125	0.002
125.1	0.002
125.2	0.002
125.3	0.002
125.4	0.002
125.5	0.002
125.6	0.002
125.7	0.002
125.8	0.002
125.9	0.002
126	0.002
126.1	0.002
126.2	0.002
126.3	0.002
126.4	0.002
126.5	0.002
126.6	0.002
126.7	0.002
126.8	0.002
126.9	0.002
127	0.002
127.1	0.002
127.2	0.002
127.3	0.002
127.4	0.002
127.5	0.002
127.6	0.002
127.7	0.002
127.8	0.002
127.9	0.002
128	0.002
128.1	0.002
128.2	0.002
128.3	0.002
128.4	0.002
128.5	0.002
128.6	0.002
128.7	0.002
128.8	0.002
128.9	0.002
129	0.002
129.1	0.002
129.2	0.002
129.3	0.002
129.4	0.002
129.5	0.002
129.6	0.002
129.7	0.002
129.8	0.002
129.9	0.002
130	0.003
130.1	0.002
130.2	0.002
130.3	0.002
130.4	0.002
130.5	0.003
130.6	0.003
130.7	0.003
130.8	0.003
130.9	0.003
131	0.004
131.1	0.004
131.2	0.004
131.3	0.004
131.4	0.004
131.5	0.004
131.6	0.004
131.7	0.004
131.8	0.004
131.9	0.004
132	0.004
132.1	0.004
132.2	0.004
132.3	0.004
132.4	0.004
132.5	0.004
132.6	0.004
132.7	0.004
132.8	0.004
132.9	0.004
133	0.004
133.1	0.004
133.2	0.004
133.3	0.004
133.4	0.004
133.5	0.004
133.6	0.004
133.7	0.004
133.8	0.004
133.9	0.004
134	0.004
134.1	0.004
134.2	0.004
134.3	0.004
134.4	0.004
134.5	0.004
134.6	0.004
134.7	0.004
134.8	0.004
134.9	0.004
135	0.004
135.1	0.004
135.2	0.004
135.3	0.004
135.4	0.004
135.5	0.004
135.6	0.004
135.7	0.004
135.8	0.004
135.9	0.004
136	0.004
136.1	0.005
136.2	0.005
136.3	0.005
136.4	0.005
136.5	0.005
136.6	0.005
136.7	0.005
136.8	0.005
136.9	0.005
137	0.005
137.1	0.005
137.2	0.005
137.3	0.005
137.4	0.005
137.5	0.005
137.6	0.005
137.7	0.005
137.8	0.005
137.9	0.005
138	0.005
138.1	0.005
138.2	0.005
138.3	0.005
138.4	0.005
138.5	0.005
138.6	0.005
138.7	0.005
138.8	0.005
138.9	0.005
139	0.005
139.1	0.005
139.2	0.005
139.3	0.005
139.4	0.005
139.5	0.005
139.6	0.005
139.7	0.005
139.8	0.005
139.9	0.005
140	0.006
140.1	0.006
140.2	0.006
140.3	0.006
140.4	0.006
140.5	0.006
140.6	0.006
140.7	0.006
140.8	0.006
140.9	0.006
141	0.006
141.1	0.006
141.2	0.006
141.3	0.006
141.4	0.006
141.5	0.006
141.6	0.006
141.7	0.006
141.8	0.006
141.9	0.006
142	0.006
142.1	0.006
142.2	0.006
142.3	0.006
142.4	0.006
142.5	0.006
142.6	0.006
142.7	0.006
142.8	0.006
142.9	0.006
143	0.006
143.1	0.006
143.2	0.006
143.3	0.006
143.4	0.006
143.5	0.006
143.6	0.006
143.7	0.006
143.8	0.006
143.9	0.006
144	0.006
144.1	0.006
144.2	0.006
144.3	0.006
144.4	0.006
144.5	0.006
144.6	0.007
144.7	0.007
144.8	0.007
144.9	0.007
145	0.007
145.1	0.007
145.2	0.007
145.3	0.007
145.4	0.007
145.5	0.007
145.6	0.007
145.7	0.007
145.8	0.007
145.9	0.007
146	0.007
146.1	0.007
146.2	0.007
146.3	0.008
146.4	0.008
146.5	0.008
146.6	0.008
146.7	0.008
146.8	0.007
146.9	0.007
147	0.007
147.1	0.008
147.2	0.008
147.3	0.009
147.4	0.009
147.5	0.009
147.6	0.01
147.7	0.01
147.8	0.01
147.9	0.01
148	0.01
148.1	0.01
148.2	0.01
148.3	0.01
148.4	0.01
148.5	0.01
148.6	0.01
148.7	0.011
148.8	0.011
148.9	0.011
149	0.011
149.1	0.011
149.2	0.011
149.3	0.011
149.4	0.011
149.5	0.011
149.6	0.011
149.7	0.011
149.8	0.011
149.9	0.011
150	0.011
150.1	0.011
150.2	0.011
150.3	0.011
150.4	0.011
150.5	0.011
150.6	0.011
150.7	0.011
150.8	0.011
150.9	0.012
151	0.012
151.1	0.012
151.2	0.012
151.3	0.012
151.4	0.012
151.5	0.012
151.6	0.012
151.7	0.012
151.8	0.012
151.9	0.012
152	0.012
152.1	0.012
152.2	0.012
152.3	0.012
152.4	0.012
152.5	0.012
152.6	0.012
152.7	0.012
152.8	0.012
152.9	0.012
153	0.012
153.1	0.012
153.2	0.012
153.3	0.012
153.4	0.012
153.5	0.012
153.6	0.012
153.7	0.012
153.8	0.012
153.9	0.012
154	0.012
154.1	0.012
154.2	0.012
154.3	0.012
154.4	0.012
154.5	0.012
154.6	0.012
154.7	0.012
154.8	0.012
154.9	0.012
155	0.012
155.1	0.012
155.2	0.012
155.3	0.012
155.4	0.012
155.5	0.011
155.6	0.011
155.7	0.011
155.8	0.011
155.9	0.011
156	0.011
156.1	0.011
156.2	0.012
156.3	0.012
156.4	0.012
156.5	0.012
156.6	0.012
156.7	0.012
156.8	0.012
156.9	0.012
157	0.013
157.1	0.013
157.2	0.013
157.3	0.013
157.4	0.013
157.5	0.014
157.6	0.014
157.7	0.015
157.8	0.015
157.9	0.015
158	0.015
158.1	0.015
158.2	0.015
158.3	0.015
158.4	0.015
158.5	0.015
158.6	0.015
158.7	0.015
158.8	0.015
158.9	0.015
159	0.015
159.1	0.015
159.2	0.015
159.3	0.015
159.4	0.015
159.5	0.015
159.6	0.015
159.7	0.015
159.8	0.015
159.9	0.015
160	0.015
160.1	0.015
160.2	0.015
160.3	0.015
160.4	0.015
160.5	0.015
160.6	0.015
160.7	0.015
160.8	0.015
160.9	0.015
161	0.015
161.1	0.015
161.2	0.015
161.3	0.015
161.4	0.015
161.5	0.015
161.6	0.015
161.7	0.015
161.8	0.015
161.9	0.015
162	0.015
162.1	0.015
162.2	0.015
162.3	0.015
162.4	0.015
162.5	0.015
162.6	0.015
162.7	0.015
162.8	0.015
162.9	0.015
163	0.015
163.1	0.015
163.2	0.015
163.3	0.015
163.4	0.015
163.5	0.015
163.6	0.015
163.7	0.015
163.8	0.015
163.9	0.015
164	0.015
164.1	0.015
164.2	0.015
164.3	0.015
164.4	0.015
164.5	0.015
164.6	0.015
164.7	0.015
164.8	0.015
164.9	0.015
165	0.015
165.1	0.015
165.2	0.015
165.3	0.015
165.4	0.015
165.5	0.015
165.6	0.015
165.7	0.015
165.8	0.015
165.9	0.015
166	0.015
166.1	0.015
166.2	0.015
166.3	0.015
166.4	0.015
166.5	0.015
166.6	0.015
166.7	0.015
166.8	0.015
166.9	0.015
167	0.015
167.1	0.015
167.2	0.015
167.3	0.015
167.4	0.015
167.5	0.015
167.6	0.015
167.7	0.015
167.8	0.015
167.9	0.015
168	0.015
168.1	0.015
168.2	0.015
168.3	0.015
168.4	0.015
168.5	0.014
168.6	0.014
168.7	0.014
168.8	0.014
168.9	0.014
169	0.016
169.1	0.016
169.2	0.016
169.3	0.016
169.4	0.016
169.5	0.016
169.6	0.016
169.7	0.016
169.8	0.016
169.9	0.016
170	0.017
170.1	0.017
170.2	0.017
170.3	0.017
170.4	0.017
170.5	0.017
170.6	0.017
170.7	0.017
170.8	0.017
170.9	0.018
171	0.018
171.1	0.018
171.2	0.018
171.3	0.018
171.4	0.019
171.5	0.019
171.6	0.019
171.7	0.019
171.8	0.019
171.9	0.019
172	0.019
172.1	0.019
172.2	0.019
172.3	0.019
172.4	0.019
172.5	0.019
172.6	0.019
172.7	0.019
172.8	0.019
172.9	0.019
173	0.019
173.1	0.019
173.2	0.019
173.3	0.019
173.4	0.019
173.5	0.019
173.6	0.019
173.7	0.019
173.8	0.019
173.9	0.019
174	0.019
174.1	0.019
174.2	0.019
174.3	0.019
174.4	0.019
174.5	0.019
174.6	0.019
174.7	0.019
174.8	0.019
174.9	0.019
175	0.019
175.1	0.019
175.2	0.019
175.3	0.019
175.4	0.019
175.5	0.019
175.6	0.019
175.7	0.019
175.8	0.019
175.9	0.019
176	0.019
176.1	0.019
176.2	0.019
176.3	0.019
176.4	0.019
176.5	0.019
176.6	0.019
176.7	0.019
176.8	0.019
176.9	0.019
177	0.019
177.1	0.019
177.2	0.019
177.3	0.019
177.4	0.019
177.5	0.019
177.6	0.019
177.7	0.019
177.8	0.019
177.9	0.018
178	0.018
178.1	0.018
178.2	0.018
178.3	0.018
178.4	0.018
178.5	0.018
178.6	0.018
178.7	0.018
178.8	0.018
178.9	0.018
179	0.018
179.1	0.018
179.2	0.018
179.3	0.018
179.4	0.018
179.5	0.018
179.6	0.018
179.7	0.018
179.8	0.018
179.9	0.018
180	0.018
180.1	0.018
180.2	0.018
180.3	0.018
180.4	0.018
180.5	0.018
180.6	0.018
180.7	0.018
180.8	0.018
180.9	0.018
181	0.017
181.1	0.017
181.2	0.017
181.3	0.017
181.4	0.017
181.5	0.017
181.6	0.017
181.7	0.017
181.8	0.017
181.9	0.017
182	0.017
182.1	0.017
182.2	0.017
182.3	0.017
182.4	0.017
182.5	0.017
182.6	0.017
182.7	0.017
182.8	0.017
182.9	0.017
183	0.017
183.1	0.017
183.2	0.017
183.3	0.017
183.4	0.017
183.5	0.017
183.6	0.017
183.7	0.017
183.8	0.018
183.9	0.018
184	0.018
184.1	0.018
184.2	0.018
184.3	0.018
184.4	0.018
184.5	0.018
184.6	0.018
184.7	0.018
184.8	0.018
184.9	0.018
185	0.018
185.1	0.018
185.2	0.018
185.3	0.018
185.4	0.018
185.5	0.018
185.6	0.018
185.7	0.018
185.8	0.018
185.9	0.018
186	0.018
186.1	0.018
186.2	0.018
186.3	0.018
186.4	0.018
186.5	0.018
186.6	0.018
186.7	0.018
186.8	0.018
186.9	0.018
187	0.018
187.1	0.018
187.2	0.018
187.3	0.018
187.4	0.018
187.5	0.018
187.6	0.018
187.7	0.018
187.8	0.018
187.9	0.018
188	0.018
188.1	0.018
188.2	0.018
188.3	0.018
188.4	0.018
188.5	0.018
188.6	0.018
188.7	0.018
188.8	0.018
188.9	0.018
189	0.018
189.1	0.018
189.2	0.018
189.3	0.018
189.4	0.018
189.5	0.018
189.6	0.018
189.7	0.018
189.8	0.018
189.9	0.018
190	0.018
190.1	0.018
190.2	0.018
190.3	0.018
190.4	0.018
190.5	0.018
190.6	0.018
190.7	0.018
190.8	0.018
190.9	0.018
191	0.018
191.1	0.018
191.2	0.018
191.3	0.018
191.4	0.018
191.5	0.018
191.6	0.018
191.7	0.018
191.8	0.018
191.9	0.018
192	0.018
192.1	0.018
192.2	0.018
192.3	0.019
192.4	0.019
192.5	0.019
192.6	0.019
192.7	0.019
192.8	0.019
192.9	0.019
193	0.019
193.1	0.019
193.2	0.019
193.3	0.019
193.4	0.019
193.5	0.019
193.6	0.019
193.7	0.019
193.8	0.019
193.9	0.019
194	0.019
194.1	0.019
194.2	0.019
194.3	0.019
194.4	0.019
194.5	0.019
194.6	0.019
194.7	0.019
194.8	0.019
194.9	0.019
195	0.019
195.1	0.019
195.2	0.019
195.3	0.02
195.4	0.02
195.5	0.02
195.6	0.02
195.7	0.02
195.8	0.02
195.9	0.02
196	0.02
196.1	0.02
196.2	0.02
196.3	0.02
196.4	0.02
196.5	0.02
196.6	0.02
196.7	0.02
196.8	0.02
196.9	0.02
197	0.02
197.1	0.02
197.2	0.02
197.3	0.02
197.4	0.02
197.5	0.021
197.6	0.021
197.7	0.021
197.8	0.021
197.9	0.021
198	0.021
198.1	0.021
198.2	0.021
198.3	0.021
198.4	0.021
198.5	0.021
198.6	0.021
198.7	0.021
198.8	0.021
198.9	0.021
199	0.021
199.1	0.021
199.2	0.021
199.3	0.021
199.4	0.021
199.5	0.021
199.6	0.021
199.7	0.021
199.8	0.021
199.9	0.021
200	0.021
[truncated: 14,000 more rows]
