# Supplementary material for: Bayesian inference of kinetic schemes for ion channels by Kalman filtering
Source: eLife journal article supplement (doi:10.7554/elife.62714), 2022-05-04
Supplement: fig4-data1 [file 1_Sim_N_80_Fluor_MW.xlsx]

## Sheet: 16 M
0.1	0
0.2	0
0.3	0
0.4	0
0.5	0
0.6	0
0.7	0
0.8	0
0.9	0
1	0
1.1	0
1.2	0
1.3	0
1.4	0
1.5	0
1.6	0
1.7	0
1.8	0
1.9	0
2	0
2.1	0
2.2	0
2.3	0
2.4	0
2.5	0
2.6	0
2.7	0
2.8	0
2.9	0
3	0
3.1	0
3.2	0
3.3	0
3.4	0
3.5	0
3.6	0
3.7	0
3.8	0
3.9	0
4	0
4.1	0
4.2	0
4.3	0
4.4	0
4.5	0
4.6	0
4.7	0
4.8	0
4.9	0
5	0
5.1	0
5.2	0
5.3	0
5.4	0
5.5	0
5.6	0
5.7	0
5.8	0
5.9	0
6	0
6.1	0
6.2	0
6.3	0
6.4	0
6.5	0
6.6	0
6.7	0
6.8	0
6.9	0
7	0
7.1	0
7.2	0
7.3	0
7.4	0
7.5	0
7.6	0
7.7	0
7.8	0
7.9	0
8	0
8.1	0
8.2	0
8.3	0
8.4	0
8.5	0
8.6	0
8.7	0
8.8	0
8.9	0
9	0
9.1	0
9.2	0
9.3	0
9.4	0
9.5	0
9.6	0
9.7	0
9.8	0
9.9	0
10	0
10.1	0
10.2	0
10.3	0
10.4	0
10.5	0
10.6	0
10.7	0
10.8	0
10.9	0
11	0
11.1	0
11.2	0
11.3	0
11.4	0
11.5	0
11.6	0
11.7	0
11.8	0
11.9	0
12	0
12.1	0
12.2	0
12.3	0
12.4	0
12.5	0
12.6	0
12.7	0
12.8	0
12.9	0
13	0
13.1	0
13.2	0
13.3	0
13.4	0
13.5	0
13.6	0
13.7	0
13.8	0
13.9	0
14	0
14.1	0
14.2	0
14.3	0
14.4	0
14.5	0
14.6	0
14.7	0
14.8	0
14.9	0
15	0
15.1	0
15.2	0
15.3	0
15.4	0
15.5	0
15.6	0
15.7	0
15.8	0
15.9	0
16	0
16.1	0
16.2	0
16.3	0
16.4	0
16.5	0
16.6	0
16.7	0
16.8	0
16.9	0
17	0
17.1	0
17.2	0
17.3	0
17.4	0
17.5	0
17.6	0
17.7	0
17.8	0
17.9	0
18	0
18.1	0
18.2	0
18.3	0
18.4	0
18.5	0
18.6	0
18.7	0
18.8	0
18.9	0
19	0
19.1	0
19.2	0
19.3	0
19.4	0
19.5	0
19.6	0
19.7	0
19.8	0
19.9	0
20	0
20.1	0
20.2	0
20.3	0
20.4	0
20.5	0
20.6	0
20.7	0
20.8	0
20.9	0
21	0
21.1	0
21.2	0
21.3	0
21.4	0
21.5	0
21.6	0
21.7	0
21.8	0
21.9	0
22	0
22.1	0
22.2	0
22.3	0
22.4	0
22.5	0
22.6	0
22.7	0
22.8	0
22.9	0
23	0
23.1	0
23.2	0
23.3	0
23.4	0
23.5	0
23.6	0
23.7	0
23.8	0
23.9	0
24	0
24.1	0
24.2	0
24.3	0
24.4	0
24.5	0
24.6	0
24.7	0
24.8	0
24.9	0
25	0
25.1	0
25.2	0
25.3	0
25.4	0
25.5	0
25.6	0
25.7	0
25.8	0
25.9	0
26	0
26.1	0
26.2	0
26.3	0
26.4	0
26.5	0
26.6	0
26.7	0
26.8	0
26.9	0
27	0
27.1	0
27.2	0
27.3	0
27.4	0
27.5	0
27.6	0
27.7	0
27.8	0
27.9	0
28	0
28.1	0
28.2	0
28.3	0
28.4	0
28.5	0
28.6	0
28.7	0
28.8	0
28.9	0
29	0
29.1	0
29.2	0
29.3	0
29.4	0
29.5	0
29.6	0
29.7	0
29.8	0
29.9	0
30	0
30.1	0
30.2	0
30.3	0
30.4	0
30.5	0
30.6	0
30.7	0
30.8	0
30.9	0
31	0
31.1	0
31.2	0
31.3	0
31.4	0
31.5	0
31.6	0
31.7	0
31.8	0
31.9	0
32	0
32.1	0
32.2	0
32.3	0
32.4	0
32.5	0
32.6	0
32.7	0
32.8	0
32.9	0
33	0
33.1	0
33.2	0
33.3	0
33.4	0
33.5	0
33.6	0
33.7	0
33.8	0
33.9	0
34	0
34.1	0
34.2	0
34.3	0
34.4	0
34.5	0
34.6	0
34.7	0
34.8	0
34.9	0
35	0
35.1	0
35.2	0
35.3	0
35.4	0
35.5	0
35.6	0
35.7	0
35.8	0
35.9	0
36	0
36.1	0
36.2	0
36.3	0
36.4	0
36.5	0
36.6	0
36.7	0
36.8	0
36.9	0
37	0
37.1	0
37.2	0
37.3	0
37.4	0
37.5	0
37.6	0
37.7	0
37.8	0
37.9	0
38	0
38.1	0
38.2	0
38.3	0
38.4	0
38.5	0
38.6	0
38.7	0
38.8	0
38.9	0
39	0
39.1	0
39.2	0
39.3	0
39.4	0
39.5	0
39.6	0
39.7	0
39.8	0
39.9	0
40	0
40.1	0
40.2	0
40.3	0
40.4	0
40.5	0
40.6	0
40.7	0
40.8	0
40.9	0
41	0
41.1	0
41.2	0
41.3	0
41.4	0
41.5	0
41.6	0
41.7	0
41.8	0
41.9	0
42	0
42.1	0
42.2	0
42.3	0
42.4	0
42.5	0
42.6	0
42.7	0
42.8	0
42.9	0
43	0
43.1	0
43.2	0
43.3	0
43.4	0
43.5	0
43.6	0
43.7	0
43.8	0
43.9	0
44	0
44.1	0
44.2	0
44.3	0
44.4	0
44.5	0
44.6	0
44.7	0
44.8	0
44.9	0
45	0
45.1	0
45.2	0
45.3	0
45.4	0
45.5	0
45.6	0
45.7	0
45.8	0
45.9	0
46	0
46.1	0
46.2	0
46.3	0
46.4	0
46.5	0
46.6	0
46.7	0
46.8	0
46.9	0
47	0
47.1	0
47.2	0
47.3	0
47.4	0
47.5	0
47.6	0
47.7	0
47.8	0
47.9	0
48	0
48.1	0
48.2	0
48.3	0
48.4	0
48.5	0
48.6	0
48.7	0
48.8	0
48.9	0
49	0
49.1	0
49.2	0
49.3	0
49.4	0
49.5	0
49.6	0
49.7	0
49.8	0
49.9	0
50	0
50.1	0
50.2	0
50.3	0
50.4	0
50.5	0
50.6	0
50.7	0
50.8	0
50.9	0
51	0
51.1	0
51.2	0
51.3	0
51.4	0
51.5	0
51.6	0
51.7	0
51.8	0
51.9	0
52	0
52.1	0
52.2	0
52.3	0
52.4	0
52.5	0
52.6	0
52.7	0
52.8	0
52.9	0
53	0
53.1	0
53.2	0
53.3	0
53.4	0
53.5	0
53.6	0
53.7	0
53.8	0
53.9	0
54	0
54.1	0
54.2	0
54.3	0
54.4	0
54.5	0
54.6	0
54.7	0
54.8	0
54.9	0
55	0
55.1	0
55.2	0
55.3	0
55.4	0
55.5	0
55.6	0
55.7	0
55.8	0
55.9	0
56	0
56.1	0
56.2	0
56.3	0
56.4	0
56.5	0
56.6	0
56.7	0
56.8	0
56.9	0
57	0
57.1	0
57.2	0
57.3	0
57.4	0
57.5	0
57.6	0
57.7	0
57.8	0
57.9	0
58	0
58.1	0
58.2	0
58.3	0
58.4	0
58.5	0
58.6	0
58.7	0
58.8	0
58.9	0
59	0
59.1	0
59.2	0
59.3	0
59.4	0
59.5	0
59.6	0
59.7	0
59.8	0
59.9	0
60	0
60.1	0
60.2	0
60.3	0
60.4	0
60.5	0
60.6	0
60.7	0
60.8	0
60.9	0
61	0
61.1	0
61.2	0
61.3	0
61.4	0
61.5	0
61.6	0
61.7	0
61.8	0
61.9	0
62	0
62.1	0
62.2	0
62.3	0
62.4	0
62.5	0
62.6	0
62.7	0
62.8	0
62.9	0
63	0
63.1	0
63.2	0
63.3	0
63.4	0
63.5	0
63.6	0
63.7	0
63.8	0
63.9	0
64	0
64.1	0
64.2	0
64.3	0
64.4	0
64.5	0
64.6	0
64.7	0
64.8	0
64.9	0
65	0
65.1	0
65.2	0
65.3	0
65.4	0
65.5	0
65.6	0
65.7	0
65.8	0
65.9	0
66	0
66.1	0
66.2	0
66.3	0
66.4	0
66.5	0
66.6	0
66.7	0
66.8	0
66.9	0
67	0
67.1	0
67.2	0
67.3	0
67.4	0
67.5	0
67.6	0
67.7	0
67.8	0
67.9	0
68	0
68.1	0
68.2	0
68.3	0
68.4	0
68.5	0
68.6	0
68.7	0
68.8	0
68.9	0
69	0
69.1	0
69.2	0
69.3	0
69.4	0
69.5	0
69.6	0
69.7	0
69.8	0
69.9	0
70	0
70.1	0
70.2	0
70.3	0
70.4	0
70.5	0
70.6	0
70.7	0
70.8	0
70.9	0
71	0
71.1	0
71.2	0
71.3	0
71.4	0
71.5	0
71.6	0
71.7	0
71.8	0
71.9	0
72	0
72.1	0
72.2	0
72.3	0
72.4	0
72.5	0
72.6	0
72.7	0
72.8	0
72.9	0
73	0
73.1	0
73.2	0
73.3	0
73.4	0
73.5	0
73.6	0
73.7	0
73.8	0
73.9	0
74	0
74.1	0
74.2	0
74.3	0
74.4	0
74.5	0
74.6	0
74.7	0
74.8	0
74.9	0
75	0
75.1	0
75.2	0
75.3	0
75.4	0
75.5	0
75.6	0
75.7	0
75.8	0
75.9	0
76	0
76.1	0
76.2	0
76.3	0
76.4	0
76.5	0
76.6	0
76.7	0
76.8	0
76.9	0
77	0
77.1	0
77.2	0
77.3	0
77.4	0
77.5	0
77.6	0
77.7	0
77.8	0
77.9	0
78	0
78.1	0
78.2	0
78.3	0
78.4	0
78.5	0
78.6	0
78.7	0
78.8	0
78.9	0
79	0
79.1	0
79.2	0
79.3	0
79.4	0
79.5	0
79.6	0
79.7	0
79.8	0
79.9	0
80	0
80.1	0
80.2	0
80.3	0
80.4	0
80.5	0
80.6	0
80.7	0
80.8	0
80.9	0
81	0
81.1	0
81.2	0
81.3	0
81.4	0
81.5	0
81.6	0
81.7	0
81.8	0
81.9	0
82	0
82.1	0
82.2	0
82.3	0
82.4	0
82.5	0
82.6	0
82.7	0
82.8	0
82.9	0
83	0
83.1	0
83.2	0
83.3	0
83.4	0
83.5	0
83.6	0
83.7	0
83.8	0
83.9	0
84	0
84.1	0
84.2	0
84.3	0
84.4	0
84.5	0
84.6	0
84.7	0
84.8	0
84.9	0
85	0
85.1	0
85.2	0
85.3	0
85.4	0
85.5	0
85.6	0
85.7	0
85.8	0
85.9	0
86	0
86.1	0
86.2	0
86.3	0
86.4	0
86.5	0
86.6	0
86.7	0
86.8	0
86.9	0
87	0
87.1	0
87.2	0
87.3	0
87.4	0
87.5	0
87.6	0
87.7	0
87.8	0
87.9	0
88	0
88.1	0
88.2	0
88.3	0
88.4	0
88.5	0
88.6	0
88.7	0
88.8	0
88.9	0
89	0
89.1	0
89.2	0
89.3	0
89.4	0
89.5	0
89.6	0
89.7	0
89.8	0
89.9	0
90	0
90.1	0
90.2	0
90.3	0
90.4	0
90.5	0
90.6	0
90.7	0
90.8	0
90.9	0
91	0
91.1	0
91.2	0
91.3	0
91.4	0
91.5	0
91.6	0
91.7	0
91.8	0
91.9	0
92	0
92.1	0
92.2	0
92.3	0
92.4	0
92.5	0
92.6	0
92.7	0
92.8	0
92.9	0
93	0
93.1	0
93.2	0
93.3	0
93.4	0
93.5	0
93.6	0
93.7	0
93.8	0
93.9	0
94	0
94.1	0
94.2	0
94.3	0
94.4	0
94.5	0
94.6	0
94.7	0
94.8	0
94.9	0
95	0
95.1	0
95.2	0
95.3	0
95.4	0
95.5	0
95.6	0
95.7	0
95.8	0
95.9	0
96	0
96.1	0
96.2	0
96.3	0
96.4	0
96.5	0
96.6	0
96.7	0
96.8	0
96.9	0
97	0
97.1	0
97.2	0
97.3	0
97.4	0
97.5	0
97.6	0
97.7	0
97.8	0
97.9	0
98	0
98.1	0
98.2	0
98.3	0
98.4	0
98.5	0
98.6	0
98.7	0
98.8	0
98.9	0
99	0
99.1	0
99.2	0
99.3	0
99.4	0
99.5	0
99.6	0
99.7	0
99.8	0
99.9	0
100	0
100.1	0.4875
100.2	0.7125
100.3	0.8125
100.4	0.875
100.5	0.9125
100.6	0.9125
100.7	0.91875
100.8	0.93125
100.9	0.9375
101	0.94375
101.1	0.95625
101.2	0.9375
101.3	0.95
101.4	0.93125
101.5	0.94375
101.6	0.93125
101.7	0.94375
101.8	0.95625
101.9	0.95625
102	0.95625
102.1	0.96875
102.2	0.9625
102.3	0.9625
102.4	0.9625
102.5	0.96875
102.6	0.975
102.7	0.9625
102.8	0.975
102.9	0.9625
103	0.98125
103.1	0.95
103.2	0.95
103.3	0.9625
103.4	0.95625
103.5	0.93125
103.6	0.94375
103.7	0.93125
103.8	0.94375
103.9	0.94375
104	0.95
104.1	0.9625
104.2	0.98125
104.3	0.975
104.4	0.9625
104.5	0.96875
104.6	0.95
104.7	0.9375
104.8	0.94375
104.9	0.95625
105	0.95625
105.1	0.95625
105.2	0.96875
105.3	0.98125
105.4	0.96875
105.5	0.9625
105.6	0.975
105.7	0.9625
105.8	0.96875
105.9	0.975
106	0.96875
106.1	0.975
106.2	0.975
106.3	0.98125
106.4	0.9625
106.5	0.9625
106.6	0.9625
106.7	0.9625
106.8	0.9875
106.9	0.98125
107	0.95
107.1	0.95625
107.2	0.95625
107.3	0.94375
107.4	0.9625
107.5	0.975
107.6	0.96875
107.7	0.98125
107.8	0.96875
107.9	0.96875
108	0.96875
108.1	0.975
108.2	0.9625
108.3	0.96875
108.4	0.95
108.5	0.95625
108.6	0.975
108.7	0.96875
108.8	0.96875
108.9	0.96875
109	0.95625
109.1	0.95
109.2	0.95
109.3	0.95625
109.4	0.95625
109.5	0.9375
109.6	0.95625
109.7	0.95625
109.8	0.95
109.9	0.95
110	0.94375
110.1	0.96875
110.2	0.9625
110.3	0.9625
110.4	0.98125
110.5	0.9875
110.6	0.98125
110.7	0.96875
110.8	0.95625
110.9	0.96875
111	0.94375
111.1	0.95625
111.2	0.96875
111.3	0.975
111.4	0.9625
111.5	0.9625
111.6	0.9625
111.7	0.9625
111.8	0.95
111.9	0.9625
112	0.95625
112.1	0.96875
112.2	0.96875
112.3	0.975
112.4	0.975
112.5	0.98125
112.6	0.9875
112.7	0.98125
112.8	0.9875
112.9	1
113	0.98125
113.1	0.98125
113.2	0.98125
113.3	0.98125
113.4	0.975
113.5	0.975
113.6	0.9875
113.7	0.9875
113.8	0.98125
113.9	0.975
114	0.96875
114.1	0.975
114.2	0.975
114.3	0.96875
114.4	0.98125
114.5	0.99375
114.6	0.98125
114.7	0.9875
114.8	0.9875
114.9	0.98125
115	0.9875
115.1	0.975
115.2	0.9875
115.3	0.98125
115.4	0.96875
115.5	0.98125
115.6	0.9875
115.7	0.975
115.8	0.96875
115.9	0.9875
116	0.98125
116.1	0.96875
116.2	0.99375
116.3	0.9625
116.4	0.975
116.5	0.99375
116.6	0.99375
116.7	0.99375
116.8	0.98125
116.9	0.98125
117	0.99375
117.1	0.9875
117.2	0.96875
117.3	0.96875
117.4	0.96875
117.5	0.96875
117.6	0.975
117.7	0.9625
117.8	0.95
117.9	0.9375
118	0.9375
118.1	0.96875
118.2	0.975
118.3	0.9875
118.4	0.99375
118.5	0.98125
118.6	0.9875
118.7	0.99375
118.8	0.9875
118.9	0.9875
119	0.99375
119.1	0.9875
119.2	0.98125
119.3	0.96875
119.4	0.975
119.5	0.96875
119.6	0.975
119.7	0.9625
119.8	0.9625
119.9	0.96875
120	0.9875
120.1	0.975
120.2	0.98125
120.3	0.975
120.4	0.98125
120.5	0.98125
120.6	0.975
120.7	0.98125
120.8	0.9875
120.9	1
121	0.99375
121.1	0.99375
121.2	0.975
121.3	0.975
121.4	0.96875
121.5	0.95625
121.6	0.9625
121.7	0.975
121.8	0.9875
121.9	0.9875
122	0.975
122.1	0.9875
122.2	0.9875
122.3	0.975
122.4	0.9875
122.5	0.99375
122.6	1
122.7	0.9875
122.8	0.9875
122.9	0.9875
123	0.9875
123.1	0.9625
123.2	0.98125
123.3	0.98125
123.4	0.99375
123.5	0.99375
123.6	0.9875
123.7	0.98125
123.8	0.9875
123.9	0.975
124	0.9875
124.1	0.99375
124.2	0.99375
124.3	0.98125
124.4	0.98125
124.5	0.9875
124.6	0.9875
124.7	0.99375
124.8	0.99375
124.9	0.9875
125	0.9875
125.1	0.9875
125.2	1
125.3	0.9875
125.4	0.975
125.5	0.98125
125.6	0.98125
125.7	0.975
125.8	0.975
125.9	0.9875
126	0.975
126.1	0.9875
126.2	0.98125
126.3	0.98125
126.4	0.9875
126.5	0.98125
126.6	0.99375
126.7	0.9875
126.8	1
126.9	0.99375
127	0.9875
127.1	0.975
127.2	0.96875
127.3	0.98125
127.4	0.98125
127.5	0.9875
127.6	0.96875
127.7	0.975
127.8	0.98125
127.9	0.9875
128	0.99375
128.1	0.9875
128.2	0.9875
128.3	0.98125
128.4	0.9875
128.5	0.98125
128.6	0.98125
128.7	0.9875
128.8	0.99375
128.9	0.9875
129	1
129.1	1
129.2	1
129.3	0.99375
129.4	0.99375
129.5	0.9875
129.6	0.99375
129.7	1
129.8	0.99375
129.9	0.99375
130	1
130.1	0.99375
130.2	0.9875
130.3	0.99375
130.4	0.99375
130.5	0.96875
130.6	0.975
130.7	0.95625
130.8	0.975
130.9	0.975
131	0.96875
131.1	0.98125
131.2	0.98125
131.3	0.98125
131.4	0.9875
131.5	0.99375
131.6	0.9875
131.7	0.96875
131.8	0.98125
131.9	0.98125
132	0.99375
132.1	0.9875
132.2	0.9875
132.3	0.98125
132.4	0.99375
132.5	0.98125
132.6	0.99375
132.7	0.99375
132.8	0.99375
132.9	0.9875
133	0.9875
133.1	0.9875
133.2	0.98125
133.3	0.98125
133.4	0.975
133.5	0.9625
133.6	0.975
133.7	0.98125
133.8	0.975
133.9	0.96875
134	0.975
134.1	0.98125
134.2	0.99375
134.3	0.9875
134.4	0.98125
134.5	0.975
134.6	0.98125
134.7	0.975
134.8	0.96875
134.9	0.975
135	0.98125
135.1	0.975
135.2	0.9875
135.3	0.9875
135.4	0.975
135.5	0.96875
135.6	0.95625
135.7	0.96875
135.8	0.96875
135.9	0.96875
136	0.98125
136.1	0.98125
136.2	0.96875
136.3	0.975
136.4	0.98125
136.5	0.9875
136.6	0.9625
136.7	0.975
136.8	0.9875
136.9	0.9875
137	0.9875
137.1	0.99375
137.2	0.99375
137.3	0.99375
137.4	0.99375
137.5	1
137.6	0.9875
137.7	0.99375
137.8	0.9875
137.9	0.98125
138	0.98125
138.1	0.98125
138.2	0.98125
138.3	0.975
138.4	0.96875
138.5	0.9875
138.6	0.9875
138.7	0.98125
138.8	0.975
138.9	0.9625
139	0.975
139.1	0.9875
139.2	0.98125
139.3	0.9875
139.4	0.98125
139.5	0.975
139.6	0.99375
139.7	0.99375
139.8	1
139.9	0.99375
140	0.99375
140.1	0.98125
140.2	0.98125
140.3	0.99375
140.4	0.9875
140.5	0.96875
140.6	0.98125
140.7	0.9875
140.8	0.9875
140.9	0.98125
141	0.9875
141.1	0.9875
141.2	0.99375
141.3	0.96875
141.4	0.98125
141.5	0.98125
141.6	0.96875
141.7	0.9875
141.8	0.99375
141.9	0.99375
142	1
142.1	1
142.2	0.99375
142.3	0.99375
142.4	1
142.5	0.99375
142.6	0.9875
142.7	0.9875
142.8	1
142.9	0.99375
143	0.9875
143.1	0.9875
143.2	0.9875
143.3	0.99375
143.4	0.9875
143.5	0.975
143.6	0.99375
143.7	0.9875
143.8	1
143.9	1
144	0.99375
144.1	0.9875
144.2	0.98125
144.3	0.98125
144.4	0.99375
144.5	0.99375
144.6	0.99375
144.7	0.9875
144.8	0.975
144.9	0.975
145	0.9875
145.1	0.9875
145.2	0.98125
145.3	0.9875
145.4	0.975
145.5	0.96875
145.6	0.9875
145.7	0.975
145.8	0.99375
145.9	0.99375
146	0.99375
146.1	0.99375
146.2	0.99375
146.3	0.98125
146.4	0.9875
146.5	0.99375
146.6	0.99375
146.7	0.98125
146.8	0.99375
146.9	0.9875
147	0.98125
147.1	0.96875
147.2	0.975
147.3	0.98125
147.4	0.98125
147.5	0.9875
147.6	0.98125
147.7	0.99375
147.8	1
147.9	0.99375
148	0.99375
148.1	0.99375
148.2	0.99375
148.3	1
148.4	1
148.5	1
148.6	0.99375
148.7	0.99375
148.8	0.98125
148.9	0.9875
149	0.99375
149.1	0.98125
149.2	0.96875
149.3	0.9875
149.4	1
149.5	0.9875
149.6	0.975
149.7	1
149.8	0.99375
149.9	0.99375
150	0.99375
150.1	1
150.2	0.9875
150.3	0.9875
150.4	0.9875
150.5	0.99375
150.6	1
150.7	1
150.8	0.975
150.9	0.98125
151	0.98125
151.1	0.975
151.2	0.9875
151.3	0.99375
151.4	0.9875
151.5	1
151.6	0.9875
151.7	0.9875
151.8	0.99375
151.9	0.98125
152	0.9875
152.1	0.99375
152.2	0.98125
152.3	1
152.4	0.98125
152.5	0.9875
152.6	0.98125
152.7	0.9875
152.8	0.98125
152.9	1
153	1
153.1	1
153.2	0.99375
153.3	1
153.4	0.99375
153.5	1
153.6	0.99375
153.7	0.99375
153.8	1
153.9	0.99375
154	0.9875
154.1	0.9875
154.2	1
154.3	1
154.4	0.9875
154.5	0.99375
154.6	0.99375
154.7	0.9875
154.8	0.9875
154.9	0.99375
155	0.9875
155.1	0.99375
155.2	0.98125
155.3	0.98125
155.4	0.9875
155.5	0.975
155.6	0.98125
155.7	0.98125
155.8	0.98125
155.9	0.96875
156	0.9875
156.1	0.9875
156.2	0.9875
156.3	0.9875
156.4	0.99375
156.5	0.9875
156.6	0.98125
156.7	0.975
156.8	0.975
156.9	0.98125
157	0.98125
157.1	0.9875
157.2	0.9875
157.3	0.9875
157.4	0.99375
157.5	0.9875
157.6	0.99375
157.7	0.99375
157.8	0.99375
157.9	0.99375
158	0.99375
158.1	0.99375
158.2	0.99375
158.3	0.99375
158.4	0.9875
158.5	0.975
158.6	0.98125
158.7	0.99375
158.8	0.975
158.9	0.98125
159	0.975
159.1	0.98125
159.2	1
159.3	0.99375
159.4	0.99375
159.5	0.99375
159.6	0.99375
159.7	0.98125
159.8	0.9875
159.9	0.98125
160	0.9875
160.1	0.99375
160.2	0.99375
160.3	0.99375
160.4	0.99375
160.5	0.9875
160.6	0.96875
160.7	0.98125
160.8	0.9875
160.9	0.98125
161	0.9875
161.1	0.98125
161.2	0.98125
161.3	0.98125
161.4	0.98125
161.5	0.98125
161.6	0.98125
161.7	0.9875
161.8	0.9875
161.9	0.9875
162	0.99375
162.1	1
162.2	0.99375
162.3	0.975
162.4	0.99375
162.5	1
162.6	0.9875
162.7	0.99375
162.8	0.99375
162.9	0.99375
163	0.9875
163.1	0.98125
163.2	0.98125
163.3	0.98125
163.4	0.98125
163.5	0.9875
163.6	0.98125
163.7	1
163.8	1
163.9	0.99375
164	1
164.1	1
164.2	1
164.3	1
164.4	1
164.5	0.99375
164.6	0.99375
164.7	1
164.8	0.99375
164.9	0.99375
165	0.9875
165.1	0.98125
165.2	0.9875
165.3	0.99375
165.4	0.99375
165.5	0.9875
165.6	0.99375
165.7	1
165.8	0.9875
165.9	0.99375
166	1
166.1	1
166.2	1
166.3	1
166.4	0.99375
166.5	0.99375
166.6	0.99375
166.7	0.99375
166.8	0.98125
166.9	0.975
167	0.975
167.1	0.99375
167.2	0.99375
167.3	1
167.4	1
167.5	0.99375
167.6	1
167.7	0.99375
167.8	1
167.9	1
168	1
168.1	0.99375
168.2	0.975
168.3	0.98125
168.4	0.98125
168.5	0.9875
168.6	0.99375
168.7	1
168.8	1
168.9	0.99375
169	0.99375
169.1	0.99375
169.2	1
169.3	0.99375
169.4	1
169.5	0.99375
169.6	0.99375
169.7	0.9875
169.8	0.9875
169.9	0.99375
170	0.99375
170.1	0.98125
170.2	0.98125
170.3	0.9875
170.4	1
170.5	0.99375
170.6	1
170.7	0.98125
170.8	0.9875
170.9	0.99375
171	1
171.1	0.99375
171.2	0.99375
171.3	0.98125
171.4	0.98125
171.5	0.98125
171.6	0.975
171.7	0.975
171.8	0.9875
171.9	0.9875
172	0.98125
172.1	0.98125
172.2	0.9875
172.3	0.99375
172.4	0.99375
172.5	0.99375
172.6	0.99375
172.7	1
172.8	0.99375
172.9	0.9875
173	0.98125
173.1	0.98125
173.2	0.98125
173.3	0.9875
173.4	1
173.5	1
173.6	1
173.7	1
173.8	1
173.9	0.99375
174	1
174.1	0.99375
174.2	0.99375
174.3	0.99375
174.4	0.99375
174.5	0.98125
174.6	0.98125
174.7	0.975
174.8	0.975
174.9	0.9875
175	0.99375
175.1	0.99375
175.2	0.9875
175.3	0.98125
175.4	0.975
175.5	0.9875
175.6	1
175.7	1
175.8	0.9875
175.9	0.9875
176	0.98125
176.1	0.9875
176.2	0.98125
176.3	0.99375
176.4	1
176.5	0.99375
176.6	0.99375
176.7	0.9875
176.8	0.9875
176.9	0.99375
177	0.9875
177.1	0.99375
177.2	0.99375
177.3	0.9875
177.4	0.9875
177.5	1
177.6	0.98125
177.7	0.9875
177.8	0.975
177.9	0.98125
178	0.98125
178.1	0.9875
178.2	0.9875
178.3	1
178.4	0.9875
178.5	0.9875
178.6	0.98125
178.7	0.99375
178.8	0.99375
178.9	0.9875
179	0.98125
179.1	0.99375
179.2	0.98125
179.3	0.98125
179.4	0.98125
179.5	0.975
179.6	0.96875
179.7	0.98125
179.8	0.9875
179.9	0.98125
180	0.975
180.1	0.975
180.2	0.9875
180.3	0.99375
180.4	0.99375
180.5	0.98125
180.6	0.9875
180.7	0.99375
180.8	0.9875
180.9	0.98125
181	0.98125
181.1	0.975
181.2	0.98125
181.3	0.98125
181.4	0.975
181.5	0.96875
181.6	0.9875
181.7	0.9875
181.8	0.9875
181.9	0.9875
182	0.975
182.1	0.99375
182.2	0.99375
182.3	0.99375
182.4	1
182.5	1
182.6	1
182.7	1
182.8	0.99375
182.9	0.98125
183	0.98125
183.1	0.9875
183.2	1
183.3	1
183.4	0.99375
183.5	0.99375
183.6	0.99375
183.7	0.9875
183.8	1
183.9	1
184	1
184.1	0.99375
184.2	0.99375
184.3	0.99375
184.4	0.9875
184.5	0.99375
184.6	0.9875
184.7	0.9875
184.8	0.9875
184.9	1
185	1
185.1	0.98125
185.2	0.98125
185.3	0.98125
185.4	0.9875
185.5	0.98125
185.6	0.975
185.7	0.98125
185.8	0.975
185.9	0.98125
186	0.99375
186.1	0.99375
186.2	0.975
186.3	0.9875
186.4	0.9875
186.5	0.9875
186.6	0.99375
186.7	0.99375
186.8	0.98125
186.9	0.98125
187	1
187.1	0.99375
187.2	0.9875
187.3	0.98125
187.4	0.9875
187.5	0.975
187.6	0.975
187.7	0.98125
187.8	0.98125
187.9	0.96875
188	0.98125
188.1	0.9875
188.2	0.99375
188.3	0.9875
188.4	0.9875
188.5	0.9875
188.6	0.9875
188.7	0.98125
188.8	0.98125
188.9	0.975
189	0.975
189.1	0.975
189.2	0.9625
189.3	0.975
189.4	0.9875
189.5	0.9875
189.6	0.9875
189.7	0.9875
189.8	0.98125
189.9	0.9875
190	0.99375
190.1	0.9875
190.2	0.99375
190.3	0.99375
190.4	0.98125
190.5	0.9875
190.6	1
190.7	1
190.8	1
190.9	1
191	0.99375
191.1	0.99375
191.2	0.99375
191.3	0.99375
191.4	0.99375
191.5	0.99375
191.6	0.9875
191.7	0.99375
191.8	1
191.9	0.9875
192	1
192.1	1
192.2	0.99375
192.3	0.99375
192.4	0.99375
192.5	1
192.6	0.99375
192.7	0.99375
192.8	0.99375
192.9	1
193	0.99375
193.1	1
193.2	1
193.3	1
193.4	1
193.5	1
193.6	1
193.7	1
193.8	1
193.9	1
194	1
194.1	1
194.2	1
194.3	1
194.4	1
194.5	1
194.6	1
194.7	1
194.8	1
194.9	0.99375
195	0.98125
195.1	0.98125
195.2	0.9875
195.3	0.99375
195.4	0.9875
195.5	0.9875
195.6	0.99375
195.7	0.99375
195.8	0.99375
195.9	0.9875
196	0.98125
196.1	0.9875
196.2	0.99375
196.3	0.99375
196.4	1
196.5	1
196.6	0.99375
196.7	0.98125
196.8	0.9875
196.9	0.98125
197	0.98125
197.1	0.9875
197.2	0.98125
197.3	0.9875
197.4	0.99375
197.5	0.99375
197.6	0.9875
197.7	0.9875
197.8	0.98125
197.9	0.975
198	0.98125
198.1	0.9875
198.2	0.975
198.3	0.98125
198.4	0.9875
198.5	0.98125
198.6	0.99375
198.7	0.99375
198.8	0.99375
198.9	1
199	1
199.1	0.99375
199.2	0.9875
199.3	0.9875
199.4	0.98125
199.5	0.9875
199.6	0.9875
199.7	0.99375
199.8	1
199.9	0.9875
200	0.9875
[truncated: 14,000 more rows]
