# Supplementary material for: Bayesian inference of kinetic schemes for ion channels by Kalman filtering
Source: eLife journal article supplement (doi:10.7554/elife.62714), 2022-05-04
Supplement: fig4-data1 [file 1_Sim_N_80_Strom_MW.xlsx]

## Sheet: 16 M
0.1	0
0.2	0
0.3	0
0.4	0
0.5	0
0.6	0
0.7	0
0.8	0
0.9	0
1	0
1.1	0
1.2	0
1.3	0
1.4	0
1.5	0
1.6	0
1.7	0
1.8	0
1.9	0
2	0
2.1	0
2.2	0
2.3	0
2.4	0
2.5	0
2.6	0
2.7	0
2.8	0
2.9	0
3	0
3.1	0
3.2	0
3.3	0
3.4	0
3.5	0
3.6	0
3.7	0
3.8	0
3.9	0
4	0
4.1	0
4.2	0
4.3	0
4.4	0
4.5	0
4.6	0
4.7	0
4.8	0
4.9	0
5	0
5.1	0
5.2	0
5.3	0
5.4	0
5.5	0
5.6	0
5.7	0
5.8	0
5.9	0
6	0
6.1	0
6.2	0
6.3	0
6.4	0
6.5	0
6.6	0
6.7	0
6.8	0
6.9	0
7	0
7.1	0
7.2	0
7.3	0
7.4	0
7.5	0
7.6	0
7.7	0
7.8	0
7.9	0
8	0
8.1	0
8.2	0
8.3	0
8.4	0
8.5	0
8.6	0
8.7	0
8.8	0
8.9	0
9	0
9.1	0
9.2	0
9.3	0
9.4	0
9.5	0
9.6	0
9.7	0
9.8	0
9.9	0
10	0
10.1	0
10.2	0
10.3	0
10.4	0
10.5	0
10.6	0
10.7	0
10.8	0
10.9	0
11	0
11.1	0
11.2	0
11.3	0
11.4	0
11.5	0
11.6	0
11.7	0
11.8	0
11.9	0
12	0
12.1	0
12.2	0
12.3	0
12.4	0
12.5	0
12.6	0
12.7	0
12.8	0
12.9	0
13	0
13.1	0
13.2	0
13.3	0
13.4	0
13.5	0
13.6	0
13.7	0
13.8	0
13.9	0
14	0
14.1	0
14.2	0
14.3	0
14.4	0
14.5	0
14.6	0
14.7	0
14.8	0
14.9	0
15	0
15.1	0
15.2	0
15.3	0
15.4	0
15.5	0
15.6	0
15.7	0
15.8	0
15.9	0
16	0
16.1	0
16.2	0
16.3	0
16.4	0
16.5	0
16.6	0
16.7	0
16.8	0
16.9	0
17	0
17.1	0
17.2	0
17.3	0
17.4	0
17.5	0
17.6	0
17.7	0
17.8	0
17.9	0
18	0
18.1	0
18.2	0
18.3	0
18.4	0
18.5	0
18.6	0
18.7	0
18.8	0
18.9	0
19	0
19.1	0
19.2	0
19.3	0
19.4	0
19.5	0
19.6	0
19.7	0
19.8	0
19.9	0
20	0
20.1	0
20.2	0
20.3	0
20.4	0
20.5	0
20.6	0
20.7	0
20.8	0
20.9	0
21	0
21.1	0
21.2	0
21.3	0
21.4	0
21.5	0
21.6	0
21.7	0
21.8	0
21.9	0
22	0
22.1	0
22.2	0
22.3	0
22.4	0
22.5	0
22.6	0
22.7	0
22.8	0
22.9	0
23	0
23.1	0
23.2	0
23.3	0
23.4	0
23.5	0
23.6	0
23.7	0
23.8	0
23.9	0
24	0
24.1	0
24.2	0
24.3	0
24.4	0
24.5	0
24.6	0
24.7	0
24.8	0
24.9	0
25	0
25.1	0
25.2	0
25.3	0
25.4	0
25.5	0
25.6	0
25.7	0
25.8	0
25.9	0
26	0
26.1	0
26.2	0
26.3	0
26.4	0
26.5	0
26.6	0
26.7	0
26.8	0
26.9	0
27	0
27.1	0
27.2	0
27.3	0
27.4	0
27.5	0
27.6	0
27.7	0
27.8	0
27.9	0
28	0
28.1	0
28.2	0
28.3	0
28.4	0
28.5	0
28.6	0
28.7	0
28.8	0
28.9	0
29	0
29.1	0
29.2	0
29.3	0
29.4	0
29.5	0
29.6	0
29.7	0
29.8	0
29.9	0
30	0
30.1	0
30.2	0
30.3	0
30.4	0
30.5	0
30.6	0
30.7	0
30.8	0
30.9	0
31	0
31.1	0
31.2	0
31.3	0
31.4	0
31.5	0
31.6	0
31.7	0
31.8	0
31.9	0
32	0
32.1	0
32.2	0
32.3	0
32.4	0
32.5	0
32.6	0
32.7	0
32.8	0
32.9	0
33	0
33.1	0
33.2	0
33.3	0
33.4	0
33.5	0
33.6	0
33.7	0
33.8	0
33.9	0
34	0
34.1	0
34.2	0
34.3	0
34.4	0
34.5	0
34.6	0
34.7	0
34.8	0
34.9	0
35	0
35.1	0
35.2	0
35.3	0
35.4	0
35.5	0
35.6	0
35.7	0
35.8	0
35.9	0
36	0
36.1	0
36.2	0
36.3	0
36.4	0
36.5	0
36.6	0
36.7	0
36.8	0
36.9	0
37	0
37.1	0
37.2	0
37.3	0
37.4	0
37.5	0
37.6	0
37.7	0
37.8	0
37.9	0
38	0
38.1	0
38.2	0
38.3	0
38.4	0
38.5	0
38.6	0
38.7	0
38.8	0
38.9	0
39	0
39.1	0
39.2	0
39.3	0
39.4	0
39.5	0
39.6	0
39.7	0
39.8	0
39.9	0
40	0
40.1	0
40.2	0
40.3	0
40.4	0
40.5	0
40.6	0
40.7	0
40.8	0
40.9	0
41	0
41.1	0
41.2	0
41.3	0
41.4	0
41.5	0
41.6	0
41.7	0
41.8	0
41.9	0
42	0
42.1	0
42.2	0
42.3	0
42.4	0
42.5	0
42.6	0
42.7	0
42.8	0
42.9	0
43	0
43.1	0
43.2	0
43.3	0
43.4	0
43.5	0
43.6	0
43.7	0
43.8	0
43.9	0
44	0
44.1	0
44.2	0
44.3	0
44.4	0
44.5	0
44.6	0
44.7	0
44.8	0
44.9	0
45	0
45.1	0
45.2	0
45.3	0
45.4	0
45.5	0
45.6	0
45.7	0
45.8	0
45.9	0
46	0
46.1	0
46.2	0
46.3	0
46.4	0
46.5	0
46.6	0
46.7	0
46.8	0
46.9	0
47	0
47.1	0
47.2	0
47.3	0
47.4	0
47.5	0
47.6	0
47.7	0
47.8	0
47.9	0
48	0
48.1	0
48.2	0
48.3	0
48.4	0
48.5	0
48.6	0
48.7	0
48.8	0
48.9	0
49	0
49.1	0
49.2	0
49.3	0
49.4	0
49.5	0
49.6	0
49.7	0
49.8	0
49.9	0
50	0
50.1	0
50.2	0
50.3	0
50.4	0
50.5	0
50.6	0
50.7	0
50.8	0
50.9	0
51	0
51.1	0
51.2	0
51.3	0
51.4	0
51.5	0
51.6	0
51.7	0
51.8	0
51.9	0
52	0
52.1	0
52.2	0
52.3	0
52.4	0
52.5	0
52.6	0
52.7	0
52.8	0
52.9	0
53	0
53.1	0
53.2	0
53.3	0
53.4	0
53.5	0
53.6	0
53.7	0
53.8	0
53.9	0
54	0
54.1	0
54.2	0
54.3	0
54.4	0
54.5	0
54.6	0
54.7	0
54.8	0
54.9	0
55	0
55.1	0
55.2	0
55.3	0
55.4	0
55.5	0
55.6	0
55.7	0
55.8	0
55.9	0
56	0
56.1	0
56.2	0
56.3	0
56.4	0
56.5	0
56.6	0
56.7	0
56.8	0
56.9	0
57	0
57.1	0
57.2	0
57.3	0
57.4	0
57.5	0
57.6	0
57.7	0
57.8	0
57.9	0
58	0
58.1	0
58.2	0
58.3	0
58.4	0
58.5	0
58.6	0
58.7	0
58.8	0
58.9	0
59	0
59.1	0
59.2	0
59.3	0
59.4	0
59.5	0
59.6	0
59.7	0
59.8	0
59.9	0
60	0
60.1	0
60.2	0
60.3	0
60.4	0
60.5	0
60.6	0
60.7	0
60.8	0
60.9	0
61	0
61.1	0
61.2	0
61.3	0
61.4	0
61.5	0
61.6	0
61.7	0
61.8	0
61.9	0
62	0
62.1	0
62.2	0
62.3	0
62.4	0
62.5	0
62.6	0
62.7	0
62.8	0
62.9	0
63	0
63.1	0
63.2	0
63.3	0
63.4	0
63.5	0
63.6	0
63.7	0
63.8	0
63.9	0
64	0
64.1	0
64.2	0
64.3	0
64.4	0
64.5	0
64.6	0
64.7	0
64.8	0
64.9	0
65	0
65.1	0
65.2	0
65.3	0
65.4	0
65.5	0
65.6	0
65.7	0
65.8	0
65.9	0
66	0
66.1	0
66.2	0
66.3	0
66.4	0
66.5	0
66.6	0
66.7	0
66.8	0
66.9	0
67	0
67.1	0
67.2	0
67.3	0
67.4	0
67.5	0
67.6	0
67.7	0
67.8	0
67.9	0
68	0
68.1	0
68.2	0
68.3	0
68.4	0
68.5	0
68.6	0
68.7	0
68.8	0
68.9	0
69	0
69.1	0
69.2	0
69.3	0
69.4	0
69.5	0
69.6	0
69.7	0
69.8	0
69.9	0
70	0
70.1	0
70.2	0
70.3	0
70.4	0
70.5	0
70.6	0
70.7	0
70.8	0
70.9	0
71	0
71.1	0
71.2	0
71.3	0
71.4	0
71.5	0
71.6	0
71.7	0
71.8	0
71.9	0
72	0
72.1	0
72.2	0
72.3	0
72.4	0
72.5	0
72.6	0
72.7	0
72.8	0
72.9	0
73	0
73.1	0
73.2	0
73.3	0
73.4	0
73.5	0
73.6	0
73.7	0
73.8	0
73.9	0
74	0
74.1	0
74.2	0
74.3	0
74.4	0
74.5	0
74.6	0
74.7	0
74.8	0
74.9	0
75	0
75.1	0
75.2	0
75.3	0
75.4	0
75.5	0
75.6	0
75.7	0
75.8	0
75.9	0
76	0
76.1	0
76.2	0
76.3	0
76.4	0
76.5	0
76.6	0
76.7	0
76.8	0
76.9	0
77	0
77.1	0
77.2	0
77.3	0
77.4	0
77.5	0
77.6	0
77.7	0
77.8	0
77.9	0
78	0
78.1	0
78.2	0
78.3	0
78.4	0
78.5	0
78.6	0
78.7	0
78.8	0
78.9	0
79	0
79.1	0
79.2	0
79.3	0
79.4	0
79.5	0
79.6	0
79.7	0
79.8	0
79.9	0
80	0
80.1	0
80.2	0
80.3	0
80.4	0
80.5	0
80.6	0
80.7	0
80.8	0
80.9	0
81	0
81.1	0
81.2	0
81.3	0
81.4	0
81.5	0
81.6	0
81.7	0
81.8	0
81.9	0
82	0
82.1	0
82.2	0
82.3	0
82.4	0
82.5	0
82.6	0
82.7	0
82.8	0
82.9	0
83	0
83.1	0
83.2	0
83.3	0
83.4	0
83.5	0
83.6	0
83.7	0
83.8	0
83.9	0
84	0
84.1	0
84.2	0
84.3	0
84.4	0
84.5	0
84.6	0
84.7	0
84.8	0
84.9	0
85	0
85.1	0
85.2	0
85.3	0
85.4	0
85.5	0
85.6	0
85.7	0
85.8	0
85.9	0
86	0
86.1	0
86.2	0
86.3	0
86.4	0
86.5	0
86.6	0
86.7	0
86.8	0
86.9	0
87	0
87.1	0
87.2	0
87.3	0
87.4	0
87.5	0
87.6	0
87.7	0
87.8	0
87.9	0
88	0
88.1	0
88.2	0
88.3	0
88.4	0
88.5	0
88.6	0
88.7	0
88.8	0
88.9	0
89	0
89.1	0
89.2	0
89.3	0
89.4	0
89.5	0
89.6	0
89.7	0
89.8	0
89.9	0
90	0
90.1	0
90.2	0
90.3	0
90.4	0
90.5	0
90.6	0
90.7	0
90.8	0
90.9	0
91	0
91.1	0
91.2	0
91.3	0
91.4	0
91.5	0
91.6	0
91.7	0
91.8	0
91.9	0
92	0
92.1	0
92.2	0
92.3	0
92.4	0
92.5	0
92.6	0
92.7	0
92.8	0
92.9	0
93	0
93.1	0
93.2	0
93.3	0
93.4	0
93.5	0
93.6	0
93.7	0
93.8	0
93.9	0
94	0
94.1	0
94.2	0
94.3	0
94.4	0
94.5	0
94.6	0
94.7	0
94.8	0
94.9	0
95	0
95.1	0
95.2	0
95.3	0
95.4	0
95.5	0
95.6	0
95.7	0
95.8	0
95.9	0
96	0
96.1	0
96.2	0
96.3	0
96.4	0
96.5	0
96.6	0
96.7	0
96.8	0
96.9	0
97	0
97.1	0
97.2	0
97.3	0
97.4	0
97.5	0
97.6	0
97.7	0
97.8	0
97.9	0
98	0
98.1	0
98.2	0
98.3	0
98.4	0
98.5	0
98.6	0
98.7	0
98.8	0
98.9	0
99	0
99.1	0
99.2	0
99.3	0
99.4	0
99.5	0
99.6	0
99.7	0
99.8	0
99.9	0
100	0
100.1	0
100.2	0
100.3	0
100.4	0.0125
100.5	0.025
100.6	0.0375
100.7	0.0375
100.8	0.0375
100.9	0.05
101	0.05
101.1	0.05
101.2	0.05
101.3	0.05
101.4	0.05
101.5	0.05
101.6	0.0625
101.7	0.0625
101.8	0.0625
101.9	0.0625
102	0.075
102.1	0.075
102.2	0.075
102.3	0.075
102.4	0.075
102.5	0.0875
102.6	0.0875
102.7	0.0875
102.8	0.1
102.9	0.1
103	0.1
103.1	0.1
103.2	0.1125
103.3	0.1125
103.4	0.1125
103.5	0.1125
103.6	0.1125
103.7	0.125
103.8	0.125
103.9	0.15
104	0.1625
104.1	0.175
104.2	0.175
104.3	0.1875
104.4	0.1875
104.5	0.1875
104.6	0.1875
104.7	0.1875
104.8	0.1875
104.9	0.2125
105	0.2125
105.1	0.2125
105.2	0.225
105.3	0.225
105.4	0.225
105.5	0.2375
105.6	0.25
105.7	0.25
105.8	0.25
105.9	0.25
106	0.2625
106.1	0.2625
106.2	0.2625
106.3	0.2625
106.4	0.275
106.5	0.275
106.6	0.275
106.7	0.275
106.8	0.275
106.9	0.275
107	0.275
107.1	0.2875
107.2	0.2875
107.3	0.275
107.4	0.2875
107.5	0.2875
107.6	0.2875
107.7	0.2875
107.8	0.2875
107.9	0.2875
108	0.2875
108.1	0.2875
108.2	0.2875
108.3	0.2875
108.4	0.2875
108.5	0.2875
108.6	0.2875
108.7	0.2875
108.8	0.3
108.9	0.3
109	0.3
109.1	0.3
109.2	0.3125
109.3	0.3125
109.4	0.3125
109.5	0.3125
109.6	0.3125
109.7	0.325
109.8	0.325
109.9	0.325
110	0.325
110.1	0.325
110.2	0.325
110.3	0.325
110.4	0.3375
110.5	0.3375
110.6	0.3375
110.7	0.35
110.8	0.3625
110.9	0.375
111	0.375
111.1	0.375
111.2	0.375
111.3	0.375
111.4	0.4125
111.5	0.4125
111.6	0.4125
111.7	0.4125
111.8	0.4125
111.9	0.425
112	0.425
112.1	0.425
112.2	0.425
112.3	0.425
112.4	0.425
112.5	0.425
112.6	0.425
112.7	0.425
112.8	0.4375
112.9	0.4375
113	0.4375
113.1	0.4375
113.2	0.45
113.3	0.45
113.4	0.45
113.5	0.45
113.6	0.45
113.7	0.45
113.8	0.45
113.9	0.45
114	0.45
114.1	0.45
114.2	0.45
114.3	0.45
114.4	0.45
114.5	0.45
114.6	0.45
114.7	0.45
114.8	0.45
114.9	0.45
115	0.45
115.1	0.45
115.2	0.4625
115.3	0.4625
115.4	0.4625
115.5	0.4625
115.6	0.4625
115.7	0.4625
115.8	0.4625
115.9	0.4625
116	0.4625
116.1	0.4625
116.2	0.4625
116.3	0.4625
116.4	0.4625
116.5	0.4625
116.6	0.4625
116.7	0.4625
116.8	0.4625
116.9	0.4625
117	0.4625
117.1	0.4625
117.2	0.475
117.3	0.475
117.4	0.475
117.5	0.475
117.6	0.475
117.7	0.475
117.8	0.475
117.9	0.4875
118	0.4875
118.1	0.4875
118.2	0.4875
118.3	0.4875
118.4	0.4875
118.5	0.5
118.6	0.5125
118.7	0.5125
118.8	0.525
118.9	0.525
119	0.525
119.1	0.525
119.2	0.525
119.3	0.525
119.4	0.525
119.5	0.5375
119.6	0.5375
119.7	0.5375
119.8	0.5375
119.9	0.5375
120	0.5375
120.1	0.5375
120.2	0.5375
120.3	0.5375
120.4	0.5375
120.5	0.55
120.6	0.5375
120.7	0.55
120.8	0.55
120.9	0.55
121	0.55
121.1	0.55
121.2	0.55
121.3	0.55
121.4	0.55
121.5	0.55
121.6	0.55
121.7	0.55
121.8	0.55
121.9	0.55
122	0.55
122.1	0.55
122.2	0.5625
122.3	0.5625
122.4	0.5625
122.5	0.5625
122.6	0.5625
122.7	0.5625
122.8	0.5625
122.9	0.5625
123	0.5625
123.1	0.5625
123.2	0.5625
123.3	0.5625
123.4	0.5625
123.5	0.5625
123.6	0.5625
123.7	0.5625
123.8	0.5625
123.9	0.5625
124	0.575
124.1	0.575
124.2	0.575
124.3	0.575
124.4	0.575
124.5	0.575
124.6	0.575
124.7	0.575
124.8	0.575
124.9	0.575
125	0.5625
125.1	0.5625
125.2	0.5625
125.3	0.5625
125.4	0.575
125.5	0.575
125.6	0.575
125.7	0.575
125.8	0.575
125.9	0.575
126	0.5875
126.1	0.5875
126.2	0.5875
126.3	0.5875
126.4	0.5875
126.5	0.5875
126.6	0.6
126.7	0.6125
126.8	0.6125
126.9	0.6125
127	0.625
127.1	0.625
127.2	0.625
127.3	0.625
127.4	0.625
127.5	0.625
127.6	0.625
127.7	0.6375
127.8	0.6375
127.9	0.6375
128	0.6375
128.1	0.6375
128.2	0.6375
128.3	0.6375
128.4	0.65
128.5	0.65
128.6	0.6625
128.7	0.6625
128.8	0.675
128.9	0.675
129	0.675
129.1	0.675
129.2	0.675
129.3	0.675
129.4	0.675
129.5	0.675
129.6	0.675
129.7	0.675
129.8	0.675
129.9	0.675
130	0.675
130.1	0.675
130.2	0.675
130.3	0.675
130.4	0.675
130.5	0.6875
130.6	0.6875
130.7	0.675
130.8	0.675
130.9	0.675
131	0.675
131.1	0.675
131.2	0.675
131.3	0.675
131.4	0.675
131.5	0.675
131.6	0.675
131.7	0.675
131.8	0.675
131.9	0.675
132	0.6625
132.1	0.6625
132.2	0.6625
132.3	0.675
132.4	0.675
132.5	0.675
132.6	0.675
132.7	0.675
132.8	0.675
132.9	0.675
133	0.675
133.1	0.675
133.2	0.675
133.3	0.675
133.4	0.675
133.5	0.675
133.6	0.675
133.7	0.675
133.8	0.675
133.9	0.675
134	0.675
134.1	0.675
134.2	0.675
134.3	0.675
134.4	0.675
134.5	0.675
134.6	0.675
134.7	0.675
134.8	0.6625
134.9	0.6625
135	0.6625
135.1	0.6625
135.2	0.6625
135.3	0.6625
135.4	0.6625
135.5	0.6625
135.6	0.6625
135.7	0.6625
135.8	0.6625
135.9	0.6625
136	0.6625
136.1	0.6625
136.2	0.6625
136.3	0.6625
136.4	0.6625
136.5	0.6625
136.6	0.6625
136.7	0.6625
136.8	0.6625
136.9	0.6625
137	0.6625
137.1	0.6625
137.2	0.6625
137.3	0.6625
137.4	0.6625
137.5	0.6625
137.6	0.6625
137.7	0.6625
137.8	0.6625
137.9	0.675
138	0.6875
138.1	0.6875
138.2	0.6875
138.3	0.6875
138.4	0.6875
138.5	0.6875
138.6	0.6875
138.7	0.6875
138.8	0.6875
138.9	0.6875
139	0.6875
139.1	0.675
139.2	0.675
139.3	0.675
139.4	0.675
139.5	0.675
139.6	0.675
139.7	0.675
139.8	0.675
139.9	0.6875
140	0.7
140.1	0.7
140.2	0.7
140.3	0.7
140.4	0.7
140.5	0.7
140.6	0.7
140.7	0.7
140.8	0.7125
140.9	0.7125
141	0.725
141.1	0.725
141.2	0.725
141.3	0.725
141.4	0.725
141.5	0.725
141.6	0.725
141.7	0.725
141.8	0.725
141.9	0.725
142	0.725
142.1	0.725
142.2	0.725
142.3	0.725
142.4	0.725
142.5	0.725
142.6	0.725
142.7	0.725
142.8	0.7375
142.9	0.7375
143	0.7375
143.1	0.7375
143.2	0.7375
143.3	0.7375
143.4	0.7375
143.5	0.7375
143.6	0.7375
143.7	0.7375
143.8	0.725
143.9	0.725
144	0.725
144.1	0.725
144.2	0.725
144.3	0.725
144.4	0.725
144.5	0.725
144.6	0.725
144.7	0.725
144.8	0.725
144.9	0.725
145	0.7125
145.1	0.7125
145.2	0.725
145.3	0.725
145.4	0.725
145.5	0.7375
145.6	0.7375
145.7	0.75
145.8	0.75
145.9	0.75
146	0.7625
146.1	0.7625
146.2	0.7625
146.3	0.7625
146.4	0.7625
146.5	0.7625
146.6	0.775
146.7	0.775
146.8	0.7625
146.9	0.7625
147	0.7625
147.1	0.7625
147.2	0.7625
147.3	0.7625
147.4	0.7625
147.5	0.7625
147.6	0.7625
147.7	0.7625
147.8	0.7625
147.9	0.7625
148	0.775
148.1	0.775
148.2	0.775
148.3	0.775
148.4	0.775
148.5	0.775
148.6	0.7875
148.7	0.7875
148.8	0.775
148.9	0.775
149	0.775
149.1	0.775
149.2	0.775
149.3	0.7625
149.4	0.7625
149.5	0.75
149.6	0.75
149.7	0.75
149.8	0.75
149.9	0.75
150	0.75
150.1	0.75
150.2	0.75
150.3	0.75
150.4	0.75
150.5	0.75
150.6	0.75
150.7	0.75
150.8	0.75
150.9	0.75
151	0.75
151.1	0.75
151.2	0.75
151.3	0.75
151.4	0.75
151.5	0.75
151.6	0.75
151.7	0.75
151.8	0.7625
151.9	0.7625
152	0.7625
152.1	0.7625
152.2	0.775
152.3	0.7875
152.4	0.7875
152.5	0.7875
152.6	0.7875
152.7	0.7875
152.8	0.7875
152.9	0.7875
153	0.7875
153.1	0.7875
153.2	0.7875
153.3	0.7875
153.4	0.7875
153.5	0.7875
153.6	0.7875
153.7	0.7875
153.8	0.7875
153.9	0.7875
154	0.7875
154.1	0.7875
154.2	0.7875
154.3	0.8
154.4	0.8125
154.5	0.8125
154.6	0.8125
154.7	0.8125
154.8	0.8125
154.9	0.8125
155	0.8
155.1	0.8
155.2	0.8
155.3	0.8
155.4	0.8
155.5	0.8
155.6	0.8
155.7	0.8
155.8	0.8
155.9	0.8
156	0.775
156.1	0.775
156.2	0.775
156.3	0.775
156.4	0.775
156.5	0.775
156.6	0.7625
156.7	0.7625
156.8	0.7625
156.9	0.7625
157	0.7625
157.1	0.7625
157.2	0.7625
157.3	0.7625
157.4	0.7625
157.5	0.7625
157.6	0.7625
157.7	0.7625
157.8	0.7625
157.9	0.7625
158	0.7625
158.1	0.775
158.2	0.775
158.3	0.7625
158.4	0.7625
158.5	0.7625
158.6	0.7625
158.7	0.75
158.8	0.75
158.9	0.7625
159	0.7625
159.1	0.7625
159.2	0.7625
159.3	0.7625
159.4	0.7625
159.5	0.775
159.6	0.775
159.7	0.775
159.8	0.775
159.9	0.775
160	0.775
160.1	0.775
160.2	0.775
160.3	0.775
160.4	0.775
160.5	0.775
160.6	0.775
160.7	0.775
160.8	0.7875
160.9	0.7875
161	0.7875
161.1	0.7875
161.2	0.7875
161.3	0.7875
161.4	0.7875
161.5	0.7875
161.6	0.7875
161.7	0.7875
161.8	0.7875
161.9	0.8
162	0.8
162.1	0.8
162.2	0.8
162.3	0.8
162.4	0.8
162.5	0.8
162.6	0.8
162.7	0.8
162.8	0.8
162.9	0.8
163	0.8
163.1	0.8
163.2	0.8
163.3	0.8
163.4	0.8
163.5	0.8
163.6	0.8
163.7	0.8
163.8	0.8
163.9	0.8125
164	0.8125
164.1	0.8
164.2	0.8
164.3	0.8125
164.4	0.8125
164.5	0.825
164.6	0.825
164.7	0.825
164.8	0.825
164.9	0.825
165	0.825
165.1	0.825
165.2	0.8125
165.3	0.8125
165.4	0.8125
165.5	0.8125
165.6	0.8125
165.7	0.8125
165.8	0.8125
165.9	0.8125
166	0.8125
166.1	0.8125
166.2	0.8125
166.3	0.8125
166.4	0.8125
166.5	0.8125
166.6	0.8125
166.7	0.8125
166.8	0.825
166.9	0.825
167	0.8375
167.1	0.8375
167.2	0.8375
167.3	0.8375
167.4	0.8375
167.5	0.8375
167.6	0.8375
167.7	0.8375
167.8	0.8375
167.9	0.8375
168	0.8375
168.1	0.8375
168.2	0.8375
168.3	0.8375
168.4	0.8375
168.5	0.8375
168.6	0.825
168.7	0.825
168.8	0.825
168.9	0.825
169	0.825
169.1	0.825
169.2	0.8125
169.3	0.8125
169.4	0.8125
169.5	0.8
169.6	0.8
169.7	0.8
169.8	0.8
169.9	0.7875
170	0.7875
170.1	0.7875
170.2	0.8
170.3	0.8
170.4	0.8125
170.5	0.8
170.6	0.8
170.7	0.8
170.8	0.8
170.9	0.8
171	0.8
171.1	0.8
171.2	0.8
171.3	0.8
171.4	0.8
171.5	0.8
171.6	0.8
171.7	0.8
171.8	0.8
171.9	0.8
172	0.8
172.1	0.8
172.2	0.8
172.3	0.8
172.4	0.7875
172.5	0.7875
172.6	0.775
172.7	0.775
172.8	0.775
172.9	0.775
173	0.775
173.1	0.775
173.2	0.775
173.3	0.775
173.4	0.775
173.5	0.775
173.6	0.7875
173.7	0.7875
173.8	0.7875
173.9	0.7875
174	0.7875
174.1	0.7875
174.2	0.7875
174.3	0.7875
174.4	0.7875
174.5	0.7875
174.6	0.7875
174.7	0.7875
174.8	0.7875
174.9	0.7875
175	0.7875
175.1	0.7875
175.2	0.7875
175.3	0.7875
175.4	0.7875
175.5	0.7875
175.6	0.7875
175.7	0.7875
175.8	0.7875
175.9	0.775
176	0.775
176.1	0.775
176.2	0.775
176.3	0.775
176.4	0.775
176.5	0.7625
176.6	0.7625
176.7	0.7625
176.8	0.7625
176.9	0.7625
177	0.7625
177.1	0.75
177.2	0.75
177.3	0.75
177.4	0.75
177.5	0.7625
177.6	0.7625
177.7	0.7625
177.8	0.7625
177.9	0.7625
178	0.7625
178.1	0.7625
178.2	0.7625
178.3	0.7625
178.4	0.7625
178.5	0.7625
178.6	0.7625
178.7	0.7625
178.8	0.7625
178.9	0.7625
179	0.7625
179.1	0.7625
179.2	0.75
179.3	0.75
179.4	0.75
179.5	0.75
179.6	0.75
179.7	0.75
179.8	0.75
179.9	0.75
180	0.75
180.1	0.75
180.2	0.75
180.3	0.7625
180.4	0.7625
180.5	0.7625
180.6	0.7625
180.7	0.7625
180.8	0.7625
180.9	0.7625
181	0.7625
181.1	0.75
181.2	0.7625
181.3	0.7625
181.4	0.7625
181.5	0.7625
181.6	0.7625
181.7	0.775
181.8	0.775
181.9	0.775
182	0.775
182.1	0.775
182.2	0.775
182.3	0.775
182.4	0.775
182.5	0.775
182.6	0.775
182.7	0.775
182.8	0.7875
182.9	0.7875
183	0.7875
183.1	0.7875
183.2	0.7875
183.3	0.7875
183.4	0.7875
183.5	0.7875
183.6	0.7875
183.7	0.7875
183.8	0.7875
183.9	0.7875
184	0.7875
184.1	0.7875
184.2	0.7625
184.3	0.7625
184.4	0.7625
184.5	0.7625
184.6	0.7625
184.7	0.7625
184.8	0.7625
184.9	0.7625
185	0.7625
185.1	0.7625
185.2	0.7625
185.3	0.7625
185.4	0.7625
185.5	0.7625
185.6	0.7625
185.7	0.7625
185.8	0.7625
185.9	0.7625
186	0.7625
186.1	0.7625
186.2	0.7625
186.3	0.7625
186.4	0.7625
186.5	0.775
186.6	0.775
186.7	0.775
186.8	0.775
186.9	0.7625
187	0.7625
187.1	0.7625
187.2	0.7625
187.3	0.7625
187.4	0.7625
187.5	0.7625
187.6	0.7625
187.7	0.7625
187.8	0.7625
187.9	0.7625
188	0.7625
188.1	0.7625
188.2	0.7625
188.3	0.7625
188.4	0.7625
188.5	0.7625
188.6	0.7625
188.7	0.7625
188.8	0.7625
188.9	0.7625
189	0.7625
189.1	0.7625
189.2	0.7625
189.3	0.7625
189.4	0.7625
189.5	0.7625
189.6	0.7625
189.7	0.775
189.8	0.775
189.9	0.775
190	0.775
190.1	0.775
190.2	0.775
190.3	0.775
190.4	0.775
190.5	0.775
190.6	0.775
190.7	0.775
190.8	0.775
190.9	0.775
191	0.775
191.1	0.775
191.2	0.7625
191.3	0.7625
191.4	0.7625
191.5	0.7625
191.6	0.7625
191.7	0.7625
191.8	0.7625
191.9	0.7625
192	0.775
192.1	0.775
192.2	0.7875
192.3	0.7875
192.4	0.7875
192.5	0.7875
192.6	0.7875
192.7	0.7875
192.8	0.7875
192.9	0.7875
193	0.7875
193.1	0.7875
193.2	0.8
193.3	0.8
193.4	0.8
193.5	0.8
193.6	0.7875
193.7	0.7875
193.8	0.7875
193.9	0.775
194	0.775
194.1	0.7875
194.2	0.7875
194.3	0.7875
194.4	0.7875
194.5	0.7875
194.6	0.7875
194.7	0.8
194.8	0.8
194.9	0.8
195	0.8
195.1	0.8
195.2	0.8
195.3	0.8
195.4	0.8
195.5	0.7875
195.6	0.7875
195.7	0.7875
195.8	0.7875
195.9	0.7875
196	0.7875
196.1	0.7875
196.2	0.7875
196.3	0.7875
196.4	0.7875
196.5	0.7875
196.6	0.7875
196.7	0.7875
196.8	0.7875
196.9	0.8
197	0.8
197.1	0.8
197.2	0.8
197.3	0.8
197.4	0.8
197.5	0.8
197.6	0.8
197.7	0.8
197.8	0.8
197.9	0.8
198	0.8
198.1	0.8
198.2	0.8
198.3	0.8
198.4	0.8
198.5	0.8
198.6	0.8
198.7	0.8
198.8	0.7875
198.9	0.7875
199	0.7875
199.1	0.775
199.2	0.775
199.3	0.775
199.4	0.775
199.5	0.775
199.6	0.7875
199.7	0.7875
199.8	0.7875
199.9	0.7875
200	0.7875
[truncated: 14,000 more rows]
