# Supplementary material for: Bayesian inference of kinetic schemes for ion channels by Kalman filtering
Source: eLife journal article supplement (doi:10.7554/elife.62714), 2022-05-04
Supplement: fig4-data1 [file 1_Sim_N_100_Fluor_MW.xlsx]

## Sheet: Tabelle1
0.1	0
0.2	0
0.3	0
0.4	0
0.5	0
0.6	0
0.7	0
0.8	0
0.9	0
1	0
1.1	0
1.2	0
1.3	0
1.4	0
1.5	0
1.6	0
1.7	0
1.8	0
1.9	0
2	0
2.1	0
2.2	0
2.3	0
2.4	0
2.5	0
2.6	0
2.7	0
2.8	0
2.9	0
3	0
3.1	0
3.2	0
3.3	0
3.4	0
3.5	0
3.6	0
3.7	0
3.8	0
3.9	0
4	0
4.1	0
4.2	0
4.3	0
4.4	0
4.5	0
4.6	0
4.7	0
4.8	0
4.9	0
5	0
5.1	0
5.2	0
5.3	0
5.4	0
5.5	0
5.6	0
5.7	0
5.8	0
5.9	0
6	0
6.1	0
6.2	0
6.3	0
6.4	0
6.5	0
6.6	0
6.7	0
6.8	0
6.9	0
7	0
7.1	0
7.2	0
7.3	0
7.4	0
7.5	0
7.6	0
7.7	0
7.8	0
7.9	0
8	0
8.1	0
8.2	0
8.3	0
8.4	0
8.5	0
8.6	0
8.7	0
8.8	0
8.9	0
9	0
9.1	0
9.2	0
9.3	0
9.4	0
9.5	0
9.6	0
9.7	0
9.8	0
9.9	0
10	0
10.1	0
10.2	0
10.3	0
10.4	0
10.5	0
10.6	0
10.7	0
10.8	0
10.9	0
11	0
11.1	0
11.2	0
11.3	0
11.4	0
11.5	0
11.6	0
11.7	0
11.8	0
11.9	0
12	0
12.1	0
12.2	0
12.3	0
12.4	0
12.5	0
12.6	0
12.7	0
12.8	0
12.9	0
13	0
13.1	0
13.2	0
13.3	0
13.4	0
13.5	0
13.6	0
13.7	0
13.8	0
13.9	0
14	0
14.1	0
14.2	0
14.3	0
14.4	0
14.5	0
14.6	0
14.7	0
14.8	0
14.9	0
15	0
15.1	0
15.2	0
15.3	0
15.4	0
15.5	0
15.6	0
15.7	0
15.8	0
15.9	0
16	0
16.1	0
16.2	0
16.3	0
16.4	0
16.5	0
16.6	0
16.7	0
16.8	0
16.9	0
17	0
17.1	0
17.2	0
17.3	0
17.4	0
17.5	0
17.6	0
17.7	0
17.8	0
17.9	0
18	0
18.1	0
18.2	0
18.3	0
18.4	0
18.5	0
18.6	0
18.7	0
18.8	0
18.9	0
19	0
19.1	0
19.2	0
19.3	0
19.4	0
19.5	0
19.6	0
19.7	0
19.8	0
19.9	0
20	0
20.1	0
20.2	0
20.3	0
20.4	0
20.5	0
20.6	0
20.7	0
20.8	0
20.9	0
21	0
21.1	0
21.2	0
21.3	0
21.4	0
21.5	0
21.6	0
21.7	0
21.8	0
21.9	0
22	0
22.1	0
22.2	0
22.3	0
22.4	0
22.5	0
22.6	0
22.7	0
22.8	0
22.9	0
23	0
23.1	0
23.2	0
23.3	0
23.4	0
23.5	0
23.6	0
23.7	0
23.8	0
23.9	0
24	0
24.1	0
24.2	0
24.3	0
24.4	0
24.5	0
24.6	0
24.7	0
24.8	0
24.9	0
25	0
25.1	0
25.2	0
25.3	0
25.4	0
25.5	0
25.6	0
25.7	0
25.8	0
25.9	0
26	0
26.1	0
26.2	0
26.3	0
26.4	0
26.5	0
26.6	0
26.7	0
26.8	0
26.9	0
27	0
27.1	0
27.2	0
27.3	0
27.4	0
27.5	0
27.6	0
27.7	0
27.8	0
27.9	0
28	0
28.1	0
28.2	0
28.3	0
28.4	0
28.5	0
28.6	0
28.7	0
28.8	0
28.9	0
29	0
29.1	0
29.2	0
29.3	0
29.4	0
29.5	0
29.6	0
29.7	0
29.8	0
29.9	0
30	0
30.1	0
30.2	0
30.3	0
30.4	0
30.5	0
30.6	0
30.7	0
30.8	0
30.9	0
31	0
31.1	0
31.2	0
31.3	0
31.4	0
31.5	0
31.6	0
31.7	0
31.8	0
31.9	0
32	0
32.1	0
32.2	0
32.3	0
32.4	0
32.5	0
32.6	0
32.7	0
32.8	0
32.9	0
33	0
33.1	0
33.2	0
33.3	0
33.4	0
33.5	0
33.6	0
33.7	0
33.8	0
33.9	0
34	0
34.1	0
34.2	0
34.3	0
34.4	0
34.5	0
34.6	0
34.7	0
34.8	0
34.9	0
35	0
35.1	0
35.2	0
35.3	0
35.4	0
35.5	0
35.6	0
35.7	0
35.8	0
35.9	0
36	0
36.1	0
36.2	0
36.3	0
36.4	0
36.5	0
36.6	0
36.7	0
36.8	0
36.9	0
37	0
37.1	0
37.2	0
37.3	0
37.4	0
37.5	0
37.6	0
37.7	0
37.8	0
37.9	0
38	0
38.1	0
38.2	0
38.3	0
38.4	0
38.5	0
38.6	0
38.7	0
38.8	0
38.9	0
39	0
39.1	0
39.2	0
39.3	0
39.4	0
39.5	0
39.6	0
39.7	0
39.8	0
39.9	0
40	0
40.1	0
40.2	0
40.3	0
40.4	0
40.5	0
40.6	0
40.7	0
40.8	0
40.9	0
41	0
41.1	0
41.2	0
41.3	0
41.4	0
41.5	0
41.6	0
41.7	0
41.8	0
41.9	0
42	0
42.1	0
42.2	0
42.3	0
42.4	0
42.5	0
42.6	0
42.7	0
42.8	0
42.9	0
43	0
43.1	0
43.2	0
43.3	0
43.4	0
43.5	0
43.6	0
43.7	0
43.8	0
43.9	0
44	0
44.1	0
44.2	0
44.3	0
44.4	0
44.5	0
44.6	0
44.7	0
44.8	0
44.9	0
45	0
45.1	0
45.2	0
45.3	0
45.4	0
45.5	0
45.6	0
45.7	0
45.8	0
45.9	0
46	0
46.1	0
46.2	0
46.3	0
46.4	0
46.5	0
46.6	0
46.7	0
46.8	0
46.9	0
47	0
47.1	0
47.2	0
47.3	0
47.4	0
47.5	0
47.6	0
47.7	0
47.8	0
47.9	0
48	0
48.1	0
48.2	0
48.3	0
48.4	0
48.5	0
48.6	0
48.7	0
48.8	0
48.9	0
49	0
49.1	0
49.2	0
49.3	0
49.4	0
49.5	0
49.6	0
49.7	0
49.8	0
49.9	0
50	0
50.1	0
50.2	0
50.3	0
50.4	0
50.5	0
50.6	0
50.7	0
50.8	0
50.9	0
51	0
51.1	0
51.2	0
51.3	0
51.4	0
51.5	0
51.6	0
51.7	0
51.8	0
51.9	0
52	0
52.1	0
52.2	0
52.3	0
52.4	0
52.5	0
52.6	0
52.7	0
52.8	0
52.9	0
53	0
53.1	0
53.2	0
53.3	0
53.4	0
53.5	0
53.6	0
53.7	0
53.8	0
53.9	0
54	0
54.1	0
54.2	0
54.3	0
54.4	0
54.5	0
54.6	0
54.7	0
54.8	0
54.9	0
55	0
55.1	0
55.2	0
55.3	0
55.4	0
55.5	0
55.6	0
55.7	0
55.8	0
55.9	0
56	0
56.1	0
56.2	0
56.3	0
56.4	0
56.5	0
56.6	0
56.7	0
56.8	0
56.9	0
57	0
57.1	0
57.2	0
57.3	0
57.4	0
57.5	0
57.6	0
57.7	0
57.8	0
57.9	0
58	0
58.1	0
58.2	0
58.3	0
58.4	0
58.5	0
58.6	0
58.7	0
58.8	0
58.9	0
59	0
59.1	0
59.2	0
59.3	0
59.4	0
59.5	0
59.6	0
59.7	0
59.8	0
59.9	0
60	0
60.1	0
60.2	0
60.3	0
60.4	0
60.5	0
60.6	0
60.7	0
60.8	0
60.9	0
61	0
61.1	0
61.2	0
61.3	0
61.4	0
61.5	0
61.6	0
61.7	0
61.8	0
61.9	0
62	0
62.1	0
62.2	0
62.3	0
62.4	0
62.5	0
62.6	0
62.7	0
62.8	0
62.9	0
63	0
63.1	0
63.2	0
63.3	0
63.4	0
63.5	0
63.6	0
63.7	0
63.8	0
63.9	0
64	0
64.1	0
64.2	0
64.3	0
64.4	0
64.5	0
64.6	0
64.7	0
64.8	0
64.9	0
65	0
65.1	0
65.2	0
65.3	0
65.4	0
65.5	0
65.6	0
65.7	0
65.8	0
65.9	0
66	0
66.1	0
66.2	0
66.3	0
66.4	0
66.5	0
66.6	0
66.7	0
66.8	0
66.9	0
67	0
67.1	0
67.2	0
67.3	0
67.4	0
67.5	0
67.6	0
67.7	0
67.8	0
67.9	0
68	0
68.1	0
68.2	0
68.3	0
68.4	0
68.5	0
68.6	0
68.7	0
68.8	0
68.9	0
69	0
69.1	0
69.2	0
69.3	0
69.4	0
69.5	0
69.6	0
69.7	0
69.8	0
69.9	0
70	0
70.1	0
70.2	0
70.3	0
70.4	0
70.5	0
70.6	0
70.7	0
70.8	0
70.9	0
71	0
71.1	0
71.2	0
71.3	0
71.4	0
71.5	0
71.6	0
71.7	0
71.8	0
71.9	0
72	0
72.1	0
72.2	0
72.3	0
72.4	0
72.5	0
72.6	0
72.7	0
72.8	0
72.9	0
73	0
73.1	0
73.2	0
73.3	0
73.4	0
73.5	0
73.6	0
73.7	0
73.8	0
73.9	0
74	0
74.1	0
74.2	0
74.3	0
74.4	0
74.5	0
74.6	0
74.7	0
74.8	0
74.9	0
75	0
75.1	0
75.2	0
75.3	0
75.4	0
75.5	0
75.6	0
75.7	0
75.8	0
75.9	0
76	0
76.1	0
76.2	0
76.3	0
76.4	0
76.5	0
76.6	0
76.7	0
76.8	0
76.9	0
77	0
77.1	0
77.2	0
77.3	0
77.4	0
77.5	0
77.6	0
77.7	0
77.8	0
77.9	0
78	0
78.1	0
78.2	0
78.3	0
78.4	0
78.5	0
78.6	0
78.7	0
78.8	0
78.9	0
79	0
79.1	0
79.2	0
79.3	0
79.4	0
79.5	0
79.6	0
79.7	0
79.8	0
79.9	0
80	0
80.1	0
80.2	0
80.3	0
80.4	0
80.5	0
80.6	0
80.7	0
80.8	0
80.9	0
81	0
81.1	0
81.2	0
81.3	0
81.4	0
81.5	0
81.6	0
81.7	0
81.8	0
81.9	0
82	0
82.1	0
82.2	0
82.3	0
82.4	0
82.5	0
82.6	0
82.7	0
82.8	0
82.9	0
83	0
83.1	0
83.2	0
83.3	0
83.4	0
83.5	0
83.6	0
83.7	0
83.8	0
83.9	0
84	0
84.1	0
84.2	0
84.3	0
84.4	0
84.5	0
84.6	0
84.7	0
84.8	0
84.9	0
85	0
85.1	0
85.2	0
85.3	0
85.4	0
85.5	0
85.6	0
85.7	0
85.8	0
85.9	0
86	0
86.1	0
86.2	0
86.3	0
86.4	0
86.5	0
86.6	0
86.7	0
86.8	0
86.9	0
87	0
87.1	0
87.2	0
87.3	0
87.4	0
87.5	0
87.6	0
87.7	0
87.8	0
87.9	0
88	0
88.1	0
88.2	0
88.3	0
88.4	0
88.5	0
88.6	0
88.7	0
88.8	0
88.9	0
89	0
89.1	0
89.2	0
89.3	0
89.4	0
89.5	0
89.6	0
89.7	0
89.8	0
89.9	0
90	0
90.1	0
90.2	0
90.3	0
90.4	0
90.5	0
90.6	0
90.7	0
90.8	0
90.9	0
91	0
91.1	0
91.2	0
91.3	0
91.4	0
91.5	0
91.6	0
91.7	0
91.8	0
91.9	0
92	0
92.1	0
92.2	0
92.3	0
92.4	0
92.5	0
92.6	0
92.7	0
92.8	0
92.9	0
93	0
93.1	0
93.2	0
93.3	0
93.4	0
93.5	0
93.6	0
93.7	0
93.8	0
93.9	0
94	0
94.1	0
94.2	0
94.3	0
94.4	0
94.5	0
94.6	0
94.7	0
94.8	0
94.9	0
95	0
95.1	0
95.2	0
95.3	0
95.4	0
95.5	0
95.6	0
95.7	0
95.8	0
95.9	0
96	0
96.1	0
96.2	0
96.3	0
96.4	0
96.5	0
96.6	0
96.7	0
96.8	0
96.9	0
97	0
97.1	0
97.2	0
97.3	0
97.4	0
97.5	0
97.6	0
97.7	0
97.8	0
97.9	0
98	0
98.1	0
98.2	0
98.3	0
98.4	0
98.5	0
98.6	0
98.7	0
98.8	0
98.9	0
99	0
99.1	0
99.2	0
99.3	0
99.4	0
99.5	0
99.6	0
99.7	0
99.8	0
99.9	0
100	0
100.1	0.55
100.2	0.715
100.3	0.82
100.4	0.88
100.5	0.915
100.6	0.94
100.7	0.945
100.8	0.94
100.9	0.955
101	0.945
101.1	0.97
101.2	0.96
101.3	0.96
101.4	0.98
101.5	0.98
101.6	0.945
101.7	0.955
101.8	0.965
101.9	0.95
102	0.955
102.1	0.975
102.2	0.965
102.3	0.98
102.4	0.965
102.5	0.96
102.6	0.96
102.7	0.975
102.8	0.98
102.9	0.98
103	0.98
103.1	0.97
103.2	0.955
103.3	0.94
103.4	0.93
103.5	0.945
103.6	0.95
103.7	0.945
103.8	0.93
103.9	0.95
104	0.96
104.1	0.965
104.2	0.945
104.3	0.97
104.4	0.975
104.5	0.97
104.6	0.975
104.7	0.98
104.8	0.955
104.9	0.945
105	0.945
105.1	0.945
105.2	0.96
105.3	0.955
105.4	0.965
105.5	0.985
105.6	0.975
105.7	0.975
105.8	0.945
105.9	0.95
106	0.955
106.1	0.965
106.2	0.965
106.3	0.965
106.4	0.965
106.5	0.97
106.6	0.95
106.7	0.965
106.8	0.955
106.9	0.965
107	0.965
107.1	0.985
107.2	0.955
107.3	0.97
107.4	0.97
107.5	0.945
107.6	0.945
107.7	0.945
107.8	0.955
107.9	0.955
108	0.97
108.1	0.97
108.2	0.98
108.3	0.985
108.4	0.955
108.5	0.955
108.6	0.965
108.7	0.975
108.8	0.96
108.9	0.95
109	0.97
109.1	0.975
109.2	0.975
109.3	0.96
109.4	0.97
109.5	0.965
109.6	0.97
109.7	0.95
109.8	0.95
109.9	0.955
110	0.96
110.1	0.975
110.2	0.96
110.3	0.97
110.4	0.97
110.5	0.95
110.6	0.965
110.7	0.965
110.8	0.97
110.9	0.955
111	0.965
111.1	0.95
111.2	0.965
111.3	0.955
111.4	0.96
111.5	0.955
111.6	0.965
111.7	0.97
111.8	0.965
111.9	0.965
112	0.975
112.1	0.98
112.2	0.98
112.3	0.98
112.4	0.955
112.5	0.96
112.6	0.955
112.7	0.97
112.8	0.99
112.9	0.97
113	0.975
113.1	0.97
113.2	0.975
113.3	0.965
113.4	0.98
113.5	0.965
113.6	0.965
113.7	0.99
113.8	0.985
113.9	0.975
114	0.96
114.1	0.955
114.2	0.93
114.3	0.92
114.4	0.94
114.5	0.965
114.6	0.96
114.7	0.965
114.8	0.965
114.9	0.975
115	0.97
115.1	0.955
115.2	0.965
115.3	0.97
115.4	0.98
115.5	0.98
115.6	0.98
115.7	0.97
115.8	0.96
115.9	0.975
116	0.98
116.1	0.99
116.2	0.98
116.3	0.98
116.4	0.975
116.5	0.98
116.6	0.97
116.7	0.96
116.8	0.965
116.9	0.96
117	0.965
117.1	0.98
117.2	0.965
117.3	0.95
117.4	0.975
117.5	0.98
117.6	0.985
117.7	0.99
117.8	0.975
117.9	0.98
118	0.975
118.1	0.98
118.2	0.985
118.3	0.985
118.4	0.98
118.5	0.975
118.6	0.965
118.7	0.975
118.8	0.975
118.9	0.98
119	0.98
119.1	0.98
119.2	0.975
119.3	0.955
119.4	0.97
119.5	0.96
119.6	0.975
119.7	0.97
119.8	0.975
119.9	0.985
120	0.985
120.1	0.985
120.2	0.99
120.3	0.99
120.4	0.98
120.5	0.98
120.6	0.96
120.7	0.97
120.8	0.975
120.9	0.975
121	0.975
121.1	0.975
121.2	0.98
121.3	0.98
121.4	0.985
121.5	0.98
121.6	0.98
121.7	0.985
121.8	0.97
121.9	0.975
122	0.96
122.1	0.965
122.2	0.98
122.3	0.975
122.4	0.975
122.5	0.975
122.6	0.985
122.7	0.98
122.8	0.965
122.9	0.94
123	0.95
123.1	0.965
123.2	0.955
123.3	0.96
123.4	0.965
123.5	0.965
123.6	0.98
123.7	0.98
123.8	0.975
123.9	0.98
124	0.99
124.1	0.985
124.2	0.975
124.3	0.98
124.4	0.97
124.5	0.98
124.6	0.99
124.7	0.99
124.8	0.985
124.9	0.99
125	0.98
125.1	0.98
125.2	0.98
125.3	0.98
125.4	0.98
125.5	0.985
125.6	0.995
125.7	0.99
125.8	0.985
125.9	0.97
126	0.975
126.1	0.99
126.2	0.99
126.3	0.98
126.4	0.985
126.5	0.97
126.6	0.975
126.7	0.975
126.8	0.96
126.9	0.97
127	0.97
127.1	0.965
127.2	0.975
127.3	0.965
127.4	0.965
127.5	0.975
127.6	0.98
127.7	0.99
127.8	0.985
127.9	0.975
128	0.965
128.1	0.96
128.2	0.98
128.3	1
128.4	0.995
128.5	1
128.6	0.995
128.7	0.995
128.8	0.98
128.9	0.97
129	0.965
129.1	0.975
129.2	0.965
129.3	0.965
129.4	0.98
129.5	0.965
129.6	0.98
129.7	0.99
129.8	0.98
129.9	0.99
130	0.985
130.1	0.99
130.2	0.99
130.3	0.985
130.4	0.99
130.5	0.99
130.6	0.995
130.7	0.995
130.8	0.995
130.9	0.995
131	0.99
131.1	0.985
131.2	0.98
131.3	0.98
131.4	0.995
131.5	0.995
131.6	0.985
131.7	0.985
131.8	1
131.9	0.99
132	0.985
132.1	0.98
132.2	0.99
132.3	0.995
132.4	0.995
132.5	0.985
132.6	0.99
132.7	0.995
132.8	0.99
132.9	1
133	1
133.1	0.985
133.2	0.985
133.3	0.99
133.4	0.995
133.5	1
133.6	0.99
133.7	0.99
133.8	0.99
133.9	0.995
134	0.995
134.1	0.995
134.2	0.98
134.3	0.98
134.4	0.995
134.5	0.99
134.6	1
134.7	0.99
134.8	0.98
134.9	0.985
135	0.985
135.1	0.99
135.2	0.99
135.3	0.995
135.4	0.995
135.5	0.99
135.6	0.995
135.7	0.995
135.8	0.99
135.9	0.985
136	0.98
136.1	0.975
136.2	0.985
136.3	0.99
136.4	0.98
136.5	0.985
136.6	0.975
136.7	0.975
136.8	0.98
136.9	0.98
137	0.98
137.1	0.98
137.2	0.985
137.3	0.98
137.4	0.99
137.5	0.985
137.6	0.98
137.7	0.97
137.8	0.99
137.9	0.99
138	0.99
138.1	0.995
138.2	0.985
138.3	0.99
138.4	0.985
138.5	0.99
138.6	0.99
138.7	0.995
138.8	0.995
138.9	0.995
139	0.985
139.1	0.975
139.2	0.98
139.3	0.98
139.4	0.99
139.5	0.99
139.6	1
139.7	1
139.8	0.99
139.9	0.995
140	0.99
140.1	0.985
140.2	0.98
140.3	0.98
140.4	0.985
140.5	0.995
140.6	0.995
140.7	0.99
140.8	0.99
140.9	0.985
141	0.985
141.1	0.99
141.2	0.985
141.3	0.98
141.4	0.985
141.5	0.975
141.6	0.99
141.7	0.975
141.8	0.98
141.9	0.98
142	0.985
142.1	0.985
142.2	0.99
142.3	0.995
142.4	0.995
142.5	1
142.6	0.995
142.7	0.995
142.8	0.985
142.9	0.995
143	0.995
143.1	1
143.2	0.99
143.3	0.995
143.4	0.99
143.5	0.99
143.6	0.995
143.7	1
143.8	1
143.9	1
144	0.995
144.1	0.99
144.2	1
144.3	1
144.4	1
144.5	1
144.6	0.995
144.7	1
144.8	0.99
144.9	0.995
145	0.985
145.1	0.985
145.2	0.995
145.3	0.995
145.4	0.995
145.5	0.995
145.6	0.995
145.7	0.99
145.8	0.985
145.9	0.99
146	0.98
146.1	0.985
146.2	0.995
146.3	0.99
146.4	0.99
146.5	0.985
146.6	0.985
146.7	0.98
146.8	1
146.9	0.995
147	0.995
147.1	0.995
147.2	0.99
147.3	0.985
147.4	0.99
147.5	0.99
147.6	0.99
147.7	0.99
147.8	0.995
147.9	0.985
148	0.985
148.1	0.985
148.2	0.995
148.3	0.99
148.4	0.99
148.5	0.995
148.6	0.995
148.7	0.995
148.8	0.985
148.9	0.97
149	0.985
149.1	0.99
149.2	0.995
149.3	0.995
149.4	0.99
149.5	0.98
149.6	0.995
149.7	0.99
149.8	0.985
149.9	0.99
150	0.985
150.1	0.985
150.2	0.995
150.3	0.99
150.4	0.99
150.5	0.98
150.6	0.98
150.7	0.99
150.8	0.995
150.9	0.99
151	0.995
151.1	0.99
151.2	0.99
151.3	0.985
151.4	0.98
151.5	0.985
151.6	1
151.7	1
151.8	1
151.9	0.995
152	0.99
152.1	1
152.2	0.99
152.3	0.98
152.4	0.98
152.5	0.975
152.6	0.99
152.7	0.99
152.8	0.995
152.9	1
153	1
153.1	0.995
153.2	0.99
153.3	0.99
153.4	0.995
153.5	0.99
153.6	0.99
153.7	0.995
153.8	0.995
153.9	1
154	0.995
154.1	1
154.2	1
154.3	1
154.4	0.99
154.5	0.99
154.6	0.985
154.7	0.975
154.8	0.985
154.9	0.985
155	0.99
155.1	0.985
155.2	0.99
155.3	0.985
155.4	0.99
155.5	0.99
155.6	0.995
155.7	0.99
155.8	0.99
155.9	0.985
156	0.985
156.1	0.98
156.2	0.995
156.3	0.985
156.4	0.99
156.5	1
156.6	1
156.7	1
156.8	1
156.9	0.995
157	0.995
157.1	0.995
157.2	0.99
157.3	0.995
157.4	0.99
157.5	0.99
157.6	0.995
157.7	0.995
157.8	0.99
157.9	0.985
158	0.985
158.1	0.99
158.2	0.995
158.3	1
158.4	0.99
158.5	0.995
158.6	0.995
158.7	0.985
158.8	0.99
158.9	0.995
159	1
159.1	0.995
159.2	0.98
159.3	0.985
159.4	0.985
159.5	0.995
159.6	0.985
159.7	0.985
159.8	0.98
159.9	0.98
160	0.99
160.1	0.99
160.2	0.99
160.3	0.985
160.4	0.995
160.5	0.995
160.6	0.995
160.7	0.995
160.8	0.995
160.9	1
161	1
161.1	0.995
161.2	0.99
161.3	0.995
161.4	0.985
161.5	0.985
161.6	0.995
161.7	0.985
161.8	0.98
161.9	0.985
162	0.995
162.1	0.995
162.2	1
162.3	1
162.4	1
162.5	1
162.6	0.995
162.7	0.99
162.8	0.99
162.9	0.99
163	0.995
163.1	0.99
163.2	1
163.3	0.995
163.4	0.99
163.5	0.995
163.6	0.995
163.7	0.98
163.8	0.995
163.9	1
164	0.99
164.1	0.99
164.2	0.985
164.3	0.99
164.4	0.99
164.5	0.995
164.6	0.995
164.7	1
164.8	0.99
164.9	1
165	0.995
165.1	0.995
165.2	0.98
165.3	0.99
165.4	0.99
165.5	0.99
165.6	0.995
165.7	0.995
165.8	1
165.9	1
166	0.995
166.1	0.995
166.2	0.995
166.3	0.995
166.4	0.985
166.5	0.98
166.6	0.98
166.7	0.98
166.8	0.99
166.9	0.985
167	0.98
167.1	0.98
167.2	0.985
167.3	0.985
167.4	0.98
167.5	0.98
167.6	0.985
167.7	0.98
167.8	0.98
167.9	0.975
168	0.98
168.1	0.99
168.2	0.995
168.3	1
168.4	0.99
168.5	0.99
168.6	0.99
168.7	0.99
168.8	0.995
168.9	1
169	1
169.1	1
169.2	1
169.3	0.995
169.4	0.995
169.5	0.99
169.6	0.99
169.7	0.99
169.8	0.985
169.9	0.99
170	0.99
170.1	1
170.2	0.995
170.3	1
170.4	1
170.5	0.995
170.6	1
170.7	1
170.8	1
170.9	0.995
171	1
171.1	0.995
171.2	0.99
171.3	0.98
171.4	0.98
171.5	0.98
171.6	0.99
171.7	0.99
171.8	0.99
171.9	0.99
172	0.985
172.1	0.99
172.2	0.995
172.3	0.995
172.4	0.99
172.5	0.995
172.6	0.99
172.7	0.995
172.8	0.99
172.9	0.985
173	0.99
173.1	0.985
173.2	0.985
173.3	0.99
173.4	0.99
173.5	0.99
173.6	0.985
173.7	0.99
173.8	0.99
173.9	0.995
174	0.995
174.1	0.995
174.2	0.995
174.3	0.995
174.4	0.995
174.5	0.99
174.6	0.99
174.7	0.99
174.8	0.99
174.9	0.99
175	0.995
175.1	0.995
175.2	0.99
175.3	0.985
175.4	0.98
175.5	0.99
175.6	0.98
175.7	0.985
175.8	0.995
175.9	1
176	0.99
176.1	0.995
176.2	1
176.3	1
176.4	1
176.5	1
176.6	1
176.7	1
176.8	1
176.9	1
177	0.995
177.1	0.995
177.2	1
177.3	1
177.4	1
177.5	0.995
177.6	1
177.7	1
177.8	0.995
177.9	0.99
178	0.99
178.1	0.985
178.2	0.99
178.3	1
178.4	0.99
178.5	0.985
178.6	0.975
178.7	0.98
178.8	0.98
178.9	0.98
179	0.98
179.1	0.98
179.2	0.99
179.3	0.995
179.4	0.98
179.5	0.985
179.6	0.99
179.7	0.995
179.8	0.995
179.9	0.995
180	0.995
180.1	0.985
180.2	0.98
180.3	0.98
180.4	0.995
180.5	1
180.6	1
180.7	1
180.8	0.995
180.9	0.98
181	0.975
181.1	0.985
181.2	0.995
181.3	0.995
181.4	0.99
181.5	1
181.6	0.99
181.7	1
181.8	1
181.9	0.995
182	0.995
182.1	0.985
182.2	0.995
182.3	0.995
182.4	0.995
182.5	1
182.6	1
182.7	0.99
182.8	0.985
182.9	0.985
183	0.99
183.1	0.985
183.2	0.99
183.3	0.99
183.4	0.985
183.5	0.99
183.6	0.995
183.7	0.995
183.8	1
183.9	1
184	0.995
184.1	0.99
184.2	0.995
184.3	0.995
184.4	0.99
184.5	0.985
184.6	0.98
184.7	0.985
184.8	0.995
184.9	0.985
185	0.985
185.1	0.985
185.2	0.99
185.3	0.985
185.4	0.98
185.5	0.97
185.6	0.99
185.7	0.995
185.8	0.995
185.9	0.985
186	0.99
186.1	0.99
186.2	0.995
186.3	0.99
186.4	1
186.5	0.995
186.6	0.99
186.7	0.99
186.8	0.99
186.9	0.99
187	0.99
187.1	0.995
187.2	0.995
187.3	0.995
187.4	0.99
187.5	0.985
187.6	0.985
187.7	0.99
187.8	0.99
187.9	0.995
188	0.985
188.1	0.985
188.2	0.975
188.3	0.985
188.4	0.985
188.5	1
188.6	0.995
188.7	0.99
188.8	0.99
188.9	0.99
189	0.98
189.1	0.975
189.2	0.975
189.3	0.98
189.4	0.985
189.5	0.975
189.6	0.96
189.7	0.97
189.8	0.97
189.9	0.98
190	0.99
190.1	0.995
190.2	0.995
190.3	0.99
190.4	0.99
190.5	0.98
190.6	0.98
190.7	0.975
190.8	0.99
190.9	0.98
191	0.985
191.1	0.975
191.2	0.975
191.3	0.985
191.4	1
191.5	1
191.6	1
191.7	0.99
191.8	0.985
191.9	0.985
192	0.98
192.1	1
192.2	0.99
192.3	0.985
192.4	0.98
192.5	0.985
192.6	0.99
192.7	0.99
192.8	0.995
192.9	1
193	0.99
193.1	1
193.2	1
193.3	0.985
193.4	0.985
193.5	0.995
193.6	0.985
193.7	0.99
193.8	0.985
193.9	0.99
194	0.99
194.1	0.995
194.2	0.995
194.3	0.99
194.4	0.99
194.5	0.99
194.6	0.995
194.7	0.995
194.8	0.995
194.9	0.98
195	0.99
195.1	0.995
195.2	0.995
195.3	0.975
195.4	0.98
195.5	0.975
195.6	0.98
195.7	0.99
195.8	0.99
195.9	0.99
196	0.99
196.1	0.985
196.2	0.985
196.3	0.995
196.4	0.995
196.5	0.995
196.6	0.995
196.7	1
196.8	0.99
196.9	0.99
197	0.985
197.1	0.995
197.2	0.99
197.3	0.995
197.4	0.995
197.5	0.99
197.6	0.995
197.7	0.99
197.8	0.995
197.9	0.995
198	0.995
198.1	0.99
198.2	0.995
198.3	0.99
198.4	0.985
198.5	0.99
198.6	0.99
198.7	0.995
198.8	0.995
198.9	0.995
199	0.995
199.1	0.995
199.2	1
199.3	0.995
199.4	0.995
199.5	0.99
199.6	0.985
199.7	0.985
199.8	0.98
199.9	0.985
200	0.99
[truncated: 14,000 more rows]
