# Supplementary material for: Bayesian inference of kinetic schemes for ion channels by Kalman filtering
Source: eLife journal article supplement (doi:10.7554/elife.62714), 2022-05-04
Supplement: fig4-data1 [file 1_Sim_N_100_theor_Fluor_Werte.xlsx]

## Sheet: Tabelle1
0.1	0
0.2	0
0.3	0
0.4	0
0.5	0
0.6	0
0.7	0
0.8	0
0.9	0
1	0
1.1	0
1.2	0
1.3	0
1.4	0
1.5	0
1.6	0
1.7	0
1.8	0
1.9	0
2	0
2.1	0
2.2	0
2.3	0
2.4	0
2.5	0
2.6	0
2.7	0
2.8	0
2.9	0
3	0
3.1	0
3.2	0
3.3	0
3.4	0
3.5	0
3.6	0
3.7	0
3.8	0
3.9	0
4	0
4.1	0
4.2	0
4.3	0
4.4	0
4.5	0
4.6	0
4.7	0
4.8	0
4.9	0
5	0
5.1	0
5.2	0
5.3	0
5.4	0
5.5	0
5.6	0
5.7	0
5.8	0
5.9	0
6	0
6.1	0
6.2	0
6.3	0
6.4	0
6.5	0
6.6	0
6.7	0
6.8	0
6.9	0
7	0
7.1	0
7.2	0
7.3	0
7.4	0
7.5	0
7.6	0
7.7	0
7.8	0
7.9	0
8	0
8.1	0
8.2	0
8.3	0
8.4	0
8.5	0
8.6	0
8.7	0
8.8	0
8.9	0
9	0
9.1	0
9.2	0
9.3	0
9.4	0
9.5	0
9.6	0
9.7	0
9.8	0
9.9	0
10	0
10.1	0
10.2	0
10.3	0
10.4	0
10.5	0
10.6	0
10.7	0
10.8	0
10.9	0
11	0
11.1	0
11.2	0
11.3	0
11.4	0
11.5	0
11.6	0
11.7	0
11.8	0
11.9	0
12	0
12.1	0
12.2	0
12.3	0
12.4	0
12.5	0
12.6	0
12.7	0
12.8	0
12.9	0
13	0
13.1	0
13.2	0
13.3	0
13.4	0
13.5	0
13.6	0
13.7	0
13.8	0
13.9	0
14	0
14.1	0
14.2	0
14.3	0
14.4	0
14.5	0
14.6	0
14.7	0
14.8	0
14.9	0
15	0
15.1	0
15.2	0
15.3	0
15.4	0
15.5	0
15.6	0
15.7	0
15.8	0
15.9	0
16	0
16.1	0
16.2	0
16.3	0
16.4	0
16.5	0
16.6	0
16.7	0
16.8	0
16.9	0
17	0
17.1	0
17.2	0
17.3	0
17.4	0
17.5	0
17.6	0
17.7	0
17.8	0
17.9	0
18	0
18.1	0
18.2	0
18.3	0
18.4	0
18.5	0
18.6	0
18.7	0
18.8	0
18.9	0
19	0
19.1	0
19.2	0
19.3	0
19.4	0
19.5	0
19.6	0
19.7	0
19.8	0
19.9	0
20	0
20.1	0
20.2	0
20.3	0
20.4	0
20.5	0
20.6	0
20.7	0
20.8	0
20.9	0
21	0
21.1	0
21.2	0
21.3	0
21.4	0
21.5	0
21.6	0
21.7	0
21.8	0
21.9	0
22	0
22.1	0
22.2	0
22.3	0
22.4	0
22.5	0
22.6	0
22.7	0
22.8	0
22.9	0
23	0
23.1	0
23.2	0
23.3	0
23.4	0
23.5	0
23.6	0
23.7	0
23.8	0
23.9	0
24	0
24.1	0
24.2	0
24.3	0
24.4	0
24.5	0
24.6	0
24.7	0
24.8	0
24.9	0
25	0
25.1	0
25.2	0
25.3	0
25.4	0
25.5	0
25.6	0
25.7	0
25.8	0
25.9	0
26	0
26.1	0
26.2	0
26.3	0
26.4	0
26.5	0
26.6	0
26.7	0
26.8	0
26.9	0
27	0
27.1	0
27.2	0
27.3	0
27.4	0
27.5	0
27.6	0
27.7	0
27.8	0
27.9	0
28	0
28.1	0
28.2	0
28.3	0
28.4	0
28.5	0
28.6	0
28.7	0
28.8	0
28.9	0
29	0
29.1	0
29.2	0
29.3	0
29.4	0
29.5	0
29.6	0
29.7	0
29.8	0
29.9	0
30	0
30.1	0
30.2	0
30.3	0
30.4	0
30.5	0
30.6	0
30.7	0
30.8	0
30.9	0
31	0
31.1	0
31.2	0
31.3	0
31.4	0
31.5	0
31.6	0
31.7	0
31.8	0
31.9	0
32	0
32.1	0
32.2	0
32.3	0
32.4	0
32.5	0
32.6	0
32.7	0
32.8	0
32.9	0
33	0
33.1	0
33.2	0
33.3	0
33.4	0
33.5	0
33.6	0
33.7	0
33.8	0
33.9	0
34	0
34.1	0
34.2	0
34.3	0
34.4	0
34.5	0
34.6	0
34.7	0
34.8	0
34.9	0
35	0
35.1	0
35.2	0
35.3	0
35.4	0
35.5	0
35.6	0
35.7	0
35.8	0
35.9	0
36	0
36.1	0
36.2	0
36.3	0
36.4	0
36.5	0
36.6	0
36.7	0
36.8	0
36.9	0
37	0
37.1	0
37.2	0
37.3	0
37.4	0
37.5	0
37.6	0
37.7	0
37.8	0
37.9	0
38	0
38.1	0
38.2	0
38.3	0
38.4	0
38.5	0
38.6	0
38.7	0
38.8	0
38.9	0
39	0
39.1	0
39.2	0
39.3	0
39.4	0
39.5	0
39.6	0
39.7	0
39.8	0
39.9	0
40	0
40.1	0
40.2	0
40.3	0
40.4	0
40.5	0
40.6	0
40.7	0
40.8	0
40.9	0
41	0
41.1	0
41.2	0
41.3	0
41.4	0
41.5	0
41.6	0
41.7	0
41.8	0
41.9	0
42	0
42.1	0
42.2	0
42.3	0
42.4	0
42.5	0
42.6	0
42.7	0
42.8	0
42.9	0
43	0
43.1	0
43.2	0
43.3	0
43.4	0
43.5	0
43.6	0
43.7	0
43.8	0
43.9	0
44	0
44.1	0
44.2	0
44.3	0
44.4	0
44.5	0
44.6	0
44.7	0
44.8	0
44.9	0
45	0
45.1	0
45.2	0
45.3	0
45.4	0
45.5	0
45.6	0
45.7	0
45.8	0
45.9	0
46	0
46.1	0
46.2	0
46.3	0
46.4	0
46.5	0
46.6	0
46.7	0
46.8	0
46.9	0
47	0
47.1	0
47.2	0
47.3	0
47.4	0
47.5	0
47.6	0
47.7	0
47.8	0
47.9	0
48	0
48.1	0
48.2	0
48.3	0
48.4	0
48.5	0
48.6	0
48.7	0
48.8	0
48.9	0
49	0
49.1	0
49.2	0
49.3	0
49.4	0
49.5	0
49.6	0
49.7	0
49.8	0
49.9	0
50	0
50.1	0
50.2	0
50.3	0
50.4	0
50.5	0
50.6	0
50.7	0
50.8	0
50.9	0
51	0
51.1	0
51.2	0
51.3	0
51.4	0
51.5	0
51.6	0
51.7	0
51.8	0
51.9	0
52	0
52.1	0
52.2	0
52.3	0
52.4	0
52.5	0
52.6	0
52.7	0
52.8	0
52.9	0
53	0
53.1	0
53.2	0
53.3	0
53.4	0
53.5	0
53.6	0
53.7	0
53.8	0
53.9	0
54	0
54.1	0
54.2	0
54.3	0
54.4	0
54.5	0
54.6	0
54.7	0
54.8	0
54.9	0
55	0
55.1	0
55.2	0
55.3	0
55.4	0
55.5	0
55.6	0
55.7	0
55.8	0
55.9	0
56	0
56.1	0
56.2	0
56.3	0
56.4	0
56.5	0
56.6	0
56.7	0
56.8	0
56.9	0
57	0
57.1	0
57.2	0
57.3	0
57.4	0
57.5	0
57.6	0
57.7	0
57.8	0
57.9	0
58	0
58.1	0
58.2	0
58.3	0
58.4	0
58.5	0
58.6	0
58.7	0
58.8	0
58.9	0
59	0
59.1	0
59.2	0
59.3	0
59.4	0
59.5	0
59.6	0
59.7	0
59.8	0
59.9	0
60	0
60.1	0
60.2	0
60.3	0
60.4	0
60.5	0
60.6	0
60.7	0
60.8	0
60.9	0
61	0
61.1	0
61.2	0
61.3	0
61.4	0
61.5	0
61.6	0
61.7	0
61.8	0
61.9	0
62	0
62.1	0
62.2	0
62.3	0
62.4	0
62.5	0
62.6	0
62.7	0
62.8	0
62.9	0
63	0
63.1	0
63.2	0
63.3	0
63.4	0
63.5	0
63.6	0
63.7	0
63.8	0
63.9	0
64	0
64.1	0
64.2	0
64.3	0
64.4	0
64.5	0
64.6	0
64.7	0
64.8	0
64.9	0
65	0
65.1	0
65.2	0
65.3	0
65.4	0
65.5	0
65.6	0
65.7	0
65.8	0
65.9	0
66	0
66.1	0
66.2	0
66.3	0
66.4	0
66.5	0
66.6	0
66.7	0
66.8	0
66.9	0
67	0
67.1	0
67.2	0
67.3	0
67.4	0
67.5	0
67.6	0
67.7	0
67.8	0
67.9	0
68	0
68.1	0
68.2	0
68.3	0
68.4	0
68.5	0
68.6	0
68.7	0
68.8	0
68.9	0
69	0
69.1	0
69.2	0
69.3	0
69.4	0
69.5	0
69.6	0
69.7	0
69.8	0
69.9	0
70	0
70.1	0
70.2	0
70.3	0
70.4	0
70.5	0
70.6	0
70.7	0
70.8	0
70.9	0
71	0
71.1	0
71.2	0
71.3	0
71.4	0
71.5	0
71.6	0
71.7	0
71.8	0
71.9	0
72	0
72.1	0
72.2	0
72.3	0
72.4	0
72.5	0
72.6	0
72.7	0
72.8	0
72.9	0
73	0
73.1	0
73.2	0
73.3	0
73.4	0
73.5	0
73.6	0
73.7	0
73.8	0
73.9	0
74	0
74.1	0
74.2	0
74.3	0
74.4	0
74.5	0
74.6	0
74.7	0
74.8	0
74.9	0
75	0
75.1	0
75.2	0
75.3	0
75.4	0
75.5	0
75.6	0
75.7	0
75.8	0
75.9	0
76	0
76.1	0
76.2	0
76.3	0
76.4	0
76.5	0
76.6	0
76.7	0
76.8	0
76.9	0
77	0
77.1	0
77.2	0
77.3	0
77.4	0
77.5	0
77.6	0
77.7	0
77.8	0
77.9	0
78	0
78.1	0
78.2	0
78.3	0
78.4	0
78.5	0
78.6	0
78.7	0
78.8	0
78.9	0
79	0
79.1	0
79.2	0
79.3	0
79.4	0
79.5	0
79.6	0
79.7	0
79.8	0
79.9	0
80	0
80.1	0
80.2	0
80.3	0
80.4	0
80.5	0
80.6	0
80.7	0
80.8	0
80.9	0
81	0
81.1	0
81.2	0
81.3	0
81.4	0
81.5	0
81.6	0
81.7	0
81.8	0
81.9	0
82	0
82.1	0
82.2	0
82.3	0
82.4	0
82.5	0
82.6	0
82.7	0
82.8	0
82.9	0
83	0
83.1	0
83.2	0
83.3	0
83.4	0
83.5	0
83.6	0
83.7	0
83.8	0
83.9	0
84	0
84.1	0
84.2	0
84.3	0
84.4	0
84.5	0
84.6	0
84.7	0
84.8	0
84.9	0
85	0
85.1	0
85.2	0
85.3	0
85.4	0
85.5	0
85.6	0
85.7	0
85.8	0
85.9	0
86	0
86.1	0
86.2	0
86.3	0
86.4	0
86.5	0
86.6	0
86.7	0
86.8	0
86.9	0
87	0
87.1	0
87.2	0
87.3	0
87.4	0
87.5	0
87.6	0
87.7	0
87.8	0
87.9	0
88	0
88.1	0
88.2	0
88.3	0
88.4	0
88.5	0
88.6	0
88.7	0
88.8	0
88.9	0
89	0
89.1	0
89.2	0
89.3	0
89.4	0
89.5	0
89.6	0
89.7	0
89.8	0
89.9	0
90	0
90.1	0
90.2	0
90.3	0
90.4	0
90.5	0
90.6	0
90.7	0
90.8	0
90.9	0
91	0
91.1	0
91.2	0
91.3	0
91.4	0
91.5	0
91.6	0
91.7	0
91.8	0
91.9	0
92	0
92.1	0
92.2	0
92.3	0
92.4	0
92.5	0
92.6	0
92.7	0
92.8	0
92.9	0
93	0
93.1	0
93.2	0
93.3	0
93.4	0
93.5	0
93.6	0
93.7	0
93.8	0
93.9	0
94	0
94.1	0
94.2	0
94.3	0
94.4	0
94.5	0
94.6	0
94.7	0
94.8	0
94.9	0
95	0
95.1	0
95.2	0
95.3	0
95.4	0
95.5	0
95.6	0
95.7	0
95.8	0
95.9	0
96	0
96.1	0
96.2	0
96.3	0
96.4	0
96.5	0
96.6	0
96.7	0
96.8	0
96.9	0
97	0
97.1	0
97.2	0
97.3	0
97.4	0
97.5	0
97.6	0
97.7	0
97.8	0
97.9	0
98	0
98.1	0
98.2	0
98.3	0
98.4	0
98.5	0
98.6	0
98.7	0
98.8	0
98.9	0
99	0
99.1	0
99.2	0
99.3	0
99.4	0
99.5	0
99.6	0
99.7	0
99.8	0
99.9	0
100	0
100.1	0.535226
100.2	0.727042
100.3	0.822396
100.4	0.876176
100.5	0.907636
100.6	0.92624
100.7	0.937302
100.8	0.943917
100.9	0.947907
101	0.950348
101.1	0.951873
101.2	0.952858
101.3	0.953523
101.4	0.953999
101.5	0.954363
101.6	0.95466
101.7	0.954917
101.8	0.95515
101.9	0.955369
102	0.955578
102.1	0.955782
102.2	0.955982
102.3	0.956179
102.4	0.956374
102.5	0.956568
102.6	0.95676
102.7	0.956951
102.8	0.957141
102.9	0.957329
103	0.957517
103.1	0.957703
103.2	0.957889
103.3	0.958073
103.4	0.958256
103.5	0.958439
103.6	0.95862
103.7	0.958801
103.8	0.95898
103.9	0.959158
104	0.959336
104.1	0.959512
104.2	0.959688
104.3	0.959862
104.4	0.960036
104.5	0.960208
104.6	0.96038
104.7	0.960551
104.8	0.96072
104.9	0.960889
105	0.961057
105.1	0.961224
105.2	0.96139
105.3	0.961555
105.4	0.961719
105.5	0.961883
105.6	0.962045
105.7	0.962206
105.8	0.962367
105.9	0.962527
106	0.962686
106.1	0.962844
106.2	0.963001
106.3	0.963157
106.4	0.963312
106.5	0.963467
106.6	0.963621
106.7	0.963773
106.8	0.963925
106.9	0.964077
107	0.964227
107.1	0.964376
107.2	0.964525
107.3	0.964673
107.4	0.96482
107.5	0.964966
107.6	0.965112
107.7	0.965256
107.8	0.9654
107.9	0.965543
108	0.965685
108.1	0.965827
108.2	0.965968
108.3	0.966108
108.4	0.966247
108.5	0.966385
108.6	0.966523
108.7	0.96666
108.8	0.966796
108.9	0.966931
109	0.967066
109.1	0.967199
109.2	0.967333
109.3	0.967465
109.4	0.967597
109.5	0.967728
109.6	0.967858
109.7	0.967987
109.8	0.968116
109.9	0.968244
110	0.968372
110.1	0.968498
110.2	0.968624
110.3	0.96875
110.4	0.968874
110.5	0.968998
110.6	0.969121
110.7	0.969244
110.8	0.969366
110.9	0.969487
111	0.969607
111.1	0.969727
111.2	0.969847
111.3	0.969965
111.4	0.970083
111.5	0.9702
111.6	0.970317
111.7	0.970433
111.8	0.970548
111.9	0.970663
112	0.970777
112.1	0.97089
112.2	0.971003
112.3	0.971115
112.4	0.971227
112.5	0.971338
112.6	0.971448
112.7	0.971558
112.8	0.971667
112.9	0.971776
113	0.971884
113.1	0.971991
113.2	0.972098
113.3	0.972204
113.4	0.972309
113.5	0.972414
113.6	0.972519
113.7	0.972623
113.8	0.972726
113.9	0.972829
114	0.972931
114.1	0.973032
114.2	0.973133
114.3	0.973234
114.4	0.973334
114.5	0.973433
114.6	0.973532
114.7	0.97363
114.8	0.973728
114.9	0.973825
115	0.973922
115.1	0.974018
115.2	0.974113
115.3	0.974208
115.4	0.974303
115.5	0.974397
115.6	0.974491
115.7	0.974584
115.8	0.974676
115.9	0.974768
116	0.974859
116.1	0.97495
116.2	0.975041
116.3	0.975131
116.4	0.97522
116.5	0.975309
116.6	0.975398
116.7	0.975486
116.8	0.975573
116.9	0.97566
117	0.975747
117.1	0.975833
117.2	0.975918
117.3	0.976004
117.4	0.976088
117.5	0.976172
117.6	0.976256
117.7	0.976339
117.8	0.976422
117.9	0.976505
118	0.976586
118.1	0.976668
118.2	0.976749
118.3	0.976829
118.4	0.97691
118.5	0.976989
118.6	0.977068
118.7	0.977147
118.8	0.977226
118.9	0.977304
119	0.977381
119.1	0.977458
119.2	0.977535
119.3	0.977611
119.4	0.977687
119.5	0.977762
119.6	0.977837
119.7	0.977912
119.8	0.977986
119.9	0.97806
120	0.978133
120.1	0.978206
120.2	0.978278
120.3	0.978351
120.4	0.978422
120.5	0.978494
120.6	0.978565
120.7	0.978635
120.8	0.978705
120.9	0.978775
121	0.978845
121.1	0.978914
121.2	0.978982
121.3	0.97905
121.4	0.979118
121.5	0.979186
121.6	0.979253
121.7	0.97932
121.8	0.979386
121.9	0.979452
122	0.979518
122.1	0.979583
122.2	0.979648
122.3	0.979713
122.4	0.979777
122.5	0.979841
122.6	0.979904
122.7	0.979967
122.8	0.98003
122.9	0.980093
123	0.980155
123.1	0.980217
123.2	0.980278
123.3	0.980339
123.4	0.9804
123.5	0.980461
123.6	0.980521
123.7	0.98058
123.8	0.98064
123.9	0.980699
124	0.980758
124.1	0.980816
124.2	0.980875
124.3	0.980932
124.4	0.98099
124.5	0.981047
124.6	0.981104
124.7	0.981161
124.8	0.981217
124.9	0.981273
125	0.981328
125.1	0.981384
125.2	0.981439
125.3	0.981494
125.4	0.981548
125.5	0.981602
125.6	0.981656
125.7	0.981709
125.8	0.981763
125.9	0.981816
126	0.981868
126.1	0.981921
126.2	0.981973
126.3	0.982025
126.4	0.982076
126.5	0.982127
126.6	0.982178
126.7	0.982229
126.8	0.982279
126.9	0.982329
127	0.982379
127.1	0.982429
127.2	0.982478
127.3	0.982527
127.4	0.982576
127.5	0.982624
127.6	0.982672
127.7	0.98272
127.8	0.982768
127.9	0.982815
128	0.982863
128.1	0.98291
128.2	0.982956
128.3	0.983003
128.4	0.983049
128.5	0.983095
128.6	0.98314
128.7	0.983185
128.8	0.983231
128.9	0.983275
129	0.98332
129.1	0.983364
129.2	0.983409
129.3	0.983452
129.4	0.983496
129.5	0.98354
129.6	0.983583
129.7	0.983626
129.8	0.983668
129.9	0.983711
130	0.983753
130.1	0.983795
130.2	0.983837
130.3	0.983878
130.4	0.98392
130.5	0.983961
130.6	0.984001
130.7	0.984042
130.8	0.984083
130.9	0.984123
131	0.984163
131.1	0.984202
131.2	0.984242
131.3	0.984281
131.4	0.98432
131.5	0.984359
131.6	0.984398
131.7	0.984436
131.8	0.984474
131.9	0.984512
132	0.98455
132.1	0.984588
132.2	0.984625
132.3	0.984662
132.4	0.984699
132.5	0.984736
132.6	0.984773
132.7	0.984809
132.8	0.984845
132.9	0.984881
133	0.984917
133.1	0.984953
133.2	0.984988
133.3	0.985023
133.4	0.985058
133.5	0.985093
133.6	0.985128
133.7	0.985162
133.8	0.985196
133.9	0.98523
134	0.985264
134.1	0.985298
134.2	0.985331
134.3	0.985365
134.4	0.985398
134.5	0.985431
134.6	0.985463
134.7	0.985496
134.8	0.985528
134.9	0.985561
135	0.985593
135.1	0.985625
135.2	0.985656
135.3	0.985688
135.4	0.985719
135.5	0.98575
135.6	0.985781
135.7	0.985812
135.8	0.985843
135.9	0.985873
136	0.985904
136.1	0.985934
136.2	0.985964
136.3	0.985993
136.4	0.986023
136.5	0.986053
136.6	0.986082
136.7	0.986111
136.8	0.98614
136.9	0.986169
137	0.986198
137.1	0.986226
137.2	0.986255
137.3	0.986283
137.4	0.986311
137.5	0.986339
137.6	0.986367
137.7	0.986394
137.8	0.986422
137.9	0.986449
138	0.986476
138.1	0.986503
138.2	0.98653
138.3	0.986557
138.4	0.986583
138.5	0.98661
138.6	0.986636
138.7	0.986662
138.8	0.986688
138.9	0.986714
139	0.986739
139.1	0.986765
139.2	0.98679
139.3	0.986816
139.4	0.986841
139.5	0.986866
139.6	0.986891
139.7	0.986915
139.8	0.98694
139.9	0.986964
140	0.986989
140.1	0.987013
140.2	0.987037
140.3	0.987061
140.4	0.987085
140.5	0.987108
140.6	0.987132
140.7	0.987155
140.8	0.987178
140.9	0.987201
141	0.987224
141.1	0.987247
141.2	0.98727
141.3	0.987293
141.4	0.987315
141.5	0.987338
141.6	0.98736
141.7	0.987382
141.8	0.987404
141.9	0.987426
142	0.987448
142.1	0.987469
142.2	0.987491
142.3	0.987512
142.4	0.987534
142.5	0.987555
142.6	0.987576
142.7	0.987597
142.8	0.987618
142.9	0.987638
143	0.987659
143.1	0.987679
143.2	0.9877
143.3	0.98772
143.4	0.98774
143.5	0.98776
143.6	0.98778
143.7	0.9878
143.8	0.98782
143.9	0.987839
144	0.987859
144.1	0.987878
144.2	0.987897
144.3	0.987917
144.4	0.987936
144.5	0.987955
144.6	0.987973
144.7	0.987992
144.8	0.988011
144.9	0.988029
145	0.988048
145.1	0.988066
145.2	0.988084
145.3	0.988103
145.4	0.988121
145.5	0.988139
145.6	0.988156
145.7	0.988174
145.8	0.988192
145.9	0.988209
146	0.988227
146.1	0.988244
146.2	0.988261
146.3	0.988279
146.4	0.988296
146.5	0.988313
146.6	0.988329
146.7	0.988346
146.8	0.988363
146.9	0.98838
147	0.988396
147.1	0.988413
147.2	0.988429
147.3	0.988445
147.4	0.988461
147.5	0.988477
147.6	0.988493
147.7	0.988509
147.8	0.988525
147.9	0.988541
148	0.988556
148.1	0.988572
148.2	0.988587
148.3	0.988603
148.4	0.988618
148.5	0.988633
148.6	0.988648
148.7	0.988663
148.8	0.988678
148.9	0.988693
149	0.988708
149.1	0.988723
149.2	0.988737
149.3	0.988752
149.4	0.988766
149.5	0.988781
149.6	0.988795
149.7	0.988809
149.8	0.988823
149.9	0.988838
150	0.988852
150.1	0.988865
150.2	0.988879
150.3	0.988893
150.4	0.988907
150.5	0.98892
150.6	0.988934
150.7	0.988947
150.8	0.988961
150.9	0.988974
151	0.988987
151.1	0.989
151.2	0.989014
151.3	0.989027
151.4	0.98904
151.5	0.989052
151.6	0.989065
151.7	0.989078
151.8	0.989091
151.9	0.989103
152	0.989116
152.1	0.989128
152.2	0.989141
152.3	0.989153
152.4	0.989165
152.5	0.989177
152.6	0.98919
152.7	0.989202
152.8	0.989214
152.9	0.989226
153	0.989237
153.1	0.989249
153.2	0.989261
153.3	0.989273
153.4	0.989284
153.5	0.989296
153.6	0.989307
153.7	0.989319
153.8	0.98933
153.9	0.989341
154	0.989352
154.1	0.989364
154.2	0.989375
154.3	0.989386
154.4	0.989397
154.5	0.989408
154.6	0.989418
154.7	0.989429
154.8	0.98944
154.9	0.989451
155	0.989461
155.1	0.989472
155.2	0.989482
155.3	0.989493
155.4	0.989503
155.5	0.989514
155.6	0.989524
155.7	0.989534
155.8	0.989544
155.9	0.989554
156	0.989564
156.1	0.989574
156.2	0.989584
156.3	0.989594
156.4	0.989604
156.5	0.989614
156.6	0.989623
156.7	0.989633
156.8	0.989643
156.9	0.989652
157	0.989662
157.1	0.989671
157.2	0.989681
157.3	0.98969
157.4	0.989699
157.5	0.989709
157.6	0.989718
157.7	0.989727
157.8	0.989736
157.9	0.989745
158	0.989754
158.1	0.989763
158.2	0.989772
158.3	0.989781
158.4	0.98979
158.5	0.989798
158.6	0.989807
158.7	0.989816
158.8	0.989824
158.9	0.989833
159	0.989841
159.1	0.98985
159.2	0.989858
159.3	0.989867
159.4	0.989875
159.5	0.989883
159.6	0.989892
159.7	0.9899
159.8	0.989908
159.9	0.989916
160	0.989924
160.1	0.989932
160.2	0.98994
160.3	0.989948
160.4	0.989956
160.5	0.989964
160.6	0.989971
160.7	0.989979
160.8	0.989987
160.9	0.989995
161	0.990002
161.1	0.99001
161.2	0.990017
161.3	0.990025
161.4	0.990032
161.5	0.99004
161.6	0.990047
161.7	0.990054
161.8	0.990062
161.9	0.990069
162	0.990076
162.1	0.990083
162.2	0.99009
162.3	0.990098
162.4	0.990105
162.5	0.990112
162.6	0.990119
162.7	0.990126
162.8	0.990132
162.9	0.990139
163	0.990146
163.1	0.990153
163.2	0.99016
163.3	0.990166
163.4	0.990173
163.5	0.99018
163.6	0.990186
163.7	0.990193
163.8	0.990199
163.9	0.990206
164	0.990212
164.1	0.990219
164.2	0.990225
164.3	0.990232
164.4	0.990238
164.5	0.990244
164.6	0.99025
164.7	0.990257
164.8	0.990263
164.9	0.990269
165	0.990275
165.1	0.990281
165.2	0.990287
165.3	0.990293
165.4	0.990299
165.5	0.990305
165.6	0.990311
165.7	0.990317
165.8	0.990323
165.9	0.990329
166	0.990334
166.1	0.99034
166.2	0.990346
166.3	0.990352
166.4	0.990357
166.5	0.990363
166.6	0.990368
166.7	0.990374
166.8	0.99038
166.9	0.990385
167	0.990391
167.1	0.990396
167.2	0.990401
167.3	0.990407
167.4	0.990412
167.5	0.990417
167.6	0.990423
167.7	0.990428
167.8	0.990433
167.9	0.990439
168	0.990444
168.1	0.990449
168.2	0.990454
168.3	0.990459
168.4	0.990464
168.5	0.990469
168.6	0.990474
168.7	0.990479
168.8	0.990484
168.9	0.990489
169	0.990494
169.1	0.990499
169.2	0.990504
169.3	0.990508
169.4	0.990513
169.5	0.990518
169.6	0.990523
169.7	0.990528
169.8	0.990532
169.9	0.990537
170	0.990542
170.1	0.990546
170.2	0.990551
170.3	0.990555
170.4	0.99056
170.5	0.990564
170.6	0.990569
170.7	0.990573
170.8	0.990578
170.9	0.990582
171	0.990587
171.1	0.990591
171.2	0.990595
171.3	0.9906
171.4	0.990604
171.5	0.990608
171.6	0.990612
171.7	0.990617
171.8	0.990621
171.9	0.990625
172	0.990629
172.1	0.990633
172.2	0.990637
172.3	0.990641
172.4	0.990646
172.5	0.99065
172.6	0.990654
172.7	0.990658
172.8	0.990662
172.9	0.990665
173	0.990669
173.1	0.990673
173.2	0.990677
173.3	0.990681
173.4	0.990685
173.5	0.990689
173.6	0.990693
173.7	0.990696
173.8	0.9907
173.9	0.990704
174	0.990708
174.1	0.990711
174.2	0.990715
174.3	0.990719
174.4	0.990722
174.5	0.990726
174.6	0.990729
174.7	0.990733
174.8	0.990737
174.9	0.99074
175	0.990744
175.1	0.990747
175.2	0.990751
175.3	0.990754
175.4	0.990758
175.5	0.990761
175.6	0.990764
175.7	0.990768
175.8	0.990771
175.9	0.990774
176	0.990778
176.1	0.990781
176.2	0.990784
176.3	0.990788
176.4	0.990791
176.5	0.990794
176.6	0.990797
176.7	0.990801
176.8	0.990804
176.9	0.990807
177	0.99081
177.1	0.990813
177.2	0.990816
177.3	0.990819
177.4	0.990823
177.5	0.990826
177.6	0.990829
177.7	0.990832
177.8	0.990835
177.9	0.990838
178	0.990841
178.1	0.990844
178.2	0.990847
178.3	0.99085
178.4	0.990852
178.5	0.990855
178.6	0.990858
178.7	0.990861
178.8	0.990864
178.9	0.990867
179	0.99087
179.1	0.990872
179.2	0.990875
179.3	0.990878
179.4	0.990881
179.5	0.990884
179.6	0.990886
179.7	0.990889
179.8	0.990892
179.9	0.990894
180	0.990897
180.1	0.9909
180.2	0.990902
180.3	0.990905
180.4	0.990908
180.5	0.99091
180.6	0.990913
180.7	0.990915
180.8	0.990918
180.9	0.99092
181	0.990923
181.1	0.990925
181.2	0.990928
181.3	0.99093
181.4	0.990933
181.5	0.990935
181.6	0.990938
181.7	0.99094
181.8	0.990943
181.9	0.990945
182	0.990947
182.1	0.99095
182.2	0.990952
182.3	0.990955
182.4	0.990957
182.5	0.990959
182.6	0.990962
182.7	0.990964
182.8	0.990966
182.9	0.990968
183	0.990971
183.1	0.990973
183.2	0.990975
183.3	0.990977
183.4	0.99098
183.5	0.990982
183.6	0.990984
183.7	0.990986
183.8	0.990988
183.9	0.99099
184	0.990993
184.1	0.990995
184.2	0.990997
184.3	0.990999
184.4	0.991001
184.5	0.991003
184.6	0.991005
184.7	0.991007
184.8	0.991009
184.9	0.991011
185	0.991013
185.1	0.991015
185.2	0.991017
185.3	0.991019
185.4	0.991021
185.5	0.991023
185.6	0.991025
185.7	0.991027
185.8	0.991029
185.9	0.991031
186	0.991033
186.1	0.991035
186.2	0.991037
186.3	0.991039
186.4	0.991041
186.5	0.991042
186.6	0.991044
186.7	0.991046
186.8	0.991048
186.9	0.99105
187	0.991052
187.1	0.991053
187.2	0.991055
187.3	0.991057
187.4	0.991059
187.5	0.991061
187.6	0.991062
187.7	0.991064
187.8	0.991066
187.9	0.991068
188	0.991069
188.1	0.991071
188.2	0.991073
188.3	0.991074
188.4	0.991076
188.5	0.991078
188.6	0.991079
188.7	0.991081
188.8	0.991083
188.9	0.991084
189	0.991086
189.1	0.991088
189.2	0.991089
189.3	0.991091
189.4	0.991092
189.5	0.991094
189.6	0.991096
189.7	0.991097
189.8	0.991099
189.9	0.9911
190	0.991102
190.1	0.991103
190.2	0.991105
190.3	0.991106
190.4	0.991108
190.5	0.991109
190.6	0.991111
190.7	0.991112
190.8	0.991114
190.9	0.991115
191	0.991117
191.1	0.991118
191.2	0.99112
191.3	0.991121
191.4	0.991122
191.5	0.991124
191.6	0.991125
191.7	0.991127
191.8	0.991128
191.9	0.991129
192	0.991131
192.1	0.991132
192.2	0.991133
192.3	0.991135
192.4	0.991136
192.5	0.991138
192.6	0.991139
192.7	0.99114
192.8	0.991141
192.9	0.991143
193	0.991144
193.1	0.991145
193.2	0.991147
193.3	0.991148
193.4	0.991149
193.5	0.991151
193.6	0.991152
193.7	0.991153
193.8	0.991154
193.9	0.991156
194	0.991157
194.1	0.991158
194.2	0.991159
194.3	0.99116
194.4	0.991162
194.5	0.991163
194.6	0.991164
194.7	0.991165
194.8	0.991166
194.9	0.991168
195	0.991169
195.1	0.99117
195.2	0.991171
195.3	0.991172
195.4	0.991173
195.5	0.991174
195.6	0.991176
195.7	0.991177
195.8	0.991178
195.9	0.991179
196	0.99118
196.1	0.991181
196.2	0.991182
196.3	0.991183
196.4	0.991184
196.5	0.991185
196.6	0.991187
196.7	0.991188
196.8	0.991189
196.9	0.99119
197	0.991191
197.1	0.991192
197.2	0.991193
197.3	0.991194
197.4	0.991195
197.5	0.991196
197.6	0.991197
197.7	0.991198
197.8	0.991199
197.9	0.9912
198	0.991201
198.1	0.991202
198.2	0.991203
198.3	0.991204
198.4	0.991205
198.5	0.991206
198.6	0.991207
198.7	0.991208
198.8	0.991209
198.9	0.99121
199	0.99121
199.1	0.991211
199.2	0.991212
199.3	0.991213
199.4	0.991214
199.5	0.991215
199.6	0.991216
199.7	0.991217
199.8	0.991218
199.9	0.991219
200	0.99122
[truncated: 14,000 more rows]
