# Supplementary material for: Bayesian inference of kinetic schemes for ion channels by Kalman filtering
Source: eLife journal article supplement (doi:10.7554/elife.62714), 2022-05-04
Supplement: fig4-data1 [file 1_Sim_N_100_theor_Strom_Werte.xlsx]

## Sheet: Tabelle1
0.1	0
0.2	0
0.3	0
0.4	0
0.5	0
0.6	0
0.7	0
0.8	0
0.9	0
1	0
1.1	0
1.2	0
1.3	0
1.4	0
1.5	0
1.6	0
1.7	0
1.8	0
1.9	0
2	0
2.1	0
2.2	0
2.3	0
2.4	0
2.5	0
2.6	0
2.7	0
2.8	0
2.9	0
3	0
3.1	0
3.2	0
3.3	0
3.4	0
3.5	0
3.6	0
3.7	0
3.8	0
3.9	0
4	0
4.1	0
4.2	0
4.3	0
4.4	0
4.5	0
4.6	0
4.7	0
4.8	0
4.9	0
5	0
5.1	0
5.2	0
5.3	0
5.4	0
5.5	0
5.6	0
5.7	0
5.8	0
5.9	0
6	0
6.1	0
6.2	0
6.3	0
6.4	0
6.5	0
6.6	0
6.7	0
6.8	0
6.9	0
7	0
7.1	0
7.2	0
7.3	0
7.4	0
7.5	0
7.6	0
7.7	0
7.8	0
7.9	0
8	0
8.1	0
8.2	0
8.3	0
8.4	0
8.5	0
8.6	0
8.7	0
8.8	0
8.9	0
9	0
9.1	0
9.2	0
9.3	0
9.4	0
9.5	0
9.6	0
9.7	0
9.8	0
9.9	0
10	0
10.1	0
10.2	0
10.3	0
10.4	0
10.5	0
10.6	0
10.7	0
10.8	0
10.9	0
11	0
11.1	0
11.2	0
11.3	0
11.4	0
11.5	0
11.6	0
11.7	0
11.8	0
11.9	0
12	0
12.1	0
12.2	0
12.3	0
12.4	0
12.5	0
12.6	0
12.7	0
12.8	0
12.9	0
13	0
13.1	0
13.2	0
13.3	0
13.4	0
13.5	0
13.6	0
13.7	0
13.8	0
13.9	0
14	0
14.1	0
14.2	0
14.3	0
14.4	0
14.5	0
14.6	0
14.7	0
14.8	0
14.9	0
15	0
15.1	0
15.2	0
15.3	0
15.4	0
15.5	0
15.6	0
15.7	0
15.8	0
15.9	0
16	0
16.1	0
16.2	0
16.3	0
16.4	0
16.5	0
16.6	0
16.7	0
16.8	0
16.9	0
17	0
17.1	0
17.2	0
17.3	0
17.4	0
17.5	0
17.6	0
17.7	0
17.8	0
17.9	0
18	0
18.1	0
18.2	0
18.3	0
18.4	0
18.5	0
18.6	0
18.7	0
18.8	0
18.9	0
19	0
19.1	0
19.2	0
19.3	0
19.4	0
19.5	0
19.6	0
19.7	0
19.8	0
19.9	0
20	0
20.1	0
20.2	0
20.3	0
20.4	0
20.5	0
20.6	0
20.7	0
20.8	0
20.9	0
21	0
21.1	0
21.2	0
21.3	0
21.4	0
21.5	0
21.6	0
21.7	0
21.8	0
21.9	0
22	0
22.1	0
22.2	0
22.3	0
22.4	0
22.5	0
22.6	0
22.7	0
22.8	0
22.9	0
23	0
23.1	0
23.2	0
23.3	0
23.4	0
23.5	0
23.6	0
23.7	0
23.8	0
23.9	0
24	0
24.1	0
24.2	0
24.3	0
24.4	0
24.5	0
24.6	0
24.7	0
24.8	0
24.9	0
25	0
25.1	0
25.2	0
25.3	0
25.4	0
25.5	0
25.6	0
25.7	0
25.8	0
25.9	0
26	0
26.1	0
26.2	0
26.3	0
26.4	0
26.5	0
26.6	0
26.7	0
26.8	0
26.9	0
27	0
27.1	0
27.2	0
27.3	0
27.4	0
27.5	0
27.6	0
27.7	0
27.8	0
27.9	0
28	0
28.1	0
28.2	0
28.3	0
28.4	0
28.5	0
28.6	0
28.7	0
28.8	0
28.9	0
29	0
29.1	0
29.2	0
29.3	0
29.4	0
29.5	0
29.6	0
29.7	0
29.8	0
29.9	0
30	0
30.1	0
30.2	0
30.3	0
30.4	0
30.5	0
30.6	0
30.7	0
30.8	0
30.9	0
31	0
31.1	0
31.2	0
31.3	0
31.4	0
31.5	0
31.6	0
31.7	0
31.8	0
31.9	0
32	0
32.1	0
32.2	0
32.3	0
32.4	0
32.5	0
32.6	0
32.7	0
32.8	0
32.9	0
33	0
33.1	0
33.2	0
33.3	0
33.4	0
33.5	0
33.6	0
33.7	0
33.8	0
33.9	0
34	0
34.1	0
34.2	0
34.3	0
34.4	0
34.5	0
34.6	0
34.7	0
34.8	0
34.9	0
35	0
35.1	0
35.2	0
35.3	0
35.4	0
35.5	0
35.6	0
35.7	0
35.8	0
35.9	0
36	0
36.1	0
36.2	0
36.3	0
36.4	0
36.5	0
36.6	0
36.7	0
36.8	0
36.9	0
37	0
37.1	0
37.2	0
37.3	0
37.4	0
37.5	0
37.6	0
37.7	0
37.8	0
37.9	0
38	0
38.1	0
38.2	0
38.3	0
38.4	0
38.5	0
38.6	0
38.7	0
38.8	0
38.9	0
39	0
39.1	0
39.2	0
39.3	0
39.4	0
39.5	0
39.6	0
39.7	0
39.8	0
39.9	0
40	0
40.1	0
40.2	0
40.3	0
40.4	0
40.5	0
40.6	0
40.7	0
40.8	0
40.9	0
41	0
41.1	0
41.2	0
41.3	0
41.4	0
41.5	0
41.6	0
41.7	0
41.8	0
41.9	0
42	0
42.1	0
42.2	0
42.3	0
42.4	0
42.5	0
42.6	0
42.7	0
42.8	0
42.9	0
43	0
43.1	0
43.2	0
43.3	0
43.4	0
43.5	0
43.6	0
43.7	0
43.8	0
43.9	0
44	0
44.1	0
44.2	0
44.3	0
44.4	0
44.5	0
44.6	0
44.7	0
44.8	0
44.9	0
45	0
45.1	0
45.2	0
45.3	0
45.4	0
45.5	0
45.6	0
45.7	0
45.8	0
45.9	0
46	0
46.1	0
46.2	0
46.3	0
46.4	0
46.5	0
46.6	0
46.7	0
46.8	0
46.9	0
47	0
47.1	0
47.2	0
47.3	0
47.4	0
47.5	0
47.6	0
47.7	0
47.8	0
47.9	0
48	0
48.1	0
48.2	0
48.3	0
48.4	0
48.5	0
48.6	0
48.7	0
48.8	0
48.9	0
49	0
49.1	0
49.2	0
49.3	0
49.4	0
49.5	0
49.6	0
49.7	0
49.8	0
49.9	0
50	0
50.1	0
50.2	0
50.3	0
50.4	0
50.5	0
50.6	0
50.7	0
50.8	0
50.9	0
51	0
51.1	0
51.2	0
51.3	0
51.4	0
51.5	0
51.6	0
51.7	0
51.8	0
51.9	0
52	0
52.1	0
52.2	0
52.3	0
52.4	0
52.5	0
52.6	0
52.7	0
52.8	0
52.9	0
53	0
53.1	0
53.2	0
53.3	0
53.4	0
53.5	0
53.6	0
53.7	0
53.8	0
53.9	0
54	0
54.1	0
54.2	0
54.3	0
54.4	0
54.5	0
54.6	0
54.7	0
54.8	0
54.9	0
55	0
55.1	0
55.2	0
55.3	0
55.4	0
55.5	0
55.6	0
55.7	0
55.8	0
55.9	0
56	0
56.1	0
56.2	0
56.3	0
56.4	0
56.5	0
56.6	0
56.7	0
56.8	0
56.9	0
57	0
57.1	0
57.2	0
57.3	0
57.4	0
57.5	0
57.6	0
57.7	0
57.8	0
57.9	0
58	0
58.1	0
58.2	0
58.3	0
58.4	0
58.5	0
58.6	0
58.7	0
58.8	0
58.9	0
59	0
59.1	0
59.2	0
59.3	0
59.4	0
59.5	0
59.6	0
59.7	0
59.8	0
59.9	0
60	0
60.1	0
60.2	0
60.3	0
60.4	0
60.5	0
60.6	0
60.7	0
60.8	0
60.9	0
61	0
61.1	0
61.2	0
61.3	0
61.4	0
61.5	0
61.6	0
61.7	0
61.8	0
61.9	0
62	0
62.1	0
62.2	0
62.3	0
62.4	0
62.5	0
62.6	0
62.7	0
62.8	0
62.9	0
63	0
63.1	0
63.2	0
63.3	0
63.4	0
63.5	0
63.6	0
63.7	0
63.8	0
63.9	0
64	0
64.1	0
64.2	0
64.3	0
64.4	0
64.5	0
64.6	0
64.7	0
64.8	0
64.9	0
65	0
65.1	0
65.2	0
65.3	0
65.4	0
65.5	0
65.6	0
65.7	0
65.8	0
65.9	0
66	0
66.1	0
66.2	0
66.3	0
66.4	0
66.5	0
66.6	0
66.7	0
66.8	0
66.9	0
67	0
67.1	0
67.2	0
67.3	0
67.4	0
67.5	0
67.6	0
67.7	0
67.8	0
67.9	0
68	0
68.1	0
68.2	0
68.3	0
68.4	0
68.5	0
68.6	0
68.7	0
68.8	0
68.9	0
69	0
69.1	0
69.2	0
69.3	0
69.4	0
69.5	0
69.6	0
69.7	0
69.8	0
69.9	0
70	0
70.1	0
70.2	0
70.3	0
70.4	0
70.5	0
70.6	0
70.7	0
70.8	0
70.9	0
71	0
71.1	0
71.2	0
71.3	0
71.4	0
71.5	0
71.6	0
71.7	0
71.8	0
71.9	0
72	0
72.1	0
72.2	0
72.3	0
72.4	0
72.5	0
72.6	0
72.7	0
72.8	0
72.9	0
73	0
73.1	0
73.2	0
73.3	0
73.4	0
73.5	0
73.6	0
73.7	0
73.8	0
73.9	0
74	0
74.1	0
74.2	0
74.3	0
74.4	0
74.5	0
74.6	0
74.7	0
74.8	0
74.9	0
75	0
75.1	0
75.2	0
75.3	0
75.4	0
75.5	0
75.6	0
75.7	0
75.8	0
75.9	0
76	0
76.1	0
76.2	0
76.3	0
76.4	0
76.5	0
76.6	0
76.7	0
76.8	0
76.9	0
77	0
77.1	0
77.2	0
77.3	0
77.4	0
77.5	0
77.6	0
77.7	0
77.8	0
77.9	0
78	0
78.1	0
78.2	0
78.3	0
78.4	0
78.5	0
78.6	0
78.7	0
78.8	0
78.9	0
79	0
79.1	0
79.2	0
79.3	0
79.4	0
79.5	0
79.6	0
79.7	0
79.8	0
79.9	0
80	0
80.1	0
80.2	0
80.3	0
80.4	0
80.5	0
80.6	0
80.7	0
80.8	0
80.9	0
81	0
81.1	0
81.2	0
81.3	0
81.4	0
81.5	0
81.6	0
81.7	0
81.8	0
81.9	0
82	0
82.1	0
82.2	0
82.3	0
82.4	0
82.5	0
82.6	0
82.7	0
82.8	0
82.9	0
83	0
83.1	0
83.2	0
83.3	0
83.4	0
83.5	0
83.6	0
83.7	0
83.8	0
83.9	0
84	0
84.1	0
84.2	0
84.3	0
84.4	0
84.5	0
84.6	0
84.7	0
84.8	0
84.9	0
85	0
85.1	0
85.2	0
85.3	0
85.4	0
85.5	0
85.6	0
85.7	0
85.8	0
85.9	0
86	0
86.1	0
86.2	0
86.3	0
86.4	0
86.5	0
86.6	0
86.7	0
86.8	0
86.9	0
87	0
87.1	0
87.2	0
87.3	0
87.4	0
87.5	0
87.6	0
87.7	0
87.8	0
87.9	0
88	0
88.1	0
88.2	0
88.3	0
88.4	0
88.5	0
88.6	0
88.7	0
88.8	0
88.9	0
89	0
89.1	0
89.2	0
89.3	0
89.4	0
89.5	0
89.6	0
89.7	0
89.8	0
89.9	0
90	0
90.1	0
90.2	0
90.3	0
90.4	0
90.5	0
90.6	0
90.7	0
90.8	0
90.9	0
91	0
91.1	0
91.2	0
91.3	0
91.4	0
91.5	0
91.6	0
91.7	0
91.8	0
91.9	0
92	0
92.1	0
92.2	0
92.3	0
92.4	0
92.5	0
92.6	0
92.7	0
92.8	0
92.9	0
93	0
93.1	0
93.2	0
93.3	0
93.4	0
93.5	0
93.6	0
93.7	0
93.8	0
93.9	0
94	0
94.1	0
94.2	0
94.3	0
94.4	0
94.5	0
94.6	0
94.7	0
94.8	0
94.9	0
95	0
95.1	0
95.2	0
95.3	0
95.4	0
95.5	0
95.6	0
95.7	0
95.8	0
95.9	0
96	0
96.1	0
96.2	0
96.3	0
96.4	0
96.5	0
96.6	0
96.7	0
96.8	0
96.9	0
97	0
97.1	0
97.2	0
97.3	0
97.4	0
97.5	0
97.6	0
97.7	0
97.8	0
97.9	0
98	0
98.1	0
98.2	0
98.3	0
98.4	0
98.5	0
98.6	0
98.7	0
98.8	0
98.9	0
99	0
99.1	0
99.2	0
99.3	0
99.4	0
99.5	0
99.6	0
99.7	0
99.8	0
99.9	0
100	0
100.1	0.000439071
100.2	0.00221028
100.3	0.00504436
100.4	0.00853724
100.5	0.012415
100.6	0.0165108
100.7	0.0207255
100.8	0.0250005
100.9	0.0293013
101	0.0336075
101.1	0.0379072
101.2	0.0421934
101.3	0.046462
101.4	0.0507106
101.5	0.0549379
101.6	0.0591431
101.7	0.0633259
101.8	0.0674862
101.9	0.0716237
102	0.0757387
102.1	0.0798311
102.2	0.083901
102.3	0.0879485
102.4	0.0919737
102.5	0.0959768
102.6	0.0999579
102.7	0.103917
102.8	0.107854
102.9	0.11177
103	0.115664
103.1	0.119537
103.2	0.123388
103.3	0.127218
103.4	0.131027
103.5	0.134816
103.6	0.138583
103.7	0.142329
103.8	0.146055
103.9	0.14976
104	0.153445
104.1	0.15711
104.2	0.160755
104.3	0.164379
104.4	0.167983
104.5	0.171568
104.6	0.175133
104.7	0.178678
104.8	0.182204
104.9	0.18571
105	0.189197
105.1	0.192665
105.2	0.196114
105.3	0.199544
105.4	0.202954
105.5	0.206346
105.6	0.20972
105.7	0.213075
105.8	0.216411
105.9	0.219729
106	0.223029
106.1	0.22631
106.2	0.229574
106.3	0.232819
106.4	0.236047
106.5	0.239257
106.6	0.242449
106.7	0.245624
106.8	0.248781
106.9	0.25192
107	0.255043
107.1	0.258148
107.2	0.261236
107.3	0.264308
107.4	0.267362
107.5	0.270399
107.6	0.27342
107.7	0.276424
107.8	0.279412
107.9	0.282383
108	0.285338
108.1	0.288276
108.2	0.291198
108.3	0.294105
108.4	0.296995
108.5	0.299869
108.6	0.302728
108.7	0.30557
108.8	0.308397
108.9	0.311209
109	0.314005
109.1	0.316786
109.2	0.319551
109.3	0.322301
109.4	0.325036
109.5	0.327756
109.6	0.330461
109.7	0.333151
109.8	0.335826
109.9	0.338487
110	0.341132
110.1	0.343764
110.2	0.346381
110.3	0.348983
110.4	0.351571
110.5	0.354145
110.6	0.356704
110.7	0.35925
110.8	0.361781
110.9	0.364299
111	0.366803
111.1	0.369293
111.2	0.371769
111.3	0.374232
111.4	0.376681
111.5	0.379116
111.6	0.381538
111.7	0.383947
111.8	0.386343
111.9	0.388725
112	0.391094
112.1	0.393451
112.2	0.395794
112.3	0.398124
112.4	0.400442
112.5	0.402746
112.6	0.405038
112.7	0.407318
112.8	0.409585
112.9	0.411839
113	0.414081
113.1	0.416311
113.2	0.418528
113.3	0.420733
113.4	0.422926
113.5	0.425107
113.6	0.427276
113.7	0.429433
113.8	0.431578
113.9	0.433712
114	0.435833
114.1	0.437943
114.2	0.440041
114.3	0.442128
114.4	0.444203
114.5	0.446267
114.6	0.448319
114.7	0.450361
114.8	0.45239
114.9	0.454409
115	0.456417
115.1	0.458413
115.2	0.460399
115.3	0.462373
115.4	0.464337
115.5	0.46629
115.6	0.468232
115.7	0.470164
115.8	0.472085
115.9	0.473995
116	0.475895
116.1	0.477784
116.2	0.479663
116.3	0.481531
116.4	0.48339
116.5	0.485238
116.6	0.487076
116.7	0.488903
116.8	0.490721
116.9	0.492529
117	0.494326
117.1	0.496114
117.2	0.497892
117.3	0.49966
117.4	0.501419
117.5	0.503168
117.6	0.504907
117.7	0.506636
117.8	0.508356
117.9	0.510067
118	0.511768
118.1	0.51346
118.2	0.515142
118.3	0.516816
118.4	0.51848
118.5	0.520134
118.6	0.52178
118.7	0.523417
118.8	0.525045
118.9	0.526663
119	0.528273
119.1	0.529874
119.2	0.531466
119.3	0.533049
119.4	0.534624
119.5	0.53619
119.6	0.537747
119.7	0.539296
119.8	0.540836
119.9	0.542368
120	0.543891
120.1	0.545406
120.2	0.546913
120.3	0.548411
120.4	0.549901
120.5	0.551383
120.6	0.552857
120.7	0.554322
120.8	0.55578
120.9	0.557229
121	0.558671
121.1	0.560104
121.2	0.56153
121.3	0.562948
121.4	0.564358
121.5	0.56576
121.6	0.567154
121.7	0.568541
121.8	0.56992
121.9	0.571292
122	0.572656
122.1	0.574013
122.2	0.575362
122.3	0.576703
122.4	0.578038
122.5	0.579365
122.6	0.580684
122.7	0.581997
122.8	0.583302
122.9	0.5846
123	0.58589
123.1	0.587174
123.2	0.588451
123.3	0.58972
123.4	0.590983
123.5	0.592239
123.6	0.593487
123.7	0.594729
123.8	0.595964
123.9	0.597192
124	0.598414
124.1	0.599629
124.2	0.600837
124.3	0.602038
124.4	0.603233
124.5	0.604421
124.6	0.605603
124.7	0.606778
124.8	0.607947
124.9	0.609109
125	0.610265
125.1	0.611414
125.2	0.612557
125.3	0.613694
125.4	0.614825
125.5	0.615949
125.6	0.617067
125.7	0.618179
125.8	0.619285
125.9	0.620385
126	0.621479
126.1	0.622567
126.2	0.623648
126.3	0.624724
126.4	0.625794
126.5	0.626858
126.6	0.627916
126.7	0.628968
126.8	0.630015
126.9	0.631056
127	0.632091
127.1	0.63312
127.2	0.634144
127.3	0.635162
127.4	0.636174
127.5	0.637181
127.6	0.638182
127.7	0.639178
127.8	0.640168
127.9	0.641153
128	0.642132
128.1	0.643106
128.2	0.644075
128.3	0.645038
128.4	0.645996
128.5	0.646949
128.6	0.647897
128.7	0.648839
128.8	0.649776
128.9	0.650708
129	0.651635
129.1	0.652557
129.2	0.653473
129.3	0.654385
129.4	0.655291
129.5	0.656193
129.6	0.65709
129.7	0.657981
129.8	0.658868
129.9	0.65975
130	0.660627
130.1	0.661499
130.2	0.662366
130.3	0.663229
130.4	0.664087
130.5	0.66494
130.6	0.665789
130.7	0.666632
130.8	0.667471
130.9	0.668306
131	0.669136
131.1	0.669961
131.2	0.670782
131.3	0.671598
131.4	0.67241
131.5	0.673217
131.6	0.67402
131.7	0.674819
131.8	0.675613
131.9	0.676403
132	0.677188
132.1	0.677969
132.2	0.678746
132.3	0.679518
132.4	0.680286
132.5	0.68105
132.6	0.68181
132.7	0.682565
132.8	0.683317
132.9	0.684064
133	0.684807
133.1	0.685546
133.2	0.686281
133.3	0.687012
133.4	0.687739
133.5	0.688462
133.6	0.689181
133.7	0.689896
133.8	0.690607
133.9	0.691314
134	0.692018
134.1	0.692717
134.2	0.693412
134.3	0.694104
134.4	0.694792
134.5	0.695476
134.6	0.696156
134.7	0.696833
134.8	0.697506
134.9	0.698175
135	0.69884
135.1	0.699502
135.2	0.70016
135.3	0.700815
135.4	0.701466
135.5	0.702113
135.6	0.702757
135.7	0.703397
135.8	0.704034
135.9	0.704667
136	0.705297
136.1	0.705923
136.2	0.706546
136.3	0.707165
136.4	0.707781
136.5	0.708394
136.6	0.709003
136.7	0.709609
136.8	0.710211
136.9	0.710811
137	0.711406
137.1	0.711999
137.2	0.712588
137.3	0.713174
137.4	0.713757
137.5	0.714337
137.6	0.714914
137.7	0.715487
137.8	0.716057
137.9	0.716624
138	0.717188
138.1	0.717749
138.2	0.718306
138.3	0.718861
138.4	0.719413
138.5	0.719961
138.6	0.720507
138.7	0.721049
138.8	0.721589
138.9	0.722125
139	0.722659
139.1	0.723189
139.2	0.723717
139.3	0.724242
139.4	0.724764
139.5	0.725283
139.6	0.725799
139.7	0.726313
139.8	0.726823
139.9	0.727331
140	0.727836
140.1	0.728338
140.2	0.728837
140.3	0.729334
140.4	0.729828
140.5	0.730319
140.6	0.730808
140.7	0.731293
140.8	0.731776
140.9	0.732257
141	0.732735
141.1	0.73321
141.2	0.733682
141.3	0.734152
141.4	0.73462
141.5	0.735085
141.6	0.735547
141.7	0.736007
141.8	0.736464
141.9	0.736918
142	0.737371
142.1	0.73782
142.2	0.738267
142.3	0.738712
142.4	0.739154
142.5	0.739594
142.6	0.740032
142.7	0.740467
142.8	0.740899
142.9	0.741329
143	0.741757
143.1	0.742183
143.2	0.742606
143.3	0.743027
143.4	0.743445
143.5	0.743862
143.6	0.744275
143.7	0.744687
143.8	0.745096
143.9	0.745504
144	0.745908
144.1	0.746311
144.2	0.746712
144.3	0.74711
144.4	0.747506
144.5	0.7479
144.6	0.748291
144.7	0.748681
144.8	0.749068
144.9	0.749454
145	0.749837
145.1	0.750218
145.2	0.750597
145.3	0.750973
145.4	0.751348
145.5	0.751721
145.6	0.752092
145.7	0.75246
145.8	0.752827
145.9	0.753191
146	0.753554
146.1	0.753914
146.2	0.754273
146.3	0.75463
146.4	0.754984
146.5	0.755337
146.6	0.755688
146.7	0.756036
146.8	0.756383
146.9	0.756728
147	0.757071
147.1	0.757413
147.2	0.757752
147.3	0.758089
147.4	0.758425
147.5	0.758759
147.6	0.759091
147.7	0.759421
147.8	0.759749
147.9	0.760075
148	0.7604
148.1	0.760723
148.2	0.761044
148.3	0.761363
148.4	0.761681
148.5	0.761997
148.6	0.762311
148.7	0.762623
148.8	0.762934
148.9	0.763243
149	0.76355
149.1	0.763855
149.2	0.764159
149.3	0.764461
149.4	0.764762
149.5	0.765061
149.6	0.765358
149.7	0.765653
149.8	0.765947
149.9	0.76624
150	0.76653
150.1	0.766819
150.2	0.767107
150.3	0.767393
150.4	0.767677
150.5	0.76796
150.6	0.768241
150.7	0.768521
150.8	0.768799
150.9	0.769076
151	0.769351
151.1	0.769624
151.2	0.769897
151.3	0.770167
151.4	0.770436
151.5	0.770704
151.6	0.77097
151.7	0.771235
151.8	0.771498
151.9	0.77176
152	0.77202
152.1	0.772279
152.2	0.772536
152.3	0.772792
152.4	0.773047
152.5	0.7733
152.6	0.773552
152.7	0.773802
152.8	0.774051
152.9	0.774299
153	0.774546
153.1	0.77479
153.2	0.775034
153.3	0.775276
153.4	0.775517
153.5	0.775757
153.6	0.775995
153.7	0.776232
153.8	0.776468
153.9	0.776702
154	0.776935
154.1	0.777167
154.2	0.777398
154.3	0.777627
154.4	0.777855
154.5	0.778082
154.6	0.778307
154.7	0.778532
154.8	0.778755
154.9	0.778976
155	0.779197
155.1	0.779416
155.2	0.779635
155.3	0.779852
155.4	0.780067
155.5	0.780282
155.6	0.780495
155.7	0.780708
155.8	0.780919
155.9	0.781128
156	0.781337
156.1	0.781545
156.2	0.781751
156.3	0.781957
156.4	0.782161
156.5	0.782364
156.6	0.782566
156.7	0.782767
156.8	0.782966
156.9	0.783165
157	0.783362
157.1	0.783559
157.2	0.783754
157.3	0.783948
157.4	0.784142
157.5	0.784334
157.6	0.784525
157.7	0.784715
157.8	0.784904
157.9	0.785092
158	0.785279
158.1	0.785465
158.2	0.785649
158.3	0.785833
158.4	0.786016
158.5	0.786198
158.6	0.786379
158.7	0.786559
158.8	0.786737
158.9	0.786915
159	0.787092
159.1	0.787268
159.2	0.787443
159.3	0.787617
159.4	0.78779
159.5	0.787962
159.6	0.788133
159.7	0.788303
159.8	0.788473
159.9	0.788641
160	0.788808
160.1	0.788975
160.2	0.78914
160.3	0.789305
160.4	0.789469
160.5	0.789631
160.6	0.789793
160.7	0.789954
160.8	0.790114
160.9	0.790274
161	0.790432
161.1	0.79059
161.2	0.790746
161.3	0.790902
161.4	0.791057
161.5	0.791211
161.6	0.791364
161.7	0.791517
161.8	0.791668
161.9	0.791819
162	0.791969
162.1	0.792118
162.2	0.792266
162.3	0.792413
162.4	0.79256
162.5	0.792706
162.6	0.792851
162.7	0.792995
162.8	0.793138
162.9	0.793281
163	0.793423
163.1	0.793564
163.2	0.793704
163.3	0.793844
163.4	0.793982
163.5	0.79412
163.6	0.794258
163.7	0.794394
163.8	0.79453
163.9	0.794665
164	0.794799
164.1	0.794932
164.2	0.795065
164.3	0.795197
164.4	0.795328
164.5	0.795459
164.6	0.795589
164.7	0.795718
164.8	0.795846
164.9	0.795974
165	0.796101
165.1	0.796227
165.2	0.796353
165.3	0.796478
165.4	0.796602
165.5	0.796725
165.6	0.796848
165.7	0.796971
165.8	0.797092
165.9	0.797213
166	0.797333
166.1	0.797453
166.2	0.797571
166.3	0.79769
166.4	0.797807
166.5	0.797924
166.6	0.79804
166.7	0.798156
166.8	0.798271
166.9	0.798385
167	0.798499
167.1	0.798612
167.2	0.798725
167.3	0.798836
167.4	0.798948
167.5	0.799058
167.6	0.799168
167.7	0.799278
167.8	0.799387
167.9	0.799495
168	0.799602
168.1	0.799709
168.2	0.799816
168.3	0.799922
168.4	0.800027
168.5	0.800132
168.6	0.800236
168.7	0.800339
168.8	0.800442
168.9	0.800545
169	0.800646
169.1	0.800748
169.2	0.800848
169.3	0.800949
169.4	0.801048
169.5	0.801147
169.6	0.801246
169.7	0.801344
169.8	0.801441
169.9	0.801538
170	0.801634
170.1	0.80173
170.2	0.801826
170.3	0.80192
170.4	0.802015
170.5	0.802108
170.6	0.802202
170.7	0.802294
170.8	0.802386
170.9	0.802478
171	0.802569
171.1	0.80266
171.2	0.80275
171.3	0.80284
171.4	0.802929
171.5	0.803018
171.6	0.803106
171.7	0.803194
171.8	0.803281
171.9	0.803368
172	0.803454
172.1	0.80354
172.2	0.803625
172.3	0.80371
172.4	0.803794
172.5	0.803878
172.6	0.803962
172.7	0.804045
172.8	0.804127
172.9	0.80421
173	0.804291
173.1	0.804372
173.2	0.804453
173.3	0.804533
173.4	0.804613
173.5	0.804693
173.6	0.804772
173.7	0.80485
173.8	0.804928
173.9	0.805006
174	0.805083
174.1	0.80516
174.2	0.805237
174.3	0.805313
174.4	0.805388
174.5	0.805463
174.6	0.805538
174.7	0.805613
174.8	0.805686
174.9	0.80576
175	0.805833
175.1	0.805906
175.2	0.805978
175.3	0.80605
175.4	0.806122
175.5	0.806193
175.6	0.806263
175.7	0.806334
175.8	0.806404
175.9	0.806473
176	0.806542
176.1	0.806611
176.2	0.80668
176.3	0.806748
176.4	0.806815
176.5	0.806883
176.6	0.80695
176.7	0.807016
176.8	0.807082
176.9	0.807148
177	0.807214
177.1	0.807279
177.2	0.807344
177.3	0.807408
177.4	0.807472
177.5	0.807536
177.6	0.807599
177.7	0.807662
177.8	0.807725
177.9	0.807787
178	0.807849
178.1	0.807911
178.2	0.807972
178.3	0.808033
178.4	0.808093
178.5	0.808154
178.6	0.808214
178.7	0.808273
178.8	0.808333
178.9	0.808391
179	0.80845
179.1	0.808508
179.2	0.808566
179.3	0.808624
179.4	0.808681
179.5	0.808738
179.6	0.808795
179.7	0.808852
179.8	0.808908
179.9	0.808963
180	0.809019
180.1	0.809074
180.2	0.809129
180.3	0.809184
180.4	0.809238
180.5	0.809292
180.6	0.809345
180.7	0.809399
180.8	0.809452
180.9	0.809505
181	0.809557
181.1	0.809609
181.2	0.809661
181.3	0.809713
181.4	0.809764
181.5	0.809815
181.6	0.809866
181.7	0.809917
181.8	0.809967
181.9	0.810017
182	0.810067
182.1	0.810116
182.2	0.810165
182.3	0.810214
182.4	0.810263
182.5	0.810311
182.6	0.810359
182.7	0.810407
182.8	0.810454
182.9	0.810502
183	0.810549
183.1	0.810595
183.2	0.810642
183.3	0.810688
183.4	0.810734
183.5	0.81078
183.6	0.810825
183.7	0.81087
183.8	0.810915
183.9	0.81096
184	0.811005
184.1	0.811049
184.2	0.811093
184.3	0.811137
184.4	0.81118
184.5	0.811223
184.6	0.811266
184.7	0.811309
184.8	0.811352
184.9	0.811394
185	0.811436
185.1	0.811478
185.2	0.81152
185.3	0.811561
185.4	0.811602
185.5	0.811643
185.6	0.811684
185.7	0.811724
185.8	0.811765
185.9	0.811805
186	0.811845
186.1	0.811884
186.2	0.811924
186.3	0.811963
186.4	0.812002
186.5	0.812041
186.6	0.812079
186.7	0.812117
186.8	0.812156
186.9	0.812193
187	0.812231
187.1	0.812269
187.2	0.812306
187.3	0.812343
187.4	0.81238
187.5	0.812417
187.6	0.812453
187.7	0.812489
187.8	0.812525
187.9	0.812561
188	0.812597
188.1	0.812632
188.2	0.812668
188.3	0.812703
188.4	0.812738
188.5	0.812772
188.6	0.812807
188.7	0.812841
188.8	0.812875
188.9	0.812909
189	0.812943
189.1	0.812977
189.2	0.81301
189.3	0.813043
189.4	0.813076
189.5	0.813109
189.6	0.813142
189.7	0.813174
189.8	0.813206
189.9	0.813238
190	0.81327
190.1	0.813302
190.2	0.813334
190.3	0.813365
190.4	0.813396
190.5	0.813428
190.6	0.813458
190.7	0.813489
190.8	0.81352
190.9	0.81355
191	0.81358
191.1	0.81361
191.2	0.81364
191.3	0.81367
191.4	0.8137
191.5	0.813729
191.6	0.813758
191.7	0.813787
191.8	0.813816
191.9	0.813845
192	0.813874
192.1	0.813902
192.2	0.81393
192.3	0.813958
192.4	0.813986
192.5	0.814014
192.6	0.814042
192.7	0.814069
192.8	0.814097
192.9	0.814124
193	0.814151
193.1	0.814178
193.2	0.814205
193.3	0.814231
193.4	0.814258
193.5	0.814284
193.6	0.81431
193.7	0.814336
193.8	0.814362
193.9	0.814388
194	0.814414
194.1	0.814439
194.2	0.814464
194.3	0.81449
194.4	0.814515
194.5	0.81454
194.6	0.814564
194.7	0.814589
194.8	0.814614
194.9	0.814638
195	0.814662
195.1	0.814686
195.2	0.81471
195.3	0.814734
195.4	0.814758
195.5	0.814781
195.6	0.814805
195.7	0.814828
195.8	0.814851
195.9	0.814874
196	0.814897
196.1	0.81492
196.2	0.814943
196.3	0.814965
196.4	0.814988
196.5	0.81501
196.6	0.815032
196.7	0.815054
196.8	0.815076
196.9	0.815098
197	0.81512
197.1	0.815141
197.2	0.815163
197.3	0.815184
197.4	0.815205
197.5	0.815227
197.6	0.815248
197.7	0.815268
197.8	0.815289
197.9	0.81531
198	0.81533
198.1	0.815351
198.2	0.815371
198.3	0.815391
198.4	0.815411
198.5	0.815431
198.6	0.815451
198.7	0.815471
198.8	0.815491
198.9	0.81551
199	0.81553
199.1	0.815549
199.2	0.815568
199.3	0.815587
199.4	0.815606
199.5	0.815625
199.6	0.815644
199.7	0.815663
199.8	0.815681
199.9	0.8157
200	0.815718
[truncated: 14,000 more rows]
