# Supplementary material for: Bayesian inference of kinetic schemes for ion channels by Kalman filtering
Source: eLife journal article supplement (doi:10.7554/elife.62714), 2022-05-04
Supplement: fig4-data1 [file 1_Sim_N_200_Fluor_MW_16M.xlsx]

## Sheet: 16 M
0.1	0
0.2	0
0.3	0
0.4	0
0.5	0
0.6	0
0.7	0
0.8	0
0.9	0
1	0
1.1	0
1.2	0
1.3	0
1.4	0
1.5	0
1.6	0
1.7	0
1.8	0
1.9	0
2	0
2.1	0
2.2	0
2.3	0
2.4	0
2.5	0
2.6	0
2.7	0
2.8	0
2.9	0
3	0
3.1	0
3.2	0
3.3	0
3.4	0
3.5	0
3.6	0
3.7	0
3.8	0
3.9	0
4	0
4.1	0
4.2	0
4.3	0
4.4	0
4.5	0
4.6	0
4.7	0
4.8	0
4.9	0
5	0
5.1	0
5.2	0
5.3	0
5.4	0
5.5	0
5.6	0
5.7	0
5.8	0
5.9	0
6	0
6.1	0
6.2	0
6.3	0
6.4	0
6.5	0
6.6	0
6.7	0
6.8	0
6.9	0
7	0
7.1	0
7.2	0
7.3	0
7.4	0
7.5	0
7.6	0
7.7	0
7.8	0
7.9	0
8	0
8.1	0
8.2	0
8.3	0
8.4	0
8.5	0
8.6	0
8.7	0
8.8	0
8.9	0
9	0
9.1	0
9.2	0
9.3	0
9.4	0
9.5	0
9.6	0
9.7	0
9.8	0
9.9	0
10	0
10.1	0
10.2	0
10.3	0
10.4	0
10.5	0
10.6	0
10.7	0
10.8	0
10.9	0
11	0
11.1	0
11.2	0
11.3	0
11.4	0
11.5	0
11.6	0
11.7	0
11.8	0
11.9	0
12	0
12.1	0
12.2	0
12.3	0
12.4	0
12.5	0
12.6	0
12.7	0
12.8	0
12.9	0
13	0
13.1	0
13.2	0
13.3	0
13.4	0
13.5	0
13.6	0
13.7	0
13.8	0
13.9	0
14	0
14.1	0
14.2	0
14.3	0
14.4	0
14.5	0
14.6	0
14.7	0
14.8	0
14.9	0
15	0
15.1	0
15.2	0
15.3	0
15.4	0
15.5	0
15.6	0
15.7	0
15.8	0
15.9	0
16	0
16.1	0
16.2	0
16.3	0
16.4	0
16.5	0
16.6	0
16.7	0
16.8	0
16.9	0
17	0
17.1	0
17.2	0
17.3	0
17.4	0
17.5	0
17.6	0
17.7	0
17.8	0
17.9	0
18	0
18.1	0
18.2	0
18.3	0
18.4	0
18.5	0
18.6	0
18.7	0
18.8	0
18.9	0
19	0
19.1	0
19.2	0
19.3	0
19.4	0
19.5	0
19.6	0
19.7	0
19.8	0
19.9	0
20	0
20.1	0
20.2	0
20.3	0
20.4	0
20.5	0
20.6	0
20.7	0
20.8	0
20.9	0
21	0
21.1	0
21.2	0
21.3	0
21.4	0
21.5	0
21.6	0
21.7	0
21.8	0
21.9	0
22	0
22.1	0
22.2	0
22.3	0
22.4	0
22.5	0
22.6	0
22.7	0
22.8	0
22.9	0
23	0
23.1	0
23.2	0
23.3	0
23.4	0
23.5	0
23.6	0
23.7	0
23.8	0
23.9	0
24	0
24.1	0
24.2	0
24.3	0
24.4	0
24.5	0
24.6	0
24.7	0
24.8	0
24.9	0
25	0
25.1	0
25.2	0
25.3	0
25.4	0
25.5	0
25.6	0
25.7	0
25.8	0
25.9	0
26	0
26.1	0
26.2	0
26.3	0
26.4	0
26.5	0
26.6	0
26.7	0
26.8	0
26.9	0
27	0
27.1	0
27.2	0
27.3	0
27.4	0
27.5	0
27.6	0
27.7	0
27.8	0
27.9	0
28	0
28.1	0
28.2	0
28.3	0
28.4	0
28.5	0
28.6	0
28.7	0
28.8	0
28.9	0
29	0
29.1	0
29.2	0
29.3	0
29.4	0
29.5	0
29.6	0
29.7	0
29.8	0
29.9	0
30	0
30.1	0
30.2	0
30.3	0
30.4	0
30.5	0
30.6	0
30.7	0
30.8	0
30.9	0
31	0
31.1	0
31.2	0
31.3	0
31.4	0
31.5	0
31.6	0
31.7	0
31.8	0
31.9	0
32	0
32.1	0
32.2	0
32.3	0
32.4	0
32.5	0
32.6	0
32.7	0
32.8	0
32.9	0
33	0
33.1	0
33.2	0
33.3	0
33.4	0
33.5	0
33.6	0
33.7	0
33.8	0
33.9	0
34	0
34.1	0
34.2	0
34.3	0
34.4	0
34.5	0
34.6	0
34.7	0
34.8	0
34.9	0
35	0
35.1	0
35.2	0
35.3	0
35.4	0
35.5	0
35.6	0
35.7	0
35.8	0
35.9	0
36	0
36.1	0
36.2	0
36.3	0
36.4	0
36.5	0
36.6	0
36.7	0
36.8	0
36.9	0
37	0
37.1	0
37.2	0
37.3	0
37.4	0
37.5	0
37.6	0
37.7	0
37.8	0
37.9	0
38	0
38.1	0
38.2	0
38.3	0
38.4	0
38.5	0
38.6	0
38.7	0
38.8	0
38.9	0
39	0
39.1	0
39.2	0
39.3	0
39.4	0
39.5	0
39.6	0
39.7	0
39.8	0
39.9	0
40	0
40.1	0
40.2	0
40.3	0
40.4	0
40.5	0
40.6	0
40.7	0
40.8	0
40.9	0
41	0
41.1	0
41.2	0
41.3	0
41.4	0
41.5	0
41.6	0
41.7	0
41.8	0
41.9	0
42	0
42.1	0
42.2	0
42.3	0
42.4	0
42.5	0
42.6	0
42.7	0
42.8	0
42.9	0
43	0
43.1	0
43.2	0
43.3	0
43.4	0
43.5	0
43.6	0
43.7	0
43.8	0
43.9	0
44	0
44.1	0
44.2	0
44.3	0
44.4	0
44.5	0
44.6	0
44.7	0
44.8	0
44.9	0
45	0
45.1	0
45.2	0
45.3	0
45.4	0
45.5	0
45.6	0
45.7	0
45.8	0
45.9	0
46	0
46.1	0
46.2	0
46.3	0
46.4	0
46.5	0
46.6	0
46.7	0
46.8	0
46.9	0
47	0
47.1	0
47.2	0
47.3	0
47.4	0
47.5	0
47.6	0
47.7	0
47.8	0
47.9	0
48	0
48.1	0
48.2	0
48.3	0
48.4	0
48.5	0
48.6	0
48.7	0
48.8	0
48.9	0
49	0
49.1	0
49.2	0
49.3	0
49.4	0
49.5	0
49.6	0
49.7	0
49.8	0
49.9	0
50	0
50.1	0
50.2	0
50.3	0
50.4	0
50.5	0
50.6	0
50.7	0
50.8	0
50.9	0
51	0
51.1	0
51.2	0
51.3	0
51.4	0
51.5	0
51.6	0
51.7	0
51.8	0
51.9	0
52	0
52.1	0
52.2	0
52.3	0
52.4	0
52.5	0
52.6	0
52.7	0
52.8	0
52.9	0
53	0
53.1	0
53.2	0
53.3	0
53.4	0
53.5	0
53.6	0
53.7	0
53.8	0
53.9	0
54	0
54.1	0
54.2	0
54.3	0
54.4	0
54.5	0
54.6	0
54.7	0
54.8	0
54.9	0
55	0
55.1	0
55.2	0
55.3	0
55.4	0
55.5	0
55.6	0
55.7	0
55.8	0
55.9	0
56	0
56.1	0
56.2	0
56.3	0
56.4	0
56.5	0
56.6	0
56.7	0
56.8	0
56.9	0
57	0
57.1	0
57.2	0
57.3	0
57.4	0
57.5	0
57.6	0
57.7	0
57.8	0
57.9	0
58	0
58.1	0
58.2	0
58.3	0
58.4	0
58.5	0
58.6	0
58.7	0
58.8	0
58.9	0
59	0
59.1	0
59.2	0
59.3	0
59.4	0
59.5	0
59.6	0
59.7	0
59.8	0
59.9	0
60	0
60.1	0
60.2	0
60.3	0
60.4	0
60.5	0
60.6	0
60.7	0
60.8	0
60.9	0
61	0
61.1	0
61.2	0
61.3	0
61.4	0
61.5	0
61.6	0
61.7	0
61.8	0
61.9	0
62	0
62.1	0
62.2	0
62.3	0
62.4	0
62.5	0
62.6	0
62.7	0
62.8	0
62.9	0
63	0
63.1	0
63.2	0
63.3	0
63.4	0
63.5	0
63.6	0
63.7	0
63.8	0
63.9	0
64	0
64.1	0
64.2	0
64.3	0
64.4	0
64.5	0
64.6	0
64.7	0
64.8	0
64.9	0
65	0
65.1	0
65.2	0
65.3	0
65.4	0
65.5	0
65.6	0
65.7	0
65.8	0
65.9	0
66	0
66.1	0
66.2	0
66.3	0
66.4	0
66.5	0
66.6	0
66.7	0
66.8	0
66.9	0
67	0
67.1	0
67.2	0
67.3	0
67.4	0
67.5	0
67.6	0
67.7	0
67.8	0
67.9	0
68	0
68.1	0
68.2	0
68.3	0
68.4	0
68.5	0
68.6	0
68.7	0
68.8	0
68.9	0
69	0
69.1	0
69.2	0
69.3	0
69.4	0
69.5	0
69.6	0
69.7	0
69.8	0
69.9	0
70	0
70.1	0
70.2	0
70.3	0
70.4	0
70.5	0
70.6	0
70.7	0
70.8	0
70.9	0
71	0
71.1	0
71.2	0
71.3	0
71.4	0
71.5	0
71.6	0
71.7	0
71.8	0
71.9	0
72	0
72.1	0
72.2	0
72.3	0
72.4	0
72.5	0
72.6	0
72.7	0
72.8	0
72.9	0
73	0
73.1	0
73.2	0
73.3	0
73.4	0
73.5	0
73.6	0
73.7	0
73.8	0
73.9	0
74	0
74.1	0
74.2	0
74.3	0
74.4	0
74.5	0
74.6	0
74.7	0
74.8	0
74.9	0
75	0
75.1	0
75.2	0
75.3	0
75.4	0
75.5	0
75.6	0
75.7	0
75.8	0
75.9	0
76	0
76.1	0
76.2	0
76.3	0
76.4	0
76.5	0
76.6	0
76.7	0
76.8	0
76.9	0
77	0
77.1	0
77.2	0
77.3	0
77.4	0
77.5	0
77.6	0
77.7	0
77.8	0
77.9	0
78	0
78.1	0
78.2	0
78.3	0
78.4	0
78.5	0
78.6	0
78.7	0
78.8	0
78.9	0
79	0
79.1	0
79.2	0
79.3	0
79.4	0
79.5	0
79.6	0
79.7	0
79.8	0
79.9	0
80	0
80.1	0
80.2	0
80.3	0
80.4	0
80.5	0
80.6	0
80.7	0
80.8	0
80.9	0
81	0
81.1	0
81.2	0
81.3	0
81.4	0
81.5	0
81.6	0
81.7	0
81.8	0
81.9	0
82	0
82.1	0
82.2	0
82.3	0
82.4	0
82.5	0
82.6	0
82.7	0
82.8	0
82.9	0
83	0
83.1	0
83.2	0
83.3	0
83.4	0
83.5	0
83.6	0
83.7	0
83.8	0
83.9	0
84	0
84.1	0
84.2	0
84.3	0
84.4	0
84.5	0
84.6	0
84.7	0
84.8	0
84.9	0
85	0
85.1	0
85.2	0
85.3	0
85.4	0
85.5	0
85.6	0
85.7	0
85.8	0
85.9	0
86	0
86.1	0
86.2	0
86.3	0
86.4	0
86.5	0
86.6	0
86.7	0
86.8	0
86.9	0
87	0
87.1	0
87.2	0
87.3	0
87.4	0
87.5	0
87.6	0
87.7	0
87.8	0
87.9	0
88	0
88.1	0
88.2	0
88.3	0
88.4	0
88.5	0
88.6	0
88.7	0
88.8	0
88.9	0
89	0
89.1	0
89.2	0
89.3	0
89.4	0
89.5	0
89.6	0
89.7	0
89.8	0
89.9	0
90	0
90.1	0
90.2	0
90.3	0
90.4	0
90.5	0
90.6	0
90.7	0
90.8	0
90.9	0
91	0
91.1	0
91.2	0
91.3	0
91.4	0
91.5	0
91.6	0
91.7	0
91.8	0
91.9	0
92	0
92.1	0
92.2	0
92.3	0
92.4	0
92.5	0
92.6	0
92.7	0
92.8	0
92.9	0
93	0
93.1	0
93.2	0
93.3	0
93.4	0
93.5	0
93.6	0
93.7	0
93.8	0
93.9	0
94	0
94.1	0
94.2	0
94.3	0
94.4	0
94.5	0
94.6	0
94.7	0
94.8	0
94.9	0
95	0
95.1	0
95.2	0
95.3	0
95.4	0
95.5	0
95.6	0
95.7	0
95.8	0
95.9	0
96	0
96.1	0
96.2	0
96.3	0
96.4	0
96.5	0
96.6	0
96.7	0
96.8	0
96.9	0
97	0
97.1	0
97.2	0
97.3	0
97.4	0
97.5	0
97.6	0
97.7	0
97.8	0
97.9	0
98	0
98.1	0
98.2	0
98.3	0
98.4	0
98.5	0
98.6	0
98.7	0
98.8	0
98.9	0
99	0
99.1	0
99.2	0
99.3	0
99.4	0
99.5	0
99.6	0
99.7	0
99.8	0
99.9	0
100	0
100.1	0.5175
100.2	0.705
100.3	0.8075
100.4	0.8625
100.5	0.895
100.6	0.9075
100.7	0.9225
100.8	0.9325
100.9	0.9375
101	0.945
101.1	0.9375
101.2	0.92
101.3	0.9325
101.4	0.935
101.5	0.945
101.6	0.9425
101.7	0.955
101.8	0.96
101.9	0.9675
102	0.9675
102.1	0.97
102.2	0.9675
102.3	0.95
102.4	0.9525
102.5	0.965
102.6	0.9675
102.7	0.97
102.8	0.975
102.9	0.965
103	0.9725
103.1	0.96
103.2	0.9575
103.3	0.97
103.4	0.97
103.5	0.9575
103.6	0.9525
103.7	0.95
103.8	0.9525
103.9	0.9525
104	0.9675
104.1	0.9725
104.2	0.9725
104.3	0.975
104.4	0.97
104.5	0.975
104.6	0.975
104.7	0.9725
104.8	0.97
104.9	0.9675
105	0.9625
105.1	0.96
105.2	0.9725
105.3	0.9775
105.4	0.975
105.5	0.97
105.6	0.97
105.7	0.97
105.8	0.9775
105.9	0.97
106	0.97
106.1	0.9725
106.2	0.97
106.3	0.9575
106.4	0.96
106.5	0.9625
106.6	0.9575
106.7	0.965
106.8	0.9775
106.9	0.9725
107	0.96
107.1	0.9575
107.2	0.96
107.3	0.96
107.4	0.965
107.5	0.975
107.6	0.9825
107.7	0.9825
107.8	0.98
107.9	0.98
108	0.98
108.1	0.9825
108.2	0.975
108.3	0.9725
108.4	0.9625
108.5	0.9625
108.6	0.965
108.7	0.97
108.8	0.98
108.9	0.9675
109	0.975
109.1	0.965
109.2	0.965
109.3	0.9625
109.4	0.9625
109.5	0.95
109.6	0.9625
109.7	0.9625
109.8	0.965
109.9	0.975
110	0.965
110.1	0.9775
110.2	0.9725
110.3	0.97
110.4	0.9775
110.5	0.98
110.6	0.9875
110.7	0.9775
110.8	0.97
110.9	0.9775
111	0.9625
111.1	0.9675
111.2	0.9725
111.3	0.9775
111.4	0.9775
111.5	0.975
111.6	0.975
111.7	0.97
111.8	0.965
111.9	0.975
112	0.9625
112.1	0.9675
112.2	0.97
112.3	0.9725
112.4	0.97
112.5	0.9625
112.6	0.965
112.7	0.9575
112.8	0.975
112.9	0.9825
113	0.975
113.1	0.9725
113.2	0.975
113.3	0.9775
113.4	0.9775
113.5	0.97
113.6	0.98
113.7	0.9875
113.8	0.985
113.9	0.975
114	0.97
114.1	0.9775
114.2	0.975
114.3	0.9725
114.4	0.98
114.5	0.98
114.6	0.975
114.7	0.9775
114.8	0.98
114.9	0.9825
115	0.985
115.1	0.9825
115.2	0.985
115.3	0.98
115.4	0.9775
115.5	0.975
115.6	0.98
115.7	0.97
115.8	0.965
115.9	0.98
116	0.97
116.1	0.97
116.2	0.9825
116.3	0.98
116.4	0.9825
116.5	0.9775
116.6	0.9775
116.7	0.9725
116.8	0.975
116.9	0.9725
117	0.9725
117.1	0.9825
117.2	0.9725
117.3	0.965
117.4	0.9575
117.5	0.9725
117.6	0.975
117.7	0.9775
117.8	0.9725
117.9	0.965
118	0.9625
118.1	0.9775
118.2	0.9775
118.3	0.9775
118.4	0.98
118.5	0.9775
118.6	0.9775
118.7	0.975
118.8	0.98
118.9	0.9825
119	0.985
119.1	0.985
119.2	0.9825
119.3	0.98
119.4	0.98
119.5	0.975
119.6	0.97
119.7	0.9625
119.8	0.9625
119.9	0.965
120	0.9775
120.1	0.9775
120.2	0.98
120.3	0.9775
120.4	0.9825
120.5	0.9775
120.6	0.9825
120.7	0.985
120.8	0.9875
120.9	0.99
121	0.985
121.1	0.9875
121.2	0.98
121.3	0.9825
121.4	0.985
121.5	0.975
121.6	0.98
121.7	0.9775
121.8	0.9825
121.9	0.985
122	0.98
122.1	0.9825
122.2	0.99
122.3	0.9825
122.4	0.99
122.5	0.9925
122.6	0.99
122.7	0.98
122.8	0.985
122.9	0.985
123	0.985
123.1	0.9725
123.2	0.9825
123.3	0.985
123.4	0.99
123.5	0.9875
123.6	0.98
123.7	0.985
123.8	0.99
123.9	0.98
124	0.98
124.1	0.985
124.2	0.98
124.3	0.9775
124.4	0.98
124.5	0.9875
124.6	0.99
124.7	0.995
124.8	0.9925
124.9	0.9875
125	0.9875
125.1	0.9875
125.2	1
125.3	0.9925
125.4	0.9875
125.5	0.9775
125.6	0.9825
125.7	0.975
125.8	0.9775
125.9	0.98
126	0.9825
126.1	0.9825
126.2	0.975
126.3	0.9825
126.4	0.99
126.5	0.985
126.6	0.985
126.7	0.99
126.8	0.9975
126.9	0.9875
127	0.99
127.1	0.9825
127.2	0.975
127.3	0.9825
127.4	0.9825
127.5	0.9875
127.6	0.98
127.7	0.98
127.8	0.9875
127.9	0.985
128	0.9875
128.1	0.985
128.2	0.985
128.3	0.98
128.4	0.985
128.5	0.9775
128.6	0.975
128.7	0.98
128.8	0.9925
128.9	0.9875
129	0.995
129.1	0.995
129.2	0.995
129.3	0.9875
129.4	0.9875
129.5	0.9875
129.6	0.9875
129.7	0.995
129.8	0.9925
129.9	0.985
130	0.995
130.1	0.99
130.2	0.985
130.3	0.9875
130.4	0.9925
130.5	0.985
130.6	0.985
130.7	0.9725
130.8	0.98
130.9	0.98
131	0.9725
131.1	0.98
131.2	0.9775
131.3	0.9775
131.4	0.9825
131.5	0.9925
131.6	0.9875
131.7	0.975
131.8	0.98
131.9	0.98
132	0.9825
132.1	0.98
132.2	0.985
132.3	0.98
132.4	0.9875
132.5	0.98
132.6	0.9825
132.7	0.9925
132.8	0.9975
132.9	0.9825
133	0.99
133.1	0.9825
133.2	0.9825
133.3	0.98
133.4	0.9775
133.5	0.9775
133.6	0.975
133.7	0.9825
133.8	0.98
133.9	0.9825
134	0.985
134.1	0.9875
134.2	0.9925
134.3	0.99
134.4	0.9875
134.5	0.98
134.6	0.9875
134.7	0.9825
134.8	0.985
134.9	0.9875
135	0.9875
135.1	0.9825
135.2	0.985
135.3	0.99
135.4	0.975
135.5	0.97
135.6	0.97
135.7	0.9725
135.8	0.97
135.9	0.9675
136	0.9775
136.1	0.985
136.2	0.9825
136.3	0.9825
136.4	0.985
136.5	0.99
136.6	0.9825
136.7	0.985
136.8	0.99
136.9	0.99
137	0.9875
137.1	0.99
137.2	0.9875
137.3	0.9875
137.4	0.995
137.5	1
137.6	0.9925
137.7	0.9975
137.8	0.9875
137.9	0.9875
138	0.9875
138.1	0.99
138.2	0.9875
138.3	0.9825
138.4	0.9825
138.5	0.9925
138.6	0.985
138.7	0.99
138.8	0.98
138.9	0.975
139	0.9775
139.1	0.9875
139.2	0.9925
139.3	0.9925
139.4	0.9875
139.5	0.99
139.6	0.995
139.7	0.995
139.8	0.9975
139.9	0.9925
140	0.99
140.1	0.99
140.2	0.99
140.3	0.9925
140.4	0.99
140.5	0.98
140.6	0.985
140.7	0.99
140.8	0.9925
140.9	0.9875
141	0.99
141.1	0.99
141.2	0.99
141.3	0.985
141.4	0.985
141.5	0.985
141.6	0.98
141.7	0.9875
141.8	0.99
141.9	0.9975
142	0.9925
142.1	0.9975
142.2	0.9875
142.3	0.99
142.4	0.995
142.5	0.9925
142.6	0.995
142.7	0.995
142.8	0.995
142.9	0.995
143	0.9875
143.1	0.9875
143.2	0.98
143.3	0.9875
143.4	0.9825
143.5	0.98
143.6	0.9925
143.7	0.9875
143.8	0.9875
143.9	0.9875
144	0.9825
144.1	0.9825
144.2	0.98
144.3	0.9825
144.4	0.9925
144.5	0.99
144.6	0.9825
144.7	0.99
144.8	0.985
144.9	0.985
145	0.9875
145.1	0.99
145.2	0.99
145.3	0.99
145.4	0.9825
145.5	0.98
145.6	0.9825
145.7	0.9725
145.8	0.9775
145.9	0.995
146	0.99
146.1	0.9825
146.2	0.985
146.3	0.9825
146.4	0.985
146.5	0.9875
146.6	0.985
146.7	0.9825
146.8	0.9875
146.9	0.99
147	0.99
147.1	0.985
147.2	0.985
147.3	0.985
147.4	0.98
147.5	0.9925
147.6	0.9875
147.7	0.99
147.8	0.9925
147.9	0.9875
148	0.99
148.1	0.99
148.2	0.9875
148.3	0.9925
148.4	1
148.5	0.9975
148.6	0.9925
148.7	0.9925
148.8	0.9875
148.9	0.99
149	0.99
149.1	0.98
149.2	0.9825
149.3	0.9825
149.4	0.99
149.5	0.9825
149.6	0.98
149.7	0.9925
149.8	0.99
149.9	0.99
150	0.9925
150.1	0.995
150.2	0.99
150.3	0.985
150.4	0.985
150.5	0.99
150.6	0.99
150.7	0.9875
150.8	0.9825
150.9	0.9775
151	0.98
151.1	0.9775
151.2	0.9875
151.3	0.99
151.4	0.99
151.5	1
151.6	0.9925
151.7	0.99
151.8	0.99
151.9	0.9875
152	0.9925
152.1	0.995
152.2	0.99
152.3	0.9875
152.4	0.9875
152.5	0.99
152.6	0.99
152.7	0.9925
152.8	0.9875
152.9	0.995
153	0.9975
153.1	0.995
153.2	0.995
153.3	1
153.4	0.9975
153.5	0.9975
153.6	0.995
153.7	0.9925
153.8	0.9975
153.9	0.9875
154	0.99
154.1	0.9925
154.2	0.9975
154.3	0.9975
154.4	0.9925
154.5	0.995
154.6	0.9925
154.7	0.985
154.8	0.9875
154.9	0.9825
155	0.985
155.1	0.995
155.2	0.99
155.3	0.99
155.4	0.99
155.5	0.98
155.6	0.9925
155.7	0.99
155.8	0.9825
155.9	0.98
156	0.9875
156.1	0.99
156.2	0.9925
156.3	0.99
156.4	0.9925
156.5	0.99
156.6	0.985
156.7	0.9825
156.8	0.985
156.9	0.9875
157	0.985
157.1	0.985
157.2	0.9925
157.3	0.9875
157.4	0.99
157.5	0.9925
157.6	0.9975
157.7	0.995
157.8	0.9925
157.9	0.995
158	0.995
158.1	0.995
158.2	0.995
158.3	0.995
158.4	0.985
158.5	0.9875
158.6	0.99
158.7	0.995
158.8	0.9875
158.9	0.9875
159	0.9875
159.1	0.9925
159.2	1
159.3	0.9925
159.4	0.9925
159.5	0.99
159.6	0.99
159.7	0.985
159.8	0.9925
159.9	0.9875
160	0.9925
160.1	0.995
160.2	0.9975
160.3	0.9925
160.4	0.9875
160.5	0.9825
160.6	0.98
160.7	0.985
160.8	0.9875
160.9	0.9875
161	0.9875
161.1	0.985
161.2	0.9825
161.3	0.9775
161.4	0.985
161.5	0.985
161.6	0.985
161.7	0.99
161.8	0.9875
161.9	0.9875
162	0.9925
162.1	0.99
162.2	0.9875
162.3	0.98
162.4	0.9925
162.5	0.995
162.6	0.995
162.7	0.9975
162.8	0.9925
162.9	0.9875
163	0.99
163.1	0.99
163.2	0.9825
163.3	0.985
163.4	0.9825
163.5	0.99
163.6	0.985
163.7	0.9975
163.8	0.995
163.9	0.9925
164	0.9925
164.1	0.99
164.2	0.9925
164.3	0.9975
164.4	0.9975
164.5	0.99
164.6	0.99
164.7	0.9925
164.8	0.9925
164.9	0.99
165	0.99
165.1	0.9875
165.2	0.9925
165.3	0.99
165.4	0.995
165.5	0.9925
165.6	0.995
165.7	0.995
165.8	0.995
165.9	0.9975
166	0.9975
166.1	0.9975
166.2	0.995
166.3	0.995
166.4	0.995
166.5	0.995
166.6	0.995
166.7	0.995
166.8	0.9875
166.9	0.9825
167	0.9875
167.1	0.9975
167.2	0.9975
167.3	0.995
167.4	0.995
167.5	0.99
167.6	0.9875
167.7	0.99
167.8	0.995
167.9	0.995
168	0.995
168.1	0.9875
168.2	0.98
168.3	0.9825
168.4	0.985
168.5	0.9875
168.6	0.99
168.7	0.9975
168.8	0.9975
168.9	0.995
169	0.9925
169.1	0.995
169.2	0.995
169.3	0.9925
169.4	0.9925
169.5	0.995
169.6	0.9975
169.7	0.995
169.8	0.995
169.9	0.9975
170	0.9975
170.1	0.9925
170.2	0.985
170.3	0.985
170.4	0.9975
170.5	0.9975
170.6	1
170.7	0.9925
170.8	0.995
170.9	0.9875
171	0.9925
171.1	0.9875
171.2	0.9925
171.3	0.985
171.4	0.98
171.5	0.9775
171.6	0.975
171.7	0.98
171.8	0.985
171.9	0.98
172	0.9875
172.1	0.9875
172.2	0.99
172.3	0.9925
172.4	0.995
172.5	0.995
172.6	0.9925
172.7	0.9925
172.8	0.9925
172.9	0.99
173	0.985
173.1	0.9875
173.2	0.9875
173.3	0.99
173.4	0.995
173.5	0.9975
173.6	0.9975
173.7	0.995
173.8	0.9975
173.9	0.995
174	0.995
174.1	0.9975
174.2	0.995
174.3	0.9925
174.4	0.9925
174.5	0.99
174.6	0.9875
174.7	0.9825
174.8	0.985
174.9	0.99
175	0.99
175.1	0.995
175.2	0.99
175.3	0.9925
175.4	0.99
175.5	0.995
175.6	1
175.7	0.995
175.8	0.9875
175.9	0.9925
176	0.99
176.1	0.9875
176.2	0.985
176.3	0.99
176.4	0.995
176.5	0.9925
176.6	0.9925
176.7	0.99
176.8	0.9875
176.9	0.9875
177	0.985
177.1	0.9925
177.2	0.9925
177.3	0.99
177.4	0.9925
177.5	0.9925
177.6	0.985
177.7	0.985
177.8	0.9825
177.9	0.9875
178	0.985
178.1	0.99
178.2	0.9875
178.3	0.99
178.4	0.9825
178.5	0.985
178.6	0.99
178.7	0.995
178.8	0.99
178.9	0.9925
179	0.99
179.1	0.995
179.2	0.9875
179.3	0.99
179.4	0.99
179.5	0.9825
179.6	0.9775
179.7	0.9875
179.8	0.9875
179.9	0.9875
180	0.9875
180.1	0.99
180.2	0.9925
180.3	0.9925
180.4	0.9925
180.5	0.9875
180.6	0.9825
180.7	0.99
180.8	0.985
180.9	0.9825
181	0.985
181.1	0.98
181.2	0.985
181.3	0.98
181.4	0.9825
181.5	0.985
181.6	0.9925
181.7	0.995
181.8	0.995
181.9	0.995
182	0.9875
182.1	0.995
182.2	0.995
182.3	0.995
182.4	0.995
182.5	0.9925
182.6	0.9975
182.7	0.9925
182.8	0.9875
182.9	0.98
183	0.9825
183.1	0.9925
183.2	0.9975
183.3	1
183.4	0.9975
183.5	0.9925
183.6	0.99
183.7	0.9825
183.8	0.99
183.9	0.99
184	0.995
184.1	0.9875
184.2	0.9875
184.3	0.99
184.4	0.985
184.5	0.99
184.6	0.99
184.7	0.9925
184.8	0.9925
184.9	1
185	0.9975
185.1	0.99
185.2	0.99
185.3	0.99
185.4	0.9925
185.5	0.9875
185.6	0.9875
185.7	0.9925
185.8	0.99
185.9	0.9925
186	0.9975
186.1	0.9975
186.2	0.985
186.3	0.995
186.4	0.9975
186.5	0.995
186.6	1
186.7	1
186.8	0.985
186.9	0.9875
187	0.9975
187.1	0.9975
187.2	0.9975
187.3	0.9925
187.4	0.99
187.5	0.9875
187.6	0.99
187.7	0.9925
187.8	0.9925
187.9	0.9875
188	0.9925
188.1	0.9925
188.2	0.995
188.3	0.9925
188.4	0.995
188.5	0.9925
188.6	0.985
188.7	0.985
188.8	0.9875
188.9	0.9875
189	0.9925
189.1	0.9925
189.2	0.9825
189.3	0.9875
189.4	0.99
189.5	0.9875
189.6	0.985
189.7	0.99
189.8	0.99
189.9	0.9925
190	0.995
190.1	0.99
190.2	0.9925
190.3	1
190.4	0.99
190.5	0.99
190.6	0.995
190.7	0.9975
190.8	0.995
190.9	0.9925
191	0.99
191.1	0.9925
191.2	0.99
191.3	0.99
191.4	0.995
191.5	0.995
191.6	0.9925
191.7	0.99
191.8	0.995
191.9	0.9925
192	0.9925
192.1	0.9925
192.2	0.9925
192.3	0.995
192.4	0.995
192.5	0.9925
192.6	0.9875
192.7	0.9875
192.8	0.9875
192.9	0.9925
193	0.9975
193.1	0.9975
193.2	0.9925
193.3	0.99
193.4	0.9925
193.5	0.99
193.6	0.9925
193.7	0.9975
193.8	0.9975
193.9	0.995
194	0.995
194.1	0.9975
194.2	0.9975
194.3	0.9925
194.4	0.995
194.5	0.995
194.6	0.995
194.7	0.995
194.8	0.9975
194.9	0.995
195	0.9925
195.1	0.9875
195.2	0.9875
195.3	0.9925
195.4	0.995
195.5	0.995
195.6	0.9975
195.7	0.9975
195.8	0.9975
195.9	0.995
196	0.99
196.1	0.9875
196.2	0.985
196.3	0.985
196.4	0.9925
196.5	0.9925
196.6	0.99
196.7	0.9775
196.8	0.985
196.9	0.99
197	0.985
197.1	0.99
197.2	0.9825
197.3	0.99
197.4	0.985
197.5	0.99
197.6	0.9925
197.7	0.9925
197.8	0.99
197.9	0.9875
198	0.99
198.1	0.9875
198.2	0.98
198.3	0.9875
198.4	0.9875
198.5	0.9825
198.6	0.99
198.7	0.995
198.8	0.995
198.9	0.995
199	0.995
199.1	0.99
199.2	0.99
199.3	0.9875
199.4	0.9875
199.5	0.99
199.6	0.985
199.7	0.9925
199.8	0.995
199.9	0.9875
200	0.99
[truncated: 14,000 more rows]
