# Supplementary material for: Bayesian inference of kinetic schemes for ion channels by Kalman filtering
Source: eLife journal article supplement (doi:10.7554/elife.62714), 2022-05-04
Supplement: fig4-data1 [file 1_Sim_N_200_Strom_MW_16M.xlsx]

## Sheet: 16 M
0.1	0
0.2	0
0.3	0
0.4	0
0.5	0
0.6	0
0.7	0
0.8	0
0.9	0
1	0
1.1	0
1.2	0
1.3	0
1.4	0
1.5	0
1.6	0
1.7	0
1.8	0
1.9	0
2	0
2.1	0
2.2	0
2.3	0
2.4	0
2.5	0
2.6	0
2.7	0
2.8	0
2.9	0
3	0
3.1	0
3.2	0
3.3	0
3.4	0
3.5	0
3.6	0
3.7	0
3.8	0
3.9	0
4	0
4.1	0
4.2	0
4.3	0
4.4	0
4.5	0
4.6	0
4.7	0
4.8	0
4.9	0
5	0
5.1	0
5.2	0
5.3	0
5.4	0
5.5	0
5.6	0
5.7	0
5.8	0
5.9	0
6	0
6.1	0
6.2	0
6.3	0
6.4	0
6.5	0
6.6	0
6.7	0
6.8	0
6.9	0
7	0
7.1	0
7.2	0
7.3	0
7.4	0
7.5	0
7.6	0
7.7	0
7.8	0
7.9	0
8	0
8.1	0
8.2	0
8.3	0
8.4	0
8.5	0
8.6	0
8.7	0
8.8	0
8.9	0
9	0
9.1	0
9.2	0
9.3	0
9.4	0
9.5	0
9.6	0
9.7	0
9.8	0
9.9	0
10	0
10.1	0
10.2	0
10.3	0
10.4	0
10.5	0
10.6	0
10.7	0
10.8	0
10.9	0
11	0
11.1	0
11.2	0
11.3	0
11.4	0
11.5	0
11.6	0
11.7	0
11.8	0
11.9	0
12	0
12.1	0
12.2	0
12.3	0
12.4	0
12.5	0
12.6	0
12.7	0
12.8	0
12.9	0
13	0
13.1	0
13.2	0
13.3	0
13.4	0
13.5	0
13.6	0
13.7	0
13.8	0
13.9	0
14	0
14.1	0
14.2	0
14.3	0
14.4	0
14.5	0
14.6	0
14.7	0
14.8	0
14.9	0
15	0
15.1	0
15.2	0
15.3	0
15.4	0
15.5	0
15.6	0
15.7	0
15.8	0
15.9	0
16	0
16.1	0
16.2	0
16.3	0
16.4	0
16.5	0
16.6	0
16.7	0
16.8	0
16.9	0
17	0
17.1	0
17.2	0
17.3	0
17.4	0
17.5	0
17.6	0
17.7	0
17.8	0
17.9	0
18	0
18.1	0
18.2	0
18.3	0
18.4	0
18.5	0
18.6	0
18.7	0
18.8	0
18.9	0
19	0
19.1	0
19.2	0
19.3	0
19.4	0
19.5	0
19.6	0
19.7	0
19.8	0
19.9	0
20	0
20.1	0
20.2	0
20.3	0
20.4	0
20.5	0
20.6	0
20.7	0
20.8	0
20.9	0
21	0
21.1	0
21.2	0
21.3	0
21.4	0
21.5	0
21.6	0
21.7	0
21.8	0
21.9	0
22	0
22.1	0
22.2	0
22.3	0
22.4	0
22.5	0
22.6	0
22.7	0
22.8	0
22.9	0
23	0
23.1	0
23.2	0
23.3	0
23.4	0
23.5	0
23.6	0
23.7	0
23.8	0
23.9	0
24	0
24.1	0
24.2	0
24.3	0
24.4	0
24.5	0
24.6	0
24.7	0
24.8	0
24.9	0
25	0
25.1	0
25.2	0
25.3	0
25.4	0
25.5	0
25.6	0
25.7	0
25.8	0
25.9	0
26	0
26.1	0
26.2	0
26.3	0
26.4	0
26.5	0
26.6	0
26.7	0
26.8	0
26.9	0
27	0
27.1	0
27.2	0
27.3	0
27.4	0
27.5	0
27.6	0
27.7	0
27.8	0
27.9	0
28	0
28.1	0
28.2	0
28.3	0
28.4	0
28.5	0
28.6	0
28.7	0
28.8	0
28.9	0
29	0
29.1	0
29.2	0
29.3	0
29.4	0
29.5	0
29.6	0
29.7	0
29.8	0
29.9	0
30	0
30.1	0
30.2	0
30.3	0
30.4	0
30.5	0
30.6	0
30.7	0
30.8	0
30.9	0
31	0
31.1	0
31.2	0
31.3	0
31.4	0
31.5	0
31.6	0
31.7	0
31.8	0
31.9	0
32	0
32.1	0
32.2	0
32.3	0
32.4	0
32.5	0
32.6	0
32.7	0
32.8	0
32.9	0
33	0
33.1	0
33.2	0
33.3	0
33.4	0
33.5	0
33.6	0
33.7	0
33.8	0
33.9	0
34	0
34.1	0
34.2	0
34.3	0
34.4	0
34.5	0
34.6	0
34.7	0
34.8	0
34.9	0
35	0
35.1	0
35.2	0
35.3	0
35.4	0
35.5	0
35.6	0
35.7	0
35.8	0
35.9	0
36	0
36.1	0
36.2	0
36.3	0
36.4	0
36.5	0
36.6	0
36.7	0
36.8	0
36.9	0
37	0
37.1	0
37.2	0
37.3	0
37.4	0
37.5	0
37.6	0
37.7	0
37.8	0
37.9	0
38	0
38.1	0
38.2	0
38.3	0
38.4	0
38.5	0
38.6	0
38.7	0
38.8	0
38.9	0
39	0
39.1	0
39.2	0
39.3	0
39.4	0
39.5	0
39.6	0
39.7	0
39.8	0
39.9	0
40	0
40.1	0
40.2	0
40.3	0
40.4	0
40.5	0
40.6	0
40.7	0
40.8	0
40.9	0
41	0
41.1	0
41.2	0
41.3	0
41.4	0
41.5	0
41.6	0
41.7	0
41.8	0
41.9	0
42	0
42.1	0
42.2	0
42.3	0
42.4	0
42.5	0
42.6	0
42.7	0
42.8	0
42.9	0
43	0
43.1	0
43.2	0
43.3	0
43.4	0
43.5	0
43.6	0
43.7	0
43.8	0
43.9	0
44	0
44.1	0
44.2	0
44.3	0
44.4	0
44.5	0
44.6	0
44.7	0
44.8	0
44.9	0
45	0
45.1	0
45.2	0
45.3	0
45.4	0
45.5	0
45.6	0
45.7	0
45.8	0
45.9	0
46	0
46.1	0
46.2	0
46.3	0
46.4	0
46.5	0
46.6	0
46.7	0
46.8	0
46.9	0
47	0
47.1	0
47.2	0
47.3	0
47.4	0
47.5	0
47.6	0
47.7	0
47.8	0
47.9	0
48	0
48.1	0
48.2	0
48.3	0
48.4	0
48.5	0
48.6	0
48.7	0
48.8	0
48.9	0
49	0
49.1	0
49.2	0
49.3	0
49.4	0
49.5	0
49.6	0
49.7	0
49.8	0
49.9	0
50	0
50.1	0
50.2	0
50.3	0
50.4	0
50.5	0
50.6	0
50.7	0
50.8	0
50.9	0
51	0
51.1	0
51.2	0
51.3	0
51.4	0
51.5	0
51.6	0
51.7	0
51.8	0
51.9	0
52	0
52.1	0
52.2	0
52.3	0
52.4	0
52.5	0
52.6	0
52.7	0
52.8	0
52.9	0
53	0
53.1	0
53.2	0
53.3	0
53.4	0
53.5	0
53.6	0
53.7	0
53.8	0
53.9	0
54	0
54.1	0
54.2	0
54.3	0
54.4	0
54.5	0
54.6	0
54.7	0
54.8	0
54.9	0
55	0
55.1	0
55.2	0
55.3	0
55.4	0
55.5	0
55.6	0
55.7	0
55.8	0
55.9	0
56	0
56.1	0
56.2	0
56.3	0
56.4	0
56.5	0
56.6	0
56.7	0
56.8	0
56.9	0
57	0
57.1	0
57.2	0
57.3	0
57.4	0
57.5	0
57.6	0
57.7	0
57.8	0
57.9	0
58	0
58.1	0
58.2	0
58.3	0
58.4	0
58.5	0
58.6	0
58.7	0
58.8	0
58.9	0
59	0
59.1	0
59.2	0
59.3	0
59.4	0
59.5	0
59.6	0
59.7	0
59.8	0
59.9	0
60	0
60.1	0
60.2	0
60.3	0
60.4	0
60.5	0
60.6	0
60.7	0
60.8	0
60.9	0
61	0
61.1	0
61.2	0
61.3	0
61.4	0
61.5	0
61.6	0
61.7	0
61.8	0
61.9	0
62	0
62.1	0
62.2	0
62.3	0
62.4	0
62.5	0
62.6	0
62.7	0
62.8	0
62.9	0
63	0
63.1	0
63.2	0
63.3	0
63.4	0
63.5	0
63.6	0
63.7	0
63.8	0
63.9	0
64	0
64.1	0
64.2	0
64.3	0
64.4	0
64.5	0
64.6	0
64.7	0
64.8	0
64.9	0
65	0
65.1	0
65.2	0
65.3	0
65.4	0
65.5	0
65.6	0
65.7	0
65.8	0
65.9	0
66	0
66.1	0
66.2	0
66.3	0
66.4	0
66.5	0
66.6	0
66.7	0
66.8	0
66.9	0
67	0
67.1	0
67.2	0
67.3	0
67.4	0
67.5	0
67.6	0
67.7	0
67.8	0
67.9	0
68	0
68.1	0
68.2	0
68.3	0
68.4	0
68.5	0
68.6	0
68.7	0
68.8	0
68.9	0
69	0
69.1	0
69.2	0
69.3	0
69.4	0
69.5	0
69.6	0
69.7	0
69.8	0
69.9	0
70	0
70.1	0
70.2	0
70.3	0
70.4	0
70.5	0
70.6	0
70.7	0
70.8	0
70.9	0
71	0
71.1	0
71.2	0
71.3	0
71.4	0
71.5	0
71.6	0
71.7	0
71.8	0
71.9	0
72	0
72.1	0
72.2	0
72.3	0
72.4	0
72.5	0
72.6	0
72.7	0
72.8	0
72.9	0
73	0
73.1	0
73.2	0
73.3	0
73.4	0
73.5	0
73.6	0
73.7	0
73.8	0
73.9	0
74	0
74.1	0
74.2	0
74.3	0
74.4	0
74.5	0
74.6	0
74.7	0
74.8	0
74.9	0
75	0
75.1	0
75.2	0
75.3	0
75.4	0
75.5	0
75.6	0
75.7	0
75.8	0
75.9	0
76	0
76.1	0
76.2	0
76.3	0
76.4	0
76.5	0
76.6	0
76.7	0
76.8	0
76.9	0
77	0
77.1	0
77.2	0
77.3	0
77.4	0
77.5	0
77.6	0
77.7	0
77.8	0
77.9	0
78	0
78.1	0
78.2	0
78.3	0
78.4	0
78.5	0
78.6	0
78.7	0
78.8	0
78.9	0
79	0
79.1	0
79.2	0
79.3	0
79.4	0
79.5	0
79.6	0
79.7	0
79.8	0
79.9	0
80	0
80.1	0
80.2	0
80.3	0
80.4	0
80.5	0
80.6	0
80.7	0
80.8	0
80.9	0
81	0
81.1	0
81.2	0
81.3	0
81.4	0
81.5	0
81.6	0
81.7	0
81.8	0
81.9	0
82	0
82.1	0
82.2	0
82.3	0
82.4	0
82.5	0
82.6	0
82.7	0
82.8	0
82.9	0
83	0
83.1	0
83.2	0
83.3	0
83.4	0
83.5	0
83.6	0
83.7	0
83.8	0
83.9	0
84	0
84.1	0
84.2	0
84.3	0
84.4	0
84.5	0
84.6	0
84.7	0
84.8	0
84.9	0
85	0
85.1	0
85.2	0
85.3	0
85.4	0
85.5	0
85.6	0
85.7	0
85.8	0
85.9	0
86	0
86.1	0
86.2	0
86.3	0
86.4	0
86.5	0
86.6	0
86.7	0
86.8	0
86.9	0
87	0
87.1	0
87.2	0
87.3	0
87.4	0
87.5	0
87.6	0
87.7	0
87.8	0
87.9	0
88	0
88.1	0
88.2	0
88.3	0
88.4	0
88.5	0
88.6	0
88.7	0
88.8	0
88.9	0
89	0
89.1	0
89.2	0
89.3	0
89.4	0
89.5	0
89.6	0
89.7	0
89.8	0
89.9	0
90	0
90.1	0
90.2	0
90.3	0
90.4	0
90.5	0
90.6	0
90.7	0
90.8	0
90.9	0
91	0
91.1	0
91.2	0
91.3	0
91.4	0
91.5	0
91.6	0
91.7	0
91.8	0
91.9	0
92	0
92.1	0
92.2	0
92.3	0
92.4	0
92.5	0
92.6	0
92.7	0
92.8	0
92.9	0
93	0
93.1	0
93.2	0
93.3	0
93.4	0
93.5	0
93.6	0
93.7	0
93.8	0
93.9	0
94	0
94.1	0
94.2	0
94.3	0
94.4	0
94.5	0
94.6	0
94.7	0
94.8	0
94.9	0
95	0
95.1	0
95.2	0
95.3	0
95.4	0
95.5	0
95.6	0
95.7	0
95.8	0
95.9	0
96	0
96.1	0
96.2	0
96.3	0
96.4	0
96.5	0
96.6	0
96.7	0
96.8	0
96.9	0
97	0
97.1	0
97.2	0
97.3	0
97.4	0
97.5	0
97.6	0
97.7	0
97.8	0
97.9	0
98	0
98.1	0
98.2	0
98.3	0
98.4	0
98.5	0
98.6	0
98.7	0
98.8	0
98.9	0
99	0
99.1	0
99.2	0
99.3	0
99.4	0
99.5	0
99.6	0
99.7	0
99.8	0
99.9	0
100	0
100.1	0
100.2	0
100.3	0.005
100.4	0.015
100.5	0.02
100.6	0.03
100.7	0.03
100.8	0.03
100.9	0.04
101	0.04
101.1	0.045
101.2	0.05
101.3	0.05
101.4	0.05
101.5	0.05
101.6	0.055
101.7	0.06
101.8	0.06
101.9	0.07
102	0.09
102.1	0.09
102.2	0.095
102.3	0.1
102.4	0.105
102.5	0.11
102.6	0.11
102.7	0.115
102.8	0.12
102.9	0.12
103	0.12
103.1	0.12
103.2	0.125
103.3	0.13
103.4	0.135
103.5	0.145
103.6	0.145
103.7	0.16
103.8	0.16
103.9	0.165
104	0.175
104.1	0.185
104.2	0.19
104.3	0.195
104.4	0.195
104.5	0.2
104.6	0.21
104.7	0.21
104.8	0.21
104.9	0.225
105	0.23
105.1	0.23
105.2	0.235
105.3	0.24
105.4	0.24
105.5	0.25
105.6	0.26
105.7	0.265
105.8	0.265
105.9	0.27
106	0.275
106.1	0.28
106.2	0.28
106.3	0.28
106.4	0.29
106.5	0.29
106.6	0.29
106.7	0.295
106.8	0.295
106.9	0.295
107	0.3
107.1	0.305
107.2	0.305
107.3	0.3
107.4	0.305
107.5	0.305
107.6	0.305
107.7	0.315
107.8	0.32
107.9	0.32
108	0.325
108.1	0.325
108.2	0.33
108.3	0.335
108.4	0.335
108.5	0.335
108.6	0.335
108.7	0.335
108.8	0.335
108.9	0.34
109	0.34
109.1	0.34
109.2	0.35
109.3	0.35
109.4	0.35
109.5	0.36
109.6	0.365
109.7	0.375
109.8	0.375
109.9	0.38
110	0.38
110.1	0.38
110.2	0.385
110.3	0.385
110.4	0.39
110.5	0.39
110.6	0.4
110.7	0.405
110.8	0.405
110.9	0.41
111	0.41
111.1	0.41
111.2	0.41
111.3	0.415
111.4	0.43
111.5	0.435
111.6	0.435
111.7	0.435
111.8	0.435
111.9	0.44
112	0.44
112.1	0.44
112.2	0.44
112.3	0.445
112.4	0.45
112.5	0.45
112.6	0.45
112.7	0.455
112.8	0.46
112.9	0.46
113	0.46
113.1	0.465
113.2	0.47
113.3	0.47
113.4	0.475
113.5	0.475
113.6	0.475
113.7	0.48
113.8	0.48
113.9	0.49
114	0.485
114.1	0.485
114.2	0.485
114.3	0.49
114.4	0.49
114.5	0.49
114.6	0.49
114.7	0.49
114.8	0.49
114.9	0.49
115	0.49
115.1	0.49
115.2	0.49
115.3	0.49
115.4	0.49
115.5	0.49
115.6	0.49
115.7	0.49
115.8	0.49
115.9	0.49
116	0.49
116.1	0.49
116.2	0.49
116.3	0.49
116.4	0.495
116.5	0.495
116.6	0.495
116.7	0.495
116.8	0.495
116.9	0.5
117	0.5
117.1	0.495
117.2	0.505
117.3	0.505
117.4	0.51
117.5	0.515
117.6	0.515
117.7	0.52
117.8	0.52
117.9	0.525
118	0.525
118.1	0.525
118.2	0.525
118.3	0.52
118.4	0.52
118.5	0.525
118.6	0.53
118.7	0.53
118.8	0.54
118.9	0.545
119	0.545
119.1	0.55
119.2	0.55
119.3	0.55
119.4	0.55
119.5	0.555
119.6	0.56
119.7	0.56
119.8	0.56
119.9	0.56
120	0.56
120.1	0.565
120.2	0.565
120.3	0.565
120.4	0.56
120.5	0.565
120.6	0.555
120.7	0.555
120.8	0.555
120.9	0.555
121	0.555
121.1	0.555
121.2	0.555
121.3	0.555
121.4	0.555
121.5	0.555
121.6	0.555
121.7	0.555
121.8	0.55
121.9	0.55
122	0.555
122.1	0.555
122.2	0.565
122.3	0.565
122.4	0.565
122.5	0.57
122.6	0.57
122.7	0.575
122.8	0.585
122.9	0.58
123	0.58
123.1	0.58
123.2	0.58
123.3	0.58
123.4	0.585
123.5	0.585
123.6	0.585
123.7	0.585
123.8	0.585
123.9	0.585
124	0.59
124.1	0.59
124.2	0.59
124.3	0.59
124.4	0.59
124.5	0.59
124.6	0.595
124.7	0.595
124.8	0.595
124.9	0.595
125	0.59
125.1	0.595
125.2	0.595
125.3	0.595
125.4	0.6
125.5	0.595
125.6	0.595
125.7	0.6
125.8	0.6
125.9	0.6
126	0.61
126.1	0.61
126.2	0.61
126.3	0.615
126.4	0.625
126.5	0.625
126.6	0.635
126.7	0.64
126.8	0.645
126.9	0.655
127	0.66
127.1	0.66
127.2	0.66
127.3	0.66
127.4	0.66
127.5	0.66
127.6	0.655
127.7	0.66
127.8	0.66
127.9	0.66
128	0.66
128.1	0.66
128.2	0.665
128.3	0.665
128.4	0.67
128.5	0.675
128.6	0.68
128.7	0.68
128.8	0.685
128.9	0.685
129	0.685
129.1	0.69
129.2	0.69
129.3	0.69
129.4	0.69
129.5	0.69
129.6	0.69
129.7	0.69
129.8	0.69
129.9	0.695
130	0.695
130.1	0.695
130.2	0.69
130.3	0.69
130.4	0.69
130.5	0.695
130.6	0.7
130.7	0.695
130.8	0.695
130.9	0.695
131	0.7
131.1	0.7
131.2	0.7
131.3	0.7
131.4	0.7
131.5	0.7
131.6	0.7
131.7	0.7
131.8	0.695
131.9	0.695
132	0.69
132.1	0.685
132.2	0.685
132.3	0.69
132.4	0.69
132.5	0.69
132.6	0.685
132.7	0.685
132.8	0.685
132.9	0.685
133	0.685
133.1	0.685
133.2	0.69
133.3	0.69
133.4	0.69
133.5	0.69
133.6	0.69
133.7	0.69
133.8	0.695
133.9	0.695
134	0.69
134.1	0.69
134.2	0.69
134.3	0.69
134.4	0.69
134.5	0.69
134.6	0.7
134.7	0.7
134.8	0.7
134.9	0.7
135	0.7
135.1	0.7
135.2	0.705
135.3	0.7
135.4	0.7
135.5	0.71
135.6	0.71
135.7	0.71
135.8	0.71
135.9	0.715
136	0.715
136.1	0.715
136.2	0.72
136.3	0.72
136.4	0.72
136.5	0.72
136.6	0.72
136.7	0.72
136.8	0.72
136.9	0.72
137	0.72
137.1	0.72
137.2	0.715
137.3	0.715
137.4	0.715
137.5	0.715
137.6	0.715
137.7	0.715
137.8	0.715
137.9	0.72
138	0.725
138.1	0.725
138.2	0.725
138.3	0.72
138.4	0.72
138.5	0.72
138.6	0.72
138.7	0.72
138.8	0.72
138.9	0.72
139	0.72
139.1	0.72
139.2	0.72
139.3	0.72
139.4	0.72
139.5	0.725
139.6	0.72
139.7	0.72
139.8	0.72
139.9	0.73
140	0.73
140.1	0.735
140.2	0.735
140.3	0.735
140.4	0.735
140.5	0.73
140.6	0.73
140.7	0.73
140.8	0.735
140.9	0.735
141	0.74
141.1	0.74
141.2	0.74
141.3	0.74
141.4	0.74
141.5	0.745
141.6	0.745
141.7	0.745
141.8	0.745
141.9	0.75
142	0.75
142.1	0.75
142.2	0.75
142.3	0.75
142.4	0.75
142.5	0.75
142.6	0.75
142.7	0.745
142.8	0.745
142.9	0.745
143	0.745
143.1	0.745
143.2	0.745
143.3	0.75
143.4	0.75
143.5	0.75
143.6	0.75
143.7	0.75
143.8	0.74
143.9	0.74
144	0.74
144.1	0.74
144.2	0.74
144.3	0.74
144.4	0.745
144.5	0.745
144.6	0.745
144.7	0.75
144.8	0.75
144.9	0.75
145	0.745
145.1	0.745
145.2	0.74
145.3	0.74
145.4	0.735
145.5	0.74
145.6	0.74
145.7	0.745
145.8	0.745
145.9	0.745
146	0.75
146.1	0.75
146.2	0.745
146.3	0.74
146.4	0.75
146.5	0.75
146.6	0.755
146.7	0.755
146.8	0.75
146.9	0.75
147	0.755
147.1	0.755
147.2	0.76
147.3	0.76
147.4	0.76
147.5	0.76
147.6	0.76
147.7	0.76
147.8	0.76
147.9	0.76
148	0.765
148.1	0.765
148.2	0.765
148.3	0.765
148.4	0.765
148.5	0.765
148.6	0.77
148.7	0.77
148.8	0.76
148.9	0.76
149	0.76
149.1	0.76
149.2	0.76
149.3	0.755
149.4	0.755
149.5	0.745
149.6	0.745
149.7	0.745
149.8	0.745
149.9	0.745
150	0.745
150.1	0.745
150.2	0.745
150.3	0.75
150.4	0.755
150.5	0.755
150.6	0.755
150.7	0.755
150.8	0.755
150.9	0.755
151	0.755
151.1	0.755
151.2	0.755
151.3	0.75
151.4	0.75
151.5	0.75
151.6	0.75
151.7	0.75
151.8	0.755
151.9	0.755
152	0.755
152.1	0.75
152.2	0.755
152.3	0.76
152.4	0.76
152.5	0.76
152.6	0.76
152.7	0.765
152.8	0.765
152.9	0.76
153	0.76
153.1	0.76
153.2	0.76
153.3	0.765
153.4	0.765
153.5	0.765
153.6	0.765
153.7	0.765
153.8	0.765
153.9	0.77
154	0.77
154.1	0.77
154.2	0.77
154.3	0.775
154.4	0.785
154.5	0.785
154.6	0.785
154.7	0.785
154.8	0.785
154.9	0.785
155	0.78
155.1	0.78
155.2	0.78
155.3	0.78
155.4	0.785
155.5	0.785
155.6	0.78
155.7	0.78
155.8	0.78
155.9	0.78
156	0.78
156.1	0.78
156.2	0.78
156.3	0.78
156.4	0.77
156.5	0.77
156.6	0.765
156.7	0.76
156.8	0.76
156.9	0.76
157	0.76
157.1	0.765
157.2	0.77
157.3	0.77
157.4	0.77
157.5	0.77
157.6	0.77
157.7	0.77
157.8	0.77
157.9	0.77
158	0.77
158.1	0.775
158.2	0.775
158.3	0.775
158.4	0.775
158.5	0.775
158.6	0.77
158.7	0.765
158.8	0.765
158.9	0.77
159	0.77
159.1	0.77
159.2	0.775
159.3	0.77
159.4	0.77
159.5	0.775
159.6	0.775
159.7	0.775
159.8	0.77
159.9	0.765
160	0.765
160.1	0.77
160.2	0.77
160.3	0.77
160.4	0.77
160.5	0.77
160.6	0.77
160.7	0.77
160.8	0.77
160.9	0.77
161	0.765
161.1	0.77
161.2	0.765
161.3	0.765
161.4	0.765
161.5	0.765
161.6	0.765
161.7	0.77
161.8	0.77
161.9	0.775
162	0.775
162.1	0.775
162.2	0.775
162.3	0.775
162.4	0.78
162.5	0.78
162.6	0.785
162.7	0.785
162.8	0.785
162.9	0.785
163	0.79
163.1	0.79
163.2	0.79
163.3	0.79
163.4	0.79
163.5	0.79
163.6	0.795
163.7	0.795
163.8	0.795
163.9	0.8
164	0.8
164.1	0.795
164.2	0.795
164.3	0.8
164.4	0.8
164.5	0.805
164.6	0.805
164.7	0.805
164.8	0.805
164.9	0.805
165	0.8
165.1	0.8
165.2	0.795
165.3	0.795
165.4	0.795
165.5	0.795
165.6	0.795
165.7	0.795
165.8	0.795
165.9	0.795
166	0.795
166.1	0.795
166.2	0.795
166.3	0.795
166.4	0.795
166.5	0.795
166.6	0.8
166.7	0.805
166.8	0.81
166.9	0.81
167	0.815
167.1	0.815
167.2	0.815
167.3	0.82
167.4	0.82
167.5	0.82
167.6	0.82
167.7	0.815
167.8	0.82
167.9	0.82
168	0.82
168.1	0.82
168.2	0.82
168.3	0.82
168.4	0.825
168.5	0.825
168.6	0.82
168.7	0.825
168.8	0.825
168.9	0.825
169	0.825
169.1	0.82
169.2	0.81
169.3	0.81
169.4	0.81
169.5	0.805
169.6	0.805
169.7	0.805
169.8	0.805
169.9	0.8
170	0.8
170.1	0.8
170.2	0.805
170.3	0.805
170.4	0.81
170.5	0.805
170.6	0.805
170.7	0.8
170.8	0.8
170.9	0.8
171	0.8
171.1	0.805
171.2	0.805
171.3	0.805
171.4	0.805
171.5	0.805
171.6	0.805
171.7	0.805
171.8	0.805
171.9	0.805
172	0.805
172.1	0.805
172.2	0.805
172.3	0.805
172.4	0.805
172.5	0.805
172.6	0.805
172.7	0.8
172.8	0.805
172.9	0.805
173	0.805
173.1	0.805
173.2	0.805
173.3	0.805
173.4	0.805
173.5	0.805
173.6	0.81
173.7	0.81
173.8	0.81
173.9	0.81
174	0.81
174.1	0.815
174.2	0.81
174.3	0.805
174.4	0.805
174.5	0.805
174.6	0.805
174.7	0.8
174.8	0.8
174.9	0.8
175	0.8
175.1	0.795
175.2	0.795
175.3	0.795
175.4	0.795
175.5	0.795
175.6	0.795
175.7	0.795
175.8	0.795
175.9	0.79
176	0.79
176.1	0.79
176.2	0.795
176.3	0.8
176.4	0.8
176.5	0.795
176.6	0.795
176.7	0.8
176.8	0.8
176.9	0.805
177	0.805
177.1	0.8
177.2	0.8
177.3	0.8
177.4	0.8
177.5	0.805
177.6	0.805
177.7	0.805
177.8	0.805
177.9	0.805
178	0.805
178.1	0.8
178.2	0.795
178.3	0.795
178.4	0.795
178.5	0.795
178.6	0.795
178.7	0.795
178.8	0.795
178.9	0.795
179	0.795
179.1	0.8
179.2	0.795
179.3	0.795
179.4	0.795
179.5	0.795
179.6	0.795
179.7	0.795
179.8	0.795
179.9	0.795
180	0.795
180.1	0.79
180.2	0.79
180.3	0.795
180.4	0.795
180.5	0.795
180.6	0.795
180.7	0.8
180.8	0.8
180.9	0.8
181	0.8
181.1	0.795
181.2	0.795
181.3	0.795
181.4	0.795
181.5	0.795
181.6	0.795
181.7	0.8
181.8	0.805
181.9	0.805
182	0.805
182.1	0.805
182.2	0.805
182.3	0.805
182.4	0.805
182.5	0.805
182.6	0.805
182.7	0.805
182.8	0.81
182.9	0.81
183	0.81
183.1	0.81
183.2	0.815
183.3	0.815
183.4	0.815
183.5	0.815
183.6	0.815
183.7	0.82
183.8	0.82
183.9	0.82
184	0.82
184.1	0.82
184.2	0.81
184.3	0.81
184.4	0.81
184.5	0.81
184.6	0.805
184.7	0.81
184.8	0.81
184.9	0.81
185	0.815
185.1	0.815
185.2	0.815
185.3	0.815
185.4	0.81
185.5	0.81
185.6	0.81
185.7	0.81
185.8	0.81
185.9	0.81
186	0.81
186.1	0.81
186.2	0.81
186.3	0.81
186.4	0.81
186.5	0.815
186.6	0.815
186.7	0.815
186.8	0.815
186.9	0.81
187	0.815
187.1	0.815
187.2	0.815
187.3	0.815
187.4	0.815
187.5	0.815
187.6	0.815
187.7	0.815
187.8	0.815
187.9	0.815
188	0.82
188.1	0.82
188.2	0.82
188.3	0.82
188.4	0.82
188.5	0.82
188.6	0.82
188.7	0.82
188.8	0.82
188.9	0.815
189	0.82
189.1	0.815
189.2	0.815
189.3	0.815
189.4	0.81
189.5	0.81
189.6	0.81
189.7	0.81
189.8	0.81
189.9	0.81
190	0.815
190.1	0.81
190.2	0.81
190.3	0.81
190.4	0.81
190.5	0.815
190.6	0.815
190.7	0.815
190.8	0.815
190.9	0.815
191	0.815
191.1	0.815
191.2	0.81
191.3	0.81
191.4	0.81
191.5	0.81
191.6	0.81
191.7	0.805
191.8	0.805
191.9	0.805
192	0.81
192.1	0.815
192.2	0.82
192.3	0.82
192.4	0.81
192.5	0.81
192.6	0.81
192.7	0.81
192.8	0.81
192.9	0.81
193	0.81
193.1	0.81
193.2	0.815
193.3	0.815
193.4	0.815
193.5	0.815
193.6	0.81
193.7	0.81
193.8	0.81
193.9	0.805
194	0.805
194.1	0.81
194.2	0.81
194.3	0.81
194.4	0.815
194.5	0.82
194.6	0.82
194.7	0.825
194.8	0.825
194.9	0.825
195	0.825
195.1	0.825
195.2	0.825
195.3	0.825
195.4	0.825
195.5	0.82
195.6	0.82
195.7	0.82
195.8	0.82
195.9	0.815
196	0.815
196.1	0.815
196.2	0.815
196.3	0.815
196.4	0.815
196.5	0.815
196.6	0.815
196.7	0.815
196.8	0.815
196.9	0.82
197	0.82
197.1	0.82
197.2	0.82
197.3	0.82
197.4	0.82
197.5	0.82
197.6	0.82
197.7	0.82
197.8	0.82
197.9	0.82
198	0.82
198.1	0.82
198.2	0.82
198.3	0.82
198.4	0.82
198.5	0.82
198.6	0.82
198.7	0.82
198.8	0.815
198.9	0.82
199	0.82
199.1	0.815
199.2	0.815
199.3	0.815
199.4	0.815
199.5	0.81
199.6	0.81
199.7	0.81
199.8	0.81
199.9	0.81
200	0.81
[truncated: 14,000 more rows]
