# Supplementary material for: Bayesian inference of kinetic schemes for ion channels by Kalman filtering
Source: eLife journal article supplement (doi:10.7554/elife.62714), 2022-05-04
Supplement: fig4-data1 [file 1_Sim_N_400_Fluor_MW_16M.xlsx]

## Sheet: 16 M
0.1	0
0.2	0
0.3	0
0.4	0
0.5	0
0.6	0
0.7	0
0.8	0
0.9	0
1	0
1.1	0
1.2	0
1.3	0
1.4	0
1.5	0
1.6	0
1.7	0
1.8	0
1.9	0
2	0
2.1	0
2.2	0
2.3	0
2.4	0
2.5	0
2.6	0
2.7	0
2.8	0
2.9	0
3	0
3.1	0
3.2	0
3.3	0
3.4	0
3.5	0
3.6	0
3.7	0
3.8	0
3.9	0
4	0
4.1	0
4.2	0
4.3	0
4.4	0
4.5	0
4.6	0
4.7	0
4.8	0
4.9	0
5	0
5.1	0
5.2	0
5.3	0
5.4	0
5.5	0
5.6	0
5.7	0
5.8	0
5.9	0
6	0
6.1	0
6.2	0
6.3	0
6.4	0
6.5	0
6.6	0
6.7	0
6.8	0
6.9	0
7	0
7.1	0
7.2	0
7.3	0
7.4	0
7.5	0
7.6	0
7.7	0
7.8	0
7.9	0
8	0
8.1	0
8.2	0
8.3	0
8.4	0
8.5	0
8.6	0
8.7	0
8.8	0
8.9	0
9	0
9.1	0
9.2	0
9.3	0
9.4	0
9.5	0
9.6	0
9.7	0
9.8	0
9.9	0
10	0
10.1	0
10.2	0
10.3	0
10.4	0
10.5	0
10.6	0
10.7	0
10.8	0
10.9	0
11	0
11.1	0
11.2	0
11.3	0
11.4	0
11.5	0
11.6	0
11.7	0
11.8	0
11.9	0
12	0
12.1	0
12.2	0
12.3	0
12.4	0
12.5	0
12.6	0
12.7	0
12.8	0
12.9	0
13	0
13.1	0
13.2	0
13.3	0
13.4	0
13.5	0
13.6	0
13.7	0
13.8	0
13.9	0
14	0
14.1	0
14.2	0
14.3	0
14.4	0
14.5	0
14.6	0
14.7	0
14.8	0
14.9	0
15	0
15.1	0
15.2	0
15.3	0
15.4	0
15.5	0
15.6	0
15.7	0
15.8	0
15.9	0
16	0
16.1	0
16.2	0
16.3	0
16.4	0
16.5	0
16.6	0
16.7	0
16.8	0
16.9	0
17	0
17.1	0
17.2	0
17.3	0
17.4	0
17.5	0
17.6	0
17.7	0
17.8	0
17.9	0
18	0
18.1	0
18.2	0
18.3	0
18.4	0
18.5	0
18.6	0
18.7	0
18.8	0
18.9	0
19	0
19.1	0
19.2	0
19.3	0
19.4	0
19.5	0
19.6	0
19.7	0
19.8	0
19.9	0
20	0
20.1	0
20.2	0
20.3	0
20.4	0
20.5	0
20.6	0
20.7	0
20.8	0
20.9	0
21	0
21.1	0
21.2	0
21.3	0
21.4	0
21.5	0
21.6	0
21.7	0
21.8	0
21.9	0
22	0
22.1	0
22.2	0
22.3	0
22.4	0
22.5	0
22.6	0
22.7	0
22.8	0
22.9	0
23	0
23.1	0
23.2	0
23.3	0
23.4	0
23.5	0
23.6	0
23.7	0
23.8	0
23.9	0
24	0
24.1	0
24.2	0
24.3	0
24.4	0
24.5	0
24.6	0
24.7	0
24.8	0
24.9	0
25	0
25.1	0
25.2	0
25.3	0
25.4	0
25.5	0
25.6	0
25.7	0
25.8	0
25.9	0
26	0
26.1	0
26.2	0
26.3	0
26.4	0
26.5	0
26.6	0
26.7	0
26.8	0
26.9	0
27	0
27.1	0
27.2	0
27.3	0
27.4	0
27.5	0
27.6	0
27.7	0
27.8	0
27.9	0
28	0
28.1	0
28.2	0
28.3	0
28.4	0
28.5	0
28.6	0
28.7	0
28.8	0
28.9	0
29	0
29.1	0
29.2	0
29.3	0
29.4	0
29.5	0
29.6	0
29.7	0
29.8	0
29.9	0
30	0
30.1	0
30.2	0
30.3	0
30.4	0
30.5	0
30.6	0
30.7	0
30.8	0
30.9	0
31	0
31.1	0
31.2	0
31.3	0
31.4	0
31.5	0
31.6	0
31.7	0
31.8	0
31.9	0
32	0
32.1	0
32.2	0
32.3	0
32.4	0
32.5	0
32.6	0
32.7	0
32.8	0
32.9	0
33	0
33.1	0
33.2	0
33.3	0
33.4	0
33.5	0
33.6	0
33.7	0
33.8	0
33.9	0
34	0
34.1	0
34.2	0
34.3	0
34.4	0
34.5	0
34.6	0
34.7	0
34.8	0
34.9	0
35	0
35.1	0
35.2	0
35.3	0
35.4	0
35.5	0
35.6	0
35.7	0
35.8	0
35.9	0
36	0
36.1	0
36.2	0
36.3	0
36.4	0
36.5	0
36.6	0
36.7	0
36.8	0
36.9	0
37	0
37.1	0
37.2	0
37.3	0
37.4	0
37.5	0
37.6	0
37.7	0
37.8	0
37.9	0
38	0
38.1	0
38.2	0
38.3	0
38.4	0
38.5	0
38.6	0
38.7	0
38.8	0
38.9	0
39	0
39.1	0
39.2	0
39.3	0
39.4	0
39.5	0
39.6	0
39.7	0
39.8	0
39.9	0
40	0
40.1	0
40.2	0
40.3	0
40.4	0
40.5	0
40.6	0
40.7	0
40.8	0
40.9	0
41	0
41.1	0
41.2	0
41.3	0
41.4	0
41.5	0
41.6	0
41.7	0
41.8	0
41.9	0
42	0
42.1	0
42.2	0
42.3	0
42.4	0
42.5	0
42.6	0
42.7	0
42.8	0
42.9	0
43	0
43.1	0
43.2	0
43.3	0
43.4	0
43.5	0
43.6	0
43.7	0
43.8	0
43.9	0
44	0
44.1	0
44.2	0
44.3	0
44.4	0
44.5	0
44.6	0
44.7	0
44.8	0
44.9	0
45	0
45.1	0
45.2	0
45.3	0
45.4	0
45.5	0
45.6	0
45.7	0
45.8	0
45.9	0
46	0
46.1	0
46.2	0
46.3	0
46.4	0
46.5	0
46.6	0
46.7	0
46.8	0
46.9	0
47	0
47.1	0
47.2	0
47.3	0
47.4	0
47.5	0
47.6	0
47.7	0
47.8	0
47.9	0
48	0
48.1	0
48.2	0
48.3	0
48.4	0
48.5	0
48.6	0
48.7	0
48.8	0
48.9	0
49	0
49.1	0
49.2	0
49.3	0
49.4	0
49.5	0
49.6	0
49.7	0
49.8	0
49.9	0
50	0
50.1	0
50.2	0
50.3	0
50.4	0
50.5	0
50.6	0
50.7	0
50.8	0
50.9	0
51	0
51.1	0
51.2	0
51.3	0
51.4	0
51.5	0
51.6	0
51.7	0
51.8	0
51.9	0
52	0
52.1	0
52.2	0
52.3	0
52.4	0
52.5	0
52.6	0
52.7	0
52.8	0
52.9	0
53	0
53.1	0
53.2	0
53.3	0
53.4	0
53.5	0
53.6	0
53.7	0
53.8	0
53.9	0
54	0
54.1	0
54.2	0
54.3	0
54.4	0
54.5	0
54.6	0
54.7	0
54.8	0
54.9	0
55	0
55.1	0
55.2	0
55.3	0
55.4	0
55.5	0
55.6	0
55.7	0
55.8	0
55.9	0
56	0
56.1	0
56.2	0
56.3	0
56.4	0
56.5	0
56.6	0
56.7	0
56.8	0
56.9	0
57	0
57.1	0
57.2	0
57.3	0
57.4	0
57.5	0
57.6	0
57.7	0
57.8	0
57.9	0
58	0
58.1	0
58.2	0
58.3	0
58.4	0
58.5	0
58.6	0
58.7	0
58.8	0
58.9	0
59	0
59.1	0
59.2	0
59.3	0
59.4	0
59.5	0
59.6	0
59.7	0
59.8	0
59.9	0
60	0
60.1	0
60.2	0
60.3	0
60.4	0
60.5	0
60.6	0
60.7	0
60.8	0
60.9	0
61	0
61.1	0
61.2	0
61.3	0
61.4	0
61.5	0
61.6	0
61.7	0
61.8	0
61.9	0
62	0
62.1	0
62.2	0
62.3	0
62.4	0
62.5	0
62.6	0
62.7	0
62.8	0
62.9	0
63	0
63.1	0
63.2	0
63.3	0
63.4	0
63.5	0
63.6	0
63.7	0
63.8	0
63.9	0
64	0
64.1	0
64.2	0
64.3	0
64.4	0
64.5	0
64.6	0
64.7	0
64.8	0
64.9	0
65	0
65.1	0
65.2	0
65.3	0
65.4	0
65.5	0
65.6	0
65.7	0
65.8	0
65.9	0
66	0
66.1	0
66.2	0
66.3	0
66.4	0
66.5	0
66.6	0
66.7	0
66.8	0
66.9	0
67	0
67.1	0
67.2	0
67.3	0
67.4	0
67.5	0
67.6	0
67.7	0
67.8	0
67.9	0
68	0
68.1	0
68.2	0
68.3	0
68.4	0
68.5	0
68.6	0
68.7	0
68.8	0
68.9	0
69	0
69.1	0
69.2	0
69.3	0
69.4	0
69.5	0
69.6	0
69.7	0
69.8	0
69.9	0
70	0
70.1	0
70.2	0
70.3	0
70.4	0
70.5	0
70.6	0
70.7	0
70.8	0
70.9	0
71	0
71.1	0
71.2	0
71.3	0
71.4	0
71.5	0
71.6	0
71.7	0
71.8	0
71.9	0
72	0
72.1	0
72.2	0
72.3	0
72.4	0
72.5	0
72.6	0
72.7	0
72.8	0
72.9	0
73	0
73.1	0
73.2	0
73.3	0
73.4	0
73.5	0
73.6	0
73.7	0
73.8	0
73.9	0
74	0
74.1	0
74.2	0
74.3	0
74.4	0
74.5	0
74.6	0
74.7	0
74.8	0
74.9	0
75	0
75.1	0
75.2	0
75.3	0
75.4	0
75.5	0
75.6	0
75.7	0
75.8	0
75.9	0
76	0
76.1	0
76.2	0
76.3	0
76.4	0
76.5	0
76.6	0
76.7	0
76.8	0
76.9	0
77	0
77.1	0
77.2	0
77.3	0
77.4	0
77.5	0
77.6	0
77.7	0
77.8	0
77.9	0
78	0
78.1	0
78.2	0
78.3	0
78.4	0
78.5	0
78.6	0
78.7	0
78.8	0
78.9	0
79	0
79.1	0
79.2	0
79.3	0
79.4	0
79.5	0
79.6	0
79.7	0
79.8	0
79.9	0
80	0
80.1	0
80.2	0
80.3	0
80.4	0
80.5	0
80.6	0
80.7	0
80.8	0
80.9	0
81	0
81.1	0
81.2	0
81.3	0
81.4	0
81.5	0
81.6	0
81.7	0
81.8	0
81.9	0
82	0
82.1	0
82.2	0
82.3	0
82.4	0
82.5	0
82.6	0
82.7	0
82.8	0
82.9	0
83	0
83.1	0
83.2	0
83.3	0
83.4	0
83.5	0
83.6	0
83.7	0
83.8	0
83.9	0
84	0
84.1	0
84.2	0
84.3	0
84.4	0
84.5	0
84.6	0
84.7	0
84.8	0
84.9	0
85	0
85.1	0
85.2	0
85.3	0
85.4	0
85.5	0
85.6	0
85.7	0
85.8	0
85.9	0
86	0
86.1	0
86.2	0
86.3	0
86.4	0
86.5	0
86.6	0
86.7	0
86.8	0
86.9	0
87	0
87.1	0
87.2	0
87.3	0
87.4	0
87.5	0
87.6	0
87.7	0
87.8	0
87.9	0
88	0
88.1	0
88.2	0
88.3	0
88.4	0
88.5	0
88.6	0
88.7	0
88.8	0
88.9	0
89	0
89.1	0
89.2	0
89.3	0
89.4	0
89.5	0
89.6	0
89.7	0
89.8	0
89.9	0
90	0
90.1	0
90.2	0
90.3	0
90.4	0
90.5	0
90.6	0
90.7	0
90.8	0
90.9	0
91	0
91.1	0
91.2	0
91.3	0
91.4	0
91.5	0
91.6	0
91.7	0
91.8	0
91.9	0
92	0
92.1	0
92.2	0
92.3	0
92.4	0
92.5	0
92.6	0
92.7	0
92.8	0
92.9	0
93	0
93.1	0
93.2	0
93.3	0
93.4	0
93.5	0
93.6	0
93.7	0
93.8	0
93.9	0
94	0
94.1	0
94.2	0
94.3	0
94.4	0
94.5	0
94.6	0
94.7	0
94.8	0
94.9	0
95	0
95.1	0
95.2	0
95.3	0
95.4	0
95.5	0
95.6	0
95.7	0
95.8	0
95.9	0
96	0
96.1	0
96.2	0
96.3	0
96.4	0
96.5	0
96.6	0
96.7	0
96.8	0
96.9	0
97	0
97.1	0
97.2	0
97.3	0
97.4	0
97.5	0
97.6	0
97.7	0
97.8	0
97.9	0
98	0
98.1	0
98.2	0
98.3	0
98.4	0
98.5	0
98.6	0
98.7	0
98.8	0
98.9	0
99	0
99.1	0
99.2	0
99.3	0
99.4	0
99.5	0
99.6	0
99.7	0
99.8	0
99.9	0
100	0
100.1	0.52375
100.2	0.71875
100.3	0.81625
100.4	0.87125
100.5	0.9075
100.6	0.9225
100.7	0.93875
100.8	0.945
100.9	0.9575
101	0.95375
101.1	0.955
101.2	0.95125
101.3	0.95375
101.4	0.94375
101.5	0.94625
101.6	0.96
101.7	0.9525
101.8	0.94625
101.9	0.95375
102	0.96
102.1	0.95875
102.2	0.96
102.3	0.95875
102.4	0.955
102.5	0.96125
102.6	0.96625
102.7	0.96
102.8	0.95875
102.9	0.95625
103	0.97375
103.1	0.97375
103.2	0.9775
103.3	0.9725
103.4	0.975
103.5	0.96875
103.6	0.95875
103.7	0.96375
103.8	0.97375
103.9	0.96625
104	0.95625
104.1	0.94875
104.2	0.955
104.3	0.96125
104.4	0.965
104.5	0.96625
104.6	0.97125
104.7	0.97
104.8	0.9675
104.9	0.965
105	0.96625
105.1	0.95875
105.2	0.96
105.3	0.96125
105.4	0.9575
105.5	0.9625
105.6	0.96125
105.7	0.97
105.8	0.97125
105.9	0.97125
106	0.97375
106.1	0.9725
106.2	0.9675
106.3	0.95375
106.4	0.96
106.5	0.96125
106.6	0.96625
106.7	0.9725
106.8	0.9625
106.9	0.96
107	0.97
107.1	0.97125
107.2	0.97
107.3	0.9675
107.4	0.95875
107.5	0.9625
107.6	0.96125
107.7	0.9625
107.8	0.9675
107.9	0.9725
108	0.9825
108.1	0.97875
108.2	0.98125
108.3	0.98625
108.4	0.97625
108.5	0.9675
108.6	0.97625
108.7	0.95875
108.8	0.965
108.9	0.97125
109	0.96875
109.1	0.95625
109.2	0.955
109.3	0.96
109.4	0.96125
109.5	0.9475
109.6	0.96125
109.7	0.9625
109.8	0.9625
109.9	0.9625
110	0.9625
110.1	0.97
110.2	0.97625
110.3	0.98125
110.4	0.97625
110.5	0.975
110.6	0.97125
110.7	0.97125
110.8	0.9675
110.9	0.9775
111	0.97375
111.1	0.96625
111.2	0.9625
111.3	0.9675
111.4	0.97125
111.5	0.97375
111.6	0.97625
111.7	0.975
111.8	0.975
111.9	0.97625
112	0.97625
112.1	0.97125
112.2	0.9675
112.3	0.96625
112.4	0.96625
112.5	0.9625
112.6	0.9675
112.7	0.9675
112.8	0.96625
112.9	0.96875
113	0.975
113.1	0.97625
113.2	0.97625
113.3	0.97625
113.4	0.9775
113.5	0.97875
113.6	0.97125
113.7	0.975
113.8	0.96875
113.9	0.96875
114	0.97125
114.1	0.97625
114.2	0.97125
114.3	0.96625
114.4	0.96875
114.5	0.97
114.6	0.98
114.7	0.98125
114.8	0.98375
114.9	0.9825
115	0.97875
115.1	0.97375
115.2	0.95625
115.3	0.965
115.4	0.97
115.5	0.9725
115.6	0.9725
115.7	0.96875
115.8	0.96875
115.9	0.965
116	0.9625
116.1	0.96375
116.2	0.95875
116.3	0.9625
116.4	0.95875
116.5	0.97375
116.6	0.97
116.7	0.98375
116.8	0.9775
116.9	0.9825
117	0.97375
117.1	0.95875
117.2	0.97
117.3	0.96875
117.4	0.975
117.5	0.97375
117.6	0.9825
117.7	0.98375
117.8	0.9775
117.9	0.9725
118	0.97875
118.1	0.9775
118.2	0.9725
118.3	0.97375
118.4	0.97
118.5	0.9725
118.6	0.97625
118.7	0.9775
118.8	0.98
118.9	0.975
119	0.97625
119.1	0.97875
119.2	0.98375
119.3	0.98125
119.4	0.98
119.5	0.98125
119.6	0.975
119.7	0.97625
119.8	0.9775
119.9	0.97375
120	0.9775
120.1	0.97375
120.2	0.97125
120.3	0.97625
120.4	0.97875
120.5	0.97875
120.6	0.98875
120.7	0.985
120.8	0.9775
120.9	0.96625
121	0.97125
121.1	0.97875
121.2	0.98
121.3	0.98
121.4	0.97875
121.5	0.98
121.6	0.98
121.7	0.97875
121.8	0.97875
121.9	0.98375
122	0.975
122.1	0.975
122.2	0.97375
122.3	0.9775
122.4	0.97375
122.5	0.975
122.6	0.9775
122.7	0.97875
122.8	0.975
122.9	0.97
123	0.97625
123.1	0.985
123.2	0.98875
123.3	0.98125
123.4	0.98625
123.5	0.9875
123.6	0.98375
123.7	0.985
123.8	0.98625
123.9	0.98625
124	0.9825
124.1	0.985
124.2	0.98375
124.3	0.98625
124.4	0.9875
124.5	0.9725
124.6	0.9825
124.7	0.98625
124.8	0.9875
124.9	0.99125
125	0.98625
125.1	0.9875
125.2	0.98375
125.3	0.9775
125.4	0.98
125.5	0.97375
125.6	0.97625
125.7	0.98125
125.8	0.97125
125.9	0.975
126	0.9825
126.1	0.9825
126.2	0.97375
126.3	0.98625
126.4	0.98625
126.5	0.98625
126.6	0.98875
126.7	0.99
126.8	0.9925
126.9	0.99
127	0.98625
127.1	0.98125
127.2	0.985
127.3	0.99
127.4	0.98625
127.5	0.985
127.6	0.9825
127.7	0.98375
127.8	0.9875
127.9	0.99125
128	0.98625
128.1	0.985
128.2	0.98
128.3	0.975
128.4	0.98375
128.5	0.9875
128.6	0.98375
128.7	0.98875
128.8	0.98625
128.9	0.97875
129	0.9825
129.1	0.97875
129.2	0.97875
129.3	0.98125
129.4	0.98125
129.5	0.98625
129.6	0.98125
129.7	0.9825
129.8	0.97625
129.9	0.9825
130	0.975
130.1	0.98375
130.2	0.99
130.3	0.98875
130.4	0.98625
130.5	0.9825
130.6	0.9825
130.7	0.97625
130.8	0.975
130.9	0.9725
131	0.97875
131.1	0.985
131.2	0.99
131.3	0.98625
131.4	0.985
131.5	0.9825
131.6	0.9725
131.7	0.9725
131.8	0.98
131.9	0.98
132	0.975
132.1	0.97875
132.2	0.97875
132.3	0.9825
132.4	0.98125
132.5	0.98125
132.6	0.98
132.7	0.9825
132.8	0.98125
132.9	0.97875
133	0.98625
133.1	0.98375
133.2	0.98
133.3	0.98
133.4	0.9875
133.5	0.98875
133.6	0.99
133.7	0.98
133.8	0.98125
133.9	0.98375
134	0.985
134.1	0.98625
134.2	0.97875
134.3	0.97875
134.4	0.9825
134.5	0.98375
134.6	0.97875
134.7	0.9825
134.8	0.99
134.9	0.99125
135	0.99125
135.1	0.98625
135.2	0.99
135.3	0.98125
135.4	0.98125
135.5	0.99
135.6	0.98875
135.7	0.98875
135.8	0.99
135.9	0.99
136	0.99125
136.1	0.98375
136.2	0.98625
136.3	0.98875
136.4	0.98875
136.5	0.98875
136.6	0.98875
136.7	0.985
136.8	0.9875
136.9	0.98875
137	0.985
137.1	0.985
137.2	0.98375
137.3	0.98875
137.4	0.99375
137.5	0.9925
137.6	0.99125
137.7	0.98875
137.8	0.98875
137.9	0.99125
138	0.99
138.1	0.98625
138.2	0.985
138.3	0.98
138.4	0.985
138.5	0.98375
138.6	0.98375
138.7	0.9825
138.8	0.98375
138.9	0.98625
139	0.98
139.1	0.98375
139.2	0.985
139.3	0.98625
139.4	0.99
139.5	0.99375
139.6	0.9875
139.7	0.98875
139.8	0.98875
139.9	0.985
140	0.9875
140.1	0.99
140.2	0.98625
140.3	0.9875
140.4	0.98375
140.5	0.985
140.6	0.9875
140.7	0.9875
140.8	0.98875
140.9	0.98375
141	0.99
141.1	0.98625
141.2	0.985
141.3	0.99125
141.4	0.98875
141.5	0.99375
141.6	0.99125
141.7	0.9875
141.8	0.985
141.9	0.9875
142	0.98625
142.1	0.98375
142.2	0.9925
142.3	0.99125
142.4	0.9875
142.5	0.985
142.6	0.9875
142.7	0.9875
142.8	0.98625
142.9	0.985
143	0.9825
143.1	0.9875
143.2	0.99125
143.3	0.9875
143.4	0.99
143.5	0.985
143.6	0.9825
143.7	0.97625
143.8	0.9775
143.9	0.98
144	0.98125
144.1	0.985
144.2	0.9875
144.3	0.9875
144.4	0.9875
144.5	0.995
144.6	0.995
144.7	0.9925
144.8	0.98875
144.9	0.9875
145	0.99125
145.1	0.985
145.2	0.9875
145.3	0.98875
145.4	0.98875
145.5	0.99125
145.6	0.98375
145.7	0.985
145.8	0.98375
145.9	0.98875
146	0.9925
146.1	0.98375
146.2	0.98875
146.3	0.98875
146.4	0.98875
146.5	0.98875
146.6	0.9875
146.7	0.995
146.8	0.995
146.9	0.9925
147	0.995
147.1	0.9925
147.2	0.99625
147.3	0.99625
147.4	0.9925
147.5	0.99
147.6	0.98875
147.7	0.99125
147.8	0.98625
147.9	0.98625
148	0.99125
148.1	0.99
148.2	0.9825
148.3	0.98375
148.4	0.985
148.5	0.9875
148.6	0.985
148.7	0.98625
148.8	0.98625
148.9	0.98875
149	0.98625
149.1	0.9875
149.2	0.98625
149.3	0.9875
149.4	0.9875
149.5	0.985
149.6	0.9875
149.7	0.99
149.8	0.9925
149.9	0.9925
150	0.99
150.1	0.98875
150.2	0.98875
150.3	0.99
150.4	0.98875
150.5	0.99
150.6	0.9925
150.7	0.99125
150.8	0.99625
150.9	0.99
151	0.9875
151.1	0.99125
151.2	0.98875
151.3	0.99125
151.4	0.9875
151.5	0.99
151.6	0.99125
151.7	0.9925
151.8	0.99
151.9	0.98625
152	0.98625
152.1	0.99125
152.2	0.99375
152.3	0.98625
152.4	0.98875
152.5	0.9875
152.6	0.98875
152.7	0.995
152.8	0.995
152.9	0.99375
153	0.99625
153.1	0.9925
153.2	0.99125
153.3	0.99125
153.4	0.98625
153.5	0.985
153.6	0.98625
153.7	0.98625
153.8	0.9875
153.9	0.98
154	0.98125
154.1	0.98625
154.2	0.98875
154.3	0.9925
154.4	0.99125
154.5	0.9925
154.6	0.9925
154.7	0.9975
154.8	0.99625
154.9	0.9925
155	0.98625
155.1	0.9925
155.2	0.98625
155.3	0.995
155.4	0.99
155.5	0.9875
155.6	0.9875
155.7	0.9875
155.8	0.99375
155.9	0.99125
156	0.99125
156.1	0.99125
156.2	0.99625
156.3	0.99125
156.4	0.9925
156.5	0.9925
156.6	0.99125
156.7	0.98625
156.8	0.9875
156.9	0.9875
157	0.98875
157.1	0.99375
157.2	0.98625
157.3	0.98625
157.4	0.98875
157.5	0.99125
157.6	0.9925
157.7	0.99625
157.8	0.99625
157.9	0.99375
158	0.9925
158.1	0.9925
158.2	0.9925
158.3	0.99375
158.4	0.99375
158.5	0.99625
158.6	0.995
158.7	0.99375
158.8	0.99625
158.9	0.99625
159	0.99625
159.1	0.9975
159.2	0.99875
159.3	0.995
159.4	0.99125
159.5	0.98875
159.6	0.9925
159.7	0.995
159.8	0.99375
159.9	0.9875
160	0.9875
160.1	0.9825
160.2	0.98375
160.3	0.98625
160.4	0.9875
160.5	0.98625
160.6	0.98625
160.7	0.985
160.8	0.9825
160.9	0.98875
161	0.9925
161.1	0.99375
161.2	0.995
161.3	0.99125
161.4	0.9925
161.5	0.995
161.6	0.9925
161.7	0.9875
161.8	0.98875
161.9	0.98625
162	0.99125
162.1	0.98625
162.2	0.99375
162.3	0.9975
162.4	0.99625
162.5	0.99375
162.6	0.99125
162.7	0.99
162.8	0.99375
162.9	0.995
163	0.995
163.1	0.995
163.2	0.99
163.3	0.9925
163.4	0.99125
163.5	0.98875
163.6	0.9875
163.7	0.99125
163.8	0.99125
163.9	0.9925
164	0.99125
164.1	0.99
164.2	0.98875
164.3	0.98875
164.4	0.99375
164.5	0.99375
164.6	0.99625
164.7	0.99875
164.8	0.9975
164.9	0.995
165	0.995
165.1	0.99625
165.2	0.99625
165.3	0.9925
165.4	0.995
165.5	0.99625
165.6	0.99375
165.7	0.99625
165.8	0.99375
165.9	0.99
166	0.99125
166.1	0.99
166.2	0.985
166.3	0.98625
166.4	0.98625
166.5	0.98875
166.6	0.99125
166.7	0.9925
166.8	0.99
166.9	0.98625
167	0.99375
167.1	0.9925
167.2	0.99125
167.3	0.99375
167.4	0.99
167.5	0.99125
167.6	0.99
167.7	0.99125
167.8	0.98875
167.9	0.99
168	0.98875
168.1	0.98625
168.2	0.98875
168.3	0.98875
168.4	0.9925
168.5	0.9925
168.6	0.995
168.7	0.9925
168.8	0.995
168.9	0.99
169	0.98875
169.1	0.9875
169.2	0.99125
169.3	0.99125
169.4	1
169.5	0.99875
169.6	0.9975
169.7	0.99875
169.8	0.99625
169.9	0.995
170	0.99375
170.1	0.9925
170.2	0.99375
170.3	0.99
170.4	0.99375
170.5	0.99
170.6	0.99
170.7	0.99375
170.8	0.99625
170.9	0.99375
171	0.9925
171.1	0.99375
171.2	0.99375
171.3	0.99625
171.4	0.9925
171.5	0.99125
171.6	0.98875
171.7	0.99
171.8	0.99125
171.9	0.99
172	0.99375
172.1	0.99625
172.2	0.99875
172.3	0.9975
172.4	0.995
172.5	0.99375
172.6	0.995
172.7	0.99625
172.8	0.99875
172.9	0.995
173	0.995
173.1	0.99375
173.2	0.99
173.3	0.995
173.4	0.9925
173.5	0.99125
173.6	0.9925
173.7	0.995
173.8	0.995
173.9	0.9925
174	0.9925
174.1	0.99125
174.2	0.99125
174.3	0.995
174.4	0.9925
174.5	0.98875
174.6	0.99125
174.7	0.99
174.8	0.99125
174.9	0.99
175	0.99
175.1	0.98875
175.2	0.98625
175.3	0.99
175.4	0.98875
175.5	0.9925
175.6	0.99375
175.7	0.9925
175.8	0.99125
175.9	0.9925
176	0.9925
176.1	0.99375
176.2	0.99125
176.3	0.99125
176.4	0.98875
176.5	0.98625
176.6	0.99375
176.7	0.99625
176.8	0.99125
176.9	0.9925
177	0.99
177.1	0.98875
177.2	0.9875
177.3	0.995
177.4	0.99625
177.5	0.9925
177.6	0.99125
177.7	0.99125
177.8	0.99125
177.9	0.98875
178	0.99
178.1	0.99
178.2	0.99125
178.3	0.9925
178.4	0.99125
178.5	0.99625
178.6	0.99625
178.7	0.99625
178.8	0.995
178.9	0.99375
179	0.99125
179.1	0.99125
179.2	0.995
179.3	0.99375
179.4	0.9975
179.5	0.99
179.6	0.9925
179.7	0.99
179.8	0.9925
179.9	0.99125
180	0.99625
180.1	0.99625
180.2	0.99625
180.3	0.995
180.4	0.995
180.5	0.9925
180.6	0.99
180.7	0.9925
180.8	0.99125
180.9	0.99125
181	0.98875
181.1	0.99125
181.2	0.99125
181.3	0.99375
181.4	0.99125
181.5	0.9925
181.6	0.99
181.7	0.9875
181.8	0.99
181.9	0.99125
182	0.9875
182.1	0.99
182.2	0.99
182.3	0.99125
182.4	0.99
182.5	0.99125
182.6	0.99625
182.7	0.99375
182.8	0.99375
182.9	0.995
183	0.9975
183.1	0.9975
183.2	0.99375
183.3	0.99375
183.4	0.9925
183.5	0.9975
183.6	0.99375
183.7	0.9925
183.8	0.99375
183.9	0.99625
184	0.99125
184.1	0.98875
184.2	0.99
184.3	0.99125
184.4	0.99
184.5	0.99
184.6	0.99625
184.7	0.995
184.8	0.9875
184.9	0.9925
185	0.9925
185.1	0.99125
185.2	0.99125
185.3	0.98625
185.4	0.995
185.5	0.98875
185.6	0.99
185.7	0.9925
185.8	0.9925
185.9	0.9925
186	0.99375
186.1	0.99625
186.2	0.99125
186.3	0.99
186.4	0.9925
186.5	0.9925
186.6	0.99375
186.7	0.99125
186.8	0.99125
186.9	0.9925
187	0.99125
187.1	0.9975
187.2	0.9975
187.3	0.99375
187.4	0.99125
187.5	0.9925
187.6	0.995
187.7	0.99375
187.8	0.99125
187.9	0.99125
188	0.9925
188.1	0.995
188.2	0.99375
188.3	0.995
188.4	0.99375
188.5	0.99375
188.6	0.99375
188.7	0.9925
188.8	0.98875
188.9	0.99125
189	0.99125
189.1	0.9925
189.2	0.99125
189.3	0.98875
189.4	0.99125
189.5	0.99
189.6	0.98625
189.7	0.9925
189.8	0.98875
189.9	0.98625
190	0.985
190.1	0.9875
190.2	0.99
190.3	0.99
190.4	0.99
190.5	0.99125
190.6	0.99125
190.7	0.99125
190.8	0.99375
190.9	0.9925
191	0.995
191.1	0.9925
191.2	0.99125
191.3	0.98875
191.4	0.98875
191.5	0.99125
191.6	0.99125
191.7	0.9925
191.8	0.99125
191.9	0.99375
192	0.99375
192.1	0.995
192.2	0.9925
192.3	0.9925
192.4	0.995
192.5	0.995
192.6	0.9925
192.7	0.99375
192.8	0.995
192.9	0.99375
193	0.99375
193.1	0.99
193.2	0.99125
193.3	0.99125
193.4	0.995
193.5	0.995
193.6	0.995
193.7	0.99
193.8	0.99125
193.9	0.99125
194	0.9925
194.1	0.98625
194.2	0.9875
194.3	0.9875
194.4	0.99375
194.5	0.995
194.6	0.99625
194.7	0.9925
194.8	0.9925
194.9	0.99
195	0.9875
195.1	0.9925
195.2	0.99
195.3	0.9875
195.4	0.99
195.5	0.9925
195.6	0.995
195.7	0.99375
195.8	0.9975
195.9	0.99375
196	0.99
196.1	0.9875
196.2	0.9875
196.3	0.99
196.4	0.99125
196.5	0.99
196.6	0.9975
196.7	0.9975
196.8	0.9925
196.9	0.99625
197	0.99125
197.1	0.99125
197.2	0.9925
197.3	0.9925
197.4	0.99125
197.5	0.9925
197.6	0.99375
197.7	0.99375
197.8	0.99
197.9	0.99
198	0.9875
198.1	0.98875
198.2	0.98625
198.3	0.9825
198.4	0.98375
198.5	0.98875
198.6	0.99125
198.7	0.98625
198.8	0.985
198.9	0.99
199	0.99125
199.1	0.99375
199.2	0.995
199.3	0.995
199.4	0.99625
199.5	0.995
199.6	0.995
199.7	0.99625
199.8	0.995
199.9	0.99875
200	0.9925
[truncated: 14,000 more rows]
