# Supplementary material for: Bayesian inference of kinetic schemes for ion channels by Kalman filtering
Source: eLife journal article supplement (doi:10.7554/elife.62714), 2022-05-04
Supplement: fig4-data1 [file 1_Sim_N_400_Strom_MW_16M.xlsx]

## Sheet: 16 M
0.1	0
0.2	0
0.3	0
0.4	0
0.5	0
0.6	0
0.7	0
0.8	0
0.9	0
1	0
1.1	0
1.2	0
1.3	0
1.4	0
1.5	0
1.6	0
1.7	0
1.8	0
1.9	0
2	0
2.1	0
2.2	0
2.3	0
2.4	0
2.5	0
2.6	0
2.7	0
2.8	0
2.9	0
3	0
3.1	0
3.2	0
3.3	0
3.4	0
3.5	0
3.6	0
3.7	0
3.8	0
3.9	0
4	0
4.1	0
4.2	0
4.3	0
4.4	0
4.5	0
4.6	0
4.7	0
4.8	0
4.9	0
5	0
5.1	0
5.2	0
5.3	0
5.4	0
5.5	0
5.6	0
5.7	0
5.8	0
5.9	0
6	0
6.1	0
6.2	0
6.3	0
6.4	0
6.5	0
6.6	0
6.7	0
6.8	0
6.9	0
7	0
7.1	0
7.2	0
7.3	0
7.4	0
7.5	0
7.6	0
7.7	0
7.8	0
7.9	0
8	0
8.1	0
8.2	0
8.3	0
8.4	0
8.5	0
8.6	0
8.7	0
8.8	0
8.9	0
9	0
9.1	0
9.2	0
9.3	0
9.4	0
9.5	0
9.6	0
9.7	0
9.8	0
9.9	0
10	0
10.1	0
10.2	0
10.3	0
10.4	0
10.5	0
10.6	0
10.7	0
10.8	0
10.9	0
11	0
11.1	0
11.2	0
11.3	0
11.4	0
11.5	0
11.6	0
11.7	0
11.8	0
11.9	0
12	0
12.1	0
12.2	0
12.3	0
12.4	0
12.5	0
12.6	0
12.7	0
12.8	0
12.9	0
13	0
13.1	0
13.2	0
13.3	0
13.4	0
13.5	0
13.6	0
13.7	0
13.8	0
13.9	0
14	0
14.1	0
14.2	0
14.3	0
14.4	0
14.5	0
14.6	0
14.7	0
14.8	0
14.9	0
15	0
15.1	0
15.2	0
15.3	0
15.4	0
15.5	0
15.6	0
15.7	0
15.8	0
15.9	0
16	0
16.1	0
16.2	0
16.3	0
16.4	0
16.5	0
16.6	0
16.7	0
16.8	0
16.9	0
17	0
17.1	0
17.2	0
17.3	0
17.4	0
17.5	0
17.6	0
17.7	0
17.8	0
17.9	0
18	0
18.1	0
18.2	0
18.3	0
18.4	0
18.5	0
18.6	0
18.7	0
18.8	0
18.9	0
19	0
19.1	0
19.2	0
19.3	0
19.4	0
19.5	0
19.6	0
19.7	0
19.8	0
19.9	0
20	0
20.1	0
20.2	0
20.3	0
20.4	0
20.5	0
20.6	0
20.7	0
20.8	0
20.9	0
21	0
21.1	0
21.2	0
21.3	0
21.4	0
21.5	0
21.6	0
21.7	0
21.8	0
21.9	0
22	0
22.1	0
22.2	0
22.3	0
22.4	0
22.5	0
22.6	0
22.7	0
22.8	0
22.9	0
23	0
23.1	0
23.2	0
23.3	0
23.4	0
23.5	0
23.6	0
23.7	0
23.8	0
23.9	0
24	0
24.1	0
24.2	0
24.3	0
24.4	0
24.5	0
24.6	0
24.7	0
24.8	0
24.9	0
25	0
25.1	0
25.2	0
25.3	0
25.4	0
25.5	0
25.6	0
25.7	0
25.8	0
25.9	0
26	0
26.1	0
26.2	0
26.3	0
26.4	0
26.5	0
26.6	0
26.7	0
26.8	0
26.9	0
27	0
27.1	0
27.2	0
27.3	0
27.4	0
27.5	0
27.6	0
27.7	0
27.8	0
27.9	0
28	0
28.1	0
28.2	0
28.3	0
28.4	0
28.5	0
28.6	0
28.7	0
28.8	0
28.9	0
29	0
29.1	0
29.2	0
29.3	0
29.4	0
29.5	0
29.6	0
29.7	0
29.8	0
29.9	0
30	0
30.1	0
30.2	0
30.3	0
30.4	0
30.5	0
30.6	0
30.7	0
30.8	0
30.9	0
31	0
31.1	0
31.2	0
31.3	0
31.4	0
31.5	0
31.6	0
31.7	0
31.8	0
31.9	0
32	0
32.1	0
32.2	0
32.3	0
32.4	0
32.5	0
32.6	0
32.7	0
32.8	0
32.9	0
33	0
33.1	0
33.2	0
33.3	0
33.4	0
33.5	0
33.6	0
33.7	0
33.8	0
33.9	0
34	0
34.1	0
34.2	0
34.3	0
34.4	0
34.5	0
34.6	0
34.7	0
34.8	0
34.9	0
35	0
35.1	0
35.2	0
35.3	0
35.4	0
35.5	0
35.6	0
35.7	0
35.8	0
35.9	0
36	0
36.1	0
36.2	0
36.3	0
36.4	0
36.5	0
36.6	0
36.7	0
36.8	0
36.9	0
37	0
37.1	0
37.2	0
37.3	0
37.4	0
37.5	0
37.6	0
37.7	0
37.8	0
37.9	0
38	0
38.1	0
38.2	0
38.3	0
38.4	0
38.5	0
38.6	0
38.7	0
38.8	0
38.9	0
39	0
39.1	0
39.2	0
39.3	0
39.4	0
39.5	0
39.6	0
39.7	0
39.8	0
39.9	0
40	0
40.1	0
40.2	0
40.3	0
40.4	0
40.5	0
40.6	0
40.7	0
40.8	0
40.9	0
41	0
41.1	0
41.2	0
41.3	0
41.4	0
41.5	0
41.6	0
41.7	0
41.8	0
41.9	0
42	0
42.1	0
42.2	0
42.3	0
42.4	0
42.5	0
42.6	0
42.7	0
42.8	0
42.9	0
43	0
43.1	0
43.2	0
43.3	0
43.4	0
43.5	0
43.6	0
43.7	0
43.8	0
43.9	0
44	0
44.1	0
44.2	0
44.3	0
44.4	0
44.5	0
44.6	0
44.7	0
44.8	0
44.9	0
45	0
45.1	0
45.2	0
45.3	0
45.4	0
45.5	0
45.6	0
45.7	0
45.8	0
45.9	0
46	0
46.1	0
46.2	0
46.3	0
46.4	0
46.5	0
46.6	0
46.7	0
46.8	0
46.9	0
47	0
47.1	0
47.2	0
47.3	0
47.4	0
47.5	0
47.6	0
47.7	0
47.8	0
47.9	0
48	0
48.1	0
48.2	0
48.3	0
48.4	0
48.5	0
48.6	0
48.7	0
48.8	0
48.9	0
49	0
49.1	0
49.2	0
49.3	0
49.4	0
49.5	0
49.6	0
49.7	0
49.8	0
49.9	0
50	0
50.1	0
50.2	0
50.3	0
50.4	0
50.5	0
50.6	0
50.7	0
50.8	0
50.9	0
51	0
51.1	0
51.2	0
51.3	0
51.4	0
51.5	0
51.6	0
51.7	0
51.8	0
51.9	0
52	0
52.1	0
52.2	0
52.3	0
52.4	0
52.5	0
52.6	0
52.7	0
52.8	0
52.9	0
53	0
53.1	0
53.2	0
53.3	0
53.4	0
53.5	0
53.6	0
53.7	0
53.8	0
53.9	0
54	0
54.1	0
54.2	0
54.3	0
54.4	0
54.5	0
54.6	0
54.7	0
54.8	0
54.9	0
55	0
55.1	0
55.2	0
55.3	0
55.4	0
55.5	0
55.6	0
55.7	0
55.8	0
55.9	0
56	0
56.1	0
56.2	0
56.3	0
56.4	0
56.5	0
56.6	0
56.7	0
56.8	0
56.9	0
57	0
57.1	0
57.2	0
57.3	0
57.4	0
57.5	0
57.6	0
57.7	0
57.8	0
57.9	0
58	0
58.1	0
58.2	0
58.3	0
58.4	0
58.5	0
58.6	0
58.7	0
58.8	0
58.9	0
59	0
59.1	0
59.2	0
59.3	0
59.4	0
59.5	0
59.6	0
59.7	0
59.8	0
59.9	0
60	0
60.1	0
60.2	0
60.3	0
60.4	0
60.5	0
60.6	0
60.7	0
60.8	0
60.9	0
61	0
61.1	0
61.2	0
61.3	0
61.4	0
61.5	0
61.6	0
61.7	0
61.8	0
61.9	0
62	0
62.1	0
62.2	0
62.3	0
62.4	0
62.5	0
62.6	0
62.7	0
62.8	0
62.9	0
63	0
63.1	0
63.2	0
63.3	0
63.4	0
63.5	0
63.6	0
63.7	0
63.8	0
63.9	0
64	0
64.1	0
64.2	0
64.3	0
64.4	0
64.5	0
64.6	0
64.7	0
64.8	0
64.9	0
65	0
65.1	0
65.2	0
65.3	0
65.4	0
65.5	0
65.6	0
65.7	0
65.8	0
65.9	0
66	0
66.1	0
66.2	0
66.3	0
66.4	0
66.5	0
66.6	0
66.7	0
66.8	0
66.9	0
67	0
67.1	0
67.2	0
67.3	0
67.4	0
67.5	0
67.6	0
67.7	0
67.8	0
67.9	0
68	0
68.1	0
68.2	0
68.3	0
68.4	0
68.5	0
68.6	0
68.7	0
68.8	0
68.9	0
69	0
69.1	0
69.2	0
69.3	0
69.4	0
69.5	0
69.6	0
69.7	0
69.8	0
69.9	0
70	0
70.1	0
70.2	0
70.3	0
70.4	0
70.5	0
70.6	0
70.7	0
70.8	0
70.9	0
71	0
71.1	0
71.2	0
71.3	0
71.4	0
71.5	0
71.6	0
71.7	0
71.8	0
71.9	0
72	0
72.1	0
72.2	0
72.3	0
72.4	0
72.5	0
72.6	0
72.7	0
72.8	0
72.9	0
73	0
73.1	0
73.2	0
73.3	0
73.4	0
73.5	0
73.6	0
73.7	0
73.8	0
73.9	0
74	0
74.1	0
74.2	0
74.3	0
74.4	0
74.5	0
74.6	0
74.7	0
74.8	0
74.9	0
75	0
75.1	0
75.2	0
75.3	0
75.4	0
75.5	0
75.6	0
75.7	0
75.8	0
75.9	0
76	0
76.1	0
76.2	0
76.3	0
76.4	0
76.5	0
76.6	0
76.7	0
76.8	0
76.9	0
77	0
77.1	0
77.2	0
77.3	0
77.4	0
77.5	0
77.6	0
77.7	0
77.8	0
77.9	0
78	0
78.1	0
78.2	0
78.3	0
78.4	0
78.5	0
78.6	0
78.7	0
78.8	0
78.9	0
79	0
79.1	0
79.2	0
79.3	0
79.4	0
79.5	0
79.6	0
79.7	0
79.8	0
79.9	0
80	0
80.1	0
80.2	0
80.3	0
80.4	0
80.5	0
80.6	0
80.7	0
80.8	0
80.9	0
81	0
81.1	0
81.2	0
81.3	0
81.4	0
81.5	0
81.6	0
81.7	0
81.8	0
81.9	0
82	0
82.1	0
82.2	0
82.3	0
82.4	0
82.5	0
82.6	0
82.7	0
82.8	0
82.9	0
83	0
83.1	0
83.2	0
83.3	0
83.4	0
83.5	0
83.6	0
83.7	0
83.8	0
83.9	0
84	0
84.1	0
84.2	0
84.3	0
84.4	0
84.5	0
84.6	0
84.7	0
84.8	0
84.9	0
85	0
85.1	0
85.2	0
85.3	0
85.4	0
85.5	0
85.6	0
85.7	0
85.8	0
85.9	0
86	0
86.1	0
86.2	0
86.3	0
86.4	0
86.5	0
86.6	0
86.7	0
86.8	0
86.9	0
87	0
87.1	0
87.2	0
87.3	0
87.4	0
87.5	0
87.6	0
87.7	0
87.8	0
87.9	0
88	0
88.1	0
88.2	0
88.3	0
88.4	0
88.5	0
88.6	0
88.7	0
88.8	0
88.9	0
89	0
89.1	0
89.2	0
89.3	0
89.4	0
89.5	0
89.6	0
89.7	0
89.8	0
89.9	0
90	0
90.1	0
90.2	0
90.3	0
90.4	0
90.5	0
90.6	0
90.7	0
90.8	0
90.9	0
91	0
91.1	0
91.2	0
91.3	0
91.4	0
91.5	0
91.6	0
91.7	0
91.8	0
91.9	0
92	0
92.1	0
92.2	0
92.3	0
92.4	0
92.5	0
92.6	0
92.7	0
92.8	0
92.9	0
93	0
93.1	0
93.2	0
93.3	0
93.4	0
93.5	0
93.6	0
93.7	0
93.8	0
93.9	0
94	0
94.1	0
94.2	0
94.3	0
94.4	0
94.5	0
94.6	0
94.7	0
94.8	0
94.9	0
95	0
95.1	0
95.2	0
95.3	0
95.4	0
95.5	0
95.6	0
95.7	0
95.8	0
95.9	0
96	0
96.1	0
96.2	0
96.3	0
96.4	0
96.5	0
96.6	0
96.7	0
96.8	0
96.9	0
97	0
97.1	0
97.2	0
97.3	0
97.4	0
97.5	0
97.6	0
97.7	0
97.8	0
97.9	0
98	0
98.1	0
98.2	0
98.3	0
98.4	0
98.5	0
98.6	0
98.7	0
98.8	0
98.9	0
99	0
99.1	0
99.2	0
99.3	0
99.4	0
99.5	0
99.6	0
99.7	0
99.8	0
99.9	0
100	0
100.1	0
100.2	0
100.3	0
100.4	0.0025
100.5	0.0025
100.6	0.005
100.7	0.01
100.8	0.01
100.9	0.0175
101	0.02
101.1	0.02
101.2	0.0225
101.3	0.0325
101.4	0.04
101.5	0.0425
101.6	0.0425
101.7	0.05
101.8	0.0575
101.9	0.06
102	0.06
102.1	0.0675
102.2	0.075
102.3	0.08
102.4	0.085
102.5	0.09
102.6	0.0925
102.7	0.0925
102.8	0.095
102.9	0.11
103	0.11
103.1	0.115
103.2	0.115
103.3	0.12
103.4	0.125
103.5	0.125
103.6	0.1225
103.7	0.13
103.8	0.1275
103.9	0.1325
104	0.1325
104.1	0.135
104.2	0.1375
104.3	0.145
104.4	0.15
104.5	0.155
104.6	0.16
104.7	0.165
104.8	0.17
104.9	0.1725
105	0.18
105.1	0.18
105.2	0.19
105.3	0.1925
105.4	0.1925
105.5	0.2
105.6	0.205
105.7	0.205
105.8	0.2075
105.9	0.2075
106	0.2075
106.1	0.2075
106.2	0.21
106.3	0.21
106.4	0.21
106.5	0.2175
106.6	0.22
106.7	0.225
106.8	0.2325
106.9	0.2325
107	0.2375
107.1	0.24
107.2	0.2425
107.3	0.2425
107.4	0.24
107.5	0.2425
107.6	0.2475
107.7	0.2525
107.8	0.2525
107.9	0.2625
108	0.2625
108.1	0.2675
108.2	0.2725
108.3	0.2725
108.4	0.2775
108.5	0.28
108.6	0.28
108.7	0.2825
108.8	0.285
108.9	0.29
109	0.295
109.1	0.2975
109.2	0.3025
109.3	0.31
109.4	0.31
109.5	0.31
109.6	0.3175
109.7	0.32
109.8	0.3225
109.9	0.3225
110	0.325
110.1	0.3325
110.2	0.3325
110.3	0.335
110.4	0.34
110.5	0.34
110.6	0.3425
110.7	0.3425
110.8	0.345
110.9	0.345
111	0.3475
111.1	0.3475
111.2	0.35
111.3	0.355
111.4	0.355
111.5	0.355
111.6	0.3575
111.7	0.36
111.8	0.3575
111.9	0.3575
112	0.3625
112.1	0.3625
112.2	0.365
112.3	0.37
112.4	0.37
112.5	0.375
112.6	0.3775
112.7	0.38
112.8	0.3825
112.9	0.385
113	0.39
113.1	0.3875
113.2	0.3875
113.3	0.3925
113.4	0.39
113.5	0.3925
113.6	0.3925
113.7	0.3925
113.8	0.39
113.9	0.3875
114	0.395
114.1	0.4
114.2	0.4
114.3	0.4
114.4	0.4
114.5	0.405
114.6	0.41
114.7	0.4225
114.8	0.42
114.9	0.4175
115	0.42
115.1	0.4175
115.2	0.4175
115.3	0.42
115.4	0.4225
115.5	0.425
115.6	0.425
115.7	0.4275
115.8	0.4325
115.9	0.4325
116	0.4325
116.1	0.435
116.2	0.4375
116.3	0.4425
116.4	0.445
116.5	0.4475
116.6	0.45
116.7	0.455
116.8	0.455
116.9	0.4575
117	0.46
117.1	0.4625
117.2	0.4675
117.3	0.4725
117.4	0.4725
117.5	0.4725
117.6	0.4725
117.7	0.4725
117.8	0.4725
117.9	0.475
118	0.475
118.1	0.48
118.2	0.4825
118.3	0.485
118.4	0.485
118.5	0.485
118.6	0.49
118.7	0.4875
118.8	0.4875
118.9	0.4925
119	0.4925
119.1	0.495
119.2	0.495
119.3	0.5
119.4	0.5025
119.5	0.5025
119.6	0.5025
119.7	0.505
119.8	0.51
119.9	0.515
120	0.5175
120.1	0.52
120.2	0.52
120.3	0.5225
120.4	0.5225
120.5	0.525
120.6	0.525
120.7	0.5225
120.8	0.525
120.9	0.53
121	0.5325
121.1	0.53
121.2	0.53
121.3	0.535
121.4	0.54
121.5	0.54
121.6	0.5425
121.7	0.5425
121.8	0.5475
121.9	0.5475
122	0.55
122.1	0.55
122.2	0.5575
122.3	0.56
122.4	0.565
122.5	0.5675
122.6	0.5675
122.7	0.565
122.8	0.575
122.9	0.575
123	0.575
123.1	0.5775
123.2	0.58
123.3	0.5825
123.4	0.5825
123.5	0.585
123.6	0.5925
123.7	0.5925
123.8	0.5925
123.9	0.5975
124	0.5975
124.1	0.6
124.2	0.6
124.3	0.6025
124.4	0.605
124.5	0.6025
124.6	0.6025
124.7	0.605
124.8	0.6025
124.9	0.6025
125	0.6025
125.1	0.6075
125.2	0.61
125.3	0.61
125.4	0.61
125.5	0.6075
125.6	0.6075
125.7	0.6075
125.8	0.61
125.9	0.615
126	0.6175
126.1	0.62
126.2	0.6225
126.3	0.6225
126.4	0.625
126.5	0.6275
126.6	0.6325
126.7	0.63
126.8	0.63
126.9	0.63
127	0.63
127.1	0.6325
127.2	0.6325
127.3	0.63
127.4	0.63
127.5	0.63
127.6	0.625
127.7	0.6275
127.8	0.6275
127.9	0.625
128	0.6275
128.1	0.6275
128.2	0.625
128.3	0.625
128.4	0.6175
128.5	0.6175
128.6	0.615
128.7	0.6175
128.8	0.6175
128.9	0.615
129	0.6175
129.1	0.6175
129.2	0.62
129.3	0.6225
129.4	0.62
129.5	0.62
129.6	0.62
129.7	0.6225
129.8	0.625
129.9	0.6325
130	0.6325
130.1	0.6325
130.2	0.6325
130.3	0.63
130.4	0.6275
130.5	0.6275
130.6	0.635
130.7	0.6325
130.8	0.635
130.9	0.6375
131	0.6375
131.1	0.64
131.2	0.64
131.3	0.64
131.4	0.64
131.5	0.6425
131.6	0.6425
131.7	0.64
131.8	0.64
131.9	0.64
132	0.6425
132.1	0.64
132.2	0.64
132.3	0.64
132.4	0.645
132.5	0.6475
132.6	0.6525
132.7	0.6525
132.8	0.655
132.9	0.655
133	0.655
133.1	0.6625
133.2	0.665
133.3	0.665
133.4	0.665
133.5	0.6625
133.6	0.6625
133.7	0.665
133.8	0.67
133.9	0.67
134	0.67
134.1	0.67
134.2	0.6725
134.3	0.675
134.4	0.675
134.5	0.6775
134.6	0.68
134.7	0.68
134.8	0.6825
134.9	0.6825
135	0.685
135.1	0.6925
135.2	0.6925
135.3	0.6925
135.4	0.695
135.5	0.6975
135.6	0.6975
135.7	0.6975
135.8	0.6975
135.9	0.6975
136	0.695
136.1	0.695
136.2	0.695
136.3	0.695
136.4	0.6975
136.5	0.7
136.6	0.6975
136.7	0.6975
136.8	0.6975
136.9	0.7
137	0.6975
137.1	0.7
137.2	0.705
137.3	0.7075
137.4	0.7075
137.5	0.705
137.6	0.7075
137.7	0.7075
137.8	0.7075
137.9	0.7075
138	0.7125
138.1	0.7125
138.2	0.7125
138.3	0.7125
138.4	0.7125
138.5	0.715
138.6	0.715
138.7	0.7125
138.8	0.715
138.9	0.72
139	0.72
139.1	0.72
139.2	0.7225
139.3	0.72
139.4	0.7175
139.5	0.7175
139.6	0.72
139.7	0.7225
139.8	0.72
139.9	0.72
140	0.7175
140.1	0.7175
140.2	0.7175
140.3	0.72
140.4	0.72
140.5	0.72
140.6	0.7225
140.7	0.7275
140.8	0.73
140.9	0.735
141	0.7325
141.1	0.7325
141.2	0.7325
141.3	0.735
141.4	0.735
141.5	0.735
141.6	0.735
141.7	0.735
141.8	0.735
141.9	0.735
142	0.74
142.1	0.745
142.2	0.7425
142.3	0.745
142.4	0.745
142.5	0.7425
142.6	0.7425
142.7	0.74
142.8	0.7375
142.9	0.74
143	0.7425
143.1	0.7425
143.2	0.7425
143.3	0.74
143.4	0.74
143.5	0.74
143.6	0.74
143.7	0.74
143.8	0.7375
143.9	0.7325
144	0.7325
144.1	0.7325
144.2	0.7375
144.3	0.7375
144.4	0.7375
144.5	0.74
144.6	0.7425
144.7	0.7475
144.8	0.745
144.9	0.7475
145	0.75
145.1	0.75
145.2	0.75
145.3	0.75
145.4	0.75
145.5	0.75
145.6	0.75
145.7	0.7475
145.8	0.7475
145.9	0.7475
146	0.7475
146.1	0.75
146.2	0.75
146.3	0.7525
146.4	0.7525
146.5	0.755
146.6	0.755
146.7	0.755
146.8	0.755
146.9	0.7525
147	0.7525
147.1	0.75
147.2	0.75
147.3	0.75
147.4	0.75
147.5	0.75
147.6	0.7475
147.7	0.75
147.8	0.7575
147.9	0.76
148	0.755
148.1	0.7575
148.2	0.7625
148.3	0.7625
148.4	0.76
148.5	0.7625
148.6	0.76
148.7	0.7625
148.8	0.7625
148.9	0.7625
149	0.7625
149.1	0.7675
149.2	0.77
149.3	0.7725
149.4	0.7725
149.5	0.775
149.6	0.7775
149.7	0.78
149.8	0.78
149.9	0.78
150	0.78
150.1	0.78
150.2	0.785
150.3	0.785
150.4	0.785
150.5	0.785
150.6	0.785
150.7	0.785
150.8	0.785
150.9	0.78
151	0.7775
151.1	0.7775
151.2	0.7775
151.3	0.7775
151.4	0.7775
151.5	0.78
151.6	0.7825
151.7	0.78
151.8	0.7825
151.9	0.7825
152	0.7825
152.1	0.785
152.2	0.785
152.3	0.7825
152.4	0.7825
152.5	0.785
152.6	0.785
152.7	0.785
152.8	0.7875
152.9	0.7925
153	0.795
153.1	0.7925
153.2	0.795
153.3	0.795
153.4	0.795
153.5	0.795
153.6	0.795
153.7	0.7925
153.8	0.7925
153.9	0.79
154	0.79
154.1	0.7925
154.2	0.795
154.3	0.795
154.4	0.8
154.5	0.8
154.6	0.8
154.7	0.8
154.8	0.8025
154.9	0.7975
155	0.7975
155.1	0.795
155.2	0.7975
155.3	0.7975
155.4	0.7975
155.5	0.8
155.6	0.8
155.7	0.8025
155.8	0.805
155.9	0.8025
156	0.8025
156.1	0.8025
156.2	0.8025
156.3	0.805
156.4	0.805
156.5	0.8075
156.6	0.8075
156.7	0.8075
156.8	0.8075
156.9	0.8075
157	0.8075
157.1	0.8075
157.2	0.8075
157.3	0.805
157.4	0.8075
157.5	0.805
157.6	0.8025
157.7	0.8
157.8	0.8025
157.9	0.8025
158	0.805
158.1	0.81
158.2	0.81
158.3	0.81
158.4	0.81
158.5	0.81
158.6	0.8125
158.7	0.8125
158.8	0.82
158.9	0.8225
159	0.82
159.1	0.82
159.2	0.82
159.3	0.82
159.4	0.82
159.5	0.8225
159.6	0.82
159.7	0.815
159.8	0.815
159.9	0.8125
160	0.8125
160.1	0.81
160.2	0.8075
160.3	0.81
160.4	0.81
160.5	0.81
160.6	0.81
160.7	0.81
160.8	0.81
160.9	0.8075
161	0.81
161.1	0.8125
161.2	0.81
161.3	0.81
161.4	0.815
161.5	0.8175
161.6	0.8175
161.7	0.8175
161.8	0.8175
161.9	0.8175
162	0.8175
162.1	0.8175
162.2	0.8175
162.3	0.8175
162.4	0.8175
162.5	0.815
162.6	0.815
162.7	0.8125
162.8	0.8175
162.9	0.8225
163	0.825
163.1	0.825
163.2	0.825
163.3	0.825
163.4	0.825
163.5	0.8225
163.6	0.8175
163.7	0.8175
163.8	0.8175
163.9	0.8175
164	0.82
164.1	0.82
164.2	0.82
164.3	0.82
164.4	0.82
164.5	0.82
164.6	0.8225
164.7	0.8225
164.8	0.82
164.9	0.82
165	0.82
165.1	0.8225
165.2	0.8275
165.3	0.825
165.4	0.825
165.5	0.825
165.6	0.8275
165.7	0.8325
165.8	0.8325
165.9	0.8325
166	0.8325
166.1	0.8325
166.2	0.835
166.3	0.835
166.4	0.835
166.5	0.8375
166.6	0.8375
166.7	0.835
166.8	0.835
166.9	0.8325
167	0.83
167.1	0.8275
167.2	0.8275
167.3	0.8275
167.4	0.8275
167.5	0.8275
167.6	0.8275
167.7	0.8275
167.8	0.83
167.9	0.83
168	0.83
168.1	0.83
168.2	0.8325
168.3	0.8325
168.4	0.835
168.5	0.835
168.6	0.835
168.7	0.835
168.8	0.8375
168.9	0.835
169	0.835
169.1	0.8375
169.2	0.8375
169.3	0.8375
169.4	0.84
169.5	0.84
169.6	0.8425
169.7	0.845
169.8	0.8475
169.9	0.8475
170	0.8475
170.1	0.85
170.2	0.8525
170.3	0.8575
170.4	0.86
170.5	0.8575
170.6	0.8575
170.7	0.86
170.8	0.8575
170.9	0.855
171	0.855
171.1	0.855
171.2	0.855
171.3	0.855
171.4	0.8525
171.5	0.855
171.6	0.855
171.7	0.855
171.8	0.855
171.9	0.8525
172	0.855
172.1	0.855
172.2	0.855
172.3	0.855
172.4	0.8575
172.5	0.8575
172.6	0.86
172.7	0.86
172.8	0.8575
172.9	0.8575
173	0.855
173.1	0.855
173.2	0.855
173.3	0.855
173.4	0.855
173.5	0.8525
173.6	0.8525
173.7	0.85
173.8	0.85
173.9	0.85
174	0.85
174.1	0.8525
174.2	0.8525
174.3	0.8525
174.4	0.855
174.5	0.8525
174.6	0.8525
174.7	0.85
174.8	0.85
174.9	0.8525
175	0.855
175.1	0.855
175.2	0.855
175.3	0.855
175.4	0.855
175.5	0.855
175.6	0.8525
175.7	0.855
175.8	0.855
175.9	0.855
176	0.855
176.1	0.855
176.2	0.855
176.3	0.8575
176.4	0.8575
176.5	0.86
176.6	0.86
176.7	0.86
176.8	0.8625
176.9	0.8625
177	0.8575
177.1	0.8575
177.2	0.855
177.3	0.855
177.4	0.855
177.5	0.855
177.6	0.8525
177.7	0.8475
177.8	0.85
177.9	0.8475
178	0.8475
178.1	0.8475
178.2	0.8475
178.3	0.8475
178.4	0.845
178.5	0.845
178.6	0.845
178.7	0.845
178.8	0.8425
178.9	0.8425
179	0.84
179.1	0.8375
179.2	0.835
179.3	0.8375
179.4	0.835
179.5	0.835
179.6	0.8375
179.7	0.8375
179.8	0.8375
179.9	0.835
180	0.835
180.1	0.835
180.2	0.8375
180.3	0.8375
180.4	0.8375
180.5	0.8375
180.6	0.835
180.7	0.835
180.8	0.8325
180.9	0.8325
181	0.8325
181.1	0.8325
181.2	0.8325
181.3	0.8325
181.4	0.8325
181.5	0.83
181.6	0.8325
181.7	0.8325
181.8	0.8325
181.9	0.8325
182	0.8325
182.1	0.83
182.2	0.8325
182.3	0.8325
182.4	0.835
182.5	0.8325
182.6	0.8325
182.7	0.8325
182.8	0.8325
182.9	0.835
183	0.8325
183.1	0.8325
183.2	0.83
183.3	0.83
183.4	0.83
183.5	0.835
183.6	0.835
183.7	0.835
183.8	0.835
183.9	0.835
184	0.835
184.1	0.8325
184.2	0.8325
184.3	0.8325
184.4	0.8325
184.5	0.8325
184.6	0.8325
184.7	0.83
184.8	0.83
184.9	0.8325
185	0.8325
185.1	0.8325
185.2	0.8325
185.3	0.835
185.4	0.835
185.5	0.835
185.6	0.835
185.7	0.835
185.8	0.835
185.9	0.8325
186	0.83
186.1	0.83
186.2	0.8325
186.3	0.8325
186.4	0.8325
186.5	0.8325
186.6	0.835
186.7	0.8375
186.8	0.8325
186.9	0.8325
187	0.8325
187.1	0.835
187.2	0.835
187.3	0.835
187.4	0.835
187.5	0.835
187.6	0.835
187.7	0.835
187.8	0.835
187.9	0.835
188	0.835
188.1	0.835
188.2	0.835
188.3	0.8325
188.4	0.83
188.5	0.83
188.6	0.83
188.7	0.8275
188.8	0.8275
188.9	0.825
189	0.825
189.1	0.825
189.2	0.83
189.3	0.83
189.4	0.8275
189.5	0.8275
189.6	0.8275
189.7	0.83
189.8	0.83
189.9	0.83
190	0.8275
190.1	0.8275
190.2	0.83
190.3	0.8275
190.4	0.83
190.5	0.8325
190.6	0.8325
190.7	0.8325
190.8	0.8325
190.9	0.8325
191	0.8325
191.1	0.835
191.2	0.835
191.3	0.835
191.4	0.835
191.5	0.835
191.6	0.835
191.7	0.835
191.8	0.8375
191.9	0.835
192	0.8375
192.1	0.835
192.2	0.835
192.3	0.835
192.4	0.8375
192.5	0.835
192.6	0.8325
192.7	0.8325
192.8	0.83
192.9	0.83
193	0.83
193.1	0.835
193.2	0.835
193.3	0.8375
193.4	0.8325
193.5	0.8325
193.6	0.8325
193.7	0.835
193.8	0.835
193.9	0.8325
194	0.8325
194.1	0.835
194.2	0.8325
194.3	0.83
194.4	0.83
194.5	0.8275
194.6	0.83
194.7	0.825
194.8	0.8225
194.9	0.8225
195	0.8225
195.1	0.825
195.2	0.825
195.3	0.8275
195.4	0.83
195.5	0.83
195.6	0.8275
195.7	0.8275
195.8	0.83
195.9	0.8325
196	0.8325
196.1	0.8325
196.2	0.8325
196.3	0.8375
196.4	0.8375
196.5	0.835
196.6	0.8325
196.7	0.835
196.8	0.835
196.9	0.835
197	0.8325
197.1	0.83
197.2	0.83
197.3	0.83
197.4	0.83
197.5	0.83
197.6	0.83
197.7	0.83
197.8	0.8275
197.9	0.83
198	0.83
198.1	0.8275
198.2	0.8275
198.3	0.8275
198.4	0.8275
198.5	0.8275
198.6	0.8225
198.7	0.8225
198.8	0.82
198.9	0.82
199	0.82
199.1	0.8175
199.2	0.82
199.3	0.8225
199.4	0.8225
199.5	0.8225
199.6	0.825
199.7	0.825
199.8	0.82
199.9	0.82
200	0.825
[truncated: 14,000 more rows]
