# Supplementary material for: Bayesian inference of kinetic schemes for ion channels by Kalman filtering
Source: eLife journal article supplement (doi:10.7554/elife.62714), 2022-05-04
Supplement: fig4-data1 [file 1_Sim_N_500_Fluor_MW.xlsx]

## Sheet: Tabelle1
0.1	0
0.2	0
0.3	0
0.4	0
0.5	0
0.6	0
0.7	0
0.8	0
0.9	0
1	0
1.1	0
1.2	0
1.3	0
1.4	0
1.5	0
1.6	0
1.7	0
1.8	0
1.9	0
2	0
2.1	0
2.2	0
2.3	0
2.4	0
2.5	0
2.6	0
2.7	0
2.8	0
2.9	0
3	0
3.1	0
3.2	0
3.3	0
3.4	0
3.5	0
3.6	0
3.7	0
3.8	0
3.9	0
4	0
4.1	0
4.2	0
4.3	0
4.4	0
4.5	0
4.6	0
4.7	0
4.8	0
4.9	0
5	0
5.1	0
5.2	0
5.3	0
5.4	0
5.5	0
5.6	0
5.7	0
5.8	0
5.9	0
6	0
6.1	0
6.2	0
6.3	0
6.4	0
6.5	0
6.6	0
6.7	0
6.8	0
6.9	0
7	0
7.1	0
7.2	0
7.3	0
7.4	0
7.5	0
7.6	0
7.7	0
7.8	0
7.9	0
8	0
8.1	0
8.2	0
8.3	0
8.4	0
8.5	0
8.6	0
8.7	0
8.8	0
8.9	0
9	0
9.1	0
9.2	0
9.3	0
9.4	0
9.5	0
9.6	0
9.7	0
9.8	0
9.9	0
10	0
10.1	0
10.2	0
10.3	0
10.4	0
10.5	0
10.6	0
10.7	0
10.8	0
10.9	0
11	0
11.1	0
11.2	0
11.3	0
11.4	0
11.5	0
11.6	0
11.7	0
11.8	0
11.9	0
12	0
12.1	0
12.2	0
12.3	0
12.4	0
12.5	0
12.6	0
12.7	0
12.8	0
12.9	0
13	0
13.1	0
13.2	0
13.3	0
13.4	0
13.5	0
13.6	0
13.7	0
13.8	0
13.9	0
14	0
14.1	0
14.2	0
14.3	0
14.4	0
14.5	0
14.6	0
14.7	0
14.8	0
14.9	0
15	0
15.1	0
15.2	0
15.3	0
15.4	0
15.5	0
15.6	0
15.7	0
15.8	0
15.9	0
16	0
16.1	0
16.2	0
16.3	0
16.4	0
16.5	0
16.6	0
16.7	0
16.8	0
16.9	0
17	0
17.1	0
17.2	0
17.3	0
17.4	0
17.5	0
17.6	0
17.7	0
17.8	0
17.9	0
18	0
18.1	0
18.2	0
18.3	0
18.4	0
18.5	0
18.6	0
18.7	0
18.8	0
18.9	0
19	0
19.1	0
19.2	0
19.3	0
19.4	0
19.5	0
19.6	0
19.7	0
19.8	0
19.9	0
20	0
20.1	0
20.2	0
20.3	0
20.4	0
20.5	0
20.6	0
20.7	0
20.8	0
20.9	0
21	0
21.1	0
21.2	0
21.3	0
21.4	0
21.5	0
21.6	0
21.7	0
21.8	0
21.9	0
22	0
22.1	0
22.2	0
22.3	0
22.4	0
22.5	0
22.6	0
22.7	0
22.8	0
22.9	0
23	0
23.1	0
23.2	0
23.3	0
23.4	0
23.5	0
23.6	0
23.7	0
23.8	0
23.9	0
24	0
24.1	0
24.2	0
24.3	0
24.4	0
24.5	0
24.6	0
24.7	0
24.8	0
24.9	0
25	0
25.1	0
25.2	0
25.3	0
25.4	0
25.5	0
25.6	0
25.7	0
25.8	0
25.9	0
26	0
26.1	0
26.2	0
26.3	0
26.4	0
26.5	0
26.6	0
26.7	0
26.8	0
26.9	0
27	0
27.1	0
27.2	0
27.3	0
27.4	0
27.5	0
27.6	0
27.7	0
27.8	0
27.9	0
28	0
28.1	0
28.2	0
28.3	0
28.4	0
28.5	0
28.6	0
28.7	0
28.8	0
28.9	0
29	0
29.1	0
29.2	0
29.3	0
29.4	0
29.5	0
29.6	0
29.7	0
29.8	0
29.9	0
30	0
30.1	0
30.2	0
30.3	0
30.4	0
30.5	0
30.6	0
30.7	0
30.8	0
30.9	0
31	0
31.1	0
31.2	0
31.3	0
31.4	0
31.5	0
31.6	0
31.7	0
31.8	0
31.9	0
32	0
32.1	0
32.2	0
32.3	0
32.4	0
32.5	0
32.6	0
32.7	0
32.8	0
32.9	0
33	0
33.1	0
33.2	0
33.3	0
33.4	0
33.5	0
33.6	0
33.7	0
33.8	0
33.9	0
34	0
34.1	0
34.2	0
34.3	0
34.4	0
34.5	0
34.6	0
34.7	0
34.8	0
34.9	0
35	0
35.1	0
35.2	0
35.3	0
35.4	0
35.5	0
35.6	0
35.7	0
35.8	0
35.9	0
36	0
36.1	0
36.2	0
36.3	0
36.4	0
36.5	0
36.6	0
36.7	0
36.8	0
36.9	0
37	0
37.1	0
37.2	0
37.3	0
37.4	0
37.5	0
37.6	0
37.7	0
37.8	0
37.9	0
38	0
38.1	0
38.2	0
38.3	0
38.4	0
38.5	0
38.6	0
38.7	0
38.8	0
38.9	0
39	0
39.1	0
39.2	0
39.3	0
39.4	0
39.5	0
39.6	0
39.7	0
39.8	0
39.9	0
40	0
40.1	0
40.2	0
40.3	0
40.4	0
40.5	0
40.6	0
40.7	0
40.8	0
40.9	0
41	0
41.1	0
41.2	0
41.3	0
41.4	0
41.5	0
41.6	0
41.7	0
41.8	0
41.9	0
42	0
42.1	0
42.2	0
42.3	0
42.4	0
42.5	0
42.6	0
42.7	0
42.8	0
42.9	0
43	0
43.1	0
43.2	0
43.3	0
43.4	0
43.5	0
43.6	0
43.7	0
43.8	0
43.9	0
44	0
44.1	0
44.2	0
44.3	0
44.4	0
44.5	0
44.6	0
44.7	0
44.8	0
44.9	0
45	0
45.1	0
45.2	0
45.3	0
45.4	0
45.5	0
45.6	0
45.7	0
45.8	0
45.9	0
46	0
46.1	0
46.2	0
46.3	0
46.4	0
46.5	0
46.6	0
46.7	0
46.8	0
46.9	0
47	0
47.1	0
47.2	0
47.3	0
47.4	0
47.5	0
47.6	0
47.7	0
47.8	0
47.9	0
48	0
48.1	0
48.2	0
48.3	0
48.4	0
48.5	0
48.6	0
48.7	0
48.8	0
48.9	0
49	0
49.1	0
49.2	0
49.3	0
49.4	0
49.5	0
49.6	0
49.7	0
49.8	0
49.9	0
50	0
50.1	0
50.2	0
50.3	0
50.4	0
50.5	0
50.6	0
50.7	0
50.8	0
50.9	0
51	0
51.1	0
51.2	0
51.3	0
51.4	0
51.5	0
51.6	0
51.7	0
51.8	0
51.9	0
52	0
52.1	0
52.2	0
52.3	0
52.4	0
52.5	0
52.6	0
52.7	0
52.8	0
52.9	0
53	0
53.1	0
53.2	0
53.3	0
53.4	0
53.5	0
53.6	0
53.7	0
53.8	0
53.9	0
54	0
54.1	0
54.2	0
54.3	0
54.4	0
54.5	0
54.6	0
54.7	0
54.8	0
54.9	0
55	0
55.1	0
55.2	0
55.3	0
55.4	0
55.5	0
55.6	0
55.7	0
55.8	0
55.9	0
56	0
56.1	0
56.2	0
56.3	0
56.4	0
56.5	0
56.6	0
56.7	0
56.8	0
56.9	0
57	0
57.1	0
57.2	0
57.3	0
57.4	0
57.5	0
57.6	0
57.7	0
57.8	0
57.9	0
58	0
58.1	0
58.2	0
58.3	0
58.4	0
58.5	0
58.6	0
58.7	0
58.8	0
58.9	0
59	0
59.1	0
59.2	0
59.3	0
59.4	0
59.5	0
59.6	0
59.7	0
59.8	0
59.9	0
60	0
60.1	0
60.2	0
60.3	0
60.4	0
60.5	0
60.6	0
60.7	0
60.8	0
60.9	0
61	0
61.1	0
61.2	0
61.3	0
61.4	0
61.5	0
61.6	0
61.7	0
61.8	0
61.9	0
62	0
62.1	0
62.2	0
62.3	0
62.4	0
62.5	0
62.6	0
62.7	0
62.8	0
62.9	0
63	0
63.1	0
63.2	0
63.3	0
63.4	0
63.5	0
63.6	0
63.7	0
63.8	0
63.9	0
64	0
64.1	0
64.2	0
64.3	0
64.4	0
64.5	0
64.6	0
64.7	0
64.8	0
64.9	0
65	0
65.1	0
65.2	0
65.3	0
65.4	0
65.5	0
65.6	0
65.7	0
65.8	0
65.9	0
66	0
66.1	0
66.2	0
66.3	0
66.4	0
66.5	0
66.6	0
66.7	0
66.8	0
66.9	0
67	0
67.1	0
67.2	0
67.3	0
67.4	0
67.5	0
67.6	0
67.7	0
67.8	0
67.9	0
68	0
68.1	0
68.2	0
68.3	0
68.4	0
68.5	0
68.6	0
68.7	0
68.8	0
68.9	0
69	0
69.1	0
69.2	0
69.3	0
69.4	0
69.5	0
69.6	0
69.7	0
69.8	0
69.9	0
70	0
70.1	0
70.2	0
70.3	0
70.4	0
70.5	0
70.6	0
70.7	0
70.8	0
70.9	0
71	0
71.1	0
71.2	0
71.3	0
71.4	0
71.5	0
71.6	0
71.7	0
71.8	0
71.9	0
72	0
72.1	0
72.2	0
72.3	0
72.4	0
72.5	0
72.6	0
72.7	0
72.8	0
72.9	0
73	0
73.1	0
73.2	0
73.3	0
73.4	0
73.5	0
73.6	0
73.7	0
73.8	0
73.9	0
74	0
74.1	0
74.2	0
74.3	0
74.4	0
74.5	0
74.6	0
74.7	0
74.8	0
74.9	0
75	0
75.1	0
75.2	0
75.3	0
75.4	0
75.5	0
75.6	0
75.7	0
75.8	0
75.9	0
76	0
76.1	0
76.2	0
76.3	0
76.4	0
76.5	0
76.6	0
76.7	0
76.8	0
76.9	0
77	0
77.1	0
77.2	0
77.3	0
77.4	0
77.5	0
77.6	0
77.7	0
77.8	0
77.9	0
78	0
78.1	0
78.2	0
78.3	0
78.4	0
78.5	0
78.6	0
78.7	0
78.8	0
78.9	0
79	0
79.1	0
79.2	0
79.3	0
79.4	0
79.5	0
79.6	0
79.7	0
79.8	0
79.9	0
80	0
80.1	0
80.2	0
80.3	0
80.4	0
80.5	0
80.6	0
80.7	0
80.8	0
80.9	0
81	0
81.1	0
81.2	0
81.3	0
81.4	0
81.5	0
81.6	0
81.7	0
81.8	0
81.9	0
82	0
82.1	0
82.2	0
82.3	0
82.4	0
82.5	0
82.6	0
82.7	0
82.8	0
82.9	0
83	0
83.1	0
83.2	0
83.3	0
83.4	0
83.5	0
83.6	0
83.7	0
83.8	0
83.9	0
84	0
84.1	0
84.2	0
84.3	0
84.4	0
84.5	0
84.6	0
84.7	0
84.8	0
84.9	0
85	0
85.1	0
85.2	0
85.3	0
85.4	0
85.5	0
85.6	0
85.7	0
85.8	0
85.9	0
86	0
86.1	0
86.2	0
86.3	0
86.4	0
86.5	0
86.6	0
86.7	0
86.8	0
86.9	0
87	0
87.1	0
87.2	0
87.3	0
87.4	0
87.5	0
87.6	0
87.7	0
87.8	0
87.9	0
88	0
88.1	0
88.2	0
88.3	0
88.4	0
88.5	0
88.6	0
88.7	0
88.8	0
88.9	0
89	0
89.1	0
89.2	0
89.3	0
89.4	0
89.5	0
89.6	0
89.7	0
89.8	0
89.9	0
90	0
90.1	0
90.2	0
90.3	0
90.4	0
90.5	0
90.6	0
90.7	0
90.8	0
90.9	0
91	0
91.1	0
91.2	0
91.3	0
91.4	0
91.5	0
91.6	0
91.7	0
91.8	0
91.9	0
92	0
92.1	0
92.2	0
92.3	0
92.4	0
92.5	0
92.6	0
92.7	0
92.8	0
92.9	0
93	0
93.1	0
93.2	0
93.3	0
93.4	0
93.5	0
93.6	0
93.7	0
93.8	0
93.9	0
94	0
94.1	0
94.2	0
94.3	0
94.4	0
94.5	0
94.6	0
94.7	0
94.8	0
94.9	0
95	0
95.1	0
95.2	0
95.3	0
95.4	0
95.5	0
95.6	0
95.7	0
95.8	0
95.9	0
96	0
96.1	0
96.2	0
96.3	0
96.4	0
96.5	0
96.6	0
96.7	0
96.8	0
96.9	0
97	0
97.1	0
97.2	0
97.3	0
97.4	0
97.5	0
97.6	0
97.7	0
97.8	0
97.9	0
98	0
98.1	0
98.2	0
98.3	0
98.4	0
98.5	0
98.6	0
98.7	0
98.8	0
98.9	0
99	0
99.1	0
99.2	0
99.3	0
99.4	0
99.5	0
99.6	0
99.7	0
99.8	0
99.9	0
100	0
100.1	0.548
100.2	0.72
100.3	0.806
100.4	0.864
100.5	0.904
100.6	0.926
100.7	0.934
100.8	0.949
100.9	0.955
101	0.965
101.1	0.953
101.2	0.95
101.3	0.949
101.4	0.946
101.5	0.944
101.6	0.945
101.7	0.955
101.8	0.961
101.9	0.959
102	0.964
102.1	0.968
102.2	0.944
102.3	0.95
102.4	0.947
102.5	0.953
102.6	0.958
102.7	0.957
102.8	0.953
102.9	0.958
103	0.962
103.1	0.957
103.2	0.954
103.3	0.957
103.4	0.955
103.5	0.955
103.6	0.95
103.7	0.949
103.8	0.954
103.9	0.95
104	0.955
104.1	0.948
104.2	0.948
104.3	0.942
104.4	0.943
104.5	0.941
104.6	0.954
104.7	0.959
104.8	0.961
104.9	0.96
105	0.953
105.1	0.958
105.2	0.967
105.3	0.969
105.4	0.965
105.5	0.96
105.6	0.961
105.7	0.966
105.8	0.962
105.9	0.969
106	0.969
106.1	0.962
106.2	0.957
106.3	0.963
106.4	0.958
106.5	0.959
106.6	0.969
106.7	0.967
106.8	0.966
106.9	0.968
107	0.97
107.1	0.964
107.2	0.96
107.3	0.974
107.4	0.97
107.5	0.974
107.6	0.978
107.7	0.974
107.8	0.968
107.9	0.974
108	0.977
108.1	0.971
108.2	0.976
108.3	0.972
108.4	0.97
108.5	0.969
108.6	0.972
108.7	0.97
108.8	0.968
108.9	0.962
109	0.964
109.1	0.968
109.2	0.965
109.3	0.97
109.4	0.981
109.5	0.978
109.6	0.977
109.7	0.965
109.8	0.961
109.9	0.966
110	0.971
110.1	0.975
110.2	0.972
110.3	0.976
110.4	0.982
110.5	0.977
110.6	0.974
110.7	0.976
110.8	0.982
110.9	0.973
111	0.97
111.1	0.961
111.2	0.964
111.3	0.966
111.4	0.966
111.5	0.963
111.6	0.961
111.7	0.967
111.8	0.967
111.9	0.974
112	0.969
112.1	0.972
112.2	0.965
112.3	0.968
112.4	0.965
112.5	0.968
112.6	0.967
112.7	0.968
112.8	0.973
112.9	0.974
113	0.977
113.1	0.98
113.2	0.973
113.3	0.967
113.4	0.97
113.5	0.974
113.6	0.973
113.7	0.975
113.8	0.973
113.9	0.972
114	0.97
114.1	0.971
114.2	0.967
114.3	0.969
114.4	0.969
114.5	0.966
114.6	0.974
114.7	0.978
114.8	0.977
114.9	0.979
115	0.978
115.1	0.975
115.2	0.968
115.3	0.97
115.4	0.969
115.5	0.97
115.6	0.975
115.7	0.972
115.8	0.972
115.9	0.971
116	0.967
116.1	0.97
116.2	0.974
116.3	0.979
116.4	0.976
116.5	0.98
116.6	0.977
116.7	0.975
116.8	0.976
116.9	0.972
117	0.974
117.1	0.979
117.2	0.978
117.3	0.973
117.4	0.968
117.5	0.976
117.6	0.973
117.7	0.977
117.8	0.977
117.9	0.981
118	0.981
118.1	0.985
118.2	0.982
118.3	0.984
118.4	0.981
118.5	0.979
118.6	0.978
118.7	0.98
118.8	0.98
118.9	0.978
119	0.975
119.1	0.981
119.2	0.982
119.3	0.98
119.4	0.981
119.5	0.987
119.6	0.984
119.7	0.987
119.8	0.981
119.9	0.979
120	0.977
120.1	0.975
120.2	0.979
120.3	0.98
120.4	0.977
120.5	0.981
120.6	0.976
120.7	0.966
120.8	0.975
120.9	0.976
121	0.979
121.1	0.977
121.2	0.982
121.3	0.982
121.4	0.983
121.5	0.98
121.6	0.974
121.7	0.966
121.8	0.973
121.9	0.978
122	0.982
122.1	0.983
122.2	0.985
122.3	0.976
122.4	0.982
122.5	0.976
122.6	0.969
122.7	0.976
122.8	0.978
122.9	0.975
123	0.972
123.1	0.978
123.2	0.972
123.3	0.968
123.4	0.973
123.5	0.976
123.6	0.979
123.7	0.975
123.8	0.979
123.9	0.982
124	0.973
124.1	0.975
124.2	0.974
124.3	0.973
124.4	0.977
124.5	0.974
124.6	0.974
124.7	0.972
124.8	0.976
124.9	0.986
125	0.99
125.1	0.987
125.2	0.987
125.3	0.982
125.4	0.976
125.5	0.982
125.6	0.985
125.7	0.984
125.8	0.98
125.9	0.986
126	0.981
126.1	0.979
126.2	0.978
126.3	0.97
126.4	0.973
126.5	0.975
126.6	0.974
126.7	0.976
126.8	0.983
126.9	0.987
127	0.983
127.1	0.983
127.2	0.982
127.3	0.985
127.4	0.984
127.5	0.985
127.6	0.986
127.7	0.988
127.8	0.982
127.9	0.979
128	0.976
128.1	0.976
128.2	0.978
128.3	0.982
128.4	0.979
128.5	0.979
128.6	0.981
128.7	0.978
128.8	0.977
128.9	0.977
129	0.97
129.1	0.981
129.2	0.981
129.3	0.982
129.4	0.979
129.5	0.984
129.6	0.98
129.7	0.98
129.8	0.981
129.9	0.984
130	0.988
130.1	0.991
130.2	0.989
130.3	0.988
130.4	0.987
130.5	0.983
130.6	0.98
130.7	0.983
130.8	0.982
130.9	0.982
131	0.98
131.1	0.989
131.2	0.986
131.3	0.984
131.4	0.983
131.5	0.981
131.6	0.985
131.7	0.984
131.8	0.982
131.9	0.983
132	0.981
132.1	0.98
132.2	0.982
132.3	0.983
132.4	0.984
132.5	0.985
132.6	0.985
132.7	0.981
132.8	0.986
132.9	0.989
133	0.992
133.1	0.991
133.2	0.988
133.3	0.986
133.4	0.979
133.5	0.976
133.6	0.975
133.7	0.974
133.8	0.976
133.9	0.985
134	0.981
134.1	0.983
134.2	0.985
134.3	0.983
134.4	0.981
134.5	0.979
134.6	0.978
134.7	0.987
134.8	0.983
134.9	0.982
135	0.987
135.1	0.986
135.2	0.979
135.3	0.971
135.4	0.976
135.5	0.977
135.6	0.978
135.7	0.976
135.8	0.976
135.9	0.982
136	0.98
136.1	0.983
136.2	0.983
136.3	0.98
136.4	0.985
136.5	0.982
136.6	0.986
136.7	0.986
136.8	0.984
136.9	0.981
137	0.985
137.1	0.984
137.2	0.989
137.3	0.991
137.4	0.987
137.5	0.986
137.6	0.985
137.7	0.986
137.8	0.985
137.9	0.983
138	0.981
138.1	0.984
138.2	0.985
138.3	0.978
138.4	0.978
138.5	0.981
138.6	0.978
138.7	0.987
138.8	0.99
138.9	0.985
139	0.98
139.1	0.98
139.2	0.98
139.3	0.983
139.4	0.99
139.5	0.985
139.6	0.982
139.7	0.979
139.8	0.983
139.9	0.984
140	0.987
140.1	0.992
140.2	0.989
140.3	0.99
140.4	0.984
140.5	0.989
140.6	0.983
140.7	0.984
140.8	0.981
140.9	0.98
141	0.982
141.1	0.983
141.2	0.985
141.3	0.985
141.4	0.991
141.5	0.986
141.6	0.984
141.7	0.987
141.8	0.987
141.9	0.991
142	0.989
142.1	0.989
142.2	0.986
142.3	0.982
142.4	0.984
142.5	0.989
142.6	0.991
142.7	0.991
142.8	0.988
142.9	0.99
143	0.99
143.1	0.993
143.2	0.986
143.3	0.986
143.4	0.98
143.5	0.985
143.6	0.986
143.7	0.987
143.8	0.987
143.9	0.99
144	0.989
144.1	0.991
144.2	0.987
144.3	0.986
144.4	0.99
144.5	0.989
144.6	0.991
144.7	0.99
144.8	0.986
144.9	0.985
145	0.985
145.1	0.988
145.2	0.983
145.3	0.987
145.4	0.992
145.5	0.995
145.6	0.994
145.7	0.992
145.8	0.993
145.9	0.992
146	0.985
146.1	0.984
146.2	0.982
146.3	0.98
146.4	0.984
146.5	0.986
146.6	0.983
146.7	0.986
146.8	0.984
146.9	0.986
147	0.985
147.1	0.986
147.2	0.991
147.3	0.992
147.4	0.988
147.5	0.983
147.6	0.987
147.7	0.992
147.8	0.99
147.9	0.992
148	0.986
148.1	0.99
148.2	0.988
148.3	0.989
148.4	0.989
148.5	0.989
148.6	0.99
148.7	0.99
148.8	0.987
148.9	0.988
149	0.984
149.1	0.984
149.2	0.991
149.3	0.985
149.4	0.984
149.5	0.981
149.6	0.985
149.7	0.982
149.8	0.987
149.9	0.989
150	0.987
150.1	0.986
150.2	0.987
150.3	0.985
150.4	0.984
150.5	0.983
150.6	0.987
150.7	0.989
150.8	0.988
150.9	0.99
151	0.991
151.1	0.991
151.2	0.989
151.3	0.992
151.4	0.993
151.5	0.99
151.6	0.992
151.7	0.986
151.8	0.989
151.9	0.986
152	0.985
152.1	0.983
152.2	0.984
152.3	0.99
152.4	0.988
152.5	0.984
152.6	0.989
152.7	0.984
152.8	0.989
152.9	0.994
153	0.989
153.1	0.992
153.2	0.989
153.3	0.992
153.4	0.986
153.5	0.981
153.6	0.986
153.7	0.99
153.8	0.983
153.9	0.985
154	0.986
154.1	0.983
154.2	0.982
154.3	0.984
154.4	0.988
154.5	0.99
154.6	0.987
154.7	0.993
154.8	0.997
154.9	0.995
155	0.99
155.1	0.992
155.2	0.993
155.3	0.99
155.4	0.993
155.5	0.992
155.6	0.992
155.7	0.994
155.8	0.991
155.9	0.989
156	0.989
156.1	0.988
156.2	0.984
156.3	0.984
156.4	0.99
156.5	0.99
156.6	0.993
156.7	0.99
156.8	0.987
156.9	0.993
157	0.993
157.1	0.991
157.2	0.991
157.3	0.994
157.4	0.99
157.5	0.981
157.6	0.984
157.7	0.987
157.8	0.988
157.9	0.99
158	0.992
158.1	0.986
158.2	0.984
158.3	0.99
158.4	0.99
158.5	0.991
158.6	0.988
158.7	0.986
158.8	0.981
158.9	0.987
159	0.989
159.1	0.986
159.2	0.987
159.3	0.991
159.4	0.992
159.5	0.992
159.6	0.994
159.7	0.992
159.8	0.994
159.9	0.994
160	0.993
160.1	0.989
160.2	0.989
160.3	0.99
160.4	0.988
160.5	0.991
160.6	0.989
160.7	0.989
160.8	0.993
160.9	0.991
161	0.988
161.1	0.988
161.2	0.987
161.3	0.991
161.4	0.991
161.5	0.983
161.6	0.988
161.7	0.991
161.8	0.99
161.9	0.989
162	0.985
162.1	0.993
162.2	0.991
162.3	0.99
162.4	0.986
162.5	0.985
162.6	0.984
162.7	0.983
162.8	0.985
162.9	0.99
163	0.991
163.1	0.988
163.2	0.985
163.3	0.984
163.4	0.986
163.5	0.991
163.6	0.989
163.7	0.991
163.8	0.99
163.9	0.989
164	0.99
164.1	0.995
164.2	0.99
164.3	0.987
164.4	0.99
164.5	0.992
164.6	0.988
164.7	0.99
164.8	0.991
164.9	0.995
165	0.994
165.1	0.991
165.2	0.993
165.3	0.988
165.4	0.988
165.5	0.988
165.6	0.992
165.7	0.991
165.8	0.992
165.9	0.994
166	0.994
166.1	0.991
166.2	0.99
166.3	0.991
166.4	0.992
166.5	0.988
166.6	0.989
166.7	0.991
166.8	0.992
166.9	0.99
167	0.99
167.1	0.99
167.2	0.993
167.3	0.994
167.4	0.99
167.5	0.99
167.6	0.993
167.7	0.995
167.8	0.992
167.9	0.987
168	0.989
168.1	0.993
168.2	0.992
168.3	0.997
168.4	0.991
168.5	0.992
168.6	0.993
168.7	0.992
168.8	0.994
168.9	0.993
169	0.989
169.1	0.99
169.2	0.994
169.3	0.995
169.4	0.993
169.5	0.99
169.6	0.991
169.7	0.992
169.8	0.99
169.9	0.99
170	0.987
170.1	0.991
170.2	0.992
170.3	0.992
170.4	0.991
170.5	0.993
170.6	0.995
170.7	0.992
170.8	0.991
170.9	0.989
171	0.99
171.1	0.988
171.2	0.988
171.3	0.989
171.4	0.989
171.5	0.993
171.6	0.99
171.7	0.991
171.8	0.993
171.9	0.993
172	0.993
172.1	0.993
172.2	0.991
172.3	0.993
172.4	0.992
172.5	0.996
172.6	0.992
172.7	0.991
172.8	0.99
172.9	0.99
173	0.988
173.1	0.992
173.2	0.992
173.3	0.994
173.4	0.994
173.5	0.993
173.6	0.995
173.7	0.992
173.8	0.992
173.9	0.991
174	0.991
174.1	0.992
174.2	0.991
174.3	0.991
174.4	0.991
174.5	0.992
174.6	0.992
174.7	0.992
174.8	0.99
174.9	0.993
175	0.992
175.1	0.991
175.2	0.99
175.3	0.991
175.4	0.993
175.5	0.993
175.6	0.993
175.7	0.994
175.8	0.991
175.9	0.989
176	0.988
176.1	0.995
176.2	0.993
176.3	0.992
176.4	0.991
176.5	0.994
176.6	0.993
176.7	0.994
176.8	0.99
176.9	0.989
177	0.99
177.1	0.993
177.2	0.986
177.3	0.988
177.4	0.99
177.5	0.989
177.6	0.991
177.7	0.991
177.8	0.996
177.9	0.998
178	0.999
178.1	0.995
178.2	0.994
178.3	0.99
178.4	0.99
178.5	0.994
178.6	0.993
178.7	0.991
178.8	0.992
178.9	0.993
179	0.99
179.1	0.992
179.2	0.989
179.3	0.993
179.4	0.993
179.5	0.994
179.6	0.992
179.7	0.994
179.8	0.993
179.9	0.99
180	0.991
180.1	0.989
180.2	0.987
180.3	0.986
180.4	0.984
180.5	0.986
180.6	0.989
180.7	0.991
180.8	0.991
180.9	0.993
181	0.995
181.1	0.995
181.2	0.994
181.3	0.995
181.4	0.994
181.5	0.988
181.6	0.991
181.7	0.99
181.8	0.992
181.9	0.991
182	0.991
182.1	0.99
182.2	0.991
182.3	0.987
182.4	0.991
182.5	0.993
182.6	0.992
182.7	0.992
182.8	0.992
182.9	0.99
183	0.989
183.1	0.988
183.2	0.984
183.3	0.988
183.4	0.989
183.5	0.991
183.6	0.993
183.7	0.994
183.8	0.992
183.9	0.994
184	0.993
184.1	0.991
184.2	0.989
184.3	0.988
184.4	0.99
184.5	0.989
184.6	0.993
184.7	0.992
184.8	0.991
184.9	0.991
185	0.992
185.1	0.993
185.2	0.991
185.3	0.992
185.4	0.992
185.5	0.994
185.6	0.997
185.7	0.995
185.8	0.996
185.9	0.994
186	0.993
186.1	0.996
186.2	0.995
186.3	0.993
186.4	0.989
186.5	0.987
186.6	0.988
186.7	0.993
186.8	0.993
186.9	0.997
187	0.996
187.1	0.996
187.2	0.993
187.3	0.993
187.4	0.994
187.5	0.995
187.6	0.992
187.7	0.991
187.8	0.992
187.9	0.991
188	0.992
188.1	0.991
188.2	0.995
188.3	0.993
188.4	0.993
188.5	0.991
188.6	0.988
188.7	0.989
188.8	0.991
188.9	0.99
189	0.993
189.1	0.993
189.2	0.992
189.3	0.995
189.4	0.997
189.5	0.995
189.6	0.991
189.7	0.99
189.8	0.994
189.9	0.991
190	0.993
190.1	0.992
190.2	0.993
190.3	0.995
190.4	0.993
190.5	0.993
190.6	0.987
190.7	0.992
190.8	0.992
190.9	0.99
191	0.986
191.1	0.989
191.2	0.987
191.3	0.984
191.4	0.99
191.5	0.992
191.6	0.994
191.7	0.994
191.8	0.995
191.9	0.998
192	0.991
192.1	0.991
192.2	0.993
192.3	0.994
192.4	0.992
192.5	0.993
192.6	0.994
192.7	0.989
192.8	0.991
192.9	0.991
193	0.996
193.1	0.994
193.2	0.994
193.3	0.993
193.4	0.991
193.5	0.99
193.6	0.993
193.7	0.994
193.8	0.991
193.9	0.987
194	0.988
194.1	0.988
194.2	0.992
194.3	0.989
194.4	0.991
194.5	0.994
194.6	0.993
194.7	0.995
194.8	0.989
194.9	0.994
195	0.989
195.1	0.99
195.2	0.99
195.3	0.992
195.4	0.991
195.5	0.988
195.6	0.99
195.7	0.985
195.8	0.99
195.9	0.987
196	0.988
196.1	0.992
196.2	0.993
196.3	0.995
196.4	0.994
196.5	0.996
196.6	0.996
196.7	0.993
196.8	0.993
196.9	0.992
197	0.99
197.1	0.991
197.2	0.992
197.3	0.994
197.4	0.992
197.5	0.991
197.6	0.99
197.7	0.992
197.8	0.994
197.9	0.998
198	0.995
198.1	0.995
198.2	0.997
198.3	0.993
198.4	0.992
198.5	0.992
198.6	0.99
198.7	0.991
198.8	0.991
198.9	0.993
199	0.991
199.1	0.992
199.2	0.993
199.3	0.995
199.4	0.994
199.5	0.995
199.6	0.997
199.7	0.994
199.8	0.991
199.9	0.989
200	0.987
[truncated: 14,000 more rows]
