# Supplementary material for: Bayesian inference of kinetic schemes for ion channels by Kalman filtering
Source: eLife journal article supplement (doi:10.7554/elife.62714), 2022-05-04
Supplement: fig4-data1 [file 1_Sim_N_500_Strom_MW.xlsx]

## Sheet: Tabelle1
0.1	0
0.2	0
0.3	0
0.4	0
0.5	0
0.6	0
0.7	0
0.8	0
0.9	0
1	0
1.1	0
1.2	0
1.3	0
1.4	0
1.5	0
1.6	0
1.7	0
1.8	0
1.9	0
2	0
2.1	0
2.2	0
2.3	0
2.4	0
2.5	0
2.6	0
2.7	0
2.8	0
2.9	0
3	0
3.1	0
3.2	0
3.3	0
3.4	0
3.5	0
3.6	0
3.7	0
3.8	0
3.9	0
4	0
4.1	0
4.2	0
4.3	0
4.4	0
4.5	0
4.6	0
4.7	0
4.8	0
4.9	0
5	0
5.1	0
5.2	0
5.3	0
5.4	0
5.5	0
5.6	0
5.7	0
5.8	0
5.9	0
6	0
6.1	0
6.2	0
6.3	0
6.4	0
6.5	0
6.6	0
6.7	0
6.8	0
6.9	0
7	0
7.1	0
7.2	0
7.3	0
7.4	0
7.5	0
7.6	0
7.7	0
7.8	0
7.9	0
8	0
8.1	0
8.2	0
8.3	0
8.4	0
8.5	0
8.6	0
8.7	0
8.8	0
8.9	0
9	0
9.1	0
9.2	0
9.3	0
9.4	0
9.5	0
9.6	0
9.7	0
9.8	0
9.9	0
10	0
10.1	0
10.2	0
10.3	0
10.4	0
10.5	0
10.6	0
10.7	0
10.8	0
10.9	0
11	0
11.1	0
11.2	0
11.3	0
11.4	0
11.5	0
11.6	0
11.7	0
11.8	0
11.9	0
12	0
12.1	0
12.2	0
12.3	0
12.4	0
12.5	0
12.6	0
12.7	0
12.8	0
12.9	0
13	0
13.1	0
13.2	0
13.3	0
13.4	0
13.5	0
13.6	0
13.7	0
13.8	0
13.9	0
14	0
14.1	0
14.2	0
14.3	0
14.4	0
14.5	0
14.6	0
14.7	0
14.8	0
14.9	0
15	0
15.1	0
15.2	0
15.3	0
15.4	0
15.5	0
15.6	0
15.7	0
15.8	0
15.9	0
16	0
16.1	0
16.2	0
16.3	0
16.4	0
16.5	0
16.6	0
16.7	0
16.8	0
16.9	0
17	0
17.1	0
17.2	0
17.3	0
17.4	0
17.5	0
17.6	0
17.7	0
17.8	0
17.9	0
18	0
18.1	0
18.2	0
18.3	0
18.4	0
18.5	0
18.6	0
18.7	0
18.8	0
18.9	0
19	0
19.1	0
19.2	0
19.3	0
19.4	0
19.5	0
19.6	0
19.7	0
19.8	0
19.9	0
20	0
20.1	0
20.2	0
20.3	0
20.4	0
20.5	0
20.6	0
20.7	0
20.8	0
20.9	0
21	0
21.1	0
21.2	0
21.3	0
21.4	0
21.5	0
21.6	0
21.7	0
21.8	0
21.9	0
22	0
22.1	0
22.2	0
22.3	0
22.4	0
22.5	0
22.6	0
22.7	0
22.8	0
22.9	0
23	0
23.1	0
23.2	0
23.3	0
23.4	0
23.5	0
23.6	0
23.7	0
23.8	0
23.9	0
24	0
24.1	0
24.2	0
24.3	0
24.4	0
24.5	0
24.6	0
24.7	0
24.8	0
24.9	0
25	0
25.1	0
25.2	0
25.3	0
25.4	0
25.5	0
25.6	0
25.7	0
25.8	0
25.9	0
26	0
26.1	0
26.2	0
26.3	0
26.4	0
26.5	0
26.6	0
26.7	0
26.8	0
26.9	0
27	0
27.1	0
27.2	0
27.3	0
27.4	0
27.5	0
27.6	0
27.7	0
27.8	0
27.9	0
28	0
28.1	0
28.2	0
28.3	0
28.4	0
28.5	0
28.6	0
28.7	0
28.8	0
28.9	0
29	0
29.1	0
29.2	0
29.3	0
29.4	0
29.5	0
29.6	0
29.7	0
29.8	0
29.9	0
30	0
30.1	0
30.2	0
30.3	0
30.4	0
30.5	0
30.6	0
30.7	0
30.8	0
30.9	0
31	0
31.1	0
31.2	0
31.3	0
31.4	0
31.5	0
31.6	0
31.7	0
31.8	0
31.9	0
32	0
32.1	0
32.2	0
32.3	0
32.4	0
32.5	0
32.6	0
32.7	0
32.8	0
32.9	0
33	0
33.1	0
33.2	0
33.3	0
33.4	0
33.5	0
33.6	0
33.7	0
33.8	0
33.9	0
34	0
34.1	0
34.2	0
34.3	0
34.4	0
34.5	0
34.6	0
34.7	0
34.8	0
34.9	0
35	0
35.1	0
35.2	0
35.3	0
35.4	0
35.5	0
35.6	0
35.7	0
35.8	0
35.9	0
36	0
36.1	0
36.2	0
36.3	0
36.4	0
36.5	0
36.6	0
36.7	0
36.8	0
36.9	0
37	0
37.1	0
37.2	0
37.3	0
37.4	0
37.5	0
37.6	0
37.7	0
37.8	0
37.9	0
38	0
38.1	0
38.2	0
38.3	0
38.4	0
38.5	0
38.6	0
38.7	0
38.8	0
38.9	0
39	0
39.1	0
39.2	0
39.3	0
39.4	0
39.5	0
39.6	0
39.7	0
39.8	0
39.9	0
40	0
40.1	0
40.2	0
40.3	0
40.4	0
40.5	0
40.6	0
40.7	0
40.8	0
40.9	0
41	0
41.1	0
41.2	0
41.3	0
41.4	0
41.5	0
41.6	0
41.7	0
41.8	0
41.9	0
42	0
42.1	0
42.2	0
42.3	0
42.4	0
42.5	0
42.6	0
42.7	0
42.8	0
42.9	0
43	0
43.1	0
43.2	0
43.3	0
43.4	0
43.5	0
43.6	0
43.7	0
43.8	0
43.9	0
44	0
44.1	0
44.2	0
44.3	0
44.4	0
44.5	0
44.6	0
44.7	0
44.8	0
44.9	0
45	0
45.1	0
45.2	0
45.3	0
45.4	0
45.5	0
45.6	0
45.7	0
45.8	0
45.9	0
46	0
46.1	0
46.2	0
46.3	0
46.4	0
46.5	0
46.6	0
46.7	0
46.8	0
46.9	0
47	0
47.1	0
47.2	0
47.3	0
47.4	0
47.5	0
47.6	0
47.7	0
47.8	0
47.9	0
48	0
48.1	0
48.2	0
48.3	0
48.4	0
48.5	0
48.6	0
48.7	0
48.8	0
48.9	0
49	0
49.1	0
49.2	0
49.3	0
49.4	0
49.5	0
49.6	0
49.7	0
49.8	0
49.9	0
50	0
50.1	0
50.2	0
50.3	0
50.4	0
50.5	0
50.6	0
50.7	0
50.8	0
50.9	0
51	0
51.1	0
51.2	0
51.3	0
51.4	0
51.5	0
51.6	0
51.7	0
51.8	0
51.9	0
52	0
52.1	0
52.2	0
52.3	0
52.4	0
52.5	0
52.6	0
52.7	0
52.8	0
52.9	0
53	0
53.1	0
53.2	0
53.3	0
53.4	0
53.5	0
53.6	0
53.7	0
53.8	0
53.9	0
54	0
54.1	0
54.2	0
54.3	0
54.4	0
54.5	0
54.6	0
54.7	0
54.8	0
54.9	0
55	0
55.1	0
55.2	0
55.3	0
55.4	0
55.5	0
55.6	0
55.7	0
55.8	0
55.9	0
56	0
56.1	0
56.2	0
56.3	0
56.4	0
56.5	0
56.6	0
56.7	0
56.8	0
56.9	0
57	0
57.1	0
57.2	0
57.3	0
57.4	0
57.5	0
57.6	0
57.7	0
57.8	0
57.9	0
58	0
58.1	0
58.2	0
58.3	0
58.4	0
58.5	0
58.6	0
58.7	0
58.8	0
58.9	0
59	0
59.1	0
59.2	0
59.3	0
59.4	0
59.5	0
59.6	0
59.7	0
59.8	0
59.9	0
60	0
60.1	0
60.2	0
60.3	0
60.4	0
60.5	0
60.6	0
60.7	0
60.8	0
60.9	0
61	0
61.1	0
61.2	0
61.3	0
61.4	0
61.5	0
61.6	0
61.7	0
61.8	0
61.9	0
62	0
62.1	0
62.2	0
62.3	0
62.4	0
62.5	0
62.6	0
62.7	0
62.8	0
62.9	0
63	0
63.1	0
63.2	0
63.3	0
63.4	0
63.5	0
63.6	0
63.7	0
63.8	0
63.9	0
64	0
64.1	0
64.2	0
64.3	0
64.4	0
64.5	0
64.6	0
64.7	0
64.8	0
64.9	0
65	0
65.1	0
65.2	0
65.3	0
65.4	0
65.5	0
65.6	0
65.7	0
65.8	0
65.9	0
66	0
66.1	0
66.2	0
66.3	0
66.4	0
66.5	0
66.6	0
66.7	0
66.8	0
66.9	0
67	0
67.1	0
67.2	0
67.3	0
67.4	0
67.5	0
67.6	0
67.7	0
67.8	0
67.9	0
68	0
68.1	0
68.2	0
68.3	0
68.4	0
68.5	0
68.6	0
68.7	0
68.8	0
68.9	0
69	0
69.1	0
69.2	0
69.3	0
69.4	0
69.5	0
69.6	0
69.7	0
69.8	0
69.9	0
70	0
70.1	0
70.2	0
70.3	0
70.4	0
70.5	0
70.6	0
70.7	0
70.8	0
70.9	0
71	0
71.1	0
71.2	0
71.3	0
71.4	0
71.5	0
71.6	0
71.7	0
71.8	0
71.9	0
72	0
72.1	0
72.2	0
72.3	0
72.4	0
72.5	0
72.6	0
72.7	0
72.8	0
72.9	0
73	0
73.1	0
73.2	0
73.3	0
73.4	0
73.5	0
73.6	0
73.7	0
73.8	0
73.9	0
74	0
74.1	0
74.2	0
74.3	0
74.4	0
74.5	0
74.6	0
74.7	0
74.8	0
74.9	0
75	0
75.1	0
75.2	0
75.3	0
75.4	0
75.5	0
75.6	0
75.7	0
75.8	0
75.9	0
76	0
76.1	0
76.2	0
76.3	0
76.4	0
76.5	0
76.6	0
76.7	0
76.8	0
76.9	0
77	0
77.1	0
77.2	0
77.3	0
77.4	0
77.5	0
77.6	0
77.7	0
77.8	0
77.9	0
78	0
78.1	0
78.2	0
78.3	0
78.4	0
78.5	0
78.6	0
78.7	0
78.8	0
78.9	0
79	0
79.1	0
79.2	0
79.3	0
79.4	0
79.5	0
79.6	0
79.7	0
79.8	0
79.9	0
80	0
80.1	0
80.2	0
80.3	0
80.4	0
80.5	0
80.6	0
80.7	0
80.8	0
80.9	0
81	0
81.1	0
81.2	0
81.3	0
81.4	0
81.5	0
81.6	0
81.7	0
81.8	0
81.9	0
82	0
82.1	0
82.2	0
82.3	0
82.4	0
82.5	0
82.6	0
82.7	0
82.8	0
82.9	0
83	0
83.1	0
83.2	0
83.3	0
83.4	0
83.5	0
83.6	0
83.7	0
83.8	0
83.9	0
84	0
84.1	0
84.2	0
84.3	0
84.4	0
84.5	0
84.6	0
84.7	0
84.8	0
84.9	0
85	0
85.1	0
85.2	0
85.3	0
85.4	0
85.5	0
85.6	0
85.7	0
85.8	0
85.9	0
86	0
86.1	0
86.2	0
86.3	0
86.4	0
86.5	0
86.6	0
86.7	0
86.8	0
86.9	0
87	0
87.1	0
87.2	0
87.3	0
87.4	0
87.5	0
87.6	0
87.7	0
87.8	0
87.9	0
88	0
88.1	0
88.2	0
88.3	0
88.4	0
88.5	0
88.6	0
88.7	0
88.8	0
88.9	0
89	0
89.1	0
89.2	0
89.3	0
89.4	0
89.5	0
89.6	0
89.7	0
89.8	0
89.9	0
90	0
90.1	0
90.2	0
90.3	0
90.4	0
90.5	0
90.6	0
90.7	0
90.8	0
90.9	0
91	0
91.1	0
91.2	0
91.3	0
91.4	0
91.5	0
91.6	0
91.7	0
91.8	0
91.9	0
92	0
92.1	0
92.2	0
92.3	0
92.4	0
92.5	0
92.6	0
92.7	0
92.8	0
92.9	0
93	0
93.1	0
93.2	0
93.3	0
93.4	0
93.5	0
93.6	0
93.7	0
93.8	0
93.9	0
94	0
94.1	0
94.2	0
94.3	0
94.4	0
94.5	0
94.6	0
94.7	0
94.8	0
94.9	0
95	0
95.1	0
95.2	0
95.3	0
95.4	0
95.5	0
95.6	0
95.7	0
95.8	0
95.9	0
96	0
96.1	0
96.2	0
96.3	0
96.4	0
96.5	0
96.6	0
96.7	0
96.8	0
96.9	0
97	0
97.1	0
97.2	0
97.3	0
97.4	0
97.5	0
97.6	0
97.7	0
97.8	0
97.9	0
98	0
98.1	0
98.2	0
98.3	0
98.4	0
98.5	0
98.6	0
98.7	0
98.8	0
98.9	0
99	0
99.1	0
99.2	0
99.3	0
99.4	0
99.5	0
99.6	0
99.7	0
99.8	0
99.9	0
100	0
100.1	0
100.2	0.002
100.3	0.008
100.4	0.014
100.5	0.018
100.6	0.022
100.7	0.026
100.8	0.03
100.9	0.036
101	0.044
101.1	0.048
101.2	0.058
101.3	0.062
101.4	0.066
101.5	0.07
101.6	0.07
101.7	0.07
101.8	0.076
101.9	0.082
102	0.088
102.1	0.09
102.2	0.092
102.3	0.096
102.4	0.096
102.5	0.096
102.6	0.1
102.7	0.104
102.8	0.11
102.9	0.11
103	0.114
103.1	0.118
103.2	0.124
103.3	0.128
103.4	0.134
103.5	0.142
103.6	0.146
103.7	0.156
103.8	0.156
103.9	0.16
104	0.162
104.1	0.168
104.2	0.174
104.3	0.178
104.4	0.186
104.5	0.186
104.6	0.186
104.7	0.19
104.8	0.19
104.9	0.192
105	0.196
105.1	0.2
105.2	0.2
105.3	0.2
105.4	0.202
105.5	0.202
105.6	0.21
105.7	0.212
105.8	0.214
105.9	0.216
106	0.22
106.1	0.22
106.2	0.224
106.3	0.228
106.4	0.23
106.5	0.232
106.6	0.236
106.7	0.236
106.8	0.238
106.9	0.24
107	0.248
107.1	0.256
107.2	0.256
107.3	0.262
107.4	0.262
107.5	0.264
107.6	0.264
107.7	0.268
107.8	0.268
107.9	0.268
108	0.276
108.1	0.278
108.2	0.278
108.3	0.278
108.4	0.28
108.5	0.282
108.6	0.286
108.7	0.29
108.8	0.294
108.9	0.298
109	0.3
109.1	0.298
109.2	0.302
109.3	0.306
109.4	0.306
109.5	0.308
109.6	0.31
109.7	0.32
109.8	0.326
109.9	0.326
110	0.328
110.1	0.33
110.2	0.332
110.3	0.334
110.4	0.338
110.5	0.34
110.6	0.344
110.7	0.346
110.8	0.348
110.9	0.35
111	0.354
111.1	0.36
111.2	0.36
111.3	0.364
111.4	0.366
111.5	0.366
111.6	0.37
111.7	0.37
111.8	0.372
111.9	0.374
112	0.372
112.1	0.378
112.2	0.382
112.3	0.384
112.4	0.386
112.5	0.386
112.6	0.386
112.7	0.386
112.8	0.39
112.9	0.394
113	0.396
113.1	0.396
113.2	0.398
113.3	0.404
113.4	0.408
113.5	0.408
113.6	0.408
113.7	0.414
113.8	0.416
113.9	0.418
114	0.422
114.1	0.426
114.2	0.428
114.3	0.432
114.4	0.434
114.5	0.436
114.6	0.436
114.7	0.438
114.8	0.44
114.9	0.442
115	0.444
115.1	0.446
115.2	0.448
115.3	0.452
115.4	0.452
115.5	0.452
115.6	0.454
115.7	0.456
115.8	0.456
115.9	0.458
116	0.464
116.1	0.464
116.2	0.466
116.3	0.468
116.4	0.468
116.5	0.468
116.6	0.472
116.7	0.474
116.8	0.478
116.9	0.48
117	0.482
117.1	0.482
117.2	0.482
117.3	0.482
117.4	0.484
117.5	0.486
117.6	0.49
117.7	0.49
117.8	0.49
117.9	0.49
118	0.49
118.1	0.492
118.2	0.492
118.3	0.494
118.4	0.496
118.5	0.498
118.6	0.506
118.7	0.506
118.8	0.508
118.9	0.51
119	0.51
119.1	0.51
119.2	0.51
119.3	0.512
119.4	0.514
119.5	0.516
119.6	0.516
119.7	0.516
119.8	0.518
119.9	0.518
120	0.518
120.1	0.514
120.2	0.518
120.3	0.52
120.4	0.522
120.5	0.524
120.6	0.526
120.7	0.526
120.8	0.526
120.9	0.526
121	0.524
121.1	0.528
121.2	0.528
121.3	0.53
121.4	0.534
121.5	0.534
121.6	0.534
121.7	0.536
121.8	0.536
121.9	0.534
122	0.536
122.1	0.536
122.2	0.54
122.3	0.54
122.4	0.542
122.5	0.542
122.6	0.546
122.7	0.548
122.8	0.548
122.9	0.552
123	0.552
123.1	0.548
123.2	0.548
123.3	0.548
123.4	0.55
123.5	0.552
123.6	0.55
123.7	0.552
123.8	0.556
123.9	0.556
124	0.556
124.1	0.558
124.2	0.558
124.3	0.564
124.4	0.564
124.5	0.564
124.6	0.566
124.7	0.57
124.8	0.572
124.9	0.572
125	0.57
125.1	0.574
125.2	0.574
125.3	0.578
125.4	0.584
125.5	0.586
125.6	0.586
125.7	0.588
125.8	0.588
125.9	0.59
126	0.588
126.1	0.588
126.2	0.588
126.3	0.588
126.4	0.59
126.5	0.592
126.6	0.592
126.7	0.592
126.8	0.596
126.9	0.596
127	0.594
127.1	0.594
127.2	0.594
127.3	0.594
127.4	0.594
127.5	0.6
127.6	0.602
127.7	0.6
127.8	0.606
127.9	0.606
128	0.606
128.1	0.608
128.2	0.614
128.3	0.616
128.4	0.614
128.5	0.614
128.6	0.616
128.7	0.618
128.8	0.62
128.9	0.62
129	0.622
129.1	0.622
129.2	0.622
129.3	0.622
129.4	0.626
129.5	0.626
129.6	0.628
129.7	0.63
129.8	0.632
129.9	0.634
130	0.634
130.1	0.638
130.2	0.638
130.3	0.642
130.4	0.644
130.5	0.642
130.6	0.644
130.7	0.646
130.8	0.646
130.9	0.648
131	0.65
131.1	0.652
131.2	0.65
131.3	0.648
131.4	0.654
131.5	0.656
131.6	0.656
131.7	0.656
131.8	0.654
131.9	0.656
132	0.656
132.1	0.658
132.2	0.66
132.3	0.662
132.4	0.662
132.5	0.662
132.6	0.668
132.7	0.668
132.8	0.668
132.9	0.666
133	0.664
133.1	0.664
133.2	0.666
133.3	0.666
133.4	0.67
133.5	0.67
133.6	0.67
133.7	0.67
133.8	0.672
133.9	0.674
134	0.674
134.1	0.676
134.2	0.676
134.3	0.674
134.4	0.674
134.5	0.674
134.6	0.674
134.7	0.672
134.8	0.674
134.9	0.678
135	0.676
135.1	0.676
135.2	0.676
135.3	0.676
135.4	0.676
135.5	0.678
135.6	0.68
135.7	0.68
135.8	0.682
135.9	0.68
136	0.682
136.1	0.682
136.2	0.684
136.3	0.682
136.4	0.682
136.5	0.684
136.6	0.686
136.7	0.684
136.8	0.684
136.9	0.682
137	0.682
137.1	0.682
137.2	0.682
137.3	0.688
137.4	0.688
137.5	0.688
137.6	0.688
137.7	0.686
137.8	0.686
137.9	0.682
138	0.682
138.1	0.682
138.2	0.684
138.3	0.684
138.4	0.684
138.5	0.69
138.6	0.69
138.7	0.696
138.8	0.7
138.9	0.7
139	0.704
139.1	0.704
139.2	0.702
139.3	0.704
139.4	0.706
139.5	0.708
139.6	0.708
139.7	0.708
139.8	0.708
139.9	0.708
140	0.712
140.1	0.71
140.2	0.712
140.3	0.708
140.4	0.712
140.5	0.714
140.6	0.718
140.7	0.72
140.8	0.716
140.9	0.716
141	0.714
141.1	0.714
141.2	0.714
141.3	0.716
141.4	0.714
141.5	0.716
141.6	0.714
141.7	0.714
141.8	0.716
141.9	0.718
142	0.72
142.1	0.722
142.2	0.722
142.3	0.722
142.4	0.722
142.5	0.722
142.6	0.722
142.7	0.722
142.8	0.716
142.9	0.716
143	0.718
143.1	0.718
143.2	0.716
143.3	0.716
143.4	0.716
143.5	0.716
143.6	0.716
143.7	0.714
143.8	0.714
143.9	0.718
144	0.722
144.1	0.722
144.2	0.722
144.3	0.722
144.4	0.72
144.5	0.722
144.6	0.722
144.7	0.72
144.8	0.718
144.9	0.718
145	0.72
145.1	0.722
145.2	0.726
145.3	0.724
145.4	0.726
145.5	0.726
145.6	0.726
145.7	0.726
145.8	0.726
145.9	0.726
146	0.728
146.1	0.73
146.2	0.734
146.3	0.734
146.4	0.734
146.5	0.738
146.6	0.738
146.7	0.738
146.8	0.738
146.9	0.738
147	0.738
147.1	0.736
147.2	0.734
147.3	0.734
147.4	0.734
147.5	0.736
147.6	0.736
147.7	0.734
147.8	0.736
147.9	0.736
148	0.736
148.1	0.736
148.2	0.738
148.3	0.74
148.4	0.74
148.5	0.742
148.6	0.742
148.7	0.742
148.8	0.742
148.9	0.742
149	0.744
149.1	0.742
149.2	0.742
149.3	0.742
149.4	0.742
149.5	0.742
149.6	0.744
149.7	0.744
149.8	0.744
149.9	0.746
150	0.746
150.1	0.748
150.2	0.748
150.3	0.75
150.4	0.75
150.5	0.75
150.6	0.75
150.7	0.75
150.8	0.752
150.9	0.75
151	0.75
151.1	0.752
151.2	0.752
151.3	0.754
151.4	0.756
151.5	0.754
151.6	0.756
151.7	0.758
151.8	0.758
151.9	0.758
152	0.76
152.1	0.76
152.2	0.758
152.3	0.758
152.4	0.758
152.5	0.758
152.6	0.756
152.7	0.754
152.8	0.756
152.9	0.754
153	0.754
153.1	0.752
153.2	0.752
153.3	0.754
153.4	0.758
153.5	0.758
153.6	0.758
153.7	0.76
153.8	0.76
153.9	0.762
154	0.762
154.1	0.764
154.2	0.762
154.3	0.764
154.4	0.764
154.5	0.764
154.6	0.766
154.7	0.766
154.8	0.766
154.9	0.768
155	0.772
155.1	0.77
155.2	0.768
155.3	0.768
155.4	0.77
155.5	0.774
155.6	0.774
155.7	0.774
155.8	0.776
155.9	0.776
156	0.778
156.1	0.78
156.2	0.782
156.3	0.78
156.4	0.782
156.5	0.78
156.6	0.78
156.7	0.778
156.8	0.778
156.9	0.782
157	0.784
157.1	0.784
157.2	0.784
157.3	0.78
157.4	0.784
157.5	0.784
157.6	0.784
157.7	0.784
157.8	0.784
157.9	0.786
158	0.784
158.1	0.782
158.2	0.786
158.3	0.786
158.4	0.784
158.5	0.784
158.6	0.784
158.7	0.786
158.8	0.788
158.9	0.784
159	0.784
159.1	0.784
159.2	0.786
159.3	0.79
159.4	0.79
159.5	0.788
159.6	0.788
159.7	0.788
159.8	0.79
159.9	0.788
160	0.79
160.1	0.788
160.2	0.788
160.3	0.788
160.4	0.79
160.5	0.79
160.6	0.792
160.7	0.792
160.8	0.792
160.9	0.79
161	0.792
161.1	0.794
161.2	0.794
161.3	0.794
161.4	0.796
161.5	0.798
161.6	0.798
161.7	0.798
161.8	0.8
161.9	0.8
162	0.798
162.1	0.794
162.2	0.796
162.3	0.796
162.4	0.792
162.5	0.794
162.6	0.794
162.7	0.794
162.8	0.794
162.9	0.796
163	0.798
163.1	0.8
163.2	0.8
163.3	0.8
163.4	0.802
163.5	0.802
163.6	0.802
163.7	0.802
163.8	0.802
163.9	0.802
164	0.798
164.1	0.8
164.2	0.8
164.3	0.8
164.4	0.802
164.5	0.804
164.6	0.804
164.7	0.804
164.8	0.806
164.9	0.806
165	0.808
165.1	0.804
165.2	0.806
165.3	0.804
165.4	0.804
165.5	0.806
165.6	0.804
165.7	0.804
165.8	0.802
165.9	0.804
166	0.804
166.1	0.802
166.2	0.802
166.3	0.802
166.4	0.802
166.5	0.804
166.6	0.804
166.7	0.806
166.8	0.806
166.9	0.808
167	0.808
167.1	0.808
167.2	0.806
167.3	0.806
167.4	0.806
167.5	0.806
167.6	0.802
167.7	0.8
167.8	0.8
167.9	0.8
168	0.798
168.1	0.798
168.2	0.798
168.3	0.798
168.4	0.798
168.5	0.798
168.6	0.798
168.7	0.798
168.8	0.798
168.9	0.798
169	0.802
169.1	0.802
169.2	0.798
169.3	0.798
169.4	0.798
169.5	0.798
169.6	0.798
169.7	0.798
169.8	0.798
169.9	0.798
170	0.798
170.1	0.802
170.2	0.802
170.3	0.8
170.4	0.804
170.5	0.806
170.6	0.806
170.7	0.804
170.8	0.806
170.9	0.808
171	0.808
171.1	0.808
171.2	0.81
171.3	0.812
171.4	0.812
171.5	0.812
171.6	0.816
171.7	0.816
171.8	0.816
171.9	0.816
172	0.816
172.1	0.816
172.2	0.816
172.3	0.816
172.4	0.816
172.5	0.818
172.6	0.816
172.7	0.816
172.8	0.816
172.9	0.816
173	0.816
173.1	0.818
173.2	0.816
173.3	0.816
173.4	0.818
173.5	0.818
173.6	0.818
173.7	0.818
173.8	0.818
173.9	0.822
174	0.822
174.1	0.82
174.2	0.82
174.3	0.816
174.4	0.816
174.5	0.818
174.6	0.82
174.7	0.82
174.8	0.82
174.9	0.82
175	0.824
175.1	0.824
175.2	0.822
175.3	0.822
175.4	0.824
175.5	0.822
175.6	0.82
175.7	0.818
175.8	0.818
175.9	0.816
176	0.818
176.1	0.818
176.2	0.818
176.3	0.818
176.4	0.818
176.5	0.818
176.6	0.818
176.7	0.816
176.8	0.818
176.9	0.82
177	0.818
177.1	0.818
177.2	0.818
177.3	0.816
177.4	0.816
177.5	0.818
177.6	0.82
177.7	0.82
177.8	0.822
177.9	0.822
178	0.824
178.1	0.826
178.2	0.824
178.3	0.824
178.4	0.824
178.5	0.826
178.6	0.828
178.7	0.828
178.8	0.826
178.9	0.826
179	0.824
179.1	0.824
179.2	0.82
179.3	0.818
179.4	0.816
179.5	0.816
179.6	0.816
179.7	0.814
179.8	0.814
179.9	0.816
180	0.818
180.1	0.818
180.2	0.818
180.3	0.816
180.4	0.816
180.5	0.816
180.6	0.816
180.7	0.816
180.8	0.814
180.9	0.818
181	0.82
181.1	0.822
181.2	0.822
181.3	0.822
181.4	0.822
181.5	0.822
181.6	0.824
181.7	0.824
181.8	0.822
181.9	0.822
182	0.822
182.1	0.824
182.2	0.824
182.3	0.822
182.4	0.822
182.5	0.824
182.6	0.824
182.7	0.826
182.8	0.826
182.9	0.824
183	0.826
183.1	0.828
183.2	0.828
183.3	0.83
183.4	0.828
183.5	0.828
183.6	0.83
183.7	0.83
183.8	0.83
183.9	0.83
184	0.828
184.1	0.83
184.2	0.83
184.3	0.83
184.4	0.826
184.5	0.824
184.6	0.826
184.7	0.824
184.8	0.824
184.9	0.824
185	0.822
185.1	0.822
185.2	0.824
185.3	0.824
185.4	0.824
185.5	0.824
185.6	0.824
185.7	0.824
185.8	0.828
185.9	0.83
186	0.83
186.1	0.83
186.2	0.83
186.3	0.832
186.4	0.83
186.5	0.83
186.6	0.83
186.7	0.83
186.8	0.828
186.9	0.83
187	0.838
187.1	0.84
187.2	0.838
187.3	0.836
187.4	0.84
187.5	0.842
187.6	0.84
187.7	0.84
187.8	0.842
187.9	0.844
188	0.842
188.1	0.842
188.2	0.842
188.3	0.846
188.4	0.844
188.5	0.844
188.6	0.844
188.7	0.844
188.8	0.844
188.9	0.844
189	0.844
189.1	0.842
189.2	0.84
189.3	0.84
189.4	0.838
189.5	0.84
189.6	0.84
189.7	0.84
189.8	0.844
189.9	0.846
190	0.848
190.1	0.848
190.2	0.846
190.3	0.846
190.4	0.848
190.5	0.846
190.6	0.846
190.7	0.846
190.8	0.846
190.9	0.844
191	0.844
191.1	0.846
191.2	0.844
191.3	0.846
191.4	0.846
191.5	0.844
191.6	0.844
191.7	0.844
191.8	0.844
191.9	0.844
192	0.844
192.1	0.844
192.2	0.844
192.3	0.844
192.4	0.844
192.5	0.844
192.6	0.844
192.7	0.846
192.8	0.844
192.9	0.844
193	0.844
193.1	0.848
193.2	0.846
193.3	0.844
193.4	0.846
193.5	0.846
193.6	0.846
193.7	0.846
193.8	0.846
193.9	0.846
194	0.844
194.1	0.846
194.2	0.844
194.3	0.844
194.4	0.844
194.5	0.846
194.6	0.846
194.7	0.846
194.8	0.846
194.9	0.846
195	0.852
195.1	0.852
195.2	0.852
195.3	0.852
195.4	0.854
195.5	0.854
195.6	0.856
195.7	0.854
195.8	0.852
195.9	0.854
196	0.854
196.1	0.856
196.2	0.856
196.3	0.854
196.4	0.854
196.5	0.854
196.6	0.854
196.7	0.852
196.8	0.848
196.9	0.85
197	0.85
197.1	0.848
197.2	0.846
197.3	0.848
197.4	0.848
197.5	0.846
197.6	0.846
197.7	0.846
197.8	0.848
197.9	0.848
198	0.848
198.1	0.848
198.2	0.848
198.3	0.848
198.4	0.848
198.5	0.848
198.6	0.848
198.7	0.846
198.8	0.846
198.9	0.85
199	0.85
199.1	0.85
199.2	0.85
199.3	0.85
199.4	0.85
199.5	0.85
199.6	0.85
199.7	0.85
199.8	0.85
199.9	0.846
200	0.844
[truncated: 14,000 more rows]
