# Supplementary material for: Bayesian inference of kinetic schemes for ion channels by Kalman filtering
Source: eLife journal article supplement (doi:10.7554/elife.62714), 2022-05-04
Supplement: fig4-data1 [file 1_Sim_N_800_Fluor_MW_16M.xlsx]

## Sheet: Tabelle1
0.1	0
0.2	0
0.3	0
0.4	0
0.5	0
0.6	0
0.7	0
0.8	0
0.9	0
1	0
1.1	0
1.2	0
1.3	0
1.4	0
1.5	0
1.6	0
1.7	0
1.8	0
1.9	0
2	0
2.1	0
2.2	0
2.3	0
2.4	0
2.5	0
2.6	0
2.7	0
2.8	0
2.9	0
3	0
3.1	0
3.2	0
3.3	0
3.4	0
3.5	0
3.6	0
3.7	0
3.8	0
3.9	0
4	0
4.1	0
4.2	0
4.3	0
4.4	0
4.5	0
4.6	0
4.7	0
4.8	0
4.9	0
5	0
5.1	0
5.2	0
5.3	0
5.4	0
5.5	0
5.6	0
5.7	0
5.8	0
5.9	0
6	0
6.1	0
6.2	0
6.3	0
6.4	0
6.5	0
6.6	0
6.7	0
6.8	0
6.9	0
7	0
7.1	0
7.2	0
7.3	0
7.4	0
7.5	0
7.6	0
7.7	0
7.8	0
7.9	0
8	0
8.1	0
8.2	0
8.3	0
8.4	0
8.5	0
8.6	0
8.7	0
8.8	0
8.9	0
9	0
9.1	0
9.2	0
9.3	0
9.4	0
9.5	0
9.6	0
9.7	0
9.8	0
9.9	0
10	0
10.1	0
10.2	0
10.3	0
10.4	0
10.5	0
10.6	0
10.7	0
10.8	0
10.9	0
11	0
11.1	0
11.2	0
11.3	0
11.4	0
11.5	0
11.6	0
11.7	0
11.8	0
11.9	0
12	0
12.1	0
12.2	0
12.3	0
12.4	0
12.5	0
12.6	0
12.7	0
12.8	0
12.9	0
13	0
13.1	0
13.2	0
13.3	0
13.4	0
13.5	0
13.6	0
13.7	0
13.8	0
13.9	0
14	0
14.1	0
14.2	0
14.3	0
14.4	0
14.5	0
14.6	0
14.7	0
14.8	0
14.9	0
15	0
15.1	0
15.2	0
15.3	0
15.4	0
15.5	0
15.6	0
15.7	0
15.8	0
15.9	0
16	0
16.1	0
16.2	0
16.3	0
16.4	0
16.5	0
16.6	0
16.7	0
16.8	0
16.9	0
17	0
17.1	0
17.2	0
17.3	0
17.4	0
17.5	0
17.6	0
17.7	0
17.8	0
17.9	0
18	0
18.1	0
18.2	0
18.3	0
18.4	0
18.5	0
18.6	0
18.7	0
18.8	0
18.9	0
19	0
19.1	0
19.2	0
19.3	0
19.4	0
19.5	0
19.6	0
19.7	0
19.8	0
19.9	0
20	0
20.1	0
20.2	0
20.3	0
20.4	0
20.5	0
20.6	0
20.7	0
20.8	0
20.9	0
21	0
21.1	0
21.2	0
21.3	0
21.4	0
21.5	0
21.6	0
21.7	0
21.8	0
21.9	0
22	0
22.1	0
22.2	0
22.3	0
22.4	0
22.5	0
22.6	0
22.7	0
22.8	0
22.9	0
23	0
23.1	0
23.2	0
23.3	0
23.4	0
23.5	0
23.6	0
23.7	0
23.8	0
23.9	0
24	0
24.1	0
24.2	0
24.3	0
24.4	0
24.5	0
24.6	0
24.7	0
24.8	0
24.9	0
25	0
25.1	0
25.2	0
25.3	0
25.4	0
25.5	0
25.6	0
25.7	0
25.8	0
25.9	0
26	0
26.1	0
26.2	0
26.3	0
26.4	0
26.5	0
26.6	0
26.7	0
26.8	0
26.9	0
27	0
27.1	0
27.2	0
27.3	0
27.4	0
27.5	0
27.6	0
27.7	0
27.8	0
27.9	0
28	0
28.1	0
28.2	0
28.3	0
28.4	0
28.5	0
28.6	0
28.7	0
28.8	0
28.9	0
29	0
29.1	0
29.2	0
29.3	0
29.4	0
29.5	0
29.6	0
29.7	0
29.8	0
29.9	0
30	0
30.1	0
30.2	0
30.3	0
30.4	0
30.5	0
30.6	0
30.7	0
30.8	0
30.9	0
31	0
31.1	0
31.2	0
31.3	0
31.4	0
31.5	0
31.6	0
31.7	0
31.8	0
31.9	0
32	0
32.1	0
32.2	0
32.3	0
32.4	0
32.5	0
32.6	0
32.7	0
32.8	0
32.9	0
33	0
33.1	0
33.2	0
33.3	0
33.4	0
33.5	0
33.6	0
33.7	0
33.8	0
33.9	0
34	0
34.1	0
34.2	0
34.3	0
34.4	0
34.5	0
34.6	0
34.7	0
34.8	0
34.9	0
35	0
35.1	0
35.2	0
35.3	0
35.4	0
35.5	0
35.6	0
35.7	0
35.8	0
35.9	0
36	0
36.1	0
36.2	0
36.3	0
36.4	0
36.5	0
36.6	0
36.7	0
36.8	0
36.9	0
37	0
37.1	0
37.2	0
37.3	0
37.4	0
37.5	0
37.6	0
37.7	0
37.8	0
37.9	0
38	0
38.1	0
38.2	0
38.3	0
38.4	0
38.5	0
38.6	0
38.7	0
38.8	0
38.9	0
39	0
39.1	0
39.2	0
39.3	0
39.4	0
39.5	0
39.6	0
39.7	0
39.8	0
39.9	0
40	0
40.1	0
40.2	0
40.3	0
40.4	0
40.5	0
40.6	0
40.7	0
40.8	0
40.9	0
41	0
41.1	0
41.2	0
41.3	0
41.4	0
41.5	0
41.6	0
41.7	0
41.8	0
41.9	0
42	0
42.1	0
42.2	0
42.3	0
42.4	0
42.5	0
42.6	0
42.7	0
42.8	0
42.9	0
43	0
43.1	0
43.2	0
43.3	0
43.4	0
43.5	0
43.6	0
43.7	0
43.8	0
43.9	0
44	0
44.1	0
44.2	0
44.3	0
44.4	0
44.5	0
44.6	0
44.7	0
44.8	0
44.9	0
45	0
45.1	0
45.2	0
45.3	0
45.4	0
45.5	0
45.6	0
45.7	0
45.8	0
45.9	0
46	0
46.1	0
46.2	0
46.3	0
46.4	0
46.5	0
46.6	0
46.7	0
46.8	0
46.9	0
47	0
47.1	0
47.2	0
47.3	0
47.4	0
47.5	0
47.6	0
47.7	0
47.8	0
47.9	0
48	0
48.1	0
48.2	0
48.3	0
48.4	0
48.5	0
48.6	0
48.7	0
48.8	0
48.9	0
49	0
49.1	0
49.2	0
49.3	0
49.4	0
49.5	0
49.6	0
49.7	0
49.8	0
49.9	0
50	0
50.1	0
50.2	0
50.3	0
50.4	0
50.5	0
50.6	0
50.7	0
50.8	0
50.9	0
51	0
51.1	0
51.2	0
51.3	0
51.4	0
51.5	0
51.6	0
51.7	0
51.8	0
51.9	0
52	0
52.1	0
52.2	0
52.3	0
52.4	0
52.5	0
52.6	0
52.7	0
52.8	0
52.9	0
53	0
53.1	0
53.2	0
53.3	0
53.4	0
53.5	0
53.6	0
53.7	0
53.8	0
53.9	0
54	0
54.1	0
54.2	0
54.3	0
54.4	0
54.5	0
54.6	0
54.7	0
54.8	0
54.9	0
55	0
55.1	0
55.2	0
55.3	0
55.4	0
55.5	0
55.6	0
55.7	0
55.8	0
55.9	0
56	0
56.1	0
56.2	0
56.3	0
56.4	0
56.5	0
56.6	0
56.7	0
56.8	0
56.9	0
57	0
57.1	0
57.2	0
57.3	0
57.4	0
57.5	0
57.6	0
57.7	0
57.8	0
57.9	0
58	0
58.1	0
58.2	0
58.3	0
58.4	0
58.5	0
58.6	0
58.7	0
58.8	0
58.9	0
59	0
59.1	0
59.2	0
59.3	0
59.4	0
59.5	0
59.6	0
59.7	0
59.8	0
59.9	0
60	0
60.1	0
60.2	0
60.3	0
60.4	0
60.5	0
60.6	0
60.7	0
60.8	0
60.9	0
61	0
61.1	0
61.2	0
61.3	0
61.4	0
61.5	0
61.6	0
61.7	0
61.8	0
61.9	0
62	0
62.1	0
62.2	0
62.3	0
62.4	0
62.5	0
62.6	0
62.7	0
62.8	0
62.9	0
63	0
63.1	0
63.2	0
63.3	0
63.4	0
63.5	0
63.6	0
63.7	0
63.8	0
63.9	0
64	0
64.1	0
64.2	0
64.3	0
64.4	0
64.5	0
64.6	0
64.7	0
64.8	0
64.9	0
65	0
65.1	0
65.2	0
65.3	0
65.4	0
65.5	0
65.6	0
65.7	0
65.8	0
65.9	0
66	0
66.1	0
66.2	0
66.3	0
66.4	0
66.5	0
66.6	0
66.7	0
66.8	0
66.9	0
67	0
67.1	0
67.2	0
67.3	0
67.4	0
67.5	0
67.6	0
67.7	0
67.8	0
67.9	0
68	0
68.1	0
68.2	0
68.3	0
68.4	0
68.5	0
68.6	0
68.7	0
68.8	0
68.9	0
69	0
69.1	0
69.2	0
69.3	0
69.4	0
69.5	0
69.6	0
69.7	0
69.8	0
69.9	0
70	0
70.1	0
70.2	0
70.3	0
70.4	0
70.5	0
70.6	0
70.7	0
70.8	0
70.9	0
71	0
71.1	0
71.2	0
71.3	0
71.4	0
71.5	0
71.6	0
71.7	0
71.8	0
71.9	0
72	0
72.1	0
72.2	0
72.3	0
72.4	0
72.5	0
72.6	0
72.7	0
72.8	0
72.9	0
73	0
73.1	0
73.2	0
73.3	0
73.4	0
73.5	0
73.6	0
73.7	0
73.8	0
73.9	0
74	0
74.1	0
74.2	0
74.3	0
74.4	0
74.5	0
74.6	0
74.7	0
74.8	0
74.9	0
75	0
75.1	0
75.2	0
75.3	0
75.4	0
75.5	0
75.6	0
75.7	0
75.8	0
75.9	0
76	0
76.1	0
76.2	0
76.3	0
76.4	0
76.5	0
76.6	0
76.7	0
76.8	0
76.9	0
77	0
77.1	0
77.2	0
77.3	0
77.4	0
77.5	0
77.6	0
77.7	0
77.8	0
77.9	0
78	0
78.1	0
78.2	0
78.3	0
78.4	0
78.5	0
78.6	0
78.7	0
78.8	0
78.9	0
79	0
79.1	0
79.2	0
79.3	0
79.4	0
79.5	0
79.6	0
79.7	0
79.8	0
79.9	0
80	0
80.1	0
80.2	0
80.3	0
80.4	0
80.5	0
80.6	0
80.7	0
80.8	0
80.9	0
81	0
81.1	0
81.2	0
81.3	0
81.4	0
81.5	0
81.6	0
81.7	0
81.8	0
81.9	0
82	0
82.1	0
82.2	0
82.3	0
82.4	0
82.5	0
82.6	0
82.7	0
82.8	0
82.9	0
83	0
83.1	0
83.2	0
83.3	0
83.4	0
83.5	0
83.6	0
83.7	0
83.8	0
83.9	0
84	0
84.1	0
84.2	0
84.3	0
84.4	0
84.5	0
84.6	0
84.7	0
84.8	0
84.9	0
85	0
85.1	0
85.2	0
85.3	0
85.4	0
85.5	0
85.6	0
85.7	0
85.8	0
85.9	0
86	0
86.1	0
86.2	0
86.3	0
86.4	0
86.5	0
86.6	0
86.7	0
86.8	0
86.9	0
87	0
87.1	0
87.2	0
87.3	0
87.4	0
87.5	0
87.6	0
87.7	0
87.8	0
87.9	0
88	0
88.1	0
88.2	0
88.3	0
88.4	0
88.5	0
88.6	0
88.7	0
88.8	0
88.9	0
89	0
89.1	0
89.2	0
89.3	0
89.4	0
89.5	0
89.6	0
89.7	0
89.8	0
89.9	0
90	0
90.1	0
90.2	0
90.3	0
90.4	0
90.5	0
90.6	0
90.7	0
90.8	0
90.9	0
91	0
91.1	0
91.2	0
91.3	0
91.4	0
91.5	0
91.6	0
91.7	0
91.8	0
91.9	0
92	0
92.1	0
92.2	0
92.3	0
92.4	0
92.5	0
92.6	0
92.7	0
92.8	0
92.9	0
93	0
93.1	0
93.2	0
93.3	0
93.4	0
93.5	0
93.6	0
93.7	0
93.8	0
93.9	0
94	0
94.1	0
94.2	0
94.3	0
94.4	0
94.5	0
94.6	0
94.7	0
94.8	0
94.9	0
95	0
95.1	0
95.2	0
95.3	0
95.4	0
95.5	0
95.6	0
95.7	0
95.8	0
95.9	0
96	0
96.1	0
96.2	0
96.3	0
96.4	0
96.5	0
96.6	0
96.7	0
96.8	0
96.9	0
97	0
97.1	0
97.2	0
97.3	0
97.4	0
97.5	0
97.6	0
97.7	0
97.8	0
97.9	0
98	0
98.1	0
98.2	0
98.3	0
98.4	0
98.5	0
98.6	0
98.7	0
98.8	0
98.9	0
99	0
99.1	0
99.2	0
99.3	0
99.4	0
99.5	0
99.6	0
99.7	0
99.8	0
99.9	0
100	0
100.1	0.5325
100.2	0.72375
100.3	0.815625
100.4	0.87
100.5	0.905
100.6	0.92625
100.7	0.933125
100.8	0.94125
100.9	0.941875
101	0.94375
101.1	0.94625
101.2	0.948125
101.3	0.949375
101.4	0.95625
101.5	0.956875
101.6	0.9575
101.7	0.956875
101.8	0.955625
101.9	0.959375
102	0.96125
102.1	0.96
102.2	0.96125
102.3	0.9675
102.4	0.965625
102.5	0.956875
102.6	0.956875
102.7	0.959375
102.8	0.958125
102.9	0.96
103	0.965
103.1	0.958125
103.2	0.959375
103.3	0.961875
103.4	0.95875
103.5	0.953125
103.6	0.945
103.7	0.944375
103.8	0.95875
103.9	0.95875
104	0.955625
104.1	0.965
104.2	0.95875
104.3	0.954375
104.4	0.959375
104.5	0.965
104.6	0.96875
104.7	0.959375
104.8	0.96
104.9	0.9575
105	0.958125
105.1	0.960625
105.2	0.96625
105.3	0.965625
105.4	0.965625
105.5	0.965
105.6	0.951875
105.7	0.954375
105.8	0.953125
105.9	0.956875
106	0.958125
106.1	0.95875
106.2	0.95875
106.3	0.96125
106.4	0.961875
106.5	0.96125
106.6	0.966875
106.7	0.96625
106.8	0.96875
106.9	0.961875
107	0.9575
107.1	0.958125
107.2	0.95625
107.3	0.9625
107.4	0.9675
107.5	0.9725
107.6	0.96625
107.7	0.969375
107.8	0.973125
107.9	0.96375
108	0.97125
108.1	0.96875
108.2	0.964375
108.3	0.9725
108.4	0.968125
108.5	0.964375
108.6	0.9675
108.7	0.965
108.8	0.97
108.9	0.964375
109	0.96875
109.1	0.9625
109.2	0.95875
109.3	0.9575
109.4	0.955
109.5	0.95875
109.6	0.9675
109.7	0.964375
109.8	0.968125
109.9	0.96625
110	0.968125
110.1	0.966875
110.2	0.961875
110.3	0.965625
110.4	0.969375
110.5	0.97125
110.6	0.97375
110.7	0.964375
110.8	0.97125
110.9	0.975
111	0.966875
111.1	0.9725
111.2	0.971875
111.3	0.973125
111.4	0.980625
111.5	0.97125
111.6	0.975
111.7	0.97125
111.8	0.96375
111.9	0.96
112	0.9625
112.1	0.960625
112.2	0.963125
112.3	0.969375
112.4	0.9725
112.5	0.973125
112.6	0.969375
112.7	0.97125
112.8	0.970625
112.9	0.968125
113	0.9625
113.1	0.963125
113.2	0.970625
113.3	0.971875
113.4	0.97375
113.5	0.969375
113.6	0.969375
113.7	0.97125
113.8	0.968125
113.9	0.963125
114	0.966875
114.1	0.965
114.2	0.9675
114.3	0.974375
114.4	0.975
114.5	0.970625
114.6	0.975625
114.7	0.98125
114.8	0.975625
114.9	0.974375
115	0.973125
115.1	0.97875
115.2	0.976875
115.3	0.981875
115.4	0.98
115.5	0.978125
115.6	0.975625
115.7	0.9825
115.8	0.9775
115.9	0.975
116	0.976875
116.1	0.971875
116.2	0.97625
116.3	0.97375
116.4	0.98
116.5	0.985625
116.6	0.98125
116.7	0.97625
116.8	0.97125
116.9	0.975625
117	0.971875
117.1	0.97375
117.2	0.970625
117.3	0.973125
117.4	0.974375
117.5	0.97
117.6	0.970625
117.7	0.97625
117.8	0.97625
117.9	0.975
118	0.979375
118.1	0.97875
118.2	0.9775
118.3	0.975
118.4	0.9775
118.5	0.97625
118.6	0.97875
118.7	0.98125
118.8	0.9825
118.9	0.9775
119	0.97625
119.1	0.981875
119.2	0.976875
119.3	0.97625
119.4	0.975
119.5	0.975
119.6	0.973125
119.7	0.978125
119.8	0.980625
119.9	0.98
120	0.9775
120.1	0.98
120.2	0.976875
120.3	0.980625
120.4	0.97875
120.5	0.981875
120.6	0.985
120.7	0.980625
120.8	0.980625
120.9	0.9825
121	0.98125
121.1	0.978125
121.2	0.9775
121.3	0.983125
121.4	0.97875
121.5	0.980625
121.6	0.978125
121.7	0.9825
121.8	0.973125
121.9	0.97875
122	0.9725
122.1	0.97375
122.2	0.974375
122.3	0.976875
122.4	0.980625
122.5	0.984375
122.6	0.975
122.7	0.979375
122.8	0.979375
122.9	0.9825
123	0.980625
123.1	0.979375
123.2	0.97875
123.3	0.97625
123.4	0.973125
123.5	0.98125
123.6	0.9775
123.7	0.979375
123.8	0.98125
123.9	0.98125
124	0.979375
124.1	0.979375
124.2	0.981875
124.3	0.98875
124.4	0.9875
124.5	0.98375
124.6	0.98125
124.7	0.981875
124.8	0.98125
124.9	0.98
125	0.975625
125.1	0.979375
125.2	0.97625
125.3	0.980625
125.4	0.983125
125.5	0.985
125.6	0.986875
125.7	0.985
125.8	0.984375
125.9	0.9825
126	0.983125
126.1	0.97625
126.2	0.98125
126.3	0.979375
126.4	0.980625
126.5	0.983125
126.6	0.981875
126.7	0.98125
126.8	0.98
126.9	0.97875
127	0.9775
127.1	0.97875
127.2	0.985625
127.3	0.985
127.4	0.98625
127.5	0.984375
127.6	0.985625
127.7	0.983125
127.8	0.984375
127.9	0.985
128	0.984375
128.1	0.981875
128.2	0.985
128.3	0.98
128.4	0.98625
128.5	0.985
128.6	0.985625
128.7	0.9825
128.8	0.98625
128.9	0.98375
129	0.9825
129.1	0.985
129.2	0.984375
129.3	0.980625
129.4	0.980625
129.5	0.984375
129.6	0.980625
129.7	0.983125
129.8	0.985
129.9	0.985625
130	0.985625
130.1	0.984375
130.2	0.98125
130.3	0.985
130.4	0.985
130.5	0.98125
130.6	0.981875
130.7	0.98125
130.8	0.98375
130.9	0.980625
131	0.98125
131.1	0.985
131.2	0.9875
131.3	0.989375
131.4	0.986875
131.5	0.985625
131.6	0.98875
131.7	0.9875
131.8	0.986875
131.9	0.985625
132	0.986875
132.1	0.9875
132.2	0.988125
132.3	0.98625
132.4	0.983125
132.5	0.98125
132.6	0.983125
132.7	0.985625
132.8	0.983125
132.9	0.983125
133	0.985
133.1	0.983125
133.2	0.98125
133.3	0.983125
133.4	0.985
133.5	0.986875
133.6	0.980625
133.7	0.986875
133.8	0.98625
133.9	0.98375
134	0.981875
134.1	0.98625
134.2	0.983125
134.3	0.98125
134.4	0.9825
134.5	0.98125
134.6	0.97875
134.7	0.98
134.8	0.978125
134.9	0.98
135	0.9825
135.1	0.983125
135.2	0.984375
135.3	0.985625
135.4	0.985625
135.5	0.985
135.6	0.983125
135.7	0.98125
135.8	0.983125
135.9	0.984375
136	0.983125
136.1	0.98125
136.2	0.979375
136.3	0.981875
136.4	0.986875
136.5	0.990625
136.6	0.989375
136.7	0.986875
136.8	0.985625
136.9	0.986875
137	0.9875
137.1	0.980625
137.2	0.985625
137.3	0.9875
137.4	0.989375
137.5	0.989375
137.6	0.989375
137.7	0.98875
137.8	0.988125
137.9	0.985
138	0.988125
138.1	0.985625
138.2	0.985
138.3	0.98625
138.4	0.98625
138.5	0.98875
138.6	0.988125
138.7	0.989375
138.8	0.990625
138.9	0.98625
139	0.985
139.1	0.985625
139.2	0.988125
139.3	0.988125
139.4	0.988125
139.5	0.99125
139.6	0.990625
139.7	0.991875
139.8	0.98875
139.9	0.98625
140	0.984375
140.1	0.984375
140.2	0.9825
140.3	0.9825
140.4	0.986875
140.5	0.988125
140.6	0.993125
140.7	0.9925
140.8	0.99
140.9	0.9875
141	0.98375
141.1	0.986875
141.2	0.98375
141.3	0.98375
141.4	0.984375
141.5	0.98625
141.6	0.986875
141.7	0.985625
141.8	0.98625
141.9	0.99
142	0.993125
142.1	0.98875
142.2	0.988125
142.3	0.98625
142.4	0.989375
142.5	0.9925
142.6	0.985625
142.7	0.986875
142.8	0.98375
142.9	0.985625
143	0.985625
143.1	0.9875
143.2	0.9825
143.3	0.98875
143.4	0.98875
143.5	0.985
143.6	0.9875
143.7	0.986875
143.8	0.98625
143.9	0.986875
144	0.990625
144.1	0.991875
144.2	0.989375
144.3	0.990625
144.4	0.98875
144.5	0.98375
144.6	0.980625
144.7	0.983125
144.8	0.98625
144.9	0.986875
145	0.9875
145.1	0.988125
145.2	0.98625
145.3	0.985
145.4	0.98625
145.5	0.99
145.6	0.99
145.7	0.99
145.8	0.99
145.9	0.990625
146	0.988125
146.1	0.986875
146.2	0.98875
146.3	0.988125
146.4	0.990625
146.5	0.9875
146.6	0.986875
146.7	0.993125
146.8	0.991875
146.9	0.990625
147	0.99
147.1	0.98875
147.2	0.993125
147.3	0.989375
147.4	0.986875
147.5	0.985625
147.6	0.98875
147.7	0.989375
147.8	0.986875
147.9	0.985
148	0.986875
148.1	0.986875
148.2	0.990625
148.3	0.993125
148.4	0.994375
148.5	0.9925
148.6	0.991875
148.7	0.991875
148.8	0.990625
148.9	0.989375
149	0.9875
149.1	0.9875
149.2	0.990625
149.3	0.991875
149.4	0.99625
149.5	0.9925
149.6	0.990625
149.7	0.989375
149.8	0.993125
149.9	0.991875
150	0.9875
150.1	0.98875
150.2	0.990625
150.3	0.989375
150.4	0.98875
150.5	0.98625
150.6	0.988125
150.7	0.990625
150.8	0.99125
150.9	0.991875
151	0.9925
151.1	0.9925
151.2	0.989375
151.3	0.990625
151.4	0.99
151.5	0.991875
151.6	0.991875
151.7	0.985625
151.8	0.989375
151.9	0.985625
152	0.98875
152.1	0.99
152.2	0.98875
152.3	0.989375
152.4	0.98875
152.5	0.98625
152.6	0.985
152.7	0.98875
152.8	0.99
152.9	0.9875
153	0.989375
153.1	0.99125
153.2	0.990625
153.3	0.98875
153.4	0.99
153.5	0.990625
153.6	0.98875
153.7	0.986875
153.8	0.99
153.9	0.993125
154	0.9925
154.1	0.99375
154.2	0.9925
154.3	0.991875
154.4	0.9875
154.5	0.99125
154.6	0.989375
154.7	0.991875
154.8	0.991875
154.9	0.9925
155	0.9925
155.1	0.99375
155.2	0.991875
155.3	0.994375
155.4	0.993125
155.5	0.99125
155.6	0.9925
155.7	0.99
155.8	0.990625
155.9	0.990625
156	0.99125
156.1	0.99
156.2	0.991875
156.3	0.990625
156.4	0.98625
156.5	0.983125
156.6	0.988125
156.7	0.988125
156.8	0.989375
156.9	0.990625
157	0.9925
157.1	0.991875
157.2	0.990625
157.3	0.99125
157.4	0.99375
157.5	0.995625
157.6	0.9925
157.7	0.99375
157.8	0.991875
157.9	0.990625
158	0.99
158.1	0.99125
158.2	0.994375
158.3	0.994375
158.4	0.993125
158.5	0.994375
158.6	0.9925
158.7	0.990625
158.8	0.995625
158.9	0.995625
159	0.995
159.1	0.993125
159.2	0.99125
159.3	0.990625
159.4	0.99
159.5	0.99
159.6	0.99125
159.7	0.993125
159.8	0.9925
159.9	0.991875
160	0.993125
160.1	0.993125
160.2	0.99375
160.3	0.9925
160.4	0.991875
160.5	0.99
160.6	0.98875
160.7	0.984375
160.8	0.9875
160.9	0.988125
161	0.989375
161.1	0.989375
161.2	0.991875
161.3	0.989375
161.4	0.990625
161.5	0.99375
161.6	0.990625
161.7	0.993125
161.8	0.990625
161.9	0.98875
162	0.990625
162.1	0.993125
162.2	0.991875
162.3	0.994375
162.4	0.993125
162.5	0.99375
162.6	0.99375
162.7	0.99375
162.8	0.989375
162.9	0.988125
163	0.98875
163.1	0.991875
163.2	0.994375
163.3	0.993125
163.4	0.99125
163.5	0.98875
163.6	0.989375
163.7	0.9925
163.8	0.99375
163.9	0.993125
164	0.99125
164.1	0.993125
164.2	0.990625
164.3	0.990625
164.4	0.991875
164.5	0.9925
164.6	0.991875
164.7	0.991875
164.8	0.99125
164.9	0.993125
165	0.99125
165.1	0.993125
165.2	0.990625
165.3	0.989375
165.4	0.9925
165.5	0.995
165.6	0.993125
165.7	0.9925
165.8	0.99375
165.9	0.99375
166	0.9925
166.1	0.99
166.2	0.9925
166.3	0.990625
166.4	0.9925
166.5	0.991875
166.6	0.99125
166.7	0.99125
166.8	0.988125
166.9	0.989375
167	0.99125
167.1	0.98875
167.2	0.98875
167.3	0.985625
167.4	0.990625
167.5	0.991875
167.6	0.988125
167.7	0.990625
167.8	0.99125
167.9	0.9925
168	0.991875
168.1	0.99375
168.2	0.99375
168.3	0.995625
168.4	0.995625
168.5	0.99375
168.6	0.990625
168.7	0.99
168.8	0.99125
168.9	0.991875
169	0.9925
169.1	0.993125
169.2	0.991875
169.3	0.988125
169.4	0.990625
169.5	0.991875
169.6	0.993125
169.7	0.988125
169.8	0.98875
169.9	0.991875
170	0.99125
170.1	0.99
170.2	0.98875
170.3	0.9875
170.4	0.99
170.5	0.99125
170.6	0.99125
170.7	0.990625
170.8	0.98875
170.9	0.990625
171	0.99375
171.1	0.9925
171.2	0.995
171.3	0.995625
171.4	0.993125
171.5	0.994375
171.6	0.99125
171.7	0.989375
171.8	0.99
171.9	0.991875
172	0.990625
172.1	0.986875
172.2	0.989375
172.3	0.989375
172.4	0.99
172.5	0.986875
172.6	0.98625
172.7	0.99
172.8	0.990625
172.9	0.986875
173	0.98875
173.1	0.989375
173.2	0.990625
173.3	0.990625
173.4	0.990625
173.5	0.9925
173.6	0.99375
173.7	0.99375
173.8	0.994375
173.9	0.990625
174	0.991875
174.1	0.994375
174.2	0.993125
174.3	0.9875
174.4	0.985625
174.5	0.9875
174.6	0.985
174.7	0.983125
174.8	0.9825
174.9	0.981875
175	0.985
175.1	0.984375
175.2	0.98625
175.3	0.98875
175.4	0.990625
175.5	0.99125
175.6	0.989375
175.7	0.9925
175.8	0.993125
175.9	0.99125
176	0.99375
176.1	0.994375
176.2	0.99125
176.3	0.989375
176.4	0.991875
176.5	0.990625
176.6	0.99125
176.7	0.990625
176.8	0.98625
176.9	0.988125
177	0.986875
177.1	0.990625
177.2	0.995
177.3	0.995
177.4	0.994375
177.5	0.991875
177.6	0.988125
177.7	0.988125
177.8	0.990625
177.9	0.99375
178	0.995
178.1	0.99375
178.2	0.995625
178.3	0.99375
178.4	0.99375
178.5	0.993125
178.6	0.99125
178.7	0.993125
178.8	0.99125
178.9	0.990625
179	0.9925
179.1	0.988125
179.2	0.99
179.3	0.98875
179.4	0.990625
179.5	0.990625
179.6	0.993125
179.7	0.99125
179.8	0.99125
179.9	0.99375
180	0.98875
180.1	0.99125
180.2	0.9925
180.3	0.993125
180.4	0.993125
180.5	0.9925
180.6	0.9925
180.7	0.99
180.8	0.99125
180.9	0.99375
181	0.99375
181.1	0.99125
181.2	0.990625
181.3	0.994375
181.4	0.99125
181.5	0.9925
181.6	0.990625
181.7	0.990625
181.8	0.99
181.9	0.990625
182	0.989375
182.1	0.988125
182.2	0.99
182.3	0.9925
182.4	0.9925
182.5	0.99125
182.6	0.99
182.7	0.99125
182.8	0.991875
182.9	0.990625
183	0.9925
183.1	0.991875
183.2	0.993125
183.3	0.995625
183.4	0.995
183.5	0.994375
183.6	0.991875
183.7	0.988125
183.8	0.990625
183.9	0.99
184	0.990625
184.1	0.99125
184.2	0.9925
184.3	0.995
184.4	0.99
184.5	0.98875
184.6	0.99
184.7	0.98875
184.8	0.989375
184.9	0.99
185	0.993125
185.1	0.99375
185.2	0.991875
185.3	0.991875
185.4	0.993125
185.5	0.9925
185.6	0.990625
185.7	0.991875
185.8	0.99375
185.9	0.99125
186	0.99125
186.1	0.991875
186.2	0.99
186.3	0.9925
186.4	0.988125
186.5	0.9875
186.6	0.989375
186.7	0.988125
186.8	0.990625
186.9	0.988125
187	0.99
187.1	0.99
187.2	0.99
187.3	0.989375
187.4	0.98875
187.5	0.99125
187.6	0.99375
187.7	0.991875
187.8	0.989375
187.9	0.9875
188	0.99
188.1	0.989375
188.2	0.99125
188.3	0.990625
188.4	0.989375
188.5	0.99
188.6	0.991875
188.7	0.993125
188.8	0.99125
188.9	0.988125
189	0.985
189.1	0.98875
189.2	0.988125
189.3	0.990625
189.4	0.9925
189.5	0.99375
189.6	0.99375
189.7	0.993125
189.8	0.993125
189.9	0.990625
190	0.990625
190.1	0.989375
190.2	0.990625
190.3	0.9925
190.4	0.99125
190.5	0.99125
190.6	0.991875
190.7	0.990625
190.8	0.990625
190.9	0.988125
191	0.98875
191.1	0.99
191.2	0.99
191.3	0.9925
191.4	0.993125
191.5	0.991875
191.6	0.993125
191.7	0.991875
191.8	0.991875
191.9	0.99375
192	0.9925
192.1	0.99375
192.2	0.995
192.3	0.995
192.4	0.9925
192.5	0.990625
192.6	0.99
192.7	0.993125
192.8	0.989375
192.9	0.99
193	0.990625
193.1	0.986875
193.2	0.98625
193.3	0.991875
193.4	0.9925
193.5	0.993125
193.6	0.991875
193.7	0.99125
193.8	0.990625
193.9	0.99
194	0.994375
194.1	0.9925
194.2	0.99125
194.3	0.9925
194.4	0.99375
194.5	0.993125
194.6	0.993125
194.7	0.991875
194.8	0.991875
194.9	0.99125
195	0.990625
195.1	0.989375
195.2	0.99375
195.3	0.991875
195.4	0.991875
195.5	0.995
195.6	0.993125
195.7	0.99375
195.8	0.9925
195.9	0.99125
196	0.99
196.1	0.99125
196.2	0.994375
196.3	0.991875
196.4	0.9925
196.5	0.995
196.6	0.9925
196.7	0.993125
196.8	0.9925
196.9	0.995625
197	0.993125
197.1	0.989375
197.2	0.99
197.3	0.9925
197.4	0.99125
197.5	0.98875
197.6	0.991875
197.7	0.990625
197.8	0.99
197.9	0.990625
198	0.98875
198.1	0.988125
198.2	0.99
198.3	0.991875
198.4	0.990625
198.5	0.993125
198.6	0.995
198.7	0.99
198.8	0.99
198.9	0.989375
199	0.9875
199.1	0.989375
199.2	0.995625
199.3	0.991875
199.4	0.9925
199.5	0.993125
199.6	0.989375
199.7	0.9875
199.8	0.99
199.9	0.99375
200	0.995
[truncated: 14,000 more rows]
