# Supplementary material for: Bayesian inference of kinetic schemes for ion channels by Kalman filtering
Source: eLife journal article supplement (doi:10.7554/elife.62714), 2022-05-04
Supplement: fig4-data1 [file 1_Sim_N_800_Strom_MW_16M.xlsx]

## Sheet: Tabelle1
0.1	0
0.2	0
0.3	0
0.4	0
0.5	0
0.6	0
0.7	0
0.8	0
0.9	0
1	0
1.1	0
1.2	0
1.3	0
1.4	0
1.5	0
1.6	0
1.7	0
1.8	0
1.9	0
2	0
2.1	0
2.2	0
2.3	0
2.4	0
2.5	0
2.6	0
2.7	0
2.8	0
2.9	0
3	0
3.1	0
3.2	0
3.3	0
3.4	0
3.5	0
3.6	0
3.7	0
3.8	0
3.9	0
4	0
4.1	0
4.2	0
4.3	0
4.4	0
4.5	0
4.6	0
4.7	0
4.8	0
4.9	0
5	0
5.1	0
5.2	0
5.3	0
5.4	0
5.5	0
5.6	0
5.7	0
5.8	0
5.9	0
6	0
6.1	0
6.2	0
6.3	0
6.4	0
6.5	0
6.6	0
6.7	0
6.8	0
6.9	0
7	0
7.1	0
7.2	0
7.3	0
7.4	0
7.5	0
7.6	0
7.7	0
7.8	0
7.9	0
8	0
8.1	0
8.2	0
8.3	0
8.4	0
8.5	0
8.6	0
8.7	0
8.8	0
8.9	0
9	0
9.1	0
9.2	0
9.3	0
9.4	0
9.5	0
9.6	0
9.7	0
9.8	0
9.9	0
10	0
10.1	0
10.2	0
10.3	0
10.4	0
10.5	0
10.6	0
10.7	0
10.8	0
10.9	0
11	0
11.1	0
11.2	0
11.3	0
11.4	0
11.5	0
11.6	0
11.7	0
11.8	0
11.9	0
12	0
12.1	0
12.2	0
12.3	0
12.4	0
12.5	0
12.6	0
12.7	0
12.8	0
12.9	0
13	0
13.1	0
13.2	0
13.3	0
13.4	0
13.5	0
13.6	0
13.7	0
13.8	0
13.9	0
14	0
14.1	0
14.2	0
14.3	0
14.4	0
14.5	0
14.6	0
14.7	0
14.8	0
14.9	0
15	0
15.1	0
15.2	0
15.3	0
15.4	0
15.5	0
15.6	0
15.7	0
15.8	0
15.9	0
16	0
16.1	0
16.2	0
16.3	0
16.4	0
16.5	0
16.6	0
16.7	0
16.8	0
16.9	0
17	0
17.1	0
17.2	0
17.3	0
17.4	0
17.5	0
17.6	0
17.7	0
17.8	0
17.9	0
18	0
18.1	0
18.2	0
18.3	0
18.4	0
18.5	0
18.6	0
18.7	0
18.8	0
18.9	0
19	0
19.1	0
19.2	0
19.3	0
19.4	0
19.5	0
19.6	0
19.7	0
19.8	0
19.9	0
20	0
20.1	0
20.2	0
20.3	0
20.4	0
20.5	0
20.6	0
20.7	0
20.8	0
20.9	0
21	0
21.1	0
21.2	0
21.3	0
21.4	0
21.5	0
21.6	0
21.7	0
21.8	0
21.9	0
22	0
22.1	0
22.2	0
22.3	0
22.4	0
22.5	0
22.6	0
22.7	0
22.8	0
22.9	0
23	0
23.1	0
23.2	0
23.3	0
23.4	0
23.5	0
23.6	0
23.7	0
23.8	0
23.9	0
24	0
24.1	0
24.2	0
24.3	0
24.4	0
24.5	0
24.6	0
24.7	0
24.8	0
24.9	0
25	0
25.1	0
25.2	0
25.3	0
25.4	0
25.5	0
25.6	0
25.7	0
25.8	0
25.9	0
26	0
26.1	0
26.2	0
26.3	0
26.4	0
26.5	0
26.6	0
26.7	0
26.8	0
26.9	0
27	0
27.1	0
27.2	0
27.3	0
27.4	0
27.5	0
27.6	0
27.7	0
27.8	0
27.9	0
28	0
28.1	0
28.2	0
28.3	0
28.4	0
28.5	0
28.6	0
28.7	0
28.8	0
28.9	0
29	0
29.1	0
29.2	0
29.3	0
29.4	0
29.5	0
29.6	0
29.7	0
29.8	0
29.9	0
30	0
30.1	0
30.2	0
30.3	0
30.4	0
30.5	0
30.6	0
30.7	0
30.8	0
30.9	0
31	0
31.1	0
31.2	0
31.3	0
31.4	0
31.5	0
31.6	0
31.7	0
31.8	0
31.9	0
32	0
32.1	0
32.2	0
32.3	0
32.4	0
32.5	0
32.6	0
32.7	0
32.8	0
32.9	0
33	0
33.1	0
33.2	0
33.3	0
33.4	0
33.5	0
33.6	0
33.7	0
33.8	0
33.9	0
34	0
34.1	0
34.2	0
34.3	0
34.4	0
34.5	0
34.6	0
34.7	0
34.8	0
34.9	0
35	0
35.1	0
35.2	0
35.3	0
35.4	0
35.5	0
35.6	0
35.7	0
35.8	0
35.9	0
36	0
36.1	0
36.2	0
36.3	0
36.4	0
36.5	0
36.6	0
36.7	0
36.8	0
36.9	0
37	0
37.1	0
37.2	0
37.3	0
37.4	0
37.5	0
37.6	0
37.7	0
37.8	0
37.9	0
38	0
38.1	0
38.2	0
38.3	0
38.4	0
38.5	0
38.6	0
38.7	0
38.8	0
38.9	0
39	0
39.1	0
39.2	0
39.3	0
39.4	0
39.5	0
39.6	0
39.7	0
39.8	0
39.9	0
40	0
40.1	0
40.2	0
40.3	0
40.4	0
40.5	0
40.6	0
40.7	0
40.8	0
40.9	0
41	0
41.1	0
41.2	0
41.3	0
41.4	0
41.5	0
41.6	0
41.7	0
41.8	0
41.9	0
42	0
42.1	0
42.2	0
42.3	0
42.4	0
42.5	0
42.6	0
42.7	0
42.8	0
42.9	0
43	0
43.1	0
43.2	0
43.3	0
43.4	0
43.5	0
43.6	0
43.7	0
43.8	0
43.9	0
44	0
44.1	0
44.2	0
44.3	0
44.4	0
44.5	0
44.6	0
44.7	0
44.8	0
44.9	0
45	0
45.1	0
45.2	0
45.3	0
45.4	0
45.5	0
45.6	0
45.7	0
45.8	0
45.9	0
46	0
46.1	0
46.2	0
46.3	0
46.4	0
46.5	0
46.6	0
46.7	0
46.8	0
46.9	0
47	0
47.1	0
47.2	0
47.3	0
47.4	0
47.5	0
47.6	0
47.7	0
47.8	0
47.9	0
48	0
48.1	0
48.2	0
48.3	0
48.4	0
48.5	0
48.6	0
48.7	0
48.8	0
48.9	0
49	0
49.1	0
49.2	0
49.3	0
49.4	0
49.5	0
49.6	0
49.7	0
49.8	0
49.9	0
50	0
50.1	0
50.2	0
50.3	0
50.4	0
50.5	0
50.6	0
50.7	0
50.8	0
50.9	0
51	0
51.1	0
51.2	0
51.3	0
51.4	0
51.5	0
51.6	0
51.7	0
51.8	0
51.9	0
52	0
52.1	0
52.2	0
52.3	0
52.4	0
52.5	0
52.6	0
52.7	0
52.8	0
52.9	0
53	0
53.1	0
53.2	0
53.3	0
53.4	0
53.5	0
53.6	0
53.7	0
53.8	0
53.9	0
54	0
54.1	0
54.2	0
54.3	0
54.4	0
54.5	0
54.6	0
54.7	0
54.8	0
54.9	0
55	0
55.1	0
55.2	0
55.3	0
55.4	0
55.5	0
55.6	0
55.7	0
55.8	0
55.9	0
56	0
56.1	0
56.2	0
56.3	0
56.4	0
56.5	0
56.6	0
56.7	0
56.8	0
56.9	0
57	0
57.1	0
57.2	0
57.3	0
57.4	0
57.5	0
57.6	0
57.7	0
57.8	0
57.9	0
58	0
58.1	0
58.2	0
58.3	0
58.4	0
58.5	0
58.6	0
58.7	0
58.8	0
58.9	0
59	0
59.1	0
59.2	0
59.3	0
59.4	0
59.5	0
59.6	0
59.7	0
59.8	0
59.9	0
60	0
60.1	0
60.2	0
60.3	0
60.4	0
60.5	0
60.6	0
60.7	0
60.8	0
60.9	0
61	0
61.1	0
61.2	0
61.3	0
61.4	0
61.5	0
61.6	0
61.7	0
61.8	0
61.9	0
62	0
62.1	0
62.2	0
62.3	0
62.4	0
62.5	0
62.6	0
62.7	0
62.8	0
62.9	0
63	0
63.1	0
63.2	0
63.3	0
63.4	0
63.5	0
63.6	0
63.7	0
63.8	0
63.9	0
64	0
64.1	0
64.2	0
64.3	0
64.4	0
64.5	0
64.6	0
64.7	0
64.8	0
64.9	0
65	0
65.1	0
65.2	0
65.3	0
65.4	0
65.5	0
65.6	0
65.7	0
65.8	0
65.9	0
66	0
66.1	0
66.2	0
66.3	0
66.4	0
66.5	0
66.6	0
66.7	0
66.8	0
66.9	0
67	0
67.1	0
67.2	0
67.3	0
67.4	0
67.5	0
67.6	0
67.7	0
67.8	0
67.9	0
68	0
68.1	0
68.2	0
68.3	0
68.4	0
68.5	0
68.6	0
68.7	0
68.8	0
68.9	0
69	0
69.1	0
69.2	0
69.3	0
69.4	0
69.5	0
69.6	0
69.7	0
69.8	0
69.9	0
70	0
70.1	0
70.2	0
70.3	0
70.4	0
70.5	0
70.6	0
70.7	0
70.8	0
70.9	0
71	0
71.1	0
71.2	0
71.3	0
71.4	0
71.5	0
71.6	0
71.7	0
71.8	0
71.9	0
72	0
72.1	0
72.2	0
72.3	0
72.4	0
72.5	0
72.6	0
72.7	0
72.8	0
72.9	0
73	0
73.1	0
73.2	0
73.3	0
73.4	0
73.5	0
73.6	0
73.7	0
73.8	0
73.9	0
74	0
74.1	0
74.2	0
74.3	0
74.4	0
74.5	0
74.6	0
74.7	0
74.8	0
74.9	0
75	0
75.1	0
75.2	0
75.3	0
75.4	0
75.5	0
75.6	0
75.7	0
75.8	0
75.9	0
76	0
76.1	0
76.2	0
76.3	0
76.4	0
76.5	0
76.6	0
76.7	0
76.8	0
76.9	0
77	0
77.1	0
77.2	0
77.3	0
77.4	0
77.5	0
77.6	0
77.7	0
77.8	0
77.9	0
78	0
78.1	0
78.2	0
78.3	0
78.4	0
78.5	0
78.6	0
78.7	0
78.8	0
78.9	0
79	0
79.1	0
79.2	0
79.3	0
79.4	0
79.5	0
79.6	0
79.7	0
79.8	0
79.9	0
80	0
80.1	0
80.2	0
80.3	0
80.4	0
80.5	0
80.6	0
80.7	0
80.8	0
80.9	0
81	0
81.1	0
81.2	0
81.3	0
81.4	0
81.5	0
81.6	0
81.7	0
81.8	0
81.9	0
82	0
82.1	0
82.2	0
82.3	0
82.4	0
82.5	0
82.6	0
82.7	0
82.8	0
82.9	0
83	0
83.1	0
83.2	0
83.3	0
83.4	0
83.5	0
83.6	0
83.7	0
83.8	0
83.9	0
84	0
84.1	0
84.2	0
84.3	0
84.4	0
84.5	0
84.6	0
84.7	0
84.8	0
84.9	0
85	0
85.1	0
85.2	0
85.3	0
85.4	0
85.5	0
85.6	0
85.7	0
85.8	0
85.9	0
86	0
86.1	0
86.2	0
86.3	0
86.4	0
86.5	0
86.6	0
86.7	0
86.8	0
86.9	0
87	0
87.1	0
87.2	0
87.3	0
87.4	0
87.5	0
87.6	0
87.7	0
87.8	0
87.9	0
88	0
88.1	0
88.2	0
88.3	0
88.4	0
88.5	0
88.6	0
88.7	0
88.8	0
88.9	0
89	0
89.1	0
89.2	0
89.3	0
89.4	0
89.5	0
89.6	0
89.7	0
89.8	0
89.9	0
90	0
90.1	0
90.2	0
90.3	0
90.4	0
90.5	0
90.6	0
90.7	0
90.8	0
90.9	0
91	0
91.1	0
91.2	0
91.3	0
91.4	0
91.5	0
91.6	0
91.7	0
91.8	0
91.9	0
92	0
92.1	0
92.2	0
92.3	0
92.4	0
92.5	0
92.6	0
92.7	0
92.8	0
92.9	0
93	0
93.1	0
93.2	0
93.3	0
93.4	0
93.5	0
93.6	0
93.7	0
93.8	0
93.9	0
94	0
94.1	0
94.2	0
94.3	0
94.4	0
94.5	0
94.6	0
94.7	0
94.8	0
94.9	0
95	0
95.1	0
95.2	0
95.3	0
95.4	0
95.5	0
95.6	0
95.7	0
95.8	0
95.9	0
96	0
96.1	0
96.2	0
96.3	0
96.4	0
96.5	0
96.6	0
96.7	0
96.8	0
96.9	0
97	0
97.1	0
97.2	0
97.3	0
97.4	0
97.5	0
97.6	0
97.7	0
97.8	0
97.9	0
98	0
98.1	0
98.2	0
98.3	0
98.4	0
98.5	0
98.6	0
98.7	0
98.8	0
98.9	0
99	0
99.1	0
99.2	0
99.3	0
99.4	0
99.5	0
99.6	0
99.7	0
99.8	0
99.9	0
100	0
100.1	0
100.2	0
100.3	0
100.4	0.0025
100.5	0.00625
100.6	0.00875
100.7	0.00875
100.8	0.015
100.9	0.025
101	0.03125
101.1	0.0325
101.2	0.035
101.3	0.04125
101.4	0.04875
101.5	0.055
101.6	0.06
101.7	0.06125
101.8	0.065
101.9	0.07
102	0.07375
102.1	0.0825
102.2	0.08625
102.3	0.09125
102.4	0.09375
102.5	0.1
102.6	0.10375
102.7	0.10875
102.8	0.1125
102.9	0.11625
103	0.1175
103.1	0.125
103.2	0.1325
103.3	0.135
103.4	0.135
103.5	0.1375
103.6	0.1375
103.7	0.14375
103.8	0.1475
103.9	0.15
104	0.15125
104.1	0.155
104.2	0.16375
104.3	0.16625
104.4	0.16625
104.5	0.1675
104.6	0.1675
104.7	0.1675
104.8	0.16875
104.9	0.175
105	0.18
105.1	0.18375
105.2	0.18875
105.3	0.19125
105.4	0.19375
105.5	0.19875
105.6	0.2
105.7	0.20125
105.8	0.20625
105.9	0.2125
106	0.2125
106.1	0.21625
106.2	0.22125
106.3	0.2225
106.4	0.2275
106.5	0.23125
106.6	0.23375
106.7	0.23375
106.8	0.2375
106.9	0.24
107	0.24625
107.1	0.25
107.2	0.25375
107.3	0.26
107.4	0.265
107.5	0.27125
107.6	0.275
107.7	0.275
107.8	0.27375
107.9	0.2775
108	0.2775
108.1	0.28125
108.2	0.28625
108.3	0.2875
108.4	0.28875
108.5	0.28875
108.6	0.29125
108.7	0.295
108.8	0.2975
108.9	0.29875
109	0.3075
109.1	0.3075
109.2	0.30875
109.3	0.3125
109.4	0.315
109.5	0.31875
109.6	0.3225
109.7	0.3225
109.8	0.3275
109.9	0.33
110	0.33125
110.1	0.335
110.2	0.33625
110.3	0.34125
110.4	0.34375
110.5	0.35125
110.6	0.35125
110.7	0.355
110.8	0.35625
110.9	0.36375
111	0.36375
111.1	0.36375
111.2	0.365
111.3	0.36625
111.4	0.37625
111.5	0.38
111.6	0.385
111.7	0.38625
111.8	0.38625
111.9	0.39125
112	0.3925
112.1	0.395
112.2	0.39375
112.3	0.39625
112.4	0.3975
112.5	0.40125
112.6	0.4025
112.7	0.405
112.8	0.40875
112.9	0.41125
113	0.4125
113.1	0.415
113.2	0.415
113.3	0.41875
113.4	0.41875
113.5	0.4225
113.6	0.42125
113.7	0.42375
113.8	0.42875
113.9	0.43
114	0.4325
114.1	0.435
114.2	0.43875
114.3	0.4375
114.4	0.43875
114.5	0.43875
114.6	0.44
114.7	0.44125
114.8	0.44125
114.9	0.44125
115	0.44375
115.1	0.44625
115.2	0.44625
115.3	0.4475
115.4	0.44875
115.5	0.455
115.6	0.45875
115.7	0.4625
115.8	0.46625
115.9	0.46875
116	0.4675
116.1	0.47125
116.2	0.47375
116.3	0.47875
116.4	0.4775
116.5	0.48
116.6	0.48125
116.7	0.48375
116.8	0.485
116.9	0.4875
117	0.4875
117.1	0.49
117.2	0.49125
117.3	0.4925
117.4	0.495
117.5	0.495
117.6	0.5
117.7	0.50125
117.8	0.50375
117.9	0.505
118	0.50875
118.1	0.51125
118.2	0.51375
118.3	0.5175
118.4	0.51875
118.5	0.52
118.6	0.52
118.7	0.52125
118.8	0.52125
118.9	0.5225
119	0.5225
119.1	0.5225
119.2	0.52625
119.3	0.5275
119.4	0.5325
119.5	0.53375
119.6	0.535
119.7	0.53875
119.8	0.53875
119.9	0.5375
120	0.53875
120.1	0.54125
120.2	0.545
120.3	0.545
120.4	0.545
120.5	0.54625
120.6	0.5475
120.7	0.5475
120.8	0.54625
120.9	0.55
121	0.55125
121.1	0.555
121.2	0.55375
121.3	0.55375
121.4	0.555
121.5	0.55125
121.6	0.55625
121.7	0.555
121.8	0.55625
121.9	0.5575
122	0.56
122.1	0.56125
122.2	0.56
122.3	0.5625
122.4	0.565
122.5	0.565
122.6	0.565
122.7	0.56875
122.8	0.57
122.9	0.5725
123	0.57375
123.1	0.5775
123.2	0.5775
123.3	0.57875
123.4	0.5775
123.5	0.58
123.6	0.58
123.7	0.5825
123.8	0.5875
123.9	0.58875
124	0.59125
124.1	0.59375
124.2	0.59375
124.3	0.59625
124.4	0.5975
124.5	0.59875
124.6	0.60125
124.7	0.6025
124.8	0.60125
124.9	0.60375
125	0.60375
125.1	0.60375
125.2	0.60375
125.3	0.60625
125.4	0.6075
125.5	0.6075
125.6	0.61
125.7	0.61125
125.8	0.61625
125.9	0.6175
126	0.615
126.1	0.615
126.2	0.61625
126.3	0.6175
126.4	0.6175
126.5	0.62
126.6	0.6225
126.7	0.625
126.8	0.62875
126.9	0.63
127	0.63
127.1	0.63
127.2	0.63
127.3	0.6325
127.4	0.63375
127.5	0.6375
127.6	0.63625
127.7	0.63625
127.8	0.64
127.9	0.6425
128	0.64125
128.1	0.6425
128.2	0.6425
128.3	0.645
128.4	0.65
128.5	0.6525
128.6	0.65
128.7	0.65125
128.8	0.65375
128.9	0.65875
129	0.66375
129.1	0.665
129.2	0.66625
129.3	0.665
129.4	0.66625
129.5	0.66625
129.6	0.66625
129.7	0.66375
129.8	0.665
129.9	0.665
130	0.665
130.1	0.665
130.2	0.66625
130.3	0.67
130.4	0.67375
130.5	0.67375
130.6	0.67375
130.7	0.675
130.8	0.67875
130.9	0.67875
131	0.68
131.1	0.68125
131.2	0.6825
131.3	0.68125
131.4	0.68
131.5	0.68
131.6	0.68
131.7	0.68
131.8	0.68125
131.9	0.68125
132	0.68
132.1	0.6775
132.2	0.67375
132.3	0.67375
132.4	0.675
132.5	0.67625
132.6	0.67625
132.7	0.67625
132.8	0.675
132.9	0.67625
133	0.6775
133.1	0.67875
133.2	0.67875
133.3	0.6825
133.4	0.68
133.5	0.685
133.6	0.68875
133.7	0.68875
133.8	0.69
133.9	0.69
134	0.69
134.1	0.69125
134.2	0.69125
134.3	0.6925
134.4	0.695
134.5	0.695
134.6	0.695
134.7	0.6975
134.8	0.69875
134.9	0.69875
135	0.70125
135.1	0.705
135.2	0.705
135.3	0.705
135.4	0.70625
135.5	0.70875
135.6	0.70875
135.7	0.7075
135.8	0.70625
135.9	0.71
136	0.71125
136.1	0.71125
136.2	0.7125
136.3	0.71
136.4	0.71
136.5	0.70875
136.6	0.70875
136.7	0.71375
136.8	0.71625
136.9	0.72
137	0.72125
137.1	0.72125
137.2	0.72125
137.3	0.725
137.4	0.725
137.5	0.725
137.6	0.72375
137.7	0.725
137.8	0.72375
137.9	0.72625
138	0.72875
138.1	0.72625
138.2	0.72875
138.3	0.73
138.4	0.73125
138.5	0.735
138.6	0.735
138.7	0.73625
138.8	0.74
138.9	0.74
139	0.74125
139.1	0.7425
139.2	0.74125
139.3	0.7425
139.4	0.73875
139.5	0.74
139.6	0.74125
139.7	0.74125
139.8	0.74
139.9	0.74125
140	0.74
140.1	0.73875
140.2	0.73875
140.3	0.74
140.4	0.73875
140.5	0.74
140.6	0.74125
140.7	0.7425
140.8	0.745
140.9	0.74875
141	0.74875
141.1	0.75125
141.2	0.75125
141.3	0.75125
141.4	0.75
141.5	0.7525
141.6	0.755
141.7	0.75375
141.8	0.75375
141.9	0.7525
142	0.75375
142.1	0.75375
142.2	0.7525
142.3	0.7525
142.4	0.7525
142.5	0.75375
142.6	0.755
142.7	0.75625
142.8	0.75625
142.9	0.75375
143	0.75625
143.1	0.76
143.2	0.76
143.3	0.75875
143.4	0.76
143.5	0.76
143.6	0.75875
143.7	0.7575
143.8	0.7575
143.9	0.75875
144	0.76
144.1	0.76
144.2	0.76125
144.3	0.7625
144.4	0.7625
144.5	0.76125
144.6	0.7625
144.7	0.76125
144.8	0.76125
144.9	0.76
145	0.76
145.1	0.76
145.2	0.7625
145.3	0.76375
145.4	0.76375
145.5	0.7625
145.6	0.765
145.7	0.765
145.8	0.7675
145.9	0.7675
146	0.77
146.1	0.77
146.2	0.775
146.3	0.775
146.4	0.775
146.5	0.77625
146.6	0.77625
146.7	0.7775
146.8	0.7775
146.9	0.7775
147	0.7775
147.1	0.78
147.2	0.78125
147.3	0.77625
147.4	0.77625
147.5	0.775
147.6	0.7775
147.7	0.7775
147.8	0.77875
147.9	0.78
148	0.78
148.1	0.78
148.2	0.78125
148.3	0.78
148.4	0.78
148.5	0.77875
148.6	0.77875
148.7	0.78
148.8	0.78
148.9	0.7825
149	0.78375
149.1	0.7825
149.2	0.7825
149.3	0.7825
149.4	0.78125
149.5	0.7825
149.6	0.78125
149.7	0.78125
149.8	0.78125
149.9	0.7825
150	0.78375
150.1	0.78625
150.2	0.7875
150.3	0.785
150.4	0.78625
150.5	0.78625
150.6	0.78625
150.7	0.78625
150.8	0.7875
150.9	0.7875
151	0.79
151.1	0.7925
151.2	0.7925
151.3	0.7925
151.4	0.79
151.5	0.79125
151.6	0.79
151.7	0.79
151.8	0.79
151.9	0.79
152	0.79125
152.1	0.79125
152.2	0.79375
152.3	0.79375
152.4	0.79375
152.5	0.7925
152.6	0.79125
152.7	0.7925
152.8	0.7925
152.9	0.79
153	0.79125
153.1	0.79375
153.2	0.79625
153.3	0.7975
153.4	0.79875
153.5	0.795
153.6	0.79625
153.7	0.795
153.8	0.795
153.9	0.7925
154	0.7925
154.1	0.78875
154.2	0.7925
154.3	0.7925
154.4	0.79375
154.5	0.795
154.6	0.79625
154.7	0.7975
154.8	0.79625
154.9	0.8
155	0.8025
155.1	0.80375
155.2	0.80625
155.3	0.80625
155.4	0.805
155.5	0.8075
155.6	0.80875
155.7	0.80875
155.8	0.80875
155.9	0.80875
156	0.80875
156.1	0.80625
156.2	0.805
156.3	0.805
156.4	0.80375
156.5	0.80375
156.6	0.805
156.7	0.805
156.8	0.80375
156.9	0.8025
157	0.805
157.1	0.80625
157.2	0.80625
157.3	0.80625
157.4	0.8075
157.5	0.80875
157.6	0.81
157.7	0.81125
157.8	0.81375
157.9	0.81375
158	0.8125
158.1	0.81375
158.2	0.81375
158.3	0.81375
158.4	0.81625
158.5	0.81625
158.6	0.81625
158.7	0.81625
158.8	0.81625
158.9	0.815
159	0.815
159.1	0.815
159.2	0.815
159.3	0.81375
159.4	0.81375
159.5	0.81375
159.6	0.81375
159.7	0.81625
159.8	0.8175
159.9	0.81625
160	0.81875
160.1	0.81875
160.2	0.82
160.3	0.82125
160.4	0.82
160.5	0.82125
160.6	0.82125
160.7	0.82125
160.8	0.81875
160.9	0.81875
161	0.81875
161.1	0.81875
161.2	0.81875
161.3	0.81875
161.4	0.82125
161.5	0.82
161.6	0.82125
161.7	0.8225
161.8	0.8225
161.9	0.82125
162	0.82125
162.1	0.82125
162.2	0.8225
162.3	0.8225
162.4	0.82625
162.5	0.82625
162.6	0.82625
162.7	0.82625
162.8	0.825
162.9	0.82625
163	0.83
163.1	0.83125
163.2	0.83
163.3	0.83
163.4	0.83125
163.5	0.83
163.6	0.83
163.7	0.82375
163.8	0.82375
163.9	0.82375
164	0.825
164.1	0.8275
164.2	0.82875
164.3	0.82875
164.4	0.83
164.5	0.83
164.6	0.83125
164.7	0.8275
164.8	0.825
164.9	0.82375
165	0.8225
165.1	0.82125
165.2	0.8225
165.3	0.81875
165.4	0.81875
165.5	0.81875
165.6	0.81875
165.7	0.8175
165.8	0.8175
165.9	0.81625
166	0.815
166.1	0.81625
166.2	0.81625
166.3	0.81625
166.4	0.81625
166.5	0.81875
166.6	0.82125
166.7	0.82
166.8	0.8225
166.9	0.8225
167	0.82625
167.1	0.82375
167.2	0.8225
167.3	0.8225
167.4	0.82125
167.5	0.82125
167.6	0.82125
167.7	0.8225
167.8	0.82125
167.9	0.8225
168	0.82375
168.1	0.8225
168.2	0.8225
168.3	0.82
168.4	0.82
168.5	0.81875
168.6	0.81875
168.7	0.82
168.8	0.82
168.9	0.81875
169	0.8175
169.1	0.8175
169.2	0.8175
169.3	0.815
169.4	0.81375
169.5	0.8175
169.6	0.815
169.7	0.81625
169.8	0.815
169.9	0.81375
170	0.815
170.1	0.815
170.2	0.8175
170.3	0.815
170.4	0.81625
170.5	0.8175
170.6	0.81625
170.7	0.815
170.8	0.8125
170.9	0.81125
171	0.8125
171.1	0.81
171.2	0.81
171.3	0.81
171.4	0.8075
171.5	0.80875
171.6	0.8075
171.7	0.8075
171.8	0.81
171.9	0.81
172	0.8075
172.1	0.8075
172.2	0.8075
172.3	0.80625
172.4	0.80625
172.5	0.80625
172.6	0.80625
172.7	0.80625
172.8	0.805
172.9	0.805
173	0.80375
173.1	0.80125
173.2	0.80125
173.3	0.80125
173.4	0.80375
173.5	0.805
173.6	0.80625
173.7	0.8075
173.8	0.80875
173.9	0.80625
174	0.8075
174.1	0.81
174.2	0.80875
174.3	0.8075
174.4	0.80875
174.5	0.81
174.6	0.80875
174.7	0.80875
174.8	0.80875
174.9	0.80875
175	0.8075
175.1	0.8075
175.2	0.8075
175.3	0.81
175.4	0.81
175.5	0.81
175.6	0.81
175.7	0.81
175.8	0.81125
175.9	0.81125
176	0.8125
176.1	0.8125
176.2	0.81125
176.3	0.81125
176.4	0.81125
176.5	0.81
176.6	0.80875
176.7	0.81125
176.8	0.8075
176.9	0.8075
177	0.8075
177.1	0.8075
177.2	0.80875
177.3	0.80625
177.4	0.80625
177.5	0.80875
177.6	0.81
177.7	0.81
177.8	0.80875
177.9	0.80875
178	0.81125
178.1	0.81375
178.2	0.8125
178.3	0.8125
178.4	0.81125
178.5	0.81125
178.6	0.81375
178.7	0.815
178.8	0.81375
178.9	0.81375
179	0.815
179.1	0.815
179.2	0.81375
179.3	0.8125
179.4	0.8125
179.5	0.81375
179.6	0.81375
179.7	0.81625
179.8	0.81625
179.9	0.815
180	0.815
180.1	0.81375
180.2	0.8125
180.3	0.8125
180.4	0.81375
180.5	0.8125
180.6	0.8125
180.7	0.8125
180.8	0.81125
180.9	0.81
181	0.80875
181.1	0.80625
181.2	0.81
181.3	0.81125
181.4	0.81125
181.5	0.81
181.6	0.81125
181.7	0.8125
181.8	0.81375
181.9	0.815
182	0.81625
182.1	0.8175
182.2	0.8125
182.3	0.81375
182.4	0.81375
182.5	0.815
182.6	0.82
182.7	0.81875
182.8	0.82
182.9	0.82
183	0.82
183.1	0.82
183.2	0.82125
183.3	0.8225
183.4	0.8225
183.5	0.8225
183.6	0.825
183.7	0.825
183.8	0.825
183.9	0.82625
184	0.825
184.1	0.82375
184.2	0.82375
184.3	0.82375
184.4	0.825
184.5	0.82375
184.6	0.825
184.7	0.82375
184.8	0.825
184.9	0.825
185	0.825
185.1	0.82625
185.2	0.8275
185.3	0.82625
185.4	0.82625
185.5	0.82875
185.6	0.82875
185.7	0.83
185.8	0.82875
185.9	0.82875
186	0.82875
186.1	0.82875
186.2	0.82875
186.3	0.8275
186.4	0.825
186.5	0.8275
186.6	0.8275
186.7	0.82625
186.8	0.82625
186.9	0.825
187	0.825
187.1	0.8275
187.2	0.8275
187.3	0.8275
187.4	0.8275
187.5	0.8275
187.6	0.82625
187.7	0.825
187.8	0.825
187.9	0.825
188	0.825
188.1	0.825
188.2	0.82375
188.3	0.82625
188.4	0.82875
188.5	0.82875
188.6	0.82875
188.7	0.82875
188.8	0.8275
188.9	0.8275
189	0.82625
189.1	0.82625
189.2	0.825
189.3	0.81875
189.4	0.8175
189.5	0.8175
189.6	0.8175
189.7	0.81875
189.8	0.8175
189.9	0.81625
190	0.8175
190.1	0.81875
190.2	0.81875
190.3	0.82
190.4	0.82
190.5	0.82
190.6	0.82
190.7	0.82
190.8	0.8225
190.9	0.82375
191	0.82625
191.1	0.8225
191.2	0.82125
191.3	0.82125
191.4	0.82125
191.5	0.82
191.6	0.82125
191.7	0.82125
191.8	0.82125
191.9	0.8225
192	0.825
192.1	0.82375
192.2	0.82375
192.3	0.82375
192.4	0.8225
192.5	0.82
192.6	0.81875
192.7	0.81875
192.8	0.81875
192.9	0.81875
193	0.82125
193.1	0.82375
193.2	0.82625
193.3	0.82625
193.4	0.82875
193.5	0.83
193.6	0.82875
193.7	0.83125
193.8	0.83
193.9	0.83
194	0.83
194.1	0.83125
194.2	0.8325
194.3	0.8325
194.4	0.8325
194.5	0.83375
194.6	0.83375
194.7	0.83375
194.8	0.83375
194.9	0.835
195	0.835
195.1	0.835
195.2	0.835
195.3	0.835
195.4	0.83375
195.5	0.835
195.6	0.835
195.7	0.83625
195.8	0.83625
195.9	0.835
196	0.83375
196.1	0.83
196.2	0.82875
196.3	0.83125
196.4	0.83
196.5	0.83
196.6	0.83375
196.7	0.83625
196.8	0.835
196.9	0.835
197	0.83625
197.1	0.83375
197.2	0.835
197.3	0.835
197.4	0.83375
197.5	0.835
197.6	0.83125
197.7	0.83125
197.8	0.82875
197.9	0.82875
198	0.82875
198.1	0.8275
198.2	0.82625
198.3	0.82625
198.4	0.825
198.5	0.82625
198.6	0.82625
198.7	0.82625
198.8	0.8275
198.9	0.8275
199	0.82625
199.1	0.825
199.2	0.825
199.3	0.825
199.4	0.8275
199.5	0.8275
199.6	0.8275
199.7	0.8275
199.8	0.8275
199.9	0.82875
200	0.8275
[truncated: 14,000 more rows]
