# Supplementary material for: Bayesian inference of kinetic schemes for ion channels by Kalman filtering
Source: eLife journal article supplement (doi:10.7554/elife.62714), 2022-05-04
Supplement: fig4-data1 [file 1_Sim_N_1500_Fluor_MW_16M.xlsx]

## Sheet: Tabelle1
0.1	0
0.2	0
0.3	0
0.4	0
0.5	0
0.6	0
0.7	0
0.8	0
0.9	0
1	0
1.1	0
1.2	0
1.3	0
1.4	0
1.5	0
1.6	0
1.7	0
1.8	0
1.9	0
2	0
2.1	0
2.2	0
2.3	0
2.4	0
2.5	0
2.6	0
2.7	0
2.8	0
2.9	0
3	0
3.1	0
3.2	0
3.3	0
3.4	0
3.5	0
3.6	0
3.7	0
3.8	0
3.9	0
4	0
4.1	0
4.2	0
4.3	0
4.4	0
4.5	0
4.6	0
4.7	0
4.8	0
4.9	0
5	0
5.1	0
5.2	0
5.3	0
5.4	0
5.5	0
5.6	0
5.7	0
5.8	0
5.9	0
6	0
6.1	0
6.2	0
6.3	0
6.4	0
6.5	0
6.6	0
6.7	0
6.8	0
6.9	0
7	0
7.1	0
7.2	0
7.3	0
7.4	0
7.5	0
7.6	0
7.7	0
7.8	0
7.9	0
8	0
8.1	0
8.2	0
8.3	0
8.4	0
8.5	0
8.6	0
8.7	0
8.8	0
8.9	0
9	0
9.1	0
9.2	0
9.3	0
9.4	0
9.5	0
9.6	0
9.7	0
9.8	0
9.9	0
10	0
10.1	0
10.2	0
10.3	0
10.4	0
10.5	0
10.6	0
10.7	0
10.8	0
10.9	0
11	0
11.1	0
11.2	0
11.3	0
11.4	0
11.5	0
11.6	0
11.7	0
11.8	0
11.9	0
12	0
12.1	0
12.2	0
12.3	0
12.4	0
12.5	0
12.6	0
12.7	0
12.8	0
12.9	0
13	0
13.1	0
13.2	0
13.3	0
13.4	0
13.5	0
13.6	0
13.7	0
13.8	0
13.9	0
14	0
14.1	0
14.2	0
14.3	0
14.4	0
14.5	0
14.6	0
14.7	0
14.8	0
14.9	0
15	0
15.1	0
15.2	0
15.3	0
15.4	0
15.5	0
15.6	0
15.7	0
15.8	0
15.9	0
16	0
16.1	0
16.2	0
16.3	0
16.4	0
16.5	0
16.6	0
16.7	0
16.8	0
16.9	0
17	0
17.1	0
17.2	0
17.3	0
17.4	0
17.5	0
17.6	0
17.7	0
17.8	0
17.9	0
18	0
18.1	0
18.2	0
18.3	0
18.4	0
18.5	0
18.6	0
18.7	0
18.8	0
18.9	0
19	0
19.1	0
19.2	0
19.3	0
19.4	0
19.5	0
19.6	0
19.7	0
19.8	0
19.9	0
20	0
20.1	0
20.2	0
20.3	0
20.4	0
20.5	0
20.6	0
20.7	0
20.8	0
20.9	0
21	0
21.1	0
21.2	0
21.3	0
21.4	0
21.5	0
21.6	0
21.7	0
21.8	0
21.9	0
22	0
22.1	0
22.2	0
22.3	0
22.4	0
22.5	0
22.6	0
22.7	0
22.8	0
22.9	0
23	0
23.1	0
23.2	0
23.3	0
23.4	0
23.5	0
23.6	0
23.7	0
23.8	0
23.9	0
24	0
24.1	0
24.2	0
24.3	0
24.4	0
24.5	0
24.6	0
24.7	0
24.8	0
24.9	0
25	0
25.1	0
25.2	0
25.3	0
25.4	0
25.5	0
25.6	0
25.7	0
25.8	0
25.9	0
26	0
26.1	0
26.2	0
26.3	0
26.4	0
26.5	0
26.6	0
26.7	0
26.8	0
26.9	0
27	0
27.1	0
27.2	0
27.3	0
27.4	0
27.5	0
27.6	0
27.7	0
27.8	0
27.9	0
28	0
28.1	0
28.2	0
28.3	0
28.4	0
28.5	0
28.6	0
28.7	0
28.8	0
28.9	0
29	0
29.1	0
29.2	0
29.3	0
29.4	0
29.5	0
29.6	0
29.7	0
29.8	0
29.9	0
30	0
30.1	0
30.2	0
30.3	0
30.4	0
30.5	0
30.6	0
30.7	0
30.8	0
30.9	0
31	0
31.1	0
31.2	0
31.3	0
31.4	0
31.5	0
31.6	0
31.7	0
31.8	0
31.9	0
32	0
32.1	0
32.2	0
32.3	0
32.4	0
32.5	0
32.6	0
32.7	0
32.8	0
32.9	0
33	0
33.1	0
33.2	0
33.3	0
33.4	0
33.5	0
33.6	0
33.7	0
33.8	0
33.9	0
34	0
34.1	0
34.2	0
34.3	0
34.4	0
34.5	0
34.6	0
34.7	0
34.8	0
34.9	0
35	0
35.1	0
35.2	0
35.3	0
35.4	0
35.5	0
35.6	0
35.7	0
35.8	0
35.9	0
36	0
36.1	0
36.2	0
36.3	0
36.4	0
36.5	0
36.6	0
36.7	0
36.8	0
36.9	0
37	0
37.1	0
37.2	0
37.3	0
37.4	0
37.5	0
37.6	0
37.7	0
37.8	0
37.9	0
38	0
38.1	0
38.2	0
38.3	0
38.4	0
38.5	0
38.6	0
38.7	0
38.8	0
38.9	0
39	0
39.1	0
39.2	0
39.3	0
39.4	0
39.5	0
39.6	0
39.7	0
39.8	0
39.9	0
40	0
40.1	0
40.2	0
40.3	0
40.4	0
40.5	0
40.6	0
40.7	0
40.8	0
40.9	0
41	0
41.1	0
41.2	0
41.3	0
41.4	0
41.5	0
41.6	0
41.7	0
41.8	0
41.9	0
42	0
42.1	0
42.2	0
42.3	0
42.4	0
42.5	0
42.6	0
42.7	0
42.8	0
42.9	0
43	0
43.1	0
43.2	0
43.3	0
43.4	0
43.5	0
43.6	0
43.7	0
43.8	0
43.9	0
44	0
44.1	0
44.2	0
44.3	0
44.4	0
44.5	0
44.6	0
44.7	0
44.8	0
44.9	0
45	0
45.1	0
45.2	0
45.3	0
45.4	0
45.5	0
45.6	0
45.7	0
45.8	0
45.9	0
46	0
46.1	0
46.2	0
46.3	0
46.4	0
46.5	0
46.6	0
46.7	0
46.8	0
46.9	0
47	0
47.1	0
47.2	0
47.3	0
47.4	0
47.5	0
47.6	0
47.7	0
47.8	0
47.9	0
48	0
48.1	0
48.2	0
48.3	0
48.4	0
48.5	0
48.6	0
48.7	0
48.8	0
48.9	0
49	0
49.1	0
49.2	0
49.3	0
49.4	0
49.5	0
49.6	0
49.7	0
49.8	0
49.9	0
50	0
50.1	0
50.2	0
50.3	0
50.4	0
50.5	0
50.6	0
50.7	0
50.8	0
50.9	0
51	0
51.1	0
51.2	0
51.3	0
51.4	0
51.5	0
51.6	0
51.7	0
51.8	0
51.9	0
52	0
52.1	0
52.2	0
52.3	0
52.4	0
52.5	0
52.6	0
52.7	0
52.8	0
52.9	0
53	0
53.1	0
53.2	0
53.3	0
53.4	0
53.5	0
53.6	0
53.7	0
53.8	0
53.9	0
54	0
54.1	0
54.2	0
54.3	0
54.4	0
54.5	0
54.6	0
54.7	0
54.8	0
54.9	0
55	0
55.1	0
55.2	0
55.3	0
55.4	0
55.5	0
55.6	0
55.7	0
55.8	0
55.9	0
56	0
56.1	0
56.2	0
56.3	0
56.4	0
56.5	0
56.6	0
56.7	0
56.8	0
56.9	0
57	0
57.1	0
57.2	0
57.3	0
57.4	0
57.5	0
57.6	0
57.7	0
57.8	0
57.9	0
58	0
58.1	0
58.2	0
58.3	0
58.4	0
58.5	0
58.6	0
58.7	0
58.8	0
58.9	0
59	0
59.1	0
59.2	0
59.3	0
59.4	0
59.5	0
59.6	0
59.7	0
59.8	0
59.9	0
60	0
60.1	0
60.2	0
60.3	0
60.4	0
60.5	0
60.6	0
60.7	0
60.8	0
60.9	0
61	0
61.1	0
61.2	0
61.3	0
61.4	0
61.5	0
61.6	0
61.7	0
61.8	0
61.9	0
62	0
62.1	0
62.2	0
62.3	0
62.4	0
62.5	0
62.6	0
62.7	0
62.8	0
62.9	0
63	0
63.1	0
63.2	0
63.3	0
63.4	0
63.5	0
63.6	0
63.7	0
63.8	0
63.9	0
64	0
64.1	0
64.2	0
64.3	0
64.4	0
64.5	0
64.6	0
64.7	0
64.8	0
64.9	0
65	0
65.1	0
65.2	0
65.3	0
65.4	0
65.5	0
65.6	0
65.7	0
65.8	0
65.9	0
66	0
66.1	0
66.2	0
66.3	0
66.4	0
66.5	0
66.6	0
66.7	0
66.8	0
66.9	0
67	0
67.1	0
67.2	0
67.3	0
67.4	0
67.5	0
67.6	0
67.7	0
67.8	0
67.9	0
68	0
68.1	0
68.2	0
68.3	0
68.4	0
68.5	0
68.6	0
68.7	0
68.8	0
68.9	0
69	0
69.1	0
69.2	0
69.3	0
69.4	0
69.5	0
69.6	0
69.7	0
69.8	0
69.9	0
70	0
70.1	0
70.2	0
70.3	0
70.4	0
70.5	0
70.6	0
70.7	0
70.8	0
70.9	0
71	0
71.1	0
71.2	0
71.3	0
71.4	0
71.5	0
71.6	0
71.7	0
71.8	0
71.9	0
72	0
72.1	0
72.2	0
72.3	0
72.4	0
72.5	0
72.6	0
72.7	0
72.8	0
72.9	0
73	0
73.1	0
73.2	0
73.3	0
73.4	0
73.5	0
73.6	0
73.7	0
73.8	0
73.9	0
74	0
74.1	0
74.2	0
74.3	0
74.4	0
74.5	0
74.6	0
74.7	0
74.8	0
74.9	0
75	0
75.1	0
75.2	0
75.3	0
75.4	0
75.5	0
75.6	0
75.7	0
75.8	0
75.9	0
76	0
76.1	0
76.2	0
76.3	0
76.4	0
76.5	0
76.6	0
76.7	0
76.8	0
76.9	0
77	0
77.1	0
77.2	0
77.3	0
77.4	0
77.5	0
77.6	0
77.7	0
77.8	0
77.9	0
78	0
78.1	0
78.2	0
78.3	0
78.4	0
78.5	0
78.6	0
78.7	0
78.8	0
78.9	0
79	0
79.1	0
79.2	0
79.3	0
79.4	0
79.5	0
79.6	0
79.7	0
79.8	0
79.9	0
80	0
80.1	0
80.2	0
80.3	0
80.4	0
80.5	0
80.6	0
80.7	0
80.8	0
80.9	0
81	0
81.1	0
81.2	0
81.3	0
81.4	0
81.5	0
81.6	0
81.7	0
81.8	0
81.9	0
82	0
82.1	0
82.2	0
82.3	0
82.4	0
82.5	0
82.6	0
82.7	0
82.8	0
82.9	0
83	0
83.1	0
83.2	0
83.3	0
83.4	0
83.5	0
83.6	0
83.7	0
83.8	0
83.9	0
84	0
84.1	0
84.2	0
84.3	0
84.4	0
84.5	0
84.6	0
84.7	0
84.8	0
84.9	0
85	0
85.1	0
85.2	0
85.3	0
85.4	0
85.5	0
85.6	0
85.7	0
85.8	0
85.9	0
86	0
86.1	0
86.2	0
86.3	0
86.4	0
86.5	0
86.6	0
86.7	0
86.8	0
86.9	0
87	0
87.1	0
87.2	0
87.3	0
87.4	0
87.5	0
87.6	0
87.7	0
87.8	0
87.9	0
88	0
88.1	0
88.2	0
88.3	0
88.4	0
88.5	0
88.6	0
88.7	0
88.8	0
88.9	0
89	0
89.1	0
89.2	0
89.3	0
89.4	0
89.5	0
89.6	0
89.7	0
89.8	0
89.9	0
90	0
90.1	0
90.2	0
90.3	0
90.4	0
90.5	0
90.6	0
90.7	0
90.8	0
90.9	0
91	0
91.1	0
91.2	0
91.3	0
91.4	0
91.5	0
91.6	0
91.7	0
91.8	0
91.9	0
92	0
92.1	0
92.2	0
92.3	0
92.4	0
92.5	0
92.6	0
92.7	0
92.8	0
92.9	0
93	0
93.1	0
93.2	0
93.3	0
93.4	0
93.5	0
93.6	0
93.7	0
93.8	0
93.9	0
94	0
94.1	0
94.2	0
94.3	0
94.4	0
94.5	0
94.6	0
94.7	0
94.8	0
94.9	0
95	0
95.1	0
95.2	0
95.3	0
95.4	0
95.5	0
95.6	0
95.7	0
95.8	0
95.9	0
96	0
96.1	0
96.2	0
96.3	0
96.4	0
96.5	0
96.6	0
96.7	0
96.8	0
96.9	0
97	0
97.1	0
97.2	0
97.3	0
97.4	0
97.5	0
97.6	0
97.7	0
97.8	0
97.9	0
98	0
98.1	0
98.2	0
98.3	0
98.4	0
98.5	0
98.6	0
98.7	0
98.8	0
98.9	0
99	0
99.1	0
99.2	0
99.3	0
99.4	0
99.5	0
99.6	0
99.7	0
99.8	0
99.9	0
100	0
100.1	0.538667
100.2	0.735333
100.3	0.833
100.4	0.881667
100.5	0.915
100.6	0.928333
100.7	0.941333
100.8	0.948333
100.9	0.949
101	0.946667
101.1	0.947333
101.2	0.952
101.3	0.953667
101.4	0.952333
101.5	0.954667
101.6	0.951667
101.7	0.950667
101.8	0.952333
101.9	0.96
102	0.959667
102.1	0.962667
102.2	0.959333
102.3	0.960333
102.4	0.957333
102.5	0.957
102.6	0.959
102.7	0.963333
102.8	0.958333
102.9	0.958
103	0.956667
103.1	0.957667
103.2	0.961667
103.3	0.958
103.4	0.961667
103.5	0.96
103.6	0.955333
103.7	0.957333
103.8	0.957
103.9	0.960667
104	0.962
104.1	0.958667
104.2	0.955
104.3	0.953667
104.4	0.958667
104.5	0.963667
104.6	0.963667
104.7	0.961667
104.8	0.961667
104.9	0.958667
105	0.961
105.1	0.961
105.2	0.967667
105.3	0.963667
105.4	0.96
105.5	0.958
105.6	0.961667
105.7	0.964
105.8	0.962667
105.9	0.965
106	0.964667
106.1	0.966667
106.2	0.968333
106.3	0.962333
106.4	0.96
106.5	0.963333
106.6	0.964667
106.7	0.962333
106.8	0.962333
106.9	0.962
107	0.964667
107.1	0.968
107.2	0.97
107.3	0.972333
107.4	0.969333
107.5	0.969333
107.6	0.966667
107.7	0.965333
107.8	0.968
107.9	0.971667
108	0.974
108.1	0.970333
108.2	0.969
108.3	0.963
108.4	0.966
108.5	0.966667
108.6	0.965333
108.7	0.967333
108.8	0.97
108.9	0.970333
109	0.965
109.1	0.966667
109.2	0.964
109.3	0.964333
109.4	0.966
109.5	0.967
109.6	0.966
109.7	0.965667
109.8	0.966
109.9	0.964
110	0.962
110.1	0.966333
110.2	0.966667
110.3	0.967333
110.4	0.971
110.5	0.968667
110.6	0.966333
110.7	0.965333
110.8	0.966667
110.9	0.974333
111	0.973333
111.1	0.972333
111.2	0.972
111.3	0.969
111.4	0.967333
111.5	0.968333
111.6	0.965333
111.7	0.962667
111.8	0.969333
111.9	0.974667
112	0.973
112.1	0.971667
112.2	0.975
112.3	0.974333
112.4	0.977333
112.5	0.975333
112.6	0.972
112.7	0.97
112.8	0.969
112.9	0.972333
113	0.974667
113.1	0.971333
113.2	0.971333
113.3	0.971667
113.4	0.974333
113.5	0.972667
113.6	0.974
113.7	0.974333
113.8	0.972667
113.9	0.974333
114	0.973
114.1	0.969333
114.2	0.972667
114.3	0.968667
114.4	0.969667
114.5	0.973333
114.6	0.969333
114.7	0.968667
114.8	0.971
114.9	0.969
115	0.967667
115.1	0.968
115.2	0.972333
115.3	0.970667
115.4	0.969333
115.5	0.973
115.6	0.975667
115.7	0.979333
115.8	0.976667
115.9	0.975333
116	0.972
116.1	0.975
116.2	0.977
116.3	0.975
116.4	0.974
116.5	0.974
116.6	0.974333
116.7	0.975667
116.8	0.976667
116.9	0.976
117	0.974333
117.1	0.975
117.2	0.977667
117.3	0.977
117.4	0.974667
117.5	0.977667
117.6	0.976667
117.7	0.976333
117.8	0.975
117.9	0.972
118	0.971667
118.1	0.970667
118.2	0.968667
118.3	0.971333
118.4	0.969667
118.5	0.971667
118.6	0.976667
118.7	0.976333
118.8	0.977667
118.9	0.976667
119	0.975333
119.1	0.975
119.2	0.976667
119.3	0.972667
119.4	0.973333
119.5	0.971667
119.6	0.978
119.7	0.977333
119.8	0.980667
119.9	0.979333
120	0.978
120.1	0.978667
120.2	0.979
120.3	0.977
120.4	0.979667
120.5	0.98
120.6	0.976667
120.7	0.982
120.8	0.982
120.9	0.978667
121	0.977
121.1	0.975
121.2	0.976667
121.3	0.979333
121.4	0.976333
121.5	0.976333
121.6	0.975667
121.7	0.976
121.8	0.978333
121.9	0.976667
122	0.98
122.1	0.978333
122.2	0.981333
122.3	0.983
122.4	0.981333
122.5	0.981667
122.6	0.981667
122.7	0.980333
122.8	0.979667
122.9	0.978333
123	0.979667
123.1	0.981
123.2	0.981333
123.3	0.981333
123.4	0.976667
123.5	0.976333
123.6	0.978
123.7	0.980667
123.8	0.98
123.9	0.978
124	0.981333
124.1	0.979
124.2	0.978667
124.3	0.979333
124.4	0.979
124.5	0.975667
124.6	0.977
124.7	0.977333
124.8	0.980333
124.9	0.976333
125	0.976
125.1	0.981333
125.2	0.984333
125.3	0.984667
125.4	0.982
125.5	0.982
125.6	0.980667
125.7	0.98
125.8	0.982333
125.9	0.984667
126	0.979333
126.1	0.979667
126.2	0.981667
126.3	0.982333
126.4	0.984333
126.5	0.984333
126.6	0.982
126.7	0.98
126.8	0.981
126.9	0.982333
127	0.980667
127.1	0.982333
127.2	0.982667
127.3	0.981333
127.4	0.984
127.5	0.982
127.6	0.981333
127.7	0.984667
127.8	0.985667
127.9	0.984667
128	0.985333
128.1	0.985333
128.2	0.984
128.3	0.979
128.4	0.982
128.5	0.981667
128.6	0.982
128.7	0.983667
128.8	0.985333
128.9	0.986333
129	0.984
129.1	0.980667
129.2	0.982667
129.3	0.977667
129.4	0.983
129.5	0.980333
129.6	0.979333
129.7	0.977667
129.8	0.980667
129.9	0.977333
130	0.978
130.1	0.980333
130.2	0.984
130.3	0.981667
130.4	0.985333
130.5	0.982667
130.6	0.983
130.7	0.982
130.8	0.98
130.9	0.980333
131	0.984333
131.1	0.984333
131.2	0.987333
131.3	0.981667
131.4	0.986333
131.5	0.986667
131.6	0.985667
131.7	0.986
131.8	0.984667
131.9	0.981667
132	0.983
132.1	0.985667
132.2	0.982667
132.3	0.982333
132.4	0.983
132.5	0.982333
132.6	0.986667
132.7	0.985667
132.8	0.987
132.9	0.987
133	0.985333
133.1	0.983
133.2	0.983333
133.3	0.983
133.4	0.986667
133.5	0.987667
133.6	0.991667
133.7	0.988
133.8	0.989667
133.9	0.987667
134	0.984
134.1	0.980333
134.2	0.980667
134.3	0.982667
134.4	0.982667
134.5	0.985333
134.6	0.984667
134.7	0.984333
134.8	0.985333
134.9	0.983333
135	0.982667
135.1	0.984667
135.2	0.984333
135.3	0.982333
135.4	0.981
135.5	0.982
135.6	0.981667
135.7	0.985
135.8	0.985
135.9	0.984
136	0.983333
136.1	0.982667
136.2	0.984333
136.3	0.985667
136.4	0.983333
136.5	0.982667
136.6	0.985333
136.7	0.984333
136.8	0.987
136.9	0.984667
137	0.986
137.1	0.985
137.2	0.983667
137.3	0.984333
137.4	0.984
137.5	0.987
137.6	0.988
137.7	0.987333
137.8	0.988333
137.9	0.987333
138	0.989333
138.1	0.987333
138.2	0.988667
138.3	0.988
138.4	0.988
138.5	0.986333
138.6	0.985667
138.7	0.987
138.8	0.986
138.9	0.984333
139	0.984333
139.1	0.988333
139.2	0.991
139.3	0.990333
139.4	0.991
139.5	0.988667
139.6	0.986333
139.7	0.987333
139.8	0.988667
139.9	0.988333
140	0.990667
140.1	0.989
140.2	0.983667
140.3	0.986333
140.4	0.983333
140.5	0.983333
140.6	0.982333
140.7	0.985
140.8	0.986667
140.9	0.986667
141	0.985
141.1	0.982667
141.2	0.984333
141.3	0.986
141.4	0.987333
141.5	0.988333
141.6	0.988333
141.7	0.989333
141.8	0.988
141.9	0.989
142	0.989667
142.1	0.989
142.2	0.987333
142.3	0.987333
142.4	0.987667
142.5	0.988333
142.6	0.988333
142.7	0.988667
142.8	0.987667
142.9	0.985
143	0.986667
143.1	0.987
143.2	0.99
143.3	0.989
143.4	0.990333
143.5	0.988333
143.6	0.989
143.7	0.989333
143.8	0.986333
143.9	0.987
144	0.986333
144.1	0.986333
144.2	0.987
144.3	0.989667
144.4	0.989333
144.5	0.988
144.6	0.986
144.7	0.985667
144.8	0.986
144.9	0.986
145	0.987667
145.1	0.985333
145.2	0.986333
145.3	0.986
145.4	0.988667
145.5	0.987333
145.6	0.988
145.7	0.989
145.8	0.989
145.9	0.986667
146	0.987667
146.1	0.987333
146.2	0.984333
146.3	0.985333
146.4	0.986333
146.5	0.986333
146.6	0.989
146.7	0.988333
146.8	0.988667
146.9	0.987667
147	0.988667
147.1	0.988667
147.2	0.989667
147.3	0.990333
147.4	0.990333
147.5	0.988
147.6	0.986333
147.7	0.983
147.8	0.983
147.9	0.984667
148	0.986
148.1	0.989333
148.2	0.988333
148.3	0.987333
148.4	0.984333
148.5	0.986667
148.6	0.986667
148.7	0.986
148.8	0.989667
148.9	0.989667
149	0.985667
149.1	0.988
149.2	0.988333
149.3	0.987667
149.4	0.986
149.5	0.983667
149.6	0.983
149.7	0.987
149.8	0.988
149.9	0.989667
150	0.987667
150.1	0.989
150.2	0.989
150.3	0.989667
150.4	0.989
150.5	0.988
150.6	0.987333
150.7	0.986
150.8	0.987333
150.9	0.988333
151	0.989333
151.1	0.988667
151.2	0.987333
151.3	0.987333
151.4	0.984667
151.5	0.987333
151.6	0.988667
151.7	0.986667
151.8	0.985667
151.9	0.988
152	0.988
152.1	0.986
152.2	0.988333
152.3	0.988
152.4	0.989
152.5	0.988667
152.6	0.984667
152.7	0.985333
152.8	0.986667
152.9	0.987333
153	0.987333
153.1	0.987
153.2	0.985
153.3	0.986667
153.4	0.987
153.5	0.987333
153.6	0.984
153.7	0.985
153.8	0.987
153.9	0.989333
154	0.988333
154.1	0.988
154.2	0.988667
154.3	0.989667
154.4	0.988667
154.5	0.989667
154.6	0.990667
154.7	0.989
154.8	0.988333
154.9	0.987333
155	0.989667
155.1	0.987333
155.2	0.987333
155.3	0.989
155.4	0.986333
155.5	0.988667
155.6	0.99
155.7	0.990667
155.8	0.989333
155.9	0.987
156	0.988333
156.1	0.987
156.2	0.986
156.3	0.987
156.4	0.988667
156.5	0.989667
156.6	0.988667
156.7	0.988333
156.8	0.988333
156.9	0.990333
157	0.989
157.1	0.99
157.2	0.989
157.3	0.989667
157.4	0.990667
157.5	0.988667
157.6	0.989333
157.7	0.985667
157.8	0.985333
157.9	0.987
158	0.986333
158.1	0.987667
158.2	0.988
158.3	0.987
158.4	0.988
158.5	0.99
158.6	0.990333
158.7	0.992333
158.8	0.992
158.9	0.991
159	0.988667
159.1	0.989333
159.2	0.990333
159.3	0.99
159.4	0.990333
159.5	0.988333
159.6	0.986667
159.7	0.988667
159.8	0.990667
159.9	0.991667
160	0.988333
160.1	0.987333
160.2	0.987
160.3	0.990333
160.4	0.988333
160.5	0.986667
160.6	0.984667
160.7	0.983667
160.8	0.988333
160.9	0.987333
161	0.985333
161.1	0.989333
161.2	0.989667
161.3	0.992
161.4	0.991667
161.5	0.992333
161.6	0.991667
161.7	0.990333
161.8	0.989333
161.9	0.987
162	0.987333
162.1	0.989667
162.2	0.989333
162.3	0.990333
162.4	0.990333
162.5	0.992
162.6	0.989333
162.7	0.991
162.8	0.989667
162.9	0.988333
163	0.988667
163.1	0.987333
163.2	0.986667
163.3	0.988
163.4	0.989333
163.5	0.991
163.6	0.989333
163.7	0.986667
163.8	0.988667
163.9	0.990333
164	0.989667
164.1	0.989667
164.2	0.989667
164.3	0.989
164.4	0.990333
164.5	0.987667
164.6	0.990667
164.7	0.99
164.8	0.989333
164.9	0.987667
165	0.986667
165.1	0.986
165.2	0.987333
165.3	0.988
165.4	0.988333
165.5	0.99
165.6	0.992667
165.7	0.991667
165.8	0.989333
165.9	0.99
166	0.992
166.1	0.990333
166.2	0.991
166.3	0.990667
166.4	0.989667
166.5	0.990667
166.6	0.99
166.7	0.99
166.8	0.987667
166.9	0.989
167	0.990667
167.1	0.988667
167.2	0.990667
167.3	0.992333
167.4	0.988333
167.5	0.988667
167.6	0.988
167.7	0.989
167.8	0.988
167.9	0.992
168	0.993
168.1	0.992
168.2	0.991
168.3	0.987333
168.4	0.989333
168.5	0.991
168.6	0.990333
168.7	0.99
168.8	0.989
168.9	0.989667
169	0.991
169.1	0.990667
169.2	0.991667
169.3	0.990333
169.4	0.991333
169.5	0.991333
169.6	0.989
169.7	0.989333
169.8	0.99
169.9	0.989
170	0.991667
170.1	0.990333
170.2	0.992
170.3	0.992333
170.4	0.991
170.5	0.992
170.6	0.990667
170.7	0.990667
170.8	0.989667
170.9	0.990333
171	0.991
171.1	0.993
171.2	0.991667
171.3	0.991333
171.4	0.990667
171.5	0.989
171.6	0.987
171.7	0.988667
171.8	0.987667
171.9	0.988667
172	0.987667
172.1	0.988667
172.2	0.986
172.3	0.988333
172.4	0.990333
172.5	0.988333
172.6	0.990667
172.7	0.992
172.8	0.990667
172.9	0.992333
173	0.991
173.1	0.990667
173.2	0.991667
173.3	0.992
173.4	0.991
173.5	0.992667
173.6	0.992333
173.7	0.993333
173.8	0.992
173.9	0.991667
174	0.989667
174.1	0.990333
174.2	0.991
174.3	0.992
174.4	0.992333
174.5	0.993
174.6	0.993
174.7	0.992667
174.8	0.99
174.9	0.990667
175	0.992
175.1	0.992
175.2	0.991333
175.3	0.991
175.4	0.992
175.5	0.993333
175.6	0.992
175.7	0.993667
175.8	0.992667
175.9	0.991667
176	0.990667
176.1	0.991667
176.2	0.991
176.3	0.991333
176.4	0.99
176.5	0.988667
176.6	0.989
176.7	0.991333
176.8	0.990667
176.9	0.992333
177	0.992333
177.1	0.994
177.2	0.992333
177.3	0.992333
177.4	0.992
177.5	0.993333
177.6	0.993
177.7	0.993
177.8	0.991667
177.9	0.991333
178	0.993333
178.1	0.992667
178.2	0.991333
178.3	0.992333
178.4	0.993
178.5	0.991333
178.6	0.991667
178.7	0.993667
178.8	0.995333
178.9	0.992667
179	0.992
179.1	0.991
179.2	0.99
179.3	0.989667
179.4	0.989667
179.5	0.992
179.6	0.994
179.7	0.991667
179.8	0.990667
179.9	0.99
180	0.991667
180.1	0.99
180.2	0.989
180.3	0.990333
180.4	0.989667
180.5	0.99
180.6	0.991333
180.7	0.990333
180.8	0.99
180.9	0.990333
181	0.989667
181.1	0.992667
181.2	0.992
181.3	0.992
181.4	0.99
181.5	0.991333
181.6	0.990333
181.7	0.992333
181.8	0.991667
181.9	0.990333
182	0.991667
182.1	0.991333
182.2	0.992
182.3	0.991333
182.4	0.992333
182.5	0.992333
182.6	0.993
182.7	0.994
182.8	0.994333
182.9	0.993333
183	0.991333
183.1	0.992
183.2	0.992333
183.3	0.991667
183.4	0.991
183.5	0.991667
183.6	0.990333
183.7	0.988667
183.8	0.989333
183.9	0.988333
184	0.989
184.1	0.989
184.2	0.988667
184.3	0.991333
184.4	0.991667
184.5	0.992333
184.6	0.991667
184.7	0.991
184.8	0.989333
184.9	0.989667
185	0.990333
185.1	0.989
185.2	0.990333
185.3	0.99
185.4	0.992333
185.5	0.992
185.6	0.992
185.7	0.988667
185.8	0.991333
185.9	0.991333
186	0.990667
186.1	0.993
186.2	0.992333
186.3	0.993333
186.4	0.993
186.5	0.993667
186.6	0.993667
186.7	0.992667
186.8	0.992667
186.9	0.993333
187	0.991667
187.1	0.991667
187.2	0.992333
187.3	0.991333
187.4	0.990333
187.5	0.991
187.6	0.991667
187.7	0.992
187.8	0.995
187.9	0.992333
188	0.992667
188.1	0.992667
188.2	0.991333
188.3	0.991667
188.4	0.993
188.5	0.993667
188.6	0.993667
188.7	0.99
188.8	0.991667
188.9	0.992
189	0.991333
189.1	0.991333
189.2	0.994
189.3	0.994333
189.4	0.992667
189.5	0.993
189.6	0.992667
189.7	0.992
189.8	0.994
189.9	0.992333
190	0.993
190.1	0.993333
190.2	0.991667
190.3	0.996
190.4	0.995
190.5	0.995
190.6	0.995
190.7	0.992333
190.8	0.991667
190.9	0.991333
191	0.989333
191.1	0.989
191.2	0.988667
191.3	0.990333
191.4	0.988333
191.5	0.991
191.6	0.992
191.7	0.990667
191.8	0.99
191.9	0.988667
192	0.991333
192.1	0.991667
192.2	0.992
192.3	0.993333
192.4	0.994667
192.5	0.991
192.6	0.99
192.7	0.989333
192.8	0.988333
192.9	0.991
193	0.993
193.1	0.993333
193.2	0.994333
193.3	0.993
193.4	0.992667
193.5	0.989
193.6	0.989
193.7	0.991333
193.8	0.99
193.9	0.991
194	0.990667
194.1	0.991333
194.2	0.994
194.3	0.992667
194.4	0.992
194.5	0.993667
194.6	0.990667
194.7	0.989333
194.8	0.991333
194.9	0.993667
195	0.993
195.1	0.991
195.2	0.991333
195.3	0.991333
195.4	0.994
195.5	0.993333
195.6	0.994
195.7	0.991
195.8	0.99
195.9	0.992667
196	0.993
196.1	0.994667
196.2	0.994333
196.3	0.993667
196.4	0.993
196.5	0.994
196.6	0.993
196.7	0.992667
196.8	0.993333
196.9	0.993333
197	0.995
197.1	0.991333
197.2	0.991333
197.3	0.989667
197.4	0.992333
197.5	0.991667
197.6	0.992
197.7	0.991
197.8	0.992
197.9	0.995333
198	0.991667
198.1	0.993333
198.2	0.990667
198.3	0.993333
198.4	0.993
198.5	0.992667
198.6	0.992
198.7	0.990333
198.8	0.992667
198.9	0.992
199	0.991
199.1	0.989667
199.2	0.991667
199.3	0.990667
199.4	0.991333
199.5	0.990667
199.6	0.992
199.7	0.99
199.8	0.991667
199.9	0.989333
200	0.990333
[truncated: 14,000 more rows]
