# Supplementary material for: Bayesian inference of kinetic schemes for ion channels by Kalman filtering
Source: eLife journal article supplement (doi:10.7554/elife.62714), 2022-05-04
Supplement: fig4-data1 [file 1_Sim_N_1500_Strom_MW_16M.xlsx]

## Sheet: Tabelle1
0.1	0
0.2	0
0.3	0
0.4	0
0.5	0
0.6	0
0.7	0
0.8	0
0.9	0
1	0
1.1	0
1.2	0
1.3	0
1.4	0
1.5	0
1.6	0
1.7	0
1.8	0
1.9	0
2	0
2.1	0
2.2	0
2.3	0
2.4	0
2.5	0
2.6	0
2.7	0
2.8	0
2.9	0
3	0
3.1	0
3.2	0
3.3	0
3.4	0
3.5	0
3.6	0
3.7	0
3.8	0
3.9	0
4	0
4.1	0
4.2	0
4.3	0
4.4	0
4.5	0
4.6	0
4.7	0
4.8	0
4.9	0
5	0
5.1	0
5.2	0
5.3	0
5.4	0
5.5	0
5.6	0
5.7	0
5.8	0
5.9	0
6	0
6.1	0
6.2	0
6.3	0
6.4	0
6.5	0
6.6	0
6.7	0
6.8	0
6.9	0
7	0
7.1	0
7.2	0
7.3	0
7.4	0
7.5	0
7.6	0
7.7	0
7.8	0
7.9	0
8	0
8.1	0
8.2	0
8.3	0
8.4	0
8.5	0
8.6	0
8.7	0
8.8	0
8.9	0
9	0
9.1	0
9.2	0
9.3	0
9.4	0
9.5	0
9.6	0
9.7	0
9.8	0
9.9	0
10	0
10.1	0
10.2	0
10.3	0
10.4	0
10.5	0
10.6	0
10.7	0
10.8	0
10.9	0
11	0
11.1	0
11.2	0
11.3	0
11.4	0
11.5	0
11.6	0
11.7	0
11.8	0
11.9	0
12	0
12.1	0
12.2	0
12.3	0
12.4	0
12.5	0
12.6	0
12.7	0
12.8	0
12.9	0
13	0
13.1	0
13.2	0
13.3	0
13.4	0
13.5	0
13.6	0
13.7	0
13.8	0
13.9	0
14	0
14.1	0
14.2	0
14.3	0
14.4	0
14.5	0
14.6	0
14.7	0
14.8	0
14.9	0
15	0
15.1	0
15.2	0
15.3	0
15.4	0
15.5	0
15.6	0
15.7	0
15.8	0
15.9	0
16	0
16.1	0
16.2	0
16.3	0
16.4	0
16.5	0
16.6	0
16.7	0
16.8	0
16.9	0
17	0
17.1	0
17.2	0
17.3	0
17.4	0
17.5	0
17.6	0
17.7	0
17.8	0
17.9	0
18	0
18.1	0
18.2	0
18.3	0
18.4	0
18.5	0
18.6	0
18.7	0
18.8	0
18.9	0
19	0
19.1	0
19.2	0
19.3	0
19.4	0
19.5	0
19.6	0
19.7	0
19.8	0
19.9	0
20	0
20.1	0
20.2	0
20.3	0
20.4	0
20.5	0
20.6	0
20.7	0
20.8	0
20.9	0
21	0
21.1	0
21.2	0
21.3	0
21.4	0
21.5	0
21.6	0
21.7	0
21.8	0
21.9	0
22	0
22.1	0
22.2	0
22.3	0
22.4	0
22.5	0
22.6	0
22.7	0
22.8	0
22.9	0
23	0
23.1	0
23.2	0
23.3	0
23.4	0
23.5	0
23.6	0
23.7	0
23.8	0
23.9	0
24	0
24.1	0
24.2	0
24.3	0
24.4	0
24.5	0
24.6	0
24.7	0
24.8	0
24.9	0
25	0
25.1	0
25.2	0
25.3	0
25.4	0
25.5	0
25.6	0
25.7	0
25.8	0
25.9	0
26	0
26.1	0
26.2	0
26.3	0
26.4	0
26.5	0
26.6	0
26.7	0
26.8	0
26.9	0
27	0
27.1	0
27.2	0
27.3	0
27.4	0
27.5	0
27.6	0
27.7	0
27.8	0
27.9	0
28	0
28.1	0
28.2	0
28.3	0
28.4	0
28.5	0
28.6	0
28.7	0
28.8	0
28.9	0
29	0
29.1	0
29.2	0
29.3	0
29.4	0
29.5	0
29.6	0
29.7	0
29.8	0
29.9	0
30	0
30.1	0
30.2	0
30.3	0
30.4	0
30.5	0
30.6	0
30.7	0
30.8	0
30.9	0
31	0
31.1	0
31.2	0
31.3	0
31.4	0
31.5	0
31.6	0
31.7	0
31.8	0
31.9	0
32	0
32.1	0
32.2	0
32.3	0
32.4	0
32.5	0
32.6	0
32.7	0
32.8	0
32.9	0
33	0
33.1	0
33.2	0
33.3	0
33.4	0
33.5	0
33.6	0
33.7	0
33.8	0
33.9	0
34	0
34.1	0
34.2	0
34.3	0
34.4	0
34.5	0
34.6	0
34.7	0
34.8	0
34.9	0
35	0
35.1	0
35.2	0
35.3	0
35.4	0
35.5	0
35.6	0
35.7	0
35.8	0
35.9	0
36	0
36.1	0
36.2	0
36.3	0
36.4	0
36.5	0
36.6	0
36.7	0
36.8	0
36.9	0
37	0
37.1	0
37.2	0
37.3	0
37.4	0
37.5	0
37.6	0
37.7	0
37.8	0
37.9	0
38	0
38.1	0
38.2	0
38.3	0
38.4	0
38.5	0
38.6	0
38.7	0
38.8	0
38.9	0
39	0
39.1	0
39.2	0
39.3	0
39.4	0
39.5	0
39.6	0
39.7	0
39.8	0
39.9	0
40	0
40.1	0
40.2	0
40.3	0
40.4	0
40.5	0
40.6	0
40.7	0
40.8	0
40.9	0
41	0
41.1	0
41.2	0
41.3	0
41.4	0
41.5	0
41.6	0
41.7	0
41.8	0
41.9	0
42	0
42.1	0
42.2	0
42.3	0
42.4	0
42.5	0
42.6	0
42.7	0
42.8	0
42.9	0
43	0
43.1	0
43.2	0
43.3	0
43.4	0
43.5	0
43.6	0
43.7	0
43.8	0
43.9	0
44	0
44.1	0
44.2	0
44.3	0
44.4	0
44.5	0
44.6	0
44.7	0
44.8	0
44.9	0
45	0
45.1	0
45.2	0
45.3	0
45.4	0
45.5	0
45.6	0
45.7	0
45.8	0
45.9	0
46	0
46.1	0
46.2	0
46.3	0
46.4	0
46.5	0
46.6	0
46.7	0
46.8	0
46.9	0
47	0
47.1	0
47.2	0
47.3	0
47.4	0
47.5	0
47.6	0
47.7	0
47.8	0
47.9	0
48	0
48.1	0
48.2	0
48.3	0
48.4	0
48.5	0
48.6	0
48.7	0
48.8	0
48.9	0
49	0
49.1	0
49.2	0
49.3	0
49.4	0
49.5	0
49.6	0
49.7	0
49.8	0
49.9	0
50	0
50.1	0
50.2	0
50.3	0
50.4	0
50.5	0
50.6	0
50.7	0
50.8	0
50.9	0
51	0
51.1	0
51.2	0
51.3	0
51.4	0
51.5	0
51.6	0
51.7	0
51.8	0
51.9	0
52	0
52.1	0
52.2	0
52.3	0
52.4	0
52.5	0
52.6	0
52.7	0
52.8	0
52.9	0
53	0
53.1	0
53.2	0
53.3	0
53.4	0
53.5	0
53.6	0
53.7	0
53.8	0
53.9	0
54	0
54.1	0
54.2	0
54.3	0
54.4	0
54.5	0
54.6	0
54.7	0
54.8	0
54.9	0
55	0
55.1	0
55.2	0
55.3	0
55.4	0
55.5	0
55.6	0
55.7	0
55.8	0
55.9	0
56	0
56.1	0
56.2	0
56.3	0
56.4	0
56.5	0
56.6	0
56.7	0
56.8	0
56.9	0
57	0
57.1	0
57.2	0
57.3	0
57.4	0
57.5	0
57.6	0
57.7	0
57.8	0
57.9	0
58	0
58.1	0
58.2	0
58.3	0
58.4	0
58.5	0
58.6	0
58.7	0
58.8	0
58.9	0
59	0
59.1	0
59.2	0
59.3	0
59.4	0
59.5	0
59.6	0
59.7	0
59.8	0
59.9	0
60	0
60.1	0
60.2	0
60.3	0
60.4	0
60.5	0
60.6	0
60.7	0
60.8	0
60.9	0
61	0
61.1	0
61.2	0
61.3	0
61.4	0
61.5	0
61.6	0
61.7	0
61.8	0
61.9	0
62	0
62.1	0
62.2	0
62.3	0
62.4	0
62.5	0
62.6	0
62.7	0
62.8	0
62.9	0
63	0
63.1	0
63.2	0
63.3	0
63.4	0
63.5	0
63.6	0
63.7	0
63.8	0
63.9	0
64	0
64.1	0
64.2	0
64.3	0
64.4	0
64.5	0
64.6	0
64.7	0
64.8	0
64.9	0
65	0
65.1	0
65.2	0
65.3	0
65.4	0
65.5	0
65.6	0
65.7	0
65.8	0
65.9	0
66	0
66.1	0
66.2	0
66.3	0
66.4	0
66.5	0
66.6	0
66.7	0
66.8	0
66.9	0
67	0
67.1	0
67.2	0
67.3	0
67.4	0
67.5	0
67.6	0
67.7	0
67.8	0
67.9	0
68	0
68.1	0
68.2	0
68.3	0
68.4	0
68.5	0
68.6	0
68.7	0
68.8	0
68.9	0
69	0
69.1	0
69.2	0
69.3	0
69.4	0
69.5	0
69.6	0
69.7	0
69.8	0
69.9	0
70	0
70.1	0
70.2	0
70.3	0
70.4	0
70.5	0
70.6	0
70.7	0
70.8	0
70.9	0
71	0
71.1	0
71.2	0
71.3	0
71.4	0
71.5	0
71.6	0
71.7	0
71.8	0
71.9	0
72	0
72.1	0
72.2	0
72.3	0
72.4	0
72.5	0
72.6	0
72.7	0
72.8	0
72.9	0
73	0
73.1	0
73.2	0
73.3	0
73.4	0
73.5	0
73.6	0
73.7	0
73.8	0
73.9	0
74	0
74.1	0
74.2	0
74.3	0
74.4	0
74.5	0
74.6	0
74.7	0
74.8	0
74.9	0
75	0
75.1	0
75.2	0
75.3	0
75.4	0
75.5	0
75.6	0
75.7	0
75.8	0
75.9	0
76	0
76.1	0
76.2	0
76.3	0
76.4	0
76.5	0
76.6	0
76.7	0
76.8	0
76.9	0
77	0
77.1	0
77.2	0
77.3	0
77.4	0
77.5	0
77.6	0
77.7	0
77.8	0
77.9	0
78	0
78.1	0
78.2	0
78.3	0
78.4	0
78.5	0
78.6	0
78.7	0
78.8	0
78.9	0
79	0
79.1	0
79.2	0
79.3	0
79.4	0
79.5	0
79.6	0
79.7	0
79.8	0
79.9	0
80	0
80.1	0
80.2	0
80.3	0
80.4	0
80.5	0
80.6	0
80.7	0
80.8	0
80.9	0
81	0
81.1	0
81.2	0
81.3	0
81.4	0
81.5	0
81.6	0
81.7	0
81.8	0
81.9	0
82	0
82.1	0
82.2	0
82.3	0
82.4	0
82.5	0
82.6	0
82.7	0
82.8	0
82.9	0
83	0
83.1	0
83.2	0
83.3	0
83.4	0
83.5	0
83.6	0
83.7	0
83.8	0
83.9	0
84	0
84.1	0
84.2	0
84.3	0
84.4	0
84.5	0
84.6	0
84.7	0
84.8	0
84.9	0
85	0
85.1	0
85.2	0
85.3	0
85.4	0
85.5	0
85.6	0
85.7	0
85.8	0
85.9	0
86	0
86.1	0
86.2	0
86.3	0
86.4	0
86.5	0
86.6	0
86.7	0
86.8	0
86.9	0
87	0
87.1	0
87.2	0
87.3	0
87.4	0
87.5	0
87.6	0
87.7	0
87.8	0
87.9	0
88	0
88.1	0
88.2	0
88.3	0
88.4	0
88.5	0
88.6	0
88.7	0
88.8	0
88.9	0
89	0
89.1	0
89.2	0
89.3	0
89.4	0
89.5	0
89.6	0
89.7	0
89.8	0
89.9	0
90	0
90.1	0
90.2	0
90.3	0
90.4	0
90.5	0
90.6	0
90.7	0
90.8	0
90.9	0
91	0
91.1	0
91.2	0
91.3	0
91.4	0
91.5	0
91.6	0
91.7	0
91.8	0
91.9	0
92	0
92.1	0
92.2	0
92.3	0
92.4	0
92.5	0
92.6	0
92.7	0
92.8	0
92.9	0
93	0
93.1	0
93.2	0
93.3	0
93.4	0
93.5	0
93.6	0
93.7	0
93.8	0
93.9	0
94	0
94.1	0
94.2	0
94.3	0
94.4	0
94.5	0
94.6	0
94.7	0
94.8	0
94.9	0
95	0
95.1	0
95.2	0
95.3	0
95.4	0
95.5	0
95.6	0
95.7	0
95.8	0
95.9	0
96	0
96.1	0
96.2	0
96.3	0
96.4	0
96.5	0
96.6	0
96.7	0
96.8	0
96.9	0
97	0
97.1	0
97.2	0
97.3	0
97.4	0
97.5	0
97.6	0
97.7	0
97.8	0
97.9	0
98	0
98.1	0
98.2	0
98.3	0
98.4	0
98.5	0
98.6	0
98.7	0
98.8	0
98.9	0
99	0
99.1	0
99.2	0
99.3	0
99.4	0
99.5	0
99.6	0
99.7	0
99.8	0
99.9	0
100	0
100.1	0.000666667
100.2	0.00133333
100.3	0.00333333
100.4	0.00666667
100.5	0.0106667
100.6	0.0146667
100.7	0.018
100.8	0.022
100.9	0.0246667
101	0.0273333
101.1	0.032
101.2	0.0346667
101.3	0.0386667
101.4	0.0426667
101.5	0.0473333
101.6	0.0506667
101.7	0.056
101.8	0.0586667
101.9	0.064
102	0.0686667
102.1	0.0713333
102.2	0.0753333
102.3	0.0813333
102.4	0.09
102.5	0.0913333
102.6	0.0933333
102.7	0.0993333
102.8	0.105333
102.9	0.11
103	0.116
103.1	0.12
103.2	0.120667
103.3	0.122
103.4	0.129333
103.5	0.133333
103.6	0.137333
103.7	0.141333
103.8	0.142667
103.9	0.146667
104	0.149333
104.1	0.151333
104.2	0.155333
104.3	0.159333
104.4	0.163333
104.5	0.165333
104.6	0.168667
104.7	0.172667
104.8	0.176
104.9	0.182667
105	0.189333
105.1	0.193333
105.2	0.195333
105.3	0.196667
105.4	0.202667
105.5	0.206667
105.6	0.210667
105.7	0.215333
105.8	0.218
105.9	0.222
106	0.225333
106.1	0.23
106.2	0.232667
106.3	0.234667
106.4	0.240667
106.5	0.246
106.6	0.248667
106.7	0.250667
106.8	0.256
106.9	0.258667
107	0.26
107.1	0.262667
107.2	0.264667
107.3	0.267333
107.4	0.27
107.5	0.273333
107.6	0.274667
107.7	0.276667
107.8	0.278667
107.9	0.278667
108	0.28
108.1	0.283333
108.2	0.285333
108.3	0.286667
108.4	0.288
108.5	0.29
108.6	0.293333
108.7	0.295333
108.8	0.296667
108.9	0.301333
109	0.303333
109.1	0.308
109.2	0.312
109.3	0.312
109.4	0.314
109.5	0.318
109.6	0.319333
109.7	0.319333
109.8	0.32
109.9	0.323333
110	0.327333
110.1	0.328
110.2	0.33
110.3	0.333333
110.4	0.335333
110.5	0.338667
110.6	0.339333
110.7	0.342
110.8	0.344667
110.9	0.348667
111	0.348667
111.1	0.351333
111.2	0.356
111.3	0.358
111.4	0.360667
111.5	0.363333
111.6	0.366667
111.7	0.366667
111.8	0.371333
111.9	0.375333
112	0.378
112.1	0.381333
112.2	0.384
112.3	0.387333
112.4	0.389333
112.5	0.392
112.6	0.394
112.7	0.394667
112.8	0.394667
112.9	0.395333
113	0.397333
113.1	0.399333
113.2	0.404667
113.3	0.407333
113.4	0.409333
113.5	0.41
113.6	0.413333
113.7	0.416667
113.8	0.418667
113.9	0.420667
114	0.422
114.1	0.424667
114.2	0.426667
114.3	0.425333
114.4	0.428667
114.5	0.429333
114.6	0.43
114.7	0.431333
114.8	0.433333
114.9	0.435333
115	0.437333
115.1	0.44
115.2	0.440667
115.3	0.442667
115.4	0.443333
115.5	0.444667
115.6	0.446667
115.7	0.447333
115.8	0.446667
115.9	0.452
116	0.451333
116.1	0.452
116.2	0.454667
116.3	0.455333
116.4	0.458
116.5	0.458667
116.6	0.460667
116.7	0.462667
116.8	0.463333
116.9	0.466
117	0.468
117.1	0.469333
117.2	0.472667
117.3	0.476667
117.4	0.476667
117.5	0.476667
117.6	0.478667
117.7	0.482
117.8	0.484667
117.9	0.485333
118	0.486667
118.1	0.492
118.2	0.492667
118.3	0.494
118.4	0.495333
118.5	0.497333
118.6	0.5
118.7	0.502
118.8	0.502
118.9	0.503333
119	0.505333
119.1	0.508
119.2	0.511333
119.3	0.512667
119.4	0.514
119.5	0.516
119.6	0.518667
119.7	0.52
119.8	0.52
119.9	0.522
120	0.523333
120.1	0.527333
120.2	0.527333
120.3	0.528667
120.4	0.529333
120.5	0.532
120.6	0.535333
120.7	0.538667
120.8	0.538667
120.9	0.540667
121	0.542
121.1	0.546667
121.2	0.547333
121.3	0.548667
121.4	0.552667
121.5	0.552
121.6	0.555333
121.7	0.555333
121.8	0.556
121.9	0.558667
122	0.559333
122.1	0.56
122.2	0.560667
122.3	0.562
122.4	0.565333
122.5	0.569333
122.6	0.571333
122.7	0.572667
122.8	0.575333
122.9	0.576
123	0.574667
123.1	0.574667
123.2	0.576
123.3	0.578
123.4	0.578667
123.5	0.581333
123.6	0.580667
123.7	0.584
123.8	0.584
123.9	0.586
124	0.589333
124.1	0.59
124.2	0.592
124.3	0.592667
124.4	0.594
124.5	0.595333
124.6	0.595333
124.7	0.597333
124.8	0.597333
124.9	0.598
125	0.597333
125.1	0.596667
125.2	0.598
125.3	0.598667
125.4	0.602
125.5	0.603333
125.6	0.604667
125.7	0.605333
125.8	0.606
125.9	0.604667
126	0.607333
126.1	0.610667
126.2	0.610667
126.3	0.610667
126.4	0.613333
126.5	0.613333
126.6	0.614
126.7	0.614667
126.8	0.614667
126.9	0.616667
127	0.617333
127.1	0.618
127.2	0.618667
127.3	0.620667
127.4	0.622
127.5	0.626667
127.6	0.626667
127.7	0.626
127.8	0.626667
127.9	0.626667
128	0.627333
128.1	0.628667
128.2	0.629333
128.3	0.628667
128.4	0.632
128.5	0.632
128.6	0.633333
128.7	0.633333
128.8	0.635333
128.9	0.635333
129	0.634667
129.1	0.635333
129.2	0.635333
129.3	0.637333
129.4	0.638
129.5	0.637333
129.6	0.637333
129.7	0.638
129.8	0.640667
129.9	0.642667
130	0.642667
130.1	0.643333
130.2	0.646
130.3	0.646667
130.4	0.647333
130.5	0.646667
130.6	0.648667
130.7	0.651333
130.8	0.651333
130.9	0.652
131	0.653333
131.1	0.654667
131.2	0.657333
131.3	0.657333
131.4	0.660667
131.5	0.664
131.6	0.666
131.7	0.666
131.8	0.666
131.9	0.666667
132	0.667333
132.1	0.667333
132.2	0.668
132.3	0.668667
132.4	0.668667
132.5	0.669333
132.6	0.67
132.7	0.670667
132.8	0.671333
132.9	0.67
133	0.671333
133.1	0.670667
133.2	0.672
133.3	0.672
133.4	0.673333
133.5	0.674
133.6	0.674
133.7	0.676
133.8	0.679333
133.9	0.68
134	0.68
134.1	0.680667
134.2	0.681333
134.3	0.682667
134.4	0.684
134.5	0.683333
134.6	0.684667
134.7	0.685333
134.8	0.685333
134.9	0.686
135	0.687333
135.1	0.688667
135.2	0.689333
135.3	0.689333
135.4	0.69
135.5	0.688
135.6	0.690667
135.7	0.692
135.8	0.694667
135.9	0.696
136	0.698
136.1	0.698
136.2	0.698667
136.3	0.698667
136.4	0.7
136.5	0.698667
136.6	0.698667
136.7	0.7
136.8	0.7
136.9	0.699333
137	0.698667
137.1	0.698667
137.2	0.697333
137.3	0.698
137.4	0.697333
137.5	0.698667
137.6	0.698667
137.7	0.698667
137.8	0.700667
137.9	0.701333
138	0.701333
138.1	0.704
138.2	0.704667
138.3	0.705333
138.4	0.706667
138.5	0.706667
138.6	0.707333
138.7	0.707333
138.8	0.707333
138.9	0.707333
139	0.707333
139.1	0.707333
139.2	0.707333
139.3	0.710667
139.4	0.711333
139.5	0.710667
139.6	0.710667
139.7	0.711333
139.8	0.711333
139.9	0.710667
140	0.712
140.1	0.712
140.2	0.715333
140.3	0.715333
140.4	0.72
140.5	0.720667
140.6	0.72
140.7	0.723333
140.8	0.726
140.9	0.727333
141	0.726667
141.1	0.726
141.2	0.724667
141.3	0.725333
141.4	0.726667
141.5	0.726
141.6	0.726667
141.7	0.727333
141.8	0.728
141.9	0.727333
142	0.728667
142.1	0.728667
142.2	0.728
142.3	0.729333
142.4	0.728
142.5	0.728667
142.6	0.729333
142.7	0.728667
142.8	0.728
142.9	0.728
143	0.728
143.1	0.729333
143.2	0.730667
143.3	0.732
143.4	0.734
143.5	0.734667
143.6	0.736
143.7	0.739333
143.8	0.74
143.9	0.740667
144	0.742
144.1	0.742
144.2	0.740667
144.3	0.742
144.4	0.742
144.5	0.742667
144.6	0.744
144.7	0.746
144.8	0.746667
144.9	0.746
145	0.746667
145.1	0.746667
145.2	0.747333
145.3	0.748667
145.4	0.749333
145.5	0.75
145.6	0.750667
145.7	0.749333
145.8	0.75
145.9	0.75
146	0.749333
146.1	0.748667
146.2	0.752
146.3	0.752
146.4	0.751333
146.5	0.750667
146.6	0.75
146.7	0.748667
146.8	0.748
146.9	0.748
147	0.748
147.1	0.75
147.2	0.750667
147.3	0.750667
147.4	0.753333
147.5	0.752
147.6	0.752
147.7	0.751333
147.8	0.752
147.9	0.752
148	0.752
148.1	0.751333
148.2	0.752667
148.3	0.754
148.4	0.754
148.5	0.753333
148.6	0.754
148.7	0.753333
148.8	0.752667
148.9	0.754667
149	0.753333
149.1	0.753333
149.2	0.753333
149.3	0.755333
149.4	0.754
149.5	0.751333
149.6	0.750667
149.7	0.752667
149.8	0.753333
149.9	0.752667
150	0.752
150.1	0.752667
150.2	0.752667
150.3	0.752667
150.4	0.754
150.5	0.754
150.6	0.754667
150.7	0.758
150.8	0.759333
150.9	0.758667
151	0.758
151.1	0.758
151.2	0.757333
151.3	0.757333
151.4	0.759333
151.5	0.76
151.6	0.76
151.7	0.758667
151.8	0.758
151.9	0.759333
152	0.76
152.1	0.759333
152.2	0.760667
152.3	0.762
152.4	0.762
152.5	0.762
152.6	0.761333
152.7	0.76
152.8	0.760667
152.9	0.761333
153	0.762667
153.1	0.763333
153.2	0.764667
153.3	0.761333
153.4	0.762
153.5	0.762
153.6	0.762
153.7	0.761333
153.8	0.76
153.9	0.758667
154	0.757333
154.1	0.759333
154.2	0.761333
154.3	0.762667
154.4	0.763333
154.5	0.762667
154.6	0.762667
154.7	0.764667
154.8	0.764667
154.9	0.764667
155	0.766667
155.1	0.767333
155.2	0.768
155.3	0.769333
155.4	0.771333
155.5	0.770667
155.6	0.77
155.7	0.771333
155.8	0.769333
155.9	0.768667
156	0.768
156.1	0.769333
156.2	0.770667
156.3	0.772
156.4	0.771333
156.5	0.772
156.6	0.772667
156.7	0.770667
156.8	0.770667
156.9	0.770667
157	0.771333
157.1	0.770667
157.2	0.77
157.3	0.771333
157.4	0.772
157.5	0.770667
157.6	0.771333
157.7	0.77
157.8	0.769333
157.9	0.769333
158	0.770667
158.1	0.769333
158.2	0.769333
158.3	0.769333
158.4	0.770667
158.5	0.772
158.6	0.772
158.7	0.773333
158.8	0.774
158.9	0.773333
159	0.772
159.1	0.772
159.2	0.774
159.3	0.774
159.4	0.774667
159.5	0.774
159.6	0.778
159.7	0.778
159.8	0.779333
159.9	0.778667
160	0.778667
160.1	0.779333
160.2	0.780667
160.3	0.783333
160.4	0.782667
160.5	0.782667
160.6	0.784667
160.7	0.788667
160.8	0.788667
160.9	0.789333
161	0.789333
161.1	0.789333
161.2	0.789333
161.3	0.789333
161.4	0.79
161.5	0.789333
161.6	0.79
161.7	0.79
161.8	0.79
161.9	0.788
162	0.788667
162.1	0.788
162.2	0.788667
162.3	0.788
162.4	0.79
162.5	0.790667
162.6	0.790667
162.7	0.790667
162.8	0.791333
162.9	0.792667
163	0.792
163.1	0.791333
163.2	0.792
163.3	0.79
163.4	0.789333
163.5	0.79
163.6	0.79
163.7	0.790667
163.8	0.79
163.9	0.788667
164	0.789333
164.1	0.788667
164.2	0.788
164.3	0.788
164.4	0.786
164.5	0.784667
164.6	0.786
164.7	0.786
164.8	0.786667
164.9	0.788
165	0.79
165.1	0.791333
165.2	0.792
165.3	0.792
165.4	0.792667
165.5	0.793333
165.6	0.794667
165.7	0.794667
165.8	0.795333
165.9	0.795333
166	0.795333
166.1	0.796
166.2	0.797333
166.3	0.796667
166.4	0.798
166.5	0.798667
166.6	0.799333
166.7	0.798
166.8	0.798
166.9	0.800667
167	0.801333
167.1	0.801333
167.2	0.802667
167.3	0.802
167.4	0.803333
167.5	0.802667
167.6	0.803333
167.7	0.805333
167.8	0.804
167.9	0.801333
168	0.800667
168.1	0.802667
168.2	0.804
168.3	0.804
168.4	0.806667
168.5	0.806667
168.6	0.806667
168.7	0.806
168.8	0.806667
168.9	0.807333
169	0.807333
169.1	0.806
169.2	0.805333
169.3	0.806
169.4	0.806
169.5	0.804667
169.6	0.805333
169.7	0.806667
169.8	0.806667
169.9	0.808
170	0.808667
170.1	0.808667
170.2	0.807333
170.3	0.807333
170.4	0.806667
170.5	0.808667
170.6	0.808
170.7	0.808
170.8	0.806667
170.9	0.806
171	0.806667
171.1	0.806
171.2	0.806667
171.3	0.808667
171.4	0.809333
171.5	0.810667
171.6	0.808667
171.7	0.81
171.8	0.809333
171.9	0.810667
172	0.810667
172.1	0.81
172.2	0.81
172.3	0.811333
172.4	0.81
172.5	0.812
172.6	0.812667
172.7	0.812667
172.8	0.813333
172.9	0.812667
173	0.812667
173.1	0.812
173.2	0.812
173.3	0.812
173.4	0.810667
173.5	0.810667
173.6	0.810667
173.7	0.809333
173.8	0.808667
173.9	0.810667
174	0.811333
174.1	0.812
174.2	0.811333
174.3	0.810667
174.4	0.811333
174.5	0.812
174.6	0.811333
174.7	0.810667
174.8	0.81
174.9	0.81
175	0.809333
175.1	0.808
175.2	0.808
175.3	0.807333
175.4	0.806
175.5	0.807333
175.6	0.808667
175.7	0.808
175.8	0.808
175.9	0.808667
176	0.808667
176.1	0.807333
176.2	0.806
176.3	0.806667
176.4	0.806667
176.5	0.807333
176.6	0.807333
176.7	0.808
176.8	0.808
176.9	0.808
177	0.808
177.1	0.808
177.2	0.808667
177.3	0.806667
177.4	0.807333
177.5	0.806667
177.6	0.806667
177.7	0.807333
177.8	0.808
177.9	0.806
178	0.805333
178.1	0.806667
178.2	0.806
178.3	0.808
178.4	0.808
178.5	0.807333
178.6	0.808
178.7	0.81
178.8	0.812
178.9	0.812667
179	0.813333
179.1	0.812
179.2	0.81
179.3	0.809333
179.4	0.810667
179.5	0.809333
179.6	0.808667
179.7	0.808667
179.8	0.81
179.9	0.810667
180	0.811333
180.1	0.810667
180.2	0.810667
180.3	0.810667
180.4	0.811333
180.5	0.810667
180.6	0.812
180.7	0.812
180.8	0.813333
180.9	0.813333
181	0.814
181.1	0.815333
181.2	0.814667
181.3	0.814667
181.4	0.814
181.5	0.814
181.6	0.814
181.7	0.814667
181.8	0.814
181.9	0.814667
182	0.815333
182.1	0.816667
182.2	0.815333
182.3	0.816667
182.4	0.818667
182.5	0.818
182.6	0.818
182.7	0.817333
182.8	0.818667
182.9	0.818667
183	0.818
183.1	0.818667
183.2	0.82
183.3	0.821333
183.4	0.821333
183.5	0.821333
183.6	0.821333
183.7	0.822
183.8	0.822
183.9	0.822
184	0.822667
184.1	0.822
184.2	0.822
184.3	0.822
184.4	0.824
184.5	0.822667
184.6	0.822667
184.7	0.822667
184.8	0.822667
184.9	0.821333
185	0.820667
185.1	0.82
185.2	0.82
185.3	0.817333
185.4	0.816667
185.5	0.816
185.6	0.816
185.7	0.817333
185.8	0.818667
185.9	0.817333
186	0.817333
186.1	0.820667
186.2	0.820667
186.3	0.820667
186.4	0.820667
186.5	0.82
186.6	0.818667
186.7	0.818667
186.8	0.819333
186.9	0.82
187	0.819333
187.1	0.82
187.2	0.82
187.3	0.819333
187.4	0.818
187.5	0.818667
187.6	0.818667
187.7	0.818
187.8	0.818
187.9	0.818
188	0.816
188.1	0.815333
188.2	0.815333
188.3	0.816
188.4	0.816
188.5	0.815333
188.6	0.815333
188.7	0.814
188.8	0.814
188.9	0.813333
189	0.814
189.1	0.814
189.2	0.814667
189.3	0.816
189.4	0.816
189.5	0.816
189.6	0.815333
189.7	0.817333
189.8	0.818667
189.9	0.82
190	0.820667
190.1	0.818
190.2	0.818
190.3	0.819333
190.4	0.818
190.5	0.818
190.6	0.819333
190.7	0.818667
190.8	0.818667
190.9	0.818
191	0.816667
191.1	0.818
191.2	0.819333
191.3	0.82
191.4	0.82
191.5	0.819333
191.6	0.822
191.7	0.822
191.8	0.822
191.9	0.821333
192	0.822
192.1	0.822
192.2	0.821333
192.3	0.820667
192.4	0.819333
192.5	0.82
192.6	0.820667
192.7	0.822667
192.8	0.822
192.9	0.820667
193	0.821333
193.1	0.821333
193.2	0.821333
193.3	0.821333
193.4	0.821333
193.5	0.821333
193.6	0.822
193.7	0.822
193.8	0.822667
193.9	0.822667
194	0.825333
194.1	0.824667
194.2	0.826
194.3	0.826667
194.4	0.826667
194.5	0.826667
194.6	0.825333
194.7	0.826
194.8	0.826667
194.9	0.827333
195	0.827333
195.1	0.827333
195.2	0.827333
195.3	0.827333
195.4	0.826667
195.5	0.827333
195.6	0.828
195.7	0.826667
195.8	0.826
195.9	0.826
196	0.826
196.1	0.825333
196.2	0.824667
196.3	0.827333
196.4	0.826667
196.5	0.826667
196.6	0.825333
196.7	0.825333
196.8	0.826
196.9	0.826667
197	0.827333
197.1	0.827333
197.2	0.826667
197.3	0.829333
197.4	0.829333
197.5	0.830667
197.6	0.832
197.7	0.832
197.8	0.832667
197.9	0.832667
198	0.832667
198.1	0.833333
198.2	0.833333
198.3	0.832667
198.4	0.832
198.5	0.832667
198.6	0.833333
198.7	0.832667
198.8	0.833333
198.9	0.834667
199	0.832
199.1	0.831333
199.2	0.831333
199.3	0.832667
199.4	0.830667
199.5	0.832
199.6	0.831333
199.7	0.831333
199.8	0.831333
199.9	0.832
200	0.833333
[truncated: 14,000 more rows]
