# Supplementary material for: Bayesian inference of kinetic schemes for ion channels by Kalman filtering
Source: eLife journal article supplement (doi:10.7554/elife.62714), 2022-05-04
Supplement: fig4-data1 [file 1_Sim_N_2000_Fluor_MW.xlsx]

## Sheet: Tabelle1
0.1	0
0.2	0
0.3	0
0.4	0
0.5	0
0.6	0
0.7	0
0.8	0
0.9	0
1	0
1.1	0
1.2	0
1.3	0
1.4	0
1.5	0
1.6	0
1.7	0
1.8	0
1.9	0
2	0
2.1	0
2.2	0
2.3	0
2.4	0
2.5	0
2.6	0
2.7	0
2.8	0
2.9	0
3	0
3.1	0
3.2	0
3.3	0
3.4	0
3.5	0
3.6	0
3.7	0
3.8	0
3.9	0
4	0
4.1	0
4.2	0
4.3	0
4.4	0
4.5	0
4.6	0
4.7	0
4.8	0
4.9	0
5	0
5.1	0
5.2	0
5.3	0
5.4	0
5.5	0
5.6	0
5.7	0
5.8	0
5.9	0
6	0
6.1	0
6.2	0
6.3	0
6.4	0
6.5	0
6.6	0
6.7	0
6.8	0
6.9	0
7	0
7.1	0
7.2	0
7.3	0
7.4	0
7.5	0
7.6	0
7.7	0
7.8	0
7.9	0
8	0
8.1	0
8.2	0
8.3	0
8.4	0
8.5	0
8.6	0
8.7	0
8.8	0
8.9	0
9	0
9.1	0
9.2	0
9.3	0
9.4	0
9.5	0
9.6	0
9.7	0
9.8	0
9.9	0
10	0
10.1	0
10.2	0
10.3	0
10.4	0
10.5	0
10.6	0
10.7	0
10.8	0
10.9	0
11	0
11.1	0
11.2	0
11.3	0
11.4	0
11.5	0
11.6	0
11.7	0
11.8	0
11.9	0
12	0
12.1	0
12.2	0
12.3	0
12.4	0
12.5	0
12.6	0
12.7	0
12.8	0
12.9	0
13	0
13.1	0
13.2	0
13.3	0
13.4	0
13.5	0
13.6	0
13.7	0
13.8	0
13.9	0
14	0
14.1	0
14.2	0
14.3	0
14.4	0
14.5	0
14.6	0
14.7	0
14.8	0
14.9	0
15	0
15.1	0
15.2	0
15.3	0
15.4	0
15.5	0
15.6	0
15.7	0
15.8	0
15.9	0
16	0
16.1	0
16.2	0
16.3	0
16.4	0
16.5	0
16.6	0
16.7	0
16.8	0
16.9	0
17	0
17.1	0
17.2	0
17.3	0
17.4	0
17.5	0
17.6	0
17.7	0
17.8	0
17.9	0
18	0
18.1	0
18.2	0
18.3	0
18.4	0
18.5	0
18.6	0
18.7	0
18.8	0
18.9	0
19	0
19.1	0
19.2	0
19.3	0
19.4	0
19.5	0
19.6	0
19.7	0
19.8	0
19.9	0
20	0
20.1	0
20.2	0
20.3	0
20.4	0
20.5	0
20.6	0
20.7	0
20.8	0
20.9	0
21	0
21.1	0
21.2	0
21.3	0
21.4	0
21.5	0
21.6	0
21.7	0
21.8	0
21.9	0
22	0
22.1	0
22.2	0
22.3	0
22.4	0
22.5	0
22.6	0
22.7	0
22.8	0
22.9	0
23	0
23.1	0
23.2	0
23.3	0
23.4	0
23.5	0
23.6	0
23.7	0
23.8	0
23.9	0
24	0
24.1	0
24.2	0
24.3	0
24.4	0
24.5	0
24.6	0
24.7	0
24.8	0
24.9	0
25	0
25.1	0
25.2	0
25.3	0
25.4	0
25.5	0
25.6	0
25.7	0
25.8	0
25.9	0
26	0
26.1	0
26.2	0
26.3	0
26.4	0
26.5	0
26.6	0
26.7	0
26.8	0
26.9	0
27	0
27.1	0
27.2	0
27.3	0
27.4	0
27.5	0
27.6	0
27.7	0
27.8	0
27.9	0
28	0
28.1	0
28.2	0
28.3	0
28.4	0
28.5	0
28.6	0
28.7	0
28.8	0
28.9	0
29	0
29.1	0
29.2	0
29.3	0
29.4	0
29.5	0
29.6	0
29.7	0
29.8	0
29.9	0
30	0
30.1	0
30.2	0
30.3	0
30.4	0
30.5	0
30.6	0
30.7	0
30.8	0
30.9	0
31	0
31.1	0
31.2	0
31.3	0
31.4	0
31.5	0
31.6	0
31.7	0
31.8	0
31.9	0
32	0
32.1	0
32.2	0
32.3	0
32.4	0
32.5	0
32.6	0
32.7	0
32.8	0
32.9	0
33	0
33.1	0
33.2	0
33.3	0
33.4	0
33.5	0
33.6	0
33.7	0
33.8	0
33.9	0
34	0
34.1	0
34.2	0
34.3	0
34.4	0
34.5	0
34.6	0
34.7	0
34.8	0
34.9	0
35	0
35.1	0
35.2	0
35.3	0
35.4	0
35.5	0
35.6	0
35.7	0
35.8	0
35.9	0
36	0
36.1	0
36.2	0
36.3	0
36.4	0
36.5	0
36.6	0
36.7	0
36.8	0
36.9	0
37	0
37.1	0
37.2	0
37.3	0
37.4	0
37.5	0
37.6	0
37.7	0
37.8	0
37.9	0
38	0
38.1	0
38.2	0
38.3	0
38.4	0
38.5	0
38.6	0
38.7	0
38.8	0
38.9	0
39	0
39.1	0
39.2	0
39.3	0
39.4	0
39.5	0
39.6	0
39.7	0
39.8	0
39.9	0
40	0
40.1	0
40.2	0
40.3	0
40.4	0
40.5	0
40.6	0
40.7	0
40.8	0
40.9	0
41	0
41.1	0
41.2	0
41.3	0
41.4	0
41.5	0
41.6	0
41.7	0
41.8	0
41.9	0
42	0
42.1	0
42.2	0
42.3	0
42.4	0
42.5	0
42.6	0
42.7	0
42.8	0
42.9	0
43	0
43.1	0
43.2	0
43.3	0
43.4	0
43.5	0
43.6	0
43.7	0
43.8	0
43.9	0
44	0
44.1	0
44.2	0
44.3	0
44.4	0
44.5	0
44.6	0
44.7	0
44.8	0
44.9	0
45	0
45.1	0
45.2	0
45.3	0
45.4	0
45.5	0
45.6	0
45.7	0
45.8	0
45.9	0
46	0
46.1	0
46.2	0
46.3	0
46.4	0
46.5	0
46.6	0
46.7	0
46.8	0
46.9	0
47	0
47.1	0
47.2	0
47.3	0
47.4	0
47.5	0
47.6	0
47.7	0
47.8	0
47.9	0
48	0
48.1	0
48.2	0
48.3	0
48.4	0
48.5	0
48.6	0
48.7	0
48.8	0
48.9	0
49	0
49.1	0
49.2	0
49.3	0
49.4	0
49.5	0
49.6	0
49.7	0
49.8	0
49.9	0
50	0
50.1	0
50.2	0
50.3	0
50.4	0
50.5	0
50.6	0
50.7	0
50.8	0
50.9	0
51	0
51.1	0
51.2	0
51.3	0
51.4	0
51.5	0
51.6	0
51.7	0
51.8	0
51.9	0
52	0
52.1	0
52.2	0
52.3	0
52.4	0
52.5	0
52.6	0
52.7	0
52.8	0
52.9	0
53	0
53.1	0
53.2	0
53.3	0
53.4	0
53.5	0
53.6	0
53.7	0
53.8	0
53.9	0
54	0
54.1	0
54.2	0
54.3	0
54.4	0
54.5	0
54.6	0
54.7	0
54.8	0
54.9	0
55	0
55.1	0
55.2	0
55.3	0
55.4	0
55.5	0
55.6	0
55.7	0
55.8	0
55.9	0
56	0
56.1	0
56.2	0
56.3	0
56.4	0
56.5	0
56.6	0
56.7	0
56.8	0
56.9	0
57	0
57.1	0
57.2	0
57.3	0
57.4	0
57.5	0
57.6	0
57.7	0
57.8	0
57.9	0
58	0
58.1	0
58.2	0
58.3	0
58.4	0
58.5	0
58.6	0
58.7	0
58.8	0
58.9	0
59	0
59.1	0
59.2	0
59.3	0
59.4	0
59.5	0
59.6	0
59.7	0
59.8	0
59.9	0
60	0
60.1	0
60.2	0
60.3	0
60.4	0
60.5	0
60.6	0
60.7	0
60.8	0
60.9	0
61	0
61.1	0
61.2	0
61.3	0
61.4	0
61.5	0
61.6	0
61.7	0
61.8	0
61.9	0
62	0
62.1	0
62.2	0
62.3	0
62.4	0
62.5	0
62.6	0
62.7	0
62.8	0
62.9	0
63	0
63.1	0
63.2	0
63.3	0
63.4	0
63.5	0
63.6	0
63.7	0
63.8	0
63.9	0
64	0
64.1	0
64.2	0
64.3	0
64.4	0
64.5	0
64.6	0
64.7	0
64.8	0
64.9	0
65	0
65.1	0
65.2	0
65.3	0
65.4	0
65.5	0
65.6	0
65.7	0
65.8	0
65.9	0
66	0
66.1	0
66.2	0
66.3	0
66.4	0
66.5	0
66.6	0
66.7	0
66.8	0
66.9	0
67	0
67.1	0
67.2	0
67.3	0
67.4	0
67.5	0
67.6	0
67.7	0
67.8	0
67.9	0
68	0
68.1	0
68.2	0
68.3	0
68.4	0
68.5	0
68.6	0
68.7	0
68.8	0
68.9	0
69	0
69.1	0
69.2	0
69.3	0
69.4	0
69.5	0
69.6	0
69.7	0
69.8	0
69.9	0
70	0
70.1	0
70.2	0
70.3	0
70.4	0
70.5	0
70.6	0
70.7	0
70.8	0
70.9	0
71	0
71.1	0
71.2	0
71.3	0
71.4	0
71.5	0
71.6	0
71.7	0
71.8	0
71.9	0
72	0
72.1	0
72.2	0
72.3	0
72.4	0
72.5	0
72.6	0
72.7	0
72.8	0
72.9	0
73	0
73.1	0
73.2	0
73.3	0
73.4	0
73.5	0
73.6	0
73.7	0
73.8	0
73.9	0
74	0
74.1	0
74.2	0
74.3	0
74.4	0
74.5	0
74.6	0
74.7	0
74.8	0
74.9	0
75	0
75.1	0
75.2	0
75.3	0
75.4	0
75.5	0
75.6	0
75.7	0
75.8	0
75.9	0
76	0
76.1	0
76.2	0
76.3	0
76.4	0
76.5	0
76.6	0
76.7	0
76.8	0
76.9	0
77	0
77.1	0
77.2	0
77.3	0
77.4	0
77.5	0
77.6	0
77.7	0
77.8	0
77.9	0
78	0
78.1	0
78.2	0
78.3	0
78.4	0
78.5	0
78.6	0
78.7	0
78.8	0
78.9	0
79	0
79.1	0
79.2	0
79.3	0
79.4	0
79.5	0
79.6	0
79.7	0
79.8	0
79.9	0
80	0
80.1	0
80.2	0
80.3	0
80.4	0
80.5	0
80.6	0
80.7	0
80.8	0
80.9	0
81	0
81.1	0
81.2	0
81.3	0
81.4	0
81.5	0
81.6	0
81.7	0
81.8	0
81.9	0
82	0
82.1	0
82.2	0
82.3	0
82.4	0
82.5	0
82.6	0
82.7	0
82.8	0
82.9	0
83	0
83.1	0
83.2	0
83.3	0
83.4	0
83.5	0
83.6	0
83.7	0
83.8	0
83.9	0
84	0
84.1	0
84.2	0
84.3	0
84.4	0
84.5	0
84.6	0
84.7	0
84.8	0
84.9	0
85	0
85.1	0
85.2	0
85.3	0
85.4	0
85.5	0
85.6	0
85.7	0
85.8	0
85.9	0
86	0
86.1	0
86.2	0
86.3	0
86.4	0
86.5	0
86.6	0
86.7	0
86.8	0
86.9	0
87	0
87.1	0
87.2	0
87.3	0
87.4	0
87.5	0
87.6	0
87.7	0
87.8	0
87.9	0
88	0
88.1	0
88.2	0
88.3	0
88.4	0
88.5	0
88.6	0
88.7	0
88.8	0
88.9	0
89	0
89.1	0
89.2	0
89.3	0
89.4	0
89.5	0
89.6	0
89.7	0
89.8	0
89.9	0
90	0
90.1	0
90.2	0
90.3	0
90.4	0
90.5	0
90.6	0
90.7	0
90.8	0
90.9	0
91	0
91.1	0
91.2	0
91.3	0
91.4	0
91.5	0
91.6	0
91.7	0
91.8	0
91.9	0
92	0
92.1	0
92.2	0
92.3	0
92.4	0
92.5	0
92.6	0
92.7	0
92.8	0
92.9	0
93	0
93.1	0
93.2	0
93.3	0
93.4	0
93.5	0
93.6	0
93.7	0
93.8	0
93.9	0
94	0
94.1	0
94.2	0
94.3	0
94.4	0
94.5	0
94.6	0
94.7	0
94.8	0
94.9	0
95	0
95.1	0
95.2	0
95.3	0
95.4	0
95.5	0
95.6	0
95.7	0
95.8	0
95.9	0
96	0
96.1	0
96.2	0
96.3	0
96.4	0
96.5	0
96.6	0
96.7	0
96.8	0
96.9	0
97	0
97.1	0
97.2	0
97.3	0
97.4	0
97.5	0
97.6	0
97.7	0
97.8	0
97.9	0
98	0
98.1	0
98.2	0
98.3	0
98.4	0
98.5	0
98.6	0
98.7	0
98.8	0
98.9	0
99	0
99.1	0
99.2	0
99.3	0
99.4	0
99.5	0
99.6	0
99.7	0
99.8	0
99.9	0
100	0
100.1	0.53525
100.2	0.7265
100.3	0.818
100.4	0.87375
100.5	0.90625
100.6	0.92275
100.7	0.933
100.8	0.94525
100.9	0.94975
101	0.95025
101.1	0.9525
101.2	0.9535
101.3	0.9515
101.4	0.95425
101.5	0.953
101.6	0.9525
101.7	0.95425
101.8	0.956
101.9	0.95375
102	0.952
102.1	0.9535
102.2	0.9535
102.3	0.95525
102.4	0.9555
102.5	0.9565
102.6	0.95675
102.7	0.95725
102.8	0.955
102.9	0.96375
103	0.96175
103.1	0.96
103.2	0.96175
103.3	0.9615
103.4	0.961
103.5	0.96075
103.6	0.959
103.7	0.96025
103.8	0.96525
103.9	0.961
104	0.95725
104.1	0.957
104.2	0.9585
104.3	0.95875
104.4	0.95875
104.5	0.9545
104.6	0.956
104.7	0.96125
104.8	0.96025
104.9	0.96075
105	0.95925
105.1	0.9565
105.2	0.96075
105.3	0.962
105.4	0.95925
105.5	0.962
105.6	0.9615
105.7	0.96375
105.8	0.96525
105.9	0.96475
106	0.9655
106.1	0.96325
106.2	0.9625
106.3	0.96425
106.4	0.96075
106.5	0.96225
106.6	0.9645
106.7	0.96725
106.8	0.96625
106.9	0.96275
107	0.967
107.1	0.964
107.2	0.96575
107.3	0.967
107.4	0.9625
107.5	0.96825
107.6	0.967
107.7	0.96675
107.8	0.9665
107.9	0.967
108	0.9685
108.1	0.967
108.2	0.96925
108.3	0.9725
108.4	0.97125
108.5	0.96875
108.6	0.9735
108.7	0.968
108.8	0.96675
108.9	0.96975
109	0.96725
109.1	0.96425
109.2	0.96325
109.3	0.962
109.4	0.96425
109.5	0.965
109.6	0.96875
109.7	0.9705
109.8	0.9685
109.9	0.966
110	0.966
110.1	0.9695
110.2	0.97
110.3	0.96775
110.4	0.96825
110.5	0.9695
110.6	0.969
110.7	0.968
110.8	0.96675
110.9	0.9705
111	0.97375
111.1	0.973
111.2	0.969
111.3	0.97
111.4	0.97175
111.5	0.96825
111.6	0.97175
111.7	0.9755
111.8	0.97475
111.9	0.97375
112	0.97225
112.1	0.96825
112.2	0.96825
112.3	0.97025
112.4	0.9685
112.5	0.96625
112.6	0.969
112.7	0.96825
112.8	0.97
112.9	0.972
113	0.97175
113.1	0.97125
113.2	0.96875
113.3	0.9695
113.4	0.97125
113.5	0.97275
113.6	0.9735
113.7	0.97525
113.8	0.972
113.9	0.97175
114	0.97225
114.1	0.9745
114.2	0.974
114.3	0.9735
114.4	0.97125
114.5	0.96875
114.6	0.97325
114.7	0.973
114.8	0.976
114.9	0.9765
115	0.97575
115.1	0.9755
115.2	0.9715
115.3	0.97225
115.4	0.97325
115.5	0.972
115.6	0.974
115.7	0.9735
115.8	0.97425
115.9	0.97175
116	0.973
116.1	0.97675
116.2	0.97425
116.3	0.97675
116.4	0.97375
116.5	0.977
116.6	0.9745
116.7	0.97725
116.8	0.97575
116.9	0.9755
117	0.97475
117.1	0.9725
117.2	0.9765
117.3	0.97575
117.4	0.97825
117.5	0.97725
117.6	0.9805
117.7	0.98025
117.8	0.97625
117.9	0.9735
118	0.9745
118.1	0.9765
118.2	0.9775
118.3	0.98
118.4	0.97725
118.5	0.97575
118.6	0.9755
118.7	0.97475
118.8	0.976
118.9	0.977
119	0.97575
119.1	0.97675
119.2	0.977
119.3	0.9785
119.4	0.9805
119.5	0.98075
119.6	0.97875
119.7	0.9785
119.8	0.98
119.9	0.9805
120	0.9775
120.1	0.97625
120.2	0.97525
120.3	0.9755
120.4	0.9775
120.5	0.97875
120.6	0.98175
120.7	0.9805
120.8	0.98175
120.9	0.9805
121	0.98
121.1	0.9805
121.2	0.97925
121.3	0.98075
121.4	0.983
121.5	0.9815
121.6	0.98375
121.7	0.98125
121.8	0.9815
121.9	0.9815
122	0.98175
122.1	0.98325
122.2	0.98125
122.3	0.98
122.4	0.981
122.5	0.98175
122.6	0.9835
122.7	0.98175
122.8	0.9785
122.9	0.97875
123	0.98025
123.1	0.98375
123.2	0.98425
123.3	0.97975
123.4	0.977
123.5	0.9795
123.6	0.97975
123.7	0.98
123.8	0.98125
123.9	0.982
124	0.98125
124.1	0.98
124.2	0.9775
124.3	0.98225
124.4	0.984
124.5	0.9815
124.6	0.98425
124.7	0.983
124.8	0.98275
124.9	0.984
125	0.9825
125.1	0.9825
125.2	0.983
125.3	0.9795
125.4	0.97975
125.5	0.97975
125.6	0.9815
125.7	0.98225
125.8	0.98025
125.9	0.98125
126	0.98375
126.1	0.98375
126.2	0.98225
126.3	0.98125
126.4	0.98425
126.5	0.982
126.6	0.98275
126.7	0.984
126.8	0.98325
126.9	0.98525
127	0.983
127.1	0.981
127.2	0.98225
127.3	0.98425
127.4	0.9845
127.5	0.985
127.6	0.98525
127.7	0.98475
127.8	0.98425
127.9	0.98575
128	0.9845
128.1	0.985
128.2	0.98375
128.3	0.98
128.4	0.983
128.5	0.98225
128.6	0.98125
128.7	0.985
128.8	0.9805
128.9	0.98225
129	0.984
129.1	0.98225
129.2	0.98025
129.3	0.9825
129.4	0.98625
129.5	0.987
129.6	0.98575
129.7	0.985
129.8	0.98375
129.9	0.98675
130	0.98325
130.1	0.983
130.2	0.9855
130.3	0.98525
130.4	0.98425
130.5	0.98425
130.6	0.983
130.7	0.98225
130.8	0.9855
130.9	0.9825
131	0.9825
131.1	0.985
131.2	0.985
131.3	0.9845
131.4	0.9855
131.5	0.98525
131.6	0.98375
131.7	0.98475
131.8	0.988
131.9	0.9855
132	0.98275
132.1	0.98325
132.2	0.98525
132.3	0.98425
132.4	0.98425
132.5	0.98575
132.6	0.98325
132.7	0.9845
132.8	0.983
132.9	0.98425
133	0.98675
133.1	0.9845
133.2	0.98375
133.3	0.984
133.4	0.9855
133.5	0.98525
133.6	0.9855
133.7	0.982
133.8	0.984
133.9	0.985
134	0.985
134.1	0.98575
134.2	0.98625
134.3	0.9865
134.4	0.98675
134.5	0.98625
134.6	0.98475
134.7	0.98625
134.8	0.989
134.9	0.99025
135	0.988
135.1	0.98675
135.2	0.98725
135.3	0.98475
135.4	0.986
135.5	0.98675
135.6	0.9865
135.7	0.98575
135.8	0.98625
135.9	0.98675
136	0.98625
136.1	0.98375
136.2	0.98675
136.3	0.98775
136.4	0.988
136.5	0.9875
136.6	0.98775
136.7	0.986
136.8	0.988
136.9	0.98725
137	0.98675
137.1	0.986
137.2	0.98675
137.3	0.99
137.4	0.99025
137.5	0.98825
137.6	0.987
137.7	0.9885
137.8	0.98925
137.9	0.9875
138	0.98725
138.1	0.9885
138.2	0.9895
138.3	0.98775
138.4	0.988
138.5	0.986
138.6	0.98725
138.7	0.985
138.8	0.986
138.9	0.9885
139	0.9865
139.1	0.9875
139.2	0.9865
139.3	0.98625
139.4	0.98625
139.5	0.986
139.6	0.9855
139.7	0.98575
139.8	0.989
139.9	0.9895
140	0.98875
140.1	0.98925
140.2	0.98875
140.3	0.98625
140.4	0.98675
140.5	0.9865
140.6	0.987
140.7	0.989
140.8	0.991
140.9	0.99
141	0.9915
141.1	0.98975
141.2	0.9875
141.3	0.98825
141.4	0.9885
141.5	0.9895
141.6	0.989
141.7	0.9895
141.8	0.98925
141.9	0.99025
142	0.99
142.1	0.98975
142.2	0.98925
142.3	0.98975
142.4	0.98875
142.5	0.9855
142.6	0.985
142.7	0.98425
142.8	0.98475
142.9	0.98625
143	0.98675
143.1	0.98975
143.2	0.9895
143.3	0.98525
143.4	0.9875
143.5	0.987
143.6	0.9865
143.7	0.98425
143.8	0.985
143.9	0.98675
144	0.98775
144.1	0.9895
144.2	0.989
144.3	0.98875
144.4	0.98775
144.5	0.989
144.6	0.9885
144.7	0.99025
144.8	0.98925
144.9	0.98825
145	0.989
145.1	0.9885
145.2	0.98875
145.3	0.988
145.4	0.98775
145.5	0.99
145.6	0.9875
145.7	0.9875
145.8	0.98525
145.9	0.98725
146	0.9885
146.1	0.98825
146.2	0.98925
146.3	0.989
146.4	0.99125
146.5	0.992
146.6	0.99025
146.7	0.98925
146.8	0.99025
146.9	0.99
147	0.99
147.1	0.9915
147.2	0.99
147.3	0.9915
147.4	0.9895
147.5	0.9895
147.6	0.98875
147.7	0.99075
147.8	0.98975
147.9	0.99
148	0.991
148.1	0.991
148.2	0.9885
148.3	0.987
148.4	0.98775
148.5	0.9885
148.6	0.98825
148.7	0.989
148.8	0.98725
148.9	0.9885
149	0.989
149.1	0.98925
149.2	0.98925
149.3	0.98825
149.4	0.98825
149.5	0.988
149.6	0.991
149.7	0.989
149.8	0.99075
149.9	0.99125
150	0.992
150.1	0.991
150.2	0.989
150.3	0.9895
150.4	0.9895
150.5	0.9915
150.6	0.98875
150.7	0.98975
150.8	0.9915
150.9	0.98975
151	0.9895
151.1	0.989
151.2	0.98775
151.3	0.98775
151.4	0.98775
151.5	0.98775
151.6	0.9885
151.7	0.9885
151.8	0.988
151.9	0.98925
152	0.988
152.1	0.99
152.2	0.9915
152.3	0.99
152.4	0.98975
152.5	0.9895
152.6	0.98875
152.7	0.9905
152.8	0.9915
152.9	0.992
153	0.9915
153.1	0.99125
153.2	0.9905
153.3	0.99075
153.4	0.98875
153.5	0.98925
153.6	0.98925
153.7	0.9885
153.8	0.98825
153.9	0.9865
154	0.988
154.1	0.98975
154.2	0.989
154.3	0.99075
154.4	0.9905
154.5	0.99175
154.6	0.99125
154.7	0.9925
154.8	0.9905
154.9	0.98925
155	0.988
155.1	0.99025
155.2	0.99025
155.3	0.991
155.4	0.98825
155.5	0.988
155.6	0.988
155.7	0.98675
155.8	0.98975
155.9	0.99025
156	0.992
156.1	0.99125
156.2	0.99175
156.3	0.99175
156.4	0.9925
156.5	0.9925
156.6	0.9915
156.7	0.99075
156.8	0.99025
156.9	0.989
157	0.98925
157.1	0.991
157.2	0.98925
157.3	0.98825
157.4	0.98775
157.5	0.9895
157.6	0.98925
157.7	0.99025
157.8	0.99125
157.9	0.99175
158	0.991
158.1	0.99
158.2	0.99075
158.3	0.9915
158.4	0.992
158.5	0.991
158.6	0.98975
158.7	0.98975
158.8	0.993
158.9	0.9935
159	0.99375
159.1	0.99175
159.2	0.9915
159.3	0.99
159.4	0.98925
159.5	0.9895
159.6	0.98975
159.7	0.9905
159.8	0.9905
159.9	0.98825
160	0.98825
160.1	0.9895
160.2	0.98975
160.3	0.98875
160.4	0.99
160.5	0.99
160.6	0.9905
160.7	0.9885
160.8	0.989
160.9	0.99125
161	0.992
161.1	0.99225
161.2	0.992
161.3	0.99275
161.4	0.991
161.5	0.99
161.6	0.99075
161.7	0.99025
161.8	0.99175
161.9	0.99225
162	0.99275
162.1	0.98875
162.2	0.9905
162.3	0.991
162.4	0.99
162.5	0.98925
162.6	0.9895
162.7	0.98925
162.8	0.99175
162.9	0.99
163	0.98775
163.1	0.9895
163.2	0.991
163.3	0.98975
163.4	0.99025
163.5	0.99
163.6	0.98875
163.7	0.98825
163.8	0.98875
163.9	0.98925
164	0.9885
164.1	0.98975
164.2	0.98975
164.3	0.99075
164.4	0.9915
164.5	0.99125
164.6	0.9915
164.7	0.9915
164.8	0.9905
164.9	0.9905
165	0.99225
165.1	0.994
165.2	0.994
165.3	0.99325
165.4	0.994
165.5	0.99475
165.6	0.991
165.7	0.99325
165.8	0.98925
165.9	0.989
166	0.98925
166.1	0.98975
166.2	0.98875
166.3	0.98975
166.4	0.9905
166.5	0.98925
166.6	0.98775
166.7	0.9895
166.8	0.99075
166.9	0.98925
167	0.992
167.1	0.99
167.2	0.99025
167.3	0.99075
167.4	0.99025
167.5	0.99125
167.6	0.9905
167.7	0.99025
167.8	0.991
167.9	0.99075
168	0.98925
168.1	0.9885
168.2	0.98925
168.3	0.98975
168.4	0.99175
168.5	0.99275
168.6	0.9925
168.7	0.9925
168.8	0.9925
168.9	0.9895
169	0.9915
169.1	0.99025
169.2	0.99125
169.3	0.99125
169.4	0.9925
169.5	0.99175
169.6	0.993
169.7	0.9925
169.8	0.9895
169.9	0.99125
170	0.99075
170.1	0.992
170.2	0.99225
170.3	0.99
170.4	0.992
170.5	0.99075
170.6	0.9925
170.7	0.99125
170.8	0.99375
170.9	0.99175
171	0.992
171.1	0.99275
171.2	0.9925
171.3	0.992
171.4	0.991
171.5	0.9905
171.6	0.9885
171.7	0.9885
171.8	0.9915
171.9	0.9915
172	0.991
172.1	0.99275
172.2	0.9945
172.3	0.99175
172.4	0.9905
172.5	0.99075
172.6	0.992
172.7	0.992
172.8	0.99175
172.9	0.9915
173	0.992
173.1	0.992
173.2	0.99075
173.3	0.9925
173.4	0.99075
173.5	0.988
173.6	0.98875
173.7	0.99025
173.8	0.98875
173.9	0.9895
174	0.9905
174.1	0.99125
174.2	0.991
174.3	0.99225
174.4	0.9915
174.5	0.9915
174.6	0.99125
174.7	0.992
174.8	0.9915
174.9	0.99075
175	0.9905
175.1	0.991
175.2	0.9905
175.3	0.99025
175.4	0.99075
175.5	0.9915
175.6	0.993
175.7	0.9945
175.8	0.994
175.9	0.9935
176	0.993
176.1	0.993
176.2	0.99325
176.3	0.9905
176.4	0.99
176.5	0.989
176.6	0.9915
176.7	0.992
176.8	0.99125
176.9	0.99225
177	0.99325
177.1	0.99225
177.2	0.993
177.3	0.99425
177.4	0.99375
177.5	0.993
177.6	0.992
177.7	0.992
177.8	0.991
177.9	0.988
178	0.98825
178.1	0.99075
178.2	0.99275
178.3	0.99125
178.4	0.99025
178.5	0.99175
178.6	0.99225
178.7	0.9925
178.8	0.992
178.9	0.9905
179	0.99
179.1	0.98975
179.2	0.99175
179.3	0.99125
179.4	0.99275
179.5	0.9905
179.6	0.99
179.7	0.9885
179.8	0.9885
179.9	0.989
180	0.99225
180.1	0.99125
180.2	0.992
180.3	0.9925
180.4	0.99325
180.5	0.992
180.6	0.9895
180.7	0.99175
180.8	0.98975
180.9	0.98975
181	0.98825
181.1	0.98875
181.2	0.988
181.3	0.99125
181.4	0.992
181.5	0.9925
181.6	0.993
181.7	0.99075
181.8	0.991
181.9	0.9905
182	0.99075
182.1	0.98925
182.2	0.99125
182.3	0.99025
182.4	0.9905
182.5	0.98925
182.6	0.9895
182.7	0.991
182.8	0.9915
182.9	0.9895
183	0.9915
183.1	0.99175
183.2	0.992
183.3	0.99
183.4	0.9915
183.5	0.994
183.6	0.99325
183.7	0.9895
183.8	0.9905
183.9	0.99025
184	0.98875
184.1	0.98825
184.2	0.98825
184.3	0.9895
184.4	0.98925
184.5	0.99075
184.6	0.993
184.7	0.993
184.8	0.9915
184.9	0.991
185	0.988
185.1	0.98975
185.2	0.9895
185.3	0.98875
185.4	0.99175
185.5	0.98975
185.6	0.9915
185.7	0.9915
185.8	0.992
185.9	0.9925
186	0.9935
186.1	0.99325
186.2	0.99025
186.3	0.989
186.4	0.989
186.5	0.98975
186.6	0.99125
186.7	0.99
186.8	0.989
186.9	0.9905
187	0.9915
187.1	0.9915
187.2	0.99075
187.3	0.991
187.4	0.9915
187.5	0.99025
187.6	0.9915
187.7	0.992
187.8	0.9915
187.9	0.99075
188	0.98775
188.1	0.991
188.2	0.9915
188.3	0.992
188.4	0.99075
188.5	0.99025
188.6	0.98925
188.7	0.99075
188.8	0.99225
188.9	0.99075
189	0.991
189.1	0.9895
189.2	0.987
189.3	0.988
189.4	0.98825
189.5	0.98675
189.6	0.98775
189.7	0.9885
189.8	0.9875
189.9	0.98875
190	0.9885
190.1	0.9875
190.2	0.98875
190.3	0.9875
190.4	0.98925
190.5	0.991
190.6	0.9905
190.7	0.98825
190.8	0.99025
190.9	0.9915
191	0.99175
191.1	0.992
191.2	0.992
191.3	0.9895
191.4	0.98975
191.5	0.9895
191.6	0.98875
191.7	0.989
191.8	0.98725
191.9	0.989
192	0.98975
192.1	0.9925
192.2	0.9915
192.3	0.99
192.4	0.9925
192.5	0.992
192.6	0.99125
192.7	0.991
192.8	0.99325
192.9	0.992
193	0.991
193.1	0.989
193.2	0.98775
193.3	0.98825
193.4	0.987
193.5	0.99025
193.6	0.99025
193.7	0.988
193.8	0.988
193.9	0.98875
194	0.99025
194.1	0.98875
194.2	0.9895
194.3	0.99075
194.4	0.9925
194.5	0.993
194.6	0.9925
194.7	0.993
194.8	0.99125
194.9	0.991
195	0.98925
195.1	0.9895
195.2	0.991
195.3	0.9905
195.4	0.99125
195.5	0.99125
195.6	0.99325
195.7	0.99075
195.8	0.9925
195.9	0.99275
196	0.98975
196.1	0.988
196.2	0.98675
196.3	0.988
196.4	0.98775
196.5	0.99
196.6	0.991
196.7	0.99175
196.8	0.98875
196.9	0.99225
197	0.99275
197.1	0.99175
197.2	0.992
197.3	0.99275
197.4	0.99175
197.5	0.9885
197.6	0.99
197.7	0.99025
197.8	0.99075
197.9	0.99075
198	0.9905
198.1	0.99125
198.2	0.9875
198.3	0.9875
198.4	0.98625
198.5	0.987
198.6	0.988
198.7	0.9895
198.8	0.98925
198.9	0.9905
199	0.9915
199.1	0.99375
199.2	0.99275
199.3	0.991
199.4	0.99175
199.5	0.99175
199.6	0.9925
199.7	0.992
199.8	0.99075
199.9	0.993
200	0.9905
[truncated: 14,000 more rows]
