# Supplementary material for: Bayesian inference of kinetic schemes for ion channels by Kalman filtering
Source: eLife journal article supplement (doi:10.7554/elife.62714), 2022-05-04
Supplement: fig4-data1 [file 1_Sim_N_2000_Strom_MW.xlsx]

## Sheet: Tabelle1
0.1	0
0.2	0
0.3	0
0.4	0
0.5	0
0.6	0
0.7	0
0.8	0
0.9	0
1	0
1.1	0
1.2	0
1.3	0
1.4	0
1.5	0
1.6	0
1.7	0
1.8	0
1.9	0
2	0
2.1	0
2.2	0
2.3	0
2.4	0
2.5	0
2.6	0
2.7	0
2.8	0
2.9	0
3	0
3.1	0
3.2	0
3.3	0
3.4	0
3.5	0
3.6	0
3.7	0
3.8	0
3.9	0
4	0
4.1	0
4.2	0
4.3	0
4.4	0
4.5	0
4.6	0
4.7	0
4.8	0
4.9	0
5	0
5.1	0
5.2	0
5.3	0
5.4	0
5.5	0
5.6	0
5.7	0
5.8	0
5.9	0
6	0
6.1	0
6.2	0
6.3	0
6.4	0
6.5	0
6.6	0
6.7	0
6.8	0
6.9	0
7	0
7.1	0
7.2	0
7.3	0
7.4	0
7.5	0
7.6	0
7.7	0
7.8	0
7.9	0
8	0
8.1	0
8.2	0
8.3	0
8.4	0
8.5	0
8.6	0
8.7	0
8.8	0
8.9	0
9	0
9.1	0
9.2	0
9.3	0
9.4	0
9.5	0
9.6	0
9.7	0
9.8	0
9.9	0
10	0
10.1	0
10.2	0
10.3	0
10.4	0
10.5	0
10.6	0
10.7	0
10.8	0
10.9	0
11	0
11.1	0
11.2	0
11.3	0
11.4	0
11.5	0
11.6	0
11.7	0
11.8	0
11.9	0
12	0
12.1	0
12.2	0
12.3	0
12.4	0
12.5	0
12.6	0
12.7	0
12.8	0
12.9	0
13	0
13.1	0
13.2	0
13.3	0
13.4	0
13.5	0
13.6	0
13.7	0
13.8	0
13.9	0
14	0
14.1	0
14.2	0
14.3	0
14.4	0
14.5	0
14.6	0
14.7	0
14.8	0
14.9	0
15	0
15.1	0
15.2	0
15.3	0
15.4	0
15.5	0
15.6	0
15.7	0
15.8	0
15.9	0
16	0
16.1	0
16.2	0
16.3	0
16.4	0
16.5	0
16.6	0
16.7	0
16.8	0
16.9	0
17	0
17.1	0
17.2	0
17.3	0
17.4	0
17.5	0
17.6	0
17.7	0
17.8	0
17.9	0
18	0
18.1	0
18.2	0
18.3	0
18.4	0
18.5	0
18.6	0
18.7	0
18.8	0
18.9	0
19	0
19.1	0
19.2	0
19.3	0
19.4	0
19.5	0
19.6	0
19.7	0
19.8	0
19.9	0
20	0
20.1	0
20.2	0
20.3	0
20.4	0
20.5	0
20.6	0
20.7	0
20.8	0
20.9	0
21	0
21.1	0
21.2	0
21.3	0
21.4	0
21.5	0
21.6	0
21.7	0
21.8	0
21.9	0
22	0
22.1	0
22.2	0
22.3	0
22.4	0
22.5	0
22.6	0
22.7	0
22.8	0
22.9	0
23	0
23.1	0
23.2	0
23.3	0
23.4	0
23.5	0
23.6	0
23.7	0
23.8	0
23.9	0
24	0
24.1	0
24.2	0
24.3	0
24.4	0
24.5	0
24.6	0
24.7	0
24.8	0
24.9	0
25	0
25.1	0
25.2	0
25.3	0
25.4	0
25.5	0
25.6	0
25.7	0
25.8	0
25.9	0
26	0
26.1	0
26.2	0
26.3	0
26.4	0
26.5	0
26.6	0
26.7	0
26.8	0
26.9	0
27	0
27.1	0
27.2	0
27.3	0
27.4	0
27.5	0
27.6	0
27.7	0
27.8	0
27.9	0
28	0
28.1	0
28.2	0
28.3	0
28.4	0
28.5	0
28.6	0
28.7	0
28.8	0
28.9	0
29	0
29.1	0
29.2	0
29.3	0
29.4	0
29.5	0
29.6	0
29.7	0
29.8	0
29.9	0
30	0
30.1	0
30.2	0
30.3	0
30.4	0
30.5	0
30.6	0
30.7	0
30.8	0
30.9	0
31	0
31.1	0
31.2	0
31.3	0
31.4	0
31.5	0
31.6	0
31.7	0
31.8	0
31.9	0
32	0
32.1	0
32.2	0
32.3	0
32.4	0
32.5	0
32.6	0
32.7	0
32.8	0
32.9	0
33	0
33.1	0
33.2	0
33.3	0
33.4	0
33.5	0
33.6	0
33.7	0
33.8	0
33.9	0
34	0
34.1	0
34.2	0
34.3	0
34.4	0
34.5	0
34.6	0
34.7	0
34.8	0
34.9	0
35	0
35.1	0
35.2	0
35.3	0
35.4	0
35.5	0
35.6	0
35.7	0
35.8	0
35.9	0
36	0
36.1	0
36.2	0
36.3	0
36.4	0
36.5	0
36.6	0
36.7	0
36.8	0
36.9	0
37	0
37.1	0
37.2	0
37.3	0
37.4	0
37.5	0
37.6	0
37.7	0
37.8	0
37.9	0
38	0
38.1	0
38.2	0
38.3	0
38.4	0
38.5	0
38.6	0
38.7	0
38.8	0
38.9	0
39	0
39.1	0
39.2	0
39.3	0
39.4	0
39.5	0
39.6	0
39.7	0
39.8	0
39.9	0
40	0
40.1	0
40.2	0
40.3	0
40.4	0
40.5	0
40.6	0
40.7	0
40.8	0
40.9	0
41	0
41.1	0
41.2	0
41.3	0
41.4	0
41.5	0
41.6	0
41.7	0
41.8	0
41.9	0
42	0
42.1	0
42.2	0
42.3	0
42.4	0
42.5	0
42.6	0
42.7	0
42.8	0
42.9	0
43	0
43.1	0
43.2	0
43.3	0
43.4	0
43.5	0
43.6	0
43.7	0
43.8	0
43.9	0
44	0
44.1	0
44.2	0
44.3	0
44.4	0
44.5	0
44.6	0
44.7	0
44.8	0
44.9	0
45	0
45.1	0
45.2	0
45.3	0
45.4	0
45.5	0
45.6	0
45.7	0
45.8	0
45.9	0
46	0
46.1	0
46.2	0
46.3	0
46.4	0
46.5	0
46.6	0
46.7	0
46.8	0
46.9	0
47	0
47.1	0
47.2	0
47.3	0
47.4	0
47.5	0
47.6	0
47.7	0
47.8	0
47.9	0
48	0
48.1	0
48.2	0
48.3	0
48.4	0
48.5	0
48.6	0
48.7	0
48.8	0
48.9	0
49	0
49.1	0
49.2	0
49.3	0
49.4	0
49.5	0
49.6	0
49.7	0
49.8	0
49.9	0
50	0
50.1	0
50.2	0
50.3	0
50.4	0
50.5	0
50.6	0
50.7	0
50.8	0
50.9	0
51	0
51.1	0
51.2	0
51.3	0
51.4	0
51.5	0
51.6	0
51.7	0
51.8	0
51.9	0
52	0
52.1	0
52.2	0
52.3	0
52.4	0
52.5	0
52.6	0
52.7	0
52.8	0
52.9	0
53	0
53.1	0
53.2	0
53.3	0
53.4	0
53.5	0
53.6	0
53.7	0
53.8	0
53.9	0
54	0
54.1	0
54.2	0
54.3	0
54.4	0
54.5	0
54.6	0
54.7	0
54.8	0
54.9	0
55	0
55.1	0
55.2	0
55.3	0
55.4	0
55.5	0
55.6	0
55.7	0
55.8	0
55.9	0
56	0
56.1	0
56.2	0
56.3	0
56.4	0
56.5	0
56.6	0
56.7	0
56.8	0
56.9	0
57	0
57.1	0
57.2	0
57.3	0
57.4	0
57.5	0
57.6	0
57.7	0
57.8	0
57.9	0
58	0
58.1	0
58.2	0
58.3	0
58.4	0
58.5	0
58.6	0
58.7	0
58.8	0
58.9	0
59	0
59.1	0
59.2	0
59.3	0
59.4	0
59.5	0
59.6	0
59.7	0
59.8	0
59.9	0
60	0
60.1	0
60.2	0
60.3	0
60.4	0
60.5	0
60.6	0
60.7	0
60.8	0
60.9	0
61	0
61.1	0
61.2	0
61.3	0
61.4	0
61.5	0
61.6	0
61.7	0
61.8	0
61.9	0
62	0
62.1	0
62.2	0
62.3	0
62.4	0
62.5	0
62.6	0
62.7	0
62.8	0
62.9	0
63	0
63.1	0
63.2	0
63.3	0
63.4	0
63.5	0
63.6	0
63.7	0
63.8	0
63.9	0
64	0
64.1	0
64.2	0
64.3	0
64.4	0
64.5	0
64.6	0
64.7	0
64.8	0
64.9	0
65	0
65.1	0
65.2	0
65.3	0
65.4	0
65.5	0
65.6	0
65.7	0
65.8	0
65.9	0
66	0
66.1	0
66.2	0
66.3	0
66.4	0
66.5	0
66.6	0
66.7	0
66.8	0
66.9	0
67	0
67.1	0
67.2	0
67.3	0
67.4	0
67.5	0
67.6	0
67.7	0
67.8	0
67.9	0
68	0
68.1	0
68.2	0
68.3	0
68.4	0
68.5	0
68.6	0
68.7	0
68.8	0
68.9	0
69	0
69.1	0
69.2	0
69.3	0
69.4	0
69.5	0
69.6	0
69.7	0
69.8	0
69.9	0
70	0
70.1	0
70.2	0
70.3	0
70.4	0
70.5	0
70.6	0
70.7	0
70.8	0
70.9	0
71	0
71.1	0
71.2	0
71.3	0
71.4	0
71.5	0
71.6	0
71.7	0
71.8	0
71.9	0
72	0
72.1	0
72.2	0
72.3	0
72.4	0
72.5	0
72.6	0
72.7	0
72.8	0
72.9	0
73	0
73.1	0
73.2	0
73.3	0
73.4	0
73.5	0
73.6	0
73.7	0
73.8	0
73.9	0
74	0
74.1	0
74.2	0
74.3	0
74.4	0
74.5	0
74.6	0
74.7	0
74.8	0
74.9	0
75	0
75.1	0
75.2	0
75.3	0
75.4	0
75.5	0
75.6	0
75.7	0
75.8	0
75.9	0
76	0
76.1	0
76.2	0
76.3	0
76.4	0
76.5	0
76.6	0
76.7	0
76.8	0
76.9	0
77	0
77.1	0
77.2	0
77.3	0
77.4	0
77.5	0
77.6	0
77.7	0
77.8	0
77.9	0
78	0
78.1	0
78.2	0
78.3	0
78.4	0
78.5	0
78.6	0
78.7	0
78.8	0
78.9	0
79	0
79.1	0
79.2	0
79.3	0
79.4	0
79.5	0
79.6	0
79.7	0
79.8	0
79.9	0
80	0
80.1	0
80.2	0
80.3	0
80.4	0
80.5	0
80.6	0
80.7	0
80.8	0
80.9	0
81	0
81.1	0
81.2	0
81.3	0
81.4	0
81.5	0
81.6	0
81.7	0
81.8	0
81.9	0
82	0
82.1	0
82.2	0
82.3	0
82.4	0
82.5	0
82.6	0
82.7	0
82.8	0
82.9	0
83	0
83.1	0
83.2	0
83.3	0
83.4	0
83.5	0
83.6	0
83.7	0
83.8	0
83.9	0
84	0
84.1	0
84.2	0
84.3	0
84.4	0
84.5	0
84.6	0
84.7	0
84.8	0
84.9	0
85	0
85.1	0
85.2	0
85.3	0
85.4	0
85.5	0
85.6	0
85.7	0
85.8	0
85.9	0
86	0
86.1	0
86.2	0
86.3	0
86.4	0
86.5	0
86.6	0
86.7	0
86.8	0
86.9	0
87	0
87.1	0
87.2	0
87.3	0
87.4	0
87.5	0
87.6	0
87.7	0
87.8	0
87.9	0
88	0
88.1	0
88.2	0
88.3	0
88.4	0
88.5	0
88.6	0
88.7	0
88.8	0
88.9	0
89	0
89.1	0
89.2	0
89.3	0
89.4	0
89.5	0
89.6	0
89.7	0
89.8	0
89.9	0
90	0
90.1	0
90.2	0
90.3	0
90.4	0
90.5	0
90.6	0
90.7	0
90.8	0
90.9	0
91	0
91.1	0
91.2	0
91.3	0
91.4	0
91.5	0
91.6	0
91.7	0
91.8	0
91.9	0
92	0
92.1	0
92.2	0
92.3	0
92.4	0
92.5	0
92.6	0
92.7	0
92.8	0
92.9	0
93	0
93.1	0
93.2	0
93.3	0
93.4	0
93.5	0
93.6	0
93.7	0
93.8	0
93.9	0
94	0
94.1	0
94.2	0
94.3	0
94.4	0
94.5	0
94.6	0
94.7	0
94.8	0
94.9	0
95	0
95.1	0
95.2	0
95.3	0
95.4	0
95.5	0
95.6	0
95.7	0
95.8	0
95.9	0
96	0
96.1	0
96.2	0
96.3	0
96.4	0
96.5	0
96.6	0
96.7	0
96.8	0
96.9	0
97	0
97.1	0
97.2	0
97.3	0
97.4	0
97.5	0
97.6	0
97.7	0
97.8	0
97.9	0
98	0
98.1	0
98.2	0
98.3	0
98.4	0
98.5	0
98.6	0
98.7	0
98.8	0
98.9	0
99	0
99.1	0
99.2	0
99.3	0
99.4	0
99.5	0
99.6	0
99.7	0
99.8	0
99.9	0
100	0
100.1	0.001
100.2	0.003
100.3	0.0065
100.4	0.0095
100.5	0.012
100.6	0.0155
100.7	0.02
100.8	0.0225
100.9	0.0245
101	0.029
101.1	0.031
101.2	0.033
101.3	0.039
101.4	0.044
101.5	0.048
101.6	0.0505
101.7	0.0555
101.8	0.06
101.9	0.064
102	0.0665
102.1	0.0705
102.2	0.0765
102.3	0.0805
102.4	0.084
102.5	0.0875
102.6	0.091
102.7	0.094
102.8	0.0975
102.9	0.1075
103	0.1115
103.1	0.114
103.2	0.116
103.3	0.1205
103.4	0.125
103.5	0.1285
103.6	0.135
103.7	0.1395
103.8	0.1425
103.9	0.147
104	0.1495
104.1	0.1545
104.2	0.159
104.3	0.1615
104.4	0.1655
104.5	0.1685
104.6	0.173
104.7	0.1765
104.8	0.18
104.9	0.1825
105	0.1865
105.1	0.193
105.2	0.1995
105.3	0.203
105.4	0.207
105.5	0.212
105.6	0.215
105.7	0.2175
105.8	0.22
105.9	0.2225
106	0.2255
106.1	0.226
106.2	0.228
106.3	0.229
106.4	0.2315
106.5	0.236
106.6	0.24
106.7	0.243
106.8	0.246
106.9	0.251
107	0.255
107.1	0.257
107.2	0.2595
107.3	0.2605
107.4	0.262
107.5	0.2635
107.6	0.265
107.7	0.2665
107.8	0.2685
107.9	0.2715
108	0.2735
108.1	0.2765
108.2	0.2815
108.3	0.285
108.4	0.288
108.5	0.291
108.6	0.2935
108.7	0.296
108.8	0.2965
108.9	0.299
109	0.304
109.1	0.3055
109.2	0.3065
109.3	0.3095
109.4	0.312
109.5	0.3125
109.6	0.316
109.7	0.3175
109.8	0.3205
109.9	0.323
110	0.326
110.1	0.3295
110.2	0.3315
110.3	0.333
110.4	0.336
110.5	0.3385
110.6	0.341
110.7	0.342
110.8	0.346
110.9	0.349
111	0.3505
111.1	0.353
111.2	0.3565
111.3	0.361
111.4	0.3635
111.5	0.366
111.6	0.3685
111.7	0.3725
111.8	0.374
111.9	0.3785
112	0.381
112.1	0.384
112.2	0.386
112.3	0.387
112.4	0.3885
112.5	0.3925
112.6	0.395
112.7	0.3965
112.8	0.3985
112.9	0.4005
113	0.404
113.1	0.405
113.2	0.4075
113.3	0.4095
113.4	0.412
113.5	0.414
113.6	0.4165
113.7	0.4195
113.8	0.4245
113.9	0.4265
114	0.43
114.1	0.4315
114.2	0.432
114.3	0.4325
114.4	0.435
114.5	0.437
114.6	0.439
114.7	0.4415
114.8	0.4405
114.9	0.441
115	0.4415
115.1	0.442
115.2	0.446
115.3	0.449
115.4	0.4505
115.5	0.4525
115.6	0.452
115.7	0.4535
115.8	0.4555
115.9	0.4575
116	0.46
116.1	0.4625
116.2	0.4645
116.3	0.467
116.4	0.4685
116.5	0.47
116.6	0.4735
116.7	0.477
116.8	0.478
116.9	0.479
117	0.4805
117.1	0.479
117.2	0.48
117.3	0.4815
117.4	0.483
117.5	0.4845
117.6	0.486
117.7	0.4855
117.8	0.488
117.9	0.491
118	0.4925
118.1	0.4965
118.2	0.498
118.3	0.5
118.4	0.5
118.5	0.5015
118.6	0.504
118.7	0.506
118.8	0.5085
118.9	0.511
119	0.514
119.1	0.5165
119.2	0.52
119.3	0.5245
119.4	0.5235
119.5	0.524
119.6	0.5255
119.7	0.527
119.8	0.5275
119.9	0.53
120	0.5305
120.1	0.532
120.2	0.534
120.3	0.538
120.4	0.5405
120.5	0.543
120.6	0.5435
120.7	0.5445
120.8	0.547
120.9	0.55
121	0.552
121.1	0.555
121.2	0.555
121.3	0.5565
121.4	0.558
121.5	0.5605
121.6	0.5635
121.7	0.5635
121.8	0.5655
121.9	0.567
122	0.5685
122.1	0.571
122.2	0.574
122.3	0.5775
122.4	0.5785
122.5	0.581
122.6	0.5825
122.7	0.584
122.8	0.585
122.9	0.5865
123	0.588
123.1	0.5905
123.2	0.5925
123.3	0.594
123.4	0.596
123.5	0.5975
123.6	0.599
123.7	0.5995
123.8	0.6015
123.9	0.603
124	0.606
124.1	0.608
124.2	0.609
124.3	0.6085
124.4	0.6105
124.5	0.6115
124.6	0.6125
124.7	0.615
124.8	0.6145
124.9	0.617
125	0.6175
125.1	0.619
125.2	0.621
125.3	0.6215
125.4	0.622
125.5	0.62
125.6	0.6215
125.7	0.6215
125.8	0.624
125.9	0.625
126	0.6255
126.1	0.625
126.2	0.6265
126.3	0.6255
126.4	0.627
126.5	0.628
126.6	0.63
126.7	0.6305
126.8	0.63
126.9	0.63
127	0.631
127.1	0.633
127.2	0.6345
127.3	0.636
127.4	0.6375
127.5	0.639
127.6	0.6395
127.7	0.6395
127.8	0.6415
127.9	0.642
128	0.6435
128.1	0.6445
128.2	0.644
128.3	0.645
128.4	0.6455
128.5	0.6445
128.6	0.6435
128.7	0.647
128.8	0.647
128.9	0.6485
129	0.649
129.1	0.648
129.2	0.649
129.3	0.652
129.4	0.651
129.5	0.651
129.6	0.6505
129.7	0.652
129.8	0.6545
129.9	0.657
130	0.657
130.1	0.6595
130.2	0.661
130.3	0.6595
130.4	0.662
130.5	0.661
130.6	0.6625
130.7	0.664
130.8	0.665
130.9	0.666
131	0.6665
131.1	0.6675
131.2	0.6675
131.3	0.6695
131.4	0.67
131.5	0.6705
131.6	0.6715
131.7	0.6725
131.8	0.673
131.9	0.673
132	0.675
132.1	0.6745
132.2	0.675
132.3	0.675
132.4	0.6765
132.5	0.678
132.6	0.6785
132.7	0.679
132.8	0.6795
132.9	0.6825
133	0.6845
133.1	0.6865
133.2	0.6865
133.3	0.688
133.4	0.687
133.5	0.688
133.6	0.689
133.7	0.69
133.8	0.691
133.9	0.692
134	0.693
134.1	0.6935
134.2	0.694
134.3	0.696
134.4	0.697
134.5	0.6975
134.6	0.6985
134.7	0.6995
134.8	0.7005
134.9	0.7005
135	0.702
135.1	0.704
135.2	0.7045
135.3	0.705
135.4	0.705
135.5	0.706
135.6	0.7075
135.7	0.708
135.8	0.709
135.9	0.7115
136	0.712
136.1	0.712
136.2	0.713
136.3	0.713
136.4	0.7135
136.5	0.7145
136.6	0.714
136.7	0.714
136.8	0.7135
136.9	0.715
137	0.7145
137.1	0.715
137.2	0.716
137.3	0.7175
137.4	0.7175
137.5	0.7185
137.6	0.7195
137.7	0.72
137.8	0.7215
137.9	0.723
138	0.725
138.1	0.7255
138.2	0.7275
138.3	0.727
138.4	0.727
138.5	0.729
138.6	0.729
138.7	0.7285
138.8	0.729
138.9	0.731
139	0.731
139.1	0.73
139.2	0.7315
139.3	0.7315
139.4	0.731
139.5	0.73
139.6	0.7295
139.7	0.7305
139.8	0.73
139.9	0.732
140	0.7325
140.1	0.7325
140.2	0.7325
140.3	0.733
140.4	0.7335
140.5	0.733
140.6	0.734
140.7	0.735
140.8	0.7355
140.9	0.739
141	0.7395
141.1	0.74
141.2	0.7405
141.3	0.742
141.4	0.744
141.5	0.743
141.6	0.7435
141.7	0.742
141.8	0.743
141.9	0.742
142	0.7435
142.1	0.744
142.2	0.7455
142.3	0.7455
142.4	0.746
142.5	0.7455
142.6	0.745
142.7	0.7465
142.8	0.747
142.9	0.748
143	0.7475
143.1	0.749
143.2	0.75
143.3	0.7505
143.4	0.751
143.5	0.7515
143.6	0.7505
143.7	0.7505
143.8	0.7495
143.9	0.7515
144	0.751
144.1	0.751
144.2	0.752
144.3	0.751
144.4	0.753
144.5	0.7545
144.6	0.7545
144.7	0.7575
144.8	0.7575
144.9	0.7585
145	0.7595
145.1	0.7615
145.2	0.7615
145.3	0.761
145.4	0.7615
145.5	0.7625
145.6	0.763
145.7	0.763
145.8	0.763
145.9	0.7645
146	0.7635
146.1	0.765
146.2	0.7655
146.3	0.766
146.4	0.766
146.5	0.765
146.6	0.7665
146.7	0.767
146.8	0.7665
146.9	0.765
147	0.766
147.1	0.7665
147.2	0.766
147.3	0.766
147.4	0.764
147.5	0.7655
147.6	0.7655
147.7	0.7655
147.8	0.7675
147.9	0.769
148	0.768
148.1	0.7685
148.2	0.7685
148.3	0.7675
148.4	0.7675
148.5	0.7665
148.6	0.768
148.7	0.768
148.8	0.7675
148.9	0.769
149	0.7685
149.1	0.77
149.2	0.7705
149.3	0.7715
149.4	0.7715
149.5	0.7715
149.6	0.771
149.7	0.772
149.8	0.771
149.9	0.7715
150	0.771
150.1	0.774
150.2	0.7765
150.3	0.7785
150.4	0.7785
150.5	0.7785
150.6	0.7785
150.7	0.7775
150.8	0.7775
150.9	0.777
151	0.7755
151.1	0.774
151.2	0.7755
151.3	0.7765
151.4	0.777
151.5	0.7795
151.6	0.779
151.7	0.779
151.8	0.7785
151.9	0.779
152	0.78
152.1	0.782
152.2	0.783
152.3	0.7825
152.4	0.782
152.5	0.7845
152.6	0.7845
152.7	0.784
152.8	0.784
152.9	0.786
153	0.7865
153.1	0.785
153.2	0.786
153.3	0.786
153.4	0.786
153.5	0.7885
153.6	0.791
153.7	0.792
153.8	0.792
153.9	0.7915
154	0.791
154.1	0.792
154.2	0.7935
154.3	0.7925
154.4	0.7925
154.5	0.793
154.6	0.792
154.7	0.792
154.8	0.793
154.9	0.793
155	0.7935
155.1	0.793
155.2	0.7935
155.3	0.7925
155.4	0.793
155.5	0.795
155.6	0.7955
155.7	0.796
155.8	0.7965
155.9	0.796
156	0.7965
156.1	0.7965
156.2	0.7965
156.3	0.7985
156.4	0.7975
156.5	0.7965
156.6	0.7975
156.7	0.799
156.8	0.798
156.9	0.7985
157	0.799
157.1	0.8
157.2	0.8
157.3	0.799
157.4	0.799
157.5	0.799
157.6	0.799
157.7	0.798
157.8	0.7985
157.9	0.799
158	0.8
158.1	0.801
158.2	0.801
158.3	0.8
158.4	0.802
158.5	0.8025
158.6	0.803
158.7	0.803
158.8	0.8045
158.9	0.808
159	0.808
159.1	0.807
159.2	0.807
159.3	0.807
159.4	0.8075
159.5	0.808
159.6	0.807
159.7	0.806
159.8	0.8055
159.9	0.8065
160	0.8065
160.1	0.8055
160.2	0.8035
160.3	0.805
160.4	0.806
160.5	0.807
160.6	0.8075
160.7	0.807
160.8	0.806
160.9	0.8065
161	0.807
161.1	0.807
161.2	0.806
161.3	0.8075
161.4	0.809
161.5	0.809
161.6	0.8085
161.7	0.8075
161.8	0.807
161.9	0.8075
162	0.807
162.1	0.807
162.2	0.8065
162.3	0.8065
162.4	0.806
162.5	0.804
162.6	0.8025
162.7	0.8025
162.8	0.804
162.9	0.8065
163	0.8065
163.1	0.8065
163.2	0.806
163.3	0.8055
163.4	0.806
163.5	0.8055
163.6	0.805
163.7	0.806
163.8	0.8075
163.9	0.808
164	0.81
164.1	0.809
164.2	0.809
164.3	0.8075
164.4	0.809
164.5	0.809
164.6	0.8085
164.7	0.809
164.8	0.808
164.9	0.8085
165	0.807
165.1	0.8085
165.2	0.81
165.3	0.81
165.4	0.8085
165.5	0.808
165.6	0.8085
165.7	0.81
165.8	0.811
165.9	0.8115
166	0.811
166.1	0.811
166.2	0.8125
166.3	0.8105
166.4	0.81
166.5	0.809
166.6	0.8095
166.7	0.8085
166.8	0.8075
166.9	0.807
167	0.8065
167.1	0.8075
167.2	0.8095
167.3	0.809
167.4	0.8085
167.5	0.8085
167.6	0.808
167.7	0.807
167.8	0.807
167.9	0.808
168	0.809
168.1	0.809
168.2	0.81
168.3	0.8105
168.4	0.8105
168.5	0.811
168.6	0.8125
168.7	0.813
168.8	0.814
168.9	0.8135
169	0.813
169.1	0.8135
169.2	0.8135
169.3	0.815
169.4	0.8165
169.5	0.8175
169.6	0.819
169.7	0.82
169.8	0.8195
169.9	0.8195
170	0.8185
170.1	0.818
170.2	0.817
170.3	0.8195
170.4	0.819
170.5	0.8195
170.6	0.817
170.7	0.8175
170.8	0.817
170.9	0.8185
171	0.8185
171.1	0.8175
171.2	0.819
171.3	0.8175
171.4	0.8165
171.5	0.817
171.6	0.817
171.7	0.8175
171.8	0.818
171.9	0.8185
172	0.82
172.1	0.82
172.2	0.8195
172.3	0.819
172.4	0.8175
172.5	0.8175
172.6	0.8175
172.7	0.815
172.8	0.8145
172.9	0.814
173	0.813
173.1	0.8145
173.2	0.8135
173.3	0.814
173.4	0.813
173.5	0.8115
173.6	0.8115
173.7	0.812
173.8	0.812
173.9	0.812
174	0.812
174.1	0.8145
174.2	0.815
174.3	0.8155
174.4	0.816
174.5	0.816
174.6	0.8155
174.7	0.8145
174.8	0.815
174.9	0.8165
175	0.817
175.1	0.8165
175.2	0.816
175.3	0.817
175.4	0.8185
175.5	0.817
175.6	0.8175
175.7	0.818
175.8	0.8185
175.9	0.819
176	0.8185
176.1	0.8175
176.2	0.8175
176.3	0.8185
176.4	0.818
176.5	0.819
176.6	0.8175
176.7	0.8165
176.8	0.816
176.9	0.8155
177	0.8155
177.1	0.8145
177.2	0.8135
177.3	0.813
177.4	0.8135
177.5	0.813
177.6	0.812
177.7	0.8105
177.8	0.811
177.9	0.8115
178	0.8125
178.1	0.8115
178.2	0.8105
178.3	0.8115
178.4	0.811
178.5	0.812
178.6	0.812
178.7	0.814
178.8	0.8155
178.9	0.8155
179	0.8145
179.1	0.8145
179.2	0.814
179.3	0.816
179.4	0.814
179.5	0.814
179.6	0.8145
179.7	0.814
179.8	0.813
179.9	0.812
180	0.8115
180.1	0.81
180.2	0.8095
180.3	0.809
180.4	0.8085
180.5	0.808
180.6	0.8075
180.7	0.807
180.8	0.8055
180.9	0.806
181	0.8055
181.1	0.805
181.2	0.8045
181.3	0.804
181.4	0.8035
181.5	0.8035
181.6	0.804
181.7	0.802
181.8	0.8035
181.9	0.803
182	0.804
182.1	0.8035
182.2	0.8045
182.3	0.8055
182.4	0.8065
182.5	0.8065
182.6	0.8065
182.7	0.808
182.8	0.809
182.9	0.8095
183	0.809
183.1	0.808
183.2	0.808
183.3	0.808
183.4	0.8085
183.5	0.81
183.6	0.8095
183.7	0.808
183.8	0.809
183.9	0.8085
184	0.808
184.1	0.8075
184.2	0.807
184.3	0.807
184.4	0.807
184.5	0.806
184.6	0.8055
184.7	0.804
184.8	0.8035
184.9	0.803
185	0.8015
185.1	0.801
185.2	0.801
185.3	0.8025
185.4	0.802
185.5	0.802
185.6	0.8
185.7	0.799
185.8	0.8
185.9	0.8
186	0.8
186.1	0.7995
186.2	0.8
186.3	0.7995
186.4	0.798
186.5	0.7975
186.6	0.7975
186.7	0.797
186.8	0.797
186.9	0.7975
187	0.797
187.1	0.7975
187.2	0.798
187.3	0.7985
187.4	0.799
187.5	0.799
187.6	0.7995
187.7	0.798
187.8	0.798
187.9	0.798
188	0.798
188.1	0.798
188.2	0.7985
188.3	0.797
188.4	0.797
188.5	0.7965
188.6	0.7965
188.7	0.7965
188.8	0.7965
188.9	0.7955
189	0.794
189.1	0.7955
189.2	0.797
189.3	0.7975
189.4	0.7965
189.5	0.7955
189.6	0.796
189.7	0.7935
189.8	0.794
189.9	0.793
190	0.7925
190.1	0.793
190.2	0.792
190.3	0.791
190.4	0.7915
190.5	0.7915
190.6	0.7905
190.7	0.79
190.8	0.7905
190.9	0.7905
191	0.79
191.1	0.791
191.2	0.7905
191.3	0.7905
191.4	0.791
191.5	0.7915
191.6	0.7915
191.7	0.791
191.8	0.7925
191.9	0.7915
192	0.792
192.1	0.792
192.2	0.7935
192.3	0.794
192.4	0.795
192.5	0.7955
192.6	0.796
192.7	0.7955
192.8	0.795
192.9	0.7935
193	0.794
193.1	0.7955
193.2	0.796
193.3	0.7955
193.4	0.7955
193.5	0.7945
193.6	0.7935
193.7	0.793
193.8	0.792
193.9	0.7915
194	0.791
194.1	0.7935
194.2	0.792
194.3	0.7925
194.4	0.794
194.5	0.7935
194.6	0.7935
194.7	0.792
194.8	0.793
194.9	0.793
195	0.793
195.1	0.794
195.2	0.793
195.3	0.7935
195.4	0.795
195.5	0.796
195.6	0.796
195.7	0.796
195.8	0.7955
195.9	0.7965
196	0.798
196.1	0.7995
196.2	0.7995
196.3	0.8005
196.4	0.8015
196.5	0.801
196.6	0.8005
196.7	0.8005
196.8	0.8005
196.9	0.8005
197	0.7995
197.1	0.8
197.2	0.8
197.3	0.7995
197.4	0.8005
197.5	0.8005
197.6	0.8
197.7	0.8
197.8	0.7995
197.9	0.8005
198	0.801
198.1	0.7995
198.2	0.799
198.3	0.7985
198.4	0.7975
198.5	0.798
198.6	0.797
198.7	0.7975
198.8	0.796
198.9	0.7985
199	0.8005
199.1	0.8
199.2	0.799
199.3	0.8015
199.4	0.8025
199.5	0.8025
199.6	0.8035
199.7	0.8035
199.8	0.802
199.9	0.8025
200	0.804
[truncated: 14,000 more rows]
