# Supplementary material for: Bayesian inference of kinetic schemes for ion channels by Kalman filtering
Source: eLife journal article supplement (doi:10.7554/elife.62714), 2022-05-04
Supplement: fig4-data1 [file 1_Sim_N_3000_Fluor_MW_16M.xlsx]

## Sheet: Tabelle1
0.1	0
0.2	0
0.3	0
0.4	0
0.5	0
0.6	0
0.7	0
0.8	0
0.9	0
1	0
1.1	0
1.2	0
1.3	0
1.4	0
1.5	0
1.6	0
1.7	0
1.8	0
1.9	0
2	0
2.1	0
2.2	0
2.3	0
2.4	0
2.5	0
2.6	0
2.7	0
2.8	0
2.9	0
3	0
3.1	0
3.2	0
3.3	0
3.4	0
3.5	0
3.6	0
3.7	0
3.8	0
3.9	0
4	0
4.1	0
4.2	0
4.3	0
4.4	0
4.5	0
4.6	0
4.7	0
4.8	0
4.9	0
5	0
5.1	0
5.2	0
5.3	0
5.4	0
5.5	0
5.6	0
5.7	0
5.8	0
5.9	0
6	0
6.1	0
6.2	0
6.3	0
6.4	0
6.5	0
6.6	0
6.7	0
6.8	0
6.9	0
7	0
7.1	0
7.2	0
7.3	0
7.4	0
7.5	0
7.6	0
7.7	0
7.8	0
7.9	0
8	0
8.1	0
8.2	0
8.3	0
8.4	0
8.5	0
8.6	0
8.7	0
8.8	0
8.9	0
9	0
9.1	0
9.2	0
9.3	0
9.4	0
9.5	0
9.6	0
9.7	0
9.8	0
9.9	0
10	0
10.1	0
10.2	0
10.3	0
10.4	0
10.5	0
10.6	0
10.7	0
10.8	0
10.9	0
11	0
11.1	0
11.2	0
11.3	0
11.4	0
11.5	0
11.6	0
11.7	0
11.8	0
11.9	0
12	0
12.1	0
12.2	0
12.3	0
12.4	0
12.5	0
12.6	0
12.7	0
12.8	0
12.9	0
13	0
13.1	0
13.2	0
13.3	0
13.4	0
13.5	0
13.6	0
13.7	0
13.8	0
13.9	0
14	0
14.1	0
14.2	0
14.3	0
14.4	0
14.5	0
14.6	0
14.7	0
14.8	0
14.9	0
15	0
15.1	0
15.2	0
15.3	0
15.4	0
15.5	0
15.6	0
15.7	0
15.8	0
15.9	0
16	0
16.1	0
16.2	0
16.3	0
16.4	0
16.5	0
16.6	0
16.7	0
16.8	0
16.9	0
17	0
17.1	0
17.2	0
17.3	0
17.4	0
17.5	0
17.6	0
17.7	0
17.8	0
17.9	0
18	0
18.1	0
18.2	0
18.3	0
18.4	0
18.5	0
18.6	0
18.7	0
18.8	0
18.9	0
19	0
19.1	0
19.2	0
19.3	0
19.4	0
19.5	0
19.6	0
19.7	0
19.8	0
19.9	0
20	0
20.1	0
20.2	0
20.3	0
20.4	0
20.5	0
20.6	0
20.7	0
20.8	0
20.9	0
21	0
21.1	0
21.2	0
21.3	0
21.4	0
21.5	0
21.6	0
21.7	0
21.8	0
21.9	0
22	0
22.1	0
22.2	0
22.3	0
22.4	0
22.5	0
22.6	0
22.7	0
22.8	0
22.9	0
23	0
23.1	0
23.2	0
23.3	0
23.4	0
23.5	0
23.6	0
23.7	0
23.8	0
23.9	0
24	0
24.1	0
24.2	0
24.3	0
24.4	0
24.5	0
24.6	0
24.7	0
24.8	0
24.9	0
25	0
25.1	0
25.2	0
25.3	0
25.4	0
25.5	0
25.6	0
25.7	0
25.8	0
25.9	0
26	0
26.1	0
26.2	0
26.3	0
26.4	0
26.5	0
26.6	0
26.7	0
26.8	0
26.9	0
27	0
27.1	0
27.2	0
27.3	0
27.4	0
27.5	0
27.6	0
27.7	0
27.8	0
27.9	0
28	0
28.1	0
28.2	0
28.3	0
28.4	0
28.5	0
28.6	0
28.7	0
28.8	0
28.9	0
29	0
29.1	0
29.2	0
29.3	0
29.4	0
29.5	0
29.6	0
29.7	0
29.8	0
29.9	0
30	0
30.1	0
30.2	0
30.3	0
30.4	0
30.5	0
30.6	0
30.7	0
30.8	0
30.9	0
31	0
31.1	0
31.2	0
31.3	0
31.4	0
31.5	0
31.6	0
31.7	0
31.8	0
31.9	0
32	0
32.1	0
32.2	0
32.3	0
32.4	0
32.5	0
32.6	0
32.7	0
32.8	0
32.9	0
33	0
33.1	0
33.2	0
33.3	0
33.4	0
33.5	0
33.6	0
33.7	0
33.8	0
33.9	0
34	0
34.1	0
34.2	0
34.3	0
34.4	0
34.5	0
34.6	0
34.7	0
34.8	0
34.9	0
35	0
35.1	0
35.2	0
35.3	0
35.4	0
35.5	0
35.6	0
35.7	0
35.8	0
35.9	0
36	0
36.1	0
36.2	0
36.3	0
36.4	0
36.5	0
36.6	0
36.7	0
36.8	0
36.9	0
37	0
37.1	0
37.2	0
37.3	0
37.4	0
37.5	0
37.6	0
37.7	0
37.8	0
37.9	0
38	0
38.1	0
38.2	0
38.3	0
38.4	0
38.5	0
38.6	0
38.7	0
38.8	0
38.9	0
39	0
39.1	0
39.2	0
39.3	0
39.4	0
39.5	0
39.6	0
39.7	0
39.8	0
39.9	0
40	0
40.1	0
40.2	0
40.3	0
40.4	0
40.5	0
40.6	0
40.7	0
40.8	0
40.9	0
41	0
41.1	0
41.2	0
41.3	0
41.4	0
41.5	0
41.6	0
41.7	0
41.8	0
41.9	0
42	0
42.1	0
42.2	0
42.3	0
42.4	0
42.5	0
42.6	0
42.7	0
42.8	0
42.9	0
43	0
43.1	0
43.2	0
43.3	0
43.4	0
43.5	0
43.6	0
43.7	0
43.8	0
43.9	0
44	0
44.1	0
44.2	0
44.3	0
44.4	0
44.5	0
44.6	0
44.7	0
44.8	0
44.9	0
45	0
45.1	0
45.2	0
45.3	0
45.4	0
45.5	0
45.6	0
45.7	0
45.8	0
45.9	0
46	0
46.1	0
46.2	0
46.3	0
46.4	0
46.5	0
46.6	0
46.7	0
46.8	0
46.9	0
47	0
47.1	0
47.2	0
47.3	0
47.4	0
47.5	0
47.6	0
47.7	0
47.8	0
47.9	0
48	0
48.1	0
48.2	0
48.3	0
48.4	0
48.5	0
48.6	0
48.7	0
48.8	0
48.9	0
49	0
49.1	0
49.2	0
49.3	0
49.4	0
49.5	0
49.6	0
49.7	0
49.8	0
49.9	0
50	0
50.1	0
50.2	0
50.3	0
50.4	0
50.5	0
50.6	0
50.7	0
50.8	0
50.9	0
51	0
51.1	0
51.2	0
51.3	0
51.4	0
51.5	0
51.6	0
51.7	0
51.8	0
51.9	0
52	0
52.1	0
52.2	0
52.3	0
52.4	0
52.5	0
52.6	0
52.7	0
52.8	0
52.9	0
53	0
53.1	0
53.2	0
53.3	0
53.4	0
53.5	0
53.6	0
53.7	0
53.8	0
53.9	0
54	0
54.1	0
54.2	0
54.3	0
54.4	0
54.5	0
54.6	0
54.7	0
54.8	0
54.9	0
55	0
55.1	0
55.2	0
55.3	0
55.4	0
55.5	0
55.6	0
55.7	0
55.8	0
55.9	0
56	0
56.1	0
56.2	0
56.3	0
56.4	0
56.5	0
56.6	0
56.7	0
56.8	0
56.9	0
57	0
57.1	0
57.2	0
57.3	0
57.4	0
57.5	0
57.6	0
57.7	0
57.8	0
57.9	0
58	0
58.1	0
58.2	0
58.3	0
58.4	0
58.5	0
58.6	0
58.7	0
58.8	0
58.9	0
59	0
59.1	0
59.2	0
59.3	0
59.4	0
59.5	0
59.6	0
59.7	0
59.8	0
59.9	0
60	0
60.1	0
60.2	0
60.3	0
60.4	0
60.5	0
60.6	0
60.7	0
60.8	0
60.9	0
61	0
61.1	0
61.2	0
61.3	0
61.4	0
61.5	0
61.6	0
61.7	0
61.8	0
61.9	0
62	0
62.1	0
62.2	0
62.3	0
62.4	0
62.5	0
62.6	0
62.7	0
62.8	0
62.9	0
63	0
63.1	0
63.2	0
63.3	0
63.4	0
63.5	0
63.6	0
63.7	0
63.8	0
63.9	0
64	0
64.1	0
64.2	0
64.3	0
64.4	0
64.5	0
64.6	0
64.7	0
64.8	0
64.9	0
65	0
65.1	0
65.2	0
65.3	0
65.4	0
65.5	0
65.6	0
65.7	0
65.8	0
65.9	0
66	0
66.1	0
66.2	0
66.3	0
66.4	0
66.5	0
66.6	0
66.7	0
66.8	0
66.9	0
67	0
67.1	0
67.2	0
67.3	0
67.4	0
67.5	0
67.6	0
67.7	0
67.8	0
67.9	0
68	0
68.1	0
68.2	0
68.3	0
68.4	0
68.5	0
68.6	0
68.7	0
68.8	0
68.9	0
69	0
69.1	0
69.2	0
69.3	0
69.4	0
69.5	0
69.6	0
69.7	0
69.8	0
69.9	0
70	0
70.1	0
70.2	0
70.3	0
70.4	0
70.5	0
70.6	0
70.7	0
70.8	0
70.9	0
71	0
71.1	0
71.2	0
71.3	0
71.4	0
71.5	0
71.6	0
71.7	0
71.8	0
71.9	0
72	0
72.1	0
72.2	0
72.3	0
72.4	0
72.5	0
72.6	0
72.7	0
72.8	0
72.9	0
73	0
73.1	0
73.2	0
73.3	0
73.4	0
73.5	0
73.6	0
73.7	0
73.8	0
73.9	0
74	0
74.1	0
74.2	0
74.3	0
74.4	0
74.5	0
74.6	0
74.7	0
74.8	0
74.9	0
75	0
75.1	0
75.2	0
75.3	0
75.4	0
75.5	0
75.6	0
75.7	0
75.8	0
75.9	0
76	0
76.1	0
76.2	0
76.3	0
76.4	0
76.5	0
76.6	0
76.7	0
76.8	0
76.9	0
77	0
77.1	0
77.2	0
77.3	0
77.4	0
77.5	0
77.6	0
77.7	0
77.8	0
77.9	0
78	0
78.1	0
78.2	0
78.3	0
78.4	0
78.5	0
78.6	0
78.7	0
78.8	0
78.9	0
79	0
79.1	0
79.2	0
79.3	0
79.4	0
79.5	0
79.6	0
79.7	0
79.8	0
79.9	0
80	0
80.1	0
80.2	0
80.3	0
80.4	0
80.5	0
80.6	0
80.7	0
80.8	0
80.9	0
81	0
81.1	0
81.2	0
81.3	0
81.4	0
81.5	0
81.6	0
81.7	0
81.8	0
81.9	0
82	0
82.1	0
82.2	0
82.3	0
82.4	0
82.5	0
82.6	0
82.7	0
82.8	0
82.9	0
83	0
83.1	0
83.2	0
83.3	0
83.4	0
83.5	0
83.6	0
83.7	0
83.8	0
83.9	0
84	0
84.1	0
84.2	0
84.3	0
84.4	0
84.5	0
84.6	0
84.7	0
84.8	0
84.9	0
85	0
85.1	0
85.2	0
85.3	0
85.4	0
85.5	0
85.6	0
85.7	0
85.8	0
85.9	0
86	0
86.1	0
86.2	0
86.3	0
86.4	0
86.5	0
86.6	0
86.7	0
86.8	0
86.9	0
87	0
87.1	0
87.2	0
87.3	0
87.4	0
87.5	0
87.6	0
87.7	0
87.8	0
87.9	0
88	0
88.1	0
88.2	0
88.3	0
88.4	0
88.5	0
88.6	0
88.7	0
88.8	0
88.9	0
89	0
89.1	0
89.2	0
89.3	0
89.4	0
89.5	0
89.6	0
89.7	0
89.8	0
89.9	0
90	0
90.1	0
90.2	0
90.3	0
90.4	0
90.5	0
90.6	0
90.7	0
90.8	0
90.9	0
91	0
91.1	0
91.2	0
91.3	0
91.4	0
91.5	0
91.6	0
91.7	0
91.8	0
91.9	0
92	0
92.1	0
92.2	0
92.3	0
92.4	0
92.5	0
92.6	0
92.7	0
92.8	0
92.9	0
93	0
93.1	0
93.2	0
93.3	0
93.4	0
93.5	0
93.6	0
93.7	0
93.8	0
93.9	0
94	0
94.1	0
94.2	0
94.3	0
94.4	0
94.5	0
94.6	0
94.7	0
94.8	0
94.9	0
95	0
95.1	0
95.2	0
95.3	0
95.4	0
95.5	0
95.6	0
95.7	0
95.8	0
95.9	0
96	0
96.1	0
96.2	0
96.3	0
96.4	0
96.5	0
96.6	0
96.7	0
96.8	0
96.9	0
97	0
97.1	0
97.2	0
97.3	0
97.4	0
97.5	0
97.6	0
97.7	0
97.8	0
97.9	0
98	0
98.1	0
98.2	0
98.3	0
98.4	0
98.5	0
98.6	0
98.7	0
98.8	0
98.9	0
99	0
99.1	0
99.2	0
99.3	0
99.4	0
99.5	0
99.6	0
99.7	0
99.8	0
99.9	0
100	0
100.1	0.542
100.2	0.723667
100.3	0.821667
100.4	0.88
100.5	0.9105
100.6	0.925167
100.7	0.935833
100.8	0.943
100.9	0.9505
101	0.954
101.1	0.950833
101.2	0.952667
101.3	0.953167
101.4	0.9545
101.5	0.954
101.6	0.952333
101.7	0.950333
101.8	0.949333
101.9	0.9515
102	0.950667
102.1	0.951167
102.2	0.952667
102.3	0.9535
102.4	0.9555
102.5	0.956833
102.6	0.953667
102.7	0.950833
102.8	0.9555
102.9	0.957
103	0.9585
103.1	0.958167
103.2	0.9575
103.3	0.959667
103.4	0.961
103.5	0.960167
103.6	0.958333
103.7	0.957833
103.8	0.9585
103.9	0.9585
104	0.9575
104.1	0.9575
104.2	0.958
104.3	0.962167
104.4	0.962333
104.5	0.963333
104.6	0.961333
104.7	0.957167
104.8	0.962333
104.9	0.962667
105	0.961167
105.1	0.959167
105.2	0.9635
105.3	0.962667
105.4	0.961
105.5	0.963833
105.6	0.9645
105.7	0.9615
105.8	0.9635
105.9	0.9635
106	0.9675
106.1	0.968667
106.2	0.967
106.3	0.962167
106.4	0.962667
106.5	0.962833
106.6	0.9625
106.7	0.962833
106.8	0.961
106.9	0.959667
107	0.959833
107.1	0.9615
107.2	0.962833
107.3	0.9655
107.4	0.965
107.5	0.964833
107.6	0.968167
107.7	0.963333
107.8	0.965167
107.9	0.9665
108	0.967333
108.1	0.968
108.2	0.968
108.3	0.966667
108.4	0.965667
108.5	0.965667
108.6	0.966
108.7	0.964333
108.8	0.966
108.9	0.966
109	0.966667
109.1	0.965667
109.2	0.965167
109.3	0.9645
109.4	0.9635
109.5	0.964
109.6	0.9645
109.7	0.964833
109.8	0.968667
109.9	0.965667
110	0.967667
110.1	0.965167
110.2	0.9675
110.3	0.965333
110.4	0.9655
110.5	0.971
110.6	0.971
110.7	0.969667
110.8	0.973
110.9	0.971
111	0.972333
111.1	0.970333
111.2	0.970833
111.3	0.967333
111.4	0.9685
111.5	0.968333
111.6	0.969
111.7	0.969333
111.8	0.967167
111.9	0.968167
112	0.970833
112.1	0.972333
112.2	0.9735
112.3	0.972333
112.4	0.974333
112.5	0.974
112.6	0.9735
112.7	0.971
112.8	0.972
112.9	0.973833
113	0.973667
113.1	0.975
113.2	0.9715
113.3	0.9715
113.4	0.969833
113.5	0.972167
113.6	0.9715
113.7	0.9735
113.8	0.973333
113.9	0.973333
114	0.971167
114.1	0.971667
114.2	0.974
114.3	0.970167
114.4	0.971667
114.5	0.970167
114.6	0.971167
114.7	0.972833
114.8	0.972333
114.9	0.9735
115	0.9725
115.1	0.969833
115.2	0.973667
115.3	0.973833
115.4	0.973
115.5	0.975833
115.6	0.973667
115.7	0.975833
115.8	0.979833
115.9	0.978167
116	0.9785
116.1	0.975833
116.2	0.974333
116.3	0.973333
116.4	0.973667
116.5	0.9755
116.6	0.973
116.7	0.975
116.8	0.975833
116.9	0.974
117	0.972667
117.1	0.9735
117.2	0.972
117.3	0.9755
117.4	0.976333
117.5	0.977333
117.6	0.980667
117.7	0.979667
117.8	0.978667
117.9	0.9775
118	0.976833
118.1	0.9755
118.2	0.973167
118.3	0.974833
118.4	0.974333
118.5	0.973667
118.6	0.975833
118.7	0.976167
118.8	0.9765
118.9	0.974833
119	0.975667
119.1	0.975667
119.2	0.975833
119.3	0.975333
119.4	0.975
119.5	0.973
119.6	0.976167
119.7	0.9755
119.8	0.976333
119.9	0.9785
120	0.975
120.1	0.976833
120.2	0.974333
120.3	0.977
120.4	0.979833
120.5	0.981167
120.6	0.981833
120.7	0.982333
120.8	0.982
120.9	0.9825
121	0.981167
121.1	0.980833
121.2	0.981167
121.3	0.978833
121.4	0.979833
121.5	0.979667
121.6	0.9795
121.7	0.980333
121.8	0.981333
121.9	0.98
122	0.978667
122.1	0.978667
122.2	0.9785
122.3	0.976667
122.4	0.978667
122.5	0.982
122.6	0.98
122.7	0.978833
122.8	0.978
122.9	0.976667
123	0.978333
123.1	0.979333
123.2	0.976
123.3	0.977833
123.4	0.976833
123.5	0.979833
123.6	0.980333
123.7	0.9795
123.8	0.9795
123.9	0.979667
124	0.980333
124.1	0.978833
124.2	0.9795
124.3	0.981333
124.4	0.980333
124.5	0.982167
124.6	0.9825
124.7	0.9815
124.8	0.980833
124.9	0.980333
125	0.983333
125.1	0.981167
125.2	0.979333
125.3	0.979667
125.4	0.982667
125.5	0.982167
125.6	0.982
125.7	0.981333
125.8	0.983833
125.9	0.985167
126	0.984
126.1	0.984167
126.2	0.9815
126.3	0.978833
126.4	0.979833
126.5	0.979833
126.6	0.983667
126.7	0.981333
126.8	0.981833
126.9	0.982
127	0.984667
127.1	0.983333
127.2	0.982833
127.3	0.9835
127.4	0.983667
127.5	0.983167
127.6	0.984333
127.7	0.983167
127.8	0.985833
127.9	0.984333
128	0.983333
128.1	0.982
128.2	0.982
128.3	0.983667
128.4	0.984167
128.5	0.983833
128.6	0.985
128.7	0.9855
128.8	0.984833
128.9	0.986
129	0.985333
129.1	0.984
129.2	0.982833
129.3	0.985167
129.4	0.984167
129.5	0.986333
129.6	0.985167
129.7	0.983167
129.8	0.986333
129.9	0.983833
130	0.983833
130.1	0.983833
130.2	0.985333
130.3	0.982667
130.4	0.983333
130.5	0.982833
130.6	0.984
130.7	0.985333
130.8	0.985667
130.9	0.987333
131	0.986
131.1	0.985833
131.2	0.987167
131.3	0.986
131.4	0.985
131.5	0.986167
131.6	0.986167
131.7	0.986667
131.8	0.986667
131.9	0.9845
132	0.987667
132.1	0.987667
132.2	0.9865
132.3	0.987667
132.4	0.985333
132.5	0.985
132.6	0.982
132.7	0.983833
132.8	0.9845
132.9	0.986167
133	0.985833
133.1	0.984167
133.2	0.9875
133.3	0.987333
133.4	0.988167
133.5	0.987167
133.6	0.9855
133.7	0.984167
133.8	0.984167
133.9	0.983833
134	0.9825
134.1	0.984167
134.2	0.983333
134.3	0.985167
134.4	0.985833
134.5	0.9845
134.6	0.982333
134.7	0.984833
134.8	0.987167
134.9	0.9855
135	0.984833
135.1	0.985667
135.2	0.986667
135.3	0.987333
135.4	0.985833
135.5	0.986167
135.6	0.986167
135.7	0.984833
135.8	0.986167
135.9	0.987333
136	0.9865
136.1	0.988
136.2	0.988833
136.3	0.988833
136.4	0.9885
136.5	0.987833
136.6	0.9865
136.7	0.988
136.8	0.988
136.9	0.985333
137	0.986167
137.1	0.985
137.2	0.9875
137.3	0.989
137.4	0.9895
137.5	0.989
137.6	0.988667
137.7	0.987833
137.8	0.987333
137.9	0.988
138	0.988667
138.1	0.9875
138.2	0.984667
138.3	0.986333
138.4	0.9875
138.5	0.988333
138.6	0.986333
138.7	0.987833
138.8	0.984833
138.9	0.985833
139	0.986333
139.1	0.985333
139.2	0.9865
139.3	0.987
139.4	0.985333
139.5	0.986167
139.6	0.983833
139.7	0.985333
139.8	0.9865
139.9	0.986833
140	0.984167
140.1	0.985833
140.2	0.985
140.3	0.986
140.4	0.9875
140.5	0.989167
140.6	0.988667
140.7	0.986833
140.8	0.9855
140.9	0.986333
141	0.985333
141.1	0.9845
141.2	0.986667
141.3	0.988167
141.4	0.9865
141.5	0.985667
141.6	0.987167
141.7	0.9875
141.8	0.986667
141.9	0.988833
142	0.987667
142.1	0.987
142.2	0.987667
142.3	0.986
142.4	0.986167
142.5	0.9865
142.6	0.987167
142.7	0.988
142.8	0.987833
142.9	0.988
143	0.9875
143.1	0.987167
143.2	0.988833
143.3	0.988667
143.4	0.988667
143.5	0.987
143.6	0.9895
143.7	0.99
143.8	0.986333
143.9	0.985167
144	0.984667
144.1	0.9845
144.2	0.986833
144.3	0.987667
144.4	0.987833
144.5	0.9885
144.6	0.988833
144.7	0.988667
144.8	0.987833
144.9	0.9895
145	0.988167
145.1	0.988
145.2	0.988667
145.3	0.987
145.4	0.986667
145.5	0.985667
145.6	0.985
145.7	0.986667
145.8	0.988667
145.9	0.989
146	0.9895
146.1	0.9915
146.2	0.990167
146.3	0.991333
146.4	0.990667
146.5	0.9905
146.6	0.988667
146.7	0.988
146.8	0.9865
146.9	0.986667
147	0.989333
147.1	0.988667
147.2	0.989
147.3	0.989333
147.4	0.988833
147.5	0.99
147.6	0.989167
147.7	0.989667
147.8	0.99
147.9	0.9905
148	0.988833
148.1	0.986667
148.2	0.987667
148.3	0.987833
148.4	0.987667
148.5	0.987833
148.6	0.988667
148.7	0.988
148.8	0.987833
148.9	0.987167
149	0.9895
149.1	0.99
149.2	0.988
149.3	0.989667
149.4	0.989167
149.5	0.988667
149.6	0.988833
149.7	0.988833
149.8	0.989833
149.9	0.988667
150	0.989333
150.1	0.990667
150.2	0.9895
150.3	0.99
150.4	0.988333
150.5	0.988167
150.6	0.9875
150.7	0.988
150.8	0.986333
150.9	0.988667
151	0.9885
151.1	0.987
151.2	0.986667
151.3	0.987
151.4	0.988167
151.5	0.9865
151.6	0.988
151.7	0.9885
151.8	0.988
151.9	0.988667
152	0.989167
152.1	0.988667
152.2	0.987667
152.3	0.988167
152.4	0.987833
152.5	0.99
152.6	0.989333
152.7	0.986833
152.8	0.987667
152.9	0.987833
153	0.988667
153.1	0.989333
153.2	0.9905
153.3	0.991
153.4	0.988167
153.5	0.989167
153.6	0.989667
153.7	0.987833
153.8	0.987
153.9	0.990667
154	0.989667
154.1	0.989167
154.2	0.989667
154.3	0.9895
154.4	0.99
154.5	0.989
154.6	0.989667
154.7	0.990167
154.8	0.99
154.9	0.990667
155	0.9915
155.1	0.9915
155.2	0.990667
155.3	0.991833
155.4	0.9925
155.5	0.991
155.6	0.992333
155.7	0.992167
155.8	0.9915
155.9	0.9895
156	0.989167
156.1	0.9895
156.2	0.99
156.3	0.991333
156.4	0.990833
156.5	0.989
156.6	0.988833
156.7	0.992
156.8	0.993
156.9	0.992
157	0.989667
157.1	0.99
157.2	0.989667
157.3	0.989
157.4	0.988333
157.5	0.9885
157.6	0.990833
157.7	0.990667
157.8	0.989833
157.9	0.99
158	0.989667
158.1	0.9885
158.2	0.988833
158.3	0.99
158.4	0.990667
158.5	0.991667
158.6	0.988167
158.7	0.990833
158.8	0.989833
158.9	0.988833
159	0.989667
159.1	0.990667
159.2	0.989167
159.3	0.990333
159.4	0.9895
159.5	0.989167
159.6	0.989167
159.7	0.989167
159.8	0.989667
159.9	0.991333
160	0.990333
160.1	0.990833
160.2	0.991167
160.3	0.990333
160.4	0.991833
160.5	0.991
160.6	0.9895
160.7	0.989
160.8	0.988667
160.9	0.9895
161	0.99
161.1	0.9895
161.2	0.986
161.3	0.988
161.4	0.985167
161.5	0.985833
161.6	0.986333
161.7	0.988167
161.8	0.989667
161.9	0.990833
162	0.991667
162.1	0.991833
162.2	0.9925
162.3	0.992167
162.4	0.992
162.5	0.9915
162.6	0.991
162.7	0.991167
162.8	0.99
162.9	0.99
163	0.990833
163.1	0.991167
163.2	0.990333
163.3	0.989833
163.4	0.989333
163.5	0.990833
163.6	0.988
163.7	0.987833
163.8	0.989167
163.9	0.989
164	0.990167
164.1	0.990167
164.2	0.99
164.3	0.9895
164.4	0.990667
164.5	0.989833
164.6	0.990333
164.7	0.989
164.8	0.990833
164.9	0.989667
165	0.991333
165.1	0.9895
165.2	0.989167
165.3	0.989
165.4	0.989333
165.5	0.99
165.6	0.990333
165.7	0.989333
165.8	0.989333
165.9	0.9885
166	0.988333
166.1	0.988167
166.2	0.9885
166.3	0.9905
166.4	0.987833
166.5	0.989667
166.6	0.991167
166.7	0.991333
166.8	0.9925
166.9	0.991667
167	0.990833
167.1	0.990167
167.2	0.99
167.3	0.989833
167.4	0.989833
167.5	0.989667
167.6	0.986667
167.7	0.987667
167.8	0.9895
167.9	0.989333
168	0.990333
168.1	0.988833
168.2	0.987667
168.3	0.988333
168.4	0.988333
168.5	0.990333
168.6	0.991
168.7	0.990167
168.8	0.990333
168.9	0.991833
169	0.992167
169.1	0.991
169.2	0.990167
169.3	0.989333
169.4	0.99
169.5	0.988833
169.6	0.990167
169.7	0.991167
169.8	0.99
169.9	0.9905
170	0.9895
170.1	0.989167
170.2	0.990833
170.3	0.992333
170.4	0.991167
170.5	0.990167
170.6	0.991667
170.7	0.9925
170.8	0.991333
170.9	0.989667
171	0.990167
171.1	0.9905
171.2	0.991833
171.3	0.991667
171.4	0.993
171.5	0.991667
171.6	0.991667
171.7	0.991333
171.8	0.9905
171.9	0.990833
172	0.991
172.1	0.990667
172.2	0.992167
172.3	0.9925
172.4	0.9905
172.5	0.989833
172.6	0.9905
172.7	0.991833
172.8	0.991167
172.9	0.990833
173	0.99
173.1	0.990333
173.2	0.990333
173.3	0.9895
173.4	0.991167
173.5	0.991
173.6	0.989333
173.7	0.990333
173.8	0.9895
173.9	0.988833
174	0.990333
174.1	0.989
174.2	0.988333
174.3	0.9875
174.4	0.99
174.5	0.991167
174.6	0.990833
174.7	0.989833
174.8	0.992167
174.9	0.991833
175	0.991167
175.1	0.991667
175.2	0.988833
175.3	0.992
175.4	0.992333
175.5	0.9915
175.6	0.991
175.7	0.990667
175.8	0.992333
175.9	0.9925
176	0.991667
176.1	0.993833
176.2	0.993
176.3	0.991833
176.4	0.991333
176.5	0.991167
176.6	0.991
176.7	0.990167
176.8	0.988333
176.9	0.987833
177	0.989833
177.1	0.989833
177.2	0.9895
177.3	0.991167
177.4	0.989167
177.5	0.990333
177.6	0.9895
177.7	0.988167
177.8	0.987333
177.9	0.990333
178	0.9915
178.1	0.991167
178.2	0.9905
178.3	0.991833
178.4	0.992333
178.5	0.992167
178.6	0.992167
178.7	0.992
178.8	0.991833
178.9	0.9905
179	0.991167
179.1	0.992833
179.2	0.992333
179.3	0.992667
179.4	0.991167
179.5	0.991333
179.6	0.9915
179.7	0.990167
179.8	0.989667
179.9	0.9895
180	0.988833
180.1	0.989333
180.2	0.988167
180.3	0.989333
180.4	0.990833
180.5	0.9915
180.6	0.991167
180.7	0.990667
180.8	0.989833
180.9	0.990667
181	0.991
181.1	0.990333
181.2	0.990167
181.3	0.991833
181.4	0.991333
181.5	0.991167
181.6	0.9905
181.7	0.990333
181.8	0.9905
181.9	0.989
182	0.989833
182.1	0.989
182.2	0.9895
182.3	0.991
182.4	0.991833
182.5	0.991
182.6	0.9905
182.7	0.990333
182.8	0.991833
182.9	0.990333
183	0.990833
183.1	0.992333
183.2	0.991
183.3	0.991167
183.4	0.9915
183.5	0.9905
183.6	0.991
183.7	0.9915
183.8	0.9915
183.9	0.992
184	0.991667
184.1	0.9905
184.2	0.990167
184.3	0.991833
184.4	0.991167
184.5	0.991833
184.6	0.991667
184.7	0.99
184.8	0.992833
184.9	0.991667
185	0.990833
185.1	0.992167
185.2	0.990833
185.3	0.992333
185.4	0.993
185.5	0.994167
185.6	0.994
185.7	0.9935
185.8	0.992667
185.9	0.991833
186	0.9935
186.1	0.9935
186.2	0.992
186.3	0.990667
186.4	0.991667
186.5	0.991333
186.6	0.991667
186.7	0.989667
186.8	0.989833
186.9	0.988833
187	0.9895
187.1	0.9905
187.2	0.991167
187.3	0.990333
187.4	0.991167
187.5	0.9915
187.6	0.992
187.7	0.991667
187.8	0.9915
187.9	0.991167
188	0.991333
188.1	0.991167
188.2	0.991333
188.3	0.994
188.4	0.992833
188.5	0.992
188.6	0.991167
188.7	0.991833
188.8	0.992167
188.9	0.991167
189	0.9915
189.1	0.991333
189.2	0.992667
189.3	0.991167
189.4	0.9915
189.5	0.991333
189.6	0.991667
189.7	0.992833
189.8	0.993167
189.9	0.991667
190	0.990667
190.1	0.990667
190.2	0.991667
190.3	0.993333
190.4	0.993167
190.5	0.992667
190.6	0.992667
190.7	0.993
190.8	0.992167
190.9	0.993
191	0.991333
191.1	0.991167
191.2	0.990833
191.3	0.990833
191.4	0.991167
191.5	0.991
191.6	0.991167
191.7	0.990333
191.8	0.990833
191.9	0.988833
192	0.990833
192.1	0.992167
192.2	0.9915
192.3	0.990833
192.4	0.9895
192.5	0.988833
192.6	0.989
192.7	0.989833
192.8	0.9905
192.9	0.991833
193	0.990167
193.1	0.991667
193.2	0.992333
193.3	0.991333
193.4	0.9905
193.5	0.992167
193.6	0.992167
193.7	0.991
193.8	0.990833
193.9	0.991
194	0.990833
194.1	0.990667
194.2	0.991833
194.3	0.991667
194.4	0.9915
194.5	0.9925
194.6	0.993333
194.7	0.9935
194.8	0.994667
194.9	0.992333
195	0.992333
195.1	0.991833
195.2	0.992667
195.3	0.990833
195.4	0.990333
195.5	0.991333
195.6	0.992333
195.7	0.993
195.8	0.992333
195.9	0.991167
196	0.99
196.1	0.99
196.2	0.99
196.3	0.990167
196.4	0.992667
196.5	0.9925
196.6	0.9915
196.7	0.991833
196.8	0.9905
196.9	0.9905
197	0.991333
197.1	0.9915
197.2	0.991167
197.3	0.991167
197.4	0.992667
197.5	0.991167
197.6	0.992167
197.7	0.992
197.8	0.992167
197.9	0.991
198	0.990167
198.1	0.99
198.2	0.9905
198.3	0.992333
198.4	0.991333
198.5	0.9905
198.6	0.990333
198.7	0.990667
198.8	0.990833
198.9	0.990333
199	0.988833
199.1	0.99
199.2	0.9905
199.3	0.99
199.4	0.9905
199.5	0.990833
199.6	0.989167
199.7	0.9905
199.8	0.990833
199.9	0.9905
200	0.991
[truncated: 14,000 more rows]
