# Supplementary material for: Bayesian inference of kinetic schemes for ion channels by Kalman filtering
Source: eLife journal article supplement (doi:10.7554/elife.62714), 2022-05-04
Supplement: fig4-data1 [file 1_Sim_N_3000_Strom_MW_16M.xlsx]

## Sheet: Tabelle1
0.1	0
0.2	0
0.3	0
0.4	0
0.5	0
0.6	0
0.7	0
0.8	0
0.9	0
1	0
1.1	0
1.2	0
1.3	0
1.4	0
1.5	0
1.6	0
1.7	0
1.8	0
1.9	0
2	0
2.1	0
2.2	0
2.3	0
2.4	0
2.5	0
2.6	0
2.7	0
2.8	0
2.9	0
3	0
3.1	0
3.2	0
3.3	0
3.4	0
3.5	0
3.6	0
3.7	0
3.8	0
3.9	0
4	0
4.1	0
4.2	0
4.3	0
4.4	0
4.5	0
4.6	0
4.7	0
4.8	0
4.9	0
5	0
5.1	0
5.2	0
5.3	0
5.4	0
5.5	0
5.6	0
5.7	0
5.8	0
5.9	0
6	0
6.1	0
6.2	0
6.3	0
6.4	0
6.5	0
6.6	0
6.7	0
6.8	0
6.9	0
7	0
7.1	0
7.2	0
7.3	0
7.4	0
7.5	0
7.6	0
7.7	0
7.8	0
7.9	0
8	0
8.1	0
8.2	0
8.3	0
8.4	0
8.5	0
8.6	0
8.7	0
8.8	0
8.9	0
9	0
9.1	0
9.2	0
9.3	0
9.4	0
9.5	0
9.6	0
9.7	0
9.8	0
9.9	0
10	0
10.1	0
10.2	0
10.3	0
10.4	0
10.5	0
10.6	0
10.7	0
10.8	0
10.9	0
11	0
11.1	0
11.2	0
11.3	0
11.4	0
11.5	0
11.6	0
11.7	0
11.8	0
11.9	0
12	0
12.1	0
12.2	0
12.3	0
12.4	0
12.5	0
12.6	0
12.7	0
12.8	0
12.9	0
13	0
13.1	0
13.2	0
13.3	0
13.4	0
13.5	0
13.6	0
13.7	0
13.8	0
13.9	0
14	0
14.1	0
14.2	0
14.3	0
14.4	0
14.5	0
14.6	0
14.7	0
14.8	0
14.9	0
15	0
15.1	0
15.2	0
15.3	0
15.4	0
15.5	0
15.6	0
15.7	0
15.8	0
15.9	0
16	0
16.1	0
16.2	0
16.3	0
16.4	0
16.5	0
16.6	0
16.7	0
16.8	0
16.9	0
17	0
17.1	0
17.2	0
17.3	0
17.4	0
17.5	0
17.6	0
17.7	0
17.8	0
17.9	0
18	0
18.1	0
18.2	0
18.3	0
18.4	0
18.5	0
18.6	0
18.7	0
18.8	0
18.9	0
19	0
19.1	0
19.2	0
19.3	0
19.4	0
19.5	0
19.6	0
19.7	0
19.8	0
19.9	0
20	0
20.1	0
20.2	0
20.3	0
20.4	0
20.5	0
20.6	0
20.7	0
20.8	0
20.9	0
21	0
21.1	0
21.2	0
21.3	0
21.4	0
21.5	0
21.6	0
21.7	0
21.8	0
21.9	0
22	0
22.1	0
22.2	0
22.3	0
22.4	0
22.5	0
22.6	0
22.7	0
22.8	0
22.9	0
23	0
23.1	0
23.2	0
23.3	0
23.4	0
23.5	0
23.6	0
23.7	0
23.8	0
23.9	0
24	0
24.1	0
24.2	0
24.3	0
24.4	0
24.5	0
24.6	0
24.7	0
24.8	0
24.9	0
25	0
25.1	0
25.2	0
25.3	0
25.4	0
25.5	0
25.6	0
25.7	0
25.8	0
25.9	0
26	0
26.1	0
26.2	0
26.3	0
26.4	0
26.5	0
26.6	0
26.7	0
26.8	0
26.9	0
27	0
27.1	0
27.2	0
27.3	0
27.4	0
27.5	0
27.6	0
27.7	0
27.8	0
27.9	0
28	0
28.1	0
28.2	0
28.3	0
28.4	0
28.5	0
28.6	0
28.7	0
28.8	0
28.9	0
29	0
29.1	0
29.2	0
29.3	0
29.4	0
29.5	0
29.6	0
29.7	0
29.8	0
29.9	0
30	0
30.1	0
30.2	0
30.3	0
30.4	0
30.5	0
30.6	0
30.7	0
30.8	0
30.9	0
31	0
31.1	0
31.2	0
31.3	0
31.4	0
31.5	0
31.6	0
31.7	0
31.8	0
31.9	0
32	0
32.1	0
32.2	0
32.3	0
32.4	0
32.5	0
32.6	0
32.7	0
32.8	0
32.9	0
33	0
33.1	0
33.2	0
33.3	0
33.4	0
33.5	0
33.6	0
33.7	0
33.8	0
33.9	0
34	0
34.1	0
34.2	0
34.3	0
34.4	0
34.5	0
34.6	0
34.7	0
34.8	0
34.9	0
35	0
35.1	0
35.2	0
35.3	0
35.4	0
35.5	0
35.6	0
35.7	0
35.8	0
35.9	0
36	0
36.1	0
36.2	0
36.3	0
36.4	0
36.5	0
36.6	0
36.7	0
36.8	0
36.9	0
37	0
37.1	0
37.2	0
37.3	0
37.4	0
37.5	0
37.6	0
37.7	0
37.8	0
37.9	0
38	0
38.1	0
38.2	0
38.3	0
38.4	0
38.5	0
38.6	0
38.7	0
38.8	0
38.9	0
39	0
39.1	0
39.2	0
39.3	0
39.4	0
39.5	0
39.6	0
39.7	0
39.8	0
39.9	0
40	0
40.1	0
40.2	0
40.3	0
40.4	0
40.5	0
40.6	0
40.7	0
40.8	0
40.9	0
41	0
41.1	0
41.2	0
41.3	0
41.4	0
41.5	0
41.6	0
41.7	0
41.8	0
41.9	0
42	0
42.1	0
42.2	0
42.3	0
42.4	0
42.5	0
42.6	0
42.7	0
42.8	0
42.9	0
43	0
43.1	0
43.2	0
43.3	0
43.4	0
43.5	0
43.6	0
43.7	0
43.8	0
43.9	0
44	0
44.1	0
44.2	0
44.3	0
44.4	0
44.5	0
44.6	0
44.7	0
44.8	0
44.9	0
45	0
45.1	0
45.2	0
45.3	0
45.4	0
45.5	0
45.6	0
45.7	0
45.8	0
45.9	0
46	0
46.1	0
46.2	0
46.3	0
46.4	0
46.5	0
46.6	0
46.7	0
46.8	0
46.9	0
47	0
47.1	0
47.2	0
47.3	0
47.4	0
47.5	0
47.6	0
47.7	0
47.8	0
47.9	0
48	0
48.1	0
48.2	0
48.3	0
48.4	0
48.5	0
48.6	0
48.7	0
48.8	0
48.9	0
49	0
49.1	0
49.2	0
49.3	0
49.4	0
49.5	0
49.6	0
49.7	0
49.8	0
49.9	0
50	0
50.1	0
50.2	0
50.3	0
50.4	0
50.5	0
50.6	0
50.7	0
50.8	0
50.9	0
51	0
51.1	0
51.2	0
51.3	0
51.4	0
51.5	0
51.6	0
51.7	0
51.8	0
51.9	0
52	0
52.1	0
52.2	0
52.3	0
52.4	0
52.5	0
52.6	0
52.7	0
52.8	0
52.9	0
53	0
53.1	0
53.2	0
53.3	0
53.4	0
53.5	0
53.6	0
53.7	0
53.8	0
53.9	0
54	0
54.1	0
54.2	0
54.3	0
54.4	0
54.5	0
54.6	0
54.7	0
54.8	0
54.9	0
55	0
55.1	0
55.2	0
55.3	0
55.4	0
55.5	0
55.6	0
55.7	0
55.8	0
55.9	0
56	0
56.1	0
56.2	0
56.3	0
56.4	0
56.5	0
56.6	0
56.7	0
56.8	0
56.9	0
57	0
57.1	0
57.2	0
57.3	0
57.4	0
57.5	0
57.6	0
57.7	0
57.8	0
57.9	0
58	0
58.1	0
58.2	0
58.3	0
58.4	0
58.5	0
58.6	0
58.7	0
58.8	0
58.9	0
59	0
59.1	0
59.2	0
59.3	0
59.4	0
59.5	0
59.6	0
59.7	0
59.8	0
59.9	0
60	0
60.1	0
60.2	0
60.3	0
60.4	0
60.5	0
60.6	0
60.7	0
60.8	0
60.9	0
61	0
61.1	0
61.2	0
61.3	0
61.4	0
61.5	0
61.6	0
61.7	0
61.8	0
61.9	0
62	0
62.1	0
62.2	0
62.3	0
62.4	0
62.5	0
62.6	0
62.7	0
62.8	0
62.9	0
63	0
63.1	0
63.2	0
63.3	0
63.4	0
63.5	0
63.6	0
63.7	0
63.8	0
63.9	0
64	0
64.1	0
64.2	0
64.3	0
64.4	0
64.5	0
64.6	0
64.7	0
64.8	0
64.9	0
65	0
65.1	0
65.2	0
65.3	0
65.4	0
65.5	0
65.6	0
65.7	0
65.8	0
65.9	0
66	0
66.1	0
66.2	0
66.3	0
66.4	0
66.5	0
66.6	0
66.7	0
66.8	0
66.9	0
67	0
67.1	0
67.2	0
67.3	0
67.4	0
67.5	0
67.6	0
67.7	0
67.8	0
67.9	0
68	0
68.1	0
68.2	0
68.3	0
68.4	0
68.5	0
68.6	0
68.7	0
68.8	0
68.9	0
69	0
69.1	0
69.2	0
69.3	0
69.4	0
69.5	0
69.6	0
69.7	0
69.8	0
69.9	0
70	0
70.1	0
70.2	0
70.3	0
70.4	0
70.5	0
70.6	0
70.7	0
70.8	0
70.9	0
71	0
71.1	0
71.2	0
71.3	0
71.4	0
71.5	0
71.6	0
71.7	0
71.8	0
71.9	0
72	0
72.1	0
72.2	0
72.3	0
72.4	0
72.5	0
72.6	0
72.7	0
72.8	0
72.9	0
73	0
73.1	0
73.2	0
73.3	0
73.4	0
73.5	0
73.6	0
73.7	0
73.8	0
73.9	0
74	0
74.1	0
74.2	0
74.3	0
74.4	0
74.5	0
74.6	0
74.7	0
74.8	0
74.9	0
75	0
75.1	0
75.2	0
75.3	0
75.4	0
75.5	0
75.6	0
75.7	0
75.8	0
75.9	0
76	0
76.1	0
76.2	0
76.3	0
76.4	0
76.5	0
76.6	0
76.7	0
76.8	0
76.9	0
77	0
77.1	0
77.2	0
77.3	0
77.4	0
77.5	0
77.6	0
77.7	0
77.8	0
77.9	0
78	0
78.1	0
78.2	0
78.3	0
78.4	0
78.5	0
78.6	0
78.7	0
78.8	0
78.9	0
79	0
79.1	0
79.2	0
79.3	0
79.4	0
79.5	0
79.6	0
79.7	0
79.8	0
79.9	0
80	0
80.1	0
80.2	0
80.3	0
80.4	0
80.5	0
80.6	0
80.7	0
80.8	0
80.9	0
81	0
81.1	0
81.2	0
81.3	0
81.4	0
81.5	0
81.6	0
81.7	0
81.8	0
81.9	0
82	0
82.1	0
82.2	0
82.3	0
82.4	0
82.5	0
82.6	0
82.7	0
82.8	0
82.9	0
83	0
83.1	0
83.2	0
83.3	0
83.4	0
83.5	0
83.6	0
83.7	0
83.8	0
83.9	0
84	0
84.1	0
84.2	0
84.3	0
84.4	0
84.5	0
84.6	0
84.7	0
84.8	0
84.9	0
85	0
85.1	0
85.2	0
85.3	0
85.4	0
85.5	0
85.6	0
85.7	0
85.8	0
85.9	0
86	0
86.1	0
86.2	0
86.3	0
86.4	0
86.5	0
86.6	0
86.7	0
86.8	0
86.9	0
87	0
87.1	0
87.2	0
87.3	0
87.4	0
87.5	0
87.6	0
87.7	0
87.8	0
87.9	0
88	0
88.1	0
88.2	0
88.3	0
88.4	0
88.5	0
88.6	0
88.7	0
88.8	0
88.9	0
89	0
89.1	0
89.2	0
89.3	0
89.4	0
89.5	0
89.6	0
89.7	0
89.8	0
89.9	0
90	0
90.1	0
90.2	0
90.3	0
90.4	0
90.5	0
90.6	0
90.7	0
90.8	0
90.9	0
91	0
91.1	0
91.2	0
91.3	0
91.4	0
91.5	0
91.6	0
91.7	0
91.8	0
91.9	0
92	0
92.1	0
92.2	0
92.3	0
92.4	0
92.5	0
92.6	0
92.7	0
92.8	0
92.9	0
93	0
93.1	0
93.2	0
93.3	0
93.4	0
93.5	0
93.6	0
93.7	0
93.8	0
93.9	0
94	0
94.1	0
94.2	0
94.3	0
94.4	0
94.5	0
94.6	0
94.7	0
94.8	0
94.9	0
95	0
95.1	0
95.2	0
95.3	0
95.4	0
95.5	0
95.6	0
95.7	0
95.8	0
95.9	0
96	0
96.1	0
96.2	0
96.3	0
96.4	0
96.5	0
96.6	0
96.7	0
96.8	0
96.9	0
97	0
97.1	0
97.2	0
97.3	0
97.4	0
97.5	0
97.6	0
97.7	0
97.8	0
97.9	0
98	0
98.1	0
98.2	0
98.3	0
98.4	0
98.5	0
98.6	0
98.7	0
98.8	0
98.9	0
99	0
99.1	0
99.2	0
99.3	0
99.4	0
99.5	0
99.6	0
99.7	0
99.8	0
99.9	0
100	0
100.1	0
100.2	0.00166667
100.3	0.003
100.4	0.00766667
100.5	0.011
100.6	0.0123333
100.7	0.0183333
100.8	0.0233333
100.9	0.0286667
101	0.033
101.1	0.038
101.2	0.0413333
101.3	0.0463333
101.4	0.05
101.5	0.0543333
101.6	0.0573333
101.7	0.061
101.8	0.064
101.9	0.068
102	0.072
102.1	0.0763333
102.2	0.0836667
102.3	0.0893333
102.4	0.093
102.5	0.097
102.6	0.100667
102.7	0.105
102.8	0.108
102.9	0.111
103	0.112333
103.1	0.116333
103.2	0.121333
103.3	0.126667
103.4	0.130333
103.5	0.133
103.6	0.135333
103.7	0.139333
103.8	0.144667
103.9	0.148
104	0.151
104.1	0.153333
104.2	0.157333
104.3	0.159667
104.4	0.163333
104.5	0.167333
104.6	0.173
104.7	0.176667
104.8	0.181667
104.9	0.184667
105	0.189
105.1	0.192333
105.2	0.196
105.3	0.197667
105.4	0.199333
105.5	0.202667
105.6	0.204667
105.7	0.207333
105.8	0.21
105.9	0.212667
106	0.216
106.1	0.218333
106.2	0.221667
106.3	0.225667
106.4	0.230333
106.5	0.233667
106.6	0.235
106.7	0.237667
106.8	0.240333
106.9	0.243
107	0.244
107.1	0.246333
107.2	0.250333
107.3	0.251333
107.4	0.255
107.5	0.258
107.6	0.260667
107.7	0.262333
107.8	0.264667
107.9	0.266667
108	0.270667
108.1	0.273333
108.2	0.276333
108.3	0.28
108.4	0.282
108.5	0.285333
108.6	0.286333
108.7	0.290667
108.8	0.292333
108.9	0.295333
109	0.298667
109.1	0.301333
109.2	0.305667
109.3	0.308333
109.4	0.313
109.5	0.315333
109.6	0.320333
109.7	0.323
109.8	0.324333
109.9	0.326333
110	0.328
110.1	0.331
110.2	0.334
110.3	0.338333
110.4	0.339667
110.5	0.341333
110.6	0.346
110.7	0.348333
110.8	0.351333
110.9	0.353667
111	0.355
111.1	0.357667
111.2	0.359333
111.3	0.361
111.4	0.364333
111.5	0.366333
111.6	0.369667
111.7	0.372
111.8	0.373333
111.9	0.376333
112	0.381333
112.1	0.385333
112.2	0.387333
112.3	0.389667
112.4	0.395
112.5	0.396333
112.6	0.397
112.7	0.400667
112.8	0.403333
112.9	0.405
113	0.406333
113.1	0.407333
113.2	0.409667
113.3	0.412667
113.4	0.414
113.5	0.415
113.6	0.417333
113.7	0.420667
113.8	0.424
113.9	0.427
114	0.431
114.1	0.432333
114.2	0.436333
114.3	0.437667
114.4	0.439333
114.5	0.441667
114.6	0.443333
114.7	0.446667
114.8	0.451667
114.9	0.454
115	0.455333
115.1	0.457
115.2	0.459333
115.3	0.460667
115.4	0.464
115.5	0.466667
115.6	0.468
115.7	0.468333
115.8	0.469333
115.9	0.470333
116	0.471667
116.1	0.476
116.2	0.476
116.3	0.478333
116.4	0.480667
116.5	0.481667
116.6	0.483333
116.7	0.484667
116.8	0.487
116.9	0.489667
117	0.490667
117.1	0.493667
117.2	0.498667
117.3	0.499667
117.4	0.501333
117.5	0.502667
117.6	0.505
117.7	0.507
117.8	0.509667
117.9	0.513667
118	0.515
118.1	0.516667
118.2	0.517333
118.3	0.52
118.4	0.522
118.5	0.525
118.6	0.525333
118.7	0.526
118.8	0.528333
118.9	0.53
119	0.532
119.1	0.533
119.2	0.535333
119.3	0.535667
119.4	0.537667
119.5	0.538333
119.6	0.538333
119.7	0.540333
119.8	0.543
119.9	0.543333
120	0.545
120.1	0.546333
120.2	0.547333
120.3	0.549333
120.4	0.550667
120.5	0.551333
120.6	0.551667
120.7	0.553667
120.8	0.554
120.9	0.556
121	0.557333
121.1	0.558
121.2	0.559667
121.3	0.560667
121.4	0.561333
121.5	0.563667
121.6	0.564667
121.7	0.565333
121.8	0.564667
121.9	0.566667
122	0.567667
122.1	0.567333
122.2	0.567667
122.3	0.569667
122.4	0.571
122.5	0.572
122.6	0.573667
122.7	0.572667
122.8	0.573333
122.9	0.575333
123	0.576333
123.1	0.576667
123.2	0.578
123.3	0.579
123.4	0.580667
123.5	0.582
123.6	0.582
123.7	0.583
123.8	0.584667
123.9	0.586333
124	0.588333
124.1	0.592
124.2	0.593
124.3	0.595333
124.4	0.596667
124.5	0.598
124.6	0.601333
124.7	0.603
124.8	0.604
124.9	0.605333
125	0.606333
125.1	0.608
125.2	0.609
125.3	0.610667
125.4	0.613333
125.5	0.613667
125.6	0.615
125.7	0.616333
125.8	0.617
125.9	0.619667
126	0.621667
126.1	0.622
126.2	0.622333
126.3	0.624333
126.4	0.627
126.5	0.628667
126.6	0.629667
126.7	0.631333
126.8	0.633333
126.9	0.635333
127	0.636
127.1	0.638
127.2	0.639667
127.3	0.639333
127.4	0.641667
127.5	0.644333
127.6	0.645667
127.7	0.646333
127.8	0.646667
127.9	0.648333
128	0.649667
128.1	0.651
128.2	0.652667
128.3	0.653
128.4	0.655
128.5	0.657333
128.6	0.659333
128.7	0.661333
128.8	0.662333
128.9	0.664333
129	0.665667
129.1	0.667667
129.2	0.668333
129.3	0.668667
129.4	0.669667
129.5	0.672333
129.6	0.674333
129.7	0.675667
129.8	0.676
129.9	0.677333
130	0.678333
130.1	0.679667
130.2	0.680333
130.3	0.680333
130.4	0.681
130.5	0.682333
130.6	0.685
130.7	0.686333
130.8	0.688333
130.9	0.688667
131	0.688333
131.1	0.69
131.2	0.69
131.3	0.690667
131.4	0.693
131.5	0.692
131.6	0.691333
131.7	0.692
131.8	0.691667
131.9	0.691667
132	0.692
132.1	0.692
132.2	0.692667
132.3	0.692333
132.4	0.693333
132.5	0.694667
132.6	0.695
132.7	0.696333
132.8	0.697
132.9	0.697333
133	0.698
133.1	0.698667
133.2	0.7
133.3	0.7
133.4	0.699333
133.5	0.701
133.6	0.702333
133.7	0.704333
133.8	0.705667
133.9	0.706
134	0.706
134.1	0.706667
134.2	0.707
134.3	0.707
134.4	0.709
134.5	0.709667
134.6	0.710333
134.7	0.710667
134.8	0.71
134.9	0.709667
135	0.709667
135.1	0.71
135.2	0.710667
135.3	0.711667
135.4	0.712667
135.5	0.713333
135.6	0.714333
135.7	0.713333
135.8	0.714
135.9	0.715
136	0.715667
136.1	0.717
136.2	0.717667
136.3	0.719
136.4	0.719667
136.5	0.719333
136.6	0.720333
136.7	0.719333
136.8	0.719667
136.9	0.720333
137	0.720667
137.1	0.723667
137.2	0.724333
137.3	0.724333
137.4	0.725667
137.5	0.727
137.6	0.727667
137.7	0.728
137.8	0.728333
137.9	0.729667
138	0.729333
138.1	0.729
138.2	0.729333
138.3	0.728667
138.4	0.728333
138.5	0.727667
138.6	0.727333
138.7	0.727667
138.8	0.728
138.9	0.729
139	0.73
139.1	0.731333
139.2	0.733
139.3	0.732667
139.4	0.732
139.5	0.732
139.6	0.731
139.7	0.729667
139.8	0.73
139.9	0.73
140	0.73
140.1	0.73
140.2	0.731
140.3	0.731333
140.4	0.731667
140.5	0.733
140.6	0.733667
140.7	0.734667
140.8	0.734667
140.9	0.735
141	0.735
141.1	0.736667
141.2	0.738
141.3	0.738
141.4	0.740667
141.5	0.739333
141.6	0.74
141.7	0.739667
141.8	0.740667
141.9	0.741333
142	0.741333
142.1	0.741333
142.2	0.743
142.3	0.743
142.4	0.744667
142.5	0.744
142.6	0.744333
142.7	0.745667
142.8	0.746
142.9	0.746
143	0.747
143.1	0.747
143.2	0.747333
143.3	0.748667
143.4	0.750333
143.5	0.748667
143.6	0.748333
143.7	0.749667
143.8	0.750667
143.9	0.75
144	0.75
144.1	0.751333
144.2	0.751667
144.3	0.752
144.4	0.753333
144.5	0.754333
144.6	0.754667
144.7	0.754333
144.8	0.756333
144.9	0.757
145	0.759
145.1	0.758333
145.2	0.759333
145.3	0.759333
145.4	0.758667
145.5	0.759
145.6	0.757333
145.7	0.757333
145.8	0.758
145.9	0.76
146	0.760667
146.1	0.758667
146.2	0.76
146.3	0.761
146.4	0.763333
146.5	0.762667
146.6	0.762333
146.7	0.762667
146.8	0.763333
146.9	0.762333
147	0.763333
147.1	0.764
147.2	0.764333
147.3	0.764
147.4	0.764333
147.5	0.764667
147.6	0.765
147.7	0.766
147.8	0.765333
147.9	0.765667
148	0.766333
148.1	0.767333
148.2	0.768333
148.3	0.768333
148.4	0.769
148.5	0.769
148.6	0.768333
148.7	0.769333
148.8	0.769
148.9	0.769
149	0.769
149.1	0.768667
149.2	0.768667
149.3	0.768333
149.4	0.768333
149.5	0.768
149.6	0.767667
149.7	0.767
149.8	0.767333
149.9	0.768333
150	0.768
150.1	0.769333
150.2	0.769
150.3	0.769667
150.4	0.768667
150.5	0.769
150.6	0.769667
150.7	0.770333
150.8	0.770667
150.9	0.770667
151	0.771
151.1	0.770333
151.2	0.772667
151.3	0.773
151.4	0.773667
151.5	0.774333
151.6	0.774667
151.7	0.774667
151.8	0.775667
151.9	0.775333
152	0.776
152.1	0.776667
152.2	0.776667
152.3	0.776667
152.4	0.776333
152.5	0.777
152.6	0.776667
152.7	0.777
152.8	0.777333
152.9	0.778667
153	0.779333
153.1	0.778667
153.2	0.779333
153.3	0.779667
153.4	0.779333
153.5	0.780667
153.6	0.780667
153.7	0.781
153.8	0.782
153.9	0.782667
154	0.784
154.1	0.784
154.2	0.784333
154.3	0.784667
154.4	0.785
154.5	0.785
154.6	0.785667
154.7	0.786667
154.8	0.787667
154.9	0.787667
155	0.787
155.1	0.787667
155.2	0.787667
155.3	0.787667
155.4	0.788
155.5	0.789333
155.6	0.789333
155.7	0.789333
155.8	0.789667
155.9	0.789
156	0.788333
156.1	0.79
156.2	0.79
156.3	0.791333
156.4	0.791667
156.5	0.790667
156.6	0.790667
156.7	0.79
156.8	0.79
156.9	0.789333
157	0.789333
157.1	0.788667
157.2	0.788
157.3	0.787
157.4	0.786667
157.5	0.786
157.6	0.785333
157.7	0.785667
157.8	0.786667
157.9	0.786333
158	0.787
158.1	0.790333
158.2	0.790667
158.3	0.791333
158.4	0.792333
158.5	0.792333
158.6	0.792667
158.7	0.793
158.8	0.794
158.9	0.793
159	0.793333
159.1	0.793667
159.2	0.794333
159.3	0.794667
159.4	0.793333
159.5	0.794667
159.6	0.793667
159.7	0.792333
159.8	0.792333
159.9	0.791
160	0.791667
160.1	0.793
160.2	0.793667
160.3	0.792
160.4	0.791
160.5	0.789667
160.6	0.790333
160.7	0.790333
160.8	0.790667
160.9	0.791333
161	0.791
161.1	0.789667
161.2	0.79
161.3	0.790667
161.4	0.791333
161.5	0.791
161.6	0.791333
161.7	0.792
161.8	0.792667
161.9	0.793333
162	0.793333
162.1	0.793333
162.2	0.793333
162.3	0.794333
162.4	0.794667
162.5	0.795
162.6	0.795
162.7	0.794
162.8	0.794
162.9	0.794
163	0.793667
163.1	0.793667
163.2	0.793333
163.3	0.791333
163.4	0.789667
163.5	0.788667
163.6	0.79
163.7	0.79
163.8	0.790667
163.9	0.789333
164	0.789667
164.1	0.789667
164.2	0.789667
164.3	0.790333
164.4	0.790667
164.5	0.79
164.6	0.792333
164.7	0.793333
164.8	0.795
164.9	0.794
165	0.793667
165.1	0.794667
165.2	0.795667
165.3	0.796333
165.4	0.795667
165.5	0.795667
165.6	0.796333
165.7	0.795333
165.8	0.795
165.9	0.793667
166	0.793
166.1	0.793
166.2	0.793
166.3	0.795
166.4	0.796333
166.5	0.795
166.6	0.794333
166.7	0.793333
166.8	0.793
166.9	0.793
167	0.792667
167.1	0.794667
167.2	0.794667
167.3	0.795333
167.4	0.794667
167.5	0.793667
167.6	0.793333
167.7	0.794667
167.8	0.795
167.9	0.796
168	0.796333
168.1	0.797333
168.2	0.797333
168.3	0.798667
168.4	0.798333
168.5	0.798333
168.6	0.799667
168.7	0.800667
168.8	0.801667
168.9	0.801667
169	0.800667
169.1	0.8
169.2	0.8
169.3	0.8
169.4	0.801333
169.5	0.801333
169.6	0.8
169.7	0.799333
169.8	0.798333
169.9	0.798667
170	0.798333
170.1	0.798333
170.2	0.798667
170.3	0.799333
170.4	0.799667
170.5	0.800333
170.6	0.800667
170.7	0.800667
170.8	0.801
170.9	0.8
171	0.799333
171.1	0.8
171.2	0.8
171.3	0.800667
171.4	0.799333
171.5	0.799333
171.6	0.799667
171.7	0.799667
171.8	0.799333
171.9	0.798667
172	0.798333
172.1	0.798333
172.2	0.799
172.3	0.798
172.4	0.799667
172.5	0.799667
172.6	0.799333
172.7	0.800667
172.8	0.801
172.9	0.801
173	0.801
173.1	0.8
173.2	0.800333
173.3	0.800667
173.4	0.801
173.5	0.801
173.6	0.801667
173.7	0.803333
173.8	0.803667
173.9	0.805
174	0.804333
174.1	0.806333
174.2	0.806333
174.3	0.806333
174.4	0.806333
174.5	0.805333
174.6	0.806333
174.7	0.807
174.8	0.806
174.9	0.805667
175	0.806
175.1	0.807
175.2	0.806667
175.3	0.807333
175.4	0.807
175.5	0.805333
175.6	0.805333
175.7	0.804667
175.8	0.805667
175.9	0.805667
176	0.806667
176.1	0.806667
176.2	0.807667
176.3	0.807667
176.4	0.808
176.5	0.807667
176.6	0.806667
176.7	0.807333
176.8	0.807333
176.9	0.808
177	0.809
177.1	0.809
177.2	0.809667
177.3	0.809667
177.4	0.808333
177.5	0.809333
177.6	0.809333
177.7	0.809667
177.8	0.810333
177.9	0.809667
178	0.808667
178.1	0.808333
178.2	0.808
178.3	0.808333
178.4	0.808667
178.5	0.808
178.6	0.809
178.7	0.809333
178.8	0.809667
178.9	0.809
179	0.809
179.1	0.808667
179.2	0.808333
179.3	0.809333
179.4	0.809
179.5	0.808333
179.6	0.807
179.7	0.806333
179.8	0.806
179.9	0.806
180	0.806333
180.1	0.806333
180.2	0.806667
180.3	0.807667
180.4	0.807667
180.5	0.809333
180.6	0.809
180.7	0.81
180.8	0.810333
180.9	0.810667
181	0.811667
181.1	0.812667
181.2	0.812333
181.3	0.814
181.4	0.813667
181.5	0.814333
181.6	0.814333
181.7	0.814333
181.8	0.814333
181.9	0.815667
182	0.816333
182.1	0.816
182.2	0.816
182.3	0.816667
182.4	0.817667
182.5	0.818667
182.6	0.818333
182.7	0.817333
182.8	0.816333
182.9	0.816667
183	0.815667
183.1	0.815333
183.2	0.815667
183.3	0.815667
183.4	0.815
183.5	0.815333
183.6	0.815667
183.7	0.816
183.8	0.816333
183.9	0.816667
184	0.816333
184.1	0.815667
184.2	0.815333
184.3	0.817
184.4	0.817333
184.5	0.817
184.6	0.818
184.7	0.818333
184.8	0.817667
184.9	0.818
185	0.817333
185.1	0.817
185.2	0.816667
185.3	0.816
185.4	0.816333
185.5	0.816333
185.6	0.815667
185.7	0.816667
185.8	0.815667
185.9	0.816333
186	0.815
186.1	0.815333
186.2	0.814667
186.3	0.815333
186.4	0.816333
186.5	0.817667
186.6	0.817333
186.7	0.817333
186.8	0.819333
186.9	0.819333
187	0.818333
187.1	0.817667
187.2	0.818
187.3	0.818333
187.4	0.818333
187.5	0.818667
187.6	0.818
187.7	0.817667
187.8	0.817333
187.9	0.817333
188	0.817333
188.1	0.818
188.2	0.817667
188.3	0.817667
188.4	0.818
188.5	0.818
188.6	0.817
188.7	0.818333
188.8	0.819667
188.9	0.82
189	0.82
189.1	0.82
189.2	0.82
189.3	0.819667
189.4	0.819333
189.5	0.819333
189.6	0.820333
189.7	0.821333
189.8	0.821667
189.9	0.821
190	0.821667
190.1	0.821667
190.2	0.821
190.3	0.821
190.4	0.821
190.5	0.822
190.6	0.823
190.7	0.823
190.8	0.823333
190.9	0.824333
191	0.823667
191.1	0.823333
191.2	0.823
191.3	0.823
191.4	0.821667
191.5	0.822667
191.6	0.821667
191.7	0.821667
191.8	0.822
191.9	0.821667
192	0.822667
192.1	0.823333
192.2	0.823667
192.3	0.823333
192.4	0.823667
192.5	0.823667
192.6	0.823667
192.7	0.823333
192.8	0.822333
192.9	0.822667
193	0.822
193.1	0.821667
193.2	0.821667
193.3	0.821
193.4	0.821333
193.5	0.820667
193.6	0.820333
193.7	0.821
193.8	0.822333
193.9	0.823
194	0.823333
194.1	0.823
194.2	0.822333
194.3	0.820333
194.4	0.821333
194.5	0.822
194.6	0.822667
194.7	0.823
194.8	0.823667
194.9	0.824
195	0.823667
195.1	0.823667
195.2	0.825
195.3	0.825
195.4	0.824333
195.5	0.824667
195.6	0.824667
195.7	0.824
195.8	0.823667
195.9	0.823667
196	0.823667
196.1	0.823333
196.2	0.822667
196.3	0.822667
196.4	0.823667
196.5	0.823667
196.6	0.824
196.7	0.823667
196.8	0.824667
196.9	0.822667
197	0.822667
197.1	0.822333
197.2	0.821667
197.3	0.820667
197.4	0.821333
197.5	0.821
197.6	0.820333
197.7	0.819333
197.8	0.819333
197.9	0.818667
198	0.817333
198.1	0.816667
198.2	0.816667
198.3	0.818333
198.4	0.819
198.5	0.819667
198.6	0.819
198.7	0.819
198.8	0.818333
198.9	0.818
199	0.818
199.1	0.818
199.2	0.818667
199.3	0.818333
199.4	0.817333
199.5	0.818
199.6	0.818333
199.7	0.818667
199.8	0.818333
199.9	0.817667
200	0.817667
[truncated: 14,000 more rows]
