# Supplementary material for: Bayesian inference of kinetic schemes for ion channels by Kalman filtering
Source: eLife journal article supplement (doi:10.7554/elife.62714), 2022-05-04
Supplement: fig4-data1 [file 1_Sim_N_4000_Fluor_MW_16M.xlsx]

## Sheet: Tabelle1
0.1	0
0.2	0
0.3	0
0.4	0
0.5	0
0.6	0
0.7	0
0.8	0
0.9	0
1	0
1.1	0
1.2	0
1.3	0
1.4	0
1.5	0
1.6	0
1.7	0
1.8	0
1.9	0
2	0
2.1	0
2.2	0
2.3	0
2.4	0
2.5	0
2.6	0
2.7	0
2.8	0
2.9	0
3	0
3.1	0
3.2	0
3.3	0
3.4	0
3.5	0
3.6	0
3.7	0
3.8	0
3.9	0
4	0
4.1	0
4.2	0
4.3	0
4.4	0
4.5	0
4.6	0
4.7	0
4.8	0
4.9	0
5	0
5.1	0
5.2	0
5.3	0
5.4	0
5.5	0
5.6	0
5.7	0
5.8	0
5.9	0
6	0
6.1	0
6.2	0
6.3	0
6.4	0
6.5	0
6.6	0
6.7	0
6.8	0
6.9	0
7	0
7.1	0
7.2	0
7.3	0
7.4	0
7.5	0
7.6	0
7.7	0
7.8	0
7.9	0
8	0
8.1	0
8.2	0
8.3	0
8.4	0
8.5	0
8.6	0
8.7	0
8.8	0
8.9	0
9	0
9.1	0
9.2	0
9.3	0
9.4	0
9.5	0
9.6	0
9.7	0
9.8	0
9.9	0
10	0
10.1	0
10.2	0
10.3	0
10.4	0
10.5	0
10.6	0
10.7	0
10.8	0
10.9	0
11	0
11.1	0
11.2	0
11.3	0
11.4	0
11.5	0
11.6	0
11.7	0
11.8	0
11.9	0
12	0
12.1	0
12.2	0
12.3	0
12.4	0
12.5	0
12.6	0
12.7	0
12.8	0
12.9	0
13	0
13.1	0
13.2	0
13.3	0
13.4	0
13.5	0
13.6	0
13.7	0
13.8	0
13.9	0
14	0
14.1	0
14.2	0
14.3	0
14.4	0
14.5	0
14.6	0
14.7	0
14.8	0
14.9	0
15	0
15.1	0
15.2	0
15.3	0
15.4	0
15.5	0
15.6	0
15.7	0
15.8	0
15.9	0
16	0
16.1	0
16.2	0
16.3	0
16.4	0
16.5	0
16.6	0
16.7	0
16.8	0
16.9	0
17	0
17.1	0
17.2	0
17.3	0
17.4	0
17.5	0
17.6	0
17.7	0
17.8	0
17.9	0
18	0
18.1	0
18.2	0
18.3	0
18.4	0
18.5	0
18.6	0
18.7	0
18.8	0
18.9	0
19	0
19.1	0
19.2	0
19.3	0
19.4	0
19.5	0
19.6	0
19.7	0
19.8	0
19.9	0
20	0
20.1	0
20.2	0
20.3	0
20.4	0
20.5	0
20.6	0
20.7	0
20.8	0
20.9	0
21	0
21.1	0
21.2	0
21.3	0
21.4	0
21.5	0
21.6	0
21.7	0
21.8	0
21.9	0
22	0
22.1	0
22.2	0
22.3	0
22.4	0
22.5	0
22.6	0
22.7	0
22.8	0
22.9	0
23	0
23.1	0
23.2	0
23.3	0
23.4	0
23.5	0
23.6	0
23.7	0
23.8	0
23.9	0
24	0
24.1	0
24.2	0
24.3	0
24.4	0
24.5	0
24.6	0
24.7	0
24.8	0
24.9	0
25	0
25.1	0
25.2	0
25.3	0
25.4	0
25.5	0
25.6	0
25.7	0
25.8	0
25.9	0
26	0
26.1	0
26.2	0
26.3	0
26.4	0
26.5	0
26.6	0
26.7	0
26.8	0
26.9	0
27	0
27.1	0
27.2	0
27.3	0
27.4	0
27.5	0
27.6	0
27.7	0
27.8	0
27.9	0
28	0
28.1	0
28.2	0
28.3	0
28.4	0
28.5	0
28.6	0
28.7	0
28.8	0
28.9	0
29	0
29.1	0
29.2	0
29.3	0
29.4	0
29.5	0
29.6	0
29.7	0
29.8	0
29.9	0
30	0
30.1	0
30.2	0
30.3	0
30.4	0
30.5	0
30.6	0
30.7	0
30.8	0
30.9	0
31	0
31.1	0
31.2	0
31.3	0
31.4	0
31.5	0
31.6	0
31.7	0
31.8	0
31.9	0
32	0
32.1	0
32.2	0
32.3	0
32.4	0
32.5	0
32.6	0
32.7	0
32.8	0
32.9	0
33	0
33.1	0
33.2	0
33.3	0
33.4	0
33.5	0
33.6	0
33.7	0
33.8	0
33.9	0
34	0
34.1	0
34.2	0
34.3	0
34.4	0
34.5	0
34.6	0
34.7	0
34.8	0
34.9	0
35	0
35.1	0
35.2	0
35.3	0
35.4	0
35.5	0
35.6	0
35.7	0
35.8	0
35.9	0
36	0
36.1	0
36.2	0
36.3	0
36.4	0
36.5	0
36.6	0
36.7	0
36.8	0
36.9	0
37	0
37.1	0
37.2	0
37.3	0
37.4	0
37.5	0
37.6	0
37.7	0
37.8	0
37.9	0
38	0
38.1	0
38.2	0
38.3	0
38.4	0
38.5	0
38.6	0
38.7	0
38.8	0
38.9	0
39	0
39.1	0
39.2	0
39.3	0
39.4	0
39.5	0
39.6	0
39.7	0
39.8	0
39.9	0
40	0
40.1	0
40.2	0
40.3	0
40.4	0
40.5	0
40.6	0
40.7	0
40.8	0
40.9	0
41	0
41.1	0
41.2	0
41.3	0
41.4	0
41.5	0
41.6	0
41.7	0
41.8	0
41.9	0
42	0
42.1	0
42.2	0
42.3	0
42.4	0
42.5	0
42.6	0
42.7	0
42.8	0
42.9	0
43	0
43.1	0
43.2	0
43.3	0
43.4	0
43.5	0
43.6	0
43.7	0
43.8	0
43.9	0
44	0
44.1	0
44.2	0
44.3	0
44.4	0
44.5	0
44.6	0
44.7	0
44.8	0
44.9	0
45	0
45.1	0
45.2	0
45.3	0
45.4	0
45.5	0
45.6	0
45.7	0
45.8	0
45.9	0
46	0
46.1	0
46.2	0
46.3	0
46.4	0
46.5	0
46.6	0
46.7	0
46.8	0
46.9	0
47	0
47.1	0
47.2	0
47.3	0
47.4	0
47.5	0
47.6	0
47.7	0
47.8	0
47.9	0
48	0
48.1	0
48.2	0
48.3	0
48.4	0
48.5	0
48.6	0
48.7	0
48.8	0
48.9	0
49	0
49.1	0
49.2	0
49.3	0
49.4	0
49.5	0
49.6	0
49.7	0
49.8	0
49.9	0
50	0
50.1	0
50.2	0
50.3	0
50.4	0
50.5	0
50.6	0
50.7	0
50.8	0
50.9	0
51	0
51.1	0
51.2	0
51.3	0
51.4	0
51.5	0
51.6	0
51.7	0
51.8	0
51.9	0
52	0
52.1	0
52.2	0
52.3	0
52.4	0
52.5	0
52.6	0
52.7	0
52.8	0
52.9	0
53	0
53.1	0
53.2	0
53.3	0
53.4	0
53.5	0
53.6	0
53.7	0
53.8	0
53.9	0
54	0
54.1	0
54.2	0
54.3	0
54.4	0
54.5	0
54.6	0
54.7	0
54.8	0
54.9	0
55	0
55.1	0
55.2	0
55.3	0
55.4	0
55.5	0
55.6	0
55.7	0
55.8	0
55.9	0
56	0
56.1	0
56.2	0
56.3	0
56.4	0
56.5	0
56.6	0
56.7	0
56.8	0
56.9	0
57	0
57.1	0
57.2	0
57.3	0
57.4	0
57.5	0
57.6	0
57.7	0
57.8	0
57.9	0
58	0
58.1	0
58.2	0
58.3	0
58.4	0
58.5	0
58.6	0
58.7	0
58.8	0
58.9	0
59	0
59.1	0
59.2	0
59.3	0
59.4	0
59.5	0
59.6	0
59.7	0
59.8	0
59.9	0
60	0
60.1	0
60.2	0
60.3	0
60.4	0
60.5	0
60.6	0
60.7	0
60.8	0
60.9	0
61	0
61.1	0
61.2	0
61.3	0
61.4	0
61.5	0
61.6	0
61.7	0
61.8	0
61.9	0
62	0
62.1	0
62.2	0
62.3	0
62.4	0
62.5	0
62.6	0
62.7	0
62.8	0
62.9	0
63	0
63.1	0
63.2	0
63.3	0
63.4	0
63.5	0
63.6	0
63.7	0
63.8	0
63.9	0
64	0
64.1	0
64.2	0
64.3	0
64.4	0
64.5	0
64.6	0
64.7	0
64.8	0
64.9	0
65	0
65.1	0
65.2	0
65.3	0
65.4	0
65.5	0
65.6	0
65.7	0
65.8	0
65.9	0
66	0
66.1	0
66.2	0
66.3	0
66.4	0
66.5	0
66.6	0
66.7	0
66.8	0
66.9	0
67	0
67.1	0
67.2	0
67.3	0
67.4	0
67.5	0
67.6	0
67.7	0
67.8	0
67.9	0
68	0
68.1	0
68.2	0
68.3	0
68.4	0
68.5	0
68.6	0
68.7	0
68.8	0
68.9	0
69	0
69.1	0
69.2	0
69.3	0
69.4	0
69.5	0
69.6	0
69.7	0
69.8	0
69.9	0
70	0
70.1	0
70.2	0
70.3	0
70.4	0
70.5	0
70.6	0
70.7	0
70.8	0
70.9	0
71	0
71.1	0
71.2	0
71.3	0
71.4	0
71.5	0
71.6	0
71.7	0
71.8	0
71.9	0
72	0
72.1	0
72.2	0
72.3	0
72.4	0
72.5	0
72.6	0
72.7	0
72.8	0
72.9	0
73	0
73.1	0
73.2	0
73.3	0
73.4	0
73.5	0
73.6	0
73.7	0
73.8	0
73.9	0
74	0
74.1	0
74.2	0
74.3	0
74.4	0
74.5	0
74.6	0
74.7	0
74.8	0
74.9	0
75	0
75.1	0
75.2	0
75.3	0
75.4	0
75.5	0
75.6	0
75.7	0
75.8	0
75.9	0
76	0
76.1	0
76.2	0
76.3	0
76.4	0
76.5	0
76.6	0
76.7	0
76.8	0
76.9	0
77	0
77.1	0
77.2	0
77.3	0
77.4	0
77.5	0
77.6	0
77.7	0
77.8	0
77.9	0
78	0
78.1	0
78.2	0
78.3	0
78.4	0
78.5	0
78.6	0
78.7	0
78.8	0
78.9	0
79	0
79.1	0
79.2	0
79.3	0
79.4	0
79.5	0
79.6	0
79.7	0
79.8	0
79.9	0
80	0
80.1	0
80.2	0
80.3	0
80.4	0
80.5	0
80.6	0
80.7	0
80.8	0
80.9	0
81	0
81.1	0
81.2	0
81.3	0
81.4	0
81.5	0
81.6	0
81.7	0
81.8	0
81.9	0
82	0
82.1	0
82.2	0
82.3	0
82.4	0
82.5	0
82.6	0
82.7	0
82.8	0
82.9	0
83	0
83.1	0
83.2	0
83.3	0
83.4	0
83.5	0
83.6	0
83.7	0
83.8	0
83.9	0
84	0
84.1	0
84.2	0
84.3	0
84.4	0
84.5	0
84.6	0
84.7	0
84.8	0
84.9	0
85	0
85.1	0
85.2	0
85.3	0
85.4	0
85.5	0
85.6	0
85.7	0
85.8	0
85.9	0
86	0
86.1	0
86.2	0
86.3	0
86.4	0
86.5	0
86.6	0
86.7	0
86.8	0
86.9	0
87	0
87.1	0
87.2	0
87.3	0
87.4	0
87.5	0
87.6	0
87.7	0
87.8	0
87.9	0
88	0
88.1	0
88.2	0
88.3	0
88.4	0
88.5	0
88.6	0
88.7	0
88.8	0
88.9	0
89	0
89.1	0
89.2	0
89.3	0
89.4	0
89.5	0
89.6	0
89.7	0
89.8	0
89.9	0
90	0
90.1	0
90.2	0
90.3	0
90.4	0
90.5	0
90.6	0
90.7	0
90.8	0
90.9	0
91	0
91.1	0
91.2	0
91.3	0
91.4	0
91.5	0
91.6	0
91.7	0
91.8	0
91.9	0
92	0
92.1	0
92.2	0
92.3	0
92.4	0
92.5	0
92.6	0
92.7	0
92.8	0
92.9	0
93	0
93.1	0
93.2	0
93.3	0
93.4	0
93.5	0
93.6	0
93.7	0
93.8	0
93.9	0
94	0
94.1	0
94.2	0
94.3	0
94.4	0
94.5	0
94.6	0
94.7	0
94.8	0
94.9	0
95	0
95.1	0
95.2	0
95.3	0
95.4	0
95.5	0
95.6	0
95.7	0
95.8	0
95.9	0
96	0
96.1	0
96.2	0
96.3	0
96.4	0
96.5	0
96.6	0
96.7	0
96.8	0
96.9	0
97	0
97.1	0
97.2	0
97.3	0
97.4	0
97.5	0
97.6	0
97.7	0
97.8	0
97.9	0
98	0
98.1	0
98.2	0
98.3	0
98.4	0
98.5	0
98.6	0
98.7	0
98.8	0
98.9	0
99	0
99.1	0
99.2	0
99.3	0
99.4	0
99.5	0
99.6	0
99.7	0
99.8	0
99.9	0
100	0
100.1	0.540875
100.2	0.728
100.3	0.8235
100.4	0.87975
100.5	0.906375
100.6	0.924625
100.7	0.935125
100.8	0.943875
100.9	0.949
101	0.953625
101.1	0.9525
101.2	0.95075
101.3	0.953875
101.4	0.955125
101.5	0.955
101.6	0.9525
101.7	0.951375
101.8	0.95275
101.9	0.955
102	0.953875
102.1	0.952625
102.2	0.951
102.3	0.953375
102.4	0.955875
102.5	0.958
102.6	0.955625
102.7	0.956125
102.8	0.95625
102.9	0.954375
103	0.95425
103.1	0.958875
103.2	0.95675
103.3	0.956875
103.4	0.9575
103.5	0.959375
103.6	0.960125
103.7	0.9595
103.8	0.95825
103.9	0.95825
104	0.96075
104.1	0.956875
104.2	0.95775
104.3	0.9565
104.4	0.957375
104.5	0.958625
104.6	0.963875
104.7	0.9635
104.8	0.95975
104.9	0.961
105	0.95875
105.1	0.9615
105.2	0.962375
105.3	0.962125
105.4	0.96025
105.5	0.961
105.6	0.96225
105.7	0.9635
105.8	0.9625
105.9	0.963875
106	0.961125
106.1	0.9595
106.2	0.95925
106.3	0.9615
106.4	0.96225
106.5	0.965125
106.6	0.967625
106.7	0.9655
106.8	0.962875
106.9	0.96325
107	0.96375
107.1	0.964875
107.2	0.9635
107.3	0.963875
107.4	0.9625
107.5	0.962625
107.6	0.961
107.7	0.9635
107.8	0.966625
107.9	0.967625
108	0.968875
108.1	0.968
108.2	0.970125
108.3	0.969
108.4	0.96725
108.5	0.964125
108.6	0.96525
108.7	0.967625
108.8	0.96725
108.9	0.96625
109	0.968875
109.1	0.968375
109.2	0.96725
109.3	0.96725
109.4	0.96625
109.5	0.966375
109.6	0.96575
109.7	0.9665
109.8	0.965875
109.9	0.97025
110	0.97
110.1	0.97175
110.2	0.969625
110.3	0.972
110.4	0.97175
110.5	0.971125
110.6	0.97275
110.7	0.973625
110.8	0.970875
110.9	0.967
111	0.96775
111.1	0.969625
111.2	0.9695
111.3	0.969
111.4	0.967875
111.5	0.9675
111.6	0.96825
111.7	0.97075
111.8	0.97325
111.9	0.971125
112	0.972125
112.1	0.971
112.2	0.972375
112.3	0.97325
112.4	0.972
112.5	0.970625
112.6	0.972625
112.7	0.97325
112.8	0.971875
112.9	0.97225
113	0.974125
113.1	0.975625
113.2	0.97725
113.3	0.974375
113.4	0.975125
113.5	0.97375
113.6	0.973375
113.7	0.976
113.8	0.972375
113.9	0.9735
114	0.974
114.1	0.975125
114.2	0.977125
114.3	0.974625
114.4	0.976625
114.5	0.974875
114.6	0.978
114.7	0.97825
114.8	0.97625
114.9	0.977
115	0.97275
115.1	0.976625
115.2	0.974125
115.3	0.973875
115.4	0.97525
115.5	0.97575
115.6	0.974
115.7	0.973625
115.8	0.974
115.9	0.976125
116	0.9765
116.1	0.97525
116.2	0.97625
116.3	0.97625
116.4	0.97625
116.5	0.977375
116.6	0.97575
116.7	0.976875
116.8	0.9745
116.9	0.974875
117	0.976375
117.1	0.978125
117.2	0.97675
117.3	0.976125
117.4	0.975
117.5	0.9745
117.6	0.976625
117.7	0.97725
117.8	0.97925
117.9	0.978625
118	0.977125
118.1	0.976625
118.2	0.975375
118.3	0.974125
118.4	0.97475
118.5	0.976125
118.6	0.975375
118.7	0.978
118.8	0.97725
118.9	0.97775
119	0.979625
119.1	0.97925
119.2	0.979625
119.3	0.9785
119.4	0.9775
119.5	0.974
119.6	0.975375
119.7	0.976375
119.8	0.9775
119.9	0.9785
120	0.97875
120.1	0.98075
120.2	0.97875
120.3	0.979625
120.4	0.9805
120.5	0.9805
120.6	0.981
120.7	0.980875
120.8	0.981125
120.9	0.978625
121	0.982125
121.1	0.978875
121.2	0.9785
121.3	0.97975
121.4	0.9785
121.5	0.977
121.6	0.977
121.7	0.977375
121.8	0.979625
121.9	0.983625
122	0.982375
122.1	0.980875
122.2	0.980125
122.3	0.982625
122.4	0.983875
122.5	0.981375
122.6	0.98175
122.7	0.982
122.8	0.981375
122.9	0.981625
123	0.982875
123.1	0.981125
123.2	0.979625
123.3	0.978375
123.4	0.976375
123.5	0.979375
123.6	0.979875
123.7	0.980875
123.8	0.98175
123.9	0.981875
124	0.982375
124.1	0.981125
124.2	0.98225
124.3	0.98175
124.4	0.982125
124.5	0.9815
124.6	0.979
124.7	0.9805
124.8	0.9815
124.9	0.9815
125	0.981375
125.1	0.981875
125.2	0.9835
125.3	0.981875
125.4	0.98175
125.5	0.9785
125.6	0.98025
125.7	0.980625
125.8	0.98
125.9	0.98225
126	0.9815
126.1	0.980375
126.2	0.981125
126.3	0.979875
126.4	0.980875
126.5	0.98175
126.6	0.982625
126.7	0.98125
126.8	0.98225
126.9	0.984375
127	0.9825
127.1	0.984
127.2	0.984375
127.3	0.98475
127.4	0.98525
127.5	0.9845
127.6	0.983125
127.7	0.982625
127.8	0.981625
127.9	0.9815
128	0.9855
128.1	0.982875
128.2	0.982125
128.3	0.984375
128.4	0.984875
128.5	0.98425
128.6	0.984625
128.7	0.984
128.8	0.983875
128.9	0.98525
129	0.9825
129.1	0.984625
129.2	0.983125
129.3	0.98475
129.4	0.9845
129.5	0.983
129.6	0.983
129.7	0.98325
129.8	0.985
129.9	0.98375
130	0.984625
130.1	0.98575
130.2	0.983625
130.3	0.983875
130.4	0.98175
130.5	0.98275
130.6	0.9825
130.7	0.983625
130.8	0.98625
130.9	0.986875
131	0.984625
131.1	0.983625
131.2	0.984375
131.3	0.984875
131.4	0.9855
131.5	0.9845
131.6	0.9855
131.7	0.985125
131.8	0.9845
131.9	0.984
132	0.9835
132.1	0.985
132.2	0.98225
132.3	0.983375
132.4	0.984875
132.5	0.983625
132.6	0.983
132.7	0.983625
132.8	0.984875
132.9	0.984375
133	0.984375
133.1	0.983375
133.2	0.98275
133.3	0.9835
133.4	0.982625
133.5	0.985375
133.6	0.98375
133.7	0.9845
133.8	0.985125
133.9	0.986
134	0.985125
134.1	0.98425
134.2	0.985
134.3	0.98525
134.4	0.9875
134.5	0.98425
134.6	0.98725
134.7	0.987375
134.8	0.985625
134.9	0.985625
135	0.98675
135.1	0.9855
135.2	0.98575
135.3	0.984375
135.4	0.985125
135.5	0.98475
135.6	0.985125
135.7	0.98625
135.8	0.988125
135.9	0.987875
136	0.986375
136.1	0.986
136.2	0.9845
136.3	0.984625
136.4	0.98475
136.5	0.985
136.6	0.98675
136.7	0.986
136.8	0.985875
136.9	0.98575
137	0.98625
137.1	0.98475
137.2	0.984
137.3	0.98275
137.4	0.98425
137.5	0.987
137.6	0.986875
137.7	0.987125
137.8	0.98725
137.9	0.988
138	0.98625
138.1	0.987125
138.2	0.9865
138.3	0.985875
138.4	0.9885
138.5	0.989
138.6	0.989
138.7	0.988
138.8	0.9885
138.9	0.98875
139	0.988875
139.1	0.98875
139.2	0.9885
139.3	0.98575
139.4	0.984125
139.5	0.98575
139.6	0.985625
139.7	0.986875
139.8	0.986375
139.9	0.985875
140	0.985875
140.1	0.98575
140.2	0.987125
140.3	0.986875
140.4	0.987875
140.5	0.986625
140.6	0.98575
140.7	0.985375
140.8	0.98625
140.9	0.986125
141	0.9865
141.1	0.986375
141.2	0.987125
141.3	0.986125
141.4	0.986375
141.5	0.987
141.6	0.988375
141.7	0.988375
141.8	0.989
141.9	0.989
142	0.98775
142.1	0.9885
142.2	0.988
142.3	0.98725
142.4	0.988625
142.5	0.989
142.6	0.9885
142.7	0.989125
142.8	0.98775
142.9	0.988625
143	0.98825
143.1	0.987
143.2	0.987
143.3	0.98775
143.4	0.9875
143.5	0.98725
143.6	0.986375
143.7	0.98675
143.8	0.987625
143.9	0.98975
144	0.989125
144.1	0.989375
144.2	0.98875
144.3	0.991
144.4	0.9875
144.5	0.986125
144.6	0.9865
144.7	0.98675
144.8	0.987
144.9	0.987375
145	0.988
145.1	0.986625
145.2	0.98825
145.3	0.98925
145.4	0.988875
145.5	0.98825
145.6	0.989625
145.7	0.987875
145.8	0.988
145.9	0.98675
146	0.9875
146.1	0.988375
146.2	0.98775
146.3	0.986875
146.4	0.98775
146.5	0.98925
146.6	0.988375
146.7	0.98925
146.8	0.989
146.9	0.988875
147	0.987375
147.1	0.98725
147.2	0.986625
147.3	0.987
147.4	0.98625
147.5	0.986125
147.6	0.988
147.7	0.988625
147.8	0.98825
147.9	0.989875
148	0.989
148.1	0.987875
148.2	0.988125
148.3	0.989
148.4	0.989375
148.5	0.988625
148.6	0.98825
148.7	0.988125
148.8	0.988875
148.9	0.98875
149	0.989375
149.1	0.989
149.2	0.990125
149.3	0.989
149.4	0.9895
149.5	0.987375
149.6	0.988125
149.7	0.986875
149.8	0.987625
149.9	0.986625
150	0.987875
150.1	0.9885
150.2	0.989375
150.3	0.989625
150.4	0.989125
150.5	0.98825
150.6	0.9875
150.7	0.98775
150.8	0.988375
150.9	0.987375
151	0.98575
151.1	0.987875
151.2	0.987375
151.3	0.98925
151.4	0.988625
151.5	0.9895
151.6	0.989375
151.7	0.9905
151.8	0.988625
151.9	0.989875
152	0.9895
152.1	0.989875
152.2	0.989875
152.3	0.98825
152.4	0.988625
152.5	0.98825
152.6	0.98825
152.7	0.988375
152.8	0.988375
152.9	0.989125
153	0.989125
153.1	0.98925
153.2	0.988625
153.3	0.989125
153.4	0.989375
153.5	0.989375
153.6	0.989375
153.7	0.989875
153.8	0.989625
153.9	0.991125
154	0.990875
154.1	0.990875
154.2	0.99
154.3	0.988875
154.4	0.99025
154.5	0.989625
154.6	0.98925
154.7	0.988125
154.8	0.98825
154.9	0.98775
155	0.98675
155.1	0.9885
155.2	0.98825
155.3	0.98825
155.4	0.98925
155.5	0.990625
155.6	0.99025
155.7	0.99225
155.8	0.9895
155.9	0.98975
156	0.98875
156.1	0.98925
156.2	0.989375
156.3	0.989375
156.4	0.988125
156.5	0.989
156.6	0.98975
156.7	0.99025
156.8	0.992375
156.9	0.993
157	0.99175
157.1	0.991
157.2	0.991375
157.3	0.990125
157.4	0.990625
157.5	0.989625
157.6	0.989
157.7	0.98825
157.8	0.987
157.9	0.98825
158	0.98675
158.1	0.987625
158.2	0.98825
158.3	0.98875
158.4	0.990125
158.5	0.99125
158.6	0.992125
158.7	0.99025
158.8	0.99125
158.9	0.99125
159	0.99025
159.1	0.990625
159.2	0.991125
159.3	0.99075
159.4	0.989625
159.5	0.9885
159.6	0.99
159.7	0.989
159.8	0.98975
159.9	0.990125
160	0.990625
160.1	0.9895
160.2	0.98975
160.3	0.99075
160.4	0.98875
160.5	0.988625
160.6	0.989625
160.7	0.989
160.8	0.9885
160.9	0.988375
161	0.9895
161.1	0.990125
161.2	0.990375
161.3	0.990375
161.4	0.99075
161.5	0.990375
161.6	0.989875
161.7	0.990625
161.8	0.991
161.9	0.99
162	0.99025
162.1	0.989125
162.2	0.988625
162.3	0.9905
162.4	0.989875
162.5	0.991125
162.6	0.9925
162.7	0.99075
162.8	0.99
162.9	0.9895
163	0.989375
163.1	0.988375
163.2	0.99
163.3	0.989375
163.4	0.990875
163.5	0.99025
163.6	0.990625
163.7	0.98975
163.8	0.98875
163.9	0.989875
164	0.990625
164.1	0.990375
164.2	0.990625
164.3	0.99
164.4	0.98775
164.5	0.98775
164.6	0.9875
164.7	0.988125
164.8	0.9895
164.9	0.989375
165	0.990875
165.1	0.99075
165.2	0.989625
165.3	0.989125
165.4	0.98825
165.5	0.988375
165.6	0.991
165.7	0.989625
165.8	0.98975
165.9	0.99
166	0.991125
166.1	0.989625
166.2	0.988125
166.3	0.98875
166.4	0.99075
166.5	0.991125
166.6	0.989875
166.7	0.989375
166.8	0.990875
166.9	0.9905
167	0.991875
167.1	0.99125
167.2	0.992
167.3	0.990875
167.4	0.991625
167.5	0.9915
167.6	0.99175
167.7	0.990375
167.8	0.9895
167.9	0.991
168	0.99225
168.1	0.991625
168.2	0.9905
168.3	0.9915
168.4	0.98975
168.5	0.98975
168.6	0.98975
168.7	0.990125
168.8	0.991
168.9	0.9905
169	0.990625
169.1	0.99175
169.2	0.9915
169.3	0.99175
169.4	0.99175
169.5	0.99125
169.6	0.991375
169.7	0.991
169.8	0.990625
169.9	0.990125
170	0.990375
170.1	0.990625
170.2	0.99025
170.3	0.991375
170.4	0.99025
170.5	0.991125
170.6	0.9895
170.7	0.98925
170.8	0.990125
170.9	0.98975
171	0.988375
171.1	0.99
171.2	0.991375
171.3	0.99275
171.4	0.991375
171.5	0.991875
171.6	0.99225
171.7	0.991
171.8	0.991125
171.9	0.99
172	0.9905
172.1	0.991
172.2	0.99125
172.3	0.990875
172.4	0.990375
172.5	0.989875
172.6	0.989625
172.7	0.988875
172.8	0.98875
172.9	0.988125
173	0.989375
173.1	0.988625
173.2	0.990625
173.3	0.990125
173.4	0.990375
173.5	0.99125
173.6	0.990375
173.7	0.991375
173.8	0.990125
173.9	0.991125
174	0.991375
174.1	0.99275
174.2	0.992375
174.3	0.992
174.4	0.99225
174.5	0.99275
174.6	0.993125
174.7	0.992875
174.8	0.991375
174.9	0.992375
175	0.99
175.1	0.9895
175.2	0.989125
175.3	0.987625
175.4	0.98925
175.5	0.988875
175.6	0.989375
175.7	0.989375
175.8	0.990875
175.9	0.99125
176	0.991125
176.1	0.991375
176.2	0.99
176.3	0.990625
176.4	0.99075
176.5	0.990875
176.6	0.991
176.7	0.9895
176.8	0.989625
176.9	0.989125
177	0.9895
177.1	0.9905
177.2	0.991875
177.3	0.992375
177.4	0.99175
177.5	0.99175
177.6	0.9915
177.7	0.991625
177.8	0.991125
177.9	0.9925
178	0.990625
178.1	0.9915
178.2	0.991375
178.3	0.991875
178.4	0.99025
178.5	0.990125
178.6	0.99025
178.7	0.991625
178.8	0.9905
178.9	0.991125
179	0.992125
179.1	0.991875
179.2	0.9915
179.3	0.989875
179.4	0.989625
179.5	0.99125
179.6	0.991625
179.7	0.991875
179.8	0.992375
179.9	0.991875
180	0.990875
180.1	0.991375
180.2	0.991
180.3	0.98975
180.4	0.990875
180.5	0.9905
180.6	0.9905
180.7	0.99125
180.8	0.9905
180.9	0.99125
181	0.990875
181.1	0.990875
181.2	0.990125
181.3	0.99125
181.4	0.992125
181.5	0.98975
181.6	0.99
181.7	0.99175
181.8	0.9905
181.9	0.990875
182	0.990125
182.1	0.990125
182.2	0.992
182.3	0.99175
182.4	0.992
182.5	0.992125
182.6	0.99175
182.7	0.9915
182.8	0.991375
182.9	0.990375
183	0.991375
183.1	0.992125
183.2	0.99175
183.3	0.9915
183.4	0.992
183.5	0.991375
183.6	0.991625
183.7	0.99125
183.8	0.990875
183.9	0.991625
184	0.9915
184.1	0.99275
184.2	0.992375
184.3	0.99125
184.4	0.99025
184.5	0.991375
184.6	0.9915
184.7	0.993125
184.8	0.99275
184.9	0.9925
185	0.9925
185.1	0.991125
185.2	0.99225
185.3	0.9915
185.4	0.99075
185.5	0.990125
185.6	0.9885
185.7	0.991125
185.8	0.991
185.9	0.989875
186	0.990625
186.1	0.991625
186.2	0.99275
186.3	0.991625
186.4	0.99025
186.5	0.991125
186.6	0.991625
186.7	0.990375
186.8	0.9905
186.9	0.991875
187	0.991125
187.1	0.990625
187.2	0.992375
187.3	0.990875
187.4	0.991375
187.5	0.991625
187.6	0.99125
187.7	0.990875
187.8	0.991125
187.9	0.99175
188	0.9915
188.1	0.9905
188.2	0.990625
188.3	0.991
188.4	0.99025
188.5	0.990625
188.6	0.99075
188.7	0.990875
188.8	0.989625
188.9	0.9895
189	0.99
189.1	0.991125
189.2	0.990375
189.3	0.99075
189.4	0.99275
189.5	0.992125
189.6	0.9915
189.7	0.990625
189.8	0.990625
189.9	0.99175
190	0.991
190.1	0.99125
190.2	0.99125
190.3	0.991125
190.4	0.990875
190.5	0.99125
190.6	0.991875
190.7	0.991125
190.8	0.98925
190.9	0.990125
191	0.991875
191.1	0.992375
191.2	0.9935
191.3	0.992
191.4	0.991875
191.5	0.99175
191.6	0.990625
191.7	0.990875
191.8	0.992875
191.9	0.991625
192	0.991375
192.1	0.990125
192.2	0.990875
192.3	0.99
192.4	0.9905
192.5	0.989625
192.6	0.98975
192.7	0.9905
192.8	0.990375
192.9	0.990375
193	0.991625
193.1	0.991875
193.2	0.991625
193.3	0.9915
193.4	0.99075
193.5	0.990625
193.6	0.992
193.7	0.993625
193.8	0.9925
193.9	0.992625
194	0.9915
194.1	0.99075
194.2	0.99175
194.3	0.99175
194.4	0.989625
194.5	0.99025
194.6	0.990625
194.7	0.990875
194.8	0.992375
194.9	0.991375
195	0.992375
195.1	0.991875
195.2	0.99225
195.3	0.992125
195.4	0.991
195.5	0.99075
195.6	0.990375
195.7	0.99125
195.8	0.990375
195.9	0.991125
196	0.992125
196.1	0.99075
196.2	0.990375
196.3	0.99225
196.4	0.992625
196.5	0.993
196.6	0.992875
196.7	0.99225
196.8	0.993
196.9	0.9915
197	0.9925
197.1	0.99225
197.2	0.991875
197.3	0.991875
197.4	0.9925
197.5	0.992375
197.6	0.9915
197.7	0.991125
197.8	0.99175
197.9	0.99025
198	0.991375
198.1	0.991625
198.2	0.990875
198.3	0.991125
198.4	0.991375
198.5	0.990125
198.6	0.99125
198.7	0.99025
198.8	0.98925
198.9	0.989875
199	0.990875
199.1	0.98975
199.2	0.990875
199.3	0.990875
199.4	0.991
199.5	0.99125
199.6	0.99125
199.7	0.990625
199.8	0.992375
199.9	0.9915
200	0.990625
[truncated: 14,000 more rows]
