# Supplementary material for: Bayesian inference of kinetic schemes for ion channels by Kalman filtering
Source: eLife journal article supplement (doi:10.7554/elife.62714), 2022-05-04
Supplement: fig4-data1 [file 1_Sim_N_4000_Strom_MW_16M.xlsx]

## Sheet: Tabelle1
0.1	0
0.2	0
0.3	0
0.4	0
0.5	0
0.6	0
0.7	0
0.8	0
0.9	0
1	0
1.1	0
1.2	0
1.3	0
1.4	0
1.5	0
1.6	0
1.7	0
1.8	0
1.9	0
2	0
2.1	0
2.2	0
2.3	0
2.4	0
2.5	0
2.6	0
2.7	0
2.8	0
2.9	0
3	0
3.1	0
3.2	0
3.3	0
3.4	0
3.5	0
3.6	0
3.7	0
3.8	0
3.9	0
4	0
4.1	0
4.2	0
4.3	0
4.4	0
4.5	0
4.6	0
4.7	0
4.8	0
4.9	0
5	0
5.1	0
5.2	0
5.3	0
5.4	0
5.5	0
5.6	0
5.7	0
5.8	0
5.9	0
6	0
6.1	0
6.2	0
6.3	0
6.4	0
6.5	0
6.6	0
6.7	0
6.8	0
6.9	0
7	0
7.1	0
7.2	0
7.3	0
7.4	0
7.5	0
7.6	0
7.7	0
7.8	0
7.9	0
8	0
8.1	0
8.2	0
8.3	0
8.4	0
8.5	0
8.6	0
8.7	0
8.8	0
8.9	0
9	0
9.1	0
9.2	0
9.3	0
9.4	0
9.5	0
9.6	0
9.7	0
9.8	0
9.9	0
10	0
10.1	0
10.2	0
10.3	0
10.4	0
10.5	0
10.6	0
10.7	0
10.8	0
10.9	0
11	0
11.1	0
11.2	0
11.3	0
11.4	0
11.5	0
11.6	0
11.7	0
11.8	0
11.9	0
12	0
12.1	0
12.2	0
12.3	0
12.4	0
12.5	0
12.6	0
12.7	0
12.8	0
12.9	0
13	0
13.1	0
13.2	0
13.3	0
13.4	0
13.5	0
13.6	0
13.7	0
13.8	0
13.9	0
14	0
14.1	0
14.2	0
14.3	0
14.4	0
14.5	0
14.6	0
14.7	0
14.8	0
14.9	0
15	0
15.1	0
15.2	0
15.3	0
15.4	0
15.5	0
15.6	0
15.7	0
15.8	0
15.9	0
16	0
16.1	0
16.2	0
16.3	0
16.4	0
16.5	0
16.6	0
16.7	0
16.8	0
16.9	0
17	0
17.1	0
17.2	0
17.3	0
17.4	0
17.5	0
17.6	0
17.7	0
17.8	0
17.9	0
18	0
18.1	0
18.2	0
18.3	0
18.4	0
18.5	0
18.6	0
18.7	0
18.8	0
18.9	0
19	0
19.1	0
19.2	0
19.3	0
19.4	0
19.5	0
19.6	0
19.7	0
19.8	0
19.9	0
20	0
20.1	0
20.2	0
20.3	0
20.4	0
20.5	0
20.6	0
20.7	0
20.8	0
20.9	0
21	0
21.1	0
21.2	0
21.3	0
21.4	0
21.5	0
21.6	0
21.7	0
21.8	0
21.9	0
22	0
22.1	0
22.2	0
22.3	0
22.4	0
22.5	0
22.6	0
22.7	0
22.8	0
22.9	0
23	0
23.1	0
23.2	0
23.3	0
23.4	0
23.5	0
23.6	0
23.7	0
23.8	0
23.9	0
24	0
24.1	0
24.2	0
24.3	0
24.4	0
24.5	0
24.6	0
24.7	0
24.8	0
24.9	0
25	0
25.1	0
25.2	0
25.3	0
25.4	0
25.5	0
25.6	0
25.7	0
25.8	0
25.9	0
26	0
26.1	0
26.2	0
26.3	0
26.4	0
26.5	0
26.6	0
26.7	0
26.8	0
26.9	0
27	0
27.1	0
27.2	0
27.3	0
27.4	0
27.5	0
27.6	0
27.7	0
27.8	0
27.9	0
28	0
28.1	0
28.2	0
28.3	0
28.4	0
28.5	0
28.6	0
28.7	0
28.8	0
28.9	0
29	0
29.1	0
29.2	0
29.3	0
29.4	0
29.5	0
29.6	0
29.7	0
29.8	0
29.9	0
30	0
30.1	0
30.2	0
30.3	0
30.4	0
30.5	0
30.6	0
30.7	0
30.8	0
30.9	0
31	0
31.1	0
31.2	0
31.3	0
31.4	0
31.5	0
31.6	0
31.7	0
31.8	0
31.9	0
32	0
32.1	0
32.2	0
32.3	0
32.4	0
32.5	0
32.6	0
32.7	0
32.8	0
32.9	0
33	0
33.1	0
33.2	0
33.3	0
33.4	0
33.5	0
33.6	0
33.7	0
33.8	0
33.9	0
34	0
34.1	0
34.2	0
34.3	0
34.4	0
34.5	0
34.6	0
34.7	0
34.8	0
34.9	0
35	0
35.1	0
35.2	0
35.3	0
35.4	0
35.5	0
35.6	0
35.7	0
35.8	0
35.9	0
36	0
36.1	0
36.2	0
36.3	0
36.4	0
36.5	0
36.6	0
36.7	0
36.8	0
36.9	0
37	0
37.1	0
37.2	0
37.3	0
37.4	0
37.5	0
37.6	0
37.7	0
37.8	0
37.9	0
38	0
38.1	0
38.2	0
38.3	0
38.4	0
38.5	0
38.6	0
38.7	0
38.8	0
38.9	0
39	0
39.1	0
39.2	0
39.3	0
39.4	0
39.5	0
39.6	0
39.7	0
39.8	0
39.9	0
40	0
40.1	0
40.2	0
40.3	0
40.4	0
40.5	0
40.6	0
40.7	0
40.8	0
40.9	0
41	0
41.1	0
41.2	0
41.3	0
41.4	0
41.5	0
41.6	0
41.7	0
41.8	0
41.9	0
42	0
42.1	0
42.2	0
42.3	0
42.4	0
42.5	0
42.6	0
42.7	0
42.8	0
42.9	0
43	0
43.1	0
43.2	0
43.3	0
43.4	0
43.5	0
43.6	0
43.7	0
43.8	0
43.9	0
44	0
44.1	0
44.2	0
44.3	0
44.4	0
44.5	0
44.6	0
44.7	0
44.8	0
44.9	0
45	0
45.1	0
45.2	0
45.3	0
45.4	0
45.5	0
45.6	0
45.7	0
45.8	0
45.9	0
46	0
46.1	0
46.2	0
46.3	0
46.4	0
46.5	0
46.6	0
46.7	0
46.8	0
46.9	0
47	0
47.1	0
47.2	0
47.3	0
47.4	0
47.5	0
47.6	0
47.7	0
47.8	0
47.9	0
48	0
48.1	0
48.2	0
48.3	0
48.4	0
48.5	0
48.6	0
48.7	0
48.8	0
48.9	0
49	0
49.1	0
49.2	0
49.3	0
49.4	0
49.5	0
49.6	0
49.7	0
49.8	0
49.9	0
50	0
50.1	0
50.2	0
50.3	0
50.4	0
50.5	0
50.6	0
50.7	0
50.8	0
50.9	0
51	0
51.1	0
51.2	0
51.3	0
51.4	0
51.5	0
51.6	0
51.7	0
51.8	0
51.9	0
52	0
52.1	0
52.2	0
52.3	0
52.4	0
52.5	0
52.6	0
52.7	0
52.8	0
52.9	0
53	0
53.1	0
53.2	0
53.3	0
53.4	0
53.5	0
53.6	0
53.7	0
53.8	0
53.9	0
54	0
54.1	0
54.2	0
54.3	0
54.4	0
54.5	0
54.6	0
54.7	0
54.8	0
54.9	0
55	0
55.1	0
55.2	0
55.3	0
55.4	0
55.5	0
55.6	0
55.7	0
55.8	0
55.9	0
56	0
56.1	0
56.2	0
56.3	0
56.4	0
56.5	0
56.6	0
56.7	0
56.8	0
56.9	0
57	0
57.1	0
57.2	0
57.3	0
57.4	0
57.5	0
57.6	0
57.7	0
57.8	0
57.9	0
58	0
58.1	0
58.2	0
58.3	0
58.4	0
58.5	0
58.6	0
58.7	0
58.8	0
58.9	0
59	0
59.1	0
59.2	0
59.3	0
59.4	0
59.5	0
59.6	0
59.7	0
59.8	0
59.9	0
60	0
60.1	0
60.2	0
60.3	0
60.4	0
60.5	0
60.6	0
60.7	0
60.8	0
60.9	0
61	0
61.1	0
61.2	0
61.3	0
61.4	0
61.5	0
61.6	0
61.7	0
61.8	0
61.9	0
62	0
62.1	0
62.2	0
62.3	0
62.4	0
62.5	0
62.6	0
62.7	0
62.8	0
62.9	0
63	0
63.1	0
63.2	0
63.3	0
63.4	0
63.5	0
63.6	0
63.7	0
63.8	0
63.9	0
64	0
64.1	0
64.2	0
64.3	0
64.4	0
64.5	0
64.6	0
64.7	0
64.8	0
64.9	0
65	0
65.1	0
65.2	0
65.3	0
65.4	0
65.5	0
65.6	0
65.7	0
65.8	0
65.9	0
66	0
66.1	0
66.2	0
66.3	0
66.4	0
66.5	0
66.6	0
66.7	0
66.8	0
66.9	0
67	0
67.1	0
67.2	0
67.3	0
67.4	0
67.5	0
67.6	0
67.7	0
67.8	0
67.9	0
68	0
68.1	0
68.2	0
68.3	0
68.4	0
68.5	0
68.6	0
68.7	0
68.8	0
68.9	0
69	0
69.1	0
69.2	0
69.3	0
69.4	0
69.5	0
69.6	0
69.7	0
69.8	0
69.9	0
70	0
70.1	0
70.2	0
70.3	0
70.4	0
70.5	0
70.6	0
70.7	0
70.8	0
70.9	0
71	0
71.1	0
71.2	0
71.3	0
71.4	0
71.5	0
71.6	0
71.7	0
71.8	0
71.9	0
72	0
72.1	0
72.2	0
72.3	0
72.4	0
72.5	0
72.6	0
72.7	0
72.8	0
72.9	0
73	0
73.1	0
73.2	0
73.3	0
73.4	0
73.5	0
73.6	0
73.7	0
73.8	0
73.9	0
74	0
74.1	0
74.2	0
74.3	0
74.4	0
74.5	0
74.6	0
74.7	0
74.8	0
74.9	0
75	0
75.1	0
75.2	0
75.3	0
75.4	0
75.5	0
75.6	0
75.7	0
75.8	0
75.9	0
76	0
76.1	0
76.2	0
76.3	0
76.4	0
76.5	0
76.6	0
76.7	0
76.8	0
76.9	0
77	0
77.1	0
77.2	0
77.3	0
77.4	0
77.5	0
77.6	0
77.7	0
77.8	0
77.9	0
78	0
78.1	0
78.2	0
78.3	0
78.4	0
78.5	0
78.6	0
78.7	0
78.8	0
78.9	0
79	0
79.1	0
79.2	0
79.3	0
79.4	0
79.5	0
79.6	0
79.7	0
79.8	0
79.9	0
80	0
80.1	0
80.2	0
80.3	0
80.4	0
80.5	0
80.6	0
80.7	0
80.8	0
80.9	0
81	0
81.1	0
81.2	0
81.3	0
81.4	0
81.5	0
81.6	0
81.7	0
81.8	0
81.9	0
82	0
82.1	0
82.2	0
82.3	0
82.4	0
82.5	0
82.6	0
82.7	0
82.8	0
82.9	0
83	0
83.1	0
83.2	0
83.3	0
83.4	0
83.5	0
83.6	0
83.7	0
83.8	0
83.9	0
84	0
84.1	0
84.2	0
84.3	0
84.4	0
84.5	0
84.6	0
84.7	0
84.8	0
84.9	0
85	0
85.1	0
85.2	0
85.3	0
85.4	0
85.5	0
85.6	0
85.7	0
85.8	0
85.9	0
86	0
86.1	0
86.2	0
86.3	0
86.4	0
86.5	0
86.6	0
86.7	0
86.8	0
86.9	0
87	0
87.1	0
87.2	0
87.3	0
87.4	0
87.5	0
87.6	0
87.7	0
87.8	0
87.9	0
88	0
88.1	0
88.2	0
88.3	0
88.4	0
88.5	0
88.6	0
88.7	0
88.8	0
88.9	0
89	0
89.1	0
89.2	0
89.3	0
89.4	0
89.5	0
89.6	0
89.7	0
89.8	0
89.9	0
90	0
90.1	0
90.2	0
90.3	0
90.4	0
90.5	0
90.6	0
90.7	0
90.8	0
90.9	0
91	0
91.1	0
91.2	0
91.3	0
91.4	0
91.5	0
91.6	0
91.7	0
91.8	0
91.9	0
92	0
92.1	0
92.2	0
92.3	0
92.4	0
92.5	0
92.6	0
92.7	0
92.8	0
92.9	0
93	0
93.1	0
93.2	0
93.3	0
93.4	0
93.5	0
93.6	0
93.7	0
93.8	0
93.9	0
94	0
94.1	0
94.2	0
94.3	0
94.4	0
94.5	0
94.6	0
94.7	0
94.8	0
94.9	0
95	0
95.1	0
95.2	0
95.3	0
95.4	0
95.5	0
95.6	0
95.7	0
95.8	0
95.9	0
96	0
96.1	0
96.2	0
96.3	0
96.4	0
96.5	0
96.6	0
96.7	0
96.8	0
96.9	0
97	0
97.1	0
97.2	0
97.3	0
97.4	0
97.5	0
97.6	0
97.7	0
97.8	0
97.9	0
98	0
98.1	0
98.2	0
98.3	0
98.4	0
98.5	0
98.6	0
98.7	0
98.8	0
98.9	0
99	0
99.1	0
99.2	0
99.3	0
99.4	0
99.5	0
99.6	0
99.7	0
99.8	0
99.9	0
100	0
100.1	0.00025
100.2	0.0015
100.3	0.00525
100.4	0.0115
100.5	0.0145
100.6	0.01825
100.7	0.02325
100.8	0.02775
100.9	0.03275
101	0.03675
101.1	0.04325
101.2	0.04775
101.3	0.05125
101.4	0.05475
101.5	0.0585
101.6	0.0625
101.7	0.06775
101.8	0.07175
101.9	0.075
102	0.08
102.1	0.084
102.2	0.087
102.3	0.09175
102.4	0.0945
102.5	0.0995
102.6	0.1035
102.7	0.1075
102.8	0.11075
102.9	0.1145
103	0.118
103.1	0.122
103.2	0.12725
103.3	0.13
103.4	0.134
103.5	0.13625
103.6	0.14025
103.7	0.14375
103.8	0.1475
103.9	0.1515
104	0.15525
104.1	0.16
104.2	0.16375
104.3	0.166
104.4	0.17025
104.5	0.1725
104.6	0.178
104.7	0.18225
104.8	0.187
104.9	0.189
105	0.19375
105.1	0.196
105.2	0.19875
105.3	0.2025
105.4	0.207
105.5	0.20925
105.6	0.2125
105.7	0.2145
105.8	0.21725
105.9	0.22
106	0.22325
106.1	0.226
106.2	0.228
106.3	0.22925
106.4	0.23225
106.5	0.23825
106.6	0.242
106.7	0.2455
106.8	0.248
106.9	0.25075
107	0.25275
107.1	0.254
107.2	0.2585
107.3	0.26475
107.4	0.26625
107.5	0.26875
107.6	0.27175
107.7	0.275
107.8	0.27825
107.9	0.28075
108	0.284
108.1	0.28825
108.2	0.29275
108.3	0.29575
108.4	0.29925
108.5	0.3005
108.6	0.30375
108.7	0.30775
108.8	0.311
108.9	0.31325
109	0.316
109.1	0.32
109.2	0.32325
109.3	0.32525
109.4	0.32775
109.5	0.33025
109.6	0.3325
109.7	0.33575
109.8	0.33875
109.9	0.343
110	0.3455
110.1	0.34875
110.2	0.352
110.3	0.35425
110.4	0.3565
110.5	0.35875
110.6	0.36025
110.7	0.36325
110.8	0.36475
110.9	0.36625
111	0.36975
111.1	0.37225
111.2	0.375
111.3	0.379
111.4	0.38
111.5	0.38175
111.6	0.384
111.7	0.38525
111.8	0.38975
111.9	0.392
112	0.393
112.1	0.39525
112.2	0.39675
112.3	0.3995
112.4	0.4015
112.5	0.404
112.6	0.40575
112.7	0.40925
112.8	0.411
112.9	0.41425
113	0.41875
113.1	0.42175
113.2	0.425
113.3	0.428
113.4	0.4295
113.5	0.43075
113.6	0.43225
113.7	0.43525
113.8	0.4375
113.9	0.4405
114	0.44225
114.1	0.4445
114.2	0.4485
114.3	0.45175
114.4	0.45325
114.5	0.456
114.6	0.45825
114.7	0.46025
114.8	0.46225
114.9	0.46425
115	0.466
115.1	0.4675
115.2	0.46925
115.3	0.472
115.4	0.474
115.5	0.47525
115.6	0.47775
115.7	0.479
115.8	0.48025
115.9	0.483
116	0.48475
116.1	0.48625
116.2	0.48975
116.3	0.4935
116.4	0.495
116.5	0.4965
116.6	0.49825
116.7	0.501
116.8	0.502
116.9	0.50375
117	0.5045
117.1	0.50625
117.2	0.5075
117.3	0.50875
117.4	0.5095
117.5	0.50975
117.6	0.511
117.7	0.51325
117.8	0.515
117.9	0.51625
118	0.518
118.1	0.5205
118.2	0.523
118.3	0.52525
118.4	0.52725
118.5	0.52725
118.6	0.52925
118.7	0.53125
118.8	0.53225
118.9	0.53375
119	0.53725
119.1	0.53925
119.2	0.54075
119.3	0.5425
119.4	0.54375
119.5	0.545
119.6	0.546
119.7	0.547
119.8	0.5495
119.9	0.55225
120	0.554
120.1	0.55625
120.2	0.55825
120.3	0.55925
120.4	0.55925
120.5	0.561
120.6	0.562
120.7	0.56275
120.8	0.56325
120.9	0.5645
121	0.5655
121.1	0.5655
121.2	0.5645
121.3	0.5655
121.4	0.56775
121.5	0.569
121.6	0.56975
121.7	0.57075
121.8	0.571
121.9	0.57225
122	0.57425
122.1	0.57425
122.2	0.575
122.3	0.576
122.4	0.57725
122.5	0.579
122.6	0.58025
122.7	0.58075
122.8	0.58175
122.9	0.58275
123	0.583
123.1	0.583
123.2	0.584
123.3	0.58575
123.4	0.58625
123.5	0.58725
123.6	0.58825
123.7	0.59
123.8	0.59125
123.9	0.592
124	0.593
124.1	0.59475
124.2	0.5955
124.3	0.59625
124.4	0.59875
124.5	0.60125
124.6	0.60375
124.7	0.60475
124.8	0.60625
124.9	0.60775
125	0.60725
125.1	0.60825
125.2	0.6105
125.3	0.6115
125.4	0.61175
125.5	0.614
125.6	0.61475
125.7	0.617
125.8	0.6175
125.9	0.62
126	0.62
126.1	0.6215
126.2	0.62225
126.3	0.623
126.4	0.62475
126.5	0.625
126.6	0.62575
126.7	0.62625
126.8	0.62675
126.9	0.628
127	0.629
127.1	0.63075
127.2	0.631
127.3	0.6335
127.4	0.63475
127.5	0.63625
127.6	0.63675
127.7	0.637
127.8	0.638
127.9	0.63825
128	0.63875
128.1	0.6395
128.2	0.6395
128.3	0.641
128.4	0.64375
128.5	0.6435
128.6	0.64575
128.7	0.64675
128.8	0.6475
128.9	0.649
129	0.65075
129.1	0.65175
129.2	0.65275
129.3	0.6525
129.4	0.6555
129.5	0.656
129.6	0.6555
129.7	0.656
129.8	0.65625
129.9	0.65725
130	0.658
130.1	0.66025
130.2	0.66225
130.3	0.66375
130.4	0.6655
130.5	0.66675
130.6	0.6685
130.7	0.6695
130.8	0.671
130.9	0.6705
131	0.67125
131.1	0.6725
131.2	0.673
131.3	0.67325
131.4	0.67675
131.5	0.67875
131.6	0.67875
131.7	0.67875
131.8	0.68
131.9	0.67975
132	0.68025
132.1	0.681
132.2	0.68275
132.3	0.68325
132.4	0.683
132.5	0.6835
132.6	0.68325
132.7	0.68325
132.8	0.684
132.9	0.68425
133	0.68475
133.1	0.6845
133.2	0.6835
133.3	0.6845
133.4	0.6845
133.5	0.68525
133.6	0.68725
133.7	0.688
133.8	0.689
133.9	0.68925
134	0.69075
134.1	0.6915
134.2	0.693
134.3	0.69275
134.4	0.69325
134.5	0.69475
134.6	0.69625
134.7	0.6965
134.8	0.6975
134.9	0.69925
135	0.6995
135.1	0.699
135.2	0.699
135.3	0.70025
135.4	0.70125
135.5	0.70325
135.6	0.70375
135.7	0.70425
135.8	0.7045
135.9	0.705
136	0.70575
136.1	0.7065
136.2	0.70625
136.3	0.70625
136.4	0.70675
136.5	0.70775
136.6	0.708
136.7	0.709
136.8	0.709
136.9	0.7105
137	0.7115
137.1	0.711
137.2	0.71175
137.3	0.713
137.4	0.71325
137.5	0.7145
137.6	0.71425
137.7	0.715
137.8	0.716
137.9	0.71725
138	0.71725
138.1	0.71775
138.2	0.7175
138.3	0.71675
138.4	0.718
138.5	0.71875
138.6	0.72025
138.7	0.7205
138.8	0.7215
138.9	0.7205
139	0.722
139.1	0.72225
139.2	0.723
139.3	0.72425
139.4	0.724
139.5	0.7245
139.6	0.72525
139.7	0.72575
139.8	0.726
139.9	0.72725
140	0.727
140.1	0.7275
140.2	0.72775
140.3	0.728
140.4	0.7285
140.5	0.7295
140.6	0.729
140.7	0.73
140.8	0.7305
140.9	0.73
141	0.7305
141.1	0.73025
141.2	0.731
141.3	0.73075
141.4	0.732
141.5	0.7325
141.6	0.7325
141.7	0.73375
141.8	0.73325
141.9	0.7345
142	0.73575
142.1	0.7375
142.2	0.73775
142.3	0.739
142.4	0.7395
142.5	0.7395
142.6	0.73975
142.7	0.73975
142.8	0.741
142.9	0.741
143	0.742
143.1	0.74225
143.2	0.74225
143.3	0.742
143.4	0.7435
143.5	0.743
143.6	0.7435
143.7	0.74375
143.8	0.7445
143.9	0.7455
144	0.745
144.1	0.744
144.2	0.74425
144.3	0.746
144.4	0.74625
144.5	0.74725
144.6	0.747
144.7	0.7465
144.8	0.7465
144.9	0.74625
145	0.74525
145.1	0.74575
145.2	0.7465
145.3	0.74675
145.4	0.74625
145.5	0.746
145.6	0.74725
145.7	0.747
145.8	0.74725
145.9	0.749
146	0.7485
146.1	0.74875
146.2	0.74925
146.3	0.749
146.4	0.74875
146.5	0.74825
146.6	0.74825
146.7	0.74875
146.8	0.74875
146.9	0.74875
147	0.749
147.1	0.7495
147.2	0.75075
147.3	0.75125
147.4	0.7525
147.5	0.752
147.6	0.75175
147.7	0.75075
147.8	0.75075
147.9	0.75175
148	0.75375
148.1	0.75525
148.2	0.757
148.3	0.757
148.4	0.75725
148.5	0.757
148.6	0.7585
148.7	0.7595
148.8	0.7605
148.9	0.7605
149	0.76075
149.1	0.76125
149.2	0.762
149.3	0.76275
149.4	0.7635
149.5	0.7635
149.6	0.76425
149.7	0.76375
149.8	0.76375
149.9	0.76375
150	0.7645
150.1	0.765
150.2	0.7645
150.3	0.76525
150.4	0.7655
150.5	0.766
150.6	0.76675
150.7	0.76625
150.8	0.76625
150.9	0.766
151	0.766
151.1	0.7665
151.2	0.76625
151.3	0.76625
151.4	0.76675
151.5	0.76775
151.6	0.768
151.7	0.767
151.8	0.7665
151.9	0.767
152	0.76675
152.1	0.76675
152.2	0.767
152.3	0.7675
152.4	0.76675
152.5	0.7675
152.6	0.76725
152.7	0.76775
152.8	0.76775
152.9	0.76825
153	0.76825
153.1	0.7685
153.2	0.76875
153.3	0.76975
153.4	0.771
153.5	0.77175
153.6	0.77175
153.7	0.7725
153.8	0.7735
153.9	0.7755
154	0.77425
154.1	0.77425
154.2	0.77475
154.3	0.77475
154.4	0.77525
154.5	0.7765
154.6	0.77625
154.7	0.7765
154.8	0.7765
154.9	0.77675
155	0.7775
155.1	0.7785
155.2	0.77875
155.3	0.77775
155.4	0.77825
155.5	0.77875
155.6	0.77925
155.7	0.77975
155.8	0.7795
155.9	0.77925
156	0.77875
156.1	0.7785
156.2	0.7785
156.3	0.7795
156.4	0.779
156.5	0.779
156.6	0.7795
156.7	0.7805
156.8	0.7815
156.9	0.7825
157	0.782
157.1	0.7825
157.2	0.7825
157.3	0.78275
157.4	0.78275
157.5	0.78225
157.6	0.78225
157.7	0.7825
157.8	0.783
157.9	0.783
158	0.7845
158.1	0.78375
158.2	0.78525
158.3	0.78525
158.4	0.785
158.5	0.78525
158.6	0.7855
158.7	0.78525
158.8	0.7845
158.9	0.785
159	0.78575
159.1	0.786
159.2	0.7865
159.3	0.786
159.4	0.7865
159.5	0.78625
159.6	0.7855
159.7	0.78575
159.8	0.7865
159.9	0.78625
160	0.7855
160.1	0.7855
160.2	0.785
160.3	0.78525
160.4	0.78525
160.5	0.7845
160.6	0.784
160.7	0.7845
160.8	0.7845
160.9	0.784
161	0.784
161.1	0.784
161.2	0.7825
161.3	0.783
161.4	0.7835
161.5	0.78475
161.6	0.785
161.7	0.78575
161.8	0.7855
161.9	0.78575
162	0.78575
162.1	0.78575
162.2	0.78625
162.3	0.787
162.4	0.7875
162.5	0.788
162.6	0.78875
162.7	0.78825
162.8	0.78925
162.9	0.78925
163	0.79
163.1	0.79025
163.2	0.7915
163.3	0.7905
163.4	0.79075
163.5	0.79175
163.6	0.7915
163.7	0.79175
163.8	0.791
163.9	0.79125
164	0.79125
164.1	0.7915
164.2	0.79
164.3	0.79125
164.4	0.791
164.5	0.7905
164.6	0.7905
164.7	0.79025
164.8	0.79125
164.9	0.79225
165	0.79225
165.1	0.7915
165.2	0.793
165.3	0.79375
165.4	0.79475
165.5	0.79325
165.6	0.7935
165.7	0.794
165.8	0.794
165.9	0.794
166	0.79425
166.1	0.7935
166.2	0.795
166.3	0.79525
166.4	0.7955
166.5	0.79575
166.6	0.79525
166.7	0.7945
166.8	0.79475
166.9	0.7945
167	0.79475
167.1	0.79475
167.2	0.794
167.3	0.795
167.4	0.79625
167.5	0.796
167.6	0.796
167.7	0.7965
167.8	0.7975
167.9	0.79775
168	0.798
168.1	0.79775
168.2	0.79725
168.3	0.798
168.4	0.798
168.5	0.799
168.6	0.799
168.7	0.7995
168.8	0.7985
168.9	0.799
169	0.79975
169.1	0.8
169.2	0.8
169.3	0.79975
169.4	0.8005
169.5	0.80025
169.6	0.7995
169.7	0.799
169.8	0.79975
169.9	0.8005
170	0.80125
170.1	0.80125
170.2	0.80225
170.3	0.80225
170.4	0.80275
170.5	0.804
170.6	0.80525
170.7	0.80475
170.8	0.805
170.9	0.804
171	0.80425
171.1	0.80425
171.2	0.8045
171.3	0.80475
171.4	0.804
171.5	0.80275
171.6	0.802
171.7	0.80225
171.8	0.80325
171.9	0.8035
172	0.80375
172.1	0.804
172.2	0.80375
172.3	0.80425
172.4	0.80475
172.5	0.804
172.6	0.80275
172.7	0.80225
172.8	0.80175
172.9	0.802
173	0.8025
173.1	0.8025
173.2	0.80175
173.3	0.801
173.4	0.802
173.5	0.80175
173.6	0.80225
173.7	0.802
173.8	0.80275
173.9	0.80425
174	0.80475
174.1	0.80525
174.2	0.804
174.3	0.8045
174.4	0.8045
174.5	0.80475
174.6	0.8045
174.7	0.803
174.8	0.80275
174.9	0.803
175	0.80275
175.1	0.80375
175.2	0.804
175.3	0.80375
175.4	0.8045
175.5	0.80475
175.6	0.80575
175.7	0.806
175.8	0.807
175.9	0.80675
176	0.8065
176.1	0.80625
176.2	0.80625
176.3	0.8065
176.4	0.80675
176.5	0.8055
176.6	0.806
176.7	0.807
176.8	0.806
176.9	0.80625
177	0.80725
177.1	0.80725
177.2	0.8075
177.3	0.8075
177.4	0.80775
177.5	0.80775
177.6	0.80825
177.7	0.80825
177.8	0.80775
177.9	0.8085
178	0.8085
178.1	0.80875
178.2	0.80925
178.3	0.81025
178.4	0.8105
178.5	0.811
178.6	0.811
178.7	0.8105
178.8	0.8105
178.9	0.8105
179	0.811
179.1	0.81125
179.2	0.81325
179.3	0.81375
179.4	0.81475
179.5	0.8145
179.6	0.8155
179.7	0.8155
179.8	0.816
179.9	0.816
180	0.8155
180.1	0.8155
180.2	0.815
180.3	0.8145
180.4	0.81375
180.5	0.81425
180.6	0.81425
180.7	0.81375
180.8	0.8125
180.9	0.81325
181	0.815
181.1	0.81375
181.2	0.8145
181.3	0.8155
181.4	0.81675
181.5	0.81575
181.6	0.81575
181.7	0.81625
181.8	0.816
181.9	0.81625
182	0.81575
182.1	0.81575
182.2	0.81475
182.3	0.81375
182.4	0.81325
182.5	0.814
182.6	0.8145
182.7	0.8145
182.8	0.815
182.9	0.8155
183	0.81575
183.1	0.8145
183.2	0.814
183.3	0.8145
183.4	0.81475
183.5	0.81525
183.6	0.816
183.7	0.81625
183.8	0.8165
183.9	0.816
184	0.8155
184.1	0.81525
184.2	0.81525
184.3	0.816
184.4	0.817
184.5	0.817
184.6	0.8175
184.7	0.81975
184.8	0.81825
184.9	0.819
185	0.81825
185.1	0.81875
185.2	0.81825
185.3	0.8185
185.4	0.818
185.5	0.81825
185.6	0.81875
185.7	0.81775
185.8	0.81775
185.9	0.81825
186	0.81825
186.1	0.81925
186.2	0.81925
186.3	0.8185
186.4	0.81975
186.5	0.81975
186.6	0.82025
186.7	0.821
186.8	0.82075
186.9	0.8205
187	0.81975
187.1	0.82
187.2	0.819
187.3	0.8185
187.4	0.81975
187.5	0.8205
187.6	0.82025
187.7	0.819
187.8	0.81925
187.9	0.8195
188	0.818
188.1	0.818
188.2	0.81825
188.3	0.817
188.4	0.817
188.5	0.81725
188.6	0.816
188.7	0.816
188.8	0.81525
188.9	0.8155
189	0.81625
189.1	0.8165
189.2	0.81575
189.3	0.815
189.4	0.814
189.5	0.815
189.6	0.81525
189.7	0.8155
189.8	0.81675
189.9	0.81775
190	0.816
190.1	0.81525
190.2	0.81575
190.3	0.81475
190.4	0.815
190.5	0.81575
190.6	0.816
190.7	0.8165
190.8	0.8165
190.9	0.8165
191	0.8165
191.1	0.817
191.2	0.817
191.3	0.81725
191.4	0.817
191.5	0.8165
191.6	0.81575
191.7	0.81525
191.8	0.8155
191.9	0.81575
192	0.816
192.1	0.8155
192.2	0.816
192.3	0.8165
192.4	0.81675
192.5	0.8165
192.6	0.816
192.7	0.817
192.8	0.81725
192.9	0.81825
193	0.81925
193.1	0.82025
193.2	0.82025
193.3	0.82
193.4	0.81975
193.5	0.81925
193.6	0.819
193.7	0.81825
193.8	0.818
193.9	0.818
194	0.818
194.1	0.8175
194.2	0.81675
194.3	0.81675
194.4	0.81725
194.5	0.8165
194.6	0.81625
194.7	0.816
194.8	0.816
194.9	0.817
195	0.81675
195.1	0.817
195.2	0.8165
195.3	0.81725
195.4	0.81725
195.5	0.81825
195.6	0.81825
195.7	0.818
195.8	0.819
195.9	0.82
196	0.82025
196.1	0.8205
196.2	0.81925
196.3	0.81925
196.4	0.8185
196.5	0.8185
196.6	0.8185
196.7	0.81825
196.8	0.81775
196.9	0.817
197	0.81625
197.1	0.81625
197.2	0.81625
197.3	0.816
197.4	0.8145
197.5	0.8145
197.6	0.81575
197.7	0.81625
197.8	0.81725
197.9	0.816
198	0.816
198.1	0.816
198.2	0.8155
198.3	0.815
198.4	0.81525
198.5	0.81575
198.6	0.81525
198.7	0.81475
198.8	0.81525
198.9	0.816
199	0.816
199.1	0.816
199.2	0.817
199.3	0.817
199.4	0.81675
199.5	0.81675
199.6	0.8165
199.7	0.816
199.8	0.81475
199.9	0.815
200	0.81525
[truncated: 14,000 more rows]
