# Supplementary material for: Bayesian inference of kinetic schemes for ion channels by Kalman filtering
Source: eLife journal article supplement (doi:10.7554/elife.62714), 2022-05-04
Supplement: fig4-data1 [file 1_Sim_N_5000_Fluor_MW.xlsx]

## Sheet: Tabelle1
0.1	0
0.2	0
0.3	0
0.4	0
0.5	0
0.6	0
0.7	0
0.8	0
0.9	0
1	0
1.1	0
1.2	0
1.3	0
1.4	0
1.5	0
1.6	0
1.7	0
1.8	0
1.9	0
2	0
2.1	0
2.2	0
2.3	0
2.4	0
2.5	0
2.6	0
2.7	0
2.8	0
2.9	0
3	0
3.1	0
3.2	0
3.3	0
3.4	0
3.5	0
3.6	0
3.7	0
3.8	0
3.9	0
4	0
4.1	0
4.2	0
4.3	0
4.4	0
4.5	0
4.6	0
4.7	0
4.8	0
4.9	0
5	0
5.1	0
5.2	0
5.3	0
5.4	0
5.5	0
5.6	0
5.7	0
5.8	0
5.9	0
6	0
6.1	0
6.2	0
6.3	0
6.4	0
6.5	0
6.6	0
6.7	0
6.8	0
6.9	0
7	0
7.1	0
7.2	0
7.3	0
7.4	0
7.5	0
7.6	0
7.7	0
7.8	0
7.9	0
8	0
8.1	0
8.2	0
8.3	0
8.4	0
8.5	0
8.6	0
8.7	0
8.8	0
8.9	0
9	0
9.1	0
9.2	0
9.3	0
9.4	0
9.5	0
9.6	0
9.7	0
9.8	0
9.9	0
10	0
10.1	0
10.2	0
10.3	0
10.4	0
10.5	0
10.6	0
10.7	0
10.8	0
10.9	0
11	0
11.1	0
11.2	0
11.3	0
11.4	0
11.5	0
11.6	0
11.7	0
11.8	0
11.9	0
12	0
12.1	0
12.2	0
12.3	0
12.4	0
12.5	0
12.6	0
12.7	0
12.8	0
12.9	0
13	0
13.1	0
13.2	0
13.3	0
13.4	0
13.5	0
13.6	0
13.7	0
13.8	0
13.9	0
14	0
14.1	0
14.2	0
14.3	0
14.4	0
14.5	0
14.6	0
14.7	0
14.8	0
14.9	0
15	0
15.1	0
15.2	0
15.3	0
15.4	0
15.5	0
15.6	0
15.7	0
15.8	0
15.9	0
16	0
16.1	0
16.2	0
16.3	0
16.4	0
16.5	0
16.6	0
16.7	0
16.8	0
16.9	0
17	0
17.1	0
17.2	0
17.3	0
17.4	0
17.5	0
17.6	0
17.7	0
17.8	0
17.9	0
18	0
18.1	0
18.2	0
18.3	0
18.4	0
18.5	0
18.6	0
18.7	0
18.8	0
18.9	0
19	0
19.1	0
19.2	0
19.3	0
19.4	0
19.5	0
19.6	0
19.7	0
19.8	0
19.9	0
20	0
20.1	0
20.2	0
20.3	0
20.4	0
20.5	0
20.6	0
20.7	0
20.8	0
20.9	0
21	0
21.1	0
21.2	0
21.3	0
21.4	0
21.5	0
21.6	0
21.7	0
21.8	0
21.9	0
22	0
22.1	0
22.2	0
22.3	0
22.4	0
22.5	0
22.6	0
22.7	0
22.8	0
22.9	0
23	0
23.1	0
23.2	0
23.3	0
23.4	0
23.5	0
23.6	0
23.7	0
23.8	0
23.9	0
24	0
24.1	0
24.2	0
24.3	0
24.4	0
24.5	0
24.6	0
24.7	0
24.8	0
24.9	0
25	0
25.1	0
25.2	0
25.3	0
25.4	0
25.5	0
25.6	0
25.7	0
25.8	0
25.9	0
26	0
26.1	0
26.2	0
26.3	0
26.4	0
26.5	0
26.6	0
26.7	0
26.8	0
26.9	0
27	0
27.1	0
27.2	0
27.3	0
27.4	0
27.5	0
27.6	0
27.7	0
27.8	0
27.9	0
28	0
28.1	0
28.2	0
28.3	0
28.4	0
28.5	0
28.6	0
28.7	0
28.8	0
28.9	0
29	0
29.1	0
29.2	0
29.3	0
29.4	0
29.5	0
29.6	0
29.7	0
29.8	0
29.9	0
30	0
30.1	0
30.2	0
30.3	0
30.4	0
30.5	0
30.6	0
30.7	0
30.8	0
30.9	0
31	0
31.1	0
31.2	0
31.3	0
31.4	0
31.5	0
31.6	0
31.7	0
31.8	0
31.9	0
32	0
32.1	0
32.2	0
32.3	0
32.4	0
32.5	0
32.6	0
32.7	0
32.8	0
32.9	0
33	0
33.1	0
33.2	0
33.3	0
33.4	0
33.5	0
33.6	0
33.7	0
33.8	0
33.9	0
34	0
34.1	0
34.2	0
34.3	0
34.4	0
34.5	0
34.6	0
34.7	0
34.8	0
34.9	0
35	0
35.1	0
35.2	0
35.3	0
35.4	0
35.5	0
35.6	0
35.7	0
35.8	0
35.9	0
36	0
36.1	0
36.2	0
36.3	0
36.4	0
36.5	0
36.6	0
36.7	0
36.8	0
36.9	0
37	0
37.1	0
37.2	0
37.3	0
37.4	0
37.5	0
37.6	0
37.7	0
37.8	0
37.9	0
38	0
38.1	0
38.2	0
38.3	0
38.4	0
38.5	0
38.6	0
38.7	0
38.8	0
38.9	0
39	0
39.1	0
39.2	0
39.3	0
39.4	0
39.5	0
39.6	0
39.7	0
39.8	0
39.9	0
40	0
40.1	0
40.2	0
40.3	0
40.4	0
40.5	0
40.6	0
40.7	0
40.8	0
40.9	0
41	0
41.1	0
41.2	0
41.3	0
41.4	0
41.5	0
41.6	0
41.7	0
41.8	0
41.9	0
42	0
42.1	0
42.2	0
42.3	0
42.4	0
42.5	0
42.6	0
42.7	0
42.8	0
42.9	0
43	0
43.1	0
43.2	0
43.3	0
43.4	0
43.5	0
43.6	0
43.7	0
43.8	0
43.9	0
44	0
44.1	0
44.2	0
44.3	0
44.4	0
44.5	0
44.6	0
44.7	0
44.8	0
44.9	0
45	0
45.1	0
45.2	0
45.3	0
45.4	0
45.5	0
45.6	0
45.7	0
45.8	0
45.9	0
46	0
46.1	0
46.2	0
46.3	0
46.4	0
46.5	0
46.6	0
46.7	0
46.8	0
46.9	0
47	0
47.1	0
47.2	0
47.3	0
47.4	0
47.5	0
47.6	0
47.7	0
47.8	0
47.9	0
48	0
48.1	0
48.2	0
48.3	0
48.4	0
48.5	0
48.6	0
48.7	0
48.8	0
48.9	0
49	0
49.1	0
49.2	0
49.3	0
49.4	0
49.5	0
49.6	0
49.7	0
49.8	0
49.9	0
50	0
50.1	0
50.2	0
50.3	0
50.4	0
50.5	0
50.6	0
50.7	0
50.8	0
50.9	0
51	0
51.1	0
51.2	0
51.3	0
51.4	0
51.5	0
51.6	0
51.7	0
51.8	0
51.9	0
52	0
52.1	0
52.2	0
52.3	0
52.4	0
52.5	0
52.6	0
52.7	0
52.8	0
52.9	0
53	0
53.1	0
53.2	0
53.3	0
53.4	0
53.5	0
53.6	0
53.7	0
53.8	0
53.9	0
54	0
54.1	0
54.2	0
54.3	0
54.4	0
54.5	0
54.6	0
54.7	0
54.8	0
54.9	0
55	0
55.1	0
55.2	0
55.3	0
55.4	0
55.5	0
55.6	0
55.7	0
55.8	0
55.9	0
56	0
56.1	0
56.2	0
56.3	0
56.4	0
56.5	0
56.6	0
56.7	0
56.8	0
56.9	0
57	0
57.1	0
57.2	0
57.3	0
57.4	0
57.5	0
57.6	0
57.7	0
57.8	0
57.9	0
58	0
58.1	0
58.2	0
58.3	0
58.4	0
58.5	0
58.6	0
58.7	0
58.8	0
58.9	0
59	0
59.1	0
59.2	0
59.3	0
59.4	0
59.5	0
59.6	0
59.7	0
59.8	0
59.9	0
60	0
60.1	0
60.2	0
60.3	0
60.4	0
60.5	0
60.6	0
60.7	0
60.8	0
60.9	0
61	0
61.1	0
61.2	0
61.3	0
61.4	0
61.5	0
61.6	0
61.7	0
61.8	0
61.9	0
62	0
62.1	0
62.2	0
62.3	0
62.4	0
62.5	0
62.6	0
62.7	0
62.8	0
62.9	0
63	0
63.1	0
63.2	0
63.3	0
63.4	0
63.5	0
63.6	0
63.7	0
63.8	0
63.9	0
64	0
64.1	0
64.2	0
64.3	0
64.4	0
64.5	0
64.6	0
64.7	0
64.8	0
64.9	0
65	0
65.1	0
65.2	0
65.3	0
65.4	0
65.5	0
65.6	0
65.7	0
65.8	0
65.9	0
66	0
66.1	0
66.2	0
66.3	0
66.4	0
66.5	0
66.6	0
66.7	0
66.8	0
66.9	0
67	0
67.1	0
67.2	0
67.3	0
67.4	0
67.5	0
67.6	0
67.7	0
67.8	0
67.9	0
68	0
68.1	0
68.2	0
68.3	0
68.4	0
68.5	0
68.6	0
68.7	0
68.8	0
68.9	0
69	0
69.1	0
69.2	0
69.3	0
69.4	0
69.5	0
69.6	0
69.7	0
69.8	0
69.9	0
70	0
70.1	0
70.2	0
70.3	0
70.4	0
70.5	0
70.6	0
70.7	0
70.8	0
70.9	0
71	0
71.1	0
71.2	0
71.3	0
71.4	0
71.5	0
71.6	0
71.7	0
71.8	0
71.9	0
72	0
72.1	0
72.2	0
72.3	0
72.4	0
72.5	0
72.6	0
72.7	0
72.8	0
72.9	0
73	0
73.1	0
73.2	0
73.3	0
73.4	0
73.5	0
73.6	0
73.7	0
73.8	0
73.9	0
74	0
74.1	0
74.2	0
74.3	0
74.4	0
74.5	0
74.6	0
74.7	0
74.8	0
74.9	0
75	0
75.1	0
75.2	0
75.3	0
75.4	0
75.5	0
75.6	0
75.7	0
75.8	0
75.9	0
76	0
76.1	0
76.2	0
76.3	0
76.4	0
76.5	0
76.6	0
76.7	0
76.8	0
76.9	0
77	0
77.1	0
77.2	0
77.3	0
77.4	0
77.5	0
77.6	0
77.7	0
77.8	0
77.9	0
78	0
78.1	0
78.2	0
78.3	0
78.4	0
78.5	0
78.6	0
78.7	0
78.8	0
78.9	0
79	0
79.1	0
79.2	0
79.3	0
79.4	0
79.5	0
79.6	0
79.7	0
79.8	0
79.9	0
80	0
80.1	0
80.2	0
80.3	0
80.4	0
80.5	0
80.6	0
80.7	0
80.8	0
80.9	0
81	0
81.1	0
81.2	0
81.3	0
81.4	0
81.5	0
81.6	0
81.7	0
81.8	0
81.9	0
82	0
82.1	0
82.2	0
82.3	0
82.4	0
82.5	0
82.6	0
82.7	0
82.8	0
82.9	0
83	0
83.1	0
83.2	0
83.3	0
83.4	0
83.5	0
83.6	0
83.7	0
83.8	0
83.9	0
84	0
84.1	0
84.2	0
84.3	0
84.4	0
84.5	0
84.6	0
84.7	0
84.8	0
84.9	0
85	0
85.1	0
85.2	0
85.3	0
85.4	0
85.5	0
85.6	0
85.7	0
85.8	0
85.9	0
86	0
86.1	0
86.2	0
86.3	0
86.4	0
86.5	0
86.6	0
86.7	0
86.8	0
86.9	0
87	0
87.1	0
87.2	0
87.3	0
87.4	0
87.5	0
87.6	0
87.7	0
87.8	0
87.9	0
88	0
88.1	0
88.2	0
88.3	0
88.4	0
88.5	0
88.6	0
88.7	0
88.8	0
88.9	0
89	0
89.1	0
89.2	0
89.3	0
89.4	0
89.5	0
89.6	0
89.7	0
89.8	0
89.9	0
90	0
90.1	0
90.2	0
90.3	0
90.4	0
90.5	0
90.6	0
90.7	0
90.8	0
90.9	0
91	0
91.1	0
91.2	0
91.3	0
91.4	0
91.5	0
91.6	0
91.7	0
91.8	0
91.9	0
92	0
92.1	0
92.2	0
92.3	0
92.4	0
92.5	0
92.6	0
92.7	0
92.8	0
92.9	0
93	0
93.1	0
93.2	0
93.3	0
93.4	0
93.5	0
93.6	0
93.7	0
93.8	0
93.9	0
94	0
94.1	0
94.2	0
94.3	0
94.4	0
94.5	0
94.6	0
94.7	0
94.8	0
94.9	0
95	0
95.1	0
95.2	0
95.3	0
95.4	0
95.5	0
95.6	0
95.7	0
95.8	0
95.9	0
96	0
96.1	0
96.2	0
96.3	0
96.4	0
96.5	0
96.6	0
96.7	0
96.8	0
96.9	0
97	0
97.1	0
97.2	0
97.3	0
97.4	0
97.5	0
97.6	0
97.7	0
97.8	0
97.9	0
98	0
98.1	0
98.2	0
98.3	0
98.4	0
98.5	0
98.6	0
98.7	0
98.8	0
98.9	0
99	0
99.1	0
99.2	0
99.3	0
99.4	0
99.5	0
99.6	0
99.7	0
99.8	0
99.9	0
100	0
100.1	0.5327
100.2	0.7266
100.3	0.8225
100.4	0.8764
100.5	0.91
100.6	0.9246
100.7	0.9376
100.8	0.9453
100.9	0.9509
101	0.9513
101.1	0.9496
101.2	0.9509
101.3	0.9531
101.4	0.9539
101.5	0.9555
101.6	0.9563
101.7	0.9506
101.8	0.9535
101.9	0.9551
102	0.9542
102.1	0.9553
102.2	0.9566
102.3	0.9547
102.4	0.9568
102.5	0.9585
102.6	0.9587
102.7	0.9547
102.8	0.956
102.9	0.9561
103	0.9573
103.1	0.9555
103.2	0.9564
103.3	0.9561
103.4	0.9594
103.5	0.9597
103.6	0.958
103.7	0.9586
103.8	0.9621
103.9	0.9616
104	0.9597
104.1	0.9623
104.2	0.9582
104.3	0.9597
104.4	0.9593
104.5	0.96
104.6	0.9611
104.7	0.9619
104.8	0.9616
104.9	0.9605
105	0.9614
105.1	0.9603
105.2	0.9611
105.3	0.9618
105.4	0.9598
105.5	0.9626
105.6	0.9653
105.7	0.9636
105.8	0.965
105.9	0.9635
106	0.9614
106.1	0.963
106.2	0.9647
106.3	0.9643
106.4	0.9678
106.5	0.9681
106.6	0.9676
106.7	0.9649
106.8	0.9655
106.9	0.9641
107	0.965
107.1	0.9652
107.2	0.9621
107.3	0.9628
107.4	0.9632
107.5	0.9644
107.6	0.9608
107.7	0.9647
107.8	0.9652
107.9	0.9669
108	0.9643
108.1	0.966
108.2	0.9655
108.3	0.9654
108.4	0.9675
108.5	0.9643
108.6	0.9633
108.7	0.963
108.8	0.9629
108.9	0.9636
109	0.9647
109.1	0.9665
109.2	0.9667
109.3	0.9691
109.4	0.9669
109.5	0.967
109.6	0.9678
109.7	0.968
109.8	0.9676
109.9	0.9679
110	0.9691
110.1	0.968
110.2	0.9684
110.3	0.9675
110.4	0.9687
110.5	0.967
110.6	0.9668
110.7	0.9697
110.8	0.9703
110.9	0.9688
111	0.9704
111.1	0.9709
111.2	0.9709
111.3	0.9717
111.4	0.9731
111.5	0.9739
111.6	0.9725
111.7	0.9713
111.8	0.9711
111.9	0.9691
112	0.9695
112.1	0.9678
112.2	0.97
112.3	0.9725
112.4	0.972
112.5	0.9718
112.6	0.973
112.7	0.9726
112.8	0.9743
112.9	0.9752
113	0.9733
113.1	0.9727
113.2	0.9719
113.3	0.9734
113.4	0.9724
113.5	0.9732
113.6	0.9732
113.7	0.9711
113.8	0.9704
113.9	0.9721
114	0.9744
114.1	0.9738
114.2	0.973
114.3	0.9749
114.4	0.9737
114.5	0.9744
114.6	0.9744
114.7	0.9735
114.8	0.9724
114.9	0.9725
115	0.9726
115.1	0.9719
115.2	0.9713
115.3	0.9717
115.4	0.9739
115.5	0.9743
115.6	0.9727
115.7	0.973
115.8	0.9729
115.9	0.9717
116	0.9715
116.1	0.9726
116.2	0.9735
116.3	0.9746
116.4	0.9746
116.5	0.9751
116.6	0.9769
116.7	0.9776
116.8	0.9775
116.9	0.9735
117	0.9754
117.1	0.9771
117.2	0.9754
117.3	0.9745
117.4	0.9749
117.5	0.9735
117.6	0.9746
117.7	0.976
117.8	0.9764
117.9	0.9768
118	0.9785
118.1	0.9765
118.2	0.9761
118.3	0.9742
118.4	0.9761
118.5	0.9776
118.6	0.9789
118.7	0.9793
118.8	0.978
118.9	0.9764
119	0.9743
119.1	0.9762
119.2	0.977
119.3	0.9763
119.4	0.9769
119.5	0.9758
119.6	0.9766
119.7	0.9748
119.8	0.9761
119.9	0.977
120	0.9768
120.1	0.9784
120.2	0.9801
120.3	0.9792
120.4	0.9791
120.5	0.979
120.6	0.9795
120.7	0.9788
120.8	0.978
120.9	0.9765
121	0.9787
121.1	0.9769
121.2	0.9776
121.3	0.9796
121.4	0.9789
121.5	0.979
121.6	0.9799
121.7	0.979
121.8	0.9777
121.9	0.9793
122	0.981
122.1	0.9796
122.2	0.9792
122.3	0.9818
122.4	0.9806
122.5	0.9814
122.6	0.9794
122.7	0.9793
122.8	0.9798
122.9	0.9789
123	0.9798
123.1	0.9784
123.2	0.9792
123.3	0.9762
123.4	0.9774
123.5	0.9783
123.6	0.9787
123.7	0.9789
123.8	0.98
123.9	0.9796
124	0.9811
124.1	0.9798
124.2	0.9785
124.3	0.9795
124.4	0.9794
124.5	0.9798
124.6	0.9796
124.7	0.9807
124.8	0.9787
124.9	0.9797
125	0.9785
125.1	0.9795
125.2	0.9799
125.3	0.9812
125.4	0.981
125.5	0.9812
125.6	0.9821
125.7	0.9831
125.8	0.9831
125.9	0.9836
126	0.9832
126.1	0.9841
126.2	0.9811
126.3	0.982
126.4	0.981
126.5	0.9822
126.6	0.9831
126.7	0.9821
126.8	0.9816
126.9	0.9801
127	0.9808
127.1	0.9811
127.2	0.9827
127.3	0.9798
127.4	0.9794
127.5	0.9814
127.6	0.9815
127.7	0.9809
127.8	0.9812
127.9	0.9811
128	0.9814
128.1	0.9822
128.2	0.9831
128.3	0.9826
128.4	0.9822
128.5	0.9823
128.6	0.9824
128.7	0.9845
128.8	0.9847
128.9	0.9842
129	0.9846
129.1	0.9853
129.2	0.9851
129.3	0.9855
129.4	0.985
129.5	0.9853
129.6	0.9846
129.7	0.9831
129.8	0.9824
129.9	0.9834
130	0.9844
130.1	0.9849
130.2	0.9845
130.3	0.9845
130.4	0.9858
130.5	0.9835
130.6	0.9832
130.7	0.9835
130.8	0.9812
130.9	0.9834
131	0.9839
131.1	0.9838
131.2	0.9854
131.3	0.9837
131.4	0.9828
131.5	0.9839
131.6	0.9831
131.7	0.9855
131.8	0.9852
131.9	0.9866
132	0.9852
132.1	0.985
132.2	0.985
132.3	0.9856
132.4	0.9859
132.5	0.985
132.6	0.9845
132.7	0.985
132.8	0.9853
132.9	0.9852
133	0.9833
133.1	0.9854
133.2	0.9855
133.3	0.9842
133.4	0.9839
133.5	0.9842
133.6	0.9849
133.7	0.9851
133.8	0.984
133.9	0.9848
134	0.9839
134.1	0.9855
134.2	0.9866
134.3	0.9864
134.4	0.9849
134.5	0.9853
134.6	0.9838
134.7	0.9843
134.8	0.9831
134.9	0.9835
135	0.9849
135.1	0.9846
135.2	0.984
135.3	0.9851
135.4	0.9857
135.5	0.9872
135.6	0.9872
135.7	0.9852
135.8	0.9864
135.9	0.9854
136	0.9851
136.1	0.9866
136.2	0.9864
136.3	0.9857
136.4	0.9877
136.5	0.9873
136.6	0.9871
136.7	0.9879
136.8	0.9865
136.9	0.986
137	0.9868
137.1	0.9861
137.2	0.9872
137.3	0.9888
137.4	0.9854
137.5	0.9873
137.6	0.9863
137.7	0.986
137.8	0.9873
137.9	0.987
138	0.9866
138.1	0.9862
138.2	0.9865
138.3	0.9866
138.4	0.988
138.5	0.9891
138.6	0.9876
138.7	0.9868
138.8	0.9882
138.9	0.9877
139	0.9887
139.1	0.9884
139.2	0.9883
139.3	0.9887
139.4	0.9879
139.5	0.9883
139.6	0.9885
139.7	0.9869
139.8	0.987
139.9	0.9875
140	0.9884
140.1	0.9883
140.2	0.9873
140.3	0.9876
140.4	0.9883
140.5	0.9869
140.6	0.9886
140.7	0.9872
140.8	0.9877
140.9	0.987
141	0.9875
141.1	0.9873
141.2	0.986
141.3	0.9855
141.4	0.9872
141.5	0.9865
141.6	0.9867
141.7	0.9875
141.8	0.9864
141.9	0.9862
142	0.9868
142.1	0.9879
142.2	0.9877
142.3	0.9881
142.4	0.9873
142.5	0.9855
142.6	0.9877
142.7	0.9869
142.8	0.9877
142.9	0.9871
143	0.988
143.1	0.9888
143.2	0.9882
143.3	0.9885
143.4	0.9871
143.5	0.9861
143.6	0.9856
143.7	0.988
143.8	0.9879
143.9	0.9869
144	0.9868
144.1	0.9889
144.2	0.9897
144.3	0.9887
144.4	0.9889
144.5	0.9888
144.6	0.9888
144.7	0.9893
144.8	0.9893
144.9	0.9903
145	0.9892
145.1	0.9887
145.2	0.9882
145.3	0.9886
145.4	0.9887
145.5	0.9899
145.6	0.9887
145.7	0.9898
145.8	0.9888
145.9	0.9893
146	0.9901
146.1	0.9896
146.2	0.9879
146.3	0.9877
146.4	0.9869
146.5	0.9883
146.6	0.9878
146.7	0.9871
146.8	0.9876
146.9	0.9877
147	0.9887
147.1	0.9882
147.2	0.9892
147.3	0.9903
147.4	0.9903
147.5	0.9909
147.6	0.9909
147.7	0.9905
147.8	0.9897
147.9	0.9897
148	0.99
148.1	0.9899
148.2	0.9889
148.3	0.9891
148.4	0.9888
148.5	0.9883
148.6	0.9882
148.7	0.9899
148.8	0.9897
148.9	0.9883
149	0.9894
149.1	0.9892
149.2	0.9896
149.3	0.99
149.4	0.9898
149.5	0.9892
149.6	0.9889
149.7	0.9879
149.8	0.9884
149.9	0.9884
150	0.9895
150.1	0.989
150.2	0.9887
150.3	0.9883
150.4	0.9885
150.5	0.9891
150.6	0.9884
150.7	0.9879
150.8	0.9881
150.9	0.9881
151	0.9884
151.1	0.9876
151.2	0.9883
151.3	0.9897
151.4	0.9897
151.5	0.9902
151.6	0.9909
151.7	0.9897
151.8	0.9899
151.9	0.9892
152	0.9895
152.1	0.9895
152.2	0.9886
152.3	0.9885
152.4	0.9885
152.5	0.9883
152.6	0.9893
152.7	0.9897
152.8	0.9892
152.9	0.9902
153	0.989
153.1	0.9882
153.2	0.9894
153.3	0.9904
153.4	0.9894
153.5	0.9882
153.6	0.9901
153.7	0.991
153.8	0.9904
153.9	0.9901
154	0.99
154.1	0.9887
154.2	0.9905
154.3	0.991
154.4	0.9905
154.5	0.9897
154.6	0.9894
154.7	0.9894
154.8	0.988
154.9	0.9882
155	0.9887
155.1	0.9882
155.2	0.9884
155.3	0.9877
155.4	0.9884
155.5	0.9891
155.6	0.9886
155.7	0.9903
155.8	0.989
155.9	0.9898
156	0.9877
156.1	0.989
156.2	0.9895
156.3	0.9881
156.4	0.9886
156.5	0.9884
156.6	0.9898
156.7	0.99
156.8	0.9887
156.9	0.9884
157	0.9894
157.1	0.9906
157.2	0.9907
157.3	0.9904
157.4	0.991
157.5	0.9898
157.6	0.9898
157.7	0.9896
157.8	0.9885
157.9	0.9901
158	0.9883
158.1	0.9885
158.2	0.9904
158.3	0.9899
158.4	0.9901
158.5	0.9905
158.6	0.9898
158.7	0.9891
158.8	0.9896
158.9	0.9902
159	0.9912
159.1	0.9898
159.2	0.9898
159.3	0.9904
159.4	0.9898
159.5	0.9896
159.6	0.9904
159.7	0.9911
159.8	0.9914
159.9	0.9907
160	0.991
160.1	0.9903
160.2	0.9902
160.3	0.9897
160.4	0.99
160.5	0.9897
160.6	0.989
160.7	0.9904
160.8	0.9903
160.9	0.9899
161	0.9881
161.1	0.9903
161.2	0.9904
161.3	0.9905
161.4	0.9914
161.5	0.9905
161.6	0.9902
161.7	0.9902
161.8	0.9919
161.9	0.9916
162	0.9917
162.1	0.9911
162.2	0.9901
162.3	0.9903
162.4	0.9918
162.5	0.9937
162.6	0.9908
162.7	0.9909
162.8	0.991
162.9	0.9912
163	0.991
163.1	0.9911
163.2	0.9899
163.3	0.9909
163.4	0.9921
163.5	0.9917
163.6	0.9898
163.7	0.9899
163.8	0.9909
163.9	0.9907
164	0.9917
164.1	0.9925
164.2	0.9917
164.3	0.9915
164.4	0.9912
164.5	0.9923
164.6	0.992
164.7	0.9915
164.8	0.9916
164.9	0.992
165	0.9899
165.1	0.9893
165.2	0.9902
165.3	0.9899
165.4	0.9906
165.5	0.9906
165.6	0.9887
165.7	0.9888
165.8	0.9895
165.9	0.9897
166	0.9901
166.1	0.9895
166.2	0.9899
166.3	0.9897
166.4	0.9903
166.5	0.9906
166.6	0.9911
166.7	0.9908
166.8	0.9912
166.9	0.9908
167	0.991
167.1	0.991
167.2	0.9924
167.3	0.9914
167.4	0.9915
167.5	0.9926
167.6	0.9918
167.7	0.992
167.8	0.9909
167.9	0.9916
168	0.9929
168.1	0.9921
168.2	0.9915
168.3	0.9899
168.4	0.9908
168.5	0.9916
168.6	0.9922
168.7	0.9931
168.8	0.992
168.9	0.9936
169	0.9915
169.1	0.9917
169.2	0.9914
169.3	0.9913
169.4	0.9908
169.5	0.9895
169.6	0.9894
169.7	0.9916
169.8	0.992
169.9	0.9927
170	0.9919
170.1	0.9918
170.2	0.9914
170.3	0.99
170.4	0.9905
170.5	0.9902
170.6	0.9901
170.7	0.989
170.8	0.9883
170.9	0.9904
171	0.9907
171.1	0.9908
171.2	0.9918
171.3	0.9921
171.4	0.9913
171.5	0.9904
171.6	0.9901
171.7	0.9898
171.8	0.9888
171.9	0.99
172	0.9914
172.1	0.9904
172.2	0.9889
172.3	0.99
172.4	0.9899
172.5	0.99
172.6	0.99
172.7	0.9905
172.8	0.9915
172.9	0.9913
173	0.9903
173.1	0.9903
173.2	0.9904
173.3	0.9916
173.4	0.9909
173.5	0.9908
173.6	0.9897
173.7	0.9897
173.8	0.9908
173.9	0.9906
174	0.9911
174.1	0.9912
174.2	0.9909
174.3	0.9906
174.4	0.9904
174.5	0.9906
174.6	0.9894
174.7	0.9898
174.8	0.9901
174.9	0.9914
175	0.9909
175.1	0.9915
175.2	0.9904
175.3	0.9903
175.4	0.9909
175.5	0.9908
175.6	0.9908
175.7	0.9915
175.8	0.9921
175.9	0.993
176	0.9927
176.1	0.9929
176.2	0.9929
176.3	0.9918
176.4	0.9918
176.5	0.9916
176.6	0.9925
176.7	0.9921
176.8	0.9912
176.9	0.992
177	0.9928
177.1	0.9925
177.2	0.992
177.3	0.993
177.4	0.9923
177.5	0.993
177.6	0.9919
177.7	0.9909
177.8	0.9906
177.9	0.9904
178	0.9899
178.1	0.991
178.2	0.99
178.3	0.9903
178.4	0.9916
178.5	0.9907
178.6	0.991
178.7	0.9918
178.8	0.9919
178.9	0.9914
179	0.9914
179.1	0.9927
179.2	0.9927
179.3	0.9928
179.4	0.9918
179.5	0.9927
179.6	0.9927
179.7	0.9926
179.8	0.9927
179.9	0.9922
180	0.9915
180.1	0.992
180.2	0.9909
180.3	0.9909
180.4	0.9911
180.5	0.9901
180.6	0.9914
180.7	0.9914
180.8	0.99
180.9	0.9899
181	0.9901
181.1	0.9912
181.2	0.9925
181.3	0.9928
181.4	0.9921
181.5	0.9915
181.6	0.9913
181.7	0.991
181.8	0.9919
181.9	0.9923
182	0.9914
182.1	0.9917
182.2	0.9916
182.3	0.9924
182.4	0.9937
182.5	0.9921
182.6	0.993
182.7	0.9928
182.8	0.9911
182.9	0.9916
183	0.9914
183.1	0.9913
183.2	0.9898
183.3	0.9908
183.4	0.9916
183.5	0.9913
183.6	0.9912
183.7	0.9903
183.8	0.9914
183.9	0.9912
184	0.9908
184.1	0.9921
184.2	0.991
184.3	0.9906
184.4	0.9899
184.5	0.9893
184.6	0.9908
184.7	0.9903
184.8	0.9913
184.9	0.9921
185	0.9913
185.1	0.9909
185.2	0.9912
185.3	0.9913
185.4	0.9912
185.5	0.9919
185.6	0.9912
185.7	0.9909
185.8	0.9908
185.9	0.9914
186	0.9914
186.1	0.9916
186.2	0.9914
186.3	0.9921
186.4	0.9914
186.5	0.992
186.6	0.9917
186.7	0.9927
186.8	0.9914
186.9	0.9913
187	0.9912
187.1	0.9927
187.2	0.9921
187.3	0.9913
187.4	0.9911
187.5	0.9911
187.6	0.9906
187.7	0.9898
187.8	0.9907
187.9	0.9896
188	0.9901
188.1	0.9914
188.2	0.9922
188.3	0.9914
188.4	0.9911
188.5	0.992
188.6	0.9905
188.7	0.9918
188.8	0.9916
188.9	0.9915
189	0.9922
189.1	0.9925
189.2	0.9931
189.3	0.993
189.4	0.9927
189.5	0.9924
189.6	0.9917
189.7	0.9909
189.8	0.9902
189.9	0.9907
190	0.9901
190.1	0.9897
190.2	0.9886
190.3	0.99
190.4	0.9909
190.5	0.9917
190.6	0.9922
190.7	0.9929
190.8	0.9923
190.9	0.9918
191	0.9921
191.1	0.9918
191.2	0.992
191.3	0.9917
191.4	0.9908
191.5	0.9915
191.6	0.9894
191.7	0.99
191.8	0.9903
191.9	0.9889
192	0.9909
192.1	0.9901
192.2	0.9909
192.3	0.9908
192.4	0.9906
192.5	0.9911
192.6	0.9915
192.7	0.9916
192.8	0.9935
192.9	0.9931
193	0.9918
193.1	0.9922
193.2	0.9915
193.3	0.9922
193.4	0.9916
193.5	0.9924
193.6	0.9912
193.7	0.992
193.8	0.9915
193.9	0.9918
194	0.992
194.1	0.9909
194.2	0.9913
194.3	0.9914
194.4	0.9917
194.5	0.9909
194.6	0.9901
194.7	0.9901
194.8	0.99
194.9	0.9901
195	0.991
195.1	0.9898
195.2	0.9904
195.3	0.9906
195.4	0.9902
195.5	0.9927
195.6	0.9932
195.7	0.993
195.8	0.9917
195.9	0.9903
196	0.9913
196.1	0.9898
196.2	0.9904
196.3	0.9917
196.4	0.9912
196.5	0.9917
196.6	0.9909
196.7	0.9917
196.8	0.9918
196.9	0.9921
197	0.9928
197.1	0.9924
197.2	0.9918
197.3	0.9924
197.4	0.9919
197.5	0.9917
197.6	0.9927
197.7	0.9926
197.8	0.9925
197.9	0.9925
198	0.9929
198.1	0.9926
198.2	0.9929
198.3	0.9912
198.4	0.9909
198.5	0.991
198.6	0.9901
198.7	0.9918
198.8	0.9921
198.9	0.9924
199	0.9917
199.1	0.9907
199.2	0.9906
199.3	0.9916
199.4	0.991
199.5	0.9916
199.6	0.9917
199.7	0.992
199.8	0.9919
199.9	0.991
200	0.9913
[truncated: 14,000 more rows]
