# Supplementary material for: Bayesian inference of kinetic schemes for ion channels by Kalman filtering
Source: eLife journal article supplement (doi:10.7554/elife.62714), 2022-05-04
Supplement: fig4-data1 [file 1_Sim_N_5000_Strom_MW.xlsx]

## Sheet: Tabelle1
0.1	0
0.2	0
0.3	0
0.4	0
0.5	0
0.6	0
0.7	0
0.8	0
0.9	0
1	0
1.1	0
1.2	0
1.3	0
1.4	0
1.5	0
1.6	0
1.7	0
1.8	0
1.9	0
2	0
2.1	0
2.2	0
2.3	0
2.4	0
2.5	0
2.6	0
2.7	0
2.8	0
2.9	0
3	0
3.1	0
3.2	0
3.3	0
3.4	0
3.5	0
3.6	0
3.7	0
3.8	0
3.9	0
4	0
4.1	0
4.2	0
4.3	0
4.4	0
4.5	0
4.6	0
4.7	0
4.8	0
4.9	0
5	0
5.1	0
5.2	0
5.3	0
5.4	0
5.5	0
5.6	0
5.7	0
5.8	0
5.9	0
6	0
6.1	0
6.2	0
6.3	0
6.4	0
6.5	0
6.6	0
6.7	0
6.8	0
6.9	0
7	0
7.1	0
7.2	0
7.3	0
7.4	0
7.5	0
7.6	0
7.7	0
7.8	0
7.9	0
8	0
8.1	0
8.2	0
8.3	0
8.4	0
8.5	0
8.6	0
8.7	0
8.8	0
8.9	0
9	0
9.1	0
9.2	0
9.3	0
9.4	0
9.5	0
9.6	0
9.7	0
9.8	0
9.9	0
10	0
10.1	0
10.2	0
10.3	0
10.4	0
10.5	0
10.6	0
10.7	0
10.8	0
10.9	0
11	0
11.1	0
11.2	0
11.3	0
11.4	0
11.5	0
11.6	0
11.7	0
11.8	0
11.9	0
12	0
12.1	0
12.2	0
12.3	0
12.4	0
12.5	0
12.6	0
12.7	0
12.8	0
12.9	0
13	0
13.1	0
13.2	0
13.3	0
13.4	0
13.5	0
13.6	0
13.7	0
13.8	0
13.9	0
14	0
14.1	0
14.2	0
14.3	0
14.4	0
14.5	0
14.6	0
14.7	0
14.8	0
14.9	0
15	0
15.1	0
15.2	0
15.3	0
15.4	0
15.5	0
15.6	0
15.7	0
15.8	0
15.9	0
16	0
16.1	0
16.2	0
16.3	0
16.4	0
16.5	0
16.6	0
16.7	0
16.8	0
16.9	0
17	0
17.1	0
17.2	0
17.3	0
17.4	0
17.5	0
17.6	0
17.7	0
17.8	0
17.9	0
18	0
18.1	0
18.2	0
18.3	0
18.4	0
18.5	0
18.6	0
18.7	0
18.8	0
18.9	0
19	0
19.1	0
19.2	0
19.3	0
19.4	0
19.5	0
19.6	0
19.7	0
19.8	0
19.9	0
20	0
20.1	0
20.2	0
20.3	0
20.4	0
20.5	0
20.6	0
20.7	0
20.8	0
20.9	0
21	0
21.1	0
21.2	0
21.3	0
21.4	0
21.5	0
21.6	0
21.7	0
21.8	0
21.9	0
22	0
22.1	0
22.2	0
22.3	0
22.4	0
22.5	0
22.6	0
22.7	0
22.8	0
22.9	0
23	0
23.1	0
23.2	0
23.3	0
23.4	0
23.5	0
23.6	0
23.7	0
23.8	0
23.9	0
24	0
24.1	0
24.2	0
24.3	0
24.4	0
24.5	0
24.6	0
24.7	0
24.8	0
24.9	0
25	0
25.1	0
25.2	0
25.3	0
25.4	0
25.5	0
25.6	0
25.7	0
25.8	0
25.9	0
26	0
26.1	0
26.2	0
26.3	0
26.4	0
26.5	0
26.6	0
26.7	0
26.8	0
26.9	0
27	0
27.1	0
27.2	0
27.3	0
27.4	0
27.5	0
27.6	0
27.7	0
27.8	0
27.9	0
28	0
28.1	0
28.2	0
28.3	0
28.4	0
28.5	0
28.6	0
28.7	0
28.8	0
28.9	0
29	0
29.1	0
29.2	0
29.3	0
29.4	0
29.5	0
29.6	0
29.7	0
29.8	0
29.9	0
30	0
30.1	0
30.2	0
30.3	0
30.4	0
30.5	0
30.6	0
30.7	0
30.8	0
30.9	0
31	0
31.1	0
31.2	0
31.3	0
31.4	0
31.5	0
31.6	0
31.7	0
31.8	0
31.9	0
32	0
32.1	0
32.2	0
32.3	0
32.4	0
32.5	0
32.6	0
32.7	0
32.8	0
32.9	0
33	0
33.1	0
33.2	0
33.3	0
33.4	0
33.5	0
33.6	0
33.7	0
33.8	0
33.9	0
34	0
34.1	0
34.2	0
34.3	0
34.4	0
34.5	0
34.6	0
34.7	0
34.8	0
34.9	0
35	0
35.1	0
35.2	0
35.3	0
35.4	0
35.5	0
35.6	0
35.7	0
35.8	0
35.9	0
36	0
36.1	0
36.2	0
36.3	0
36.4	0
36.5	0
36.6	0
36.7	0
36.8	0
36.9	0
37	0
37.1	0
37.2	0
37.3	0
37.4	0
37.5	0
37.6	0
37.7	0
37.8	0
37.9	0
38	0
38.1	0
38.2	0
38.3	0
38.4	0
38.5	0
38.6	0
38.7	0
38.8	0
38.9	0
39	0
39.1	0
39.2	0
39.3	0
39.4	0
39.5	0
39.6	0
39.7	0
39.8	0
39.9	0
40	0
40.1	0
40.2	0
40.3	0
40.4	0
40.5	0
40.6	0
40.7	0
40.8	0
40.9	0
41	0
41.1	0
41.2	0
41.3	0
41.4	0
41.5	0
41.6	0
41.7	0
41.8	0
41.9	0
42	0
42.1	0
42.2	0
42.3	0
42.4	0
42.5	0
42.6	0
42.7	0
42.8	0
42.9	0
43	0
43.1	0
43.2	0
43.3	0
43.4	0
43.5	0
43.6	0
43.7	0
43.8	0
43.9	0
44	0
44.1	0
44.2	0
44.3	0
44.4	0
44.5	0
44.6	0
44.7	0
44.8	0
44.9	0
45	0
45.1	0
45.2	0
45.3	0
45.4	0
45.5	0
45.6	0
45.7	0
45.8	0
45.9	0
46	0
46.1	0
46.2	0
46.3	0
46.4	0
46.5	0
46.6	0
46.7	0
46.8	0
46.9	0
47	0
47.1	0
47.2	0
47.3	0
47.4	0
47.5	0
47.6	0
47.7	0
47.8	0
47.9	0
48	0
48.1	0
48.2	0
48.3	0
48.4	0
48.5	0
48.6	0
48.7	0
48.8	0
48.9	0
49	0
49.1	0
49.2	0
49.3	0
49.4	0
49.5	0
49.6	0
49.7	0
49.8	0
49.9	0
50	0
50.1	0
50.2	0
50.3	0
50.4	0
50.5	0
50.6	0
50.7	0
50.8	0
50.9	0
51	0
51.1	0
51.2	0
51.3	0
51.4	0
51.5	0
51.6	0
51.7	0
51.8	0
51.9	0
52	0
52.1	0
52.2	0
52.3	0
52.4	0
52.5	0
52.6	0
52.7	0
52.8	0
52.9	0
53	0
53.1	0
53.2	0
53.3	0
53.4	0
53.5	0
53.6	0
53.7	0
53.8	0
53.9	0
54	0
54.1	0
54.2	0
54.3	0
54.4	0
54.5	0
54.6	0
54.7	0
54.8	0
54.9	0
55	0
55.1	0
55.2	0
55.3	0
55.4	0
55.5	0
55.6	0
55.7	0
55.8	0
55.9	0
56	0
56.1	0
56.2	0
56.3	0
56.4	0
56.5	0
56.6	0
56.7	0
56.8	0
56.9	0
57	0
57.1	0
57.2	0
57.3	0
57.4	0
57.5	0
57.6	0
57.7	0
57.8	0
57.9	0
58	0
58.1	0
58.2	0
58.3	0
58.4	0
58.5	0
58.6	0
58.7	0
58.8	0
58.9	0
59	0
59.1	0
59.2	0
59.3	0
59.4	0
59.5	0
59.6	0
59.7	0
59.8	0
59.9	0
60	0
60.1	0
60.2	0
60.3	0
60.4	0
60.5	0
60.6	0
60.7	0
60.8	0
60.9	0
61	0
61.1	0
61.2	0
61.3	0
61.4	0
61.5	0
61.6	0
61.7	0
61.8	0
61.9	0
62	0
62.1	0
62.2	0
62.3	0
62.4	0
62.5	0
62.6	0
62.7	0
62.8	0
62.9	0
63	0
63.1	0
63.2	0
63.3	0
63.4	0
63.5	0
63.6	0
63.7	0
63.8	0
63.9	0
64	0
64.1	0
64.2	0
64.3	0
64.4	0
64.5	0
64.6	0
64.7	0
64.8	0
64.9	0
65	0
65.1	0
65.2	0
65.3	0
65.4	0
65.5	0
65.6	0
65.7	0
65.8	0
65.9	0
66	0
66.1	0
66.2	0
66.3	0
66.4	0
66.5	0
66.6	0
66.7	0
66.8	0
66.9	0
67	0
67.1	0
67.2	0
67.3	0
67.4	0
67.5	0
67.6	0
67.7	0
67.8	0
67.9	0
68	0
68.1	0
68.2	0
68.3	0
68.4	0
68.5	0
68.6	0
68.7	0
68.8	0
68.9	0
69	0
69.1	0
69.2	0
69.3	0
69.4	0
69.5	0
69.6	0
69.7	0
69.8	0
69.9	0
70	0
70.1	0
70.2	0
70.3	0
70.4	0
70.5	0
70.6	0
70.7	0
70.8	0
70.9	0
71	0
71.1	0
71.2	0
71.3	0
71.4	0
71.5	0
71.6	0
71.7	0
71.8	0
71.9	0
72	0
72.1	0
72.2	0
72.3	0
72.4	0
72.5	0
72.6	0
72.7	0
72.8	0
72.9	0
73	0
73.1	0
73.2	0
73.3	0
73.4	0
73.5	0
73.6	0
73.7	0
73.8	0
73.9	0
74	0
74.1	0
74.2	0
74.3	0
74.4	0
74.5	0
74.6	0
74.7	0
74.8	0
74.9	0
75	0
75.1	0
75.2	0
75.3	0
75.4	0
75.5	0
75.6	0
75.7	0
75.8	0
75.9	0
76	0
76.1	0
76.2	0
76.3	0
76.4	0
76.5	0
76.6	0
76.7	0
76.8	0
76.9	0
77	0
77.1	0
77.2	0
77.3	0
77.4	0
77.5	0
77.6	0
77.7	0
77.8	0
77.9	0
78	0
78.1	0
78.2	0
78.3	0
78.4	0
78.5	0
78.6	0
78.7	0
78.8	0
78.9	0
79	0
79.1	0
79.2	0
79.3	0
79.4	0
79.5	0
79.6	0
79.7	0
79.8	0
79.9	0
80	0
80.1	0
80.2	0
80.3	0
80.4	0
80.5	0
80.6	0
80.7	0
80.8	0
80.9	0
81	0
81.1	0
81.2	0
81.3	0
81.4	0
81.5	0
81.6	0
81.7	0
81.8	0
81.9	0
82	0
82.1	0
82.2	0
82.3	0
82.4	0
82.5	0
82.6	0
82.7	0
82.8	0
82.9	0
83	0
83.1	0
83.2	0
83.3	0
83.4	0
83.5	0
83.6	0
83.7	0
83.8	0
83.9	0
84	0
84.1	0
84.2	0
84.3	0
84.4	0
84.5	0
84.6	0
84.7	0
84.8	0
84.9	0
85	0
85.1	0
85.2	0
85.3	0
85.4	0
85.5	0
85.6	0
85.7	0
85.8	0
85.9	0
86	0
86.1	0
86.2	0
86.3	0
86.4	0
86.5	0
86.6	0
86.7	0
86.8	0
86.9	0
87	0
87.1	0
87.2	0
87.3	0
87.4	0
87.5	0
87.6	0
87.7	0
87.8	0
87.9	0
88	0
88.1	0
88.2	0
88.3	0
88.4	0
88.5	0
88.6	0
88.7	0
88.8	0
88.9	0
89	0
89.1	0
89.2	0
89.3	0
89.4	0
89.5	0
89.6	0
89.7	0
89.8	0
89.9	0
90	0
90.1	0
90.2	0
90.3	0
90.4	0
90.5	0
90.6	0
90.7	0
90.8	0
90.9	0
91	0
91.1	0
91.2	0
91.3	0
91.4	0
91.5	0
91.6	0
91.7	0
91.8	0
91.9	0
92	0
92.1	0
92.2	0
92.3	0
92.4	0
92.5	0
92.6	0
92.7	0
92.8	0
92.9	0
93	0
93.1	0
93.2	0
93.3	0
93.4	0
93.5	0
93.6	0
93.7	0
93.8	0
93.9	0
94	0
94.1	0
94.2	0
94.3	0
94.4	0
94.5	0
94.6	0
94.7	0
94.8	0
94.9	0
95	0
95.1	0
95.2	0
95.3	0
95.4	0
95.5	0
95.6	0
95.7	0
95.8	0
95.9	0
96	0
96.1	0
96.2	0
96.3	0
96.4	0
96.5	0
96.6	0
96.7	0
96.8	0
96.9	0
97	0
97.1	0
97.2	0
97.3	0
97.4	0
97.5	0
97.6	0
97.7	0
97.8	0
97.9	0
98	0
98.1	0
98.2	0
98.3	0
98.4	0
98.5	0
98.6	0
98.7	0
98.8	0
98.9	0
99	0
99.1	0
99.2	0
99.3	0
99.4	0
99.5	0
99.6	0
99.7	0
99.8	0
99.9	0
100	0
100.1	0.0006
100.2	0.0026
100.3	0.0056
100.4	0.0092
100.5	0.0128
100.6	0.0156
100.7	0.0202
100.8	0.023
100.9	0.0276
101	0.033
101.1	0.0366
101.2	0.0404
101.3	0.0446
101.4	0.0496
101.5	0.0532
101.6	0.0562
101.7	0.061
101.8	0.0644
101.9	0.0684
102	0.0716
102.1	0.0754
102.2	0.0778
102.3	0.0812
102.4	0.0852
102.5	0.0892
102.6	0.0928
102.7	0.0958
102.8	0.1006
102.9	0.1044
103	0.1078
103.1	0.1106
103.2	0.1152
103.3	0.1192
103.4	0.1216
103.5	0.1276
103.6	0.1322
103.7	0.1354
103.8	0.1382
103.9	0.1414
104	0.1466
104.1	0.15
104.2	0.154
104.3	0.1568
104.4	0.1602
104.5	0.1634
104.6	0.167
104.7	0.1704
104.8	0.1744
104.9	0.1776
105	0.1824
105.1	0.1866
105.2	0.1924
105.3	0.1962
105.4	0.1994
105.5	0.202
105.6	0.2068
105.7	0.2108
105.8	0.2132
105.9	0.216
106	0.2194
106.1	0.223
106.2	0.2264
106.3	0.2274
106.4	0.2312
106.5	0.2332
106.6	0.2356
106.7	0.2382
106.8	0.2424
106.9	0.2444
107	0.2484
107.1	0.2516
107.2	0.2552
107.3	0.2578
107.4	0.2606
107.5	0.2628
107.6	0.2656
107.7	0.267
107.8	0.2712
107.9	0.2738
108	0.276
108.1	0.278
108.2	0.2798
108.3	0.2822
108.4	0.2842
108.5	0.287
108.6	0.29
108.7	0.2924
108.8	0.2948
108.9	0.2978
109	0.3004
109.1	0.3032
109.2	0.307
109.3	0.31
109.4	0.3128
109.5	0.3158
109.6	0.3184
109.7	0.3208
109.8	0.323
109.9	0.3258
110	0.3268
110.1	0.3302
110.2	0.3338
110.3	0.3362
110.4	0.3394
110.5	0.342
110.6	0.3442
110.7	0.3466
110.8	0.349
110.9	0.351
111	0.353
111.1	0.3564
111.2	0.358
111.3	0.36
111.4	0.3638
111.5	0.3664
111.6	0.3676
111.7	0.3716
111.8	0.375
111.9	0.3776
112	0.3794
112.1	0.382
112.2	0.3838
112.3	0.3842
112.4	0.3854
112.5	0.3874
112.6	0.3894
112.7	0.392
112.8	0.3942
112.9	0.396
113	0.3982
113.1	0.4004
113.2	0.4022
113.3	0.404
113.4	0.4058
113.5	0.4078
113.6	0.4106
113.7	0.4138
113.8	0.4154
113.9	0.4184
114	0.4194
114.1	0.4212
114.2	0.4238
114.3	0.4258
114.4	0.4276
114.5	0.4308
114.6	0.4328
114.7	0.4336
114.8	0.4358
114.9	0.4374
115	0.4394
115.1	0.4426
115.2	0.4444
115.3	0.4454
115.4	0.4478
115.5	0.4496
115.6	0.451
115.7	0.4536
115.8	0.4544
115.9	0.4558
116	0.4584
116.1	0.461
116.2	0.4634
116.3	0.465
116.4	0.4678
116.5	0.4706
116.6	0.473
116.7	0.4754
116.8	0.4768
116.9	0.4782
117	0.4798
117.1	0.4804
117.2	0.4824
117.3	0.4838
117.4	0.4868
117.5	0.4884
117.6	0.4914
117.7	0.4932
117.8	0.495
117.9	0.4972
118	0.4994
118.1	0.501
118.2	0.502
118.3	0.5032
118.4	0.5058
118.5	0.5066
118.6	0.508
118.7	0.5088
118.8	0.5108
118.9	0.513
119	0.5152
119.1	0.5162
119.2	0.5178
119.3	0.5186
119.4	0.5216
119.5	0.524
119.6	0.5256
119.7	0.5268
119.8	0.528
119.9	0.5312
120	0.534
120.1	0.5364
120.2	0.539
120.3	0.5394
120.4	0.5414
120.5	0.5424
120.6	0.5428
120.7	0.544
120.8	0.5446
120.9	0.546
121	0.5476
121.1	0.5504
121.2	0.5528
121.3	0.5562
121.4	0.556
121.5	0.5584
121.6	0.5594
121.7	0.5608
121.8	0.5614
121.9	0.5624
122	0.5636
122.1	0.5652
122.2	0.5662
122.3	0.568
122.4	0.5692
122.5	0.5706
122.6	0.5718
122.7	0.5722
122.8	0.572
122.9	0.5734
123	0.5742
123.1	0.575
123.2	0.5776
123.3	0.5782
123.4	0.5792
123.5	0.5812
123.6	0.5818
123.7	0.5826
123.8	0.5832
123.9	0.5846
124	0.5872
124.1	0.5882
124.2	0.5888
124.3	0.591
124.4	0.5924
124.5	0.5944
124.6	0.5954
124.7	0.5962
124.8	0.5966
124.9	0.5982
125	0.599
125.1	0.6018
125.2	0.6036
125.3	0.6034
125.4	0.6048
125.5	0.6068
125.6	0.6086
125.7	0.61
125.8	0.6114
125.9	0.6128
126	0.6138
126.1	0.614
126.2	0.6162
126.3	0.6166
126.4	0.6174
126.5	0.6182
126.6	0.6186
126.7	0.619
126.8	0.6208
126.9	0.621
127	0.6234
127.1	0.6248
127.2	0.6252
127.3	0.6272
127.4	0.6292
127.5	0.63
127.6	0.6314
127.7	0.6316
127.8	0.6322
127.9	0.6326
128	0.6338
128.1	0.6358
128.2	0.6374
128.3	0.638
128.4	0.638
128.5	0.6394
128.6	0.642
128.7	0.6422
128.8	0.644
128.9	0.645
129	0.6452
129.1	0.6462
129.2	0.647
129.3	0.6476
129.4	0.648
129.5	0.6496
129.6	0.6498
129.7	0.6502
129.8	0.6502
129.9	0.6518
130	0.6532
130.1	0.654
130.2	0.6552
130.3	0.657
130.4	0.6586
130.5	0.6594
130.6	0.6602
130.7	0.6604
130.8	0.661
130.9	0.6636
131	0.6644
131.1	0.6658
131.2	0.6656
131.3	0.6666
131.4	0.667
131.5	0.6676
131.6	0.6694
131.7	0.67
131.8	0.6708
131.9	0.6714
132	0.6712
132.1	0.673
132.2	0.6748
132.3	0.6768
132.4	0.6772
132.5	0.679
132.6	0.6802
132.7	0.6804
132.8	0.681
132.9	0.683
133	0.6842
133.1	0.6848
133.2	0.6852
133.3	0.686
133.4	0.6866
133.5	0.6868
133.6	0.6872
133.7	0.6874
133.8	0.689
133.9	0.6892
134	0.6888
134.1	0.6896
134.2	0.6902
134.3	0.6906
134.4	0.6908
134.5	0.6922
134.6	0.6922
134.7	0.6942
134.8	0.6948
134.9	0.6948
135	0.695
135.1	0.6958
135.2	0.6968
135.3	0.6978
135.4	0.6992
135.5	0.6994
135.6	0.7006
135.7	0.7014
135.8	0.702
135.9	0.7018
136	0.7026
136.1	0.7042
136.2	0.7038
136.3	0.7054
136.4	0.7064
136.5	0.7068
136.6	0.7078
136.7	0.7096
136.8	0.7094
136.9	0.7108
137	0.7136
137.1	0.714
137.2	0.7146
137.3	0.7152
137.4	0.716
137.5	0.717
137.6	0.7176
137.7	0.718
137.8	0.7184
137.9	0.7194
138	0.7202
138.1	0.7212
138.2	0.721
138.3	0.722
138.4	0.7224
138.5	0.7244
138.6	0.7246
138.7	0.7248
138.8	0.7246
138.9	0.726
139	0.7262
139.1	0.7268
139.2	0.727
139.3	0.728
139.4	0.7282
139.5	0.7286
139.6	0.729
139.7	0.7288
139.8	0.7286
139.9	0.7294
140	0.7294
140.1	0.7302
140.2	0.7304
140.3	0.7314
140.4	0.7314
140.5	0.7318
140.6	0.7334
140.7	0.7328
140.8	0.7332
140.9	0.7334
141	0.7342
141.1	0.7346
141.2	0.7354
141.3	0.7372
141.4	0.7378
141.5	0.7376
141.6	0.7384
141.7	0.7398
141.8	0.7398
141.9	0.7414
142	0.7424
142.1	0.7432
142.2	0.7436
142.3	0.744
142.4	0.7446
142.5	0.745
142.6	0.7444
142.7	0.7442
142.8	0.7438
142.9	0.7444
143	0.745
143.1	0.746
143.2	0.7474
143.3	0.748
143.4	0.749
143.5	0.7498
143.6	0.7508
143.7	0.7492
143.8	0.75
143.9	0.75
144	0.7504
144.1	0.75
144.2	0.7508
144.3	0.7526
144.4	0.753
144.5	0.7532
144.6	0.7534
144.7	0.753
144.8	0.7532
144.9	0.7534
145	0.7538
145.1	0.7534
145.2	0.7546
145.3	0.7554
145.4	0.7556
145.5	0.756
145.6	0.7564
145.7	0.757
145.8	0.7576
145.9	0.7578
146	0.759
146.1	0.7584
146.2	0.7592
146.3	0.7596
146.4	0.7604
146.5	0.7616
146.6	0.7626
146.7	0.7628
146.8	0.7638
146.9	0.7642
147	0.7644
147.1	0.7644
147.2	0.763
147.3	0.7634
147.4	0.7638
147.5	0.7648
147.6	0.7656
147.7	0.7664
147.8	0.7664
147.9	0.7674
148	0.7682
148.1	0.7674
148.2	0.7686
148.3	0.7684
148.4	0.7688
148.5	0.7684
148.6	0.7686
148.7	0.7688
148.8	0.7696
148.9	0.7694
149	0.7704
149.1	0.7708
149.2	0.7716
149.3	0.7722
149.4	0.773
149.5	0.7726
149.6	0.7724
149.7	0.7716
149.8	0.7718
149.9	0.7726
150	0.7732
150.1	0.7726
150.2	0.7724
150.3	0.7716
150.4	0.7704
150.5	0.7702
150.6	0.7714
150.7	0.7722
150.8	0.7726
150.9	0.7742
151	0.7748
151.1	0.7766
151.2	0.7762
151.3	0.7762
151.4	0.7772
151.5	0.7784
151.6	0.7782
151.7	0.778
151.8	0.7782
151.9	0.7786
152	0.779
152.1	0.7794
152.2	0.7792
152.3	0.7786
152.4	0.7776
152.5	0.778
152.6	0.7784
152.7	0.7782
152.8	0.779
152.9	0.779
153	0.7794
153.1	0.7792
153.2	0.7792
153.3	0.7786
153.4	0.779
153.5	0.7776
153.6	0.7784
153.7	0.778
153.8	0.7782
153.9	0.7784
154	0.778
154.1	0.7776
154.2	0.7782
154.3	0.7776
154.4	0.7784
154.5	0.7784
154.6	0.7798
154.7	0.78
154.8	0.7812
154.9	0.7818
155	0.7818
155.1	0.7824
155.2	0.7818
155.3	0.7816
155.4	0.7818
155.5	0.7822
155.6	0.783
155.7	0.7836
155.8	0.7826
155.9	0.7824
156	0.7826
156.1	0.7824
156.2	0.7824
156.3	0.7818
156.4	0.7832
156.5	0.7822
156.6	0.783
156.7	0.7834
156.8	0.7846
156.9	0.7846
157	0.786
157.1	0.7856
157.2	0.7864
157.3	0.7874
157.4	0.7872
157.5	0.7868
157.6	0.787
157.7	0.7876
157.8	0.7876
157.9	0.7876
158	0.7876
158.1	0.7872
158.2	0.7882
158.3	0.7888
158.4	0.789
158.5	0.7894
158.6	0.7892
158.7	0.788
158.8	0.7882
158.9	0.7882
159	0.7892
159.1	0.79
159.2	0.7902
159.3	0.7906
159.4	0.7902
159.5	0.7912
159.6	0.7916
159.7	0.7924
159.8	0.7914
159.9	0.7916
160	0.7926
160.1	0.793
160.2	0.7928
160.3	0.7946
160.4	0.7936
160.5	0.7948
160.6	0.7946
160.7	0.7948
160.8	0.7958
160.9	0.7958
161	0.7964
161.1	0.7968
161.2	0.797
161.3	0.798
161.4	0.7986
161.5	0.7984
161.6	0.7988
161.7	0.8004
161.8	0.8
161.9	0.8
162	0.7992
162.1	0.7998
162.2	0.8
162.3	0.7996
162.4	0.8
162.5	0.8
162.6	0.8008
162.7	0.8008
162.8	0.8014
162.9	0.8012
163	0.8002
163.1	0.8006
163.2	0.8004
163.3	0.8004
163.4	0.8012
163.5	0.8012
163.6	0.8014
163.7	0.802
163.8	0.8022
163.9	0.803
164	0.8034
164.1	0.803
164.2	0.803
164.3	0.8032
164.4	0.8028
164.5	0.8022
164.6	0.8014
164.7	0.8012
164.8	0.8016
164.9	0.8022
165	0.8034
165.1	0.804
165.2	0.8048
165.3	0.8044
165.4	0.8044
165.5	0.8036
165.6	0.8034
165.7	0.8038
165.8	0.8048
165.9	0.8044
166	0.8054
166.1	0.8054
166.2	0.8066
166.3	0.8072
166.4	0.8072
166.5	0.8078
166.6	0.8084
166.7	0.8088
166.8	0.8086
166.9	0.809
167	0.8102
167.1	0.8106
167.2	0.811
167.3	0.8114
167.4	0.812
167.5	0.812
167.6	0.812
167.7	0.8112
167.8	0.8108
167.9	0.811
168	0.8116
168.1	0.8116
168.2	0.811
168.3	0.811
168.4	0.8122
168.5	0.812
168.6	0.8126
168.7	0.8126
168.8	0.8128
168.9	0.8124
169	0.8114
169.1	0.8118
169.2	0.8112
169.3	0.812
169.4	0.8122
169.5	0.813
169.6	0.8124
169.7	0.8128
169.8	0.8126
169.9	0.8134
170	0.8138
170.1	0.8142
170.2	0.8144
170.3	0.8142
170.4	0.8144
170.5	0.8146
170.6	0.8142
170.7	0.8154
170.8	0.8162
170.9	0.8158
171	0.8148
171.1	0.8156
171.2	0.8156
171.3	0.816
171.4	0.8164
171.5	0.8166
171.6	0.8158
171.7	0.8156
171.8	0.8156
171.9	0.8142
172	0.8144
172.1	0.8148
172.2	0.8152
172.3	0.8152
172.4	0.8148
172.5	0.8152
172.6	0.8146
172.7	0.816
172.8	0.8156
172.9	0.8154
173	0.815
173.1	0.8152
173.2	0.8154
173.3	0.8158
173.4	0.8158
173.5	0.816
173.6	0.8162
173.7	0.8168
173.8	0.8172
173.9	0.817
174	0.8166
174.1	0.8168
174.2	0.8168
174.3	0.816
174.4	0.8154
174.5	0.8158
174.6	0.8152
174.7	0.8158
174.8	0.817
174.9	0.8174
175	0.8162
175.1	0.816
175.2	0.8154
175.3	0.8156
175.4	0.8162
175.5	0.8164
175.6	0.8172
175.7	0.8168
175.8	0.8176
175.9	0.817
176	0.8176
176.1	0.817
176.2	0.8166
176.3	0.8162
176.4	0.8158
176.5	0.8164
176.6	0.8172
176.7	0.818
176.8	0.8182
176.9	0.8186
177	0.8176
177.1	0.8186
177.2	0.8192
177.3	0.82
177.4	0.8202
177.5	0.82
177.6	0.8202
177.7	0.819
177.8	0.8184
177.9	0.8182
178	0.8186
178.1	0.8184
178.2	0.8182
178.3	0.8182
178.4	0.819
178.5	0.8188
178.6	0.819
178.7	0.82
178.8	0.8204
178.9	0.8204
179	0.8202
179.1	0.8208
179.2	0.819
179.3	0.818
179.4	0.8178
179.5	0.8172
179.6	0.8176
179.7	0.8182
179.8	0.8186
179.9	0.8178
180	0.818
180.1	0.818
180.2	0.8184
180.3	0.819
180.4	0.8192
180.5	0.8192
180.6	0.82
180.7	0.8194
180.8	0.8192
180.9	0.8198
181	0.8204
181.1	0.8194
181.2	0.8198
181.3	0.8196
181.4	0.8196
181.5	0.819
181.6	0.8202
181.7	0.8206
181.8	0.8216
181.9	0.8214
182	0.8214
182.1	0.822
182.2	0.8206
182.3	0.8206
182.4	0.8204
182.5	0.8208
182.6	0.8196
182.7	0.8202
182.8	0.8204
182.9	0.8196
183	0.8212
183.1	0.821
183.2	0.8208
183.3	0.8206
183.4	0.821
183.5	0.821
183.6	0.8214
183.7	0.821
183.8	0.8212
183.9	0.821
184	0.8212
184.1	0.8208
184.2	0.8216
184.3	0.8212
184.4	0.8212
184.5	0.8214
184.6	0.8204
184.7	0.8206
184.8	0.8204
184.9	0.8196
185	0.819
185.1	0.8194
185.2	0.8194
185.3	0.8196
185.4	0.8208
185.5	0.8208
185.6	0.8218
185.7	0.8224
185.8	0.822
185.9	0.8232
186	0.8232
186.1	0.8224
186.2	0.8214
186.3	0.8214
186.4	0.8224
186.5	0.8218
186.6	0.8212
186.7	0.8206
186.8	0.8212
186.9	0.822
187	0.8216
187.1	0.8216
187.2	0.8222
187.3	0.822
187.4	0.8208
187.5	0.8206
187.6	0.8204
187.7	0.8212
187.8	0.8216
187.9	0.8226
188	0.8226
188.1	0.8222
188.2	0.8226
188.3	0.8224
188.4	0.8226
188.5	0.8218
188.6	0.8214
188.7	0.8214
188.8	0.8232
188.9	0.8238
189	0.824
189.1	0.8234
189.2	0.8228
189.3	0.8228
189.4	0.8224
189.5	0.8228
189.6	0.8234
189.7	0.8226
189.8	0.8228
189.9	0.823
190	0.8226
190.1	0.8214
190.2	0.821
190.3	0.8206
190.4	0.8206
190.5	0.8204
190.6	0.8206
190.7	0.8218
190.8	0.8224
190.9	0.8224
191	0.8224
191.1	0.822
191.2	0.8218
191.3	0.8228
191.4	0.8234
191.5	0.8226
191.6	0.8218
191.7	0.822
191.8	0.8224
191.9	0.8228
192	0.8236
192.1	0.8238
192.2	0.8242
192.3	0.8244
192.4	0.8248
192.5	0.8238
192.6	0.8234
192.7	0.8236
192.8	0.8238
192.9	0.824
193	0.8238
193.1	0.824
193.2	0.8252
193.3	0.8248
193.4	0.825
193.5	0.8252
193.6	0.8262
193.7	0.8272
193.8	0.8274
193.9	0.827
194	0.8278
194.1	0.8276
194.2	0.8276
194.3	0.8276
194.4	0.8276
194.5	0.8264
194.6	0.8264
194.7	0.8272
194.8	0.8274
194.9	0.8276
195	0.8274
195.1	0.8268
195.2	0.8272
195.3	0.8266
195.4	0.827
195.5	0.8262
195.6	0.8266
195.7	0.8268
195.8	0.8264
195.9	0.8264
196	0.8264
196.1	0.8264
196.2	0.8256
196.3	0.8262
196.4	0.8258
196.5	0.8258
196.6	0.8254
196.7	0.825
196.8	0.825
196.9	0.8254
197	0.8254
197.1	0.825
197.2	0.8248
197.3	0.8248
197.4	0.8248
197.5	0.8246
197.6	0.824
197.7	0.8238
197.8	0.8232
197.9	0.823
198	0.8228
198.1	0.8228
198.2	0.8232
198.3	0.8236
198.4	0.8226
198.5	0.823
198.6	0.8226
198.7	0.8222
198.8	0.8222
198.9	0.822
199	0.8222
199.1	0.8222
199.2	0.8226
199.3	0.8222
199.4	0.8212
199.5	0.8214
199.6	0.8224
199.7	0.8222
199.8	0.8214
199.9	0.8216
200	0.8214
[truncated: 14,000 more rows]
