# Supplementary material for: Bayesian inference of kinetic schemes for ion channels by Kalman filtering
Source: eLife journal article supplement (doi:10.7554/elife.62714), 2022-05-04
Supplement: fig4-data1 [file 1_Sim_N_6000_Fluor_MW_16M.xlsx]

## Sheet: Tabelle1
0.1	0
0.2	0
0.3	0
0.4	0
0.5	0
0.6	0
0.7	0
0.8	0
0.9	0
1	0
1.1	0
1.2	0
1.3	0
1.4	0
1.5	0
1.6	0
1.7	0
1.8	0
1.9	0
2	0
2.1	0
2.2	0
2.3	0
2.4	0
2.5	0
2.6	0
2.7	0
2.8	0
2.9	0
3	0
3.1	0
3.2	0
3.3	0
3.4	0
3.5	0
3.6	0
3.7	0
3.8	0
3.9	0
4	0
4.1	0
4.2	0
4.3	0
4.4	0
4.5	0
4.6	0
4.7	0
4.8	0
4.9	0
5	0
5.1	0
5.2	0
5.3	0
5.4	0
5.5	0
5.6	0
5.7	0
5.8	0
5.9	0
6	0
6.1	0
6.2	0
6.3	0
6.4	0
6.5	0
6.6	0
6.7	0
6.8	0
6.9	0
7	0
7.1	0
7.2	0
7.3	0
7.4	0
7.5	0
7.6	0
7.7	0
7.8	0
7.9	0
8	0
8.1	0
8.2	0
8.3	0
8.4	0
8.5	0
8.6	0
8.7	0
8.8	0
8.9	0
9	0
9.1	0
9.2	0
9.3	0
9.4	0
9.5	0
9.6	0
9.7	0
9.8	0
9.9	0
10	0
10.1	0
10.2	0
10.3	0
10.4	0
10.5	0
10.6	0
10.7	0
10.8	0
10.9	0
11	0
11.1	0
11.2	0
11.3	0
11.4	0
11.5	0
11.6	0
11.7	0
11.8	0
11.9	0
12	0
12.1	0
12.2	0
12.3	0
12.4	0
12.5	0
12.6	0
12.7	0
12.8	0
12.9	0
13	0
13.1	0
13.2	0
13.3	0
13.4	0
13.5	0
13.6	0
13.7	0
13.8	0
13.9	0
14	0
14.1	0
14.2	0
14.3	0
14.4	0
14.5	0
14.6	0
14.7	0
14.8	0
14.9	0
15	0
15.1	0
15.2	0
15.3	0
15.4	0
15.5	0
15.6	0
15.7	0
15.8	0
15.9	0
16	0
16.1	0
16.2	0
16.3	0
16.4	0
16.5	0
16.6	0
16.7	0
16.8	0
16.9	0
17	0
17.1	0
17.2	0
17.3	0
17.4	0
17.5	0
17.6	0
17.7	0
17.8	0
17.9	0
18	0
18.1	0
18.2	0
18.3	0
18.4	0
18.5	0
18.6	0
18.7	0
18.8	0
18.9	0
19	0
19.1	0
19.2	0
19.3	0
19.4	0
19.5	0
19.6	0
19.7	0
19.8	0
19.9	0
20	0
20.1	0
20.2	0
20.3	0
20.4	0
20.5	0
20.6	0
20.7	0
20.8	0
20.9	0
21	0
21.1	0
21.2	0
21.3	0
21.4	0
21.5	0
21.6	0
21.7	0
21.8	0
21.9	0
22	0
22.1	0
22.2	0
22.3	0
22.4	0
22.5	0
22.6	0
22.7	0
22.8	0
22.9	0
23	0
23.1	0
23.2	0
23.3	0
23.4	0
23.5	0
23.6	0
23.7	0
23.8	0
23.9	0
24	0
24.1	0
24.2	0
24.3	0
24.4	0
24.5	0
24.6	0
24.7	0
24.8	0
24.9	0
25	0
25.1	0
25.2	0
25.3	0
25.4	0
25.5	0
25.6	0
25.7	0
25.8	0
25.9	0
26	0
26.1	0
26.2	0
26.3	0
26.4	0
26.5	0
26.6	0
26.7	0
26.8	0
26.9	0
27	0
27.1	0
27.2	0
27.3	0
27.4	0
27.5	0
27.6	0
27.7	0
27.8	0
27.9	0
28	0
28.1	0
28.2	0
28.3	0
28.4	0
28.5	0
28.6	0
28.7	0
28.8	0
28.9	0
29	0
29.1	0
29.2	0
29.3	0
29.4	0
29.5	0
29.6	0
29.7	0
29.8	0
29.9	0
30	0
30.1	0
30.2	0
30.3	0
30.4	0
30.5	0
30.6	0
30.7	0
30.8	0
30.9	0
31	0
31.1	0
31.2	0
31.3	0
31.4	0
31.5	0
31.6	0
31.7	0
31.8	0
31.9	0
32	0
32.1	0
32.2	0
32.3	0
32.4	0
32.5	0
32.6	0
32.7	0
32.8	0
32.9	0
33	0
33.1	0
33.2	0
33.3	0
33.4	0
33.5	0
33.6	0
33.7	0
33.8	0
33.9	0
34	0
34.1	0
34.2	0
34.3	0
34.4	0
34.5	0
34.6	0
34.7	0
34.8	0
34.9	0
35	0
35.1	0
35.2	0
35.3	0
35.4	0
35.5	0
35.6	0
35.7	0
35.8	0
35.9	0
36	0
36.1	0
36.2	0
36.3	0
36.4	0
36.5	0
36.6	0
36.7	0
36.8	0
36.9	0
37	0
37.1	0
37.2	0
37.3	0
37.4	0
37.5	0
37.6	0
37.7	0
37.8	0
37.9	0
38	0
38.1	0
38.2	0
38.3	0
38.4	0
38.5	0
38.6	0
38.7	0
38.8	0
38.9	0
39	0
39.1	0
39.2	0
39.3	0
39.4	0
39.5	0
39.6	0
39.7	0
39.8	0
39.9	0
40	0
40.1	0
40.2	0
40.3	0
40.4	0
40.5	0
40.6	0
40.7	0
40.8	0
40.9	0
41	0
41.1	0
41.2	0
41.3	0
41.4	0
41.5	0
41.6	0
41.7	0
41.8	0
41.9	0
42	0
42.1	0
42.2	0
42.3	0
42.4	0
42.5	0
42.6	0
42.7	0
42.8	0
42.9	0
43	0
43.1	0
43.2	0
43.3	0
43.4	0
43.5	0
43.6	0
43.7	0
43.8	0
43.9	0
44	0
44.1	0
44.2	0
44.3	0
44.4	0
44.5	0
44.6	0
44.7	0
44.8	0
44.9	0
45	0
45.1	0
45.2	0
45.3	0
45.4	0
45.5	0
45.6	0
45.7	0
45.8	0
45.9	0
46	0
46.1	0
46.2	0
46.3	0
46.4	0
46.5	0
46.6	0
46.7	0
46.8	0
46.9	0
47	0
47.1	0
47.2	0
47.3	0
47.4	0
47.5	0
47.6	0
47.7	0
47.8	0
47.9	0
48	0
48.1	0
48.2	0
48.3	0
48.4	0
48.5	0
48.6	0
48.7	0
48.8	0
48.9	0
49	0
49.1	0
49.2	0
49.3	0
49.4	0
49.5	0
49.6	0
49.7	0
49.8	0
49.9	0
50	0
50.1	0
50.2	0
50.3	0
50.4	0
50.5	0
50.6	0
50.7	0
50.8	0
50.9	0
51	0
51.1	0
51.2	0
51.3	0
51.4	0
51.5	0
51.6	0
51.7	0
51.8	0
51.9	0
52	0
52.1	0
52.2	0
52.3	0
52.4	0
52.5	0
52.6	0
52.7	0
52.8	0
52.9	0
53	0
53.1	0
53.2	0
53.3	0
53.4	0
53.5	0
53.6	0
53.7	0
53.8	0
53.9	0
54	0
54.1	0
54.2	0
54.3	0
54.4	0
54.5	0
54.6	0
54.7	0
54.8	0
54.9	0
55	0
55.1	0
55.2	0
55.3	0
55.4	0
55.5	0
55.6	0
55.7	0
55.8	0
55.9	0
56	0
56.1	0
56.2	0
56.3	0
56.4	0
56.5	0
56.6	0
56.7	0
56.8	0
56.9	0
57	0
57.1	0
57.2	0
57.3	0
57.4	0
57.5	0
57.6	0
57.7	0
57.8	0
57.9	0
58	0
58.1	0
58.2	0
58.3	0
58.4	0
58.5	0
58.6	0
58.7	0
58.8	0
58.9	0
59	0
59.1	0
59.2	0
59.3	0
59.4	0
59.5	0
59.6	0
59.7	0
59.8	0
59.9	0
60	0
60.1	0
60.2	0
60.3	0
60.4	0
60.5	0
60.6	0
60.7	0
60.8	0
60.9	0
61	0
61.1	0
61.2	0
61.3	0
61.4	0
61.5	0
61.6	0
61.7	0
61.8	0
61.9	0
62	0
62.1	0
62.2	0
62.3	0
62.4	0
62.5	0
62.6	0
62.7	0
62.8	0
62.9	0
63	0
63.1	0
63.2	0
63.3	0
63.4	0
63.5	0
63.6	0
63.7	0
63.8	0
63.9	0
64	0
64.1	0
64.2	0
64.3	0
64.4	0
64.5	0
64.6	0
64.7	0
64.8	0
64.9	0
65	0
65.1	0
65.2	0
65.3	0
65.4	0
65.5	0
65.6	0
65.7	0
65.8	0
65.9	0
66	0
66.1	0
66.2	0
66.3	0
66.4	0
66.5	0
66.6	0
66.7	0
66.8	0
66.9	0
67	0
67.1	0
67.2	0
67.3	0
67.4	0
67.5	0
67.6	0
67.7	0
67.8	0
67.9	0
68	0
68.1	0
68.2	0
68.3	0
68.4	0
68.5	0
68.6	0
68.7	0
68.8	0
68.9	0
69	0
69.1	0
69.2	0
69.3	0
69.4	0
69.5	0
69.6	0
69.7	0
69.8	0
69.9	0
70	0
70.1	0
70.2	0
70.3	0
70.4	0
70.5	0
70.6	0
70.7	0
70.8	0
70.9	0
71	0
71.1	0
71.2	0
71.3	0
71.4	0
71.5	0
71.6	0
71.7	0
71.8	0
71.9	0
72	0
72.1	0
72.2	0
72.3	0
72.4	0
72.5	0
72.6	0
72.7	0
72.8	0
72.9	0
73	0
73.1	0
73.2	0
73.3	0
73.4	0
73.5	0
73.6	0
73.7	0
73.8	0
73.9	0
74	0
74.1	0
74.2	0
74.3	0
74.4	0
74.5	0
74.6	0
74.7	0
74.8	0
74.9	0
75	0
75.1	0
75.2	0
75.3	0
75.4	0
75.5	0
75.6	0
75.7	0
75.8	0
75.9	0
76	0
76.1	0
76.2	0
76.3	0
76.4	0
76.5	0
76.6	0
76.7	0
76.8	0
76.9	0
77	0
77.1	0
77.2	0
77.3	0
77.4	0
77.5	0
77.6	0
77.7	0
77.8	0
77.9	0
78	0
78.1	0
78.2	0
78.3	0
78.4	0
78.5	0
78.6	0
78.7	0
78.8	0
78.9	0
79	0
79.1	0
79.2	0
79.3	0
79.4	0
79.5	0
79.6	0
79.7	0
79.8	0
79.9	0
80	0
80.1	0
80.2	0
80.3	0
80.4	0
80.5	0
80.6	0
80.7	0
80.8	0
80.9	0
81	0
81.1	0
81.2	0
81.3	0
81.4	0
81.5	0
81.6	0
81.7	0
81.8	0
81.9	0
82	0
82.1	0
82.2	0
82.3	0
82.4	0
82.5	0
82.6	0
82.7	0
82.8	0
82.9	0
83	0
83.1	0
83.2	0
83.3	0
83.4	0
83.5	0
83.6	0
83.7	0
83.8	0
83.9	0
84	0
84.1	0
84.2	0
84.3	0
84.4	0
84.5	0
84.6	0
84.7	0
84.8	0
84.9	0
85	0
85.1	0
85.2	0
85.3	0
85.4	0
85.5	0
85.6	0
85.7	0
85.8	0
85.9	0
86	0
86.1	0
86.2	0
86.3	0
86.4	0
86.5	0
86.6	0
86.7	0
86.8	0
86.9	0
87	0
87.1	0
87.2	0
87.3	0
87.4	0
87.5	0
87.6	0
87.7	0
87.8	0
87.9	0
88	0
88.1	0
88.2	0
88.3	0
88.4	0
88.5	0
88.6	0
88.7	0
88.8	0
88.9	0
89	0
89.1	0
89.2	0
89.3	0
89.4	0
89.5	0
89.6	0
89.7	0
89.8	0
89.9	0
90	0
90.1	0
90.2	0
90.3	0
90.4	0
90.5	0
90.6	0
90.7	0
90.8	0
90.9	0
91	0
91.1	0
91.2	0
91.3	0
91.4	0
91.5	0
91.6	0
91.7	0
91.8	0
91.9	0
92	0
92.1	0
92.2	0
92.3	0
92.4	0
92.5	0
92.6	0
92.7	0
92.8	0
92.9	0
93	0
93.1	0
93.2	0
93.3	0
93.4	0
93.5	0
93.6	0
93.7	0
93.8	0
93.9	0
94	0
94.1	0
94.2	0
94.3	0
94.4	0
94.5	0
94.6	0
94.7	0
94.8	0
94.9	0
95	0
95.1	0
95.2	0
95.3	0
95.4	0
95.5	0
95.6	0
95.7	0
95.8	0
95.9	0
96	0
96.1	0
96.2	0
96.3	0
96.4	0
96.5	0
96.6	0
96.7	0
96.8	0
96.9	0
97	0
97.1	0
97.2	0
97.3	0
97.4	0
97.5	0
97.6	0
97.7	0
97.8	0
97.9	0
98	0
98.1	0
98.2	0
98.3	0
98.4	0
98.5	0
98.6	0
98.7	0
98.8	0
98.9	0
99	0
99.1	0
99.2	0
99.3	0
99.4	0
99.5	0
99.6	0
99.7	0
99.8	0
99.9	0
100	0
100.1	0.531333
100.2	0.725917
100.3	0.8215
100.4	0.871833
100.5	0.9055
100.6	0.928667
100.7	0.9385
100.8	0.94075
100.9	0.947167
101	0.94775
101.1	0.948833
101.2	0.950917
101.3	0.95525
101.4	0.9555
101.5	0.9545
101.6	0.955083
101.7	0.956833
101.8	0.956833
101.9	0.955583
102	0.955667
102.1	0.952917
102.2	0.955
102.3	0.956
102.4	0.957667
102.5	0.959167
102.6	0.957417
102.7	0.959417
102.8	0.95875
102.9	0.957
103	0.95575
103.1	0.958667
103.2	0.956917
103.3	0.95975
103.4	0.958917
103.5	0.958
103.6	0.960333
103.7	0.960583
103.8	0.960667
103.9	0.95925
104	0.961667
104.1	0.957333
104.2	0.959
104.3	0.961083
104.4	0.965583
104.5	0.962833
104.6	0.961333
104.7	0.960583
104.8	0.961917
104.9	0.963
105	0.959917
105.1	0.959167
105.2	0.96
105.3	0.96025
105.4	0.960833
105.5	0.959333
105.6	0.962333
105.7	0.9635
105.8	0.961833
105.9	0.963833
106	0.961917
106.1	0.961333
106.2	0.962917
106.3	0.961833
106.4	0.9625
106.5	0.960667
106.6	0.962667
106.7	0.962417
106.8	0.963167
106.9	0.964583
107	0.966917
107.1	0.965
107.2	0.963333
107.3	0.9655
107.4	0.966
107.5	0.96375
107.6	0.964917
107.7	0.963083
107.8	0.965417
107.9	0.964417
108	0.964833
108.1	0.967
108.2	0.96775
108.3	0.968083
108.4	0.967167
108.5	0.968083
108.6	0.968833
108.7	0.969917
108.8	0.968083
108.9	0.966667
109	0.967083
109.1	0.966667
109.2	0.965833
109.3	0.966167
109.4	0.964667
109.5	0.96525
109.6	0.9655
109.7	0.968083
109.8	0.968083
109.9	0.969667
110	0.9715
110.1	0.970917
110.2	0.971333
110.3	0.969917
110.4	0.971
110.5	0.969917
110.6	0.969
110.7	0.968667
110.8	0.969833
110.9	0.96975
111	0.969667
111.1	0.969833
111.2	0.970833
111.3	0.969167
111.4	0.968917
111.5	0.969083
111.6	0.971167
111.7	0.969917
111.8	0.971583
111.9	0.970333
112	0.972333
112.1	0.971417
112.2	0.969417
112.3	0.967917
112.4	0.968167
112.5	0.968917
112.6	0.968833
112.7	0.97075
112.8	0.97125
112.9	0.970833
113	0.97125
113.1	0.971917
113.2	0.973167
113.3	0.97325
113.4	0.971667
113.5	0.971667
113.6	0.972583
113.7	0.973333
113.8	0.970417
113.9	0.971917
114	0.972583
114.1	0.973417
114.2	0.974583
114.3	0.973083
114.4	0.973917
114.5	0.9725
114.6	0.974167
114.7	0.973333
114.8	0.972167
114.9	0.972333
115	0.973083
115.1	0.97075
115.2	0.973417
115.3	0.974833
115.4	0.975417
115.5	0.97625
115.6	0.975167
115.7	0.97525
115.8	0.97625
115.9	0.974
116	0.975917
116.1	0.976917
116.2	0.9765
116.3	0.976
116.4	0.9735
116.5	0.974667
116.6	0.973833
116.7	0.9755
116.8	0.972333
116.9	0.97375
117	0.97375
117.1	0.972667
117.2	0.9725
117.3	0.973417
117.4	0.975167
117.5	0.973667
117.6	0.974417
117.7	0.9745
117.8	0.975
117.9	0.975583
118	0.974583
118.1	0.974833
118.2	0.976167
118.3	0.977667
118.4	0.977417
118.5	0.975583
118.6	0.977417
118.7	0.977333
118.8	0.978
118.9	0.977667
119	0.978417
119.1	0.977167
119.2	0.976333
119.3	0.977083
119.4	0.977417
119.5	0.978833
119.6	0.977833
119.7	0.976583
119.8	0.9775
119.9	0.97575
120	0.978417
120.1	0.97675
120.2	0.97825
120.3	0.977167
120.4	0.977917
120.5	0.978667
120.6	0.977917
120.7	0.978167
120.8	0.977167
120.9	0.977667
121	0.978583
121.1	0.979833
121.2	0.979667
121.3	0.98
121.4	0.980583
121.5	0.979583
121.6	0.980917
121.7	0.981083
121.8	0.980667
121.9	0.978917
122	0.980167
122.1	0.978917
122.2	0.980833
122.3	0.97775
122.4	0.979
122.5	0.978167
122.6	0.977833
122.7	0.9785
122.8	0.979583
122.9	0.97975
123	0.979167
123.1	0.981833
123.2	0.981
123.3	0.981083
123.4	0.978667
123.5	0.979667
123.6	0.9815
123.7	0.980083
123.8	0.980417
123.9	0.982
124	0.981333
124.1	0.983
124.2	0.98225
124.3	0.98225
124.4	0.981417
124.5	0.98125
124.6	0.9795
124.7	0.9785
124.8	0.97925
124.9	0.98125
125	0.981083
125.1	0.980583
125.2	0.9805
125.3	0.9805
125.4	0.980917
125.5	0.98225
125.6	0.983667
125.7	0.98175
125.8	0.981333
125.9	0.981667
126	0.981333
126.1	0.981167
126.2	0.980417
126.3	0.981667
126.4	0.981333
126.5	0.979417
126.6	0.982
126.7	0.982667
126.8	0.98175
126.9	0.98125
127	0.981
127.1	0.982167
127.2	0.981917
127.3	0.981667
127.4	0.982833
127.5	0.98425
127.6	0.983417
127.7	0.982167
127.8	0.981583
127.9	0.98225
128	0.984083
128.1	0.983583
128.2	0.9855
128.3	0.984417
128.4	0.985083
128.5	0.98425
128.6	0.984333
128.7	0.98475
128.8	0.983417
128.9	0.980583
129	0.983667
129.1	0.983333
129.2	0.983417
129.3	0.984333
129.4	0.986083
129.5	0.985417
129.6	0.98425
129.7	0.983417
129.8	0.983583
129.9	0.983083
130	0.982583
130.1	0.984
130.2	0.984833
130.3	0.9845
130.4	0.984333
130.5	0.983667
130.6	0.983417
130.7	0.982333
130.8	0.9815
130.9	0.9835
131	0.983833
131.1	0.98325
131.2	0.98325
131.3	0.983333
131.4	0.984083
131.5	0.982833
131.6	0.982667
131.7	0.984333
131.8	0.983333
131.9	0.98425
132	0.984167
132.1	0.984583
132.2	0.983667
132.3	0.983667
132.4	0.984917
132.5	0.985583
132.6	0.984667
132.7	0.985083
132.8	0.985917
132.9	0.9845
133	0.983083
133.1	0.98525
133.2	0.985917
133.3	0.985417
133.4	0.986083
133.5	0.985417
133.6	0.986
133.7	0.987583
133.8	0.98525
133.9	0.985667
134	0.985167
134.1	0.986
134.2	0.98725
134.3	0.984333
134.4	0.98425
134.5	0.985
134.6	0.98575
134.7	0.98525
134.8	0.986167
134.9	0.9855
135	0.985833
135.1	0.986667
135.2	0.9855
135.3	0.98525
135.4	0.985417
135.5	0.984917
135.6	0.985667
135.7	0.986333
135.8	0.985667
135.9	0.983583
136	0.984667
136.1	0.98475
136.2	0.9845
136.3	0.985167
136.4	0.986833
136.5	0.9865
136.6	0.986667
136.7	0.98675
136.8	0.986167
136.9	0.9875
137	0.988583
137.1	0.987667
137.2	0.9875
137.3	0.987083
137.4	0.986333
137.5	0.9865
137.6	0.986917
137.7	0.987167
137.8	0.986083
137.9	0.985083
138	0.986167
138.1	0.986667
138.2	0.988417
138.3	0.986417
138.4	0.985333
138.5	0.986
138.6	0.986667
138.7	0.987167
138.8	0.986083
138.9	0.98625
139	0.986417
139.1	0.987667
139.2	0.98725
139.3	0.986917
139.4	0.984833
139.5	0.985667
139.6	0.985
139.7	0.984167
139.8	0.98575
139.9	0.985833
140	0.986667
140.1	0.988083
140.2	0.988667
140.3	0.987583
140.4	0.985167
140.5	0.98525
140.6	0.985333
140.7	0.98675
140.8	0.98725
140.9	0.986917
141	0.98675
141.1	0.987167
141.2	0.98625
141.3	0.986583
141.4	0.98525
141.5	0.984667
141.6	0.98425
141.7	0.984583
141.8	0.985583
141.9	0.985833
142	0.987
142.1	0.986333
142.2	0.985833
142.3	0.987083
142.4	0.9895
142.5	0.988667
142.6	0.98925
142.7	0.989333
142.8	0.989167
142.9	0.988833
143	0.98825
143.1	0.987583
143.2	0.987833
143.3	0.987
143.4	0.987333
143.5	0.9875
143.6	0.988
143.7	0.987167
143.8	0.988167
143.9	0.987333
144	0.988
144.1	0.989167
144.2	0.988583
144.3	0.988917
144.4	0.988083
144.5	0.98875
144.6	0.9895
144.7	0.988083
144.8	0.987583
144.9	0.988417
145	0.98775
145.1	0.985417
145.2	0.986917
145.3	0.987083
145.4	0.986583
145.5	0.987417
145.6	0.988583
145.7	0.987417
145.8	0.988167
145.9	0.98825
146	0.988
146.1	0.98875
146.2	0.9885
146.3	0.989083
146.4	0.987917
146.5	0.9875
146.6	0.98775
146.7	0.98875
146.8	0.988
146.9	0.989417
147	0.990083
147.1	0.990167
147.2	0.990167
147.3	0.99
147.4	0.989417
147.5	0.98875
147.6	0.988333
147.7	0.989
147.8	0.989167
147.9	0.988583
148	0.98825
148.1	0.98825
148.2	0.988833
148.3	0.988667
148.4	0.9885
148.5	0.988917
148.6	0.9895
148.7	0.988667
148.8	0.990333
148.9	0.9895
149	0.988667
149.1	0.98825
149.2	0.988
149.3	0.989
149.4	0.989083
149.5	0.989417
149.6	0.989
149.7	0.989333
149.8	0.9895
149.9	0.989083
150	0.98975
150.1	0.989417
150.2	0.99
150.3	0.989417
150.4	0.98975
150.5	0.98975
150.6	0.989333
150.7	0.988667
150.8	0.989167
150.9	0.99
151	0.989167
151.1	0.98875
151.2	0.98925
151.3	0.990167
151.4	0.9905
151.5	0.989417
151.6	0.989667
151.7	0.989083
151.8	0.98875
151.9	0.988083
152	0.988583
152.1	0.987583
152.2	0.987667
152.3	0.988083
152.4	0.988917
152.5	0.989
152.6	0.98925
152.7	0.98975
152.8	0.9875
152.9	0.988917
153	0.989167
153.1	0.990833
153.2	0.99
153.3	0.990583
153.4	0.989417
153.5	0.989583
153.6	0.990417
153.7	0.989333
153.8	0.989333
153.9	0.9885
154	0.987583
154.1	0.988417
154.2	0.987417
154.3	0.988167
154.4	0.988333
154.5	0.988167
154.6	0.98725
154.7	0.987333
154.8	0.987667
154.9	0.988417
155	0.988583
155.1	0.989917
155.2	0.9895
155.3	0.990083
155.4	0.98925
155.5	0.989833
155.6	0.98925
155.7	0.98925
155.8	0.989333
155.9	0.989583
156	0.989333
156.1	0.99075
156.2	0.990417
156.3	0.99
156.4	0.990083
156.5	0.990333
156.6	0.989333
156.7	0.990333
156.8	0.988583
156.9	0.988833
157	0.989
157.1	0.98975
157.2	0.991417
157.3	0.99075
157.4	0.990667
157.5	0.99
157.6	0.990667
157.7	0.990917
157.8	0.990167
157.9	0.99
158	0.99
158.1	0.98925
158.2	0.990083
158.3	0.989583
158.4	0.989
158.5	0.99
158.6	0.9895
158.7	0.99
158.8	0.98975
158.9	0.990083
159	0.98975
159.1	0.989333
159.2	0.988167
159.3	0.990167
159.4	0.989
159.5	0.989917
159.6	0.99
159.7	0.991417
159.8	0.991167
159.9	0.990667
160	0.990583
160.1	0.991583
160.2	0.9915
160.3	0.992333
160.4	0.991833
160.5	0.991167
160.6	0.99
160.7	0.990083
160.8	0.990167
160.9	0.991167
161	0.991417
161.1	0.991917
161.2	0.992
161.3	0.99025
161.4	0.989583
161.5	0.99025
161.6	0.991917
161.7	0.990083
161.8	0.9905
161.9	0.99025
162	0.989833
162.1	0.99025
162.2	0.988833
162.3	0.98975
162.4	0.989
162.5	0.99125
162.6	0.991667
162.7	0.990583
162.8	0.990583
162.9	0.989417
163	0.98975
163.1	0.989667
163.2	0.99075
163.3	0.990667
163.4	0.99075
163.5	0.990167
163.6	0.990167
163.7	0.990333
163.8	0.9905
163.9	0.991
164	0.99025
164.1	0.99
164.2	0.989167
164.3	0.989917
164.4	0.99025
164.5	0.990667
164.6	0.991417
164.7	0.990333
164.8	0.991083
164.9	0.99075
165	0.99125
165.1	0.9925
165.2	0.991917
165.3	0.991833
165.4	0.990167
165.5	0.989917
165.6	0.988667
165.7	0.989833
165.8	0.991
165.9	0.991167
166	0.99175
166.1	0.990917
166.2	0.99075
166.3	0.989917
166.4	0.990667
166.5	0.990917
166.6	0.990917
166.7	0.991333
166.8	0.991833
166.9	0.990583
167	0.98975
167.1	0.990167
167.2	0.990083
167.3	0.990583
167.4	0.990583
167.5	0.990583
167.6	0.990917
167.7	0.9905
167.8	0.990667
167.9	0.990333
168	0.990417
168.1	0.989417
168.2	0.989417
168.3	0.991333
168.4	0.989667
168.5	0.990583
168.6	0.990333
168.7	0.98925
168.8	0.9895
168.9	0.99
169	0.989583
169.1	0.989583
169.2	0.990167
169.3	0.989833
169.4	0.98975
169.5	0.989667
169.6	0.989417
169.7	0.989333
169.8	0.989833
169.9	0.988667
170	0.98975
170.1	0.98925
170.2	0.989917
170.3	0.989917
170.4	0.991
170.5	0.990083
170.6	0.9895
170.7	0.99
170.8	0.989833
170.9	0.990083
171	0.989167
171.1	0.990333
171.2	0.989333
171.3	0.98975
171.4	0.99
171.5	0.990583
171.6	0.989417
171.7	0.98925
171.8	0.9895
171.9	0.989583
172	0.989583
172.1	0.989083
172.2	0.989417
172.3	0.989917
172.4	0.991417
172.5	0.990417
172.6	0.98925
172.7	0.990167
172.8	0.99125
172.9	0.99
173	0.990083
173.1	0.989167
173.2	0.989583
173.3	0.99075
173.4	0.989083
173.5	0.9895
173.6	0.989667
173.7	0.989167
173.8	0.989917
173.9	0.990333
174	0.9895
174.1	0.990333
174.2	0.99025
174.3	0.99
174.4	0.991083
174.5	0.990083
174.6	0.989833
174.7	0.98925
174.8	0.988917
174.9	0.991583
175	0.990667
175.1	0.990417
175.2	0.990167
175.3	0.99025
175.4	0.98925
175.5	0.98875
175.6	0.990083
175.7	0.98925
175.8	0.990583
175.9	0.990833
176	0.990417
176.1	0.99075
176.2	0.991
176.3	0.9915
176.4	0.991667
176.5	0.990917
176.6	0.990833
176.7	0.989583
176.8	0.990917
176.9	0.991167
177	0.990667
177.1	0.992
177.2	0.990917
177.3	0.991833
177.4	0.991333
177.5	0.992
177.6	0.991
177.7	0.990417
177.8	0.991167
177.9	0.990417
178	0.991333
178.1	0.991
178.2	0.990417
178.3	0.991917
178.4	0.99025
178.5	0.991
178.6	0.991
178.7	0.989917
178.8	0.98975
178.9	0.990167
179	0.991
179.1	0.9905
179.2	0.990417
179.3	0.98875
179.4	0.9905
179.5	0.99025
179.6	0.98925
179.7	0.99025
179.8	0.99025
179.9	0.990667
180	0.98975
180.1	0.990167
180.2	0.9905
180.3	0.9895
180.4	0.99075
180.5	0.99
180.6	0.990417
180.7	0.991167
180.8	0.991833
180.9	0.991
181	0.99025
181.1	0.9895
181.2	0.988833
181.3	0.991
181.4	0.990917
181.5	0.990667
181.6	0.9905
181.7	0.99
181.8	0.988583
181.9	0.989417
182	0.98975
182.1	0.99025
182.2	0.988667
182.3	0.98975
182.4	0.990083
182.5	0.9905
182.6	0.991083
182.7	0.991833
182.8	0.990167
182.9	0.990833
183	0.991917
183.1	0.991333
183.2	0.991
183.3	0.990583
183.4	0.98975
183.5	0.98975
183.6	0.990167
183.7	0.991083
183.8	0.99075
183.9	0.9905
184	0.990167
184.1	0.989417
184.2	0.99025
184.3	0.990083
184.4	0.990833
184.5	0.990917
184.6	0.991417
184.7	0.991833
184.8	0.9915
184.9	0.99125
185	0.991
185.1	0.991333
185.2	0.991083
185.3	0.992583
185.4	0.9915
185.5	0.991083
185.6	0.991333
185.7	0.991583
185.8	0.99075
185.9	0.991417
186	0.991917
186.1	0.991167
186.2	0.99025
186.3	0.990833
186.4	0.992083
186.5	0.991
186.6	0.989917
186.7	0.989417
186.8	0.989917
186.9	0.988833
187	0.990417
187.1	0.990833
187.2	0.990083
187.3	0.989917
187.4	0.98925
187.5	0.98925
187.6	0.99125
187.7	0.98975
187.8	0.989667
187.9	0.990417
188	0.992167
188.1	0.991167
188.2	0.99075
188.3	0.990583
188.4	0.990417
188.5	0.99125
188.6	0.990667
188.7	0.990667
188.8	0.99
188.9	0.991333
189	0.99025
189.1	0.989333
189.2	0.989083
189.3	0.990833
189.4	0.990083
189.5	0.990167
189.6	0.9905
189.7	0.990667
189.8	0.989917
189.9	0.990917
190	0.989667
190.1	0.991083
190.2	0.99125
190.3	0.99125
190.4	0.990583
190.5	0.990417
190.6	0.991333
190.7	0.99
190.8	0.989417
190.9	0.989833
191	0.990333
191.1	0.98925
191.2	0.99
191.3	0.98975
191.4	0.9905
191.5	0.989167
191.6	0.990667
191.7	0.990417
191.8	0.990333
191.9	0.991667
192	0.991333
192.1	0.991667
192.2	0.993583
192.3	0.9925
192.4	0.991917
192.5	0.99075
192.6	0.99
192.7	0.9895
192.8	0.990417
192.9	0.99075
193	0.98975
193.1	0.990667
193.2	0.9905
193.3	0.990917
193.4	0.991167
193.5	0.990083
193.6	0.990917
193.7	0.99175
193.8	0.9915
193.9	0.99025
194	0.990333
194.1	0.9905
194.2	0.99025
194.3	0.99
194.4	0.989417
194.5	0.99
194.6	0.990667
194.7	0.990917
194.8	0.9905
194.9	0.991083
195	0.989583
195.1	0.990917
195.2	0.99075
195.3	0.990833
195.4	0.991583
195.5	0.992
195.6	0.99125
195.7	0.991417
195.8	0.989917
195.9	0.989917
196	0.990167
196.1	0.99075
196.2	0.99125
196.3	0.9905
196.4	0.990167
196.5	0.990083
196.6	0.989833
196.7	0.990833
196.8	0.9905
196.9	0.9905
197	0.990167
197.1	0.991417
197.2	0.989667
197.3	0.990333
197.4	0.9895
197.5	0.990417
197.6	0.99025
197.7	0.988417
197.8	0.990167
197.9	0.990833
198	0.991
198.1	0.990583
198.2	0.990667
198.3	0.990333
198.4	0.990333
198.5	0.990917
198.6	0.991
198.7	0.990583
198.8	0.990167
198.9	0.989917
199	0.990583
199.1	0.990083
199.2	0.99125
199.3	0.99075
199.4	0.990167
199.5	0.991167
199.6	0.99125
199.7	0.988917
199.8	0.9885
199.9	0.989833
200	0.990417
[truncated: 14,000 more rows]
