# Supplementary material for: Bayesian inference of kinetic schemes for ion channels by Kalman filtering
Source: eLife journal article supplement (doi:10.7554/elife.62714), 2022-05-04
Supplement: fig4-data1 [file 1_Sim_N_6000_Strom_MW_16M.xlsx]

## Sheet: Tabelle1
0.1	0
0.2	0
0.3	0
0.4	0
0.5	0
0.6	0
0.7	0
0.8	0
0.9	0
1	0
1.1	0
1.2	0
1.3	0
1.4	0
1.5	0
1.6	0
1.7	0
1.8	0
1.9	0
2	0
2.1	0
2.2	0
2.3	0
2.4	0
2.5	0
2.6	0
2.7	0
2.8	0
2.9	0
3	0
3.1	0
3.2	0
3.3	0
3.4	0
3.5	0
3.6	0
3.7	0
3.8	0
3.9	0
4	0
4.1	0
4.2	0
4.3	0
4.4	0
4.5	0
4.6	0
4.7	0
4.8	0
4.9	0
5	0
5.1	0
5.2	0
5.3	0
5.4	0
5.5	0
5.6	0
5.7	0
5.8	0
5.9	0
6	0
6.1	0
6.2	0
6.3	0
6.4	0
6.5	0
6.6	0
6.7	0
6.8	0
6.9	0
7	0
7.1	0
7.2	0
7.3	0
7.4	0
7.5	0
7.6	0
7.7	0
7.8	0
7.9	0
8	0
8.1	0
8.2	0
8.3	0
8.4	0
8.5	0
8.6	0
8.7	0
8.8	0
8.9	0
9	0
9.1	0
9.2	0
9.3	0
9.4	0
9.5	0
9.6	0
9.7	0
9.8	0
9.9	0
10	0
10.1	0
10.2	0
10.3	0
10.4	0
10.5	0
10.6	0
10.7	0
10.8	0
10.9	0
11	0
11.1	0
11.2	0
11.3	0
11.4	0
11.5	0
11.6	0
11.7	0
11.8	0
11.9	0
12	0
12.1	0
12.2	0
12.3	0
12.4	0
12.5	0
12.6	0
12.7	0
12.8	0
12.9	0
13	0
13.1	0
13.2	0
13.3	0
13.4	0
13.5	0
13.6	0
13.7	0
13.8	0
13.9	0
14	0
14.1	0
14.2	0
14.3	0
14.4	0
14.5	0
14.6	0
14.7	0
14.8	0
14.9	0
15	0
15.1	0
15.2	0
15.3	0
15.4	0
15.5	0
15.6	0
15.7	0
15.8	0
15.9	0
16	0
16.1	0
16.2	0
16.3	0
16.4	0
16.5	0
16.6	0
16.7	0
16.8	0
16.9	0
17	0
17.1	0
17.2	0
17.3	0
17.4	0
17.5	0
17.6	0
17.7	0
17.8	0
17.9	0
18	0
18.1	0
18.2	0
18.3	0
18.4	0
18.5	0
18.6	0
18.7	0
18.8	0
18.9	0
19	0
19.1	0
19.2	0
19.3	0
19.4	0
19.5	0
19.6	0
19.7	0
19.8	0
19.9	0
20	0
20.1	0
20.2	0
20.3	0
20.4	0
20.5	0
20.6	0
20.7	0
20.8	0
20.9	0
21	0
21.1	0
21.2	0
21.3	0
21.4	0
21.5	0
21.6	0
21.7	0
21.8	0
21.9	0
22	0
22.1	0
22.2	0
22.3	0
22.4	0
22.5	0
22.6	0
22.7	0
22.8	0
22.9	0
23	0
23.1	0
23.2	0
23.3	0
23.4	0
23.5	0
23.6	0
23.7	0
23.8	0
23.9	0
24	0
24.1	0
24.2	0
24.3	0
24.4	0
24.5	0
24.6	0
24.7	0
24.8	0
24.9	0
25	0
25.1	0
25.2	0
25.3	0
25.4	0
25.5	0
25.6	0
25.7	0
25.8	0
25.9	0
26	0
26.1	0
26.2	0
26.3	0
26.4	0
26.5	0
26.6	0
26.7	0
26.8	0
26.9	0
27	0
27.1	0
27.2	0
27.3	0
27.4	0
27.5	0
27.6	0
27.7	0
27.8	0
27.9	0
28	0
28.1	0
28.2	0
28.3	0
28.4	0
28.5	0
28.6	0
28.7	0
28.8	0
28.9	0
29	0
29.1	0
29.2	0
29.3	0
29.4	0
29.5	0
29.6	0
29.7	0
29.8	0
29.9	0
30	0
30.1	0
30.2	0
30.3	0
30.4	0
30.5	0
30.6	0
30.7	0
30.8	0
30.9	0
31	0
31.1	0
31.2	0
31.3	0
31.4	0
31.5	0
31.6	0
31.7	0
31.8	0
31.9	0
32	0
32.1	0
32.2	0
32.3	0
32.4	0
32.5	0
32.6	0
32.7	0
32.8	0
32.9	0
33	0
33.1	0
33.2	0
33.3	0
33.4	0
33.5	0
33.6	0
33.7	0
33.8	0
33.9	0
34	0
34.1	0
34.2	0
34.3	0
34.4	0
34.5	0
34.6	0
34.7	0
34.8	0
34.9	0
35	0
35.1	0
35.2	0
35.3	0
35.4	0
35.5	0
35.6	0
35.7	0
35.8	0
35.9	0
36	0
36.1	0
36.2	0
36.3	0
36.4	0
36.5	0
36.6	0
36.7	0
36.8	0
36.9	0
37	0
37.1	0
37.2	0
37.3	0
37.4	0
37.5	0
37.6	0
37.7	0
37.8	0
37.9	0
38	0
38.1	0
38.2	0
38.3	0
38.4	0
38.5	0
38.6	0
38.7	0
38.8	0
38.9	0
39	0
39.1	0
39.2	0
39.3	0
39.4	0
39.5	0
39.6	0
39.7	0
39.8	0
39.9	0
40	0
40.1	0
40.2	0
40.3	0
40.4	0
40.5	0
40.6	0
40.7	0
40.8	0
40.9	0
41	0
41.1	0
41.2	0
41.3	0
41.4	0
41.5	0
41.6	0
41.7	0
41.8	0
41.9	0
42	0
42.1	0
42.2	0
42.3	0
42.4	0
42.5	0
42.6	0
42.7	0
42.8	0
42.9	0
43	0
43.1	0
43.2	0
43.3	0
43.4	0
43.5	0
43.6	0
43.7	0
43.8	0
43.9	0
44	0
44.1	0
44.2	0
44.3	0
44.4	0
44.5	0
44.6	0
44.7	0
44.8	0
44.9	0
45	0
45.1	0
45.2	0
45.3	0
45.4	0
45.5	0
45.6	0
45.7	0
45.8	0
45.9	0
46	0
46.1	0
46.2	0
46.3	0
46.4	0
46.5	0
46.6	0
46.7	0
46.8	0
46.9	0
47	0
47.1	0
47.2	0
47.3	0
47.4	0
47.5	0
47.6	0
47.7	0
47.8	0
47.9	0
48	0
48.1	0
48.2	0
48.3	0
48.4	0
48.5	0
48.6	0
48.7	0
48.8	0
48.9	0
49	0
49.1	0
49.2	0
49.3	0
49.4	0
49.5	0
49.6	0
49.7	0
49.8	0
49.9	0
50	0
50.1	0
50.2	0
50.3	0
50.4	0
50.5	0
50.6	0
50.7	0
50.8	0
50.9	0
51	0
51.1	0
51.2	0
51.3	0
51.4	0
51.5	0
51.6	0
51.7	0
51.8	0
51.9	0
52	0
52.1	0
52.2	0
52.3	0
52.4	0
52.5	0
52.6	0
52.7	0
52.8	0
52.9	0
53	0
53.1	0
53.2	0
53.3	0
53.4	0
53.5	0
53.6	0
53.7	0
53.8	0
53.9	0
54	0
54.1	0
54.2	0
54.3	0
54.4	0
54.5	0
54.6	0
54.7	0
54.8	0
54.9	0
55	0
55.1	0
55.2	0
55.3	0
55.4	0
55.5	0
55.6	0
55.7	0
55.8	0
55.9	0
56	0
56.1	0
56.2	0
56.3	0
56.4	0
56.5	0
56.6	0
56.7	0
56.8	0
56.9	0
57	0
57.1	0
57.2	0
57.3	0
57.4	0
57.5	0
57.6	0
57.7	0
57.8	0
57.9	0
58	0
58.1	0
58.2	0
58.3	0
58.4	0
58.5	0
58.6	0
58.7	0
58.8	0
58.9	0
59	0
59.1	0
59.2	0
59.3	0
59.4	0
59.5	0
59.6	0
59.7	0
59.8	0
59.9	0
60	0
60.1	0
60.2	0
60.3	0
60.4	0
60.5	0
60.6	0
60.7	0
60.8	0
60.9	0
61	0
61.1	0
61.2	0
61.3	0
61.4	0
61.5	0
61.6	0
61.7	0
61.8	0
61.9	0
62	0
62.1	0
62.2	0
62.3	0
62.4	0
62.5	0
62.6	0
62.7	0
62.8	0
62.9	0
63	0
63.1	0
63.2	0
63.3	0
63.4	0
63.5	0
63.6	0
63.7	0
63.8	0
63.9	0
64	0
64.1	0
64.2	0
64.3	0
64.4	0
64.5	0
64.6	0
64.7	0
64.8	0
64.9	0
65	0
65.1	0
65.2	0
65.3	0
65.4	0
65.5	0
65.6	0
65.7	0
65.8	0
65.9	0
66	0
66.1	0
66.2	0
66.3	0
66.4	0
66.5	0
66.6	0
66.7	0
66.8	0
66.9	0
67	0
67.1	0
67.2	0
67.3	0
67.4	0
67.5	0
67.6	0
67.7	0
67.8	0
67.9	0
68	0
68.1	0
68.2	0
68.3	0
68.4	0
68.5	0
68.6	0
68.7	0
68.8	0
68.9	0
69	0
69.1	0
69.2	0
69.3	0
69.4	0
69.5	0
69.6	0
69.7	0
69.8	0
69.9	0
70	0
70.1	0
70.2	0
70.3	0
70.4	0
70.5	0
70.6	0
70.7	0
70.8	0
70.9	0
71	0
71.1	0
71.2	0
71.3	0
71.4	0
71.5	0
71.6	0
71.7	0
71.8	0
71.9	0
72	0
72.1	0
72.2	0
72.3	0
72.4	0
72.5	0
72.6	0
72.7	0
72.8	0
72.9	0
73	0
73.1	0
73.2	0
73.3	0
73.4	0
73.5	0
73.6	0
73.7	0
73.8	0
73.9	0
74	0
74.1	0
74.2	0
74.3	0
74.4	0
74.5	0
74.6	0
74.7	0
74.8	0
74.9	0
75	0
75.1	0
75.2	0
75.3	0
75.4	0
75.5	0
75.6	0
75.7	0
75.8	0
75.9	0
76	0
76.1	0
76.2	0
76.3	0
76.4	0
76.5	0
76.6	0
76.7	0
76.8	0
76.9	0
77	0
77.1	0
77.2	0
77.3	0
77.4	0
77.5	0
77.6	0
77.7	0
77.8	0
77.9	0
78	0
78.1	0
78.2	0
78.3	0
78.4	0
78.5	0
78.6	0
78.7	0
78.8	0
78.9	0
79	0
79.1	0
79.2	0
79.3	0
79.4	0
79.5	0
79.6	0
79.7	0
79.8	0
79.9	0
80	0
80.1	0
80.2	0
80.3	0
80.4	0
80.5	0
80.6	0
80.7	0
80.8	0
80.9	0
81	0
81.1	0
81.2	0
81.3	0
81.4	0
81.5	0
81.6	0
81.7	0
81.8	0
81.9	0
82	0
82.1	0
82.2	0
82.3	0
82.4	0
82.5	0
82.6	0
82.7	0
82.8	0
82.9	0
83	0
83.1	0
83.2	0
83.3	0
83.4	0
83.5	0
83.6	0
83.7	0
83.8	0
83.9	0
84	0
84.1	0
84.2	0
84.3	0
84.4	0
84.5	0
84.6	0
84.7	0
84.8	0
84.9	0
85	0
85.1	0
85.2	0
85.3	0
85.4	0
85.5	0
85.6	0
85.7	0
85.8	0
85.9	0
86	0
86.1	0
86.2	0
86.3	0
86.4	0
86.5	0
86.6	0
86.7	0
86.8	0
86.9	0
87	0
87.1	0
87.2	0
87.3	0
87.4	0
87.5	0
87.6	0
87.7	0
87.8	0
87.9	0
88	0
88.1	0
88.2	0
88.3	0
88.4	0
88.5	0
88.6	0
88.7	0
88.8	0
88.9	0
89	0
89.1	0
89.2	0
89.3	0
89.4	0
89.5	0
89.6	0
89.7	0
89.8	0
89.9	0
90	0
90.1	0
90.2	0
90.3	0
90.4	0
90.5	0
90.6	0
90.7	0
90.8	0
90.9	0
91	0
91.1	0
91.2	0
91.3	0
91.4	0
91.5	0
91.6	0
91.7	0
91.8	0
91.9	0
92	0
92.1	0
92.2	0
92.3	0
92.4	0
92.5	0
92.6	0
92.7	0
92.8	0
92.9	0
93	0
93.1	0
93.2	0
93.3	0
93.4	0
93.5	0
93.6	0
93.7	0
93.8	0
93.9	0
94	0
94.1	0
94.2	0
94.3	0
94.4	0
94.5	0
94.6	0
94.7	0
94.8	0
94.9	0
95	0
95.1	0
95.2	0
95.3	0
95.4	0
95.5	0
95.6	0
95.7	0
95.8	0
95.9	0
96	0
96.1	0
96.2	0
96.3	0
96.4	0
96.5	0
96.6	0
96.7	0
96.8	0
96.9	0
97	0
97.1	0
97.2	0
97.3	0
97.4	0
97.5	0
97.6	0
97.7	0
97.8	0
97.9	0
98	0
98.1	0
98.2	0
98.3	0
98.4	0
98.5	0
98.6	0
98.7	0
98.8	0
98.9	0
99	0
99.1	0
99.2	0
99.3	0
99.4	0
99.5	0
99.6	0
99.7	0
99.8	0
99.9	0
100	0
100.1	0.000333333
100.2	0.003
100.3	0.00716667
100.4	0.0116667
100.5	0.016
100.6	0.0198333
100.7	0.0245
100.8	0.028
100.9	0.032
101	0.0365
101.1	0.041
101.2	0.0461667
101.3	0.0506667
101.4	0.054
101.5	0.0591667
101.6	0.0628333
101.7	0.0658333
101.8	0.0695
101.9	0.0733333
102	0.0766667
102.1	0.0806667
102.2	0.085
102.3	0.0886667
102.4	0.0921667
102.5	0.097
102.6	0.0996667
102.7	0.104167
102.8	0.110167
102.9	0.114667
103	0.117667
103.1	0.120667
103.2	0.126
103.3	0.13
103.4	0.133667
103.5	0.136667
103.6	0.140667
103.7	0.145333
103.8	0.148167
103.9	0.151667
104	0.154167
104.1	0.158333
104.2	0.161667
104.3	0.165
104.4	0.169667
104.5	0.174333
104.6	0.177833
104.7	0.182333
104.8	0.186833
104.9	0.1895
105	0.193333
105.1	0.197333
105.2	0.2
105.3	0.202833
105.4	0.206
105.5	0.210167
105.6	0.214167
105.7	0.217333
105.8	0.2215
105.9	0.225833
106	0.229
106.1	0.2325
106.2	0.234833
106.3	0.237833
106.4	0.240667
106.5	0.243667
106.6	0.247167
106.7	0.249333
106.8	0.250833
106.9	0.254
107	0.2565
107.1	0.2605
107.2	0.263167
107.3	0.267667
107.4	0.271
107.5	0.2735
107.6	0.275
107.7	0.2775
107.8	0.281
107.9	0.2835
108	0.286333
108.1	0.289667
108.2	0.2935
108.3	0.295333
108.4	0.297667
108.5	0.300333
108.6	0.303
108.7	0.305667
108.8	0.309167
108.9	0.311667
109	0.315833
109.1	0.318333
109.2	0.322167
109.3	0.326
109.4	0.328333
109.5	0.33
109.6	0.332833
109.7	0.336667
109.8	0.3395
109.9	0.340667
110	0.344167
110.1	0.346667
110.2	0.348833
110.3	0.351833
110.4	0.355
110.5	0.357167
110.6	0.359
110.7	0.361167
110.8	0.363667
110.9	0.366833
111	0.369667
111.1	0.372333
111.2	0.375667
111.3	0.3785
111.4	0.381333
111.5	0.384
111.6	0.3855
111.7	0.388667
111.8	0.3915
111.9	0.394
112	0.397
112.1	0.400167
112.2	0.401833
112.3	0.402667
112.4	0.404
112.5	0.406167
112.6	0.4095
112.7	0.412
112.8	0.414667
112.9	0.415833
113	0.4175
113.1	0.4195
113.2	0.421667
113.3	0.423
113.4	0.425
113.5	0.427667
113.6	0.429333
113.7	0.431667
113.8	0.433833
113.9	0.436167
114	0.438
114.1	0.4395
114.2	0.440167
114.3	0.441
114.4	0.443167
114.5	0.444667
114.6	0.447333
114.7	0.4495
114.8	0.451833
114.9	0.4535
115	0.4545
115.1	0.4555
115.2	0.458167
115.3	0.4595
115.4	0.461167
115.5	0.464167
115.6	0.4665
115.7	0.4685
115.8	0.4705
115.9	0.472667
116	0.474833
116.1	0.477167
116.2	0.4785
116.3	0.4805
116.4	0.480667
116.5	0.4825
116.6	0.485
116.7	0.486333
116.8	0.489167
116.9	0.4905
117	0.492833
117.1	0.493167
117.2	0.494333
117.3	0.4955
117.4	0.497333
117.5	0.500167
117.6	0.501167
117.7	0.503167
117.8	0.505
117.9	0.5055
118	0.5065
118.1	0.508833
118.2	0.510667
118.3	0.513833
118.4	0.515667
118.5	0.516833
118.6	0.518333
118.7	0.520167
118.8	0.5215
118.9	0.5225
119	0.524833
119.1	0.527333
119.2	0.528167
119.3	0.529333
119.4	0.530667
119.5	0.532667
119.6	0.534
119.7	0.536
119.8	0.537
119.9	0.5385
120	0.540333
120.1	0.542167
120.2	0.544333
120.3	0.546167
120.4	0.5485
120.5	0.55
120.6	0.550667
120.7	0.551833
120.8	0.554
120.9	0.555667
121	0.557833
121.1	0.559667
121.2	0.560833
121.3	0.562833
121.4	0.563833
121.5	0.5645
121.6	0.566833
121.7	0.569
121.8	0.57
121.9	0.570667
122	0.572167
122.1	0.574833
122.2	0.575333
122.3	0.574833
122.4	0.575
122.5	0.576
122.6	0.577167
122.7	0.578167
122.8	0.578167
122.9	0.579833
123	0.581833
123.1	0.583
123.2	0.584333
123.3	0.586
123.4	0.586333
123.5	0.587333
123.6	0.588833
123.7	0.590167
123.8	0.591333
123.9	0.592833
124	0.593833
124.1	0.594333
124.2	0.595
124.3	0.598333
124.4	0.599833
124.5	0.6015
124.6	0.602667
124.7	0.603667
124.8	0.605
124.9	0.605833
125	0.607167
125.1	0.608167
125.2	0.608667
125.3	0.609833
125.4	0.611167
125.5	0.611667
125.6	0.6125
125.7	0.614
125.8	0.615833
125.9	0.617
126	0.616833
126.1	0.618167
126.2	0.619833
126.3	0.62
126.4	0.6225
126.5	0.624
126.6	0.624667
126.7	0.625167
126.8	0.625667
126.9	0.627167
127	0.628833
127.1	0.629667
127.2	0.630667
127.3	0.632167
127.4	0.633167
127.5	0.634833
127.6	0.636333
127.7	0.6365
127.8	0.637167
127.9	0.638167
128	0.639333
128.1	0.639833
128.2	0.640167
128.3	0.641333
128.4	0.641333
128.5	0.641833
128.6	0.642
128.7	0.642833
128.8	0.643667
128.9	0.644667
129	0.644833
129.1	0.645667
129.2	0.647
129.3	0.647667
129.4	0.6495
129.5	0.650833
129.6	0.6515
129.7	0.651
129.8	0.652667
129.9	0.653167
130	0.6545
130.1	0.654
130.2	0.654
130.3	0.654333
130.4	0.656
130.5	0.657833
130.6	0.658333
130.7	0.66
130.8	0.659833
130.9	0.660667
131	0.6615
131.1	0.662667
131.2	0.663
131.3	0.664
131.4	0.6655
131.5	0.665333
131.6	0.665667
131.7	0.6655
131.8	0.666333
131.9	0.667667
132	0.668833
132.1	0.6705
132.2	0.671
132.3	0.672
132.4	0.674
132.5	0.675167
132.6	0.675833
132.7	0.6765
132.8	0.6775
132.9	0.677833
133	0.677833
133.1	0.678667
133.2	0.679
133.3	0.6805
133.4	0.6815
133.5	0.682
133.6	0.681667
133.7	0.6835
133.8	0.685
133.9	0.686167
134	0.686667
134.1	0.6885
134.2	0.688833
134.3	0.689167
134.4	0.690333
134.5	0.6905
134.6	0.691
134.7	0.692333
134.8	0.693167
134.9	0.694333
135	0.695
135.1	0.6955
135.2	0.695667
135.3	0.696667
135.4	0.697667
135.5	0.698
135.6	0.7
135.7	0.7005
135.8	0.7005
135.9	0.700167
136	0.701667
136.1	0.702333
136.2	0.703333
136.3	0.704167
136.4	0.7055
136.5	0.705833
136.6	0.7065
136.7	0.707333
136.8	0.7075
136.9	0.707667
137	0.707833
137.1	0.71
137.2	0.710667
137.3	0.711167
137.4	0.711833
137.5	0.7115
137.6	0.7125
137.7	0.7135
137.8	0.713833
137.9	0.7155
138	0.716167
138.1	0.7165
138.2	0.7175
138.3	0.717667
138.4	0.718667
138.5	0.719667
138.6	0.72
138.7	0.7205
138.8	0.722333
138.9	0.722833
139	0.722667
139.1	0.7235
139.2	0.723333
139.3	0.723667
139.4	0.723
139.5	0.723833
139.6	0.7245
139.7	0.725667
139.8	0.725333
139.9	0.725667
140	0.727
140.1	0.728
140.2	0.728333
140.3	0.729333
140.4	0.728667
140.5	0.729333
140.6	0.730167
140.7	0.73
140.8	0.731167
140.9	0.731833
141	0.733
141.1	0.733833
141.2	0.734667
141.3	0.735667
141.4	0.737167
141.5	0.738
141.6	0.7385
141.7	0.738333
141.8	0.738833
141.9	0.739333
142	0.7395
142.1	0.740167
142.2	0.740167
142.3	0.741333
142.4	0.741833
142.5	0.742167
142.6	0.742333
142.7	0.7415
142.8	0.741667
142.9	0.742667
143	0.744167
143.1	0.744333
143.2	0.744333
143.3	0.744333
143.4	0.745333
143.5	0.746833
143.6	0.746167
143.7	0.7465
143.8	0.747167
143.9	0.7475
144	0.747167
144.1	0.747
144.2	0.747
144.3	0.748167
144.4	0.748167
144.5	0.749
144.6	0.749333
144.7	0.749667
144.8	0.750167
144.9	0.750333
145	0.751333
145.1	0.751167
145.2	0.752
145.3	0.7535
145.4	0.7535
145.5	0.754167
145.6	0.754167
145.7	0.755667
145.8	0.757167
145.9	0.757167
146	0.757333
146.1	0.757667
146.2	0.758
146.3	0.757167
146.4	0.7575
146.5	0.757333
146.6	0.7575
146.7	0.757667
146.8	0.757833
146.9	0.757833
147	0.757833
147.1	0.758
147.2	0.757333
147.3	0.757833
147.4	0.758
147.5	0.758
147.6	0.7575
147.7	0.758667
147.8	0.759167
147.9	0.759667
148	0.760833
148.1	0.7615
148.2	0.763
148.3	0.763167
148.4	0.764167
148.5	0.765167
148.6	0.765667
148.7	0.765833
148.8	0.765333
148.9	0.766667
149	0.767667
149.1	0.7675
149.2	0.767833
149.3	0.767
149.4	0.768
149.5	0.767833
149.6	0.7685
149.7	0.769333
149.8	0.769667
149.9	0.769
150	0.7695
150.1	0.7705
150.2	0.7705
150.3	0.771
150.4	0.772333
150.5	0.772333
150.6	0.771833
150.7	0.772167
150.8	0.772333
150.9	0.772833
151	0.773333
151.1	0.773
151.2	0.773167
151.3	0.773167
151.4	0.774
151.5	0.774167
151.6	0.774167
151.7	0.775167
151.8	0.775167
151.9	0.774667
152	0.775667
152.1	0.775833
152.2	0.776667
152.3	0.776667
152.4	0.776833
152.5	0.7775
152.6	0.777
152.7	0.777167
152.8	0.776167
152.9	0.776
153	0.776667
153.1	0.776333
153.2	0.775667
153.3	0.776167
153.4	0.777
153.5	0.776833
153.6	0.7765
153.7	0.777167
153.8	0.776333
153.9	0.776833
154	0.777667
154.1	0.778
154.2	0.778167
154.3	0.778833
154.4	0.778667
154.5	0.779333
154.6	0.778667
154.7	0.778333
154.8	0.778667
154.9	0.778667
155	0.779833
155.1	0.780167
155.2	0.7805
155.3	0.7805
155.4	0.780667
155.5	0.7795
155.6	0.779333
155.7	0.78
155.8	0.7795
155.9	0.779667
156	0.780167
156.1	0.780333
156.2	0.780833
156.3	0.781333
156.4	0.781167
156.5	0.780833
156.6	0.780833
156.7	0.7815
156.8	0.7815
156.9	0.781167
157	0.781833
157.1	0.782667
157.2	0.7825
157.3	0.7825
157.4	0.782667
157.5	0.783333
157.6	0.783833
157.7	0.784667
157.8	0.785667
157.9	0.786
158	0.785
158.1	0.785667
158.2	0.787
158.3	0.787833
158.4	0.7875
158.5	0.787833
158.6	0.788167
158.7	0.788667
158.8	0.788833
158.9	0.789
159	0.7885
159.1	0.788333
159.2	0.789
159.3	0.789
159.4	0.788167
159.5	0.787833
159.6	0.788833
159.7	0.7895
159.8	0.7895
159.9	0.790167
160	0.791333
160.1	0.792333
160.2	0.793
160.3	0.793333
160.4	0.794
160.5	0.793333
160.6	0.793167
160.7	0.792333
160.8	0.792833
160.9	0.792167
161	0.792667
161.1	0.7925
161.2	0.792333
161.3	0.792667
161.4	0.7935
161.5	0.794
161.6	0.795167
161.7	0.796
161.8	0.7955
161.9	0.795667
162	0.794667
162.1	0.794333
162.2	0.794333
162.3	0.794
162.4	0.7945
162.5	0.795
162.6	0.793833
162.7	0.7945
162.8	0.7945
162.9	0.7955
163	0.796833
163.1	0.796833
163.2	0.798167
163.3	0.798833
163.4	0.797667
163.5	0.796333
163.6	0.796833
163.7	0.797667
163.8	0.798167
163.9	0.797667
164	0.797667
164.1	0.797333
164.2	0.797667
164.3	0.797833
164.4	0.798
164.5	0.796833
164.6	0.796667
164.7	0.796333
164.8	0.797
164.9	0.7975
165	0.797833
165.1	0.7975
165.2	0.797167
165.3	0.797167
165.4	0.796167
165.5	0.796
165.6	0.795667
165.7	0.796167
165.8	0.795833
165.9	0.7965
166	0.796833
166.1	0.797
166.2	0.797
166.3	0.797667
166.4	0.797333
166.5	0.797
166.6	0.7965
166.7	0.795667
166.8	0.795
166.9	0.795167
167	0.795667
167.1	0.7955
167.2	0.794667
167.3	0.794833
167.4	0.795333
167.5	0.794833
167.6	0.794333
167.7	0.794833
167.8	0.794167
167.9	0.793833
168	0.7935
168.1	0.793167
168.2	0.792833
168.3	0.792333
168.4	0.792667
168.5	0.7925
168.6	0.792833
168.7	0.793167
168.8	0.792833
168.9	0.7925
169	0.792167
169.1	0.792167
169.2	0.791833
169.3	0.7915
169.4	0.790667
169.5	0.790333
169.6	0.790333
169.7	0.791167
169.8	0.791333
169.9	0.790833
170	0.791333
170.1	0.791167
170.2	0.791833
170.3	0.791167
170.4	0.791333
170.5	0.791833
170.6	0.792
170.7	0.7925
170.8	0.792833
170.9	0.7925
171	0.792167
171.1	0.792333
171.2	0.792667
171.3	0.793833
171.4	0.793667
171.5	0.794833
171.6	0.794333
171.7	0.794667
171.8	0.794333
171.9	0.795333
172	0.795667
172.1	0.795833
172.2	0.7955
172.3	0.795333
172.4	0.795667
172.5	0.7965
172.6	0.797333
172.7	0.797333
172.8	0.797167
172.9	0.7965
173	0.796667
173.1	0.797667
173.2	0.798167
173.3	0.797833
173.4	0.798333
173.5	0.798
173.6	0.798167
173.7	0.798333
173.8	0.7985
173.9	0.797333
174	0.797667
174.1	0.797667
174.2	0.798333
174.3	0.798833
174.4	0.798833
174.5	0.799167
174.6	0.799
174.7	0.799333
174.8	0.8
174.9	0.800167
175	0.8005
175.1	0.801167
175.2	0.801667
175.3	0.8015
175.4	0.802167
175.5	0.802
175.6	0.801833
175.7	0.801667
175.8	0.801667
175.9	0.802
176	0.801667
176.1	0.801667
176.2	0.801167
176.3	0.801333
176.4	0.801167
176.5	0.801
176.6	0.800833
176.7	0.800667
176.8	0.8005
176.9	0.800833
177	0.800833
177.1	0.8
177.2	0.800667
177.3	0.801
177.4	0.8015
177.5	0.801167
177.6	0.800833
177.7	0.801
177.8	0.801333
177.9	0.802333
178	0.801333
178.1	0.8015
178.2	0.802667
178.3	0.803167
178.4	0.803333
178.5	0.802833
178.6	0.802833
178.7	0.803167
178.8	0.803167
178.9	0.803833
179	0.803333
179.1	0.804333
179.2	0.8045
179.3	0.804
179.4	0.803833
179.5	0.803333
179.6	0.803833
179.7	0.804167
179.8	0.804167
179.9	0.804667
180	0.805167
180.1	0.8045
180.2	0.804833
180.3	0.805167
180.4	0.805
180.5	0.805667
180.6	0.806333
180.7	0.806
180.8	0.8055
180.9	0.805833
181	0.807167
181.1	0.807333
181.2	0.807
181.3	0.806833
181.4	0.807
181.5	0.807333
181.6	0.806667
181.7	0.806833
181.8	0.807167
181.9	0.807167
182	0.806333
182.1	0.807
182.2	0.807167
182.3	0.807333
182.4	0.807167
182.5	0.8075
182.6	0.808167
182.7	0.807833
182.8	0.808333
182.9	0.808833
183	0.807833
183.1	0.807333
183.2	0.8075
183.3	0.807333
183.4	0.807
183.5	0.807
183.6	0.807333
183.7	0.806833
183.8	0.8065
183.9	0.807
184	0.807333
184.1	0.807333
184.2	0.807333
184.3	0.806833
184.4	0.806667
184.5	0.8075
184.6	0.808
184.7	0.8075
184.8	0.806667
184.9	0.805667
185	0.805
185.1	0.804333
185.2	0.8045
185.3	0.804
185.4	0.803333
185.5	0.8025
185.6	0.802667
185.7	0.802667
185.8	0.803667
185.9	0.804167
186	0.804333
186.1	0.8035
186.2	0.803
186.3	0.804
186.4	0.8045
186.5	0.8045
186.6	0.805
186.7	0.805167
186.8	0.804667
186.9	0.804667
187	0.805
187.1	0.805
187.2	0.805167
187.3	0.804333
187.4	0.805167
187.5	0.805
187.6	0.805167
187.7	0.8045
187.8	0.804167
187.9	0.8045
188	0.804167
188.1	0.804333
188.2	0.804167
188.3	0.8045
188.4	0.804833
188.5	0.805667
188.6	0.806333
188.7	0.806167
188.8	0.805667
188.9	0.805333
189	0.804333
189.1	0.804
189.2	0.803833
189.3	0.803667
189.4	0.804
189.5	0.8035
189.6	0.803667
189.7	0.803167
189.8	0.803667
189.9	0.803833
190	0.8045
190.1	0.804667
190.2	0.804833
190.3	0.805
190.4	0.805667
190.5	0.805667
190.6	0.8055
190.7	0.805
190.8	0.805167
190.9	0.8045
191	0.804
191.1	0.8045
191.2	0.804167
191.3	0.804
191.4	0.803667
191.5	0.8045
191.6	0.804167
191.7	0.804167
191.8	0.804167
191.9	0.8035
192	0.8035
192.1	0.804667
192.2	0.805167
192.3	0.805667
192.4	0.805167
192.5	0.804333
192.6	0.8045
192.7	0.803167
192.8	0.803167
192.9	0.802667
193	0.803833
193.1	0.8045
193.2	0.8045
193.3	0.8045
193.4	0.804333
193.5	0.804
193.6	0.804
193.7	0.803667
193.8	0.803
193.9	0.802833
194	0.8035
194.1	0.803333
194.2	0.803167
194.3	0.803333
194.4	0.803333
194.5	0.8035
194.6	0.803667
194.7	0.803833
194.8	0.803667
194.9	0.803833
195	0.803167
195.1	0.8025
195.2	0.801167
195.3	0.8015
195.4	0.802167
195.5	0.802167
195.6	0.802167
195.7	0.8025
195.8	0.802833
195.9	0.802167
196	0.802333
196.1	0.802
196.2	0.802
196.3	0.801833
196.4	0.802333
196.5	0.802833
196.6	0.803333
196.7	0.803167
196.8	0.802333
196.9	0.802167
197	0.802333
197.1	0.801833
197.2	0.8015
197.3	0.801833
197.4	0.802
197.5	0.801167
197.6	0.800833
197.7	0.801
197.8	0.801167
197.9	0.801333
198	0.801333
198.1	0.8015
198.2	0.8015
198.3	0.8015
198.4	0.801167
198.5	0.801167
198.6	0.801333
198.7	0.8015
198.8	0.8015
198.9	0.801333
199	0.801
199.1	0.800833
199.2	0.800167
199.3	0.800667
199.4	0.801
199.5	0.800833
199.6	0.801333
199.7	0.801667
199.8	0.801667
199.9	0.802667
200	0.802333
[truncated: 14,000 more rows]
