# Supplementary material for: Bayesian inference of kinetic schemes for ion channels by Kalman filtering
Source: eLife journal article supplement (doi:10.7554/elife.62714), 2022-05-04
Supplement: fig4-data1 [file 1_Sim_N_7000_Fluor_MW_16M.xlsx]

## Sheet: Tabelle1
0.1	0
0.2	0
0.3	0
0.4	0
0.5	0
0.6	0
0.7	0
0.8	0
0.9	0
1	0
1.1	0
1.2	0
1.3	0
1.4	0
1.5	0
1.6	0
1.7	0
1.8	0
1.9	0
2	0
2.1	0
2.2	0
2.3	0
2.4	0
2.5	0
2.6	0
2.7	0
2.8	0
2.9	0
3	0
3.1	0
3.2	0
3.3	0
3.4	0
3.5	0
3.6	0
3.7	0
3.8	0
3.9	0
4	0
4.1	0
4.2	0
4.3	0
4.4	0
4.5	0
4.6	0
4.7	0
4.8	0
4.9	0
5	0
5.1	0
5.2	0
5.3	0
5.4	0
5.5	0
5.6	0
5.7	0
5.8	0
5.9	0
6	0
6.1	0
6.2	0
6.3	0
6.4	0
6.5	0
6.6	0
6.7	0
6.8	0
6.9	0
7	0
7.1	0
7.2	0
7.3	0
7.4	0
7.5	0
7.6	0
7.7	0
7.8	0
7.9	0
8	0
8.1	0
8.2	0
8.3	0
8.4	0
8.5	0
8.6	0
8.7	0
8.8	0
8.9	0
9	0
9.1	0
9.2	0
9.3	0
9.4	0
9.5	0
9.6	0
9.7	0
9.8	0
9.9	0
10	0
10.1	0
10.2	0
10.3	0
10.4	0
10.5	0
10.6	0
10.7	0
10.8	0
10.9	0
11	0
11.1	0
11.2	0
11.3	0
11.4	0
11.5	0
11.6	0
11.7	0
11.8	0
11.9	0
12	0
12.1	0
12.2	0
12.3	0
12.4	0
12.5	0
12.6	0
12.7	0
12.8	0
12.9	0
13	0
13.1	0
13.2	0
13.3	0
13.4	0
13.5	0
13.6	0
13.7	0
13.8	0
13.9	0
14	0
14.1	0
14.2	0
14.3	0
14.4	0
14.5	0
14.6	0
14.7	0
14.8	0
14.9	0
15	0
15.1	0
15.2	0
15.3	0
15.4	0
15.5	0
15.6	0
15.7	0
15.8	0
15.9	0
16	0
16.1	0
16.2	0
16.3	0
16.4	0
16.5	0
16.6	0
16.7	0
16.8	0
16.9	0
17	0
17.1	0
17.2	0
17.3	0
17.4	0
17.5	0
17.6	0
17.7	0
17.8	0
17.9	0
18	0
18.1	0
18.2	0
18.3	0
18.4	0
18.5	0
18.6	0
18.7	0
18.8	0
18.9	0
19	0
19.1	0
19.2	0
19.3	0
19.4	0
19.5	0
19.6	0
19.7	0
19.8	0
19.9	0
20	0
20.1	0
20.2	0
20.3	0
20.4	0
20.5	0
20.6	0
20.7	0
20.8	0
20.9	0
21	0
21.1	0
21.2	0
21.3	0
21.4	0
21.5	0
21.6	0
21.7	0
21.8	0
21.9	0
22	0
22.1	0
22.2	0
22.3	0
22.4	0
22.5	0
22.6	0
22.7	0
22.8	0
22.9	0
23	0
23.1	0
23.2	0
23.3	0
23.4	0
23.5	0
23.6	0
23.7	0
23.8	0
23.9	0
24	0
24.1	0
24.2	0
24.3	0
24.4	0
24.5	0
24.6	0
24.7	0
24.8	0
24.9	0
25	0
25.1	0
25.2	0
25.3	0
25.4	0
25.5	0
25.6	0
25.7	0
25.8	0
25.9	0
26	0
26.1	0
26.2	0
26.3	0
26.4	0
26.5	0
26.6	0
26.7	0
26.8	0
26.9	0
27	0
27.1	0
27.2	0
27.3	0
27.4	0
27.5	0
27.6	0
27.7	0
27.8	0
27.9	0
28	0
28.1	0
28.2	0
28.3	0
28.4	0
28.5	0
28.6	0
28.7	0
28.8	0
28.9	0
29	0
29.1	0
29.2	0
29.3	0
29.4	0
29.5	0
29.6	0
29.7	0
29.8	0
29.9	0
30	0
30.1	0
30.2	0
30.3	0
30.4	0
30.5	0
30.6	0
30.7	0
30.8	0
30.9	0
31	0
31.1	0
31.2	0
31.3	0
31.4	0
31.5	0
31.6	0
31.7	0
31.8	0
31.9	0
32	0
32.1	0
32.2	0
32.3	0
32.4	0
32.5	0
32.6	0
32.7	0
32.8	0
32.9	0
33	0
33.1	0
33.2	0
33.3	0
33.4	0
33.5	0
33.6	0
33.7	0
33.8	0
33.9	0
34	0
34.1	0
34.2	0
34.3	0
34.4	0
34.5	0
34.6	0
34.7	0
34.8	0
34.9	0
35	0
35.1	0
35.2	0
35.3	0
35.4	0
35.5	0
35.6	0
35.7	0
35.8	0
35.9	0
36	0
36.1	0
36.2	0
36.3	0
36.4	0
36.5	0
36.6	0
36.7	0
36.8	0
36.9	0
37	0
37.1	0
37.2	0
37.3	0
37.4	0
37.5	0
37.6	0
37.7	0
37.8	0
37.9	0
38	0
38.1	0
38.2	0
38.3	0
38.4	0
38.5	0
38.6	0
38.7	0
38.8	0
38.9	0
39	0
39.1	0
39.2	0
39.3	0
39.4	0
39.5	0
39.6	0
39.7	0
39.8	0
39.9	0
40	0
40.1	0
40.2	0
40.3	0
40.4	0
40.5	0
40.6	0
40.7	0
40.8	0
40.9	0
41	0
41.1	0
41.2	0
41.3	0
41.4	0
41.5	0
41.6	0
41.7	0
41.8	0
41.9	0
42	0
42.1	0
42.2	0
42.3	0
42.4	0
42.5	0
42.6	0
42.7	0
42.8	0
42.9	0
43	0
43.1	0
43.2	0
43.3	0
43.4	0
43.5	0
43.6	0
43.7	0
43.8	0
43.9	0
44	0
44.1	0
44.2	0
44.3	0
44.4	0
44.5	0
44.6	0
44.7	0
44.8	0
44.9	0
45	0
45.1	0
45.2	0
45.3	0
45.4	0
45.5	0
45.6	0
45.7	0
45.8	0
45.9	0
46	0
46.1	0
46.2	0
46.3	0
46.4	0
46.5	0
46.6	0
46.7	0
46.8	0
46.9	0
47	0
47.1	0
47.2	0
47.3	0
47.4	0
47.5	0
47.6	0
47.7	0
47.8	0
47.9	0
48	0
48.1	0
48.2	0
48.3	0
48.4	0
48.5	0
48.6	0
48.7	0
48.8	0
48.9	0
49	0
49.1	0
49.2	0
49.3	0
49.4	0
49.5	0
49.6	0
49.7	0
49.8	0
49.9	0
50	0
50.1	0
50.2	0
50.3	0
50.4	0
50.5	0
50.6	0
50.7	0
50.8	0
50.9	0
51	0
51.1	0
51.2	0
51.3	0
51.4	0
51.5	0
51.6	0
51.7	0
51.8	0
51.9	0
52	0
52.1	0
52.2	0
52.3	0
52.4	0
52.5	0
52.6	0
52.7	0
52.8	0
52.9	0
53	0
53.1	0
53.2	0
53.3	0
53.4	0
53.5	0
53.6	0
53.7	0
53.8	0
53.9	0
54	0
54.1	0
54.2	0
54.3	0
54.4	0
54.5	0
54.6	0
54.7	0
54.8	0
54.9	0
55	0
55.1	0
55.2	0
55.3	0
55.4	0
55.5	0
55.6	0
55.7	0
55.8	0
55.9	0
56	0
56.1	0
56.2	0
56.3	0
56.4	0
56.5	0
56.6	0
56.7	0
56.8	0
56.9	0
57	0
57.1	0
57.2	0
57.3	0
57.4	0
57.5	0
57.6	0
57.7	0
57.8	0
57.9	0
58	0
58.1	0
58.2	0
58.3	0
58.4	0
58.5	0
58.6	0
58.7	0
58.8	0
58.9	0
59	0
59.1	0
59.2	0
59.3	0
59.4	0
59.5	0
59.6	0
59.7	0
59.8	0
59.9	0
60	0
60.1	0
60.2	0
60.3	0
60.4	0
60.5	0
60.6	0
60.7	0
60.8	0
60.9	0
61	0
61.1	0
61.2	0
61.3	0
61.4	0
61.5	0
61.6	0
61.7	0
61.8	0
61.9	0
62	0
62.1	0
62.2	0
62.3	0
62.4	0
62.5	0
62.6	0
62.7	0
62.8	0
62.9	0
63	0
63.1	0
63.2	0
63.3	0
63.4	0
63.5	0
63.6	0
63.7	0
63.8	0
63.9	0
64	0
64.1	0
64.2	0
64.3	0
64.4	0
64.5	0
64.6	0
64.7	0
64.8	0
64.9	0
65	0
65.1	0
65.2	0
65.3	0
65.4	0
65.5	0
65.6	0
65.7	0
65.8	0
65.9	0
66	0
66.1	0
66.2	0
66.3	0
66.4	0
66.5	0
66.6	0
66.7	0
66.8	0
66.9	0
67	0
67.1	0
67.2	0
67.3	0
67.4	0
67.5	0
67.6	0
67.7	0
67.8	0
67.9	0
68	0
68.1	0
68.2	0
68.3	0
68.4	0
68.5	0
68.6	0
68.7	0
68.8	0
68.9	0
69	0
69.1	0
69.2	0
69.3	0
69.4	0
69.5	0
69.6	0
69.7	0
69.8	0
69.9	0
70	0
70.1	0
70.2	0
70.3	0
70.4	0
70.5	0
70.6	0
70.7	0
70.8	0
70.9	0
71	0
71.1	0
71.2	0
71.3	0
71.4	0
71.5	0
71.6	0
71.7	0
71.8	0
71.9	0
72	0
72.1	0
72.2	0
72.3	0
72.4	0
72.5	0
72.6	0
72.7	0
72.8	0
72.9	0
73	0
73.1	0
73.2	0
73.3	0
73.4	0
73.5	0
73.6	0
73.7	0
73.8	0
73.9	0
74	0
74.1	0
74.2	0
74.3	0
74.4	0
74.5	0
74.6	0
74.7	0
74.8	0
74.9	0
75	0
75.1	0
75.2	0
75.3	0
75.4	0
75.5	0
75.6	0
75.7	0
75.8	0
75.9	0
76	0
76.1	0
76.2	0
76.3	0
76.4	0
76.5	0
76.6	0
76.7	0
76.8	0
76.9	0
77	0
77.1	0
77.2	0
77.3	0
77.4	0
77.5	0
77.6	0
77.7	0
77.8	0
77.9	0
78	0
78.1	0
78.2	0
78.3	0
78.4	0
78.5	0
78.6	0
78.7	0
78.8	0
78.9	0
79	0
79.1	0
79.2	0
79.3	0
79.4	0
79.5	0
79.6	0
79.7	0
79.8	0
79.9	0
80	0
80.1	0
80.2	0
80.3	0
80.4	0
80.5	0
80.6	0
80.7	0
80.8	0
80.9	0
81	0
81.1	0
81.2	0
81.3	0
81.4	0
81.5	0
81.6	0
81.7	0
81.8	0
81.9	0
82	0
82.1	0
82.2	0
82.3	0
82.4	0
82.5	0
82.6	0
82.7	0
82.8	0
82.9	0
83	0
83.1	0
83.2	0
83.3	0
83.4	0
83.5	0
83.6	0
83.7	0
83.8	0
83.9	0
84	0
84.1	0
84.2	0
84.3	0
84.4	0
84.5	0
84.6	0
84.7	0
84.8	0
84.9	0
85	0
85.1	0
85.2	0
85.3	0
85.4	0
85.5	0
85.6	0
85.7	0
85.8	0
85.9	0
86	0
86.1	0
86.2	0
86.3	0
86.4	0
86.5	0
86.6	0
86.7	0
86.8	0
86.9	0
87	0
87.1	0
87.2	0
87.3	0
87.4	0
87.5	0
87.6	0
87.7	0
87.8	0
87.9	0
88	0
88.1	0
88.2	0
88.3	0
88.4	0
88.5	0
88.6	0
88.7	0
88.8	0
88.9	0
89	0
89.1	0
89.2	0
89.3	0
89.4	0
89.5	0
89.6	0
89.7	0
89.8	0
89.9	0
90	0
90.1	0
90.2	0
90.3	0
90.4	0
90.5	0
90.6	0
90.7	0
90.8	0
90.9	0
91	0
91.1	0
91.2	0
91.3	0
91.4	0
91.5	0
91.6	0
91.7	0
91.8	0
91.9	0
92	0
92.1	0
92.2	0
92.3	0
92.4	0
92.5	0
92.6	0
92.7	0
92.8	0
92.9	0
93	0
93.1	0
93.2	0
93.3	0
93.4	0
93.5	0
93.6	0
93.7	0
93.8	0
93.9	0
94	0
94.1	0
94.2	0
94.3	0
94.4	0
94.5	0
94.6	0
94.7	0
94.8	0
94.9	0
95	0
95.1	0
95.2	0
95.3	0
95.4	0
95.5	0
95.6	0
95.7	0
95.8	0
95.9	0
96	0
96.1	0
96.2	0
96.3	0
96.4	0
96.5	0
96.6	0
96.7	0
96.8	0
96.9	0
97	0
97.1	0
97.2	0
97.3	0
97.4	0
97.5	0
97.6	0
97.7	0
97.8	0
97.9	0
98	0
98.1	0
98.2	0
98.3	0
98.4	0
98.5	0
98.6	0
98.7	0
98.8	0
98.9	0
99	0
99.1	0
99.2	0
99.3	0
99.4	0
99.5	0
99.6	0
99.7	0
99.8	0
99.9	0
100	0
100.1	0.5365
100.2	0.723286
100.3	0.821786
100.4	0.877857
100.5	0.910357
100.6	0.926643
100.7	0.940143
100.8	0.9465
100.9	0.949357
101	0.950357
101.1	0.953643
101.2	0.954714
101.3	0.953786
101.4	0.955857
101.5	0.956857
101.6	0.956429
101.7	0.9575
101.8	0.958
101.9	0.958714
102	0.957429
102.1	0.956571
102.2	0.954929
102.3	0.956
102.4	0.955286
102.5	0.9565
102.6	0.957143
102.7	0.957214
102.8	0.956429
102.9	0.9565
103	0.957929
103.1	0.960786
103.2	0.960786
103.3	0.9595
103.4	0.959143
103.5	0.958
103.6	0.957
103.7	0.958
103.8	0.959143
103.9	0.958571
104	0.959143
104.1	0.959571
104.2	0.959857
104.3	0.958857
104.4	0.959
104.5	0.9615
104.6	0.962571
104.7	0.960786
104.8	0.963643
104.9	0.964286
105	0.963929
105.1	0.965071
105.2	0.963786
105.3	0.960929
105.4	0.960286
105.5	0.961071
105.6	0.963357
105.7	0.962857
105.8	0.964357
105.9	0.9625
106	0.961857
106.1	0.962357
106.2	0.963714
106.3	0.965429
106.4	0.966786
106.5	0.966
106.6	0.965143
106.7	0.967
106.8	0.966
106.9	0.964786
107	0.965643
107.1	0.965643
107.2	0.966
107.3	0.966
107.4	0.964143
107.5	0.965
107.6	0.966143
107.7	0.965
107.8	0.965429
107.9	0.964357
108	0.965643
108.1	0.9635
108.2	0.962786
108.3	0.962071
108.4	0.964
108.5	0.965214
108.6	0.964857
108.7	0.963214
108.8	0.964643
108.9	0.967143
109	0.966429
109.1	0.968071
109.2	0.966714
109.3	0.966929
109.4	0.968714
109.5	0.967571
109.6	0.968286
109.7	0.968786
109.8	0.969357
109.9	0.966643
110	0.968643
110.1	0.969857
110.2	0.968857
110.3	0.966071
110.4	0.966571
110.5	0.966929
110.6	0.968
110.7	0.968429
110.8	0.968214
110.9	0.969071
111	0.969214
111.1	0.968571
111.2	0.970929
111.3	0.9715
111.4	0.970714
111.5	0.970214
111.6	0.970286
111.7	0.969429
111.8	0.970214
111.9	0.971571
112	0.969214
112.1	0.968643
112.2	0.969286
112.3	0.968071
112.4	0.969571
112.5	0.970429
112.6	0.9715
112.7	0.969714
112.8	0.969929
112.9	0.969786
113	0.971214
113.1	0.9715
113.2	0.973143
113.3	0.972286
113.4	0.971786
113.5	0.972929
113.6	0.973143
113.7	0.973143
113.8	0.973
113.9	0.974
114	0.974143
114.1	0.973643
114.2	0.973857
114.3	0.973643
114.4	0.971429
114.5	0.973929
114.6	0.973357
114.7	0.974857
114.8	0.975071
114.9	0.973929
115	0.975071
115.1	0.975643
115.2	0.973714
115.3	0.972643
115.4	0.974429
115.5	0.973286
115.6	0.974643
115.7	0.972
115.8	0.9735
115.9	0.975786
116	0.975714
116.1	0.975357
116.2	0.974786
116.3	0.975643
116.4	0.973714
116.5	0.973071
116.6	0.972786
116.7	0.972571
116.8	0.974786
116.9	0.975857
117	0.973929
117.1	0.973929
117.2	0.977286
117.3	0.975429
117.4	0.9755
117.5	0.976357
117.6	0.978143
117.7	0.978214
117.8	0.978
117.9	0.978357
118	0.976786
118.1	0.975857
118.2	0.9775
118.3	0.975643
118.4	0.977429
118.5	0.977857
118.6	0.977143
118.7	0.978071
118.8	0.976857
118.9	0.977071
119	0.975286
119.1	0.976429
119.2	0.975714
119.3	0.975643
119.4	0.978429
119.5	0.979
119.6	0.977357
119.7	0.978214
119.8	0.977714
119.9	0.976571
120	0.977429
120.1	0.979214
120.2	0.979214
120.3	0.978
120.4	0.980071
120.5	0.980714
120.6	0.979143
120.7	0.981357
120.8	0.978643
120.9	0.977429
121	0.976286
121.1	0.977571
121.2	0.9805
121.3	0.979286
121.4	0.982286
121.5	0.980429
121.6	0.979643
121.7	0.978714
121.8	0.979214
121.9	0.979143
122	0.978929
122.1	0.977
122.2	0.976
122.3	0.976643
122.4	0.978786
122.5	0.9795
122.6	0.979714
122.7	0.979857
122.8	0.979714
122.9	0.980929
123	0.98
123.1	0.981071
123.2	0.9805
123.3	0.98
123.4	0.979214
123.5	0.979857
123.6	0.980357
123.7	0.979643
123.8	0.979214
123.9	0.981429
124	0.980357
124.1	0.980714
124.2	0.979786
124.3	0.980714
124.4	0.981429
124.5	0.982786
124.6	0.981571
124.7	0.982286
124.8	0.981786
124.9	0.981857
125	0.981714
125.1	0.981357
125.2	0.982929
125.3	0.983286
125.4	0.982929
125.5	0.981857
125.6	0.982857
125.7	0.981643
125.8	0.9805
125.9	0.981214
126	0.982429
126.1	0.982071
126.2	0.980286
126.3	0.981357
126.4	0.981071
126.5	0.980571
126.6	0.980714
126.7	0.981643
126.8	0.982357
126.9	0.979571
127	0.980714
127.1	0.981143
127.2	0.981929
127.3	0.9835
127.4	0.984714
127.5	0.9835
127.6	0.983429
127.7	0.982714
127.8	0.984
127.9	0.983143
128	0.982214
128.1	0.982071
128.2	0.983357
128.3	0.983143
128.4	0.981786
128.5	0.983571
128.6	0.984357
128.7	0.984571
128.8	0.984286
128.9	0.984714
129	0.984071
129.1	0.982857
129.2	0.984357
129.3	0.982143
129.4	0.9835
129.5	0.983286
129.6	0.984143
129.7	0.983643
129.8	0.984071
129.9	0.983357
130	0.983714
130.1	0.983357
130.2	0.983643
130.3	0.984214
130.4	0.984143
130.5	0.982714
130.6	0.983286
130.7	0.983286
130.8	0.983071
130.9	0.983286
131	0.984214
131.1	0.983214
131.2	0.983071
131.3	0.984643
131.4	0.9855
131.5	0.984071
131.6	0.984
131.7	0.983357
131.8	0.982857
131.9	0.983929
132	0.983643
132.1	0.984643
132.2	0.983929
132.3	0.985071
132.4	0.984714
132.5	0.983857
132.6	0.983
132.7	0.984643
132.8	0.984214
132.9	0.984357
133	0.984857
133.1	0.986
133.2	0.985929
133.3	0.985429
133.4	0.985143
133.5	0.984357
133.6	0.984929
133.7	0.985786
133.8	0.985143
133.9	0.985214
134	0.985786
134.1	0.985214
134.2	0.983929
134.3	0.984786
134.4	0.985071
134.5	0.984714
134.6	0.984429
134.7	0.985429
134.8	0.986357
134.9	0.986714
135	0.985571
135.1	0.984429
135.2	0.985
135.3	0.987071
135.4	0.986214
135.5	0.986143
135.6	0.986143
135.7	0.985429
135.8	0.985571
135.9	0.986286
136	0.986643
136.1	0.986357
136.2	0.985857
136.3	0.985786
136.4	0.986571
136.5	0.988857
136.6	0.987714
136.7	0.985
136.8	0.988214
136.9	0.986071
137	0.985071
137.1	0.9855
137.2	0.986571
137.3	0.9855
137.4	0.987143
137.5	0.9865
137.6	0.987214
137.7	0.986071
137.8	0.986429
137.9	0.986214
138	0.985071
138.1	0.986929
138.2	0.986429
138.3	0.987286
138.4	0.987571
138.5	0.987143
138.6	0.988071
138.7	0.986714
138.8	0.986429
138.9	0.985571
139	0.985714
139.1	0.986571
139.2	0.986571
139.3	0.986786
139.4	0.986429
139.5	0.988214
139.6	0.9875
139.7	0.9875
139.8	0.986357
139.9	0.986714
140	0.986214
140.1	0.9885
140.2	0.987714
140.3	0.988071
140.4	0.986643
140.5	0.986714
140.6	0.986643
140.7	0.987643
140.8	0.987571
140.9	0.989286
141	0.986786
141.1	0.986786
141.2	0.986643
141.3	0.987357
141.4	0.985786
141.5	0.987071
141.6	0.988071
141.7	0.988
141.8	0.987786
141.9	0.989143
142	0.989143
142.1	0.988357
142.2	0.987429
142.3	0.986714
142.4	0.988357
142.5	0.988714
142.6	0.987571
142.7	0.9875
142.8	0.986571
142.9	0.986143
143	0.987
143.1	0.987857
143.2	0.987286
143.3	0.986786
143.4	0.987429
143.5	0.986929
143.6	0.988571
143.7	0.989
143.8	0.989214
143.9	0.9885
144	0.989214
144.1	0.988357
144.2	0.988143
144.3	0.9875
144.4	0.985714
144.5	0.986143
144.6	0.986857
144.7	0.986286
144.8	0.986714
144.9	0.988714
145	0.989
145.1	0.988429
145.2	0.988786
145.3	0.988714
145.4	0.987643
145.5	0.988214
145.6	0.989429
145.7	0.989214
145.8	0.988786
145.9	0.986357
146	0.986857
146.1	0.988571
146.2	0.988429
146.3	0.988643
146.4	0.988429
146.5	0.988857
146.6	0.988214
146.7	0.988071
146.8	0.988857
146.9	0.989357
147	0.989643
147.1	0.989143
147.2	0.989143
147.3	0.989714
147.4	0.989286
147.5	0.990143
147.6	0.989643
147.7	0.988143
147.8	0.988786
147.9	0.989071
148	0.988286
148.1	0.988429
148.2	0.989429
148.3	0.989
148.4	0.988929
148.5	0.989786
148.6	0.988929
148.7	0.9895
148.8	0.989286
148.9	0.988714
149	0.9875
149.1	0.987286
149.2	0.987857
149.3	0.988071
149.4	0.988857
149.5	0.990286
149.6	0.990214
149.7	0.99
149.8	0.9895
149.9	0.988214
150	0.988429
150.1	0.989357
150.2	0.989071
150.3	0.989286
150.4	0.989286
150.5	0.99
150.6	0.989
150.7	0.988571
150.8	0.989857
150.9	0.988143
151	0.989
151.1	0.989643
151.2	0.990143
151.3	0.989286
151.4	0.989429
151.5	0.988714
151.6	0.989071
151.7	0.989857
151.8	0.988929
151.9	0.989143
152	0.989714
152.1	0.988857
152.2	0.989214
152.3	0.990643
152.4	0.990571
152.5	0.989786
152.6	0.989214
152.7	0.988357
152.8	0.989071
152.9	0.989286
153	0.988857
153.1	0.988357
153.2	0.989714
153.3	0.989214
153.4	0.9905
153.5	0.990357
153.6	0.990429
153.7	0.989786
153.8	0.990286
153.9	0.988786
154	0.988643
154.1	0.989
154.2	0.990571
154.3	0.990357
154.4	0.990643
154.5	0.990071
154.6	0.990286
154.7	0.989357
154.8	0.989857
154.9	0.989571
155	0.9895
155.1	0.990143
155.2	0.989643
155.3	0.988714
155.4	0.988857
155.5	0.989214
155.6	0.989571
155.7	0.988786
155.8	0.989714
155.9	0.989857
156	0.989571
156.1	0.988929
156.2	0.990143
156.3	0.99
156.4	0.9905
156.5	0.989643
156.6	0.989357
156.7	0.989071
156.8	0.988857
156.9	0.987929
157	0.988643
157.1	0.990071
157.2	0.988786
157.3	0.988857
157.4	0.989357
157.5	0.989286
157.6	0.989643
157.7	0.989
157.8	0.989857
157.9	0.990214
158	0.989929
158.1	0.990714
158.2	0.990214
158.3	0.990214
158.4	0.989929
158.5	0.989143
158.6	0.990071
158.7	0.989857
158.8	0.988857
158.9	0.989714
159	0.990071
159.1	0.989286
159.2	0.991071
159.3	0.990357
159.4	0.9905
159.5	0.991286
159.6	0.990643
159.7	0.990071
159.8	0.989643
159.9	0.9885
160	0.989357
160.1	0.988786
160.2	0.988929
160.3	0.989857
160.4	0.990429
160.5	0.990571
160.6	0.990643
160.7	0.990357
160.8	0.989357
160.9	0.988571
161	0.9885
161.1	0.988714
161.2	0.989786
161.3	0.989143
161.4	0.989857
161.5	0.990143
161.6	0.990286
161.7	0.990429
161.8	0.990786
161.9	0.990929
162	0.9905
162.1	0.990857
162.2	0.9915
162.3	0.990071
162.4	0.990571
162.5	0.990571
162.6	0.9895
162.7	0.989214
162.8	0.988571
162.9	0.990643
163	0.991429
163.1	0.9905
163.2	0.991714
163.3	0.991643
163.4	0.990357
163.5	0.990143
163.6	0.990071
163.7	0.991714
163.8	0.9905
163.9	0.990071
164	0.9905
164.1	0.990929
164.2	0.990714
164.3	0.991714
164.4	0.991429
164.5	0.989571
164.6	0.990286
164.7	0.989571
164.8	0.989429
164.9	0.990286
165	0.990286
165.1	0.990357
165.2	0.990786
165.3	0.989857
165.4	0.990214
165.5	0.990429
165.6	0.990429
165.7	0.990786
165.8	0.9885
165.9	0.989214
166	0.990357
166.1	0.990786
166.2	0.990286
166.3	0.99
166.4	0.990071
166.5	0.989929
166.6	0.990357
166.7	0.990286
166.8	0.990429
166.9	0.991071
167	0.991571
167.1	0.990929
167.2	0.991
167.3	0.991214
167.4	0.991357
167.5	0.9905
167.6	0.990214
167.7	0.989857
167.8	0.989214
167.9	0.989857
168	0.990286
168.1	0.990286
168.2	0.990143
168.3	0.990857
168.4	0.990929
168.5	0.9905
168.6	0.990143
168.7	0.99
168.8	0.991286
168.9	0.991286
169	0.990571
169.1	0.991071
169.2	0.9915
169.3	0.991929
169.4	0.992071
169.5	0.991286
169.6	0.991429
169.7	0.991071
169.8	0.991143
169.9	0.990857
170	0.990929
170.1	0.991143
170.2	0.9905
170.3	0.991786
170.4	0.991857
170.5	0.991071
170.6	0.992143
170.7	0.991786
170.8	0.992286
170.9	0.992
171	0.992357
171.1	0.991786
171.2	0.991357
171.3	0.990571
171.4	0.990714
171.5	0.990643
171.6	0.990143
171.7	0.990643
171.8	0.989786
171.9	0.989857
172	0.9895
172.1	0.989786
172.2	0.990357
172.3	0.991429
172.4	0.991
172.5	0.990786
172.6	0.990286
172.7	0.989714
172.8	0.990429
172.9	0.990857
173	0.991571
173.1	0.990857
173.2	0.992143
173.3	0.991929
173.4	0.992786
173.5	0.992357
173.6	0.991286
173.7	0.990357
173.8	0.990857
173.9	0.990214
174	0.990786
174.1	0.990714
174.2	0.989929
174.3	0.990429
174.4	0.991071
174.5	0.990714
174.6	0.990929
174.7	0.990786
174.8	0.990286
174.9	0.990429
175	0.991
175.1	0.9915
175.2	0.991857
175.3	0.991357
175.4	0.991214
175.5	0.991714
175.6	0.991857
175.7	0.991
175.8	0.991571
175.9	0.991286
176	0.990429
176.1	0.990929
176.2	0.989786
176.3	0.99
176.4	0.989
176.5	0.989643
176.6	0.989143
176.7	0.989286
176.8	0.989714
176.9	0.989714
177	0.99
177.1	0.991286
177.2	0.992071
177.3	0.990571
177.4	0.990643
177.5	0.990857
177.6	0.9905
177.7	0.990571
177.8	0.990643
177.9	0.989571
178	0.9895
178.1	0.989286
178.2	0.989929
178.3	0.990643
178.4	0.990071
178.5	0.990429
178.6	0.99
178.7	0.989429
178.8	0.989214
178.9	0.990357
179	0.991143
179.1	0.990214
179.2	0.990714
179.3	0.990643
179.4	0.990929
179.5	0.990071
179.6	0.989571
179.7	0.989571
179.8	0.989857
179.9	0.989714
180	0.9915
180.1	0.992143
180.2	0.991357
180.3	0.991071
180.4	0.990286
180.5	0.989143
180.6	0.989214
180.7	0.988357
180.8	0.988786
180.9	0.989286
181	0.988786
181.1	0.989429
181.2	0.989571
181.3	0.9895
181.4	0.990286
181.5	0.991071
181.6	0.991
181.7	0.990929
181.8	0.991857
181.9	0.990929
182	0.99
182.1	0.989643
182.2	0.990214
182.3	0.989
182.4	0.989571
182.5	0.990357
182.6	0.990643
182.7	0.990286
182.8	0.990143
182.9	0.989929
183	0.989357
183.1	0.991
183.2	0.991857
183.3	0.991857
183.4	0.992071
183.5	0.991571
183.6	0.991643
183.7	0.991429
183.8	0.991
183.9	0.990643
184	0.989286
184.1	0.989714
184.2	0.989857
184.3	0.991143
184.4	0.991214
184.5	0.991214
184.6	0.9915
184.7	0.990143
184.8	0.991
184.9	0.990929
185	0.991
185.1	0.990857
185.2	0.990143
185.3	0.990857
185.4	0.992286
185.5	0.991857
185.6	0.991143
185.7	0.989929
185.8	0.990214
185.9	0.990214
186	0.989857
186.1	0.990857
186.2	0.992214
186.3	0.990357
186.4	0.989643
186.5	0.989786
186.6	0.991214
186.7	0.989929
186.8	0.990143
186.9	0.989714
187	0.989643
187.1	0.990786
187.2	0.990643
187.3	0.990929
187.4	0.9905
187.5	0.990143
187.6	0.990143
187.7	0.99
187.8	0.989357
187.9	0.990357
188	0.990857
188.1	0.990929
188.2	0.990571
188.3	0.990143
188.4	0.989571
188.5	0.989857
188.6	0.989429
188.7	0.9905
188.8	0.991714
188.9	0.991857
189	0.991214
189.1	0.991857
189.2	0.991429
189.3	0.990357
189.4	0.989643
189.5	0.9895
189.6	0.989786
189.7	0.991
189.8	0.990214
189.9	0.991071
190	0.991714
190.1	0.992214
190.2	0.991357
190.3	0.991
190.4	0.992143
190.5	0.9925
190.6	0.992857
190.7	0.991786
190.8	0.990786
190.9	0.990286
191	0.990857
191.1	0.992
191.2	0.991714
191.3	0.991357
191.4	0.990429
191.5	0.990143
191.6	0.990214
191.7	0.990429
191.8	0.989286
191.9	0.989286
192	0.990857
192.1	0.991
192.2	0.990143
192.3	0.989857
192.4	0.990357
192.5	0.990643
192.6	0.989357
192.7	0.990429
192.8	0.990357
192.9	0.9905
193	0.991357
193.1	0.9925
193.2	0.992286
193.3	0.991143
193.4	0.991429
193.5	0.990643
193.6	0.991214
193.7	0.9905
193.8	0.991
193.9	0.992714
194	0.992
194.1	0.991929
194.2	0.992214
194.3	0.9915
194.4	0.990143
194.5	0.990214
194.6	0.990286
194.7	0.991214
194.8	0.991143
194.9	0.990214
195	0.990286
195.1	0.990214
195.2	0.989357
195.3	0.988643
195.4	0.988643
195.5	0.989571
195.6	0.989929
195.7	0.9895
195.8	0.990571
195.9	0.99
196	0.990143
196.1	0.991571
196.2	0.991429
196.3	0.990571
196.4	0.989
196.5	0.989714
196.6	0.991429
196.7	0.991071
196.8	0.990214
196.9	0.989714
197	0.991357
197.1	0.990571
197.2	0.990929
197.3	0.990214
197.4	0.990571
197.5	0.990071
197.6	0.990286
197.7	0.990643
197.8	0.989929
197.9	0.989571
198	0.989286
198.1	0.990143
198.2	0.991286
198.3	0.991929
198.4	0.991357
198.5	0.991857
198.6	0.990429
198.7	0.990643
198.8	0.990786
198.9	0.990643
199	0.9915
199.1	0.990786
199.2	0.9895
199.3	0.990214
199.4	0.991143
199.5	0.991214
199.6	0.989929
199.7	0.9915
199.8	0.992571
199.9	0.992571
200	0.992714
[truncated: 14,000 more rows]
