# Supplementary material for: Bayesian inference of kinetic schemes for ion channels by Kalman filtering
Source: eLife journal article supplement (doi:10.7554/elife.62714), 2022-05-04
Supplement: fig4-data1 [file 1_Sim_N_7000_Strom_MW_16M.xlsx]

## Sheet: Tabelle1
0.1	0
0.2	0
0.3	0
0.4	0
0.5	0
0.6	0
0.7	0
0.8	0
0.9	0
1	0
1.1	0
1.2	0
1.3	0
1.4	0
1.5	0
1.6	0
1.7	0
1.8	0
1.9	0
2	0
2.1	0
2.2	0
2.3	0
2.4	0
2.5	0
2.6	0
2.7	0
2.8	0
2.9	0
3	0
3.1	0
3.2	0
3.3	0
3.4	0
3.5	0
3.6	0
3.7	0
3.8	0
3.9	0
4	0
4.1	0
4.2	0
4.3	0
4.4	0
4.5	0
4.6	0
4.7	0
4.8	0
4.9	0
5	0
5.1	0
5.2	0
5.3	0
5.4	0
5.5	0
5.6	0
5.7	0
5.8	0
5.9	0
6	0
6.1	0
6.2	0
6.3	0
6.4	0
6.5	0
6.6	0
6.7	0
6.8	0
6.9	0
7	0
7.1	0
7.2	0
7.3	0
7.4	0
7.5	0
7.6	0
7.7	0
7.8	0
7.9	0
8	0
8.1	0
8.2	0
8.3	0
8.4	0
8.5	0
8.6	0
8.7	0
8.8	0
8.9	0
9	0
9.1	0
9.2	0
9.3	0
9.4	0
9.5	0
9.6	0
9.7	0
9.8	0
9.9	0
10	0
10.1	0
10.2	0
10.3	0
10.4	0
10.5	0
10.6	0
10.7	0
10.8	0
10.9	0
11	0
11.1	0
11.2	0
11.3	0
11.4	0
11.5	0
11.6	0
11.7	0
11.8	0
11.9	0
12	0
12.1	0
12.2	0
12.3	0
12.4	0
12.5	0
12.6	0
12.7	0
12.8	0
12.9	0
13	0
13.1	0
13.2	0
13.3	0
13.4	0
13.5	0
13.6	0
13.7	0
13.8	0
13.9	0
14	0
14.1	0
14.2	0
14.3	0
14.4	0
14.5	0
14.6	0
14.7	0
14.8	0
14.9	0
15	0
15.1	0
15.2	0
15.3	0
15.4	0
15.5	0
15.6	0
15.7	0
15.8	0
15.9	0
16	0
16.1	0
16.2	0
16.3	0
16.4	0
16.5	0
16.6	0
16.7	0
16.8	0
16.9	0
17	0
17.1	0
17.2	0
17.3	0
17.4	0
17.5	0
17.6	0
17.7	0
17.8	0
17.9	0
18	0
18.1	0
18.2	0
18.3	0
18.4	0
18.5	0
18.6	0
18.7	0
18.8	0
18.9	0
19	0
19.1	0
19.2	0
19.3	0
19.4	0
19.5	0
19.6	0
19.7	0
19.8	0
19.9	0
20	0
20.1	0
20.2	0
20.3	0
20.4	0
20.5	0
20.6	0
20.7	0
20.8	0
20.9	0
21	0
21.1	0
21.2	0
21.3	0
21.4	0
21.5	0
21.6	0
21.7	0
21.8	0
21.9	0
22	0
22.1	0
22.2	0
22.3	0
22.4	0
22.5	0
22.6	0
22.7	0
22.8	0
22.9	0
23	0
23.1	0
23.2	0
23.3	0
23.4	0
23.5	0
23.6	0
23.7	0
23.8	0
23.9	0
24	0
24.1	0
24.2	0
24.3	0
24.4	0
24.5	0
24.6	0
24.7	0
24.8	0
24.9	0
25	0
25.1	0
25.2	0
25.3	0
25.4	0
25.5	0
25.6	0
25.7	0
25.8	0
25.9	0
26	0
26.1	0
26.2	0
26.3	0
26.4	0
26.5	0
26.6	0
26.7	0
26.8	0
26.9	0
27	0
27.1	0
27.2	0
27.3	0
27.4	0
27.5	0
27.6	0
27.7	0
27.8	0
27.9	0
28	0
28.1	0
28.2	0
28.3	0
28.4	0
28.5	0
28.6	0
28.7	0
28.8	0
28.9	0
29	0
29.1	0
29.2	0
29.3	0
29.4	0
29.5	0
29.6	0
29.7	0
29.8	0
29.9	0
30	0
30.1	0
30.2	0
30.3	0
30.4	0
30.5	0
30.6	0
30.7	0
30.8	0
30.9	0
31	0
31.1	0
31.2	0
31.3	0
31.4	0
31.5	0
31.6	0
31.7	0
31.8	0
31.9	0
32	0
32.1	0
32.2	0
32.3	0
32.4	0
32.5	0
32.6	0
32.7	0
32.8	0
32.9	0
33	0
33.1	0
33.2	0
33.3	0
33.4	0
33.5	0
33.6	0
33.7	0
33.8	0
33.9	0
34	0
34.1	0
34.2	0
34.3	0
34.4	0
34.5	0
34.6	0
34.7	0
34.8	0
34.9	0
35	0
35.1	0
35.2	0
35.3	0
35.4	0
35.5	0
35.6	0
35.7	0
35.8	0
35.9	0
36	0
36.1	0
36.2	0
36.3	0
36.4	0
36.5	0
36.6	0
36.7	0
36.8	0
36.9	0
37	0
37.1	0
37.2	0
37.3	0
37.4	0
37.5	0
37.6	0
37.7	0
37.8	0
37.9	0
38	0
38.1	0
38.2	0
38.3	0
38.4	0
38.5	0
38.6	0
38.7	0
38.8	0
38.9	0
39	0
39.1	0
39.2	0
39.3	0
39.4	0
39.5	0
39.6	0
39.7	0
39.8	0
39.9	0
40	0
40.1	0
40.2	0
40.3	0
40.4	0
40.5	0
40.6	0
40.7	0
40.8	0
40.9	0
41	0
41.1	0
41.2	0
41.3	0
41.4	0
41.5	0
41.6	0
41.7	0
41.8	0
41.9	0
42	0
42.1	0
42.2	0
42.3	0
42.4	0
42.5	0
42.6	0
42.7	0
42.8	0
42.9	0
43	0
43.1	0
43.2	0
43.3	0
43.4	0
43.5	0
43.6	0
43.7	0
43.8	0
43.9	0
44	0
44.1	0
44.2	0
44.3	0
44.4	0
44.5	0
44.6	0
44.7	0
44.8	0
44.9	0
45	0
45.1	0
45.2	0
45.3	0
45.4	0
45.5	0
45.6	0
45.7	0
45.8	0
45.9	0
46	0
46.1	0
46.2	0
46.3	0
46.4	0
46.5	0
46.6	0
46.7	0
46.8	0
46.9	0
47	0
47.1	0
47.2	0
47.3	0
47.4	0
47.5	0
47.6	0
47.7	0
47.8	0
47.9	0
48	0
48.1	0
48.2	0
48.3	0
48.4	0
48.5	0
48.6	0
48.7	0
48.8	0
48.9	0
49	0
49.1	0
49.2	0
49.3	0
49.4	0
49.5	0
49.6	0
49.7	0
49.8	0
49.9	0
50	0
50.1	0
50.2	0
50.3	0
50.4	0
50.5	0
50.6	0
50.7	0
50.8	0
50.9	0
51	0
51.1	0
51.2	0
51.3	0
51.4	0
51.5	0
51.6	0
51.7	0
51.8	0
51.9	0
52	0
52.1	0
52.2	0
52.3	0
52.4	0
52.5	0
52.6	0
52.7	0
52.8	0
52.9	0
53	0
53.1	0
53.2	0
53.3	0
53.4	0
53.5	0
53.6	0
53.7	0
53.8	0
53.9	0
54	0
54.1	0
54.2	0
54.3	0
54.4	0
54.5	0
54.6	0
54.7	0
54.8	0
54.9	0
55	0
55.1	0
55.2	0
55.3	0
55.4	0
55.5	0
55.6	0
55.7	0
55.8	0
55.9	0
56	0
56.1	0
56.2	0
56.3	0
56.4	0
56.5	0
56.6	0
56.7	0
56.8	0
56.9	0
57	0
57.1	0
57.2	0
57.3	0
57.4	0
57.5	0
57.6	0
57.7	0
57.8	0
57.9	0
58	0
58.1	0
58.2	0
58.3	0
58.4	0
58.5	0
58.6	0
58.7	0
58.8	0
58.9	0
59	0
59.1	0
59.2	0
59.3	0
59.4	0
59.5	0
59.6	0
59.7	0
59.8	0
59.9	0
60	0
60.1	0
60.2	0
60.3	0
60.4	0
60.5	0
60.6	0
60.7	0
60.8	0
60.9	0
61	0
61.1	0
61.2	0
61.3	0
61.4	0
61.5	0
61.6	0
61.7	0
61.8	0
61.9	0
62	0
62.1	0
62.2	0
62.3	0
62.4	0
62.5	0
62.6	0
62.7	0
62.8	0
62.9	0
63	0
63.1	0
63.2	0
63.3	0
63.4	0
63.5	0
63.6	0
63.7	0
63.8	0
63.9	0
64	0
64.1	0
64.2	0
64.3	0
64.4	0
64.5	0
64.6	0
64.7	0
64.8	0
64.9	0
65	0
65.1	0
65.2	0
65.3	0
65.4	0
65.5	0
65.6	0
65.7	0
65.8	0
65.9	0
66	0
66.1	0
66.2	0
66.3	0
66.4	0
66.5	0
66.6	0
66.7	0
66.8	0
66.9	0
67	0
67.1	0
67.2	0
67.3	0
67.4	0
67.5	0
67.6	0
67.7	0
67.8	0
67.9	0
68	0
68.1	0
68.2	0
68.3	0
68.4	0
68.5	0
68.6	0
68.7	0
68.8	0
68.9	0
69	0
69.1	0
69.2	0
69.3	0
69.4	0
69.5	0
69.6	0
69.7	0
69.8	0
69.9	0
70	0
70.1	0
70.2	0
70.3	0
70.4	0
70.5	0
70.6	0
70.7	0
70.8	0
70.9	0
71	0
71.1	0
71.2	0
71.3	0
71.4	0
71.5	0
71.6	0
71.7	0
71.8	0
71.9	0
72	0
72.1	0
72.2	0
72.3	0
72.4	0
72.5	0
72.6	0
72.7	0
72.8	0
72.9	0
73	0
73.1	0
73.2	0
73.3	0
73.4	0
73.5	0
73.6	0
73.7	0
73.8	0
73.9	0
74	0
74.1	0
74.2	0
74.3	0
74.4	0
74.5	0
74.6	0
74.7	0
74.8	0
74.9	0
75	0
75.1	0
75.2	0
75.3	0
75.4	0
75.5	0
75.6	0
75.7	0
75.8	0
75.9	0
76	0
76.1	0
76.2	0
76.3	0
76.4	0
76.5	0
76.6	0
76.7	0
76.8	0
76.9	0
77	0
77.1	0
77.2	0
77.3	0
77.4	0
77.5	0
77.6	0
77.7	0
77.8	0
77.9	0
78	0
78.1	0
78.2	0
78.3	0
78.4	0
78.5	0
78.6	0
78.7	0
78.8	0
78.9	0
79	0
79.1	0
79.2	0
79.3	0
79.4	0
79.5	0
79.6	0
79.7	0
79.8	0
79.9	0
80	0
80.1	0
80.2	0
80.3	0
80.4	0
80.5	0
80.6	0
80.7	0
80.8	0
80.9	0
81	0
81.1	0
81.2	0
81.3	0
81.4	0
81.5	0
81.6	0
81.7	0
81.8	0
81.9	0
82	0
82.1	0
82.2	0
82.3	0
82.4	0
82.5	0
82.6	0
82.7	0
82.8	0
82.9	0
83	0
83.1	0
83.2	0
83.3	0
83.4	0
83.5	0
83.6	0
83.7	0
83.8	0
83.9	0
84	0
84.1	0
84.2	0
84.3	0
84.4	0
84.5	0
84.6	0
84.7	0
84.8	0
84.9	0
85	0
85.1	0
85.2	0
85.3	0
85.4	0
85.5	0
85.6	0
85.7	0
85.8	0
85.9	0
86	0
86.1	0
86.2	0
86.3	0
86.4	0
86.5	0
86.6	0
86.7	0
86.8	0
86.9	0
87	0
87.1	0
87.2	0
87.3	0
87.4	0
87.5	0
87.6	0
87.7	0
87.8	0
87.9	0
88	0
88.1	0
88.2	0
88.3	0
88.4	0
88.5	0
88.6	0
88.7	0
88.8	0
88.9	0
89	0
89.1	0
89.2	0
89.3	0
89.4	0
89.5	0
89.6	0
89.7	0
89.8	0
89.9	0
90	0
90.1	0
90.2	0
90.3	0
90.4	0
90.5	0
90.6	0
90.7	0
90.8	0
90.9	0
91	0
91.1	0
91.2	0
91.3	0
91.4	0
91.5	0
91.6	0
91.7	0
91.8	0
91.9	0
92	0
92.1	0
92.2	0
92.3	0
92.4	0
92.5	0
92.6	0
92.7	0
92.8	0
92.9	0
93	0
93.1	0
93.2	0
93.3	0
93.4	0
93.5	0
93.6	0
93.7	0
93.8	0
93.9	0
94	0
94.1	0
94.2	0
94.3	0
94.4	0
94.5	0
94.6	0
94.7	0
94.8	0
94.9	0
95	0
95.1	0
95.2	0
95.3	0
95.4	0
95.5	0
95.6	0
95.7	0
95.8	0
95.9	0
96	0
96.1	0
96.2	0
96.3	0
96.4	0
96.5	0
96.6	0
96.7	0
96.8	0
96.9	0
97	0
97.1	0
97.2	0
97.3	0
97.4	0
97.5	0
97.6	0
97.7	0
97.8	0
97.9	0
98	0
98.1	0
98.2	0
98.3	0
98.4	0
98.5	0
98.6	0
98.7	0
98.8	0
98.9	0
99	0
99.1	0
99.2	0
99.3	0
99.4	0
99.5	0
99.6	0
99.7	0
99.8	0
99.9	0
100	0
100.1	0.000428571
100.2	0.00171429
100.3	0.005
100.4	0.00828571
100.5	0.0118571
100.6	0.0158571
100.7	0.0204286
100.8	0.0251429
100.9	0.0281429
101	0.0325714
101.1	0.0378571
101.2	0.0418571
101.3	0.0464286
101.4	0.0507143
101.5	0.0545714
101.6	0.0601429
101.7	0.0632857
101.8	0.0657143
101.9	0.0698571
102	0.0748571
102.1	0.0788571
102.2	0.083
102.3	0.0864286
102.4	0.0907143
102.5	0.094
102.6	0.0971429
102.7	0.103
102.8	0.107
102.9	0.110143
103	0.112857
103.1	0.117429
103.2	0.120429
103.3	0.123
103.4	0.127
103.5	0.13
103.6	0.133857
103.7	0.138143
103.8	0.144
103.9	0.147429
104	0.151571
104.1	0.154286
104.2	0.158571
104.3	0.162571
104.4	0.165571
104.5	0.168429
104.6	0.172143
104.7	0.175857
104.8	0.180857
104.9	0.182714
105	0.188143
105.1	0.192
105.2	0.195
105.3	0.198286
105.4	0.201571
105.5	0.205571
105.6	0.209143
105.7	0.212
105.8	0.216286
105.9	0.22
106	0.223857
106.1	0.227429
106.2	0.230286
106.3	0.234714
106.4	0.239
106.5	0.242286
106.6	0.245
106.7	0.249714
106.8	0.251857
106.9	0.254286
107	0.256857
107.1	0.259857
107.2	0.263429
107.3	0.267429
107.4	0.27
107.5	0.273286
107.6	0.276714
107.7	0.279571
107.8	0.284
107.9	0.287286
108	0.289429
108.1	0.293571
108.2	0.295714
108.3	0.298429
108.4	0.300571
108.5	0.303714
108.6	0.306571
108.7	0.308571
108.8	0.311857
108.9	0.315143
109	0.316857
109.1	0.319571
109.2	0.322429
109.3	0.324714
109.4	0.327
109.5	0.330571
109.6	0.334
109.7	0.335571
109.8	0.337714
109.9	0.34
110	0.342
110.1	0.345
110.2	0.348429
110.3	0.351286
110.4	0.354143
110.5	0.357429
110.6	0.359857
110.7	0.362143
110.8	0.366571
110.9	0.369857
111	0.372857
111.1	0.375143
111.2	0.377286
111.3	0.379571
111.4	0.381857
111.5	0.384143
111.6	0.386
111.7	0.387429
111.8	0.389
111.9	0.392286
112	0.394857
112.1	0.396429
112.2	0.399
112.3	0.401429
112.4	0.404286
112.5	0.406286
112.6	0.409286
112.7	0.410857
112.8	0.413
112.9	0.415571
113	0.417429
113.1	0.420143
113.2	0.421429
113.3	0.424571
113.4	0.426571
113.5	0.427857
113.6	0.430143
113.7	0.432
113.8	0.433571
113.9	0.435571
114	0.437571
114.1	0.439286
114.2	0.441429
114.3	0.443571
114.4	0.445571
114.5	0.447143
114.6	0.45
114.7	0.453
114.8	0.455286
114.9	0.457286
115	0.459143
115.1	0.461
115.2	0.464286
115.3	0.465857
115.4	0.467714
115.5	0.470429
115.6	0.471143
115.7	0.473143
115.8	0.475429
115.9	0.476714
116	0.477286
116.1	0.479571
116.2	0.482
116.3	0.483571
116.4	0.485857
116.5	0.487714
116.6	0.489
116.7	0.491571
116.8	0.493143
116.9	0.494429
117	0.497714
117.1	0.5
117.2	0.502571
117.3	0.504714
117.4	0.507714
117.5	0.509429
117.6	0.510857
117.7	0.513143
117.8	0.514429
117.9	0.515857
118	0.517571
118.1	0.519429
118.2	0.521286
118.3	0.522714
118.4	0.524857
118.5	0.526857
118.6	0.529143
118.7	0.530143
118.8	0.532
118.9	0.533714
119	0.534714
119.1	0.536429
119.2	0.537571
119.3	0.539143
119.4	0.541
119.5	0.542
119.6	0.542286
119.7	0.543857
119.8	0.546143
119.9	0.548286
120	0.550143
120.1	0.551
120.2	0.552143
120.3	0.553429
120.4	0.555429
120.5	0.555429
120.6	0.556
120.7	0.556714
120.8	0.558286
120.9	0.561429
121	0.563
121.1	0.564
121.2	0.565571
121.3	0.565429
121.4	0.566429
121.5	0.567857
121.6	0.569
121.7	0.571286
121.8	0.572857
121.9	0.574571
122	0.576857
122.1	0.577429
122.2	0.578571
122.3	0.58
122.4	0.582143
122.5	0.583429
122.6	0.584286
122.7	0.584714
122.8	0.586857
122.9	0.587286
123	0.588286
123.1	0.589714
123.2	0.591286
123.3	0.592143
123.4	0.593429
123.5	0.594286
123.6	0.595714
123.7	0.596286
123.8	0.597714
123.9	0.599857
124	0.600857
124.1	0.601
124.2	0.602143
124.3	0.603286
124.4	0.604429
124.5	0.605571
124.6	0.606571
124.7	0.608286
124.8	0.609143
124.9	0.610571
125	0.612714
125.1	0.613857
125.2	0.614857
125.3	0.615857
125.4	0.616429
125.5	0.617429
125.6	0.618714
125.7	0.619429
125.8	0.620286
125.9	0.621143
126	0.621429
126.1	0.622143
126.2	0.622714
126.3	0.623857
126.4	0.625286
126.5	0.626
126.6	0.627429
126.7	0.629
126.8	0.63
126.9	0.631571
127	0.633571
127.1	0.633714
127.2	0.635
127.3	0.636
127.4	0.637714
127.5	0.638
127.6	0.638857
127.7	0.639
127.8	0.639
127.9	0.639143
128	0.640429
128.1	0.641286
128.2	0.641857
128.3	0.642714
128.4	0.643429
128.5	0.644429
128.6	0.645571
128.7	0.647143
128.8	0.647857
128.9	0.648857
129	0.65
129.1	0.650857
129.2	0.652143
129.3	0.653143
129.4	0.654143
129.5	0.655143
129.6	0.655857
129.7	0.657429
129.8	0.658143
129.9	0.659429
130	0.660429
130.1	0.660714
130.2	0.661143
130.3	0.662
130.4	0.663857
130.5	0.665143
130.6	0.667
130.7	0.668143
130.8	0.67
130.9	0.670857
131	0.671429
131.1	0.671
131.2	0.672143
131.3	0.673143
131.4	0.673286
131.5	0.673
131.6	0.675286
131.7	0.676286
131.8	0.678429
131.9	0.678571
132	0.678857
132.1	0.679286
132.2	0.681143
132.3	0.681143
132.4	0.681429
132.5	0.681857
132.6	0.682429
132.7	0.683857
132.8	0.684714
132.9	0.685286
133	0.686857
133.1	0.687714
133.2	0.688143
133.3	0.688429
133.4	0.689571
133.5	0.689429
133.6	0.689286
133.7	0.689857
133.8	0.690714
133.9	0.691143
134	0.692
134.1	0.692857
134.2	0.693857
134.3	0.694857
134.4	0.695571
134.5	0.696429
134.6	0.697857
134.7	0.698571
134.8	0.698857
134.9	0.699286
135	0.7
135.1	0.700714
135.2	0.702
135.3	0.702571
135.4	0.703143
135.5	0.704857
135.6	0.704857
135.7	0.706429
135.8	0.707429
135.9	0.707571
136	0.707571
136.1	0.707714
136.2	0.708857
136.3	0.709714
136.4	0.710714
136.5	0.711
136.6	0.711857
136.7	0.712
136.8	0.713143
136.9	0.713286
137	0.714
137.1	0.714714
137.2	0.714571
137.3	0.713857
137.4	0.714429
137.5	0.714571
137.6	0.714571
137.7	0.716571
137.8	0.718
137.9	0.718571
138	0.717857
138.1	0.718286
138.2	0.718286
138.3	0.718
138.4	0.719429
138.5	0.72
138.6	0.720857
138.7	0.720857
138.8	0.722429
138.9	0.723143
139	0.723571
139.1	0.724
139.2	0.724429
139.3	0.724286
139.4	0.724429
139.5	0.725
139.6	0.725857
139.7	0.727143
139.8	0.726857
139.9	0.727429
140	0.727143
140.1	0.729
140.2	0.728714
140.3	0.729571
140.4	0.730714
140.5	0.731714
140.6	0.732286
140.7	0.733143
140.8	0.733571
140.9	0.734429
141	0.734286
141.1	0.734714
141.2	0.735571
141.3	0.736143
141.4	0.735857
141.5	0.736286
141.6	0.736429
141.7	0.736429
141.8	0.737143
141.9	0.737714
142	0.737286
142.1	0.738143
142.2	0.739143
142.3	0.739429
142.4	0.739857
142.5	0.740571
142.6	0.740857
142.7	0.741
142.8	0.741571
142.9	0.743286
143	0.742571
143.1	0.742857
143.2	0.744286
143.3	0.744571
143.4	0.745
143.5	0.746
143.6	0.746143
143.7	0.746714
143.8	0.746857
143.9	0.747286
144	0.747857
144.1	0.749
144.2	0.749286
144.3	0.749714
144.4	0.750714
144.5	0.751286
144.6	0.751429
144.7	0.752571
144.8	0.752857
144.9	0.753143
145	0.752714
145.1	0.753
145.2	0.753571
145.3	0.754857
145.4	0.755429
145.5	0.756143
145.6	0.757
145.7	0.756857
145.8	0.757
145.9	0.756857
146	0.756857
146.1	0.757714
146.2	0.758571
146.3	0.759429
146.4	0.76
146.5	0.759571
146.6	0.760429
146.7	0.760286
146.8	0.762143
146.9	0.762143
147	0.762143
147.1	0.761857
147.2	0.762857
147.3	0.762429
147.4	0.763
147.5	0.763286
147.6	0.764286
147.7	0.764714
147.8	0.765571
147.9	0.766429
148	0.766571
148.1	0.767286
148.2	0.768429
148.3	0.767714
148.4	0.766714
148.5	0.767286
148.6	0.768286
148.7	0.769429
148.8	0.769429
148.9	0.770143
149	0.770143
149.1	0.770857
149.2	0.770857
149.3	0.771571
149.4	0.771286
149.5	0.770286
149.6	0.771143
149.7	0.771429
149.8	0.771714
149.9	0.772429
150	0.773
150.1	0.773286
150.2	0.772857
150.3	0.773143
150.4	0.774143
150.5	0.774714
150.6	0.774571
150.7	0.775429
150.8	0.775857
150.9	0.776714
151	0.776714
151.1	0.776714
151.2	0.776143
151.3	0.776
151.4	0.776857
151.5	0.776429
151.6	0.776857
151.7	0.777429
151.8	0.778
151.9	0.777571
152	0.776857
152.1	0.776571
152.2	0.777
152.3	0.777286
152.4	0.777857
152.5	0.777286
152.6	0.777429
152.7	0.778571
152.8	0.778
152.9	0.779
153	0.779571
153.1	0.78
153.2	0.780429
153.3	0.780571
153.4	0.780429
153.5	0.780143
153.6	0.780143
153.7	0.780143
153.8	0.780714
153.9	0.780571
154	0.780571
154.1	0.781
154.2	0.780571
154.3	0.780857
154.4	0.781429
154.5	0.782857
154.6	0.782857
154.7	0.783143
154.8	0.783143
154.9	0.782714
155	0.782857
155.1	0.783143
155.2	0.783286
155.3	0.783286
155.4	0.784429
155.5	0.785143
155.6	0.786
155.7	0.786286
155.8	0.786
155.9	0.786571
156	0.786714
156.1	0.786143
156.2	0.785571
156.3	0.785714
156.4	0.786286
156.5	0.786286
156.6	0.786571
156.7	0.786857
156.8	0.786857
156.9	0.787
157	0.787286
157.1	0.787
157.2	0.786857
157.3	0.787
157.4	0.787143
157.5	0.787429
157.6	0.787286
157.7	0.788143
157.8	0.788143
157.9	0.787857
158	0.788571
158.1	0.788714
158.2	0.789143
158.3	0.789429
158.4	0.789571
158.5	0.789571
158.6	0.789714
158.7	0.789571
158.8	0.79
158.9	0.790143
159	0.790857
159.1	0.790571
159.2	0.789857
159.3	0.789857
159.4	0.79
159.5	0.789143
159.6	0.789714
159.7	0.789714
159.8	0.789571
159.9	0.789714
160	0.790143
160.1	0.790571
160.2	0.790857
160.3	0.791143
160.4	0.791
160.5	0.790714
160.6	0.791286
160.7	0.791143
160.8	0.790571
160.9	0.791
161	0.791143
161.1	0.791571
161.2	0.791714
161.3	0.792286
161.4	0.791571
161.5	0.792143
161.6	0.792714
161.7	0.793571
161.8	0.794
161.9	0.793714
162	0.793857
162.1	0.794429
162.2	0.795143
162.3	0.795714
162.4	0.796714
162.5	0.796429
162.6	0.796286
162.7	0.795571
162.8	0.796286
162.9	0.796429
163	0.796286
163.1	0.796857
163.2	0.797429
163.3	0.797857
163.4	0.797857
163.5	0.798571
163.6	0.799
163.7	0.799
163.8	0.798429
163.9	0.798857
164	0.798857
164.1	0.799429
164.2	0.799286
164.3	0.8
164.4	0.800429
164.5	0.800143
164.6	0.800286
164.7	0.800429
164.8	0.800857
164.9	0.801143
165	0.802143
165.1	0.801857
165.2	0.802143
165.3	0.802286
165.4	0.802143
165.5	0.802
165.6	0.801857
165.7	0.802143
165.8	0.802571
165.9	0.803571
166	0.804
166.1	0.804429
166.2	0.804714
166.3	0.805286
166.4	0.804286
166.5	0.804143
166.6	0.804571
166.7	0.805143
166.8	0.805429
166.9	0.805143
167	0.805286
167.1	0.804857
167.2	0.804714
167.3	0.804857
167.4	0.805
167.5	0.804571
167.6	0.804286
167.7	0.804571
167.8	0.804571
167.9	0.804429
168	0.804286
168.1	0.804
168.2	0.804714
168.3	0.804857
168.4	0.803857
168.5	0.804286
168.6	0.804571
168.7	0.805286
168.8	0.805143
168.9	0.805
169	0.805286
169.1	0.806
169.2	0.806714
169.3	0.807
169.4	0.806714
169.5	0.806857
169.6	0.807429
169.7	0.807571
169.8	0.807714
169.9	0.807714
170	0.807857
170.1	0.806429
170.2	0.806
170.3	0.806286
170.4	0.806429
170.5	0.807
170.6	0.806571
170.7	0.807286
170.8	0.806286
170.9	0.807286
171	0.806714
171.1	0.807143
171.2	0.807
171.3	0.807714
171.4	0.807286
171.5	0.808
171.6	0.807429
171.7	0.807
171.8	0.807143
171.9	0.807286
172	0.806286
172.1	0.807143
172.2	0.807714
172.3	0.807571
172.4	0.808143
172.5	0.808571
172.6	0.808571
172.7	0.808714
172.8	0.808286
172.9	0.807286
173	0.807286
173.1	0.807286
173.2	0.808143
173.3	0.808857
173.4	0.809429
173.5	0.808571
173.6	0.808286
173.7	0.808429
173.8	0.808571
173.9	0.808571
174	0.808571
174.1	0.808143
174.2	0.808143
174.3	0.807857
174.4	0.807571
174.5	0.808
174.6	0.808857
174.7	0.808857
174.8	0.807857
174.9	0.807714
175	0.807571
175.1	0.807286
175.2	0.807143
175.3	0.807714
175.4	0.807571
175.5	0.806714
175.6	0.806571
175.7	0.805857
175.8	0.806143
175.9	0.805143
176	0.805143
176.1	0.804143
176.2	0.805
176.3	0.804714
176.4	0.804571
176.5	0.804857
176.6	0.804857
176.7	0.804857
176.8	0.805143
176.9	0.805571
177	0.806143
177.1	0.806286
177.2	0.806714
177.3	0.806857
177.4	0.807143
177.5	0.806714
177.6	0.807143
177.7	0.807143
177.8	0.806857
177.9	0.806857
178	0.806143
178.1	0.806286
178.2	0.806714
178.3	0.806714
178.4	0.806286
178.5	0.806286
178.6	0.806571
178.7	0.806429
178.8	0.805714
178.9	0.806
179	0.805857
179.1	0.806
179.2	0.805714
179.3	0.805286
179.4	0.805429
179.5	0.805571
179.6	0.805857
179.7	0.805857
179.8	0.806429
179.9	0.806714
180	0.807
180.1	0.807143
180.2	0.806714
180.3	0.806857
180.4	0.806714
180.5	0.806571
180.6	0.805571
180.7	0.806
180.8	0.805571
180.9	0.805429
181	0.805143
181.1	0.806286
181.2	0.805429
181.3	0.805143
181.4	0.805286
181.5	0.805286
181.6	0.805143
181.7	0.805857
181.8	0.805714
181.9	0.806429
182	0.806714
182.1	0.807
182.2	0.807286
182.3	0.807
182.4	0.806429
182.5	0.805571
182.6	0.805857
182.7	0.806143
182.8	0.806143
182.9	0.806143
183	0.806143
183.1	0.806
183.2	0.805857
183.3	0.805714
183.4	0.806571
183.5	0.806857
183.6	0.806143
183.7	0.805857
183.8	0.806286
183.9	0.806286
184	0.806714
184.1	0.807
184.2	0.806429
184.3	0.806714
184.4	0.806286
184.5	0.806714
184.6	0.806714
184.7	0.806857
184.8	0.807429
184.9	0.807286
185	0.806857
185.1	0.807286
185.2	0.806857
185.3	0.807429
185.4	0.808143
185.5	0.807714
185.6	0.807857
185.7	0.807571
185.8	0.807429
185.9	0.807571
186	0.806571
186.1	0.806429
186.2	0.806286
186.3	0.806429
186.4	0.806
186.5	0.806286
186.6	0.806429
186.7	0.807286
186.8	0.807571
186.9	0.808714
187	0.809286
187.1	0.809286
187.2	0.809143
187.3	0.808857
187.4	0.809286
187.5	0.809429
187.6	0.809714
187.7	0.809857
187.8	0.809714
187.9	0.809714
188	0.809286
188.1	0.808857
188.2	0.809
188.3	0.809
188.4	0.809143
188.5	0.808857
188.6	0.809143
188.7	0.808857
188.8	0.809143
188.9	0.809143
189	0.809571
189.1	0.809571
189.2	0.809143
189.3	0.808857
189.4	0.808714
189.5	0.809
189.6	0.809
189.7	0.809714
189.8	0.81
189.9	0.810286
190	0.810714
190.1	0.81
190.2	0.810143
190.3	0.809143
190.4	0.809429
190.5	0.809429
190.6	0.809714
190.7	0.809571
190.8	0.809857
190.9	0.809429
191	0.809429
191.1	0.809714
191.2	0.810714
191.3	0.810571
191.4	0.810571
191.5	0.811
191.6	0.811286
191.7	0.810714
191.8	0.810571
191.9	0.811
192	0.812143
192.1	0.811429
192.2	0.810857
192.3	0.812286
192.4	0.811714
192.5	0.812143
192.6	0.812286
192.7	0.812571
192.8	0.812571
192.9	0.813286
193	0.813571
193.1	0.813429
193.2	0.813714
193.3	0.814
193.4	0.813571
193.5	0.814143
193.6	0.813714
193.7	0.813857
193.8	0.814429
193.9	0.813143
194	0.812
194.1	0.811143
194.2	0.811571
194.3	0.812143
194.4	0.811714
194.5	0.811714
194.6	0.811857
194.7	0.811429
194.8	0.811857
194.9	0.812
195	0.811857
195.1	0.811571
195.2	0.811714
195.3	0.811429
195.4	0.810571
195.5	0.810429
195.6	0.810286
195.7	0.810286
195.8	0.809571
195.9	0.809714
196	0.809143
196.1	0.809857
196.2	0.809857
196.3	0.808857
196.4	0.809571
196.5	0.809429
196.6	0.808571
196.7	0.808714
196.8	0.808286
196.9	0.808143
197	0.808714
197.1	0.809286
197.2	0.809
197.3	0.809
197.4	0.809286
197.5	0.809286
197.6	0.809714
197.7	0.809714
197.8	0.809857
197.9	0.81
198	0.811
198.1	0.812143
198.2	0.811143
198.3	0.811143
198.4	0.811857
198.5	0.811
198.6	0.809857
198.7	0.81
198.8	0.811143
198.9	0.811
199	0.810714
199.1	0.810429
199.2	0.810714
199.3	0.811429
199.4	0.811857
199.5	0.811
199.6	0.811571
199.7	0.811857
199.8	0.811714
199.9	0.812
200	0.812143
[truncated: 14,000 more rows]
