# Supplementary material for: Bayesian inference of kinetic schemes for ion channels by Kalman filtering
Source: eLife journal article supplement (doi:10.7554/elife.62714), 2022-05-04
Supplement: fig4-data1 [file 1_Sim_N_10000_Fluor_MW.xlsx]

## Sheet: Tabelle1
0.1	0
0.2	0
0.3	0
0.4	0
0.5	0
0.6	0
0.7	0
0.8	0
0.9	0
1	0
1.1	0
1.2	0
1.3	0
1.4	0
1.5	0
1.6	0
1.7	0
1.8	0
1.9	0
2	0
2.1	0
2.2	0
2.3	0
2.4	0
2.5	0
2.6	0
2.7	0
2.8	0
2.9	0
3	0
3.1	0
3.2	0
3.3	0
3.4	0
3.5	0
3.6	0
3.7	0
3.8	0
3.9	0
4	0
4.1	0
4.2	0
4.3	0
4.4	0
4.5	0
4.6	0
4.7	0
4.8	0
4.9	0
5	0
5.1	0
5.2	0
5.3	0
5.4	0
5.5	0
5.6	0
5.7	0
5.8	0
5.9	0
6	0
6.1	0
6.2	0
6.3	0
6.4	0
6.5	0
6.6	0
6.7	0
6.8	0
6.9	0
7	0
7.1	0
7.2	0
7.3	0
7.4	0
7.5	0
7.6	0
7.7	0
7.8	0
7.9	0
8	0
8.1	0
8.2	0
8.3	0
8.4	0
8.5	0
8.6	0
8.7	0
8.8	0
8.9	0
9	0
9.1	0
9.2	0
9.3	0
9.4	0
9.5	0
9.6	0
9.7	0
9.8	0
9.9	0
10	0
10.1	0
10.2	0
10.3	0
10.4	0
10.5	0
10.6	0
10.7	0
10.8	0
10.9	0
11	0
11.1	0
11.2	0
11.3	0
11.4	0
11.5	0
11.6	0
11.7	0
11.8	0
11.9	0
12	0
12.1	0
12.2	0
12.3	0
12.4	0
12.5	0
12.6	0
12.7	0
12.8	0
12.9	0
13	0
13.1	0
13.2	0
13.3	0
13.4	0
13.5	0
13.6	0
13.7	0
13.8	0
13.9	0
14	0
14.1	0
14.2	0
14.3	0
14.4	0
14.5	0
14.6	0
14.7	0
14.8	0
14.9	0
15	0
15.1	0
15.2	0
15.3	0
15.4	0
15.5	0
15.6	0
15.7	0
15.8	0
15.9	0
16	0
16.1	0
16.2	0
16.3	0
16.4	0
16.5	0
16.6	0
16.7	0
16.8	0
16.9	0
17	0
17.1	0
17.2	0
17.3	0
17.4	0
17.5	0
17.6	0
17.7	0
17.8	0
17.9	0
18	0
18.1	0
18.2	0
18.3	0
18.4	0
18.5	0
18.6	0
18.7	0
18.8	0
18.9	0
19	0
19.1	0
19.2	0
19.3	0
19.4	0
19.5	0
19.6	0
19.7	0
19.8	0
19.9	0
20	0
20.1	0
20.2	0
20.3	0
20.4	0
20.5	0
20.6	0
20.7	0
20.8	0
20.9	0
21	0
21.1	0
21.2	0
21.3	0
21.4	0
21.5	0
21.6	0
21.7	0
21.8	0
21.9	0
22	0
22.1	0
22.2	0
22.3	0
22.4	0
22.5	0
22.6	0
22.7	0
22.8	0
22.9	0
23	0
23.1	0
23.2	0
23.3	0
23.4	0
23.5	0
23.6	0
23.7	0
23.8	0
23.9	0
24	0
24.1	0
24.2	0
24.3	0
24.4	0
24.5	0
24.6	0
24.7	0
24.8	0
24.9	0
25	0
25.1	0
25.2	0
25.3	0
25.4	0
25.5	0
25.6	0
25.7	0
25.8	0
25.9	0
26	0
26.1	0
26.2	0
26.3	0
26.4	0
26.5	0
26.6	0
26.7	0
26.8	0
26.9	0
27	0
27.1	0
27.2	0
27.3	0
27.4	0
27.5	0
27.6	0
27.7	0
27.8	0
27.9	0
28	0
28.1	0
28.2	0
28.3	0
28.4	0
28.5	0
28.6	0
28.7	0
28.8	0
28.9	0
29	0
29.1	0
29.2	0
29.3	0
29.4	0
29.5	0
29.6	0
29.7	0
29.8	0
29.9	0
30	0
30.1	0
30.2	0
30.3	0
30.4	0
30.5	0
30.6	0
30.7	0
30.8	0
30.9	0
31	0
31.1	0
31.2	0
31.3	0
31.4	0
31.5	0
31.6	0
31.7	0
31.8	0
31.9	0
32	0
32.1	0
32.2	0
32.3	0
32.4	0
32.5	0
32.6	0
32.7	0
32.8	0
32.9	0
33	0
33.1	0
33.2	0
33.3	0
33.4	0
33.5	0
33.6	0
33.7	0
33.8	0
33.9	0
34	0
34.1	0
34.2	0
34.3	0
34.4	0
34.5	0
34.6	0
34.7	0
34.8	0
34.9	0
35	0
35.1	0
35.2	0
35.3	0
35.4	0
35.5	0
35.6	0
35.7	0
35.8	0
35.9	0
36	0
36.1	0
36.2	0
36.3	0
36.4	0
36.5	0
36.6	0
36.7	0
36.8	0
36.9	0
37	0
37.1	0
37.2	0
37.3	0
37.4	0
37.5	0
37.6	0
37.7	0
37.8	0
37.9	0
38	0
38.1	0
38.2	0
38.3	0
38.4	0
38.5	0
38.6	0
38.7	0
38.8	0
38.9	0
39	0
39.1	0
39.2	0
39.3	0
39.4	0
39.5	0
39.6	0
39.7	0
39.8	0
39.9	0
40	0
40.1	0
40.2	0
40.3	0
40.4	0
40.5	0
40.6	0
40.7	0
40.8	0
40.9	0
41	0
41.1	0
41.2	0
41.3	0
41.4	0
41.5	0
41.6	0
41.7	0
41.8	0
41.9	0
42	0
42.1	0
42.2	0
42.3	0
42.4	0
42.5	0
42.6	0
42.7	0
42.8	0
42.9	0
43	0
43.1	0
43.2	0
43.3	0
43.4	0
43.5	0
43.6	0
43.7	0
43.8	0
43.9	0
44	0
44.1	0
44.2	0
44.3	0
44.4	0
44.5	0
44.6	0
44.7	0
44.8	0
44.9	0
45	0
45.1	0
45.2	0
45.3	0
45.4	0
45.5	0
45.6	0
45.7	0
45.8	0
45.9	0
46	0
46.1	0
46.2	0
46.3	0
46.4	0
46.5	0
46.6	0
46.7	0
46.8	0
46.9	0
47	0
47.1	0
47.2	0
47.3	0
47.4	0
47.5	0
47.6	0
47.7	0
47.8	0
47.9	0
48	0
48.1	0
48.2	0
48.3	0
48.4	0
48.5	0
48.6	0
48.7	0
48.8	0
48.9	0
49	0
49.1	0
49.2	0
49.3	0
49.4	0
49.5	0
49.6	0
49.7	0
49.8	0
49.9	0
50	0
50.1	0
50.2	0
50.3	0
50.4	0
50.5	0
50.6	0
50.7	0
50.8	0
50.9	0
51	0
51.1	0
51.2	0
51.3	0
51.4	0
51.5	0
51.6	0
51.7	0
51.8	0
51.9	0
52	0
52.1	0
52.2	0
52.3	0
52.4	0
52.5	0
52.6	0
52.7	0
52.8	0
52.9	0
53	0
53.1	0
53.2	0
53.3	0
53.4	0
53.5	0
53.6	0
53.7	0
53.8	0
53.9	0
54	0
54.1	0
54.2	0
54.3	0
54.4	0
54.5	0
54.6	0
54.7	0
54.8	0
54.9	0
55	0
55.1	0
55.2	0
55.3	0
55.4	0
55.5	0
55.6	0
55.7	0
55.8	0
55.9	0
56	0
56.1	0
56.2	0
56.3	0
56.4	0
56.5	0
56.6	0
56.7	0
56.8	0
56.9	0
57	0
57.1	0
57.2	0
57.3	0
57.4	0
57.5	0
57.6	0
57.7	0
57.8	0
57.9	0
58	0
58.1	0
58.2	0
58.3	0
58.4	0
58.5	0
58.6	0
58.7	0
58.8	0
58.9	0
59	0
59.1	0
59.2	0
59.3	0
59.4	0
59.5	0
59.6	0
59.7	0
59.8	0
59.9	0
60	0
60.1	0
60.2	0
60.3	0
60.4	0
60.5	0
60.6	0
60.7	0
60.8	0
60.9	0
61	0
61.1	0
61.2	0
61.3	0
61.4	0
61.5	0
61.6	0
61.7	0
61.8	0
61.9	0
62	0
62.1	0
62.2	0
62.3	0
62.4	0
62.5	0
62.6	0
62.7	0
62.8	0
62.9	0
63	0
63.1	0
63.2	0
63.3	0
63.4	0
63.5	0
63.6	0
63.7	0
63.8	0
63.9	0
64	0
64.1	0
64.2	0
64.3	0
64.4	0
64.5	0
64.6	0
64.7	0
64.8	0
64.9	0
65	0
65.1	0
65.2	0
65.3	0
65.4	0
65.5	0
65.6	0
65.7	0
65.8	0
65.9	0
66	0
66.1	0
66.2	0
66.3	0
66.4	0
66.5	0
66.6	0
66.7	0
66.8	0
66.9	0
67	0
67.1	0
67.2	0
67.3	0
67.4	0
67.5	0
67.6	0
67.7	0
67.8	0
67.9	0
68	0
68.1	0
68.2	0
68.3	0
68.4	0
68.5	0
68.6	0
68.7	0
68.8	0
68.9	0
69	0
69.1	0
69.2	0
69.3	0
69.4	0
69.5	0
69.6	0
69.7	0
69.8	0
69.9	0
70	0
70.1	0
70.2	0
70.3	0
70.4	0
70.5	0
70.6	0
70.7	0
70.8	0
70.9	0
71	0
71.1	0
71.2	0
71.3	0
71.4	0
71.5	0
71.6	0
71.7	0
71.8	0
71.9	0
72	0
72.1	0
72.2	0
72.3	0
72.4	0
72.5	0
72.6	0
72.7	0
72.8	0
72.9	0
73	0
73.1	0
73.2	0
73.3	0
73.4	0
73.5	0
73.6	0
73.7	0
73.8	0
73.9	0
74	0
74.1	0
74.2	0
74.3	0
74.4	0
74.5	0
74.6	0
74.7	0
74.8	0
74.9	0
75	0
75.1	0
75.2	0
75.3	0
75.4	0
75.5	0
75.6	0
75.7	0
75.8	0
75.9	0
76	0
76.1	0
76.2	0
76.3	0
76.4	0
76.5	0
76.6	0
76.7	0
76.8	0
76.9	0
77	0
77.1	0
77.2	0
77.3	0
77.4	0
77.5	0
77.6	0
77.7	0
77.8	0
77.9	0
78	0
78.1	0
78.2	0
78.3	0
78.4	0
78.5	0
78.6	0
78.7	0
78.8	0
78.9	0
79	0
79.1	0
79.2	0
79.3	0
79.4	0
79.5	0
79.6	0
79.7	0
79.8	0
79.9	0
80	0
80.1	0
80.2	0
80.3	0
80.4	0
80.5	0
80.6	0
80.7	0
80.8	0
80.9	0
81	0
81.1	0
81.2	0
81.3	0
81.4	0
81.5	0
81.6	0
81.7	0
81.8	0
81.9	0
82	0
82.1	0
82.2	0
82.3	0
82.4	0
82.5	0
82.6	0
82.7	0
82.8	0
82.9	0
83	0
83.1	0
83.2	0
83.3	0
83.4	0
83.5	0
83.6	0
83.7	0
83.8	0
83.9	0
84	0
84.1	0
84.2	0
84.3	0
84.4	0
84.5	0
84.6	0
84.7	0
84.8	0
84.9	0
85	0
85.1	0
85.2	0
85.3	0
85.4	0
85.5	0
85.6	0
85.7	0
85.8	0
85.9	0
86	0
86.1	0
86.2	0
86.3	0
86.4	0
86.5	0
86.6	0
86.7	0
86.8	0
86.9	0
87	0
87.1	0
87.2	0
87.3	0
87.4	0
87.5	0
87.6	0
87.7	0
87.8	0
87.9	0
88	0
88.1	0
88.2	0
88.3	0
88.4	0
88.5	0
88.6	0
88.7	0
88.8	0
88.9	0
89	0
89.1	0
89.2	0
89.3	0
89.4	0
89.5	0
89.6	0
89.7	0
89.8	0
89.9	0
90	0
90.1	0
90.2	0
90.3	0
90.4	0
90.5	0
90.6	0
90.7	0
90.8	0
90.9	0
91	0
91.1	0
91.2	0
91.3	0
91.4	0
91.5	0
91.6	0
91.7	0
91.8	0
91.9	0
92	0
92.1	0
92.2	0
92.3	0
92.4	0
92.5	0
92.6	0
92.7	0
92.8	0
92.9	0
93	0
93.1	0
93.2	0
93.3	0
93.4	0
93.5	0
93.6	0
93.7	0
93.8	0
93.9	0
94	0
94.1	0
94.2	0
94.3	0
94.4	0
94.5	0
94.6	0
94.7	0
94.8	0
94.9	0
95	0
95.1	0
95.2	0
95.3	0
95.4	0
95.5	0
95.6	0
95.7	0
95.8	0
95.9	0
96	0
96.1	0
96.2	0
96.3	0
96.4	0
96.5	0
96.6	0
96.7	0
96.8	0
96.9	0
97	0
97.1	0
97.2	0
97.3	0
97.4	0
97.5	0
97.6	0
97.7	0
97.8	0
97.9	0
98	0
98.1	0
98.2	0
98.3	0
98.4	0
98.5	0
98.6	0
98.7	0
98.8	0
98.9	0
99	0
99.1	0
99.2	0
99.3	0
99.4	0
99.5	0
99.6	0
99.7	0
99.8	0
99.9	0
100	0
100.1	0.53355
100.2	0.72985
100.3	0.8216
100.4	0.87665
100.5	0.90905
100.6	0.92665
100.7	0.93785
100.8	0.9431
100.9	0.9482
101	0.9506
101.1	0.95415
101.2	0.95445
101.3	0.95475
101.4	0.9543
101.5	0.9551
101.6	0.9531
101.7	0.95435
101.8	0.95435
101.9	0.9522
102	0.95435
102.1	0.9552
102.2	0.9555
102.3	0.95535
102.4	0.95565
102.5	0.95755
102.6	0.9584
102.7	0.95725
102.8	0.9587
102.9	0.95665
103	0.95785
103.1	0.9575
103.2	0.9578
103.3	0.9563
103.4	0.95715
103.5	0.9567
103.6	0.95675
103.7	0.95845
103.8	0.95905
103.9	0.9591
104	0.95915
104.1	0.95825
104.2	0.95905
104.3	0.9588
104.4	0.9609
104.5	0.9614
104.6	0.9606
104.7	0.96125
104.8	0.9612
104.9	0.96075
105	0.9624
105.1	0.9619
105.2	0.9614
105.3	0.96295
105.4	0.9623
105.5	0.96285
105.6	0.9626
105.7	0.9628
105.8	0.9634
105.9	0.96395
106	0.9646
106.1	0.963
106.2	0.96285
106.3	0.9641
106.4	0.96405
106.5	0.9634
106.6	0.96365
106.7	0.9635
106.8	0.9621
106.9	0.9628
107	0.9619
107.1	0.9627
107.2	0.9628
107.3	0.9638
107.4	0.96425
107.5	0.9646
107.6	0.9656
107.7	0.9665
107.8	0.9658
107.9	0.96565
108	0.96545
108.1	0.9657
108.2	0.96625
108.3	0.96655
108.4	0.96725
108.5	0.96655
108.6	0.9674
108.7	0.96695
108.8	0.96795
108.9	0.96795
109	0.9692
109.1	0.9687
109.2	0.96945
109.3	0.9696
109.4	0.9699
109.5	0.96775
109.6	0.96785
109.7	0.9694
109.8	0.9703
109.9	0.96755
110	0.9668
110.1	0.96695
110.2	0.9678
110.3	0.96675
110.4	0.96735
110.5	0.96765
110.6	0.9685
110.7	0.96835
110.8	0.97
110.9	0.97005
111	0.9722
111.1	0.9707
111.2	0.97
111.3	0.9704
111.4	0.9707
111.5	0.97045
111.6	0.9714
111.7	0.9711
111.8	0.97155
111.9	0.97075
112	0.9724
112.1	0.97225
112.2	0.97315
112.3	0.97325
112.4	0.97235
112.5	0.97265
112.6	0.97185
112.7	0.97215
112.8	0.9731
112.9	0.9726
113	0.9715
113.1	0.9717
113.2	0.9735
113.3	0.9732
113.4	0.97315
113.5	0.9736
113.6	0.97085
113.7	0.97185
113.8	0.9719
113.9	0.97395
114	0.9736
114.1	0.9724
114.2	0.9746
114.3	0.9749
114.4	0.97475
114.5	0.97335
114.6	0.9752
114.7	0.9741
114.8	0.973
114.9	0.9729
115	0.9737
115.1	0.9739
115.2	0.97315
115.3	0.9739
115.4	0.9746
115.5	0.974
115.6	0.97445
115.7	0.9741
115.8	0.97215
115.9	0.97315
116	0.9751
116.1	0.9752
116.2	0.9754
116.3	0.97645
116.4	0.97605
116.5	0.97705
116.6	0.9766
116.7	0.97715
116.8	0.97705
116.9	0.97745
117	0.97685
117.1	0.97715
117.2	0.9756
117.3	0.9749
117.4	0.9756
117.5	0.9745
117.6	0.97535
117.7	0.9749
117.8	0.9754
117.9	0.9746
118	0.976
118.1	0.9763
118.2	0.9765
118.3	0.9779
118.4	0.97725
118.5	0.97675
118.6	0.9776
118.7	0.97785
118.8	0.9776
118.9	0.978
119	0.97685
119.1	0.97685
119.2	0.9764
119.3	0.9767
119.4	0.97655
119.5	0.97715
119.6	0.97625
119.7	0.97875
119.8	0.97725
119.9	0.97885
120	0.9786
120.1	0.9796
120.2	0.97995
120.3	0.97915
120.4	0.97875
120.5	0.9782
120.6	0.9795
120.7	0.9786
120.8	0.9786
120.9	0.97965
121	0.979
121.1	0.97865
121.2	0.97955
121.3	0.97935
121.4	0.9786
121.5	0.9783
121.6	0.9794
121.7	0.97965
121.8	0.9795
121.9	0.97995
122	0.97955
122.1	0.9809
122.2	0.9809
122.3	0.98045
122.4	0.98015
122.5	0.9781
122.6	0.9791
122.7	0.97975
122.8	0.9786
122.9	0.9792
123	0.98045
123.1	0.9806
123.2	0.97945
123.3	0.9792
123.4	0.9792
123.5	0.98085
123.6	0.9808
123.7	0.98115
123.8	0.98135
123.9	0.9804
124	0.98175
124.1	0.98135
124.2	0.98075
124.3	0.98065
124.4	0.9802
124.5	0.9806
124.6	0.98085
124.7	0.9804
124.8	0.98135
124.9	0.98075
125	0.98095
125.1	0.9817
125.2	0.98015
125.3	0.97945
125.4	0.97995
125.5	0.98115
125.6	0.98095
125.7	0.98135
125.8	0.98105
125.9	0.9818
126	0.9822
126.1	0.98275
126.2	0.98325
126.3	0.982
126.4	0.98255
126.5	0.98155
126.6	0.9818
126.7	0.98275
126.8	0.98215
126.9	0.98225
127	0.98265
127.1	0.9827
127.2	0.98235
127.3	0.9838
127.4	0.98375
127.5	0.9829
127.6	0.9837
127.7	0.98385
127.8	0.983
127.9	0.98125
128	0.981
128.1	0.9805
128.2	0.98145
128.3	0.98195
128.4	0.98165
128.5	0.982
128.6	0.9828
128.7	0.9841
128.8	0.9828
128.9	0.98285
129	0.9833
129.1	0.98285
129.2	0.98185
129.3	0.98205
129.4	0.9823
129.5	0.98235
129.6	0.98305
129.7	0.98375
129.8	0.9822
129.9	0.98275
130	0.98355
130.1	0.9839
130.2	0.98295
130.3	0.9837
130.4	0.98455
130.5	0.98475
130.6	0.9845
130.7	0.9855
130.8	0.9856
130.9	0.98465
131	0.9846
131.1	0.9841
131.2	0.9844
131.3	0.98485
131.4	0.98585
131.5	0.98575
131.6	0.9859
131.7	0.9862
131.8	0.9863
131.9	0.9858
132	0.98515
132.1	0.98475
132.2	0.9852
132.3	0.98555
132.4	0.9855
132.5	0.9848
132.6	0.98435
132.7	0.98355
132.8	0.98315
132.9	0.9828
133	0.9842
133.1	0.985
133.2	0.98575
133.3	0.9842
133.4	0.9834
133.5	0.9852
133.6	0.98565
133.7	0.9849
133.8	0.986
133.9	0.9852
134	0.98465
134.1	0.98495
134.2	0.98515
134.3	0.9859
134.4	0.9854
134.5	0.98575
134.6	0.9854
134.7	0.98395
134.8	0.9844
134.9	0.98495
135	0.9867
135.1	0.98605
135.2	0.98415
135.3	0.98525
135.4	0.98495
135.5	0.98495
135.6	0.98485
135.7	0.98475
135.8	0.98505
135.9	0.985
136	0.98605
136.1	0.9862
136.2	0.9859
136.3	0.9854
136.4	0.9856
136.5	0.98585
136.6	0.9859
136.7	0.9857
136.8	0.9861
136.9	0.9867
137	0.98615
137.1	0.9851
137.2	0.9849
137.3	0.9863
137.4	0.98585
137.5	0.9856
137.6	0.9852
137.7	0.98445
137.8	0.98565
137.9	0.9858
138	0.98555
138.1	0.98695
138.2	0.9864
138.3	0.9858
138.4	0.98665
138.5	0.98615
138.6	0.98645
138.7	0.9859
138.8	0.98675
138.9	0.9865
139	0.9874
139.1	0.9884
139.2	0.98665
139.3	0.9862
139.4	0.9879
139.5	0.9878
139.6	0.98735
139.7	0.9862
139.8	0.9857
139.9	0.9855
140	0.98695
140.1	0.9877
140.2	0.9854
140.3	0.9857
140.4	0.98655
140.5	0.9862
140.6	0.98505
140.7	0.9864
140.8	0.98605
140.9	0.9845
141	0.98555
141.1	0.98545
141.2	0.985
141.3	0.98565
141.4	0.9867
141.5	0.9864
141.6	0.98485
141.7	0.98715
141.8	0.9871
141.9	0.9876
142	0.98905
142.1	0.98885
142.2	0.98875
142.3	0.9881
142.4	0.9862
142.5	0.9869
142.6	0.98465
142.7	0.98635
142.8	0.9861
142.9	0.98715
143	0.9865
143.1	0.98775
143.2	0.98725
143.3	0.9878
143.4	0.9871
143.5	0.9876
143.6	0.9879
143.7	0.9875
143.8	0.98765
143.9	0.987
144	0.98645
144.1	0.98775
144.2	0.9876
144.3	0.98845
144.4	0.988
144.5	0.98775
144.6	0.98815
144.7	0.9883
144.8	0.98825
144.9	0.9885
145	0.988
145.1	0.9876
145.2	0.9885
145.3	0.98825
145.4	0.98825
145.5	0.98785
145.6	0.98815
145.7	0.98725
145.8	0.9871
145.9	0.98795
146	0.9878
146.1	0.98655
146.2	0.9873
146.3	0.9884
146.4	0.98915
146.5	0.9888
146.6	0.98945
146.7	0.9892
146.8	0.9891
146.9	0.9876
147	0.98835
147.1	0.98845
147.2	0.9879
147.3	0.988
147.4	0.9894
147.5	0.98835
147.6	0.98835
147.7	0.9897
147.8	0.9886
147.9	0.98825
148	0.9887
148.1	0.9883
148.2	0.9883
148.3	0.98865
148.4	0.9895
148.5	0.98915
148.6	0.9886
148.7	0.9878
148.8	0.988
148.9	0.98855
149	0.98945
149.1	0.9887
149.2	0.98875
149.3	0.988
149.4	0.98865
149.5	0.9885
149.6	0.9893
149.7	0.98905
149.8	0.9889
149.9	0.9886
150	0.98865
150.1	0.9884
150.2	0.98895
150.3	0.98795
150.4	0.9886
150.5	0.98925
150.6	0.98985
150.7	0.99
150.8	0.989
150.9	0.98825
151	0.98865
151.1	0.98895
151.2	0.98915
151.3	0.9893
151.4	0.98885
151.5	0.98855
151.6	0.9881
151.7	0.9888
151.8	0.9888
151.9	0.98925
152	0.98845
152.1	0.98765
152.2	0.98865
152.3	0.9895
152.4	0.99
152.5	0.99045
152.6	0.9896
152.7	0.98985
152.8	0.98985
152.9	0.98915
153	0.9895
153.1	0.98925
153.2	0.9879
153.3	0.9882
153.4	0.9888
153.5	0.98915
153.6	0.9895
153.7	0.9894
153.8	0.9886
153.9	0.989
154	0.9895
154.1	0.9896
154.2	0.9905
154.3	0.9895
154.4	0.9895
154.5	0.98905
154.6	0.9893
154.7	0.9903
154.8	0.9892
154.9	0.9896
155	0.9881
155.1	0.9884
155.2	0.98895
155.3	0.98835
155.4	0.99
155.5	0.9897
155.6	0.98955
155.7	0.98945
155.8	0.9896
155.9	0.99
156	0.98965
156.1	0.98975
156.2	0.98915
156.3	0.9899
156.4	0.9907
156.5	0.9904
156.6	0.98925
156.7	0.98945
156.8	0.989
156.9	0.98965
157	0.98945
157.1	0.98925
157.2	0.9891
157.3	0.98805
157.4	0.98805
157.5	0.98885
157.6	0.98845
157.7	0.98875
157.8	0.98995
157.9	0.9892
158	0.9899
158.1	0.9901
158.2	0.9901
158.3	0.9901
158.4	0.98905
158.5	0.98965
158.6	0.98975
158.7	0.9894
158.8	0.98875
158.9	0.9896
159	0.98935
159.1	0.9885
159.2	0.98915
159.3	0.9893
159.4	0.98905
159.5	0.98985
159.6	0.9899
159.7	0.98965
159.8	0.9903
159.9	0.9889
160	0.9897
160.1	0.99
160.2	0.9903
160.3	0.99005
160.4	0.9895
160.5	0.989
160.6	0.9886
160.7	0.9896
160.8	0.99025
160.9	0.99015
161	0.9895
161.1	0.99005
161.2	0.99015
161.3	0.9913
161.4	0.99065
161.5	0.99075
161.6	0.9908
161.7	0.9898
161.8	0.99045
161.9	0.9901
162	0.9897
162.1	0.99045
162.2	0.98945
162.3	0.99035
162.4	0.9908
162.5	0.9909
162.6	0.9901
162.7	0.98915
162.8	0.9898
162.9	0.9898
163	0.9897
163.1	0.98895
163.2	0.9895
163.3	0.99015
163.4	0.98945
163.5	0.98935
163.6	0.98955
163.7	0.99005
163.8	0.9899
163.9	0.9901
164	0.9896
164.1	0.99025
164.2	0.9903
164.3	0.99115
164.4	0.9906
164.5	0.98975
164.6	0.9892
164.7	0.9905
164.8	0.99105
164.9	0.9899
165	0.9902
165.1	0.99035
165.2	0.98945
165.3	0.9901
165.4	0.99025
165.5	0.9906
165.6	0.9902
165.7	0.99005
165.8	0.99035
165.9	0.9905
166	0.98985
166.1	0.9898
166.2	0.989
166.3	0.98955
166.4	0.9892
166.5	0.98955
166.6	0.9892
166.7	0.98955
166.8	0.99025
166.9	0.9907
167	0.9905
167.1	0.9911
167.2	0.98995
167.3	0.9909
167.4	0.99025
167.5	0.98955
167.6	0.98965
167.7	0.99055
167.8	0.9903
167.9	0.99085
168	0.99045
168.1	0.99075
168.2	0.99095
168.3	0.9912
168.4	0.9909
168.5	0.9907
168.6	0.99025
168.7	0.98925
168.8	0.9883
168.9	0.9896
169	0.9906
169.1	0.9915
169.2	0.99095
169.3	0.99075
169.4	0.99065
169.5	0.99025
169.6	0.9906
169.7	0.98975
169.8	0.9896
169.9	0.98985
170	0.9906
170.1	0.9895
170.2	0.9899
170.3	0.99035
170.4	0.992
170.5	0.99115
170.6	0.9908
170.7	0.99125
170.8	0.99185
170.9	0.9916
171	0.9906
171.1	0.99055
171.2	0.99095
171.3	0.99045
171.4	0.99005
171.5	0.99
171.6	0.98995
171.7	0.99025
171.8	0.9905
171.9	0.9915
172	0.9911
172.1	0.99065
172.2	0.99075
172.3	0.9909
172.4	0.9909
172.5	0.99075
172.6	0.99155
172.7	0.991
172.8	0.9922
172.9	0.99155
173	0.99055
173.1	0.9912
173.2	0.98995
173.3	0.98995
173.4	0.9902
173.5	0.98975
173.6	0.9902
173.7	0.991
173.8	0.9909
173.9	0.9907
174	0.99085
174.1	0.9903
174.2	0.99015
174.3	0.99075
174.4	0.9904
174.5	0.9898
174.6	0.9893
174.7	0.99015
174.8	0.9892
174.9	0.98965
175	0.9903
175.1	0.99095
175.2	0.99065
175.3	0.9896
175.4	0.99045
175.5	0.9902
175.6	0.99025
175.7	0.98995
175.8	0.98975
175.9	0.9904
176	0.9902
176.1	0.99075
176.2	0.99095
176.3	0.99045
176.4	0.9905
176.5	0.99025
176.6	0.98965
176.7	0.99035
176.8	0.9897
176.9	0.9912
177	0.9915
177.1	0.9904
177.2	0.99025
177.3	0.99025
177.4	0.99075
177.5	0.9911
177.6	0.9904
177.7	0.99035
177.8	0.99125
177.9	0.99135
178	0.9919
178.1	0.99115
178.2	0.9906
178.3	0.98955
178.4	0.9903
178.5	0.99005
178.6	0.99055
178.7	0.99135
178.8	0.9907
178.9	0.99095
179	0.99055
179.1	0.99005
179.2	0.99105
179.3	0.991
179.4	0.9905
179.5	0.9913
179.6	0.99165
179.7	0.9919
179.8	0.991
179.9	0.99045
180	0.99065
180.1	0.9899
180.2	0.99075
180.3	0.99085
180.4	0.9907
180.5	0.99085
180.6	0.9911
180.7	0.992
180.8	0.9916
180.9	0.9911
181	0.9909
181.1	0.98965
181.2	0.9903
181.3	0.98985
181.4	0.99025
181.5	0.99035
181.6	0.9903
181.7	0.99075
181.8	0.9911
181.9	0.99105
182	0.99065
182.1	0.9905
182.2	0.99035
182.3	0.99
182.4	0.98995
182.5	0.9912
182.6	0.99125
182.7	0.9912
182.8	0.991
182.9	0.99075
183	0.99025
183.1	0.9904
183.2	0.99035
183.3	0.9902
183.4	0.99035
183.5	0.9907
183.6	0.9911
183.7	0.99015
183.8	0.9905
183.9	0.99015
184	0.98995
184.1	0.9909
184.2	0.99005
184.3	0.98985
184.4	0.9911
184.5	0.991
184.6	0.99065
184.7	0.99055
184.8	0.9911
184.9	0.99155
185	0.9904
185.1	0.99065
185.2	0.99055
185.3	0.99145
185.4	0.9903
185.5	0.9908
185.6	0.9915
185.7	0.99105
185.8	0.9913
185.9	0.99105
186	0.9904
186.1	0.9912
186.2	0.99045
186.3	0.99015
186.4	0.98995
186.5	0.98985
186.6	0.9905
186.7	0.99075
186.8	0.991
186.9	0.9914
187	0.99115
187.1	0.9909
187.2	0.991
187.3	0.99115
187.4	0.99125
187.5	0.99135
187.6	0.99145
187.7	0.991
187.8	0.99035
187.9	0.9902
188	0.9908
188.1	0.9901
188.2	0.9898
188.3	0.9898
188.4	0.98985
188.5	0.99025
188.6	0.9903
188.7	0.991
188.8	0.9904
188.9	0.99075
189	0.98995
189.1	0.9897
189.2	0.99
189.3	0.99075
189.4	0.99085
189.5	0.9909
189.6	0.99075
189.7	0.99085
189.8	0.99105
189.9	0.99105
190	0.99045
190.1	0.99035
190.2	0.9901
190.3	0.99045
190.4	0.991
190.5	0.99005
190.6	0.99025
190.7	0.9894
190.8	0.9906
190.9	0.99095
191	0.991
191.1	0.99075
191.2	0.99085
191.3	0.9912
191.4	0.99065
191.5	0.9907
191.6	0.9913
191.7	0.99095
191.8	0.99155
191.9	0.99075
192	0.9908
192.1	0.9905
192.2	0.99075
192.3	0.9904
192.4	0.991
192.5	0.9903
192.6	0.9899
192.7	0.9903
192.8	0.99045
192.9	0.9905
193	0.9914
193.1	0.99035
193.2	0.99005
193.3	0.98985
193.4	0.99065
193.5	0.99
193.6	0.9906
193.7	0.9906
193.8	0.9902
193.9	0.98995
194	0.99055
194.1	0.9908
194.2	0.9901
194.3	0.9904
194.4	0.99025
194.5	0.99065
194.6	0.99
194.7	0.99005
194.8	0.9895
194.9	0.99045
195	0.98995
195.1	0.9898
195.2	0.99
195.3	0.99125
195.4	0.99075
195.5	0.9909
195.6	0.99105
195.7	0.99115
195.8	0.9915
195.9	0.9916
196	0.99175
196.1	0.9917
196.2	0.99095
196.3	0.9916
196.4	0.9914
196.5	0.99195
196.6	0.99175
196.7	0.9915
196.8	0.991
196.9	0.9907
197	0.9907
197.1	0.99025
197.2	0.99025
197.3	0.98995
197.4	0.99115
197.5	0.99185
197.6	0.99255
197.7	0.99125
197.8	0.99125
197.9	0.99095
198	0.9909
198.1	0.9913
198.2	0.991
198.3	0.9914
198.4	0.99125
198.5	0.9904
198.6	0.9909
198.7	0.99005
198.8	0.9903
198.9	0.9914
199	0.9916
199.1	0.99065
199.2	0.99085
199.3	0.9916
199.4	0.9917
199.5	0.9909
199.6	0.9903
199.7	0.99115
199.8	0.99105
199.9	0.99035
200	0.99085
[truncated: 14,000 more rows]
