# Supplementary material for: Bayesian inference of kinetic schemes for ion channels by Kalman filtering
Source: eLife journal article supplement (doi:10.7554/elife.62714), 2022-05-04
Supplement: fig4-data1 [file 1_Sim_N_10000_Strom_MW.xlsx]

## Sheet: Tabelle1
0.1	0
0.2	0
0.3	0
0.4	0
0.5	0
0.6	0
0.7	0
0.8	0
0.9	0
1	0
1.1	0
1.2	0
1.3	0
1.4	0
1.5	0
1.6	0
1.7	0
1.8	0
1.9	0
2	0
2.1	0
2.2	0
2.3	0
2.4	0
2.5	0
2.6	0
2.7	0
2.8	0
2.9	0
3	0
3.1	0
3.2	0
3.3	0
3.4	0
3.5	0
3.6	0
3.7	0
3.8	0
3.9	0
4	0
4.1	0
4.2	0
4.3	0
4.4	0
4.5	0
4.6	0
4.7	0
4.8	0
4.9	0
5	0
5.1	0
5.2	0
5.3	0
5.4	0
5.5	0
5.6	0
5.7	0
5.8	0
5.9	0
6	0
6.1	0
6.2	0
6.3	0
6.4	0
6.5	0
6.6	0
6.7	0
6.8	0
6.9	0
7	0
7.1	0
7.2	0
7.3	0
7.4	0
7.5	0
7.6	0
7.7	0
7.8	0
7.9	0
8	0
8.1	0
8.2	0
8.3	0
8.4	0
8.5	0
8.6	0
8.7	0
8.8	0
8.9	0
9	0
9.1	0
9.2	0
9.3	0
9.4	0
9.5	0
9.6	0
9.7	0
9.8	0
9.9	0
10	0
10.1	0
10.2	0
10.3	0
10.4	0
10.5	0
10.6	0
10.7	0
10.8	0
10.9	0
11	0
11.1	0
11.2	0
11.3	0
11.4	0
11.5	0
11.6	0
11.7	0
11.8	0
11.9	0
12	0
12.1	0
12.2	0
12.3	0
12.4	0
12.5	0
12.6	0
12.7	0
12.8	0
12.9	0
13	0
13.1	0
13.2	0
13.3	0
13.4	0
13.5	0
13.6	0
13.7	0
13.8	0
13.9	0
14	0
14.1	0
14.2	0
14.3	0
14.4	0
14.5	0
14.6	0
14.7	0
14.8	0
14.9	0
15	0
15.1	0
15.2	0
15.3	0
15.4	0
15.5	0
15.6	0
15.7	0
15.8	0
15.9	0
16	0
16.1	0
16.2	0
16.3	0
16.4	0
16.5	0
16.6	0
16.7	0
16.8	0
16.9	0
17	0
17.1	0
17.2	0
17.3	0
17.4	0
17.5	0
17.6	0
17.7	0
17.8	0
17.9	0
18	0
18.1	0
18.2	0
18.3	0
18.4	0
18.5	0
18.6	0
18.7	0
18.8	0
18.9	0
19	0
19.1	0
19.2	0
19.3	0
19.4	0
19.5	0
19.6	0
19.7	0
19.8	0
19.9	0
20	0
20.1	0
20.2	0
20.3	0
20.4	0
20.5	0
20.6	0
20.7	0
20.8	0
20.9	0
21	0
21.1	0
21.2	0
21.3	0
21.4	0
21.5	0
21.6	0
21.7	0
21.8	0
21.9	0
22	0
22.1	0
22.2	0
22.3	0
22.4	0
22.5	0
22.6	0
22.7	0
22.8	0
22.9	0
23	0
23.1	0
23.2	0
23.3	0
23.4	0
23.5	0
23.6	0
23.7	0
23.8	0
23.9	0
24	0
24.1	0
24.2	0
24.3	0
24.4	0
24.5	0
24.6	0
24.7	0
24.8	0
24.9	0
25	0
25.1	0
25.2	0
25.3	0
25.4	0
25.5	0
25.6	0
25.7	0
25.8	0
25.9	0
26	0
26.1	0
26.2	0
26.3	0
26.4	0
26.5	0
26.6	0
26.7	0
26.8	0
26.9	0
27	0
27.1	0
27.2	0
27.3	0
27.4	0
27.5	0
27.6	0
27.7	0
27.8	0
27.9	0
28	0
28.1	0
28.2	0
28.3	0
28.4	0
28.5	0
28.6	0
28.7	0
28.8	0
28.9	0
29	0
29.1	0
29.2	0
29.3	0
29.4	0
29.5	0
29.6	0
29.7	0
29.8	0
29.9	0
30	0
30.1	0
30.2	0
30.3	0
30.4	0
30.5	0
30.6	0
30.7	0
30.8	0
30.9	0
31	0
31.1	0
31.2	0
31.3	0
31.4	0
31.5	0
31.6	0
31.7	0
31.8	0
31.9	0
32	0
32.1	0
32.2	0
32.3	0
32.4	0
32.5	0
32.6	0
32.7	0
32.8	0
32.9	0
33	0
33.1	0
33.2	0
33.3	0
33.4	0
33.5	0
33.6	0
33.7	0
33.8	0
33.9	0
34	0
34.1	0
34.2	0
34.3	0
34.4	0
34.5	0
34.6	0
34.7	0
34.8	0
34.9	0
35	0
35.1	0
35.2	0
35.3	0
35.4	0
35.5	0
35.6	0
35.7	0
35.8	0
35.9	0
36	0
36.1	0
36.2	0
36.3	0
36.4	0
36.5	0
36.6	0
36.7	0
36.8	0
36.9	0
37	0
37.1	0
37.2	0
37.3	0
37.4	0
37.5	0
37.6	0
37.7	0
37.8	0
37.9	0
38	0
38.1	0
38.2	0
38.3	0
38.4	0
38.5	0
38.6	0
38.7	0
38.8	0
38.9	0
39	0
39.1	0
39.2	0
39.3	0
39.4	0
39.5	0
39.6	0
39.7	0
39.8	0
39.9	0
40	0
40.1	0
40.2	0
40.3	0
40.4	0
40.5	0
40.6	0
40.7	0
40.8	0
40.9	0
41	0
41.1	0
41.2	0
41.3	0
41.4	0
41.5	0
41.6	0
41.7	0
41.8	0
41.9	0
42	0
42.1	0
42.2	0
42.3	0
42.4	0
42.5	0
42.6	0
42.7	0
42.8	0
42.9	0
43	0
43.1	0
43.2	0
43.3	0
43.4	0
43.5	0
43.6	0
43.7	0
43.8	0
43.9	0
44	0
44.1	0
44.2	0
44.3	0
44.4	0
44.5	0
44.6	0
44.7	0
44.8	0
44.9	0
45	0
45.1	0
45.2	0
45.3	0
45.4	0
45.5	0
45.6	0
45.7	0
45.8	0
45.9	0
46	0
46.1	0
46.2	0
46.3	0
46.4	0
46.5	0
46.6	0
46.7	0
46.8	0
46.9	0
47	0
47.1	0
47.2	0
47.3	0
47.4	0
47.5	0
47.6	0
47.7	0
47.8	0
47.9	0
48	0
48.1	0
48.2	0
48.3	0
48.4	0
48.5	0
48.6	0
48.7	0
48.8	0
48.9	0
49	0
49.1	0
49.2	0
49.3	0
49.4	0
49.5	0
49.6	0
49.7	0
49.8	0
49.9	0
50	0
50.1	0
50.2	0
50.3	0
50.4	0
50.5	0
50.6	0
50.7	0
50.8	0
50.9	0
51	0
51.1	0
51.2	0
51.3	0
51.4	0
51.5	0
51.6	0
51.7	0
51.8	0
51.9	0
52	0
52.1	0
52.2	0
52.3	0
52.4	0
52.5	0
52.6	0
52.7	0
52.8	0
52.9	0
53	0
53.1	0
53.2	0
53.3	0
53.4	0
53.5	0
53.6	0
53.7	0
53.8	0
53.9	0
54	0
54.1	0
54.2	0
54.3	0
54.4	0
54.5	0
54.6	0
54.7	0
54.8	0
54.9	0
55	0
55.1	0
55.2	0
55.3	0
55.4	0
55.5	0
55.6	0
55.7	0
55.8	0
55.9	0
56	0
56.1	0
56.2	0
56.3	0
56.4	0
56.5	0
56.6	0
56.7	0
56.8	0
56.9	0
57	0
57.1	0
57.2	0
57.3	0
57.4	0
57.5	0
57.6	0
57.7	0
57.8	0
57.9	0
58	0
58.1	0
58.2	0
58.3	0
58.4	0
58.5	0
58.6	0
58.7	0
58.8	0
58.9	0
59	0
59.1	0
59.2	0
59.3	0
59.4	0
59.5	0
59.6	0
59.7	0
59.8	0
59.9	0
60	0
60.1	0
60.2	0
60.3	0
60.4	0
60.5	0
60.6	0
60.7	0
60.8	0
60.9	0
61	0
61.1	0
61.2	0
61.3	0
61.4	0
61.5	0
61.6	0
61.7	0
61.8	0
61.9	0
62	0
62.1	0
62.2	0
62.3	0
62.4	0
62.5	0
62.6	0
62.7	0
62.8	0
62.9	0
63	0
63.1	0
63.2	0
63.3	0
63.4	0
63.5	0
63.6	0
63.7	0
63.8	0
63.9	0
64	0
64.1	0
64.2	0
64.3	0
64.4	0
64.5	0
64.6	0
64.7	0
64.8	0
64.9	0
65	0
65.1	0
65.2	0
65.3	0
65.4	0
65.5	0
65.6	0
65.7	0
65.8	0
65.9	0
66	0
66.1	0
66.2	0
66.3	0
66.4	0
66.5	0
66.6	0
66.7	0
66.8	0
66.9	0
67	0
67.1	0
67.2	0
67.3	0
67.4	0
67.5	0
67.6	0
67.7	0
67.8	0
67.9	0
68	0
68.1	0
68.2	0
68.3	0
68.4	0
68.5	0
68.6	0
68.7	0
68.8	0
68.9	0
69	0
69.1	0
69.2	0
69.3	0
69.4	0
69.5	0
69.6	0
69.7	0
69.8	0
69.9	0
70	0
70.1	0
70.2	0
70.3	0
70.4	0
70.5	0
70.6	0
70.7	0
70.8	0
70.9	0
71	0
71.1	0
71.2	0
71.3	0
71.4	0
71.5	0
71.6	0
71.7	0
71.8	0
71.9	0
72	0
72.1	0
72.2	0
72.3	0
72.4	0
72.5	0
72.6	0
72.7	0
72.8	0
72.9	0
73	0
73.1	0
73.2	0
73.3	0
73.4	0
73.5	0
73.6	0
73.7	0
73.8	0
73.9	0
74	0
74.1	0
74.2	0
74.3	0
74.4	0
74.5	0
74.6	0
74.7	0
74.8	0
74.9	0
75	0
75.1	0
75.2	0
75.3	0
75.4	0
75.5	0
75.6	0
75.7	0
75.8	0
75.9	0
76	0
76.1	0
76.2	0
76.3	0
76.4	0
76.5	0
76.6	0
76.7	0
76.8	0
76.9	0
77	0
77.1	0
77.2	0
77.3	0
77.4	0
77.5	0
77.6	0
77.7	0
77.8	0
77.9	0
78	0
78.1	0
78.2	0
78.3	0
78.4	0
78.5	0
78.6	0
78.7	0
78.8	0
78.9	0
79	0
79.1	0
79.2	0
79.3	0
79.4	0
79.5	0
79.6	0
79.7	0
79.8	0
79.9	0
80	0
80.1	0
80.2	0
80.3	0
80.4	0
80.5	0
80.6	0
80.7	0
80.8	0
80.9	0
81	0
81.1	0
81.2	0
81.3	0
81.4	0
81.5	0
81.6	0
81.7	0
81.8	0
81.9	0
82	0
82.1	0
82.2	0
82.3	0
82.4	0
82.5	0
82.6	0
82.7	0
82.8	0
82.9	0
83	0
83.1	0
83.2	0
83.3	0
83.4	0
83.5	0
83.6	0
83.7	0
83.8	0
83.9	0
84	0
84.1	0
84.2	0
84.3	0
84.4	0
84.5	0
84.6	0
84.7	0
84.8	0
84.9	0
85	0
85.1	0
85.2	0
85.3	0
85.4	0
85.5	0
85.6	0
85.7	0
85.8	0
85.9	0
86	0
86.1	0
86.2	0
86.3	0
86.4	0
86.5	0
86.6	0
86.7	0
86.8	0
86.9	0
87	0
87.1	0
87.2	0
87.3	0
87.4	0
87.5	0
87.6	0
87.7	0
87.8	0
87.9	0
88	0
88.1	0
88.2	0
88.3	0
88.4	0
88.5	0
88.6	0
88.7	0
88.8	0
88.9	0
89	0
89.1	0
89.2	0
89.3	0
89.4	0
89.5	0
89.6	0
89.7	0
89.8	0
89.9	0
90	0
90.1	0
90.2	0
90.3	0
90.4	0
90.5	0
90.6	0
90.7	0
90.8	0
90.9	0
91	0
91.1	0
91.2	0
91.3	0
91.4	0
91.5	0
91.6	0
91.7	0
91.8	0
91.9	0
92	0
92.1	0
92.2	0
92.3	0
92.4	0
92.5	0
92.6	0
92.7	0
92.8	0
92.9	0
93	0
93.1	0
93.2	0
93.3	0
93.4	0
93.5	0
93.6	0
93.7	0
93.8	0
93.9	0
94	0
94.1	0
94.2	0
94.3	0
94.4	0
94.5	0
94.6	0
94.7	0
94.8	0
94.9	0
95	0
95.1	0
95.2	0
95.3	0
95.4	0
95.5	0
95.6	0
95.7	0
95.8	0
95.9	0
96	0
96.1	0
96.2	0
96.3	0
96.4	0
96.5	0
96.6	0
96.7	0
96.8	0
96.9	0
97	0
97.1	0
97.2	0
97.3	0
97.4	0
97.5	0
97.6	0
97.7	0
97.8	0
97.9	0
98	0
98.1	0
98.2	0
98.3	0
98.4	0
98.5	0
98.6	0
98.7	0
98.8	0
98.9	0
99	0
99.1	0
99.2	0
99.3	0
99.4	0
99.5	0
99.6	0
99.7	0
99.8	0
99.9	0
100	0
100.1	0.0004
100.2	0.002
100.3	0.0042
100.4	0.0084
100.5	0.0119
100.6	0.0153
100.7	0.0189
100.8	0.0234
100.9	0.0281
101	0.0319
101.1	0.0359
101.2	0.0408
101.3	0.0454
101.4	0.0492
101.5	0.0521
101.6	0.0559
101.7	0.0614
101.8	0.0644
101.9	0.0694
102	0.0734
102.1	0.0776
102.2	0.0815
102.3	0.0857
102.4	0.0896
102.5	0.094
102.6	0.0976
102.7	0.1029
102.8	0.1071
102.9	0.1106
103	0.1147
103.1	0.1188
103.2	0.1227
103.3	0.1265
103.4	0.131
103.5	0.1339
103.6	0.1375
103.7	0.1415
103.8	0.1456
103.9	0.149
104	0.1549
104.1	0.1583
104.2	0.1619
104.3	0.1655
104.4	0.1671
104.5	0.1705
104.6	0.1741
104.7	0.178
104.8	0.1809
104.9	0.1846
105	0.1875
105.1	0.1906
105.2	0.194
105.3	0.198
105.4	0.2016
105.5	0.2046
105.6	0.208
105.7	0.2122
105.8	0.216
105.9	0.2191
106	0.2238
106.1	0.2269
106.2	0.2303
106.3	0.2332
106.4	0.2371
106.5	0.2404
106.6	0.2442
106.7	0.2478
106.8	0.2509
106.9	0.2543
107	0.2581
107.1	0.2615
107.2	0.2651
107.3	0.2681
107.4	0.2705
107.5	0.2737
107.6	0.2778
107.7	0.2817
107.8	0.2843
107.9	0.2871
108	0.2903
108.1	0.2929
108.2	0.296
108.3	0.2992
108.4	0.3015
108.5	0.3036
108.6	0.3063
108.7	0.3093
108.8	0.3119
108.9	0.3139
109	0.3171
109.1	0.3194
109.2	0.322
109.3	0.3244
109.4	0.3274
109.5	0.3305
109.6	0.3336
109.7	0.337
109.8	0.3398
109.9	0.3411
110	0.3435
110.1	0.3475
110.2	0.3505
110.3	0.353
110.4	0.3558
110.5	0.3568
110.6	0.3593
110.7	0.3628
110.8	0.3653
110.9	0.3678
111	0.3696
111.1	0.3719
111.2	0.3739
111.3	0.3761
111.4	0.3791
111.5	0.3808
111.6	0.3848
111.7	0.3878
111.8	0.3904
111.9	0.3928
112	0.3945
112.1	0.3964
112.2	0.3984
112.3	0.401
112.4	0.4042
112.5	0.4067
112.6	0.4091
112.7	0.4115
112.8	0.4141
112.9	0.4169
113	0.4186
113.1	0.4206
113.2	0.4231
113.3	0.4254
113.4	0.4276
113.5	0.4297
113.6	0.4321
113.7	0.4343
113.8	0.4366
113.9	0.4381
114	0.4406
114.1	0.4424
114.2	0.4437
114.3	0.4451
114.4	0.4462
114.5	0.4469
114.6	0.4488
114.7	0.4512
114.8	0.4537
114.9	0.4557
115	0.4579
115.1	0.4599
115.2	0.4626
115.3	0.4642
115.4	0.4653
115.5	0.468
115.6	0.4696
115.7	0.4706
115.8	0.4722
115.9	0.4752
116	0.4775
116.1	0.4783
116.2	0.4804
116.3	0.4825
116.4	0.4841
116.5	0.4857
116.6	0.4869
116.7	0.4894
116.8	0.4912
116.9	0.4937
117	0.4957
117.1	0.4987
117.2	0.5008
117.3	0.5025
117.4	0.5042
117.5	0.506
117.6	0.5075
117.7	0.5088
117.8	0.5116
117.9	0.5137
118	0.5147
118.1	0.5162
118.2	0.5183
118.3	0.5197
118.4	0.5217
118.5	0.5232
118.6	0.5242
118.7	0.5253
118.8	0.527
118.9	0.5285
119	0.5301
119.1	0.5319
119.2	0.5332
119.3	0.5353
119.4	0.5364
119.5	0.538
119.6	0.5394
119.7	0.5415
119.8	0.5425
119.9	0.5451
120	0.5472
120.1	0.5486
120.2	0.5512
120.3	0.5529
120.4	0.554
120.5	0.556
120.6	0.5576
120.7	0.5588
120.8	0.5602
120.9	0.5618
121	0.5635
121.1	0.5642
121.2	0.5658
121.3	0.5674
121.4	0.5683
121.5	0.5701
121.6	0.5719
121.7	0.5732
121.8	0.5746
121.9	0.5756
122	0.577
122.1	0.578
122.2	0.5798
122.3	0.5811
122.4	0.5824
122.5	0.5835
122.6	0.5851
122.7	0.5861
122.8	0.5864
122.9	0.5879
123	0.5898
123.1	0.5911
123.2	0.591
123.3	0.5918
123.4	0.5936
123.5	0.5947
123.6	0.5964
123.7	0.5976
123.8	0.5989
123.9	0.6014
124	0.6023
124.1	0.6032
124.2	0.6042
124.3	0.6047
124.4	0.6052
124.5	0.6057
124.6	0.6064
124.7	0.6067
124.8	0.6087
124.9	0.6099
125	0.6113
125.1	0.6127
125.2	0.6139
125.3	0.6146
125.4	0.6153
125.5	0.617
125.6	0.6172
125.7	0.6179
125.8	0.6191
125.9	0.6196
126	0.6204
126.1	0.6228
126.2	0.6239
126.3	0.6256
126.4	0.6261
126.5	0.6276
126.6	0.6285
126.7	0.629
126.8	0.6295
126.9	0.6305
127	0.6318
127.1	0.6324
127.2	0.6335
127.3	0.6349
127.4	0.6356
127.5	0.6363
127.6	0.638
127.7	0.6383
127.8	0.6397
127.9	0.6407
128	0.6418
128.1	0.6433
128.2	0.6438
128.3	0.6441
128.4	0.6444
128.5	0.6458
128.6	0.6462
128.7	0.6466
128.8	0.6472
128.9	0.6478
129	0.6486
129.1	0.6491
129.2	0.6498
129.3	0.6503
129.4	0.6513
129.5	0.6528
129.6	0.6532
129.7	0.6539
129.8	0.6541
129.9	0.6548
130	0.6567
130.1	0.658
130.2	0.6588
130.3	0.6592
130.4	0.66
130.5	0.6611
130.6	0.6628
130.7	0.6628
130.8	0.6633
130.9	0.6649
131	0.6667
131.1	0.6677
131.2	0.6681
131.3	0.6688
131.4	0.6694
131.5	0.6702
131.6	0.6718
131.7	0.6723
131.8	0.6719
131.9	0.6727
132	0.6741
132.1	0.6752
132.2	0.6754
132.3	0.6758
132.4	0.6768
132.5	0.6773
132.6	0.6779
132.7	0.6781
132.8	0.6787
132.9	0.6799
133	0.6804
133.1	0.6803
133.2	0.6807
133.3	0.6811
133.4	0.6819
133.5	0.6821
133.6	0.6833
133.7	0.6837
133.8	0.6838
133.9	0.6845
134	0.685
134.1	0.6856
134.2	0.686
134.3	0.6871
134.4	0.6883
134.5	0.6885
134.6	0.6905
134.7	0.6908
134.8	0.6914
134.9	0.6919
135	0.6921
135.1	0.6925
135.2	0.6932
135.3	0.6942
135.4	0.6955
135.5	0.696
135.6	0.6964
135.7	0.697
135.8	0.6982
135.9	0.6983
136	0.6993
136.1	0.6997
136.2	0.7002
136.3	0.7011
136.4	0.7012
136.5	0.7012
136.6	0.7023
136.7	0.7028
136.8	0.7036
136.9	0.704
137	0.704
137.1	0.7045
137.2	0.7054
137.3	0.7062
137.4	0.7069
137.5	0.7068
137.6	0.708
137.7	0.7079
137.8	0.709
137.9	0.7093
138	0.7101
138.1	0.7109
138.2	0.7116
138.3	0.7118
138.4	0.7119
138.5	0.7117
138.6	0.7124
138.7	0.7126
138.8	0.7127
138.9	0.7135
139	0.7137
139.1	0.715
139.2	0.7153
139.3	0.7161
139.4	0.717
139.5	0.7173
139.6	0.7178
139.7	0.7184
139.8	0.7181
139.9	0.7192
140	0.7204
140.1	0.7206
140.2	0.7209
140.3	0.7212
140.4	0.7219
140.5	0.7225
140.6	0.7232
140.7	0.7236
140.8	0.7247
140.9	0.7252
141	0.7261
141.1	0.7275
141.2	0.7279
141.3	0.7283
141.4	0.7292
141.5	0.7296
141.6	0.7302
141.7	0.7304
141.8	0.7312
141.9	0.7309
142	0.731
142.1	0.7319
142.2	0.7322
142.3	0.7321
142.4	0.7328
142.5	0.7339
142.6	0.7345
142.7	0.7348
142.8	0.7352
142.9	0.7355
143	0.7363
143.1	0.7367
143.2	0.737
143.3	0.7373
143.4	0.7381
143.5	0.7388
143.6	0.7392
143.7	0.739
143.8	0.7395
143.9	0.7399
144	0.7406
144.1	0.7405
144.2	0.741
144.3	0.7419
144.4	0.7428
144.5	0.7438
144.6	0.7445
144.7	0.745
144.8	0.7458
144.9	0.7467
145	0.7466
145.1	0.7471
145.2	0.7472
145.3	0.7483
145.4	0.7491
145.5	0.7491
145.6	0.7492
145.7	0.7501
145.8	0.7502
145.9	0.7507
146	0.751
146.1	0.7515
146.2	0.7521
146.3	0.7533
146.4	0.7534
146.5	0.7535
146.6	0.7535
146.7	0.7548
146.8	0.7553
146.9	0.7554
147	0.7555
147.1	0.7556
147.2	0.7561
147.3	0.7561
147.4	0.7569
147.5	0.758
147.6	0.759
147.7	0.7589
147.8	0.76
147.9	0.7604
148	0.761
148.1	0.7615
148.2	0.7617
148.3	0.762
148.4	0.7616
148.5	0.7623
148.6	0.7626
148.7	0.7625
148.8	0.762
148.9	0.7622
149	0.7614
149.1	0.7624
149.2	0.7629
149.3	0.7625
149.4	0.7633
149.5	0.763
149.6	0.7642
149.7	0.7641
149.8	0.7645
149.9	0.7647
150	0.7652
150.1	0.7657
150.2	0.7661
150.3	0.7663
150.4	0.7664
150.5	0.767
150.6	0.7671
150.7	0.7672
150.8	0.7673
150.9	0.7682
151	0.7686
151.1	0.7691
151.2	0.7693
151.3	0.7696
151.4	0.7705
151.5	0.7709
151.6	0.7711
151.7	0.7712
151.8	0.7717
151.9	0.772
152	0.7728
152.1	0.7728
152.2	0.7727
152.3	0.7729
152.4	0.7732
152.5	0.7737
152.6	0.7741
152.7	0.7744
152.8	0.775
152.9	0.7764
153	0.7759
153.1	0.7754
153.2	0.7756
153.3	0.776
153.4	0.7767
153.5	0.7777
153.6	0.7778
153.7	0.7776
153.8	0.7782
153.9	0.7777
154	0.778
154.1	0.7783
154.2	0.7783
154.3	0.7794
154.4	0.78
154.5	0.7805
154.6	0.7811
154.7	0.7806
154.8	0.7812
154.9	0.7813
155	0.7813
155.1	0.7812
155.2	0.7809
155.3	0.7818
155.4	0.782
155.5	0.7826
155.6	0.783
155.7	0.7824
155.8	0.7826
155.9	0.7825
156	0.7827
156.1	0.7828
156.2	0.7826
156.3	0.7831
156.4	0.7839
156.5	0.7834
156.6	0.7832
156.7	0.7833
156.8	0.783
156.9	0.7827
157	0.7812
157.1	0.7814
157.2	0.7821
157.3	0.7825
157.4	0.7833
157.5	0.7839
157.6	0.7837
157.7	0.7827
157.8	0.7835
157.9	0.7833
158	0.7835
158.1	0.7839
158.2	0.7833
158.3	0.783
158.4	0.7834
158.5	0.7835
158.6	0.7828
158.7	0.7829
158.8	0.7828
158.9	0.7829
159	0.7824
159.1	0.7829
159.2	0.783
159.3	0.783
159.4	0.7832
159.5	0.7828
159.6	0.7831
159.7	0.7837
159.8	0.7836
159.9	0.7843
160	0.7843
160.1	0.7836
160.2	0.7841
160.3	0.7847
160.4	0.7853
160.5	0.7853
160.6	0.7848
160.7	0.7853
160.8	0.7861
160.9	0.7859
161	0.7865
161.1	0.7866
161.2	0.7872
161.3	0.7869
161.4	0.7875
161.5	0.7872
161.6	0.7867
161.7	0.787
161.8	0.7871
161.9	0.7872
162	0.7875
162.1	0.7875
162.2	0.7883
162.3	0.7881
162.4	0.7875
162.5	0.788
162.6	0.7877
162.7	0.7879
162.8	0.7878
162.9	0.7877
163	0.7871
163.1	0.787
163.2	0.7874
163.3	0.7879
163.4	0.788
163.5	0.7883
163.6	0.7879
163.7	0.7885
163.8	0.7888
163.9	0.7892
164	0.789
164.1	0.7893
164.2	0.7895
164.3	0.7896
164.4	0.7901
164.5	0.7907
164.6	0.7909
164.7	0.7908
164.8	0.7908
164.9	0.7909
165	0.7902
165.1	0.7907
165.2	0.7908
165.3	0.7915
165.4	0.7914
165.5	0.7916
165.6	0.7917
165.7	0.7918
165.8	0.792
165.9	0.7914
166	0.7916
166.1	0.791
166.2	0.7913
166.3	0.7913
166.4	0.7923
166.5	0.7928
166.6	0.7931
166.7	0.7932
166.8	0.7934
166.9	0.7938
167	0.7938
167.1	0.7937
167.2	0.7938
167.3	0.794
167.4	0.7949
167.5	0.7955
167.6	0.7957
167.7	0.7967
167.8	0.7968
167.9	0.7961
168	0.7966
168.1	0.7959
168.2	0.7965
168.3	0.7965
168.4	0.7972
168.5	0.7971
168.6	0.7974
168.7	0.7974
168.8	0.7973
168.9	0.7976
169	0.7977
169.1	0.7978
169.2	0.7979
169.3	0.7975
169.4	0.7972
169.5	0.7967
169.6	0.7969
169.7	0.7975
169.8	0.7975
169.9	0.7971
170	0.7972
170.1	0.7971
170.2	0.7974
170.3	0.7976
170.4	0.7976
170.5	0.798
170.6	0.7978
170.7	0.7982
170.8	0.7989
170.9	0.799
171	0.7992
171.1	0.799
171.2	0.7997
171.3	0.7997
171.4	0.8006
171.5	0.8005
171.6	0.8007
171.7	0.8003
171.8	0.8007
171.9	0.8007
172	0.8006
172.1	0.801
172.2	0.8014
172.3	0.8009
172.4	0.8007
172.5	0.8007
172.6	0.8001
172.7	0.8005
172.8	0.8008
172.9	0.8012
173	0.801
173.1	0.8022
173.2	0.802
173.3	0.802
173.4	0.8017
173.5	0.8016
173.6	0.8019
173.7	0.8017
173.8	0.8016
173.9	0.8019
174	0.8023
174.1	0.8021
174.2	0.8023
174.3	0.8022
174.4	0.8019
174.5	0.8014
174.6	0.8014
174.7	0.8014
174.8	0.8013
174.9	0.8015
175	0.8012
175.1	0.8022
175.2	0.8021
175.3	0.8019
175.4	0.8016
175.5	0.8018
175.6	0.8019
175.7	0.8022
175.8	0.802
175.9	0.8025
176	0.8024
176.1	0.8024
176.2	0.8025
176.3	0.8031
176.4	0.8038
176.5	0.8036
176.6	0.804
176.7	0.8044
176.8	0.8046
176.9	0.8045
177	0.8042
177.1	0.8045
177.2	0.805
177.3	0.8048
177.4	0.8046
177.5	0.8048
177.6	0.8042
177.7	0.8042
177.8	0.8043
177.9	0.8041
178	0.8041
178.1	0.8045
178.2	0.8042
178.3	0.8042
178.4	0.8045
178.5	0.8048
178.6	0.8043
178.7	0.804
178.8	0.8044
178.9	0.8055
179	0.8056
179.1	0.8062
179.2	0.8065
179.3	0.806
179.4	0.8059
179.5	0.806
179.6	0.8052
179.7	0.8044
179.8	0.8045
179.9	0.8046
180	0.8045
180.1	0.8049
180.2	0.8043
180.3	0.8042
180.4	0.805
180.5	0.8052
180.6	0.8051
180.7	0.8058
180.8	0.8052
180.9	0.805
181	0.8048
181.1	0.8041
181.2	0.8049
181.3	0.805
181.4	0.8053
181.5	0.8053
181.6	0.8057
181.7	0.8067
181.8	0.8069
181.9	0.8068
182	0.8067
182.1	0.8072
182.2	0.8073
182.3	0.8071
182.4	0.8068
182.5	0.807
182.6	0.8068
182.7	0.8058
182.8	0.8057
182.9	0.8058
183	0.8065
183.1	0.8063
183.2	0.8068
183.3	0.8078
183.4	0.8075
183.5	0.807
183.6	0.8064
183.7	0.8065
183.8	0.8064
183.9	0.8058
184	0.8056
184.1	0.8059
184.2	0.806
184.3	0.8061
184.4	0.8071
184.5	0.8068
184.6	0.8067
184.7	0.8071
184.8	0.8067
184.9	0.8062
185	0.806
185.1	0.8059
185.2	0.8062
185.3	0.8065
185.4	0.8062
185.5	0.8061
185.6	0.8061
185.7	0.8057
185.8	0.8054
185.9	0.8054
186	0.8057
186.1	0.8053
186.2	0.8052
186.3	0.8052
186.4	0.8049
186.5	0.8046
186.6	0.805
186.7	0.8043
186.8	0.8044
186.9	0.8043
187	0.8045
187.1	0.8046
187.2	0.8047
187.3	0.8049
187.4	0.8047
187.5	0.8041
187.6	0.8034
187.7	0.8036
187.8	0.8035
187.9	0.8032
188	0.8033
188.1	0.8029
188.2	0.803
188.3	0.8025
188.4	0.8031
188.5	0.8034
188.6	0.8033
188.7	0.8036
188.8	0.8041
188.9	0.8042
189	0.804
189.1	0.8035
189.2	0.8034
189.3	0.8028
189.4	0.8029
189.5	0.8031
189.6	0.8028
189.7	0.8025
189.8	0.8028
189.9	0.8033
190	0.8038
190.1	0.8038
190.2	0.8033
190.3	0.8025
190.4	0.8025
190.5	0.8023
190.6	0.8025
190.7	0.803
190.8	0.8035
190.9	0.8036
191	0.8031
191.1	0.8029
191.2	0.8031
191.3	0.803
191.4	0.8032
191.5	0.8032
191.6	0.8029
191.7	0.8024
191.8	0.8023
191.9	0.802
192	0.8024
192.1	0.8019
192.2	0.8017
192.3	0.8021
192.4	0.8021
192.5	0.8022
192.6	0.8024
192.7	0.803
192.8	0.8028
192.9	0.8023
193	0.8026
193.1	0.803
193.2	0.8035
193.3	0.8036
193.4	0.804
193.5	0.8034
193.6	0.8037
193.7	0.8033
193.8	0.8029
193.9	0.8031
194	0.8026
194.1	0.8025
194.2	0.8024
194.3	0.803
194.4	0.8028
194.5	0.8026
194.6	0.8028
194.7	0.8026
194.8	0.8026
194.9	0.8034
195	0.8034
195.1	0.8035
195.2	0.8035
195.3	0.8037
195.4	0.8038
195.5	0.8042
195.6	0.8037
195.7	0.8039
195.8	0.8043
195.9	0.8043
196	0.8052
196.1	0.8047
196.2	0.8042
196.3	0.8038
196.4	0.8039
196.5	0.8035
196.6	0.8037
196.7	0.8046
196.8	0.8054
196.9	0.8057
197	0.8059
197.1	0.8059
197.2	0.8062
197.3	0.8063
197.4	0.8063
197.5	0.8072
197.6	0.8074
197.7	0.8078
197.8	0.8076
197.9	0.8086
198	0.8091
198.1	0.8091
198.2	0.81
198.3	0.8096
198.4	0.8091
198.5	0.8094
198.6	0.8098
198.7	0.8102
198.8	0.8095
198.9	0.8097
199	0.8093
199.1	0.8088
199.2	0.8088
199.3	0.8086
199.4	0.8088
199.5	0.8094
199.6	0.8097
199.7	0.8096
199.8	0.8097
199.9	0.8095
200	0.81
[truncated: 14,000 more rows]
