# Supplementary material for: Bayesian inference of kinetic schemes for ion channels by Kalman filtering
Source: eLife journal article supplement (doi:10.7554/elife.62714), 2022-05-04
Supplement: fig4-data1 [file 1_Sim_N_20000_Fluor_MW_16M.xlsx]

## Sheet: Tabelle1
0.1	0
0.2	0
0.3	0
0.4	0
0.5	0
0.6	0
0.7	0
0.8	0
0.9	0
1	0
1.1	0
1.2	0
1.3	0
1.4	0
1.5	0
1.6	0
1.7	0
1.8	0
1.9	0
2	0
2.1	0
2.2	0
2.3	0
2.4	0
2.5	0
2.6	0
2.7	0
2.8	0
2.9	0
3	0
3.1	0
3.2	0
3.3	0
3.4	0
3.5	0
3.6	0
3.7	0
3.8	0
3.9	0
4	0
4.1	0
4.2	0
4.3	0
4.4	0
4.5	0
4.6	0
4.7	0
4.8	0
4.9	0
5	0
5.1	0
5.2	0
5.3	0
5.4	0
5.5	0
5.6	0
5.7	0
5.8	0
5.9	0
6	0
6.1	0
6.2	0
6.3	0
6.4	0
6.5	0
6.6	0
6.7	0
6.8	0
6.9	0
7	0
7.1	0
7.2	0
7.3	0
7.4	0
7.5	0
7.6	0
7.7	0
7.8	0
7.9	0
8	0
8.1	0
8.2	0
8.3	0
8.4	0
8.5	0
8.6	0
8.7	0
8.8	0
8.9	0
9	0
9.1	0
9.2	0
9.3	0
9.4	0
9.5	0
9.6	0
9.7	0
9.8	0
9.9	0
10	0
10.1	0
10.2	0
10.3	0
10.4	0
10.5	0
10.6	0
10.7	0
10.8	0
10.9	0
11	0
11.1	0
11.2	0
11.3	0
11.4	0
11.5	0
11.6	0
11.7	0
11.8	0
11.9	0
12	0
12.1	0
12.2	0
12.3	0
12.4	0
12.5	0
12.6	0
12.7	0
12.8	0
12.9	0
13	0
13.1	0
13.2	0
13.3	0
13.4	0
13.5	0
13.6	0
13.7	0
13.8	0
13.9	0
14	0
14.1	0
14.2	0
14.3	0
14.4	0
14.5	0
14.6	0
14.7	0
14.8	0
14.9	0
15	0
15.1	0
15.2	0
15.3	0
15.4	0
15.5	0
15.6	0
15.7	0
15.8	0
15.9	0
16	0
16.1	0
16.2	0
16.3	0
16.4	0
16.5	0
16.6	0
16.7	0
16.8	0
16.9	0
17	0
17.1	0
17.2	0
17.3	0
17.4	0
17.5	0
17.6	0
17.7	0
17.8	0
17.9	0
18	0
18.1	0
18.2	0
18.3	0
18.4	0
18.5	0
18.6	0
18.7	0
18.8	0
18.9	0
19	0
19.1	0
19.2	0
19.3	0
19.4	0
19.5	0
19.6	0
19.7	0
19.8	0
19.9	0
20	0
20.1	0
20.2	0
20.3	0
20.4	0
20.5	0
20.6	0
20.7	0
20.8	0
20.9	0
21	0
21.1	0
21.2	0
21.3	0
21.4	0
21.5	0
21.6	0
21.7	0
21.8	0
21.9	0
22	0
22.1	0
22.2	0
22.3	0
22.4	0
22.5	0
22.6	0
22.7	0
22.8	0
22.9	0
23	0
23.1	0
23.2	0
23.3	0
23.4	0
23.5	0
23.6	0
23.7	0
23.8	0
23.9	0
24	0
24.1	0
24.2	0
24.3	0
24.4	0
24.5	0
24.6	0
24.7	0
24.8	0
24.9	0
25	0
25.1	0
25.2	0
25.3	0
25.4	0
25.5	0
25.6	0
25.7	0
25.8	0
25.9	0
26	0
26.1	0
26.2	0
26.3	0
26.4	0
26.5	0
26.6	0
26.7	0
26.8	0
26.9	0
27	0
27.1	0
27.2	0
27.3	0
27.4	0
27.5	0
27.6	0
27.7	0
27.8	0
27.9	0
28	0
28.1	0
28.2	0
28.3	0
28.4	0
28.5	0
28.6	0
28.7	0
28.8	0
28.9	0
29	0
29.1	0
29.2	0
29.3	0
29.4	0
29.5	0
29.6	0
29.7	0
29.8	0
29.9	0
30	0
30.1	0
30.2	0
30.3	0
30.4	0
30.5	0
30.6	0
30.7	0
30.8	0
30.9	0
31	0
31.1	0
31.2	0
31.3	0
31.4	0
31.5	0
31.6	0
31.7	0
31.8	0
31.9	0
32	0
32.1	0
32.2	0
32.3	0
32.4	0
32.5	0
32.6	0
32.7	0
32.8	0
32.9	0
33	0
33.1	0
33.2	0
33.3	0
33.4	0
33.5	0
33.6	0
33.7	0
33.8	0
33.9	0
34	0
34.1	0
34.2	0
34.3	0
34.4	0
34.5	0
34.6	0
34.7	0
34.8	0
34.9	0
35	0
35.1	0
35.2	0
35.3	0
35.4	0
35.5	0
35.6	0
35.7	0
35.8	0
35.9	0
36	0
36.1	0
36.2	0
36.3	0
36.4	0
36.5	0
36.6	0
36.7	0
36.8	0
36.9	0
37	0
37.1	0
37.2	0
37.3	0
37.4	0
37.5	0
37.6	0
37.7	0
37.8	0
37.9	0
38	0
38.1	0
38.2	0
38.3	0
38.4	0
38.5	0
38.6	0
38.7	0
38.8	0
38.9	0
39	0
39.1	0
39.2	0
39.3	0
39.4	0
39.5	0
39.6	0
39.7	0
39.8	0
39.9	0
40	0
40.1	0
40.2	0
40.3	0
40.4	0
40.5	0
40.6	0
40.7	0
40.8	0
40.9	0
41	0
41.1	0
41.2	0
41.3	0
41.4	0
41.5	0
41.6	0
41.7	0
41.8	0
41.9	0
42	0
42.1	0
42.2	0
42.3	0
42.4	0
42.5	0
42.6	0
42.7	0
42.8	0
42.9	0
43	0
43.1	0
43.2	0
43.3	0
43.4	0
43.5	0
43.6	0
43.7	0
43.8	0
43.9	0
44	0
44.1	0
44.2	0
44.3	0
44.4	0
44.5	0
44.6	0
44.7	0
44.8	0
44.9	0
45	0
45.1	0
45.2	0
45.3	0
45.4	0
45.5	0
45.6	0
45.7	0
45.8	0
45.9	0
46	0
46.1	0
46.2	0
46.3	0
46.4	0
46.5	0
46.6	0
46.7	0
46.8	0
46.9	0
47	0
47.1	0
47.2	0
47.3	0
47.4	0
47.5	0
47.6	0
47.7	0
47.8	0
47.9	0
48	0
48.1	0
48.2	0
48.3	0
48.4	0
48.5	0
48.6	0
48.7	0
48.8	0
48.9	0
49	0
49.1	0
49.2	0
49.3	0
49.4	0
49.5	0
49.6	0
49.7	0
49.8	0
49.9	0
50	0
50.1	0
50.2	0
50.3	0
50.4	0
50.5	0
50.6	0
50.7	0
50.8	0
50.9	0
51	0
51.1	0
51.2	0
51.3	0
51.4	0
51.5	0
51.6	0
51.7	0
51.8	0
51.9	0
52	0
52.1	0
52.2	0
52.3	0
52.4	0
52.5	0
52.6	0
52.7	0
52.8	0
52.9	0
53	0
53.1	0
53.2	0
53.3	0
53.4	0
53.5	0
53.6	0
53.7	0
53.8	0
53.9	0
54	0
54.1	0
54.2	0
54.3	0
54.4	0
54.5	0
54.6	0
54.7	0
54.8	0
54.9	0
55	0
55.1	0
55.2	0
55.3	0
55.4	0
55.5	0
55.6	0
55.7	0
55.8	0
55.9	0
56	0
56.1	0
56.2	0
56.3	0
56.4	0
56.5	0
56.6	0
56.7	0
56.8	0
56.9	0
57	0
57.1	0
57.2	0
57.3	0
57.4	0
57.5	0
57.6	0
57.7	0
57.8	0
57.9	0
58	0
58.1	0
58.2	0
58.3	0
58.4	0
58.5	0
58.6	0
58.7	0
58.8	0
58.9	0
59	0
59.1	0
59.2	0
59.3	0
59.4	0
59.5	0
59.6	0
59.7	0
59.8	0
59.9	0
60	0
60.1	0
60.2	0
60.3	0
60.4	0
60.5	0
60.6	0
60.7	0
60.8	0
60.9	0
61	0
61.1	0
61.2	0
61.3	0
61.4	0
61.5	0
61.6	0
61.7	0
61.8	0
61.9	0
62	0
62.1	0
62.2	0
62.3	0
62.4	0
62.5	0
62.6	0
62.7	0
62.8	0
62.9	0
63	0
63.1	0
63.2	0
63.3	0
63.4	0
63.5	0
63.6	0
63.7	0
63.8	0
63.9	0
64	0
64.1	0
64.2	0
64.3	0
64.4	0
64.5	0
64.6	0
64.7	0
64.8	0
64.9	0
65	0
65.1	0
65.2	0
65.3	0
65.4	0
65.5	0
65.6	0
65.7	0
65.8	0
65.9	0
66	0
66.1	0
66.2	0
66.3	0
66.4	0
66.5	0
66.6	0
66.7	0
66.8	0
66.9	0
67	0
67.1	0
67.2	0
67.3	0
67.4	0
67.5	0
67.6	0
67.7	0
67.8	0
67.9	0
68	0
68.1	0
68.2	0
68.3	0
68.4	0
68.5	0
68.6	0
68.7	0
68.8	0
68.9	0
69	0
69.1	0
69.2	0
69.3	0
69.4	0
69.5	0
69.6	0
69.7	0
69.8	0
69.9	0
70	0
70.1	0
70.2	0
70.3	0
70.4	0
70.5	0
70.6	0
70.7	0
70.8	0
70.9	0
71	0
71.1	0
71.2	0
71.3	0
71.4	0
71.5	0
71.6	0
71.7	0
71.8	0
71.9	0
72	0
72.1	0
72.2	0
72.3	0
72.4	0
72.5	0
72.6	0
72.7	0
72.8	0
72.9	0
73	0
73.1	0
73.2	0
73.3	0
73.4	0
73.5	0
73.6	0
73.7	0
73.8	0
73.9	0
74	0
74.1	0
74.2	0
74.3	0
74.4	0
74.5	0
74.6	0
74.7	0
74.8	0
74.9	0
75	0
75.1	0
75.2	0
75.3	0
75.4	0
75.5	0
75.6	0
75.7	0
75.8	0
75.9	0
76	0
76.1	0
76.2	0
76.3	0
76.4	0
76.5	0
76.6	0
76.7	0
76.8	0
76.9	0
77	0
77.1	0
77.2	0
77.3	0
77.4	0
77.5	0
77.6	0
77.7	0
77.8	0
77.9	0
78	0
78.1	0
78.2	0
78.3	0
78.4	0
78.5	0
78.6	0
78.7	0
78.8	0
78.9	0
79	0
79.1	0
79.2	0
79.3	0
79.4	0
79.5	0
79.6	0
79.7	0
79.8	0
79.9	0
80	0
80.1	0
80.2	0
80.3	0
80.4	0
80.5	0
80.6	0
80.7	0
80.8	0
80.9	0
81	0
81.1	0
81.2	0
81.3	0
81.4	0
81.5	0
81.6	0
81.7	0
81.8	0
81.9	0
82	0
82.1	0
82.2	0
82.3	0
82.4	0
82.5	0
82.6	0
82.7	0
82.8	0
82.9	0
83	0
83.1	0
83.2	0
83.3	0
83.4	0
83.5	0
83.6	0
83.7	0
83.8	0
83.9	0
84	0
84.1	0
84.2	0
84.3	0
84.4	0
84.5	0
84.6	0
84.7	0
84.8	0
84.9	0
85	0
85.1	0
85.2	0
85.3	0
85.4	0
85.5	0
85.6	0
85.7	0
85.8	0
85.9	0
86	0
86.1	0
86.2	0
86.3	0
86.4	0
86.5	0
86.6	0
86.7	0
86.8	0
86.9	0
87	0
87.1	0
87.2	0
87.3	0
87.4	0
87.5	0
87.6	0
87.7	0
87.8	0
87.9	0
88	0
88.1	0
88.2	0
88.3	0
88.4	0
88.5	0
88.6	0
88.7	0
88.8	0
88.9	0
89	0
89.1	0
89.2	0
89.3	0
89.4	0
89.5	0
89.6	0
89.7	0
89.8	0
89.9	0
90	0
90.1	0
90.2	0
90.3	0
90.4	0
90.5	0
90.6	0
90.7	0
90.8	0
90.9	0
91	0
91.1	0
91.2	0
91.3	0
91.4	0
91.5	0
91.6	0
91.7	0
91.8	0
91.9	0
92	0
92.1	0
92.2	0
92.3	0
92.4	0
92.5	0
92.6	0
92.7	0
92.8	0
92.9	0
93	0
93.1	0
93.2	0
93.3	0
93.4	0
93.5	0
93.6	0
93.7	0
93.8	0
93.9	0
94	0
94.1	0
94.2	0
94.3	0
94.4	0
94.5	0
94.6	0
94.7	0
94.8	0
94.9	0
95	0
95.1	0
95.2	0
95.3	0
95.4	0
95.5	0
95.6	0
95.7	0
95.8	0
95.9	0
96	0
96.1	0
96.2	0
96.3	0
96.4	0
96.5	0
96.6	0
96.7	0
96.8	0
96.9	0
97	0
97.1	0
97.2	0
97.3	0
97.4	0
97.5	0
97.6	0
97.7	0
97.8	0
97.9	0
98	0
98.1	0
98.2	0
98.3	0
98.4	0
98.5	0
98.6	0
98.7	0
98.8	0
98.9	0
99	0
99.1	0
99.2	0
99.3	0
99.4	0
99.5	0
99.6	0
99.7	0
99.8	0
99.9	0
100	0
100.1	0.537125
100.2	0.726475
100.3	0.821375
100.4	0.87615
100.5	0.90565
100.6	0.924225
100.7	0.93375
100.8	0.941725
100.9	0.94635
101	0.951075
101.1	0.950275
101.2	0.951225
101.3	0.95285
101.4	0.953625
101.5	0.953825
101.6	0.9538
101.7	0.95535
101.8	0.955475
101.9	0.955675
102	0.9549
102.1	0.956075
102.2	0.955475
102.3	0.9565
102.4	0.95565
102.5	0.956825
102.6	0.955525
102.7	0.9563
102.8	0.956625
102.9	0.9571
103	0.95725
103.1	0.9593
103.2	0.958375
103.3	0.959175
103.4	0.95895
103.5	0.95815
103.6	0.95875
103.7	0.95815
103.8	0.9585
103.9	0.959225
104	0.9587
104.1	0.959475
104.2	0.95875
104.3	0.9591
104.4	0.95895
104.5	0.959875
104.6	0.96005
104.7	0.962
104.8	0.962
104.9	0.9619
105	0.962325
105.1	0.96215
105.2	0.9618
105.3	0.96235
105.4	0.96175
105.5	0.960775
105.6	0.962
105.7	0.962175
105.8	0.9619
105.9	0.96175
106	0.96365
106.1	0.96165
106.2	0.96215
106.3	0.9644
106.4	0.964625
106.5	0.96505
106.6	0.9634
106.7	0.9627
106.8	0.962925
106.9	0.9642
107	0.964425
107.1	0.965425
107.2	0.96545
107.3	0.96495
107.4	0.964125
107.5	0.964175
107.6	0.9633
107.7	0.96385
107.8	0.965075
107.9	0.9664
108	0.967125
108.1	0.9655
108.2	0.965375
108.3	0.96525
108.4	0.965525
108.5	0.965775
108.6	0.965075
108.7	0.967175
108.8	0.966075
108.9	0.966175
109	0.96765
109.1	0.9677
109.2	0.967625
109.3	0.96825
109.4	0.968425
109.5	0.968475
109.6	0.967725
109.7	0.96735
109.8	0.96775
109.9	0.967275
110	0.9686
110.1	0.9688
110.2	0.967825
110.3	0.967675
110.4	0.967975
110.5	0.969
110.6	0.9695
110.7	0.969725
110.8	0.96945
110.9	0.969825
111	0.970725
111.1	0.9705
111.2	0.97075
111.3	0.9712
111.4	0.970275
111.5	0.971
111.6	0.9708
111.7	0.971025
111.8	0.971025
111.9	0.9707
112	0.9703
112.1	0.9712
112.2	0.971375
112.3	0.9706
112.4	0.971025
112.5	0.97215
112.6	0.972125
112.7	0.9728
112.8	0.9703
112.9	0.971025
113	0.972175
113.1	0.97265
113.2	0.972375
113.3	0.9734
113.4	0.97195
113.5	0.9712
113.6	0.971325
113.7	0.97075
113.8	0.97065
113.9	0.97125
114	0.972625
114.1	0.972325
114.2	0.973275
114.3	0.97285
114.4	0.974275
114.5	0.9736
114.6	0.973875
114.7	0.973625
114.8	0.974825
114.9	0.974275
115	0.9747
115.1	0.97505
115.2	0.974175
115.3	0.974975
115.4	0.9751
115.5	0.9749
115.6	0.973425
115.7	0.97385
115.8	0.975225
115.9	0.974575
116	0.974075
116.1	0.974
116.2	0.974475
116.3	0.974825
116.4	0.975725
116.5	0.976275
116.6	0.9755
116.7	0.975525
116.8	0.97595
116.9	0.9756
117	0.975125
117.1	0.97455
117.2	0.974975
117.3	0.974625
117.4	0.9751
117.5	0.975775
117.6	0.976625
117.7	0.976125
117.8	0.97605
117.9	0.97465
118	0.976025
118.1	0.974775
118.2	0.974925
118.3	0.976425
118.4	0.976225
118.5	0.977475
118.6	0.978125
118.7	0.9776
118.8	0.977825
118.9	0.977075
119	0.97875
119.1	0.9787
119.2	0.977625
119.3	0.9769
119.4	0.978575
119.5	0.978225
119.6	0.977275
119.7	0.9782
119.8	0.977825
119.9	0.9769
120	0.976925
120.1	0.97705
120.2	0.977675
120.3	0.978325
120.4	0.979675
120.5	0.979175
120.6	0.979025
120.7	0.9782
120.8	0.9774
120.9	0.977525
121	0.97785
121.1	0.977425
121.2	0.97825
121.3	0.9787
121.4	0.978675
121.5	0.977975
121.6	0.97875
121.7	0.978375
121.8	0.9786
121.9	0.9784
122	0.979575
122.1	0.97955
122.2	0.98005
122.3	0.97945
122.4	0.979875
122.5	0.979475
122.6	0.979125
122.7	0.978975
122.8	0.979325
122.9	0.980125
123	0.980325
123.1	0.9789
123.2	0.9797
123.3	0.98045
123.4	0.980175
123.5	0.97985
123.6	0.98015
123.7	0.979725
123.8	0.979425
123.9	0.980725
124	0.980125
124.1	0.980425
124.2	0.98005
124.3	0.98055
124.4	0.980775
124.5	0.982125
124.6	0.9814
124.7	0.980775
124.8	0.9808
124.9	0.980625
125	0.980975
125.1	0.981725
125.2	0.9811
125.3	0.981025
125.4	0.9823
125.5	0.98235
125.6	0.9819
125.7	0.981525
125.8	0.98235
125.9	0.98225
126	0.9825
126.1	0.98235
126.2	0.98165
126.3	0.981175
126.4	0.9806
126.5	0.981675
126.6	0.981775
126.7	0.98205
126.8	0.981475
126.9	0.9819
127	0.9815
127.1	0.98175
127.2	0.98255
127.3	0.982375
127.4	0.981975
127.5	0.98125
127.6	0.98215
127.7	0.983175
127.8	0.98295
127.9	0.982625
128	0.983825
128.1	0.9828
128.2	0.9819
128.3	0.982275
128.4	0.98235
128.5	0.9819
128.6	0.983025
128.7	0.98235
128.8	0.982775
128.9	0.983275
129	0.9832
129.1	0.982625
129.2	0.98265
129.3	0.982925
129.4	0.983225
129.5	0.9841
129.6	0.9837
129.7	0.98325
129.8	0.982475
129.9	0.9837
130	0.98405
130.1	0.984
130.2	0.983975
130.3	0.98365
130.4	0.982975
130.5	0.9834
130.6	0.98325
130.7	0.984475
130.8	0.9851
130.9	0.985275
131	0.984825
131.1	0.984875
131.2	0.98425
131.3	0.985
131.4	0.985125
131.5	0.985375
131.6	0.98575
131.7	0.9862
131.8	0.985175
131.9	0.984875
132	0.9845
132.1	0.983775
132.2	0.98435
132.3	0.984075
132.4	0.98365
132.5	0.983525
132.6	0.985
132.7	0.985575
132.8	0.98565
132.9	0.984625
133	0.9844
133.1	0.9854
133.2	0.985775
133.3	0.985
133.4	0.985275
133.5	0.9854
133.6	0.98535
133.7	0.9852
133.8	0.986275
133.9	0.9854
134	0.984575
134.1	0.9846
134.2	0.984875
134.3	0.98525
134.4	0.984725
134.5	0.98585
134.6	0.985925
134.7	0.9869
134.8	0.98605
134.9	0.986225
135	0.98505
135.1	0.984625
135.2	0.98515
135.3	0.985775
135.4	0.985275
135.5	0.9854
135.6	0.9861
135.7	0.986325
135.8	0.9857
135.9	0.9861
136	0.98685
136.1	0.98595
136.2	0.985775
136.3	0.98685
136.4	0.985975
136.5	0.986525
136.6	0.986125
136.7	0.987
136.8	0.98675
136.9	0.9854
137	0.98575
137.1	0.9857
137.2	0.985925
137.3	0.986225
137.4	0.985475
137.5	0.9859
137.6	0.986
137.7	0.9867
137.8	0.986375
137.9	0.985825
138	0.9848
138.1	0.985275
138.2	0.9853
138.3	0.985825
138.4	0.986275
138.5	0.98685
138.6	0.987125
138.7	0.986775
138.8	0.987675
138.9	0.98685
139	0.987675
139.1	0.987
139.2	0.986625
139.3	0.98695
139.4	0.98645
139.5	0.98655
139.6	0.986375
139.7	0.986525
139.8	0.98655
139.9	0.98735
140	0.987
140.1	0.9864
140.2	0.986675
140.3	0.987925
140.4	0.9878
140.5	0.9875
140.6	0.98745
140.7	0.9879
140.8	0.987925
140.9	0.986875
141	0.986975
141.1	0.986725
141.2	0.987175
141.3	0.98755
141.4	0.98745
141.5	0.987225
141.6	0.986975
141.7	0.988025
141.8	0.987075
141.9	0.987525
142	0.988075
142.1	0.9878
142.2	0.9882
142.3	0.987875
142.4	0.987875
142.5	0.9874
142.6	0.9871
142.7	0.987725
142.8	0.987825
142.9	0.987675
143	0.9877
143.1	0.9871
143.2	0.98765
143.3	0.98765
143.4	0.987475
143.5	0.98745
143.6	0.98755
143.7	0.987
143.8	0.9878
143.9	0.988075
144	0.9881
144.1	0.987575
144.2	0.987875
144.3	0.9883
144.4	0.988525
144.5	0.9881
144.6	0.98785
144.7	0.988175
144.8	0.988
144.9	0.987825
145	0.98835
145.1	0.988675
145.2	0.9886
145.3	0.987775
145.4	0.988
145.5	0.988025
145.6	0.98775
145.7	0.987875
145.8	0.988475
145.9	0.988375
146	0.98875
146.1	0.9885
146.2	0.98915
146.3	0.988525
146.4	0.9887
146.5	0.98835
146.6	0.989225
146.7	0.988625
146.8	0.9882
146.9	0.9882
147	0.988525
147.1	0.98815
147.2	0.987875
147.3	0.988525
147.4	0.988875
147.5	0.988775
147.6	0.988375
147.7	0.98885
147.8	0.98855
147.9	0.987475
148	0.98785
148.1	0.9889
148.2	0.9888
148.3	0.988425
148.4	0.988575
148.5	0.989025
148.6	0.989475
148.7	0.98935
148.8	0.989125
148.9	0.9891
149	0.989025
149.1	0.988375
149.2	0.98815
149.3	0.98875
149.4	0.988225
149.5	0.98825
149.6	0.98835
149.7	0.98855
149.8	0.989
149.9	0.9883
150	0.988825
150.1	0.988925
150.2	0.989125
150.3	0.98925
150.4	0.988975
150.5	0.988925
150.6	0.988475
150.7	0.988875
150.8	0.989075
150.9	0.98935
151	0.989225
151.1	0.98815
151.2	0.9886
151.3	0.988775
151.4	0.98875
151.5	0.98915
151.6	0.989375
151.7	0.989625
151.8	0.989725
151.9	0.989925
152	0.989825
152.1	0.989875
152.2	0.9896
152.3	0.98935
152.4	0.988975
152.5	0.988825
152.6	0.989025
152.7	0.98925
152.8	0.990125
152.9	0.98995
153	0.9898
153.1	0.989525
153.2	0.989625
153.3	0.988925
153.4	0.98855
153.5	0.9886
153.6	0.988475
153.7	0.9892
153.8	0.989425
153.9	0.988875
154	0.989075
154.1	0.9899
154.2	0.9904
154.3	0.989775
154.4	0.99
154.5	0.990125
154.6	0.98915
154.7	0.98975
154.8	0.989725
154.9	0.98895
155	0.9895
155.1	0.9893
155.2	0.98955
155.3	0.98915
155.4	0.989225
155.5	0.989025
155.6	0.988325
155.7	0.9888
155.8	0.989225
155.9	0.990125
156	0.98985
156.1	0.990325
156.2	0.989625
156.3	0.990425
156.4	0.99045
156.5	0.99
156.6	0.989075
156.7	0.989375
156.8	0.989775
156.9	0.989975
157	0.990175
157.1	0.9906
157.2	0.989375
157.3	0.990075
157.4	0.989875
157.5	0.989925
157.6	0.99045
157.7	0.9899
157.8	0.989625
157.9	0.990425
158	0.99055
158.1	0.9898
158.2	0.9899
158.3	0.990075
158.4	0.988975
158.5	0.988625
158.6	0.9893
158.7	0.98955
158.8	0.99055
158.9	0.9902
159	0.989375
159.1	0.9897
159.2	0.98995
159.3	0.989575
159.4	0.9894
159.5	0.99
159.6	0.989425
159.7	0.989575
159.8	0.98995
159.9	0.99
160	0.990275
160.1	0.99035
160.2	0.9909
160.3	0.990225
160.4	0.99025
160.5	0.9909
160.6	0.99035
160.7	0.990725
160.8	0.9902
160.9	0.990425
161	0.990775
161.1	0.989825
161.2	0.989775
161.3	0.989575
161.4	0.989275
161.5	0.990425
161.6	0.990525
161.7	0.990375
161.8	0.98995
161.9	0.989475
162	0.989675
162.1	0.990175
162.2	0.9898
162.3	0.98985
162.4	0.989825
162.5	0.99
162.6	0.99005
162.7	0.990575
162.8	0.989925
162.9	0.98965
163	0.990375
163.1	0.99035
163.2	0.99045
163.3	0.98965
163.4	0.990225
163.5	0.9908
163.6	0.99035
163.7	0.990175
163.8	0.99015
163.9	0.990325
164	0.99005
164.1	0.98985
164.2	0.990125
164.3	0.989525
164.4	0.990075
164.5	0.990175
164.6	0.990325
164.7	0.9901
164.8	0.98955
164.9	0.98945
165	0.990375
165.1	0.990275
165.2	0.9898
165.3	0.990225
165.4	0.99
165.5	0.9899
165.6	0.990525
165.7	0.98975
165.8	0.98965
165.9	0.98985
166	0.98985
166.1	0.990175
166.2	0.9899
166.3	0.989875
166.4	0.99045
166.5	0.990775
166.6	0.99085
166.7	0.99065
166.8	0.99
166.9	0.990225
167	0.990175
167.1	0.990775
167.2	0.9901
167.3	0.989725
167.4	0.98985
167.5	0.98985
167.6	0.99045
167.7	0.990175
167.8	0.99075
167.9	0.99045
168	0.990875
168.1	0.99005
168.2	0.989825
168.3	0.989125
168.4	0.990075
168.5	0.990825
168.6	0.991175
168.7	0.990425
168.8	0.990225
168.9	0.990725
169	0.989625
169.1	0.98985
169.2	0.990125
169.3	0.990075
169.4	0.990925
169.5	0.99095
169.6	0.9911
169.7	0.990825
169.8	0.990925
169.9	0.99065
170	0.990225
170.1	0.990325
170.2	0.990325
170.3	0.990175
170.4	0.9897
170.5	0.990275
170.6	0.990225
170.7	0.990125
170.8	0.990725
170.9	0.99045
171	0.990125
171.1	0.990375
171.2	0.990575
171.3	0.99
171.4	0.990325
171.5	0.989675
171.6	0.990575
171.7	0.990675
171.8	0.98995
171.9	0.990525
172	0.9906
172.1	0.991225
172.2	0.991025
172.3	0.99065
172.4	0.9908
172.5	0.990525
172.6	0.991525
172.7	0.990725
172.8	0.99
172.9	0.99075
173	0.99105
173.1	0.99065
173.2	0.9906
173.3	0.990925
173.4	0.990425
173.5	0.9906
173.6	0.9904
173.7	0.9903
173.8	0.99025
173.9	0.990175
174	0.990475
174.1	0.990975
174.2	0.990725
174.3	0.990775
174.4	0.990875
174.5	0.989975
174.6	0.989525
174.7	0.989675
174.8	0.9902
174.9	0.990925
175	0.99075
175.1	0.990675
175.2	0.9902
175.3	0.9903
175.4	0.99115
175.5	0.9903
175.6	0.990775
175.7	0.9898
175.8	0.9899
175.9	0.990175
176	0.99055
176.1	0.99005
176.2	0.990625
176.3	0.991075
176.4	0.990675
176.5	0.99035
176.6	0.991125
176.7	0.9902
176.8	0.990125
176.9	0.990525
177	0.990325
177.1	0.990275
177.2	0.9902
177.3	0.990125
177.4	0.990125
177.5	0.989975
177.6	0.990275
177.7	0.99105
177.8	0.990675
177.9	0.99105
178	0.9909
178.1	0.991125
178.2	0.990675
178.3	0.9901
178.4	0.9903
178.5	0.991
178.6	0.991225
178.7	0.990775
178.8	0.991075
178.9	0.991825
179	0.991375
179.1	0.990975
179.2	0.990625
179.3	0.99065
179.4	0.990325
179.5	0.9903
179.6	0.991025
179.7	0.99105
179.8	0.990575
179.9	0.990125
180	0.990775
180.1	0.990275
180.2	0.9905
180.3	0.990875
180.4	0.99065
180.5	0.990875
180.6	0.9905
180.7	0.990625
180.8	0.990425
180.9	0.99015
181	0.990275
181.1	0.9898
181.2	0.990275
181.3	0.99005
181.4	0.990725
181.5	0.99065
181.6	0.990975
181.7	0.990825
181.8	0.990775
181.9	0.990425
182	0.9909
182.1	0.9912
182.2	0.990875
182.3	0.9909
182.4	0.99105
182.5	0.9906
182.6	0.99015
182.7	0.990425
182.8	0.990525
182.9	0.99035
183	0.99035
183.1	0.991025
183.2	0.991225
183.3	0.991625
183.4	0.990075
183.5	0.990275
183.6	0.99065
183.7	0.99065
183.8	0.9911
183.9	0.991175
184	0.9916
184.1	0.991525
184.2	0.991325
184.3	0.991425
184.4	0.991825
184.5	0.9917
184.6	0.991275
184.7	0.99095
184.8	0.99145
184.9	0.99135
185	0.991
185.1	0.990575
185.2	0.9911
185.3	0.991225
185.4	0.9911
185.5	0.989475
185.6	0.9907
185.7	0.99025
185.8	0.990925
185.9	0.990425
186	0.9908
186.1	0.9908
186.2	0.99095
186.3	0.991725
186.4	0.99165
186.5	0.9918
186.6	0.991625
186.7	0.9911
186.8	0.99125
186.9	0.99055
187	0.990975
187.1	0.99105
187.2	0.99205
187.3	0.991325
187.4	0.99115
187.5	0.990575
187.6	0.99015
187.7	0.99025
187.8	0.99055
187.9	0.9904
188	0.99095
188.1	0.99075
188.2	0.991175
188.3	0.99055
188.4	0.990925
188.5	0.991275
188.6	0.9911
188.7	0.9913
188.8	0.991175
188.9	0.991075
189	0.991225
189.1	0.990925
189.2	0.99135
189.3	0.991925
189.4	0.9916
189.5	0.991
189.6	0.9907
189.7	0.991075
189.8	0.991125
189.9	0.990475
190	0.99045
190.1	0.9904
190.2	0.990625
190.3	0.991175
190.4	0.991075
190.5	0.9912
190.6	0.991575
190.7	0.9917
190.8	0.99125
190.9	0.991575
191	0.99035
191.1	0.990125
191.2	0.99005
191.3	0.990775
191.4	0.99065
191.5	0.990525
191.6	0.991025
191.7	0.991525
191.8	0.99175
191.9	0.991575
192	0.9912
192.1	0.990475
192.2	0.991225
192.3	0.9906
192.4	0.99085
192.5	0.99115
192.6	0.990525
192.7	0.990575
192.8	0.990625
192.9	0.990875
193	0.991125
193.1	0.991475
193.2	0.9909
193.3	0.99085
193.4	0.99155
193.5	0.991275
193.6	0.99125
193.7	0.991275
193.8	0.990775
193.9	0.990625
194	0.990975
194.1	0.9909
194.2	0.990925
194.3	0.99025
194.4	0.99045
194.5	0.9904
194.6	0.99065
194.7	0.990775
194.8	0.990825
194.9	0.99095
195	0.991225
195.1	0.9912
195.2	0.990075
195.3	0.990625
195.4	0.9905
195.5	0.99065
195.6	0.990875
195.7	0.991425
195.8	0.990875
195.9	0.99105
196	0.9911
196.1	0.99115
196.2	0.991225
196.3	0.991
196.4	0.99095
196.5	0.990975
196.6	0.99115
196.7	0.99055
196.8	0.9903
196.9	0.991125
197	0.9913
197.1	0.99105
197.2	0.99085
197.3	0.990075
197.4	0.99025
197.5	0.99085
197.6	0.990775
197.7	0.990575
197.8	0.99075
197.9	0.99045
198	0.9902
198.1	0.99105
198.2	0.990525
198.3	0.990475
198.4	0.9903
198.5	0.990325
198.6	0.99135
198.7	0.9912
198.8	0.99105
198.9	0.991475
199	0.9911
199.1	0.9917
199.2	0.991375
199.3	0.990575
199.4	0.99105
199.5	0.991475
199.6	0.991625
199.7	0.990625
199.8	0.99095
199.9	0.99065
200	0.9909
[truncated: 14,000 more rows]
