# Supplementary material for: Bayesian inference of kinetic schemes for ion channels by Kalman filtering
Source: eLife journal article supplement (doi:10.7554/elife.62714), 2022-05-04
Supplement: fig4-data1 [file 1_Sim_N_20000_Strom_MW_16M.xlsx]

## Sheet: Tabelle1
0.1	0
0.2	0
0.3	0
0.4	0
0.5	0
0.6	0
0.7	0
0.8	0
0.9	0
1	0
1.1	0
1.2	0
1.3	0
1.4	0
1.5	0
1.6	0
1.7	0
1.8	0
1.9	0
2	0
2.1	0
2.2	0
2.3	0
2.4	0
2.5	0
2.6	0
2.7	0
2.8	0
2.9	0
3	0
3.1	0
3.2	0
3.3	0
3.4	0
3.5	0
3.6	0
3.7	0
3.8	0
3.9	0
4	0
4.1	0
4.2	0
4.3	0
4.4	0
4.5	0
4.6	0
4.7	0
4.8	0
4.9	0
5	0
5.1	0
5.2	0
5.3	0
5.4	0
5.5	0
5.6	0
5.7	0
5.8	0
5.9	0
6	0
6.1	0
6.2	0
6.3	0
6.4	0
6.5	0
6.6	0
6.7	0
6.8	0
6.9	0
7	0
7.1	0
7.2	0
7.3	0
7.4	0
7.5	0
7.6	0
7.7	0
7.8	0
7.9	0
8	0
8.1	0
8.2	0
8.3	0
8.4	0
8.5	0
8.6	0
8.7	0
8.8	0
8.9	0
9	0
9.1	0
9.2	0
9.3	0
9.4	0
9.5	0
9.6	0
9.7	0
9.8	0
9.9	0
10	0
10.1	0
10.2	0
10.3	0
10.4	0
10.5	0
10.6	0
10.7	0
10.8	0
10.9	0
11	0
11.1	0
11.2	0
11.3	0
11.4	0
11.5	0
11.6	0
11.7	0
11.8	0
11.9	0
12	0
12.1	0
12.2	0
12.3	0
12.4	0
12.5	0
12.6	0
12.7	0
12.8	0
12.9	0
13	0
13.1	0
13.2	0
13.3	0
13.4	0
13.5	0
13.6	0
13.7	0
13.8	0
13.9	0
14	0
14.1	0
14.2	0
14.3	0
14.4	0
14.5	0
14.6	0
14.7	0
14.8	0
14.9	0
15	0
15.1	0
15.2	0
15.3	0
15.4	0
15.5	0
15.6	0
15.7	0
15.8	0
15.9	0
16	0
16.1	0
16.2	0
16.3	0
16.4	0
16.5	0
16.6	0
16.7	0
16.8	0
16.9	0
17	0
17.1	0
17.2	0
17.3	0
17.4	0
17.5	0
17.6	0
17.7	0
17.8	0
17.9	0
18	0
18.1	0
18.2	0
18.3	0
18.4	0
18.5	0
18.6	0
18.7	0
18.8	0
18.9	0
19	0
19.1	0
19.2	0
19.3	0
19.4	0
19.5	0
19.6	0
19.7	0
19.8	0
19.9	0
20	0
20.1	0
20.2	0
20.3	0
20.4	0
20.5	0
20.6	0
20.7	0
20.8	0
20.9	0
21	0
21.1	0
21.2	0
21.3	0
21.4	0
21.5	0
21.6	0
21.7	0
21.8	0
21.9	0
22	0
22.1	0
22.2	0
22.3	0
22.4	0
22.5	0
22.6	0
22.7	0
22.8	0
22.9	0
23	0
23.1	0
23.2	0
23.3	0
23.4	0
23.5	0
23.6	0
23.7	0
23.8	0
23.9	0
24	0
24.1	0
24.2	0
24.3	0
24.4	0
24.5	0
24.6	0
24.7	0
24.8	0
24.9	0
25	0
25.1	0
25.2	0
25.3	0
25.4	0
25.5	0
25.6	0
25.7	0
25.8	0
25.9	0
26	0
26.1	0
26.2	0
26.3	0
26.4	0
26.5	0
26.6	0
26.7	0
26.8	0
26.9	0
27	0
27.1	0
27.2	0
27.3	0
27.4	0
27.5	0
27.6	0
27.7	0
27.8	0
27.9	0
28	0
28.1	0
28.2	0
28.3	0
28.4	0
28.5	0
28.6	0
28.7	0
28.8	0
28.9	0
29	0
29.1	0
29.2	0
29.3	0
29.4	0
29.5	0
29.6	0
29.7	0
29.8	0
29.9	0
30	0
30.1	0
30.2	0
30.3	0
30.4	0
30.5	0
30.6	0
30.7	0
30.8	0
30.9	0
31	0
31.1	0
31.2	0
31.3	0
31.4	0
31.5	0
31.6	0
31.7	0
31.8	0
31.9	0
32	0
32.1	0
32.2	0
32.3	0
32.4	0
32.5	0
32.6	0
32.7	0
32.8	0
32.9	0
33	0
33.1	0
33.2	0
33.3	0
33.4	0
33.5	0
33.6	0
33.7	0
33.8	0
33.9	0
34	0
34.1	0
34.2	0
34.3	0
34.4	0
34.5	0
34.6	0
34.7	0
34.8	0
34.9	0
35	0
35.1	0
35.2	0
35.3	0
35.4	0
35.5	0
35.6	0
35.7	0
35.8	0
35.9	0
36	0
36.1	0
36.2	0
36.3	0
36.4	0
36.5	0
36.6	0
36.7	0
36.8	0
36.9	0
37	0
37.1	0
37.2	0
37.3	0
37.4	0
37.5	0
37.6	0
37.7	0
37.8	0
37.9	0
38	0
38.1	0
38.2	0
38.3	0
38.4	0
38.5	0
38.6	0
38.7	0
38.8	0
38.9	0
39	0
39.1	0
39.2	0
39.3	0
39.4	0
39.5	0
39.6	0
39.7	0
39.8	0
39.9	0
40	0
40.1	0
40.2	0
40.3	0
40.4	0
40.5	0
40.6	0
40.7	0
40.8	0
40.9	0
41	0
41.1	0
41.2	0
41.3	0
41.4	0
41.5	0
41.6	0
41.7	0
41.8	0
41.9	0
42	0
42.1	0
42.2	0
42.3	0
42.4	0
42.5	0
42.6	0
42.7	0
42.8	0
42.9	0
43	0
43.1	0
43.2	0
43.3	0
43.4	0
43.5	0
43.6	0
43.7	0
43.8	0
43.9	0
44	0
44.1	0
44.2	0
44.3	0
44.4	0
44.5	0
44.6	0
44.7	0
44.8	0
44.9	0
45	0
45.1	0
45.2	0
45.3	0
45.4	0
45.5	0
45.6	0
45.7	0
45.8	0
45.9	0
46	0
46.1	0
46.2	0
46.3	0
46.4	0
46.5	0
46.6	0
46.7	0
46.8	0
46.9	0
47	0
47.1	0
47.2	0
47.3	0
47.4	0
47.5	0
47.6	0
47.7	0
47.8	0
47.9	0
48	0
48.1	0
48.2	0
48.3	0
48.4	0
48.5	0
48.6	0
48.7	0
48.8	0
48.9	0
49	0
49.1	0
49.2	0
49.3	0
49.4	0
49.5	0
49.6	0
49.7	0
49.8	0
49.9	0
50	0
50.1	0
50.2	0
50.3	0
50.4	0
50.5	0
50.6	0
50.7	0
50.8	0
50.9	0
51	0
51.1	0
51.2	0
51.3	0
51.4	0
51.5	0
51.6	0
51.7	0
51.8	0
51.9	0
52	0
52.1	0
52.2	0
52.3	0
52.4	0
52.5	0
52.6	0
52.7	0
52.8	0
52.9	0
53	0
53.1	0
53.2	0
53.3	0
53.4	0
53.5	0
53.6	0
53.7	0
53.8	0
53.9	0
54	0
54.1	0
54.2	0
54.3	0
54.4	0
54.5	0
54.6	0
54.7	0
54.8	0
54.9	0
55	0
55.1	0
55.2	0
55.3	0
55.4	0
55.5	0
55.6	0
55.7	0
55.8	0
55.9	0
56	0
56.1	0
56.2	0
56.3	0
56.4	0
56.5	0
56.6	0
56.7	0
56.8	0
56.9	0
57	0
57.1	0
57.2	0
57.3	0
57.4	0
57.5	0
57.6	0
57.7	0
57.8	0
57.9	0
58	0
58.1	0
58.2	0
58.3	0
58.4	0
58.5	0
58.6	0
58.7	0
58.8	0
58.9	0
59	0
59.1	0
59.2	0
59.3	0
59.4	0
59.5	0
59.6	0
59.7	0
59.8	0
59.9	0
60	0
60.1	0
60.2	0
60.3	0
60.4	0
60.5	0
60.6	0
60.7	0
60.8	0
60.9	0
61	0
61.1	0
61.2	0
61.3	0
61.4	0
61.5	0
61.6	0
61.7	0
61.8	0
61.9	0
62	0
62.1	0
62.2	0
62.3	0
62.4	0
62.5	0
62.6	0
62.7	0
62.8	0
62.9	0
63	0
63.1	0
63.2	0
63.3	0
63.4	0
63.5	0
63.6	0
63.7	0
63.8	0
63.9	0
64	0
64.1	0
64.2	0
64.3	0
64.4	0
64.5	0
64.6	0
64.7	0
64.8	0
64.9	0
65	0
65.1	0
65.2	0
65.3	0
65.4	0
65.5	0
65.6	0
65.7	0
65.8	0
65.9	0
66	0
66.1	0
66.2	0
66.3	0
66.4	0
66.5	0
66.6	0
66.7	0
66.8	0
66.9	0
67	0
67.1	0
67.2	0
67.3	0
67.4	0
67.5	0
67.6	0
67.7	0
67.8	0
67.9	0
68	0
68.1	0
68.2	0
68.3	0
68.4	0
68.5	0
68.6	0
68.7	0
68.8	0
68.9	0
69	0
69.1	0
69.2	0
69.3	0
69.4	0
69.5	0
69.6	0
69.7	0
69.8	0
69.9	0
70	0
70.1	0
70.2	0
70.3	0
70.4	0
70.5	0
70.6	0
70.7	0
70.8	0
70.9	0
71	0
71.1	0
71.2	0
71.3	0
71.4	0
71.5	0
71.6	0
71.7	0
71.8	0
71.9	0
72	0
72.1	0
72.2	0
72.3	0
72.4	0
72.5	0
72.6	0
72.7	0
72.8	0
72.9	0
73	0
73.1	0
73.2	0
73.3	0
73.4	0
73.5	0
73.6	0
73.7	0
73.8	0
73.9	0
74	0
74.1	0
74.2	0
74.3	0
74.4	0
74.5	0
74.6	0
74.7	0
74.8	0
74.9	0
75	0
75.1	0
75.2	0
75.3	0
75.4	0
75.5	0
75.6	0
75.7	0
75.8	0
75.9	0
76	0
76.1	0
76.2	0
76.3	0
76.4	0
76.5	0
76.6	0
76.7	0
76.8	0
76.9	0
77	0
77.1	0
77.2	0
77.3	0
77.4	0
77.5	0
77.6	0
77.7	0
77.8	0
77.9	0
78	0
78.1	0
78.2	0
78.3	0
78.4	0
78.5	0
78.6	0
78.7	0
78.8	0
78.9	0
79	0
79.1	0
79.2	0
79.3	0
79.4	0
79.5	0
79.6	0
79.7	0
79.8	0
79.9	0
80	0
80.1	0
80.2	0
80.3	0
80.4	0
80.5	0
80.6	0
80.7	0
80.8	0
80.9	0
81	0
81.1	0
81.2	0
81.3	0
81.4	0
81.5	0
81.6	0
81.7	0
81.8	0
81.9	0
82	0
82.1	0
82.2	0
82.3	0
82.4	0
82.5	0
82.6	0
82.7	0
82.8	0
82.9	0
83	0
83.1	0
83.2	0
83.3	0
83.4	0
83.5	0
83.6	0
83.7	0
83.8	0
83.9	0
84	0
84.1	0
84.2	0
84.3	0
84.4	0
84.5	0
84.6	0
84.7	0
84.8	0
84.9	0
85	0
85.1	0
85.2	0
85.3	0
85.4	0
85.5	0
85.6	0
85.7	0
85.8	0
85.9	0
86	0
86.1	0
86.2	0
86.3	0
86.4	0
86.5	0
86.6	0
86.7	0
86.8	0
86.9	0
87	0
87.1	0
87.2	0
87.3	0
87.4	0
87.5	0
87.6	0
87.7	0
87.8	0
87.9	0
88	0
88.1	0
88.2	0
88.3	0
88.4	0
88.5	0
88.6	0
88.7	0
88.8	0
88.9	0
89	0
89.1	0
89.2	0
89.3	0
89.4	0
89.5	0
89.6	0
89.7	0
89.8	0
89.9	0
90	0
90.1	0
90.2	0
90.3	0
90.4	0
90.5	0
90.6	0
90.7	0
90.8	0
90.9	0
91	0
91.1	0
91.2	0
91.3	0
91.4	0
91.5	0
91.6	0
91.7	0
91.8	0
91.9	0
92	0
92.1	0
92.2	0
92.3	0
92.4	0
92.5	0
92.6	0
92.7	0
92.8	0
92.9	0
93	0
93.1	0
93.2	0
93.3	0
93.4	0
93.5	0
93.6	0
93.7	0
93.8	0
93.9	0
94	0
94.1	0
94.2	0
94.3	0
94.4	0
94.5	0
94.6	0
94.7	0
94.8	0
94.9	0
95	0
95.1	0
95.2	0
95.3	0
95.4	0
95.5	0
95.6	0
95.7	0
95.8	0
95.9	0
96	0
96.1	0
96.2	0
96.3	0
96.4	0
96.5	0
96.6	0
96.7	0
96.8	0
96.9	0
97	0
97.1	0
97.2	0
97.3	0
97.4	0
97.5	0
97.6	0
97.7	0
97.8	0
97.9	0
98	0
98.1	0
98.2	0
98.3	0
98.4	0
98.5	0
98.6	0
98.7	0
98.8	0
98.9	0
99	0
99.1	0
99.2	0
99.3	0
99.4	0
99.5	0
99.6	0
99.7	0
99.8	0
99.9	0
100	0
100.1	0.0006
100.2	0.00165
100.3	0.0048
100.4	0.0082
100.5	0.01145
100.6	0.0154
100.7	0.01965
100.8	0.02305
100.9	0.028
101	0.03235
101.1	0.03625
101.2	0.0399
101.3	0.045
101.4	0.0492
101.5	0.0538
101.6	0.05825
101.7	0.06255
101.8	0.06745
101.9	0.07225
102	0.0762
102.1	0.0806
102.2	0.08545
102.3	0.0902
102.4	0.09435
102.5	0.0984
102.6	0.1023
102.7	0.10605
102.8	0.11085
102.9	0.11465
103	0.1189
103.1	0.12215
103.2	0.12615
103.3	0.13075
103.4	0.1352
103.5	0.1393
103.6	0.14325
103.7	0.14665
103.8	0.15105
103.9	0.15445
104	0.1575
104.1	0.16165
104.2	0.16585
104.3	0.1701
104.4	0.1743
104.5	0.17705
104.6	0.18085
104.7	0.1842
104.8	0.18735
104.9	0.19105
105	0.19425
105.1	0.19795
105.2	0.2018
105.3	0.20545
105.4	0.209
105.5	0.21255
105.6	0.2159
105.7	0.21875
105.8	0.22215
105.9	0.2255
106	0.22835
106.1	0.23235
106.2	0.23495
106.3	0.2382
106.4	0.2413
106.5	0.2441
106.6	0.24695
106.7	0.2505
106.8	0.2529
106.9	0.25575
107	0.259
107.1	0.26195
107.2	0.26495
107.3	0.26725
107.4	0.27085
107.5	0.2742
107.6	0.27685
107.7	0.27985
107.8	0.28225
107.9	0.28515
108	0.28735
108.1	0.29005
108.2	0.29325
108.3	0.2965
108.4	0.29855
108.5	0.3009
108.6	0.3039
108.7	0.30685
108.8	0.3092
108.9	0.31165
109	0.3141
109.1	0.31645
109.2	0.3192
109.3	0.3215
109.4	0.3247
109.5	0.328
109.6	0.33075
109.7	0.3331
109.8	0.33575
109.9	0.3381
110	0.34055
110.1	0.34395
110.2	0.3465
110.3	0.3487
110.4	0.35085
110.5	0.3533
110.6	0.3558
110.7	0.35795
110.8	0.3601
110.9	0.3626
111	0.36525
111.1	0.36755
111.2	0.37075
111.3	0.37365
111.4	0.3767
111.5	0.37905
111.6	0.38125
111.7	0.3834
111.8	0.38545
111.9	0.3877
112	0.3899
112.1	0.39265
112.2	0.39505
112.3	0.39755
112.4	0.40005
112.5	0.4032
112.6	0.40545
112.7	0.40735
112.8	0.40945
112.9	0.4118
113	0.4142
113.1	0.41625
113.2	0.41755
113.3	0.41925
113.4	0.4216
113.5	0.4239
113.6	0.42685
113.7	0.4286
113.8	0.43055
113.9	0.43265
114	0.4346
114.1	0.43635
114.2	0.43885
114.3	0.44085
114.4	0.4428
114.5	0.4453
114.6	0.4475
114.7	0.4498
114.8	0.45215
114.9	0.4538
115	0.45565
115.1	0.458
115.2	0.4603
115.3	0.46195
115.4	0.4636
115.5	0.4659
115.6	0.46755
115.7	0.47
115.8	0.4713
115.9	0.47275
116	0.4749
116.1	0.4766
116.2	0.47835
116.3	0.48005
116.4	0.48205
116.5	0.4844
116.6	0.4857
116.7	0.4883
116.8	0.48995
116.9	0.4916
117	0.49345
117.1	0.4949
117.2	0.4961
117.3	0.49755
117.4	0.4988
117.5	0.5004
117.6	0.5022
117.7	0.5038
117.8	0.5054
117.9	0.50725
118	0.50885
118.1	0.51075
118.2	0.5123
118.3	0.51305
118.4	0.5149
118.5	0.517
118.6	0.5183
118.7	0.5206
118.8	0.5219
118.9	0.5238
119	0.52525
119.1	0.52645
119.2	0.5276
119.3	0.5289
119.4	0.5304
119.5	0.53285
119.6	0.53415
119.7	0.5357
119.8	0.53715
119.9	0.53895
120	0.54125
120.1	0.54295
120.2	0.5443
120.3	0.5455
120.4	0.54675
120.5	0.54735
120.6	0.5493
120.7	0.55105
120.8	0.55245
120.9	0.5536
121	0.55485
121.1	0.55615
121.2	0.55695
121.3	0.55835
121.4	0.56005
121.5	0.56135
121.6	0.5628
121.7	0.564
121.8	0.5655
121.9	0.567
122	0.56775
122.1	0.56865
122.2	0.56985
122.3	0.57135
122.4	0.5731
122.5	0.5748
122.6	0.5757
122.7	0.57645
122.8	0.57785
122.9	0.57825
123	0.58035
123.1	0.58115
123.2	0.5824
123.3	0.58405
123.4	0.58535
123.5	0.5866
123.6	0.58875
123.7	0.5901
123.8	0.5916
123.9	0.593
124	0.59395
124.1	0.5958
124.2	0.5968
124.3	0.59805
124.4	0.5992
124.5	0.60095
124.6	0.6022
124.7	0.6028
124.8	0.6041
124.9	0.6055
125	0.60695
125.1	0.6083
125.2	0.6088
125.3	0.6104
125.4	0.61145
125.5	0.6131
125.6	0.614
125.7	0.61545
125.8	0.61685
125.9	0.6183
126	0.62005
126.1	0.6215
126.2	0.6227
126.3	0.6235
126.4	0.62465
126.5	0.62565
126.6	0.6263
126.7	0.6271
126.8	0.6275
126.9	0.6283
127	0.62945
127.1	0.6307
127.2	0.632
127.3	0.63315
127.4	0.6349
127.5	0.6357
127.6	0.63645
127.7	0.63765
127.8	0.63865
127.9	0.6401
128	0.64135
128.1	0.64225
128.2	0.64265
128.3	0.64355
128.4	0.6441
128.5	0.6453
128.6	0.64705
128.7	0.64765
128.8	0.64895
128.9	0.65025
129	0.65115
129.1	0.652
129.2	0.65345
129.3	0.65425
129.4	0.65505
129.5	0.6561
129.6	0.65745
129.7	0.65875
129.8	0.6602
129.9	0.6616
130	0.66335
130.1	0.6637
130.2	0.66465
130.3	0.66585
130.4	0.66655
130.5	0.6672
130.6	0.66795
130.7	0.6686
130.8	0.6699
130.9	0.6713
131	0.67235
131.1	0.67245
131.2	0.673
131.3	0.67375
131.4	0.6749
131.5	0.6753
131.6	0.6762
131.7	0.6773
131.8	0.67855
131.9	0.67925
132	0.67995
132.1	0.68005
132.2	0.6808
132.3	0.68125
132.4	0.68205
132.5	0.68305
132.6	0.68365
132.7	0.6843
132.8	0.6854
132.9	0.68585
133	0.6862
133.1	0.687
133.2	0.6876
133.3	0.68825
133.4	0.6892
133.5	0.6897
133.6	0.69075
133.7	0.6917
133.8	0.6925
133.9	0.6932
134	0.6944
134.1	0.6951
134.2	0.69575
134.3	0.69665
134.4	0.69735
134.5	0.6979
134.6	0.6984
134.7	0.6993
134.8	0.6996
134.9	0.7003
135	0.70055
135.1	0.701
135.2	0.7017
135.3	0.70245
135.4	0.7026
135.5	0.70305
135.6	0.7037
135.7	0.70425
135.8	0.7049
135.9	0.7059
136	0.7059
136.1	0.7067
136.2	0.70755
136.3	0.70805
136.4	0.70835
136.5	0.7084
136.6	0.70925
136.7	0.7097
136.8	0.71065
136.9	0.71055
137	0.71115
137.1	0.71145
137.2	0.71205
137.3	0.71245
137.4	0.71365
137.5	0.7143
137.6	0.71465
137.7	0.7152
137.8	0.7151
137.9	0.7159
138	0.71615
138.1	0.7167
138.2	0.71735
138.3	0.7179
138.4	0.7187
138.5	0.719
138.6	0.71925
138.7	0.71905
138.8	0.7198
138.9	0.7201
139	0.7216
139.1	0.7223
139.2	0.72305
139.3	0.7235
139.4	0.72435
139.5	0.7247
139.6	0.7252
139.7	0.72625
139.8	0.72735
139.9	0.72805
140	0.72835
140.1	0.7288
140.2	0.7291
140.3	0.72995
140.4	0.73015
140.5	0.73065
140.6	0.7314
140.7	0.7315
140.8	0.7317
140.9	0.73225
141	0.73275
141.1	0.7334
141.2	0.73425
141.3	0.7346
141.4	0.73515
141.5	0.73555
141.6	0.7364
141.7	0.7367
141.8	0.73705
141.9	0.73735
142	0.7379
142.1	0.7385
142.2	0.73945
142.3	0.7404
142.4	0.74045
142.5	0.7409
142.6	0.74155
142.7	0.74225
142.8	0.74275
142.9	0.74255
143	0.74295
143.1	0.74325
143.2	0.74365
143.3	0.74395
143.4	0.74445
143.5	0.74445
143.6	0.74455
143.7	0.74495
143.8	0.7455
143.9	0.7461
144	0.74685
144.1	0.7469
144.2	0.7469
144.3	0.74735
144.4	0.74775
144.5	0.7489
144.6	0.749
144.7	0.7491
144.8	0.7493
144.9	0.7498
145	0.75015
145.1	0.75055
145.2	0.75085
145.3	0.75105
145.4	0.7518
145.5	0.7521
145.6	0.7527
145.7	0.7529
145.8	0.75345
145.9	0.75375
146	0.7547
146.1	0.7551
146.2	0.756
146.3	0.75635
146.4	0.75645
146.5	0.75715
146.6	0.75765
146.7	0.7579
146.8	0.75835
146.9	0.7586
147	0.7589
147.1	0.7592
147.2	0.7594
147.3	0.7591
147.4	0.7596
147.5	0.7602
147.6	0.76045
147.7	0.76065
147.8	0.76155
147.9	0.7616
148	0.762
148.1	0.76215
148.2	0.7626
148.3	0.76285
148.4	0.7636
148.5	0.7645
148.6	0.7648
148.7	0.76485
148.8	0.7651
148.9	0.76515
149	0.7647
149.1	0.7648
149.2	0.7651
149.3	0.7656
149.4	0.76585
149.5	0.76665
149.6	0.7666
149.7	0.76685
149.8	0.76665
149.9	0.76655
150	0.76705
150.1	0.76775
150.2	0.76795
150.3	0.76865
150.4	0.76885
150.5	0.76915
150.6	0.7696
150.7	0.7706
150.8	0.77095
150.9	0.77075
151	0.77085
151.1	0.7712
151.2	0.77155
151.3	0.77165
151.4	0.77215
151.5	0.77255
151.6	0.7727
151.7	0.77285
151.8	0.77315
151.9	0.77365
152	0.773
152.1	0.7732
152.2	0.77365
152.3	0.77395
152.4	0.7743
152.5	0.77455
152.6	0.7751
152.7	0.775
152.8	0.77585
152.9	0.7758
153	0.7758
153.1	0.77625
153.2	0.77585
153.3	0.77575
153.4	0.7756
153.5	0.77625
153.6	0.777
153.7	0.77685
153.8	0.77715
153.9	0.77795
154	0.77805
154.1	0.7783
154.2	0.77835
154.3	0.7785
154.4	0.77845
154.5	0.77845
154.6	0.77875
154.7	0.77905
154.8	0.77935
154.9	0.7794
155	0.7798
155.1	0.7794
155.2	0.77965
155.3	0.78045
155.4	0.78095
155.5	0.7812
155.6	0.7809
155.7	0.7813
155.8	0.7814
155.9	0.78175
156	0.7819
156.1	0.7824
156.2	0.78255
156.3	0.78275
156.4	0.7828
156.5	0.78305
156.6	0.7836
156.7	0.78365
156.8	0.78335
156.9	0.7837
157	0.78375
157.1	0.78395
157.2	0.7842
157.3	0.78455
157.4	0.7847
157.5	0.78505
157.6	0.785
157.7	0.78535
157.8	0.7857
157.9	0.78595
158	0.7863
158.1	0.78595
158.2	0.78625
158.3	0.78655
158.4	0.7864
158.5	0.787
158.6	0.787
158.7	0.78735
158.8	0.7878
158.9	0.7882
159	0.78795
159.1	0.78775
159.2	0.78815
159.3	0.7882
159.4	0.78835
159.5	0.7885
159.6	0.78895
159.7	0.7895
159.8	0.7898
159.9	0.7899
160	0.7897
160.1	0.79
160.2	0.79065
160.3	0.79115
160.4	0.79135
160.5	0.79175
160.6	0.7917
160.7	0.7917
160.8	0.7922
160.9	0.792
161	0.79225
161.1	0.79155
161.2	0.7917
161.3	0.7921
161.4	0.79195
161.5	0.7916
161.6	0.792
161.7	0.7922
161.8	0.7926
161.9	0.7926
162	0.7928
162.1	0.79335
162.2	0.79345
162.3	0.79365
162.4	0.7936
162.5	0.7934
162.6	0.79395
162.7	0.7935
162.8	0.7937
162.9	0.7937
163	0.7938
163.1	0.7943
163.2	0.7943
163.3	0.7947
163.4	0.795
163.5	0.7947
163.6	0.79485
163.7	0.7953
163.8	0.79495
163.9	0.7952
164	0.79525
164.1	0.79565
164.2	0.796
164.3	0.7962
164.4	0.7964
164.5	0.796
164.6	0.7959
164.7	0.7961
164.8	0.79665
164.9	0.797
165	0.7975
165.1	0.7974
165.2	0.7973
165.3	0.797
165.4	0.79735
165.5	0.7973
165.6	0.79755
165.7	0.79765
165.8	0.79775
165.9	0.79755
166	0.79725
166.1	0.7972
166.2	0.7969
166.3	0.79685
166.4	0.79655
166.5	0.7967
166.6	0.79695
166.7	0.79695
166.8	0.7968
166.9	0.7967
167	0.79675
167.1	0.7967
167.2	0.79695
167.3	0.79715
167.4	0.7972
167.5	0.7976
167.6	0.797
167.7	0.79695
167.8	0.7972
167.9	0.79795
168	0.7986
168.1	0.7984
168.2	0.798
168.3	0.798
168.4	0.7987
168.5	0.79895
168.6	0.7987
168.7	0.7989
168.8	0.79935
168.9	0.7997
169	0.79985
169.1	0.80015
169.2	0.80005
169.3	0.7999
169.4	0.80005
169.5	0.79995
169.6	0.8001
169.7	0.80005
169.8	0.80025
169.9	0.8004
170	0.80035
170.1	0.80035
170.2	0.80045
170.3	0.8006
170.4	0.80025
170.5	0.8002
170.6	0.8
170.7	0.80045
170.8	0.80025
170.9	0.80075
171	0.8007
171.1	0.8007
171.2	0.80105
171.3	0.8013
171.4	0.80125
171.5	0.8011
171.6	0.8015
171.7	0.80155
171.8	0.8019
171.9	0.8021
172	0.80235
172.1	0.8022
172.2	0.80225
172.3	0.8024
172.4	0.80255
172.5	0.80275
172.6	0.803
172.7	0.80305
172.8	0.80345
172.9	0.8033
173	0.8033
173.1	0.8032
173.2	0.80355
173.3	0.80395
173.4	0.8038
173.5	0.80405
173.6	0.80385
173.7	0.8039
173.8	0.80385
173.9	0.8035
174	0.8038
174.1	0.8035
174.2	0.8035
174.3	0.80365
174.4	0.80455
174.5	0.8046
174.6	0.80415
174.7	0.8042
174.8	0.8044
174.9	0.8043
175	0.80375
175.1	0.80365
175.2	0.804
175.3	0.804
175.4	0.80465
175.5	0.80475
175.6	0.80455
175.7	0.8048
175.8	0.80475
175.9	0.80505
176	0.80495
176.1	0.80535
176.2	0.80465
176.3	0.8052
176.4	0.80505
176.5	0.80555
176.6	0.8059
176.7	0.80605
176.8	0.8063
176.9	0.80615
177	0.80595
177.1	0.8065
177.2	0.8063
177.3	0.8067
177.4	0.80615
177.5	0.80665
177.6	0.8063
177.7	0.80645
177.8	0.80675
177.9	0.8067
178	0.8072
178.1	0.80755
178.2	0.8076
178.3	0.8079
178.4	0.80825
178.5	0.80805
178.6	0.8086
178.7	0.8083
178.8	0.80865
178.9	0.80875
179	0.80875
179.1	0.80905
179.2	0.8094
179.3	0.80915
179.4	0.8094
179.5	0.80955
179.6	0.8095
179.7	0.80865
179.8	0.8086
179.9	0.8088
180	0.8084
180.1	0.8089
180.2	0.8088
180.3	0.8089
180.4	0.80925
180.5	0.8091
180.6	0.80925
180.7	0.80925
180.8	0.80925
180.9	0.80945
181	0.80975
181.1	0.81
181.2	0.81015
181.3	0.80995
181.4	0.8099
181.5	0.80975
181.6	0.80985
181.7	0.8093
181.8	0.8095
181.9	0.80975
182	0.80955
182.1	0.80935
182.2	0.80965
182.3	0.80965
182.4	0.8095
182.5	0.80905
182.6	0.8092
182.7	0.80875
182.8	0.80865
182.9	0.80855
183	0.80825
183.1	0.8082
183.2	0.80805
183.3	0.80765
183.4	0.80755
183.5	0.8072
183.6	0.8074
183.7	0.8075
183.8	0.80745
183.9	0.8076
184	0.80735
184.1	0.80695
184.2	0.807
184.3	0.80715
184.4	0.8073
184.5	0.8073
184.6	0.8074
184.7	0.8079
184.8	0.808
184.9	0.808
185	0.8078
185.1	0.80825
185.2	0.80815
185.3	0.80815
185.4	0.80765
185.5	0.80775
185.6	0.80755
185.7	0.80765
185.8	0.8081
185.9	0.8077
186	0.8074
186.1	0.80745
186.2	0.80765
186.3	0.8074
186.4	0.80785
186.5	0.8082
186.6	0.8088
186.7	0.80925
186.8	0.8094
186.9	0.80925
187	0.80915
187.1	0.80935
187.2	0.80885
187.3	0.80915
187.4	0.8091
187.5	0.80945
187.6	0.8089
187.7	0.8094
187.8	0.8094
187.9	0.80955
188	0.80955
188.1	0.8095
188.2	0.80945
188.3	0.8094
188.4	0.8093
188.5	0.8097
188.6	0.80965
188.7	0.81035
188.8	0.81025
188.9	0.81035
189	0.8101
189.1	0.8098
189.2	0.81015
189.3	0.8102
189.4	0.81045
189.5	0.81035
189.6	0.8102
189.7	0.81035
189.8	0.8104
189.9	0.8105
190	0.81085
190.1	0.81075
190.2	0.81065
190.3	0.81055
190.4	0.81085
190.5	0.81035
190.6	0.81035
190.7	0.8104
190.8	0.81025
190.9	0.81045
191	0.8109
191.1	0.811
191.2	0.81085
191.3	0.81045
191.4	0.8104
191.5	0.8106
191.6	0.81095
191.7	0.81155
191.8	0.81165
191.9	0.8115
192	0.8116
192.1	0.81165
192.2	0.81155
192.3	0.81185
192.4	0.8121
192.5	0.81215
192.6	0.81215
192.7	0.8118
192.8	0.8116
192.9	0.81155
193	0.811
193.1	0.8108
193.2	0.8108
193.3	0.8107
193.4	0.8106
193.5	0.8105
193.6	0.81025
193.7	0.8096
193.8	0.80945
193.9	0.8095
194	0.81005
194.1	0.8098
194.2	0.80965
194.3	0.8091
194.4	0.80855
194.5	0.8087
194.6	0.8086
194.7	0.8088
194.8	0.80865
194.9	0.8092
195	0.809
195.1	0.8092
195.2	0.8097
195.3	0.80985
195.4	0.80965
195.5	0.8092
195.6	0.80955
195.7	0.8097
195.8	0.81
195.9	0.80945
196	0.8091
196.1	0.8091
196.2	0.80905
196.3	0.80945
196.4	0.8093
196.5	0.80935
196.6	0.81
196.7	0.81015
196.8	0.81005
196.9	0.81015
197	0.8101
197.1	0.8099
197.2	0.8097
197.3	0.81005
197.4	0.80955
197.5	0.81005
197.6	0.81025
197.7	0.80995
197.8	0.81005
197.9	0.8106
198	0.81035
198.1	0.8106
198.2	0.81165
198.3	0.81215
198.4	0.8125
198.5	0.81265
198.6	0.81285
198.7	0.8128
198.8	0.813
198.9	0.8133
199	0.8134
199.1	0.81335
199.2	0.8134
199.3	0.81315
199.4	0.81355
199.5	0.81335
199.6	0.8133
199.7	0.8135
199.8	0.8136
199.9	0.8136
200	0.81365
[truncated: 14,000 more rows]
