# Supplementary material for: Bayesian inference of kinetic schemes for ion channels by Kalman filtering
Source: eLife journal article supplement (doi:10.7554/elife.62714), 2022-05-04
Supplement: fig4-data1 [file 1_Sim_N_50000_Fluor_MW_16M.xlsx]

## Sheet: 16 M
0.1	0
0.2	0
0.3	0
0.4	0
0.5	0
0.6	0
0.7	0
0.8	0
0.9	0
1	0
1.1	0
1.2	0
1.3	0
1.4	0
1.5	0
1.6	0
1.7	0
1.8	0
1.9	0
2	0
2.1	0
2.2	0
2.3	0
2.4	0
2.5	0
2.6	0
2.7	0
2.8	0
2.9	0
3	0
3.1	0
3.2	0
3.3	0
3.4	0
3.5	0
3.6	0
3.7	0
3.8	0
3.9	0
4	0
4.1	0
4.2	0
4.3	0
4.4	0
4.5	0
4.6	0
4.7	0
4.8	0
4.9	0
5	0
5.1	0
5.2	0
5.3	0
5.4	0
5.5	0
5.6	0
5.7	0
5.8	0
5.9	0
6	0
6.1	0
6.2	0
6.3	0
6.4	0
6.5	0
6.6	0
6.7	0
6.8	0
6.9	0
7	0
7.1	0
7.2	0
7.3	0
7.4	0
7.5	0
7.6	0
7.7	0
7.8	0
7.9	0
8	0
8.1	0
8.2	0
8.3	0
8.4	0
8.5	0
8.6	0
8.7	0
8.8	0
8.9	0
9	0
9.1	0
9.2	0
9.3	0
9.4	0
9.5	0
9.6	0
9.7	0
9.8	0
9.9	0
10	0
10.1	0
10.2	0
10.3	0
10.4	0
10.5	0
10.6	0
10.7	0
10.8	0
10.9	0
11	0
11.1	0
11.2	0
11.3	0
11.4	0
11.5	0
11.6	0
11.7	0
11.8	0
11.9	0
12	0
12.1	0
12.2	0
12.3	0
12.4	0
12.5	0
12.6	0
12.7	0
12.8	0
12.9	0
13	0
13.1	0
13.2	0
13.3	0
13.4	0
13.5	0
13.6	0
13.7	0
13.8	0
13.9	0
14	0
14.1	0
14.2	0
14.3	0
14.4	0
14.5	0
14.6	0
14.7	0
14.8	0
14.9	0
15	0
15.1	0
15.2	0
15.3	0
15.4	0
15.5	0
15.6	0
15.7	0
15.8	0
15.9	0
16	0
16.1	0
16.2	0
16.3	0
16.4	0
16.5	0
16.6	0
16.7	0
16.8	0
16.9	0
17	0
17.1	0
17.2	0
17.3	0
17.4	0
17.5	0
17.6	0
17.7	0
17.8	0
17.9	0
18	0
18.1	0
18.2	0
18.3	0
18.4	0
18.5	0
18.6	0
18.7	0
18.8	0
18.9	0
19	0
19.1	0
19.2	0
19.3	0
19.4	0
19.5	0
19.6	0
19.7	0
19.8	0
19.9	0
20	0
20.1	0
20.2	0
20.3	0
20.4	0
20.5	0
20.6	0
20.7	0
20.8	0
20.9	0
21	0
21.1	0
21.2	0
21.3	0
21.4	0
21.5	0
21.6	0
21.7	0
21.8	0
21.9	0
22	0
22.1	0
22.2	0
22.3	0
22.4	0
22.5	0
22.6	0
22.7	0
22.8	0
22.9	0
23	0
23.1	0
23.2	0
23.3	0
23.4	0
23.5	0
23.6	0
23.7	0
23.8	0
23.9	0
24	0
24.1	0
24.2	0
24.3	0
24.4	0
24.5	0
24.6	0
24.7	0
24.8	0
24.9	0
25	0
25.1	0
25.2	0
25.3	0
25.4	0
25.5	0
25.6	0
25.7	0
25.8	0
25.9	0
26	0
26.1	0
26.2	0
26.3	0
26.4	0
26.5	0
26.6	0
26.7	0
26.8	0
26.9	0
27	0
27.1	0
27.2	0
27.3	0
27.4	0
27.5	0
27.6	0
27.7	0
27.8	0
27.9	0
28	0
28.1	0
28.2	0
28.3	0
28.4	0
28.5	0
28.6	0
28.7	0
28.8	0
28.9	0
29	0
29.1	0
29.2	0
29.3	0
29.4	0
29.5	0
29.6	0
29.7	0
29.8	0
29.9	0
30	0
30.1	0
30.2	0
30.3	0
30.4	0
30.5	0
30.6	0
30.7	0
30.8	0
30.9	0
31	0
31.1	0
31.2	0
31.3	0
31.4	0
31.5	0
31.6	0
31.7	0
31.8	0
31.9	0
32	0
32.1	0
32.2	0
32.3	0
32.4	0
32.5	0
32.6	0
32.7	0
32.8	0
32.9	0
33	0
33.1	0
33.2	0
33.3	0
33.4	0
33.5	0
33.6	0
33.7	0
33.8	0
33.9	0
34	0
34.1	0
34.2	0
34.3	0
34.4	0
34.5	0
34.6	0
34.7	0
34.8	0
34.9	0
35	0
35.1	0
35.2	0
35.3	0
35.4	0
35.5	0
35.6	0
35.7	0
35.8	0
35.9	0
36	0
36.1	0
36.2	0
36.3	0
36.4	0
36.5	0
36.6	0
36.7	0
36.8	0
36.9	0
37	0
37.1	0
37.2	0
37.3	0
37.4	0
37.5	0
37.6	0
37.7	0
37.8	0
37.9	0
38	0
38.1	0
38.2	0
38.3	0
38.4	0
38.5	0
38.6	0
38.7	0
38.8	0
38.9	0
39	0
39.1	0
39.2	0
39.3	0
39.4	0
39.5	0
39.6	0
39.7	0
39.8	0
39.9	0
40	0
40.1	0
40.2	0
40.3	0
40.4	0
40.5	0
40.6	0
40.7	0
40.8	0
40.9	0
41	0
41.1	0
41.2	0
41.3	0
41.4	0
41.5	0
41.6	0
41.7	0
41.8	0
41.9	0
42	0
42.1	0
42.2	0
42.3	0
42.4	0
42.5	0
42.6	0
42.7	0
42.8	0
42.9	0
43	0
43.1	0
43.2	0
43.3	0
43.4	0
43.5	0
43.6	0
43.7	0
43.8	0
43.9	0
44	0
44.1	0
44.2	0
44.3	0
44.4	0
44.5	0
44.6	0
44.7	0
44.8	0
44.9	0
45	0
45.1	0
45.2	0
45.3	0
45.4	0
45.5	0
45.6	0
45.7	0
45.8	0
45.9	0
46	0
46.1	0
46.2	0
46.3	0
46.4	0
46.5	0
46.6	0
46.7	0
46.8	0
46.9	0
47	0
47.1	0
47.2	0
47.3	0
47.4	0
47.5	0
47.6	0
47.7	0
47.8	0
47.9	0
48	0
48.1	0
48.2	0
48.3	0
48.4	0
48.5	0
48.6	0
48.7	0
48.8	0
48.9	0
49	0
49.1	0
49.2	0
49.3	0
49.4	0
49.5	0
49.6	0
49.7	0
49.8	0
49.9	0
50	0
50.1	0
50.2	0
50.3	0
50.4	0
50.5	0
50.6	0
50.7	0
50.8	0
50.9	0
51	0
51.1	0
51.2	0
51.3	0
51.4	0
51.5	0
51.6	0
51.7	0
51.8	0
51.9	0
52	0
52.1	0
52.2	0
52.3	0
52.4	0
52.5	0
52.6	0
52.7	0
52.8	0
52.9	0
53	0
53.1	0
53.2	0
53.3	0
53.4	0
53.5	0
53.6	0
53.7	0
53.8	0
53.9	0
54	0
54.1	0
54.2	0
54.3	0
54.4	0
54.5	0
54.6	0
54.7	0
54.8	0
54.9	0
55	0
55.1	0
55.2	0
55.3	0
55.4	0
55.5	0
55.6	0
55.7	0
55.8	0
55.9	0
56	0
56.1	0
56.2	0
56.3	0
56.4	0
56.5	0
56.6	0
56.7	0
56.8	0
56.9	0
57	0
57.1	0
57.2	0
57.3	0
57.4	0
57.5	0
57.6	0
57.7	0
57.8	0
57.9	0
58	0
58.1	0
58.2	0
58.3	0
58.4	0
58.5	0
58.6	0
58.7	0
58.8	0
58.9	0
59	0
59.1	0
59.2	0
59.3	0
59.4	0
59.5	0
59.6	0
59.7	0
59.8	0
59.9	0
60	0
60.1	0
60.2	0
60.3	0
60.4	0
60.5	0
60.6	0
60.7	0
60.8	0
60.9	0
61	0
61.1	0
61.2	0
61.3	0
61.4	0
61.5	0
61.6	0
61.7	0
61.8	0
61.9	0
62	0
62.1	0
62.2	0
62.3	0
62.4	0
62.5	0
62.6	0
62.7	0
62.8	0
62.9	0
63	0
63.1	0
63.2	0
63.3	0
63.4	0
63.5	0
63.6	0
63.7	0
63.8	0
63.9	0
64	0
64.1	0
64.2	0
64.3	0
64.4	0
64.5	0
64.6	0
64.7	0
64.8	0
64.9	0
65	0
65.1	0
65.2	0
65.3	0
65.4	0
65.5	0
65.6	0
65.7	0
65.8	0
65.9	0
66	0
66.1	0
66.2	0
66.3	0
66.4	0
66.5	0
66.6	0
66.7	0
66.8	0
66.9	0
67	0
67.1	0
67.2	0
67.3	0
67.4	0
67.5	0
67.6	0
67.7	0
67.8	0
67.9	0
68	0
68.1	0
68.2	0
68.3	0
68.4	0
68.5	0
68.6	0
68.7	0
68.8	0
68.9	0
69	0
69.1	0
69.2	0
69.3	0
69.4	0
69.5	0
69.6	0
69.7	0
69.8	0
69.9	0
70	0
70.1	0
70.2	0
70.3	0
70.4	0
70.5	0
70.6	0
70.7	0
70.8	0
70.9	0
71	0
71.1	0
71.2	0
71.3	0
71.4	0
71.5	0
71.6	0
71.7	0
71.8	0
71.9	0
72	0
72.1	0
72.2	0
72.3	0
72.4	0
72.5	0
72.6	0
72.7	0
72.8	0
72.9	0
73	0
73.1	0
73.2	0
73.3	0
73.4	0
73.5	0
73.6	0
73.7	0
73.8	0
73.9	0
74	0
74.1	0
74.2	0
74.3	0
74.4	0
74.5	0
74.6	0
74.7	0
74.8	0
74.9	0
75	0
75.1	0
75.2	0
75.3	0
75.4	0
75.5	0
75.6	0
75.7	0
75.8	0
75.9	0
76	0
76.1	0
76.2	0
76.3	0
76.4	0
76.5	0
76.6	0
76.7	0
76.8	0
76.9	0
77	0
77.1	0
77.2	0
77.3	0
77.4	0
77.5	0
77.6	0
77.7	0
77.8	0
77.9	0
78	0
78.1	0
78.2	0
78.3	0
78.4	0
78.5	0
78.6	0
78.7	0
78.8	0
78.9	0
79	0
79.1	0
79.2	0
79.3	0
79.4	0
79.5	0
79.6	0
79.7	0
79.8	0
79.9	0
80	0
80.1	0
80.2	0
80.3	0
80.4	0
80.5	0
80.6	0
80.7	0
80.8	0
80.9	0
81	0
81.1	0
81.2	0
81.3	0
81.4	0
81.5	0
81.6	0
81.7	0
81.8	0
81.9	0
82	0
82.1	0
82.2	0
82.3	0
82.4	0
82.5	0
82.6	0
82.7	0
82.8	0
82.9	0
83	0
83.1	0
83.2	0
83.3	0
83.4	0
83.5	0
83.6	0
83.7	0
83.8	0
83.9	0
84	0
84.1	0
84.2	0
84.3	0
84.4	0
84.5	0
84.6	0
84.7	0
84.8	0
84.9	0
85	0
85.1	0
85.2	0
85.3	0
85.4	0
85.5	0
85.6	0
85.7	0
85.8	0
85.9	0
86	0
86.1	0
86.2	0
86.3	0
86.4	0
86.5	0
86.6	0
86.7	0
86.8	0
86.9	0
87	0
87.1	0
87.2	0
87.3	0
87.4	0
87.5	0
87.6	0
87.7	0
87.8	0
87.9	0
88	0
88.1	0
88.2	0
88.3	0
88.4	0
88.5	0
88.6	0
88.7	0
88.8	0
88.9	0
89	0
89.1	0
89.2	0
89.3	0
89.4	0
89.5	0
89.6	0
89.7	0
89.8	0
89.9	0
90	0
90.1	0
90.2	0
90.3	0
90.4	0
90.5	0
90.6	0
90.7	0
90.8	0
90.9	0
91	0
91.1	0
91.2	0
91.3	0
91.4	0
91.5	0
91.6	0
91.7	0
91.8	0
91.9	0
92	0
92.1	0
92.2	0
92.3	0
92.4	0
92.5	0
92.6	0
92.7	0
92.8	0
92.9	0
93	0
93.1	0
93.2	0
93.3	0
93.4	0
93.5	0
93.6	0
93.7	0
93.8	0
93.9	0
94	0
94.1	0
94.2	0
94.3	0
94.4	0
94.5	0
94.6	0
94.7	0
94.8	0
94.9	0
95	0
95.1	0
95.2	0
95.3	0
95.4	0
95.5	0
95.6	0
95.7	0
95.8	0
95.9	0
96	0
96.1	0
96.2	0
96.3	0
96.4	0
96.5	0
96.6	0
96.7	0
96.8	0
96.9	0
97	0
97.1	0
97.2	0
97.3	0
97.4	0
97.5	0
97.6	0
97.7	0
97.8	0
97.9	0
98	0
98.1	0
98.2	0
98.3	0
98.4	0
98.5	0
98.6	0
98.7	0
98.8	0
98.9	0
99	0
99.1	0
99.2	0
99.3	0
99.4	0
99.5	0
99.6	0
99.7	0
99.8	0
99.9	0
100	0
100.1	0.53467
100.2	0.72627
100.3	0.82086
100.4	0.87566
100.5	0.90792
100.6	0.92713
100.7	0.93733
100.8	0.94406
100.9	0.9482
101	0.95094
101.1	0.95182
101.2	0.95232
101.3	0.95281
101.4	0.95364
101.5	0.95384
101.6	0.95476
101.7	0.95454
101.8	0.95477
101.9	0.95595
102	0.9557
102.1	0.95662
102.2	0.95647
102.3	0.95694
102.4	0.9573
102.5	0.95713
102.6	0.95717
102.7	0.95641
102.8	0.95625
102.9	0.95671
103	0.95742
103.1	0.95775
103.2	0.95719
103.3	0.9571
103.4	0.95801
103.5	0.95783
103.6	0.9576
103.7	0.95754
103.8	0.95866
103.9	0.95964
104	0.95941
104.1	0.96032
104.2	0.95998
104.3	0.96004
104.4	0.96074
104.5	0.96108
104.6	0.96081
104.7	0.96086
104.8	0.96083
104.9	0.96058
105	0.96139
105.1	0.9618
105.2	0.96155
105.3	0.96139
105.4	0.96204
105.5	0.96191
105.6	0.96223
105.7	0.96204
105.8	0.96094
105.9	0.96174
106	0.96283
106.1	0.96262
106.2	0.96286
106.3	0.96254
106.4	0.9629
106.5	0.96349
106.6	0.96369
106.7	0.96387
106.8	0.96421
106.9	0.96403
107	0.96492
107.1	0.96455
107.2	0.96398
107.3	0.96389
107.4	0.96407
107.5	0.96532
107.6	0.96458
107.7	0.96427
107.8	0.96499
107.9	0.96494
108	0.9654
108.1	0.96579
108.2	0.96652
108.3	0.96647
108.4	0.96627
108.5	0.96591
108.6	0.96676
108.7	0.96702
108.8	0.9671
108.9	0.96793
109	0.96688
109.1	0.96718
109.2	0.96695
109.3	0.96761
109.4	0.96747
109.5	0.96792
109.6	0.96783
109.7	0.96796
109.8	0.96823
109.9	0.96857
110	0.96863
110.1	0.96922
110.2	0.96897
110.3	0.96941
110.4	0.96934
110.5	0.96848
110.6	0.96872
110.7	0.96868
110.8	0.96868
110.9	0.96817
111	0.96859
111.1	0.96853
111.2	0.96883
111.3	0.96943
111.4	0.96973
111.5	0.97028
111.6	0.97031
111.7	0.97012
111.8	0.97015
111.9	0.97086
112	0.97144
112.1	0.97063
112.2	0.97159
112.3	0.97135
112.4	0.97171
112.5	0.97105
112.6	0.97163
112.7	0.97151
112.8	0.97203
112.9	0.97231
113	0.9727
113.1	0.97238
113.2	0.97185
113.3	0.97136
113.4	0.97187
113.5	0.97292
113.6	0.97247
113.7	0.97242
113.8	0.9728
113.9	0.97233
114	0.97239
114.1	0.9724
114.2	0.97218
114.3	0.97315
114.4	0.97327
114.5	0.97335
114.6	0.9738
114.7	0.97348
114.8	0.97346
114.9	0.97351
115	0.97398
115.1	0.97406
115.2	0.97454
115.3	0.97425
115.4	0.9744
115.5	0.9754
115.6	0.97512
115.7	0.97478
115.8	0.97487
115.9	0.97503
116	0.97563
116.1	0.97569
116.2	0.97576
116.3	0.97562
116.4	0.97576
116.5	0.97574
116.6	0.97592
116.7	0.97604
116.8	0.97609
116.9	0.97645
117	0.97631
117.1	0.97598
117.2	0.97615
117.3	0.97608
117.4	0.97596
117.5	0.97568
117.6	0.97601
117.7	0.97596
117.8	0.97629
117.9	0.97663
118	0.97702
118.1	0.97639
118.2	0.97661
118.3	0.97673
118.4	0.97654
118.5	0.97714
118.6	0.97658
118.7	0.9776
118.8	0.97759
118.9	0.97782
119	0.97689
119.1	0.97642
119.2	0.97662
119.3	0.97736
119.4	0.97716
119.5	0.97736
119.6	0.97778
119.7	0.97793
119.8	0.97796
119.9	0.97801
120	0.97835
120.1	0.97916
120.2	0.97876
120.3	0.97828
120.4	0.9781
120.5	0.97815
120.6	0.9784
120.7	0.97917
120.8	0.97913
120.9	0.97947
121	0.97957
121.1	0.97984
121.2	0.97936
121.3	0.9798
121.4	0.97954
121.5	0.97982
121.6	0.97993
121.7	0.9798
121.8	0.97946
121.9	0.9796
122	0.98004
122.1	0.97999
122.2	0.98029
122.3	0.98051
122.4	0.98027
122.5	0.97975
122.6	0.98054
122.7	0.98044
122.8	0.98018
122.9	0.9804
123	0.98056
123.1	0.98049
123.2	0.9805
123.3	0.98061
123.4	0.98115
123.5	0.98102
123.6	0.98097
123.7	0.98122
123.8	0.98157
123.9	0.98141
124	0.9811
124.1	0.98111
124.2	0.98084
124.3	0.98085
124.4	0.9805
124.5	0.98022
124.6	0.98006
124.7	0.98035
124.8	0.98068
124.9	0.98129
125	0.98157
125.1	0.98172
125.2	0.98179
125.3	0.98163
125.4	0.98141
125.5	0.98153
125.6	0.98201
125.7	0.98158
125.8	0.98163
125.9	0.98181
126	0.98203
126.1	0.98265
126.2	0.9826
126.3	0.9827
126.4	0.98266
126.5	0.98231
126.6	0.98259
126.7	0.9828
126.8	0.9828
126.9	0.98269
127	0.98293
127.1	0.98331
127.2	0.98294
127.3	0.9822
127.4	0.98246
127.5	0.98225
127.6	0.98247
127.7	0.98267
127.8	0.9824
127.9	0.98317
128	0.98291
128.1	0.98309
128.2	0.98295
128.3	0.98311
128.4	0.98303
128.5	0.98314
128.6	0.98337
128.7	0.98382
128.8	0.9834
128.9	0.98354
129	0.98375
129.1	0.98363
129.2	0.98354
129.3	0.9834
129.4	0.98329
129.5	0.98412
129.6	0.98402
129.7	0.98427
129.8	0.98387
129.9	0.98435
130	0.98391
130.1	0.98425
130.2	0.98365
130.3	0.98399
130.4	0.98389
130.5	0.98421
130.6	0.98411
130.7	0.98421
130.8	0.98438
130.9	0.98394
131	0.9837
131.1	0.9841
131.2	0.98346
131.3	0.98406
131.4	0.98448
131.5	0.98504
131.6	0.98484
131.7	0.98453
131.8	0.98486
131.9	0.98481
132	0.98466
132.1	0.98463
132.2	0.98507
132.3	0.98531
132.4	0.98538
132.5	0.98528
132.6	0.98519
132.7	0.98499
132.8	0.98517
132.9	0.98554
133	0.98495
133.1	0.98513
133.2	0.98556
133.3	0.98564
133.4	0.98606
133.5	0.98549
133.6	0.98539
133.7	0.98487
133.8	0.98443
133.9	0.9848
134	0.98517
134.1	0.98518
134.2	0.98537
134.3	0.9851
134.4	0.98563
134.5	0.9852
134.6	0.98514
134.7	0.98516
134.8	0.9848
134.9	0.98506
135	0.98539
135.1	0.98575
135.2	0.98562
135.3	0.98556
135.4	0.98512
135.5	0.98503
135.6	0.98575
135.7	0.98539
135.8	0.98569
135.9	0.98551
136	0.986
136.1	0.98606
136.2	0.986
136.3	0.98571
136.4	0.98656
136.5	0.98633
136.6	0.98616
136.7	0.98619
136.8	0.9862
136.9	0.9865
137	0.98673
137.1	0.98678
137.2	0.98676
137.3	0.98683
137.4	0.98655
137.5	0.98647
137.6	0.98686
137.7	0.987
137.8	0.98653
137.9	0.98652
138	0.98665
138.1	0.98677
138.2	0.98663
138.3	0.98627
138.4	0.98597
138.5	0.98639
138.6	0.986
138.7	0.9858
138.8	0.98644
138.9	0.98658
139	0.98654
139.1	0.98654
139.2	0.98641
139.3	0.98644
139.4	0.98666
139.5	0.98641
139.6	0.98688
139.7	0.98697
139.8	0.98722
139.9	0.98689
140	0.98655
140.1	0.98731
140.2	0.98697
140.3	0.98741
140.4	0.98714
140.5	0.9868
140.6	0.98752
140.7	0.98785
140.8	0.98751
140.9	0.98728
141	0.98752
141.1	0.98712
141.2	0.98695
141.3	0.98676
141.4	0.9867
141.5	0.98695
141.6	0.98723
141.7	0.98727
141.8	0.98735
141.9	0.98752
142	0.98794
142.1	0.98774
142.2	0.98773
142.3	0.98799
142.4	0.9877
142.5	0.98741
142.6	0.98704
142.7	0.98742
142.8	0.98737
142.9	0.98694
143	0.98737
143.1	0.98757
143.2	0.98791
143.3	0.98829
143.4	0.98812
143.5	0.98789
143.6	0.98802
143.7	0.98797
143.8	0.98763
143.9	0.98745
144	0.98731
144.1	0.98714
144.2	0.98788
144.3	0.98784
144.4	0.98794
144.5	0.98797
144.6	0.98765
144.7	0.98751
144.8	0.98734
144.9	0.98791
145	0.98791
145.1	0.98803
145.2	0.98805
145.3	0.98756
145.4	0.98787
145.5	0.98754
145.6	0.98793
145.7	0.98824
145.8	0.98794
145.9	0.98853
146	0.98841
146.1	0.98844
146.2	0.98846
146.3	0.9882
146.4	0.98852
146.5	0.98832
146.6	0.9888
146.7	0.98882
146.8	0.98903
146.9	0.98918
147	0.98901
147.1	0.98834
147.2	0.98854
147.3	0.98848
147.4	0.98868
147.5	0.98885
147.6	0.98864
147.7	0.98831
147.8	0.98817
147.9	0.9884
148	0.98864
148.1	0.98879
148.2	0.98917
148.3	0.9892
148.4	0.98863
148.5	0.98907
148.6	0.98883
148.7	0.98871
148.8	0.98823
148.9	0.98866
149	0.98778
149.1	0.98864
149.2	0.98875
149.3	0.98857
149.4	0.98842
149.5	0.989
149.6	0.98895
149.7	0.98877
149.8	0.98888
149.9	0.98874
150	0.98903
150.1	0.98903
150.2	0.98879
150.3	0.98894
150.4	0.98904
150.5	0.98865
150.6	0.98899
150.7	0.98858
150.8	0.98838
150.9	0.98878
151	0.98855
151.1	0.9886
151.2	0.98877
151.3	0.98908
151.4	0.98906
151.5	0.98927
151.6	0.98933
151.7	0.98882
151.8	0.98913
151.9	0.98928
152	0.98952
152.1	0.98929
152.2	0.98963
152.3	0.98925
152.4	0.98942
152.5	0.98984
152.6	0.98962
152.7	0.98936
152.8	0.98945
152.9	0.98957
153	0.98973
153.1	0.98941
153.2	0.98938
153.3	0.98953
153.4	0.98935
153.5	0.98947
153.6	0.98944
153.7	0.98913
153.8	0.98878
153.9	0.98889
154	0.98918
154.1	0.98927
154.2	0.98923
154.3	0.98949
154.4	0.98955
154.5	0.98953
154.6	0.98953
154.7	0.98944
154.8	0.98936
154.9	0.98953
155	0.98917
155.1	0.98905
155.2	0.98899
155.3	0.98942
155.4	0.9897
155.5	0.98979
155.6	0.98944
155.7	0.98942
155.8	0.98952
155.9	0.9899
156	0.99017
156.1	0.98988
156.2	0.99019
156.3	0.99009
156.4	0.99006
156.5	0.98975
156.6	0.98964
156.7	0.9894
156.8	0.98947
156.9	0.98961
157	0.98964
157.1	0.98948
157.2	0.9897
157.3	0.98973
157.4	0.98986
157.5	0.99006
157.6	0.98998
157.7	0.99012
157.8	0.98964
157.9	0.98945
158	0.98983
158.1	0.99007
158.2	0.99036
158.3	0.99031
158.4	0.98988
158.5	0.98974
158.6	0.9897
158.7	0.98966
158.8	0.98935
158.9	0.98957
159	0.98951
159.1	0.98974
159.2	0.98964
159.3	0.98977
159.4	0.98989
159.5	0.98984
159.6	0.99022
159.7	0.99003
159.8	0.99045
159.9	0.99066
160	0.99028
160.1	0.99015
160.2	0.99037
160.3	0.98983
160.4	0.98986
160.5	0.98962
160.6	0.98988
160.7	0.99014
160.8	0.99036
160.9	0.99073
161	0.99066
161.1	0.99056
161.2	0.99036
161.3	0.99058
161.4	0.99007
161.5	0.99027
161.6	0.99003
161.7	0.99042
161.8	0.99047
161.9	0.99035
162	0.99043
162.1	0.99043
162.2	0.99059
162.3	0.99037
162.4	0.98987
162.5	0.9902
162.6	0.98983
162.7	0.99053
162.8	0.99043
162.9	0.99008
163	0.99009
163.1	0.99067
163.2	0.99003
163.3	0.99014
163.4	0.9902
163.5	0.99023
163.6	0.99044
163.7	0.99059
163.8	0.99021
163.9	0.9905
164	0.99037
164.1	0.98986
164.2	0.98994
164.3	0.99014
164.4	0.98995
164.5	0.99006
164.6	0.99017
164.7	0.99001
164.8	0.99021
164.9	0.99038
165	0.99045
165.1	0.99047
165.2	0.99058
165.3	0.99065
165.4	0.99057
165.5	0.99068
165.6	0.98994
165.7	0.99035
165.8	0.99042
165.9	0.9906
166	0.99043
166.1	0.99074
166.2	0.9901
166.3	0.98984
166.4	0.99035
166.5	0.98998
166.6	0.99004
166.7	0.98975
166.8	0.98999
166.9	0.99004
167	0.99007
167.1	0.99026
167.2	0.9905
167.3	0.99019
167.4	0.99009
167.5	0.99019
167.6	0.99001
167.7	0.99025
167.8	0.98995
167.9	0.99038
168	0.99056
168.1	0.99082
168.2	0.9909
168.3	0.9907
168.4	0.99109
168.5	0.9915
168.6	0.99085
168.7	0.99053
168.8	0.99032
168.9	0.99022
169	0.99063
169.1	0.9907
169.2	0.99044
169.3	0.99042
169.4	0.99025
169.5	0.98989
169.6	0.99005
169.7	0.99078
169.8	0.9901
169.9	0.98997
170	0.9907
170.1	0.99105
170.2	0.99047
170.3	0.99052
170.4	0.99077
170.5	0.99076
170.6	0.99077
170.7	0.99064
170.8	0.99062
170.9	0.99066
171	0.99096
171.1	0.99107
171.2	0.99043
171.3	0.99116
171.4	0.99127
171.5	0.99063
171.6	0.99071
171.7	0.9904
171.8	0.99028
171.9	0.99014
172	0.99002
172.1	0.9897
172.2	0.99005
172.3	0.99058
172.4	0.99098
172.5	0.99081
172.6	0.99081
172.7	0.99064
172.8	0.99072
172.9	0.99062
173	0.99014
173.1	0.99033
173.2	0.99084
173.3	0.9906
173.4	0.9904
173.5	0.99053
173.6	0.99067
173.7	0.99028
173.8	0.99049
173.9	0.9905
174	0.99058
174.1	0.99092
174.2	0.99048
174.3	0.99088
174.4	0.99043
174.5	0.99062
174.6	0.99085
174.7	0.99085
174.8	0.99079
174.9	0.99066
175	0.99038
175.1	0.99049
175.2	0.99082
175.3	0.99102
175.4	0.99103
175.5	0.99089
175.6	0.99108
175.7	0.99118
175.8	0.99131
175.9	0.99078
176	0.99111
176.1	0.99145
176.2	0.9915
176.3	0.99085
176.4	0.99085
176.5	0.99041
176.6	0.99084
176.7	0.99093
176.8	0.99092
176.9	0.99069
177	0.9904
177.1	0.99077
177.2	0.9909
177.3	0.99074
177.4	0.99126
177.5	0.99103
177.6	0.9913
177.7	0.99118
177.8	0.99089
177.9	0.99094
178	0.99121
178.1	0.99103
178.2	0.99094
178.3	0.9909
178.4	0.99117
178.5	0.99109
178.6	0.99119
178.7	0.99112
178.8	0.99092
178.9	0.99121
179	0.99107
179.1	0.99138
179.2	0.99127
179.3	0.99093
179.4	0.99089
179.5	0.99088
179.6	0.99099
179.7	0.99119
179.8	0.99101
179.9	0.99121
180	0.99087
180.1	0.99093
180.2	0.99122
180.3	0.99149
180.4	0.99128
180.5	0.9913
180.6	0.99102
180.7	0.99096
180.8	0.99084
180.9	0.99102
181	0.99113
181.1	0.99136
181.2	0.99094
181.3	0.99073
181.4	0.99131
181.5	0.99097
181.6	0.99096
181.7	0.99083
181.8	0.99095
181.9	0.9908
182	0.99102
182.1	0.99095
182.2	0.99132
182.3	0.99172
182.4	0.99137
182.5	0.99137
182.6	0.99155
182.7	0.99102
182.8	0.9912
182.9	0.99084
183	0.9911
183.1	0.9914
183.2	0.99128
183.3	0.99102
183.4	0.99132
183.5	0.9913
183.6	0.99094
183.7	0.99111
183.8	0.99092
183.9	0.9915
184	0.99113
184.1	0.99124
184.2	0.99126
184.3	0.99102
184.4	0.99109
184.5	0.99111
184.6	0.99098
184.7	0.99098
184.8	0.99089
184.9	0.99078
185	0.99098
185.1	0.99092
185.2	0.99117
185.3	0.99122
185.4	0.99115
185.5	0.99073
185.6	0.99073
185.7	0.99082
185.8	0.99103
185.9	0.99129
186	0.99091
186.1	0.991
186.2	0.99067
186.3	0.99111
186.4	0.99082
186.5	0.99041
186.6	0.99073
186.7	0.99072
186.8	0.99112
186.9	0.99075
187	0.99098
187.1	0.99108
187.2	0.99132
187.3	0.99175
187.4	0.99099
187.5	0.99106
187.6	0.99066
187.7	0.99103
187.8	0.99128
187.9	0.99085
188	0.9909
188.1	0.99053
188.2	0.99081
188.3	0.99064
188.4	0.99089
188.5	0.99105
188.6	0.99123
188.7	0.99137
188.8	0.99173
188.9	0.99143
189	0.99142
189.1	0.99114
189.2	0.99111
189.3	0.99129
189.4	0.99122
189.5	0.99098
189.6	0.99087
189.7	0.99063
189.8	0.99097
189.9	0.99112
190	0.99122
190.1	0.9911
190.2	0.99116
190.3	0.99136
190.4	0.991
190.5	0.99112
190.6	0.9909
190.7	0.99049
190.8	0.99072
190.9	0.99047
191	0.99058
191.1	0.99051
191.2	0.99105
191.3	0.99135
191.4	0.99146
191.5	0.99089
191.6	0.99125
191.7	0.99073
191.8	0.99044
191.9	0.99129
192	0.99175
192.1	0.99119
192.2	0.99143
192.3	0.99169
192.4	0.9916
192.5	0.99114
192.6	0.99129
192.7	0.99113
192.8	0.99099
192.9	0.99116
193	0.99094
193.1	0.99061
193.2	0.99088
193.3	0.99053
193.4	0.99081
193.5	0.99115
193.6	0.99086
193.7	0.99084
193.8	0.99103
193.9	0.99109
194	0.99119
194.1	0.9915
194.2	0.9912
194.3	0.99114
194.4	0.99127
194.5	0.99122
194.6	0.99092
194.7	0.99065
194.8	0.99114
194.9	0.9908
195	0.99064
195.1	0.99093
195.2	0.99083
195.3	0.99099
195.4	0.99078
195.5	0.99108
195.6	0.99122
195.7	0.99093
195.8	0.99123
195.9	0.99092
196	0.99112
196.1	0.99123
196.2	0.99085
196.3	0.9908
196.4	0.99078
196.5	0.99097
196.6	0.99111
196.7	0.99086
196.8	0.99042
196.9	0.99093
197	0.99101
197.1	0.99107
197.2	0.99126
197.3	0.99118
197.4	0.99114
197.5	0.9913
197.6	0.99087
197.7	0.99072
197.8	0.99125
197.9	0.99099
198	0.99092
198.1	0.99081
198.2	0.99096
198.3	0.99104
198.4	0.99147
198.5	0.99168
198.6	0.99132
198.7	0.99097
198.8	0.99026
198.9	0.99055
199	0.99096
199.1	0.99084
199.2	0.99081
199.3	0.99114
199.4	0.99144
199.5	0.99148
199.6	0.99142
199.7	0.99204
199.8	0.99151
199.9	0.99169
200	0.99143
[truncated: 14,000 more rows]
