# Supplementary material for: Bayesian inference of kinetic schemes for ion channels by Kalman filtering
Source: eLife journal article supplement (doi:10.7554/elife.62714), 2022-05-04
Supplement: fig4-data1 [file 1_Sim_N_50000_Strom_MW_16M.xlsx]

## Sheet: 16 M
0.1	0
0.2	0
0.3	0
0.4	0
0.5	0
0.6	0
0.7	0
0.8	0
0.9	0
1	0
1.1	0
1.2	0
1.3	0
1.4	0
1.5	0
1.6	0
1.7	0
1.8	0
1.9	0
2	0
2.1	0
2.2	0
2.3	0
2.4	0
2.5	0
2.6	0
2.7	0
2.8	0
2.9	0
3	0
3.1	0
3.2	0
3.3	0
3.4	0
3.5	0
3.6	0
3.7	0
3.8	0
3.9	0
4	0
4.1	0
4.2	0
4.3	0
4.4	0
4.5	0
4.6	0
4.7	0
4.8	0
4.9	0
5	0
5.1	0
5.2	0
5.3	0
5.4	0
5.5	0
5.6	0
5.7	0
5.8	0
5.9	0
6	0
6.1	0
6.2	0
6.3	0
6.4	0
6.5	0
6.6	0
6.7	0
6.8	0
6.9	0
7	0
7.1	0
7.2	0
7.3	0
7.4	0
7.5	0
7.6	0
7.7	0
7.8	0
7.9	0
8	0
8.1	0
8.2	0
8.3	0
8.4	0
8.5	0
8.6	0
8.7	0
8.8	0
8.9	0
9	0
9.1	0
9.2	0
9.3	0
9.4	0
9.5	0
9.6	0
9.7	0
9.8	0
9.9	0
10	0
10.1	0
10.2	0
10.3	0
10.4	0
10.5	0
10.6	0
10.7	0
10.8	0
10.9	0
11	0
11.1	0
11.2	0
11.3	0
11.4	0
11.5	0
11.6	0
11.7	0
11.8	0
11.9	0
12	0
12.1	0
12.2	0
12.3	0
12.4	0
12.5	0
12.6	0
12.7	0
12.8	0
12.9	0
13	0
13.1	0
13.2	0
13.3	0
13.4	0
13.5	0
13.6	0
13.7	0
13.8	0
13.9	0
14	0
14.1	0
14.2	0
14.3	0
14.4	0
14.5	0
14.6	0
14.7	0
14.8	0
14.9	0
15	0
15.1	0
15.2	0
15.3	0
15.4	0
15.5	0
15.6	0
15.7	0
15.8	0
15.9	0
16	0
16.1	0
16.2	0
16.3	0
16.4	0
16.5	0
16.6	0
16.7	0
16.8	0
16.9	0
17	0
17.1	0
17.2	0
17.3	0
17.4	0
17.5	0
17.6	0
17.7	0
17.8	0
17.9	0
18	0
18.1	0
18.2	0
18.3	0
18.4	0
18.5	0
18.6	0
18.7	0
18.8	0
18.9	0
19	0
19.1	0
19.2	0
19.3	0
19.4	0
19.5	0
19.6	0
19.7	0
19.8	0
19.9	0
20	0
20.1	0
20.2	0
20.3	0
20.4	0
20.5	0
20.6	0
20.7	0
20.8	0
20.9	0
21	0
21.1	0
21.2	0
21.3	0
21.4	0
21.5	0
21.6	0
21.7	0
21.8	0
21.9	0
22	0
22.1	0
22.2	0
22.3	0
22.4	0
22.5	0
22.6	0
22.7	0
22.8	0
22.9	0
23	0
23.1	0
23.2	0
23.3	0
23.4	0
23.5	0
23.6	0
23.7	0
23.8	0
23.9	0
24	0
24.1	0
24.2	0
24.3	0
24.4	0
24.5	0
24.6	0
24.7	0
24.8	0
24.9	0
25	0
25.1	0
25.2	0
25.3	0
25.4	0
25.5	0
25.6	0
25.7	0
25.8	0
25.9	0
26	0
26.1	0
26.2	0
26.3	0
26.4	0
26.5	0
26.6	0
26.7	0
26.8	0
26.9	0
27	0
27.1	0
27.2	0
27.3	0
27.4	0
27.5	0
27.6	0
27.7	0
27.8	0
27.9	0
28	0
28.1	0
28.2	0
28.3	0
28.4	0
28.5	0
28.6	0
28.7	0
28.8	0
28.9	0
29	0
29.1	0
29.2	0
29.3	0
29.4	0
29.5	0
29.6	0
29.7	0
29.8	0
29.9	0
30	0
30.1	0
30.2	0
30.3	0
30.4	0
30.5	0
30.6	0
30.7	0
30.8	0
30.9	0
31	0
31.1	0
31.2	0
31.3	0
31.4	0
31.5	0
31.6	0
31.7	0
31.8	0
31.9	0
32	0
32.1	0
32.2	0
32.3	0
32.4	0
32.5	0
32.6	0
32.7	0
32.8	0
32.9	0
33	0
33.1	0
33.2	0
33.3	0
33.4	0
33.5	0
33.6	0
33.7	0
33.8	0
33.9	0
34	0
34.1	0
34.2	0
34.3	0
34.4	0
34.5	0
34.6	0
34.7	0
34.8	0
34.9	0
35	0
35.1	0
35.2	0
35.3	0
35.4	0
35.5	0
35.6	0
35.7	0
35.8	0
35.9	0
36	0
36.1	0
36.2	0
36.3	0
36.4	0
36.5	0
36.6	0
36.7	0
36.8	0
36.9	0
37	0
37.1	0
37.2	0
37.3	0
37.4	0
37.5	0
37.6	0
37.7	0
37.8	0
37.9	0
38	0
38.1	0
38.2	0
38.3	0
38.4	0
38.5	0
38.6	0
38.7	0
38.8	0
38.9	0
39	0
39.1	0
39.2	0
39.3	0
39.4	0
39.5	0
39.6	0
39.7	0
39.8	0
39.9	0
40	0
40.1	0
40.2	0
40.3	0
40.4	0
40.5	0
40.6	0
40.7	0
40.8	0
40.9	0
41	0
41.1	0
41.2	0
41.3	0
41.4	0
41.5	0
41.6	0
41.7	0
41.8	0
41.9	0
42	0
42.1	0
42.2	0
42.3	0
42.4	0
42.5	0
42.6	0
42.7	0
42.8	0
42.9	0
43	0
43.1	0
43.2	0
43.3	0
43.4	0
43.5	0
43.6	0
43.7	0
43.8	0
43.9	0
44	0
44.1	0
44.2	0
44.3	0
44.4	0
44.5	0
44.6	0
44.7	0
44.8	0
44.9	0
45	0
45.1	0
45.2	0
45.3	0
45.4	0
45.5	0
45.6	0
45.7	0
45.8	0
45.9	0
46	0
46.1	0
46.2	0
46.3	0
46.4	0
46.5	0
46.6	0
46.7	0
46.8	0
46.9	0
47	0
47.1	0
47.2	0
47.3	0
47.4	0
47.5	0
47.6	0
47.7	0
47.8	0
47.9	0
48	0
48.1	0
48.2	0
48.3	0
48.4	0
48.5	0
48.6	0
48.7	0
48.8	0
48.9	0
49	0
49.1	0
49.2	0
49.3	0
49.4	0
49.5	0
49.6	0
49.7	0
49.8	0
49.9	0
50	0
50.1	0
50.2	0
50.3	0
50.4	0
50.5	0
50.6	0
50.7	0
50.8	0
50.9	0
51	0
51.1	0
51.2	0
51.3	0
51.4	0
51.5	0
51.6	0
51.7	0
51.8	0
51.9	0
52	0
52.1	0
52.2	0
52.3	0
52.4	0
52.5	0
52.6	0
52.7	0
52.8	0
52.9	0
53	0
53.1	0
53.2	0
53.3	0
53.4	0
53.5	0
53.6	0
53.7	0
53.8	0
53.9	0
54	0
54.1	0
54.2	0
54.3	0
54.4	0
54.5	0
54.6	0
54.7	0
54.8	0
54.9	0
55	0
55.1	0
55.2	0
55.3	0
55.4	0
55.5	0
55.6	0
55.7	0
55.8	0
55.9	0
56	0
56.1	0
56.2	0
56.3	0
56.4	0
56.5	0
56.6	0
56.7	0
56.8	0
56.9	0
57	0
57.1	0
57.2	0
57.3	0
57.4	0
57.5	0
57.6	0
57.7	0
57.8	0
57.9	0
58	0
58.1	0
58.2	0
58.3	0
58.4	0
58.5	0
58.6	0
58.7	0
58.8	0
58.9	0
59	0
59.1	0
59.2	0
59.3	0
59.4	0
59.5	0
59.6	0
59.7	0
59.8	0
59.9	0
60	0
60.1	0
60.2	0
60.3	0
60.4	0
60.5	0
60.6	0
60.7	0
60.8	0
60.9	0
61	0
61.1	0
61.2	0
61.3	0
61.4	0
61.5	0
61.6	0
61.7	0
61.8	0
61.9	0
62	0
62.1	0
62.2	0
62.3	0
62.4	0
62.5	0
62.6	0
62.7	0
62.8	0
62.9	0
63	0
63.1	0
63.2	0
63.3	0
63.4	0
63.5	0
63.6	0
63.7	0
63.8	0
63.9	0
64	0
64.1	0
64.2	0
64.3	0
64.4	0
64.5	0
64.6	0
64.7	0
64.8	0
64.9	0
65	0
65.1	0
65.2	0
65.3	0
65.4	0
65.5	0
65.6	0
65.7	0
65.8	0
65.9	0
66	0
66.1	0
66.2	0
66.3	0
66.4	0
66.5	0
66.6	0
66.7	0
66.8	0
66.9	0
67	0
67.1	0
67.2	0
67.3	0
67.4	0
67.5	0
67.6	0
67.7	0
67.8	0
67.9	0
68	0
68.1	0
68.2	0
68.3	0
68.4	0
68.5	0
68.6	0
68.7	0
68.8	0
68.9	0
69	0
69.1	0
69.2	0
69.3	0
69.4	0
69.5	0
69.6	0
69.7	0
69.8	0
69.9	0
70	0
70.1	0
70.2	0
70.3	0
70.4	0
70.5	0
70.6	0
70.7	0
70.8	0
70.9	0
71	0
71.1	0
71.2	0
71.3	0
71.4	0
71.5	0
71.6	0
71.7	0
71.8	0
71.9	0
72	0
72.1	0
72.2	0
72.3	0
72.4	0
72.5	0
72.6	0
72.7	0
72.8	0
72.9	0
73	0
73.1	0
73.2	0
73.3	0
73.4	0
73.5	0
73.6	0
73.7	0
73.8	0
73.9	0
74	0
74.1	0
74.2	0
74.3	0
74.4	0
74.5	0
74.6	0
74.7	0
74.8	0
74.9	0
75	0
75.1	0
75.2	0
75.3	0
75.4	0
75.5	0
75.6	0
75.7	0
75.8	0
75.9	0
76	0
76.1	0
76.2	0
76.3	0
76.4	0
76.5	0
76.6	0
76.7	0
76.8	0
76.9	0
77	0
77.1	0
77.2	0
77.3	0
77.4	0
77.5	0
77.6	0
77.7	0
77.8	0
77.9	0
78	0
78.1	0
78.2	0
78.3	0
78.4	0
78.5	0
78.6	0
78.7	0
78.8	0
78.9	0
79	0
79.1	0
79.2	0
79.3	0
79.4	0
79.5	0
79.6	0
79.7	0
79.8	0
79.9	0
80	0
80.1	0
80.2	0
80.3	0
80.4	0
80.5	0
80.6	0
80.7	0
80.8	0
80.9	0
81	0
81.1	0
81.2	0
81.3	0
81.4	0
81.5	0
81.6	0
81.7	0
81.8	0
81.9	0
82	0
82.1	0
82.2	0
82.3	0
82.4	0
82.5	0
82.6	0
82.7	0
82.8	0
82.9	0
83	0
83.1	0
83.2	0
83.3	0
83.4	0
83.5	0
83.6	0
83.7	0
83.8	0
83.9	0
84	0
84.1	0
84.2	0
84.3	0
84.4	0
84.5	0
84.6	0
84.7	0
84.8	0
84.9	0
85	0
85.1	0
85.2	0
85.3	0
85.4	0
85.5	0
85.6	0
85.7	0
85.8	0
85.9	0
86	0
86.1	0
86.2	0
86.3	0
86.4	0
86.5	0
86.6	0
86.7	0
86.8	0
86.9	0
87	0
87.1	0
87.2	0
87.3	0
87.4	0
87.5	0
87.6	0
87.7	0
87.8	0
87.9	0
88	0
88.1	0
88.2	0
88.3	0
88.4	0
88.5	0
88.6	0
88.7	0
88.8	0
88.9	0
89	0
89.1	0
89.2	0
89.3	0
89.4	0
89.5	0
89.6	0
89.7	0
89.8	0
89.9	0
90	0
90.1	0
90.2	0
90.3	0
90.4	0
90.5	0
90.6	0
90.7	0
90.8	0
90.9	0
91	0
91.1	0
91.2	0
91.3	0
91.4	0
91.5	0
91.6	0
91.7	0
91.8	0
91.9	0
92	0
92.1	0
92.2	0
92.3	0
92.4	0
92.5	0
92.6	0
92.7	0
92.8	0
92.9	0
93	0
93.1	0
93.2	0
93.3	0
93.4	0
93.5	0
93.6	0
93.7	0
93.8	0
93.9	0
94	0
94.1	0
94.2	0
94.3	0
94.4	0
94.5	0
94.6	0
94.7	0
94.8	0
94.9	0
95	0
95.1	0
95.2	0
95.3	0
95.4	0
95.5	0
95.6	0
95.7	0
95.8	0
95.9	0
96	0
96.1	0
96.2	0
96.3	0
96.4	0
96.5	0
96.6	0
96.7	0
96.8	0
96.9	0
97	0
97.1	0
97.2	0
97.3	0
97.4	0
97.5	0
97.6	0
97.7	0
97.8	0
97.9	0
98	0
98.1	0
98.2	0
98.3	0
98.4	0
98.5	0
98.6	0
98.7	0
98.8	0
98.9	0
99	0
99.1	0
99.2	0
99.3	0
99.4	0
99.5	0
99.6	0
99.7	0
99.8	0
99.9	0
100	0
100.1	0.00054
100.2	0.00268
100.3	0.00576
100.4	0.00938
100.5	0.01314
100.6	0.01722
100.7	0.02142
100.8	0.02562
100.9	0.02976
101	0.03422
101.1	0.03872
101.2	0.04294
101.3	0.04698
101.4	0.05078
101.5	0.0549
101.6	0.05978
101.7	0.06402
101.8	0.06814
101.9	0.07216
102	0.07576
102.1	0.07992
102.2	0.08374
102.3	0.08818
102.4	0.09212
102.5	0.09596
102.6	0.09964
102.7	0.10344
102.8	0.10758
102.9	0.11182
103	0.11592
103.1	0.12062
103.2	0.12398
103.3	0.12746
103.4	0.13142
103.5	0.13536
103.6	0.13852
103.7	0.14182
103.8	0.14598
103.9	0.14946
104	0.15332
104.1	0.15684
104.2	0.16026
104.3	0.16416
104.4	0.16768
104.5	0.17154
104.6	0.17534
104.7	0.17874
104.8	0.18224
104.9	0.18586
105	0.18922
105.1	0.19206
105.2	0.19542
105.3	0.19884
105.4	0.2023
105.5	0.20556
105.6	0.20896
105.7	0.21236
105.8	0.21568
105.9	0.21936
106	0.22236
106.1	0.22552
106.2	0.2284
106.3	0.23192
106.4	0.23494
106.5	0.23842
106.6	0.24192
106.7	0.24506
106.8	0.2482
106.9	0.25162
107	0.2546
107.1	0.25774
107.2	0.26064
107.3	0.26404
107.4	0.26706
107.5	0.26994
107.6	0.27288
107.7	0.2757
107.8	0.27864
107.9	0.28144
108	0.28442
108.1	0.28714
108.2	0.2901
108.3	0.29268
108.4	0.2957
108.5	0.2982
108.6	0.30108
108.7	0.30436
108.8	0.3068
108.9	0.30992
109	0.3126
109.1	0.31544
109.2	0.31844
109.3	0.32154
109.4	0.32408
109.5	0.32704
109.6	0.33002
109.7	0.33258
109.8	0.33566
109.9	0.33832
110	0.34098
110.1	0.34314
110.2	0.34556
110.3	0.3483
110.4	0.35068
110.5	0.35344
110.6	0.35584
110.7	0.35814
110.8	0.36108
110.9	0.36396
111	0.36678
111.1	0.36908
111.2	0.37104
111.3	0.37358
111.4	0.37596
111.5	0.37818
111.6	0.3805
111.7	0.38288
111.8	0.3851
111.9	0.38746
112	0.39026
112.1	0.39246
112.2	0.39472
112.3	0.39688
112.4	0.39902
112.5	0.40084
112.6	0.40316
112.7	0.40544
112.8	0.40786
112.9	0.41012
113	0.41242
113.1	0.41454
113.2	0.41704
113.3	0.41912
113.4	0.42068
113.5	0.42296
113.6	0.4251
113.7	0.42752
113.8	0.42956
113.9	0.43162
114	0.43392
114.1	0.43596
114.2	0.43824
114.3	0.44032
114.4	0.44244
114.5	0.44424
114.6	0.44636
114.7	0.44836
114.8	0.45042
114.9	0.45232
115	0.4546
115.1	0.45638
115.2	0.45866
115.3	0.46088
115.4	0.46284
115.5	0.46494
115.6	0.46756
115.7	0.4697
115.8	0.47188
115.9	0.47334
116	0.47516
116.1	0.4773
116.2	0.47936
116.3	0.4814
116.4	0.48326
116.5	0.48488
116.6	0.48684
116.7	0.48886
116.8	0.49066
116.9	0.49236
117	0.49394
117.1	0.49622
117.2	0.49826
117.3	0.49992
117.4	0.50152
117.5	0.5028
117.6	0.5042
117.7	0.5058
117.8	0.5076
117.9	0.50964
118	0.51166
118.1	0.5135
118.2	0.51518
118.3	0.51702
118.4	0.51868
118.5	0.52032
118.6	0.52208
118.7	0.52378
118.8	0.52536
118.9	0.52654
119	0.5279
119.1	0.52938
119.2	0.5309
119.3	0.53262
119.4	0.53428
119.5	0.5359
119.6	0.53738
119.7	0.53886
119.8	0.5405
119.9	0.54184
120	0.54344
120.1	0.54516
120.2	0.54702
120.3	0.5484
120.4	0.54988
120.5	0.55166
120.6	0.55356
120.7	0.55518
120.8	0.5567
120.9	0.55824
121	0.55958
121.1	0.56084
121.2	0.56262
121.3	0.5639
121.4	0.56564
121.5	0.56752
121.6	0.56896
121.7	0.57044
121.8	0.5716
121.9	0.57278
122	0.57412
122.1	0.57512
122.2	0.57678
122.3	0.57816
122.4	0.57938
122.5	0.58066
122.6	0.58174
122.7	0.5832
122.8	0.5844
122.9	0.58572
123	0.58696
123.1	0.58814
123.2	0.58944
123.3	0.59102
123.4	0.59254
123.5	0.59368
123.6	0.59494
123.7	0.59618
123.8	0.59762
123.9	0.59912
124	0.59992
124.1	0.60128
124.2	0.6024
124.3	0.60342
124.4	0.60442
124.5	0.6057
124.6	0.60664
124.7	0.6075
124.8	0.60844
124.9	0.6096
125	0.61114
125.1	0.61242
125.2	0.61326
125.3	0.61468
125.4	0.6161
125.5	0.61732
125.6	0.61852
125.7	0.61928
125.8	0.62034
125.9	0.62136
126	0.62206
126.1	0.62298
126.2	0.62376
126.3	0.62466
126.4	0.6257
126.5	0.62712
126.6	0.62816
126.7	0.62944
126.8	0.63068
126.9	0.63196
127	0.63302
127.1	0.63402
127.2	0.63508
127.3	0.63614
127.4	0.63732
127.5	0.63824
127.6	0.63922
127.7	0.6404
127.8	0.6411
127.9	0.6419
128	0.64304
128.1	0.64438
128.2	0.64542
128.3	0.64642
128.4	0.64714
128.5	0.64806
128.6	0.6489
128.7	0.64994
128.8	0.65082
128.9	0.65184
129	0.65308
129.1	0.65394
129.2	0.6551
129.3	0.65626
129.4	0.65734
129.5	0.65814
129.6	0.65868
129.7	0.65956
129.8	0.66034
129.9	0.66088
130	0.66186
130.1	0.66244
130.2	0.66338
130.3	0.66444
130.4	0.66516
130.5	0.66632
130.6	0.66728
130.7	0.66798
130.8	0.6688
130.9	0.66978
131	0.67052
131.1	0.67112
131.2	0.6722
131.3	0.67284
131.4	0.6738
131.5	0.6748
131.6	0.67566
131.7	0.6763
131.8	0.67692
131.9	0.67732
132	0.67806
132.1	0.67906
132.2	0.68012
132.3	0.68072
132.4	0.68142
132.5	0.68218
132.6	0.68266
132.7	0.68324
132.8	0.684
132.9	0.68492
133	0.68564
133.1	0.68596
133.2	0.68656
133.3	0.68754
133.4	0.68826
133.5	0.68904
133.6	0.68964
133.7	0.69036
133.8	0.69094
133.9	0.69144
134	0.69234
134.1	0.69296
134.2	0.6937
134.3	0.69424
134.4	0.69452
134.5	0.69508
134.6	0.69556
134.7	0.69632
134.8	0.69716
134.9	0.69768
135	0.69846
135.1	0.69882
135.2	0.69992
135.3	0.70066
135.4	0.70146
135.5	0.7021
135.6	0.70264
135.7	0.70324
135.8	0.70388
135.9	0.70452
136	0.70532
136.1	0.7059
136.2	0.70632
136.3	0.70684
136.4	0.70742
136.5	0.708
136.6	0.70824
136.7	0.70886
136.8	0.70956
136.9	0.71032
137	0.71132
137.1	0.71186
137.2	0.71218
137.3	0.7128
137.4	0.71324
137.5	0.71404
137.6	0.71434
137.7	0.71482
137.8	0.71514
137.9	0.7154
138	0.71562
138.1	0.71638
138.2	0.717
138.3	0.71716
138.4	0.71796
138.5	0.71872
138.6	0.71928
138.7	0.71986
138.8	0.72048
138.9	0.72088
139	0.72152
139.1	0.72202
139.2	0.72262
139.3	0.7234
139.4	0.72442
139.5	0.72484
139.6	0.72546
139.7	0.72586
139.8	0.72614
139.9	0.72654
140	0.72726
140.1	0.72762
140.2	0.72834
140.3	0.72892
140.4	0.72944
140.5	0.72962
140.6	0.73018
140.7	0.73064
140.8	0.73114
140.9	0.73158
141	0.73186
141.1	0.73234
141.2	0.73276
141.3	0.73336
141.4	0.73372
141.5	0.73436
141.6	0.73478
141.7	0.73542
141.8	0.73584
141.9	0.7361
142	0.73648
142.1	0.73696
142.2	0.73736
142.3	0.73776
142.4	0.7382
142.5	0.73848
142.6	0.73878
142.7	0.73926
142.8	0.73944
142.9	0.73998
143	0.74044
143.1	0.74122
143.2	0.74186
143.3	0.74232
143.4	0.74254
143.5	0.74322
143.6	0.74348
143.7	0.74378
143.8	0.7441
143.9	0.74422
144	0.7446
144.1	0.74506
144.2	0.74522
144.3	0.74578
144.4	0.74602
144.5	0.74652
144.6	0.74692
144.7	0.74714
144.8	0.74716
144.9	0.74772
145	0.7482
145.1	0.74846
145.2	0.74944
145.3	0.75022
145.4	0.7507
145.5	0.75104
145.6	0.75154
145.7	0.75206
145.8	0.75232
145.9	0.75262
146	0.7527
146.1	0.75284
146.2	0.7531
146.3	0.75372
146.4	0.75426
146.5	0.7547
146.6	0.75532
146.7	0.75562
146.8	0.75606
146.9	0.75642
147	0.7567
147.1	0.75726
147.2	0.7578
147.3	0.7584
147.4	0.75848
147.5	0.75858
147.6	0.7587
147.7	0.7587
147.8	0.75924
147.9	0.75956
148	0.75998
148.1	0.75996
148.2	0.7601
148.3	0.7608
148.4	0.76144
148.5	0.76162
148.6	0.76208
148.7	0.7623
148.8	0.76274
148.9	0.76318
149	0.7636
149.1	0.76346
149.2	0.76398
149.3	0.76428
149.4	0.76484
149.5	0.76486
149.6	0.76532
149.7	0.76552
149.8	0.76608
149.9	0.76618
150	0.76652
150.1	0.7668
150.2	0.7673
150.3	0.76756
150.4	0.76796
150.5	0.7681
150.6	0.76846
150.7	0.76872
150.8	0.76872
150.9	0.769
151	0.7693
151.1	0.76932
151.2	0.76972
151.3	0.76992
151.4	0.77012
151.5	0.7705
151.6	0.77098
151.7	0.77114
151.8	0.77122
151.9	0.7715
152	0.77178
152.1	0.77184
152.2	0.77204
152.3	0.77216
152.4	0.77278
152.5	0.77278
152.6	0.77312
152.7	0.77322
152.8	0.77356
152.9	0.7736
153	0.7742
153.1	0.77436
153.2	0.77454
153.3	0.77474
153.4	0.77504
153.5	0.77556
153.6	0.7759
153.7	0.7761
153.8	0.77642
153.9	0.77654
154	0.77636
154.1	0.7765
154.2	0.77656
154.3	0.77688
154.4	0.77742
154.5	0.7779
154.6	0.7778
154.7	0.77762
154.8	0.77788
154.9	0.77784
155	0.7781
155.1	0.77866
155.2	0.7789
155.3	0.7794
155.4	0.77968
155.5	0.77986
155.6	0.78028
155.7	0.78056
155.8	0.78068
155.9	0.78114
156	0.78124
156.1	0.78124
156.2	0.7814
156.3	0.78142
156.4	0.78138
156.5	0.78172
156.6	0.78182
156.7	0.78214
156.8	0.78254
156.9	0.78286
157	0.7832
157.1	0.78322
157.2	0.78362
157.3	0.78416
157.4	0.78436
157.5	0.78452
157.6	0.78442
157.7	0.78446
157.8	0.78474
157.9	0.7848
158	0.78518
158.1	0.78522
158.2	0.78538
158.3	0.7855
158.4	0.78572
158.5	0.78608
158.6	0.78638
158.7	0.78658
158.8	0.78688
158.9	0.78694
159	0.7873
159.1	0.78758
159.2	0.78778
159.3	0.78828
159.4	0.78834
159.5	0.78838
159.6	0.78862
159.7	0.78882
159.8	0.78884
159.9	0.78906
160	0.7894
160.1	0.78956
160.2	0.78962
160.3	0.78984
160.4	0.78982
160.5	0.79022
160.6	0.7909
160.7	0.79112
160.8	0.79076
160.9	0.7908
161	0.79072
161.1	0.79086
161.2	0.7907
161.3	0.7909
161.4	0.7909
161.5	0.79072
161.6	0.79078
161.7	0.79096
161.8	0.79104
161.9	0.79124
162	0.79162
162.1	0.79184
162.2	0.79194
162.3	0.79192
162.4	0.79192
162.5	0.7926
162.6	0.79278
162.7	0.79252
162.8	0.79268
162.9	0.793
163	0.79326
163.1	0.79344
163.2	0.79394
163.3	0.79384
163.4	0.79372
163.5	0.79402
163.6	0.79404
163.7	0.79392
163.8	0.7941
163.9	0.79386
164	0.79378
164.1	0.79372
164.2	0.79356
164.3	0.79376
164.4	0.79386
164.5	0.79388
164.6	0.79444
164.7	0.79464
164.8	0.7949
164.9	0.79498
165	0.79488
165.1	0.79504
165.2	0.79524
165.3	0.79566
165.4	0.79572
165.5	0.79598
165.6	0.79608
165.7	0.79646
165.8	0.79632
165.9	0.79652
166	0.7966
166.1	0.79698
166.2	0.79748
166.3	0.79798
166.4	0.79838
166.5	0.79854
166.6	0.79864
166.7	0.79884
166.8	0.799
166.9	0.79922
167	0.79906
167.1	0.79886
167.2	0.79896
167.3	0.79922
167.4	0.79932
167.5	0.79944
167.6	0.79948
167.7	0.7996
167.8	0.79974
167.9	0.7996
168	0.79974
168.1	0.79958
168.2	0.79982
168.3	0.79964
168.4	0.79962
168.5	0.79958
168.6	0.79964
168.7	0.79986
168.8	0.80002
168.9	0.7999
169	0.80016
169.1	0.80026
169.2	0.80046
169.3	0.80028
169.4	0.8002
169.5	0.8003
169.6	0.80026
169.7	0.80054
169.8	0.80048
169.9	0.80044
170	0.80074
170.1	0.80068
170.2	0.80092
170.3	0.801
170.4	0.80112
170.5	0.80112
170.6	0.80108
170.7	0.80096
170.8	0.80116
170.9	0.80114
171	0.80126
171.1	0.8015
171.2	0.80162
171.3	0.80152
171.4	0.80168
171.5	0.80174
171.6	0.80176
171.7	0.80166
171.8	0.80196
171.9	0.8021
172	0.80216
172.1	0.80232
172.2	0.8025
172.3	0.8026
172.4	0.8027
172.5	0.80304
172.6	0.80304
172.7	0.80306
172.8	0.80342
172.9	0.80398
173	0.80392
173.1	0.8039
173.2	0.80384
173.3	0.80392
173.4	0.80394
173.5	0.80398
173.6	0.804
173.7	0.8044
173.8	0.80444
173.9	0.80442
174	0.80456
174.1	0.80474
174.2	0.80512
174.3	0.80514
174.4	0.80502
174.5	0.80512
174.6	0.80516
174.7	0.8054
174.8	0.80546
174.9	0.80534
175	0.80552
175.1	0.80556
175.2	0.80576
175.3	0.80542
175.4	0.8056
175.5	0.8056
175.6	0.80576
175.7	0.80582
175.8	0.80604
175.9	0.80598
176	0.80618
176.1	0.8061
176.2	0.80628
176.3	0.80628
176.4	0.80636
176.5	0.80638
176.6	0.80626
176.7	0.80652
176.8	0.80682
176.9	0.80688
177	0.80694
177.1	0.80686
177.2	0.8071
177.3	0.80736
177.4	0.80752
177.5	0.8077
177.6	0.80766
177.7	0.80776
177.8	0.80758
177.9	0.8075
178	0.80746
178.1	0.8079
178.2	0.8079
178.3	0.8079
178.4	0.80806
178.5	0.80826
178.6	0.80798
178.7	0.80798
178.8	0.80798
178.9	0.8078
179	0.8078
179.1	0.80764
179.2	0.80774
179.3	0.80808
179.4	0.80798
179.5	0.80812
179.6	0.8084
179.7	0.80806
179.8	0.80828
179.9	0.80828
180	0.8084
180.1	0.80868
180.2	0.80878
180.3	0.80902
180.4	0.80886
180.5	0.80874
180.6	0.80874
180.7	0.80898
180.8	0.80908
180.9	0.80878
181	0.80878
181.1	0.80872
181.2	0.80882
181.3	0.80884
181.4	0.80892
181.5	0.80918
181.6	0.80918
181.7	0.809
181.8	0.80898
181.9	0.80932
182	0.80894
182.1	0.80926
182.2	0.80948
182.3	0.8097
182.4	0.80986
182.5	0.80984
182.6	0.80994
182.7	0.80986
182.8	0.80992
182.9	0.80988
183	0.8099
183.1	0.81002
183.2	0.81062
183.3	0.8107
183.4	0.8107
183.5	0.81098
183.6	0.81106
183.7	0.81124
183.8	0.81102
183.9	0.81104
184	0.8111
184.1	0.81118
184.2	0.81136
184.3	0.81148
184.4	0.81136
184.5	0.81122
184.6	0.8112
184.7	0.81114
184.8	0.81114
184.9	0.81112
185	0.81128
185.1	0.81148
185.2	0.81134
185.3	0.8115
185.4	0.81126
185.5	0.8111
185.6	0.81128
185.7	0.8112
185.8	0.81138
185.9	0.81158
186	0.81152
186.1	0.81138
186.2	0.81096
186.3	0.81092
186.4	0.81082
186.5	0.81088
186.6	0.81132
186.7	0.8116
186.8	0.812
186.9	0.8119
187	0.81178
187.1	0.81168
187.2	0.81208
187.3	0.81194
187.4	0.8119
187.5	0.81176
187.6	0.81192
187.7	0.81184
187.8	0.81196
187.9	0.81174
188	0.81194
188.1	0.81174
188.2	0.81164
188.3	0.81196
188.4	0.81198
188.5	0.8119
188.6	0.81196
188.7	0.81166
188.8	0.81174
188.9	0.81166
189	0.8118
189.1	0.81198
189.2	0.81212
189.3	0.81188
189.4	0.81178
189.5	0.81198
189.6	0.8121
189.7	0.81214
189.8	0.812
189.9	0.81198
190	0.81188
190.1	0.81184
190.2	0.81198
190.3	0.81198
190.4	0.81208
190.5	0.81234
190.6	0.8122
190.7	0.81216
190.8	0.81222
190.9	0.812
191	0.8117
191.1	0.81182
191.2	0.81182
191.3	0.81186
191.4	0.81188
191.5	0.812
191.6	0.81214
191.7	0.81214
191.8	0.81204
191.9	0.81202
192	0.81204
192.1	0.8123
192.2	0.8123
192.3	0.81208
192.4	0.81218
192.5	0.81228
192.6	0.81222
192.7	0.81234
192.8	0.81222
192.9	0.81236
193	0.81284
193.1	0.8129
193.2	0.8128
193.3	0.81278
193.4	0.8128
193.5	0.81294
193.6	0.81304
193.7	0.8132
193.8	0.81312
193.9	0.81322
194	0.81338
194.1	0.8132
194.2	0.81304
194.3	0.81306
194.4	0.81342
194.5	0.8134
194.6	0.8135
194.7	0.81344
194.8	0.81332
194.9	0.81356
195	0.81342
195.1	0.81356
195.2	0.8139
195.3	0.814
195.4	0.8141
195.5	0.81428
195.6	0.81424
195.7	0.8142
195.8	0.81416
195.9	0.81396
196	0.81426
196.1	0.81418
196.2	0.81406
196.3	0.81386
196.4	0.81382
196.5	0.8138
196.6	0.81384
196.7	0.81412
196.8	0.81416
196.9	0.81422
197	0.81442
197.1	0.81444
197.2	0.81428
197.3	0.81442
197.4	0.8145
197.5	0.81446
197.6	0.8143
197.7	0.81448
197.8	0.81458
197.9	0.81482
198	0.81484
198.1	0.8147
198.2	0.81472
198.3	0.81466
198.4	0.81466
198.5	0.81466
198.6	0.81458
198.7	0.8146
198.8	0.81474
198.9	0.81488
199	0.8149
199.1	0.8151
199.2	0.8151
199.3	0.8153
199.4	0.81512
199.5	0.81512
199.6	0.81508
199.7	0.81526
199.8	0.81516
199.9	0.81522
200	0.8152
[truncated: 14,000 more rows]
