# Supplementary material for: Bayesian inference of kinetic schemes for ion channels by Kalman filtering
Source: eLife journal article supplement (doi:10.7554/elife.62714), 2022-05-04
Supplement: fig4-data2 [file 1_Sim_N_50_Fluor_MW_64M.xlsx]

## Sheet: 64 M
0.1	0
0.2	0
0.3	0
0.4	0
0.5	0
0.6	0
0.7	0
0.8	0
0.9	0
1	0
1.1	0
1.2	0
1.3	0
1.4	0
1.5	0
1.6	0
1.7	0
1.8	0
1.9	0
2	0
2.1	0
2.2	0
2.3	0
2.4	0
2.5	0
2.6	0
2.7	0
2.8	0
2.9	0
3	0
3.1	0
3.2	0
3.3	0
3.4	0
3.5	0
3.6	0
3.7	0
3.8	0
3.9	0
4	0
4.1	0
4.2	0
4.3	0
4.4	0
4.5	0
4.6	0
4.7	0
4.8	0
4.9	0
5	0
5.1	0
5.2	0
5.3	0
5.4	0
5.5	0
5.6	0
5.7	0
5.8	0
5.9	0
6	0
6.1	0
6.2	0
6.3	0
6.4	0
6.5	0
6.6	0
6.7	0
6.8	0
6.9	0
7	0
7.1	0
7.2	0
7.3	0
7.4	0
7.5	0
7.6	0
7.7	0
7.8	0
7.9	0
8	0
8.1	0
8.2	0
8.3	0
8.4	0
8.5	0
8.6	0
8.7	0
8.8	0
8.9	0
9	0
9.1	0
9.2	0
9.3	0
9.4	0
9.5	0
9.6	0
9.7	0
9.8	0
9.9	0
10	0
10.1	0
10.2	0
10.3	0
10.4	0
10.5	0
10.6	0
10.7	0
10.8	0
10.9	0
11	0
11.1	0
11.2	0
11.3	0
11.4	0
11.5	0
11.6	0
11.7	0
11.8	0
11.9	0
12	0
12.1	0
12.2	0
12.3	0
12.4	0
12.5	0
12.6	0
12.7	0
12.8	0
12.9	0
13	0
13.1	0
13.2	0
13.3	0
13.4	0
13.5	0
13.6	0
13.7	0
13.8	0
13.9	0
14	0
14.1	0
14.2	0
14.3	0
14.4	0
14.5	0
14.6	0
14.7	0
14.8	0
14.9	0
15	0
15.1	0
15.2	0
15.3	0
15.4	0
15.5	0
15.6	0
15.7	0
15.8	0
15.9	0
16	0
16.1	0
16.2	0
16.3	0
16.4	0
16.5	0
16.6	0
16.7	0
16.8	0
16.9	0
17	0
17.1	0
17.2	0
17.3	0
17.4	0
17.5	0
17.6	0
17.7	0
17.8	0
17.9	0
18	0
18.1	0
18.2	0
18.3	0
18.4	0
18.5	0
18.6	0
18.7	0
18.8	0
18.9	0
19	0
19.1	0
19.2	0
19.3	0
19.4	0
19.5	0
19.6	0
19.7	0
19.8	0
19.9	0
20	0
20.1	0
20.2	0
20.3	0
20.4	0
20.5	0
20.6	0
20.7	0
20.8	0
20.9	0
21	0
21.1	0
21.2	0
21.3	0
21.4	0
21.5	0
21.6	0
21.7	0
21.8	0
21.9	0
22	0
22.1	0
22.2	0
22.3	0
22.4	0
22.5	0
22.6	0
22.7	0
22.8	0
22.9	0
23	0
23.1	0
23.2	0
23.3	0
23.4	0
23.5	0
23.6	0
23.7	0
23.8	0
23.9	0
24	0
24.1	0
24.2	0
24.3	0
24.4	0
24.5	0
24.6	0
24.7	0
24.8	0
24.9	0
25	0
25.1	0
25.2	0
25.3	0
25.4	0
25.5	0
25.6	0
25.7	0
25.8	0
25.9	0
26	0
26.1	0
26.2	0
26.3	0
26.4	0
26.5	0
26.6	0
26.7	0
26.8	0
26.9	0
27	0
27.1	0
27.2	0
27.3	0
27.4	0
27.5	0
27.6	0
27.7	0
27.8	0
27.9	0
28	0
28.1	0
28.2	0
28.3	0
28.4	0
28.5	0
28.6	0
28.7	0
28.8	0
28.9	0
29	0
29.1	0
29.2	0
29.3	0
29.4	0
29.5	0
29.6	0
29.7	0
29.8	0
29.9	0
30	0
30.1	0
30.2	0
30.3	0
30.4	0
30.5	0
30.6	0
30.7	0
30.8	0
30.9	0
31	0
31.1	0
31.2	0
31.3	0
31.4	0
31.5	0
31.6	0
31.7	0
31.8	0
31.9	0
32	0
32.1	0
32.2	0
32.3	0
32.4	0
32.5	0
32.6	0
32.7	0
32.8	0
32.9	0
33	0
33.1	0
33.2	0
33.3	0
33.4	0
33.5	0
33.6	0
33.7	0
33.8	0
33.9	0
34	0
34.1	0
34.2	0
34.3	0
34.4	0
34.5	0
34.6	0
34.7	0
34.8	0
34.9	0
35	0
35.1	0
35.2	0
35.3	0
35.4	0
35.5	0
35.6	0
35.7	0
35.8	0
35.9	0
36	0
36.1	0
36.2	0
36.3	0
36.4	0
36.5	0
36.6	0
36.7	0
36.8	0
36.9	0
37	0
37.1	0
37.2	0
37.3	0
37.4	0
37.5	0
37.6	0
37.7	0
37.8	0
37.9	0
38	0
38.1	0
38.2	0
38.3	0
38.4	0
38.5	0
38.6	0
38.7	0
38.8	0
38.9	0
39	0
39.1	0
39.2	0
39.3	0
39.4	0
39.5	0
39.6	0
39.7	0
39.8	0
39.9	0
40	0
40.1	0
40.2	0
40.3	0
40.4	0
40.5	0
40.6	0
40.7	0
40.8	0
40.9	0
41	0
41.1	0
41.2	0
41.3	0
41.4	0
41.5	0
41.6	0
41.7	0
41.8	0
41.9	0
42	0
42.1	0
42.2	0
42.3	0
42.4	0
42.5	0
42.6	0
42.7	0
42.8	0
42.9	0
43	0
43.1	0
43.2	0
43.3	0
43.4	0
43.5	0
43.6	0
43.7	0
43.8	0
43.9	0
44	0
44.1	0
44.2	0
44.3	0
44.4	0
44.5	0
44.6	0
44.7	0
44.8	0
44.9	0
45	0
45.1	0
45.2	0
45.3	0
45.4	0
45.5	0
45.6	0
45.7	0
45.8	0
45.9	0
46	0
46.1	0
46.2	0
46.3	0
46.4	0
46.5	0
46.6	0
46.7	0
46.8	0
46.9	0
47	0
47.1	0
47.2	0
47.3	0
47.4	0
47.5	0
47.6	0
47.7	0
47.8	0
47.9	0
48	0
48.1	0
48.2	0
48.3	0
48.4	0
48.5	0
48.6	0
48.7	0
48.8	0
48.9	0
49	0
49.1	0
49.2	0
49.3	0
49.4	0
49.5	0
49.6	0
49.7	0
49.8	0
49.9	0
50	0
50.1	0
50.2	0
50.3	0
50.4	0
50.5	0
50.6	0
50.7	0
50.8	0
50.9	0
51	0
51.1	0
51.2	0
51.3	0
51.4	0
51.5	0
51.6	0
51.7	0
51.8	0
51.9	0
52	0
52.1	0
52.2	0
52.3	0
52.4	0
52.5	0
52.6	0
52.7	0
52.8	0
52.9	0
53	0
53.1	0
53.2	0
53.3	0
53.4	0
53.5	0
53.6	0
53.7	0
53.8	0
53.9	0
54	0
54.1	0
54.2	0
54.3	0
54.4	0
54.5	0
54.6	0
54.7	0
54.8	0
54.9	0
55	0
55.1	0
55.2	0
55.3	0
55.4	0
55.5	0
55.6	0
55.7	0
55.8	0
55.9	0
56	0
56.1	0
56.2	0
56.3	0
56.4	0
56.5	0
56.6	0
56.7	0
56.8	0
56.9	0
57	0
57.1	0
57.2	0
57.3	0
57.4	0
57.5	0
57.6	0
57.7	0
57.8	0
57.9	0
58	0
58.1	0
58.2	0
58.3	0
58.4	0
58.5	0
58.6	0
58.7	0
58.8	0
58.9	0
59	0
59.1	0
59.2	0
59.3	0
59.4	0
59.5	0
59.6	0
59.7	0
59.8	0
59.9	0
60	0
60.1	0
60.2	0
60.3	0
60.4	0
60.5	0
60.6	0
60.7	0
60.8	0
60.9	0
61	0
61.1	0
61.2	0
61.3	0
61.4	0
61.5	0
61.6	0
61.7	0
61.8	0
61.9	0
62	0
62.1	0
62.2	0
62.3	0
62.4	0
62.5	0
62.6	0
62.7	0
62.8	0
62.9	0
63	0
63.1	0
63.2	0
63.3	0
63.4	0
63.5	0
63.6	0
63.7	0
63.8	0
63.9	0
64	0
64.1	0
64.2	0
64.3	0
64.4	0
64.5	0
64.6	0
64.7	0
64.8	0
64.9	0
65	0
65.1	0
65.2	0
65.3	0
65.4	0
65.5	0
65.6	0
65.7	0
65.8	0
65.9	0
66	0
66.1	0
66.2	0
66.3	0
66.4	0
66.5	0
66.6	0
66.7	0
66.8	0
66.9	0
67	0
67.1	0
67.2	0
67.3	0
67.4	0
67.5	0
67.6	0
67.7	0
67.8	0
67.9	0
68	0
68.1	0
68.2	0
68.3	0
68.4	0
68.5	0
68.6	0
68.7	0
68.8	0
68.9	0
69	0
69.1	0
69.2	0
69.3	0
69.4	0
69.5	0
69.6	0
69.7	0
69.8	0
69.9	0
70	0
70.1	0
70.2	0
70.3	0
70.4	0
70.5	0
70.6	0
70.7	0
70.8	0
70.9	0
71	0
71.1	0
71.2	0
71.3	0
71.4	0
71.5	0
71.6	0
71.7	0
71.8	0
71.9	0
72	0
72.1	0
72.2	0
72.3	0
72.4	0
72.5	0
72.6	0
72.7	0
72.8	0
72.9	0
73	0
73.1	0
73.2	0
73.3	0
73.4	0
73.5	0
73.6	0
73.7	0
73.8	0
73.9	0
74	0
74.1	0
74.2	0
74.3	0
74.4	0
74.5	0
74.6	0
74.7	0
74.8	0
74.9	0
75	0
75.1	0
75.2	0
75.3	0
75.4	0
75.5	0
75.6	0
75.7	0
75.8	0
75.9	0
76	0
76.1	0
76.2	0
76.3	0
76.4	0
76.5	0
76.6	0
76.7	0
76.8	0
76.9	0
77	0
77.1	0
77.2	0
77.3	0
77.4	0
77.5	0
77.6	0
77.7	0
77.8	0
77.9	0
78	0
78.1	0
78.2	0
78.3	0
78.4	0
78.5	0
78.6	0
78.7	0
78.8	0
78.9	0
79	0
79.1	0
79.2	0
79.3	0
79.4	0
79.5	0
79.6	0
79.7	0
79.8	0
79.9	0
80	0
80.1	0
80.2	0
80.3	0
80.4	0
80.5	0
80.6	0
80.7	0
80.8	0
80.9	0
81	0
81.1	0
81.2	0
81.3	0
81.4	0
81.5	0
81.6	0
81.7	0
81.8	0
81.9	0
82	0
82.1	0
82.2	0
82.3	0
82.4	0
82.5	0
82.6	0
82.7	0
82.8	0
82.9	0
83	0
83.1	0
83.2	0
83.3	0
83.4	0
83.5	0
83.6	0
83.7	0
83.8	0
83.9	0
84	0
84.1	0
84.2	0
84.3	0
84.4	0
84.5	0
84.6	0
84.7	0
84.8	0
84.9	0
85	0
85.1	0
85.2	0
85.3	0
85.4	0
85.5	0
85.6	0
85.7	0
85.8	0
85.9	0
86	0
86.1	0
86.2	0
86.3	0
86.4	0
86.5	0
86.6	0
86.7	0
86.8	0
86.9	0
87	0
87.1	0
87.2	0
87.3	0
87.4	0
87.5	0
87.6	0
87.7	0
87.8	0
87.9	0
88	0
88.1	0
88.2	0
88.3	0
88.4	0
88.5	0
88.6	0
88.7	0
88.8	0
88.9	0
89	0
89.1	0
89.2	0
89.3	0
89.4	0
89.5	0
89.6	0
89.7	0
89.8	0
89.9	0
90	0
90.1	0
90.2	0
90.3	0
90.4	0
90.5	0
90.6	0
90.7	0
90.8	0
90.9	0
91	0
91.1	0
91.2	0
91.3	0
91.4	0
91.5	0
91.6	0
91.7	0
91.8	0
91.9	0
92	0
92.1	0
92.2	0
92.3	0
92.4	0
92.5	0
92.6	0
92.7	0
92.8	0
92.9	0
93	0
93.1	0
93.2	0
93.3	0
93.4	0
93.5	0
93.6	0
93.7	0
93.8	0
93.9	0
94	0
94.1	0
94.2	0
94.3	0
94.4	0
94.5	0
94.6	0
94.7	0
94.8	0
94.9	0
95	0
95.1	0
95.2	0
95.3	0
95.4	0
95.5	0
95.6	0
95.7	0
95.8	0
95.9	0
96	0
96.1	0
96.2	0
96.3	0
96.4	0
96.5	0
96.6	0
96.7	0
96.8	0
96.9	0
97	0
97.1	0
97.2	0
97.3	0
97.4	0
97.5	0
97.6	0
97.7	0
97.8	0
97.9	0
98	0
98.1	0
98.2	0
98.3	0
98.4	0
98.5	0
98.6	0
98.7	0
98.8	0
98.9	0
99	0
99.1	0
99.2	0
99.3	0
99.4	0
99.5	0
99.6	0
99.7	0
99.8	0
99.9	0
100	0
100.1	0.89
100.2	0.96
100.3	1
100.4	0.99
100.5	0.98
100.6	0.98
100.7	1
100.8	0.99
100.9	1
101	1
101.1	0.99
101.2	0.97
101.3	0.98
101.4	0.98
101.5	1
101.6	0.98
101.7	1
101.8	0.97
101.9	1
102	0.98
102.1	1
102.2	0.99
102.3	0.99
102.4	0.99
102.5	1
102.6	1
102.7	1
102.8	0.98
102.9	0.98
103	1
103.1	1
103.2	0.99
103.3	1
103.4	0.99
103.5	0.97
103.6	0.99
103.7	0.98
103.8	0.99
103.9	0.99
104	1
104.1	0.98
104.2	1
104.3	0.99
104.4	0.98
104.5	1
104.6	1
104.7	0.99
104.8	0.99
104.9	1
105	1
105.1	1
105.2	1
105.3	1
105.4	0.99
105.5	0.99
105.6	1
105.7	1
105.8	0.99
105.9	0.99
106	0.98
106.1	0.99
106.2	0.99
106.3	0.99
106.4	0.99
106.5	0.98
106.6	0.99
106.7	1
106.8	1
106.9	0.98
107	0.99
107.1	0.99
107.2	0.99
107.3	0.99
107.4	0.98
107.5	0.97
107.6	0.98
107.7	1
107.8	0.99
107.9	0.98
108	0.97
108.1	1
108.2	0.97
108.3	0.99
108.4	1
108.5	1
108.6	1
108.7	1
108.8	1
108.9	0.99
109	0.99
109.1	1
109.2	0.98
109.3	0.98
109.4	0.97
109.5	0.98
109.6	1
109.7	1
109.8	0.99
109.9	0.98
110	1
110.1	0.99
110.2	1
110.3	0.99
110.4	0.99
110.5	1
110.6	0.99
110.7	0.99
110.8	0.99
110.9	1
111	0.98
111.1	0.99
111.2	0.99
111.3	1
111.4	0.99
111.5	0.99
111.6	1
111.7	0.99
111.8	0.99
111.9	1
112	1
112.1	0.99
112.2	1
112.3	1
112.4	1
112.5	1
112.6	0.99
112.7	0.99
112.8	1
112.9	1
113	1
113.1	1
113.2	0.99
113.3	0.99
113.4	0.97
113.5	1
113.6	1
113.7	1
113.8	1
113.9	0.99
114	1
114.1	1
114.2	0.99
114.3	1
114.4	0.99
114.5	0.97
114.6	1
114.7	1
114.8	1
114.9	1
115	1
115.1	1
115.2	1
115.3	1
115.4	1
115.5	0.99
115.6	0.99
115.7	1
115.8	1
115.9	1
116	1
116.1	0.99
116.2	0.99
116.3	1
116.4	1
116.5	1
116.6	0.98
116.7	0.98
116.8	0.98
116.9	0.98
117	1
117.1	0.98
117.2	0.99
117.3	1
117.4	1
117.5	1
117.6	1
117.7	1
117.8	1
117.9	0.98
118	0.99
118.1	0.98
118.2	0.99
118.3	0.99
118.4	0.99
118.5	0.99
118.6	0.99
118.7	1
118.8	1
118.9	0.99
119	1
119.1	1
119.2	1
119.3	0.99
119.4	0.99
119.5	1
119.6	0.99
119.7	0.99
119.8	1
119.9	0.99
120	1
120.1	1
120.2	1
120.3	1
120.4	0.99
120.5	0.99
120.6	1
120.7	1
120.8	0.99
120.9	1
121	1
121.1	0.99
121.2	0.99
121.3	1
121.4	1
121.5	1
121.6	0.99
121.7	1
121.8	0.98
121.9	1
122	1
122.1	1
122.2	0.99
122.3	1
122.4	0.99
122.5	1
122.6	1
122.7	1
122.8	1
122.9	1
123	0.99
123.1	1
123.2	1
123.3	0.99
123.4	0.99
123.5	1
123.6	1
123.7	1
123.8	1
123.9	1
124	1
124.1	0.99
124.2	1
124.3	1
124.4	1
124.5	1
124.6	0.99
124.7	1
124.8	1
124.9	1
125	1
125.1	1
125.2	0.99
125.3	1
125.4	1
125.5	1
125.6	1
125.7	1
125.8	1
125.9	0.99
126	0.99
126.1	1
126.2	1
126.3	1
126.4	1
126.5	1
126.6	0.99
126.7	1
126.8	0.98
126.9	0.99
127	1
127.1	1
127.2	1
127.3	0.99
127.4	1
127.5	0.99
127.6	1
127.7	1
127.8	0.99
127.9	0.99
128	0.99
128.1	1
128.2	1
128.3	0.99
128.4	0.99
128.5	1
128.6	1
128.7	1
128.8	1
128.9	1
129	1
129.1	1
129.2	1
129.3	1
129.4	1
129.5	1
129.6	0.99
129.7	0.98
129.8	0.99
129.9	0.99
130	1
130.1	1
130.2	1
130.3	1
130.4	0.99
130.5	0.99
130.6	1
130.7	1
130.8	1
130.9	1
131	0.99
131.1	0.99
131.2	1
131.3	0.99
131.4	1
131.5	1
131.6	1
131.7	1
131.8	1
131.9	1
132	1
132.1	1
132.2	0.99
132.3	1
132.4	1
132.5	1
132.6	1
132.7	1
132.8	1
132.9	0.98
133	0.99
133.1	1
133.2	1
133.3	1
133.4	1
133.5	1
133.6	1
133.7	1
133.8	1
133.9	1
134	1
134.1	1
134.2	1
134.3	0.99
134.4	0.99
134.5	1
134.6	0.99
134.7	1
134.8	1
134.9	1
135	1
135.1	0.99
135.2	1
135.3	1
135.4	0.99
135.5	1
135.6	1
135.7	1
135.8	1
135.9	1
136	1
136.1	1
136.2	1
136.3	1
136.4	1
136.5	0.99
136.6	1
136.7	1
136.8	1
136.9	1
137	1
137.1	1
137.2	0.99
137.3	1
137.4	1
137.5	0.99
137.6	1
137.7	1
137.8	0.99
137.9	1
138	1
138.1	1
138.2	1
138.3	1
138.4	1
138.5	1
138.6	1
138.7	1
138.8	1
138.9	0.99
139	0.99
139.1	1
139.2	1
139.3	1
139.4	1
139.5	1
139.6	0.99
139.7	0.99
139.8	1
139.9	1
140	1
140.1	1
140.2	1
140.3	0.99
140.4	1
140.5	1
140.6	1
140.7	1
140.8	1
140.9	1
141	1
141.1	1
141.2	0.99
141.3	0.99
141.4	1
141.5	1
141.6	1
141.7	1
141.8	1
141.9	0.99
142	1
142.1	1
142.2	1
142.3	0.99
142.4	1
142.5	1
142.6	0.99
142.7	1
142.8	1
142.9	1
143	0.99
143.1	1
143.2	0.99
143.3	1
143.4	1
143.5	1
143.6	1
143.7	1
143.8	0.99
143.9	0.99
144	1
144.1	1
144.2	1
144.3	1
144.4	1
144.5	1
144.6	1
144.7	1
144.8	1
144.9	1
145	1
145.1	1
145.2	1
145.3	1
145.4	1
145.5	1
145.6	1
145.7	1
145.8	1
145.9	0.99
146	0.99
146.1	0.99
146.2	1
146.3	1
146.4	1
146.5	1
146.6	0.99
146.7	1
146.8	1
146.9	1
147	1
147.1	1
147.2	1
147.3	1
147.4	1
147.5	0.99
147.6	0.98
147.7	1
147.8	1
147.9	0.98
148	0.99
148.1	1
148.2	1
148.3	1
148.4	1
148.5	1
148.6	1
148.7	0.99
148.8	1
148.9	0.99
149	1
149.1	1
149.2	1
149.3	0.99
149.4	0.99
149.5	0.99
149.6	0.99
149.7	0.99
149.8	1
149.9	1
150	1
150.1	1
150.2	0.99
150.3	1
150.4	1
150.5	1
150.6	1
150.7	1
150.8	1
150.9	1
151	0.99
151.1	1
151.2	0.99
151.3	1
151.4	1
151.5	1
151.6	0.99
151.7	1
151.8	0.99
151.9	0.99
152	1
152.1	1
152.2	0.99
152.3	0.99
152.4	0.99
152.5	0.99
152.6	0.99
152.7	1
152.8	1
152.9	1
153	1
153.1	1
153.2	1
153.3	1
153.4	1
153.5	0.99
153.6	0.99
153.7	0.98
153.8	1
153.9	1
154	1
154.1	1
154.2	1
154.3	1
154.4	1
154.5	1
154.6	1
154.7	1
154.8	0.99
154.9	0.99
155	1
155.1	1
155.2	1
155.3	0.98
155.4	0.99
155.5	0.99
155.6	1
155.7	1
155.8	1
155.9	1
156	1
156.1	0.99
156.2	1
156.3	0.99
156.4	1
156.5	1
156.6	0.99
156.7	1
156.8	1
156.9	1
157	1
157.1	1
157.2	1
157.3	1
157.4	1
157.5	1
157.6	1
157.7	0.98
157.8	1
157.9	1
158	1
158.1	1
158.2	1
158.3	1
158.4	0.98
158.5	1
158.6	1
158.7	0.99
158.8	0.99
158.9	1
159	1
159.1	1
159.2	1
159.3	1
159.4	0.99
159.5	1
159.6	0.99
159.7	1
159.8	1
159.9	1
160	1
160.1	0.99
160.2	1
160.3	1
160.4	1
160.5	0.99
160.6	1
160.7	1
160.8	1
160.9	1
161	1
161.1	1
161.2	1
161.3	1
161.4	1
161.5	1
161.6	1
161.7	0.98
161.8	0.99
161.9	1
162	1
162.1	0.99
162.2	1
162.3	1
162.4	1
162.5	1
162.6	0.99
162.7	1
162.8	1
162.9	0.99
163	0.98
163.1	1
163.2	1
163.3	1
163.4	0.99
163.5	1
163.6	0.99
163.7	1
163.8	1
163.9	1
164	1
164.1	1
164.2	1
164.3	1
164.4	1
164.5	0.99
164.6	1
164.7	0.99
164.8	0.99
164.9	0.99
165	1
165.1	1
165.2	1
165.3	1
165.4	0.99
165.5	1
165.6	1
165.7	1
165.8	1
165.9	1
166	1
166.1	1
166.2	1
166.3	1
166.4	1
166.5	1
166.6	1
166.7	0.99
166.8	0.98
166.9	0.99
167	0.99
167.1	1
167.2	1
167.3	1
167.4	1
167.5	1
167.6	1
167.7	1
167.8	1
167.9	1
168	1
168.1	0.99
168.2	0.99
168.3	1
168.4	0.99
168.5	1
168.6	1
168.7	1
168.8	1
168.9	1
169	1
169.1	1
169.2	1
169.3	1
169.4	1
169.5	1
169.6	1
169.7	0.99
169.8	0.99
169.9	0.99
170	0.99
170.1	1
170.2	1
170.3	0.99
170.4	1
170.5	1
170.6	1
170.7	1
170.8	1
170.9	1
171	1
171.1	1
171.2	1
171.3	1
171.4	1
171.5	0.99
171.6	1
171.7	1
171.8	1
171.9	1
172	1
172.1	1
172.2	0.99
172.3	0.99
172.4	1
172.5	0.99
172.6	1
172.7	0.99
172.8	1
172.9	1
173	0.99
173.1	1
173.2	1
173.3	1
173.4	1
173.5	1
173.6	1
173.7	1
173.8	1
173.9	1
174	1
174.1	1
174.2	1
174.3	1
174.4	1
174.5	1
174.6	0.99
174.7	0.99
174.8	0.99
174.9	1
175	0.99
175.1	1
175.2	1
175.3	0.99
175.4	1
175.5	0.99
175.6	0.99
175.7	1
175.8	1
175.9	1
176	1
176.1	1
176.2	0.98
176.3	1
176.4	1
176.5	0.99
176.6	1
176.7	1
176.8	1
176.9	1
177	1
177.1	1
177.2	0.99
177.3	0.99
177.4	1
177.5	1
177.6	0.99
177.7	1
177.8	0.99
177.9	1
178	1
178.1	1
178.2	0.99
178.3	1
178.4	1
178.5	1
178.6	1
178.7	1
178.8	1
178.9	0.97
179	0.99
179.1	1
179.2	1
179.3	1
179.4	1
179.5	0.99
179.6	1
179.7	1
179.8	1
179.9	1
180	0.99
180.1	1
180.2	1
180.3	1
180.4	1
180.5	1
180.6	1
180.7	1
180.8	1
180.9	1
181	1
181.1	1
181.2	1
181.3	1
181.4	0.99
181.5	1
181.6	1
181.7	1
181.8	1
181.9	1
182	1
182.1	1
182.2	1
182.3	1
182.4	1
182.5	0.99
182.6	0.99
182.7	1
182.8	0.99
182.9	1
183	1
183.1	0.99
183.2	1
183.3	1
183.4	1
183.5	1
183.6	1
183.7	1
183.8	0.98
183.9	0.99
184	1
184.1	1
184.2	1
184.3	1
184.4	0.97
184.5	0.99
184.6	1
184.7	0.99
184.8	0.99
184.9	1
185	1
185.1	1
185.2	1
185.3	1
185.4	1
185.5	1
185.6	0.99
185.7	1
185.8	1
185.9	1
186	1
186.1	1
186.2	1
186.3	1
186.4	1
186.5	1
186.6	0.99
186.7	1
186.8	1
186.9	1
187	1
187.1	1
187.2	1
187.3	1
187.4	0.99
187.5	0.99
187.6	1
187.7	1
187.8	1
187.9	0.99
188	1
188.1	1
188.2	1
188.3	1
188.4	1
188.5	1
188.6	1
188.7	1
188.8	1
188.9	1
189	1
189.1	1
189.2	1
189.3	1
189.4	1
189.5	1
189.6	1
189.7	1
189.8	1
189.9	1
190	0.99
190.1	1
190.2	1
190.3	1
190.4	1
190.5	1
190.6	1
190.7	1
190.8	0.99
190.9	1
191	1
191.1	1
191.2	1
191.3	1
191.4	1
191.5	1
191.6	1
191.7	1
191.8	1
191.9	1
192	1
192.1	1
192.2	1
192.3	0.99
192.4	0.99
192.5	1
192.6	1
192.7	1
192.8	1
192.9	1
193	1
193.1	1
193.2	0.99
193.3	1
193.4	1
193.5	0.99
193.6	0.99
193.7	1
193.8	0.99
193.9	1
194	1
194.1	1
194.2	1
194.3	1
194.4	1
194.5	1
194.6	1
194.7	0.99
194.8	0.99
194.9	0.99
195	1
195.1	1
195.2	0.99
195.3	1
195.4	1
195.5	1
195.6	1
195.7	1
195.8	1
195.9	0.99
196	1
196.1	1
196.2	0.99
196.3	0.98
196.4	1
196.5	1
196.6	1
196.7	1
196.8	1
196.9	1
197	1
197.1	0.99
197.2	0.99
197.3	1
197.4	0.99
197.5	1
197.6	1
197.7	1
197.8	1
197.9	1
198	1
198.1	1
198.2	1
198.3	1
198.4	1
198.5	0.99
198.6	1
198.7	1
198.8	1
198.9	1
199	1
199.1	1
199.2	1
199.3	1
199.4	1
199.5	1
199.6	1
199.7	1
199.8	1
199.9	1
200	0.99
[truncated: 14,000 more rows]
