# Supplementary material for: Bayesian inference of kinetic schemes for ion channels by Kalman filtering
Source: eLife journal article supplement (doi:10.7554/elife.62714), 2022-05-04
Supplement: fig4-data2 [file 1_Sim_N_80_Fluor_MW.xlsx]

## Sheet: 64 M
0.1	0
0.2	0
0.3	0
0.4	0
0.5	0
0.6	0
0.7	0
0.8	0
0.9	0
1	0
1.1	0
1.2	0
1.3	0
1.4	0
1.5	0
1.6	0
1.7	0
1.8	0
1.9	0
2	0
2.1	0
2.2	0
2.3	0
2.4	0
2.5	0
2.6	0
2.7	0
2.8	0
2.9	0
3	0
3.1	0
3.2	0
3.3	0
3.4	0
3.5	0
3.6	0
3.7	0
3.8	0
3.9	0
4	0
4.1	0
4.2	0
4.3	0
4.4	0
4.5	0
4.6	0
4.7	0
4.8	0
4.9	0
5	0
5.1	0
5.2	0
5.3	0
5.4	0
5.5	0
5.6	0
5.7	0
5.8	0
5.9	0
6	0
6.1	0
6.2	0
6.3	0
6.4	0
6.5	0
6.6	0
6.7	0
6.8	0
6.9	0
7	0
7.1	0
7.2	0
7.3	0
7.4	0
7.5	0
7.6	0
7.7	0
7.8	0
7.9	0
8	0
8.1	0
8.2	0
8.3	0
8.4	0
8.5	0
8.6	0
8.7	0
8.8	0
8.9	0
9	0
9.1	0
9.2	0
9.3	0
9.4	0
9.5	0
9.6	0
9.7	0
9.8	0
9.9	0
10	0
10.1	0
10.2	0
10.3	0
10.4	0
10.5	0
10.6	0
10.7	0
10.8	0
10.9	0
11	0
11.1	0
11.2	0
11.3	0
11.4	0
11.5	0
11.6	0
11.7	0
11.8	0
11.9	0
12	0
12.1	0
12.2	0
12.3	0
12.4	0
12.5	0
12.6	0
12.7	0
12.8	0
12.9	0
13	0
13.1	0
13.2	0
13.3	0
13.4	0
13.5	0
13.6	0
13.7	0
13.8	0
13.9	0
14	0
14.1	0
14.2	0
14.3	0
14.4	0
14.5	0
14.6	0
14.7	0
14.8	0
14.9	0
15	0
15.1	0
15.2	0
15.3	0
15.4	0
15.5	0
15.6	0
15.7	0
15.8	0
15.9	0
16	0
16.1	0
16.2	0
16.3	0
16.4	0
16.5	0
16.6	0
16.7	0
16.8	0
16.9	0
17	0
17.1	0
17.2	0
17.3	0
17.4	0
17.5	0
17.6	0
17.7	0
17.8	0
17.9	0
18	0
18.1	0
18.2	0
18.3	0
18.4	0
18.5	0
18.6	0
18.7	0
18.8	0
18.9	0
19	0
19.1	0
19.2	0
19.3	0
19.4	0
19.5	0
19.6	0
19.7	0
19.8	0
19.9	0
20	0
20.1	0
20.2	0
20.3	0
20.4	0
20.5	0
20.6	0
20.7	0
20.8	0
20.9	0
21	0
21.1	0
21.2	0
21.3	0
21.4	0
21.5	0
21.6	0
21.7	0
21.8	0
21.9	0
22	0
22.1	0
22.2	0
22.3	0
22.4	0
22.5	0
22.6	0
22.7	0
22.8	0
22.9	0
23	0
23.1	0
23.2	0
23.3	0
23.4	0
23.5	0
23.6	0
23.7	0
23.8	0
23.9	0
24	0
24.1	0
24.2	0
24.3	0
24.4	0
24.5	0
24.6	0
24.7	0
24.8	0
24.9	0
25	0
25.1	0
25.2	0
25.3	0
25.4	0
25.5	0
25.6	0
25.7	0
25.8	0
25.9	0
26	0
26.1	0
26.2	0
26.3	0
26.4	0
26.5	0
26.6	0
26.7	0
26.8	0
26.9	0
27	0
27.1	0
27.2	0
27.3	0
27.4	0
27.5	0
27.6	0
27.7	0
27.8	0
27.9	0
28	0
28.1	0
28.2	0
28.3	0
28.4	0
28.5	0
28.6	0
28.7	0
28.8	0
28.9	0
29	0
29.1	0
29.2	0
29.3	0
29.4	0
29.5	0
29.6	0
29.7	0
29.8	0
29.9	0
30	0
30.1	0
30.2	0
30.3	0
30.4	0
30.5	0
30.6	0
30.7	0
30.8	0
30.9	0
31	0
31.1	0
31.2	0
31.3	0
31.4	0
31.5	0
31.6	0
31.7	0
31.8	0
31.9	0
32	0
32.1	0
32.2	0
32.3	0
32.4	0
32.5	0
32.6	0
32.7	0
32.8	0
32.9	0
33	0
33.1	0
33.2	0
33.3	0
33.4	0
33.5	0
33.6	0
33.7	0
33.8	0
33.9	0
34	0
34.1	0
34.2	0
34.3	0
34.4	0
34.5	0
34.6	0
34.7	0
34.8	0
34.9	0
35	0
35.1	0
35.2	0
35.3	0
35.4	0
35.5	0
35.6	0
35.7	0
35.8	0
35.9	0
36	0
36.1	0
36.2	0
36.3	0
36.4	0
36.5	0
36.6	0
36.7	0
36.8	0
36.9	0
37	0
37.1	0
37.2	0
37.3	0
37.4	0
37.5	0
37.6	0
37.7	0
37.8	0
37.9	0
38	0
38.1	0
38.2	0
38.3	0
38.4	0
38.5	0
38.6	0
38.7	0
38.8	0
38.9	0
39	0
39.1	0
39.2	0
39.3	0
39.4	0
39.5	0
39.6	0
39.7	0
39.8	0
39.9	0
40	0
40.1	0
40.2	0
40.3	0
40.4	0
40.5	0
40.6	0
40.7	0
40.8	0
40.9	0
41	0
41.1	0
41.2	0
41.3	0
41.4	0
41.5	0
41.6	0
41.7	0
41.8	0
41.9	0
42	0
42.1	0
42.2	0
42.3	0
42.4	0
42.5	0
42.6	0
42.7	0
42.8	0
42.9	0
43	0
43.1	0
43.2	0
43.3	0
43.4	0
43.5	0
43.6	0
43.7	0
43.8	0
43.9	0
44	0
44.1	0
44.2	0
44.3	0
44.4	0
44.5	0
44.6	0
44.7	0
44.8	0
44.9	0
45	0
45.1	0
45.2	0
45.3	0
45.4	0
45.5	0
45.6	0
45.7	0
45.8	0
45.9	0
46	0
46.1	0
46.2	0
46.3	0
46.4	0
46.5	0
46.6	0
46.7	0
46.8	0
46.9	0
47	0
47.1	0
47.2	0
47.3	0
47.4	0
47.5	0
47.6	0
47.7	0
47.8	0
47.9	0
48	0
48.1	0
48.2	0
48.3	0
48.4	0
48.5	0
48.6	0
48.7	0
48.8	0
48.9	0
49	0
49.1	0
49.2	0
49.3	0
49.4	0
49.5	0
49.6	0
49.7	0
49.8	0
49.9	0
50	0
50.1	0
50.2	0
50.3	0
50.4	0
50.5	0
50.6	0
50.7	0
50.8	0
50.9	0
51	0
51.1	0
51.2	0
51.3	0
51.4	0
51.5	0
51.6	0
51.7	0
51.8	0
51.9	0
52	0
52.1	0
52.2	0
52.3	0
52.4	0
52.5	0
52.6	0
52.7	0
52.8	0
52.9	0
53	0
53.1	0
53.2	0
53.3	0
53.4	0
53.5	0
53.6	0
53.7	0
53.8	0
53.9	0
54	0
54.1	0
54.2	0
54.3	0
54.4	0
54.5	0
54.6	0
54.7	0
54.8	0
54.9	0
55	0
55.1	0
55.2	0
55.3	0
55.4	0
55.5	0
55.6	0
55.7	0
55.8	0
55.9	0
56	0
56.1	0
56.2	0
56.3	0
56.4	0
56.5	0
56.6	0
56.7	0
56.8	0
56.9	0
57	0
57.1	0
57.2	0
57.3	0
57.4	0
57.5	0
57.6	0
57.7	0
57.8	0
57.9	0
58	0
58.1	0
58.2	0
58.3	0
58.4	0
58.5	0
58.6	0
58.7	0
58.8	0
58.9	0
59	0
59.1	0
59.2	0
59.3	0
59.4	0
59.5	0
59.6	0
59.7	0
59.8	0
59.9	0
60	0
60.1	0
60.2	0
60.3	0
60.4	0
60.5	0
60.6	0
60.7	0
60.8	0
60.9	0
61	0
61.1	0
61.2	0
61.3	0
61.4	0
61.5	0
61.6	0
61.7	0
61.8	0
61.9	0
62	0
62.1	0
62.2	0
62.3	0
62.4	0
62.5	0
62.6	0
62.7	0
62.8	0
62.9	0
63	0
63.1	0
63.2	0
63.3	0
63.4	0
63.5	0
63.6	0
63.7	0
63.8	0
63.9	0
64	0
64.1	0
64.2	0
64.3	0
64.4	0
64.5	0
64.6	0
64.7	0
64.8	0
64.9	0
65	0
65.1	0
65.2	0
65.3	0
65.4	0
65.5	0
65.6	0
65.7	0
65.8	0
65.9	0
66	0
66.1	0
66.2	0
66.3	0
66.4	0
66.5	0
66.6	0
66.7	0
66.8	0
66.9	0
67	0
67.1	0
67.2	0
67.3	0
67.4	0
67.5	0
67.6	0
67.7	0
67.8	0
67.9	0
68	0
68.1	0
68.2	0
68.3	0
68.4	0
68.5	0
68.6	0
68.7	0
68.8	0
68.9	0
69	0
69.1	0
69.2	0
69.3	0
69.4	0
69.5	0
69.6	0
69.7	0
69.8	0
69.9	0
70	0
70.1	0
70.2	0
70.3	0
70.4	0
70.5	0
70.6	0
70.7	0
70.8	0
70.9	0
71	0
71.1	0
71.2	0
71.3	0
71.4	0
71.5	0
71.6	0
71.7	0
71.8	0
71.9	0
72	0
72.1	0
72.2	0
72.3	0
72.4	0
72.5	0
72.6	0
72.7	0
72.8	0
72.9	0
73	0
73.1	0
73.2	0
73.3	0
73.4	0
73.5	0
73.6	0
73.7	0
73.8	0
73.9	0
74	0
74.1	0
74.2	0
74.3	0
74.4	0
74.5	0
74.6	0
74.7	0
74.8	0
74.9	0
75	0
75.1	0
75.2	0
75.3	0
75.4	0
75.5	0
75.6	0
75.7	0
75.8	0
75.9	0
76	0
76.1	0
76.2	0
76.3	0
76.4	0
76.5	0
76.6	0
76.7	0
76.8	0
76.9	0
77	0
77.1	0
77.2	0
77.3	0
77.4	0
77.5	0
77.6	0
77.7	0
77.8	0
77.9	0
78	0
78.1	0
78.2	0
78.3	0
78.4	0
78.5	0
78.6	0
78.7	0
78.8	0
78.9	0
79	0
79.1	0
79.2	0
79.3	0
79.4	0
79.5	0
79.6	0
79.7	0
79.8	0
79.9	0
80	0
80.1	0
80.2	0
80.3	0
80.4	0
80.5	0
80.6	0
80.7	0
80.8	0
80.9	0
81	0
81.1	0
81.2	0
81.3	0
81.4	0
81.5	0
81.6	0
81.7	0
81.8	0
81.9	0
82	0
82.1	0
82.2	0
82.3	0
82.4	0
82.5	0
82.6	0
82.7	0
82.8	0
82.9	0
83	0
83.1	0
83.2	0
83.3	0
83.4	0
83.5	0
83.6	0
83.7	0
83.8	0
83.9	0
84	0
84.1	0
84.2	0
84.3	0
84.4	0
84.5	0
84.6	0
84.7	0
84.8	0
84.9	0
85	0
85.1	0
85.2	0
85.3	0
85.4	0
85.5	0
85.6	0
85.7	0
85.8	0
85.9	0
86	0
86.1	0
86.2	0
86.3	0
86.4	0
86.5	0
86.6	0
86.7	0
86.8	0
86.9	0
87	0
87.1	0
87.2	0
87.3	0
87.4	0
87.5	0
87.6	0
87.7	0
87.8	0
87.9	0
88	0
88.1	0
88.2	0
88.3	0
88.4	0
88.5	0
88.6	0
88.7	0
88.8	0
88.9	0
89	0
89.1	0
89.2	0
89.3	0
89.4	0
89.5	0
89.6	0
89.7	0
89.8	0
89.9	0
90	0
90.1	0
90.2	0
90.3	0
90.4	0
90.5	0
90.6	0
90.7	0
90.8	0
90.9	0
91	0
91.1	0
91.2	0
91.3	0
91.4	0
91.5	0
91.6	0
91.7	0
91.8	0
91.9	0
92	0
92.1	0
92.2	0
92.3	0
92.4	0
92.5	0
92.6	0
92.7	0
92.8	0
92.9	0
93	0
93.1	0
93.2	0
93.3	0
93.4	0
93.5	0
93.6	0
93.7	0
93.8	0
93.9	0
94	0
94.1	0
94.2	0
94.3	0
94.4	0
94.5	0
94.6	0
94.7	0
94.8	0
94.9	0
95	0
95.1	0
95.2	0
95.3	0
95.4	0
95.5	0
95.6	0
95.7	0
95.8	0
95.9	0
96	0
96.1	0
96.2	0
96.3	0
96.4	0
96.5	0
96.6	0
96.7	0
96.8	0
96.9	0
97	0
97.1	0
97.2	0
97.3	0
97.4	0
97.5	0
97.6	0
97.7	0
97.8	0
97.9	0
98	0
98.1	0
98.2	0
98.3	0
98.4	0
98.5	0
98.6	0
98.7	0
98.8	0
98.9	0
99	0
99.1	0
99.2	0
99.3	0
99.4	0
99.5	0
99.6	0
99.7	0
99.8	0
99.9	0
100	0
100.1	0.9
100.2	0.975
100.3	1
100.4	0.99375
100.5	1
100.6	0.99375
100.7	1
100.8	0.99375
100.9	1
101	0.98125
101.1	0.975
101.2	1
101.3	0.9875
101.4	0.98125
101.5	0.98125
101.6	0.9875
101.7	0.99375
101.8	0.99375
101.9	0.98125
102	0.96875
102.1	0.975
102.2	0.99375
102.3	0.99375
102.4	0.99375
102.5	0.98125
102.6	0.975
102.7	0.98125
102.8	0.99375
102.9	0.975
103	0.99375
103.1	1
103.2	0.96875
103.3	0.99375
103.4	1
103.5	1
103.6	0.9875
103.7	0.9875
103.8	0.975
103.9	0.99375
104	0.99375
104.1	0.99375
104.2	0.99375
104.3	1
104.4	0.975
104.5	0.99375
104.6	0.9875
104.7	0.98125
104.8	0.9875
104.9	1
105	0.9875
105.1	0.99375
105.2	0.9875
105.3	1
105.4	0.98125
105.5	0.98125
105.6	1
105.7	0.99375
105.8	0.96875
105.9	0.98125
106	0.99375
106.1	0.9875
106.2	0.99375
106.3	1
106.4	0.9875
106.5	1
106.6	0.9875
106.7	0.9875
106.8	0.99375
106.9	0.975
107	0.99375
107.1	0.9875
107.2	0.975
107.3	0.99375
107.4	0.99375
107.5	0.9875
107.6	1
107.7	1
107.8	0.99375
107.9	0.99375
108	0.99375
108.1	0.9875
108.2	0.99375
108.3	1
108.4	0.9875
108.5	1
108.6	0.98125
108.7	0.98125
108.8	0.9875
108.9	0.9875
109	0.9875
109.1	0.99375
109.2	0.98125
109.3	0.9875
109.4	0.9875
109.5	0.99375
109.6	1
109.7	0.99375
109.8	1
109.9	0.9875
110	0.98125
110.1	1
110.2	0.98125
110.3	0.99375
110.4	0.99375
110.5	0.98125
110.6	0.9875
110.7	0.9875
110.8	0.975
110.9	0.9875
111	0.99375
111.1	0.9875
111.2	0.975
111.3	0.98125
111.4	0.9875
111.5	0.99375
111.6	0.99375
111.7	0.99375
111.8	0.98125
111.9	0.99375
112	0.99375
112.1	0.98125
112.2	0.9875
112.3	0.9875
112.4	0.9875
112.5	0.9875
112.6	0.99375
112.7	1
112.8	0.99375
112.9	1
113	0.99375
113.1	1
113.2	1
113.3	0.9875
113.4	0.99375
113.5	0.99375
113.6	0.98125
113.7	0.98125
113.8	0.98125
113.9	0.98125
114	0.99375
114.1	0.99375
114.2	0.98125
114.3	0.99375
114.4	0.9875
114.5	0.9875
114.6	0.99375
114.7	1
114.8	1
114.9	0.9875
115	1
115.1	0.98125
115.2	0.99375
115.3	0.9875
115.4	0.99375
115.5	0.99375
115.6	1
115.7	0.9875
115.8	1
115.9	0.99375
116	0.99375
116.1	0.9875
116.2	0.9875
116.3	0.99375
116.4	1
116.5	0.9875
116.6	1
116.7	0.99375
116.8	0.99375
116.9	1
117	1
117.1	0.99375
117.2	0.98125
117.3	0.99375
117.4	0.99375
117.5	0.99375
117.6	0.99375
117.7	1
117.8	1
117.9	0.99375
118	1
118.1	1
118.2	0.99375
118.3	0.975
118.4	0.9875
118.5	0.99375
118.6	0.975
118.7	0.99375
118.8	0.99375
118.9	1
119	1
119.1	1
119.2	1
119.3	0.975
119.4	0.99375
119.5	0.99375
119.6	0.975
119.7	0.9875
119.8	0.9875
119.9	0.9875
120	0.9875
120.1	0.99375
120.2	0.98125
120.3	0.98125
120.4	0.98125
120.5	0.99375
120.6	0.99375
120.7	0.99375
120.8	0.99375
120.9	0.9875
121	0.9875
121.1	0.99375
121.2	1
121.3	0.9875
121.4	0.98125
121.5	0.975
121.6	1
121.7	0.98125
121.8	0.99375
121.9	1
122	0.9875
122.1	0.99375
122.2	1
122.3	0.9875
122.4	0.9875
122.5	0.9875
122.6	1
122.7	1
122.8	0.99375
122.9	0.99375
123	0.99375
123.1	0.99375
123.2	1
123.3	0.9875
123.4	1
123.5	0.99375
123.6	0.99375
123.7	0.99375
123.8	0.99375
123.9	1
124	0.99375
124.1	1
124.2	1
124.3	0.99375
124.4	0.99375
124.5	1
124.6	0.99375
124.7	1
124.8	0.99375
124.9	0.98125
125	0.9875
125.1	0.99375
125.2	0.9875
125.3	1
125.4	0.99375
125.5	1
125.6	0.9875
125.7	0.99375
125.8	0.99375
125.9	1
126	0.9875
126.1	1
126.2	0.99375
126.3	0.9875
126.4	0.9875
126.5	0.9875
126.6	0.9875
126.7	0.99375
126.8	0.99375
126.9	0.9875
127	1
127.1	1
127.2	0.99375
127.3	1
127.4	0.99375
127.5	1
127.6	1
127.7	0.99375
127.8	1
127.9	0.99375
128	0.99375
128.1	1
128.2	1
128.3	0.99375
128.4	0.99375
128.5	1
128.6	1
128.7	0.98125
128.8	0.99375
128.9	1
129	1
129.1	1
129.2	0.99375
129.3	1
129.4	0.9875
129.5	1
129.6	1
129.7	1
129.8	0.99375
129.9	0.99375
130	0.99375
130.1	1
130.2	0.99375
130.3	1
130.4	1
130.5	0.99375
130.6	1
130.7	1
130.8	1
130.9	0.99375
131	1
131.1	1
131.2	1
131.3	1
131.4	1
131.5	1
131.6	1
131.7	0.99375
131.8	1
131.9	1
132	1
132.1	1
132.2	0.99375
132.3	1
132.4	1
132.5	0.9875
132.6	1
132.7	0.99375
132.8	0.99375
132.9	0.99375
133	1
133.1	1
133.2	0.99375
133.3	0.99375
133.4	0.9875
133.5	1
133.6	0.9875
133.7	1
133.8	1
133.9	1
134	1
134.1	0.9875
134.2	0.9875
134.3	0.99375
134.4	1
134.5	1
134.6	1
134.7	0.9875
134.8	1
134.9	1
135	1
135.1	1
135.2	1
135.3	0.99375
135.4	0.99375
135.5	0.99375
135.6	1
135.7	1
135.8	0.99375
135.9	0.99375
136	1
136.1	0.99375
136.2	0.99375
136.3	1
136.4	1
136.5	0.99375
136.6	1
136.7	1
136.8	1
136.9	0.99375
137	0.99375
137.1	1
137.2	1
137.3	1
137.4	1
137.5	0.9875
137.6	1
137.7	1
137.8	0.99375
137.9	1
138	1
138.1	1
138.2	1
138.3	1
138.4	1
138.5	0.99375
138.6	0.9875
138.7	0.99375
138.8	0.99375
138.9	0.99375
139	0.99375
139.1	0.99375
139.2	1
139.3	1
139.4	0.99375
139.5	1
139.6	0.99375
139.7	1
139.8	0.99375
139.9	1
140	1
140.1	1
140.2	0.9875
140.3	1
140.4	1
140.5	1
140.6	1
140.7	1
140.8	0.99375
140.9	0.99375
141	0.99375
141.1	0.99375
141.2	1
141.3	1
141.4	1
141.5	0.99375
141.6	1
141.7	1
141.8	1
141.9	1
142	1
142.1	1
142.2	1
142.3	0.99375
142.4	1
142.5	1
142.6	1
142.7	1
142.8	0.99375
142.9	0.9875
143	1
143.1	1
143.2	1
143.3	0.99375
143.4	1
143.5	1
143.6	1
143.7	1
143.8	0.99375
143.9	1
144	1
144.1	1
144.2	1
144.3	1
144.4	1
144.5	0.99375
144.6	1
144.7	1
144.8	1
144.9	0.99375
145	1
145.1	0.99375
145.2	1
145.3	1
145.4	0.99375
145.5	1
145.6	1
145.7	0.99375
145.8	1
145.9	0.99375
146	1
146.1	0.99375
146.2	0.99375
146.3	0.99375
146.4	1
146.5	1
146.6	1
146.7	0.99375
146.8	1
146.9	0.99375
147	1
147.1	1
147.2	1
147.3	0.99375
147.4	1
147.5	1
147.6	1
147.7	1
147.8	0.99375
147.9	0.99375
148	1
148.1	1
148.2	1
148.3	1
148.4	0.99375
148.5	0.99375
148.6	1
148.7	0.99375
148.8	1
148.9	1
149	1
149.1	0.99375
149.2	0.99375
149.3	0.99375
149.4	0.99375
149.5	0.99375
149.6	0.99375
149.7	1
149.8	0.99375
149.9	1
150	1
150.1	1
150.2	1
150.3	0.99375
150.4	1
150.5	0.99375
150.6	0.99375
150.7	0.9875
150.8	1
150.9	1
151	1
151.1	1
151.2	1
151.3	1
151.4	1
151.5	0.99375
151.6	1
151.7	0.99375
151.8	1
151.9	1
152	0.99375
152.1	1
152.2	0.99375
152.3	1
152.4	0.99375
152.5	1
152.6	0.99375
152.7	1
152.8	0.99375
152.9	1
153	0.99375
153.1	0.9875
153.2	0.9875
153.3	0.99375
153.4	1
153.5	1
153.6	0.99375
153.7	0.99375
153.8	1
153.9	0.98125
154	0.9875
154.1	0.9875
154.2	1
154.3	0.9875
154.4	1
154.5	1
154.6	0.99375
154.7	1
154.8	1
154.9	0.98125
155	1
155.1	1
155.2	1
155.3	0.99375
155.4	1
155.5	1
155.6	1
155.7	1
155.8	0.99375
155.9	1
156	1
156.1	1
156.2	1
156.3	1
156.4	1
156.5	1
156.6	0.99375
156.7	1
156.8	1
156.9	1
157	1
157.1	0.9875
157.2	0.99375
157.3	0.99375
157.4	1
157.5	1
157.6	1
157.7	1
157.8	0.9875
157.9	0.99375
158	1
158.1	1
158.2	1
158.3	1
158.4	1
158.5	0.99375
158.6	1
158.7	0.99375
158.8	0.99375
158.9	1
159	1
159.1	1
159.2	1
159.3	1
159.4	1
159.5	0.99375
159.6	1
159.7	1
159.8	1
159.9	1
160	1
160.1	1
160.2	1
160.3	1
160.4	0.99375
160.5	1
160.6	1
160.7	1
160.8	0.99375
160.9	1
161	1
161.1	1
161.2	1
161.3	0.99375
161.4	1
161.5	1
161.6	1
161.7	0.99375
161.8	0.99375
161.9	1
162	0.99375
162.1	1
162.2	0.99375
162.3	0.9875
162.4	0.99375
162.5	1
162.6	0.99375
162.7	0.9875
162.8	1
162.9	0.99375
163	1
163.1	1
163.2	1
163.3	1
163.4	1
163.5	1
163.6	1
163.7	1
163.8	0.99375
163.9	0.99375
164	0.99375
164.1	0.9875
164.2	0.98125
164.3	0.99375
164.4	1
164.5	1
164.6	1
164.7	1
164.8	1
164.9	1
165	1
165.1	0.9875
165.2	0.99375
165.3	1
165.4	1
165.5	1
165.6	1
165.7	0.99375
165.8	1
165.9	1
166	0.99375
166.1	0.99375
166.2	0.9875
166.3	1
166.4	0.9875
166.5	1
166.6	0.99375
166.7	0.99375
166.8	1
166.9	1
167	1
167.1	1
167.2	1
167.3	1
167.4	1
167.5	1
167.6	0.99375
167.7	0.99375
167.8	1
167.9	1
168	0.99375
168.1	1
168.2	0.99375
168.3	0.99375
168.4	0.99375
168.5	0.99375
168.6	1
168.7	1
168.8	1
168.9	1
169	1
169.1	1
169.2	1
169.3	1
169.4	1
169.5	0.99375
169.6	0.9875
169.7	1
169.8	1
169.9	1
170	1
170.1	1
170.2	1
170.3	0.99375
170.4	1
170.5	0.99375
170.6	0.9875
170.7	1
170.8	0.99375
170.9	1
171	1
171.1	1
171.2	1
171.3	0.99375
171.4	1
171.5	1
171.6	1
171.7	1
171.8	1
171.9	1
172	1
172.1	0.99375
172.2	1
172.3	1
172.4	1
172.5	1
172.6	1
172.7	1
172.8	1
172.9	1
173	1
173.1	1
173.2	1
173.3	1
173.4	1
173.5	1
173.6	1
173.7	1
173.8	1
173.9	0.99375
174	1
174.1	1
174.2	1
174.3	1
174.4	1
174.5	1
174.6	1
174.7	1
174.8	1
174.9	1
175	1
175.1	0.99375
175.2	1
175.3	1
175.4	1
175.5	1
175.6	0.99375
175.7	1
175.8	1
175.9	1
176	1
176.1	1
176.2	1
176.3	1
176.4	1
176.5	1
176.6	1
176.7	0.99375
176.8	0.9875
176.9	0.99375
177	0.99375
177.1	1
177.2	1
177.3	1
177.4	1
177.5	1
177.6	1
177.7	1
177.8	1
177.9	1
178	1
178.1	1
178.2	1
178.3	1
178.4	1
178.5	1
178.6	0.99375
178.7	1
178.8	1
178.9	1
179	1
179.1	1
179.2	1
179.3	1
179.4	1
179.5	1
179.6	1
179.7	0.99375
179.8	1
179.9	1
180	1
180.1	1
180.2	1
180.3	1
180.4	1
180.5	1
180.6	0.99375
180.7	1
180.8	1
180.9	1
181	1
181.1	1
181.2	1
181.3	0.99375
181.4	1
181.5	1
181.6	1
181.7	1
181.8	1
181.9	1
182	1
182.1	0.99375
182.2	1
182.3	1
182.4	1
182.5	1
182.6	0.99375
182.7	1
182.8	0.99375
182.9	1
183	1
183.1	1
183.2	0.99375
183.3	0.99375
183.4	1
183.5	0.99375
183.6	1
183.7	1
183.8	1
183.9	0.99375
184	0.99375
184.1	1
184.2	1
184.3	1
184.4	1
184.5	0.99375
184.6	0.99375
184.7	0.99375
184.8	0.99375
184.9	1
185	1
185.1	0.99375
185.2	1
185.3	0.9875
185.4	1
185.5	1
185.6	1
185.7	1
185.8	1
185.9	1
186	1
186.1	1
186.2	1
186.3	1
186.4	1
186.5	0.99375
186.6	1
186.7	1
186.8	0.99375
186.9	1
187	1
187.1	0.99375
187.2	0.99375
187.3	1
187.4	1
187.5	1
187.6	1
187.7	1
187.8	1
187.9	1
188	0.99375
188.1	1
188.2	1
188.3	1
188.4	1
188.5	1
188.6	1
188.7	1
188.8	1
188.9	0.99375
189	0.99375
189.1	1
189.2	0.99375
189.3	0.99375
189.4	0.99375
189.5	1
189.6	0.99375
189.7	0.99375
189.8	1
189.9	0.99375
190	0.99375
190.1	0.99375
190.2	0.99375
190.3	1
190.4	1
190.5	1
190.6	1
190.7	1
190.8	1
190.9	0.99375
191	0.99375
191.1	1
191.2	1
191.3	1
191.4	1
191.5	0.99375
191.6	1
191.7	1
191.8	1
191.9	1
192	1
192.1	1
192.2	1
192.3	0.99375
192.4	1
192.5	1
192.6	0.98125
192.7	1
192.8	1
192.9	0.99375
193	0.99375
193.1	0.99375
193.2	1
193.3	0.9875
193.4	0.9875
193.5	1
193.6	0.99375
193.7	1
193.8	1
193.9	1
194	1
194.1	1
194.2	1
194.3	1
194.4	0.9875
194.5	1
194.6	1
194.7	0.99375
194.8	1
194.9	0.99375
195	1
195.1	0.99375
195.2	1
195.3	1
195.4	1
195.5	0.99375
195.6	1
195.7	1
195.8	0.99375
195.9	1
196	1
196.1	1
196.2	0.99375
196.3	1
196.4	1
196.5	1
196.6	1
196.7	0.99375
196.8	1
196.9	1
197	1
197.1	1
197.2	1
197.3	1
197.4	0.9875
197.5	1
197.6	0.99375
197.7	1
197.8	1
197.9	1
198	0.99375
198.1	0.99375
198.2	1
198.3	1
198.4	1
198.5	1
198.6	1
198.7	0.9875
198.8	1
198.9	0.99375
199	1
199.1	1
199.2	1
199.3	1
199.4	1
199.5	0.99375
199.6	1
199.7	0.99375
199.8	0.9875
199.9	1
200	0.99375
[truncated: 14,000 more rows]
