# Supplementary material for: Bayesian inference of kinetic schemes for ion channels by Kalman filtering
Source: eLife journal article supplement (doi:10.7554/elife.62714), 2022-05-04
Supplement: fig4-data2 [file 1_Sim_N_80_Strom_MW.xlsx]

## Sheet: 64 M
0.1	0
0.2	0
0.3	0
0.4	0
0.5	0
0.6	0
0.7	0
0.8	0
0.9	0
1	0
1.1	0
1.2	0
1.3	0
1.4	0
1.5	0
1.6	0
1.7	0
1.8	0
1.9	0
2	0
2.1	0
2.2	0
2.3	0
2.4	0
2.5	0
2.6	0
2.7	0
2.8	0
2.9	0
3	0
3.1	0
3.2	0
3.3	0
3.4	0
3.5	0
3.6	0
3.7	0
3.8	0
3.9	0
4	0
4.1	0
4.2	0
4.3	0
4.4	0
4.5	0
4.6	0
4.7	0
4.8	0
4.9	0
5	0
5.1	0
5.2	0
5.3	0
5.4	0
5.5	0
5.6	0
5.7	0
5.8	0
5.9	0
6	0
6.1	0
6.2	0
6.3	0
6.4	0
6.5	0
6.6	0
6.7	0
6.8	0
6.9	0
7	0
7.1	0
7.2	0
7.3	0
7.4	0
7.5	0
7.6	0
7.7	0
7.8	0
7.9	0
8	0
8.1	0
8.2	0
8.3	0
8.4	0
8.5	0
8.6	0
8.7	0
8.8	0
8.9	0
9	0
9.1	0
9.2	0
9.3	0
9.4	0
9.5	0
9.6	0
9.7	0
9.8	0
9.9	0
10	0
10.1	0
10.2	0
10.3	0
10.4	0
10.5	0
10.6	0
10.7	0
10.8	0
10.9	0
11	0
11.1	0
11.2	0
11.3	0
11.4	0
11.5	0
11.6	0
11.7	0
11.8	0
11.9	0
12	0
12.1	0
12.2	0
12.3	0
12.4	0
12.5	0
12.6	0
12.7	0
12.8	0
12.9	0
13	0
13.1	0
13.2	0
13.3	0
13.4	0
13.5	0
13.6	0
13.7	0
13.8	0
13.9	0
14	0
14.1	0
14.2	0
14.3	0
14.4	0
14.5	0
14.6	0
14.7	0
14.8	0
14.9	0
15	0
15.1	0
15.2	0
15.3	0
15.4	0
15.5	0
15.6	0
15.7	0
15.8	0
15.9	0
16	0
16.1	0
16.2	0
16.3	0
16.4	0
16.5	0
16.6	0
16.7	0
16.8	0
16.9	0
17	0
17.1	0
17.2	0
17.3	0
17.4	0
17.5	0
17.6	0
17.7	0
17.8	0
17.9	0
18	0
18.1	0
18.2	0
18.3	0
18.4	0
18.5	0
18.6	0
18.7	0
18.8	0
18.9	0
19	0
19.1	0
19.2	0
19.3	0
19.4	0
19.5	0
19.6	0
19.7	0
19.8	0
19.9	0
20	0
20.1	0
20.2	0
20.3	0
20.4	0
20.5	0
20.6	0
20.7	0
20.8	0
20.9	0
21	0
21.1	0
21.2	0
21.3	0
21.4	0
21.5	0
21.6	0
21.7	0
21.8	0
21.9	0
22	0
22.1	0
22.2	0
22.3	0
22.4	0
22.5	0
22.6	0
22.7	0
22.8	0
22.9	0
23	0
23.1	0
23.2	0
23.3	0
23.4	0
23.5	0
23.6	0
23.7	0
23.8	0
23.9	0
24	0
24.1	0
24.2	0
24.3	0
24.4	0
24.5	0
24.6	0
24.7	0
24.8	0
24.9	0
25	0
25.1	0
25.2	0
25.3	0
25.4	0
25.5	0
25.6	0
25.7	0
25.8	0
25.9	0
26	0
26.1	0
26.2	0
26.3	0
26.4	0
26.5	0
26.6	0
26.7	0
26.8	0
26.9	0
27	0
27.1	0
27.2	0
27.3	0
27.4	0
27.5	0
27.6	0
27.7	0
27.8	0
27.9	0
28	0
28.1	0
28.2	0
28.3	0
28.4	0
28.5	0
28.6	0
28.7	0
28.8	0
28.9	0
29	0
29.1	0
29.2	0
29.3	0
29.4	0
29.5	0
29.6	0
29.7	0
29.8	0
29.9	0
30	0
30.1	0
30.2	0
30.3	0
30.4	0
30.5	0
30.6	0
30.7	0
30.8	0
30.9	0
31	0
31.1	0
31.2	0
31.3	0
31.4	0
31.5	0
31.6	0
31.7	0
31.8	0
31.9	0
32	0
32.1	0
32.2	0
32.3	0
32.4	0
32.5	0
32.6	0
32.7	0
32.8	0
32.9	0
33	0
33.1	0
33.2	0
33.3	0
33.4	0
33.5	0
33.6	0
33.7	0
33.8	0
33.9	0
34	0
34.1	0
34.2	0
34.3	0
34.4	0
34.5	0
34.6	0
34.7	0
34.8	0
34.9	0
35	0
35.1	0
35.2	0
35.3	0
35.4	0
35.5	0
35.6	0
35.7	0
35.8	0
35.9	0
36	0
36.1	0
36.2	0
36.3	0
36.4	0
36.5	0
36.6	0
36.7	0
36.8	0
36.9	0
37	0
37.1	0
37.2	0
37.3	0
37.4	0
37.5	0
37.6	0
37.7	0
37.8	0
37.9	0
38	0
38.1	0
38.2	0
38.3	0
38.4	0
38.5	0
38.6	0
38.7	0
38.8	0
38.9	0
39	0
39.1	0
39.2	0
39.3	0
39.4	0
39.5	0
39.6	0
39.7	0
39.8	0
39.9	0
40	0
40.1	0
40.2	0
40.3	0
40.4	0
40.5	0
40.6	0
40.7	0
40.8	0
40.9	0
41	0
41.1	0
41.2	0
41.3	0
41.4	0
41.5	0
41.6	0
41.7	0
41.8	0
41.9	0
42	0
42.1	0
42.2	0
42.3	0
42.4	0
42.5	0
42.6	0
42.7	0
42.8	0
42.9	0
43	0
43.1	0
43.2	0
43.3	0
43.4	0
43.5	0
43.6	0
43.7	0
43.8	0
43.9	0
44	0
44.1	0
44.2	0
44.3	0
44.4	0
44.5	0
44.6	0
44.7	0
44.8	0
44.9	0
45	0
45.1	0
45.2	0
45.3	0
45.4	0
45.5	0
45.6	0
45.7	0
45.8	0
45.9	0
46	0
46.1	0
46.2	0
46.3	0
46.4	0
46.5	0
46.6	0
46.7	0
46.8	0
46.9	0
47	0
47.1	0
47.2	0
47.3	0
47.4	0
47.5	0
47.6	0
47.7	0
47.8	0
47.9	0
48	0
48.1	0
48.2	0
48.3	0
48.4	0
48.5	0
48.6	0
48.7	0
48.8	0
48.9	0
49	0
49.1	0
49.2	0
49.3	0
49.4	0
49.5	0
49.6	0
49.7	0
49.8	0
49.9	0
50	0
50.1	0
50.2	0
50.3	0
50.4	0
50.5	0
50.6	0
50.7	0
50.8	0
50.9	0
51	0
51.1	0
51.2	0
51.3	0
51.4	0
51.5	0
51.6	0
51.7	0
51.8	0
51.9	0
52	0
52.1	0
52.2	0
52.3	0
52.4	0
52.5	0
52.6	0
52.7	0
52.8	0
52.9	0
53	0
53.1	0
53.2	0
53.3	0
53.4	0
53.5	0
53.6	0
53.7	0
53.8	0
53.9	0
54	0
54.1	0
54.2	0
54.3	0
54.4	0
54.5	0
54.6	0
54.7	0
54.8	0
54.9	0
55	0
55.1	0
55.2	0
55.3	0
55.4	0
55.5	0
55.6	0
55.7	0
55.8	0
55.9	0
56	0
56.1	0
56.2	0
56.3	0
56.4	0
56.5	0
56.6	0
56.7	0
56.8	0
56.9	0
57	0
57.1	0
57.2	0
57.3	0
57.4	0
57.5	0
57.6	0
57.7	0
57.8	0
57.9	0
58	0
58.1	0
58.2	0
58.3	0
58.4	0
58.5	0
58.6	0
58.7	0
58.8	0
58.9	0
59	0
59.1	0
59.2	0
59.3	0
59.4	0
59.5	0
59.6	0
59.7	0
59.8	0
59.9	0
60	0
60.1	0
60.2	0
60.3	0
60.4	0
60.5	0
60.6	0
60.7	0
60.8	0
60.9	0
61	0
61.1	0
61.2	0
61.3	0
61.4	0
61.5	0
61.6	0
61.7	0
61.8	0
61.9	0
62	0
62.1	0
62.2	0
62.3	0
62.4	0
62.5	0
62.6	0
62.7	0
62.8	0
62.9	0
63	0
63.1	0
63.2	0
63.3	0
63.4	0
63.5	0
63.6	0
63.7	0
63.8	0
63.9	0
64	0
64.1	0
64.2	0
64.3	0
64.4	0
64.5	0
64.6	0
64.7	0
64.8	0
64.9	0
65	0
65.1	0
65.2	0
65.3	0
65.4	0
65.5	0
65.6	0
65.7	0
65.8	0
65.9	0
66	0
66.1	0
66.2	0
66.3	0
66.4	0
66.5	0
66.6	0
66.7	0
66.8	0
66.9	0
67	0
67.1	0
67.2	0
67.3	0
67.4	0
67.5	0
67.6	0
67.7	0
67.8	0
67.9	0
68	0
68.1	0
68.2	0
68.3	0
68.4	0
68.5	0
68.6	0
68.7	0
68.8	0
68.9	0
69	0
69.1	0
69.2	0
69.3	0
69.4	0
69.5	0
69.6	0
69.7	0
69.8	0
69.9	0
70	0
70.1	0
70.2	0
70.3	0
70.4	0
70.5	0
70.6	0
70.7	0
70.8	0
70.9	0
71	0
71.1	0
71.2	0
71.3	0
71.4	0
71.5	0
71.6	0
71.7	0
71.8	0
71.9	0
72	0
72.1	0
72.2	0
72.3	0
72.4	0
72.5	0
72.6	0
72.7	0
72.8	0
72.9	0
73	0
73.1	0
73.2	0
73.3	0
73.4	0
73.5	0
73.6	0
73.7	0
73.8	0
73.9	0
74	0
74.1	0
74.2	0
74.3	0
74.4	0
74.5	0
74.6	0
74.7	0
74.8	0
74.9	0
75	0
75.1	0
75.2	0
75.3	0
75.4	0
75.5	0
75.6	0
75.7	0
75.8	0
75.9	0
76	0
76.1	0
76.2	0
76.3	0
76.4	0
76.5	0
76.6	0
76.7	0
76.8	0
76.9	0
77	0
77.1	0
77.2	0
77.3	0
77.4	0
77.5	0
77.6	0
77.7	0
77.8	0
77.9	0
78	0
78.1	0
78.2	0
78.3	0
78.4	0
78.5	0
78.6	0
78.7	0
78.8	0
78.9	0
79	0
79.1	0
79.2	0
79.3	0
79.4	0
79.5	0
79.6	0
79.7	0
79.8	0
79.9	0
80	0
80.1	0
80.2	0
80.3	0
80.4	0
80.5	0
80.6	0
80.7	0
80.8	0
80.9	0
81	0
81.1	0
81.2	0
81.3	0
81.4	0
81.5	0
81.6	0
81.7	0
81.8	0
81.9	0
82	0
82.1	0
82.2	0
82.3	0
82.4	0
82.5	0
82.6	0
82.7	0
82.8	0
82.9	0
83	0
83.1	0
83.2	0
83.3	0
83.4	0
83.5	0
83.6	0
83.7	0
83.8	0
83.9	0
84	0
84.1	0
84.2	0
84.3	0
84.4	0
84.5	0
84.6	0
84.7	0
84.8	0
84.9	0
85	0
85.1	0
85.2	0
85.3	0
85.4	0
85.5	0
85.6	0
85.7	0
85.8	0
85.9	0
86	0
86.1	0
86.2	0
86.3	0
86.4	0
86.5	0
86.6	0
86.7	0
86.8	0
86.9	0
87	0
87.1	0
87.2	0
87.3	0
87.4	0
87.5	0
87.6	0
87.7	0
87.8	0
87.9	0
88	0
88.1	0
88.2	0
88.3	0
88.4	0
88.5	0
88.6	0
88.7	0
88.8	0
88.9	0
89	0
89.1	0
89.2	0
89.3	0
89.4	0
89.5	0
89.6	0
89.7	0
89.8	0
89.9	0
90	0
90.1	0
90.2	0
90.3	0
90.4	0
90.5	0
90.6	0
90.7	0
90.8	0
90.9	0
91	0
91.1	0
91.2	0
91.3	0
91.4	0
91.5	0
91.6	0
91.7	0
91.8	0
91.9	0
92	0
92.1	0
92.2	0
92.3	0
92.4	0
92.5	0
92.6	0
92.7	0
92.8	0
92.9	0
93	0
93.1	0
93.2	0
93.3	0
93.4	0
93.5	0
93.6	0
93.7	0
93.8	0
93.9	0
94	0
94.1	0
94.2	0
94.3	0
94.4	0
94.5	0
94.6	0
94.7	0
94.8	0
94.9	0
95	0
95.1	0
95.2	0
95.3	0
95.4	0
95.5	0
95.6	0
95.7	0
95.8	0
95.9	0
96	0
96.1	0
96.2	0
96.3	0
96.4	0
96.5	0
96.6	0
96.7	0
96.8	0
96.9	0
97	0
97.1	0
97.2	0
97.3	0
97.4	0
97.5	0
97.6	0
97.7	0
97.8	0
97.9	0
98	0
98.1	0
98.2	0
98.3	0
98.4	0
98.5	0
98.6	0
98.7	0
98.8	0
98.9	0
99	0
99.1	0
99.2	0
99.3	0
99.4	0
99.5	0
99.6	0
99.7	0
99.8	0
99.9	0
100	0
100.1	0
100.2	0
100.3	0
100.4	0
100.5	0
100.6	0.025
100.7	0.025
100.8	0.025
100.9	0.025
101	0.025
101.1	0.025
101.2	0.0375
101.3	0.05
101.4	0.05
101.5	0.05
101.6	0.05
101.7	0.05
101.8	0.0625
101.9	0.05
102	0.0625
102.1	0.0625
102.2	0.0625
102.3	0.0625
102.4	0.075
102.5	0.075
102.6	0.075
102.7	0.0875
102.8	0.1
102.9	0.1
103	0.1125
103.1	0.1125
103.2	0.1125
103.3	0.125
103.4	0.1125
103.5	0.1125
103.6	0.1125
103.7	0.1125
103.8	0.1125
103.9	0.125
104	0.125
104.1	0.15
104.2	0.15
104.3	0.15
104.4	0.15
104.5	0.15
104.6	0.15
104.7	0.15
104.8	0.1375
104.9	0.1375
105	0.1375
105.1	0.15
105.2	0.15
105.3	0.15
105.4	0.1625
105.5	0.1875
105.6	0.2
105.7	0.2125
105.8	0.225
105.9	0.225
106	0.225
106.1	0.225
106.2	0.225
106.3	0.225
106.4	0.2625
106.5	0.2625
106.6	0.2625
106.7	0.2625
106.8	0.25
106.9	0.25
107	0.25
107.1	0.25
107.2	0.2625
107.3	0.2625
107.4	0.2625
107.5	0.2625
107.6	0.2625
107.7	0.2625
107.8	0.2625
107.9	0.2625
108	0.2625
108.1	0.2625
108.2	0.2625
108.3	0.2625
108.4	0.2625
108.5	0.2625
108.6	0.2625
108.7	0.2625
108.8	0.2625
108.9	0.275
109	0.2875
109.1	0.2875
109.2	0.2875
109.3	0.2875
109.4	0.3
109.5	0.3
109.6	0.3
109.7	0.3
109.8	0.2875
109.9	0.2875
110	0.2875
110.1	0.2875
110.2	0.3
110.3	0.3
110.4	0.3125
110.5	0.325
110.6	0.325
110.7	0.325
110.8	0.3375
110.9	0.3375
111	0.3375
111.1	0.3375
111.2	0.3375
111.3	0.3375
111.4	0.3375
111.5	0.3375
111.6	0.3375
111.7	0.3375
111.8	0.35
111.9	0.3625
112	0.3625
112.1	0.3625
112.2	0.3625
112.3	0.3625
112.4	0.3625
112.5	0.375
112.6	0.375
112.7	0.375
112.8	0.3875
112.9	0.3875
113	0.3875
113.1	0.4
113.2	0.4
113.3	0.4
113.4	0.4
113.5	0.4
113.6	0.4
113.7	0.4
113.8	0.4125
113.9	0.425
114	0.425
114.1	0.425
114.2	0.425
114.3	0.425
114.4	0.425
114.5	0.425
114.6	0.4375
114.7	0.45
114.8	0.45
114.9	0.45
115	0.45
115.1	0.4625
115.2	0.4625
115.3	0.4625
115.4	0.4625
115.5	0.4625
115.6	0.4625
115.7	0.4625
115.8	0.4625
115.9	0.4625
116	0.475
116.1	0.475
116.2	0.475
116.3	0.475
116.4	0.475
116.5	0.4625
116.6	0.4625
116.7	0.4625
116.8	0.4625
116.9	0.4625
117	0.4625
117.1	0.4625
117.2	0.4625
117.3	0.4625
117.4	0.475
117.5	0.475
117.6	0.475
117.7	0.475
117.8	0.475
117.9	0.475
118	0.475
118.1	0.475
118.2	0.475
118.3	0.475
118.4	0.4625
118.5	0.4625
118.6	0.4625
118.7	0.4625
118.8	0.4625
118.9	0.4625
119	0.45
119.1	0.4625
119.2	0.4625
119.3	0.4625
119.4	0.4625
119.5	0.4625
119.6	0.4625
119.7	0.4625
119.8	0.4625
119.9	0.4625
120	0.4625
120.1	0.4625
120.2	0.4625
120.3	0.4625
120.4	0.475
120.5	0.475
120.6	0.4875
120.7	0.4875
120.8	0.4875
120.9	0.4875
121	0.4875
121.1	0.4875
121.2	0.4875
121.3	0.4875
121.4	0.4875
121.5	0.4875
121.6	0.4875
121.7	0.4875
121.8	0.5
121.9	0.5
122	0.5
122.1	0.5125
122.2	0.5125
122.3	0.5125
122.4	0.5125
122.5	0.5125
122.6	0.525
122.7	0.525
122.8	0.525
122.9	0.525
123	0.525
123.1	0.525
123.2	0.525
123.3	0.525
123.4	0.525
123.5	0.525
123.6	0.5375
123.7	0.5375
123.8	0.5375
123.9	0.5375
124	0.5375
124.1	0.5375
124.2	0.5375
124.3	0.5375
124.4	0.5375
124.5	0.5375
124.6	0.5375
124.7	0.5375
124.8	0.5375
124.9	0.525
125	0.525
125.1	0.55
125.2	0.55
125.3	0.55
125.4	0.5625
125.5	0.5625
125.6	0.575
125.7	0.575
125.8	0.575
125.9	0.5625
126	0.5625
126.1	0.5625
126.2	0.5625
126.3	0.5625
126.4	0.5625
126.5	0.5625
126.6	0.5625
126.7	0.575
126.8	0.575
126.9	0.5875
127	0.5875
127.1	0.5875
127.2	0.5875
127.3	0.5875
127.4	0.6
127.5	0.6
127.6	0.625
127.7	0.65
127.8	0.65
127.9	0.65
128	0.65
128.1	0.65
128.2	0.6375
128.3	0.6375
128.4	0.6375
128.5	0.6375
128.6	0.65
128.7	0.65
128.8	0.65
128.9	0.65
129	0.65
129.1	0.65
129.2	0.65
129.3	0.65
129.4	0.65
129.5	0.65
129.6	0.65
129.7	0.65
129.8	0.65
129.9	0.65
130	0.65
130.1	0.65
130.2	0.65
130.3	0.65
130.4	0.65
130.5	0.65
130.6	0.6625
130.7	0.6625
130.8	0.675
130.9	0.675
131	0.675
131.1	0.675
131.2	0.675
131.3	0.675
131.4	0.675
131.5	0.675
131.6	0.675
131.7	0.6875
131.8	0.6875
131.9	0.6875
132	0.6875
132.1	0.6875
132.2	0.7
132.3	0.7
132.4	0.7
132.5	0.7125
132.6	0.7125
132.7	0.7125
132.8	0.7125
132.9	0.7125
133	0.7125
133.1	0.7125
133.2	0.7125
133.3	0.7125
133.4	0.7125
133.5	0.7125
133.6	0.7125
133.7	0.7125
133.8	0.7125
133.9	0.7125
134	0.7125
134.1	0.7125
134.2	0.7125
134.3	0.7125
134.4	0.7
134.5	0.7125
134.6	0.7125
134.7	0.7125
134.8	0.7125
134.9	0.7125
135	0.7125
135.1	0.7125
135.2	0.7125
135.3	0.7125
135.4	0.7125
135.5	0.7125
135.6	0.7125
135.7	0.7125
135.8	0.725
135.9	0.725
136	0.725
136.1	0.725
136.2	0.7375
136.3	0.75
136.4	0.75
136.5	0.75
136.6	0.75
136.7	0.7625
136.8	0.7625
136.9	0.7625
137	0.775
137.1	0.775
137.2	0.775
137.3	0.775
137.4	0.775
137.5	0.775
137.6	0.775
137.7	0.775
137.8	0.7625
137.9	0.7625
138	0.7625
138.1	0.75
138.2	0.75
138.3	0.7625
138.4	0.7625
138.5	0.7625
138.6	0.7625
138.7	0.775
138.8	0.775
138.9	0.775
139	0.775
139.1	0.775
139.2	0.775
139.3	0.775
139.4	0.775
139.5	0.775
139.6	0.775
139.7	0.7625
139.8	0.7625
139.9	0.7625
140	0.775
140.1	0.775
140.2	0.775
140.3	0.775
140.4	0.775
140.5	0.7875
140.6	0.7875
140.7	0.7875
140.8	0.7875
140.9	0.7875
141	0.7875
141.1	0.7875
141.2	0.7875
141.3	0.7875
141.4	0.7875
141.5	0.7875
141.6	0.7875
141.7	0.7875
141.8	0.7875
141.9	0.7875
142	0.7875
142.1	0.7875
142.2	0.7875
142.3	0.775
142.4	0.775
142.5	0.775
142.6	0.775
142.7	0.7875
142.8	0.7875
142.9	0.7875
143	0.7875
143.1	0.7875
143.2	0.8125
143.3	0.8125
143.4	0.8125
143.5	0.8125
143.6	0.8125
143.7	0.8125
143.8	0.8125
143.9	0.8125
144	0.8
144.1	0.8
144.2	0.8
144.3	0.8
144.4	0.7875
144.5	0.7875
144.6	0.7875
144.7	0.7875
144.8	0.7875
144.9	0.7875
145	0.7875
145.1	0.7875
145.2	0.7875
145.3	0.7875
145.4	0.7875
145.5	0.7875
145.6	0.7875
145.7	0.7875
145.8	0.7875
145.9	0.7875
146	0.7875
146.1	0.7875
146.2	0.7875
146.3	0.7875
146.4	0.7875
146.5	0.7875
146.6	0.7875
146.7	0.7875
146.8	0.7875
146.9	0.7875
147	0.7875
147.1	0.7875
147.2	0.7875
147.3	0.7875
147.4	0.7875
147.5	0.7875
147.6	0.7875
147.7	0.7875
147.8	0.7875
147.9	0.7875
148	0.7875
148.1	0.7875
148.2	0.8
148.3	0.8
148.4	0.8
148.5	0.8
148.6	0.8
148.7	0.8
148.8	0.8
148.9	0.8
149	0.8
149.1	0.8
149.2	0.8125
149.3	0.8125
149.4	0.8125
149.5	0.8125
149.6	0.8
149.7	0.8
149.8	0.8
149.9	0.8
150	0.8
150.1	0.8
150.2	0.8
150.3	0.8
150.4	0.8
150.5	0.8
150.6	0.8
150.7	0.825
150.8	0.825
150.9	0.8125
151	0.8125
151.1	0.8125
151.2	0.8125
151.3	0.8
151.4	0.8
151.5	0.7875
151.6	0.7875
151.7	0.7875
151.8	0.7875
151.9	0.7875
152	0.7875
152.1	0.7875
152.2	0.7875
152.3	0.7875
152.4	0.775
152.5	0.7875
152.6	0.7875
152.7	0.7875
152.8	0.7875
152.9	0.7875
153	0.7875
153.1	0.7875
153.2	0.7875
153.3	0.7875
153.4	0.7875
153.5	0.7875
153.6	0.7875
153.7	0.775
153.8	0.775
153.9	0.775
154	0.775
154.1	0.775
154.2	0.775
154.3	0.7875
154.4	0.7875
154.5	0.7875
154.6	0.7875
154.7	0.7875
154.8	0.775
154.9	0.775
155	0.775
155.1	0.775
155.2	0.8125
155.3	0.8125
155.4	0.8125
155.5	0.825
155.6	0.825
155.7	0.825
155.8	0.825
155.9	0.825
156	0.825
156.1	0.825
156.2	0.825
156.3	0.825
156.4	0.825
156.5	0.825
156.6	0.825
156.7	0.825
156.8	0.8125
156.9	0.8
157	0.8
157.1	0.8125
157.2	0.8125
157.3	0.825
157.4	0.825
157.5	0.825
157.6	0.825
157.7	0.825
157.8	0.825
157.9	0.825
158	0.825
158.1	0.8125
158.2	0.8125
158.3	0.8125
158.4	0.8125
158.5	0.8125
158.6	0.825
158.7	0.825
158.8	0.825
158.9	0.825
159	0.8375
159.1	0.8375
159.2	0.8375
159.3	0.8375
159.4	0.8375
159.5	0.8375
159.6	0.8375
159.7	0.85
159.8	0.85
159.9	0.85
160	0.85
160.1	0.8375
160.2	0.825
160.3	0.825
160.4	0.825
160.5	0.825
160.6	0.825
160.7	0.825
160.8	0.825
160.9	0.825
161	0.825
161.1	0.825
161.2	0.825
161.3	0.825
161.4	0.825
161.5	0.825
161.6	0.8125
161.7	0.8125
161.8	0.8125
161.9	0.8125
162	0.8
162.1	0.8
162.2	0.8
162.3	0.8
162.4	0.8
162.5	0.8
162.6	0.8
162.7	0.8
162.8	0.8
162.9	0.8
163	0.7875
163.1	0.7875
163.2	0.7875
163.3	0.7875
163.4	0.8
163.5	0.8
163.6	0.8
163.7	0.8
163.8	0.8
163.9	0.8
164	0.7875
164.1	0.7875
164.2	0.7875
164.3	0.7875
164.4	0.8125
164.5	0.825
164.6	0.8
164.7	0.8
164.8	0.8
164.9	0.8
165	0.8
165.1	0.8
165.2	0.8
165.3	0.8
165.4	0.8
165.5	0.8125
165.6	0.8125
165.7	0.8125
165.8	0.8125
165.9	0.8125
166	0.8125
166.1	0.8125
166.2	0.8125
166.3	0.8125
166.4	0.8125
166.5	0.8125
166.6	0.8125
166.7	0.8125
166.8	0.8125
166.9	0.8125
167	0.8
167.1	0.8
167.2	0.8125
167.3	0.8125
167.4	0.8125
167.5	0.8125
167.6	0.8125
167.7	0.8125
167.8	0.8125
167.9	0.8125
168	0.8125
168.1	0.8125
168.2	0.8125
168.3	0.8125
168.4	0.8125
168.5	0.8125
168.6	0.8125
168.7	0.8125
168.8	0.8125
168.9	0.8125
169	0.8125
169.1	0.8125
169.2	0.8125
169.3	0.8125
169.4	0.8125
169.5	0.8125
169.6	0.8125
169.7	0.8125
169.8	0.825
169.9	0.825
170	0.825
170.1	0.825
170.2	0.825
170.3	0.8125
170.4	0.8125
170.5	0.8125
170.6	0.8125
170.7	0.8125
170.8	0.8125
170.9	0.8125
171	0.8125
171.1	0.8125
171.2	0.8125
171.3	0.8
171.4	0.8
171.5	0.8
171.6	0.8
171.7	0.8
171.8	0.8125
171.9	0.8125
172	0.8125
172.1	0.8125
172.2	0.8125
172.3	0.8125
172.4	0.8125
172.5	0.8125
172.6	0.8125
172.7	0.8125
172.8	0.8125
172.9	0.8125
173	0.8125
173.1	0.8125
173.2	0.8125
173.3	0.8125
173.4	0.8125
173.5	0.825
173.6	0.8375
173.7	0.8375
173.8	0.8375
173.9	0.8375
174	0.8375
174.1	0.8375
174.2	0.8375
174.3	0.8375
174.4	0.8375
174.5	0.8375
174.6	0.825
174.7	0.825
174.8	0.825
174.9	0.825
175	0.825
175.1	0.825
175.2	0.825
175.3	0.825
175.4	0.825
175.5	0.825
175.6	0.825
175.7	0.8375
175.8	0.8375
175.9	0.8375
176	0.8375
176.1	0.8375
176.2	0.8375
176.3	0.85
176.4	0.875
176.5	0.875
176.6	0.875
176.7	0.875
176.8	0.875
176.9	0.875
177	0.875
177.1	0.875
177.2	0.8875
177.3	0.875
177.4	0.875
177.5	0.875
177.6	0.875
177.7	0.875
177.8	0.875
177.9	0.875
178	0.875
178.1	0.875
178.2	0.875
178.3	0.875
178.4	0.875
178.5	0.875
178.6	0.875
178.7	0.875
178.8	0.875
178.9	0.875
179	0.875
179.1	0.875
179.2	0.875
179.3	0.875
179.4	0.875
179.5	0.875
179.6	0.875
179.7	0.875
179.8	0.875
179.9	0.875
180	0.875
180.1	0.875
180.2	0.875
180.3	0.875
180.4	0.875
180.5	0.875
180.6	0.875
180.7	0.875
180.8	0.8625
180.9	0.8625
181	0.8625
181.1	0.8625
181.2	0.8625
181.3	0.8625
181.4	0.8625
181.5	0.8625
181.6	0.85
181.7	0.8625
181.8	0.8625
181.9	0.875
182	0.875
182.1	0.875
182.2	0.875
182.3	0.875
182.4	0.875
182.5	0.875
182.6	0.8625
182.7	0.8625
182.8	0.8625
182.9	0.8625
183	0.8625
183.1	0.85
183.2	0.85
183.3	0.85
183.4	0.8625
183.5	0.875
183.6	0.875
183.7	0.875
183.8	0.875
183.9	0.875
184	0.875
184.1	0.875
184.2	0.875
184.3	0.875
184.4	0.875
184.5	0.875
184.6	0.875
184.7	0.875
184.8	0.875
184.9	0.875
185	0.875
185.1	0.875
185.2	0.875
185.3	0.8625
185.4	0.8625
185.5	0.8625
185.6	0.8625
185.7	0.8625
185.8	0.8625
185.9	0.8625
186	0.8625
186.1	0.8625
186.2	0.8625
186.3	0.8625
186.4	0.85
186.5	0.85
186.6	0.85
186.7	0.85
186.8	0.85
186.9	0.8375
187	0.8375
187.1	0.8375
187.2	0.8375
187.3	0.8375
187.4	0.8375
187.5	0.8375
187.6	0.85
187.7	0.85
187.8	0.85
187.9	0.85
188	0.85
188.1	0.8375
188.2	0.8375
188.3	0.8375
188.4	0.8375
188.5	0.8375
188.6	0.85
188.7	0.85
188.8	0.85
188.9	0.85
189	0.85
189.1	0.85
189.2	0.85
189.3	0.85
189.4	0.85
189.5	0.85
189.6	0.85
189.7	0.85
189.8	0.85
189.9	0.85
190	0.8375
190.1	0.8375
190.2	0.8375
190.3	0.8375
190.4	0.8375
190.5	0.8375
190.6	0.8375
190.7	0.8375
190.8	0.8375
190.9	0.8375
191	0.8375
191.1	0.8375
191.2	0.8375
191.3	0.8375
191.4	0.8375
191.5	0.8375
191.6	0.8375
191.7	0.8375
191.8	0.8375
191.9	0.8375
192	0.8375
192.1	0.8375
192.2	0.825
192.3	0.825
192.4	0.825
192.5	0.825
192.6	0.825
192.7	0.825
192.8	0.8375
192.9	0.8375
193	0.8375
193.1	0.8375
193.2	0.8375
193.3	0.8375
193.4	0.8375
193.5	0.8375
193.6	0.8375
193.7	0.8375
193.8	0.8375
193.9	0.8375
194	0.8375
194.1	0.8375
194.2	0.8375
194.3	0.8375
194.4	0.8375
194.5	0.8375
194.6	0.8375
194.7	0.8375
194.8	0.8375
194.9	0.8375
195	0.825
195.1	0.8375
195.2	0.8375
195.3	0.8375
195.4	0.8375
195.5	0.8375
195.6	0.8375
195.7	0.8375
195.8	0.8375
195.9	0.8375
196	0.8375
196.1	0.8375
196.2	0.8375
196.3	0.8375
196.4	0.8375
196.5	0.8375
196.6	0.8375
196.7	0.8375
196.8	0.8375
196.9	0.8375
197	0.8375
197.1	0.8375
197.2	0.8375
197.3	0.8375
197.4	0.8375
197.5	0.8375
197.6	0.8375
197.7	0.8375
197.8	0.8375
197.9	0.8375
198	0.85
198.1	0.85
198.2	0.85
198.3	0.85
198.4	0.85
198.5	0.85
198.6	0.85
198.7	0.85
198.8	0.85
198.9	0.85
199	0.85
199.1	0.85
199.2	0.85
199.3	0.85
199.4	0.85
199.5	0.85
199.6	0.85
199.7	0.85
199.8	0.85
199.9	0.85
200	0.85
[truncated: 14,000 more rows]
