# Supplementary material for: Bayesian inference of kinetic schemes for ion channels by Kalman filtering
Source: eLife journal article supplement (doi:10.7554/elife.62714), 2022-05-04
Supplement: fig4-data2 [file 1_Sim_N_100_theor_Fluor_Werte.xlsx]

## Sheet: Tabelle1
0.1	0
0.2	0
0.3	0
0.4	0
0.5	0
0.6	0
0.7	0
0.8	0
0.9	0
1	0
1.1	0
1.2	0
1.3	0
1.4	0
1.5	0
1.6	0
1.7	0
1.8	0
1.9	0
2	0
2.1	0
2.2	0
2.3	0
2.4	0
2.5	0
2.6	0
2.7	0
2.8	0
2.9	0
3	0
3.1	0
3.2	0
3.3	0
3.4	0
3.5	0
3.6	0
3.7	0
3.8	0
3.9	0
4	0
4.1	0
4.2	0
4.3	0
4.4	0
4.5	0
4.6	0
4.7	0
4.8	0
4.9	0
5	0
5.1	0
5.2	0
5.3	0
5.4	0
5.5	0
5.6	0
5.7	0
5.8	0
5.9	0
6	0
6.1	0
6.2	0
6.3	0
6.4	0
6.5	0
6.6	0
6.7	0
6.8	0
6.9	0
7	0
7.1	0
7.2	0
7.3	0
7.4	0
7.5	0
7.6	0
7.7	0
7.8	0
7.9	0
8	0
8.1	0
8.2	0
8.3	0
8.4	0
8.5	0
8.6	0
8.7	0
8.8	0
8.9	0
9	0
9.1	0
9.2	0
9.3	0
9.4	0
9.5	0
9.6	0
9.7	0
9.8	0
9.9	0
10	0
10.1	0
10.2	0
10.3	0
10.4	0
10.5	0
10.6	0
10.7	0
10.8	0
10.9	0
11	0
11.1	0
11.2	0
11.3	0
11.4	0
11.5	0
11.6	0
11.7	0
11.8	0
11.9	0
12	0
12.1	0
12.2	0
12.3	0
12.4	0
12.5	0
12.6	0
12.7	0
12.8	0
12.9	0
13	0
13.1	0
13.2	0
13.3	0
13.4	0
13.5	0
13.6	0
13.7	0
13.8	0
13.9	0
14	0
14.1	0
14.2	0
14.3	0
14.4	0
14.5	0
14.6	0
14.7	0
14.8	0
14.9	0
15	0
15.1	0
15.2	0
15.3	0
15.4	0
15.5	0
15.6	0
15.7	0
15.8	0
15.9	0
16	0
16.1	0
16.2	0
16.3	0
16.4	0
16.5	0
16.6	0
16.7	0
16.8	0
16.9	0
17	0
17.1	0
17.2	0
17.3	0
17.4	0
17.5	0
17.6	0
17.7	0
17.8	0
17.9	0
18	0
18.1	0
18.2	0
18.3	0
18.4	0
18.5	0
18.6	0
18.7	0
18.8	0
18.9	0
19	0
19.1	0
19.2	0
19.3	0
19.4	0
19.5	0
19.6	0
19.7	0
19.8	0
19.9	0
20	0
20.1	0
20.2	0
20.3	0
20.4	0
20.5	0
20.6	0
20.7	0
20.8	0
20.9	0
21	0
21.1	0
21.2	0
21.3	0
21.4	0
21.5	0
21.6	0
21.7	0
21.8	0
21.9	0
22	0
22.1	0
22.2	0
22.3	0
22.4	0
22.5	0
22.6	0
22.7	0
22.8	0
22.9	0
23	0
23.1	0
23.2	0
23.3	0
23.4	0
23.5	0
23.6	0
23.7	0
23.8	0
23.9	0
24	0
24.1	0
24.2	0
24.3	0
24.4	0
24.5	0
24.6	0
24.7	0
24.8	0
24.9	0
25	0
25.1	0
25.2	0
25.3	0
25.4	0
25.5	0
25.6	0
25.7	0
25.8	0
25.9	0
26	0
26.1	0
26.2	0
26.3	0
26.4	0
26.5	0
26.6	0
26.7	0
26.8	0
26.9	0
27	0
27.1	0
27.2	0
27.3	0
27.4	0
27.5	0
27.6	0
27.7	0
27.8	0
27.9	0
28	0
28.1	0
28.2	0
28.3	0
28.4	0
28.5	0
28.6	0
28.7	0
28.8	0
28.9	0
29	0
29.1	0
29.2	0
29.3	0
29.4	0
29.5	0
29.6	0
29.7	0
29.8	0
29.9	0
30	0
30.1	0
30.2	0
30.3	0
30.4	0
30.5	0
30.6	0
30.7	0
30.8	0
30.9	0
31	0
31.1	0
31.2	0
31.3	0
31.4	0
31.5	0
31.6	0
31.7	0
31.8	0
31.9	0
32	0
32.1	0
32.2	0
32.3	0
32.4	0
32.5	0
32.6	0
32.7	0
32.8	0
32.9	0
33	0
33.1	0
33.2	0
33.3	0
33.4	0
33.5	0
33.6	0
33.7	0
33.8	0
33.9	0
34	0
34.1	0
34.2	0
34.3	0
34.4	0
34.5	0
34.6	0
34.7	0
34.8	0
34.9	0
35	0
35.1	0
35.2	0
35.3	0
35.4	0
35.5	0
35.6	0
35.7	0
35.8	0
35.9	0
36	0
36.1	0
36.2	0
36.3	0
36.4	0
36.5	0
36.6	0
36.7	0
36.8	0
36.9	0
37	0
37.1	0
37.2	0
37.3	0
37.4	0
37.5	0
37.6	0
37.7	0
37.8	0
37.9	0
38	0
38.1	0
38.2	0
38.3	0
38.4	0
38.5	0
38.6	0
38.7	0
38.8	0
38.9	0
39	0
39.1	0
39.2	0
39.3	0
39.4	0
39.5	0
39.6	0
39.7	0
39.8	0
39.9	0
40	0
40.1	0
40.2	0
40.3	0
40.4	0
40.5	0
40.6	0
40.7	0
40.8	0
40.9	0
41	0
41.1	0
41.2	0
41.3	0
41.4	0
41.5	0
41.6	0
41.7	0
41.8	0
41.9	0
42	0
42.1	0
42.2	0
42.3	0
42.4	0
42.5	0
42.6	0
42.7	0
42.8	0
42.9	0
43	0
43.1	0
43.2	0
43.3	0
43.4	0
43.5	0
43.6	0
43.7	0
43.8	0
43.9	0
44	0
44.1	0
44.2	0
44.3	0
44.4	0
44.5	0
44.6	0
44.7	0
44.8	0
44.9	0
45	0
45.1	0
45.2	0
45.3	0
45.4	0
45.5	0
45.6	0
45.7	0
45.8	0
45.9	0
46	0
46.1	0
46.2	0
46.3	0
46.4	0
46.5	0
46.6	0
46.7	0
46.8	0
46.9	0
47	0
47.1	0
47.2	0
47.3	0
47.4	0
47.5	0
47.6	0
47.7	0
47.8	0
47.9	0
48	0
48.1	0
48.2	0
48.3	0
48.4	0
48.5	0
48.6	0
48.7	0
48.8	0
48.9	0
49	0
49.1	0
49.2	0
49.3	0
49.4	0
49.5	0
49.6	0
49.7	0
49.8	0
49.9	0
50	0
50.1	0
50.2	0
50.3	0
50.4	0
50.5	0
50.6	0
50.7	0
50.8	0
50.9	0
51	0
51.1	0
51.2	0
51.3	0
51.4	0
51.5	0
51.6	0
51.7	0
51.8	0
51.9	0
52	0
52.1	0
52.2	0
52.3	0
52.4	0
52.5	0
52.6	0
52.7	0
52.8	0
52.9	0
53	0
53.1	0
53.2	0
53.3	0
53.4	0
53.5	0
53.6	0
53.7	0
53.8	0
53.9	0
54	0
54.1	0
54.2	0
54.3	0
54.4	0
54.5	0
54.6	0
54.7	0
54.8	0
54.9	0
55	0
55.1	0
55.2	0
55.3	0
55.4	0
55.5	0
55.6	0
55.7	0
55.8	0
55.9	0
56	0
56.1	0
56.2	0
56.3	0
56.4	0
56.5	0
56.6	0
56.7	0
56.8	0
56.9	0
57	0
57.1	0
57.2	0
57.3	0
57.4	0
57.5	0
57.6	0
57.7	0
57.8	0
57.9	0
58	0
58.1	0
58.2	0
58.3	0
58.4	0
58.5	0
58.6	0
58.7	0
58.8	0
58.9	0
59	0
59.1	0
59.2	0
59.3	0
59.4	0
59.5	0
59.6	0
59.7	0
59.8	0
59.9	0
60	0
60.1	0
60.2	0
60.3	0
60.4	0
60.5	0
60.6	0
60.7	0
60.8	0
60.9	0
61	0
61.1	0
61.2	0
61.3	0
61.4	0
61.5	0
61.6	0
61.7	0
61.8	0
61.9	0
62	0
62.1	0
62.2	0
62.3	0
62.4	0
62.5	0
62.6	0
62.7	0
62.8	0
62.9	0
63	0
63.1	0
63.2	0
63.3	0
63.4	0
63.5	0
63.6	0
63.7	0
63.8	0
63.9	0
64	0
64.1	0
64.2	0
64.3	0
64.4	0
64.5	0
64.6	0
64.7	0
64.8	0
64.9	0
65	0
65.1	0
65.2	0
65.3	0
65.4	0
65.5	0
65.6	0
65.7	0
65.8	0
65.9	0
66	0
66.1	0
66.2	0
66.3	0
66.4	0
66.5	0
66.6	0
66.7	0
66.8	0
66.9	0
67	0
67.1	0
67.2	0
67.3	0
67.4	0
67.5	0
67.6	0
67.7	0
67.8	0
67.9	0
68	0
68.1	0
68.2	0
68.3	0
68.4	0
68.5	0
68.6	0
68.7	0
68.8	0
68.9	0
69	0
69.1	0
69.2	0
69.3	0
69.4	0
69.5	0
69.6	0
69.7	0
69.8	0
69.9	0
70	0
70.1	0
70.2	0
70.3	0
70.4	0
70.5	0
70.6	0
70.7	0
70.8	0
70.9	0
71	0
71.1	0
71.2	0
71.3	0
71.4	0
71.5	0
71.6	0
71.7	0
71.8	0
71.9	0
72	0
72.1	0
72.2	0
72.3	0
72.4	0
72.5	0
72.6	0
72.7	0
72.8	0
72.9	0
73	0
73.1	0
73.2	0
73.3	0
73.4	0
73.5	0
73.6	0
73.7	0
73.8	0
73.9	0
74	0
74.1	0
74.2	0
74.3	0
74.4	0
74.5	0
74.6	0
74.7	0
74.8	0
74.9	0
75	0
75.1	0
75.2	0
75.3	0
75.4	0
75.5	0
75.6	0
75.7	0
75.8	0
75.9	0
76	0
76.1	0
76.2	0
76.3	0
76.4	0
76.5	0
76.6	0
76.7	0
76.8	0
76.9	0
77	0
77.1	0
77.2	0
77.3	0
77.4	0
77.5	0
77.6	0
77.7	0
77.8	0
77.9	0
78	0
78.1	0
78.2	0
78.3	0
78.4	0
78.5	0
78.6	0
78.7	0
78.8	0
78.9	0
79	0
79.1	0
79.2	0
79.3	0
79.4	0
79.5	0
79.6	0
79.7	0
79.8	0
79.9	0
80	0
80.1	0
80.2	0
80.3	0
80.4	0
80.5	0
80.6	0
80.7	0
80.8	0
80.9	0
81	0
81.1	0
81.2	0
81.3	0
81.4	0
81.5	0
81.6	0
81.7	0
81.8	0
81.9	0
82	0
82.1	0
82.2	0
82.3	0
82.4	0
82.5	0
82.6	0
82.7	0
82.8	0
82.9	0
83	0
83.1	0
83.2	0
83.3	0
83.4	0
83.5	0
83.6	0
83.7	0
83.8	0
83.9	0
84	0
84.1	0
84.2	0
84.3	0
84.4	0
84.5	0
84.6	0
84.7	0
84.8	0
84.9	0
85	0
85.1	0
85.2	0
85.3	0
85.4	0
85.5	0
85.6	0
85.7	0
85.8	0
85.9	0
86	0
86.1	0
86.2	0
86.3	0
86.4	0
86.5	0
86.6	0
86.7	0
86.8	0
86.9	0
87	0
87.1	0
87.2	0
87.3	0
87.4	0
87.5	0
87.6	0
87.7	0
87.8	0
87.9	0
88	0
88.1	0
88.2	0
88.3	0
88.4	0
88.5	0
88.6	0
88.7	0
88.8	0
88.9	0
89	0
89.1	0
89.2	0
89.3	0
89.4	0
89.5	0
89.6	0
89.7	0
89.8	0
89.9	0
90	0
90.1	0
90.2	0
90.3	0
90.4	0
90.5	0
90.6	0
90.7	0
90.8	0
90.9	0
91	0
91.1	0
91.2	0
91.3	0
91.4	0
91.5	0
91.6	0
91.7	0
91.8	0
91.9	0
92	0
92.1	0
92.2	0
92.3	0
92.4	0
92.5	0
92.6	0
92.7	0
92.8	0
92.9	0
93	0
93.1	0
93.2	0
93.3	0
93.4	0
93.5	0
93.6	0
93.7	0
93.8	0
93.9	0
94	0
94.1	0
94.2	0
94.3	0
94.4	0
94.5	0
94.6	0
94.7	0
94.8	0
94.9	0
95	0
95.1	0
95.2	0
95.3	0
95.4	0
95.5	0
95.6	0
95.7	0
95.8	0
95.9	0
96	0
96.1	0
96.2	0
96.3	0
96.4	0
96.5	0
96.6	0
96.7	0
96.8	0
96.9	0
97	0
97.1	0
97.2	0
97.3	0
97.4	0
97.5	0
97.6	0
97.7	0
97.8	0
97.9	0
98	0
98.1	0
98.2	0
98.3	0
98.4	0
98.5	0
98.6	0
98.7	0
98.8	0
98.9	0
99	0
99.1	0
99.2	0
99.3	0
99.4	0
99.5	0
99.6	0
99.7	0
99.8	0
99.9	0
100	0
100.1	0.895378
100.2	0.974495
100.3	0.985595
100.4	0.987201
100.5	0.987478
100.6	0.987569
100.7	0.987633
100.8	0.987693
100.9	0.987753
101	0.987812
101.1	0.98787
101.2	0.987929
101.3	0.987987
101.4	0.988044
101.5	0.988102
101.6	0.988159
101.7	0.988215
101.8	0.988272
101.9	0.988328
102	0.988383
102.1	0.988439
102.2	0.988494
102.3	0.988548
102.4	0.988603
102.5	0.988657
102.6	0.988711
102.7	0.988764
102.8	0.988817
102.9	0.98887
103	0.988922
103.1	0.988975
103.2	0.989026
103.3	0.989078
103.4	0.989129
103.5	0.98918
103.6	0.989231
103.7	0.989281
103.8	0.989331
103.9	0.989381
104	0.989431
104.1	0.98948
104.2	0.989529
104.3	0.989577
104.4	0.989626
104.5	0.989674
104.6	0.989722
104.7	0.989769
104.8	0.989816
104.9	0.989863
105	0.98991
105.1	0.989956
105.2	0.990002
105.3	0.990048
105.4	0.990094
105.5	0.990139
105.6	0.990184
105.7	0.990229
105.8	0.990273
105.9	0.990318
106	0.990362
106.1	0.990406
106.2	0.990449
106.3	0.990492
106.4	0.990535
106.5	0.990578
106.6	0.99062
106.7	0.990663
106.8	0.990705
106.9	0.990746
107	0.990788
107.1	0.990829
107.2	0.99087
107.3	0.990911
107.4	0.990951
107.5	0.990992
107.6	0.991032
107.7	0.991072
107.8	0.991111
107.9	0.991151
108	0.99119
108.1	0.991229
108.2	0.991267
108.3	0.991306
108.4	0.991344
108.5	0.991382
108.6	0.99142
108.7	0.991457
108.8	0.991495
108.9	0.991532
109	0.991569
109.1	0.991605
109.2	0.991642
109.3	0.991678
109.4	0.991714
109.5	0.99175
109.6	0.991786
109.7	0.991821
109.8	0.991856
109.9	0.991891
110	0.991926
110.1	0.991961
110.2	0.991995
110.3	0.992029
110.4	0.992063
110.5	0.992097
110.6	0.992131
110.7	0.992164
110.8	0.992197
110.9	0.99223
111	0.992263
111.1	0.992296
111.2	0.992328
111.3	0.99236
111.4	0.992392
111.5	0.992424
111.6	0.992456
111.7	0.992487
111.8	0.992519
111.9	0.99255
112	0.992581
112.1	0.992611
112.2	0.992642
112.3	0.992672
112.4	0.992703
112.5	0.992733
112.6	0.992763
112.7	0.992792
112.8	0.992822
112.9	0.992851
113	0.99288
113.1	0.992909
113.2	0.992938
113.3	0.992967
113.4	0.992995
113.5	0.993024
113.6	0.993052
113.7	0.99308
113.8	0.993108
113.9	0.993135
114	0.993163
114.1	0.99319
114.2	0.993217
114.3	0.993244
114.4	0.993271
114.5	0.993298
114.6	0.993324
114.7	0.993351
114.8	0.993377
114.9	0.993403
115	0.993429
115.1	0.993455
115.2	0.993481
115.3	0.993506
115.4	0.993531
115.5	0.993557
115.6	0.993582
115.7	0.993607
115.8	0.993631
115.9	0.993656
116	0.99368
116.1	0.993705
116.2	0.993729
116.3	0.993753
116.4	0.993777
116.5	0.993801
116.6	0.993824
116.7	0.993848
116.8	0.993871
116.9	0.993894
117	0.993917
117.1	0.99394
117.2	0.993963
117.3	0.993986
117.4	0.994008
117.5	0.994031
117.6	0.994053
117.7	0.994075
117.8	0.994097
117.9	0.994119
118	0.994141
118.1	0.994162
118.2	0.994184
118.3	0.994205
118.4	0.994226
118.5	0.994247
118.6	0.994268
118.7	0.994289
118.8	0.99431
118.9	0.994331
119	0.994351
119.1	0.994372
119.2	0.994392
119.3	0.994412
119.4	0.994432
119.5	0.994452
119.6	0.994472
119.7	0.994492
119.8	0.994511
119.9	0.994531
120	0.99455
120.1	0.994569
120.2	0.994588
120.3	0.994607
120.4	0.994626
120.5	0.994645
120.6	0.994664
120.7	0.994682
120.8	0.994701
120.9	0.994719
121	0.994737
121.1	0.994755
121.2	0.994773
121.3	0.994791
121.4	0.994809
121.5	0.994827
121.6	0.994844
121.7	0.994862
121.8	0.994879
121.9	0.994897
122	0.994914
122.1	0.994931
122.2	0.994948
122.3	0.994965
122.4	0.994982
122.5	0.994998
122.6	0.995015
122.7	0.995031
122.8	0.995048
122.9	0.995064
123	0.99508
123.1	0.995096
123.2	0.995112
123.3	0.995128
123.4	0.995144
123.5	0.99516
123.6	0.995176
123.7	0.995191
123.8	0.995207
123.9	0.995222
124	0.995237
124.1	0.995253
124.2	0.995268
124.3	0.995283
124.4	0.995298
124.5	0.995312
124.6	0.995327
124.7	0.995342
124.8	0.995356
124.9	0.995371
125	0.995385
125.1	0.9954
125.2	0.995414
125.3	0.995428
125.4	0.995442
125.5	0.995456
125.6	0.99547
125.7	0.995484
125.8	0.995498
125.9	0.995511
126	0.995525
126.1	0.995539
126.2	0.995552
126.3	0.995565
126.4	0.995579
126.5	0.995592
126.6	0.995605
126.7	0.995618
126.8	0.995631
126.9	0.995644
127	0.995657
127.1	0.995669
127.2	0.995682
127.3	0.995695
127.4	0.995707
127.5	0.99572
127.6	0.995732
127.7	0.995744
127.8	0.995757
127.9	0.995769
128	0.995781
128.1	0.995793
128.2	0.995805
128.3	0.995817
128.4	0.995829
128.5	0.99584
128.6	0.995852
128.7	0.995864
128.8	0.995875
128.9	0.995887
129	0.995898
129.1	0.995909
129.2	0.995921
129.3	0.995932
129.4	0.995943
129.5	0.995954
129.6	0.995965
129.7	0.995976
129.8	0.995987
129.9	0.995998
130	0.996008
130.1	0.996019
130.2	0.99603
130.3	0.99604
130.4	0.996051
130.5	0.996061
130.6	0.996072
130.7	0.996082
130.8	0.996092
130.9	0.996102
131	0.996112
131.1	0.996123
131.2	0.996133
131.3	0.996143
131.4	0.996152
131.5	0.996162
131.6	0.996172
131.7	0.996182
131.8	0.996191
131.9	0.996201
132	0.996211
132.1	0.99622
132.2	0.99623
132.3	0.996239
132.4	0.996248
132.5	0.996258
132.6	0.996267
132.7	0.996276
132.8	0.996285
132.9	0.996294
133	0.996303
133.1	0.996312
133.2	0.996321
133.3	0.99633
133.4	0.996339
133.5	0.996347
133.6	0.996356
133.7	0.996365
133.8	0.996373
133.9	0.996382
134	0.99639
134.1	0.996399
134.2	0.996407
134.3	0.996416
134.4	0.996424
134.5	0.996432
134.6	0.99644
134.7	0.996449
134.8	0.996457
134.9	0.996465
135	0.996473
135.1	0.996481
135.2	0.996489
135.3	0.996497
135.4	0.996504
135.5	0.996512
135.6	0.99652
135.7	0.996528
135.8	0.996535
135.9	0.996543
136	0.99655
136.1	0.996558
136.2	0.996565
136.3	0.996573
136.4	0.99658
136.5	0.996588
136.6	0.996595
136.7	0.996602
136.8	0.996609
136.9	0.996616
137	0.996624
137.1	0.996631
137.2	0.996638
137.3	0.996645
137.4	0.996652
137.5	0.996659
137.6	0.996665
137.7	0.996672
137.8	0.996679
137.9	0.996686
138	0.996693
138.1	0.996699
138.2	0.996706
138.3	0.996713
138.4	0.996719
138.5	0.996726
138.6	0.996732
138.7	0.996739
138.8	0.996745
138.9	0.996751
139	0.996758
139.1	0.996764
139.2	0.99677
139.3	0.996776
139.4	0.996783
139.5	0.996789
139.6	0.996795
139.7	0.996801
139.8	0.996807
139.9	0.996813
140	0.996819
140.1	0.996825
140.2	0.996831
140.3	0.996837
140.4	0.996843
140.5	0.996848
140.6	0.996854
140.7	0.99686
140.8	0.996866
140.9	0.996871
141	0.996877
141.1	0.996883
141.2	0.996888
141.3	0.996894
141.4	0.996899
141.5	0.996905
141.6	0.99691
141.7	0.996915
141.8	0.996921
141.9	0.996926
142	0.996931
142.1	0.996937
142.2	0.996942
142.3	0.996947
142.4	0.996952
142.5	0.996958
142.6	0.996963
142.7	0.996968
142.8	0.996973
142.9	0.996978
143	0.996983
143.1	0.996988
143.2	0.996993
143.3	0.996998
143.4	0.997003
143.5	0.997008
143.6	0.997012
143.7	0.997017
143.8	0.997022
143.9	0.997027
144	0.997031
144.1	0.997036
144.2	0.997041
144.3	0.997045
144.4	0.99705
144.5	0.997055
144.6	0.997059
144.7	0.997064
144.8	0.997068
144.9	0.997073
145	0.997077
145.1	0.997082
145.2	0.997086
145.3	0.99709
145.4	0.997095
145.5	0.997099
145.6	0.997103
145.7	0.997108
145.8	0.997112
145.9	0.997116
146	0.99712
146.1	0.997125
146.2	0.997129
146.3	0.997133
146.4	0.997137
146.5	0.997141
146.6	0.997145
146.7	0.997149
146.8	0.997153
146.9	0.997157
147	0.997161
147.1	0.997165
147.2	0.997169
147.3	0.997173
147.4	0.997177
147.5	0.99718
147.6	0.997184
147.7	0.997188
147.8	0.997192
147.9	0.997196
148	0.997199
148.1	0.997203
148.2	0.997207
148.3	0.99721
148.4	0.997214
148.5	0.997218
148.6	0.997221
148.7	0.997225
148.8	0.997228
148.9	0.997232
149	0.997236
149.1	0.997239
149.2	0.997243
149.3	0.997246
149.4	0.997249
149.5	0.997253
149.6	0.997256
149.7	0.99726
149.8	0.997263
149.9	0.997266
150	0.99727
150.1	0.997273
150.2	0.997276
150.3	0.99728
150.4	0.997283
150.5	0.997286
150.6	0.997289
150.7	0.997292
150.8	0.997296
150.9	0.997299
151	0.997302
151.1	0.997305
151.2	0.997308
151.3	0.997311
151.4	0.997314
151.5	0.997317
151.6	0.99732
151.7	0.997323
151.8	0.997326
151.9	0.997329
152	0.997332
152.1	0.997335
152.2	0.997338
152.3	0.997341
152.4	0.997344
152.5	0.997347
152.6	0.99735
152.7	0.997352
152.8	0.997355
152.9	0.997358
153	0.997361
153.1	0.997364
153.2	0.997366
153.3	0.997369
153.4	0.997372
153.5	0.997374
153.6	0.997377
153.7	0.99738
153.8	0.997382
153.9	0.997385
154	0.997388
154.1	0.99739
154.2	0.997393
154.3	0.997396
154.4	0.997398
154.5	0.997401
154.6	0.997403
154.7	0.997406
154.8	0.997408
154.9	0.997411
155	0.997413
155.1	0.997416
155.2	0.997418
155.3	0.997421
155.4	0.997423
155.5	0.997425
155.6	0.997428
155.7	0.99743
155.8	0.997432
155.9	0.997435
156	0.997437
156.1	0.997439
156.2	0.997442
156.3	0.997444
156.4	0.997446
156.5	0.997449
156.6	0.997451
156.7	0.997453
156.8	0.997455
156.9	0.997458
157	0.99746
157.1	0.997462
157.2	0.997464
157.3	0.997466
157.4	0.997468
157.5	0.997471
157.6	0.997473
157.7	0.997475
157.8	0.997477
157.9	0.997479
158	0.997481
158.1	0.997483
158.2	0.997485
158.3	0.997487
158.4	0.997489
158.5	0.997491
158.6	0.997493
158.7	0.997495
158.8	0.997497
158.9	0.997499
159	0.997501
159.1	0.997503
159.2	0.997505
159.3	0.997507
159.4	0.997509
159.5	0.997511
159.6	0.997513
159.7	0.997515
159.8	0.997516
159.9	0.997518
160	0.99752
160.1	0.997522
160.2	0.997524
160.3	0.997526
160.4	0.997527
160.5	0.997529
160.6	0.997531
160.7	0.997533
160.8	0.997535
160.9	0.997536
161	0.997538
161.1	0.99754
161.2	0.997541
161.3	0.997543
161.4	0.997545
161.5	0.997547
161.6	0.997548
161.7	0.99755
161.8	0.997552
161.9	0.997553
162	0.997555
162.1	0.997557
162.2	0.997558
162.3	0.99756
162.4	0.997561
162.5	0.997563
162.6	0.997565
162.7	0.997566
162.8	0.997568
162.9	0.997569
163	0.997571
163.1	0.997572
163.2	0.997574
163.3	0.997575
163.4	0.997577
163.5	0.997578
163.6	0.99758
163.7	0.997581
163.8	0.997583
163.9	0.997584
164	0.997586
164.1	0.997587
164.2	0.997589
164.3	0.99759
164.4	0.997592
164.5	0.997593
164.6	0.997594
164.7	0.997596
164.8	0.997597
164.9	0.997599
165	0.9976
165.1	0.997601
165.2	0.997603
165.3	0.997604
165.4	0.997605
165.5	0.997607
165.6	0.997608
165.7	0.997609
165.8	0.997611
165.9	0.997612
166	0.997613
166.1	0.997615
166.2	0.997616
166.3	0.997617
166.4	0.997618
166.5	0.99762
166.6	0.997621
166.7	0.997622
166.8	0.997623
166.9	0.997625
167	0.997626
167.1	0.997627
167.2	0.997628
167.3	0.997629
167.4	0.997631
167.5	0.997632
167.6	0.997633
167.7	0.997634
167.8	0.997635
167.9	0.997637
168	0.997638
168.1	0.997639
168.2	0.99764
168.3	0.997641
168.4	0.997642
168.5	0.997643
168.6	0.997644
168.7	0.997646
168.8	0.997647
168.9	0.997648
169	0.997649
169.1	0.99765
169.2	0.997651
169.3	0.997652
169.4	0.997653
169.5	0.997654
169.6	0.997655
169.7	0.997656
169.8	0.997657
169.9	0.997658
170	0.997659
170.1	0.99766
170.2	0.997661
170.3	0.997662
170.4	0.997663
170.5	0.997664
170.6	0.997665
170.7	0.997666
170.8	0.997667
170.9	0.997668
171	0.997669
171.1	0.99767
171.2	0.997671
171.3	0.997672
171.4	0.997673
171.5	0.997674
171.6	0.997675
171.7	0.997676
171.8	0.997677
171.9	0.997678
172	0.997679
172.1	0.99768
172.2	0.99768
172.3	0.997681
172.4	0.997682
172.5	0.997683
172.6	0.997684
172.7	0.997685
172.8	0.997686
172.9	0.997687
173	0.997688
173.1	0.997688
173.2	0.997689
173.3	0.99769
173.4	0.997691
173.5	0.997692
173.6	0.997693
173.7	0.997693
173.8	0.997694
173.9	0.997695
174	0.997696
174.1	0.997697
174.2	0.997697
174.3	0.997698
174.4	0.997699
174.5	0.9977
174.6	0.997701
174.7	0.997701
174.8	0.997702
174.9	0.997703
175	0.997704
175.1	0.997704
175.2	0.997705
175.3	0.997706
175.4	0.997707
175.5	0.997707
175.6	0.997708
175.7	0.997709
175.8	0.99771
175.9	0.99771
176	0.997711
176.1	0.997712
176.2	0.997713
176.3	0.997713
176.4	0.997714
176.5	0.997715
176.6	0.997715
176.7	0.997716
176.8	0.997717
176.9	0.997717
177	0.997718
177.1	0.997719
177.2	0.997719
177.3	0.99772
177.4	0.997721
177.5	0.997721
177.6	0.997722
177.7	0.997723
177.8	0.997723
177.9	0.997724
178	0.997725
178.1	0.997725
178.2	0.997726
178.3	0.997727
178.4	0.997727
178.5	0.997728
178.6	0.997728
178.7	0.997729
178.8	0.99773
178.9	0.99773
179	0.997731
179.1	0.997732
179.2	0.997732
179.3	0.997733
179.4	0.997733
179.5	0.997734
179.6	0.997734
179.7	0.997735
179.8	0.997736
179.9	0.997736
180	0.997737
180.1	0.997737
180.2	0.997738
180.3	0.997738
180.4	0.997739
180.5	0.99774
180.6	0.99774
180.7	0.997741
180.8	0.997741
180.9	0.997742
181	0.997742
181.1	0.997743
181.2	0.997743
181.3	0.997744
181.4	0.997744
181.5	0.997745
181.6	0.997745
181.7	0.997746
181.8	0.997746
181.9	0.997747
182	0.997748
182.1	0.997748
182.2	0.997749
182.3	0.997749
182.4	0.99775
182.5	0.99775
182.6	0.99775
182.7	0.997751
182.8	0.997751
182.9	0.997752
183	0.997752
183.1	0.997753
183.2	0.997753
183.3	0.997754
183.4	0.997754
183.5	0.997755
183.6	0.997755
183.7	0.997756
183.8	0.997756
183.9	0.997757
184	0.997757
184.1	0.997757
184.2	0.997758
184.3	0.997758
184.4	0.997759
184.5	0.997759
184.6	0.99776
184.7	0.99776
184.8	0.997761
184.9	0.997761
185	0.997761
185.1	0.997762
185.2	0.997762
185.3	0.997763
185.4	0.997763
185.5	0.997764
185.6	0.997764
185.7	0.997764
185.8	0.997765
185.9	0.997765
186	0.997766
186.1	0.997766
186.2	0.997766
186.3	0.997767
186.4	0.997767
186.5	0.997768
186.6	0.997768
186.7	0.997768
186.8	0.997769
186.9	0.997769
187	0.997769
187.1	0.99777
187.2	0.99777
187.3	0.997771
187.4	0.997771
187.5	0.997771
187.6	0.997772
187.7	0.997772
187.8	0.997772
187.9	0.997773
188	0.997773
188.1	0.997773
188.2	0.997774
188.3	0.997774
188.4	0.997774
188.5	0.997775
188.6	0.997775
188.7	0.997776
188.8	0.997776
188.9	0.997776
189	0.997777
189.1	0.997777
189.2	0.997777
189.3	0.997778
189.4	0.997778
189.5	0.997778
189.6	0.997779
189.7	0.997779
189.8	0.997779
189.9	0.997779
190	0.99778
190.1	0.99778
190.2	0.99778
190.3	0.997781
190.4	0.997781
190.5	0.997781
190.6	0.997782
190.7	0.997782
190.8	0.997782
190.9	0.997783
191	0.997783
191.1	0.997783
191.2	0.997783
191.3	0.997784
191.4	0.997784
191.5	0.997784
191.6	0.997785
191.7	0.997785
191.8	0.997785
191.9	0.997785
192	0.997786
192.1	0.997786
192.2	0.997786
192.3	0.997787
192.4	0.997787
192.5	0.997787
192.6	0.997787
192.7	0.997788
192.8	0.997788
192.9	0.997788
193	0.997788
193.1	0.997789
193.2	0.997789
193.3	0.997789
193.4	0.99779
193.5	0.99779
193.6	0.99779
193.7	0.99779
193.8	0.997791
193.9	0.997791
194	0.997791
194.1	0.997791
194.2	0.997792
194.3	0.997792
194.4	0.997792
194.5	0.997792
194.6	0.997793
194.7	0.997793
194.8	0.997793
194.9	0.997793
195	0.997793
195.1	0.997794
195.2	0.997794
195.3	0.997794
195.4	0.997794
195.5	0.997795
195.6	0.997795
195.7	0.997795
195.8	0.997795
195.9	0.997796
196	0.997796
196.1	0.997796
196.2	0.997796
196.3	0.997796
196.4	0.997797
196.5	0.997797
196.6	0.997797
196.7	0.997797
196.8	0.997798
196.9	0.997798
197	0.997798
197.1	0.997798
197.2	0.997798
197.3	0.997799
197.4	0.997799
197.5	0.997799
197.6	0.997799
197.7	0.997799
197.8	0.9978
197.9	0.9978
198	0.9978
198.1	0.9978
198.2	0.9978
198.3	0.997801
198.4	0.997801
198.5	0.997801
198.6	0.997801
198.7	0.997801
198.8	0.997802
198.9	0.997802
199	0.997802
199.1	0.997802
199.2	0.997802
199.3	0.997802
199.4	0.997803
199.5	0.997803
199.6	0.997803
199.7	0.997803
199.8	0.997803
199.9	0.997804
200	0.997804
[truncated: 14,000 more rows]
