# Supplementary material for: Bayesian inference of kinetic schemes for ion channels by Kalman filtering
Source: eLife journal article supplement (doi:10.7554/elife.62714), 2022-05-04
Supplement: fig4-data2 [file 1_Sim_N_100_theor_Strom_Werte.xlsx]

## Sheet: Tabelle1
0.1	0
0.2	0
0.3	0
0.4	0
0.5	0
0.6	0
0.7	0
0.8	0
0.9	0
1	0
1.1	0
1.2	0
1.3	0
1.4	0
1.5	0
1.6	0
1.7	0
1.8	0
1.9	0
2	0
2.1	0
2.2	0
2.3	0
2.4	0
2.5	0
2.6	0
2.7	0
2.8	0
2.9	0
3	0
3.1	0
3.2	0
3.3	0
3.4	0
3.5	0
3.6	0
3.7	0
3.8	0
3.9	0
4	0
4.1	0
4.2	0
4.3	0
4.4	0
4.5	0
4.6	0
4.7	0
4.8	0
4.9	0
5	0
5.1	0
5.2	0
5.3	0
5.4	0
5.5	0
5.6	0
5.7	0
5.8	0
5.9	0
6	0
6.1	0
6.2	0
6.3	0
6.4	0
6.5	0
6.6	0
6.7	0
6.8	0
6.9	0
7	0
7.1	0
7.2	0
7.3	0
7.4	0
7.5	0
7.6	0
7.7	0
7.8	0
7.9	0
8	0
8.1	0
8.2	0
8.3	0
8.4	0
8.5	0
8.6	0
8.7	0
8.8	0
8.9	0
9	0
9.1	0
9.2	0
9.3	0
9.4	0
9.5	0
9.6	0
9.7	0
9.8	0
9.9	0
10	0
10.1	0
10.2	0
10.3	0
10.4	0
10.5	0
10.6	0
10.7	0
10.8	0
10.9	0
11	0
11.1	0
11.2	0
11.3	0
11.4	0
11.5	0
11.6	0
11.7	0
11.8	0
11.9	0
12	0
12.1	0
12.2	0
12.3	0
12.4	0
12.5	0
12.6	0
12.7	0
12.8	0
12.9	0
13	0
13.1	0
13.2	0
13.3	0
13.4	0
13.5	0
13.6	0
13.7	0
13.8	0
13.9	0
14	0
14.1	0
14.2	0
14.3	0
14.4	0
14.5	0
14.6	0
14.7	0
14.8	0
14.9	0
15	0
15.1	0
15.2	0
15.3	0
15.4	0
15.5	0
15.6	0
15.7	0
15.8	0
15.9	0
16	0
16.1	0
16.2	0
16.3	0
16.4	0
16.5	0
16.6	0
16.7	0
16.8	0
16.9	0
17	0
17.1	0
17.2	0
17.3	0
17.4	0
17.5	0
17.6	0
17.7	0
17.8	0
17.9	0
18	0
18.1	0
18.2	0
18.3	0
18.4	0
18.5	0
18.6	0
18.7	0
18.8	0
18.9	0
19	0
19.1	0
19.2	0
19.3	0
19.4	0
19.5	0
19.6	0
19.7	0
19.8	0
19.9	0
20	0
20.1	0
20.2	0
20.3	0
20.4	0
20.5	0
20.6	0
20.7	0
20.8	0
20.9	0
21	0
21.1	0
21.2	0
21.3	0
21.4	0
21.5	0
21.6	0
21.7	0
21.8	0
21.9	0
22	0
22.1	0
22.2	0
22.3	0
22.4	0
22.5	0
22.6	0
22.7	0
22.8	0
22.9	0
23	0
23.1	0
23.2	0
23.3	0
23.4	0
23.5	0
23.6	0
23.7	0
23.8	0
23.9	0
24	0
24.1	0
24.2	0
24.3	0
24.4	0
24.5	0
24.6	0
24.7	0
24.8	0
24.9	0
25	0
25.1	0
25.2	0
25.3	0
25.4	0
25.5	0
25.6	0
25.7	0
25.8	0
25.9	0
26	0
26.1	0
26.2	0
26.3	0
26.4	0
26.5	0
26.6	0
26.7	0
26.8	0
26.9	0
27	0
27.1	0
27.2	0
27.3	0
27.4	0
27.5	0
27.6	0
27.7	0
27.8	0
27.9	0
28	0
28.1	0
28.2	0
28.3	0
28.4	0
28.5	0
28.6	0
28.7	0
28.8	0
28.9	0
29	0
29.1	0
29.2	0
29.3	0
29.4	0
29.5	0
29.6	0
29.7	0
29.8	0
29.9	0
30	0
30.1	0
30.2	0
30.3	0
30.4	0
30.5	0
30.6	0
30.7	0
30.8	0
30.9	0
31	0
31.1	0
31.2	0
31.3	0
31.4	0
31.5	0
31.6	0
31.7	0
31.8	0
31.9	0
32	0
32.1	0
32.2	0
32.3	0
32.4	0
32.5	0
32.6	0
32.7	0
32.8	0
32.9	0
33	0
33.1	0
33.2	0
33.3	0
33.4	0
33.5	0
33.6	0
33.7	0
33.8	0
33.9	0
34	0
34.1	0
34.2	0
34.3	0
34.4	0
34.5	0
34.6	0
34.7	0
34.8	0
34.9	0
35	0
35.1	0
35.2	0
35.3	0
35.4	0
35.5	0
35.6	0
35.7	0
35.8	0
35.9	0
36	0
36.1	0
36.2	0
36.3	0
36.4	0
36.5	0
36.6	0
36.7	0
36.8	0
36.9	0
37	0
37.1	0
37.2	0
37.3	0
37.4	0
37.5	0
37.6	0
37.7	0
37.8	0
37.9	0
38	0
38.1	0
38.2	0
38.3	0
38.4	0
38.5	0
38.6	0
38.7	0
38.8	0
38.9	0
39	0
39.1	0
39.2	0
39.3	0
39.4	0
39.5	0
39.6	0
39.7	0
39.8	0
39.9	0
40	0
40.1	0
40.2	0
40.3	0
40.4	0
40.5	0
40.6	0
40.7	0
40.8	0
40.9	0
41	0
41.1	0
41.2	0
41.3	0
41.4	0
41.5	0
41.6	0
41.7	0
41.8	0
41.9	0
42	0
42.1	0
42.2	0
42.3	0
42.4	0
42.5	0
42.6	0
42.7	0
42.8	0
42.9	0
43	0
43.1	0
43.2	0
43.3	0
43.4	0
43.5	0
43.6	0
43.7	0
43.8	0
43.9	0
44	0
44.1	0
44.2	0
44.3	0
44.4	0
44.5	0
44.6	0
44.7	0
44.8	0
44.9	0
45	0
45.1	0
45.2	0
45.3	0
45.4	0
45.5	0
45.6	0
45.7	0
45.8	0
45.9	0
46	0
46.1	0
46.2	0
46.3	0
46.4	0
46.5	0
46.6	0
46.7	0
46.8	0
46.9	0
47	0
47.1	0
47.2	0
47.3	0
47.4	0
47.5	0
47.6	0
47.7	0
47.8	0
47.9	0
48	0
48.1	0
48.2	0
48.3	0
48.4	0
48.5	0
48.6	0
48.7	0
48.8	0
48.9	0
49	0
49.1	0
49.2	0
49.3	0
49.4	0
49.5	0
49.6	0
49.7	0
49.8	0
49.9	0
50	0
50.1	0
50.2	0
50.3	0
50.4	0
50.5	0
50.6	0
50.7	0
50.8	0
50.9	0
51	0
51.1	0
51.2	0
51.3	0
51.4	0
51.5	0
51.6	0
51.7	0
51.8	0
51.9	0
52	0
52.1	0
52.2	0
52.3	0
52.4	0
52.5	0
52.6	0
52.7	0
52.8	0
52.9	0
53	0
53.1	0
53.2	0
53.3	0
53.4	0
53.5	0
53.6	0
53.7	0
53.8	0
53.9	0
54	0
54.1	0
54.2	0
54.3	0
54.4	0
54.5	0
54.6	0
54.7	0
54.8	0
54.9	0
55	0
55.1	0
55.2	0
55.3	0
55.4	0
55.5	0
55.6	0
55.7	0
55.8	0
55.9	0
56	0
56.1	0
56.2	0
56.3	0
56.4	0
56.5	0
56.6	0
56.7	0
56.8	0
56.9	0
57	0
57.1	0
57.2	0
57.3	0
57.4	0
57.5	0
57.6	0
57.7	0
57.8	0
57.9	0
58	0
58.1	0
58.2	0
58.3	0
58.4	0
58.5	0
58.6	0
58.7	0
58.8	0
58.9	0
59	0
59.1	0
59.2	0
59.3	0
59.4	0
59.5	0
59.6	0
59.7	0
59.8	0
59.9	0
60	0
60.1	0
60.2	0
60.3	0
60.4	0
60.5	0
60.6	0
60.7	0
60.8	0
60.9	0
61	0
61.1	0
61.2	0
61.3	0
61.4	0
61.5	0
61.6	0
61.7	0
61.8	0
61.9	0
62	0
62.1	0
62.2	0
62.3	0
62.4	0
62.5	0
62.6	0
62.7	0
62.8	0
62.9	0
63	0
63.1	0
63.2	0
63.3	0
63.4	0
63.5	0
63.6	0
63.7	0
63.8	0
63.9	0
64	0
64.1	0
64.2	0
64.3	0
64.4	0
64.5	0
64.6	0
64.7	0
64.8	0
64.9	0
65	0
65.1	0
65.2	0
65.3	0
65.4	0
65.5	0
65.6	0
65.7	0
65.8	0
65.9	0
66	0
66.1	0
66.2	0
66.3	0
66.4	0
66.5	0
66.6	0
66.7	0
66.8	0
66.9	0
67	0
67.1	0
67.2	0
67.3	0
67.4	0
67.5	0
67.6	0
67.7	0
67.8	0
67.9	0
68	0
68.1	0
68.2	0
68.3	0
68.4	0
68.5	0
68.6	0
68.7	0
68.8	0
68.9	0
69	0
69.1	0
69.2	0
69.3	0
69.4	0
69.5	0
69.6	0
69.7	0
69.8	0
69.9	0
70	0
70.1	0
70.2	0
70.3	0
70.4	0
70.5	0
70.6	0
70.7	0
70.8	0
70.9	0
71	0
71.1	0
71.2	0
71.3	0
71.4	0
71.5	0
71.6	0
71.7	0
71.8	0
71.9	0
72	0
72.1	0
72.2	0
72.3	0
72.4	0
72.5	0
72.6	0
72.7	0
72.8	0
72.9	0
73	0
73.1	0
73.2	0
73.3	0
73.4	0
73.5	0
73.6	0
73.7	0
73.8	0
73.9	0
74	0
74.1	0
74.2	0
74.3	0
74.4	0
74.5	0
74.6	0
74.7	0
74.8	0
74.9	0
75	0
75.1	0
75.2	0
75.3	0
75.4	0
75.5	0
75.6	0
75.7	0
75.8	0
75.9	0
76	0
76.1	0
76.2	0
76.3	0
76.4	0
76.5	0
76.6	0
76.7	0
76.8	0
76.9	0
77	0
77.1	0
77.2	0
77.3	0
77.4	0
77.5	0
77.6	0
77.7	0
77.8	0
77.9	0
78	0
78.1	0
78.2	0
78.3	0
78.4	0
78.5	0
78.6	0
78.7	0
78.8	0
78.9	0
79	0
79.1	0
79.2	0
79.3	0
79.4	0
79.5	0
79.6	0
79.7	0
79.8	0
79.9	0
80	0
80.1	0
80.2	0
80.3	0
80.4	0
80.5	0
80.6	0
80.7	0
80.8	0
80.9	0
81	0
81.1	0
81.2	0
81.3	0
81.4	0
81.5	0
81.6	0
81.7	0
81.8	0
81.9	0
82	0
82.1	0
82.2	0
82.3	0
82.4	0
82.5	0
82.6	0
82.7	0
82.8	0
82.9	0
83	0
83.1	0
83.2	0
83.3	0
83.4	0
83.5	0
83.6	0
83.7	0
83.8	0
83.9	0
84	0
84.1	0
84.2	0
84.3	0
84.4	0
84.5	0
84.6	0
84.7	0
84.8	0
84.9	0
85	0
85.1	0
85.2	0
85.3	0
85.4	0
85.5	0
85.6	0
85.7	0
85.8	0
85.9	0
86	0
86.1	0
86.2	0
86.3	0
86.4	0
86.5	0
86.6	0
86.7	0
86.8	0
86.9	0
87	0
87.1	0
87.2	0
87.3	0
87.4	0
87.5	0
87.6	0
87.7	0
87.8	0
87.9	0
88	0
88.1	0
88.2	0
88.3	0
88.4	0
88.5	0
88.6	0
88.7	0
88.8	0
88.9	0
89	0
89.1	0
89.2	0
89.3	0
89.4	0
89.5	0
89.6	0
89.7	0
89.8	0
89.9	0
90	0
90.1	0
90.2	0
90.3	0
90.4	0
90.5	0
90.6	0
90.7	0
90.8	0
90.9	0
91	0
91.1	0
91.2	0
91.3	0
91.4	0
91.5	0
91.6	0
91.7	0
91.8	0
91.9	0
92	0
92.1	0
92.2	0
92.3	0
92.4	0
92.5	0
92.6	0
92.7	0
92.8	0
92.9	0
93	0
93.1	0
93.2	0
93.3	0
93.4	0
93.5	0
93.6	0
93.7	0
93.8	0
93.9	0
94	0
94.1	0
94.2	0
94.3	0
94.4	0
94.5	0
94.6	0
94.7	0
94.8	0
94.9	0
95	0
95.1	0
95.2	0
95.3	0
95.4	0
95.5	0
95.6	0
95.7	0
95.8	0
95.9	0
96	0
96.1	0
96.2	0
96.3	0
96.4	0
96.5	0
96.6	0
96.7	0
96.8	0
96.9	0
97	0
97.1	0
97.2	0
97.3	0
97.4	0
97.5	0
97.6	0
97.7	0
97.8	0
97.9	0
98	0
98.1	0
98.2	0
98.3	0
98.4	0
98.5	0
98.6	0
98.7	0
98.8	0
98.9	0
99	0
99.1	0
99.2	0
99.3	0
99.4	0
99.5	0
99.6	0
99.7	0
99.8	0
99.9	0
100	0
100.1	0.00222294
100.2	0.00666939
100.3	0.0114329
100.4	0.0162164
100.5	0.0209787
100.6	0.0257141
100.7	0.0304218
100.8	0.0351021
100.9	0.0397549
101	0.0443804
101.1	0.0489789
101.2	0.0535504
101.3	0.0580952
101.4	0.0626134
101.5	0.0671051
101.6	0.0715705
101.7	0.0760098
101.8	0.0804231
101.9	0.0848105
102	0.0891723
102.1	0.0935085
102.2	0.0978193
102.3	0.102105
102.4	0.106365
102.5	0.110601
102.6	0.114812
102.7	0.118998
102.8	0.123159
102.9	0.127296
103	0.131409
103.1	0.135498
103.2	0.139563
103.3	0.143604
103.4	0.147622
103.5	0.151616
103.6	0.155586
103.7	0.159534
103.8	0.163458
103.9	0.167359
104	0.171238
104.1	0.175093
104.2	0.178926
104.3	0.182737
104.4	0.186525
104.5	0.190292
104.6	0.194036
104.7	0.197758
104.8	0.201458
104.9	0.205137
105	0.208794
105.1	0.21243
105.2	0.216045
105.3	0.219638
105.4	0.22321
105.5	0.226761
105.6	0.230292
105.7	0.233802
105.8	0.237291
105.9	0.24076
106	0.244209
106.1	0.247637
106.2	0.251046
106.3	0.254434
106.4	0.257803
106.5	0.261151
106.6	0.264481
106.7	0.26779
106.8	0.271081
106.9	0.274352
107	0.277604
107.1	0.280836
107.2	0.28405
107.3	0.287246
107.4	0.290422
107.5	0.29358
107.6	0.296719
107.7	0.29984
107.8	0.302943
107.9	0.306027
108	0.309094
108.1	0.312142
108.2	0.315173
108.3	0.318186
108.4	0.321181
108.5	0.324159
108.6	0.327119
108.7	0.330062
108.8	0.332988
108.9	0.335896
109	0.338788
109.1	0.341662
109.2	0.34452
109.3	0.347361
109.4	0.350186
109.5	0.352994
109.6	0.355785
109.7	0.35856
109.8	0.361319
109.9	0.364062
110	0.366788
110.1	0.369499
110.2	0.372194
110.3	0.374873
110.4	0.377536
110.5	0.380184
110.6	0.382816
110.7	0.385433
110.8	0.388034
110.9	0.390621
111	0.393192
111.1	0.395748
111.2	0.398289
111.3	0.400815
111.4	0.403327
111.5	0.405823
111.6	0.408305
111.7	0.410773
111.8	0.413226
111.9	0.415665
112	0.418089
112.1	0.4205
112.2	0.422896
112.3	0.425278
112.4	0.427646
112.5	0.43
112.6	0.432341
112.7	0.434668
112.8	0.436981
112.9	0.439281
113	0.441567
113.1	0.44384
113.2	0.446099
113.3	0.448345
113.4	0.450579
113.5	0.452799
113.6	0.455006
113.7	0.4572
113.8	0.459381
113.9	0.46155
114	0.463705
114.1	0.465849
114.2	0.467979
114.3	0.470097
114.4	0.472203
114.5	0.474297
114.6	0.476378
114.7	0.478447
114.8	0.480504
114.9	0.482548
115	0.484581
115.1	0.486602
115.2	0.488611
115.3	0.490609
115.4	0.492594
115.5	0.494568
115.6	0.496531
115.7	0.498482
115.8	0.500421
115.9	0.50235
116	0.504266
116.1	0.506172
116.2	0.508067
116.3	0.50995
116.4	0.511823
116.5	0.513684
116.6	0.515535
116.7	0.517374
116.8	0.519203
116.9	0.521021
117	0.522829
117.1	0.524626
117.2	0.526412
117.3	0.528188
117.4	0.529954
117.5	0.531709
117.6	0.533454
117.7	0.535189
117.8	0.536914
117.9	0.538628
118	0.540333
118.1	0.542027
118.2	0.543712
118.3	0.545387
118.4	0.547051
118.5	0.548707
118.6	0.550352
118.7	0.551988
118.8	0.553614
118.9	0.555231
119	0.556838
119.1	0.558436
119.2	0.560025
119.3	0.561604
119.4	0.563174
119.5	0.564735
119.6	0.566286
119.7	0.567829
119.8	0.569362
119.9	0.570887
120	0.572402
120.1	0.573909
120.2	0.575407
120.3	0.576896
120.4	0.578376
120.5	0.579848
120.6	0.581311
120.7	0.582766
120.8	0.584212
120.9	0.58565
121	0.587079
121.1	0.5885
121.2	0.589912
121.3	0.591316
121.4	0.592712
121.5	0.5941
121.6	0.59548
121.7	0.596851
121.8	0.598215
121.9	0.59957
122	0.600918
122.1	0.602258
122.2	0.60359
122.3	0.604914
122.4	0.60623
122.5	0.607539
122.6	0.60884
122.7	0.610133
122.8	0.611419
122.9	0.612697
123	0.613968
123.1	0.615231
123.2	0.616487
123.3	0.617736
123.4	0.618977
123.5	0.620211
123.6	0.621438
123.7	0.622658
123.8	0.62387
123.9	0.625075
124	0.626274
124.1	0.627465
124.2	0.628649
124.3	0.629827
124.4	0.630997
124.5	0.632161
124.6	0.633318
124.7	0.634468
124.8	0.635611
124.9	0.636748
125	0.637878
125.1	0.639001
125.2	0.640118
125.3	0.641228
125.4	0.642332
125.5	0.643429
125.6	0.64452
125.7	0.645604
125.8	0.646682
125.9	0.647754
126	0.64882
126.1	0.649879
126.2	0.650932
126.3	0.651979
126.4	0.65302
126.5	0.654054
126.6	0.655083
126.7	0.656106
126.8	0.657122
126.9	0.658133
127	0.659138
127.1	0.660137
127.2	0.66113
127.3	0.662117
127.4	0.663098
127.5	0.664074
127.6	0.665044
127.7	0.666008
127.8	0.666967
127.9	0.66792
128	0.668867
128.1	0.669809
128.2	0.670745
128.3	0.671676
128.4	0.672602
128.5	0.673522
128.6	0.674436
128.7	0.675346
128.8	0.67625
128.9	0.677148
129	0.678042
129.1	0.67893
129.2	0.679813
129.3	0.680691
129.4	0.681563
129.5	0.682431
129.6	0.683293
129.7	0.684151
129.8	0.685003
129.9	0.685851
130	0.686693
130.1	0.687531
130.2	0.688363
130.3	0.689191
130.4	0.690014
130.5	0.690832
130.6	0.691645
130.7	0.692454
130.8	0.693257
130.9	0.694057
131	0.694851
131.1	0.695641
131.2	0.696426
131.3	0.697206
131.4	0.697982
131.5	0.698754
131.6	0.699521
131.7	0.700283
131.8	0.701041
131.9	0.701794
132	0.702544
132.1	0.703288
132.2	0.704029
132.3	0.704765
132.4	0.705496
132.5	0.706224
132.6	0.706947
132.7	0.707666
132.8	0.708381
132.9	0.709091
133	0.709797
133.1	0.7105
133.2	0.711198
133.3	0.711892
133.4	0.712582
133.5	0.713268
133.6	0.71395
133.7	0.714628
133.8	0.715301
133.9	0.715971
134	0.716638
134.1	0.7173
134.2	0.717958
134.3	0.718612
134.4	0.719263
134.5	0.71991
134.6	0.720553
134.7	0.721192
134.8	0.721828
134.9	0.722459
135	0.723088
135.1	0.723712
135.2	0.724333
135.3	0.72495
135.4	0.725563
135.5	0.726173
135.6	0.72678
135.7	0.727382
135.8	0.727982
135.9	0.728577
136	0.72917
136.1	0.729759
136.2	0.730344
136.3	0.730926
136.4	0.731504
136.5	0.732079
136.6	0.732651
136.7	0.73322
136.8	0.733785
136.9	0.734346
137	0.734905
137.1	0.73546
137.2	0.736012
137.3	0.736561
137.4	0.737106
137.5	0.737649
137.6	0.738188
137.7	0.738724
137.8	0.739257
137.9	0.739786
138	0.740313
138.1	0.740837
138.2	0.741357
138.3	0.741875
138.4	0.742389
138.5	0.7429
138.6	0.743409
138.7	0.743914
138.8	0.744417
138.9	0.744916
139	0.745413
139.1	0.745907
139.2	0.746397
139.3	0.746885
139.4	0.74737
139.5	0.747853
139.6	0.748332
139.7	0.748809
139.8	0.749282
139.9	0.749753
140	0.750222
140.1	0.750687
140.2	0.75115
140.3	0.75161
140.4	0.752067
140.5	0.752522
140.6	0.752974
140.7	0.753424
140.8	0.75387
140.9	0.754315
141	0.754756
141.1	0.755195
141.2	0.755632
141.3	0.756065
141.4	0.756497
141.5	0.756926
141.6	0.757352
141.7	0.757776
141.8	0.758197
141.9	0.758616
142	0.759032
142.1	0.759446
142.2	0.759858
142.3	0.760267
142.4	0.760673
142.5	0.761078
142.6	0.76148
142.7	0.761879
142.8	0.762277
142.9	0.762672
143	0.763064
143.1	0.763455
143.2	0.763843
143.3	0.764228
143.4	0.764612
143.5	0.764993
143.6	0.765372
143.7	0.765749
143.8	0.766124
143.9	0.766496
144	0.766866
144.1	0.767234
144.2	0.7676
144.3	0.767964
144.4	0.768326
144.5	0.768685
144.6	0.769043
144.7	0.769398
144.8	0.769751
144.9	0.770102
145	0.770452
145.1	0.770799
145.2	0.771144
145.3	0.771487
145.4	0.771828
145.5	0.772167
145.6	0.772504
145.7	0.772839
145.8	0.773172
145.9	0.773503
146	0.773832
146.1	0.77416
146.2	0.774485
146.3	0.774808
146.4	0.77513
146.5	0.77545
146.6	0.775768
146.7	0.776083
146.8	0.776398
146.9	0.77671
147	0.77702
147.1	0.777329
147.2	0.777636
147.3	0.777941
147.4	0.778244
147.5	0.778545
147.6	0.778845
147.7	0.779143
147.8	0.779439
147.9	0.779734
148	0.780026
148.1	0.780317
148.2	0.780607
148.3	0.780894
148.4	0.78118
148.5	0.781465
148.6	0.781747
148.7	0.782028
148.8	0.782307
148.9	0.782585
149	0.782861
149.1	0.783135
149.2	0.783408
149.3	0.78368
149.4	0.783949
149.5	0.784217
149.6	0.784484
149.7	0.784749
149.8	0.785012
149.9	0.785274
150	0.785534
150.1	0.785793
150.2	0.78605
150.3	0.786306
150.4	0.78656
150.5	0.786813
150.6	0.787064
150.7	0.787314
150.8	0.787562
150.9	0.787809
151	0.788055
151.1	0.788299
151.2	0.788541
151.3	0.788782
151.4	0.789022
151.5	0.78926
151.6	0.789497
151.7	0.789733
151.8	0.789967
151.9	0.7902
152	0.790431
152.1	0.790661
152.2	0.79089
152.3	0.791118
152.4	0.791344
152.5	0.791568
152.6	0.791792
152.7	0.792014
152.8	0.792235
152.9	0.792454
153	0.792673
153.1	0.79289
153.2	0.793105
153.3	0.79332
153.4	0.793533
153.5	0.793745
153.6	0.793956
153.7	0.794165
153.8	0.794373
153.9	0.79458
154	0.794786
154.1	0.794991
154.2	0.795194
154.3	0.795396
154.4	0.795597
154.5	0.795797
154.6	0.795996
154.7	0.796193
154.8	0.79639
154.9	0.796585
155	0.796779
155.1	0.796972
155.2	0.797164
155.3	0.797354
155.4	0.797544
155.5	0.797732
155.6	0.79792
155.7	0.798106
155.8	0.798291
155.9	0.798475
156	0.798658
156.1	0.79884
156.2	0.799021
156.3	0.799201
156.4	0.799379
156.5	0.799557
156.6	0.799734
156.7	0.799909
156.8	0.800084
156.9	0.800258
157	0.80043
157.1	0.800602
157.2	0.800772
157.3	0.800942
157.4	0.80111
157.5	0.801278
157.6	0.801444
157.7	0.80161
157.8	0.801775
157.9	0.801938
158	0.802101
158.1	0.802263
158.2	0.802424
158.3	0.802584
158.4	0.802742
158.5	0.8029
158.6	0.803058
158.7	0.803214
158.8	0.803369
158.9	0.803523
159	0.803677
159.1	0.803829
159.2	0.803981
159.3	0.804132
159.4	0.804282
159.5	0.804431
159.6	0.804579
159.7	0.804726
159.8	0.804872
159.9	0.805018
160	0.805163
160.1	0.805306
160.2	0.805449
160.3	0.805591
160.4	0.805733
160.5	0.805873
160.6	0.806013
160.7	0.806152
160.8	0.80629
160.9	0.806427
161	0.806564
161.1	0.806699
161.2	0.806834
161.3	0.806968
161.4	0.807101
161.5	0.807234
161.6	0.807366
161.7	0.807496
161.8	0.807627
161.9	0.807756
162	0.807885
162.1	0.808013
162.2	0.80814
162.3	0.808266
162.4	0.808392
162.5	0.808517
162.6	0.808641
162.7	0.808764
162.8	0.808887
162.9	0.809009
163	0.80913
163.1	0.809251
163.2	0.809371
163.3	0.80949
163.4	0.809609
163.5	0.809726
163.6	0.809844
163.7	0.80996
163.8	0.810076
163.9	0.810191
164	0.810305
164.1	0.810419
164.2	0.810532
164.3	0.810644
164.4	0.810756
164.5	0.810867
164.6	0.810978
164.7	0.811087
164.8	0.811197
164.9	0.811305
165	0.811413
165.1	0.81152
165.2	0.811627
165.3	0.811733
165.4	0.811838
165.5	0.811943
165.6	0.812047
165.7	0.812151
165.8	0.812253
165.9	0.812356
166	0.812457
166.1	0.812559
166.2	0.812659
166.3	0.812759
166.4	0.812858
166.5	0.812957
166.6	0.813055
166.7	0.813153
166.8	0.81325
166.9	0.813347
167	0.813442
167.1	0.813538
167.2	0.813633
167.3	0.813727
167.4	0.813821
167.5	0.813914
167.6	0.814006
167.7	0.814098
167.8	0.81419
167.9	0.814281
168	0.814371
168.1	0.814461
168.2	0.814551
168.3	0.814639
168.4	0.814728
168.5	0.814816
168.6	0.814903
168.7	0.81499
168.8	0.815076
168.9	0.815162
169	0.815247
169.1	0.815332
169.2	0.815416
169.3	0.8155
169.4	0.815583
169.5	0.815666
169.6	0.815748
169.7	0.81583
169.8	0.815912
169.9	0.815993
170	0.816073
170.1	0.816153
170.2	0.816232
170.3	0.816311
170.4	0.81639
170.5	0.816468
170.6	0.816546
170.7	0.816623
170.8	0.8167
170.9	0.816776
171	0.816852
171.1	0.816927
171.2	0.817002
171.3	0.817077
171.4	0.817151
171.5	0.817224
171.6	0.817298
171.7	0.81737
171.8	0.817443
171.9	0.817515
172	0.817586
172.1	0.817657
172.2	0.817728
172.3	0.817798
172.4	0.817868
172.5	0.817937
172.6	0.818006
172.7	0.818075
172.8	0.818143
172.9	0.818211
173	0.818279
173.1	0.818346
173.2	0.818412
173.3	0.818479
173.4	0.818544
173.5	0.81861
173.6	0.818675
173.7	0.81874
173.8	0.818804
173.9	0.818868
174	0.818932
174.1	0.818995
174.2	0.819058
174.3	0.81912
174.4	0.819182
174.5	0.819244
174.6	0.819305
174.7	0.819366
174.8	0.819427
174.9	0.819487
175	0.819547
175.1	0.819607
175.2	0.819666
175.3	0.819725
175.4	0.819784
175.5	0.819842
175.6	0.8199
175.7	0.819957
175.8	0.820014
175.9	0.820071
176	0.820128
176.1	0.820184
176.2	0.82024
176.3	0.820296
176.4	0.820351
176.5	0.820406
176.6	0.82046
176.7	0.820515
176.8	0.820568
176.9	0.820622
177	0.820675
177.1	0.820728
177.2	0.820781
177.3	0.820833
177.4	0.820886
177.5	0.820937
177.6	0.820989
177.7	0.82104
177.8	0.821091
177.9	0.821141
178	0.821192
178.1	0.821242
178.2	0.821291
178.3	0.821341
178.4	0.82139
178.5	0.821439
178.6	0.821487
178.7	0.821535
178.8	0.821583
178.9	0.821631
179	0.821679
179.1	0.821726
179.2	0.821772
179.3	0.821819
179.4	0.821865
179.5	0.821911
179.6	0.821957
179.7	0.822003
179.8	0.822048
179.9	0.822093
180	0.822138
180.1	0.822182
180.2	0.822226
180.3	0.82227
180.4	0.822314
180.5	0.822357
180.6	0.8224
180.7	0.822443
180.8	0.822486
180.9	0.822528
181	0.82257
181.1	0.822612
181.2	0.822654
181.3	0.822695
181.4	0.822737
181.5	0.822778
181.6	0.822818
181.7	0.822859
181.8	0.822899
181.9	0.822939
182	0.822979
182.1	0.823018
182.2	0.823057
182.3	0.823097
182.4	0.823135
182.5	0.823174
182.6	0.823212
182.7	0.82325
182.8	0.823288
182.9	0.823326
183	0.823364
183.1	0.823401
183.2	0.823438
183.3	0.823475
183.4	0.823511
183.5	0.823548
183.6	0.823584
183.7	0.82362
183.8	0.823656
183.9	0.823691
184	0.823727
184.1	0.823762
184.2	0.823797
184.3	0.823831
184.4	0.823866
184.5	0.8239
184.6	0.823934
184.7	0.823968
184.8	0.824002
184.9	0.824035
185	0.824069
185.1	0.824102
185.2	0.824135
185.3	0.824168
185.4	0.8242
185.5	0.824233
185.6	0.824265
185.7	0.824297
185.8	0.824328
185.9	0.82436
186	0.824392
186.1	0.824423
186.2	0.824454
186.3	0.824485
186.4	0.824515
186.5	0.824546
186.6	0.824576
186.7	0.824606
186.8	0.824636
186.9	0.824666
187	0.824696
187.1	0.824725
187.2	0.824755
187.3	0.824784
187.4	0.824813
187.5	0.824841
187.6	0.82487
187.7	0.824898
187.8	0.824927
187.9	0.824955
188	0.824983
188.1	0.825011
188.2	0.825038
188.3	0.825066
188.4	0.825093
188.5	0.82512
188.6	0.825147
188.7	0.825174
188.8	0.825201
188.9	0.825227
189	0.825253
189.1	0.82528
189.2	0.825306
189.3	0.825332
189.4	0.825357
189.5	0.825383
189.6	0.825408
189.7	0.825434
189.8	0.825459
189.9	0.825484
190	0.825509
190.1	0.825533
190.2	0.825558
190.3	0.825582
190.4	0.825607
190.5	0.825631
190.6	0.825655
190.7	0.825679
190.8	0.825702
190.9	0.825726
191	0.825749
191.1	0.825773
191.2	0.825796
191.3	0.825819
191.4	0.825842
191.5	0.825864
191.6	0.825887
191.7	0.825909
191.8	0.825932
191.9	0.825954
192	0.825976
192.1	0.825998
192.2	0.82602
192.3	0.826042
192.4	0.826063
192.5	0.826085
192.6	0.826106
192.7	0.826127
192.8	0.826148
192.9	0.826169
193	0.82619
193.1	0.826211
193.2	0.826231
193.3	0.826252
193.4	0.826272
193.5	0.826292
193.6	0.826313
193.7	0.826333
193.8	0.826352
193.9	0.826372
194	0.826392
194.1	0.826411
194.2	0.826431
194.3	0.82645
194.4	0.826469
194.5	0.826488
194.6	0.826507
194.7	0.826526
194.8	0.826545
194.9	0.826564
195	0.826582
195.1	0.8266
195.2	0.826619
195.3	0.826637
195.4	0.826655
195.5	0.826673
195.6	0.826691
195.7	0.826709
195.8	0.826726
195.9	0.826744
196	0.826761
196.1	0.826779
196.2	0.826796
196.3	0.826813
196.4	0.82683
196.5	0.826847
196.6	0.826864
196.7	0.826881
196.8	0.826898
196.9	0.826914
197	0.826931
197.1	0.826947
197.2	0.826963
197.3	0.826979
197.4	0.826996
197.5	0.827012
197.6	0.827027
197.7	0.827043
197.8	0.827059
197.9	0.827075
198	0.82709
198.1	0.827106
198.2	0.827121
198.3	0.827136
198.4	0.827151
198.5	0.827166
198.6	0.827181
198.7	0.827196
198.8	0.827211
198.9	0.827226
199	0.827241
199.1	0.827255
199.2	0.82727
199.3	0.827284
199.4	0.827298
199.5	0.827312
199.6	0.827327
199.7	0.827341
199.8	0.827355
199.9	0.827369
200	0.827382
[truncated: 14,000 more rows]
