# Supplementary material for: Bayesian inference of kinetic schemes for ion channels by Kalman filtering
Source: eLife journal article supplement (doi:10.7554/elife.62714), 2022-05-04
Supplement: fig4-data2 [file 1_Sim_N_200_Fluor_MW.xlsx]

## Sheet: 64 M
0.1	0
0.2	0
0.3	0
0.4	0
0.5	0
0.6	0
0.7	0
0.8	0
0.9	0
1	0
1.1	0
1.2	0
1.3	0
1.4	0
1.5	0
1.6	0
1.7	0
1.8	0
1.9	0
2	0
2.1	0
2.2	0
2.3	0
2.4	0
2.5	0
2.6	0
2.7	0
2.8	0
2.9	0
3	0
3.1	0
3.2	0
3.3	0
3.4	0
3.5	0
3.6	0
3.7	0
3.8	0
3.9	0
4	0
4.1	0
4.2	0
4.3	0
4.4	0
4.5	0
4.6	0
4.7	0
4.8	0
4.9	0
5	0
5.1	0
5.2	0
5.3	0
5.4	0
5.5	0
5.6	0
5.7	0
5.8	0
5.9	0
6	0
6.1	0
6.2	0
6.3	0
6.4	0
6.5	0
6.6	0
6.7	0
6.8	0
6.9	0
7	0
7.1	0
7.2	0
7.3	0
7.4	0
7.5	0
7.6	0
7.7	0
7.8	0
7.9	0
8	0
8.1	0
8.2	0
8.3	0
8.4	0
8.5	0
8.6	0
8.7	0
8.8	0
8.9	0
9	0
9.1	0
9.2	0
9.3	0
9.4	0
9.5	0
9.6	0
9.7	0
9.8	0
9.9	0
10	0
10.1	0
10.2	0
10.3	0
10.4	0
10.5	0
10.6	0
10.7	0
10.8	0
10.9	0
11	0
11.1	0
11.2	0
11.3	0
11.4	0
11.5	0
11.6	0
11.7	0
11.8	0
11.9	0
12	0
12.1	0
12.2	0
12.3	0
12.4	0
12.5	0
12.6	0
12.7	0
12.8	0
12.9	0
13	0
13.1	0
13.2	0
13.3	0
13.4	0
13.5	0
13.6	0
13.7	0
13.8	0
13.9	0
14	0
14.1	0
14.2	0
14.3	0
14.4	0
14.5	0
14.6	0
14.7	0
14.8	0
14.9	0
15	0
15.1	0
15.2	0
15.3	0
15.4	0
15.5	0
15.6	0
15.7	0
15.8	0
15.9	0
16	0
16.1	0
16.2	0
16.3	0
16.4	0
16.5	0
16.6	0
16.7	0
16.8	0
16.9	0
17	0
17.1	0
17.2	0
17.3	0
17.4	0
17.5	0
17.6	0
17.7	0
17.8	0
17.9	0
18	0
18.1	0
18.2	0
18.3	0
18.4	0
18.5	0
18.6	0
18.7	0
18.8	0
18.9	0
19	0
19.1	0
19.2	0
19.3	0
19.4	0
19.5	0
19.6	0
19.7	0
19.8	0
19.9	0
20	0
20.1	0
20.2	0
20.3	0
20.4	0
20.5	0
20.6	0
20.7	0
20.8	0
20.9	0
21	0
21.1	0
21.2	0
21.3	0
21.4	0
21.5	0
21.6	0
21.7	0
21.8	0
21.9	0
22	0
22.1	0
22.2	0
22.3	0
22.4	0
22.5	0
22.6	0
22.7	0
22.8	0
22.9	0
23	0
23.1	0
23.2	0
23.3	0
23.4	0
23.5	0
23.6	0
23.7	0
23.8	0
23.9	0
24	0
24.1	0
24.2	0
24.3	0
24.4	0
24.5	0
24.6	0
24.7	0
24.8	0
24.9	0
25	0
25.1	0
25.2	0
25.3	0
25.4	0
25.5	0
25.6	0
25.7	0
25.8	0
25.9	0
26	0
26.1	0
26.2	0
26.3	0
26.4	0
26.5	0
26.6	0
26.7	0
26.8	0
26.9	0
27	0
27.1	0
27.2	0
27.3	0
27.4	0
27.5	0
27.6	0
27.7	0
27.8	0
27.9	0
28	0
28.1	0
28.2	0
28.3	0
28.4	0
28.5	0
28.6	0
28.7	0
28.8	0
28.9	0
29	0
29.1	0
29.2	0
29.3	0
29.4	0
29.5	0
29.6	0
29.7	0
29.8	0
29.9	0
30	0
30.1	0
30.2	0
30.3	0
30.4	0
30.5	0
30.6	0
30.7	0
30.8	0
30.9	0
31	0
31.1	0
31.2	0
31.3	0
31.4	0
31.5	0
31.6	0
31.7	0
31.8	0
31.9	0
32	0
32.1	0
32.2	0
32.3	0
32.4	0
32.5	0
32.6	0
32.7	0
32.8	0
32.9	0
33	0
33.1	0
33.2	0
33.3	0
33.4	0
33.5	0
33.6	0
33.7	0
33.8	0
33.9	0
34	0
34.1	0
34.2	0
34.3	0
34.4	0
34.5	0
34.6	0
34.7	0
34.8	0
34.9	0
35	0
35.1	0
35.2	0
35.3	0
35.4	0
35.5	0
35.6	0
35.7	0
35.8	0
35.9	0
36	0
36.1	0
36.2	0
36.3	0
36.4	0
36.5	0
36.6	0
36.7	0
36.8	0
36.9	0
37	0
37.1	0
37.2	0
37.3	0
37.4	0
37.5	0
37.6	0
37.7	0
37.8	0
37.9	0
38	0
38.1	0
38.2	0
38.3	0
38.4	0
38.5	0
38.6	0
38.7	0
38.8	0
38.9	0
39	0
39.1	0
39.2	0
39.3	0
39.4	0
39.5	0
39.6	0
39.7	0
39.8	0
39.9	0
40	0
40.1	0
40.2	0
40.3	0
40.4	0
40.5	0
40.6	0
40.7	0
40.8	0
40.9	0
41	0
41.1	0
41.2	0
41.3	0
41.4	0
41.5	0
41.6	0
41.7	0
41.8	0
41.9	0
42	0
42.1	0
42.2	0
42.3	0
42.4	0
42.5	0
42.6	0
42.7	0
42.8	0
42.9	0
43	0
43.1	0
43.2	0
43.3	0
43.4	0
43.5	0
43.6	0
43.7	0
43.8	0
43.9	0
44	0
44.1	0
44.2	0
44.3	0
44.4	0
44.5	0
44.6	0
44.7	0
44.8	0
44.9	0
45	0
45.1	0
45.2	0
45.3	0
45.4	0
45.5	0
45.6	0
45.7	0
45.8	0
45.9	0
46	0
46.1	0
46.2	0
46.3	0
46.4	0
46.5	0
46.6	0
46.7	0
46.8	0
46.9	0
47	0
47.1	0
47.2	0
47.3	0
47.4	0
47.5	0
47.6	0
47.7	0
47.8	0
47.9	0
48	0
48.1	0
48.2	0
48.3	0
48.4	0
48.5	0
48.6	0
48.7	0
48.8	0
48.9	0
49	0
49.1	0
49.2	0
49.3	0
49.4	0
49.5	0
49.6	0
49.7	0
49.8	0
49.9	0
50	0
50.1	0
50.2	0
50.3	0
50.4	0
50.5	0
50.6	0
50.7	0
50.8	0
50.9	0
51	0
51.1	0
51.2	0
51.3	0
51.4	0
51.5	0
51.6	0
51.7	0
51.8	0
51.9	0
52	0
52.1	0
52.2	0
52.3	0
52.4	0
52.5	0
52.6	0
52.7	0
52.8	0
52.9	0
53	0
53.1	0
53.2	0
53.3	0
53.4	0
53.5	0
53.6	0
53.7	0
53.8	0
53.9	0
54	0
54.1	0
54.2	0
54.3	0
54.4	0
54.5	0
54.6	0
54.7	0
54.8	0
54.9	0
55	0
55.1	0
55.2	0
55.3	0
55.4	0
55.5	0
55.6	0
55.7	0
55.8	0
55.9	0
56	0
56.1	0
56.2	0
56.3	0
56.4	0
56.5	0
56.6	0
56.7	0
56.8	0
56.9	0
57	0
57.1	0
57.2	0
57.3	0
57.4	0
57.5	0
57.6	0
57.7	0
57.8	0
57.9	0
58	0
58.1	0
58.2	0
58.3	0
58.4	0
58.5	0
58.6	0
58.7	0
58.8	0
58.9	0
59	0
59.1	0
59.2	0
59.3	0
59.4	0
59.5	0
59.6	0
59.7	0
59.8	0
59.9	0
60	0
60.1	0
60.2	0
60.3	0
60.4	0
60.5	0
60.6	0
60.7	0
60.8	0
60.9	0
61	0
61.1	0
61.2	0
61.3	0
61.4	0
61.5	0
61.6	0
61.7	0
61.8	0
61.9	0
62	0
62.1	0
62.2	0
62.3	0
62.4	0
62.5	0
62.6	0
62.7	0
62.8	0
62.9	0
63	0
63.1	0
63.2	0
63.3	0
63.4	0
63.5	0
63.6	0
63.7	0
63.8	0
63.9	0
64	0
64.1	0
64.2	0
64.3	0
64.4	0
64.5	0
64.6	0
64.7	0
64.8	0
64.9	0
65	0
65.1	0
65.2	0
65.3	0
65.4	0
65.5	0
65.6	0
65.7	0
65.8	0
65.9	0
66	0
66.1	0
66.2	0
66.3	0
66.4	0
66.5	0
66.6	0
66.7	0
66.8	0
66.9	0
67	0
67.1	0
67.2	0
67.3	0
67.4	0
67.5	0
67.6	0
67.7	0
67.8	0
67.9	0
68	0
68.1	0
68.2	0
68.3	0
68.4	0
68.5	0
68.6	0
68.7	0
68.8	0
68.9	0
69	0
69.1	0
69.2	0
69.3	0
69.4	0
69.5	0
69.6	0
69.7	0
69.8	0
69.9	0
70	0
70.1	0
70.2	0
70.3	0
70.4	0
70.5	0
70.6	0
70.7	0
70.8	0
70.9	0
71	0
71.1	0
71.2	0
71.3	0
71.4	0
71.5	0
71.6	0
71.7	0
71.8	0
71.9	0
72	0
72.1	0
72.2	0
72.3	0
72.4	0
72.5	0
72.6	0
72.7	0
72.8	0
72.9	0
73	0
73.1	0
73.2	0
73.3	0
73.4	0
73.5	0
73.6	0
73.7	0
73.8	0
73.9	0
74	0
74.1	0
74.2	0
74.3	0
74.4	0
74.5	0
74.6	0
74.7	0
74.8	0
74.9	0
75	0
75.1	0
75.2	0
75.3	0
75.4	0
75.5	0
75.6	0
75.7	0
75.8	0
75.9	0
76	0
76.1	0
76.2	0
76.3	0
76.4	0
76.5	0
76.6	0
76.7	0
76.8	0
76.9	0
77	0
77.1	0
77.2	0
77.3	0
77.4	0
77.5	0
77.6	0
77.7	0
77.8	0
77.9	0
78	0
78.1	0
78.2	0
78.3	0
78.4	0
78.5	0
78.6	0
78.7	0
78.8	0
78.9	0
79	0
79.1	0
79.2	0
79.3	0
79.4	0
79.5	0
79.6	0
79.7	0
79.8	0
79.9	0
80	0
80.1	0
80.2	0
80.3	0
80.4	0
80.5	0
80.6	0
80.7	0
80.8	0
80.9	0
81	0
81.1	0
81.2	0
81.3	0
81.4	0
81.5	0
81.6	0
81.7	0
81.8	0
81.9	0
82	0
82.1	0
82.2	0
82.3	0
82.4	0
82.5	0
82.6	0
82.7	0
82.8	0
82.9	0
83	0
83.1	0
83.2	0
83.3	0
83.4	0
83.5	0
83.6	0
83.7	0
83.8	0
83.9	0
84	0
84.1	0
84.2	0
84.3	0
84.4	0
84.5	0
84.6	0
84.7	0
84.8	0
84.9	0
85	0
85.1	0
85.2	0
85.3	0
85.4	0
85.5	0
85.6	0
85.7	0
85.8	0
85.9	0
86	0
86.1	0
86.2	0
86.3	0
86.4	0
86.5	0
86.6	0
86.7	0
86.8	0
86.9	0
87	0
87.1	0
87.2	0
87.3	0
87.4	0
87.5	0
87.6	0
87.7	0
87.8	0
87.9	0
88	0
88.1	0
88.2	0
88.3	0
88.4	0
88.5	0
88.6	0
88.7	0
88.8	0
88.9	0
89	0
89.1	0
89.2	0
89.3	0
89.4	0
89.5	0
89.6	0
89.7	0
89.8	0
89.9	0
90	0
90.1	0
90.2	0
90.3	0
90.4	0
90.5	0
90.6	0
90.7	0
90.8	0
90.9	0
91	0
91.1	0
91.2	0
91.3	0
91.4	0
91.5	0
91.6	0
91.7	0
91.8	0
91.9	0
92	0
92.1	0
92.2	0
92.3	0
92.4	0
92.5	0
92.6	0
92.7	0
92.8	0
92.9	0
93	0
93.1	0
93.2	0
93.3	0
93.4	0
93.5	0
93.6	0
93.7	0
93.8	0
93.9	0
94	0
94.1	0
94.2	0
94.3	0
94.4	0
94.5	0
94.6	0
94.7	0
94.8	0
94.9	0
95	0
95.1	0
95.2	0
95.3	0
95.4	0
95.5	0
95.6	0
95.7	0
95.8	0
95.9	0
96	0
96.1	0
96.2	0
96.3	0
96.4	0
96.5	0
96.6	0
96.7	0
96.8	0
96.9	0
97	0
97.1	0
97.2	0
97.3	0
97.4	0
97.5	0
97.6	0
97.7	0
97.8	0
97.9	0
98	0
98.1	0
98.2	0
98.3	0
98.4	0
98.5	0
98.6	0
98.7	0
98.8	0
98.9	0
99	0
99.1	0
99.2	0
99.3	0
99.4	0
99.5	0
99.6	0
99.7	0
99.8	0
99.9	0
100	0
100.1	0.8975
100.2	0.9875
100.3	0.9875
100.4	0.985
100.5	0.98
100.6	0.9825
100.7	0.9825
100.8	0.9825
100.9	0.9875
101	0.99
101.1	0.9775
101.2	0.9875
101.3	0.995
101.4	0.9975
101.5	0.9975
101.6	0.99
101.7	0.985
101.8	0.985
101.9	0.985
102	0.9825
102.1	0.99
102.2	0.9975
102.3	0.995
102.4	0.995
102.5	0.985
102.6	0.9875
102.7	1
102.8	0.9975
102.9	0.985
103	0.9875
103.1	0.98
103.2	0.985
103.3	0.99
103.4	0.985
103.5	0.9875
103.6	0.995
103.7	0.9975
103.8	0.99
103.9	0.995
104	0.9925
104.1	0.9925
104.2	0.99
104.3	0.9825
104.4	0.99
104.5	0.985
104.6	0.9875
104.7	0.9825
104.8	0.99
104.9	0.99
105	0.9975
105.1	0.985
105.2	0.995
105.3	0.985
105.4	0.985
105.5	0.9975
105.6	0.99
105.7	0.99
105.8	0.99
105.9	1
106	1
106.1	0.9875
106.2	0.9925
106.3	0.9925
106.4	0.9975
106.5	0.9875
106.6	0.995
106.7	0.99
106.8	0.9975
106.9	0.9925
107	0.9925
107.1	0.9925
107.2	0.995
107.3	0.9925
107.4	0.995
107.5	0.9975
107.6	0.995
107.7	0.9925
107.8	0.99
107.9	0.9925
108	0.99
108.1	0.99
108.2	0.9975
108.3	0.995
108.4	0.985
108.5	0.98
108.6	0.9975
108.7	0.995
108.8	0.9975
108.9	0.985
109	0.99
109.1	0.9925
109.2	0.9925
109.3	0.9925
109.4	0.9925
109.5	0.9925
109.6	0.9925
109.7	0.99
109.8	0.995
109.9	0.99
110	0.9975
110.1	0.995
110.2	0.99
110.3	1
110.4	0.99
110.5	0.9925
110.6	1
110.7	0.99
110.8	0.9975
110.9	0.9975
111	0.995
111.1	0.9925
111.2	0.99
111.3	0.99
111.4	0.9925
111.5	0.9975
111.6	0.99
111.7	0.995
111.8	0.9975
111.9	0.995
112	0.9875
112.1	0.99
112.2	0.9975
112.3	0.99
112.4	0.9925
112.5	0.9925
112.6	0.995
112.7	0.995
112.8	0.995
112.9	0.9925
113	0.9875
113.1	0.9925
113.2	0.995
113.3	0.99
113.4	0.9925
113.5	0.995
113.6	0.99
113.7	0.9875
113.8	0.9975
113.9	0.9925
114	0.99
114.1	0.9975
114.2	0.9825
114.3	0.98
114.4	0.9875
114.5	0.9875
114.6	0.9975
114.7	0.9925
114.8	0.985
114.9	0.99
115	0.995
115.1	1
115.2	0.995
115.3	0.995
115.4	0.9925
115.5	0.9975
115.6	0.9975
115.7	1
115.8	0.9975
115.9	0.9925
116	0.9925
116.1	0.995
116.2	0.9925
116.3	0.9975
116.4	1
116.5	1
116.6	0.995
116.7	0.9875
116.8	0.995
116.9	0.995
117	0.9975
117.1	0.99
117.2	0.995
117.3	0.9975
117.4	0.9975
117.5	0.9925
117.6	0.9975
117.7	0.9975
117.8	0.995
117.9	1
118	0.9925
118.1	0.9975
118.2	1
118.3	1
118.4	0.9925
118.5	0.9925
118.6	0.995
118.7	1
118.8	0.995
118.9	1
119	0.9975
119.1	0.995
119.2	1
119.3	1
119.4	0.995
119.5	0.9925
119.6	0.9925
119.7	0.995
119.8	1
119.9	0.9925
120	0.995
120.1	0.9925
120.2	0.99
120.3	0.995
120.4	0.995
120.5	0.9975
120.6	0.995
120.7	0.9925
120.8	0.995
120.9	0.99
121	0.9975
121.1	0.9975
121.2	1
121.3	0.9925
121.4	0.995
121.5	0.985
121.6	0.9925
121.7	0.9925
121.8	0.9975
121.9	0.995
122	0.9975
122.1	0.9925
122.2	0.9975
122.3	0.99
122.4	1
122.5	0.995
122.6	0.995
122.7	0.995
122.8	1
122.9	0.9975
123	0.995
123.1	0.9925
123.2	0.995
123.3	0.9975
123.4	0.995
123.5	0.9975
123.6	0.995
123.7	0.9925
123.8	0.995
123.9	0.99
124	0.9975
124.1	0.995
124.2	0.9975
124.3	1
124.4	1
124.5	1
124.6	1
124.7	0.995
124.8	1
124.9	1
125	1
125.1	0.9975
125.2	0.995
125.3	0.9925
125.4	0.9975
125.5	0.9925
125.6	0.9975
125.7	0.9925
125.8	1
125.9	1
126	0.995
126.1	0.9975
126.2	0.995
126.3	0.995
126.4	0.995
126.5	0.9925
126.6	0.9925
126.7	0.995
126.8	0.9925
126.9	0.9975
127	0.9975
127.1	1
127.2	0.995
127.3	0.9975
127.4	0.995
127.5	0.9975
127.6	0.9975
127.7	1
127.8	1
127.9	0.995
128	1
128.1	0.9925
128.2	0.9925
128.3	0.99
128.4	0.995
128.5	0.995
128.6	0.9925
128.7	0.995
128.8	0.9975
128.9	0.99
129	0.995
129.1	1
129.2	0.9975
129.3	0.9975
129.4	0.9925
129.5	0.995
129.6	0.9975
129.7	0.9975
129.8	0.9975
129.9	0.9975
130	1
130.1	1
130.2	0.99
130.3	0.995
130.4	0.9975
130.5	1
130.6	0.9975
130.7	1
130.8	1
130.9	1
131	1
131.1	0.9975
131.2	0.9925
131.3	0.9975
131.4	1
131.5	0.9925
131.6	0.9975
131.7	0.9925
131.8	0.9975
131.9	0.9975
132	0.9975
132.1	1
132.2	1
132.3	0.995
132.4	1
132.5	1
132.6	0.9975
132.7	1
132.8	0.9975
132.9	0.9925
133	0.9975
133.1	1
133.2	1
133.3	0.9975
133.4	0.9975
133.5	1
133.6	0.9975
133.7	0.9925
133.8	0.9925
133.9	0.995
134	1
134.1	0.9975
134.2	0.9925
134.3	1
134.4	0.9975
134.5	0.995
134.6	1
134.7	1
134.8	0.9975
134.9	0.9975
135	0.9975
135.1	0.995
135.2	1
135.3	1
135.4	0.9975
135.5	0.995
135.6	1
135.7	0.995
135.8	1
135.9	1
136	1
136.1	1
136.2	0.9975
136.3	0.995
136.4	1
136.5	0.9975
136.6	0.995
136.7	0.9975
136.8	0.9925
136.9	0.9975
137	0.9975
137.1	1
137.2	1
137.3	0.9975
137.4	0.995
137.5	0.995
137.6	0.995
137.7	0.9975
137.8	1
137.9	1
138	0.9975
138.1	0.9975
138.2	0.9975
138.3	1
138.4	0.995
138.5	1
138.6	0.9975
138.7	1
138.8	1
138.9	0.9975
139	0.9975
139.1	0.9975
139.2	1
139.3	0.9975
139.4	0.9975
139.5	1
139.6	0.9925
139.7	0.995
139.8	1
139.9	0.9975
140	0.995
140.1	1
140.2	1
140.3	0.9975
140.4	1
140.5	1
140.6	0.9975
140.7	0.995
140.8	1
140.9	0.9975
141	1
141.1	1
141.2	0.9975
141.3	1
141.4	1
141.5	1
141.6	1
141.7	1
141.8	0.9925
141.9	0.9975
142	0.9975
142.1	0.9975
142.2	0.9975
142.3	0.9925
142.4	1
142.5	0.9975
142.6	0.9975
142.7	1
142.8	0.9975
142.9	0.995
143	0.995
143.1	0.995
143.2	0.9975
143.3	0.995
143.4	0.995
143.5	1
143.6	1
143.7	1
143.8	1
143.9	0.9975
144	1
144.1	0.9975
144.2	0.995
144.3	0.9975
144.4	0.9975
144.5	0.9975
144.6	0.9975
144.7	1
144.8	0.9975
144.9	0.995
145	0.995
145.1	1
145.2	0.9925
145.3	0.9975
145.4	1
145.5	1
145.6	0.9975
145.7	0.9975
145.8	1
145.9	0.995
146	1
146.1	0.9975
146.2	0.9975
146.3	1
146.4	1
146.5	1
146.6	0.9975
146.7	1
146.8	0.9975
146.9	0.995
147	0.9975
147.1	1
147.2	1
147.3	1
147.4	1
147.5	0.995
147.6	0.995
147.7	0.9975
147.8	0.995
147.9	1
148	1
148.1	1
148.2	1
148.3	1
148.4	1
148.5	0.995
148.6	1
148.7	1
148.8	0.9975
148.9	0.9925
149	1
149.1	0.9975
149.2	0.9975
149.3	0.9925
149.4	0.9975
149.5	0.9975
149.6	1
149.7	0.995
149.8	1
149.9	1
150	1
150.1	0.995
150.2	1
150.3	0.9975
150.4	0.9975
150.5	1
150.6	0.9975
150.7	0.9925
150.8	1
150.9	1
151	0.9975
151.1	0.9975
151.2	1
151.3	0.9975
151.4	1
151.5	0.9975
151.6	0.9975
151.7	0.9975
151.8	1
151.9	0.9975
152	0.995
152.1	1
152.2	1
152.3	0.9975
152.4	0.9975
152.5	1
152.6	0.995
152.7	0.995
152.8	1
152.9	1
153	1
153.1	1
153.2	1
153.3	1
153.4	1
153.5	1
153.6	0.9975
153.7	1
153.8	0.9975
153.9	1
154	1
154.1	1
154.2	1
154.3	0.9925
154.4	0.995
154.5	1
154.6	0.995
154.7	0.9975
154.8	0.995
154.9	0.995
155	0.995
155.1	0.9975
155.2	0.9975
155.3	1
155.4	0.9975
155.5	0.9975
155.6	1
155.7	0.9975
155.8	0.9975
155.9	0.9875
156	1
156.1	0.9975
156.2	0.9975
156.3	1
156.4	0.995
156.5	1
156.6	0.9975
156.7	1
156.8	0.9975
156.9	0.9975
157	0.9975
157.1	0.9975
157.2	0.995
157.3	0.995
157.4	0.9975
157.5	0.9975
157.6	0.9975
157.7	1
157.8	0.9975
157.9	0.9975
158	1
158.1	1
158.2	1
158.3	0.9925
158.4	0.995
158.5	0.9975
158.6	0.995
158.7	0.995
158.8	0.995
158.9	0.9975
159	1
159.1	0.9975
159.2	0.995
159.3	0.995
159.4	0.9975
159.5	0.9975
159.6	1
159.7	1
159.8	0.9975
159.9	0.9975
160	1
160.1	1
160.2	1
160.3	0.9975
160.4	1
160.5	1
160.6	1
160.7	0.9975
160.8	0.9975
160.9	1
161	0.995
161.1	1
161.2	1
161.3	1
161.4	1
161.5	1
161.6	0.9975
161.7	1
161.8	0.9975
161.9	0.9975
162	0.9975
162.1	0.99
162.2	0.99
162.3	0.9975
162.4	0.9975
162.5	1
162.6	0.995
162.7	1
162.8	0.995
162.9	0.9975
163	0.9975
163.1	0.9975
163.2	0.9975
163.3	1
163.4	1
163.5	1
163.6	1
163.7	0.9975
163.8	0.995
163.9	1
164	1
164.1	1
164.2	1
164.3	1
164.4	0.9975
164.5	1
164.6	0.9975
164.7	0.995
164.8	0.9975
164.9	1
165	1
165.1	0.9975
165.2	1
165.3	1
165.4	1
165.5	0.9975
165.6	0.9975
165.7	0.9975
165.8	1
165.9	0.9975
166	1
166.1	0.9975
166.2	0.9975
166.3	0.9925
166.4	0.9975
166.5	1
166.6	1
166.7	0.9975
166.8	1
166.9	0.995
167	0.9975
167.1	0.9975
167.2	1
167.3	0.995
167.4	1
167.5	1
167.6	0.995
167.7	0.995
167.8	1
167.9	1
168	0.9975
168.1	0.9925
168.2	0.995
168.3	1
168.4	0.9975
168.5	1
168.6	0.9975
168.7	1
168.8	0.9975
168.9	0.9975
169	1
169.1	1
169.2	0.9975
169.3	1
169.4	0.9975
169.5	0.995
169.6	0.9975
169.7	0.9975
169.8	0.995
169.9	0.9975
170	0.9975
170.1	0.9925
170.2	1
170.3	1
170.4	1
170.5	0.9975
170.6	1
170.7	1
170.8	1
170.9	1
171	1
171.1	1
171.2	0.9975
171.3	1
171.4	1
171.5	1
171.6	1
171.7	1
171.8	0.9975
171.9	1
172	0.995
172.1	0.9925
172.2	1
172.3	0.9975
172.4	1
172.5	1
172.6	0.9975
172.7	0.9975
172.8	0.9975
172.9	0.9975
173	0.995
173.1	0.995
173.2	1
173.3	0.9975
173.4	0.9975
173.5	0.9975
173.6	0.9975
173.7	1
173.8	1
173.9	0.995
174	0.9975
174.1	1
174.2	0.9925
174.3	0.9975
174.4	0.9975
174.5	1
174.6	0.995
174.7	0.9925
174.8	1
174.9	0.9975
175	0.9975
175.1	1
175.2	0.9975
175.3	1
175.4	1
175.5	0.9975
175.6	0.9975
175.7	0.9975
175.8	0.9975
175.9	0.9975
176	1
176.1	0.99
176.2	0.9925
176.3	0.9975
176.4	1
176.5	0.9975
176.6	1
176.7	1
176.8	0.995
176.9	0.9975
177	0.995
177.1	1
177.2	1
177.3	1
177.4	0.9975
177.5	0.995
177.6	1
177.7	0.9975
177.8	1
177.9	0.9975
178	1
178.1	1
178.2	1
178.3	0.9975
178.4	0.9975
178.5	0.9975
178.6	0.9975
178.7	1
178.8	0.9975
178.9	0.9975
179	0.9975
179.1	1
179.2	0.9975
179.3	0.9975
179.4	0.9975
179.5	1
179.6	1
179.7	1
179.8	0.9975
179.9	0.9975
180	0.995
180.1	1
180.2	0.9975
180.3	0.9925
180.4	0.9925
180.5	1
180.6	1
180.7	0.9975
180.8	0.9975
180.9	1
181	1
181.1	0.9975
181.2	0.995
181.3	0.995
181.4	0.9975
181.5	0.9975
181.6	0.9975
181.7	1
181.8	0.9975
181.9	0.9925
182	0.995
182.1	0.995
182.2	0.9975
182.3	0.9975
182.4	1
182.5	0.9975
182.6	0.9975
182.7	0.9975
182.8	1
182.9	1
183	1
183.1	1
183.2	0.9975
183.3	1
183.4	0.9975
183.5	0.9975
183.6	0.9975
183.7	0.9975
183.8	0.9975
183.9	0.9925
184	0.9975
184.1	0.9975
184.2	1
184.3	0.9975
184.4	0.995
184.5	0.9975
184.6	0.9975
184.7	0.995
184.8	1
184.9	1
185	0.9975
185.1	0.9975
185.2	0.9975
185.3	0.995
185.4	0.9975
185.5	0.9975
185.6	0.995
185.7	0.9975
185.8	0.9975
185.9	1
186	1
186.1	1
186.2	0.9975
186.3	0.9975
186.4	1
186.5	0.9975
186.6	0.995
186.7	0.995
186.8	0.9975
186.9	1
187	1
187.1	1
187.2	0.9975
187.3	1
187.4	1
187.5	0.9975
187.6	0.9975
187.7	0.9925
187.8	0.9975
187.9	0.9975
188	0.9975
188.1	0.995
188.2	0.9925
188.3	0.995
188.4	1
188.5	1
188.6	1
188.7	0.9975
188.8	0.995
188.9	0.9975
189	0.9975
189.1	0.9975
189.2	1
189.3	1
189.4	0.995
189.5	1
189.6	0.9975
189.7	0.9975
189.8	1
189.9	1
190	0.9975
190.1	0.9975
190.2	0.9925
190.3	0.9975
190.4	0.9925
190.5	1
190.6	1
190.7	1
190.8	1
190.9	0.9975
191	1
191.1	0.9975
191.2	1
191.3	0.9975
191.4	1
191.5	1
191.6	1
191.7	0.9975
191.8	0.995
191.9	0.995
192	0.9975
192.1	0.9975
192.2	0.9975
192.3	0.9975
192.4	0.995
192.5	0.9975
192.6	0.9975
192.7	0.9975
192.8	0.995
192.9	0.9975
193	0.9975
193.1	1
193.2	0.9975
193.3	0.9975
193.4	0.995
193.5	1
193.6	0.995
193.7	0.9975
193.8	1
193.9	0.9975
194	0.9975
194.1	1
194.2	1
194.3	0.995
194.4	1
194.5	1
194.6	1
194.7	1
194.8	0.9925
194.9	0.9975
195	1
195.1	0.9975
195.2	0.9975
195.3	1
195.4	0.995
195.5	0.9975
195.6	0.9975
195.7	1
195.8	0.995
195.9	1
196	0.9975
196.1	1
196.2	1
196.3	1
196.4	0.9975
196.5	0.9975
196.6	1
196.7	0.9975
196.8	0.9975
196.9	1
197	1
197.1	1
197.2	0.9925
197.3	1
197.4	0.9975
197.5	1
197.6	0.9975
197.7	1
197.8	0.9925
197.9	0.9975
198	1
198.1	1
198.2	0.995
198.3	1
198.4	0.9975
198.5	0.9975
198.6	0.9975
198.7	1
198.8	1
198.9	1
199	0.9975
199.1	1
199.2	1
199.3	0.9975
199.4	1
199.5	1
199.6	0.995
199.7	1
199.8	0.995
199.9	0.9975
200	0.9975
[truncated: 14,000 more rows]
