# Supplementary material for: Bayesian inference of kinetic schemes for ion channels by Kalman filtering
Source: eLife journal article supplement (doi:10.7554/elife.62714), 2022-05-04
Supplement: fig4-data2 [file 1_Sim_N_200_Strom_MW.xlsx]

## Sheet: 64 M
0.1	0
0.2	0
0.3	0
0.4	0
0.5	0
0.6	0
0.7	0
0.8	0
0.9	0
1	0
1.1	0
1.2	0
1.3	0
1.4	0
1.5	0
1.6	0
1.7	0
1.8	0
1.9	0
2	0
2.1	0
2.2	0
2.3	0
2.4	0
2.5	0
2.6	0
2.7	0
2.8	0
2.9	0
3	0
3.1	0
3.2	0
3.3	0
3.4	0
3.5	0
3.6	0
3.7	0
3.8	0
3.9	0
4	0
4.1	0
4.2	0
4.3	0
4.4	0
4.5	0
4.6	0
4.7	0
4.8	0
4.9	0
5	0
5.1	0
5.2	0
5.3	0
5.4	0
5.5	0
5.6	0
5.7	0
5.8	0
5.9	0
6	0
6.1	0
6.2	0
6.3	0
6.4	0
6.5	0
6.6	0
6.7	0
6.8	0
6.9	0
7	0
7.1	0
7.2	0
7.3	0
7.4	0
7.5	0
7.6	0
7.7	0
7.8	0
7.9	0
8	0
8.1	0
8.2	0
8.3	0
8.4	0
8.5	0
8.6	0
8.7	0
8.8	0
8.9	0
9	0
9.1	0
9.2	0
9.3	0
9.4	0
9.5	0
9.6	0
9.7	0
9.8	0
9.9	0
10	0
10.1	0
10.2	0
10.3	0
10.4	0
10.5	0
10.6	0
10.7	0
10.8	0
10.9	0
11	0
11.1	0
11.2	0
11.3	0
11.4	0
11.5	0
11.6	0
11.7	0
11.8	0
11.9	0
12	0
12.1	0
12.2	0
12.3	0
12.4	0
12.5	0
12.6	0
12.7	0
12.8	0
12.9	0
13	0
13.1	0
13.2	0
13.3	0
13.4	0
13.5	0
13.6	0
13.7	0
13.8	0
13.9	0
14	0
14.1	0
14.2	0
14.3	0
14.4	0
14.5	0
14.6	0
14.7	0
14.8	0
14.9	0
15	0
15.1	0
15.2	0
15.3	0
15.4	0
15.5	0
15.6	0
15.7	0
15.8	0
15.9	0
16	0
16.1	0
16.2	0
16.3	0
16.4	0
16.5	0
16.6	0
16.7	0
16.8	0
16.9	0
17	0
17.1	0
17.2	0
17.3	0
17.4	0
17.5	0
17.6	0
17.7	0
17.8	0
17.9	0
18	0
18.1	0
18.2	0
18.3	0
18.4	0
18.5	0
18.6	0
18.7	0
18.8	0
18.9	0
19	0
19.1	0
19.2	0
19.3	0
19.4	0
19.5	0
19.6	0
19.7	0
19.8	0
19.9	0
20	0
20.1	0
20.2	0
20.3	0
20.4	0
20.5	0
20.6	0
20.7	0
20.8	0
20.9	0
21	0
21.1	0
21.2	0
21.3	0
21.4	0
21.5	0
21.6	0
21.7	0
21.8	0
21.9	0
22	0
22.1	0
22.2	0
22.3	0
22.4	0
22.5	0
22.6	0
22.7	0
22.8	0
22.9	0
23	0
23.1	0
23.2	0
23.3	0
23.4	0
23.5	0
23.6	0
23.7	0
23.8	0
23.9	0
24	0
24.1	0
24.2	0
24.3	0
24.4	0
24.5	0
24.6	0
24.7	0
24.8	0
24.9	0
25	0
25.1	0
25.2	0
25.3	0
25.4	0
25.5	0
25.6	0
25.7	0
25.8	0
25.9	0
26	0
26.1	0
26.2	0
26.3	0
26.4	0
26.5	0
26.6	0
26.7	0
26.8	0
26.9	0
27	0
27.1	0
27.2	0
27.3	0
27.4	0
27.5	0
27.6	0
27.7	0
27.8	0
27.9	0
28	0
28.1	0
28.2	0
28.3	0
28.4	0
28.5	0
28.6	0
28.7	0
28.8	0
28.9	0
29	0
29.1	0
29.2	0
29.3	0
29.4	0
29.5	0
29.6	0
29.7	0
29.8	0
29.9	0
30	0
30.1	0
30.2	0
30.3	0
30.4	0
30.5	0
30.6	0
30.7	0
30.8	0
30.9	0
31	0
31.1	0
31.2	0
31.3	0
31.4	0
31.5	0
31.6	0
31.7	0
31.8	0
31.9	0
32	0
32.1	0
32.2	0
32.3	0
32.4	0
32.5	0
32.6	0
32.7	0
32.8	0
32.9	0
33	0
33.1	0
33.2	0
33.3	0
33.4	0
33.5	0
33.6	0
33.7	0
33.8	0
33.9	0
34	0
34.1	0
34.2	0
34.3	0
34.4	0
34.5	0
34.6	0
34.7	0
34.8	0
34.9	0
35	0
35.1	0
35.2	0
35.3	0
35.4	0
35.5	0
35.6	0
35.7	0
35.8	0
35.9	0
36	0
36.1	0
36.2	0
36.3	0
36.4	0
36.5	0
36.6	0
36.7	0
36.8	0
36.9	0
37	0
37.1	0
37.2	0
37.3	0
37.4	0
37.5	0
37.6	0
37.7	0
37.8	0
37.9	0
38	0
38.1	0
38.2	0
38.3	0
38.4	0
38.5	0
38.6	0
38.7	0
38.8	0
38.9	0
39	0
39.1	0
39.2	0
39.3	0
39.4	0
39.5	0
39.6	0
39.7	0
39.8	0
39.9	0
40	0
40.1	0
40.2	0
40.3	0
40.4	0
40.5	0
40.6	0
40.7	0
40.8	0
40.9	0
41	0
41.1	0
41.2	0
41.3	0
41.4	0
41.5	0
41.6	0
41.7	0
41.8	0
41.9	0
42	0
42.1	0
42.2	0
42.3	0
42.4	0
42.5	0
42.6	0
42.7	0
42.8	0
42.9	0
43	0
43.1	0
43.2	0
43.3	0
43.4	0
43.5	0
43.6	0
43.7	0
43.8	0
43.9	0
44	0
44.1	0
44.2	0
44.3	0
44.4	0
44.5	0
44.6	0
44.7	0
44.8	0
44.9	0
45	0
45.1	0
45.2	0
45.3	0
45.4	0
45.5	0
45.6	0
45.7	0
45.8	0
45.9	0
46	0
46.1	0
46.2	0
46.3	0
46.4	0
46.5	0
46.6	0
46.7	0
46.8	0
46.9	0
47	0
47.1	0
47.2	0
47.3	0
47.4	0
47.5	0
47.6	0
47.7	0
47.8	0
47.9	0
48	0
48.1	0
48.2	0
48.3	0
48.4	0
48.5	0
48.6	0
48.7	0
48.8	0
48.9	0
49	0
49.1	0
49.2	0
49.3	0
49.4	0
49.5	0
49.6	0
49.7	0
49.8	0
49.9	0
50	0
50.1	0
50.2	0
50.3	0
50.4	0
50.5	0
50.6	0
50.7	0
50.8	0
50.9	0
51	0
51.1	0
51.2	0
51.3	0
51.4	0
51.5	0
51.6	0
51.7	0
51.8	0
51.9	0
52	0
52.1	0
52.2	0
52.3	0
52.4	0
52.5	0
52.6	0
52.7	0
52.8	0
52.9	0
53	0
53.1	0
53.2	0
53.3	0
53.4	0
53.5	0
53.6	0
53.7	0
53.8	0
53.9	0
54	0
54.1	0
54.2	0
54.3	0
54.4	0
54.5	0
54.6	0
54.7	0
54.8	0
54.9	0
55	0
55.1	0
55.2	0
55.3	0
55.4	0
55.5	0
55.6	0
55.7	0
55.8	0
55.9	0
56	0
56.1	0
56.2	0
56.3	0
56.4	0
56.5	0
56.6	0
56.7	0
56.8	0
56.9	0
57	0
57.1	0
57.2	0
57.3	0
57.4	0
57.5	0
57.6	0
57.7	0
57.8	0
57.9	0
58	0
58.1	0
58.2	0
58.3	0
58.4	0
58.5	0
58.6	0
58.7	0
58.8	0
58.9	0
59	0
59.1	0
59.2	0
59.3	0
59.4	0
59.5	0
59.6	0
59.7	0
59.8	0
59.9	0
60	0
60.1	0
60.2	0
60.3	0
60.4	0
60.5	0
60.6	0
60.7	0
60.8	0
60.9	0
61	0
61.1	0
61.2	0
61.3	0
61.4	0
61.5	0
61.6	0
61.7	0
61.8	0
61.9	0
62	0
62.1	0
62.2	0
62.3	0
62.4	0
62.5	0
62.6	0
62.7	0
62.8	0
62.9	0
63	0
63.1	0
63.2	0
63.3	0
63.4	0
63.5	0
63.6	0
63.7	0
63.8	0
63.9	0
64	0
64.1	0
64.2	0
64.3	0
64.4	0
64.5	0
64.6	0
64.7	0
64.8	0
64.9	0
65	0
65.1	0
65.2	0
65.3	0
65.4	0
65.5	0
65.6	0
65.7	0
65.8	0
65.9	0
66	0
66.1	0
66.2	0
66.3	0
66.4	0
66.5	0
66.6	0
66.7	0
66.8	0
66.9	0
67	0
67.1	0
67.2	0
67.3	0
67.4	0
67.5	0
67.6	0
67.7	0
67.8	0
67.9	0
68	0
68.1	0
68.2	0
68.3	0
68.4	0
68.5	0
68.6	0
68.7	0
68.8	0
68.9	0
69	0
69.1	0
69.2	0
69.3	0
69.4	0
69.5	0
69.6	0
69.7	0
69.8	0
69.9	0
70	0
70.1	0
70.2	0
70.3	0
70.4	0
70.5	0
70.6	0
70.7	0
70.8	0
70.9	0
71	0
71.1	0
71.2	0
71.3	0
71.4	0
71.5	0
71.6	0
71.7	0
71.8	0
71.9	0
72	0
72.1	0
72.2	0
72.3	0
72.4	0
72.5	0
72.6	0
72.7	0
72.8	0
72.9	0
73	0
73.1	0
73.2	0
73.3	0
73.4	0
73.5	0
73.6	0
73.7	0
73.8	0
73.9	0
74	0
74.1	0
74.2	0
74.3	0
74.4	0
74.5	0
74.6	0
74.7	0
74.8	0
74.9	0
75	0
75.1	0
75.2	0
75.3	0
75.4	0
75.5	0
75.6	0
75.7	0
75.8	0
75.9	0
76	0
76.1	0
76.2	0
76.3	0
76.4	0
76.5	0
76.6	0
76.7	0
76.8	0
76.9	0
77	0
77.1	0
77.2	0
77.3	0
77.4	0
77.5	0
77.6	0
77.7	0
77.8	0
77.9	0
78	0
78.1	0
78.2	0
78.3	0
78.4	0
78.5	0
78.6	0
78.7	0
78.8	0
78.9	0
79	0
79.1	0
79.2	0
79.3	0
79.4	0
79.5	0
79.6	0
79.7	0
79.8	0
79.9	0
80	0
80.1	0
80.2	0
80.3	0
80.4	0
80.5	0
80.6	0
80.7	0
80.8	0
80.9	0
81	0
81.1	0
81.2	0
81.3	0
81.4	0
81.5	0
81.6	0
81.7	0
81.8	0
81.9	0
82	0
82.1	0
82.2	0
82.3	0
82.4	0
82.5	0
82.6	0
82.7	0
82.8	0
82.9	0
83	0
83.1	0
83.2	0
83.3	0
83.4	0
83.5	0
83.6	0
83.7	0
83.8	0
83.9	0
84	0
84.1	0
84.2	0
84.3	0
84.4	0
84.5	0
84.6	0
84.7	0
84.8	0
84.9	0
85	0
85.1	0
85.2	0
85.3	0
85.4	0
85.5	0
85.6	0
85.7	0
85.8	0
85.9	0
86	0
86.1	0
86.2	0
86.3	0
86.4	0
86.5	0
86.6	0
86.7	0
86.8	0
86.9	0
87	0
87.1	0
87.2	0
87.3	0
87.4	0
87.5	0
87.6	0
87.7	0
87.8	0
87.9	0
88	0
88.1	0
88.2	0
88.3	0
88.4	0
88.5	0
88.6	0
88.7	0
88.8	0
88.9	0
89	0
89.1	0
89.2	0
89.3	0
89.4	0
89.5	0
89.6	0
89.7	0
89.8	0
89.9	0
90	0
90.1	0
90.2	0
90.3	0
90.4	0
90.5	0
90.6	0
90.7	0
90.8	0
90.9	0
91	0
91.1	0
91.2	0
91.3	0
91.4	0
91.5	0
91.6	0
91.7	0
91.8	0
91.9	0
92	0
92.1	0
92.2	0
92.3	0
92.4	0
92.5	0
92.6	0
92.7	0
92.8	0
92.9	0
93	0
93.1	0
93.2	0
93.3	0
93.4	0
93.5	0
93.6	0
93.7	0
93.8	0
93.9	0
94	0
94.1	0
94.2	0
94.3	0
94.4	0
94.5	0
94.6	0
94.7	0
94.8	0
94.9	0
95	0
95.1	0
95.2	0
95.3	0
95.4	0
95.5	0
95.6	0
95.7	0
95.8	0
95.9	0
96	0
96.1	0
96.2	0
96.3	0
96.4	0
96.5	0
96.6	0
96.7	0
96.8	0
96.9	0
97	0
97.1	0
97.2	0
97.3	0
97.4	0
97.5	0
97.6	0
97.7	0
97.8	0
97.9	0
98	0
98.1	0
98.2	0
98.3	0
98.4	0
98.5	0
98.6	0
98.7	0
98.8	0
98.9	0
99	0
99.1	0
99.2	0
99.3	0
99.4	0
99.5	0
99.6	0
99.7	0
99.8	0
99.9	0
100	0
100.1	0
100.2	0.005
100.3	0.01
100.4	0.015
100.5	0.02
100.6	0.03
100.7	0.03
100.8	0.04
100.9	0.05
101	0.055
101.1	0.055
101.2	0.065
101.3	0.065
101.4	0.065
101.5	0.065
101.6	0.065
101.7	0.08
101.8	0.08
101.9	0.08
102	0.08
102.1	0.09
102.2	0.095
102.3	0.105
102.4	0.11
102.5	0.115
102.6	0.115
102.7	0.125
102.8	0.125
102.9	0.125
103	0.125
103.1	0.14
103.2	0.145
103.3	0.155
103.4	0.16
103.5	0.165
103.6	0.17
103.7	0.175
103.8	0.18
103.9	0.185
104	0.185
104.1	0.185
104.2	0.195
104.3	0.195
104.4	0.195
104.5	0.195
104.6	0.2
104.7	0.205
104.8	0.205
104.9	0.205
105	0.21
105.1	0.21
105.2	0.215
105.3	0.215
105.4	0.225
105.5	0.24
105.6	0.245
105.7	0.245
105.8	0.26
105.9	0.27
106	0.285
106.1	0.285
106.2	0.285
106.3	0.29
106.4	0.3
106.5	0.305
106.6	0.315
106.7	0.315
106.8	0.32
106.9	0.32
107	0.32
107.1	0.325
107.2	0.33
107.3	0.33
107.4	0.325
107.5	0.33
107.6	0.33
107.7	0.33
107.8	0.33
107.9	0.335
108	0.325
108.1	0.325
108.2	0.335
108.3	0.345
108.4	0.35
108.5	0.35
108.6	0.35
108.7	0.35
108.8	0.35
108.9	0.355
109	0.355
109.1	0.36
109.2	0.355
109.3	0.365
109.4	0.365
109.5	0.37
109.6	0.38
109.7	0.38
109.8	0.385
109.9	0.385
110	0.395
110.1	0.395
110.2	0.395
110.3	0.395
110.4	0.395
110.5	0.395
110.6	0.4
110.7	0.41
110.8	0.415
110.9	0.415
111	0.415
111.1	0.415
111.2	0.415
111.3	0.42
111.4	0.42
111.5	0.425
111.6	0.435
111.7	0.44
111.8	0.44
111.9	0.44
112	0.445
112.1	0.445
112.2	0.455
112.3	0.455
112.4	0.46
112.5	0.475
112.6	0.475
112.7	0.48
112.8	0.48
112.9	0.485
113	0.485
113.1	0.485
113.2	0.49
113.3	0.49
113.4	0.48
113.5	0.485
113.6	0.485
113.7	0.49
113.8	0.49
113.9	0.495
114	0.495
114.1	0.495
114.2	0.495
114.3	0.485
114.4	0.49
114.5	0.49
114.6	0.49
114.7	0.49
114.8	0.485
114.9	0.49
115	0.49
115.1	0.485
115.2	0.485
115.3	0.485
115.4	0.485
115.5	0.48
115.6	0.48
115.7	0.48
115.8	0.485
115.9	0.49
116	0.49
116.1	0.5
116.2	0.5
116.3	0.5
116.4	0.5
116.5	0.5
116.6	0.505
116.7	0.495
116.8	0.5
116.9	0.5
117	0.495
117.1	0.495
117.2	0.5
117.3	0.51
117.4	0.51
117.5	0.515
117.6	0.515
117.7	0.515
117.8	0.515
117.9	0.52
118	0.525
118.1	0.53
118.2	0.54
118.3	0.555
118.4	0.56
118.5	0.565
118.6	0.565
118.7	0.565
118.8	0.56
118.9	0.555
119	0.555
119.1	0.55
119.2	0.55
119.3	0.555
119.4	0.565
119.5	0.565
119.6	0.565
119.7	0.565
119.8	0.57
119.9	0.57
120	0.575
120.1	0.57
120.2	0.575
120.3	0.575
120.4	0.575
120.5	0.575
120.6	0.575
120.7	0.575
120.8	0.58
120.9	0.58
121	0.58
121.1	0.58
121.2	0.585
121.3	0.59
121.4	0.59
121.5	0.59
121.6	0.595
121.7	0.595
121.8	0.615
121.9	0.615
122	0.62
122.1	0.625
122.2	0.63
122.3	0.63
122.4	0.63
122.5	0.625
122.6	0.63
122.7	0.65
122.8	0.65
122.9	0.65
123	0.65
123.1	0.655
123.2	0.66
123.3	0.665
123.4	0.665
123.5	0.67
123.6	0.665
123.7	0.665
123.8	0.665
123.9	0.665
124	0.66
124.1	0.66
124.2	0.655
124.3	0.655
124.4	0.66
124.5	0.66
124.6	0.66
124.7	0.67
124.8	0.67
124.9	0.67
125	0.67
125.1	0.67
125.2	0.675
125.3	0.675
125.4	0.675
125.5	0.675
125.6	0.675
125.7	0.675
125.8	0.675
125.9	0.675
126	0.675
126.1	0.675
126.2	0.675
126.3	0.675
126.4	0.68
126.5	0.69
126.6	0.69
126.7	0.695
126.8	0.695
126.9	0.7
127	0.695
127.1	0.695
127.2	0.7
127.3	0.71
127.4	0.715
127.5	0.715
127.6	0.715
127.7	0.72
127.8	0.72
127.9	0.72
128	0.72
128.1	0.72
128.2	0.72
128.3	0.72
128.4	0.72
128.5	0.725
128.6	0.72
128.7	0.72
128.8	0.72
128.9	0.72
129	0.715
129.1	0.72
129.2	0.72
129.3	0.715
129.4	0.715
129.5	0.72
129.6	0.72
129.7	0.72
129.8	0.72
129.9	0.715
130	0.71
130.1	0.705
130.2	0.71
130.3	0.715
130.4	0.71
130.5	0.71
130.6	0.715
130.7	0.715
130.8	0.715
130.9	0.715
131	0.725
131.1	0.72
131.2	0.72
131.3	0.72
131.4	0.72
131.5	0.72
131.6	0.72
131.7	0.72
131.8	0.725
131.9	0.725
132	0.725
132.1	0.725
132.2	0.725
132.3	0.73
132.4	0.735
132.5	0.74
132.6	0.74
132.7	0.745
132.8	0.745
132.9	0.75
133	0.75
133.1	0.755
133.2	0.755
133.3	0.755
133.4	0.755
133.5	0.755
133.6	0.755
133.7	0.755
133.8	0.755
133.9	0.755
134	0.755
134.1	0.755
134.2	0.75
134.3	0.75
134.4	0.75
134.5	0.745
134.6	0.745
134.7	0.745
134.8	0.745
134.9	0.75
135	0.755
135.1	0.755
135.2	0.75
135.3	0.75
135.4	0.75
135.5	0.75
135.6	0.745
135.7	0.75
135.8	0.75
135.9	0.75
136	0.75
136.1	0.75
136.2	0.75
136.3	0.75
136.4	0.75
136.5	0.75
136.6	0.75
136.7	0.75
136.8	0.755
136.9	0.755
137	0.76
137.1	0.76
137.2	0.76
137.3	0.76
137.4	0.76
137.5	0.76
137.6	0.76
137.7	0.765
137.8	0.765
137.9	0.765
138	0.76
138.1	0.76
138.2	0.77
138.3	0.77
138.4	0.77
138.5	0.775
138.6	0.78
138.7	0.78
138.8	0.785
138.9	0.785
139	0.785
139.1	0.785
139.2	0.785
139.3	0.785
139.4	0.79
139.5	0.785
139.6	0.79
139.7	0.795
139.8	0.8
139.9	0.8
140	0.8
140.1	0.805
140.2	0.805
140.3	0.805
140.4	0.805
140.5	0.805
140.6	0.795
140.7	0.795
140.8	0.805
140.9	0.81
141	0.81
141.1	0.805
141.2	0.805
141.3	0.81
141.4	0.81
141.5	0.815
141.6	0.815
141.7	0.815
141.8	0.815
141.9	0.82
142	0.82
142.1	0.82
142.2	0.82
142.3	0.825
142.4	0.825
142.5	0.825
142.6	0.825
142.7	0.825
142.8	0.825
142.9	0.825
143	0.825
143.1	0.825
143.2	0.82
143.3	0.82
143.4	0.82
143.5	0.82
143.6	0.82
143.7	0.82
143.8	0.82
143.9	0.815
144	0.815
144.1	0.815
144.2	0.82
144.3	0.82
144.4	0.82
144.5	0.82
144.6	0.82
144.7	0.82
144.8	0.825
144.9	0.825
145	0.825
145.1	0.83
145.2	0.83
145.3	0.83
145.4	0.825
145.5	0.83
145.6	0.83
145.7	0.83
145.8	0.83
145.9	0.83
146	0.835
146.1	0.835
146.2	0.835
146.3	0.835
146.4	0.835
146.5	0.835
146.6	0.835
146.7	0.835
146.8	0.83
146.9	0.83
147	0.83
147.1	0.83
147.2	0.83
147.3	0.835
147.4	0.835
147.5	0.835
147.6	0.83
147.7	0.83
147.8	0.83
147.9	0.83
148	0.83
148.1	0.83
148.2	0.825
148.3	0.825
148.4	0.825
148.5	0.825
148.6	0.83
148.7	0.83
148.8	0.83
148.9	0.83
149	0.835
149.1	0.84
149.2	0.84
149.3	0.84
149.4	0.84
149.5	0.845
149.6	0.845
149.7	0.845
149.8	0.845
149.9	0.845
150	0.845
150.1	0.845
150.2	0.845
150.3	0.845
150.4	0.845
150.5	0.845
150.6	0.845
150.7	0.845
150.8	0.845
150.9	0.845
151	0.845
151.1	0.845
151.2	0.845
151.3	0.845
151.4	0.84
151.5	0.84
151.6	0.84
151.7	0.84
151.8	0.84
151.9	0.84
152	0.84
152.1	0.84
152.2	0.84
152.3	0.84
152.4	0.84
152.5	0.835
152.6	0.84
152.7	0.84
152.8	0.84
152.9	0.84
153	0.84
153.1	0.84
153.2	0.84
153.3	0.84
153.4	0.84
153.5	0.84
153.6	0.84
153.7	0.835
153.8	0.83
153.9	0.83
154	0.83
154.1	0.83
154.2	0.83
154.3	0.83
154.4	0.83
154.5	0.83
154.6	0.825
154.7	0.825
154.8	0.82
154.9	0.82
155	0.825
155.1	0.82
155.2	0.82
155.3	0.815
155.4	0.82
155.5	0.815
155.6	0.815
155.7	0.81
155.8	0.805
155.9	0.805
156	0.81
156.1	0.81
156.2	0.815
156.3	0.815
156.4	0.815
156.5	0.815
156.6	0.81
156.7	0.81
156.8	0.81
156.9	0.81
157	0.81
157.1	0.81
157.2	0.81
157.3	0.81
157.4	0.815
157.5	0.815
157.6	0.815
157.7	0.815
157.8	0.815
157.9	0.815
158	0.82
158.1	0.82
158.2	0.82
158.3	0.82
158.4	0.82
158.5	0.82
158.6	0.82
158.7	0.82
158.8	0.82
158.9	0.82
159	0.82
159.1	0.82
159.2	0.825
159.3	0.825
159.4	0.835
159.5	0.835
159.6	0.835
159.7	0.835
159.8	0.835
159.9	0.835
160	0.84
160.1	0.84
160.2	0.84
160.3	0.84
160.4	0.84
160.5	0.84
160.6	0.84
160.7	0.84
160.8	0.84
160.9	0.84
161	0.84
161.1	0.84
161.2	0.84
161.3	0.84
161.4	0.845
161.5	0.845
161.6	0.845
161.7	0.845
161.8	0.845
161.9	0.845
162	0.845
162.1	0.845
162.2	0.845
162.3	0.845
162.4	0.845
162.5	0.845
162.6	0.84
162.7	0.845
162.8	0.845
162.9	0.845
163	0.84
163.1	0.84
163.2	0.84
163.3	0.84
163.4	0.84
163.5	0.835
163.6	0.835
163.7	0.835
163.8	0.84
163.9	0.835
164	0.835
164.1	0.835
164.2	0.835
164.3	0.835
164.4	0.835
164.5	0.835
164.6	0.835
164.7	0.84
164.8	0.835
164.9	0.835
165	0.84
165.1	0.835
165.2	0.835
165.3	0.835
165.4	0.835
165.5	0.83
165.6	0.84
165.7	0.84
165.8	0.84
165.9	0.84
166	0.84
166.1	0.84
166.2	0.84
166.3	0.835
166.4	0.835
166.5	0.835
166.6	0.84
166.7	0.84
166.8	0.84
166.9	0.84
167	0.84
167.1	0.84
167.2	0.84
167.3	0.845
167.4	0.845
167.5	0.84
167.6	0.835
167.7	0.835
167.8	0.835
167.9	0.835
168	0.835
168.1	0.835
168.2	0.835
168.3	0.835
168.4	0.83
168.5	0.83
168.6	0.83
168.7	0.83
168.8	0.83
168.9	0.84
169	0.84
169.1	0.85
169.2	0.85
169.3	0.85
169.4	0.85
169.5	0.85
169.6	0.85
169.7	0.855
169.8	0.86
169.9	0.865
170	0.865
170.1	0.86
170.2	0.86
170.3	0.86
170.4	0.865
170.5	0.865
170.6	0.87
170.7	0.865
170.8	0.865
170.9	0.865
171	0.865
171.1	0.86
171.2	0.86
171.3	0.86
171.4	0.865
171.5	0.865
171.6	0.865
171.7	0.87
171.8	0.87
171.9	0.87
172	0.87
172.1	0.865
172.2	0.86
172.3	0.86
172.4	0.855
172.5	0.855
172.6	0.86
172.7	0.855
172.8	0.86
172.9	0.86
173	0.86
173.1	0.86
173.2	0.86
173.3	0.86
173.4	0.86
173.5	0.86
173.6	0.86
173.7	0.86
173.8	0.855
173.9	0.855
174	0.855
174.1	0.855
174.2	0.855
174.3	0.855
174.4	0.855
174.5	0.855
174.6	0.855
174.7	0.855
174.8	0.855
174.9	0.86
175	0.865
175.1	0.865
175.2	0.865
175.3	0.865
175.4	0.865
175.5	0.87
175.6	0.87
175.7	0.865
175.8	0.86
175.9	0.86
176	0.86
176.1	0.86
176.2	0.86
176.3	0.86
176.4	0.86
176.5	0.86
176.6	0.85
176.7	0.855
176.8	0.855
176.9	0.855
177	0.845
177.1	0.84
177.2	0.84
177.3	0.84
177.4	0.835
177.5	0.84
177.6	0.84
177.7	0.84
177.8	0.84
177.9	0.835
178	0.835
178.1	0.835
178.2	0.83
178.3	0.825
178.4	0.825
178.5	0.825
178.6	0.825
178.7	0.825
178.8	0.825
178.9	0.825
179	0.825
179.1	0.825
179.2	0.825
179.3	0.825
179.4	0.825
179.5	0.82
179.6	0.825
179.7	0.82
179.8	0.82
179.9	0.82
180	0.815
180.1	0.815
180.2	0.815
180.3	0.815
180.4	0.815
180.5	0.815
180.6	0.815
180.7	0.815
180.8	0.815
180.9	0.81
181	0.81
181.1	0.81
181.2	0.815
181.3	0.815
181.4	0.81
181.5	0.81
181.6	0.81
181.7	0.805
181.8	0.805
181.9	0.805
182	0.8
182.1	0.8
182.2	0.795
182.3	0.795
182.4	0.795
182.5	0.795
182.6	0.795
182.7	0.795
182.8	0.795
182.9	0.795
183	0.795
183.1	0.795
183.2	0.79
183.3	0.79
183.4	0.78
183.5	0.78
183.6	0.78
183.7	0.785
183.8	0.785
183.9	0.79
184	0.79
184.1	0.79
184.2	0.79
184.3	0.79
184.4	0.795
184.5	0.795
184.6	0.795
184.7	0.8
184.8	0.8
184.9	0.8
185	0.795
185.1	0.79
185.2	0.78
185.3	0.78
185.4	0.775
185.5	0.77
185.6	0.77
185.7	0.77
185.8	0.77
185.9	0.775
186	0.78
186.1	0.785
186.2	0.79
186.3	0.79
186.4	0.79
186.5	0.79
186.6	0.79
186.7	0.785
186.8	0.785
186.9	0.79
187	0.79
187.1	0.79
187.2	0.79
187.3	0.795
187.4	0.795
187.5	0.795
187.6	0.795
187.7	0.8
187.8	0.8
187.9	0.81
188	0.81
188.1	0.81
188.2	0.805
188.3	0.805
188.4	0.805
188.5	0.805
188.6	0.805
188.7	0.81
188.8	0.81
188.9	0.815
189	0.815
189.1	0.815
189.2	0.82
189.3	0.82
189.4	0.825
189.5	0.82
189.6	0.815
189.7	0.81
189.8	0.805
189.9	0.805
190	0.805
190.1	0.805
190.2	0.805
190.3	0.8
190.4	0.8
190.5	0.8
190.6	0.8
190.7	0.805
190.8	0.805
190.9	0.805
191	0.805
191.1	0.805
191.2	0.805
191.3	0.805
191.4	0.8
191.5	0.805
191.6	0.81
191.7	0.81
191.8	0.81
191.9	0.81
192	0.81
192.1	0.81
192.2	0.81
192.3	0.81
192.4	0.815
192.5	0.815
192.6	0.815
192.7	0.815
192.8	0.815
192.9	0.815
193	0.815
193.1	0.815
193.2	0.815
193.3	0.815
193.4	0.815
193.5	0.815
193.6	0.815
193.7	0.815
193.8	0.815
193.9	0.815
194	0.815
194.1	0.815
194.2	0.815
194.3	0.82
194.4	0.825
194.5	0.825
194.6	0.825
194.7	0.825
194.8	0.825
194.9	0.83
195	0.83
195.1	0.825
195.2	0.825
195.3	0.825
195.4	0.825
195.5	0.82
195.6	0.825
195.7	0.83
195.8	0.83
195.9	0.83
196	0.83
196.1	0.83
196.2	0.83
196.3	0.83
196.4	0.815
196.5	0.815
196.6	0.815
196.7	0.815
196.8	0.815
196.9	0.815
197	0.81
197.1	0.81
197.2	0.805
197.3	0.805
197.4	0.805
197.5	0.81
197.6	0.81
197.7	0.81
197.8	0.81
197.9	0.81
198	0.81
198.1	0.81
198.2	0.805
198.3	0.805
198.4	0.805
198.5	0.81
198.6	0.81
198.7	0.81
198.8	0.81
198.9	0.81
199	0.81
199.1	0.81
199.2	0.81
199.3	0.81
199.4	0.81
199.5	0.81
199.6	0.81
199.7	0.81
199.8	0.805
199.9	0.805
200	0.805
[truncated: 14,000 more rows]
