# Supplementary material for: Bayesian inference of kinetic schemes for ion channels by Kalman filtering
Source: eLife journal article supplement (doi:10.7554/elife.62714), 2022-05-04
Supplement: fig4-data2 [file 1_Sim_N_400_Fluor_MW.xlsx]

## Sheet: 64 M
0.1	0
0.2	0
0.3	0
0.4	0
0.5	0
0.6	0
0.7	0
0.8	0
0.9	0
1	0
1.1	0
1.2	0
1.3	0
1.4	0
1.5	0
1.6	0
1.7	0
1.8	0
1.9	0
2	0
2.1	0
2.2	0
2.3	0
2.4	0
2.5	0
2.6	0
2.7	0
2.8	0
2.9	0
3	0
3.1	0
3.2	0
3.3	0
3.4	0
3.5	0
3.6	0
3.7	0
3.8	0
3.9	0
4	0
4.1	0
4.2	0
4.3	0
4.4	0
4.5	0
4.6	0
4.7	0
4.8	0
4.9	0
5	0
5.1	0
5.2	0
5.3	0
5.4	0
5.5	0
5.6	0
5.7	0
5.8	0
5.9	0
6	0
6.1	0
6.2	0
6.3	0
6.4	0
6.5	0
6.6	0
6.7	0
6.8	0
6.9	0
7	0
7.1	0
7.2	0
7.3	0
7.4	0
7.5	0
7.6	0
7.7	0
7.8	0
7.9	0
8	0
8.1	0
8.2	0
8.3	0
8.4	0
8.5	0
8.6	0
8.7	0
8.8	0
8.9	0
9	0
9.1	0
9.2	0
9.3	0
9.4	0
9.5	0
9.6	0
9.7	0
9.8	0
9.9	0
10	0
10.1	0
10.2	0
10.3	0
10.4	0
10.5	0
10.6	0
10.7	0
10.8	0
10.9	0
11	0
11.1	0
11.2	0
11.3	0
11.4	0
11.5	0
11.6	0
11.7	0
11.8	0
11.9	0
12	0
12.1	0
12.2	0
12.3	0
12.4	0
12.5	0
12.6	0
12.7	0
12.8	0
12.9	0
13	0
13.1	0
13.2	0
13.3	0
13.4	0
13.5	0
13.6	0
13.7	0
13.8	0
13.9	0
14	0
14.1	0
14.2	0
14.3	0
14.4	0
14.5	0
14.6	0
14.7	0
14.8	0
14.9	0
15	0
15.1	0
15.2	0
15.3	0
15.4	0
15.5	0
15.6	0
15.7	0
15.8	0
15.9	0
16	0
16.1	0
16.2	0
16.3	0
16.4	0
16.5	0
16.6	0
16.7	0
16.8	0
16.9	0
17	0
17.1	0
17.2	0
17.3	0
17.4	0
17.5	0
17.6	0
17.7	0
17.8	0
17.9	0
18	0
18.1	0
18.2	0
18.3	0
18.4	0
18.5	0
18.6	0
18.7	0
18.8	0
18.9	0
19	0
19.1	0
19.2	0
19.3	0
19.4	0
19.5	0
19.6	0
19.7	0
19.8	0
19.9	0
20	0
20.1	0
20.2	0
20.3	0
20.4	0
20.5	0
20.6	0
20.7	0
20.8	0
20.9	0
21	0
21.1	0
21.2	0
21.3	0
21.4	0
21.5	0
21.6	0
21.7	0
21.8	0
21.9	0
22	0
22.1	0
22.2	0
22.3	0
22.4	0
22.5	0
22.6	0
22.7	0
22.8	0
22.9	0
23	0
23.1	0
23.2	0
23.3	0
23.4	0
23.5	0
23.6	0
23.7	0
23.8	0
23.9	0
24	0
24.1	0
24.2	0
24.3	0
24.4	0
24.5	0
24.6	0
24.7	0
24.8	0
24.9	0
25	0
25.1	0
25.2	0
25.3	0
25.4	0
25.5	0
25.6	0
25.7	0
25.8	0
25.9	0
26	0
26.1	0
26.2	0
26.3	0
26.4	0
26.5	0
26.6	0
26.7	0
26.8	0
26.9	0
27	0
27.1	0
27.2	0
27.3	0
27.4	0
27.5	0
27.6	0
27.7	0
27.8	0
27.9	0
28	0
28.1	0
28.2	0
28.3	0
28.4	0
28.5	0
28.6	0
28.7	0
28.8	0
28.9	0
29	0
29.1	0
29.2	0
29.3	0
29.4	0
29.5	0
29.6	0
29.7	0
29.8	0
29.9	0
30	0
30.1	0
30.2	0
30.3	0
30.4	0
30.5	0
30.6	0
30.7	0
30.8	0
30.9	0
31	0
31.1	0
31.2	0
31.3	0
31.4	0
31.5	0
31.6	0
31.7	0
31.8	0
31.9	0
32	0
32.1	0
32.2	0
32.3	0
32.4	0
32.5	0
32.6	0
32.7	0
32.8	0
32.9	0
33	0
33.1	0
33.2	0
33.3	0
33.4	0
33.5	0
33.6	0
33.7	0
33.8	0
33.9	0
34	0
34.1	0
34.2	0
34.3	0
34.4	0
34.5	0
34.6	0
34.7	0
34.8	0
34.9	0
35	0
35.1	0
35.2	0
35.3	0
35.4	0
35.5	0
35.6	0
35.7	0
35.8	0
35.9	0
36	0
36.1	0
36.2	0
36.3	0
36.4	0
36.5	0
36.6	0
36.7	0
36.8	0
36.9	0
37	0
37.1	0
37.2	0
37.3	0
37.4	0
37.5	0
37.6	0
37.7	0
37.8	0
37.9	0
38	0
38.1	0
38.2	0
38.3	0
38.4	0
38.5	0
38.6	0
38.7	0
38.8	0
38.9	0
39	0
39.1	0
39.2	0
39.3	0
39.4	0
39.5	0
39.6	0
39.7	0
39.8	0
39.9	0
40	0
40.1	0
40.2	0
40.3	0
40.4	0
40.5	0
40.6	0
40.7	0
40.8	0
40.9	0
41	0
41.1	0
41.2	0
41.3	0
41.4	0
41.5	0
41.6	0
41.7	0
41.8	0
41.9	0
42	0
42.1	0
42.2	0
42.3	0
42.4	0
42.5	0
42.6	0
42.7	0
42.8	0
42.9	0
43	0
43.1	0
43.2	0
43.3	0
43.4	0
43.5	0
43.6	0
43.7	0
43.8	0
43.9	0
44	0
44.1	0
44.2	0
44.3	0
44.4	0
44.5	0
44.6	0
44.7	0
44.8	0
44.9	0
45	0
45.1	0
45.2	0
45.3	0
45.4	0
45.5	0
45.6	0
45.7	0
45.8	0
45.9	0
46	0
46.1	0
46.2	0
46.3	0
46.4	0
46.5	0
46.6	0
46.7	0
46.8	0
46.9	0
47	0
47.1	0
47.2	0
47.3	0
47.4	0
47.5	0
47.6	0
47.7	0
47.8	0
47.9	0
48	0
48.1	0
48.2	0
48.3	0
48.4	0
48.5	0
48.6	0
48.7	0
48.8	0
48.9	0
49	0
49.1	0
49.2	0
49.3	0
49.4	0
49.5	0
49.6	0
49.7	0
49.8	0
49.9	0
50	0
50.1	0
50.2	0
50.3	0
50.4	0
50.5	0
50.6	0
50.7	0
50.8	0
50.9	0
51	0
51.1	0
51.2	0
51.3	0
51.4	0
51.5	0
51.6	0
51.7	0
51.8	0
51.9	0
52	0
52.1	0
52.2	0
52.3	0
52.4	0
52.5	0
52.6	0
52.7	0
52.8	0
52.9	0
53	0
53.1	0
53.2	0
53.3	0
53.4	0
53.5	0
53.6	0
53.7	0
53.8	0
53.9	0
54	0
54.1	0
54.2	0
54.3	0
54.4	0
54.5	0
54.6	0
54.7	0
54.8	0
54.9	0
55	0
55.1	0
55.2	0
55.3	0
55.4	0
55.5	0
55.6	0
55.7	0
55.8	0
55.9	0
56	0
56.1	0
56.2	0
56.3	0
56.4	0
56.5	0
56.6	0
56.7	0
56.8	0
56.9	0
57	0
57.1	0
57.2	0
57.3	0
57.4	0
57.5	0
57.6	0
57.7	0
57.8	0
57.9	0
58	0
58.1	0
58.2	0
58.3	0
58.4	0
58.5	0
58.6	0
58.7	0
58.8	0
58.9	0
59	0
59.1	0
59.2	0
59.3	0
59.4	0
59.5	0
59.6	0
59.7	0
59.8	0
59.9	0
60	0
60.1	0
60.2	0
60.3	0
60.4	0
60.5	0
60.6	0
60.7	0
60.8	0
60.9	0
61	0
61.1	0
61.2	0
61.3	0
61.4	0
61.5	0
61.6	0
61.7	0
61.8	0
61.9	0
62	0
62.1	0
62.2	0
62.3	0
62.4	0
62.5	0
62.6	0
62.7	0
62.8	0
62.9	0
63	0
63.1	0
63.2	0
63.3	0
63.4	0
63.5	0
63.6	0
63.7	0
63.8	0
63.9	0
64	0
64.1	0
64.2	0
64.3	0
64.4	0
64.5	0
64.6	0
64.7	0
64.8	0
64.9	0
65	0
65.1	0
65.2	0
65.3	0
65.4	0
65.5	0
65.6	0
65.7	0
65.8	0
65.9	0
66	0
66.1	0
66.2	0
66.3	0
66.4	0
66.5	0
66.6	0
66.7	0
66.8	0
66.9	0
67	0
67.1	0
67.2	0
67.3	0
67.4	0
67.5	0
67.6	0
67.7	0
67.8	0
67.9	0
68	0
68.1	0
68.2	0
68.3	0
68.4	0
68.5	0
68.6	0
68.7	0
68.8	0
68.9	0
69	0
69.1	0
69.2	0
69.3	0
69.4	0
69.5	0
69.6	0
69.7	0
69.8	0
69.9	0
70	0
70.1	0
70.2	0
70.3	0
70.4	0
70.5	0
70.6	0
70.7	0
70.8	0
70.9	0
71	0
71.1	0
71.2	0
71.3	0
71.4	0
71.5	0
71.6	0
71.7	0
71.8	0
71.9	0
72	0
72.1	0
72.2	0
72.3	0
72.4	0
72.5	0
72.6	0
72.7	0
72.8	0
72.9	0
73	0
73.1	0
73.2	0
73.3	0
73.4	0
73.5	0
73.6	0
73.7	0
73.8	0
73.9	0
74	0
74.1	0
74.2	0
74.3	0
74.4	0
74.5	0
74.6	0
74.7	0
74.8	0
74.9	0
75	0
75.1	0
75.2	0
75.3	0
75.4	0
75.5	0
75.6	0
75.7	0
75.8	0
75.9	0
76	0
76.1	0
76.2	0
76.3	0
76.4	0
76.5	0
76.6	0
76.7	0
76.8	0
76.9	0
77	0
77.1	0
77.2	0
77.3	0
77.4	0
77.5	0
77.6	0
77.7	0
77.8	0
77.9	0
78	0
78.1	0
78.2	0
78.3	0
78.4	0
78.5	0
78.6	0
78.7	0
78.8	0
78.9	0
79	0
79.1	0
79.2	0
79.3	0
79.4	0
79.5	0
79.6	0
79.7	0
79.8	0
79.9	0
80	0
80.1	0
80.2	0
80.3	0
80.4	0
80.5	0
80.6	0
80.7	0
80.8	0
80.9	0
81	0
81.1	0
81.2	0
81.3	0
81.4	0
81.5	0
81.6	0
81.7	0
81.8	0
81.9	0
82	0
82.1	0
82.2	0
82.3	0
82.4	0
82.5	0
82.6	0
82.7	0
82.8	0
82.9	0
83	0
83.1	0
83.2	0
83.3	0
83.4	0
83.5	0
83.6	0
83.7	0
83.8	0
83.9	0
84	0
84.1	0
84.2	0
84.3	0
84.4	0
84.5	0
84.6	0
84.7	0
84.8	0
84.9	0
85	0
85.1	0
85.2	0
85.3	0
85.4	0
85.5	0
85.6	0
85.7	0
85.8	0
85.9	0
86	0
86.1	0
86.2	0
86.3	0
86.4	0
86.5	0
86.6	0
86.7	0
86.8	0
86.9	0
87	0
87.1	0
87.2	0
87.3	0
87.4	0
87.5	0
87.6	0
87.7	0
87.8	0
87.9	0
88	0
88.1	0
88.2	0
88.3	0
88.4	0
88.5	0
88.6	0
88.7	0
88.8	0
88.9	0
89	0
89.1	0
89.2	0
89.3	0
89.4	0
89.5	0
89.6	0
89.7	0
89.8	0
89.9	0
90	0
90.1	0
90.2	0
90.3	0
90.4	0
90.5	0
90.6	0
90.7	0
90.8	0
90.9	0
91	0
91.1	0
91.2	0
91.3	0
91.4	0
91.5	0
91.6	0
91.7	0
91.8	0
91.9	0
92	0
92.1	0
92.2	0
92.3	0
92.4	0
92.5	0
92.6	0
92.7	0
92.8	0
92.9	0
93	0
93.1	0
93.2	0
93.3	0
93.4	0
93.5	0
93.6	0
93.7	0
93.8	0
93.9	0
94	0
94.1	0
94.2	0
94.3	0
94.4	0
94.5	0
94.6	0
94.7	0
94.8	0
94.9	0
95	0
95.1	0
95.2	0
95.3	0
95.4	0
95.5	0
95.6	0
95.7	0
95.8	0
95.9	0
96	0
96.1	0
96.2	0
96.3	0
96.4	0
96.5	0
96.6	0
96.7	0
96.8	0
96.9	0
97	0
97.1	0
97.2	0
97.3	0
97.4	0
97.5	0
97.6	0
97.7	0
97.8	0
97.9	0
98	0
98.1	0
98.2	0
98.3	0
98.4	0
98.5	0
98.6	0
98.7	0
98.8	0
98.9	0
99	0
99.1	0
99.2	0
99.3	0
99.4	0
99.5	0
99.6	0
99.7	0
99.8	0
99.9	0
100	0
100.1	0.89375
100.2	0.9675
100.3	0.97625
100.4	0.98625
100.5	0.9875
100.6	0.98625
100.7	0.9775
100.8	0.99
100.9	0.9925
101	0.98875
101.1	0.985
101.2	0.9875
101.3	0.97875
101.4	0.99
101.5	0.99125
101.6	0.99125
101.7	0.9875
101.8	0.9925
101.9	0.98
102	0.9875
102.1	0.98875
102.2	0.985
102.3	0.98625
102.4	0.99125
102.5	0.98875
102.6	0.9875
102.7	0.99125
102.8	0.985
102.9	0.9875
103	0.98375
103.1	0.98625
103.2	0.98875
103.3	0.99
103.4	0.99
103.5	0.9875
103.6	0.99
103.7	0.98875
103.8	0.99375
103.9	0.98625
104	0.98625
104.1	0.9875
104.2	0.99125
104.3	0.99375
104.4	0.99375
104.5	0.99125
104.6	0.99125
104.7	0.99
104.8	0.99125
104.9	0.98625
105	0.98625
105.1	0.99125
105.2	0.98625
105.3	0.9875
105.4	0.99
105.5	0.99375
105.6	0.99375
105.7	0.98625
105.8	0.98625
105.9	0.985
106	0.985
106.1	0.9925
106.2	0.99
106.3	0.9925
106.4	0.98875
106.5	0.98625
106.6	0.98875
106.7	0.98625
106.8	0.9925
106.9	0.99
107	0.985
107.1	0.9925
107.2	0.99625
107.3	0.9875
107.4	0.99375
107.5	0.99375
107.6	0.99125
107.7	0.99125
107.8	0.9925
107.9	0.995
108	0.9875
108.1	0.99375
108.2	0.99125
108.3	0.98625
108.4	0.99
108.5	0.98625
108.6	0.99625
108.7	0.98875
108.8	0.9925
108.9	0.99125
109	0.9875
109.1	0.995
109.2	0.99125
109.3	0.995
109.4	0.99125
109.5	0.99
109.6	0.9875
109.7	0.99625
109.8	0.995
109.9	0.99
110	0.995
110.1	0.99125
110.2	0.9925
110.3	0.99875
110.4	0.99625
110.5	0.99125
110.6	0.995
110.7	0.995
110.8	0.9925
110.9	0.9925
111	0.9875
111.1	0.99
111.2	0.985
111.3	0.9925
111.4	0.99375
111.5	0.99375
111.6	0.9975
111.7	0.99625
111.8	0.9925
111.9	0.9925
112	0.995
112.1	0.995
112.2	0.99375
112.3	0.99125
112.4	0.99375
112.5	0.9925
112.6	0.99125
112.7	0.99
112.8	0.99375
112.9	0.99125
113	0.9925
113.1	0.99125
113.2	0.99375
113.3	0.99625
113.4	0.99375
113.5	0.99375
113.6	0.98875
113.7	0.995
113.8	0.99125
113.9	0.98625
114	0.98875
114.1	0.995
114.2	0.995
114.3	0.9975
114.4	0.995
114.5	0.99125
114.6	0.99125
114.7	0.99625
114.8	0.98875
114.9	0.9925
115	0.99375
115.1	0.9925
115.2	0.98875
115.3	0.99375
115.4	0.9925
115.5	0.99
115.6	0.99375
115.7	0.995
115.8	0.9925
115.9	0.9925
116	0.98875
116.1	0.99125
116.2	0.99625
116.3	0.99375
116.4	0.9925
116.5	0.99125
116.6	0.99625
116.7	0.995
116.8	0.9925
116.9	0.99625
117	0.99125
117.1	0.9925
117.2	0.9975
117.3	0.99375
117.4	0.995
117.5	0.98875
117.6	0.99375
117.7	0.995
117.8	0.995
117.9	0.9975
118	0.9925
118.1	0.99875
118.2	0.99375
118.3	0.99875
118.4	0.995
118.5	0.99625
118.6	0.995
118.7	0.99625
118.8	0.9925
118.9	0.99625
119	0.99125
119.1	0.99625
119.2	0.99875
119.3	0.99875
119.4	0.99625
119.5	0.99625
119.6	0.995
119.7	0.99625
119.8	0.99
119.9	0.99375
120	0.9975
120.1	0.995
120.2	0.995
120.3	0.99625
120.4	0.995
120.5	0.995
120.6	0.99625
120.7	0.99375
120.8	0.995
120.9	0.995
121	0.99625
121.1	0.99625
121.2	0.9975
121.3	0.9975
121.4	0.99375
121.5	0.99
121.6	0.99625
121.7	0.98875
121.8	0.9975
121.9	0.9975
122	0.99375
122.1	0.995
122.2	0.9925
122.3	0.99625
122.4	0.995
122.5	0.99875
122.6	0.99625
122.7	0.9975
122.8	0.99
122.9	0.9925
123	0.99125
123.1	0.995
123.2	0.99625
123.3	0.99625
123.4	0.99625
123.5	0.98625
123.6	0.98875
123.7	0.99375
123.8	0.99625
123.9	0.99375
124	0.9975
124.1	0.9975
124.2	0.99125
124.3	0.99375
124.4	0.99625
124.5	0.995
124.6	0.99875
124.7	0.995
124.8	0.995
124.9	0.99625
125	0.9975
125.1	0.995
125.2	0.995
125.3	0.99875
125.4	0.9975
125.5	0.995
125.6	0.995
125.7	0.995
125.8	0.99875
125.9	0.9975
126	0.9975
126.1	0.99625
126.2	0.99875
126.3	0.9975
126.4	0.99625
126.5	0.99375
126.6	0.99625
126.7	0.99875
126.8	0.9925
126.9	0.9975
127	0.995
127.1	0.99375
127.2	0.9975
127.3	0.99875
127.4	0.9975
127.5	0.99875
127.6	0.99375
127.7	0.995
127.8	0.99875
127.9	0.995
128	0.9975
128.1	0.99625
128.2	0.99625
128.3	0.9975
128.4	0.99625
128.5	0.995
128.6	0.99625
128.7	0.99375
128.8	0.99125
128.9	0.99375
129	1
129.1	0.99875
129.2	0.99375
129.3	0.99625
129.4	0.99625
129.5	0.99625
129.6	0.9925
129.7	0.99625
129.8	0.995
129.9	0.9975
130	0.99625
130.1	0.99875
130.2	0.99625
130.3	0.995
130.4	0.99375
130.5	0.9975
130.6	0.9975
130.7	0.995
130.8	0.99375
130.9	0.99625
131	0.995
131.1	0.9975
131.2	0.9975
131.3	0.9975
131.4	0.9975
131.5	0.99875
131.6	0.99875
131.7	0.9975
131.8	0.9975
131.9	0.9975
132	0.99875
132.1	1
132.2	0.995
132.3	0.995
132.4	0.99625
132.5	0.99625
132.6	0.99875
132.7	0.99875
132.8	0.99875
132.9	0.9975
133	0.995
133.1	0.99875
133.2	0.9975
133.3	0.9975
133.4	0.99625
133.5	0.99875
133.6	0.9925
133.7	0.995
133.8	1
133.9	0.9925
134	0.99625
134.1	0.99875
134.2	0.995
134.3	0.9975
134.4	0.995
134.5	0.9975
134.6	0.99875
134.7	0.9975
134.8	0.99125
134.9	0.99625
135	0.99875
135.1	0.99625
135.2	0.995
135.3	0.9975
135.4	0.99375
135.5	0.995
135.6	0.99625
135.7	0.99375
135.8	0.9925
135.9	0.99625
136	0.99625
136.1	0.99875
136.2	0.99625
136.3	0.99875
136.4	0.99625
136.5	0.99625
136.6	0.995
136.7	0.9975
136.8	0.995
136.9	0.995
137	0.99875
137.1	0.995
137.2	0.99875
137.3	0.99875
137.4	0.9975
137.5	0.9975
137.6	0.99625
137.7	0.99625
137.8	0.99875
137.9	0.99625
138	0.99875
138.1	0.99625
138.2	0.9975
138.3	0.99625
138.4	0.9975
138.5	0.99875
138.6	0.9975
138.7	0.9975
138.8	0.99875
138.9	0.9975
139	0.99875
139.1	0.9975
139.2	0.9975
139.3	0.995
139.4	0.995
139.5	0.99625
139.6	0.99625
139.7	0.99875
139.8	0.99375
139.9	0.9975
140	0.99625
140.1	0.9975
140.2	0.99875
140.3	0.99875
140.4	1
140.5	0.9975
140.6	0.9975
140.7	0.9975
140.8	0.99625
140.9	0.99875
141	0.9975
141.1	0.9975
141.2	0.99625
141.3	1
141.4	0.9975
141.5	0.9975
141.6	0.99375
141.7	0.99875
141.8	0.9975
141.9	0.995
142	0.99625
142.1	0.99625
142.2	0.99625
142.3	0.9975
142.4	0.9975
142.5	1
142.6	0.99875
142.7	0.9975
142.8	0.99625
142.9	0.99125
143	0.995
143.1	0.9975
143.2	0.9975
143.3	0.99375
143.4	0.99125
143.5	0.9925
143.6	0.99375
143.7	0.99875
143.8	0.9975
143.9	0.995
144	0.995
144.1	0.99625
144.2	0.9975
144.3	0.99875
144.4	0.99875
144.5	0.99875
144.6	0.9975
144.7	0.99
144.8	0.99125
144.9	0.99625
145	0.995
145.1	0.99375
145.2	0.9975
145.3	0.99875
145.4	1
145.5	0.99875
145.6	0.995
145.7	0.99625
145.8	0.99375
145.9	1
146	0.9975
146.1	0.99875
146.2	0.99875
146.3	0.99875
146.4	0.99875
146.5	0.99625
146.6	0.995
146.7	0.99375
146.8	0.995
146.9	0.99875
147	0.99875
147.1	1
147.2	0.99625
147.3	0.99875
147.4	0.99875
147.5	0.995
147.6	0.99875
147.7	0.9975
147.8	1
147.9	0.99625
148	0.99625
148.1	0.99875
148.2	0.995
148.3	0.995
148.4	0.99375
148.5	0.99875
148.6	0.99625
148.7	0.99875
148.8	0.9975
148.9	0.99875
149	1
149.1	1
149.2	0.99875
149.3	0.99625
149.4	0.9975
149.5	0.99375
149.6	0.995
149.7	0.9975
149.8	0.99625
149.9	0.99625
150	0.9975
150.1	0.99875
150.2	0.995
150.3	0.99875
150.4	1
150.5	1
150.6	0.99875
150.7	0.9975
150.8	0.995
150.9	0.9975
151	0.99375
151.1	0.99625
151.2	0.99875
151.3	0.9975
151.4	0.99625
151.5	0.99875
151.6	1
151.7	0.9975
151.8	0.99875
151.9	0.9975
152	0.995
152.1	0.99625
152.2	0.99625
152.3	0.9975
152.4	0.99875
152.5	0.99875
152.6	0.995
152.7	0.995
152.8	0.99625
152.9	0.99875
153	0.9975
153.1	0.9975
153.2	1
153.3	0.99875
153.4	0.99625
153.5	0.9975
153.6	0.99625
153.7	0.995
153.8	0.99875
153.9	0.99875
154	0.9975
154.1	0.99625
154.2	0.99875
154.3	0.99875
154.4	1
154.5	1
154.6	0.99625
154.7	0.99875
154.8	0.99875
154.9	0.99875
155	0.9975
155.1	0.99625
155.2	0.99875
155.3	0.99875
155.4	0.995
155.5	0.99625
155.6	0.9975
155.7	1
155.8	0.9975
155.9	0.99875
156	0.99375
156.1	0.995
156.2	0.9975
156.3	0.9975
156.4	0.9975
156.5	0.9975
156.6	0.9975
156.7	0.995
156.8	0.9975
156.9	0.9975
157	0.995
157.1	0.99875
157.2	1
157.3	0.9975
157.4	0.99875
157.5	1
157.6	0.99625
157.7	0.99875
157.8	0.99875
157.9	0.9975
158	0.9975
158.1	0.995
158.2	0.9975
158.3	0.9975
158.4	0.99875
158.5	0.99625
158.6	0.995
158.7	0.9975
158.8	0.99875
158.9	0.99875
159	0.9975
159.1	0.995
159.2	0.99875
159.3	0.99875
159.4	0.99875
159.5	0.99625
159.6	1
159.7	1
159.8	0.99625
159.9	0.9975
160	0.99875
160.1	0.99875
160.2	0.9975
160.3	0.9975
160.4	1
160.5	0.9975
160.6	0.9975
160.7	1
160.8	0.99625
160.9	0.99625
161	1
161.1	0.99375
161.2	0.9975
161.3	1
161.4	1
161.5	1
161.6	1
161.7	1
161.8	0.99125
161.9	0.9975
162	0.99625
162.1	0.99875
162.2	0.99375
162.3	0.99875
162.4	0.9975
162.5	0.99625
162.6	1
162.7	0.9975
162.8	0.9975
162.9	0.9975
163	0.995
163.1	0.99625
163.2	1
163.3	1
163.4	0.99875
163.5	0.99875
163.6	0.995
163.7	0.99625
163.8	1
163.9	0.99875
164	1
164.1	0.99875
164.2	0.99625
164.3	0.99625
164.4	0.99625
164.5	0.9975
164.6	0.99875
164.7	0.9975
164.8	0.99875
164.9	0.9975
165	0.99875
165.1	0.9975
165.2	0.99875
165.3	0.9975
165.4	0.99875
165.5	1
165.6	0.99875
165.7	1
165.8	0.99625
165.9	0.99625
166	0.99875
166.1	0.99625
166.2	0.99875
166.3	0.9975
166.4	1
166.5	1
166.6	1
166.7	1
166.8	0.995
166.9	0.99875
167	0.99625
167.1	0.9975
167.2	0.9975
167.3	0.99625
167.4	0.99875
167.5	0.9975
167.6	0.9975
167.7	0.9975
167.8	1
167.9	0.9975
168	0.9975
168.1	0.9975
168.2	0.99625
168.3	0.99875
168.4	0.99875
168.5	0.9975
168.6	0.99625
168.7	0.99875
168.8	1
168.9	1
169	0.99625
169.1	0.99875
169.2	0.99625
169.3	0.9975
169.4	0.9975
169.5	0.99625
169.6	0.99875
169.7	0.9975
169.8	0.99625
169.9	0.9975
170	0.99625
170.1	0.99875
170.2	0.99625
170.3	1
170.4	0.9975
170.5	0.99875
170.6	0.9975
170.7	0.99875
170.8	1
170.9	0.9975
171	0.99875
171.1	0.99625
171.2	0.995
171.3	0.9975
171.4	0.99625
171.5	0.99875
171.6	1
171.7	0.99875
171.8	0.9975
171.9	1
172	1
172.1	1
172.2	0.99625
172.3	0.9975
172.4	0.99875
172.5	1
172.6	0.99875
172.7	1
172.8	0.9975
172.9	0.99875
173	1
173.1	1
173.2	0.99875
173.3	1
173.4	0.99875
173.5	0.99875
173.6	1
173.7	0.99875
173.8	0.99625
173.9	0.99875
174	0.995
174.1	0.995
174.2	0.99625
174.3	0.9975
174.4	0.99875
174.5	1
174.6	0.9975
174.7	0.995
174.8	0.9975
174.9	1
175	0.99625
175.1	0.99875
175.2	0.995
175.3	0.99625
175.4	1
175.5	1
175.6	1
175.7	0.995
175.8	0.9975
175.9	1
176	0.99875
176.1	0.99625
176.2	0.9975
176.3	0.99625
176.4	0.9975
176.5	0.9975
176.6	0.9975
176.7	0.99875
176.8	0.99875
176.9	0.99875
177	0.99875
177.1	0.99875
177.2	1
177.3	1
177.4	0.995
177.5	0.9975
177.6	1
177.7	0.99875
177.8	0.995
177.9	0.9975
178	1
178.1	0.99625
178.2	0.99875
178.3	0.99875
178.4	1
178.5	0.9975
178.6	0.9975
178.7	0.99875
178.8	0.99875
178.9	0.9975
179	0.99875
179.1	0.99875
179.2	0.99875
179.3	1
179.4	0.99875
179.5	0.995
179.6	1
179.7	0.995
179.8	0.99875
179.9	0.99875
180	1
180.1	1
180.2	0.9975
180.3	0.99625
180.4	0.99875
180.5	0.99875
180.6	1
180.7	0.99875
180.8	0.99875
180.9	0.99875
181	0.9975
181.1	0.99875
181.2	0.99875
181.3	0.9975
181.4	0.9975
181.5	0.9975
181.6	1
181.7	0.99875
181.8	0.9975
181.9	0.99875
182	1
182.1	0.99875
182.2	0.99875
182.3	0.99875
182.4	1
182.5	0.99875
182.6	0.99875
182.7	0.99625
182.8	1
182.9	0.99875
183	0.99875
183.1	0.9975
183.2	0.99625
183.3	0.9975
183.4	1
183.5	0.9975
183.6	0.9975
183.7	0.9975
183.8	1
183.9	0.99875
184	0.99875
184.1	0.99875
184.2	0.99625
184.3	0.99625
184.4	0.9975
184.5	1
184.6	0.9975
184.7	0.99625
184.8	1
184.9	1
185	0.99875
185.1	1
185.2	0.99875
185.3	0.99875
185.4	1
185.5	0.99875
185.6	0.99875
185.7	0.99625
185.8	0.9975
185.9	0.99875
186	0.99875
186.1	0.99875
186.2	0.99875
186.3	0.99625
186.4	0.99875
186.5	0.99875
186.6	0.9975
186.7	0.99625
186.8	0.9975
186.9	0.99875
187	1
187.1	0.99875
187.2	0.99875
187.3	1
187.4	0.99875
187.5	0.99625
187.6	0.9975
187.7	0.9975
187.8	0.9975
187.9	0.99875
188	0.99875
188.1	0.99875
188.2	0.9975
188.3	0.99875
188.4	1
188.5	0.99875
188.6	0.9975
188.7	1
188.8	0.99875
188.9	0.9975
189	0.99875
189.1	0.99875
189.2	0.99875
189.3	1
189.4	0.9975
189.5	0.9975
189.6	0.99875
189.7	1
189.8	0.99875
189.9	0.9975
190	0.99875
190.1	0.99875
190.2	0.9975
190.3	1
190.4	1
190.5	0.99875
190.6	1
190.7	0.9975
190.8	0.9975
190.9	0.99875
191	0.99875
191.1	0.99625
191.2	1
191.3	0.9975
191.4	1
191.5	0.99625
191.6	1
191.7	0.99625
191.8	0.99625
191.9	1
192	1
192.1	0.99625
192.2	0.9975
192.3	0.99875
192.4	0.99875
192.5	1
192.6	0.99875
192.7	0.99875
192.8	0.99875
192.9	1
193	0.99875
193.1	1
193.2	0.99875
193.3	1
193.4	1
193.5	0.99625
193.6	0.995
193.7	0.99625
193.8	0.995
193.9	1
194	0.99875
194.1	0.99625
194.2	0.99875
194.3	0.9975
194.4	0.9975
194.5	0.9975
194.6	0.99875
194.7	1
194.8	1
194.9	0.9975
195	0.9975
195.1	0.9975
195.2	0.99875
195.3	0.9975
195.4	0.99875
195.5	0.99875
195.6	0.99875
195.7	0.99875
195.8	0.99875
195.9	0.9975
196	0.99625
196.1	0.99875
196.2	1
196.3	0.99875
196.4	0.9975
196.5	0.99625
196.6	0.9975
196.7	0.995
196.8	0.995
196.9	1
197	0.99875
197.1	0.99625
197.2	0.99875
197.3	0.995
197.4	0.99625
197.5	0.995
197.6	0.99875
197.7	0.9975
197.8	1
197.9	0.99875
198	0.9975
198.1	1
198.2	1
198.3	1
198.4	0.99875
198.5	0.99875
198.6	0.99875
198.7	0.99625
198.8	0.9975
198.9	0.99625
199	0.99875
199.1	0.99875
199.2	0.9975
199.3	0.995
199.4	0.99875
199.5	1
199.6	1
199.7	1
199.8	0.99875
199.9	0.99875
200	1
[truncated: 14,000 more rows]
