# Supplementary material for: Bayesian inference of kinetic schemes for ion channels by Kalman filtering
Source: eLife journal article supplement (doi:10.7554/elife.62714), 2022-05-04
Supplement: fig4-data2 [file 1_Sim_N_400_Strom_MW.xlsx]

## Sheet: 64 M
0.1	0
0.2	0
0.3	0
0.4	0
0.5	0
0.6	0
0.7	0
0.8	0
0.9	0
1	0
1.1	0
1.2	0
1.3	0
1.4	0
1.5	0
1.6	0
1.7	0
1.8	0
1.9	0
2	0
2.1	0
2.2	0
2.3	0
2.4	0
2.5	0
2.6	0
2.7	0
2.8	0
2.9	0
3	0
3.1	0
3.2	0
3.3	0
3.4	0
3.5	0
3.6	0
3.7	0
3.8	0
3.9	0
4	0
4.1	0
4.2	0
4.3	0
4.4	0
4.5	0
4.6	0
4.7	0
4.8	0
4.9	0
5	0
5.1	0
5.2	0
5.3	0
5.4	0
5.5	0
5.6	0
5.7	0
5.8	0
5.9	0
6	0
6.1	0
6.2	0
6.3	0
6.4	0
6.5	0
6.6	0
6.7	0
6.8	0
6.9	0
7	0
7.1	0
7.2	0
7.3	0
7.4	0
7.5	0
7.6	0
7.7	0
7.8	0
7.9	0
8	0
8.1	0
8.2	0
8.3	0
8.4	0
8.5	0
8.6	0
8.7	0
8.8	0
8.9	0
9	0
9.1	0
9.2	0
9.3	0
9.4	0
9.5	0
9.6	0
9.7	0
9.8	0
9.9	0
10	0
10.1	0
10.2	0
10.3	0
10.4	0
10.5	0
10.6	0
10.7	0
10.8	0
10.9	0
11	0
11.1	0
11.2	0
11.3	0
11.4	0
11.5	0
11.6	0
11.7	0
11.8	0
11.9	0
12	0
12.1	0
12.2	0
12.3	0
12.4	0
12.5	0
12.6	0
12.7	0
12.8	0
12.9	0
13	0
13.1	0
13.2	0
13.3	0
13.4	0
13.5	0
13.6	0
13.7	0
13.8	0
13.9	0
14	0
14.1	0
14.2	0
14.3	0
14.4	0
14.5	0
14.6	0
14.7	0
14.8	0
14.9	0
15	0
15.1	0
15.2	0
15.3	0
15.4	0
15.5	0
15.6	0
15.7	0
15.8	0
15.9	0
16	0
16.1	0
16.2	0
16.3	0
16.4	0
16.5	0
16.6	0
16.7	0
16.8	0
16.9	0
17	0
17.1	0
17.2	0
17.3	0
17.4	0
17.5	0
17.6	0
17.7	0
17.8	0
17.9	0
18	0
18.1	0
18.2	0
18.3	0
18.4	0
18.5	0
18.6	0
18.7	0
18.8	0
18.9	0
19	0
19.1	0
19.2	0
19.3	0
19.4	0
19.5	0
19.6	0
19.7	0
19.8	0
19.9	0
20	0
20.1	0
20.2	0
20.3	0
20.4	0
20.5	0
20.6	0
20.7	0
20.8	0
20.9	0
21	0
21.1	0
21.2	0
21.3	0
21.4	0
21.5	0
21.6	0
21.7	0
21.8	0
21.9	0
22	0
22.1	0
22.2	0
22.3	0
22.4	0
22.5	0
22.6	0
22.7	0
22.8	0
22.9	0
23	0
23.1	0
23.2	0
23.3	0
23.4	0
23.5	0
23.6	0
23.7	0
23.8	0
23.9	0
24	0
24.1	0
24.2	0
24.3	0
24.4	0
24.5	0
24.6	0
24.7	0
24.8	0
24.9	0
25	0
25.1	0
25.2	0
25.3	0
25.4	0
25.5	0
25.6	0
25.7	0
25.8	0
25.9	0
26	0
26.1	0
26.2	0
26.3	0
26.4	0
26.5	0
26.6	0
26.7	0
26.8	0
26.9	0
27	0
27.1	0
27.2	0
27.3	0
27.4	0
27.5	0
27.6	0
27.7	0
27.8	0
27.9	0
28	0
28.1	0
28.2	0
28.3	0
28.4	0
28.5	0
28.6	0
28.7	0
28.8	0
28.9	0
29	0
29.1	0
29.2	0
29.3	0
29.4	0
29.5	0
29.6	0
29.7	0
29.8	0
29.9	0
30	0
30.1	0
30.2	0
30.3	0
30.4	0
30.5	0
30.6	0
30.7	0
30.8	0
30.9	0
31	0
31.1	0
31.2	0
31.3	0
31.4	0
31.5	0
31.6	0
31.7	0
31.8	0
31.9	0
32	0
32.1	0
32.2	0
32.3	0
32.4	0
32.5	0
32.6	0
32.7	0
32.8	0
32.9	0
33	0
33.1	0
33.2	0
33.3	0
33.4	0
33.5	0
33.6	0
33.7	0
33.8	0
33.9	0
34	0
34.1	0
34.2	0
34.3	0
34.4	0
34.5	0
34.6	0
34.7	0
34.8	0
34.9	0
35	0
35.1	0
35.2	0
35.3	0
35.4	0
35.5	0
35.6	0
35.7	0
35.8	0
35.9	0
36	0
36.1	0
36.2	0
36.3	0
36.4	0
36.5	0
36.6	0
36.7	0
36.8	0
36.9	0
37	0
37.1	0
37.2	0
37.3	0
37.4	0
37.5	0
37.6	0
37.7	0
37.8	0
37.9	0
38	0
38.1	0
38.2	0
38.3	0
38.4	0
38.5	0
38.6	0
38.7	0
38.8	0
38.9	0
39	0
39.1	0
39.2	0
39.3	0
39.4	0
39.5	0
39.6	0
39.7	0
39.8	0
39.9	0
40	0
40.1	0
40.2	0
40.3	0
40.4	0
40.5	0
40.6	0
40.7	0
40.8	0
40.9	0
41	0
41.1	0
41.2	0
41.3	0
41.4	0
41.5	0
41.6	0
41.7	0
41.8	0
41.9	0
42	0
42.1	0
42.2	0
42.3	0
42.4	0
42.5	0
42.6	0
42.7	0
42.8	0
42.9	0
43	0
43.1	0
43.2	0
43.3	0
43.4	0
43.5	0
43.6	0
43.7	0
43.8	0
43.9	0
44	0
44.1	0
44.2	0
44.3	0
44.4	0
44.5	0
44.6	0
44.7	0
44.8	0
44.9	0
45	0
45.1	0
45.2	0
45.3	0
45.4	0
45.5	0
45.6	0
45.7	0
45.8	0
45.9	0
46	0
46.1	0
46.2	0
46.3	0
46.4	0
46.5	0
46.6	0
46.7	0
46.8	0
46.9	0
47	0
47.1	0
47.2	0
47.3	0
47.4	0
47.5	0
47.6	0
47.7	0
47.8	0
47.9	0
48	0
48.1	0
48.2	0
48.3	0
48.4	0
48.5	0
48.6	0
48.7	0
48.8	0
48.9	0
49	0
49.1	0
49.2	0
49.3	0
49.4	0
49.5	0
49.6	0
49.7	0
49.8	0
49.9	0
50	0
50.1	0
50.2	0
50.3	0
50.4	0
50.5	0
50.6	0
50.7	0
50.8	0
50.9	0
51	0
51.1	0
51.2	0
51.3	0
51.4	0
51.5	0
51.6	0
51.7	0
51.8	0
51.9	0
52	0
52.1	0
52.2	0
52.3	0
52.4	0
52.5	0
52.6	0
52.7	0
52.8	0
52.9	0
53	0
53.1	0
53.2	0
53.3	0
53.4	0
53.5	0
53.6	0
53.7	0
53.8	0
53.9	0
54	0
54.1	0
54.2	0
54.3	0
54.4	0
54.5	0
54.6	0
54.7	0
54.8	0
54.9	0
55	0
55.1	0
55.2	0
55.3	0
55.4	0
55.5	0
55.6	0
55.7	0
55.8	0
55.9	0
56	0
56.1	0
56.2	0
56.3	0
56.4	0
56.5	0
56.6	0
56.7	0
56.8	0
56.9	0
57	0
57.1	0
57.2	0
57.3	0
57.4	0
57.5	0
57.6	0
57.7	0
57.8	0
57.9	0
58	0
58.1	0
58.2	0
58.3	0
58.4	0
58.5	0
58.6	0
58.7	0
58.8	0
58.9	0
59	0
59.1	0
59.2	0
59.3	0
59.4	0
59.5	0
59.6	0
59.7	0
59.8	0
59.9	0
60	0
60.1	0
60.2	0
60.3	0
60.4	0
60.5	0
60.6	0
60.7	0
60.8	0
60.9	0
61	0
61.1	0
61.2	0
61.3	0
61.4	0
61.5	0
61.6	0
61.7	0
61.8	0
61.9	0
62	0
62.1	0
62.2	0
62.3	0
62.4	0
62.5	0
62.6	0
62.7	0
62.8	0
62.9	0
63	0
63.1	0
63.2	0
63.3	0
63.4	0
63.5	0
63.6	0
63.7	0
63.8	0
63.9	0
64	0
64.1	0
64.2	0
64.3	0
64.4	0
64.5	0
64.6	0
64.7	0
64.8	0
64.9	0
65	0
65.1	0
65.2	0
65.3	0
65.4	0
65.5	0
65.6	0
65.7	0
65.8	0
65.9	0
66	0
66.1	0
66.2	0
66.3	0
66.4	0
66.5	0
66.6	0
66.7	0
66.8	0
66.9	0
67	0
67.1	0
67.2	0
67.3	0
67.4	0
67.5	0
67.6	0
67.7	0
67.8	0
67.9	0
68	0
68.1	0
68.2	0
68.3	0
68.4	0
68.5	0
68.6	0
68.7	0
68.8	0
68.9	0
69	0
69.1	0
69.2	0
69.3	0
69.4	0
69.5	0
69.6	0
69.7	0
69.8	0
69.9	0
70	0
70.1	0
70.2	0
70.3	0
70.4	0
70.5	0
70.6	0
70.7	0
70.8	0
70.9	0
71	0
71.1	0
71.2	0
71.3	0
71.4	0
71.5	0
71.6	0
71.7	0
71.8	0
71.9	0
72	0
72.1	0
72.2	0
72.3	0
72.4	0
72.5	0
72.6	0
72.7	0
72.8	0
72.9	0
73	0
73.1	0
73.2	0
73.3	0
73.4	0
73.5	0
73.6	0
73.7	0
73.8	0
73.9	0
74	0
74.1	0
74.2	0
74.3	0
74.4	0
74.5	0
74.6	0
74.7	0
74.8	0
74.9	0
75	0
75.1	0
75.2	0
75.3	0
75.4	0
75.5	0
75.6	0
75.7	0
75.8	0
75.9	0
76	0
76.1	0
76.2	0
76.3	0
76.4	0
76.5	0
76.6	0
76.7	0
76.8	0
76.9	0
77	0
77.1	0
77.2	0
77.3	0
77.4	0
77.5	0
77.6	0
77.7	0
77.8	0
77.9	0
78	0
78.1	0
78.2	0
78.3	0
78.4	0
78.5	0
78.6	0
78.7	0
78.8	0
78.9	0
79	0
79.1	0
79.2	0
79.3	0
79.4	0
79.5	0
79.6	0
79.7	0
79.8	0
79.9	0
80	0
80.1	0
80.2	0
80.3	0
80.4	0
80.5	0
80.6	0
80.7	0
80.8	0
80.9	0
81	0
81.1	0
81.2	0
81.3	0
81.4	0
81.5	0
81.6	0
81.7	0
81.8	0
81.9	0
82	0
82.1	0
82.2	0
82.3	0
82.4	0
82.5	0
82.6	0
82.7	0
82.8	0
82.9	0
83	0
83.1	0
83.2	0
83.3	0
83.4	0
83.5	0
83.6	0
83.7	0
83.8	0
83.9	0
84	0
84.1	0
84.2	0
84.3	0
84.4	0
84.5	0
84.6	0
84.7	0
84.8	0
84.9	0
85	0
85.1	0
85.2	0
85.3	0
85.4	0
85.5	0
85.6	0
85.7	0
85.8	0
85.9	0
86	0
86.1	0
86.2	0
86.3	0
86.4	0
86.5	0
86.6	0
86.7	0
86.8	0
86.9	0
87	0
87.1	0
87.2	0
87.3	0
87.4	0
87.5	0
87.6	0
87.7	0
87.8	0
87.9	0
88	0
88.1	0
88.2	0
88.3	0
88.4	0
88.5	0
88.6	0
88.7	0
88.8	0
88.9	0
89	0
89.1	0
89.2	0
89.3	0
89.4	0
89.5	0
89.6	0
89.7	0
89.8	0
89.9	0
90	0
90.1	0
90.2	0
90.3	0
90.4	0
90.5	0
90.6	0
90.7	0
90.8	0
90.9	0
91	0
91.1	0
91.2	0
91.3	0
91.4	0
91.5	0
91.6	0
91.7	0
91.8	0
91.9	0
92	0
92.1	0
92.2	0
92.3	0
92.4	0
92.5	0
92.6	0
92.7	0
92.8	0
92.9	0
93	0
93.1	0
93.2	0
93.3	0
93.4	0
93.5	0
93.6	0
93.7	0
93.8	0
93.9	0
94	0
94.1	0
94.2	0
94.3	0
94.4	0
94.5	0
94.6	0
94.7	0
94.8	0
94.9	0
95	0
95.1	0
95.2	0
95.3	0
95.4	0
95.5	0
95.6	0
95.7	0
95.8	0
95.9	0
96	0
96.1	0
96.2	0
96.3	0
96.4	0
96.5	0
96.6	0
96.7	0
96.8	0
96.9	0
97	0
97.1	0
97.2	0
97.3	0
97.4	0
97.5	0
97.6	0
97.7	0
97.8	0
97.9	0
98	0
98.1	0
98.2	0
98.3	0
98.4	0
98.5	0
98.6	0
98.7	0
98.8	0
98.9	0
99	0
99.1	0
99.2	0
99.3	0
99.4	0
99.5	0
99.6	0
99.7	0
99.8	0
99.9	0
100	0
100.1	0.0025
100.2	0.0075
100.3	0.0125
100.4	0.0175
100.5	0.025
100.6	0.0275
100.7	0.0375
100.8	0.0425
100.9	0.045
101	0.05
101.1	0.05
101.2	0.0475
101.3	0.055
101.4	0.06
101.5	0.065
101.6	0.07
101.7	0.08
101.8	0.085
101.9	0.095
102	0.1
102.1	0.1125
102.2	0.1175
102.3	0.1225
102.4	0.125
102.5	0.1325
102.6	0.1375
102.7	0.1425
102.8	0.145
102.9	0.15
103	0.1525
103.1	0.1525
103.2	0.155
103.3	0.16
103.4	0.1575
103.5	0.1575
103.6	0.1625
103.7	0.1625
103.8	0.1675
103.9	0.1675
104	0.17
104.1	0.1725
104.2	0.175
104.3	0.175
104.4	0.18
104.5	0.185
104.6	0.1925
104.7	0.2
104.8	0.205
104.9	0.22
105	0.2225
105.1	0.2225
105.2	0.2275
105.3	0.23
105.4	0.2325
105.5	0.2325
105.6	0.24
105.7	0.2425
105.8	0.25
105.9	0.2575
106	0.255
106.1	0.2575
106.2	0.26
106.3	0.26
106.4	0.2625
106.5	0.2675
106.6	0.27
106.7	0.2725
106.8	0.2725
106.9	0.275
107	0.28
107.1	0.285
107.2	0.2875
107.3	0.29
107.4	0.2925
107.5	0.295
107.6	0.2975
107.7	0.2975
107.8	0.305
107.9	0.305
108	0.305
108.1	0.3125
108.2	0.3175
108.3	0.3175
108.4	0.3225
108.5	0.3225
108.6	0.325
108.7	0.325
108.8	0.325
108.9	0.3275
109	0.3275
109.1	0.33
109.2	0.33
109.3	0.335
109.4	0.335
109.5	0.335
109.6	0.34
109.7	0.345
109.8	0.345
109.9	0.355
110	0.36
110.1	0.3575
110.2	0.36
110.3	0.3575
110.4	0.36
110.5	0.365
110.6	0.375
110.7	0.3775
110.8	0.38
110.9	0.38
111	0.38
111.1	0.385
111.2	0.385
111.3	0.385
111.4	0.3875
111.5	0.3925
111.6	0.4
111.7	0.4
111.8	0.405
111.9	0.4075
112	0.41
112.1	0.41
112.2	0.41
112.3	0.415
112.4	0.4125
112.5	0.4175
112.6	0.42
112.7	0.4175
112.8	0.42
112.9	0.4225
113	0.4225
113.1	0.425
113.2	0.4275
113.3	0.4275
113.4	0.43
113.5	0.4325
113.6	0.435
113.7	0.4375
113.8	0.44
113.9	0.44
114	0.4425
114.1	0.4475
114.2	0.45
114.3	0.4575
114.4	0.4675
114.5	0.4675
114.6	0.47
114.7	0.4775
114.8	0.4775
114.9	0.4825
115	0.4825
115.1	0.485
115.2	0.4875
115.3	0.4875
115.4	0.4975
115.5	0.5025
115.6	0.505
115.7	0.51
115.8	0.515
115.9	0.515
116	0.515
116.1	0.515
116.2	0.515
116.3	0.515
116.4	0.515
116.5	0.515
116.6	0.5225
116.7	0.5225
116.8	0.525
116.9	0.52
117	0.52
117.1	0.52
117.2	0.5275
117.3	0.5275
117.4	0.5325
117.5	0.53
117.6	0.535
117.7	0.54
117.8	0.545
117.9	0.545
118	0.5475
118.1	0.55
118.2	0.55
118.3	0.555
118.4	0.5575
118.5	0.56
118.6	0.5625
118.7	0.565
118.8	0.565
118.9	0.5675
119	0.57
119.1	0.5725
119.2	0.5725
119.3	0.5725
119.4	0.5725
119.5	0.5725
119.6	0.5725
119.7	0.57
119.8	0.57
119.9	0.5725
120	0.5775
120.1	0.5775
120.2	0.58
120.3	0.58
120.4	0.585
120.5	0.585
120.6	0.5875
120.7	0.5875
120.8	0.5925
120.9	0.595
121	0.5975
121.1	0.595
121.2	0.595
121.3	0.595
121.4	0.5925
121.5	0.5925
121.6	0.5925
121.7	0.5925
121.8	0.595
121.9	0.5975
122	0.5975
122.1	0.6
122.2	0.6
122.3	0.6025
122.4	0.605
122.5	0.6075
122.6	0.6075
122.7	0.61
122.8	0.61
122.9	0.61
123	0.6125
123.1	0.615
123.2	0.615
123.3	0.615
123.4	0.62
123.5	0.6225
123.6	0.6225
123.7	0.625
123.8	0.6275
123.9	0.63
124	0.64
124.1	0.6375
124.2	0.6375
124.3	0.6375
124.4	0.6375
124.5	0.6375
124.6	0.6425
124.7	0.6425
124.8	0.6425
124.9	0.655
125	0.655
125.1	0.655
125.2	0.6575
125.3	0.66
125.4	0.6625
125.5	0.6625
125.6	0.6625
125.7	0.66
125.8	0.66
125.9	0.6575
126	0.66
126.1	0.6625
126.2	0.67
126.3	0.67
126.4	0.67
126.5	0.6725
126.6	0.6775
126.7	0.6775
126.8	0.68
126.9	0.68
127	0.68
127.1	0.6775
127.2	0.68
127.3	0.68
127.4	0.6825
127.5	0.6825
127.6	0.68
127.7	0.68
127.8	0.6825
127.9	0.6825
128	0.685
128.1	0.685
128.2	0.6825
128.3	0.6825
128.4	0.685
128.5	0.6875
128.6	0.6875
128.7	0.6875
128.8	0.6875
128.9	0.6875
129	0.6875
129.1	0.6875
129.2	0.6875
129.3	0.69
129.4	0.6925
129.5	0.695
129.6	0.6975
129.7	0.7
129.8	0.6975
129.9	0.7
130	0.695
130.1	0.695
130.2	0.7025
130.3	0.705
130.4	0.7025
130.5	0.7025
130.6	0.705
130.7	0.705
130.8	0.7075
130.9	0.7075
131	0.71
131.1	0.71
131.2	0.71
131.3	0.71
131.4	0.7075
131.5	0.71
131.6	0.7075
131.7	0.7025
131.8	0.7075
131.9	0.7075
132	0.7125
132.1	0.7125
132.2	0.7125
132.3	0.7175
132.4	0.715
132.5	0.715
132.6	0.7175
132.7	0.72
132.8	0.7175
132.9	0.7225
133	0.7225
133.1	0.7225
133.2	0.7225
133.3	0.7225
133.4	0.72
133.5	0.72
133.6	0.7225
133.7	0.725
133.8	0.725
133.9	0.725
134	0.73
134.1	0.7325
134.2	0.7325
134.3	0.735
134.4	0.73
134.5	0.7325
134.6	0.735
134.7	0.7375
134.8	0.7375
134.9	0.7375
135	0.7375
135.1	0.74
135.2	0.7425
135.3	0.7425
135.4	0.745
135.5	0.745
135.6	0.7475
135.7	0.7475
135.8	0.7475
135.9	0.745
136	0.745
136.1	0.7475
136.2	0.75
136.3	0.7525
136.4	0.755
136.5	0.755
136.6	0.755
136.7	0.7575
136.8	0.755
136.9	0.7525
137	0.7525
137.1	0.7575
137.2	0.7575
137.3	0.755
137.4	0.755
137.5	0.755
137.6	0.755
137.7	0.7575
137.8	0.755
137.9	0.755
138	0.755
138.1	0.7575
138.2	0.7575
138.3	0.7575
138.4	0.7575
138.5	0.7575
138.6	0.7575
138.7	0.76
138.8	0.76
138.9	0.7625
139	0.7625
139.1	0.7625
139.2	0.7625
139.3	0.765
139.4	0.76
139.5	0.7575
139.6	0.765
139.7	0.765
139.8	0.7625
139.9	0.7625
140	0.7625
140.1	0.7625
140.2	0.76
140.3	0.7625
140.4	0.7625
140.5	0.7675
140.6	0.7675
140.7	0.7675
140.8	0.765
140.9	0.77
141	0.7625
141.1	0.7625
141.2	0.765
141.3	0.765
141.4	0.77
141.5	0.7725
141.6	0.7725
141.7	0.7725
141.8	0.7725
141.9	0.775
142	0.7775
142.1	0.78
142.2	0.78
142.3	0.7825
142.4	0.785
142.5	0.785
142.6	0.785
142.7	0.785
142.8	0.785
142.9	0.785
143	0.785
143.1	0.785
143.2	0.785
143.3	0.79
143.4	0.79
143.5	0.79
143.6	0.7925
143.7	0.7925
143.8	0.795
143.9	0.795
144	0.7925
144.1	0.795
144.2	0.7925
144.3	0.7975
144.4	0.7975
144.5	0.7975
144.6	0.7975
144.7	0.795
144.8	0.795
144.9	0.795
145	0.795
145.1	0.7925
145.2	0.7925
145.3	0.7925
145.4	0.79
145.5	0.79
145.6	0.7875
145.7	0.7875
145.8	0.79
145.9	0.7925
146	0.7925
146.1	0.79
146.2	0.79
146.3	0.7925
146.4	0.795
146.5	0.795
146.6	0.795
146.7	0.8
146.8	0.8
146.9	0.8
147	0.8025
147.1	0.8
147.2	0.795
147.3	0.7925
147.4	0.7925
147.5	0.795
147.6	0.7975
147.7	0.7925
147.8	0.7875
147.9	0.785
148	0.785
148.1	0.785
148.2	0.7875
148.3	0.7825
148.4	0.785
148.5	0.785
148.6	0.785
148.7	0.785
148.8	0.7825
148.9	0.785
149	0.7875
149.1	0.79
149.2	0.7875
149.3	0.7875
149.4	0.79
149.5	0.7875
149.6	0.7875
149.7	0.7925
149.8	0.79
149.9	0.7925
150	0.79
150.1	0.7925
150.2	0.7925
150.3	0.7925
150.4	0.795
150.5	0.7975
150.6	0.795
150.7	0.795
150.8	0.795
150.9	0.7925
151	0.795
151.1	0.795
151.2	0.795
151.3	0.7975
151.4	0.7975
151.5	0.8
151.6	0.8
151.7	0.8025
151.8	0.805
151.9	0.8075
152	0.81
152.1	0.8075
152.2	0.805
152.3	0.8
152.4	0.8025
152.5	0.805
152.6	0.8025
152.7	0.8025
152.8	0.805
152.9	0.805
153	0.805
153.1	0.805
153.2	0.805
153.3	0.805
153.4	0.8075
153.5	0.81
153.6	0.81
153.7	0.81
153.8	0.81
153.9	0.8125
154	0.815
154.1	0.815
154.2	0.815
154.3	0.8175
154.4	0.8175
154.5	0.8175
154.6	0.8175
154.7	0.815
154.8	0.82
154.9	0.8175
155	0.8175
155.1	0.815
155.2	0.8125
155.3	0.815
155.4	0.815
155.5	0.8175
155.6	0.815
155.7	0.815
155.8	0.8125
155.9	0.8125
156	0.815
156.1	0.815
156.2	0.815
156.3	0.8175
156.4	0.815
156.5	0.8125
156.6	0.815
156.7	0.815
156.8	0.815
156.9	0.8125
157	0.8125
157.1	0.815
157.2	0.815
157.3	0.815
157.4	0.815
157.5	0.815
157.6	0.815
157.7	0.8125
157.8	0.8125
157.9	0.8175
158	0.8175
158.1	0.8175
158.2	0.815
158.3	0.815
158.4	0.815
158.5	0.815
158.6	0.8125
158.7	0.8125
158.8	0.8125
158.9	0.8125
159	0.815
159.1	0.82
159.2	0.8225
159.3	0.82
159.4	0.82
159.5	0.8175
159.6	0.8175
159.7	0.8175
159.8	0.815
159.9	0.815
160	0.815
160.1	0.815
160.2	0.815
160.3	0.8175
160.4	0.8175
160.5	0.8175
160.6	0.8175
160.7	0.815
160.8	0.815
160.9	0.8175
161	0.815
161.1	0.815
161.2	0.815
161.3	0.8175
161.4	0.8175
161.5	0.82
161.6	0.8225
161.7	0.82
161.8	0.82
161.9	0.82
162	0.82
162.1	0.82
162.2	0.82
162.3	0.82
162.4	0.82
162.5	0.825
162.6	0.825
162.7	0.825
162.8	0.825
162.9	0.825
163	0.825
163.1	0.825
163.2	0.825
163.3	0.8225
163.4	0.8225
163.5	0.825
163.6	0.825
163.7	0.825
163.8	0.8275
163.9	0.825
164	0.8275
164.1	0.8275
164.2	0.8275
164.3	0.8275
164.4	0.8275
164.5	0.8275
164.6	0.8275
164.7	0.8275
164.8	0.83
164.9	0.83
165	0.83
165.1	0.83
165.2	0.83
165.3	0.8325
165.4	0.8325
165.5	0.835
165.6	0.835
165.7	0.835
165.8	0.8325
165.9	0.8325
166	0.8325
166.1	0.8325
166.2	0.8325
166.3	0.8325
166.4	0.8375
166.5	0.84
166.6	0.8375
166.7	0.835
166.8	0.8375
166.9	0.8375
167	0.835
167.1	0.8325
167.2	0.8325
167.3	0.835
167.4	0.835
167.5	0.84
167.6	0.8425
167.7	0.84
167.8	0.84
167.9	0.84
168	0.84
168.1	0.84
168.2	0.84
168.3	0.84
168.4	0.84
168.5	0.84
168.6	0.84
168.7	0.8425
168.8	0.845
168.9	0.845
169	0.8475
169.1	0.8475
169.2	0.8475
169.3	0.85
169.4	0.85
169.5	0.8475
169.6	0.8475
169.7	0.8475
169.8	0.8475
169.9	0.8475
170	0.8475
170.1	0.8475
170.2	0.845
170.3	0.8475
170.4	0.8525
170.5	0.8525
170.6	0.85
170.7	0.85
170.8	0.85
170.9	0.85
171	0.85
171.1	0.85
171.2	0.85
171.3	0.8475
171.4	0.85
171.5	0.85
171.6	0.8475
171.7	0.8475
171.8	0.85
171.9	0.855
172	0.855
172.1	0.855
172.2	0.8525
172.3	0.8525
172.4	0.855
172.5	0.8525
172.6	0.855
172.7	0.855
172.8	0.855
172.9	0.855
173	0.8575
173.1	0.86
173.2	0.86
173.3	0.86
173.4	0.86
173.5	0.8625
173.6	0.8625
173.7	0.865
173.8	0.865
173.9	0.865
174	0.865
174.1	0.865
174.2	0.865
174.3	0.8625
174.4	0.8625
174.5	0.8625
174.6	0.8625
174.7	0.865
174.8	0.865
174.9	0.8625
175	0.8625
175.1	0.8625
175.2	0.8625
175.3	0.8625
175.4	0.8625
175.5	0.86
175.6	0.855
175.7	0.8525
175.8	0.8525
175.9	0.855
176	0.855
176.1	0.8525
176.2	0.8575
176.3	0.8575
176.4	0.8575
176.5	0.8575
176.6	0.8575
176.7	0.8575
176.8	0.86
176.9	0.86
177	0.86
177.1	0.8575
177.2	0.8575
177.3	0.8575
177.4	0.855
177.5	0.855
177.6	0.855
177.7	0.85
177.8	0.8525
177.9	0.8525
178	0.85
178.1	0.85
178.2	0.85
178.3	0.85
178.4	0.8525
178.5	0.8525
178.6	0.855
178.7	0.855
178.8	0.855
178.9	0.855
179	0.855
179.1	0.8525
179.2	0.8525
179.3	0.8525
179.4	0.8525
179.5	0.85
179.6	0.85
179.7	0.8525
179.8	0.8525
179.9	0.85
180	0.85
180.1	0.8475
180.2	0.85
180.3	0.85
180.4	0.85
180.5	0.85
180.6	0.8475
180.7	0.845
180.8	0.845
180.9	0.845
181	0.845
181.1	0.8475
181.2	0.8475
181.3	0.845
181.4	0.845
181.5	0.8425
181.6	0.84
181.7	0.84
181.8	0.845
181.9	0.845
182	0.845
182.1	0.8475
182.2	0.8425
182.3	0.8375
182.4	0.8375
182.5	0.8375
182.6	0.8375
182.7	0.835
182.8	0.835
182.9	0.8375
183	0.8375
183.1	0.8375
183.2	0.8375
183.3	0.8325
183.4	0.8325
183.5	0.8325
183.6	0.8325
183.7	0.8325
183.8	0.8325
183.9	0.835
184	0.835
184.1	0.8375
184.2	0.8375
184.3	0.8425
184.4	0.845
184.5	0.8475
184.6	0.8475
184.7	0.8475
184.8	0.8475
184.9	0.8475
185	0.845
185.1	0.8475
185.2	0.8475
185.3	0.8475
185.4	0.8475
185.5	0.8475
185.6	0.8475
185.7	0.8475
185.8	0.8475
185.9	0.8475
186	0.8475
186.1	0.8525
186.2	0.8525
186.3	0.8525
186.4	0.8525
186.5	0.855
186.6	0.855
186.7	0.855
186.8	0.855
186.9	0.8575
187	0.8575
187.1	0.855
187.2	0.855
187.3	0.86
187.4	0.86
187.5	0.86
187.6	0.86
187.7	0.86
187.8	0.86
187.9	0.86
188	0.86
188.1	0.86
188.2	0.86
188.3	0.86
188.4	0.86
188.5	0.86
188.6	0.86
188.7	0.86
188.8	0.86
188.9	0.86
189	0.865
189.1	0.865
189.2	0.8625
189.3	0.8625
189.4	0.86
189.5	0.86
189.6	0.8575
189.7	0.8575
189.8	0.855
189.9	0.86
190	0.8625
190.1	0.865
190.2	0.8625
190.3	0.8625
190.4	0.8625
190.5	0.8625
190.6	0.86
190.7	0.86
190.8	0.86
190.9	0.86
191	0.8575
191.1	0.855
191.2	0.855
191.3	0.855
191.4	0.855
191.5	0.855
191.6	0.8525
191.7	0.855
191.8	0.855
191.9	0.8525
192	0.85
192.1	0.85
192.2	0.85
192.3	0.8525
192.4	0.8525
192.5	0.8525
192.6	0.85
192.7	0.8525
192.8	0.855
192.9	0.8525
193	0.8525
193.1	0.855
193.2	0.855
193.3	0.855
193.4	0.855
193.5	0.855
193.6	0.85
193.7	0.85
193.8	0.8475
193.9	0.8475
194	0.85
194.1	0.85
194.2	0.85
194.3	0.85
194.4	0.85
194.5	0.85
194.6	0.85
194.7	0.85
194.8	0.85
194.9	0.85
195	0.85
195.1	0.8525
195.2	0.8525
195.3	0.8525
195.4	0.8525
195.5	0.8525
195.6	0.8525
195.7	0.8575
195.8	0.8575
195.9	0.8575
196	0.8575
196.1	0.8575
196.2	0.8575
196.3	0.8575
196.4	0.86
196.5	0.855
196.6	0.855
196.7	0.855
196.8	0.855
196.9	0.855
197	0.855
197.1	0.855
197.2	0.8575
197.3	0.86
197.4	0.86
197.5	0.86
197.6	0.8575
197.7	0.8575
197.8	0.86
197.9	0.86
198	0.86
198.1	0.86
198.2	0.8625
198.3	0.86
198.4	0.86
198.5	0.8625
198.6	0.865
198.7	0.8625
198.8	0.8625
198.9	0.8575
199	0.8575
199.1	0.8575
199.2	0.8575
199.3	0.8575
199.4	0.8575
199.5	0.8575
199.6	0.8575
199.7	0.8575
199.8	0.86
199.9	0.8575
200	0.8575
[truncated: 14,000 more rows]
