# Supplementary material for: Bayesian inference of kinetic schemes for ion channels by Kalman filtering
Source: eLife journal article supplement (doi:10.7554/elife.62714), 2022-05-04
Supplement: fig4-data2 [file 1_Sim_N_500_Fluor_MW.xlsx]

## Sheet: Tabelle1
0.1	0
0.2	0
0.3	0
0.4	0
0.5	0
0.6	0
0.7	0
0.8	0
0.9	0
1	0
1.1	0
1.2	0
1.3	0
1.4	0
1.5	0
1.6	0
1.7	0
1.8	0
1.9	0
2	0
2.1	0
2.2	0
2.3	0
2.4	0
2.5	0
2.6	0
2.7	0
2.8	0
2.9	0
3	0
3.1	0
3.2	0
3.3	0
3.4	0
3.5	0
3.6	0
3.7	0
3.8	0
3.9	0
4	0
4.1	0
4.2	0
4.3	0
4.4	0
4.5	0
4.6	0
4.7	0
4.8	0
4.9	0
5	0
5.1	0
5.2	0
5.3	0
5.4	0
5.5	0
5.6	0
5.7	0
5.8	0
5.9	0
6	0
6.1	0
6.2	0
6.3	0
6.4	0
6.5	0
6.6	0
6.7	0
6.8	0
6.9	0
7	0
7.1	0
7.2	0
7.3	0
7.4	0
7.5	0
7.6	0
7.7	0
7.8	0
7.9	0
8	0
8.1	0
8.2	0
8.3	0
8.4	0
8.5	0
8.6	0
8.7	0
8.8	0
8.9	0
9	0
9.1	0
9.2	0
9.3	0
9.4	0
9.5	0
9.6	0
9.7	0
9.8	0
9.9	0
10	0
10.1	0
10.2	0
10.3	0
10.4	0
10.5	0
10.6	0
10.7	0
10.8	0
10.9	0
11	0
11.1	0
11.2	0
11.3	0
11.4	0
11.5	0
11.6	0
11.7	0
11.8	0
11.9	0
12	0
12.1	0
12.2	0
12.3	0
12.4	0
12.5	0
12.6	0
12.7	0
12.8	0
12.9	0
13	0
13.1	0
13.2	0
13.3	0
13.4	0
13.5	0
13.6	0
13.7	0
13.8	0
13.9	0
14	0
14.1	0
14.2	0
14.3	0
14.4	0
14.5	0
14.6	0
14.7	0
14.8	0
14.9	0
15	0
15.1	0
15.2	0
15.3	0
15.4	0
15.5	0
15.6	0
15.7	0
15.8	0
15.9	0
16	0
16.1	0
16.2	0
16.3	0
16.4	0
16.5	0
16.6	0
16.7	0
16.8	0
16.9	0
17	0
17.1	0
17.2	0
17.3	0
17.4	0
17.5	0
17.6	0
17.7	0
17.8	0
17.9	0
18	0
18.1	0
18.2	0
18.3	0
18.4	0
18.5	0
18.6	0
18.7	0
18.8	0
18.9	0
19	0
19.1	0
19.2	0
19.3	0
19.4	0
19.5	0
19.6	0
19.7	0
19.8	0
19.9	0
20	0
20.1	0
20.2	0
20.3	0
20.4	0
20.5	0
20.6	0
20.7	0
20.8	0
20.9	0
21	0
21.1	0
21.2	0
21.3	0
21.4	0
21.5	0
21.6	0
21.7	0
21.8	0
21.9	0
22	0
22.1	0
22.2	0
22.3	0
22.4	0
22.5	0
22.6	0
22.7	0
22.8	0
22.9	0
23	0
23.1	0
23.2	0
23.3	0
23.4	0
23.5	0
23.6	0
23.7	0
23.8	0
23.9	0
24	0
24.1	0
24.2	0
24.3	0
24.4	0
24.5	0
24.6	0
24.7	0
24.8	0
24.9	0
25	0
25.1	0
25.2	0
25.3	0
25.4	0
25.5	0
25.6	0
25.7	0
25.8	0
25.9	0
26	0
26.1	0
26.2	0
26.3	0
26.4	0
26.5	0
26.6	0
26.7	0
26.8	0
26.9	0
27	0
27.1	0
27.2	0
27.3	0
27.4	0
27.5	0
27.6	0
27.7	0
27.8	0
27.9	0
28	0
28.1	0
28.2	0
28.3	0
28.4	0
28.5	0
28.6	0
28.7	0
28.8	0
28.9	0
29	0
29.1	0
29.2	0
29.3	0
29.4	0
29.5	0
29.6	0
29.7	0
29.8	0
29.9	0
30	0
30.1	0
30.2	0
30.3	0
30.4	0
30.5	0
30.6	0
30.7	0
30.8	0
30.9	0
31	0
31.1	0
31.2	0
31.3	0
31.4	0
31.5	0
31.6	0
31.7	0
31.8	0
31.9	0
32	0
32.1	0
32.2	0
32.3	0
32.4	0
32.5	0
32.6	0
32.7	0
32.8	0
32.9	0
33	0
33.1	0
33.2	0
33.3	0
33.4	0
33.5	0
33.6	0
33.7	0
33.8	0
33.9	0
34	0
34.1	0
34.2	0
34.3	0
34.4	0
34.5	0
34.6	0
34.7	0
34.8	0
34.9	0
35	0
35.1	0
35.2	0
35.3	0
35.4	0
35.5	0
35.6	0
35.7	0
35.8	0
35.9	0
36	0
36.1	0
36.2	0
36.3	0
36.4	0
36.5	0
36.6	0
36.7	0
36.8	0
36.9	0
37	0
37.1	0
37.2	0
37.3	0
37.4	0
37.5	0
37.6	0
37.7	0
37.8	0
37.9	0
38	0
38.1	0
38.2	0
38.3	0
38.4	0
38.5	0
38.6	0
38.7	0
38.8	0
38.9	0
39	0
39.1	0
39.2	0
39.3	0
39.4	0
39.5	0
39.6	0
39.7	0
39.8	0
39.9	0
40	0
40.1	0
40.2	0
40.3	0
40.4	0
40.5	0
40.6	0
40.7	0
40.8	0
40.9	0
41	0
41.1	0
41.2	0
41.3	0
41.4	0
41.5	0
41.6	0
41.7	0
41.8	0
41.9	0
42	0
42.1	0
42.2	0
42.3	0
42.4	0
42.5	0
42.6	0
42.7	0
42.8	0
42.9	0
43	0
43.1	0
43.2	0
43.3	0
43.4	0
43.5	0
43.6	0
43.7	0
43.8	0
43.9	0
44	0
44.1	0
44.2	0
44.3	0
44.4	0
44.5	0
44.6	0
44.7	0
44.8	0
44.9	0
45	0
45.1	0
45.2	0
45.3	0
45.4	0
45.5	0
45.6	0
45.7	0
45.8	0
45.9	0
46	0
46.1	0
46.2	0
46.3	0
46.4	0
46.5	0
46.6	0
46.7	0
46.8	0
46.9	0
47	0
47.1	0
47.2	0
47.3	0
47.4	0
47.5	0
47.6	0
47.7	0
47.8	0
47.9	0
48	0
48.1	0
48.2	0
48.3	0
48.4	0
48.5	0
48.6	0
48.7	0
48.8	0
48.9	0
49	0
49.1	0
49.2	0
49.3	0
49.4	0
49.5	0
49.6	0
49.7	0
49.8	0
49.9	0
50	0
50.1	0
50.2	0
50.3	0
50.4	0
50.5	0
50.6	0
50.7	0
50.8	0
50.9	0
51	0
51.1	0
51.2	0
51.3	0
51.4	0
51.5	0
51.6	0
51.7	0
51.8	0
51.9	0
52	0
52.1	0
52.2	0
52.3	0
52.4	0
52.5	0
52.6	0
52.7	0
52.8	0
52.9	0
53	0
53.1	0
53.2	0
53.3	0
53.4	0
53.5	0
53.6	0
53.7	0
53.8	0
53.9	0
54	0
54.1	0
54.2	0
54.3	0
54.4	0
54.5	0
54.6	0
54.7	0
54.8	0
54.9	0
55	0
55.1	0
55.2	0
55.3	0
55.4	0
55.5	0
55.6	0
55.7	0
55.8	0
55.9	0
56	0
56.1	0
56.2	0
56.3	0
56.4	0
56.5	0
56.6	0
56.7	0
56.8	0
56.9	0
57	0
57.1	0
57.2	0
57.3	0
57.4	0
57.5	0
57.6	0
57.7	0
57.8	0
57.9	0
58	0
58.1	0
58.2	0
58.3	0
58.4	0
58.5	0
58.6	0
58.7	0
58.8	0
58.9	0
59	0
59.1	0
59.2	0
59.3	0
59.4	0
59.5	0
59.6	0
59.7	0
59.8	0
59.9	0
60	0
60.1	0
60.2	0
60.3	0
60.4	0
60.5	0
60.6	0
60.7	0
60.8	0
60.9	0
61	0
61.1	0
61.2	0
61.3	0
61.4	0
61.5	0
61.6	0
61.7	0
61.8	0
61.9	0
62	0
62.1	0
62.2	0
62.3	0
62.4	0
62.5	0
62.6	0
62.7	0
62.8	0
62.9	0
63	0
63.1	0
63.2	0
63.3	0
63.4	0
63.5	0
63.6	0
63.7	0
63.8	0
63.9	0
64	0
64.1	0
64.2	0
64.3	0
64.4	0
64.5	0
64.6	0
64.7	0
64.8	0
64.9	0
65	0
65.1	0
65.2	0
65.3	0
65.4	0
65.5	0
65.6	0
65.7	0
65.8	0
65.9	0
66	0
66.1	0
66.2	0
66.3	0
66.4	0
66.5	0
66.6	0
66.7	0
66.8	0
66.9	0
67	0
67.1	0
67.2	0
67.3	0
67.4	0
67.5	0
67.6	0
67.7	0
67.8	0
67.9	0
68	0
68.1	0
68.2	0
68.3	0
68.4	0
68.5	0
68.6	0
68.7	0
68.8	0
68.9	0
69	0
69.1	0
69.2	0
69.3	0
69.4	0
69.5	0
69.6	0
69.7	0
69.8	0
69.9	0
70	0
70.1	0
70.2	0
70.3	0
70.4	0
70.5	0
70.6	0
70.7	0
70.8	0
70.9	0
71	0
71.1	0
71.2	0
71.3	0
71.4	0
71.5	0
71.6	0
71.7	0
71.8	0
71.9	0
72	0
72.1	0
72.2	0
72.3	0
72.4	0
72.5	0
72.6	0
72.7	0
72.8	0
72.9	0
73	0
73.1	0
73.2	0
73.3	0
73.4	0
73.5	0
73.6	0
73.7	0
73.8	0
73.9	0
74	0
74.1	0
74.2	0
74.3	0
74.4	0
74.5	0
74.6	0
74.7	0
74.8	0
74.9	0
75	0
75.1	0
75.2	0
75.3	0
75.4	0
75.5	0
75.6	0
75.7	0
75.8	0
75.9	0
76	0
76.1	0
76.2	0
76.3	0
76.4	0
76.5	0
76.6	0
76.7	0
76.8	0
76.9	0
77	0
77.1	0
77.2	0
77.3	0
77.4	0
77.5	0
77.6	0
77.7	0
77.8	0
77.9	0
78	0
78.1	0
78.2	0
78.3	0
78.4	0
78.5	0
78.6	0
78.7	0
78.8	0
78.9	0
79	0
79.1	0
79.2	0
79.3	0
79.4	0
79.5	0
79.6	0
79.7	0
79.8	0
79.9	0
80	0
80.1	0
80.2	0
80.3	0
80.4	0
80.5	0
80.6	0
80.7	0
80.8	0
80.9	0
81	0
81.1	0
81.2	0
81.3	0
81.4	0
81.5	0
81.6	0
81.7	0
81.8	0
81.9	0
82	0
82.1	0
82.2	0
82.3	0
82.4	0
82.5	0
82.6	0
82.7	0
82.8	0
82.9	0
83	0
83.1	0
83.2	0
83.3	0
83.4	0
83.5	0
83.6	0
83.7	0
83.8	0
83.9	0
84	0
84.1	0
84.2	0
84.3	0
84.4	0
84.5	0
84.6	0
84.7	0
84.8	0
84.9	0
85	0
85.1	0
85.2	0
85.3	0
85.4	0
85.5	0
85.6	0
85.7	0
85.8	0
85.9	0
86	0
86.1	0
86.2	0
86.3	0
86.4	0
86.5	0
86.6	0
86.7	0
86.8	0
86.9	0
87	0
87.1	0
87.2	0
87.3	0
87.4	0
87.5	0
87.6	0
87.7	0
87.8	0
87.9	0
88	0
88.1	0
88.2	0
88.3	0
88.4	0
88.5	0
88.6	0
88.7	0
88.8	0
88.9	0
89	0
89.1	0
89.2	0
89.3	0
89.4	0
89.5	0
89.6	0
89.7	0
89.8	0
89.9	0
90	0
90.1	0
90.2	0
90.3	0
90.4	0
90.5	0
90.6	0
90.7	0
90.8	0
90.9	0
91	0
91.1	0
91.2	0
91.3	0
91.4	0
91.5	0
91.6	0
91.7	0
91.8	0
91.9	0
92	0
92.1	0
92.2	0
92.3	0
92.4	0
92.5	0
92.6	0
92.7	0
92.8	0
92.9	0
93	0
93.1	0
93.2	0
93.3	0
93.4	0
93.5	0
93.6	0
93.7	0
93.8	0
93.9	0
94	0
94.1	0
94.2	0
94.3	0
94.4	0
94.5	0
94.6	0
94.7	0
94.8	0
94.9	0
95	0
95.1	0
95.2	0
95.3	0
95.4	0
95.5	0
95.6	0
95.7	0
95.8	0
95.9	0
96	0
96.1	0
96.2	0
96.3	0
96.4	0
96.5	0
96.6	0
96.7	0
96.8	0
96.9	0
97	0
97.1	0
97.2	0
97.3	0
97.4	0
97.5	0
97.6	0
97.7	0
97.8	0
97.9	0
98	0
98.1	0
98.2	0
98.3	0
98.4	0
98.5	0
98.6	0
98.7	0
98.8	0
98.9	0
99	0
99.1	0
99.2	0
99.3	0
99.4	0
99.5	0
99.6	0
99.7	0
99.8	0
99.9	0
100	0
100.1	0.898
100.2	0.97
100.3	0.983
100.4	0.987
100.5	0.98
100.6	0.986
100.7	0.988
100.8	0.985
100.9	0.989
101	0.986
101.1	0.987
101.2	0.984
101.3	0.985
101.4	0.987
101.5	0.988
101.6	0.984
101.7	0.99
101.8	0.986
101.9	0.989
102	0.992
102.1	0.993
102.2	0.992
102.3	0.991
102.4	0.99
102.5	0.994
102.6	0.988
102.7	0.993
102.8	0.991
102.9	0.988
103	0.992
103.1	0.989
103.2	0.986
103.3	0.988
103.4	0.991
103.5	0.991
103.6	0.992
103.7	0.989
103.8	0.987
103.9	0.993
104	0.984
104.1	0.989
104.2	0.988
104.3	0.993
104.4	0.988
104.5	0.986
104.6	0.99
104.7	0.991
104.8	0.989
104.9	0.987
105	0.986
105.1	0.99
105.2	0.991
105.3	0.984
105.4	0.99
105.5	0.986
105.6	0.992
105.7	0.992
105.8	0.987
105.9	0.991
106	0.987
106.1	0.993
106.2	0.988
106.3	0.99
106.4	0.987
106.5	0.993
106.6	0.987
106.7	0.995
106.8	0.987
106.9	0.992
107	0.988
107.1	0.988
107.2	0.986
107.3	0.985
107.4	0.989
107.5	0.994
107.6	0.992
107.7	0.994
107.8	0.992
107.9	0.989
108	0.993
108.1	0.986
108.2	0.986
108.3	0.992
108.4	0.992
108.5	0.994
108.6	0.99
108.7	0.989
108.8	0.995
108.9	0.994
109	0.994
109.1	0.991
109.2	0.995
109.3	0.993
109.4	0.992
109.5	0.991
109.6	0.988
109.7	0.996
109.8	0.996
109.9	0.994
110	0.992
110.1	0.993
110.2	0.994
110.3	0.993
110.4	0.986
110.5	0.991
110.6	0.994
110.7	0.995
110.8	0.993
110.9	0.992
111	0.995
111.1	0.992
111.2	0.991
111.3	0.993
111.4	0.99
111.5	0.994
111.6	0.995
111.7	0.993
111.8	0.989
111.9	0.99
112	0.99
112.1	0.997
112.2	0.991
112.3	0.992
112.4	0.988
112.5	0.99
112.6	0.993
112.7	0.988
112.8	0.993
112.9	0.995
113	0.992
113.1	0.993
113.2	0.986
113.3	0.992
113.4	0.996
113.5	0.999
113.6	0.992
113.7	0.991
113.8	0.991
113.9	0.992
114	0.993
114.1	0.997
114.2	0.991
114.3	0.993
114.4	0.992
114.5	0.995
114.6	0.997
114.7	0.991
114.8	0.997
114.9	0.995
115	0.993
115.1	0.994
115.2	0.995
115.3	0.994
115.4	0.99
115.5	0.991
115.6	0.992
115.7	0.998
115.8	0.996
115.9	0.997
116	0.993
116.1	0.995
116.2	0.992
116.3	0.993
116.4	0.995
116.5	0.994
116.6	0.992
116.7	0.995
116.8	0.993
116.9	0.996
117	0.994
117.1	0.994
117.2	0.991
117.3	0.992
117.4	0.997
117.5	0.996
117.6	0.997
117.7	0.998
117.8	0.991
117.9	0.993
118	0.994
118.1	0.996
118.2	0.997
118.3	0.996
118.4	0.992
118.5	0.993
118.6	0.995
118.7	0.993
118.8	0.992
118.9	0.995
119	0.991
119.1	0.993
119.2	0.994
119.3	0.99
119.4	0.997
119.5	0.995
119.6	0.988
119.7	0.995
119.8	0.996
119.9	0.992
120	0.994
120.1	0.99
120.2	0.994
120.3	0.997
120.4	0.994
120.5	0.994
120.6	0.995
120.7	0.994
120.8	0.997
120.9	0.994
121	0.992
121.1	0.995
121.2	0.994
121.3	0.997
121.4	0.992
121.5	0.997
121.6	0.996
121.7	0.99
121.8	0.997
121.9	0.996
122	0.994
122.1	0.994
122.2	0.994
122.3	0.997
122.4	0.996
122.5	0.994
122.6	0.997
122.7	0.997
122.8	0.994
122.9	0.996
123	0.988
123.1	0.994
123.2	0.996
123.3	0.993
123.4	0.997
123.5	0.993
123.6	0.994
123.7	0.991
123.8	0.996
123.9	0.993
124	0.998
124.1	0.995
124.2	0.994
124.3	0.99
124.4	0.992
124.5	0.995
124.6	0.997
124.7	0.998
124.8	0.996
124.9	0.997
125	0.992
125.1	0.996
125.2	0.999
125.3	0.997
125.4	0.997
125.5	0.996
125.6	0.998
125.7	0.993
125.8	0.996
125.9	0.997
126	0.998
126.1	0.996
126.2	0.995
126.3	0.999
126.4	0.993
126.5	0.99
126.6	0.996
126.7	0.995
126.8	0.998
126.9	0.996
127	0.998
127.1	0.994
127.2	0.993
127.3	0.995
127.4	0.996
127.5	0.996
127.6	0.998
127.7	0.993
127.8	0.995
127.9	0.998
128	0.996
128.1	0.992
128.2	0.995
128.3	0.996
128.4	0.997
128.5	0.996
128.6	0.996
128.7	0.995
128.8	0.997
128.9	0.996
129	0.993
129.1	0.996
129.2	0.998
129.3	0.997
129.4	0.998
129.5	0.995
129.6	0.996
129.7	0.998
129.8	0.995
129.9	0.999
130	0.995
130.1	0.996
130.2	0.999
130.3	0.998
130.4	0.998
130.5	0.993
130.6	0.998
130.7	0.997
130.8	0.996
130.9	0.995
131	1
131.1	0.998
131.2	0.999
131.3	0.996
131.4	0.996
131.5	0.996
131.6	0.999
131.7	0.994
131.8	0.995
131.9	0.998
132	0.996
132.1	0.995
132.2	0.997
132.3	0.995
132.4	0.993
132.5	0.997
132.6	0.997
132.7	0.997
132.8	0.999
132.9	0.994
133	0.998
133.1	0.995
133.2	0.991
133.3	0.992
133.4	0.996
133.5	0.993
133.6	0.999
133.7	1
133.8	0.999
133.9	0.999
134	0.997
134.1	0.998
134.2	0.997
134.3	0.996
134.4	0.997
134.5	0.997
134.6	0.998
134.7	0.997
134.8	0.997
134.9	0.996
135	0.997
135.1	0.996
135.2	0.994
135.3	0.998
135.4	0.999
135.5	0.998
135.6	0.999
135.7	0.998
135.8	0.997
135.9	0.995
136	0.996
136.1	0.997
136.2	0.999
136.3	0.998
136.4	0.997
136.5	0.998
136.6	0.996
136.7	0.997
136.8	0.999
136.9	0.999
137	0.998
137.1	0.998
137.2	0.997
137.3	0.997
137.4	0.997
137.5	0.995
137.6	0.996
137.7	0.998
137.8	0.996
137.9	0.995
138	0.995
138.1	0.997
138.2	0.998
138.3	0.997
138.4	0.999
138.5	0.997
138.6	0.998
138.7	0.997
138.8	0.997
138.9	0.998
139	0.999
139.1	0.999
139.2	0.996
139.3	0.997
139.4	0.999
139.5	0.998
139.6	0.993
139.7	0.998
139.8	0.997
139.9	0.996
140	0.994
140.1	0.995
140.2	0.997
140.3	0.998
140.4	0.996
140.5	0.997
140.6	0.998
140.7	0.999
140.8	0.998
140.9	0.997
141	0.996
141.1	0.998
141.2	0.995
141.3	0.997
141.4	0.999
141.5	0.995
141.6	0.998
141.7	0.997
141.8	0.995
141.9	0.997
142	0.997
142.1	0.997
142.2	0.997
142.3	0.997
142.4	0.998
142.5	0.996
142.6	0.998
142.7	0.998
142.8	0.999
142.9	0.996
143	0.997
143.1	1
143.2	0.998
143.3	1
143.4	1
143.5	0.997
143.6	0.996
143.7	0.998
143.8	0.997
143.9	0.995
144	0.997
144.1	0.996
144.2	0.997
144.3	0.998
144.4	0.997
144.5	0.998
144.6	0.998
144.7	0.996
144.8	0.996
144.9	0.995
145	0.999
145.1	0.996
145.2	1
145.3	0.998
145.4	0.996
145.5	0.997
145.6	0.999
145.7	0.996
145.8	0.997
145.9	0.998
146	0.998
146.1	0.997
146.2	0.998
146.3	0.998
146.4	0.999
146.5	0.998
146.6	0.996
146.7	0.994
146.8	0.997
146.9	0.995
147	0.999
147.1	0.997
147.2	0.999
147.3	0.998
147.4	0.998
147.5	0.996
147.6	0.998
147.7	0.997
147.8	0.997
147.9	1
148	0.998
148.1	0.996
148.2	0.999
148.3	0.998
148.4	0.994
148.5	0.998
148.6	0.997
148.7	0.996
148.8	0.996
148.9	0.997
149	0.999
149.1	0.997
149.2	0.997
149.3	0.995
149.4	0.997
149.5	0.996
149.6	0.998
149.7	0.996
149.8	0.995
149.9	0.996
150	0.997
150.1	0.999
150.2	0.999
150.3	0.998
150.4	1
150.5	0.998
150.6	1
150.7	0.997
150.8	0.998
150.9	1
151	1
151.1	0.999
151.2	0.999
151.3	0.997
151.4	0.998
151.5	0.995
151.6	1
151.7	0.997
151.8	0.998
151.9	0.996
152	0.997
152.1	0.996
152.2	0.994
152.3	0.999
152.4	0.995
152.5	0.997
152.6	0.999
152.7	0.998
152.8	0.999
152.9	0.996
153	0.998
153.1	0.997
153.2	0.997
153.3	0.998
153.4	0.998
153.5	0.998
153.6	0.996
153.7	0.998
153.8	0.998
153.9	0.995
154	0.999
154.1	0.999
154.2	0.997
154.3	1
154.4	0.999
154.5	0.998
154.6	0.995
154.7	0.999
154.8	0.998
154.9	0.997
155	0.998
155.1	0.999
155.2	0.998
155.3	0.997
155.4	0.997
155.5	0.998
155.6	0.998
155.7	0.998
155.8	0.999
155.9	0.999
156	0.998
156.1	0.996
156.2	0.997
156.3	0.997
156.4	0.998
156.5	0.997
156.6	0.997
156.7	0.995
156.8	0.997
156.9	0.999
157	0.998
157.1	0.995
157.2	0.997
157.3	1
157.4	1
157.5	0.993
157.6	0.997
157.7	0.998
157.8	0.996
157.9	0.996
158	0.998
158.1	0.997
158.2	0.995
158.3	0.995
158.4	0.999
158.5	0.999
158.6	0.997
158.7	0.998
158.8	0.999
158.9	0.999
159	0.999
159.1	0.994
159.2	0.996
159.3	0.999
159.4	0.998
159.5	0.998
159.6	0.998
159.7	0.995
159.8	0.996
159.9	0.996
160	0.999
160.1	0.999
160.2	0.999
160.3	0.997
160.4	0.996
160.5	0.998
160.6	0.999
160.7	0.997
160.8	0.996
160.9	1
161	0.997
161.1	0.997
161.2	0.998
161.3	0.997
161.4	0.999
161.5	0.997
161.6	0.997
161.7	0.996
161.8	0.998
161.9	0.995
162	0.995
162.1	0.996
162.2	0.998
162.3	0.997
162.4	0.998
162.5	0.996
162.6	1
162.7	0.997
162.8	0.999
162.9	0.999
163	0.997
163.1	0.998
163.2	0.998
163.3	0.993
163.4	0.998
163.5	0.998
163.6	0.996
163.7	0.995
163.8	0.997
163.9	0.997
164	0.998
164.1	0.999
164.2	0.997
164.3	0.999
164.4	0.996
164.5	0.997
164.6	0.999
164.7	0.999
164.8	0.999
164.9	0.998
165	0.998
165.1	0.999
165.2	0.997
165.3	0.993
165.4	0.994
165.5	0.997
165.6	0.996
165.7	0.997
165.8	0.997
165.9	0.996
166	0.998
166.1	0.997
166.2	1
166.3	0.999
166.4	0.998
166.5	0.998
166.6	0.999
166.7	0.997
166.8	0.999
166.9	0.998
167	0.998
167.1	0.997
167.2	0.995
167.3	0.998
167.4	0.998
167.5	0.999
167.6	1
167.7	0.996
167.8	0.999
167.9	0.999
168	0.995
168.1	0.997
168.2	0.999
168.3	0.998
168.4	0.997
168.5	0.992
168.6	0.995
168.7	0.999
168.8	1
168.9	0.998
169	0.996
169.1	0.997
169.2	0.999
169.3	1
169.4	0.994
169.5	0.998
169.6	1
169.7	0.999
169.8	0.997
169.9	0.997
170	0.999
170.1	1
170.2	0.998
170.3	0.996
170.4	0.995
170.5	0.999
170.6	0.996
170.7	0.998
170.8	0.999
170.9	0.996
171	0.996
171.1	0.997
171.2	0.997
171.3	0.999
171.4	0.998
171.5	0.998
171.6	0.997
171.7	0.999
171.8	0.997
171.9	0.999
172	1
172.1	0.997
172.2	0.999
172.3	0.997
172.4	0.999
172.5	0.998
172.6	0.999
172.7	0.997
172.8	0.997
172.9	0.992
173	0.995
173.1	0.998
173.2	0.997
173.3	1
173.4	0.998
173.5	0.998
173.6	0.995
173.7	0.995
173.8	0.997
173.9	1
174	0.998
174.1	0.997
174.2	0.996
174.3	0.998
174.4	0.995
174.5	0.998
174.6	0.998
174.7	0.996
174.8	0.997
174.9	0.998
175	0.995
175.1	1
175.2	0.997
175.3	0.999
175.4	0.998
175.5	0.997
175.6	0.997
175.7	0.995
175.8	0.997
175.9	0.995
176	0.997
176.1	0.998
176.2	0.997
176.3	0.999
176.4	0.996
176.5	0.999
176.6	0.998
176.7	0.999
176.8	0.995
176.9	0.997
177	0.999
177.1	0.996
177.2	0.996
177.3	0.996
177.4	0.997
177.5	0.999
177.6	1
177.7	0.998
177.8	0.996
177.9	0.997
178	0.999
178.1	0.997
178.2	0.998
178.3	0.994
178.4	0.997
178.5	0.998
178.6	0.999
178.7	1
178.8	0.998
178.9	0.994
179	0.994
179.1	0.997
179.2	0.998
179.3	0.998
179.4	0.999
179.5	0.997
179.6	0.994
179.7	0.997
179.8	0.997
179.9	1
180	1
180.1	0.997
180.2	0.996
180.3	0.997
180.4	0.998
180.5	0.999
180.6	1
180.7	0.997
180.8	1
180.9	0.994
181	0.995
181.1	1
181.2	0.996
181.3	0.998
181.4	0.999
181.5	1
181.6	0.999
181.7	0.998
181.8	0.999
181.9	1
182	0.997
182.1	0.999
182.2	0.999
182.3	0.998
182.4	0.998
182.5	0.995
182.6	0.997
182.7	0.998
182.8	0.997
182.9	0.998
183	0.998
183.1	0.995
183.2	0.998
183.3	0.996
183.4	0.998
183.5	0.994
183.6	0.999
183.7	0.999
183.8	0.998
183.9	1
184	0.999
184.1	0.996
184.2	0.999
184.3	0.997
184.4	0.998
184.5	1
184.6	0.998
184.7	0.998
184.8	0.999
184.9	0.999
185	0.998
185.1	0.996
185.2	0.999
185.3	0.996
185.4	0.997
185.5	0.998
185.6	0.998
185.7	0.997
185.8	0.997
185.9	0.995
186	0.998
186.1	0.996
186.2	0.995
186.3	0.999
186.4	0.999
186.5	0.999
186.6	0.996
186.7	0.997
186.8	0.998
186.9	0.997
187	0.999
187.1	1
187.2	1
187.3	0.999
187.4	0.999
187.5	0.996
187.6	0.995
187.7	0.997
187.8	1
187.9	1
188	0.999
188.1	0.997
188.2	0.998
188.3	0.999
188.4	1
188.5	0.998
188.6	0.997
188.7	0.999
188.8	0.996
188.9	0.998
189	1
189.1	0.999
189.2	1
189.3	1
189.4	0.998
189.5	0.996
189.6	0.996
189.7	0.997
189.8	0.999
189.9	0.996
190	1
190.1	1
190.2	0.999
190.3	0.998
190.4	0.997
190.5	0.999
190.6	0.999
190.7	0.998
190.8	0.997
190.9	0.998
191	0.998
191.1	0.998
191.2	0.999
191.3	0.998
191.4	0.998
191.5	0.995
191.6	0.994
191.7	0.997
191.8	0.997
191.9	0.999
192	0.998
192.1	1
192.2	0.999
192.3	1
192.4	0.998
192.5	0.997
192.6	0.999
192.7	0.995
192.8	0.998
192.9	0.999
193	0.999
193.1	0.999
193.2	0.999
193.3	0.999
193.4	1
193.5	0.995
193.6	0.998
193.7	0.998
193.8	1
193.9	0.999
194	1
194.1	0.999
194.2	0.998
194.3	0.999
194.4	0.999
194.5	0.996
194.6	0.999
194.7	1
194.8	0.998
194.9	0.998
195	0.998
195.1	0.999
195.2	0.999
195.3	1
195.4	0.999
195.5	0.996
195.6	0.998
195.7	0.998
195.8	0.996
195.9	0.999
196	0.998
196.1	0.998
196.2	0.999
196.3	0.998
196.4	0.998
196.5	0.994
196.6	0.996
196.7	0.996
196.8	1
196.9	0.998
197	0.999
197.1	0.999
197.2	0.999
197.3	1
197.4	0.998
197.5	0.997
197.6	0.995
197.7	0.998
197.8	0.998
197.9	0.999
198	0.998
198.1	0.998
198.2	0.997
198.3	0.999
198.4	0.999
198.5	0.998
198.6	0.997
198.7	0.999
198.8	0.998
198.9	0.998
199	0.997
199.1	0.997
199.2	0.997
199.3	0.997
199.4	0.997
199.5	0.997
199.6	0.995
199.7	1
199.8	0.999
199.9	0.999
200	0.998
[truncated: 14,000 more rows]
