# Supplementary material for: Bayesian inference of kinetic schemes for ion channels by Kalman filtering
Source: eLife journal article supplement (doi:10.7554/elife.62714), 2022-05-04
Supplement: fig4-data2 [file 1_Sim_N_500_Strom_MW.xlsx]

## Sheet: Tabelle1
0.1	0
0.2	0
0.3	0
0.4	0
0.5	0
0.6	0
0.7	0
0.8	0
0.9	0
1	0
1.1	0
1.2	0
1.3	0
1.4	0
1.5	0
1.6	0
1.7	0
1.8	0
1.9	0
2	0
2.1	0
2.2	0
2.3	0
2.4	0
2.5	0
2.6	0
2.7	0
2.8	0
2.9	0
3	0
3.1	0
3.2	0
3.3	0
3.4	0
3.5	0
3.6	0
3.7	0
3.8	0
3.9	0
4	0
4.1	0
4.2	0
4.3	0
4.4	0
4.5	0
4.6	0
4.7	0
4.8	0
4.9	0
5	0
5.1	0
5.2	0
5.3	0
5.4	0
5.5	0
5.6	0
5.7	0
5.8	0
5.9	0
6	0
6.1	0
6.2	0
6.3	0
6.4	0
6.5	0
6.6	0
6.7	0
6.8	0
6.9	0
7	0
7.1	0
7.2	0
7.3	0
7.4	0
7.5	0
7.6	0
7.7	0
7.8	0
7.9	0
8	0
8.1	0
8.2	0
8.3	0
8.4	0
8.5	0
8.6	0
8.7	0
8.8	0
8.9	0
9	0
9.1	0
9.2	0
9.3	0
9.4	0
9.5	0
9.6	0
9.7	0
9.8	0
9.9	0
10	0
10.1	0
10.2	0
10.3	0
10.4	0
10.5	0
10.6	0
10.7	0
10.8	0
10.9	0
11	0
11.1	0
11.2	0
11.3	0
11.4	0
11.5	0
11.6	0
11.7	0
11.8	0
11.9	0
12	0
12.1	0
12.2	0
12.3	0
12.4	0
12.5	0
12.6	0
12.7	0
12.8	0
12.9	0
13	0
13.1	0
13.2	0
13.3	0
13.4	0
13.5	0
13.6	0
13.7	0
13.8	0
13.9	0
14	0
14.1	0
14.2	0
14.3	0
14.4	0
14.5	0
14.6	0
14.7	0
14.8	0
14.9	0
15	0
15.1	0
15.2	0
15.3	0
15.4	0
15.5	0
15.6	0
15.7	0
15.8	0
15.9	0
16	0
16.1	0
16.2	0
16.3	0
16.4	0
16.5	0
16.6	0
16.7	0
16.8	0
16.9	0
17	0
17.1	0
17.2	0
17.3	0
17.4	0
17.5	0
17.6	0
17.7	0
17.8	0
17.9	0
18	0
18.1	0
18.2	0
18.3	0
18.4	0
18.5	0
18.6	0
18.7	0
18.8	0
18.9	0
19	0
19.1	0
19.2	0
19.3	0
19.4	0
19.5	0
19.6	0
19.7	0
19.8	0
19.9	0
20	0
20.1	0
20.2	0
20.3	0
20.4	0
20.5	0
20.6	0
20.7	0
20.8	0
20.9	0
21	0
21.1	0
21.2	0
21.3	0
21.4	0
21.5	0
21.6	0
21.7	0
21.8	0
21.9	0
22	0
22.1	0
22.2	0
22.3	0
22.4	0
22.5	0
22.6	0
22.7	0
22.8	0
22.9	0
23	0
23.1	0
23.2	0
23.3	0
23.4	0
23.5	0
23.6	0
23.7	0
23.8	0
23.9	0
24	0
24.1	0
24.2	0
24.3	0
24.4	0
24.5	0
24.6	0
24.7	0
24.8	0
24.9	0
25	0
25.1	0
25.2	0
25.3	0
25.4	0
25.5	0
25.6	0
25.7	0
25.8	0
25.9	0
26	0
26.1	0
26.2	0
26.3	0
26.4	0
26.5	0
26.6	0
26.7	0
26.8	0
26.9	0
27	0
27.1	0
27.2	0
27.3	0
27.4	0
27.5	0
27.6	0
27.7	0
27.8	0
27.9	0
28	0
28.1	0
28.2	0
28.3	0
28.4	0
28.5	0
28.6	0
28.7	0
28.8	0
28.9	0
29	0
29.1	0
29.2	0
29.3	0
29.4	0
29.5	0
29.6	0
29.7	0
29.8	0
29.9	0
30	0
30.1	0
30.2	0
30.3	0
30.4	0
30.5	0
30.6	0
30.7	0
30.8	0
30.9	0
31	0
31.1	0
31.2	0
31.3	0
31.4	0
31.5	0
31.6	0
31.7	0
31.8	0
31.9	0
32	0
32.1	0
32.2	0
32.3	0
32.4	0
32.5	0
32.6	0
32.7	0
32.8	0
32.9	0
33	0
33.1	0
33.2	0
33.3	0
33.4	0
33.5	0
33.6	0
33.7	0
33.8	0
33.9	0
34	0
34.1	0
34.2	0
34.3	0
34.4	0
34.5	0
34.6	0
34.7	0
34.8	0
34.9	0
35	0
35.1	0
35.2	0
35.3	0
35.4	0
35.5	0
35.6	0
35.7	0
35.8	0
35.9	0
36	0
36.1	0
36.2	0
36.3	0
36.4	0
36.5	0
36.6	0
36.7	0
36.8	0
36.9	0
37	0
37.1	0
37.2	0
37.3	0
37.4	0
37.5	0
37.6	0
37.7	0
37.8	0
37.9	0
38	0
38.1	0
38.2	0
38.3	0
38.4	0
38.5	0
38.6	0
38.7	0
38.8	0
38.9	0
39	0
39.1	0
39.2	0
39.3	0
39.4	0
39.5	0
39.6	0
39.7	0
39.8	0
39.9	0
40	0
40.1	0
40.2	0
40.3	0
40.4	0
40.5	0
40.6	0
40.7	0
40.8	0
40.9	0
41	0
41.1	0
41.2	0
41.3	0
41.4	0
41.5	0
41.6	0
41.7	0
41.8	0
41.9	0
42	0
42.1	0
42.2	0
42.3	0
42.4	0
42.5	0
42.6	0
42.7	0
42.8	0
42.9	0
43	0
43.1	0
43.2	0
43.3	0
43.4	0
43.5	0
43.6	0
43.7	0
43.8	0
43.9	0
44	0
44.1	0
44.2	0
44.3	0
44.4	0
44.5	0
44.6	0
44.7	0
44.8	0
44.9	0
45	0
45.1	0
45.2	0
45.3	0
45.4	0
45.5	0
45.6	0
45.7	0
45.8	0
45.9	0
46	0
46.1	0
46.2	0
46.3	0
46.4	0
46.5	0
46.6	0
46.7	0
46.8	0
46.9	0
47	0
47.1	0
47.2	0
47.3	0
47.4	0
47.5	0
47.6	0
47.7	0
47.8	0
47.9	0
48	0
48.1	0
48.2	0
48.3	0
48.4	0
48.5	0
48.6	0
48.7	0
48.8	0
48.9	0
49	0
49.1	0
49.2	0
49.3	0
49.4	0
49.5	0
49.6	0
49.7	0
49.8	0
49.9	0
50	0
50.1	0
50.2	0
50.3	0
50.4	0
50.5	0
50.6	0
50.7	0
50.8	0
50.9	0
51	0
51.1	0
51.2	0
51.3	0
51.4	0
51.5	0
51.6	0
51.7	0
51.8	0
51.9	0
52	0
52.1	0
52.2	0
52.3	0
52.4	0
52.5	0
52.6	0
52.7	0
52.8	0
52.9	0
53	0
53.1	0
53.2	0
53.3	0
53.4	0
53.5	0
53.6	0
53.7	0
53.8	0
53.9	0
54	0
54.1	0
54.2	0
54.3	0
54.4	0
54.5	0
54.6	0
54.7	0
54.8	0
54.9	0
55	0
55.1	0
55.2	0
55.3	0
55.4	0
55.5	0
55.6	0
55.7	0
55.8	0
55.9	0
56	0
56.1	0
56.2	0
56.3	0
56.4	0
56.5	0
56.6	0
56.7	0
56.8	0
56.9	0
57	0
57.1	0
57.2	0
57.3	0
57.4	0
57.5	0
57.6	0
57.7	0
57.8	0
57.9	0
58	0
58.1	0
58.2	0
58.3	0
58.4	0
58.5	0
58.6	0
58.7	0
58.8	0
58.9	0
59	0
59.1	0
59.2	0
59.3	0
59.4	0
59.5	0
59.6	0
59.7	0
59.8	0
59.9	0
60	0
60.1	0
60.2	0
60.3	0
60.4	0
60.5	0
60.6	0
60.7	0
60.8	0
60.9	0
61	0
61.1	0
61.2	0
61.3	0
61.4	0
61.5	0
61.6	0
61.7	0
61.8	0
61.9	0
62	0
62.1	0
62.2	0
62.3	0
62.4	0
62.5	0
62.6	0
62.7	0
62.8	0
62.9	0
63	0
63.1	0
63.2	0
63.3	0
63.4	0
63.5	0
63.6	0
63.7	0
63.8	0
63.9	0
64	0
64.1	0
64.2	0
64.3	0
64.4	0
64.5	0
64.6	0
64.7	0
64.8	0
64.9	0
65	0
65.1	0
65.2	0
65.3	0
65.4	0
65.5	0
65.6	0
65.7	0
65.8	0
65.9	0
66	0
66.1	0
66.2	0
66.3	0
66.4	0
66.5	0
66.6	0
66.7	0
66.8	0
66.9	0
67	0
67.1	0
67.2	0
67.3	0
67.4	0
67.5	0
67.6	0
67.7	0
67.8	0
67.9	0
68	0
68.1	0
68.2	0
68.3	0
68.4	0
68.5	0
68.6	0
68.7	0
68.8	0
68.9	0
69	0
69.1	0
69.2	0
69.3	0
69.4	0
69.5	0
69.6	0
69.7	0
69.8	0
69.9	0
70	0
70.1	0
70.2	0
70.3	0
70.4	0
70.5	0
70.6	0
70.7	0
70.8	0
70.9	0
71	0
71.1	0
71.2	0
71.3	0
71.4	0
71.5	0
71.6	0
71.7	0
71.8	0
71.9	0
72	0
72.1	0
72.2	0
72.3	0
72.4	0
72.5	0
72.6	0
72.7	0
72.8	0
72.9	0
73	0
73.1	0
73.2	0
73.3	0
73.4	0
73.5	0
73.6	0
73.7	0
73.8	0
73.9	0
74	0
74.1	0
74.2	0
74.3	0
74.4	0
74.5	0
74.6	0
74.7	0
74.8	0
74.9	0
75	0
75.1	0
75.2	0
75.3	0
75.4	0
75.5	0
75.6	0
75.7	0
75.8	0
75.9	0
76	0
76.1	0
76.2	0
76.3	0
76.4	0
76.5	0
76.6	0
76.7	0
76.8	0
76.9	0
77	0
77.1	0
77.2	0
77.3	0
77.4	0
77.5	0
77.6	0
77.7	0
77.8	0
77.9	0
78	0
78.1	0
78.2	0
78.3	0
78.4	0
78.5	0
78.6	0
78.7	0
78.8	0
78.9	0
79	0
79.1	0
79.2	0
79.3	0
79.4	0
79.5	0
79.6	0
79.7	0
79.8	0
79.9	0
80	0
80.1	0
80.2	0
80.3	0
80.4	0
80.5	0
80.6	0
80.7	0
80.8	0
80.9	0
81	0
81.1	0
81.2	0
81.3	0
81.4	0
81.5	0
81.6	0
81.7	0
81.8	0
81.9	0
82	0
82.1	0
82.2	0
82.3	0
82.4	0
82.5	0
82.6	0
82.7	0
82.8	0
82.9	0
83	0
83.1	0
83.2	0
83.3	0
83.4	0
83.5	0
83.6	0
83.7	0
83.8	0
83.9	0
84	0
84.1	0
84.2	0
84.3	0
84.4	0
84.5	0
84.6	0
84.7	0
84.8	0
84.9	0
85	0
85.1	0
85.2	0
85.3	0
85.4	0
85.5	0
85.6	0
85.7	0
85.8	0
85.9	0
86	0
86.1	0
86.2	0
86.3	0
86.4	0
86.5	0
86.6	0
86.7	0
86.8	0
86.9	0
87	0
87.1	0
87.2	0
87.3	0
87.4	0
87.5	0
87.6	0
87.7	0
87.8	0
87.9	0
88	0
88.1	0
88.2	0
88.3	0
88.4	0
88.5	0
88.6	0
88.7	0
88.8	0
88.9	0
89	0
89.1	0
89.2	0
89.3	0
89.4	0
89.5	0
89.6	0
89.7	0
89.8	0
89.9	0
90	0
90.1	0
90.2	0
90.3	0
90.4	0
90.5	0
90.6	0
90.7	0
90.8	0
90.9	0
91	0
91.1	0
91.2	0
91.3	0
91.4	0
91.5	0
91.6	0
91.7	0
91.8	0
91.9	0
92	0
92.1	0
92.2	0
92.3	0
92.4	0
92.5	0
92.6	0
92.7	0
92.8	0
92.9	0
93	0
93.1	0
93.2	0
93.3	0
93.4	0
93.5	0
93.6	0
93.7	0
93.8	0
93.9	0
94	0
94.1	0
94.2	0
94.3	0
94.4	0
94.5	0
94.6	0
94.7	0
94.8	0
94.9	0
95	0
95.1	0
95.2	0
95.3	0
95.4	0
95.5	0
95.6	0
95.7	0
95.8	0
95.9	0
96	0
96.1	0
96.2	0
96.3	0
96.4	0
96.5	0
96.6	0
96.7	0
96.8	0
96.9	0
97	0
97.1	0
97.2	0
97.3	0
97.4	0
97.5	0
97.6	0
97.7	0
97.8	0
97.9	0
98	0
98.1	0
98.2	0
98.3	0
98.4	0
98.5	0
98.6	0
98.7	0
98.8	0
98.9	0
99	0
99.1	0
99.2	0
99.3	0
99.4	0
99.5	0
99.6	0
99.7	0
99.8	0
99.9	0
100	0
100.1	0
100.2	0.004
100.3	0.006
100.4	0.008
100.5	0.012
100.6	0.016
100.7	0.018
100.8	0.018
100.9	0.024
101	0.026
101.1	0.03
101.2	0.032
101.3	0.036
101.4	0.04
101.5	0.042
101.6	0.044
101.7	0.05
101.8	0.056
101.9	0.064
102	0.072
102.1	0.078
102.2	0.084
102.3	0.082
102.4	0.086
102.5	0.088
102.6	0.092
102.7	0.1
102.8	0.104
102.9	0.11
103	0.12
103.1	0.126
103.2	0.126
103.3	0.138
103.4	0.144
103.5	0.15
103.6	0.156
103.7	0.164
103.8	0.164
103.9	0.17
104	0.17
104.1	0.178
104.2	0.182
104.3	0.186
104.4	0.19
104.5	0.198
104.6	0.198
104.7	0.204
104.8	0.204
104.9	0.208
105	0.21
105.1	0.21
105.2	0.216
105.3	0.22
105.4	0.226
105.5	0.232
105.6	0.234
105.7	0.238
105.8	0.24
105.9	0.242
106	0.25
106.1	0.254
106.2	0.256
106.3	0.26
106.4	0.26
106.5	0.26
106.6	0.268
106.7	0.27
106.8	0.266
106.9	0.27
107	0.272
107.1	0.278
107.2	0.282
107.3	0.284
107.4	0.284
107.5	0.286
107.6	0.288
107.7	0.29
107.8	0.294
107.9	0.296
108	0.294
108.1	0.294
108.2	0.3
108.3	0.302
108.4	0.304
108.5	0.306
108.6	0.306
108.7	0.306
108.8	0.31
108.9	0.31
109	0.312
109.1	0.316
109.2	0.322
109.3	0.326
109.4	0.328
109.5	0.33
109.6	0.332
109.7	0.34
109.8	0.342
109.9	0.344
110	0.35
110.1	0.354
110.2	0.356
110.3	0.358
110.4	0.358
110.5	0.358
110.6	0.362
110.7	0.362
110.8	0.364
110.9	0.368
111	0.37
111.1	0.372
111.2	0.37
111.3	0.378
111.4	0.384
111.5	0.388
111.6	0.39
111.7	0.394
111.8	0.396
111.9	0.396
112	0.398
112.1	0.398
112.2	0.404
112.3	0.406
112.4	0.408
112.5	0.41
112.6	0.412
112.7	0.41
112.8	0.412
112.9	0.414
113	0.414
113.1	0.418
113.2	0.42
113.3	0.422
113.4	0.422
113.5	0.43
113.6	0.436
113.7	0.436
113.8	0.446
113.9	0.448
114	0.45
114.1	0.454
114.2	0.452
114.3	0.456
114.4	0.458
114.5	0.462
114.6	0.464
114.7	0.466
114.8	0.468
114.9	0.47
115	0.478
115.1	0.482
115.2	0.484
115.3	0.486
115.4	0.486
115.5	0.494
115.6	0.496
115.7	0.496
115.8	0.498
115.9	0.504
116	0.51
116.1	0.51
116.2	0.512
116.3	0.512
116.4	0.514
116.5	0.518
116.6	0.518
116.7	0.52
116.8	0.526
116.9	0.528
117	0.528
117.1	0.53
117.2	0.53
117.3	0.534
117.4	0.538
117.5	0.538
117.6	0.538
117.7	0.54
117.8	0.54
117.9	0.542
118	0.542
118.1	0.548
118.2	0.548
118.3	0.548
118.4	0.548
118.5	0.55
118.6	0.55
118.7	0.55
118.8	0.552
118.9	0.55
119	0.554
119.1	0.558
119.2	0.558
119.3	0.56
119.4	0.562
119.5	0.568
119.6	0.572
119.7	0.572
119.8	0.574
119.9	0.574
120	0.576
120.1	0.576
120.2	0.58
120.3	0.58
120.4	0.58
120.5	0.58
120.6	0.582
120.7	0.582
120.8	0.582
120.9	0.584
121	0.584
121.1	0.584
121.2	0.584
121.3	0.584
121.4	0.586
121.5	0.588
121.6	0.59
121.7	0.59
121.8	0.59
121.9	0.592
122	0.592
122.1	0.592
122.2	0.592
122.3	0.594
122.4	0.594
122.5	0.596
122.6	0.6
122.7	0.602
122.8	0.604
122.9	0.604
123	0.606
123.1	0.608
123.2	0.612
123.3	0.61
123.4	0.61
123.5	0.608
123.6	0.61
123.7	0.61
123.8	0.612
123.9	0.612
124	0.618
124.1	0.62
124.2	0.622
124.3	0.626
124.4	0.624
124.5	0.626
124.6	0.63
124.7	0.63
124.8	0.634
124.9	0.634
125	0.636
125.1	0.64
125.2	0.642
125.3	0.646
125.4	0.646
125.5	0.646
125.6	0.648
125.7	0.65
125.8	0.652
125.9	0.652
126	0.656
126.1	0.656
126.2	0.656
126.3	0.656
126.4	0.658
126.5	0.66
126.6	0.66
126.7	0.66
126.8	0.658
126.9	0.66
127	0.662
127.1	0.66
127.2	0.664
127.3	0.666
127.4	0.666
127.5	0.668
127.6	0.668
127.7	0.668
127.8	0.67
127.9	0.674
128	0.676
128.1	0.676
128.2	0.682
128.3	0.686
128.4	0.69
128.5	0.684
128.6	0.684
128.7	0.684
128.8	0.688
128.9	0.69
129	0.69
129.1	0.69
129.2	0.69
129.3	0.694
129.4	0.696
129.5	0.696
129.6	0.694
129.7	0.694
129.8	0.694
129.9	0.694
130	0.692
130.1	0.692
130.2	0.692
130.3	0.692
130.4	0.694
130.5	0.698
130.6	0.7
130.7	0.702
130.8	0.704
130.9	0.704
131	0.71
131.1	0.712
131.2	0.712
131.3	0.714
131.4	0.714
131.5	0.712
131.6	0.712
131.7	0.708
131.8	0.706
131.9	0.702
132	0.702
132.1	0.702
132.2	0.704
132.3	0.708
132.4	0.71
132.5	0.712
132.6	0.712
132.7	0.71
132.8	0.71
132.9	0.708
133	0.712
133.1	0.714
133.2	0.714
133.3	0.714
133.4	0.714
133.5	0.712
133.6	0.716
133.7	0.718
133.8	0.718
133.9	0.72
134	0.722
134.1	0.722
134.2	0.722
134.3	0.724
134.4	0.724
134.5	0.724
134.6	0.724
134.7	0.722
134.8	0.724
134.9	0.726
135	0.726
135.1	0.726
135.2	0.724
135.3	0.724
135.4	0.724
135.5	0.724
135.6	0.728
135.7	0.726
135.8	0.726
135.9	0.73
136	0.734
136.1	0.736
136.2	0.736
136.3	0.734
136.4	0.736
136.5	0.738
136.6	0.74
136.7	0.74
136.8	0.74
136.9	0.74
137	0.74
137.1	0.738
137.2	0.734
137.3	0.734
137.4	0.736
137.5	0.734
137.6	0.732
137.7	0.73
137.8	0.73
137.9	0.73
138	0.732
138.1	0.73
138.2	0.73
138.3	0.728
138.4	0.726
138.5	0.728
138.6	0.732
138.7	0.732
138.8	0.732
138.9	0.738
139	0.742
139.1	0.744
139.2	0.746
139.3	0.752
139.4	0.754
139.5	0.752
139.6	0.754
139.7	0.756
139.8	0.758
139.9	0.76
140	0.76
140.1	0.76
140.2	0.762
140.3	0.764
140.4	0.764
140.5	0.766
140.6	0.768
140.7	0.77
140.8	0.772
140.9	0.78
141	0.782
141.1	0.782
141.2	0.782
141.3	0.782
141.4	0.782
141.5	0.782
141.6	0.782
141.7	0.784
141.8	0.786
141.9	0.788
142	0.784
142.1	0.784
142.2	0.79
142.3	0.788
142.4	0.788
142.5	0.786
142.6	0.786
142.7	0.786
142.8	0.784
142.9	0.786
143	0.788
143.1	0.79
143.2	0.79
143.3	0.794
143.4	0.792
143.5	0.792
143.6	0.792
143.7	0.794
143.8	0.794
143.9	0.796
144	0.796
144.1	0.798
144.2	0.798
144.3	0.798
144.4	0.796
144.5	0.796
144.6	0.796
144.7	0.796
144.8	0.796
144.9	0.796
145	0.794
145.1	0.794
145.2	0.794
145.3	0.792
145.4	0.79
145.5	0.79
145.6	0.788
145.7	0.786
145.8	0.784
145.9	0.784
146	0.784
146.1	0.784
146.2	0.784
146.3	0.782
146.4	0.782
146.5	0.78
146.6	0.78
146.7	0.78
146.8	0.78
146.9	0.778
147	0.778
147.1	0.778
147.2	0.776
147.3	0.778
147.4	0.78
147.5	0.782
147.6	0.782
147.7	0.782
147.8	0.78
147.9	0.778
148	0.778
148.1	0.774
148.2	0.774
148.3	0.774
148.4	0.776
148.5	0.776
148.6	0.774
148.7	0.778
148.8	0.778
148.9	0.778
149	0.78
149.1	0.78
149.2	0.784
149.3	0.784
149.4	0.788
149.5	0.786
149.6	0.788
149.7	0.79
149.8	0.788
149.9	0.79
150	0.792
150.1	0.794
150.2	0.796
150.3	0.8
150.4	0.8
150.5	0.8
150.6	0.798
150.7	0.798
150.8	0.798
150.9	0.796
151	0.796
151.1	0.794
151.2	0.794
151.3	0.794
151.4	0.79
151.5	0.788
151.6	0.79
151.7	0.792
151.8	0.792
151.9	0.788
152	0.79
152.1	0.79
152.2	0.79
152.3	0.79
152.4	0.79
152.5	0.79
152.6	0.794
152.7	0.794
152.8	0.796
152.9	0.796
153	0.796
153.1	0.796
153.2	0.796
153.3	0.796
153.4	0.796
153.5	0.798
153.6	0.798
153.7	0.792
153.8	0.79
153.9	0.792
154	0.792
154.1	0.792
154.2	0.792
154.3	0.796
154.4	0.792
154.5	0.792
154.6	0.794
154.7	0.798
154.8	0.796
154.9	0.798
155	0.8
155.1	0.802
155.2	0.8
155.3	0.802
155.4	0.796
155.5	0.796
155.6	0.798
155.7	0.798
155.8	0.798
155.9	0.8
156	0.802
156.1	0.804
156.2	0.804
156.3	0.804
156.4	0.804
156.5	0.798
156.6	0.798
156.7	0.802
156.8	0.804
156.9	0.806
157	0.806
157.1	0.806
157.2	0.806
157.3	0.804
157.4	0.8
157.5	0.804
157.6	0.806
157.7	0.806
157.8	0.808
157.9	0.808
158	0.806
158.1	0.804
158.2	0.804
158.3	0.806
158.4	0.806
158.5	0.804
158.6	0.802
158.7	0.802
158.8	0.806
158.9	0.804
159	0.802
159.1	0.802
159.2	0.802
159.3	0.8
159.4	0.804
159.5	0.804
159.6	0.804
159.7	0.806
159.8	0.804
159.9	0.802
160	0.802
160.1	0.806
160.2	0.808
160.3	0.806
160.4	0.806
160.5	0.806
160.6	0.806
160.7	0.808
160.8	0.806
160.9	0.806
161	0.806
161.1	0.806
161.2	0.806
161.3	0.808
161.4	0.808
161.5	0.81
161.6	0.804
161.7	0.804
161.8	0.804
161.9	0.804
162	0.804
162.1	0.802
162.2	0.802
162.3	0.802
162.4	0.802
162.5	0.8
162.6	0.802
162.7	0.804
162.8	0.804
162.9	0.802
163	0.802
163.1	0.802
163.2	0.81
163.3	0.81
163.4	0.812
163.5	0.812
163.6	0.814
163.7	0.812
163.8	0.81
163.9	0.81
164	0.81
164.1	0.812
164.2	0.812
164.3	0.81
164.4	0.808
164.5	0.806
164.6	0.808
164.7	0.808
164.8	0.808
164.9	0.808
165	0.806
165.1	0.804
165.2	0.808
165.3	0.806
165.4	0.804
165.5	0.804
165.6	0.804
165.7	0.804
165.8	0.802
165.9	0.8
166	0.802
166.1	0.802
166.2	0.802
166.3	0.804
166.4	0.804
166.5	0.802
166.6	0.802
166.7	0.798
166.8	0.798
166.9	0.796
167	0.796
167.1	0.796
167.2	0.798
167.3	0.798
167.4	0.798
167.5	0.798
167.6	0.8
167.7	0.798
167.8	0.8
167.9	0.8
168	0.8
168.1	0.8
168.2	0.8
168.3	0.8
168.4	0.8
168.5	0.8
168.6	0.806
168.7	0.806
168.8	0.806
168.9	0.804
169	0.804
169.1	0.808
169.2	0.808
169.3	0.808
169.4	0.81
169.5	0.812
169.6	0.81
169.7	0.804
169.8	0.806
169.9	0.804
170	0.808
170.1	0.806
170.2	0.808
170.3	0.81
170.4	0.81
170.5	0.812
170.6	0.808
170.7	0.808
170.8	0.81
170.9	0.808
171	0.806
171.1	0.808
171.2	0.804
171.3	0.804
171.4	0.802
171.5	0.802
171.6	0.802
171.7	0.802
171.8	0.802
171.9	0.802
172	0.802
172.1	0.802
172.2	0.802
172.3	0.802
172.4	0.802
172.5	0.804
172.6	0.804
172.7	0.804
172.8	0.804
172.9	0.804
173	0.806
173.1	0.808
173.2	0.814
173.3	0.816
173.4	0.816
173.5	0.814
173.6	0.814
173.7	0.812
173.8	0.81
173.9	0.812
174	0.812
174.1	0.812
174.2	0.81
174.3	0.81
174.4	0.81
174.5	0.81
174.6	0.81
174.7	0.808
174.8	0.812
174.9	0.812
175	0.814
175.1	0.812
175.2	0.814
175.3	0.814
175.4	0.814
175.5	0.812
175.6	0.81
175.7	0.808
175.8	0.806
175.9	0.806
176	0.804
176.1	0.806
176.2	0.804
176.3	0.804
176.4	0.806
176.5	0.806
176.6	0.806
176.7	0.808
176.8	0.808
176.9	0.808
177	0.808
177.1	0.808
177.2	0.81
177.3	0.814
177.4	0.82
177.5	0.814
177.6	0.812
177.7	0.81
177.8	0.808
177.9	0.81
178	0.81
178.1	0.806
178.2	0.804
178.3	0.802
178.4	0.802
178.5	0.804
178.6	0.804
178.7	0.806
178.8	0.806
178.9	0.806
179	0.808
179.1	0.812
179.2	0.814
179.3	0.814
179.4	0.82
179.5	0.82
179.6	0.82
179.7	0.82
179.8	0.816
179.9	0.816
180	0.818
180.1	0.816
180.2	0.816
180.3	0.814
180.4	0.818
180.5	0.82
180.6	0.82
180.7	0.818
180.8	0.818
180.9	0.818
181	0.82
181.1	0.822
181.2	0.822
181.3	0.82
181.4	0.822
181.5	0.824
181.6	0.826
181.7	0.828
181.8	0.824
181.9	0.824
182	0.824
182.1	0.822
182.2	0.822
182.3	0.822
182.4	0.824
182.5	0.822
182.6	0.822
182.7	0.826
182.8	0.828
182.9	0.826
183	0.826
183.1	0.822
183.2	0.824
183.3	0.826
183.4	0.824
183.5	0.826
183.6	0.828
183.7	0.828
183.8	0.828
183.9	0.83
184	0.83
184.1	0.83
184.2	0.83
184.3	0.832
184.4	0.834
184.5	0.836
184.6	0.836
184.7	0.834
184.8	0.832
184.9	0.832
185	0.832
185.1	0.832
185.2	0.832
185.3	0.834
185.4	0.832
185.5	0.83
185.6	0.83
185.7	0.83
185.8	0.83
185.9	0.832
186	0.832
186.1	0.834
186.2	0.836
186.3	0.834
186.4	0.834
186.5	0.834
186.6	0.832
186.7	0.834
186.8	0.832
186.9	0.834
187	0.834
187.1	0.834
187.2	0.834
187.3	0.834
187.4	0.834
187.5	0.836
187.6	0.84
187.7	0.842
187.8	0.842
187.9	0.842
188	0.842
188.1	0.842
188.2	0.84
188.3	0.838
188.4	0.838
188.5	0.838
188.6	0.838
188.7	0.84
188.8	0.84
188.9	0.838
189	0.838
189.1	0.84
189.2	0.836
189.3	0.838
189.4	0.838
189.5	0.836
189.6	0.836
189.7	0.836
189.8	0.838
189.9	0.84
190	0.84
190.1	0.842
190.2	0.844
190.3	0.844
190.4	0.846
190.5	0.846
190.6	0.846
190.7	0.844
190.8	0.844
190.9	0.84
191	0.844
191.1	0.844
191.2	0.844
191.3	0.844
191.4	0.84
191.5	0.84
191.6	0.84
191.7	0.84
191.8	0.844
191.9	0.846
192	0.846
192.1	0.846
192.2	0.846
192.3	0.846
192.4	0.844
192.5	0.842
192.6	0.84
192.7	0.838
192.8	0.838
192.9	0.838
193	0.836
193.1	0.838
193.2	0.84
193.3	0.838
193.4	0.838
193.5	0.838
193.6	0.838
193.7	0.84
193.8	0.84
193.9	0.844
194	0.848
194.1	0.848
194.2	0.846
194.3	0.846
194.4	0.85
194.5	0.85
194.6	0.848
194.7	0.848
194.8	0.846
194.9	0.846
195	0.848
195.1	0.85
195.2	0.85
195.3	0.85
195.4	0.848
195.5	0.848
195.6	0.848
195.7	0.854
195.8	0.852
195.9	0.852
196	0.85
196.1	0.85
196.2	0.848
196.3	0.85
196.4	0.852
196.5	0.85
196.6	0.85
196.7	0.848
196.8	0.848
196.9	0.85
197	0.85
197.1	0.85
197.2	0.85
197.3	0.85
197.4	0.85
197.5	0.85
197.6	0.85
197.7	0.854
197.8	0.85
197.9	0.852
198	0.85
198.1	0.85
198.2	0.85
198.3	0.846
198.4	0.848
198.5	0.848
198.6	0.846
198.7	0.846
198.8	0.85
198.9	0.848
199	0.852
199.1	0.852
199.2	0.852
199.3	0.852
199.4	0.85
199.5	0.85
199.6	0.85
199.7	0.85
199.8	0.852
199.9	0.85
200	0.85
[truncated: 14,000 more rows]
