# Supplementary material for: Bayesian inference of kinetic schemes for ion channels by Kalman filtering
Source: eLife journal article supplement (doi:10.7554/elife.62714), 2022-05-04
Supplement: fig4-data2 [file 1_Sim_N_800_Fluor_MW.xlsx]

## Sheet: Tabelle1
0.1	0
0.2	0
0.3	0
0.4	0
0.5	0
0.6	0
0.7	0
0.8	0
0.9	0
1	0
1.1	0
1.2	0
1.3	0
1.4	0
1.5	0
1.6	0
1.7	0
1.8	0
1.9	0
2	0
2.1	0
2.2	0
2.3	0
2.4	0
2.5	0
2.6	0
2.7	0
2.8	0
2.9	0
3	0
3.1	0
3.2	0
3.3	0
3.4	0
3.5	0
3.6	0
3.7	0
3.8	0
3.9	0
4	0
4.1	0
4.2	0
4.3	0
4.4	0
4.5	0
4.6	0
4.7	0
4.8	0
4.9	0
5	0
5.1	0
5.2	0
5.3	0
5.4	0
5.5	0
5.6	0
5.7	0
5.8	0
5.9	0
6	0
6.1	0
6.2	0
6.3	0
6.4	0
6.5	0
6.6	0
6.7	0
6.8	0
6.9	0
7	0
7.1	0
7.2	0
7.3	0
7.4	0
7.5	0
7.6	0
7.7	0
7.8	0
7.9	0
8	0
8.1	0
8.2	0
8.3	0
8.4	0
8.5	0
8.6	0
8.7	0
8.8	0
8.9	0
9	0
9.1	0
9.2	0
9.3	0
9.4	0
9.5	0
9.6	0
9.7	0
9.8	0
9.9	0
10	0
10.1	0
10.2	0
10.3	0
10.4	0
10.5	0
10.6	0
10.7	0
10.8	0
10.9	0
11	0
11.1	0
11.2	0
11.3	0
11.4	0
11.5	0
11.6	0
11.7	0
11.8	0
11.9	0
12	0
12.1	0
12.2	0
12.3	0
12.4	0
12.5	0
12.6	0
12.7	0
12.8	0
12.9	0
13	0
13.1	0
13.2	0
13.3	0
13.4	0
13.5	0
13.6	0
13.7	0
13.8	0
13.9	0
14	0
14.1	0
14.2	0
14.3	0
14.4	0
14.5	0
14.6	0
14.7	0
14.8	0
14.9	0
15	0
15.1	0
15.2	0
15.3	0
15.4	0
15.5	0
15.6	0
15.7	0
15.8	0
15.9	0
16	0
16.1	0
16.2	0
16.3	0
16.4	0
16.5	0
16.6	0
16.7	0
16.8	0
16.9	0
17	0
17.1	0
17.2	0
17.3	0
17.4	0
17.5	0
17.6	0
17.7	0
17.8	0
17.9	0
18	0
18.1	0
18.2	0
18.3	0
18.4	0
18.5	0
18.6	0
18.7	0
18.8	0
18.9	0
19	0
19.1	0
19.2	0
19.3	0
19.4	0
19.5	0
19.6	0
19.7	0
19.8	0
19.9	0
20	0
20.1	0
20.2	0
20.3	0
20.4	0
20.5	0
20.6	0
20.7	0
20.8	0
20.9	0
21	0
21.1	0
21.2	0
21.3	0
21.4	0
21.5	0
21.6	0
21.7	0
21.8	0
21.9	0
22	0
22.1	0
22.2	0
22.3	0
22.4	0
22.5	0
22.6	0
22.7	0
22.8	0
22.9	0
23	0
23.1	0
23.2	0
23.3	0
23.4	0
23.5	0
23.6	0
23.7	0
23.8	0
23.9	0
24	0
24.1	0
24.2	0
24.3	0
24.4	0
24.5	0
24.6	0
24.7	0
24.8	0
24.9	0
25	0
25.1	0
25.2	0
25.3	0
25.4	0
25.5	0
25.6	0
25.7	0
25.8	0
25.9	0
26	0
26.1	0
26.2	0
26.3	0
26.4	0
26.5	0
26.6	0
26.7	0
26.8	0
26.9	0
27	0
27.1	0
27.2	0
27.3	0
27.4	0
27.5	0
27.6	0
27.7	0
27.8	0
27.9	0
28	0
28.1	0
28.2	0
28.3	0
28.4	0
28.5	0
28.6	0
28.7	0
28.8	0
28.9	0
29	0
29.1	0
29.2	0
29.3	0
29.4	0
29.5	0
29.6	0
29.7	0
29.8	0
29.9	0
30	0
30.1	0
30.2	0
30.3	0
30.4	0
30.5	0
30.6	0
30.7	0
30.8	0
30.9	0
31	0
31.1	0
31.2	0
31.3	0
31.4	0
31.5	0
31.6	0
31.7	0
31.8	0
31.9	0
32	0
32.1	0
32.2	0
32.3	0
32.4	0
32.5	0
32.6	0
32.7	0
32.8	0
32.9	0
33	0
33.1	0
33.2	0
33.3	0
33.4	0
33.5	0
33.6	0
33.7	0
33.8	0
33.9	0
34	0
34.1	0
34.2	0
34.3	0
34.4	0
34.5	0
34.6	0
34.7	0
34.8	0
34.9	0
35	0
35.1	0
35.2	0
35.3	0
35.4	0
35.5	0
35.6	0
35.7	0
35.8	0
35.9	0
36	0
36.1	0
36.2	0
36.3	0
36.4	0
36.5	0
36.6	0
36.7	0
36.8	0
36.9	0
37	0
37.1	0
37.2	0
37.3	0
37.4	0
37.5	0
37.6	0
37.7	0
37.8	0
37.9	0
38	0
38.1	0
38.2	0
38.3	0
38.4	0
38.5	0
38.6	0
38.7	0
38.8	0
38.9	0
39	0
39.1	0
39.2	0
39.3	0
39.4	0
39.5	0
39.6	0
39.7	0
39.8	0
39.9	0
40	0
40.1	0
40.2	0
40.3	0
40.4	0
40.5	0
40.6	0
40.7	0
40.8	0
40.9	0
41	0
41.1	0
41.2	0
41.3	0
41.4	0
41.5	0
41.6	0
41.7	0
41.8	0
41.9	0
42	0
42.1	0
42.2	0
42.3	0
42.4	0
42.5	0
42.6	0
42.7	0
42.8	0
42.9	0
43	0
43.1	0
43.2	0
43.3	0
43.4	0
43.5	0
43.6	0
43.7	0
43.8	0
43.9	0
44	0
44.1	0
44.2	0
44.3	0
44.4	0
44.5	0
44.6	0
44.7	0
44.8	0
44.9	0
45	0
45.1	0
45.2	0
45.3	0
45.4	0
45.5	0
45.6	0
45.7	0
45.8	0
45.9	0
46	0
46.1	0
46.2	0
46.3	0
46.4	0
46.5	0
46.6	0
46.7	0
46.8	0
46.9	0
47	0
47.1	0
47.2	0
47.3	0
47.4	0
47.5	0
47.6	0
47.7	0
47.8	0
47.9	0
48	0
48.1	0
48.2	0
48.3	0
48.4	0
48.5	0
48.6	0
48.7	0
48.8	0
48.9	0
49	0
49.1	0
49.2	0
49.3	0
49.4	0
49.5	0
49.6	0
49.7	0
49.8	0
49.9	0
50	0
50.1	0
50.2	0
50.3	0
50.4	0
50.5	0
50.6	0
50.7	0
50.8	0
50.9	0
51	0
51.1	0
51.2	0
51.3	0
51.4	0
51.5	0
51.6	0
51.7	0
51.8	0
51.9	0
52	0
52.1	0
52.2	0
52.3	0
52.4	0
52.5	0
52.6	0
52.7	0
52.8	0
52.9	0
53	0
53.1	0
53.2	0
53.3	0
53.4	0
53.5	0
53.6	0
53.7	0
53.8	0
53.9	0
54	0
54.1	0
54.2	0
54.3	0
54.4	0
54.5	0
54.6	0
54.7	0
54.8	0
54.9	0
55	0
55.1	0
55.2	0
55.3	0
55.4	0
55.5	0
55.6	0
55.7	0
55.8	0
55.9	0
56	0
56.1	0
56.2	0
56.3	0
56.4	0
56.5	0
56.6	0
56.7	0
56.8	0
56.9	0
57	0
57.1	0
57.2	0
57.3	0
57.4	0
57.5	0
57.6	0
57.7	0
57.8	0
57.9	0
58	0
58.1	0
58.2	0
58.3	0
58.4	0
58.5	0
58.6	0
58.7	0
58.8	0
58.9	0
59	0
59.1	0
59.2	0
59.3	0
59.4	0
59.5	0
59.6	0
59.7	0
59.8	0
59.9	0
60	0
60.1	0
60.2	0
60.3	0
60.4	0
60.5	0
60.6	0
60.7	0
60.8	0
60.9	0
61	0
61.1	0
61.2	0
61.3	0
61.4	0
61.5	0
61.6	0
61.7	0
61.8	0
61.9	0
62	0
62.1	0
62.2	0
62.3	0
62.4	0
62.5	0
62.6	0
62.7	0
62.8	0
62.9	0
63	0
63.1	0
63.2	0
63.3	0
63.4	0
63.5	0
63.6	0
63.7	0
63.8	0
63.9	0
64	0
64.1	0
64.2	0
64.3	0
64.4	0
64.5	0
64.6	0
64.7	0
64.8	0
64.9	0
65	0
65.1	0
65.2	0
65.3	0
65.4	0
65.5	0
65.6	0
65.7	0
65.8	0
65.9	0
66	0
66.1	0
66.2	0
66.3	0
66.4	0
66.5	0
66.6	0
66.7	0
66.8	0
66.9	0
67	0
67.1	0
67.2	0
67.3	0
67.4	0
67.5	0
67.6	0
67.7	0
67.8	0
67.9	0
68	0
68.1	0
68.2	0
68.3	0
68.4	0
68.5	0
68.6	0
68.7	0
68.8	0
68.9	0
69	0
69.1	0
69.2	0
69.3	0
69.4	0
69.5	0
69.6	0
69.7	0
69.8	0
69.9	0
70	0
70.1	0
70.2	0
70.3	0
70.4	0
70.5	0
70.6	0
70.7	0
70.8	0
70.9	0
71	0
71.1	0
71.2	0
71.3	0
71.4	0
71.5	0
71.6	0
71.7	0
71.8	0
71.9	0
72	0
72.1	0
72.2	0
72.3	0
72.4	0
72.5	0
72.6	0
72.7	0
72.8	0
72.9	0
73	0
73.1	0
73.2	0
73.3	0
73.4	0
73.5	0
73.6	0
73.7	0
73.8	0
73.9	0
74	0
74.1	0
74.2	0
74.3	0
74.4	0
74.5	0
74.6	0
74.7	0
74.8	0
74.9	0
75	0
75.1	0
75.2	0
75.3	0
75.4	0
75.5	0
75.6	0
75.7	0
75.8	0
75.9	0
76	0
76.1	0
76.2	0
76.3	0
76.4	0
76.5	0
76.6	0
76.7	0
76.8	0
76.9	0
77	0
77.1	0
77.2	0
77.3	0
77.4	0
77.5	0
77.6	0
77.7	0
77.8	0
77.9	0
78	0
78.1	0
78.2	0
78.3	0
78.4	0
78.5	0
78.6	0
78.7	0
78.8	0
78.9	0
79	0
79.1	0
79.2	0
79.3	0
79.4	0
79.5	0
79.6	0
79.7	0
79.8	0
79.9	0
80	0
80.1	0
80.2	0
80.3	0
80.4	0
80.5	0
80.6	0
80.7	0
80.8	0
80.9	0
81	0
81.1	0
81.2	0
81.3	0
81.4	0
81.5	0
81.6	0
81.7	0
81.8	0
81.9	0
82	0
82.1	0
82.2	0
82.3	0
82.4	0
82.5	0
82.6	0
82.7	0
82.8	0
82.9	0
83	0
83.1	0
83.2	0
83.3	0
83.4	0
83.5	0
83.6	0
83.7	0
83.8	0
83.9	0
84	0
84.1	0
84.2	0
84.3	0
84.4	0
84.5	0
84.6	0
84.7	0
84.8	0
84.9	0
85	0
85.1	0
85.2	0
85.3	0
85.4	0
85.5	0
85.6	0
85.7	0
85.8	0
85.9	0
86	0
86.1	0
86.2	0
86.3	0
86.4	0
86.5	0
86.6	0
86.7	0
86.8	0
86.9	0
87	0
87.1	0
87.2	0
87.3	0
87.4	0
87.5	0
87.6	0
87.7	0
87.8	0
87.9	0
88	0
88.1	0
88.2	0
88.3	0
88.4	0
88.5	0
88.6	0
88.7	0
88.8	0
88.9	0
89	0
89.1	0
89.2	0
89.3	0
89.4	0
89.5	0
89.6	0
89.7	0
89.8	0
89.9	0
90	0
90.1	0
90.2	0
90.3	0
90.4	0
90.5	0
90.6	0
90.7	0
90.8	0
90.9	0
91	0
91.1	0
91.2	0
91.3	0
91.4	0
91.5	0
91.6	0
91.7	0
91.8	0
91.9	0
92	0
92.1	0
92.2	0
92.3	0
92.4	0
92.5	0
92.6	0
92.7	0
92.8	0
92.9	0
93	0
93.1	0
93.2	0
93.3	0
93.4	0
93.5	0
93.6	0
93.7	0
93.8	0
93.9	0
94	0
94.1	0
94.2	0
94.3	0
94.4	0
94.5	0
94.6	0
94.7	0
94.8	0
94.9	0
95	0
95.1	0
95.2	0
95.3	0
95.4	0
95.5	0
95.6	0
95.7	0
95.8	0
95.9	0
96	0
96.1	0
96.2	0
96.3	0
96.4	0
96.5	0
96.6	0
96.7	0
96.8	0
96.9	0
97	0
97.1	0
97.2	0
97.3	0
97.4	0
97.5	0
97.6	0
97.7	0
97.8	0
97.9	0
98	0
98.1	0
98.2	0
98.3	0
98.4	0
98.5	0
98.6	0
98.7	0
98.8	0
98.9	0
99	0
99.1	0
99.2	0
99.3	0
99.4	0
99.5	0
99.6	0
99.7	0
99.8	0
99.9	0
100	0
100.1	0.8925
100.2	0.978125
100.3	0.98125
100.4	0.99125
100.5	0.98875
100.6	0.986875
100.7	0.991875
100.8	0.985625
100.9	0.988125
101	0.985625
101.1	0.989375
101.2	0.98375
101.3	0.9875
101.4	0.981875
101.5	0.981875
101.6	0.98625
101.7	0.988125
101.8	0.988125
101.9	0.98625
102	0.9875
102.1	0.986875
102.2	0.991875
102.3	0.988125
102.4	0.985625
102.5	0.99
102.6	0.986875
102.7	0.99125
102.8	0.98375
102.9	0.989375
103	0.986875
103.1	0.989375
103.2	0.989375
103.3	0.98875
103.4	0.99
103.5	0.98875
103.6	0.990625
103.7	0.99375
103.8	0.990625
103.9	0.98875
104	0.986875
104.1	0.986875
104.2	0.989375
104.3	0.988125
104.4	0.9925
104.5	0.988125
104.6	0.98875
104.7	0.98625
104.8	0.991875
104.9	0.988125
105	0.99
105.1	0.989375
105.2	0.991875
105.3	0.995
105.4	0.988125
105.5	0.98875
105.6	0.991875
105.7	0.99
105.8	0.988125
105.9	0.990625
106	0.990625
106.1	0.99
106.2	0.98875
106.3	0.991875
106.4	0.99125
106.5	0.98875
106.6	0.990625
106.7	0.990625
106.8	0.99125
106.9	0.99
107	0.995625
107.1	0.993125
107.2	0.99375
107.3	0.990625
107.4	0.99
107.5	0.9875
107.6	0.99375
107.7	0.98875
107.8	0.989375
107.9	0.99125
108	0.989375
108.1	0.993125
108.2	0.993125
108.3	0.993125
108.4	0.994375
108.5	0.995625
108.6	0.99
108.7	0.99375
108.8	0.991875
108.9	0.99125
109	0.98875
109.1	0.988125
109.2	0.9875
109.3	0.99375
109.4	0.990625
109.5	0.99125
109.6	0.991875
109.7	0.99125
109.8	0.99
109.9	0.99375
110	0.991875
110.1	0.988125
110.2	0.99
110.3	0.993125
110.4	0.991875
110.5	0.994375
110.6	0.9925
110.7	0.99
110.8	0.989375
110.9	0.991875
111	0.994375
111.1	0.9925
111.2	0.9925
111.3	0.9925
111.4	0.994375
111.5	0.9925
111.6	0.995625
111.7	0.993125
111.8	0.988125
111.9	0.99375
112	0.993125
112.1	0.995625
112.2	0.9925
112.3	0.990625
112.4	0.99
112.5	0.99125
112.6	0.989375
112.7	0.99375
112.8	0.991875
112.9	0.9925
113	0.989375
113.1	0.990625
113.2	0.990625
113.3	0.99125
113.4	0.993125
113.5	0.99
113.6	0.995625
113.7	0.995625
113.8	0.99
113.9	0.989375
114	0.991875
114.1	0.99375
114.2	0.994375
114.3	0.9925
114.4	0.99125
114.5	0.9975
114.6	0.994375
114.7	0.9925
114.8	0.99125
114.9	0.994375
115	0.9925
115.1	0.995625
115.2	0.994375
115.3	0.99375
115.4	0.994375
115.5	0.99375
115.6	0.996875
115.7	0.994375
115.8	0.995
115.9	0.990625
116	0.993125
116.1	0.994375
116.2	0.995625
116.3	0.9925
116.4	0.993125
116.5	0.99625
116.6	0.996875
116.7	0.9925
116.8	0.991875
116.9	0.9975
117	0.99625
117.1	0.99375
117.2	0.99375
117.3	0.9925
117.4	0.995625
117.5	0.99375
117.6	0.993125
117.7	0.9925
117.8	0.991875
117.9	0.993125
118	0.98625
118.1	0.991875
118.2	0.993125
118.3	0.994375
118.4	0.995625
118.5	0.996875
118.6	0.995625
118.7	0.99375
118.8	0.995625
118.9	0.995
119	0.993125
119.1	0.9925
119.2	0.990625
119.3	0.99
119.4	0.993125
119.5	0.99625
119.6	0.9975
119.7	0.9925
119.8	0.99375
119.9	0.99375
120	0.993125
120.1	0.991875
120.2	0.991875
120.3	0.995625
120.4	0.994375
120.5	0.9975
120.6	1
120.7	0.996875
120.8	0.995
120.9	0.993125
121	0.994375
121.1	0.991875
121.2	0.99875
121.3	0.995
121.4	0.995
121.5	0.993125
121.6	0.994375
121.7	0.9975
121.8	0.994375
121.9	0.994375
122	0.9975
122.1	0.998125
122.2	0.994375
122.3	0.991875
122.4	0.9975
122.5	0.995
122.6	0.9925
122.7	0.993125
122.8	0.99375
122.9	0.993125
123	0.99625
123.1	0.995
123.2	0.99125
123.3	0.994375
123.4	0.996875
123.5	0.995625
123.6	0.994375
123.7	0.994375
123.8	0.991875
123.9	0.996875
124	0.996875
124.1	0.9975
124.2	0.995625
124.3	0.995
124.4	0.995625
124.5	0.99625
124.6	0.99375
124.7	0.991875
124.8	0.998125
124.9	0.99625
125	0.995625
125.1	0.994375
125.2	0.996875
125.3	0.99625
125.4	0.9975
125.5	0.99625
125.6	0.993125
125.7	0.995625
125.8	0.996875
125.9	0.9975
126	0.995625
126.1	0.994375
126.2	0.989375
126.3	0.996875
126.4	0.993125
126.5	0.99625
126.6	0.995
126.7	0.996875
126.8	0.998125
126.9	0.995
127	0.995625
127.1	0.996875
127.2	0.994375
127.3	0.99625
127.4	0.99625
127.5	0.99375
127.6	0.998125
127.7	0.995625
127.8	0.993125
127.9	0.996875
128	0.995
128.1	0.995
128.2	0.994375
128.3	0.99625
128.4	0.99375
128.5	0.99375
128.6	0.996875
128.7	0.99375
128.8	0.994375
128.9	0.994375
129	0.9925
129.1	0.9975
129.2	0.995
129.3	0.998125
129.4	0.996875
129.5	0.996875
129.6	0.995
129.7	0.995
129.8	0.996875
129.9	0.995625
130	0.99625
130.1	0.994375
130.2	0.994375
130.3	0.994375
130.4	0.998125
130.5	0.994375
130.6	0.99625
130.7	0.995
130.8	0.99625
130.9	0.995
131	0.995625
131.1	0.995
131.2	0.995
131.3	0.994375
131.4	0.996875
131.5	0.996875
131.6	0.996875
131.7	0.995625
131.8	0.994375
131.9	0.99625
132	0.996875
132.1	0.995625
132.2	0.99625
132.3	0.995625
132.4	0.9925
132.5	0.993125
132.6	0.995
132.7	0.995625
132.8	0.99625
132.9	0.9925
133	0.99375
133.1	0.9975
133.2	0.995625
133.3	0.996875
133.4	0.995625
133.5	0.998125
133.6	0.996875
133.7	0.993125
133.8	0.996875
133.9	0.996875
134	0.9975
134.1	0.99625
134.2	0.995
134.3	0.995
134.4	0.9925
134.5	0.996875
134.6	0.995
134.7	0.995625
134.8	0.996875
134.9	0.995625
135	0.996875
135.1	0.99625
135.2	0.996875
135.3	0.994375
135.4	0.995
135.5	0.995
135.6	0.9975
135.7	0.998125
135.8	0.99375
135.9	0.995
136	0.9975
136.1	0.995
136.2	0.9975
136.3	0.99625
136.4	0.99625
136.5	0.9975
136.6	0.998125
136.7	0.99375
136.8	0.996875
136.9	0.99375
137	0.995
137.1	0.99625
137.2	0.99625
137.3	0.99625
137.4	0.99625
137.5	0.994375
137.6	0.99625
137.7	0.998125
137.8	0.995
137.9	0.995
138	0.99375
138.1	0.9925
138.2	0.998125
138.3	0.998125
138.4	0.995
138.5	0.9975
138.6	0.998125
138.7	0.9975
138.8	0.995625
138.9	0.996875
139	0.996875
139.1	0.999375
139.2	0.99625
139.3	0.99625
139.4	0.995625
139.5	0.998125
139.6	0.99625
139.7	0.995625
139.8	0.9975
139.9	0.996875
140	0.998125
140.1	0.998125
140.2	1
140.3	0.995
140.4	0.996875
140.5	0.99875
140.6	0.99875
140.7	0.9975
140.8	0.995
140.9	0.998125
141	0.99875
141.1	0.995625
141.2	0.994375
141.3	0.99375
141.4	0.9975
141.5	0.999375
141.6	0.99875
141.7	0.9975
141.8	0.995
141.9	0.996875
142	0.996875
142.1	0.99625
142.2	0.99625
142.3	0.9975
142.4	0.999375
142.5	0.99625
142.6	0.998125
142.7	0.996875
142.8	0.998125
142.9	0.996875
143	0.99875
143.1	0.99875
143.2	0.998125
143.3	0.996875
143.4	0.9975
143.5	0.998125
143.6	0.9975
143.7	0.9975
143.8	0.995
143.9	0.996875
144	0.996875
144.1	0.99625
144.2	0.998125
144.3	0.99875
144.4	0.99875
144.5	0.995625
144.6	0.99375
144.7	0.9925
144.8	0.998125
144.9	0.99625
145	0.99625
145.1	0.99875
145.2	0.99625
145.3	0.99625
145.4	0.996875
145.5	0.995625
145.6	0.995625
145.7	0.9975
145.8	0.995
145.9	0.9975
146	0.99875
146.1	0.995
146.2	0.99625
146.3	0.9975
146.4	0.99875
146.5	0.99875
146.6	0.99625
146.7	0.996875
146.8	0.998125
146.9	0.9975
147	0.996875
147.1	0.998125
147.2	0.99625
147.3	0.995625
147.4	0.998125
147.5	0.998125
147.6	0.9975
147.7	1
147.8	0.998125
147.9	0.9975
148	0.9975
148.1	0.995
148.2	0.99875
148.3	0.995625
148.4	0.996875
148.5	0.9975
148.6	0.995
148.7	0.99875
148.8	0.99625
148.9	0.99875
149	0.999375
149.1	0.9975
149.2	0.999375
149.3	0.998125
149.4	0.995
149.5	0.993125
149.6	0.9975
149.7	0.99625
149.8	0.9975
149.9	0.999375
150	0.9975
150.1	0.9975
150.2	0.9975
150.3	0.998125
150.4	0.998125
150.5	0.9975
150.6	0.995
150.7	0.996875
150.8	0.9975
150.9	0.998125
151	0.999375
151.1	0.998125
151.2	0.99875
151.3	0.999375
151.4	0.99625
151.5	0.998125
151.6	0.995625
151.7	0.99875
151.8	0.9975
151.9	0.995625
152	0.9975
152.1	0.998125
152.2	0.999375
152.3	0.998125
152.4	0.999375
152.5	0.9975
152.6	0.998125
152.7	0.998125
152.8	0.995
152.9	0.998125
153	0.99625
153.1	0.99875
153.2	0.99875
153.3	0.9975
153.4	0.99875
153.5	0.995625
153.6	0.995
153.7	0.995625
153.8	0.9975
153.9	0.99625
154	0.99375
154.1	0.996875
154.2	0.996875
154.3	0.996875
154.4	0.99625
154.5	0.99625
154.6	0.99875
154.7	0.99875
154.8	0.9975
154.9	1
155	0.9975
155.1	0.996875
155.2	0.9975
155.3	0.995625
155.4	0.995
155.5	0.996875
155.6	1
155.7	0.99875
155.8	0.998125
155.9	0.99875
156	0.996875
156.1	0.996875
156.2	0.998125
156.3	0.99625
156.4	0.9975
156.5	0.996875
156.6	0.996875
156.7	0.9975
156.8	0.998125
156.9	0.998125
157	0.995
157.1	0.99625
157.2	0.995625
157.3	0.995625
157.4	0.996875
157.5	0.99875
157.6	0.99875
157.7	0.99625
157.8	0.9975
157.9	0.99875
158	0.996875
158.1	0.99875
158.2	0.998125
158.3	0.996875
158.4	0.995625
158.5	0.99875
158.6	0.998125
158.7	0.996875
158.8	0.9975
158.9	0.99875
159	0.9975
159.1	0.999375
159.2	0.999375
159.3	0.9975
159.4	0.996875
159.5	0.99625
159.6	0.999375
159.7	0.9975
159.8	0.995
159.9	0.998125
160	0.995625
160.1	0.99875
160.2	0.996875
160.3	0.996875
160.4	0.99875
160.5	0.99625
160.6	0.99625
160.7	0.9975
160.8	0.995625
160.9	0.998125
161	0.996875
161.1	0.996875
161.2	0.9975
161.3	0.99875
161.4	0.99875
161.5	0.998125
161.6	0.99625
161.7	0.9975
161.8	0.995
161.9	0.9975
162	0.999375
162.1	0.99625
162.2	0.996875
162.3	0.999375
162.4	0.99875
162.5	0.998125
162.6	0.998125
162.7	0.999375
162.8	0.99875
162.9	0.995
163	0.995625
163.1	0.99625
163.2	0.9975
163.3	0.99875
163.4	0.999375
163.5	0.996875
163.6	0.99625
163.7	0.9975
163.8	0.9975
163.9	0.99875
164	0.99625
164.1	0.996875
164.2	0.99625
164.3	0.996875
164.4	0.999375
164.5	0.9975
164.6	0.99875
164.7	0.9975
164.8	0.998125
164.9	0.99875
165	0.9975
165.1	0.999375
165.2	0.995625
165.3	0.998125
165.4	0.998125
165.5	0.996875
165.6	0.9975
165.7	0.996875
165.8	0.998125
165.9	0.99875
166	0.99875
166.1	0.9975
166.2	0.996875
166.3	0.99625
166.4	0.999375
166.5	0.999375
166.6	0.998125
166.7	0.998125
166.8	1
166.9	0.998125
167	0.9975
167.1	0.99875
167.2	0.996875
167.3	0.9975
167.4	0.9975
167.5	0.998125
167.6	0.9975
167.7	1
167.8	0.999375
167.9	0.998125
168	0.998125
168.1	0.999375
168.2	0.998125
168.3	0.99625
168.4	0.998125
168.5	0.9975
168.6	0.998125
168.7	0.99875
168.8	0.99625
168.9	0.99875
169	0.998125
169.1	0.996875
169.2	0.99875
169.3	0.9975
169.4	0.9975
169.5	0.995625
169.6	0.99875
169.7	0.9975
169.8	0.999375
169.9	0.99875
170	0.9975
170.1	0.99625
170.2	0.996875
170.3	0.9975
170.4	0.995625
170.5	0.99875
170.6	0.998125
170.7	0.99875
170.8	0.99875
170.9	0.99875
171	0.9975
171.1	0.999375
171.2	0.99875
171.3	0.996875
171.4	0.99875
171.5	0.99875
171.6	0.9975
171.7	0.9975
171.8	0.995625
171.9	0.995
172	0.995
172.1	0.998125
172.2	0.9975
172.3	0.9975
172.4	0.996875
172.5	0.9975
172.6	0.998125
172.7	0.996875
172.8	0.99875
172.9	0.99875
173	0.998125
173.1	0.998125
173.2	0.9975
173.3	0.998125
173.4	0.998125
173.5	0.999375
173.6	0.99875
173.7	0.998125
173.8	0.99875
173.9	0.99875
174	0.995
174.1	0.995
174.2	0.998125
174.3	0.998125
174.4	0.9975
174.5	0.995
174.6	0.9975
174.7	0.999375
174.8	0.9975
174.9	0.996875
175	0.99875
175.1	0.998125
175.2	0.9975
175.3	0.996875
175.4	0.996875
175.5	0.99875
175.6	0.995625
175.7	0.996875
175.8	0.998125
175.9	0.995625
176	0.998125
176.1	0.999375
176.2	0.99875
176.3	0.9975
176.4	0.99875
176.5	0.996875
176.6	0.99875
176.7	0.9975
176.8	0.996875
176.9	0.9975
177	0.9975
177.1	0.998125
177.2	0.998125
177.3	0.998125
177.4	0.99875
177.5	0.996875
177.6	0.998125
177.7	0.999375
177.8	0.99875
177.9	0.9975
178	0.99875
178.1	0.99875
178.2	1
178.3	0.9975
178.4	0.995
178.5	0.9975
178.6	0.99625
178.7	0.9975
178.8	0.995
178.9	0.9975
179	0.9975
179.1	0.9975
179.2	0.998125
179.3	0.996875
179.4	0.9975
179.5	0.998125
179.6	0.9975
179.7	0.998125
179.8	0.998125
179.9	0.996875
180	0.996875
180.1	0.996875
180.2	0.996875
180.3	0.9975
180.4	0.99875
180.5	0.998125
180.6	0.998125
180.7	0.998125
180.8	0.998125
180.9	0.996875
181	0.99875
181.1	0.998125
181.2	0.99875
181.3	0.999375
181.4	0.99875
181.5	0.99625
181.6	0.99875
181.7	0.99875
181.8	0.99875
181.9	0.998125
182	0.99875
182.1	0.998125
182.2	0.998125
182.3	0.99875
182.4	0.99625
182.5	0.999375
182.6	0.9975
182.7	0.99875
182.8	0.99625
182.9	0.9975
183	0.9975
183.1	0.998125
183.2	0.9975
183.3	0.9975
183.4	0.9975
183.5	0.996875
183.6	0.99875
183.7	0.99875
183.8	0.9975
183.9	0.999375
184	0.996875
184.1	0.999375
184.2	0.99875
184.3	0.9975
184.4	0.9975
184.5	0.998125
184.6	0.999375
184.7	0.9975
184.8	0.995625
184.9	0.994375
185	0.995625
185.1	0.9975
185.2	0.9975
185.3	0.999375
185.4	0.998125
185.5	0.9975
185.6	0.999375
185.7	0.999375
185.8	0.9975
185.9	0.999375
186	0.996875
186.1	0.998125
186.2	0.999375
186.3	0.999375
186.4	0.998125
186.5	0.9975
186.6	0.998125
186.7	0.999375
186.8	0.9975
186.9	0.99875
187	0.99875
187.1	0.998125
187.2	1
187.3	0.99875
187.4	0.99875
187.5	0.999375
187.6	0.995625
187.7	0.999375
187.8	0.99875
187.9	0.998125
188	0.99875
188.1	0.9975
188.2	0.994375
188.3	0.996875
188.4	0.999375
188.5	0.99875
188.6	0.998125
188.7	0.996875
188.8	0.99875
188.9	0.99875
189	0.9975
189.1	0.995625
189.2	0.998125
189.3	0.999375
189.4	0.99875
189.5	0.9975
189.6	0.995625
189.7	0.994375
189.8	0.998125
189.9	0.9975
190	0.999375
190.1	0.99875
190.2	0.995625
190.3	0.99875
190.4	0.99875
190.5	0.998125
190.6	0.9975
190.7	0.996875
190.8	1
190.9	0.996875
191	0.99875
191.1	0.99875
191.2	0.99375
191.3	0.99875
191.4	0.998125
191.5	0.99625
191.6	0.998125
191.7	0.995
191.8	0.996875
191.9	0.9975
192	0.999375
192.1	0.99875
192.2	0.999375
192.3	0.998125
192.4	0.99875
192.5	0.999375
192.6	0.998125
192.7	1
192.8	0.99875
192.9	0.999375
193	0.996875
193.1	0.998125
193.2	0.999375
193.3	0.998125
193.4	1
193.5	1
193.6	0.999375
193.7	0.999375
193.8	0.996875
193.9	0.998125
194	1
194.1	0.9975
194.2	0.9975
194.3	0.9975
194.4	0.995625
194.5	0.99625
194.6	0.995625
194.7	0.9975
194.8	0.998125
194.9	0.99625
195	0.99625
195.1	0.9975
195.2	0.9975
195.3	0.995625
195.4	0.995625
195.5	0.99875
195.6	0.9975
195.7	0.998125
195.8	0.999375
195.9	0.998125
196	0.998125
196.1	0.999375
196.2	0.998125
196.3	0.99625
196.4	0.99875
196.5	0.9975
196.6	0.998125
196.7	0.998125
196.8	0.998125
196.9	0.99875
197	0.99875
197.1	0.9975
197.2	0.996875
197.3	0.996875
197.4	0.99625
197.5	1
197.6	0.996875
197.7	0.999375
197.8	0.995625
197.9	0.9975
198	0.9975
198.1	0.995
198.2	0.99875
198.3	0.999375
198.4	0.998125
198.5	0.998125
198.6	0.998125
198.7	0.999375
198.8	0.998125
198.9	0.998125
199	0.9975
199.1	0.99875
199.2	0.999375
199.3	0.999375
199.4	0.999375
199.5	0.996875
199.6	0.998125
199.7	0.998125
199.8	0.99875
199.9	0.9975
200	0.99875
[truncated: 14,000 more rows]
