# Supplementary material for: Bayesian inference of kinetic schemes for ion channels by Kalman filtering
Source: eLife journal article supplement (doi:10.7554/elife.62714), 2022-05-04
Supplement: fig4-data2 [file 1_Sim_N_800_Strom_MW.xlsx]

## Sheet: Tabelle1
0.1	0
0.2	0
0.3	0
0.4	0
0.5	0
0.6	0
0.7	0
0.8	0
0.9	0
1	0
1.1	0
1.2	0
1.3	0
1.4	0
1.5	0
1.6	0
1.7	0
1.8	0
1.9	0
2	0
2.1	0
2.2	0
2.3	0
2.4	0
2.5	0
2.6	0
2.7	0
2.8	0
2.9	0
3	0
3.1	0
3.2	0
3.3	0
3.4	0
3.5	0
3.6	0
3.7	0
3.8	0
3.9	0
4	0
4.1	0
4.2	0
4.3	0
4.4	0
4.5	0
4.6	0
4.7	0
4.8	0
4.9	0
5	0
5.1	0
5.2	0
5.3	0
5.4	0
5.5	0
5.6	0
5.7	0
5.8	0
5.9	0
6	0
6.1	0
6.2	0
6.3	0
6.4	0
6.5	0
6.6	0
6.7	0
6.8	0
6.9	0
7	0
7.1	0
7.2	0
7.3	0
7.4	0
7.5	0
7.6	0
7.7	0
7.8	0
7.9	0
8	0
8.1	0
8.2	0
8.3	0
8.4	0
8.5	0
8.6	0
8.7	0
8.8	0
8.9	0
9	0
9.1	0
9.2	0
9.3	0
9.4	0
9.5	0
9.6	0
9.7	0
9.8	0
9.9	0
10	0
10.1	0
10.2	0
10.3	0
10.4	0
10.5	0
10.6	0
10.7	0
10.8	0
10.9	0
11	0
11.1	0
11.2	0
11.3	0
11.4	0
11.5	0
11.6	0
11.7	0
11.8	0
11.9	0
12	0
12.1	0
12.2	0
12.3	0
12.4	0
12.5	0
12.6	0
12.7	0
12.8	0
12.9	0
13	0
13.1	0
13.2	0
13.3	0
13.4	0
13.5	0
13.6	0
13.7	0
13.8	0
13.9	0
14	0
14.1	0
14.2	0
14.3	0
14.4	0
14.5	0
14.6	0
14.7	0
14.8	0
14.9	0
15	0
15.1	0
15.2	0
15.3	0
15.4	0
15.5	0
15.6	0
15.7	0
15.8	0
15.9	0
16	0
16.1	0
16.2	0
16.3	0
16.4	0
16.5	0
16.6	0
16.7	0
16.8	0
16.9	0
17	0
17.1	0
17.2	0
17.3	0
17.4	0
17.5	0
17.6	0
17.7	0
17.8	0
17.9	0
18	0
18.1	0
18.2	0
18.3	0
18.4	0
18.5	0
18.6	0
18.7	0
18.8	0
18.9	0
19	0
19.1	0
19.2	0
19.3	0
19.4	0
19.5	0
19.6	0
19.7	0
19.8	0
19.9	0
20	0
20.1	0
20.2	0
20.3	0
20.4	0
20.5	0
20.6	0
20.7	0
20.8	0
20.9	0
21	0
21.1	0
21.2	0
21.3	0
21.4	0
21.5	0
21.6	0
21.7	0
21.8	0
21.9	0
22	0
22.1	0
22.2	0
22.3	0
22.4	0
22.5	0
22.6	0
22.7	0
22.8	0
22.9	0
23	0
23.1	0
23.2	0
23.3	0
23.4	0
23.5	0
23.6	0
23.7	0
23.8	0
23.9	0
24	0
24.1	0
24.2	0
24.3	0
24.4	0
24.5	0
24.6	0
24.7	0
24.8	0
24.9	0
25	0
25.1	0
25.2	0
25.3	0
25.4	0
25.5	0
25.6	0
25.7	0
25.8	0
25.9	0
26	0
26.1	0
26.2	0
26.3	0
26.4	0
26.5	0
26.6	0
26.7	0
26.8	0
26.9	0
27	0
27.1	0
27.2	0
27.3	0
27.4	0
27.5	0
27.6	0
27.7	0
27.8	0
27.9	0
28	0
28.1	0
28.2	0
28.3	0
28.4	0
28.5	0
28.6	0
28.7	0
28.8	0
28.9	0
29	0
29.1	0
29.2	0
29.3	0
29.4	0
29.5	0
29.6	0
29.7	0
29.8	0
29.9	0
30	0
30.1	0
30.2	0
30.3	0
30.4	0
30.5	0
30.6	0
30.7	0
30.8	0
30.9	0
31	0
31.1	0
31.2	0
31.3	0
31.4	0
31.5	0
31.6	0
31.7	0
31.8	0
31.9	0
32	0
32.1	0
32.2	0
32.3	0
32.4	0
32.5	0
32.6	0
32.7	0
32.8	0
32.9	0
33	0
33.1	0
33.2	0
33.3	0
33.4	0
33.5	0
33.6	0
33.7	0
33.8	0
33.9	0
34	0
34.1	0
34.2	0
34.3	0
34.4	0
34.5	0
34.6	0
34.7	0
34.8	0
34.9	0
35	0
35.1	0
35.2	0
35.3	0
35.4	0
35.5	0
35.6	0
35.7	0
35.8	0
35.9	0
36	0
36.1	0
36.2	0
36.3	0
36.4	0
36.5	0
36.6	0
36.7	0
36.8	0
36.9	0
37	0
37.1	0
37.2	0
37.3	0
37.4	0
37.5	0
37.6	0
37.7	0
37.8	0
37.9	0
38	0
38.1	0
38.2	0
38.3	0
38.4	0
38.5	0
38.6	0
38.7	0
38.8	0
38.9	0
39	0
39.1	0
39.2	0
39.3	0
39.4	0
39.5	0
39.6	0
39.7	0
39.8	0
39.9	0
40	0
40.1	0
40.2	0
40.3	0
40.4	0
40.5	0
40.6	0
40.7	0
40.8	0
40.9	0
41	0
41.1	0
41.2	0
41.3	0
41.4	0
41.5	0
41.6	0
41.7	0
41.8	0
41.9	0
42	0
42.1	0
42.2	0
42.3	0
42.4	0
42.5	0
42.6	0
42.7	0
42.8	0
42.9	0
43	0
43.1	0
43.2	0
43.3	0
43.4	0
43.5	0
43.6	0
43.7	0
43.8	0
43.9	0
44	0
44.1	0
44.2	0
44.3	0
44.4	0
44.5	0
44.6	0
44.7	0
44.8	0
44.9	0
45	0
45.1	0
45.2	0
45.3	0
45.4	0
45.5	0
45.6	0
45.7	0
45.8	0
45.9	0
46	0
46.1	0
46.2	0
46.3	0
46.4	0
46.5	0
46.6	0
46.7	0
46.8	0
46.9	0
47	0
47.1	0
47.2	0
47.3	0
47.4	0
47.5	0
47.6	0
47.7	0
47.8	0
47.9	0
48	0
48.1	0
48.2	0
48.3	0
48.4	0
48.5	0
48.6	0
48.7	0
48.8	0
48.9	0
49	0
49.1	0
49.2	0
49.3	0
49.4	0
49.5	0
49.6	0
49.7	0
49.8	0
49.9	0
50	0
50.1	0
50.2	0
50.3	0
50.4	0
50.5	0
50.6	0
50.7	0
50.8	0
50.9	0
51	0
51.1	0
51.2	0
51.3	0
51.4	0
51.5	0
51.6	0
51.7	0
51.8	0
51.9	0
52	0
52.1	0
52.2	0
52.3	0
52.4	0
52.5	0
52.6	0
52.7	0
52.8	0
52.9	0
53	0
53.1	0
53.2	0
53.3	0
53.4	0
53.5	0
53.6	0
53.7	0
53.8	0
53.9	0
54	0
54.1	0
54.2	0
54.3	0
54.4	0
54.5	0
54.6	0
54.7	0
54.8	0
54.9	0
55	0
55.1	0
55.2	0
55.3	0
55.4	0
55.5	0
55.6	0
55.7	0
55.8	0
55.9	0
56	0
56.1	0
56.2	0
56.3	0
56.4	0
56.5	0
56.6	0
56.7	0
56.8	0
56.9	0
57	0
57.1	0
57.2	0
57.3	0
57.4	0
57.5	0
57.6	0
57.7	0
57.8	0
57.9	0
58	0
58.1	0
58.2	0
58.3	0
58.4	0
58.5	0
58.6	0
58.7	0
58.8	0
58.9	0
59	0
59.1	0
59.2	0
59.3	0
59.4	0
59.5	0
59.6	0
59.7	0
59.8	0
59.9	0
60	0
60.1	0
60.2	0
60.3	0
60.4	0
60.5	0
60.6	0
60.7	0
60.8	0
60.9	0
61	0
61.1	0
61.2	0
61.3	0
61.4	0
61.5	0
61.6	0
61.7	0
61.8	0
61.9	0
62	0
62.1	0
62.2	0
62.3	0
62.4	0
62.5	0
62.6	0
62.7	0
62.8	0
62.9	0
63	0
63.1	0
63.2	0
63.3	0
63.4	0
63.5	0
63.6	0
63.7	0
63.8	0
63.9	0
64	0
64.1	0
64.2	0
64.3	0
64.4	0
64.5	0
64.6	0
64.7	0
64.8	0
64.9	0
65	0
65.1	0
65.2	0
65.3	0
65.4	0
65.5	0
65.6	0
65.7	0
65.8	0
65.9	0
66	0
66.1	0
66.2	0
66.3	0
66.4	0
66.5	0
66.6	0
66.7	0
66.8	0
66.9	0
67	0
67.1	0
67.2	0
67.3	0
67.4	0
67.5	0
67.6	0
67.7	0
67.8	0
67.9	0
68	0
68.1	0
68.2	0
68.3	0
68.4	0
68.5	0
68.6	0
68.7	0
68.8	0
68.9	0
69	0
69.1	0
69.2	0
69.3	0
69.4	0
69.5	0
69.6	0
69.7	0
69.8	0
69.9	0
70	0
70.1	0
70.2	0
70.3	0
70.4	0
70.5	0
70.6	0
70.7	0
70.8	0
70.9	0
71	0
71.1	0
71.2	0
71.3	0
71.4	0
71.5	0
71.6	0
71.7	0
71.8	0
71.9	0
72	0
72.1	0
72.2	0
72.3	0
72.4	0
72.5	0
72.6	0
72.7	0
72.8	0
72.9	0
73	0
73.1	0
73.2	0
73.3	0
73.4	0
73.5	0
73.6	0
73.7	0
73.8	0
73.9	0
74	0
74.1	0
74.2	0
74.3	0
74.4	0
74.5	0
74.6	0
74.7	0
74.8	0
74.9	0
75	0
75.1	0
75.2	0
75.3	0
75.4	0
75.5	0
75.6	0
75.7	0
75.8	0
75.9	0
76	0
76.1	0
76.2	0
76.3	0
76.4	0
76.5	0
76.6	0
76.7	0
76.8	0
76.9	0
77	0
77.1	0
77.2	0
77.3	0
77.4	0
77.5	0
77.6	0
77.7	0
77.8	0
77.9	0
78	0
78.1	0
78.2	0
78.3	0
78.4	0
78.5	0
78.6	0
78.7	0
78.8	0
78.9	0
79	0
79.1	0
79.2	0
79.3	0
79.4	0
79.5	0
79.6	0
79.7	0
79.8	0
79.9	0
80	0
80.1	0
80.2	0
80.3	0
80.4	0
80.5	0
80.6	0
80.7	0
80.8	0
80.9	0
81	0
81.1	0
81.2	0
81.3	0
81.4	0
81.5	0
81.6	0
81.7	0
81.8	0
81.9	0
82	0
82.1	0
82.2	0
82.3	0
82.4	0
82.5	0
82.6	0
82.7	0
82.8	0
82.9	0
83	0
83.1	0
83.2	0
83.3	0
83.4	0
83.5	0
83.6	0
83.7	0
83.8	0
83.9	0
84	0
84.1	0
84.2	0
84.3	0
84.4	0
84.5	0
84.6	0
84.7	0
84.8	0
84.9	0
85	0
85.1	0
85.2	0
85.3	0
85.4	0
85.5	0
85.6	0
85.7	0
85.8	0
85.9	0
86	0
86.1	0
86.2	0
86.3	0
86.4	0
86.5	0
86.6	0
86.7	0
86.8	0
86.9	0
87	0
87.1	0
87.2	0
87.3	0
87.4	0
87.5	0
87.6	0
87.7	0
87.8	0
87.9	0
88	0
88.1	0
88.2	0
88.3	0
88.4	0
88.5	0
88.6	0
88.7	0
88.8	0
88.9	0
89	0
89.1	0
89.2	0
89.3	0
89.4	0
89.5	0
89.6	0
89.7	0
89.8	0
89.9	0
90	0
90.1	0
90.2	0
90.3	0
90.4	0
90.5	0
90.6	0
90.7	0
90.8	0
90.9	0
91	0
91.1	0
91.2	0
91.3	0
91.4	0
91.5	0
91.6	0
91.7	0
91.8	0
91.9	0
92	0
92.1	0
92.2	0
92.3	0
92.4	0
92.5	0
92.6	0
92.7	0
92.8	0
92.9	0
93	0
93.1	0
93.2	0
93.3	0
93.4	0
93.5	0
93.6	0
93.7	0
93.8	0
93.9	0
94	0
94.1	0
94.2	0
94.3	0
94.4	0
94.5	0
94.6	0
94.7	0
94.8	0
94.9	0
95	0
95.1	0
95.2	0
95.3	0
95.4	0
95.5	0
95.6	0
95.7	0
95.8	0
95.9	0
96	0
96.1	0
96.2	0
96.3	0
96.4	0
96.5	0
96.6	0
96.7	0
96.8	0
96.9	0
97	0
97.1	0
97.2	0
97.3	0
97.4	0
97.5	0
97.6	0
97.7	0
97.8	0
97.9	0
98	0
98.1	0
98.2	0
98.3	0
98.4	0
98.5	0
98.6	0
98.7	0
98.8	0
98.9	0
99	0
99.1	0
99.2	0
99.3	0
99.4	0
99.5	0
99.6	0
99.7	0
99.8	0
99.9	0
100	0
100.1	0.00125
100.2	0.00375
100.3	0.01
100.4	0.01625
100.5	0.02
100.6	0.02125
100.7	0.03
100.8	0.0325
100.9	0.0375
101	0.04
101.1	0.04375
101.2	0.04625
101.3	0.04875
101.4	0.05
101.5	0.0525
101.6	0.05875
101.7	0.06125
101.8	0.06375
101.9	0.07125
102	0.07875
102.1	0.08125
102.2	0.085
102.3	0.09
102.4	0.095
102.5	0.10375
102.6	0.1075
102.7	0.11125
102.8	0.11625
102.9	0.12125
103	0.12125
103.1	0.12125
103.2	0.125
103.3	0.1325
103.4	0.1425
103.5	0.14875
103.6	0.15375
103.7	0.16125
103.8	0.1625
103.9	0.17125
104	0.17125
104.1	0.175
104.2	0.18
104.3	0.1825
104.4	0.18375
104.5	0.18875
104.6	0.19625
104.7	0.19875
104.8	0.20375
104.9	0.20875
105	0.21125
105.1	0.2125
105.2	0.215
105.3	0.2175
105.4	0.21875
105.5	0.2225
105.6	0.22375
105.7	0.23
105.8	0.235
105.9	0.245
106	0.2475
106.1	0.24875
106.2	0.25125
106.3	0.2525
106.4	0.255
106.5	0.2575
106.6	0.2575
106.7	0.26
106.8	0.2625
106.9	0.26
107	0.265
107.1	0.26625
107.2	0.2675
107.3	0.2725
107.4	0.27375
107.5	0.275
107.6	0.275
107.7	0.27625
107.8	0.28
107.9	0.2825
108	0.28625
108.1	0.29125
108.2	0.295
108.3	0.3
108.4	0.30375
108.5	0.305
108.6	0.30875
108.7	0.3125
108.8	0.31625
108.9	0.3175
109	0.32125
109.1	0.32875
109.2	0.33125
109.3	0.33125
109.4	0.33625
109.5	0.3375
109.6	0.34
109.7	0.34
109.8	0.34125
109.9	0.34625
110	0.34625
110.1	0.34875
110.2	0.35375
110.3	0.3575
110.4	0.3575
110.5	0.3625
110.6	0.36375
110.7	0.3675
110.8	0.36875
110.9	0.3775
111	0.38
111.1	0.37875
111.2	0.37625
111.3	0.38
111.4	0.385
111.5	0.385
111.6	0.3825
111.7	0.38625
111.8	0.395
111.9	0.3975
112	0.39875
112.1	0.40375
112.2	0.41
112.3	0.41
112.4	0.41375
112.5	0.41625
112.6	0.4175
112.7	0.4175
112.8	0.42
112.9	0.42
113	0.42125
113.1	0.42375
113.2	0.425
113.3	0.425
113.4	0.4275
113.5	0.4275
113.6	0.43125
113.7	0.4325
113.8	0.43625
113.9	0.44
114	0.4425
114.1	0.445
114.2	0.4475
114.3	0.4525
114.4	0.455
114.5	0.455
114.6	0.45875
114.7	0.45875
114.8	0.45625
114.9	0.4575
115	0.46
115.1	0.46125
115.2	0.4625
115.3	0.46375
115.4	0.465
115.5	0.46625
115.6	0.46875
115.7	0.47
115.8	0.4725
115.9	0.4725
116	0.4775
116.1	0.48
116.2	0.48375
116.3	0.48625
116.4	0.4925
116.5	0.495
116.6	0.49375
116.7	0.49375
116.8	0.495
116.9	0.49625
117	0.5
117.1	0.50625
117.2	0.50625
117.3	0.50875
117.4	0.50875
117.5	0.51125
117.6	0.51375
117.7	0.5175
117.8	0.51625
117.9	0.52
118	0.52125
118.1	0.5275
118.2	0.53125
118.3	0.53375
118.4	0.5375
118.5	0.54125
118.6	0.54125
118.7	0.54
118.8	0.54125
118.9	0.545
119	0.54375
119.1	0.545
119.2	0.55
119.3	0.55375
119.4	0.555
119.5	0.55375
119.6	0.5575
119.7	0.56
119.8	0.565
119.9	0.56625
120	0.56875
120.1	0.57
120.2	0.57125
120.3	0.5725
120.4	0.5725
120.5	0.57875
120.6	0.5775
120.7	0.58
120.8	0.58
120.9	0.58625
121	0.58875
121.1	0.5925
121.2	0.59375
121.3	0.5925
121.4	0.59125
121.5	0.5925
121.6	0.595
121.7	0.59625
121.8	0.59625
121.9	0.59625
122	0.5975
122.1	0.5925
122.2	0.595
122.3	0.59375
122.4	0.59625
122.5	0.5975
122.6	0.6
122.7	0.6
122.8	0.60625
122.9	0.6075
123	0.605
123.1	0.605
123.2	0.60625
123.3	0.60625
123.4	0.60875
123.5	0.6075
123.6	0.61125
123.7	0.61375
123.8	0.615
123.9	0.61625
124	0.61625
124.1	0.6175
124.2	0.6175
124.3	0.6225
124.4	0.62375
124.5	0.62375
124.6	0.6225
124.7	0.62125
124.8	0.62125
124.9	0.6225
125	0.625
125.1	0.62625
125.2	0.6275
125.3	0.63125
125.4	0.63
125.5	0.62875
125.6	0.62875
125.7	0.63125
125.8	0.63
125.9	0.63125
126	0.6325
126.1	0.63375
126.2	0.635
126.3	0.6375
126.4	0.63875
126.5	0.6375
126.6	0.63875
126.7	0.63875
126.8	0.64
126.9	0.63875
127	0.64
127.1	0.64
127.2	0.6425
127.3	0.645
127.4	0.64875
127.5	0.64875
127.6	0.64875
127.7	0.65
127.8	0.65
127.9	0.65375
128	0.65375
128.1	0.65375
128.2	0.65625
128.3	0.6575
128.4	0.66
128.5	0.6625
128.6	0.6625
128.7	0.66
128.8	0.65875
128.9	0.65875
129	0.6575
129.1	0.66
129.2	0.6625
129.3	0.66125
129.4	0.6625
129.5	0.66375
129.6	0.66375
129.7	0.66625
129.8	0.66625
129.9	0.665
130	0.67125
130.1	0.6725
130.2	0.675
130.3	0.6775
130.4	0.6775
130.5	0.67875
130.6	0.68
130.7	0.6775
130.8	0.67625
130.9	0.6775
131	0.68
131.1	0.68
131.2	0.6825
131.3	0.68125
131.4	0.685
131.5	0.68875
131.6	0.68625
131.7	0.6875
131.8	0.68875
131.9	0.6875
132	0.68875
132.1	0.6875
132.2	0.68875
132.3	0.69
132.4	0.68875
132.5	0.6875
132.6	0.6875
132.7	0.68375
132.8	0.6825
132.9	0.685
133	0.685
133.1	0.68125
133.2	0.6825
133.3	0.6825
133.4	0.6825
133.5	0.68375
133.6	0.685
133.7	0.685
133.8	0.685
133.9	0.68625
134	0.68625
134.1	0.68625
134.2	0.6875
134.3	0.6875
134.4	0.68625
134.5	0.68875
134.6	0.68875
134.7	0.69125
134.8	0.6925
134.9	0.695
135	0.695
135.1	0.6975
135.2	0.69875
135.3	0.7
135.4	0.7
135.5	0.7
135.6	0.70125
135.7	0.70375
135.8	0.70375
135.9	0.70625
136	0.70625
136.1	0.70875
136.2	0.71125
136.3	0.71125
136.4	0.71
136.5	0.71
136.6	0.71
136.7	0.7125
136.8	0.715
136.9	0.715
137	0.715
137.1	0.71625
137.2	0.72
137.3	0.72
137.4	0.71875
137.5	0.71875
137.6	0.71875
137.7	0.72375
137.8	0.72375
137.9	0.72625
138	0.725
138.1	0.72625
138.2	0.72625
138.3	0.73
138.4	0.73375
138.5	0.735
138.6	0.73125
138.7	0.73125
138.8	0.73
138.9	0.73375
139	0.73625
139.1	0.73875
139.2	0.74125
139.3	0.74
139.4	0.74
139.5	0.74125
139.6	0.7425
139.7	0.74625
139.8	0.74875
139.9	0.74875
140	0.7475
140.1	0.74875
140.2	0.74875
140.3	0.7525
140.4	0.75125
140.5	0.7525
140.6	0.7525
140.7	0.74875
140.8	0.75
140.9	0.75
141	0.75
141.1	0.7525
141.2	0.75375
141.3	0.75625
141.4	0.75375
141.5	0.75375
141.6	0.7525
141.7	0.7525
141.8	0.7525
141.9	0.755
142	0.755
142.1	0.75375
142.2	0.75625
142.3	0.755
142.4	0.755
142.5	0.75875
142.6	0.76
142.7	0.76
142.8	0.76
142.9	0.7625
143	0.7625
143.1	0.76375
143.2	0.765
143.3	0.76625
143.4	0.7675
143.5	0.76875
143.6	0.77
143.7	0.77
143.8	0.77
143.9	0.77125
144	0.77
144.1	0.76875
144.2	0.77125
144.3	0.7725
144.4	0.77125
144.5	0.77125
144.6	0.7725
144.7	0.77375
144.8	0.77625
144.9	0.77625
145	0.77375
145.1	0.77375
145.2	0.77375
145.3	0.77375
145.4	0.77875
145.5	0.7775
145.6	0.77875
145.7	0.78125
145.8	0.78125
145.9	0.78375
146	0.7825
146.1	0.7825
146.2	0.7825
146.3	0.7825
146.4	0.7825
146.5	0.78
146.6	0.78
146.7	0.7775
146.8	0.775
146.9	0.77625
147	0.77875
147.1	0.77875
147.2	0.78125
147.3	0.78125
147.4	0.7825
147.5	0.7825
147.6	0.785
147.7	0.78375
147.8	0.785
147.9	0.785
148	0.785
148.1	0.78625
148.2	0.78625
148.3	0.78875
148.4	0.7925
148.5	0.7925
148.6	0.79375
148.7	0.795
148.8	0.79375
148.9	0.79375
149	0.795
149.1	0.7975
149.2	0.8
149.3	0.8025
149.4	0.8025
149.5	0.8025
149.6	0.805
149.7	0.80625
149.8	0.8075
149.9	0.8075
150	0.80875
150.1	0.80875
150.2	0.81
150.3	0.8075
150.4	0.8075
150.5	0.80875
150.6	0.80375
150.7	0.8025
150.8	0.80625
150.9	0.8075
151	0.8075
151.1	0.80625
151.2	0.80625
151.3	0.80625
151.4	0.80625
151.5	0.805
151.6	0.805
151.7	0.805
151.8	0.805
151.9	0.805
152	0.80375
152.1	0.80375
152.2	0.80375
152.3	0.80375
152.4	0.80375
152.5	0.8025
152.6	0.8025
152.7	0.8025
152.8	0.8
152.9	0.8
153	0.80125
153.1	0.80125
153.2	0.8025
153.3	0.80125
153.4	0.80125
153.5	0.80125
153.6	0.8025
153.7	0.80375
153.8	0.80375
153.9	0.80125
154	0.8025
154.1	0.80125
154.2	0.79875
154.3	0.79625
154.4	0.7975
154.5	0.79875
154.6	0.7975
154.7	0.79875
154.8	0.8
154.9	0.80125
155	0.8025
155.1	0.8025
155.2	0.80125
155.3	0.8
155.4	0.8025
155.5	0.8025
155.6	0.80375
155.7	0.8025
155.8	0.80125
155.9	0.80125
156	0.8025
156.1	0.80125
156.2	0.8025
156.3	0.8025
156.4	0.8025
156.5	0.80375
156.6	0.805
156.7	0.80375
156.8	0.80125
156.9	0.80125
157	0.8
157.1	0.7975
157.2	0.79375
157.3	0.79375
157.4	0.79625
157.5	0.8
157.6	0.80125
157.7	0.80125
157.8	0.80125
157.9	0.80125
158	0.8025
158.1	0.8025
158.2	0.8025
158.3	0.8025
158.4	0.8025
158.5	0.80375
158.6	0.80125
158.7	0.8025
158.8	0.8025
158.9	0.79875
159	0.7975
159.1	0.7975
159.2	0.8025
159.3	0.8025
159.4	0.8025
159.5	0.80375
159.6	0.80375
159.7	0.8025
159.8	0.8025
159.9	0.80375
160	0.80375
160.1	0.80375
160.2	0.805
160.3	0.80375
160.4	0.8025
160.5	0.80125
160.6	0.8
160.7	0.80125
160.8	0.8
160.9	0.80125
161	0.8025
161.1	0.80375
161.2	0.805
161.3	0.8075
161.4	0.80875
161.5	0.80875
161.6	0.80875
161.7	0.8075
161.8	0.80875
161.9	0.80875
162	0.8075
162.1	0.8075
162.2	0.805
162.3	0.805
162.4	0.80375
162.5	0.8025
162.6	0.8
162.7	0.80125
162.8	0.79875
162.9	0.8
163	0.8025
163.1	0.80125
163.2	0.80125
163.3	0.8
163.4	0.80125
163.5	0.8025
163.6	0.8025
163.7	0.80375
163.8	0.80625
163.9	0.80875
164	0.80875
164.1	0.8075
164.2	0.80875
164.3	0.80875
164.4	0.80875
164.5	0.81
164.6	0.8125
164.7	0.81125
164.8	0.81
164.9	0.8125
165	0.8125
165.1	0.81375
165.2	0.81625
165.3	0.8175
165.4	0.8175
165.5	0.8175
165.6	0.81875
165.7	0.81875
165.8	0.8175
165.9	0.81875
166	0.81875
166.1	0.81875
166.2	0.82125
166.3	0.82125
166.4	0.82
166.5	0.8225
166.6	0.82125
166.7	0.8225
166.8	0.82125
166.9	0.82
167	0.82125
167.1	0.82125
167.2	0.8225
167.3	0.82
167.4	0.82125
167.5	0.82375
167.6	0.82375
167.7	0.825
167.8	0.825
167.9	0.825
168	0.825
168.1	0.82625
168.2	0.8275
168.3	0.83125
168.4	0.83
168.5	0.83
168.6	0.83125
168.7	0.83
168.8	0.83
168.9	0.83125
169	0.8325
169.1	0.8325
169.2	0.83375
169.3	0.83125
169.4	0.83125
169.5	0.8325
169.6	0.82875
169.7	0.82875
169.8	0.8275
169.9	0.82875
170	0.82625
170.1	0.825
170.2	0.82375
170.3	0.82375
170.4	0.82375
170.5	0.82375
170.6	0.82375
170.7	0.825
170.8	0.825
170.9	0.82375
171	0.825
171.1	0.82375
171.2	0.825
171.3	0.825
171.4	0.8225
171.5	0.82125
171.6	0.82
171.7	0.8225
171.8	0.8225
171.9	0.82125
172	0.81875
172.1	0.82
172.2	0.82125
172.3	0.82
172.4	0.82
172.5	0.82
172.6	0.81875
172.7	0.81625
172.8	0.81625
172.9	0.8175
173	0.81875
173.1	0.81625
173.2	0.81625
173.3	0.81625
173.4	0.81625
173.5	0.815
173.6	0.815
173.7	0.81375
173.8	0.815
173.9	0.815
174	0.815
174.1	0.8125
174.2	0.8125
174.3	0.81125
174.4	0.81
174.5	0.80875
174.6	0.81
174.7	0.80875
174.8	0.8075
174.9	0.8075
175	0.80625
175.1	0.805
175.2	0.80625
175.3	0.80625
175.4	0.8075
175.5	0.80875
175.6	0.81
175.7	0.81125
175.8	0.81375
175.9	0.815
176	0.81625
176.1	0.8175
176.2	0.81875
176.3	0.8175
176.4	0.8175
176.5	0.81625
176.6	0.81375
176.7	0.81375
176.8	0.81375
176.9	0.815
177	0.815
177.1	0.815
177.2	0.815
177.3	0.81625
177.4	0.8175
177.5	0.8175
177.6	0.815
177.7	0.815
177.8	0.815
177.9	0.81875
178	0.8225
178.1	0.8225
178.2	0.8225
178.3	0.8225
178.4	0.8225
178.5	0.82625
178.6	0.82375
178.7	0.8225
178.8	0.8225
178.9	0.82125
179	0.825
179.1	0.82625
179.2	0.82625
179.3	0.82625
179.4	0.82375
179.5	0.825
179.6	0.82375
179.7	0.82375
179.8	0.82375
179.9	0.8225
180	0.825
180.1	0.82625
180.2	0.8275
180.3	0.82875
180.4	0.82875
180.5	0.8325
180.6	0.83375
180.7	0.83375
180.8	0.835
180.9	0.835
181	0.835
181.1	0.835
181.2	0.83375
181.3	0.835
181.4	0.835
181.5	0.835
181.6	0.835
181.7	0.835
181.8	0.835
181.9	0.83125
182	0.82875
182.1	0.82875
182.2	0.82875
182.3	0.8275
182.4	0.8275
182.5	0.8275
182.6	0.82625
182.7	0.82625
182.8	0.825
182.9	0.825
183	0.82375
183.1	0.82375
183.2	0.825
183.3	0.8275
183.4	0.8275
183.5	0.825
183.6	0.8275
183.7	0.83
183.8	0.83125
183.9	0.83125
184	0.83125
184.1	0.83125
184.2	0.8325
184.3	0.83125
184.4	0.83125
184.5	0.8325
184.6	0.8325
184.7	0.83375
184.8	0.83375
184.9	0.8325
185	0.8325
185.1	0.83375
185.2	0.83375
185.3	0.83375
185.4	0.83375
185.5	0.835
185.6	0.83375
185.7	0.8325
185.8	0.83125
185.9	0.83125
186	0.83
186.1	0.8275
186.2	0.82625
186.3	0.82625
186.4	0.825
186.5	0.825
186.6	0.825
186.7	0.82375
186.8	0.82125
186.9	0.82125
187	0.82125
187.1	0.82125
187.2	0.82375
187.3	0.82375
187.4	0.82375
187.5	0.82625
187.6	0.82625
187.7	0.82625
187.8	0.8275
187.9	0.83
188	0.8275
188.1	0.8275
188.2	0.82625
188.3	0.82625
188.4	0.8275
188.5	0.8275
188.6	0.8275
188.7	0.82625
188.8	0.8275
188.9	0.82875
189	0.83
189.1	0.83
189.2	0.83125
189.3	0.83125
189.4	0.83
189.5	0.83125
189.6	0.83125
189.7	0.83125
189.8	0.83375
189.9	0.835
190	0.835
190.1	0.83625
190.2	0.83625
190.3	0.83875
190.4	0.8375
190.5	0.83875
190.6	0.83875
190.7	0.84
190.8	0.84125
190.9	0.84125
191	0.84125
191.1	0.84125
191.2	0.84
191.3	0.8425
191.4	0.84
191.5	0.84125
191.6	0.84
191.7	0.83875
191.8	0.83875
191.9	0.8375
192	0.83875
192.1	0.83625
192.2	0.83625
192.3	0.835
192.4	0.835
192.5	0.83375
192.6	0.835
192.7	0.83375
192.8	0.83125
192.9	0.83125
193	0.83125
193.1	0.8325
193.2	0.83375
193.3	0.83375
193.4	0.835
193.5	0.83625
193.6	0.835
193.7	0.83375
193.8	0.83375
193.9	0.8325
194	0.83375
194.1	0.82875
194.2	0.8275
194.3	0.8275
194.4	0.8275
194.5	0.82625
194.6	0.82625
194.7	0.82625
194.8	0.82625
194.9	0.825
195	0.825
195.1	0.825
195.2	0.825
195.3	0.825
195.4	0.825
195.5	0.82625
195.6	0.8275
195.7	0.8275
195.8	0.8275
195.9	0.8275
196	0.82625
196.1	0.82625
196.2	0.82875
196.3	0.82875
196.4	0.83
196.5	0.83
196.6	0.82875
196.7	0.83
196.8	0.82875
196.9	0.8275
197	0.825
197.1	0.82375
197.2	0.825
197.3	0.825
197.4	0.82375
197.5	0.825
197.6	0.825
197.7	0.825
197.8	0.825
197.9	0.8225
198	0.82375
198.1	0.82375
198.2	0.82375
198.3	0.82375
198.4	0.82625
198.5	0.8275
198.6	0.82875
198.7	0.83125
198.8	0.83125
198.9	0.835
199	0.8375
199.1	0.84
199.2	0.84
199.3	0.84
199.4	0.83875
199.5	0.8375
199.6	0.8375
199.7	0.83625
199.8	0.83625
199.9	0.8375
200	0.83875
[truncated: 14,000 more rows]
