# Supplementary material for: Bayesian inference of kinetic schemes for ion channels by Kalman filtering
Source: eLife journal article supplement (doi:10.7554/elife.62714), 2022-05-04
Supplement: fig4-data2 [file 1_Sim_N_1500_Fluor_MW.xlsx]

## Sheet: Tabelle1
0.1	0
0.2	0
0.3	0
0.4	0
0.5	0
0.6	0
0.7	0
0.8	0
0.9	0
1	0
1.1	0
1.2	0
1.3	0
1.4	0
1.5	0
1.6	0
1.7	0
1.8	0
1.9	0
2	0
2.1	0
2.2	0
2.3	0
2.4	0
2.5	0
2.6	0
2.7	0
2.8	0
2.9	0
3	0
3.1	0
3.2	0
3.3	0
3.4	0
3.5	0
3.6	0
3.7	0
3.8	0
3.9	0
4	0
4.1	0
4.2	0
4.3	0
4.4	0
4.5	0
4.6	0
4.7	0
4.8	0
4.9	0
5	0
5.1	0
5.2	0
5.3	0
5.4	0
5.5	0
5.6	0
5.7	0
5.8	0
5.9	0
6	0
6.1	0
6.2	0
6.3	0
6.4	0
6.5	0
6.6	0
6.7	0
6.8	0
6.9	0
7	0
7.1	0
7.2	0
7.3	0
7.4	0
7.5	0
7.6	0
7.7	0
7.8	0
7.9	0
8	0
8.1	0
8.2	0
8.3	0
8.4	0
8.5	0
8.6	0
8.7	0
8.8	0
8.9	0
9	0
9.1	0
9.2	0
9.3	0
9.4	0
9.5	0
9.6	0
9.7	0
9.8	0
9.9	0
10	0
10.1	0
10.2	0
10.3	0
10.4	0
10.5	0
10.6	0
10.7	0
10.8	0
10.9	0
11	0
11.1	0
11.2	0
11.3	0
11.4	0
11.5	0
11.6	0
11.7	0
11.8	0
11.9	0
12	0
12.1	0
12.2	0
12.3	0
12.4	0
12.5	0
12.6	0
12.7	0
12.8	0
12.9	0
13	0
13.1	0
13.2	0
13.3	0
13.4	0
13.5	0
13.6	0
13.7	0
13.8	0
13.9	0
14	0
14.1	0
14.2	0
14.3	0
14.4	0
14.5	0
14.6	0
14.7	0
14.8	0
14.9	0
15	0
15.1	0
15.2	0
15.3	0
15.4	0
15.5	0
15.6	0
15.7	0
15.8	0
15.9	0
16	0
16.1	0
16.2	0
16.3	0
16.4	0
16.5	0
16.6	0
16.7	0
16.8	0
16.9	0
17	0
17.1	0
17.2	0
17.3	0
17.4	0
17.5	0
17.6	0
17.7	0
17.8	0
17.9	0
18	0
18.1	0
18.2	0
18.3	0
18.4	0
18.5	0
18.6	0
18.7	0
18.8	0
18.9	0
19	0
19.1	0
19.2	0
19.3	0
19.4	0
19.5	0
19.6	0
19.7	0
19.8	0
19.9	0
20	0
20.1	0
20.2	0
20.3	0
20.4	0
20.5	0
20.6	0
20.7	0
20.8	0
20.9	0
21	0
21.1	0
21.2	0
21.3	0
21.4	0
21.5	0
21.6	0
21.7	0
21.8	0
21.9	0
22	0
22.1	0
22.2	0
22.3	0
22.4	0
22.5	0
22.6	0
22.7	0
22.8	0
22.9	0
23	0
23.1	0
23.2	0
23.3	0
23.4	0
23.5	0
23.6	0
23.7	0
23.8	0
23.9	0
24	0
24.1	0
24.2	0
24.3	0
24.4	0
24.5	0
24.6	0
24.7	0
24.8	0
24.9	0
25	0
25.1	0
25.2	0
25.3	0
25.4	0
25.5	0
25.6	0
25.7	0
25.8	0
25.9	0
26	0
26.1	0
26.2	0
26.3	0
26.4	0
26.5	0
26.6	0
26.7	0
26.8	0
26.9	0
27	0
27.1	0
27.2	0
27.3	0
27.4	0
27.5	0
27.6	0
27.7	0
27.8	0
27.9	0
28	0
28.1	0
28.2	0
28.3	0
28.4	0
28.5	0
28.6	0
28.7	0
28.8	0
28.9	0
29	0
29.1	0
29.2	0
29.3	0
29.4	0
29.5	0
29.6	0
29.7	0
29.8	0
29.9	0
30	0
30.1	0
30.2	0
30.3	0
30.4	0
30.5	0
30.6	0
30.7	0
30.8	0
30.9	0
31	0
31.1	0
31.2	0
31.3	0
31.4	0
31.5	0
31.6	0
31.7	0
31.8	0
31.9	0
32	0
32.1	0
32.2	0
32.3	0
32.4	0
32.5	0
32.6	0
32.7	0
32.8	0
32.9	0
33	0
33.1	0
33.2	0
33.3	0
33.4	0
33.5	0
33.6	0
33.7	0
33.8	0
33.9	0
34	0
34.1	0
34.2	0
34.3	0
34.4	0
34.5	0
34.6	0
34.7	0
34.8	0
34.9	0
35	0
35.1	0
35.2	0
35.3	0
35.4	0
35.5	0
35.6	0
35.7	0
35.8	0
35.9	0
36	0
36.1	0
36.2	0
36.3	0
36.4	0
36.5	0
36.6	0
36.7	0
36.8	0
36.9	0
37	0
37.1	0
37.2	0
37.3	0
37.4	0
37.5	0
37.6	0
37.7	0
37.8	0
37.9	0
38	0
38.1	0
38.2	0
38.3	0
38.4	0
38.5	0
38.6	0
38.7	0
38.8	0
38.9	0
39	0
39.1	0
39.2	0
39.3	0
39.4	0
39.5	0
39.6	0
39.7	0
39.8	0
39.9	0
40	0
40.1	0
40.2	0
40.3	0
40.4	0
40.5	0
40.6	0
40.7	0
40.8	0
40.9	0
41	0
41.1	0
41.2	0
41.3	0
41.4	0
41.5	0
41.6	0
41.7	0
41.8	0
41.9	0
42	0
42.1	0
42.2	0
42.3	0
42.4	0
42.5	0
42.6	0
42.7	0
42.8	0
42.9	0
43	0
43.1	0
43.2	0
43.3	0
43.4	0
43.5	0
43.6	0
43.7	0
43.8	0
43.9	0
44	0
44.1	0
44.2	0
44.3	0
44.4	0
44.5	0
44.6	0
44.7	0
44.8	0
44.9	0
45	0
45.1	0
45.2	0
45.3	0
45.4	0
45.5	0
45.6	0
45.7	0
45.8	0
45.9	0
46	0
46.1	0
46.2	0
46.3	0
46.4	0
46.5	0
46.6	0
46.7	0
46.8	0
46.9	0
47	0
47.1	0
47.2	0
47.3	0
47.4	0
47.5	0
47.6	0
47.7	0
47.8	0
47.9	0
48	0
48.1	0
48.2	0
48.3	0
48.4	0
48.5	0
48.6	0
48.7	0
48.8	0
48.9	0
49	0
49.1	0
49.2	0
49.3	0
49.4	0
49.5	0
49.6	0
49.7	0
49.8	0
49.9	0
50	0
50.1	0
50.2	0
50.3	0
50.4	0
50.5	0
50.6	0
50.7	0
50.8	0
50.9	0
51	0
51.1	0
51.2	0
51.3	0
51.4	0
51.5	0
51.6	0
51.7	0
51.8	0
51.9	0
52	0
52.1	0
52.2	0
52.3	0
52.4	0
52.5	0
52.6	0
52.7	0
52.8	0
52.9	0
53	0
53.1	0
53.2	0
53.3	0
53.4	0
53.5	0
53.6	0
53.7	0
53.8	0
53.9	0
54	0
54.1	0
54.2	0
54.3	0
54.4	0
54.5	0
54.6	0
54.7	0
54.8	0
54.9	0
55	0
55.1	0
55.2	0
55.3	0
55.4	0
55.5	0
55.6	0
55.7	0
55.8	0
55.9	0
56	0
56.1	0
56.2	0
56.3	0
56.4	0
56.5	0
56.6	0
56.7	0
56.8	0
56.9	0
57	0
57.1	0
57.2	0
57.3	0
57.4	0
57.5	0
57.6	0
57.7	0
57.8	0
57.9	0
58	0
58.1	0
58.2	0
58.3	0
58.4	0
58.5	0
58.6	0
58.7	0
58.8	0
58.9	0
59	0
59.1	0
59.2	0
59.3	0
59.4	0
59.5	0
59.6	0
59.7	0
59.8	0
59.9	0
60	0
60.1	0
60.2	0
60.3	0
60.4	0
60.5	0
60.6	0
60.7	0
60.8	0
60.9	0
61	0
61.1	0
61.2	0
61.3	0
61.4	0
61.5	0
61.6	0
61.7	0
61.8	0
61.9	0
62	0
62.1	0
62.2	0
62.3	0
62.4	0
62.5	0
62.6	0
62.7	0
62.8	0
62.9	0
63	0
63.1	0
63.2	0
63.3	0
63.4	0
63.5	0
63.6	0
63.7	0
63.8	0
63.9	0
64	0
64.1	0
64.2	0
64.3	0
64.4	0
64.5	0
64.6	0
64.7	0
64.8	0
64.9	0
65	0
65.1	0
65.2	0
65.3	0
65.4	0
65.5	0
65.6	0
65.7	0
65.8	0
65.9	0
66	0
66.1	0
66.2	0
66.3	0
66.4	0
66.5	0
66.6	0
66.7	0
66.8	0
66.9	0
67	0
67.1	0
67.2	0
67.3	0
67.4	0
67.5	0
67.6	0
67.7	0
67.8	0
67.9	0
68	0
68.1	0
68.2	0
68.3	0
68.4	0
68.5	0
68.6	0
68.7	0
68.8	0
68.9	0
69	0
69.1	0
69.2	0
69.3	0
69.4	0
69.5	0
69.6	0
69.7	0
69.8	0
69.9	0
70	0
70.1	0
70.2	0
70.3	0
70.4	0
70.5	0
70.6	0
70.7	0
70.8	0
70.9	0
71	0
71.1	0
71.2	0
71.3	0
71.4	0
71.5	0
71.6	0
71.7	0
71.8	0
71.9	0
72	0
72.1	0
72.2	0
72.3	0
72.4	0
72.5	0
72.6	0
72.7	0
72.8	0
72.9	0
73	0
73.1	0
73.2	0
73.3	0
73.4	0
73.5	0
73.6	0
73.7	0
73.8	0
73.9	0
74	0
74.1	0
74.2	0
74.3	0
74.4	0
74.5	0
74.6	0
74.7	0
74.8	0
74.9	0
75	0
75.1	0
75.2	0
75.3	0
75.4	0
75.5	0
75.6	0
75.7	0
75.8	0
75.9	0
76	0
76.1	0
76.2	0
76.3	0
76.4	0
76.5	0
76.6	0
76.7	0
76.8	0
76.9	0
77	0
77.1	0
77.2	0
77.3	0
77.4	0
77.5	0
77.6	0
77.7	0
77.8	0
77.9	0
78	0
78.1	0
78.2	0
78.3	0
78.4	0
78.5	0
78.6	0
78.7	0
78.8	0
78.9	0
79	0
79.1	0
79.2	0
79.3	0
79.4	0
79.5	0
79.6	0
79.7	0
79.8	0
79.9	0
80	0
80.1	0
80.2	0
80.3	0
80.4	0
80.5	0
80.6	0
80.7	0
80.8	0
80.9	0
81	0
81.1	0
81.2	0
81.3	0
81.4	0
81.5	0
81.6	0
81.7	0
81.8	0
81.9	0
82	0
82.1	0
82.2	0
82.3	0
82.4	0
82.5	0
82.6	0
82.7	0
82.8	0
82.9	0
83	0
83.1	0
83.2	0
83.3	0
83.4	0
83.5	0
83.6	0
83.7	0
83.8	0
83.9	0
84	0
84.1	0
84.2	0
84.3	0
84.4	0
84.5	0
84.6	0
84.7	0
84.8	0
84.9	0
85	0
85.1	0
85.2	0
85.3	0
85.4	0
85.5	0
85.6	0
85.7	0
85.8	0
85.9	0
86	0
86.1	0
86.2	0
86.3	0
86.4	0
86.5	0
86.6	0
86.7	0
86.8	0
86.9	0
87	0
87.1	0
87.2	0
87.3	0
87.4	0
87.5	0
87.6	0
87.7	0
87.8	0
87.9	0
88	0
88.1	0
88.2	0
88.3	0
88.4	0
88.5	0
88.6	0
88.7	0
88.8	0
88.9	0
89	0
89.1	0
89.2	0
89.3	0
89.4	0
89.5	0
89.6	0
89.7	0
89.8	0
89.9	0
90	0
90.1	0
90.2	0
90.3	0
90.4	0
90.5	0
90.6	0
90.7	0
90.8	0
90.9	0
91	0
91.1	0
91.2	0
91.3	0
91.4	0
91.5	0
91.6	0
91.7	0
91.8	0
91.9	0
92	0
92.1	0
92.2	0
92.3	0
92.4	0
92.5	0
92.6	0
92.7	0
92.8	0
92.9	0
93	0
93.1	0
93.2	0
93.3	0
93.4	0
93.5	0
93.6	0
93.7	0
93.8	0
93.9	0
94	0
94.1	0
94.2	0
94.3	0
94.4	0
94.5	0
94.6	0
94.7	0
94.8	0
94.9	0
95	0
95.1	0
95.2	0
95.3	0
95.4	0
95.5	0
95.6	0
95.7	0
95.8	0
95.9	0
96	0
96.1	0
96.2	0
96.3	0
96.4	0
96.5	0
96.6	0
96.7	0
96.8	0
96.9	0
97	0
97.1	0
97.2	0
97.3	0
97.4	0
97.5	0
97.6	0
97.7	0
97.8	0
97.9	0
98	0
98.1	0
98.2	0
98.3	0
98.4	0
98.5	0
98.6	0
98.7	0
98.8	0
98.9	0
99	0
99.1	0
99.2	0
99.3	0
99.4	0
99.5	0
99.6	0
99.7	0
99.8	0
99.9	0
100	0
100.1	0.900333
100.2	0.975333
100.3	0.984333
100.4	0.987333
100.5	0.988
100.6	0.988667
100.7	0.988333
100.8	0.989333
100.9	0.988667
101	0.990667
101.1	0.988333
101.2	0.987
101.3	0.987
101.4	0.988333
101.5	0.987333
101.6	0.987
101.7	0.988667
101.8	0.99
101.9	0.985667
102	0.984333
102.1	0.984333
102.2	0.992333
102.3	0.991667
102.4	0.989333
102.5	0.991
102.6	0.989667
102.7	0.988333
102.8	0.99
102.9	0.993333
103	0.988
103.1	0.989
103.2	0.987333
103.3	0.99
103.4	0.987
103.5	0.989667
103.6	0.991333
103.7	0.988667
103.8	0.99
103.9	0.989667
104	0.989333
104.1	0.989
104.2	0.990667
104.3	0.987667
104.4	0.986667
104.5	0.989
104.6	0.990667
104.7	0.990667
104.8	0.990333
104.9	0.988667
105	0.990333
105.1	0.991
105.2	0.991333
105.3	0.992333
105.4	0.990667
105.5	0.991333
105.6	0.991333
105.7	0.986333
105.8	0.99
105.9	0.991667
106	0.990667
106.1	0.990333
106.2	0.990333
106.3	0.988667
106.4	0.993333
106.5	0.989667
106.6	0.988667
106.7	0.989667
106.8	0.989667
106.9	0.992667
107	0.99
107.1	0.990333
107.2	0.987667
107.3	0.991333
107.4	0.992
107.5	0.992667
107.6	0.991
107.7	0.991
107.8	0.992667
107.9	0.99
108	0.990333
108.1	0.990667
108.2	0.99
108.3	0.991
108.4	0.989667
108.5	0.991333
108.6	0.992667
108.7	0.994
108.8	0.991667
108.9	0.990667
109	0.99
109.1	0.992333
109.2	0.992
109.3	0.988667
109.4	0.995333
109.5	0.991333
109.6	0.987667
109.7	0.994
109.8	0.990667
109.9	0.990667
110	0.992333
110.1	0.991333
110.2	0.991667
110.3	0.991333
110.4	0.993333
110.5	0.992
110.6	0.992667
110.7	0.993667
110.8	0.991667
110.9	0.991
111	0.991
111.1	0.993667
111.2	0.992667
111.3	0.992667
111.4	0.992667
111.5	0.992
111.6	0.993
111.7	0.993333
111.8	0.994
111.9	0.994
112	0.993333
112.1	0.993
112.2	0.993333
112.3	0.994667
112.4	0.989667
112.5	0.991
112.6	0.991333
112.7	0.993333
112.8	0.990667
112.9	0.993333
113	0.993333
113.1	0.994
113.2	0.995
113.3	0.990667
113.4	0.993333
113.5	0.991333
113.6	0.993333
113.7	0.990333
113.8	0.992667
113.9	0.991667
114	0.992
114.1	0.991667
114.2	0.994
114.3	0.994333
114.4	0.995333
114.5	0.992667
114.6	0.995333
114.7	0.992
114.8	0.991333
114.9	0.993333
115	0.992333
115.1	0.991333
115.2	0.994
115.3	0.991667
115.4	0.991333
115.5	0.993667
115.6	0.991
115.7	0.994333
115.8	0.993333
115.9	0.995667
116	0.994333
116.1	0.995
116.2	0.993333
116.3	0.996333
116.4	0.991333
116.5	0.994667
116.6	0.992333
116.7	0.994667
116.8	0.993667
116.9	0.993
117	0.996667
117.1	0.996333
117.2	0.994333
117.3	0.993333
117.4	0.993667
117.5	0.994
117.6	0.993667
117.7	0.993667
117.8	0.993667
117.9	0.991667
118	0.992333
118.1	0.997333
118.2	0.992333
118.3	0.991667
118.4	0.993
118.5	0.991333
118.6	0.991667
118.7	0.996
118.8	0.99
118.9	0.996333
119	0.991667
119.1	0.993667
119.2	0.992667
119.3	0.993667
119.4	0.994667
119.5	0.994
119.6	0.996
119.7	0.994333
119.8	0.995
119.9	0.993667
120	0.994
120.1	0.995
120.2	0.995
120.3	0.996
120.4	0.994667
120.5	0.993
120.6	0.994667
120.7	0.995
120.8	0.993333
120.9	0.994
121	0.993333
121.1	0.995333
121.2	0.995
121.3	0.993667
121.4	0.993333
121.5	0.995
121.6	0.994667
121.7	0.995
121.8	0.995
121.9	0.995333
122	0.993333
122.1	0.995667
122.2	0.995
122.3	0.995667
122.4	0.994333
122.5	0.995667
122.6	0.996667
122.7	0.995667
122.8	0.996
122.9	0.995333
123	0.993667
123.1	0.995
123.2	0.996
123.3	0.995
123.4	0.995
123.5	0.995333
123.6	0.994
123.7	0.993
123.8	0.993
123.9	0.993333
124	0.996
124.1	0.995333
124.2	0.996333
124.3	0.996667
124.4	0.994
124.5	0.994333
124.6	0.995333
124.7	0.996667
124.8	0.994333
124.9	0.995
125	0.995333
125.1	0.993
125.2	0.995333
125.3	0.997667
125.4	0.997
125.5	0.995667
125.6	0.996667
125.7	0.996333
125.8	0.995
125.9	0.997
126	0.997333
126.1	0.995
126.2	0.996
126.3	0.994667
126.4	0.996
126.5	0.995333
126.6	0.996333
126.7	0.994333
126.8	0.994333
126.9	0.995
127	0.996333
127.1	0.996333
127.2	0.994667
127.3	0.995
127.4	0.996
127.5	0.996333
127.6	0.996333
127.7	0.995333
127.8	0.996333
127.9	0.996667
128	0.998667
128.1	0.997333
128.2	0.996667
128.3	0.997
128.4	0.996667
128.5	0.997333
128.6	0.996667
128.7	0.998
128.8	0.995667
128.9	0.996
129	0.996667
129.1	0.996
129.2	0.995667
129.3	0.995667
129.4	0.997
129.5	0.997
129.6	0.997667
129.7	0.998
129.8	0.996667
129.9	0.996333
130	0.997333
130.1	0.996333
130.2	0.994333
130.3	0.996
130.4	0.996
130.5	0.995667
130.6	0.997333
130.7	0.995
130.8	0.996333
130.9	0.995333
131	0.995333
131.1	0.994
131.2	0.995667
131.3	0.994
131.4	0.995667
131.5	0.998
131.6	0.997
131.7	0.997
131.8	0.996333
131.9	0.997333
132	0.997
132.1	0.997333
132.2	0.995667
132.3	0.996
132.4	0.996667
132.5	0.996667
132.6	0.996667
132.7	0.997
132.8	0.995
132.9	0.995333
133	0.996333
133.1	0.995
133.2	0.995667
133.3	0.995
133.4	0.995
133.5	0.996333
133.6	0.996333
133.7	0.995667
133.8	0.997333
133.9	0.995
134	0.995
134.1	0.997
134.2	0.997667
134.3	0.998333
134.4	0.995667
134.5	0.998667
134.6	0.997
134.7	0.998333
134.8	0.997
134.9	0.996667
135	0.996
135.1	0.996333
135.2	0.995667
135.3	0.993667
135.4	0.996667
135.5	0.997333
135.6	0.996667
135.7	0.996333
135.8	0.996333
135.9	0.996
136	0.995667
136.1	0.995667
136.2	0.996667
136.3	0.998
136.4	0.996667
136.5	0.996667
136.6	0.996
136.7	0.998
136.8	0.997
136.9	0.996667
137	0.996
137.1	0.994667
137.2	0.997667
137.3	0.995
137.4	0.996667
137.5	0.997
137.6	0.997667
137.7	0.998333
137.8	0.998
137.9	0.998667
138	0.998333
138.1	0.997667
138.2	0.998333
138.3	0.996
138.4	0.998
138.5	0.996
138.6	0.996
138.7	0.994667
138.8	0.997
138.9	0.997
139	0.997333
139.1	0.997333
139.2	0.998333
139.3	0.997333
139.4	0.998
139.5	0.997333
139.6	0.998333
139.7	0.996333
139.8	0.996667
139.9	0.995333
140	0.994667
140.1	0.996333
140.2	0.994667
140.3	0.997333
140.4	0.996
140.5	0.997333
140.6	0.997333
140.7	0.997
140.8	0.993667
140.9	0.995667
141	0.996333
141.1	0.996333
141.2	0.995667
141.3	0.996667
141.4	0.998
141.5	0.995333
141.6	0.996333
141.7	0.997
141.8	0.997667
141.9	0.997
142	0.997667
142.1	0.997
142.2	0.996333
142.3	0.996667
142.4	0.996667
142.5	0.997
142.6	0.996
142.7	0.997333
142.8	0.997667
142.9	0.998333
143	0.996667
143.1	0.996333
143.2	0.997333
143.3	0.997
143.4	0.998333
143.5	0.997667
143.6	0.998333
143.7	0.995667
143.8	0.998
143.9	0.998
144	0.996667
144.1	0.996
144.2	0.998
144.3	0.996
144.4	0.997
144.5	0.996333
144.6	0.995667
144.7	0.996
144.8	0.996667
144.9	0.997
145	0.996
145.1	0.995667
145.2	0.996333
145.3	0.997333
145.4	0.997
145.5	0.998333
145.6	0.996
145.7	0.996333
145.8	0.996333
145.9	0.997667
146	0.997667
146.1	0.997333
146.2	0.996333
146.3	0.997667
146.4	0.997
146.5	0.997333
146.6	0.997333
146.7	0.996333
146.8	0.997
146.9	0.997
147	0.998
147.1	0.997667
147.2	0.997667
147.3	0.998
147.4	0.997667
147.5	0.995333
147.6	0.996
147.7	0.996667
147.8	0.996
147.9	0.994
148	0.996333
148.1	0.997333
148.2	0.996333
148.3	0.997333
148.4	0.997
148.5	0.997
148.6	0.996
148.7	0.997333
148.8	0.996667
148.9	0.996667
149	0.997
149.1	0.998333
149.2	0.996
149.3	0.997
149.4	0.995333
149.5	0.996667
149.6	0.994667
149.7	0.997667
149.8	0.997667
149.9	0.997
150	0.997333
150.1	0.997
150.2	0.996667
150.3	0.997667
150.4	0.996333
150.5	0.995333
150.6	0.997667
150.7	0.998333
150.8	0.997
150.9	0.996
151	0.997
151.1	0.997333
151.2	0.996333
151.3	0.997667
151.4	0.998667
151.5	0.997667
151.6	0.997333
151.7	0.996667
151.8	0.997
151.9	0.997333
152	0.998
152.1	0.997333
152.2	0.996667
152.3	0.995333
152.4	0.997333
152.5	0.997667
152.6	0.996333
152.7	0.997
152.8	0.997667
152.9	0.996333
153	0.995667
153.1	0.997333
153.2	0.998667
153.3	0.998333
153.4	0.999333
153.5	0.995667
153.6	0.996667
153.7	0.997333
153.8	0.996333
153.9	0.996333
154	0.999333
154.1	0.997667
154.2	0.997
154.3	0.996333
154.4	0.998333
154.5	0.997667
154.6	0.997333
154.7	0.998667
154.8	0.997667
154.9	0.998333
155	0.997
155.1	0.997
155.2	0.997
155.3	0.997333
155.4	0.998333
155.5	0.997
155.6	0.997333
155.7	0.998333
155.8	0.998667
155.9	0.997
156	0.997
156.1	0.996
156.2	0.997333
156.3	0.997667
156.4	0.997333
156.5	0.998667
156.6	0.997667
156.7	0.996333
156.8	0.997333
156.9	0.998333
157	0.997333
157.1	0.996
157.2	0.997333
157.3	0.998
157.4	0.996333
157.5	0.998333
157.6	0.997333
157.7	0.996
157.8	0.997333
157.9	0.997
158	0.997667
158.1	0.998667
158.2	0.996333
158.3	0.998667
158.4	0.998333
158.5	0.996333
158.6	0.997667
158.7	0.996667
158.8	0.995333
158.9	0.996
159	0.997333
159.1	0.998333
159.2	0.997667
159.3	0.995667
159.4	0.997667
159.5	0.998
159.6	0.996667
159.7	0.996667
159.8	0.998667
159.9	0.997333
160	0.995
160.1	0.997333
160.2	0.997667
160.3	0.998
160.4	0.998
160.5	0.996
160.6	0.997
160.7	0.997333
160.8	0.998333
160.9	0.997667
161	0.998333
161.1	0.998667
161.2	0.998
161.3	0.998667
161.4	0.998333
161.5	0.998
161.6	0.998667
161.7	0.997333
161.8	0.996667
161.9	0.998333
162	0.997667
162.1	0.996
162.2	0.999
162.3	0.996
162.4	0.997667
162.5	0.997
162.6	0.997333
162.7	0.996667
162.8	0.995667
162.9	0.998333
163	0.997333
163.1	0.998
163.2	0.997
163.3	0.998667
163.4	0.998333
163.5	0.997
163.6	0.997
163.7	0.997333
163.8	0.998
163.9	0.998333
164	0.999333
164.1	0.998667
164.2	0.997
164.3	0.997667
164.4	0.996
164.5	0.997
164.6	0.998
164.7	0.998
164.8	0.996
164.9	0.998667
165	0.997333
165.1	0.996
165.2	0.998
165.3	0.997
165.4	0.998
165.5	0.998333
165.6	0.997667
165.7	0.998
165.8	0.998
165.9	0.996333
166	0.997333
166.1	0.998333
166.2	0.998
166.3	0.997333
166.4	0.998333
166.5	0.997667
166.6	0.998333
166.7	0.997667
166.8	0.997
166.9	0.998
167	0.997667
167.1	0.998333
167.2	0.998
167.3	0.997333
167.4	0.997333
167.5	0.997667
167.6	0.998333
167.7	0.998667
167.8	0.996
167.9	0.998
168	0.999333
168.1	0.999333
168.2	0.998
168.3	0.998333
168.4	0.998
168.5	0.998667
168.6	0.997667
168.7	0.997667
168.8	0.998
168.9	0.998333
169	0.997667
169.1	0.996667
169.2	0.996667
169.3	0.998333
169.4	0.999333
169.5	0.998667
169.6	0.998667
169.7	0.998
169.8	0.997333
169.9	0.997
170	0.997333
170.1	0.996667
170.2	0.998333
170.3	0.998667
170.4	0.999333
170.5	0.998667
170.6	0.997
170.7	0.997667
170.8	0.997
170.9	0.998333
171	0.998
171.1	0.998333
171.2	0.998
171.3	0.996667
171.4	0.997667
171.5	0.997667
171.6	0.999
171.7	0.998
171.8	0.997667
171.9	0.998
172	0.999
172.1	0.998667
172.2	0.998333
172.3	0.998
172.4	0.998
172.5	0.998
172.6	0.998
172.7	0.999333
172.8	0.998
172.9	0.996
173	0.998
173.1	0.997667
173.2	0.997667
173.3	0.998
173.4	0.999333
173.5	0.997667
173.6	0.997667
173.7	0.997667
173.8	0.997333
173.9	0.997333
174	0.998
174.1	0.997667
174.2	0.997667
174.3	0.998667
174.4	0.997
174.5	0.999
174.6	0.997333
174.7	0.996667
174.8	0.996667
174.9	0.998
175	0.997333
175.1	0.998
175.2	0.998333
175.3	0.997333
175.4	0.998667
175.5	0.998667
175.6	0.997
175.7	0.998
175.8	0.996333
175.9	0.996333
176	0.997667
176.1	0.998
176.2	0.999
176.3	0.998
176.4	0.998
176.5	0.998
176.6	0.999333
176.7	0.997
176.8	0.998
176.9	0.997
177	0.997667
177.1	0.998333
177.2	0.999
177.3	0.998333
177.4	0.998333
177.5	0.997667
177.6	0.997333
177.7	0.997
177.8	0.996667
177.9	0.998
178	0.998333
178.1	0.998667
178.2	0.997333
178.3	0.997333
178.4	0.995333
178.5	0.996667
178.6	0.997333
178.7	0.996667
178.8	0.998667
178.9	0.999
179	0.999667
179.1	0.998
179.2	0.996
179.3	0.996
179.4	0.998
179.5	0.997667
179.6	0.997333
179.7	0.996
179.8	0.997667
179.9	0.997667
180	0.998667
180.1	0.997
180.2	0.997333
180.3	0.997
180.4	0.997667
180.5	0.998333
180.6	0.996333
180.7	0.997
180.8	0.998667
180.9	0.996667
181	0.996667
181.1	0.997
181.2	0.997
181.3	0.999
181.4	0.997333
181.5	0.997
181.6	0.999
181.7	0.997
181.8	0.997333
181.9	0.998
182	0.997333
182.1	0.995667
182.2	0.996333
182.3	0.999
182.4	0.997
182.5	0.997667
182.6	0.998
182.7	0.999667
182.8	0.999333
182.9	0.998333
183	0.997667
183.1	0.997333
183.2	0.997
183.3	0.998
183.4	0.998667
183.5	0.998
183.6	0.999
183.7	0.996333
183.8	0.996667
183.9	0.997667
184	0.998333
184.1	0.997333
184.2	0.999
184.3	0.998333
184.4	0.998333
184.5	0.997333
184.6	0.996
184.7	0.998333
184.8	0.997667
184.9	0.999333
185	0.998667
185.1	0.997333
185.2	0.997
185.3	0.999
185.4	0.996
185.5	0.998
185.6	0.997667
185.7	0.997667
185.8	0.998667
185.9	0.995333
186	0.999
186.1	0.998333
186.2	0.997333
186.3	0.998333
186.4	0.996
186.5	0.997
186.6	0.998667
186.7	0.997333
186.8	0.998333
186.9	0.997
187	0.997
187.1	0.997333
187.2	0.997667
187.3	0.996333
187.4	0.996667
187.5	0.998333
187.6	0.997333
187.7	0.999333
187.8	0.997333
187.9	0.999
188	0.999
188.1	0.998333
188.2	0.999
188.3	0.998
188.4	0.996667
188.5	0.997667
188.6	0.998333
188.7	0.999
188.8	0.997667
188.9	0.998
189	0.997333
189.1	0.997667
189.2	0.996667
189.3	0.997333
189.4	0.998333
189.5	0.997333
189.6	0.997
189.7	0.998333
189.8	0.997333
189.9	0.996667
190	0.998667
190.1	0.998
190.2	0.999
190.3	0.998333
190.4	0.997
190.5	0.997667
190.6	0.997667
190.7	0.997667
190.8	0.995667
190.9	0.998
191	0.999
191.1	0.996333
191.2	0.998333
191.3	0.998667
191.4	0.997667
191.5	0.999
191.6	0.997333
191.7	0.997667
191.8	0.998667
191.9	0.998667
192	0.998333
192.1	0.999333
192.2	0.998667
192.3	0.997667
192.4	0.998333
192.5	0.998667
192.6	0.998667
192.7	0.997
192.8	0.998333
192.9	0.997667
193	0.997333
193.1	0.998333
193.2	0.997333
193.3	0.997667
193.4	0.997667
193.5	0.998
193.6	0.998
193.7	0.997667
193.8	0.997333
193.9	0.996667
194	0.998333
194.1	0.998333
194.2	0.999
194.3	0.999
194.4	0.997333
194.5	0.998
194.6	0.997333
194.7	0.997
194.8	0.997
194.9	0.998333
195	0.996667
195.1	0.999
195.2	0.998667
195.3	0.998
195.4	0.998667
195.5	0.999
195.6	0.997333
195.7	0.999333
195.8	0.998667
195.9	0.999
196	0.998667
196.1	0.997333
196.2	0.996667
196.3	0.999
196.4	0.997667
196.5	1
196.6	0.997667
196.7	0.998667
196.8	0.998
196.9	0.997667
197	0.998333
197.1	0.998333
197.2	0.997333
197.3	0.997333
197.4	0.998333
197.5	0.999333
197.6	0.999333
197.7	0.998
197.8	0.997333
197.9	0.998
198	0.997333
198.1	0.997667
198.2	0.998333
198.3	0.998333
198.4	0.997667
198.5	0.998667
198.6	0.998667
198.7	0.999333
198.8	0.999333
198.9	0.998
199	0.996667
199.1	0.998
199.2	0.996333
199.3	0.998333
199.4	0.998
199.5	0.996667
199.6	0.996667
199.7	0.998
199.8	0.998667
199.9	0.997667
200	0.997
[truncated: 14,000 more rows]
