# Supplementary material for: Bayesian inference of kinetic schemes for ion channels by Kalman filtering
Source: eLife journal article supplement (doi:10.7554/elife.62714), 2022-05-04
Supplement: fig4-data2 [file 1_Sim_N_1500_Strom_MW.xlsx]

## Sheet: Tabelle1
0.1	0
0.2	0
0.3	0
0.4	0
0.5	0
0.6	0
0.7	0
0.8	0
0.9	0
1	0
1.1	0
1.2	0
1.3	0
1.4	0
1.5	0
1.6	0
1.7	0
1.8	0
1.9	0
2	0
2.1	0
2.2	0
2.3	0
2.4	0
2.5	0
2.6	0
2.7	0
2.8	0
2.9	0
3	0
3.1	0
3.2	0
3.3	0
3.4	0
3.5	0
3.6	0
3.7	0
3.8	0
3.9	0
4	0
4.1	0
4.2	0
4.3	0
4.4	0
4.5	0
4.6	0
4.7	0
4.8	0
4.9	0
5	0
5.1	0
5.2	0
5.3	0
5.4	0
5.5	0
5.6	0
5.7	0
5.8	0
5.9	0
6	0
6.1	0
6.2	0
6.3	0
6.4	0
6.5	0
6.6	0
6.7	0
6.8	0
6.9	0
7	0
7.1	0
7.2	0
7.3	0
7.4	0
7.5	0
7.6	0
7.7	0
7.8	0
7.9	0
8	0
8.1	0
8.2	0
8.3	0
8.4	0
8.5	0
8.6	0
8.7	0
8.8	0
8.9	0
9	0
9.1	0
9.2	0
9.3	0
9.4	0
9.5	0
9.6	0
9.7	0
9.8	0
9.9	0
10	0
10.1	0
10.2	0
10.3	0
10.4	0
10.5	0
10.6	0
10.7	0
10.8	0
10.9	0
11	0
11.1	0
11.2	0
11.3	0
11.4	0
11.5	0
11.6	0
11.7	0
11.8	0
11.9	0
12	0
12.1	0
12.2	0
12.3	0
12.4	0
12.5	0
12.6	0
12.7	0
12.8	0
12.9	0
13	0
13.1	0
13.2	0
13.3	0
13.4	0
13.5	0
13.6	0
13.7	0
13.8	0
13.9	0
14	0
14.1	0
14.2	0
14.3	0
14.4	0
14.5	0
14.6	0
14.7	0
14.8	0
14.9	0
15	0
15.1	0
15.2	0
15.3	0
15.4	0
15.5	0
15.6	0
15.7	0
15.8	0
15.9	0
16	0
16.1	0
16.2	0
16.3	0
16.4	0
16.5	0
16.6	0
16.7	0
16.8	0
16.9	0
17	0
17.1	0
17.2	0
17.3	0
17.4	0
17.5	0
17.6	0
17.7	0
17.8	0
17.9	0
18	0
18.1	0
18.2	0
18.3	0
18.4	0
18.5	0
18.6	0
18.7	0
18.8	0
18.9	0
19	0
19.1	0
19.2	0
19.3	0
19.4	0
19.5	0
19.6	0
19.7	0
19.8	0
19.9	0
20	0
20.1	0
20.2	0
20.3	0
20.4	0
20.5	0
20.6	0
20.7	0
20.8	0
20.9	0
21	0
21.1	0
21.2	0
21.3	0
21.4	0
21.5	0
21.6	0
21.7	0
21.8	0
21.9	0
22	0
22.1	0
22.2	0
22.3	0
22.4	0
22.5	0
22.6	0
22.7	0
22.8	0
22.9	0
23	0
23.1	0
23.2	0
23.3	0
23.4	0
23.5	0
23.6	0
23.7	0
23.8	0
23.9	0
24	0
24.1	0
24.2	0
24.3	0
24.4	0
24.5	0
24.6	0
24.7	0
24.8	0
24.9	0
25	0
25.1	0
25.2	0
25.3	0
25.4	0
25.5	0
25.6	0
25.7	0
25.8	0
25.9	0
26	0
26.1	0
26.2	0
26.3	0
26.4	0
26.5	0
26.6	0
26.7	0
26.8	0
26.9	0
27	0
27.1	0
27.2	0
27.3	0
27.4	0
27.5	0
27.6	0
27.7	0
27.8	0
27.9	0
28	0
28.1	0
28.2	0
28.3	0
28.4	0
28.5	0
28.6	0
28.7	0
28.8	0
28.9	0
29	0
29.1	0
29.2	0
29.3	0
29.4	0
29.5	0
29.6	0
29.7	0
29.8	0
29.9	0
30	0
30.1	0
30.2	0
30.3	0
30.4	0
30.5	0
30.6	0
30.7	0
30.8	0
30.9	0
31	0
31.1	0
31.2	0
31.3	0
31.4	0
31.5	0
31.6	0
31.7	0
31.8	0
31.9	0
32	0
32.1	0
32.2	0
32.3	0
32.4	0
32.5	0
32.6	0
32.7	0
32.8	0
32.9	0
33	0
33.1	0
33.2	0
33.3	0
33.4	0
33.5	0
33.6	0
33.7	0
33.8	0
33.9	0
34	0
34.1	0
34.2	0
34.3	0
34.4	0
34.5	0
34.6	0
34.7	0
34.8	0
34.9	0
35	0
35.1	0
35.2	0
35.3	0
35.4	0
35.5	0
35.6	0
35.7	0
35.8	0
35.9	0
36	0
36.1	0
36.2	0
36.3	0
36.4	0
36.5	0
36.6	0
36.7	0
36.8	0
36.9	0
37	0
37.1	0
37.2	0
37.3	0
37.4	0
37.5	0
37.6	0
37.7	0
37.8	0
37.9	0
38	0
38.1	0
38.2	0
38.3	0
38.4	0
38.5	0
38.6	0
38.7	0
38.8	0
38.9	0
39	0
39.1	0
39.2	0
39.3	0
39.4	0
39.5	0
39.6	0
39.7	0
39.8	0
39.9	0
40	0
40.1	0
40.2	0
40.3	0
40.4	0
40.5	0
40.6	0
40.7	0
40.8	0
40.9	0
41	0
41.1	0
41.2	0
41.3	0
41.4	0
41.5	0
41.6	0
41.7	0
41.8	0
41.9	0
42	0
42.1	0
42.2	0
42.3	0
42.4	0
42.5	0
42.6	0
42.7	0
42.8	0
42.9	0
43	0
43.1	0
43.2	0
43.3	0
43.4	0
43.5	0
43.6	0
43.7	0
43.8	0
43.9	0
44	0
44.1	0
44.2	0
44.3	0
44.4	0
44.5	0
44.6	0
44.7	0
44.8	0
44.9	0
45	0
45.1	0
45.2	0
45.3	0
45.4	0
45.5	0
45.6	0
45.7	0
45.8	0
45.9	0
46	0
46.1	0
46.2	0
46.3	0
46.4	0
46.5	0
46.6	0
46.7	0
46.8	0
46.9	0
47	0
47.1	0
47.2	0
47.3	0
47.4	0
47.5	0
47.6	0
47.7	0
47.8	0
47.9	0
48	0
48.1	0
48.2	0
48.3	0
48.4	0
48.5	0
48.6	0
48.7	0
48.8	0
48.9	0
49	0
49.1	0
49.2	0
49.3	0
49.4	0
49.5	0
49.6	0
49.7	0
49.8	0
49.9	0
50	0
50.1	0
50.2	0
50.3	0
50.4	0
50.5	0
50.6	0
50.7	0
50.8	0
50.9	0
51	0
51.1	0
51.2	0
51.3	0
51.4	0
51.5	0
51.6	0
51.7	0
51.8	0
51.9	0
52	0
52.1	0
52.2	0
52.3	0
52.4	0
52.5	0
52.6	0
52.7	0
52.8	0
52.9	0
53	0
53.1	0
53.2	0
53.3	0
53.4	0
53.5	0
53.6	0
53.7	0
53.8	0
53.9	0
54	0
54.1	0
54.2	0
54.3	0
54.4	0
54.5	0
54.6	0
54.7	0
54.8	0
54.9	0
55	0
55.1	0
55.2	0
55.3	0
55.4	0
55.5	0
55.6	0
55.7	0
55.8	0
55.9	0
56	0
56.1	0
56.2	0
56.3	0
56.4	0
56.5	0
56.6	0
56.7	0
56.8	0
56.9	0
57	0
57.1	0
57.2	0
57.3	0
57.4	0
57.5	0
57.6	0
57.7	0
57.8	0
57.9	0
58	0
58.1	0
58.2	0
58.3	0
58.4	0
58.5	0
58.6	0
58.7	0
58.8	0
58.9	0
59	0
59.1	0
59.2	0
59.3	0
59.4	0
59.5	0
59.6	0
59.7	0
59.8	0
59.9	0
60	0
60.1	0
60.2	0
60.3	0
60.4	0
60.5	0
60.6	0
60.7	0
60.8	0
60.9	0
61	0
61.1	0
61.2	0
61.3	0
61.4	0
61.5	0
61.6	0
61.7	0
61.8	0
61.9	0
62	0
62.1	0
62.2	0
62.3	0
62.4	0
62.5	0
62.6	0
62.7	0
62.8	0
62.9	0
63	0
63.1	0
63.2	0
63.3	0
63.4	0
63.5	0
63.6	0
63.7	0
63.8	0
63.9	0
64	0
64.1	0
64.2	0
64.3	0
64.4	0
64.5	0
64.6	0
64.7	0
64.8	0
64.9	0
65	0
65.1	0
65.2	0
65.3	0
65.4	0
65.5	0
65.6	0
65.7	0
65.8	0
65.9	0
66	0
66.1	0
66.2	0
66.3	0
66.4	0
66.5	0
66.6	0
66.7	0
66.8	0
66.9	0
67	0
67.1	0
67.2	0
67.3	0
67.4	0
67.5	0
67.6	0
67.7	0
67.8	0
67.9	0
68	0
68.1	0
68.2	0
68.3	0
68.4	0
68.5	0
68.6	0
68.7	0
68.8	0
68.9	0
69	0
69.1	0
69.2	0
69.3	0
69.4	0
69.5	0
69.6	0
69.7	0
69.8	0
69.9	0
70	0
70.1	0
70.2	0
70.3	0
70.4	0
70.5	0
70.6	0
70.7	0
70.8	0
70.9	0
71	0
71.1	0
71.2	0
71.3	0
71.4	0
71.5	0
71.6	0
71.7	0
71.8	0
71.9	0
72	0
72.1	0
72.2	0
72.3	0
72.4	0
72.5	0
72.6	0
72.7	0
72.8	0
72.9	0
73	0
73.1	0
73.2	0
73.3	0
73.4	0
73.5	0
73.6	0
73.7	0
73.8	0
73.9	0
74	0
74.1	0
74.2	0
74.3	0
74.4	0
74.5	0
74.6	0
74.7	0
74.8	0
74.9	0
75	0
75.1	0
75.2	0
75.3	0
75.4	0
75.5	0
75.6	0
75.7	0
75.8	0
75.9	0
76	0
76.1	0
76.2	0
76.3	0
76.4	0
76.5	0
76.6	0
76.7	0
76.8	0
76.9	0
77	0
77.1	0
77.2	0
77.3	0
77.4	0
77.5	0
77.6	0
77.7	0
77.8	0
77.9	0
78	0
78.1	0
78.2	0
78.3	0
78.4	0
78.5	0
78.6	0
78.7	0
78.8	0
78.9	0
79	0
79.1	0
79.2	0
79.3	0
79.4	0
79.5	0
79.6	0
79.7	0
79.8	0
79.9	0
80	0
80.1	0
80.2	0
80.3	0
80.4	0
80.5	0
80.6	0
80.7	0
80.8	0
80.9	0
81	0
81.1	0
81.2	0
81.3	0
81.4	0
81.5	0
81.6	0
81.7	0
81.8	0
81.9	0
82	0
82.1	0
82.2	0
82.3	0
82.4	0
82.5	0
82.6	0
82.7	0
82.8	0
82.9	0
83	0
83.1	0
83.2	0
83.3	0
83.4	0
83.5	0
83.6	0
83.7	0
83.8	0
83.9	0
84	0
84.1	0
84.2	0
84.3	0
84.4	0
84.5	0
84.6	0
84.7	0
84.8	0
84.9	0
85	0
85.1	0
85.2	0
85.3	0
85.4	0
85.5	0
85.6	0
85.7	0
85.8	0
85.9	0
86	0
86.1	0
86.2	0
86.3	0
86.4	0
86.5	0
86.6	0
86.7	0
86.8	0
86.9	0
87	0
87.1	0
87.2	0
87.3	0
87.4	0
87.5	0
87.6	0
87.7	0
87.8	0
87.9	0
88	0
88.1	0
88.2	0
88.3	0
88.4	0
88.5	0
88.6	0
88.7	0
88.8	0
88.9	0
89	0
89.1	0
89.2	0
89.3	0
89.4	0
89.5	0
89.6	0
89.7	0
89.8	0
89.9	0
90	0
90.1	0
90.2	0
90.3	0
90.4	0
90.5	0
90.6	0
90.7	0
90.8	0
90.9	0
91	0
91.1	0
91.2	0
91.3	0
91.4	0
91.5	0
91.6	0
91.7	0
91.8	0
91.9	0
92	0
92.1	0
92.2	0
92.3	0
92.4	0
92.5	0
92.6	0
92.7	0
92.8	0
92.9	0
93	0
93.1	0
93.2	0
93.3	0
93.4	0
93.5	0
93.6	0
93.7	0
93.8	0
93.9	0
94	0
94.1	0
94.2	0
94.3	0
94.4	0
94.5	0
94.6	0
94.7	0
94.8	0
94.9	0
95	0
95.1	0
95.2	0
95.3	0
95.4	0
95.5	0
95.6	0
95.7	0
95.8	0
95.9	0
96	0
96.1	0
96.2	0
96.3	0
96.4	0
96.5	0
96.6	0
96.7	0
96.8	0
96.9	0
97	0
97.1	0
97.2	0
97.3	0
97.4	0
97.5	0
97.6	0
97.7	0
97.8	0
97.9	0
98	0
98.1	0
98.2	0
98.3	0
98.4	0
98.5	0
98.6	0
98.7	0
98.8	0
98.9	0
99	0
99.1	0
99.2	0
99.3	0
99.4	0
99.5	0
99.6	0
99.7	0
99.8	0
99.9	0
100	0
100.1	0.004
100.2	0.00733333
100.3	0.01
100.4	0.0166667
100.5	0.0226667
100.6	0.028
100.7	0.0333333
100.8	0.038
100.9	0.044
101	0.0493333
101.1	0.0546667
101.2	0.0566667
101.3	0.0606667
101.4	0.0653333
101.5	0.0673333
101.6	0.0733333
101.7	0.076
101.8	0.078
101.9	0.0813333
102	0.0873333
102.1	0.0926667
102.2	0.0973333
102.3	0.101333
102.4	0.107333
102.5	0.112667
102.6	0.117333
102.7	0.124
102.8	0.126667
102.9	0.13
103	0.134667
103.1	0.137333
103.2	0.140667
103.3	0.145333
103.4	0.148
103.5	0.153333
103.6	0.16
103.7	0.162667
103.8	0.166667
103.9	0.171333
104	0.176
104.1	0.181333
104.2	0.182
104.3	0.186
104.4	0.19
104.5	0.190667
104.6	0.192667
104.7	0.196667
104.8	0.199333
104.9	0.203333
105	0.21
105.1	0.211333
105.2	0.214
105.3	0.217333
105.4	0.221333
105.5	0.223333
105.6	0.227333
105.7	0.232667
105.8	0.235333
105.9	0.241333
106	0.246
106.1	0.252
106.2	0.256
106.3	0.260667
106.4	0.265333
106.5	0.268667
106.6	0.27
106.7	0.271333
106.8	0.273333
106.9	0.278667
107	0.28
107.1	0.281333
107.2	0.287333
107.3	0.29
107.4	0.293333
107.5	0.3
107.6	0.300667
107.7	0.304667
107.8	0.308
107.9	0.310667
108	0.311333
108.1	0.314
108.2	0.312667
108.3	0.314667
108.4	0.316
108.5	0.322667
108.6	0.325333
108.7	0.328667
108.8	0.332
108.9	0.332667
109	0.333333
109.1	0.336
109.2	0.34
109.3	0.341333
109.4	0.343333
109.5	0.344667
109.6	0.345333
109.7	0.347333
109.8	0.351333
109.9	0.352667
110	0.356
110.1	0.359333
110.2	0.360667
110.3	0.363333
110.4	0.369333
110.5	0.372
110.6	0.377333
110.7	0.378667
110.8	0.383333
110.9	0.384667
111	0.388667
111.1	0.390667
111.2	0.392
111.3	0.394
111.4	0.397333
111.5	0.399333
111.6	0.402
111.7	0.404667
111.8	0.408
111.9	0.408
112	0.408
112.1	0.411333
112.2	0.411333
112.3	0.413333
112.4	0.416
112.5	0.418667
112.6	0.418667
112.7	0.420667
112.8	0.422667
112.9	0.424
113	0.423333
113.1	0.424667
113.2	0.427333
113.3	0.428
113.4	0.428
113.5	0.432
113.6	0.436
113.7	0.436
113.8	0.439333
113.9	0.440667
114	0.441333
114.1	0.441333
114.2	0.444667
114.3	0.445333
114.4	0.447333
114.5	0.450667
114.6	0.452667
114.7	0.457333
114.8	0.462667
114.9	0.466
115	0.467333
115.1	0.468
115.2	0.47
115.3	0.471333
115.4	0.473333
115.5	0.474
115.6	0.474667
115.7	0.474667
115.8	0.478
115.9	0.479333
116	0.483333
116.1	0.484
116.2	0.484667
116.3	0.486667
116.4	0.491333
116.5	0.492
116.6	0.492667
116.7	0.494
116.8	0.496
116.9	0.499333
117	0.500667
117.1	0.504667
117.2	0.506667
117.3	0.509333
117.4	0.51
117.5	0.513333
117.6	0.516667
117.7	0.518667
117.8	0.52
117.9	0.517333
118	0.519333
118.1	0.520667
118.2	0.522
118.3	0.522667
118.4	0.526667
118.5	0.526
118.6	0.528
118.7	0.532
118.8	0.533333
118.9	0.535333
119	0.536
119.1	0.536667
119.2	0.542
119.3	0.543333
119.4	0.544
119.5	0.546
119.6	0.547333
119.7	0.549333
119.8	0.551333
119.9	0.553333
120	0.558667
120.1	0.561333
120.2	0.563333
120.3	0.566667
120.4	0.568667
120.5	0.57
120.6	0.572667
120.7	0.573333
120.8	0.574667
120.9	0.574667
121	0.576667
121.1	0.578667
121.2	0.58
121.3	0.58
121.4	0.580667
121.5	0.582
121.6	0.584
121.7	0.582667
121.8	0.586667
121.9	0.590667
122	0.592
122.1	0.591333
122.2	0.594
122.3	0.594
122.4	0.596667
122.5	0.597333
122.6	0.598667
122.7	0.599333
122.8	0.602
122.9	0.603333
123	0.605333
123.1	0.608
123.2	0.611333
123.3	0.614
123.4	0.616
123.5	0.615333
123.6	0.615333
123.7	0.616667
123.8	0.616667
123.9	0.619333
124	0.619333
124.1	0.622667
124.2	0.622
124.3	0.624667
124.4	0.626
124.5	0.629333
124.6	0.630667
124.7	0.631333
124.8	0.633333
124.9	0.634667
125	0.634
125.1	0.636
125.2	0.640667
125.3	0.640667
125.4	0.642667
125.5	0.641333
125.6	0.642
125.7	0.642667
125.8	0.644667
125.9	0.646667
126	0.647333
126.1	0.648667
126.2	0.649333
126.3	0.65
126.4	0.651333
126.5	0.652
126.6	0.653333
126.7	0.655333
126.8	0.656667
126.9	0.656667
127	0.657333
127.1	0.657333
127.2	0.658
127.3	0.658667
127.4	0.66
127.5	0.661333
127.6	0.663333
127.7	0.664
127.8	0.666667
127.9	0.668
128	0.668667
128.1	0.669333
128.2	0.669333
128.3	0.67
128.4	0.671333
128.5	0.669333
128.6	0.671333
128.7	0.671333
128.8	0.672
128.9	0.674
129	0.675333
129.1	0.678
129.2	0.68
129.3	0.68
129.4	0.680667
129.5	0.682
129.6	0.684667
129.7	0.685333
129.8	0.687333
129.9	0.687333
130	0.687333
130.1	0.689333
130.2	0.692
130.3	0.692
130.4	0.693333
130.5	0.693333
130.6	0.692667
130.7	0.694667
130.8	0.696
130.9	0.697333
131	0.698
131.1	0.698
131.2	0.699333
131.3	0.702
131.4	0.700667
131.5	0.7
131.6	0.702
131.7	0.703333
131.8	0.704667
131.9	0.704
132	0.704667
132.1	0.704667
132.2	0.707333
132.3	0.708
132.4	0.708667
132.5	0.708667
132.6	0.707333
132.7	0.708667
132.8	0.710667
132.9	0.711333
133	0.712667
133.1	0.713333
133.2	0.714
133.3	0.715333
133.4	0.715333
133.5	0.716
133.6	0.715333
133.7	0.716
133.8	0.717333
133.9	0.718
134	0.716667
134.1	0.719333
134.2	0.720667
134.3	0.720667
134.4	0.720667
134.5	0.721333
134.6	0.722667
134.7	0.724
134.8	0.725333
134.9	0.728667
135	0.728
135.1	0.727333
135.2	0.725333
135.3	0.726
135.4	0.729333
135.5	0.730667
135.6	0.730667
135.7	0.732
135.8	0.732
135.9	0.732
136	0.730667
136.1	0.730667
136.2	0.73
136.3	0.729333
136.4	0.73
136.5	0.73
136.6	0.730667
136.7	0.732
136.8	0.732
136.9	0.734
137	0.734667
137.1	0.736
137.2	0.736667
137.3	0.738667
137.4	0.738
137.5	0.739333
137.6	0.738667
137.7	0.738
137.8	0.740667
137.9	0.74
138	0.740667
138.1	0.742667
138.2	0.742
138.3	0.743333
138.4	0.743333
138.5	0.743333
138.6	0.744667
138.7	0.744
138.8	0.744667
138.9	0.744667
139	0.743333
139.1	0.743333
139.2	0.742667
139.3	0.743333
139.4	0.742
139.5	0.744
139.6	0.744
139.7	0.743333
139.8	0.742667
139.9	0.742
140	0.742
140.1	0.742
140.2	0.741333
140.3	0.742667
140.4	0.742667
140.5	0.742667
140.6	0.744
140.7	0.745333
140.8	0.745333
140.9	0.745333
141	0.745333
141.1	0.744667
141.2	0.746667
141.3	0.747333
141.4	0.747333
141.5	0.747333
141.6	0.746667
141.7	0.748
141.8	0.747333
141.9	0.748667
142	0.747333
142.1	0.749333
142.2	0.75
142.3	0.751333
142.4	0.752667
142.5	0.751333
142.6	0.752
142.7	0.754
142.8	0.752667
142.9	0.754
143	0.754667
143.1	0.756
143.2	0.756
143.3	0.756
143.4	0.756667
143.5	0.757333
143.6	0.756
143.7	0.756667
143.8	0.755333
143.9	0.756
144	0.755333
144.1	0.756
144.2	0.756667
144.3	0.758667
144.4	0.76
144.5	0.759333
144.6	0.76
144.7	0.758667
144.8	0.759333
144.9	0.758667
145	0.758
145.1	0.758
145.2	0.759333
145.3	0.759333
145.4	0.761333
145.5	0.761333
145.6	0.76
145.7	0.76
145.8	0.762
145.9	0.766
146	0.767333
146.1	0.769333
146.2	0.769333
146.3	0.769333
146.4	0.769333
146.5	0.768667
146.6	0.770667
146.7	0.770667
146.8	0.77
146.9	0.768667
147	0.767333
147.1	0.767333
147.2	0.764667
147.3	0.762667
147.4	0.762667
147.5	0.763333
147.6	0.763333
147.7	0.764
147.8	0.762
147.9	0.762
148	0.762
148.1	0.761333
148.2	0.763333
148.3	0.764
148.4	0.764
148.5	0.763333
148.6	0.763333
148.7	0.762667
148.8	0.761333
148.9	0.762667
149	0.763333
149.1	0.762667
149.2	0.764667
149.3	0.764
149.4	0.763333
149.5	0.763333
149.6	0.763333
149.7	0.762667
149.8	0.763333
149.9	0.762667
150	0.762
150.1	0.762
150.2	0.763333
150.3	0.764667
150.4	0.764667
150.5	0.764667
150.6	0.766667
150.7	0.766667
150.8	0.766667
150.9	0.767333
151	0.766
151.1	0.766667
151.2	0.767333
151.3	0.768
151.4	0.77
151.5	0.771333
151.6	0.773333
151.7	0.772
151.8	0.774
151.9	0.775333
152	0.776667
152.1	0.778
152.2	0.778
152.3	0.779333
152.4	0.780667
152.5	0.782
152.6	0.782667
152.7	0.781333
152.8	0.782
152.9	0.782
153	0.785333
153.1	0.785333
153.2	0.786
153.3	0.788
153.4	0.788
153.5	0.79
153.6	0.789333
153.7	0.79
153.8	0.791333
153.9	0.792
154	0.792667
154.1	0.792
154.2	0.792667
154.3	0.793333
154.4	0.794667
154.5	0.793333
154.6	0.794
154.7	0.796
154.8	0.798
154.9	0.797333
155	0.797333
155.1	0.797333
155.2	0.798
155.3	0.797333
155.4	0.797333
155.5	0.796667
155.6	0.796667
155.7	0.797333
155.8	0.796667
155.9	0.796
156	0.795333
156.1	0.794667
156.2	0.794
156.3	0.79
156.4	0.788667
156.5	0.786667
156.6	0.786667
156.7	0.788
156.8	0.788667
156.9	0.787333
157	0.786667
157.1	0.784667
157.2	0.785333
157.3	0.786667
157.4	0.785333
157.5	0.786
157.6	0.786667
157.7	0.787333
157.8	0.786667
157.9	0.787333
158	0.784667
158.1	0.784667
158.2	0.785333
158.3	0.785333
158.4	0.785333
158.5	0.787333
158.6	0.787333
158.7	0.789333
158.8	0.792
158.9	0.79
159	0.791333
159.1	0.791333
159.2	0.792
159.3	0.795333
159.4	0.794
159.5	0.792
159.6	0.791333
159.7	0.790667
159.8	0.788667
159.9	0.786667
160	0.788
160.1	0.785333
160.2	0.785333
160.3	0.784667
160.4	0.784
160.5	0.786667
160.6	0.788667
160.7	0.790667
160.8	0.79
160.9	0.790667
161	0.791333
161.1	0.791333
161.2	0.791333
161.3	0.792667
161.4	0.792667
161.5	0.794
161.6	0.793333
161.7	0.795333
161.8	0.795333
161.9	0.795333
162	0.796
162.1	0.796
162.2	0.797333
162.3	0.797333
162.4	0.798667
162.5	0.798
162.6	0.798667
162.7	0.798
162.8	0.798667
162.9	0.797333
163	0.796667
163.1	0.796
163.2	0.794
163.3	0.795333
163.4	0.796
163.5	0.797333
163.6	0.798
163.7	0.798
163.8	0.798
163.9	0.799333
164	0.800667
164.1	0.802667
164.2	0.802667
164.3	0.802
164.4	0.803333
164.5	0.802
164.6	0.802667
164.7	0.804667
164.8	0.806
164.9	0.807333
165	0.807333
165.1	0.808
165.2	0.808667
165.3	0.808
165.4	0.809333
165.5	0.808
165.6	0.808
165.7	0.808
165.8	0.808667
165.9	0.808667
166	0.809333
166.1	0.810667
166.2	0.811333
166.3	0.813333
166.4	0.814667
166.5	0.813333
166.6	0.814667
166.7	0.814
166.8	0.813333
166.9	0.812
167	0.812
167.1	0.811333
167.2	0.812
167.3	0.812
167.4	0.814
167.5	0.814667
167.6	0.814
167.7	0.814
167.8	0.814
167.9	0.813333
168	0.813333
168.1	0.814
168.2	0.814667
168.3	0.815333
168.4	0.816667
168.5	0.817333
168.6	0.816667
168.7	0.816
168.8	0.815333
168.9	0.815333
169	0.814
169.1	0.812
169.2	0.812
169.3	0.813333
169.4	0.812
169.5	0.812667
169.6	0.812
169.7	0.814
169.8	0.814
169.9	0.813333
170	0.814
170.1	0.814
170.2	0.814667
170.3	0.813333
170.4	0.814
170.5	0.814
170.6	0.814667
170.7	0.813333
170.8	0.814667
170.9	0.816
171	0.817333
171.1	0.817333
171.2	0.816667
171.3	0.817333
171.4	0.816667
171.5	0.818
171.6	0.818
171.7	0.818
171.8	0.817333
171.9	0.819333
172	0.818667
172.1	0.818667
172.2	0.819333
172.3	0.822
172.4	0.820667
172.5	0.820667
172.6	0.820667
172.7	0.82
172.8	0.818667
172.9	0.820667
173	0.82
173.1	0.818667
173.2	0.819333
173.3	0.819333
173.4	0.820667
173.5	0.821333
173.6	0.820667
173.7	0.822
173.8	0.822
173.9	0.820667
174	0.820667
174.1	0.82
174.2	0.820667
174.3	0.82
174.4	0.819333
174.5	0.818667
174.6	0.818667
174.7	0.819333
174.8	0.820667
174.9	0.82
175	0.822
175.1	0.822
175.2	0.820667
175.3	0.820667
175.4	0.82
175.5	0.82
175.6	0.819333
175.7	0.82
175.8	0.82
175.9	0.82
176	0.820667
176.1	0.82
176.2	0.820667
176.3	0.82
176.4	0.820667
176.5	0.821333
176.6	0.825333
176.7	0.826
176.8	0.825333
176.9	0.824667
177	0.824
177.1	0.826667
177.2	0.826
177.3	0.828
177.4	0.828
177.5	0.828
177.6	0.828
177.7	0.829333
177.8	0.829333
177.9	0.831333
178	0.832
178.1	0.833333
178.2	0.834
178.3	0.833333
178.4	0.832
178.5	0.833333
178.6	0.833333
178.7	0.833333
178.8	0.833333
178.9	0.832
179	0.833333
179.1	0.834667
179.2	0.832667
179.3	0.830667
179.4	0.830667
179.5	0.831333
179.6	0.831333
179.7	0.832667
179.8	0.830667
179.9	0.830667
180	0.83
180.1	0.83
180.2	0.83
180.3	0.830667
180.4	0.830667
180.5	0.830667
180.6	0.830667
180.7	0.831333
180.8	0.830667
180.9	0.830667
181	0.830667
181.1	0.83
181.2	0.83
181.3	0.830667
181.4	0.830667
181.5	0.829333
181.6	0.83
181.7	0.830667
181.8	0.832
181.9	0.832667
182	0.830667
182.1	0.830667
182.2	0.830667
182.3	0.830667
182.4	0.828667
182.5	0.83
182.6	0.831333
182.7	0.832667
182.8	0.832667
182.9	0.832
183	0.832
183.1	0.831333
183.2	0.83
183.3	0.828667
183.4	0.826667
183.5	0.827333
183.6	0.828
183.7	0.827333
183.8	0.824667
183.9	0.826667
184	0.826
184.1	0.826667
184.2	0.826667
184.3	0.826
184.4	0.827333
184.5	0.824667
184.6	0.824667
184.7	0.824
184.8	0.823333
184.9	0.822667
185	0.82
185.1	0.82
185.2	0.82
185.3	0.820667
185.4	0.821333
185.5	0.822
185.6	0.824
185.7	0.825333
185.8	0.826
185.9	0.826667
186	0.826
186.1	0.826667
186.2	0.826
186.3	0.827333
186.4	0.826667
186.5	0.827333
186.6	0.827333
186.7	0.827333
186.8	0.826667
186.9	0.826
187	0.824667
187.1	0.824
187.2	0.822667
187.3	0.824
187.4	0.824667
187.5	0.824667
187.6	0.824
187.7	0.823333
187.8	0.825333
187.9	0.825333
188	0.824
188.1	0.824667
188.2	0.824667
188.3	0.824
188.4	0.824
188.5	0.823333
188.6	0.823333
188.7	0.825333
188.8	0.824
188.9	0.826
189	0.824
189.1	0.826
189.2	0.824
189.3	0.823333
189.4	0.824667
189.5	0.824667
189.6	0.825333
189.7	0.824667
189.8	0.825333
189.9	0.827333
190	0.826667
190.1	0.826667
190.2	0.826667
190.3	0.826667
190.4	0.829333
190.5	0.829333
190.6	0.83
190.7	0.830667
190.8	0.83
190.9	0.83
191	0.828667
191.1	0.828
191.2	0.828667
191.3	0.830667
191.4	0.831333
191.5	0.832667
191.6	0.833333
191.7	0.832
191.8	0.833333
191.9	0.833333
192	0.834
192.1	0.836
192.2	0.834667
192.3	0.836
192.4	0.835333
192.5	0.835333
192.6	0.834667
192.7	0.833333
192.8	0.833333
192.9	0.832667
193	0.834667
193.1	0.835333
193.2	0.835333
193.3	0.836
193.4	0.836667
193.5	0.836
193.6	0.836
193.7	0.837333
193.8	0.836
193.9	0.832667
194	0.832667
194.1	0.834
194.2	0.833333
194.3	0.835333
194.4	0.835333
194.5	0.837333
194.6	0.837333
194.7	0.836
194.8	0.837333
194.9	0.838
195	0.838
195.1	0.837333
195.2	0.836
195.3	0.836
195.4	0.836
195.5	0.835333
195.6	0.836667
195.7	0.835333
195.8	0.834667
195.9	0.834
196	0.833333
196.1	0.836
196.2	0.836667
196.3	0.833333
196.4	0.832667
196.5	0.833333
196.6	0.834
196.7	0.834667
196.8	0.834
196.9	0.832667
197	0.832
197.1	0.832667
197.2	0.832
197.3	0.834
197.4	0.834667
197.5	0.834667
197.6	0.834667
197.7	0.833333
197.8	0.833333
197.9	0.831333
198	0.834
198.1	0.832667
198.2	0.832667
198.3	0.832
198.4	0.832
198.5	0.832
198.6	0.831333
198.7	0.831333
198.8	0.832667
198.9	0.832667
199	0.831333
199.1	0.831333
199.2	0.830667
199.3	0.831333
199.4	0.830667
199.5	0.83
199.6	0.831333
199.7	0.831333
199.8	0.830667
199.9	0.830667
200	0.830667
[truncated: 14,000 more rows]
