# Supplementary material for: Bayesian inference of kinetic schemes for ion channels by Kalman filtering
Source: eLife journal article supplement (doi:10.7554/elife.62714), 2022-05-04
Supplement: fig4-data2 [file 1_Sim_N_2000_Fluor_MW.xlsx]

## Sheet: Tabelle1
0.1	0
0.2	0
0.3	0
0.4	0
0.5	0
0.6	0
0.7	0
0.8	0
0.9	0
1	0
1.1	0
1.2	0
1.3	0
1.4	0
1.5	0
1.6	0
1.7	0
1.8	0
1.9	0
2	0
2.1	0
2.2	0
2.3	0
2.4	0
2.5	0
2.6	0
2.7	0
2.8	0
2.9	0
3	0
3.1	0
3.2	0
3.3	0
3.4	0
3.5	0
3.6	0
3.7	0
3.8	0
3.9	0
4	0
4.1	0
4.2	0
4.3	0
4.4	0
4.5	0
4.6	0
4.7	0
4.8	0
4.9	0
5	0
5.1	0
5.2	0
5.3	0
5.4	0
5.5	0
5.6	0
5.7	0
5.8	0
5.9	0
6	0
6.1	0
6.2	0
6.3	0
6.4	0
6.5	0
6.6	0
6.7	0
6.8	0
6.9	0
7	0
7.1	0
7.2	0
7.3	0
7.4	0
7.5	0
7.6	0
7.7	0
7.8	0
7.9	0
8	0
8.1	0
8.2	0
8.3	0
8.4	0
8.5	0
8.6	0
8.7	0
8.8	0
8.9	0
9	0
9.1	0
9.2	0
9.3	0
9.4	0
9.5	0
9.6	0
9.7	0
9.8	0
9.9	0
10	0
10.1	0
10.2	0
10.3	0
10.4	0
10.5	0
10.6	0
10.7	0
10.8	0
10.9	0
11	0
11.1	0
11.2	0
11.3	0
11.4	0
11.5	0
11.6	0
11.7	0
11.8	0
11.9	0
12	0
12.1	0
12.2	0
12.3	0
12.4	0
12.5	0
12.6	0
12.7	0
12.8	0
12.9	0
13	0
13.1	0
13.2	0
13.3	0
13.4	0
13.5	0
13.6	0
13.7	0
13.8	0
13.9	0
14	0
14.1	0
14.2	0
14.3	0
14.4	0
14.5	0
14.6	0
14.7	0
14.8	0
14.9	0
15	0
15.1	0
15.2	0
15.3	0
15.4	0
15.5	0
15.6	0
15.7	0
15.8	0
15.9	0
16	0
16.1	0
16.2	0
16.3	0
16.4	0
16.5	0
16.6	0
16.7	0
16.8	0
16.9	0
17	0
17.1	0
17.2	0
17.3	0
17.4	0
17.5	0
17.6	0
17.7	0
17.8	0
17.9	0
18	0
18.1	0
18.2	0
18.3	0
18.4	0
18.5	0
18.6	0
18.7	0
18.8	0
18.9	0
19	0
19.1	0
19.2	0
19.3	0
19.4	0
19.5	0
19.6	0
19.7	0
19.8	0
19.9	0
20	0
20.1	0
20.2	0
20.3	0
20.4	0
20.5	0
20.6	0
20.7	0
20.8	0
20.9	0
21	0
21.1	0
21.2	0
21.3	0
21.4	0
21.5	0
21.6	0
21.7	0
21.8	0
21.9	0
22	0
22.1	0
22.2	0
22.3	0
22.4	0
22.5	0
22.6	0
22.7	0
22.8	0
22.9	0
23	0
23.1	0
23.2	0
23.3	0
23.4	0
23.5	0
23.6	0
23.7	0
23.8	0
23.9	0
24	0
24.1	0
24.2	0
24.3	0
24.4	0
24.5	0
24.6	0
24.7	0
24.8	0
24.9	0
25	0
25.1	0
25.2	0
25.3	0
25.4	0
25.5	0
25.6	0
25.7	0
25.8	0
25.9	0
26	0
26.1	0
26.2	0
26.3	0
26.4	0
26.5	0
26.6	0
26.7	0
26.8	0
26.9	0
27	0
27.1	0
27.2	0
27.3	0
27.4	0
27.5	0
27.6	0
27.7	0
27.8	0
27.9	0
28	0
28.1	0
28.2	0
28.3	0
28.4	0
28.5	0
28.6	0
28.7	0
28.8	0
28.9	0
29	0
29.1	0
29.2	0
29.3	0
29.4	0
29.5	0
29.6	0
29.7	0
29.8	0
29.9	0
30	0
30.1	0
30.2	0
30.3	0
30.4	0
30.5	0
30.6	0
30.7	0
30.8	0
30.9	0
31	0
31.1	0
31.2	0
31.3	0
31.4	0
31.5	0
31.6	0
31.7	0
31.8	0
31.9	0
32	0
32.1	0
32.2	0
32.3	0
32.4	0
32.5	0
32.6	0
32.7	0
32.8	0
32.9	0
33	0
33.1	0
33.2	0
33.3	0
33.4	0
33.5	0
33.6	0
33.7	0
33.8	0
33.9	0
34	0
34.1	0
34.2	0
34.3	0
34.4	0
34.5	0
34.6	0
34.7	0
34.8	0
34.9	0
35	0
35.1	0
35.2	0
35.3	0
35.4	0
35.5	0
35.6	0
35.7	0
35.8	0
35.9	0
36	0
36.1	0
36.2	0
36.3	0
36.4	0
36.5	0
36.6	0
36.7	0
36.8	0
36.9	0
37	0
37.1	0
37.2	0
37.3	0
37.4	0
37.5	0
37.6	0
37.7	0
37.8	0
37.9	0
38	0
38.1	0
38.2	0
38.3	0
38.4	0
38.5	0
38.6	0
38.7	0
38.8	0
38.9	0
39	0
39.1	0
39.2	0
39.3	0
39.4	0
39.5	0
39.6	0
39.7	0
39.8	0
39.9	0
40	0
40.1	0
40.2	0
40.3	0
40.4	0
40.5	0
40.6	0
40.7	0
40.8	0
40.9	0
41	0
41.1	0
41.2	0
41.3	0
41.4	0
41.5	0
41.6	0
41.7	0
41.8	0
41.9	0
42	0
42.1	0
42.2	0
42.3	0
42.4	0
42.5	0
42.6	0
42.7	0
42.8	0
42.9	0
43	0
43.1	0
43.2	0
43.3	0
43.4	0
43.5	0
43.6	0
43.7	0
43.8	0
43.9	0
44	0
44.1	0
44.2	0
44.3	0
44.4	0
44.5	0
44.6	0
44.7	0
44.8	0
44.9	0
45	0
45.1	0
45.2	0
45.3	0
45.4	0
45.5	0
45.6	0
45.7	0
45.8	0
45.9	0
46	0
46.1	0
46.2	0
46.3	0
46.4	0
46.5	0
46.6	0
46.7	0
46.8	0
46.9	0
47	0
47.1	0
47.2	0
47.3	0
47.4	0
47.5	0
47.6	0
47.7	0
47.8	0
47.9	0
48	0
48.1	0
48.2	0
48.3	0
48.4	0
48.5	0
48.6	0
48.7	0
48.8	0
48.9	0
49	0
49.1	0
49.2	0
49.3	0
49.4	0
49.5	0
49.6	0
49.7	0
49.8	0
49.9	0
50	0
50.1	0
50.2	0
50.3	0
50.4	0
50.5	0
50.6	0
50.7	0
50.8	0
50.9	0
51	0
51.1	0
51.2	0
51.3	0
51.4	0
51.5	0
51.6	0
51.7	0
51.8	0
51.9	0
52	0
52.1	0
52.2	0
52.3	0
52.4	0
52.5	0
52.6	0
52.7	0
52.8	0
52.9	0
53	0
53.1	0
53.2	0
53.3	0
53.4	0
53.5	0
53.6	0
53.7	0
53.8	0
53.9	0
54	0
54.1	0
54.2	0
54.3	0
54.4	0
54.5	0
54.6	0
54.7	0
54.8	0
54.9	0
55	0
55.1	0
55.2	0
55.3	0
55.4	0
55.5	0
55.6	0
55.7	0
55.8	0
55.9	0
56	0
56.1	0
56.2	0
56.3	0
56.4	0
56.5	0
56.6	0
56.7	0
56.8	0
56.9	0
57	0
57.1	0
57.2	0
57.3	0
57.4	0
57.5	0
57.6	0
57.7	0
57.8	0
57.9	0
58	0
58.1	0
58.2	0
58.3	0
58.4	0
58.5	0
58.6	0
58.7	0
58.8	0
58.9	0
59	0
59.1	0
59.2	0
59.3	0
59.4	0
59.5	0
59.6	0
59.7	0
59.8	0
59.9	0
60	0
60.1	0
60.2	0
60.3	0
60.4	0
60.5	0
60.6	0
60.7	0
60.8	0
60.9	0
61	0
61.1	0
61.2	0
61.3	0
61.4	0
61.5	0
61.6	0
61.7	0
61.8	0
61.9	0
62	0
62.1	0
62.2	0
62.3	0
62.4	0
62.5	0
62.6	0
62.7	0
62.8	0
62.9	0
63	0
63.1	0
63.2	0
63.3	0
63.4	0
63.5	0
63.6	0
63.7	0
63.8	0
63.9	0
64	0
64.1	0
64.2	0
64.3	0
64.4	0
64.5	0
64.6	0
64.7	0
64.8	0
64.9	0
65	0
65.1	0
65.2	0
65.3	0
65.4	0
65.5	0
65.6	0
65.7	0
65.8	0
65.9	0
66	0
66.1	0
66.2	0
66.3	0
66.4	0
66.5	0
66.6	0
66.7	0
66.8	0
66.9	0
67	0
67.1	0
67.2	0
67.3	0
67.4	0
67.5	0
67.6	0
67.7	0
67.8	0
67.9	0
68	0
68.1	0
68.2	0
68.3	0
68.4	0
68.5	0
68.6	0
68.7	0
68.8	0
68.9	0
69	0
69.1	0
69.2	0
69.3	0
69.4	0
69.5	0
69.6	0
69.7	0
69.8	0
69.9	0
70	0
70.1	0
70.2	0
70.3	0
70.4	0
70.5	0
70.6	0
70.7	0
70.8	0
70.9	0
71	0
71.1	0
71.2	0
71.3	0
71.4	0
71.5	0
71.6	0
71.7	0
71.8	0
71.9	0
72	0
72.1	0
72.2	0
72.3	0
72.4	0
72.5	0
72.6	0
72.7	0
72.8	0
72.9	0
73	0
73.1	0
73.2	0
73.3	0
73.4	0
73.5	0
73.6	0
73.7	0
73.8	0
73.9	0
74	0
74.1	0
74.2	0
74.3	0
74.4	0
74.5	0
74.6	0
74.7	0
74.8	0
74.9	0
75	0
75.1	0
75.2	0
75.3	0
75.4	0
75.5	0
75.6	0
75.7	0
75.8	0
75.9	0
76	0
76.1	0
76.2	0
76.3	0
76.4	0
76.5	0
76.6	0
76.7	0
76.8	0
76.9	0
77	0
77.1	0
77.2	0
77.3	0
77.4	0
77.5	0
77.6	0
77.7	0
77.8	0
77.9	0
78	0
78.1	0
78.2	0
78.3	0
78.4	0
78.5	0
78.6	0
78.7	0
78.8	0
78.9	0
79	0
79.1	0
79.2	0
79.3	0
79.4	0
79.5	0
79.6	0
79.7	0
79.8	0
79.9	0
80	0
80.1	0
80.2	0
80.3	0
80.4	0
80.5	0
80.6	0
80.7	0
80.8	0
80.9	0
81	0
81.1	0
81.2	0
81.3	0
81.4	0
81.5	0
81.6	0
81.7	0
81.8	0
81.9	0
82	0
82.1	0
82.2	0
82.3	0
82.4	0
82.5	0
82.6	0
82.7	0
82.8	0
82.9	0
83	0
83.1	0
83.2	0
83.3	0
83.4	0
83.5	0
83.6	0
83.7	0
83.8	0
83.9	0
84	0
84.1	0
84.2	0
84.3	0
84.4	0
84.5	0
84.6	0
84.7	0
84.8	0
84.9	0
85	0
85.1	0
85.2	0
85.3	0
85.4	0
85.5	0
85.6	0
85.7	0
85.8	0
85.9	0
86	0
86.1	0
86.2	0
86.3	0
86.4	0
86.5	0
86.6	0
86.7	0
86.8	0
86.9	0
87	0
87.1	0
87.2	0
87.3	0
87.4	0
87.5	0
87.6	0
87.7	0
87.8	0
87.9	0
88	0
88.1	0
88.2	0
88.3	0
88.4	0
88.5	0
88.6	0
88.7	0
88.8	0
88.9	0
89	0
89.1	0
89.2	0
89.3	0
89.4	0
89.5	0
89.6	0
89.7	0
89.8	0
89.9	0
90	0
90.1	0
90.2	0
90.3	0
90.4	0
90.5	0
90.6	0
90.7	0
90.8	0
90.9	0
91	0
91.1	0
91.2	0
91.3	0
91.4	0
91.5	0
91.6	0
91.7	0
91.8	0
91.9	0
92	0
92.1	0
92.2	0
92.3	0
92.4	0
92.5	0
92.6	0
92.7	0
92.8	0
92.9	0
93	0
93.1	0
93.2	0
93.3	0
93.4	0
93.5	0
93.6	0
93.7	0
93.8	0
93.9	0
94	0
94.1	0
94.2	0
94.3	0
94.4	0
94.5	0
94.6	0
94.7	0
94.8	0
94.9	0
95	0
95.1	0
95.2	0
95.3	0
95.4	0
95.5	0
95.6	0
95.7	0
95.8	0
95.9	0
96	0
96.1	0
96.2	0
96.3	0
96.4	0
96.5	0
96.6	0
96.7	0
96.8	0
96.9	0
97	0
97.1	0
97.2	0
97.3	0
97.4	0
97.5	0
97.6	0
97.7	0
97.8	0
97.9	0
98	0
98.1	0
98.2	0
98.3	0
98.4	0
98.5	0
98.6	0
98.7	0
98.8	0
98.9	0
99	0
99.1	0
99.2	0
99.3	0
99.4	0
99.5	0
99.6	0
99.7	0
99.8	0
99.9	0
100	0
100.1	0.8925
100.2	0.97725
100.3	0.98775
100.4	0.99075
100.5	0.9865
100.6	0.98825
100.7	0.987
100.8	0.988
100.9	0.98775
101	0.99
101.1	0.988
101.2	0.992
101.3	0.989
101.4	0.9905
101.5	0.987
101.6	0.9875
101.7	0.99075
101.8	0.987
101.9	0.98675
102	0.9885
102.1	0.98625
102.2	0.98775
102.3	0.991
102.4	0.98825
102.5	0.9885
102.6	0.98825
102.7	0.9905
102.8	0.98875
102.9	0.98675
103	0.9885
103.1	0.9905
103.2	0.9915
103.3	0.992
103.4	0.99125
103.5	0.99
103.6	0.987
103.7	0.9885
103.8	0.9885
103.9	0.987
104	0.9895
104.1	0.99525
104.2	0.99
104.3	0.99175
104.4	0.99
104.5	0.99025
104.6	0.99225
104.7	0.989
104.8	0.99025
104.9	0.98825
105	0.99
105.1	0.98675
105.2	0.99075
105.3	0.9895
105.4	0.988
105.5	0.988
105.6	0.99075
105.7	0.99075
105.8	0.99
105.9	0.99275
106	0.98925
106.1	0.987
106.2	0.9895
106.3	0.99125
106.4	0.98975
106.5	0.98975
106.6	0.99175
106.7	0.99025
106.8	0.98975
106.9	0.988
107	0.993
107.1	0.99125
107.2	0.99075
107.3	0.99075
107.4	0.9915
107.5	0.99075
107.6	0.99225
107.7	0.99075
107.8	0.991
107.9	0.99
108	0.99425
108.1	0.993
108.2	0.993
108.3	0.98925
108.4	0.99425
108.5	0.99075
108.6	0.99025
108.7	0.989
108.8	0.98925
108.9	0.99325
109	0.99025
109.1	0.99125
109.2	0.99275
109.3	0.99075
109.4	0.991
109.5	0.99175
109.6	0.99225
109.7	0.99275
109.8	0.992
109.9	0.993
110	0.99125
110.1	0.992
110.2	0.99
110.3	0.991
110.4	0.9905
110.5	0.99275
110.6	0.99125
110.7	0.99075
110.8	0.99325
110.9	0.99175
111	0.99325
111.1	0.99325
111.2	0.992
111.3	0.99225
111.4	0.99175
111.5	0.9915
111.6	0.9935
111.7	0.9935
111.8	0.993
111.9	0.9915
112	0.99375
112.1	0.9915
112.2	0.99225
112.3	0.99425
112.4	0.99475
112.5	0.99375
112.6	0.99075
112.7	0.9935
112.8	0.9945
112.9	0.99325
113	0.9935
113.1	0.9925
113.2	0.99225
113.3	0.9905
113.4	0.992
113.5	0.996
113.6	0.993
113.7	0.9925
113.8	0.9945
113.9	0.9925
114	0.9925
114.1	0.993
114.2	0.9925
114.3	0.99375
114.4	0.9945
114.5	0.99275
114.6	0.99175
114.7	0.99225
114.8	0.99525
114.9	0.994
115	0.99125
115.1	0.994
115.2	0.99275
115.3	0.99525
115.4	0.99425
115.5	0.99475
115.6	0.99575
115.7	0.99625
115.8	0.996
115.9	0.99525
116	0.995
116.1	0.9925
116.2	0.994
116.3	0.99375
116.4	0.9915
116.5	0.99175
116.6	0.9915
116.7	0.99225
116.8	0.99575
116.9	0.99475
117	0.994
117.1	0.9965
117.2	0.99525
117.3	0.99325
117.4	0.994
117.5	0.99475
117.6	0.99375
117.7	0.9965
117.8	0.99425
117.9	0.99475
118	0.994
118.1	0.995
118.2	0.995
118.3	0.99525
118.4	0.996
118.5	0.995
118.6	0.994
118.7	0.9945
118.8	0.9945
118.9	0.99525
119	0.992
119.1	0.99275
119.2	0.99325
119.3	0.995
119.4	0.99725
119.5	0.995
119.6	0.9935
119.7	0.9955
119.8	0.99425
119.9	0.99525
120	0.995
120.1	0.994
120.2	0.994
120.3	0.995
120.4	0.9945
120.5	0.994
120.6	0.99575
120.7	0.99525
120.8	0.99325
120.9	0.995
121	0.99275
121.1	0.994
121.2	0.99425
121.3	0.99475
121.4	0.99575
121.5	0.9945
121.6	0.99425
121.7	0.9955
121.8	0.9965
121.9	0.995
122	0.994
122.1	0.9945
122.2	0.99375
122.3	0.995
122.4	0.9945
122.5	0.99475
122.6	0.9945
122.7	0.9955
122.8	0.99525
122.9	0.995
123	0.99475
123.1	0.9955
123.2	0.995
123.3	0.99675
123.4	0.99675
123.5	0.996
123.6	0.99575
123.7	0.99575
123.8	0.995
123.9	0.9945
124	0.996
124.1	0.9975
124.2	0.99575
124.3	0.99575
124.4	0.9925
124.5	0.99325
124.6	0.9945
124.7	0.996
124.8	0.99525
124.9	0.996
125	0.9965
125.1	0.9945
125.2	0.9945
125.3	0.997
125.4	0.99475
125.5	0.99625
125.6	0.9965
125.7	0.9975
125.8	0.99575
125.9	0.99725
126	0.99575
126.1	0.9965
126.2	0.99525
126.3	0.99675
126.4	0.9955
126.5	0.99575
126.6	0.99575
126.7	0.9955
126.8	0.99475
126.9	0.9925
127	0.99425
127.1	0.99625
127.2	0.995
127.3	0.9955
127.4	0.9975
127.5	0.99725
127.6	0.99725
127.7	0.9965
127.8	0.99725
127.9	0.995
128	0.99625
128.1	0.99575
128.2	0.99675
128.3	0.996
128.4	0.99475
128.5	0.9955
128.6	0.99675
128.7	0.9955
128.8	0.996
128.9	0.998
129	0.9965
129.1	0.99675
129.2	0.9955
129.3	0.9975
129.4	0.99375
129.5	0.99475
129.6	0.997
129.7	0.99625
129.8	0.99625
129.9	0.99525
130	0.99375
130.1	0.9955
130.2	0.9945
130.3	0.9955
130.4	0.9955
130.5	0.99525
130.6	0.99475
130.7	0.99525
130.8	0.99475
130.9	0.99675
131	0.99525
131.1	0.99625
131.2	0.99575
131.3	0.9975
131.4	0.99725
131.5	0.9955
131.6	0.996
131.7	0.99775
131.8	0.9965
131.9	0.99475
132	0.99625
132.1	0.9965
132.2	0.995
132.3	0.99675
132.4	0.99675
132.5	0.99675
132.6	0.99675
132.7	0.997
132.8	0.99575
132.9	0.99425
133	0.99525
133.1	0.99575
133.2	0.99625
133.3	0.99675
133.4	0.9965
133.5	0.99725
133.6	0.99775
133.7	0.997
133.8	0.9945
133.9	0.99675
134	0.996
134.1	0.9975
134.2	0.99625
134.3	0.9955
134.4	0.9975
134.5	0.99725
134.6	0.99625
134.7	0.99675
134.8	0.997
134.9	0.996
135	0.997
135.1	0.99725
135.2	0.995
135.3	0.99675
135.4	0.9955
135.5	0.99675
135.6	0.997
135.7	0.9975
135.8	0.997
135.9	0.99575
136	0.99675
136.1	0.9975
136.2	0.9975
136.3	0.9965
136.4	0.99775
136.5	0.99725
136.6	0.99725
136.7	0.997
136.8	0.99575
136.9	0.99675
137	0.99675
137.1	0.996
137.2	0.9975
137.3	0.99675
137.4	0.99475
137.5	0.99675
137.6	0.997
137.7	0.995
137.8	0.9965
137.9	0.9985
138	0.9975
138.1	0.99775
138.2	0.9955
138.3	0.9955
138.4	0.99575
138.5	0.9965
138.6	0.997
138.7	0.99725
138.8	0.99625
138.9	0.997
139	0.997
139.1	0.99575
139.2	0.99775
139.3	0.99725
139.4	0.9975
139.5	0.996
139.6	0.9955
139.7	0.997
139.8	0.997
139.9	0.997
140	0.99675
140.1	0.995
140.2	0.99675
140.3	0.9965
140.4	0.99725
140.5	0.998
140.6	0.99725
140.7	0.99625
140.8	0.996
140.9	0.9975
141	0.9975
141.1	0.99775
141.2	0.9955
141.3	0.997
141.4	0.996
141.5	0.9965
141.6	0.99775
141.7	0.9985
141.8	0.99675
141.9	0.997
142	0.99675
142.1	0.997
142.2	0.9985
142.3	0.998
142.4	0.999
142.5	0.9965
142.6	0.99725
142.7	0.995
142.8	0.9955
142.9	0.9975
143	0.9975
143.1	0.99875
143.2	0.9965
143.3	0.99775
143.4	0.998
143.5	0.99575
143.6	0.99775
143.7	0.99625
143.8	0.99725
143.9	0.99725
144	0.998
144.1	0.9975
144.2	0.99825
144.3	0.998
144.4	0.997
144.5	0.99625
144.6	0.99575
144.7	0.9985
144.8	0.99725
144.9	0.99725
145	0.997
145.1	0.9975
145.2	0.99625
145.3	0.99625
145.4	0.99725
145.5	0.99675
145.6	0.997
145.7	0.9965
145.8	0.9975
145.9	0.99675
146	0.995
146.1	0.99625
146.2	0.99625
146.3	0.9985
146.4	0.9975
146.5	0.99675
146.6	0.99625
146.7	0.99725
146.8	0.99725
146.9	0.99725
147	0.9965
147.1	0.997
147.2	0.9975
147.3	0.998
147.4	0.997
147.5	0.9975
147.6	0.99825
147.7	0.99725
147.8	0.99775
147.9	0.995
148	0.997
148.1	0.997
148.2	0.99625
148.3	0.997
148.4	0.9955
148.5	0.99725
148.6	0.99675
148.7	0.998
148.8	0.99825
148.9	0.9975
149	0.9955
149.1	0.99725
149.2	0.99675
149.3	0.9975
149.4	0.99575
149.5	0.99825
149.6	0.996
149.7	0.99775
149.8	0.99775
149.9	0.99675
150	0.99675
150.1	0.9975
150.2	0.997
150.3	0.998
150.4	0.9975
150.5	0.9985
150.6	0.9985
150.7	0.99825
150.8	0.997
150.9	0.99675
151	0.99675
151.1	0.9965
151.2	0.9955
151.3	0.99775
151.4	0.9975
151.5	0.99825
151.6	0.99825
151.7	0.99675
151.8	0.99725
151.9	0.9965
152	0.99775
152.1	0.997
152.2	0.99825
152.3	0.997
152.4	0.99775
152.5	0.997
152.6	0.99725
152.7	0.99675
152.8	0.99675
152.9	0.998
153	0.99825
153.1	0.99675
153.2	0.99675
153.3	0.998
153.4	0.99725
153.5	0.99875
153.6	0.99725
153.7	0.996
153.8	0.99725
153.9	0.99775
154	0.9985
154.1	0.99675
154.2	0.9975
154.3	0.99875
154.4	0.99725
154.5	0.997
154.6	0.99575
154.7	0.997
154.8	0.99675
154.9	0.99775
155	0.998
155.1	0.99775
155.2	0.99825
155.3	0.997
155.4	0.998
155.5	0.99725
155.6	0.99675
155.7	0.99775
155.8	0.99725
155.9	0.99725
156	0.9965
156.1	0.9965
156.2	0.99775
156.3	0.99725
156.4	0.99775
156.5	0.99625
156.6	0.9975
156.7	0.99775
156.8	0.9975
156.9	0.99675
157	0.99875
157.1	0.9975
157.2	0.999
157.3	0.9955
157.4	0.99675
157.5	0.99725
157.6	0.99725
157.7	0.99725
157.8	0.99675
157.9	0.997
158	0.9975
158.1	0.99725
158.2	0.99725
158.3	0.997
158.4	0.9965
158.5	0.9985
158.6	0.9975
158.7	0.998
158.8	0.99775
158.9	0.9975
159	0.99825
159.1	0.999
159.2	0.999
159.3	0.998
159.4	0.99875
159.5	0.9975
159.6	0.997
159.7	0.99725
159.8	0.99575
159.9	0.99575
160	0.99775
160.1	0.99725
160.2	0.99575
160.3	0.99725
160.4	0.9975
160.5	0.99725
160.6	0.9985
160.7	0.998
160.8	0.9975
160.9	0.99825
161	0.9985
161.1	0.998
161.2	0.99825
161.3	0.99675
161.4	0.99625
161.5	0.9965
161.6	0.99675
161.7	0.99725
161.8	0.99775
161.9	0.99775
162	0.998
162.1	0.9985
162.2	0.99975
162.3	0.9975
162.4	0.99725
162.5	0.99675
162.6	0.99825
162.7	0.997
162.8	0.99925
162.9	0.998
163	0.996
163.1	0.998
163.2	0.998
163.3	0.9965
163.4	0.997
163.5	0.997
163.6	0.99775
163.7	0.998
163.8	0.9985
163.9	0.99725
164	0.99675
164.1	0.997
164.2	0.9975
164.3	0.99675
164.4	0.997
164.5	0.9975
164.6	0.9975
164.7	0.99725
164.8	0.99775
164.9	0.998
165	0.99575
165.1	0.996
165.2	0.99875
165.3	0.9975
165.4	0.99775
165.5	0.998
165.6	0.99775
165.7	0.997
165.8	0.9965
165.9	0.9975
166	0.998
166.1	0.9985
166.2	0.99875
166.3	0.99725
166.4	0.9965
166.5	0.997
166.6	0.997
166.7	0.99625
166.8	0.9975
166.9	0.9985
167	0.999
167.1	0.9975
167.2	0.998
167.3	0.99775
167.4	0.996
167.5	0.99575
167.6	0.9975
167.7	0.9975
167.8	0.99675
167.9	0.99775
168	0.9975
168.1	0.997
168.2	0.9975
168.3	0.99825
168.4	0.99825
168.5	0.99875
168.6	0.99675
168.7	0.997
168.8	0.99675
168.9	0.9975
169	0.997
169.1	0.997
169.2	0.99775
169.3	0.99675
169.4	0.99875
169.5	0.998
169.6	0.997
169.7	0.9975
169.8	0.997
169.9	0.998
170	0.99775
170.1	0.998
170.2	0.99825
170.3	0.99825
170.4	0.99775
170.5	0.99825
170.6	0.9985
170.7	0.99775
170.8	0.997
170.9	0.998
171	0.999
171.1	0.997
171.2	0.99725
171.3	0.998
171.4	0.9975
171.5	0.9965
171.6	0.997
171.7	0.998
171.8	0.99775
171.9	0.998
172	0.99825
172.1	0.99725
172.2	0.99725
172.3	0.99725
172.4	0.99775
172.5	0.997
172.6	0.997
172.7	0.99725
172.8	0.99775
172.9	0.998
173	0.997
173.1	0.997
173.2	0.99725
173.3	0.9975
173.4	0.9975
173.5	0.99775
173.6	0.997
173.7	0.99725
173.8	0.99725
173.9	0.99775
174	0.998
174.1	0.998
174.2	0.99775
174.3	0.999
174.4	0.99775
174.5	0.9975
174.6	0.998
174.7	0.9965
174.8	0.99675
174.9	0.9985
175	0.99675
175.1	0.997
175.2	0.99875
175.3	0.99925
175.4	0.99775
175.5	0.9965
175.6	0.99825
175.7	0.997
175.8	0.99775
175.9	0.99725
176	0.998
176.1	0.997
176.2	0.9985
176.3	0.99625
176.4	0.9985
176.5	0.998
176.6	0.9985
176.7	0.996
176.8	0.99825
176.9	0.999
177	0.99775
177.1	0.9975
177.2	0.998
177.3	0.99825
177.4	0.99775
177.5	0.99675
177.6	0.99775
177.7	0.9975
177.8	0.9975
177.9	0.9965
178	0.997
178.1	0.99875
178.2	0.9985
178.3	0.99875
178.4	0.99875
178.5	0.9985
178.6	0.999
178.7	0.99675
178.8	0.99675
178.9	0.99675
179	0.997
179.1	0.99875
179.2	0.998
179.3	0.99825
179.4	0.99675
179.5	0.999
179.6	0.99675
179.7	0.999
179.8	0.9985
179.9	0.99775
180	0.998
180.1	0.99625
180.2	0.9995
180.3	0.998
180.4	0.99775
180.5	0.9985
180.6	0.998
180.7	0.99775
180.8	0.997
180.9	0.998
181	0.99775
181.1	0.9985
181.2	0.99825
181.3	0.99775
181.4	0.998
181.5	0.9985
181.6	0.99875
181.7	0.99725
181.8	0.9965
181.9	0.99775
182	0.9985
182.1	0.9975
182.2	0.9965
182.3	0.99875
182.4	0.999
182.5	0.9995
182.6	0.9985
182.7	0.998
182.8	0.99775
182.9	0.9985
183	0.997
183.1	0.99775
183.2	0.99825
183.3	0.998
183.4	0.99775
183.5	0.997
183.6	0.997
183.7	0.9975
183.8	0.997
183.9	0.99825
184	0.9975
184.1	0.99675
184.2	0.99775
184.3	0.998
184.4	0.9985
184.5	0.99825
184.6	0.99775
184.7	0.99825
184.8	0.9985
184.9	0.99725
185	0.99725
185.1	0.99725
185.2	0.99725
185.3	0.9975
185.4	0.99875
185.5	0.997
185.6	0.99725
185.7	0.9985
185.8	0.9975
185.9	0.9965
186	0.99925
186.1	0.997
186.2	0.9975
186.3	0.9965
186.4	0.998
186.5	0.99825
186.6	0.9975
186.7	0.9975
186.8	0.99925
186.9	0.9985
187	0.9985
187.1	0.99775
187.2	0.998
187.3	0.99775
187.4	0.9975
187.5	0.99775
187.6	0.9985
187.7	0.99825
187.8	0.9975
187.9	0.9985
188	0.99875
188.1	0.9965
188.2	0.998
188.3	0.99825
188.4	0.99775
188.5	0.99775
188.6	0.9975
188.7	0.9985
188.8	0.99925
188.9	0.99675
189	0.997
189.1	0.998
189.2	0.99675
189.3	0.997
189.4	0.99675
189.5	0.9975
189.6	0.9985
189.7	0.99725
189.8	0.9975
189.9	0.99825
190	0.998
190.1	0.99825
190.2	0.99875
190.3	0.99825
190.4	0.9975
190.5	0.999
190.6	0.998
190.7	0.99775
190.8	0.99775
190.9	0.99825
191	0.99725
191.1	0.998
191.2	0.998
191.3	0.99625
191.4	0.99725
191.5	0.99775
191.6	0.99675
191.7	0.998
191.8	0.9985
191.9	0.9985
192	0.99825
192.1	0.99675
192.2	0.9965
192.3	0.99625
192.4	0.99825
192.5	0.99775
192.6	0.998
192.7	0.997
192.8	0.99825
192.9	0.99875
193	0.99925
193.1	0.9975
193.2	0.9965
193.3	0.99775
193.4	0.99775
193.5	0.9975
193.6	0.997
193.7	0.99825
193.8	0.9985
193.9	0.9985
194	0.99775
194.1	0.9985
194.2	0.99675
194.3	0.99775
194.4	0.9975
194.5	0.999
194.6	0.9975
194.7	0.99875
194.8	0.997
194.9	0.9995
195	0.999
195.1	0.99725
195.2	0.99775
195.3	0.99775
195.4	0.99725
195.5	0.99525
195.6	0.99525
195.7	0.997
195.8	0.99775
195.9	0.99825
196	0.99725
196.1	0.9975
196.2	0.99775
196.3	0.997
196.4	0.9955
196.5	0.99725
196.6	0.9985
196.7	0.99875
196.8	0.99775
196.9	0.99825
197	0.99875
197.1	0.9975
197.2	0.9985
197.3	0.99875
197.4	0.99775
197.5	0.9975
197.6	0.996
197.7	0.998
197.8	0.997
197.9	0.9975
198	0.99775
198.1	0.99725
198.2	0.99675
198.3	0.99775
198.4	0.9975
198.5	0.99675
198.6	0.998
198.7	0.997
198.8	0.998
198.9	0.99825
199	0.99725
199.1	0.99775
199.2	0.99775
199.3	0.99725
199.4	0.997
199.5	0.99675
199.6	0.999
199.7	0.9965
199.8	0.99825
199.9	0.9975
200	0.99775
[truncated: 14,000 more rows]
