# Supplementary material for: Bayesian inference of kinetic schemes for ion channels by Kalman filtering
Source: eLife journal article supplement (doi:10.7554/elife.62714), 2022-05-04
Supplement: fig4-data2 [file 1_Sim_N_2000_Strom_MW.xlsx]

## Sheet: Tabelle1
0.1	0
0.2	0
0.3	0
0.4	0
0.5	0
0.6	0
0.7	0
0.8	0
0.9	0
1	0
1.1	0
1.2	0
1.3	0
1.4	0
1.5	0
1.6	0
1.7	0
1.8	0
1.9	0
2	0
2.1	0
2.2	0
2.3	0
2.4	0
2.5	0
2.6	0
2.7	0
2.8	0
2.9	0
3	0
3.1	0
3.2	0
3.3	0
3.4	0
3.5	0
3.6	0
3.7	0
3.8	0
3.9	0
4	0
4.1	0
4.2	0
4.3	0
4.4	0
4.5	0
4.6	0
4.7	0
4.8	0
4.9	0
5	0
5.1	0
5.2	0
5.3	0
5.4	0
5.5	0
5.6	0
5.7	0
5.8	0
5.9	0
6	0
6.1	0
6.2	0
6.3	0
6.4	0
6.5	0
6.6	0
6.7	0
6.8	0
6.9	0
7	0
7.1	0
7.2	0
7.3	0
7.4	0
7.5	0
7.6	0
7.7	0
7.8	0
7.9	0
8	0
8.1	0
8.2	0
8.3	0
8.4	0
8.5	0
8.6	0
8.7	0
8.8	0
8.9	0
9	0
9.1	0
9.2	0
9.3	0
9.4	0
9.5	0
9.6	0
9.7	0
9.8	0
9.9	0
10	0
10.1	0
10.2	0
10.3	0
10.4	0
10.5	0
10.6	0
10.7	0
10.8	0
10.9	0
11	0
11.1	0
11.2	0
11.3	0
11.4	0
11.5	0
11.6	0
11.7	0
11.8	0
11.9	0
12	0
12.1	0
12.2	0
12.3	0
12.4	0
12.5	0
12.6	0
12.7	0
12.8	0
12.9	0
13	0
13.1	0
13.2	0
13.3	0
13.4	0
13.5	0
13.6	0
13.7	0
13.8	0
13.9	0
14	0
14.1	0
14.2	0
14.3	0
14.4	0
14.5	0
14.6	0
14.7	0
14.8	0
14.9	0
15	0
15.1	0
15.2	0
15.3	0
15.4	0
15.5	0
15.6	0
15.7	0
15.8	0
15.9	0
16	0
16.1	0
16.2	0
16.3	0
16.4	0
16.5	0
16.6	0
16.7	0
16.8	0
16.9	0
17	0
17.1	0
17.2	0
17.3	0
17.4	0
17.5	0
17.6	0
17.7	0
17.8	0
17.9	0
18	0
18.1	0
18.2	0
18.3	0
18.4	0
18.5	0
18.6	0
18.7	0
18.8	0
18.9	0
19	0
19.1	0
19.2	0
19.3	0
19.4	0
19.5	0
19.6	0
19.7	0
19.8	0
19.9	0
20	0
20.1	0
20.2	0
20.3	0
20.4	0
20.5	0
20.6	0
20.7	0
20.8	0
20.9	0
21	0
21.1	0
21.2	0
21.3	0
21.4	0
21.5	0
21.6	0
21.7	0
21.8	0
21.9	0
22	0
22.1	0
22.2	0
22.3	0
22.4	0
22.5	0
22.6	0
22.7	0
22.8	0
22.9	0
23	0
23.1	0
23.2	0
23.3	0
23.4	0
23.5	0
23.6	0
23.7	0
23.8	0
23.9	0
24	0
24.1	0
24.2	0
24.3	0
24.4	0
24.5	0
24.6	0
24.7	0
24.8	0
24.9	0
25	0
25.1	0
25.2	0
25.3	0
25.4	0
25.5	0
25.6	0
25.7	0
25.8	0
25.9	0
26	0
26.1	0
26.2	0
26.3	0
26.4	0
26.5	0
26.6	0
26.7	0
26.8	0
26.9	0
27	0
27.1	0
27.2	0
27.3	0
27.4	0
27.5	0
27.6	0
27.7	0
27.8	0
27.9	0
28	0
28.1	0
28.2	0
28.3	0
28.4	0
28.5	0
28.6	0
28.7	0
28.8	0
28.9	0
29	0
29.1	0
29.2	0
29.3	0
29.4	0
29.5	0
29.6	0
29.7	0
29.8	0
29.9	0
30	0
30.1	0
30.2	0
30.3	0
30.4	0
30.5	0
30.6	0
30.7	0
30.8	0
30.9	0
31	0
31.1	0
31.2	0
31.3	0
31.4	0
31.5	0
31.6	0
31.7	0
31.8	0
31.9	0
32	0
32.1	0
32.2	0
32.3	0
32.4	0
32.5	0
32.6	0
32.7	0
32.8	0
32.9	0
33	0
33.1	0
33.2	0
33.3	0
33.4	0
33.5	0
33.6	0
33.7	0
33.8	0
33.9	0
34	0
34.1	0
34.2	0
34.3	0
34.4	0
34.5	0
34.6	0
34.7	0
34.8	0
34.9	0
35	0
35.1	0
35.2	0
35.3	0
35.4	0
35.5	0
35.6	0
35.7	0
35.8	0
35.9	0
36	0
36.1	0
36.2	0
36.3	0
36.4	0
36.5	0
36.6	0
36.7	0
36.8	0
36.9	0
37	0
37.1	0
37.2	0
37.3	0
37.4	0
37.5	0
37.6	0
37.7	0
37.8	0
37.9	0
38	0
38.1	0
38.2	0
38.3	0
38.4	0
38.5	0
38.6	0
38.7	0
38.8	0
38.9	0
39	0
39.1	0
39.2	0
39.3	0
39.4	0
39.5	0
39.6	0
39.7	0
39.8	0
39.9	0
40	0
40.1	0
40.2	0
40.3	0
40.4	0
40.5	0
40.6	0
40.7	0
40.8	0
40.9	0
41	0
41.1	0
41.2	0
41.3	0
41.4	0
41.5	0
41.6	0
41.7	0
41.8	0
41.9	0
42	0
42.1	0
42.2	0
42.3	0
42.4	0
42.5	0
42.6	0
42.7	0
42.8	0
42.9	0
43	0
43.1	0
43.2	0
43.3	0
43.4	0
43.5	0
43.6	0
43.7	0
43.8	0
43.9	0
44	0
44.1	0
44.2	0
44.3	0
44.4	0
44.5	0
44.6	0
44.7	0
44.8	0
44.9	0
45	0
45.1	0
45.2	0
45.3	0
45.4	0
45.5	0
45.6	0
45.7	0
45.8	0
45.9	0
46	0
46.1	0
46.2	0
46.3	0
46.4	0
46.5	0
46.6	0
46.7	0
46.8	0
46.9	0
47	0
47.1	0
47.2	0
47.3	0
47.4	0
47.5	0
47.6	0
47.7	0
47.8	0
47.9	0
48	0
48.1	0
48.2	0
48.3	0
48.4	0
48.5	0
48.6	0
48.7	0
48.8	0
48.9	0
49	0
49.1	0
49.2	0
49.3	0
49.4	0
49.5	0
49.6	0
49.7	0
49.8	0
49.9	0
50	0
50.1	0
50.2	0
50.3	0
50.4	0
50.5	0
50.6	0
50.7	0
50.8	0
50.9	0
51	0
51.1	0
51.2	0
51.3	0
51.4	0
51.5	0
51.6	0
51.7	0
51.8	0
51.9	0
52	0
52.1	0
52.2	0
52.3	0
52.4	0
52.5	0
52.6	0
52.7	0
52.8	0
52.9	0
53	0
53.1	0
53.2	0
53.3	0
53.4	0
53.5	0
53.6	0
53.7	0
53.8	0
53.9	0
54	0
54.1	0
54.2	0
54.3	0
54.4	0
54.5	0
54.6	0
54.7	0
54.8	0
54.9	0
55	0
55.1	0
55.2	0
55.3	0
55.4	0
55.5	0
55.6	0
55.7	0
55.8	0
55.9	0
56	0
56.1	0
56.2	0
56.3	0
56.4	0
56.5	0
56.6	0
56.7	0
56.8	0
56.9	0
57	0
57.1	0
57.2	0
57.3	0
57.4	0
57.5	0
57.6	0
57.7	0
57.8	0
57.9	0
58	0
58.1	0
58.2	0
58.3	0
58.4	0
58.5	0
58.6	0
58.7	0
58.8	0
58.9	0
59	0
59.1	0
59.2	0
59.3	0
59.4	0
59.5	0
59.6	0
59.7	0
59.8	0
59.9	0
60	0
60.1	0
60.2	0
60.3	0
60.4	0
60.5	0
60.6	0
60.7	0
60.8	0
60.9	0
61	0
61.1	0
61.2	0
61.3	0
61.4	0
61.5	0
61.6	0
61.7	0
61.8	0
61.9	0
62	0
62.1	0
62.2	0
62.3	0
62.4	0
62.5	0
62.6	0
62.7	0
62.8	0
62.9	0
63	0
63.1	0
63.2	0
63.3	0
63.4	0
63.5	0
63.6	0
63.7	0
63.8	0
63.9	0
64	0
64.1	0
64.2	0
64.3	0
64.4	0
64.5	0
64.6	0
64.7	0
64.8	0
64.9	0
65	0
65.1	0
65.2	0
65.3	0
65.4	0
65.5	0
65.6	0
65.7	0
65.8	0
65.9	0
66	0
66.1	0
66.2	0
66.3	0
66.4	0
66.5	0
66.6	0
66.7	0
66.8	0
66.9	0
67	0
67.1	0
67.2	0
67.3	0
67.4	0
67.5	0
67.6	0
67.7	0
67.8	0
67.9	0
68	0
68.1	0
68.2	0
68.3	0
68.4	0
68.5	0
68.6	0
68.7	0
68.8	0
68.9	0
69	0
69.1	0
69.2	0
69.3	0
69.4	0
69.5	0
69.6	0
69.7	0
69.8	0
69.9	0
70	0
70.1	0
70.2	0
70.3	0
70.4	0
70.5	0
70.6	0
70.7	0
70.8	0
70.9	0
71	0
71.1	0
71.2	0
71.3	0
71.4	0
71.5	0
71.6	0
71.7	0
71.8	0
71.9	0
72	0
72.1	0
72.2	0
72.3	0
72.4	0
72.5	0
72.6	0
72.7	0
72.8	0
72.9	0
73	0
73.1	0
73.2	0
73.3	0
73.4	0
73.5	0
73.6	0
73.7	0
73.8	0
73.9	0
74	0
74.1	0
74.2	0
74.3	0
74.4	0
74.5	0
74.6	0
74.7	0
74.8	0
74.9	0
75	0
75.1	0
75.2	0
75.3	0
75.4	0
75.5	0
75.6	0
75.7	0
75.8	0
75.9	0
76	0
76.1	0
76.2	0
76.3	0
76.4	0
76.5	0
76.6	0
76.7	0
76.8	0
76.9	0
77	0
77.1	0
77.2	0
77.3	0
77.4	0
77.5	0
77.6	0
77.7	0
77.8	0
77.9	0
78	0
78.1	0
78.2	0
78.3	0
78.4	0
78.5	0
78.6	0
78.7	0
78.8	0
78.9	0
79	0
79.1	0
79.2	0
79.3	0
79.4	0
79.5	0
79.6	0
79.7	0
79.8	0
79.9	0
80	0
80.1	0
80.2	0
80.3	0
80.4	0
80.5	0
80.6	0
80.7	0
80.8	0
80.9	0
81	0
81.1	0
81.2	0
81.3	0
81.4	0
81.5	0
81.6	0
81.7	0
81.8	0
81.9	0
82	0
82.1	0
82.2	0
82.3	0
82.4	0
82.5	0
82.6	0
82.7	0
82.8	0
82.9	0
83	0
83.1	0
83.2	0
83.3	0
83.4	0
83.5	0
83.6	0
83.7	0
83.8	0
83.9	0
84	0
84.1	0
84.2	0
84.3	0
84.4	0
84.5	0
84.6	0
84.7	0
84.8	0
84.9	0
85	0
85.1	0
85.2	0
85.3	0
85.4	0
85.5	0
85.6	0
85.7	0
85.8	0
85.9	0
86	0
86.1	0
86.2	0
86.3	0
86.4	0
86.5	0
86.6	0
86.7	0
86.8	0
86.9	0
87	0
87.1	0
87.2	0
87.3	0
87.4	0
87.5	0
87.6	0
87.7	0
87.8	0
87.9	0
88	0
88.1	0
88.2	0
88.3	0
88.4	0
88.5	0
88.6	0
88.7	0
88.8	0
88.9	0
89	0
89.1	0
89.2	0
89.3	0
89.4	0
89.5	0
89.6	0
89.7	0
89.8	0
89.9	0
90	0
90.1	0
90.2	0
90.3	0
90.4	0
90.5	0
90.6	0
90.7	0
90.8	0
90.9	0
91	0
91.1	0
91.2	0
91.3	0
91.4	0
91.5	0
91.6	0
91.7	0
91.8	0
91.9	0
92	0
92.1	0
92.2	0
92.3	0
92.4	0
92.5	0
92.6	0
92.7	0
92.8	0
92.9	0
93	0
93.1	0
93.2	0
93.3	0
93.4	0
93.5	0
93.6	0
93.7	0
93.8	0
93.9	0
94	0
94.1	0
94.2	0
94.3	0
94.4	0
94.5	0
94.6	0
94.7	0
94.8	0
94.9	0
95	0
95.1	0
95.2	0
95.3	0
95.4	0
95.5	0
95.6	0
95.7	0
95.8	0
95.9	0
96	0
96.1	0
96.2	0
96.3	0
96.4	0
96.5	0
96.6	0
96.7	0
96.8	0
96.9	0
97	0
97.1	0
97.2	0
97.3	0
97.4	0
97.5	0
97.6	0
97.7	0
97.8	0
97.9	0
98	0
98.1	0
98.2	0
98.3	0
98.4	0
98.5	0
98.6	0
98.7	0
98.8	0
98.9	0
99	0
99.1	0
99.2	0
99.3	0
99.4	0
99.5	0
99.6	0
99.7	0
99.8	0
99.9	0
100	0
100.1	0.001
100.2	0.005
100.3	0.0075
100.4	0.012
100.5	0.016
100.6	0.019
100.7	0.0255
100.8	0.0315
100.9	0.038
101	0.043
101.1	0.0485
101.2	0.0525
101.3	0.0575
101.4	0.0625
101.5	0.0665
101.6	0.0735
101.7	0.0785
101.8	0.085
101.9	0.0895
102	0.0975
102.1	0.1025
102.2	0.108
102.3	0.1135
102.4	0.1175
102.5	0.122
102.6	0.126
102.7	0.1305
102.8	0.1345
102.9	0.1395
103	0.1425
103.1	0.1465
103.2	0.151
103.3	0.1535
103.4	0.1555
103.5	0.1595
103.6	0.163
103.7	0.1655
103.8	0.1705
103.9	0.173
104	0.1765
104.1	0.181
104.2	0.184
104.3	0.186
104.4	0.189
104.5	0.193
104.6	0.196
104.7	0.199
104.8	0.203
104.9	0.2045
105	0.2085
105.1	0.211
105.2	0.214
105.3	0.2165
105.4	0.219
105.5	0.222
105.6	0.2235
105.7	0.2255
105.8	0.2295
105.9	0.232
106	0.2365
106.1	0.2385
106.2	0.242
106.3	0.249
106.4	0.2525
106.5	0.256
106.6	0.2595
106.7	0.264
106.8	0.2665
106.9	0.271
107	0.2745
107.1	0.2785
107.2	0.282
107.3	0.2845
107.4	0.287
107.5	0.291
107.6	0.2955
107.7	0.298
107.8	0.301
107.9	0.3045
108	0.3085
108.1	0.312
108.2	0.3155
108.3	0.3165
108.4	0.32
108.5	0.323
108.6	0.3255
108.7	0.3295
108.8	0.333
108.9	0.3375
109	0.343
109.1	0.3455
109.2	0.348
109.3	0.353
109.4	0.356
109.5	0.3585
109.6	0.362
109.7	0.363
109.8	0.3645
109.9	0.367
110	0.369
110.1	0.37
110.2	0.3715
110.3	0.3755
110.4	0.3775
110.5	0.379
110.6	0.382
110.7	0.382
110.8	0.3865
110.9	0.389
111	0.395
111.1	0.398
111.2	0.398
111.3	0.401
111.4	0.403
111.5	0.4085
111.6	0.414
111.7	0.4165
111.8	0.4205
111.9	0.423
112	0.426
112.1	0.431
112.2	0.4335
112.3	0.4375
112.4	0.4385
112.5	0.4395
112.6	0.444
112.7	0.444
112.8	0.4465
112.9	0.449
113	0.4495
113.1	0.4515
113.2	0.453
113.3	0.4545
113.4	0.4535
113.5	0.4555
113.6	0.4585
113.7	0.4625
113.8	0.4665
113.9	0.4695
114	0.4685
114.1	0.4735
114.2	0.476
114.3	0.4775
114.4	0.481
114.5	0.487
114.6	0.487
114.7	0.489
114.8	0.4915
114.9	0.494
115	0.4965
115.1	0.4985
115.2	0.5005
115.3	0.501
115.4	0.503
115.5	0.5045
115.6	0.5085
115.7	0.5095
115.8	0.51
115.9	0.5125
116	0.5155
116.1	0.5185
116.2	0.5205
116.3	0.5225
116.4	0.5265
116.5	0.527
116.6	0.5295
116.7	0.5315
116.8	0.5335
116.9	0.5355
117	0.536
117.1	0.5375
117.2	0.539
117.3	0.541
117.4	0.544
117.5	0.5465
117.6	0.5505
117.7	0.553
117.8	0.5555
117.9	0.5575
118	0.559
118.1	0.5605
118.2	0.561
118.3	0.5635
118.4	0.565
118.5	0.567
118.6	0.569
118.7	0.5715
118.8	0.573
118.9	0.5745
119	0.576
119.1	0.5775
119.2	0.58
119.3	0.5795
119.4	0.5825
119.5	0.5825
119.6	0.583
119.7	0.585
119.8	0.5865
119.9	0.587
120	0.59
120.1	0.5925
120.2	0.5935
120.3	0.599
120.4	0.599
120.5	0.5995
120.6	0.6
120.7	0.599
120.8	0.6
120.9	0.6
121	0.6
121.1	0.6015
121.2	0.6025
121.3	0.603
121.4	0.6035
121.5	0.6035
121.6	0.607
121.7	0.6085
121.8	0.6085
121.9	0.6105
122	0.612
122.1	0.6125
122.2	0.613
122.3	0.6135
122.4	0.614
122.5	0.616
122.6	0.617
122.7	0.617
122.8	0.6185
122.9	0.6195
123	0.6215
123.1	0.624
123.2	0.6255
123.3	0.627
123.4	0.6275
123.5	0.6265
123.6	0.627
123.7	0.629
123.8	0.6295
123.9	0.6295
124	0.6305
124.1	0.6295
124.2	0.6295
124.3	0.631
124.4	0.6315
124.5	0.6325
124.6	0.6335
124.7	0.6345
124.8	0.636
124.9	0.635
125	0.6355
125.1	0.6375
125.2	0.6395
125.3	0.6405
125.4	0.6415
125.5	0.6415
125.6	0.644
125.7	0.645
125.8	0.645
125.9	0.6485
126	0.6485
126.1	0.6475
126.2	0.6485
126.3	0.647
126.4	0.6495
126.5	0.6505
126.6	0.652
126.7	0.6535
126.8	0.6545
126.9	0.656
127	0.6565
127.1	0.657
127.2	0.6565
127.3	0.658
127.4	0.6585
127.5	0.66
127.6	0.661
127.7	0.6625
127.8	0.664
127.9	0.6655
128	0.667
128.1	0.668
128.2	0.669
128.3	0.669
128.4	0.67
128.5	0.6705
128.6	0.6725
128.7	0.6725
128.8	0.673
128.9	0.6755
129	0.676
129.1	0.6765
129.2	0.677
129.3	0.677
129.4	0.6785
129.5	0.6785
129.6	0.678
129.7	0.6795
129.8	0.681
129.9	0.6835
130	0.684
130.1	0.685
130.2	0.6855
130.3	0.685
130.4	0.6865
130.5	0.6865
130.6	0.6875
130.7	0.6875
130.8	0.6885
130.9	0.69
131	0.6915
131.1	0.694
131.2	0.6965
131.3	0.697
131.4	0.697
131.5	0.6985
131.6	0.699
131.7	0.698
131.8	0.6985
131.9	0.6995
132	0.7005
132.1	0.7015
132.2	0.7015
132.3	0.7005
132.4	0.702
132.5	0.703
132.6	0.705
132.7	0.7065
132.8	0.708
132.9	0.71
133	0.71
133.1	0.7085
133.2	0.709
133.3	0.7095
133.4	0.7105
133.5	0.7125
133.6	0.712
133.7	0.7135
133.8	0.714
133.9	0.714
134	0.7155
134.1	0.716
134.2	0.7165
134.3	0.717
134.4	0.7185
134.5	0.718
134.6	0.717
134.7	0.717
134.8	0.7185
134.9	0.7175
135	0.7195
135.1	0.7205
135.2	0.7215
135.3	0.7225
135.4	0.722
135.5	0.723
135.6	0.7245
135.7	0.7255
135.8	0.7255
135.9	0.727
136	0.727
136.1	0.727
136.2	0.7265
136.3	0.7275
136.4	0.7285
136.5	0.729
136.6	0.728
136.7	0.7285
136.8	0.731
136.9	0.7345
137	0.7335
137.1	0.7335
137.2	0.7335
137.3	0.734
137.4	0.7355
137.5	0.736
137.6	0.736
137.7	0.7365
137.8	0.737
137.9	0.736
138	0.735
138.1	0.7355
138.2	0.736
138.3	0.734
138.4	0.7355
138.5	0.736
138.6	0.7375
138.7	0.739
138.8	0.7395
138.9	0.7395
139	0.7425
139.1	0.744
139.2	0.746
139.3	0.747
139.4	0.747
139.5	0.7475
139.6	0.7465
139.7	0.746
139.8	0.747
139.9	0.749
140	0.749
140.1	0.7505
140.2	0.75
140.3	0.75
140.4	0.749
140.5	0.7505
140.6	0.7515
140.7	0.7525
140.8	0.7545
140.9	0.753
141	0.754
141.1	0.7565
141.2	0.756
141.3	0.7565
141.4	0.755
141.5	0.756
141.6	0.758
141.7	0.758
141.8	0.7585
141.9	0.7585
142	0.759
142.1	0.7595
142.2	0.761
142.3	0.761
142.4	0.7615
142.5	0.7615
142.6	0.761
142.7	0.761
142.8	0.761
142.9	0.7605
143	0.761
143.1	0.761
143.2	0.7615
143.3	0.76
143.4	0.76
143.5	0.759
143.6	0.7595
143.7	0.761
143.8	0.7615
143.9	0.7595
144	0.759
144.1	0.7585
144.2	0.7605
144.3	0.759
144.4	0.758
144.5	0.76
144.6	0.76
144.7	0.7605
144.8	0.76
144.9	0.76
145	0.759
145.1	0.759
145.2	0.7585
145.3	0.7585
145.4	0.7575
145.5	0.7585
145.6	0.76
145.7	0.761
145.8	0.762
145.9	0.7615
146	0.7625
146.1	0.7635
146.2	0.764
146.3	0.7635
146.4	0.765
146.5	0.766
146.6	0.766
146.7	0.767
146.8	0.7675
146.9	0.769
147	0.769
147.1	0.768
147.2	0.769
147.3	0.769
147.4	0.769
147.5	0.771
147.6	0.772
147.7	0.7735
147.8	0.7735
147.9	0.774
148	0.7745
148.1	0.776
148.2	0.7765
148.3	0.777
148.4	0.7785
148.5	0.7785
148.6	0.78
148.7	0.781
148.8	0.782
148.9	0.782
149	0.783
149.1	0.784
149.2	0.784
149.3	0.7855
149.4	0.7845
149.5	0.7855
149.6	0.7845
149.7	0.786
149.8	0.785
149.9	0.784
150	0.7855
150.1	0.7855
150.2	0.786
150.3	0.7855
150.4	0.786
150.5	0.7865
150.6	0.787
150.7	0.7875
150.8	0.7875
150.9	0.7865
151	0.7885
151.1	0.788
151.2	0.7875
151.3	0.7865
151.4	0.7855
151.5	0.7865
151.6	0.7875
151.7	0.787
151.8	0.787
151.9	0.7865
152	0.788
152.1	0.7885
152.2	0.7875
152.3	0.7875
152.4	0.787
152.5	0.7875
152.6	0.7895
152.7	0.7885
152.8	0.789
152.9	0.788
153	0.7895
153.1	0.792
153.2	0.792
153.3	0.7915
153.4	0.792
153.5	0.7925
153.6	0.792
153.7	0.792
153.8	0.793
153.9	0.7945
154	0.797
154.1	0.7995
154.2	0.799
154.3	0.8
154.4	0.802
154.5	0.803
154.6	0.804
154.7	0.804
154.8	0.803
154.9	0.804
155	0.8045
155.1	0.804
155.2	0.806
155.3	0.805
155.4	0.8045
155.5	0.805
155.6	0.8045
155.7	0.804
155.8	0.8025
155.9	0.801
156	0.8015
156.1	0.8005
156.2	0.802
156.3	0.801
156.4	0.8005
156.5	0.802
156.6	0.8025
156.7	0.803
156.8	0.803
156.9	0.803
157	0.8025
157.1	0.8025
157.2	0.804
157.3	0.803
157.4	0.8025
157.5	0.8025
157.6	0.8025
157.7	0.8035
157.8	0.804
157.9	0.8045
158	0.8045
158.1	0.803
158.2	0.802
158.3	0.801
158.4	0.8005
158.5	0.8015
158.6	0.8005
158.7	0.8005
158.8	0.8015
158.9	0.8
159	0.7995
159.1	0.8005
159.2	0.8
159.3	0.8
159.4	0.801
159.5	0.8015
159.6	0.8005
159.7	0.8005
159.8	0.8005
159.9	0.8
160	0.8
160.1	0.799
160.2	0.8
160.3	0.8005
160.4	0.7995
160.5	0.8005
160.6	0.7995
160.7	0.799
160.8	0.798
160.9	0.799
161	0.8015
161.1	0.8015
161.2	0.802
161.3	0.8015
161.4	0.8015
161.5	0.8015
161.6	0.801
161.7	0.8015
161.8	0.8015
161.9	0.8015
162	0.801
162.1	0.801
162.2	0.8015
162.3	0.8025
162.4	0.8035
162.5	0.804
162.6	0.805
162.7	0.8035
162.8	0.8045
162.9	0.8045
163	0.8045
163.1	0.8045
163.2	0.804
163.3	0.804
163.4	0.804
163.5	0.8035
163.6	0.803
163.7	0.804
163.8	0.8035
163.9	0.804
164	0.8045
164.1	0.804
164.2	0.8045
164.3	0.8035
164.4	0.803
164.5	0.8035
164.6	0.8025
164.7	0.8025
164.8	0.801
164.9	0.802
165	0.8025
165.1	0.8025
165.2	0.8025
165.3	0.8025
165.4	0.8035
165.5	0.8045
165.6	0.804
165.7	0.8045
165.8	0.8055
165.9	0.806
166	0.808
166.1	0.8095
166.2	0.809
166.3	0.809
166.4	0.8095
166.5	0.809
166.6	0.81
166.7	0.8075
166.8	0.808
166.9	0.808
167	0.808
167.1	0.808
167.2	0.808
167.3	0.8075
167.4	0.808
167.5	0.808
167.6	0.8075
167.7	0.8085
167.8	0.8085
167.9	0.8095
168	0.809
168.1	0.8095
168.2	0.8115
168.3	0.8105
168.4	0.81
168.5	0.811
168.6	0.8115
168.7	0.812
168.8	0.812
168.9	0.812
169	0.814
169.1	0.815
169.2	0.815
169.3	0.816
169.4	0.8155
169.5	0.8155
169.6	0.816
169.7	0.816
169.8	0.816
169.9	0.817
170	0.8165
170.1	0.8165
170.2	0.8155
170.3	0.815
170.4	0.816
170.5	0.815
170.6	0.814
170.7	0.8145
170.8	0.8145
170.9	0.814
171	0.814
171.1	0.8145
171.2	0.815
171.3	0.8145
171.4	0.814
171.5	0.8145
171.6	0.814
171.7	0.8135
171.8	0.813
171.9	0.813
172	0.813
172.1	0.8135
172.2	0.8135
172.3	0.8145
172.4	0.815
172.5	0.815
172.6	0.8155
172.7	0.817
172.8	0.816
172.9	0.815
173	0.8145
173.1	0.815
173.2	0.8155
173.3	0.815
173.4	0.814
173.5	0.8135
173.6	0.813
173.7	0.811
173.8	0.813
173.9	0.812
174	0.81
174.1	0.8095
174.2	0.8085
174.3	0.809
174.4	0.8085
174.5	0.8085
174.6	0.809
174.7	0.81
174.8	0.812
174.9	0.813
175	0.813
175.1	0.813
175.2	0.8125
175.3	0.812
175.4	0.8125
175.5	0.8145
175.6	0.8145
175.7	0.813
175.8	0.8125
175.9	0.813
176	0.813
176.1	0.8135
176.2	0.814
176.3	0.814
176.4	0.8135
176.5	0.814
176.6	0.814
176.7	0.8145
176.8	0.813
176.9	0.8155
177	0.816
177.1	0.8155
177.2	0.814
177.3	0.815
177.4	0.815
177.5	0.8135
177.6	0.814
177.7	0.8145
177.8	0.814
177.9	0.8145
178	0.816
178.1	0.8175
178.2	0.8185
178.3	0.818
178.4	0.818
178.5	0.82
178.6	0.82
178.7	0.8215
178.8	0.821
178.9	0.82
179	0.82
179.1	0.8195
179.2	0.8205
179.3	0.821
179.4	0.823
179.5	0.8235
179.6	0.823
179.7	0.824
179.8	0.825
179.9	0.825
180	0.825
180.1	0.8235
180.2	0.8245
180.3	0.8255
180.4	0.8255
180.5	0.8265
180.6	0.827
180.7	0.8285
180.8	0.827
180.9	0.8275
181	0.828
181.1	0.827
181.2	0.8275
181.3	0.827
181.4	0.8265
181.5	0.827
181.6	0.8295
181.7	0.83
181.8	0.83
181.9	0.83
182	0.829
182.1	0.8285
182.2	0.83
182.3	0.8305
182.4	0.8305
182.5	0.8295
182.6	0.831
182.7	0.83
182.8	0.8295
182.9	0.8285
183	0.831
183.1	0.8315
183.2	0.833
183.3	0.832
183.4	0.8325
183.5	0.8325
183.6	0.832
183.7	0.8315
183.8	0.831
183.9	0.8305
184	0.831
184.1	0.832
184.2	0.832
184.3	0.831
184.4	0.83
184.5	0.83
184.6	0.8315
184.7	0.831
184.8	0.8315
184.9	0.8305
185	0.832
185.1	0.8325
185.2	0.833
185.3	0.833
185.4	0.8325
185.5	0.8335
185.6	0.8335
185.7	0.8335
185.8	0.8335
185.9	0.834
186	0.834
186.1	0.834
186.2	0.834
186.3	0.8345
186.4	0.8355
186.5	0.836
186.6	0.834
186.7	0.8335
186.8	0.833
186.9	0.8325
187	0.833
187.1	0.8325
187.2	0.832
187.3	0.8315
187.4	0.8305
187.5	0.8315
187.6	0.8315
187.7	0.832
187.8	0.8325
187.9	0.8325
188	0.831
188.1	0.83
188.2	0.8305
188.3	0.83
188.4	0.8305
188.5	0.832
188.6	0.832
188.7	0.832
188.8	0.832
188.9	0.8315
189	0.831
189.1	0.8325
189.2	0.8325
189.3	0.8325
189.4	0.832
189.5	0.8325
189.6	0.833
189.7	0.831
189.8	0.8305
189.9	0.8295
190	0.8295
190.1	0.8305
190.2	0.8305
190.3	0.832
190.4	0.8325
190.5	0.8325
190.6	0.8325
190.7	0.833
190.8	0.832
190.9	0.831
191	0.829
191.1	0.829
191.2	0.829
191.3	0.8295
191.4	0.829
191.5	0.829
191.6	0.8295
191.7	0.831
191.8	0.83
191.9	0.83
192	0.83
192.1	0.829
192.2	0.8285
192.3	0.8275
192.4	0.8265
192.5	0.8265
192.6	0.826
192.7	0.8265
192.8	0.8265
192.9	0.8265
193	0.8265
193.1	0.8275
193.2	0.8255
193.3	0.824
193.4	0.823
193.5	0.8225
193.6	0.822
193.7	0.821
193.8	0.821
193.9	0.821
194	0.819
194.1	0.8185
194.2	0.818
194.3	0.819
194.4	0.8205
194.5	0.8215
194.6	0.821
194.7	0.8215
194.8	0.8215
194.9	0.821
195	0.821
195.1	0.82
195.2	0.82
195.3	0.8195
195.4	0.818
195.5	0.8185
195.6	0.819
195.7	0.8195
195.8	0.8195
195.9	0.8195
196	0.8175
196.1	0.8185
196.2	0.819
196.3	0.82
196.4	0.8205
196.5	0.821
196.6	0.8215
196.7	0.823
196.8	0.8225
196.9	0.821
197	0.8215
197.1	0.8205
197.2	0.8205
197.3	0.8185
197.4	0.821
197.5	0.8215
197.6	0.8225
197.7	0.8225
197.8	0.8225
197.9	0.8235
198	0.824
198.1	0.825
198.2	0.825
198.3	0.824
198.4	0.8245
198.5	0.8235
198.6	0.824
198.7	0.8245
198.8	0.824
198.9	0.825
199	0.824
199.1	0.8245
199.2	0.824
199.3	0.823
199.4	0.824
199.5	0.824
199.6	0.825
199.7	0.8245
199.8	0.826
199.9	0.826
200	0.826
[truncated: 14,000 more rows]
