# Supplementary material for: Bayesian inference of kinetic schemes for ion channels by Kalman filtering
Source: eLife journal article supplement (doi:10.7554/elife.62714), 2022-05-04
Supplement: fig4-data2 [file 1_Sim_N_3000_Fluor_MW.xlsx]

## Sheet: Tabelle1
0.1	0
0.2	0
0.3	0
0.4	0
0.5	0
0.6	0
0.7	0
0.8	0
0.9	0
1	0
1.1	0
1.2	0
1.3	0
1.4	0
1.5	0
1.6	0
1.7	0
1.8	0
1.9	0
2	0
2.1	0
2.2	0
2.3	0
2.4	0
2.5	0
2.6	0
2.7	0
2.8	0
2.9	0
3	0
3.1	0
3.2	0
3.3	0
3.4	0
3.5	0
3.6	0
3.7	0
3.8	0
3.9	0
4	0
4.1	0
4.2	0
4.3	0
4.4	0
4.5	0
4.6	0
4.7	0
4.8	0
4.9	0
5	0
5.1	0
5.2	0
5.3	0
5.4	0
5.5	0
5.6	0
5.7	0
5.8	0
5.9	0
6	0
6.1	0
6.2	0
6.3	0
6.4	0
6.5	0
6.6	0
6.7	0
6.8	0
6.9	0
7	0
7.1	0
7.2	0
7.3	0
7.4	0
7.5	0
7.6	0
7.7	0
7.8	0
7.9	0
8	0
8.1	0
8.2	0
8.3	0
8.4	0
8.5	0
8.6	0
8.7	0
8.8	0
8.9	0
9	0
9.1	0
9.2	0
9.3	0
9.4	0
9.5	0
9.6	0
9.7	0
9.8	0
9.9	0
10	0
10.1	0
10.2	0
10.3	0
10.4	0
10.5	0
10.6	0
10.7	0
10.8	0
10.9	0
11	0
11.1	0
11.2	0
11.3	0
11.4	0
11.5	0
11.6	0
11.7	0
11.8	0
11.9	0
12	0
12.1	0
12.2	0
12.3	0
12.4	0
12.5	0
12.6	0
12.7	0
12.8	0
12.9	0
13	0
13.1	0
13.2	0
13.3	0
13.4	0
13.5	0
13.6	0
13.7	0
13.8	0
13.9	0
14	0
14.1	0
14.2	0
14.3	0
14.4	0
14.5	0
14.6	0
14.7	0
14.8	0
14.9	0
15	0
15.1	0
15.2	0
15.3	0
15.4	0
15.5	0
15.6	0
15.7	0
15.8	0
15.9	0
16	0
16.1	0
16.2	0
16.3	0
16.4	0
16.5	0
16.6	0
16.7	0
16.8	0
16.9	0
17	0
17.1	0
17.2	0
17.3	0
17.4	0
17.5	0
17.6	0
17.7	0
17.8	0
17.9	0
18	0
18.1	0
18.2	0
18.3	0
18.4	0
18.5	0
18.6	0
18.7	0
18.8	0
18.9	0
19	0
19.1	0
19.2	0
19.3	0
19.4	0
19.5	0
19.6	0
19.7	0
19.8	0
19.9	0
20	0
20.1	0
20.2	0
20.3	0
20.4	0
20.5	0
20.6	0
20.7	0
20.8	0
20.9	0
21	0
21.1	0
21.2	0
21.3	0
21.4	0
21.5	0
21.6	0
21.7	0
21.8	0
21.9	0
22	0
22.1	0
22.2	0
22.3	0
22.4	0
22.5	0
22.6	0
22.7	0
22.8	0
22.9	0
23	0
23.1	0
23.2	0
23.3	0
23.4	0
23.5	0
23.6	0
23.7	0
23.8	0
23.9	0
24	0
24.1	0
24.2	0
24.3	0
24.4	0
24.5	0
24.6	0
24.7	0
24.8	0
24.9	0
25	0
25.1	0
25.2	0
25.3	0
25.4	0
25.5	0
25.6	0
25.7	0
25.8	0
25.9	0
26	0
26.1	0
26.2	0
26.3	0
26.4	0
26.5	0
26.6	0
26.7	0
26.8	0
26.9	0
27	0
27.1	0
27.2	0
27.3	0
27.4	0
27.5	0
27.6	0
27.7	0
27.8	0
27.9	0
28	0
28.1	0
28.2	0
28.3	0
28.4	0
28.5	0
28.6	0
28.7	0
28.8	0
28.9	0
29	0
29.1	0
29.2	0
29.3	0
29.4	0
29.5	0
29.6	0
29.7	0
29.8	0
29.9	0
30	0
30.1	0
30.2	0
30.3	0
30.4	0
30.5	0
30.6	0
30.7	0
30.8	0
30.9	0
31	0
31.1	0
31.2	0
31.3	0
31.4	0
31.5	0
31.6	0
31.7	0
31.8	0
31.9	0
32	0
32.1	0
32.2	0
32.3	0
32.4	0
32.5	0
32.6	0
32.7	0
32.8	0
32.9	0
33	0
33.1	0
33.2	0
33.3	0
33.4	0
33.5	0
33.6	0
33.7	0
33.8	0
33.9	0
34	0
34.1	0
34.2	0
34.3	0
34.4	0
34.5	0
34.6	0
34.7	0
34.8	0
34.9	0
35	0
35.1	0
35.2	0
35.3	0
35.4	0
35.5	0
35.6	0
35.7	0
35.8	0
35.9	0
36	0
36.1	0
36.2	0
36.3	0
36.4	0
36.5	0
36.6	0
36.7	0
36.8	0
36.9	0
37	0
37.1	0
37.2	0
37.3	0
37.4	0
37.5	0
37.6	0
37.7	0
37.8	0
37.9	0
38	0
38.1	0
38.2	0
38.3	0
38.4	0
38.5	0
38.6	0
38.7	0
38.8	0
38.9	0
39	0
39.1	0
39.2	0
39.3	0
39.4	0
39.5	0
39.6	0
39.7	0
39.8	0
39.9	0
40	0
40.1	0
40.2	0
40.3	0
40.4	0
40.5	0
40.6	0
40.7	0
40.8	0
40.9	0
41	0
41.1	0
41.2	0
41.3	0
41.4	0
41.5	0
41.6	0
41.7	0
41.8	0
41.9	0
42	0
42.1	0
42.2	0
42.3	0
42.4	0
42.5	0
42.6	0
42.7	0
42.8	0
42.9	0
43	0
43.1	0
43.2	0
43.3	0
43.4	0
43.5	0
43.6	0
43.7	0
43.8	0
43.9	0
44	0
44.1	0
44.2	0
44.3	0
44.4	0
44.5	0
44.6	0
44.7	0
44.8	0
44.9	0
45	0
45.1	0
45.2	0
45.3	0
45.4	0
45.5	0
45.6	0
45.7	0
45.8	0
45.9	0
46	0
46.1	0
46.2	0
46.3	0
46.4	0
46.5	0
46.6	0
46.7	0
46.8	0
46.9	0
47	0
47.1	0
47.2	0
47.3	0
47.4	0
47.5	0
47.6	0
47.7	0
47.8	0
47.9	0
48	0
48.1	0
48.2	0
48.3	0
48.4	0
48.5	0
48.6	0
48.7	0
48.8	0
48.9	0
49	0
49.1	0
49.2	0
49.3	0
49.4	0
49.5	0
49.6	0
49.7	0
49.8	0
49.9	0
50	0
50.1	0
50.2	0
50.3	0
50.4	0
50.5	0
50.6	0
50.7	0
50.8	0
50.9	0
51	0
51.1	0
51.2	0
51.3	0
51.4	0
51.5	0
51.6	0
51.7	0
51.8	0
51.9	0
52	0
52.1	0
52.2	0
52.3	0
52.4	0
52.5	0
52.6	0
52.7	0
52.8	0
52.9	0
53	0
53.1	0
53.2	0
53.3	0
53.4	0
53.5	0
53.6	0
53.7	0
53.8	0
53.9	0
54	0
54.1	0
54.2	0
54.3	0
54.4	0
54.5	0
54.6	0
54.7	0
54.8	0
54.9	0
55	0
55.1	0
55.2	0
55.3	0
55.4	0
55.5	0
55.6	0
55.7	0
55.8	0
55.9	0
56	0
56.1	0
56.2	0
56.3	0
56.4	0
56.5	0
56.6	0
56.7	0
56.8	0
56.9	0
57	0
57.1	0
57.2	0
57.3	0
57.4	0
57.5	0
57.6	0
57.7	0
57.8	0
57.9	0
58	0
58.1	0
58.2	0
58.3	0
58.4	0
58.5	0
58.6	0
58.7	0
58.8	0
58.9	0
59	0
59.1	0
59.2	0
59.3	0
59.4	0
59.5	0
59.6	0
59.7	0
59.8	0
59.9	0
60	0
60.1	0
60.2	0
60.3	0
60.4	0
60.5	0
60.6	0
60.7	0
60.8	0
60.9	0
61	0
61.1	0
61.2	0
61.3	0
61.4	0
61.5	0
61.6	0
61.7	0
61.8	0
61.9	0
62	0
62.1	0
62.2	0
62.3	0
62.4	0
62.5	0
62.6	0
62.7	0
62.8	0
62.9	0
63	0
63.1	0
63.2	0
63.3	0
63.4	0
63.5	0
63.6	0
63.7	0
63.8	0
63.9	0
64	0
64.1	0
64.2	0
64.3	0
64.4	0
64.5	0
64.6	0
64.7	0
64.8	0
64.9	0
65	0
65.1	0
65.2	0
65.3	0
65.4	0
65.5	0
65.6	0
65.7	0
65.8	0
65.9	0
66	0
66.1	0
66.2	0
66.3	0
66.4	0
66.5	0
66.6	0
66.7	0
66.8	0
66.9	0
67	0
67.1	0
67.2	0
67.3	0
67.4	0
67.5	0
67.6	0
67.7	0
67.8	0
67.9	0
68	0
68.1	0
68.2	0
68.3	0
68.4	0
68.5	0
68.6	0
68.7	0
68.8	0
68.9	0
69	0
69.1	0
69.2	0
69.3	0
69.4	0
69.5	0
69.6	0
69.7	0
69.8	0
69.9	0
70	0
70.1	0
70.2	0
70.3	0
70.4	0
70.5	0
70.6	0
70.7	0
70.8	0
70.9	0
71	0
71.1	0
71.2	0
71.3	0
71.4	0
71.5	0
71.6	0
71.7	0
71.8	0
71.9	0
72	0
72.1	0
72.2	0
72.3	0
72.4	0
72.5	0
72.6	0
72.7	0
72.8	0
72.9	0
73	0
73.1	0
73.2	0
73.3	0
73.4	0
73.5	0
73.6	0
73.7	0
73.8	0
73.9	0
74	0
74.1	0
74.2	0
74.3	0
74.4	0
74.5	0
74.6	0
74.7	0
74.8	0
74.9	0
75	0
75.1	0
75.2	0
75.3	0
75.4	0
75.5	0
75.6	0
75.7	0
75.8	0
75.9	0
76	0
76.1	0
76.2	0
76.3	0
76.4	0
76.5	0
76.6	0
76.7	0
76.8	0
76.9	0
77	0
77.1	0
77.2	0
77.3	0
77.4	0
77.5	0
77.6	0
77.7	0
77.8	0
77.9	0
78	0
78.1	0
78.2	0
78.3	0
78.4	0
78.5	0
78.6	0
78.7	0
78.8	0
78.9	0
79	0
79.1	0
79.2	0
79.3	0
79.4	0
79.5	0
79.6	0
79.7	0
79.8	0
79.9	0
80	0
80.1	0
80.2	0
80.3	0
80.4	0
80.5	0
80.6	0
80.7	0
80.8	0
80.9	0
81	0
81.1	0
81.2	0
81.3	0
81.4	0
81.5	0
81.6	0
81.7	0
81.8	0
81.9	0
82	0
82.1	0
82.2	0
82.3	0
82.4	0
82.5	0
82.6	0
82.7	0
82.8	0
82.9	0
83	0
83.1	0
83.2	0
83.3	0
83.4	0
83.5	0
83.6	0
83.7	0
83.8	0
83.9	0
84	0
84.1	0
84.2	0
84.3	0
84.4	0
84.5	0
84.6	0
84.7	0
84.8	0
84.9	0
85	0
85.1	0
85.2	0
85.3	0
85.4	0
85.5	0
85.6	0
85.7	0
85.8	0
85.9	0
86	0
86.1	0
86.2	0
86.3	0
86.4	0
86.5	0
86.6	0
86.7	0
86.8	0
86.9	0
87	0
87.1	0
87.2	0
87.3	0
87.4	0
87.5	0
87.6	0
87.7	0
87.8	0
87.9	0
88	0
88.1	0
88.2	0
88.3	0
88.4	0
88.5	0
88.6	0
88.7	0
88.8	0
88.9	0
89	0
89.1	0
89.2	0
89.3	0
89.4	0
89.5	0
89.6	0
89.7	0
89.8	0
89.9	0
90	0
90.1	0
90.2	0
90.3	0
90.4	0
90.5	0
90.6	0
90.7	0
90.8	0
90.9	0
91	0
91.1	0
91.2	0
91.3	0
91.4	0
91.5	0
91.6	0
91.7	0
91.8	0
91.9	0
92	0
92.1	0
92.2	0
92.3	0
92.4	0
92.5	0
92.6	0
92.7	0
92.8	0
92.9	0
93	0
93.1	0
93.2	0
93.3	0
93.4	0
93.5	0
93.6	0
93.7	0
93.8	0
93.9	0
94	0
94.1	0
94.2	0
94.3	0
94.4	0
94.5	0
94.6	0
94.7	0
94.8	0
94.9	0
95	0
95.1	0
95.2	0
95.3	0
95.4	0
95.5	0
95.6	0
95.7	0
95.8	0
95.9	0
96	0
96.1	0
96.2	0
96.3	0
96.4	0
96.5	0
96.6	0
96.7	0
96.8	0
96.9	0
97	0
97.1	0
97.2	0
97.3	0
97.4	0
97.5	0
97.6	0
97.7	0
97.8	0
97.9	0
98	0
98.1	0
98.2	0
98.3	0
98.4	0
98.5	0
98.6	0
98.7	0
98.8	0
98.9	0
99	0
99.1	0
99.2	0
99.3	0
99.4	0
99.5	0
99.6	0
99.7	0
99.8	0
99.9	0
100	0
100.1	0.889667
100.2	0.973667
100.3	0.9855
100.4	0.987167
100.5	0.986833
100.6	0.987
100.7	0.989167
100.8	0.987833
100.9	0.987
101	0.986333
101.1	0.987333
101.2	0.9905
101.3	0.989333
101.4	0.989
101.5	0.989333
101.6	0.989
101.7	0.987833
101.8	0.988333
101.9	0.987333
102	0.988
102.1	0.988167
102.2	0.986333
102.3	0.9865
102.4	0.987667
102.5	0.988667
102.6	0.989333
102.7	0.986833
102.8	0.9895
102.9	0.9905
103	0.987167
103.1	0.989333
103.2	0.989167
103.3	0.988833
103.4	0.988667
103.5	0.989
103.6	0.990333
103.7	0.9905
103.8	0.990333
103.9	0.989667
104	0.989333
104.1	0.990333
104.2	0.991
104.3	0.991333
104.4	0.989
104.5	0.989833
104.6	0.989833
104.7	0.990333
104.8	0.991833
104.9	0.988333
105	0.991167
105.1	0.990833
105.2	0.989833
105.3	0.989333
105.4	0.9895
105.5	0.991667
105.6	0.991667
105.7	0.989167
105.8	0.991
105.9	0.989333
106	0.990833
106.1	0.989
106.2	0.9905
106.3	0.992667
106.4	0.990833
106.5	0.990333
106.6	0.992333
106.7	0.993333
106.8	0.991333
106.9	0.990333
107	0.991
107.1	0.992333
107.2	0.991
107.3	0.99
107.4	0.992167
107.5	0.99
107.6	0.9895
107.7	0.990833
107.8	0.9895
107.9	0.990833
108	0.993667
108.1	0.991
108.2	0.9905
108.3	0.992333
108.4	0.992667
108.5	0.991667
108.6	0.991667
108.7	0.991
108.8	0.991333
108.9	0.992
109	0.991833
109.1	0.991333
109.2	0.992333
109.3	0.992667
109.4	0.992333
109.5	0.991833
109.6	0.9925
109.7	0.9905
109.8	0.990167
109.9	0.9915
110	0.992167
110.1	0.993833
110.2	0.993
110.3	0.989667
110.4	0.992833
110.5	0.991833
110.6	0.9915
110.7	0.992333
110.8	0.991333
110.9	0.993
111	0.9925
111.1	0.991333
111.2	0.990667
111.3	0.9925
111.4	0.9945
111.5	0.994
111.6	0.9925
111.7	0.992167
111.8	0.993333
111.9	0.992
112	0.993167
112.1	0.993667
112.2	0.992167
112.3	0.990833
112.4	0.992167
112.5	0.992833
112.6	0.9935
112.7	0.992
112.8	0.992833
112.9	0.9945
113	0.993333
113.1	0.994
113.2	0.991167
113.3	0.990667
113.4	0.9925
113.5	0.993667
113.6	0.993167
113.7	0.991667
113.8	0.994
113.9	0.993667
114	0.994333
114.1	0.994667
114.2	0.994167
114.3	0.993833
114.4	0.992667
114.5	0.9935
114.6	0.9945
114.7	0.991833
114.8	0.991667
114.9	0.992667
115	0.993
115.1	0.992667
115.2	0.993333
115.3	0.992833
115.4	0.995167
115.5	0.994
115.6	0.993333
115.7	0.9925
115.8	0.992833
115.9	0.993
116	0.994167
116.1	0.992833
116.2	0.995
116.3	0.995
116.4	0.993667
116.5	0.992667
116.6	0.995
116.7	0.9945
116.8	0.995167
116.9	0.9935
117	0.994833
117.1	0.992833
117.2	0.992
117.3	0.995167
117.4	0.994
117.5	0.993167
117.6	0.994167
117.7	0.993833
117.8	0.9955
117.9	0.993833
118	0.995833
118.1	0.995167
118.2	0.9955
118.3	0.992667
118.4	0.992667
118.5	0.993833
118.6	0.993167
118.7	0.994333
118.8	0.994833
118.9	0.994
119	0.994
119.1	0.9945
119.2	0.996167
119.3	0.994833
119.4	0.9945
119.5	0.993167
119.6	0.992833
119.7	0.9945
119.8	0.994833
119.9	0.994667
120	0.996333
120.1	0.995
120.2	0.996
120.3	0.996
120.4	0.996333
120.5	0.995333
120.6	0.996667
120.7	0.994833
120.8	0.996
120.9	0.995833
121	0.996167
121.1	0.9955
121.2	0.995667
121.3	0.995
121.4	0.995833
121.5	0.995333
121.6	0.996167
121.7	0.994333
121.8	0.994
121.9	0.994333
122	0.994833
122.1	0.995333
122.2	0.995833
122.3	0.995167
122.4	0.996167
122.5	0.9955
122.6	0.9945
122.7	0.996333
122.8	0.995833
122.9	0.994833
123	0.9955
123.1	0.995667
123.2	0.995333
123.3	0.995
123.4	0.996167
123.5	0.995333
123.6	0.9955
123.7	0.994333
123.8	0.9965
123.9	0.9945
124	0.994333
124.1	0.995667
124.2	0.994167
124.3	0.996667
124.4	0.994667
124.5	0.9935
124.6	0.996333
124.7	0.996
124.8	0.994833
124.9	0.996
125	0.995833
125.1	0.994333
125.2	0.9955
125.3	0.9945
125.4	0.996333
125.5	0.996
125.6	0.994833
125.7	0.997333
125.8	0.996667
125.9	0.995
126	0.995333
126.1	0.997167
126.2	0.997
126.3	0.9965
126.4	0.9965
126.5	0.997333
126.6	0.996
126.7	0.995
126.8	0.9975
126.9	0.995333
127	0.993167
127.1	0.994667
127.2	0.996
127.3	0.995167
127.4	0.996667
127.5	0.997167
127.6	0.995833
127.7	0.9965
127.8	0.996
127.9	0.995167
128	0.9945
128.1	0.997167
128.2	0.996
128.3	0.9965
128.4	0.996167
128.5	0.994167
128.6	0.996833
128.7	0.997333
128.8	0.997667
128.9	0.995167
129	0.993667
129.1	0.9965
129.2	0.996
129.3	0.996167
129.4	0.996
129.5	0.995667
129.6	0.9965
129.7	0.995833
129.8	0.996833
129.9	0.997
130	0.9955
130.1	0.996167
130.2	0.996833
130.3	0.995667
130.4	0.995167
130.5	0.995
130.6	0.995333
130.7	0.996667
130.8	0.995667
130.9	0.995167
131	0.995667
131.1	0.9965
131.2	0.996833
131.3	0.997833
131.4	0.995
131.5	0.9965
131.6	0.996167
131.7	0.996667
131.8	0.9965
131.9	0.9955
132	0.996167
132.1	0.996333
132.2	0.996167
132.3	0.995667
132.4	0.995833
132.5	0.995833
132.6	0.9955
132.7	0.996667
132.8	0.997
132.9	0.996333
133	0.997667
133.1	0.996667
133.2	0.996333
133.3	0.996333
133.4	0.9965
133.5	0.997333
133.6	0.998333
133.7	0.996833
133.8	0.9975
133.9	0.996667
134	0.995667
134.1	0.994833
134.2	0.996
134.3	0.996833
134.4	0.995667
134.5	0.997167
134.6	0.997167
134.7	0.995667
134.8	0.994167
134.9	0.996
135	0.996833
135.1	0.995833
135.2	0.9965
135.3	0.997333
135.4	0.9975
135.5	0.997
135.6	0.996333
135.7	0.997667
135.8	0.998
135.9	0.997167
136	0.996
136.1	0.997167
136.2	0.996
136.3	0.997333
136.4	0.9955
136.5	0.997
136.6	0.996333
136.7	0.996
136.8	0.996667
136.9	0.997667
137	0.9965
137.1	0.995167
137.2	0.997
137.3	0.9965
137.4	0.996667
137.5	0.997333
137.6	0.996667
137.7	0.996833
137.8	0.995833
137.9	0.996167
138	0.997167
138.1	0.997833
138.2	0.996667
138.3	0.996
138.4	0.995333
138.5	0.996
138.6	0.997333
138.7	0.9975
138.8	0.997167
138.9	0.996167
139	0.996333
139.1	0.997833
139.2	0.9975
139.3	0.996333
139.4	0.997333
139.5	0.997333
139.6	0.997167
139.7	0.997333
139.8	0.997167
139.9	0.996167
140	0.996333
140.1	0.997
140.2	0.997833
140.3	0.996667
140.4	0.997667
140.5	0.997667
140.6	0.996333
140.7	0.996833
140.8	0.997167
140.9	0.996667
141	0.998333
141.1	0.997
141.2	0.997667
141.3	0.998167
141.4	0.996167
141.5	0.996833
141.6	0.996667
141.7	0.997
141.8	0.995167
141.9	0.996833
142	0.996333
142.1	0.998167
142.2	0.9985
142.3	0.996333
142.4	0.996833
142.5	0.997333
142.6	0.997
142.7	0.997167
142.8	0.997
142.9	0.997
143	0.997
143.1	0.998667
143.2	0.995833
143.3	0.996
143.4	0.9965
143.5	0.998
143.6	0.9965
143.7	0.997333
143.8	0.997833
143.9	0.996333
144	0.996667
144.1	0.9965
144.2	0.996833
144.3	0.997
144.4	0.9975
144.5	0.996667
144.6	0.996667
144.7	0.997667
144.8	0.997333
144.9	0.996833
145	0.995833
145.1	0.997167
145.2	0.997
145.3	0.997167
145.4	0.996833
145.5	0.997333
145.6	0.9965
145.7	0.997667
145.8	0.9985
145.9	0.995333
146	0.996833
146.1	0.997667
146.2	0.996833
146.3	0.996667
146.4	0.998167
146.5	0.998
146.6	0.997167
146.7	0.996167
146.8	0.997167
146.9	0.998
147	0.998333
147.1	0.997
147.2	0.997167
147.3	0.997
147.4	0.996167
147.5	0.995833
147.6	0.996333
147.7	0.996833
147.8	0.997
147.9	0.997667
148	0.997333
148.1	0.9975
148.2	0.996333
148.3	0.997333
148.4	0.997333
148.5	0.998
148.6	0.996333
148.7	0.996667
148.8	0.997
148.9	0.9965
149	0.995833
149.1	0.997
149.2	0.997833
149.3	0.997667
149.4	0.997167
149.5	0.9975
149.6	0.9975
149.7	0.997167
149.8	0.997167
149.9	0.9975
150	0.997667
150.1	0.998333
150.2	0.998
150.3	0.998333
150.4	0.997667
150.5	0.9975
150.6	0.997333
150.7	0.997833
150.8	0.998333
150.9	0.997667
151	0.9975
151.1	0.997333
151.2	0.997333
151.3	0.997167
151.4	0.997333
151.5	0.996833
151.6	0.9965
151.7	0.996167
151.8	0.997833
151.9	0.997333
152	0.995333
152.1	0.996667
152.2	0.997167
152.3	0.997333
152.4	0.997
152.5	0.9965
152.6	0.996833
152.7	0.998167
152.8	0.997333
152.9	0.9965
153	0.996833
153.1	0.997333
153.2	0.9965
153.3	0.997167
153.4	0.996667
153.5	0.997333
153.6	0.997167
153.7	0.996167
153.8	0.996333
153.9	0.998167
154	0.997
154.1	0.996667
154.2	0.997167
154.3	0.998667
154.4	0.998333
154.5	0.998167
154.6	0.998667
154.7	0.997833
154.8	0.998333
154.9	0.997667
155	0.997
155.1	0.998
155.2	0.997167
155.3	0.998167
155.4	0.998
155.5	0.9985
155.6	0.9975
155.7	0.998
155.8	0.996833
155.9	0.997167
156	0.998667
156.1	0.997833
156.2	0.997833
156.3	0.997
156.4	0.997833
156.5	0.9975
156.6	0.997333
156.7	0.9975
156.8	0.996333
156.9	0.997667
157	0.998167
157.1	0.997667
157.2	0.9975
157.3	0.997167
157.4	0.997333
157.5	0.997
157.6	0.997833
157.7	0.9975
157.8	0.997667
157.9	0.997667
158	0.997333
158.1	0.997333
158.2	0.998167
158.3	0.998
158.4	0.997833
158.5	0.9985
158.6	0.999
158.7	0.998667
158.8	0.997
158.9	0.9985
159	0.9965
159.1	0.997333
159.2	0.9975
159.3	0.9975
159.4	0.9975
159.5	0.998167
159.6	0.998333
159.7	0.997167
159.8	0.997833
159.9	0.9975
160	0.9975
160.1	0.997333
160.2	0.998167
160.3	0.997833
160.4	0.996333
160.5	0.997
160.6	0.997667
160.7	0.996667
160.8	0.998
160.9	0.997667
161	0.998667
161.1	0.996667
161.2	0.998333
161.3	0.998
161.4	0.997333
161.5	0.996167
161.6	0.997333
161.7	0.998667
161.8	0.996
161.9	0.997667
162	0.9985
162.1	0.998833
162.2	0.9985
162.3	0.997667
162.4	0.9975
162.5	0.997333
162.6	0.998
162.7	0.998333
162.8	0.9985
162.9	0.997667
163	0.997167
163.1	0.997833
163.2	0.997667
163.3	0.998
163.4	0.998
163.5	0.997667
163.6	0.998
163.7	0.998
163.8	0.998333
163.9	0.998333
164	0.997
164.1	0.9975
164.2	0.997833
164.3	0.999167
164.4	0.9985
164.5	0.997833
164.6	0.998
164.7	0.997667
164.8	0.997667
164.9	0.998
165	0.997667
165.1	0.998167
165.2	0.996667
165.3	0.998167
165.4	0.998667
165.5	0.998
165.6	0.996833
165.7	0.9985
165.8	0.9975
165.9	0.9975
166	0.997167
166.1	0.997667
166.2	0.998
166.3	0.9975
166.4	0.9985
166.5	0.998167
166.6	0.998667
166.7	0.998833
166.8	0.998
166.9	0.998
167	0.9975
167.1	0.998167
167.2	0.997167
167.3	0.998
167.4	0.997833
167.5	0.9975
167.6	0.998833
167.7	0.997167
167.8	0.997
167.9	0.997667
168	0.998
168.1	0.998333
168.2	0.998167
168.3	0.998
168.4	0.997833
168.5	0.997667
168.6	0.997333
168.7	0.998
168.8	0.998
168.9	0.997667
169	0.997333
169.1	0.997833
169.2	0.998167
169.3	0.997833
169.4	0.998667
169.5	0.998
169.6	0.997
169.7	0.997833
169.8	0.999
169.9	0.996833
170	0.997833
170.1	0.997667
170.2	0.998
170.3	0.9985
170.4	0.9985
170.5	0.998333
170.6	0.997667
170.7	0.997833
170.8	0.997667
170.9	0.997167
171	0.998
171.1	0.998667
171.2	0.998333
171.3	0.998333
171.4	0.998167
171.5	0.998167
171.6	0.996833
171.7	0.9975
171.8	0.998667
171.9	0.9985
172	0.9965
172.1	0.997
172.2	0.9985
172.3	0.998333
172.4	0.996667
172.5	0.997167
172.6	0.998333
172.7	0.998333
172.8	0.998167
172.9	0.998
173	0.998167
173.1	0.997833
173.2	0.997667
173.3	0.9985
173.4	0.998
173.5	0.998167
173.6	0.998333
173.7	0.996667
173.8	0.997333
173.9	0.997667
174	0.9965
174.1	0.9985
174.2	0.996833
174.3	0.998167
174.4	0.997333
174.5	0.997
174.6	0.997833
174.7	0.9975
174.8	0.997
174.9	0.999
175	0.998333
175.1	0.998333
175.2	0.998167
175.3	0.9975
175.4	0.997833
175.5	0.997167
175.6	0.997833
175.7	0.9975
175.8	0.9985
175.9	0.998
176	0.998333
176.1	0.9985
176.2	0.998167
176.3	0.998333
176.4	0.998
176.5	0.9975
176.6	0.997833
176.7	0.998
176.8	0.998333
176.9	0.9985
177	0.997333
177.1	0.997667
177.2	0.997667
177.3	0.997333
177.4	0.997167
177.5	0.997833
177.6	0.997167
177.7	0.996833
177.8	0.997667
177.9	0.997333
178	0.998333
178.1	0.998167
178.2	0.9985
178.3	0.998333
178.4	0.996667
178.5	0.997
178.6	0.998
178.7	0.997
178.8	0.998167
178.9	0.997833
179	0.997667
179.1	0.997833
179.2	0.998
179.3	0.9985
179.4	0.998
179.5	0.997833
179.6	0.997833
179.7	0.9975
179.8	0.996667
179.9	0.995333
180	0.998
180.1	0.998
180.2	0.998167
180.3	0.997167
180.4	0.998
180.5	0.997333
180.6	0.997833
180.7	0.9975
180.8	0.997167
180.9	0.997167
181	0.997167
181.1	0.997
181.2	0.998833
181.3	0.998167
181.4	0.9985
181.5	0.998
181.6	0.997667
181.7	0.998
181.8	0.998667
181.9	0.998667
182	0.995667
182.1	0.9975
182.2	0.997333
182.3	0.9975
182.4	0.997833
182.5	0.998
182.6	0.997167
182.7	0.9985
182.8	0.997667
182.9	0.996667
183	0.997833
183.1	0.998333
183.2	0.9975
183.3	0.997667
183.4	0.997667
183.5	0.997667
183.6	0.998333
183.7	0.998
183.8	0.996667
183.9	0.997833
184	0.999333
184.1	0.997333
184.2	0.997667
184.3	0.997667
184.4	0.998167
184.5	0.998167
184.6	0.998167
184.7	0.998
184.8	0.997833
184.9	0.998167
185	0.997667
185.1	0.997333
185.2	0.996333
185.3	0.997167
185.4	0.999
185.5	0.998167
185.6	0.997333
185.7	0.9985
185.8	0.998
185.9	0.998167
186	0.999333
186.1	0.998667
186.2	0.997833
186.3	0.997667
186.4	0.996667
186.5	0.9975
186.6	0.998833
186.7	0.997667
186.8	0.9975
186.9	0.997
187	0.997667
187.1	0.997833
187.2	0.998167
187.3	0.998
187.4	0.997
187.5	0.997333
187.6	0.997167
187.7	0.997833
187.8	0.9975
187.9	0.997833
188	0.997667
188.1	0.998
188.2	0.997333
188.3	0.997833
188.4	0.997
188.5	0.997167
188.6	0.996667
188.7	0.9975
188.8	0.997833
188.9	0.9975
189	0.997167
189.1	0.998
189.2	0.996833
189.3	0.998
189.4	0.997667
189.5	0.996833
189.6	0.997667
189.7	0.997833
189.8	0.998
189.9	0.998333
190	0.997167
190.1	0.997333
190.2	0.997333
190.3	0.998167
190.4	0.997167
190.5	0.9965
190.6	0.998
190.7	0.998667
190.8	0.997667
190.9	0.997333
191	0.9975
191.1	0.998
191.2	0.998167
191.3	0.997
191.4	0.997667
191.5	0.998167
191.6	0.9975
191.7	0.997
191.8	0.999333
191.9	0.9975
192	0.9985
192.1	0.997667
192.2	0.998167
192.3	0.9975
192.4	0.998
192.5	0.998
192.6	0.9975
192.7	0.998333
192.8	0.998
192.9	0.998
193	0.998
193.1	0.998333
193.2	0.998
193.3	0.997667
193.4	0.998167
193.5	0.997
193.6	0.998333
193.7	0.997
193.8	0.9975
193.9	0.998167
194	0.9975
194.1	0.997667
194.2	0.9975
194.3	0.998
194.4	0.998167
194.5	0.997833
194.6	0.997333
194.7	0.997833
194.8	0.9965
194.9	0.997333
195	0.997333
195.1	0.9965
195.2	0.997667
195.3	0.998
195.4	0.998167
195.5	0.996667
195.6	0.997833
195.7	0.998333
195.8	0.997333
195.9	0.996667
196	0.998
196.1	0.998
196.2	0.997
196.3	0.998
196.4	0.999
196.5	0.998333
196.6	0.998167
196.7	0.997667
196.8	0.9975
196.9	0.997333
197	0.997167
197.1	0.9985
197.2	0.998667
197.3	0.997833
197.4	0.997667
197.5	0.997833
197.6	0.998
197.7	0.997
197.8	0.998167
197.9	0.996833
198	0.997833
198.1	0.997167
198.2	0.997333
198.3	0.998167
198.4	0.997167
198.5	0.9975
198.6	0.998333
198.7	0.996833
198.8	0.998833
198.9	0.996833
199	0.9975
199.1	0.997833
199.2	0.997167
199.3	0.996667
199.4	0.997667
199.5	0.998833
199.6	0.997333
199.7	0.997667
199.8	0.997833
199.9	0.999
200	0.998333
[truncated: 14,000 more rows]
