# Supplementary material for: Bayesian inference of kinetic schemes for ion channels by Kalman filtering
Source: eLife journal article supplement (doi:10.7554/elife.62714), 2022-05-04
Supplement: fig4-data2 [file 1_Sim_N_3000_Strom_MW.xlsx]

## Sheet: Tabelle1
0.1	0
0.2	0
0.3	0
0.4	0
0.5	0
0.6	0
0.7	0
0.8	0
0.9	0
1	0
1.1	0
1.2	0
1.3	0
1.4	0
1.5	0
1.6	0
1.7	0
1.8	0
1.9	0
2	0
2.1	0
2.2	0
2.3	0
2.4	0
2.5	0
2.6	0
2.7	0
2.8	0
2.9	0
3	0
3.1	0
3.2	0
3.3	0
3.4	0
3.5	0
3.6	0
3.7	0
3.8	0
3.9	0
4	0
4.1	0
4.2	0
4.3	0
4.4	0
4.5	0
4.6	0
4.7	0
4.8	0
4.9	0
5	0
5.1	0
5.2	0
5.3	0
5.4	0
5.5	0
5.6	0
5.7	0
5.8	0
5.9	0
6	0
6.1	0
6.2	0
6.3	0
6.4	0
6.5	0
6.6	0
6.7	0
6.8	0
6.9	0
7	0
7.1	0
7.2	0
7.3	0
7.4	0
7.5	0
7.6	0
7.7	0
7.8	0
7.9	0
8	0
8.1	0
8.2	0
8.3	0
8.4	0
8.5	0
8.6	0
8.7	0
8.8	0
8.9	0
9	0
9.1	0
9.2	0
9.3	0
9.4	0
9.5	0
9.6	0
9.7	0
9.8	0
9.9	0
10	0
10.1	0
10.2	0
10.3	0
10.4	0
10.5	0
10.6	0
10.7	0
10.8	0
10.9	0
11	0
11.1	0
11.2	0
11.3	0
11.4	0
11.5	0
11.6	0
11.7	0
11.8	0
11.9	0
12	0
12.1	0
12.2	0
12.3	0
12.4	0
12.5	0
12.6	0
12.7	0
12.8	0
12.9	0
13	0
13.1	0
13.2	0
13.3	0
13.4	0
13.5	0
13.6	0
13.7	0
13.8	0
13.9	0
14	0
14.1	0
14.2	0
14.3	0
14.4	0
14.5	0
14.6	0
14.7	0
14.8	0
14.9	0
15	0
15.1	0
15.2	0
15.3	0
15.4	0
15.5	0
15.6	0
15.7	0
15.8	0
15.9	0
16	0
16.1	0
16.2	0
16.3	0
16.4	0
16.5	0
16.6	0
16.7	0
16.8	0
16.9	0
17	0
17.1	0
17.2	0
17.3	0
17.4	0
17.5	0
17.6	0
17.7	0
17.8	0
17.9	0
18	0
18.1	0
18.2	0
18.3	0
18.4	0
18.5	0
18.6	0
18.7	0
18.8	0
18.9	0
19	0
19.1	0
19.2	0
19.3	0
19.4	0
19.5	0
19.6	0
19.7	0
19.8	0
19.9	0
20	0
20.1	0
20.2	0
20.3	0
20.4	0
20.5	0
20.6	0
20.7	0
20.8	0
20.9	0
21	0
21.1	0
21.2	0
21.3	0
21.4	0
21.5	0
21.6	0
21.7	0
21.8	0
21.9	0
22	0
22.1	0
22.2	0
22.3	0
22.4	0
22.5	0
22.6	0
22.7	0
22.8	0
22.9	0
23	0
23.1	0
23.2	0
23.3	0
23.4	0
23.5	0
23.6	0
23.7	0
23.8	0
23.9	0
24	0
24.1	0
24.2	0
24.3	0
24.4	0
24.5	0
24.6	0
24.7	0
24.8	0
24.9	0
25	0
25.1	0
25.2	0
25.3	0
25.4	0
25.5	0
25.6	0
25.7	0
25.8	0
25.9	0
26	0
26.1	0
26.2	0
26.3	0
26.4	0
26.5	0
26.6	0
26.7	0
26.8	0
26.9	0
27	0
27.1	0
27.2	0
27.3	0
27.4	0
27.5	0
27.6	0
27.7	0
27.8	0
27.9	0
28	0
28.1	0
28.2	0
28.3	0
28.4	0
28.5	0
28.6	0
28.7	0
28.8	0
28.9	0
29	0
29.1	0
29.2	0
29.3	0
29.4	0
29.5	0
29.6	0
29.7	0
29.8	0
29.9	0
30	0
30.1	0
30.2	0
30.3	0
30.4	0
30.5	0
30.6	0
30.7	0
30.8	0
30.9	0
31	0
31.1	0
31.2	0
31.3	0
31.4	0
31.5	0
31.6	0
31.7	0
31.8	0
31.9	0
32	0
32.1	0
32.2	0
32.3	0
32.4	0
32.5	0
32.6	0
32.7	0
32.8	0
32.9	0
33	0
33.1	0
33.2	0
33.3	0
33.4	0
33.5	0
33.6	0
33.7	0
33.8	0
33.9	0
34	0
34.1	0
34.2	0
34.3	0
34.4	0
34.5	0
34.6	0
34.7	0
34.8	0
34.9	0
35	0
35.1	0
35.2	0
35.3	0
35.4	0
35.5	0
35.6	0
35.7	0
35.8	0
35.9	0
36	0
36.1	0
36.2	0
36.3	0
36.4	0
36.5	0
36.6	0
36.7	0
36.8	0
36.9	0
37	0
37.1	0
37.2	0
37.3	0
37.4	0
37.5	0
37.6	0
37.7	0
37.8	0
37.9	0
38	0
38.1	0
38.2	0
38.3	0
38.4	0
38.5	0
38.6	0
38.7	0
38.8	0
38.9	0
39	0
39.1	0
39.2	0
39.3	0
39.4	0
39.5	0
39.6	0
39.7	0
39.8	0
39.9	0
40	0
40.1	0
40.2	0
40.3	0
40.4	0
40.5	0
40.6	0
40.7	0
40.8	0
40.9	0
41	0
41.1	0
41.2	0
41.3	0
41.4	0
41.5	0
41.6	0
41.7	0
41.8	0
41.9	0
42	0
42.1	0
42.2	0
42.3	0
42.4	0
42.5	0
42.6	0
42.7	0
42.8	0
42.9	0
43	0
43.1	0
43.2	0
43.3	0
43.4	0
43.5	0
43.6	0
43.7	0
43.8	0
43.9	0
44	0
44.1	0
44.2	0
44.3	0
44.4	0
44.5	0
44.6	0
44.7	0
44.8	0
44.9	0
45	0
45.1	0
45.2	0
45.3	0
45.4	0
45.5	0
45.6	0
45.7	0
45.8	0
45.9	0
46	0
46.1	0
46.2	0
46.3	0
46.4	0
46.5	0
46.6	0
46.7	0
46.8	0
46.9	0
47	0
47.1	0
47.2	0
47.3	0
47.4	0
47.5	0
47.6	0
47.7	0
47.8	0
47.9	0
48	0
48.1	0
48.2	0
48.3	0
48.4	0
48.5	0
48.6	0
48.7	0
48.8	0
48.9	0
49	0
49.1	0
49.2	0
49.3	0
49.4	0
49.5	0
49.6	0
49.7	0
49.8	0
49.9	0
50	0
50.1	0
50.2	0
50.3	0
50.4	0
50.5	0
50.6	0
50.7	0
50.8	0
50.9	0
51	0
51.1	0
51.2	0
51.3	0
51.4	0
51.5	0
51.6	0
51.7	0
51.8	0
51.9	0
52	0
52.1	0
52.2	0
52.3	0
52.4	0
52.5	0
52.6	0
52.7	0
52.8	0
52.9	0
53	0
53.1	0
53.2	0
53.3	0
53.4	0
53.5	0
53.6	0
53.7	0
53.8	0
53.9	0
54	0
54.1	0
54.2	0
54.3	0
54.4	0
54.5	0
54.6	0
54.7	0
54.8	0
54.9	0
55	0
55.1	0
55.2	0
55.3	0
55.4	0
55.5	0
55.6	0
55.7	0
55.8	0
55.9	0
56	0
56.1	0
56.2	0
56.3	0
56.4	0
56.5	0
56.6	0
56.7	0
56.8	0
56.9	0
57	0
57.1	0
57.2	0
57.3	0
57.4	0
57.5	0
57.6	0
57.7	0
57.8	0
57.9	0
58	0
58.1	0
58.2	0
58.3	0
58.4	0
58.5	0
58.6	0
58.7	0
58.8	0
58.9	0
59	0
59.1	0
59.2	0
59.3	0
59.4	0
59.5	0
59.6	0
59.7	0
59.8	0
59.9	0
60	0
60.1	0
60.2	0
60.3	0
60.4	0
60.5	0
60.6	0
60.7	0
60.8	0
60.9	0
61	0
61.1	0
61.2	0
61.3	0
61.4	0
61.5	0
61.6	0
61.7	0
61.8	0
61.9	0
62	0
62.1	0
62.2	0
62.3	0
62.4	0
62.5	0
62.6	0
62.7	0
62.8	0
62.9	0
63	0
63.1	0
63.2	0
63.3	0
63.4	0
63.5	0
63.6	0
63.7	0
63.8	0
63.9	0
64	0
64.1	0
64.2	0
64.3	0
64.4	0
64.5	0
64.6	0
64.7	0
64.8	0
64.9	0
65	0
65.1	0
65.2	0
65.3	0
65.4	0
65.5	0
65.6	0
65.7	0
65.8	0
65.9	0
66	0
66.1	0
66.2	0
66.3	0
66.4	0
66.5	0
66.6	0
66.7	0
66.8	0
66.9	0
67	0
67.1	0
67.2	0
67.3	0
67.4	0
67.5	0
67.6	0
67.7	0
67.8	0
67.9	0
68	0
68.1	0
68.2	0
68.3	0
68.4	0
68.5	0
68.6	0
68.7	0
68.8	0
68.9	0
69	0
69.1	0
69.2	0
69.3	0
69.4	0
69.5	0
69.6	0
69.7	0
69.8	0
69.9	0
70	0
70.1	0
70.2	0
70.3	0
70.4	0
70.5	0
70.6	0
70.7	0
70.8	0
70.9	0
71	0
71.1	0
71.2	0
71.3	0
71.4	0
71.5	0
71.6	0
71.7	0
71.8	0
71.9	0
72	0
72.1	0
72.2	0
72.3	0
72.4	0
72.5	0
72.6	0
72.7	0
72.8	0
72.9	0
73	0
73.1	0
73.2	0
73.3	0
73.4	0
73.5	0
73.6	0
73.7	0
73.8	0
73.9	0
74	0
74.1	0
74.2	0
74.3	0
74.4	0
74.5	0
74.6	0
74.7	0
74.8	0
74.9	0
75	0
75.1	0
75.2	0
75.3	0
75.4	0
75.5	0
75.6	0
75.7	0
75.8	0
75.9	0
76	0
76.1	0
76.2	0
76.3	0
76.4	0
76.5	0
76.6	0
76.7	0
76.8	0
76.9	0
77	0
77.1	0
77.2	0
77.3	0
77.4	0
77.5	0
77.6	0
77.7	0
77.8	0
77.9	0
78	0
78.1	0
78.2	0
78.3	0
78.4	0
78.5	0
78.6	0
78.7	0
78.8	0
78.9	0
79	0
79.1	0
79.2	0
79.3	0
79.4	0
79.5	0
79.6	0
79.7	0
79.8	0
79.9	0
80	0
80.1	0
80.2	0
80.3	0
80.4	0
80.5	0
80.6	0
80.7	0
80.8	0
80.9	0
81	0
81.1	0
81.2	0
81.3	0
81.4	0
81.5	0
81.6	0
81.7	0
81.8	0
81.9	0
82	0
82.1	0
82.2	0
82.3	0
82.4	0
82.5	0
82.6	0
82.7	0
82.8	0
82.9	0
83	0
83.1	0
83.2	0
83.3	0
83.4	0
83.5	0
83.6	0
83.7	0
83.8	0
83.9	0
84	0
84.1	0
84.2	0
84.3	0
84.4	0
84.5	0
84.6	0
84.7	0
84.8	0
84.9	0
85	0
85.1	0
85.2	0
85.3	0
85.4	0
85.5	0
85.6	0
85.7	0
85.8	0
85.9	0
86	0
86.1	0
86.2	0
86.3	0
86.4	0
86.5	0
86.6	0
86.7	0
86.8	0
86.9	0
87	0
87.1	0
87.2	0
87.3	0
87.4	0
87.5	0
87.6	0
87.7	0
87.8	0
87.9	0
88	0
88.1	0
88.2	0
88.3	0
88.4	0
88.5	0
88.6	0
88.7	0
88.8	0
88.9	0
89	0
89.1	0
89.2	0
89.3	0
89.4	0
89.5	0
89.6	0
89.7	0
89.8	0
89.9	0
90	0
90.1	0
90.2	0
90.3	0
90.4	0
90.5	0
90.6	0
90.7	0
90.8	0
90.9	0
91	0
91.1	0
91.2	0
91.3	0
91.4	0
91.5	0
91.6	0
91.7	0
91.8	0
91.9	0
92	0
92.1	0
92.2	0
92.3	0
92.4	0
92.5	0
92.6	0
92.7	0
92.8	0
92.9	0
93	0
93.1	0
93.2	0
93.3	0
93.4	0
93.5	0
93.6	0
93.7	0
93.8	0
93.9	0
94	0
94.1	0
94.2	0
94.3	0
94.4	0
94.5	0
94.6	0
94.7	0
94.8	0
94.9	0
95	0
95.1	0
95.2	0
95.3	0
95.4	0
95.5	0
95.6	0
95.7	0
95.8	0
95.9	0
96	0
96.1	0
96.2	0
96.3	0
96.4	0
96.5	0
96.6	0
96.7	0
96.8	0
96.9	0
97	0
97.1	0
97.2	0
97.3	0
97.4	0
97.5	0
97.6	0
97.7	0
97.8	0
97.9	0
98	0
98.1	0
98.2	0
98.3	0
98.4	0
98.5	0
98.6	0
98.7	0
98.8	0
98.9	0
99	0
99.1	0
99.2	0
99.3	0
99.4	0
99.5	0
99.6	0
99.7	0
99.8	0
99.9	0
100	0
100.1	0.00333333
100.2	0.00966667
100.3	0.015
100.4	0.0186667
100.5	0.0236667
100.6	0.03
100.7	0.0336667
100.8	0.0363333
100.9	0.0403333
101	0.0436667
101.1	0.0466667
101.2	0.0526667
101.3	0.056
101.4	0.0603333
101.5	0.067
101.6	0.0736667
101.7	0.078
101.8	0.0813333
101.9	0.0856667
102	0.0893333
102.1	0.0926667
102.2	0.098
102.3	0.105
102.4	0.109667
102.5	0.113667
102.6	0.117333
102.7	0.121667
102.8	0.125667
102.9	0.129667
103	0.133333
103.1	0.135333
103.2	0.138667
103.3	0.140667
103.4	0.143667
103.5	0.147667
103.6	0.152333
103.7	0.159
103.8	0.163667
103.9	0.166333
104	0.173
104.1	0.175667
104.2	0.177667
104.3	0.18
104.4	0.184
104.5	0.188333
104.6	0.191333
104.7	0.196
104.8	0.199667
104.9	0.204
105	0.209
105.1	0.211667
105.2	0.216
105.3	0.221667
105.4	0.226333
105.5	0.232333
105.6	0.235667
105.7	0.238333
105.8	0.239667
105.9	0.242
106	0.243667
106.1	0.247333
106.2	0.250667
106.3	0.253333
106.4	0.257
106.5	0.26
106.6	0.265667
106.7	0.268667
106.8	0.270667
106.9	0.274
107	0.278333
107.1	0.281333
107.2	0.284333
107.3	0.287333
107.4	0.289
107.5	0.294
107.6	0.297
107.7	0.301333
107.8	0.304
107.9	0.306333
108	0.308667
108.1	0.311667
108.2	0.315667
108.3	0.319667
108.4	0.323667
108.5	0.326
108.6	0.329333
108.7	0.332333
108.8	0.335333
108.9	0.336667
109	0.339667
109.1	0.342667
109.2	0.344333
109.3	0.345333
109.4	0.348667
109.5	0.353333
109.6	0.355667
109.7	0.358333
109.8	0.361667
109.9	0.363667
110	0.367
110.1	0.371
110.2	0.374
110.3	0.378
110.4	0.383
110.5	0.385333
110.6	0.387333
110.7	0.39
110.8	0.391333
110.9	0.392333
111	0.396
111.1	0.398333
111.2	0.400667
111.3	0.403333
111.4	0.406
111.5	0.409333
111.6	0.411667
111.7	0.416
111.8	0.417333
111.9	0.422
112	0.425333
112.1	0.428
112.2	0.428333
112.3	0.431
112.4	0.433333
112.5	0.435
112.6	0.436667
112.7	0.439333
112.8	0.441667
112.9	0.445667
113	0.447
113.1	0.449667
113.2	0.453333
113.3	0.455
113.4	0.457333
113.5	0.458333
113.6	0.460333
113.7	0.461333
113.8	0.463667
113.9	0.464333
114	0.469
114.1	0.469667
114.2	0.470333
114.3	0.472333
114.4	0.475667
114.5	0.476
114.6	0.476667
114.7	0.478667
114.8	0.482333
114.9	0.486
115	0.489
115.1	0.490667
115.2	0.493
115.3	0.495333
115.4	0.495333
115.5	0.496333
115.6	0.498333
115.7	0.499
115.8	0.501333
115.9	0.502
116	0.503333
116.1	0.504333
116.2	0.506333
116.3	0.510667
116.4	0.513333
116.5	0.517333
116.6	0.518333
116.7	0.518667
116.8	0.521
116.9	0.522333
117	0.525
117.1	0.526333
117.2	0.528333
117.3	0.529667
117.4	0.531667
117.5	0.535
117.6	0.538333
117.7	0.539333
117.8	0.543667
117.9	0.546667
118	0.548667
118.1	0.549667
118.2	0.550333
118.3	0.555333
118.4	0.558333
118.5	0.559333
118.6	0.559
118.7	0.560667
118.8	0.561333
118.9	0.564
119	0.566667
119.1	0.569
119.2	0.571
119.3	0.572333
119.4	0.573333
119.5	0.575333
119.6	0.578667
119.7	0.579667
119.8	0.580667
119.9	0.581667
120	0.583667
120.1	0.585333
120.2	0.589333
120.3	0.591333
120.4	0.592333
120.5	0.592667
120.6	0.594667
120.7	0.597333
120.8	0.599333
120.9	0.600667
121	0.602
121.1	0.602
121.2	0.603333
121.3	0.605333
121.4	0.606667
121.5	0.607
121.6	0.607
121.7	0.609667
121.8	0.611667
121.9	0.613667
122	0.616
122.1	0.617667
122.2	0.619667
122.3	0.621
122.4	0.624
122.5	0.627333
122.6	0.628333
122.7	0.630333
122.8	0.631333
122.9	0.633333
123	0.636667
123.1	0.639667
123.2	0.642
123.3	0.642333
123.4	0.643333
123.5	0.644333
123.6	0.646333
123.7	0.647667
123.8	0.647333
123.9	0.647333
124	0.648667
124.1	0.651
124.2	0.652333
124.3	0.654667
124.4	0.656
124.5	0.656333
124.6	0.657667
124.7	0.656667
124.8	0.655333
124.9	0.655
125	0.656
125.1	0.657667
125.2	0.66
125.3	0.661667
125.4	0.662
125.5	0.662667
125.6	0.663333
125.7	0.664
125.8	0.665
125.9	0.666
126	0.666667
126.1	0.667667
126.2	0.669
126.3	0.669333
126.4	0.670667
126.5	0.672333
126.6	0.672667
126.7	0.673
126.8	0.675
126.9	0.676
127	0.677
127.1	0.677
127.2	0.677667
127.3	0.677333
127.4	0.678
127.5	0.679
127.6	0.68
127.7	0.680333
127.8	0.681667
127.9	0.682667
128	0.684
128.1	0.684
128.2	0.686
128.3	0.686
128.4	0.686667
128.5	0.686667
128.6	0.687667
128.7	0.689
128.8	0.688667
128.9	0.688333
129	0.688333
129.1	0.69
129.2	0.691667
129.3	0.692
129.4	0.694
129.5	0.694333
129.6	0.695
129.7	0.696
129.8	0.695667
129.9	0.695667
130	0.695
130.1	0.693333
130.2	0.695
130.3	0.696
130.4	0.696667
130.5	0.698333
130.6	0.699667
130.7	0.700333
130.8	0.702
130.9	0.702
131	0.702
131.1	0.703667
131.2	0.704333
131.3	0.704667
131.4	0.705667
131.5	0.707333
131.6	0.706667
131.7	0.705667
131.8	0.705667
131.9	0.705
132	0.706667
132.1	0.705667
132.2	0.707
132.3	0.707333
132.4	0.708333
132.5	0.708333
132.6	0.709667
132.7	0.709667
132.8	0.709333
132.9	0.710333
133	0.712333
133.1	0.713
133.2	0.714333
133.3	0.715333
133.4	0.713667
133.5	0.715
133.6	0.716667
133.7	0.717333
133.8	0.717667
133.9	0.717333
134	0.717333
134.1	0.717
134.2	0.717333
134.3	0.717667
134.4	0.717667
134.5	0.717667
134.6	0.718667
134.7	0.717333
134.8	0.718667
134.9	0.718667
135	0.719333
135.1	0.72
135.2	0.719
135.3	0.72
135.4	0.721
135.5	0.721
135.6	0.721667
135.7	0.722333
135.8	0.723333
135.9	0.722333
136	0.723
136.1	0.723333
136.2	0.725
136.3	0.727667
136.4	0.728333
136.5	0.728
136.6	0.73
136.7	0.732
136.8	0.733667
136.9	0.734333
137	0.735333
137.1	0.735
137.2	0.735333
137.3	0.736333
137.4	0.737
137.5	0.736333
137.6	0.736667
137.7	0.737
137.8	0.738667
137.9	0.739333
138	0.738333
138.1	0.738333
138.2	0.739
138.3	0.738333
138.4	0.738667
138.5	0.739333
138.6	0.739667
138.7	0.740333
138.8	0.741
138.9	0.742667
139	0.742667
139.1	0.741333
139.2	0.742
139.3	0.742667
139.4	0.742667
139.5	0.743333
139.6	0.745333
139.7	0.746333
139.8	0.746667
139.9	0.747
140	0.746
140.1	0.747667
140.2	0.747
140.3	0.747333
140.4	0.747667
140.5	0.748
140.6	0.748333
140.7	0.749333
140.8	0.750333
140.9	0.75
141	0.752
141.1	0.751
141.2	0.752667
141.3	0.752333
141.4	0.752333
141.5	0.752667
141.6	0.752667
141.7	0.752
141.8	0.753333
141.9	0.754
142	0.754667
142.1	0.755667
142.2	0.756
142.3	0.755667
142.4	0.755
142.5	0.755667
142.6	0.755333
142.7	0.756333
142.8	0.757
142.9	0.758
143	0.759
143.1	0.758333
143.2	0.759333
143.3	0.76
143.4	0.759
143.5	0.76
143.6	0.761
143.7	0.759
143.8	0.759333
143.9	0.76
144	0.759333
144.1	0.760333
144.2	0.761667
144.3	0.761333
144.4	0.761667
144.5	0.762
144.6	0.761
144.7	0.761333
144.8	0.761333
144.9	0.762667
145	0.763667
145.1	0.763
145.2	0.761667
145.3	0.762667
145.4	0.764333
145.5	0.765
145.6	0.766
145.7	0.766667
145.8	0.767667
145.9	0.769
146	0.768333
146.1	0.768667
146.2	0.770667
146.3	0.77
146.4	0.769
146.5	0.770333
146.6	0.770667
146.7	0.771
146.8	0.770333
146.9	0.771667
147	0.771333
147.1	0.772
147.2	0.773333
147.3	0.773667
147.4	0.774
147.5	0.772667
147.6	0.772
147.7	0.772333
147.8	0.772333
147.9	0.772667
148	0.774
148.1	0.772667
148.2	0.772667
148.3	0.773
148.4	0.774
148.5	0.773667
148.6	0.775
148.7	0.774667
148.8	0.775
148.9	0.775667
149	0.776
149.1	0.776
149.2	0.777333
149.3	0.777
149.4	0.777
149.5	0.777667
149.6	0.778333
149.7	0.779333
149.8	0.780667
149.9	0.780333
150	0.78
150.1	0.779
150.2	0.778667
150.3	0.779667
150.4	0.779333
150.5	0.779667
150.6	0.779
150.7	0.779333
150.8	0.78
150.9	0.779667
151	0.780667
151.1	0.782
151.2	0.782333
151.3	0.783333
151.4	0.783667
151.5	0.784333
151.6	0.783667
151.7	0.786
151.8	0.787
151.9	0.788333
152	0.788667
152.1	0.788667
152.2	0.789333
152.3	0.788667
152.4	0.789333
152.5	0.788
152.6	0.788333
152.7	0.789333
152.8	0.791
152.9	0.791667
153	0.792333
153.1	0.792667
153.2	0.793
153.3	0.792
153.4	0.792
153.5	0.791
153.6	0.790333
153.7	0.791
153.8	0.790333
153.9	0.791333
154	0.792
154.1	0.792333
154.2	0.792667
154.3	0.792333
154.4	0.792333
154.5	0.793667
154.6	0.796333
154.7	0.796
154.8	0.797667
154.9	0.798667
155	0.799333
155.1	0.798333
155.2	0.798667
155.3	0.799
155.4	0.799667
155.5	0.799667
155.6	0.800667
155.7	0.801333
155.8	0.801667
155.9	0.804333
156	0.804
156.1	0.803
156.2	0.803333
156.3	0.803333
156.4	0.803333
156.5	0.803333
156.6	0.804
156.7	0.803667
156.8	0.804
156.9	0.804667
157	0.803333
157.1	0.804
157.2	0.806667
157.3	0.806333
157.4	0.805667
157.5	0.805333
157.6	0.804667
157.7	0.806
157.8	0.806333
157.9	0.805333
158	0.806
158.1	0.805
158.2	0.807
158.3	0.808667
158.4	0.808333
158.5	0.808
158.6	0.808333
158.7	0.808
158.8	0.808
158.9	0.808
159	0.808
159.1	0.809667
159.2	0.809667
159.3	0.809667
159.4	0.809667
159.5	0.81
159.6	0.810667
159.7	0.811667
159.8	0.812
159.9	0.812667
160	0.813
160.1	0.813333
160.2	0.812333
160.3	0.811333
160.4	0.812333
160.5	0.812333
160.6	0.812
160.7	0.812667
160.8	0.812333
160.9	0.813333
161	0.812333
161.1	0.812333
161.2	0.812
161.3	0.811
161.4	0.811
161.5	0.811
161.6	0.810333
161.7	0.810333
161.8	0.811
161.9	0.812333
162	0.813667
162.1	0.813333
162.2	0.813
162.3	0.813333
162.4	0.813333
162.5	0.813
162.6	0.813
162.7	0.813667
162.8	0.814667
162.9	0.815
163	0.815667
163.1	0.816
163.2	0.814667
163.3	0.814333
163.4	0.815333
163.5	0.816333
163.6	0.816
163.7	0.816
163.8	0.816667
163.9	0.816
164	0.817333
164.1	0.817333
164.2	0.819
164.3	0.82
164.4	0.819
164.5	0.819667
164.6	0.821
164.7	0.821333
164.8	0.821667
164.9	0.821333
165	0.822
165.1	0.820667
165.2	0.821
165.3	0.821667
165.4	0.821
165.5	0.822333
165.6	0.822667
165.7	0.821333
165.8	0.821
165.9	0.823333
166	0.824
166.1	0.824
166.2	0.824333
166.3	0.824
166.4	0.825
166.5	0.826667
166.6	0.826333
166.7	0.826
166.8	0.827
166.9	0.827333
167	0.827
167.1	0.827333
167.2	0.827333
167.3	0.827
167.4	0.827333
167.5	0.828333
167.6	0.826667
167.7	0.826667
167.8	0.826667
167.9	0.827333
168	0.827333
168.1	0.828
168.2	0.828333
168.3	0.828
168.4	0.828
168.5	0.826667
168.6	0.826333
168.7	0.826667
168.8	0.826333
168.9	0.826667
169	0.827333
169.1	0.827
169.2	0.827667
169.3	0.827333
169.4	0.827
169.5	0.826
169.6	0.826333
169.7	0.825667
169.8	0.825333
169.9	0.826333
170	0.827333
170.1	0.827333
170.2	0.827667
170.3	0.829667
170.4	0.829667
170.5	0.83
170.6	0.83
170.7	0.829
170.8	0.828667
170.9	0.828
171	0.826667
171.1	0.826333
171.2	0.827333
171.3	0.827667
171.4	0.827333
171.5	0.828
171.6	0.827667
171.7	0.826333
171.8	0.826333
171.9	0.826
172	0.826
172.1	0.826667
172.2	0.826667
172.3	0.827
172.4	0.826667
172.5	0.828333
172.6	0.828333
172.7	0.829333
172.8	0.830333
172.9	0.830333
173	0.829333
173.1	0.829
173.2	0.83
173.3	0.830333
173.4	0.830333
173.5	0.830667
173.6	0.830667
173.7	0.830333
173.8	0.83
173.9	0.829667
174	0.829
174.1	0.829333
174.2	0.829333
174.3	0.83
174.4	0.829333
174.5	0.830333
174.6	0.829
174.7	0.829
174.8	0.829333
174.9	0.828667
175	0.829
175.1	0.828333
175.2	0.828
175.3	0.829
175.4	0.830333
175.5	0.830667
175.6	0.83
175.7	0.829667
175.8	0.830333
175.9	0.830333
176	0.828667
176.1	0.829
176.2	0.829
176.3	0.83
176.4	0.828333
176.5	0.829667
176.6	0.830333
176.7	0.830667
176.8	0.829333
176.9	0.829
177	0.829333
177.1	0.829333
177.2	0.830667
177.3	0.829333
177.4	0.828333
177.5	0.827
177.6	0.827333
177.7	0.827667
177.8	0.827667
177.9	0.828667
178	0.828
178.1	0.828667
178.2	0.829
178.3	0.829333
178.4	0.829333
178.5	0.829667
178.6	0.830333
178.7	0.830667
178.8	0.831
178.9	0.830333
179	0.830667
179.1	0.831333
179.2	0.831333
179.3	0.830667
179.4	0.830667
179.5	0.830333
179.6	0.829333
179.7	0.828333
179.8	0.827
179.9	0.826
180	0.825667
180.1	0.826333
180.2	0.825333
180.3	0.826667
180.4	0.825333
180.5	0.825333
180.6	0.825333
180.7	0.826333
180.8	0.825
180.9	0.825333
181	0.824333
181.1	0.824333
181.2	0.823333
181.3	0.821
181.4	0.820667
181.5	0.820667
181.6	0.822
181.7	0.821333
181.8	0.821
181.9	0.821667
182	0.821667
182.1	0.821
182.2	0.822
182.3	0.822
182.4	0.821667
182.5	0.821667
182.6	0.822667
182.7	0.822667
182.8	0.822
182.9	0.822
183	0.822333
183.1	0.822
183.2	0.821
183.3	0.821
183.4	0.820667
183.5	0.82
183.6	0.819
183.7	0.820333
183.8	0.820333
183.9	0.820333
184	0.82
184.1	0.819333
184.2	0.819333
184.3	0.818333
184.4	0.818
184.5	0.818667
184.6	0.817333
184.7	0.816667
184.8	0.815667
184.9	0.815
185	0.815667
185.1	0.815333
185.2	0.815333
185.3	0.814333
185.4	0.814667
185.5	0.815333
185.6	0.814
185.7	0.814333
185.8	0.813667
185.9	0.814333
186	0.813667
186.1	0.815333
186.2	0.815333
186.3	0.816
186.4	0.816333
186.5	0.815667
186.6	0.816
186.7	0.818
186.8	0.816667
186.9	0.817
187	0.818
187.1	0.817
187.2	0.817
187.3	0.817
187.4	0.818333
187.5	0.819
187.6	0.818333
187.7	0.819
187.8	0.820333
187.9	0.820333
188	0.821333
188.1	0.822
188.2	0.822333
188.3	0.822667
188.4	0.822667
188.5	0.822333
188.6	0.821333
188.7	0.821667
188.8	0.821667
188.9	0.821333
189	0.821
189.1	0.821333
189.2	0.820667
189.3	0.82
189.4	0.819667
189.5	0.818333
189.6	0.819
189.7	0.818333
189.8	0.820333
189.9	0.821
190	0.821333
190.1	0.821333
190.2	0.820333
190.3	0.819
190.4	0.819333
190.5	0.818667
190.6	0.819333
190.7	0.82
190.8	0.82
190.9	0.819333
191	0.819333
191.1	0.821667
191.2	0.821667
191.3	0.821333
191.4	0.822333
191.5	0.822
191.6	0.823
191.7	0.822
191.8	0.821
191.9	0.820667
192	0.82
192.1	0.818667
192.2	0.819667
192.3	0.82
192.4	0.819333
192.5	0.820333
192.6	0.819
192.7	0.818333
192.8	0.818
192.9	0.817333
193	0.818667
193.1	0.82
193.2	0.820667
193.3	0.820667
193.4	0.820667
193.5	0.821333
193.6	0.821667
193.7	0.822667
193.8	0.822
193.9	0.821667
194	0.823333
194.1	0.822333
194.2	0.823
194.3	0.824
194.4	0.823333
194.5	0.823333
194.6	0.822667
194.7	0.822667
194.8	0.822333
194.9	0.822
195	0.822
195.1	0.823333
195.2	0.823
195.3	0.823
195.4	0.823
195.5	0.822667
195.6	0.821667
195.7	0.820333
195.8	0.820667
195.9	0.821333
196	0.822
196.1	0.823667
196.2	0.825333
196.3	0.825333
196.4	0.824667
196.5	0.824333
196.6	0.824
196.7	0.824667
196.8	0.823333
196.9	0.823333
197	0.822667
197.1	0.823333
197.2	0.824667
197.3	0.824
197.4	0.825333
197.5	0.825667
197.6	0.825333
197.7	0.824667
197.8	0.825667
197.9	0.825
198	0.825667
198.1	0.825
198.2	0.825667
198.3	0.826667
198.4	0.826333
198.5	0.826
198.6	0.825667
198.7	0.826667
198.8	0.825667
198.9	0.824333
199	0.822667
199.1	0.822667
199.2	0.821
199.3	0.822667
199.4	0.822667
199.5	0.821333
199.6	0.821667
199.7	0.821667
199.8	0.820667
199.9	0.820667
200	0.819667
[truncated: 14,000 more rows]
