# Supplementary material for: Bayesian inference of kinetic schemes for ion channels by Kalman filtering
Source: eLife journal article supplement (doi:10.7554/elife.62714), 2022-05-04
Supplement: fig4-data2 [file 1_Sim_N_4000_Fluor_MW.xlsx]

## Sheet: Tabelle1
0.1	0
0.2	0
0.3	0
0.4	0
0.5	0
0.6	0
0.7	0
0.8	0
0.9	0
1	0
1.1	0
1.2	0
1.3	0
1.4	0
1.5	0
1.6	0
1.7	0
1.8	0
1.9	0
2	0
2.1	0
2.2	0
2.3	0
2.4	0
2.5	0
2.6	0
2.7	0
2.8	0
2.9	0
3	0
3.1	0
3.2	0
3.3	0
3.4	0
3.5	0
3.6	0
3.7	0
3.8	0
3.9	0
4	0
4.1	0
4.2	0
4.3	0
4.4	0
4.5	0
4.6	0
4.7	0
4.8	0
4.9	0
5	0
5.1	0
5.2	0
5.3	0
5.4	0
5.5	0
5.6	0
5.7	0
5.8	0
5.9	0
6	0
6.1	0
6.2	0
6.3	0
6.4	0
6.5	0
6.6	0
6.7	0
6.8	0
6.9	0
7	0
7.1	0
7.2	0
7.3	0
7.4	0
7.5	0
7.6	0
7.7	0
7.8	0
7.9	0
8	0
8.1	0
8.2	0
8.3	0
8.4	0
8.5	0
8.6	0
8.7	0
8.8	0
8.9	0
9	0
9.1	0
9.2	0
9.3	0
9.4	0
9.5	0
9.6	0
9.7	0
9.8	0
9.9	0
10	0
10.1	0
10.2	0
10.3	0
10.4	0
10.5	0
10.6	0
10.7	0
10.8	0
10.9	0
11	0
11.1	0
11.2	0
11.3	0
11.4	0
11.5	0
11.6	0
11.7	0
11.8	0
11.9	0
12	0
12.1	0
12.2	0
12.3	0
12.4	0
12.5	0
12.6	0
12.7	0
12.8	0
12.9	0
13	0
13.1	0
13.2	0
13.3	0
13.4	0
13.5	0
13.6	0
13.7	0
13.8	0
13.9	0
14	0
14.1	0
14.2	0
14.3	0
14.4	0
14.5	0
14.6	0
14.7	0
14.8	0
14.9	0
15	0
15.1	0
15.2	0
15.3	0
15.4	0
15.5	0
15.6	0
15.7	0
15.8	0
15.9	0
16	0
16.1	0
16.2	0
16.3	0
16.4	0
16.5	0
16.6	0
16.7	0
16.8	0
16.9	0
17	0
17.1	0
17.2	0
17.3	0
17.4	0
17.5	0
17.6	0
17.7	0
17.8	0
17.9	0
18	0
18.1	0
18.2	0
18.3	0
18.4	0
18.5	0
18.6	0
18.7	0
18.8	0
18.9	0
19	0
19.1	0
19.2	0
19.3	0
19.4	0
19.5	0
19.6	0
19.7	0
19.8	0
19.9	0
20	0
20.1	0
20.2	0
20.3	0
20.4	0
20.5	0
20.6	0
20.7	0
20.8	0
20.9	0
21	0
21.1	0
21.2	0
21.3	0
21.4	0
21.5	0
21.6	0
21.7	0
21.8	0
21.9	0
22	0
22.1	0
22.2	0
22.3	0
22.4	0
22.5	0
22.6	0
22.7	0
22.8	0
22.9	0
23	0
23.1	0
23.2	0
23.3	0
23.4	0
23.5	0
23.6	0
23.7	0
23.8	0
23.9	0
24	0
24.1	0
24.2	0
24.3	0
24.4	0
24.5	0
24.6	0
24.7	0
24.8	0
24.9	0
25	0
25.1	0
25.2	0
25.3	0
25.4	0
25.5	0
25.6	0
25.7	0
25.8	0
25.9	0
26	0
26.1	0
26.2	0
26.3	0
26.4	0
26.5	0
26.6	0
26.7	0
26.8	0
26.9	0
27	0
27.1	0
27.2	0
27.3	0
27.4	0
27.5	0
27.6	0
27.7	0
27.8	0
27.9	0
28	0
28.1	0
28.2	0
28.3	0
28.4	0
28.5	0
28.6	0
28.7	0
28.8	0
28.9	0
29	0
29.1	0
29.2	0
29.3	0
29.4	0
29.5	0
29.6	0
29.7	0
29.8	0
29.9	0
30	0
30.1	0
30.2	0
30.3	0
30.4	0
30.5	0
30.6	0
30.7	0
30.8	0
30.9	0
31	0
31.1	0
31.2	0
31.3	0
31.4	0
31.5	0
31.6	0
31.7	0
31.8	0
31.9	0
32	0
32.1	0
32.2	0
32.3	0
32.4	0
32.5	0
32.6	0
32.7	0
32.8	0
32.9	0
33	0
33.1	0
33.2	0
33.3	0
33.4	0
33.5	0
33.6	0
33.7	0
33.8	0
33.9	0
34	0
34.1	0
34.2	0
34.3	0
34.4	0
34.5	0
34.6	0
34.7	0
34.8	0
34.9	0
35	0
35.1	0
35.2	0
35.3	0
35.4	0
35.5	0
35.6	0
35.7	0
35.8	0
35.9	0
36	0
36.1	0
36.2	0
36.3	0
36.4	0
36.5	0
36.6	0
36.7	0
36.8	0
36.9	0
37	0
37.1	0
37.2	0
37.3	0
37.4	0
37.5	0
37.6	0
37.7	0
37.8	0
37.9	0
38	0
38.1	0
38.2	0
38.3	0
38.4	0
38.5	0
38.6	0
38.7	0
38.8	0
38.9	0
39	0
39.1	0
39.2	0
39.3	0
39.4	0
39.5	0
39.6	0
39.7	0
39.8	0
39.9	0
40	0
40.1	0
40.2	0
40.3	0
40.4	0
40.5	0
40.6	0
40.7	0
40.8	0
40.9	0
41	0
41.1	0
41.2	0
41.3	0
41.4	0
41.5	0
41.6	0
41.7	0
41.8	0
41.9	0
42	0
42.1	0
42.2	0
42.3	0
42.4	0
42.5	0
42.6	0
42.7	0
42.8	0
42.9	0
43	0
43.1	0
43.2	0
43.3	0
43.4	0
43.5	0
43.6	0
43.7	0
43.8	0
43.9	0
44	0
44.1	0
44.2	0
44.3	0
44.4	0
44.5	0
44.6	0
44.7	0
44.8	0
44.9	0
45	0
45.1	0
45.2	0
45.3	0
45.4	0
45.5	0
45.6	0
45.7	0
45.8	0
45.9	0
46	0
46.1	0
46.2	0
46.3	0
46.4	0
46.5	0
46.6	0
46.7	0
46.8	0
46.9	0
47	0
47.1	0
47.2	0
47.3	0
47.4	0
47.5	0
47.6	0
47.7	0
47.8	0
47.9	0
48	0
48.1	0
48.2	0
48.3	0
48.4	0
48.5	0
48.6	0
48.7	0
48.8	0
48.9	0
49	0
49.1	0
49.2	0
49.3	0
49.4	0
49.5	0
49.6	0
49.7	0
49.8	0
49.9	0
50	0
50.1	0
50.2	0
50.3	0
50.4	0
50.5	0
50.6	0
50.7	0
50.8	0
50.9	0
51	0
51.1	0
51.2	0
51.3	0
51.4	0
51.5	0
51.6	0
51.7	0
51.8	0
51.9	0
52	0
52.1	0
52.2	0
52.3	0
52.4	0
52.5	0
52.6	0
52.7	0
52.8	0
52.9	0
53	0
53.1	0
53.2	0
53.3	0
53.4	0
53.5	0
53.6	0
53.7	0
53.8	0
53.9	0
54	0
54.1	0
54.2	0
54.3	0
54.4	0
54.5	0
54.6	0
54.7	0
54.8	0
54.9	0
55	0
55.1	0
55.2	0
55.3	0
55.4	0
55.5	0
55.6	0
55.7	0
55.8	0
55.9	0
56	0
56.1	0
56.2	0
56.3	0
56.4	0
56.5	0
56.6	0
56.7	0
56.8	0
56.9	0
57	0
57.1	0
57.2	0
57.3	0
57.4	0
57.5	0
57.6	0
57.7	0
57.8	0
57.9	0
58	0
58.1	0
58.2	0
58.3	0
58.4	0
58.5	0
58.6	0
58.7	0
58.8	0
58.9	0
59	0
59.1	0
59.2	0
59.3	0
59.4	0
59.5	0
59.6	0
59.7	0
59.8	0
59.9	0
60	0
60.1	0
60.2	0
60.3	0
60.4	0
60.5	0
60.6	0
60.7	0
60.8	0
60.9	0
61	0
61.1	0
61.2	0
61.3	0
61.4	0
61.5	0
61.6	0
61.7	0
61.8	0
61.9	0
62	0
62.1	0
62.2	0
62.3	0
62.4	0
62.5	0
62.6	0
62.7	0
62.8	0
62.9	0
63	0
63.1	0
63.2	0
63.3	0
63.4	0
63.5	0
63.6	0
63.7	0
63.8	0
63.9	0
64	0
64.1	0
64.2	0
64.3	0
64.4	0
64.5	0
64.6	0
64.7	0
64.8	0
64.9	0
65	0
65.1	0
65.2	0
65.3	0
65.4	0
65.5	0
65.6	0
65.7	0
65.8	0
65.9	0
66	0
66.1	0
66.2	0
66.3	0
66.4	0
66.5	0
66.6	0
66.7	0
66.8	0
66.9	0
67	0
67.1	0
67.2	0
67.3	0
67.4	0
67.5	0
67.6	0
67.7	0
67.8	0
67.9	0
68	0
68.1	0
68.2	0
68.3	0
68.4	0
68.5	0
68.6	0
68.7	0
68.8	0
68.9	0
69	0
69.1	0
69.2	0
69.3	0
69.4	0
69.5	0
69.6	0
69.7	0
69.8	0
69.9	0
70	0
70.1	0
70.2	0
70.3	0
70.4	0
70.5	0
70.6	0
70.7	0
70.8	0
70.9	0
71	0
71.1	0
71.2	0
71.3	0
71.4	0
71.5	0
71.6	0
71.7	0
71.8	0
71.9	0
72	0
72.1	0
72.2	0
72.3	0
72.4	0
72.5	0
72.6	0
72.7	0
72.8	0
72.9	0
73	0
73.1	0
73.2	0
73.3	0
73.4	0
73.5	0
73.6	0
73.7	0
73.8	0
73.9	0
74	0
74.1	0
74.2	0
74.3	0
74.4	0
74.5	0
74.6	0
74.7	0
74.8	0
74.9	0
75	0
75.1	0
75.2	0
75.3	0
75.4	0
75.5	0
75.6	0
75.7	0
75.8	0
75.9	0
76	0
76.1	0
76.2	0
76.3	0
76.4	0
76.5	0
76.6	0
76.7	0
76.8	0
76.9	0
77	0
77.1	0
77.2	0
77.3	0
77.4	0
77.5	0
77.6	0
77.7	0
77.8	0
77.9	0
78	0
78.1	0
78.2	0
78.3	0
78.4	0
78.5	0
78.6	0
78.7	0
78.8	0
78.9	0
79	0
79.1	0
79.2	0
79.3	0
79.4	0
79.5	0
79.6	0
79.7	0
79.8	0
79.9	0
80	0
80.1	0
80.2	0
80.3	0
80.4	0
80.5	0
80.6	0
80.7	0
80.8	0
80.9	0
81	0
81.1	0
81.2	0
81.3	0
81.4	0
81.5	0
81.6	0
81.7	0
81.8	0
81.9	0
82	0
82.1	0
82.2	0
82.3	0
82.4	0
82.5	0
82.6	0
82.7	0
82.8	0
82.9	0
83	0
83.1	0
83.2	0
83.3	0
83.4	0
83.5	0
83.6	0
83.7	0
83.8	0
83.9	0
84	0
84.1	0
84.2	0
84.3	0
84.4	0
84.5	0
84.6	0
84.7	0
84.8	0
84.9	0
85	0
85.1	0
85.2	0
85.3	0
85.4	0
85.5	0
85.6	0
85.7	0
85.8	0
85.9	0
86	0
86.1	0
86.2	0
86.3	0
86.4	0
86.5	0
86.6	0
86.7	0
86.8	0
86.9	0
87	0
87.1	0
87.2	0
87.3	0
87.4	0
87.5	0
87.6	0
87.7	0
87.8	0
87.9	0
88	0
88.1	0
88.2	0
88.3	0
88.4	0
88.5	0
88.6	0
88.7	0
88.8	0
88.9	0
89	0
89.1	0
89.2	0
89.3	0
89.4	0
89.5	0
89.6	0
89.7	0
89.8	0
89.9	0
90	0
90.1	0
90.2	0
90.3	0
90.4	0
90.5	0
90.6	0
90.7	0
90.8	0
90.9	0
91	0
91.1	0
91.2	0
91.3	0
91.4	0
91.5	0
91.6	0
91.7	0
91.8	0
91.9	0
92	0
92.1	0
92.2	0
92.3	0
92.4	0
92.5	0
92.6	0
92.7	0
92.8	0
92.9	0
93	0
93.1	0
93.2	0
93.3	0
93.4	0
93.5	0
93.6	0
93.7	0
93.8	0
93.9	0
94	0
94.1	0
94.2	0
94.3	0
94.4	0
94.5	0
94.6	0
94.7	0
94.8	0
94.9	0
95	0
95.1	0
95.2	0
95.3	0
95.4	0
95.5	0
95.6	0
95.7	0
95.8	0
95.9	0
96	0
96.1	0
96.2	0
96.3	0
96.4	0
96.5	0
96.6	0
96.7	0
96.8	0
96.9	0
97	0
97.1	0
97.2	0
97.3	0
97.4	0
97.5	0
97.6	0
97.7	0
97.8	0
97.9	0
98	0
98.1	0
98.2	0
98.3	0
98.4	0
98.5	0
98.6	0
98.7	0
98.8	0
98.9	0
99	0
99.1	0
99.2	0
99.3	0
99.4	0
99.5	0
99.6	0
99.7	0
99.8	0
99.9	0
100	0
100.1	0.89325
100.2	0.97525
100.3	0.98675
100.4	0.987375
100.5	0.98925
100.6	0.986625
100.7	0.98825
100.8	0.98725
100.9	0.98675
101	0.987625
101.1	0.989
101.2	0.98775
101.3	0.989875
101.4	0.9875
101.5	0.9885
101.6	0.98925
101.7	0.989375
101.8	0.989625
101.9	0.98775
102	0.98725
102.1	0.987375
102.2	0.988
102.3	0.98675
102.4	0.98775
102.5	0.989375
102.6	0.988875
102.7	0.98575
102.8	0.98875
102.9	0.98675
103	0.987875
103.1	0.990375
103.2	0.989875
103.3	0.988625
103.4	0.98925
103.5	0.991
103.6	0.988
103.7	0.987875
103.8	0.98925
103.9	0.990875
104	0.990375
104.1	0.98775
104.2	0.988125
104.3	0.991875
104.4	0.990125
104.5	0.99075
104.6	0.98975
104.7	0.99
104.8	0.989625
104.9	0.990125
105	0.987625
105.1	0.988875
105.2	0.988125
105.3	0.990625
105.4	0.9905
105.5	0.991
105.6	0.991875
105.7	0.991375
105.8	0.989375
105.9	0.990125
106	0.991125
106.1	0.991875
106.2	0.991625
106.3	0.992
106.4	0.990625
106.5	0.992
106.6	0.992
106.7	0.991375
106.8	0.99
106.9	0.991625
107	0.990875
107.1	0.99075
107.2	0.990875
107.3	0.991375
107.4	0.99025
107.5	0.990625
107.6	0.990875
107.7	0.99275
107.8	0.990375
107.9	0.991125
108	0.991125
108.1	0.990625
108.2	0.990125
108.3	0.9925
108.4	0.9925
108.5	0.9905
108.6	0.992875
108.7	0.99125
108.8	0.989
108.9	0.991875
109	0.992625
109.1	0.99275
109.2	0.99225
109.3	0.99275
109.4	0.992125
109.5	0.9935
109.6	0.993875
109.7	0.992625
109.8	0.991625
109.9	0.9915
110	0.992875
110.1	0.992375
110.2	0.99225
110.3	0.99125
110.4	0.992875
110.5	0.99325
110.6	0.99175
110.7	0.991625
110.8	0.99375
110.9	0.992625
111	0.99275
111.1	0.991625
111.2	0.9925
111.3	0.9935
111.4	0.9905
111.5	0.9925
111.6	0.9915
111.7	0.993375
111.8	0.99175
111.9	0.99175
112	0.990625
112.1	0.991
112.2	0.99275
112.3	0.991375
112.4	0.99175
112.5	0.99225
112.6	0.992625
112.7	0.99475
112.8	0.99475
112.9	0.99025
113	0.993125
113.1	0.991875
113.2	0.9925
113.3	0.9915
113.4	0.991625
113.5	0.99275
113.6	0.992
113.7	0.992125
113.8	0.993625
113.9	0.99275
114	0.992375
114.1	0.995125
114.2	0.993
114.3	0.9945
114.4	0.9915
114.5	0.99375
114.6	0.99275
114.7	0.99275
114.8	0.994125
114.9	0.994
115	0.99375
115.1	0.994375
115.2	0.993375
115.3	0.994375
115.4	0.993
115.5	0.992875
115.6	0.9945
115.7	0.993
115.8	0.99375
115.9	0.994875
116	0.9945
116.1	0.993125
116.2	0.993625
116.3	0.994875
116.4	0.993625
116.5	0.99425
116.6	0.993875
116.7	0.995625
116.8	0.993875
116.9	0.9935
117	0.993375
117.1	0.9955
117.2	0.993125
117.3	0.994
117.4	0.994625
117.5	0.99525
117.6	0.994875
117.7	0.9935
117.8	0.99475
117.9	0.993375
118	0.993375
118.1	0.9935
118.2	0.992625
118.3	0.993375
118.4	0.992875
118.5	0.9935
118.6	0.9945
118.7	0.993125
118.8	0.99325
118.9	0.995
119	0.993375
119.1	0.99275
119.2	0.993125
119.3	0.99625
119.4	0.99525
119.5	0.994875
119.6	0.995375
119.7	0.995625
119.8	0.993875
119.9	0.994
120	0.99525
120.1	0.99575
120.2	0.993
120.3	0.993375
120.4	0.995375
120.5	0.994125
120.6	0.995
120.7	0.992375
120.8	0.996125
120.9	0.99575
121	0.995625
121.1	0.99325
121.2	0.99475
121.3	0.995125
121.4	0.99525
121.5	0.995
121.6	0.995625
121.7	0.99525
121.8	0.9955
121.9	0.995125
122	0.995875
122.1	0.9965
122.2	0.995125
122.3	0.9955
122.4	0.9955
122.5	0.992875
122.6	0.994125
122.7	0.994375
122.8	0.99575
122.9	0.99475
123	0.993875
123.1	0.995375
123.2	0.99525
123.3	0.994875
123.4	0.99525
123.5	0.99525
123.6	0.9955
123.7	0.994125
123.8	0.99525
123.9	0.996
124	0.996
124.1	0.995
124.2	0.996125
124.3	0.99525
124.4	0.9945
124.5	0.995875
124.6	0.9955
124.7	0.99475
124.8	0.995125
124.9	0.995
125	0.994125
125.1	0.995875
125.2	0.996125
125.3	0.994375
125.4	0.99525
125.5	0.995375
125.6	0.99475
125.7	0.99625
125.8	0.9965
125.9	0.99575
126	0.995125
126.1	0.9945
126.2	0.99625
126.3	0.99475
126.4	0.9965
126.5	0.996625
126.6	0.996625
126.7	0.99675
126.8	0.9955
126.9	0.995625
127	0.995625
127.1	0.995375
127.2	0.995875
127.3	0.99475
127.4	0.996375
127.5	0.99525
127.6	0.99675
127.7	0.995125
127.8	0.99475
127.9	0.9945
128	0.995
128.1	0.995125
128.2	0.99625
128.3	0.995625
128.4	0.995125
128.5	0.99525
128.6	0.99575
128.7	0.995
128.8	0.996875
128.9	0.99575
129	0.994125
129.1	0.995875
129.2	0.997375
129.3	0.996875
129.4	0.996
129.5	0.9955
129.6	0.99575
129.7	0.995125
129.8	0.994625
129.9	0.99525
130	0.996
130.1	0.996875
130.2	0.9955
130.3	0.995375
130.4	0.996875
130.5	0.996875
130.6	0.99525
130.7	0.996
130.8	0.996
130.9	0.99525
131	0.995
131.1	0.99675
131.2	0.9965
131.3	0.997125
131.4	0.995625
131.5	0.996875
131.6	0.996375
131.7	0.996
131.8	0.996375
131.9	0.995125
132	0.9955
132.1	0.995625
132.2	0.994625
132.3	0.994875
132.4	0.996625
132.5	0.995625
132.6	0.996
132.7	0.99625
132.8	0.9965
132.9	0.996
133	0.997125
133.1	0.99625
133.2	0.997125
133.3	0.996875
133.4	0.995875
133.5	0.99625
133.6	0.995875
133.7	0.994875
133.8	0.996625
133.9	0.99625
134	0.995625
134.1	0.996125
134.2	0.996625
134.3	0.99625
134.4	0.996125
134.5	0.995625
134.6	0.996375
134.7	0.998
134.8	0.995625
134.9	0.998125
135	0.997
135.1	0.996875
135.2	0.99625
135.3	0.99575
135.4	0.99625
135.5	0.99775
135.6	0.995875
135.7	0.9955
135.8	0.99525
135.9	0.9965
136	0.99775
136.1	0.99775
136.2	0.997375
136.3	0.996125
136.4	0.996
136.5	0.996875
136.6	0.99725
136.7	0.99625
136.8	0.997625
136.9	0.99675
137	0.997
137.1	0.99675
137.2	0.996125
137.3	0.997125
137.4	0.99675
137.5	0.99675
137.6	0.997125
137.7	0.9955
137.8	0.99675
137.9	0.997375
138	0.997
138.1	0.996125
138.2	0.99675
138.3	0.997125
138.4	0.99775
138.5	0.997375
138.6	0.99625
138.7	0.997375
138.8	0.996625
138.9	0.9965
139	0.99625
139.1	0.99675
139.2	0.996
139.3	0.996375
139.4	0.997125
139.5	0.998
139.6	0.9975
139.7	0.997125
139.8	0.99625
139.9	0.997
140	0.996875
140.1	0.99775
140.2	0.9965
140.3	0.997375
140.4	0.99675
140.5	0.99625
140.6	0.99625
140.7	0.99675
140.8	0.997125
140.9	0.99675
141	0.996875
141.1	0.997375
141.2	0.997125
141.3	0.997125
141.4	0.995625
141.5	0.996125
141.6	0.99675
141.7	0.996375
141.8	0.995875
141.9	0.997625
142	0.997875
142.1	0.996125
142.2	0.99675
142.3	0.997125
142.4	0.996625
142.5	0.997625
142.6	0.99675
142.7	0.99675
142.8	0.997375
142.9	0.997
143	0.997
143.1	0.997375
143.2	0.99625
143.3	0.99725
143.4	0.997125
143.5	0.997375
143.6	0.99675
143.7	0.9965
143.8	0.996
143.9	0.996125
144	0.9965
144.1	0.996
144.2	0.997375
144.3	0.99775
144.4	0.99725
144.5	0.9975
144.6	0.997625
144.7	0.996125
144.8	0.996625
144.9	0.995375
145	0.996625
145.1	0.997625
145.2	0.997375
145.3	0.99625
145.4	0.99775
145.5	0.997
145.6	0.996375
145.7	0.99775
145.8	0.998125
145.9	0.9975
146	0.99775
146.1	0.997
146.2	0.99675
146.3	0.996875
146.4	0.997125
146.5	0.99725
146.6	0.997125
146.7	0.996625
146.8	0.996
146.9	0.997
147	0.997125
147.1	0.99725
147.2	0.997625
147.3	0.996625
147.4	0.9975
147.5	0.997
147.6	0.997125
147.7	0.997875
147.8	0.997625
147.9	0.996
148	0.997375
148.1	0.996875
148.2	0.996
148.3	0.9975
148.4	0.998125
148.5	0.9965
148.6	0.99825
148.7	0.997
148.8	0.99675
148.9	0.9965
149	0.996875
149.1	0.997875
149.2	0.9965
149.3	0.99675
149.4	0.997625
149.5	0.998
149.6	0.9965
149.7	0.997375
149.8	0.998125
149.9	0.99825
150	0.997625
150.1	0.996625
150.2	0.9975
150.3	0.997875
150.4	0.998
150.5	0.997125
150.6	0.9975
150.7	0.996875
150.8	0.997375
150.9	0.99725
151	0.9965
151.1	0.997625
151.2	0.996375
151.3	0.998375
151.4	0.997875
151.5	0.997125
151.6	0.998
151.7	0.996625
151.8	0.99725
151.9	0.996875
152	0.997
152.1	0.997625
152.2	0.99725
152.3	0.997625
152.4	0.997625
152.5	0.997375
152.6	0.997625
152.7	0.998125
152.8	0.997
152.9	0.99725
153	0.998125
153.1	0.996375
153.2	0.99725
153.3	0.9965
153.4	0.99525
153.5	0.996875
153.6	0.997
153.7	0.99675
153.8	0.997875
153.9	0.997875
154	0.997375
154.1	0.997
154.2	0.99775
154.3	0.99825
154.4	0.998625
154.5	0.99775
154.6	0.99725
154.7	0.996125
154.8	0.99725
154.9	0.997875
155	0.9975
155.1	0.99725
155.2	0.997875
155.3	0.997875
155.4	0.999
155.5	0.998125
155.6	0.996875
155.7	0.998125
155.8	0.99725
155.9	0.9975
156	0.997375
156.1	0.998375
156.2	0.997375
156.3	0.9975
156.4	0.99675
156.5	0.998
156.6	0.99775
156.7	0.99775
156.8	0.995875
156.9	0.99625
157	0.998
157.1	0.998125
157.2	0.997
157.3	0.997375
157.4	0.9975
157.5	0.997625
157.6	0.99775
157.7	0.99725
157.8	0.9975
157.9	0.997375
158	0.997375
158.1	0.996625
158.2	0.99775
158.3	0.997125
158.4	0.998125
158.5	0.997125
158.6	0.997625
158.7	0.997875
158.8	0.9975
158.9	0.997625
159	0.99725
159.1	0.997625
159.2	0.9975
159.3	0.997125
159.4	0.9975
159.5	0.99775
159.6	0.9975
159.7	0.997
159.8	0.997625
159.9	0.997625
160	0.99775
160.1	0.99725
160.2	0.997375
160.3	0.9965
160.4	0.996875
160.5	0.998125
160.6	0.997875
160.7	0.997875
160.8	0.997
160.9	0.99725
161	0.996875
161.1	0.9975
161.2	0.997625
161.3	0.9975
161.4	0.9975
161.5	0.99825
161.6	0.997875
161.7	0.997
161.8	0.99725
161.9	0.997625
162	0.99675
162.1	0.9975
162.2	0.998125
162.3	0.997125
162.4	0.997
162.5	0.996375
162.6	0.99725
162.7	0.99675
162.8	0.997625
162.9	0.998625
163	0.9975
163.1	0.9985
163.2	0.998
163.3	0.9975
163.4	0.998
163.5	0.9975
163.6	0.997625
163.7	0.99725
163.8	0.9975
163.9	0.997375
164	0.997875
164.1	0.99725
164.2	0.997875
164.3	0.99725
164.4	0.998125
164.5	0.997875
164.6	0.997875
164.7	0.9985
164.8	0.9975
164.9	0.997125
165	0.998
165.1	0.996625
165.2	0.997375
165.3	0.997875
165.4	0.998125
165.5	0.997875
165.6	0.997875
165.7	0.997375
165.8	0.997625
165.9	0.9975
166	0.997625
166.1	0.997125
166.2	0.99775
166.3	0.997125
166.4	0.996875
166.5	0.99725
166.6	0.99775
166.7	0.9965
166.8	0.997875
166.9	0.9975
167	0.997875
167.1	0.997625
167.2	0.9975
167.3	0.997
167.4	0.996625
167.5	0.998
167.6	0.998125
167.7	0.99825
167.8	0.9975
167.9	0.99725
168	0.998375
168.1	0.997625
168.2	0.997625
168.3	0.9975
168.4	0.99825
168.5	0.997125
168.6	0.997375
168.7	0.99725
168.8	0.996375
168.9	0.99825
169	0.9975
169.1	0.997375
169.2	0.998
169.3	0.997
169.4	0.997875
169.5	0.997625
169.6	0.99775
169.7	0.998125
169.8	0.997625
169.9	0.997875
170	0.998625
170.1	0.99775
170.2	0.998125
170.3	0.998
170.4	0.99825
170.5	0.99875
170.6	0.99825
170.7	0.998
170.8	0.9975
170.9	0.99775
171	0.99775
171.1	0.997875
171.2	0.996875
171.3	0.997625
171.4	0.99725
171.5	0.9975
171.6	0.997875
171.7	0.997625
171.8	0.997625
171.9	0.997375
172	0.998
172.1	0.997875
172.2	0.997
172.3	0.997
172.4	0.99825
172.5	0.997375
172.6	0.998625
172.7	0.997125
172.8	0.99725
172.9	0.9965
173	0.998125
173.1	0.997
173.2	0.997
173.3	0.997875
173.4	0.9975
173.5	0.99825
173.6	0.998875
173.7	0.997375
173.8	0.998125
173.9	0.99675
174	0.998125
174.1	0.997625
174.2	0.997375
174.3	0.997875
174.4	0.9975
174.5	0.998625
174.6	0.99775
174.7	0.998375
174.8	0.998875
174.9	0.998125
175	0.99675
175.1	0.997375
175.2	0.99775
175.3	0.997875
175.4	0.996625
175.5	0.99775
175.6	0.9985
175.7	0.9985
175.8	0.998
175.9	0.998375
176	0.997625
176.1	0.996875
176.2	0.997125
176.3	0.997875
176.4	0.997125
176.5	0.99775
176.6	0.997375
176.7	0.9975
176.8	0.997625
176.9	0.998625
177	0.9975
177.1	0.996875
177.2	0.999
177.3	0.99825
177.4	0.997125
177.5	0.997375
177.6	0.997375
177.7	0.998375
177.8	0.99725
177.9	0.998375
178	0.998
178.1	0.996875
178.2	0.997
178.3	0.997125
178.4	0.996375
178.5	0.997
178.6	0.996875
178.7	0.997625
178.8	0.997125
178.9	0.998125
179	0.997875
179.1	0.9975
179.2	0.996875
179.3	0.997875
179.4	0.997875
179.5	0.997
179.6	0.99775
179.7	0.997875
179.8	0.998
179.9	0.998625
180	0.999
180.1	0.998125
180.2	0.996875
180.3	0.997375
180.4	0.997375
180.5	0.997625
180.6	0.997875
180.7	0.998125
180.8	0.997625
180.9	0.997375
181	0.997875
181.1	0.997625
181.2	0.997125
181.3	0.99775
181.4	0.997375
181.5	0.9985
181.6	0.997625
181.7	0.998625
181.8	0.996875
181.9	0.998
182	0.99775
182.1	0.99725
182.2	0.997125
182.3	0.99775
182.4	0.9975
182.5	0.9965
182.6	0.998
182.7	0.997875
182.8	0.997625
182.9	0.998
183	0.998125
183.1	0.997875
183.2	0.998
183.3	0.9985
183.4	0.997125
183.5	0.998375
183.6	0.997625
183.7	0.997375
183.8	0.99775
183.9	0.998
184	0.998375
184.1	0.99775
184.2	0.99825
184.3	0.998
184.4	0.997625
184.5	0.997625
184.6	0.997125
184.7	0.99775
184.8	0.99725
184.9	0.998125
185	0.999
185.1	0.9985
185.2	0.9985
185.3	0.99875
185.4	0.99825
185.5	0.996625
185.6	0.997875
185.7	0.998125
185.8	0.998875
185.9	0.9975
186	0.997125
186.1	0.99825
186.2	0.9975
186.3	0.997625
186.4	0.997375
186.5	0.997375
186.6	0.997
186.7	0.9975
186.8	0.9985
186.9	0.99675
187	0.997875
187.1	0.99775
187.2	0.997625
187.3	0.998375
187.4	0.998625
187.5	0.99775
187.6	0.997375
187.7	0.99775
187.8	0.997875
187.9	0.998125
188	0.997125
188.1	0.997375
188.2	0.9975
188.3	0.99775
188.4	0.998875
188.5	0.998125
188.6	0.9985
188.7	0.99775
188.8	0.99775
188.9	0.998625
189	0.99825
189.1	0.997625
189.2	0.99725
189.3	0.997125
189.4	0.998125
189.5	0.997375
189.6	0.998
189.7	0.99825
189.8	0.9985
189.9	0.99875
190	0.997625
190.1	0.99825
190.2	0.997625
190.3	0.997875
190.4	0.997875
190.5	0.9975
190.6	0.998125
190.7	0.9975
190.8	0.998
190.9	0.997875
191	0.997625
191.1	0.998
191.2	0.996625
191.3	0.998
191.4	0.997625
191.5	0.99775
191.6	0.997875
191.7	0.998
191.8	0.997625
191.9	0.99725
192	0.998125
192.1	0.997875
192.2	0.99725
192.3	0.99775
192.4	0.997875
192.5	0.997625
192.6	0.998125
192.7	0.99775
192.8	0.997375
192.9	0.99775
193	0.998125
193.1	0.997375
193.2	0.998625
193.3	0.998125
193.4	0.99875
193.5	0.99775
193.6	0.9985
193.7	0.9975
193.8	0.997
193.9	0.997875
194	0.998625
194.1	0.998125
194.2	0.9985
194.3	0.997875
194.4	0.998
194.5	0.997625
194.6	0.996125
194.7	0.997375
194.8	0.998625
194.9	0.99875
195	0.998875
195.1	0.9985
195.2	0.99725
195.3	0.9975
195.4	0.998
195.5	0.99775
195.6	0.99775
195.7	0.997
195.8	0.998125
195.9	0.997125
196	0.997125
196.1	0.997625
196.2	0.998125
196.3	0.997875
196.4	0.997875
196.5	0.997
196.6	0.99725
196.7	0.99875
196.8	0.9985
196.9	0.998375
197	0.997875
197.1	0.998
197.2	0.997375
197.3	0.9985
197.4	0.997625
197.5	0.9985
197.6	0.9975
197.7	0.997625
197.8	0.997625
197.9	0.99825
198	0.997875
198.1	0.997875
198.2	0.998125
198.3	0.9985
198.4	0.998125
198.5	0.9985
198.6	0.998625
198.7	0.999
198.8	0.99825
198.9	0.998375
199	0.99825
199.1	0.99775
199.2	0.998
199.3	0.9985
199.4	0.997625
199.5	0.997
199.6	0.997875
199.7	0.998125
199.8	0.999125
199.9	0.998
200	0.9975
[truncated: 14,000 more rows]
