# Supplementary material for: Bayesian inference of kinetic schemes for ion channels by Kalman filtering
Source: eLife journal article supplement (doi:10.7554/elife.62714), 2022-05-04
Supplement: fig4-data2 [file 1_Sim_N_4000_Strom_MW.xlsx]

## Sheet: Tabelle1
0.1	0
0.2	0
0.3	0
0.4	0
0.5	0
0.6	0
0.7	0
0.8	0
0.9	0
1	0
1.1	0
1.2	0
1.3	0
1.4	0
1.5	0
1.6	0
1.7	0
1.8	0
1.9	0
2	0
2.1	0
2.2	0
2.3	0
2.4	0
2.5	0
2.6	0
2.7	0
2.8	0
2.9	0
3	0
3.1	0
3.2	0
3.3	0
3.4	0
3.5	0
3.6	0
3.7	0
3.8	0
3.9	0
4	0
4.1	0
4.2	0
4.3	0
4.4	0
4.5	0
4.6	0
4.7	0
4.8	0
4.9	0
5	0
5.1	0
5.2	0
5.3	0
5.4	0
5.5	0
5.6	0
5.7	0
5.8	0
5.9	0
6	0
6.1	0
6.2	0
6.3	0
6.4	0
6.5	0
6.6	0
6.7	0
6.8	0
6.9	0
7	0
7.1	0
7.2	0
7.3	0
7.4	0
7.5	0
7.6	0
7.7	0
7.8	0
7.9	0
8	0
8.1	0
8.2	0
8.3	0
8.4	0
8.5	0
8.6	0
8.7	0
8.8	0
8.9	0
9	0
9.1	0
9.2	0
9.3	0
9.4	0
9.5	0
9.6	0
9.7	0
9.8	0
9.9	0
10	0
10.1	0
10.2	0
10.3	0
10.4	0
10.5	0
10.6	0
10.7	0
10.8	0
10.9	0
11	0
11.1	0
11.2	0
11.3	0
11.4	0
11.5	0
11.6	0
11.7	0
11.8	0
11.9	0
12	0
12.1	0
12.2	0
12.3	0
12.4	0
12.5	0
12.6	0
12.7	0
12.8	0
12.9	0
13	0
13.1	0
13.2	0
13.3	0
13.4	0
13.5	0
13.6	0
13.7	0
13.8	0
13.9	0
14	0
14.1	0
14.2	0
14.3	0
14.4	0
14.5	0
14.6	0
14.7	0
14.8	0
14.9	0
15	0
15.1	0
15.2	0
15.3	0
15.4	0
15.5	0
15.6	0
15.7	0
15.8	0
15.9	0
16	0
16.1	0
16.2	0
16.3	0
16.4	0
16.5	0
16.6	0
16.7	0
16.8	0
16.9	0
17	0
17.1	0
17.2	0
17.3	0
17.4	0
17.5	0
17.6	0
17.7	0
17.8	0
17.9	0
18	0
18.1	0
18.2	0
18.3	0
18.4	0
18.5	0
18.6	0
18.7	0
18.8	0
18.9	0
19	0
19.1	0
19.2	0
19.3	0
19.4	0
19.5	0
19.6	0
19.7	0
19.8	0
19.9	0
20	0
20.1	0
20.2	0
20.3	0
20.4	0
20.5	0
20.6	0
20.7	0
20.8	0
20.9	0
21	0
21.1	0
21.2	0
21.3	0
21.4	0
21.5	0
21.6	0
21.7	0
21.8	0
21.9	0
22	0
22.1	0
22.2	0
22.3	0
22.4	0
22.5	0
22.6	0
22.7	0
22.8	0
22.9	0
23	0
23.1	0
23.2	0
23.3	0
23.4	0
23.5	0
23.6	0
23.7	0
23.8	0
23.9	0
24	0
24.1	0
24.2	0
24.3	0
24.4	0
24.5	0
24.6	0
24.7	0
24.8	0
24.9	0
25	0
25.1	0
25.2	0
25.3	0
25.4	0
25.5	0
25.6	0
25.7	0
25.8	0
25.9	0
26	0
26.1	0
26.2	0
26.3	0
26.4	0
26.5	0
26.6	0
26.7	0
26.8	0
26.9	0
27	0
27.1	0
27.2	0
27.3	0
27.4	0
27.5	0
27.6	0
27.7	0
27.8	0
27.9	0
28	0
28.1	0
28.2	0
28.3	0
28.4	0
28.5	0
28.6	0
28.7	0
28.8	0
28.9	0
29	0
29.1	0
29.2	0
29.3	0
29.4	0
29.5	0
29.6	0
29.7	0
29.8	0
29.9	0
30	0
30.1	0
30.2	0
30.3	0
30.4	0
30.5	0
30.6	0
30.7	0
30.8	0
30.9	0
31	0
31.1	0
31.2	0
31.3	0
31.4	0
31.5	0
31.6	0
31.7	0
31.8	0
31.9	0
32	0
32.1	0
32.2	0
32.3	0
32.4	0
32.5	0
32.6	0
32.7	0
32.8	0
32.9	0
33	0
33.1	0
33.2	0
33.3	0
33.4	0
33.5	0
33.6	0
33.7	0
33.8	0
33.9	0
34	0
34.1	0
34.2	0
34.3	0
34.4	0
34.5	0
34.6	0
34.7	0
34.8	0
34.9	0
35	0
35.1	0
35.2	0
35.3	0
35.4	0
35.5	0
35.6	0
35.7	0
35.8	0
35.9	0
36	0
36.1	0
36.2	0
36.3	0
36.4	0
36.5	0
36.6	0
36.7	0
36.8	0
36.9	0
37	0
37.1	0
37.2	0
37.3	0
37.4	0
37.5	0
37.6	0
37.7	0
37.8	0
37.9	0
38	0
38.1	0
38.2	0
38.3	0
38.4	0
38.5	0
38.6	0
38.7	0
38.8	0
38.9	0
39	0
39.1	0
39.2	0
39.3	0
39.4	0
39.5	0
39.6	0
39.7	0
39.8	0
39.9	0
40	0
40.1	0
40.2	0
40.3	0
40.4	0
40.5	0
40.6	0
40.7	0
40.8	0
40.9	0
41	0
41.1	0
41.2	0
41.3	0
41.4	0
41.5	0
41.6	0
41.7	0
41.8	0
41.9	0
42	0
42.1	0
42.2	0
42.3	0
42.4	0
42.5	0
42.6	0
42.7	0
42.8	0
42.9	0
43	0
43.1	0
43.2	0
43.3	0
43.4	0
43.5	0
43.6	0
43.7	0
43.8	0
43.9	0
44	0
44.1	0
44.2	0
44.3	0
44.4	0
44.5	0
44.6	0
44.7	0
44.8	0
44.9	0
45	0
45.1	0
45.2	0
45.3	0
45.4	0
45.5	0
45.6	0
45.7	0
45.8	0
45.9	0
46	0
46.1	0
46.2	0
46.3	0
46.4	0
46.5	0
46.6	0
46.7	0
46.8	0
46.9	0
47	0
47.1	0
47.2	0
47.3	0
47.4	0
47.5	0
47.6	0
47.7	0
47.8	0
47.9	0
48	0
48.1	0
48.2	0
48.3	0
48.4	0
48.5	0
48.6	0
48.7	0
48.8	0
48.9	0
49	0
49.1	0
49.2	0
49.3	0
49.4	0
49.5	0
49.6	0
49.7	0
49.8	0
49.9	0
50	0
50.1	0
50.2	0
50.3	0
50.4	0
50.5	0
50.6	0
50.7	0
50.8	0
50.9	0
51	0
51.1	0
51.2	0
51.3	0
51.4	0
51.5	0
51.6	0
51.7	0
51.8	0
51.9	0
52	0
52.1	0
52.2	0
52.3	0
52.4	0
52.5	0
52.6	0
52.7	0
52.8	0
52.9	0
53	0
53.1	0
53.2	0
53.3	0
53.4	0
53.5	0
53.6	0
53.7	0
53.8	0
53.9	0
54	0
54.1	0
54.2	0
54.3	0
54.4	0
54.5	0
54.6	0
54.7	0
54.8	0
54.9	0
55	0
55.1	0
55.2	0
55.3	0
55.4	0
55.5	0
55.6	0
55.7	0
55.8	0
55.9	0
56	0
56.1	0
56.2	0
56.3	0
56.4	0
56.5	0
56.6	0
56.7	0
56.8	0
56.9	0
57	0
57.1	0
57.2	0
57.3	0
57.4	0
57.5	0
57.6	0
57.7	0
57.8	0
57.9	0
58	0
58.1	0
58.2	0
58.3	0
58.4	0
58.5	0
58.6	0
58.7	0
58.8	0
58.9	0
59	0
59.1	0
59.2	0
59.3	0
59.4	0
59.5	0
59.6	0
59.7	0
59.8	0
59.9	0
60	0
60.1	0
60.2	0
60.3	0
60.4	0
60.5	0
60.6	0
60.7	0
60.8	0
60.9	0
61	0
61.1	0
61.2	0
61.3	0
61.4	0
61.5	0
61.6	0
61.7	0
61.8	0
61.9	0
62	0
62.1	0
62.2	0
62.3	0
62.4	0
62.5	0
62.6	0
62.7	0
62.8	0
62.9	0
63	0
63.1	0
63.2	0
63.3	0
63.4	0
63.5	0
63.6	0
63.7	0
63.8	0
63.9	0
64	0
64.1	0
64.2	0
64.3	0
64.4	0
64.5	0
64.6	0
64.7	0
64.8	0
64.9	0
65	0
65.1	0
65.2	0
65.3	0
65.4	0
65.5	0
65.6	0
65.7	0
65.8	0
65.9	0
66	0
66.1	0
66.2	0
66.3	0
66.4	0
66.5	0
66.6	0
66.7	0
66.8	0
66.9	0
67	0
67.1	0
67.2	0
67.3	0
67.4	0
67.5	0
67.6	0
67.7	0
67.8	0
67.9	0
68	0
68.1	0
68.2	0
68.3	0
68.4	0
68.5	0
68.6	0
68.7	0
68.8	0
68.9	0
69	0
69.1	0
69.2	0
69.3	0
69.4	0
69.5	0
69.6	0
69.7	0
69.8	0
69.9	0
70	0
70.1	0
70.2	0
70.3	0
70.4	0
70.5	0
70.6	0
70.7	0
70.8	0
70.9	0
71	0
71.1	0
71.2	0
71.3	0
71.4	0
71.5	0
71.6	0
71.7	0
71.8	0
71.9	0
72	0
72.1	0
72.2	0
72.3	0
72.4	0
72.5	0
72.6	0
72.7	0
72.8	0
72.9	0
73	0
73.1	0
73.2	0
73.3	0
73.4	0
73.5	0
73.6	0
73.7	0
73.8	0
73.9	0
74	0
74.1	0
74.2	0
74.3	0
74.4	0
74.5	0
74.6	0
74.7	0
74.8	0
74.9	0
75	0
75.1	0
75.2	0
75.3	0
75.4	0
75.5	0
75.6	0
75.7	0
75.8	0
75.9	0
76	0
76.1	0
76.2	0
76.3	0
76.4	0
76.5	0
76.6	0
76.7	0
76.8	0
76.9	0
77	0
77.1	0
77.2	0
77.3	0
77.4	0
77.5	0
77.6	0
77.7	0
77.8	0
77.9	0
78	0
78.1	0
78.2	0
78.3	0
78.4	0
78.5	0
78.6	0
78.7	0
78.8	0
78.9	0
79	0
79.1	0
79.2	0
79.3	0
79.4	0
79.5	0
79.6	0
79.7	0
79.8	0
79.9	0
80	0
80.1	0
80.2	0
80.3	0
80.4	0
80.5	0
80.6	0
80.7	0
80.8	0
80.9	0
81	0
81.1	0
81.2	0
81.3	0
81.4	0
81.5	0
81.6	0
81.7	0
81.8	0
81.9	0
82	0
82.1	0
82.2	0
82.3	0
82.4	0
82.5	0
82.6	0
82.7	0
82.8	0
82.9	0
83	0
83.1	0
83.2	0
83.3	0
83.4	0
83.5	0
83.6	0
83.7	0
83.8	0
83.9	0
84	0
84.1	0
84.2	0
84.3	0
84.4	0
84.5	0
84.6	0
84.7	0
84.8	0
84.9	0
85	0
85.1	0
85.2	0
85.3	0
85.4	0
85.5	0
85.6	0
85.7	0
85.8	0
85.9	0
86	0
86.1	0
86.2	0
86.3	0
86.4	0
86.5	0
86.6	0
86.7	0
86.8	0
86.9	0
87	0
87.1	0
87.2	0
87.3	0
87.4	0
87.5	0
87.6	0
87.7	0
87.8	0
87.9	0
88	0
88.1	0
88.2	0
88.3	0
88.4	0
88.5	0
88.6	0
88.7	0
88.8	0
88.9	0
89	0
89.1	0
89.2	0
89.3	0
89.4	0
89.5	0
89.6	0
89.7	0
89.8	0
89.9	0
90	0
90.1	0
90.2	0
90.3	0
90.4	0
90.5	0
90.6	0
90.7	0
90.8	0
90.9	0
91	0
91.1	0
91.2	0
91.3	0
91.4	0
91.5	0
91.6	0
91.7	0
91.8	0
91.9	0
92	0
92.1	0
92.2	0
92.3	0
92.4	0
92.5	0
92.6	0
92.7	0
92.8	0
92.9	0
93	0
93.1	0
93.2	0
93.3	0
93.4	0
93.5	0
93.6	0
93.7	0
93.8	0
93.9	0
94	0
94.1	0
94.2	0
94.3	0
94.4	0
94.5	0
94.6	0
94.7	0
94.8	0
94.9	0
95	0
95.1	0
95.2	0
95.3	0
95.4	0
95.5	0
95.6	0
95.7	0
95.8	0
95.9	0
96	0
96.1	0
96.2	0
96.3	0
96.4	0
96.5	0
96.6	0
96.7	0
96.8	0
96.9	0
97	0
97.1	0
97.2	0
97.3	0
97.4	0
97.5	0
97.6	0
97.7	0
97.8	0
97.9	0
98	0
98.1	0
98.2	0
98.3	0
98.4	0
98.5	0
98.6	0
98.7	0
98.8	0
98.9	0
99	0
99.1	0
99.2	0
99.3	0
99.4	0
99.5	0
99.6	0
99.7	0
99.8	0
99.9	0
100	0
100.1	0.00125
100.2	0.00675
100.3	0.0095
100.4	0.01425
100.5	0.021
100.6	0.0285
100.7	0.03175
100.8	0.036
100.9	0.04275
101	0.0475
101.1	0.053
101.2	0.05925
101.3	0.06225
101.4	0.0665
101.5	0.0725
101.6	0.07725
101.7	0.081
101.8	0.085
101.9	0.09075
102	0.0955
102.1	0.09875
102.2	0.103
102.3	0.107
102.4	0.11175
102.5	0.11625
102.6	0.119
102.7	0.12375
102.8	0.127
102.9	0.13075
103	0.1345
103.1	0.13775
103.2	0.143
103.3	0.14525
103.4	0.14975
103.5	0.15475
103.6	0.15875
103.7	0.16175
103.8	0.16675
103.9	0.17025
104	0.17475
104.1	0.18
104.2	0.1845
104.3	0.188
104.4	0.1905
104.5	0.19575
104.6	0.2
104.7	0.2015
104.8	0.20525
104.9	0.20875
105	0.21275
105.1	0.21775
105.2	0.2205
105.3	0.224
105.4	0.228
105.5	0.23225
105.6	0.23625
105.7	0.239
105.8	0.24425
105.9	0.248
106	0.25075
106.1	0.25525
106.2	0.25725
106.3	0.26125
106.4	0.26625
106.5	0.26975
106.6	0.27375
106.7	0.276
106.8	0.2785
106.9	0.28275
107	0.28525
107.1	0.28825
107.2	0.291
107.3	0.293
107.4	0.297
107.5	0.29975
107.6	0.30425
107.7	0.31
107.8	0.312
107.9	0.3155
108	0.32025
108.1	0.32375
108.2	0.3265
108.3	0.3295
108.4	0.333
108.5	0.33625
108.6	0.3385
108.7	0.343
108.8	0.345
108.9	0.3485
109	0.3515
109.1	0.3545
109.2	0.35825
109.3	0.359
109.4	0.361
109.5	0.3625
109.6	0.366
109.7	0.36675
109.8	0.3705
109.9	0.372
110	0.37375
110.1	0.37525
110.2	0.37625
110.3	0.3785
110.4	0.37975
110.5	0.38275
110.6	0.38475
110.7	0.388
110.8	0.38925
110.9	0.3915
111	0.39375
111.1	0.3965
111.2	0.39925
111.3	0.4005
111.4	0.4045
111.5	0.40775
111.6	0.41
111.7	0.4125
111.8	0.41425
111.9	0.4155
112	0.418
112.1	0.42125
112.2	0.423
112.3	0.42475
112.4	0.4265
112.5	0.42875
112.6	0.4315
112.7	0.4355
112.8	0.43775
112.9	0.44025
113	0.4415
113.1	0.4435
113.2	0.44375
113.3	0.44725
113.4	0.44825
113.5	0.45
113.6	0.4515
113.7	0.4545
113.8	0.45775
113.9	0.46225
114	0.4655
114.1	0.46675
114.2	0.46925
114.3	0.46925
114.4	0.472
114.5	0.47275
114.6	0.47375
114.7	0.4745
114.8	0.4765
114.9	0.4785
115	0.47925
115.1	0.48075
115.2	0.4825
115.3	0.48425
115.4	0.486
115.5	0.4865
115.6	0.48825
115.7	0.49
115.8	0.4915
115.9	0.4935
116	0.49525
116.1	0.49725
116.2	0.4995
116.3	0.5005
116.4	0.50275
116.5	0.506
116.6	0.508
116.7	0.5095
116.8	0.5115
116.9	0.5125
117	0.51475
117.1	0.517
117.2	0.52
117.3	0.52325
117.4	0.52525
117.5	0.5265
117.6	0.5275
117.7	0.5295
117.8	0.53175
117.9	0.5335
118	0.534
118.1	0.53575
118.2	0.53775
118.3	0.53975
118.4	0.54125
118.5	0.54525
118.6	0.54825
118.7	0.55025
118.8	0.55075
118.9	0.5535
119	0.556
119.1	0.5565
119.2	0.55875
119.3	0.55925
119.4	0.56225
119.5	0.56325
119.6	0.56525
119.7	0.56675
119.8	0.5665
119.9	0.56775
120	0.57
120.1	0.57075
120.2	0.57225
120.3	0.5735
120.4	0.576
120.5	0.578
120.6	0.5785
120.7	0.57975
120.8	0.58175
120.9	0.58225
121	0.58375
121.1	0.58475
121.2	0.587
121.3	0.58775
121.4	0.58925
121.5	0.59125
121.6	0.593
121.7	0.59375
121.8	0.59775
121.9	0.59975
122	0.60125
122.1	0.60275
122.2	0.60375
122.3	0.60625
122.4	0.60675
122.5	0.6085
122.6	0.609
122.7	0.61
122.8	0.612
122.9	0.6135
123	0.6155
123.1	0.61575
123.2	0.6195
123.3	0.62025
123.4	0.62175
123.5	0.6235
123.6	0.624
123.7	0.62475
123.8	0.626
123.9	0.627
124	0.62725
124.1	0.628
124.2	0.62925
124.3	0.63125
124.4	0.63325
124.5	0.635
124.6	0.63625
124.7	0.637
124.8	0.63925
124.9	0.64025
125	0.6415
125.1	0.64325
125.2	0.6435
125.3	0.6455
125.4	0.64675
125.5	0.64725
125.6	0.648
125.7	0.64975
125.8	0.6505
125.9	0.65175
126	0.6545
126.1	0.6545
126.2	0.65475
126.3	0.65575
126.4	0.658
126.5	0.6585
126.6	0.658
126.7	0.658
126.8	0.66075
126.9	0.66175
127	0.6645
127.1	0.66725
127.2	0.66775
127.3	0.66875
127.4	0.669
127.5	0.66975
127.6	0.6725
127.7	0.674
127.8	0.67475
127.9	0.6765
128	0.677
128.1	0.67625
128.2	0.677
128.3	0.67725
128.4	0.6775
128.5	0.6775
128.6	0.677
128.7	0.6775
128.8	0.67825
128.9	0.68025
129	0.6805
129.1	0.68125
129.2	0.68275
129.3	0.6845
129.4	0.686
129.5	0.68625
129.6	0.688
129.7	0.68975
129.8	0.6905
129.9	0.69125
130	0.692
130.1	0.6925
130.2	0.69425
130.3	0.6945
130.4	0.69575
130.5	0.6965
130.6	0.69775
130.7	0.697
130.8	0.697
130.9	0.69825
131	0.7
131.1	0.70025
131.2	0.70025
131.3	0.70025
131.4	0.69975
131.5	0.7005
131.6	0.701
131.7	0.70225
131.8	0.702
131.9	0.70325
132	0.70475
132.1	0.7075
132.2	0.7075
132.3	0.70725
132.4	0.71025
132.5	0.7115
132.6	0.7115
132.7	0.71175
132.8	0.712
132.9	0.713
133	0.71325
133.1	0.71325
133.2	0.714
133.3	0.71475
133.4	0.7165
133.5	0.71575
133.6	0.7175
133.7	0.71775
133.8	0.71875
133.9	0.71925
134	0.721
134.1	0.72125
134.2	0.722
134.3	0.72325
134.4	0.724
134.5	0.725
134.6	0.725
134.7	0.72725
134.8	0.728
134.9	0.7285
135	0.7295
135.1	0.73
135.2	0.7305
135.3	0.7305
135.4	0.731
135.5	0.732
135.6	0.73275
135.7	0.73375
135.8	0.734
135.9	0.734
136	0.7345
136.1	0.736
136.2	0.7365
136.3	0.7375
136.4	0.738
136.5	0.73925
136.6	0.7395
136.7	0.74075
136.8	0.74075
136.9	0.741
137	0.743
137.1	0.7435
137.2	0.74375
137.3	0.74375
137.4	0.744
137.5	0.74375
137.6	0.7445
137.7	0.74525
137.8	0.74575
137.9	0.746
138	0.746
138.1	0.74725
138.2	0.74875
138.3	0.7495
138.4	0.7495
138.5	0.7505
138.6	0.75
138.7	0.74925
138.8	0.749
138.9	0.75
139	0.75025
139.1	0.75025
139.2	0.751
139.3	0.7505
139.4	0.75075
139.5	0.75075
139.6	0.75125
139.7	0.7515
139.8	0.7525
139.9	0.75275
140	0.75325
140.1	0.754
140.2	0.754
140.3	0.75525
140.4	0.75575
140.5	0.75675
140.6	0.75625
140.7	0.75775
140.8	0.7575
140.9	0.75925
141	0.75925
141.1	0.76025
141.2	0.7595
141.3	0.759
141.4	0.75925
141.5	0.76
141.6	0.761
141.7	0.762
141.8	0.7635
141.9	0.76475
142	0.765
142.1	0.765
142.2	0.76675
142.3	0.768
142.4	0.768
142.5	0.76725
142.6	0.7685
142.7	0.769
142.8	0.769
142.9	0.7685
143	0.77
143.1	0.7695
143.2	0.7695
143.3	0.7715
143.4	0.77175
143.5	0.773
143.6	0.77175
143.7	0.773
143.8	0.773
143.9	0.77275
144	0.77225
144.1	0.7725
144.2	0.7745
144.3	0.77475
144.4	0.77375
144.5	0.77525
144.6	0.77625
144.7	0.7765
144.8	0.777
144.9	0.778
145	0.77675
145.1	0.77775
145.2	0.777
145.3	0.7775
145.4	0.778
145.5	0.77775
145.6	0.77675
145.7	0.7775
145.8	0.779
145.9	0.77925
146	0.77875
146.1	0.779
146.2	0.779
146.3	0.779
146.4	0.778
146.5	0.77825
146.6	0.77925
146.7	0.779
146.8	0.78025
146.9	0.78
147	0.77975
147.1	0.77975
147.2	0.7795
147.3	0.7805
147.4	0.78125
147.5	0.7815
147.6	0.7825
147.7	0.7835
147.8	0.78325
147.9	0.78275
148	0.78325
148.1	0.783
148.2	0.7835
148.3	0.784
148.4	0.7855
148.5	0.7845
148.6	0.7855
148.7	0.7855
148.8	0.785
148.9	0.78625
149	0.786
149.1	0.78675
149.2	0.78725
149.3	0.787
149.4	0.787
149.5	0.787
149.6	0.7875
149.7	0.7875
149.8	0.7885
149.9	0.7885
150	0.78875
150.1	0.78925
150.2	0.78925
150.3	0.78925
150.4	0.78925
150.5	0.78975
150.6	0.78975
150.7	0.78975
150.8	0.7905
150.9	0.791
151	0.79125
151.1	0.79075
151.2	0.79125
151.3	0.7915
151.4	0.79125
151.5	0.79175
151.6	0.792
151.7	0.79175
151.8	0.79075
151.9	0.7905
152	0.791
152.1	0.79175
152.2	0.79225
152.3	0.792
152.4	0.79275
152.5	0.79225
152.6	0.79225
152.7	0.7905
152.8	0.7915
152.9	0.7925
153	0.79175
153.1	0.7915
153.2	0.79075
153.3	0.7915
153.4	0.793
153.5	0.792
153.6	0.7935
153.7	0.7945
153.8	0.7955
153.9	0.79575
154	0.79525
154.1	0.79625
154.2	0.79675
154.3	0.7965
154.4	0.7965
154.5	0.79675
154.6	0.797
154.7	0.797
154.8	0.7965
154.9	0.7975
155	0.79825
155.1	0.79875
155.2	0.79825
155.3	0.7985
155.4	0.7995
155.5	0.79975
155.6	0.7995
155.7	0.799
155.8	0.7985
155.9	0.79925
156	0.799
156.1	0.7985
156.2	0.79925
156.3	0.80025
156.4	0.801
156.5	0.80025
156.6	0.7995
156.7	0.7995
156.8	0.7995
156.9	0.8
157	0.8005
157.1	0.79975
157.2	0.79975
157.3	0.8005
157.4	0.8
157.5	0.801
157.6	0.80125
157.7	0.802
157.8	0.80175
157.9	0.802
158	0.80275
158.1	0.802
158.2	0.8025
158.3	0.80225
158.4	0.8035
158.5	0.8035
158.6	0.80325
158.7	0.80425
158.8	0.80325
158.9	0.80375
159	0.804
159.1	0.80425
159.2	0.8035
159.3	0.80275
159.4	0.803
159.5	0.80475
159.6	0.805
159.7	0.805
159.8	0.80475
159.9	0.805
160	0.80575
160.1	0.8055
160.2	0.80525
160.3	0.80575
160.4	0.80625
160.5	0.806
160.6	0.80575
160.7	0.80575
160.8	0.80475
160.9	0.80475
161	0.805
161.1	0.80525
161.2	0.806
161.3	0.8055
161.4	0.8055
161.5	0.80525
161.6	0.80575
161.7	0.80475
161.8	0.80525
161.9	0.805
162	0.805
162.1	0.80625
162.2	0.806
162.3	0.8065
162.4	0.80675
162.5	0.80725
162.6	0.8075
162.7	0.807
162.8	0.80725
162.9	0.807
163	0.80825
163.1	0.80875
163.2	0.8085
163.3	0.80925
163.4	0.80925
163.5	0.809
163.6	0.80925
163.7	0.81
163.8	0.81
163.9	0.8105
164	0.8105
164.1	0.8115
164.2	0.81
164.3	0.811
164.4	0.81025
164.5	0.81075
164.6	0.8115
164.7	0.81125
164.8	0.8115
164.9	0.8115
165	0.811
165.1	0.81125
165.2	0.81075
165.3	0.81075
165.4	0.8105
165.5	0.81
165.6	0.81125
165.7	0.81175
165.8	0.81225
165.9	0.81225
166	0.8125
166.1	0.813
166.2	0.81325
166.3	0.81175
166.4	0.81075
166.5	0.81
166.6	0.81
166.7	0.809
166.8	0.80975
166.9	0.81
167	0.8105
167.1	0.81
167.2	0.81075
167.3	0.8105
167.4	0.81025
167.5	0.81025
167.6	0.81125
167.7	0.81075
167.8	0.8115
167.9	0.81225
168	0.81325
168.1	0.81325
168.2	0.81475
168.3	0.8145
168.4	0.81475
168.5	0.8155
168.6	0.81475
168.7	0.81475
168.8	0.81525
168.9	0.81675
169	0.817
169.1	0.818
169.2	0.8175
169.3	0.81775
169.4	0.8185
169.5	0.818
169.6	0.81825
169.7	0.81825
169.8	0.819
169.9	0.8185
170	0.819
170.1	0.818
170.2	0.81825
170.3	0.81725
170.4	0.8165
170.5	0.81625
170.6	0.816
170.7	0.8165
170.8	0.81575
170.9	0.8155
171	0.815
171.1	0.81525
171.2	0.8145
171.3	0.81375
171.4	0.8125
171.5	0.81275
171.6	0.81225
171.7	0.8125
171.8	0.81425
171.9	0.8135
172	0.814
172.1	0.8145
172.2	0.8155
172.3	0.815
172.4	0.816
172.5	0.81525
172.6	0.81525
172.7	0.81375
172.8	0.81425
172.9	0.81475
173	0.81425
173.1	0.814
173.2	0.814
173.3	0.814
173.4	0.81425
173.5	0.81425
173.6	0.814
173.7	0.815
173.8	0.816
173.9	0.81625
174	0.816
174.1	0.81625
174.2	0.81725
174.3	0.8175
174.4	0.81675
174.5	0.817
174.6	0.81675
174.7	0.817
174.8	0.818
174.9	0.81875
175	0.819
175.1	0.81925
175.2	0.8195
175.3	0.8205
175.4	0.82025
175.5	0.82
175.6	0.82
175.7	0.82025
175.8	0.82025
175.9	0.8205
176	0.82025
176.1	0.8195
176.2	0.81925
176.3	0.819
176.4	0.818
176.5	0.81775
176.6	0.8185
176.7	0.818
176.8	0.81825
176.9	0.81875
177	0.81925
177.1	0.81875
177.2	0.819
177.3	0.8195
177.4	0.81825
177.5	0.819
177.6	0.819
177.7	0.81925
177.8	0.8195
177.9	0.81925
178	0.818
178.1	0.81925
178.2	0.81975
178.3	0.81925
178.4	0.819
178.5	0.81925
178.6	0.82
178.7	0.81975
178.8	0.82025
178.9	0.821
179	0.82125
179.1	0.82025
179.2	0.821
179.3	0.82125
179.4	0.82
179.5	0.821
179.6	0.822
179.7	0.82125
179.8	0.822
179.9	0.8225
180	0.823
180.1	0.8225
180.2	0.82275
180.3	0.8225
180.4	0.8225
180.5	0.8235
180.6	0.82325
180.7	0.82275
180.8	0.823
180.9	0.82375
181	0.8235
181.1	0.8245
181.2	0.82475
181.3	0.825
181.4	0.825
181.5	0.82475
181.6	0.82425
181.7	0.825
181.8	0.82475
181.9	0.825
182	0.8255
182.1	0.825
182.2	0.82525
182.3	0.82475
182.4	0.82625
182.5	0.82775
182.6	0.827
182.7	0.827
182.8	0.8275
182.9	0.82725
183	0.82675
183.1	0.827
183.2	0.82675
183.3	0.826
183.4	0.8265
183.5	0.828
183.6	0.82775
183.7	0.828
183.8	0.82825
183.9	0.82925
184	0.83025
184.1	0.83125
184.2	0.831
184.3	0.832
184.4	0.832
184.5	0.83375
184.6	0.83425
184.7	0.83475
184.8	0.83475
184.9	0.83425
185	0.83425
185.1	0.8335
185.2	0.83425
185.3	0.83475
185.4	0.83525
185.5	0.83525
185.6	0.8355
185.7	0.836
185.8	0.83625
185.9	0.83675
186	0.83675
186.1	0.836
186.2	0.835
186.3	0.83575
186.4	0.836
186.5	0.83575
186.6	0.8355
186.7	0.83475
186.8	0.8345
186.9	0.83375
187	0.83475
187.1	0.8345
187.2	0.83475
187.3	0.835
187.4	0.83475
187.5	0.8335
187.6	0.83375
187.7	0.833
187.8	0.83275
187.9	0.833
188	0.83375
188.1	0.83325
188.2	0.833
188.3	0.8335
188.4	0.83375
188.5	0.83475
188.6	0.835
188.7	0.83575
188.8	0.83475
188.9	0.8345
189	0.83375
189.1	0.83325
189.2	0.83275
189.3	0.83275
189.4	0.83275
189.5	0.833
189.6	0.83325
189.7	0.8335
189.8	0.833
189.9	0.8325
190	0.83275
190.1	0.83225
190.2	0.83175
190.3	0.83225
190.4	0.83275
190.5	0.83275
190.6	0.8335
190.7	0.8355
190.8	0.8345
190.9	0.835
191	0.836
191.1	0.83675
191.2	0.83625
191.3	0.83625
191.4	0.83725
191.5	0.837
191.6	0.83625
191.7	0.836
191.8	0.836
191.9	0.8355
192	0.83475
192.1	0.83425
192.2	0.83425
192.3	0.83425
192.4	0.8345
192.5	0.835
192.6	0.8345
192.7	0.834
192.8	0.8345
192.9	0.834
193	0.83275
193.1	0.83325
193.2	0.8335
193.3	0.833
193.4	0.83425
193.5	0.83475
193.6	0.83425
193.7	0.83425
193.8	0.83325
193.9	0.8325
194	0.8315
194.1	0.8315
194.2	0.83225
194.3	0.8325
194.4	0.8325
194.5	0.83325
194.6	0.83325
194.7	0.83225
194.8	0.83275
194.9	0.832
195	0.83225
195.1	0.83275
195.2	0.8325
195.3	0.83225
195.4	0.83175
195.5	0.8325
195.6	0.833
195.7	0.83275
195.8	0.8325
195.9	0.8325
196	0.832
196.1	0.832
196.2	0.833
196.3	0.8325
196.4	0.832
196.5	0.8315
196.6	0.83125
196.7	0.8325
196.8	0.834
196.9	0.834
197	0.83375
197.1	0.8345
197.2	0.8345
197.3	0.83475
197.4	0.83425
197.5	0.8335
197.6	0.8335
197.7	0.83375
197.8	0.834
197.9	0.83375
198	0.83375
198.1	0.8335
198.2	0.83325
198.3	0.83275
198.4	0.8335
198.5	0.834
198.6	0.834
198.7	0.834
198.8	0.83475
198.9	0.83425
199	0.83325
199.1	0.833
199.2	0.834
199.3	0.8335
199.4	0.8335
199.5	0.83275
199.6	0.8325
199.7	0.833
199.8	0.83325
199.9	0.832
200	0.8315
[truncated: 14,000 more rows]
