# Supplementary material for: Bayesian inference of kinetic schemes for ion channels by Kalman filtering
Source: eLife journal article supplement (doi:10.7554/elife.62714), 2022-05-04
Supplement: fig4-data2 [file 1_Sim_N_5000_Fluor_MW.xlsx]

## Sheet: Tabelle1
0.1	0
0.2	0
0.3	0
0.4	0
0.5	0
0.6	0
0.7	0
0.8	0
0.9	0
1	0
1.1	0
1.2	0
1.3	0
1.4	0
1.5	0
1.6	0
1.7	0
1.8	0
1.9	0
2	0
2.1	0
2.2	0
2.3	0
2.4	0
2.5	0
2.6	0
2.7	0
2.8	0
2.9	0
3	0
3.1	0
3.2	0
3.3	0
3.4	0
3.5	0
3.6	0
3.7	0
3.8	0
3.9	0
4	0
4.1	0
4.2	0
4.3	0
4.4	0
4.5	0
4.6	0
4.7	0
4.8	0
4.9	0
5	0
5.1	0
5.2	0
5.3	0
5.4	0
5.5	0
5.6	0
5.7	0
5.8	0
5.9	0
6	0
6.1	0
6.2	0
6.3	0
6.4	0
6.5	0
6.6	0
6.7	0
6.8	0
6.9	0
7	0
7.1	0
7.2	0
7.3	0
7.4	0
7.5	0
7.6	0
7.7	0
7.8	0
7.9	0
8	0
8.1	0
8.2	0
8.3	0
8.4	0
8.5	0
8.6	0
8.7	0
8.8	0
8.9	0
9	0
9.1	0
9.2	0
9.3	0
9.4	0
9.5	0
9.6	0
9.7	0
9.8	0
9.9	0
10	0
10.1	0
10.2	0
10.3	0
10.4	0
10.5	0
10.6	0
10.7	0
10.8	0
10.9	0
11	0
11.1	0
11.2	0
11.3	0
11.4	0
11.5	0
11.6	0
11.7	0
11.8	0
11.9	0
12	0
12.1	0
12.2	0
12.3	0
12.4	0
12.5	0
12.6	0
12.7	0
12.8	0
12.9	0
13	0
13.1	0
13.2	0
13.3	0
13.4	0
13.5	0
13.6	0
13.7	0
13.8	0
13.9	0
14	0
14.1	0
14.2	0
14.3	0
14.4	0
14.5	0
14.6	0
14.7	0
14.8	0
14.9	0
15	0
15.1	0
15.2	0
15.3	0
15.4	0
15.5	0
15.6	0
15.7	0
15.8	0
15.9	0
16	0
16.1	0
16.2	0
16.3	0
16.4	0
16.5	0
16.6	0
16.7	0
16.8	0
16.9	0
17	0
17.1	0
17.2	0
17.3	0
17.4	0
17.5	0
17.6	0
17.7	0
17.8	0
17.9	0
18	0
18.1	0
18.2	0
18.3	0
18.4	0
18.5	0
18.6	0
18.7	0
18.8	0
18.9	0
19	0
19.1	0
19.2	0
19.3	0
19.4	0
19.5	0
19.6	0
19.7	0
19.8	0
19.9	0
20	0
20.1	0
20.2	0
20.3	0
20.4	0
20.5	0
20.6	0
20.7	0
20.8	0
20.9	0
21	0
21.1	0
21.2	0
21.3	0
21.4	0
21.5	0
21.6	0
21.7	0
21.8	0
21.9	0
22	0
22.1	0
22.2	0
22.3	0
22.4	0
22.5	0
22.6	0
22.7	0
22.8	0
22.9	0
23	0
23.1	0
23.2	0
23.3	0
23.4	0
23.5	0
23.6	0
23.7	0
23.8	0
23.9	0
24	0
24.1	0
24.2	0
24.3	0
24.4	0
24.5	0
24.6	0
24.7	0
24.8	0
24.9	0
25	0
25.1	0
25.2	0
25.3	0
25.4	0
25.5	0
25.6	0
25.7	0
25.8	0
25.9	0
26	0
26.1	0
26.2	0
26.3	0
26.4	0
26.5	0
26.6	0
26.7	0
26.8	0
26.9	0
27	0
27.1	0
27.2	0
27.3	0
27.4	0
27.5	0
27.6	0
27.7	0
27.8	0
27.9	0
28	0
28.1	0
28.2	0
28.3	0
28.4	0
28.5	0
28.6	0
28.7	0
28.8	0
28.9	0
29	0
29.1	0
29.2	0
29.3	0
29.4	0
29.5	0
29.6	0
29.7	0
29.8	0
29.9	0
30	0
30.1	0
30.2	0
30.3	0
30.4	0
30.5	0
30.6	0
30.7	0
30.8	0
30.9	0
31	0
31.1	0
31.2	0
31.3	0
31.4	0
31.5	0
31.6	0
31.7	0
31.8	0
31.9	0
32	0
32.1	0
32.2	0
32.3	0
32.4	0
32.5	0
32.6	0
32.7	0
32.8	0
32.9	0
33	0
33.1	0
33.2	0
33.3	0
33.4	0
33.5	0
33.6	0
33.7	0
33.8	0
33.9	0
34	0
34.1	0
34.2	0
34.3	0
34.4	0
34.5	0
34.6	0
34.7	0
34.8	0
34.9	0
35	0
35.1	0
35.2	0
35.3	0
35.4	0
35.5	0
35.6	0
35.7	0
35.8	0
35.9	0
36	0
36.1	0
36.2	0
36.3	0
36.4	0
36.5	0
36.6	0
36.7	0
36.8	0
36.9	0
37	0
37.1	0
37.2	0
37.3	0
37.4	0
37.5	0
37.6	0
37.7	0
37.8	0
37.9	0
38	0
38.1	0
38.2	0
38.3	0
38.4	0
38.5	0
38.6	0
38.7	0
38.8	0
38.9	0
39	0
39.1	0
39.2	0
39.3	0
39.4	0
39.5	0
39.6	0
39.7	0
39.8	0
39.9	0
40	0
40.1	0
40.2	0
40.3	0
40.4	0
40.5	0
40.6	0
40.7	0
40.8	0
40.9	0
41	0
41.1	0
41.2	0
41.3	0
41.4	0
41.5	0
41.6	0
41.7	0
41.8	0
41.9	0
42	0
42.1	0
42.2	0
42.3	0
42.4	0
42.5	0
42.6	0
42.7	0
42.8	0
42.9	0
43	0
43.1	0
43.2	0
43.3	0
43.4	0
43.5	0
43.6	0
43.7	0
43.8	0
43.9	0
44	0
44.1	0
44.2	0
44.3	0
44.4	0
44.5	0
44.6	0
44.7	0
44.8	0
44.9	0
45	0
45.1	0
45.2	0
45.3	0
45.4	0
45.5	0
45.6	0
45.7	0
45.8	0
45.9	0
46	0
46.1	0
46.2	0
46.3	0
46.4	0
46.5	0
46.6	0
46.7	0
46.8	0
46.9	0
47	0
47.1	0
47.2	0
47.3	0
47.4	0
47.5	0
47.6	0
47.7	0
47.8	0
47.9	0
48	0
48.1	0
48.2	0
48.3	0
48.4	0
48.5	0
48.6	0
48.7	0
48.8	0
48.9	0
49	0
49.1	0
49.2	0
49.3	0
49.4	0
49.5	0
49.6	0
49.7	0
49.8	0
49.9	0
50	0
50.1	0
50.2	0
50.3	0
50.4	0
50.5	0
50.6	0
50.7	0
50.8	0
50.9	0
51	0
51.1	0
51.2	0
51.3	0
51.4	0
51.5	0
51.6	0
51.7	0
51.8	0
51.9	0
52	0
52.1	0
52.2	0
52.3	0
52.4	0
52.5	0
52.6	0
52.7	0
52.8	0
52.9	0
53	0
53.1	0
53.2	0
53.3	0
53.4	0
53.5	0
53.6	0
53.7	0
53.8	0
53.9	0
54	0
54.1	0
54.2	0
54.3	0
54.4	0
54.5	0
54.6	0
54.7	0
54.8	0
54.9	0
55	0
55.1	0
55.2	0
55.3	0
55.4	0
55.5	0
55.6	0
55.7	0
55.8	0
55.9	0
56	0
56.1	0
56.2	0
56.3	0
56.4	0
56.5	0
56.6	0
56.7	0
56.8	0
56.9	0
57	0
57.1	0
57.2	0
57.3	0
57.4	0
57.5	0
57.6	0
57.7	0
57.8	0
57.9	0
58	0
58.1	0
58.2	0
58.3	0
58.4	0
58.5	0
58.6	0
58.7	0
58.8	0
58.9	0
59	0
59.1	0
59.2	0
59.3	0
59.4	0
59.5	0
59.6	0
59.7	0
59.8	0
59.9	0
60	0
60.1	0
60.2	0
60.3	0
60.4	0
60.5	0
60.6	0
60.7	0
60.8	0
60.9	0
61	0
61.1	0
61.2	0
61.3	0
61.4	0
61.5	0
61.6	0
61.7	0
61.8	0
61.9	0
62	0
62.1	0
62.2	0
62.3	0
62.4	0
62.5	0
62.6	0
62.7	0
62.8	0
62.9	0
63	0
63.1	0
63.2	0
63.3	0
63.4	0
63.5	0
63.6	0
63.7	0
63.8	0
63.9	0
64	0
64.1	0
64.2	0
64.3	0
64.4	0
64.5	0
64.6	0
64.7	0
64.8	0
64.9	0
65	0
65.1	0
65.2	0
65.3	0
65.4	0
65.5	0
65.6	0
65.7	0
65.8	0
65.9	0
66	0
66.1	0
66.2	0
66.3	0
66.4	0
66.5	0
66.6	0
66.7	0
66.8	0
66.9	0
67	0
67.1	0
67.2	0
67.3	0
67.4	0
67.5	0
67.6	0
67.7	0
67.8	0
67.9	0
68	0
68.1	0
68.2	0
68.3	0
68.4	0
68.5	0
68.6	0
68.7	0
68.8	0
68.9	0
69	0
69.1	0
69.2	0
69.3	0
69.4	0
69.5	0
69.6	0
69.7	0
69.8	0
69.9	0
70	0
70.1	0
70.2	0
70.3	0
70.4	0
70.5	0
70.6	0
70.7	0
70.8	0
70.9	0
71	0
71.1	0
71.2	0
71.3	0
71.4	0
71.5	0
71.6	0
71.7	0
71.8	0
71.9	0
72	0
72.1	0
72.2	0
72.3	0
72.4	0
72.5	0
72.6	0
72.7	0
72.8	0
72.9	0
73	0
73.1	0
73.2	0
73.3	0
73.4	0
73.5	0
73.6	0
73.7	0
73.8	0
73.9	0
74	0
74.1	0
74.2	0
74.3	0
74.4	0
74.5	0
74.6	0
74.7	0
74.8	0
74.9	0
75	0
75.1	0
75.2	0
75.3	0
75.4	0
75.5	0
75.6	0
75.7	0
75.8	0
75.9	0
76	0
76.1	0
76.2	0
76.3	0
76.4	0
76.5	0
76.6	0
76.7	0
76.8	0
76.9	0
77	0
77.1	0
77.2	0
77.3	0
77.4	0
77.5	0
77.6	0
77.7	0
77.8	0
77.9	0
78	0
78.1	0
78.2	0
78.3	0
78.4	0
78.5	0
78.6	0
78.7	0
78.8	0
78.9	0
79	0
79.1	0
79.2	0
79.3	0
79.4	0
79.5	0
79.6	0
79.7	0
79.8	0
79.9	0
80	0
80.1	0
80.2	0
80.3	0
80.4	0
80.5	0
80.6	0
80.7	0
80.8	0
80.9	0
81	0
81.1	0
81.2	0
81.3	0
81.4	0
81.5	0
81.6	0
81.7	0
81.8	0
81.9	0
82	0
82.1	0
82.2	0
82.3	0
82.4	0
82.5	0
82.6	0
82.7	0
82.8	0
82.9	0
83	0
83.1	0
83.2	0
83.3	0
83.4	0
83.5	0
83.6	0
83.7	0
83.8	0
83.9	0
84	0
84.1	0
84.2	0
84.3	0
84.4	0
84.5	0
84.6	0
84.7	0
84.8	0
84.9	0
85	0
85.1	0
85.2	0
85.3	0
85.4	0
85.5	0
85.6	0
85.7	0
85.8	0
85.9	0
86	0
86.1	0
86.2	0
86.3	0
86.4	0
86.5	0
86.6	0
86.7	0
86.8	0
86.9	0
87	0
87.1	0
87.2	0
87.3	0
87.4	0
87.5	0
87.6	0
87.7	0
87.8	0
87.9	0
88	0
88.1	0
88.2	0
88.3	0
88.4	0
88.5	0
88.6	0
88.7	0
88.8	0
88.9	0
89	0
89.1	0
89.2	0
89.3	0
89.4	0
89.5	0
89.6	0
89.7	0
89.8	0
89.9	0
90	0
90.1	0
90.2	0
90.3	0
90.4	0
90.5	0
90.6	0
90.7	0
90.8	0
90.9	0
91	0
91.1	0
91.2	0
91.3	0
91.4	0
91.5	0
91.6	0
91.7	0
91.8	0
91.9	0
92	0
92.1	0
92.2	0
92.3	0
92.4	0
92.5	0
92.6	0
92.7	0
92.8	0
92.9	0
93	0
93.1	0
93.2	0
93.3	0
93.4	0
93.5	0
93.6	0
93.7	0
93.8	0
93.9	0
94	0
94.1	0
94.2	0
94.3	0
94.4	0
94.5	0
94.6	0
94.7	0
94.8	0
94.9	0
95	0
95.1	0
95.2	0
95.3	0
95.4	0
95.5	0
95.6	0
95.7	0
95.8	0
95.9	0
96	0
96.1	0
96.2	0
96.3	0
96.4	0
96.5	0
96.6	0
96.7	0
96.8	0
96.9	0
97	0
97.1	0
97.2	0
97.3	0
97.4	0
97.5	0
97.6	0
97.7	0
97.8	0
97.9	0
98	0
98.1	0
98.2	0
98.3	0
98.4	0
98.5	0
98.6	0
98.7	0
98.8	0
98.9	0
99	0
99.1	0
99.2	0
99.3	0
99.4	0
99.5	0
99.6	0
99.7	0
99.8	0
99.9	0
100	0
100.1	0.8969
100.2	0.9741
100.3	0.9866
100.4	0.9856
100.5	0.9877
100.6	0.9877
100.7	0.9879
100.8	0.9884
100.9	0.9875
101	0.988
101.1	0.9879
101.2	0.9891
101.3	0.9867
101.4	0.9879
101.5	0.9881
101.6	0.9892
101.7	0.9902
101.8	0.988
101.9	0.987
102	0.9886
102.1	0.988
102.2	0.9888
102.3	0.9903
102.4	0.9891
102.5	0.9887
102.6	0.9891
102.7	0.9897
102.8	0.9903
102.9	0.9886
103	0.9878
103.1	0.9878
103.2	0.9893
103.3	0.9861
103.4	0.9891
103.5	0.9893
103.6	0.9894
103.7	0.989
103.8	0.9907
103.9	0.9894
104	0.9902
104.1	0.989
104.2	0.9882
104.3	0.9891
104.4	0.9885
104.5	0.9896
104.6	0.9881
104.7	0.9891
104.8	0.9892
104.9	0.9886
105	0.9885
105.1	0.9906
105.2	0.9902
105.3	0.9907
105.4	0.991
105.5	0.9915
105.6	0.991
105.7	0.9916
105.8	0.9887
105.9	0.9891
106	0.9909
106.1	0.9908
106.2	0.9905
106.3	0.9912
106.4	0.9893
106.5	0.9899
106.6	0.9897
106.7	0.9898
106.8	0.9894
106.9	0.9894
107	0.9916
107.1	0.9896
107.2	0.9908
107.3	0.9913
107.4	0.9911
107.5	0.9895
107.6	0.9906
107.7	0.9908
107.8	0.9898
107.9	0.9909
108	0.9916
108.1	0.9916
108.2	0.9914
108.3	0.9921
108.4	0.9917
108.5	0.9903
108.6	0.9923
108.7	0.9924
108.8	0.9937
108.9	0.9923
109	0.9903
109.1	0.9921
109.2	0.9903
109.3	0.9942
109.4	0.9921
109.5	0.9928
109.6	0.9923
109.7	0.9925
109.8	0.9926
109.9	0.9932
110	0.9944
110.1	0.9914
110.2	0.9901
110.3	0.9902
110.4	0.9911
110.5	0.9928
110.6	0.9905
110.7	0.9933
110.8	0.9923
110.9	0.9921
111	0.9946
111.1	0.9935
111.2	0.9932
111.3	0.9928
111.4	0.992
111.5	0.9928
111.6	0.9913
111.7	0.9925
111.8	0.993
111.9	0.992
112	0.9926
112.1	0.9932
112.2	0.9907
112.3	0.9911
112.4	0.9926
112.5	0.9932
112.6	0.9933
112.7	0.9932
112.8	0.9944
112.9	0.9939
113	0.9941
113.1	0.9916
113.2	0.9929
113.3	0.9924
113.4	0.9931
113.5	0.9927
113.6	0.9929
113.7	0.9919
113.8	0.9939
113.9	0.9944
114	0.9936
114.1	0.9938
114.2	0.9936
114.3	0.9919
114.4	0.9926
114.5	0.9935
114.6	0.9944
114.7	0.9933
114.8	0.9933
114.9	0.9933
115	0.9931
115.1	0.9923
115.2	0.9925
115.3	0.9943
115.4	0.9931
115.5	0.993
115.6	0.9938
115.7	0.9944
115.8	0.9935
115.9	0.9939
116	0.9944
116.1	0.994
116.2	0.9934
116.3	0.9946
116.4	0.9942
116.5	0.9936
116.6	0.9939
116.7	0.9942
116.8	0.995
116.9	0.9947
117	0.9933
117.1	0.9943
117.2	0.9946
117.3	0.9935
117.4	0.9949
117.5	0.9929
117.6	0.9945
117.7	0.9937
117.8	0.9943
117.9	0.9945
118	0.9942
118.1	0.9925
118.2	0.9932
118.3	0.9947
118.4	0.9939
118.5	0.9941
118.6	0.9936
118.7	0.9944
118.8	0.9956
118.9	0.9946
119	0.9947
119.1	0.9944
119.2	0.9935
119.3	0.9948
119.4	0.9935
119.5	0.9933
119.6	0.9942
119.7	0.9934
119.8	0.994
119.9	0.9941
120	0.9939
120.1	0.9945
120.2	0.9952
120.3	0.9952
120.4	0.9954
120.5	0.996
120.6	0.9943
120.7	0.9944
120.8	0.9948
120.9	0.9946
121	0.9934
121.1	0.9941
121.2	0.9951
121.3	0.9941
121.4	0.9952
121.5	0.9954
121.6	0.9952
121.7	0.9951
121.8	0.9949
121.9	0.9946
122	0.9946
122.1	0.995
122.2	0.9957
122.3	0.9944
122.4	0.9947
122.5	0.9953
122.6	0.996
122.7	0.996
122.8	0.9951
122.9	0.9947
123	0.9951
123.1	0.9952
123.2	0.9951
123.3	0.9959
123.4	0.9957
123.5	0.9957
123.6	0.996
123.7	0.9954
123.8	0.9946
123.9	0.9947
124	0.9955
124.1	0.9954
124.2	0.9957
124.3	0.9957
124.4	0.9943
124.5	0.9962
124.6	0.9957
124.7	0.996
124.8	0.9946
124.9	0.9953
125	0.9952
125.1	0.9957
125.2	0.9943
125.3	0.9954
125.4	0.9954
125.5	0.9947
125.6	0.9957
125.7	0.9942
125.8	0.9949
125.9	0.9963
126	0.9958
126.1	0.9961
126.2	0.9952
126.3	0.9969
126.4	0.9957
126.5	0.9953
126.6	0.9953
126.7	0.9966
126.8	0.9956
126.9	0.9949
127	0.9957
127.1	0.996
127.2	0.996
127.3	0.9958
127.4	0.9954
127.5	0.9969
127.6	0.9966
127.7	0.9953
127.8	0.9966
127.9	0.9964
128	0.9958
128.1	0.9954
128.2	0.9949
128.3	0.9959
128.4	0.9956
128.5	0.9955
128.6	0.9946
128.7	0.9971
128.8	0.9964
128.9	0.9949
129	0.9963
129.1	0.9962
129.2	0.9959
129.3	0.9962
129.4	0.9955
129.5	0.9964
129.6	0.9969
129.7	0.9958
129.8	0.9957
129.9	0.9965
130	0.9951
130.1	0.9961
130.2	0.9958
130.3	0.9951
130.4	0.9953
130.5	0.9961
130.6	0.9955
130.7	0.996
130.8	0.9962
130.9	0.9961
131	0.996
131.1	0.9967
131.2	0.9959
131.3	0.996
131.4	0.9953
131.5	0.9967
131.6	0.9956
131.7	0.9966
131.8	0.9963
131.9	0.9966
132	0.9964
132.1	0.9957
132.2	0.996
132.3	0.9969
132.4	0.9974
132.5	0.9961
132.6	0.9967
132.7	0.996
132.8	0.9961
132.9	0.9971
133	0.9962
133.1	0.996
133.2	0.9958
133.3	0.9963
133.4	0.9961
133.5	0.9972
133.6	0.9967
133.7	0.9964
133.8	0.9965
133.9	0.9966
134	0.9951
134.1	0.996
134.2	0.997
134.3	0.9971
134.4	0.9969
134.5	0.9964
134.6	0.9962
134.7	0.9963
134.8	0.9971
134.9	0.9968
135	0.9968
135.1	0.9959
135.2	0.9965
135.3	0.9976
135.4	0.9966
135.5	0.9967
135.6	0.9971
135.7	0.9958
135.8	0.9961
135.9	0.9965
136	0.9973
136.1	0.9972
136.2	0.9966
136.3	0.9967
136.4	0.9965
136.5	0.9966
136.6	0.9972
136.7	0.9965
136.8	0.9955
136.9	0.997
137	0.9965
137.1	0.9977
137.2	0.9967
137.3	0.9965
137.4	0.9957
137.5	0.9953
137.6	0.9953
137.7	0.9967
137.8	0.9959
137.9	0.997
138	0.9961
138.1	0.9959
138.2	0.9962
138.3	0.9967
138.4	0.996
138.5	0.9968
138.6	0.9958
138.7	0.997
138.8	0.9971
138.9	0.9978
139	0.9974
139.1	0.9966
139.2	0.9976
139.3	0.9967
139.4	0.996
139.5	0.9972
139.6	0.9966
139.7	0.9977
139.8	0.9978
139.9	0.9967
140	0.9972
140.1	0.9968
140.2	0.996
140.3	0.9961
140.4	0.9972
140.5	0.9967
140.6	0.9978
140.7	0.9969
140.8	0.9973
140.9	0.9969
141	0.9979
141.1	0.9971
141.2	0.997
141.3	0.9962
141.4	0.9976
141.5	0.9963
141.6	0.9964
141.7	0.997
141.8	0.9959
141.9	0.9964
142	0.9961
142.1	0.9972
142.2	0.9966
142.3	0.9979
142.4	0.9975
142.5	0.9974
142.6	0.9974
142.7	0.9969
142.8	0.9962
142.9	0.9976
143	0.9975
143.1	0.9971
143.2	0.9973
143.3	0.9966
143.4	0.9964
143.5	0.9974
143.6	0.9974
143.7	0.9963
143.8	0.9967
143.9	0.9969
144	0.9981
144.1	0.9972
144.2	0.9958
144.3	0.9969
144.4	0.9968
144.5	0.9973
144.6	0.9967
144.7	0.9971
144.8	0.9965
144.9	0.9976
145	0.9973
145.1	0.9978
145.2	0.9982
145.3	0.9974
145.4	0.9973
145.5	0.9971
145.6	0.9976
145.7	0.9978
145.8	0.998
145.9	0.9973
146	0.9979
146.1	0.9977
146.2	0.9978
146.3	0.9966
146.4	0.9978
146.5	0.9969
146.6	0.9971
146.7	0.9977
146.8	0.9966
146.9	0.9979
147	0.9968
147.1	0.997
147.2	0.9976
147.3	0.9971
147.4	0.9974
147.5	0.9968
147.6	0.9968
147.7	0.9975
147.8	0.9979
147.9	0.9975
148	0.9988
148.1	0.9976
148.2	0.9972
148.3	0.9974
148.4	0.9973
148.5	0.9975
148.6	0.9964
148.7	0.9974
148.8	0.997
148.9	0.998
149	0.9977
149.1	0.9975
149.2	0.9979
149.3	0.9984
149.4	0.9967
149.5	0.9969
149.6	0.997
149.7	0.9968
149.8	0.9981
149.9	0.998
150	0.9966
150.1	0.9981
150.2	0.9972
150.3	0.9972
150.4	0.9972
150.5	0.9974
150.6	0.9973
150.7	0.9962
150.8	0.9977
150.9	0.9972
151	0.9968
151.1	0.9973
151.2	0.9982
151.3	0.997
151.4	0.9978
151.5	0.9973
151.6	0.9973
151.7	0.9969
151.8	0.9978
151.9	0.9978
152	0.9978
152.1	0.9975
152.2	0.9972
152.3	0.998
152.4	0.9975
152.5	0.9984
152.6	0.9976
152.7	0.9974
152.8	0.9976
152.9	0.9977
153	0.9974
153.1	0.9975
153.2	0.9975
153.3	0.9974
153.4	0.9975
153.5	0.9972
153.6	0.9971
153.7	0.9976
153.8	0.9969
153.9	0.9972
154	0.9978
154.1	0.9974
154.2	0.9977
154.3	0.9976
154.4	0.9974
154.5	0.9977
154.6	0.9972
154.7	0.9965
154.8	0.9969
154.9	0.9974
155	0.9981
155.1	0.9981
155.2	0.9977
155.3	0.9973
155.4	0.9971
155.5	0.9972
155.6	0.9979
155.7	0.9979
155.8	0.9971
155.9	0.9979
156	0.9976
156.1	0.9977
156.2	0.9979
156.3	0.9982
156.4	0.9973
156.5	0.9978
156.6	0.9982
156.7	0.9972
156.8	0.9976
156.9	0.9976
157	0.9973
157.1	0.997
157.2	0.9975
157.3	0.9976
157.4	0.9985
157.5	0.9974
157.6	0.9977
157.7	0.9978
157.8	0.9985
157.9	0.997
158	0.9975
158.1	0.9974
158.2	0.9973
158.3	0.9969
158.4	0.997
158.5	0.9976
158.6	0.9982
158.7	0.9975
158.8	0.9972
158.9	0.9969
159	0.9979
159.1	0.9979
159.2	0.9975
159.3	0.9978
159.4	0.9984
159.5	0.997
159.6	0.9977
159.7	0.9978
159.8	0.9967
159.9	0.9974
160	0.9979
160.1	0.998
160.2	0.9981
160.3	0.998
160.4	0.9979
160.5	0.9981
160.6	0.9978
160.7	0.9972
160.8	0.9982
160.9	0.9983
161	0.997
161.1	0.997
161.2	0.9971
161.3	0.9976
161.4	0.9982
161.5	0.9978
161.6	0.9973
161.7	0.9979
161.8	0.9977
161.9	0.9974
162	0.9978
162.1	0.9976
162.2	0.9978
162.3	0.9979
162.4	0.9977
162.5	0.9979
162.6	0.9975
162.7	0.9982
162.8	0.9976
162.9	0.9981
163	0.9981
163.1	0.9977
163.2	0.9981
163.3	0.9977
163.4	0.9977
163.5	0.9971
163.6	0.9975
163.7	0.9984
163.8	0.9981
163.9	0.9977
164	0.9971
164.1	0.9969
164.2	0.9981
164.3	0.9973
164.4	0.9982
164.5	0.9974
164.6	0.9982
164.7	0.9974
164.8	0.9973
164.9	0.9973
165	0.9971
165.1	0.9981
165.2	0.9974
165.3	0.9968
165.4	0.998
165.5	0.9975
165.6	0.9975
165.7	0.997
165.8	0.9977
165.9	0.9985
166	0.9983
166.1	0.9979
166.2	0.9982
166.3	0.998
166.4	0.9972
166.5	0.9974
166.6	0.9982
166.7	0.9983
166.8	0.9974
166.9	0.998
167	0.9982
167.1	0.9984
167.2	0.9977
167.3	0.997
167.4	0.9983
167.5	0.9971
167.6	0.9978
167.7	0.9976
167.8	0.9975
167.9	0.997
168	0.9983
168.1	0.998
168.2	0.9979
168.3	0.9979
168.4	0.9986
168.5	0.9982
168.6	0.998
168.7	0.9981
168.8	0.9983
168.9	0.9979
169	0.9982
169.1	0.9979
169.2	0.9973
169.3	0.9975
169.4	0.9964
169.5	0.998
169.6	0.9977
169.7	0.9974
169.8	0.9981
169.9	0.9978
170	0.9976
170.1	0.9979
170.2	0.998
170.3	0.9986
170.4	0.9978
170.5	0.9969
170.6	0.9966
170.7	0.9965
170.8	0.997
170.9	0.9979
171	0.9978
171.1	0.9977
171.2	0.9979
171.3	0.9972
171.4	0.9965
171.5	0.9979
171.6	0.9983
171.7	0.9983
171.8	0.998
171.9	0.9977
172	0.9981
172.1	0.9978
172.2	0.9979
172.3	0.9972
172.4	0.9972
172.5	0.9978
172.6	0.9979
172.7	0.9974
172.8	0.9975
172.9	0.9966
173	0.9977
173.1	0.9981
173.2	0.9972
173.3	0.9969
173.4	0.9974
173.5	0.9975
173.6	0.997
173.7	0.9981
173.8	0.9974
173.9	0.9971
174	0.9977
174.1	0.9985
174.2	0.9978
174.3	0.9979
174.4	0.9986
174.5	0.9978
174.6	0.9972
174.7	0.9976
174.8	0.9977
174.9	0.9974
175	0.9972
175.1	0.9977
175.2	0.9981
175.3	0.9983
175.4	0.9979
175.5	0.9967
175.6	0.9974
175.7	0.997
175.8	0.9974
175.9	0.9983
176	0.998
176.1	0.9977
176.2	0.9973
176.3	0.9977
176.4	0.9976
176.5	0.9972
176.6	0.9982
176.7	0.9975
176.8	0.9975
176.9	0.9985
177	0.9977
177.1	0.9974
177.2	0.9971
177.3	0.9979
177.4	0.9965
177.5	0.997
177.6	0.9979
177.7	0.9975
177.8	0.9972
177.9	0.9968
178	0.9976
178.1	0.9975
178.2	0.9969
178.3	0.9978
178.4	0.9979
178.5	0.9978
178.6	0.9976
178.7	0.9973
178.8	0.997
178.9	0.9976
179	0.9975
179.1	0.998
179.2	0.9983
179.3	0.9976
179.4	0.9981
179.5	0.9983
179.6	0.9979
179.7	0.9979
179.8	0.9979
179.9	0.9976
180	0.9975
180.1	0.9974
180.2	0.9974
180.3	0.9983
180.4	0.9974
180.5	0.9983
180.6	0.9987
180.7	0.9984
180.8	0.9976
180.9	0.9971
181	0.9982
181.1	0.9965
181.2	0.9981
181.3	0.998
181.4	0.998
181.5	0.9984
181.6	0.9975
181.7	0.9973
181.8	0.9983
181.9	0.9969
182	0.9981
182.1	0.9976
182.2	0.9981
182.3	0.9978
182.4	0.9974
182.5	0.9981
182.6	0.9975
182.7	0.9972
182.8	0.998
182.9	0.9982
183	0.998
183.1	0.9975
183.2	0.997
183.3	0.9979
183.4	0.9978
183.5	0.9974
183.6	0.9975
183.7	0.9967
183.8	0.9976
183.9	0.9965
184	0.9977
184.1	0.9974
184.2	0.9983
184.3	0.9976
184.4	0.9974
184.5	0.9974
184.6	0.9978
184.7	0.9975
184.8	0.9976
184.9	0.9976
185	0.9987
185.1	0.998
185.2	0.9982
185.3	0.998
185.4	0.9969
185.5	0.9975
185.6	0.9979
185.7	0.9979
185.8	0.9977
185.9	0.9977
186	0.9979
186.1	0.9986
186.2	0.9976
186.3	0.9978
186.4	0.9976
186.5	0.998
186.6	0.9981
186.7	0.9975
186.8	0.9987
186.9	0.9966
187	0.9978
187.1	0.9978
187.2	0.9981
187.3	0.9977
187.4	0.9977
187.5	0.9978
187.6	0.9981
187.7	0.9982
187.8	0.9978
187.9	0.9968
188	0.9979
188.1	0.9975
188.2	0.9979
188.3	0.9977
188.4	0.9975
188.5	0.9975
188.6	0.9975
188.7	0.9973
188.8	0.9975
188.9	0.9971
189	0.9979
189.1	0.9977
189.2	0.9983
189.3	0.9985
189.4	0.9984
189.5	0.9971
189.6	0.9977
189.7	0.9979
189.8	0.9978
189.9	0.9977
190	0.9981
190.1	0.9978
190.2	0.9981
190.3	0.9976
190.4	0.9981
190.5	0.998
190.6	0.9974
190.7	0.9979
190.8	0.9978
190.9	0.9982
191	0.9971
191.1	0.9973
191.2	0.9979
191.3	0.9977
191.4	0.998
191.5	0.9984
191.6	0.9975
191.7	0.998
191.8	0.9979
191.9	0.9978
192	0.9983
192.1	0.9978
192.2	0.9981
192.3	0.9986
192.4	0.9976
192.5	0.9977
192.6	0.9972
192.7	0.9977
192.8	0.9972
192.9	0.9975
193	0.9973
193.1	0.998
193.2	0.9984
193.3	0.9974
193.4	0.998
193.5	0.9982
193.6	0.9981
193.7	0.9972
193.8	0.998
193.9	0.9975
194	0.998
194.1	0.9979
194.2	0.9978
194.3	0.9975
194.4	0.9976
194.5	0.9974
194.6	0.9975
194.7	0.9979
194.8	0.9976
194.9	0.9983
195	0.9972
195.1	0.998
195.2	0.9977
195.3	0.9979
195.4	0.9989
195.5	0.9973
195.6	0.9982
195.7	0.9982
195.8	0.9973
195.9	0.9978
196	0.9971
196.1	0.999
196.2	0.9986
196.3	0.9981
196.4	0.9978
196.5	0.9978
196.6	0.9973
196.7	0.9981
196.8	0.9983
196.9	0.9983
197	0.9982
197.1	0.9984
197.2	0.9976
197.3	0.9983
197.4	0.9978
197.5	0.9981
197.6	0.9981
197.7	0.9982
197.8	0.9984
197.9	0.9986
198	0.9981
198.1	0.9976
198.2	0.9981
198.3	0.9981
198.4	0.9976
198.5	0.9979
198.6	0.9975
198.7	0.9978
198.8	0.9973
198.9	0.9977
199	0.9975
199.1	0.9973
199.2	0.9981
199.3	0.9982
199.4	0.998
199.5	0.9987
199.6	0.9975
199.7	0.9978
199.8	0.9981
199.9	0.9982
200	0.9982
[truncated: 14,000 more rows]
