# Supplementary material for: Bayesian inference of kinetic schemes for ion channels by Kalman filtering
Source: eLife journal article supplement (doi:10.7554/elife.62714), 2022-05-04
Supplement: fig4-data2 [file 1_Sim_N_5000_Strom_MW.xlsx]

## Sheet: Tabelle1
0.1	0
0.2	0
0.3	0
0.4	0
0.5	0
0.6	0
0.7	0
0.8	0
0.9	0
1	0
1.1	0
1.2	0
1.3	0
1.4	0
1.5	0
1.6	0
1.7	0
1.8	0
1.9	0
2	0
2.1	0
2.2	0
2.3	0
2.4	0
2.5	0
2.6	0
2.7	0
2.8	0
2.9	0
3	0
3.1	0
3.2	0
3.3	0
3.4	0
3.5	0
3.6	0
3.7	0
3.8	0
3.9	0
4	0
4.1	0
4.2	0
4.3	0
4.4	0
4.5	0
4.6	0
4.7	0
4.8	0
4.9	0
5	0
5.1	0
5.2	0
5.3	0
5.4	0
5.5	0
5.6	0
5.7	0
5.8	0
5.9	0
6	0
6.1	0
6.2	0
6.3	0
6.4	0
6.5	0
6.6	0
6.7	0
6.8	0
6.9	0
7	0
7.1	0
7.2	0
7.3	0
7.4	0
7.5	0
7.6	0
7.7	0
7.8	0
7.9	0
8	0
8.1	0
8.2	0
8.3	0
8.4	0
8.5	0
8.6	0
8.7	0
8.8	0
8.9	0
9	0
9.1	0
9.2	0
9.3	0
9.4	0
9.5	0
9.6	0
9.7	0
9.8	0
9.9	0
10	0
10.1	0
10.2	0
10.3	0
10.4	0
10.5	0
10.6	0
10.7	0
10.8	0
10.9	0
11	0
11.1	0
11.2	0
11.3	0
11.4	0
11.5	0
11.6	0
11.7	0
11.8	0
11.9	0
12	0
12.1	0
12.2	0
12.3	0
12.4	0
12.5	0
12.6	0
12.7	0
12.8	0
12.9	0
13	0
13.1	0
13.2	0
13.3	0
13.4	0
13.5	0
13.6	0
13.7	0
13.8	0
13.9	0
14	0
14.1	0
14.2	0
14.3	0
14.4	0
14.5	0
14.6	0
14.7	0
14.8	0
14.9	0
15	0
15.1	0
15.2	0
15.3	0
15.4	0
15.5	0
15.6	0
15.7	0
15.8	0
15.9	0
16	0
16.1	0
16.2	0
16.3	0
16.4	0
16.5	0
16.6	0
16.7	0
16.8	0
16.9	0
17	0
17.1	0
17.2	0
17.3	0
17.4	0
17.5	0
17.6	0
17.7	0
17.8	0
17.9	0
18	0
18.1	0
18.2	0
18.3	0
18.4	0
18.5	0
18.6	0
18.7	0
18.8	0
18.9	0
19	0
19.1	0
19.2	0
19.3	0
19.4	0
19.5	0
19.6	0
19.7	0
19.8	0
19.9	0
20	0
20.1	0
20.2	0
20.3	0
20.4	0
20.5	0
20.6	0
20.7	0
20.8	0
20.9	0
21	0
21.1	0
21.2	0
21.3	0
21.4	0
21.5	0
21.6	0
21.7	0
21.8	0
21.9	0
22	0
22.1	0
22.2	0
22.3	0
22.4	0
22.5	0
22.6	0
22.7	0
22.8	0
22.9	0
23	0
23.1	0
23.2	0
23.3	0
23.4	0
23.5	0
23.6	0
23.7	0
23.8	0
23.9	0
24	0
24.1	0
24.2	0
24.3	0
24.4	0
24.5	0
24.6	0
24.7	0
24.8	0
24.9	0
25	0
25.1	0
25.2	0
25.3	0
25.4	0
25.5	0
25.6	0
25.7	0
25.8	0
25.9	0
26	0
26.1	0
26.2	0
26.3	0
26.4	0
26.5	0
26.6	0
26.7	0
26.8	0
26.9	0
27	0
27.1	0
27.2	0
27.3	0
27.4	0
27.5	0
27.6	0
27.7	0
27.8	0
27.9	0
28	0
28.1	0
28.2	0
28.3	0
28.4	0
28.5	0
28.6	0
28.7	0
28.8	0
28.9	0
29	0
29.1	0
29.2	0
29.3	0
29.4	0
29.5	0
29.6	0
29.7	0
29.8	0
29.9	0
30	0
30.1	0
30.2	0
30.3	0
30.4	0
30.5	0
30.6	0
30.7	0
30.8	0
30.9	0
31	0
31.1	0
31.2	0
31.3	0
31.4	0
31.5	0
31.6	0
31.7	0
31.8	0
31.9	0
32	0
32.1	0
32.2	0
32.3	0
32.4	0
32.5	0
32.6	0
32.7	0
32.8	0
32.9	0
33	0
33.1	0
33.2	0
33.3	0
33.4	0
33.5	0
33.6	0
33.7	0
33.8	0
33.9	0
34	0
34.1	0
34.2	0
34.3	0
34.4	0
34.5	0
34.6	0
34.7	0
34.8	0
34.9	0
35	0
35.1	0
35.2	0
35.3	0
35.4	0
35.5	0
35.6	0
35.7	0
35.8	0
35.9	0
36	0
36.1	0
36.2	0
36.3	0
36.4	0
36.5	0
36.6	0
36.7	0
36.8	0
36.9	0
37	0
37.1	0
37.2	0
37.3	0
37.4	0
37.5	0
37.6	0
37.7	0
37.8	0
37.9	0
38	0
38.1	0
38.2	0
38.3	0
38.4	0
38.5	0
38.6	0
38.7	0
38.8	0
38.9	0
39	0
39.1	0
39.2	0
39.3	0
39.4	0
39.5	0
39.6	0
39.7	0
39.8	0
39.9	0
40	0
40.1	0
40.2	0
40.3	0
40.4	0
40.5	0
40.6	0
40.7	0
40.8	0
40.9	0
41	0
41.1	0
41.2	0
41.3	0
41.4	0
41.5	0
41.6	0
41.7	0
41.8	0
41.9	0
42	0
42.1	0
42.2	0
42.3	0
42.4	0
42.5	0
42.6	0
42.7	0
42.8	0
42.9	0
43	0
43.1	0
43.2	0
43.3	0
43.4	0
43.5	0
43.6	0
43.7	0
43.8	0
43.9	0
44	0
44.1	0
44.2	0
44.3	0
44.4	0
44.5	0
44.6	0
44.7	0
44.8	0
44.9	0
45	0
45.1	0
45.2	0
45.3	0
45.4	0
45.5	0
45.6	0
45.7	0
45.8	0
45.9	0
46	0
46.1	0
46.2	0
46.3	0
46.4	0
46.5	0
46.6	0
46.7	0
46.8	0
46.9	0
47	0
47.1	0
47.2	0
47.3	0
47.4	0
47.5	0
47.6	0
47.7	0
47.8	0
47.9	0
48	0
48.1	0
48.2	0
48.3	0
48.4	0
48.5	0
48.6	0
48.7	0
48.8	0
48.9	0
49	0
49.1	0
49.2	0
49.3	0
49.4	0
49.5	0
49.6	0
49.7	0
49.8	0
49.9	0
50	0
50.1	0
50.2	0
50.3	0
50.4	0
50.5	0
50.6	0
50.7	0
50.8	0
50.9	0
51	0
51.1	0
51.2	0
51.3	0
51.4	0
51.5	0
51.6	0
51.7	0
51.8	0
51.9	0
52	0
52.1	0
52.2	0
52.3	0
52.4	0
52.5	0
52.6	0
52.7	0
52.8	0
52.9	0
53	0
53.1	0
53.2	0
53.3	0
53.4	0
53.5	0
53.6	0
53.7	0
53.8	0
53.9	0
54	0
54.1	0
54.2	0
54.3	0
54.4	0
54.5	0
54.6	0
54.7	0
54.8	0
54.9	0
55	0
55.1	0
55.2	0
55.3	0
55.4	0
55.5	0
55.6	0
55.7	0
55.8	0
55.9	0
56	0
56.1	0
56.2	0
56.3	0
56.4	0
56.5	0
56.6	0
56.7	0
56.8	0
56.9	0
57	0
57.1	0
57.2	0
57.3	0
57.4	0
57.5	0
57.6	0
57.7	0
57.8	0
57.9	0
58	0
58.1	0
58.2	0
58.3	0
58.4	0
58.5	0
58.6	0
58.7	0
58.8	0
58.9	0
59	0
59.1	0
59.2	0
59.3	0
59.4	0
59.5	0
59.6	0
59.7	0
59.8	0
59.9	0
60	0
60.1	0
60.2	0
60.3	0
60.4	0
60.5	0
60.6	0
60.7	0
60.8	0
60.9	0
61	0
61.1	0
61.2	0
61.3	0
61.4	0
61.5	0
61.6	0
61.7	0
61.8	0
61.9	0
62	0
62.1	0
62.2	0
62.3	0
62.4	0
62.5	0
62.6	0
62.7	0
62.8	0
62.9	0
63	0
63.1	0
63.2	0
63.3	0
63.4	0
63.5	0
63.6	0
63.7	0
63.8	0
63.9	0
64	0
64.1	0
64.2	0
64.3	0
64.4	0
64.5	0
64.6	0
64.7	0
64.8	0
64.9	0
65	0
65.1	0
65.2	0
65.3	0
65.4	0
65.5	0
65.6	0
65.7	0
65.8	0
65.9	0
66	0
66.1	0
66.2	0
66.3	0
66.4	0
66.5	0
66.6	0
66.7	0
66.8	0
66.9	0
67	0
67.1	0
67.2	0
67.3	0
67.4	0
67.5	0
67.6	0
67.7	0
67.8	0
67.9	0
68	0
68.1	0
68.2	0
68.3	0
68.4	0
68.5	0
68.6	0
68.7	0
68.8	0
68.9	0
69	0
69.1	0
69.2	0
69.3	0
69.4	0
69.5	0
69.6	0
69.7	0
69.8	0
69.9	0
70	0
70.1	0
70.2	0
70.3	0
70.4	0
70.5	0
70.6	0
70.7	0
70.8	0
70.9	0
71	0
71.1	0
71.2	0
71.3	0
71.4	0
71.5	0
71.6	0
71.7	0
71.8	0
71.9	0
72	0
72.1	0
72.2	0
72.3	0
72.4	0
72.5	0
72.6	0
72.7	0
72.8	0
72.9	0
73	0
73.1	0
73.2	0
73.3	0
73.4	0
73.5	0
73.6	0
73.7	0
73.8	0
73.9	0
74	0
74.1	0
74.2	0
74.3	0
74.4	0
74.5	0
74.6	0
74.7	0
74.8	0
74.9	0
75	0
75.1	0
75.2	0
75.3	0
75.4	0
75.5	0
75.6	0
75.7	0
75.8	0
75.9	0
76	0
76.1	0
76.2	0
76.3	0
76.4	0
76.5	0
76.6	0
76.7	0
76.8	0
76.9	0
77	0
77.1	0
77.2	0
77.3	0
77.4	0
77.5	0
77.6	0
77.7	0
77.8	0
77.9	0
78	0
78.1	0
78.2	0
78.3	0
78.4	0
78.5	0
78.6	0
78.7	0
78.8	0
78.9	0
79	0
79.1	0
79.2	0
79.3	0
79.4	0
79.5	0
79.6	0
79.7	0
79.8	0
79.9	0
80	0
80.1	0
80.2	0
80.3	0
80.4	0
80.5	0
80.6	0
80.7	0
80.8	0
80.9	0
81	0
81.1	0
81.2	0
81.3	0
81.4	0
81.5	0
81.6	0
81.7	0
81.8	0
81.9	0
82	0
82.1	0
82.2	0
82.3	0
82.4	0
82.5	0
82.6	0
82.7	0
82.8	0
82.9	0
83	0
83.1	0
83.2	0
83.3	0
83.4	0
83.5	0
83.6	0
83.7	0
83.8	0
83.9	0
84	0
84.1	0
84.2	0
84.3	0
84.4	0
84.5	0
84.6	0
84.7	0
84.8	0
84.9	0
85	0
85.1	0
85.2	0
85.3	0
85.4	0
85.5	0
85.6	0
85.7	0
85.8	0
85.9	0
86	0
86.1	0
86.2	0
86.3	0
86.4	0
86.5	0
86.6	0
86.7	0
86.8	0
86.9	0
87	0
87.1	0
87.2	0
87.3	0
87.4	0
87.5	0
87.6	0
87.7	0
87.8	0
87.9	0
88	0
88.1	0
88.2	0
88.3	0
88.4	0
88.5	0
88.6	0
88.7	0
88.8	0
88.9	0
89	0
89.1	0
89.2	0
89.3	0
89.4	0
89.5	0
89.6	0
89.7	0
89.8	0
89.9	0
90	0
90.1	0
90.2	0
90.3	0
90.4	0
90.5	0
90.6	0
90.7	0
90.8	0
90.9	0
91	0
91.1	0
91.2	0
91.3	0
91.4	0
91.5	0
91.6	0
91.7	0
91.8	0
91.9	0
92	0
92.1	0
92.2	0
92.3	0
92.4	0
92.5	0
92.6	0
92.7	0
92.8	0
92.9	0
93	0
93.1	0
93.2	0
93.3	0
93.4	0
93.5	0
93.6	0
93.7	0
93.8	0
93.9	0
94	0
94.1	0
94.2	0
94.3	0
94.4	0
94.5	0
94.6	0
94.7	0
94.8	0
94.9	0
95	0
95.1	0
95.2	0
95.3	0
95.4	0
95.5	0
95.6	0
95.7	0
95.8	0
95.9	0
96	0
96.1	0
96.2	0
96.3	0
96.4	0
96.5	0
96.6	0
96.7	0
96.8	0
96.9	0
97	0
97.1	0
97.2	0
97.3	0
97.4	0
97.5	0
97.6	0
97.7	0
97.8	0
97.9	0
98	0
98.1	0
98.2	0
98.3	0
98.4	0
98.5	0
98.6	0
98.7	0
98.8	0
98.9	0
99	0
99.1	0
99.2	0
99.3	0
99.4	0
99.5	0
99.6	0
99.7	0
99.8	0
99.9	0
100	0
100.1	0.0024
100.2	0.0058
100.3	0.0106
100.4	0.0164
100.5	0.021
100.6	0.0262
100.7	0.0302
100.8	0.0342
100.9	0.039
101	0.0446
101.1	0.049
101.2	0.055
101.3	0.0594
101.4	0.0648
101.5	0.0692
101.6	0.0746
101.7	0.0798
101.8	0.085
101.9	0.0892
102	0.0952
102.1	0.1002
102.2	0.1036
102.3	0.1058
102.4	0.1108
102.5	0.1134
102.6	0.1168
102.7	0.1218
102.8	0.1258
102.9	0.1294
103	0.1328
103.1	0.136
103.2	0.1406
103.3	0.1452
103.4	0.1492
103.5	0.1532
103.6	0.1566
103.7	0.1608
103.8	0.1626
103.9	0.1658
104	0.1708
104.1	0.1762
104.2	0.18
104.3	0.1848
104.4	0.188
104.5	0.1928
104.6	0.1962
104.7	0.2
104.8	0.2038
104.9	0.2082
105	0.2118
105.1	0.2154
105.2	0.2182
105.3	0.2218
105.4	0.227
105.5	0.2304
105.6	0.2346
105.7	0.2378
105.8	0.24
105.9	0.2432
106	0.247
106.1	0.2504
106.2	0.2534
106.3	0.256
106.4	0.2592
106.5	0.2624
106.6	0.2654
106.7	0.2678
106.8	0.2708
106.9	0.2752
107	0.278
107.1	0.2792
107.2	0.2824
107.3	0.2846
107.4	0.2884
107.5	0.292
107.6	0.2938
107.7	0.296
107.8	0.2988
107.9	0.3014
108	0.3058
108.1	0.3102
108.2	0.3136
108.3	0.3182
108.4	0.3214
108.5	0.3242
108.6	0.327
108.7	0.3302
108.8	0.3332
108.9	0.3364
109	0.3386
109.1	0.3424
109.2	0.3454
109.3	0.3482
109.4	0.3504
109.5	0.3526
109.6	0.3558
109.7	0.358
109.8	0.3632
109.9	0.3654
110	0.3668
110.1	0.3698
110.2	0.3734
110.3	0.3758
110.4	0.3788
110.5	0.3814
110.6	0.3836
110.7	0.386
110.8	0.388
110.9	0.3918
111	0.3948
111.1	0.3962
111.2	0.4002
111.3	0.405
111.4	0.4082
111.5	0.4108
111.6	0.4132
111.7	0.4152
111.8	0.4172
111.9	0.4196
112	0.4218
112.1	0.4266
112.2	0.4282
112.3	0.4302
112.4	0.4314
112.5	0.4342
112.6	0.4356
112.7	0.4374
112.8	0.4394
112.9	0.4438
113	0.4452
113.1	0.447
113.2	0.4484
113.3	0.4516
113.4	0.4542
113.5	0.457
113.6	0.4592
113.7	0.4608
113.8	0.4624
113.9	0.4634
114	0.4664
114.1	0.4686
114.2	0.472
114.3	0.474
114.4	0.4754
114.5	0.4782
114.6	0.48
114.7	0.4812
114.8	0.4824
114.9	0.4852
115	0.4868
115.1	0.4892
115.2	0.4902
115.3	0.4924
115.4	0.4938
115.5	0.496
115.6	0.4978
115.7	0.4998
115.8	0.5018
115.9	0.5028
116	0.5044
116.1	0.5046
116.2	0.5062
116.3	0.5078
116.4	0.509
116.5	0.5106
116.6	0.5138
116.7	0.5158
116.8	0.5174
116.9	0.5196
117	0.5206
117.1	0.524
117.2	0.525
117.3	0.5264
117.4	0.5276
117.5	0.5284
117.6	0.5298
117.7	0.5318
117.8	0.5332
117.9	0.536
118	0.5382
118.1	0.5404
118.2	0.543
118.3	0.5454
118.4	0.5464
118.5	0.549
118.6	0.5506
118.7	0.55
118.8	0.5524
118.9	0.5536
119	0.5544
119.1	0.5554
119.2	0.5566
119.3	0.558
119.4	0.561
119.5	0.5632
119.6	0.5652
119.7	0.5674
119.8	0.5686
119.9	0.5698
120	0.5724
120.1	0.5734
120.2	0.5756
120.3	0.576
120.4	0.577
120.5	0.5788
120.6	0.5806
120.7	0.583
120.8	0.5846
120.9	0.5874
121	0.5888
121.1	0.5902
121.2	0.5928
121.3	0.5942
121.4	0.5946
121.5	0.5966
121.6	0.5972
121.7	0.5986
121.8	0.5988
121.9	0.601
122	0.6014
122.1	0.6022
122.2	0.6042
122.3	0.6068
122.4	0.608
122.5	0.6082
122.6	0.6106
122.7	0.6108
122.8	0.6124
122.9	0.614
123	0.615
123.1	0.6148
123.2	0.6154
123.3	0.6154
123.4	0.6164
123.5	0.6184
123.6	0.62
123.7	0.6198
123.8	0.621
123.9	0.6212
124	0.623
124.1	0.6234
124.2	0.625
124.3	0.6266
124.4	0.6276
124.5	0.628
124.6	0.6294
124.7	0.6292
124.8	0.6294
124.9	0.6318
125	0.6332
125.1	0.6342
125.2	0.6356
125.3	0.6358
125.4	0.638
125.5	0.6386
125.6	0.6398
125.7	0.641
125.8	0.6418
125.9	0.6428
126	0.6436
126.1	0.6446
126.2	0.6452
126.3	0.6462
126.4	0.648
126.5	0.6492
126.6	0.651
126.7	0.6516
126.8	0.654
126.9	0.655
127	0.6558
127.1	0.6574
127.2	0.6588
127.3	0.6594
127.4	0.6606
127.5	0.662
127.6	0.6634
127.7	0.6634
127.8	0.6638
127.9	0.6646
128	0.6668
128.1	0.6678
128.2	0.6684
128.3	0.6698
128.4	0.6712
128.5	0.6718
128.6	0.6734
128.7	0.674
128.8	0.6762
128.9	0.676
129	0.6772
129.1	0.6776
129.2	0.6784
129.3	0.6796
129.4	0.6812
129.5	0.6818
129.6	0.6824
129.7	0.6822
129.8	0.6826
129.9	0.683
130	0.6832
130.1	0.683
130.2	0.6844
130.3	0.684
130.4	0.6846
130.5	0.6848
130.6	0.6864
130.7	0.6874
130.8	0.6884
130.9	0.6888
131	0.6906
131.1	0.6928
131.2	0.693
131.3	0.6932
131.4	0.6938
131.5	0.694
131.6	0.696
131.7	0.6974
131.8	0.6988
131.9	0.6998
132	0.7002
132.1	0.7008
132.2	0.7016
132.3	0.7028
132.4	0.7036
132.5	0.7038
132.6	0.7052
132.7	0.7056
132.8	0.707
132.9	0.7076
133	0.7078
133.1	0.7086
133.2	0.71
133.3	0.7106
133.4	0.7118
133.5	0.7126
133.6	0.7136
133.7	0.7156
133.8	0.7166
133.9	0.718
134	0.7194
134.1	0.7202
134.2	0.72
134.3	0.7204
134.4	0.7212
134.5	0.722
134.6	0.7228
134.7	0.7234
134.8	0.7242
134.9	0.7244
135	0.7254
135.1	0.7268
135.2	0.7264
135.3	0.7264
135.4	0.7276
135.5	0.7284
135.6	0.729
135.7	0.7294
135.8	0.7294
135.9	0.7292
136	0.7294
136.1	0.7304
136.2	0.7316
136.3	0.7314
136.4	0.732
136.5	0.7332
136.6	0.734
136.7	0.733
136.8	0.7344
136.9	0.735
137	0.735
137.1	0.7354
137.2	0.7356
137.3	0.7348
137.4	0.7354
137.5	0.7366
137.6	0.7368
137.7	0.7376
137.8	0.7382
137.9	0.7388
138	0.739
138.1	0.7402
138.2	0.7414
138.3	0.7422
138.4	0.743
138.5	0.7426
138.6	0.7426
138.7	0.7422
138.8	0.7434
138.9	0.743
139	0.7444
139.1	0.7454
139.2	0.7468
139.3	0.7476
139.4	0.7474
139.5	0.7476
139.6	0.7484
139.7	0.7498
139.8	0.75
139.9	0.7492
140	0.7498
140.1	0.7498
140.2	0.7496
140.3	0.7498
140.4	0.7508
140.5	0.7512
140.6	0.7516
140.7	0.752
140.8	0.753
140.9	0.7538
141	0.7548
141.1	0.755
141.2	0.756
141.3	0.7564
141.4	0.7566
141.5	0.7564
141.6	0.7574
141.7	0.7578
141.8	0.7592
141.9	0.7592
142	0.759
142.1	0.76
142.2	0.7598
142.3	0.76
142.4	0.7604
142.5	0.7612
142.6	0.7614
142.7	0.7612
142.8	0.761
142.9	0.7628
143	0.7636
143.1	0.764
143.2	0.7648
143.3	0.765
143.4	0.7652
143.5	0.765
143.6	0.7654
143.7	0.7658
143.8	0.7662
143.9	0.766
144	0.766
144.1	0.7666
144.2	0.7678
144.3	0.7676
144.4	0.7672
144.5	0.7688
144.6	0.7694
144.7	0.7696
144.8	0.7704
144.9	0.7696
145	0.7702
145.1	0.7714
145.2	0.7712
145.3	0.771
145.4	0.7716
145.5	0.7732
145.6	0.7732
145.7	0.7736
145.8	0.774
145.9	0.7748
146	0.776
146.1	0.7756
146.2	0.7768
146.3	0.7776
146.4	0.778
146.5	0.7786
146.6	0.7788
146.7	0.7782
146.8	0.779
146.9	0.7798
147	0.7804
147.1	0.7802
147.2	0.781
147.3	0.782
147.4	0.782
147.5	0.7824
147.6	0.7828
147.7	0.7834
147.8	0.7844
147.9	0.7846
148	0.7844
148.1	0.7846
148.2	0.7838
148.3	0.784
148.4	0.7848
148.5	0.7846
148.6	0.785
148.7	0.7844
148.8	0.7856
148.9	0.785
149	0.784
149.1	0.7846
149.2	0.7846
149.3	0.7858
149.4	0.7866
149.5	0.7876
149.6	0.7876
149.7	0.7878
149.8	0.7874
149.9	0.7876
150	0.7876
150.1	0.787
150.2	0.7872
150.3	0.788
150.4	0.7884
150.5	0.789
150.6	0.7898
150.7	0.7896
150.8	0.79
150.9	0.7904
151	0.7914
151.1	0.7926
151.2	0.7932
151.3	0.793
151.4	0.7944
151.5	0.794
151.6	0.7948
151.7	0.7958
151.8	0.795
151.9	0.7952
152	0.795
152.1	0.7946
152.2	0.795
152.3	0.7964
152.4	0.7974
152.5	0.7968
152.6	0.7972
152.7	0.7972
152.8	0.7982
152.9	0.7986
153	0.7998
153.1	0.7998
153.2	0.8002
153.3	0.8006
153.4	0.8014
153.5	0.8014
153.6	0.8016
153.7	0.8008
153.8	0.8012
153.9	0.8008
154	0.8004
154.1	0.8002
154.2	0.8004
154.3	0.7996
154.4	0.7992
154.5	0.7988
154.6	0.7994
154.7	0.8004
154.8	0.8014
154.9	0.8022
155	0.8022
155.1	0.8038
155.2	0.8046
155.3	0.8054
155.4	0.8064
155.5	0.8062
155.6	0.807
155.7	0.8072
155.8	0.8068
155.9	0.8068
156	0.8078
156.1	0.8086
156.2	0.8086
156.3	0.808
156.4	0.8084
156.5	0.8082
156.6	0.8088
156.7	0.8086
156.8	0.808
156.9	0.8084
157	0.808
157.1	0.8076
157.2	0.8078
157.3	0.8074
157.4	0.8074
157.5	0.8072
157.6	0.808
157.7	0.8084
157.8	0.8088
157.9	0.8082
158	0.8078
158.1	0.8082
158.2	0.809
158.3	0.8084
158.4	0.808
158.5	0.8078
158.6	0.809
158.7	0.8088
158.8	0.8088
158.9	0.809
159	0.8106
159.1	0.811
159.2	0.811
159.3	0.8118
159.4	0.8108
159.5	0.8108
159.6	0.8098
159.7	0.8082
159.8	0.808
159.9	0.8076
160	0.8064
160.1	0.8064
160.2	0.808
160.3	0.8088
160.4	0.809
160.5	0.8086
160.6	0.8084
160.7	0.8084
160.8	0.809
160.9	0.8088
161	0.8088
161.1	0.8078
161.2	0.8086
161.3	0.8088
161.4	0.8088
161.5	0.809
161.6	0.8094
161.7	0.8098
161.8	0.8098
161.9	0.81
162	0.81
162.1	0.8106
162.2	0.811
162.3	0.811
162.4	0.812
162.5	0.8116
162.6	0.8106
162.7	0.8102
162.8	0.8098
162.9	0.8102
163	0.8096
163.1	0.8096
163.2	0.8108
163.3	0.8114
163.4	0.8116
163.5	0.811
163.6	0.811
163.7	0.811
163.8	0.811
163.9	0.81
164	0.8086
164.1	0.8086
164.2	0.8086
164.3	0.808
164.4	0.8082
164.5	0.8078
164.6	0.808
164.7	0.8084
164.8	0.8088
164.9	0.8082
165	0.808
165.1	0.808
165.2	0.808
165.3	0.8082
165.4	0.8088
165.5	0.8074
165.6	0.8072
165.7	0.8072
165.8	0.8072
165.9	0.8072
166	0.8074
166.1	0.8078
166.2	0.8074
166.3	0.8076
166.4	0.8064
166.5	0.807
166.6	0.806
166.7	0.8064
166.8	0.806
166.9	0.806
167	0.8062
167.1	0.8068
167.2	0.8068
167.3	0.8076
167.4	0.8086
167.5	0.808
167.6	0.808
167.7	0.808
167.8	0.8076
167.9	0.8086
168	0.8084
168.1	0.8086
168.2	0.8092
168.3	0.809
168.4	0.8092
168.5	0.8096
168.6	0.81
168.7	0.8112
168.8	0.811
168.9	0.8108
169	0.812
169.1	0.812
169.2	0.8122
169.3	0.8118
169.4	0.8108
169.5	0.8102
169.6	0.8088
169.7	0.8094
169.8	0.8084
169.9	0.809
170	0.809
170.1	0.8094
170.2	0.8098
170.3	0.81
170.4	0.8094
170.5	0.8096
170.6	0.8096
170.7	0.8092
170.8	0.8084
170.9	0.8092
171	0.8086
171.1	0.8088
171.2	0.8094
171.3	0.8092
171.4	0.8088
171.5	0.8088
171.6	0.8094
171.7	0.8102
171.8	0.8112
171.9	0.812
172	0.8124
172.1	0.812
172.2	0.8124
172.3	0.8124
172.4	0.8124
172.5	0.8128
172.6	0.813
172.7	0.8134
172.8	0.8144
172.9	0.8138
173	0.8136
173.1	0.8132
173.2	0.8136
173.3	0.8142
173.4	0.8144
173.5	0.814
173.6	0.8146
173.7	0.815
173.8	0.816
173.9	0.8162
174	0.8166
174.1	0.8168
174.2	0.8178
174.3	0.8182
174.4	0.8188
174.5	0.8186
174.6	0.8186
174.7	0.819
174.8	0.8186
174.9	0.818
175	0.8188
175.1	0.8194
175.2	0.8196
175.3	0.8192
175.4	0.8196
175.5	0.8198
175.6	0.8202
175.7	0.8212
175.8	0.8216
175.9	0.8216
176	0.8212
176.1	0.8214
176.2	0.822
176.3	0.8218
176.4	0.8212
176.5	0.8216
176.6	0.8224
176.7	0.8236
176.8	0.8242
176.9	0.8248
177	0.826
177.1	0.8258
177.2	0.8254
177.3	0.8254
177.4	0.8254
177.5	0.8254
177.6	0.8264
177.7	0.8266
177.8	0.8268
177.9	0.827
178	0.8262
178.1	0.826
178.2	0.826
178.3	0.8264
178.4	0.827
178.5	0.8272
178.6	0.8262
178.7	0.8268
178.8	0.8272
178.9	0.827
179	0.8268
179.1	0.8276
179.2	0.8274
179.3	0.8276
179.4	0.828
179.5	0.8284
179.6	0.8278
179.7	0.828
179.8	0.8284
179.9	0.8278
180	0.8274
180.1	0.8278
180.2	0.827
180.3	0.827
180.4	0.827
180.5	0.8272
180.6	0.8278
180.7	0.8276
180.8	0.8278
180.9	0.8276
181	0.8286
181.1	0.8266
181.2	0.8272
181.3	0.8282
181.4	0.8282
181.5	0.8282
181.6	0.8274
181.7	0.827
181.8	0.8268
181.9	0.8264
182	0.8272
182.1	0.8282
182.2	0.8278
182.3	0.827
182.4	0.828
182.5	0.828
182.6	0.8278
182.7	0.828
182.8	0.828
182.9	0.8282
183	0.8284
183.1	0.8278
183.2	0.827
183.3	0.827
183.4	0.827
183.5	0.826
183.6	0.8258
183.7	0.825
183.8	0.825
183.9	0.8254
184	0.8254
184.1	0.8258
184.2	0.8264
184.3	0.826
184.4	0.8254
184.5	0.8248
184.6	0.825
184.7	0.825
184.8	0.8256
184.9	0.8262
185	0.8272
185.1	0.8272
185.2	0.8276
185.3	0.8278
185.4	0.8282
185.5	0.8274
185.6	0.8276
185.7	0.8268
185.8	0.8274
185.9	0.8272
186	0.8262
186.1	0.8266
186.2	0.827
186.3	0.8268
186.4	0.8268
186.5	0.8274
186.6	0.8274
186.7	0.827
186.8	0.8266
186.9	0.8268
187	0.8272
187.1	0.8268
187.2	0.8266
187.3	0.8264
187.4	0.8274
187.5	0.8272
187.6	0.8272
187.7	0.8278
187.8	0.8276
187.9	0.8286
188	0.8282
188.1	0.8286
188.2	0.8282
188.3	0.8288
188.4	0.8286
188.5	0.8286
188.6	0.8286
188.7	0.8288
188.8	0.8288
188.9	0.8286
189	0.8284
189.1	0.8286
189.2	0.8286
189.3	0.8288
189.4	0.8284
189.5	0.8278
189.6	0.8276
189.7	0.8278
189.8	0.8274
189.9	0.8272
190	0.8264
190.1	0.827
190.2	0.827
190.3	0.8272
190.4	0.8266
190.5	0.827
190.6	0.8278
190.7	0.8272
190.8	0.8262
190.9	0.8258
191	0.8248
191.1	0.8246
191.2	0.8246
191.3	0.8256
191.4	0.8258
191.5	0.8258
191.6	0.8256
191.7	0.8254
191.8	0.8262
191.9	0.8264
192	0.8256
192.1	0.8258
192.2	0.8258
192.3	0.826
192.4	0.8258
192.5	0.8252
192.6	0.825
192.7	0.8246
192.8	0.825
192.9	0.8252
193	0.8254
193.1	0.8264
193.2	0.8274
193.3	0.8274
193.4	0.828
193.5	0.8286
193.6	0.8282
193.7	0.8276
193.8	0.827
193.9	0.8272
194	0.8282
194.1	0.8278
194.2	0.8284
194.3	0.828
194.4	0.8282
194.5	0.8286
194.6	0.8292
194.7	0.8296
194.8	0.8304
194.9	0.8304
195	0.8302
195.1	0.8304
195.2	0.8302
195.3	0.8302
195.4	0.8302
195.5	0.8304
195.6	0.8298
195.7	0.8302
195.8	0.8302
195.9	0.8298
196	0.8294
196.1	0.8296
196.2	0.8284
196.3	0.8284
196.4	0.8276
196.5	0.8274
196.6	0.828
196.7	0.8274
196.8	0.8278
196.9	0.8276
197	0.8272
197.1	0.8272
197.2	0.8276
197.3	0.827
197.4	0.8272
197.5	0.8272
197.6	0.8278
197.7	0.8276
197.8	0.8276
197.9	0.8274
198	0.8268
198.1	0.8274
198.2	0.827
198.3	0.8272
198.4	0.8272
198.5	0.8272
198.6	0.826
198.7	0.8258
198.8	0.8252
198.9	0.825
199	0.8248
199.1	0.8252
199.2	0.8246
199.3	0.8246
199.4	0.8254
199.5	0.8252
199.6	0.8254
199.7	0.8262
199.8	0.8256
199.9	0.8256
200	0.827
[truncated: 14,000 more rows]
