# Supplementary material for: Bayesian inference of kinetic schemes for ion channels by Kalman filtering
Source: eLife journal article supplement (doi:10.7554/elife.62714), 2022-05-04
Supplement: fig4-data2 [file 1_Sim_N_6000_Fluor_MW.xlsx]

## Sheet: Tabelle1
0.1	0
0.2	0
0.3	0
0.4	0
0.5	0
0.6	0
0.7	0
0.8	0
0.9	0
1	0
1.1	0
1.2	0
1.3	0
1.4	0
1.5	0
1.6	0
1.7	0
1.8	0
1.9	0
2	0
2.1	0
2.2	0
2.3	0
2.4	0
2.5	0
2.6	0
2.7	0
2.8	0
2.9	0
3	0
3.1	0
3.2	0
3.3	0
3.4	0
3.5	0
3.6	0
3.7	0
3.8	0
3.9	0
4	0
4.1	0
4.2	0
4.3	0
4.4	0
4.5	0
4.6	0
4.7	0
4.8	0
4.9	0
5	0
5.1	0
5.2	0
5.3	0
5.4	0
5.5	0
5.6	0
5.7	0
5.8	0
5.9	0
6	0
6.1	0
6.2	0
6.3	0
6.4	0
6.5	0
6.6	0
6.7	0
6.8	0
6.9	0
7	0
7.1	0
7.2	0
7.3	0
7.4	0
7.5	0
7.6	0
7.7	0
7.8	0
7.9	0
8	0
8.1	0
8.2	0
8.3	0
8.4	0
8.5	0
8.6	0
8.7	0
8.8	0
8.9	0
9	0
9.1	0
9.2	0
9.3	0
9.4	0
9.5	0
9.6	0
9.7	0
9.8	0
9.9	0
10	0
10.1	0
10.2	0
10.3	0
10.4	0
10.5	0
10.6	0
10.7	0
10.8	0
10.9	0
11	0
11.1	0
11.2	0
11.3	0
11.4	0
11.5	0
11.6	0
11.7	0
11.8	0
11.9	0
12	0
12.1	0
12.2	0
12.3	0
12.4	0
12.5	0
12.6	0
12.7	0
12.8	0
12.9	0
13	0
13.1	0
13.2	0
13.3	0
13.4	0
13.5	0
13.6	0
13.7	0
13.8	0
13.9	0
14	0
14.1	0
14.2	0
14.3	0
14.4	0
14.5	0
14.6	0
14.7	0
14.8	0
14.9	0
15	0
15.1	0
15.2	0
15.3	0
15.4	0
15.5	0
15.6	0
15.7	0
15.8	0
15.9	0
16	0
16.1	0
16.2	0
16.3	0
16.4	0
16.5	0
16.6	0
16.7	0
16.8	0
16.9	0
17	0
17.1	0
17.2	0
17.3	0
17.4	0
17.5	0
17.6	0
17.7	0
17.8	0
17.9	0
18	0
18.1	0
18.2	0
18.3	0
18.4	0
18.5	0
18.6	0
18.7	0
18.8	0
18.9	0
19	0
19.1	0
19.2	0
19.3	0
19.4	0
19.5	0
19.6	0
19.7	0
19.8	0
19.9	0
20	0
20.1	0
20.2	0
20.3	0
20.4	0
20.5	0
20.6	0
20.7	0
20.8	0
20.9	0
21	0
21.1	0
21.2	0
21.3	0
21.4	0
21.5	0
21.6	0
21.7	0
21.8	0
21.9	0
22	0
22.1	0
22.2	0
22.3	0
22.4	0
22.5	0
22.6	0
22.7	0
22.8	0
22.9	0
23	0
23.1	0
23.2	0
23.3	0
23.4	0
23.5	0
23.6	0
23.7	0
23.8	0
23.9	0
24	0
24.1	0
24.2	0
24.3	0
24.4	0
24.5	0
24.6	0
24.7	0
24.8	0
24.9	0
25	0
25.1	0
25.2	0
25.3	0
25.4	0
25.5	0
25.6	0
25.7	0
25.8	0
25.9	0
26	0
26.1	0
26.2	0
26.3	0
26.4	0
26.5	0
26.6	0
26.7	0
26.8	0
26.9	0
27	0
27.1	0
27.2	0
27.3	0
27.4	0
27.5	0
27.6	0
27.7	0
27.8	0
27.9	0
28	0
28.1	0
28.2	0
28.3	0
28.4	0
28.5	0
28.6	0
28.7	0
28.8	0
28.9	0
29	0
29.1	0
29.2	0
29.3	0
29.4	0
29.5	0
29.6	0
29.7	0
29.8	0
29.9	0
30	0
30.1	0
30.2	0
30.3	0
30.4	0
30.5	0
30.6	0
30.7	0
30.8	0
30.9	0
31	0
31.1	0
31.2	0
31.3	0
31.4	0
31.5	0
31.6	0
31.7	0
31.8	0
31.9	0
32	0
32.1	0
32.2	0
32.3	0
32.4	0
32.5	0
32.6	0
32.7	0
32.8	0
32.9	0
33	0
33.1	0
33.2	0
33.3	0
33.4	0
33.5	0
33.6	0
33.7	0
33.8	0
33.9	0
34	0
34.1	0
34.2	0
34.3	0
34.4	0
34.5	0
34.6	0
34.7	0
34.8	0
34.9	0
35	0
35.1	0
35.2	0
35.3	0
35.4	0
35.5	0
35.6	0
35.7	0
35.8	0
35.9	0
36	0
36.1	0
36.2	0
36.3	0
36.4	0
36.5	0
36.6	0
36.7	0
36.8	0
36.9	0
37	0
37.1	0
37.2	0
37.3	0
37.4	0
37.5	0
37.6	0
37.7	0
37.8	0
37.9	0
38	0
38.1	0
38.2	0
38.3	0
38.4	0
38.5	0
38.6	0
38.7	0
38.8	0
38.9	0
39	0
39.1	0
39.2	0
39.3	0
39.4	0
39.5	0
39.6	0
39.7	0
39.8	0
39.9	0
40	0
40.1	0
40.2	0
40.3	0
40.4	0
40.5	0
40.6	0
40.7	0
40.8	0
40.9	0
41	0
41.1	0
41.2	0
41.3	0
41.4	0
41.5	0
41.6	0
41.7	0
41.8	0
41.9	0
42	0
42.1	0
42.2	0
42.3	0
42.4	0
42.5	0
42.6	0
42.7	0
42.8	0
42.9	0
43	0
43.1	0
43.2	0
43.3	0
43.4	0
43.5	0
43.6	0
43.7	0
43.8	0
43.9	0
44	0
44.1	0
44.2	0
44.3	0
44.4	0
44.5	0
44.6	0
44.7	0
44.8	0
44.9	0
45	0
45.1	0
45.2	0
45.3	0
45.4	0
45.5	0
45.6	0
45.7	0
45.8	0
45.9	0
46	0
46.1	0
46.2	0
46.3	0
46.4	0
46.5	0
46.6	0
46.7	0
46.8	0
46.9	0
47	0
47.1	0
47.2	0
47.3	0
47.4	0
47.5	0
47.6	0
47.7	0
47.8	0
47.9	0
48	0
48.1	0
48.2	0
48.3	0
48.4	0
48.5	0
48.6	0
48.7	0
48.8	0
48.9	0
49	0
49.1	0
49.2	0
49.3	0
49.4	0
49.5	0
49.6	0
49.7	0
49.8	0
49.9	0
50	0
50.1	0
50.2	0
50.3	0
50.4	0
50.5	0
50.6	0
50.7	0
50.8	0
50.9	0
51	0
51.1	0
51.2	0
51.3	0
51.4	0
51.5	0
51.6	0
51.7	0
51.8	0
51.9	0
52	0
52.1	0
52.2	0
52.3	0
52.4	0
52.5	0
52.6	0
52.7	0
52.8	0
52.9	0
53	0
53.1	0
53.2	0
53.3	0
53.4	0
53.5	0
53.6	0
53.7	0
53.8	0
53.9	0
54	0
54.1	0
54.2	0
54.3	0
54.4	0
54.5	0
54.6	0
54.7	0
54.8	0
54.9	0
55	0
55.1	0
55.2	0
55.3	0
55.4	0
55.5	0
55.6	0
55.7	0
55.8	0
55.9	0
56	0
56.1	0
56.2	0
56.3	0
56.4	0
56.5	0
56.6	0
56.7	0
56.8	0
56.9	0
57	0
57.1	0
57.2	0
57.3	0
57.4	0
57.5	0
57.6	0
57.7	0
57.8	0
57.9	0
58	0
58.1	0
58.2	0
58.3	0
58.4	0
58.5	0
58.6	0
58.7	0
58.8	0
58.9	0
59	0
59.1	0
59.2	0
59.3	0
59.4	0
59.5	0
59.6	0
59.7	0
59.8	0
59.9	0
60	0
60.1	0
60.2	0
60.3	0
60.4	0
60.5	0
60.6	0
60.7	0
60.8	0
60.9	0
61	0
61.1	0
61.2	0
61.3	0
61.4	0
61.5	0
61.6	0
61.7	0
61.8	0
61.9	0
62	0
62.1	0
62.2	0
62.3	0
62.4	0
62.5	0
62.6	0
62.7	0
62.8	0
62.9	0
63	0
63.1	0
63.2	0
63.3	0
63.4	0
63.5	0
63.6	0
63.7	0
63.8	0
63.9	0
64	0
64.1	0
64.2	0
64.3	0
64.4	0
64.5	0
64.6	0
64.7	0
64.8	0
64.9	0
65	0
65.1	0
65.2	0
65.3	0
65.4	0
65.5	0
65.6	0
65.7	0
65.8	0
65.9	0
66	0
66.1	0
66.2	0
66.3	0
66.4	0
66.5	0
66.6	0
66.7	0
66.8	0
66.9	0
67	0
67.1	0
67.2	0
67.3	0
67.4	0
67.5	0
67.6	0
67.7	0
67.8	0
67.9	0
68	0
68.1	0
68.2	0
68.3	0
68.4	0
68.5	0
68.6	0
68.7	0
68.8	0
68.9	0
69	0
69.1	0
69.2	0
69.3	0
69.4	0
69.5	0
69.6	0
69.7	0
69.8	0
69.9	0
70	0
70.1	0
70.2	0
70.3	0
70.4	0
70.5	0
70.6	0
70.7	0
70.8	0
70.9	0
71	0
71.1	0
71.2	0
71.3	0
71.4	0
71.5	0
71.6	0
71.7	0
71.8	0
71.9	0
72	0
72.1	0
72.2	0
72.3	0
72.4	0
72.5	0
72.6	0
72.7	0
72.8	0
72.9	0
73	0
73.1	0
73.2	0
73.3	0
73.4	0
73.5	0
73.6	0
73.7	0
73.8	0
73.9	0
74	0
74.1	0
74.2	0
74.3	0
74.4	0
74.5	0
74.6	0
74.7	0
74.8	0
74.9	0
75	0
75.1	0
75.2	0
75.3	0
75.4	0
75.5	0
75.6	0
75.7	0
75.8	0
75.9	0
76	0
76.1	0
76.2	0
76.3	0
76.4	0
76.5	0
76.6	0
76.7	0
76.8	0
76.9	0
77	0
77.1	0
77.2	0
77.3	0
77.4	0
77.5	0
77.6	0
77.7	0
77.8	0
77.9	0
78	0
78.1	0
78.2	0
78.3	0
78.4	0
78.5	0
78.6	0
78.7	0
78.8	0
78.9	0
79	0
79.1	0
79.2	0
79.3	0
79.4	0
79.5	0
79.6	0
79.7	0
79.8	0
79.9	0
80	0
80.1	0
80.2	0
80.3	0
80.4	0
80.5	0
80.6	0
80.7	0
80.8	0
80.9	0
81	0
81.1	0
81.2	0
81.3	0
81.4	0
81.5	0
81.6	0
81.7	0
81.8	0
81.9	0
82	0
82.1	0
82.2	0
82.3	0
82.4	0
82.5	0
82.6	0
82.7	0
82.8	0
82.9	0
83	0
83.1	0
83.2	0
83.3	0
83.4	0
83.5	0
83.6	0
83.7	0
83.8	0
83.9	0
84	0
84.1	0
84.2	0
84.3	0
84.4	0
84.5	0
84.6	0
84.7	0
84.8	0
84.9	0
85	0
85.1	0
85.2	0
85.3	0
85.4	0
85.5	0
85.6	0
85.7	0
85.8	0
85.9	0
86	0
86.1	0
86.2	0
86.3	0
86.4	0
86.5	0
86.6	0
86.7	0
86.8	0
86.9	0
87	0
87.1	0
87.2	0
87.3	0
87.4	0
87.5	0
87.6	0
87.7	0
87.8	0
87.9	0
88	0
88.1	0
88.2	0
88.3	0
88.4	0
88.5	0
88.6	0
88.7	0
88.8	0
88.9	0
89	0
89.1	0
89.2	0
89.3	0
89.4	0
89.5	0
89.6	0
89.7	0
89.8	0
89.9	0
90	0
90.1	0
90.2	0
90.3	0
90.4	0
90.5	0
90.6	0
90.7	0
90.8	0
90.9	0
91	0
91.1	0
91.2	0
91.3	0
91.4	0
91.5	0
91.6	0
91.7	0
91.8	0
91.9	0
92	0
92.1	0
92.2	0
92.3	0
92.4	0
92.5	0
92.6	0
92.7	0
92.8	0
92.9	0
93	0
93.1	0
93.2	0
93.3	0
93.4	0
93.5	0
93.6	0
93.7	0
93.8	0
93.9	0
94	0
94.1	0
94.2	0
94.3	0
94.4	0
94.5	0
94.6	0
94.7	0
94.8	0
94.9	0
95	0
95.1	0
95.2	0
95.3	0
95.4	0
95.5	0
95.6	0
95.7	0
95.8	0
95.9	0
96	0
96.1	0
96.2	0
96.3	0
96.4	0
96.5	0
96.6	0
96.7	0
96.8	0
96.9	0
97	0
97.1	0
97.2	0
97.3	0
97.4	0
97.5	0
97.6	0
97.7	0
97.8	0
97.9	0
98	0
98.1	0
98.2	0
98.3	0
98.4	0
98.5	0
98.6	0
98.7	0
98.8	0
98.9	0
99	0
99.1	0
99.2	0
99.3	0
99.4	0
99.5	0
99.6	0
99.7	0
99.8	0
99.9	0
100	0
100.1	0.896333
100.2	0.974083
100.3	0.985833
100.4	0.987333
100.5	0.98625
100.6	0.986583
100.7	0.98875
100.8	0.987333
100.9	0.98775
101	0.989417
101.1	0.988417
101.2	0.986583
101.3	0.9875
101.4	0.988667
101.5	0.987333
101.6	0.9875
101.7	0.987667
101.8	0.9875
101.9	0.988333
102	0.987417
102.1	0.988
102.2	0.987833
102.3	0.987667
102.4	0.988667
102.5	0.987167
102.6	0.988167
102.7	0.99025
102.8	0.989917
102.9	0.9895
103	0.9885
103.1	0.988833
103.2	0.989917
103.3	0.988833
103.4	0.99
103.5	0.99075
103.6	0.9915
103.7	0.990333
103.8	0.988083
103.9	0.989583
104	0.988
104.1	0.988583
104.2	0.988667
104.3	0.9905
104.4	0.989833
104.5	0.988
104.6	0.9905
104.7	0.989583
104.8	0.987917
104.9	0.9895
105	0.9885
105.1	0.990583
105.2	0.990333
105.3	0.989833
105.4	0.991083
105.5	0.98875
105.6	0.988417
105.7	0.989333
105.8	0.988917
105.9	0.988417
106	0.98975
106.1	0.991333
106.2	0.98875
106.3	0.99075
106.4	0.990333
106.5	0.988917
106.6	0.990583
106.7	0.991333
106.8	0.992083
106.9	0.991083
107	0.99125
107.1	0.99125
107.2	0.990667
107.3	0.9905
107.4	0.988417
107.5	0.99125
107.6	0.99125
107.7	0.99075
107.8	0.990833
107.9	0.9905
108	0.990667
108.1	0.9915
108.2	0.990167
108.3	0.9925
108.4	0.99175
108.5	0.992083
108.6	0.990667
108.7	0.991917
108.8	0.992083
108.9	0.992917
109	0.990833
109.1	0.990917
109.2	0.991417
109.3	0.991667
109.4	0.99175
109.5	0.99175
109.6	0.992583
109.7	0.992333
109.8	0.99275
109.9	0.991667
110	0.990917
110.1	0.992333
110.2	0.99325
110.3	0.991583
110.4	0.991417
110.5	0.991833
110.6	0.99225
110.7	0.991833
110.8	0.99225
110.9	0.993167
111	0.992583
111.1	0.992333
111.2	0.99125
111.3	0.991917
111.4	0.9915
111.5	0.993417
111.6	0.991583
111.7	0.99225
111.8	0.993083
111.9	0.992583
112	0.993583
112.1	0.993417
112.2	0.99225
112.3	0.992417
112.4	0.991333
112.5	0.992083
112.6	0.992417
112.7	0.991417
112.8	0.992083
112.9	0.994167
113	0.9925
113.1	0.993667
113.2	0.993333
113.3	0.993833
113.4	0.993417
113.5	0.9935
113.6	0.9935
113.7	0.99325
113.8	0.993167
113.9	0.993583
114	0.994167
114.1	0.99475
114.2	0.993667
114.3	0.992333
114.4	0.992417
114.5	0.993167
114.6	0.9935
114.7	0.994417
114.8	0.993
114.9	0.993083
115	0.994083
115.1	0.99475
115.2	0.993417
115.3	0.993167
115.4	0.992667
115.5	0.993167
115.6	0.993667
115.7	0.994167
115.8	0.994583
115.9	0.993583
116	0.99425
116.1	0.993667
116.2	0.993583
116.3	0.993083
116.4	0.994
116.5	0.993167
116.6	0.994
116.7	0.994083
116.8	0.99375
116.9	0.994167
117	0.995667
117.1	0.993917
117.2	0.99325
117.3	0.994167
117.4	0.994167
117.5	0.994333
117.6	0.995667
117.7	0.995333
117.8	0.994083
117.9	0.993167
118	0.993917
118.1	0.994
118.2	0.994417
118.3	0.993333
118.4	0.9925
118.5	0.992333
118.6	0.992833
118.7	0.993167
118.8	0.9945
118.9	0.99475
119	0.995333
119.1	0.9955
119.2	0.995417
119.3	0.99375
119.4	0.9955
119.5	0.994667
119.6	0.992417
119.7	0.9935
119.8	0.994417
119.9	0.995333
120	0.994583
120.1	0.995667
120.2	0.995
120.3	0.994917
120.4	0.994333
120.5	0.994583
120.6	0.994667
120.7	0.994667
120.8	0.99525
120.9	0.994
121	0.99425
121.1	0.9945
121.2	0.993167
121.3	0.994667
121.4	0.994667
121.5	0.9945
121.6	0.995083
121.7	0.994167
121.8	0.994667
121.9	0.99425
122	0.994417
122.1	0.99525
122.2	0.99575
122.3	0.9945
122.4	0.995667
122.5	0.995583
122.6	0.995417
122.7	0.995583
122.8	0.995583
122.9	0.995417
123	0.9945
123.1	0.9955
123.2	0.995583
123.3	0.995083
123.4	0.995333
123.5	0.995333
123.6	0.994417
123.7	0.9945
123.8	0.99575
123.9	0.996083
124	0.995667
124.1	0.994917
124.2	0.99625
124.3	0.994917
124.4	0.9945
124.5	0.99475
124.6	0.995167
124.7	0.996167
124.8	0.9955
124.9	0.996917
125	0.99625
125.1	0.994917
125.2	0.995417
125.3	0.995833
125.4	0.996
125.5	0.99575
125.6	0.996667
125.7	0.995167
125.8	0.996333
125.9	0.996417
126	0.996
126.1	0.99575
126.2	0.995417
126.3	0.99625
126.4	0.9965
126.5	0.996083
126.6	0.995167
126.7	0.995667
126.8	0.996667
126.9	0.996583
127	0.99525
127.1	0.995583
127.2	0.996583
127.3	0.995167
127.4	0.995
127.5	0.9955
127.6	0.99525
127.7	0.995833
127.8	0.995833
127.9	0.996167
128	0.995833
128.1	0.995167
128.2	0.995667
128.3	0.996583
128.4	0.996417
128.5	0.996
128.6	0.996083
128.7	0.995417
128.8	0.996417
128.9	0.99575
129	0.99525
129.1	0.994917
129.2	0.996
129.3	0.995583
129.4	0.99675
129.5	0.99675
129.6	0.995833
129.7	0.995833
129.8	0.995333
129.9	0.996
130	0.995667
130.1	0.995583
130.2	0.996833
130.3	0.99625
130.4	0.996917
130.5	0.995667
130.6	0.996083
130.7	0.995833
130.8	0.995417
130.9	0.995833
131	0.997
131.1	0.996917
131.2	0.995667
131.3	0.996333
131.4	0.995
131.5	0.996333
131.6	0.995833
131.7	0.9955
131.8	0.996333
131.9	0.996167
132	0.996167
132.1	0.996333
132.2	0.996167
132.3	0.996583
132.4	0.995833
132.5	0.996
132.6	0.99675
132.7	0.99675
132.8	0.9965
132.9	0.996083
133	0.99675
133.1	0.995833
133.2	0.99575
133.3	0.996583
133.4	0.996917
133.5	0.99575
133.6	0.996833
133.7	0.994917
133.8	0.997083
133.9	0.996833
134	0.996083
134.1	0.997333
134.2	0.9965
134.3	0.99675
134.4	0.996583
134.5	0.996417
134.6	0.996333
134.7	0.996
134.8	0.997083
134.9	0.996083
135	0.997083
135.1	0.997083
135.2	0.996667
135.3	0.996833
135.4	0.996917
135.5	0.99625
135.6	0.996
135.7	0.996583
135.8	0.996583
135.9	0.9965
136	0.99625
136.1	0.996167
136.2	0.99725
136.3	0.996417
136.4	0.995917
136.5	0.996833
136.6	0.997417
136.7	0.9965
136.8	0.996333
136.9	0.995917
137	0.996917
137.1	0.996917
137.2	0.996
137.3	0.996583
137.4	0.9965
137.5	0.995833
137.6	0.99575
137.7	0.996083
137.8	0.996333
137.9	0.99625
138	0.997
138.1	0.996917
138.2	0.99725
138.3	0.996917
138.4	0.996417
138.5	0.9975
138.6	0.997333
138.7	0.997
138.8	0.996667
138.9	0.996583
139	0.9965
139.1	0.99675
139.2	0.996667
139.3	0.996667
139.4	0.997167
139.5	0.996917
139.6	0.996333
139.7	0.996667
139.8	0.996333
139.9	0.997417
140	0.995833
140.1	0.996583
140.2	0.9965
140.3	0.997333
140.4	0.99675
140.5	0.99725
140.6	0.997333
140.7	0.997167
140.8	0.997917
140.9	0.997167
141	0.996333
141.1	0.997417
141.2	0.997333
141.3	0.996667
141.4	0.997417
141.5	0.997333
141.6	0.997417
141.7	0.997417
141.8	0.997083
141.9	0.997
142	0.99725
142.1	0.997667
142.2	0.996667
142.3	0.996
142.4	0.997667
142.5	0.997083
142.6	0.99675
142.7	0.997083
142.8	0.997083
142.9	0.997333
143	0.99675
143.1	0.996583
143.2	0.997583
143.3	0.997417
143.4	0.997583
143.5	0.99775
143.6	0.9975
143.7	0.9975
143.8	0.99675
143.9	0.99725
144	0.99675
144.1	0.99725
144.2	0.99775
144.3	0.997583
144.4	0.996917
144.5	0.996833
144.6	0.997667
144.7	0.997333
144.8	0.996417
144.9	0.996833
145	0.997917
145.1	0.99725
145.2	0.997333
145.3	0.9975
145.4	0.997167
145.5	0.997167
145.6	0.997833
145.7	0.996667
145.8	0.996917
145.9	0.997167
146	0.997583
146.1	0.9975
146.2	0.996667
146.3	0.997583
146.4	0.99725
146.5	0.99675
146.6	0.997
146.7	0.997
146.8	0.997083
146.9	0.996917
147	0.998333
147.1	0.997333
147.2	0.9975
147.3	0.996417
147.4	0.997583
147.5	0.9975
147.6	0.997
147.7	0.997917
147.8	0.99725
147.9	0.99675
148	0.997833
148.1	0.997167
148.2	0.9975
148.3	0.998167
148.4	0.997167
148.5	0.998
148.6	0.997
148.7	0.996917
148.8	0.997667
148.9	0.997
149	0.997667
149.1	0.997583
149.2	0.997333
149.3	0.996667
149.4	0.997917
149.5	0.997
149.6	0.996917
149.7	0.997083
149.8	0.997
149.9	0.997167
150	0.997583
150.1	0.997083
150.2	0.9965
150.3	0.997083
150.4	0.998
150.5	0.9975
150.6	0.998
150.7	0.997167
150.8	0.997083
150.9	0.99775
151	0.997
151.1	0.997417
151.2	0.9965
151.3	0.997083
151.4	0.997083
151.5	0.997083
151.6	0.997333
151.7	0.996583
151.8	0.997167
151.9	0.997
152	0.997833
152.1	0.996917
152.2	0.997333
152.3	0.997667
152.4	0.99775
152.5	0.9975
152.6	0.997417
152.7	0.997833
152.8	0.996667
152.9	0.997333
153	0.997667
153.1	0.99675
153.2	0.997417
153.3	0.997417
153.4	0.9985
153.5	0.998333
153.6	0.99725
153.7	0.998
153.8	0.998
153.9	0.997417
154	0.997667
154.1	0.99725
154.2	0.997667
154.3	0.997583
154.4	0.997917
154.5	0.997917
154.6	0.997917
154.7	0.997917
154.8	0.99725
154.9	0.99725
155	0.9975
155.1	0.996833
155.2	0.997917
155.3	0.997833
155.4	0.996833
155.5	0.99675
155.6	0.996667
155.7	0.99775
155.8	0.998
155.9	0.998167
156	0.997667
156.1	0.997167
156.2	0.9975
156.3	0.997
156.4	0.99775
156.5	0.99675
156.6	0.99675
156.7	0.997083
156.8	0.996333
156.9	0.997167
157	0.997583
157.1	0.997583
157.2	0.998
157.3	0.997583
157.4	0.99775
157.5	0.996417
157.6	0.997167
157.7	0.997083
157.8	0.996833
157.9	0.997
158	0.997667
158.1	0.997333
158.2	0.996917
158.3	0.9975
158.4	0.998667
158.5	0.997917
158.6	0.997667
158.7	0.997333
158.8	0.997417
158.9	0.997917
159	0.998583
159.1	0.997583
159.2	0.997083
159.3	0.996917
159.4	0.99775
159.5	0.997833
159.6	0.997583
159.7	0.99825
159.8	0.9975
159.9	0.997
160	0.996833
160.1	0.997417
160.2	0.99775
160.3	0.998083
160.4	0.99775
160.5	0.998333
160.6	0.99825
160.7	0.997917
160.8	0.9975
160.9	0.997
161	0.997417
161.1	0.997583
161.2	0.997167
161.3	0.997167
161.4	0.997333
161.5	0.99725
161.6	0.99725
161.7	0.997583
161.8	0.996917
161.9	0.996
162	0.997
162.1	0.99675
162.2	0.9975
162.3	0.997333
162.4	0.996833
162.5	0.99775
162.6	0.998167
162.7	0.996833
162.8	0.997417
162.9	0.997833
163	0.99775
163.1	0.998167
163.2	0.997583
163.3	0.997333
163.4	0.998
163.5	0.998167
163.6	0.997333
163.7	0.998
163.8	0.997417
163.9	0.997583
164	0.998083
164.1	0.9975
164.2	0.997583
164.3	0.997833
164.4	0.997583
164.5	0.9975
164.6	0.99775
164.7	0.998
164.8	0.99775
164.9	0.997167
165	0.9965
165.1	0.997
165.2	0.998083
165.3	0.99725
165.4	0.997417
165.5	0.99825
165.6	0.997583
165.7	0.997833
165.8	0.997667
165.9	0.997667
166	0.99825
166.1	0.99725
166.2	0.997917
166.3	0.997667
166.4	0.997
166.5	0.997083
166.6	0.9975
166.7	0.998417
166.8	0.998083
166.9	0.997167
167	0.99775
167.1	0.997583
167.2	0.997833
167.3	0.998333
167.4	0.99725
167.5	0.997583
167.6	0.997417
167.7	0.997333
167.8	0.997583
167.9	0.998583
168	0.997167
168.1	0.997333
168.2	0.997917
168.3	0.998083
168.4	0.9975
168.5	0.99625
168.6	0.99775
168.7	0.99725
168.8	0.99775
168.9	0.997833
169	0.997333
169.1	0.997
169.2	0.997583
169.3	0.9975
169.4	0.9975
169.5	0.997667
169.6	0.998
169.7	0.997583
169.8	0.998167
169.9	0.997333
170	0.997
170.1	0.996917
170.2	0.99725
170.3	0.997083
170.4	0.99675
170.5	0.997667
170.6	0.997333
170.7	0.99725
170.8	0.997833
170.9	0.996583
171	0.997
171.1	0.997
171.2	0.99725
171.3	0.997583
171.4	0.9965
171.5	0.99725
171.6	0.997583
171.7	0.9975
171.8	0.9975
171.9	0.998667
172	0.998083
172.1	0.997833
172.2	0.998083
172.3	0.997833
172.4	0.997917
172.5	0.997667
172.6	0.998
172.7	0.997917
172.8	0.998
172.9	0.996667
173	0.997083
173.1	0.99725
173.2	0.997333
173.3	0.998
173.4	0.997917
173.5	0.997917
173.6	0.997583
173.7	0.9965
173.8	0.997583
173.9	0.997333
174	0.997917
174.1	0.9975
174.2	0.99675
174.3	0.997583
174.4	0.997333
174.5	0.998333
174.6	0.998167
174.7	0.997167
174.8	0.997417
174.9	0.9975
175	0.9975
175.1	0.998
175.2	0.997667
175.3	0.998583
175.4	0.997417
175.5	0.99725
175.6	0.997667
175.7	0.996667
175.8	0.997083
175.9	0.996833
176	0.9975
176.1	0.997
176.2	0.997667
176.3	0.997833
176.4	0.997
176.5	0.998
176.6	0.99725
176.7	0.998
176.8	0.998083
176.9	0.998333
177	0.997667
177.1	0.99775
177.2	0.998417
177.3	0.997167
177.4	0.998
177.5	0.998083
177.6	0.998083
177.7	0.998083
177.8	0.99725
177.9	0.997
178	0.997583
178.1	0.997667
178.2	0.997917
178.3	0.997583
178.4	0.998167
178.5	0.997667
178.6	0.997583
178.7	0.997333
178.8	0.99775
178.9	0.9975
179	0.996333
179.1	0.997333
179.2	0.997583
179.3	0.997917
179.4	0.998083
179.5	0.998667
179.6	0.997333
179.7	0.9975
179.8	0.997667
179.9	0.997833
180	0.997917
180.1	0.997917
180.2	0.997333
180.3	0.99675
180.4	0.998083
180.5	0.998
180.6	0.998167
180.7	0.99775
180.8	0.996833
180.9	0.997083
181	0.997833
181.1	0.997917
181.2	0.9975
181.3	0.997167
181.4	0.998333
181.5	0.998583
181.6	0.99775
181.7	0.998083
181.8	0.997917
181.9	0.998
182	0.996667
182.1	0.99725
182.2	0.997333
182.3	0.998417
182.4	0.998417
182.5	0.997917
182.6	0.997833
182.7	0.997667
182.8	0.997583
182.9	0.998
183	0.997667
183.1	0.99775
183.2	0.998167
183.3	0.997583
183.4	0.99775
183.5	0.997167
183.6	0.997583
183.7	0.997917
183.8	0.997083
183.9	0.997833
184	0.997667
184.1	0.99775
184.2	0.998
184.3	0.997667
184.4	0.998583
184.5	0.998
184.6	0.997833
184.7	0.998083
184.8	0.9975
184.9	0.997833
185	0.997917
185.1	0.998167
185.2	0.998333
185.3	0.997583
185.4	0.99775
185.5	0.997833
185.6	0.99725
185.7	0.997667
185.8	0.99725
185.9	0.997917
186	0.9975
186.1	0.99775
186.2	0.998167
186.3	0.998167
186.4	0.997083
186.5	0.99775
186.6	0.997167
186.7	0.997667
186.8	0.997417
186.9	0.997833
187	0.997167
187.1	0.99825
187.2	0.997833
187.3	0.998333
187.4	0.997833
187.5	0.997917
187.6	0.9975
187.7	0.997833
187.8	0.998417
187.9	0.99775
188	0.99825
188.1	0.9975
188.2	0.9975
188.3	0.9975
188.4	0.99825
188.5	0.997083
188.6	0.998
188.7	0.99825
188.8	0.997833
188.9	0.997
189	0.997417
189.1	0.997583
189.2	0.99775
189.3	0.9985
189.4	0.997667
189.5	0.997667
189.6	0.997417
189.7	0.997667
189.8	0.997083
189.9	0.997333
190	0.998333
190.1	0.998
190.2	0.9975
190.3	0.997917
190.4	0.99825
190.5	0.9985
190.6	0.998167
190.7	0.99775
190.8	0.998083
190.9	0.997083
191	0.998333
191.1	0.997083
191.2	0.99825
191.3	0.997667
191.4	0.997083
191.5	0.997333
191.6	0.99725
191.7	0.997583
191.8	0.998
191.9	0.997083
192	0.997833
192.1	0.997833
192.2	0.998
192.3	0.997583
192.4	0.99775
192.5	0.998583
192.6	0.997833
192.7	0.99775
192.8	0.99775
192.9	0.997917
193	0.998583
193.1	0.998417
193.2	0.997917
193.3	0.997667
193.4	0.997667
193.5	0.997417
193.6	0.998
193.7	0.9975
193.8	0.998
193.9	0.998
194	0.998583
194.1	0.998167
194.2	0.998
194.3	0.998583
194.4	0.997583
194.5	0.997917
194.6	0.99825
194.7	0.997583
194.8	0.997417
194.9	0.99775
195	0.997833
195.1	0.9975
195.2	0.998167
195.3	0.998417
195.4	0.997917
195.5	0.99825
195.6	0.998083
195.7	0.9975
195.8	0.998333
195.9	0.99725
196	0.99725
196.1	0.99775
196.2	0.997667
196.3	0.997667
196.4	0.998083
196.5	0.998167
196.6	0.997833
196.7	0.997583
196.8	0.997
196.9	0.997583
197	0.9975
197.1	0.99775
197.2	0.997083
197.3	0.997417
197.4	0.997833
197.5	0.997583
197.6	0.99775
197.7	0.998417
197.8	0.997083
197.9	0.9975
198	0.997333
198.1	0.9975
198.2	0.99775
198.3	0.998083
198.4	0.997667
198.5	0.997417
198.6	0.997667
198.7	0.997333
198.8	0.997417
198.9	0.997917
199	0.99775
199.1	0.998583
199.2	0.998417
199.3	0.997917
199.4	0.998083
199.5	0.997917
199.6	0.99825
199.7	0.998333
199.8	0.99775
199.9	0.997917
200	0.997917
[truncated: 14,000 more rows]
