# Supplementary material for: Bayesian inference of kinetic schemes for ion channels by Kalman filtering
Source: eLife journal article supplement (doi:10.7554/elife.62714), 2022-05-04
Supplement: fig4-data2 [file 1_Sim_N_6000_Strom_MW.xlsx]

## Sheet: Tabelle1
0.1	0
0.2	0
0.3	0
0.4	0
0.5	0
0.6	0
0.7	0
0.8	0
0.9	0
1	0
1.1	0
1.2	0
1.3	0
1.4	0
1.5	0
1.6	0
1.7	0
1.8	0
1.9	0
2	0
2.1	0
2.2	0
2.3	0
2.4	0
2.5	0
2.6	0
2.7	0
2.8	0
2.9	0
3	0
3.1	0
3.2	0
3.3	0
3.4	0
3.5	0
3.6	0
3.7	0
3.8	0
3.9	0
4	0
4.1	0
4.2	0
4.3	0
4.4	0
4.5	0
4.6	0
4.7	0
4.8	0
4.9	0
5	0
5.1	0
5.2	0
5.3	0
5.4	0
5.5	0
5.6	0
5.7	0
5.8	0
5.9	0
6	0
6.1	0
6.2	0
6.3	0
6.4	0
6.5	0
6.6	0
6.7	0
6.8	0
6.9	0
7	0
7.1	0
7.2	0
7.3	0
7.4	0
7.5	0
7.6	0
7.7	0
7.8	0
7.9	0
8	0
8.1	0
8.2	0
8.3	0
8.4	0
8.5	0
8.6	0
8.7	0
8.8	0
8.9	0
9	0
9.1	0
9.2	0
9.3	0
9.4	0
9.5	0
9.6	0
9.7	0
9.8	0
9.9	0
10	0
10.1	0
10.2	0
10.3	0
10.4	0
10.5	0
10.6	0
10.7	0
10.8	0
10.9	0
11	0
11.1	0
11.2	0
11.3	0
11.4	0
11.5	0
11.6	0
11.7	0
11.8	0
11.9	0
12	0
12.1	0
12.2	0
12.3	0
12.4	0
12.5	0
12.6	0
12.7	0
12.8	0
12.9	0
13	0
13.1	0
13.2	0
13.3	0
13.4	0
13.5	0
13.6	0
13.7	0
13.8	0
13.9	0
14	0
14.1	0
14.2	0
14.3	0
14.4	0
14.5	0
14.6	0
14.7	0
14.8	0
14.9	0
15	0
15.1	0
15.2	0
15.3	0
15.4	0
15.5	0
15.6	0
15.7	0
15.8	0
15.9	0
16	0
16.1	0
16.2	0
16.3	0
16.4	0
16.5	0
16.6	0
16.7	0
16.8	0
16.9	0
17	0
17.1	0
17.2	0
17.3	0
17.4	0
17.5	0
17.6	0
17.7	0
17.8	0
17.9	0
18	0
18.1	0
18.2	0
18.3	0
18.4	0
18.5	0
18.6	0
18.7	0
18.8	0
18.9	0
19	0
19.1	0
19.2	0
19.3	0
19.4	0
19.5	0
19.6	0
19.7	0
19.8	0
19.9	0
20	0
20.1	0
20.2	0
20.3	0
20.4	0
20.5	0
20.6	0
20.7	0
20.8	0
20.9	0
21	0
21.1	0
21.2	0
21.3	0
21.4	0
21.5	0
21.6	0
21.7	0
21.8	0
21.9	0
22	0
22.1	0
22.2	0
22.3	0
22.4	0
22.5	0
22.6	0
22.7	0
22.8	0
22.9	0
23	0
23.1	0
23.2	0
23.3	0
23.4	0
23.5	0
23.6	0
23.7	0
23.8	0
23.9	0
24	0
24.1	0
24.2	0
24.3	0
24.4	0
24.5	0
24.6	0
24.7	0
24.8	0
24.9	0
25	0
25.1	0
25.2	0
25.3	0
25.4	0
25.5	0
25.6	0
25.7	0
25.8	0
25.9	0
26	0
26.1	0
26.2	0
26.3	0
26.4	0
26.5	0
26.6	0
26.7	0
26.8	0
26.9	0
27	0
27.1	0
27.2	0
27.3	0
27.4	0
27.5	0
27.6	0
27.7	0
27.8	0
27.9	0
28	0
28.1	0
28.2	0
28.3	0
28.4	0
28.5	0
28.6	0
28.7	0
28.8	0
28.9	0
29	0
29.1	0
29.2	0
29.3	0
29.4	0
29.5	0
29.6	0
29.7	0
29.8	0
29.9	0
30	0
30.1	0
30.2	0
30.3	0
30.4	0
30.5	0
30.6	0
30.7	0
30.8	0
30.9	0
31	0
31.1	0
31.2	0
31.3	0
31.4	0
31.5	0
31.6	0
31.7	0
31.8	0
31.9	0
32	0
32.1	0
32.2	0
32.3	0
32.4	0
32.5	0
32.6	0
32.7	0
32.8	0
32.9	0
33	0
33.1	0
33.2	0
33.3	0
33.4	0
33.5	0
33.6	0
33.7	0
33.8	0
33.9	0
34	0
34.1	0
34.2	0
34.3	0
34.4	0
34.5	0
34.6	0
34.7	0
34.8	0
34.9	0
35	0
35.1	0
35.2	0
35.3	0
35.4	0
35.5	0
35.6	0
35.7	0
35.8	0
35.9	0
36	0
36.1	0
36.2	0
36.3	0
36.4	0
36.5	0
36.6	0
36.7	0
36.8	0
36.9	0
37	0
37.1	0
37.2	0
37.3	0
37.4	0
37.5	0
37.6	0
37.7	0
37.8	0
37.9	0
38	0
38.1	0
38.2	0
38.3	0
38.4	0
38.5	0
38.6	0
38.7	0
38.8	0
38.9	0
39	0
39.1	0
39.2	0
39.3	0
39.4	0
39.5	0
39.6	0
39.7	0
39.8	0
39.9	0
40	0
40.1	0
40.2	0
40.3	0
40.4	0
40.5	0
40.6	0
40.7	0
40.8	0
40.9	0
41	0
41.1	0
41.2	0
41.3	0
41.4	0
41.5	0
41.6	0
41.7	0
41.8	0
41.9	0
42	0
42.1	0
42.2	0
42.3	0
42.4	0
42.5	0
42.6	0
42.7	0
42.8	0
42.9	0
43	0
43.1	0
43.2	0
43.3	0
43.4	0
43.5	0
43.6	0
43.7	0
43.8	0
43.9	0
44	0
44.1	0
44.2	0
44.3	0
44.4	0
44.5	0
44.6	0
44.7	0
44.8	0
44.9	0
45	0
45.1	0
45.2	0
45.3	0
45.4	0
45.5	0
45.6	0
45.7	0
45.8	0
45.9	0
46	0
46.1	0
46.2	0
46.3	0
46.4	0
46.5	0
46.6	0
46.7	0
46.8	0
46.9	0
47	0
47.1	0
47.2	0
47.3	0
47.4	0
47.5	0
47.6	0
47.7	0
47.8	0
47.9	0
48	0
48.1	0
48.2	0
48.3	0
48.4	0
48.5	0
48.6	0
48.7	0
48.8	0
48.9	0
49	0
49.1	0
49.2	0
49.3	0
49.4	0
49.5	0
49.6	0
49.7	0
49.8	0
49.9	0
50	0
50.1	0
50.2	0
50.3	0
50.4	0
50.5	0
50.6	0
50.7	0
50.8	0
50.9	0
51	0
51.1	0
51.2	0
51.3	0
51.4	0
51.5	0
51.6	0
51.7	0
51.8	0
51.9	0
52	0
52.1	0
52.2	0
52.3	0
52.4	0
52.5	0
52.6	0
52.7	0
52.8	0
52.9	0
53	0
53.1	0
53.2	0
53.3	0
53.4	0
53.5	0
53.6	0
53.7	0
53.8	0
53.9	0
54	0
54.1	0
54.2	0
54.3	0
54.4	0
54.5	0
54.6	0
54.7	0
54.8	0
54.9	0
55	0
55.1	0
55.2	0
55.3	0
55.4	0
55.5	0
55.6	0
55.7	0
55.8	0
55.9	0
56	0
56.1	0
56.2	0
56.3	0
56.4	0
56.5	0
56.6	0
56.7	0
56.8	0
56.9	0
57	0
57.1	0
57.2	0
57.3	0
57.4	0
57.5	0
57.6	0
57.7	0
57.8	0
57.9	0
58	0
58.1	0
58.2	0
58.3	0
58.4	0
58.5	0
58.6	0
58.7	0
58.8	0
58.9	0
59	0
59.1	0
59.2	0
59.3	0
59.4	0
59.5	0
59.6	0
59.7	0
59.8	0
59.9	0
60	0
60.1	0
60.2	0
60.3	0
60.4	0
60.5	0
60.6	0
60.7	0
60.8	0
60.9	0
61	0
61.1	0
61.2	0
61.3	0
61.4	0
61.5	0
61.6	0
61.7	0
61.8	0
61.9	0
62	0
62.1	0
62.2	0
62.3	0
62.4	0
62.5	0
62.6	0
62.7	0
62.8	0
62.9	0
63	0
63.1	0
63.2	0
63.3	0
63.4	0
63.5	0
63.6	0
63.7	0
63.8	0
63.9	0
64	0
64.1	0
64.2	0
64.3	0
64.4	0
64.5	0
64.6	0
64.7	0
64.8	0
64.9	0
65	0
65.1	0
65.2	0
65.3	0
65.4	0
65.5	0
65.6	0
65.7	0
65.8	0
65.9	0
66	0
66.1	0
66.2	0
66.3	0
66.4	0
66.5	0
66.6	0
66.7	0
66.8	0
66.9	0
67	0
67.1	0
67.2	0
67.3	0
67.4	0
67.5	0
67.6	0
67.7	0
67.8	0
67.9	0
68	0
68.1	0
68.2	0
68.3	0
68.4	0
68.5	0
68.6	0
68.7	0
68.8	0
68.9	0
69	0
69.1	0
69.2	0
69.3	0
69.4	0
69.5	0
69.6	0
69.7	0
69.8	0
69.9	0
70	0
70.1	0
70.2	0
70.3	0
70.4	0
70.5	0
70.6	0
70.7	0
70.8	0
70.9	0
71	0
71.1	0
71.2	0
71.3	0
71.4	0
71.5	0
71.6	0
71.7	0
71.8	0
71.9	0
72	0
72.1	0
72.2	0
72.3	0
72.4	0
72.5	0
72.6	0
72.7	0
72.8	0
72.9	0
73	0
73.1	0
73.2	0
73.3	0
73.4	0
73.5	0
73.6	0
73.7	0
73.8	0
73.9	0
74	0
74.1	0
74.2	0
74.3	0
74.4	0
74.5	0
74.6	0
74.7	0
74.8	0
74.9	0
75	0
75.1	0
75.2	0
75.3	0
75.4	0
75.5	0
75.6	0
75.7	0
75.8	0
75.9	0
76	0
76.1	0
76.2	0
76.3	0
76.4	0
76.5	0
76.6	0
76.7	0
76.8	0
76.9	0
77	0
77.1	0
77.2	0
77.3	0
77.4	0
77.5	0
77.6	0
77.7	0
77.8	0
77.9	0
78	0
78.1	0
78.2	0
78.3	0
78.4	0
78.5	0
78.6	0
78.7	0
78.8	0
78.9	0
79	0
79.1	0
79.2	0
79.3	0
79.4	0
79.5	0
79.6	0
79.7	0
79.8	0
79.9	0
80	0
80.1	0
80.2	0
80.3	0
80.4	0
80.5	0
80.6	0
80.7	0
80.8	0
80.9	0
81	0
81.1	0
81.2	0
81.3	0
81.4	0
81.5	0
81.6	0
81.7	0
81.8	0
81.9	0
82	0
82.1	0
82.2	0
82.3	0
82.4	0
82.5	0
82.6	0
82.7	0
82.8	0
82.9	0
83	0
83.1	0
83.2	0
83.3	0
83.4	0
83.5	0
83.6	0
83.7	0
83.8	0
83.9	0
84	0
84.1	0
84.2	0
84.3	0
84.4	0
84.5	0
84.6	0
84.7	0
84.8	0
84.9	0
85	0
85.1	0
85.2	0
85.3	0
85.4	0
85.5	0
85.6	0
85.7	0
85.8	0
85.9	0
86	0
86.1	0
86.2	0
86.3	0
86.4	0
86.5	0
86.6	0
86.7	0
86.8	0
86.9	0
87	0
87.1	0
87.2	0
87.3	0
87.4	0
87.5	0
87.6	0
87.7	0
87.8	0
87.9	0
88	0
88.1	0
88.2	0
88.3	0
88.4	0
88.5	0
88.6	0
88.7	0
88.8	0
88.9	0
89	0
89.1	0
89.2	0
89.3	0
89.4	0
89.5	0
89.6	0
89.7	0
89.8	0
89.9	0
90	0
90.1	0
90.2	0
90.3	0
90.4	0
90.5	0
90.6	0
90.7	0
90.8	0
90.9	0
91	0
91.1	0
91.2	0
91.3	0
91.4	0
91.5	0
91.6	0
91.7	0
91.8	0
91.9	0
92	0
92.1	0
92.2	0
92.3	0
92.4	0
92.5	0
92.6	0
92.7	0
92.8	0
92.9	0
93	0
93.1	0
93.2	0
93.3	0
93.4	0
93.5	0
93.6	0
93.7	0
93.8	0
93.9	0
94	0
94.1	0
94.2	0
94.3	0
94.4	0
94.5	0
94.6	0
94.7	0
94.8	0
94.9	0
95	0
95.1	0
95.2	0
95.3	0
95.4	0
95.5	0
95.6	0
95.7	0
95.8	0
95.9	0
96	0
96.1	0
96.2	0
96.3	0
96.4	0
96.5	0
96.6	0
96.7	0
96.8	0
96.9	0
97	0
97.1	0
97.2	0
97.3	0
97.4	0
97.5	0
97.6	0
97.7	0
97.8	0
97.9	0
98	0
98.1	0
98.2	0
98.3	0
98.4	0
98.5	0
98.6	0
98.7	0
98.8	0
98.9	0
99	0
99.1	0
99.2	0
99.3	0
99.4	0
99.5	0
99.6	0
99.7	0
99.8	0
99.9	0
100	0
100.1	0.00266667
100.2	0.0055
100.3	0.0101667
100.4	0.0158333
100.5	0.022
100.6	0.027
100.7	0.0311667
100.8	0.0356667
100.9	0.0406667
101	0.0451667
101.1	0.049
101.2	0.0536667
101.3	0.0603333
101.4	0.065
101.5	0.0698333
101.6	0.0753333
101.7	0.0805
101.8	0.0845
101.9	0.0916667
102	0.097
102.1	0.1005
102.2	0.104333
102.3	0.107
102.4	0.112167
102.5	0.116333
102.6	0.1215
102.7	0.125
102.8	0.128333
102.9	0.1325
103	0.138
103.1	0.141167
103.2	0.143167
103.3	0.148
103.4	0.1515
103.5	0.154333
103.6	0.158333
103.7	0.163333
103.8	0.167167
103.9	0.1715
104	0.175333
104.1	0.180667
104.2	0.184167
104.3	0.188667
104.4	0.1925
104.5	0.197
104.6	0.200333
104.7	0.204333
104.8	0.208833
104.9	0.212667
105	0.216167
105.1	0.219833
105.2	0.2245
105.3	0.226833
105.4	0.231167
105.5	0.235167
105.6	0.239
105.7	0.2425
105.8	0.246
105.9	0.249333
106	0.253
106.1	0.257
106.2	0.2605
106.3	0.264333
106.4	0.267
106.5	0.269333
106.6	0.2745
106.7	0.277333
106.8	0.281667
106.9	0.284333
107	0.2875
107.1	0.291667
107.2	0.294667
107.3	0.297667
107.4	0.299833
107.5	0.302167
107.6	0.306333
107.7	0.308667
107.8	0.311167
107.9	0.313833
108	0.315
108.1	0.319167
108.2	0.323167
108.3	0.327167
108.4	0.331167
108.5	0.333
108.6	0.336667
108.7	0.339
108.8	0.342
108.9	0.344167
109	0.347667
109.1	0.349833
109.2	0.354167
109.3	0.356167
109.4	0.3595
109.5	0.361833
109.6	0.365667
109.7	0.368333
109.8	0.371667
109.9	0.374333
110	0.378167
110.1	0.380167
110.2	0.383
110.3	0.385
110.4	0.387667
110.5	0.390167
110.6	0.392167
110.7	0.394167
110.8	0.397167
110.9	0.4015
111	0.403833
111.1	0.406
111.2	0.409667
111.3	0.413
111.4	0.415167
111.5	0.417833
111.6	0.4205
111.7	0.422667
111.8	0.424833
111.9	0.426667
112	0.428167
112.1	0.430333
112.2	0.432833
112.3	0.434167
112.4	0.435833
112.5	0.437167
112.6	0.44
112.7	0.441
112.8	0.443167
112.9	0.444667
113	0.446667
113.1	0.449667
113.2	0.452333
113.3	0.454167
113.4	0.457333
113.5	0.459167
113.6	0.4625
113.7	0.463333
113.8	0.4665
113.9	0.468833
114	0.4705
114.1	0.472
114.2	0.474
114.3	0.476833
114.4	0.479167
114.5	0.481167
114.6	0.483333
114.7	0.484667
114.8	0.487333
114.9	0.490667
115	0.494167
115.1	0.496167
115.2	0.498
115.3	0.499833
115.4	0.500833
115.5	0.502833
115.6	0.505167
115.7	0.507
115.8	0.508333
115.9	0.512
116	0.513667
116.1	0.515
116.2	0.517167
116.3	0.519333
116.4	0.521333
116.5	0.524
116.6	0.526167
116.7	0.528167
116.8	0.530333
116.9	0.532667
117	0.534833
117.1	0.5355
117.2	0.537
117.3	0.539167
117.4	0.541167
117.5	0.542167
117.6	0.544333
117.7	0.546
117.8	0.547667
117.9	0.549
118	0.5505
118.1	0.551167
118.2	0.552833
118.3	0.5535
118.4	0.5555
118.5	0.5575
118.6	0.559833
118.7	0.5605
118.8	0.560833
118.9	0.563
119	0.564667
119.1	0.566333
119.2	0.568
119.3	0.570167
119.4	0.571667
119.5	0.5745
119.6	0.575833
119.7	0.577667
119.8	0.579333
119.9	0.581667
120	0.5835
120.1	0.5845
120.2	0.586333
120.3	0.5885
120.4	0.590167
120.5	0.5915
120.6	0.593167
120.7	0.593
120.8	0.594333
120.9	0.595667
121	0.597
121.1	0.599167
121.2	0.601667
121.3	0.6025
121.4	0.6035
121.5	0.6055
121.6	0.605333
121.7	0.606333
121.8	0.6075
121.9	0.608167
122	0.609833
122.1	0.610333
122.2	0.610667
122.3	0.612
122.4	0.614
122.5	0.615
122.6	0.616833
122.7	0.617833
122.8	0.618833
122.9	0.620333
123	0.622333
123.1	0.623833
123.2	0.625667
123.3	0.6265
123.4	0.628167
123.5	0.629833
123.6	0.630833
123.7	0.6325
123.8	0.633
123.9	0.635167
124	0.636333
124.1	0.638167
124.2	0.639
124.3	0.6415
124.4	0.642
124.5	0.6435
124.6	0.645667
124.7	0.647167
124.8	0.649167
124.9	0.650167
125	0.6505
125.1	0.652333
125.2	0.653
125.3	0.653667
125.4	0.654833
125.5	0.654833
125.6	0.655667
125.7	0.6585
125.8	0.659833
125.9	0.660333
126	0.660667
126.1	0.661667
126.2	0.662167
126.3	0.663333
126.4	0.664833
126.5	0.6665
126.6	0.667667
126.7	0.668167
126.8	0.669167
126.9	0.669667
127	0.669667
127.1	0.67
127.2	0.672167
127.3	0.672833
127.4	0.673667
127.5	0.674333
127.6	0.674667
127.7	0.675167
127.8	0.675167
127.9	0.676833
128	0.677
128.1	0.678667
128.2	0.68
128.3	0.682
128.4	0.683667
128.5	0.683833
128.6	0.6845
128.7	0.6855
128.8	0.686167
128.9	0.687167
129	0.686167
129.1	0.686833
129.2	0.686333
129.3	0.687167
129.4	0.6875
129.5	0.688667
129.6	0.689833
129.7	0.692
129.8	0.692833
129.9	0.6935
130	0.693833
130.1	0.694
130.2	0.695
130.3	0.695667
130.4	0.695667
130.5	0.696333
130.6	0.6975
130.7	0.6985
130.8	0.699667
130.9	0.700667
131	0.702167
131.1	0.7025
131.2	0.702833
131.3	0.703167
131.4	0.703833
131.5	0.704333
131.6	0.705
131.7	0.7045
131.8	0.7045
131.9	0.706
132	0.707
132.1	0.706833
132.2	0.707833
132.3	0.709333
132.4	0.7095
132.5	0.709833
132.6	0.710833
132.7	0.712167
132.8	0.712333
132.9	0.712833
133	0.713
133.1	0.714
133.2	0.7145
133.3	0.715333
133.4	0.716
133.5	0.7165
133.6	0.717833
133.7	0.718
133.8	0.718
133.9	0.718333
134	0.718167
134.1	0.7185
134.2	0.719667
134.3	0.720167
134.4	0.7215
134.5	0.722
134.6	0.722667
134.7	0.722833
134.8	0.723667
134.9	0.7245
135	0.724667
135.1	0.7255
135.2	0.724167
135.3	0.725
135.4	0.726167
135.5	0.726667
135.6	0.727833
135.7	0.729333
135.8	0.729
135.9	0.730333
136	0.731833
136.1	0.732167
136.2	0.7325
136.3	0.733167
136.4	0.733333
136.5	0.734167
136.6	0.7355
136.7	0.736167
136.8	0.736833
136.9	0.7375
137	0.738333
137.1	0.738167
137.2	0.738667
137.3	0.738833
137.4	0.7385
137.5	0.738833
137.6	0.738833
137.7	0.738667
137.8	0.738833
137.9	0.7385
138	0.74
138.1	0.740333
138.2	0.741833
138.3	0.742
138.4	0.743167
138.5	0.744333
138.6	0.745667
138.7	0.746167
138.8	0.7465
138.9	0.747333
139	0.748
139.1	0.7485
139.2	0.748833
139.3	0.749333
139.4	0.750667
139.5	0.751667
139.6	0.752667
139.7	0.754833
139.8	0.7555
139.9	0.7555
140	0.7555
140.1	0.7555
140.2	0.7565
140.3	0.756167
140.4	0.757333
140.5	0.758
140.6	0.758833
140.7	0.759667
140.8	0.760667
140.9	0.762167
141	0.761833
141.1	0.763167
141.2	0.763667
141.3	0.764167
141.4	0.764833
141.5	0.764667
141.6	0.766167
141.7	0.767167
141.8	0.767333
141.9	0.768833
142	0.769667
142.1	0.7695
142.2	0.7705
142.3	0.770667
142.4	0.770833
142.5	0.7715
142.6	0.772167
142.7	0.772167
142.8	0.771
142.9	0.771
143	0.771333
143.1	0.772167
143.2	0.772
143.3	0.7715
143.4	0.771
143.5	0.770833
143.6	0.7715
143.7	0.771833
143.8	0.772667
143.9	0.772833
144	0.773667
144.1	0.773667
144.2	0.7735
144.3	0.774667
144.4	0.775
144.5	0.775667
144.6	0.7755
144.7	0.7755
144.8	0.7755
144.9	0.776333
145	0.7775
145.1	0.777667
145.2	0.778
145.3	0.7785
145.4	0.777667
145.5	0.777167
145.6	0.776667
145.7	0.777
145.8	0.777333
145.9	0.777833
146	0.777833
146.1	0.778667
146.2	0.780333
146.3	0.78
146.4	0.781333
146.5	0.781
146.6	0.780833
146.7	0.7815
146.8	0.7825
146.9	0.782167
147	0.782667
147.1	0.783667
147.2	0.783667
147.3	0.784333
147.4	0.785
147.5	0.785667
147.6	0.785167
147.7	0.785167
147.8	0.784833
147.9	0.785667
148	0.786
148.1	0.785333
148.2	0.784833
148.3	0.785
148.4	0.7855
148.5	0.786833
148.6	0.787333
148.7	0.7875
148.8	0.787667
148.9	0.788167
149	0.789167
149.1	0.789167
149.2	0.789333
149.3	0.789667
149.4	0.789833
149.5	0.789667
149.6	0.789
149.7	0.788667
149.8	0.788833
149.9	0.788667
150	0.789167
150.1	0.789333
150.2	0.789333
150.3	0.79
150.4	0.7895
150.5	0.788833
150.6	0.789167
150.7	0.7895
150.8	0.789833
150.9	0.790667
151	0.790167
151.1	0.790833
151.2	0.790833
151.3	0.790833
151.4	0.790833
151.5	0.791167
151.6	0.790833
151.7	0.7925
151.8	0.793833
151.9	0.794167
152	0.795
152.1	0.795833
152.2	0.7965
152.3	0.7965
152.4	0.796333
152.5	0.7965
152.6	0.796667
152.7	0.797
152.8	0.797667
152.9	0.798
153	0.7975
153.1	0.796833
153.2	0.796833
153.3	0.796833
153.4	0.797
153.5	0.7975
153.6	0.797333
153.7	0.7975
153.8	0.797167
153.9	0.798167
154	0.798833
154.1	0.8
154.2	0.800167
154.3	0.800333
154.4	0.7995
154.5	0.799333
154.6	0.799667
154.7	0.800167
154.8	0.8
154.9	0.801
155	0.7995
155.1	0.800167
155.2	0.800667
155.3	0.800667
155.4	0.800833
155.5	0.800333
155.6	0.799833
155.7	0.800667
155.8	0.800667
155.9	0.800833
156	0.801167
156.1	0.801
156.2	0.801333
156.3	0.801667
156.4	0.802167
156.5	0.801833
156.6	0.801833
156.7	0.802333
156.8	0.803
156.9	0.802833
157	0.803333
157.1	0.8035
157.2	0.804167
157.3	0.8035
157.4	0.8025
157.5	0.802167
157.6	0.802833
157.7	0.803167
157.8	0.8035
157.9	0.803833
158	0.805
158.1	0.804833
158.2	0.805167
158.3	0.805833
158.4	0.805167
158.5	0.805
158.6	0.804667
158.7	0.804333
158.8	0.805167
158.9	0.806167
159	0.806
159.1	0.806167
159.2	0.806667
159.3	0.806
159.4	0.806
159.5	0.806
159.6	0.8065
159.7	0.806833
159.8	0.806667
159.9	0.806833
160	0.807
160.1	0.808167
160.2	0.808667
160.3	0.808833
160.4	0.808167
160.5	0.8085
160.6	0.808167
160.7	0.808667
160.8	0.809167
160.9	0.809833
161	0.810167
161.1	0.810833
161.2	0.810333
161.3	0.810167
161.4	0.809833
161.5	0.810333
161.6	0.809333
161.7	0.809
161.8	0.808667
161.9	0.808667
162	0.8085
162.1	0.809
162.2	0.809167
162.3	0.808
162.4	0.808
162.5	0.807167
162.6	0.807667
162.7	0.807167
162.8	0.807167
162.9	0.8065
163	0.806833
163.1	0.807167
163.2	0.808
163.3	0.807667
163.4	0.807167
163.5	0.806833
163.6	0.807
163.7	0.807167
163.8	0.807
163.9	0.807167
164	0.807667
164.1	0.808
164.2	0.8075
164.3	0.807333
164.4	0.8075
164.5	0.806667
164.6	0.807
164.7	0.807
164.8	0.806667
164.9	0.8065
165	0.806
165.1	0.805667
165.2	0.806
165.3	0.805833
165.4	0.806167
165.5	0.806167
165.6	0.806333
165.7	0.806667
165.8	0.8065
165.9	0.807167
166	0.807833
166.1	0.807
166.2	0.807167
166.3	0.807667
166.4	0.8075
166.5	0.808
166.6	0.808833
166.7	0.808167
166.8	0.8085
166.9	0.808333
167	0.8085
167.1	0.808167
167.2	0.808333
167.3	0.808667
167.4	0.808333
167.5	0.809
167.6	0.8095
167.7	0.810167
167.8	0.8105
167.9	0.810333
168	0.81
168.1	0.8105
168.2	0.810833
168.3	0.812
168.4	0.812333
168.5	0.813167
168.6	0.813167
168.7	0.814167
168.8	0.814667
168.9	0.813833
169	0.812833
169.1	0.813
169.2	0.8135
169.3	0.8135
169.4	0.813167
169.5	0.813333
169.6	0.813667
169.7	0.813167
169.8	0.813
169.9	0.812833
170	0.8125
170.1	0.811667
170.2	0.811667
170.3	0.8125
170.4	0.8125
170.5	0.8125
170.6	0.812833
170.7	0.8125
170.8	0.813167
170.9	0.812667
171	0.812167
171.1	0.811833
171.2	0.811167
171.3	0.8115
171.4	0.811167
171.5	0.811667
171.6	0.812167
171.7	0.811833
171.8	0.812167
171.9	0.812167
172	0.812
172.1	0.812667
172.2	0.812833
172.3	0.813167
172.4	0.8125
172.5	0.813167
172.6	0.814
172.7	0.813667
172.8	0.813167
172.9	0.813833
173	0.815
173.1	0.815167
173.2	0.816167
173.3	0.816833
173.4	0.816833
173.5	0.816167
173.6	0.817333
173.7	0.817333
173.8	0.817667
173.9	0.8185
174	0.818333
174.1	0.819333
174.2	0.819167
174.3	0.820333
174.4	0.8205
174.5	0.820333
174.6	0.820167
174.7	0.819
174.8	0.818833
174.9	0.818333
175	0.818333
175.1	0.8185
175.2	0.819
175.3	0.819
175.4	0.8185
175.5	0.819
175.6	0.819
175.7	0.819333
175.8	0.819167
175.9	0.819167
176	0.819333
176.1	0.819167
176.2	0.819333
176.3	0.819833
176.4	0.819833
176.5	0.819833
176.6	0.82
176.7	0.820167
176.8	0.820667
176.9	0.820833
177	0.821
177.1	0.820833
177.2	0.821167
177.3	0.8215
177.4	0.8225
177.5	0.821333
177.6	0.821167
177.7	0.8205
177.8	0.82
177.9	0.8205
178	0.82
178.1	0.819833
178.2	0.821
178.3	0.8215
178.4	0.821333
178.5	0.822333
178.6	0.822833
178.7	0.823167
178.8	0.8235
178.9	0.823333
179	0.823167
179.1	0.823333
179.2	0.8235
179.3	0.824
179.4	0.825833
179.5	0.826
179.6	0.826333
179.7	0.8275
179.8	0.827167
179.9	0.827167
180	0.827333
180.1	0.8275
180.2	0.827
180.3	0.826667
180.4	0.826667
180.5	0.8265
180.6	0.826167
180.7	0.825167
180.8	0.825333
180.9	0.825833
181	0.826833
181.1	0.826833
181.2	0.826833
181.3	0.826333
181.4	0.826
181.5	0.826167
181.6	0.826
181.7	0.826833
181.8	0.826833
181.9	0.826333
182	0.825667
182.1	0.825667
182.2	0.8255
182.3	0.825167
182.4	0.825333
182.5	0.825167
182.6	0.825
182.7	0.826167
182.8	0.825667
182.9	0.8255
183	0.825333
183.1	0.8245
183.2	0.824667
183.3	0.825
183.4	0.824833
183.5	0.824333
183.6	0.824167
183.7	0.824333
183.8	0.825
183.9	0.824667
184	0.824667
184.1	0.824167
184.2	0.824333
184.3	0.824333
184.4	0.8255
184.5	0.824667
184.6	0.825167
184.7	0.824667
184.8	0.824333
184.9	0.824167
185	0.824833
185.1	0.824167
185.2	0.824
185.3	0.824667
185.4	0.824
185.5	0.823667
185.6	0.824333
185.7	0.824167
185.8	0.824333
185.9	0.825
186	0.825
186.1	0.825167
186.2	0.826
186.3	0.826
186.4	0.825167
186.5	0.825
186.6	0.8245
186.7	0.825333
186.8	0.824667
186.9	0.824667
187	0.824167
187.1	0.824167
187.2	0.824167
187.3	0.824667
187.4	0.825167
187.5	0.824833
187.6	0.824833
187.7	0.8245
187.8	0.825167
187.9	0.826333
188	0.826833
188.1	0.826167
188.2	0.826
188.3	0.826333
188.4	0.826333
188.5	0.826
188.6	0.827167
188.7	0.827
188.8	0.827333
188.9	0.826833
189	0.827167
189.1	0.828
189.2	0.828
189.3	0.828333
189.4	0.828167
189.5	0.828667
189.6	0.828833
189.7	0.827667
189.8	0.828333
189.9	0.828667
190	0.829
190.1	0.828667
190.2	0.827667
190.3	0.827
190.4	0.826667
190.5	0.826667
190.6	0.827
190.7	0.826333
190.8	0.827333
190.9	0.827
191	0.827667
191.1	0.8285
191.2	0.829333
191.3	0.829333
191.4	0.828667
191.5	0.829167
191.6	0.829167
191.7	0.829667
191.8	0.83
191.9	0.8305
192	0.8295
192.1	0.829
192.2	0.829
192.3	0.8285
192.4	0.827833
192.5	0.827667
192.6	0.828
192.7	0.827833
192.8	0.828
192.9	0.828
193	0.828
193.1	0.828167
193.2	0.827667
193.3	0.827667
193.4	0.827833
193.5	0.828833
193.6	0.828833
193.7	0.8285
193.8	0.828833
193.9	0.829
194	0.8295
194.1	0.829167
194.2	0.829
194.3	0.828333
194.4	0.829167
194.5	0.829667
194.6	0.829
194.7	0.829
194.8	0.8295
194.9	0.829667
195	0.830167
195.1	0.830333
195.2	0.829833
195.3	0.83
195.4	0.829833
195.5	0.830333
195.6	0.829167
195.7	0.829833
195.8	0.829833
195.9	0.8295
196	0.829167
196.1	0.8295
196.2	0.83
196.3	0.83
196.4	0.830333
196.5	0.829833
196.6	0.830167
196.7	0.831
196.8	0.829667
196.9	0.830333
197	0.829667
197.1	0.8295
197.2	0.829667
197.3	0.829167
197.4	0.828333
197.5	0.828
197.6	0.827833
197.7	0.829333
197.8	0.8295
197.9	0.829833
198	0.83
198.1	0.830333
198.2	0.830167
198.3	0.830167
198.4	0.830833
198.5	0.830333
198.6	0.829833
198.7	0.830333
198.8	0.8305
198.9	0.8295
199	0.830167
199.1	0.83
199.2	0.83
199.3	0.8305
199.4	0.829333
199.5	0.829
199.6	0.829
199.7	0.829167
199.8	0.829833
199.9	0.829667
200	0.8295
[truncated: 14,000 more rows]
