# Supplementary material for: Bayesian inference of kinetic schemes for ion channels by Kalman filtering
Source: eLife journal article supplement (doi:10.7554/elife.62714), 2022-05-04
Supplement: fig4-data2 [file 1_Sim_N_7000_Fluor_MW.xlsx]

## Sheet: Tabelle1
0.1	0
0.2	0
0.3	0
0.4	0
0.5	0
0.6	0
0.7	0
0.8	0
0.9	0
1	0
1.1	0
1.2	0
1.3	0
1.4	0
1.5	0
1.6	0
1.7	0
1.8	0
1.9	0
2	0
2.1	0
2.2	0
2.3	0
2.4	0
2.5	0
2.6	0
2.7	0
2.8	0
2.9	0
3	0
3.1	0
3.2	0
3.3	0
3.4	0
3.5	0
3.6	0
3.7	0
3.8	0
3.9	0
4	0
4.1	0
4.2	0
4.3	0
4.4	0
4.5	0
4.6	0
4.7	0
4.8	0
4.9	0
5	0
5.1	0
5.2	0
5.3	0
5.4	0
5.5	0
5.6	0
5.7	0
5.8	0
5.9	0
6	0
6.1	0
6.2	0
6.3	0
6.4	0
6.5	0
6.6	0
6.7	0
6.8	0
6.9	0
7	0
7.1	0
7.2	0
7.3	0
7.4	0
7.5	0
7.6	0
7.7	0
7.8	0
7.9	0
8	0
8.1	0
8.2	0
8.3	0
8.4	0
8.5	0
8.6	0
8.7	0
8.8	0
8.9	0
9	0
9.1	0
9.2	0
9.3	0
9.4	0
9.5	0
9.6	0
9.7	0
9.8	0
9.9	0
10	0
10.1	0
10.2	0
10.3	0
10.4	0
10.5	0
10.6	0
10.7	0
10.8	0
10.9	0
11	0
11.1	0
11.2	0
11.3	0
11.4	0
11.5	0
11.6	0
11.7	0
11.8	0
11.9	0
12	0
12.1	0
12.2	0
12.3	0
12.4	0
12.5	0
12.6	0
12.7	0
12.8	0
12.9	0
13	0
13.1	0
13.2	0
13.3	0
13.4	0
13.5	0
13.6	0
13.7	0
13.8	0
13.9	0
14	0
14.1	0
14.2	0
14.3	0
14.4	0
14.5	0
14.6	0
14.7	0
14.8	0
14.9	0
15	0
15.1	0
15.2	0
15.3	0
15.4	0
15.5	0
15.6	0
15.7	0
15.8	0
15.9	0
16	0
16.1	0
16.2	0
16.3	0
16.4	0
16.5	0
16.6	0
16.7	0
16.8	0
16.9	0
17	0
17.1	0
17.2	0
17.3	0
17.4	0
17.5	0
17.6	0
17.7	0
17.8	0
17.9	0
18	0
18.1	0
18.2	0
18.3	0
18.4	0
18.5	0
18.6	0
18.7	0
18.8	0
18.9	0
19	0
19.1	0
19.2	0
19.3	0
19.4	0
19.5	0
19.6	0
19.7	0
19.8	0
19.9	0
20	0
20.1	0
20.2	0
20.3	0
20.4	0
20.5	0
20.6	0
20.7	0
20.8	0
20.9	0
21	0
21.1	0
21.2	0
21.3	0
21.4	0
21.5	0
21.6	0
21.7	0
21.8	0
21.9	0
22	0
22.1	0
22.2	0
22.3	0
22.4	0
22.5	0
22.6	0
22.7	0
22.8	0
22.9	0
23	0
23.1	0
23.2	0
23.3	0
23.4	0
23.5	0
23.6	0
23.7	0
23.8	0
23.9	0
24	0
24.1	0
24.2	0
24.3	0
24.4	0
24.5	0
24.6	0
24.7	0
24.8	0
24.9	0
25	0
25.1	0
25.2	0
25.3	0
25.4	0
25.5	0
25.6	0
25.7	0
25.8	0
25.9	0
26	0
26.1	0
26.2	0
26.3	0
26.4	0
26.5	0
26.6	0
26.7	0
26.8	0
26.9	0
27	0
27.1	0
27.2	0
27.3	0
27.4	0
27.5	0
27.6	0
27.7	0
27.8	0
27.9	0
28	0
28.1	0
28.2	0
28.3	0
28.4	0
28.5	0
28.6	0
28.7	0
28.8	0
28.9	0
29	0
29.1	0
29.2	0
29.3	0
29.4	0
29.5	0
29.6	0
29.7	0
29.8	0
29.9	0
30	0
30.1	0
30.2	0
30.3	0
30.4	0
30.5	0
30.6	0
30.7	0
30.8	0
30.9	0
31	0
31.1	0
31.2	0
31.3	0
31.4	0
31.5	0
31.6	0
31.7	0
31.8	0
31.9	0
32	0
32.1	0
32.2	0
32.3	0
32.4	0
32.5	0
32.6	0
32.7	0
32.8	0
32.9	0
33	0
33.1	0
33.2	0
33.3	0
33.4	0
33.5	0
33.6	0
33.7	0
33.8	0
33.9	0
34	0
34.1	0
34.2	0
34.3	0
34.4	0
34.5	0
34.6	0
34.7	0
34.8	0
34.9	0
35	0
35.1	0
35.2	0
35.3	0
35.4	0
35.5	0
35.6	0
35.7	0
35.8	0
35.9	0
36	0
36.1	0
36.2	0
36.3	0
36.4	0
36.5	0
36.6	0
36.7	0
36.8	0
36.9	0
37	0
37.1	0
37.2	0
37.3	0
37.4	0
37.5	0
37.6	0
37.7	0
37.8	0
37.9	0
38	0
38.1	0
38.2	0
38.3	0
38.4	0
38.5	0
38.6	0
38.7	0
38.8	0
38.9	0
39	0
39.1	0
39.2	0
39.3	0
39.4	0
39.5	0
39.6	0
39.7	0
39.8	0
39.9	0
40	0
40.1	0
40.2	0
40.3	0
40.4	0
40.5	0
40.6	0
40.7	0
40.8	0
40.9	0
41	0
41.1	0
41.2	0
41.3	0
41.4	0
41.5	0
41.6	0
41.7	0
41.8	0
41.9	0
42	0
42.1	0
42.2	0
42.3	0
42.4	0
42.5	0
42.6	0
42.7	0
42.8	0
42.9	0
43	0
43.1	0
43.2	0
43.3	0
43.4	0
43.5	0
43.6	0
43.7	0
43.8	0
43.9	0
44	0
44.1	0
44.2	0
44.3	0
44.4	0
44.5	0
44.6	0
44.7	0
44.8	0
44.9	0
45	0
45.1	0
45.2	0
45.3	0
45.4	0
45.5	0
45.6	0
45.7	0
45.8	0
45.9	0
46	0
46.1	0
46.2	0
46.3	0
46.4	0
46.5	0
46.6	0
46.7	0
46.8	0
46.9	0
47	0
47.1	0
47.2	0
47.3	0
47.4	0
47.5	0
47.6	0
47.7	0
47.8	0
47.9	0
48	0
48.1	0
48.2	0
48.3	0
48.4	0
48.5	0
48.6	0
48.7	0
48.8	0
48.9	0
49	0
49.1	0
49.2	0
49.3	0
49.4	0
49.5	0
49.6	0
49.7	0
49.8	0
49.9	0
50	0
50.1	0
50.2	0
50.3	0
50.4	0
50.5	0
50.6	0
50.7	0
50.8	0
50.9	0
51	0
51.1	0
51.2	0
51.3	0
51.4	0
51.5	0
51.6	0
51.7	0
51.8	0
51.9	0
52	0
52.1	0
52.2	0
52.3	0
52.4	0
52.5	0
52.6	0
52.7	0
52.8	0
52.9	0
53	0
53.1	0
53.2	0
53.3	0
53.4	0
53.5	0
53.6	0
53.7	0
53.8	0
53.9	0
54	0
54.1	0
54.2	0
54.3	0
54.4	0
54.5	0
54.6	0
54.7	0
54.8	0
54.9	0
55	0
55.1	0
55.2	0
55.3	0
55.4	0
55.5	0
55.6	0
55.7	0
55.8	0
55.9	0
56	0
56.1	0
56.2	0
56.3	0
56.4	0
56.5	0
56.6	0
56.7	0
56.8	0
56.9	0
57	0
57.1	0
57.2	0
57.3	0
57.4	0
57.5	0
57.6	0
57.7	0
57.8	0
57.9	0
58	0
58.1	0
58.2	0
58.3	0
58.4	0
58.5	0
58.6	0
58.7	0
58.8	0
58.9	0
59	0
59.1	0
59.2	0
59.3	0
59.4	0
59.5	0
59.6	0
59.7	0
59.8	0
59.9	0
60	0
60.1	0
60.2	0
60.3	0
60.4	0
60.5	0
60.6	0
60.7	0
60.8	0
60.9	0
61	0
61.1	0
61.2	0
61.3	0
61.4	0
61.5	0
61.6	0
61.7	0
61.8	0
61.9	0
62	0
62.1	0
62.2	0
62.3	0
62.4	0
62.5	0
62.6	0
62.7	0
62.8	0
62.9	0
63	0
63.1	0
63.2	0
63.3	0
63.4	0
63.5	0
63.6	0
63.7	0
63.8	0
63.9	0
64	0
64.1	0
64.2	0
64.3	0
64.4	0
64.5	0
64.6	0
64.7	0
64.8	0
64.9	0
65	0
65.1	0
65.2	0
65.3	0
65.4	0
65.5	0
65.6	0
65.7	0
65.8	0
65.9	0
66	0
66.1	0
66.2	0
66.3	0
66.4	0
66.5	0
66.6	0
66.7	0
66.8	0
66.9	0
67	0
67.1	0
67.2	0
67.3	0
67.4	0
67.5	0
67.6	0
67.7	0
67.8	0
67.9	0
68	0
68.1	0
68.2	0
68.3	0
68.4	0
68.5	0
68.6	0
68.7	0
68.8	0
68.9	0
69	0
69.1	0
69.2	0
69.3	0
69.4	0
69.5	0
69.6	0
69.7	0
69.8	0
69.9	0
70	0
70.1	0
70.2	0
70.3	0
70.4	0
70.5	0
70.6	0
70.7	0
70.8	0
70.9	0
71	0
71.1	0
71.2	0
71.3	0
71.4	0
71.5	0
71.6	0
71.7	0
71.8	0
71.9	0
72	0
72.1	0
72.2	0
72.3	0
72.4	0
72.5	0
72.6	0
72.7	0
72.8	0
72.9	0
73	0
73.1	0
73.2	0
73.3	0
73.4	0
73.5	0
73.6	0
73.7	0
73.8	0
73.9	0
74	0
74.1	0
74.2	0
74.3	0
74.4	0
74.5	0
74.6	0
74.7	0
74.8	0
74.9	0
75	0
75.1	0
75.2	0
75.3	0
75.4	0
75.5	0
75.6	0
75.7	0
75.8	0
75.9	0
76	0
76.1	0
76.2	0
76.3	0
76.4	0
76.5	0
76.6	0
76.7	0
76.8	0
76.9	0
77	0
77.1	0
77.2	0
77.3	0
77.4	0
77.5	0
77.6	0
77.7	0
77.8	0
77.9	0
78	0
78.1	0
78.2	0
78.3	0
78.4	0
78.5	0
78.6	0
78.7	0
78.8	0
78.9	0
79	0
79.1	0
79.2	0
79.3	0
79.4	0
79.5	0
79.6	0
79.7	0
79.8	0
79.9	0
80	0
80.1	0
80.2	0
80.3	0
80.4	0
80.5	0
80.6	0
80.7	0
80.8	0
80.9	0
81	0
81.1	0
81.2	0
81.3	0
81.4	0
81.5	0
81.6	0
81.7	0
81.8	0
81.9	0
82	0
82.1	0
82.2	0
82.3	0
82.4	0
82.5	0
82.6	0
82.7	0
82.8	0
82.9	0
83	0
83.1	0
83.2	0
83.3	0
83.4	0
83.5	0
83.6	0
83.7	0
83.8	0
83.9	0
84	0
84.1	0
84.2	0
84.3	0
84.4	0
84.5	0
84.6	0
84.7	0
84.8	0
84.9	0
85	0
85.1	0
85.2	0
85.3	0
85.4	0
85.5	0
85.6	0
85.7	0
85.8	0
85.9	0
86	0
86.1	0
86.2	0
86.3	0
86.4	0
86.5	0
86.6	0
86.7	0
86.8	0
86.9	0
87	0
87.1	0
87.2	0
87.3	0
87.4	0
87.5	0
87.6	0
87.7	0
87.8	0
87.9	0
88	0
88.1	0
88.2	0
88.3	0
88.4	0
88.5	0
88.6	0
88.7	0
88.8	0
88.9	0
89	0
89.1	0
89.2	0
89.3	0
89.4	0
89.5	0
89.6	0
89.7	0
89.8	0
89.9	0
90	0
90.1	0
90.2	0
90.3	0
90.4	0
90.5	0
90.6	0
90.7	0
90.8	0
90.9	0
91	0
91.1	0
91.2	0
91.3	0
91.4	0
91.5	0
91.6	0
91.7	0
91.8	0
91.9	0
92	0
92.1	0
92.2	0
92.3	0
92.4	0
92.5	0
92.6	0
92.7	0
92.8	0
92.9	0
93	0
93.1	0
93.2	0
93.3	0
93.4	0
93.5	0
93.6	0
93.7	0
93.8	0
93.9	0
94	0
94.1	0
94.2	0
94.3	0
94.4	0
94.5	0
94.6	0
94.7	0
94.8	0
94.9	0
95	0
95.1	0
95.2	0
95.3	0
95.4	0
95.5	0
95.6	0
95.7	0
95.8	0
95.9	0
96	0
96.1	0
96.2	0
96.3	0
96.4	0
96.5	0
96.6	0
96.7	0
96.8	0
96.9	0
97	0
97.1	0
97.2	0
97.3	0
97.4	0
97.5	0
97.6	0
97.7	0
97.8	0
97.9	0
98	0
98.1	0
98.2	0
98.3	0
98.4	0
98.5	0
98.6	0
98.7	0
98.8	0
98.9	0
99	0
99.1	0
99.2	0
99.3	0
99.4	0
99.5	0
99.6	0
99.7	0
99.8	0
99.9	0
100	0
100.1	0.896214
100.2	0.975143
100.3	0.984786
100.4	0.986857
100.5	0.986571
100.6	0.988429
100.7	0.9875
100.8	0.987429
100.9	0.988
101	0.987571
101.1	0.988571
101.2	0.989786
101.3	0.988143
101.4	0.987643
101.5	0.988429
101.6	0.989643
101.7	0.988857
101.8	0.988143
101.9	0.987786
102	0.988214
102.1	0.987357
102.2	0.988
102.3	0.989143
102.4	0.988929
102.5	0.988286
102.6	0.987286
102.7	0.989071
102.8	0.990071
102.9	0.989643
103	0.988571
103.1	0.990929
103.2	0.989571
103.3	0.990429
103.4	0.9905
103.5	0.988357
103.6	0.989429
103.7	0.987929
103.8	0.989571
103.9	0.9895
104	0.990214
104.1	0.989786
104.2	0.988857
104.3	0.990143
104.4	0.989643
104.5	0.988357
104.6	0.989929
104.7	0.989643
104.8	0.990214
104.9	0.988929
105	0.991143
105.1	0.989571
105.2	0.991357
105.3	0.990071
105.4	0.990214
105.5	0.990143
105.6	0.99
105.7	0.989857
105.8	0.989857
105.9	0.991286
106	0.991143
106.1	0.990071
106.2	0.990357
106.3	0.990071
106.4	0.991571
106.5	0.989071
106.6	0.991214
106.7	0.991143
106.8	0.991429
106.9	0.9915
107	0.990929
107.1	0.991286
107.2	0.989929
107.3	0.99
107.4	0.989714
107.5	0.990857
107.6	0.990357
107.7	0.991929
107.8	0.991214
107.9	0.992
108	0.989643
108.1	0.9905
108.2	0.991571
108.3	0.992214
108.4	0.9925
108.5	0.989357
108.6	0.991714
108.7	0.992429
108.8	0.991143
108.9	0.990643
109	0.992429
109.1	0.992214
109.2	0.990571
109.3	0.989071
109.4	0.991929
109.5	0.992286
109.6	0.992429
109.7	0.993214
109.8	0.991143
109.9	0.991429
110	0.992857
110.1	0.990929
110.2	0.9925
110.3	0.993071
110.4	0.993071
110.5	0.992357
110.6	0.992643
110.7	0.9935
110.8	0.992143
110.9	0.990571
111	0.992071
111.1	0.9935
111.2	0.992286
111.3	0.992357
111.4	0.992929
111.5	0.992786
111.6	0.9925
111.7	0.993286
111.8	0.992071
111.9	0.992714
112	0.993357
112.1	0.993
112.2	0.992214
112.3	0.991571
112.4	0.992857
112.5	0.992214
112.6	0.992071
112.7	0.991786
112.8	0.991
112.9	0.993429
113	0.992071
113.1	0.992
113.2	0.993643
113.3	0.992429
113.4	0.992357
113.5	0.992643
113.6	0.991714
113.7	0.991714
113.8	0.992643
113.9	0.993
114	0.994929
114.1	0.992714
114.2	0.993429
114.3	0.9925
114.4	0.993429
114.5	0.994143
114.6	0.993357
114.7	0.992714
114.8	0.9935
114.9	0.993
115	0.993071
115.1	0.993643
115.2	0.993286
115.3	0.994429
115.4	0.993786
115.5	0.994714
115.6	0.993643
115.7	0.991786
115.8	0.993214
115.9	0.992286
116	0.993643
116.1	0.993929
116.2	0.993714
116.3	0.994143
116.4	0.994
116.5	0.994786
116.6	0.993143
116.7	0.992786
116.8	0.994286
116.9	0.993214
117	0.993429
117.1	0.994214
117.2	0.995286
117.3	0.994643
117.4	0.9945
117.5	0.994143
117.6	0.994571
117.7	0.993286
117.8	0.994071
117.9	0.993857
118	0.995429
118.1	0.994786
118.2	0.994143
118.3	0.993143
118.4	0.994357
118.5	0.993714
118.6	0.993357
118.7	0.994571
118.8	0.994214
118.9	0.993357
119	0.994357
119.1	0.994429
119.2	0.993571
119.3	0.993286
119.4	0.993429
119.5	0.994214
119.6	0.993143
119.7	0.993786
119.8	0.994429
119.9	0.993857
120	0.993714
120.1	0.993571
120.2	0.993857
120.3	0.993643
120.4	0.995357
120.5	0.993571
120.6	0.994929
120.7	0.994286
120.8	0.994286
120.9	0.994786
121	0.995357
121.1	0.994357
121.2	0.994786
121.3	0.994357
121.4	0.994214
121.5	0.994214
121.6	0.994429
121.7	0.9945
121.8	0.9955
121.9	0.995071
122	0.994857
122.1	0.994357
122.2	0.995214
122.3	0.995071
122.4	0.994857
122.5	0.995571
122.6	0.995786
122.7	0.994929
122.8	0.994357
122.9	0.994357
123	0.993786
123.1	0.994643
123.2	0.995714
123.3	0.9955
123.4	0.995286
123.5	0.994643
123.6	0.995286
123.7	0.994643
123.8	0.995071
123.9	0.995786
124	0.995214
124.1	0.995643
124.2	0.996071
124.3	0.996
124.4	0.994857
124.5	0.994857
124.6	0.995357
124.7	0.995143
124.8	0.996
124.9	0.995786
125	0.995429
125.1	0.995071
125.2	0.996143
125.3	0.994571
125.4	0.995429
125.5	0.996714
125.6	0.995714
125.7	0.995643
125.8	0.9955
125.9	0.995286
126	0.995429
126.1	0.995357
126.2	0.995571
126.3	0.996071
126.4	0.995714
126.5	0.995714
126.6	0.995929
126.7	0.9945
126.8	0.995286
126.9	0.995714
127	0.995786
127.1	0.995857
127.2	0.9965
127.3	0.995571
127.4	0.996071
127.5	0.996071
127.6	0.9955
127.7	0.996071
127.8	0.994571
127.9	0.995429
128	0.995643
128.1	0.996214
128.2	0.995929
128.3	0.994857
128.4	0.996
128.5	0.996071
128.6	0.996571
128.7	0.996143
128.8	0.995929
128.9	0.995571
129	0.995857
129.1	0.995714
129.2	0.996
129.3	0.996071
129.4	0.995357
129.5	0.997214
129.6	0.996571
129.7	0.995857
129.8	0.996286
129.9	0.996
130	0.996
130.1	0.996857
130.2	0.995286
130.3	0.996643
130.4	0.996071
130.5	0.996143
130.6	0.995357
130.7	0.997071
130.8	0.996214
130.9	0.9965
131	0.996143
131.1	0.996071
131.2	0.996071
131.3	0.996857
131.4	0.996
131.5	0.996571
131.6	0.9965
131.7	0.996429
131.8	0.995786
131.9	0.996357
132	0.996571
132.1	0.996143
132.2	0.996
132.3	0.996429
132.4	0.997429
132.5	0.997143
132.6	0.997071
132.7	0.996786
132.8	0.996857
132.9	0.996571
133	0.997071
133.1	0.997
133.2	0.997357
133.3	0.996357
133.4	0.996
133.5	0.995929
133.6	0.995929
133.7	0.996
133.8	0.996857
133.9	0.995429
134	0.996786
134.1	0.996714
134.2	0.996429
134.3	0.997214
134.4	0.996429
134.5	0.996929
134.6	0.997357
134.7	0.996786
134.8	0.9965
134.9	0.995643
135	0.996214
135.1	0.997357
135.2	0.9965
135.3	0.996286
135.4	0.996786
135.5	0.996714
135.6	0.996
135.7	0.996714
135.8	0.996643
135.9	0.996571
136	0.996286
136.1	0.9965
136.2	0.996
136.3	0.996643
136.4	0.996571
136.5	0.996643
136.6	0.995857
136.7	0.996786
136.8	0.997286
136.9	0.996571
137	0.997071
137.1	0.997071
137.2	0.996643
137.3	0.996214
137.4	0.997143
137.5	0.997
137.6	0.997357
137.7	0.996071
137.8	0.996571
137.9	0.995786
138	0.996643
138.1	0.9965
138.2	0.996929
138.3	0.996643
138.4	0.996571
138.5	0.997071
138.6	0.997071
138.7	0.997143
138.8	0.995714
138.9	0.996143
139	0.997286
139.1	0.995857
139.2	0.996
139.3	0.997
139.4	0.9965
139.5	0.9965
139.6	0.996357
139.7	0.996357
139.8	0.995929
139.9	0.996786
140	0.996643
140.1	0.996357
140.2	0.996786
140.3	0.996357
140.4	0.9965
140.5	0.997
140.6	0.996714
140.7	0.997714
140.8	0.997786
140.9	0.997071
141	0.997
141.1	0.997357
141.2	0.997071
141.3	0.997214
141.4	0.996857
141.5	0.996714
141.6	0.996643
141.7	0.997
141.8	0.997143
141.9	0.997143
142	0.996786
142.1	0.997643
142.2	0.997571
142.3	0.996357
142.4	0.997429
142.5	0.997214
142.6	0.996929
142.7	0.996857
142.8	0.997286
142.9	0.996857
143	0.997571
143.1	0.996
143.2	0.996714
143.3	0.997357
143.4	0.997
143.5	0.9975
143.6	0.996929
143.7	0.996929
143.8	0.997714
143.9	0.997071
144	0.996357
144.1	0.997429
144.2	0.9975
144.3	0.997214
144.4	0.997143
144.5	0.997786
144.6	0.997429
144.7	0.997429
144.8	0.997143
144.9	0.997071
145	0.997286
145.1	0.996857
145.2	0.997
145.3	0.997
145.4	0.997571
145.5	0.996929
145.6	0.997786
145.7	0.996429
145.8	0.996714
145.9	0.997286
146	0.996571
146.1	0.997357
146.2	0.997571
146.3	0.996857
146.4	0.996643
146.5	0.997357
146.6	0.997357
146.7	0.9965
146.8	0.997214
146.9	0.996571
147	0.996357
147.1	0.996643
147.2	0.997071
147.3	0.996357
147.4	0.997643
147.5	0.998429
147.6	0.998071
147.7	0.997071
147.8	0.996786
147.9	0.997071
148	0.997429
148.1	0.997071
148.2	0.997429
148.3	0.997429
148.4	0.996214
148.5	0.997214
148.6	0.997
148.7	0.998071
148.8	0.997714
148.9	0.997571
149	0.997357
149.1	0.997571
149.2	0.997714
149.3	0.997429
149.4	0.997357
149.5	0.997786
149.6	0.997429
149.7	0.997571
149.8	0.997429
149.9	0.997571
150	0.997357
150.1	0.997214
150.2	0.996929
150.3	0.996714
150.4	0.997714
150.5	0.996929
150.6	0.997
150.7	0.997429
150.8	0.997429
150.9	0.996786
151	0.997571
151.1	0.996786
151.2	0.996929
151.3	0.997357
151.4	0.996786
151.5	0.997143
151.6	0.996643
151.7	0.997429
151.8	0.997286
151.9	0.997643
152	0.998143
152.1	0.998
152.2	0.997857
152.3	0.998
152.4	0.997071
152.5	0.9975
152.6	0.997643
152.7	0.997643
152.8	0.998143
152.9	0.998143
153	0.997429
153.1	0.997714
153.2	0.997357
153.3	0.996857
153.4	0.997571
153.5	0.997571
153.6	0.997357
153.7	0.997429
153.8	0.997857
153.9	0.998
154	0.996929
154.1	0.997357
154.2	0.9985
154.3	0.997643
154.4	0.996857
154.5	0.997714
154.6	0.996714
154.7	0.996786
154.8	0.997857
154.9	0.997571
155	0.996643
155.1	0.996357
155.2	0.997357
155.3	0.997
155.4	0.997643
155.5	0.997429
155.6	0.998214
155.7	0.998429
155.8	0.997571
155.9	0.998143
156	0.997571
156.1	0.997357
156.2	0.998071
156.3	0.9975
156.4	0.998143
156.5	0.998286
156.6	0.997571
156.7	0.997786
156.8	0.997
156.9	0.997357
157	0.998071
157.1	0.9975
157.2	0.997357
157.3	0.997929
157.4	0.997571
157.5	0.996714
157.6	0.997
157.7	0.997429
157.8	0.998643
157.9	0.997143
158	0.997
158.1	0.997143
158.2	0.997071
158.3	0.998357
158.4	0.997714
158.5	0.997857
158.6	0.997929
158.7	0.997571
158.8	0.997286
158.9	0.997571
159	0.998071
159.1	0.9975
159.2	0.997857
159.3	0.997143
159.4	0.998357
159.5	0.997929
159.6	0.997857
159.7	0.998429
159.8	0.9975
159.9	0.996714
160	0.998
160.1	0.997143
160.2	0.997571
160.3	0.998429
160.4	0.997929
160.5	0.997929
160.6	0.997857
160.7	0.998
160.8	0.9975
160.9	0.997929
161	0.9975
161.1	0.997786
161.2	0.997357
161.3	0.998143
161.4	0.997571
161.5	0.998
161.6	0.997643
161.7	0.997357
161.8	0.997429
161.9	0.997714
162	0.997429
162.1	0.997357
162.2	0.998286
162.3	0.9985
162.4	0.997786
162.5	0.998071
162.6	0.998643
162.7	0.997929
162.8	0.997714
162.9	0.997357
163	0.997357
163.1	0.997286
163.2	0.997857
163.3	0.998143
163.4	0.997571
163.5	0.997071
163.6	0.997857
163.7	0.997643
163.8	0.997214
163.9	0.997571
164	0.997
164.1	0.997143
164.2	0.9975
164.3	0.998
164.4	0.997214
164.5	0.997786
164.6	0.997929
164.7	0.997714
164.8	0.997143
164.9	0.997786
165	0.998571
165.1	0.999
165.2	0.998
165.3	0.997929
165.4	0.998429
165.5	0.998214
165.6	0.997929
165.7	0.997357
165.8	0.9975
165.9	0.997214
166	0.997857
166.1	0.998071
166.2	0.998
166.3	0.996714
166.4	0.997929
166.5	0.997143
166.6	0.997
166.7	0.998143
166.8	0.997357
166.9	0.997429
167	0.997929
167.1	0.997929
167.2	0.997786
167.3	0.997714
167.4	0.997571
167.5	0.998429
167.6	0.997714
167.7	0.998286
167.8	0.997214
167.9	0.997714
168	0.997857
168.1	0.997929
168.2	0.997714
168.3	0.998143
168.4	0.997786
168.5	0.997857
168.6	0.998214
168.7	0.997714
168.8	0.997143
168.9	0.997857
169	0.9975
169.1	0.997786
169.2	0.997857
169.3	0.998357
169.4	0.998071
169.5	0.998
169.6	0.997857
169.7	0.998286
169.8	0.997214
169.9	0.9985
170	0.997714
170.1	0.998143
170.2	0.997929
170.3	0.9975
170.4	0.997714
170.5	0.997071
170.6	0.997357
170.7	0.997429
170.8	0.997571
170.9	0.998571
171	0.997929
171.1	0.998071
171.2	0.998143
171.3	0.998143
171.4	0.997
171.5	0.998
171.6	0.998143
171.7	0.997214
171.8	0.997214
171.9	0.997571
172	0.997429
172.1	0.998214
172.2	0.997714
172.3	0.997357
172.4	0.997429
172.5	0.998357
172.6	0.997714
172.7	0.997929
172.8	0.997286
172.9	0.996857
173	0.997786
173.1	0.997857
173.2	0.997286
173.3	0.998071
173.4	0.997429
173.5	0.996857
173.6	0.997
173.7	0.997857
173.8	0.998071
173.9	0.9975
174	0.996857
174.1	0.998
174.2	0.997643
174.3	0.998143
174.4	0.997786
174.5	0.997714
174.6	0.997429
174.7	0.998214
174.8	0.997786
174.9	0.998286
175	0.997643
175.1	0.997857
175.2	0.998857
175.3	0.997786
175.4	0.997857
175.5	0.998
175.6	0.997929
175.7	0.997643
175.8	0.9975
175.9	0.997786
176	0.997571
176.1	0.998
176.2	0.997857
176.3	0.997
176.4	0.997071
176.5	0.9975
176.6	0.997286
176.7	0.997929
176.8	0.997643
176.9	0.998071
177	0.998143
177.1	0.997929
177.2	0.998143
177.3	0.997786
177.4	0.997
177.5	0.998
177.6	0.997714
177.7	0.997857
177.8	0.998143
177.9	0.997857
178	0.997643
178.1	0.998071
178.2	0.998071
178.3	0.997929
178.4	0.997857
178.5	0.997786
178.6	0.997571
178.7	0.998286
178.8	0.997714
178.9	0.997286
179	0.997071
179.1	0.997857
179.2	0.998429
179.3	0.997714
179.4	0.997643
179.5	0.997857
179.6	0.997214
179.7	0.997357
179.8	0.997786
179.9	0.9975
180	0.997929
180.1	0.997571
180.2	0.997643
180.3	0.997857
180.4	0.997214
180.5	0.997429
180.6	0.997357
180.7	0.997357
180.8	0.997571
180.9	0.998
181	0.997571
181.1	0.997714
181.2	0.997429
181.3	0.997929
181.4	0.997714
181.5	0.998071
181.6	0.997714
181.7	0.996929
181.8	0.997786
181.9	0.997786
182	0.997643
182.1	0.997571
182.2	0.997643
182.3	0.997786
182.4	0.998
182.5	0.998
182.6	0.997929
182.7	0.997857
182.8	0.997357
182.9	0.998071
183	0.9985
183.1	0.998143
183.2	0.997714
183.3	0.997571
183.4	0.998286
183.5	0.997857
183.6	0.997643
183.7	0.9975
183.8	0.997786
183.9	0.997857
184	0.997571
184.1	0.997857
184.2	0.997071
184.3	0.997
184.4	0.997286
184.5	0.997929
184.6	0.997857
184.7	0.997571
184.8	0.997286
184.9	0.997714
185	0.998
185.1	0.997429
185.2	0.997429
185.3	0.9975
185.4	0.997786
185.5	0.9975
185.6	0.998429
185.7	0.997357
185.8	0.997571
185.9	0.997571
186	0.997786
186.1	0.997357
186.2	0.997714
186.3	0.997786
186.4	0.997714
186.5	0.997786
186.6	0.996857
186.7	0.996929
186.8	0.998071
186.9	0.997714
187	0.997714
187.1	0.9975
187.2	0.9975
187.3	0.997071
187.4	0.997643
187.5	0.997786
187.6	0.997929
187.7	0.998357
187.8	0.9975
187.9	0.998286
188	0.998286
188.1	0.998571
188.2	0.998429
188.3	0.997929
188.4	0.998071
188.5	0.997
188.6	0.996786
188.7	0.997929
188.8	0.997357
188.9	0.997143
189	0.997929
189.1	0.997786
189.2	0.998643
189.3	0.997571
189.4	0.998143
189.5	0.997929
189.6	0.997643
189.7	0.998357
189.8	0.9975
189.9	0.997571
190	0.997714
190.1	0.997857
190.2	0.998357
190.3	0.996929
190.4	0.997214
190.5	0.997429
190.6	0.997643
190.7	0.997786
190.8	0.997786
190.9	0.997929
191	0.997286
191.1	0.998
191.2	0.997571
191.3	0.997857
191.4	0.997929
191.5	0.9985
191.6	0.998214
191.7	0.997357
191.8	0.997
191.9	0.998286
192	0.9975
192.1	0.998143
192.2	0.997
192.3	0.998143
192.4	0.997929
192.5	0.997357
192.6	0.998
192.7	0.998214
192.8	0.998143
192.9	0.997429
193	0.997857
193.1	0.998071
193.2	0.998143
193.3	0.997357
193.4	0.997071
193.5	0.9975
193.6	0.996286
193.7	0.9975
193.8	0.997857
193.9	0.997
194	0.998
194.1	0.997714
194.2	0.997
194.3	0.9975
194.4	0.997714
194.5	0.997714
194.6	0.997214
194.7	0.997643
194.8	0.997714
194.9	0.997571
195	0.998357
195.1	0.998
195.2	0.9975
195.3	0.998143
195.4	0.997214
195.5	0.997357
195.6	0.998286
195.7	0.997929
195.8	0.998429
195.9	0.997714
196	0.997429
196.1	0.9975
196.2	0.998071
196.3	0.997071
196.4	0.9975
196.5	0.997929
196.6	0.997786
196.7	0.998214
196.8	0.998071
196.9	0.997571
197	0.997857
197.1	0.998357
197.2	0.998429
197.3	0.997643
197.4	0.9975
197.5	0.998286
197.6	0.998143
197.7	0.998
197.8	0.9975
197.9	0.997357
198	0.997857
198.1	0.998571
198.2	0.998
198.3	0.998786
198.4	0.998071
198.5	0.996786
198.6	0.997286
198.7	0.997786
198.8	0.997429
198.9	0.997786
199	0.9975
199.1	0.997429
199.2	0.997071
199.3	0.997643
199.4	0.998214
199.5	0.997857
199.6	0.998071
199.7	0.998143
199.8	0.996857
199.9	0.997286
200	0.997643
[truncated: 14,000 more rows]
