# Supplementary material for: Bayesian inference of kinetic schemes for ion channels by Kalman filtering
Source: eLife journal article supplement (doi:10.7554/elife.62714), 2022-05-04
Supplement: fig4-data2 [file 1_Sim_N_7000_Strom_MW.xlsx]

## Sheet: Tabelle1
0.1	0
0.2	0
0.3	0
0.4	0
0.5	0
0.6	0
0.7	0
0.8	0
0.9	0
1	0
1.1	0
1.2	0
1.3	0
1.4	0
1.5	0
1.6	0
1.7	0
1.8	0
1.9	0
2	0
2.1	0
2.2	0
2.3	0
2.4	0
2.5	0
2.6	0
2.7	0
2.8	0
2.9	0
3	0
3.1	0
3.2	0
3.3	0
3.4	0
3.5	0
3.6	0
3.7	0
3.8	0
3.9	0
4	0
4.1	0
4.2	0
4.3	0
4.4	0
4.5	0
4.6	0
4.7	0
4.8	0
4.9	0
5	0
5.1	0
5.2	0
5.3	0
5.4	0
5.5	0
5.6	0
5.7	0
5.8	0
5.9	0
6	0
6.1	0
6.2	0
6.3	0
6.4	0
6.5	0
6.6	0
6.7	0
6.8	0
6.9	0
7	0
7.1	0
7.2	0
7.3	0
7.4	0
7.5	0
7.6	0
7.7	0
7.8	0
7.9	0
8	0
8.1	0
8.2	0
8.3	0
8.4	0
8.5	0
8.6	0
8.7	0
8.8	0
8.9	0
9	0
9.1	0
9.2	0
9.3	0
9.4	0
9.5	0
9.6	0
9.7	0
9.8	0
9.9	0
10	0
10.1	0
10.2	0
10.3	0
10.4	0
10.5	0
10.6	0
10.7	0
10.8	0
10.9	0
11	0
11.1	0
11.2	0
11.3	0
11.4	0
11.5	0
11.6	0
11.7	0
11.8	0
11.9	0
12	0
12.1	0
12.2	0
12.3	0
12.4	0
12.5	0
12.6	0
12.7	0
12.8	0
12.9	0
13	0
13.1	0
13.2	0
13.3	0
13.4	0
13.5	0
13.6	0
13.7	0
13.8	0
13.9	0
14	0
14.1	0
14.2	0
14.3	0
14.4	0
14.5	0
14.6	0
14.7	0
14.8	0
14.9	0
15	0
15.1	0
15.2	0
15.3	0
15.4	0
15.5	0
15.6	0
15.7	0
15.8	0
15.9	0
16	0
16.1	0
16.2	0
16.3	0
16.4	0
16.5	0
16.6	0
16.7	0
16.8	0
16.9	0
17	0
17.1	0
17.2	0
17.3	0
17.4	0
17.5	0
17.6	0
17.7	0
17.8	0
17.9	0
18	0
18.1	0
18.2	0
18.3	0
18.4	0
18.5	0
18.6	0
18.7	0
18.8	0
18.9	0
19	0
19.1	0
19.2	0
19.3	0
19.4	0
19.5	0
19.6	0
19.7	0
19.8	0
19.9	0
20	0
20.1	0
20.2	0
20.3	0
20.4	0
20.5	0
20.6	0
20.7	0
20.8	0
20.9	0
21	0
21.1	0
21.2	0
21.3	0
21.4	0
21.5	0
21.6	0
21.7	0
21.8	0
21.9	0
22	0
22.1	0
22.2	0
22.3	0
22.4	0
22.5	0
22.6	0
22.7	0
22.8	0
22.9	0
23	0
23.1	0
23.2	0
23.3	0
23.4	0
23.5	0
23.6	0
23.7	0
23.8	0
23.9	0
24	0
24.1	0
24.2	0
24.3	0
24.4	0
24.5	0
24.6	0
24.7	0
24.8	0
24.9	0
25	0
25.1	0
25.2	0
25.3	0
25.4	0
25.5	0
25.6	0
25.7	0
25.8	0
25.9	0
26	0
26.1	0
26.2	0
26.3	0
26.4	0
26.5	0
26.6	0
26.7	0
26.8	0
26.9	0
27	0
27.1	0
27.2	0
27.3	0
27.4	0
27.5	0
27.6	0
27.7	0
27.8	0
27.9	0
28	0
28.1	0
28.2	0
28.3	0
28.4	0
28.5	0
28.6	0
28.7	0
28.8	0
28.9	0
29	0
29.1	0
29.2	0
29.3	0
29.4	0
29.5	0
29.6	0
29.7	0
29.8	0
29.9	0
30	0
30.1	0
30.2	0
30.3	0
30.4	0
30.5	0
30.6	0
30.7	0
30.8	0
30.9	0
31	0
31.1	0
31.2	0
31.3	0
31.4	0
31.5	0
31.6	0
31.7	0
31.8	0
31.9	0
32	0
32.1	0
32.2	0
32.3	0
32.4	0
32.5	0
32.6	0
32.7	0
32.8	0
32.9	0
33	0
33.1	0
33.2	0
33.3	0
33.4	0
33.5	0
33.6	0
33.7	0
33.8	0
33.9	0
34	0
34.1	0
34.2	0
34.3	0
34.4	0
34.5	0
34.6	0
34.7	0
34.8	0
34.9	0
35	0
35.1	0
35.2	0
35.3	0
35.4	0
35.5	0
35.6	0
35.7	0
35.8	0
35.9	0
36	0
36.1	0
36.2	0
36.3	0
36.4	0
36.5	0
36.6	0
36.7	0
36.8	0
36.9	0
37	0
37.1	0
37.2	0
37.3	0
37.4	0
37.5	0
37.6	0
37.7	0
37.8	0
37.9	0
38	0
38.1	0
38.2	0
38.3	0
38.4	0
38.5	0
38.6	0
38.7	0
38.8	0
38.9	0
39	0
39.1	0
39.2	0
39.3	0
39.4	0
39.5	0
39.6	0
39.7	0
39.8	0
39.9	0
40	0
40.1	0
40.2	0
40.3	0
40.4	0
40.5	0
40.6	0
40.7	0
40.8	0
40.9	0
41	0
41.1	0
41.2	0
41.3	0
41.4	0
41.5	0
41.6	0
41.7	0
41.8	0
41.9	0
42	0
42.1	0
42.2	0
42.3	0
42.4	0
42.5	0
42.6	0
42.7	0
42.8	0
42.9	0
43	0
43.1	0
43.2	0
43.3	0
43.4	0
43.5	0
43.6	0
43.7	0
43.8	0
43.9	0
44	0
44.1	0
44.2	0
44.3	0
44.4	0
44.5	0
44.6	0
44.7	0
44.8	0
44.9	0
45	0
45.1	0
45.2	0
45.3	0
45.4	0
45.5	0
45.6	0
45.7	0
45.8	0
45.9	0
46	0
46.1	0
46.2	0
46.3	0
46.4	0
46.5	0
46.6	0
46.7	0
46.8	0
46.9	0
47	0
47.1	0
47.2	0
47.3	0
47.4	0
47.5	0
47.6	0
47.7	0
47.8	0
47.9	0
48	0
48.1	0
48.2	0
48.3	0
48.4	0
48.5	0
48.6	0
48.7	0
48.8	0
48.9	0
49	0
49.1	0
49.2	0
49.3	0
49.4	0
49.5	0
49.6	0
49.7	0
49.8	0
49.9	0
50	0
50.1	0
50.2	0
50.3	0
50.4	0
50.5	0
50.6	0
50.7	0
50.8	0
50.9	0
51	0
51.1	0
51.2	0
51.3	0
51.4	0
51.5	0
51.6	0
51.7	0
51.8	0
51.9	0
52	0
52.1	0
52.2	0
52.3	0
52.4	0
52.5	0
52.6	0
52.7	0
52.8	0
52.9	0
53	0
53.1	0
53.2	0
53.3	0
53.4	0
53.5	0
53.6	0
53.7	0
53.8	0
53.9	0
54	0
54.1	0
54.2	0
54.3	0
54.4	0
54.5	0
54.6	0
54.7	0
54.8	0
54.9	0
55	0
55.1	0
55.2	0
55.3	0
55.4	0
55.5	0
55.6	0
55.7	0
55.8	0
55.9	0
56	0
56.1	0
56.2	0
56.3	0
56.4	0
56.5	0
56.6	0
56.7	0
56.8	0
56.9	0
57	0
57.1	0
57.2	0
57.3	0
57.4	0
57.5	0
57.6	0
57.7	0
57.8	0
57.9	0
58	0
58.1	0
58.2	0
58.3	0
58.4	0
58.5	0
58.6	0
58.7	0
58.8	0
58.9	0
59	0
59.1	0
59.2	0
59.3	0
59.4	0
59.5	0
59.6	0
59.7	0
59.8	0
59.9	0
60	0
60.1	0
60.2	0
60.3	0
60.4	0
60.5	0
60.6	0
60.7	0
60.8	0
60.9	0
61	0
61.1	0
61.2	0
61.3	0
61.4	0
61.5	0
61.6	0
61.7	0
61.8	0
61.9	0
62	0
62.1	0
62.2	0
62.3	0
62.4	0
62.5	0
62.6	0
62.7	0
62.8	0
62.9	0
63	0
63.1	0
63.2	0
63.3	0
63.4	0
63.5	0
63.6	0
63.7	0
63.8	0
63.9	0
64	0
64.1	0
64.2	0
64.3	0
64.4	0
64.5	0
64.6	0
64.7	0
64.8	0
64.9	0
65	0
65.1	0
65.2	0
65.3	0
65.4	0
65.5	0
65.6	0
65.7	0
65.8	0
65.9	0
66	0
66.1	0
66.2	0
66.3	0
66.4	0
66.5	0
66.6	0
66.7	0
66.8	0
66.9	0
67	0
67.1	0
67.2	0
67.3	0
67.4	0
67.5	0
67.6	0
67.7	0
67.8	0
67.9	0
68	0
68.1	0
68.2	0
68.3	0
68.4	0
68.5	0
68.6	0
68.7	0
68.8	0
68.9	0
69	0
69.1	0
69.2	0
69.3	0
69.4	0
69.5	0
69.6	0
69.7	0
69.8	0
69.9	0
70	0
70.1	0
70.2	0
70.3	0
70.4	0
70.5	0
70.6	0
70.7	0
70.8	0
70.9	0
71	0
71.1	0
71.2	0
71.3	0
71.4	0
71.5	0
71.6	0
71.7	0
71.8	0
71.9	0
72	0
72.1	0
72.2	0
72.3	0
72.4	0
72.5	0
72.6	0
72.7	0
72.8	0
72.9	0
73	0
73.1	0
73.2	0
73.3	0
73.4	0
73.5	0
73.6	0
73.7	0
73.8	0
73.9	0
74	0
74.1	0
74.2	0
74.3	0
74.4	0
74.5	0
74.6	0
74.7	0
74.8	0
74.9	0
75	0
75.1	0
75.2	0
75.3	0
75.4	0
75.5	0
75.6	0
75.7	0
75.8	0
75.9	0
76	0
76.1	0
76.2	0
76.3	0
76.4	0
76.5	0
76.6	0
76.7	0
76.8	0
76.9	0
77	0
77.1	0
77.2	0
77.3	0
77.4	0
77.5	0
77.6	0
77.7	0
77.8	0
77.9	0
78	0
78.1	0
78.2	0
78.3	0
78.4	0
78.5	0
78.6	0
78.7	0
78.8	0
78.9	0
79	0
79.1	0
79.2	0
79.3	0
79.4	0
79.5	0
79.6	0
79.7	0
79.8	0
79.9	0
80	0
80.1	0
80.2	0
80.3	0
80.4	0
80.5	0
80.6	0
80.7	0
80.8	0
80.9	0
81	0
81.1	0
81.2	0
81.3	0
81.4	0
81.5	0
81.6	0
81.7	0
81.8	0
81.9	0
82	0
82.1	0
82.2	0
82.3	0
82.4	0
82.5	0
82.6	0
82.7	0
82.8	0
82.9	0
83	0
83.1	0
83.2	0
83.3	0
83.4	0
83.5	0
83.6	0
83.7	0
83.8	0
83.9	0
84	0
84.1	0
84.2	0
84.3	0
84.4	0
84.5	0
84.6	0
84.7	0
84.8	0
84.9	0
85	0
85.1	0
85.2	0
85.3	0
85.4	0
85.5	0
85.6	0
85.7	0
85.8	0
85.9	0
86	0
86.1	0
86.2	0
86.3	0
86.4	0
86.5	0
86.6	0
86.7	0
86.8	0
86.9	0
87	0
87.1	0
87.2	0
87.3	0
87.4	0
87.5	0
87.6	0
87.7	0
87.8	0
87.9	0
88	0
88.1	0
88.2	0
88.3	0
88.4	0
88.5	0
88.6	0
88.7	0
88.8	0
88.9	0
89	0
89.1	0
89.2	0
89.3	0
89.4	0
89.5	0
89.6	0
89.7	0
89.8	0
89.9	0
90	0
90.1	0
90.2	0
90.3	0
90.4	0
90.5	0
90.6	0
90.7	0
90.8	0
90.9	0
91	0
91.1	0
91.2	0
91.3	0
91.4	0
91.5	0
91.6	0
91.7	0
91.8	0
91.9	0
92	0
92.1	0
92.2	0
92.3	0
92.4	0
92.5	0
92.6	0
92.7	0
92.8	0
92.9	0
93	0
93.1	0
93.2	0
93.3	0
93.4	0
93.5	0
93.6	0
93.7	0
93.8	0
93.9	0
94	0
94.1	0
94.2	0
94.3	0
94.4	0
94.5	0
94.6	0
94.7	0
94.8	0
94.9	0
95	0
95.1	0
95.2	0
95.3	0
95.4	0
95.5	0
95.6	0
95.7	0
95.8	0
95.9	0
96	0
96.1	0
96.2	0
96.3	0
96.4	0
96.5	0
96.6	0
96.7	0
96.8	0
96.9	0
97	0
97.1	0
97.2	0
97.3	0
97.4	0
97.5	0
97.6	0
97.7	0
97.8	0
97.9	0
98	0
98.1	0
98.2	0
98.3	0
98.4	0
98.5	0
98.6	0
98.7	0
98.8	0
98.9	0
99	0
99.1	0
99.2	0
99.3	0
99.4	0
99.5	0
99.6	0
99.7	0
99.8	0
99.9	0
100	0
100.1	0.00271429
100.2	0.00614286
100.3	0.00971429
100.4	0.013
100.5	0.0174286
100.6	0.0212857
100.7	0.0267143
100.8	0.0317143
100.9	0.0365714
101	0.0405714
101.1	0.0448571
101.2	0.0507143
101.3	0.056
101.4	0.0598571
101.5	0.0634286
101.6	0.0681429
101.7	0.0717143
101.8	0.0761429
101.9	0.08
102	0.0837143
102.1	0.0881429
102.2	0.0925714
102.3	0.0975714
102.4	0.101
102.5	0.104
102.6	0.107429
102.7	0.110714
102.8	0.114143
102.9	0.117857
103	0.123
103.1	0.126714
103.2	0.131286
103.3	0.135429
103.4	0.138857
103.5	0.144143
103.6	0.149571
103.7	0.152286
103.8	0.156571
103.9	0.161571
104	0.165
104.1	0.169429
104.2	0.174714
104.3	0.178429
104.4	0.181857
104.5	0.185
104.6	0.190143
104.7	0.193857
104.8	0.198429
104.9	0.201429
105	0.206143
105.1	0.209429
105.2	0.214143
105.3	0.217714
105.4	0.219714
105.5	0.222286
105.6	0.225143
105.7	0.228
105.8	0.231429
105.9	0.232857
106	0.236143
106.1	0.238714
106.2	0.241857
106.3	0.245429
106.4	0.248143
106.5	0.250714
106.6	0.254143
106.7	0.257
106.8	0.259714
106.9	0.263286
107	0.267714
107.1	0.270571
107.2	0.273429
107.3	0.276
107.4	0.278857
107.5	0.282286
107.6	0.285286
107.7	0.288571
107.8	0.291143
107.9	0.294429
108	0.297143
108.1	0.299
108.2	0.303
108.3	0.305143
108.4	0.307857
108.5	0.311857
108.6	0.315429
108.7	0.319857
108.8	0.323429
108.9	0.326571
109	0.329
109.1	0.331571
109.2	0.333286
109.3	0.335571
109.4	0.338429
109.5	0.341429
109.6	0.345
109.7	0.347286
109.8	0.350571
109.9	0.353286
110	0.356429
110.1	0.358286
110.2	0.361714
110.3	0.364429
110.4	0.367571
110.5	0.371429
110.6	0.373286
110.7	0.376
110.8	0.378857
110.9	0.381
111	0.383571
111.1	0.386429
111.2	0.388143
111.3	0.391143
111.4	0.395
111.5	0.396714
111.6	0.398143
111.7	0.400714
111.8	0.403857
111.9	0.406
112	0.408714
112.1	0.411286
112.2	0.414286
112.3	0.415429
112.4	0.418143
112.5	0.42
112.6	0.422429
112.7	0.424714
112.8	0.427857
112.9	0.430857
113	0.434
113.1	0.435286
113.2	0.438571
113.3	0.441
113.4	0.443714
113.5	0.445571
113.6	0.448429
113.7	0.450857
113.8	0.454286
113.9	0.456286
114	0.458571
114.1	0.460571
114.2	0.462286
114.3	0.465429
114.4	0.467143
114.5	0.47
114.6	0.470857
114.7	0.473571
114.8	0.475143
114.9	0.478286
115	0.479143
115.1	0.481
115.2	0.483714
115.3	0.485429
115.4	0.487286
115.5	0.490286
115.6	0.491714
115.7	0.493571
115.8	0.494857
115.9	0.496714
116	0.497571
116.1	0.500143
116.2	0.502429
116.3	0.505143
116.4	0.507571
116.5	0.509
116.6	0.512571
116.7	0.513571
116.8	0.513571
116.9	0.514429
117	0.517143
117.1	0.519
117.2	0.520857
117.3	0.521857
117.4	0.523429
117.5	0.524286
117.6	0.526571
117.7	0.528857
117.8	0.530857
117.9	0.531714
118	0.533857
118.1	0.535714
118.2	0.537429
118.3	0.539571
118.4	0.541714
118.5	0.542857
118.6	0.544857
118.7	0.546143
118.8	0.548
118.9	0.549429
119	0.551714
119.1	0.553286
119.2	0.556
119.3	0.557714
119.4	0.559714
119.5	0.561429
119.6	0.561857
119.7	0.563857
119.8	0.564429
119.9	0.566714
120	0.568
120.1	0.569429
120.2	0.572429
120.3	0.574429
120.4	0.574429
120.5	0.575429
120.6	0.576714
120.7	0.577714
120.8	0.579857
120.9	0.582286
121	0.583143
121.1	0.584714
121.2	0.586429
121.3	0.588
121.4	0.590143
121.5	0.591571
121.6	0.592571
121.7	0.594286
121.8	0.595571
121.9	0.596286
122	0.598
122.1	0.601143
122.2	0.601429
122.3	0.603
122.4	0.604714
122.5	0.606286
122.6	0.607286
122.7	0.609286
122.8	0.610571
122.9	0.612
123	0.613143
123.1	0.615143
123.2	0.617143
123.3	0.618
123.4	0.619286
123.5	0.620714
123.6	0.621143
123.7	0.622857
123.8	0.624286
123.9	0.625857
124	0.627714
124.1	0.63
124.2	0.631143
124.3	0.632
124.4	0.632714
124.5	0.633286
124.6	0.634286
124.7	0.635143
124.8	0.635286
124.9	0.636143
125	0.637286
125.1	0.64
125.2	0.641
125.3	0.642571
125.4	0.643857
125.5	0.645
125.6	0.646714
125.7	0.647429
125.8	0.649286
125.9	0.650714
126	0.652286
126.1	0.653714
126.2	0.654429
126.3	0.655714
126.4	0.657286
126.5	0.658857
126.6	0.661286
126.7	0.662571
126.8	0.663429
126.9	0.665286
127	0.666571
127.1	0.668
127.2	0.669429
127.3	0.67
127.4	0.670714
127.5	0.671286
127.6	0.672571
127.7	0.673714
127.8	0.675286
127.9	0.676
128	0.677
128.1	0.678
128.2	0.678857
128.3	0.679429
128.4	0.68
128.5	0.680857
128.6	0.681286
128.7	0.681143
128.8	0.682286
128.9	0.683
129	0.683286
129.1	0.684
129.2	0.685
129.3	0.684857
129.4	0.686429
129.5	0.687714
129.6	0.687857
129.7	0.688429
129.8	0.689857
129.9	0.690286
130	0.691
130.1	0.692143
130.2	0.693143
130.3	0.693
130.4	0.693
130.5	0.693714
130.6	0.695429
130.7	0.695857
130.8	0.697143
130.9	0.698143
131	0.698
131.1	0.699
131.2	0.7
131.3	0.701714
131.4	0.702
131.5	0.702857
131.6	0.703429
131.7	0.703429
131.8	0.703429
131.9	0.704
132	0.704857
132.1	0.705286
132.2	0.705429
132.3	0.706
132.4	0.707286
132.5	0.708
132.6	0.709429
132.7	0.709
132.8	0.709286
132.9	0.709143
133	0.709857
133.1	0.711143
133.2	0.712714
133.3	0.712286
133.4	0.712571
133.5	0.712857
133.6	0.713
133.7	0.713571
133.8	0.714714
133.9	0.715857
134	0.716429
134.1	0.717571
134.2	0.717714
134.3	0.719143
134.4	0.719
134.5	0.719429
134.6	0.719857
134.7	0.720429
134.8	0.72
134.9	0.721
135	0.721714
135.1	0.723143
135.2	0.724714
135.3	0.724286
135.4	0.724571
135.5	0.726714
135.6	0.727286
135.7	0.727714
135.8	0.729143
135.9	0.730571
136	0.732286
136.1	0.732571
136.2	0.733143
136.3	0.734571
136.4	0.735143
136.5	0.736143
136.6	0.737
136.7	0.736714
136.8	0.737714
136.9	0.737571
137	0.738714
137.1	0.739286
137.2	0.739286
137.3	0.739571
137.4	0.739857
137.5	0.740714
137.6	0.741857
137.7	0.743
137.8	0.744714
137.9	0.745857
138	0.746571
138.1	0.747
138.2	0.748
138.3	0.747857
138.4	0.748286
138.5	0.748857
138.6	0.748286
138.7	0.748
138.8	0.748714
138.9	0.75
139	0.750571
139.1	0.750857
139.2	0.751571
139.3	0.751714
139.4	0.751571
139.5	0.751286
139.6	0.752143
139.7	0.752286
139.8	0.752286
139.9	0.752286
140	0.753
140.1	0.753571
140.2	0.754143
140.3	0.754857
140.4	0.755571
140.5	0.756429
140.6	0.757429
140.7	0.758286
140.8	0.759
140.9	0.759143
141	0.758857
141.1	0.759
141.2	0.759286
141.3	0.759714
141.4	0.760429
141.5	0.760429
141.6	0.761143
141.7	0.761
141.8	0.761571
141.9	0.761857
142	0.762
142.1	0.761429
142.2	0.761
142.3	0.761429
142.4	0.762143
142.5	0.762857
142.6	0.763429
142.7	0.763
142.8	0.763286
142.9	0.762571
143	0.762857
143.1	0.763571
143.2	0.763571
143.3	0.763714
143.4	0.763429
143.5	0.763714
143.6	0.765
143.7	0.766857
143.8	0.767714
143.9	0.768143
144	0.769286
144.1	0.770143
144.2	0.771
144.3	0.771143
144.4	0.772
144.5	0.772
144.6	0.772714
144.7	0.772714
144.8	0.773571
144.9	0.775
145	0.775143
145.1	0.774857
145.2	0.775857
145.3	0.776571
145.4	0.776714
145.5	0.777286
145.6	0.777857
145.7	0.778286
145.8	0.778571
145.9	0.779429
146	0.779857
146.1	0.781571
146.2	0.781714
146.3	0.782286
146.4	0.782714
146.5	0.782857
146.6	0.783571
146.7	0.784143
146.8	0.784286
146.9	0.784429
147	0.784286
147.1	0.784286
147.2	0.784714
147.3	0.785143
147.4	0.785857
147.5	0.785714
147.6	0.786429
147.7	0.786571
147.8	0.786429
147.9	0.786571
148	0.787571
148.1	0.788143
148.2	0.789
148.3	0.789857
148.4	0.789857
148.5	0.789286
148.6	0.789429
148.7	0.788429
148.8	0.787857
148.9	0.788143
149	0.788714
149.1	0.788
149.2	0.788429
149.3	0.789143
149.4	0.789714
149.5	0.790286
149.6	0.789714
149.7	0.789857
149.8	0.79
149.9	0.791
150	0.791
150.1	0.790714
150.2	0.790857
150.3	0.791
150.4	0.790571
150.5	0.790857
150.6	0.791286
150.7	0.791857
150.8	0.792571
150.9	0.793143
151	0.793286
151.1	0.794143
151.2	0.794143
151.3	0.794143
151.4	0.794143
151.5	0.794571
151.6	0.794571
151.7	0.795286
151.8	0.795714
151.9	0.796143
152	0.796143
152.1	0.796714
152.2	0.796429
152.3	0.796857
152.4	0.796857
152.5	0.796571
152.6	0.797143
152.7	0.797
152.8	0.796286
152.9	0.796143
153	0.796714
153.1	0.796571
153.2	0.797286
153.3	0.797286
153.4	0.797571
153.5	0.798429
153.6	0.798
153.7	0.799857
153.8	0.8
153.9	0.799714
154	0.799714
154.1	0.800143
154.2	0.801143
154.3	0.801
154.4	0.801714
154.5	0.801571
154.6	0.801571
154.7	0.801286
154.8	0.801143
154.9	0.800571
155	0.801143
155.1	0.800429
155.2	0.801143
155.3	0.802429
155.4	0.802857
155.5	0.803571
155.6	0.803286
155.7	0.803286
155.8	0.804429
155.9	0.804286
156	0.805429
156.1	0.805714
156.2	0.805286
156.3	0.805143
156.4	0.805143
156.5	0.804857
156.6	0.805429
156.7	0.804857
156.8	0.804286
156.9	0.805143
157	0.805714
157.1	0.806
157.2	0.806
157.3	0.806571
157.4	0.806857
157.5	0.807
157.6	0.807286
157.7	0.807286
157.8	0.807571
157.9	0.808
158	0.808429
158.1	0.808714
158.2	0.808571
158.3	0.808857
158.4	0.808857
158.5	0.809143
158.6	0.809429
158.7	0.81
158.8	0.810429
158.9	0.810286
159	0.810571
159.1	0.811429
159.2	0.812429
159.3	0.812857
159.4	0.813
159.5	0.812714
159.6	0.812286
159.7	0.813
159.8	0.812857
159.9	0.813714
160	0.814571
160.1	0.815143
160.2	0.814857
160.3	0.815571
160.4	0.816143
160.5	0.815143
160.6	0.815429
160.7	0.816
160.8	0.816286
160.9	0.817571
161	0.817429
161.1	0.817714
161.2	0.817143
161.3	0.817857
161.4	0.817429
161.5	0.817714
161.6	0.817857
161.7	0.817714
161.8	0.817714
161.9	0.817714
162	0.818143
162.1	0.818857
162.2	0.818714
162.3	0.818571
162.4	0.817857
162.5	0.818429
162.6	0.819143
162.7	0.819429
162.8	0.819714
162.9	0.819571
163	0.82
163.1	0.820571
163.2	0.821
163.3	0.821143
163.4	0.820429
163.5	0.819857
163.6	0.82
163.7	0.820286
163.8	0.821
163.9	0.821143
164	0.820857
164.1	0.821571
164.2	0.822286
164.3	0.822714
164.4	0.822571
164.5	0.822429
164.6	0.822429
164.7	0.822143
164.8	0.822286
164.9	0.821714
165	0.821571
165.1	0.822
165.2	0.821857
165.3	0.821571
165.4	0.821571
165.5	0.821714
165.6	0.822714
165.7	0.822143
165.8	0.822857
165.9	0.822571
166	0.822143
166.1	0.822286
166.2	0.822857
166.3	0.822857
166.4	0.822571
166.5	0.823
166.6	0.823143
166.7	0.822857
166.8	0.822571
166.9	0.823143
167	0.823
167.1	0.823429
167.2	0.822571
167.3	0.823143
167.4	0.823714
167.5	0.823429
167.6	0.824571
167.7	0.824
167.8	0.824286
167.9	0.824571
168	0.825286
168.1	0.825571
168.2	0.825714
168.3	0.825714
168.4	0.825286
168.5	0.825
168.6	0.825429
168.7	0.825714
168.8	0.826429
168.9	0.826143
169	0.826143
169.1	0.825571
169.2	0.825714
169.3	0.825714
169.4	0.826429
169.5	0.827714
169.6	0.827857
169.7	0.827143
169.8	0.826571
169.9	0.826714
170	0.826857
170.1	0.826571
170.2	0.827143
170.3	0.827
170.4	0.827286
170.5	0.826714
170.6	0.826571
170.7	0.826429
170.8	0.826429
170.9	0.826429
171	0.826
171.1	0.825429
171.2	0.825571
171.3	0.825429
171.4	0.825286
171.5	0.825286
171.6	0.825714
171.7	0.826
171.8	0.825143
171.9	0.825
172	0.825429
172.1	0.824286
172.2	0.823714
172.3	0.823429
172.4	0.822714
172.5	0.822714
172.6	0.822857
172.7	0.822714
172.8	0.822714
172.9	0.822714
173	0.823
173.1	0.822429
173.2	0.823
173.3	0.822571
173.4	0.822714
173.5	0.823
173.6	0.822429
173.7	0.822571
173.8	0.822571
173.9	0.822857
174	0.822429
174.1	0.822714
174.2	0.823286
174.3	0.823714
174.4	0.823429
174.5	0.823
174.6	0.823857
174.7	0.823429
174.8	0.823429
174.9	0.823286
175	0.823429
175.1	0.823857
175.2	0.823857
175.3	0.823286
175.4	0.824
175.5	0.824429
175.6	0.824
175.7	0.823857
175.8	0.823857
175.9	0.823714
176	0.823143
176.1	0.824143
176.2	0.824429
176.3	0.823571
176.4	0.823857
176.5	0.824
176.6	0.823857
176.7	0.824
176.8	0.823429
176.9	0.823571
177	0.823429
177.1	0.823857
177.2	0.823429
177.3	0.824286
177.4	0.823429
177.5	0.823429
177.6	0.823857
177.7	0.824857
177.8	0.825
177.9	0.825714
178	0.825571
178.1	0.825286
178.2	0.825143
178.3	0.825571
178.4	0.825286
178.5	0.825429
178.6	0.825429
178.7	0.824429
178.8	0.824714
178.9	0.824286
179	0.823
179.1	0.823
179.2	0.822429
179.3	0.822
179.4	0.822143
179.5	0.821571
179.6	0.821286
179.7	0.822143
179.8	0.821429
179.9	0.820857
180	0.821286
180.1	0.821429
180.2	0.821143
180.3	0.821571
180.4	0.821714
180.5	0.821857
180.6	0.821714
180.7	0.822857
180.8	0.822857
180.9	0.822429
181	0.822714
181.1	0.822714
181.2	0.822571
181.3	0.822143
181.4	0.822857
181.5	0.822857
181.6	0.823714
181.7	0.823286
181.8	0.823714
181.9	0.823714
182	0.824429
182.1	0.824
182.2	0.824714
182.3	0.826
182.4	0.826
182.5	0.827143
182.6	0.826714
182.7	0.826857
182.8	0.826714
182.9	0.826571
183	0.826286
183.1	0.826143
183.2	0.827143
183.3	0.826714
183.4	0.826286
183.5	0.827143
183.6	0.827143
183.7	0.826286
183.8	0.825714
183.9	0.826143
184	0.826857
184.1	0.826286
184.2	0.826857
184.3	0.827286
184.4	0.827714
184.5	0.828571
184.6	0.829143
184.7	0.829286
184.8	0.829714
184.9	0.829143
185	0.829286
185.1	0.829714
185.2	0.829714
185.3	0.829143
185.4	0.829571
185.5	0.829714
185.6	0.830143
185.7	0.829429
185.8	0.829286
185.9	0.829429
186	0.829143
186.1	0.828429
186.2	0.827571
186.3	0.827571
186.4	0.827714
186.5	0.828
186.6	0.828429
186.7	0.828429
186.8	0.828429
186.9	0.828571
187	0.828143
187.1	0.828714
187.2	0.828857
187.3	0.828714
187.4	0.827714
187.5	0.828
187.6	0.827286
187.7	0.827571
187.8	0.827714
187.9	0.827714
188	0.827714
188.1	0.826857
188.2	0.827429
188.3	0.826714
188.4	0.826857
188.5	0.826857
188.6	0.826571
188.7	0.826286
188.8	0.826
188.9	0.826714
189	0.826
189.1	0.825571
189.2	0.826
189.3	0.826143
189.4	0.827571
189.5	0.827143
189.6	0.827143
189.7	0.826571
189.8	0.826714
189.9	0.826571
190	0.825571
190.1	0.824857
190.2	0.824857
190.3	0.824286
190.4	0.824571
190.5	0.824571
190.6	0.824857
190.7	0.825
190.8	0.824143
190.9	0.824286
191	0.824571
191.1	0.823571
191.2	0.823857
191.3	0.824714
191.4	0.824429
191.5	0.824714
191.6	0.825571
191.7	0.825714
191.8	0.825857
191.9	0.826714
192	0.827
192.1	0.826143
192.2	0.825714
192.3	0.826571
192.4	0.826571
192.5	0.826714
192.6	0.826714
192.7	0.826714
192.8	0.826571
192.9	0.826714
193	0.826286
193.1	0.827
193.2	0.827571
193.3	0.827429
193.4	0.827429
193.5	0.828
193.6	0.828
193.7	0.828143
193.8	0.828143
193.9	0.828286
194	0.827714
194.1	0.827286
194.2	0.828
194.3	0.828714
194.4	0.829143
194.5	0.828429
194.6	0.829429
194.7	0.828857
194.8	0.829
194.9	0.827714
195	0.828
195.1	0.828714
195.2	0.828571
195.3	0.829
195.4	0.828714
195.5	0.829
195.6	0.828714
195.7	0.828571
195.8	0.828714
195.9	0.829
196	0.829
196.1	0.828143
196.2	0.828143
196.3	0.827571
196.4	0.827429
196.5	0.827571
196.6	0.827714
196.7	0.827143
196.8	0.827714
196.9	0.827429
197	0.828143
197.1	0.827429
197.2	0.826714
197.3	0.826714
197.4	0.826429
197.5	0.825429
197.6	0.825
197.7	0.825286
197.8	0.825857
197.9	0.825714
198	0.826429
198.1	0.826
198.2	0.825857
198.3	0.825857
198.4	0.825714
198.5	0.825857
198.6	0.825429
198.7	0.825286
198.8	0.825143
198.9	0.825714
199	0.825571
199.1	0.824571
199.2	0.825429
199.3	0.825571
199.4	0.825429
199.5	0.824286
199.6	0.825
199.7	0.825
199.8	0.824714
199.9	0.824429
200	0.825
[truncated: 14,000 more rows]
