# Supplementary material for: Bayesian inference of kinetic schemes for ion channels by Kalman filtering
Source: eLife journal article supplement (doi:10.7554/elife.62714), 2022-05-04
Supplement: fig4-data2 [file 1_Sim_N_10000_Fluor_MW.xlsx]

## Sheet: Tabelle1
0.1	0
0.2	0
0.3	0
0.4	0
0.5	0
0.6	0
0.7	0
0.8	0
0.9	0
1	0
1.1	0
1.2	0
1.3	0
1.4	0
1.5	0
1.6	0
1.7	0
1.8	0
1.9	0
2	0
2.1	0
2.2	0
2.3	0
2.4	0
2.5	0
2.6	0
2.7	0
2.8	0
2.9	0
3	0
3.1	0
3.2	0
3.3	0
3.4	0
3.5	0
3.6	0
3.7	0
3.8	0
3.9	0
4	0
4.1	0
4.2	0
4.3	0
4.4	0
4.5	0
4.6	0
4.7	0
4.8	0
4.9	0
5	0
5.1	0
5.2	0
5.3	0
5.4	0
5.5	0
5.6	0
5.7	0
5.8	0
5.9	0
6	0
6.1	0
6.2	0
6.3	0
6.4	0
6.5	0
6.6	0
6.7	0
6.8	0
6.9	0
7	0
7.1	0
7.2	0
7.3	0
7.4	0
7.5	0
7.6	0
7.7	0
7.8	0
7.9	0
8	0
8.1	0
8.2	0
8.3	0
8.4	0
8.5	0
8.6	0
8.7	0
8.8	0
8.9	0
9	0
9.1	0
9.2	0
9.3	0
9.4	0
9.5	0
9.6	0
9.7	0
9.8	0
9.9	0
10	0
10.1	0
10.2	0
10.3	0
10.4	0
10.5	0
10.6	0
10.7	0
10.8	0
10.9	0
11	0
11.1	0
11.2	0
11.3	0
11.4	0
11.5	0
11.6	0
11.7	0
11.8	0
11.9	0
12	0
12.1	0
12.2	0
12.3	0
12.4	0
12.5	0
12.6	0
12.7	0
12.8	0
12.9	0
13	0
13.1	0
13.2	0
13.3	0
13.4	0
13.5	0
13.6	0
13.7	0
13.8	0
13.9	0
14	0
14.1	0
14.2	0
14.3	0
14.4	0
14.5	0
14.6	0
14.7	0
14.8	0
14.9	0
15	0
15.1	0
15.2	0
15.3	0
15.4	0
15.5	0
15.6	0
15.7	0
15.8	0
15.9	0
16	0
16.1	0
16.2	0
16.3	0
16.4	0
16.5	0
16.6	0
16.7	0
16.8	0
16.9	0
17	0
17.1	0
17.2	0
17.3	0
17.4	0
17.5	0
17.6	0
17.7	0
17.8	0
17.9	0
18	0
18.1	0
18.2	0
18.3	0
18.4	0
18.5	0
18.6	0
18.7	0
18.8	0
18.9	0
19	0
19.1	0
19.2	0
19.3	0
19.4	0
19.5	0
19.6	0
19.7	0
19.8	0
19.9	0
20	0
20.1	0
20.2	0
20.3	0
20.4	0
20.5	0
20.6	0
20.7	0
20.8	0
20.9	0
21	0
21.1	0
21.2	0
21.3	0
21.4	0
21.5	0
21.6	0
21.7	0
21.8	0
21.9	0
22	0
22.1	0
22.2	0
22.3	0
22.4	0
22.5	0
22.6	0
22.7	0
22.8	0
22.9	0
23	0
23.1	0
23.2	0
23.3	0
23.4	0
23.5	0
23.6	0
23.7	0
23.8	0
23.9	0
24	0
24.1	0
24.2	0
24.3	0
24.4	0
24.5	0
24.6	0
24.7	0
24.8	0
24.9	0
25	0
25.1	0
25.2	0
25.3	0
25.4	0
25.5	0
25.6	0
25.7	0
25.8	0
25.9	0
26	0
26.1	0
26.2	0
26.3	0
26.4	0
26.5	0
26.6	0
26.7	0
26.8	0
26.9	0
27	0
27.1	0
27.2	0
27.3	0
27.4	0
27.5	0
27.6	0
27.7	0
27.8	0
27.9	0
28	0
28.1	0
28.2	0
28.3	0
28.4	0
28.5	0
28.6	0
28.7	0
28.8	0
28.9	0
29	0
29.1	0
29.2	0
29.3	0
29.4	0
29.5	0
29.6	0
29.7	0
29.8	0
29.9	0
30	0
30.1	0
30.2	0
30.3	0
30.4	0
30.5	0
30.6	0
30.7	0
30.8	0
30.9	0
31	0
31.1	0
31.2	0
31.3	0
31.4	0
31.5	0
31.6	0
31.7	0
31.8	0
31.9	0
32	0
32.1	0
32.2	0
32.3	0
32.4	0
32.5	0
32.6	0
32.7	0
32.8	0
32.9	0
33	0
33.1	0
33.2	0
33.3	0
33.4	0
33.5	0
33.6	0
33.7	0
33.8	0
33.9	0
34	0
34.1	0
34.2	0
34.3	0
34.4	0
34.5	0
34.6	0
34.7	0
34.8	0
34.9	0
35	0
35.1	0
35.2	0
35.3	0
35.4	0
35.5	0
35.6	0
35.7	0
35.8	0
35.9	0
36	0
36.1	0
36.2	0
36.3	0
36.4	0
36.5	0
36.6	0
36.7	0
36.8	0
36.9	0
37	0
37.1	0
37.2	0
37.3	0
37.4	0
37.5	0
37.6	0
37.7	0
37.8	0
37.9	0
38	0
38.1	0
38.2	0
38.3	0
38.4	0
38.5	0
38.6	0
38.7	0
38.8	0
38.9	0
39	0
39.1	0
39.2	0
39.3	0
39.4	0
39.5	0
39.6	0
39.7	0
39.8	0
39.9	0
40	0
40.1	0
40.2	0
40.3	0
40.4	0
40.5	0
40.6	0
40.7	0
40.8	0
40.9	0
41	0
41.1	0
41.2	0
41.3	0
41.4	0
41.5	0
41.6	0
41.7	0
41.8	0
41.9	0
42	0
42.1	0
42.2	0
42.3	0
42.4	0
42.5	0
42.6	0
42.7	0
42.8	0
42.9	0
43	0
43.1	0
43.2	0
43.3	0
43.4	0
43.5	0
43.6	0
43.7	0
43.8	0
43.9	0
44	0
44.1	0
44.2	0
44.3	0
44.4	0
44.5	0
44.6	0
44.7	0
44.8	0
44.9	0
45	0
45.1	0
45.2	0
45.3	0
45.4	0
45.5	0
45.6	0
45.7	0
45.8	0
45.9	0
46	0
46.1	0
46.2	0
46.3	0
46.4	0
46.5	0
46.6	0
46.7	0
46.8	0
46.9	0
47	0
47.1	0
47.2	0
47.3	0
47.4	0
47.5	0
47.6	0
47.7	0
47.8	0
47.9	0
48	0
48.1	0
48.2	0
48.3	0
48.4	0
48.5	0
48.6	0
48.7	0
48.8	0
48.9	0
49	0
49.1	0
49.2	0
49.3	0
49.4	0
49.5	0
49.6	0
49.7	0
49.8	0
49.9	0
50	0
50.1	0
50.2	0
50.3	0
50.4	0
50.5	0
50.6	0
50.7	0
50.8	0
50.9	0
51	0
51.1	0
51.2	0
51.3	0
51.4	0
51.5	0
51.6	0
51.7	0
51.8	0
51.9	0
52	0
52.1	0
52.2	0
52.3	0
52.4	0
52.5	0
52.6	0
52.7	0
52.8	0
52.9	0
53	0
53.1	0
53.2	0
53.3	0
53.4	0
53.5	0
53.6	0
53.7	0
53.8	0
53.9	0
54	0
54.1	0
54.2	0
54.3	0
54.4	0
54.5	0
54.6	0
54.7	0
54.8	0
54.9	0
55	0
55.1	0
55.2	0
55.3	0
55.4	0
55.5	0
55.6	0
55.7	0
55.8	0
55.9	0
56	0
56.1	0
56.2	0
56.3	0
56.4	0
56.5	0
56.6	0
56.7	0
56.8	0
56.9	0
57	0
57.1	0
57.2	0
57.3	0
57.4	0
57.5	0
57.6	0
57.7	0
57.8	0
57.9	0
58	0
58.1	0
58.2	0
58.3	0
58.4	0
58.5	0
58.6	0
58.7	0
58.8	0
58.9	0
59	0
59.1	0
59.2	0
59.3	0
59.4	0
59.5	0
59.6	0
59.7	0
59.8	0
59.9	0
60	0
60.1	0
60.2	0
60.3	0
60.4	0
60.5	0
60.6	0
60.7	0
60.8	0
60.9	0
61	0
61.1	0
61.2	0
61.3	0
61.4	0
61.5	0
61.6	0
61.7	0
61.8	0
61.9	0
62	0
62.1	0
62.2	0
62.3	0
62.4	0
62.5	0
62.6	0
62.7	0
62.8	0
62.9	0
63	0
63.1	0
63.2	0
63.3	0
63.4	0
63.5	0
63.6	0
63.7	0
63.8	0
63.9	0
64	0
64.1	0
64.2	0
64.3	0
64.4	0
64.5	0
64.6	0
64.7	0
64.8	0
64.9	0
65	0
65.1	0
65.2	0
65.3	0
65.4	0
65.5	0
65.6	0
65.7	0
65.8	0
65.9	0
66	0
66.1	0
66.2	0
66.3	0
66.4	0
66.5	0
66.6	0
66.7	0
66.8	0
66.9	0
67	0
67.1	0
67.2	0
67.3	0
67.4	0
67.5	0
67.6	0
67.7	0
67.8	0
67.9	0
68	0
68.1	0
68.2	0
68.3	0
68.4	0
68.5	0
68.6	0
68.7	0
68.8	0
68.9	0
69	0
69.1	0
69.2	0
69.3	0
69.4	0
69.5	0
69.6	0
69.7	0
69.8	0
69.9	0
70	0
70.1	0
70.2	0
70.3	0
70.4	0
70.5	0
70.6	0
70.7	0
70.8	0
70.9	0
71	0
71.1	0
71.2	0
71.3	0
71.4	0
71.5	0
71.6	0
71.7	0
71.8	0
71.9	0
72	0
72.1	0
72.2	0
72.3	0
72.4	0
72.5	0
72.6	0
72.7	0
72.8	0
72.9	0
73	0
73.1	0
73.2	0
73.3	0
73.4	0
73.5	0
73.6	0
73.7	0
73.8	0
73.9	0
74	0
74.1	0
74.2	0
74.3	0
74.4	0
74.5	0
74.6	0
74.7	0
74.8	0
74.9	0
75	0
75.1	0
75.2	0
75.3	0
75.4	0
75.5	0
75.6	0
75.7	0
75.8	0
75.9	0
76	0
76.1	0
76.2	0
76.3	0
76.4	0
76.5	0
76.6	0
76.7	0
76.8	0
76.9	0
77	0
77.1	0
77.2	0
77.3	0
77.4	0
77.5	0
77.6	0
77.7	0
77.8	0
77.9	0
78	0
78.1	0
78.2	0
78.3	0
78.4	0
78.5	0
78.6	0
78.7	0
78.8	0
78.9	0
79	0
79.1	0
79.2	0
79.3	0
79.4	0
79.5	0
79.6	0
79.7	0
79.8	0
79.9	0
80	0
80.1	0
80.2	0
80.3	0
80.4	0
80.5	0
80.6	0
80.7	0
80.8	0
80.9	0
81	0
81.1	0
81.2	0
81.3	0
81.4	0
81.5	0
81.6	0
81.7	0
81.8	0
81.9	0
82	0
82.1	0
82.2	0
82.3	0
82.4	0
82.5	0
82.6	0
82.7	0
82.8	0
82.9	0
83	0
83.1	0
83.2	0
83.3	0
83.4	0
83.5	0
83.6	0
83.7	0
83.8	0
83.9	0
84	0
84.1	0
84.2	0
84.3	0
84.4	0
84.5	0
84.6	0
84.7	0
84.8	0
84.9	0
85	0
85.1	0
85.2	0
85.3	0
85.4	0
85.5	0
85.6	0
85.7	0
85.8	0
85.9	0
86	0
86.1	0
86.2	0
86.3	0
86.4	0
86.5	0
86.6	0
86.7	0
86.8	0
86.9	0
87	0
87.1	0
87.2	0
87.3	0
87.4	0
87.5	0
87.6	0
87.7	0
87.8	0
87.9	0
88	0
88.1	0
88.2	0
88.3	0
88.4	0
88.5	0
88.6	0
88.7	0
88.8	0
88.9	0
89	0
89.1	0
89.2	0
89.3	0
89.4	0
89.5	0
89.6	0
89.7	0
89.8	0
89.9	0
90	0
90.1	0
90.2	0
90.3	0
90.4	0
90.5	0
90.6	0
90.7	0
90.8	0
90.9	0
91	0
91.1	0
91.2	0
91.3	0
91.4	0
91.5	0
91.6	0
91.7	0
91.8	0
91.9	0
92	0
92.1	0
92.2	0
92.3	0
92.4	0
92.5	0
92.6	0
92.7	0
92.8	0
92.9	0
93	0
93.1	0
93.2	0
93.3	0
93.4	0
93.5	0
93.6	0
93.7	0
93.8	0
93.9	0
94	0
94.1	0
94.2	0
94.3	0
94.4	0
94.5	0
94.6	0
94.7	0
94.8	0
94.9	0
95	0
95.1	0
95.2	0
95.3	0
95.4	0
95.5	0
95.6	0
95.7	0
95.8	0
95.9	0
96	0
96.1	0
96.2	0
96.3	0
96.4	0
96.5	0
96.6	0
96.7	0
96.8	0
96.9	0
97	0
97.1	0
97.2	0
97.3	0
97.4	0
97.5	0
97.6	0
97.7	0
97.8	0
97.9	0
98	0
98.1	0
98.2	0
98.3	0
98.4	0
98.5	0
98.6	0
98.7	0
98.8	0
98.9	0
99	0
99.1	0
99.2	0
99.3	0
99.4	0
99.5	0
99.6	0
99.7	0
99.8	0
99.9	0
100	0
100.1	0.8933
100.2	0.97445
100.3	0.9853
100.4	0.98715
100.5	0.9866
100.6	0.98835
100.7	0.98785
100.8	0.9878
100.9	0.98835
101	0.9875
101.1	0.98905
101.2	0.98935
101.3	0.98835
101.4	0.9882
101.5	0.98875
101.6	0.9894
101.7	0.9886
101.8	0.9883
101.9	0.9887
102	0.98725
102.1	0.9882
102.2	0.9877
102.3	0.98845
102.4	0.9887
102.5	0.98815
102.6	0.98855
102.7	0.98915
102.8	0.9897
102.9	0.99
103	0.9884
103.1	0.99035
103.2	0.98945
103.3	0.98945
103.4	0.98985
103.5	0.98905
103.6	0.9897
103.7	0.98865
103.8	0.99025
103.9	0.9895
104	0.9903
104.1	0.9904
104.2	0.989
104.3	0.9899
104.4	0.9899
104.5	0.98945
104.6	0.9903
104.7	0.99
104.8	0.98945
104.9	0.98905
105	0.9907
105.1	0.9903
105.2	0.9915
105.3	0.98925
105.4	0.9898
105.5	0.98995
105.6	0.98975
105.7	0.9901
105.8	0.9894
105.9	0.9909
106	0.99115
106.1	0.99025
106.2	0.9893
106.3	0.9897
106.4	0.99175
106.5	0.9902
106.6	0.9915
106.7	0.99115
106.8	0.99105
106.9	0.9912
107	0.9907
107.1	0.9908
107.2	0.9901
107.3	0.99065
107.4	0.9908
107.5	0.99125
107.6	0.99105
107.7	0.99205
107.8	0.9913
107.9	0.99185
108	0.9905
108.1	0.9902
108.2	0.99165
108.3	0.99205
108.4	0.9921
108.5	0.9901
108.6	0.9912
108.7	0.9922
108.8	0.99065
108.9	0.99075
109	0.992
109.1	0.992
109.2	0.99075
109.3	0.99065
109.4	0.99195
109.5	0.99235
109.6	0.9927
109.7	0.99295
109.8	0.99145
109.9	0.99165
110	0.9934
110.1	0.9916
110.2	0.99225
110.3	0.99225
110.4	0.99275
110.5	0.99245
110.6	0.99295
110.7	0.9932
110.8	0.9925
110.9	0.99165
111	0.9924
111.1	0.99305
111.2	0.99275
111.3	0.99235
111.4	0.9928
111.5	0.9924
111.6	0.99265
111.7	0.99295
111.8	0.99215
111.9	0.9924
112	0.9926
112.1	0.99305
112.2	0.9924
112.3	0.992
112.4	0.99275
112.5	0.9922
112.6	0.99245
112.7	0.9926
112.8	0.99165
112.9	0.9927
113	0.99195
113.1	0.9922
113.2	0.9936
113.3	0.99255
113.4	0.9927
113.5	0.99335
113.6	0.99295
113.7	0.99205
113.8	0.9929
113.9	0.99335
114	0.9941
114.1	0.99275
114.2	0.99365
114.3	0.99365
114.4	0.99325
114.5	0.99365
114.6	0.9934
114.7	0.9933
114.8	0.9933
114.9	0.9936
115	0.99285
115.1	0.99325
115.2	0.99345
115.3	0.9937
115.4	0.9933
115.5	0.994
115.6	0.99315
115.7	0.99205
115.8	0.9932
115.9	0.99285
116	0.9936
116.1	0.99385
116.2	0.99335
116.3	0.9935
116.4	0.9936
116.5	0.99435
116.6	0.9931
116.7	0.9931
116.8	0.9939
116.9	0.99335
117	0.9939
117.1	0.99425
117.2	0.9954
117.3	0.99435
117.4	0.99495
117.5	0.9942
117.6	0.9947
117.7	0.993
117.8	0.99405
117.9	0.9935
118	0.9944
118.1	0.99435
118.2	0.99395
118.3	0.99345
118.4	0.9949
118.5	0.9936
118.6	0.9927
118.7	0.9946
118.8	0.99455
118.9	0.9945
119	0.9944
119.1	0.9944
119.2	0.9941
119.3	0.994
119.4	0.99375
119.5	0.994
119.6	0.99355
119.7	0.99395
119.8	0.9945
119.9	0.99405
120	0.99345
120.1	0.99455
120.2	0.9943
120.3	0.99415
120.4	0.995
120.5	0.99415
120.6	0.9951
120.7	0.99425
120.8	0.9941
120.9	0.99505
121	0.99525
121.1	0.99445
121.2	0.995
121.3	0.9944
121.4	0.9949
121.5	0.9947
121.6	0.995
121.7	0.9946
121.8	0.99545
121.9	0.9948
122	0.99465
122.1	0.9945
122.2	0.9954
122.3	0.9947
122.4	0.9954
122.5	0.99545
122.6	0.99575
122.7	0.99545
122.8	0.9949
122.9	0.9949
123	0.99415
123.1	0.99435
123.2	0.9952
123.3	0.99535
123.4	0.9947
123.5	0.99505
123.6	0.9952
123.7	0.99475
123.8	0.99555
123.9	0.99575
124	0.9954
124.1	0.9951
124.2	0.9958
124.3	0.9955
124.4	0.99515
124.5	0.99495
124.6	0.99545
124.7	0.9952
124.8	0.9959
124.9	0.9959
125	0.996
125.1	0.99515
125.2	0.99565
125.3	0.9942
125.4	0.99535
125.5	0.99625
125.6	0.9956
125.7	0.99495
125.8	0.9954
125.9	0.99565
126	0.9954
126.1	0.9949
126.2	0.9953
126.3	0.9962
126.4	0.99505
126.5	0.99585
126.6	0.99565
126.7	0.99495
126.8	0.99555
126.9	0.9952
127	0.99615
127.1	0.99565
127.2	0.99665
127.3	0.99585
127.4	0.99565
127.5	0.9962
127.6	0.9955
127.7	0.9957
127.8	0.9948
127.9	0.9953
128	0.99565
128.1	0.99575
128.2	0.9954
128.3	0.9953
128.4	0.9957
128.5	0.9957
128.6	0.9959
128.7	0.996
128.8	0.996
128.9	0.99495
129	0.99525
129.1	0.99575
129.2	0.99525
129.3	0.9963
129.4	0.99585
129.5	0.99695
129.6	0.99655
129.7	0.996
129.8	0.9962
129.9	0.9963
130	0.99605
130.1	0.99615
130.2	0.9951
130.3	0.99645
130.4	0.9956
130.5	0.99595
130.6	0.9953
130.7	0.9967
130.8	0.9967
130.9	0.99625
131	0.9966
131.1	0.9961
131.2	0.9961
131.3	0.99675
131.4	0.99575
131.5	0.9962
131.6	0.9962
131.7	0.99645
131.8	0.99585
131.9	0.99625
132	0.9968
132.1	0.99615
132.2	0.99655
132.3	0.99665
132.4	0.99715
132.5	0.99655
132.6	0.9969
132.7	0.9969
132.8	0.99645
132.9	0.9965
133	0.9974
133.1	0.99675
133.2	0.99655
133.3	0.99625
133.4	0.9965
133.5	0.99635
133.6	0.99625
133.7	0.9954
133.8	0.99685
133.9	0.9954
134	0.99625
134.1	0.99675
134.2	0.99675
134.3	0.9968
134.4	0.9964
134.5	0.9974
134.6	0.9971
134.7	0.9969
134.8	0.99715
134.9	0.99605
135	0.9967
135.1	0.99685
135.2	0.9966
135.3	0.9966
135.4	0.99695
135.5	0.99645
135.6	0.9953
135.7	0.99635
135.8	0.9962
135.9	0.99625
136	0.9965
136.1	0.99705
136.2	0.9965
136.3	0.9964
136.4	0.99655
136.5	0.99655
136.6	0.9964
136.7	0.99775
136.8	0.9968
136.9	0.99675
137	0.99685
137.1	0.9966
137.2	0.9967
137.3	0.9966
137.4	0.99705
137.5	0.9966
137.6	0.997
137.7	0.99645
137.8	0.99665
137.9	0.99585
138	0.99675
138.1	0.9964
138.2	0.99695
138.3	0.99685
138.4	0.99655
138.5	0.997
138.6	0.997
138.7	0.9972
138.8	0.9963
138.9	0.99625
139	0.99745
139.1	0.9962
139.2	0.99665
139.3	0.9968
139.4	0.99675
139.5	0.9968
139.6	0.99665
139.7	0.99635
139.8	0.99645
139.9	0.9968
140	0.99665
140.1	0.99695
140.2	0.99705
140.3	0.99655
140.4	0.9969
140.5	0.99685
140.6	0.99695
140.7	0.99745
140.8	0.99745
140.9	0.9968
141	0.99705
141.1	0.9974
141.2	0.9971
141.3	0.9974
141.4	0.99685
141.5	0.99685
141.6	0.9967
141.7	0.997
141.8	0.99705
141.9	0.99725
142	0.99705
142.1	0.99735
142.2	0.997
142.3	0.9967
142.4	0.9976
142.5	0.99755
142.6	0.99745
142.7	0.9969
142.8	0.99685
142.9	0.99665
143	0.99735
143.1	0.99625
143.2	0.9967
143.3	0.9974
143.4	0.99735
143.5	0.997
143.6	0.99695
143.7	0.99705
143.8	0.9975
143.9	0.99675
144	0.9969
144.1	0.9976
144.2	0.99705
144.3	0.99705
144.4	0.99715
144.5	0.9976
144.6	0.9974
144.7	0.99705
144.8	0.99735
144.9	0.9967
145	0.99715
145.1	0.997
145.2	0.9974
145.3	0.99705
145.4	0.9976
145.5	0.99705
145.6	0.99785
145.7	0.99675
145.8	0.99675
145.9	0.9971
146	0.9969
146.1	0.99745
146.2	0.9975
146.3	0.99725
146.4	0.9971
146.5	0.99705
146.6	0.99735
146.7	0.99675
146.8	0.9974
146.9	0.997
147	0.99615
147.1	0.99715
147.2	0.99745
147.3	0.99645
147.4	0.9982
147.5	0.99815
147.6	0.99785
147.7	0.99705
147.8	0.99735
147.9	0.99745
148	0.9974
148.1	0.99695
148.2	0.9968
148.3	0.99715
148.4	0.997
148.5	0.99725
148.6	0.9968
148.7	0.99755
148.8	0.99775
148.9	0.9977
149	0.99735
149.1	0.99775
149.2	0.99785
149.3	0.9975
149.4	0.9973
149.5	0.99755
149.6	0.99645
149.7	0.99735
149.8	0.9977
149.9	0.9977
150	0.99765
150.1	0.9974
150.2	0.9969
150.3	0.99665
150.4	0.99735
150.5	0.99715
150.6	0.9973
150.7	0.9973
150.8	0.997
150.9	0.9972
151	0.99695
151.1	0.9968
151.2	0.9975
151.3	0.9975
151.4	0.99685
151.5	0.9971
151.6	0.9967
151.7	0.99785
151.8	0.99755
151.9	0.99755
152	0.9979
152.1	0.99795
152.2	0.99805
152.3	0.99815
152.4	0.9976
152.5	0.9979
152.6	0.99785
152.7	0.99775
152.8	0.998
152.9	0.99795
153	0.9973
153.1	0.99785
153.2	0.9972
153.3	0.9968
153.4	0.99695
153.5	0.99755
153.6	0.99755
153.7	0.99745
153.8	0.9979
153.9	0.99785
154	0.9973
154.1	0.9975
154.2	0.99745
154.3	0.99745
154.4	0.9971
154.5	0.9971
154.6	0.99705
154.7	0.99695
154.8	0.99765
154.9	0.99765
155	0.9968
155.1	0.997
155.2	0.99745
155.3	0.997
155.4	0.99755
155.5	0.99735
155.6	0.9981
155.7	0.9983
155.8	0.99795
155.9	0.9983
156	0.9973
156.1	0.99725
156.2	0.998
156.3	0.99805
156.4	0.9979
156.5	0.99795
156.6	0.9977
156.7	0.99745
156.8	0.99715
156.9	0.9974
157	0.9976
157.1	0.9973
157.2	0.9976
157.3	0.99745
157.4	0.9976
157.5	0.99695
157.6	0.9971
157.7	0.99775
157.8	0.99845
157.9	0.99725
158	0.9973
158.1	0.99745
158.2	0.9975
158.3	0.99795
158.4	0.9976
158.5	0.9978
158.6	0.99795
158.7	0.9973
158.8	0.9973
158.9	0.9972
159	0.9982
159.1	0.99765
159.2	0.99805
159.3	0.99765
159.4	0.99815
159.5	0.99765
159.6	0.998
159.7	0.9984
159.8	0.9976
159.9	0.99725
160	0.9979
160.1	0.99725
160.2	0.9975
160.3	0.9983
160.4	0.9978
160.5	0.99795
160.6	0.9977
160.7	0.9974
160.8	0.9977
160.9	0.9979
161	0.99755
161.1	0.99765
161.2	0.99725
161.3	0.99825
161.4	0.99775
161.5	0.9978
161.6	0.9978
161.7	0.99765
161.8	0.99755
161.9	0.99755
162	0.9974
162.1	0.9977
162.2	0.9981
162.3	0.99815
162.4	0.9977
162.5	0.9982
162.6	0.9983
162.7	0.998
162.8	0.9978
162.9	0.99745
163	0.99785
163.1	0.9976
163.2	0.9981
163.3	0.99795
163.4	0.9975
163.5	0.99725
163.6	0.99805
163.7	0.9979
163.8	0.9974
163.9	0.99765
164	0.99735
164.1	0.9976
164.2	0.9977
164.3	0.99805
164.4	0.99775
164.5	0.99785
164.6	0.9979
164.7	0.99775
164.8	0.9972
164.9	0.9976
165	0.99835
165.1	0.9988
165.2	0.9976
165.3	0.99735
165.4	0.99825
165.5	0.9981
165.6	0.99765
165.7	0.9975
165.8	0.99785
165.9	0.99745
166	0.99745
166.1	0.998
166.2	0.9979
166.3	0.9973
166.4	0.99805
166.5	0.99735
166.6	0.997
166.7	0.9979
166.8	0.99715
166.9	0.99755
167	0.99825
167.1	0.99755
167.2	0.9978
167.3	0.99785
167.4	0.99775
167.5	0.99795
167.6	0.9978
167.7	0.99835
167.8	0.99735
167.9	0.99785
168	0.99785
168.1	0.99805
168.2	0.99745
168.3	0.9977
168.4	0.9981
168.5	0.9978
168.6	0.99795
168.7	0.99785
168.8	0.99765
168.9	0.99755
169	0.99785
169.1	0.99775
169.2	0.99775
169.3	0.9978
169.4	0.9978
169.5	0.998
169.6	0.9974
169.7	0.9979
169.8	0.9976
169.9	0.9977
170	0.9978
170.1	0.99825
170.2	0.99785
170.3	0.99755
170.4	0.99785
170.5	0.9974
170.6	0.99765
170.7	0.997
170.8	0.9972
170.9	0.9981
171	0.99755
171.1	0.99795
171.2	0.99815
171.3	0.9982
171.4	0.99715
171.5	0.9983
171.6	0.9985
171.7	0.99745
171.8	0.99715
171.9	0.99775
172	0.99795
172.1	0.99825
172.2	0.99775
172.3	0.9974
172.4	0.99745
172.5	0.998
172.6	0.99755
172.7	0.998
172.8	0.99745
172.9	0.99665
173	0.9972
173.1	0.99725
173.2	0.99735
173.3	0.9978
173.4	0.9976
173.5	0.9972
173.6	0.99745
173.7	0.998
173.8	0.9977
173.9	0.9973
174	0.99685
174.1	0.99785
174.2	0.9978
174.3	0.9982
174.4	0.9979
174.5	0.99785
174.6	0.9973
174.7	0.9979
174.8	0.99765
174.9	0.99785
175	0.99755
175.1	0.99775
175.2	0.99855
175.3	0.99815
175.4	0.9981
175.5	0.99785
175.6	0.99795
175.7	0.99765
175.8	0.9977
175.9	0.99795
176	0.99765
176.1	0.99795
176.2	0.9978
176.3	0.9974
176.4	0.9971
176.5	0.9974
176.6	0.9976
176.7	0.99775
176.8	0.9976
176.9	0.9979
177	0.99815
177.1	0.998
177.2	0.99835
177.3	0.9978
177.4	0.9974
177.5	0.99795
177.6	0.998
177.7	0.9977
177.8	0.9979
177.9	0.99785
178	0.99775
178.1	0.9983
178.2	0.998
178.3	0.99795
178.4	0.99795
178.5	0.998
178.6	0.99755
178.7	0.99785
178.8	0.99765
178.9	0.99755
179	0.9972
179.1	0.9978
179.2	0.9982
179.3	0.99735
179.4	0.9974
179.5	0.99785
179.6	0.9973
179.7	0.99735
179.8	0.9977
179.9	0.99745
180	0.9979
180.1	0.99775
180.2	0.9974
180.3	0.9979
180.4	0.99745
180.5	0.9977
180.6	0.9974
180.7	0.99755
180.8	0.9973
180.9	0.99775
181	0.99765
181.1	0.9977
181.2	0.99755
181.3	0.9979
181.4	0.99765
181.5	0.99805
181.6	0.99775
181.7	0.99695
181.8	0.9977
181.9	0.9977
182	0.99765
182.1	0.99765
182.2	0.9977
182.3	0.9979
182.4	0.9982
182.5	0.99825
182.6	0.99755
182.7	0.99775
182.8	0.9974
182.9	0.99805
183	0.99845
183.1	0.99785
183.2	0.99735
183.3	0.99765
183.4	0.99805
183.5	0.9977
183.6	0.99765
183.7	0.9974
183.8	0.99775
183.9	0.99765
184	0.99775
184.1	0.99745
184.2	0.9973
184.3	0.99695
184.4	0.99775
184.5	0.99775
184.6	0.99785
184.7	0.9977
184.8	0.9975
184.9	0.99775
185	0.99785
185.1	0.9972
185.2	0.99775
185.3	0.99755
185.4	0.99765
185.5	0.9974
185.6	0.99825
185.7	0.9972
185.8	0.9977
185.9	0.99795
186	0.9978
186.1	0.99805
186.2	0.9979
186.3	0.9977
186.4	0.99785
186.5	0.99775
186.6	0.99735
186.7	0.997
186.8	0.9981
186.9	0.99755
187	0.99795
187.1	0.99765
187.2	0.9972
187.3	0.9976
187.4	0.99775
187.5	0.99785
187.6	0.9982
187.7	0.9981
187.8	0.9974
187.9	0.99795
188	0.99845
188.1	0.99805
188.2	0.99825
188.3	0.9973
188.4	0.9977
188.5	0.99745
188.6	0.99725
188.7	0.99785
188.8	0.9975
188.9	0.99755
189	0.9981
189.1	0.9979
189.2	0.99835
189.3	0.99755
189.4	0.99815
189.5	0.9981
189.6	0.99775
189.7	0.99825
189.8	0.9975
189.9	0.9975
190	0.9976
190.1	0.99765
190.2	0.9985
190.3	0.99745
190.4	0.99765
190.5	0.99755
190.6	0.99805
190.7	0.99755
190.8	0.9981
190.9	0.99815
191	0.9974
191.1	0.998
191.2	0.9979
191.3	0.99815
191.4	0.99775
191.5	0.99815
191.6	0.99815
191.7	0.9978
191.8	0.9976
191.9	0.9982
192	0.9977
192.1	0.99805
192.2	0.9973
192.3	0.99825
192.4	0.9976
192.5	0.9974
192.6	0.99835
192.7	0.9982
192.8	0.99785
192.9	0.9975
193	0.99765
193.1	0.9981
193.2	0.9983
193.3	0.9976
193.4	0.9975
193.5	0.99755
193.6	0.99685
193.7	0.9977
193.8	0.99775
193.9	0.99715
194	0.99785
194.1	0.9978
194.2	0.99725
194.3	0.99765
194.4	0.99765
194.5	0.99775
194.6	0.99745
194.7	0.99765
194.8	0.99765
194.9	0.9976
195	0.99765
195.1	0.9978
195.2	0.9976
195.3	0.99825
195.4	0.99765
195.5	0.99765
195.6	0.99805
195.7	0.99805
195.8	0.9984
195.9	0.99805
196	0.99735
196.1	0.99765
196.2	0.9978
196.3	0.9973
196.4	0.998
196.5	0.99795
196.6	0.9978
196.7	0.99785
196.8	0.9982
196.9	0.9974
197	0.9977
197.1	0.99795
197.2	0.9981
197.3	0.9977
197.4	0.99775
197.5	0.9982
197.6	0.99795
197.7	0.9979
197.8	0.9975
197.9	0.99735
198	0.9981
198.1	0.9983
198.2	0.99795
198.3	0.9984
198.4	0.99785
198.5	0.99705
198.6	0.9974
198.7	0.9979
198.8	0.99765
198.9	0.99765
199	0.99775
199.1	0.9974
199.2	0.9975
199.3	0.9979
199.4	0.9982
199.5	0.99795
199.6	0.998
199.7	0.998
199.8	0.99725
199.9	0.9977
200	0.99765
[truncated: 14,000 more rows]
