# Supplementary material for: Bayesian inference of kinetic schemes for ion channels by Kalman filtering
Source: eLife journal article supplement (doi:10.7554/elife.62714), 2022-05-04
Supplement: fig4-data2 [file 1_Sim_N_10000_Strom_MW.xlsx]

## Sheet: Tabelle1
0.1	0
0.2	0
0.3	0
0.4	0
0.5	0
0.6	0
0.7	0
0.8	0
0.9	0
1	0
1.1	0
1.2	0
1.3	0
1.4	0
1.5	0
1.6	0
1.7	0
1.8	0
1.9	0
2	0
2.1	0
2.2	0
2.3	0
2.4	0
2.5	0
2.6	0
2.7	0
2.8	0
2.9	0
3	0
3.1	0
3.2	0
3.3	0
3.4	0
3.5	0
3.6	0
3.7	0
3.8	0
3.9	0
4	0
4.1	0
4.2	0
4.3	0
4.4	0
4.5	0
4.6	0
4.7	0
4.8	0
4.9	0
5	0
5.1	0
5.2	0
5.3	0
5.4	0
5.5	0
5.6	0
5.7	0
5.8	0
5.9	0
6	0
6.1	0
6.2	0
6.3	0
6.4	0
6.5	0
6.6	0
6.7	0
6.8	0
6.9	0
7	0
7.1	0
7.2	0
7.3	0
7.4	0
7.5	0
7.6	0
7.7	0
7.8	0
7.9	0
8	0
8.1	0
8.2	0
8.3	0
8.4	0
8.5	0
8.6	0
8.7	0
8.8	0
8.9	0
9	0
9.1	0
9.2	0
9.3	0
9.4	0
9.5	0
9.6	0
9.7	0
9.8	0
9.9	0
10	0
10.1	0
10.2	0
10.3	0
10.4	0
10.5	0
10.6	0
10.7	0
10.8	0
10.9	0
11	0
11.1	0
11.2	0
11.3	0
11.4	0
11.5	0
11.6	0
11.7	0
11.8	0
11.9	0
12	0
12.1	0
12.2	0
12.3	0
12.4	0
12.5	0
12.6	0
12.7	0
12.8	0
12.9	0
13	0
13.1	0
13.2	0
13.3	0
13.4	0
13.5	0
13.6	0
13.7	0
13.8	0
13.9	0
14	0
14.1	0
14.2	0
14.3	0
14.4	0
14.5	0
14.6	0
14.7	0
14.8	0
14.9	0
15	0
15.1	0
15.2	0
15.3	0
15.4	0
15.5	0
15.6	0
15.7	0
15.8	0
15.9	0
16	0
16.1	0
16.2	0
16.3	0
16.4	0
16.5	0
16.6	0
16.7	0
16.8	0
16.9	0
17	0
17.1	0
17.2	0
17.3	0
17.4	0
17.5	0
17.6	0
17.7	0
17.8	0
17.9	0
18	0
18.1	0
18.2	0
18.3	0
18.4	0
18.5	0
18.6	0
18.7	0
18.8	0
18.9	0
19	0
19.1	0
19.2	0
19.3	0
19.4	0
19.5	0
19.6	0
19.7	0
19.8	0
19.9	0
20	0
20.1	0
20.2	0
20.3	0
20.4	0
20.5	0
20.6	0
20.7	0
20.8	0
20.9	0
21	0
21.1	0
21.2	0
21.3	0
21.4	0
21.5	0
21.6	0
21.7	0
21.8	0
21.9	0
22	0
22.1	0
22.2	0
22.3	0
22.4	0
22.5	0
22.6	0
22.7	0
22.8	0
22.9	0
23	0
23.1	0
23.2	0
23.3	0
23.4	0
23.5	0
23.6	0
23.7	0
23.8	0
23.9	0
24	0
24.1	0
24.2	0
24.3	0
24.4	0
24.5	0
24.6	0
24.7	0
24.8	0
24.9	0
25	0
25.1	0
25.2	0
25.3	0
25.4	0
25.5	0
25.6	0
25.7	0
25.8	0
25.9	0
26	0
26.1	0
26.2	0
26.3	0
26.4	0
26.5	0
26.6	0
26.7	0
26.8	0
26.9	0
27	0
27.1	0
27.2	0
27.3	0
27.4	0
27.5	0
27.6	0
27.7	0
27.8	0
27.9	0
28	0
28.1	0
28.2	0
28.3	0
28.4	0
28.5	0
28.6	0
28.7	0
28.8	0
28.9	0
29	0
29.1	0
29.2	0
29.3	0
29.4	0
29.5	0
29.6	0
29.7	0
29.8	0
29.9	0
30	0
30.1	0
30.2	0
30.3	0
30.4	0
30.5	0
30.6	0
30.7	0
30.8	0
30.9	0
31	0
31.1	0
31.2	0
31.3	0
31.4	0
31.5	0
31.6	0
31.7	0
31.8	0
31.9	0
32	0
32.1	0
32.2	0
32.3	0
32.4	0
32.5	0
32.6	0
32.7	0
32.8	0
32.9	0
33	0
33.1	0
33.2	0
33.3	0
33.4	0
33.5	0
33.6	0
33.7	0
33.8	0
33.9	0
34	0
34.1	0
34.2	0
34.3	0
34.4	0
34.5	0
34.6	0
34.7	0
34.8	0
34.9	0
35	0
35.1	0
35.2	0
35.3	0
35.4	0
35.5	0
35.6	0
35.7	0
35.8	0
35.9	0
36	0
36.1	0
36.2	0
36.3	0
36.4	0
36.5	0
36.6	0
36.7	0
36.8	0
36.9	0
37	0
37.1	0
37.2	0
37.3	0
37.4	0
37.5	0
37.6	0
37.7	0
37.8	0
37.9	0
38	0
38.1	0
38.2	0
38.3	0
38.4	0
38.5	0
38.6	0
38.7	0
38.8	0
38.9	0
39	0
39.1	0
39.2	0
39.3	0
39.4	0
39.5	0
39.6	0
39.7	0
39.8	0
39.9	0
40	0
40.1	0
40.2	0
40.3	0
40.4	0
40.5	0
40.6	0
40.7	0
40.8	0
40.9	0
41	0
41.1	0
41.2	0
41.3	0
41.4	0
41.5	0
41.6	0
41.7	0
41.8	0
41.9	0
42	0
42.1	0
42.2	0
42.3	0
42.4	0
42.5	0
42.6	0
42.7	0
42.8	0
42.9	0
43	0
43.1	0
43.2	0
43.3	0
43.4	0
43.5	0
43.6	0
43.7	0
43.8	0
43.9	0
44	0
44.1	0
44.2	0
44.3	0
44.4	0
44.5	0
44.6	0
44.7	0
44.8	0
44.9	0
45	0
45.1	0
45.2	0
45.3	0
45.4	0
45.5	0
45.6	0
45.7	0
45.8	0
45.9	0
46	0
46.1	0
46.2	0
46.3	0
46.4	0
46.5	0
46.6	0
46.7	0
46.8	0
46.9	0
47	0
47.1	0
47.2	0
47.3	0
47.4	0
47.5	0
47.6	0
47.7	0
47.8	0
47.9	0
48	0
48.1	0
48.2	0
48.3	0
48.4	0
48.5	0
48.6	0
48.7	0
48.8	0
48.9	0
49	0
49.1	0
49.2	0
49.3	0
49.4	0
49.5	0
49.6	0
49.7	0
49.8	0
49.9	0
50	0
50.1	0
50.2	0
50.3	0
50.4	0
50.5	0
50.6	0
50.7	0
50.8	0
50.9	0
51	0
51.1	0
51.2	0
51.3	0
51.4	0
51.5	0
51.6	0
51.7	0
51.8	0
51.9	0
52	0
52.1	0
52.2	0
52.3	0
52.4	0
52.5	0
52.6	0
52.7	0
52.8	0
52.9	0
53	0
53.1	0
53.2	0
53.3	0
53.4	0
53.5	0
53.6	0
53.7	0
53.8	0
53.9	0
54	0
54.1	0
54.2	0
54.3	0
54.4	0
54.5	0
54.6	0
54.7	0
54.8	0
54.9	0
55	0
55.1	0
55.2	0
55.3	0
55.4	0
55.5	0
55.6	0
55.7	0
55.8	0
55.9	0
56	0
56.1	0
56.2	0
56.3	0
56.4	0
56.5	0
56.6	0
56.7	0
56.8	0
56.9	0
57	0
57.1	0
57.2	0
57.3	0
57.4	0
57.5	0
57.6	0
57.7	0
57.8	0
57.9	0
58	0
58.1	0
58.2	0
58.3	0
58.4	0
58.5	0
58.6	0
58.7	0
58.8	0
58.9	0
59	0
59.1	0
59.2	0
59.3	0
59.4	0
59.5	0
59.6	0
59.7	0
59.8	0
59.9	0
60	0
60.1	0
60.2	0
60.3	0
60.4	0
60.5	0
60.6	0
60.7	0
60.8	0
60.9	0
61	0
61.1	0
61.2	0
61.3	0
61.4	0
61.5	0
61.6	0
61.7	0
61.8	0
61.9	0
62	0
62.1	0
62.2	0
62.3	0
62.4	0
62.5	0
62.6	0
62.7	0
62.8	0
62.9	0
63	0
63.1	0
63.2	0
63.3	0
63.4	0
63.5	0
63.6	0
63.7	0
63.8	0
63.9	0
64	0
64.1	0
64.2	0
64.3	0
64.4	0
64.5	0
64.6	0
64.7	0
64.8	0
64.9	0
65	0
65.1	0
65.2	0
65.3	0
65.4	0
65.5	0
65.6	0
65.7	0
65.8	0
65.9	0
66	0
66.1	0
66.2	0
66.3	0
66.4	0
66.5	0
66.6	0
66.7	0
66.8	0
66.9	0
67	0
67.1	0
67.2	0
67.3	0
67.4	0
67.5	0
67.6	0
67.7	0
67.8	0
67.9	0
68	0
68.1	0
68.2	0
68.3	0
68.4	0
68.5	0
68.6	0
68.7	0
68.8	0
68.9	0
69	0
69.1	0
69.2	0
69.3	0
69.4	0
69.5	0
69.6	0
69.7	0
69.8	0
69.9	0
70	0
70.1	0
70.2	0
70.3	0
70.4	0
70.5	0
70.6	0
70.7	0
70.8	0
70.9	0
71	0
71.1	0
71.2	0
71.3	0
71.4	0
71.5	0
71.6	0
71.7	0
71.8	0
71.9	0
72	0
72.1	0
72.2	0
72.3	0
72.4	0
72.5	0
72.6	0
72.7	0
72.8	0
72.9	0
73	0
73.1	0
73.2	0
73.3	0
73.4	0
73.5	0
73.6	0
73.7	0
73.8	0
73.9	0
74	0
74.1	0
74.2	0
74.3	0
74.4	0
74.5	0
74.6	0
74.7	0
74.8	0
74.9	0
75	0
75.1	0
75.2	0
75.3	0
75.4	0
75.5	0
75.6	0
75.7	0
75.8	0
75.9	0
76	0
76.1	0
76.2	0
76.3	0
76.4	0
76.5	0
76.6	0
76.7	0
76.8	0
76.9	0
77	0
77.1	0
77.2	0
77.3	0
77.4	0
77.5	0
77.6	0
77.7	0
77.8	0
77.9	0
78	0
78.1	0
78.2	0
78.3	0
78.4	0
78.5	0
78.6	0
78.7	0
78.8	0
78.9	0
79	0
79.1	0
79.2	0
79.3	0
79.4	0
79.5	0
79.6	0
79.7	0
79.8	0
79.9	0
80	0
80.1	0
80.2	0
80.3	0
80.4	0
80.5	0
80.6	0
80.7	0
80.8	0
80.9	0
81	0
81.1	0
81.2	0
81.3	0
81.4	0
81.5	0
81.6	0
81.7	0
81.8	0
81.9	0
82	0
82.1	0
82.2	0
82.3	0
82.4	0
82.5	0
82.6	0
82.7	0
82.8	0
82.9	0
83	0
83.1	0
83.2	0
83.3	0
83.4	0
83.5	0
83.6	0
83.7	0
83.8	0
83.9	0
84	0
84.1	0
84.2	0
84.3	0
84.4	0
84.5	0
84.6	0
84.7	0
84.8	0
84.9	0
85	0
85.1	0
85.2	0
85.3	0
85.4	0
85.5	0
85.6	0
85.7	0
85.8	0
85.9	0
86	0
86.1	0
86.2	0
86.3	0
86.4	0
86.5	0
86.6	0
86.7	0
86.8	0
86.9	0
87	0
87.1	0
87.2	0
87.3	0
87.4	0
87.5	0
87.6	0
87.7	0
87.8	0
87.9	0
88	0
88.1	0
88.2	0
88.3	0
88.4	0
88.5	0
88.6	0
88.7	0
88.8	0
88.9	0
89	0
89.1	0
89.2	0
89.3	0
89.4	0
89.5	0
89.6	0
89.7	0
89.8	0
89.9	0
90	0
90.1	0
90.2	0
90.3	0
90.4	0
90.5	0
90.6	0
90.7	0
90.8	0
90.9	0
91	0
91.1	0
91.2	0
91.3	0
91.4	0
91.5	0
91.6	0
91.7	0
91.8	0
91.9	0
92	0
92.1	0
92.2	0
92.3	0
92.4	0
92.5	0
92.6	0
92.7	0
92.8	0
92.9	0
93	0
93.1	0
93.2	0
93.3	0
93.4	0
93.5	0
93.6	0
93.7	0
93.8	0
93.9	0
94	0
94.1	0
94.2	0
94.3	0
94.4	0
94.5	0
94.6	0
94.7	0
94.8	0
94.9	0
95	0
95.1	0
95.2	0
95.3	0
95.4	0
95.5	0
95.6	0
95.7	0
95.8	0
95.9	0
96	0
96.1	0
96.2	0
96.3	0
96.4	0
96.5	0
96.6	0
96.7	0
96.8	0
96.9	0
97	0
97.1	0
97.2	0
97.3	0
97.4	0
97.5	0
97.6	0
97.7	0
97.8	0
97.9	0
98	0
98.1	0
98.2	0
98.3	0
98.4	0
98.5	0
98.6	0
98.7	0
98.8	0
98.9	0
99	0
99.1	0
99.2	0
99.3	0
99.4	0
99.5	0
99.6	0
99.7	0
99.8	0
99.9	0
100	0
100.1	0.0022
100.2	0.0061
100.3	0.0104
100.4	0.0142
100.5	0.0193
100.6	0.0234
100.7	0.028
100.8	0.0329
100.9	0.038
101	0.0428
101.1	0.0477
101.2	0.0531
101.3	0.0582
101.4	0.0626
101.5	0.0666
101.6	0.0712
101.7	0.0757
101.8	0.0804
101.9	0.0839
102	0.088
102.1	0.0924
102.2	0.0974
102.3	0.1016
102.4	0.1054
102.5	0.1085
102.6	0.112
102.7	0.1156
102.8	0.1198
102.9	0.1233
103	0.1278
103.1	0.1313
103.2	0.1357
103.3	0.1397
103.4	0.1434
103.5	0.1479
103.6	0.153
103.7	0.1564
103.8	0.1601
103.9	0.165
104	0.1692
104.1	0.1739
104.2	0.1787
104.3	0.1826
104.4	0.1865
104.5	0.1901
104.6	0.1943
104.7	0.1982
104.8	0.2024
104.9	0.206
105	0.2109
105.1	0.2142
105.2	0.2182
105.3	0.2218
105.4	0.225
105.5	0.2283
105.6	0.2318
105.7	0.2349
105.8	0.2383
105.9	0.2405
106	0.2439
106.1	0.2471
106.2	0.2505
106.3	0.2539
106.4	0.257
106.5	0.2599
106.6	0.263
106.7	0.265
106.8	0.2681
106.9	0.2715
107	0.2753
107.1	0.2789
107.2	0.2821
107.3	0.2843
107.4	0.2877
107.5	0.2908
107.6	0.2932
107.7	0.2965
107.8	0.2989
107.9	0.3019
108	0.3046
108.1	0.3067
108.2	0.3106
108.3	0.3136
108.4	0.3169
108.5	0.3205
108.6	0.3243
108.7	0.3284
108.8	0.3314
108.9	0.335
109	0.3372
109.1	0.3397
109.2	0.3422
109.3	0.3448
109.4	0.3474
109.5	0.3503
109.6	0.3533
109.7	0.3557
109.8	0.3586
109.9	0.3604
110	0.3632
110.1	0.3649
110.2	0.3682
110.3	0.3708
110.4	0.3736
110.5	0.3767
110.6	0.3781
110.7	0.3809
110.8	0.3833
110.9	0.3856
111	0.3878
111.1	0.3905
111.2	0.3934
111.3	0.3971
111.4	0.4006
111.5	0.4027
111.6	0.4052
111.7	0.408
111.8	0.4105
111.9	0.4128
112	0.4154
112.1	0.4187
112.2	0.4216
112.3	0.4232
112.4	0.4256
112.5	0.428
112.6	0.4303
112.7	0.4323
112.8	0.4351
112.9	0.438
113	0.441
113.1	0.4426
113.2	0.4448
113.3	0.4472
113.4	0.4497
113.5	0.4514
113.6	0.4535
113.7	0.4558
113.8	0.4582
113.9	0.4602
114	0.4621
114.1	0.4646
114.2	0.4666
114.3	0.4695
114.4	0.4712
114.5	0.4742
114.6	0.4764
114.7	0.4786
114.8	0.4805
114.9	0.4839
115	0.4848
115.1	0.4867
115.2	0.4891
115.3	0.4908
115.4	0.4922
115.5	0.4948
115.6	0.4965
115.7	0.4984
115.8	0.5
115.9	0.5019
116	0.5029
116.1	0.505
116.2	0.5068
116.3	0.5094
116.4	0.5118
116.5	0.5127
116.6	0.5168
116.7	0.5181
116.8	0.5186
116.9	0.5196
117	0.5221
117.1	0.5243
117.2	0.5259
117.3	0.5273
117.4	0.5283
117.5	0.5299
117.6	0.532
117.7	0.5339
117.8	0.5353
117.9	0.5372
118	0.5388
118.1	0.5411
118.2	0.543
118.3	0.5443
118.4	0.5463
118.5	0.5476
118.6	0.5492
118.7	0.5503
118.8	0.5523
118.9	0.5537
119	0.5557
119.1	0.5573
119.2	0.5592
119.3	0.5605
119.4	0.5632
119.5	0.5649
119.6	0.5659
119.7	0.5677
119.8	0.5686
119.9	0.5705
120	0.5719
120.1	0.5728
120.2	0.575
120.3	0.5768
120.4	0.5772
120.5	0.5783
120.6	0.58
120.7	0.5814
120.8	0.5838
120.9	0.586
121	0.5869
121.1	0.5888
121.2	0.5907
121.3	0.5926
121.4	0.5943
121.5	0.5961
121.6	0.5971
121.7	0.5986
121.8	0.6001
121.9	0.601
122	0.6022
122.1	0.6046
122.2	0.6051
122.3	0.6068
122.4	0.6084
122.5	0.6097
122.6	0.611
122.7	0.6135
122.8	0.6149
122.9	0.6163
123	0.6172
123.1	0.6189
123.2	0.6212
123.3	0.6221
123.4	0.623
123.5	0.6241
123.6	0.6249
123.7	0.6261
123.8	0.6279
123.9	0.6292
124	0.6311
124.1	0.6328
124.2	0.6344
124.3	0.6357
124.4	0.6366
124.5	0.6378
124.6	0.639
124.7	0.64
124.8	0.6401
124.9	0.641
125	0.6423
125.1	0.6442
125.2	0.6453
125.3	0.6467
125.4	0.6482
125.5	0.6492
125.6	0.6507
125.7	0.6511
125.8	0.6533
125.9	0.6547
126	0.6562
126.1	0.6577
126.2	0.6586
126.3	0.6595
126.4	0.661
126.5	0.6622
126.6	0.6644
126.7	0.6653
126.8	0.6665
126.9	0.6681
127	0.669
127.1	0.67
127.2	0.6708
127.3	0.6714
127.4	0.6716
127.5	0.6722
127.6	0.6738
127.7	0.6742
127.8	0.6746
127.9	0.6748
128	0.6758
128.1	0.6771
128.2	0.6776
128.3	0.6784
128.4	0.6788
128.5	0.6795
128.6	0.6801
128.7	0.68
128.8	0.6806
128.9	0.6815
129	0.6821
129.1	0.6828
129.2	0.6836
129.3	0.6835
129.4	0.6846
129.5	0.6853
129.6	0.6852
129.7	0.6857
129.8	0.6865
129.9	0.6871
130	0.6882
130.1	0.6893
130.2	0.6904
130.3	0.6907
130.4	0.6907
130.5	0.6916
130.6	0.6932
130.7	0.6937
130.8	0.6952
130.9	0.696
131	0.6966
131.1	0.6975
131.2	0.6987
131.3	0.6995
131.4	0.6995
131.5	0.7005
131.6	0.7016
131.7	0.7016
131.8	0.7016
131.9	0.7029
132	0.7038
132.1	0.7043
132.2	0.7052
132.3	0.7059
132.4	0.7076
132.5	0.7082
132.6	0.7098
132.7	0.7096
132.8	0.7102
132.9	0.7104
133	0.7117
133.1	0.7126
133.2	0.714
133.3	0.7143
133.4	0.7153
133.5	0.7159
133.6	0.7163
133.7	0.7171
133.8	0.718
133.9	0.7189
134	0.7196
134.1	0.7203
134.2	0.7209
134.3	0.7223
134.4	0.723
134.5	0.7233
134.6	0.7236
134.7	0.7241
134.8	0.7237
134.9	0.7247
135	0.7256
135.1	0.7271
135.2	0.7283
135.3	0.7284
135.4	0.7287
135.5	0.7305
135.6	0.7308
135.7	0.7315
135.8	0.7324
135.9	0.7341
136	0.7353
136.1	0.7355
136.2	0.7362
136.3	0.7371
136.4	0.7374
136.5	0.7383
136.6	0.7395
136.7	0.7393
136.8	0.7403
136.9	0.7406
137	0.7415
137.1	0.742
137.2	0.7421
137.3	0.7424
137.4	0.7424
137.5	0.7433
137.6	0.7443
137.7	0.7451
137.8	0.7464
137.9	0.7471
138	0.7481
138.1	0.7487
138.2	0.7497
138.3	0.7503
138.4	0.7508
138.5	0.751
138.6	0.7508
138.7	0.7507
138.8	0.7516
138.9	0.7526
139	0.7534
139.1	0.7536
139.2	0.7543
139.3	0.7543
139.4	0.7543
139.5	0.754
139.6	0.7546
139.7	0.7548
139.8	0.755
139.9	0.7549
140	0.7554
140.1	0.7558
140.2	0.7567
140.3	0.7573
140.4	0.7583
140.5	0.759
140.6	0.7594
140.7	0.7601
140.8	0.7606
140.9	0.7612
141	0.7611
141.1	0.7612
141.2	0.7618
141.3	0.7622
141.4	0.763
141.5	0.7631
141.6	0.7641
141.7	0.7643
141.8	0.7647
141.9	0.7651
142	0.7651
142.1	0.7651
142.2	0.7646
142.3	0.7648
142.4	0.7654
142.5	0.7661
142.6	0.7663
142.7	0.766
142.8	0.7667
142.9	0.7664
143	0.767
143.1	0.7676
143.2	0.7679
143.3	0.7684
143.4	0.7678
143.5	0.7682
143.6	0.7694
143.7	0.771
143.8	0.7714
143.9	0.7716
144	0.7721
144.1	0.7729
144.2	0.7738
144.3	0.7739
144.4	0.7747
144.5	0.7748
144.6	0.7757
144.7	0.776
144.8	0.7766
144.9	0.7777
145	0.7777
145.1	0.7775
145.2	0.7787
145.3	0.7793
145.4	0.7795
145.5	0.7803
145.6	0.7805
145.7	0.7808
145.8	0.7809
145.9	0.7817
146	0.7824
146.1	0.784
146.2	0.7843
146.3	0.7845
146.4	0.7856
146.5	0.786
146.6	0.7865
146.7	0.7871
146.8	0.7872
146.9	0.7874
147	0.7871
147.1	0.7872
147.2	0.7878
147.3	0.7882
147.4	0.7889
147.5	0.789
147.6	0.7898
147.7	0.7901
147.8	0.79
147.9	0.7899
148	0.7908
148.1	0.7912
148.2	0.7917
148.3	0.7923
148.4	0.7921
148.5	0.7917
148.6	0.7918
148.7	0.7912
148.8	0.7911
148.9	0.7912
149	0.792
149.1	0.7916
149.2	0.7917
149.3	0.7925
149.4	0.7929
149.5	0.7935
149.6	0.7929
149.7	0.7931
149.8	0.7932
149.9	0.7939
150	0.7946
150.1	0.7941
150.2	0.7941
150.3	0.7941
150.4	0.7937
150.5	0.7935
150.6	0.794
150.7	0.7944
150.8	0.795
150.9	0.7948
151	0.7949
151.1	0.7954
151.2	0.796
151.3	0.7961
151.4	0.7965
151.5	0.7966
151.6	0.7967
151.7	0.7974
151.8	0.7975
151.9	0.798
152	0.7984
152.1	0.7984
152.2	0.798
152.3	0.7987
152.4	0.7993
152.5	0.7988
152.6	0.7992
152.7	0.7995
152.8	0.7992
152.9	0.7989
153	0.7991
153.1	0.7995
153.2	0.8004
153.3	0.8007
153.4	0.8011
153.5	0.8019
153.6	0.8016
153.7	0.8028
153.8	0.8029
153.9	0.8025
154	0.8025
154.1	0.8024
154.2	0.8027
154.3	0.8029
154.4	0.8031
154.5	0.8028
154.6	0.8032
154.7	0.803
154.8	0.8033
154.9	0.8031
155	0.8034
155.1	0.803
155.2	0.8038
155.3	0.805
155.4	0.8054
155.5	0.8063
155.6	0.8058
155.7	0.8063
155.8	0.8076
155.9	0.8076
156	0.8085
156.1	0.8091
156.2	0.8086
156.3	0.8086
156.4	0.8087
156.5	0.8084
156.6	0.8091
156.7	0.8084
156.8	0.8077
156.9	0.8081
157	0.8083
157.1	0.8085
157.2	0.8084
157.3	0.8087
157.4	0.8091
157.5	0.8096
157.6	0.8097
157.7	0.8096
157.8	0.8099
157.9	0.8102
158	0.8106
158.1	0.8109
158.2	0.811
158.3	0.8112
158.4	0.8117
158.5	0.8119
158.6	0.8122
158.7	0.8126
158.8	0.8135
158.9	0.8134
159	0.8139
159.1	0.8145
159.2	0.8152
159.3	0.8156
159.4	0.8154
159.5	0.8153
159.6	0.815
159.7	0.8152
159.8	0.8155
159.9	0.8163
160	0.8163
160.1	0.8172
160.2	0.8173
160.3	0.8178
160.4	0.8179
160.5	0.8176
160.6	0.8179
160.7	0.8178
160.8	0.8182
160.9	0.819
161	0.8191
161.1	0.819
161.2	0.8188
161.3	0.8192
161.4	0.819
161.5	0.8198
161.6	0.8197
161.7	0.8193
161.8	0.8192
161.9	0.8191
162	0.8193
162.1	0.8197
162.2	0.8196
162.3	0.8194
162.4	0.8192
162.5	0.8195
162.6	0.8197
162.7	0.8198
162.8	0.8203
162.9	0.8202
163	0.8206
163.1	0.8211
163.2	0.8213
163.3	0.8215
163.4	0.8212
163.5	0.8208
163.6	0.8206
163.7	0.8213
163.8	0.8221
163.9	0.822
164	0.8217
164.1	0.8226
164.2	0.8231
164.3	0.8232
164.4	0.8229
164.5	0.823
164.6	0.8227
164.7	0.8221
164.8	0.8222
164.9	0.8223
165	0.822
165.1	0.8224
165.2	0.8226
165.3	0.8226
165.4	0.8224
165.5	0.8223
165.6	0.823
165.7	0.8222
165.8	0.823
165.9	0.8227
166	0.8224
166.1	0.8226
166.2	0.8234
166.3	0.8234
166.4	0.823
166.5	0.8233
166.6	0.8233
166.7	0.8236
166.8	0.823
166.9	0.8234
167	0.8233
167.1	0.824
167.2	0.8234
167.3	0.8239
167.4	0.8244
167.5	0.8239
167.6	0.8245
167.7	0.8244
167.8	0.8244
167.9	0.8246
168	0.8247
168.1	0.8248
168.2	0.8248
168.3	0.8246
168.4	0.8243
168.5	0.8243
168.6	0.8247
168.7	0.8245
168.8	0.8249
168.9	0.8241
169	0.824
169.1	0.8237
169.2	0.8241
169.3	0.824
169.4	0.8241
169.5	0.8251
169.6	0.8249
169.7	0.8246
169.8	0.8243
169.9	0.8242
170	0.8243
170.1	0.8241
170.2	0.8244
170.3	0.8241
170.4	0.8241
170.5	0.8232
170.6	0.8235
170.7	0.8236
170.8	0.8233
170.9	0.8235
171	0.8232
171.1	0.823
171.2	0.8229
171.3	0.8231
171.4	0.823
171.5	0.8234
171.6	0.8237
171.7	0.8245
171.8	0.8241
171.9	0.824
172	0.8243
172.1	0.8233
172.2	0.8234
172.3	0.8232
172.4	0.8226
172.5	0.8227
172.6	0.8226
172.7	0.8224
172.8	0.8225
172.9	0.8226
173	0.8231
173.1	0.8222
173.2	0.8225
173.3	0.8222
173.4	0.8225
173.5	0.8232
173.6	0.8231
173.7	0.8235
173.8	0.8237
173.9	0.824
174	0.8237
174.1	0.8238
174.2	0.8243
174.3	0.8249
174.4	0.8244
174.5	0.8239
174.6	0.8246
174.7	0.8241
174.8	0.8241
174.9	0.8237
175	0.8244
175.1	0.825
175.2	0.825
175.3	0.8247
175.4	0.8253
175.5	0.8254
175.6	0.8251
175.7	0.8252
175.8	0.8251
175.9	0.8252
176	0.8249
176.1	0.8255
176.2	0.8258
176.3	0.8252
176.4	0.825
176.5	0.8255
176.6	0.8258
176.7	0.8263
176.8	0.8264
176.9	0.8265
177	0.8267
177.1	0.8269
177.2	0.8268
177.3	0.8275
177.4	0.8269
177.5	0.8264
177.6	0.8267
177.7	0.8273
177.8	0.8279
177.9	0.8282
178	0.8281
178.1	0.8277
178.2	0.8276
178.3	0.828
178.4	0.8277
178.5	0.8279
178.6	0.8276
178.7	0.827
178.8	0.8271
178.9	0.8267
179	0.8259
179.1	0.8258
179.2	0.8257
179.3	0.8255
179.4	0.8258
179.5	0.825
179.6	0.8248
179.7	0.8252
179.8	0.8245
179.9	0.8241
180	0.8241
180.1	0.8246
180.2	0.8246
180.3	0.8248
180.4	0.825
180.5	0.825
180.6	0.8253
180.7	0.8264
180.8	0.8266
180.9	0.8264
181	0.827
181.1	0.8269
181.2	0.8268
181.3	0.8264
181.4	0.8268
181.5	0.8271
181.6	0.8279
181.7	0.8273
181.8	0.8272
181.9	0.8272
182	0.8278
182.1	0.8276
182.2	0.8279
182.3	0.8283
182.4	0.8288
182.5	0.8293
182.6	0.8287
182.7	0.8286
182.8	0.8285
182.9	0.8283
183	0.828
183.1	0.8277
183.2	0.8286
183.3	0.8282
183.4	0.8278
183.5	0.8282
183.6	0.8284
183.7	0.8276
183.8	0.8275
183.9	0.8279
184	0.8284
184.1	0.8282
184.2	0.8285
184.3	0.8289
184.4	0.8289
184.5	0.8294
184.6	0.8293
184.7	0.8293
184.8	0.8296
184.9	0.8296
185	0.8299
185.1	0.83
185.2	0.8297
185.3	0.8288
185.4	0.8288
185.5	0.8288
185.6	0.829
185.7	0.8277
185.8	0.8275
185.9	0.8274
186	0.8274
186.1	0.8268
186.2	0.8266
186.3	0.8264
186.4	0.8269
186.5	0.8277
186.6	0.8279
186.7	0.8277
186.8	0.8275
186.9	0.8274
187	0.8266
187.1	0.8274
187.2	0.8272
187.3	0.8273
187.4	0.8273
187.5	0.8279
187.6	0.8275
187.7	0.8276
187.8	0.8272
187.9	0.8274
188	0.8278
188.1	0.827
188.2	0.8276
188.3	0.8273
188.4	0.8276
188.5	0.8277
188.6	0.8274
188.7	0.8269
188.8	0.827
188.9	0.8279
189	0.8279
189.1	0.8275
189.2	0.8279
189.3	0.8276
189.4	0.8282
189.5	0.8276
189.6	0.8278
189.7	0.8276
189.8	0.8277
189.9	0.8276
190	0.8269
190.1	0.8263
190.2	0.8262
190.3	0.8258
190.4	0.8259
190.5	0.826
190.6	0.8262
190.7	0.8259
190.8	0.8252
190.9	0.8258
191	0.8258
191.1	0.8248
191.2	0.8248
191.3	0.826
191.4	0.8261
191.5	0.8264
191.6	0.8268
191.7	0.8276
191.8	0.8277
191.9	0.828
192	0.8281
192.1	0.8273
192.2	0.8274
192.3	0.8283
192.4	0.828
192.5	0.8282
192.6	0.8282
192.7	0.8284
192.8	0.8283
192.9	0.8285
193	0.8282
193.1	0.8288
193.2	0.829
193.3	0.8292
193.4	0.8293
193.5	0.8299
193.6	0.8297
193.7	0.83
193.8	0.8297
193.9	0.83
194	0.8299
194.1	0.8297
194.2	0.8299
194.3	0.8306
194.4	0.8308
194.5	0.8301
194.6	0.8304
194.7	0.83
194.8	0.8301
194.9	0.8292
195	0.8292
195.1	0.8296
195.2	0.8298
195.3	0.83
195.4	0.8301
195.5	0.8304
195.6	0.8301
195.7	0.8301
195.8	0.8302
195.9	0.8306
196	0.8307
196.1	0.83
196.2	0.8296
196.3	0.8295
196.4	0.829
196.5	0.8292
196.6	0.829
196.7	0.8288
196.8	0.8291
196.9	0.829
197	0.8297
197.1	0.8292
197.2	0.8286
197.3	0.8284
197.4	0.8283
197.5	0.8276
197.6	0.8274
197.7	0.8273
197.8	0.8277
197.9	0.8278
198	0.8285
198.1	0.8284
198.2	0.8283
198.3	0.8284
198.4	0.8284
198.5	0.8281
198.6	0.8277
198.7	0.8276
198.8	0.8273
198.9	0.8278
199	0.8273
199.1	0.8269
199.2	0.8273
199.3	0.8272
199.4	0.8271
199.5	0.8264
199.6	0.8267
199.7	0.8271
199.8	0.8264
199.9	0.8264
200	0.827
[truncated: 14,000 more rows]
