# Supplementary material for: Bayesian inference of kinetic schemes for ion channels by Kalman filtering
Source: eLife journal article supplement (doi:10.7554/elife.62714), 2022-05-04
Supplement: fig4-data2 [file 1_Sim_N_20000_Fluor_MW.xlsx]

## Sheet: Tabelle1
0.1	0
0.2	0
0.3	0
0.4	0
0.5	0
0.6	0
0.7	0
0.8	0
0.9	0
1	0
1.1	0
1.2	0
1.3	0
1.4	0
1.5	0
1.6	0
1.7	0
1.8	0
1.9	0
2	0
2.1	0
2.2	0
2.3	0
2.4	0
2.5	0
2.6	0
2.7	0
2.8	0
2.9	0
3	0
3.1	0
3.2	0
3.3	0
3.4	0
3.5	0
3.6	0
3.7	0
3.8	0
3.9	0
4	0
4.1	0
4.2	0
4.3	0
4.4	0
4.5	0
4.6	0
4.7	0
4.8	0
4.9	0
5	0
5.1	0
5.2	0
5.3	0
5.4	0
5.5	0
5.6	0
5.7	0
5.8	0
5.9	0
6	0
6.1	0
6.2	0
6.3	0
6.4	0
6.5	0
6.6	0
6.7	0
6.8	0
6.9	0
7	0
7.1	0
7.2	0
7.3	0
7.4	0
7.5	0
7.6	0
7.7	0
7.8	0
7.9	0
8	0
8.1	0
8.2	0
8.3	0
8.4	0
8.5	0
8.6	0
8.7	0
8.8	0
8.9	0
9	0
9.1	0
9.2	0
9.3	0
9.4	0
9.5	0
9.6	0
9.7	0
9.8	0
9.9	0
10	0
10.1	0
10.2	0
10.3	0
10.4	0
10.5	0
10.6	0
10.7	0
10.8	0
10.9	0
11	0
11.1	0
11.2	0
11.3	0
11.4	0
11.5	0
11.6	0
11.7	0
11.8	0
11.9	0
12	0
12.1	0
12.2	0
12.3	0
12.4	0
12.5	0
12.6	0
12.7	0
12.8	0
12.9	0
13	0
13.1	0
13.2	0
13.3	0
13.4	0
13.5	0
13.6	0
13.7	0
13.8	0
13.9	0
14	0
14.1	0
14.2	0
14.3	0
14.4	0
14.5	0
14.6	0
14.7	0
14.8	0
14.9	0
15	0
15.1	0
15.2	0
15.3	0
15.4	0
15.5	0
15.6	0
15.7	0
15.8	0
15.9	0
16	0
16.1	0
16.2	0
16.3	0
16.4	0
16.5	0
16.6	0
16.7	0
16.8	0
16.9	0
17	0
17.1	0
17.2	0
17.3	0
17.4	0
17.5	0
17.6	0
17.7	0
17.8	0
17.9	0
18	0
18.1	0
18.2	0
18.3	0
18.4	0
18.5	0
18.6	0
18.7	0
18.8	0
18.9	0
19	0
19.1	0
19.2	0
19.3	0
19.4	0
19.5	0
19.6	0
19.7	0
19.8	0
19.9	0
20	0
20.1	0
20.2	0
20.3	0
20.4	0
20.5	0
20.6	0
20.7	0
20.8	0
20.9	0
21	0
21.1	0
21.2	0
21.3	0
21.4	0
21.5	0
21.6	0
21.7	0
21.8	0
21.9	0
22	0
22.1	0
22.2	0
22.3	0
22.4	0
22.5	0
22.6	0
22.7	0
22.8	0
22.9	0
23	0
23.1	0
23.2	0
23.3	0
23.4	0
23.5	0
23.6	0
23.7	0
23.8	0
23.9	0
24	0
24.1	0
24.2	0
24.3	0
24.4	0
24.5	0
24.6	0
24.7	0
24.8	0
24.9	0
25	0
25.1	0
25.2	0
25.3	0
25.4	0
25.5	0
25.6	0
25.7	0
25.8	0
25.9	0
26	0
26.1	0
26.2	0
26.3	0
26.4	0
26.5	0
26.6	0
26.7	0
26.8	0
26.9	0
27	0
27.1	0
27.2	0
27.3	0
27.4	0
27.5	0
27.6	0
27.7	0
27.8	0
27.9	0
28	0
28.1	0
28.2	0
28.3	0
28.4	0
28.5	0
28.6	0
28.7	0
28.8	0
28.9	0
29	0
29.1	0
29.2	0
29.3	0
29.4	0
29.5	0
29.6	0
29.7	0
29.8	0
29.9	0
30	0
30.1	0
30.2	0
30.3	0
30.4	0
30.5	0
30.6	0
30.7	0
30.8	0
30.9	0
31	0
31.1	0
31.2	0
31.3	0
31.4	0
31.5	0
31.6	0
31.7	0
31.8	0
31.9	0
32	0
32.1	0
32.2	0
32.3	0
32.4	0
32.5	0
32.6	0
32.7	0
32.8	0
32.9	0
33	0
33.1	0
33.2	0
33.3	0
33.4	0
33.5	0
33.6	0
33.7	0
33.8	0
33.9	0
34	0
34.1	0
34.2	0
34.3	0
34.4	0
34.5	0
34.6	0
34.7	0
34.8	0
34.9	0
35	0
35.1	0
35.2	0
35.3	0
35.4	0
35.5	0
35.6	0
35.7	0
35.8	0
35.9	0
36	0
36.1	0
36.2	0
36.3	0
36.4	0
36.5	0
36.6	0
36.7	0
36.8	0
36.9	0
37	0
37.1	0
37.2	0
37.3	0
37.4	0
37.5	0
37.6	0
37.7	0
37.8	0
37.9	0
38	0
38.1	0
38.2	0
38.3	0
38.4	0
38.5	0
38.6	0
38.7	0
38.8	0
38.9	0
39	0
39.1	0
39.2	0
39.3	0
39.4	0
39.5	0
39.6	0
39.7	0
39.8	0
39.9	0
40	0
40.1	0
40.2	0
40.3	0
40.4	0
40.5	0
40.6	0
40.7	0
40.8	0
40.9	0
41	0
41.1	0
41.2	0
41.3	0
41.4	0
41.5	0
41.6	0
41.7	0
41.8	0
41.9	0
42	0
42.1	0
42.2	0
42.3	0
42.4	0
42.5	0
42.6	0
42.7	0
42.8	0
42.9	0
43	0
43.1	0
43.2	0
43.3	0
43.4	0
43.5	0
43.6	0
43.7	0
43.8	0
43.9	0
44	0
44.1	0
44.2	0
44.3	0
44.4	0
44.5	0
44.6	0
44.7	0
44.8	0
44.9	0
45	0
45.1	0
45.2	0
45.3	0
45.4	0
45.5	0
45.6	0
45.7	0
45.8	0
45.9	0
46	0
46.1	0
46.2	0
46.3	0
46.4	0
46.5	0
46.6	0
46.7	0
46.8	0
46.9	0
47	0
47.1	0
47.2	0
47.3	0
47.4	0
47.5	0
47.6	0
47.7	0
47.8	0
47.9	0
48	0
48.1	0
48.2	0
48.3	0
48.4	0
48.5	0
48.6	0
48.7	0
48.8	0
48.9	0
49	0
49.1	0
49.2	0
49.3	0
49.4	0
49.5	0
49.6	0
49.7	0
49.8	0
49.9	0
50	0
50.1	0
50.2	0
50.3	0
50.4	0
50.5	0
50.6	0
50.7	0
50.8	0
50.9	0
51	0
51.1	0
51.2	0
51.3	0
51.4	0
51.5	0
51.6	0
51.7	0
51.8	0
51.9	0
52	0
52.1	0
52.2	0
52.3	0
52.4	0
52.5	0
52.6	0
52.7	0
52.8	0
52.9	0
53	0
53.1	0
53.2	0
53.3	0
53.4	0
53.5	0
53.6	0
53.7	0
53.8	0
53.9	0
54	0
54.1	0
54.2	0
54.3	0
54.4	0
54.5	0
54.6	0
54.7	0
54.8	0
54.9	0
55	0
55.1	0
55.2	0
55.3	0
55.4	0
55.5	0
55.6	0
55.7	0
55.8	0
55.9	0
56	0
56.1	0
56.2	0
56.3	0
56.4	0
56.5	0
56.6	0
56.7	0
56.8	0
56.9	0
57	0
57.1	0
57.2	0
57.3	0
57.4	0
57.5	0
57.6	0
57.7	0
57.8	0
57.9	0
58	0
58.1	0
58.2	0
58.3	0
58.4	0
58.5	0
58.6	0
58.7	0
58.8	0
58.9	0
59	0
59.1	0
59.2	0
59.3	0
59.4	0
59.5	0
59.6	0
59.7	0
59.8	0
59.9	0
60	0
60.1	0
60.2	0
60.3	0
60.4	0
60.5	0
60.6	0
60.7	0
60.8	0
60.9	0
61	0
61.1	0
61.2	0
61.3	0
61.4	0
61.5	0
61.6	0
61.7	0
61.8	0
61.9	0
62	0
62.1	0
62.2	0
62.3	0
62.4	0
62.5	0
62.6	0
62.7	0
62.8	0
62.9	0
63	0
63.1	0
63.2	0
63.3	0
63.4	0
63.5	0
63.6	0
63.7	0
63.8	0
63.9	0
64	0
64.1	0
64.2	0
64.3	0
64.4	0
64.5	0
64.6	0
64.7	0
64.8	0
64.9	0
65	0
65.1	0
65.2	0
65.3	0
65.4	0
65.5	0
65.6	0
65.7	0
65.8	0
65.9	0
66	0
66.1	0
66.2	0
66.3	0
66.4	0
66.5	0
66.6	0
66.7	0
66.8	0
66.9	0
67	0
67.1	0
67.2	0
67.3	0
67.4	0
67.5	0
67.6	0
67.7	0
67.8	0
67.9	0
68	0
68.1	0
68.2	0
68.3	0
68.4	0
68.5	0
68.6	0
68.7	0
68.8	0
68.9	0
69	0
69.1	0
69.2	0
69.3	0
69.4	0
69.5	0
69.6	0
69.7	0
69.8	0
69.9	0
70	0
70.1	0
70.2	0
70.3	0
70.4	0
70.5	0
70.6	0
70.7	0
70.8	0
70.9	0
71	0
71.1	0
71.2	0
71.3	0
71.4	0
71.5	0
71.6	0
71.7	0
71.8	0
71.9	0
72	0
72.1	0
72.2	0
72.3	0
72.4	0
72.5	0
72.6	0
72.7	0
72.8	0
72.9	0
73	0
73.1	0
73.2	0
73.3	0
73.4	0
73.5	0
73.6	0
73.7	0
73.8	0
73.9	0
74	0
74.1	0
74.2	0
74.3	0
74.4	0
74.5	0
74.6	0
74.7	0
74.8	0
74.9	0
75	0
75.1	0
75.2	0
75.3	0
75.4	0
75.5	0
75.6	0
75.7	0
75.8	0
75.9	0
76	0
76.1	0
76.2	0
76.3	0
76.4	0
76.5	0
76.6	0
76.7	0
76.8	0
76.9	0
77	0
77.1	0
77.2	0
77.3	0
77.4	0
77.5	0
77.6	0
77.7	0
77.8	0
77.9	0
78	0
78.1	0
78.2	0
78.3	0
78.4	0
78.5	0
78.6	0
78.7	0
78.8	0
78.9	0
79	0
79.1	0
79.2	0
79.3	0
79.4	0
79.5	0
79.6	0
79.7	0
79.8	0
79.9	0
80	0
80.1	0
80.2	0
80.3	0
80.4	0
80.5	0
80.6	0
80.7	0
80.8	0
80.9	0
81	0
81.1	0
81.2	0
81.3	0
81.4	0
81.5	0
81.6	0
81.7	0
81.8	0
81.9	0
82	0
82.1	0
82.2	0
82.3	0
82.4	0
82.5	0
82.6	0
82.7	0
82.8	0
82.9	0
83	0
83.1	0
83.2	0
83.3	0
83.4	0
83.5	0
83.6	0
83.7	0
83.8	0
83.9	0
84	0
84.1	0
84.2	0
84.3	0
84.4	0
84.5	0
84.6	0
84.7	0
84.8	0
84.9	0
85	0
85.1	0
85.2	0
85.3	0
85.4	0
85.5	0
85.6	0
85.7	0
85.8	0
85.9	0
86	0
86.1	0
86.2	0
86.3	0
86.4	0
86.5	0
86.6	0
86.7	0
86.8	0
86.9	0
87	0
87.1	0
87.2	0
87.3	0
87.4	0
87.5	0
87.6	0
87.7	0
87.8	0
87.9	0
88	0
88.1	0
88.2	0
88.3	0
88.4	0
88.5	0
88.6	0
88.7	0
88.8	0
88.9	0
89	0
89.1	0
89.2	0
89.3	0
89.4	0
89.5	0
89.6	0
89.7	0
89.8	0
89.9	0
90	0
90.1	0
90.2	0
90.3	0
90.4	0
90.5	0
90.6	0
90.7	0
90.8	0
90.9	0
91	0
91.1	0
91.2	0
91.3	0
91.4	0
91.5	0
91.6	0
91.7	0
91.8	0
91.9	0
92	0
92.1	0
92.2	0
92.3	0
92.4	0
92.5	0
92.6	0
92.7	0
92.8	0
92.9	0
93	0
93.1	0
93.2	0
93.3	0
93.4	0
93.5	0
93.6	0
93.7	0
93.8	0
93.9	0
94	0
94.1	0
94.2	0
94.3	0
94.4	0
94.5	0
94.6	0
94.7	0
94.8	0
94.9	0
95	0
95.1	0
95.2	0
95.3	0
95.4	0
95.5	0
95.6	0
95.7	0
95.8	0
95.9	0
96	0
96.1	0
96.2	0
96.3	0
96.4	0
96.5	0
96.6	0
96.7	0
96.8	0
96.9	0
97	0
97.1	0
97.2	0
97.3	0
97.4	0
97.5	0
97.6	0
97.7	0
97.8	0
97.9	0
98	0
98.1	0
98.2	0
98.3	0
98.4	0
98.5	0
98.6	0
98.7	0
98.8	0
98.9	0
99	0
99.1	0
99.2	0
99.3	0
99.4	0
99.5	0
99.6	0
99.7	0
99.8	0
99.9	0
100	0
100.1	0.897175
100.2	0.975525
100.3	0.986275
100.4	0.9872
100.5	0.987175
100.6	0.9878
100.7	0.987225
100.8	0.98705
100.9	0.987575
101	0.987275
101.1	0.98845
101.2	0.988775
101.3	0.987175
101.4	0.9881
101.5	0.987575
101.6	0.9878
101.7	0.98865
101.8	0.98895
101.9	0.98875
102	0.98695
102.1	0.9885
102.2	0.98785
102.3	0.988975
102.4	0.9881
102.5	0.9887
102.6	0.989075
102.7	0.989375
102.8	0.98885
102.9	0.988625
103	0.98845
103.1	0.98915
103.2	0.98835
103.3	0.987675
103.4	0.989
103.5	0.9897
103.6	0.98905
103.7	0.9894
103.8	0.9899
103.9	0.989425
104	0.9896
104.1	0.989225
104.2	0.988775
104.3	0.989425
104.4	0.9889
104.5	0.99045
104.6	0.9894
104.7	0.9895
104.8	0.990125
104.9	0.989675
105	0.98965
105.1	0.989725
105.2	0.990625
105.3	0.9903
105.4	0.99035
105.5	0.99065
105.6	0.9902
105.7	0.990675
105.8	0.989375
105.9	0.990125
106	0.989775
106.1	0.9907
106.2	0.9897
106.3	0.991125
106.4	0.99
106.5	0.9905
106.6	0.990675
106.7	0.990075
106.8	0.990125
106.9	0.990975
107	0.9909
107.1	0.9914
107.2	0.99065
107.3	0.9909
107.4	0.991275
107.5	0.99115
107.6	0.991275
107.7	0.991175
107.8	0.9906
107.9	0.9909
108	0.99055
108.1	0.99105
108.2	0.99115
108.3	0.991425
108.4	0.991725
108.5	0.991225
108.6	0.99145
108.7	0.992125
108.8	0.992275
108.9	0.9925
109	0.99105
109.1	0.992025
109.2	0.991125
109.3	0.99255
109.4	0.992175
109.5	0.992025
109.6	0.992
109.7	0.992
109.8	0.99165
109.9	0.99195
110	0.9932
110.1	0.99235
110.2	0.9916
110.3	0.99225
110.4	0.99255
110.5	0.99285
110.6	0.992075
110.7	0.992325
110.8	0.9926
110.9	0.992475
111	0.9928
111.1	0.992325
111.2	0.99295
111.3	0.99305
111.4	0.992175
111.5	0.991725
111.6	0.992025
111.7	0.992475
111.8	0.992575
111.9	0.99165
112	0.991925
112.1	0.992975
112.2	0.992775
112.3	0.99245
112.4	0.992525
112.5	0.9935
112.6	0.993
112.7	0.9929
112.8	0.992925
112.9	0.99335
113	0.9936
113.1	0.99275
113.2	0.993125
113.3	0.993375
113.4	0.993425
113.5	0.9931
113.6	0.992725
113.7	0.991575
113.8	0.9937
113.9	0.993225
114	0.9927
114.1	0.993525
114.2	0.99355
114.3	0.993775
114.4	0.9931
114.5	0.99315
114.6	0.993225
114.7	0.993125
114.8	0.993225
114.9	0.9936
115	0.99285
115.1	0.992775
115.2	0.993675
115.3	0.9939
115.4	0.99355
115.5	0.9925
115.6	0.992975
115.7	0.993475
115.8	0.994175
115.9	0.9935
116	0.9937
116.1	0.993875
116.2	0.9939
116.3	0.99385
116.4	0.993325
116.5	0.993975
116.6	0.994575
116.7	0.994
116.8	0.99445
116.9	0.994125
117	0.994075
117.1	0.994825
117.2	0.9941
117.3	0.993875
117.4	0.994175
117.5	0.993975
117.6	0.994225
117.7	0.994225
117.8	0.994325
117.9	0.994075
118	0.993525
118.1	0.9935
118.2	0.99395
118.3	0.99415
118.4	0.99425
118.5	0.993725
118.6	0.9934
118.7	0.99465
118.8	0.994175
118.9	0.993825
119	0.994525
119.1	0.994525
119.2	0.994225
119.3	0.994825
119.4	0.994025
119.5	0.99415
119.6	0.9942
119.7	0.994325
119.8	0.9943
119.9	0.994025
120	0.993775
120.1	0.995075
120.2	0.994875
120.3	0.993975
120.4	0.99475
120.5	0.995025
120.6	0.994925
120.7	0.994725
120.8	0.99465
120.9	0.99505
121	0.99435
121.1	0.994375
121.2	0.9951
121.3	0.99495
121.4	0.995
121.5	0.9952
121.6	0.9952
121.7	0.9953
121.8	0.995325
121.9	0.995125
122	0.995125
122.1	0.99485
122.2	0.995275
122.3	0.994725
122.4	0.995025
122.5	0.9951
122.6	0.9952
122.7	0.995475
122.8	0.9951
122.9	0.995
123	0.994725
123.1	0.994425
123.2	0.9948
123.3	0.9954
123.4	0.994925
123.5	0.99535
123.6	0.995225
123.7	0.995225
123.8	0.99495
123.9	0.9958
124	0.9954
124.1	0.9946
124.2	0.995325
124.3	0.9957
124.4	0.995025
124.5	0.995375
124.6	0.9954
124.7	0.9959
124.8	0.99495
124.9	0.995475
125	0.99545
125.1	0.99545
125.2	0.995275
125.3	0.99515
125.4	0.995275
125.5	0.99565
125.6	0.9952
125.7	0.99505
125.8	0.995525
125.9	0.995625
126	0.995825
126.1	0.99595
126.2	0.995375
126.3	0.99635
126.4	0.9955
126.5	0.9958
126.6	0.995225
126.7	0.99575
126.8	0.9956
126.9	0.995775
127	0.996
127.1	0.995775
127.2	0.99595
127.3	0.995375
127.4	0.995475
127.5	0.996225
127.6	0.9955
127.7	0.99535
127.8	0.995775
127.9	0.996025
128	0.995625
128.1	0.996075
128.2	0.995775
128.3	0.995875
128.4	0.9958
128.5	0.99595
128.6	0.9955
128.7	0.995925
128.8	0.99585
128.9	0.99565
129	0.995825
129.1	0.996375
129.2	0.995575
129.3	0.996275
129.4	0.99655
129.5	0.996375
129.6	0.9966
129.7	0.99605
129.8	0.9961
129.9	0.996775
130	0.995475
130.1	0.995925
130.2	0.996025
130.3	0.996125
130.4	0.995725
130.5	0.99585
130.6	0.995325
130.7	0.9963
130.8	0.996275
130.9	0.9959
131	0.99645
131.1	0.995975
131.2	0.995875
131.3	0.99605
131.4	0.99605
131.5	0.996525
131.6	0.99575
131.7	0.99615
131.8	0.9968
131.9	0.996325
132	0.996525
132.1	0.9962
132.2	0.996325
132.3	0.996175
132.4	0.9967
132.5	0.996075
132.6	0.996825
132.7	0.996225
132.8	0.99585
132.9	0.9966
133	0.99605
133.1	0.9961
133.2	0.996175
133.3	0.9961
133.4	0.996275
133.5	0.9966
133.6	0.9968
133.7	0.99635
133.8	0.996225
133.9	0.99615
134	0.996025
134.1	0.996125
134.2	0.996375
134.3	0.9964
134.4	0.99605
134.5	0.996375
134.6	0.9962
134.7	0.9965
134.8	0.99665
134.9	0.9963
135	0.9963
135.1	0.9961
135.2	0.9962
135.3	0.99705
135.4	0.99655
135.5	0.996675
135.6	0.99625
135.7	0.996375
135.8	0.99635
135.9	0.996025
136	0.9966
136.1	0.996725
136.2	0.996725
136.3	0.996475
136.4	0.99625
136.5	0.996525
136.6	0.9966
136.7	0.996975
136.8	0.99645
136.9	0.9968
137	0.996425
137.1	0.99675
137.2	0.99685
137.3	0.996425
137.4	0.99655
137.5	0.99625
137.6	0.9964
137.7	0.996825
137.8	0.996575
137.9	0.996875
138	0.996375
138.1	0.996225
138.2	0.9967
138.3	0.996875
138.4	0.996825
138.5	0.99695
138.6	0.996375
138.7	0.996875
138.8	0.9968
138.9	0.99715
139	0.997025
139.1	0.996325
139.2	0.99695
139.3	0.996725
139.4	0.996325
139.5	0.9969
139.6	0.9966
139.7	0.9968
139.8	0.99755
139.9	0.9967
140	0.997125
140.1	0.99715
140.2	0.996725
140.3	0.99675
140.4	0.996975
140.5	0.996425
140.6	0.997
140.7	0.996975
140.8	0.99705
140.9	0.996875
141	0.9972
141.1	0.99705
141.2	0.99705
141.3	0.99705
141.4	0.99705
141.5	0.996375
141.6	0.997125
141.7	0.9966
141.8	0.9966
141.9	0.997
142	0.997125
142.1	0.996675
142.2	0.996675
142.3	0.997525
142.4	0.99725
142.5	0.9974
142.6	0.9973
142.7	0.997475
142.8	0.99645
142.9	0.99705
143	0.996975
143.1	0.997325
143.2	0.997
143.3	0.997075
143.4	0.996975
143.5	0.9969
143.6	0.9974
143.7	0.996975
143.8	0.99685
143.9	0.996575
144	0.997
144.1	0.996925
144.2	0.996925
144.3	0.99695
144.4	0.99685
144.5	0.997125
144.6	0.9971
144.7	0.997075
144.8	0.997225
144.9	0.997175
145	0.9974
145.1	0.997325
145.2	0.997175
145.3	0.9967
145.4	0.997375
145.5	0.9971
145.6	0.997325
145.7	0.99705
145.8	0.997375
145.9	0.99725
146	0.997575
146.1	0.99715
146.2	0.997325
146.3	0.997025
146.4	0.997075
146.5	0.997125
146.6	0.9971
146.7	0.9977
146.8	0.997075
146.9	0.997575
147	0.997075
147.1	0.99755
147.2	0.9975
147.3	0.99725
147.4	0.997725
147.5	0.997425
147.6	0.99715
147.7	0.99735
147.8	0.9972
147.9	0.9973
148	0.997775
148.1	0.99735
148.2	0.996725
148.3	0.99735
148.4	0.997675
148.5	0.9971
148.6	0.996675
148.7	0.9974
148.8	0.9972
148.9	0.997525
149	0.997375
149.1	0.997225
149.2	0.9974
149.3	0.997625
149.4	0.99675
149.5	0.996825
149.6	0.997075
149.7	0.99695
149.8	0.99775
149.9	0.996925
150	0.99715
150.1	0.9979
150.2	0.9973
150.3	0.997425
150.4	0.9972
150.5	0.9975
150.6	0.997125
150.7	0.996925
150.8	0.997275
150.9	0.99765
151	0.9971
151.1	0.997075
151.2	0.99775
151.3	0.9971
151.4	0.9977
151.5	0.99755
151.6	0.997
151.7	0.9976
151.8	0.997175
151.9	0.99745
152	0.997375
152.1	0.996975
152.2	0.9973
152.3	0.99745
152.4	0.99715
152.5	0.9978
152.6	0.997475
152.7	0.99765
152.8	0.997275
152.9	0.997125
153	0.997475
153.1	0.9975
153.2	0.9978
153.3	0.9971
153.4	0.9973
153.5	0.996875
153.6	0.9968
153.7	0.997425
153.8	0.99735
153.9	0.997775
154	0.99765
154.1	0.997
154.2	0.99725
154.3	0.997375
154.4	0.997375
154.5	0.99725
154.6	0.9975
154.7	0.997275
154.8	0.997325
154.9	0.99735
155	0.9975
155.1	0.99795
155.2	0.9977
155.3	0.997
155.4	0.997125
155.5	0.997225
155.6	0.99735
155.7	0.997575
155.8	0.9971
155.9	0.997775
156	0.997525
156.1	0.997375
156.2	0.997625
156.3	0.997875
156.4	0.997425
156.5	0.997525
156.6	0.99745
156.7	0.9974
156.8	0.9974
156.9	0.99755
157	0.997375
157.1	0.997275
157.2	0.997425
157.3	0.99755
157.4	0.99785
157.5	0.997675
157.6	0.99755
157.7	0.997475
157.8	0.997525
157.9	0.997275
158	0.997275
158.1	0.997375
158.2	0.997275
158.3	0.997125
158.4	0.997625
158.5	0.9979
158.6	0.9978
158.7	0.997675
158.8	0.9975
158.9	0.997075
159	0.9978
159.1	0.99785
159.2	0.997275
159.3	0.997625
159.4	0.9979
159.5	0.9969
159.6	0.997425
159.7	0.9971
159.8	0.997425
159.9	0.997625
160	0.99775
160.1	0.9977
160.2	0.997625
160.3	0.9975
160.4	0.9972
160.5	0.997525
160.6	0.997225
160.7	0.9973
160.8	0.998075
160.9	0.99785
161	0.997525
161.1	0.9975
161.2	0.997575
161.3	0.99785
161.4	0.9974
161.5	0.99705
161.6	0.9976
161.7	0.998025
161.8	0.99795
161.9	0.9975
162	0.997825
162.1	0.9977
162.2	0.99775
162.3	0.9976
162.4	0.997475
162.5	0.9974
162.6	0.997475
162.7	0.9979
162.8	0.99725
162.9	0.9979
163	0.997975
163.1	0.9972
163.2	0.9977
163.3	0.997525
163.4	0.997425
163.5	0.9976
163.6	0.99725
163.7	0.99805
163.8	0.997975
163.9	0.9974
164	0.9975
164.1	0.9976
164.2	0.998
164.3	0.99775
164.4	0.9979
164.5	0.9975
164.6	0.9977
164.7	0.997425
164.8	0.9973
164.9	0.997475
165	0.9975
165.1	0.997625
165.2	0.99725
165.3	0.99735
165.4	0.997475
165.5	0.997725
165.6	0.997675
165.7	0.997425
165.8	0.997675
165.9	0.99755
166	0.9977
166.1	0.99735
166.2	0.99785
166.3	0.997825
166.4	0.99765
166.5	0.9975
166.6	0.997525
166.7	0.997725
166.8	0.997375
166.9	0.997675
167	0.997925
167.1	0.99805
167.2	0.997575
167.3	0.9976
167.4	0.99785
167.5	0.997425
167.6	0.997775
167.7	0.997625
167.8	0.99775
167.9	0.997675
168	0.997425
168.1	0.9976
168.2	0.997575
168.3	0.997525
168.4	0.998025
168.5	0.997775
168.6	0.99765
168.7	0.997875
168.8	0.99775
168.9	0.997625
169	0.998125
169.1	0.99795
169.2	0.997775
169.3	0.997725
169.4	0.9974
169.5	0.99735
169.6	0.9975
169.7	0.9973
169.8	0.9982
169.9	0.99755
170	0.99755
170.1	0.997475
170.2	0.9975
170.3	0.997975
170.4	0.9977
170.5	0.9973
170.6	0.997425
170.7	0.997025
170.8	0.9973
170.9	0.997375
171	0.9975
171.1	0.99755
171.2	0.997625
171.3	0.99785
171.4	0.99715
171.5	0.998
171.6	0.998075
171.7	0.99735
171.8	0.99765
171.9	0.99785
172	0.99815
172.1	0.997975
172.2	0.997675
172.3	0.99775
172.4	0.99785
172.5	0.997725
172.6	0.99755
172.7	0.998075
172.8	0.9975
172.9	0.99705
173	0.9975
173.1	0.99755
173.2	0.997575
173.3	0.996875
173.4	0.99745
173.5	0.997825
173.6	0.99765
173.7	0.998
173.8	0.997475
173.9	0.99755
174	0.9971
174.1	0.997875
174.2	0.997625
174.3	0.997625
174.4	0.997825
174.5	0.9977
174.6	0.997625
174.7	0.99725
174.8	0.99775
174.9	0.99755
175	0.997575
175.1	0.99765
175.2	0.997825
175.3	0.997725
175.4	0.99765
175.5	0.997225
175.6	0.99795
175.7	0.9975
175.8	0.99785
175.9	0.9978
176	0.997775
176.1	0.997675
176.2	0.997575
176.3	0.9977
176.4	0.997775
176.5	0.99755
176.6	0.99785
176.7	0.997575
176.8	0.99785
176.9	0.998075
177	0.99775
177.1	0.99765
177.2	0.99775
177.3	0.997975
177.4	0.997275
177.5	0.997625
177.6	0.9978
177.7	0.997425
177.8	0.997625
177.9	0.997375
178	0.9977
178.1	0.997925
178.2	0.997625
178.3	0.997975
178.4	0.99805
178.5	0.99775
178.6	0.9974
178.7	0.99725
178.8	0.9976
178.9	0.997325
179	0.99755
179.1	0.997475
179.2	0.997875
179.3	0.997575
179.4	0.99805
179.5	0.998125
179.6	0.99785
179.7	0.9979
179.8	0.997475
179.9	0.997575
180	0.9977
180.1	0.99775
180.2	0.99785
180.3	0.99815
180.4	0.99775
180.5	0.99775
180.6	0.998
180.7	0.99785
180.8	0.997325
180.9	0.997375
181	0.997775
181.1	0.99765
181.2	0.997975
181.3	0.998025
181.4	0.997675
181.5	0.998025
181.6	0.997775
181.7	0.99755
181.8	0.998
181.9	0.997425
182	0.9979
182.1	0.997875
182.2	0.9983
182.3	0.997925
182.4	0.9977
182.5	0.998025
182.6	0.997775
182.7	0.9979
182.8	0.997725
182.9	0.998125
183	0.9979
183.1	0.997825
183.2	0.9976
183.3	0.997525
183.4	0.9979
183.5	0.99795
183.6	0.997725
183.7	0.9976
183.8	0.99795
183.9	0.9972
184	0.9977
184.1	0.997575
184.2	0.9979
184.3	0.99765
184.4	0.997525
184.5	0.997925
184.6	0.9976
184.7	0.9976
184.8	0.99765
184.9	0.997725
185	0.998
185.1	0.997775
185.2	0.997675
185.3	0.997875
185.4	0.997475
185.5	0.99735
185.6	0.997275
185.7	0.997525
185.8	0.9976
185.9	0.998025
186	0.99775
186.1	0.99825
186.2	0.99785
186.3	0.9978
186.4	0.99765
186.5	0.997825
186.6	0.997875
186.7	0.997625
186.8	0.99825
186.9	0.997425
187	0.997625
187.1	0.997925
187.2	0.9974
187.3	0.9975
187.4	0.99745
187.5	0.997875
187.6	0.9979
187.7	0.997775
187.8	0.99795
187.9	0.99755
188	0.9977
188.1	0.997675
188.2	0.998025
188.3	0.997575
188.4	0.9974
188.5	0.9976
188.6	0.997875
188.7	0.9978
188.8	0.997425
188.9	0.99785
189	0.99755
189.1	0.997925
189.2	0.997875
189.3	0.9976
189.4	0.997975
189.5	0.997975
189.6	0.997875
189.7	0.997875
189.8	0.997575
189.9	0.99755
190	0.99785
190.1	0.9976
190.2	0.99815
190.3	0.998
190.4	0.9978
190.5	0.997875
190.6	0.99775
190.7	0.99735
190.8	0.9977
190.9	0.998025
191	0.9971
191.1	0.997525
191.2	0.9978
191.3	0.9978
191.4	0.99775
191.5	0.997875
191.6	0.99785
191.7	0.997875
191.8	0.99785
191.9	0.997925
192	0.9979
192.1	0.997725
192.2	0.99795
192.3	0.997725
192.4	0.997375
192.5	0.9977
192.6	0.99745
192.7	0.9973
192.8	0.99765
192.9	0.997425
193	0.997325
193.1	0.99805
193.2	0.998125
193.3	0.99765
193.4	0.997875
193.5	0.99795
193.6	0.997825
193.7	0.9975
193.8	0.9978
193.9	0.997975
194	0.9976
194.1	0.99795
194.2	0.99755
194.3	0.997825
194.4	0.99775
194.5	0.997525
194.6	0.9978
194.7	0.9978
194.8	0.9977
194.9	0.998075
195	0.99725
195.1	0.99785
195.2	0.997875
195.3	0.99775
195.4	0.997875
195.5	0.998
195.6	0.997575
195.7	0.997575
195.8	0.9977
195.9	0.99805
196	0.99775
196.1	0.997875
196.2	0.997725
196.3	0.998
196.4	0.9976
196.5	0.99765
196.6	0.99775
196.7	0.997725
196.8	0.997825
196.9	0.9978
197	0.998025
197.1	0.9976
197.2	0.9978
197.3	0.9981
197.4	0.99785
197.5	0.998025
197.6	0.99785
197.7	0.997925
197.8	0.9977
197.9	0.997875
198	0.997775
198.1	0.997475
198.2	0.997975
198.3	0.997875
198.4	0.997775
198.5	0.998025
198.6	0.997625
198.7	0.997875
198.8	0.997575
198.9	0.997525
199	0.99775
199.1	0.9978
199.2	0.998325
199.3	0.998125
199.4	0.99775
199.5	0.998025
199.6	0.99775
199.7	0.99795
199.8	0.997925
199.9	0.998275
200	0.998125
[truncated: 14,000 more rows]
