# Supplementary material for: Bayesian inference of kinetic schemes for ion channels by Kalman filtering
Source: eLife journal article supplement (doi:10.7554/elife.62714), 2022-05-04
Supplement: fig4-data2 [file 1_Sim_N_20000_Strom_MW.xlsx]

## Sheet: Tabelle1
0.1	0
0.2	0
0.3	0
0.4	0
0.5	0
0.6	0
0.7	0
0.8	0
0.9	0
1	0
1.1	0
1.2	0
1.3	0
1.4	0
1.5	0
1.6	0
1.7	0
1.8	0
1.9	0
2	0
2.1	0
2.2	0
2.3	0
2.4	0
2.5	0
2.6	0
2.7	0
2.8	0
2.9	0
3	0
3.1	0
3.2	0
3.3	0
3.4	0
3.5	0
3.6	0
3.7	0
3.8	0
3.9	0
4	0
4.1	0
4.2	0
4.3	0
4.4	0
4.5	0
4.6	0
4.7	0
4.8	0
4.9	0
5	0
5.1	0
5.2	0
5.3	0
5.4	0
5.5	0
5.6	0
5.7	0
5.8	0
5.9	0
6	0
6.1	0
6.2	0
6.3	0
6.4	0
6.5	0
6.6	0
6.7	0
6.8	0
6.9	0
7	0
7.1	0
7.2	0
7.3	0
7.4	0
7.5	0
7.6	0
7.7	0
7.8	0
7.9	0
8	0
8.1	0
8.2	0
8.3	0
8.4	0
8.5	0
8.6	0
8.7	0
8.8	0
8.9	0
9	0
9.1	0
9.2	0
9.3	0
9.4	0
9.5	0
9.6	0
9.7	0
9.8	0
9.9	0
10	0
10.1	0
10.2	0
10.3	0
10.4	0
10.5	0
10.6	0
10.7	0
10.8	0
10.9	0
11	0
11.1	0
11.2	0
11.3	0
11.4	0
11.5	0
11.6	0
11.7	0
11.8	0
11.9	0
12	0
12.1	0
12.2	0
12.3	0
12.4	0
12.5	0
12.6	0
12.7	0
12.8	0
12.9	0
13	0
13.1	0
13.2	0
13.3	0
13.4	0
13.5	0
13.6	0
13.7	0
13.8	0
13.9	0
14	0
14.1	0
14.2	0
14.3	0
14.4	0
14.5	0
14.6	0
14.7	0
14.8	0
14.9	0
15	0
15.1	0
15.2	0
15.3	0
15.4	0
15.5	0
15.6	0
15.7	0
15.8	0
15.9	0
16	0
16.1	0
16.2	0
16.3	0
16.4	0
16.5	0
16.6	0
16.7	0
16.8	0
16.9	0
17	0
17.1	0
17.2	0
17.3	0
17.4	0
17.5	0
17.6	0
17.7	0
17.8	0
17.9	0
18	0
18.1	0
18.2	0
18.3	0
18.4	0
18.5	0
18.6	0
18.7	0
18.8	0
18.9	0
19	0
19.1	0
19.2	0
19.3	0
19.4	0
19.5	0
19.6	0
19.7	0
19.8	0
19.9	0
20	0
20.1	0
20.2	0
20.3	0
20.4	0
20.5	0
20.6	0
20.7	0
20.8	0
20.9	0
21	0
21.1	0
21.2	0
21.3	0
21.4	0
21.5	0
21.6	0
21.7	0
21.8	0
21.9	0
22	0
22.1	0
22.2	0
22.3	0
22.4	0
22.5	0
22.6	0
22.7	0
22.8	0
22.9	0
23	0
23.1	0
23.2	0
23.3	0
23.4	0
23.5	0
23.6	0
23.7	0
23.8	0
23.9	0
24	0
24.1	0
24.2	0
24.3	0
24.4	0
24.5	0
24.6	0
24.7	0
24.8	0
24.9	0
25	0
25.1	0
25.2	0
25.3	0
25.4	0
25.5	0
25.6	0
25.7	0
25.8	0
25.9	0
26	0
26.1	0
26.2	0
26.3	0
26.4	0
26.5	0
26.6	0
26.7	0
26.8	0
26.9	0
27	0
27.1	0
27.2	0
27.3	0
27.4	0
27.5	0
27.6	0
27.7	0
27.8	0
27.9	0
28	0
28.1	0
28.2	0
28.3	0
28.4	0
28.5	0
28.6	0
28.7	0
28.8	0
28.9	0
29	0
29.1	0
29.2	0
29.3	0
29.4	0
29.5	0
29.6	0
29.7	0
29.8	0
29.9	0
30	0
30.1	0
30.2	0
30.3	0
30.4	0
30.5	0
30.6	0
30.7	0
30.8	0
30.9	0
31	0
31.1	0
31.2	0
31.3	0
31.4	0
31.5	0
31.6	0
31.7	0
31.8	0
31.9	0
32	0
32.1	0
32.2	0
32.3	0
32.4	0
32.5	0
32.6	0
32.7	0
32.8	0
32.9	0
33	0
33.1	0
33.2	0
33.3	0
33.4	0
33.5	0
33.6	0
33.7	0
33.8	0
33.9	0
34	0
34.1	0
34.2	0
34.3	0
34.4	0
34.5	0
34.6	0
34.7	0
34.8	0
34.9	0
35	0
35.1	0
35.2	0
35.3	0
35.4	0
35.5	0
35.6	0
35.7	0
35.8	0
35.9	0
36	0
36.1	0
36.2	0
36.3	0
36.4	0
36.5	0
36.6	0
36.7	0
36.8	0
36.9	0
37	0
37.1	0
37.2	0
37.3	0
37.4	0
37.5	0
37.6	0
37.7	0
37.8	0
37.9	0
38	0
38.1	0
38.2	0
38.3	0
38.4	0
38.5	0
38.6	0
38.7	0
38.8	0
38.9	0
39	0
39.1	0
39.2	0
39.3	0
39.4	0
39.5	0
39.6	0
39.7	0
39.8	0
39.9	0
40	0
40.1	0
40.2	0
40.3	0
40.4	0
40.5	0
40.6	0
40.7	0
40.8	0
40.9	0
41	0
41.1	0
41.2	0
41.3	0
41.4	0
41.5	0
41.6	0
41.7	0
41.8	0
41.9	0
42	0
42.1	0
42.2	0
42.3	0
42.4	0
42.5	0
42.6	0
42.7	0
42.8	0
42.9	0
43	0
43.1	0
43.2	0
43.3	0
43.4	0
43.5	0
43.6	0
43.7	0
43.8	0
43.9	0
44	0
44.1	0
44.2	0
44.3	0
44.4	0
44.5	0
44.6	0
44.7	0
44.8	0
44.9	0
45	0
45.1	0
45.2	0
45.3	0
45.4	0
45.5	0
45.6	0
45.7	0
45.8	0
45.9	0
46	0
46.1	0
46.2	0
46.3	0
46.4	0
46.5	0
46.6	0
46.7	0
46.8	0
46.9	0
47	0
47.1	0
47.2	0
47.3	0
47.4	0
47.5	0
47.6	0
47.7	0
47.8	0
47.9	0
48	0
48.1	0
48.2	0
48.3	0
48.4	0
48.5	0
48.6	0
48.7	0
48.8	0
48.9	0
49	0
49.1	0
49.2	0
49.3	0
49.4	0
49.5	0
49.6	0
49.7	0
49.8	0
49.9	0
50	0
50.1	0
50.2	0
50.3	0
50.4	0
50.5	0
50.6	0
50.7	0
50.8	0
50.9	0
51	0
51.1	0
51.2	0
51.3	0
51.4	0
51.5	0
51.6	0
51.7	0
51.8	0
51.9	0
52	0
52.1	0
52.2	0
52.3	0
52.4	0
52.5	0
52.6	0
52.7	0
52.8	0
52.9	0
53	0
53.1	0
53.2	0
53.3	0
53.4	0
53.5	0
53.6	0
53.7	0
53.8	0
53.9	0
54	0
54.1	0
54.2	0
54.3	0
54.4	0
54.5	0
54.6	0
54.7	0
54.8	0
54.9	0
55	0
55.1	0
55.2	0
55.3	0
55.4	0
55.5	0
55.6	0
55.7	0
55.8	0
55.9	0
56	0
56.1	0
56.2	0
56.3	0
56.4	0
56.5	0
56.6	0
56.7	0
56.8	0
56.9	0
57	0
57.1	0
57.2	0
57.3	0
57.4	0
57.5	0
57.6	0
57.7	0
57.8	0
57.9	0
58	0
58.1	0
58.2	0
58.3	0
58.4	0
58.5	0
58.6	0
58.7	0
58.8	0
58.9	0
59	0
59.1	0
59.2	0
59.3	0
59.4	0
59.5	0
59.6	0
59.7	0
59.8	0
59.9	0
60	0
60.1	0
60.2	0
60.3	0
60.4	0
60.5	0
60.6	0
60.7	0
60.8	0
60.9	0
61	0
61.1	0
61.2	0
61.3	0
61.4	0
61.5	0
61.6	0
61.7	0
61.8	0
61.9	0
62	0
62.1	0
62.2	0
62.3	0
62.4	0
62.5	0
62.6	0
62.7	0
62.8	0
62.9	0
63	0
63.1	0
63.2	0
63.3	0
63.4	0
63.5	0
63.6	0
63.7	0
63.8	0
63.9	0
64	0
64.1	0
64.2	0
64.3	0
64.4	0
64.5	0
64.6	0
64.7	0
64.8	0
64.9	0
65	0
65.1	0
65.2	0
65.3	0
65.4	0
65.5	0
65.6	0
65.7	0
65.8	0
65.9	0
66	0
66.1	0
66.2	0
66.3	0
66.4	0
66.5	0
66.6	0
66.7	0
66.8	0
66.9	0
67	0
67.1	0
67.2	0
67.3	0
67.4	0
67.5	0
67.6	0
67.7	0
67.8	0
67.9	0
68	0
68.1	0
68.2	0
68.3	0
68.4	0
68.5	0
68.6	0
68.7	0
68.8	0
68.9	0
69	0
69.1	0
69.2	0
69.3	0
69.4	0
69.5	0
69.6	0
69.7	0
69.8	0
69.9	0
70	0
70.1	0
70.2	0
70.3	0
70.4	0
70.5	0
70.6	0
70.7	0
70.8	0
70.9	0
71	0
71.1	0
71.2	0
71.3	0
71.4	0
71.5	0
71.6	0
71.7	0
71.8	0
71.9	0
72	0
72.1	0
72.2	0
72.3	0
72.4	0
72.5	0
72.6	0
72.7	0
72.8	0
72.9	0
73	0
73.1	0
73.2	0
73.3	0
73.4	0
73.5	0
73.6	0
73.7	0
73.8	0
73.9	0
74	0
74.1	0
74.2	0
74.3	0
74.4	0
74.5	0
74.6	0
74.7	0
74.8	0
74.9	0
75	0
75.1	0
75.2	0
75.3	0
75.4	0
75.5	0
75.6	0
75.7	0
75.8	0
75.9	0
76	0
76.1	0
76.2	0
76.3	0
76.4	0
76.5	0
76.6	0
76.7	0
76.8	0
76.9	0
77	0
77.1	0
77.2	0
77.3	0
77.4	0
77.5	0
77.6	0
77.7	0
77.8	0
77.9	0
78	0
78.1	0
78.2	0
78.3	0
78.4	0
78.5	0
78.6	0
78.7	0
78.8	0
78.9	0
79	0
79.1	0
79.2	0
79.3	0
79.4	0
79.5	0
79.6	0
79.7	0
79.8	0
79.9	0
80	0
80.1	0
80.2	0
80.3	0
80.4	0
80.5	0
80.6	0
80.7	0
80.8	0
80.9	0
81	0
81.1	0
81.2	0
81.3	0
81.4	0
81.5	0
81.6	0
81.7	0
81.8	0
81.9	0
82	0
82.1	0
82.2	0
82.3	0
82.4	0
82.5	0
82.6	0
82.7	0
82.8	0
82.9	0
83	0
83.1	0
83.2	0
83.3	0
83.4	0
83.5	0
83.6	0
83.7	0
83.8	0
83.9	0
84	0
84.1	0
84.2	0
84.3	0
84.4	0
84.5	0
84.6	0
84.7	0
84.8	0
84.9	0
85	0
85.1	0
85.2	0
85.3	0
85.4	0
85.5	0
85.6	0
85.7	0
85.8	0
85.9	0
86	0
86.1	0
86.2	0
86.3	0
86.4	0
86.5	0
86.6	0
86.7	0
86.8	0
86.9	0
87	0
87.1	0
87.2	0
87.3	0
87.4	0
87.5	0
87.6	0
87.7	0
87.8	0
87.9	0
88	0
88.1	0
88.2	0
88.3	0
88.4	0
88.5	0
88.6	0
88.7	0
88.8	0
88.9	0
89	0
89.1	0
89.2	0
89.3	0
89.4	0
89.5	0
89.6	0
89.7	0
89.8	0
89.9	0
90	0
90.1	0
90.2	0
90.3	0
90.4	0
90.5	0
90.6	0
90.7	0
90.8	0
90.9	0
91	0
91.1	0
91.2	0
91.3	0
91.4	0
91.5	0
91.6	0
91.7	0
91.8	0
91.9	0
92	0
92.1	0
92.2	0
92.3	0
92.4	0
92.5	0
92.6	0
92.7	0
92.8	0
92.9	0
93	0
93.1	0
93.2	0
93.3	0
93.4	0
93.5	0
93.6	0
93.7	0
93.8	0
93.9	0
94	0
94.1	0
94.2	0
94.3	0
94.4	0
94.5	0
94.6	0
94.7	0
94.8	0
94.9	0
95	0
95.1	0
95.2	0
95.3	0
95.4	0
95.5	0
95.6	0
95.7	0
95.8	0
95.9	0
96	0
96.1	0
96.2	0
96.3	0
96.4	0
96.5	0
96.6	0
96.7	0
96.8	0
96.9	0
97	0
97.1	0
97.2	0
97.3	0
97.4	0
97.5	0
97.6	0
97.7	0
97.8	0
97.9	0
98	0
98.1	0
98.2	0
98.3	0
98.4	0
98.5	0
98.6	0
98.7	0
98.8	0
98.9	0
99	0
99.1	0
99.2	0
99.3	0
99.4	0
99.5	0
99.6	0
99.7	0
99.8	0
99.9	0
100	0
100.1	0.00235
100.2	0.0061
100.3	0.0114
100.4	0.01615
100.5	0.02075
100.6	0.025
100.7	0.0295
100.8	0.03425
100.9	0.0393
101	0.04385
101.1	0.0484
101.2	0.05295
101.3	0.0584
101.4	0.06315
101.5	0.06755
101.6	0.07175
101.7	0.0761
101.8	0.08015
101.9	0.08455
102	0.0891
102.1	0.0933
102.2	0.0974
102.3	0.10095
102.4	0.10485
102.5	0.10825
102.6	0.11205
102.7	0.11635
102.8	0.12095
102.9	0.1257
103	0.12925
103.1	0.1335
103.2	0.13775
103.3	0.1418
103.4	0.1462
103.5	0.1502
103.6	0.15345
103.7	0.1575
103.8	0.1609
103.9	0.165
104	0.16885
104.1	0.17315
104.2	0.17635
104.3	0.181
104.4	0.18485
104.5	0.18855
104.6	0.1925
104.7	0.19625
104.8	0.19995
104.9	0.20445
105	0.20825
105.1	0.2122
105.2	0.21605
105.3	0.21965
105.4	0.22485
105.5	0.2286
105.6	0.2324
105.7	0.23655
105.8	0.24045
105.9	0.2437
106	0.24745
106.1	0.2512
106.2	0.25425
106.3	0.2578
106.4	0.2611
106.5	0.26425
106.6	0.2677
106.7	0.27015
106.8	0.27385
106.9	0.27725
107	0.2804
107.1	0.28345
107.2	0.2874
107.3	0.28955
107.4	0.29235
107.5	0.2959
107.6	0.29825
107.7	0.30145
107.8	0.3035
107.9	0.3066
108	0.3103
108.1	0.31295
108.2	0.31625
108.3	0.3196
108.4	0.3228
108.5	0.326
108.6	0.329
108.7	0.33205
108.8	0.33515
108.9	0.33825
109	0.34085
109.1	0.34385
109.2	0.34645
109.3	0.35025
109.4	0.3534
109.5	0.35595
109.6	0.3588
109.7	0.3613
109.8	0.3646
109.9	0.36665
110	0.3691
110.1	0.3715
110.2	0.3741
110.3	0.3768
110.4	0.37955
110.5	0.382
110.6	0.3842
110.7	0.3867
110.8	0.3885
110.9	0.3911
111	0.394
111.1	0.3965
111.2	0.4
111.3	0.4031
111.4	0.40575
111.5	0.4088
111.6	0.41125
111.7	0.4137
111.8	0.41605
111.9	0.41885
112	0.42095
112.1	0.4241
112.2	0.4265
112.3	0.42875
112.4	0.43075
112.5	0.4332
112.6	0.43535
112.7	0.4375
112.8	0.43945
112.9	0.4424
113	0.4449
113.1	0.44705
113.2	0.449
113.3	0.45135
113.4	0.4539
113.5	0.4563
113.6	0.45845
113.7	0.4607
113.8	0.46305
113.9	0.46495
114	0.4664
114.1	0.46865
114.2	0.4718
114.3	0.474
114.4	0.4762
114.5	0.47905
114.6	0.48145
114.7	0.4837
114.8	0.48565
114.9	0.48775
115	0.48935
115.1	0.49115
115.2	0.49235
115.3	0.49455
115.4	0.4957
115.5	0.49775
115.6	0.50005
115.7	0.50225
115.8	0.50425
115.9	0.50595
116	0.50755
116.1	0.50915
116.2	0.51045
116.3	0.51215
116.4	0.51365
116.5	0.515
116.6	0.51745
116.7	0.5191
116.8	0.521
116.9	0.52305
117	0.52465
117.1	0.52685
117.2	0.52825
117.3	0.52985
117.4	0.531
117.5	0.53275
117.6	0.5345
117.7	0.5364
117.8	0.53795
117.9	0.54045
118	0.5421
118.1	0.54435
118.2	0.5463
118.3	0.54845
118.4	0.5502
118.5	0.5526
118.6	0.5544
118.7	0.55555
118.8	0.55815
118.9	0.56025
119	0.5613
119.1	0.56275
119.2	0.56465
119.3	0.56675
119.4	0.56845
119.5	0.56965
119.6	0.57155
119.7	0.57335
119.8	0.575
119.9	0.5758
120	0.57745
120.1	0.57875
120.2	0.5805
120.3	0.58165
120.4	0.5831
120.5	0.58425
120.6	0.58515
120.7	0.58635
120.8	0.5875
120.9	0.5889
121	0.59045
121.1	0.59195
121.2	0.59405
121.3	0.5954
121.4	0.59605
121.5	0.5977
121.6	0.59855
121.7	0.59975
121.8	0.6009
121.9	0.60255
122	0.6035
122.1	0.6048
122.2	0.60595
122.3	0.6078
122.4	0.60875
122.5	0.60965
122.6	0.6112
122.7	0.612
122.8	0.6131
122.9	0.6147
123	0.61585
123.1	0.61635
123.2	0.61825
123.3	0.619
123.4	0.61975
123.5	0.6212
123.6	0.62245
123.7	0.62325
123.8	0.6246
123.9	0.6257
124	0.62715
124.1	0.6285
124.2	0.62985
124.3	0.63135
124.4	0.63225
124.5	0.63325
124.6	0.63515
124.7	0.6366
124.8	0.6373
124.9	0.63895
125	0.64035
125.1	0.6411
125.2	0.64245
125.3	0.64305
125.4	0.6446
125.5	0.64535
125.6	0.64695
125.7	0.6482
125.8	0.6497
125.9	0.65115
126	0.6521
126.1	0.65345
126.2	0.6545
126.3	0.65555
126.4	0.6566
126.5	0.65705
126.6	0.6583
126.7	0.6587
126.8	0.66025
126.9	0.6612
127	0.66225
127.1	0.6633
127.2	0.66395
127.3	0.665
127.4	0.6659
127.5	0.66685
127.6	0.66825
127.7	0.66825
127.8	0.6685
127.9	0.6691
128	0.6705
128.1	0.6717
128.2	0.6728
128.3	0.67365
128.4	0.6745
128.5	0.6752
128.6	0.6763
128.7	0.6768
128.8	0.6776
128.9	0.67845
129	0.67945
129.1	0.68
129.2	0.68055
129.3	0.68155
129.4	0.6831
129.5	0.68385
129.6	0.68485
129.7	0.68505
129.8	0.6857
129.9	0.6867
130	0.6876
130.1	0.68835
130.2	0.689
130.3	0.6896
130.4	0.6899
130.5	0.6906
130.6	0.69105
130.7	0.69195
130.8	0.69305
130.9	0.6938
131	0.69485
131.1	0.69525
131.2	0.69635
131.3	0.69715
131.4	0.69795
131.5	0.698
131.6	0.69915
131.7	0.6998
131.8	0.7006
131.9	0.7019
132	0.70265
132.1	0.70325
132.2	0.7044
132.3	0.70535
132.4	0.7062
132.5	0.70695
132.6	0.7076
132.7	0.70845
132.8	0.7094
132.9	0.70955
133	0.71005
133.1	0.71055
133.2	0.71155
133.3	0.71225
133.4	0.71335
133.5	0.7142
133.6	0.71515
133.7	0.7159
133.8	0.7164
133.9	0.71735
134	0.7186
134.1	0.71905
134.2	0.71925
134.3	0.71985
134.4	0.72065
134.5	0.7214
134.6	0.72215
134.7	0.723
134.8	0.72315
134.9	0.7237
135	0.7241
135.1	0.7251
135.2	0.72515
135.3	0.726
135.4	0.72695
135.5	0.72825
135.6	0.72925
135.7	0.72955
135.8	0.72995
135.9	0.7303
136	0.7309
136.1	0.73135
136.2	0.7321
136.3	0.732
136.4	0.73275
136.5	0.73305
136.6	0.7337
136.7	0.7337
136.8	0.7341
136.9	0.7348
137	0.73555
137.1	0.73625
137.2	0.73655
137.3	0.7366
137.4	0.73705
137.5	0.73795
137.6	0.7382
137.7	0.73825
137.8	0.73905
137.9	0.7396
138	0.74065
138.1	0.74115
138.2	0.74245
138.3	0.7435
138.4	0.74425
138.5	0.7446
138.6	0.7448
138.7	0.7455
138.8	0.7463
138.9	0.74645
139	0.74735
139.1	0.7477
139.2	0.7485
139.3	0.74935
139.4	0.7498
139.5	0.75025
139.6	0.75085
139.7	0.75135
139.8	0.75175
139.9	0.752
140	0.7524
140.1	0.753
140.2	0.75395
140.3	0.7539
140.4	0.75435
140.5	0.75485
140.6	0.75495
140.7	0.75545
140.8	0.756
140.9	0.75645
141	0.75695
141.1	0.75735
141.2	0.75825
141.3	0.75895
141.4	0.7589
141.5	0.7586
141.6	0.75935
141.7	0.76
141.8	0.7604
141.9	0.7605
142	0.7608
142.1	0.7615
142.2	0.7616
142.3	0.7622
142.4	0.7629
142.5	0.7634
142.6	0.7639
142.7	0.7639
142.8	0.76455
142.9	0.7652
143	0.76575
143.1	0.766
143.2	0.7667
143.3	0.76685
143.4	0.76665
143.5	0.7666
143.6	0.767
143.7	0.76765
143.8	0.7679
143.9	0.76795
144	0.7684
144.1	0.76855
144.2	0.76935
144.3	0.7694
144.4	0.7695
144.5	0.76985
144.6	0.7707
144.7	0.77115
144.8	0.7712
144.9	0.7714
145	0.77155
145.1	0.7723
145.2	0.77295
145.3	0.77335
145.4	0.77345
145.5	0.77395
145.6	0.7741
145.7	0.77425
145.8	0.7745
145.9	0.77495
146	0.77545
146.1	0.77595
146.2	0.77685
146.3	0.7769
146.4	0.77745
146.5	0.77845
146.6	0.7789
146.7	0.77915
146.8	0.7794
146.9	0.78
147	0.78015
147.1	0.78045
147.2	0.7808
147.3	0.7813
147.4	0.7813
147.5	0.78165
147.6	0.78195
147.7	0.7826
147.8	0.7828
147.9	0.78315
148	0.783
148.1	0.783
148.2	0.78255
148.3	0.7831
148.4	0.7832
148.5	0.7832
148.6	0.78305
148.7	0.78305
148.8	0.7836
148.9	0.78415
149	0.78435
149.1	0.78465
149.2	0.785
149.3	0.7854
149.4	0.786
149.5	0.7864
149.6	0.78655
149.7	0.78635
149.8	0.7862
149.9	0.7866
150	0.7869
150.1	0.7865
150.2	0.78635
150.3	0.78645
150.4	0.78635
150.5	0.78685
150.6	0.787
150.7	0.78695
150.8	0.78665
150.9	0.78695
151	0.7874
151.1	0.7878
151.2	0.7882
151.3	0.78835
151.4	0.78885
151.5	0.78915
151.6	0.78935
151.7	0.7896
151.8	0.7898
151.9	0.7903
152	0.7904
152.1	0.79065
152.2	0.79095
152.3	0.79125
152.4	0.79185
152.5	0.7917
152.6	0.79235
152.7	0.79255
152.8	0.79265
152.9	0.79245
153	0.79275
153.1	0.79295
153.2	0.7935
153.3	0.7939
153.4	0.7946
153.5	0.79475
153.6	0.795
153.7	0.79505
153.8	0.7952
153.9	0.7954
154	0.7957
154.1	0.7952
154.2	0.7953
154.3	0.7956
154.4	0.7955
154.5	0.79565
154.6	0.7958
154.7	0.79585
154.8	0.7957
154.9	0.79625
155	0.7961
155.1	0.79675
155.2	0.79735
155.3	0.79755
155.4	0.79845
155.5	0.7987
155.6	0.79875
155.7	0.7995
155.8	0.79935
155.9	0.79915
156	0.7993
156.1	0.7999
156.2	0.79985
156.3	0.8
156.4	0.80015
156.5	0.80005
156.6	0.8005
156.7	0.80095
156.8	0.801
156.9	0.80105
157	0.801
157.1	0.80065
157.2	0.8006
157.3	0.80045
157.4	0.80065
157.5	0.80125
157.6	0.8017
157.7	0.8016
157.8	0.802
157.9	0.80195
158	0.80205
158.1	0.80215
158.2	0.8026
158.3	0.8027
158.4	0.80285
158.5	0.803
158.6	0.8037
158.7	0.80335
158.8	0.8037
158.9	0.80385
159	0.8042
159.1	0.8043
159.2	0.8043
159.3	0.80455
159.4	0.8043
159.5	0.8043
159.6	0.80415
159.7	0.80395
159.8	0.8038
159.9	0.80425
160	0.8041
160.1	0.8046
160.2	0.8054
160.3	0.806
160.4	0.8065
160.5	0.80645
160.6	0.80645
160.7	0.8063
160.8	0.80645
160.9	0.80675
161	0.8065
161.1	0.80645
161.2	0.80685
161.3	0.807
161.4	0.8071
161.5	0.8075
161.6	0.80745
161.7	0.80745
161.8	0.80725
161.9	0.8076
162	0.80785
162.1	0.80765
162.2	0.808
162.3	0.80775
162.4	0.80835
162.5	0.8079
162.6	0.80735
162.7	0.80745
162.8	0.8076
162.9	0.8078
163	0.80785
163.1	0.80785
163.2	0.8083
163.3	0.8085
163.4	0.8089
163.5	0.80845
163.6	0.80835
163.7	0.808
163.8	0.8087
163.9	0.8088
164	0.8085
164.1	0.80875
164.2	0.8087
164.3	0.80835
164.4	0.8083
164.5	0.80875
164.6	0.80875
164.7	0.80885
164.8	0.8092
164.9	0.8098
165	0.8096
165.1	0.80955
165.2	0.8097
165.3	0.81025
165.4	0.81045
165.5	0.8103
165.6	0.8107
165.7	0.8104
165.8	0.8105
165.9	0.81055
166	0.81125
166.1	0.8114
166.2	0.8114
166.3	0.81145
166.4	0.8114
166.5	0.8113
166.6	0.81075
166.7	0.8112
166.8	0.81075
166.9	0.81115
167	0.81145
167.1	0.8122
167.2	0.81225
167.3	0.8126
167.4	0.8133
167.5	0.8128
167.6	0.81295
167.7	0.8127
167.8	0.81275
167.9	0.81285
168	0.8131
168.1	0.81285
168.2	0.8129
168.3	0.81275
168.4	0.8125
168.5	0.81275
168.6	0.81295
168.7	0.81335
168.8	0.8129
168.9	0.8125
169	0.8127
169.1	0.81255
169.2	0.81275
169.3	0.8126
169.4	0.8125
169.5	0.8122
169.6	0.81175
169.7	0.81155
169.8	0.8112
169.9	0.81185
170	0.8118
170.1	0.8121
170.2	0.8126
170.3	0.81285
170.4	0.81245
170.5	0.81245
170.6	0.81255
170.7	0.8132
170.8	0.8132
170.9	0.8136
171	0.8136
171.1	0.8138
171.2	0.8139
171.3	0.81415
171.4	0.8141
171.5	0.8142
171.6	0.81435
171.7	0.8146
171.8	0.81475
171.9	0.81485
172	0.815
172.1	0.81485
172.2	0.8151
172.3	0.8154
172.4	0.81545
172.5	0.8158
172.6	0.81585
172.7	0.816
172.8	0.816
172.9	0.8156
173	0.8158
173.1	0.81575
173.2	0.8155
173.3	0.8156
173.4	0.81585
173.5	0.8162
173.6	0.81635
173.7	0.81615
173.8	0.8166
173.9	0.8161
174	0.8164
174.1	0.81685
174.2	0.8172
174.3	0.8177
174.4	0.8177
174.5	0.8177
174.6	0.81765
174.7	0.8174
174.8	0.81715
174.9	0.8168
175	0.81765
175.1	0.81805
175.2	0.81825
175.3	0.81875
175.4	0.81905
175.5	0.81945
175.6	0.81935
175.7	0.8196
175.8	0.81935
175.9	0.8194
176	0.8193
176.1	0.8192
176.2	0.8197
176.3	0.8194
176.4	0.8193
176.5	0.8198
176.6	0.8198
176.7	0.82045
176.8	0.82105
176.9	0.8213
177	0.8216
177.1	0.82185
177.2	0.82175
177.3	0.82215
177.4	0.82205
177.5	0.822
177.6	0.82235
177.7	0.8226
177.8	0.8229
177.9	0.8226
178	0.82225
178.1	0.82235
178.2	0.8225
178.3	0.82275
178.4	0.82275
178.5	0.8234
178.6	0.82265
178.7	0.82275
178.8	0.823
178.9	0.8231
179	0.823
179.1	0.8229
179.2	0.8229
179.3	0.82275
179.4	0.8225
179.5	0.8222
179.6	0.82205
179.7	0.82285
179.8	0.8232
179.9	0.8229
180	0.8226
180.1	0.82275
180.2	0.8224
180.3	0.82235
180.4	0.8226
180.5	0.82245
180.6	0.8228
180.7	0.8227
180.8	0.82285
180.9	0.8229
181	0.8233
181.1	0.82285
181.2	0.82285
181.3	0.82325
181.4	0.8229
181.5	0.82295
181.6	0.82265
181.7	0.8222
181.8	0.822
181.9	0.82215
182	0.8224
182.1	0.82295
182.2	0.82335
182.3	0.82285
182.4	0.823
182.5	0.82315
182.6	0.8235
182.7	0.8234
182.8	0.8234
182.9	0.8238
183	0.82395
183.1	0.82375
183.2	0.8239
183.3	0.82385
183.4	0.824
183.5	0.8231
183.6	0.8228
183.7	0.82245
183.8	0.82275
183.9	0.82285
184	0.82255
184.1	0.82255
184.2	0.8227
184.3	0.82255
184.4	0.82255
184.5	0.82215
184.6	0.82185
184.7	0.82185
184.8	0.822
184.9	0.8226
185	0.82295
185.1	0.8232
185.2	0.8231
185.3	0.82295
185.4	0.8229
185.5	0.8226
185.6	0.82245
185.7	0.8215
185.8	0.82195
185.9	0.82165
186	0.82155
186.1	0.8218
186.2	0.8219
186.3	0.8217
186.4	0.82185
186.5	0.8224
186.6	0.8223
186.7	0.82225
186.8	0.8224
186.9	0.82225
187	0.8221
187.1	0.82245
187.2	0.82265
187.3	0.82295
187.4	0.8233
187.5	0.82355
187.6	0.82385
187.7	0.8242
187.8	0.82385
187.9	0.8241
188	0.82395
188.1	0.8237
188.2	0.82385
188.3	0.82405
188.4	0.8236
188.5	0.82405
188.6	0.82365
188.7	0.8231
188.8	0.8232
188.9	0.82305
189	0.82355
189.1	0.82415
189.2	0.8243
189.3	0.8241
189.4	0.82395
189.5	0.82355
189.6	0.82365
189.7	0.82415
189.8	0.82405
189.9	0.82365
190	0.8238
190.1	0.824
190.2	0.82395
190.3	0.82375
190.4	0.82375
190.5	0.82385
190.6	0.8238
190.7	0.8238
190.8	0.82375
190.9	0.8239
191	0.82345
191.1	0.82345
191.2	0.82345
191.3	0.8239
191.4	0.8241
191.5	0.82415
191.6	0.82415
191.7	0.82445
191.8	0.8246
191.9	0.82425
192	0.824
192.1	0.82405
192.2	0.8244
192.3	0.8245
192.4	0.8245
192.5	0.8244
192.6	0.8249
192.7	0.8253
192.8	0.8255
192.9	0.82545
193	0.82525
193.1	0.8253
193.2	0.82565
193.3	0.82575
193.4	0.82605
193.5	0.82605
193.6	0.8256
193.7	0.82555
193.8	0.8258
193.9	0.8262
194	0.82615
194.1	0.8265
194.2	0.82675
194.3	0.82715
194.4	0.8272
194.5	0.82715
194.6	0.82695
194.7	0.8272
194.8	0.8273
194.9	0.82715
195	0.82695
195.1	0.82695
195.2	0.82695
195.3	0.827
195.4	0.8271
195.5	0.8269
195.6	0.82655
195.7	0.8262
195.8	0.8265
195.9	0.8266
196	0.8265
196.1	0.82645
196.2	0.8263
196.3	0.82655
196.4	0.82635
196.5	0.8265
196.6	0.8262
196.7	0.826
196.8	0.82635
196.9	0.82645
197	0.8271
197.1	0.82715
197.2	0.827
197.3	0.8266
197.4	0.82685
197.5	0.8269
197.6	0.8272
197.7	0.82695
197.8	0.8272
197.9	0.8271
198	0.82715
198.1	0.82755
198.2	0.82775
198.3	0.8276
198.4	0.82785
198.5	0.82735
198.6	0.8275
198.7	0.8279
198.8	0.8274
198.9	0.8276
199	0.8276
199.1	0.8278
199.2	0.8274
199.3	0.8273
199.4	0.82775
199.5	0.8278
199.6	0.8281
199.7	0.82885
199.8	0.82845
199.9	0.82845
200	0.8287
[truncated: 14,000 more rows]
