# Supplementary material for: Bayesian inference of kinetic schemes for ion channels by Kalman filtering
Source: eLife journal article supplement (doi:10.7554/elife.62714), 2022-05-04
Supplement: fig4-data2 [file 1_Sim_N_50000_Fluor_MW.xlsx]

## Sheet: 64 M
0.1	0
0.2	0
0.3	0
0.4	0
0.5	0
0.6	0
0.7	0
0.8	0
0.9	0
1	0
1.1	0
1.2	0
1.3	0
1.4	0
1.5	0
1.6	0
1.7	0
1.8	0
1.9	0
2	0
2.1	0
2.2	0
2.3	0
2.4	0
2.5	0
2.6	0
2.7	0
2.8	0
2.9	0
3	0
3.1	0
3.2	0
3.3	0
3.4	0
3.5	0
3.6	0
3.7	0
3.8	0
3.9	0
4	0
4.1	0
4.2	0
4.3	0
4.4	0
4.5	0
4.6	0
4.7	0
4.8	0
4.9	0
5	0
5.1	0
5.2	0
5.3	0
5.4	0
5.5	0
5.6	0
5.7	0
5.8	0
5.9	0
6	0
6.1	0
6.2	0
6.3	0
6.4	0
6.5	0
6.6	0
6.7	0
6.8	0
6.9	0
7	0
7.1	0
7.2	0
7.3	0
7.4	0
7.5	0
7.6	0
7.7	0
7.8	0
7.9	0
8	0
8.1	0
8.2	0
8.3	0
8.4	0
8.5	0
8.6	0
8.7	0
8.8	0
8.9	0
9	0
9.1	0
9.2	0
9.3	0
9.4	0
9.5	0
9.6	0
9.7	0
9.8	0
9.9	0
10	0
10.1	0
10.2	0
10.3	0
10.4	0
10.5	0
10.6	0
10.7	0
10.8	0
10.9	0
11	0
11.1	0
11.2	0
11.3	0
11.4	0
11.5	0
11.6	0
11.7	0
11.8	0
11.9	0
12	0
12.1	0
12.2	0
12.3	0
12.4	0
12.5	0
12.6	0
12.7	0
12.8	0
12.9	0
13	0
13.1	0
13.2	0
13.3	0
13.4	0
13.5	0
13.6	0
13.7	0
13.8	0
13.9	0
14	0
14.1	0
14.2	0
14.3	0
14.4	0
14.5	0
14.6	0
14.7	0
14.8	0
14.9	0
15	0
15.1	0
15.2	0
15.3	0
15.4	0
15.5	0
15.6	0
15.7	0
15.8	0
15.9	0
16	0
16.1	0
16.2	0
16.3	0
16.4	0
16.5	0
16.6	0
16.7	0
16.8	0
16.9	0
17	0
17.1	0
17.2	0
17.3	0
17.4	0
17.5	0
17.6	0
17.7	0
17.8	0
17.9	0
18	0
18.1	0
18.2	0
18.3	0
18.4	0
18.5	0
18.6	0
18.7	0
18.8	0
18.9	0
19	0
19.1	0
19.2	0
19.3	0
19.4	0
19.5	0
19.6	0
19.7	0
19.8	0
19.9	0
20	0
20.1	0
20.2	0
20.3	0
20.4	0
20.5	0
20.6	0
20.7	0
20.8	0
20.9	0
21	0
21.1	0
21.2	0
21.3	0
21.4	0
21.5	0
21.6	0
21.7	0
21.8	0
21.9	0
22	0
22.1	0
22.2	0
22.3	0
22.4	0
22.5	0
22.6	0
22.7	0
22.8	0
22.9	0
23	0
23.1	0
23.2	0
23.3	0
23.4	0
23.5	0
23.6	0
23.7	0
23.8	0
23.9	0
24	0
24.1	0
24.2	0
24.3	0
24.4	0
24.5	0
24.6	0
24.7	0
24.8	0
24.9	0
25	0
25.1	0
25.2	0
25.3	0
25.4	0
25.5	0
25.6	0
25.7	0
25.8	0
25.9	0
26	0
26.1	0
26.2	0
26.3	0
26.4	0
26.5	0
26.6	0
26.7	0
26.8	0
26.9	0
27	0
27.1	0
27.2	0
27.3	0
27.4	0
27.5	0
27.6	0
27.7	0
27.8	0
27.9	0
28	0
28.1	0
28.2	0
28.3	0
28.4	0
28.5	0
28.6	0
28.7	0
28.8	0
28.9	0
29	0
29.1	0
29.2	0
29.3	0
29.4	0
29.5	0
29.6	0
29.7	0
29.8	0
29.9	0
30	0
30.1	0
30.2	0
30.3	0
30.4	0
30.5	0
30.6	0
30.7	0
30.8	0
30.9	0
31	0
31.1	0
31.2	0
31.3	0
31.4	0
31.5	0
31.6	0
31.7	0
31.8	0
31.9	0
32	0
32.1	0
32.2	0
32.3	0
32.4	0
32.5	0
32.6	0
32.7	0
32.8	0
32.9	0
33	0
33.1	0
33.2	0
33.3	0
33.4	0
33.5	0
33.6	0
33.7	0
33.8	0
33.9	0
34	0
34.1	0
34.2	0
34.3	0
34.4	0
34.5	0
34.6	0
34.7	0
34.8	0
34.9	0
35	0
35.1	0
35.2	0
35.3	0
35.4	0
35.5	0
35.6	0
35.7	0
35.8	0
35.9	0
36	0
36.1	0
36.2	0
36.3	0
36.4	0
36.5	0
36.6	0
36.7	0
36.8	0
36.9	0
37	0
37.1	0
37.2	0
37.3	0
37.4	0
37.5	0
37.6	0
37.7	0
37.8	0
37.9	0
38	0
38.1	0
38.2	0
38.3	0
38.4	0
38.5	0
38.6	0
38.7	0
38.8	0
38.9	0
39	0
39.1	0
39.2	0
39.3	0
39.4	0
39.5	0
39.6	0
39.7	0
39.8	0
39.9	0
40	0
40.1	0
40.2	0
40.3	0
40.4	0
40.5	0
40.6	0
40.7	0
40.8	0
40.9	0
41	0
41.1	0
41.2	0
41.3	0
41.4	0
41.5	0
41.6	0
41.7	0
41.8	0
41.9	0
42	0
42.1	0
42.2	0
42.3	0
42.4	0
42.5	0
42.6	0
42.7	0
42.8	0
42.9	0
43	0
43.1	0
43.2	0
43.3	0
43.4	0
43.5	0
43.6	0
43.7	0
43.8	0
43.9	0
44	0
44.1	0
44.2	0
44.3	0
44.4	0
44.5	0
44.6	0
44.7	0
44.8	0
44.9	0
45	0
45.1	0
45.2	0
45.3	0
45.4	0
45.5	0
45.6	0
45.7	0
45.8	0
45.9	0
46	0
46.1	0
46.2	0
46.3	0
46.4	0
46.5	0
46.6	0
46.7	0
46.8	0
46.9	0
47	0
47.1	0
47.2	0
47.3	0
47.4	0
47.5	0
47.6	0
47.7	0
47.8	0
47.9	0
48	0
48.1	0
48.2	0
48.3	0
48.4	0
48.5	0
48.6	0
48.7	0
48.8	0
48.9	0
49	0
49.1	0
49.2	0
49.3	0
49.4	0
49.5	0
49.6	0
49.7	0
49.8	0
49.9	0
50	0
50.1	0
50.2	0
50.3	0
50.4	0
50.5	0
50.6	0
50.7	0
50.8	0
50.9	0
51	0
51.1	0
51.2	0
51.3	0
51.4	0
51.5	0
51.6	0
51.7	0
51.8	0
51.9	0
52	0
52.1	0
52.2	0
52.3	0
52.4	0
52.5	0
52.6	0
52.7	0
52.8	0
52.9	0
53	0
53.1	0
53.2	0
53.3	0
53.4	0
53.5	0
53.6	0
53.7	0
53.8	0
53.9	0
54	0
54.1	0
54.2	0
54.3	0
54.4	0
54.5	0
54.6	0
54.7	0
54.8	0
54.9	0
55	0
55.1	0
55.2	0
55.3	0
55.4	0
55.5	0
55.6	0
55.7	0
55.8	0
55.9	0
56	0
56.1	0
56.2	0
56.3	0
56.4	0
56.5	0
56.6	0
56.7	0
56.8	0
56.9	0
57	0
57.1	0
57.2	0
57.3	0
57.4	0
57.5	0
57.6	0
57.7	0
57.8	0
57.9	0
58	0
58.1	0
58.2	0
58.3	0
58.4	0
58.5	0
58.6	0
58.7	0
58.8	0
58.9	0
59	0
59.1	0
59.2	0
59.3	0
59.4	0
59.5	0
59.6	0
59.7	0
59.8	0
59.9	0
60	0
60.1	0
60.2	0
60.3	0
60.4	0
60.5	0
60.6	0
60.7	0
60.8	0
60.9	0
61	0
61.1	0
61.2	0
61.3	0
61.4	0
61.5	0
61.6	0
61.7	0
61.8	0
61.9	0
62	0
62.1	0
62.2	0
62.3	0
62.4	0
62.5	0
62.6	0
62.7	0
62.8	0
62.9	0
63	0
63.1	0
63.2	0
63.3	0
63.4	0
63.5	0
63.6	0
63.7	0
63.8	0
63.9	0
64	0
64.1	0
64.2	0
64.3	0
64.4	0
64.5	0
64.6	0
64.7	0
64.8	0
64.9	0
65	0
65.1	0
65.2	0
65.3	0
65.4	0
65.5	0
65.6	0
65.7	0
65.8	0
65.9	0
66	0
66.1	0
66.2	0
66.3	0
66.4	0
66.5	0
66.6	0
66.7	0
66.8	0
66.9	0
67	0
67.1	0
67.2	0
67.3	0
67.4	0
67.5	0
67.6	0
67.7	0
67.8	0
67.9	0
68	0
68.1	0
68.2	0
68.3	0
68.4	0
68.5	0
68.6	0
68.7	0
68.8	0
68.9	0
69	0
69.1	0
69.2	0
69.3	0
69.4	0
69.5	0
69.6	0
69.7	0
69.8	0
69.9	0
70	0
70.1	0
70.2	0
70.3	0
70.4	0
70.5	0
70.6	0
70.7	0
70.8	0
70.9	0
71	0
71.1	0
71.2	0
71.3	0
71.4	0
71.5	0
71.6	0
71.7	0
71.8	0
71.9	0
72	0
72.1	0
72.2	0
72.3	0
72.4	0
72.5	0
72.6	0
72.7	0
72.8	0
72.9	0
73	0
73.1	0
73.2	0
73.3	0
73.4	0
73.5	0
73.6	0
73.7	0
73.8	0
73.9	0
74	0
74.1	0
74.2	0
74.3	0
74.4	0
74.5	0
74.6	0
74.7	0
74.8	0
74.9	0
75	0
75.1	0
75.2	0
75.3	0
75.4	0
75.5	0
75.6	0
75.7	0
75.8	0
75.9	0
76	0
76.1	0
76.2	0
76.3	0
76.4	0
76.5	0
76.6	0
76.7	0
76.8	0
76.9	0
77	0
77.1	0
77.2	0
77.3	0
77.4	0
77.5	0
77.6	0
77.7	0
77.8	0
77.9	0
78	0
78.1	0
78.2	0
78.3	0
78.4	0
78.5	0
78.6	0
78.7	0
78.8	0
78.9	0
79	0
79.1	0
79.2	0
79.3	0
79.4	0
79.5	0
79.6	0
79.7	0
79.8	0
79.9	0
80	0
80.1	0
80.2	0
80.3	0
80.4	0
80.5	0
80.6	0
80.7	0
80.8	0
80.9	0
81	0
81.1	0
81.2	0
81.3	0
81.4	0
81.5	0
81.6	0
81.7	0
81.8	0
81.9	0
82	0
82.1	0
82.2	0
82.3	0
82.4	0
82.5	0
82.6	0
82.7	0
82.8	0
82.9	0
83	0
83.1	0
83.2	0
83.3	0
83.4	0
83.5	0
83.6	0
83.7	0
83.8	0
83.9	0
84	0
84.1	0
84.2	0
84.3	0
84.4	0
84.5	0
84.6	0
84.7	0
84.8	0
84.9	0
85	0
85.1	0
85.2	0
85.3	0
85.4	0
85.5	0
85.6	0
85.7	0
85.8	0
85.9	0
86	0
86.1	0
86.2	0
86.3	0
86.4	0
86.5	0
86.6	0
86.7	0
86.8	0
86.9	0
87	0
87.1	0
87.2	0
87.3	0
87.4	0
87.5	0
87.6	0
87.7	0
87.8	0
87.9	0
88	0
88.1	0
88.2	0
88.3	0
88.4	0
88.5	0
88.6	0
88.7	0
88.8	0
88.9	0
89	0
89.1	0
89.2	0
89.3	0
89.4	0
89.5	0
89.6	0
89.7	0
89.8	0
89.9	0
90	0
90.1	0
90.2	0
90.3	0
90.4	0
90.5	0
90.6	0
90.7	0
90.8	0
90.9	0
91	0
91.1	0
91.2	0
91.3	0
91.4	0
91.5	0
91.6	0
91.7	0
91.8	0
91.9	0
92	0
92.1	0
92.2	0
92.3	0
92.4	0
92.5	0
92.6	0
92.7	0
92.8	0
92.9	0
93	0
93.1	0
93.2	0
93.3	0
93.4	0
93.5	0
93.6	0
93.7	0
93.8	0
93.9	0
94	0
94.1	0
94.2	0
94.3	0
94.4	0
94.5	0
94.6	0
94.7	0
94.8	0
94.9	0
95	0
95.1	0
95.2	0
95.3	0
95.4	0
95.5	0
95.6	0
95.7	0
95.8	0
95.9	0
96	0
96.1	0
96.2	0
96.3	0
96.4	0
96.5	0
96.6	0
96.7	0
96.8	0
96.9	0
97	0
97.1	0
97.2	0
97.3	0
97.4	0
97.5	0
97.6	0
97.7	0
97.8	0
97.9	0
98	0
98.1	0
98.2	0
98.3	0
98.4	0
98.5	0
98.6	0
98.7	0
98.8	0
98.9	0
99	0
99.1	0
99.2	0
99.3	0
99.4	0
99.5	0
99.6	0
99.7	0
99.8	0
99.9	0
100	0
100.1	0.89464
100.2	0.97369
100.3	0.9857
100.4	0.98746
100.5	0.98795
100.6	0.98808
100.7	0.98831
100.8	0.98897
100.9	0.98789
101	0.9879
101.1	0.98744
101.2	0.98761
101.3	0.98793
101.4	0.98786
101.5	0.98762
101.6	0.98802
101.7	0.98819
101.8	0.98858
101.9	0.98894
102	0.98897
102.1	0.98823
102.2	0.9883
102.3	0.98849
102.4	0.98871
102.5	0.98882
102.6	0.98841
102.7	0.98818
102.8	0.98875
102.9	0.98888
103	0.98873
103.1	0.98886
103.2	0.98889
103.3	0.9888
103.4	0.98898
103.5	0.98883
103.6	0.98892
103.7	0.98952
103.8	0.98999
103.9	0.98928
104	0.98961
104.1	0.98954
104.2	0.98966
104.3	0.98961
104.4	0.98941
104.5	0.99005
104.6	0.99011
104.7	0.9897
104.8	0.98991
104.9	0.98985
105	0.98952
105.1	0.98976
105.2	0.98976
105.3	0.98973
105.4	0.9897
105.5	0.99009
105.6	0.99052
105.7	0.9902
105.8	0.99044
105.9	0.99078
106	0.99099
106.1	0.99035
106.2	0.99027
106.3	0.9902
106.4	0.99035
106.5	0.99066
106.6	0.99054
106.7	0.9903
106.8	0.99145
106.9	0.99129
107	0.99108
107.1	0.99068
107.2	0.99033
107.3	0.99056
107.4	0.99092
107.5	0.99077
107.6	0.99117
107.7	0.99094
107.8	0.99102
107.9	0.99169
108	0.99109
108.1	0.99115
108.2	0.99148
108.3	0.99134
108.4	0.99162
108.5	0.99166
108.6	0.9915
108.7	0.99162
108.8	0.99134
108.9	0.99178
109	0.99163
109.1	0.99196
109.2	0.99151
109.3	0.99142
109.4	0.99193
109.5	0.99182
109.6	0.99178
109.7	0.99155
109.8	0.99183
109.9	0.99204
110	0.99221
110.1	0.99231
110.2	0.99229
110.3	0.99227
110.4	0.99203
110.5	0.99171
110.6	0.99197
110.7	0.99253
110.8	0.99228
110.9	0.99247
111	0.99216
111.1	0.99204
111.2	0.99254
111.3	0.99245
111.4	0.99236
111.5	0.99199
111.6	0.99213
111.7	0.9924
111.8	0.99209
111.9	0.99268
112	0.99275
112.1	0.99217
112.2	0.99264
112.3	0.99281
112.4	0.99319
112.5	0.99236
112.6	0.9922
112.7	0.99237
112.8	0.99262
112.9	0.99282
113	0.99312
113.1	0.99287
113.2	0.99304
113.3	0.99257
113.4	0.99274
113.5	0.99246
113.6	0.99323
113.7	0.9933
113.8	0.99298
113.9	0.99315
114	0.99299
114.1	0.99325
114.2	0.99307
114.3	0.99311
114.4	0.99303
114.5	0.99308
114.6	0.99374
114.7	0.99275
114.8	0.99361
114.9	0.99374
115	0.99358
115.1	0.99353
115.2	0.99371
115.3	0.99327
115.4	0.9933
115.5	0.99353
115.6	0.9935
115.7	0.99406
115.8	0.99362
115.9	0.99331
116	0.99415
116.1	0.99422
116.2	0.9941
116.3	0.99342
116.4	0.99338
116.5	0.99395
116.6	0.99425
116.7	0.99395
116.8	0.99385
116.9	0.99375
117	0.99369
117.1	0.99412
117.2	0.99398
117.3	0.99378
117.4	0.99347
117.5	0.99413
117.6	0.99387
117.7	0.99408
117.8	0.9946
117.9	0.99426
118	0.99412
118.1	0.99429
118.2	0.99436
118.3	0.99457
118.4	0.99447
118.5	0.99433
118.6	0.99457
118.7	0.9945
118.8	0.99451
118.9	0.9943
119	0.99432
119.1	0.99435
119.2	0.99442
119.3	0.99436
119.4	0.99434
119.5	0.99437
119.6	0.99442
119.7	0.99454
119.8	0.99482
119.9	0.99437
120	0.99456
120.1	0.99461
120.2	0.99465
120.3	0.99464
120.4	0.99481
120.5	0.99483
120.6	0.99448
120.7	0.99459
120.8	0.99488
120.9	0.99483
121	0.99453
121.1	0.99466
121.2	0.99494
121.3	0.9949
121.4	0.99472
121.5	0.99491
121.6	0.99511
121.7	0.99497
121.8	0.99502
121.9	0.99504
122	0.99463
122.1	0.995
122.2	0.99536
122.3	0.99506
122.4	0.99493
122.5	0.99502
122.6	0.99488
122.7	0.99518
122.8	0.99526
122.9	0.99474
123	0.99481
123.1	0.99502
123.2	0.99475
123.3	0.99517
123.4	0.99516
123.5	0.99482
123.6	0.99498
123.7	0.99535
123.8	0.99526
123.9	0.99517
124	0.99507
124.1	0.99579
124.2	0.99546
124.3	0.99535
124.4	0.99539
124.5	0.99562
124.6	0.99554
124.7	0.99551
124.8	0.99537
124.9	0.99555
125	0.99574
125.1	0.99549
125.2	0.99533
125.3	0.99559
125.4	0.99535
125.5	0.99544
125.6	0.99549
125.7	0.99557
125.8	0.99579
125.9	0.99563
126	0.99576
126.1	0.99532
126.2	0.99554
126.3	0.99546
126.4	0.99566
126.5	0.99546
126.6	0.99518
126.7	0.99557
126.8	0.99544
126.9	0.99578
127	0.99569
127.1	0.99567
127.2	0.99583
127.3	0.99582
127.4	0.99573
127.5	0.99556
127.6	0.99578
127.7	0.99622
127.8	0.99549
127.9	0.99559
128	0.99566
128.1	0.9958
128.2	0.99597
128.3	0.99587
128.4	0.99589
128.5	0.99572
128.6	0.99558
128.7	0.99604
128.8	0.99601
128.9	0.99607
129	0.99583
129.1	0.99588
129.2	0.99633
129.3	0.99592
129.4	0.99568
129.5	0.99631
129.6	0.99613
129.7	0.99599
129.8	0.99636
129.9	0.99609
130	0.99595
130.1	0.99616
130.2	0.99623
130.3	0.99634
130.4	0.99613
130.5	0.99612
130.6	0.99621
130.7	0.99585
130.8	0.99603
130.9	0.99619
131	0.99613
131.1	0.9962
131.2	0.99615
131.3	0.99585
131.4	0.99646
131.5	0.9961
131.6	0.99617
131.7	0.99618
131.8	0.99613
131.9	0.99621
132	0.99601
132.1	0.99616
132.2	0.9962
132.3	0.99606
132.4	0.99638
132.5	0.99616
132.6	0.99625
132.7	0.99616
132.8	0.99636
132.9	0.99624
133	0.99584
133.1	0.99637
133.2	0.9965
133.3	0.99605
133.4	0.99628
133.5	0.99626
133.6	0.99622
133.7	0.99633
133.8	0.99637
133.9	0.99637
134	0.99652
134.1	0.99673
134.2	0.9965
134.3	0.99655
134.4	0.99649
134.5	0.99665
134.6	0.99625
134.7	0.99634
134.8	0.99646
134.9	0.99623
135	0.99654
135.1	0.99631
135.2	0.99634
135.3	0.9969
135.4	0.99661
135.5	0.99638
135.6	0.99665
135.7	0.99673
135.8	0.99641
135.9	0.99652
136	0.9965
136.1	0.9965
136.2	0.99672
136.3	0.99654
136.4	0.99663
136.5	0.99665
136.6	0.9967
136.7	0.99645
136.8	0.99653
136.9	0.99678
137	0.99689
137.1	0.9968
137.2	0.99649
137.3	0.99667
137.4	0.99654
137.5	0.99681
137.6	0.99677
137.7	0.99676
137.8	0.99643
137.9	0.9966
138	0.99664
138.1	0.99684
138.2	0.99666
138.3	0.99671
138.4	0.99676
138.5	0.99661
138.6	0.99675
138.7	0.99679
138.8	0.9967
138.9	0.99719
139	0.9968
139.1	0.99702
139.2	0.99669
139.3	0.99661
139.4	0.99673
139.5	0.9968
139.6	0.99711
139.7	0.9971
139.8	0.99696
139.9	0.9968
140	0.9969
140.1	0.99675
140.2	0.99684
140.3	0.99696
140.4	0.9964
140.5	0.99675
140.6	0.99661
140.7	0.99634
140.8	0.99694
140.9	0.99684
141	0.99715
141.1	0.99656
141.2	0.99682
141.3	0.99667
141.4	0.99662
141.5	0.99667
141.6	0.99689
141.7	0.99716
141.8	0.99671
141.9	0.99704
142	0.99702
142.1	0.99697
142.2	0.9972
142.3	0.99711
142.4	0.99685
142.5	0.99675
142.6	0.99698
142.7	0.99724
142.8	0.99685
142.9	0.99693
143	0.99718
143.1	0.99679
143.2	0.99709
143.3	0.99711
143.4	0.99694
143.5	0.99712
143.6	0.9968
143.7	0.99707
143.8	0.99707
143.9	0.9972
144	0.99698
144.1	0.99685
144.2	0.99692
144.3	0.99714
144.4	0.99692
144.5	0.99682
144.6	0.99681
144.7	0.99681
144.8	0.99683
144.9	0.997
145	0.99685
145.1	0.9969
145.2	0.99703
145.3	0.9972
145.4	0.99695
145.5	0.99695
145.6	0.99718
145.7	0.99721
145.8	0.99709
145.9	0.99699
146	0.99716
146.1	0.99671
146.2	0.99718
146.3	0.99695
146.4	0.99717
146.5	0.99729
146.6	0.99714
146.7	0.9968
146.8	0.99728
146.9	0.99741
147	0.99752
147.1	0.99722
147.2	0.99708
147.3	0.99718
147.4	0.99744
147.5	0.99722
147.6	0.99715
147.7	0.99712
147.8	0.99699
147.9	0.99716
148	0.99712
148.1	0.99706
148.2	0.99686
148.3	0.99714
148.4	0.99734
148.5	0.99735
148.6	0.9972
148.7	0.99735
148.8	0.99725
148.9	0.99727
149	0.99732
149.1	0.99757
149.2	0.99727
149.3	0.99705
149.4	0.99729
149.5	0.99699
149.6	0.99714
149.7	0.99731
149.8	0.99735
149.9	0.99731
150	0.99768
150.1	0.99721
150.2	0.9975
150.3	0.99728
150.4	0.99704
150.5	0.99728
150.6	0.99726
150.7	0.99724
150.8	0.99707
150.9	0.99694
151	0.99734
151.1	0.99751
151.2	0.99737
151.3	0.99731
151.4	0.99721
151.5	0.99723
151.6	0.9972
151.7	0.99697
151.8	0.99709
151.9	0.99741
152	0.99717
152.1	0.9974
152.2	0.99722
152.3	0.99753
152.4	0.99714
152.5	0.99728
152.6	0.99753
152.7	0.99742
152.8	0.99759
152.9	0.99729
153	0.99721
153.1	0.99701
153.2	0.99713
153.3	0.99736
153.4	0.99744
153.5	0.99734
153.6	0.99747
153.7	0.99746
153.8	0.99748
153.9	0.99713
154	0.99755
154.1	0.99734
154.2	0.99763
154.3	0.99708
154.4	0.99747
154.5	0.99737
154.6	0.9973
154.7	0.9975
154.8	0.99744
154.9	0.99754
155	0.99733
155.1	0.99768
155.2	0.9974
155.3	0.99737
155.4	0.99721
155.5	0.9974
155.6	0.99765
155.7	0.99753
155.8	0.99772
155.9	0.99751
156	0.9977
156.1	0.99735
156.2	0.99744
156.3	0.99754
156.4	0.99731
156.5	0.99744
156.6	0.99749
156.7	0.99756
156.8	0.99733
156.9	0.99746
157	0.99726
157.1	0.99748
157.2	0.99749
157.3	0.99759
157.4	0.99758
157.5	0.99749
157.6	0.99767
157.7	0.99736
157.8	0.9976
157.9	0.99737
158	0.99761
158.1	0.9975
158.2	0.99738
158.3	0.99769
158.4	0.99748
158.5	0.99745
158.6	0.99753
158.7	0.99723
158.8	0.99751
158.9	0.99775
159	0.99745
159.1	0.99776
159.2	0.99772
159.3	0.9976
159.4	0.99762
159.5	0.99758
159.6	0.99743
159.7	0.99766
159.8	0.99756
159.9	0.99757
160	0.9973
160.1	0.99734
160.2	0.99746
160.3	0.99753
160.4	0.99748
160.5	0.99748
160.6	0.99749
160.7	0.99755
160.8	0.99772
160.9	0.99761
161	0.99746
161.1	0.99768
161.2	0.99762
161.3	0.99728
161.4	0.99747
161.5	0.99751
161.6	0.99728
161.7	0.99739
161.8	0.99741
161.9	0.99773
162	0.99765
162.1	0.99745
162.2	0.99754
162.3	0.99736
162.4	0.99763
162.5	0.99757
162.6	0.99776
162.7	0.99743
162.8	0.99764
162.9	0.99761
163	0.99763
163.1	0.99721
163.2	0.99753
163.3	0.99748
163.4	0.99763
163.5	0.99766
163.6	0.9975
163.7	0.99773
163.8	0.99746
163.9	0.99756
164	0.99727
164.1	0.99757
164.2	0.99767
164.3	0.99715
164.4	0.99746
164.5	0.99737
164.6	0.99777
164.7	0.99744
164.8	0.99759
164.9	0.99759
165	0.99784
165.1	0.99767
165.2	0.99738
165.3	0.99757
165.4	0.99752
165.5	0.99743
165.6	0.99792
165.7	0.99763
165.8	0.9976
165.9	0.9974
166	0.99775
166.1	0.9975
166.2	0.99768
166.3	0.99733
166.4	0.9977
166.5	0.99802
166.6	0.99759
166.7	0.99755
166.8	0.99775
166.9	0.99766
167	0.99767
167.1	0.99772
167.2	0.99752
167.3	0.99768
167.4	0.99747
167.5	0.99771
167.6	0.99793
167.7	0.99778
167.8	0.99723
167.9	0.99756
168	0.99768
168.1	0.99766
168.2	0.99747
168.3	0.99776
168.4	0.99772
168.5	0.99756
168.6	0.9975
168.7	0.99737
168.8	0.99747
168.9	0.99757
169	0.99791
169.1	0.99773
169.2	0.99776
169.3	0.99757
169.4	0.99757
169.5	0.99759
169.6	0.99771
169.7	0.9977
169.8	0.99768
169.9	0.99748
170	0.99764
170.1	0.99786
170.2	0.99748
170.3	0.9978
170.4	0.99789
170.5	0.99798
170.6	0.99788
170.7	0.99778
170.8	0.99746
170.9	0.99753
171	0.99752
171.1	0.99766
171.2	0.99767
171.3	0.99754
171.4	0.99759
171.5	0.99775
171.6	0.99778
171.7	0.99766
171.8	0.99772
171.9	0.99756
172	0.99757
172.1	0.9977
172.2	0.99787
172.3	0.99763
172.4	0.99749
172.5	0.99782
172.6	0.99753
172.7	0.99755
172.8	0.99751
172.9	0.99768
173	0.99731
173.1	0.99749
173.2	0.99773
173.3	0.99774
173.4	0.99778
173.5	0.99778
173.6	0.99764
173.7	0.99754
173.8	0.99775
173.9	0.99767
174	0.99755
174.1	0.99771
174.2	0.99763
174.3	0.99779
174.4	0.99751
174.5	0.99767
174.6	0.99746
174.7	0.99749
174.8	0.99768
174.9	0.99753
175	0.99777
175.1	0.99797
175.2	0.99796
175.3	0.9976
175.4	0.99777
175.5	0.99772
175.6	0.9977
175.7	0.99802
175.8	0.99806
175.9	0.99779
176	0.99765
176.1	0.99806
176.2	0.99786
176.3	0.99798
176.4	0.99773
176.5	0.99777
176.6	0.99779
176.7	0.99735
176.8	0.99785
176.9	0.99779
177	0.99772
177.1	0.99742
177.2	0.9976
177.3	0.99748
177.4	0.99772
177.5	0.9978
177.6	0.99754
177.7	0.99752
177.8	0.99758
177.9	0.99755
178	0.99774
178.1	0.99778
178.2	0.99788
178.3	0.99777
178.4	0.99774
178.5	0.99781
178.6	0.99796
178.7	0.99777
178.8	0.99768
178.9	0.99761
179	0.99764
179.1	0.99789
179.2	0.9979
179.3	0.99765
179.4	0.99779
179.5	0.99752
179.6	0.99777
179.7	0.99784
179.8	0.99795
179.9	0.99805
180	0.99775
180.1	0.99782
180.2	0.99743
180.3	0.99774
180.4	0.99777
180.5	0.99787
180.6	0.99778
180.7	0.99781
180.8	0.998
180.9	0.99756
181	0.9977
181.1	0.99764
181.2	0.99771
181.3	0.99781
181.4	0.99764
181.5	0.99745
181.6	0.99775
181.7	0.99801
181.8	0.99812
181.9	0.99784
182	0.9976
182.1	0.99771
182.2	0.99782
182.3	0.99786
182.4	0.99774
182.5	0.99782
182.6	0.99787
182.7	0.99786
182.8	0.99765
182.9	0.99787
183	0.9979
183.1	0.99771
183.2	0.99769
183.3	0.99779
183.4	0.99769
183.5	0.9976
183.6	0.99768
183.7	0.99779
183.8	0.99783
183.9	0.99784
184	0.99761
184.1	0.99766
184.2	0.9978
184.3	0.99783
184.4	0.99762
184.5	0.99756
184.6	0.99759
184.7	0.99777
184.8	0.99786
184.9	0.99766
185	0.99775
185.1	0.99762
185.2	0.99772
185.3	0.99788
185.4	0.9977
185.5	0.99768
185.6	0.99752
185.7	0.99766
185.8	0.99762
185.9	0.99774
186	0.99774
186.1	0.99765
186.2	0.99782
186.3	0.99775
186.4	0.99791
186.5	0.99758
186.6	0.99782
186.7	0.99774
186.8	0.99748
186.9	0.99772
187	0.99751
187.1	0.99796
187.2	0.99782
187.3	0.99764
187.4	0.99739
187.5	0.99776
187.6	0.99797
187.7	0.99803
187.8	0.99803
187.9	0.99798
188	0.99775
188.1	0.99784
188.2	0.99818
188.3	0.99804
188.4	0.99792
188.5	0.99778
188.6	0.99787
188.7	0.9976
188.8	0.99794
188.9	0.99778
189	0.99788
189.1	0.99797
189.2	0.99774
189.3	0.99781
189.4	0.99784
189.5	0.99774
189.6	0.99762
189.7	0.9976
189.8	0.99771
189.9	0.99746
190	0.99788
190.1	0.99786
190.2	0.99774
190.3	0.99763
190.4	0.99771
190.5	0.99791
190.6	0.99773
190.7	0.99781
190.8	0.99784
190.9	0.99786
191	0.99781
191.1	0.99782
191.2	0.99767
191.3	0.99784
191.4	0.99797
191.5	0.99778
191.6	0.99782
191.7	0.99772
191.8	0.99775
191.9	0.99793
192	0.9976
192.1	0.99761
192.2	0.99777
192.3	0.99794
192.4	0.99768
192.5	0.99738
192.6	0.99764
192.7	0.9977
192.8	0.99765
192.9	0.99761
193	0.99769
193.1	0.99758
193.2	0.99758
193.3	0.99762
193.4	0.99778
193.5	0.99764
193.6	0.99764
193.7	0.9975
193.8	0.99769
193.9	0.9976
194	0.998
194.1	0.99817
194.2	0.99779
194.3	0.99754
194.4	0.99752
194.5	0.99789
194.6	0.99775
194.7	0.99765
194.8	0.99765
194.9	0.99778
195	0.99749
195.1	0.99785
195.2	0.99782
195.3	0.99777
195.4	0.99786
195.5	0.99782
195.6	0.99764
195.7	0.99779
195.8	0.99765
195.9	0.99787
196	0.9977
196.1	0.99757
196.2	0.99804
196.3	0.99778
196.4	0.99778
196.5	0.99794
196.6	0.99795
196.7	0.99772
196.8	0.998
196.9	0.99759
197	0.99772
197.1	0.99795
197.2	0.99745
197.3	0.99771
197.4	0.99775
197.5	0.99799
197.6	0.99772
197.7	0.99757
197.8	0.99775
197.9	0.99781
198	0.99787
198.1	0.99793
198.2	0.9978
198.3	0.99794
198.4	0.99779
198.5	0.99796
198.6	0.99778
198.7	0.99776
198.8	0.99778
198.9	0.99793
199	0.99799
199.1	0.99767
199.2	0.9977
199.3	0.99772
199.4	0.9977
199.5	0.9977
199.6	0.99775
199.7	0.99785
199.8	0.99785
199.9	0.99785
200	0.99798
[truncated: 14,000 more rows]
