# Supplementary material for: Bayesian inference of kinetic schemes for ion channels by Kalman filtering
Source: eLife journal article supplement (doi:10.7554/elife.62714), 2022-05-04
Supplement: fig4-data2 [file 1_Sim_N_50000_Strom_MW.xlsx]

## Sheet: 64 M
0.1	0
0.2	0
0.3	0
0.4	0
0.5	0
0.6	0
0.7	0
0.8	0
0.9	0
1	0
1.1	0
1.2	0
1.3	0
1.4	0
1.5	0
1.6	0
1.7	0
1.8	0
1.9	0
2	0
2.1	0
2.2	0
2.3	0
2.4	0
2.5	0
2.6	0
2.7	0
2.8	0
2.9	0
3	0
3.1	0
3.2	0
3.3	0
3.4	0
3.5	0
3.6	0
3.7	0
3.8	0
3.9	0
4	0
4.1	0
4.2	0
4.3	0
4.4	0
4.5	0
4.6	0
4.7	0
4.8	0
4.9	0
5	0
5.1	0
5.2	0
5.3	0
5.4	0
5.5	0
5.6	0
5.7	0
5.8	0
5.9	0
6	0
6.1	0
6.2	0
6.3	0
6.4	0
6.5	0
6.6	0
6.7	0
6.8	0
6.9	0
7	0
7.1	0
7.2	0
7.3	0
7.4	0
7.5	0
7.6	0
7.7	0
7.8	0
7.9	0
8	0
8.1	0
8.2	0
8.3	0
8.4	0
8.5	0
8.6	0
8.7	0
8.8	0
8.9	0
9	0
9.1	0
9.2	0
9.3	0
9.4	0
9.5	0
9.6	0
9.7	0
9.8	0
9.9	0
10	0
10.1	0
10.2	0
10.3	0
10.4	0
10.5	0
10.6	0
10.7	0
10.8	0
10.9	0
11	0
11.1	0
11.2	0
11.3	0
11.4	0
11.5	0
11.6	0
11.7	0
11.8	0
11.9	0
12	0
12.1	0
12.2	0
12.3	0
12.4	0
12.5	0
12.6	0
12.7	0
12.8	0
12.9	0
13	0
13.1	0
13.2	0
13.3	0
13.4	0
13.5	0
13.6	0
13.7	0
13.8	0
13.9	0
14	0
14.1	0
14.2	0
14.3	0
14.4	0
14.5	0
14.6	0
14.7	0
14.8	0
14.9	0
15	0
15.1	0
15.2	0
15.3	0
15.4	0
15.5	0
15.6	0
15.7	0
15.8	0
15.9	0
16	0
16.1	0
16.2	0
16.3	0
16.4	0
16.5	0
16.6	0
16.7	0
16.8	0
16.9	0
17	0
17.1	0
17.2	0
17.3	0
17.4	0
17.5	0
17.6	0
17.7	0
17.8	0
17.9	0
18	0
18.1	0
18.2	0
18.3	0
18.4	0
18.5	0
18.6	0
18.7	0
18.8	0
18.9	0
19	0
19.1	0
19.2	0
19.3	0
19.4	0
19.5	0
19.6	0
19.7	0
19.8	0
19.9	0
20	0
20.1	0
20.2	0
20.3	0
20.4	0
20.5	0
20.6	0
20.7	0
20.8	0
20.9	0
21	0
21.1	0
21.2	0
21.3	0
21.4	0
21.5	0
21.6	0
21.7	0
21.8	0
21.9	0
22	0
22.1	0
22.2	0
22.3	0
22.4	0
22.5	0
22.6	0
22.7	0
22.8	0
22.9	0
23	0
23.1	0
23.2	0
23.3	0
23.4	0
23.5	0
23.6	0
23.7	0
23.8	0
23.9	0
24	0
24.1	0
24.2	0
24.3	0
24.4	0
24.5	0
24.6	0
24.7	0
24.8	0
24.9	0
25	0
25.1	0
25.2	0
25.3	0
25.4	0
25.5	0
25.6	0
25.7	0
25.8	0
25.9	0
26	0
26.1	0
26.2	0
26.3	0
26.4	0
26.5	0
26.6	0
26.7	0
26.8	0
26.9	0
27	0
27.1	0
27.2	0
27.3	0
27.4	0
27.5	0
27.6	0
27.7	0
27.8	0
27.9	0
28	0
28.1	0
28.2	0
28.3	0
28.4	0
28.5	0
28.6	0
28.7	0
28.8	0
28.9	0
29	0
29.1	0
29.2	0
29.3	0
29.4	0
29.5	0
29.6	0
29.7	0
29.8	0
29.9	0
30	0
30.1	0
30.2	0
30.3	0
30.4	0
30.5	0
30.6	0
30.7	0
30.8	0
30.9	0
31	0
31.1	0
31.2	0
31.3	0
31.4	0
31.5	0
31.6	0
31.7	0
31.8	0
31.9	0
32	0
32.1	0
32.2	0
32.3	0
32.4	0
32.5	0
32.6	0
32.7	0
32.8	0
32.9	0
33	0
33.1	0
33.2	0
33.3	0
33.4	0
33.5	0
33.6	0
33.7	0
33.8	0
33.9	0
34	0
34.1	0
34.2	0
34.3	0
34.4	0
34.5	0
34.6	0
34.7	0
34.8	0
34.9	0
35	0
35.1	0
35.2	0
35.3	0
35.4	0
35.5	0
35.6	0
35.7	0
35.8	0
35.9	0
36	0
36.1	0
36.2	0
36.3	0
36.4	0
36.5	0
36.6	0
36.7	0
36.8	0
36.9	0
37	0
37.1	0
37.2	0
37.3	0
37.4	0
37.5	0
37.6	0
37.7	0
37.8	0
37.9	0
38	0
38.1	0
38.2	0
38.3	0
38.4	0
38.5	0
38.6	0
38.7	0
38.8	0
38.9	0
39	0
39.1	0
39.2	0
39.3	0
39.4	0
39.5	0
39.6	0
39.7	0
39.8	0
39.9	0
40	0
40.1	0
40.2	0
40.3	0
40.4	0
40.5	0
40.6	0
40.7	0
40.8	0
40.9	0
41	0
41.1	0
41.2	0
41.3	0
41.4	0
41.5	0
41.6	0
41.7	0
41.8	0
41.9	0
42	0
42.1	0
42.2	0
42.3	0
42.4	0
42.5	0
42.6	0
42.7	0
42.8	0
42.9	0
43	0
43.1	0
43.2	0
43.3	0
43.4	0
43.5	0
43.6	0
43.7	0
43.8	0
43.9	0
44	0
44.1	0
44.2	0
44.3	0
44.4	0
44.5	0
44.6	0
44.7	0
44.8	0
44.9	0
45	0
45.1	0
45.2	0
45.3	0
45.4	0
45.5	0
45.6	0
45.7	0
45.8	0
45.9	0
46	0
46.1	0
46.2	0
46.3	0
46.4	0
46.5	0
46.6	0
46.7	0
46.8	0
46.9	0
47	0
47.1	0
47.2	0
47.3	0
47.4	0
47.5	0
47.6	0
47.7	0
47.8	0
47.9	0
48	0
48.1	0
48.2	0
48.3	0
48.4	0
48.5	0
48.6	0
48.7	0
48.8	0
48.9	0
49	0
49.1	0
49.2	0
49.3	0
49.4	0
49.5	0
49.6	0
49.7	0
49.8	0
49.9	0
50	0
50.1	0
50.2	0
50.3	0
50.4	0
50.5	0
50.6	0
50.7	0
50.8	0
50.9	0
51	0
51.1	0
51.2	0
51.3	0
51.4	0
51.5	0
51.6	0
51.7	0
51.8	0
51.9	0
52	0
52.1	0
52.2	0
52.3	0
52.4	0
52.5	0
52.6	0
52.7	0
52.8	0
52.9	0
53	0
53.1	0
53.2	0
53.3	0
53.4	0
53.5	0
53.6	0
53.7	0
53.8	0
53.9	0
54	0
54.1	0
54.2	0
54.3	0
54.4	0
54.5	0
54.6	0
54.7	0
54.8	0
54.9	0
55	0
55.1	0
55.2	0
55.3	0
55.4	0
55.5	0
55.6	0
55.7	0
55.8	0
55.9	0
56	0
56.1	0
56.2	0
56.3	0
56.4	0
56.5	0
56.6	0
56.7	0
56.8	0
56.9	0
57	0
57.1	0
57.2	0
57.3	0
57.4	0
57.5	0
57.6	0
57.7	0
57.8	0
57.9	0
58	0
58.1	0
58.2	0
58.3	0
58.4	0
58.5	0
58.6	0
58.7	0
58.8	0
58.9	0
59	0
59.1	0
59.2	0
59.3	0
59.4	0
59.5	0
59.6	0
59.7	0
59.8	0
59.9	0
60	0
60.1	0
60.2	0
60.3	0
60.4	0
60.5	0
60.6	0
60.7	0
60.8	0
60.9	0
61	0
61.1	0
61.2	0
61.3	0
61.4	0
61.5	0
61.6	0
61.7	0
61.8	0
61.9	0
62	0
62.1	0
62.2	0
62.3	0
62.4	0
62.5	0
62.6	0
62.7	0
62.8	0
62.9	0
63	0
63.1	0
63.2	0
63.3	0
63.4	0
63.5	0
63.6	0
63.7	0
63.8	0
63.9	0
64	0
64.1	0
64.2	0
64.3	0
64.4	0
64.5	0
64.6	0
64.7	0
64.8	0
64.9	0
65	0
65.1	0
65.2	0
65.3	0
65.4	0
65.5	0
65.6	0
65.7	0
65.8	0
65.9	0
66	0
66.1	0
66.2	0
66.3	0
66.4	0
66.5	0
66.6	0
66.7	0
66.8	0
66.9	0
67	0
67.1	0
67.2	0
67.3	0
67.4	0
67.5	0
67.6	0
67.7	0
67.8	0
67.9	0
68	0
68.1	0
68.2	0
68.3	0
68.4	0
68.5	0
68.6	0
68.7	0
68.8	0
68.9	0
69	0
69.1	0
69.2	0
69.3	0
69.4	0
69.5	0
69.6	0
69.7	0
69.8	0
69.9	0
70	0
70.1	0
70.2	0
70.3	0
70.4	0
70.5	0
70.6	0
70.7	0
70.8	0
70.9	0
71	0
71.1	0
71.2	0
71.3	0
71.4	0
71.5	0
71.6	0
71.7	0
71.8	0
71.9	0
72	0
72.1	0
72.2	0
72.3	0
72.4	0
72.5	0
72.6	0
72.7	0
72.8	0
72.9	0
73	0
73.1	0
73.2	0
73.3	0
73.4	0
73.5	0
73.6	0
73.7	0
73.8	0
73.9	0
74	0
74.1	0
74.2	0
74.3	0
74.4	0
74.5	0
74.6	0
74.7	0
74.8	0
74.9	0
75	0
75.1	0
75.2	0
75.3	0
75.4	0
75.5	0
75.6	0
75.7	0
75.8	0
75.9	0
76	0
76.1	0
76.2	0
76.3	0
76.4	0
76.5	0
76.6	0
76.7	0
76.8	0
76.9	0
77	0
77.1	0
77.2	0
77.3	0
77.4	0
77.5	0
77.6	0
77.7	0
77.8	0
77.9	0
78	0
78.1	0
78.2	0
78.3	0
78.4	0
78.5	0
78.6	0
78.7	0
78.8	0
78.9	0
79	0
79.1	0
79.2	0
79.3	0
79.4	0
79.5	0
79.6	0
79.7	0
79.8	0
79.9	0
80	0
80.1	0
80.2	0
80.3	0
80.4	0
80.5	0
80.6	0
80.7	0
80.8	0
80.9	0
81	0
81.1	0
81.2	0
81.3	0
81.4	0
81.5	0
81.6	0
81.7	0
81.8	0
81.9	0
82	0
82.1	0
82.2	0
82.3	0
82.4	0
82.5	0
82.6	0
82.7	0
82.8	0
82.9	0
83	0
83.1	0
83.2	0
83.3	0
83.4	0
83.5	0
83.6	0
83.7	0
83.8	0
83.9	0
84	0
84.1	0
84.2	0
84.3	0
84.4	0
84.5	0
84.6	0
84.7	0
84.8	0
84.9	0
85	0
85.1	0
85.2	0
85.3	0
85.4	0
85.5	0
85.6	0
85.7	0
85.8	0
85.9	0
86	0
86.1	0
86.2	0
86.3	0
86.4	0
86.5	0
86.6	0
86.7	0
86.8	0
86.9	0
87	0
87.1	0
87.2	0
87.3	0
87.4	0
87.5	0
87.6	0
87.7	0
87.8	0
87.9	0
88	0
88.1	0
88.2	0
88.3	0
88.4	0
88.5	0
88.6	0
88.7	0
88.8	0
88.9	0
89	0
89.1	0
89.2	0
89.3	0
89.4	0
89.5	0
89.6	0
89.7	0
89.8	0
89.9	0
90	0
90.1	0
90.2	0
90.3	0
90.4	0
90.5	0
90.6	0
90.7	0
90.8	0
90.9	0
91	0
91.1	0
91.2	0
91.3	0
91.4	0
91.5	0
91.6	0
91.7	0
91.8	0
91.9	0
92	0
92.1	0
92.2	0
92.3	0
92.4	0
92.5	0
92.6	0
92.7	0
92.8	0
92.9	0
93	0
93.1	0
93.2	0
93.3	0
93.4	0
93.5	0
93.6	0
93.7	0
93.8	0
93.9	0
94	0
94.1	0
94.2	0
94.3	0
94.4	0
94.5	0
94.6	0
94.7	0
94.8	0
94.9	0
95	0
95.1	0
95.2	0
95.3	0
95.4	0
95.5	0
95.6	0
95.7	0
95.8	0
95.9	0
96	0
96.1	0
96.2	0
96.3	0
96.4	0
96.5	0
96.6	0
96.7	0
96.8	0
96.9	0
97	0
97.1	0
97.2	0
97.3	0
97.4	0
97.5	0
97.6	0
97.7	0
97.8	0
97.9	0
98	0
98.1	0
98.2	0
98.3	0
98.4	0
98.5	0
98.6	0
98.7	0
98.8	0
98.9	0
99	0
99.1	0
99.2	0
99.3	0
99.4	0
99.5	0
99.6	0
99.7	0
99.8	0
99.9	0
100	0
100.1	0.0022
100.2	0.0064
100.3	0.01132
100.4	0.01574
100.5	0.02104
100.6	0.02612
100.7	0.03014
100.8	0.0348
100.9	0.03922
101	0.04318
101.1	0.048
101.2	0.05254
101.3	0.05734
101.4	0.06228
101.5	0.0673
101.6	0.07152
101.7	0.07612
101.8	0.08066
101.9	0.08534
102	0.08936
102.1	0.0938
102.2	0.098
102.3	0.10226
102.4	0.10618
102.5	0.11016
102.6	0.1142
102.7	0.11862
102.8	0.12298
102.9	0.1272
103	0.13144
103.1	0.13538
103.2	0.13938
103.3	0.14332
103.4	0.1474
103.5	0.1517
103.6	0.156
103.7	0.1598
103.8	0.16428
103.9	0.16822
104	0.1719
104.1	0.17562
104.2	0.1798
104.3	0.18396
104.4	0.18758
104.5	0.19108
104.6	0.19442
104.7	0.19772
104.8	0.20136
104.9	0.20528
105	0.20918
105.1	0.21254
105.2	0.21564
105.3	0.21932
105.4	0.22288
105.5	0.22632
105.6	0.22974
105.7	0.23298
105.8	0.23646
105.9	0.23958
106	0.2431
106.1	0.2464
106.2	0.25022
106.3	0.25418
106.4	0.2577
106.5	0.26092
106.6	0.26432
106.7	0.26754
106.8	0.27116
106.9	0.2742
107	0.27746
107.1	0.28034
107.2	0.2839
107.3	0.28684
107.4	0.28988
107.5	0.29308
107.6	0.29578
107.7	0.2989
107.8	0.30194
107.9	0.30528
108	0.30844
108.1	0.3116
108.2	0.31472
108.3	0.31736
108.4	0.31996
108.5	0.3227
108.6	0.32598
108.7	0.32944
108.8	0.33216
108.9	0.33536
109	0.33844
109.1	0.34132
109.2	0.3444
109.3	0.3472
109.4	0.35026
109.5	0.35308
109.6	0.35554
109.7	0.3581
109.8	0.3606
109.9	0.3633
110	0.36632
110.1	0.36892
110.2	0.37136
110.3	0.37432
110.4	0.3769
110.5	0.3796
110.6	0.38268
110.7	0.3848
110.8	0.3879
110.9	0.38998
111	0.3922
111.1	0.3945
111.2	0.3972
111.3	0.3999
111.4	0.4022
111.5	0.40472
111.6	0.40706
111.7	0.40952
111.8	0.4119
111.9	0.4138
112	0.41626
112.1	0.41844
112.2	0.42132
112.3	0.42434
112.4	0.42684
112.5	0.42874
112.6	0.4311
112.7	0.43382
112.8	0.43624
112.9	0.43832
113	0.44092
113.1	0.44312
113.2	0.44498
113.3	0.4473
113.4	0.44912
113.5	0.45134
113.6	0.45368
113.7	0.45568
113.8	0.45788
113.9	0.45976
114	0.46144
114.1	0.46402
114.2	0.46592
114.3	0.468
114.4	0.47026
114.5	0.47202
114.6	0.47394
114.7	0.47596
114.8	0.47794
114.9	0.47996
115	0.482
115.1	0.48442
115.2	0.48662
115.3	0.48834
115.4	0.4902
115.5	0.4919
115.6	0.49402
115.7	0.49584
115.8	0.49794
115.9	0.5
116	0.50188
116.1	0.50332
116.2	0.50552
116.3	0.50752
116.4	0.5098
116.5	0.51206
116.6	0.51494
116.7	0.51716
116.8	0.51902
116.9	0.52098
117	0.5231
117.1	0.52512
117.2	0.52668
117.3	0.5283
117.4	0.5304
117.5	0.5319
117.6	0.53362
117.7	0.53558
117.8	0.53758
117.9	0.5394
118	0.54122
118.1	0.54266
118.2	0.54408
118.3	0.54546
118.4	0.5471
118.5	0.54882
118.6	0.55064
118.7	0.55212
118.8	0.55358
118.9	0.555
119	0.55664
119.1	0.55842
119.2	0.56002
119.3	0.56158
119.4	0.56334
119.5	0.56522
119.6	0.56672
119.7	0.56818
119.8	0.56974
119.9	0.57098
120	0.57262
120.1	0.57374
120.2	0.5751
120.3	0.57666
120.4	0.57798
120.5	0.57936
120.6	0.5807
120.7	0.58242
120.8	0.5841
120.9	0.5856
121	0.58718
121.1	0.58858
121.2	0.59018
121.3	0.59168
121.4	0.593
121.5	0.59454
121.6	0.59574
121.7	0.59664
121.8	0.59798
121.9	0.59954
122	0.60104
122.1	0.60192
122.2	0.60368
122.3	0.605
122.4	0.60668
122.5	0.6077
122.6	0.60894
122.7	0.61
122.8	0.6116
122.9	0.61262
123	0.61406
123.1	0.61524
123.2	0.61658
123.3	0.61766
123.4	0.61888
123.5	0.61964
123.6	0.62104
123.7	0.62234
123.8	0.6234
123.9	0.62458
124	0.62586
124.1	0.62696
124.2	0.62804
124.3	0.62926
124.4	0.6299
124.5	0.63098
124.6	0.63206
124.7	0.6333
124.8	0.63418
124.9	0.63536
125	0.63648
125.1	0.6379
125.2	0.63882
125.3	0.63976
125.4	0.64074
125.5	0.6416
125.6	0.64304
125.7	0.64436
125.8	0.64528
125.9	0.64676
126	0.64786
126.1	0.64888
126.2	0.64982
126.3	0.65064
126.4	0.6517
126.5	0.6527
126.6	0.65364
126.7	0.65464
126.8	0.65588
126.9	0.657
127	0.65792
127.1	0.6593
127.2	0.66018
127.3	0.66116
127.4	0.66178
127.5	0.66282
127.6	0.66386
127.7	0.66502
127.8	0.6656
127.9	0.66664
128	0.66748
128.1	0.66862
128.2	0.66944
128.3	0.67026
128.4	0.67138
128.5	0.6725
128.6	0.67336
128.7	0.67388
128.8	0.6746
128.9	0.67566
129	0.6764
129.1	0.67726
129.2	0.67802
129.3	0.67928
129.4	0.68002
129.5	0.68058
129.6	0.68162
129.7	0.68266
129.8	0.68404
129.9	0.6851
130	0.6857
130.1	0.68658
130.2	0.68752
130.3	0.68834
130.4	0.68924
130.5	0.6895
130.6	0.69028
130.7	0.69088
130.8	0.69186
130.9	0.69282
131	0.69376
131.1	0.69452
131.2	0.69528
131.3	0.696
131.4	0.6966
131.5	0.69708
131.6	0.69756
131.7	0.69818
131.8	0.69894
131.9	0.69968
132	0.70056
132.1	0.70114
132.2	0.70174
132.3	0.70272
132.4	0.70336
132.5	0.70432
132.6	0.70496
132.7	0.70576
132.8	0.70642
132.9	0.7072
133	0.70788
133.1	0.70898
133.2	0.70984
133.3	0.7105
133.4	0.71116
133.5	0.7118
133.6	0.71236
133.7	0.71292
133.8	0.71338
133.9	0.71448
134	0.71482
134.1	0.7156
134.2	0.71624
134.3	0.7172
134.4	0.71778
134.5	0.7188
134.6	0.71916
134.7	0.71954
134.8	0.71972
134.9	0.72036
135	0.72114
135.1	0.72168
135.2	0.72234
135.3	0.72276
135.4	0.72358
135.5	0.72412
135.6	0.7247
135.7	0.72518
135.8	0.72592
135.9	0.7264
136	0.72688
136.1	0.72726
136.2	0.72806
136.3	0.72854
136.4	0.7289
136.5	0.72948
136.6	0.73026
136.7	0.73072
136.8	0.73114
136.9	0.73196
137	0.73232
137.1	0.73238
137.2	0.73284
137.3	0.73334
137.4	0.73404
137.5	0.73476
137.6	0.73528
137.7	0.73586
137.8	0.7366
137.9	0.73698
138	0.73782
138.1	0.73858
138.2	0.73902
138.3	0.73986
138.4	0.7406
138.5	0.7412
138.6	0.7419
138.7	0.74232
138.8	0.74278
138.9	0.74354
139	0.74366
139.1	0.74418
139.2	0.74496
139.3	0.74548
139.4	0.7456
139.5	0.74606
139.6	0.74648
139.7	0.7472
139.8	0.74754
139.9	0.7482
140	0.74874
140.1	0.74888
140.2	0.7495
140.3	0.75026
140.4	0.75048
140.5	0.75108
140.6	0.75162
140.7	0.75196
140.8	0.75226
140.9	0.75302
141	0.75334
141.1	0.75388
141.2	0.75416
141.3	0.75442
141.4	0.7549
141.5	0.75544
141.6	0.75606
141.7	0.75646
141.8	0.75698
141.9	0.75744
142	0.7579
142.1	0.75804
142.2	0.75842
142.3	0.75868
142.4	0.75886
142.5	0.7595
142.6	0.76042
142.7	0.76052
142.8	0.76072
142.9	0.7611
143	0.76154
143.1	0.76218
143.2	0.76276
143.3	0.7634
143.4	0.76428
143.5	0.76468
143.6	0.76502
143.7	0.76496
143.8	0.76562
143.9	0.766
144	0.76604
144.1	0.76654
144.2	0.76694
144.3	0.76686
144.4	0.76728
144.5	0.76746
144.6	0.7678
144.7	0.76836
144.8	0.76874
144.9	0.76928
145	0.76976
145.1	0.77016
145.2	0.7708
145.3	0.7709
145.4	0.77102
145.5	0.7713
145.6	0.77188
145.7	0.77208
145.8	0.77248
145.9	0.77298
146	0.77336
146.1	0.77368
146.2	0.77444
146.3	0.775
146.4	0.77528
146.5	0.77552
146.6	0.77594
146.7	0.776
146.8	0.77628
146.9	0.77656
147	0.77668
147.1	0.77686
147.2	0.77722
147.3	0.7773
147.4	0.77732
147.5	0.77758
147.6	0.77788
147.7	0.77834
147.8	0.77862
147.9	0.77894
148	0.77942
148.1	0.77996
148.2	0.77996
148.3	0.78052
148.4	0.78042
148.5	0.7806
148.6	0.78076
148.7	0.78106
148.8	0.78108
148.9	0.78148
149	0.7816
149.1	0.78138
149.2	0.78154
149.3	0.782
149.4	0.78218
149.5	0.78224
149.6	0.78236
149.7	0.7824
149.8	0.78276
149.9	0.78298
150	0.78304
150.1	0.78292
150.2	0.78316
150.3	0.78338
150.4	0.78368
150.5	0.78372
150.6	0.78426
150.7	0.78474
150.8	0.78512
150.9	0.78512
151	0.78562
151.1	0.78628
151.2	0.7865
151.3	0.78666
151.4	0.78734
151.5	0.78744
151.6	0.7876
151.7	0.78806
151.8	0.78828
151.9	0.78856
152	0.78882
152.1	0.789
152.2	0.78918
152.3	0.78906
152.4	0.78908
152.5	0.7891
152.6	0.78928
152.7	0.78928
152.8	0.78956
152.9	0.78976
153	0.79006
153.1	0.79022
153.2	0.79062
153.3	0.79072
153.4	0.79088
153.5	0.79082
153.6	0.79098
153.7	0.7916
153.8	0.7921
153.9	0.79172
154	0.79166
154.1	0.7918
154.2	0.79202
154.3	0.7927
154.4	0.79314
154.5	0.79352
154.6	0.79358
154.7	0.79384
154.8	0.79424
154.9	0.79428
155	0.79476
155.1	0.79506
155.2	0.79564
155.3	0.79562
155.4	0.79548
155.5	0.79552
155.6	0.79578
155.7	0.79572
155.8	0.79588
155.9	0.79588
156	0.79612
156.1	0.79614
156.2	0.79616
156.3	0.7967
156.4	0.79706
156.5	0.79762
156.6	0.7979
156.7	0.79806
156.8	0.79834
156.9	0.79838
157	0.79866
157.1	0.79916
157.2	0.79924
157.3	0.7993
157.4	0.79928
157.5	0.79946
157.6	0.79986
157.7	0.80034
157.8	0.80048
157.9	0.80094
158	0.80136
158.1	0.80118
158.2	0.80102
158.3	0.80132
158.4	0.8014
158.5	0.80146
158.6	0.80212
158.7	0.80212
158.8	0.8021
158.9	0.80192
159	0.80204
159.1	0.80228
159.2	0.80246
159.3	0.80246
159.4	0.80288
159.5	0.80304
159.6	0.80288
159.7	0.8027
159.8	0.8029
159.9	0.80306
160	0.80326
160.1	0.80334
160.2	0.80352
160.3	0.80376
160.4	0.80372
160.5	0.80426
160.6	0.80426
160.7	0.80466
160.8	0.80494
160.9	0.80496
161	0.80486
161.1	0.80496
161.2	0.8049
161.3	0.80526
161.4	0.80544
161.5	0.80534
161.6	0.8052
161.7	0.80548
161.8	0.8054
161.9	0.80558
162	0.80564
162.1	0.80566
162.2	0.80606
162.3	0.80604
162.4	0.80576
162.5	0.80584
162.6	0.80574
162.7	0.80582
162.8	0.80596
162.9	0.8059
163	0.80582
163.1	0.80592
163.2	0.80612
163.3	0.8064
163.4	0.80646
163.5	0.80664
163.6	0.807
163.7	0.80724
163.8	0.8071
163.9	0.80704
164	0.80746
164.1	0.80766
164.2	0.8078
164.3	0.80788
164.4	0.8078
164.5	0.80786
164.6	0.8081
164.7	0.8083
164.8	0.80886
164.9	0.80864
165	0.80858
165.1	0.80886
165.2	0.8091
165.3	0.80896
165.4	0.80922
165.5	0.80944
165.6	0.80974
165.7	0.81002
165.8	0.81014
165.9	0.81026
166	0.81036
166.1	0.8108
166.2	0.81104
166.3	0.81092
166.4	0.81072
166.5	0.81086
166.6	0.81098
166.7	0.81114
166.8	0.8112
166.9	0.81128
167	0.81148
167.1	0.81162
167.2	0.81168
167.3	0.81168
167.4	0.81216
167.5	0.81254
167.6	0.81306
167.7	0.81348
167.8	0.81344
167.9	0.81366
168	0.81368
168.1	0.81366
168.2	0.81364
168.3	0.81382
168.4	0.81418
168.5	0.81434
168.6	0.81442
168.7	0.81436
168.8	0.81456
168.9	0.81444
169	0.81474
169.1	0.81502
169.2	0.8149
169.3	0.81508
169.4	0.81522
169.5	0.8154
169.6	0.81532
169.7	0.81524
169.8	0.81532
169.9	0.81518
170	0.81546
170.1	0.8156
170.2	0.81558
170.3	0.81542
170.4	0.81524
170.5	0.81562
170.6	0.81594
170.7	0.81562
170.8	0.81542
170.9	0.81568
171	0.81548
171.1	0.81568
171.2	0.81574
171.3	0.81586
171.4	0.81608
171.5	0.81636
171.6	0.81654
171.7	0.81658
171.8	0.81708
171.9	0.81684
172	0.81688
172.1	0.81688
172.2	0.8172
172.3	0.81756
172.4	0.81756
172.5	0.81772
172.6	0.81754
172.7	0.81762
172.8	0.81742
172.9	0.81746
173	0.81728
173.1	0.81716
173.2	0.8172
173.3	0.81716
173.4	0.8174
173.5	0.81752
173.6	0.81756
173.7	0.81776
173.8	0.8176
173.9	0.81752
174	0.81748
174.1	0.81754
174.2	0.81782
174.3	0.818
174.4	0.81818
174.5	0.81836
174.6	0.81846
174.7	0.8186
174.8	0.8188
174.9	0.8191
175	0.81968
175.1	0.81966
175.2	0.81972
175.3	0.81998
175.4	0.82018
175.5	0.82
175.6	0.82004
175.7	0.8199
175.8	0.82006
175.9	0.82008
176	0.81998
176.1	0.82006
176.2	0.81974
176.3	0.81962
176.4	0.81952
176.5	0.81962
176.6	0.81948
176.7	0.8196
176.8	0.8196
176.9	0.81944
177	0.81918
177.1	0.81906
177.2	0.81906
177.3	0.81936
177.4	0.81908
177.5	0.81896
177.6	0.81908
177.7	0.81888
177.8	0.8188
177.9	0.81862
178	0.81884
178.1	0.8188
178.2	0.81906
178.3	0.81904
178.4	0.81924
178.5	0.81922
178.6	0.81932
178.7	0.8195
178.8	0.8199
178.9	0.82
179	0.81988
179.1	0.81978
179.2	0.82016
179.3	0.82034
179.4	0.8208
179.5	0.82068
179.6	0.8207
179.7	0.8206
179.8	0.82078
179.9	0.82048
180	0.82048
180.1	0.8208
180.2	0.82082
180.3	0.82098
180.4	0.82114
180.5	0.82102
180.6	0.82102
180.7	0.82108
180.8	0.8216
180.9	0.82184
181	0.82198
181.1	0.8219
181.2	0.82188
181.3	0.82194
181.4	0.82214
181.5	0.82192
181.6	0.8221
181.7	0.8221
181.8	0.82228
181.9	0.8223
182	0.82238
182.1	0.8226
182.2	0.82264
182.3	0.82244
182.4	0.82244
182.5	0.82248
182.6	0.82288
182.7	0.82278
182.8	0.82272
182.9	0.82262
183	0.8227
183.1	0.82258
183.2	0.8226
183.3	0.8227
183.4	0.82308
183.5	0.8227
183.6	0.82282
183.7	0.82302
183.8	0.823
183.9	0.823
184	0.8232
184.1	0.82328
184.2	0.82346
184.3	0.82332
184.4	0.82362
184.5	0.82354
184.6	0.82386
184.7	0.82382
184.8	0.8237
184.9	0.82386
185	0.82376
185.1	0.82346
185.2	0.8234
185.3	0.82322
185.4	0.82316
185.5	0.82316
185.6	0.82328
185.7	0.823
185.8	0.82338
185.9	0.82352
186	0.82374
186.1	0.82386
186.2	0.82352
186.3	0.82356
186.4	0.82346
186.5	0.82372
186.6	0.82382
186.7	0.82374
186.8	0.82372
186.9	0.82366
187	0.82374
187.1	0.82362
187.2	0.82388
187.3	0.82376
187.4	0.82408
187.5	0.8242
187.6	0.82434
187.7	0.82424
187.8	0.82426
187.9	0.82438
188	0.82434
188.1	0.82468
188.2	0.82482
188.3	0.8247
188.4	0.8248
188.5	0.82458
188.6	0.82462
188.7	0.82482
188.8	0.82476
188.9	0.82476
189	0.82466
189.1	0.82488
189.2	0.82462
189.3	0.82474
189.4	0.82492
189.5	0.82504
189.6	0.82488
189.7	0.82478
189.8	0.82464
189.9	0.82446
190	0.8245
190.1	0.82466
190.2	0.82474
190.3	0.82488
190.4	0.82486
190.5	0.82496
190.6	0.82496
190.7	0.82494
190.8	0.8249
190.9	0.82514
191	0.8254
191.1	0.82532
191.2	0.82526
191.3	0.82536
191.4	0.82568
191.5	0.82574
191.6	0.82574
191.7	0.82556
191.8	0.82536
191.9	0.82544
192	0.8255
192.1	0.82546
192.2	0.82578
192.3	0.82562
192.4	0.82574
192.5	0.8255
192.6	0.82502
192.7	0.82518
192.8	0.82496
192.9	0.82478
193	0.82484
193.1	0.82468
193.2	0.82456
193.3	0.82484
193.4	0.8247
193.5	0.82486
193.6	0.82482
193.7	0.8249
193.8	0.82486
193.9	0.82498
194	0.82522
194.1	0.82534
194.2	0.82544
194.3	0.82556
194.4	0.8258
194.5	0.82596
194.6	0.82586
194.7	0.82594
194.8	0.82584
194.9	0.82638
195	0.8264
195.1	0.82628
195.2	0.82672
195.3	0.82656
195.4	0.82664
195.5	0.82688
195.6	0.82706
195.7	0.82756
195.8	0.82708
195.9	0.82698
196	0.82718
196.1	0.82716
196.2	0.82734
196.3	0.82712
196.4	0.82706
196.5	0.82716
196.6	0.82704
196.7	0.82724
196.8	0.82704
196.9	0.82698
197	0.82666
197.1	0.82676
197.2	0.82694
197.3	0.82696
197.4	0.82686
197.5	0.82674
197.6	0.82664
197.7	0.82644
197.8	0.82618
197.9	0.82642
198	0.82642
198.1	0.82684
198.2	0.82702
198.3	0.82696
198.4	0.827
198.5	0.8266
198.6	0.82672
198.7	0.82672
198.8	0.82666
198.9	0.82668
199	0.82694
199.1	0.82702
199.2	0.82698
199.3	0.82706
199.4	0.82698
199.5	0.82728
199.6	0.8273
199.7	0.82754
199.8	0.82766
199.9	0.82772
200	0.82774
[truncated: 14,000 more rows]
