# Supplementary material for: Bayesian inference of kinetic schemes for ion channels by Kalman filtering
Source: eLife journal article supplement (doi:10.7554/elife.62714), 2022-05-04
Supplement: fig4-data3 [file 1_Sim_N_80_Fluor_MW.xlsx]

## Sheet: 32 M
0.1	0
0.2	0
0.3	0
0.4	0
0.5	0
0.6	0
0.7	0
0.8	0
0.9	0
1	0
1.1	0
1.2	0
1.3	0
1.4	0
1.5	0
1.6	0
1.7	0
1.8	0
1.9	0
2	0
2.1	0
2.2	0
2.3	0
2.4	0
2.5	0
2.6	0
2.7	0
2.8	0
2.9	0
3	0
3.1	0
3.2	0
3.3	0
3.4	0
3.5	0
3.6	0
3.7	0
3.8	0
3.9	0
4	0
4.1	0
4.2	0
4.3	0
4.4	0
4.5	0
4.6	0
4.7	0
4.8	0
4.9	0
5	0
5.1	0
5.2	0
5.3	0
5.4	0
5.5	0
5.6	0
5.7	0
5.8	0
5.9	0
6	0
6.1	0
6.2	0
6.3	0
6.4	0
6.5	0
6.6	0
6.7	0
6.8	0
6.9	0
7	0
7.1	0
7.2	0
7.3	0
7.4	0
7.5	0
7.6	0
7.7	0
7.8	0
7.9	0
8	0
8.1	0
8.2	0
8.3	0
8.4	0
8.5	0
8.6	0
8.7	0
8.8	0
8.9	0
9	0
9.1	0
9.2	0
9.3	0
9.4	0
9.5	0
9.6	0
9.7	0
9.8	0
9.9	0
10	0
10.1	0
10.2	0
10.3	0
10.4	0
10.5	0
10.6	0
10.7	0
10.8	0
10.9	0
11	0
11.1	0
11.2	0
11.3	0
11.4	0
11.5	0
11.6	0
11.7	0
11.8	0
11.9	0
12	0
12.1	0
12.2	0
12.3	0
12.4	0
12.5	0
12.6	0
12.7	0
12.8	0
12.9	0
13	0
13.1	0
13.2	0
13.3	0
13.4	0
13.5	0
13.6	0
13.7	0
13.8	0
13.9	0
14	0
14.1	0
14.2	0
14.3	0
14.4	0
14.5	0
14.6	0
14.7	0
14.8	0
14.9	0
15	0
15.1	0
15.2	0
15.3	0
15.4	0
15.5	0
15.6	0
15.7	0
15.8	0
15.9	0
16	0
16.1	0
16.2	0
16.3	0
16.4	0
16.5	0
16.6	0
16.7	0
16.8	0
16.9	0
17	0
17.1	0
17.2	0
17.3	0
17.4	0
17.5	0
17.6	0
17.7	0
17.8	0
17.9	0
18	0
18.1	0
18.2	0
18.3	0
18.4	0
18.5	0
18.6	0
18.7	0
18.8	0
18.9	0
19	0
19.1	0
19.2	0
19.3	0
19.4	0
19.5	0
19.6	0
19.7	0
19.8	0
19.9	0
20	0
20.1	0
20.2	0
20.3	0
20.4	0
20.5	0
20.6	0
20.7	0
20.8	0
20.9	0
21	0
21.1	0
21.2	0
21.3	0
21.4	0
21.5	0
21.6	0
21.7	0
21.8	0
21.9	0
22	0
22.1	0
22.2	0
22.3	0
22.4	0
22.5	0
22.6	0
22.7	0
22.8	0
22.9	0
23	0
23.1	0
23.2	0
23.3	0
23.4	0
23.5	0
23.6	0
23.7	0
23.8	0
23.9	0
24	0
24.1	0
24.2	0
24.3	0
24.4	0
24.5	0
24.6	0
24.7	0
24.8	0
24.9	0
25	0
25.1	0
25.2	0
25.3	0
25.4	0
25.5	0
25.6	0
25.7	0
25.8	0
25.9	0
26	0
26.1	0
26.2	0
26.3	0
26.4	0
26.5	0
26.6	0
26.7	0
26.8	0
26.9	0
27	0
27.1	0
27.2	0
27.3	0
27.4	0
27.5	0
27.6	0
27.7	0
27.8	0
27.9	0
28	0
28.1	0
28.2	0
28.3	0
28.4	0
28.5	0
28.6	0
28.7	0
28.8	0
28.9	0
29	0
29.1	0
29.2	0
29.3	0
29.4	0
29.5	0
29.6	0
29.7	0
29.8	0
29.9	0
30	0
30.1	0
30.2	0
30.3	0
30.4	0
30.5	0
30.6	0
30.7	0
30.8	0
30.9	0
31	0
31.1	0
31.2	0
31.3	0
31.4	0
31.5	0
31.6	0
31.7	0
31.8	0
31.9	0
32	0
32.1	0
32.2	0
32.3	0
32.4	0
32.5	0
32.6	0
32.7	0
32.8	0
32.9	0
33	0
33.1	0
33.2	0
33.3	0
33.4	0
33.5	0
33.6	0
33.7	0
33.8	0
33.9	0
34	0
34.1	0
34.2	0
34.3	0
34.4	0
34.5	0
34.6	0
34.7	0
34.8	0
34.9	0
35	0
35.1	0
35.2	0
35.3	0
35.4	0
35.5	0
35.6	0
35.7	0
35.8	0
35.9	0
36	0
36.1	0
36.2	0
36.3	0
36.4	0
36.5	0
36.6	0
36.7	0
36.8	0
36.9	0
37	0
37.1	0
37.2	0
37.3	0
37.4	0
37.5	0
37.6	0
37.7	0
37.8	0
37.9	0
38	0
38.1	0
38.2	0
38.3	0
38.4	0
38.5	0
38.6	0
38.7	0
38.8	0
38.9	0
39	0
39.1	0
39.2	0
39.3	0
39.4	0
39.5	0
39.6	0
39.7	0
39.8	0
39.9	0
40	0
40.1	0
40.2	0
40.3	0
40.4	0
40.5	0
40.6	0
40.7	0
40.8	0
40.9	0
41	0
41.1	0
41.2	0
41.3	0
41.4	0
41.5	0
41.6	0
41.7	0
41.8	0
41.9	0
42	0
42.1	0
42.2	0
42.3	0
42.4	0
42.5	0
42.6	0
42.7	0
42.8	0
42.9	0
43	0
43.1	0
43.2	0
43.3	0
43.4	0
43.5	0
43.6	0
43.7	0
43.8	0
43.9	0
44	0
44.1	0
44.2	0
44.3	0
44.4	0
44.5	0
44.6	0
44.7	0
44.8	0
44.9	0
45	0
45.1	0
45.2	0
45.3	0
45.4	0
45.5	0
45.6	0
45.7	0
45.8	0
45.9	0
46	0
46.1	0
46.2	0
46.3	0
46.4	0
46.5	0
46.6	0
46.7	0
46.8	0
46.9	0
47	0
47.1	0
47.2	0
47.3	0
47.4	0
47.5	0
47.6	0
47.7	0
47.8	0
47.9	0
48	0
48.1	0
48.2	0
48.3	0
48.4	0
48.5	0
48.6	0
48.7	0
48.8	0
48.9	0
49	0
49.1	0
49.2	0
49.3	0
49.4	0
49.5	0
49.6	0
49.7	0
49.8	0
49.9	0
50	0
50.1	0
50.2	0
50.3	0
50.4	0
50.5	0
50.6	0
50.7	0
50.8	0
50.9	0
51	0
51.1	0
51.2	0
51.3	0
51.4	0
51.5	0
51.6	0
51.7	0
51.8	0
51.9	0
52	0
52.1	0
52.2	0
52.3	0
52.4	0
52.5	0
52.6	0
52.7	0
52.8	0
52.9	0
53	0
53.1	0
53.2	0
53.3	0
53.4	0
53.5	0
53.6	0
53.7	0
53.8	0
53.9	0
54	0
54.1	0
54.2	0
54.3	0
54.4	0
54.5	0
54.6	0
54.7	0
54.8	0
54.9	0
55	0
55.1	0
55.2	0
55.3	0
55.4	0
55.5	0
55.6	0
55.7	0
55.8	0
55.9	0
56	0
56.1	0
56.2	0
56.3	0
56.4	0
56.5	0
56.6	0
56.7	0
56.8	0
56.9	0
57	0
57.1	0
57.2	0
57.3	0
57.4	0
57.5	0
57.6	0
57.7	0
57.8	0
57.9	0
58	0
58.1	0
58.2	0
58.3	0
58.4	0
58.5	0
58.6	0
58.7	0
58.8	0
58.9	0
59	0
59.1	0
59.2	0
59.3	0
59.4	0
59.5	0
59.6	0
59.7	0
59.8	0
59.9	0
60	0
60.1	0
60.2	0
60.3	0
60.4	0
60.5	0
60.6	0
60.7	0
60.8	0
60.9	0
61	0
61.1	0
61.2	0
61.3	0
61.4	0
61.5	0
61.6	0
61.7	0
61.8	0
61.9	0
62	0
62.1	0
62.2	0
62.3	0
62.4	0
62.5	0
62.6	0
62.7	0
62.8	0
62.9	0
63	0
63.1	0
63.2	0
63.3	0
63.4	0
63.5	0
63.6	0
63.7	0
63.8	0
63.9	0
64	0
64.1	0
64.2	0
64.3	0
64.4	0
64.5	0
64.6	0
64.7	0
64.8	0
64.9	0
65	0
65.1	0
65.2	0
65.3	0
65.4	0
65.5	0
65.6	0
65.7	0
65.8	0
65.9	0
66	0
66.1	0
66.2	0
66.3	0
66.4	0
66.5	0
66.6	0
66.7	0
66.8	0
66.9	0
67	0
67.1	0
67.2	0
67.3	0
67.4	0
67.5	0
67.6	0
67.7	0
67.8	0
67.9	0
68	0
68.1	0
68.2	0
68.3	0
68.4	0
68.5	0
68.6	0
68.7	0
68.8	0
68.9	0
69	0
69.1	0
69.2	0
69.3	0
69.4	0
69.5	0
69.6	0
69.7	0
69.8	0
69.9	0
70	0
70.1	0
70.2	0
70.3	0
70.4	0
70.5	0
70.6	0
70.7	0
70.8	0
70.9	0
71	0
71.1	0
71.2	0
71.3	0
71.4	0
71.5	0
71.6	0
71.7	0
71.8	0
71.9	0
72	0
72.1	0
72.2	0
72.3	0
72.4	0
72.5	0
72.6	0
72.7	0
72.8	0
72.9	0
73	0
73.1	0
73.2	0
73.3	0
73.4	0
73.5	0
73.6	0
73.7	0
73.8	0
73.9	0
74	0
74.1	0
74.2	0
74.3	0
74.4	0
74.5	0
74.6	0
74.7	0
74.8	0
74.9	0
75	0
75.1	0
75.2	0
75.3	0
75.4	0
75.5	0
75.6	0
75.7	0
75.8	0
75.9	0
76	0
76.1	0
76.2	0
76.3	0
76.4	0
76.5	0
76.6	0
76.7	0
76.8	0
76.9	0
77	0
77.1	0
77.2	0
77.3	0
77.4	0
77.5	0
77.6	0
77.7	0
77.8	0
77.9	0
78	0
78.1	0
78.2	0
78.3	0
78.4	0
78.5	0
78.6	0
78.7	0
78.8	0
78.9	0
79	0
79.1	0
79.2	0
79.3	0
79.4	0
79.5	0
79.6	0
79.7	0
79.8	0
79.9	0
80	0
80.1	0
80.2	0
80.3	0
80.4	0
80.5	0
80.6	0
80.7	0
80.8	0
80.9	0
81	0
81.1	0
81.2	0
81.3	0
81.4	0
81.5	0
81.6	0
81.7	0
81.8	0
81.9	0
82	0
82.1	0
82.2	0
82.3	0
82.4	0
82.5	0
82.6	0
82.7	0
82.8	0
82.9	0
83	0
83.1	0
83.2	0
83.3	0
83.4	0
83.5	0
83.6	0
83.7	0
83.8	0
83.9	0
84	0
84.1	0
84.2	0
84.3	0
84.4	0
84.5	0
84.6	0
84.7	0
84.8	0
84.9	0
85	0
85.1	0
85.2	0
85.3	0
85.4	0
85.5	0
85.6	0
85.7	0
85.8	0
85.9	0
86	0
86.1	0
86.2	0
86.3	0
86.4	0
86.5	0
86.6	0
86.7	0
86.8	0
86.9	0
87	0
87.1	0
87.2	0
87.3	0
87.4	0
87.5	0
87.6	0
87.7	0
87.8	0
87.9	0
88	0
88.1	0
88.2	0
88.3	0
88.4	0
88.5	0
88.6	0
88.7	0
88.8	0
88.9	0
89	0
89.1	0
89.2	0
89.3	0
89.4	0
89.5	0
89.6	0
89.7	0
89.8	0
89.9	0
90	0
90.1	0
90.2	0
90.3	0
90.4	0
90.5	0
90.6	0
90.7	0
90.8	0
90.9	0
91	0
91.1	0
91.2	0
91.3	0
91.4	0
91.5	0
91.6	0
91.7	0
91.8	0
91.9	0
92	0
92.1	0
92.2	0
92.3	0
92.4	0
92.5	0
92.6	0
92.7	0
92.8	0
92.9	0
93	0
93.1	0
93.2	0
93.3	0
93.4	0
93.5	0
93.6	0
93.7	0
93.8	0
93.9	0
94	0
94.1	0
94.2	0
94.3	0
94.4	0
94.5	0
94.6	0
94.7	0
94.8	0
94.9	0
95	0
95.1	0
95.2	0
95.3	0
95.4	0
95.5	0
95.6	0
95.7	0
95.8	0
95.9	0
96	0
96.1	0
96.2	0
96.3	0
96.4	0
96.5	0
96.6	0
96.7	0
96.8	0
96.9	0
97	0
97.1	0
97.2	0
97.3	0
97.4	0
97.5	0
97.6	0
97.7	0
97.8	0
97.9	0
98	0
98.1	0
98.2	0
98.3	0
98.4	0
98.5	0
98.6	0
98.7	0
98.8	0
98.9	0
99	0
99.1	0
99.2	0
99.3	0
99.4	0
99.5	0
99.6	0
99.7	0
99.8	0
99.9	0
100	0
100.1	0.69375
100.2	0.88125
100.3	0.95625
100.4	0.9375
100.5	0.96875
100.6	0.975
100.7	0.98125
100.8	0.975
100.9	0.96875
101	0.95625
101.1	0.95625
101.2	0.96875
101.3	0.9625
101.4	0.9875
101.5	0.98125
101.6	0.9875
101.7	0.975
101.8	0.9875
101.9	0.99375
102	0.9875
102.1	0.95625
102.2	0.9625
102.3	0.975
102.4	0.9875
102.5	0.975
102.6	0.9625
102.7	0.9625
102.8	0.98125
102.9	0.99375
103	0.98125
103.1	0.975
103.2	0.975
103.3	0.975
103.4	0.9875
103.5	1
103.6	1
103.7	0.99375
103.8	0.9875
103.9	0.99375
104	0.99375
104.1	0.9875
104.2	0.98125
104.3	0.9625
104.4	0.975
104.5	0.96875
104.6	0.96875
104.7	0.9875
104.8	0.975
104.9	0.96875
105	0.99375
105.1	1
105.2	0.9875
105.3	0.9875
105.4	0.98125
105.5	0.98125
105.6	0.95625
105.7	0.9625
105.8	0.96875
105.9	0.98125
106	0.975
106.1	0.98125
106.2	0.98125
106.3	0.96875
106.4	0.99375
106.5	0.975
106.6	0.975
106.7	0.9875
106.8	0.99375
106.9	0.99375
107	0.9875
107.1	0.9875
107.2	1
107.3	0.99375
107.4	1
107.5	0.98125
107.6	0.98125
107.7	1
107.8	0.9875
107.9	0.9875
108	0.975
108.1	0.975
108.2	0.975
108.3	0.9875
108.4	1
108.5	0.98125
108.6	0.96875
108.7	0.9875
108.8	0.9875
108.9	0.99375
109	0.9875
109.1	0.9875
109.2	0.975
109.3	0.9875
109.4	0.98125
109.5	0.9875
109.6	0.99375
109.7	0.9875
109.8	0.99375
109.9	0.98125
110	0.99375
110.1	0.9875
110.2	0.96875
110.3	0.96875
110.4	0.9875
110.5	0.99375
110.6	0.98125
110.7	0.95625
110.8	0.9875
110.9	0.98125
111	0.96875
111.1	0.975
111.2	0.96875
111.3	0.98125
111.4	0.9875
111.5	0.975
111.6	0.96875
111.7	0.98125
111.8	0.9875
111.9	0.99375
112	0.98125
112.1	0.99375
112.2	0.98125
112.3	0.98125
112.4	0.9875
112.5	0.99375
112.6	0.99375
112.7	0.9875
112.8	0.9875
112.9	0.9875
113	0.9875
113.1	0.9875
113.2	0.975
113.3	0.98125
113.4	0.98125
113.5	0.99375
113.6	0.99375
113.7	1
113.8	1
113.9	1
114	0.99375
114.1	0.98125
114.2	0.98125
114.3	0.99375
114.4	0.99375
114.5	0.975
114.6	0.99375
114.7	0.99375
114.8	1
114.9	1
115	0.98125
115.1	0.975
115.2	0.99375
115.3	1
115.4	0.99375
115.5	0.9875
115.6	1
115.7	1
115.8	0.96875
115.9	0.98125
116	0.9875
116.1	0.98125
116.2	0.98125
116.3	0.975
116.4	0.9875
116.5	0.9875
116.6	0.9875
116.7	0.9875
116.8	1
116.9	0.99375
117	0.99375
117.1	1
117.2	0.99375
117.3	0.98125
117.4	0.98125
117.5	0.99375
117.6	0.98125
117.7	0.975
117.8	0.98125
117.9	0.975
118	0.9875
118.1	0.9875
118.2	0.9875
118.3	1
118.4	1
118.5	0.98125
118.6	0.98125
118.7	0.98125
118.8	1
118.9	1
119	1
119.1	1
119.2	0.98125
119.3	0.975
119.4	0.975
119.5	0.99375
119.6	0.99375
119.7	0.9875
119.8	0.98125
119.9	0.99375
120	0.99375
120.1	0.99375
120.2	0.99375
120.3	0.99375
120.4	0.99375
120.5	0.99375
120.6	0.99375
120.7	0.9875
120.8	0.98125
120.9	0.9875
121	1
121.1	0.9875
121.2	0.99375
121.3	0.99375
121.4	1
121.5	0.99375
121.6	1
121.7	1
121.8	1
121.9	0.9875
122	0.975
122.1	0.975
122.2	0.9875
122.3	1
122.4	1
122.5	0.99375
122.6	0.99375
122.7	0.99375
122.8	0.99375
122.9	1
123	1
123.1	0.99375
123.2	0.99375
123.3	0.9875
123.4	0.98125
123.5	0.99375
123.6	1
123.7	0.98125
123.8	0.99375
123.9	1
124	0.99375
124.1	0.99375
124.2	0.9875
124.3	1
124.4	1
124.5	0.99375
124.6	0.96875
124.7	0.975
124.8	0.96875
124.9	0.9875
125	1
125.1	0.99375
125.2	0.99375
125.3	0.9875
125.4	0.99375
125.5	1
125.6	1
125.7	0.99375
125.8	1
125.9	0.99375
126	1
126.1	1
126.2	1
126.3	1
126.4	1
126.5	0.9875
126.6	0.9875
126.7	0.98125
126.8	0.99375
126.9	1
127	0.9875
127.1	0.98125
127.2	0.99375
127.3	0.99375
127.4	1
127.5	1
127.6	0.99375
127.7	0.9875
127.8	0.9875
127.9	0.99375
128	0.99375
128.1	0.9875
128.2	0.9875
128.3	0.9875
128.4	0.98125
128.5	0.9875
128.6	0.98125
128.7	0.98125
128.8	0.99375
128.9	1
129	0.9875
129.1	0.99375
129.2	0.9875
129.3	0.9875
129.4	0.98125
129.5	0.99375
129.6	0.9875
129.7	0.9875
129.8	1
129.9	1
130	0.99375
130.1	1
130.2	0.99375
130.3	0.9875
130.4	0.98125
130.5	0.9875
130.6	0.9875
130.7	1
130.8	0.99375
130.9	0.9875
131	0.9875
131.1	0.99375
131.2	1
131.3	1
131.4	1
131.5	1
131.6	1
131.7	0.99375
131.8	0.99375
131.9	0.99375
132	1
132.1	1
132.2	1
132.3	1
132.4	0.99375
132.5	0.99375
132.6	0.9875
132.7	0.9875
132.8	0.98125
132.9	0.9875
133	0.9875
133.1	1
133.2	1
133.3	0.9875
133.4	1
133.5	0.9875
133.6	0.99375
133.7	0.9875
133.8	1
133.9	0.99375
134	0.99375
134.1	0.99375
134.2	0.9875
134.3	0.99375
134.4	0.99375
134.5	1
134.6	0.99375
134.7	0.99375
134.8	0.99375
134.9	1
135	0.99375
135.1	0.99375
135.2	0.9875
135.3	0.9875
135.4	0.9875
135.5	0.99375
135.6	0.9875
135.7	0.99375
135.8	0.9875
135.9	1
136	0.99375
136.1	0.9875
136.2	0.99375
136.3	0.99375
136.4	0.98125
136.5	0.98125
136.6	0.9875
136.7	0.9875
136.8	0.99375
136.9	0.99375
137	1
137.1	1
137.2	1
137.3	0.9875
137.4	0.98125
137.5	0.99375
137.6	0.99375
137.7	0.99375
137.8	1
137.9	1
138	0.99375
138.1	1
138.2	1
138.3	1
138.4	1
138.5	1
138.6	0.99375
138.7	1
138.8	1
138.9	1
139	1
139.1	1
139.2	0.99375
139.3	0.99375
139.4	0.9875
139.5	0.9875
139.6	0.99375
139.7	0.99375
139.8	0.99375
139.9	0.99375
140	0.99375
140.1	0.9875
140.2	0.9875
140.3	0.98125
140.4	0.99375
140.5	1
140.6	0.9875
140.7	1
140.8	1
140.9	0.9875
141	1
141.1	0.9875
141.2	0.99375
141.3	0.99375
141.4	0.99375
141.5	0.98125
141.6	1
141.7	1
141.8	1
141.9	1
142	1
142.1	0.99375
142.2	1
142.3	0.99375
142.4	0.9875
142.5	0.99375
142.6	1
142.7	0.99375
142.8	0.99375
142.9	0.98125
143	1
143.1	0.99375
143.2	0.99375
143.3	1
143.4	1
143.5	1
143.6	0.99375
143.7	1
143.8	1
143.9	0.99375
144	0.99375
144.1	0.99375
144.2	0.99375
144.3	0.99375
144.4	0.99375
144.5	0.9875
144.6	0.99375
144.7	0.9875
144.8	1
144.9	1
145	1
145.1	0.99375
145.2	0.99375
145.3	0.99375
145.4	1
145.5	0.9875
145.6	0.9875
145.7	0.99375
145.8	0.9875
145.9	1
146	1
146.1	1
146.2	0.99375
146.3	1
146.4	1
146.5	1
146.6	1
146.7	1
146.8	0.99375
146.9	0.99375
147	1
147.1	1
147.2	0.99375
147.3	1
147.4	1
147.5	1
147.6	1
147.7	0.99375
147.8	1
147.9	1
148	1
148.1	1
148.2	0.99375
148.3	0.99375
148.4	1
148.5	0.99375
148.6	1
148.7	0.9875
148.8	0.99375
148.9	0.99375
149	0.99375
149.1	0.99375
149.2	0.99375
149.3	0.99375
149.4	1
149.5	1
149.6	1
149.7	0.99375
149.8	0.9875
149.9	1
150	1
150.1	1
150.2	1
150.3	0.99375
150.4	1
150.5	1
150.6	0.99375
150.7	1
150.8	1
150.9	1
151	0.98125
151.1	0.9875
151.2	0.99375
151.3	1
151.4	1
151.5	1
151.6	1
151.7	1
151.8	1
151.9	1
152	1
152.1	1
152.2	0.99375
152.3	0.9875
152.4	0.99375
152.5	0.99375
152.6	0.99375
152.7	1
152.8	1
152.9	0.99375
153	1
153.1	1
153.2	0.99375
153.3	1
153.4	1
153.5	1
153.6	1
153.7	1
153.8	1
153.9	1
154	1
154.1	0.9875
154.2	0.99375
154.3	0.99375
154.4	0.99375
154.5	1
154.6	1
154.7	0.99375
154.8	1
154.9	1
155	0.99375
155.1	0.99375
155.2	0.99375
155.3	0.99375
155.4	1
155.5	1
155.6	1
155.7	1
155.8	1
155.9	1
156	1
156.1	1
156.2	0.99375
156.3	0.99375
156.4	1
156.5	1
156.6	0.99375
156.7	0.99375
156.8	1
156.9	1
157	0.9875
157.1	1
157.2	0.99375
157.3	0.99375
157.4	0.99375
157.5	1
157.6	0.99375
157.7	1
157.8	1
157.9	1
158	1
158.1	1
158.2	0.99375
158.3	0.9875
158.4	0.99375
158.5	1
158.6	0.99375
158.7	1
158.8	0.99375
158.9	0.9875
159	1
159.1	1
159.2	0.99375
159.3	1
159.4	1
159.5	1
159.6	1
159.7	1
159.8	0.99375
159.9	1
160	1
160.1	1
160.2	1
160.3	1
160.4	0.9875
160.5	0.99375
160.6	0.99375
160.7	1
160.8	1
160.9	1
161	1
161.1	1
161.2	0.99375
161.3	1
161.4	1
161.5	1
161.6	0.99375
161.7	1
161.8	1
161.9	1
162	1
162.1	0.99375
162.2	1
162.3	1
162.4	0.98125
162.5	0.9875
162.6	0.9875
162.7	0.9875
162.8	1
162.9	1
163	1
163.1	0.99375
163.2	1
163.3	1
163.4	0.99375
163.5	1
163.6	1
163.7	1
163.8	1
163.9	1
164	0.9875
164.1	0.99375
164.2	1
164.3	1
164.4	1
164.5	0.99375
164.6	1
164.7	1
164.8	0.99375
164.9	0.99375
165	1
165.1	0.99375
165.2	0.99375
165.3	0.99375
165.4	0.9875
165.5	0.99375
165.6	1
165.7	1
165.8	1
165.9	0.99375
166	0.99375
166.1	0.99375
166.2	0.99375
166.3	1
166.4	0.99375
166.5	1
166.6	1
166.7	1
166.8	0.99375
166.9	0.9875
167	1
167.1	1
167.2	1
167.3	1
167.4	1
167.5	0.99375
167.6	0.99375
167.7	0.99375
167.8	0.99375
167.9	1
168	1
168.1	0.99375
168.2	1
168.3	1
168.4	1
168.5	1
168.6	1
168.7	1
168.8	0.99375
168.9	1
169	0.99375
169.1	1
169.2	1
169.3	0.9875
169.4	0.99375
169.5	1
169.6	1
169.7	0.99375
169.8	1
169.9	1
170	1
170.1	1
170.2	1
170.3	1
170.4	0.99375
170.5	0.99375
170.6	0.9875
170.7	1
170.8	1
170.9	1
171	0.99375
171.1	1
171.2	0.99375
171.3	1
171.4	0.99375
171.5	0.99375
171.6	0.99375
171.7	1
171.8	0.98125
171.9	0.99375
172	1
172.1	1
172.2	0.99375
172.3	1
172.4	1
172.5	0.99375
172.6	1
172.7	1
172.8	0.99375
172.9	0.99375
173	1
173.1	1
173.2	1
173.3	0.99375
173.4	0.9875
173.5	0.9875
173.6	1
173.7	1
173.8	1
173.9	1
174	1
174.1	1
174.2	1
174.3	1
174.4	0.9875
174.5	1
174.6	1
174.7	0.99375
174.8	1
174.9	1
175	0.99375
175.1	0.99375
175.2	0.99375
175.3	1
175.4	1
175.5	1
175.6	1
175.7	1
175.8	0.99375
175.9	0.99375
176	1
176.1	1
176.2	1
176.3	1
176.4	1
176.5	1
176.6	1
176.7	1
176.8	1
176.9	1
177	1
177.1	1
177.2	1
177.3	0.99375
177.4	1
177.5	1
177.6	1
177.7	1
177.8	1
177.9	1
178	1
178.1	1
178.2	1
178.3	1
178.4	0.99375
178.5	0.9875
178.6	0.9875
178.7	0.99375
178.8	1
178.9	1
179	1
179.1	1
179.2	0.99375
179.3	1
179.4	1
179.5	1
179.6	1
179.7	1
179.8	1
179.9	1
180	0.9875
180.1	1
180.2	1
180.3	1
180.4	1
180.5	1
180.6	0.99375
180.7	0.99375
180.8	0.99375
180.9	1
181	1
181.1	1
181.2	1
181.3	1
181.4	1
181.5	0.99375
181.6	1
181.7	1
181.8	1
181.9	1
182	1
182.1	1
182.2	1
182.3	1
182.4	1
182.5	0.99375
182.6	0.99375
182.7	0.99375
182.8	1
182.9	1
183	1
183.1	1
183.2	1
183.3	1
183.4	1
183.5	1
183.6	1
183.7	1
183.8	0.98125
183.9	0.99375
184	1
184.1	1
184.2	1
184.3	1
184.4	1
184.5	1
184.6	1
184.7	1
184.8	1
184.9	1
185	1
185.1	1
185.2	0.99375
185.3	0.99375
185.4	1
185.5	1
185.6	0.99375
185.7	1
185.8	1
185.9	1
186	1
186.1	1
186.2	0.99375
186.3	0.99375
186.4	1
186.5	1
186.6	1
186.7	1
186.8	1
186.9	1
187	1
187.1	0.99375
187.2	0.99375
187.3	1
187.4	1
187.5	1
187.6	1
187.7	0.99375
187.8	0.99375
187.9	0.99375
188	0.99375
188.1	0.99375
188.2	0.99375
188.3	1
188.4	1
188.5	1
188.6	1
188.7	1
188.8	1
188.9	1
189	1
189.1	1
189.2	1
189.3	0.99375
189.4	0.99375
189.5	0.99375
189.6	1
189.7	1
189.8	1
189.9	1
190	1
190.1	1
190.2	1
190.3	1
190.4	1
190.5	1
190.6	1
190.7	1
190.8	1
190.9	0.99375
191	0.99375
191.1	0.99375
191.2	0.99375
191.3	0.99375
191.4	0.99375
191.5	0.99375
191.6	1
191.7	0.99375
191.8	0.99375
191.9	1
192	0.99375
192.1	0.99375
192.2	0.99375
192.3	0.99375
192.4	1
192.5	0.99375
192.6	0.99375
192.7	0.99375
192.8	0.99375
192.9	0.99375
193	0.99375
193.1	0.99375
193.2	0.9875
193.3	0.99375
193.4	0.99375
193.5	1
193.6	0.99375
193.7	0.9875
193.8	0.99375
193.9	0.99375
194	1
194.1	1
194.2	0.99375
194.3	0.99375
194.4	1
194.5	1
194.6	1
194.7	1
194.8	0.99375
194.9	1
195	0.98125
195.1	0.99375
195.2	1
195.3	1
195.4	1
195.5	0.99375
195.6	1
195.7	1
195.8	1
195.9	1
196	1
196.1	0.99375
196.2	0.9875
196.3	0.9875
196.4	0.9875
196.5	0.99375
196.6	0.99375
196.7	0.99375
196.8	1
196.9	1
197	0.99375
197.1	1
197.2	0.99375
197.3	0.99375
197.4	1
197.5	1
197.6	1
197.7	1
197.8	1
197.9	0.9875
198	1
198.1	1
198.2	1
198.3	1
198.4	1
198.5	1
198.6	1
198.7	0.99375
198.8	0.99375
198.9	0.99375
199	1
199.1	0.9875
199.2	0.99375
199.3	0.99375
199.4	1
199.5	1
199.6	0.99375
199.7	0.99375
199.8	0.99375
199.9	0.99375
200	0.99375
[truncated: 14,000 more rows]
