# Supplementary material for: Bayesian inference of kinetic schemes for ion channels by Kalman filtering
Source: eLife journal article supplement (doi:10.7554/elife.62714), 2022-05-04
Supplement: fig4-data3 [file 1_Sim_N_80_Strom_MW.xlsx]

## Sheet: 32 M
0.1	0
0.2	0
0.3	0
0.4	0
0.5	0
0.6	0
0.7	0
0.8	0
0.9	0
1	0
1.1	0
1.2	0
1.3	0
1.4	0
1.5	0
1.6	0
1.7	0
1.8	0
1.9	0
2	0
2.1	0
2.2	0
2.3	0
2.4	0
2.5	0
2.6	0
2.7	0
2.8	0
2.9	0
3	0
3.1	0
3.2	0
3.3	0
3.4	0
3.5	0
3.6	0
3.7	0
3.8	0
3.9	0
4	0
4.1	0
4.2	0
4.3	0
4.4	0
4.5	0
4.6	0
4.7	0
4.8	0
4.9	0
5	0
5.1	0
5.2	0
5.3	0
5.4	0
5.5	0
5.6	0
5.7	0
5.8	0
5.9	0
6	0
6.1	0
6.2	0
6.3	0
6.4	0
6.5	0
6.6	0
6.7	0
6.8	0
6.9	0
7	0
7.1	0
7.2	0
7.3	0
7.4	0
7.5	0
7.6	0
7.7	0
7.8	0
7.9	0
8	0
8.1	0
8.2	0
8.3	0
8.4	0
8.5	0
8.6	0
8.7	0
8.8	0
8.9	0
9	0
9.1	0
9.2	0
9.3	0
9.4	0
9.5	0
9.6	0
9.7	0
9.8	0
9.9	0
10	0
10.1	0
10.2	0
10.3	0
10.4	0
10.5	0
10.6	0
10.7	0
10.8	0
10.9	0
11	0
11.1	0
11.2	0
11.3	0
11.4	0
11.5	0
11.6	0
11.7	0
11.8	0
11.9	0
12	0
12.1	0
12.2	0
12.3	0
12.4	0
12.5	0
12.6	0
12.7	0
12.8	0
12.9	0
13	0
13.1	0
13.2	0
13.3	0
13.4	0
13.5	0
13.6	0
13.7	0
13.8	0
13.9	0
14	0
14.1	0
14.2	0
14.3	0
14.4	0
14.5	0
14.6	0
14.7	0
14.8	0
14.9	0
15	0
15.1	0
15.2	0
15.3	0
15.4	0
15.5	0
15.6	0
15.7	0
15.8	0
15.9	0
16	0
16.1	0
16.2	0
16.3	0
16.4	0
16.5	0
16.6	0
16.7	0
16.8	0
16.9	0
17	0
17.1	0
17.2	0
17.3	0
17.4	0
17.5	0
17.6	0
17.7	0
17.8	0
17.9	0
18	0
18.1	0
18.2	0
18.3	0
18.4	0
18.5	0
18.6	0
18.7	0
18.8	0
18.9	0
19	0
19.1	0
19.2	0
19.3	0
19.4	0
19.5	0
19.6	0
19.7	0
19.8	0
19.9	0
20	0
20.1	0
20.2	0
20.3	0
20.4	0
20.5	0
20.6	0
20.7	0
20.8	0
20.9	0
21	0
21.1	0
21.2	0
21.3	0
21.4	0
21.5	0
21.6	0
21.7	0
21.8	0
21.9	0
22	0
22.1	0
22.2	0
22.3	0
22.4	0
22.5	0
22.6	0
22.7	0
22.8	0
22.9	0
23	0
23.1	0
23.2	0
23.3	0
23.4	0
23.5	0
23.6	0
23.7	0
23.8	0
23.9	0
24	0
24.1	0
24.2	0
24.3	0
24.4	0
24.5	0
24.6	0
24.7	0
24.8	0
24.9	0
25	0
25.1	0
25.2	0
25.3	0
25.4	0
25.5	0
25.6	0
25.7	0
25.8	0
25.9	0
26	0
26.1	0
26.2	0
26.3	0
26.4	0
26.5	0
26.6	0
26.7	0
26.8	0
26.9	0
27	0
27.1	0
27.2	0
27.3	0
27.4	0
27.5	0
27.6	0
27.7	0
27.8	0
27.9	0
28	0
28.1	0
28.2	0
28.3	0
28.4	0
28.5	0
28.6	0
28.7	0
28.8	0
28.9	0
29	0
29.1	0
29.2	0
29.3	0
29.4	0
29.5	0
29.6	0
29.7	0
29.8	0
29.9	0
30	0
30.1	0
30.2	0
30.3	0
30.4	0
30.5	0
30.6	0
30.7	0
30.8	0
30.9	0
31	0
31.1	0
31.2	0
31.3	0
31.4	0
31.5	0
31.6	0
31.7	0
31.8	0
31.9	0
32	0
32.1	0
32.2	0
32.3	0
32.4	0
32.5	0
32.6	0
32.7	0
32.8	0
32.9	0
33	0
33.1	0
33.2	0
33.3	0
33.4	0
33.5	0
33.6	0
33.7	0
33.8	0
33.9	0
34	0
34.1	0
34.2	0
34.3	0
34.4	0
34.5	0
34.6	0
34.7	0
34.8	0
34.9	0
35	0
35.1	0
35.2	0
35.3	0
35.4	0
35.5	0
35.6	0
35.7	0
35.8	0
35.9	0
36	0
36.1	0
36.2	0
36.3	0
36.4	0
36.5	0
36.6	0
36.7	0
36.8	0
36.9	0
37	0
37.1	0
37.2	0
37.3	0
37.4	0
37.5	0
37.6	0
37.7	0
37.8	0
37.9	0
38	0
38.1	0
38.2	0
38.3	0
38.4	0
38.5	0
38.6	0
38.7	0
38.8	0
38.9	0
39	0
39.1	0
39.2	0
39.3	0
39.4	0
39.5	0
39.6	0
39.7	0
39.8	0
39.9	0
40	0
40.1	0
40.2	0
40.3	0
40.4	0
40.5	0
40.6	0
40.7	0
40.8	0
40.9	0
41	0
41.1	0
41.2	0
41.3	0
41.4	0
41.5	0
41.6	0
41.7	0
41.8	0
41.9	0
42	0
42.1	0
42.2	0
42.3	0
42.4	0
42.5	0
42.6	0
42.7	0
42.8	0
42.9	0
43	0
43.1	0
43.2	0
43.3	0
43.4	0
43.5	0
43.6	0
43.7	0
43.8	0
43.9	0
44	0
44.1	0
44.2	0
44.3	0
44.4	0
44.5	0
44.6	0
44.7	0
44.8	0
44.9	0
45	0
45.1	0
45.2	0
45.3	0
45.4	0
45.5	0
45.6	0
45.7	0
45.8	0
45.9	0
46	0
46.1	0
46.2	0
46.3	0
46.4	0
46.5	0
46.6	0
46.7	0
46.8	0
46.9	0
47	0
47.1	0
47.2	0
47.3	0
47.4	0
47.5	0
47.6	0
47.7	0
47.8	0
47.9	0
48	0
48.1	0
48.2	0
48.3	0
48.4	0
48.5	0
48.6	0
48.7	0
48.8	0
48.9	0
49	0
49.1	0
49.2	0
49.3	0
49.4	0
49.5	0
49.6	0
49.7	0
49.8	0
49.9	0
50	0
50.1	0
50.2	0
50.3	0
50.4	0
50.5	0
50.6	0
50.7	0
50.8	0
50.9	0
51	0
51.1	0
51.2	0
51.3	0
51.4	0
51.5	0
51.6	0
51.7	0
51.8	0
51.9	0
52	0
52.1	0
52.2	0
52.3	0
52.4	0
52.5	0
52.6	0
52.7	0
52.8	0
52.9	0
53	0
53.1	0
53.2	0
53.3	0
53.4	0
53.5	0
53.6	0
53.7	0
53.8	0
53.9	0
54	0
54.1	0
54.2	0
54.3	0
54.4	0
54.5	0
54.6	0
54.7	0
54.8	0
54.9	0
55	0
55.1	0
55.2	0
55.3	0
55.4	0
55.5	0
55.6	0
55.7	0
55.8	0
55.9	0
56	0
56.1	0
56.2	0
56.3	0
56.4	0
56.5	0
56.6	0
56.7	0
56.8	0
56.9	0
57	0
57.1	0
57.2	0
57.3	0
57.4	0
57.5	0
57.6	0
57.7	0
57.8	0
57.9	0
58	0
58.1	0
58.2	0
58.3	0
58.4	0
58.5	0
58.6	0
58.7	0
58.8	0
58.9	0
59	0
59.1	0
59.2	0
59.3	0
59.4	0
59.5	0
59.6	0
59.7	0
59.8	0
59.9	0
60	0
60.1	0
60.2	0
60.3	0
60.4	0
60.5	0
60.6	0
60.7	0
60.8	0
60.9	0
61	0
61.1	0
61.2	0
61.3	0
61.4	0
61.5	0
61.6	0
61.7	0
61.8	0
61.9	0
62	0
62.1	0
62.2	0
62.3	0
62.4	0
62.5	0
62.6	0
62.7	0
62.8	0
62.9	0
63	0
63.1	0
63.2	0
63.3	0
63.4	0
63.5	0
63.6	0
63.7	0
63.8	0
63.9	0
64	0
64.1	0
64.2	0
64.3	0
64.4	0
64.5	0
64.6	0
64.7	0
64.8	0
64.9	0
65	0
65.1	0
65.2	0
65.3	0
65.4	0
65.5	0
65.6	0
65.7	0
65.8	0
65.9	0
66	0
66.1	0
66.2	0
66.3	0
66.4	0
66.5	0
66.6	0
66.7	0
66.8	0
66.9	0
67	0
67.1	0
67.2	0
67.3	0
67.4	0
67.5	0
67.6	0
67.7	0
67.8	0
67.9	0
68	0
68.1	0
68.2	0
68.3	0
68.4	0
68.5	0
68.6	0
68.7	0
68.8	0
68.9	0
69	0
69.1	0
69.2	0
69.3	0
69.4	0
69.5	0
69.6	0
69.7	0
69.8	0
69.9	0
70	0
70.1	0
70.2	0
70.3	0
70.4	0
70.5	0
70.6	0
70.7	0
70.8	0
70.9	0
71	0
71.1	0
71.2	0
71.3	0
71.4	0
71.5	0
71.6	0
71.7	0
71.8	0
71.9	0
72	0
72.1	0
72.2	0
72.3	0
72.4	0
72.5	0
72.6	0
72.7	0
72.8	0
72.9	0
73	0
73.1	0
73.2	0
73.3	0
73.4	0
73.5	0
73.6	0
73.7	0
73.8	0
73.9	0
74	0
74.1	0
74.2	0
74.3	0
74.4	0
74.5	0
74.6	0
74.7	0
74.8	0
74.9	0
75	0
75.1	0
75.2	0
75.3	0
75.4	0
75.5	0
75.6	0
75.7	0
75.8	0
75.9	0
76	0
76.1	0
76.2	0
76.3	0
76.4	0
76.5	0
76.6	0
76.7	0
76.8	0
76.9	0
77	0
77.1	0
77.2	0
77.3	0
77.4	0
77.5	0
77.6	0
77.7	0
77.8	0
77.9	0
78	0
78.1	0
78.2	0
78.3	0
78.4	0
78.5	0
78.6	0
78.7	0
78.8	0
78.9	0
79	0
79.1	0
79.2	0
79.3	0
79.4	0
79.5	0
79.6	0
79.7	0
79.8	0
79.9	0
80	0
80.1	0
80.2	0
80.3	0
80.4	0
80.5	0
80.6	0
80.7	0
80.8	0
80.9	0
81	0
81.1	0
81.2	0
81.3	0
81.4	0
81.5	0
81.6	0
81.7	0
81.8	0
81.9	0
82	0
82.1	0
82.2	0
82.3	0
82.4	0
82.5	0
82.6	0
82.7	0
82.8	0
82.9	0
83	0
83.1	0
83.2	0
83.3	0
83.4	0
83.5	0
83.6	0
83.7	0
83.8	0
83.9	0
84	0
84.1	0
84.2	0
84.3	0
84.4	0
84.5	0
84.6	0
84.7	0
84.8	0
84.9	0
85	0
85.1	0
85.2	0
85.3	0
85.4	0
85.5	0
85.6	0
85.7	0
85.8	0
85.9	0
86	0
86.1	0
86.2	0
86.3	0
86.4	0
86.5	0
86.6	0
86.7	0
86.8	0
86.9	0
87	0
87.1	0
87.2	0
87.3	0
87.4	0
87.5	0
87.6	0
87.7	0
87.8	0
87.9	0
88	0
88.1	0
88.2	0
88.3	0
88.4	0
88.5	0
88.6	0
88.7	0
88.8	0
88.9	0
89	0
89.1	0
89.2	0
89.3	0
89.4	0
89.5	0
89.6	0
89.7	0
89.8	0
89.9	0
90	0
90.1	0
90.2	0
90.3	0
90.4	0
90.5	0
90.6	0
90.7	0
90.8	0
90.9	0
91	0
91.1	0
91.2	0
91.3	0
91.4	0
91.5	0
91.6	0
91.7	0
91.8	0
91.9	0
92	0
92.1	0
92.2	0
92.3	0
92.4	0
92.5	0
92.6	0
92.7	0
92.8	0
92.9	0
93	0
93.1	0
93.2	0
93.3	0
93.4	0
93.5	0
93.6	0
93.7	0
93.8	0
93.9	0
94	0
94.1	0
94.2	0
94.3	0
94.4	0
94.5	0
94.6	0
94.7	0
94.8	0
94.9	0
95	0
95.1	0
95.2	0
95.3	0
95.4	0
95.5	0
95.6	0
95.7	0
95.8	0
95.9	0
96	0
96.1	0
96.2	0
96.3	0
96.4	0
96.5	0
96.6	0
96.7	0
96.8	0
96.9	0
97	0
97.1	0
97.2	0
97.3	0
97.4	0
97.5	0
97.6	0
97.7	0
97.8	0
97.9	0
98	0
98.1	0
98.2	0
98.3	0
98.4	0
98.5	0
98.6	0
98.7	0
98.8	0
98.9	0
99	0
99.1	0
99.2	0
99.3	0
99.4	0
99.5	0
99.6	0
99.7	0
99.8	0
99.9	0
100	0
100.1	0
100.2	0
100.3	0
100.4	0
100.5	0
100.6	0.0125
100.7	0.0375
100.8	0.05
100.9	0.075
101	0.075
101.1	0.075
101.2	0.075
101.3	0.075
101.4	0.075
101.5	0.0875
101.6	0.1
101.7	0.125
101.8	0.1375
101.9	0.15
102	0.15
102.1	0.15
102.2	0.15
102.3	0.15
102.4	0.15
102.5	0.1625
102.6	0.1625
102.7	0.1625
102.8	0.175
102.9	0.175
103	0.175
103.1	0.175
103.2	0.175
103.3	0.175
103.4	0.1875
103.5	0.1875
103.6	0.2
103.7	0.2
103.8	0.2
103.9	0.2
104	0.2
104.1	0.2
104.2	0.2125
104.3	0.2125
104.4	0.2125
104.5	0.225
104.6	0.2375
104.7	0.25
104.8	0.25
104.9	0.25
105	0.25
105.1	0.25
105.2	0.25
105.3	0.2625
105.4	0.2625
105.5	0.2625
105.6	0.275
105.7	0.275
105.8	0.275
105.9	0.275
106	0.275
106.1	0.2875
106.2	0.2875
106.3	0.2875
106.4	0.2875
106.5	0.2875
106.6	0.2875
106.7	0.3
106.8	0.3
106.9	0.3
107	0.3
107.1	0.3
107.2	0.3
107.3	0.3
107.4	0.3
107.5	0.3
107.6	0.3125
107.7	0.3125
107.8	0.3125
107.9	0.3125
108	0.3125
108.1	0.325
108.2	0.325
108.3	0.3375
108.4	0.3625
108.5	0.3625
108.6	0.35
108.7	0.35
108.8	0.35
108.9	0.35
109	0.3625
109.1	0.3625
109.2	0.3625
109.3	0.3625
109.4	0.3625
109.5	0.3625
109.6	0.3625
109.7	0.3625
109.8	0.3625
109.9	0.3625
110	0.3625
110.1	0.3625
110.2	0.3625
110.3	0.3625
110.4	0.3625
110.5	0.3625
110.6	0.3625
110.7	0.3625
110.8	0.3625
110.9	0.3625
111	0.3625
111.1	0.375
111.2	0.375
111.3	0.4
111.4	0.4125
111.5	0.4125
111.6	0.4125
111.7	0.4125
111.8	0.425
111.9	0.425
112	0.4375
112.1	0.4375
112.2	0.45
112.3	0.45
112.4	0.45
112.5	0.4625
112.6	0.4625
112.7	0.4625
112.8	0.475
112.9	0.475
113	0.475
113.1	0.475
113.2	0.475
113.3	0.475
113.4	0.475
113.5	0.475
113.6	0.475
113.7	0.475
113.8	0.475
113.9	0.475
114	0.4875
114.1	0.4875
114.2	0.4875
114.3	0.4875
114.4	0.4875
114.5	0.4875
114.6	0.4875
114.7	0.4875
114.8	0.4875
114.9	0.4875
115	0.4875
115.1	0.5
115.2	0.5
115.3	0.525
115.4	0.5375
115.5	0.5375
115.6	0.5375
115.7	0.5375
115.8	0.5375
115.9	0.5375
116	0.5375
116.1	0.5375
116.2	0.5375
116.3	0.5375
116.4	0.5375
116.5	0.5375
116.6	0.5375
116.7	0.5375
116.8	0.5375
116.9	0.55
117	0.55
117.1	0.55
117.2	0.55
117.3	0.55
117.4	0.55
117.5	0.55
117.6	0.55
117.7	0.55
117.8	0.55
117.9	0.575
118	0.575
118.1	0.575
118.2	0.575
118.3	0.575
118.4	0.575
118.5	0.575
118.6	0.575
118.7	0.575
118.8	0.575
118.9	0.575
119	0.575
119.1	0.575
119.2	0.575
119.3	0.5875
119.4	0.5875
119.5	0.5875
119.6	0.5875
119.7	0.5875
119.8	0.5875
119.9	0.5875
120	0.5875
120.1	0.6
120.2	0.6125
120.3	0.6125
120.4	0.6125
120.5	0.6125
120.6	0.6125
120.7	0.6125
120.8	0.6125
120.9	0.6125
121	0.6125
121.1	0.6125
121.2	0.6125
121.3	0.6125
121.4	0.6125
121.5	0.6125
121.6	0.6125
121.7	0.6125
121.8	0.6125
121.9	0.6125
122	0.6125
122.1	0.625
122.2	0.625
122.3	0.625
122.4	0.6125
122.5	0.6125
122.6	0.6125
122.7	0.6125
122.8	0.6125
122.9	0.6125
123	0.6125
123.1	0.625
123.2	0.625
123.3	0.625
123.4	0.625
123.5	0.625
123.6	0.625
123.7	0.625
123.8	0.625
123.9	0.6375
124	0.6375
124.1	0.6375
124.2	0.6375
124.3	0.6375
124.4	0.6375
124.5	0.6375
124.6	0.65
124.7	0.65
124.8	0.65
124.9	0.6625
125	0.6625
125.1	0.6625
125.2	0.675
125.3	0.675
125.4	0.6875
125.5	0.6875
125.6	0.6875
125.7	0.6875
125.8	0.6875
125.9	0.6875
126	0.6875
126.1	0.6875
126.2	0.6875
126.3	0.6875
126.4	0.6875
126.5	0.6875
126.6	0.6875
126.7	0.6875
126.8	0.6875
126.9	0.6875
127	0.675
127.1	0.675
127.2	0.675
127.3	0.675
127.4	0.675
127.5	0.675
127.6	0.675
127.7	0.6875
127.8	0.6875
127.9	0.6875
128	0.6875
128.1	0.675
128.2	0.675
128.3	0.675
128.4	0.675
128.5	0.675
128.6	0.675
128.7	0.6875
128.8	0.6875
128.9	0.6875
129	0.6875
129.1	0.7
129.2	0.7
129.3	0.7
129.4	0.7
129.5	0.7
129.6	0.7
129.7	0.7
129.8	0.7
129.9	0.7
130	0.7
130.1	0.7125
130.2	0.6875
130.3	0.6875
130.4	0.7
130.5	0.7
130.6	0.7
130.7	0.7
130.8	0.7
130.9	0.7
131	0.7125
131.1	0.7125
131.2	0.7125
131.3	0.7125
131.4	0.7125
131.5	0.7125
131.6	0.7125
131.7	0.7125
131.8	0.7125
131.9	0.7
132	0.7
132.1	0.6875
132.2	0.6875
132.3	0.6875
132.4	0.7
132.5	0.7
132.6	0.7
132.7	0.7
132.8	0.7
132.9	0.7
133	0.7
133.1	0.6875
133.2	0.6875
133.3	0.6875
133.4	0.7125
133.5	0.7125
133.6	0.7
133.7	0.7125
133.8	0.7125
133.9	0.725
134	0.725
134.1	0.725
134.2	0.7375
134.3	0.7375
134.4	0.75
134.5	0.75
134.6	0.75
134.7	0.75
134.8	0.75
134.9	0.75
135	0.75
135.1	0.75
135.2	0.7375
135.3	0.7375
135.4	0.7375
135.5	0.7375
135.6	0.7375
135.7	0.7375
135.8	0.7375
135.9	0.7375
136	0.7375
136.1	0.7375
136.2	0.7375
136.3	0.725
136.4	0.725
136.5	0.725
136.6	0.725
136.7	0.7375
136.8	0.7375
136.9	0.7375
137	0.75
137.1	0.75
137.2	0.75
137.3	0.75
137.4	0.7375
137.5	0.7375
137.6	0.7375
137.7	0.7375
137.8	0.7375
137.9	0.7375
138	0.7375
138.1	0.7375
138.2	0.7375
138.3	0.7375
138.4	0.7375
138.5	0.7375
138.6	0.7375
138.7	0.7375
138.8	0.7375
138.9	0.7375
139	0.725
139.1	0.725
139.2	0.725
139.3	0.725
139.4	0.725
139.5	0.725
139.6	0.7375
139.7	0.7375
139.8	0.7375
139.9	0.725
140	0.725
140.1	0.725
140.2	0.7375
140.3	0.7375
140.4	0.7375
140.5	0.7375
140.6	0.7375
140.7	0.7375
140.8	0.75
140.9	0.7625
141	0.7625
141.1	0.7625
141.2	0.75
141.3	0.75
141.4	0.75
141.5	0.75
141.6	0.75
141.7	0.75
141.8	0.75
141.9	0.75
142	0.7625
142.1	0.7625
142.2	0.775
142.3	0.775
142.4	0.775
142.5	0.775
142.6	0.775
142.7	0.775
142.8	0.775
142.9	0.7875
143	0.775
143.1	0.7625
143.2	0.7625
143.3	0.7625
143.4	0.7625
143.5	0.7625
143.6	0.7625
143.7	0.7625
143.8	0.7625
143.9	0.7625
144	0.75
144.1	0.75
144.2	0.7375
144.3	0.75
144.4	0.75
144.5	0.75
144.6	0.7375
144.7	0.7375
144.8	0.7375
144.9	0.75
145	0.7625
145.1	0.7625
145.2	0.7625
145.3	0.7625
145.4	0.7625
145.5	0.7625
145.6	0.7625
145.7	0.775
145.8	0.7875
145.9	0.7875
146	0.7875
146.1	0.7875
146.2	0.8
146.3	0.8
146.4	0.7875
146.5	0.7875
146.6	0.7875
146.7	0.7875
146.8	0.7875
146.9	0.7875
147	0.7875
147.1	0.8
147.2	0.8
147.3	0.8
147.4	0.8
147.5	0.8
147.6	0.8
147.7	0.8
147.8	0.8
147.9	0.8
148	0.8
148.1	0.8
148.2	0.8
148.3	0.8
148.4	0.8
148.5	0.8
148.6	0.8
148.7	0.8
148.8	0.8
148.9	0.8
149	0.8
149.1	0.8
149.2	0.8
149.3	0.8
149.4	0.8
149.5	0.8
149.6	0.8
149.7	0.8
149.8	0.8
149.9	0.8
150	0.8
150.1	0.8
150.2	0.8
150.3	0.8
150.4	0.8
150.5	0.8
150.6	0.8
150.7	0.8
150.8	0.8
150.9	0.8
151	0.8
151.1	0.8
151.2	0.8
151.3	0.8
151.4	0.8
151.5	0.8
151.6	0.8
151.7	0.8
151.8	0.8
151.9	0.8
152	0.8
152.1	0.8
152.2	0.8
152.3	0.8
152.4	0.8
152.5	0.8
152.6	0.8
152.7	0.8125
152.8	0.8125
152.9	0.8125
153	0.8125
153.1	0.8125
153.2	0.8125
153.3	0.8125
153.4	0.8125
153.5	0.825
153.6	0.825
153.7	0.8125
153.8	0.8125
153.9	0.825
154	0.825
154.1	0.825
154.2	0.825
154.3	0.825
154.4	0.825
154.5	0.825
154.6	0.825
154.7	0.825
154.8	0.825
154.9	0.825
155	0.825
155.1	0.825
155.2	0.825
155.3	0.825
155.4	0.8125
155.5	0.8125
155.6	0.8125
155.7	0.8125
155.8	0.8125
155.9	0.8125
156	0.825
156.1	0.825
156.2	0.825
156.3	0.825
156.4	0.825
156.5	0.825
156.6	0.8375
156.7	0.8375
156.8	0.8375
156.9	0.8375
157	0.8375
157.1	0.8375
157.2	0.85
157.3	0.85
157.4	0.85
157.5	0.85
157.6	0.85
157.7	0.85
157.8	0.85
157.9	0.85
158	0.85
158.1	0.85
158.2	0.85
158.3	0.85
158.4	0.85
158.5	0.85
158.6	0.85
158.7	0.85
158.8	0.85
158.9	0.85
159	0.85
159.1	0.85
159.2	0.85
159.3	0.85
159.4	0.8375
159.5	0.8375
159.6	0.8375
159.7	0.8375
159.8	0.8375
159.9	0.8375
160	0.8375
160.1	0.825
160.2	0.8375
160.3	0.8375
160.4	0.825
160.5	0.8375
160.6	0.8375
160.7	0.8375
160.8	0.8375
160.9	0.8375
161	0.8375
161.1	0.8375
161.2	0.8375
161.3	0.8375
161.4	0.8375
161.5	0.8375
161.6	0.825
161.7	0.825
161.8	0.8125
161.9	0.8125
162	0.8125
162.1	0.8125
162.2	0.8125
162.3	0.825
162.4	0.8375
162.5	0.8375
162.6	0.8375
162.7	0.8375
162.8	0.8375
162.9	0.8375
163	0.8375
163.1	0.8375
163.2	0.8375
163.3	0.8375
163.4	0.8375
163.5	0.8375
163.6	0.8375
163.7	0.8375
163.8	0.8375
163.9	0.8375
164	0.8375
164.1	0.8375
164.2	0.8375
164.3	0.8375
164.4	0.8375
164.5	0.8375
164.6	0.8375
164.7	0.8375
164.8	0.8375
164.9	0.8375
165	0.85
165.1	0.85
165.2	0.85
165.3	0.85
165.4	0.85
165.5	0.85
165.6	0.85
165.7	0.85
165.8	0.85
165.9	0.85
166	0.85
166.1	0.85
166.2	0.85
166.3	0.85
166.4	0.85
166.5	0.85
166.6	0.85
166.7	0.85
166.8	0.85
166.9	0.85
167	0.85
167.1	0.8375
167.2	0.8375
167.3	0.8375
167.4	0.8375
167.5	0.8375
167.6	0.8375
167.7	0.8375
167.8	0.8375
167.9	0.85
168	0.85
168.1	0.85
168.2	0.85
168.3	0.85
168.4	0.8625
168.5	0.8625
168.6	0.8625
168.7	0.8625
168.8	0.8625
168.9	0.85
169	0.85
169.1	0.85
169.2	0.85
169.3	0.85
169.4	0.85
169.5	0.85
169.6	0.85
169.7	0.85
169.8	0.85
169.9	0.85
170	0.85
170.1	0.85
170.2	0.85
170.3	0.85
170.4	0.85
170.5	0.85
170.6	0.85
170.7	0.8375
170.8	0.8375
170.9	0.8375
171	0.8375
171.1	0.85
171.2	0.85
171.3	0.85
171.4	0.85
171.5	0.85
171.6	0.85
171.7	0.85
171.8	0.85
171.9	0.85
172	0.85
172.1	0.85
172.2	0.85
172.3	0.85
172.4	0.85
172.5	0.85
172.6	0.85
172.7	0.85
172.8	0.85
172.9	0.85
173	0.85
173.1	0.85
173.2	0.85
173.3	0.85
173.4	0.85
173.5	0.85
173.6	0.8625
173.7	0.8625
173.8	0.8625
173.9	0.8625
174	0.8625
174.1	0.875
174.2	0.875
174.3	0.8875
174.4	0.8875
174.5	0.8875
174.6	0.8875
174.7	0.9
174.8	0.9
174.9	0.9
175	0.9
175.1	0.8875
175.2	0.8875
175.3	0.8875
175.4	0.9
175.5	0.9
175.6	0.9125
175.7	0.9125
175.8	0.9125
175.9	0.9125
176	0.925
176.1	0.925
176.2	0.925
176.3	0.925
176.4	0.925
176.5	0.925
176.6	0.925
176.7	0.925
176.8	0.925
176.9	0.925
177	0.9125
177.1	0.9125
177.2	0.9125
177.3	0.9125
177.4	0.9125
177.5	0.9
177.6	0.9
177.7	0.9
177.8	0.9
177.9	0.9
178	0.8875
178.1	0.8875
178.2	0.8875
178.3	0.875
178.4	0.875
178.5	0.875
178.6	0.875
178.7	0.875
178.8	0.875
178.9	0.875
179	0.875
179.1	0.875
179.2	0.875
179.3	0.8625
179.4	0.8625
179.5	0.8625
179.6	0.875
179.7	0.875
179.8	0.875
179.9	0.8875
180	0.8875
180.1	0.8875
180.2	0.8875
180.3	0.8875
180.4	0.9
180.5	0.9
180.6	0.9
180.7	0.9
180.8	0.9
180.9	0.9
181	0.9
181.1	0.9
181.2	0.9
181.3	0.9
181.4	0.9
181.5	0.9
181.6	0.9
181.7	0.9
181.8	0.9
181.9	0.9
182	0.9
182.1	0.9
182.2	0.9
182.3	0.9
182.4	0.9
182.5	0.9
182.6	0.9
182.7	0.9
182.8	0.8875
182.9	0.8875
183	0.8875
183.1	0.8875
183.2	0.8875
183.3	0.8875
183.4	0.8875
183.5	0.8875
183.6	0.8875
183.7	0.8875
183.8	0.8875
183.9	0.8875
184	0.8875
184.1	0.8875
184.2	0.8875
184.3	0.8875
184.4	0.8875
184.5	0.8875
184.6	0.8875
184.7	0.8875
184.8	0.8875
184.9	0.8875
185	0.8875
185.1	0.8875
185.2	0.8875
185.3	0.8875
185.4	0.8875
185.5	0.8875
185.6	0.8875
185.7	0.8875
185.8	0.8875
185.9	0.8875
186	0.9
186.1	0.9
186.2	0.9125
186.3	0.925
186.4	0.925
186.5	0.925
186.6	0.925
186.7	0.9375
186.8	0.9375
186.9	0.9375
187	0.9375
187.1	0.9375
187.2	0.9375
187.3	0.9375
187.4	0.9375
187.5	0.9375
187.6	0.9375
187.7	0.9375
187.8	0.9375
187.9	0.9375
188	0.9375
188.1	0.9375
188.2	0.925
188.3	0.9125
188.4	0.9125
188.5	0.9
188.6	0.9
188.7	0.9
188.8	0.9
188.9	0.9
189	0.9
189.1	0.9
189.2	0.9
189.3	0.9
189.4	0.9
189.5	0.9
189.6	0.9
189.7	0.9
189.8	0.9
189.9	0.9
190	0.9
190.1	0.9
190.2	0.9
190.3	0.9
190.4	0.9
190.5	0.9
190.6	0.9
190.7	0.9
190.8	0.9
190.9	0.9
191	0.9
191.1	0.9
191.2	0.9
191.3	0.9
191.4	0.9
191.5	0.9
191.6	0.9
191.7	0.9
191.8	0.9
191.9	0.9
192	0.9
192.1	0.9
192.2	0.9
192.3	0.9
192.4	0.9
192.5	0.9
192.6	0.9
192.7	0.9
192.8	0.9
192.9	0.9
193	0.9
193.1	0.9
193.2	0.9
193.3	0.8875
193.4	0.8875
193.5	0.8875
193.6	0.8875
193.7	0.8875
193.8	0.8875
193.9	0.8875
194	0.8875
194.1	0.8875
194.2	0.8875
194.3	0.8875
194.4	0.8875
194.5	0.8875
194.6	0.8875
194.7	0.8875
194.8	0.8875
194.9	0.8875
195	0.8875
195.1	0.8875
195.2	0.8875
195.3	0.8875
195.4	0.8875
195.5	0.8875
195.6	0.8875
195.7	0.8875
195.8	0.8875
195.9	0.8875
196	0.8875
196.1	0.8875
196.2	0.8875
196.3	0.8875
196.4	0.8875
196.5	0.8875
196.6	0.8875
196.7	0.8875
196.8	0.8875
196.9	0.8875
197	0.8875
197.1	0.8875
197.2	0.8875
197.3	0.8875
197.4	0.8875
197.5	0.8875
197.6	0.8875
197.7	0.8625
197.8	0.8625
197.9	0.8875
198	0.8875
198.1	0.8875
198.2	0.8875
198.3	0.8875
198.4	0.8875
198.5	0.8875
198.6	0.8875
198.7	0.8875
198.8	0.8875
198.9	0.8875
199	0.8875
199.1	0.8875
199.2	0.8875
199.3	0.8875
199.4	0.8875
199.5	0.9
199.6	0.9
199.7	0.9
199.8	0.9
199.9	0.9
200	0.9
[truncated: 14,000 more rows]
