# Supplementary material for: Bayesian inference of kinetic schemes for ion channels by Kalman filtering
Source: eLife journal article supplement (doi:10.7554/elife.62714), 2022-05-04
Supplement: fig4-data3 [file 1_Sim_N_100_Fluor_MW.xlsx]

## Sheet: Tabelle1
0.1	0
0.2	0
0.3	0
0.4	0
0.5	0
0.6	0
0.7	0
0.8	0
0.9	0
1	0
1.1	0
1.2	0
1.3	0
1.4	0
1.5	0
1.6	0
1.7	0
1.8	0
1.9	0
2	0
2.1	0
2.2	0
2.3	0
2.4	0
2.5	0
2.6	0
2.7	0
2.8	0
2.9	0
3	0
3.1	0
3.2	0
3.3	0
3.4	0
3.5	0
3.6	0
3.7	0
3.8	0
3.9	0
4	0
4.1	0
4.2	0
4.3	0
4.4	0
4.5	0
4.6	0
4.7	0
4.8	0
4.9	0
5	0
5.1	0
5.2	0
5.3	0
5.4	0
5.5	0
5.6	0
5.7	0
5.8	0
5.9	0
6	0
6.1	0
6.2	0
6.3	0
6.4	0
6.5	0
6.6	0
6.7	0
6.8	0
6.9	0
7	0
7.1	0
7.2	0
7.3	0
7.4	0
7.5	0
7.6	0
7.7	0
7.8	0
7.9	0
8	0
8.1	0
8.2	0
8.3	0
8.4	0
8.5	0
8.6	0
8.7	0
8.8	0
8.9	0
9	0
9.1	0
9.2	0
9.3	0
9.4	0
9.5	0
9.6	0
9.7	0
9.8	0
9.9	0
10	0
10.1	0
10.2	0
10.3	0
10.4	0
10.5	0
10.6	0
10.7	0
10.8	0
10.9	0
11	0
11.1	0
11.2	0
11.3	0
11.4	0
11.5	0
11.6	0
11.7	0
11.8	0
11.9	0
12	0
12.1	0
12.2	0
12.3	0
12.4	0
12.5	0
12.6	0
12.7	0
12.8	0
12.9	0
13	0
13.1	0
13.2	0
13.3	0
13.4	0
13.5	0
13.6	0
13.7	0
13.8	0
13.9	0
14	0
14.1	0
14.2	0
14.3	0
14.4	0
14.5	0
14.6	0
14.7	0
14.8	0
14.9	0
15	0
15.1	0
15.2	0
15.3	0
15.4	0
15.5	0
15.6	0
15.7	0
15.8	0
15.9	0
16	0
16.1	0
16.2	0
16.3	0
16.4	0
16.5	0
16.6	0
16.7	0
16.8	0
16.9	0
17	0
17.1	0
17.2	0
17.3	0
17.4	0
17.5	0
17.6	0
17.7	0
17.8	0
17.9	0
18	0
18.1	0
18.2	0
18.3	0
18.4	0
18.5	0
18.6	0
18.7	0
18.8	0
18.9	0
19	0
19.1	0
19.2	0
19.3	0
19.4	0
19.5	0
19.6	0
19.7	0
19.8	0
19.9	0
20	0
20.1	0
20.2	0
20.3	0
20.4	0
20.5	0
20.6	0
20.7	0
20.8	0
20.9	0
21	0
21.1	0
21.2	0
21.3	0
21.4	0
21.5	0
21.6	0
21.7	0
21.8	0
21.9	0
22	0
22.1	0
22.2	0
22.3	0
22.4	0
22.5	0
22.6	0
22.7	0
22.8	0
22.9	0
23	0
23.1	0
23.2	0
23.3	0
23.4	0
23.5	0
23.6	0
23.7	0
23.8	0
23.9	0
24	0
24.1	0
24.2	0
24.3	0
24.4	0
24.5	0
24.6	0
24.7	0
24.8	0
24.9	0
25	0
25.1	0
25.2	0
25.3	0
25.4	0
25.5	0
25.6	0
25.7	0
25.8	0
25.9	0
26	0
26.1	0
26.2	0
26.3	0
26.4	0
26.5	0
26.6	0
26.7	0
26.8	0
26.9	0
27	0
27.1	0
27.2	0
27.3	0
27.4	0
27.5	0
27.6	0
27.7	0
27.8	0
27.9	0
28	0
28.1	0
28.2	0
28.3	0
28.4	0
28.5	0
28.6	0
28.7	0
28.8	0
28.9	0
29	0
29.1	0
29.2	0
29.3	0
29.4	0
29.5	0
29.6	0
29.7	0
29.8	0
29.9	0
30	0
30.1	0
30.2	0
30.3	0
30.4	0
30.5	0
30.6	0
30.7	0
30.8	0
30.9	0
31	0
31.1	0
31.2	0
31.3	0
31.4	0
31.5	0
31.6	0
31.7	0
31.8	0
31.9	0
32	0
32.1	0
32.2	0
32.3	0
32.4	0
32.5	0
32.6	0
32.7	0
32.8	0
32.9	0
33	0
33.1	0
33.2	0
33.3	0
33.4	0
33.5	0
33.6	0
33.7	0
33.8	0
33.9	0
34	0
34.1	0
34.2	0
34.3	0
34.4	0
34.5	0
34.6	0
34.7	0
34.8	0
34.9	0
35	0
35.1	0
35.2	0
35.3	0
35.4	0
35.5	0
35.6	0
35.7	0
35.8	0
35.9	0
36	0
36.1	0
36.2	0
36.3	0
36.4	0
36.5	0
36.6	0
36.7	0
36.8	0
36.9	0
37	0
37.1	0
37.2	0
37.3	0
37.4	0
37.5	0
37.6	0
37.7	0
37.8	0
37.9	0
38	0
38.1	0
38.2	0
38.3	0
38.4	0
38.5	0
38.6	0
38.7	0
38.8	0
38.9	0
39	0
39.1	0
39.2	0
39.3	0
39.4	0
39.5	0
39.6	0
39.7	0
39.8	0
39.9	0
40	0
40.1	0
40.2	0
40.3	0
40.4	0
40.5	0
40.6	0
40.7	0
40.8	0
40.9	0
41	0
41.1	0
41.2	0
41.3	0
41.4	0
41.5	0
41.6	0
41.7	0
41.8	0
41.9	0
42	0
42.1	0
42.2	0
42.3	0
42.4	0
42.5	0
42.6	0
42.7	0
42.8	0
42.9	0
43	0
43.1	0
43.2	0
43.3	0
43.4	0
43.5	0
43.6	0
43.7	0
43.8	0
43.9	0
44	0
44.1	0
44.2	0
44.3	0
44.4	0
44.5	0
44.6	0
44.7	0
44.8	0
44.9	0
45	0
45.1	0
45.2	0
45.3	0
45.4	0
45.5	0
45.6	0
45.7	0
45.8	0
45.9	0
46	0
46.1	0
46.2	0
46.3	0
46.4	0
46.5	0
46.6	0
46.7	0
46.8	0
46.9	0
47	0
47.1	0
47.2	0
47.3	0
47.4	0
47.5	0
47.6	0
47.7	0
47.8	0
47.9	0
48	0
48.1	0
48.2	0
48.3	0
48.4	0
48.5	0
48.6	0
48.7	0
48.8	0
48.9	0
49	0
49.1	0
49.2	0
49.3	0
49.4	0
49.5	0
49.6	0
49.7	0
49.8	0
49.9	0
50	0
50.1	0
50.2	0
50.3	0
50.4	0
50.5	0
50.6	0
50.7	0
50.8	0
50.9	0
51	0
51.1	0
51.2	0
51.3	0
51.4	0
51.5	0
51.6	0
51.7	0
51.8	0
51.9	0
52	0
52.1	0
52.2	0
52.3	0
52.4	0
52.5	0
52.6	0
52.7	0
52.8	0
52.9	0
53	0
53.1	0
53.2	0
53.3	0
53.4	0
53.5	0
53.6	0
53.7	0
53.8	0
53.9	0
54	0
54.1	0
54.2	0
54.3	0
54.4	0
54.5	0
54.6	0
54.7	0
54.8	0
54.9	0
55	0
55.1	0
55.2	0
55.3	0
55.4	0
55.5	0
55.6	0
55.7	0
55.8	0
55.9	0
56	0
56.1	0
56.2	0
56.3	0
56.4	0
56.5	0
56.6	0
56.7	0
56.8	0
56.9	0
57	0
57.1	0
57.2	0
57.3	0
57.4	0
57.5	0
57.6	0
57.7	0
57.8	0
57.9	0
58	0
58.1	0
58.2	0
58.3	0
58.4	0
58.5	0
58.6	0
58.7	0
58.8	0
58.9	0
59	0
59.1	0
59.2	0
59.3	0
59.4	0
59.5	0
59.6	0
59.7	0
59.8	0
59.9	0
60	0
60.1	0
60.2	0
60.3	0
60.4	0
60.5	0
60.6	0
60.7	0
60.8	0
60.9	0
61	0
61.1	0
61.2	0
61.3	0
61.4	0
61.5	0
61.6	0
61.7	0
61.8	0
61.9	0
62	0
62.1	0
62.2	0
62.3	0
62.4	0
62.5	0
62.6	0
62.7	0
62.8	0
62.9	0
63	0
63.1	0
63.2	0
63.3	0
63.4	0
63.5	0
63.6	0
63.7	0
63.8	0
63.9	0
64	0
64.1	0
64.2	0
64.3	0
64.4	0
64.5	0
64.6	0
64.7	0
64.8	0
64.9	0
65	0
65.1	0
65.2	0
65.3	0
65.4	0
65.5	0
65.6	0
65.7	0
65.8	0
65.9	0
66	0
66.1	0
66.2	0
66.3	0
66.4	0
66.5	0
66.6	0
66.7	0
66.8	0
66.9	0
67	0
67.1	0
67.2	0
67.3	0
67.4	0
67.5	0
67.6	0
67.7	0
67.8	0
67.9	0
68	0
68.1	0
68.2	0
68.3	0
68.4	0
68.5	0
68.6	0
68.7	0
68.8	0
68.9	0
69	0
69.1	0
69.2	0
69.3	0
69.4	0
69.5	0
69.6	0
69.7	0
69.8	0
69.9	0
70	0
70.1	0
70.2	0
70.3	0
70.4	0
70.5	0
70.6	0
70.7	0
70.8	0
70.9	0
71	0
71.1	0
71.2	0
71.3	0
71.4	0
71.5	0
71.6	0
71.7	0
71.8	0
71.9	0
72	0
72.1	0
72.2	0
72.3	0
72.4	0
72.5	0
72.6	0
72.7	0
72.8	0
72.9	0
73	0
73.1	0
73.2	0
73.3	0
73.4	0
73.5	0
73.6	0
73.7	0
73.8	0
73.9	0
74	0
74.1	0
74.2	0
74.3	0
74.4	0
74.5	0
74.6	0
74.7	0
74.8	0
74.9	0
75	0
75.1	0
75.2	0
75.3	0
75.4	0
75.5	0
75.6	0
75.7	0
75.8	0
75.9	0
76	0
76.1	0
76.2	0
76.3	0
76.4	0
76.5	0
76.6	0
76.7	0
76.8	0
76.9	0
77	0
77.1	0
77.2	0
77.3	0
77.4	0
77.5	0
77.6	0
77.7	0
77.8	0
77.9	0
78	0
78.1	0
78.2	0
78.3	0
78.4	0
78.5	0
78.6	0
78.7	0
78.8	0
78.9	0
79	0
79.1	0
79.2	0
79.3	0
79.4	0
79.5	0
79.6	0
79.7	0
79.8	0
79.9	0
80	0
80.1	0
80.2	0
80.3	0
80.4	0
80.5	0
80.6	0
80.7	0
80.8	0
80.9	0
81	0
81.1	0
81.2	0
81.3	0
81.4	0
81.5	0
81.6	0
81.7	0
81.8	0
81.9	0
82	0
82.1	0
82.2	0
82.3	0
82.4	0
82.5	0
82.6	0
82.7	0
82.8	0
82.9	0
83	0
83.1	0
83.2	0
83.3	0
83.4	0
83.5	0
83.6	0
83.7	0
83.8	0
83.9	0
84	0
84.1	0
84.2	0
84.3	0
84.4	0
84.5	0
84.6	0
84.7	0
84.8	0
84.9	0
85	0
85.1	0
85.2	0
85.3	0
85.4	0
85.5	0
85.6	0
85.7	0
85.8	0
85.9	0
86	0
86.1	0
86.2	0
86.3	0
86.4	0
86.5	0
86.6	0
86.7	0
86.8	0
86.9	0
87	0
87.1	0
87.2	0
87.3	0
87.4	0
87.5	0
87.6	0
87.7	0
87.8	0
87.9	0
88	0
88.1	0
88.2	0
88.3	0
88.4	0
88.5	0
88.6	0
88.7	0
88.8	0
88.9	0
89	0
89.1	0
89.2	0
89.3	0
89.4	0
89.5	0
89.6	0
89.7	0
89.8	0
89.9	0
90	0
90.1	0
90.2	0
90.3	0
90.4	0
90.5	0
90.6	0
90.7	0
90.8	0
90.9	0
91	0
91.1	0
91.2	0
91.3	0
91.4	0
91.5	0
91.6	0
91.7	0
91.8	0
91.9	0
92	0
92.1	0
92.2	0
92.3	0
92.4	0
92.5	0
92.6	0
92.7	0
92.8	0
92.9	0
93	0
93.1	0
93.2	0
93.3	0
93.4	0
93.5	0
93.6	0
93.7	0
93.8	0
93.9	0
94	0
94.1	0
94.2	0
94.3	0
94.4	0
94.5	0
94.6	0
94.7	0
94.8	0
94.9	0
95	0
95.1	0
95.2	0
95.3	0
95.4	0
95.5	0
95.6	0
95.7	0
95.8	0
95.9	0
96	0
96.1	0
96.2	0
96.3	0
96.4	0
96.5	0
96.6	0
96.7	0
96.8	0
96.9	0
97	0
97.1	0
97.2	0
97.3	0
97.4	0
97.5	0
97.6	0
97.7	0
97.8	0
97.9	0
98	0
98.1	0
98.2	0
98.3	0
98.4	0
98.5	0
98.6	0
98.7	0
98.8	0
98.9	0
99	0
99.1	0
99.2	0
99.3	0
99.4	0
99.5	0
99.6	0
99.7	0
99.8	0
99.9	0
100	0
100.1	0.695
100.2	0.895
100.3	0.96
100.4	0.97
100.5	0.975
100.6	0.965
100.7	0.95
100.8	0.97
100.9	0.985
101	0.99
101.1	0.985
101.2	0.965
101.3	0.975
101.4	0.97
101.5	0.98
101.6	0.965
101.7	0.98
101.8	0.99
101.9	0.98
102	0.98
102.1	0.96
102.2	0.96
102.3	0.975
102.4	0.98
102.5	0.98
102.6	0.96
102.7	0.965
102.8	0.98
102.9	0.985
103	0.99
103.1	0.985
103.2	0.98
103.3	0.985
103.4	0.98
103.5	0.98
103.6	0.99
103.7	0.99
103.8	0.99
103.9	0.985
104	0.985
104.1	0.985
104.2	0.975
104.3	0.97
104.4	0.97
104.5	0.975
104.6	0.97
104.7	0.98
104.8	0.97
104.9	0.98
105	0.98
105.1	0.985
105.2	0.99
105.3	0.995
105.4	0.995
105.5	0.975
105.6	0.97
105.7	0.975
105.8	0.97
105.9	0.99
106	0.99
106.1	0.99
106.2	0.995
106.3	0.99
106.4	0.985
106.5	0.98
106.6	0.99
106.7	0.985
106.8	1
106.9	1
107	0.995
107.1	0.985
107.2	0.985
107.3	0.98
107.4	0.975
107.5	0.985
107.6	0.995
107.7	0.995
107.8	0.995
107.9	0.985
108	0.985
108.1	0.985
108.2	0.98
108.3	0.975
108.4	0.975
108.5	0.97
108.6	0.985
108.7	0.97
108.8	0.98
108.9	0.975
109	0.985
109.1	0.985
109.2	0.985
109.3	0.99
109.4	0.98
109.5	0.965
109.6	0.975
109.7	0.98
109.8	0.97
109.9	0.97
110	0.985
110.1	0.99
110.2	0.995
110.3	0.975
110.4	0.995
110.5	0.98
110.6	0.985
110.7	0.97
110.8	0.965
110.9	0.975
111	0.98
111.1	0.99
111.2	0.995
111.3	0.99
111.4	0.99
111.5	0.99
111.6	0.995
111.7	0.99
111.8	0.995
111.9	0.995
112	0.995
112.1	0.995
112.2	0.99
112.3	0.99
112.4	0.99
112.5	0.99
112.6	0.995
112.7	0.99
112.8	0.995
112.9	0.995
113	0.99
113.1	1
113.2	0.995
113.3	0.99
113.4	0.99
113.5	0.98
113.6	0.975
113.7	0.985
113.8	0.985
113.9	0.985
114	0.99
114.1	0.985
114.2	0.975
114.3	0.985
114.4	0.985
114.5	0.985
114.6	0.985
114.7	0.975
114.8	0.985
114.9	0.975
115	0.995
115.1	1
115.2	0.985
115.3	0.98
115.4	0.985
115.5	0.98
115.6	1
115.7	0.985
115.8	0.985
115.9	0.98
116	0.985
116.1	0.985
116.2	0.98
116.3	0.99
116.4	0.99
116.5	0.995
116.6	0.995
116.7	0.985
116.8	0.985
116.9	0.99
117	0.99
117.1	0.975
117.2	0.99
117.3	0.99
117.4	0.99
117.5	0.995
117.6	0.99
117.7	0.995
117.8	0.99
117.9	0.985
118	0.99
118.1	0.995
118.2	1
118.3	0.985
118.4	0.98
118.5	0.99
118.6	0.99
118.7	0.99
118.8	0.99
118.9	0.995
119	1
119.1	1
119.2	1
119.3	1
119.4	0.995
119.5	0.99
119.6	0.995
119.7	0.995
119.8	0.99
119.9	0.99
120	0.975
120.1	0.985
120.2	0.99
120.3	1
120.4	0.99
120.5	0.99
120.6	0.995
120.7	1
120.8	1
120.9	1
121	0.995
121.1	0.975
121.2	0.985
121.3	0.99
121.4	0.99
121.5	0.99
121.6	0.99
121.7	0.99
121.8	0.99
121.9	0.995
122	0.985
122.1	0.98
122.2	0.985
122.3	0.985
122.4	0.99
122.5	0.995
122.6	0.995
122.7	0.985
122.8	0.985
122.9	0.98
123	0.985
123.1	1
123.2	0.99
123.3	0.98
123.4	0.995
123.5	1
123.6	0.995
123.7	0.995
123.8	0.99
123.9	0.995
124	0.995
124.1	1
124.2	1
124.3	1
124.4	0.995
124.5	0.99
124.6	0.995
124.7	1
124.8	0.995
124.9	0.995
125	1
125.1	1
125.2	1
125.3	1
125.4	0.995
125.5	1
125.6	0.995
125.7	0.99
125.8	1
125.9	0.995
126	0.995
126.1	1
126.2	0.995
126.3	0.995
126.4	0.99
126.5	0.995
126.6	0.99
126.7	0.995
126.8	1
126.9	0.995
127	0.995
127.1	0.99
127.2	0.995
127.3	0.995
127.4	1
127.5	1
127.6	0.995
127.7	1
127.8	0.995
127.9	0.985
128	1
128.1	1
128.2	1
128.3	0.99
128.4	0.99
128.5	0.995
128.6	0.99
128.7	1
128.8	1
128.9	0.995
129	0.995
129.1	0.99
129.2	0.995
129.3	1
129.4	0.995
129.5	0.995
129.6	0.995
129.7	0.99
129.8	0.995
129.9	1
130	0.99
130.1	1
130.2	1
130.3	1
130.4	1
130.5	0.99
130.6	1
130.7	1
130.8	1
130.9	1
131	0.995
131.1	0.99
131.2	1
131.3	1
131.4	1
131.5	1
131.6	0.995
131.7	0.995
131.8	0.99
131.9	0.99
132	0.995
132.1	0.995
132.2	1
132.3	0.995
132.4	1
132.5	1
132.6	0.995
132.7	0.995
132.8	0.99
132.9	0.99
133	1
133.1	1
133.2	0.995
133.3	0.995
133.4	0.99
133.5	1
133.6	1
133.7	1
133.8	1
133.9	1
134	0.99
134.1	0.985
134.2	0.995
134.3	0.995
134.4	1
134.5	0.995
134.6	0.995
134.7	0.995
134.8	0.99
134.9	0.99
135	1
135.1	1
135.2	0.995
135.3	1
135.4	0.995
135.5	0.99
135.6	0.995
135.7	0.995
135.8	1
135.9	0.995
136	1
136.1	1
136.2	1
136.3	1
136.4	1
136.5	1
136.6	1
136.7	0.995
136.8	0.995
136.9	0.995
137	0.995
137.1	0.995
137.2	0.995
137.3	0.995
137.4	0.98
137.5	0.995
137.6	1
137.7	0.99
137.8	0.99
137.9	0.99
138	0.99
138.1	0.99
138.2	0.995
138.3	0.995
138.4	1
138.5	1
138.6	1
138.7	1
138.8	0.995
138.9	0.99
139	1
139.1	1
139.2	1
139.3	1
139.4	1
139.5	1
139.6	1
139.7	0.995
139.8	0.995
139.9	1
140	1
140.1	1
140.2	0.99
140.3	0.995
140.4	0.995
140.5	1
140.6	1
140.7	1
140.8	1
140.9	1
141	0.995
141.1	0.995
141.2	1
141.3	1
141.4	0.995
141.5	0.995
141.6	0.995
141.7	0.995
141.8	0.995
141.9	1
142	1
142.1	0.995
142.2	0.995
142.3	1
142.4	1
142.5	1
142.6	1
142.7	0.995
142.8	0.995
142.9	1
143	1
143.1	0.995
143.2	1
143.3	0.995
143.4	0.995
143.5	0.99
143.6	0.995
143.7	0.995
143.8	1
143.9	1
144	1
144.1	0.995
144.2	0.99
144.3	1
144.4	0.995
144.5	0.985
144.6	0.99
144.7	0.995
144.8	1
144.9	1
145	0.995
145.1	0.995
145.2	0.995
145.3	0.995
145.4	1
145.5	0.99
145.6	0.995
145.7	1
145.8	0.99
145.9	0.995
146	0.985
146.1	1
146.2	0.995
146.3	0.995
146.4	0.995
146.5	0.995
146.6	1
146.7	1
146.8	1
146.9	0.995
147	0.995
147.1	0.995
147.2	1
147.3	0.995
147.4	0.995
147.5	1
147.6	1
147.7	1
147.8	1
147.9	0.995
148	0.99
148.1	0.99
148.2	1
148.3	1
148.4	1
148.5	1
148.6	1
148.7	1
148.8	0.995
148.9	1
149	0.995
149.1	0.995
149.2	0.995
149.3	1
149.4	0.995
149.5	1
149.6	1
149.7	1
149.8	1
149.9	0.995
150	0.995
150.1	1
150.2	1
150.3	1
150.4	1
150.5	1
150.6	0.995
150.7	1
150.8	0.99
150.9	1
151	0.995
151.1	0.995
151.2	0.98
151.3	0.985
151.4	0.995
151.5	1
151.6	0.995
151.7	0.995
151.8	1
151.9	0.995
152	0.995
152.1	0.99
152.2	1
152.3	1
152.4	1
152.5	0.995
152.6	1
152.7	1
152.8	1
152.9	1
153	1
153.1	1
153.2	1
153.3	1
153.4	0.995
153.5	0.99
153.6	1
153.7	0.995
153.8	0.99
153.9	0.995
154	0.995
154.1	0.995
154.2	0.995
154.3	0.995
154.4	0.99
154.5	1
154.6	0.995
154.7	1
154.8	0.995
154.9	1
155	1
155.1	1
155.2	0.995
155.3	0.995
155.4	0.99
155.5	0.99
155.6	0.99
155.7	0.99
155.8	0.995
155.9	0.995
156	1
156.1	0.995
156.2	0.995
156.3	0.995
156.4	1
156.5	1
156.6	1
156.7	1
156.8	0.995
156.9	1
157	0.995
157.1	1
157.2	1
157.3	0.99
157.4	0.995
157.5	0.995
157.6	0.99
157.7	0.99
157.8	0.985
157.9	0.995
158	1
158.1	0.995
158.2	0.99
158.3	1
158.4	1
158.5	1
158.6	0.995
158.7	0.995
158.8	0.99
158.9	0.995
159	0.985
159.1	0.995
159.2	1
159.3	1
159.4	1
159.5	1
159.6	0.99
159.7	0.99
159.8	0.995
159.9	1
160	1
160.1	1
160.2	1
160.3	1
160.4	1
160.5	1
160.6	1
160.7	1
160.8	0.995
160.9	1
161	1
161.1	1
161.2	1
161.3	1
161.4	1
161.5	1
161.6	0.995
161.7	1
161.8	1
161.9	1
162	0.99
162.1	0.995
162.2	1
162.3	0.995
162.4	0.995
162.5	0.985
162.6	0.995
162.7	1
162.8	1
162.9	1
163	0.995
163.1	0.99
163.2	0.99
163.3	1
163.4	1
163.5	0.995
163.6	0.995
163.7	1
163.8	0.995
163.9	0.995
164	0.99
164.1	1
164.2	0.99
164.3	0.99
164.4	0.99
164.5	0.995
164.6	1
164.7	1
164.8	0.995
164.9	0.995
165	0.995
165.1	0.995
165.2	1
165.3	0.995
165.4	0.995
165.5	0.995
165.6	0.985
165.7	0.99
165.8	0.985
165.9	0.995
166	0.995
166.1	1
166.2	1
166.3	1
166.4	0.995
166.5	0.995
166.6	1
166.7	0.995
166.8	0.99
166.9	0.995
167	0.985
167.1	0.99
167.2	0.995
167.3	0.995
167.4	1
167.5	0.995
167.6	1
167.7	1
167.8	1
167.9	1
168	1
168.1	1
168.2	1
168.3	1
168.4	0.995
168.5	1
168.6	0.995
168.7	1
168.8	0.99
168.9	0.995
169	0.99
169.1	0.99
169.2	0.985
169.3	1
169.4	0.99
169.5	0.995
169.6	1
169.7	1
169.8	1
169.9	1
170	0.985
170.1	0.99
170.2	1
170.3	1
170.4	0.995
170.5	1
170.6	0.995
170.7	1
170.8	1
170.9	0.995
171	1
171.1	0.995
171.2	0.99
171.3	0.995
171.4	1
171.5	1
171.6	1
171.7	0.995
171.8	0.985
171.9	0.995
172	1
172.1	1
172.2	0.995
172.3	0.995
172.4	0.995
172.5	1
172.6	0.995
172.7	0.995
172.8	1
172.9	0.995
173	1
173.1	1
173.2	1
173.3	1
173.4	1
173.5	0.99
173.6	0.99
173.7	0.985
173.8	0.985
173.9	0.995
174	0.99
174.1	0.985
174.2	0.99
174.3	0.985
174.4	0.985
174.5	0.995
174.6	0.99
174.7	0.995
174.8	1
174.9	1
175	0.99
175.1	0.985
175.2	1
175.3	1
175.4	1
175.5	0.995
175.6	1
175.7	1
175.8	1
175.9	0.995
176	0.995
176.1	1
176.2	0.995
176.3	0.99
176.4	0.995
176.5	1
176.6	0.995
176.7	0.995
176.8	1
176.9	1
177	1
177.1	1
177.2	0.995
177.3	0.995
177.4	0.995
177.5	1
177.6	0.995
177.7	0.995
177.8	1
177.9	1
178	0.995
178.1	1
178.2	1
178.3	1
178.4	1
178.5	0.995
178.6	1
178.7	0.995
178.8	0.995
178.9	0.99
179	0.99
179.1	0.995
179.2	0.995
179.3	1
179.4	1
179.5	0.995
179.6	1
179.7	0.99
179.8	0.995
179.9	1
180	1
180.1	1
180.2	0.995
180.3	0.995
180.4	0.995
180.5	1
180.6	1
180.7	0.995
180.8	1
180.9	0.995
181	0.995
181.1	0.995
181.2	0.99
181.3	1
181.4	0.995
181.5	0.995
181.6	0.99
181.7	0.995
181.8	0.995
181.9	0.995
182	0.99
182.1	0.99
182.2	0.995
182.3	0.99
182.4	0.985
182.5	0.995
182.6	1
182.7	1
182.8	1
182.9	1
183	0.995
183.1	0.995
183.2	0.99
183.3	0.99
183.4	1
183.5	1
183.6	0.995
183.7	0.985
183.8	1
183.9	1
184	0.995
184.1	0.995
184.2	0.995
184.3	0.995
184.4	1
184.5	0.995
184.6	1
184.7	1
184.8	0.995
184.9	1
185	1
185.1	1
185.2	0.995
185.3	0.995
185.4	0.995
185.5	0.995
185.6	0.995
185.7	0.995
185.8	1
185.9	0.995
186	1
186.1	0.98
186.2	0.985
186.3	1
186.4	0.995
186.5	1
186.6	1
186.7	0.995
186.8	1
186.9	1
187	1
187.1	1
187.2	1
187.3	1
187.4	1
187.5	1
187.6	0.99
187.7	1
187.8	0.995
187.9	1
188	0.99
188.1	0.99
188.2	1
188.3	0.995
188.4	1
188.5	0.995
188.6	0.995
188.7	0.99
188.8	1
188.9	1
189	1
189.1	1
189.2	1
189.3	1
189.4	0.99
189.5	0.995
189.6	1
189.7	1
189.8	1
189.9	1
190	1
190.1	1
190.2	1
190.3	1
190.4	1
190.5	1
190.6	1
190.7	1
190.8	0.99
190.9	1
191	0.99
191.1	0.99
191.2	1
191.3	1
191.4	1
191.5	0.995
191.6	1
191.7	1
191.8	1
191.9	1
192	1
192.1	0.995
192.2	0.995
192.3	1
192.4	1
192.5	0.995
192.6	0.995
192.7	0.995
192.8	1
192.9	0.995
193	0.995
193.1	0.995
193.2	1
193.3	0.995
193.4	1
193.5	0.99
193.6	1
193.7	1
193.8	0.995
193.9	0.995
194	0.995
194.1	0.995
194.2	0.995
194.3	1
194.4	1
194.5	0.995
194.6	0.995
194.7	0.99
194.8	1
194.9	1
195	1
195.1	1
195.2	1
195.3	0.995
195.4	1
195.5	1
195.6	0.995
195.7	0.995
195.8	0.995
195.9	0.995
196	0.995
196.1	1
196.2	1
196.3	1
196.4	0.995
196.5	1
196.6	1
196.7	1
196.8	1
196.9	0.995
197	1
197.1	0.99
197.2	0.995
197.3	0.985
197.4	0.99
197.5	0.995
197.6	1
197.7	1
197.8	1
197.9	1
198	1
198.1	1
198.2	0.99
198.3	1
198.4	1
198.5	1
198.6	1
198.7	0.995
198.8	0.995
198.9	0.995
199	1
199.1	1
199.2	0.99
199.3	0.995
199.4	0.995
199.5	1
199.6	1
199.7	0.995
199.8	0.995
199.9	1
200	0.995
[truncated: 14,000 more rows]
