# Supplementary material for: Bayesian inference of kinetic schemes for ion channels by Kalman filtering
Source: eLife journal article supplement (doi:10.7554/elife.62714), 2022-05-04
Supplement: fig4-data3 [file 1_Sim_N_100_theor_Fluor_Werte.xlsx]

## Sheet: Tabelle1
0.1	0
0.2	0
0.3	0
0.4	0
0.5	0
0.6	0
0.7	0
0.8	0
0.9	0
1	0
1.1	0
1.2	0
1.3	0
1.4	0
1.5	0
1.6	0
1.7	0
1.8	0
1.9	0
2	0
2.1	0
2.2	0
2.3	0
2.4	0
2.5	0
2.6	0
2.7	0
2.8	0
2.9	0
3	0
3.1	0
3.2	0
3.3	0
3.4	0
3.5	0
3.6	0
3.7	0
3.8	0
3.9	0
4	0
4.1	0
4.2	0
4.3	0
4.4	0
4.5	0
4.6	0
4.7	0
4.8	0
4.9	0
5	0
5.1	0
5.2	0
5.3	0
5.4	0
5.5	0
5.6	0
5.7	0
5.8	0
5.9	0
6	0
6.1	0
6.2	0
6.3	0
6.4	0
6.5	0
6.6	0
6.7	0
6.8	0
6.9	0
7	0
7.1	0
7.2	0
7.3	0
7.4	0
7.5	0
7.6	0
7.7	0
7.8	0
7.9	0
8	0
8.1	0
8.2	0
8.3	0
8.4	0
8.5	0
8.6	0
8.7	0
8.8	0
8.9	0
9	0
9.1	0
9.2	0
9.3	0
9.4	0
9.5	0
9.6	0
9.7	0
9.8	0
9.9	0
10	0
10.1	0
10.2	0
10.3	0
10.4	0
10.5	0
10.6	0
10.7	0
10.8	0
10.9	0
11	0
11.1	0
11.2	0
11.3	0
11.4	0
11.5	0
11.6	0
11.7	0
11.8	0
11.9	0
12	0
12.1	0
12.2	0
12.3	0
12.4	0
12.5	0
12.6	0
12.7	0
12.8	0
12.9	0
13	0
13.1	0
13.2	0
13.3	0
13.4	0
13.5	0
13.6	0
13.7	0
13.8	0
13.9	0
14	0
14.1	0
14.2	0
14.3	0
14.4	0
14.5	0
14.6	0
14.7	0
14.8	0
14.9	0
15	0
15.1	0
15.2	0
15.3	0
15.4	0
15.5	0
15.6	0
15.7	0
15.8	0
15.9	0
16	0
16.1	0
16.2	0
16.3	0
16.4	0
16.5	0
16.6	0
16.7	0
16.8	0
16.9	0
17	0
17.1	0
17.2	0
17.3	0
17.4	0
17.5	0
17.6	0
17.7	0
17.8	0
17.9	0
18	0
18.1	0
18.2	0
18.3	0
18.4	0
18.5	0
18.6	0
18.7	0
18.8	0
18.9	0
19	0
19.1	0
19.2	0
19.3	0
19.4	0
19.5	0
19.6	0
19.7	0
19.8	0
19.9	0
20	0
20.1	0
20.2	0
20.3	0
20.4	0
20.5	0
20.6	0
20.7	0
20.8	0
20.9	0
21	0
21.1	0
21.2	0
21.3	0
21.4	0
21.5	0
21.6	0
21.7	0
21.8	0
21.9	0
22	0
22.1	0
22.2	0
22.3	0
22.4	0
22.5	0
22.6	0
22.7	0
22.8	0
22.9	0
23	0
23.1	0
23.2	0
23.3	0
23.4	0
23.5	0
23.6	0
23.7	0
23.8	0
23.9	0
24	0
24.1	0
24.2	0
24.3	0
24.4	0
24.5	0
24.6	0
24.7	0
24.8	0
24.9	0
25	0
25.1	0
25.2	0
25.3	0
25.4	0
25.5	0
25.6	0
25.7	0
25.8	0
25.9	0
26	0
26.1	0
26.2	0
26.3	0
26.4	0
26.5	0
26.6	0
26.7	0
26.8	0
26.9	0
27	0
27.1	0
27.2	0
27.3	0
27.4	0
27.5	0
27.6	0
27.7	0
27.8	0
27.9	0
28	0
28.1	0
28.2	0
28.3	0
28.4	0
28.5	0
28.6	0
28.7	0
28.8	0
28.9	0
29	0
29.1	0
29.2	0
29.3	0
29.4	0
29.5	0
29.6	0
29.7	0
29.8	0
29.9	0
30	0
30.1	0
30.2	0
30.3	0
30.4	0
30.5	0
30.6	0
30.7	0
30.8	0
30.9	0
31	0
31.1	0
31.2	0
31.3	0
31.4	0
31.5	0
31.6	0
31.7	0
31.8	0
31.9	0
32	0
32.1	0
32.2	0
32.3	0
32.4	0
32.5	0
32.6	0
32.7	0
32.8	0
32.9	0
33	0
33.1	0
33.2	0
33.3	0
33.4	0
33.5	0
33.6	0
33.7	0
33.8	0
33.9	0
34	0
34.1	0
34.2	0
34.3	0
34.4	0
34.5	0
34.6	0
34.7	0
34.8	0
34.9	0
35	0
35.1	0
35.2	0
35.3	0
35.4	0
35.5	0
35.6	0
35.7	0
35.8	0
35.9	0
36	0
36.1	0
36.2	0
36.3	0
36.4	0
36.5	0
36.6	0
36.7	0
36.8	0
36.9	0
37	0
37.1	0
37.2	0
37.3	0
37.4	0
37.5	0
37.6	0
37.7	0
37.8	0
37.9	0
38	0
38.1	0
38.2	0
38.3	0
38.4	0
38.5	0
38.6	0
38.7	0
38.8	0
38.9	0
39	0
39.1	0
39.2	0
39.3	0
39.4	0
39.5	0
39.6	0
39.7	0
39.8	0
39.9	0
40	0
40.1	0
40.2	0
40.3	0
40.4	0
40.5	0
40.6	0
40.7	0
40.8	0
40.9	0
41	0
41.1	0
41.2	0
41.3	0
41.4	0
41.5	0
41.6	0
41.7	0
41.8	0
41.9	0
42	0
42.1	0
42.2	0
42.3	0
42.4	0
42.5	0
42.6	0
42.7	0
42.8	0
42.9	0
43	0
43.1	0
43.2	0
43.3	0
43.4	0
43.5	0
43.6	0
43.7	0
43.8	0
43.9	0
44	0
44.1	0
44.2	0
44.3	0
44.4	0
44.5	0
44.6	0
44.7	0
44.8	0
44.9	0
45	0
45.1	0
45.2	0
45.3	0
45.4	0
45.5	0
45.6	0
45.7	0
45.8	0
45.9	0
46	0
46.1	0
46.2	0
46.3	0
46.4	0
46.5	0
46.6	0
46.7	0
46.8	0
46.9	0
47	0
47.1	0
47.2	0
47.3	0
47.4	0
47.5	0
47.6	0
47.7	0
47.8	0
47.9	0
48	0
48.1	0
48.2	0
48.3	0
48.4	0
48.5	0
48.6	0
48.7	0
48.8	0
48.9	0
49	0
49.1	0
49.2	0
49.3	0
49.4	0
49.5	0
49.6	0
49.7	0
49.8	0
49.9	0
50	0
50.1	0
50.2	0
50.3	0
50.4	0
50.5	0
50.6	0
50.7	0
50.8	0
50.9	0
51	0
51.1	0
51.2	0
51.3	0
51.4	0
51.5	0
51.6	0
51.7	0
51.8	0
51.9	0
52	0
52.1	0
52.2	0
52.3	0
52.4	0
52.5	0
52.6	0
52.7	0
52.8	0
52.9	0
53	0
53.1	0
53.2	0
53.3	0
53.4	0
53.5	0
53.6	0
53.7	0
53.8	0
53.9	0
54	0
54.1	0
54.2	0
54.3	0
54.4	0
54.5	0
54.6	0
54.7	0
54.8	0
54.9	0
55	0
55.1	0
55.2	0
55.3	0
55.4	0
55.5	0
55.6	0
55.7	0
55.8	0
55.9	0
56	0
56.1	0
56.2	0
56.3	0
56.4	0
56.5	0
56.6	0
56.7	0
56.8	0
56.9	0
57	0
57.1	0
57.2	0
57.3	0
57.4	0
57.5	0
57.6	0
57.7	0
57.8	0
57.9	0
58	0
58.1	0
58.2	0
58.3	0
58.4	0
58.5	0
58.6	0
58.7	0
58.8	0
58.9	0
59	0
59.1	0
59.2	0
59.3	0
59.4	0
59.5	0
59.6	0
59.7	0
59.8	0
59.9	0
60	0
60.1	0
60.2	0
60.3	0
60.4	0
60.5	0
60.6	0
60.7	0
60.8	0
60.9	0
61	0
61.1	0
61.2	0
61.3	0
61.4	0
61.5	0
61.6	0
61.7	0
61.8	0
61.9	0
62	0
62.1	0
62.2	0
62.3	0
62.4	0
62.5	0
62.6	0
62.7	0
62.8	0
62.9	0
63	0
63.1	0
63.2	0
63.3	0
63.4	0
63.5	0
63.6	0
63.7	0
63.8	0
63.9	0
64	0
64.1	0
64.2	0
64.3	0
64.4	0
64.5	0
64.6	0
64.7	0
64.8	0
64.9	0
65	0
65.1	0
65.2	0
65.3	0
65.4	0
65.5	0
65.6	0
65.7	0
65.8	0
65.9	0
66	0
66.1	0
66.2	0
66.3	0
66.4	0
66.5	0
66.6	0
66.7	0
66.8	0
66.9	0
67	0
67.1	0
67.2	0
67.3	0
67.4	0
67.5	0
67.6	0
67.7	0
67.8	0
67.9	0
68	0
68.1	0
68.2	0
68.3	0
68.4	0
68.5	0
68.6	0
68.7	0
68.8	0
68.9	0
69	0
69.1	0
69.2	0
69.3	0
69.4	0
69.5	0
69.6	0
69.7	0
69.8	0
69.9	0
70	0
70.1	0
70.2	0
70.3	0
70.4	0
70.5	0
70.6	0
70.7	0
70.8	0
70.9	0
71	0
71.1	0
71.2	0
71.3	0
71.4	0
71.5	0
71.6	0
71.7	0
71.8	0
71.9	0
72	0
72.1	0
72.2	0
72.3	0
72.4	0
72.5	0
72.6	0
72.7	0
72.8	0
72.9	0
73	0
73.1	0
73.2	0
73.3	0
73.4	0
73.5	0
73.6	0
73.7	0
73.8	0
73.9	0
74	0
74.1	0
74.2	0
74.3	0
74.4	0
74.5	0
74.6	0
74.7	0
74.8	0
74.9	0
75	0
75.1	0
75.2	0
75.3	0
75.4	0
75.5	0
75.6	0
75.7	0
75.8	0
75.9	0
76	0
76.1	0
76.2	0
76.3	0
76.4	0
76.5	0
76.6	0
76.7	0
76.8	0
76.9	0
77	0
77.1	0
77.2	0
77.3	0
77.4	0
77.5	0
77.6	0
77.7	0
77.8	0
77.9	0
78	0
78.1	0
78.2	0
78.3	0
78.4	0
78.5	0
78.6	0
78.7	0
78.8	0
78.9	0
79	0
79.1	0
79.2	0
79.3	0
79.4	0
79.5	0
79.6	0
79.7	0
79.8	0
79.9	0
80	0
80.1	0
80.2	0
80.3	0
80.4	0
80.5	0
80.6	0
80.7	0
80.8	0
80.9	0
81	0
81.1	0
81.2	0
81.3	0
81.4	0
81.5	0
81.6	0
81.7	0
81.8	0
81.9	0
82	0
82.1	0
82.2	0
82.3	0
82.4	0
82.5	0
82.6	0
82.7	0
82.8	0
82.9	0
83	0
83.1	0
83.2	0
83.3	0
83.4	0
83.5	0
83.6	0
83.7	0
83.8	0
83.9	0
84	0
84.1	0
84.2	0
84.3	0
84.4	0
84.5	0
84.6	0
84.7	0
84.8	0
84.9	0
85	0
85.1	0
85.2	0
85.3	0
85.4	0
85.5	0
85.6	0
85.7	0
85.8	0
85.9	0
86	0
86.1	0
86.2	0
86.3	0
86.4	0
86.5	0
86.6	0
86.7	0
86.8	0
86.9	0
87	0
87.1	0
87.2	0
87.3	0
87.4	0
87.5	0
87.6	0
87.7	0
87.8	0
87.9	0
88	0
88.1	0
88.2	0
88.3	0
88.4	0
88.5	0
88.6	0
88.7	0
88.8	0
88.9	0
89	0
89.1	0
89.2	0
89.3	0
89.4	0
89.5	0
89.6	0
89.7	0
89.8	0
89.9	0
90	0
90.1	0
90.2	0
90.3	0
90.4	0
90.5	0
90.6	0
90.7	0
90.8	0
90.9	0
91	0
91.1	0
91.2	0
91.3	0
91.4	0
91.5	0
91.6	0
91.7	0
91.8	0
91.9	0
92	0
92.1	0
92.2	0
92.3	0
92.4	0
92.5	0
92.6	0
92.7	0
92.8	0
92.9	0
93	0
93.1	0
93.2	0
93.3	0
93.4	0
93.5	0
93.6	0
93.7	0
93.8	0
93.9	0
94	0
94.1	0
94.2	0
94.3	0
94.4	0
94.5	0
94.6	0
94.7	0
94.8	0
94.9	0
95	0
95.1	0
95.2	0
95.3	0
95.4	0
95.5	0
95.6	0
95.7	0
95.8	0
95.9	0
96	0
96.1	0
96.2	0
96.3	0
96.4	0
96.5	0
96.6	0
96.7	0
96.8	0
96.9	0
97	0
97.1	0
97.2	0
97.3	0
97.4	0
97.5	0
97.6	0
97.7	0
97.8	0
97.9	0
98	0
98.1	0
98.2	0
98.3	0
98.4	0
98.5	0
98.6	0
98.7	0
98.8	0
98.9	0
99	0
99.1	0
99.2	0
99.3	0
99.4	0
99.5	0
99.6	0
99.7	0
99.8	0
99.9	0
100	0
100.1	0.732248
100.2	0.888816
100.3	0.943739
100.4	0.96383
100.5	0.971243
100.6	0.974025
100.7	0.975115
100.8	0.975585
100.9	0.975829
101	0.97599
101.1	0.97612
101.2	0.976239
101.3	0.976352
101.4	0.976464
101.5	0.976574
101.6	0.976684
101.7	0.976793
101.8	0.976901
101.9	0.977009
102	0.977116
102.1	0.977222
102.2	0.977328
102.3	0.977433
102.4	0.977538
102.5	0.977642
102.6	0.977745
102.7	0.977848
102.8	0.97795
102.9	0.978052
103	0.978153
103.1	0.978253
103.2	0.978353
103.3	0.978453
103.4	0.978551
103.5	0.97865
103.6	0.978747
103.7	0.978844
103.8	0.978941
103.9	0.979037
104	0.979132
104.1	0.979227
104.2	0.979321
104.3	0.979415
104.4	0.979508
104.5	0.979601
104.6	0.979693
104.7	0.979785
104.8	0.979876
104.9	0.979967
105	0.980057
105.1	0.980146
105.2	0.980235
105.3	0.980324
105.4	0.980412
105.5	0.980499
105.6	0.980586
105.7	0.980673
105.8	0.980759
105.9	0.980844
106	0.980929
106.1	0.981014
106.2	0.981098
106.3	0.981182
106.4	0.981265
106.5	0.981347
106.6	0.981429
106.7	0.981511
106.8	0.981592
106.9	0.981673
107	0.981753
107.1	0.981833
107.2	0.981913
107.3	0.981991
107.4	0.98207
107.5	0.982148
107.6	0.982226
107.7	0.982303
107.8	0.982379
107.9	0.982456
108	0.982531
108.1	0.982607
108.2	0.982682
108.3	0.982756
108.4	0.98283
108.5	0.982904
108.6	0.982977
108.7	0.98305
108.8	0.983122
108.9	0.983194
109	0.983266
109.1	0.983337
109.2	0.983408
109.3	0.983478
109.4	0.983548
109.5	0.983618
109.6	0.983687
109.7	0.983755
109.8	0.983824
109.9	0.983892
110	0.983959
110.1	0.984026
110.2	0.984093
110.3	0.98416
110.4	0.984226
110.5	0.984291
110.6	0.984357
110.7	0.984421
110.8	0.984486
110.9	0.98455
111	0.984614
111.1	0.984677
111.2	0.98474
111.3	0.984803
111.4	0.984865
111.5	0.984927
111.6	0.984989
111.7	0.98505
111.8	0.985111
111.9	0.985172
112	0.985232
112.1	0.985292
112.2	0.985351
112.3	0.985411
112.4	0.98547
112.5	0.985528
112.6	0.985586
112.7	0.985644
112.8	0.985702
112.9	0.985759
113	0.985816
113.1	0.985872
113.2	0.985928
113.3	0.985984
113.4	0.98604
113.5	0.986095
113.6	0.98615
113.7	0.986205
113.8	0.986259
113.9	0.986313
114	0.986367
114.1	0.98642
114.2	0.986473
114.3	0.986526
114.4	0.986578
114.5	0.98663
114.6	0.986682
114.7	0.986734
114.8	0.986785
114.9	0.986836
115	0.986887
115.1	0.986937
115.2	0.986987
115.3	0.987037
115.4	0.987087
115.5	0.987136
115.6	0.987185
115.7	0.987233
115.8	0.987282
115.9	0.98733
116	0.987378
116.1	0.987425
116.2	0.987473
116.3	0.98752
116.4	0.987566
116.5	0.987613
116.6	0.987659
116.7	0.987705
116.8	0.987751
116.9	0.987796
117	0.987841
117.1	0.987886
117.2	0.987931
117.3	0.987975
117.4	0.98802
117.5	0.988063
117.6	0.988107
117.7	0.988151
117.8	0.988194
117.9	0.988237
118	0.988279
118.1	0.988322
118.2	0.988364
118.3	0.988406
118.4	0.988447
118.5	0.988489
118.6	0.98853
118.7	0.988571
118.8	0.988612
118.9	0.988652
119	0.988692
119.1	0.988733
119.2	0.988772
119.3	0.988812
119.4	0.988851
119.5	0.98889
119.6	0.988929
119.7	0.988968
119.8	0.989006
119.9	0.989045
120	0.989083
120.1	0.98912
120.2	0.989158
120.3	0.989195
120.4	0.989233
120.5	0.98927
120.6	0.989306
120.7	0.989343
120.8	0.989379
120.9	0.989415
121	0.989451
121.1	0.989487
121.2	0.989522
121.3	0.989558
121.4	0.989593
121.5	0.989627
121.6	0.989662
121.7	0.989697
121.8	0.989731
121.9	0.989765
122	0.989799
122.1	0.989833
122.2	0.989866
122.3	0.989899
122.4	0.989932
122.5	0.989965
122.6	0.989998
122.7	0.990031
122.8	0.990063
122.9	0.990095
123	0.990127
123.1	0.990159
123.2	0.990191
123.3	0.990222
123.4	0.990253
123.5	0.990284
123.6	0.990315
123.7	0.990346
123.8	0.990377
123.9	0.990407
124	0.990437
124.1	0.990467
124.2	0.990497
124.3	0.990527
124.4	0.990556
124.5	0.990586
124.6	0.990615
124.7	0.990644
124.8	0.990673
124.9	0.990701
125	0.99073
125.1	0.990758
125.2	0.990786
125.3	0.990814
125.4	0.990842
125.5	0.99087
125.6	0.990898
125.7	0.990925
125.8	0.990952
125.9	0.990979
126	0.991006
126.1	0.991033
126.2	0.99106
126.3	0.991086
126.4	0.991112
126.5	0.991139
126.6	0.991165
126.7	0.99119
126.8	0.991216
126.9	0.991242
127	0.991267
127.1	0.991292
127.2	0.991318
127.3	0.991343
127.4	0.991367
127.5	0.991392
127.6	0.991417
127.7	0.991441
127.8	0.991465
127.9	0.991489
128	0.991513
128.1	0.991537
128.2	0.991561
128.3	0.991585
128.4	0.991608
128.5	0.991631
128.6	0.991655
128.7	0.991678
128.8	0.991701
128.9	0.991723
129	0.991746
129.1	0.991769
129.2	0.991791
129.3	0.991813
129.4	0.991835
129.5	0.991857
129.6	0.991879
129.7	0.991901
129.8	0.991923
129.9	0.991944
130	0.991966
130.1	0.991987
130.2	0.992008
130.3	0.992029
130.4	0.99205
130.5	0.992071
130.6	0.992091
130.7	0.992112
130.8	0.992132
130.9	0.992153
131	0.992173
131.1	0.992193
131.2	0.992213
131.3	0.992233
131.4	0.992252
131.5	0.992272
131.6	0.992292
131.7	0.992311
131.8	0.99233
131.9	0.992349
132	0.992369
132.1	0.992387
132.2	0.992406
132.3	0.992425
132.4	0.992444
132.5	0.992462
132.6	0.992481
132.7	0.992499
132.8	0.992517
132.9	0.992535
133	0.992553
133.1	0.992571
133.2	0.992589
133.3	0.992607
133.4	0.992624
133.5	0.992642
133.6	0.992659
133.7	0.992676
133.8	0.992694
133.9	0.992711
134	0.992728
134.1	0.992745
134.2	0.992761
134.3	0.992778
134.4	0.992795
134.5	0.992811
134.6	0.992828
134.7	0.992844
134.8	0.99286
134.9	0.992876
135	0.992892
135.1	0.992908
135.2	0.992924
135.3	0.99294
135.4	0.992956
135.5	0.992971
135.6	0.992987
135.7	0.993002
135.8	0.993017
135.9	0.993033
136	0.993048
136.1	0.993063
136.2	0.993078
136.3	0.993093
136.4	0.993108
136.5	0.993122
136.6	0.993137
136.7	0.993152
136.8	0.993166
136.9	0.99318
137	0.993195
137.1	0.993209
137.2	0.993223
137.3	0.993237
137.4	0.993251
137.5	0.993265
137.6	0.993279
137.7	0.993293
137.8	0.993306
137.9	0.99332
138	0.993333
138.1	0.993347
138.2	0.99336
138.3	0.993373
138.4	0.993387
138.5	0.9934
138.6	0.993413
138.7	0.993426
138.8	0.993439
138.9	0.993451
139	0.993464
139.1	0.993477
139.2	0.993489
139.3	0.993502
139.4	0.993514
139.5	0.993527
139.6	0.993539
139.7	0.993551
139.8	0.993564
139.9	0.993576
140	0.993588
140.1	0.9936
140.2	0.993612
140.3	0.993623
140.4	0.993635
140.5	0.993647
140.6	0.993658
140.7	0.99367
140.8	0.993681
140.9	0.993693
141	0.993704
141.1	0.993716
141.2	0.993727
141.3	0.993738
141.4	0.993749
141.5	0.99376
141.6	0.993771
141.7	0.993782
141.8	0.993793
141.9	0.993804
142	0.993814
142.1	0.993825
142.2	0.993836
142.3	0.993846
142.4	0.993857
142.5	0.993867
142.6	0.993877
142.7	0.993888
142.8	0.993898
142.9	0.993908
143	0.993918
143.1	0.993928
143.2	0.993938
143.3	0.993948
143.4	0.993958
143.5	0.993968
143.6	0.993978
143.7	0.993988
143.8	0.993997
143.9	0.994007
144	0.994017
144.1	0.994026
144.2	0.994035
144.3	0.994045
144.4	0.994054
144.5	0.994064
144.6	0.994073
144.7	0.994082
144.8	0.994091
144.9	0.9941
145	0.994109
145.1	0.994118
145.2	0.994127
145.3	0.994136
145.4	0.994145
145.5	0.994154
145.6	0.994162
145.7	0.994171
145.8	0.99418
145.9	0.994188
146	0.994197
146.1	0.994205
146.2	0.994214
146.3	0.994222
146.4	0.99423
146.5	0.994239
146.6	0.994247
146.7	0.994255
146.8	0.994263
146.9	0.994271
147	0.994279
147.1	0.994287
147.2	0.994295
147.3	0.994303
147.4	0.994311
147.5	0.994319
147.6	0.994327
147.7	0.994334
147.8	0.994342
147.9	0.99435
148	0.994357
148.1	0.994365
148.2	0.994372
148.3	0.99438
148.4	0.994387
148.5	0.994395
148.6	0.994402
148.7	0.994409
148.8	0.994416
148.9	0.994424
149	0.994431
149.1	0.994438
149.2	0.994445
149.3	0.994452
149.4	0.994459
149.5	0.994466
149.6	0.994473
149.7	0.99448
149.8	0.994487
149.9	0.994494
150	0.9945
150.1	0.994507
150.2	0.994514
150.3	0.99452
150.4	0.994527
150.5	0.994534
150.6	0.99454
150.7	0.994547
150.8	0.994553
150.9	0.99456
151	0.994566
151.1	0.994572
151.2	0.994579
151.3	0.994585
151.4	0.994591
151.5	0.994597
151.6	0.994604
151.7	0.99461
151.8	0.994616
151.9	0.994622
152	0.994628
152.1	0.994634
152.2	0.99464
152.3	0.994646
152.4	0.994652
152.5	0.994658
152.6	0.994663
152.7	0.994669
152.8	0.994675
152.9	0.994681
153	0.994686
153.1	0.994692
153.2	0.994698
153.3	0.994703
153.4	0.994709
153.5	0.994714
153.6	0.99472
153.7	0.994725
153.8	0.994731
153.9	0.994736
154	0.994742
154.1	0.994747
154.2	0.994752
154.3	0.994758
154.4	0.994763
154.5	0.994768
154.6	0.994773
154.7	0.994779
154.8	0.994784
154.9	0.994789
155	0.994794
155.1	0.994799
155.2	0.994804
155.3	0.994809
155.4	0.994814
155.5	0.994819
155.6	0.994824
155.7	0.994829
155.8	0.994833
155.9	0.994838
156	0.994843
156.1	0.994848
156.2	0.994853
156.3	0.994857
156.4	0.994862
156.5	0.994867
156.6	0.994871
156.7	0.994876
156.8	0.99488
156.9	0.994885
157	0.99489
157.1	0.994894
157.2	0.994899
157.3	0.994903
157.4	0.994907
157.5	0.994912
157.6	0.994916
157.7	0.994921
157.8	0.994925
157.9	0.994929
158	0.994933
158.1	0.994938
158.2	0.994942
158.3	0.994946
158.4	0.99495
158.5	0.994954
158.6	0.994959
158.7	0.994963
158.8	0.994967
158.9	0.994971
159	0.994975
159.1	0.994979
159.2	0.994983
159.3	0.994987
159.4	0.994991
159.5	0.994995
159.6	0.994999
159.7	0.995002
159.8	0.995006
159.9	0.99501
160	0.995014
160.1	0.995018
160.2	0.995022
160.3	0.995025
160.4	0.995029
160.5	0.995033
160.6	0.995036
160.7	0.99504
160.8	0.995044
160.9	0.995047
161	0.995051
161.1	0.995054
161.2	0.995058
161.3	0.995062
161.4	0.995065
161.5	0.995069
161.6	0.995072
161.7	0.995076
161.8	0.995079
161.9	0.995082
162	0.995086
162.1	0.995089
162.2	0.995092
162.3	0.995096
162.4	0.995099
162.5	0.995102
162.6	0.995106
162.7	0.995109
162.8	0.995112
162.9	0.995115
163	0.995119
163.1	0.995122
163.2	0.995125
163.3	0.995128
163.4	0.995131
163.5	0.995134
163.6	0.995138
163.7	0.995141
163.8	0.995144
163.9	0.995147
164	0.99515
164.1	0.995153
164.2	0.995156
164.3	0.995159
164.4	0.995162
164.5	0.995165
164.6	0.995168
164.7	0.99517
164.8	0.995173
164.9	0.995176
165	0.995179
165.1	0.995182
165.2	0.995185
165.3	0.995188
165.4	0.99519
165.5	0.995193
165.6	0.995196
165.7	0.995199
165.8	0.995201
165.9	0.995204
166	0.995207
166.1	0.995209
166.2	0.995212
166.3	0.995215
166.4	0.995217
166.5	0.99522
166.6	0.995223
166.7	0.995225
166.8	0.995228
166.9	0.99523
167	0.995233
167.1	0.995235
167.2	0.995238
167.3	0.99524
167.4	0.995243
167.5	0.995245
167.6	0.995248
167.7	0.99525
167.8	0.995253
167.9	0.995255
168	0.995258
168.1	0.99526
168.2	0.995262
168.3	0.995265
168.4	0.995267
168.5	0.995269
168.6	0.995272
168.7	0.995274
168.8	0.995276
168.9	0.995279
169	0.995281
169.1	0.995283
169.2	0.995285
169.3	0.995288
169.4	0.99529
169.5	0.995292
169.6	0.995294
169.7	0.995296
169.8	0.995299
169.9	0.995301
170	0.995303
170.1	0.995305
170.2	0.995307
170.3	0.995309
170.4	0.995311
170.5	0.995313
170.6	0.995316
170.7	0.995318
170.8	0.99532
170.9	0.995322
171	0.995324
171.1	0.995326
171.2	0.995328
171.3	0.99533
171.4	0.995332
171.5	0.995334
171.6	0.995336
171.7	0.995338
171.8	0.99534
171.9	0.995341
172	0.995343
172.1	0.995345
172.2	0.995347
172.3	0.995349
172.4	0.995351
172.5	0.995353
172.6	0.995355
172.7	0.995356
172.8	0.995358
172.9	0.99536
173	0.995362
173.1	0.995364
173.2	0.995365
173.3	0.995367
173.4	0.995369
173.5	0.995371
173.6	0.995372
173.7	0.995374
173.8	0.995376
173.9	0.995378
174	0.995379
174.1	0.995381
174.2	0.995383
174.3	0.995384
174.4	0.995386
174.5	0.995388
174.6	0.995389
174.7	0.995391
174.8	0.995393
174.9	0.995394
175	0.995396
175.1	0.995397
175.2	0.995399
175.3	0.995401
175.4	0.995402
175.5	0.995404
175.6	0.995405
175.7	0.995407
175.8	0.995408
175.9	0.99541
176	0.995411
176.1	0.995413
176.2	0.995414
176.3	0.995416
176.4	0.995417
176.5	0.995419
176.6	0.99542
176.7	0.995422
176.8	0.995423
176.9	0.995425
177	0.995426
177.1	0.995428
177.2	0.995429
177.3	0.99543
177.4	0.995432
177.5	0.995433
177.6	0.995435
177.7	0.995436
177.8	0.995437
177.9	0.995439
178	0.99544
178.1	0.995441
178.2	0.995443
178.3	0.995444
178.4	0.995445
178.5	0.995447
178.6	0.995448
178.7	0.995449
178.8	0.995451
178.9	0.995452
179	0.995453
179.1	0.995454
179.2	0.995456
179.3	0.995457
179.4	0.995458
179.5	0.995459
179.6	0.995461
179.7	0.995462
179.8	0.995463
179.9	0.995464
180	0.995466
180.1	0.995467
180.2	0.995468
180.3	0.995469
180.4	0.99547
180.5	0.995471
180.6	0.995473
180.7	0.995474
180.8	0.995475
180.9	0.995476
181	0.995477
181.1	0.995478
181.2	0.995479
181.3	0.995481
181.4	0.995482
181.5	0.995483
181.6	0.995484
181.7	0.995485
181.8	0.995486
181.9	0.995487
182	0.995488
182.1	0.995489
182.2	0.99549
182.3	0.995491
182.4	0.995493
182.5	0.995494
182.6	0.995495
182.7	0.995496
182.8	0.995497
182.9	0.995498
183	0.995499
183.1	0.9955
183.2	0.995501
183.3	0.995502
183.4	0.995503
183.5	0.995504
183.6	0.995505
183.7	0.995506
183.8	0.995507
183.9	0.995508
184	0.995509
184.1	0.995509
184.2	0.99551
184.3	0.995511
184.4	0.995512
184.5	0.995513
184.6	0.995514
184.7	0.995515
184.8	0.995516
184.9	0.995517
185	0.995518
185.1	0.995519
185.2	0.99552
185.3	0.995521
185.4	0.995521
185.5	0.995522
185.6	0.995523
185.7	0.995524
185.8	0.995525
185.9	0.995526
186	0.995527
186.1	0.995527
186.2	0.995528
186.3	0.995529
186.4	0.99553
186.5	0.995531
186.6	0.995532
186.7	0.995532
186.8	0.995533
186.9	0.995534
187	0.995535
187.1	0.995536
187.2	0.995536
187.3	0.995537
187.4	0.995538
187.5	0.995539
187.6	0.99554
187.7	0.99554
187.8	0.995541
187.9	0.995542
188	0.995543
188.1	0.995543
188.2	0.995544
188.3	0.995545
188.4	0.995546
188.5	0.995546
188.6	0.995547
188.7	0.995548
188.8	0.995549
188.9	0.995549
189	0.99555
189.1	0.995551
189.2	0.995551
189.3	0.995552
189.4	0.995553
189.5	0.995554
189.6	0.995554
189.7	0.995555
189.8	0.995556
189.9	0.995556
190	0.995557
190.1	0.995558
190.2	0.995558
190.3	0.995559
190.4	0.99556
190.5	0.99556
190.6	0.995561
190.7	0.995562
190.8	0.995562
190.9	0.995563
191	0.995564
191.1	0.995564
191.2	0.995565
191.3	0.995566
191.4	0.995566
191.5	0.995567
191.6	0.995567
191.7	0.995568
191.8	0.995569
191.9	0.995569
192	0.99557
192.1	0.99557
192.2	0.995571
192.3	0.995572
192.4	0.995572
192.5	0.995573
192.6	0.995573
192.7	0.995574
192.8	0.995575
192.9	0.995575
193	0.995576
193.1	0.995576
193.2	0.995577
193.3	0.995577
193.4	0.995578
193.5	0.995578
193.6	0.995579
193.7	0.99558
193.8	0.99558
193.9	0.995581
194	0.995581
194.1	0.995582
194.2	0.995582
194.3	0.995583
194.4	0.995583
194.5	0.995584
194.6	0.995584
194.7	0.995585
194.8	0.995585
194.9	0.995586
195	0.995586
195.1	0.995587
195.2	0.995587
195.3	0.995588
195.4	0.995588
195.5	0.995589
195.6	0.995589
195.7	0.99559
195.8	0.99559
195.9	0.995591
196	0.995591
196.1	0.995592
196.2	0.995592
196.3	0.995593
196.4	0.995593
196.5	0.995594
196.6	0.995594
196.7	0.995595
196.8	0.995595
196.9	0.995596
197	0.995596
197.1	0.995596
197.2	0.995597
197.3	0.995597
197.4	0.995598
197.5	0.995598
197.6	0.995599
197.7	0.995599
197.8	0.9956
197.9	0.9956
198	0.9956
198.1	0.995601
198.2	0.995601
198.3	0.995602
198.4	0.995602
198.5	0.995603
198.6	0.995603
198.7	0.995603
198.8	0.995604
198.9	0.995604
199	0.995605
199.1	0.995605
199.2	0.995605
199.3	0.995606
199.4	0.995606
199.5	0.995607
199.6	0.995607
199.7	0.995607
199.8	0.995608
199.9	0.995608
200	0.995609
[truncated: 14,000 more rows]
