# Supplementary material for: Bayesian inference of kinetic schemes for ion channels by Kalman filtering
Source: eLife journal article supplement (doi:10.7554/elife.62714), 2022-05-04
Supplement: fig4-data3 [file 1_Sim_N_100_theor_Strom_Werte.xlsx]

## Sheet: Tabelle1
0.1	0
0.2	0
0.3	0
0.4	0
0.5	0
0.6	0
0.7	0
0.8	0
0.9	0
1	0
1.1	0
1.2	0
1.3	0
1.4	0
1.5	0
1.6	0
1.7	0
1.8	0
1.9	0
2	0
2.1	0
2.2	0
2.3	0
2.4	0
2.5	0
2.6	0
2.7	0
2.8	0
2.9	0
3	0
3.1	0
3.2	0
3.3	0
3.4	0
3.5	0
3.6	0
3.7	0
3.8	0
3.9	0
4	0
4.1	0
4.2	0
4.3	0
4.4	0
4.5	0
4.6	0
4.7	0
4.8	0
4.9	0
5	0
5.1	0
5.2	0
5.3	0
5.4	0
5.5	0
5.6	0
5.7	0
5.8	0
5.9	0
6	0
6.1	0
6.2	0
6.3	0
6.4	0
6.5	0
6.6	0
6.7	0
6.8	0
6.9	0
7	0
7.1	0
7.2	0
7.3	0
7.4	0
7.5	0
7.6	0
7.7	0
7.8	0
7.9	0
8	0
8.1	0
8.2	0
8.3	0
8.4	0
8.5	0
8.6	0
8.7	0
8.8	0
8.9	0
9	0
9.1	0
9.2	0
9.3	0
9.4	0
9.5	0
9.6	0
9.7	0
9.8	0
9.9	0
10	0
10.1	0
10.2	0
10.3	0
10.4	0
10.5	0
10.6	0
10.7	0
10.8	0
10.9	0
11	0
11.1	0
11.2	0
11.3	0
11.4	0
11.5	0
11.6	0
11.7	0
11.8	0
11.9	0
12	0
12.1	0
12.2	0
12.3	0
12.4	0
12.5	0
12.6	0
12.7	0
12.8	0
12.9	0
13	0
13.1	0
13.2	0
13.3	0
13.4	0
13.5	0
13.6	0
13.7	0
13.8	0
13.9	0
14	0
14.1	0
14.2	0
14.3	0
14.4	0
14.5	0
14.6	0
14.7	0
14.8	0
14.9	0
15	0
15.1	0
15.2	0
15.3	0
15.4	0
15.5	0
15.6	0
15.7	0
15.8	0
15.9	0
16	0
16.1	0
16.2	0
16.3	0
16.4	0
16.5	0
16.6	0
16.7	0
16.8	0
16.9	0
17	0
17.1	0
17.2	0
17.3	0
17.4	0
17.5	0
17.6	0
17.7	0
17.8	0
17.9	0
18	0
18.1	0
18.2	0
18.3	0
18.4	0
18.5	0
18.6	0
18.7	0
18.8	0
18.9	0
19	0
19.1	0
19.2	0
19.3	0
19.4	0
19.5	0
19.6	0
19.7	0
19.8	0
19.9	0
20	0
20.1	0
20.2	0
20.3	0
20.4	0
20.5	0
20.6	0
20.7	0
20.8	0
20.9	0
21	0
21.1	0
21.2	0
21.3	0
21.4	0
21.5	0
21.6	0
21.7	0
21.8	0
21.9	0
22	0
22.1	0
22.2	0
22.3	0
22.4	0
22.5	0
22.6	0
22.7	0
22.8	0
22.9	0
23	0
23.1	0
23.2	0
23.3	0
23.4	0
23.5	0
23.6	0
23.7	0
23.8	0
23.9	0
24	0
24.1	0
24.2	0
24.3	0
24.4	0
24.5	0
24.6	0
24.7	0
24.8	0
24.9	0
25	0
25.1	0
25.2	0
25.3	0
25.4	0
25.5	0
25.6	0
25.7	0
25.8	0
25.9	0
26	0
26.1	0
26.2	0
26.3	0
26.4	0
26.5	0
26.6	0
26.7	0
26.8	0
26.9	0
27	0
27.1	0
27.2	0
27.3	0
27.4	0
27.5	0
27.6	0
27.7	0
27.8	0
27.9	0
28	0
28.1	0
28.2	0
28.3	0
28.4	0
28.5	0
28.6	0
28.7	0
28.8	0
28.9	0
29	0
29.1	0
29.2	0
29.3	0
29.4	0
29.5	0
29.6	0
29.7	0
29.8	0
29.9	0
30	0
30.1	0
30.2	0
30.3	0
30.4	0
30.5	0
30.6	0
30.7	0
30.8	0
30.9	0
31	0
31.1	0
31.2	0
31.3	0
31.4	0
31.5	0
31.6	0
31.7	0
31.8	0
31.9	0
32	0
32.1	0
32.2	0
32.3	0
32.4	0
32.5	0
32.6	0
32.7	0
32.8	0
32.9	0
33	0
33.1	0
33.2	0
33.3	0
33.4	0
33.5	0
33.6	0
33.7	0
33.8	0
33.9	0
34	0
34.1	0
34.2	0
34.3	0
34.4	0
34.5	0
34.6	0
34.7	0
34.8	0
34.9	0
35	0
35.1	0
35.2	0
35.3	0
35.4	0
35.5	0
35.6	0
35.7	0
35.8	0
35.9	0
36	0
36.1	0
36.2	0
36.3	0
36.4	0
36.5	0
36.6	0
36.7	0
36.8	0
36.9	0
37	0
37.1	0
37.2	0
37.3	0
37.4	0
37.5	0
37.6	0
37.7	0
37.8	0
37.9	0
38	0
38.1	0
38.2	0
38.3	0
38.4	0
38.5	0
38.6	0
38.7	0
38.8	0
38.9	0
39	0
39.1	0
39.2	0
39.3	0
39.4	0
39.5	0
39.6	0
39.7	0
39.8	0
39.9	0
40	0
40.1	0
40.2	0
40.3	0
40.4	0
40.5	0
40.6	0
40.7	0
40.8	0
40.9	0
41	0
41.1	0
41.2	0
41.3	0
41.4	0
41.5	0
41.6	0
41.7	0
41.8	0
41.9	0
42	0
42.1	0
42.2	0
42.3	0
42.4	0
42.5	0
42.6	0
42.7	0
42.8	0
42.9	0
43	0
43.1	0
43.2	0
43.3	0
43.4	0
43.5	0
43.6	0
43.7	0
43.8	0
43.9	0
44	0
44.1	0
44.2	0
44.3	0
44.4	0
44.5	0
44.6	0
44.7	0
44.8	0
44.9	0
45	0
45.1	0
45.2	0
45.3	0
45.4	0
45.5	0
45.6	0
45.7	0
45.8	0
45.9	0
46	0
46.1	0
46.2	0
46.3	0
46.4	0
46.5	0
46.6	0
46.7	0
46.8	0
46.9	0
47	0
47.1	0
47.2	0
47.3	0
47.4	0
47.5	0
47.6	0
47.7	0
47.8	0
47.9	0
48	0
48.1	0
48.2	0
48.3	0
48.4	0
48.5	0
48.6	0
48.7	0
48.8	0
48.9	0
49	0
49.1	0
49.2	0
49.3	0
49.4	0
49.5	0
49.6	0
49.7	0
49.8	0
49.9	0
50	0
50.1	0
50.2	0
50.3	0
50.4	0
50.5	0
50.6	0
50.7	0
50.8	0
50.9	0
51	0
51.1	0
51.2	0
51.3	0
51.4	0
51.5	0
51.6	0
51.7	0
51.8	0
51.9	0
52	0
52.1	0
52.2	0
52.3	0
52.4	0
52.5	0
52.6	0
52.7	0
52.8	0
52.9	0
53	0
53.1	0
53.2	0
53.3	0
53.4	0
53.5	0
53.6	0
53.7	0
53.8	0
53.9	0
54	0
54.1	0
54.2	0
54.3	0
54.4	0
54.5	0
54.6	0
54.7	0
54.8	0
54.9	0
55	0
55.1	0
55.2	0
55.3	0
55.4	0
55.5	0
55.6	0
55.7	0
55.8	0
55.9	0
56	0
56.1	0
56.2	0
56.3	0
56.4	0
56.5	0
56.6	0
56.7	0
56.8	0
56.9	0
57	0
57.1	0
57.2	0
57.3	0
57.4	0
57.5	0
57.6	0
57.7	0
57.8	0
57.9	0
58	0
58.1	0
58.2	0
58.3	0
58.4	0
58.5	0
58.6	0
58.7	0
58.8	0
58.9	0
59	0
59.1	0
59.2	0
59.3	0
59.4	0
59.5	0
59.6	0
59.7	0
59.8	0
59.9	0
60	0
60.1	0
60.2	0
60.3	0
60.4	0
60.5	0
60.6	0
60.7	0
60.8	0
60.9	0
61	0
61.1	0
61.2	0
61.3	0
61.4	0
61.5	0
61.6	0
61.7	0
61.8	0
61.9	0
62	0
62.1	0
62.2	0
62.3	0
62.4	0
62.5	0
62.6	0
62.7	0
62.8	0
62.9	0
63	0
63.1	0
63.2	0
63.3	0
63.4	0
63.5	0
63.6	0
63.7	0
63.8	0
63.9	0
64	0
64.1	0
64.2	0
64.3	0
64.4	0
64.5	0
64.6	0
64.7	0
64.8	0
64.9	0
65	0
65.1	0
65.2	0
65.3	0
65.4	0
65.5	0
65.6	0
65.7	0
65.8	0
65.9	0
66	0
66.1	0
66.2	0
66.3	0
66.4	0
66.5	0
66.6	0
66.7	0
66.8	0
66.9	0
67	0
67.1	0
67.2	0
67.3	0
67.4	0
67.5	0
67.6	0
67.7	0
67.8	0
67.9	0
68	0
68.1	0
68.2	0
68.3	0
68.4	0
68.5	0
68.6	0
68.7	0
68.8	0
68.9	0
69	0
69.1	0
69.2	0
69.3	0
69.4	0
69.5	0
69.6	0
69.7	0
69.8	0
69.9	0
70	0
70.1	0
70.2	0
70.3	0
70.4	0
70.5	0
70.6	0
70.7	0
70.8	0
70.9	0
71	0
71.1	0
71.2	0
71.3	0
71.4	0
71.5	0
71.6	0
71.7	0
71.8	0
71.9	0
72	0
72.1	0
72.2	0
72.3	0
72.4	0
72.5	0
72.6	0
72.7	0
72.8	0
72.9	0
73	0
73.1	0
73.2	0
73.3	0
73.4	0
73.5	0
73.6	0
73.7	0
73.8	0
73.9	0
74	0
74.1	0
74.2	0
74.3	0
74.4	0
74.5	0
74.6	0
74.7	0
74.8	0
74.9	0
75	0
75.1	0
75.2	0
75.3	0
75.4	0
75.5	0
75.6	0
75.7	0
75.8	0
75.9	0
76	0
76.1	0
76.2	0
76.3	0
76.4	0
76.5	0
76.6	0
76.7	0
76.8	0
76.9	0
77	0
77.1	0
77.2	0
77.3	0
77.4	0
77.5	0
77.6	0
77.7	0
77.8	0
77.9	0
78	0
78.1	0
78.2	0
78.3	0
78.4	0
78.5	0
78.6	0
78.7	0
78.8	0
78.9	0
79	0
79.1	0
79.2	0
79.3	0
79.4	0
79.5	0
79.6	0
79.7	0
79.8	0
79.9	0
80	0
80.1	0
80.2	0
80.3	0
80.4	0
80.5	0
80.6	0
80.7	0
80.8	0
80.9	0
81	0
81.1	0
81.2	0
81.3	0
81.4	0
81.5	0
81.6	0
81.7	0
81.8	0
81.9	0
82	0
82.1	0
82.2	0
82.3	0
82.4	0
82.5	0
82.6	0
82.7	0
82.8	0
82.9	0
83	0
83.1	0
83.2	0
83.3	0
83.4	0
83.5	0
83.6	0
83.7	0
83.8	0
83.9	0
84	0
84.1	0
84.2	0
84.3	0
84.4	0
84.5	0
84.6	0
84.7	0
84.8	0
84.9	0
85	0
85.1	0
85.2	0
85.3	0
85.4	0
85.5	0
85.6	0
85.7	0
85.8	0
85.9	0
86	0
86.1	0
86.2	0
86.3	0
86.4	0
86.5	0
86.6	0
86.7	0
86.8	0
86.9	0
87	0
87.1	0
87.2	0
87.3	0
87.4	0
87.5	0
87.6	0
87.7	0
87.8	0
87.9	0
88	0
88.1	0
88.2	0
88.3	0
88.4	0
88.5	0
88.6	0
88.7	0
88.8	0
88.9	0
89	0
89.1	0
89.2	0
89.3	0
89.4	0
89.5	0
89.6	0
89.7	0
89.8	0
89.9	0
90	0
90.1	0
90.2	0
90.3	0
90.4	0
90.5	0
90.6	0
90.7	0
90.8	0
90.9	0
91	0
91.1	0
91.2	0
91.3	0
91.4	0
91.5	0
91.6	0
91.7	0
91.8	0
91.9	0
92	0
92.1	0
92.2	0
92.3	0
92.4	0
92.5	0
92.6	0
92.7	0
92.8	0
92.9	0
93	0
93.1	0
93.2	0
93.3	0
93.4	0
93.5	0
93.6	0
93.7	0
93.8	0
93.9	0
94	0
94.1	0
94.2	0
94.3	0
94.4	0
94.5	0
94.6	0
94.7	0
94.8	0
94.9	0
95	0
95.1	0
95.2	0
95.3	0
95.4	0
95.5	0
95.6	0
95.7	0
95.8	0
95.9	0
96	0
96.1	0
96.2	0
96.3	0
96.4	0
96.5	0
96.6	0
96.7	0
96.8	0
96.9	0
97	0
97.1	0
97.2	0
97.3	0
97.4	0
97.5	0
97.6	0
97.7	0
97.8	0
97.9	0
98	0
98.1	0
98.2	0
98.3	0
98.4	0
98.5	0
98.6	0
98.7	0
98.8	0
98.9	0
99	0
99.1	0
99.2	0
99.3	0
99.4	0
99.5	0
99.6	0
99.7	0
99.8	0
99.9	0
100	0
100.1	0.001122
100.2	0.00438556
100.3	0.00855837
100.4	0.0130493
100.5	0.0176396
100.6	0.0222492
100.7	0.026849
100.8	0.0314286
100.9	0.0359842
101	0.0405144
101.1	0.045019
101.2	0.0494979
101.3	0.0539511
101.4	0.0583788
101.5	0.0627811
101.6	0.0671581
101.7	0.0715101
101.8	0.0758371
101.9	0.0801393
102	0.0844169
102.1	0.0886699
102.2	0.0928985
102.3	0.0971029
102.4	0.101283
102.5	0.105439
102.6	0.109572
102.7	0.113681
102.8	0.117766
102.9	0.121828
103	0.125866
103.1	0.129882
103.2	0.133874
103.3	0.137843
103.4	0.14179
103.5	0.145714
103.6	0.149616
103.7	0.153495
103.8	0.157352
103.9	0.161186
104	0.164999
104.1	0.16879
104.2	0.172559
104.3	0.176307
104.4	0.180033
104.5	0.183738
104.6	0.187421
104.7	0.191084
104.8	0.194725
104.9	0.198346
105	0.201945
105.1	0.205525
105.2	0.209083
105.3	0.212621
105.4	0.216139
105.5	0.219637
105.6	0.223115
105.7	0.226572
105.8	0.23001
105.9	0.233428
106	0.236827
106.1	0.240206
106.2	0.243566
106.3	0.246906
106.4	0.250228
106.5	0.25353
106.6	0.256813
106.7	0.260078
106.8	0.263324
106.9	0.266551
107	0.269759
107.1	0.27295
107.2	0.276122
107.3	0.279275
107.4	0.282411
107.5	0.285529
107.6	0.288629
107.7	0.291711
107.8	0.294775
107.9	0.297822
108	0.300851
108.1	0.303863
108.2	0.306858
108.3	0.309836
108.4	0.312796
108.5	0.31574
108.6	0.318666
108.7	0.321576
108.8	0.324469
108.9	0.327346
109	0.330206
109.1	0.333049
109.2	0.335877
109.3	0.338688
109.4	0.341483
109.5	0.344262
109.6	0.347025
109.7	0.349772
109.8	0.352504
109.9	0.35522
110	0.35792
110.1	0.360605
110.2	0.363274
110.3	0.365928
110.4	0.368567
110.5	0.371191
110.6	0.373799
110.7	0.376393
110.8	0.378972
110.9	0.381536
111	0.384085
111.1	0.38662
111.2	0.38914
111.3	0.391646
111.4	0.394137
111.5	0.396614
111.6	0.399077
111.7	0.401526
111.8	0.403961
111.9	0.406382
112	0.408788
112.1	0.411182
112.2	0.413561
112.3	0.415927
112.4	0.418279
112.5	0.420617
112.6	0.422943
112.7	0.425255
112.8	0.427553
112.9	0.429839
113	0.432111
113.1	0.434371
113.2	0.436617
113.3	0.43885
113.4	0.441071
113.5	0.443279
113.6	0.445474
113.7	0.447657
113.8	0.449827
113.9	0.451985
114	0.454131
114.1	0.456264
114.2	0.458385
114.3	0.460493
114.4	0.46259
114.5	0.464674
114.6	0.466747
114.7	0.468808
114.8	0.470857
114.9	0.472894
115	0.474919
115.1	0.476933
115.2	0.478936
115.3	0.480927
115.4	0.482906
115.5	0.484874
115.6	0.486831
115.7	0.488777
115.8	0.490711
115.9	0.492634
116	0.494547
116.1	0.496448
116.2	0.498338
116.3	0.500218
116.4	0.502087
116.5	0.503945
116.6	0.505792
116.7	0.507629
116.8	0.509456
116.9	0.511272
117	0.513077
117.1	0.514872
117.2	0.516657
117.3	0.518432
117.4	0.520196
117.5	0.52195
117.6	0.523694
117.7	0.525429
117.8	0.527153
117.9	0.528867
118	0.530572
118.1	0.532267
118.2	0.533952
118.3	0.535627
118.4	0.537293
118.5	0.538949
118.6	0.540596
118.7	0.542233
118.8	0.543861
118.9	0.54548
119	0.547089
119.1	0.548689
119.2	0.55028
119.3	0.551862
119.4	0.553435
119.5	0.554998
119.6	0.556553
119.7	0.558099
119.8	0.559636
119.9	0.561164
120	0.562683
120.1	0.564194
120.2	0.565696
120.3	0.567189
120.4	0.568674
120.5	0.57015
120.6	0.571618
120.7	0.573078
120.8	0.574529
120.9	0.575971
121	0.577406
121.1	0.578832
121.2	0.58025
121.3	0.58166
121.4	0.583062
121.5	0.584456
121.6	0.585842
121.7	0.58722
121.8	0.58859
121.9	0.589952
122	0.591306
122.1	0.592653
122.2	0.593991
122.3	0.595322
122.4	0.596646
122.5	0.597962
122.6	0.59927
122.7	0.600571
122.8	0.601865
122.9	0.603151
123	0.604429
123.1	0.6057
123.2	0.606964
123.3	0.608221
123.4	0.609471
123.5	0.610713
123.6	0.611948
123.7	0.613177
123.8	0.614398
123.9	0.615612
124	0.616819
124.1	0.618019
124.2	0.619213
124.3	0.620399
124.4	0.621579
124.5	0.622752
124.6	0.623918
124.7	0.625078
124.8	0.626231
124.9	0.627377
125	0.628517
125.1	0.62965
125.2	0.630776
125.3	0.631897
125.4	0.63301
125.5	0.634118
125.6	0.635219
125.7	0.636314
125.8	0.637402
125.9	0.638484
126	0.63956
126.1	0.64063
126.2	0.641694
126.3	0.642752
126.4	0.643803
126.5	0.644849
126.6	0.645888
126.7	0.646922
126.8	0.647949
126.9	0.648971
127	0.649987
127.1	0.650997
127.2	0.652001
127.3	0.653
127.4	0.653993
127.5	0.65498
127.6	0.655961
127.7	0.656937
127.8	0.657907
127.9	0.658872
128	0.659831
128.1	0.660785
128.2	0.661733
128.3	0.662676
128.4	0.663613
128.5	0.664545
128.6	0.665471
128.7	0.666393
128.8	0.667309
128.9	0.668219
129	0.669125
129.1	0.670025
129.2	0.67092
129.3	0.671811
129.4	0.672695
129.5	0.673575
129.6	0.67445
129.7	0.67532
129.8	0.676185
129.9	0.677045
130	0.6779
130.1	0.67875
130.2	0.679595
130.3	0.680435
130.4	0.68127
130.5	0.682101
130.6	0.682927
130.7	0.683748
130.8	0.684565
130.9	0.685377
131	0.686184
131.1	0.686986
131.2	0.687784
131.3	0.688577
131.4	0.689366
131.5	0.690151
131.6	0.69093
131.7	0.691706
131.8	0.692476
131.9	0.693243
132	0.694005
132.1	0.694763
132.2	0.695516
132.3	0.696265
132.4	0.69701
132.5	0.69775
132.6	0.698486
132.7	0.699218
132.8	0.699946
132.9	0.70067
133	0.701389
133.1	0.702104
133.2	0.702816
133.3	0.703523
133.4	0.704226
133.5	0.704925
133.6	0.70562
133.7	0.706311
133.8	0.706998
133.9	0.707681
134	0.708361
134.1	0.709036
134.2	0.709708
134.3	0.710375
134.4	0.711039
134.5	0.711699
134.6	0.712355
134.7	0.713008
134.8	0.713656
134.9	0.714301
135	0.714943
135.1	0.71558
135.2	0.716214
135.3	0.716845
135.4	0.717471
135.5	0.718094
135.6	0.718714
135.7	0.71933
135.8	0.719942
135.9	0.720551
136	0.721157
136.1	0.721759
136.2	0.722357
136.3	0.722952
136.4	0.723544
136.5	0.724132
136.6	0.724717
136.7	0.725299
136.8	0.725877
136.9	0.726452
137	0.727024
137.1	0.727592
137.2	0.728157
137.3	0.728719
137.4	0.729278
137.5	0.729833
137.6	0.730385
137.7	0.730934
137.8	0.73148
137.9	0.732023
138	0.732563
138.1	0.733099
138.2	0.733633
138.3	0.734163
138.4	0.734691
138.5	0.735215
138.6	0.735736
138.7	0.736255
138.8	0.73677
138.9	0.737283
139	0.737792
139.1	0.738299
139.2	0.738802
139.3	0.739303
139.4	0.739801
139.5	0.740296
139.6	0.740789
139.7	0.741278
139.8	0.741765
139.9	0.742248
140	0.742729
140.1	0.743208
140.2	0.743683
140.3	0.744156
140.4	0.744626
140.5	0.745094
140.6	0.745558
140.7	0.74602
140.8	0.74648
140.9	0.746937
141	0.747391
141.1	0.747842
141.2	0.748291
141.3	0.748738
141.4	0.749182
141.5	0.749623
141.6	0.750062
141.7	0.750498
141.8	0.750932
141.9	0.751363
142	0.751792
142.1	0.752218
142.2	0.752642
142.3	0.753063
142.4	0.753482
142.5	0.753899
142.6	0.754313
142.7	0.754725
142.8	0.755135
142.9	0.755542
143	0.755947
143.1	0.756349
143.2	0.756749
143.3	0.757147
143.4	0.757543
143.5	0.757936
143.6	0.758327
143.7	0.758716
143.8	0.759103
143.9	0.759487
144	0.759869
144.1	0.760249
144.2	0.760627
144.3	0.761003
144.4	0.761376
144.5	0.761748
144.6	0.762117
144.7	0.762484
144.8	0.762849
144.9	0.763212
145	0.763573
145.1	0.763932
145.2	0.764288
145.3	0.764643
145.4	0.764996
145.5	0.765346
145.6	0.765695
145.7	0.766042
145.8	0.766386
145.9	0.766729
146	0.767069
146.1	0.767408
146.2	0.767745
146.3	0.76808
146.4	0.768413
146.5	0.768744
146.6	0.769073
146.7	0.7694
146.8	0.769725
146.9	0.770049
147	0.770371
147.1	0.77069
147.2	0.771008
147.3	0.771325
147.4	0.771639
147.5	0.771951
147.6	0.772262
147.7	0.772571
147.8	0.772878
147.9	0.773184
148	0.773487
148.1	0.773789
148.2	0.774089
148.3	0.774388
148.4	0.774685
148.5	0.77498
148.6	0.775273
148.7	0.775565
148.8	0.775855
148.9	0.776143
149	0.77643
149.1	0.776715
149.2	0.776998
149.3	0.77728
149.4	0.77756
149.5	0.777839
149.6	0.778116
149.7	0.778391
149.8	0.778665
149.9	0.778937
150	0.779208
150.1	0.779477
150.2	0.779745
150.3	0.780011
150.4	0.780275
150.5	0.780538
150.6	0.7808
150.7	0.78106
150.8	0.781318
150.9	0.781575
151	0.781831
151.1	0.782085
151.2	0.782338
151.3	0.782589
151.4	0.782838
151.5	0.783087
151.6	0.783334
151.7	0.783579
151.8	0.783823
151.9	0.784066
152	0.784307
152.1	0.784547
152.2	0.784785
152.3	0.785023
152.4	0.785258
152.5	0.785493
152.6	0.785726
152.7	0.785958
152.8	0.786188
152.9	0.786417
153	0.786645
153.1	0.786871
153.2	0.787097
153.3	0.787321
153.4	0.787543
153.5	0.787764
153.6	0.787985
153.7	0.788203
153.8	0.788421
153.9	0.788637
154	0.788852
154.1	0.789066
154.2	0.789279
154.3	0.78949
154.4	0.7897
154.5	0.789909
154.6	0.790117
154.7	0.790324
154.8	0.790529
154.9	0.790733
155	0.790936
155.1	0.791138
155.2	0.791339
155.3	0.791538
155.4	0.791737
155.5	0.791934
155.6	0.79213
155.7	0.792325
155.8	0.792519
155.9	0.792712
156	0.792904
156.1	0.793094
156.2	0.793284
156.3	0.793472
156.4	0.793659
156.5	0.793846
156.6	0.794031
156.7	0.794215
156.8	0.794398
156.9	0.79458
157	0.794761
157.1	0.794941
157.2	0.79512
157.3	0.795298
157.4	0.795475
157.5	0.795651
157.6	0.795825
157.7	0.795999
157.8	0.796172
157.9	0.796344
158	0.796515
158.1	0.796685
158.2	0.796854
158.3	0.797022
158.4	0.797189
158.5	0.797355
158.6	0.79752
158.7	0.797684
158.8	0.797847
158.9	0.798009
159	0.798171
159.1	0.798331
159.2	0.79849
159.3	0.798649
159.4	0.798807
159.5	0.798963
159.6	0.799119
159.7	0.799274
159.8	0.799428
159.9	0.799581
160	0.799734
160.1	0.799885
160.2	0.800036
160.3	0.800185
160.4	0.800334
160.5	0.800482
160.6	0.800629
160.7	0.800776
160.8	0.800921
160.9	0.801066
161	0.80121
161.1	0.801352
161.2	0.801495
161.3	0.801636
161.4	0.801776
161.5	0.801916
161.6	0.802055
161.7	0.802193
161.8	0.802331
161.9	0.802467
162	0.802603
162.1	0.802738
162.2	0.802872
162.3	0.803005
162.4	0.803138
162.5	0.80327
162.6	0.803401
162.7	0.803532
162.8	0.803661
162.9	0.80379
163	0.803918
163.1	0.804046
163.2	0.804173
163.3	0.804298
163.4	0.804424
163.5	0.804548
163.6	0.804672
163.7	0.804795
163.8	0.804918
163.9	0.805039
164	0.80516
164.1	0.805281
164.2	0.8054
164.3	0.805519
164.4	0.805637
164.5	0.805755
164.6	0.805872
164.7	0.805988
164.8	0.806104
164.9	0.806219
165	0.806333
165.1	0.806447
165.2	0.806559
165.3	0.806672
165.4	0.806783
165.5	0.806894
165.6	0.807005
165.7	0.807115
165.8	0.807224
165.9	0.807332
166	0.80744
166.1	0.807547
166.2	0.807654
166.3	0.80776
166.4	0.807865
166.5	0.80797
166.6	0.808074
166.7	0.808178
166.8	0.808281
166.9	0.808383
167	0.808485
167.1	0.808586
167.2	0.808687
167.3	0.808787
167.4	0.808887
167.5	0.808986
167.6	0.809084
167.7	0.809182
167.8	0.809279
167.9	0.809376
168	0.809472
168.1	0.809568
168.2	0.809663
168.3	0.809757
168.4	0.809851
168.5	0.809944
168.6	0.810037
168.7	0.81013
168.8	0.810221
168.9	0.810313
169	0.810404
169.1	0.810494
169.2	0.810584
169.3	0.810673
169.4	0.810761
169.5	0.81085
169.6	0.810937
169.7	0.811025
169.8	0.811111
169.9	0.811197
170	0.811283
170.1	0.811368
170.2	0.811453
170.3	0.811537
170.4	0.811621
170.5	0.811704
170.6	0.811787
170.7	0.811869
170.8	0.811951
170.9	0.812033
171	0.812114
171.1	0.812194
171.2	0.812274
171.3	0.812354
171.4	0.812433
171.5	0.812511
171.6	0.812589
171.7	0.812667
171.8	0.812744
171.9	0.812821
172	0.812898
172.1	0.812974
172.2	0.813049
172.3	0.813124
172.4	0.813199
172.5	0.813273
172.6	0.813347
172.7	0.81342
172.8	0.813493
172.9	0.813566
173	0.813638
173.1	0.813709
173.2	0.813781
173.3	0.813852
173.4	0.813922
173.5	0.813992
173.6	0.814062
173.7	0.814131
173.8	0.8142
173.9	0.814269
174	0.814337
174.1	0.814404
174.2	0.814472
174.3	0.814539
174.4	0.814605
174.5	0.814671
174.6	0.814737
174.7	0.814802
174.8	0.814867
174.9	0.814932
175	0.814996
175.1	0.81506
175.2	0.815124
175.3	0.815187
175.4	0.81525
175.5	0.815312
175.6	0.815374
175.7	0.815436
175.8	0.815498
175.9	0.815559
176	0.815619
176.1	0.81568
176.2	0.81574
176.3	0.815799
176.4	0.815859
176.5	0.815918
176.6	0.815976
176.7	0.816035
176.8	0.816092
176.9	0.81615
177	0.816207
177.1	0.816264
177.2	0.816321
177.3	0.816377
177.4	0.816433
177.5	0.816489
177.6	0.816544
177.7	0.816599
177.8	0.816654
177.9	0.816709
178	0.816763
178.1	0.816816
178.2	0.81687
178.3	0.816923
178.4	0.816976
178.5	0.817029
178.6	0.817081
178.7	0.817133
178.8	0.817184
178.9	0.817236
179	0.817287
179.1	0.817338
179.2	0.817388
179.3	0.817438
179.4	0.817488
179.5	0.817538
179.6	0.817587
179.7	0.817636
179.8	0.817685
179.9	0.817734
180	0.817782
180.1	0.81783
180.2	0.817877
180.3	0.817925
180.4	0.817972
180.5	0.818019
180.6	0.818065
180.7	0.818112
180.8	0.818158
180.9	0.818203
181	0.818249
181.1	0.818294
181.2	0.818339
181.3	0.818384
181.4	0.818429
181.5	0.818473
181.6	0.818517
181.7	0.81856
181.8	0.818604
181.9	0.818647
182	0.81869
182.1	0.818733
182.2	0.818775
182.3	0.818818
182.4	0.81886
182.5	0.818901
182.6	0.818943
182.7	0.818984
182.8	0.819025
182.9	0.819066
183	0.819107
183.1	0.819147
183.2	0.819187
183.3	0.819227
183.4	0.819267
183.5	0.819306
183.6	0.819345
183.7	0.819384
183.8	0.819423
183.9	0.819462
184	0.8195
184.1	0.819538
184.2	0.819576
184.3	0.819614
184.4	0.819651
184.5	0.819688
184.6	0.819725
184.7	0.819762
184.8	0.819799
184.9	0.819835
185	0.819871
185.1	0.819907
185.2	0.819943
185.3	0.819978
185.4	0.820014
185.5	0.820049
185.6	0.820084
185.7	0.820119
185.8	0.820153
185.9	0.820187
186	0.820222
186.1	0.820256
186.2	0.820289
186.3	0.820323
186.4	0.820356
186.5	0.820389
186.6	0.820422
186.7	0.820455
186.8	0.820488
186.9	0.82052
187	0.820553
187.1	0.820585
187.2	0.820616
187.3	0.820648
187.4	0.82068
187.5	0.820711
187.6	0.820742
187.7	0.820773
187.8	0.820804
187.9	0.820835
188	0.820865
188.1	0.820895
188.2	0.820925
188.3	0.820955
188.4	0.820985
188.5	0.821015
188.6	0.821044
188.7	0.821073
188.8	0.821102
188.9	0.821131
189	0.82116
189.1	0.821189
189.2	0.821217
189.3	0.821245
189.4	0.821273
189.5	0.821301
189.6	0.821329
189.7	0.821357
189.8	0.821384
189.9	0.821411
190	0.821438
190.1	0.821465
190.2	0.821492
190.3	0.821519
190.4	0.821545
190.5	0.821572
190.6	0.821598
190.7	0.821624
190.8	0.82165
190.9	0.821676
191	0.821701
191.1	0.821727
191.2	0.821752
191.3	0.821777
191.4	0.821802
191.5	0.821827
191.6	0.821852
191.7	0.821877
191.8	0.821901
191.9	0.821925
192	0.82195
192.1	0.821974
192.2	0.821998
192.3	0.822021
192.4	0.822045
192.5	0.822068
192.6	0.822092
192.7	0.822115
192.8	0.822138
192.9	0.822161
193	0.822184
193.1	0.822207
193.2	0.822229
193.3	0.822252
193.4	0.822274
193.5	0.822296
193.6	0.822318
193.7	0.82234
193.8	0.822362
193.9	0.822384
194	0.822405
194.1	0.822427
194.2	0.822448
194.3	0.822469
194.4	0.82249
194.5	0.822511
194.6	0.822532
194.7	0.822553
194.8	0.822573
194.9	0.822594
195	0.822614
195.1	0.822634
195.2	0.822654
195.3	0.822674
195.4	0.822694
195.5	0.822714
195.6	0.822734
195.7	0.822753
195.8	0.822773
195.9	0.822792
196	0.822811
196.1	0.82283
196.2	0.822849
196.3	0.822868
196.4	0.822887
196.5	0.822906
196.6	0.822924
196.7	0.822943
196.8	0.822961
196.9	0.822979
197	0.822997
197.1	0.823016
197.2	0.823033
197.3	0.823051
197.4	0.823069
197.5	0.823087
197.6	0.823104
197.7	0.823122
197.8	0.823139
197.9	0.823156
198	0.823173
198.1	0.82319
198.2	0.823207
198.3	0.823224
198.4	0.823241
198.5	0.823257
198.6	0.823274
198.7	0.82329
198.8	0.823307
198.9	0.823323
199	0.823339
199.1	0.823355
199.2	0.823371
199.3	0.823387
199.4	0.823403
199.5	0.823419
199.6	0.823434
199.7	0.82345
199.8	0.823465
199.9	0.823481
200	0.823496
[truncated: 14,000 more rows]
