# Supplementary material for: Bayesian inference of kinetic schemes for ion channels by Kalman filtering
Source: eLife journal article supplement (doi:10.7554/elife.62714), 2022-05-04
Supplement: fig4-data3 [file 1_Sim_N_200_Fluor_MW_32M.xlsx]

## Sheet: 32 M
0.1	0
0.2	0
0.3	0
0.4	0
0.5	0
0.6	0
0.7	0
0.8	0
0.9	0
1	0
1.1	0
1.2	0
1.3	0
1.4	0
1.5	0
1.6	0
1.7	0
1.8	0
1.9	0
2	0
2.1	0
2.2	0
2.3	0
2.4	0
2.5	0
2.6	0
2.7	0
2.8	0
2.9	0
3	0
3.1	0
3.2	0
3.3	0
3.4	0
3.5	0
3.6	0
3.7	0
3.8	0
3.9	0
4	0
4.1	0
4.2	0
4.3	0
4.4	0
4.5	0
4.6	0
4.7	0
4.8	0
4.9	0
5	0
5.1	0
5.2	0
5.3	0
5.4	0
5.5	0
5.6	0
5.7	0
5.8	0
5.9	0
6	0
6.1	0
6.2	0
6.3	0
6.4	0
6.5	0
6.6	0
6.7	0
6.8	0
6.9	0
7	0
7.1	0
7.2	0
7.3	0
7.4	0
7.5	0
7.6	0
7.7	0
7.8	0
7.9	0
8	0
8.1	0
8.2	0
8.3	0
8.4	0
8.5	0
8.6	0
8.7	0
8.8	0
8.9	0
9	0
9.1	0
9.2	0
9.3	0
9.4	0
9.5	0
9.6	0
9.7	0
9.8	0
9.9	0
10	0
10.1	0
10.2	0
10.3	0
10.4	0
10.5	0
10.6	0
10.7	0
10.8	0
10.9	0
11	0
11.1	0
11.2	0
11.3	0
11.4	0
11.5	0
11.6	0
11.7	0
11.8	0
11.9	0
12	0
12.1	0
12.2	0
12.3	0
12.4	0
12.5	0
12.6	0
12.7	0
12.8	0
12.9	0
13	0
13.1	0
13.2	0
13.3	0
13.4	0
13.5	0
13.6	0
13.7	0
13.8	0
13.9	0
14	0
14.1	0
14.2	0
14.3	0
14.4	0
14.5	0
14.6	0
14.7	0
14.8	0
14.9	0
15	0
15.1	0
15.2	0
15.3	0
15.4	0
15.5	0
15.6	0
15.7	0
15.8	0
15.9	0
16	0
16.1	0
16.2	0
16.3	0
16.4	0
16.5	0
16.6	0
16.7	0
16.8	0
16.9	0
17	0
17.1	0
17.2	0
17.3	0
17.4	0
17.5	0
17.6	0
17.7	0
17.8	0
17.9	0
18	0
18.1	0
18.2	0
18.3	0
18.4	0
18.5	0
18.6	0
18.7	0
18.8	0
18.9	0
19	0
19.1	0
19.2	0
19.3	0
19.4	0
19.5	0
19.6	0
19.7	0
19.8	0
19.9	0
20	0
20.1	0
20.2	0
20.3	0
20.4	0
20.5	0
20.6	0
20.7	0
20.8	0
20.9	0
21	0
21.1	0
21.2	0
21.3	0
21.4	0
21.5	0
21.6	0
21.7	0
21.8	0
21.9	0
22	0
22.1	0
22.2	0
22.3	0
22.4	0
22.5	0
22.6	0
22.7	0
22.8	0
22.9	0
23	0
23.1	0
23.2	0
23.3	0
23.4	0
23.5	0
23.6	0
23.7	0
23.8	0
23.9	0
24	0
24.1	0
24.2	0
24.3	0
24.4	0
24.5	0
24.6	0
24.7	0
24.8	0
24.9	0
25	0
25.1	0
25.2	0
25.3	0
25.4	0
25.5	0
25.6	0
25.7	0
25.8	0
25.9	0
26	0
26.1	0
26.2	0
26.3	0
26.4	0
26.5	0
26.6	0
26.7	0
26.8	0
26.9	0
27	0
27.1	0
27.2	0
27.3	0
27.4	0
27.5	0
27.6	0
27.7	0
27.8	0
27.9	0
28	0
28.1	0
28.2	0
28.3	0
28.4	0
28.5	0
28.6	0
28.7	0
28.8	0
28.9	0
29	0
29.1	0
29.2	0
29.3	0
29.4	0
29.5	0
29.6	0
29.7	0
29.8	0
29.9	0
30	0
30.1	0
30.2	0
30.3	0
30.4	0
30.5	0
30.6	0
30.7	0
30.8	0
30.9	0
31	0
31.1	0
31.2	0
31.3	0
31.4	0
31.5	0
31.6	0
31.7	0
31.8	0
31.9	0
32	0
32.1	0
32.2	0
32.3	0
32.4	0
32.5	0
32.6	0
32.7	0
32.8	0
32.9	0
33	0
33.1	0
33.2	0
33.3	0
33.4	0
33.5	0
33.6	0
33.7	0
33.8	0
33.9	0
34	0
34.1	0
34.2	0
34.3	0
34.4	0
34.5	0
34.6	0
34.7	0
34.8	0
34.9	0
35	0
35.1	0
35.2	0
35.3	0
35.4	0
35.5	0
35.6	0
35.7	0
35.8	0
35.9	0
36	0
36.1	0
36.2	0
36.3	0
36.4	0
36.5	0
36.6	0
36.7	0
36.8	0
36.9	0
37	0
37.1	0
37.2	0
37.3	0
37.4	0
37.5	0
37.6	0
37.7	0
37.8	0
37.9	0
38	0
38.1	0
38.2	0
38.3	0
38.4	0
38.5	0
38.6	0
38.7	0
38.8	0
38.9	0
39	0
39.1	0
39.2	0
39.3	0
39.4	0
39.5	0
39.6	0
39.7	0
39.8	0
39.9	0
40	0
40.1	0
40.2	0
40.3	0
40.4	0
40.5	0
40.6	0
40.7	0
40.8	0
40.9	0
41	0
41.1	0
41.2	0
41.3	0
41.4	0
41.5	0
41.6	0
41.7	0
41.8	0
41.9	0
42	0
42.1	0
42.2	0
42.3	0
42.4	0
42.5	0
42.6	0
42.7	0
42.8	0
42.9	0
43	0
43.1	0
43.2	0
43.3	0
43.4	0
43.5	0
43.6	0
43.7	0
43.8	0
43.9	0
44	0
44.1	0
44.2	0
44.3	0
44.4	0
44.5	0
44.6	0
44.7	0
44.8	0
44.9	0
45	0
45.1	0
45.2	0
45.3	0
45.4	0
45.5	0
45.6	0
45.7	0
45.8	0
45.9	0
46	0
46.1	0
46.2	0
46.3	0
46.4	0
46.5	0
46.6	0
46.7	0
46.8	0
46.9	0
47	0
47.1	0
47.2	0
47.3	0
47.4	0
47.5	0
47.6	0
47.7	0
47.8	0
47.9	0
48	0
48.1	0
48.2	0
48.3	0
48.4	0
48.5	0
48.6	0
48.7	0
48.8	0
48.9	0
49	0
49.1	0
49.2	0
49.3	0
49.4	0
49.5	0
49.6	0
49.7	0
49.8	0
49.9	0
50	0
50.1	0
50.2	0
50.3	0
50.4	0
50.5	0
50.6	0
50.7	0
50.8	0
50.9	0
51	0
51.1	0
51.2	0
51.3	0
51.4	0
51.5	0
51.6	0
51.7	0
51.8	0
51.9	0
52	0
52.1	0
52.2	0
52.3	0
52.4	0
52.5	0
52.6	0
52.7	0
52.8	0
52.9	0
53	0
53.1	0
53.2	0
53.3	0
53.4	0
53.5	0
53.6	0
53.7	0
53.8	0
53.9	0
54	0
54.1	0
54.2	0
54.3	0
54.4	0
54.5	0
54.6	0
54.7	0
54.8	0
54.9	0
55	0
55.1	0
55.2	0
55.3	0
55.4	0
55.5	0
55.6	0
55.7	0
55.8	0
55.9	0
56	0
56.1	0
56.2	0
56.3	0
56.4	0
56.5	0
56.6	0
56.7	0
56.8	0
56.9	0
57	0
57.1	0
57.2	0
57.3	0
57.4	0
57.5	0
57.6	0
57.7	0
57.8	0
57.9	0
58	0
58.1	0
58.2	0
58.3	0
58.4	0
58.5	0
58.6	0
58.7	0
58.8	0
58.9	0
59	0
59.1	0
59.2	0
59.3	0
59.4	0
59.5	0
59.6	0
59.7	0
59.8	0
59.9	0
60	0
60.1	0
60.2	0
60.3	0
60.4	0
60.5	0
60.6	0
60.7	0
60.8	0
60.9	0
61	0
61.1	0
61.2	0
61.3	0
61.4	0
61.5	0
61.6	0
61.7	0
61.8	0
61.9	0
62	0
62.1	0
62.2	0
62.3	0
62.4	0
62.5	0
62.6	0
62.7	0
62.8	0
62.9	0
63	0
63.1	0
63.2	0
63.3	0
63.4	0
63.5	0
63.6	0
63.7	0
63.8	0
63.9	0
64	0
64.1	0
64.2	0
64.3	0
64.4	0
64.5	0
64.6	0
64.7	0
64.8	0
64.9	0
65	0
65.1	0
65.2	0
65.3	0
65.4	0
65.5	0
65.6	0
65.7	0
65.8	0
65.9	0
66	0
66.1	0
66.2	0
66.3	0
66.4	0
66.5	0
66.6	0
66.7	0
66.8	0
66.9	0
67	0
67.1	0
67.2	0
67.3	0
67.4	0
67.5	0
67.6	0
67.7	0
67.8	0
67.9	0
68	0
68.1	0
68.2	0
68.3	0
68.4	0
68.5	0
68.6	0
68.7	0
68.8	0
68.9	0
69	0
69.1	0
69.2	0
69.3	0
69.4	0
69.5	0
69.6	0
69.7	0
69.8	0
69.9	0
70	0
70.1	0
70.2	0
70.3	0
70.4	0
70.5	0
70.6	0
70.7	0
70.8	0
70.9	0
71	0
71.1	0
71.2	0
71.3	0
71.4	0
71.5	0
71.6	0
71.7	0
71.8	0
71.9	0
72	0
72.1	0
72.2	0
72.3	0
72.4	0
72.5	0
72.6	0
72.7	0
72.8	0
72.9	0
73	0
73.1	0
73.2	0
73.3	0
73.4	0
73.5	0
73.6	0
73.7	0
73.8	0
73.9	0
74	0
74.1	0
74.2	0
74.3	0
74.4	0
74.5	0
74.6	0
74.7	0
74.8	0
74.9	0
75	0
75.1	0
75.2	0
75.3	0
75.4	0
75.5	0
75.6	0
75.7	0
75.8	0
75.9	0
76	0
76.1	0
76.2	0
76.3	0
76.4	0
76.5	0
76.6	0
76.7	0
76.8	0
76.9	0
77	0
77.1	0
77.2	0
77.3	0
77.4	0
77.5	0
77.6	0
77.7	0
77.8	0
77.9	0
78	0
78.1	0
78.2	0
78.3	0
78.4	0
78.5	0
78.6	0
78.7	0
78.8	0
78.9	0
79	0
79.1	0
79.2	0
79.3	0
79.4	0
79.5	0
79.6	0
79.7	0
79.8	0
79.9	0
80	0
80.1	0
80.2	0
80.3	0
80.4	0
80.5	0
80.6	0
80.7	0
80.8	0
80.9	0
81	0
81.1	0
81.2	0
81.3	0
81.4	0
81.5	0
81.6	0
81.7	0
81.8	0
81.9	0
82	0
82.1	0
82.2	0
82.3	0
82.4	0
82.5	0
82.6	0
82.7	0
82.8	0
82.9	0
83	0
83.1	0
83.2	0
83.3	0
83.4	0
83.5	0
83.6	0
83.7	0
83.8	0
83.9	0
84	0
84.1	0
84.2	0
84.3	0
84.4	0
84.5	0
84.6	0
84.7	0
84.8	0
84.9	0
85	0
85.1	0
85.2	0
85.3	0
85.4	0
85.5	0
85.6	0
85.7	0
85.8	0
85.9	0
86	0
86.1	0
86.2	0
86.3	0
86.4	0
86.5	0
86.6	0
86.7	0
86.8	0
86.9	0
87	0
87.1	0
87.2	0
87.3	0
87.4	0
87.5	0
87.6	0
87.7	0
87.8	0
87.9	0
88	0
88.1	0
88.2	0
88.3	0
88.4	0
88.5	0
88.6	0
88.7	0
88.8	0
88.9	0
89	0
89.1	0
89.2	0
89.3	0
89.4	0
89.5	0
89.6	0
89.7	0
89.8	0
89.9	0
90	0
90.1	0
90.2	0
90.3	0
90.4	0
90.5	0
90.6	0
90.7	0
90.8	0
90.9	0
91	0
91.1	0
91.2	0
91.3	0
91.4	0
91.5	0
91.6	0
91.7	0
91.8	0
91.9	0
92	0
92.1	0
92.2	0
92.3	0
92.4	0
92.5	0
92.6	0
92.7	0
92.8	0
92.9	0
93	0
93.1	0
93.2	0
93.3	0
93.4	0
93.5	0
93.6	0
93.7	0
93.8	0
93.9	0
94	0
94.1	0
94.2	0
94.3	0
94.4	0
94.5	0
94.6	0
94.7	0
94.8	0
94.9	0
95	0
95.1	0
95.2	0
95.3	0
95.4	0
95.5	0
95.6	0
95.7	0
95.8	0
95.9	0
96	0
96.1	0
96.2	0
96.3	0
96.4	0
96.5	0
96.6	0
96.7	0
96.8	0
96.9	0
97	0
97.1	0
97.2	0
97.3	0
97.4	0
97.5	0
97.6	0
97.7	0
97.8	0
97.9	0
98	0
98.1	0
98.2	0
98.3	0
98.4	0
98.5	0
98.6	0
98.7	0
98.8	0
98.9	0
99	0
99.1	0
99.2	0
99.3	0
99.4	0
99.5	0
99.6	0
99.7	0
99.8	0
99.9	0
100	0
100.1	0.7
100.2	0.875
100.3	0.9575
100.4	0.96
100.5	0.9725
100.6	0.975
100.7	0.985
100.8	0.98
100.9	0.9925
101	0.9825
101.1	0.9875
101.2	0.98
101.3	0.975
101.4	0.9775
101.5	0.975
101.6	0.975
101.7	0.9725
101.8	0.9825
101.9	0.98
102	0.9775
102.1	0.9675
102.2	0.9725
102.3	0.9825
102.4	0.98
102.5	0.9825
102.6	0.98
102.7	0.975
102.8	0.9875
102.9	0.98
103	0.9675
103.1	0.9625
103.2	0.975
103.3	0.9675
103.4	0.9675
103.5	0.98
103.6	0.9675
103.7	0.96
103.8	0.97
103.9	0.9675
104	0.9775
104.1	0.97
104.2	0.9775
104.3	0.98
104.4	0.9725
104.5	0.9725
104.6	0.98
104.7	0.9775
104.8	0.9825
104.9	0.9875
105	0.98
105.1	0.985
105.2	0.98
105.3	0.99
105.4	0.98
105.5	0.975
105.6	0.985
105.7	0.9825
105.8	0.9675
105.9	0.9825
106	0.9825
106.1	0.9725
106.2	0.9775
106.3	0.9725
106.4	0.9775
106.5	0.99
106.6	0.985
106.7	0.9825
106.8	0.98
106.9	0.9825
107	0.9825
107.1	0.9825
107.2	0.985
107.3	0.98
107.4	0.9625
107.5	0.975
107.6	0.9925
107.7	0.9925
107.8	0.985
107.9	0.99
108	0.985
108.1	0.9775
108.2	0.9775
108.3	0.985
108.4	0.99
108.5	0.9825
108.6	0.985
108.7	0.98
108.8	0.97
108.9	0.9775
109	0.985
109.1	0.98
109.2	0.9825
109.3	0.9875
109.4	0.99
109.5	0.9875
109.6	0.9875
109.7	0.9825
109.8	0.99
109.9	0.99
110	0.9875
110.1	0.9875
110.2	0.9875
110.3	0.9875
110.4	0.99
110.5	0.9925
110.6	0.9825
110.7	0.9625
110.8	0.975
110.9	0.98
111	0.98
111.1	0.9775
111.2	0.975
111.3	0.98
111.4	0.9775
111.5	0.98
111.6	0.985
111.7	0.985
111.8	0.98
111.9	0.975
112	0.98
112.1	0.9825
112.2	0.9825
112.3	0.9775
112.4	0.98
112.5	0.985
112.6	0.9825
112.7	0.9825
112.8	0.99
112.9	0.99
113	0.9775
113.1	0.99
113.2	0.985
113.3	0.995
113.4	0.9925
113.5	0.98
113.6	0.985
113.7	0.9825
113.8	0.9875
113.9	0.9925
114	0.985
114.1	0.985
114.2	0.98
114.3	0.9825
114.4	0.99
114.5	0.99
114.6	0.98
114.7	0.9775
114.8	0.9925
114.9	0.995
115	0.99
115.1	0.9925
115.2	0.9925
115.3	0.99
115.4	0.99
115.5	0.9725
115.6	0.9875
115.7	0.9875
115.8	0.99
115.9	0.995
116	0.9875
116.1	0.98
116.2	0.985
116.3	0.99
116.4	0.99
116.5	0.9925
116.6	0.9875
116.7	0.985
116.8	0.985
116.9	0.98
117	0.9875
117.1	0.9925
117.2	0.9925
117.3	0.9925
117.4	0.9825
117.5	0.99
117.6	0.995
117.7	0.985
117.8	0.985
117.9	0.985
118	0.9925
118.1	0.99
118.2	0.9925
118.3	0.9925
118.4	0.985
118.5	0.985
118.6	0.9875
118.7	0.9825
118.8	0.985
118.9	0.985
119	0.985
119.1	0.9825
119.2	0.985
119.3	0.98
119.4	0.9875
119.5	0.9875
119.6	0.9825
119.7	0.985
119.8	0.9875
119.9	0.9875
120	0.9875
120.1	0.99
120.2	0.99
120.3	0.9825
120.4	0.9775
120.5	0.985
120.6	0.995
120.7	0.9825
120.8	0.98
120.9	0.98
121	0.9925
121.1	0.985
121.2	0.985
121.3	0.99
121.4	0.9775
121.5	0.99
121.6	0.9975
121.7	0.9875
121.8	0.9925
121.9	0.9875
122	0.995
122.1	0.9825
122.2	0.9825
122.3	0.9925
122.4	0.99
122.5	0.99
122.6	0.9875
122.7	0.99
122.8	0.975
122.9	0.99
123	0.99
123.1	0.99
123.2	0.9925
123.3	0.995
123.4	0.9925
123.5	0.9875
123.6	0.9875
123.7	0.9875
123.8	0.9925
123.9	0.9825
124	0.975
124.1	0.9925
124.2	0.985
124.3	0.98
124.4	0.985
124.5	0.995
124.6	0.9925
124.7	0.9975
124.8	0.99
124.9	0.99
125	0.9875
125.1	0.9875
125.2	0.9875
125.3	0.99
125.4	0.995
125.5	0.9975
125.6	0.995
125.7	0.9925
125.8	0.99
125.9	0.995
126	0.99
126.1	0.9825
126.2	0.985
126.3	0.9875
126.4	0.985
126.5	0.9825
126.6	0.985
126.7	0.985
126.8	0.9925
126.9	0.995
127	0.985
127.1	0.9875
127.2	0.995
127.3	0.9875
127.4	0.9825
127.5	0.9875
127.6	0.985
127.7	0.98
127.8	0.99
127.9	0.9925
128	0.995
128.1	0.99
128.2	0.9875
128.3	0.995
128.4	0.9825
128.5	0.985
128.6	0.9975
128.7	0.995
128.8	0.9925
128.9	0.9875
129	0.99
129.1	0.99
129.2	0.99
129.3	0.985
129.4	0.9825
129.5	0.9875
129.6	0.9925
129.7	0.9925
129.8	0.99
129.9	0.995
130	0.99
130.1	0.9925
130.2	0.9875
130.3	0.9925
130.4	0.9925
130.5	0.99
130.6	0.9925
130.7	0.9975
130.8	1
130.9	0.995
131	0.995
131.1	0.99
131.2	0.9825
131.3	0.985
131.4	0.9875
131.5	0.9875
131.6	0.99
131.7	0.9925
131.8	0.9925
131.9	0.9975
132	0.9975
132.1	0.9975
132.2	0.995
132.3	0.9925
132.4	0.995
132.5	0.9875
132.6	0.9875
132.7	0.995
132.8	0.99
132.9	0.9875
133	0.9875
133.1	0.985
133.2	0.99
133.3	0.99
133.4	0.9975
133.5	0.985
133.6	0.995
133.7	0.99
133.8	0.9925
133.9	1
134	0.995
134.1	1
134.2	0.9975
134.3	0.99
134.4	0.9925
134.5	0.9975
134.6	0.9925
134.7	0.9825
134.8	0.99
134.9	0.99
135	0.9925
135.1	0.995
135.2	0.99
135.3	0.995
135.4	0.9875
135.5	0.9825
135.6	0.99
135.7	0.9975
135.8	1
135.9	0.9975
136	0.9925
136.1	0.99
136.2	0.995
136.3	0.995
136.4	0.99
136.5	0.995
136.6	0.99
136.7	0.995
136.8	0.9975
136.9	0.9925
137	0.9875
137.1	0.9875
137.2	0.99
137.3	0.9875
137.4	0.995
137.5	0.9975
137.6	0.99
137.7	0.9925
137.8	0.995
137.9	0.9925
138	0.9925
138.1	0.99
138.2	0.99
138.3	0.995
138.4	0.995
138.5	1
138.6	1
138.7	0.9975
138.8	1
138.9	0.9975
139	0.995
139.1	0.9975
139.2	0.99
139.3	0.995
139.4	0.99
139.5	0.995
139.6	0.99
139.7	0.9875
139.8	0.985
139.9	0.99
140	0.995
140.1	0.9875
140.2	0.985
140.3	0.9875
140.4	0.99
140.5	0.9925
140.6	0.9925
140.7	0.9975
140.8	0.9875
140.9	0.9925
141	0.9925
141.1	0.9975
141.2	0.995
141.3	0.995
141.4	1
141.5	0.995
141.6	0.985
141.7	0.995
141.8	0.995
141.9	0.9925
142	0.9975
142.1	0.99
142.2	0.995
142.3	0.995
142.4	0.9975
142.5	0.995
142.6	0.9875
142.7	0.9975
142.8	0.9975
142.9	0.995
143	0.9925
143.1	0.995
143.2	0.9975
143.3	0.9975
143.4	0.9975
143.5	0.9975
143.6	0.9975
143.7	0.9975
143.8	0.995
143.9	0.985
144	0.9875
144.1	0.9925
144.2	0.995
144.3	0.99
144.4	0.9925
144.5	0.9875
144.6	0.9925
144.7	0.995
144.8	0.995
144.9	0.995
145	0.995
145.1	0.9925
145.2	0.99
145.3	0.9925
145.4	0.995
145.5	0.9875
145.6	0.985
145.7	0.995
145.8	0.9975
145.9	0.995
146	0.9925
146.1	0.99
146.2	0.99
146.3	0.9975
146.4	0.9925
146.5	0.995
146.6	0.9925
146.7	0.9975
146.8	0.995
146.9	0.9975
147	0.995
147.1	0.995
147.2	0.9875
147.3	0.9925
147.4	0.99
147.5	0.99
147.6	0.995
147.7	0.9925
147.8	1
147.9	1
148	0.995
148.1	0.9925
148.2	0.9925
148.3	0.9925
148.4	0.9925
148.5	0.99
148.6	0.995
148.7	0.9875
148.8	0.9925
148.9	0.9925
149	0.985
149.1	0.985
149.2	0.9925
149.3	0.9925
149.4	0.995
149.5	0.9925
149.6	0.9975
149.7	0.9925
149.8	0.9925
149.9	0.995
150	0.99
150.1	0.9825
150.2	0.9875
150.3	0.99
150.4	0.99
150.5	0.99
150.6	1
150.7	0.9925
150.8	0.9875
150.9	0.985
151	0.9875
151.1	0.995
151.2	0.99
151.3	0.9925
151.4	0.9875
151.5	0.9975
151.6	0.9925
151.7	0.99
151.8	0.9875
151.9	0.995
152	0.9975
152.1	0.995
152.2	0.9925
152.3	0.995
152.4	0.99
152.5	0.995
152.6	0.995
152.7	0.9925
152.8	0.9975
152.9	0.9975
153	0.995
153.1	0.995
153.2	0.995
153.3	0.9975
153.4	0.9925
153.5	0.995
153.6	0.995
153.7	0.9975
153.8	0.9975
153.9	0.9875
154	0.9925
154.1	0.985
154.2	0.99
154.3	0.99
154.4	0.9925
154.5	0.9925
154.6	0.9925
154.7	0.995
154.8	0.9975
154.9	0.99
155	0.9925
155.1	0.99
155.2	0.9875
155.3	0.9875
155.4	0.98
155.5	0.98
155.6	0.9925
155.7	0.995
155.8	0.9925
155.9	0.99
156	0.9875
156.1	0.9925
156.2	0.995
156.3	0.9975
156.4	0.995
156.5	0.995
156.6	0.995
156.7	0.995
156.8	0.995
156.9	0.9925
157	0.995
157.1	0.9975
157.2	0.9975
157.3	1
157.4	0.995
157.5	1
157.6	1
157.7	1
157.8	0.995
157.9	0.9925
158	0.995
158.1	0.9925
158.2	0.99
158.3	0.9925
158.4	0.995
158.5	0.9975
158.6	1
158.7	1
158.8	0.995
158.9	0.9975
159	0.9975
159.1	0.9975
159.2	0.995
159.3	1
159.4	0.9975
159.5	0.9925
159.6	0.9925
159.7	0.9975
159.8	1
159.9	0.995
160	0.995
160.1	0.9925
160.2	0.9975
160.3	0.9975
160.4	0.995
160.5	0.9925
160.6	0.9975
160.7	1
160.8	0.995
160.9	1
161	0.995
161.1	0.9975
161.2	0.995
161.3	1
161.4	1
161.5	0.9975
161.6	0.9925
161.7	0.9925
161.8	0.995
161.9	1
162	0.9975
162.1	0.995
162.2	0.9925
162.3	0.995
162.4	0.99
162.5	0.9975
162.6	0.9975
162.7	0.9975
162.8	0.995
162.9	0.995
163	0.995
163.1	0.99
163.2	0.99
163.3	0.99
163.4	0.99
163.5	0.995
163.6	0.9975
163.7	0.995
163.8	0.9925
163.9	0.995
164	0.9975
164.1	1
164.2	0.995
164.3	0.9975
164.4	0.99
164.5	0.9975
164.6	1
164.7	1
164.8	0.9975
164.9	0.995
165	0.9975
165.1	0.9975
165.2	0.995
165.3	0.9925
165.4	0.995
165.5	0.9975
165.6	0.9975
165.7	0.995
165.8	0.9975
165.9	0.995
166	0.99
166.1	0.99
166.2	0.99
166.3	0.9925
166.4	0.995
166.5	0.9925
166.6	0.9975
166.7	0.995
166.8	0.995
166.9	0.9975
167	0.995
167.1	0.9925
167.2	0.9975
167.3	0.9925
167.4	1
167.5	0.9975
167.6	0.9925
167.7	0.9925
167.8	0.995
167.9	0.9975
168	0.9975
168.1	0.9975
168.2	0.995
168.3	0.99
168.4	0.99
168.5	0.9925
168.6	0.9975
168.7	0.9975
168.8	1
168.9	1
169	0.995
169.1	0.995
169.2	0.995
169.3	0.9925
169.4	0.9925
169.5	0.9975
169.6	0.9975
169.7	0.9975
169.8	0.995
169.9	1
170	0.995
170.1	0.9975
170.2	0.9975
170.3	0.995
170.4	0.9975
170.5	0.995
170.6	1
170.7	0.995
170.8	0.995
170.9	0.995
171	1
171.1	0.995
171.2	0.9975
171.3	0.9975
171.4	0.9875
171.5	0.99
171.6	0.99
171.7	0.9925
171.8	0.995
171.9	0.9925
172	0.995
172.1	0.99
172.2	0.9975
172.3	0.995
172.4	1
172.5	0.995
172.6	0.995
172.7	0.995
172.8	0.9925
172.9	0.9925
173	0.995
173.1	0.9975
173.2	0.9975
173.3	0.9925
173.4	0.9975
173.5	0.995
173.6	0.99
173.7	1
173.8	1
173.9	0.9975
174	0.9875
174.1	0.995
174.2	0.995
174.3	1
174.4	0.99
174.5	0.9975
174.6	0.995
174.7	0.9975
174.8	0.9975
174.9	0.9975
175	1
175.1	1
175.2	1
175.3	0.99
175.4	0.995
175.5	0.9975
175.6	0.9975
175.7	0.9975
175.8	0.9975
175.9	0.9975
176	0.9975
176.1	0.995
176.2	0.995
176.3	0.9975
176.4	0.995
176.5	0.9925
176.6	0.9975
176.7	0.99
176.8	0.99
176.9	0.99
177	0.9825
177.1	0.9925
177.2	1
177.3	1
177.4	0.9975
177.5	0.995
177.6	0.9975
177.7	1
177.8	1
177.9	0.995
178	1
178.1	1
178.2	0.99
178.3	0.995
178.4	0.9925
178.5	0.995
178.6	0.99
178.7	0.995
178.8	0.9975
178.9	0.99
179	0.9925
179.1	0.9975
179.2	0.995
179.3	1
179.4	1
179.5	0.9975
179.6	0.995
179.7	0.9975
179.8	0.9975
179.9	1
180	0.9975
180.1	0.9925
180.2	0.9975
180.3	0.995
180.4	0.99
180.5	0.995
180.6	0.9975
180.7	1
180.8	0.9925
180.9	0.9975
181	0.9975
181.1	0.9975
181.2	0.995
181.3	0.995
181.4	0.9975
181.5	0.9925
181.6	0.9975
181.7	0.9975
181.8	0.9975
181.9	0.995
182	0.9975
182.1	1
182.2	0.9975
182.3	0.9975
182.4	0.9925
182.5	0.9975
182.6	0.9975
182.7	0.9975
182.8	0.9975
182.9	0.995
183	0.99
183.1	0.995
183.2	0.995
183.3	0.995
183.4	1
183.5	0.9975
183.6	0.9975
183.7	0.9975
183.8	0.9975
183.9	0.9975
184	0.995
184.1	0.9975
184.2	0.9975
184.3	0.9975
184.4	0.995
184.5	0.9975
184.6	0.9975
184.7	0.9975
184.8	0.9925
184.9	0.9975
185	0.99
185.1	0.9975
185.2	1
185.3	0.9975
185.4	1
185.5	1
185.6	0.9975
185.7	0.9975
185.8	1
185.9	1
186	0.9975
186.1	1
186.2	1
186.3	0.9975
186.4	0.9975
186.5	0.9925
186.6	1
186.7	1
186.8	0.9975
186.9	0.9975
187	0.9925
187.1	0.9925
187.2	0.995
187.3	0.9975
187.4	0.9925
187.5	0.9975
187.6	0.9975
187.7	0.9975
187.8	0.9975
187.9	0.995
188	0.9975
188.1	0.9975
188.2	0.9925
188.3	0.995
188.4	0.9925
188.5	0.9975
188.6	0.9975
188.7	0.9925
188.8	0.9925
188.9	0.9925
189	0.995
189.1	0.9925
189.2	0.9925
189.3	0.9925
189.4	0.9975
189.5	0.995
189.6	0.9975
189.7	0.9975
189.8	0.9975
189.9	0.995
190	0.99
190.1	0.995
190.2	0.9925
190.3	0.9925
190.4	0.9975
190.5	0.995
190.6	0.995
190.7	0.995
190.8	0.9975
190.9	0.9975
191	0.9975
191.1	0.99
191.2	1
191.3	1
191.4	0.9925
191.5	0.9975
191.6	1
191.7	0.9975
191.8	0.995
191.9	0.995
192	0.9925
192.1	0.9975
192.2	0.9925
192.3	0.9925
192.4	0.995
192.5	0.99
192.6	0.9925
192.7	0.99
192.8	1
192.9	0.9925
193	0.9975
193.1	0.9925
193.2	0.9925
193.3	0.9975
193.4	1
193.5	1
193.6	0.9925
193.7	0.9975
193.8	0.9975
193.9	0.9925
194	0.995
194.1	0.9925
194.2	0.9975
194.3	0.995
194.4	1
194.5	0.9975
194.6	1
194.7	1
194.8	1
194.9	0.9975
195	0.99
195.1	0.9875
195.2	0.9875
195.3	0.99
195.4	0.995
195.5	0.995
195.6	1
195.7	0.995
195.8	0.99
195.9	0.9975
196	0.9925
196.1	0.9975
196.2	1
196.3	0.9925
196.4	0.995
196.5	0.9975
196.6	1
196.7	0.995
196.8	1
196.9	1
197	0.995
197.1	0.995
197.2	0.995
197.3	1
197.4	1
197.5	0.9975
197.6	0.9975
197.7	0.9925
197.8	1
197.9	1
198	0.9975
198.1	0.9925
198.2	0.995
198.3	0.9975
198.4	0.995
198.5	0.9925
198.6	0.9925
198.7	0.995
198.8	0.9975
198.9	0.9925
199	0.99
199.1	0.9875
199.2	0.9925
199.3	0.995
199.4	0.995
199.5	0.9975
199.6	0.9975
199.7	0.995
199.8	0.9975
199.9	1
200	0.9975
[truncated: 14,000 more rows]
