# Supplementary material for: Bayesian inference of kinetic schemes for ion channels by Kalman filtering
Source: eLife journal article supplement (doi:10.7554/elife.62714), 2022-05-04
Supplement: fig4-data3 [file 1_Sim_N_200_Strom_MW_32M.xlsx]

## Sheet: 32 M
0.1	0
0.2	0
0.3	0
0.4	0
0.5	0
0.6	0
0.7	0
0.8	0
0.9	0
1	0
1.1	0
1.2	0
1.3	0
1.4	0
1.5	0
1.6	0
1.7	0
1.8	0
1.9	0
2	0
2.1	0
2.2	0
2.3	0
2.4	0
2.5	0
2.6	0
2.7	0
2.8	0
2.9	0
3	0
3.1	0
3.2	0
3.3	0
3.4	0
3.5	0
3.6	0
3.7	0
3.8	0
3.9	0
4	0
4.1	0
4.2	0
4.3	0
4.4	0
4.5	0
4.6	0
4.7	0
4.8	0
4.9	0
5	0
5.1	0
5.2	0
5.3	0
5.4	0
5.5	0
5.6	0
5.7	0
5.8	0
5.9	0
6	0
6.1	0
6.2	0
6.3	0
6.4	0
6.5	0
6.6	0
6.7	0
6.8	0
6.9	0
7	0
7.1	0
7.2	0
7.3	0
7.4	0
7.5	0
7.6	0
7.7	0
7.8	0
7.9	0
8	0
8.1	0
8.2	0
8.3	0
8.4	0
8.5	0
8.6	0
8.7	0
8.8	0
8.9	0
9	0
9.1	0
9.2	0
9.3	0
9.4	0
9.5	0
9.6	0
9.7	0
9.8	0
9.9	0
10	0
10.1	0
10.2	0
10.3	0
10.4	0
10.5	0
10.6	0
10.7	0
10.8	0
10.9	0
11	0
11.1	0
11.2	0
11.3	0
11.4	0
11.5	0
11.6	0
11.7	0
11.8	0
11.9	0
12	0
12.1	0
12.2	0
12.3	0
12.4	0
12.5	0
12.6	0
12.7	0
12.8	0
12.9	0
13	0
13.1	0
13.2	0
13.3	0
13.4	0
13.5	0
13.6	0
13.7	0
13.8	0
13.9	0
14	0
14.1	0
14.2	0
14.3	0
14.4	0
14.5	0
14.6	0
14.7	0
14.8	0
14.9	0
15	0
15.1	0
15.2	0
15.3	0
15.4	0
15.5	0
15.6	0
15.7	0
15.8	0
15.9	0
16	0
16.1	0
16.2	0
16.3	0
16.4	0
16.5	0
16.6	0
16.7	0
16.8	0
16.9	0
17	0
17.1	0
17.2	0
17.3	0
17.4	0
17.5	0
17.6	0
17.7	0
17.8	0
17.9	0
18	0
18.1	0
18.2	0
18.3	0
18.4	0
18.5	0
18.6	0
18.7	0
18.8	0
18.9	0
19	0
19.1	0
19.2	0
19.3	0
19.4	0
19.5	0
19.6	0
19.7	0
19.8	0
19.9	0
20	0
20.1	0
20.2	0
20.3	0
20.4	0
20.5	0
20.6	0
20.7	0
20.8	0
20.9	0
21	0
21.1	0
21.2	0
21.3	0
21.4	0
21.5	0
21.6	0
21.7	0
21.8	0
21.9	0
22	0
22.1	0
22.2	0
22.3	0
22.4	0
22.5	0
22.6	0
22.7	0
22.8	0
22.9	0
23	0
23.1	0
23.2	0
23.3	0
23.4	0
23.5	0
23.6	0
23.7	0
23.8	0
23.9	0
24	0
24.1	0
24.2	0
24.3	0
24.4	0
24.5	0
24.6	0
24.7	0
24.8	0
24.9	0
25	0
25.1	0
25.2	0
25.3	0
25.4	0
25.5	0
25.6	0
25.7	0
25.8	0
25.9	0
26	0
26.1	0
26.2	0
26.3	0
26.4	0
26.5	0
26.6	0
26.7	0
26.8	0
26.9	0
27	0
27.1	0
27.2	0
27.3	0
27.4	0
27.5	0
27.6	0
27.7	0
27.8	0
27.9	0
28	0
28.1	0
28.2	0
28.3	0
28.4	0
28.5	0
28.6	0
28.7	0
28.8	0
28.9	0
29	0
29.1	0
29.2	0
29.3	0
29.4	0
29.5	0
29.6	0
29.7	0
29.8	0
29.9	0
30	0
30.1	0
30.2	0
30.3	0
30.4	0
30.5	0
30.6	0
30.7	0
30.8	0
30.9	0
31	0
31.1	0
31.2	0
31.3	0
31.4	0
31.5	0
31.6	0
31.7	0
31.8	0
31.9	0
32	0
32.1	0
32.2	0
32.3	0
32.4	0
32.5	0
32.6	0
32.7	0
32.8	0
32.9	0
33	0
33.1	0
33.2	0
33.3	0
33.4	0
33.5	0
33.6	0
33.7	0
33.8	0
33.9	0
34	0
34.1	0
34.2	0
34.3	0
34.4	0
34.5	0
34.6	0
34.7	0
34.8	0
34.9	0
35	0
35.1	0
35.2	0
35.3	0
35.4	0
35.5	0
35.6	0
35.7	0
35.8	0
35.9	0
36	0
36.1	0
36.2	0
36.3	0
36.4	0
36.5	0
36.6	0
36.7	0
36.8	0
36.9	0
37	0
37.1	0
37.2	0
37.3	0
37.4	0
37.5	0
37.6	0
37.7	0
37.8	0
37.9	0
38	0
38.1	0
38.2	0
38.3	0
38.4	0
38.5	0
38.6	0
38.7	0
38.8	0
38.9	0
39	0
39.1	0
39.2	0
39.3	0
39.4	0
39.5	0
39.6	0
39.7	0
39.8	0
39.9	0
40	0
40.1	0
40.2	0
40.3	0
40.4	0
40.5	0
40.6	0
40.7	0
40.8	0
40.9	0
41	0
41.1	0
41.2	0
41.3	0
41.4	0
41.5	0
41.6	0
41.7	0
41.8	0
41.9	0
42	0
42.1	0
42.2	0
42.3	0
42.4	0
42.5	0
42.6	0
42.7	0
42.8	0
42.9	0
43	0
43.1	0
43.2	0
43.3	0
43.4	0
43.5	0
43.6	0
43.7	0
43.8	0
43.9	0
44	0
44.1	0
44.2	0
44.3	0
44.4	0
44.5	0
44.6	0
44.7	0
44.8	0
44.9	0
45	0
45.1	0
45.2	0
45.3	0
45.4	0
45.5	0
45.6	0
45.7	0
45.8	0
45.9	0
46	0
46.1	0
46.2	0
46.3	0
46.4	0
46.5	0
46.6	0
46.7	0
46.8	0
46.9	0
47	0
47.1	0
47.2	0
47.3	0
47.4	0
47.5	0
47.6	0
47.7	0
47.8	0
47.9	0
48	0
48.1	0
48.2	0
48.3	0
48.4	0
48.5	0
48.6	0
48.7	0
48.8	0
48.9	0
49	0
49.1	0
49.2	0
49.3	0
49.4	0
49.5	0
49.6	0
49.7	0
49.8	0
49.9	0
50	0
50.1	0
50.2	0
50.3	0
50.4	0
50.5	0
50.6	0
50.7	0
50.8	0
50.9	0
51	0
51.1	0
51.2	0
51.3	0
51.4	0
51.5	0
51.6	0
51.7	0
51.8	0
51.9	0
52	0
52.1	0
52.2	0
52.3	0
52.4	0
52.5	0
52.6	0
52.7	0
52.8	0
52.9	0
53	0
53.1	0
53.2	0
53.3	0
53.4	0
53.5	0
53.6	0
53.7	0
53.8	0
53.9	0
54	0
54.1	0
54.2	0
54.3	0
54.4	0
54.5	0
54.6	0
54.7	0
54.8	0
54.9	0
55	0
55.1	0
55.2	0
55.3	0
55.4	0
55.5	0
55.6	0
55.7	0
55.8	0
55.9	0
56	0
56.1	0
56.2	0
56.3	0
56.4	0
56.5	0
56.6	0
56.7	0
56.8	0
56.9	0
57	0
57.1	0
57.2	0
57.3	0
57.4	0
57.5	0
57.6	0
57.7	0
57.8	0
57.9	0
58	0
58.1	0
58.2	0
58.3	0
58.4	0
58.5	0
58.6	0
58.7	0
58.8	0
58.9	0
59	0
59.1	0
59.2	0
59.3	0
59.4	0
59.5	0
59.6	0
59.7	0
59.8	0
59.9	0
60	0
60.1	0
60.2	0
60.3	0
60.4	0
60.5	0
60.6	0
60.7	0
60.8	0
60.9	0
61	0
61.1	0
61.2	0
61.3	0
61.4	0
61.5	0
61.6	0
61.7	0
61.8	0
61.9	0
62	0
62.1	0
62.2	0
62.3	0
62.4	0
62.5	0
62.6	0
62.7	0
62.8	0
62.9	0
63	0
63.1	0
63.2	0
63.3	0
63.4	0
63.5	0
63.6	0
63.7	0
63.8	0
63.9	0
64	0
64.1	0
64.2	0
64.3	0
64.4	0
64.5	0
64.6	0
64.7	0
64.8	0
64.9	0
65	0
65.1	0
65.2	0
65.3	0
65.4	0
65.5	0
65.6	0
65.7	0
65.8	0
65.9	0
66	0
66.1	0
66.2	0
66.3	0
66.4	0
66.5	0
66.6	0
66.7	0
66.8	0
66.9	0
67	0
67.1	0
67.2	0
67.3	0
67.4	0
67.5	0
67.6	0
67.7	0
67.8	0
67.9	0
68	0
68.1	0
68.2	0
68.3	0
68.4	0
68.5	0
68.6	0
68.7	0
68.8	0
68.9	0
69	0
69.1	0
69.2	0
69.3	0
69.4	0
69.5	0
69.6	0
69.7	0
69.8	0
69.9	0
70	0
70.1	0
70.2	0
70.3	0
70.4	0
70.5	0
70.6	0
70.7	0
70.8	0
70.9	0
71	0
71.1	0
71.2	0
71.3	0
71.4	0
71.5	0
71.6	0
71.7	0
71.8	0
71.9	0
72	0
72.1	0
72.2	0
72.3	0
72.4	0
72.5	0
72.6	0
72.7	0
72.8	0
72.9	0
73	0
73.1	0
73.2	0
73.3	0
73.4	0
73.5	0
73.6	0
73.7	0
73.8	0
73.9	0
74	0
74.1	0
74.2	0
74.3	0
74.4	0
74.5	0
74.6	0
74.7	0
74.8	0
74.9	0
75	0
75.1	0
75.2	0
75.3	0
75.4	0
75.5	0
75.6	0
75.7	0
75.8	0
75.9	0
76	0
76.1	0
76.2	0
76.3	0
76.4	0
76.5	0
76.6	0
76.7	0
76.8	0
76.9	0
77	0
77.1	0
77.2	0
77.3	0
77.4	0
77.5	0
77.6	0
77.7	0
77.8	0
77.9	0
78	0
78.1	0
78.2	0
78.3	0
78.4	0
78.5	0
78.6	0
78.7	0
78.8	0
78.9	0
79	0
79.1	0
79.2	0
79.3	0
79.4	0
79.5	0
79.6	0
79.7	0
79.8	0
79.9	0
80	0
80.1	0
80.2	0
80.3	0
80.4	0
80.5	0
80.6	0
80.7	0
80.8	0
80.9	0
81	0
81.1	0
81.2	0
81.3	0
81.4	0
81.5	0
81.6	0
81.7	0
81.8	0
81.9	0
82	0
82.1	0
82.2	0
82.3	0
82.4	0
82.5	0
82.6	0
82.7	0
82.8	0
82.9	0
83	0
83.1	0
83.2	0
83.3	0
83.4	0
83.5	0
83.6	0
83.7	0
83.8	0
83.9	0
84	0
84.1	0
84.2	0
84.3	0
84.4	0
84.5	0
84.6	0
84.7	0
84.8	0
84.9	0
85	0
85.1	0
85.2	0
85.3	0
85.4	0
85.5	0
85.6	0
85.7	0
85.8	0
85.9	0
86	0
86.1	0
86.2	0
86.3	0
86.4	0
86.5	0
86.6	0
86.7	0
86.8	0
86.9	0
87	0
87.1	0
87.2	0
87.3	0
87.4	0
87.5	0
87.6	0
87.7	0
87.8	0
87.9	0
88	0
88.1	0
88.2	0
88.3	0
88.4	0
88.5	0
88.6	0
88.7	0
88.8	0
88.9	0
89	0
89.1	0
89.2	0
89.3	0
89.4	0
89.5	0
89.6	0
89.7	0
89.8	0
89.9	0
90	0
90.1	0
90.2	0
90.3	0
90.4	0
90.5	0
90.6	0
90.7	0
90.8	0
90.9	0
91	0
91.1	0
91.2	0
91.3	0
91.4	0
91.5	0
91.6	0
91.7	0
91.8	0
91.9	0
92	0
92.1	0
92.2	0
92.3	0
92.4	0
92.5	0
92.6	0
92.7	0
92.8	0
92.9	0
93	0
93.1	0
93.2	0
93.3	0
93.4	0
93.5	0
93.6	0
93.7	0
93.8	0
93.9	0
94	0
94.1	0
94.2	0
94.3	0
94.4	0
94.5	0
94.6	0
94.7	0
94.8	0
94.9	0
95	0
95.1	0
95.2	0
95.3	0
95.4	0
95.5	0
95.6	0
95.7	0
95.8	0
95.9	0
96	0
96.1	0
96.2	0
96.3	0
96.4	0
96.5	0
96.6	0
96.7	0
96.8	0
96.9	0
97	0
97.1	0
97.2	0
97.3	0
97.4	0
97.5	0
97.6	0
97.7	0
97.8	0
97.9	0
98	0
98.1	0
98.2	0
98.3	0
98.4	0
98.5	0
98.6	0
98.7	0
98.8	0
98.9	0
99	0
99.1	0
99.2	0
99.3	0
99.4	0
99.5	0
99.6	0
99.7	0
99.8	0
99.9	0
100	0
100.1	0
100.2	0.005
100.3	0.005
100.4	0.005
100.5	0.005
100.6	0.02
100.7	0.025
100.8	0.025
100.9	0.025
101	0.025
101.1	0.025
101.2	0.025
101.3	0.025
101.4	0.03
101.5	0.03
101.6	0.035
101.7	0.045
101.8	0.045
101.9	0.045
102	0.05
102.1	0.065
102.2	0.065
102.3	0.07
102.4	0.07
102.5	0.075
102.6	0.085
102.7	0.09
102.8	0.095
102.9	0.1
103	0.1
103.1	0.105
103.2	0.105
103.3	0.105
103.4	0.11
103.5	0.105
103.6	0.105
103.7	0.11
103.8	0.115
103.9	0.125
104	0.125
104.1	0.125
104.2	0.125
104.3	0.13
104.4	0.135
104.5	0.15
104.6	0.155
104.7	0.155
104.8	0.15
104.9	0.15
105	0.155
105.1	0.155
105.2	0.16
105.3	0.17
105.4	0.17
105.5	0.18
105.6	0.185
105.7	0.19
105.8	0.2
105.9	0.22
106	0.22
106.1	0.23
106.2	0.23
106.3	0.23
106.4	0.23
106.5	0.245
106.6	0.245
106.7	0.245
106.8	0.25
106.9	0.255
107	0.255
107.1	0.255
107.2	0.255
107.3	0.255
107.4	0.26
107.5	0.26
107.6	0.26
107.7	0.27
107.8	0.275
107.9	0.275
108	0.275
108.1	0.285
108.2	0.285
108.3	0.29
108.4	0.295
108.5	0.305
108.6	0.305
108.7	0.315
108.8	0.315
108.9	0.31
109	0.305
109.1	0.31
109.2	0.31
109.3	0.315
109.4	0.315
109.5	0.32
109.6	0.325
109.7	0.325
109.8	0.33
109.9	0.335
110	0.335
110.1	0.34
110.2	0.345
110.3	0.35
110.4	0.35
110.5	0.355
110.6	0.355
110.7	0.355
110.8	0.36
110.9	0.36
111	0.36
111.1	0.365
111.2	0.365
111.3	0.365
111.4	0.37
111.5	0.375
111.6	0.375
111.7	0.375
111.8	0.375
111.9	0.385
112	0.385
112.1	0.39
112.2	0.395
112.3	0.395
112.4	0.4
112.5	0.41
112.6	0.41
112.7	0.41
112.8	0.41
112.9	0.415
113	0.415
113.1	0.42
113.2	0.42
113.3	0.42
113.4	0.425
113.5	0.435
113.6	0.44
113.7	0.44
113.8	0.44
113.9	0.44
114	0.44
114.1	0.445
114.2	0.445
114.3	0.455
114.4	0.46
114.5	0.46
114.6	0.455
114.7	0.46
114.8	0.46
114.9	0.46
115	0.465
115.1	0.465
115.2	0.465
115.3	0.47
115.4	0.47
115.5	0.47
115.6	0.47
115.7	0.475
115.8	0.485
115.9	0.485
116	0.485
116.1	0.485
116.2	0.49
116.3	0.49
116.4	0.49
116.5	0.49
116.6	0.49
116.7	0.49
116.8	0.49
116.9	0.49
117	0.49
117.1	0.49
117.2	0.495
117.3	0.495
117.4	0.495
117.5	0.5
117.6	0.5
117.7	0.505
117.8	0.51
117.9	0.51
118	0.505
118.1	0.505
118.2	0.505
118.3	0.51
118.4	0.51
118.5	0.51
118.6	0.51
118.7	0.51
118.8	0.515
118.9	0.515
119	0.515
119.1	0.515
119.2	0.51
119.3	0.51
119.4	0.515
119.5	0.515
119.6	0.515
119.7	0.515
119.8	0.515
119.9	0.515
120	0.515
120.1	0.51
120.2	0.51
120.3	0.51
120.4	0.51
120.5	0.51
120.6	0.505
120.7	0.515
120.8	0.515
120.9	0.515
121	0.52
121.1	0.52
121.2	0.525
121.3	0.52
121.4	0.525
121.5	0.525
121.6	0.53
121.7	0.535
121.8	0.535
121.9	0.54
122	0.54
122.1	0.54
122.2	0.54
122.3	0.55
122.4	0.545
122.5	0.55
122.6	0.555
122.7	0.555
122.8	0.56
122.9	0.56
123	0.555
123.1	0.555
123.2	0.56
123.3	0.56
123.4	0.57
123.5	0.565
123.6	0.565
123.7	0.565
123.8	0.565
123.9	0.57
124	0.565
124.1	0.565
124.2	0.575
124.3	0.58
124.4	0.58
124.5	0.575
124.6	0.58
124.7	0.58
124.8	0.58
124.9	0.58
125	0.58
125.1	0.58
125.2	0.58
125.3	0.585
125.4	0.585
125.5	0.585
125.6	0.585
125.7	0.59
125.8	0.595
125.9	0.59
126	0.59
126.1	0.59
126.2	0.59
126.3	0.59
126.4	0.59
126.5	0.59
126.6	0.59
126.7	0.595
126.8	0.6
126.9	0.605
127	0.605
127.1	0.605
127.2	0.615
127.3	0.62
127.4	0.62
127.5	0.63
127.6	0.63
127.7	0.64
127.8	0.64
127.9	0.64
128	0.64
128.1	0.635
128.2	0.635
128.3	0.635
128.4	0.635
128.5	0.64
128.6	0.645
128.7	0.645
128.8	0.645
128.9	0.645
129	0.645
129.1	0.66
129.2	0.66
129.3	0.66
129.4	0.66
129.5	0.66
129.6	0.66
129.7	0.66
129.8	0.665
129.9	0.665
130	0.665
130.1	0.665
130.2	0.66
130.3	0.66
130.4	0.66
130.5	0.66
130.6	0.66
130.7	0.66
130.8	0.66
130.9	0.66
131	0.66
131.1	0.66
131.2	0.66
131.3	0.66
131.4	0.66
131.5	0.665
131.6	0.665
131.7	0.67
131.8	0.67
131.9	0.67
132	0.67
132.1	0.67
132.2	0.67
132.3	0.675
132.4	0.685
132.5	0.685
132.6	0.685
132.7	0.675
132.8	0.675
132.9	0.675
133	0.68
133.1	0.675
133.2	0.675
133.3	0.67
133.4	0.675
133.5	0.675
133.6	0.68
133.7	0.68
133.8	0.68
133.9	0.68
134	0.68
134.1	0.69
134.2	0.695
134.3	0.695
134.4	0.695
134.5	0.695
134.6	0.695
134.7	0.69
134.8	0.69
134.9	0.69
135	0.695
135.1	0.695
135.2	0.695
135.3	0.695
135.4	0.695
135.5	0.695
135.6	0.695
135.7	0.695
135.8	0.7
135.9	0.7
136	0.7
136.1	0.705
136.2	0.705
136.3	0.71
136.4	0.71
136.5	0.71
136.6	0.71
136.7	0.715
136.8	0.715
136.9	0.715
137	0.715
137.1	0.715
137.2	0.71
137.3	0.71
137.4	0.705
137.5	0.705
137.6	0.71
137.7	0.71
137.8	0.71
137.9	0.715
138	0.715
138.1	0.715
138.2	0.715
138.3	0.715
138.4	0.73
138.5	0.73
138.6	0.725
138.7	0.725
138.8	0.725
138.9	0.725
139	0.725
139.1	0.725
139.2	0.73
139.3	0.73
139.4	0.725
139.5	0.725
139.6	0.72
139.7	0.72
139.8	0.72
139.9	0.72
140	0.72
140.1	0.715
140.2	0.715
140.3	0.715
140.4	0.715
140.5	0.715
140.6	0.72
140.7	0.72
140.8	0.725
140.9	0.725
141	0.725
141.1	0.725
141.2	0.72
141.3	0.72
141.4	0.72
141.5	0.72
141.6	0.725
141.7	0.725
141.8	0.725
141.9	0.725
142	0.725
142.1	0.735
142.2	0.735
142.3	0.745
142.4	0.745
142.5	0.75
142.6	0.75
142.7	0.745
142.8	0.745
142.9	0.75
143	0.75
143.1	0.75
143.2	0.75
143.3	0.75
143.4	0.75
143.5	0.755
143.6	0.755
143.7	0.755
143.8	0.755
143.9	0.755
144	0.755
144.1	0.75
144.2	0.755
144.3	0.755
144.4	0.755
144.5	0.755
144.6	0.755
144.7	0.755
144.8	0.75
144.9	0.75
145	0.755
145.1	0.755
145.2	0.75
145.3	0.75
145.4	0.745
145.5	0.74
145.6	0.74
145.7	0.745
145.8	0.75
145.9	0.75
146	0.75
146.1	0.755
146.2	0.755
146.3	0.755
146.4	0.75
146.5	0.75
146.6	0.75
146.7	0.75
146.8	0.75
146.9	0.75
147	0.755
147.1	0.755
147.2	0.755
147.3	0.76
147.4	0.76
147.5	0.76
147.6	0.765
147.7	0.76
147.8	0.76
147.9	0.76
148	0.765
148.1	0.765
148.2	0.765
148.3	0.755
148.4	0.755
148.5	0.755
148.6	0.76
148.7	0.76
148.8	0.76
148.9	0.755
149	0.755
149.1	0.755
149.2	0.755
149.3	0.755
149.4	0.755
149.5	0.755
149.6	0.76
149.7	0.76
149.8	0.76
149.9	0.76
150	0.76
150.1	0.76
150.2	0.765
150.3	0.765
150.4	0.765
150.5	0.77
150.6	0.77
150.7	0.765
150.8	0.765
150.9	0.765
151	0.765
151.1	0.765
151.2	0.765
151.3	0.76
151.4	0.77
151.5	0.77
151.6	0.765
151.7	0.765
151.8	0.765
151.9	0.765
152	0.765
152.1	0.765
152.2	0.76
152.3	0.76
152.4	0.755
152.5	0.75
152.6	0.75
152.7	0.75
152.8	0.755
152.9	0.755
153	0.76
153.1	0.765
153.2	0.77
153.3	0.77
153.4	0.765
153.5	0.765
153.6	0.765
153.7	0.77
153.8	0.77
153.9	0.77
154	0.775
154.1	0.78
154.2	0.78
154.3	0.78
154.4	0.78
154.5	0.785
154.6	0.785
154.7	0.79
154.8	0.79
154.9	0.79
155	0.78
155.1	0.78
155.2	0.78
155.3	0.78
155.4	0.78
155.5	0.775
155.6	0.775
155.7	0.77
155.8	0.77
155.9	0.775
156	0.78
156.1	0.78
156.2	0.785
156.3	0.78
156.4	0.785
156.5	0.785
156.6	0.785
156.7	0.785
156.8	0.785
156.9	0.785
157	0.785
157.1	0.785
157.2	0.785
157.3	0.785
157.4	0.785
157.5	0.785
157.6	0.79
157.7	0.79
157.8	0.79
157.9	0.79
158	0.79
158.1	0.79
158.2	0.79
158.3	0.79
158.4	0.79
158.5	0.79
158.6	0.79
158.7	0.79
158.8	0.79
158.9	0.785
159	0.78
159.1	0.78
159.2	0.78
159.3	0.78
159.4	0.78
159.5	0.78
159.6	0.78
159.7	0.78
159.8	0.78
159.9	0.79
160	0.79
160.1	0.79
160.2	0.79
160.3	0.79
160.4	0.79
160.5	0.79
160.6	0.795
160.7	0.795
160.8	0.795
160.9	0.795
161	0.795
161.1	0.8
161.2	0.8
161.3	0.795
161.4	0.795
161.5	0.8
161.6	0.8
161.7	0.8
161.8	0.795
161.9	0.795
162	0.79
162.1	0.79
162.2	0.785
162.3	0.785
162.4	0.785
162.5	0.785
162.6	0.79
162.7	0.79
162.8	0.79
162.9	0.785
163	0.785
163.1	0.78
163.2	0.785
163.3	0.79
163.4	0.785
163.5	0.785
163.6	0.79
163.7	0.785
163.8	0.785
163.9	0.785
164	0.785
164.1	0.79
164.2	0.79
164.3	0.79
164.4	0.79
164.5	0.79
164.6	0.795
164.7	0.795
164.8	0.8
164.9	0.8
165	0.805
165.1	0.8
165.2	0.8
165.3	0.8
165.4	0.805
165.5	0.81
165.6	0.82
165.7	0.82
165.8	0.815
165.9	0.815
166	0.815
166.1	0.815
166.2	0.82
166.3	0.82
166.4	0.82
166.5	0.82
166.6	0.82
166.7	0.82
166.8	0.825
166.9	0.825
167	0.82
167.1	0.82
167.2	0.82
167.3	0.82
167.4	0.81
167.5	0.81
167.6	0.815
167.7	0.815
167.8	0.815
167.9	0.815
168	0.815
168.1	0.815
168.2	0.815
168.3	0.815
168.4	0.815
168.5	0.815
168.6	0.815
168.7	0.815
168.8	0.815
168.9	0.81
169	0.81
169.1	0.805
169.2	0.805
169.3	0.8
169.4	0.8
169.5	0.795
169.6	0.795
169.7	0.795
169.8	0.795
169.9	0.795
170	0.795
170.1	0.8
170.2	0.805
170.3	0.805
170.4	0.805
170.5	0.805
170.6	0.805
170.7	0.805
170.8	0.805
170.9	0.805
171	0.805
171.1	0.815
171.2	0.815
171.3	0.815
171.4	0.815
171.5	0.815
171.6	0.815
171.7	0.815
171.8	0.815
171.9	0.815
172	0.815
172.1	0.815
172.2	0.815
172.3	0.815
172.4	0.815
172.5	0.815
172.6	0.815
172.7	0.815
172.8	0.815
172.9	0.81
173	0.81
173.1	0.815
173.2	0.815
173.3	0.815
173.4	0.815
173.5	0.81
173.6	0.81
173.7	0.81
173.8	0.81
173.9	0.81
174	0.81
174.1	0.815
174.2	0.815
174.3	0.815
174.4	0.815
174.5	0.815
174.6	0.815
174.7	0.815
174.8	0.815
174.9	0.815
175	0.815
175.1	0.81
175.2	0.81
175.3	0.805
175.4	0.81
175.5	0.815
175.6	0.815
175.7	0.815
175.8	0.82
175.9	0.825
176	0.825
176.1	0.825
176.2	0.825
176.3	0.825
176.4	0.825
176.5	0.83
176.6	0.835
176.7	0.835
176.8	0.84
176.9	0.84
177	0.835
177.1	0.835
177.2	0.835
177.3	0.835
177.4	0.835
177.5	0.835
177.6	0.835
177.7	0.835
177.8	0.835
177.9	0.84
178	0.835
178.1	0.83
178.2	0.825
178.3	0.825
178.4	0.825
178.5	0.825
178.6	0.83
178.7	0.83
178.8	0.835
178.9	0.835
179	0.84
179.1	0.84
179.2	0.835
179.3	0.84
179.4	0.84
179.5	0.84
179.6	0.84
179.7	0.84
179.8	0.835
179.9	0.84
180	0.84
180.1	0.84
180.2	0.84
180.3	0.84
180.4	0.84
180.5	0.84
180.6	0.845
180.7	0.845
180.8	0.845
180.9	0.84
181	0.84
181.1	0.84
181.2	0.84
181.3	0.84
181.4	0.84
181.5	0.84
181.6	0.84
181.7	0.845
181.8	0.85
181.9	0.85
182	0.85
182.1	0.85
182.2	0.85
182.3	0.85
182.4	0.845
182.5	0.855
182.6	0.855
182.7	0.855
182.8	0.86
182.9	0.86
183	0.86
183.1	0.86
183.2	0.86
183.3	0.86
183.4	0.86
183.5	0.86
183.6	0.86
183.7	0.86
183.8	0.86
183.9	0.865
184	0.865
184.1	0.86
184.2	0.86
184.3	0.86
184.4	0.86
184.5	0.86
184.6	0.86
184.7	0.87
184.8	0.87
184.9	0.87
185	0.87
185.1	0.87
185.2	0.865
185.3	0.865
185.4	0.86
185.5	0.86
185.6	0.855
185.7	0.855
185.8	0.855
185.9	0.855
186	0.85
186.1	0.855
186.2	0.855
186.3	0.86
186.4	0.855
186.5	0.855
186.6	0.855
186.7	0.855
186.8	0.855
186.9	0.85
187	0.85
187.1	0.85
187.2	0.855
187.3	0.855
187.4	0.855
187.5	0.855
187.6	0.855
187.7	0.855
187.8	0.855
187.9	0.855
188	0.85
188.1	0.85
188.2	0.85
188.3	0.85
188.4	0.85
188.5	0.85
188.6	0.85
188.7	0.85
188.8	0.85
188.9	0.84
189	0.84
189.1	0.84
189.2	0.84
189.3	0.845
189.4	0.845
189.5	0.845
189.6	0.845
189.7	0.84
189.8	0.84
189.9	0.84
190	0.845
190.1	0.845
190.2	0.845
190.3	0.85
190.4	0.84
190.5	0.84
190.6	0.84
190.7	0.84
190.8	0.84
190.9	0.84
191	0.84
191.1	0.84
191.2	0.84
191.3	0.84
191.4	0.84
191.5	0.84
191.6	0.835
191.7	0.835
191.8	0.835
191.9	0.835
192	0.835
192.1	0.835
192.2	0.835
192.3	0.835
192.4	0.835
192.5	0.84
192.6	0.835
192.7	0.84
192.8	0.84
192.9	0.84
193	0.84
193.1	0.835
193.2	0.83
193.3	0.83
193.4	0.835
193.5	0.835
193.6	0.835
193.7	0.84
193.8	0.84
193.9	0.84
194	0.84
194.1	0.845
194.2	0.845
194.3	0.845
194.4	0.845
194.5	0.845
194.6	0.84
194.7	0.84
194.8	0.84
194.9	0.84
195	0.84
195.1	0.835
195.2	0.835
195.3	0.835
195.4	0.835
195.5	0.835
195.6	0.835
195.7	0.84
195.8	0.84
195.9	0.84
196	0.84
196.1	0.84
196.2	0.84
196.3	0.84
196.4	0.84
196.5	0.84
196.6	0.84
196.7	0.835
196.8	0.835
196.9	0.835
197	0.835
197.1	0.835
197.2	0.835
197.3	0.835
197.4	0.835
197.5	0.835
197.6	0.835
197.7	0.835
197.8	0.835
197.9	0.835
198	0.835
198.1	0.835
198.2	0.835
198.3	0.835
198.4	0.835
198.5	0.835
198.6	0.84
198.7	0.84
198.8	0.84
198.9	0.84
199	0.85
199.1	0.85
199.2	0.85
199.3	0.85
199.4	0.855
199.5	0.855
199.6	0.86
199.7	0.86
199.8	0.86
199.9	0.86
200	0.86
[truncated: 14,000 more rows]
