# Supplementary material for: Bayesian inference of kinetic schemes for ion channels by Kalman filtering
Source: eLife journal article supplement (doi:10.7554/elife.62714), 2022-05-04
Supplement: fig4-data3 [file 1_Sim_N_400_Fluor_MW_32M.xlsx]

## Sheet: 32 M
0.1	0
0.2	0
0.3	0
0.4	0
0.5	0
0.6	0
0.7	0
0.8	0
0.9	0
1	0
1.1	0
1.2	0
1.3	0
1.4	0
1.5	0
1.6	0
1.7	0
1.8	0
1.9	0
2	0
2.1	0
2.2	0
2.3	0
2.4	0
2.5	0
2.6	0
2.7	0
2.8	0
2.9	0
3	0
3.1	0
3.2	0
3.3	0
3.4	0
3.5	0
3.6	0
3.7	0
3.8	0
3.9	0
4	0
4.1	0
4.2	0
4.3	0
4.4	0
4.5	0
4.6	0
4.7	0
4.8	0
4.9	0
5	0
5.1	0
5.2	0
5.3	0
5.4	0
5.5	0
5.6	0
5.7	0
5.8	0
5.9	0
6	0
6.1	0
6.2	0
6.3	0
6.4	0
6.5	0
6.6	0
6.7	0
6.8	0
6.9	0
7	0
7.1	0
7.2	0
7.3	0
7.4	0
7.5	0
7.6	0
7.7	0
7.8	0
7.9	0
8	0
8.1	0
8.2	0
8.3	0
8.4	0
8.5	0
8.6	0
8.7	0
8.8	0
8.9	0
9	0
9.1	0
9.2	0
9.3	0
9.4	0
9.5	0
9.6	0
9.7	0
9.8	0
9.9	0
10	0
10.1	0
10.2	0
10.3	0
10.4	0
10.5	0
10.6	0
10.7	0
10.8	0
10.9	0
11	0
11.1	0
11.2	0
11.3	0
11.4	0
11.5	0
11.6	0
11.7	0
11.8	0
11.9	0
12	0
12.1	0
12.2	0
12.3	0
12.4	0
12.5	0
12.6	0
12.7	0
12.8	0
12.9	0
13	0
13.1	0
13.2	0
13.3	0
13.4	0
13.5	0
13.6	0
13.7	0
13.8	0
13.9	0
14	0
14.1	0
14.2	0
14.3	0
14.4	0
14.5	0
14.6	0
14.7	0
14.8	0
14.9	0
15	0
15.1	0
15.2	0
15.3	0
15.4	0
15.5	0
15.6	0
15.7	0
15.8	0
15.9	0
16	0
16.1	0
16.2	0
16.3	0
16.4	0
16.5	0
16.6	0
16.7	0
16.8	0
16.9	0
17	0
17.1	0
17.2	0
17.3	0
17.4	0
17.5	0
17.6	0
17.7	0
17.8	0
17.9	0
18	0
18.1	0
18.2	0
18.3	0
18.4	0
18.5	0
18.6	0
18.7	0
18.8	0
18.9	0
19	0
19.1	0
19.2	0
19.3	0
19.4	0
19.5	0
19.6	0
19.7	0
19.8	0
19.9	0
20	0
20.1	0
20.2	0
20.3	0
20.4	0
20.5	0
20.6	0
20.7	0
20.8	0
20.9	0
21	0
21.1	0
21.2	0
21.3	0
21.4	0
21.5	0
21.6	0
21.7	0
21.8	0
21.9	0
22	0
22.1	0
22.2	0
22.3	0
22.4	0
22.5	0
22.6	0
22.7	0
22.8	0
22.9	0
23	0
23.1	0
23.2	0
23.3	0
23.4	0
23.5	0
23.6	0
23.7	0
23.8	0
23.9	0
24	0
24.1	0
24.2	0
24.3	0
24.4	0
24.5	0
24.6	0
24.7	0
24.8	0
24.9	0
25	0
25.1	0
25.2	0
25.3	0
25.4	0
25.5	0
25.6	0
25.7	0
25.8	0
25.9	0
26	0
26.1	0
26.2	0
26.3	0
26.4	0
26.5	0
26.6	0
26.7	0
26.8	0
26.9	0
27	0
27.1	0
27.2	0
27.3	0
27.4	0
27.5	0
27.6	0
27.7	0
27.8	0
27.9	0
28	0
28.1	0
28.2	0
28.3	0
28.4	0
28.5	0
28.6	0
28.7	0
28.8	0
28.9	0
29	0
29.1	0
29.2	0
29.3	0
29.4	0
29.5	0
29.6	0
29.7	0
29.8	0
29.9	0
30	0
30.1	0
30.2	0
30.3	0
30.4	0
30.5	0
30.6	0
30.7	0
30.8	0
30.9	0
31	0
31.1	0
31.2	0
31.3	0
31.4	0
31.5	0
31.6	0
31.7	0
31.8	0
31.9	0
32	0
32.1	0
32.2	0
32.3	0
32.4	0
32.5	0
32.6	0
32.7	0
32.8	0
32.9	0
33	0
33.1	0
33.2	0
33.3	0
33.4	0
33.5	0
33.6	0
33.7	0
33.8	0
33.9	0
34	0
34.1	0
34.2	0
34.3	0
34.4	0
34.5	0
34.6	0
34.7	0
34.8	0
34.9	0
35	0
35.1	0
35.2	0
35.3	0
35.4	0
35.5	0
35.6	0
35.7	0
35.8	0
35.9	0
36	0
36.1	0
36.2	0
36.3	0
36.4	0
36.5	0
36.6	0
36.7	0
36.8	0
36.9	0
37	0
37.1	0
37.2	0
37.3	0
37.4	0
37.5	0
37.6	0
37.7	0
37.8	0
37.9	0
38	0
38.1	0
38.2	0
38.3	0
38.4	0
38.5	0
38.6	0
38.7	0
38.8	0
38.9	0
39	0
39.1	0
39.2	0
39.3	0
39.4	0
39.5	0
39.6	0
39.7	0
39.8	0
39.9	0
40	0
40.1	0
40.2	0
40.3	0
40.4	0
40.5	0
40.6	0
40.7	0
40.8	0
40.9	0
41	0
41.1	0
41.2	0
41.3	0
41.4	0
41.5	0
41.6	0
41.7	0
41.8	0
41.9	0
42	0
42.1	0
42.2	0
42.3	0
42.4	0
42.5	0
42.6	0
42.7	0
42.8	0
42.9	0
43	0
43.1	0
43.2	0
43.3	0
43.4	0
43.5	0
43.6	0
43.7	0
43.8	0
43.9	0
44	0
44.1	0
44.2	0
44.3	0
44.4	0
44.5	0
44.6	0
44.7	0
44.8	0
44.9	0
45	0
45.1	0
45.2	0
45.3	0
45.4	0
45.5	0
45.6	0
45.7	0
45.8	0
45.9	0
46	0
46.1	0
46.2	0
46.3	0
46.4	0
46.5	0
46.6	0
46.7	0
46.8	0
46.9	0
47	0
47.1	0
47.2	0
47.3	0
47.4	0
47.5	0
47.6	0
47.7	0
47.8	0
47.9	0
48	0
48.1	0
48.2	0
48.3	0
48.4	0
48.5	0
48.6	0
48.7	0
48.8	0
48.9	0
49	0
49.1	0
49.2	0
49.3	0
49.4	0
49.5	0
49.6	0
49.7	0
49.8	0
49.9	0
50	0
50.1	0
50.2	0
50.3	0
50.4	0
50.5	0
50.6	0
50.7	0
50.8	0
50.9	0
51	0
51.1	0
51.2	0
51.3	0
51.4	0
51.5	0
51.6	0
51.7	0
51.8	0
51.9	0
52	0
52.1	0
52.2	0
52.3	0
52.4	0
52.5	0
52.6	0
52.7	0
52.8	0
52.9	0
53	0
53.1	0
53.2	0
53.3	0
53.4	0
53.5	0
53.6	0
53.7	0
53.8	0
53.9	0
54	0
54.1	0
54.2	0
54.3	0
54.4	0
54.5	0
54.6	0
54.7	0
54.8	0
54.9	0
55	0
55.1	0
55.2	0
55.3	0
55.4	0
55.5	0
55.6	0
55.7	0
55.8	0
55.9	0
56	0
56.1	0
56.2	0
56.3	0
56.4	0
56.5	0
56.6	0
56.7	0
56.8	0
56.9	0
57	0
57.1	0
57.2	0
57.3	0
57.4	0
57.5	0
57.6	0
57.7	0
57.8	0
57.9	0
58	0
58.1	0
58.2	0
58.3	0
58.4	0
58.5	0
58.6	0
58.7	0
58.8	0
58.9	0
59	0
59.1	0
59.2	0
59.3	0
59.4	0
59.5	0
59.6	0
59.7	0
59.8	0
59.9	0
60	0
60.1	0
60.2	0
60.3	0
60.4	0
60.5	0
60.6	0
60.7	0
60.8	0
60.9	0
61	0
61.1	0
61.2	0
61.3	0
61.4	0
61.5	0
61.6	0
61.7	0
61.8	0
61.9	0
62	0
62.1	0
62.2	0
62.3	0
62.4	0
62.5	0
62.6	0
62.7	0
62.8	0
62.9	0
63	0
63.1	0
63.2	0
63.3	0
63.4	0
63.5	0
63.6	0
63.7	0
63.8	0
63.9	0
64	0
64.1	0
64.2	0
64.3	0
64.4	0
64.5	0
64.6	0
64.7	0
64.8	0
64.9	0
65	0
65.1	0
65.2	0
65.3	0
65.4	0
65.5	0
65.6	0
65.7	0
65.8	0
65.9	0
66	0
66.1	0
66.2	0
66.3	0
66.4	0
66.5	0
66.6	0
66.7	0
66.8	0
66.9	0
67	0
67.1	0
67.2	0
67.3	0
67.4	0
67.5	0
67.6	0
67.7	0
67.8	0
67.9	0
68	0
68.1	0
68.2	0
68.3	0
68.4	0
68.5	0
68.6	0
68.7	0
68.8	0
68.9	0
69	0
69.1	0
69.2	0
69.3	0
69.4	0
69.5	0
69.6	0
69.7	0
69.8	0
69.9	0
70	0
70.1	0
70.2	0
70.3	0
70.4	0
70.5	0
70.6	0
70.7	0
70.8	0
70.9	0
71	0
71.1	0
71.2	0
71.3	0
71.4	0
71.5	0
71.6	0
71.7	0
71.8	0
71.9	0
72	0
72.1	0
72.2	0
72.3	0
72.4	0
72.5	0
72.6	0
72.7	0
72.8	0
72.9	0
73	0
73.1	0
73.2	0
73.3	0
73.4	0
73.5	0
73.6	0
73.7	0
73.8	0
73.9	0
74	0
74.1	0
74.2	0
74.3	0
74.4	0
74.5	0
74.6	0
74.7	0
74.8	0
74.9	0
75	0
75.1	0
75.2	0
75.3	0
75.4	0
75.5	0
75.6	0
75.7	0
75.8	0
75.9	0
76	0
76.1	0
76.2	0
76.3	0
76.4	0
76.5	0
76.6	0
76.7	0
76.8	0
76.9	0
77	0
77.1	0
77.2	0
77.3	0
77.4	0
77.5	0
77.6	0
77.7	0
77.8	0
77.9	0
78	0
78.1	0
78.2	0
78.3	0
78.4	0
78.5	0
78.6	0
78.7	0
78.8	0
78.9	0
79	0
79.1	0
79.2	0
79.3	0
79.4	0
79.5	0
79.6	0
79.7	0
79.8	0
79.9	0
80	0
80.1	0
80.2	0
80.3	0
80.4	0
80.5	0
80.6	0
80.7	0
80.8	0
80.9	0
81	0
81.1	0
81.2	0
81.3	0
81.4	0
81.5	0
81.6	0
81.7	0
81.8	0
81.9	0
82	0
82.1	0
82.2	0
82.3	0
82.4	0
82.5	0
82.6	0
82.7	0
82.8	0
82.9	0
83	0
83.1	0
83.2	0
83.3	0
83.4	0
83.5	0
83.6	0
83.7	0
83.8	0
83.9	0
84	0
84.1	0
84.2	0
84.3	0
84.4	0
84.5	0
84.6	0
84.7	0
84.8	0
84.9	0
85	0
85.1	0
85.2	0
85.3	0
85.4	0
85.5	0
85.6	0
85.7	0
85.8	0
85.9	0
86	0
86.1	0
86.2	0
86.3	0
86.4	0
86.5	0
86.6	0
86.7	0
86.8	0
86.9	0
87	0
87.1	0
87.2	0
87.3	0
87.4	0
87.5	0
87.6	0
87.7	0
87.8	0
87.9	0
88	0
88.1	0
88.2	0
88.3	0
88.4	0
88.5	0
88.6	0
88.7	0
88.8	0
88.9	0
89	0
89.1	0
89.2	0
89.3	0
89.4	0
89.5	0
89.6	0
89.7	0
89.8	0
89.9	0
90	0
90.1	0
90.2	0
90.3	0
90.4	0
90.5	0
90.6	0
90.7	0
90.8	0
90.9	0
91	0
91.1	0
91.2	0
91.3	0
91.4	0
91.5	0
91.6	0
91.7	0
91.8	0
91.9	0
92	0
92.1	0
92.2	0
92.3	0
92.4	0
92.5	0
92.6	0
92.7	0
92.8	0
92.9	0
93	0
93.1	0
93.2	0
93.3	0
93.4	0
93.5	0
93.6	0
93.7	0
93.8	0
93.9	0
94	0
94.1	0
94.2	0
94.3	0
94.4	0
94.5	0
94.6	0
94.7	0
94.8	0
94.9	0
95	0
95.1	0
95.2	0
95.3	0
95.4	0
95.5	0
95.6	0
95.7	0
95.8	0
95.9	0
96	0
96.1	0
96.2	0
96.3	0
96.4	0
96.5	0
96.6	0
96.7	0
96.8	0
96.9	0
97	0
97.1	0
97.2	0
97.3	0
97.4	0
97.5	0
97.6	0
97.7	0
97.8	0
97.9	0
98	0
98.1	0
98.2	0
98.3	0
98.4	0
98.5	0
98.6	0
98.7	0
98.8	0
98.9	0
99	0
99.1	0
99.2	0
99.3	0
99.4	0
99.5	0
99.6	0
99.7	0
99.8	0
99.9	0
100	0
100.1	0.72125
100.2	0.88
100.3	0.93125
100.4	0.96375
100.5	0.975
100.6	0.975
100.7	0.9725
100.8	0.975
100.9	0.97875
101	0.9725
101.1	0.97375
101.2	0.98375
101.3	0.98375
101.4	0.97875
101.5	0.9775
101.6	0.97375
101.7	0.99
101.8	0.98625
101.9	0.9875
102	0.97875
102.1	0.9725
102.2	0.9725
102.3	0.97625
102.4	0.98125
102.5	0.975
102.6	0.97625
102.7	0.98
102.8	0.9825
102.9	0.985
103	0.9825
103.1	0.97625
103.2	0.975
103.3	0.97125
103.4	0.97375
103.5	0.98375
103.6	0.98125
103.7	0.9775
103.8	0.98125
103.9	0.985
104	0.975
104.1	0.97
104.2	0.9775
104.3	0.97625
104.4	0.98875
104.5	0.9875
104.6	0.99125
104.7	0.98375
104.8	0.98
104.9	0.98625
105	0.9875
105.1	0.9875
105.2	0.9875
105.3	0.9875
105.4	0.9825
105.5	0.9825
105.6	0.985
105.7	0.98
105.8	0.97875
105.9	0.9825
106	0.98
106.1	0.97375
106.2	0.985
106.3	0.98
106.4	0.9775
106.5	0.97875
106.6	0.9775
106.7	0.9825
106.8	0.985
106.9	0.98375
107	0.98375
107.1	0.98375
107.2	0.98625
107.3	0.98375
107.4	0.9825
107.5	0.97875
107.6	0.9825
107.7	0.985
107.8	0.99
107.9	0.98375
108	0.97375
108.1	0.97875
108.2	0.98
108.3	0.98875
108.4	0.98625
108.5	0.98875
108.6	0.98125
108.7	0.97875
108.8	0.98125
108.9	0.98375
109	0.97875
109.1	0.975
109.2	0.975
109.3	0.97625
109.4	0.97875
109.5	0.98375
109.6	0.98875
109.7	0.98875
109.8	0.9875
109.9	0.98625
110	0.99125
110.1	0.98
110.2	0.98
110.3	0.9875
110.4	0.9825
110.5	0.99125
110.6	0.99125
110.7	0.985
110.8	0.98375
110.9	0.985
111	0.9775
111.1	0.96625
111.2	0.98125
111.3	0.98625
111.4	0.98625
111.5	0.985
111.6	0.9875
111.7	0.98125
111.8	0.98375
111.9	0.9825
112	0.9825
112.1	0.975
112.2	0.97875
112.3	0.9825
112.4	0.98625
112.5	0.98875
112.6	0.99
112.7	0.98625
112.8	0.98875
112.9	0.9875
113	0.98375
113.1	0.9775
113.2	0.97625
113.3	0.9825
113.4	0.98625
113.5	0.9875
113.6	0.9825
113.7	0.99
113.8	0.985
113.9	0.99
114	0.985
114.1	0.9875
114.2	0.9825
114.3	0.9825
114.4	0.98
114.5	0.98875
114.6	0.98875
114.7	0.9925
114.8	0.9875
114.9	0.99375
115	0.99
115.1	0.98375
115.2	0.9875
115.3	0.98625
115.4	0.98125
115.5	0.98125
115.6	0.99
115.7	0.99
115.8	0.9875
115.9	0.9875
116	0.9875
116.1	0.98875
116.2	0.985
116.3	0.9825
116.4	0.975
116.5	0.9825
116.6	0.98625
116.7	0.98375
116.8	0.98625
116.9	0.985
117	0.98875
117.1	0.99
117.2	0.99375
117.3	0.99125
117.4	0.9925
117.5	0.99125
117.6	0.985
117.7	0.985
117.8	0.9825
117.9	0.985
118	0.985
118.1	0.9825
118.2	0.98
118.3	0.985
118.4	0.99125
118.5	0.9925
118.6	0.98375
118.7	0.98375
118.8	0.98625
118.9	0.98625
119	0.9925
119.1	0.98375
119.2	0.98625
119.3	0.99
119.4	0.9925
119.5	0.99125
119.6	0.98625
119.7	0.98625
119.8	0.99125
119.9	0.99375
120	0.995
120.1	0.99375
120.2	0.99125
120.3	0.99
120.4	0.9925
120.5	0.99125
120.6	0.99125
120.7	0.98875
120.8	0.99125
120.9	0.99
121	0.9875
121.1	0.9875
121.2	0.98875
121.3	0.99125
121.4	0.98875
121.5	0.99375
121.6	0.99
121.7	0.99
121.8	0.995
121.9	0.99125
122	0.995
122.1	0.9975
122.2	0.98625
122.3	0.99125
122.4	0.99
122.5	0.98875
122.6	0.98875
122.7	0.9925
122.8	0.995
122.9	0.9975
123	0.99875
123.1	0.99375
123.2	0.98625
123.3	0.99375
123.4	0.99375
123.5	0.9875
123.6	0.98625
123.7	0.9925
123.8	0.98875
123.9	0.98625
124	0.98875
124.1	0.995
124.2	0.98875
124.3	0.9875
124.4	0.9925
124.5	0.99
124.6	0.9925
124.7	0.98875
124.8	0.98625
124.9	0.985
125	0.98625
125.1	0.99
125.2	0.99
125.3	0.9875
125.4	0.98625
125.5	0.99
125.6	0.99
125.7	0.99375
125.8	0.99125
125.9	0.9925
126	0.9875
126.1	0.9875
126.2	0.995
126.3	0.99375
126.4	0.99
126.5	0.995
126.6	0.99125
126.7	0.9875
126.8	0.9925
126.9	0.9925
127	0.9925
127.1	0.99125
127.2	0.98625
127.3	0.99375
127.4	0.9925
127.5	0.9925
127.6	0.99625
127.7	0.995
127.8	0.995
127.9	0.98625
128	0.9875
128.1	0.9925
128.2	0.99125
128.3	0.99375
128.4	0.99375
128.5	0.99375
128.6	0.9925
128.7	0.99375
128.8	0.98625
128.9	0.98875
129	0.98625
129.1	0.99125
129.2	0.99375
129.3	0.98625
129.4	0.99625
129.5	0.99375
129.6	0.99375
129.7	0.9875
129.8	0.99
129.9	0.99625
130	0.99875
130.1	0.99375
130.2	0.98875
130.3	0.9925
130.4	0.99375
130.5	0.99375
130.6	0.99
130.7	0.9925
130.8	0.9925
130.9	0.9925
131	0.9925
131.1	0.99
131.2	0.99
131.3	0.99125
131.4	0.99125
131.5	0.995
131.6	0.99375
131.7	0.99375
131.8	0.99375
131.9	0.9975
132	0.99625
132.1	0.99
132.2	0.99
132.3	0.995
132.4	0.9925
132.5	0.9975
132.6	0.99625
132.7	0.99625
132.8	0.995
132.9	0.99375
133	0.99
133.1	0.98875
133.2	0.9875
133.3	0.99
133.4	0.9975
133.5	0.99375
133.6	0.99375
133.7	0.99625
133.8	0.99625
133.9	0.9875
134	0.99125
134.1	0.99125
134.2	0.99
134.3	0.9875
134.4	0.9825
134.5	0.99
134.6	0.9925
134.7	0.9925
134.8	0.9925
134.9	0.9925
135	0.99625
135.1	0.99375
135.2	0.99
135.3	0.98875
135.4	0.9925
135.5	0.9875
135.6	0.9925
135.7	0.99125
135.8	0.99
135.9	0.99125
136	0.99625
136.1	0.995
136.2	0.9925
136.3	0.99375
136.4	0.99125
136.5	0.9925
136.6	0.995
136.7	0.9975
136.8	0.9975
136.9	0.9925
137	0.9975
137.1	0.9975
137.2	0.99
137.3	0.99125
137.4	0.995
137.5	0.995
137.6	0.99375
137.7	0.9925
137.8	0.9925
137.9	0.995
138	0.9925
138.1	0.995
138.2	0.99625
138.3	0.99875
138.4	0.99625
138.5	0.995
138.6	0.99125
138.7	0.995
138.8	0.9975
138.9	0.9925
139	0.995
139.1	0.99625
139.2	0.995
139.3	0.995
139.4	0.99625
139.5	0.99625
139.6	0.98875
139.7	0.98625
139.8	0.99
139.9	0.99375
140	0.9975
140.1	0.99125
140.2	0.99125
140.3	0.995
140.4	0.99375
140.5	0.99625
140.6	0.99125
140.7	0.995
140.8	0.99125
140.9	0.9925
141	0.9925
141.1	0.99375
141.2	0.9975
141.3	0.9925
141.4	0.99625
141.5	0.99375
141.6	0.99875
141.7	0.9925
141.8	0.99125
141.9	0.99
142	0.99
142.1	0.9925
142.2	0.995
142.3	0.9925
142.4	0.98875
142.5	0.99125
142.6	0.99375
142.7	0.99625
142.8	0.995
142.9	0.9975
143	0.9975
143.1	0.9975
143.2	0.99625
143.3	0.9975
143.4	0.995
143.5	0.995
143.6	0.9975
143.7	0.9925
143.8	0.9925
143.9	0.995
144	0.995
144.1	0.995
144.2	0.995
144.3	0.995
144.4	0.9975
144.5	0.99125
144.6	0.99125
144.7	0.9925
144.8	0.995
144.9	0.995
145	0.995
145.1	0.995
145.2	0.99875
145.3	0.99625
145.4	0.99875
145.5	0.9975
145.6	0.995
145.7	0.9925
145.8	0.9975
145.9	0.99875
146	0.99375
146.1	0.99375
146.2	0.99625
146.3	0.995
146.4	0.99375
146.5	0.99375
146.6	0.99625
146.7	0.995
146.8	0.99625
146.9	0.9975
147	0.99625
147.1	0.99375
147.2	0.99625
147.3	0.99375
147.4	0.995
147.5	0.99625
147.6	0.99875
147.7	1
147.8	0.995
147.9	0.99375
148	0.9925
148.1	0.99125
148.2	0.99125
148.3	0.99375
148.4	0.995
148.5	0.9975
148.6	0.9975
148.7	0.99625
148.8	0.9975
148.9	0.9975
149	0.99375
149.1	0.995
149.2	0.99375
149.3	0.98875
149.4	0.995
149.5	0.99375
149.6	0.99625
149.7	0.99625
149.8	0.99
149.9	0.995
150	0.99625
150.1	0.9925
150.2	0.99125
150.3	0.995
150.4	0.99875
150.5	0.99875
150.6	0.99625
150.7	0.9925
150.8	0.995
150.9	0.9975
151	0.98875
151.1	0.9925
151.2	0.995
151.3	0.99125
151.4	0.99
151.5	0.9925
151.6	0.9975
151.7	0.99625
151.8	0.99875
151.9	0.99625
152	0.995
152.1	0.995
152.2	0.9975
152.3	0.99375
152.4	0.99125
152.5	0.99375
152.6	0.99625
152.7	0.99625
152.8	0.995
152.9	0.99625
153	0.99375
153.1	0.9925
153.2	0.995
153.3	0.99625
153.4	0.995
153.5	0.995
153.6	0.99375
153.7	0.99875
153.8	1
153.9	0.99625
154	0.995
154.1	0.99375
154.2	0.99375
154.3	0.995
154.4	0.995
154.5	0.99625
154.6	0.9975
154.7	0.995
154.8	0.9925
154.9	0.99375
155	0.995
155.1	0.9975
155.2	0.99875
155.3	0.99625
155.4	0.99125
155.5	0.995
155.6	1
155.7	0.99875
155.8	0.995
155.9	0.995
156	0.995
156.1	0.995
156.2	0.99625
156.3	0.99625
156.4	0.9975
156.5	0.99625
156.6	0.9875
156.7	0.99375
156.8	0.99625
156.9	0.9975
157	0.995
157.1	0.99125
157.2	0.99375
157.3	0.995
157.4	0.99375
157.5	0.99125
157.6	0.9975
157.7	0.99125
157.8	0.99375
157.9	0.995
158	0.99375
158.1	0.99375
158.2	0.9975
158.3	0.99625
158.4	0.99375
158.5	0.995
158.6	0.99875
158.7	0.99
158.8	0.995
158.9	0.995
159	0.99375
159.1	0.9975
159.2	0.995
159.3	0.9925
159.4	0.99625
159.5	0.995
159.6	0.995
159.7	0.99125
159.8	0.99
159.9	0.99625
160	0.99625
160.1	0.99625
160.2	0.99125
160.3	0.99125
160.4	0.995
160.5	0.9925
160.6	0.995
160.7	0.99625
160.8	0.99625
160.9	0.99875
161	0.995
161.1	0.99625
161.2	0.9925
161.3	0.99875
161.4	0.99375
161.5	0.99875
161.6	0.9975
161.7	0.995
161.8	0.9925
161.9	0.99375
162	0.99875
162.1	0.9975
162.2	0.99375
162.3	0.995
162.4	0.9925
162.5	0.995
162.6	0.995
162.7	0.99875
162.8	0.9975
162.9	0.99625
163	0.9925
163.1	0.99625
163.2	0.9975
163.3	0.9975
163.4	0.99875
163.5	0.9975
163.6	0.9925
163.7	0.99
163.8	0.99375
163.9	0.995
164	0.995
164.1	0.9975
164.2	0.995
164.3	0.99375
164.4	0.99375
164.5	0.9925
164.6	0.99375
164.7	0.99125
164.8	0.99
164.9	0.99375
165	0.99125
165.1	0.99
165.2	0.99125
165.3	0.9975
165.4	0.99375
165.5	0.995
165.6	0.99875
165.7	0.99375
165.8	0.99125
165.9	0.99875
166	0.9975
166.1	0.99625
166.2	0.99875
166.3	0.9975
166.4	0.9975
166.5	0.99375
166.6	0.99625
166.7	0.99875
166.8	0.9975
166.9	0.99375
167	0.995
167.1	0.99875
167.2	0.995
167.3	0.995
167.4	0.99375
167.5	0.99625
167.6	0.99625
167.7	0.99625
167.8	0.99625
167.9	0.9975
168	0.99625
168.1	0.995
168.2	0.99625
168.3	0.995
168.4	0.99625
168.5	0.9925
168.6	0.99375
168.7	0.9925
168.8	0.99625
168.9	0.9975
169	0.995
169.1	0.9925
169.2	0.995
169.3	0.99375
169.4	0.99625
169.5	0.995
169.6	0.9925
169.7	0.99625
169.8	0.995
169.9	0.9925
170	0.99125
170.1	0.995
170.2	0.99875
170.3	0.9925
170.4	0.995
170.5	0.9925
170.6	0.99625
170.7	0.995
170.8	0.995
170.9	0.99375
171	0.99
171.1	0.98875
171.2	0.99375
171.3	0.99375
171.4	0.9925
171.5	0.99125
171.6	0.99375
171.7	0.99625
171.8	0.9975
171.9	0.99625
172	0.99375
172.1	0.995
172.2	0.9975
172.3	0.99625
172.4	0.995
172.5	0.99625
172.6	0.99125
172.7	0.99125
172.8	0.9975
172.9	0.99625
173	0.995
173.1	0.995
173.2	0.995
173.3	0.99125
173.4	0.995
173.5	0.9925
173.6	0.9925
173.7	0.99125
173.8	0.99125
173.9	0.99375
174	0.98875
174.1	0.995
174.2	0.9975
174.3	0.99875
174.4	0.99375
174.5	0.99625
174.6	0.99375
174.7	0.99125
174.8	0.99125
174.9	0.99
175	0.9925
175.1	0.99125
175.2	0.9925
175.3	0.99625
175.4	0.9975
175.5	0.99875
175.6	0.995
175.7	0.99375
175.8	0.9925
175.9	0.99375
176	0.995
176.1	0.995
176.2	0.99375
176.3	0.99125
176.4	0.98875
176.5	0.98875
176.6	0.99
176.7	0.9925
176.8	0.995
176.9	0.99625
177	0.99375
177.1	0.995
177.2	0.995
177.3	0.9975
177.4	0.99625
177.5	0.99125
177.6	0.99625
177.7	0.9975
177.8	0.99375
177.9	0.9975
178	0.995
178.1	0.9925
178.2	0.99875
178.3	0.99875
178.4	0.99125
178.5	0.99625
178.6	0.9925
178.7	0.995
178.8	0.995
178.9	0.99375
179	0.995
179.1	0.99375
179.2	0.995
179.3	0.995
179.4	0.9975
179.5	0.9975
179.6	0.9925
179.7	0.9975
179.8	0.9975
179.9	0.9975
180	0.9975
180.1	0.99625
180.2	0.99
180.3	0.99125
180.4	0.99625
180.5	0.9975
180.6	0.99875
180.7	0.995
180.8	0.99375
180.9	0.995
181	0.99
181.1	0.98875
181.2	0.99375
181.3	0.995
181.4	0.99
181.5	0.99125
181.6	0.99375
181.7	0.9975
181.8	0.99625
181.9	0.99875
182	0.9925
182.1	0.99625
182.2	0.99625
182.3	0.9975
182.4	0.9975
182.5	0.9975
182.6	0.99625
182.7	1
182.8	0.99875
182.9	0.99375
183	0.995
183.1	0.99625
183.2	0.99625
183.3	0.99875
183.4	0.9975
183.5	0.9925
183.6	0.99375
183.7	0.99625
183.8	0.995
183.9	0.9975
184	0.9975
184.1	0.99375
184.2	0.995
184.3	0.995
184.4	0.99625
184.5	0.995
184.6	0.9975
184.7	0.99875
184.8	0.99875
184.9	0.9975
185	0.99375
185.1	0.9975
185.2	0.99875
185.3	0.9975
185.4	0.99875
185.5	0.99625
185.6	0.9975
185.7	0.995
185.8	0.9975
185.9	0.995
186	0.99875
186.1	0.9925
186.2	0.995
186.3	0.995
186.4	0.99875
186.5	0.995
186.6	0.99625
186.7	0.9975
186.8	0.99875
186.9	0.9975
187	0.99375
187.1	0.99125
187.2	0.99
187.3	0.9925
187.4	0.99375
187.5	0.99125
187.6	0.99375
187.7	0.99375
187.8	0.995
187.9	0.99375
188	0.99375
188.1	0.99625
188.2	0.9925
188.3	0.99625
188.4	0.9975
188.5	0.99625
188.6	0.9975
188.7	0.995
188.8	0.99625
188.9	0.99625
189	0.99625
189.1	0.99125
189.2	0.9925
189.3	0.98875
189.4	0.99125
189.5	0.9975
189.6	0.9975
189.7	1
189.8	0.99875
189.9	0.99875
190	0.99625
190.1	0.99625
190.2	1
190.3	0.99625
190.4	0.995
190.5	0.995
190.6	0.99625
190.7	0.99125
190.8	0.9925
190.9	0.99625
191	0.99375
191.1	0.995
191.2	0.99375
191.3	0.99875
191.4	0.9975
191.5	0.99625
191.6	0.995
191.7	0.995
191.8	0.99875
191.9	0.995
192	0.9925
192.1	0.99
192.2	0.9925
192.3	0.9925
192.4	0.99625
192.5	0.99625
192.6	0.9925
192.7	0.99125
192.8	0.99625
192.9	0.995
193	0.99625
193.1	0.99875
193.2	0.995
193.3	0.9925
193.4	0.99375
193.5	0.9925
193.6	0.99375
193.7	0.99375
193.8	0.995
193.9	0.995
194	0.995
194.1	0.9925
194.2	0.99625
194.3	0.99625
194.4	0.99625
194.5	0.9925
194.6	0.9975
194.7	0.99875
194.8	0.99625
194.9	0.99375
195	0.995
195.1	0.9925
195.2	0.995
195.3	0.995
195.4	0.99375
195.5	0.9925
195.6	0.9975
195.7	0.99875
195.8	0.99375
195.9	0.995
196	0.9975
196.1	0.99625
196.2	0.9925
196.3	0.99375
196.4	0.995
196.5	0.9975
196.6	0.99375
196.7	0.995
196.8	0.9975
196.9	0.99625
197	0.99625
197.1	0.995
197.2	0.995
197.3	0.99375
197.4	0.99625
197.5	0.995
197.6	0.995
197.7	0.99375
197.8	0.995
197.9	0.99875
198	0.99625
198.1	0.995
198.2	0.9975
198.3	0.995
198.4	0.99375
198.5	0.99625
198.6	0.99375
198.7	0.99625
198.8	0.995
198.9	0.99375
199	0.9925
199.1	0.99125
199.2	0.99125
199.3	0.995
199.4	0.995
199.5	0.9925
199.6	0.99625
199.7	0.9975
199.8	0.995
199.9	0.99625
200	0.99625
[truncated: 14,000 more rows]
