# Supplementary material for: Bayesian inference of kinetic schemes for ion channels by Kalman filtering
Source: eLife journal article supplement (doi:10.7554/elife.62714), 2022-05-04
Supplement: fig4-data3 [file 1_Sim_N_400_Strom_MW_32M.xlsx]

## Sheet: 32 M
0.1	0
0.2	0
0.3	0
0.4	0
0.5	0
0.6	0
0.7	0
0.8	0
0.9	0
1	0
1.1	0
1.2	0
1.3	0
1.4	0
1.5	0
1.6	0
1.7	0
1.8	0
1.9	0
2	0
2.1	0
2.2	0
2.3	0
2.4	0
2.5	0
2.6	0
2.7	0
2.8	0
2.9	0
3	0
3.1	0
3.2	0
3.3	0
3.4	0
3.5	0
3.6	0
3.7	0
3.8	0
3.9	0
4	0
4.1	0
4.2	0
4.3	0
4.4	0
4.5	0
4.6	0
4.7	0
4.8	0
4.9	0
5	0
5.1	0
5.2	0
5.3	0
5.4	0
5.5	0
5.6	0
5.7	0
5.8	0
5.9	0
6	0
6.1	0
6.2	0
6.3	0
6.4	0
6.5	0
6.6	0
6.7	0
6.8	0
6.9	0
7	0
7.1	0
7.2	0
7.3	0
7.4	0
7.5	0
7.6	0
7.7	0
7.8	0
7.9	0
8	0
8.1	0
8.2	0
8.3	0
8.4	0
8.5	0
8.6	0
8.7	0
8.8	0
8.9	0
9	0
9.1	0
9.2	0
9.3	0
9.4	0
9.5	0
9.6	0
9.7	0
9.8	0
9.9	0
10	0
10.1	0
10.2	0
10.3	0
10.4	0
10.5	0
10.6	0
10.7	0
10.8	0
10.9	0
11	0
11.1	0
11.2	0
11.3	0
11.4	0
11.5	0
11.6	0
11.7	0
11.8	0
11.9	0
12	0
12.1	0
12.2	0
12.3	0
12.4	0
12.5	0
12.6	0
12.7	0
12.8	0
12.9	0
13	0
13.1	0
13.2	0
13.3	0
13.4	0
13.5	0
13.6	0
13.7	0
13.8	0
13.9	0
14	0
14.1	0
14.2	0
14.3	0
14.4	0
14.5	0
14.6	0
14.7	0
14.8	0
14.9	0
15	0
15.1	0
15.2	0
15.3	0
15.4	0
15.5	0
15.6	0
15.7	0
15.8	0
15.9	0
16	0
16.1	0
16.2	0
16.3	0
16.4	0
16.5	0
16.6	0
16.7	0
16.8	0
16.9	0
17	0
17.1	0
17.2	0
17.3	0
17.4	0
17.5	0
17.6	0
17.7	0
17.8	0
17.9	0
18	0
18.1	0
18.2	0
18.3	0
18.4	0
18.5	0
18.6	0
18.7	0
18.8	0
18.9	0
19	0
19.1	0
19.2	0
19.3	0
19.4	0
19.5	0
19.6	0
19.7	0
19.8	0
19.9	0
20	0
20.1	0
20.2	0
20.3	0
20.4	0
20.5	0
20.6	0
20.7	0
20.8	0
20.9	0
21	0
21.1	0
21.2	0
21.3	0
21.4	0
21.5	0
21.6	0
21.7	0
21.8	0
21.9	0
22	0
22.1	0
22.2	0
22.3	0
22.4	0
22.5	0
22.6	0
22.7	0
22.8	0
22.9	0
23	0
23.1	0
23.2	0
23.3	0
23.4	0
23.5	0
23.6	0
23.7	0
23.8	0
23.9	0
24	0
24.1	0
24.2	0
24.3	0
24.4	0
24.5	0
24.6	0
24.7	0
24.8	0
24.9	0
25	0
25.1	0
25.2	0
25.3	0
25.4	0
25.5	0
25.6	0
25.7	0
25.8	0
25.9	0
26	0
26.1	0
26.2	0
26.3	0
26.4	0
26.5	0
26.6	0
26.7	0
26.8	0
26.9	0
27	0
27.1	0
27.2	0
27.3	0
27.4	0
27.5	0
27.6	0
27.7	0
27.8	0
27.9	0
28	0
28.1	0
28.2	0
28.3	0
28.4	0
28.5	0
28.6	0
28.7	0
28.8	0
28.9	0
29	0
29.1	0
29.2	0
29.3	0
29.4	0
29.5	0
29.6	0
29.7	0
29.8	0
29.9	0
30	0
30.1	0
30.2	0
30.3	0
30.4	0
30.5	0
30.6	0
30.7	0
30.8	0
30.9	0
31	0
31.1	0
31.2	0
31.3	0
31.4	0
31.5	0
31.6	0
31.7	0
31.8	0
31.9	0
32	0
32.1	0
32.2	0
32.3	0
32.4	0
32.5	0
32.6	0
32.7	0
32.8	0
32.9	0
33	0
33.1	0
33.2	0
33.3	0
33.4	0
33.5	0
33.6	0
33.7	0
33.8	0
33.9	0
34	0
34.1	0
34.2	0
34.3	0
34.4	0
34.5	0
34.6	0
34.7	0
34.8	0
34.9	0
35	0
35.1	0
35.2	0
35.3	0
35.4	0
35.5	0
35.6	0
35.7	0
35.8	0
35.9	0
36	0
36.1	0
36.2	0
36.3	0
36.4	0
36.5	0
36.6	0
36.7	0
36.8	0
36.9	0
37	0
37.1	0
37.2	0
37.3	0
37.4	0
37.5	0
37.6	0
37.7	0
37.8	0
37.9	0
38	0
38.1	0
38.2	0
38.3	0
38.4	0
38.5	0
38.6	0
38.7	0
38.8	0
38.9	0
39	0
39.1	0
39.2	0
39.3	0
39.4	0
39.5	0
39.6	0
39.7	0
39.8	0
39.9	0
40	0
40.1	0
40.2	0
40.3	0
40.4	0
40.5	0
40.6	0
40.7	0
40.8	0
40.9	0
41	0
41.1	0
41.2	0
41.3	0
41.4	0
41.5	0
41.6	0
41.7	0
41.8	0
41.9	0
42	0
42.1	0
42.2	0
42.3	0
42.4	0
42.5	0
42.6	0
42.7	0
42.8	0
42.9	0
43	0
43.1	0
43.2	0
43.3	0
43.4	0
43.5	0
43.6	0
43.7	0
43.8	0
43.9	0
44	0
44.1	0
44.2	0
44.3	0
44.4	0
44.5	0
44.6	0
44.7	0
44.8	0
44.9	0
45	0
45.1	0
45.2	0
45.3	0
45.4	0
45.5	0
45.6	0
45.7	0
45.8	0
45.9	0
46	0
46.1	0
46.2	0
46.3	0
46.4	0
46.5	0
46.6	0
46.7	0
46.8	0
46.9	0
47	0
47.1	0
47.2	0
47.3	0
47.4	0
47.5	0
47.6	0
47.7	0
47.8	0
47.9	0
48	0
48.1	0
48.2	0
48.3	0
48.4	0
48.5	0
48.6	0
48.7	0
48.8	0
48.9	0
49	0
49.1	0
49.2	0
49.3	0
49.4	0
49.5	0
49.6	0
49.7	0
49.8	0
49.9	0
50	0
50.1	0
50.2	0
50.3	0
50.4	0
50.5	0
50.6	0
50.7	0
50.8	0
50.9	0
51	0
51.1	0
51.2	0
51.3	0
51.4	0
51.5	0
51.6	0
51.7	0
51.8	0
51.9	0
52	0
52.1	0
52.2	0
52.3	0
52.4	0
52.5	0
52.6	0
52.7	0
52.8	0
52.9	0
53	0
53.1	0
53.2	0
53.3	0
53.4	0
53.5	0
53.6	0
53.7	0
53.8	0
53.9	0
54	0
54.1	0
54.2	0
54.3	0
54.4	0
54.5	0
54.6	0
54.7	0
54.8	0
54.9	0
55	0
55.1	0
55.2	0
55.3	0
55.4	0
55.5	0
55.6	0
55.7	0
55.8	0
55.9	0
56	0
56.1	0
56.2	0
56.3	0
56.4	0
56.5	0
56.6	0
56.7	0
56.8	0
56.9	0
57	0
57.1	0
57.2	0
57.3	0
57.4	0
57.5	0
57.6	0
57.7	0
57.8	0
57.9	0
58	0
58.1	0
58.2	0
58.3	0
58.4	0
58.5	0
58.6	0
58.7	0
58.8	0
58.9	0
59	0
59.1	0
59.2	0
59.3	0
59.4	0
59.5	0
59.6	0
59.7	0
59.8	0
59.9	0
60	0
60.1	0
60.2	0
60.3	0
60.4	0
60.5	0
60.6	0
60.7	0
60.8	0
60.9	0
61	0
61.1	0
61.2	0
61.3	0
61.4	0
61.5	0
61.6	0
61.7	0
61.8	0
61.9	0
62	0
62.1	0
62.2	0
62.3	0
62.4	0
62.5	0
62.6	0
62.7	0
62.8	0
62.9	0
63	0
63.1	0
63.2	0
63.3	0
63.4	0
63.5	0
63.6	0
63.7	0
63.8	0
63.9	0
64	0
64.1	0
64.2	0
64.3	0
64.4	0
64.5	0
64.6	0
64.7	0
64.8	0
64.9	0
65	0
65.1	0
65.2	0
65.3	0
65.4	0
65.5	0
65.6	0
65.7	0
65.8	0
65.9	0
66	0
66.1	0
66.2	0
66.3	0
66.4	0
66.5	0
66.6	0
66.7	0
66.8	0
66.9	0
67	0
67.1	0
67.2	0
67.3	0
67.4	0
67.5	0
67.6	0
67.7	0
67.8	0
67.9	0
68	0
68.1	0
68.2	0
68.3	0
68.4	0
68.5	0
68.6	0
68.7	0
68.8	0
68.9	0
69	0
69.1	0
69.2	0
69.3	0
69.4	0
69.5	0
69.6	0
69.7	0
69.8	0
69.9	0
70	0
70.1	0
70.2	0
70.3	0
70.4	0
70.5	0
70.6	0
70.7	0
70.8	0
70.9	0
71	0
71.1	0
71.2	0
71.3	0
71.4	0
71.5	0
71.6	0
71.7	0
71.8	0
71.9	0
72	0
72.1	0
72.2	0
72.3	0
72.4	0
72.5	0
72.6	0
72.7	0
72.8	0
72.9	0
73	0
73.1	0
73.2	0
73.3	0
73.4	0
73.5	0
73.6	0
73.7	0
73.8	0
73.9	0
74	0
74.1	0
74.2	0
74.3	0
74.4	0
74.5	0
74.6	0
74.7	0
74.8	0
74.9	0
75	0
75.1	0
75.2	0
75.3	0
75.4	0
75.5	0
75.6	0
75.7	0
75.8	0
75.9	0
76	0
76.1	0
76.2	0
76.3	0
76.4	0
76.5	0
76.6	0
76.7	0
76.8	0
76.9	0
77	0
77.1	0
77.2	0
77.3	0
77.4	0
77.5	0
77.6	0
77.7	0
77.8	0
77.9	0
78	0
78.1	0
78.2	0
78.3	0
78.4	0
78.5	0
78.6	0
78.7	0
78.8	0
78.9	0
79	0
79.1	0
79.2	0
79.3	0
79.4	0
79.5	0
79.6	0
79.7	0
79.8	0
79.9	0
80	0
80.1	0
80.2	0
80.3	0
80.4	0
80.5	0
80.6	0
80.7	0
80.8	0
80.9	0
81	0
81.1	0
81.2	0
81.3	0
81.4	0
81.5	0
81.6	0
81.7	0
81.8	0
81.9	0
82	0
82.1	0
82.2	0
82.3	0
82.4	0
82.5	0
82.6	0
82.7	0
82.8	0
82.9	0
83	0
83.1	0
83.2	0
83.3	0
83.4	0
83.5	0
83.6	0
83.7	0
83.8	0
83.9	0
84	0
84.1	0
84.2	0
84.3	0
84.4	0
84.5	0
84.6	0
84.7	0
84.8	0
84.9	0
85	0
85.1	0
85.2	0
85.3	0
85.4	0
85.5	0
85.6	0
85.7	0
85.8	0
85.9	0
86	0
86.1	0
86.2	0
86.3	0
86.4	0
86.5	0
86.6	0
86.7	0
86.8	0
86.9	0
87	0
87.1	0
87.2	0
87.3	0
87.4	0
87.5	0
87.6	0
87.7	0
87.8	0
87.9	0
88	0
88.1	0
88.2	0
88.3	0
88.4	0
88.5	0
88.6	0
88.7	0
88.8	0
88.9	0
89	0
89.1	0
89.2	0
89.3	0
89.4	0
89.5	0
89.6	0
89.7	0
89.8	0
89.9	0
90	0
90.1	0
90.2	0
90.3	0
90.4	0
90.5	0
90.6	0
90.7	0
90.8	0
90.9	0
91	0
91.1	0
91.2	0
91.3	0
91.4	0
91.5	0
91.6	0
91.7	0
91.8	0
91.9	0
92	0
92.1	0
92.2	0
92.3	0
92.4	0
92.5	0
92.6	0
92.7	0
92.8	0
92.9	0
93	0
93.1	0
93.2	0
93.3	0
93.4	0
93.5	0
93.6	0
93.7	0
93.8	0
93.9	0
94	0
94.1	0
94.2	0
94.3	0
94.4	0
94.5	0
94.6	0
94.7	0
94.8	0
94.9	0
95	0
95.1	0
95.2	0
95.3	0
95.4	0
95.5	0
95.6	0
95.7	0
95.8	0
95.9	0
96	0
96.1	0
96.2	0
96.3	0
96.4	0
96.5	0
96.6	0
96.7	0
96.8	0
96.9	0
97	0
97.1	0
97.2	0
97.3	0
97.4	0
97.5	0
97.6	0
97.7	0
97.8	0
97.9	0
98	0
98.1	0
98.2	0
98.3	0
98.4	0
98.5	0
98.6	0
98.7	0
98.8	0
98.9	0
99	0
99.1	0
99.2	0
99.3	0
99.4	0
99.5	0
99.6	0
99.7	0
99.8	0
99.9	0
100	0
100.1	0
100.2	0.0025
100.3	0.0025
100.4	0.005
100.5	0.005
100.6	0.015
100.7	0.0225
100.8	0.0225
100.9	0.025
101	0.025
101.1	0.025
101.2	0.03
101.3	0.0425
101.4	0.045
101.5	0.0475
101.6	0.055
101.7	0.055
101.8	0.0575
101.9	0.0625
102	0.0625
102.1	0.0675
102.2	0.0725
102.3	0.0825
102.4	0.0875
102.5	0.09
102.6	0.0925
102.7	0.0925
102.8	0.095
102.9	0.1075
103	0.11
103.1	0.12
103.2	0.12
103.3	0.12
103.4	0.1225
103.5	0.13
103.6	0.1325
103.7	0.1325
103.8	0.1375
103.9	0.1425
104	0.155
104.1	0.16
104.2	0.16
104.3	0.1625
104.4	0.165
104.5	0.1725
104.6	0.1775
104.7	0.18
104.8	0.18
104.9	0.1875
105	0.1925
105.1	0.1975
105.2	0.2
105.3	0.205
105.4	0.21
105.5	0.215
105.6	0.2225
105.7	0.2225
105.8	0.225
105.9	0.2325
106	0.2375
106.1	0.235
106.2	0.24
106.3	0.2475
106.4	0.2475
106.5	0.25
106.6	0.2525
106.7	0.2625
106.8	0.27
106.9	0.27
107	0.27
107.1	0.2725
107.2	0.275
107.3	0.2725
107.4	0.2725
107.5	0.2775
107.6	0.28
107.7	0.2825
107.8	0.29
107.9	0.295
108	0.295
108.1	0.3
108.2	0.3025
108.3	0.3125
108.4	0.3125
108.5	0.32
108.6	0.3225
108.7	0.325
108.8	0.325
108.9	0.3275
109	0.325
109.1	0.325
109.2	0.3275
109.3	0.34
109.4	0.34
109.5	0.345
109.6	0.345
109.7	0.345
109.8	0.3475
109.9	0.355
110	0.3575
110.1	0.36
110.2	0.365
110.3	0.37
110.4	0.3725
110.5	0.375
110.6	0.3775
110.7	0.3775
110.8	0.38
110.9	0.385
111	0.385
111.1	0.385
111.2	0.385
111.3	0.3975
111.4	0.4
111.5	0.4025
111.6	0.4075
111.7	0.4125
111.8	0.415
111.9	0.415
112	0.42
112.1	0.425
112.2	0.425
112.3	0.4225
112.4	0.4225
112.5	0.425
112.6	0.4225
112.7	0.425
112.8	0.4275
112.9	0.4275
113	0.4325
113.1	0.435
113.2	0.4375
113.3	0.4375
113.4	0.44
113.5	0.4475
113.6	0.4525
113.7	0.4575
113.8	0.46
113.9	0.4625
114	0.4675
114.1	0.47
114.2	0.4725
114.3	0.4725
114.4	0.4825
114.5	0.48
114.6	0.48
114.7	0.485
114.8	0.485
114.9	0.485
115	0.485
115.1	0.4875
115.2	0.4875
115.3	0.4925
115.4	0.495
115.5	0.5
115.6	0.5025
115.7	0.5025
115.8	0.505
115.9	0.5075
116	0.51
116.1	0.5125
116.2	0.5125
116.3	0.5125
116.4	0.5125
116.5	0.5125
116.6	0.5125
116.7	0.5125
116.8	0.515
116.9	0.515
117	0.515
117.1	0.515
117.2	0.515
117.3	0.515
117.4	0.515
117.5	0.5175
117.6	0.5175
117.7	0.5225
117.8	0.5225
117.9	0.525
118	0.5275
118.1	0.5275
118.2	0.54
118.3	0.54
118.4	0.5425
118.5	0.5425
118.6	0.5425
118.7	0.545
118.8	0.545
118.9	0.545
119	0.5425
119.1	0.5425
119.2	0.5475
119.3	0.55
119.4	0.5525
119.5	0.555
119.6	0.555
119.7	0.5575
119.8	0.56
119.9	0.5625
120	0.5675
120.1	0.5675
120.2	0.5675
120.3	0.57
120.4	0.57
120.5	0.57
120.6	0.575
120.7	0.575
120.8	0.58
120.9	0.5775
121	0.58
121.1	0.5825
121.2	0.585
121.3	0.5875
121.4	0.5875
121.5	0.5875
121.6	0.59
121.7	0.5925
121.8	0.595
121.9	0.595
122	0.595
122.1	0.595
122.2	0.6
122.3	0.6
122.4	0.6
122.5	0.6025
122.6	0.605
122.7	0.6025
122.8	0.6025
122.9	0.605
123	0.61
123.1	0.61
123.2	0.61
123.3	0.6075
123.4	0.61
123.5	0.6075
123.6	0.615
123.7	0.6175
123.8	0.625
123.9	0.6275
124	0.6275
124.1	0.63
124.2	0.6325
124.3	0.635
124.4	0.635
124.5	0.6375
124.6	0.6375
124.7	0.64
124.8	0.64
124.9	0.6375
125	0.6375
125.1	0.6425
125.2	0.64
125.3	0.6375
125.4	0.6375
125.5	0.64
125.6	0.64
125.7	0.64
125.8	0.64
125.9	0.6375
126	0.64
126.1	0.6475
126.2	0.6475
126.3	0.6525
126.4	0.655
126.5	0.655
126.6	0.655
126.7	0.6575
126.8	0.6575
126.9	0.6575
127	0.655
127.1	0.655
127.2	0.6575
127.3	0.6625
127.4	0.6625
127.5	0.665
127.6	0.665
127.7	0.6675
127.8	0.67
127.9	0.6675
128	0.67
128.1	0.67
128.2	0.67
128.3	0.6725
128.4	0.6725
128.5	0.6725
128.6	0.6675
128.7	0.67
128.8	0.675
128.9	0.675
129	0.6775
129.1	0.68
129.2	0.68
129.3	0.6825
129.4	0.68
129.5	0.685
129.6	0.6875
129.7	0.6875
129.8	0.69
129.9	0.69
130	0.6925
130.1	0.695
130.2	0.6925
130.3	0.6975
130.4	0.7
130.5	0.7
130.6	0.7
130.7	0.7
130.8	0.6975
130.9	0.6975
131	0.6975
131.1	0.6975
131.2	0.6975
131.3	0.6975
131.4	0.6975
131.5	0.6975
131.6	0.6975
131.7	0.6975
131.8	0.6975
131.9	0.7025
132	0.6975
132.1	0.7025
132.2	0.7075
132.3	0.7075
132.4	0.7075
132.5	0.7075
132.6	0.7075
132.7	0.7075
132.8	0.7125
132.9	0.715
133	0.7225
133.1	0.72
133.2	0.72
133.3	0.72
133.4	0.72
133.5	0.72
133.6	0.715
133.7	0.7175
133.8	0.7175
133.9	0.7175
134	0.7175
134.1	0.72
134.2	0.725
134.3	0.7225
134.4	0.725
134.5	0.73
134.6	0.7325
134.7	0.7325
134.8	0.7325
134.9	0.73
135	0.735
135.1	0.7325
135.2	0.7325
135.3	0.735
135.4	0.735
135.5	0.735
135.6	0.74
135.7	0.74
135.8	0.74
135.9	0.745
136	0.7475
136.1	0.745
136.2	0.745
136.3	0.7425
136.4	0.745
136.5	0.7425
136.6	0.7425
136.7	0.745
136.8	0.7425
136.9	0.745
137	0.7475
137.1	0.75
137.2	0.7525
137.3	0.7525
137.4	0.755
137.5	0.755
137.6	0.755
137.7	0.755
137.8	0.7575
137.9	0.7575
138	0.7575
138.1	0.7575
138.2	0.7575
138.3	0.76
138.4	0.76
138.5	0.7625
138.6	0.76
138.7	0.7625
138.8	0.7625
138.9	0.7625
139	0.7625
139.1	0.7575
139.2	0.7575
139.3	0.7575
139.4	0.7575
139.5	0.7575
139.6	0.7625
139.7	0.7625
139.8	0.765
139.9	0.7675
140	0.7675
140.1	0.7675
140.2	0.7675
140.3	0.7725
140.4	0.775
140.5	0.7725
140.6	0.7675
140.7	0.77
140.8	0.7725
140.9	0.7725
141	0.7725
141.1	0.7725
141.2	0.7725
141.3	0.7725
141.4	0.775
141.5	0.775
141.6	0.775
141.7	0.775
141.8	0.7725
141.9	0.775
142	0.775
142.1	0.775
142.2	0.7725
142.3	0.7725
142.4	0.7725
142.5	0.775
142.6	0.775
142.7	0.775
142.8	0.775
142.9	0.7775
143	0.7775
143.1	0.7775
143.2	0.7775
143.3	0.7775
143.4	0.7775
143.5	0.78
143.6	0.78
143.7	0.7825
143.8	0.7825
143.9	0.785
144	0.79
144.1	0.7875
144.2	0.7875
144.3	0.79
144.4	0.79
144.5	0.79
144.6	0.79
144.7	0.79
144.8	0.7875
144.9	0.79
145	0.7925
145.1	0.795
145.2	0.795
145.3	0.7975
145.4	0.7875
145.5	0.7875
145.6	0.7875
145.7	0.785
145.8	0.7875
145.9	0.7875
146	0.7875
146.1	0.79
146.2	0.79
146.3	0.795
146.4	0.795
146.5	0.7975
146.6	0.7975
146.7	0.7975
146.8	0.7975
146.9	0.7975
147	0.7975
147.1	0.7975
147.2	0.7975
147.3	0.7975
147.4	0.7975
147.5	0.7975
147.6	0.795
147.7	0.7975
147.8	0.7975
147.9	0.7975
148	0.8
148.1	0.8
148.2	0.8
148.3	0.8025
148.4	0.7975
148.5	0.7975
148.6	0.795
148.7	0.7975
148.8	0.7975
148.9	0.7975
149	0.7975
149.1	0.795
149.2	0.8025
149.3	0.8
149.4	0.7925
149.5	0.7925
149.6	0.7925
149.7	0.79
149.8	0.79
149.9	0.79
150	0.7875
150.1	0.785
150.2	0.785
150.3	0.7825
150.4	0.7825
150.5	0.785
150.6	0.785
150.7	0.7875
150.8	0.7875
150.9	0.7875
151	0.785
151.1	0.7825
151.2	0.7825
151.3	0.785
151.4	0.785
151.5	0.785
151.6	0.785
151.7	0.785
151.8	0.7875
151.9	0.7875
152	0.7875
152.1	0.7875
152.2	0.7875
152.3	0.785
152.4	0.785
152.5	0.785
152.6	0.785
152.7	0.7875
152.8	0.79
152.9	0.785
153	0.785
153.1	0.7875
153.2	0.7875
153.3	0.7875
153.4	0.7875
153.5	0.7875
153.6	0.7875
153.7	0.7925
153.8	0.7925
153.9	0.7875
154	0.7875
154.1	0.7875
154.2	0.7875
154.3	0.7875
154.4	0.79
154.5	0.795
154.6	0.795
154.7	0.795
154.8	0.795
154.9	0.7975
155	0.7975
155.1	0.8
155.2	0.8
155.3	0.8
155.4	0.8
155.5	0.8
155.6	0.7975
155.7	0.795
155.8	0.795
155.9	0.795
156	0.7975
156.1	0.8
156.2	0.8
156.3	0.8
156.4	0.8025
156.5	0.805
156.6	0.805
156.7	0.805
156.8	0.8075
156.9	0.8075
157	0.8075
157.1	0.805
157.2	0.805
157.3	0.805
157.4	0.805
157.5	0.8025
157.6	0.8025
157.7	0.8
157.8	0.7975
157.9	0.795
158	0.7925
158.1	0.7925
158.2	0.7925
158.3	0.795
158.4	0.795
158.5	0.7975
158.6	0.7975
158.7	0.795
158.8	0.795
158.9	0.795
159	0.795
159.1	0.795
159.2	0.795
159.3	0.7875
159.4	0.785
159.5	0.785
159.6	0.7825
159.7	0.7825
159.8	0.7825
159.9	0.7825
160	0.785
160.1	0.7875
160.2	0.7875
160.3	0.79
160.4	0.7925
160.5	0.79
160.6	0.79
160.7	0.7925
160.8	0.795
160.9	0.7925
161	0.79
161.1	0.7875
161.2	0.7875
161.3	0.785
161.4	0.7875
161.5	0.785
161.6	0.7875
161.7	0.7875
161.8	0.7875
161.9	0.7875
162	0.7875
162.1	0.7875
162.2	0.78
162.3	0.7825
162.4	0.78
162.5	0.7825
162.6	0.7825
162.7	0.7825
162.8	0.78
162.9	0.78
163	0.7825
163.1	0.7825
163.2	0.7825
163.3	0.78
163.4	0.78
163.5	0.78
163.6	0.7825
163.7	0.7825
163.8	0.78
163.9	0.78
164	0.7825
164.1	0.78
164.2	0.7825
164.3	0.7825
164.4	0.7825
164.5	0.785
164.6	0.785
164.7	0.785
164.8	0.7825
164.9	0.7825
165	0.7825
165.1	0.7825
165.2	0.7875
165.3	0.79
165.4	0.795
165.5	0.795
165.6	0.7925
165.7	0.7925
165.8	0.79
165.9	0.79
166	0.7925
166.1	0.79
166.2	0.79
166.3	0.79
166.4	0.7875
166.5	0.785
166.6	0.785
166.7	0.785
166.8	0.785
166.9	0.785
167	0.785
167.1	0.7825
167.2	0.7825
167.3	0.7825
167.4	0.785
167.5	0.785
167.6	0.785
167.7	0.7825
167.8	0.7825
167.9	0.7825
168	0.785
168.1	0.7825
168.2	0.7825
168.3	0.7825
168.4	0.78
168.5	0.7775
168.6	0.7775
168.7	0.7775
168.8	0.7775
168.9	0.78
169	0.7775
169.1	0.7775
169.2	0.7775
169.3	0.7775
169.4	0.7775
169.5	0.78
169.6	0.78
169.7	0.7825
169.8	0.78
169.9	0.78
170	0.7825
170.1	0.785
170.2	0.785
170.3	0.78
170.4	0.78
170.5	0.7825
170.6	0.7825
170.7	0.7825
170.8	0.7825
170.9	0.7825
171	0.7825
171.1	0.78
171.2	0.78
171.3	0.78
171.4	0.775
171.5	0.775
171.6	0.7775
171.7	0.78
171.8	0.7825
171.9	0.785
172	0.785
172.1	0.785
172.2	0.7825
172.3	0.78
172.4	0.7825
172.5	0.7825
172.6	0.7825
172.7	0.7775
172.8	0.7825
172.9	0.785
173	0.785
173.1	0.785
173.2	0.7875
173.3	0.7875
173.4	0.7875
173.5	0.785
173.6	0.785
173.7	0.79
173.8	0.7875
173.9	0.7875
174	0.7875
174.1	0.7875
174.2	0.785
174.3	0.79
174.4	0.7875
174.5	0.785
174.6	0.785
174.7	0.785
174.8	0.785
174.9	0.785
175	0.7875
175.1	0.7875
175.2	0.7875
175.3	0.79
175.4	0.79
175.5	0.7925
175.6	0.7925
175.7	0.795
175.8	0.795
175.9	0.795
176	0.7975
176.1	0.7975
176.2	0.7975
176.3	0.795
176.4	0.795
176.5	0.7925
176.6	0.7925
176.7	0.795
176.8	0.8
176.9	0.7975
177	0.8
177.1	0.805
177.2	0.805
177.3	0.805
177.4	0.805
177.5	0.805
177.6	0.805
177.7	0.805
177.8	0.805
177.9	0.805
178	0.8075
178.1	0.8075
178.2	0.8075
178.3	0.8075
178.4	0.81
178.5	0.81
178.6	0.8075
178.7	0.8075
178.8	0.8075
178.9	0.8075
179	0.8075
179.1	0.8075
179.2	0.8075
179.3	0.805
179.4	0.8075
179.5	0.8075
179.6	0.81
179.7	0.81
179.8	0.81
179.9	0.8125
180	0.8125
180.1	0.8125
180.2	0.8125
180.3	0.8175
180.4	0.8175
180.5	0.8175
180.6	0.8175
180.7	0.815
180.8	0.8175
180.9	0.815
181	0.815
181.1	0.815
181.2	0.8175
181.3	0.82
181.4	0.82
181.5	0.82
181.6	0.82
181.7	0.825
181.8	0.825
181.9	0.825
182	0.8275
182.1	0.83
182.2	0.8275
182.3	0.8275
182.4	0.8275
182.5	0.825
182.6	0.8225
182.7	0.8225
182.8	0.8225
182.9	0.8225
183	0.8225
183.1	0.8225
183.2	0.825
183.3	0.8225
183.4	0.8225
183.5	0.825
183.6	0.825
183.7	0.825
183.8	0.825
183.9	0.8275
184	0.83
184.1	0.8325
184.2	0.8325
184.3	0.8325
184.4	0.835
184.5	0.835
184.6	0.835
184.7	0.835
184.8	0.835
184.9	0.835
185	0.8375
185.1	0.84
185.2	0.84
185.3	0.8425
185.4	0.8425
185.5	0.835
185.6	0.8375
185.7	0.8375
185.8	0.8375
185.9	0.84
186	0.84
186.1	0.84
186.2	0.8425
186.3	0.8425
186.4	0.84
186.5	0.8425
186.6	0.8425
186.7	0.84
186.8	0.8425
186.9	0.84
187	0.8375
187.1	0.835
187.2	0.83
187.3	0.8275
187.4	0.825
187.5	0.825
187.6	0.825
187.7	0.825
187.8	0.8275
187.9	0.825
188	0.825
188.1	0.8225
188.2	0.8225
188.3	0.825
188.4	0.825
188.5	0.8225
188.6	0.8225
188.7	0.8225
188.8	0.82
188.9	0.8175
189	0.8175
189.1	0.8125
189.2	0.815
189.3	0.815
189.4	0.815
189.5	0.8175
189.6	0.8175
189.7	0.8175
189.8	0.8175
189.9	0.8175
190	0.8175
190.1	0.8175
190.2	0.82
190.3	0.8225
190.4	0.8225
190.5	0.8175
190.6	0.8175
190.7	0.815
190.8	0.81
190.9	0.8075
191	0.8075
191.1	0.81
191.2	0.8075
191.3	0.8075
191.4	0.8075
191.5	0.8075
191.6	0.8075
191.7	0.81
191.8	0.805
191.9	0.805
192	0.805
192.1	0.805
192.2	0.805
192.3	0.805
192.4	0.8075
192.5	0.8075
192.6	0.81
192.7	0.81
192.8	0.81
192.9	0.81
193	0.81
193.1	0.815
193.2	0.815
193.3	0.8175
193.4	0.8225
193.5	0.82
193.6	0.82
193.7	0.82
193.8	0.8175
193.9	0.8175
194	0.8175
194.1	0.8175
194.2	0.8175
194.3	0.8175
194.4	0.8125
194.5	0.8125
194.6	0.81
194.7	0.81
194.8	0.81
194.9	0.8075
195	0.8075
195.1	0.805
195.2	0.805
195.3	0.805
195.4	0.8075
195.5	0.8075
195.6	0.815
195.7	0.81
195.8	0.8075
195.9	0.8075
196	0.805
196.1	0.805
196.2	0.805
196.3	0.805
196.4	0.805
196.5	0.8075
196.6	0.8075
196.7	0.8075
196.8	0.81
196.9	0.81
197	0.81
197.1	0.81
197.2	0.8125
197.3	0.8125
197.4	0.815
197.5	0.815
197.6	0.815
197.7	0.815
197.8	0.8125
197.9	0.81
198	0.81
198.1	0.81
198.2	0.8125
198.3	0.8125
198.4	0.8125
198.5	0.8125
198.6	0.815
198.7	0.8175
198.8	0.82
198.9	0.82
199	0.8225
199.1	0.8225
199.2	0.8225
199.3	0.8225
199.4	0.8225
199.5	0.8225
199.6	0.825
199.7	0.82
199.8	0.82
199.9	0.82
200	0.8225
[truncated: 14,000 more rows]
