# Supplementary material for: Bayesian inference of kinetic schemes for ion channels by Kalman filtering
Source: eLife journal article supplement (doi:10.7554/elife.62714), 2022-05-04
Supplement: fig4-data3 [file 1_Sim_N_500_Fluor_MW.xlsx]

## Sheet: Tabelle1
0.1	0
0.2	0
0.3	0
0.4	0
0.5	0
0.6	0
0.7	0
0.8	0
0.9	0
1	0
1.1	0
1.2	0
1.3	0
1.4	0
1.5	0
1.6	0
1.7	0
1.8	0
1.9	0
2	0
2.1	0
2.2	0
2.3	0
2.4	0
2.5	0
2.6	0
2.7	0
2.8	0
2.9	0
3	0
3.1	0
3.2	0
3.3	0
3.4	0
3.5	0
3.6	0
3.7	0
3.8	0
3.9	0
4	0
4.1	0
4.2	0
4.3	0
4.4	0
4.5	0
4.6	0
4.7	0
4.8	0
4.9	0
5	0
5.1	0
5.2	0
5.3	0
5.4	0
5.5	0
5.6	0
5.7	0
5.8	0
5.9	0
6	0
6.1	0
6.2	0
6.3	0
6.4	0
6.5	0
6.6	0
6.7	0
6.8	0
6.9	0
7	0
7.1	0
7.2	0
7.3	0
7.4	0
7.5	0
7.6	0
7.7	0
7.8	0
7.9	0
8	0
8.1	0
8.2	0
8.3	0
8.4	0
8.5	0
8.6	0
8.7	0
8.8	0
8.9	0
9	0
9.1	0
9.2	0
9.3	0
9.4	0
9.5	0
9.6	0
9.7	0
9.8	0
9.9	0
10	0
10.1	0
10.2	0
10.3	0
10.4	0
10.5	0
10.6	0
10.7	0
10.8	0
10.9	0
11	0
11.1	0
11.2	0
11.3	0
11.4	0
11.5	0
11.6	0
11.7	0
11.8	0
11.9	0
12	0
12.1	0
12.2	0
12.3	0
12.4	0
12.5	0
12.6	0
12.7	0
12.8	0
12.9	0
13	0
13.1	0
13.2	0
13.3	0
13.4	0
13.5	0
13.6	0
13.7	0
13.8	0
13.9	0
14	0
14.1	0
14.2	0
14.3	0
14.4	0
14.5	0
14.6	0
14.7	0
14.8	0
14.9	0
15	0
15.1	0
15.2	0
15.3	0
15.4	0
15.5	0
15.6	0
15.7	0
15.8	0
15.9	0
16	0
16.1	0
16.2	0
16.3	0
16.4	0
16.5	0
16.6	0
16.7	0
16.8	0
16.9	0
17	0
17.1	0
17.2	0
17.3	0
17.4	0
17.5	0
17.6	0
17.7	0
17.8	0
17.9	0
18	0
18.1	0
18.2	0
18.3	0
18.4	0
18.5	0
18.6	0
18.7	0
18.8	0
18.9	0
19	0
19.1	0
19.2	0
19.3	0
19.4	0
19.5	0
19.6	0
19.7	0
19.8	0
19.9	0
20	0
20.1	0
20.2	0
20.3	0
20.4	0
20.5	0
20.6	0
20.7	0
20.8	0
20.9	0
21	0
21.1	0
21.2	0
21.3	0
21.4	0
21.5	0
21.6	0
21.7	0
21.8	0
21.9	0
22	0
22.1	0
22.2	0
22.3	0
22.4	0
22.5	0
22.6	0
22.7	0
22.8	0
22.9	0
23	0
23.1	0
23.2	0
23.3	0
23.4	0
23.5	0
23.6	0
23.7	0
23.8	0
23.9	0
24	0
24.1	0
24.2	0
24.3	0
24.4	0
24.5	0
24.6	0
24.7	0
24.8	0
24.9	0
25	0
25.1	0
25.2	0
25.3	0
25.4	0
25.5	0
25.6	0
25.7	0
25.8	0
25.9	0
26	0
26.1	0
26.2	0
26.3	0
26.4	0
26.5	0
26.6	0
26.7	0
26.8	0
26.9	0
27	0
27.1	0
27.2	0
27.3	0
27.4	0
27.5	0
27.6	0
27.7	0
27.8	0
27.9	0
28	0
28.1	0
28.2	0
28.3	0
28.4	0
28.5	0
28.6	0
28.7	0
28.8	0
28.9	0
29	0
29.1	0
29.2	0
29.3	0
29.4	0
29.5	0
29.6	0
29.7	0
29.8	0
29.9	0
30	0
30.1	0
30.2	0
30.3	0
30.4	0
30.5	0
30.6	0
30.7	0
30.8	0
30.9	0
31	0
31.1	0
31.2	0
31.3	0
31.4	0
31.5	0
31.6	0
31.7	0
31.8	0
31.9	0
32	0
32.1	0
32.2	0
32.3	0
32.4	0
32.5	0
32.6	0
32.7	0
32.8	0
32.9	0
33	0
33.1	0
33.2	0
33.3	0
33.4	0
33.5	0
33.6	0
33.7	0
33.8	0
33.9	0
34	0
34.1	0
34.2	0
34.3	0
34.4	0
34.5	0
34.6	0
34.7	0
34.8	0
34.9	0
35	0
35.1	0
35.2	0
35.3	0
35.4	0
35.5	0
35.6	0
35.7	0
35.8	0
35.9	0
36	0
36.1	0
36.2	0
36.3	0
36.4	0
36.5	0
36.6	0
36.7	0
36.8	0
36.9	0
37	0
37.1	0
37.2	0
37.3	0
37.4	0
37.5	0
37.6	0
37.7	0
37.8	0
37.9	0
38	0
38.1	0
38.2	0
38.3	0
38.4	0
38.5	0
38.6	0
38.7	0
38.8	0
38.9	0
39	0
39.1	0
39.2	0
39.3	0
39.4	0
39.5	0
39.6	0
39.7	0
39.8	0
39.9	0
40	0
40.1	0
40.2	0
40.3	0
40.4	0
40.5	0
40.6	0
40.7	0
40.8	0
40.9	0
41	0
41.1	0
41.2	0
41.3	0
41.4	0
41.5	0
41.6	0
41.7	0
41.8	0
41.9	0
42	0
42.1	0
42.2	0
42.3	0
42.4	0
42.5	0
42.6	0
42.7	0
42.8	0
42.9	0
43	0
43.1	0
43.2	0
43.3	0
43.4	0
43.5	0
43.6	0
43.7	0
43.8	0
43.9	0
44	0
44.1	0
44.2	0
44.3	0
44.4	0
44.5	0
44.6	0
44.7	0
44.8	0
44.9	0
45	0
45.1	0
45.2	0
45.3	0
45.4	0
45.5	0
45.6	0
45.7	0
45.8	0
45.9	0
46	0
46.1	0
46.2	0
46.3	0
46.4	0
46.5	0
46.6	0
46.7	0
46.8	0
46.9	0
47	0
47.1	0
47.2	0
47.3	0
47.4	0
47.5	0
47.6	0
47.7	0
47.8	0
47.9	0
48	0
48.1	0
48.2	0
48.3	0
48.4	0
48.5	0
48.6	0
48.7	0
48.8	0
48.9	0
49	0
49.1	0
49.2	0
49.3	0
49.4	0
49.5	0
49.6	0
49.7	0
49.8	0
49.9	0
50	0
50.1	0
50.2	0
50.3	0
50.4	0
50.5	0
50.6	0
50.7	0
50.8	0
50.9	0
51	0
51.1	0
51.2	0
51.3	0
51.4	0
51.5	0
51.6	0
51.7	0
51.8	0
51.9	0
52	0
52.1	0
52.2	0
52.3	0
52.4	0
52.5	0
52.6	0
52.7	0
52.8	0
52.9	0
53	0
53.1	0
53.2	0
53.3	0
53.4	0
53.5	0
53.6	0
53.7	0
53.8	0
53.9	0
54	0
54.1	0
54.2	0
54.3	0
54.4	0
54.5	0
54.6	0
54.7	0
54.8	0
54.9	0
55	0
55.1	0
55.2	0
55.3	0
55.4	0
55.5	0
55.6	0
55.7	0
55.8	0
55.9	0
56	0
56.1	0
56.2	0
56.3	0
56.4	0
56.5	0
56.6	0
56.7	0
56.8	0
56.9	0
57	0
57.1	0
57.2	0
57.3	0
57.4	0
57.5	0
57.6	0
57.7	0
57.8	0
57.9	0
58	0
58.1	0
58.2	0
58.3	0
58.4	0
58.5	0
58.6	0
58.7	0
58.8	0
58.9	0
59	0
59.1	0
59.2	0
59.3	0
59.4	0
59.5	0
59.6	0
59.7	0
59.8	0
59.9	0
60	0
60.1	0
60.2	0
60.3	0
60.4	0
60.5	0
60.6	0
60.7	0
60.8	0
60.9	0
61	0
61.1	0
61.2	0
61.3	0
61.4	0
61.5	0
61.6	0
61.7	0
61.8	0
61.9	0
62	0
62.1	0
62.2	0
62.3	0
62.4	0
62.5	0
62.6	0
62.7	0
62.8	0
62.9	0
63	0
63.1	0
63.2	0
63.3	0
63.4	0
63.5	0
63.6	0
63.7	0
63.8	0
63.9	0
64	0
64.1	0
64.2	0
64.3	0
64.4	0
64.5	0
64.6	0
64.7	0
64.8	0
64.9	0
65	0
65.1	0
65.2	0
65.3	0
65.4	0
65.5	0
65.6	0
65.7	0
65.8	0
65.9	0
66	0
66.1	0
66.2	0
66.3	0
66.4	0
66.5	0
66.6	0
66.7	0
66.8	0
66.9	0
67	0
67.1	0
67.2	0
67.3	0
67.4	0
67.5	0
67.6	0
67.7	0
67.8	0
67.9	0
68	0
68.1	0
68.2	0
68.3	0
68.4	0
68.5	0
68.6	0
68.7	0
68.8	0
68.9	0
69	0
69.1	0
69.2	0
69.3	0
69.4	0
69.5	0
69.6	0
69.7	0
69.8	0
69.9	0
70	0
70.1	0
70.2	0
70.3	0
70.4	0
70.5	0
70.6	0
70.7	0
70.8	0
70.9	0
71	0
71.1	0
71.2	0
71.3	0
71.4	0
71.5	0
71.6	0
71.7	0
71.8	0
71.9	0
72	0
72.1	0
72.2	0
72.3	0
72.4	0
72.5	0
72.6	0
72.7	0
72.8	0
72.9	0
73	0
73.1	0
73.2	0
73.3	0
73.4	0
73.5	0
73.6	0
73.7	0
73.8	0
73.9	0
74	0
74.1	0
74.2	0
74.3	0
74.4	0
74.5	0
74.6	0
74.7	0
74.8	0
74.9	0
75	0
75.1	0
75.2	0
75.3	0
75.4	0
75.5	0
75.6	0
75.7	0
75.8	0
75.9	0
76	0
76.1	0
76.2	0
76.3	0
76.4	0
76.5	0
76.6	0
76.7	0
76.8	0
76.9	0
77	0
77.1	0
77.2	0
77.3	0
77.4	0
77.5	0
77.6	0
77.7	0
77.8	0
77.9	0
78	0
78.1	0
78.2	0
78.3	0
78.4	0
78.5	0
78.6	0
78.7	0
78.8	0
78.9	0
79	0
79.1	0
79.2	0
79.3	0
79.4	0
79.5	0
79.6	0
79.7	0
79.8	0
79.9	0
80	0
80.1	0
80.2	0
80.3	0
80.4	0
80.5	0
80.6	0
80.7	0
80.8	0
80.9	0
81	0
81.1	0
81.2	0
81.3	0
81.4	0
81.5	0
81.6	0
81.7	0
81.8	0
81.9	0
82	0
82.1	0
82.2	0
82.3	0
82.4	0
82.5	0
82.6	0
82.7	0
82.8	0
82.9	0
83	0
83.1	0
83.2	0
83.3	0
83.4	0
83.5	0
83.6	0
83.7	0
83.8	0
83.9	0
84	0
84.1	0
84.2	0
84.3	0
84.4	0
84.5	0
84.6	0
84.7	0
84.8	0
84.9	0
85	0
85.1	0
85.2	0
85.3	0
85.4	0
85.5	0
85.6	0
85.7	0
85.8	0
85.9	0
86	0
86.1	0
86.2	0
86.3	0
86.4	0
86.5	0
86.6	0
86.7	0
86.8	0
86.9	0
87	0
87.1	0
87.2	0
87.3	0
87.4	0
87.5	0
87.6	0
87.7	0
87.8	0
87.9	0
88	0
88.1	0
88.2	0
88.3	0
88.4	0
88.5	0
88.6	0
88.7	0
88.8	0
88.9	0
89	0
89.1	0
89.2	0
89.3	0
89.4	0
89.5	0
89.6	0
89.7	0
89.8	0
89.9	0
90	0
90.1	0
90.2	0
90.3	0
90.4	0
90.5	0
90.6	0
90.7	0
90.8	0
90.9	0
91	0
91.1	0
91.2	0
91.3	0
91.4	0
91.5	0
91.6	0
91.7	0
91.8	0
91.9	0
92	0
92.1	0
92.2	0
92.3	0
92.4	0
92.5	0
92.6	0
92.7	0
92.8	0
92.9	0
93	0
93.1	0
93.2	0
93.3	0
93.4	0
93.5	0
93.6	0
93.7	0
93.8	0
93.9	0
94	0
94.1	0
94.2	0
94.3	0
94.4	0
94.5	0
94.6	0
94.7	0
94.8	0
94.9	0
95	0
95.1	0
95.2	0
95.3	0
95.4	0
95.5	0
95.6	0
95.7	0
95.8	0
95.9	0
96	0
96.1	0
96.2	0
96.3	0
96.4	0
96.5	0
96.6	0
96.7	0
96.8	0
96.9	0
97	0
97.1	0
97.2	0
97.3	0
97.4	0
97.5	0
97.6	0
97.7	0
97.8	0
97.9	0
98	0
98.1	0
98.2	0
98.3	0
98.4	0
98.5	0
98.6	0
98.7	0
98.8	0
98.9	0
99	0
99.1	0
99.2	0
99.3	0
99.4	0
99.5	0
99.6	0
99.7	0
99.8	0
99.9	0
100	0
100.1	0.734
100.2	0.88
100.3	0.942
100.4	0.968
100.5	0.974
100.6	0.978
100.7	0.98
100.8	0.986
100.9	0.98
101	0.974
101.1	0.975
101.2	0.973
101.3	0.978
101.4	0.976
101.5	0.976
101.6	0.978
101.7	0.981
101.8	0.982
101.9	0.972
102	0.98
102.1	0.975
102.2	0.982
102.3	0.982
102.4	0.98
102.5	0.973
102.6	0.977
102.7	0.976
102.8	0.964
102.9	0.975
103	0.982
103.1	0.975
103.2	0.975
103.3	0.977
103.4	0.979
103.5	0.973
103.6	0.977
103.7	0.972
103.8	0.983
103.9	0.985
104	0.983
104.1	0.982
104.2	0.975
104.3	0.979
104.4	0.982
104.5	0.98
104.6	0.983
104.7	0.985
104.8	0.984
104.9	0.981
105	0.973
105.1	0.973
105.2	0.984
105.3	0.984
105.4	0.986
105.5	0.982
105.6	0.976
105.7	0.978
105.8	0.979
105.9	0.985
106	0.981
106.1	0.984
106.2	0.987
106.3	0.984
106.4	0.98
106.5	0.978
106.6	0.985
106.7	0.986
106.8	0.98
106.9	0.985
107	0.985
107.1	0.993
107.2	0.981
107.3	0.984
107.4	0.978
107.5	0.981
107.6	0.98
107.7	0.979
107.8	0.979
107.9	0.978
108	0.985
108.1	0.985
108.2	0.981
108.3	0.976
108.4	0.987
108.5	0.983
108.6	0.986
108.7	0.985
108.8	0.983
108.9	0.985
109	0.989
109.1	0.992
109.2	0.979
109.3	0.977
109.4	0.982
109.5	0.988
109.6	0.989
109.7	0.982
109.8	0.987
109.9	0.989
110	0.991
110.1	0.984
110.2	0.991
110.3	0.99
110.4	0.985
110.5	0.988
110.6	0.982
110.7	0.984
110.8	0.981
110.9	0.982
111	0.981
111.1	0.986
111.2	0.986
111.3	0.981
111.4	0.985
111.5	0.986
111.6	0.984
111.7	0.989
111.8	0.987
111.9	0.987
112	0.983
112.1	0.99
112.2	0.992
112.3	0.99
112.4	0.99
112.5	0.989
112.6	0.986
112.7	0.986
112.8	0.983
112.9	0.984
113	0.982
113.1	0.983
113.2	0.984
113.3	0.987
113.4	0.985
113.5	0.984
113.6	0.985
113.7	0.984
113.8	0.986
113.9	0.989
114	0.986
114.1	0.987
114.2	0.99
114.3	0.989
114.4	0.99
114.5	0.993
114.6	0.991
114.7	0.986
114.8	0.985
114.9	0.989
115	0.986
115.1	0.986
115.2	0.986
115.3	0.992
115.4	0.993
115.5	0.988
115.6	0.993
115.7	0.989
115.8	0.99
115.9	0.99
116	0.991
116.1	0.988
116.2	0.984
116.3	0.99
116.4	0.984
116.5	0.985
116.6	0.982
116.7	0.984
116.8	0.987
116.9	0.989
117	0.984
117.1	0.987
117.2	0.982
117.3	0.987
117.4	0.992
117.5	0.99
117.6	0.985
117.7	0.988
117.8	0.994
117.9	0.989
118	0.981
118.1	0.983
118.2	0.985
118.3	0.99
118.4	0.989
118.5	0.989
118.6	0.988
118.7	0.983
118.8	0.989
118.9	0.991
119	0.985
119.1	0.991
119.2	0.991
119.3	0.984
119.4	0.991
119.5	0.994
119.6	0.989
119.7	0.987
119.8	0.989
119.9	0.986
120	0.989
120.1	0.99
120.2	0.991
120.3	0.991
120.4	0.985
120.5	0.989
120.6	0.991
120.7	0.993
120.8	0.993
120.9	0.991
121	0.985
121.1	0.987
121.2	0.989
121.3	0.991
121.4	0.99
121.5	0.993
121.6	0.993
121.7	0.986
121.8	0.985
121.9	0.99
122	0.986
122.1	0.994
122.2	0.99
122.3	0.99
122.4	0.989
122.5	0.984
122.6	0.985
122.7	0.988
122.8	0.993
122.9	0.991
123	0.991
123.1	0.995
123.2	0.993
123.3	0.991
123.4	0.993
123.5	0.994
123.6	0.988
123.7	0.99
123.8	0.987
123.9	0.988
124	0.992
124.1	0.99
124.2	0.99
124.3	0.984
124.4	0.988
124.5	0.989
124.6	0.993
124.7	0.993
124.8	0.993
124.9	0.989
125	0.991
125.1	0.994
125.2	0.991
125.3	0.989
125.4	0.989
125.5	0.99
125.6	0.993
125.7	0.993
125.8	0.992
125.9	0.992
126	0.99
126.1	0.991
126.2	0.992
126.3	0.996
126.4	0.992
126.5	0.993
126.6	0.988
126.7	0.993
126.8	0.991
126.9	0.998
127	0.993
127.1	0.996
127.2	0.996
127.3	0.992
127.4	0.993
127.5	0.988
127.6	0.99
127.7	0.988
127.8	0.989
127.9	0.991
128	0.992
128.1	0.992
128.2	0.993
128.3	0.991
128.4	0.989
128.5	0.998
128.6	0.993
128.7	0.99
128.8	0.986
128.9	0.991
129	0.99
129.1	0.992
129.2	0.994
129.3	0.992
129.4	0.989
129.5	0.992
129.6	0.99
129.7	0.99
129.8	0.992
129.9	0.993
130	0.995
130.1	0.989
130.2	0.993
130.3	0.993
130.4	0.994
130.5	0.995
130.6	0.993
130.7	0.994
130.8	0.997
130.9	0.995
131	0.997
131.1	0.994
131.2	0.994
131.3	0.996
131.4	0.996
131.5	0.991
131.6	0.992
131.7	0.994
131.8	0.992
131.9	0.993
132	0.993
132.1	0.988
132.2	0.99
132.3	0.99
132.4	0.993
132.5	0.991
132.6	0.998
132.7	0.995
132.8	0.994
132.9	0.992
133	0.993
133.1	0.99
133.2	0.99
133.3	0.99
133.4	0.989
133.5	0.994
133.6	0.987
133.7	0.997
133.8	0.994
133.9	0.994
134	0.994
134.1	0.994
134.2	0.997
134.3	0.995
134.4	0.992
134.5	0.993
134.6	0.99
134.7	0.991
134.8	0.995
134.9	0.99
135	0.994
135.1	0.993
135.2	0.993
135.3	0.993
135.4	0.99
135.5	0.988
135.6	0.989
135.7	0.992
135.8	0.993
135.9	0.995
136	0.99
136.1	0.987
136.2	0.992
136.3	0.992
136.4	0.993
136.5	0.992
136.6	0.993
136.7	0.996
136.8	0.996
136.9	0.994
137	0.994
137.1	0.998
137.2	0.995
137.3	0.993
137.4	0.994
137.5	0.992
137.6	0.993
137.7	0.996
137.8	0.996
137.9	0.994
138	0.996
138.1	0.995
138.2	0.992
138.3	0.994
138.4	0.994
138.5	0.992
138.6	0.991
138.7	0.995
138.8	0.988
138.9	0.992
139	0.99
139.1	0.992
139.2	0.992
139.3	0.991
139.4	0.994
139.5	0.997
139.6	0.996
139.7	0.995
139.8	0.996
139.9	0.997
140	0.997
140.1	0.997
140.2	0.994
140.3	0.994
140.4	0.995
140.5	0.991
140.6	0.991
140.7	0.99
140.8	0.987
140.9	0.992
141	0.997
141.1	0.997
141.2	0.996
141.3	0.992
141.4	0.993
141.5	0.994
141.6	0.995
141.7	0.995
141.8	0.996
141.9	0.995
142	0.995
142.1	0.994
142.2	0.992
142.3	0.994
142.4	0.993
142.5	0.99
142.6	0.991
142.7	0.992
142.8	0.996
142.9	0.997
143	0.995
143.1	0.997
143.2	0.997
143.3	0.993
143.4	0.994
143.5	0.997
143.6	0.996
143.7	0.994
143.8	0.995
143.9	0.995
144	0.996
144.1	0.996
144.2	0.992
144.3	0.991
144.4	0.993
144.5	0.993
144.6	0.993
144.7	0.991
144.8	0.992
144.9	0.991
145	0.991
145.1	0.995
145.2	0.995
145.3	0.992
145.4	0.992
145.5	0.989
145.6	0.993
145.7	0.995
145.8	0.995
145.9	0.995
146	0.998
146.1	0.997
146.2	0.997
146.3	0.995
146.4	0.996
146.5	0.994
146.6	0.991
146.7	0.993
146.8	0.991
146.9	0.989
147	0.99
147.1	0.995
147.2	0.995
147.3	0.996
147.4	0.99
147.5	0.992
147.6	0.998
147.7	0.987
147.8	0.994
147.9	0.994
148	0.993
148.1	0.995
148.2	0.996
148.3	0.995
148.4	0.996
148.5	0.994
148.6	0.989
148.7	0.994
148.8	0.996
148.9	0.997
149	0.996
149.1	0.992
149.2	0.991
149.3	0.993
149.4	0.995
149.5	0.993
149.6	0.995
149.7	0.996
149.8	0.996
149.9	0.989
150	0.994
150.1	0.995
150.2	0.997
150.3	0.992
150.4	0.99
150.5	0.991
150.6	0.996
150.7	0.994
150.8	0.996
150.9	0.995
151	0.994
151.1	0.997
151.2	0.996
151.3	0.995
151.4	0.995
151.5	0.996
151.6	0.994
151.7	0.995
151.8	0.994
151.9	0.996
152	0.993
152.1	0.995
152.2	0.994
152.3	0.995
152.4	0.996
152.5	0.995
152.6	0.995
152.7	0.997
152.8	0.994
152.9	0.996
153	0.989
153.1	0.994
153.2	0.995
153.3	0.992
153.4	0.996
153.5	0.995
153.6	0.997
153.7	0.996
153.8	0.995
153.9	0.992
154	0.992
154.1	0.99
154.2	0.991
154.3	0.993
154.4	0.993
154.5	0.992
154.6	0.993
154.7	0.993
154.8	0.987
154.9	0.991
155	0.993
155.1	0.995
155.2	0.995
155.3	0.995
155.4	0.996
155.5	0.995
155.6	0.995
155.7	0.99
155.8	0.994
155.9	0.993
156	0.996
156.1	0.996
156.2	0.995
156.3	0.992
156.4	0.993
156.5	0.994
156.6	0.996
156.7	0.991
156.8	0.996
156.9	0.994
157	0.993
157.1	0.994
157.2	0.994
157.3	0.993
157.4	0.995
157.5	0.997
157.6	0.998
157.7	0.996
157.8	0.994
157.9	0.995
158	0.996
158.1	0.995
158.2	0.994
158.3	0.996
158.4	0.995
158.5	0.997
158.6	0.997
158.7	0.994
158.8	0.997
158.9	0.993
159	0.995
159.1	0.999
159.2	0.996
159.3	0.996
159.4	0.997
159.5	0.994
159.6	0.994
159.7	0.994
159.8	0.996
159.9	0.997
160	0.996
160.1	0.993
160.2	0.996
160.3	0.996
160.4	0.995
160.5	0.996
160.6	0.995
160.7	0.996
160.8	0.992
160.9	0.994
161	0.992
161.1	0.993
161.2	0.994
161.3	0.994
161.4	0.995
161.5	0.994
161.6	0.992
161.7	0.992
161.8	0.995
161.9	0.994
162	0.994
162.1	0.992
162.2	0.991
162.3	0.993
162.4	0.989
162.5	0.995
162.6	0.997
162.7	0.993
162.8	0.995
162.9	0.997
163	0.997
163.1	0.997
163.2	0.995
163.3	0.998
163.4	0.998
163.5	0.994
163.6	0.995
163.7	0.993
163.8	0.996
163.9	0.992
164	0.997
164.1	0.993
164.2	0.994
164.3	0.998
164.4	0.999
164.5	0.999
164.6	1
164.7	1
164.8	0.994
164.9	0.995
165	0.993
165.1	0.997
165.2	0.996
165.3	0.996
165.4	0.995
165.5	0.995
165.6	0.995
165.7	0.994
165.8	0.997
165.9	0.997
166	0.996
166.1	0.996
166.2	0.997
166.3	0.995
166.4	0.995
166.5	0.993
166.6	0.994
166.7	0.998
166.8	0.998
166.9	0.993
167	0.997
167.1	0.998
167.2	0.998
167.3	0.999
167.4	0.998
167.5	0.992
167.6	0.99
167.7	0.992
167.8	0.992
167.9	0.997
168	0.997
168.1	0.997
168.2	0.996
168.3	0.994
168.4	0.993
168.5	0.996
168.6	0.994
168.7	0.995
168.8	0.994
168.9	0.996
169	0.996
169.1	0.995
169.2	0.994
169.3	1
169.4	0.997
169.5	0.994
169.6	0.994
169.7	0.992
169.8	0.995
169.9	0.997
170	0.994
170.1	0.994
170.2	0.996
170.3	0.995
170.4	0.995
170.5	0.989
170.6	0.994
170.7	0.993
170.8	0.994
170.9	0.997
171	0.995
171.1	0.995
171.2	0.996
171.3	0.99
171.4	0.995
171.5	0.997
171.6	0.996
171.7	0.998
171.8	0.997
171.9	0.997
172	0.999
172.1	0.997
172.2	0.997
172.3	0.998
172.4	0.996
172.5	0.995
172.6	0.998
172.7	0.996
172.8	0.994
172.9	0.992
173	0.993
173.1	0.995
173.2	0.995
173.3	0.993
173.4	0.998
173.5	0.996
173.6	0.996
173.7	0.994
173.8	0.993
173.9	0.997
174	1
174.1	0.993
174.2	0.994
174.3	0.997
174.4	0.997
174.5	0.996
174.6	0.998
174.7	0.998
174.8	0.996
174.9	0.995
175	0.998
175.1	0.994
175.2	0.996
175.3	0.998
175.4	0.997
175.5	0.999
175.6	0.994
175.7	0.993
175.8	0.998
175.9	0.995
176	0.995
176.1	0.991
176.2	0.995
176.3	0.996
176.4	0.998
176.5	0.997
176.6	0.994
176.7	0.996
176.8	0.996
176.9	0.995
177	0.996
177.1	0.998
177.2	0.997
177.3	0.997
177.4	0.998
177.5	0.997
177.6	0.998
177.7	0.998
177.8	0.997
177.9	0.995
178	0.995
178.1	0.993
178.2	0.994
178.3	0.999
178.4	0.995
178.5	0.997
178.6	0.994
178.7	0.998
178.8	0.997
178.9	0.996
179	0.998
179.1	0.993
179.2	0.993
179.3	0.994
179.4	0.996
179.5	0.997
179.6	0.991
179.7	0.993
179.8	0.992
179.9	0.994
180	0.996
180.1	0.993
180.2	0.997
180.3	0.995
180.4	0.997
180.5	0.996
180.6	0.994
180.7	0.995
180.8	0.997
180.9	0.997
181	0.998
181.1	0.994
181.2	0.995
181.3	0.995
181.4	0.994
181.5	0.993
181.6	0.992
181.7	0.995
181.8	0.993
181.9	0.998
182	0.995
182.1	0.995
182.2	0.992
182.3	0.993
182.4	0.994
182.5	0.993
182.6	0.996
182.7	0.997
182.8	0.996
182.9	0.994
183	0.992
183.1	0.996
183.2	0.992
183.3	0.994
183.4	0.997
183.5	0.997
183.6	0.998
183.7	0.996
183.8	0.996
183.9	0.993
184	0.994
184.1	0.996
184.2	0.996
184.3	0.994
184.4	0.995
184.5	0.998
184.6	0.996
184.7	0.994
184.8	0.995
184.9	0.997
185	0.997
185.1	0.994
185.2	0.996
185.3	0.996
185.4	0.997
185.5	0.993
185.6	0.994
185.7	0.998
185.8	0.994
185.9	0.997
186	0.993
186.1	0.997
186.2	0.995
186.3	0.995
186.4	0.994
186.5	0.996
186.6	0.995
186.7	0.994
186.8	0.995
186.9	0.996
187	0.996
187.1	0.993
187.2	0.993
187.3	0.996
187.4	0.998
187.5	0.997
187.6	0.998
187.7	0.998
187.8	0.996
187.9	0.997
188	0.997
188.1	0.994
188.2	0.994
188.3	0.994
188.4	0.995
188.5	0.995
188.6	0.998
188.7	0.997
188.8	0.998
188.9	0.994
189	0.997
189.1	0.995
189.2	0.991
189.3	0.992
189.4	0.999
189.5	0.999
189.6	0.998
189.7	0.996
189.8	0.997
189.9	0.997
190	1
190.1	0.995
190.2	0.994
190.3	0.993
190.4	0.997
190.5	0.994
190.6	0.995
190.7	0.995
190.8	0.993
190.9	0.995
191	0.991
191.1	0.992
191.2	0.994
191.3	0.994
191.4	0.994
191.5	0.996
191.6	0.994
191.7	0.998
191.8	0.993
191.9	0.993
192	0.996
192.1	0.995
192.2	0.993
192.3	0.994
192.4	0.995
192.5	0.996
192.6	0.995
192.7	0.99
192.8	0.995
192.9	0.993
193	0.996
193.1	0.991
193.2	0.994
193.3	0.999
193.4	0.998
193.5	0.995
193.6	0.997
193.7	0.998
193.8	0.999
193.9	0.994
194	0.993
194.1	0.996
194.2	0.992
194.3	0.997
194.4	0.996
194.5	0.997
194.6	0.994
194.7	0.996
194.8	0.996
194.9	0.992
195	0.994
195.1	0.994
195.2	0.998
195.3	0.997
195.4	0.997
195.5	0.995
195.6	0.996
195.7	0.995
195.8	0.993
195.9	0.995
196	0.991
196.1	0.992
196.2	0.991
196.3	0.991
196.4	0.996
196.5	0.991
196.6	0.992
196.7	0.994
196.8	0.995
196.9	0.992
197	0.994
197.1	0.993
197.2	0.994
197.3	0.993
197.4	0.992
197.5	0.999
197.6	0.998
197.7	0.996
197.8	0.998
197.9	0.994
198	0.992
198.1	0.997
198.2	0.996
198.3	0.994
198.4	0.993
198.5	0.989
198.6	0.994
198.7	0.999
198.8	0.995
198.9	0.995
199	0.999
199.1	0.995
199.2	0.992
199.3	0.996
199.4	0.997
199.5	0.993
199.6	0.995
199.7	0.993
199.8	0.995
199.9	0.997
200	0.995
[truncated: 14,000 more rows]
