# Supplementary material for: Bayesian inference of kinetic schemes for ion channels by Kalman filtering
Source: eLife journal article supplement (doi:10.7554/elife.62714), 2022-05-04
Supplement: fig4-data3 [file 1_Sim_N_500_Strom_MW.xlsx]

## Sheet: Tabelle1
0.1	0
0.2	0
0.3	0
0.4	0
0.5	0
0.6	0
0.7	0
0.8	0
0.9	0
1	0
1.1	0
1.2	0
1.3	0
1.4	0
1.5	0
1.6	0
1.7	0
1.8	0
1.9	0
2	0
2.1	0
2.2	0
2.3	0
2.4	0
2.5	0
2.6	0
2.7	0
2.8	0
2.9	0
3	0
3.1	0
3.2	0
3.3	0
3.4	0
3.5	0
3.6	0
3.7	0
3.8	0
3.9	0
4	0
4.1	0
4.2	0
4.3	0
4.4	0
4.5	0
4.6	0
4.7	0
4.8	0
4.9	0
5	0
5.1	0
5.2	0
5.3	0
5.4	0
5.5	0
5.6	0
5.7	0
5.8	0
5.9	0
6	0
6.1	0
6.2	0
6.3	0
6.4	0
6.5	0
6.6	0
6.7	0
6.8	0
6.9	0
7	0
7.1	0
7.2	0
7.3	0
7.4	0
7.5	0
7.6	0
7.7	0
7.8	0
7.9	0
8	0
8.1	0
8.2	0
8.3	0
8.4	0
8.5	0
8.6	0
8.7	0
8.8	0
8.9	0
9	0
9.1	0
9.2	0
9.3	0
9.4	0
9.5	0
9.6	0
9.7	0
9.8	0
9.9	0
10	0
10.1	0
10.2	0
10.3	0
10.4	0
10.5	0
10.6	0
10.7	0
10.8	0
10.9	0
11	0
11.1	0
11.2	0
11.3	0
11.4	0
11.5	0
11.6	0
11.7	0
11.8	0
11.9	0
12	0
12.1	0
12.2	0
12.3	0
12.4	0
12.5	0
12.6	0
12.7	0
12.8	0
12.9	0
13	0
13.1	0
13.2	0
13.3	0
13.4	0
13.5	0
13.6	0
13.7	0
13.8	0
13.9	0
14	0
14.1	0
14.2	0
14.3	0
14.4	0
14.5	0
14.6	0
14.7	0
14.8	0
14.9	0
15	0
15.1	0
15.2	0
15.3	0
15.4	0
15.5	0
15.6	0
15.7	0
15.8	0
15.9	0
16	0
16.1	0
16.2	0
16.3	0
16.4	0
16.5	0
16.6	0
16.7	0
16.8	0
16.9	0
17	0
17.1	0
17.2	0
17.3	0
17.4	0
17.5	0
17.6	0
17.7	0
17.8	0
17.9	0
18	0
18.1	0
18.2	0
18.3	0
18.4	0
18.5	0
18.6	0
18.7	0
18.8	0
18.9	0
19	0
19.1	0
19.2	0
19.3	0
19.4	0
19.5	0
19.6	0
19.7	0
19.8	0
19.9	0
20	0
20.1	0
20.2	0
20.3	0
20.4	0
20.5	0
20.6	0
20.7	0
20.8	0
20.9	0
21	0
21.1	0
21.2	0
21.3	0
21.4	0
21.5	0
21.6	0
21.7	0
21.8	0
21.9	0
22	0
22.1	0
22.2	0
22.3	0
22.4	0
22.5	0
22.6	0
22.7	0
22.8	0
22.9	0
23	0
23.1	0
23.2	0
23.3	0
23.4	0
23.5	0
23.6	0
23.7	0
23.8	0
23.9	0
24	0
24.1	0
24.2	0
24.3	0
24.4	0
24.5	0
24.6	0
24.7	0
24.8	0
24.9	0
25	0
25.1	0
25.2	0
25.3	0
25.4	0
25.5	0
25.6	0
25.7	0
25.8	0
25.9	0
26	0
26.1	0
26.2	0
26.3	0
26.4	0
26.5	0
26.6	0
26.7	0
26.8	0
26.9	0
27	0
27.1	0
27.2	0
27.3	0
27.4	0
27.5	0
27.6	0
27.7	0
27.8	0
27.9	0
28	0
28.1	0
28.2	0
28.3	0
28.4	0
28.5	0
28.6	0
28.7	0
28.8	0
28.9	0
29	0
29.1	0
29.2	0
29.3	0
29.4	0
29.5	0
29.6	0
29.7	0
29.8	0
29.9	0
30	0
30.1	0
30.2	0
30.3	0
30.4	0
30.5	0
30.6	0
30.7	0
30.8	0
30.9	0
31	0
31.1	0
31.2	0
31.3	0
31.4	0
31.5	0
31.6	0
31.7	0
31.8	0
31.9	0
32	0
32.1	0
32.2	0
32.3	0
32.4	0
32.5	0
32.6	0
32.7	0
32.8	0
32.9	0
33	0
33.1	0
33.2	0
33.3	0
33.4	0
33.5	0
33.6	0
33.7	0
33.8	0
33.9	0
34	0
34.1	0
34.2	0
34.3	0
34.4	0
34.5	0
34.6	0
34.7	0
34.8	0
34.9	0
35	0
35.1	0
35.2	0
35.3	0
35.4	0
35.5	0
35.6	0
35.7	0
35.8	0
35.9	0
36	0
36.1	0
36.2	0
36.3	0
36.4	0
36.5	0
36.6	0
36.7	0
36.8	0
36.9	0
37	0
37.1	0
37.2	0
37.3	0
37.4	0
37.5	0
37.6	0
37.7	0
37.8	0
37.9	0
38	0
38.1	0
38.2	0
38.3	0
38.4	0
38.5	0
38.6	0
38.7	0
38.8	0
38.9	0
39	0
39.1	0
39.2	0
39.3	0
39.4	0
39.5	0
39.6	0
39.7	0
39.8	0
39.9	0
40	0
40.1	0
40.2	0
40.3	0
40.4	0
40.5	0
40.6	0
40.7	0
40.8	0
40.9	0
41	0
41.1	0
41.2	0
41.3	0
41.4	0
41.5	0
41.6	0
41.7	0
41.8	0
41.9	0
42	0
42.1	0
42.2	0
42.3	0
42.4	0
42.5	0
42.6	0
42.7	0
42.8	0
42.9	0
43	0
43.1	0
43.2	0
43.3	0
43.4	0
43.5	0
43.6	0
43.7	0
43.8	0
43.9	0
44	0
44.1	0
44.2	0
44.3	0
44.4	0
44.5	0
44.6	0
44.7	0
44.8	0
44.9	0
45	0
45.1	0
45.2	0
45.3	0
45.4	0
45.5	0
45.6	0
45.7	0
45.8	0
45.9	0
46	0
46.1	0
46.2	0
46.3	0
46.4	0
46.5	0
46.6	0
46.7	0
46.8	0
46.9	0
47	0
47.1	0
47.2	0
47.3	0
47.4	0
47.5	0
47.6	0
47.7	0
47.8	0
47.9	0
48	0
48.1	0
48.2	0
48.3	0
48.4	0
48.5	0
48.6	0
48.7	0
48.8	0
48.9	0
49	0
49.1	0
49.2	0
49.3	0
49.4	0
49.5	0
49.6	0
49.7	0
49.8	0
49.9	0
50	0
50.1	0
50.2	0
50.3	0
50.4	0
50.5	0
50.6	0
50.7	0
50.8	0
50.9	0
51	0
51.1	0
51.2	0
51.3	0
51.4	0
51.5	0
51.6	0
51.7	0
51.8	0
51.9	0
52	0
52.1	0
52.2	0
52.3	0
52.4	0
52.5	0
52.6	0
52.7	0
52.8	0
52.9	0
53	0
53.1	0
53.2	0
53.3	0
53.4	0
53.5	0
53.6	0
53.7	0
53.8	0
53.9	0
54	0
54.1	0
54.2	0
54.3	0
54.4	0
54.5	0
54.6	0
54.7	0
54.8	0
54.9	0
55	0
55.1	0
55.2	0
55.3	0
55.4	0
55.5	0
55.6	0
55.7	0
55.8	0
55.9	0
56	0
56.1	0
56.2	0
56.3	0
56.4	0
56.5	0
56.6	0
56.7	0
56.8	0
56.9	0
57	0
57.1	0
57.2	0
57.3	0
57.4	0
57.5	0
57.6	0
57.7	0
57.8	0
57.9	0
58	0
58.1	0
58.2	0
58.3	0
58.4	0
58.5	0
58.6	0
58.7	0
58.8	0
58.9	0
59	0
59.1	0
59.2	0
59.3	0
59.4	0
59.5	0
59.6	0
59.7	0
59.8	0
59.9	0
60	0
60.1	0
60.2	0
60.3	0
60.4	0
60.5	0
60.6	0
60.7	0
60.8	0
60.9	0
61	0
61.1	0
61.2	0
61.3	0
61.4	0
61.5	0
61.6	0
61.7	0
61.8	0
61.9	0
62	0
62.1	0
62.2	0
62.3	0
62.4	0
62.5	0
62.6	0
62.7	0
62.8	0
62.9	0
63	0
63.1	0
63.2	0
63.3	0
63.4	0
63.5	0
63.6	0
63.7	0
63.8	0
63.9	0
64	0
64.1	0
64.2	0
64.3	0
64.4	0
64.5	0
64.6	0
64.7	0
64.8	0
64.9	0
65	0
65.1	0
65.2	0
65.3	0
65.4	0
65.5	0
65.6	0
65.7	0
65.8	0
65.9	0
66	0
66.1	0
66.2	0
66.3	0
66.4	0
66.5	0
66.6	0
66.7	0
66.8	0
66.9	0
67	0
67.1	0
67.2	0
67.3	0
67.4	0
67.5	0
67.6	0
67.7	0
67.8	0
67.9	0
68	0
68.1	0
68.2	0
68.3	0
68.4	0
68.5	0
68.6	0
68.7	0
68.8	0
68.9	0
69	0
69.1	0
69.2	0
69.3	0
69.4	0
69.5	0
69.6	0
69.7	0
69.8	0
69.9	0
70	0
70.1	0
70.2	0
70.3	0
70.4	0
70.5	0
70.6	0
70.7	0
70.8	0
70.9	0
71	0
71.1	0
71.2	0
71.3	0
71.4	0
71.5	0
71.6	0
71.7	0
71.8	0
71.9	0
72	0
72.1	0
72.2	0
72.3	0
72.4	0
72.5	0
72.6	0
72.7	0
72.8	0
72.9	0
73	0
73.1	0
73.2	0
73.3	0
73.4	0
73.5	0
73.6	0
73.7	0
73.8	0
73.9	0
74	0
74.1	0
74.2	0
74.3	0
74.4	0
74.5	0
74.6	0
74.7	0
74.8	0
74.9	0
75	0
75.1	0
75.2	0
75.3	0
75.4	0
75.5	0
75.6	0
75.7	0
75.8	0
75.9	0
76	0
76.1	0
76.2	0
76.3	0
76.4	0
76.5	0
76.6	0
76.7	0
76.8	0
76.9	0
77	0
77.1	0
77.2	0
77.3	0
77.4	0
77.5	0
77.6	0
77.7	0
77.8	0
77.9	0
78	0
78.1	0
78.2	0
78.3	0
78.4	0
78.5	0
78.6	0
78.7	0
78.8	0
78.9	0
79	0
79.1	0
79.2	0
79.3	0
79.4	0
79.5	0
79.6	0
79.7	0
79.8	0
79.9	0
80	0
80.1	0
80.2	0
80.3	0
80.4	0
80.5	0
80.6	0
80.7	0
80.8	0
80.9	0
81	0
81.1	0
81.2	0
81.3	0
81.4	0
81.5	0
81.6	0
81.7	0
81.8	0
81.9	0
82	0
82.1	0
82.2	0
82.3	0
82.4	0
82.5	0
82.6	0
82.7	0
82.8	0
82.9	0
83	0
83.1	0
83.2	0
83.3	0
83.4	0
83.5	0
83.6	0
83.7	0
83.8	0
83.9	0
84	0
84.1	0
84.2	0
84.3	0
84.4	0
84.5	0
84.6	0
84.7	0
84.8	0
84.9	0
85	0
85.1	0
85.2	0
85.3	0
85.4	0
85.5	0
85.6	0
85.7	0
85.8	0
85.9	0
86	0
86.1	0
86.2	0
86.3	0
86.4	0
86.5	0
86.6	0
86.7	0
86.8	0
86.9	0
87	0
87.1	0
87.2	0
87.3	0
87.4	0
87.5	0
87.6	0
87.7	0
87.8	0
87.9	0
88	0
88.1	0
88.2	0
88.3	0
88.4	0
88.5	0
88.6	0
88.7	0
88.8	0
88.9	0
89	0
89.1	0
89.2	0
89.3	0
89.4	0
89.5	0
89.6	0
89.7	0
89.8	0
89.9	0
90	0
90.1	0
90.2	0
90.3	0
90.4	0
90.5	0
90.6	0
90.7	0
90.8	0
90.9	0
91	0
91.1	0
91.2	0
91.3	0
91.4	0
91.5	0
91.6	0
91.7	0
91.8	0
91.9	0
92	0
92.1	0
92.2	0
92.3	0
92.4	0
92.5	0
92.6	0
92.7	0
92.8	0
92.9	0
93	0
93.1	0
93.2	0
93.3	0
93.4	0
93.5	0
93.6	0
93.7	0
93.8	0
93.9	0
94	0
94.1	0
94.2	0
94.3	0
94.4	0
94.5	0
94.6	0
94.7	0
94.8	0
94.9	0
95	0
95.1	0
95.2	0
95.3	0
95.4	0
95.5	0
95.6	0
95.7	0
95.8	0
95.9	0
96	0
96.1	0
96.2	0
96.3	0
96.4	0
96.5	0
96.6	0
96.7	0
96.8	0
96.9	0
97	0
97.1	0
97.2	0
97.3	0
97.4	0
97.5	0
97.6	0
97.7	0
97.8	0
97.9	0
98	0
98.1	0
98.2	0
98.3	0
98.4	0
98.5	0
98.6	0
98.7	0
98.8	0
98.9	0
99	0
99.1	0
99.2	0
99.3	0
99.4	0
99.5	0
99.6	0
99.7	0
99.8	0
99.9	0
100	0
100.1	0.002
100.2	0.006
100.3	0.01
100.4	0.02
100.5	0.028
100.6	0.04
100.7	0.042
100.8	0.046
100.9	0.05
101	0.054
101.1	0.054
101.2	0.06
101.3	0.064
101.4	0.07
101.5	0.076
101.6	0.082
101.7	0.088
101.8	0.09
101.9	0.098
102	0.1
102.1	0.1
102.2	0.106
102.3	0.11
102.4	0.114
102.5	0.12
102.6	0.12
102.7	0.126
102.8	0.124
102.9	0.13
103	0.136
103.1	0.136
103.2	0.14
103.3	0.144
103.4	0.146
103.5	0.146
103.6	0.146
103.7	0.148
103.8	0.156
103.9	0.162
104	0.164
104.1	0.168
104.2	0.172
104.3	0.174
104.4	0.174
104.5	0.184
104.6	0.184
104.7	0.184
104.8	0.192
104.9	0.196
105	0.202
105.1	0.208
105.2	0.214
105.3	0.218
105.4	0.222
105.5	0.226
105.6	0.232
105.7	0.236
105.8	0.238
105.9	0.238
106	0.238
106.1	0.242
106.2	0.246
106.3	0.248
106.4	0.254
106.5	0.258
106.6	0.264
106.7	0.266
106.8	0.27
106.9	0.276
107	0.28
107.1	0.282
107.2	0.286
107.3	0.288
107.4	0.29
107.5	0.29
107.6	0.292
107.7	0.302
107.8	0.302
107.9	0.304
108	0.306
108.1	0.308
108.2	0.314
108.3	0.316
108.4	0.322
108.5	0.326
108.6	0.332
108.7	0.33
108.8	0.334
108.9	0.334
109	0.338
109.1	0.34
109.2	0.338
109.3	0.338
109.4	0.336
109.5	0.338
109.6	0.342
109.7	0.342
109.8	0.346
109.9	0.348
110	0.348
110.1	0.35
110.2	0.352
110.3	0.356
110.4	0.358
110.5	0.362
110.6	0.366
110.7	0.362
110.8	0.364
110.9	0.364
111	0.364
111.1	0.366
111.2	0.366
111.3	0.374
111.4	0.374
111.5	0.378
111.6	0.384
111.7	0.386
111.8	0.39
111.9	0.394
112	0.396
112.1	0.4
112.2	0.402
112.3	0.404
112.4	0.406
112.5	0.41
112.6	0.412
112.7	0.42
112.8	0.42
112.9	0.422
113	0.422
113.1	0.42
113.2	0.422
113.3	0.424
113.4	0.428
113.5	0.428
113.6	0.432
113.7	0.434
113.8	0.438
113.9	0.44
114	0.444
114.1	0.446
114.2	0.446
114.3	0.446
114.4	0.448
114.5	0.454
114.6	0.456
114.7	0.462
114.8	0.466
114.9	0.468
115	0.468
115.1	0.472
115.2	0.472
115.3	0.48
115.4	0.49
115.5	0.494
115.6	0.494
115.7	0.498
115.8	0.502
115.9	0.502
116	0.506
116.1	0.512
116.2	0.512
116.3	0.512
116.4	0.512
116.5	0.51
116.6	0.516
116.7	0.516
116.8	0.516
116.9	0.514
117	0.516
117.1	0.514
117.2	0.516
117.3	0.516
117.4	0.52
117.5	0.518
117.6	0.518
117.7	0.518
117.8	0.518
117.9	0.518
118	0.52
118.1	0.524
118.2	0.522
118.3	0.53
118.4	0.536
118.5	0.538
118.6	0.546
118.7	0.548
118.8	0.55
118.9	0.554
119	0.554
119.1	0.552
119.2	0.554
119.3	0.558
119.4	0.558
119.5	0.56
119.6	0.558
119.7	0.558
119.8	0.558
119.9	0.556
120	0.56
120.1	0.564
120.2	0.566
120.3	0.568
120.4	0.572
120.5	0.57
120.6	0.568
120.7	0.57
120.8	0.572
120.9	0.574
121	0.578
121.1	0.574
121.2	0.578
121.3	0.58
121.4	0.584
121.5	0.588
121.6	0.592
121.7	0.592
121.8	0.592
121.9	0.592
122	0.596
122.1	0.6
122.2	0.596
122.3	0.598
122.4	0.604
122.5	0.604
122.6	0.606
122.7	0.606
122.8	0.61
122.9	0.61
123	0.612
123.1	0.61
123.2	0.61
123.3	0.61
123.4	0.61
123.5	0.612
123.6	0.612
123.7	0.616
123.8	0.616
123.9	0.616
124	0.616
124.1	0.62
124.2	0.622
124.3	0.624
124.4	0.626
124.5	0.626
124.6	0.63
124.7	0.63
124.8	0.632
124.9	0.628
125	0.628
125.1	0.628
125.2	0.626
125.3	0.628
125.4	0.628
125.5	0.63
125.6	0.63
125.7	0.63
125.8	0.632
125.9	0.634
126	0.634
126.1	0.634
126.2	0.636
126.3	0.638
126.4	0.64
126.5	0.64
126.6	0.642
126.7	0.644
126.8	0.646
126.9	0.646
127	0.648
127.1	0.648
127.2	0.65
127.3	0.652
127.4	0.652
127.5	0.654
127.6	0.654
127.7	0.658
127.8	0.658
127.9	0.658
128	0.658
128.1	0.66
128.2	0.66
128.3	0.658
128.4	0.664
128.5	0.662
128.6	0.662
128.7	0.666
128.8	0.67
128.9	0.672
129	0.674
129.1	0.672
129.2	0.672
129.3	0.674
129.4	0.674
129.5	0.674
129.6	0.674
129.7	0.674
129.8	0.676
129.9	0.676
130	0.678
130.1	0.678
130.2	0.678
130.3	0.68
130.4	0.682
130.5	0.682
130.6	0.682
130.7	0.686
130.8	0.688
130.9	0.688
131	0.692
131.1	0.692
131.2	0.696
131.3	0.7
131.4	0.696
131.5	0.696
131.6	0.696
131.7	0.694
131.8	0.698
131.9	0.696
132	0.698
132.1	0.7
132.2	0.698
132.3	0.7
132.4	0.7
132.5	0.698
132.6	0.702
132.7	0.702
132.8	0.702
132.9	0.704
133	0.704
133.1	0.706
133.2	0.708
133.3	0.706
133.4	0.708
133.5	0.71
133.6	0.71
133.7	0.71
133.8	0.71
133.9	0.712
134	0.712
134.1	0.712
134.2	0.714
134.3	0.716
134.4	0.716
134.5	0.716
134.6	0.718
134.7	0.718
134.8	0.718
134.9	0.72
135	0.718
135.1	0.72
135.2	0.724
135.3	0.724
135.4	0.722
135.5	0.722
135.6	0.722
135.7	0.724
135.8	0.724
135.9	0.724
136	0.724
136.1	0.726
136.2	0.726
136.3	0.726
136.4	0.73
136.5	0.73
136.6	0.728
136.7	0.728
136.8	0.732
136.9	0.732
137	0.734
137.1	0.736
137.2	0.736
137.3	0.736
137.4	0.734
137.5	0.736
137.6	0.736
137.7	0.734
137.8	0.736
137.9	0.736
138	0.734
138.1	0.732
138.2	0.734
138.3	0.73
138.4	0.73
138.5	0.73
138.6	0.728
138.7	0.728
138.8	0.73
138.9	0.73
139	0.73
139.1	0.732
139.2	0.73
139.3	0.73
139.4	0.73
139.5	0.73
139.6	0.734
139.7	0.734
139.8	0.734
139.9	0.734
140	0.736
140.1	0.74
140.2	0.742
140.3	0.746
140.4	0.744
140.5	0.742
140.6	0.742
140.7	0.742
140.8	0.74
140.9	0.742
141	0.74
141.1	0.738
141.2	0.736
141.3	0.734
141.4	0.734
141.5	0.734
141.6	0.736
141.7	0.738
141.8	0.74
141.9	0.742
142	0.742
142.1	0.744
142.2	0.744
142.3	0.75
142.4	0.754
142.5	0.754
142.6	0.756
142.7	0.758
142.8	0.76
142.9	0.756
143	0.758
143.1	0.758
143.2	0.754
143.3	0.756
143.4	0.752
143.5	0.752
143.6	0.752
143.7	0.754
143.8	0.752
143.9	0.756
144	0.754
144.1	0.754
144.2	0.754
144.3	0.754
144.4	0.754
144.5	0.754
144.6	0.756
144.7	0.756
144.8	0.756
144.9	0.756
145	0.754
145.1	0.756
145.2	0.756
145.3	0.76
145.4	0.76
145.5	0.762
145.6	0.762
145.7	0.758
145.8	0.758
145.9	0.756
146	0.756
146.1	0.756
146.2	0.758
146.3	0.76
146.4	0.758
146.5	0.758
146.6	0.752
146.7	0.754
146.8	0.754
146.9	0.756
147	0.756
147.1	0.756
147.2	0.756
147.3	0.76
147.4	0.762
147.5	0.76
147.6	0.76
147.7	0.762
147.8	0.764
147.9	0.766
148	0.766
148.1	0.766
148.2	0.766
148.3	0.768
148.4	0.766
148.5	0.768
148.6	0.768
148.7	0.768
148.8	0.772
148.9	0.772
149	0.772
149.1	0.774
149.2	0.774
149.3	0.776
149.4	0.77
149.5	0.772
149.6	0.772
149.7	0.774
149.8	0.774
149.9	0.774
150	0.774
150.1	0.774
150.2	0.776
150.3	0.772
150.4	0.772
150.5	0.772
150.6	0.768
150.7	0.766
150.8	0.76
150.9	0.76
151	0.762
151.1	0.762
151.2	0.76
151.3	0.76
151.4	0.762
151.5	0.762
151.6	0.764
151.7	0.756
151.8	0.752
151.9	0.75
152	0.752
152.1	0.756
152.2	0.758
152.3	0.758
152.4	0.758
152.5	0.758
152.6	0.762
152.7	0.762
152.8	0.762
152.9	0.76
153	0.76
153.1	0.756
153.2	0.76
153.3	0.762
153.4	0.762
153.5	0.764
153.6	0.764
153.7	0.762
153.8	0.762
153.9	0.76
154	0.762
154.1	0.762
154.2	0.764
154.3	0.764
154.4	0.764
154.5	0.768
154.6	0.77
154.7	0.77
154.8	0.77
154.9	0.77
155	0.77
155.1	0.77
155.2	0.768
155.3	0.768
155.4	0.774
155.5	0.772
155.6	0.772
155.7	0.77
155.8	0.77
155.9	0.77
156	0.77
156.1	0.774
156.2	0.776
156.3	0.778
156.4	0.778
156.5	0.776
156.6	0.776
156.7	0.776
156.8	0.776
156.9	0.776
157	0.776
157.1	0.776
157.2	0.776
157.3	0.774
157.4	0.776
157.5	0.776
157.6	0.778
157.7	0.776
157.8	0.776
157.9	0.776
158	0.776
158.1	0.776
158.2	0.776
158.3	0.778
158.4	0.778
158.5	0.784
158.6	0.782
158.7	0.786
158.8	0.788
158.9	0.794
159	0.794
159.1	0.794
159.2	0.794
159.3	0.794
159.4	0.794
159.5	0.792
159.6	0.792
159.7	0.79
159.8	0.79
159.9	0.794
160	0.796
160.1	0.794
160.2	0.796
160.3	0.798
160.4	0.796
160.5	0.796
160.6	0.794
160.7	0.794
160.8	0.794
160.9	0.794
161	0.794
161.1	0.796
161.2	0.796
161.3	0.794
161.4	0.792
161.5	0.79
161.6	0.79
161.7	0.788
161.8	0.788
161.9	0.786
162	0.784
162.1	0.786
162.2	0.79
162.3	0.79
162.4	0.792
162.5	0.794
162.6	0.794
162.7	0.794
162.8	0.792
162.9	0.792
163	0.792
163.1	0.796
163.2	0.796
163.3	0.804
163.4	0.8
163.5	0.8
163.6	0.8
163.7	0.8
163.8	0.8
163.9	0.802
164	0.804
164.1	0.804
164.2	0.804
164.3	0.806
164.4	0.806
164.5	0.806
164.6	0.806
164.7	0.804
164.8	0.804
164.9	0.806
165	0.802
165.1	0.798
165.2	0.798
165.3	0.8
165.4	0.796
165.5	0.796
165.6	0.796
165.7	0.796
165.8	0.8
165.9	0.8
166	0.8
166.1	0.8
166.2	0.8
166.3	0.8
166.4	0.798
166.5	0.8
166.6	0.796
166.7	0.796
166.8	0.794
166.9	0.794
167	0.794
167.1	0.792
167.2	0.792
167.3	0.792
167.4	0.794
167.5	0.796
167.6	0.796
167.7	0.798
167.8	0.8
167.9	0.798
168	0.798
168.1	0.8
168.2	0.8
168.3	0.8
168.4	0.798
168.5	0.798
168.6	0.798
168.7	0.8
168.8	0.798
168.9	0.8
169	0.798
169.1	0.802
169.2	0.802
169.3	0.8
169.4	0.8
169.5	0.802
169.6	0.802
169.7	0.802
169.8	0.8
169.9	0.8
170	0.798
170.1	0.798
170.2	0.798
170.3	0.798
170.4	0.798
170.5	0.798
170.6	0.8
170.7	0.802
170.8	0.802
170.9	0.8
171	0.802
171.1	0.8
171.2	0.802
171.3	0.804
171.4	0.804
171.5	0.804
171.6	0.804
171.7	0.804
171.8	0.804
171.9	0.798
172	0.798
172.1	0.796
172.2	0.798
172.3	0.798
172.4	0.8
172.5	0.802
172.6	0.806
172.7	0.804
172.8	0.802
172.9	0.802
173	0.802
173.1	0.8
173.2	0.8
173.3	0.802
173.4	0.804
173.5	0.804
173.6	0.804
173.7	0.804
173.8	0.802
173.9	0.802
174	0.804
174.1	0.802
174.2	0.804
174.3	0.806
174.4	0.81
174.5	0.81
174.6	0.808
174.7	0.81
174.8	0.808
174.9	0.806
175	0.804
175.1	0.804
175.2	0.804
175.3	0.804
175.4	0.802
175.5	0.804
175.6	0.808
175.7	0.808
175.8	0.808
175.9	0.806
176	0.804
176.1	0.802
176.2	0.802
176.3	0.806
176.4	0.806
176.5	0.806
176.6	0.804
176.7	0.804
176.8	0.806
176.9	0.81
177	0.81
177.1	0.81
177.2	0.81
177.3	0.814
177.4	0.814
177.5	0.814
177.6	0.81
177.7	0.812
177.8	0.812
177.9	0.812
178	0.812
178.1	0.81
178.2	0.808
178.3	0.81
178.4	0.81
178.5	0.81
178.6	0.808
178.7	0.806
178.8	0.804
178.9	0.806
179	0.806
179.1	0.806
179.2	0.806
179.3	0.806
179.4	0.806
179.5	0.804
179.6	0.804
179.7	0.806
179.8	0.806
179.9	0.808
180	0.806
180.1	0.806
180.2	0.806
180.3	0.806
180.4	0.806
180.5	0.806
180.6	0.802
180.7	0.802
180.8	0.806
180.9	0.808
181	0.808
181.1	0.808
181.2	0.806
181.3	0.802
181.4	0.8
181.5	0.798
181.6	0.796
181.7	0.792
181.8	0.788
181.9	0.79
182	0.788
182.1	0.788
182.2	0.792
182.3	0.792
182.4	0.792
182.5	0.792
182.6	0.796
182.7	0.798
182.8	0.798
182.9	0.798
183	0.802
183.1	0.802
183.2	0.802
183.3	0.804
183.4	0.804
183.5	0.804
183.6	0.804
183.7	0.804
183.8	0.8
183.9	0.8
184	0.798
184.1	0.804
184.2	0.804
184.3	0.8
184.4	0.804
184.5	0.804
184.6	0.808
184.7	0.806
184.8	0.804
184.9	0.81
185	0.812
185.1	0.808
185.2	0.808
185.3	0.806
185.4	0.806
185.5	0.804
185.6	0.8
185.7	0.798
185.8	0.798
185.9	0.796
186	0.792
186.1	0.792
186.2	0.792
186.3	0.796
186.4	0.798
186.5	0.8
186.6	0.798
186.7	0.798
186.8	0.802
186.9	0.802
187	0.802
187.1	0.804
187.2	0.802
187.3	0.798
187.4	0.798
187.5	0.798
187.6	0.798
187.7	0.798
187.8	0.798
187.9	0.798
188	0.798
188.1	0.796
188.2	0.796
188.3	0.798
188.4	0.798
188.5	0.796
188.6	0.796
188.7	0.792
188.8	0.792
188.9	0.792
189	0.794
189.1	0.8
189.2	0.8
189.3	0.8
189.4	0.8
189.5	0.802
189.6	0.802
189.7	0.802
189.8	0.802
189.9	0.802
190	0.802
190.1	0.8
190.2	0.802
190.3	0.802
190.4	0.804
190.5	0.804
190.6	0.806
190.7	0.804
190.8	0.804
190.9	0.804
191	0.802
191.1	0.802
191.2	0.804
191.3	0.804
191.4	0.806
191.5	0.802
191.6	0.802
191.7	0.8
191.8	0.8
191.9	0.798
192	0.798
192.1	0.798
192.2	0.796
192.3	0.798
192.4	0.798
192.5	0.796
192.6	0.796
192.7	0.796
192.8	0.796
192.9	0.796
193	0.794
193.1	0.794
193.2	0.796
193.3	0.796
193.4	0.796
193.5	0.792
193.6	0.792
193.7	0.792
193.8	0.792
193.9	0.792
194	0.794
194.1	0.796
194.2	0.798
194.3	0.798
194.4	0.796
194.5	0.798
194.6	0.798
194.7	0.794
194.8	0.794
194.9	0.79
195	0.792
195.1	0.794
195.2	0.794
195.3	0.79
195.4	0.788
195.5	0.788
195.6	0.788
195.7	0.79
195.8	0.792
195.9	0.792
196	0.792
196.1	0.79
196.2	0.79
196.3	0.79
196.4	0.79
196.5	0.79
196.6	0.79
196.7	0.79
196.8	0.79
196.9	0.79
197	0.794
197.1	0.794
197.2	0.798
197.3	0.798
197.4	0.798
197.5	0.8
197.6	0.802
197.7	0.802
197.8	0.804
197.9	0.804
198	0.804
198.1	0.802
198.2	0.802
198.3	0.802
198.4	0.804
198.5	0.804
198.6	0.804
198.7	0.808
198.8	0.808
198.9	0.81
199	0.81
199.1	0.81
199.2	0.808
199.3	0.806
199.4	0.806
199.5	0.806
199.6	0.808
199.7	0.806
199.8	0.808
199.9	0.81
200	0.806
[truncated: 14,000 more rows]
