# Supplementary material for: Bayesian inference of kinetic schemes for ion channels by Kalman filtering
Source: eLife journal article supplement (doi:10.7554/elife.62714), 2022-05-04
Supplement: fig4-data3 [file 1_Sim_N_800_Fluor_MW_32M.xlsx]

## Sheet: Tabelle1
0.1	0
0.2	0
0.3	0
0.4	0
0.5	0
0.6	0
0.7	0
0.8	0
0.9	0
1	0
1.1	0
1.2	0
1.3	0
1.4	0
1.5	0
1.6	0
1.7	0
1.8	0
1.9	0
2	0
2.1	0
2.2	0
2.3	0
2.4	0
2.5	0
2.6	0
2.7	0
2.8	0
2.9	0
3	0
3.1	0
3.2	0
3.3	0
3.4	0
3.5	0
3.6	0
3.7	0
3.8	0
3.9	0
4	0
4.1	0
4.2	0
4.3	0
4.4	0
4.5	0
4.6	0
4.7	0
4.8	0
4.9	0
5	0
5.1	0
5.2	0
5.3	0
5.4	0
5.5	0
5.6	0
5.7	0
5.8	0
5.9	0
6	0
6.1	0
6.2	0
6.3	0
6.4	0
6.5	0
6.6	0
6.7	0
6.8	0
6.9	0
7	0
7.1	0
7.2	0
7.3	0
7.4	0
7.5	0
7.6	0
7.7	0
7.8	0
7.9	0
8	0
8.1	0
8.2	0
8.3	0
8.4	0
8.5	0
8.6	0
8.7	0
8.8	0
8.9	0
9	0
9.1	0
9.2	0
9.3	0
9.4	0
9.5	0
9.6	0
9.7	0
9.8	0
9.9	0
10	0
10.1	0
10.2	0
10.3	0
10.4	0
10.5	0
10.6	0
10.7	0
10.8	0
10.9	0
11	0
11.1	0
11.2	0
11.3	0
11.4	0
11.5	0
11.6	0
11.7	0
11.8	0
11.9	0
12	0
12.1	0
12.2	0
12.3	0
12.4	0
12.5	0
12.6	0
12.7	0
12.8	0
12.9	0
13	0
13.1	0
13.2	0
13.3	0
13.4	0
13.5	0
13.6	0
13.7	0
13.8	0
13.9	0
14	0
14.1	0
14.2	0
14.3	0
14.4	0
14.5	0
14.6	0
14.7	0
14.8	0
14.9	0
15	0
15.1	0
15.2	0
15.3	0
15.4	0
15.5	0
15.6	0
15.7	0
15.8	0
15.9	0
16	0
16.1	0
16.2	0
16.3	0
16.4	0
16.5	0
16.6	0
16.7	0
16.8	0
16.9	0
17	0
17.1	0
17.2	0
17.3	0
17.4	0
17.5	0
17.6	0
17.7	0
17.8	0
17.9	0
18	0
18.1	0
18.2	0
18.3	0
18.4	0
18.5	0
18.6	0
18.7	0
18.8	0
18.9	0
19	0
19.1	0
19.2	0
19.3	0
19.4	0
19.5	0
19.6	0
19.7	0
19.8	0
19.9	0
20	0
20.1	0
20.2	0
20.3	0
20.4	0
20.5	0
20.6	0
20.7	0
20.8	0
20.9	0
21	0
21.1	0
21.2	0
21.3	0
21.4	0
21.5	0
21.6	0
21.7	0
21.8	0
21.9	0
22	0
22.1	0
22.2	0
22.3	0
22.4	0
22.5	0
22.6	0
22.7	0
22.8	0
22.9	0
23	0
23.1	0
23.2	0
23.3	0
23.4	0
23.5	0
23.6	0
23.7	0
23.8	0
23.9	0
24	0
24.1	0
24.2	0
24.3	0
24.4	0
24.5	0
24.6	0
24.7	0
24.8	0
24.9	0
25	0
25.1	0
25.2	0
25.3	0
25.4	0
25.5	0
25.6	0
25.7	0
25.8	0
25.9	0
26	0
26.1	0
26.2	0
26.3	0
26.4	0
26.5	0
26.6	0
26.7	0
26.8	0
26.9	0
27	0
27.1	0
27.2	0
27.3	0
27.4	0
27.5	0
27.6	0
27.7	0
27.8	0
27.9	0
28	0
28.1	0
28.2	0
28.3	0
28.4	0
28.5	0
28.6	0
28.7	0
28.8	0
28.9	0
29	0
29.1	0
29.2	0
29.3	0
29.4	0
29.5	0
29.6	0
29.7	0
29.8	0
29.9	0
30	0
30.1	0
30.2	0
30.3	0
30.4	0
30.5	0
30.6	0
30.7	0
30.8	0
30.9	0
31	0
31.1	0
31.2	0
31.3	0
31.4	0
31.5	0
31.6	0
31.7	0
31.8	0
31.9	0
32	0
32.1	0
32.2	0
32.3	0
32.4	0
32.5	0
32.6	0
32.7	0
32.8	0
32.9	0
33	0
33.1	0
33.2	0
33.3	0
33.4	0
33.5	0
33.6	0
33.7	0
33.8	0
33.9	0
34	0
34.1	0
34.2	0
34.3	0
34.4	0
34.5	0
34.6	0
34.7	0
34.8	0
34.9	0
35	0
35.1	0
35.2	0
35.3	0
35.4	0
35.5	0
35.6	0
35.7	0
35.8	0
35.9	0
36	0
36.1	0
36.2	0
36.3	0
36.4	0
36.5	0
36.6	0
36.7	0
36.8	0
36.9	0
37	0
37.1	0
37.2	0
37.3	0
37.4	0
37.5	0
37.6	0
37.7	0
37.8	0
37.9	0
38	0
38.1	0
38.2	0
38.3	0
38.4	0
38.5	0
38.6	0
38.7	0
38.8	0
38.9	0
39	0
39.1	0
39.2	0
39.3	0
39.4	0
39.5	0
39.6	0
39.7	0
39.8	0
39.9	0
40	0
40.1	0
40.2	0
40.3	0
40.4	0
40.5	0
40.6	0
40.7	0
40.8	0
40.9	0
41	0
41.1	0
41.2	0
41.3	0
41.4	0
41.5	0
41.6	0
41.7	0
41.8	0
41.9	0
42	0
42.1	0
42.2	0
42.3	0
42.4	0
42.5	0
42.6	0
42.7	0
42.8	0
42.9	0
43	0
43.1	0
43.2	0
43.3	0
43.4	0
43.5	0
43.6	0
43.7	0
43.8	0
43.9	0
44	0
44.1	0
44.2	0
44.3	0
44.4	0
44.5	0
44.6	0
44.7	0
44.8	0
44.9	0
45	0
45.1	0
45.2	0
45.3	0
45.4	0
45.5	0
45.6	0
45.7	0
45.8	0
45.9	0
46	0
46.1	0
46.2	0
46.3	0
46.4	0
46.5	0
46.6	0
46.7	0
46.8	0
46.9	0
47	0
47.1	0
47.2	0
47.3	0
47.4	0
47.5	0
47.6	0
47.7	0
47.8	0
47.9	0
48	0
48.1	0
48.2	0
48.3	0
48.4	0
48.5	0
48.6	0
48.7	0
48.8	0
48.9	0
49	0
49.1	0
49.2	0
49.3	0
49.4	0
49.5	0
49.6	0
49.7	0
49.8	0
49.9	0
50	0
50.1	0
50.2	0
50.3	0
50.4	0
50.5	0
50.6	0
50.7	0
50.8	0
50.9	0
51	0
51.1	0
51.2	0
51.3	0
51.4	0
51.5	0
51.6	0
51.7	0
51.8	0
51.9	0
52	0
52.1	0
52.2	0
52.3	0
52.4	0
52.5	0
52.6	0
52.7	0
52.8	0
52.9	0
53	0
53.1	0
53.2	0
53.3	0
53.4	0
53.5	0
53.6	0
53.7	0
53.8	0
53.9	0
54	0
54.1	0
54.2	0
54.3	0
54.4	0
54.5	0
54.6	0
54.7	0
54.8	0
54.9	0
55	0
55.1	0
55.2	0
55.3	0
55.4	0
55.5	0
55.6	0
55.7	0
55.8	0
55.9	0
56	0
56.1	0
56.2	0
56.3	0
56.4	0
56.5	0
56.6	0
56.7	0
56.8	0
56.9	0
57	0
57.1	0
57.2	0
57.3	0
57.4	0
57.5	0
57.6	0
57.7	0
57.8	0
57.9	0
58	0
58.1	0
58.2	0
58.3	0
58.4	0
58.5	0
58.6	0
58.7	0
58.8	0
58.9	0
59	0
59.1	0
59.2	0
59.3	0
59.4	0
59.5	0
59.6	0
59.7	0
59.8	0
59.9	0
60	0
60.1	0
60.2	0
60.3	0
60.4	0
60.5	0
60.6	0
60.7	0
60.8	0
60.9	0
61	0
61.1	0
61.2	0
61.3	0
61.4	0
61.5	0
61.6	0
61.7	0
61.8	0
61.9	0
62	0
62.1	0
62.2	0
62.3	0
62.4	0
62.5	0
62.6	0
62.7	0
62.8	0
62.9	0
63	0
63.1	0
63.2	0
63.3	0
63.4	0
63.5	0
63.6	0
63.7	0
63.8	0
63.9	0
64	0
64.1	0
64.2	0
64.3	0
64.4	0
64.5	0
64.6	0
64.7	0
64.8	0
64.9	0
65	0
65.1	0
65.2	0
65.3	0
65.4	0
65.5	0
65.6	0
65.7	0
65.8	0
65.9	0
66	0
66.1	0
66.2	0
66.3	0
66.4	0
66.5	0
66.6	0
66.7	0
66.8	0
66.9	0
67	0
67.1	0
67.2	0
67.3	0
67.4	0
67.5	0
67.6	0
67.7	0
67.8	0
67.9	0
68	0
68.1	0
68.2	0
68.3	0
68.4	0
68.5	0
68.6	0
68.7	0
68.8	0
68.9	0
69	0
69.1	0
69.2	0
69.3	0
69.4	0
69.5	0
69.6	0
69.7	0
69.8	0
69.9	0
70	0
70.1	0
70.2	0
70.3	0
70.4	0
70.5	0
70.6	0
70.7	0
70.8	0
70.9	0
71	0
71.1	0
71.2	0
71.3	0
71.4	0
71.5	0
71.6	0
71.7	0
71.8	0
71.9	0
72	0
72.1	0
72.2	0
72.3	0
72.4	0
72.5	0
72.6	0
72.7	0
72.8	0
72.9	0
73	0
73.1	0
73.2	0
73.3	0
73.4	0
73.5	0
73.6	0
73.7	0
73.8	0
73.9	0
74	0
74.1	0
74.2	0
74.3	0
74.4	0
74.5	0
74.6	0
74.7	0
74.8	0
74.9	0
75	0
75.1	0
75.2	0
75.3	0
75.4	0
75.5	0
75.6	0
75.7	0
75.8	0
75.9	0
76	0
76.1	0
76.2	0
76.3	0
76.4	0
76.5	0
76.6	0
76.7	0
76.8	0
76.9	0
77	0
77.1	0
77.2	0
77.3	0
77.4	0
77.5	0
77.6	0
77.7	0
77.8	0
77.9	0
78	0
78.1	0
78.2	0
78.3	0
78.4	0
78.5	0
78.6	0
78.7	0
78.8	0
78.9	0
79	0
79.1	0
79.2	0
79.3	0
79.4	0
79.5	0
79.6	0
79.7	0
79.8	0
79.9	0
80	0
80.1	0
80.2	0
80.3	0
80.4	0
80.5	0
80.6	0
80.7	0
80.8	0
80.9	0
81	0
81.1	0
81.2	0
81.3	0
81.4	0
81.5	0
81.6	0
81.7	0
81.8	0
81.9	0
82	0
82.1	0
82.2	0
82.3	0
82.4	0
82.5	0
82.6	0
82.7	0
82.8	0
82.9	0
83	0
83.1	0
83.2	0
83.3	0
83.4	0
83.5	0
83.6	0
83.7	0
83.8	0
83.9	0
84	0
84.1	0
84.2	0
84.3	0
84.4	0
84.5	0
84.6	0
84.7	0
84.8	0
84.9	0
85	0
85.1	0
85.2	0
85.3	0
85.4	0
85.5	0
85.6	0
85.7	0
85.8	0
85.9	0
86	0
86.1	0
86.2	0
86.3	0
86.4	0
86.5	0
86.6	0
86.7	0
86.8	0
86.9	0
87	0
87.1	0
87.2	0
87.3	0
87.4	0
87.5	0
87.6	0
87.7	0
87.8	0
87.9	0
88	0
88.1	0
88.2	0
88.3	0
88.4	0
88.5	0
88.6	0
88.7	0
88.8	0
88.9	0
89	0
89.1	0
89.2	0
89.3	0
89.4	0
89.5	0
89.6	0
89.7	0
89.8	0
89.9	0
90	0
90.1	0
90.2	0
90.3	0
90.4	0
90.5	0
90.6	0
90.7	0
90.8	0
90.9	0
91	0
91.1	0
91.2	0
91.3	0
91.4	0
91.5	0
91.6	0
91.7	0
91.8	0
91.9	0
92	0
92.1	0
92.2	0
92.3	0
92.4	0
92.5	0
92.6	0
92.7	0
92.8	0
92.9	0
93	0
93.1	0
93.2	0
93.3	0
93.4	0
93.5	0
93.6	0
93.7	0
93.8	0
93.9	0
94	0
94.1	0
94.2	0
94.3	0
94.4	0
94.5	0
94.6	0
94.7	0
94.8	0
94.9	0
95	0
95.1	0
95.2	0
95.3	0
95.4	0
95.5	0
95.6	0
95.7	0
95.8	0
95.9	0
96	0
96.1	0
96.2	0
96.3	0
96.4	0
96.5	0
96.6	0
96.7	0
96.8	0
96.9	0
97	0
97.1	0
97.2	0
97.3	0
97.4	0
97.5	0
97.6	0
97.7	0
97.8	0
97.9	0
98	0
98.1	0
98.2	0
98.3	0
98.4	0
98.5	0
98.6	0
98.7	0
98.8	0
98.9	0
99	0
99.1	0
99.2	0
99.3	0
99.4	0
99.5	0
99.6	0
99.7	0
99.8	0
99.9	0
100	0
100.1	0.711875
100.2	0.87625
100.3	0.948125
100.4	0.955
100.5	0.971875
100.6	0.975625
100.7	0.975
100.8	0.98375
100.9	0.98
101	0.9725
101.1	0.97375
101.2	0.9725
101.3	0.975625
101.4	0.98125
101.5	0.980625
101.6	0.981875
101.7	0.97875
101.8	0.98375
101.9	0.976875
102	0.980625
102.1	0.96875
102.2	0.976875
102.3	0.978125
102.4	0.9775
102.5	0.98125
102.6	0.981875
102.7	0.974375
102.8	0.979375
102.9	0.98625
103	0.985
103.1	0.9775
103.2	0.97625
103.3	0.974375
103.4	0.980625
103.5	0.986875
103.6	0.980625
103.7	0.978125
103.8	0.978125
103.9	0.98125
104	0.980625
104.1	0.9825
104.2	0.98375
104.3	0.984375
104.4	0.98375
104.5	0.98375
104.6	0.983125
104.7	0.98375
104.8	0.98125
104.9	0.9825
105	0.986875
105.1	0.984375
105.2	0.98125
105.3	0.98125
105.4	0.98125
105.5	0.98125
105.6	0.98125
105.7	0.983125
105.8	0.978125
105.9	0.983125
106	0.98
106.1	0.9775
106.2	0.978125
106.3	0.979375
106.4	0.981875
106.5	0.980625
106.6	0.97875
106.7	0.980625
106.8	0.98
106.9	0.98625
107	0.985
107.1	0.9875
107.2	0.988125
107.3	0.988125
107.4	0.9775
107.5	0.979375
107.6	0.985
107.7	0.986875
107.8	0.981875
107.9	0.98375
108	0.98
108.1	0.98375
108.2	0.9825
108.3	0.984375
108.4	0.99
108.5	0.980625
108.6	0.980625
108.7	0.983125
108.8	0.98125
108.9	0.983125
109	0.985
109.1	0.983125
109.2	0.98125
109.3	0.986875
109.4	0.981875
109.5	0.981875
109.6	0.986875
109.7	0.98875
109.8	0.989375
109.9	0.989375
110	0.98875
110.1	0.98625
110.2	0.98375
110.3	0.984375
110.4	0.98625
110.5	0.9875
110.6	0.979375
110.7	0.97375
110.8	0.979375
110.9	0.98125
111	0.98125
111.1	0.978125
111.2	0.97875
111.3	0.985625
111.4	0.984375
111.5	0.983125
111.6	0.98375
111.7	0.988125
111.8	0.984375
111.9	0.980625
112	0.9775
112.1	0.98375
112.2	0.984375
112.3	0.98375
112.4	0.984375
112.5	0.98625
112.6	0.9825
112.7	0.981875
112.8	0.984375
112.9	0.985625
113	0.985625
113.1	0.99125
113.2	0.985
113.3	0.99125
113.4	0.99125
113.5	0.99
113.6	0.988125
113.7	0.985625
113.8	0.989375
113.9	0.989375
114	0.99125
114.1	0.989375
114.2	0.9875
114.3	0.988125
114.4	0.989375
114.5	0.989375
114.6	0.98875
114.7	0.988125
114.8	0.9875
114.9	0.989375
115	0.988125
115.1	0.99125
115.2	0.988125
115.3	0.990625
115.4	0.989375
115.5	0.985625
115.6	0.99125
115.7	0.9925
115.8	0.988125
115.9	0.98875
116	0.988125
116.1	0.98625
116.2	0.988125
116.3	0.98875
116.4	0.99375
116.5	0.99
116.6	0.98875
116.7	0.988125
116.8	0.993125
116.9	0.988125
117	0.989375
117.1	0.988125
117.2	0.985
117.3	0.98375
117.4	0.983125
117.5	0.986875
117.6	0.98875
117.7	0.986875
117.8	0.98875
117.9	0.99
118	0.990625
118.1	0.991875
118.2	0.989375
118.3	0.991875
118.4	0.990625
118.5	0.98875
118.6	0.9875
118.7	0.99
118.8	0.989375
118.9	0.99125
119	0.9875
119.1	0.9925
119.2	0.985625
119.3	0.983125
119.4	0.983125
119.5	0.98875
119.6	0.988125
119.7	0.986875
119.8	0.988125
119.9	0.988125
120	0.99125
120.1	0.99125
120.2	0.99
120.3	0.985
120.4	0.98875
120.5	0.9875
120.6	0.991875
120.7	0.986875
120.8	0.9875
120.9	0.98625
121	0.99
121.1	0.99
121.2	0.99
121.3	0.99
121.4	0.988125
121.5	0.99375
121.6	0.995625
121.7	0.993125
121.8	0.990625
121.9	0.9875
122	0.9925
122.1	0.99
122.2	0.990625
122.3	0.995
122.4	0.99125
122.5	0.9925
122.6	0.99
122.7	0.988125
122.8	0.9875
122.9	0.990625
123	0.9925
123.1	0.9925
123.2	0.993125
123.3	0.98875
123.4	0.98875
123.5	0.9875
123.6	0.99
123.7	0.9875
123.8	0.989375
123.9	0.986875
124	0.98375
124.1	0.991875
124.2	0.989375
124.3	0.99125
124.4	0.99125
124.5	0.993125
124.6	0.98625
124.7	0.989375
124.8	0.98875
124.9	0.991875
125	0.99
125.1	0.9925
125.2	0.994375
125.3	0.990625
125.4	0.99125
125.5	0.9925
125.6	0.990625
125.7	0.989375
125.8	0.98875
125.9	0.9925
126	0.9925
126.1	0.988125
126.2	0.991875
126.3	0.993125
126.4	0.9925
126.5	0.988125
126.6	0.989375
126.7	0.988125
126.8	0.99375
126.9	0.995
127	0.98875
127.1	0.98875
127.2	0.989375
127.3	0.99
127.4	0.988125
127.5	0.991875
127.6	0.988125
127.7	0.9875
127.8	0.988125
127.9	0.99375
128	0.99375
128.1	0.991875
128.2	0.9925
128.3	0.994375
128.4	0.991875
128.5	0.990625
128.6	0.99375
128.7	0.9925
128.8	0.991875
128.9	0.9925
129	0.989375
129.1	0.990625
129.2	0.993125
129.3	0.990625
129.4	0.99
129.5	0.993125
129.6	0.993125
129.7	0.99125
129.8	0.99375
129.9	0.99625
130	0.99
130.1	0.99125
130.2	0.994375
130.3	0.991875
130.4	0.991875
130.5	0.99125
130.6	0.99375
130.7	0.995
130.8	0.995625
130.9	0.993125
131	0.994375
131.1	0.98875
131.2	0.99
131.3	0.991875
131.4	0.98875
131.5	0.990625
131.6	0.993125
131.7	0.993125
131.8	0.99
131.9	0.993125
132	0.995625
132.1	0.993125
132.2	0.99375
132.3	0.99125
132.4	0.99125
132.5	0.9925
132.6	0.9925
132.7	0.994375
132.8	0.993125
132.9	0.993125
133	0.990625
133.1	0.991875
133.2	0.993125
133.3	0.990625
133.4	0.994375
133.5	0.99
133.6	0.9925
133.7	0.991875
133.8	0.990625
133.9	0.99375
134	0.993125
134.1	0.995625
134.2	0.995
134.3	0.993125
134.4	0.9925
134.5	0.995625
134.6	0.993125
134.7	0.99125
134.8	0.99375
134.9	0.9925
135	0.99125
135.1	0.990625
135.2	0.988125
135.3	0.990625
135.4	0.99
135.5	0.98875
135.6	0.985
135.7	0.9925
135.8	0.995625
135.9	0.995
136	0.9925
136.1	0.99
136.2	0.995
136.3	0.994375
136.4	0.994375
136.5	0.993125
136.6	0.991875
136.7	0.9925
136.8	0.99125
136.9	0.995
137	0.99375
137.1	0.990625
137.2	0.993125
137.3	0.99375
137.4	0.99625
137.5	0.995625
137.6	0.9925
137.7	0.995
137.8	0.996875
137.9	0.99375
138	0.99375
138.1	0.99
138.2	0.995
138.3	0.993125
138.4	0.993125
138.5	0.99625
138.6	0.996875
138.7	0.9975
138.8	0.9975
138.9	0.998125
139	0.99625
139.1	0.996875
139.2	0.995
139.3	0.994375
139.4	0.993125
139.5	0.993125
139.6	0.9925
139.7	0.9925
139.8	0.991875
139.9	0.9925
140	0.995
140.1	0.9925
140.2	0.9925
140.3	0.99125
140.4	0.993125
140.5	0.995
140.6	0.993125
140.7	0.993125
140.8	0.9925
140.9	0.9925
141	0.99375
141.1	0.99625
141.2	0.995
141.3	0.9925
141.4	0.99625
141.5	0.993125
141.6	0.99
141.7	0.99625
141.8	0.996875
141.9	0.99625
142	0.996875
142.1	0.993125
142.2	0.99625
142.3	0.99625
142.4	0.995625
142.5	0.99375
142.6	0.995625
142.7	0.995625
142.8	0.995625
142.9	0.993125
143	0.995625
143.1	0.995
143.2	0.99625
143.3	0.9975
143.4	0.996875
143.5	0.996875
143.6	0.995
143.7	0.995
143.8	0.998125
143.9	0.994375
144	0.994375
144.1	0.99625
144.2	0.99375
144.3	0.99125
144.4	0.994375
144.5	0.99125
144.6	0.995
144.7	0.994375
144.8	0.993125
144.9	0.9925
145	0.994375
145.1	0.995
145.2	0.991875
145.3	0.991875
145.4	0.995625
145.5	0.993125
145.6	0.994375
145.7	0.995
145.8	0.99625
145.9	0.99625
146	0.995625
146.1	0.995625
146.2	0.99375
146.3	0.99625
146.4	0.994375
146.5	0.995
146.6	0.993125
146.7	0.996875
146.8	0.995625
146.9	0.993125
147	0.995625
147.1	0.99625
147.2	0.99375
147.3	0.99375
147.4	0.991875
147.5	0.99375
147.6	0.993125
147.7	0.993125
147.8	0.995
147.9	0.99375
148	0.995
148.1	0.995
148.2	0.994375
148.3	0.995
148.4	0.995
148.5	0.993125
148.6	0.995625
148.7	0.991875
148.8	0.995625
148.9	0.994375
149	0.994375
149.1	0.9925
149.2	0.995
149.3	0.9925
149.4	0.994375
149.5	0.99375
149.6	0.9975
149.7	0.995
149.8	0.991875
149.9	0.994375
150	0.9925
150.1	0.99125
150.2	0.991875
150.3	0.991875
150.4	0.991875
150.5	0.99375
150.6	0.996875
150.7	0.998125
150.8	0.994375
150.9	0.991875
151	0.989375
151.1	0.993125
151.2	0.991875
151.3	0.995625
151.4	0.99375
151.5	0.996875
151.6	0.99375
151.7	0.993125
151.8	0.993125
151.9	0.994375
152	0.99625
152.1	0.99625
152.2	0.995
152.3	0.995625
152.4	0.99375
152.5	0.99375
152.6	0.994375
152.7	0.995
152.8	0.995625
152.9	0.99375
153	0.994375
153.1	0.99375
153.2	0.9925
153.3	0.991875
153.4	0.99625
153.5	0.9975
153.6	0.99625
153.7	0.9975
153.8	0.996875
153.9	0.993125
154	0.993125
154.1	0.990625
154.2	0.99375
154.3	0.994375
154.4	0.994375
154.5	0.99
154.6	0.99125
154.7	0.99375
154.8	0.9975
154.9	0.991875
155	0.994375
155.1	0.994375
155.2	0.995
155.3	0.994375
155.4	0.9925
155.5	0.990625
155.6	0.9925
155.7	0.99375
155.8	0.994375
155.9	0.99375
156	0.994375
156.1	0.993125
156.2	0.9925
156.3	0.99625
156.4	0.996875
156.5	0.995625
156.6	0.99375
156.7	0.995
156.8	0.996875
156.9	0.995
157	0.99625
157.1	0.998125
157.2	0.995625
157.3	0.9975
157.4	0.995
157.5	0.998125
157.6	0.998125
157.7	0.996875
157.8	0.994375
157.9	0.994375
158	0.995
158.1	0.995
158.2	0.995
158.3	0.99375
158.4	0.995625
158.5	0.9975
158.6	0.995625
158.7	0.998125
158.8	0.995625
158.9	0.9925
159	0.99875
159.1	0.9975
159.2	0.99625
159.3	0.99875
159.4	0.996875
159.5	0.995625
159.6	0.99625
159.7	0.998125
159.8	0.9975
159.9	0.99625
160	0.995
160.1	0.995
160.2	0.9925
160.3	0.995625
160.4	0.995
160.5	0.994375
160.6	0.995625
160.7	0.99625
160.8	0.99625
160.9	0.99875
161	0.996875
161.1	0.99875
161.2	0.9975
161.3	0.99625
161.4	0.994375
161.5	0.995625
161.6	0.99125
161.7	0.991875
161.8	0.995625
161.9	0.995625
162	0.994375
162.1	0.995625
162.2	0.996875
162.3	0.99625
162.4	0.99375
162.5	0.99625
162.6	0.99625
162.7	0.994375
162.8	0.994375
162.9	0.995625
163	0.99625
163.1	0.99375
163.2	0.99375
163.3	0.994375
163.4	0.994375
163.5	0.99625
163.6	0.9975
163.7	0.994375
163.8	0.993125
163.9	0.9975
164	0.995625
164.1	0.994375
164.2	0.99625
164.3	0.995625
164.4	0.993125
164.5	0.991875
164.6	0.995625
164.7	0.996875
164.8	0.994375
164.9	0.994375
165	0.995
165.1	0.99625
165.2	0.99625
165.3	0.995
165.4	0.996875
165.5	0.995625
165.6	0.994375
165.7	0.99375
165.8	0.994375
165.9	0.996875
166	0.994375
166.1	0.995
166.2	0.995
166.3	0.994375
166.4	0.99625
166.5	0.99625
166.6	0.996875
166.7	0.996875
166.8	0.99625
166.9	0.995625
167	0.99625
167.1	0.99375
167.2	0.996875
167.3	0.995
167.4	0.998125
167.5	0.998125
167.6	0.995
167.7	0.99375
167.8	0.996875
167.9	0.996875
168	0.99625
168.1	0.996875
168.2	0.996875
168.3	0.995
168.4	0.995
168.5	0.99625
168.6	0.99625
168.7	0.99625
168.8	0.99625
168.9	0.998125
169	0.995625
169.1	0.996875
169.2	0.995
169.3	0.995
169.4	0.9975
169.5	0.9975
169.6	0.998125
169.7	0.996875
169.8	0.99625
169.9	0.9975
170	0.996875
170.1	0.996875
170.2	0.9975
170.3	0.996875
170.4	0.994375
170.5	0.9925
170.6	0.996875
170.7	0.996875
170.8	0.995625
170.9	0.995
171	0.99625
171.1	0.9975
171.2	0.995
171.3	0.99625
171.4	0.9925
171.5	0.994375
171.6	0.995625
171.7	0.99625
171.8	0.994375
171.9	0.996875
172	0.9975
172.1	0.995625
172.2	0.996875
172.3	0.996875
172.4	0.99625
172.5	0.995625
172.6	0.99875
172.7	0.998125
172.8	0.995625
172.9	0.995625
173	0.995625
173.1	0.9975
173.2	0.99625
173.3	0.99375
173.4	0.995
173.5	0.994375
173.6	0.994375
173.7	0.996875
173.8	0.998125
173.9	0.99625
174	0.994375
174.1	0.994375
174.2	0.995
174.3	0.998125
174.4	0.994375
174.5	0.996875
174.6	0.9975
174.7	0.994375
174.8	0.995
174.9	0.9975
175	0.9975
175.1	0.994375
175.2	0.995625
175.3	0.99375
175.4	0.995
175.5	0.99625
175.6	0.995
175.7	0.995625
175.8	0.99625
175.9	0.995
176	0.99625
176.1	0.9975
176.2	0.998125
176.3	0.999375
176.4	0.995625
176.5	0.995625
176.6	0.995
176.7	0.993125
176.8	0.99625
176.9	0.99625
177	0.990625
177.1	0.993125
177.2	0.995
177.3	0.9975
177.4	0.996875
177.5	0.995
177.6	0.995
177.7	0.99875
177.8	0.99875
177.9	0.99625
178	0.9975
178.1	0.99625
178.2	0.995625
178.3	0.996875
178.4	0.9975
178.5	0.995625
178.6	0.995
178.7	0.9975
178.8	0.995
178.9	0.995
179	0.99625
179.1	0.996875
179.2	0.995625
179.3	0.999375
179.4	0.998125
179.5	0.996875
179.6	0.995
179.7	0.995
179.8	0.996875
179.9	0.99875
180	0.995625
180.1	0.994375
180.2	0.994375
180.3	0.99625
180.4	0.99625
180.5	0.996875
180.6	0.996875
180.7	0.998125
180.8	0.994375
180.9	0.9975
181	0.995625
181.1	0.9975
181.2	0.995625
181.3	0.99625
181.4	0.995625
181.5	0.994375
181.6	0.995625
181.7	0.996875
181.8	0.9975
181.9	0.996875
182	0.99625
182.1	0.99875
182.2	0.996875
182.3	0.9975
182.4	0.99625
182.5	0.9975
182.6	0.996875
182.7	0.9975
182.8	0.998125
182.9	0.9975
183	0.996875
183.1	0.9975
183.2	0.9975
183.3	0.9975
183.4	0.998125
183.5	0.998125
183.6	0.99625
183.7	0.99875
183.8	0.99625
183.9	0.996875
184	0.99625
184.1	0.996875
184.2	0.996875
184.3	0.9975
184.4	0.99625
184.5	0.99625
184.6	0.9975
184.7	0.99625
184.8	0.995625
184.9	0.998125
185	0.995
185.1	0.99625
185.2	0.996875
185.3	0.9975
185.4	0.996875
185.5	0.998125
185.6	0.99625
185.7	0.99625
185.8	0.9975
185.9	0.995
186	0.9975
186.1	0.99875
186.2	0.99875
186.3	0.996875
186.4	0.99625
186.5	0.995
186.6	0.996875
186.7	0.996875
186.8	0.9975
186.9	0.996875
187	0.995625
187.1	0.99625
187.2	0.995625
187.3	0.994375
187.4	0.993125
187.5	0.995625
187.6	0.995625
187.7	0.99875
187.8	0.9975
187.9	0.9975
188	0.9975
188.1	0.99875
188.2	0.996875
188.3	0.995625
188.4	0.9975
188.5	0.996875
188.6	0.994375
188.7	0.995
188.8	0.99625
188.9	0.996875
189	0.995625
189.1	0.99625
189.2	0.995625
189.3	0.994375
189.4	0.99625
189.5	0.995
189.6	0.995625
189.7	0.995625
189.8	0.995
189.9	0.996875
190	0.995625
190.1	0.99625
190.2	0.99625
190.3	0.99625
190.4	0.99625
190.5	0.99625
190.6	0.99625
190.7	0.99625
190.8	0.996875
190.9	0.996875
191	0.996875
191.1	0.994375
191.2	0.996875
191.3	0.996875
191.4	0.995
191.5	0.995625
191.6	0.99875
191.7	0.996875
191.8	0.99625
191.9	0.99625
192	0.995625
192.1	0.9975
192.2	0.995
192.3	0.995625
192.4	0.995625
192.5	0.995625
192.6	0.995625
192.7	0.993125
192.8	0.995625
192.9	0.995
193	0.99625
193.1	0.99625
193.2	0.995
193.3	0.998125
193.4	0.9975
193.5	0.998125
193.6	0.998125
193.7	0.995625
193.8	0.994375
193.9	0.994375
194	0.9925
194.1	0.99375
194.2	0.995
194.3	0.99625
194.4	0.9975
194.5	0.995625
194.6	0.99625
194.7	0.998125
194.8	0.995
194.9	0.995625
195	0.99125
195.1	0.99375
195.2	0.99625
195.3	0.995
195.4	0.994375
195.5	0.995625
195.6	0.995
195.7	0.99625
195.8	0.995
195.9	0.996875
196	0.99375
196.1	0.9975
196.2	0.99625
196.3	0.99375
196.4	0.993125
196.5	0.991875
196.6	0.99375
196.7	0.99375
196.8	0.995
196.9	0.99625
197	0.9925
197.1	0.995625
197.2	0.995
197.3	0.996875
197.4	0.99875
197.5	0.998125
197.6	0.998125
197.7	0.995
197.8	0.99875
197.9	0.998125
198	0.9975
198.1	0.995
198.2	0.994375
198.3	0.99625
198.4	0.994375
198.5	0.995625
198.6	0.99625
198.7	0.99625
198.8	0.995
198.9	0.99625
199	0.990625
199.1	0.990625
199.2	0.994375
199.3	0.996875
199.4	0.993125
199.5	0.995625
199.6	0.996875
199.7	0.9975
199.8	0.99625
199.9	0.996875
200	0.99375
[truncated: 14,000 more rows]
