# Supplementary material for: Bayesian inference of kinetic schemes for ion channels by Kalman filtering
Source: eLife journal article supplement (doi:10.7554/elife.62714), 2022-05-04
Supplement: fig4-data3 [file 1_Sim_N_800_Strom_MW_32M.xlsx]

## Sheet: Tabelle1
0.1	0
0.2	0
0.3	0
0.4	0
0.5	0
0.6	0
0.7	0
0.8	0
0.9	0
1	0
1.1	0
1.2	0
1.3	0
1.4	0
1.5	0
1.6	0
1.7	0
1.8	0
1.9	0
2	0
2.1	0
2.2	0
2.3	0
2.4	0
2.5	0
2.6	0
2.7	0
2.8	0
2.9	0
3	0
3.1	0
3.2	0
3.3	0
3.4	0
3.5	0
3.6	0
3.7	0
3.8	0
3.9	0
4	0
4.1	0
4.2	0
4.3	0
4.4	0
4.5	0
4.6	0
4.7	0
4.8	0
4.9	0
5	0
5.1	0
5.2	0
5.3	0
5.4	0
5.5	0
5.6	0
5.7	0
5.8	0
5.9	0
6	0
6.1	0
6.2	0
6.3	0
6.4	0
6.5	0
6.6	0
6.7	0
6.8	0
6.9	0
7	0
7.1	0
7.2	0
7.3	0
7.4	0
7.5	0
7.6	0
7.7	0
7.8	0
7.9	0
8	0
8.1	0
8.2	0
8.3	0
8.4	0
8.5	0
8.6	0
8.7	0
8.8	0
8.9	0
9	0
9.1	0
9.2	0
9.3	0
9.4	0
9.5	0
9.6	0
9.7	0
9.8	0
9.9	0
10	0
10.1	0
10.2	0
10.3	0
10.4	0
10.5	0
10.6	0
10.7	0
10.8	0
10.9	0
11	0
11.1	0
11.2	0
11.3	0
11.4	0
11.5	0
11.6	0
11.7	0
11.8	0
11.9	0
12	0
12.1	0
12.2	0
12.3	0
12.4	0
12.5	0
12.6	0
12.7	0
12.8	0
12.9	0
13	0
13.1	0
13.2	0
13.3	0
13.4	0
13.5	0
13.6	0
13.7	0
13.8	0
13.9	0
14	0
14.1	0
14.2	0
14.3	0
14.4	0
14.5	0
14.6	0
14.7	0
14.8	0
14.9	0
15	0
15.1	0
15.2	0
15.3	0
15.4	0
15.5	0
15.6	0
15.7	0
15.8	0
15.9	0
16	0
16.1	0
16.2	0
16.3	0
16.4	0
16.5	0
16.6	0
16.7	0
16.8	0
16.9	0
17	0
17.1	0
17.2	0
17.3	0
17.4	0
17.5	0
17.6	0
17.7	0
17.8	0
17.9	0
18	0
18.1	0
18.2	0
18.3	0
18.4	0
18.5	0
18.6	0
18.7	0
18.8	0
18.9	0
19	0
19.1	0
19.2	0
19.3	0
19.4	0
19.5	0
19.6	0
19.7	0
19.8	0
19.9	0
20	0
20.1	0
20.2	0
20.3	0
20.4	0
20.5	0
20.6	0
20.7	0
20.8	0
20.9	0
21	0
21.1	0
21.2	0
21.3	0
21.4	0
21.5	0
21.6	0
21.7	0
21.8	0
21.9	0
22	0
22.1	0
22.2	0
22.3	0
22.4	0
22.5	0
22.6	0
22.7	0
22.8	0
22.9	0
23	0
23.1	0
23.2	0
23.3	0
23.4	0
23.5	0
23.6	0
23.7	0
23.8	0
23.9	0
24	0
24.1	0
24.2	0
24.3	0
24.4	0
24.5	0
24.6	0
24.7	0
24.8	0
24.9	0
25	0
25.1	0
25.2	0
25.3	0
25.4	0
25.5	0
25.6	0
25.7	0
25.8	0
25.9	0
26	0
26.1	0
26.2	0
26.3	0
26.4	0
26.5	0
26.6	0
26.7	0
26.8	0
26.9	0
27	0
27.1	0
27.2	0
27.3	0
27.4	0
27.5	0
27.6	0
27.7	0
27.8	0
27.9	0
28	0
28.1	0
28.2	0
28.3	0
28.4	0
28.5	0
28.6	0
28.7	0
28.8	0
28.9	0
29	0
29.1	0
29.2	0
29.3	0
29.4	0
29.5	0
29.6	0
29.7	0
29.8	0
29.9	0
30	0
30.1	0
30.2	0
30.3	0
30.4	0
30.5	0
30.6	0
30.7	0
30.8	0
30.9	0
31	0
31.1	0
31.2	0
31.3	0
31.4	0
31.5	0
31.6	0
31.7	0
31.8	0
31.9	0
32	0
32.1	0
32.2	0
32.3	0
32.4	0
32.5	0
32.6	0
32.7	0
32.8	0
32.9	0
33	0
33.1	0
33.2	0
33.3	0
33.4	0
33.5	0
33.6	0
33.7	0
33.8	0
33.9	0
34	0
34.1	0
34.2	0
34.3	0
34.4	0
34.5	0
34.6	0
34.7	0
34.8	0
34.9	0
35	0
35.1	0
35.2	0
35.3	0
35.4	0
35.5	0
35.6	0
35.7	0
35.8	0
35.9	0
36	0
36.1	0
36.2	0
36.3	0
36.4	0
36.5	0
36.6	0
36.7	0
36.8	0
36.9	0
37	0
37.1	0
37.2	0
37.3	0
37.4	0
37.5	0
37.6	0
37.7	0
37.8	0
37.9	0
38	0
38.1	0
38.2	0
38.3	0
38.4	0
38.5	0
38.6	0
38.7	0
38.8	0
38.9	0
39	0
39.1	0
39.2	0
39.3	0
39.4	0
39.5	0
39.6	0
39.7	0
39.8	0
39.9	0
40	0
40.1	0
40.2	0
40.3	0
40.4	0
40.5	0
40.6	0
40.7	0
40.8	0
40.9	0
41	0
41.1	0
41.2	0
41.3	0
41.4	0
41.5	0
41.6	0
41.7	0
41.8	0
41.9	0
42	0
42.1	0
42.2	0
42.3	0
42.4	0
42.5	0
42.6	0
42.7	0
42.8	0
42.9	0
43	0
43.1	0
43.2	0
43.3	0
43.4	0
43.5	0
43.6	0
43.7	0
43.8	0
43.9	0
44	0
44.1	0
44.2	0
44.3	0
44.4	0
44.5	0
44.6	0
44.7	0
44.8	0
44.9	0
45	0
45.1	0
45.2	0
45.3	0
45.4	0
45.5	0
45.6	0
45.7	0
45.8	0
45.9	0
46	0
46.1	0
46.2	0
46.3	0
46.4	0
46.5	0
46.6	0
46.7	0
46.8	0
46.9	0
47	0
47.1	0
47.2	0
47.3	0
47.4	0
47.5	0
47.6	0
47.7	0
47.8	0
47.9	0
48	0
48.1	0
48.2	0
48.3	0
48.4	0
48.5	0
48.6	0
48.7	0
48.8	0
48.9	0
49	0
49.1	0
49.2	0
49.3	0
49.4	0
49.5	0
49.6	0
49.7	0
49.8	0
49.9	0
50	0
50.1	0
50.2	0
50.3	0
50.4	0
50.5	0
50.6	0
50.7	0
50.8	0
50.9	0
51	0
51.1	0
51.2	0
51.3	0
51.4	0
51.5	0
51.6	0
51.7	0
51.8	0
51.9	0
52	0
52.1	0
52.2	0
52.3	0
52.4	0
52.5	0
52.6	0
52.7	0
52.8	0
52.9	0
53	0
53.1	0
53.2	0
53.3	0
53.4	0
53.5	0
53.6	0
53.7	0
53.8	0
53.9	0
54	0
54.1	0
54.2	0
54.3	0
54.4	0
54.5	0
54.6	0
54.7	0
54.8	0
54.9	0
55	0
55.1	0
55.2	0
55.3	0
55.4	0
55.5	0
55.6	0
55.7	0
55.8	0
55.9	0
56	0
56.1	0
56.2	0
56.3	0
56.4	0
56.5	0
56.6	0
56.7	0
56.8	0
56.9	0
57	0
57.1	0
57.2	0
57.3	0
57.4	0
57.5	0
57.6	0
57.7	0
57.8	0
57.9	0
58	0
58.1	0
58.2	0
58.3	0
58.4	0
58.5	0
58.6	0
58.7	0
58.8	0
58.9	0
59	0
59.1	0
59.2	0
59.3	0
59.4	0
59.5	0
59.6	0
59.7	0
59.8	0
59.9	0
60	0
60.1	0
60.2	0
60.3	0
60.4	0
60.5	0
60.6	0
60.7	0
60.8	0
60.9	0
61	0
61.1	0
61.2	0
61.3	0
61.4	0
61.5	0
61.6	0
61.7	0
61.8	0
61.9	0
62	0
62.1	0
62.2	0
62.3	0
62.4	0
62.5	0
62.6	0
62.7	0
62.8	0
62.9	0
63	0
63.1	0
63.2	0
63.3	0
63.4	0
63.5	0
63.6	0
63.7	0
63.8	0
63.9	0
64	0
64.1	0
64.2	0
64.3	0
64.4	0
64.5	0
64.6	0
64.7	0
64.8	0
64.9	0
65	0
65.1	0
65.2	0
65.3	0
65.4	0
65.5	0
65.6	0
65.7	0
65.8	0
65.9	0
66	0
66.1	0
66.2	0
66.3	0
66.4	0
66.5	0
66.6	0
66.7	0
66.8	0
66.9	0
67	0
67.1	0
67.2	0
67.3	0
67.4	0
67.5	0
67.6	0
67.7	0
67.8	0
67.9	0
68	0
68.1	0
68.2	0
68.3	0
68.4	0
68.5	0
68.6	0
68.7	0
68.8	0
68.9	0
69	0
69.1	0
69.2	0
69.3	0
69.4	0
69.5	0
69.6	0
69.7	0
69.8	0
69.9	0
70	0
70.1	0
70.2	0
70.3	0
70.4	0
70.5	0
70.6	0
70.7	0
70.8	0
70.9	0
71	0
71.1	0
71.2	0
71.3	0
71.4	0
71.5	0
71.6	0
71.7	0
71.8	0
71.9	0
72	0
72.1	0
72.2	0
72.3	0
72.4	0
72.5	0
72.6	0
72.7	0
72.8	0
72.9	0
73	0
73.1	0
73.2	0
73.3	0
73.4	0
73.5	0
73.6	0
73.7	0
73.8	0
73.9	0
74	0
74.1	0
74.2	0
74.3	0
74.4	0
74.5	0
74.6	0
74.7	0
74.8	0
74.9	0
75	0
75.1	0
75.2	0
75.3	0
75.4	0
75.5	0
75.6	0
75.7	0
75.8	0
75.9	0
76	0
76.1	0
76.2	0
76.3	0
76.4	0
76.5	0
76.6	0
76.7	0
76.8	0
76.9	0
77	0
77.1	0
77.2	0
77.3	0
77.4	0
77.5	0
77.6	0
77.7	0
77.8	0
77.9	0
78	0
78.1	0
78.2	0
78.3	0
78.4	0
78.5	0
78.6	0
78.7	0
78.8	0
78.9	0
79	0
79.1	0
79.2	0
79.3	0
79.4	0
79.5	0
79.6	0
79.7	0
79.8	0
79.9	0
80	0
80.1	0
80.2	0
80.3	0
80.4	0
80.5	0
80.6	0
80.7	0
80.8	0
80.9	0
81	0
81.1	0
81.2	0
81.3	0
81.4	0
81.5	0
81.6	0
81.7	0
81.8	0
81.9	0
82	0
82.1	0
82.2	0
82.3	0
82.4	0
82.5	0
82.6	0
82.7	0
82.8	0
82.9	0
83	0
83.1	0
83.2	0
83.3	0
83.4	0
83.5	0
83.6	0
83.7	0
83.8	0
83.9	0
84	0
84.1	0
84.2	0
84.3	0
84.4	0
84.5	0
84.6	0
84.7	0
84.8	0
84.9	0
85	0
85.1	0
85.2	0
85.3	0
85.4	0
85.5	0
85.6	0
85.7	0
85.8	0
85.9	0
86	0
86.1	0
86.2	0
86.3	0
86.4	0
86.5	0
86.6	0
86.7	0
86.8	0
86.9	0
87	0
87.1	0
87.2	0
87.3	0
87.4	0
87.5	0
87.6	0
87.7	0
87.8	0
87.9	0
88	0
88.1	0
88.2	0
88.3	0
88.4	0
88.5	0
88.6	0
88.7	0
88.8	0
88.9	0
89	0
89.1	0
89.2	0
89.3	0
89.4	0
89.5	0
89.6	0
89.7	0
89.8	0
89.9	0
90	0
90.1	0
90.2	0
90.3	0
90.4	0
90.5	0
90.6	0
90.7	0
90.8	0
90.9	0
91	0
91.1	0
91.2	0
91.3	0
91.4	0
91.5	0
91.6	0
91.7	0
91.8	0
91.9	0
92	0
92.1	0
92.2	0
92.3	0
92.4	0
92.5	0
92.6	0
92.7	0
92.8	0
92.9	0
93	0
93.1	0
93.2	0
93.3	0
93.4	0
93.5	0
93.6	0
93.7	0
93.8	0
93.9	0
94	0
94.1	0
94.2	0
94.3	0
94.4	0
94.5	0
94.6	0
94.7	0
94.8	0
94.9	0
95	0
95.1	0
95.2	0
95.3	0
95.4	0
95.5	0
95.6	0
95.7	0
95.8	0
95.9	0
96	0
96.1	0
96.2	0
96.3	0
96.4	0
96.5	0
96.6	0
96.7	0
96.8	0
96.9	0
97	0
97.1	0
97.2	0
97.3	0
97.4	0
97.5	0
97.6	0
97.7	0
97.8	0
97.9	0
98	0
98.1	0
98.2	0
98.3	0
98.4	0
98.5	0
98.6	0
98.7	0
98.8	0
98.9	0
99	0
99.1	0
99.2	0
99.3	0
99.4	0
99.5	0
99.6	0
99.7	0
99.8	0
99.9	0
100	0
100.1	0
100.2	0.00875
100.3	0.01
100.4	0.015
100.5	0.01875
100.6	0.025
100.7	0.02875
100.8	0.035
100.9	0.04
101	0.04
101.1	0.0425
101.2	0.04625
101.3	0.04875
101.4	0.0525
101.5	0.0575
101.6	0.0625
101.7	0.0725
101.8	0.075
101.9	0.07875
102	0.0825
102.1	0.08875
102.2	0.09875
102.3	0.1025
102.4	0.1025
102.5	0.11
102.6	0.115
102.7	0.12
102.8	0.12375
102.9	0.12875
103	0.13
103.1	0.1325
103.2	0.135
103.3	0.13875
103.4	0.14375
103.5	0.1475
103.6	0.1525
103.7	0.1525
103.8	0.1575
103.9	0.16875
104	0.17125
104.1	0.1725
104.2	0.18125
104.3	0.185
104.4	0.1875
104.5	0.19375
104.6	0.19875
104.7	0.20125
104.8	0.20125
104.9	0.20375
105	0.21
105.1	0.21125
105.2	0.215
105.3	0.22
105.4	0.2225
105.5	0.2275
105.6	0.23125
105.7	0.23625
105.8	0.24125
105.9	0.25125
106	0.25375
106.1	0.25625
106.2	0.2625
106.3	0.26375
106.4	0.265
106.5	0.2725
106.6	0.275
106.7	0.28375
106.8	0.2875
106.9	0.2925
107	0.295
107.1	0.29625
107.2	0.2975
107.3	0.29875
107.4	0.30375
107.5	0.30875
107.6	0.31125
107.7	0.31375
107.8	0.315
107.9	0.32
108	0.32125
108.1	0.33125
108.2	0.33
108.3	0.33375
108.4	0.3375
108.5	0.34125
108.6	0.345
108.7	0.34875
108.8	0.35125
108.9	0.35125
109	0.3525
109.1	0.355
109.2	0.3575
109.3	0.36
109.4	0.36125
109.5	0.36375
109.6	0.365
109.7	0.36625
109.8	0.3675
109.9	0.36875
110	0.37
110.1	0.37375
110.2	0.3775
110.3	0.3825
110.4	0.3825
110.5	0.385
110.6	0.39
110.7	0.395
110.8	0.39625
110.9	0.39625
111	0.4025
111.1	0.405
111.2	0.405
111.3	0.41
111.4	0.41375
111.5	0.41625
111.6	0.41875
111.7	0.42
111.8	0.425
111.9	0.43125
112	0.43625
112.1	0.43875
112.2	0.4425
112.3	0.445
112.4	0.45125
112.5	0.455
112.6	0.455
112.7	0.4575
112.8	0.46
112.9	0.465
113	0.4675
113.1	0.47
113.2	0.47
113.3	0.47
113.4	0.47125
113.5	0.47625
113.6	0.47625
113.7	0.47875
113.8	0.48125
113.9	0.4825
114	0.48375
114.1	0.48375
114.2	0.48375
114.3	0.48625
114.4	0.48625
114.5	0.4875
114.6	0.485
114.7	0.48875
114.8	0.48875
114.9	0.49125
115	0.49375
115.1	0.49625
115.2	0.4975
115.3	0.50125
115.4	0.505
115.5	0.50625
115.6	0.5075
115.7	0.50875
115.8	0.51
115.9	0.51125
116	0.515
116.1	0.515
116.2	0.51625
116.3	0.51875
116.4	0.5225
116.5	0.52375
116.6	0.52625
116.7	0.52625
116.8	0.52625
116.9	0.5275
117	0.5275
117.1	0.53
117.2	0.53125
117.3	0.53125
117.4	0.53375
117.5	0.535
117.6	0.535
117.7	0.5375
117.8	0.54
117.9	0.54375
118	0.545
118.1	0.5425
118.2	0.5425
118.3	0.5425
118.4	0.54375
118.5	0.54625
118.6	0.54625
118.7	0.54875
118.8	0.55125
118.9	0.55375
119	0.55375
119.1	0.55375
119.2	0.5525
119.3	0.55375
119.4	0.55375
119.5	0.555
119.6	0.555
119.7	0.5575
119.8	0.55875
119.9	0.56
120	0.5625
120.1	0.56375
120.2	0.56875
120.3	0.57
120.4	0.57
120.5	0.57
120.6	0.56875
120.7	0.57
120.8	0.57
120.9	0.56875
121	0.575
121.1	0.575
121.2	0.5775
121.3	0.5775
121.4	0.57875
121.5	0.58
121.6	0.5825
121.7	0.58375
121.8	0.585
121.9	0.58375
122	0.5825
122.1	0.58375
122.2	0.58625
122.3	0.5875
122.4	0.58625
122.5	0.59
122.6	0.59125
122.7	0.59125
122.8	0.59375
122.9	0.595
123	0.59625
123.1	0.5975
123.2	0.6
123.3	0.60125
123.4	0.605
123.5	0.60375
123.6	0.60625
123.7	0.60625
123.8	0.60875
123.9	0.6125
124	0.6125
124.1	0.61125
124.2	0.615
124.3	0.61625
124.4	0.6175
124.5	0.6125
124.6	0.61375
124.7	0.61625
124.8	0.61875
124.9	0.62125
125	0.62375
125.1	0.6275
125.2	0.63
125.3	0.63125
125.4	0.635
125.5	0.63625
125.6	0.63625
125.7	0.63875
125.8	0.64
125.9	0.64
126	0.64
126.1	0.64125
126.2	0.6425
126.3	0.64375
126.4	0.6475
126.5	0.6475
126.6	0.645
126.7	0.64625
126.8	0.64625
126.9	0.65
127	0.65
127.1	0.65
127.2	0.65375
127.3	0.65625
127.4	0.65875
127.5	0.6625
127.6	0.66
127.7	0.665
127.8	0.6675
127.9	0.67
128	0.67125
128.1	0.6725
128.2	0.6725
128.3	0.6725
128.4	0.6725
128.5	0.67375
128.6	0.675
128.7	0.67875
128.8	0.68125
128.9	0.6825
129	0.68125
129.1	0.68875
129.2	0.68875
129.3	0.6875
129.4	0.69
129.5	0.69125
129.6	0.69375
129.7	0.69625
129.8	0.70125
129.9	0.7
130	0.7
130.1	0.70125
130.2	0.69875
130.3	0.6975
130.4	0.6975
130.5	0.69875
130.6	0.70125
130.7	0.7025
130.8	0.70125
130.9	0.70125
131	0.70125
131.1	0.7025
131.2	0.70125
131.3	0.7025
131.4	0.7025
131.5	0.70375
131.6	0.705
131.7	0.70625
131.8	0.7075
131.9	0.70625
132	0.70375
132.1	0.7025
132.2	0.705
132.3	0.7075
132.4	0.71
132.5	0.7125
132.6	0.7125
132.7	0.71
132.8	0.71
132.9	0.71125
133	0.71375
133.1	0.71375
133.2	0.7175
133.3	0.715
133.4	0.7175
133.5	0.7175
133.6	0.7175
133.7	0.72125
133.8	0.72125
133.9	0.72125
134	0.72125
134.1	0.7225
134.2	0.72375
134.3	0.7225
134.4	0.72625
134.5	0.72625
134.6	0.7275
134.7	0.7275
134.8	0.7275
134.9	0.7275
135	0.7275
135.1	0.7275
135.2	0.725
135.3	0.725
135.4	0.72625
135.5	0.72625
135.6	0.7275
135.7	0.72875
135.8	0.73125
135.9	0.73125
136	0.73125
136.1	0.7325
136.2	0.7325
136.3	0.73375
136.4	0.73375
136.5	0.7325
136.6	0.7325
136.7	0.73375
136.8	0.7325
136.9	0.73375
137	0.73625
137.1	0.7375
137.2	0.735
137.3	0.73625
137.4	0.735
137.5	0.7325
137.6	0.73375
137.7	0.735
137.8	0.735
137.9	0.735
138	0.735
138.1	0.73625
138.2	0.7375
138.3	0.73625
138.4	0.73875
138.5	0.73875
138.6	0.73875
138.7	0.73875
138.8	0.73875
138.9	0.73875
139	0.73875
139.1	0.74
139.2	0.7425
139.3	0.7425
139.4	0.74125
139.5	0.74
139.6	0.74125
139.7	0.74375
139.8	0.74375
139.9	0.74125
140	0.74125
140.1	0.74125
140.2	0.7425
140.3	0.74375
140.4	0.745
140.5	0.74625
140.6	0.7475
140.7	0.7475
140.8	0.75
140.9	0.7525
141	0.755
141.1	0.755
141.2	0.755
141.3	0.75625
141.4	0.755
141.5	0.755
141.6	0.75625
141.7	0.75625
141.8	0.7575
141.9	0.7575
142	0.7575
142.1	0.76
142.2	0.76
142.3	0.76375
142.4	0.76375
142.5	0.7675
142.6	0.76625
142.7	0.7625
142.8	0.765
142.9	0.76625
143	0.7675
143.1	0.7675
143.2	0.765
143.3	0.765
143.4	0.7675
143.5	0.76875
143.6	0.77125
143.7	0.7725
143.8	0.77375
143.9	0.775
144	0.77375
144.1	0.7725
144.2	0.7725
144.3	0.7725
144.4	0.77125
144.5	0.77125
144.6	0.77125
144.7	0.7725
144.8	0.77375
144.9	0.7775
145	0.78
145.1	0.78125
145.2	0.78125
145.3	0.78125
145.4	0.78
145.5	0.78125
145.6	0.78125
145.7	0.78125
145.8	0.78
145.9	0.77875
146	0.77875
146.1	0.78125
146.2	0.78125
146.3	0.78125
146.4	0.78125
146.5	0.78125
146.6	0.78125
146.7	0.7825
146.8	0.78
146.9	0.78
147	0.7825
147.1	0.78625
147.2	0.78625
147.3	0.7875
147.4	0.78625
147.5	0.78625
147.6	0.7875
147.7	0.785
147.8	0.78375
147.9	0.785
148	0.78625
148.1	0.7875
148.2	0.785
148.3	0.785
148.4	0.7875
148.5	0.78625
148.6	0.78625
148.7	0.78625
148.8	0.78625
148.9	0.785
149	0.7825
149.1	0.78125
149.2	0.7825
149.3	0.7825
149.4	0.7825
149.5	0.7825
149.6	0.78375
149.7	0.78375
149.8	0.7825
149.9	0.785
150	0.78625
150.1	0.78625
150.2	0.79
150.3	0.79
150.4	0.78875
150.5	0.78875
150.6	0.78875
150.7	0.7875
150.8	0.78625
150.9	0.78625
151	0.785
151.1	0.78875
151.2	0.78625
151.3	0.785
151.4	0.78625
151.5	0.7875
151.6	0.7875
151.7	0.7875
151.8	0.78875
151.9	0.78875
152	0.7875
152.1	0.7875
152.2	0.78625
152.3	0.78625
152.4	0.78375
152.5	0.7825
152.6	0.7825
152.7	0.78375
152.8	0.785
152.9	0.78625
153	0.7875
153.1	0.79
153.2	0.79125
153.3	0.79125
153.4	0.79125
153.5	0.7925
153.6	0.7925
153.7	0.7925
153.8	0.7925
153.9	0.7925
154	0.79375
154.1	0.795
154.2	0.795
154.3	0.79625
154.4	0.79625
154.5	0.79875
154.6	0.79875
154.7	0.79875
154.8	0.79875
154.9	0.79875
155	0.795
155.1	0.79625
155.2	0.795
155.3	0.795
155.4	0.79375
155.5	0.7925
155.6	0.79625
155.7	0.795
155.8	0.795
155.9	0.795
156	0.79625
156.1	0.7975
156.2	0.7975
156.3	0.79625
156.4	0.7975
156.5	0.7975
156.6	0.80125
156.7	0.80375
156.8	0.80625
156.9	0.805
157	0.80625
157.1	0.80625
157.2	0.8075
157.3	0.8075
157.4	0.80625
157.5	0.8075
157.6	0.81
157.7	0.8075
157.8	0.8075
157.9	0.80875
158	0.8075
158.1	0.8075
158.2	0.80625
158.3	0.80625
158.4	0.80375
158.5	0.80375
158.6	0.80625
158.7	0.80875
158.8	0.8075
158.9	0.80625
159	0.8075
159.1	0.8075
159.2	0.80625
159.3	0.8075
159.4	0.8075
159.5	0.80875
159.6	0.80875
159.7	0.81
159.8	0.81
159.9	0.8125
160	0.81625
160.1	0.815
160.2	0.81625
160.3	0.81625
160.4	0.81375
160.5	0.81375
160.6	0.81375
160.7	0.81375
160.8	0.81375
160.9	0.81375
161	0.8125
161.1	0.81375
161.2	0.8125
161.3	0.81
161.4	0.81
161.5	0.8075
161.6	0.80625
161.7	0.80875
161.8	0.80875
161.9	0.81
162	0.80875
162.1	0.81125
162.2	0.81
162.3	0.81125
162.4	0.81
162.5	0.81
162.6	0.81125
162.7	0.81
162.8	0.81
162.9	0.80875
163	0.8075
163.1	0.8075
163.2	0.81
163.3	0.81
163.4	0.80875
163.5	0.81
163.6	0.81
163.7	0.80875
163.8	0.80875
163.9	0.80875
164	0.80875
164.1	0.81
164.2	0.8125
164.3	0.81125
164.4	0.81125
164.5	0.8125
164.6	0.81375
164.7	0.8125
164.8	0.81375
164.9	0.81375
165	0.8175
165.1	0.81625
165.2	0.81625
165.3	0.81625
165.4	0.82
165.5	0.8225
165.6	0.825
165.7	0.825
165.8	0.8225
165.9	0.82375
166	0.825
166.1	0.825
166.2	0.8275
166.3	0.82875
166.4	0.83
166.5	0.83
166.6	0.82875
166.7	0.82875
166.8	0.83125
166.9	0.8325
167	0.83125
167.1	0.83
167.2	0.83
167.3	0.83
167.4	0.82625
167.5	0.8275
167.6	0.83
167.7	0.8325
167.8	0.83
167.9	0.83
168	0.83
168.1	0.83
168.2	0.83125
168.3	0.83125
168.4	0.8325
168.5	0.83375
168.6	0.83375
168.7	0.83625
168.8	0.8375
168.9	0.835
169	0.8375
169.1	0.835
169.2	0.835
169.3	0.83375
169.4	0.83375
169.5	0.83125
169.6	0.83125
169.7	0.83
169.8	0.83
169.9	0.83
170	0.8275
170.1	0.82875
170.2	0.83
170.3	0.82875
170.4	0.83125
170.5	0.83125
170.6	0.83125
170.7	0.83125
170.8	0.8325
170.9	0.8325
171	0.8325
171.1	0.83625
171.2	0.83625
171.3	0.8375
171.4	0.8375
171.5	0.84
171.6	0.83875
171.7	0.84
171.8	0.84125
171.9	0.84125
172	0.84125
172.1	0.83875
172.2	0.84
172.3	0.84
172.4	0.84
172.5	0.84
172.6	0.8375
172.7	0.83875
172.8	0.83875
172.9	0.83625
173	0.8375
173.1	0.83875
173.2	0.83875
173.3	0.83875
173.4	0.8375
173.5	0.83625
173.6	0.83875
173.7	0.8375
173.8	0.8375
173.9	0.8375
174	0.8375
174.1	0.84
174.2	0.84
174.3	0.83875
174.4	0.83875
174.5	0.8425
174.6	0.8425
174.7	0.84125
174.8	0.84
174.9	0.84
175	0.84
175.1	0.8375
175.2	0.8375
175.3	0.83625
175.4	0.8375
175.5	0.8375
175.6	0.84125
175.7	0.8425
175.8	0.8425
175.9	0.84375
176	0.84625
176.1	0.84625
176.2	0.8475
176.3	0.8475
176.4	0.8475
176.5	0.84875
176.6	0.84875
176.7	0.84875
176.8	0.84875
176.9	0.84875
177	0.84875
177.1	0.84875
177.2	0.85
177.3	0.85
177.4	0.85125
177.5	0.84875
177.6	0.84625
177.7	0.84625
177.8	0.84625
177.9	0.84625
178	0.845
178.1	0.84375
178.2	0.84375
178.3	0.84125
178.4	0.84
178.5	0.84
178.6	0.8425
178.7	0.8425
178.8	0.84375
178.9	0.84375
179	0.84375
179.1	0.84375
179.2	0.8425
179.3	0.8425
179.4	0.84
179.5	0.84
179.6	0.84
179.7	0.84125
179.8	0.84125
179.9	0.84375
180	0.8425
180.1	0.84375
180.2	0.845
180.3	0.845
180.4	0.84625
180.5	0.84375
180.6	0.8475
180.7	0.8475
180.8	0.85
180.9	0.85
181	0.84875
181.1	0.84875
181.2	0.85125
181.3	0.85375
181.4	0.8525
181.5	0.8525
181.6	0.85125
181.7	0.8525
181.8	0.8525
181.9	0.8525
182	0.8525
182.1	0.8525
182.2	0.8525
182.3	0.855
182.4	0.85375
182.5	0.855
182.6	0.855
182.7	0.855
182.8	0.855
182.9	0.85375
183	0.855
183.1	0.85375
183.2	0.85375
183.3	0.8525
183.4	0.8525
183.5	0.85125
183.6	0.85
183.7	0.85
183.8	0.85125
183.9	0.85375
184	0.8525
184.1	0.85
184.2	0.85
184.3	0.8525
184.4	0.8525
184.5	0.8525
184.6	0.8525
184.7	0.855
184.8	0.85625
184.9	0.85625
185	0.8575
185.1	0.85625
185.2	0.8575
185.3	0.8575
185.4	0.85625
185.5	0.8575
185.6	0.85875
185.7	0.8575
185.8	0.8575
185.9	0.8575
186	0.8575
186.1	0.85875
186.2	0.8625
186.3	0.865
186.4	0.8625
186.5	0.8625
186.6	0.86
186.7	0.86125
186.8	0.86125
186.9	0.86
187	0.86
187.1	0.85875
187.2	0.86
187.3	0.86
187.4	0.86
187.5	0.8575
187.6	0.855
187.7	0.855
187.8	0.85625
187.9	0.8525
188	0.85
188.1	0.85
188.2	0.84625
188.3	0.84625
188.4	0.84625
188.5	0.84625
188.6	0.845
188.7	0.845
188.8	0.84375
188.9	0.84125
189	0.8425
189.1	0.8425
189.2	0.8425
189.3	0.84375
189.4	0.845
189.5	0.84375
189.6	0.84125
189.7	0.84
189.8	0.83875
189.9	0.83875
190	0.84
190.1	0.84
190.2	0.8425
190.3	0.8425
190.4	0.84
190.5	0.83875
190.6	0.83875
190.7	0.8375
190.8	0.83875
190.9	0.8375
191	0.8375
191.1	0.835
191.2	0.83375
191.3	0.83375
191.4	0.8325
191.5	0.8325
191.6	0.83
191.7	0.83
191.8	0.83125
191.9	0.83
192	0.83
192.1	0.83125
192.2	0.83125
192.3	0.83125
192.4	0.8325
192.5	0.83375
192.6	0.8325
192.7	0.835
192.8	0.83625
192.9	0.83375
193	0.83375
193.1	0.83125
193.2	0.83
193.3	0.82875
193.4	0.83
193.5	0.83
193.6	0.83
193.7	0.83125
193.8	0.83125
193.9	0.83125
194	0.8325
194.1	0.8325
194.2	0.8325
194.3	0.8325
194.4	0.83125
194.5	0.83
194.6	0.82875
194.7	0.82875
194.8	0.8275
194.9	0.8275
195	0.82625
195.1	0.82625
195.2	0.8275
195.3	0.82625
195.4	0.82875
195.5	0.82875
195.6	0.83
195.7	0.8325
195.8	0.83375
195.9	0.83375
196	0.83375
196.1	0.83375
196.2	0.835
196.3	0.83625
196.4	0.83625
196.5	0.835
196.6	0.835
196.7	0.8325
196.8	0.835
196.9	0.835
197	0.835
197.1	0.835
197.2	0.835
197.3	0.83375
197.4	0.835
197.5	0.835
197.6	0.835
197.7	0.8325
197.8	0.8325
197.9	0.835
198	0.83625
198.1	0.8375
198.2	0.8375
198.3	0.83625
198.4	0.835
198.5	0.83375
198.6	0.835
198.7	0.83375
198.8	0.835
198.9	0.835
199	0.83875
199.1	0.83875
199.2	0.8375
199.3	0.83625
199.4	0.8375
199.5	0.83875
199.6	0.84
199.7	0.83875
199.8	0.83875
199.9	0.83875
200	0.83875
[truncated: 14,000 more rows]
