# Supplementary material for: Bayesian inference of kinetic schemes for ion channels by Kalman filtering
Source: eLife journal article supplement (doi:10.7554/elife.62714), 2022-05-04
Supplement: fig4-data3 [file 1_Sim_N_1000_Fluor_MW.xlsx]

## Sheet: Tabelle1
0.1	0
0.2	0
0.3	0
0.4	0
0.5	0
0.6	0
0.7	0
0.8	0
0.9	0
1	0
1.1	0
1.2	0
1.3	0
1.4	0
1.5	0
1.6	0
1.7	0
1.8	0
1.9	0
2	0
2.1	0
2.2	0
2.3	0
2.4	0
2.5	0
2.6	0
2.7	0
2.8	0
2.9	0
3	0
3.1	0
3.2	0
3.3	0
3.4	0
3.5	0
3.6	0
3.7	0
3.8	0
3.9	0
4	0
4.1	0
4.2	0
4.3	0
4.4	0
4.5	0
4.6	0
4.7	0
4.8	0
4.9	0
5	0
5.1	0
5.2	0
5.3	0
5.4	0
5.5	0
5.6	0
5.7	0
5.8	0
5.9	0
6	0
6.1	0
6.2	0
6.3	0
6.4	0
6.5	0
6.6	0
6.7	0
6.8	0
6.9	0
7	0
7.1	0
7.2	0
7.3	0
7.4	0
7.5	0
7.6	0
7.7	0
7.8	0
7.9	0
8	0
8.1	0
8.2	0
8.3	0
8.4	0
8.5	0
8.6	0
8.7	0
8.8	0
8.9	0
9	0
9.1	0
9.2	0
9.3	0
9.4	0
9.5	0
9.6	0
9.7	0
9.8	0
9.9	0
10	0
10.1	0
10.2	0
10.3	0
10.4	0
10.5	0
10.6	0
10.7	0
10.8	0
10.9	0
11	0
11.1	0
11.2	0
11.3	0
11.4	0
11.5	0
11.6	0
11.7	0
11.8	0
11.9	0
12	0
12.1	0
12.2	0
12.3	0
12.4	0
12.5	0
12.6	0
12.7	0
12.8	0
12.9	0
13	0
13.1	0
13.2	0
13.3	0
13.4	0
13.5	0
13.6	0
13.7	0
13.8	0
13.9	0
14	0
14.1	0
14.2	0
14.3	0
14.4	0
14.5	0
14.6	0
14.7	0
14.8	0
14.9	0
15	0
15.1	0
15.2	0
15.3	0
15.4	0
15.5	0
15.6	0
15.7	0
15.8	0
15.9	0
16	0
16.1	0
16.2	0
16.3	0
16.4	0
16.5	0
16.6	0
16.7	0
16.8	0
16.9	0
17	0
17.1	0
17.2	0
17.3	0
17.4	0
17.5	0
17.6	0
17.7	0
17.8	0
17.9	0
18	0
18.1	0
18.2	0
18.3	0
18.4	0
18.5	0
18.6	0
18.7	0
18.8	0
18.9	0
19	0
19.1	0
19.2	0
19.3	0
19.4	0
19.5	0
19.6	0
19.7	0
19.8	0
19.9	0
20	0
20.1	0
20.2	0
20.3	0
20.4	0
20.5	0
20.6	0
20.7	0
20.8	0
20.9	0
21	0
21.1	0
21.2	0
21.3	0
21.4	0
21.5	0
21.6	0
21.7	0
21.8	0
21.9	0
22	0
22.1	0
22.2	0
22.3	0
22.4	0
22.5	0
22.6	0
22.7	0
22.8	0
22.9	0
23	0
23.1	0
23.2	0
23.3	0
23.4	0
23.5	0
23.6	0
23.7	0
23.8	0
23.9	0
24	0
24.1	0
24.2	0
24.3	0
24.4	0
24.5	0
24.6	0
24.7	0
24.8	0
24.9	0
25	0
25.1	0
25.2	0
25.3	0
25.4	0
25.5	0
25.6	0
25.7	0
25.8	0
25.9	0
26	0
26.1	0
26.2	0
26.3	0
26.4	0
26.5	0
26.6	0
26.7	0
26.8	0
26.9	0
27	0
27.1	0
27.2	0
27.3	0
27.4	0
27.5	0
27.6	0
27.7	0
27.8	0
27.9	0
28	0
28.1	0
28.2	0
28.3	0
28.4	0
28.5	0
28.6	0
28.7	0
28.8	0
28.9	0
29	0
29.1	0
29.2	0
29.3	0
29.4	0
29.5	0
29.6	0
29.7	0
29.8	0
29.9	0
30	0
30.1	0
30.2	0
30.3	0
30.4	0
30.5	0
30.6	0
30.7	0
30.8	0
30.9	0
31	0
31.1	0
31.2	0
31.3	0
31.4	0
31.5	0
31.6	0
31.7	0
31.8	0
31.9	0
32	0
32.1	0
32.2	0
32.3	0
32.4	0
32.5	0
32.6	0
32.7	0
32.8	0
32.9	0
33	0
33.1	0
33.2	0
33.3	0
33.4	0
33.5	0
33.6	0
33.7	0
33.8	0
33.9	0
34	0
34.1	0
34.2	0
34.3	0
34.4	0
34.5	0
34.6	0
34.7	0
34.8	0
34.9	0
35	0
35.1	0
35.2	0
35.3	0
35.4	0
35.5	0
35.6	0
35.7	0
35.8	0
35.9	0
36	0
36.1	0
36.2	0
36.3	0
36.4	0
36.5	0
36.6	0
36.7	0
36.8	0
36.9	0
37	0
37.1	0
37.2	0
37.3	0
37.4	0
37.5	0
37.6	0
37.7	0
37.8	0
37.9	0
38	0
38.1	0
38.2	0
38.3	0
38.4	0
38.5	0
38.6	0
38.7	0
38.8	0
38.9	0
39	0
39.1	0
39.2	0
39.3	0
39.4	0
39.5	0
39.6	0
39.7	0
39.8	0
39.9	0
40	0
40.1	0
40.2	0
40.3	0
40.4	0
40.5	0
40.6	0
40.7	0
40.8	0
40.9	0
41	0
41.1	0
41.2	0
41.3	0
41.4	0
41.5	0
41.6	0
41.7	0
41.8	0
41.9	0
42	0
42.1	0
42.2	0
42.3	0
42.4	0
42.5	0
42.6	0
42.7	0
42.8	0
42.9	0
43	0
43.1	0
43.2	0
43.3	0
43.4	0
43.5	0
43.6	0
43.7	0
43.8	0
43.9	0
44	0
44.1	0
44.2	0
44.3	0
44.4	0
44.5	0
44.6	0
44.7	0
44.8	0
44.9	0
45	0
45.1	0
45.2	0
45.3	0
45.4	0
45.5	0
45.6	0
45.7	0
45.8	0
45.9	0
46	0
46.1	0
46.2	0
46.3	0
46.4	0
46.5	0
46.6	0
46.7	0
46.8	0
46.9	0
47	0
47.1	0
47.2	0
47.3	0
47.4	0
47.5	0
47.6	0
47.7	0
47.8	0
47.9	0
48	0
48.1	0
48.2	0
48.3	0
48.4	0
48.5	0
48.6	0
48.7	0
48.8	0
48.9	0
49	0
49.1	0
49.2	0
49.3	0
49.4	0
49.5	0
49.6	0
49.7	0
49.8	0
49.9	0
50	0
50.1	0
50.2	0
50.3	0
50.4	0
50.5	0
50.6	0
50.7	0
50.8	0
50.9	0
51	0
51.1	0
51.2	0
51.3	0
51.4	0
51.5	0
51.6	0
51.7	0
51.8	0
51.9	0
52	0
52.1	0
52.2	0
52.3	0
52.4	0
52.5	0
52.6	0
52.7	0
52.8	0
52.9	0
53	0
53.1	0
53.2	0
53.3	0
53.4	0
53.5	0
53.6	0
53.7	0
53.8	0
53.9	0
54	0
54.1	0
54.2	0
54.3	0
54.4	0
54.5	0
54.6	0
54.7	0
54.8	0
54.9	0
55	0
55.1	0
55.2	0
55.3	0
55.4	0
55.5	0
55.6	0
55.7	0
55.8	0
55.9	0
56	0
56.1	0
56.2	0
56.3	0
56.4	0
56.5	0
56.6	0
56.7	0
56.8	0
56.9	0
57	0
57.1	0
57.2	0
57.3	0
57.4	0
57.5	0
57.6	0
57.7	0
57.8	0
57.9	0
58	0
58.1	0
58.2	0
58.3	0
58.4	0
58.5	0
58.6	0
58.7	0
58.8	0
58.9	0
59	0
59.1	0
59.2	0
59.3	0
59.4	0
59.5	0
59.6	0
59.7	0
59.8	0
59.9	0
60	0
60.1	0
60.2	0
60.3	0
60.4	0
60.5	0
60.6	0
60.7	0
60.8	0
60.9	0
61	0
61.1	0
61.2	0
61.3	0
61.4	0
61.5	0
61.6	0
61.7	0
61.8	0
61.9	0
62	0
62.1	0
62.2	0
62.3	0
62.4	0
62.5	0
62.6	0
62.7	0
62.8	0
62.9	0
63	0
63.1	0
63.2	0
63.3	0
63.4	0
63.5	0
63.6	0
63.7	0
63.8	0
63.9	0
64	0
64.1	0
64.2	0
64.3	0
64.4	0
64.5	0
64.6	0
64.7	0
64.8	0
64.9	0
65	0
65.1	0
65.2	0
65.3	0
65.4	0
65.5	0
65.6	0
65.7	0
65.8	0
65.9	0
66	0
66.1	0
66.2	0
66.3	0
66.4	0
66.5	0
66.6	0
66.7	0
66.8	0
66.9	0
67	0
67.1	0
67.2	0
67.3	0
67.4	0
67.5	0
67.6	0
67.7	0
67.8	0
67.9	0
68	0
68.1	0
68.2	0
68.3	0
68.4	0
68.5	0
68.6	0
68.7	0
68.8	0
68.9	0
69	0
69.1	0
69.2	0
69.3	0
69.4	0
69.5	0
69.6	0
69.7	0
69.8	0
69.9	0
70	0
70.1	0
70.2	0
70.3	0
70.4	0
70.5	0
70.6	0
70.7	0
70.8	0
70.9	0
71	0
71.1	0
71.2	0
71.3	0
71.4	0
71.5	0
71.6	0
71.7	0
71.8	0
71.9	0
72	0
72.1	0
72.2	0
72.3	0
72.4	0
72.5	0
72.6	0
72.7	0
72.8	0
72.9	0
73	0
73.1	0
73.2	0
73.3	0
73.4	0
73.5	0
73.6	0
73.7	0
73.8	0
73.9	0
74	0
74.1	0
74.2	0
74.3	0
74.4	0
74.5	0
74.6	0
74.7	0
74.8	0
74.9	0
75	0
75.1	0
75.2	0
75.3	0
75.4	0
75.5	0
75.6	0
75.7	0
75.8	0
75.9	0
76	0
76.1	0
76.2	0
76.3	0
76.4	0
76.5	0
76.6	0
76.7	0
76.8	0
76.9	0
77	0
77.1	0
77.2	0
77.3	0
77.4	0
77.5	0
77.6	0
77.7	0
77.8	0
77.9	0
78	0
78.1	0
78.2	0
78.3	0
78.4	0
78.5	0
78.6	0
78.7	0
78.8	0
78.9	0
79	0
79.1	0
79.2	0
79.3	0
79.4	0
79.5	0
79.6	0
79.7	0
79.8	0
79.9	0
80	0
80.1	0
80.2	0
80.3	0
80.4	0
80.5	0
80.6	0
80.7	0
80.8	0
80.9	0
81	0
81.1	0
81.2	0
81.3	0
81.4	0
81.5	0
81.6	0
81.7	0
81.8	0
81.9	0
82	0
82.1	0
82.2	0
82.3	0
82.4	0
82.5	0
82.6	0
82.7	0
82.8	0
82.9	0
83	0
83.1	0
83.2	0
83.3	0
83.4	0
83.5	0
83.6	0
83.7	0
83.8	0
83.9	0
84	0
84.1	0
84.2	0
84.3	0
84.4	0
84.5	0
84.6	0
84.7	0
84.8	0
84.9	0
85	0
85.1	0
85.2	0
85.3	0
85.4	0
85.5	0
85.6	0
85.7	0
85.8	0
85.9	0
86	0
86.1	0
86.2	0
86.3	0
86.4	0
86.5	0
86.6	0
86.7	0
86.8	0
86.9	0
87	0
87.1	0
87.2	0
87.3	0
87.4	0
87.5	0
87.6	0
87.7	0
87.8	0
87.9	0
88	0
88.1	0
88.2	0
88.3	0
88.4	0
88.5	0
88.6	0
88.7	0
88.8	0
88.9	0
89	0
89.1	0
89.2	0
89.3	0
89.4	0
89.5	0
89.6	0
89.7	0
89.8	0
89.9	0
90	0
90.1	0
90.2	0
90.3	0
90.4	0
90.5	0
90.6	0
90.7	0
90.8	0
90.9	0
91	0
91.1	0
91.2	0
91.3	0
91.4	0
91.5	0
91.6	0
91.7	0
91.8	0
91.9	0
92	0
92.1	0
92.2	0
92.3	0
92.4	0
92.5	0
92.6	0
92.7	0
92.8	0
92.9	0
93	0
93.1	0
93.2	0
93.3	0
93.4	0
93.5	0
93.6	0
93.7	0
93.8	0
93.9	0
94	0
94.1	0
94.2	0
94.3	0
94.4	0
94.5	0
94.6	0
94.7	0
94.8	0
94.9	0
95	0
95.1	0
95.2	0
95.3	0
95.4	0
95.5	0
95.6	0
95.7	0
95.8	0
95.9	0
96	0
96.1	0
96.2	0
96.3	0
96.4	0
96.5	0
96.6	0
96.7	0
96.8	0
96.9	0
97	0
97.1	0
97.2	0
97.3	0
97.4	0
97.5	0
97.6	0
97.7	0
97.8	0
97.9	0
98	0
98.1	0
98.2	0
98.3	0
98.4	0
98.5	0
98.6	0
98.7	0
98.8	0
98.9	0
99	0
99.1	0
99.2	0
99.3	0
99.4	0
99.5	0
99.6	0
99.7	0
99.8	0
99.9	0
100	0
100.1	0.7295
100.2	0.884
100.3	0.943
100.4	0.964
100.5	0.9705
100.6	0.9755
100.7	0.9795
100.8	0.9775
100.9	0.975
101	0.9725
101.1	0.974
101.2	0.974
101.3	0.9785
101.4	0.9795
101.5	0.973
101.6	0.9715
101.7	0.968
101.8	0.978
101.9	0.978
102	0.982
102.1	0.9775
102.2	0.977
102.3	0.978
102.4	0.9785
102.5	0.9755
102.6	0.9735
102.7	0.974
102.8	0.9795
102.9	0.976
103	0.978
103.1	0.9805
103.2	0.979
103.3	0.978
103.4	0.978
103.5	0.9745
103.6	0.9795
103.7	0.98
103.8	0.972
103.9	0.9735
104	0.9785
104.1	0.9775
104.2	0.983
104.3	0.9855
104.4	0.98
104.5	0.982
104.6	0.9825
104.7	0.978
104.8	0.9845
104.9	0.986
105	0.983
105.1	0.9865
105.2	0.984
105.3	0.9775
105.4	0.981
105.5	0.982
105.6	0.9835
105.7	0.9795
105.8	0.982
105.9	0.9805
106	0.978
106.1	0.9805
106.2	0.979
106.3	0.981
106.4	0.98
106.5	0.984
106.6	0.9825
106.7	0.9855
106.8	0.99
106.9	0.9855
107	0.98
107.1	0.979
107.2	0.9855
107.3	0.982
107.4	0.983
107.5	0.985
107.6	0.981
107.7	0.9795
107.8	0.9795
107.9	0.9855
108	0.981
108.1	0.9835
108.2	0.9785
108.3	0.9795
108.4	0.98
108.5	0.979
108.6	0.983
108.7	0.978
108.8	0.9875
108.9	0.9865
109	0.9835
109.1	0.983
109.2	0.982
109.3	0.9815
109.4	0.979
109.5	0.9815
109.6	0.9865
109.7	0.9875
109.8	0.985
109.9	0.9835
110	0.978
110.1	0.9885
110.2	0.9865
110.3	0.981
110.4	0.982
110.5	0.9835
110.6	0.9835
110.7	0.988
110.8	0.983
110.9	0.984
111	0.9845
111.1	0.986
111.2	0.99
111.3	0.9815
111.4	0.9855
111.5	0.99
111.6	0.984
111.7	0.987
111.8	0.986
111.9	0.9815
112	0.9845
112.1	0.9795
112.2	0.9865
112.3	0.9865
112.4	0.9845
112.5	0.9855
112.6	0.98
112.7	0.986
112.8	0.9865
112.9	0.9855
113	0.991
113.1	0.988
113.2	0.9905
113.3	0.985
113.4	0.981
113.5	0.9865
113.6	0.9865
113.7	0.9895
113.8	0.9855
113.9	0.99
114	0.9885
114.1	0.991
114.2	0.99
114.3	0.9865
114.4	0.9885
114.5	0.992
114.6	0.983
114.7	0.9855
114.8	0.987
114.9	0.9835
115	0.986
115.1	0.9865
115.2	0.986
115.3	0.9855
115.4	0.986
115.5	0.9875
115.6	0.988
115.7	0.9885
115.8	0.9885
115.9	0.989
116	0.987
116.1	0.991
116.2	0.9875
116.3	0.989
116.4	0.9895
116.5	0.991
116.6	0.985
116.7	0.9845
116.8	0.9865
116.9	0.986
117	0.985
117.1	0.9885
117.2	0.993
117.3	0.988
117.4	0.99
117.5	0.9875
117.6	0.988
117.7	0.9915
117.8	0.9915
117.9	0.9895
118	0.9885
118.1	0.988
118.2	0.9905
118.3	0.989
118.4	0.9895
118.5	0.989
118.6	0.991
118.7	0.9895
118.8	0.9905
118.9	0.9875
119	0.988
119.1	0.989
119.2	0.991
119.3	0.992
119.4	0.9915
119.5	0.99
119.6	0.9885
119.7	0.992
119.8	0.9935
119.9	0.99
120	0.993
120.1	0.9915
120.2	0.994
120.3	0.99
120.4	0.9925
120.5	0.992
120.6	0.99
120.7	0.995
120.8	0.993
120.9	0.993
121	0.9875
121.1	0.9875
121.2	0.9905
121.3	0.99
121.4	0.99
121.5	0.9935
121.6	0.995
121.7	0.9915
121.8	0.994
121.9	0.9915
122	0.991
122.1	0.9945
122.2	0.9925
122.3	0.992
122.4	0.989
122.5	0.9895
122.6	0.992
122.7	0.99
122.8	0.9885
122.9	0.991
123	0.992
123.1	0.9915
123.2	0.9925
123.3	0.99
123.4	0.9935
123.5	0.991
123.6	0.9905
123.7	0.9885
123.8	0.9895
123.9	0.992
124	0.995
124.1	0.9935
124.2	0.992
124.3	0.9945
124.4	0.992
124.5	0.992
124.6	0.9945
124.7	0.995
124.8	0.992
124.9	0.992
125	0.9925
125.1	0.9915
125.2	0.993
125.3	0.992
125.4	0.99
125.5	0.989
125.6	0.9935
125.7	0.9875
125.8	0.9905
125.9	0.994
126	0.994
126.1	0.9955
126.2	0.9935
126.3	0.9915
126.4	0.989
126.5	0.991
126.6	0.994
126.7	0.9965
126.8	0.994
126.9	0.993
127	0.9935
127.1	0.995
127.2	0.992
127.3	0.994
127.4	0.9925
127.5	0.9895
127.6	0.989
127.7	0.9905
127.8	0.991
127.9	0.9935
128	0.991
128.1	0.99
128.2	0.9895
128.3	0.992
128.4	0.9925
128.5	0.995
128.6	0.994
128.7	0.991
128.8	0.9935
128.9	0.993
129	0.997
129.1	0.995
129.2	0.9975
129.3	0.9925
129.4	0.9915
129.5	0.9905
129.6	0.9915
129.7	0.9915
129.8	0.991
129.9	0.991
130	0.99
130.1	0.9925
130.2	0.994
130.3	0.9955
130.4	0.994
130.5	0.995
130.6	0.9955
130.7	0.9945
130.8	0.993
130.9	0.9895
131	0.989
131.1	0.989
131.2	0.992
131.3	0.9925
131.4	0.9915
131.5	0.9905
131.6	0.989
131.7	0.99
131.8	0.992
131.9	0.9935
132	0.9935
132.1	0.9925
132.2	0.992
132.3	0.9935
132.4	0.9915
132.5	0.9925
132.6	0.9895
132.7	0.993
132.8	0.993
132.9	0.9945
133	0.9925
133.1	0.996
133.2	0.9945
133.3	0.992
133.4	0.9915
133.5	0.9945
133.6	0.9955
133.7	0.996
133.8	0.9955
133.9	0.9955
134	0.9935
134.1	0.993
134.2	0.995
134.3	0.994
134.4	0.995
134.5	0.9955
134.6	0.995
134.7	0.9945
134.8	0.995
134.9	0.993
135	0.9925
135.1	0.993
135.2	0.993
135.3	0.994
135.4	0.993
135.5	0.9945
135.6	0.995
135.7	0.995
135.8	0.997
135.9	0.9925
136	0.9915
136.1	0.9915
136.2	0.9925
136.3	0.9945
136.4	0.9945
136.5	0.9935
136.6	0.9955
136.7	0.996
136.8	0.9955
136.9	0.9945
137	0.994
137.1	0.9935
137.2	0.994
137.3	0.994
137.4	0.9925
137.5	0.994
137.6	0.9955
137.7	0.9945
137.8	0.9925
137.9	0.9935
138	0.9945
138.1	0.9965
138.2	0.995
138.3	0.9935
138.4	0.993
138.5	0.993
138.6	0.994
138.7	0.9935
138.8	0.993
138.9	0.9935
139	0.989
139.1	0.9915
139.2	0.9925
139.3	0.9955
139.4	0.9965
139.5	0.9965
139.6	0.9925
139.7	0.994
139.8	0.994
139.9	0.993
140	0.9905
140.1	0.9915
140.2	0.9935
140.3	0.9915
140.4	0.99
140.5	0.9955
140.6	0.994
140.7	0.994
140.8	0.993
140.9	0.994
141	0.9915
141.1	0.993
141.2	0.9915
141.3	0.9915
141.4	0.994
141.5	0.996
141.6	0.992
141.7	0.991
141.8	0.993
141.9	0.992
142	0.9945
142.1	0.993
142.2	0.9925
142.3	0.9925
142.4	0.9935
142.5	0.994
142.6	0.9965
142.7	0.9945
142.8	0.9925
142.9	0.996
143	0.9935
143.1	0.993
143.2	0.9935
143.3	0.9945
143.4	0.992
143.5	0.993
143.6	0.995
143.7	0.994
143.8	0.9955
143.9	0.992
144	0.991
144.1	0.995
144.2	0.994
144.3	0.995
144.4	0.9965
144.5	0.995
144.6	0.9935
144.7	0.991
144.8	0.9945
144.9	0.9955
145	0.996
145.1	0.995
145.2	0.994
145.3	0.9935
145.4	0.9955
145.5	0.9955
145.6	0.996
145.7	0.9925
145.8	0.994
145.9	0.9945
146	0.9935
146.1	0.9945
146.2	0.995
146.3	0.995
146.4	0.997
146.5	0.9935
146.6	0.9945
146.7	0.9975
146.8	0.9955
146.9	0.9925
147	0.995
147.1	0.9965
147.2	0.996
147.3	0.9945
147.4	0.994
147.5	0.9945
147.6	0.995
147.7	0.9925
147.8	0.9935
147.9	0.992
148	0.9925
148.1	0.993
148.2	0.994
148.3	0.995
148.4	0.993
148.5	0.9925
148.6	0.9945
148.7	0.994
148.8	0.9945
148.9	0.9935
149	0.9955
149.1	0.992
149.2	0.9925
149.3	0.993
149.4	0.9935
149.5	0.9955
149.6	0.9945
149.7	0.9935
149.8	0.992
149.9	0.995
150	0.9955
150.1	0.997
150.2	0.9935
150.3	0.9915
150.4	0.995
150.5	0.996
150.6	0.9965
150.7	0.995
150.8	0.995
150.9	0.995
151	0.992
151.1	0.9935
151.2	0.996
151.3	0.9955
151.4	0.996
151.5	0.995
151.6	0.9945
151.7	0.996
151.8	0.997
151.9	0.997
152	0.9955
152.1	0.9945
152.2	0.994
152.3	0.9945
152.4	0.993
152.5	0.9965
152.6	0.9965
152.7	0.9965
152.8	0.995
152.9	0.9955
153	0.997
153.1	0.9945
153.2	0.9925
153.3	0.994
153.4	0.997
153.5	0.995
153.6	0.995
153.7	0.995
153.8	0.998
153.9	0.9955
154	0.996
154.1	0.9925
154.2	0.994
154.3	0.9935
154.4	0.9945
154.5	0.9955
154.6	0.995
154.7	0.9935
154.8	0.9935
154.9	0.995
155	0.9945
155.1	0.995
155.2	0.997
155.3	0.996
155.4	0.9935
155.5	0.9955
155.6	0.995
155.7	0.996
155.8	0.998
155.9	0.9945
156	0.9965
156.1	0.995
156.2	0.993
156.3	0.9945
156.4	0.996
156.5	0.996
156.6	0.9945
156.7	0.9935
156.8	0.997
156.9	0.997
157	0.9955
157.1	0.993
157.2	0.993
157.3	0.9935
157.4	0.9935
157.5	0.9955
157.6	0.9945
157.7	0.9955
157.8	0.9935
157.9	0.9965
158	0.994
158.1	0.9925
158.2	0.993
158.3	0.993
158.4	0.995
158.5	0.993
158.6	0.997
158.7	0.997
158.8	0.9955
158.9	0.9955
159	0.9945
159.1	0.9985
159.2	0.996
159.3	0.996
159.4	0.995
159.5	0.996
159.6	0.9955
159.7	0.9945
159.8	0.995
159.9	0.998
160	0.9945
160.1	0.9945
160.2	0.9925
160.3	0.995
160.4	0.9965
160.5	0.9955
160.6	0.996
160.7	0.993
160.8	0.9955
160.9	0.9925
161	0.9925
161.1	0.9955
161.2	0.9955
161.3	0.9935
161.4	0.9945
161.5	0.9965
161.6	0.996
161.7	0.995
161.8	0.9955
161.9	0.9945
162	0.9965
162.1	0.9945
162.2	0.994
162.3	0.997
162.4	0.9965
162.5	0.9945
162.6	0.9945
162.7	0.9975
162.8	0.9955
162.9	0.996
163	0.9935
163.1	0.995
163.2	0.9975
163.3	0.9955
163.4	0.994
163.5	0.9935
163.6	0.9935
163.7	0.9955
163.8	0.9965
163.9	0.9955
164	0.996
164.1	0.9965
164.2	0.9965
164.3	0.997
164.4	0.995
164.5	0.9935
164.6	0.995
164.7	0.995
164.8	0.996
164.9	0.994
165	0.9955
165.1	0.996
165.2	0.9955
165.3	0.9955
165.4	0.996
165.5	0.997
165.6	0.998
165.7	0.9955
165.8	0.996
165.9	0.996
166	0.995
166.1	0.994
166.2	0.992
166.3	0.992
166.4	0.993
166.5	0.9945
166.6	0.996
166.7	0.9975
166.8	0.9935
166.9	0.9965
167	0.9945
167.1	0.9955
167.2	0.996
167.3	0.9975
167.4	0.996
167.5	0.9945
167.6	0.9945
167.7	0.9935
167.8	0.996
167.9	0.9945
168	0.995
168.1	0.996
168.2	0.9955
168.3	0.9955
168.4	0.9975
168.5	0.997
168.6	0.9945
168.7	0.9965
168.8	0.9965
168.9	0.997
169	0.9955
169.1	0.9945
169.2	0.994
169.3	0.9935
169.4	0.9965
169.5	0.996
169.6	0.9965
169.7	0.9965
169.8	0.9965
169.9	0.998
170	0.9975
170.1	0.9965
170.2	0.997
170.3	0.996
170.4	0.996
170.5	0.998
170.6	0.9945
170.7	0.995
170.8	0.9955
170.9	0.997
171	0.9955
171.1	0.994
171.2	0.995
171.3	0.996
171.4	0.994
171.5	0.996
171.6	0.996
171.7	0.9955
171.8	0.9945
171.9	0.9945
172	0.9935
172.1	0.9945
172.2	0.994
172.3	0.9965
172.4	0.996
172.5	0.9925
172.6	0.9945
172.7	0.9945
172.8	0.993
172.9	0.9975
173	0.9965
173.1	0.9945
173.2	0.996
173.3	0.9955
173.4	0.9965
173.5	0.9945
173.6	0.994
173.7	0.996
173.8	0.9965
173.9	0.9975
174	0.996
174.1	0.994
174.2	0.9935
174.3	0.996
174.4	0.9965
174.5	0.994
174.6	0.992
174.7	0.995
174.8	0.994
174.9	0.9955
175	0.996
175.1	0.9955
175.2	0.9955
175.3	0.9945
175.4	0.995
175.5	0.9955
175.6	0.9935
175.7	0.995
175.8	0.997
175.9	0.9975
176	0.994
176.1	0.996
176.2	0.995
176.3	0.9955
176.4	0.9955
176.5	0.9945
176.6	0.9975
176.7	0.995
176.8	0.996
176.9	0.9965
177	0.9935
177.1	0.9955
177.2	0.994
177.3	0.994
177.4	0.9935
177.5	0.9945
177.6	0.995
177.7	0.995
177.8	0.9965
177.9	0.994
178	0.9955
178.1	0.9955
178.2	0.9955
178.3	0.995
178.4	0.9935
178.5	0.9955
178.6	0.997
178.7	0.9945
178.8	0.9935
178.9	0.994
179	0.9955
179.1	0.9955
179.2	0.998
179.3	0.9955
179.4	0.9985
179.5	0.9975
179.6	0.9955
179.7	0.9975
179.8	0.9945
179.9	0.996
180	0.997
180.1	0.9975
180.2	0.997
180.3	0.997
180.4	0.995
180.5	0.996
180.6	0.9945
180.7	0.9955
180.8	0.994
180.9	0.9975
181	0.9935
181.1	0.994
181.2	0.995
181.3	0.993
181.4	0.994
181.5	0.9955
181.6	0.995
181.7	0.993
181.8	0.995
181.9	0.9955
182	0.9925
182.1	0.994
182.2	0.997
182.3	0.994
182.4	0.9945
182.5	0.993
182.6	0.997
182.7	0.9955
182.8	0.994
182.9	0.996
183	0.996
183.1	0.994
183.2	0.9955
183.3	0.9945
183.4	0.994
183.5	0.996
183.6	0.997
183.7	0.9975
183.8	0.996
183.9	0.9955
184	0.994
184.1	0.9925
184.2	0.9945
184.3	0.9935
184.4	0.993
184.5	0.9975
184.6	0.9945
184.7	0.9925
184.8	0.9935
184.9	0.9915
185	0.9955
185.1	0.996
185.2	0.9955
185.3	0.9955
185.4	0.9945
185.5	0.9965
185.6	0.997
185.7	0.9965
185.8	0.9975
185.9	0.9965
186	0.9965
186.1	0.997
186.2	0.997
186.3	0.9975
186.4	0.995
186.5	0.994
186.6	0.994
186.7	0.9955
186.8	0.9955
186.9	0.9985
187	0.998
187.1	0.9945
187.2	0.995
187.3	0.996
187.4	0.9965
187.5	0.997
187.6	0.997
187.7	0.9975
187.8	0.9965
187.9	0.9955
188	0.9955
188.1	0.995
188.2	0.994
188.3	0.9935
188.4	0.9965
188.5	0.9935
188.6	0.9965
188.7	0.9955
188.8	0.9965
188.9	0.9965
189	0.9955
189.1	0.9965
189.2	0.9965
189.3	0.997
189.4	0.999
189.5	0.9975
189.6	0.995
189.7	0.997
189.8	0.9935
189.9	0.994
190	0.995
190.1	0.9915
190.2	0.993
190.3	0.996
190.4	0.992
190.5	0.9935
190.6	0.9955
190.7	0.9955
190.8	0.9955
190.9	0.9955
191	0.9965
191.1	0.9975
191.2	0.996
191.3	0.996
191.4	0.993
191.5	0.9935
191.6	0.9935
191.7	0.9945
191.8	0.996
191.9	0.9955
192	0.993
192.1	0.993
192.2	0.9955
192.3	0.9945
192.4	0.998
192.5	0.9975
192.6	0.9975
192.7	0.999
192.8	0.997
192.9	0.996
193	0.997
193.1	0.9955
193.2	0.995
193.3	0.9945
193.4	0.997
193.5	0.9985
193.6	0.996
193.7	0.996
193.8	0.997
193.9	0.9965
194	0.9975
194.1	0.997
194.2	0.996
194.3	0.994
194.4	0.995
194.5	0.9935
194.6	0.9945
194.7	0.9945
194.8	0.9955
194.9	0.996
195	0.994
195.1	0.9965
195.2	0.998
195.3	0.999
195.4	0.9965
195.5	0.9975
195.6	0.9965
195.7	0.9945
195.8	0.994
195.9	0.9935
196	0.9955
196.1	0.9955
196.2	0.997
196.3	0.9955
196.4	0.9945
196.5	0.9955
196.6	0.993
196.7	0.992
196.8	0.998
196.9	0.994
197	0.994
197.1	0.995
197.2	0.997
197.3	0.9955
197.4	0.994
197.5	0.9945
197.6	0.995
197.7	0.9955
197.8	0.9945
197.9	0.9935
198	0.995
198.1	0.9965
198.2	0.9965
198.3	0.9965
198.4	0.9965
198.5	0.999
198.6	0.996
198.7	0.9975
198.8	0.9945
198.9	0.9965
199	0.996
199.1	0.9955
199.2	0.996
199.3	0.9955
199.4	0.997
199.5	0.9955
199.6	0.9935
199.7	0.994
199.8	0.9955
199.9	0.996
200	0.993
[truncated: 14,000 more rows]
