# Supplementary material for: Bayesian inference of kinetic schemes for ion channels by Kalman filtering
Source: eLife journal article supplement (doi:10.7554/elife.62714), 2022-05-04
Supplement: fig4-data3 [file 1_Sim_N_1000_Strom_MW.xlsx]

## Sheet: Tabelle1
0.1	0
0.2	0
0.3	0
0.4	0
0.5	0
0.6	0
0.7	0
0.8	0
0.9	0
1	0
1.1	0
1.2	0
1.3	0
1.4	0
1.5	0
1.6	0
1.7	0
1.8	0
1.9	0
2	0
2.1	0
2.2	0
2.3	0
2.4	0
2.5	0
2.6	0
2.7	0
2.8	0
2.9	0
3	0
3.1	0
3.2	0
3.3	0
3.4	0
3.5	0
3.6	0
3.7	0
3.8	0
3.9	0
4	0
4.1	0
4.2	0
4.3	0
4.4	0
4.5	0
4.6	0
4.7	0
4.8	0
4.9	0
5	0
5.1	0
5.2	0
5.3	0
5.4	0
5.5	0
5.6	0
5.7	0
5.8	0
5.9	0
6	0
6.1	0
6.2	0
6.3	0
6.4	0
6.5	0
6.6	0
6.7	0
6.8	0
6.9	0
7	0
7.1	0
7.2	0
7.3	0
7.4	0
7.5	0
7.6	0
7.7	0
7.8	0
7.9	0
8	0
8.1	0
8.2	0
8.3	0
8.4	0
8.5	0
8.6	0
8.7	0
8.8	0
8.9	0
9	0
9.1	0
9.2	0
9.3	0
9.4	0
9.5	0
9.6	0
9.7	0
9.8	0
9.9	0
10	0
10.1	0
10.2	0
10.3	0
10.4	0
10.5	0
10.6	0
10.7	0
10.8	0
10.9	0
11	0
11.1	0
11.2	0
11.3	0
11.4	0
11.5	0
11.6	0
11.7	0
11.8	0
11.9	0
12	0
12.1	0
12.2	0
12.3	0
12.4	0
12.5	0
12.6	0
12.7	0
12.8	0
12.9	0
13	0
13.1	0
13.2	0
13.3	0
13.4	0
13.5	0
13.6	0
13.7	0
13.8	0
13.9	0
14	0
14.1	0
14.2	0
14.3	0
14.4	0
14.5	0
14.6	0
14.7	0
14.8	0
14.9	0
15	0
15.1	0
15.2	0
15.3	0
15.4	0
15.5	0
15.6	0
15.7	0
15.8	0
15.9	0
16	0
16.1	0
16.2	0
16.3	0
16.4	0
16.5	0
16.6	0
16.7	0
16.8	0
16.9	0
17	0
17.1	0
17.2	0
17.3	0
17.4	0
17.5	0
17.6	0
17.7	0
17.8	0
17.9	0
18	0
18.1	0
18.2	0
18.3	0
18.4	0
18.5	0
18.6	0
18.7	0
18.8	0
18.9	0
19	0
19.1	0
19.2	0
19.3	0
19.4	0
19.5	0
19.6	0
19.7	0
19.8	0
19.9	0
20	0
20.1	0
20.2	0
20.3	0
20.4	0
20.5	0
20.6	0
20.7	0
20.8	0
20.9	0
21	0
21.1	0
21.2	0
21.3	0
21.4	0
21.5	0
21.6	0
21.7	0
21.8	0
21.9	0
22	0
22.1	0
22.2	0
22.3	0
22.4	0
22.5	0
22.6	0
22.7	0
22.8	0
22.9	0
23	0
23.1	0
23.2	0
23.3	0
23.4	0
23.5	0
23.6	0
23.7	0
23.8	0
23.9	0
24	0
24.1	0
24.2	0
24.3	0
24.4	0
24.5	0
24.6	0
24.7	0
24.8	0
24.9	0
25	0
25.1	0
25.2	0
25.3	0
25.4	0
25.5	0
25.6	0
25.7	0
25.8	0
25.9	0
26	0
26.1	0
26.2	0
26.3	0
26.4	0
26.5	0
26.6	0
26.7	0
26.8	0
26.9	0
27	0
27.1	0
27.2	0
27.3	0
27.4	0
27.5	0
27.6	0
27.7	0
27.8	0
27.9	0
28	0
28.1	0
28.2	0
28.3	0
28.4	0
28.5	0
28.6	0
28.7	0
28.8	0
28.9	0
29	0
29.1	0
29.2	0
29.3	0
29.4	0
29.5	0
29.6	0
29.7	0
29.8	0
29.9	0
30	0
30.1	0
30.2	0
30.3	0
30.4	0
30.5	0
30.6	0
30.7	0
30.8	0
30.9	0
31	0
31.1	0
31.2	0
31.3	0
31.4	0
31.5	0
31.6	0
31.7	0
31.8	0
31.9	0
32	0
32.1	0
32.2	0
32.3	0
32.4	0
32.5	0
32.6	0
32.7	0
32.8	0
32.9	0
33	0
33.1	0
33.2	0
33.3	0
33.4	0
33.5	0
33.6	0
33.7	0
33.8	0
33.9	0
34	0
34.1	0
34.2	0
34.3	0
34.4	0
34.5	0
34.6	0
34.7	0
34.8	0
34.9	0
35	0
35.1	0
35.2	0
35.3	0
35.4	0
35.5	0
35.6	0
35.7	0
35.8	0
35.9	0
36	0
36.1	0
36.2	0
36.3	0
36.4	0
36.5	0
36.6	0
36.7	0
36.8	0
36.9	0
37	0
37.1	0
37.2	0
37.3	0
37.4	0
37.5	0
37.6	0
37.7	0
37.8	0
37.9	0
38	0
38.1	0
38.2	0
38.3	0
38.4	0
38.5	0
38.6	0
38.7	0
38.8	0
38.9	0
39	0
39.1	0
39.2	0
39.3	0
39.4	0
39.5	0
39.6	0
39.7	0
39.8	0
39.9	0
40	0
40.1	0
40.2	0
40.3	0
40.4	0
40.5	0
40.6	0
40.7	0
40.8	0
40.9	0
41	0
41.1	0
41.2	0
41.3	0
41.4	0
41.5	0
41.6	0
41.7	0
41.8	0
41.9	0
42	0
42.1	0
42.2	0
42.3	0
42.4	0
42.5	0
42.6	0
42.7	0
42.8	0
42.9	0
43	0
43.1	0
43.2	0
43.3	0
43.4	0
43.5	0
43.6	0
43.7	0
43.8	0
43.9	0
44	0
44.1	0
44.2	0
44.3	0
44.4	0
44.5	0
44.6	0
44.7	0
44.8	0
44.9	0
45	0
45.1	0
45.2	0
45.3	0
45.4	0
45.5	0
45.6	0
45.7	0
45.8	0
45.9	0
46	0
46.1	0
46.2	0
46.3	0
46.4	0
46.5	0
46.6	0
46.7	0
46.8	0
46.9	0
47	0
47.1	0
47.2	0
47.3	0
47.4	0
47.5	0
47.6	0
47.7	0
47.8	0
47.9	0
48	0
48.1	0
48.2	0
48.3	0
48.4	0
48.5	0
48.6	0
48.7	0
48.8	0
48.9	0
49	0
49.1	0
49.2	0
49.3	0
49.4	0
49.5	0
49.6	0
49.7	0
49.8	0
49.9	0
50	0
50.1	0
50.2	0
50.3	0
50.4	0
50.5	0
50.6	0
50.7	0
50.8	0
50.9	0
51	0
51.1	0
51.2	0
51.3	0
51.4	0
51.5	0
51.6	0
51.7	0
51.8	0
51.9	0
52	0
52.1	0
52.2	0
52.3	0
52.4	0
52.5	0
52.6	0
52.7	0
52.8	0
52.9	0
53	0
53.1	0
53.2	0
53.3	0
53.4	0
53.5	0
53.6	0
53.7	0
53.8	0
53.9	0
54	0
54.1	0
54.2	0
54.3	0
54.4	0
54.5	0
54.6	0
54.7	0
54.8	0
54.9	0
55	0
55.1	0
55.2	0
55.3	0
55.4	0
55.5	0
55.6	0
55.7	0
55.8	0
55.9	0
56	0
56.1	0
56.2	0
56.3	0
56.4	0
56.5	0
56.6	0
56.7	0
56.8	0
56.9	0
57	0
57.1	0
57.2	0
57.3	0
57.4	0
57.5	0
57.6	0
57.7	0
57.8	0
57.9	0
58	0
58.1	0
58.2	0
58.3	0
58.4	0
58.5	0
58.6	0
58.7	0
58.8	0
58.9	0
59	0
59.1	0
59.2	0
59.3	0
59.4	0
59.5	0
59.6	0
59.7	0
59.8	0
59.9	0
60	0
60.1	0
60.2	0
60.3	0
60.4	0
60.5	0
60.6	0
60.7	0
60.8	0
60.9	0
61	0
61.1	0
61.2	0
61.3	0
61.4	0
61.5	0
61.6	0
61.7	0
61.8	0
61.9	0
62	0
62.1	0
62.2	0
62.3	0
62.4	0
62.5	0
62.6	0
62.7	0
62.8	0
62.9	0
63	0
63.1	0
63.2	0
63.3	0
63.4	0
63.5	0
63.6	0
63.7	0
63.8	0
63.9	0
64	0
64.1	0
64.2	0
64.3	0
64.4	0
64.5	0
64.6	0
64.7	0
64.8	0
64.9	0
65	0
65.1	0
65.2	0
65.3	0
65.4	0
65.5	0
65.6	0
65.7	0
65.8	0
65.9	0
66	0
66.1	0
66.2	0
66.3	0
66.4	0
66.5	0
66.6	0
66.7	0
66.8	0
66.9	0
67	0
67.1	0
67.2	0
67.3	0
67.4	0
67.5	0
67.6	0
67.7	0
67.8	0
67.9	0
68	0
68.1	0
68.2	0
68.3	0
68.4	0
68.5	0
68.6	0
68.7	0
68.8	0
68.9	0
69	0
69.1	0
69.2	0
69.3	0
69.4	0
69.5	0
69.6	0
69.7	0
69.8	0
69.9	0
70	0
70.1	0
70.2	0
70.3	0
70.4	0
70.5	0
70.6	0
70.7	0
70.8	0
70.9	0
71	0
71.1	0
71.2	0
71.3	0
71.4	0
71.5	0
71.6	0
71.7	0
71.8	0
71.9	0
72	0
72.1	0
72.2	0
72.3	0
72.4	0
72.5	0
72.6	0
72.7	0
72.8	0
72.9	0
73	0
73.1	0
73.2	0
73.3	0
73.4	0
73.5	0
73.6	0
73.7	0
73.8	0
73.9	0
74	0
74.1	0
74.2	0
74.3	0
74.4	0
74.5	0
74.6	0
74.7	0
74.8	0
74.9	0
75	0
75.1	0
75.2	0
75.3	0
75.4	0
75.5	0
75.6	0
75.7	0
75.8	0
75.9	0
76	0
76.1	0
76.2	0
76.3	0
76.4	0
76.5	0
76.6	0
76.7	0
76.8	0
76.9	0
77	0
77.1	0
77.2	0
77.3	0
77.4	0
77.5	0
77.6	0
77.7	0
77.8	0
77.9	0
78	0
78.1	0
78.2	0
78.3	0
78.4	0
78.5	0
78.6	0
78.7	0
78.8	0
78.9	0
79	0
79.1	0
79.2	0
79.3	0
79.4	0
79.5	0
79.6	0
79.7	0
79.8	0
79.9	0
80	0
80.1	0
80.2	0
80.3	0
80.4	0
80.5	0
80.6	0
80.7	0
80.8	0
80.9	0
81	0
81.1	0
81.2	0
81.3	0
81.4	0
81.5	0
81.6	0
81.7	0
81.8	0
81.9	0
82	0
82.1	0
82.2	0
82.3	0
82.4	0
82.5	0
82.6	0
82.7	0
82.8	0
82.9	0
83	0
83.1	0
83.2	0
83.3	0
83.4	0
83.5	0
83.6	0
83.7	0
83.8	0
83.9	0
84	0
84.1	0
84.2	0
84.3	0
84.4	0
84.5	0
84.6	0
84.7	0
84.8	0
84.9	0
85	0
85.1	0
85.2	0
85.3	0
85.4	0
85.5	0
85.6	0
85.7	0
85.8	0
85.9	0
86	0
86.1	0
86.2	0
86.3	0
86.4	0
86.5	0
86.6	0
86.7	0
86.8	0
86.9	0
87	0
87.1	0
87.2	0
87.3	0
87.4	0
87.5	0
87.6	0
87.7	0
87.8	0
87.9	0
88	0
88.1	0
88.2	0
88.3	0
88.4	0
88.5	0
88.6	0
88.7	0
88.8	0
88.9	0
89	0
89.1	0
89.2	0
89.3	0
89.4	0
89.5	0
89.6	0
89.7	0
89.8	0
89.9	0
90	0
90.1	0
90.2	0
90.3	0
90.4	0
90.5	0
90.6	0
90.7	0
90.8	0
90.9	0
91	0
91.1	0
91.2	0
91.3	0
91.4	0
91.5	0
91.6	0
91.7	0
91.8	0
91.9	0
92	0
92.1	0
92.2	0
92.3	0
92.4	0
92.5	0
92.6	0
92.7	0
92.8	0
92.9	0
93	0
93.1	0
93.2	0
93.3	0
93.4	0
93.5	0
93.6	0
93.7	0
93.8	0
93.9	0
94	0
94.1	0
94.2	0
94.3	0
94.4	0
94.5	0
94.6	0
94.7	0
94.8	0
94.9	0
95	0
95.1	0
95.2	0
95.3	0
95.4	0
95.5	0
95.6	0
95.7	0
95.8	0
95.9	0
96	0
96.1	0
96.2	0
96.3	0
96.4	0
96.5	0
96.6	0
96.7	0
96.8	0
96.9	0
97	0
97.1	0
97.2	0
97.3	0
97.4	0
97.5	0
97.6	0
97.7	0
97.8	0
97.9	0
98	0
98.1	0
98.2	0
98.3	0
98.4	0
98.5	0
98.6	0
98.7	0
98.8	0
98.9	0
99	0
99.1	0
99.2	0
99.3	0
99.4	0
99.5	0
99.6	0
99.7	0
99.8	0
99.9	0
100	0
100.1	0.002
100.2	0.005
100.3	0.014
100.4	0.018
100.5	0.023
100.6	0.034
100.7	0.037
100.8	0.043
100.9	0.045
101	0.048
101.1	0.053
101.2	0.056
101.3	0.058
101.4	0.06
101.5	0.065
101.6	0.068
101.7	0.074
101.8	0.077
101.9	0.084
102	0.088
102.1	0.092
102.2	0.097
102.3	0.099
102.4	0.107
102.5	0.11
102.6	0.116
102.7	0.12
102.8	0.125
102.9	0.126
103	0.13
103.1	0.133
103.2	0.138
103.3	0.143
103.4	0.146
103.5	0.148
103.6	0.149
103.7	0.153
103.8	0.163
103.9	0.166
104	0.172
104.1	0.177
104.2	0.181
104.3	0.183
104.4	0.185
104.5	0.186
104.6	0.187
104.7	0.189
104.8	0.194
104.9	0.196
105	0.2
105.1	0.204
105.2	0.208
105.3	0.213
105.4	0.216
105.5	0.221
105.6	0.225
105.7	0.229
105.8	0.236
105.9	0.236
106	0.244
106.1	0.245
106.2	0.249
106.3	0.252
106.4	0.253
106.5	0.261
106.6	0.264
106.7	0.269
106.8	0.269
106.9	0.271
107	0.272
107.1	0.276
107.2	0.276
107.3	0.283
107.4	0.282
107.5	0.285
107.6	0.288
107.7	0.295
107.8	0.298
107.9	0.303
108	0.305
108.1	0.307
108.2	0.311
108.3	0.315
108.4	0.317
108.5	0.317
108.6	0.323
108.7	0.326
108.8	0.328
108.9	0.329
109	0.33
109.1	0.334
109.2	0.338
109.3	0.34
109.4	0.341
109.5	0.343
109.6	0.346
109.7	0.349
109.8	0.354
109.9	0.36
110	0.367
110.1	0.37
110.2	0.375
110.3	0.377
110.4	0.382
110.5	0.386
110.6	0.388
110.7	0.394
110.8	0.401
110.9	0.402
111	0.406
111.1	0.41
111.2	0.413
111.3	0.418
111.4	0.417
111.5	0.419
111.6	0.424
111.7	0.429
111.8	0.432
111.9	0.437
112	0.438
112.1	0.441
112.2	0.443
112.3	0.446
112.4	0.447
112.5	0.447
112.6	0.45
112.7	0.456
112.8	0.459
112.9	0.46
113	0.462
113.1	0.464
113.2	0.466
113.3	0.467
113.4	0.472
113.5	0.474
113.6	0.476
113.7	0.478
113.8	0.479
113.9	0.48
114	0.481
114.1	0.484
114.2	0.486
114.3	0.488
114.4	0.489
114.5	0.491
114.6	0.493
114.7	0.494
114.8	0.495
114.9	0.496
115	0.498
115.1	0.498
115.2	0.499
115.3	0.5
115.4	0.501
115.5	0.505
115.6	0.505
115.7	0.505
115.8	0.505
115.9	0.504
116	0.504
116.1	0.505
116.2	0.508
116.3	0.508
116.4	0.512
116.5	0.514
116.6	0.516
116.7	0.519
116.8	0.522
116.9	0.526
117	0.53
117.1	0.533
117.2	0.54
117.3	0.543
117.4	0.546
117.5	0.547
117.6	0.548
117.7	0.552
117.8	0.555
117.9	0.558
118	0.561
118.1	0.56
118.2	0.563
118.3	0.563
118.4	0.564
118.5	0.566
118.6	0.571
118.7	0.571
118.8	0.574
118.9	0.575
119	0.577
119.1	0.581
119.2	0.584
119.3	0.585
119.4	0.587
119.5	0.588
119.6	0.59
119.7	0.592
119.8	0.591
119.9	0.594
120	0.597
120.1	0.6
120.2	0.601
120.3	0.602
120.4	0.603
120.5	0.602
120.6	0.604
120.7	0.605
120.8	0.608
120.9	0.61
121	0.612
121.1	0.615
121.2	0.615
121.3	0.617
121.4	0.62
121.5	0.624
121.6	0.624
121.7	0.627
121.8	0.628
121.9	0.629
122	0.629
122.1	0.631
122.2	0.634
122.3	0.635
122.4	0.637
122.5	0.637
122.6	0.638
122.7	0.64
122.8	0.641
122.9	0.641
123	0.645
123.1	0.648
123.2	0.649
123.3	0.651
123.4	0.652
123.5	0.653
123.6	0.654
123.7	0.657
123.8	0.658
123.9	0.661
124	0.661
124.1	0.662
124.2	0.661
124.3	0.663
124.4	0.666
124.5	0.667
124.6	0.672
124.7	0.672
124.8	0.674
124.9	0.676
125	0.677
125.1	0.677
125.2	0.677
125.3	0.678
125.4	0.679
125.5	0.677
125.6	0.68
125.7	0.679
125.8	0.679
125.9	0.68
126	0.678
126.1	0.677
126.2	0.677
126.3	0.676
126.4	0.678
126.5	0.677
126.6	0.68
126.7	0.681
126.8	0.682
126.9	0.683
127	0.684
127.1	0.683
127.2	0.68
127.3	0.68
127.4	0.681
127.5	0.681
127.6	0.682
127.7	0.683
127.8	0.684
127.9	0.684
128	0.685
128.1	0.687
128.2	0.692
128.3	0.693
128.4	0.694
128.5	0.692
128.6	0.691
128.7	0.693
128.8	0.695
128.9	0.695
129	0.694
129.1	0.695
129.2	0.697
129.3	0.698
129.4	0.7
129.5	0.703
129.6	0.703
129.7	0.704
129.8	0.707
129.9	0.709
130	0.71
130.1	0.712
130.2	0.711
130.3	0.709
130.4	0.712
130.5	0.715
130.6	0.715
130.7	0.716
130.8	0.716
130.9	0.718
131	0.719
131.1	0.719
131.2	0.719
131.3	0.719
131.4	0.719
131.5	0.718
131.6	0.717
131.7	0.718
131.8	0.719
131.9	0.721
132	0.719
132.1	0.719
132.2	0.719
132.3	0.719
132.4	0.718
132.5	0.719
132.6	0.721
132.7	0.721
132.8	0.72
132.9	0.722
133	0.722
133.1	0.724
133.2	0.725
133.3	0.725
133.4	0.725
133.5	0.725
133.6	0.725
133.7	0.724
133.8	0.727
133.9	0.727
134	0.727
134.1	0.728
134.2	0.728
134.3	0.728
134.4	0.73
134.5	0.729
134.6	0.729
134.7	0.729
134.8	0.732
134.9	0.732
135	0.732
135.1	0.731
135.2	0.734
135.3	0.735
135.4	0.736
135.5	0.736
135.6	0.738
135.7	0.736
135.8	0.737
135.9	0.74
136	0.739
136.1	0.74
136.2	0.739
136.3	0.741
136.4	0.74
136.5	0.741
136.6	0.742
136.7	0.741
136.8	0.74
136.9	0.741
137	0.742
137.1	0.743
137.2	0.742
137.3	0.744
137.4	0.744
137.5	0.745
137.6	0.747
137.7	0.747
137.8	0.745
137.9	0.747
138	0.748
138.1	0.749
138.2	0.748
138.3	0.75
138.4	0.749
138.5	0.748
138.6	0.748
138.7	0.749
138.8	0.747
138.9	0.747
139	0.744
139.1	0.745
139.2	0.747
139.3	0.748
139.4	0.75
139.5	0.751
139.6	0.752
139.7	0.75
139.8	0.748
139.9	0.747
140	0.748
140.1	0.747
140.2	0.748
140.3	0.748
140.4	0.747
140.5	0.747
140.6	0.747
140.7	0.748
140.8	0.747
140.9	0.745
141	0.745
141.1	0.745
141.2	0.744
141.3	0.744
141.4	0.744
141.5	0.742
141.6	0.744
141.7	0.744
141.8	0.746
141.9	0.744
142	0.746
142.1	0.746
142.2	0.746
142.3	0.748
142.4	0.746
142.5	0.747
142.6	0.747
142.7	0.748
142.8	0.748
142.9	0.748
143	0.749
143.1	0.751
143.2	0.752
143.3	0.752
143.4	0.751
143.5	0.752
143.6	0.751
143.7	0.749
143.8	0.75
143.9	0.752
144	0.751
144.1	0.751
144.2	0.75
144.3	0.75
144.4	0.751
144.5	0.753
144.6	0.756
144.7	0.756
144.8	0.756
144.9	0.756
145	0.757
145.1	0.759
145.2	0.758
145.3	0.757
145.4	0.757
145.5	0.758
145.6	0.757
145.7	0.757
145.8	0.762
145.9	0.763
146	0.761
146.1	0.762
146.2	0.763
146.3	0.762
146.4	0.762
146.5	0.764
146.6	0.765
146.7	0.767
146.8	0.768
146.9	0.768
147	0.769
147.1	0.769
147.2	0.769
147.3	0.768
147.4	0.767
147.5	0.766
147.6	0.766
147.7	0.766
147.8	0.766
147.9	0.765
148	0.765
148.1	0.764
148.2	0.764
148.3	0.764
148.4	0.763
148.5	0.765
148.6	0.767
148.7	0.768
148.8	0.771
148.9	0.773
149	0.773
149.1	0.773
149.2	0.773
149.3	0.773
149.4	0.774
149.5	0.773
149.6	0.772
149.7	0.772
149.8	0.772
149.9	0.772
150	0.771
150.1	0.771
150.2	0.772
150.3	0.773
150.4	0.774
150.5	0.775
150.6	0.775
150.7	0.776
150.8	0.774
150.9	0.772
151	0.769
151.1	0.77
151.2	0.771
151.3	0.771
151.4	0.773
151.5	0.772
151.6	0.771
151.7	0.77
151.8	0.771
151.9	0.773
152	0.773
152.1	0.778
152.2	0.78
152.3	0.779
152.4	0.781
152.5	0.782
152.6	0.783
152.7	0.782
152.8	0.782
152.9	0.782
153	0.781
153.1	0.778
153.2	0.781
153.3	0.78
153.4	0.78
153.5	0.782
153.6	0.782
153.7	0.781
153.8	0.781
153.9	0.781
154	0.782
154.1	0.783
154.2	0.783
154.3	0.783
154.4	0.783
154.5	0.783
154.6	0.782
154.7	0.782
154.8	0.783
154.9	0.786
155	0.787
155.1	0.787
155.2	0.787
155.3	0.787
155.4	0.786
155.5	0.789
155.6	0.789
155.7	0.79
155.8	0.792
155.9	0.792
156	0.792
156.1	0.793
156.2	0.792
156.3	0.793
156.4	0.793
156.5	0.79
156.6	0.787
156.7	0.788
156.8	0.789
156.9	0.789
157	0.788
157.1	0.791
157.2	0.79
157.3	0.788
157.4	0.787
157.5	0.787
157.6	0.787
157.7	0.789
157.8	0.788
157.9	0.789
158	0.79
158.1	0.791
158.2	0.79
158.3	0.788
158.4	0.788
158.5	0.788
158.6	0.785
158.7	0.782
158.8	0.783
158.9	0.784
159	0.785
159.1	0.787
159.2	0.787
159.3	0.789
159.4	0.79
159.5	0.79
159.6	0.793
159.7	0.792
159.8	0.793
159.9	0.793
160	0.792
160.1	0.792
160.2	0.792
160.3	0.794
160.4	0.796
160.5	0.795
160.6	0.796
160.7	0.795
160.8	0.8
160.9	0.8
161	0.798
161.1	0.799
161.2	0.798
161.3	0.798
161.4	0.798
161.5	0.799
161.6	0.801
161.7	0.802
161.8	0.801
161.9	0.802
162	0.801
162.1	0.801
162.2	0.799
162.3	0.799
162.4	0.799
162.5	0.8
162.6	0.8
162.7	0.801
162.8	0.803
162.9	0.803
163	0.803
163.1	0.805
163.2	0.806
163.3	0.807
163.4	0.806
163.5	0.806
163.6	0.805
163.7	0.805
163.8	0.806
163.9	0.806
164	0.807
164.1	0.807
164.2	0.808
164.3	0.807
164.4	0.806
164.5	0.808
164.6	0.81
164.7	0.811
164.8	0.811
164.9	0.812
165	0.812
165.1	0.811
165.2	0.811
165.3	0.812
165.4	0.813
165.5	0.813
165.6	0.812
165.7	0.815
165.8	0.814
165.9	0.815
166	0.816
166.1	0.816
166.2	0.816
166.3	0.814
166.4	0.815
166.5	0.815
166.6	0.815
166.7	0.815
166.8	0.816
166.9	0.817
167	0.819
167.1	0.817
167.2	0.819
167.3	0.82
167.4	0.819
167.5	0.818
167.6	0.817
167.7	0.817
167.8	0.818
167.9	0.819
168	0.817
168.1	0.82
168.2	0.819
168.3	0.82
168.4	0.819
168.5	0.818
168.6	0.817
168.7	0.817
168.8	0.817
168.9	0.817
169	0.817
169.1	0.817
169.2	0.816
169.3	0.817
169.4	0.816
169.5	0.816
169.6	0.816
169.7	0.818
169.8	0.817
169.9	0.816
170	0.814
170.1	0.816
170.2	0.816
170.3	0.815
170.4	0.816
170.5	0.816
170.6	0.816
170.7	0.816
170.8	0.816
170.9	0.817
171	0.814
171.1	0.815
171.2	0.817
171.3	0.817
171.4	0.817
171.5	0.82
171.6	0.82
171.7	0.821
171.8	0.821
171.9	0.822
172	0.823
172.1	0.822
172.2	0.823
172.3	0.821
172.4	0.822
172.5	0.822
172.6	0.824
172.7	0.824
172.8	0.824
172.9	0.823
173	0.823
173.1	0.823
173.2	0.825
173.3	0.825
173.4	0.825
173.5	0.823
173.6	0.822
173.7	0.821
173.8	0.823
173.9	0.824
174	0.824
174.1	0.825
174.2	0.825
174.3	0.826
174.4	0.826
174.5	0.826
174.6	0.826
174.7	0.826
174.8	0.828
174.9	0.829
175	0.833
175.1	0.832
175.2	0.831
175.3	0.83
175.4	0.829
175.5	0.826
175.6	0.826
175.7	0.825
175.8	0.824
175.9	0.822
176	0.821
176.1	0.821
176.2	0.822
176.3	0.822
176.4	0.821
176.5	0.82
176.6	0.82
176.7	0.821
176.8	0.821
176.9	0.822
177	0.824
177.1	0.821
177.2	0.821
177.3	0.823
177.4	0.82
177.5	0.821
177.6	0.821
177.7	0.823
177.8	0.823
177.9	0.826
178	0.828
178.1	0.828
178.2	0.828
178.3	0.829
178.4	0.829
178.5	0.831
178.6	0.833
178.7	0.832
178.8	0.833
178.9	0.833
179	0.832
179.1	0.831
179.2	0.83
179.3	0.83
179.4	0.83
179.5	0.83
179.6	0.829
179.7	0.831
179.8	0.831
179.9	0.831
180	0.83
180.1	0.826
180.2	0.824
180.3	0.827
180.4	0.826
180.5	0.825
180.6	0.824
180.7	0.824
180.8	0.822
180.9	0.822
181	0.821
181.1	0.822
181.2	0.821
181.3	0.822
181.4	0.82
181.5	0.819
181.6	0.819
181.7	0.818
181.8	0.817
181.9	0.818
182	0.821
182.1	0.822
182.2	0.823
182.3	0.821
182.4	0.823
182.5	0.822
182.6	0.822
182.7	0.821
182.8	0.821
182.9	0.823
183	0.824
183.1	0.823
183.2	0.826
183.3	0.825
183.4	0.825
183.5	0.824
183.6	0.824
183.7	0.825
183.8	0.825
183.9	0.824
184	0.824
184.1	0.823
184.2	0.821
184.3	0.82
184.4	0.823
184.5	0.824
184.6	0.824
184.7	0.826
184.8	0.829
184.9	0.831
185	0.832
185.1	0.831
185.2	0.83
185.3	0.831
185.4	0.831
185.5	0.829
185.6	0.827
185.7	0.827
185.8	0.829
185.9	0.83
186	0.829
186.1	0.83
186.2	0.829
186.3	0.829
186.4	0.828
186.5	0.827
186.6	0.827
186.7	0.829
186.8	0.829
186.9	0.832
187	0.831
187.1	0.829
187.2	0.827
187.3	0.827
187.4	0.826
187.5	0.826
187.6	0.826
187.7	0.827
187.8	0.83
187.9	0.831
188	0.831
188.1	0.829
188.2	0.829
188.3	0.828
188.4	0.83
188.5	0.832
188.6	0.833
188.7	0.832
188.8	0.833
188.9	0.835
189	0.836
189.1	0.838
189.2	0.839
189.3	0.839
189.4	0.837
189.5	0.838
189.6	0.839
189.7	0.841
189.8	0.841
189.9	0.843
190	0.842
190.1	0.842
190.2	0.841
190.3	0.84
190.4	0.84
190.5	0.838
190.6	0.838
190.7	0.836
190.8	0.835
190.9	0.837
191	0.837
191.1	0.836
191.2	0.836
191.3	0.837
191.4	0.837
191.5	0.837
191.6	0.838
191.7	0.838
191.8	0.837
191.9	0.836
192	0.838
192.1	0.838
192.2	0.836
192.3	0.836
192.4	0.836
192.5	0.836
192.6	0.837
192.7	0.837
192.8	0.838
192.9	0.839
193	0.84
193.1	0.841
193.2	0.84
193.3	0.84
193.4	0.84
193.5	0.839
193.6	0.839
193.7	0.84
193.8	0.842
193.9	0.84
194	0.84
194.1	0.84
194.2	0.841
194.3	0.842
194.4	0.844
194.5	0.842
194.6	0.841
194.7	0.843
194.8	0.844
194.9	0.844
195	0.843
195.1	0.843
195.2	0.841
195.3	0.841
195.4	0.839
195.5	0.839
195.6	0.841
195.7	0.841
195.8	0.842
195.9	0.84
196	0.84
196.1	0.838
196.2	0.838
196.3	0.838
196.4	0.839
196.5	0.838
196.6	0.838
196.7	0.838
196.8	0.839
196.9	0.84
197	0.839
197.1	0.838
197.2	0.838
197.3	0.841
197.4	0.84
197.5	0.841
197.6	0.84
197.7	0.841
197.8	0.846
197.9	0.845
198	0.845
198.1	0.844
198.2	0.843
198.3	0.842
198.4	0.84
198.5	0.84
198.6	0.84
198.7	0.84
198.8	0.839
198.9	0.838
199	0.837
199.1	0.836
199.2	0.837
199.3	0.836
199.4	0.835
199.5	0.833
199.6	0.831
199.7	0.829
199.8	0.829
199.9	0.83
200	0.831
[truncated: 14,000 more rows]
