# Supplementary material for: Bayesian inference of kinetic schemes for ion channels by Kalman filtering
Source: eLife journal article supplement (doi:10.7554/elife.62714), 2022-05-04
Supplement: fig4-data3 [file 1_Sim_N_1500_Fluor_MW_32M.xlsx]

## Sheet: Tabelle1
0.1	0
0.2	0
0.3	0
0.4	0
0.5	0
0.6	0
0.7	0
0.8	0
0.9	0
1	0
1.1	0
1.2	0
1.3	0
1.4	0
1.5	0
1.6	0
1.7	0
1.8	0
1.9	0
2	0
2.1	0
2.2	0
2.3	0
2.4	0
2.5	0
2.6	0
2.7	0
2.8	0
2.9	0
3	0
3.1	0
3.2	0
3.3	0
3.4	0
3.5	0
3.6	0
3.7	0
3.8	0
3.9	0
4	0
4.1	0
4.2	0
4.3	0
4.4	0
4.5	0
4.6	0
4.7	0
4.8	0
4.9	0
5	0
5.1	0
5.2	0
5.3	0
5.4	0
5.5	0
5.6	0
5.7	0
5.8	0
5.9	0
6	0
6.1	0
6.2	0
6.3	0
6.4	0
6.5	0
6.6	0
6.7	0
6.8	0
6.9	0
7	0
7.1	0
7.2	0
7.3	0
7.4	0
7.5	0
7.6	0
7.7	0
7.8	0
7.9	0
8	0
8.1	0
8.2	0
8.3	0
8.4	0
8.5	0
8.6	0
8.7	0
8.8	0
8.9	0
9	0
9.1	0
9.2	0
9.3	0
9.4	0
9.5	0
9.6	0
9.7	0
9.8	0
9.9	0
10	0
10.1	0
10.2	0
10.3	0
10.4	0
10.5	0
10.6	0
10.7	0
10.8	0
10.9	0
11	0
11.1	0
11.2	0
11.3	0
11.4	0
11.5	0
11.6	0
11.7	0
11.8	0
11.9	0
12	0
12.1	0
12.2	0
12.3	0
12.4	0
12.5	0
12.6	0
12.7	0
12.8	0
12.9	0
13	0
13.1	0
13.2	0
13.3	0
13.4	0
13.5	0
13.6	0
13.7	0
13.8	0
13.9	0
14	0
14.1	0
14.2	0
14.3	0
14.4	0
14.5	0
14.6	0
14.7	0
14.8	0
14.9	0
15	0
15.1	0
15.2	0
15.3	0
15.4	0
15.5	0
15.6	0
15.7	0
15.8	0
15.9	0
16	0
16.1	0
16.2	0
16.3	0
16.4	0
16.5	0
16.6	0
16.7	0
16.8	0
16.9	0
17	0
17.1	0
17.2	0
17.3	0
17.4	0
17.5	0
17.6	0
17.7	0
17.8	0
17.9	0
18	0
18.1	0
18.2	0
18.3	0
18.4	0
18.5	0
18.6	0
18.7	0
18.8	0
18.9	0
19	0
19.1	0
19.2	0
19.3	0
19.4	0
19.5	0
19.6	0
19.7	0
19.8	0
19.9	0
20	0
20.1	0
20.2	0
20.3	0
20.4	0
20.5	0
20.6	0
20.7	0
20.8	0
20.9	0
21	0
21.1	0
21.2	0
21.3	0
21.4	0
21.5	0
21.6	0
21.7	0
21.8	0
21.9	0
22	0
22.1	0
22.2	0
22.3	0
22.4	0
22.5	0
22.6	0
22.7	0
22.8	0
22.9	0
23	0
23.1	0
23.2	0
23.3	0
23.4	0
23.5	0
23.6	0
23.7	0
23.8	0
23.9	0
24	0
24.1	0
24.2	0
24.3	0
24.4	0
24.5	0
24.6	0
24.7	0
24.8	0
24.9	0
25	0
25.1	0
25.2	0
25.3	0
25.4	0
25.5	0
25.6	0
25.7	0
25.8	0
25.9	0
26	0
26.1	0
26.2	0
26.3	0
26.4	0
26.5	0
26.6	0
26.7	0
26.8	0
26.9	0
27	0
27.1	0
27.2	0
27.3	0
27.4	0
27.5	0
27.6	0
27.7	0
27.8	0
27.9	0
28	0
28.1	0
28.2	0
28.3	0
28.4	0
28.5	0
28.6	0
28.7	0
28.8	0
28.9	0
29	0
29.1	0
29.2	0
29.3	0
29.4	0
29.5	0
29.6	0
29.7	0
29.8	0
29.9	0
30	0
30.1	0
30.2	0
30.3	0
30.4	0
30.5	0
30.6	0
30.7	0
30.8	0
30.9	0
31	0
31.1	0
31.2	0
31.3	0
31.4	0
31.5	0
31.6	0
31.7	0
31.8	0
31.9	0
32	0
32.1	0
32.2	0
32.3	0
32.4	0
32.5	0
32.6	0
32.7	0
32.8	0
32.9	0
33	0
33.1	0
33.2	0
33.3	0
33.4	0
33.5	0
33.6	0
33.7	0
33.8	0
33.9	0
34	0
34.1	0
34.2	0
34.3	0
34.4	0
34.5	0
34.6	0
34.7	0
34.8	0
34.9	0
35	0
35.1	0
35.2	0
35.3	0
35.4	0
35.5	0
35.6	0
35.7	0
35.8	0
35.9	0
36	0
36.1	0
36.2	0
36.3	0
36.4	0
36.5	0
36.6	0
36.7	0
36.8	0
36.9	0
37	0
37.1	0
37.2	0
37.3	0
37.4	0
37.5	0
37.6	0
37.7	0
37.8	0
37.9	0
38	0
38.1	0
38.2	0
38.3	0
38.4	0
38.5	0
38.6	0
38.7	0
38.8	0
38.9	0
39	0
39.1	0
39.2	0
39.3	0
39.4	0
39.5	0
39.6	0
39.7	0
39.8	0
39.9	0
40	0
40.1	0
40.2	0
40.3	0
40.4	0
40.5	0
40.6	0
40.7	0
40.8	0
40.9	0
41	0
41.1	0
41.2	0
41.3	0
41.4	0
41.5	0
41.6	0
41.7	0
41.8	0
41.9	0
42	0
42.1	0
42.2	0
42.3	0
42.4	0
42.5	0
42.6	0
42.7	0
42.8	0
42.9	0
43	0
43.1	0
43.2	0
43.3	0
43.4	0
43.5	0
43.6	0
43.7	0
43.8	0
43.9	0
44	0
44.1	0
44.2	0
44.3	0
44.4	0
44.5	0
44.6	0
44.7	0
44.8	0
44.9	0
45	0
45.1	0
45.2	0
45.3	0
45.4	0
45.5	0
45.6	0
45.7	0
45.8	0
45.9	0
46	0
46.1	0
46.2	0
46.3	0
46.4	0
46.5	0
46.6	0
46.7	0
46.8	0
46.9	0
47	0
47.1	0
47.2	0
47.3	0
47.4	0
47.5	0
47.6	0
47.7	0
47.8	0
47.9	0
48	0
48.1	0
48.2	0
48.3	0
48.4	0
48.5	0
48.6	0
48.7	0
48.8	0
48.9	0
49	0
49.1	0
49.2	0
49.3	0
49.4	0
49.5	0
49.6	0
49.7	0
49.8	0
49.9	0
50	0
50.1	0
50.2	0
50.3	0
50.4	0
50.5	0
50.6	0
50.7	0
50.8	0
50.9	0
51	0
51.1	0
51.2	0
51.3	0
51.4	0
51.5	0
51.6	0
51.7	0
51.8	0
51.9	0
52	0
52.1	0
52.2	0
52.3	0
52.4	0
52.5	0
52.6	0
52.7	0
52.8	0
52.9	0
53	0
53.1	0
53.2	0
53.3	0
53.4	0
53.5	0
53.6	0
53.7	0
53.8	0
53.9	0
54	0
54.1	0
54.2	0
54.3	0
54.4	0
54.5	0
54.6	0
54.7	0
54.8	0
54.9	0
55	0
55.1	0
55.2	0
55.3	0
55.4	0
55.5	0
55.6	0
55.7	0
55.8	0
55.9	0
56	0
56.1	0
56.2	0
56.3	0
56.4	0
56.5	0
56.6	0
56.7	0
56.8	0
56.9	0
57	0
57.1	0
57.2	0
57.3	0
57.4	0
57.5	0
57.6	0
57.7	0
57.8	0
57.9	0
58	0
58.1	0
58.2	0
58.3	0
58.4	0
58.5	0
58.6	0
58.7	0
58.8	0
58.9	0
59	0
59.1	0
59.2	0
59.3	0
59.4	0
59.5	0
59.6	0
59.7	0
59.8	0
59.9	0
60	0
60.1	0
60.2	0
60.3	0
60.4	0
60.5	0
60.6	0
60.7	0
60.8	0
60.9	0
61	0
61.1	0
61.2	0
61.3	0
61.4	0
61.5	0
61.6	0
61.7	0
61.8	0
61.9	0
62	0
62.1	0
62.2	0
62.3	0
62.4	0
62.5	0
62.6	0
62.7	0
62.8	0
62.9	0
63	0
63.1	0
63.2	0
63.3	0
63.4	0
63.5	0
63.6	0
63.7	0
63.8	0
63.9	0
64	0
64.1	0
64.2	0
64.3	0
64.4	0
64.5	0
64.6	0
64.7	0
64.8	0
64.9	0
65	0
65.1	0
65.2	0
65.3	0
65.4	0
65.5	0
65.6	0
65.7	0
65.8	0
65.9	0
66	0
66.1	0
66.2	0
66.3	0
66.4	0
66.5	0
66.6	0
66.7	0
66.8	0
66.9	0
67	0
67.1	0
67.2	0
67.3	0
67.4	0
67.5	0
67.6	0
67.7	0
67.8	0
67.9	0
68	0
68.1	0
68.2	0
68.3	0
68.4	0
68.5	0
68.6	0
68.7	0
68.8	0
68.9	0
69	0
69.1	0
69.2	0
69.3	0
69.4	0
69.5	0
69.6	0
69.7	0
69.8	0
69.9	0
70	0
70.1	0
70.2	0
70.3	0
70.4	0
70.5	0
70.6	0
70.7	0
70.8	0
70.9	0
71	0
71.1	0
71.2	0
71.3	0
71.4	0
71.5	0
71.6	0
71.7	0
71.8	0
71.9	0
72	0
72.1	0
72.2	0
72.3	0
72.4	0
72.5	0
72.6	0
72.7	0
72.8	0
72.9	0
73	0
73.1	0
73.2	0
73.3	0
73.4	0
73.5	0
73.6	0
73.7	0
73.8	0
73.9	0
74	0
74.1	0
74.2	0
74.3	0
74.4	0
74.5	0
74.6	0
74.7	0
74.8	0
74.9	0
75	0
75.1	0
75.2	0
75.3	0
75.4	0
75.5	0
75.6	0
75.7	0
75.8	0
75.9	0
76	0
76.1	0
76.2	0
76.3	0
76.4	0
76.5	0
76.6	0
76.7	0
76.8	0
76.9	0
77	0
77.1	0
77.2	0
77.3	0
77.4	0
77.5	0
77.6	0
77.7	0
77.8	0
77.9	0
78	0
78.1	0
78.2	0
78.3	0
78.4	0
78.5	0
78.6	0
78.7	0
78.8	0
78.9	0
79	0
79.1	0
79.2	0
79.3	0
79.4	0
79.5	0
79.6	0
79.7	0
79.8	0
79.9	0
80	0
80.1	0
80.2	0
80.3	0
80.4	0
80.5	0
80.6	0
80.7	0
80.8	0
80.9	0
81	0
81.1	0
81.2	0
81.3	0
81.4	0
81.5	0
81.6	0
81.7	0
81.8	0
81.9	0
82	0
82.1	0
82.2	0
82.3	0
82.4	0
82.5	0
82.6	0
82.7	0
82.8	0
82.9	0
83	0
83.1	0
83.2	0
83.3	0
83.4	0
83.5	0
83.6	0
83.7	0
83.8	0
83.9	0
84	0
84.1	0
84.2	0
84.3	0
84.4	0
84.5	0
84.6	0
84.7	0
84.8	0
84.9	0
85	0
85.1	0
85.2	0
85.3	0
85.4	0
85.5	0
85.6	0
85.7	0
85.8	0
85.9	0
86	0
86.1	0
86.2	0
86.3	0
86.4	0
86.5	0
86.6	0
86.7	0
86.8	0
86.9	0
87	0
87.1	0
87.2	0
87.3	0
87.4	0
87.5	0
87.6	0
87.7	0
87.8	0
87.9	0
88	0
88.1	0
88.2	0
88.3	0
88.4	0
88.5	0
88.6	0
88.7	0
88.8	0
88.9	0
89	0
89.1	0
89.2	0
89.3	0
89.4	0
89.5	0
89.6	0
89.7	0
89.8	0
89.9	0
90	0
90.1	0
90.2	0
90.3	0
90.4	0
90.5	0
90.6	0
90.7	0
90.8	0
90.9	0
91	0
91.1	0
91.2	0
91.3	0
91.4	0
91.5	0
91.6	0
91.7	0
91.8	0
91.9	0
92	0
92.1	0
92.2	0
92.3	0
92.4	0
92.5	0
92.6	0
92.7	0
92.8	0
92.9	0
93	0
93.1	0
93.2	0
93.3	0
93.4	0
93.5	0
93.6	0
93.7	0
93.8	0
93.9	0
94	0
94.1	0
94.2	0
94.3	0
94.4	0
94.5	0
94.6	0
94.7	0
94.8	0
94.9	0
95	0
95.1	0
95.2	0
95.3	0
95.4	0
95.5	0
95.6	0
95.7	0
95.8	0
95.9	0
96	0
96.1	0
96.2	0
96.3	0
96.4	0
96.5	0
96.6	0
96.7	0
96.8	0
96.9	0
97	0
97.1	0
97.2	0
97.3	0
97.4	0
97.5	0
97.6	0
97.7	0
97.8	0
97.9	0
98	0
98.1	0
98.2	0
98.3	0
98.4	0
98.5	0
98.6	0
98.7	0
98.8	0
98.9	0
99	0
99.1	0
99.2	0
99.3	0
99.4	0
99.5	0
99.6	0
99.7	0
99.8	0
99.9	0
100	0
100.1	0.728333
100.2	0.886667
100.3	0.947667
100.4	0.966
100.5	0.976
100.6	0.974667
100.7	0.973667
100.8	0.975667
100.9	0.978333
101	0.974667
101.1	0.974
101.2	0.971667
101.3	0.979333
101.4	0.977333
101.5	0.978
101.6	0.974667
101.7	0.979333
101.8	0.982333
101.9	0.981333
102	0.980333
102.1	0.975667
102.2	0.978667
102.3	0.982667
102.4	0.980333
102.5	0.975667
102.6	0.976667
102.7	0.980667
102.8	0.979667
102.9	0.982333
103	0.982667
103.1	0.975333
103.2	0.975333
103.3	0.982333
103.4	0.978667
103.5	0.976
103.6	0.979333
103.7	0.977333
103.8	0.978333
103.9	0.978667
104	0.974333
104.1	0.98
104.2	0.980667
104.3	0.978
104.4	0.979
104.5	0.978
104.6	0.979333
104.7	0.978333
104.8	0.976
104.9	0.98
105	0.974333
105.1	0.975333
105.2	0.979333
105.3	0.984
105.4	0.977667
105.5	0.977
105.6	0.979
105.7	0.982
105.8	0.982667
105.9	0.979333
106	0.981333
106.1	0.978
106.2	0.976
106.3	0.981
106.4	0.979333
106.5	0.983333
106.6	0.984333
106.7	0.981333
106.8	0.983667
106.9	0.980667
107	0.982333
107.1	0.981667
107.2	0.985
107.3	0.983333
107.4	0.978667
107.5	0.983333
107.6	0.984333
107.7	0.982667
107.8	0.985333
107.9	0.985
108	0.984333
108.1	0.982
108.2	0.980333
108.3	0.979
108.4	0.977667
108.5	0.981
108.6	0.982667
108.7	0.981667
108.8	0.981333
108.9	0.981333
109	0.985333
109.1	0.985667
109.2	0.985
109.3	0.985333
109.4	0.984667
109.5	0.986667
109.6	0.986333
109.7	0.984333
109.8	0.985
109.9	0.985667
110	0.986667
110.1	0.987667
110.2	0.988
110.3	0.984
110.4	0.985333
110.5	0.984667
110.6	0.984333
110.7	0.984
110.8	0.980333
110.9	0.980667
111	0.982333
111.1	0.982333
111.2	0.987333
111.3	0.987667
111.4	0.986333
111.5	0.987
111.6	0.985333
111.7	0.982333
111.8	0.984667
111.9	0.986
112	0.986
112.1	0.985
112.2	0.985
112.3	0.984333
112.4	0.983
112.5	0.983333
112.6	0.982333
112.7	0.984
112.8	0.985333
112.9	0.986667
113	0.985333
113.1	0.989
113.2	0.991667
113.3	0.989667
113.4	0.987
113.5	0.985667
113.6	0.985
113.7	0.984333
113.8	0.983333
113.9	0.983
114	0.983
114.1	0.984
114.2	0.981667
114.3	0.986667
114.4	0.985667
114.5	0.980333
114.6	0.982333
114.7	0.981333
114.8	0.981333
114.9	0.984333
115	0.987667
115.1	0.988
115.2	0.985333
115.3	0.985
115.4	0.989333
115.5	0.987667
115.6	0.986
115.7	0.985667
115.8	0.989667
115.9	0.988333
116	0.984
116.1	0.986667
116.2	0.991333
116.3	0.988
116.4	0.987333
116.5	0.991667
116.6	0.989333
116.7	0.989667
116.8	0.987333
116.9	0.987333
117	0.987667
117.1	0.984
117.2	0.987667
117.3	0.985
117.4	0.989
117.5	0.987333
117.6	0.983667
117.7	0.986333
117.8	0.988667
117.9	0.987667
118	0.992
118.1	0.991
118.2	0.988667
118.3	0.99
118.4	0.990333
118.5	0.989333
118.6	0.987667
118.7	0.988
118.8	0.992
118.9	0.990667
119	0.991333
119.1	0.990333
119.2	0.991667
119.3	0.991
119.4	0.991333
119.5	0.992667
119.6	0.990333
119.7	0.989667
119.8	0.988
119.9	0.988667
120	0.988
120.1	0.989667
120.2	0.989
120.3	0.99
120.4	0.988333
120.5	0.985
120.6	0.990667
120.7	0.993
120.8	0.991
120.9	0.986667
121	0.986333
121.1	0.987
121.2	0.988333
121.3	0.99
121.4	0.989333
121.5	0.989333
121.6	0.988667
121.7	0.987667
121.8	0.988
121.9	0.989333
122	0.988333
122.1	0.99
122.2	0.988667
122.3	0.989667
122.4	0.988667
122.5	0.990667
122.6	0.987333
122.7	0.988333
122.8	0.988
122.9	0.987667
123	0.989667
123.1	0.989333
123.2	0.991
123.3	0.989667
123.4	0.992667
123.5	0.988667
123.6	0.990333
123.7	0.991667
123.8	0.989667
123.9	0.99
124	0.989667
124.1	0.991
124.2	0.990333
124.3	0.989667
124.4	0.99
124.5	0.988667
124.6	0.989333
124.7	0.991667
124.8	0.990667
124.9	0.988667
125	0.991
125.1	0.989667
125.2	0.991
125.3	0.992667
125.4	0.990667
125.5	0.991
125.6	0.99
125.7	0.990333
125.8	0.989667
125.9	0.990333
126	0.990667
126.1	0.991667
126.2	0.989667
126.3	0.989333
126.4	0.990333
126.5	0.993
126.6	0.992333
126.7	0.991
126.8	0.990667
126.9	0.989333
127	0.990667
127.1	0.991667
127.2	0.988667
127.3	0.991
127.4	0.990667
127.5	0.992667
127.6	0.992333
127.7	0.991333
127.8	0.991333
127.9	0.988333
128	0.99
128.1	0.991
128.2	0.994
128.3	0.990667
128.4	0.991
128.5	0.988333
128.6	0.988333
128.7	0.992
128.8	0.992
128.9	0.989667
129	0.992333
129.1	0.991333
129.2	0.993667
129.3	0.993
129.4	0.995333
129.5	0.993667
129.6	0.99
129.7	0.992
129.8	0.995333
129.9	0.992667
130	0.993667
130.1	0.992667
130.2	0.994333
130.3	0.992667
130.4	0.993333
130.5	0.991
130.6	0.993667
130.7	0.994
130.8	0.994667
130.9	0.994667
131	0.992
131.1	0.990667
131.2	0.989667
131.3	0.995667
131.4	0.993667
131.5	0.990667
131.6	0.990667
131.7	0.993
131.8	0.990333
131.9	0.992
132	0.991333
132.1	0.989333
132.2	0.991333
132.3	0.993333
132.4	0.994667
132.5	0.993667
132.6	0.992333
132.7	0.993333
132.8	0.994
132.9	0.993
133	0.993333
133.1	0.994
133.2	0.990333
133.3	0.992667
133.4	0.989333
133.5	0.990667
133.6	0.991
133.7	0.991333
133.8	0.992333
133.9	0.990333
134	0.993667
134.1	0.992667
134.2	0.995667
134.3	0.995667
134.4	0.995
134.5	0.992667
134.6	0.991
134.7	0.993667
134.8	0.993333
134.9	0.994333
135	0.992333
135.1	0.991667
135.2	0.991667
135.3	0.991333
135.4	0.992333
135.5	0.99
135.6	0.992
135.7	0.994
135.8	0.994
135.9	0.994
136	0.994
136.1	0.990667
136.2	0.995333
136.3	0.991667
136.4	0.993667
136.5	0.993
136.6	0.993
136.7	0.992
136.8	0.991333
136.9	0.991667
137	0.993667
137.1	0.994333
137.2	0.996333
137.3	0.994
137.4	0.990667
137.5	0.992333
137.6	0.996
137.7	0.994667
137.8	0.992333
137.9	0.994333
138	0.991333
138.1	0.993333
138.2	0.995333
138.3	0.993
138.4	0.993667
138.5	0.992333
138.6	0.992
138.7	0.989667
138.8	0.99
138.9	0.991
139	0.992333
139.1	0.993333
139.2	0.993333
139.3	0.991667
139.4	0.994333
139.5	0.992333
139.6	0.994667
139.7	0.994667
139.8	0.992667
139.9	0.995
140	0.996
140.1	0.994
140.2	0.993
140.3	0.990667
140.4	0.993
140.5	0.995333
140.6	0.994333
140.7	0.994333
140.8	0.991667
140.9	0.995333
141	0.993
141.1	0.992333
141.2	0.995
141.3	0.995
141.4	0.992333
141.5	0.995333
141.6	0.993667
141.7	0.991333
141.8	0.994333
141.9	0.994667
142	0.993
142.1	0.994
142.2	0.994333
142.3	0.993333
142.4	0.995
142.5	0.996
142.6	0.993
142.7	0.991
142.8	0.990667
142.9	0.991667
143	0.991667
143.1	0.991333
143.2	0.990667
143.3	0.991667
143.4	0.991333
143.5	0.990667
143.6	0.993333
143.7	0.991
143.8	0.993333
143.9	0.993
144	0.991667
144.1	0.991
144.2	0.991
144.3	0.993
144.4	0.991667
144.5	0.994
144.6	0.994333
144.7	0.993667
144.8	0.992667
144.9	0.995333
145	0.992333
145.1	0.995
145.2	0.996
145.3	0.993667
145.4	0.994667
145.5	0.995
145.6	0.995
145.7	0.995
145.8	0.994333
145.9	0.995667
146	0.993
146.1	0.993667
146.2	0.995
146.3	0.992667
146.4	0.994
146.5	0.994
146.6	0.994333
146.7	0.992667
146.8	0.995
146.9	0.993333
147	0.992667
147.1	0.993333
147.2	0.995667
147.3	0.993667
147.4	0.994333
147.5	0.995333
147.6	0.995333
147.7	0.995
147.8	0.995
147.9	0.992333
148	0.993
148.1	0.993667
148.2	0.994333
148.3	0.995333
148.4	0.994
148.5	0.995
148.6	0.992667
148.7	0.995667
148.8	0.994
148.9	0.994
149	0.993
149.1	0.992
149.2	0.992333
149.3	0.993333
149.4	0.992333
149.5	0.993667
149.6	0.992667
149.7	0.994
149.8	0.996667
149.9	0.995
150	0.994333
150.1	0.993
150.2	0.993333
150.3	0.994
150.4	0.995667
150.5	0.995667
150.6	0.996333
150.7	0.995667
150.8	0.992333
150.9	0.995667
151	0.996
151.1	0.994333
151.2	0.994
151.3	0.993667
151.4	0.995
151.5	0.994
151.6	0.992333
151.7	0.991667
151.8	0.992333
151.9	0.991667
152	0.993667
152.1	0.995667
152.2	0.994
152.3	0.992
152.4	0.993
152.5	0.997
152.6	0.994
152.7	0.991667
152.8	0.993667
152.9	0.994333
153	0.995333
153.1	0.992667
153.2	0.995667
153.3	0.995
153.4	0.992667
153.5	0.993333
153.6	0.995333
153.7	0.995333
153.8	0.993333
153.9	0.996667
154	0.995667
154.1	0.995667
154.2	0.995
154.3	0.994
154.4	0.993
154.5	0.996
154.6	0.994667
154.7	0.996333
154.8	0.995
154.9	0.994667
155	0.993
155.1	0.990667
155.2	0.993
155.3	0.994
155.4	0.99
155.5	0.987667
155.6	0.991
155.7	0.992333
155.8	0.994333
155.9	0.993333
156	0.993667
156.1	0.992667
156.2	0.993667
156.3	0.994333
156.4	0.993
156.5	0.996
156.6	0.995667
156.7	0.995
156.8	0.997
156.9	0.995667
157	0.994667
157.1	0.996333
157.2	0.995667
157.3	0.994333
157.4	0.995333
157.5	0.996333
157.6	0.993667
157.7	0.995333
157.8	0.993
157.9	0.993
158	0.995333
158.1	0.994
158.2	0.994
158.3	0.994667
158.4	0.996333
158.5	0.996
158.6	0.997
158.7	0.995333
158.8	0.996
158.9	0.995667
159	0.995
159.1	0.997
159.2	0.996333
159.3	0.995667
159.4	0.994
159.5	0.993333
159.6	0.995
159.7	0.993333
159.8	0.993333
159.9	0.992667
160	0.995
160.1	0.993333
160.2	0.995333
160.3	0.994
160.4	0.994333
160.5	0.994333
160.6	0.996333
160.7	0.995667
160.8	0.994333
160.9	0.996
161	0.997
161.1	0.995
161.2	0.994333
161.3	0.992
161.4	0.993
161.5	0.997
161.6	0.996333
161.7	0.997333
161.8	0.996
161.9	0.996
162	0.993333
162.1	0.995667
162.2	0.996333
162.3	0.994667
162.4	0.997
162.5	0.995
162.6	0.996667
162.7	0.995333
162.8	0.995667
162.9	0.994667
163	0.995
163.1	0.995667
163.2	0.997
163.3	0.998
163.4	0.996333
163.5	0.995667
163.6	0.995333
163.7	0.995667
163.8	0.996667
163.9	0.995667
164	0.993333
164.1	0.994667
164.2	0.995333
164.3	0.994333
164.4	0.994333
164.5	0.996667
164.6	0.996667
164.7	0.996333
164.8	0.996667
164.9	0.995333
165	0.995333
165.1	0.995
165.2	0.995
165.3	0.994667
165.4	0.995667
165.5	0.995667
165.6	0.995333
165.7	0.995333
165.8	0.993667
165.9	0.993667
166	0.995667
166.1	0.996667
166.2	0.997
166.3	0.996
166.4	0.996333
166.5	0.996
166.6	0.995667
166.7	0.994667
166.8	0.995
166.9	0.996333
167	0.993
167.1	0.995
167.2	0.995667
167.3	0.994
167.4	0.995
167.5	0.995
167.6	0.995
167.7	0.998
167.8	0.995
167.9	0.995333
168	0.995667
168.1	0.997
168.2	0.994667
168.3	0.997
168.4	0.996333
168.5	0.994333
168.6	0.994667
168.7	0.995
168.8	0.995333
168.9	0.994667
169	0.994667
169.1	0.995333
169.2	0.996333
169.3	0.997
169.4	0.994667
169.5	0.995667
169.6	0.997333
169.7	0.996333
169.8	0.997
169.9	0.995667
170	0.994667
170.1	0.995
170.2	0.996667
170.3	0.996333
170.4	0.996333
170.5	0.995
170.6	0.996
170.7	0.994667
170.8	0.995333
170.9	0.996333
171	0.997
171.1	0.994333
171.2	0.995333
171.3	0.997333
171.4	0.995667
171.5	0.998
171.6	0.995333
171.7	0.994
171.8	0.992
171.9	0.994333
172	0.993333
172.1	0.997667
172.2	0.997333
172.3	0.995667
172.4	0.995667
172.5	0.996333
172.6	0.997333
172.7	0.997333
172.8	0.995333
172.9	0.993667
173	0.991667
173.1	0.993
173.2	0.997333
173.3	0.995
173.4	0.995333
173.5	0.995
173.6	0.997667
173.7	0.995
173.8	0.994
173.9	0.994333
174	0.994667
174.1	0.994667
174.2	0.994667
174.3	0.994
174.4	0.993333
174.5	0.995333
174.6	0.995667
174.7	0.997
174.8	0.996
174.9	0.997333
175	0.996333
175.1	0.996
175.2	0.996667
175.3	0.996
175.4	0.995
175.5	0.994667
175.6	0.995333
175.7	0.996
175.8	0.996667
175.9	0.996333
176	0.997333
176.1	0.996667
176.2	0.997667
176.3	0.997667
176.4	0.997
176.5	0.997667
176.6	0.995667
176.7	0.995
176.8	0.996
176.9	0.994667
177	0.996
177.1	0.997
177.2	0.994333
177.3	0.996667
177.4	0.995333
177.5	0.996
177.6	0.995667
177.7	0.995667
177.8	0.997333
177.9	0.995667
178	0.994667
178.1	0.994333
178.2	0.992333
178.3	0.993
178.4	0.996333
178.5	0.996667
178.6	0.996333
178.7	0.996333
178.8	0.996333
178.9	0.996667
179	0.995333
179.1	0.996667
179.2	0.995667
179.3	0.995
179.4	0.994
179.5	0.994333
179.6	0.994667
179.7	0.993667
179.8	0.996667
179.9	0.995667
180	0.995333
180.1	0.993333
180.2	0.995333
180.3	0.995
180.4	0.997
180.5	0.996
180.6	0.994
180.7	0.993667
180.8	0.992667
180.9	0.995
181	0.996667
181.1	0.994667
181.2	0.995333
181.3	0.996667
181.4	0.995667
181.5	0.996
181.6	0.995667
181.7	0.995667
181.8	0.996333
181.9	0.996333
182	0.995333
182.1	0.995
182.2	0.996
182.3	0.994333
182.4	0.993667
182.5	0.997
182.6	0.994
182.7	0.995
182.8	0.996
182.9	0.995333
183	0.995
183.1	0.994333
183.2	0.996333
183.3	0.995333
183.4	0.994667
183.5	0.997333
183.6	0.995
183.7	0.995333
183.8	0.996667
183.9	0.997
184	0.994333
184.1	0.994333
184.2	0.995667
184.3	0.996667
184.4	0.997
184.5	0.995333
184.6	0.995333
184.7	0.996
184.8	0.995
184.9	0.995
185	0.997333
185.1	0.996667
185.2	0.995
185.3	0.995667
185.4	0.993667
185.5	0.993333
185.6	0.992333
185.7	0.993667
185.8	0.995
185.9	0.996
186	0.994
186.1	0.995333
186.2	0.994667
186.3	0.994333
186.4	0.996333
186.5	0.995333
186.6	0.996
186.7	0.995333
186.8	0.997
186.9	0.995
187	0.995333
187.1	0.995
187.2	0.995
187.3	0.994333
187.4	0.996333
187.5	0.994
187.6	0.993667
187.7	0.995
187.8	0.995333
187.9	0.997
188	0.995667
188.1	0.995
188.2	0.993667
188.3	0.995
188.4	0.996667
188.5	0.996667
188.6	0.994333
188.7	0.993
188.8	0.992333
188.9	0.993333
189	0.993
189.1	0.994
189.2	0.994667
189.3	0.991
189.4	0.994
189.5	0.996667
189.6	0.995333
189.7	0.997333
189.8	0.994333
189.9	0.996333
190	0.996333
190.1	0.996333
190.2	0.994
190.3	0.992667
190.4	0.996333
190.5	0.996333
190.6	0.995333
190.7	0.994333
190.8	0.995667
190.9	0.996
191	0.995333
191.1	0.996333
191.2	0.997
191.3	0.996
191.4	0.997
191.5	0.996
191.6	0.995667
191.7	0.994
191.8	0.995333
191.9	0.996
192	0.996
192.1	0.994667
192.2	0.993333
192.3	0.995333
192.4	0.996333
192.5	0.995333
192.6	0.995667
192.7	0.994333
192.8	0.997333
192.9	0.996
193	0.995667
193.1	0.996333
193.2	0.994
193.3	0.996333
193.4	0.996667
193.5	0.994333
193.6	0.993333
193.7	0.993
193.8	0.996333
193.9	0.996667
194	0.997333
194.1	0.996333
194.2	0.996
194.3	0.995667
194.4	0.996
194.5	0.996
194.6	0.995667
194.7	0.994667
194.8	0.995333
194.9	0.995667
195	0.995667
195.1	0.995667
195.2	0.996333
195.3	0.996333
195.4	0.996667
195.5	0.996
195.6	0.995
195.7	0.996
195.8	0.996333
195.9	0.996333
196	0.995
196.1	0.996333
196.2	0.996
196.3	0.996
196.4	0.995
196.5	0.992667
196.6	0.995667
196.7	0.996333
196.8	0.996333
196.9	0.997
197	0.997
197.1	0.998
197.2	0.995333
197.3	0.994667
197.4	0.994333
197.5	0.996
197.6	0.996333
197.7	0.997667
197.8	0.997
197.9	0.995667
198	0.996333
198.1	0.997
198.2	0.995333
198.3	0.996333
198.4	0.994
198.5	0.996333
198.6	0.994333
198.7	0.994333
198.8	0.994333
198.9	0.994667
199	0.996333
199.1	0.996
199.2	0.994
199.3	0.994333
199.4	0.994667
199.5	0.997
199.6	0.997
199.7	0.995
199.8	0.993667
199.9	0.996
200	0.995333
[truncated: 14,000 more rows]
