# Supplementary material for: Bayesian inference of kinetic schemes for ion channels by Kalman filtering
Source: eLife journal article supplement (doi:10.7554/elife.62714), 2022-05-04
Supplement: fig4-data3 [file 1_Sim_N_1500_Strom_MW_32M.xlsx]

## Sheet: Tabelle1
0.1	0
0.2	0
0.3	0
0.4	0
0.5	0
0.6	0
0.7	0
0.8	0
0.9	0
1	0
1.1	0
1.2	0
1.3	0
1.4	0
1.5	0
1.6	0
1.7	0
1.8	0
1.9	0
2	0
2.1	0
2.2	0
2.3	0
2.4	0
2.5	0
2.6	0
2.7	0
2.8	0
2.9	0
3	0
3.1	0
3.2	0
3.3	0
3.4	0
3.5	0
3.6	0
3.7	0
3.8	0
3.9	0
4	0
4.1	0
4.2	0
4.3	0
4.4	0
4.5	0
4.6	0
4.7	0
4.8	0
4.9	0
5	0
5.1	0
5.2	0
5.3	0
5.4	0
5.5	0
5.6	0
5.7	0
5.8	0
5.9	0
6	0
6.1	0
6.2	0
6.3	0
6.4	0
6.5	0
6.6	0
6.7	0
6.8	0
6.9	0
7	0
7.1	0
7.2	0
7.3	0
7.4	0
7.5	0
7.6	0
7.7	0
7.8	0
7.9	0
8	0
8.1	0
8.2	0
8.3	0
8.4	0
8.5	0
8.6	0
8.7	0
8.8	0
8.9	0
9	0
9.1	0
9.2	0
9.3	0
9.4	0
9.5	0
9.6	0
9.7	0
9.8	0
9.9	0
10	0
10.1	0
10.2	0
10.3	0
10.4	0
10.5	0
10.6	0
10.7	0
10.8	0
10.9	0
11	0
11.1	0
11.2	0
11.3	0
11.4	0
11.5	0
11.6	0
11.7	0
11.8	0
11.9	0
12	0
12.1	0
12.2	0
12.3	0
12.4	0
12.5	0
12.6	0
12.7	0
12.8	0
12.9	0
13	0
13.1	0
13.2	0
13.3	0
13.4	0
13.5	0
13.6	0
13.7	0
13.8	0
13.9	0
14	0
14.1	0
14.2	0
14.3	0
14.4	0
14.5	0
14.6	0
14.7	0
14.8	0
14.9	0
15	0
15.1	0
15.2	0
15.3	0
15.4	0
15.5	0
15.6	0
15.7	0
15.8	0
15.9	0
16	0
16.1	0
16.2	0
16.3	0
16.4	0
16.5	0
16.6	0
16.7	0
16.8	0
16.9	0
17	0
17.1	0
17.2	0
17.3	0
17.4	0
17.5	0
17.6	0
17.7	0
17.8	0
17.9	0
18	0
18.1	0
18.2	0
18.3	0
18.4	0
18.5	0
18.6	0
18.7	0
18.8	0
18.9	0
19	0
19.1	0
19.2	0
19.3	0
19.4	0
19.5	0
19.6	0
19.7	0
19.8	0
19.9	0
20	0
20.1	0
20.2	0
20.3	0
20.4	0
20.5	0
20.6	0
20.7	0
20.8	0
20.9	0
21	0
21.1	0
21.2	0
21.3	0
21.4	0
21.5	0
21.6	0
21.7	0
21.8	0
21.9	0
22	0
22.1	0
22.2	0
22.3	0
22.4	0
22.5	0
22.6	0
22.7	0
22.8	0
22.9	0
23	0
23.1	0
23.2	0
23.3	0
23.4	0
23.5	0
23.6	0
23.7	0
23.8	0
23.9	0
24	0
24.1	0
24.2	0
24.3	0
24.4	0
24.5	0
24.6	0
24.7	0
24.8	0
24.9	0
25	0
25.1	0
25.2	0
25.3	0
25.4	0
25.5	0
25.6	0
25.7	0
25.8	0
25.9	0
26	0
26.1	0
26.2	0
26.3	0
26.4	0
26.5	0
26.6	0
26.7	0
26.8	0
26.9	0
27	0
27.1	0
27.2	0
27.3	0
27.4	0
27.5	0
27.6	0
27.7	0
27.8	0
27.9	0
28	0
28.1	0
28.2	0
28.3	0
28.4	0
28.5	0
28.6	0
28.7	0
28.8	0
28.9	0
29	0
29.1	0
29.2	0
29.3	0
29.4	0
29.5	0
29.6	0
29.7	0
29.8	0
29.9	0
30	0
30.1	0
30.2	0
30.3	0
30.4	0
30.5	0
30.6	0
30.7	0
30.8	0
30.9	0
31	0
31.1	0
31.2	0
31.3	0
31.4	0
31.5	0
31.6	0
31.7	0
31.8	0
31.9	0
32	0
32.1	0
32.2	0
32.3	0
32.4	0
32.5	0
32.6	0
32.7	0
32.8	0
32.9	0
33	0
33.1	0
33.2	0
33.3	0
33.4	0
33.5	0
33.6	0
33.7	0
33.8	0
33.9	0
34	0
34.1	0
34.2	0
34.3	0
34.4	0
34.5	0
34.6	0
34.7	0
34.8	0
34.9	0
35	0
35.1	0
35.2	0
35.3	0
35.4	0
35.5	0
35.6	0
35.7	0
35.8	0
35.9	0
36	0
36.1	0
36.2	0
36.3	0
36.4	0
36.5	0
36.6	0
36.7	0
36.8	0
36.9	0
37	0
37.1	0
37.2	0
37.3	0
37.4	0
37.5	0
37.6	0
37.7	0
37.8	0
37.9	0
38	0
38.1	0
38.2	0
38.3	0
38.4	0
38.5	0
38.6	0
38.7	0
38.8	0
38.9	0
39	0
39.1	0
39.2	0
39.3	0
39.4	0
39.5	0
39.6	0
39.7	0
39.8	0
39.9	0
40	0
40.1	0
40.2	0
40.3	0
40.4	0
40.5	0
40.6	0
40.7	0
40.8	0
40.9	0
41	0
41.1	0
41.2	0
41.3	0
41.4	0
41.5	0
41.6	0
41.7	0
41.8	0
41.9	0
42	0
42.1	0
42.2	0
42.3	0
42.4	0
42.5	0
42.6	0
42.7	0
42.8	0
42.9	0
43	0
43.1	0
43.2	0
43.3	0
43.4	0
43.5	0
43.6	0
43.7	0
43.8	0
43.9	0
44	0
44.1	0
44.2	0
44.3	0
44.4	0
44.5	0
44.6	0
44.7	0
44.8	0
44.9	0
45	0
45.1	0
45.2	0
45.3	0
45.4	0
45.5	0
45.6	0
45.7	0
45.8	0
45.9	0
46	0
46.1	0
46.2	0
46.3	0
46.4	0
46.5	0
46.6	0
46.7	0
46.8	0
46.9	0
47	0
47.1	0
47.2	0
47.3	0
47.4	0
47.5	0
47.6	0
47.7	0
47.8	0
47.9	0
48	0
48.1	0
48.2	0
48.3	0
48.4	0
48.5	0
48.6	0
48.7	0
48.8	0
48.9	0
49	0
49.1	0
49.2	0
49.3	0
49.4	0
49.5	0
49.6	0
49.7	0
49.8	0
49.9	0
50	0
50.1	0
50.2	0
50.3	0
50.4	0
50.5	0
50.6	0
50.7	0
50.8	0
50.9	0
51	0
51.1	0
51.2	0
51.3	0
51.4	0
51.5	0
51.6	0
51.7	0
51.8	0
51.9	0
52	0
52.1	0
52.2	0
52.3	0
52.4	0
52.5	0
52.6	0
52.7	0
52.8	0
52.9	0
53	0
53.1	0
53.2	0
53.3	0
53.4	0
53.5	0
53.6	0
53.7	0
53.8	0
53.9	0
54	0
54.1	0
54.2	0
54.3	0
54.4	0
54.5	0
54.6	0
54.7	0
54.8	0
54.9	0
55	0
55.1	0
55.2	0
55.3	0
55.4	0
55.5	0
55.6	0
55.7	0
55.8	0
55.9	0
56	0
56.1	0
56.2	0
56.3	0
56.4	0
56.5	0
56.6	0
56.7	0
56.8	0
56.9	0
57	0
57.1	0
57.2	0
57.3	0
57.4	0
57.5	0
57.6	0
57.7	0
57.8	0
57.9	0
58	0
58.1	0
58.2	0
58.3	0
58.4	0
58.5	0
58.6	0
58.7	0
58.8	0
58.9	0
59	0
59.1	0
59.2	0
59.3	0
59.4	0
59.5	0
59.6	0
59.7	0
59.8	0
59.9	0
60	0
60.1	0
60.2	0
60.3	0
60.4	0
60.5	0
60.6	0
60.7	0
60.8	0
60.9	0
61	0
61.1	0
61.2	0
61.3	0
61.4	0
61.5	0
61.6	0
61.7	0
61.8	0
61.9	0
62	0
62.1	0
62.2	0
62.3	0
62.4	0
62.5	0
62.6	0
62.7	0
62.8	0
62.9	0
63	0
63.1	0
63.2	0
63.3	0
63.4	0
63.5	0
63.6	0
63.7	0
63.8	0
63.9	0
64	0
64.1	0
64.2	0
64.3	0
64.4	0
64.5	0
64.6	0
64.7	0
64.8	0
64.9	0
65	0
65.1	0
65.2	0
65.3	0
65.4	0
65.5	0
65.6	0
65.7	0
65.8	0
65.9	0
66	0
66.1	0
66.2	0
66.3	0
66.4	0
66.5	0
66.6	0
66.7	0
66.8	0
66.9	0
67	0
67.1	0
67.2	0
67.3	0
67.4	0
67.5	0
67.6	0
67.7	0
67.8	0
67.9	0
68	0
68.1	0
68.2	0
68.3	0
68.4	0
68.5	0
68.6	0
68.7	0
68.8	0
68.9	0
69	0
69.1	0
69.2	0
69.3	0
69.4	0
69.5	0
69.6	0
69.7	0
69.8	0
69.9	0
70	0
70.1	0
70.2	0
70.3	0
70.4	0
70.5	0
70.6	0
70.7	0
70.8	0
70.9	0
71	0
71.1	0
71.2	0
71.3	0
71.4	0
71.5	0
71.6	0
71.7	0
71.8	0
71.9	0
72	0
72.1	0
72.2	0
72.3	0
72.4	0
72.5	0
72.6	0
72.7	0
72.8	0
72.9	0
73	0
73.1	0
73.2	0
73.3	0
73.4	0
73.5	0
73.6	0
73.7	0
73.8	0
73.9	0
74	0
74.1	0
74.2	0
74.3	0
74.4	0
74.5	0
74.6	0
74.7	0
74.8	0
74.9	0
75	0
75.1	0
75.2	0
75.3	0
75.4	0
75.5	0
75.6	0
75.7	0
75.8	0
75.9	0
76	0
76.1	0
76.2	0
76.3	0
76.4	0
76.5	0
76.6	0
76.7	0
76.8	0
76.9	0
77	0
77.1	0
77.2	0
77.3	0
77.4	0
77.5	0
77.6	0
77.7	0
77.8	0
77.9	0
78	0
78.1	0
78.2	0
78.3	0
78.4	0
78.5	0
78.6	0
78.7	0
78.8	0
78.9	0
79	0
79.1	0
79.2	0
79.3	0
79.4	0
79.5	0
79.6	0
79.7	0
79.8	0
79.9	0
80	0
80.1	0
80.2	0
80.3	0
80.4	0
80.5	0
80.6	0
80.7	0
80.8	0
80.9	0
81	0
81.1	0
81.2	0
81.3	0
81.4	0
81.5	0
81.6	0
81.7	0
81.8	0
81.9	0
82	0
82.1	0
82.2	0
82.3	0
82.4	0
82.5	0
82.6	0
82.7	0
82.8	0
82.9	0
83	0
83.1	0
83.2	0
83.3	0
83.4	0
83.5	0
83.6	0
83.7	0
83.8	0
83.9	0
84	0
84.1	0
84.2	0
84.3	0
84.4	0
84.5	0
84.6	0
84.7	0
84.8	0
84.9	0
85	0
85.1	0
85.2	0
85.3	0
85.4	0
85.5	0
85.6	0
85.7	0
85.8	0
85.9	0
86	0
86.1	0
86.2	0
86.3	0
86.4	0
86.5	0
86.6	0
86.7	0
86.8	0
86.9	0
87	0
87.1	0
87.2	0
87.3	0
87.4	0
87.5	0
87.6	0
87.7	0
87.8	0
87.9	0
88	0
88.1	0
88.2	0
88.3	0
88.4	0
88.5	0
88.6	0
88.7	0
88.8	0
88.9	0
89	0
89.1	0
89.2	0
89.3	0
89.4	0
89.5	0
89.6	0
89.7	0
89.8	0
89.9	0
90	0
90.1	0
90.2	0
90.3	0
90.4	0
90.5	0
90.6	0
90.7	0
90.8	0
90.9	0
91	0
91.1	0
91.2	0
91.3	0
91.4	0
91.5	0
91.6	0
91.7	0
91.8	0
91.9	0
92	0
92.1	0
92.2	0
92.3	0
92.4	0
92.5	0
92.6	0
92.7	0
92.8	0
92.9	0
93	0
93.1	0
93.2	0
93.3	0
93.4	0
93.5	0
93.6	0
93.7	0
93.8	0
93.9	0
94	0
94.1	0
94.2	0
94.3	0
94.4	0
94.5	0
94.6	0
94.7	0
94.8	0
94.9	0
95	0
95.1	0
95.2	0
95.3	0
95.4	0
95.5	0
95.6	0
95.7	0
95.8	0
95.9	0
96	0
96.1	0
96.2	0
96.3	0
96.4	0
96.5	0
96.6	0
96.7	0
96.8	0
96.9	0
97	0
97.1	0
97.2	0
97.3	0
97.4	0
97.5	0
97.6	0
97.7	0
97.8	0
97.9	0
98	0
98.1	0
98.2	0
98.3	0
98.4	0
98.5	0
98.6	0
98.7	0
98.8	0
98.9	0
99	0
99.1	0
99.2	0
99.3	0
99.4	0
99.5	0
99.6	0
99.7	0
99.8	0
99.9	0
100	0
100.1	0.000666667
100.2	0.006
100.3	0.00933333
100.4	0.014
100.5	0.0193333
100.6	0.0273333
100.7	0.0306667
100.8	0.032
100.9	0.0353333
101	0.038
101.1	0.042
101.2	0.0453333
101.3	0.0533333
101.4	0.056
101.5	0.0613333
101.6	0.0633333
101.7	0.0666667
101.8	0.0713333
101.9	0.0766667
102	0.0786667
102.1	0.0833333
102.2	0.088
102.3	0.0906667
102.4	0.0946667
102.5	0.0986667
102.6	0.103333
102.7	0.108667
102.8	0.111333
102.9	0.114667
103	0.117333
103.1	0.118667
103.2	0.123333
103.3	0.130667
103.4	0.138
103.5	0.143333
103.6	0.148
103.7	0.154667
103.8	0.158667
103.9	0.161333
104	0.166
104.1	0.168
104.2	0.168667
104.3	0.173333
104.4	0.178667
104.5	0.181333
104.6	0.184
104.7	0.186667
104.8	0.191333
104.9	0.197333
105	0.202
105.1	0.205333
105.2	0.209333
105.3	0.214
105.4	0.218
105.5	0.222667
105.6	0.225333
105.7	0.226667
105.8	0.233333
105.9	0.238667
106	0.239333
106.1	0.240667
106.2	0.246
106.3	0.248
106.4	0.25
106.5	0.252667
106.6	0.257333
106.7	0.259333
106.8	0.262667
106.9	0.266667
107	0.27
107.1	0.273333
107.2	0.276667
107.3	0.281333
107.4	0.283333
107.5	0.286667
107.6	0.288
107.7	0.292
107.8	0.294667
107.9	0.296
108	0.3
108.1	0.302
108.2	0.307333
108.3	0.307333
108.4	0.312667
108.5	0.316
108.6	0.318
108.7	0.323333
108.8	0.324667
108.9	0.326
109	0.327333
109.1	0.329333
109.2	0.333333
109.3	0.336
109.4	0.339333
109.5	0.344
109.6	0.345333
109.7	0.348
109.8	0.351333
109.9	0.352
110	0.356667
110.1	0.359333
110.2	0.364667
110.3	0.366667
110.4	0.369333
110.5	0.370667
110.6	0.375333
110.7	0.378
110.8	0.38
110.9	0.384
111	0.386667
111.1	0.393333
111.2	0.397333
111.3	0.401333
111.4	0.402667
111.5	0.404
111.6	0.406
111.7	0.412667
111.8	0.414667
111.9	0.416667
112	0.418
112.1	0.42
112.2	0.422
112.3	0.421333
112.4	0.424667
112.5	0.426667
112.6	0.428667
112.7	0.430667
112.8	0.434667
112.9	0.437333
113	0.438667
113.1	0.443333
113.2	0.446
113.3	0.448
113.4	0.448
113.5	0.447333
113.6	0.448667
113.7	0.449333
113.8	0.453333
113.9	0.456
114	0.458667
114.1	0.46
114.2	0.461333
114.3	0.463333
114.4	0.464
114.5	0.468
114.6	0.469333
114.7	0.469333
114.8	0.468667
114.9	0.47
115	0.471333
115.1	0.472
115.2	0.475333
115.3	0.475333
115.4	0.474
115.5	0.474667
115.6	0.478
115.7	0.478
115.8	0.476667
115.9	0.479333
116	0.481333
116.1	0.484667
116.2	0.487333
116.3	0.49
116.4	0.492
116.5	0.492667
116.6	0.494667
116.7	0.495333
116.8	0.495333
116.9	0.498
117	0.498
117.1	0.501333
117.2	0.503333
117.3	0.504667
117.4	0.506667
117.5	0.508667
117.6	0.510667
117.7	0.511333
117.8	0.514667
117.9	0.516667
118	0.517333
118.1	0.518
118.2	0.520667
118.3	0.524
118.4	0.525333
118.5	0.528667
118.6	0.53
118.7	0.531333
118.8	0.534667
118.9	0.538
119	0.538667
119.1	0.54
119.2	0.540667
119.3	0.542
119.4	0.543333
119.5	0.546
119.6	0.55
119.7	0.551333
119.8	0.552
119.9	0.554
120	0.554
120.1	0.557333
120.2	0.557333
120.3	0.557333
120.4	0.558667
120.5	0.56
120.6	0.563333
120.7	0.563333
120.8	0.564667
120.9	0.565333
121	0.568
121.1	0.568667
121.2	0.57
121.3	0.571333
121.4	0.573333
121.5	0.573333
121.6	0.574667
121.7	0.576
121.8	0.576667
121.9	0.58
122	0.582
122.1	0.582667
122.2	0.584
122.3	0.586667
122.4	0.587333
122.5	0.588
122.6	0.589333
122.7	0.59
122.8	0.592667
122.9	0.594
123	0.595333
123.1	0.596
123.2	0.598667
123.3	0.600667
123.4	0.601333
123.5	0.601333
123.6	0.602
123.7	0.603333
123.8	0.604
123.9	0.604
124	0.603333
124.1	0.603333
124.2	0.603333
124.3	0.604667
124.4	0.604667
124.5	0.604667
124.6	0.605333
124.7	0.606
124.8	0.606
124.9	0.607333
125	0.608
125.1	0.61
125.2	0.610667
125.3	0.613333
125.4	0.614
125.5	0.616
125.6	0.616
125.7	0.62
125.8	0.622667
125.9	0.626
126	0.627333
126.1	0.629333
126.2	0.631333
126.3	0.632
126.4	0.633333
126.5	0.633333
126.6	0.631333
126.7	0.632
126.8	0.634
126.9	0.635333
127	0.634667
127.1	0.636
127.2	0.638667
127.3	0.642
127.4	0.643333
127.5	0.643333
127.6	0.644
127.7	0.645333
127.8	0.645333
127.9	0.648
128	0.648
128.1	0.649333
128.2	0.650667
128.3	0.651333
128.4	0.652667
128.5	0.652667
128.6	0.654
128.7	0.656667
128.8	0.657333
128.9	0.659333
129	0.658667
129.1	0.659333
129.2	0.658667
129.3	0.66
129.4	0.662667
129.5	0.663333
129.6	0.664
129.7	0.667333
129.8	0.669333
129.9	0.669333
130	0.67
130.1	0.670667
130.2	0.673333
130.3	0.674
130.4	0.675333
130.5	0.674667
130.6	0.675333
130.7	0.674667
130.8	0.678
130.9	0.676667
131	0.678
131.1	0.678
131.2	0.678667
131.3	0.677333
131.4	0.676667
131.5	0.678667
131.6	0.679333
131.7	0.68
131.8	0.682
131.9	0.682
132	0.682667
132.1	0.682667
132.2	0.683333
132.3	0.682
132.4	0.684667
132.5	0.686
132.6	0.686667
132.7	0.687333
132.8	0.686
132.9	0.684667
133	0.688
133.1	0.69
133.2	0.692
133.3	0.692
133.4	0.692
133.5	0.692667
133.6	0.694
133.7	0.695333
133.8	0.696
133.9	0.696
134	0.696
134.1	0.696667
134.2	0.697333
134.3	0.698
134.4	0.698667
134.5	0.7
134.6	0.700667
134.7	0.700667
134.8	0.700667
134.9	0.702
135	0.702667
135.1	0.702667
135.2	0.704
135.3	0.707333
135.4	0.709333
135.5	0.711333
135.6	0.712667
135.7	0.714
135.8	0.712667
135.9	0.713333
136	0.713333
136.1	0.714667
136.2	0.717333
136.3	0.718667
136.4	0.718667
136.5	0.719333
136.6	0.72
136.7	0.719333
136.8	0.719333
136.9	0.720667
137	0.721333
137.1	0.720667
137.2	0.721333
137.3	0.722667
137.4	0.722
137.5	0.723333
137.6	0.724
137.7	0.726
137.8	0.728
137.9	0.728667
138	0.729333
138.1	0.729333
138.2	0.728667
138.3	0.729333
138.4	0.730667
138.5	0.730667
138.6	0.731333
138.7	0.732
138.8	0.732667
138.9	0.732667
139	0.733333
139.1	0.735333
139.2	0.736
139.3	0.736667
139.4	0.737333
139.5	0.738667
139.6	0.737333
139.7	0.740667
139.8	0.737333
139.9	0.736667
140	0.737333
140.1	0.736667
140.2	0.739333
140.3	0.738667
140.4	0.738
140.5	0.737333
140.6	0.738
140.7	0.737333
140.8	0.738667
140.9	0.737333
141	0.736667
141.1	0.737333
141.2	0.739333
141.3	0.739333
141.4	0.739333
141.5	0.740667
141.6	0.741333
141.7	0.741333
141.8	0.742
141.9	0.742667
142	0.742
142.1	0.741333
142.2	0.743333
142.3	0.746667
142.4	0.747333
142.5	0.746
142.6	0.746667
142.7	0.745333
142.8	0.746
142.9	0.746667
143	0.747333
143.1	0.747333
143.2	0.746
143.3	0.748
143.4	0.748
143.5	0.748667
143.6	0.747333
143.7	0.748
143.8	0.749333
143.9	0.749333
144	0.748667
144.1	0.748667
144.2	0.75
144.3	0.750667
144.4	0.751333
144.5	0.752
144.6	0.751333
144.7	0.752667
144.8	0.754
144.9	0.756
145	0.757333
145.1	0.756
145.2	0.758
145.3	0.76
145.4	0.76
145.5	0.758667
145.6	0.76
145.7	0.76
145.8	0.759333
145.9	0.760667
146	0.761333
146.1	0.761333
146.2	0.762667
146.3	0.762
146.4	0.760667
146.5	0.760667
146.6	0.758
146.7	0.758
146.8	0.758
146.9	0.758
147	0.758
147.1	0.758
147.2	0.758
147.3	0.758667
147.4	0.758667
147.5	0.760667
147.6	0.761333
147.7	0.762
147.8	0.762
147.9	0.762
148	0.762667
148.1	0.763333
148.2	0.762667
148.3	0.762667
148.4	0.762
148.5	0.762667
148.6	0.762
148.7	0.762
148.8	0.762667
148.9	0.763333
149	0.765333
149.1	0.765333
149.2	0.766
149.3	0.767333
149.4	0.768667
149.5	0.768667
149.6	0.768667
149.7	0.77
149.8	0.769333
149.9	0.77
150	0.77
150.1	0.77
150.2	0.769333
150.3	0.77
150.4	0.77
150.5	0.770667
150.6	0.773333
150.7	0.774
150.8	0.773333
150.9	0.772667
151	0.773333
151.1	0.775333
151.2	0.775333
151.3	0.775333
151.4	0.775333
151.5	0.776667
151.6	0.777333
151.7	0.776667
151.8	0.776667
151.9	0.777333
152	0.778
152.1	0.777333
152.2	0.777333
152.3	0.778667
152.4	0.779333
152.5	0.778667
152.6	0.778667
152.7	0.778
152.8	0.775333
152.9	0.776667
153	0.778
153.1	0.779333
153.2	0.780667
153.3	0.780667
153.4	0.784
153.5	0.784667
153.6	0.782
153.7	0.782
153.8	0.782667
153.9	0.782
154	0.782
154.1	0.784
154.2	0.783333
154.3	0.784667
154.4	0.783333
154.5	0.783333
154.6	0.782
154.7	0.785333
154.8	0.785333
154.9	0.786
155	0.784
155.1	0.784
155.2	0.785333
155.3	0.784667
155.4	0.784667
155.5	0.786
155.6	0.786667
155.7	0.786
155.8	0.786667
155.9	0.786667
156	0.788667
156.1	0.79
156.2	0.790667
156.3	0.791333
156.4	0.792667
156.5	0.792
156.6	0.792667
156.7	0.792667
156.8	0.794
156.9	0.796
157	0.796667
157.1	0.795333
157.2	0.795333
157.3	0.795333
157.4	0.794
157.5	0.795333
157.6	0.796667
157.7	0.795333
157.8	0.794667
157.9	0.794
158	0.794667
158.1	0.794667
158.2	0.796667
158.3	0.798
158.4	0.797333
158.5	0.796667
158.6	0.794
158.7	0.794667
158.8	0.793333
158.9	0.791333
159	0.792
159.1	0.792
159.2	0.791333
159.3	0.791333
159.4	0.791333
159.5	0.793333
159.6	0.794667
159.7	0.795333
159.8	0.796667
159.9	0.797333
160	0.797333
160.1	0.796667
160.2	0.798
160.3	0.800667
160.4	0.803333
160.5	0.803333
160.6	0.803333
160.7	0.803333
160.8	0.801333
160.9	0.802667
161	0.802
161.1	0.803333
161.2	0.804667
161.3	0.806
161.4	0.806667
161.5	0.806
161.6	0.806
161.7	0.806667
161.8	0.809333
161.9	0.811333
162	0.812
162.1	0.811333
162.2	0.811333
162.3	0.813333
162.4	0.814
162.5	0.814
162.6	0.812667
162.7	0.813333
162.8	0.814
162.9	0.814
163	0.812667
163.1	0.812667
163.2	0.813333
163.3	0.814
163.4	0.816
163.5	0.814667
163.6	0.811333
163.7	0.812667
163.8	0.812667
163.9	0.812
164	0.809333
164.1	0.81
164.2	0.809333
164.3	0.81
164.4	0.810667
164.5	0.808667
164.6	0.808
164.7	0.808
164.8	0.807333
164.9	0.806
165	0.805333
165.1	0.806667
165.2	0.808
165.3	0.806667
165.4	0.806667
165.5	0.808
165.6	0.809333
165.7	0.808667
165.8	0.808667
165.9	0.808667
166	0.809333
166.1	0.808
166.2	0.807333
166.3	0.807333
166.4	0.808667
166.5	0.811333
166.6	0.812
166.7	0.812
166.8	0.813333
166.9	0.815333
167	0.816
167.1	0.815333
167.2	0.817333
167.3	0.817333
167.4	0.818667
167.5	0.819333
167.6	0.821333
167.7	0.821333
167.8	0.820667
167.9	0.820667
168	0.818667
168.1	0.819333
168.2	0.819333
168.3	0.82
168.4	0.820667
168.5	0.82
168.6	0.822
168.7	0.821333
168.8	0.821333
168.9	0.822
169	0.821333
169.1	0.821333
169.2	0.821333
169.3	0.820667
169.4	0.818667
169.5	0.819333
169.6	0.818667
169.7	0.82
169.8	0.820667
169.9	0.821333
170	0.822
170.1	0.822667
170.2	0.822
170.3	0.823333
170.4	0.822667
170.5	0.822
170.6	0.824
170.7	0.824
170.8	0.824
170.9	0.824
171	0.822667
171.1	0.822667
171.2	0.823333
171.3	0.822667
171.4	0.820667
171.5	0.822
171.6	0.820667
171.7	0.820667
171.8	0.82
171.9	0.821333
172	0.821333
172.1	0.820667
172.2	0.820667
172.3	0.820667
172.4	0.822
172.5	0.822667
172.6	0.824
172.7	0.824667
172.8	0.825333
172.9	0.824667
173	0.826
173.1	0.826
173.2	0.825333
173.3	0.824667
173.4	0.823333
173.5	0.823333
173.6	0.822667
173.7	0.823333
173.8	0.824
173.9	0.823333
174	0.822
174.1	0.822
174.2	0.822
174.3	0.824
174.4	0.824667
174.5	0.823333
174.6	0.824667
174.7	0.825333
174.8	0.825333
174.9	0.824
175	0.824
175.1	0.824
175.2	0.824
175.3	0.824667
175.4	0.824
175.5	0.824667
175.6	0.824
175.7	0.824667
175.8	0.823333
175.9	0.823333
176	0.821333
176.1	0.821333
176.2	0.822667
176.3	0.824
176.4	0.824667
176.5	0.825333
176.6	0.826
176.7	0.824667
176.8	0.823333
176.9	0.824
177	0.824
177.1	0.824667
177.2	0.825333
177.3	0.826
177.4	0.824
177.5	0.824
177.6	0.824667
177.7	0.822
177.8	0.822
177.9	0.820667
178	0.82
178.1	0.821333
178.2	0.822
178.3	0.822
178.4	0.82
178.5	0.821333
178.6	0.820667
178.7	0.821333
178.8	0.82
178.9	0.819333
179	0.817333
179.1	0.818667
179.2	0.818
179.3	0.82
179.4	0.82
179.5	0.82
179.6	0.818667
179.7	0.819333
179.8	0.82
179.9	0.82
180	0.818667
180.1	0.818667
180.2	0.819333
180.3	0.82
180.4	0.820667
180.5	0.820667
180.6	0.818667
180.7	0.818
180.8	0.818
180.9	0.818
181	0.818
181.1	0.817333
181.2	0.818
181.3	0.818
181.4	0.819333
181.5	0.816
181.6	0.816
181.7	0.816
181.8	0.814667
181.9	0.814667
182	0.814
182.1	0.814667
182.2	0.814
182.3	0.814667
182.4	0.815333
182.5	0.815333
182.6	0.815333
182.7	0.815333
182.8	0.815333
182.9	0.815333
183	0.816
183.1	0.816
183.2	0.816667
183.3	0.817333
183.4	0.817333
183.5	0.818
183.6	0.815333
183.7	0.814
183.8	0.814667
183.9	0.813333
184	0.814
184.1	0.815333
184.2	0.814
184.3	0.812667
184.4	0.812667
184.5	0.813333
184.6	0.814667
184.7	0.816
184.8	0.816667
184.9	0.816667
185	0.818667
185.1	0.819333
185.2	0.818667
185.3	0.819333
185.4	0.82
185.5	0.818667
185.6	0.819333
185.7	0.819333
185.8	0.818667
185.9	0.818667
186	0.817333
186.1	0.816667
186.2	0.818
186.3	0.818667
186.4	0.818667
186.5	0.82
186.6	0.819333
186.7	0.82
186.8	0.82
186.9	0.818667
187	0.818667
187.1	0.818
187.2	0.818
187.3	0.817333
187.4	0.816667
187.5	0.816667
187.6	0.816667
187.7	0.816667
187.8	0.817333
187.9	0.817333
188	0.818
188.1	0.816667
188.2	0.815333
188.3	0.814667
188.4	0.814
188.5	0.812
188.6	0.811333
188.7	0.812
188.8	0.812
188.9	0.812667
189	0.811333
189.1	0.812
189.2	0.810667
189.3	0.811333
189.4	0.811333
189.5	0.811333
189.6	0.810667
189.7	0.811333
189.8	0.812
189.9	0.812
190	0.812
190.1	0.810667
190.2	0.81
190.3	0.811333
190.4	0.808
190.5	0.808
190.6	0.808
190.7	0.806667
190.8	0.806667
190.9	0.804667
191	0.805333
191.1	0.804
191.2	0.804667
191.3	0.805333
191.4	0.806
191.5	0.805333
191.6	0.804667
191.7	0.804
191.8	0.803333
191.9	0.802667
192	0.803333
192.1	0.804
192.2	0.804667
192.3	0.805333
192.4	0.806667
192.5	0.807333
192.6	0.807333
192.7	0.808667
192.8	0.808
192.9	0.809333
193	0.81
193.1	0.810667
193.2	0.811333
193.3	0.812667
193.4	0.811333
193.5	0.811333
193.6	0.811333
193.7	0.811333
193.8	0.811333
193.9	0.81
194	0.81
194.1	0.810667
194.2	0.808667
194.3	0.808
194.4	0.807333
194.5	0.806667
194.6	0.806
194.7	0.806667
194.8	0.807333
194.9	0.807333
195	0.807333
195.1	0.807333
195.2	0.806667
195.3	0.805333
195.4	0.806
195.5	0.807333
195.6	0.807333
195.7	0.808
195.8	0.808667
195.9	0.809333
196	0.81
196.1	0.810667
196.2	0.811333
196.3	0.810667
196.4	0.809333
196.5	0.809333
196.6	0.808667
196.7	0.81
196.8	0.811333
196.9	0.811333
197	0.81
197.1	0.810667
197.2	0.812
197.3	0.811333
197.4	0.812
197.5	0.811333
197.6	0.810667
197.7	0.809333
197.8	0.81
197.9	0.810667
198	0.810667
198.1	0.810667
198.2	0.811333
198.3	0.810667
198.4	0.809333
198.5	0.811333
198.6	0.811333
198.7	0.81
198.8	0.81
198.9	0.81
199	0.810667
199.1	0.810667
199.2	0.811333
199.3	0.810667
199.4	0.808667
199.5	0.808
199.6	0.808667
199.7	0.81
199.8	0.810667
199.9	0.81
200	0.81
[truncated: 14,000 more rows]
