# Supplementary material for: Bayesian inference of kinetic schemes for ion channels by Kalman filtering
Source: eLife journal article supplement (doi:10.7554/elife.62714), 2022-05-04
Supplement: fig4-data3 [file 1_Sim_N_2000_Fluor_MW.xlsx]

## Sheet: Tabelle1
0.1	0
0.2	0
0.3	0
0.4	0
0.5	0
0.6	0
0.7	0
0.8	0
0.9	0
1	0
1.1	0
1.2	0
1.3	0
1.4	0
1.5	0
1.6	0
1.7	0
1.8	0
1.9	0
2	0
2.1	0
2.2	0
2.3	0
2.4	0
2.5	0
2.6	0
2.7	0
2.8	0
2.9	0
3	0
3.1	0
3.2	0
3.3	0
3.4	0
3.5	0
3.6	0
3.7	0
3.8	0
3.9	0
4	0
4.1	0
4.2	0
4.3	0
4.4	0
4.5	0
4.6	0
4.7	0
4.8	0
4.9	0
5	0
5.1	0
5.2	0
5.3	0
5.4	0
5.5	0
5.6	0
5.7	0
5.8	0
5.9	0
6	0
6.1	0
6.2	0
6.3	0
6.4	0
6.5	0
6.6	0
6.7	0
6.8	0
6.9	0
7	0
7.1	0
7.2	0
7.3	0
7.4	0
7.5	0
7.6	0
7.7	0
7.8	0
7.9	0
8	0
8.1	0
8.2	0
8.3	0
8.4	0
8.5	0
8.6	0
8.7	0
8.8	0
8.9	0
9	0
9.1	0
9.2	0
9.3	0
9.4	0
9.5	0
9.6	0
9.7	0
9.8	0
9.9	0
10	0
10.1	0
10.2	0
10.3	0
10.4	0
10.5	0
10.6	0
10.7	0
10.8	0
10.9	0
11	0
11.1	0
11.2	0
11.3	0
11.4	0
11.5	0
11.6	0
11.7	0
11.8	0
11.9	0
12	0
12.1	0
12.2	0
12.3	0
12.4	0
12.5	0
12.6	0
12.7	0
12.8	0
12.9	0
13	0
13.1	0
13.2	0
13.3	0
13.4	0
13.5	0
13.6	0
13.7	0
13.8	0
13.9	0
14	0
14.1	0
14.2	0
14.3	0
14.4	0
14.5	0
14.6	0
14.7	0
14.8	0
14.9	0
15	0
15.1	0
15.2	0
15.3	0
15.4	0
15.5	0
15.6	0
15.7	0
15.8	0
15.9	0
16	0
16.1	0
16.2	0
16.3	0
16.4	0
16.5	0
16.6	0
16.7	0
16.8	0
16.9	0
17	0
17.1	0
17.2	0
17.3	0
17.4	0
17.5	0
17.6	0
17.7	0
17.8	0
17.9	0
18	0
18.1	0
18.2	0
18.3	0
18.4	0
18.5	0
18.6	0
18.7	0
18.8	0
18.9	0
19	0
19.1	0
19.2	0
19.3	0
19.4	0
19.5	0
19.6	0
19.7	0
19.8	0
19.9	0
20	0
20.1	0
20.2	0
20.3	0
20.4	0
20.5	0
20.6	0
20.7	0
20.8	0
20.9	0
21	0
21.1	0
21.2	0
21.3	0
21.4	0
21.5	0
21.6	0
21.7	0
21.8	0
21.9	0
22	0
22.1	0
22.2	0
22.3	0
22.4	0
22.5	0
22.6	0
22.7	0
22.8	0
22.9	0
23	0
23.1	0
23.2	0
23.3	0
23.4	0
23.5	0
23.6	0
23.7	0
23.8	0
23.9	0
24	0
24.1	0
24.2	0
24.3	0
24.4	0
24.5	0
24.6	0
24.7	0
24.8	0
24.9	0
25	0
25.1	0
25.2	0
25.3	0
25.4	0
25.5	0
25.6	0
25.7	0
25.8	0
25.9	0
26	0
26.1	0
26.2	0
26.3	0
26.4	0
26.5	0
26.6	0
26.7	0
26.8	0
26.9	0
27	0
27.1	0
27.2	0
27.3	0
27.4	0
27.5	0
27.6	0
27.7	0
27.8	0
27.9	0
28	0
28.1	0
28.2	0
28.3	0
28.4	0
28.5	0
28.6	0
28.7	0
28.8	0
28.9	0
29	0
29.1	0
29.2	0
29.3	0
29.4	0
29.5	0
29.6	0
29.7	0
29.8	0
29.9	0
30	0
30.1	0
30.2	0
30.3	0
30.4	0
30.5	0
30.6	0
30.7	0
30.8	0
30.9	0
31	0
31.1	0
31.2	0
31.3	0
31.4	0
31.5	0
31.6	0
31.7	0
31.8	0
31.9	0
32	0
32.1	0
32.2	0
32.3	0
32.4	0
32.5	0
32.6	0
32.7	0
32.8	0
32.9	0
33	0
33.1	0
33.2	0
33.3	0
33.4	0
33.5	0
33.6	0
33.7	0
33.8	0
33.9	0
34	0
34.1	0
34.2	0
34.3	0
34.4	0
34.5	0
34.6	0
34.7	0
34.8	0
34.9	0
35	0
35.1	0
35.2	0
35.3	0
35.4	0
35.5	0
35.6	0
35.7	0
35.8	0
35.9	0
36	0
36.1	0
36.2	0
36.3	0
36.4	0
36.5	0
36.6	0
36.7	0
36.8	0
36.9	0
37	0
37.1	0
37.2	0
37.3	0
37.4	0
37.5	0
37.6	0
37.7	0
37.8	0
37.9	0
38	0
38.1	0
38.2	0
38.3	0
38.4	0
38.5	0
38.6	0
38.7	0
38.8	0
38.9	0
39	0
39.1	0
39.2	0
39.3	0
39.4	0
39.5	0
39.6	0
39.7	0
39.8	0
39.9	0
40	0
40.1	0
40.2	0
40.3	0
40.4	0
40.5	0
40.6	0
40.7	0
40.8	0
40.9	0
41	0
41.1	0
41.2	0
41.3	0
41.4	0
41.5	0
41.6	0
41.7	0
41.8	0
41.9	0
42	0
42.1	0
42.2	0
42.3	0
42.4	0
42.5	0
42.6	0
42.7	0
42.8	0
42.9	0
43	0
43.1	0
43.2	0
43.3	0
43.4	0
43.5	0
43.6	0
43.7	0
43.8	0
43.9	0
44	0
44.1	0
44.2	0
44.3	0
44.4	0
44.5	0
44.6	0
44.7	0
44.8	0
44.9	0
45	0
45.1	0
45.2	0
45.3	0
45.4	0
45.5	0
45.6	0
45.7	0
45.8	0
45.9	0
46	0
46.1	0
46.2	0
46.3	0
46.4	0
46.5	0
46.6	0
46.7	0
46.8	0
46.9	0
47	0
47.1	0
47.2	0
47.3	0
47.4	0
47.5	0
47.6	0
47.7	0
47.8	0
47.9	0
48	0
48.1	0
48.2	0
48.3	0
48.4	0
48.5	0
48.6	0
48.7	0
48.8	0
48.9	0
49	0
49.1	0
49.2	0
49.3	0
49.4	0
49.5	0
49.6	0
49.7	0
49.8	0
49.9	0
50	0
50.1	0
50.2	0
50.3	0
50.4	0
50.5	0
50.6	0
50.7	0
50.8	0
50.9	0
51	0
51.1	0
51.2	0
51.3	0
51.4	0
51.5	0
51.6	0
51.7	0
51.8	0
51.9	0
52	0
52.1	0
52.2	0
52.3	0
52.4	0
52.5	0
52.6	0
52.7	0
52.8	0
52.9	0
53	0
53.1	0
53.2	0
53.3	0
53.4	0
53.5	0
53.6	0
53.7	0
53.8	0
53.9	0
54	0
54.1	0
54.2	0
54.3	0
54.4	0
54.5	0
54.6	0
54.7	0
54.8	0
54.9	0
55	0
55.1	0
55.2	0
55.3	0
55.4	0
55.5	0
55.6	0
55.7	0
55.8	0
55.9	0
56	0
56.1	0
56.2	0
56.3	0
56.4	0
56.5	0
56.6	0
56.7	0
56.8	0
56.9	0
57	0
57.1	0
57.2	0
57.3	0
57.4	0
57.5	0
57.6	0
57.7	0
57.8	0
57.9	0
58	0
58.1	0
58.2	0
58.3	0
58.4	0
58.5	0
58.6	0
58.7	0
58.8	0
58.9	0
59	0
59.1	0
59.2	0
59.3	0
59.4	0
59.5	0
59.6	0
59.7	0
59.8	0
59.9	0
60	0
60.1	0
60.2	0
60.3	0
60.4	0
60.5	0
60.6	0
60.7	0
60.8	0
60.9	0
61	0
61.1	0
61.2	0
61.3	0
61.4	0
61.5	0
61.6	0
61.7	0
61.8	0
61.9	0
62	0
62.1	0
62.2	0
62.3	0
62.4	0
62.5	0
62.6	0
62.7	0
62.8	0
62.9	0
63	0
63.1	0
63.2	0
63.3	0
63.4	0
63.5	0
63.6	0
63.7	0
63.8	0
63.9	0
64	0
64.1	0
64.2	0
64.3	0
64.4	0
64.5	0
64.6	0
64.7	0
64.8	0
64.9	0
65	0
65.1	0
65.2	0
65.3	0
65.4	0
65.5	0
65.6	0
65.7	0
65.8	0
65.9	0
66	0
66.1	0
66.2	0
66.3	0
66.4	0
66.5	0
66.6	0
66.7	0
66.8	0
66.9	0
67	0
67.1	0
67.2	0
67.3	0
67.4	0
67.5	0
67.6	0
67.7	0
67.8	0
67.9	0
68	0
68.1	0
68.2	0
68.3	0
68.4	0
68.5	0
68.6	0
68.7	0
68.8	0
68.9	0
69	0
69.1	0
69.2	0
69.3	0
69.4	0
69.5	0
69.6	0
69.7	0
69.8	0
69.9	0
70	0
70.1	0
70.2	0
70.3	0
70.4	0
70.5	0
70.6	0
70.7	0
70.8	0
70.9	0
71	0
71.1	0
71.2	0
71.3	0
71.4	0
71.5	0
71.6	0
71.7	0
71.8	0
71.9	0
72	0
72.1	0
72.2	0
72.3	0
72.4	0
72.5	0
72.6	0
72.7	0
72.8	0
72.9	0
73	0
73.1	0
73.2	0
73.3	0
73.4	0
73.5	0
73.6	0
73.7	0
73.8	0
73.9	0
74	0
74.1	0
74.2	0
74.3	0
74.4	0
74.5	0
74.6	0
74.7	0
74.8	0
74.9	0
75	0
75.1	0
75.2	0
75.3	0
75.4	0
75.5	0
75.6	0
75.7	0
75.8	0
75.9	0
76	0
76.1	0
76.2	0
76.3	0
76.4	0
76.5	0
76.6	0
76.7	0
76.8	0
76.9	0
77	0
77.1	0
77.2	0
77.3	0
77.4	0
77.5	0
77.6	0
77.7	0
77.8	0
77.9	0
78	0
78.1	0
78.2	0
78.3	0
78.4	0
78.5	0
78.6	0
78.7	0
78.8	0
78.9	0
79	0
79.1	0
79.2	0
79.3	0
79.4	0
79.5	0
79.6	0
79.7	0
79.8	0
79.9	0
80	0
80.1	0
80.2	0
80.3	0
80.4	0
80.5	0
80.6	0
80.7	0
80.8	0
80.9	0
81	0
81.1	0
81.2	0
81.3	0
81.4	0
81.5	0
81.6	0
81.7	0
81.8	0
81.9	0
82	0
82.1	0
82.2	0
82.3	0
82.4	0
82.5	0
82.6	0
82.7	0
82.8	0
82.9	0
83	0
83.1	0
83.2	0
83.3	0
83.4	0
83.5	0
83.6	0
83.7	0
83.8	0
83.9	0
84	0
84.1	0
84.2	0
84.3	0
84.4	0
84.5	0
84.6	0
84.7	0
84.8	0
84.9	0
85	0
85.1	0
85.2	0
85.3	0
85.4	0
85.5	0
85.6	0
85.7	0
85.8	0
85.9	0
86	0
86.1	0
86.2	0
86.3	0
86.4	0
86.5	0
86.6	0
86.7	0
86.8	0
86.9	0
87	0
87.1	0
87.2	0
87.3	0
87.4	0
87.5	0
87.6	0
87.7	0
87.8	0
87.9	0
88	0
88.1	0
88.2	0
88.3	0
88.4	0
88.5	0
88.6	0
88.7	0
88.8	0
88.9	0
89	0
89.1	0
89.2	0
89.3	0
89.4	0
89.5	0
89.6	0
89.7	0
89.8	0
89.9	0
90	0
90.1	0
90.2	0
90.3	0
90.4	0
90.5	0
90.6	0
90.7	0
90.8	0
90.9	0
91	0
91.1	0
91.2	0
91.3	0
91.4	0
91.5	0
91.6	0
91.7	0
91.8	0
91.9	0
92	0
92.1	0
92.2	0
92.3	0
92.4	0
92.5	0
92.6	0
92.7	0
92.8	0
92.9	0
93	0
93.1	0
93.2	0
93.3	0
93.4	0
93.5	0
93.6	0
93.7	0
93.8	0
93.9	0
94	0
94.1	0
94.2	0
94.3	0
94.4	0
94.5	0
94.6	0
94.7	0
94.8	0
94.9	0
95	0
95.1	0
95.2	0
95.3	0
95.4	0
95.5	0
95.6	0
95.7	0
95.8	0
95.9	0
96	0
96.1	0
96.2	0
96.3	0
96.4	0
96.5	0
96.6	0
96.7	0
96.8	0
96.9	0
97	0
97.1	0
97.2	0
97.3	0
97.4	0
97.5	0
97.6	0
97.7	0
97.8	0
97.9	0
98	0
98.1	0
98.2	0
98.3	0
98.4	0
98.5	0
98.6	0
98.7	0
98.8	0
98.9	0
99	0
99.1	0
99.2	0
99.3	0
99.4	0
99.5	0
99.6	0
99.7	0
99.8	0
99.9	0
100	0
100.1	0.73725
100.2	0.89275
100.3	0.9465
100.4	0.9695
100.5	0.97775
100.6	0.975
100.7	0.9725
100.8	0.9725
100.9	0.97875
101	0.97825
101.1	0.97725
101.2	0.978
101.3	0.9785
101.4	0.976
101.5	0.97675
101.6	0.97625
101.7	0.979
101.8	0.98075
101.9	0.979
102	0.97875
102.1	0.975
102.2	0.974
102.3	0.977
102.4	0.97725
102.5	0.97625
102.6	0.979
102.7	0.98
102.8	0.97675
102.9	0.977
103	0.97675
103.1	0.974
103.2	0.97475
103.3	0.97875
103.4	0.97425
103.5	0.9775
103.6	0.97825
103.7	0.97525
103.8	0.97675
103.9	0.98025
104	0.9765
104.1	0.9745
104.2	0.978
104.3	0.97875
104.4	0.98025
104.5	0.982
104.6	0.98425
104.7	0.98075
104.8	0.9805
104.9	0.98
105	0.98125
105.1	0.982
105.2	0.98075
105.3	0.9795
105.4	0.97725
105.5	0.977
105.6	0.98075
105.7	0.98375
105.8	0.982
105.9	0.98075
106	0.98075
106.1	0.98
106.2	0.97975
106.3	0.9815
106.4	0.98175
106.5	0.98175
106.6	0.9805
106.7	0.98025
106.8	0.98025
106.9	0.98
107	0.98025
107.1	0.98125
107.2	0.981
107.3	0.9835
107.4	0.98275
107.5	0.98475
107.6	0.98525
107.7	0.9845
107.8	0.982
107.9	0.985
108	0.98425
108.1	0.9825
108.2	0.985
108.3	0.988
108.4	0.98625
108.5	0.985
108.6	0.98175
108.7	0.98425
108.8	0.98375
108.9	0.98475
109	0.98425
109.1	0.98175
109.2	0.984
109.3	0.98375
109.4	0.98475
109.5	0.9865
109.6	0.9835
109.7	0.98325
109.8	0.98525
109.9	0.98625
110	0.9855
110.1	0.9845
110.2	0.985
110.3	0.98525
110.4	0.98825
110.5	0.98375
110.6	0.98575
110.7	0.98475
110.8	0.9825
110.9	0.98375
111	0.98375
111.1	0.9825
111.2	0.98525
111.3	0.98575
111.4	0.9835
111.5	0.98475
111.6	0.984
111.7	0.98375
111.8	0.983
111.9	0.98125
112	0.9865
112.1	0.9845
112.2	0.9845
112.3	0.98675
112.4	0.98625
112.5	0.988
112.6	0.98925
112.7	0.9865
112.8	0.98675
112.9	0.9845
113	0.9835
113.1	0.986
113.2	0.9845
113.3	0.984
113.4	0.9885
113.5	0.98775
113.6	0.983
113.7	0.98875
113.8	0.98575
113.9	0.98925
114	0.98625
114.1	0.98825
114.2	0.98575
114.3	0.98175
114.4	0.9855
114.5	0.98725
114.6	0.986
114.7	0.9865
114.8	0.98775
114.9	0.98725
115	0.98875
115.1	0.98625
115.2	0.98625
115.3	0.98975
115.4	0.989
115.5	0.98525
115.6	0.98875
115.7	0.989
115.8	0.9855
115.9	0.98625
116	0.988
116.1	0.9875
116.2	0.98525
116.3	0.9865
116.4	0.98675
116.5	0.98625
116.6	0.982
116.7	0.98575
116.8	0.987
116.9	0.98625
117	0.98775
117.1	0.987
117.2	0.9885
117.3	0.98525
117.4	0.988
117.5	0.9865
117.6	0.9875
117.7	0.987
117.8	0.986
117.9	0.9885
118	0.98675
118.1	0.98825
118.2	0.98875
118.3	0.9855
118.4	0.98725
118.5	0.9885
118.6	0.988
118.7	0.98875
118.8	0.98775
118.9	0.98975
119	0.99075
119.1	0.991
119.2	0.986
119.3	0.98725
119.4	0.987
119.5	0.9905
119.6	0.987
119.7	0.99
119.8	0.9885
119.9	0.99075
120	0.99125
120.1	0.99125
120.2	0.99
120.3	0.9885
120.4	0.989
120.5	0.9885
120.6	0.98925
120.7	0.9905
120.8	0.98975
120.9	0.99
121	0.988
121.1	0.98975
121.2	0.988
121.3	0.99025
121.4	0.98875
121.5	0.9905
121.6	0.98925
121.7	0.9895
121.8	0.991
121.9	0.991
122	0.99225
122.1	0.9895
122.2	0.98825
122.3	0.989
122.4	0.99125
122.5	0.99125
122.6	0.99075
122.7	0.993
122.8	0.99125
122.9	0.99175
123	0.99125
123.1	0.9895
123.2	0.98875
123.3	0.98975
123.4	0.99075
123.5	0.989
123.6	0.9875
123.7	0.99025
123.8	0.992
123.9	0.99125
124	0.98925
124.1	0.99125
124.2	0.99125
124.3	0.98975
124.4	0.99175
124.5	0.99025
124.6	0.98975
124.7	0.991
124.8	0.99075
124.9	0.99175
125	0.99175
125.1	0.991
125.2	0.993
125.3	0.98975
125.4	0.99
125.5	0.98875
125.6	0.98925
125.7	0.9915
125.8	0.991
125.9	0.99225
126	0.99175
126.1	0.99125
126.2	0.99375
126.3	0.993
126.4	0.99525
126.5	0.9935
126.6	0.99175
126.7	0.99175
126.8	0.994
126.9	0.99075
127	0.9925
127.1	0.9925
127.2	0.99175
127.3	0.992
127.4	0.9905
127.5	0.99025
127.6	0.99225
127.7	0.99325
127.8	0.99175
127.9	0.99125
128	0.99175
128.1	0.993
128.2	0.99225
128.3	0.99325
128.4	0.9945
128.5	0.99225
128.6	0.99175
128.7	0.99325
128.8	0.991
128.9	0.99
129	0.98925
129.1	0.99025
129.2	0.993
129.3	0.99125
129.4	0.99325
129.5	0.99175
129.6	0.99125
129.7	0.991
129.8	0.991
129.9	0.99325
130	0.99325
130.1	0.99275
130.2	0.99175
130.3	0.9925
130.4	0.9935
130.5	0.992
130.6	0.99075
130.7	0.994
130.8	0.99375
130.9	0.9945
131	0.9945
131.1	0.992
131.2	0.9925
131.3	0.99125
131.4	0.9925
131.5	0.99375
131.6	0.995
131.7	0.99325
131.8	0.9935
131.9	0.994
132	0.99
132.1	0.992
132.2	0.99325
132.3	0.99275
132.4	0.99225
132.5	0.9945
132.6	0.99325
132.7	0.9955
132.8	0.993
132.9	0.99425
133	0.99275
133.1	0.99225
133.2	0.99275
133.3	0.995
133.4	0.994
133.5	0.994
133.6	0.99225
133.7	0.9935
133.8	0.99425
133.9	0.994
134	0.9915
134.1	0.9905
134.2	0.99275
134.3	0.99275
134.4	0.9915
134.5	0.991
134.6	0.9915
134.7	0.99275
134.8	0.994
134.9	0.9945
135	0.99525
135.1	0.9945
135.2	0.99525
135.3	0.994
135.4	0.992
135.5	0.994
135.6	0.994
135.7	0.9955
135.8	0.9925
135.9	0.99325
136	0.994
136.1	0.99375
136.2	0.9935
136.3	0.99375
136.4	0.99425
136.5	0.9935
136.6	0.994
136.7	0.9935
136.8	0.995
136.9	0.99325
137	0.994
137.1	0.994
137.2	0.9935
137.3	0.99275
137.4	0.99425
137.5	0.993
137.6	0.99275
137.7	0.99275
137.8	0.99275
137.9	0.993
138	0.994
138.1	0.99575
138.2	0.99475
138.3	0.99525
138.4	0.992
138.5	0.993
138.6	0.99175
138.7	0.99675
138.8	0.9935
138.9	0.9935
139	0.994
139.1	0.99525
139.2	0.9955
139.3	0.9945
139.4	0.99425
139.5	0.9935
139.6	0.993
139.7	0.9935
139.8	0.994
139.9	0.994
140	0.99525
140.1	0.993
140.2	0.994
140.3	0.9925
140.4	0.99525
140.5	0.995
140.6	0.99375
140.7	0.99425
140.8	0.9935
140.9	0.99325
141	0.9925
141.1	0.993
141.2	0.99475
141.3	0.99425
141.4	0.99425
141.5	0.9945
141.6	0.996
141.7	0.99525
141.8	0.994
141.9	0.99225
142	0.9925
142.1	0.9935
142.2	0.99425
142.3	0.9935
142.4	0.99425
142.5	0.993
142.6	0.99525
142.7	0.99675
142.8	0.9975
142.9	0.996
143	0.99475
143.1	0.9955
143.2	0.99575
143.3	0.9955
143.4	0.99525
143.5	0.9945
143.6	0.99425
143.7	0.995
143.8	0.9945
143.9	0.99425
144	0.99375
144.1	0.994
144.2	0.996
144.3	0.995
144.4	0.99525
144.5	0.99325
144.6	0.994
144.7	0.993
144.8	0.99525
144.9	0.9935
145	0.99225
145.1	0.9945
145.2	0.995
145.3	0.9955
145.4	0.99525
145.5	0.9965
145.6	0.994
145.7	0.99375
145.8	0.99475
145.9	0.993
146	0.993
146.1	0.994
146.2	0.99525
146.3	0.99575
146.4	0.9955
146.5	0.99425
146.6	0.995
146.7	0.99425
146.8	0.9945
146.9	0.99525
147	0.996
147.1	0.996
147.2	0.994
147.3	0.99425
147.4	0.996
147.5	0.996
147.6	0.9955
147.7	0.99675
147.8	0.99575
147.9	0.994
148	0.9925
148.1	0.992
148.2	0.9925
148.3	0.99325
148.4	0.99475
148.5	0.995
148.6	0.9955
148.7	0.9945
148.8	0.99525
148.9	0.996
149	0.9955
149.1	0.995
149.2	0.9935
149.3	0.994
149.4	0.99475
149.5	0.996
149.6	0.99525
149.7	0.9955
149.8	0.99475
149.9	0.99775
150	0.997
150.1	0.99375
150.2	0.99425
150.3	0.995
150.4	0.995
150.5	0.99425
150.6	0.99425
150.7	0.99425
150.8	0.99575
150.9	0.995
151	0.9935
151.1	0.994
151.2	0.997
151.3	0.99475
151.4	0.99525
151.5	0.99525
151.6	0.998
151.7	0.99575
151.8	0.99675
151.9	0.9945
152	0.99325
152.1	0.9945
152.2	0.9945
152.3	0.99625
152.4	0.99575
152.5	0.9955
152.6	0.995
152.7	0.99225
152.8	0.994
152.9	0.99475
153	0.99475
153.1	0.997
153.2	0.99425
153.3	0.997
153.4	0.9975
153.5	0.995
153.6	0.9945
153.7	0.9955
153.8	0.996
153.9	0.99625
154	0.99625
154.1	0.9965
154.2	0.994
154.3	0.9955
154.4	0.996
154.5	0.99775
154.6	0.9965
154.7	0.996
154.8	0.9965
154.9	0.99575
155	0.994
155.1	0.99475
155.2	0.99725
155.3	0.99525
155.4	0.99475
155.5	0.99425
155.6	0.99575
155.7	0.99525
155.8	0.996
155.9	0.99575
156	0.99625
156.1	0.995
156.2	0.99675
156.3	0.996
156.4	0.9965
156.5	0.99525
156.6	0.995
156.7	0.996
156.8	0.99475
156.9	0.99525
157	0.99425
157.1	0.99425
157.2	0.99575
157.3	0.99625
157.4	0.995
157.5	0.99325
157.6	0.99575
157.7	0.99425
157.8	0.99525
157.9	0.9925
158	0.9935
158.1	0.994
158.2	0.99625
158.3	0.9955
158.4	0.9945
158.5	0.9945
158.6	0.99575
158.7	0.993
158.8	0.994
158.9	0.99425
159	0.99625
159.1	0.995
159.2	0.99425
159.3	0.996
159.4	0.995
159.5	0.99375
159.6	0.99425
159.7	0.994
159.8	0.99575
159.9	0.994
160	0.995
160.1	0.99525
160.2	0.99225
160.3	0.9945
160.4	0.99625
160.5	0.9955
160.6	0.9965
160.7	0.99575
160.8	0.99575
160.9	0.9955
161	0.99575
161.1	0.996
161.2	0.99325
161.3	0.99675
161.4	0.9955
161.5	0.99625
161.6	0.99375
161.7	0.99425
161.8	0.9945
161.9	0.995
162	0.9955
162.1	0.9955
162.2	0.99275
162.3	0.995
162.4	0.9955
162.5	0.99425
162.6	0.995
162.7	0.99625
162.8	0.9965
162.9	0.99525
163	0.99425
163.1	0.99525
163.2	0.99425
163.3	0.99675
163.4	0.99625
163.5	0.9945
163.6	0.9945
163.7	0.9955
163.8	0.99575
163.9	0.99475
164	0.99475
164.1	0.99675
164.2	0.99575
164.3	0.995
164.4	0.993
164.5	0.99375
164.6	0.9935
164.7	0.99375
164.8	0.99425
164.9	0.9955
165	0.99525
165.1	0.9955
165.2	0.99625
165.3	0.996
165.4	0.9965
165.5	0.9965
165.6	0.9965
165.7	0.99575
165.8	0.99575
165.9	0.9965
166	0.99525
166.1	0.99725
166.2	0.99675
166.3	0.9965
166.4	0.9935
166.5	0.99325
166.6	0.99275
166.7	0.99325
166.8	0.99525
166.9	0.9955
167	0.99575
167.1	0.99625
167.2	0.9945
167.3	0.99475
167.4	0.9955
167.5	0.99675
167.6	0.996
167.7	0.995
167.8	0.99275
167.9	0.994
168	0.9955
168.1	0.995
168.2	0.99575
168.3	0.996
168.4	0.99625
168.5	0.995
168.6	0.99525
168.7	0.99675
168.8	0.99425
168.9	0.99475
169	0.99525
169.1	0.99375
169.2	0.99575
169.3	0.9945
169.4	0.9955
169.5	0.99675
169.6	0.9965
169.7	0.99675
169.8	0.99725
169.9	0.99625
170	0.9945
170.1	0.99675
170.2	0.99625
170.3	0.9975
170.4	0.99625
170.5	0.99525
170.6	0.99625
170.7	0.995
170.8	0.9935
170.9	0.9955
171	0.9965
171.1	0.99475
171.2	0.9935
171.3	0.99525
171.4	0.99575
171.5	0.99425
171.6	0.995
171.7	0.9955
171.8	0.99675
171.9	0.99625
172	0.996
172.1	0.99375
172.2	0.99625
172.3	0.9965
172.4	0.996
172.5	0.99675
172.6	0.99425
172.7	0.994
172.8	0.99675
172.9	0.994
173	0.99375
173.1	0.99475
173.2	0.99525
173.3	0.99525
173.4	0.99675
173.5	0.996
173.6	0.9945
173.7	0.994
173.8	0.996
173.9	0.99525
174	0.994
174.1	0.995
174.2	0.996
174.3	0.9965
174.4	0.99625
174.5	0.9965
174.6	0.99525
174.7	0.99475
174.8	0.99375
174.9	0.994
175	0.99425
175.1	0.99525
175.2	0.99475
175.3	0.994
175.4	0.9955
175.5	0.99675
175.6	0.99775
175.7	0.99675
175.8	0.9945
175.9	0.99475
176	0.99475
176.1	0.9945
176.2	0.99475
176.3	0.99475
176.4	0.99425
176.5	0.996
176.6	0.996
176.7	0.99625
176.8	0.9955
176.9	0.9955
177	0.9945
177.1	0.9955
177.2	0.99575
177.3	0.997
177.4	0.99725
177.5	0.995
177.6	0.995
177.7	0.99625
177.8	0.9945
177.9	0.9965
178	0.9965
178.1	0.9955
178.2	0.99575
178.3	0.99525
178.4	0.99425
178.5	0.996
178.6	0.99375
178.7	0.994
178.8	0.99475
178.9	0.99275
179	0.9955
179.1	0.99575
179.2	0.9975
179.3	0.99625
179.4	0.9955
179.5	0.996
179.6	0.995
179.7	0.99625
179.8	0.995
179.9	0.9965
180	0.996
180.1	0.9975
180.2	0.997
180.3	0.9955
180.4	0.995
180.5	0.9965
180.6	0.99575
180.7	0.994
180.8	0.9955
180.9	0.99625
181	0.99425
181.1	0.99525
181.2	0.9945
181.3	0.9945
181.4	0.99425
181.5	0.99575
181.6	0.9955
181.7	0.99675
181.8	0.9965
181.9	0.99675
182	0.996
182.1	0.9945
182.2	0.9945
182.3	0.9965
182.4	0.9965
182.5	0.99675
182.6	0.99725
182.7	0.996
182.8	0.995
182.9	0.99525
183	0.99325
183.1	0.996
183.2	0.99575
183.3	0.9955
183.4	0.99425
183.5	0.99475
183.6	0.9955
183.7	0.9955
183.8	0.9955
183.9	0.9935
184	0.9945
184.1	0.99325
184.2	0.99375
184.3	0.99625
184.4	0.99525
184.5	0.996
184.6	0.99725
184.7	0.998
184.8	0.99575
184.9	0.99375
185	0.99525
185.1	0.99625
185.2	0.99625
185.3	0.99475
185.4	0.99675
185.5	0.9955
185.6	0.99725
185.7	0.996
185.8	0.99775
185.9	0.994
186	0.995
186.1	0.9945
186.2	0.995
186.3	0.9975
186.4	0.99775
186.5	0.99575
186.6	0.99625
186.7	0.99675
186.8	0.995
186.9	0.995
187	0.99375
187.1	0.996
187.2	0.99675
187.3	0.99575
187.4	0.9965
187.5	0.99525
187.6	0.996
187.7	0.996
187.8	0.9975
187.9	0.99675
188	0.99675
188.1	0.995
188.2	0.99575
188.3	0.99525
188.4	0.99575
188.5	0.9945
188.6	0.9955
188.7	0.9945
188.8	0.9955
188.9	0.99575
189	0.99675
189.1	0.99425
189.2	0.995
189.3	0.995
189.4	0.9945
189.5	0.99575
189.6	0.9965
189.7	0.99625
189.8	0.995
189.9	0.9965
190	0.99675
190.1	0.99575
190.2	0.996
190.3	0.9955
190.4	0.9945
190.5	0.995
190.6	0.99425
190.7	0.9955
190.8	0.99525
190.9	0.99675
191	0.99525
191.1	0.99625
191.2	0.996
191.3	0.99625
191.4	0.99575
191.5	0.99475
191.6	0.99325
191.7	0.99425
191.8	0.995
191.9	0.99475
192	0.99525
192.1	0.99475
192.2	0.995
192.3	0.995
192.4	0.99625
192.5	0.9945
192.6	0.99425
192.7	0.994
192.8	0.995
192.9	0.99575
193	0.99675
193.1	0.996
193.2	0.99525
193.3	0.99575
193.4	0.996
193.5	0.99475
193.6	0.99525
193.7	0.99475
193.8	0.99525
193.9	0.99525
194	0.99525
194.1	0.99475
194.2	0.99625
194.3	0.99525
194.4	0.996
194.5	0.99625
194.6	0.99425
194.7	0.996
194.8	0.9955
194.9	0.99475
195	0.995
195.1	0.995
195.2	0.995
195.3	0.99525
195.4	0.995
195.5	0.994
195.6	0.99525
195.7	0.9955
195.8	0.997
195.9	0.99525
196	0.995
196.1	0.995
196.2	0.99625
196.3	0.996
196.4	0.99775
196.5	0.99675
196.6	0.9955
196.7	0.995
196.8	0.9945
196.9	0.99425
197	0.996
197.1	0.9965
197.2	0.9945
197.3	0.995
197.4	0.99575
197.5	0.99575
197.6	0.994
197.7	0.9935
197.8	0.99425
197.9	0.99625
198	0.99475
198.1	0.99425
198.2	0.99675
198.3	0.995
198.4	0.99525
198.5	0.9965
198.6	0.9965
198.7	0.994
198.8	0.99625
198.9	0.996
199	0.9955
199.1	0.9955
199.2	0.99575
199.3	0.996
199.4	0.99575
199.5	0.99475
199.6	0.995
199.7	0.994
199.8	0.994
199.9	0.99475
200	0.9965
[truncated: 14,000 more rows]
