# Supplementary material for: Bayesian inference of kinetic schemes for ion channels by Kalman filtering
Source: eLife journal article supplement (doi:10.7554/elife.62714), 2022-05-04
Supplement: fig4-data3 [file 1_Sim_N_2000_Strom_MW.xlsx]

## Sheet: Tabelle1
0.1	0
0.2	0
0.3	0
0.4	0
0.5	0
0.6	0
0.7	0
0.8	0
0.9	0
1	0
1.1	0
1.2	0
1.3	0
1.4	0
1.5	0
1.6	0
1.7	0
1.8	0
1.9	0
2	0
2.1	0
2.2	0
2.3	0
2.4	0
2.5	0
2.6	0
2.7	0
2.8	0
2.9	0
3	0
3.1	0
3.2	0
3.3	0
3.4	0
3.5	0
3.6	0
3.7	0
3.8	0
3.9	0
4	0
4.1	0
4.2	0
4.3	0
4.4	0
4.5	0
4.6	0
4.7	0
4.8	0
4.9	0
5	0
5.1	0
5.2	0
5.3	0
5.4	0
5.5	0
5.6	0
5.7	0
5.8	0
5.9	0
6	0
6.1	0
6.2	0
6.3	0
6.4	0
6.5	0
6.6	0
6.7	0
6.8	0
6.9	0
7	0
7.1	0
7.2	0
7.3	0
7.4	0
7.5	0
7.6	0
7.7	0
7.8	0
7.9	0
8	0
8.1	0
8.2	0
8.3	0
8.4	0
8.5	0
8.6	0
8.7	0
8.8	0
8.9	0
9	0
9.1	0
9.2	0
9.3	0
9.4	0
9.5	0
9.6	0
9.7	0
9.8	0
9.9	0
10	0
10.1	0
10.2	0
10.3	0
10.4	0
10.5	0
10.6	0
10.7	0
10.8	0
10.9	0
11	0
11.1	0
11.2	0
11.3	0
11.4	0
11.5	0
11.6	0
11.7	0
11.8	0
11.9	0
12	0
12.1	0
12.2	0
12.3	0
12.4	0
12.5	0
12.6	0
12.7	0
12.8	0
12.9	0
13	0
13.1	0
13.2	0
13.3	0
13.4	0
13.5	0
13.6	0
13.7	0
13.8	0
13.9	0
14	0
14.1	0
14.2	0
14.3	0
14.4	0
14.5	0
14.6	0
14.7	0
14.8	0
14.9	0
15	0
15.1	0
15.2	0
15.3	0
15.4	0
15.5	0
15.6	0
15.7	0
15.8	0
15.9	0
16	0
16.1	0
16.2	0
16.3	0
16.4	0
16.5	0
16.6	0
16.7	0
16.8	0
16.9	0
17	0
17.1	0
17.2	0
17.3	0
17.4	0
17.5	0
17.6	0
17.7	0
17.8	0
17.9	0
18	0
18.1	0
18.2	0
18.3	0
18.4	0
18.5	0
18.6	0
18.7	0
18.8	0
18.9	0
19	0
19.1	0
19.2	0
19.3	0
19.4	0
19.5	0
19.6	0
19.7	0
19.8	0
19.9	0
20	0
20.1	0
20.2	0
20.3	0
20.4	0
20.5	0
20.6	0
20.7	0
20.8	0
20.9	0
21	0
21.1	0
21.2	0
21.3	0
21.4	0
21.5	0
21.6	0
21.7	0
21.8	0
21.9	0
22	0
22.1	0
22.2	0
22.3	0
22.4	0
22.5	0
22.6	0
22.7	0
22.8	0
22.9	0
23	0
23.1	0
23.2	0
23.3	0
23.4	0
23.5	0
23.6	0
23.7	0
23.8	0
23.9	0
24	0
24.1	0
24.2	0
24.3	0
24.4	0
24.5	0
24.6	0
24.7	0
24.8	0
24.9	0
25	0
25.1	0
25.2	0
25.3	0
25.4	0
25.5	0
25.6	0
25.7	0
25.8	0
25.9	0
26	0
26.1	0
26.2	0
26.3	0
26.4	0
26.5	0
26.6	0
26.7	0
26.8	0
26.9	0
27	0
27.1	0
27.2	0
27.3	0
27.4	0
27.5	0
27.6	0
27.7	0
27.8	0
27.9	0
28	0
28.1	0
28.2	0
28.3	0
28.4	0
28.5	0
28.6	0
28.7	0
28.8	0
28.9	0
29	0
29.1	0
29.2	0
29.3	0
29.4	0
29.5	0
29.6	0
29.7	0
29.8	0
29.9	0
30	0
30.1	0
30.2	0
30.3	0
30.4	0
30.5	0
30.6	0
30.7	0
30.8	0
30.9	0
31	0
31.1	0
31.2	0
31.3	0
31.4	0
31.5	0
31.6	0
31.7	0
31.8	0
31.9	0
32	0
32.1	0
32.2	0
32.3	0
32.4	0
32.5	0
32.6	0
32.7	0
32.8	0
32.9	0
33	0
33.1	0
33.2	0
33.3	0
33.4	0
33.5	0
33.6	0
33.7	0
33.8	0
33.9	0
34	0
34.1	0
34.2	0
34.3	0
34.4	0
34.5	0
34.6	0
34.7	0
34.8	0
34.9	0
35	0
35.1	0
35.2	0
35.3	0
35.4	0
35.5	0
35.6	0
35.7	0
35.8	0
35.9	0
36	0
36.1	0
36.2	0
36.3	0
36.4	0
36.5	0
36.6	0
36.7	0
36.8	0
36.9	0
37	0
37.1	0
37.2	0
37.3	0
37.4	0
37.5	0
37.6	0
37.7	0
37.8	0
37.9	0
38	0
38.1	0
38.2	0
38.3	0
38.4	0
38.5	0
38.6	0
38.7	0
38.8	0
38.9	0
39	0
39.1	0
39.2	0
39.3	0
39.4	0
39.5	0
39.6	0
39.7	0
39.8	0
39.9	0
40	0
40.1	0
40.2	0
40.3	0
40.4	0
40.5	0
40.6	0
40.7	0
40.8	0
40.9	0
41	0
41.1	0
41.2	0
41.3	0
41.4	0
41.5	0
41.6	0
41.7	0
41.8	0
41.9	0
42	0
42.1	0
42.2	0
42.3	0
42.4	0
42.5	0
42.6	0
42.7	0
42.8	0
42.9	0
43	0
43.1	0
43.2	0
43.3	0
43.4	0
43.5	0
43.6	0
43.7	0
43.8	0
43.9	0
44	0
44.1	0
44.2	0
44.3	0
44.4	0
44.5	0
44.6	0
44.7	0
44.8	0
44.9	0
45	0
45.1	0
45.2	0
45.3	0
45.4	0
45.5	0
45.6	0
45.7	0
45.8	0
45.9	0
46	0
46.1	0
46.2	0
46.3	0
46.4	0
46.5	0
46.6	0
46.7	0
46.8	0
46.9	0
47	0
47.1	0
47.2	0
47.3	0
47.4	0
47.5	0
47.6	0
47.7	0
47.8	0
47.9	0
48	0
48.1	0
48.2	0
48.3	0
48.4	0
48.5	0
48.6	0
48.7	0
48.8	0
48.9	0
49	0
49.1	0
49.2	0
49.3	0
49.4	0
49.5	0
49.6	0
49.7	0
49.8	0
49.9	0
50	0
50.1	0
50.2	0
50.3	0
50.4	0
50.5	0
50.6	0
50.7	0
50.8	0
50.9	0
51	0
51.1	0
51.2	0
51.3	0
51.4	0
51.5	0
51.6	0
51.7	0
51.8	0
51.9	0
52	0
52.1	0
52.2	0
52.3	0
52.4	0
52.5	0
52.6	0
52.7	0
52.8	0
52.9	0
53	0
53.1	0
53.2	0
53.3	0
53.4	0
53.5	0
53.6	0
53.7	0
53.8	0
53.9	0
54	0
54.1	0
54.2	0
54.3	0
54.4	0
54.5	0
54.6	0
54.7	0
54.8	0
54.9	0
55	0
55.1	0
55.2	0
55.3	0
55.4	0
55.5	0
55.6	0
55.7	0
55.8	0
55.9	0
56	0
56.1	0
56.2	0
56.3	0
56.4	0
56.5	0
56.6	0
56.7	0
56.8	0
56.9	0
57	0
57.1	0
57.2	0
57.3	0
57.4	0
57.5	0
57.6	0
57.7	0
57.8	0
57.9	0
58	0
58.1	0
58.2	0
58.3	0
58.4	0
58.5	0
58.6	0
58.7	0
58.8	0
58.9	0
59	0
59.1	0
59.2	0
59.3	0
59.4	0
59.5	0
59.6	0
59.7	0
59.8	0
59.9	0
60	0
60.1	0
60.2	0
60.3	0
60.4	0
60.5	0
60.6	0
60.7	0
60.8	0
60.9	0
61	0
61.1	0
61.2	0
61.3	0
61.4	0
61.5	0
61.6	0
61.7	0
61.8	0
61.9	0
62	0
62.1	0
62.2	0
62.3	0
62.4	0
62.5	0
62.6	0
62.7	0
62.8	0
62.9	0
63	0
63.1	0
63.2	0
63.3	0
63.4	0
63.5	0
63.6	0
63.7	0
63.8	0
63.9	0
64	0
64.1	0
64.2	0
64.3	0
64.4	0
64.5	0
64.6	0
64.7	0
64.8	0
64.9	0
65	0
65.1	0
65.2	0
65.3	0
65.4	0
65.5	0
65.6	0
65.7	0
65.8	0
65.9	0
66	0
66.1	0
66.2	0
66.3	0
66.4	0
66.5	0
66.6	0
66.7	0
66.8	0
66.9	0
67	0
67.1	0
67.2	0
67.3	0
67.4	0
67.5	0
67.6	0
67.7	0
67.8	0
67.9	0
68	0
68.1	0
68.2	0
68.3	0
68.4	0
68.5	0
68.6	0
68.7	0
68.8	0
68.9	0
69	0
69.1	0
69.2	0
69.3	0
69.4	0
69.5	0
69.6	0
69.7	0
69.8	0
69.9	0
70	0
70.1	0
70.2	0
70.3	0
70.4	0
70.5	0
70.6	0
70.7	0
70.8	0
70.9	0
71	0
71.1	0
71.2	0
71.3	0
71.4	0
71.5	0
71.6	0
71.7	0
71.8	0
71.9	0
72	0
72.1	0
72.2	0
72.3	0
72.4	0
72.5	0
72.6	0
72.7	0
72.8	0
72.9	0
73	0
73.1	0
73.2	0
73.3	0
73.4	0
73.5	0
73.6	0
73.7	0
73.8	0
73.9	0
74	0
74.1	0
74.2	0
74.3	0
74.4	0
74.5	0
74.6	0
74.7	0
74.8	0
74.9	0
75	0
75.1	0
75.2	0
75.3	0
75.4	0
75.5	0
75.6	0
75.7	0
75.8	0
75.9	0
76	0
76.1	0
76.2	0
76.3	0
76.4	0
76.5	0
76.6	0
76.7	0
76.8	0
76.9	0
77	0
77.1	0
77.2	0
77.3	0
77.4	0
77.5	0
77.6	0
77.7	0
77.8	0
77.9	0
78	0
78.1	0
78.2	0
78.3	0
78.4	0
78.5	0
78.6	0
78.7	0
78.8	0
78.9	0
79	0
79.1	0
79.2	0
79.3	0
79.4	0
79.5	0
79.6	0
79.7	0
79.8	0
79.9	0
80	0
80.1	0
80.2	0
80.3	0
80.4	0
80.5	0
80.6	0
80.7	0
80.8	0
80.9	0
81	0
81.1	0
81.2	0
81.3	0
81.4	0
81.5	0
81.6	0
81.7	0
81.8	0
81.9	0
82	0
82.1	0
82.2	0
82.3	0
82.4	0
82.5	0
82.6	0
82.7	0
82.8	0
82.9	0
83	0
83.1	0
83.2	0
83.3	0
83.4	0
83.5	0
83.6	0
83.7	0
83.8	0
83.9	0
84	0
84.1	0
84.2	0
84.3	0
84.4	0
84.5	0
84.6	0
84.7	0
84.8	0
84.9	0
85	0
85.1	0
85.2	0
85.3	0
85.4	0
85.5	0
85.6	0
85.7	0
85.8	0
85.9	0
86	0
86.1	0
86.2	0
86.3	0
86.4	0
86.5	0
86.6	0
86.7	0
86.8	0
86.9	0
87	0
87.1	0
87.2	0
87.3	0
87.4	0
87.5	0
87.6	0
87.7	0
87.8	0
87.9	0
88	0
88.1	0
88.2	0
88.3	0
88.4	0
88.5	0
88.6	0
88.7	0
88.8	0
88.9	0
89	0
89.1	0
89.2	0
89.3	0
89.4	0
89.5	0
89.6	0
89.7	0
89.8	0
89.9	0
90	0
90.1	0
90.2	0
90.3	0
90.4	0
90.5	0
90.6	0
90.7	0
90.8	0
90.9	0
91	0
91.1	0
91.2	0
91.3	0
91.4	0
91.5	0
91.6	0
91.7	0
91.8	0
91.9	0
92	0
92.1	0
92.2	0
92.3	0
92.4	0
92.5	0
92.6	0
92.7	0
92.8	0
92.9	0
93	0
93.1	0
93.2	0
93.3	0
93.4	0
93.5	0
93.6	0
93.7	0
93.8	0
93.9	0
94	0
94.1	0
94.2	0
94.3	0
94.4	0
94.5	0
94.6	0
94.7	0
94.8	0
94.9	0
95	0
95.1	0
95.2	0
95.3	0
95.4	0
95.5	0
95.6	0
95.7	0
95.8	0
95.9	0
96	0
96.1	0
96.2	0
96.3	0
96.4	0
96.5	0
96.6	0
96.7	0
96.8	0
96.9	0
97	0
97.1	0
97.2	0
97.3	0
97.4	0
97.5	0
97.6	0
97.7	0
97.8	0
97.9	0
98	0
98.1	0
98.2	0
98.3	0
98.4	0
98.5	0
98.6	0
98.7	0
98.8	0
98.9	0
99	0
99.1	0
99.2	0
99.3	0
99.4	0
99.5	0
99.6	0
99.7	0
99.8	0
99.9	0
100	0
100.1	0.0005
100.2	0.0045
100.3	0.007
100.4	0.011
100.5	0.0155
100.6	0.02
100.7	0.0265
100.8	0.031
100.9	0.0355
101	0.0415
101.1	0.0455
101.2	0.049
101.3	0.0565
101.4	0.0615
101.5	0.0655
101.6	0.069
101.7	0.0725
101.8	0.0785
101.9	0.084
102	0.088
102.1	0.0935
102.2	0.0995
102.3	0.1035
102.4	0.107
102.5	0.112
102.6	0.1155
102.7	0.1205
102.8	0.1225
102.9	0.129
103	0.1335
103.1	0.139
103.2	0.143
103.3	0.146
103.4	0.15
103.5	0.1525
103.6	0.158
103.7	0.1615
103.8	0.1655
103.9	0.171
104	0.178
104.1	0.1825
104.2	0.184
104.3	0.188
104.4	0.1915
104.5	0.1935
104.6	0.196
104.7	0.202
104.8	0.2055
104.9	0.2095
105	0.213
105.1	0.217
105.2	0.2185
105.3	0.2205
105.4	0.2245
105.5	0.2285
105.6	0.234
105.7	0.237
105.8	0.2385
105.9	0.2445
106	0.2485
106.1	0.252
106.2	0.256
106.3	0.258
106.4	0.2615
106.5	0.2635
106.6	0.267
106.7	0.2715
106.8	0.2745
106.9	0.2775
107	0.281
107.1	0.2835
107.2	0.289
107.3	0.2905
107.4	0.291
107.5	0.2935
107.6	0.2945
107.7	0.2985
107.8	0.3005
107.9	0.3035
108	0.306
108.1	0.3095
108.2	0.314
108.3	0.3175
108.4	0.3205
108.5	0.3255
108.6	0.331
108.7	0.3335
108.8	0.3355
108.9	0.3385
109	0.3405
109.1	0.343
109.2	0.3455
109.3	0.348
109.4	0.349
109.5	0.35
109.6	0.352
109.7	0.3555
109.8	0.359
109.9	0.3625
110	0.368
110.1	0.37
110.2	0.3735
110.3	0.376
110.4	0.378
110.5	0.38
110.6	0.3815
110.7	0.3835
110.8	0.3845
110.9	0.387
111	0.389
111.1	0.391
111.2	0.393
111.3	0.3985
111.4	0.4005
111.5	0.404
111.6	0.407
111.7	0.41
111.8	0.412
111.9	0.414
112	0.4155
112.1	0.417
112.2	0.4195
112.3	0.4205
112.4	0.421
112.5	0.4245
112.6	0.4265
112.7	0.427
112.8	0.431
112.9	0.433
113	0.438
113.1	0.4395
113.2	0.4415
113.3	0.4435
113.4	0.4445
113.5	0.45
113.6	0.4535
113.7	0.4565
113.8	0.4575
113.9	0.4605
114	0.464
114.1	0.4655
114.2	0.467
114.3	0.468
114.4	0.473
114.5	0.4745
114.6	0.4755
114.7	0.477
114.8	0.478
114.9	0.479
115	0.4815
115.1	0.4825
115.2	0.484
115.3	0.488
115.4	0.4895
115.5	0.491
115.6	0.4945
115.7	0.4975
115.8	0.502
115.9	0.5035
116	0.506
116.1	0.5075
116.2	0.509
116.3	0.5125
116.4	0.513
116.5	0.514
116.6	0.5155
116.7	0.516
116.8	0.5155
116.9	0.5165
117	0.5175
117.1	0.5195
117.2	0.5205
117.3	0.5225
117.4	0.5265
117.5	0.529
117.6	0.529
117.7	0.53
117.8	0.5315
117.9	0.534
118	0.537
118.1	0.5395
118.2	0.5415
118.3	0.544
118.4	0.5455
118.5	0.5485
118.6	0.549
118.7	0.552
118.8	0.5555
118.9	0.556
119	0.5575
119.1	0.5585
119.2	0.56
119.3	0.5615
119.4	0.562
119.5	0.563
119.6	0.564
119.7	0.566
119.8	0.5685
119.9	0.5715
120	0.575
120.1	0.5775
120.2	0.578
120.3	0.58
120.4	0.581
120.5	0.583
120.6	0.585
120.7	0.585
120.8	0.5885
120.9	0.589
121	0.5905
121.1	0.591
121.2	0.5935
121.3	0.594
121.4	0.5965
121.5	0.5995
121.6	0.6015
121.7	0.601
121.8	0.602
121.9	0.6035
122	0.6045
122.1	0.607
122.2	0.6095
122.3	0.61
122.4	0.6105
122.5	0.6135
122.6	0.615
122.7	0.6155
122.8	0.617
122.9	0.6195
123	0.6225
123.1	0.622
123.2	0.624
123.3	0.625
123.4	0.627
123.5	0.627
123.6	0.63
123.7	0.6315
123.8	0.6345
123.9	0.635
124	0.635
124.1	0.6355
124.2	0.6375
124.3	0.638
124.4	0.639
124.5	0.643
124.6	0.6455
124.7	0.647
124.8	0.6485
124.9	0.6475
125	0.648
125.1	0.6485
125.2	0.6495
125.3	0.649
125.4	0.65
125.5	0.651
125.6	0.653
125.7	0.6535
125.8	0.6545
125.9	0.654
126	0.654
126.1	0.653
126.2	0.654
126.3	0.6565
126.4	0.657
126.5	0.658
126.6	0.659
126.7	0.66
126.8	0.6595
126.9	0.658
127	0.6595
127.1	0.662
127.2	0.663
127.3	0.6645
127.4	0.6655
127.5	0.667
127.6	0.667
127.7	0.6675
127.8	0.669
127.9	0.6705
128	0.671
128.1	0.671
128.2	0.672
128.3	0.6725
128.4	0.6725
128.5	0.674
128.6	0.6745
128.7	0.6755
128.8	0.6755
128.9	0.677
129	0.677
129.1	0.679
129.2	0.6795
129.3	0.6805
129.4	0.6805
129.5	0.681
129.6	0.681
129.7	0.682
129.8	0.683
129.9	0.6855
130	0.6875
130.1	0.689
130.2	0.6905
130.3	0.6925
130.4	0.692
130.5	0.6935
130.6	0.694
130.7	0.6955
130.8	0.6965
130.9	0.6965
131	0.696
131.1	0.6965
131.2	0.698
131.3	0.697
131.4	0.6975
131.5	0.6985
131.6	0.7
131.7	0.7015
131.8	0.7015
131.9	0.704
132	0.7045
132.1	0.7045
132.2	0.706
132.3	0.707
132.4	0.707
132.5	0.7075
132.6	0.709
132.7	0.7075
132.8	0.7085
132.9	0.708
133	0.7105
133.1	0.713
133.2	0.7145
133.3	0.7165
133.4	0.7175
133.5	0.719
133.6	0.721
133.7	0.722
133.8	0.7225
133.9	0.7225
134	0.724
134.1	0.7245
134.2	0.727
134.3	0.7265
134.4	0.726
134.5	0.7275
134.6	0.728
134.7	0.7295
134.8	0.7305
134.9	0.7305
135	0.731
135.1	0.731
135.2	0.7315
135.3	0.733
135.4	0.733
135.5	0.7345
135.6	0.737
135.7	0.737
135.8	0.7375
135.9	0.7395
136	0.7405
136.1	0.7425
136.2	0.7445
136.3	0.7445
136.4	0.745
136.5	0.7455
136.6	0.746
136.7	0.7465
136.8	0.7455
136.9	0.7445
137	0.7485
137.1	0.751
137.2	0.752
137.3	0.752
137.4	0.7535
137.5	0.7525
137.6	0.755
137.7	0.7555
137.8	0.755
137.9	0.755
138	0.755
138.1	0.755
138.2	0.7565
138.3	0.757
138.4	0.7565
138.5	0.758
138.6	0.7585
138.7	0.7595
138.8	0.7605
138.9	0.7595
139	0.761
139.1	0.76
139.2	0.7605
139.3	0.7605
139.4	0.7605
139.5	0.7605
139.6	0.762
139.7	0.762
139.8	0.7655
139.9	0.7665
140	0.7665
140.1	0.767
140.2	0.767
140.3	0.7695
140.4	0.7695
140.5	0.7675
140.6	0.7695
140.7	0.769
140.8	0.771
140.9	0.771
141	0.773
141.1	0.7745
141.2	0.775
141.3	0.7735
141.4	0.7735
141.5	0.774
141.6	0.7725
141.7	0.773
141.8	0.772
141.9	0.7715
142	0.7715
142.1	0.773
142.2	0.774
142.3	0.7745
142.4	0.775
142.5	0.777
142.6	0.7785
142.7	0.7815
142.8	0.782
142.9	0.782
143	0.7845
143.1	0.7835
143.2	0.784
143.3	0.7835
143.4	0.784
143.5	0.7845
143.6	0.785
143.7	0.787
143.8	0.785
143.9	0.7875
144	0.79
144.1	0.7895
144.2	0.789
144.3	0.7895
144.4	0.7895
144.5	0.79
144.6	0.79
144.7	0.7905
144.8	0.79
144.9	0.7905
145	0.791
145.1	0.7915
145.2	0.7905
145.3	0.7905
145.4	0.789
145.5	0.789
145.6	0.788
145.7	0.79
145.8	0.7915
145.9	0.7915
146	0.7915
146.1	0.792
146.2	0.792
146.3	0.792
146.4	0.793
146.5	0.7935
146.6	0.795
146.7	0.794
146.8	0.796
146.9	0.7965
147	0.7955
147.1	0.796
147.2	0.7965
147.3	0.797
147.4	0.798
147.5	0.7995
147.6	0.8
147.7	0.8005
147.8	0.8005
147.9	0.8
148	0.7995
148.1	0.8
148.2	0.8
148.3	0.7995
148.4	0.8
148.5	0.8005
148.6	0.801
148.7	0.8015
148.8	0.802
148.9	0.803
149	0.8025
149.1	0.803
149.2	0.8035
149.3	0.8035
149.4	0.802
149.5	0.802
149.6	0.802
149.7	0.8015
149.8	0.802
149.9	0.8025
150	0.803
150.1	0.803
150.2	0.8035
150.3	0.803
150.4	0.8035
150.5	0.8035
150.6	0.803
150.7	0.8025
150.8	0.8015
150.9	0.802
151	0.801
151.1	0.8015
151.2	0.8025
151.3	0.8025
151.4	0.8035
151.5	0.8035
151.6	0.803
151.7	0.804
151.8	0.8045
151.9	0.8035
152	0.803
152.1	0.8035
152.2	0.804
152.3	0.803
152.4	0.802
152.5	0.803
152.6	0.803
152.7	0.803
152.8	0.804
152.9	0.804
153	0.8035
153.1	0.804
153.2	0.804
153.3	0.804
153.4	0.8025
153.5	0.8025
153.6	0.8015
153.7	0.801
153.8	0.8015
153.9	0.8
154	0.7995
154.1	0.7995
154.2	0.8005
154.3	0.8
154.4	0.801
154.5	0.802
154.6	0.8015
154.7	0.8005
154.8	0.801
154.9	0.8025
155	0.802
155.1	0.8015
155.2	0.8005
155.3	0.8015
155.4	0.802
155.5	0.802
155.6	0.801
155.7	0.8015
155.8	0.8015
155.9	0.8015
156	0.8025
156.1	0.8025
156.2	0.802
156.3	0.802
156.4	0.8025
156.5	0.804
156.6	0.804
156.7	0.804
156.8	0.805
156.9	0.805
157	0.8055
157.1	0.8055
157.2	0.806
157.3	0.8055
157.4	0.806
157.5	0.8055
157.6	0.806
157.7	0.8055
157.8	0.8045
157.9	0.803
158	0.802
158.1	0.803
158.2	0.802
158.3	0.802
158.4	0.8015
158.5	0.8015
158.6	0.801
158.7	0.801
158.8	0.801
158.9	0.7995
159	0.8
159.1	0.7995
159.2	0.799
159.3	0.797
159.4	0.795
159.5	0.7955
159.6	0.794
159.7	0.795
159.8	0.7965
159.9	0.799
160	0.8015
160.1	0.802
160.2	0.801
160.3	0.801
160.4	0.8015
160.5	0.802
160.6	0.802
160.7	0.8035
160.8	0.804
160.9	0.8035
161	0.8035
161.1	0.804
161.2	0.8055
161.3	0.8045
161.4	0.804
161.5	0.8025
161.6	0.804
161.7	0.804
161.8	0.8045
161.9	0.8035
162	0.8025
162.1	0.803
162.2	0.8015
162.3	0.8005
162.4	0.801
162.5	0.801
162.6	0.801
162.7	0.8015
162.8	0.8005
162.9	0.801
163	0.802
163.1	0.801
163.2	0.7995
163.3	0.7995
163.4	0.799
163.5	0.798
163.6	0.798
163.7	0.797
163.8	0.7965
163.9	0.7955
164	0.7955
164.1	0.796
164.2	0.7975
164.3	0.7965
164.4	0.7965
164.5	0.796
164.6	0.796
164.7	0.7955
164.8	0.795
164.9	0.795
165	0.795
165.1	0.7945
165.2	0.797
165.3	0.798
165.4	0.7995
165.5	0.8
165.6	0.8005
165.7	0.8005
165.8	0.801
165.9	0.802
166	0.8015
166.1	0.8015
166.2	0.8015
166.3	0.8025
166.4	0.8015
166.5	0.801
166.6	0.801
166.7	0.801
166.8	0.801
166.9	0.8
167	0.8
167.1	0.7995
167.2	0.7995
167.3	0.799
167.4	0.7995
167.5	0.8
167.6	0.799
167.7	0.798
167.8	0.7985
167.9	0.7985
168	0.8005
168.1	0.801
168.2	0.8015
168.3	0.802
168.4	0.802
168.5	0.8015
168.6	0.801
168.7	0.8015
168.8	0.803
168.9	0.804
169	0.803
169.1	0.8035
169.2	0.8035
169.3	0.802
169.4	0.8035
169.5	0.804
169.6	0.803
169.7	0.803
169.8	0.803
169.9	0.803
170	0.8035
170.1	0.804
170.2	0.803
170.3	0.801
170.4	0.801
170.5	0.802
170.6	0.8025
170.7	0.803
170.8	0.802
170.9	0.804
171	0.8045
171.1	0.8035
171.2	0.8045
171.3	0.8055
171.4	0.8055
171.5	0.805
171.6	0.805
171.7	0.805
171.8	0.8055
171.9	0.8065
172	0.808
172.1	0.8085
172.2	0.8095
172.3	0.8085
172.4	0.808
172.5	0.8085
172.6	0.809
172.7	0.8085
172.8	0.8105
172.9	0.8115
173	0.811
173.1	0.81
173.2	0.8105
173.3	0.811
173.4	0.811
173.5	0.8105
173.6	0.8105
173.7	0.812
173.8	0.812
173.9	0.812
174	0.8125
174.1	0.813
174.2	0.8125
174.3	0.8125
174.4	0.812
174.5	0.812
174.6	0.8125
174.7	0.812
174.8	0.8125
174.9	0.8125
175	0.8125
175.1	0.812
175.2	0.8115
175.3	0.8135
175.4	0.8135
175.5	0.814
175.6	0.8135
175.7	0.8125
175.8	0.8135
175.9	0.8135
176	0.8145
176.1	0.8145
176.2	0.8145
176.3	0.8135
176.4	0.812
176.5	0.8125
176.6	0.813
176.7	0.8145
176.8	0.813
176.9	0.815
177	0.817
177.1	0.8185
177.2	0.818
177.3	0.8185
177.4	0.8185
177.5	0.8195
177.6	0.819
177.7	0.8215
177.8	0.8215
177.9	0.8215
178	0.823
178.1	0.8235
178.2	0.8245
178.3	0.824
178.4	0.8235
178.5	0.8235
178.6	0.823
178.7	0.823
178.8	0.822
178.9	0.8225
179	0.822
179.1	0.821
179.2	0.821
179.3	0.82
179.4	0.82
179.5	0.821
179.6	0.8215
179.7	0.8215
179.8	0.8215
179.9	0.823
180	0.823
180.1	0.823
180.2	0.8235
180.3	0.823
180.4	0.8235
180.5	0.824
180.6	0.8245
180.7	0.8245
180.8	0.825
180.9	0.8245
181	0.824
181.1	0.824
181.2	0.8255
181.3	0.827
181.4	0.8255
181.5	0.827
181.6	0.8255
181.7	0.8265
181.8	0.826
181.9	0.8265
182	0.8265
182.1	0.8265
182.2	0.827
182.3	0.826
182.4	0.8265
182.5	0.826
182.6	0.8275
182.7	0.8275
182.8	0.8275
182.9	0.828
183	0.828
183.1	0.827
183.2	0.827
183.3	0.8265
183.4	0.8255
183.5	0.8245
183.6	0.8255
183.7	0.8245
183.8	0.824
183.9	0.824
184	0.824
184.1	0.8245
184.2	0.8245
184.3	0.8245
184.4	0.8255
184.5	0.8265
184.6	0.827
184.7	0.8275
184.8	0.8265
184.9	0.826
185	0.8275
185.1	0.8255
185.2	0.826
185.3	0.8265
185.4	0.827
185.5	0.8255
185.6	0.8255
185.7	0.826
185.8	0.8265
185.9	0.827
186	0.828
186.1	0.827
186.2	0.8275
186.3	0.8265
186.4	0.8255
186.5	0.8255
186.6	0.826
186.7	0.825
186.8	0.826
186.9	0.8255
187	0.826
187.1	0.8265
187.2	0.826
187.3	0.826
187.4	0.8255
187.5	0.825
187.6	0.825
187.7	0.8235
187.8	0.8235
187.9	0.823
188	0.823
188.1	0.8235
188.2	0.8235
188.3	0.823
188.4	0.8225
188.5	0.8235
188.6	0.824
188.7	0.823
188.8	0.822
188.9	0.822
189	0.8215
189.1	0.821
189.2	0.8215
189.3	0.8205
189.4	0.819
189.5	0.82
189.6	0.8195
189.7	0.8195
189.8	0.82
189.9	0.819
190	0.8185
190.1	0.82
190.2	0.82
190.3	0.82
190.4	0.8175
190.5	0.817
190.6	0.8165
190.7	0.8185
190.8	0.818
190.9	0.8175
191	0.819
191.1	0.818
191.2	0.8165
191.3	0.817
191.4	0.817
191.5	0.818
191.6	0.8175
191.7	0.817
191.8	0.8155
191.9	0.818
192	0.8165
192.1	0.816
192.2	0.815
192.3	0.814
192.4	0.8145
192.5	0.8145
192.6	0.815
192.7	0.815
192.8	0.8165
192.9	0.817
193	0.816
193.1	0.8155
193.2	0.817
193.3	0.817
193.4	0.8175
193.5	0.8165
193.6	0.8175
193.7	0.819
193.8	0.819
193.9	0.8185
194	0.8175
194.1	0.819
194.2	0.819
194.3	0.8195
194.4	0.8185
194.5	0.8185
194.6	0.8175
194.7	0.818
194.8	0.818
194.9	0.8165
195	0.8165
195.1	0.816
195.2	0.815
195.3	0.8155
195.4	0.8185
195.5	0.819
195.6	0.8205
195.7	0.82
195.8	0.819
195.9	0.8185
196	0.818
196.1	0.816
196.2	0.8165
196.3	0.8165
196.4	0.8165
196.5	0.8165
196.6	0.815
196.7	0.8155
196.8	0.815
196.9	0.815
197	0.817
197.1	0.8175
197.2	0.818
197.3	0.8195
197.4	0.82
197.5	0.82
197.6	0.819
197.7	0.8205
197.8	0.819
197.9	0.82
198	0.821
198.1	0.821
198.2	0.8225
198.3	0.8225
198.4	0.8215
198.5	0.8225
198.6	0.822
198.7	0.825
198.8	0.826
198.9	0.826
199	0.8265
199.1	0.827
199.2	0.8275
199.3	0.827
199.4	0.828
199.5	0.827
199.6	0.826
199.7	0.8235
199.8	0.8235
199.9	0.824
200	0.825
[truncated: 14,000 more rows]
