# Supplementary material for: Bayesian inference of kinetic schemes for ion channels by Kalman filtering
Source: eLife journal article supplement (doi:10.7554/elife.62714), 2022-05-04
Supplement: fig4-data3 [file 1_Sim_N_3000_Fluor_MW_32M.xlsx]

## Sheet: Tabelle1
0.1	0
0.2	0
0.3	0
0.4	0
0.5	0
0.6	0
0.7	0
0.8	0
0.9	0
1	0
1.1	0
1.2	0
1.3	0
1.4	0
1.5	0
1.6	0
1.7	0
1.8	0
1.9	0
2	0
2.1	0
2.2	0
2.3	0
2.4	0
2.5	0
2.6	0
2.7	0
2.8	0
2.9	0
3	0
3.1	0
3.2	0
3.3	0
3.4	0
3.5	0
3.6	0
3.7	0
3.8	0
3.9	0
4	0
4.1	0
4.2	0
4.3	0
4.4	0
4.5	0
4.6	0
4.7	0
4.8	0
4.9	0
5	0
5.1	0
5.2	0
5.3	0
5.4	0
5.5	0
5.6	0
5.7	0
5.8	0
5.9	0
6	0
6.1	0
6.2	0
6.3	0
6.4	0
6.5	0
6.6	0
6.7	0
6.8	0
6.9	0
7	0
7.1	0
7.2	0
7.3	0
7.4	0
7.5	0
7.6	0
7.7	0
7.8	0
7.9	0
8	0
8.1	0
8.2	0
8.3	0
8.4	0
8.5	0
8.6	0
8.7	0
8.8	0
8.9	0
9	0
9.1	0
9.2	0
9.3	0
9.4	0
9.5	0
9.6	0
9.7	0
9.8	0
9.9	0
10	0
10.1	0
10.2	0
10.3	0
10.4	0
10.5	0
10.6	0
10.7	0
10.8	0
10.9	0
11	0
11.1	0
11.2	0
11.3	0
11.4	0
11.5	0
11.6	0
11.7	0
11.8	0
11.9	0
12	0
12.1	0
12.2	0
12.3	0
12.4	0
12.5	0
12.6	0
12.7	0
12.8	0
12.9	0
13	0
13.1	0
13.2	0
13.3	0
13.4	0
13.5	0
13.6	0
13.7	0
13.8	0
13.9	0
14	0
14.1	0
14.2	0
14.3	0
14.4	0
14.5	0
14.6	0
14.7	0
14.8	0
14.9	0
15	0
15.1	0
15.2	0
15.3	0
15.4	0
15.5	0
15.6	0
15.7	0
15.8	0
15.9	0
16	0
16.1	0
16.2	0
16.3	0
16.4	0
16.5	0
16.6	0
16.7	0
16.8	0
16.9	0
17	0
17.1	0
17.2	0
17.3	0
17.4	0
17.5	0
17.6	0
17.7	0
17.8	0
17.9	0
18	0
18.1	0
18.2	0
18.3	0
18.4	0
18.5	0
18.6	0
18.7	0
18.8	0
18.9	0
19	0
19.1	0
19.2	0
19.3	0
19.4	0
19.5	0
19.6	0
19.7	0
19.8	0
19.9	0
20	0
20.1	0
20.2	0
20.3	0
20.4	0
20.5	0
20.6	0
20.7	0
20.8	0
20.9	0
21	0
21.1	0
21.2	0
21.3	0
21.4	0
21.5	0
21.6	0
21.7	0
21.8	0
21.9	0
22	0
22.1	0
22.2	0
22.3	0
22.4	0
22.5	0
22.6	0
22.7	0
22.8	0
22.9	0
23	0
23.1	0
23.2	0
23.3	0
23.4	0
23.5	0
23.6	0
23.7	0
23.8	0
23.9	0
24	0
24.1	0
24.2	0
24.3	0
24.4	0
24.5	0
24.6	0
24.7	0
24.8	0
24.9	0
25	0
25.1	0
25.2	0
25.3	0
25.4	0
25.5	0
25.6	0
25.7	0
25.8	0
25.9	0
26	0
26.1	0
26.2	0
26.3	0
26.4	0
26.5	0
26.6	0
26.7	0
26.8	0
26.9	0
27	0
27.1	0
27.2	0
27.3	0
27.4	0
27.5	0
27.6	0
27.7	0
27.8	0
27.9	0
28	0
28.1	0
28.2	0
28.3	0
28.4	0
28.5	0
28.6	0
28.7	0
28.8	0
28.9	0
29	0
29.1	0
29.2	0
29.3	0
29.4	0
29.5	0
29.6	0
29.7	0
29.8	0
29.9	0
30	0
30.1	0
30.2	0
30.3	0
30.4	0
30.5	0
30.6	0
30.7	0
30.8	0
30.9	0
31	0
31.1	0
31.2	0
31.3	0
31.4	0
31.5	0
31.6	0
31.7	0
31.8	0
31.9	0
32	0
32.1	0
32.2	0
32.3	0
32.4	0
32.5	0
32.6	0
32.7	0
32.8	0
32.9	0
33	0
33.1	0
33.2	0
33.3	0
33.4	0
33.5	0
33.6	0
33.7	0
33.8	0
33.9	0
34	0
34.1	0
34.2	0
34.3	0
34.4	0
34.5	0
34.6	0
34.7	0
34.8	0
34.9	0
35	0
35.1	0
35.2	0
35.3	0
35.4	0
35.5	0
35.6	0
35.7	0
35.8	0
35.9	0
36	0
36.1	0
36.2	0
36.3	0
36.4	0
36.5	0
36.6	0
36.7	0
36.8	0
36.9	0
37	0
37.1	0
37.2	0
37.3	0
37.4	0
37.5	0
37.6	0
37.7	0
37.8	0
37.9	0
38	0
38.1	0
38.2	0
38.3	0
38.4	0
38.5	0
38.6	0
38.7	0
38.8	0
38.9	0
39	0
39.1	0
39.2	0
39.3	0
39.4	0
39.5	0
39.6	0
39.7	0
39.8	0
39.9	0
40	0
40.1	0
40.2	0
40.3	0
40.4	0
40.5	0
40.6	0
40.7	0
40.8	0
40.9	0
41	0
41.1	0
41.2	0
41.3	0
41.4	0
41.5	0
41.6	0
41.7	0
41.8	0
41.9	0
42	0
42.1	0
42.2	0
42.3	0
42.4	0
42.5	0
42.6	0
42.7	0
42.8	0
42.9	0
43	0
43.1	0
43.2	0
43.3	0
43.4	0
43.5	0
43.6	0
43.7	0
43.8	0
43.9	0
44	0
44.1	0
44.2	0
44.3	0
44.4	0
44.5	0
44.6	0
44.7	0
44.8	0
44.9	0
45	0
45.1	0
45.2	0
45.3	0
45.4	0
45.5	0
45.6	0
45.7	0
45.8	0
45.9	0
46	0
46.1	0
46.2	0
46.3	0
46.4	0
46.5	0
46.6	0
46.7	0
46.8	0
46.9	0
47	0
47.1	0
47.2	0
47.3	0
47.4	0
47.5	0
47.6	0
47.7	0
47.8	0
47.9	0
48	0
48.1	0
48.2	0
48.3	0
48.4	0
48.5	0
48.6	0
48.7	0
48.8	0
48.9	0
49	0
49.1	0
49.2	0
49.3	0
49.4	0
49.5	0
49.6	0
49.7	0
49.8	0
49.9	0
50	0
50.1	0
50.2	0
50.3	0
50.4	0
50.5	0
50.6	0
50.7	0
50.8	0
50.9	0
51	0
51.1	0
51.2	0
51.3	0
51.4	0
51.5	0
51.6	0
51.7	0
51.8	0
51.9	0
52	0
52.1	0
52.2	0
52.3	0
52.4	0
52.5	0
52.6	0
52.7	0
52.8	0
52.9	0
53	0
53.1	0
53.2	0
53.3	0
53.4	0
53.5	0
53.6	0
53.7	0
53.8	0
53.9	0
54	0
54.1	0
54.2	0
54.3	0
54.4	0
54.5	0
54.6	0
54.7	0
54.8	0
54.9	0
55	0
55.1	0
55.2	0
55.3	0
55.4	0
55.5	0
55.6	0
55.7	0
55.8	0
55.9	0
56	0
56.1	0
56.2	0
56.3	0
56.4	0
56.5	0
56.6	0
56.7	0
56.8	0
56.9	0
57	0
57.1	0
57.2	0
57.3	0
57.4	0
57.5	0
57.6	0
57.7	0
57.8	0
57.9	0
58	0
58.1	0
58.2	0
58.3	0
58.4	0
58.5	0
58.6	0
58.7	0
58.8	0
58.9	0
59	0
59.1	0
59.2	0
59.3	0
59.4	0
59.5	0
59.6	0
59.7	0
59.8	0
59.9	0
60	0
60.1	0
60.2	0
60.3	0
60.4	0
60.5	0
60.6	0
60.7	0
60.8	0
60.9	0
61	0
61.1	0
61.2	0
61.3	0
61.4	0
61.5	0
61.6	0
61.7	0
61.8	0
61.9	0
62	0
62.1	0
62.2	0
62.3	0
62.4	0
62.5	0
62.6	0
62.7	0
62.8	0
62.9	0
63	0
63.1	0
63.2	0
63.3	0
63.4	0
63.5	0
63.6	0
63.7	0
63.8	0
63.9	0
64	0
64.1	0
64.2	0
64.3	0
64.4	0
64.5	0
64.6	0
64.7	0
64.8	0
64.9	0
65	0
65.1	0
65.2	0
65.3	0
65.4	0
65.5	0
65.6	0
65.7	0
65.8	0
65.9	0
66	0
66.1	0
66.2	0
66.3	0
66.4	0
66.5	0
66.6	0
66.7	0
66.8	0
66.9	0
67	0
67.1	0
67.2	0
67.3	0
67.4	0
67.5	0
67.6	0
67.7	0
67.8	0
67.9	0
68	0
68.1	0
68.2	0
68.3	0
68.4	0
68.5	0
68.6	0
68.7	0
68.8	0
68.9	0
69	0
69.1	0
69.2	0
69.3	0
69.4	0
69.5	0
69.6	0
69.7	0
69.8	0
69.9	0
70	0
70.1	0
70.2	0
70.3	0
70.4	0
70.5	0
70.6	0
70.7	0
70.8	0
70.9	0
71	0
71.1	0
71.2	0
71.3	0
71.4	0
71.5	0
71.6	0
71.7	0
71.8	0
71.9	0
72	0
72.1	0
72.2	0
72.3	0
72.4	0
72.5	0
72.6	0
72.7	0
72.8	0
72.9	0
73	0
73.1	0
73.2	0
73.3	0
73.4	0
73.5	0
73.6	0
73.7	0
73.8	0
73.9	0
74	0
74.1	0
74.2	0
74.3	0
74.4	0
74.5	0
74.6	0
74.7	0
74.8	0
74.9	0
75	0
75.1	0
75.2	0
75.3	0
75.4	0
75.5	0
75.6	0
75.7	0
75.8	0
75.9	0
76	0
76.1	0
76.2	0
76.3	0
76.4	0
76.5	0
76.6	0
76.7	0
76.8	0
76.9	0
77	0
77.1	0
77.2	0
77.3	0
77.4	0
77.5	0
77.6	0
77.7	0
77.8	0
77.9	0
78	0
78.1	0
78.2	0
78.3	0
78.4	0
78.5	0
78.6	0
78.7	0
78.8	0
78.9	0
79	0
79.1	0
79.2	0
79.3	0
79.4	0
79.5	0
79.6	0
79.7	0
79.8	0
79.9	0
80	0
80.1	0
80.2	0
80.3	0
80.4	0
80.5	0
80.6	0
80.7	0
80.8	0
80.9	0
81	0
81.1	0
81.2	0
81.3	0
81.4	0
81.5	0
81.6	0
81.7	0
81.8	0
81.9	0
82	0
82.1	0
82.2	0
82.3	0
82.4	0
82.5	0
82.6	0
82.7	0
82.8	0
82.9	0
83	0
83.1	0
83.2	0
83.3	0
83.4	0
83.5	0
83.6	0
83.7	0
83.8	0
83.9	0
84	0
84.1	0
84.2	0
84.3	0
84.4	0
84.5	0
84.6	0
84.7	0
84.8	0
84.9	0
85	0
85.1	0
85.2	0
85.3	0
85.4	0
85.5	0
85.6	0
85.7	0
85.8	0
85.9	0
86	0
86.1	0
86.2	0
86.3	0
86.4	0
86.5	0
86.6	0
86.7	0
86.8	0
86.9	0
87	0
87.1	0
87.2	0
87.3	0
87.4	0
87.5	0
87.6	0
87.7	0
87.8	0
87.9	0
88	0
88.1	0
88.2	0
88.3	0
88.4	0
88.5	0
88.6	0
88.7	0
88.8	0
88.9	0
89	0
89.1	0
89.2	0
89.3	0
89.4	0
89.5	0
89.6	0
89.7	0
89.8	0
89.9	0
90	0
90.1	0
90.2	0
90.3	0
90.4	0
90.5	0
90.6	0
90.7	0
90.8	0
90.9	0
91	0
91.1	0
91.2	0
91.3	0
91.4	0
91.5	0
91.6	0
91.7	0
91.8	0
91.9	0
92	0
92.1	0
92.2	0
92.3	0
92.4	0
92.5	0
92.6	0
92.7	0
92.8	0
92.9	0
93	0
93.1	0
93.2	0
93.3	0
93.4	0
93.5	0
93.6	0
93.7	0
93.8	0
93.9	0
94	0
94.1	0
94.2	0
94.3	0
94.4	0
94.5	0
94.6	0
94.7	0
94.8	0
94.9	0
95	0
95.1	0
95.2	0
95.3	0
95.4	0
95.5	0
95.6	0
95.7	0
95.8	0
95.9	0
96	0
96.1	0
96.2	0
96.3	0
96.4	0
96.5	0
96.6	0
96.7	0
96.8	0
96.9	0
97	0
97.1	0
97.2	0
97.3	0
97.4	0
97.5	0
97.6	0
97.7	0
97.8	0
97.9	0
98	0
98.1	0
98.2	0
98.3	0
98.4	0
98.5	0
98.6	0
98.7	0
98.8	0
98.9	0
99	0
99.1	0
99.2	0
99.3	0
99.4	0
99.5	0
99.6	0
99.7	0
99.8	0
99.9	0
100	0
100.1	0.7305
100.2	0.886667
100.3	0.9415
100.4	0.9675
100.5	0.973167
100.6	0.9745
100.7	0.972
100.8	0.975167
100.9	0.9775
101	0.9755
101.1	0.9745
101.2	0.976167
101.3	0.974667
101.4	0.976833
101.5	0.975167
101.6	0.979333
101.7	0.979667
101.8	0.977667
101.9	0.977833
102	0.977
102.1	0.974167
102.2	0.974333
102.3	0.975167
102.4	0.976
102.5	0.975
102.6	0.977167
102.7	0.977667
102.8	0.977333
102.9	0.982167
103	0.9825
103.1	0.978667
103.2	0.978333
103.3	0.9775
103.4	0.978833
103.5	0.980167
103.6	0.978833
103.7	0.977667
103.8	0.979167
103.9	0.98
104	0.98
104.1	0.976167
104.2	0.975167
104.3	0.974167
104.4	0.981167
104.5	0.982167
104.6	0.981333
104.7	0.979667
104.8	0.980167
104.9	0.98
105	0.983167
105.1	0.982167
105.2	0.980833
105.3	0.979667
105.4	0.980167
105.5	0.977667
105.6	0.981667
105.7	0.981167
105.8	0.982167
105.9	0.983667
106	0.981333
106.1	0.980333
106.2	0.980833
106.3	0.980667
106.4	0.982167
106.5	0.982833
106.6	0.983
106.7	0.983333
106.8	0.983167
106.9	0.984833
107	0.983
107.1	0.981667
107.2	0.9805
107.3	0.980333
107.4	0.981
107.5	0.982667
107.6	0.983833
107.7	0.982833
107.8	0.981333
107.9	0.982
108	0.982333
108.1	0.982833
108.2	0.9855
108.3	0.984333
108.4	0.984
108.5	0.981833
108.6	0.982167
108.7	0.984167
108.8	0.9825
108.9	0.9815
109	0.982
109.1	0.979167
109.2	0.9825
109.3	0.982667
109.4	0.983333
109.5	0.984
109.6	0.984
109.7	0.984667
109.8	0.985
109.9	0.984667
110	0.983333
110.1	0.983333
110.2	0.9835
110.3	0.9865
110.4	0.988167
110.5	0.987333
110.6	0.987667
110.7	0.985833
110.8	0.984
110.9	0.986
111	0.984333
111.1	0.982333
111.2	0.9855
111.3	0.983
111.4	0.983333
111.5	0.984333
111.6	0.984167
111.7	0.985167
111.8	0.984667
111.9	0.983
112	0.985833
112.1	0.985667
112.2	0.985
112.3	0.985167
112.4	0.986667
112.5	0.984333
112.6	0.985
112.7	0.9855
112.8	0.9875
112.9	0.9865
113	0.9855
113.1	0.987333
113.2	0.9835
113.3	0.985
113.4	0.987
113.5	0.985833
113.6	0.984333
113.7	0.986667
113.8	0.984667
113.9	0.989833
114	0.988833
114.1	0.9865
114.2	0.986333
114.3	0.984333
114.4	0.984
114.5	0.987
114.6	0.987333
114.7	0.9875
114.8	0.988167
114.9	0.9885
115	0.9885
115.1	0.988333
115.2	0.988167
115.3	0.988333
115.4	0.9875
115.5	0.9855
115.6	0.985833
115.7	0.987167
115.8	0.985667
115.9	0.987333
116	0.988
116.1	0.987833
116.2	0.987667
116.3	0.9855
116.4	0.986333
116.5	0.986
116.6	0.986333
116.7	0.985667
116.8	0.987667
116.9	0.986333
117	0.9885
117.1	0.986667
117.2	0.988667
117.3	0.9895
117.4	0.989833
117.5	0.988667
117.6	0.987833
117.7	0.987333
117.8	0.9855
117.9	0.986167
118	0.985167
118.1	0.987
118.2	0.9885
118.3	0.988167
118.4	0.989
118.5	0.989
118.6	0.987333
118.7	0.988333
118.8	0.988833
118.9	0.9875
119	0.99
119.1	0.989833
119.2	0.987333
119.3	0.9895
119.4	0.989667
119.5	0.99
119.6	0.987333
119.7	0.989667
119.8	0.989667
119.9	0.990833
120	0.99
120.1	0.990333
120.2	0.988667
120.3	0.989333
120.4	0.989
120.5	0.9895
120.6	0.989833
120.7	0.990667
120.8	0.989333
120.9	0.990333
121	0.986833
121.1	0.988333
121.2	0.9885
121.3	0.989333
121.4	0.988833
121.5	0.99
121.6	0.989667
121.7	0.988833
121.8	0.991
121.9	0.9905
122	0.991167
122.1	0.990167
122.2	0.989833
122.3	0.989667
122.4	0.990167
122.5	0.992
122.6	0.991333
122.7	0.989833
122.8	0.990667
122.9	0.991833
123	0.9915
123.1	0.991667
123.2	0.9905
123.3	0.991667
123.4	0.991167
123.5	0.991667
123.6	0.988833
123.7	0.990833
123.8	0.9905
123.9	0.990833
124	0.990333
124.1	0.991833
124.2	0.991333
124.3	0.991667
124.4	0.993
124.5	0.991833
124.6	0.992
124.7	0.991333
124.8	0.989333
124.9	0.989833
125	0.990667
125.1	0.991333
125.2	0.993
125.3	0.990167
125.4	0.99
125.5	0.989833
125.6	0.988833
125.7	0.993
125.8	0.992833
125.9	0.9925
126	0.991833
126.1	0.992167
126.2	0.993667
126.3	0.9915
126.4	0.991667
126.5	0.993
126.6	0.991667
126.7	0.991667
126.8	0.9915
126.9	0.991667
127	0.993
127.1	0.992667
127.2	0.992333
127.3	0.992333
127.4	0.9915
127.5	0.991333
127.6	0.9915
127.7	0.992167
127.8	0.992
127.9	0.991167
128	0.993
128.1	0.993167
128.2	0.991667
128.3	0.9925
128.4	0.993167
128.5	0.992
128.6	0.991333
128.7	0.9915
128.8	0.992167
128.9	0.990333
129	0.990333
129.1	0.991
129.2	0.9895
129.3	0.989
129.4	0.990833
129.5	0.992167
129.6	0.991
129.7	0.9915
129.8	0.9915
129.9	0.993333
130	0.993
130.1	0.9935
130.2	0.992333
130.3	0.993
130.4	0.992833
130.5	0.9935
130.6	0.990667
130.7	0.992833
130.8	0.993
130.9	0.994333
131	0.9935
131.1	0.993333
131.2	0.993333
131.3	0.993
131.4	0.992167
131.5	0.992833
131.6	0.992833
131.7	0.992167
131.8	0.9925
131.9	0.992667
132	0.992
132.1	0.992
132.2	0.992833
132.3	0.993167
132.4	0.9925
132.5	0.9935
132.6	0.993
132.7	0.993833
132.8	0.994167
132.9	0.994167
133	0.993333
133.1	0.992
133.2	0.9925
133.3	0.992667
133.4	0.994667
133.5	0.994833
133.6	0.994167
133.7	0.994667
133.8	0.993
133.9	0.994667
134	0.993
134.1	0.994
134.2	0.994
134.3	0.993333
134.4	0.9915
134.5	0.990333
134.6	0.991
134.7	0.993
134.8	0.993333
134.9	0.994333
135	0.994167
135.1	0.9935
135.2	0.994
135.3	0.994167
135.4	0.992833
135.5	0.992167
135.6	0.992167
135.7	0.994833
135.8	0.993333
135.9	0.9945
136	0.993667
136.1	0.992833
136.2	0.993833
136.3	0.993333
136.4	0.994167
136.5	0.992
136.6	0.993
136.7	0.993167
136.8	0.994333
136.9	0.993167
137	0.994667
137.1	0.994833
137.2	0.994167
137.3	0.9945
137.4	0.994667
137.5	0.993167
137.6	0.992167
137.7	0.992
137.8	0.991667
137.9	0.9925
138	0.9935
138.1	0.993167
138.2	0.994167
138.3	0.994333
138.4	0.993667
138.5	0.993
138.6	0.9935
138.7	0.995
138.8	0.994167
138.9	0.994
139	0.995333
139.1	0.994
139.2	0.995333
139.3	0.992333
139.4	0.994
139.5	0.994667
139.6	0.993833
139.7	0.994167
139.8	0.995
139.9	0.994833
140	0.994833
140.1	0.992
140.2	0.993333
140.3	0.9945
140.4	0.993167
140.5	0.993333
140.6	0.994
140.7	0.994667
140.8	0.993167
140.9	0.993833
141	0.992333
141.1	0.992167
141.2	0.994833
141.3	0.993833
141.4	0.994833
141.5	0.993333
141.6	0.9945
141.7	0.994
141.8	0.993833
141.9	0.992333
142	0.9905
142.1	0.992167
142.2	0.9945
142.3	0.9945
142.4	0.995167
142.5	0.994333
142.6	0.995333
142.7	0.994833
142.8	0.995833
142.9	0.994833
143	0.994167
143.1	0.995333
143.2	0.995
143.3	0.994667
143.4	0.994167
143.5	0.994833
143.6	0.9945
143.7	0.995
143.8	0.995
143.9	0.993167
144	0.993833
144.1	0.993833
144.2	0.9955
144.3	0.9945
144.4	0.995333
144.5	0.994833
144.6	0.995333
144.7	0.994
144.8	0.994833
144.9	0.995167
145	0.994167
145.1	0.9955
145.2	0.994
145.3	0.995
145.4	0.995333
145.5	0.995333
145.6	0.994167
145.7	0.993333
145.8	0.9945
145.9	0.994167
146	0.995
146.1	0.995167
146.2	0.994167
146.3	0.9935
146.4	0.993333
146.5	0.993333
146.6	0.995167
146.7	0.9935
146.8	0.994
146.9	0.9945
147	0.995667
147.1	0.994167
147.2	0.992833
147.3	0.994
147.4	0.995167
147.5	0.9955
147.6	0.995333
147.7	0.995833
147.8	0.995333
147.9	0.9935
148	0.993167
148.1	0.9935
148.2	0.993667
148.3	0.9935
148.4	0.994
148.5	0.994333
148.6	0.9945
148.7	0.9935
148.8	0.995
148.9	0.995667
149	0.9945
149.1	0.994167
149.2	0.993333
149.3	0.994167
149.4	0.994167
149.5	0.994667
149.6	0.9945
149.7	0.996333
149.8	0.995
149.9	0.996
150	0.995667
150.1	0.991833
150.2	0.993333
150.3	0.995833
150.4	0.995
150.5	0.993833
150.6	0.994
150.7	0.995167
150.8	0.994667
150.9	0.995167
151	0.995333
151.1	0.995
151.2	0.995
151.3	0.994833
151.4	0.995333
151.5	0.994833
151.6	0.995833
151.7	0.995
151.8	0.995833
151.9	0.9955
152	0.993667
152.1	0.994833
152.2	0.9955
152.3	0.995333
152.4	0.995167
152.5	0.996
152.6	0.995
152.7	0.994667
152.8	0.994167
152.9	0.994833
153	0.994833
153.1	0.996
153.2	0.994
153.3	0.995167
153.4	0.996
153.5	0.994167
153.6	0.994667
153.7	0.994833
153.8	0.995667
153.9	0.996
154	0.995667
154.1	0.995
154.2	0.993667
154.3	0.996
154.4	0.995333
154.5	0.996
154.6	0.996333
154.7	0.9955
154.8	0.994333
154.9	0.995
155	0.993167
155.1	0.994333
155.2	0.996
155.3	0.9945
155.4	0.994667
155.5	0.995
155.6	0.996167
155.7	0.9945
155.8	0.995167
155.9	0.995333
156	0.9955
156.1	0.995
156.2	0.996667
156.3	0.995167
156.4	0.994667
156.5	0.996167
156.6	0.993833
156.7	0.994333
156.8	0.994333
156.9	0.9945
157	0.994
157.1	0.994167
157.2	0.9955
157.3	0.995167
157.4	0.994833
157.5	0.994
157.6	0.996167
157.7	0.994333
157.8	0.995333
157.9	0.993167
158	0.994
158.1	0.994833
158.2	0.995833
158.3	0.9955
158.4	0.994667
158.5	0.993667
158.6	0.995667
158.7	0.994667
158.8	0.995167
158.9	0.995333
159	0.996167
159.1	0.996333
159.2	0.995167
159.3	0.996167
159.4	0.9955
159.5	0.994167
159.6	0.994167
159.7	0.9945
159.8	0.994167
159.9	0.994333
160	0.995167
160.1	0.9955
160.2	0.993333
160.3	0.994333
160.4	0.995833
160.5	0.9955
160.6	0.9955
160.7	0.995667
160.8	0.995833
160.9	0.995667
161	0.994333
161.1	0.995
161.2	0.9935
161.3	0.995833
161.4	0.995333
161.5	0.997
161.6	0.995
161.7	0.995667
161.8	0.996
161.9	0.995667
162	0.9965
162.1	0.9955
162.2	0.993833
162.3	0.994333
162.4	0.995
162.5	0.994167
162.6	0.994167
162.7	0.996833
162.8	0.996167
162.9	0.9945
163	0.993667
163.1	0.995167
163.2	0.994
163.3	0.995833
163.4	0.996
163.5	0.994833
163.6	0.994167
163.7	0.994167
163.8	0.995167
163.9	0.993667
164	0.994333
164.1	0.995833
164.2	0.995833
164.3	0.994333
164.4	0.9935
164.5	0.992833
164.6	0.993667
164.7	0.994333
164.8	0.994333
164.9	0.995167
165	0.995
165.1	0.994833
165.2	0.995333
165.3	0.9965
165.4	0.996
165.5	0.996667
165.6	0.995167
165.7	0.995333
165.8	0.995
165.9	0.995
166	0.995667
166.1	0.996167
166.2	0.995667
166.3	0.996667
166.4	0.995333
166.5	0.995
166.6	0.993833
166.7	0.995167
166.8	0.994833
166.9	0.994833
167	0.995333
167.1	0.995833
167.2	0.9945
167.3	0.996167
167.4	0.994833
167.5	0.9965
167.6	0.995667
167.7	0.994
167.8	0.9945
167.9	0.993333
168	0.994667
168.1	0.995333
168.2	0.995667
168.3	0.995833
168.4	0.995833
168.5	0.995667
168.6	0.996667
168.7	0.995167
168.8	0.995167
168.9	0.995667
169	0.9955
169.1	0.9935
169.2	0.993667
169.3	0.993667
169.4	0.995833
169.5	0.9955
169.6	0.996167
169.7	0.995667
169.8	0.994667
169.9	0.9955
170	0.994333
170.1	0.996167
170.2	0.996167
170.3	0.9955
170.4	0.996333
170.5	0.996
170.6	0.9955
170.7	0.995
170.8	0.994167
170.9	0.9945
171	0.994833
171.1	0.995333
171.2	0.994833
171.3	0.994667
171.4	0.996167
171.5	0.9955
171.6	0.996833
171.7	0.995667
171.8	0.996667
171.9	0.995667
172	0.995667
172.1	0.9945
172.2	0.996333
172.3	0.995
172.4	0.9955
172.5	0.995
172.6	0.995667
172.7	0.994
172.8	0.995833
172.9	0.994333
173	0.994833
173.1	0.995
173.2	0.9955
173.3	0.995333
173.4	0.996
173.5	0.995833
173.6	0.995667
173.7	0.995667
173.8	0.995333
173.9	0.995
174	0.994167
174.1	0.996
174.2	0.996667
174.3	0.994833
174.4	0.995333
174.5	0.9955
174.6	0.995167
174.7	0.995333
174.8	0.994833
174.9	0.993167
175	0.994167
175.1	0.994833
175.2	0.994833
175.3	0.995167
175.4	0.996333
175.5	0.995833
175.6	0.9965
175.7	0.9955
175.8	0.994333
175.9	0.995167
176	0.994667
176.1	0.995333
176.2	0.995667
176.3	0.995333
176.4	0.994833
176.5	0.995667
176.6	0.995167
176.7	0.996167
176.8	0.9955
176.9	0.995333
177	0.995833
177.1	0.996333
177.2	0.995333
177.3	0.995833
177.4	0.996833
177.5	0.995833
177.6	0.995167
177.7	0.995833
177.8	0.993333
177.9	0.994167
178	0.994667
178.1	0.994333
178.2	0.995
178.3	0.994667
178.4	0.993167
178.5	0.995333
178.6	0.994833
178.7	0.994833
178.8	0.994833
178.9	0.994667
179	0.995833
179.1	0.996167
179.2	0.995667
179.3	0.996167
179.4	0.9955
179.5	0.995833
179.6	0.994833
179.7	0.996667
179.8	0.995167
179.9	0.996
180	0.996167
180.1	0.996333
180.2	0.996
180.3	0.995667
180.4	0.995167
180.5	0.9965
180.6	0.997333
180.7	0.9955
180.8	0.995
180.9	0.995333
181	0.993667
181.1	0.995167
181.2	0.995167
181.3	0.994167
181.4	0.994833
181.5	0.994667
181.6	0.996333
181.7	0.996667
181.8	0.995833
181.9	0.996667
182	0.995333
182.1	0.9965
182.2	0.994333
182.3	0.996
182.4	0.996667
182.5	0.995667
182.6	0.995833
182.7	0.9955
182.8	0.996333
182.9	0.994
183	0.993667
183.1	0.995
183.2	0.9945
183.3	0.994333
183.4	0.9945
183.5	0.994333
183.6	0.994333
183.7	0.994
183.8	0.995167
183.9	0.993833
184	0.995667
184.1	0.994333
184.2	0.995833
184.3	0.9965
184.4	0.996833
184.5	0.996667
184.6	0.996667
184.7	0.996167
184.8	0.9965
184.9	0.994167
185	0.994667
185.1	0.994833
185.2	0.995667
185.3	0.995167
185.4	0.995
185.5	0.996333
185.6	0.997333
185.7	0.995833
185.8	0.997167
185.9	0.994167
186	0.994833
186.1	0.995333
186.2	0.995333
186.3	0.997167
186.4	0.996667
186.5	0.995
186.6	0.994667
186.7	0.996
186.8	0.9965
186.9	0.995833
187	0.995333
187.1	0.993833
187.2	0.995333
187.3	0.995167
187.4	0.995333
187.5	0.995
187.6	0.995333
187.7	0.995
187.8	0.995
187.9	0.9965
188	0.9955
188.1	0.9945
188.2	0.994667
188.3	0.995333
188.4	0.9955
188.5	0.994167
188.6	0.994333
188.7	0.994333
188.8	0.995
188.9	0.994833
189	0.995
189.1	0.994333
189.2	0.994667
189.3	0.9945
189.4	0.995
189.5	0.997
189.6	0.997167
189.7	0.996833
189.8	0.996333
189.9	0.995833
190	0.996
190.1	0.995667
190.2	0.9965
190.3	0.996
190.4	0.995333
190.5	0.995667
190.6	0.997167
190.7	0.995167
190.8	0.996167
190.9	0.996167
191	0.996667
191.1	0.997
191.2	0.995333
191.3	0.996833
191.4	0.995833
191.5	0.9945
191.6	0.994
191.7	0.994833
191.8	0.996
191.9	0.994833
192	0.995167
192.1	0.994667
192.2	0.994833
192.3	0.9955
192.4	0.9955
192.5	0.994833
192.6	0.994333
192.7	0.9945
192.8	0.996
192.9	0.995333
193	0.996167
193.1	0.996833
193.2	0.995667
193.3	0.996167
193.4	0.996167
193.5	0.993667
193.6	0.994833
193.7	0.994333
193.8	0.995833
193.9	0.994833
194	0.995833
194.1	0.994833
194.2	0.994
194.3	0.996167
194.4	0.996167
194.5	0.995333
194.6	0.995667
194.7	0.995667
194.8	0.994333
194.9	0.9945
195	0.9965
195.1	0.995667
195.2	0.995333
195.3	0.996167
195.4	0.9945
195.5	0.995
195.6	0.9965
195.7	0.996333
195.8	0.996
195.9	0.9955
196	0.994667
196.1	0.995667
196.2	0.994833
196.3	0.995167
196.4	0.996
196.5	0.9965
196.6	0.994833
196.7	0.996167
196.8	0.9955
196.9	0.9955
197	0.9955
197.1	0.995667
197.2	0.996833
197.3	0.996833
197.4	0.996333
197.5	0.995833
197.6	0.995167
197.7	0.9955
197.8	0.996167
197.9	0.9965
198	0.995333
198.1	0.995167
198.2	0.9955
198.3	0.9955
198.4	0.995667
198.5	0.996667
198.6	0.995167
198.7	0.994333
198.8	0.995833
198.9	0.995667
199	0.995333
199.1	0.995333
199.2	0.996
199.3	0.995833
199.4	0.994333
199.5	0.9935
199.6	0.993667
199.7	0.994667
199.8	0.9945
199.9	0.996167
200	0.997167
[truncated: 14,000 more rows]
