# Supplementary material for: Bayesian inference of kinetic schemes for ion channels by Kalman filtering
Source: eLife journal article supplement (doi:10.7554/elife.62714), 2022-05-04
Supplement: fig4-data3 [file 1_Sim_N_3000_Strom_MW_32M.xlsx]

## Sheet: Tabelle1
0.1	0
0.2	0
0.3	0
0.4	0
0.5	0
0.6	0
0.7	0
0.8	0
0.9	0
1	0
1.1	0
1.2	0
1.3	0
1.4	0
1.5	0
1.6	0
1.7	0
1.8	0
1.9	0
2	0
2.1	0
2.2	0
2.3	0
2.4	0
2.5	0
2.6	0
2.7	0
2.8	0
2.9	0
3	0
3.1	0
3.2	0
3.3	0
3.4	0
3.5	0
3.6	0
3.7	0
3.8	0
3.9	0
4	0
4.1	0
4.2	0
4.3	0
4.4	0
4.5	0
4.6	0
4.7	0
4.8	0
4.9	0
5	0
5.1	0
5.2	0
5.3	0
5.4	0
5.5	0
5.6	0
5.7	0
5.8	0
5.9	0
6	0
6.1	0
6.2	0
6.3	0
6.4	0
6.5	0
6.6	0
6.7	0
6.8	0
6.9	0
7	0
7.1	0
7.2	0
7.3	0
7.4	0
7.5	0
7.6	0
7.7	0
7.8	0
7.9	0
8	0
8.1	0
8.2	0
8.3	0
8.4	0
8.5	0
8.6	0
8.7	0
8.8	0
8.9	0
9	0
9.1	0
9.2	0
9.3	0
9.4	0
9.5	0
9.6	0
9.7	0
9.8	0
9.9	0
10	0
10.1	0
10.2	0
10.3	0
10.4	0
10.5	0
10.6	0
10.7	0
10.8	0
10.9	0
11	0
11.1	0
11.2	0
11.3	0
11.4	0
11.5	0
11.6	0
11.7	0
11.8	0
11.9	0
12	0
12.1	0
12.2	0
12.3	0
12.4	0
12.5	0
12.6	0
12.7	0
12.8	0
12.9	0
13	0
13.1	0
13.2	0
13.3	0
13.4	0
13.5	0
13.6	0
13.7	0
13.8	0
13.9	0
14	0
14.1	0
14.2	0
14.3	0
14.4	0
14.5	0
14.6	0
14.7	0
14.8	0
14.9	0
15	0
15.1	0
15.2	0
15.3	0
15.4	0
15.5	0
15.6	0
15.7	0
15.8	0
15.9	0
16	0
16.1	0
16.2	0
16.3	0
16.4	0
16.5	0
16.6	0
16.7	0
16.8	0
16.9	0
17	0
17.1	0
17.2	0
17.3	0
17.4	0
17.5	0
17.6	0
17.7	0
17.8	0
17.9	0
18	0
18.1	0
18.2	0
18.3	0
18.4	0
18.5	0
18.6	0
18.7	0
18.8	0
18.9	0
19	0
19.1	0
19.2	0
19.3	0
19.4	0
19.5	0
19.6	0
19.7	0
19.8	0
19.9	0
20	0
20.1	0
20.2	0
20.3	0
20.4	0
20.5	0
20.6	0
20.7	0
20.8	0
20.9	0
21	0
21.1	0
21.2	0
21.3	0
21.4	0
21.5	0
21.6	0
21.7	0
21.8	0
21.9	0
22	0
22.1	0
22.2	0
22.3	0
22.4	0
22.5	0
22.6	0
22.7	0
22.8	0
22.9	0
23	0
23.1	0
23.2	0
23.3	0
23.4	0
23.5	0
23.6	0
23.7	0
23.8	0
23.9	0
24	0
24.1	0
24.2	0
24.3	0
24.4	0
24.5	0
24.6	0
24.7	0
24.8	0
24.9	0
25	0
25.1	0
25.2	0
25.3	0
25.4	0
25.5	0
25.6	0
25.7	0
25.8	0
25.9	0
26	0
26.1	0
26.2	0
26.3	0
26.4	0
26.5	0
26.6	0
26.7	0
26.8	0
26.9	0
27	0
27.1	0
27.2	0
27.3	0
27.4	0
27.5	0
27.6	0
27.7	0
27.8	0
27.9	0
28	0
28.1	0
28.2	0
28.3	0
28.4	0
28.5	0
28.6	0
28.7	0
28.8	0
28.9	0
29	0
29.1	0
29.2	0
29.3	0
29.4	0
29.5	0
29.6	0
29.7	0
29.8	0
29.9	0
30	0
30.1	0
30.2	0
30.3	0
30.4	0
30.5	0
30.6	0
30.7	0
30.8	0
30.9	0
31	0
31.1	0
31.2	0
31.3	0
31.4	0
31.5	0
31.6	0
31.7	0
31.8	0
31.9	0
32	0
32.1	0
32.2	0
32.3	0
32.4	0
32.5	0
32.6	0
32.7	0
32.8	0
32.9	0
33	0
33.1	0
33.2	0
33.3	0
33.4	0
33.5	0
33.6	0
33.7	0
33.8	0
33.9	0
34	0
34.1	0
34.2	0
34.3	0
34.4	0
34.5	0
34.6	0
34.7	0
34.8	0
34.9	0
35	0
35.1	0
35.2	0
35.3	0
35.4	0
35.5	0
35.6	0
35.7	0
35.8	0
35.9	0
36	0
36.1	0
36.2	0
36.3	0
36.4	0
36.5	0
36.6	0
36.7	0
36.8	0
36.9	0
37	0
37.1	0
37.2	0
37.3	0
37.4	0
37.5	0
37.6	0
37.7	0
37.8	0
37.9	0
38	0
38.1	0
38.2	0
38.3	0
38.4	0
38.5	0
38.6	0
38.7	0
38.8	0
38.9	0
39	0
39.1	0
39.2	0
39.3	0
39.4	0
39.5	0
39.6	0
39.7	0
39.8	0
39.9	0
40	0
40.1	0
40.2	0
40.3	0
40.4	0
40.5	0
40.6	0
40.7	0
40.8	0
40.9	0
41	0
41.1	0
41.2	0
41.3	0
41.4	0
41.5	0
41.6	0
41.7	0
41.8	0
41.9	0
42	0
42.1	0
42.2	0
42.3	0
42.4	0
42.5	0
42.6	0
42.7	0
42.8	0
42.9	0
43	0
43.1	0
43.2	0
43.3	0
43.4	0
43.5	0
43.6	0
43.7	0
43.8	0
43.9	0
44	0
44.1	0
44.2	0
44.3	0
44.4	0
44.5	0
44.6	0
44.7	0
44.8	0
44.9	0
45	0
45.1	0
45.2	0
45.3	0
45.4	0
45.5	0
45.6	0
45.7	0
45.8	0
45.9	0
46	0
46.1	0
46.2	0
46.3	0
46.4	0
46.5	0
46.6	0
46.7	0
46.8	0
46.9	0
47	0
47.1	0
47.2	0
47.3	0
47.4	0
47.5	0
47.6	0
47.7	0
47.8	0
47.9	0
48	0
48.1	0
48.2	0
48.3	0
48.4	0
48.5	0
48.6	0
48.7	0
48.8	0
48.9	0
49	0
49.1	0
49.2	0
49.3	0
49.4	0
49.5	0
49.6	0
49.7	0
49.8	0
49.9	0
50	0
50.1	0
50.2	0
50.3	0
50.4	0
50.5	0
50.6	0
50.7	0
50.8	0
50.9	0
51	0
51.1	0
51.2	0
51.3	0
51.4	0
51.5	0
51.6	0
51.7	0
51.8	0
51.9	0
52	0
52.1	0
52.2	0
52.3	0
52.4	0
52.5	0
52.6	0
52.7	0
52.8	0
52.9	0
53	0
53.1	0
53.2	0
53.3	0
53.4	0
53.5	0
53.6	0
53.7	0
53.8	0
53.9	0
54	0
54.1	0
54.2	0
54.3	0
54.4	0
54.5	0
54.6	0
54.7	0
54.8	0
54.9	0
55	0
55.1	0
55.2	0
55.3	0
55.4	0
55.5	0
55.6	0
55.7	0
55.8	0
55.9	0
56	0
56.1	0
56.2	0
56.3	0
56.4	0
56.5	0
56.6	0
56.7	0
56.8	0
56.9	0
57	0
57.1	0
57.2	0
57.3	0
57.4	0
57.5	0
57.6	0
57.7	0
57.8	0
57.9	0
58	0
58.1	0
58.2	0
58.3	0
58.4	0
58.5	0
58.6	0
58.7	0
58.8	0
58.9	0
59	0
59.1	0
59.2	0
59.3	0
59.4	0
59.5	0
59.6	0
59.7	0
59.8	0
59.9	0
60	0
60.1	0
60.2	0
60.3	0
60.4	0
60.5	0
60.6	0
60.7	0
60.8	0
60.9	0
61	0
61.1	0
61.2	0
61.3	0
61.4	0
61.5	0
61.6	0
61.7	0
61.8	0
61.9	0
62	0
62.1	0
62.2	0
62.3	0
62.4	0
62.5	0
62.6	0
62.7	0
62.8	0
62.9	0
63	0
63.1	0
63.2	0
63.3	0
63.4	0
63.5	0
63.6	0
63.7	0
63.8	0
63.9	0
64	0
64.1	0
64.2	0
64.3	0
64.4	0
64.5	0
64.6	0
64.7	0
64.8	0
64.9	0
65	0
65.1	0
65.2	0
65.3	0
65.4	0
65.5	0
65.6	0
65.7	0
65.8	0
65.9	0
66	0
66.1	0
66.2	0
66.3	0
66.4	0
66.5	0
66.6	0
66.7	0
66.8	0
66.9	0
67	0
67.1	0
67.2	0
67.3	0
67.4	0
67.5	0
67.6	0
67.7	0
67.8	0
67.9	0
68	0
68.1	0
68.2	0
68.3	0
68.4	0
68.5	0
68.6	0
68.7	0
68.8	0
68.9	0
69	0
69.1	0
69.2	0
69.3	0
69.4	0
69.5	0
69.6	0
69.7	0
69.8	0
69.9	0
70	0
70.1	0
70.2	0
70.3	0
70.4	0
70.5	0
70.6	0
70.7	0
70.8	0
70.9	0
71	0
71.1	0
71.2	0
71.3	0
71.4	0
71.5	0
71.6	0
71.7	0
71.8	0
71.9	0
72	0
72.1	0
72.2	0
72.3	0
72.4	0
72.5	0
72.6	0
72.7	0
72.8	0
72.9	0
73	0
73.1	0
73.2	0
73.3	0
73.4	0
73.5	0
73.6	0
73.7	0
73.8	0
73.9	0
74	0
74.1	0
74.2	0
74.3	0
74.4	0
74.5	0
74.6	0
74.7	0
74.8	0
74.9	0
75	0
75.1	0
75.2	0
75.3	0
75.4	0
75.5	0
75.6	0
75.7	0
75.8	0
75.9	0
76	0
76.1	0
76.2	0
76.3	0
76.4	0
76.5	0
76.6	0
76.7	0
76.8	0
76.9	0
77	0
77.1	0
77.2	0
77.3	0
77.4	0
77.5	0
77.6	0
77.7	0
77.8	0
77.9	0
78	0
78.1	0
78.2	0
78.3	0
78.4	0
78.5	0
78.6	0
78.7	0
78.8	0
78.9	0
79	0
79.1	0
79.2	0
79.3	0
79.4	0
79.5	0
79.6	0
79.7	0
79.8	0
79.9	0
80	0
80.1	0
80.2	0
80.3	0
80.4	0
80.5	0
80.6	0
80.7	0
80.8	0
80.9	0
81	0
81.1	0
81.2	0
81.3	0
81.4	0
81.5	0
81.6	0
81.7	0
81.8	0
81.9	0
82	0
82.1	0
82.2	0
82.3	0
82.4	0
82.5	0
82.6	0
82.7	0
82.8	0
82.9	0
83	0
83.1	0
83.2	0
83.3	0
83.4	0
83.5	0
83.6	0
83.7	0
83.8	0
83.9	0
84	0
84.1	0
84.2	0
84.3	0
84.4	0
84.5	0
84.6	0
84.7	0
84.8	0
84.9	0
85	0
85.1	0
85.2	0
85.3	0
85.4	0
85.5	0
85.6	0
85.7	0
85.8	0
85.9	0
86	0
86.1	0
86.2	0
86.3	0
86.4	0
86.5	0
86.6	0
86.7	0
86.8	0
86.9	0
87	0
87.1	0
87.2	0
87.3	0
87.4	0
87.5	0
87.6	0
87.7	0
87.8	0
87.9	0
88	0
88.1	0
88.2	0
88.3	0
88.4	0
88.5	0
88.6	0
88.7	0
88.8	0
88.9	0
89	0
89.1	0
89.2	0
89.3	0
89.4	0
89.5	0
89.6	0
89.7	0
89.8	0
89.9	0
90	0
90.1	0
90.2	0
90.3	0
90.4	0
90.5	0
90.6	0
90.7	0
90.8	0
90.9	0
91	0
91.1	0
91.2	0
91.3	0
91.4	0
91.5	0
91.6	0
91.7	0
91.8	0
91.9	0
92	0
92.1	0
92.2	0
92.3	0
92.4	0
92.5	0
92.6	0
92.7	0
92.8	0
92.9	0
93	0
93.1	0
93.2	0
93.3	0
93.4	0
93.5	0
93.6	0
93.7	0
93.8	0
93.9	0
94	0
94.1	0
94.2	0
94.3	0
94.4	0
94.5	0
94.6	0
94.7	0
94.8	0
94.9	0
95	0
95.1	0
95.2	0
95.3	0
95.4	0
95.5	0
95.6	0
95.7	0
95.8	0
95.9	0
96	0
96.1	0
96.2	0
96.3	0
96.4	0
96.5	0
96.6	0
96.7	0
96.8	0
96.9	0
97	0
97.1	0
97.2	0
97.3	0
97.4	0
97.5	0
97.6	0
97.7	0
97.8	0
97.9	0
98	0
98.1	0
98.2	0
98.3	0
98.4	0
98.5	0
98.6	0
98.7	0
98.8	0
98.9	0
99	0
99.1	0
99.2	0
99.3	0
99.4	0
99.5	0
99.6	0
99.7	0
99.8	0
99.9	0
100	0
100.1	0.000666667
100.2	0.005
100.3	0.009
100.4	0.012
100.5	0.0166667
100.6	0.0233333
100.7	0.0283333
100.8	0.0316667
100.9	0.0356667
101	0.0396667
101.1	0.0436667
101.2	0.0483333
101.3	0.055
101.4	0.0596667
101.5	0.0633333
101.6	0.067
101.7	0.0706667
101.8	0.0753333
101.9	0.079
102	0.083
102.1	0.0873333
102.2	0.0913333
102.3	0.0966667
102.4	0.101333
102.5	0.106
102.6	0.110667
102.7	0.114333
102.8	0.119333
102.9	0.124
103	0.127
103.1	0.131667
103.2	0.136
103.3	0.139333
103.4	0.144333
103.5	0.148
103.6	0.153
103.7	0.155667
103.8	0.16
103.9	0.163333
104	0.169333
104.1	0.172333
104.2	0.174667
104.3	0.178
104.4	0.181
104.5	0.184667
104.6	0.188
104.7	0.193
104.8	0.196
104.9	0.200333
105	0.205333
105.1	0.210333
105.2	0.215333
105.3	0.218333
105.4	0.222333
105.5	0.228333
105.6	0.232
105.7	0.233333
105.8	0.235333
105.9	0.24
106	0.244667
106.1	0.249667
106.2	0.254667
106.3	0.259
106.4	0.262
106.5	0.265
106.6	0.268333
106.7	0.272
106.8	0.276
106.9	0.277667
107	0.281
107.1	0.283333
107.2	0.285333
107.3	0.287667
107.4	0.290333
107.5	0.292
107.6	0.293333
107.7	0.296
107.8	0.3
107.9	0.302667
108	0.305
108.1	0.308667
108.2	0.311
108.3	0.315
108.4	0.317333
108.5	0.321667
108.6	0.325333
108.7	0.327
108.8	0.328333
108.9	0.330333
109	0.333333
109.1	0.336
109.2	0.337
109.3	0.339667
109.4	0.342667
109.5	0.343667
109.6	0.347333
109.7	0.349
109.8	0.351
109.9	0.354333
110	0.357333
110.1	0.36
110.2	0.362667
110.3	0.365
110.4	0.368667
110.5	0.371
110.6	0.372667
110.7	0.374667
110.8	0.377
110.9	0.378333
111	0.38
111.1	0.382
111.2	0.385
111.3	0.388667
111.4	0.392333
111.5	0.395333
111.6	0.397
111.7	0.4
111.8	0.401667
111.9	0.405667
112	0.408333
112.1	0.410667
112.2	0.414
112.3	0.414667
112.4	0.416667
112.5	0.419667
112.6	0.421333
112.7	0.423333
112.8	0.427
112.9	0.428667
113	0.432
113.1	0.435333
113.2	0.438667
113.3	0.44
113.4	0.442333
113.5	0.445
113.6	0.448
113.7	0.450667
113.8	0.451667
113.9	0.455333
114	0.459333
114.1	0.460667
114.2	0.461667
114.3	0.463
114.4	0.466
114.5	0.468667
114.6	0.470667
114.7	0.471333
114.8	0.473
114.9	0.474333
115	0.477
115.1	0.479
115.2	0.480667
115.3	0.483667
115.4	0.486
115.5	0.489333
115.6	0.492
115.7	0.494
115.8	0.495
115.9	0.497333
116	0.500667
116.1	0.502667
116.2	0.506
116.3	0.508
116.4	0.509333
116.5	0.511
116.6	0.511667
116.7	0.513
116.8	0.514667
116.9	0.515333
117	0.517333
117.1	0.520333
117.2	0.521
117.3	0.522
117.4	0.523333
117.5	0.524333
117.6	0.525667
117.7	0.527333
117.8	0.528667
117.9	0.530667
118	0.533
118.1	0.535333
118.2	0.539
118.3	0.54
118.4	0.542333
118.5	0.544
118.6	0.544667
118.7	0.546333
118.8	0.548
118.9	0.549333
119	0.55
119.1	0.553
119.2	0.555
119.3	0.557
119.4	0.559667
119.5	0.560667
119.6	0.562
119.7	0.564
119.8	0.566333
119.9	0.568
120	0.57
120.1	0.572333
120.2	0.572333
120.3	0.573667
120.4	0.574333
120.5	0.576667
120.6	0.578667
120.7	0.58
120.8	0.583333
120.9	0.583333
121	0.584667
121.1	0.586
121.2	0.586
121.3	0.587
121.4	0.588333
121.5	0.591333
121.6	0.593
121.7	0.593
121.8	0.595667
121.9	0.596
122	0.598667
122.1	0.6
122.2	0.602
122.3	0.603
122.4	0.603333
122.5	0.605
122.6	0.608
122.7	0.608333
122.8	0.611333
122.9	0.613667
123	0.616
123.1	0.616
123.2	0.617
123.3	0.618
123.4	0.619
123.5	0.619667
123.6	0.621667
123.7	0.623
123.8	0.625333
123.9	0.625667
124	0.626333
124.1	0.627333
124.2	0.629
124.3	0.630667
124.4	0.632
124.5	0.635
124.6	0.638667
124.7	0.64
124.8	0.64
124.9	0.640667
125	0.640667
125.1	0.642667
125.2	0.644
125.3	0.643667
125.4	0.644333
125.5	0.645667
125.6	0.648333
125.7	0.649667
125.8	0.652
125.9	0.652667
126	0.654333
126.1	0.654667
126.2	0.654667
126.3	0.657
126.4	0.658
126.5	0.659
126.6	0.660333
126.7	0.661333
126.8	0.663
126.9	0.662667
127	0.663333
127.1	0.664
127.2	0.665
127.3	0.667
127.4	0.668333
127.5	0.67
127.6	0.670333
127.7	0.671333
127.8	0.672
127.9	0.672
128	0.671667
128.1	0.671333
128.2	0.672667
128.3	0.672
128.4	0.673333
128.5	0.674
128.6	0.674333
128.7	0.675
128.8	0.675667
128.9	0.677
129	0.677333
129.1	0.678333
129.2	0.678333
129.3	0.678667
129.4	0.679
129.5	0.679333
129.6	0.679667
129.7	0.680333
129.8	0.682
129.9	0.683333
130	0.685333
130.1	0.686333
130.2	0.687333
130.3	0.689
130.4	0.688667
130.5	0.688667
130.6	0.689333
130.7	0.691
130.8	0.691333
130.9	0.692
131	0.692333
131.1	0.691667
131.2	0.694333
131.3	0.693667
131.4	0.693667
131.5	0.695667
131.6	0.695667
131.7	0.696333
131.8	0.696667
131.9	0.698667
132	0.698667
132.1	0.698667
132.2	0.701667
132.3	0.701667
132.4	0.702
132.5	0.702667
132.6	0.704
132.7	0.703667
132.8	0.704333
132.9	0.705
133	0.707
133.1	0.707667
133.2	0.709
133.3	0.710667
133.4	0.712667
133.5	0.714
133.6	0.715
133.7	0.716333
133.8	0.717
133.9	0.716667
134	0.717
134.1	0.717
134.2	0.718667
134.3	0.719333
134.4	0.719
134.5	0.719667
134.6	0.719333
134.7	0.719333
134.8	0.718667
134.9	0.718667
135	0.719
135.1	0.719667
135.2	0.72
135.3	0.721
135.4	0.721667
135.5	0.723667
135.6	0.726
135.7	0.726333
135.8	0.726667
135.9	0.73
136	0.730333
136.1	0.731
136.2	0.732
136.3	0.732
136.4	0.733333
136.5	0.734
136.6	0.733667
136.7	0.734
136.8	0.733667
136.9	0.734
137	0.735333
137.1	0.737667
137.2	0.738
137.3	0.738667
137.4	0.74
137.5	0.739333
137.6	0.741333
137.7	0.741
137.8	0.741667
137.9	0.741
138	0.742
138.1	0.743
138.2	0.745
138.3	0.745667
138.4	0.746
138.5	0.747
138.6	0.746667
138.7	0.747333
138.8	0.747333
138.9	0.746333
139	0.747333
139.1	0.747333
139.2	0.747667
139.3	0.748667
139.4	0.749667
139.5	0.750333
139.6	0.750667
139.7	0.750667
139.8	0.752
139.9	0.753
140	0.754
140.1	0.754667
140.2	0.755333
140.3	0.757
140.4	0.757
140.5	0.756333
140.6	0.756667
140.7	0.757333
140.8	0.758667
140.9	0.759333
141	0.76
141.1	0.760333
141.2	0.760667
141.3	0.762
141.4	0.762
141.5	0.761333
141.6	0.76
141.7	0.760333
141.8	0.76
141.9	0.761
142	0.761
142.1	0.761667
142.2	0.761667
142.3	0.763
142.4	0.763333
142.5	0.765
142.6	0.765
142.7	0.766333
142.8	0.767333
142.9	0.767333
143	0.769333
143.1	0.769333
143.2	0.769333
143.3	0.770333
143.4	0.771
143.5	0.772
143.6	0.773
143.7	0.773667
143.8	0.772333
143.9	0.773333
144	0.774667
144.1	0.774333
144.2	0.774
144.3	0.775667
144.4	0.775333
144.5	0.776667
144.6	0.776
144.7	0.776667
144.8	0.776667
144.9	0.776333
145	0.776667
145.1	0.777
145.2	0.776667
145.3	0.776667
145.4	0.775
145.5	0.774667
145.6	0.773667
145.7	0.774333
145.8	0.775333
145.9	0.775333
146	0.775333
146.1	0.776333
146.2	0.776
146.3	0.776
146.4	0.777
146.5	0.777333
146.6	0.776667
146.7	0.776
146.8	0.777667
146.9	0.777667
147	0.778667
147.1	0.78
147.2	0.781333
147.3	0.781333
147.4	0.782
147.5	0.783
147.6	0.783333
147.7	0.783
147.8	0.783333
147.9	0.783667
148	0.784
148.1	0.784667
148.2	0.784667
148.3	0.784667
148.4	0.785
148.5	0.786333
148.6	0.787333
148.7	0.789
148.8	0.789
148.9	0.790667
149	0.79
149.1	0.790333
149.2	0.79
149.3	0.789333
149.4	0.788667
149.5	0.789667
149.6	0.789667
149.7	0.79
149.8	0.789333
149.9	0.79
150	0.789667
150.1	0.790333
150.2	0.791333
150.3	0.791
150.4	0.791667
150.5	0.792333
150.6	0.792
150.7	0.792
150.8	0.792
150.9	0.792667
151	0.791333
151.1	0.791333
151.2	0.792
151.3	0.792667
151.4	0.793
151.5	0.793333
151.6	0.794
151.7	0.795333
151.8	0.796
151.9	0.796667
152	0.796667
152.1	0.796333
152.2	0.796667
152.3	0.796667
152.4	0.797
152.5	0.797
152.6	0.797333
152.7	0.798
152.8	0.798
152.9	0.798
153	0.798333
153.1	0.797667
153.2	0.798333
153.3	0.798667
153.4	0.798
153.5	0.798
153.6	0.797667
153.7	0.797333
153.8	0.797333
153.9	0.796
154	0.795667
154.1	0.796667
154.2	0.797667
154.3	0.798667
154.4	0.799
154.5	0.800333
154.6	0.800667
154.7	0.799333
154.8	0.799
154.9	0.799333
155	0.798667
155.1	0.798667
155.2	0.798667
155.3	0.799
155.4	0.799333
155.5	0.8
155.6	0.799333
155.7	0.799333
155.8	0.799
155.9	0.800667
156	0.801667
156.1	0.802
156.2	0.802
156.3	0.801
156.4	0.801
156.5	0.802333
156.6	0.803
156.7	0.803
156.8	0.804667
156.9	0.804667
157	0.804333
157.1	0.804
157.2	0.805
157.3	0.805333
157.4	0.806
157.5	0.806333
157.6	0.807
157.7	0.807
157.8	0.806
157.9	0.805333
158	0.804
158.1	0.804
158.2	0.804
158.3	0.805
158.4	0.805667
158.5	0.805
158.6	0.803667
158.7	0.803333
158.8	0.803667
158.9	0.803
159	0.802667
159.1	0.801667
159.2	0.800667
159.3	0.799333
159.4	0.799333
159.5	0.799333
159.6	0.799333
159.7	0.799667
159.8	0.798667
159.9	0.799667
160	0.801333
160.1	0.801667
160.2	0.800667
160.3	0.801
160.4	0.801
160.5	0.801
160.6	0.800333
160.7	0.801
160.8	0.801333
160.9	0.800333
161	0.801333
161.1	0.801667
161.2	0.803
161.3	0.802333
161.4	0.803
161.5	0.801333
161.6	0.802
161.7	0.801333
161.8	0.802
161.9	0.801333
162	0.801
162.1	0.802
162.2	0.801
162.3	0.801
162.4	0.800333
162.5	0.799667
162.6	0.800333
162.7	0.800667
162.8	0.800333
162.9	0.800333
163	0.801
163.1	0.800667
163.2	0.799333
163.3	0.799333
163.4	0.799333
163.5	0.798667
163.6	0.798667
163.7	0.797667
163.8	0.797
163.9	0.797
164	0.797
164.1	0.797333
164.2	0.798333
164.3	0.798
164.4	0.798
164.5	0.798
164.6	0.798333
164.7	0.799
164.8	0.797667
164.9	0.799
165	0.798667
165.1	0.798333
165.2	0.799333
165.3	0.8
165.4	0.800667
165.5	0.801667
165.6	0.802333
165.7	0.802333
165.8	0.802667
165.9	0.804333
166	0.804667
166.1	0.804
166.2	0.804333
166.3	0.805
166.4	0.804
166.5	0.803667
166.6	0.804333
166.7	0.804333
166.8	0.806
166.9	0.805333
167	0.806
167.1	0.805333
167.2	0.804667
167.3	0.804
167.4	0.804667
167.5	0.805667
167.6	0.804
167.7	0.803667
167.8	0.803667
167.9	0.804
168	0.805
168.1	0.804667
168.2	0.805
168.3	0.805667
168.4	0.807
168.5	0.807
168.6	0.807
168.7	0.806667
168.8	0.807667
168.9	0.808667
169	0.808667
169.1	0.808
169.2	0.808
169.3	0.808
169.4	0.807333
169.5	0.808
169.6	0.806667
169.7	0.807333
169.8	0.807667
169.9	0.807667
170	0.808667
170.1	0.808
170.2	0.809
170.3	0.807333
170.4	0.807
170.5	0.808667
170.6	0.809333
170.7	0.81
170.8	0.810333
170.9	0.812
171	0.812333
171.1	0.811667
171.2	0.812
171.3	0.811667
171.4	0.811667
171.5	0.811333
171.6	0.812333
171.7	0.813
171.8	0.814
171.9	0.814333
172	0.814667
172.1	0.814667
172.2	0.813667
172.3	0.814
172.4	0.814333
172.5	0.813333
172.6	0.813333
172.7	0.812333
172.8	0.813
172.9	0.812667
173	0.812667
173.1	0.812333
173.2	0.813
173.3	0.813
173.4	0.812
173.5	0.812
173.6	0.813
173.7	0.813
173.8	0.812667
173.9	0.813
174	0.813333
174.1	0.813333
174.2	0.812667
174.3	0.811667
174.4	0.812
174.5	0.812
174.6	0.812
174.7	0.811333
174.8	0.812333
174.9	0.811667
175	0.811333
175.1	0.810667
175.2	0.811333
175.3	0.811
175.4	0.811333
175.5	0.811333
175.6	0.810333
175.7	0.809333
175.8	0.809333
175.9	0.809
176	0.810333
176.1	0.811
176.2	0.811
176.3	0.811
176.4	0.811
176.5	0.811
176.6	0.811667
176.7	0.812
176.8	0.812
176.9	0.812667
177	0.813667
177.1	0.815
177.2	0.814667
177.3	0.815333
177.4	0.815
177.5	0.815333
177.6	0.814667
177.7	0.815
177.8	0.816
177.9	0.816333
178	0.816333
178.1	0.816333
178.2	0.817
178.3	0.818
178.4	0.819
178.5	0.818333
178.6	0.816667
178.7	0.816667
178.8	0.816
178.9	0.815667
179	0.814333
179.1	0.814667
179.2	0.814667
179.3	0.813667
179.4	0.813667
179.5	0.813667
179.6	0.813333
179.7	0.812667
179.8	0.812333
179.9	0.813
180	0.813
180.1	0.813
180.2	0.813333
180.3	0.813667
180.4	0.814667
180.5	0.815
180.6	0.814667
180.7	0.813667
180.8	0.814333
180.9	0.813333
181	0.813333
181.1	0.813667
181.2	0.815667
181.3	0.816333
181.4	0.816667
181.5	0.817333
181.6	0.817
181.7	0.818
181.8	0.818667
181.9	0.819333
182	0.819667
182.1	0.820333
182.2	0.820667
182.3	0.819
182.4	0.819
182.5	0.818
182.6	0.817667
182.7	0.817333
182.8	0.816667
182.9	0.817
183	0.816667
183.1	0.817
183.2	0.816667
183.3	0.816667
183.4	0.817
183.5	0.816333
183.6	0.816333
183.7	0.816667
183.8	0.816
183.9	0.816
184	0.814667
184.1	0.815
184.2	0.815
184.3	0.815
184.4	0.815333
184.5	0.816667
184.6	0.816667
184.7	0.817
184.8	0.818
184.9	0.817667
185	0.818333
185.1	0.818333
185.2	0.818333
185.3	0.818333
185.4	0.818667
185.5	0.817
185.6	0.817333
185.7	0.818
185.8	0.817667
185.9	0.817667
186	0.818
186.1	0.818
186.2	0.818333
186.3	0.817667
186.4	0.817667
186.5	0.818
186.6	0.818
186.7	0.817333
186.8	0.818333
186.9	0.818333
187	0.817667
187.1	0.818333
187.2	0.818667
187.3	0.818667
187.4	0.818333
187.5	0.818
187.6	0.818667
187.7	0.818
187.8	0.818
187.9	0.817333
188	0.817667
188.1	0.818333
188.2	0.818667
188.3	0.819333
188.4	0.819333
188.5	0.819667
188.6	0.821
188.7	0.820333
188.8	0.820333
188.9	0.82
189	0.819667
189.1	0.819
189.2	0.819
189.3	0.817
189.4	0.815667
189.5	0.816667
189.6	0.817333
189.7	0.818
189.8	0.818
189.9	0.817667
190	0.817333
190.1	0.816333
190.2	0.818
190.3	0.817333
190.4	0.816667
190.5	0.816333
190.6	0.815667
190.7	0.816
190.8	0.814333
190.9	0.813667
191	0.813667
191.1	0.813667
191.2	0.813333
191.3	0.814333
191.4	0.813333
191.5	0.813667
191.6	0.813333
191.7	0.814
191.8	0.812667
191.9	0.813667
192	0.814333
192.1	0.814333
192.2	0.813
192.3	0.812667
192.4	0.812
192.5	0.812333
192.6	0.813667
192.7	0.813667
192.8	0.813667
192.9	0.814
193	0.813667
193.1	0.813667
193.2	0.815
193.3	0.816333
193.4	0.817333
193.5	0.817333
193.6	0.819
193.7	0.82
193.8	0.820333
193.9	0.820667
194	0.82
194.1	0.822
194.2	0.821
194.3	0.821
194.4	0.82
194.5	0.821
194.6	0.821
194.7	0.820667
194.8	0.821333
194.9	0.820667
195	0.820667
195.1	0.820333
195.2	0.820667
195.3	0.82
195.4	0.821333
195.5	0.822
195.6	0.823333
195.7	0.822333
195.8	0.821333
195.9	0.821333
196	0.820667
196.1	0.82
196.2	0.819667
196.3	0.819667
196.4	0.820333
196.5	0.820333
196.6	0.819333
196.7	0.818667
196.8	0.819
196.9	0.819
197	0.82
197.1	0.819333
197.2	0.820667
197.3	0.821667
197.4	0.823
197.5	0.822667
197.6	0.823
197.7	0.824
197.8	0.822667
197.9	0.822667
198	0.823333
198.1	0.823333
198.2	0.823667
198.3	0.823667
198.4	0.823
198.5	0.824
198.6	0.824333
198.7	0.826667
198.8	0.827333
198.9	0.827333
199	0.828
199.1	0.829333
199.2	0.828667
199.3	0.829333
199.4	0.829333
199.5	0.828333
199.6	0.828
199.7	0.826667
199.8	0.826
199.9	0.826
200	0.826333
[truncated: 14,000 more rows]
