# Supplementary material for: Bayesian inference of kinetic schemes for ion channels by Kalman filtering
Source: eLife journal article supplement (doi:10.7554/elife.62714), 2022-05-04
Supplement: fig4-data3 [file 1_Sim_N_4000_Fluor_MW_32M.xlsx]

## Sheet: Tabelle1
0.1	0
0.2	0
0.3	0
0.4	0
0.5	0
0.6	0
0.7	0
0.8	0
0.9	0
1	0
1.1	0
1.2	0
1.3	0
1.4	0
1.5	0
1.6	0
1.7	0
1.8	0
1.9	0
2	0
2.1	0
2.2	0
2.3	0
2.4	0
2.5	0
2.6	0
2.7	0
2.8	0
2.9	0
3	0
3.1	0
3.2	0
3.3	0
3.4	0
3.5	0
3.6	0
3.7	0
3.8	0
3.9	0
4	0
4.1	0
4.2	0
4.3	0
4.4	0
4.5	0
4.6	0
4.7	0
4.8	0
4.9	0
5	0
5.1	0
5.2	0
5.3	0
5.4	0
5.5	0
5.6	0
5.7	0
5.8	0
5.9	0
6	0
6.1	0
6.2	0
6.3	0
6.4	0
6.5	0
6.6	0
6.7	0
6.8	0
6.9	0
7	0
7.1	0
7.2	0
7.3	0
7.4	0
7.5	0
7.6	0
7.7	0
7.8	0
7.9	0
8	0
8.1	0
8.2	0
8.3	0
8.4	0
8.5	0
8.6	0
8.7	0
8.8	0
8.9	0
9	0
9.1	0
9.2	0
9.3	0
9.4	0
9.5	0
9.6	0
9.7	0
9.8	0
9.9	0
10	0
10.1	0
10.2	0
10.3	0
10.4	0
10.5	0
10.6	0
10.7	0
10.8	0
10.9	0
11	0
11.1	0
11.2	0
11.3	0
11.4	0
11.5	0
11.6	0
11.7	0
11.8	0
11.9	0
12	0
12.1	0
12.2	0
12.3	0
12.4	0
12.5	0
12.6	0
12.7	0
12.8	0
12.9	0
13	0
13.1	0
13.2	0
13.3	0
13.4	0
13.5	0
13.6	0
13.7	0
13.8	0
13.9	0
14	0
14.1	0
14.2	0
14.3	0
14.4	0
14.5	0
14.6	0
14.7	0
14.8	0
14.9	0
15	0
15.1	0
15.2	0
15.3	0
15.4	0
15.5	0
15.6	0
15.7	0
15.8	0
15.9	0
16	0
16.1	0
16.2	0
16.3	0
16.4	0
16.5	0
16.6	0
16.7	0
16.8	0
16.9	0
17	0
17.1	0
17.2	0
17.3	0
17.4	0
17.5	0
17.6	0
17.7	0
17.8	0
17.9	0
18	0
18.1	0
18.2	0
18.3	0
18.4	0
18.5	0
18.6	0
18.7	0
18.8	0
18.9	0
19	0
19.1	0
19.2	0
19.3	0
19.4	0
19.5	0
19.6	0
19.7	0
19.8	0
19.9	0
20	0
20.1	0
20.2	0
20.3	0
20.4	0
20.5	0
20.6	0
20.7	0
20.8	0
20.9	0
21	0
21.1	0
21.2	0
21.3	0
21.4	0
21.5	0
21.6	0
21.7	0
21.8	0
21.9	0
22	0
22.1	0
22.2	0
22.3	0
22.4	0
22.5	0
22.6	0
22.7	0
22.8	0
22.9	0
23	0
23.1	0
23.2	0
23.3	0
23.4	0
23.5	0
23.6	0
23.7	0
23.8	0
23.9	0
24	0
24.1	0
24.2	0
24.3	0
24.4	0
24.5	0
24.6	0
24.7	0
24.8	0
24.9	0
25	0
25.1	0
25.2	0
25.3	0
25.4	0
25.5	0
25.6	0
25.7	0
25.8	0
25.9	0
26	0
26.1	0
26.2	0
26.3	0
26.4	0
26.5	0
26.6	0
26.7	0
26.8	0
26.9	0
27	0
27.1	0
27.2	0
27.3	0
27.4	0
27.5	0
27.6	0
27.7	0
27.8	0
27.9	0
28	0
28.1	0
28.2	0
28.3	0
28.4	0
28.5	0
28.6	0
28.7	0
28.8	0
28.9	0
29	0
29.1	0
29.2	0
29.3	0
29.4	0
29.5	0
29.6	0
29.7	0
29.8	0
29.9	0
30	0
30.1	0
30.2	0
30.3	0
30.4	0
30.5	0
30.6	0
30.7	0
30.8	0
30.9	0
31	0
31.1	0
31.2	0
31.3	0
31.4	0
31.5	0
31.6	0
31.7	0
31.8	0
31.9	0
32	0
32.1	0
32.2	0
32.3	0
32.4	0
32.5	0
32.6	0
32.7	0
32.8	0
32.9	0
33	0
33.1	0
33.2	0
33.3	0
33.4	0
33.5	0
33.6	0
33.7	0
33.8	0
33.9	0
34	0
34.1	0
34.2	0
34.3	0
34.4	0
34.5	0
34.6	0
34.7	0
34.8	0
34.9	0
35	0
35.1	0
35.2	0
35.3	0
35.4	0
35.5	0
35.6	0
35.7	0
35.8	0
35.9	0
36	0
36.1	0
36.2	0
36.3	0
36.4	0
36.5	0
36.6	0
36.7	0
36.8	0
36.9	0
37	0
37.1	0
37.2	0
37.3	0
37.4	0
37.5	0
37.6	0
37.7	0
37.8	0
37.9	0
38	0
38.1	0
38.2	0
38.3	0
38.4	0
38.5	0
38.6	0
38.7	0
38.8	0
38.9	0
39	0
39.1	0
39.2	0
39.3	0
39.4	0
39.5	0
39.6	0
39.7	0
39.8	0
39.9	0
40	0
40.1	0
40.2	0
40.3	0
40.4	0
40.5	0
40.6	0
40.7	0
40.8	0
40.9	0
41	0
41.1	0
41.2	0
41.3	0
41.4	0
41.5	0
41.6	0
41.7	0
41.8	0
41.9	0
42	0
42.1	0
42.2	0
42.3	0
42.4	0
42.5	0
42.6	0
42.7	0
42.8	0
42.9	0
43	0
43.1	0
43.2	0
43.3	0
43.4	0
43.5	0
43.6	0
43.7	0
43.8	0
43.9	0
44	0
44.1	0
44.2	0
44.3	0
44.4	0
44.5	0
44.6	0
44.7	0
44.8	0
44.9	0
45	0
45.1	0
45.2	0
45.3	0
45.4	0
45.5	0
45.6	0
45.7	0
45.8	0
45.9	0
46	0
46.1	0
46.2	0
46.3	0
46.4	0
46.5	0
46.6	0
46.7	0
46.8	0
46.9	0
47	0
47.1	0
47.2	0
47.3	0
47.4	0
47.5	0
47.6	0
47.7	0
47.8	0
47.9	0
48	0
48.1	0
48.2	0
48.3	0
48.4	0
48.5	0
48.6	0
48.7	0
48.8	0
48.9	0
49	0
49.1	0
49.2	0
49.3	0
49.4	0
49.5	0
49.6	0
49.7	0
49.8	0
49.9	0
50	0
50.1	0
50.2	0
50.3	0
50.4	0
50.5	0
50.6	0
50.7	0
50.8	0
50.9	0
51	0
51.1	0
51.2	0
51.3	0
51.4	0
51.5	0
51.6	0
51.7	0
51.8	0
51.9	0
52	0
52.1	0
52.2	0
52.3	0
52.4	0
52.5	0
52.6	0
52.7	0
52.8	0
52.9	0
53	0
53.1	0
53.2	0
53.3	0
53.4	0
53.5	0
53.6	0
53.7	0
53.8	0
53.9	0
54	0
54.1	0
54.2	0
54.3	0
54.4	0
54.5	0
54.6	0
54.7	0
54.8	0
54.9	0
55	0
55.1	0
55.2	0
55.3	0
55.4	0
55.5	0
55.6	0
55.7	0
55.8	0
55.9	0
56	0
56.1	0
56.2	0
56.3	0
56.4	0
56.5	0
56.6	0
56.7	0
56.8	0
56.9	0
57	0
57.1	0
57.2	0
57.3	0
57.4	0
57.5	0
57.6	0
57.7	0
57.8	0
57.9	0
58	0
58.1	0
58.2	0
58.3	0
58.4	0
58.5	0
58.6	0
58.7	0
58.8	0
58.9	0
59	0
59.1	0
59.2	0
59.3	0
59.4	0
59.5	0
59.6	0
59.7	0
59.8	0
59.9	0
60	0
60.1	0
60.2	0
60.3	0
60.4	0
60.5	0
60.6	0
60.7	0
60.8	0
60.9	0
61	0
61.1	0
61.2	0
61.3	0
61.4	0
61.5	0
61.6	0
61.7	0
61.8	0
61.9	0
62	0
62.1	0
62.2	0
62.3	0
62.4	0
62.5	0
62.6	0
62.7	0
62.8	0
62.9	0
63	0
63.1	0
63.2	0
63.3	0
63.4	0
63.5	0
63.6	0
63.7	0
63.8	0
63.9	0
64	0
64.1	0
64.2	0
64.3	0
64.4	0
64.5	0
64.6	0
64.7	0
64.8	0
64.9	0
65	0
65.1	0
65.2	0
65.3	0
65.4	0
65.5	0
65.6	0
65.7	0
65.8	0
65.9	0
66	0
66.1	0
66.2	0
66.3	0
66.4	0
66.5	0
66.6	0
66.7	0
66.8	0
66.9	0
67	0
67.1	0
67.2	0
67.3	0
67.4	0
67.5	0
67.6	0
67.7	0
67.8	0
67.9	0
68	0
68.1	0
68.2	0
68.3	0
68.4	0
68.5	0
68.6	0
68.7	0
68.8	0
68.9	0
69	0
69.1	0
69.2	0
69.3	0
69.4	0
69.5	0
69.6	0
69.7	0
69.8	0
69.9	0
70	0
70.1	0
70.2	0
70.3	0
70.4	0
70.5	0
70.6	0
70.7	0
70.8	0
70.9	0
71	0
71.1	0
71.2	0
71.3	0
71.4	0
71.5	0
71.6	0
71.7	0
71.8	0
71.9	0
72	0
72.1	0
72.2	0
72.3	0
72.4	0
72.5	0
72.6	0
72.7	0
72.8	0
72.9	0
73	0
73.1	0
73.2	0
73.3	0
73.4	0
73.5	0
73.6	0
73.7	0
73.8	0
73.9	0
74	0
74.1	0
74.2	0
74.3	0
74.4	0
74.5	0
74.6	0
74.7	0
74.8	0
74.9	0
75	0
75.1	0
75.2	0
75.3	0
75.4	0
75.5	0
75.6	0
75.7	0
75.8	0
75.9	0
76	0
76.1	0
76.2	0
76.3	0
76.4	0
76.5	0
76.6	0
76.7	0
76.8	0
76.9	0
77	0
77.1	0
77.2	0
77.3	0
77.4	0
77.5	0
77.6	0
77.7	0
77.8	0
77.9	0
78	0
78.1	0
78.2	0
78.3	0
78.4	0
78.5	0
78.6	0
78.7	0
78.8	0
78.9	0
79	0
79.1	0
79.2	0
79.3	0
79.4	0
79.5	0
79.6	0
79.7	0
79.8	0
79.9	0
80	0
80.1	0
80.2	0
80.3	0
80.4	0
80.5	0
80.6	0
80.7	0
80.8	0
80.9	0
81	0
81.1	0
81.2	0
81.3	0
81.4	0
81.5	0
81.6	0
81.7	0
81.8	0
81.9	0
82	0
82.1	0
82.2	0
82.3	0
82.4	0
82.5	0
82.6	0
82.7	0
82.8	0
82.9	0
83	0
83.1	0
83.2	0
83.3	0
83.4	0
83.5	0
83.6	0
83.7	0
83.8	0
83.9	0
84	0
84.1	0
84.2	0
84.3	0
84.4	0
84.5	0
84.6	0
84.7	0
84.8	0
84.9	0
85	0
85.1	0
85.2	0
85.3	0
85.4	0
85.5	0
85.6	0
85.7	0
85.8	0
85.9	0
86	0
86.1	0
86.2	0
86.3	0
86.4	0
86.5	0
86.6	0
86.7	0
86.8	0
86.9	0
87	0
87.1	0
87.2	0
87.3	0
87.4	0
87.5	0
87.6	0
87.7	0
87.8	0
87.9	0
88	0
88.1	0
88.2	0
88.3	0
88.4	0
88.5	0
88.6	0
88.7	0
88.8	0
88.9	0
89	0
89.1	0
89.2	0
89.3	0
89.4	0
89.5	0
89.6	0
89.7	0
89.8	0
89.9	0
90	0
90.1	0
90.2	0
90.3	0
90.4	0
90.5	0
90.6	0
90.7	0
90.8	0
90.9	0
91	0
91.1	0
91.2	0
91.3	0
91.4	0
91.5	0
91.6	0
91.7	0
91.8	0
91.9	0
92	0
92.1	0
92.2	0
92.3	0
92.4	0
92.5	0
92.6	0
92.7	0
92.8	0
92.9	0
93	0
93.1	0
93.2	0
93.3	0
93.4	0
93.5	0
93.6	0
93.7	0
93.8	0
93.9	0
94	0
94.1	0
94.2	0
94.3	0
94.4	0
94.5	0
94.6	0
94.7	0
94.8	0
94.9	0
95	0
95.1	0
95.2	0
95.3	0
95.4	0
95.5	0
95.6	0
95.7	0
95.8	0
95.9	0
96	0
96.1	0
96.2	0
96.3	0
96.4	0
96.5	0
96.6	0
96.7	0
96.8	0
96.9	0
97	0
97.1	0
97.2	0
97.3	0
97.4	0
97.5	0
97.6	0
97.7	0
97.8	0
97.9	0
98	0
98.1	0
98.2	0
98.3	0
98.4	0
98.5	0
98.6	0
98.7	0
98.8	0
98.9	0
99	0
99.1	0
99.2	0
99.3	0
99.4	0
99.5	0
99.6	0
99.7	0
99.8	0
99.9	0
100	0
100.1	0.7255
100.2	0.88925
100.3	0.944125
100.4	0.967125
100.5	0.97425
100.6	0.976125
100.7	0.97775
100.8	0.977875
100.9	0.976125
101	0.975875
101.1	0.97675
101.2	0.97825
101.3	0.978
101.4	0.9755
101.5	0.97775
101.6	0.97825
101.7	0.97725
101.8	0.97775
101.9	0.9765
102	0.975
102.1	0.98
102.2	0.978875
102.3	0.979
102.4	0.975375
102.5	0.97675
102.6	0.97975
102.7	0.978125
102.8	0.975
102.9	0.975125
103	0.976
103.1	0.977
103.2	0.978
103.3	0.980875
103.4	0.9765
103.5	0.9795
103.6	0.98075
103.7	0.975625
103.8	0.97775
103.9	0.9765
104	0.976875
104.1	0.977125
104.2	0.981125
104.3	0.9805
104.4	0.9785
104.5	0.979875
104.6	0.981625
104.7	0.979625
104.8	0.982
104.9	0.98175
105	0.978625
105.1	0.9805
105.2	0.97875
105.3	0.9775
105.4	0.9765
105.5	0.978875
105.6	0.97925
105.7	0.983
105.8	0.9825
105.9	0.982125
106	0.9815
106.1	0.981125
106.2	0.9835
106.3	0.983125
106.4	0.981625
106.5	0.982625
106.6	0.982
106.7	0.980125
106.8	0.98025
106.9	0.981
107	0.983625
107.1	0.983125
107.2	0.983875
107.3	0.983375
107.4	0.984
107.5	0.98525
107.6	0.981125
107.7	0.98325
107.8	0.97875
107.9	0.98075
108	0.984375
108.1	0.98475
108.2	0.98375
108.3	0.984
108.4	0.984625
108.5	0.982125
108.6	0.982375
108.7	0.9845
108.8	0.983375
108.9	0.98275
109	0.98225
109.1	0.983
109.2	0.983875
109.3	0.98425
109.4	0.98425
109.5	0.981875
109.6	0.983375
109.7	0.9815
109.8	0.9845
109.9	0.985375
110	0.985375
110.1	0.98425
110.2	0.984375
110.3	0.982
110.4	0.985375
110.5	0.98425
110.6	0.98475
110.7	0.9825
110.8	0.983875
110.9	0.98275
111	0.98675
111.1	0.983625
111.2	0.9845
111.3	0.986875
111.4	0.986875
111.5	0.985125
111.6	0.98525
111.7	0.985125
111.8	0.9845
111.9	0.985
112	0.9875
112.1	0.985875
112.2	0.985125
112.3	0.98725
112.4	0.98675
112.5	0.987875
112.6	0.9875
112.7	0.987
112.8	0.986375
112.9	0.98625
113	0.98575
113.1	0.984375
113.2	0.98825
113.3	0.98525
113.4	0.984
113.5	0.984375
113.6	0.98375
113.7	0.986
113.8	0.9885
113.9	0.988125
114	0.987625
114.1	0.98775
114.2	0.98575
114.3	0.984625
114.4	0.987125
114.5	0.987
114.6	0.98525
114.7	0.9865
114.8	0.9865
114.9	0.987375
115	0.986125
115.1	0.98475
115.2	0.9855
115.3	0.98775
115.4	0.98775
115.5	0.98675
115.6	0.9865
115.7	0.986625
115.8	0.98775
115.9	0.987625
116	0.989375
116.1	0.988875
116.2	0.988625
116.3	0.9895
116.4	0.988375
116.5	0.986125
116.6	0.98575
116.7	0.987375
116.8	0.987375
116.9	0.9865
117	0.986375
117.1	0.988
117.2	0.988625
117.3	0.987625
117.4	0.988125
117.5	0.98825
117.6	0.98875
117.7	0.989125
117.8	0.988375
117.9	0.988625
118	0.989125
118.1	0.989625
118.2	0.98825
118.3	0.98725
118.4	0.988
118.5	0.989125
118.6	0.989
118.7	0.99075
118.8	0.99
118.9	0.9885
119	0.98825
119.1	0.990875
119.2	0.98825
119.3	0.98625
119.4	0.986875
119.5	0.98675
119.6	0.98825
119.7	0.991
119.8	0.989625
119.9	0.98825
120	0.99075
120.1	0.990625
120.2	0.989125
120.3	0.989125
120.4	0.990875
120.5	0.990375
120.6	0.991125
120.7	0.991125
120.8	0.992125
120.9	0.989375
121	0.989375
121.1	0.989125
121.2	0.990125
121.3	0.990625
121.4	0.99
121.5	0.989375
121.6	0.99
121.7	0.9895
121.8	0.991375
121.9	0.991625
122	0.990875
122.1	0.990125
122.2	0.99025
122.3	0.989625
122.4	0.990625
122.5	0.990125
122.6	0.98775
122.7	0.98975
122.8	0.989375
122.9	0.98975
123	0.990875
123.1	0.99025
123.2	0.98775
123.3	0.989625
123.4	0.991
123.5	0.991
123.6	0.990875
123.7	0.991125
123.8	0.99125
123.9	0.992375
124	0.989625
124.1	0.98875
124.2	0.990375
124.3	0.99125
124.4	0.9905
124.5	0.992125
124.6	0.990875
124.7	0.992125
124.8	0.990875
124.9	0.992875
125	0.993
125.1	0.991625
125.2	0.991
125.3	0.9895
125.4	0.988375
125.5	0.987
125.6	0.990125
125.7	0.99
125.8	0.989875
125.9	0.9915
126	0.99125
126.1	0.9915
126.2	0.993375
126.3	0.99225
126.4	0.99275
126.5	0.993125
126.6	0.99175
126.7	0.990125
126.8	0.99275
126.9	0.992
127	0.988875
127.1	0.99025
127.2	0.98925
127.3	0.991
127.4	0.991375
127.5	0.9905
127.6	0.990875
127.7	0.99175
127.8	0.991875
127.9	0.99275
128	0.991875
128.1	0.992625
128.2	0.991125
128.3	0.99175
128.4	0.9935
128.5	0.9935
128.6	0.992125
128.7	0.992625
128.8	0.991875
128.9	0.99275
129	0.992625
129.1	0.992625
129.2	0.9945
129.3	0.993625
129.4	0.992
129.5	0.993
129.6	0.991625
129.7	0.9925
129.8	0.99375
129.9	0.992125
130	0.99375
130.1	0.99275
130.2	0.99275
130.3	0.991
130.4	0.990625
130.5	0.99075
130.6	0.991625
130.7	0.991375
130.8	0.9925
130.9	0.9925
131	0.991625
131.1	0.991875
131.2	0.992
131.3	0.9915
131.4	0.992875
131.5	0.993375
131.6	0.993375
131.7	0.99175
131.8	0.991875
131.9	0.991625
132	0.990625
132.1	0.99225
132.2	0.99375
132.3	0.993125
132.4	0.99225
132.5	0.9935
132.6	0.9925
132.7	0.9935
132.8	0.992
132.9	0.993
133	0.992625
133.1	0.99375
133.2	0.993875
133.3	0.993375
133.4	0.993875
133.5	0.993375
133.6	0.991625
133.7	0.992625
133.8	0.9925
133.9	0.99325
134	0.992875
134.1	0.993125
134.2	0.9925
134.3	0.99225
134.4	0.993
134.5	0.99325
134.6	0.992125
134.7	0.993625
134.8	0.994
134.9	0.99325
135	0.993875
135.1	0.99425
135.2	0.994
135.3	0.993
135.4	0.994
135.5	0.99275
135.6	0.992375
135.7	0.992375
135.8	0.99275
135.9	0.992625
136	0.993875
136.1	0.99325
136.2	0.992875
136.3	0.99325
136.4	0.994375
136.5	0.993125
136.6	0.99275
136.7	0.99475
136.8	0.994625
136.9	0.993625
137	0.99375
137.1	0.992625
137.2	0.994375
137.3	0.993625
137.4	0.99325
137.5	0.9935
137.6	0.9945
137.7	0.994375
137.8	0.994625
137.9	0.99525
138	0.993
138.1	0.993625
138.2	0.992375
138.3	0.994125
138.4	0.99225
138.5	0.994625
138.6	0.993
138.7	0.9935
138.8	0.9945
138.9	0.99375
139	0.99375
139.1	0.994375
139.2	0.994125
139.3	0.992875
139.4	0.994125
139.5	0.99475
139.6	0.994
139.7	0.994
139.8	0.994
139.9	0.993875
140	0.992875
140.1	0.991625
140.2	0.992125
140.3	0.993125
140.4	0.994875
140.5	0.994
140.6	0.995125
140.7	0.99475
140.8	0.994375
140.9	0.99425
141	0.9945
141.1	0.994375
141.2	0.9935
141.3	0.99325
141.4	0.99375
141.5	0.99425
141.6	0.994375
141.7	0.993375
141.8	0.994375
141.9	0.994125
142	0.9935
142.1	0.99475
142.2	0.99425
142.3	0.99425
142.4	0.99525
142.5	0.994125
142.6	0.994125
142.7	0.99375
142.8	0.99475
142.9	0.99425
143	0.994125
143.1	0.993375
143.2	0.995125
143.3	0.994
143.4	0.99325
143.5	0.99475
143.6	0.994625
143.7	0.995625
143.8	0.9945
143.9	0.993875
144	0.995125
144.1	0.994
144.2	0.994625
144.3	0.993625
144.4	0.994375
144.5	0.993375
144.6	0.994625
144.7	0.9925
144.8	0.994625
144.9	0.99525
145	0.994625
145.1	0.994875
145.2	0.993875
145.3	0.9945
145.4	0.995125
145.5	0.996625
145.6	0.995125
145.7	0.994375
145.8	0.994875
145.9	0.994125
146	0.99375
146.1	0.995
146.2	0.99475
146.3	0.995125
146.4	0.996125
146.5	0.994625
146.6	0.99375
146.7	0.99425
146.8	0.9935
146.9	0.994875
147	0.995375
147.1	0.996875
147.2	0.995625
147.3	0.99425
147.4	0.9945
147.5	0.9935
147.6	0.995125
147.7	0.9955
147.8	0.9945
147.9	0.995
148	0.995875
148.1	0.99475
148.2	0.994375
148.3	0.99475
148.4	0.9955
148.5	0.99375
148.6	0.99475
148.7	0.99375
148.8	0.9955
148.9	0.995125
149	0.995875
149.1	0.99425
149.2	0.99325
149.3	0.994625
149.4	0.994875
149.5	0.994625
149.6	0.993375
149.7	0.995
149.8	0.994625
149.9	0.995375
150	0.993125
150.1	0.9945
150.2	0.9945
150.3	0.994
150.4	0.995625
150.5	0.9945
150.6	0.99525
150.7	0.9945
150.8	0.9945
150.9	0.99525
151	0.993375
151.1	0.994875
151.2	0.9965
151.3	0.995625
151.4	0.99575
151.5	0.995125
151.6	0.99525
151.7	0.994875
151.8	0.994625
151.9	0.99225
152	0.994125
152.1	0.994875
152.2	0.994375
152.3	0.995625
152.4	0.997
152.5	0.99525
152.6	0.9935
152.7	0.9945
152.8	0.9945
152.9	0.99525
153	0.995375
153.1	0.99625
153.2	0.99425
153.3	0.994875
153.4	0.995
153.5	0.99575
153.6	0.995375
153.7	0.994
153.8	0.99425
153.9	0.996375
154	0.996
154.1	0.996125
154.2	0.99575
154.3	0.995125
154.4	0.996125
154.5	0.99525
154.6	0.994375
154.7	0.993875
154.8	0.996375
154.9	0.99475
155	0.9955
155.1	0.994125
155.2	0.995
155.3	0.9945
155.4	0.994625
155.5	0.995
155.6	0.993625
155.7	0.995
155.8	0.994875
155.9	0.995125
156	0.99475
156.1	0.994625
156.2	0.99475
156.3	0.994375
156.4	0.99525
156.5	0.9955
156.6	0.995125
156.7	0.9945
156.8	0.9955
156.9	0.99525
157	0.994125
157.1	0.9955
157.2	0.9965
157.3	0.99725
157.4	0.995
157.5	0.994875
157.6	0.994
157.7	0.994375
157.8	0.995375
157.9	0.99525
158	0.9955
158.1	0.995375
158.2	0.996375
158.3	0.994125
158.4	0.993625
158.5	0.9935
158.6	0.994
158.7	0.993875
158.8	0.993875
158.9	0.9945
159	0.9935
159.1	0.993375
159.2	0.993625
159.3	0.994375
159.4	0.995375
159.5	0.99475
159.6	0.994875
159.7	0.99475
159.8	0.996375
159.9	0.995
160	0.995875
160.1	0.99525
160.2	0.995375
160.3	0.995
160.4	0.9955
160.5	0.99575
160.6	0.99575
160.7	0.994875
160.8	0.995
160.9	0.9955
161	0.996875
161.1	0.99475
161.2	0.995
161.3	0.996
161.4	0.99575
161.5	0.9955
161.6	0.996125
161.7	0.995875
161.8	0.994625
161.9	0.99425
162	0.99525
162.1	0.995625
162.2	0.9945
162.3	0.994375
162.4	0.99425
162.5	0.994125
162.6	0.99425
162.7	0.99475
162.8	0.99525
162.9	0.99475
163	0.99325
163.1	0.994875
163.2	0.995
163.3	0.995125
163.4	0.99375
163.5	0.994375
163.6	0.99525
163.7	0.99525
163.8	0.9955
163.9	0.994875
164	0.99425
164.1	0.994375
164.2	0.99475
164.3	0.995875
164.4	0.99525
164.5	0.996375
164.6	0.996125
164.7	0.994375
164.8	0.9955
164.9	0.99575
165	0.995
165.1	0.994375
165.2	0.995375
165.3	0.995125
165.4	0.995625
165.5	0.99475
165.6	0.99475
165.7	0.994875
165.8	0.9955
165.9	0.995125
166	0.995375
166.1	0.996125
166.2	0.995625
166.3	0.99475
166.4	0.994125
166.5	0.994125
166.6	0.993625
166.7	0.994125
166.8	0.996
166.9	0.9955
167	0.99575
167.1	0.996125
167.2	0.996375
167.3	0.997375
167.4	0.997125
167.5	0.995875
167.6	0.99475
167.7	0.995
167.8	0.9935
167.9	0.9945
168	0.99425
168.1	0.994875
168.2	0.996
168.3	0.995375
168.4	0.995625
168.5	0.99625
168.6	0.99575
168.7	0.99475
168.8	0.99425
168.9	0.996875
169	0.99525
169.1	0.994875
169.2	0.99475
169.3	0.9945
169.4	0.994875
169.5	0.995375
169.6	0.99625
169.7	0.996125
169.8	0.995375
169.9	0.994625
170	0.995125
170.1	0.995875
170.2	0.994875
170.3	0.997
170.4	0.996375
170.5	0.996125
170.6	0.99525
170.7	0.99525
170.8	0.994875
170.9	0.99625
171	0.996375
171.1	0.994875
171.2	0.994625
171.3	0.995625
171.4	0.99525
171.5	0.99525
171.6	0.995125
171.7	0.9955
171.8	0.995375
171.9	0.995375
172	0.996
172.1	0.996
172.2	0.99575
172.3	0.995875
172.4	0.995125
172.5	0.996375
172.6	0.995375
172.7	0.995
172.8	0.994625
172.9	0.994875
173	0.99475
173.1	0.9955
173.2	0.99575
173.3	0.995875
173.4	0.995625
173.5	0.99475
173.6	0.99575
173.7	0.99575
173.8	0.995375
173.9	0.994375
174	0.9945
174.1	0.994625
174.2	0.9945
174.3	0.995875
174.4	0.994625
174.5	0.994875
174.6	0.993625
174.7	0.995125
174.8	0.99375
174.9	0.99525
175	0.9955
175.1	0.995375
175.2	0.9955
175.3	0.99575
175.4	0.996125
175.5	0.996
175.6	0.994625
175.7	0.99625
175.8	0.994875
175.9	0.99525
176	0.995
176.1	0.995875
176.2	0.996125
176.3	0.9955
176.4	0.994875
176.5	0.994875
176.6	0.994875
176.7	0.995125
176.8	0.99425
176.9	0.995125
177	0.994625
177.1	0.995875
177.2	0.995125
177.3	0.99625
177.4	0.99575
177.5	0.995375
177.6	0.9955
177.7	0.99525
177.8	0.995625
177.9	0.996375
178	0.995
178.1	0.995375
178.2	0.995875
178.3	0.995625
178.4	0.995375
178.5	0.994625
178.6	0.99575
178.7	0.995625
178.8	0.996125
178.9	0.99525
179	0.9955
179.1	0.996
179.2	0.99575
179.3	0.995125
179.4	0.996375
179.5	0.996
179.6	0.996
179.7	0.995625
179.8	0.99475
179.9	0.994625
180	0.996375
180.1	0.997125
180.2	0.997125
180.3	0.996125
180.4	0.995875
180.5	0.9965
180.6	0.9955
180.7	0.995625
180.8	0.9965
180.9	0.993875
181	0.99475
181.1	0.99625
181.2	0.99625
181.3	0.995875
181.4	0.995875
181.5	0.99625
181.6	0.994875
181.7	0.996125
181.8	0.995625
181.9	0.996125
182	0.996625
182.1	0.995875
182.2	0.99525
182.3	0.996
182.4	0.995625
182.5	0.995125
182.6	0.995625
182.7	0.9945
182.8	0.995125
182.9	0.995375
183	0.99525
183.1	0.99575
183.2	0.995625
183.3	0.995875
183.4	0.995875
183.5	0.995125
183.6	0.995625
183.7	0.996
183.8	0.99575
183.9	0.995625
184	0.9955
184.1	0.99425
184.2	0.994625
184.3	0.994875
184.4	0.994375
184.5	0.9955
184.6	0.99575
184.7	0.99725
184.8	0.996625
184.9	0.99575
185	0.99575
185.1	0.99575
185.2	0.996
185.3	0.995875
185.4	0.996625
185.5	0.9955
185.6	0.995375
185.7	0.996125
185.8	0.995625
185.9	0.99525
186	0.995625
186.1	0.995375
186.2	0.995625
186.3	0.9955
186.4	0.995
186.5	0.993625
186.6	0.995125
186.7	0.9945
186.8	0.995375
186.9	0.995
187	0.995375
187.1	0.99575
187.2	0.995375
187.3	0.995375
187.4	0.996625
187.5	0.997
187.6	0.996625
187.7	0.995625
187.8	0.994875
187.9	0.99475
188	0.995
188.1	0.9945
188.2	0.995125
188.3	0.995
188.4	0.996125
188.5	0.996
188.6	0.995875
188.7	0.995625
188.8	0.996125
188.9	0.9955
189	0.9955
189.1	0.995875
189.2	0.9965
189.3	0.99525
189.4	0.99575
189.5	0.995625
189.6	0.99575
189.7	0.9955
189.8	0.994875
189.9	0.995375
190	0.995
190.1	0.994875
190.2	0.994125
190.3	0.99525
190.4	0.9955
190.5	0.99575
190.6	0.994375
190.7	0.996
190.8	0.995375
190.9	0.996
191	0.995875
191.1	0.995625
191.2	0.9965
191.3	0.995875
191.4	0.996
191.5	0.996375
191.6	0.99625
191.7	0.9955
191.8	0.994625
191.9	0.995625
192	0.9955
192.1	0.9955
192.2	0.9945
192.3	0.9945
192.4	0.99525
192.5	0.995875
192.6	0.995125
192.7	0.995625
192.8	0.995125
192.9	0.99525
193	0.99425
193.1	0.994375
193.2	0.995375
193.3	0.996125
193.4	0.996125
193.5	0.994375
193.6	0.99475
193.7	0.994125
193.8	0.99425
193.9	0.994
194	0.994375
194.1	0.99525
194.2	0.996625
194.3	0.994875
194.4	0.995125
194.5	0.995375
194.6	0.99475
194.7	0.995
194.8	0.995625
194.9	0.99525
195	0.994875
195.1	0.996125
195.2	0.99625
195.3	0.99525
195.4	0.99575
195.5	0.995625
195.6	0.996
195.7	0.9955
195.8	0.996375
195.9	0.99575
196	0.994875
196.1	0.99525
196.2	0.995125
196.3	0.994875
196.4	0.9945
196.5	0.995875
196.6	0.995125
196.7	0.995125
196.8	0.995125
196.9	0.99375
197	0.993125
197.1	0.9955
197.2	0.996125
197.3	0.99575
197.4	0.994625
197.5	0.99525
197.6	0.995875
197.7	0.994125
197.8	0.995875
197.9	0.995125
198	0.995
198.1	0.99375
198.2	0.995
198.3	0.995
198.4	0.995
198.5	0.995375
198.6	0.996
198.7	0.994625
198.8	0.994875
198.9	0.9955
199	0.996125
199.1	0.994625
199.2	0.994
199.3	0.995
199.4	0.99575
199.5	0.9965
199.6	0.9965
199.7	0.994875
199.8	0.9955
199.9	0.99525
200	0.995375
[truncated: 14,000 more rows]
