# Supplementary material for: Bayesian inference of kinetic schemes for ion channels by Kalman filtering
Source: eLife journal article supplement (doi:10.7554/elife.62714), 2022-05-04
Supplement: fig4-data3 [file 1_Sim_N_4000_Strom_MW_32M.xlsx]

## Sheet: Tabelle1
0.1	0
0.2	0
0.3	0
0.4	0
0.5	0
0.6	0
0.7	0
0.8	0
0.9	0
1	0
1.1	0
1.2	0
1.3	0
1.4	0
1.5	0
1.6	0
1.7	0
1.8	0
1.9	0
2	0
2.1	0
2.2	0
2.3	0
2.4	0
2.5	0
2.6	0
2.7	0
2.8	0
2.9	0
3	0
3.1	0
3.2	0
3.3	0
3.4	0
3.5	0
3.6	0
3.7	0
3.8	0
3.9	0
4	0
4.1	0
4.2	0
4.3	0
4.4	0
4.5	0
4.6	0
4.7	0
4.8	0
4.9	0
5	0
5.1	0
5.2	0
5.3	0
5.4	0
5.5	0
5.6	0
5.7	0
5.8	0
5.9	0
6	0
6.1	0
6.2	0
6.3	0
6.4	0
6.5	0
6.6	0
6.7	0
6.8	0
6.9	0
7	0
7.1	0
7.2	0
7.3	0
7.4	0
7.5	0
7.6	0
7.7	0
7.8	0
7.9	0
8	0
8.1	0
8.2	0
8.3	0
8.4	0
8.5	0
8.6	0
8.7	0
8.8	0
8.9	0
9	0
9.1	0
9.2	0
9.3	0
9.4	0
9.5	0
9.6	0
9.7	0
9.8	0
9.9	0
10	0
10.1	0
10.2	0
10.3	0
10.4	0
10.5	0
10.6	0
10.7	0
10.8	0
10.9	0
11	0
11.1	0
11.2	0
11.3	0
11.4	0
11.5	0
11.6	0
11.7	0
11.8	0
11.9	0
12	0
12.1	0
12.2	0
12.3	0
12.4	0
12.5	0
12.6	0
12.7	0
12.8	0
12.9	0
13	0
13.1	0
13.2	0
13.3	0
13.4	0
13.5	0
13.6	0
13.7	0
13.8	0
13.9	0
14	0
14.1	0
14.2	0
14.3	0
14.4	0
14.5	0
14.6	0
14.7	0
14.8	0
14.9	0
15	0
15.1	0
15.2	0
15.3	0
15.4	0
15.5	0
15.6	0
15.7	0
15.8	0
15.9	0
16	0
16.1	0
16.2	0
16.3	0
16.4	0
16.5	0
16.6	0
16.7	0
16.8	0
16.9	0
17	0
17.1	0
17.2	0
17.3	0
17.4	0
17.5	0
17.6	0
17.7	0
17.8	0
17.9	0
18	0
18.1	0
18.2	0
18.3	0
18.4	0
18.5	0
18.6	0
18.7	0
18.8	0
18.9	0
19	0
19.1	0
19.2	0
19.3	0
19.4	0
19.5	0
19.6	0
19.7	0
19.8	0
19.9	0
20	0
20.1	0
20.2	0
20.3	0
20.4	0
20.5	0
20.6	0
20.7	0
20.8	0
20.9	0
21	0
21.1	0
21.2	0
21.3	0
21.4	0
21.5	0
21.6	0
21.7	0
21.8	0
21.9	0
22	0
22.1	0
22.2	0
22.3	0
22.4	0
22.5	0
22.6	0
22.7	0
22.8	0
22.9	0
23	0
23.1	0
23.2	0
23.3	0
23.4	0
23.5	0
23.6	0
23.7	0
23.8	0
23.9	0
24	0
24.1	0
24.2	0
24.3	0
24.4	0
24.5	0
24.6	0
24.7	0
24.8	0
24.9	0
25	0
25.1	0
25.2	0
25.3	0
25.4	0
25.5	0
25.6	0
25.7	0
25.8	0
25.9	0
26	0
26.1	0
26.2	0
26.3	0
26.4	0
26.5	0
26.6	0
26.7	0
26.8	0
26.9	0
27	0
27.1	0
27.2	0
27.3	0
27.4	0
27.5	0
27.6	0
27.7	0
27.8	0
27.9	0
28	0
28.1	0
28.2	0
28.3	0
28.4	0
28.5	0
28.6	0
28.7	0
28.8	0
28.9	0
29	0
29.1	0
29.2	0
29.3	0
29.4	0
29.5	0
29.6	0
29.7	0
29.8	0
29.9	0
30	0
30.1	0
30.2	0
30.3	0
30.4	0
30.5	0
30.6	0
30.7	0
30.8	0
30.9	0
31	0
31.1	0
31.2	0
31.3	0
31.4	0
31.5	0
31.6	0
31.7	0
31.8	0
31.9	0
32	0
32.1	0
32.2	0
32.3	0
32.4	0
32.5	0
32.6	0
32.7	0
32.8	0
32.9	0
33	0
33.1	0
33.2	0
33.3	0
33.4	0
33.5	0
33.6	0
33.7	0
33.8	0
33.9	0
34	0
34.1	0
34.2	0
34.3	0
34.4	0
34.5	0
34.6	0
34.7	0
34.8	0
34.9	0
35	0
35.1	0
35.2	0
35.3	0
35.4	0
35.5	0
35.6	0
35.7	0
35.8	0
35.9	0
36	0
36.1	0
36.2	0
36.3	0
36.4	0
36.5	0
36.6	0
36.7	0
36.8	0
36.9	0
37	0
37.1	0
37.2	0
37.3	0
37.4	0
37.5	0
37.6	0
37.7	0
37.8	0
37.9	0
38	0
38.1	0
38.2	0
38.3	0
38.4	0
38.5	0
38.6	0
38.7	0
38.8	0
38.9	0
39	0
39.1	0
39.2	0
39.3	0
39.4	0
39.5	0
39.6	0
39.7	0
39.8	0
39.9	0
40	0
40.1	0
40.2	0
40.3	0
40.4	0
40.5	0
40.6	0
40.7	0
40.8	0
40.9	0
41	0
41.1	0
41.2	0
41.3	0
41.4	0
41.5	0
41.6	0
41.7	0
41.8	0
41.9	0
42	0
42.1	0
42.2	0
42.3	0
42.4	0
42.5	0
42.6	0
42.7	0
42.8	0
42.9	0
43	0
43.1	0
43.2	0
43.3	0
43.4	0
43.5	0
43.6	0
43.7	0
43.8	0
43.9	0
44	0
44.1	0
44.2	0
44.3	0
44.4	0
44.5	0
44.6	0
44.7	0
44.8	0
44.9	0
45	0
45.1	0
45.2	0
45.3	0
45.4	0
45.5	0
45.6	0
45.7	0
45.8	0
45.9	0
46	0
46.1	0
46.2	0
46.3	0
46.4	0
46.5	0
46.6	0
46.7	0
46.8	0
46.9	0
47	0
47.1	0
47.2	0
47.3	0
47.4	0
47.5	0
47.6	0
47.7	0
47.8	0
47.9	0
48	0
48.1	0
48.2	0
48.3	0
48.4	0
48.5	0
48.6	0
48.7	0
48.8	0
48.9	0
49	0
49.1	0
49.2	0
49.3	0
49.4	0
49.5	0
49.6	0
49.7	0
49.8	0
49.9	0
50	0
50.1	0
50.2	0
50.3	0
50.4	0
50.5	0
50.6	0
50.7	0
50.8	0
50.9	0
51	0
51.1	0
51.2	0
51.3	0
51.4	0
51.5	0
51.6	0
51.7	0
51.8	0
51.9	0
52	0
52.1	0
52.2	0
52.3	0
52.4	0
52.5	0
52.6	0
52.7	0
52.8	0
52.9	0
53	0
53.1	0
53.2	0
53.3	0
53.4	0
53.5	0
53.6	0
53.7	0
53.8	0
53.9	0
54	0
54.1	0
54.2	0
54.3	0
54.4	0
54.5	0
54.6	0
54.7	0
54.8	0
54.9	0
55	0
55.1	0
55.2	0
55.3	0
55.4	0
55.5	0
55.6	0
55.7	0
55.8	0
55.9	0
56	0
56.1	0
56.2	0
56.3	0
56.4	0
56.5	0
56.6	0
56.7	0
56.8	0
56.9	0
57	0
57.1	0
57.2	0
57.3	0
57.4	0
57.5	0
57.6	0
57.7	0
57.8	0
57.9	0
58	0
58.1	0
58.2	0
58.3	0
58.4	0
58.5	0
58.6	0
58.7	0
58.8	0
58.9	0
59	0
59.1	0
59.2	0
59.3	0
59.4	0
59.5	0
59.6	0
59.7	0
59.8	0
59.9	0
60	0
60.1	0
60.2	0
60.3	0
60.4	0
60.5	0
60.6	0
60.7	0
60.8	0
60.9	0
61	0
61.1	0
61.2	0
61.3	0
61.4	0
61.5	0
61.6	0
61.7	0
61.8	0
61.9	0
62	0
62.1	0
62.2	0
62.3	0
62.4	0
62.5	0
62.6	0
62.7	0
62.8	0
62.9	0
63	0
63.1	0
63.2	0
63.3	0
63.4	0
63.5	0
63.6	0
63.7	0
63.8	0
63.9	0
64	0
64.1	0
64.2	0
64.3	0
64.4	0
64.5	0
64.6	0
64.7	0
64.8	0
64.9	0
65	0
65.1	0
65.2	0
65.3	0
65.4	0
65.5	0
65.6	0
65.7	0
65.8	0
65.9	0
66	0
66.1	0
66.2	0
66.3	0
66.4	0
66.5	0
66.6	0
66.7	0
66.8	0
66.9	0
67	0
67.1	0
67.2	0
67.3	0
67.4	0
67.5	0
67.6	0
67.7	0
67.8	0
67.9	0
68	0
68.1	0
68.2	0
68.3	0
68.4	0
68.5	0
68.6	0
68.7	0
68.8	0
68.9	0
69	0
69.1	0
69.2	0
69.3	0
69.4	0
69.5	0
69.6	0
69.7	0
69.8	0
69.9	0
70	0
70.1	0
70.2	0
70.3	0
70.4	0
70.5	0
70.6	0
70.7	0
70.8	0
70.9	0
71	0
71.1	0
71.2	0
71.3	0
71.4	0
71.5	0
71.6	0
71.7	0
71.8	0
71.9	0
72	0
72.1	0
72.2	0
72.3	0
72.4	0
72.5	0
72.6	0
72.7	0
72.8	0
72.9	0
73	0
73.1	0
73.2	0
73.3	0
73.4	0
73.5	0
73.6	0
73.7	0
73.8	0
73.9	0
74	0
74.1	0
74.2	0
74.3	0
74.4	0
74.5	0
74.6	0
74.7	0
74.8	0
74.9	0
75	0
75.1	0
75.2	0
75.3	0
75.4	0
75.5	0
75.6	0
75.7	0
75.8	0
75.9	0
76	0
76.1	0
76.2	0
76.3	0
76.4	0
76.5	0
76.6	0
76.7	0
76.8	0
76.9	0
77	0
77.1	0
77.2	0
77.3	0
77.4	0
77.5	0
77.6	0
77.7	0
77.8	0
77.9	0
78	0
78.1	0
78.2	0
78.3	0
78.4	0
78.5	0
78.6	0
78.7	0
78.8	0
78.9	0
79	0
79.1	0
79.2	0
79.3	0
79.4	0
79.5	0
79.6	0
79.7	0
79.8	0
79.9	0
80	0
80.1	0
80.2	0
80.3	0
80.4	0
80.5	0
80.6	0
80.7	0
80.8	0
80.9	0
81	0
81.1	0
81.2	0
81.3	0
81.4	0
81.5	0
81.6	0
81.7	0
81.8	0
81.9	0
82	0
82.1	0
82.2	0
82.3	0
82.4	0
82.5	0
82.6	0
82.7	0
82.8	0
82.9	0
83	0
83.1	0
83.2	0
83.3	0
83.4	0
83.5	0
83.6	0
83.7	0
83.8	0
83.9	0
84	0
84.1	0
84.2	0
84.3	0
84.4	0
84.5	0
84.6	0
84.7	0
84.8	0
84.9	0
85	0
85.1	0
85.2	0
85.3	0
85.4	0
85.5	0
85.6	0
85.7	0
85.8	0
85.9	0
86	0
86.1	0
86.2	0
86.3	0
86.4	0
86.5	0
86.6	0
86.7	0
86.8	0
86.9	0
87	0
87.1	0
87.2	0
87.3	0
87.4	0
87.5	0
87.6	0
87.7	0
87.8	0
87.9	0
88	0
88.1	0
88.2	0
88.3	0
88.4	0
88.5	0
88.6	0
88.7	0
88.8	0
88.9	0
89	0
89.1	0
89.2	0
89.3	0
89.4	0
89.5	0
89.6	0
89.7	0
89.8	0
89.9	0
90	0
90.1	0
90.2	0
90.3	0
90.4	0
90.5	0
90.6	0
90.7	0
90.8	0
90.9	0
91	0
91.1	0
91.2	0
91.3	0
91.4	0
91.5	0
91.6	0
91.7	0
91.8	0
91.9	0
92	0
92.1	0
92.2	0
92.3	0
92.4	0
92.5	0
92.6	0
92.7	0
92.8	0
92.9	0
93	0
93.1	0
93.2	0
93.3	0
93.4	0
93.5	0
93.6	0
93.7	0
93.8	0
93.9	0
94	0
94.1	0
94.2	0
94.3	0
94.4	0
94.5	0
94.6	0
94.7	0
94.8	0
94.9	0
95	0
95.1	0
95.2	0
95.3	0
95.4	0
95.5	0
95.6	0
95.7	0
95.8	0
95.9	0
96	0
96.1	0
96.2	0
96.3	0
96.4	0
96.5	0
96.6	0
96.7	0
96.8	0
96.9	0
97	0
97.1	0
97.2	0
97.3	0
97.4	0
97.5	0
97.6	0
97.7	0
97.8	0
97.9	0
98	0
98.1	0
98.2	0
98.3	0
98.4	0
98.5	0
98.6	0
98.7	0
98.8	0
98.9	0
99	0
99.1	0
99.2	0
99.3	0
99.4	0
99.5	0
99.6	0
99.7	0
99.8	0
99.9	0
100	0
100.1	0.00075
100.2	0.00475
100.3	0.0085
100.4	0.01225
100.5	0.0175
100.6	0.0225
100.7	0.02725
100.8	0.03225
100.9	0.03625
101	0.04275
101.1	0.04875
101.2	0.0535
101.3	0.05875
101.4	0.06325
101.5	0.06775
101.6	0.07175
101.7	0.0765
101.8	0.08175
101.9	0.0875
102	0.092
102.1	0.096
102.2	0.10175
102.3	0.1055
102.4	0.1105
102.5	0.11425
102.6	0.1185
102.7	0.124
102.8	0.12725
102.9	0.13125
103	0.13475
103.1	0.13875
103.2	0.14175
103.3	0.1465
103.4	0.1505
103.5	0.15275
103.6	0.15575
103.7	0.15875
103.8	0.164
103.9	0.1695
104	0.17375
104.1	0.17875
104.2	0.18325
104.3	0.187
104.4	0.19125
104.5	0.1945
104.6	0.19825
104.7	0.20225
104.8	0.20525
104.9	0.20825
105	0.211
105.1	0.2145
105.2	0.217
105.3	0.221
105.4	0.2235
105.5	0.22625
105.6	0.23
105.7	0.23375
105.8	0.23675
105.9	0.24
106	0.2435
106.1	0.24825
106.2	0.251
106.3	0.254
106.4	0.25925
106.5	0.26375
106.6	0.2685
106.7	0.27225
106.8	0.275
106.9	0.27775
107	0.27975
107.1	0.2825
107.2	0.28625
107.3	0.28875
107.4	0.2905
107.5	0.29225
107.6	0.29625
107.7	0.3
107.8	0.303
107.9	0.30625
108	0.3075
108.1	0.31025
108.2	0.315
108.3	0.316
108.4	0.31975
108.5	0.321
108.6	0.32525
108.7	0.3295
108.8	0.3325
108.9	0.33425
109	0.338
109.1	0.341
109.2	0.34575
109.3	0.3475
109.4	0.3495
109.5	0.3535
109.6	0.3555
109.7	0.35825
109.8	0.36075
109.9	0.363
110	0.36725
110.1	0.3695
110.2	0.37125
110.3	0.37425
110.4	0.37525
110.5	0.37825
110.6	0.38025
110.7	0.382
110.8	0.385
110.9	0.38575
111	0.38825
111.1	0.39
111.2	0.3925
111.3	0.395
111.4	0.397
111.5	0.399
111.6	0.403
111.7	0.40675
111.8	0.409
111.9	0.41175
112	0.415
112.1	0.41675
112.2	0.418
112.3	0.4225
112.4	0.425
112.5	0.429
112.6	0.431
112.7	0.4325
112.8	0.435
112.9	0.438
113	0.441
113.1	0.4435
113.2	0.4455
113.3	0.44775
113.4	0.44725
113.5	0.448
113.6	0.45
113.7	0.45175
113.8	0.4535
113.9	0.45725
114	0.45975
114.1	0.46125
114.2	0.4635
114.3	0.46525
114.4	0.46775
114.5	0.47075
114.6	0.47175
114.7	0.4755
114.8	0.47775
114.9	0.47875
115	0.4815
115.1	0.4835
115.2	0.4855
115.3	0.488
115.4	0.48875
115.5	0.49125
115.6	0.492
115.7	0.49525
115.8	0.499
115.9	0.5
116	0.50175
116.1	0.50275
116.2	0.50375
116.3	0.507
116.4	0.50925
116.5	0.5115
116.6	0.51475
116.7	0.5165
116.8	0.518
116.9	0.5195
117	0.52125
117.1	0.52325
117.2	0.52525
117.3	0.52675
117.4	0.529
117.5	0.5315
117.6	0.53325
117.7	0.536
117.8	0.53775
117.9	0.5395
118	0.53925
118.1	0.54025
118.2	0.54275
118.3	0.54525
118.4	0.54675
118.5	0.55025
118.6	0.552
118.7	0.5545
118.8	0.556
118.9	0.5575
119	0.5585
119.1	0.56025
119.2	0.561
119.3	0.56325
119.4	0.5635
119.5	0.56575
119.6	0.5675
119.7	0.5695
119.8	0.571
119.9	0.57275
120	0.5755
120.1	0.57775
120.2	0.579
120.3	0.58025
120.4	0.582
120.5	0.58375
120.6	0.5865
120.7	0.58675
120.8	0.58975
120.9	0.5895
121	0.59
121.1	0.59075
121.2	0.59275
121.3	0.59325
121.4	0.59625
121.5	0.59675
121.6	0.5995
121.7	0.601
121.8	0.60275
121.9	0.60225
122	0.6025
122.1	0.60425
122.2	0.6045
122.3	0.60775
122.4	0.6095
122.5	0.61125
122.6	0.6135
122.7	0.614
122.8	0.615
122.9	0.61575
123	0.61725
123.1	0.618
123.2	0.61925
123.3	0.62025
123.4	0.622
123.5	0.623
123.6	0.625
123.7	0.62525
123.8	0.628
123.9	0.6285
124	0.62925
124.1	0.63
124.2	0.6315
124.3	0.63275
124.4	0.63325
124.5	0.63475
124.6	0.63475
124.7	0.634
124.8	0.63425
124.9	0.63425
125	0.6355
125.1	0.63575
125.2	0.63725
125.3	0.63825
125.4	0.63875
125.5	0.638
125.6	0.64025
125.7	0.64
125.8	0.63975
125.9	0.64025
126	0.64125
126.1	0.6415
126.2	0.64325
126.3	0.64325
126.4	0.64425
126.5	0.64525
126.6	0.646
126.7	0.64725
126.8	0.64675
126.9	0.647
127	0.64775
127.1	0.64925
127.2	0.65075
127.3	0.65325
127.4	0.65375
127.5	0.655
127.6	0.6565
127.7	0.6575
127.8	0.65875
127.9	0.65975
128	0.661
128.1	0.661
128.2	0.662
128.3	0.6635
128.4	0.66375
128.5	0.66475
128.6	0.66575
128.7	0.66825
128.8	0.6695
128.9	0.671
129	0.673
129.1	0.67325
129.2	0.674
129.3	0.6755
129.4	0.676
129.5	0.67625
129.6	0.67675
129.7	0.678
129.8	0.67875
129.9	0.6815
130	0.68275
130.1	0.68375
130.2	0.68525
130.3	0.68575
130.4	0.68775
130.5	0.68875
130.6	0.68925
130.7	0.689
130.8	0.6895
130.9	0.691
131	0.69175
131.1	0.69375
131.2	0.694
131.3	0.69525
131.4	0.6965
131.5	0.697
131.6	0.69825
131.7	0.69925
131.8	0.69975
131.9	0.701
132	0.7015
132.1	0.702
132.2	0.70275
132.3	0.704
132.4	0.7045
132.5	0.705
132.6	0.7055
132.7	0.70525
132.8	0.70675
132.9	0.7065
133	0.7075
133.1	0.70825
133.2	0.709
133.3	0.71025
133.4	0.71
133.5	0.711
133.6	0.712
133.7	0.713
133.8	0.7145
133.9	0.7155
134	0.717
134.1	0.71775
134.2	0.71925
134.3	0.7195
134.4	0.72
134.5	0.7205
134.6	0.7215
134.7	0.72375
134.8	0.72375
134.9	0.72375
135	0.7235
135.1	0.7245
135.2	0.724
135.3	0.7255
135.4	0.72725
135.5	0.72875
135.6	0.72775
135.7	0.72725
135.8	0.7285
135.9	0.72875
136	0.729
136.1	0.73125
136.2	0.7325
136.3	0.7315
136.4	0.7325
136.5	0.73325
136.6	0.73375
136.7	0.73475
136.8	0.735
136.9	0.7345
137	0.736
137.1	0.73775
137.2	0.73875
137.3	0.7395
137.4	0.74025
137.5	0.73975
137.6	0.74025
137.7	0.74
137.8	0.73975
137.9	0.73975
138	0.73975
138.1	0.74
138.2	0.74125
138.3	0.742
138.4	0.74325
138.5	0.743
138.6	0.7435
138.7	0.744
138.8	0.745
138.9	0.745
139	0.746
139.1	0.74625
139.2	0.7465
139.3	0.7475
139.4	0.749
139.5	0.74975
139.6	0.75075
139.7	0.75125
139.8	0.752
139.9	0.75225
140	0.754
140.1	0.75425
140.2	0.7545
140.3	0.75475
140.4	0.755
140.5	0.75575
140.6	0.756
140.7	0.75725
140.8	0.75775
140.9	0.758
141	0.75875
141.1	0.7595
141.2	0.7605
141.3	0.76
141.4	0.7615
141.5	0.76275
141.6	0.763
141.7	0.76275
141.8	0.7625
141.9	0.7635
142	0.76325
142.1	0.76475
142.2	0.7665
142.3	0.767
142.4	0.7675
142.5	0.76875
142.6	0.77025
142.7	0.77125
142.8	0.7715
142.9	0.77125
143	0.77175
143.1	0.77075
143.2	0.77225
143.3	0.77125
143.4	0.77125
143.5	0.77125
143.6	0.77125
143.7	0.772
143.8	0.7725
143.9	0.773
144	0.77325
144.1	0.774
144.2	0.77475
144.3	0.7755
144.4	0.775
144.5	0.775
144.6	0.77525
144.7	0.7745
144.8	0.77475
144.9	0.77425
145	0.77425
145.1	0.77375
145.2	0.773
145.3	0.7735
145.4	0.7735
145.5	0.77375
145.6	0.774
145.7	0.775
145.8	0.77475
145.9	0.77575
146	0.7765
146.1	0.77725
146.2	0.777
146.3	0.778
146.4	0.7775
146.5	0.777
146.6	0.7775
146.7	0.77825
146.8	0.77925
146.9	0.77925
147	0.77875
147.1	0.77925
147.2	0.77875
147.3	0.77975
147.4	0.77975
147.5	0.7815
147.6	0.78225
147.7	0.7825
147.8	0.7825
147.9	0.782
148	0.78325
148.1	0.783
148.2	0.78375
148.3	0.78275
148.4	0.78225
148.5	0.7825
148.6	0.7815
148.7	0.78175
148.8	0.783
148.9	0.78425
149	0.7845
149.1	0.78475
149.2	0.784
149.3	0.784
149.4	0.7855
149.5	0.78575
149.6	0.78575
149.7	0.78575
149.8	0.78625
149.9	0.787
150	0.78725
150.1	0.788
150.2	0.7895
150.3	0.78975
150.4	0.79
150.5	0.789
150.6	0.78875
150.7	0.7895
150.8	0.78975
150.9	0.78925
151	0.78975
151.1	0.78875
151.2	0.7905
151.3	0.791
151.4	0.79
151.5	0.78925
151.6	0.7895
151.7	0.79025
151.8	0.79075
151.9	0.79075
152	0.7905
152.1	0.79025
152.2	0.79125
152.3	0.791
152.4	0.791
152.5	0.7925
152.6	0.7935
152.7	0.79325
152.8	0.79425
152.9	0.794
153	0.7945
153.1	0.7955
153.2	0.79625
153.3	0.797
153.4	0.79775
153.5	0.799
153.6	0.79775
153.7	0.7985
153.8	0.798
153.9	0.79725
154	0.798
154.1	0.798
154.2	0.7975
154.3	0.7975
154.4	0.7985
154.5	0.7975
154.6	0.79825
154.7	0.799
154.8	0.79875
154.9	0.79925
155	0.79975
155.1	0.7995
155.2	0.80025
155.3	0.80175
155.4	0.802
155.5	0.80175
155.6	0.80175
155.7	0.803
155.8	0.8025
155.9	0.80225
156	0.802
156.1	0.80225
156.2	0.8025
156.3	0.80225
156.4	0.8035
156.5	0.80325
156.6	0.8025
156.7	0.803
156.8	0.8035
156.9	0.80275
157	0.802
157.1	0.80125
157.2	0.803
157.3	0.80225
157.4	0.80275
157.5	0.8015
157.6	0.8015
157.7	0.80075
157.8	0.80075
157.9	0.801
158	0.80075
158.1	0.80175
158.2	0.8015
158.3	0.8025
158.4	0.80175
158.5	0.802
158.6	0.802
158.7	0.8025
158.8	0.80225
158.9	0.80125
159	0.8025
159.1	0.803
159.2	0.80325
159.3	0.80275
159.4	0.803
159.5	0.8025
159.6	0.80175
159.7	0.80225
159.8	0.8045
159.9	0.80575
160	0.8065
160.1	0.80575
160.2	0.80575
160.3	0.806
160.4	0.80625
160.5	0.80525
160.6	0.8055
160.7	0.806
160.8	0.8055
160.9	0.8065
161	0.8075
161.1	0.80725
161.2	0.8065
161.3	0.8055
161.4	0.8065
161.5	0.80625
161.6	0.806
161.7	0.805
161.8	0.80475
161.9	0.80375
162	0.80375
162.1	0.80425
162.2	0.804
162.3	0.804
162.4	0.8035
162.5	0.80375
162.6	0.80375
162.7	0.8035
162.8	0.80375
162.9	0.8035
163	0.80425
163.1	0.80375
163.2	0.805
163.3	0.80475
163.4	0.8065
163.5	0.805
163.6	0.80425
163.7	0.8045
163.8	0.80425
163.9	0.804
164	0.80425
164.1	0.80425
164.2	0.8055
164.3	0.805
164.4	0.80475
164.5	0.80475
164.6	0.804
164.7	0.80425
164.8	0.80475
164.9	0.80525
165	0.806
165.1	0.806
165.2	0.80625
165.3	0.80625
165.4	0.806
165.5	0.805
165.6	0.8045
165.7	0.80575
165.8	0.80725
165.9	0.80725
166	0.807
166.1	0.80775
166.2	0.80875
166.3	0.80875
166.4	0.80875
166.5	0.809
166.6	0.8095
166.7	0.809
166.8	0.8085
166.9	0.80925
167	0.8085
167.1	0.80975
167.2	0.80925
167.3	0.81025
167.4	0.81075
167.5	0.811
167.6	0.81025
167.7	0.8095
167.8	0.81025
167.9	0.80925
168	0.80975
168.1	0.80925
168.2	0.80925
168.3	0.809
168.4	0.80925
168.5	0.8085
168.6	0.80825
168.7	0.80875
168.8	0.809
168.9	0.809
169	0.80875
169.1	0.8085
169.2	0.80925
169.3	0.8095
169.4	0.80975
169.5	0.80925
169.6	0.808
169.7	0.8095
169.8	0.80975
169.9	0.8105
170	0.81
170.1	0.81
170.2	0.809
170.3	0.80925
170.4	0.80875
170.5	0.80875
170.6	0.80875
170.7	0.81
170.8	0.80875
170.9	0.80925
171	0.8095
171.1	0.8095
171.2	0.8095
171.3	0.80975
171.4	0.81075
171.5	0.81025
171.6	0.81
171.7	0.8105
171.8	0.811
171.9	0.81025
172	0.8105
172.1	0.811
172.2	0.812
172.3	0.8115
172.4	0.811
172.5	0.81075
172.6	0.81175
172.7	0.81175
172.8	0.812
172.9	0.81275
173	0.813
173.1	0.81325
173.2	0.81425
173.3	0.814
173.4	0.81375
173.5	0.8135
173.6	0.813
173.7	0.81425
173.8	0.81375
173.9	0.81375
174	0.81325
174.1	0.81325
174.2	0.8125
174.3	0.813
174.4	0.813
174.5	0.8135
174.6	0.81375
174.7	0.8135
174.8	0.8135
174.9	0.8135
175	0.8135
175.1	0.814
175.2	0.81375
175.3	0.81475
175.4	0.814
175.5	0.81425
175.6	0.8125
175.7	0.8125
175.8	0.81325
175.9	0.8135
176	0.81275
176.1	0.814
176.2	0.81375
176.3	0.81375
176.4	0.81275
176.5	0.81325
176.6	0.81325
176.7	0.81325
176.8	0.81375
176.9	0.814
177	0.81275
177.1	0.81225
177.2	0.81275
177.3	0.8125
177.4	0.8115
177.5	0.81225
177.6	0.81175
177.7	0.8125
177.8	0.8125
177.9	0.81275
178	0.813
178.1	0.813
178.2	0.8135
178.3	0.8135
178.4	0.81325
178.5	0.8145
178.6	0.81575
178.7	0.81625
178.8	0.816
178.9	0.81675
179	0.81725
179.1	0.817
179.2	0.81625
179.3	0.81575
179.4	0.81575
179.5	0.81575
179.6	0.816
179.7	0.816
179.8	0.8165
179.9	0.81675
180	0.8175
180.1	0.818
180.2	0.81725
180.3	0.81675
180.4	0.81675
180.5	0.81725
180.6	0.817
180.7	0.817
180.8	0.81625
180.9	0.81625
181	0.8175
181.1	0.817
181.2	0.81675
181.3	0.81825
181.4	0.818
181.5	0.81775
181.6	0.81725
181.7	0.81775
181.8	0.81825
181.9	0.81775
182	0.8175
182.1	0.8175
182.2	0.81675
182.3	0.81725
182.4	0.818
182.5	0.8185
182.6	0.81875
182.7	0.81925
182.8	0.8195
182.9	0.81925
183	0.81775
183.1	0.817
183.2	0.81725
183.3	0.81725
183.4	0.81775
183.5	0.81825
183.6	0.8195
183.7	0.81975
183.8	0.82
183.9	0.8195
184	0.81975
184.1	0.82075
184.2	0.82025
184.3	0.8205
184.4	0.82
184.5	0.81975
184.6	0.82
184.7	0.821
184.8	0.81975
184.9	0.81975
185	0.82
185.1	0.82025
185.2	0.821
185.3	0.82075
185.4	0.822
185.5	0.82175
185.6	0.8225
185.7	0.823
185.8	0.82475
185.9	0.825
186	0.82525
186.1	0.8245
186.2	0.825
186.3	0.82425
186.4	0.824
186.5	0.82525
186.6	0.825
186.7	0.8245
186.8	0.82425
186.9	0.82425
187	0.82375
187.1	0.82325
187.2	0.8225
187.3	0.8225
187.4	0.8215
187.5	0.8205
187.6	0.81925
187.7	0.81925
187.8	0.81875
187.9	0.81825
188	0.81875
188.1	0.8195
188.2	0.81975
188.3	0.8195
188.4	0.81875
188.5	0.81825
188.6	0.818
188.7	0.8175
188.8	0.818
188.9	0.81875
189	0.819
189.1	0.81825
189.2	0.81825
189.3	0.81825
189.4	0.81925
189.5	0.819
189.6	0.81825
189.7	0.81775
189.8	0.81775
189.9	0.8175
190	0.81825
190.1	0.81975
190.2	0.819
190.3	0.8185
190.4	0.818
190.5	0.81725
190.6	0.81875
190.7	0.81975
190.8	0.81975
190.9	0.81975
191	0.8205
191.1	0.81975
191.2	0.82
191.3	0.82025
191.4	0.82025
191.5	0.82075
191.6	0.82
191.7	0.819
191.8	0.819
191.9	0.8195
192	0.8195
192.1	0.81875
192.2	0.81875
192.3	0.81925
192.4	0.8195
192.5	0.8195
192.6	0.81875
192.7	0.81925
192.8	0.81975
192.9	0.81975
193	0.819
193.1	0.819
193.2	0.82025
193.3	0.81925
193.4	0.81775
193.5	0.81775
193.6	0.81725
193.7	0.818
193.8	0.81775
193.9	0.81625
194	0.81625
194.1	0.81675
194.2	0.81725
194.3	0.818
194.4	0.81725
194.5	0.817
194.6	0.81675
194.7	0.817
194.8	0.81725
194.9	0.8175
195	0.81875
195.1	0.81825
195.2	0.81775
195.3	0.8175
195.4	0.8175
195.5	0.8175
195.6	0.817
195.7	0.817
195.8	0.817
195.9	0.8165
196	0.81575
196.1	0.815
196.2	0.8155
196.3	0.8155
196.4	0.81525
196.5	0.8155
196.6	0.8155
196.7	0.8155
196.8	0.81425
196.9	0.814
197	0.814
197.1	0.8135
197.2	0.814
197.3	0.8135
197.4	0.81325
197.5	0.814
197.6	0.814
197.7	0.8155
197.8	0.81675
197.9	0.8165
198	0.81625
198.1	0.81625
198.2	0.81775
198.3	0.81675
198.4	0.817
198.5	0.8175
198.6	0.8165
198.7	0.81725
198.8	0.81725
198.9	0.817
199	0.817
199.1	0.817
199.2	0.81725
199.3	0.81675
199.4	0.8175
199.5	0.81825
199.6	0.817
199.7	0.81725
199.8	0.81675
199.9	0.81675
200	0.81725
[truncated: 14,000 more rows]
