# Supplementary material for: Bayesian inference of kinetic schemes for ion channels by Kalman filtering
Source: eLife journal article supplement (doi:10.7554/elife.62714), 2022-05-04
Supplement: fig4-data3 [file 1_Sim_N_5000_Fluor_MW.xlsx]

## Sheet: Tabelle1
0.1	0
0.2	0
0.3	0
0.4	0
0.5	0
0.6	0
0.7	0
0.8	0
0.9	0
1	0
1.1	0
1.2	0
1.3	0
1.4	0
1.5	0
1.6	0
1.7	0
1.8	0
1.9	0
2	0
2.1	0
2.2	0
2.3	0
2.4	0
2.5	0
2.6	0
2.7	0
2.8	0
2.9	0
3	0
3.1	0
3.2	0
3.3	0
3.4	0
3.5	0
3.6	0
3.7	0
3.8	0
3.9	0
4	0
4.1	0
4.2	0
4.3	0
4.4	0
4.5	0
4.6	0
4.7	0
4.8	0
4.9	0
5	0
5.1	0
5.2	0
5.3	0
5.4	0
5.5	0
5.6	0
5.7	0
5.8	0
5.9	0
6	0
6.1	0
6.2	0
6.3	0
6.4	0
6.5	0
6.6	0
6.7	0
6.8	0
6.9	0
7	0
7.1	0
7.2	0
7.3	0
7.4	0
7.5	0
7.6	0
7.7	0
7.8	0
7.9	0
8	0
8.1	0
8.2	0
8.3	0
8.4	0
8.5	0
8.6	0
8.7	0
8.8	0
8.9	0
9	0
9.1	0
9.2	0
9.3	0
9.4	0
9.5	0
9.6	0
9.7	0
9.8	0
9.9	0
10	0
10.1	0
10.2	0
10.3	0
10.4	0
10.5	0
10.6	0
10.7	0
10.8	0
10.9	0
11	0
11.1	0
11.2	0
11.3	0
11.4	0
11.5	0
11.6	0
11.7	0
11.8	0
11.9	0
12	0
12.1	0
12.2	0
12.3	0
12.4	0
12.5	0
12.6	0
12.7	0
12.8	0
12.9	0
13	0
13.1	0
13.2	0
13.3	0
13.4	0
13.5	0
13.6	0
13.7	0
13.8	0
13.9	0
14	0
14.1	0
14.2	0
14.3	0
14.4	0
14.5	0
14.6	0
14.7	0
14.8	0
14.9	0
15	0
15.1	0
15.2	0
15.3	0
15.4	0
15.5	0
15.6	0
15.7	0
15.8	0
15.9	0
16	0
16.1	0
16.2	0
16.3	0
16.4	0
16.5	0
16.6	0
16.7	0
16.8	0
16.9	0
17	0
17.1	0
17.2	0
17.3	0
17.4	0
17.5	0
17.6	0
17.7	0
17.8	0
17.9	0
18	0
18.1	0
18.2	0
18.3	0
18.4	0
18.5	0
18.6	0
18.7	0
18.8	0
18.9	0
19	0
19.1	0
19.2	0
19.3	0
19.4	0
19.5	0
19.6	0
19.7	0
19.8	0
19.9	0
20	0
20.1	0
20.2	0
20.3	0
20.4	0
20.5	0
20.6	0
20.7	0
20.8	0
20.9	0
21	0
21.1	0
21.2	0
21.3	0
21.4	0
21.5	0
21.6	0
21.7	0
21.8	0
21.9	0
22	0
22.1	0
22.2	0
22.3	0
22.4	0
22.5	0
22.6	0
22.7	0
22.8	0
22.9	0
23	0
23.1	0
23.2	0
23.3	0
23.4	0
23.5	0
23.6	0
23.7	0
23.8	0
23.9	0
24	0
24.1	0
24.2	0
24.3	0
24.4	0
24.5	0
24.6	0
24.7	0
24.8	0
24.9	0
25	0
25.1	0
25.2	0
25.3	0
25.4	0
25.5	0
25.6	0
25.7	0
25.8	0
25.9	0
26	0
26.1	0
26.2	0
26.3	0
26.4	0
26.5	0
26.6	0
26.7	0
26.8	0
26.9	0
27	0
27.1	0
27.2	0
27.3	0
27.4	0
27.5	0
27.6	0
27.7	0
27.8	0
27.9	0
28	0
28.1	0
28.2	0
28.3	0
28.4	0
28.5	0
28.6	0
28.7	0
28.8	0
28.9	0
29	0
29.1	0
29.2	0
29.3	0
29.4	0
29.5	0
29.6	0
29.7	0
29.8	0
29.9	0
30	0
30.1	0
30.2	0
30.3	0
30.4	0
30.5	0
30.6	0
30.7	0
30.8	0
30.9	0
31	0
31.1	0
31.2	0
31.3	0
31.4	0
31.5	0
31.6	0
31.7	0
31.8	0
31.9	0
32	0
32.1	0
32.2	0
32.3	0
32.4	0
32.5	0
32.6	0
32.7	0
32.8	0
32.9	0
33	0
33.1	0
33.2	0
33.3	0
33.4	0
33.5	0
33.6	0
33.7	0
33.8	0
33.9	0
34	0
34.1	0
34.2	0
34.3	0
34.4	0
34.5	0
34.6	0
34.7	0
34.8	0
34.9	0
35	0
35.1	0
35.2	0
35.3	0
35.4	0
35.5	0
35.6	0
35.7	0
35.8	0
35.9	0
36	0
36.1	0
36.2	0
36.3	0
36.4	0
36.5	0
36.6	0
36.7	0
36.8	0
36.9	0
37	0
37.1	0
37.2	0
37.3	0
37.4	0
37.5	0
37.6	0
37.7	0
37.8	0
37.9	0
38	0
38.1	0
38.2	0
38.3	0
38.4	0
38.5	0
38.6	0
38.7	0
38.8	0
38.9	0
39	0
39.1	0
39.2	0
39.3	0
39.4	0
39.5	0
39.6	0
39.7	0
39.8	0
39.9	0
40	0
40.1	0
40.2	0
40.3	0
40.4	0
40.5	0
40.6	0
40.7	0
40.8	0
40.9	0
41	0
41.1	0
41.2	0
41.3	0
41.4	0
41.5	0
41.6	0
41.7	0
41.8	0
41.9	0
42	0
42.1	0
42.2	0
42.3	0
42.4	0
42.5	0
42.6	0
42.7	0
42.8	0
42.9	0
43	0
43.1	0
43.2	0
43.3	0
43.4	0
43.5	0
43.6	0
43.7	0
43.8	0
43.9	0
44	0
44.1	0
44.2	0
44.3	0
44.4	0
44.5	0
44.6	0
44.7	0
44.8	0
44.9	0
45	0
45.1	0
45.2	0
45.3	0
45.4	0
45.5	0
45.6	0
45.7	0
45.8	0
45.9	0
46	0
46.1	0
46.2	0
46.3	0
46.4	0
46.5	0
46.6	0
46.7	0
46.8	0
46.9	0
47	0
47.1	0
47.2	0
47.3	0
47.4	0
47.5	0
47.6	0
47.7	0
47.8	0
47.9	0
48	0
48.1	0
48.2	0
48.3	0
48.4	0
48.5	0
48.6	0
48.7	0
48.8	0
48.9	0
49	0
49.1	0
49.2	0
49.3	0
49.4	0
49.5	0
49.6	0
49.7	0
49.8	0
49.9	0
50	0
50.1	0
50.2	0
50.3	0
50.4	0
50.5	0
50.6	0
50.7	0
50.8	0
50.9	0
51	0
51.1	0
51.2	0
51.3	0
51.4	0
51.5	0
51.6	0
51.7	0
51.8	0
51.9	0
52	0
52.1	0
52.2	0
52.3	0
52.4	0
52.5	0
52.6	0
52.7	0
52.8	0
52.9	0
53	0
53.1	0
53.2	0
53.3	0
53.4	0
53.5	0
53.6	0
53.7	0
53.8	0
53.9	0
54	0
54.1	0
54.2	0
54.3	0
54.4	0
54.5	0
54.6	0
54.7	0
54.8	0
54.9	0
55	0
55.1	0
55.2	0
55.3	0
55.4	0
55.5	0
55.6	0
55.7	0
55.8	0
55.9	0
56	0
56.1	0
56.2	0
56.3	0
56.4	0
56.5	0
56.6	0
56.7	0
56.8	0
56.9	0
57	0
57.1	0
57.2	0
57.3	0
57.4	0
57.5	0
57.6	0
57.7	0
57.8	0
57.9	0
58	0
58.1	0
58.2	0
58.3	0
58.4	0
58.5	0
58.6	0
58.7	0
58.8	0
58.9	0
59	0
59.1	0
59.2	0
59.3	0
59.4	0
59.5	0
59.6	0
59.7	0
59.8	0
59.9	0
60	0
60.1	0
60.2	0
60.3	0
60.4	0
60.5	0
60.6	0
60.7	0
60.8	0
60.9	0
61	0
61.1	0
61.2	0
61.3	0
61.4	0
61.5	0
61.6	0
61.7	0
61.8	0
61.9	0
62	0
62.1	0
62.2	0
62.3	0
62.4	0
62.5	0
62.6	0
62.7	0
62.8	0
62.9	0
63	0
63.1	0
63.2	0
63.3	0
63.4	0
63.5	0
63.6	0
63.7	0
63.8	0
63.9	0
64	0
64.1	0
64.2	0
64.3	0
64.4	0
64.5	0
64.6	0
64.7	0
64.8	0
64.9	0
65	0
65.1	0
65.2	0
65.3	0
65.4	0
65.5	0
65.6	0
65.7	0
65.8	0
65.9	0
66	0
66.1	0
66.2	0
66.3	0
66.4	0
66.5	0
66.6	0
66.7	0
66.8	0
66.9	0
67	0
67.1	0
67.2	0
67.3	0
67.4	0
67.5	0
67.6	0
67.7	0
67.8	0
67.9	0
68	0
68.1	0
68.2	0
68.3	0
68.4	0
68.5	0
68.6	0
68.7	0
68.8	0
68.9	0
69	0
69.1	0
69.2	0
69.3	0
69.4	0
69.5	0
69.6	0
69.7	0
69.8	0
69.9	0
70	0
70.1	0
70.2	0
70.3	0
70.4	0
70.5	0
70.6	0
70.7	0
70.8	0
70.9	0
71	0
71.1	0
71.2	0
71.3	0
71.4	0
71.5	0
71.6	0
71.7	0
71.8	0
71.9	0
72	0
72.1	0
72.2	0
72.3	0
72.4	0
72.5	0
72.6	0
72.7	0
72.8	0
72.9	0
73	0
73.1	0
73.2	0
73.3	0
73.4	0
73.5	0
73.6	0
73.7	0
73.8	0
73.9	0
74	0
74.1	0
74.2	0
74.3	0
74.4	0
74.5	0
74.6	0
74.7	0
74.8	0
74.9	0
75	0
75.1	0
75.2	0
75.3	0
75.4	0
75.5	0
75.6	0
75.7	0
75.8	0
75.9	0
76	0
76.1	0
76.2	0
76.3	0
76.4	0
76.5	0
76.6	0
76.7	0
76.8	0
76.9	0
77	0
77.1	0
77.2	0
77.3	0
77.4	0
77.5	0
77.6	0
77.7	0
77.8	0
77.9	0
78	0
78.1	0
78.2	0
78.3	0
78.4	0
78.5	0
78.6	0
78.7	0
78.8	0
78.9	0
79	0
79.1	0
79.2	0
79.3	0
79.4	0
79.5	0
79.6	0
79.7	0
79.8	0
79.9	0
80	0
80.1	0
80.2	0
80.3	0
80.4	0
80.5	0
80.6	0
80.7	0
80.8	0
80.9	0
81	0
81.1	0
81.2	0
81.3	0
81.4	0
81.5	0
81.6	0
81.7	0
81.8	0
81.9	0
82	0
82.1	0
82.2	0
82.3	0
82.4	0
82.5	0
82.6	0
82.7	0
82.8	0
82.9	0
83	0
83.1	0
83.2	0
83.3	0
83.4	0
83.5	0
83.6	0
83.7	0
83.8	0
83.9	0
84	0
84.1	0
84.2	0
84.3	0
84.4	0
84.5	0
84.6	0
84.7	0
84.8	0
84.9	0
85	0
85.1	0
85.2	0
85.3	0
85.4	0
85.5	0
85.6	0
85.7	0
85.8	0
85.9	0
86	0
86.1	0
86.2	0
86.3	0
86.4	0
86.5	0
86.6	0
86.7	0
86.8	0
86.9	0
87	0
87.1	0
87.2	0
87.3	0
87.4	0
87.5	0
87.6	0
87.7	0
87.8	0
87.9	0
88	0
88.1	0
88.2	0
88.3	0
88.4	0
88.5	0
88.6	0
88.7	0
88.8	0
88.9	0
89	0
89.1	0
89.2	0
89.3	0
89.4	0
89.5	0
89.6	0
89.7	0
89.8	0
89.9	0
90	0
90.1	0
90.2	0
90.3	0
90.4	0
90.5	0
90.6	0
90.7	0
90.8	0
90.9	0
91	0
91.1	0
91.2	0
91.3	0
91.4	0
91.5	0
91.6	0
91.7	0
91.8	0
91.9	0
92	0
92.1	0
92.2	0
92.3	0
92.4	0
92.5	0
92.6	0
92.7	0
92.8	0
92.9	0
93	0
93.1	0
93.2	0
93.3	0
93.4	0
93.5	0
93.6	0
93.7	0
93.8	0
93.9	0
94	0
94.1	0
94.2	0
94.3	0
94.4	0
94.5	0
94.6	0
94.7	0
94.8	0
94.9	0
95	0
95.1	0
95.2	0
95.3	0
95.4	0
95.5	0
95.6	0
95.7	0
95.8	0
95.9	0
96	0
96.1	0
96.2	0
96.3	0
96.4	0
96.5	0
96.6	0
96.7	0
96.8	0
96.9	0
97	0
97.1	0
97.2	0
97.3	0
97.4	0
97.5	0
97.6	0
97.7	0
97.8	0
97.9	0
98	0
98.1	0
98.2	0
98.3	0
98.4	0
98.5	0
98.6	0
98.7	0
98.8	0
98.9	0
99	0
99.1	0
99.2	0
99.3	0
99.4	0
99.5	0
99.6	0
99.7	0
99.8	0
99.9	0
100	0
100.1	0.734
100.2	0.8873
100.3	0.9424
100.4	0.9625
100.5	0.9689
100.6	0.9727
100.7	0.9758
100.8	0.9755
100.9	0.9746
101	0.9755
101.1	0.9773
101.2	0.9796
101.3	0.9763
101.4	0.9767
101.5	0.9751
101.6	0.9763
101.7	0.9798
101.8	0.9771
101.9	0.9779
102	0.9767
102.1	0.9761
102.2	0.9779
102.3	0.9764
102.4	0.979
102.5	0.9748
102.6	0.9748
102.7	0.9731
102.8	0.9766
102.9	0.9792
103	0.9796
103.1	0.9792
103.2	0.9813
103.3	0.9794
103.4	0.9802
103.5	0.9786
103.6	0.9794
103.7	0.9806
103.8	0.9786
103.9	0.9806
104	0.9799
104.1	0.9777
104.2	0.9777
104.3	0.9794
104.4	0.981
104.5	0.9802
104.6	0.9805
104.7	0.9808
104.8	0.9799
104.9	0.9817
105	0.9796
105.1	0.9769
105.2	0.9785
105.3	0.9793
105.4	0.9794
105.5	0.9789
105.6	0.9809
105.7	0.9795
105.8	0.9804
105.9	0.9801
106	0.9794
106.1	0.9818
106.2	0.9796
106.3	0.9804
106.4	0.9821
106.5	0.9809
106.6	0.9814
106.7	0.9836
106.8	0.9842
106.9	0.9821
107	0.9826
107.1	0.9817
107.2	0.9814
107.3	0.9793
107.4	0.9799
107.5	0.9821
107.6	0.9817
107.7	0.9823
107.8	0.9815
107.9	0.9832
108	0.983
108.1	0.9828
108.2	0.9836
108.3	0.9834
108.4	0.9844
108.5	0.9828
108.6	0.9845
108.7	0.9845
108.8	0.985
108.9	0.9823
109	0.9846
109.1	0.983
109.2	0.9833
109.3	0.9815
109.4	0.9836
109.5	0.9819
109.6	0.9841
109.7	0.9847
109.8	0.984
109.9	0.9826
110	0.983
110.1	0.9845
110.2	0.9853
110.3	0.9842
110.4	0.9829
110.5	0.9832
110.6	0.9849
110.7	0.9852
110.8	0.9846
110.9	0.9863
111	0.9854
111.1	0.9835
111.2	0.9839
111.3	0.984
111.4	0.9832
111.5	0.9852
111.6	0.9859
111.7	0.9855
111.8	0.9864
111.9	0.9875
112	0.9866
112.1	0.9869
112.2	0.9863
112.3	0.9848
112.4	0.9855
112.5	0.9838
112.6	0.9844
112.7	0.9844
112.8	0.9852
112.9	0.9858
113	0.9852
113.1	0.984
113.2	0.987
113.3	0.9872
113.4	0.9857
113.5	0.9865
113.6	0.9846
113.7	0.9839
113.8	0.9857
113.9	0.9872
114	0.9858
114.1	0.9862
114.2	0.985
114.3	0.986
114.4	0.9869
114.5	0.9852
114.6	0.987
114.7	0.9857
114.8	0.985
114.9	0.986
115	0.9874
115.1	0.9873
115.2	0.9881
115.3	0.9866
115.4	0.9872
115.5	0.9873
115.6	0.9875
115.7	0.9875
115.8	0.9895
115.9	0.9872
116	0.9862
116.1	0.988
116.2	0.9866
116.3	0.9873
116.4	0.9886
116.5	0.9884
116.6	0.9886
116.7	0.9889
116.8	0.9881
116.9	0.9873
117	0.9882
117.1	0.987
117.2	0.9878
117.3	0.9881
117.4	0.987
117.5	0.9884
117.6	0.989
117.7	0.9879
117.8	0.9882
117.9	0.9877
118	0.989
118.1	0.9896
118.2	0.9879
118.3	0.9884
118.4	0.9894
118.5	0.9888
118.6	0.9881
118.7	0.9881
118.8	0.9879
118.9	0.9884
119	0.9895
119.1	0.9891
119.2	0.9893
119.3	0.9877
119.4	0.9892
119.5	0.9894
119.6	0.9878
119.7	0.9886
119.8	0.9877
119.9	0.9888
120	0.9897
120.1	0.9885
120.2	0.9895
120.3	0.9901
120.4	0.9884
120.5	0.9884
120.6	0.9885
120.7	0.991
120.8	0.99
120.9	0.9893
121	0.989
121.1	0.9887
121.2	0.9878
121.3	0.9907
121.4	0.99
121.5	0.9894
121.6	0.9898
121.7	0.99
121.8	0.9899
121.9	0.9916
122	0.9916
122.1	0.9918
122.2	0.9891
122.3	0.9896
122.4	0.9916
122.5	0.9908
122.6	0.9908
122.7	0.9911
122.8	0.9895
122.9	0.9908
123	0.99
123.1	0.9894
123.2	0.9907
123.3	0.9923
123.4	0.9898
123.5	0.9887
123.6	0.9898
123.7	0.9898
123.8	0.9892
123.9	0.9895
124	0.9904
124.1	0.9916
124.2	0.9904
124.3	0.9901
124.4	0.9901
124.5	0.9903
124.6	0.9906
124.7	0.9898
124.8	0.9895
124.9	0.9908
125	0.9906
125.1	0.9904
125.2	0.9908
125.3	0.99
125.4	0.9906
125.5	0.9918
125.6	0.9927
125.7	0.9938
125.8	0.9919
125.9	0.9918
126	0.9915
126.1	0.9907
126.2	0.9905
126.3	0.9904
126.4	0.9916
126.5	0.9909
126.6	0.9904
126.7	0.9914
126.8	0.9915
126.9	0.992
127	0.9915
127.1	0.9916
127.2	0.992
127.3	0.9898
127.4	0.9935
127.5	0.9918
127.6	0.9917
127.7	0.993
127.8	0.9929
127.9	0.9924
128	0.9919
128.1	0.9916
128.2	0.9917
128.3	0.9927
128.4	0.9925
128.5	0.9922
128.6	0.9926
128.7	0.993
128.8	0.9927
128.9	0.9907
129	0.9919
129.1	0.9911
129.2	0.9917
129.3	0.9912
129.4	0.9927
129.5	0.9923
129.6	0.9921
129.7	0.9906
129.8	0.9906
129.9	0.9916
130	0.9915
130.1	0.9911
130.2	0.9929
130.3	0.9928
130.4	0.9943
130.5	0.9927
130.6	0.9935
130.7	0.993
130.8	0.993
130.9	0.9916
131	0.9909
131.1	0.9906
131.2	0.9907
131.3	0.9916
131.4	0.9915
131.5	0.9917
131.6	0.9931
131.7	0.9933
131.8	0.9935
131.9	0.9935
132	0.9933
132.1	0.9922
132.2	0.9936
132.3	0.992
132.4	0.9922
132.5	0.9926
132.6	0.9934
132.7	0.9942
132.8	0.9939
132.9	0.994
133	0.994
133.1	0.9933
133.2	0.9928
133.3	0.9929
133.4	0.9914
133.5	0.9921
133.6	0.9936
133.7	0.9937
133.8	0.9927
133.9	0.9932
134	0.9943
134.1	0.9926
134.2	0.9915
134.3	0.9937
134.4	0.9925
134.5	0.992
134.6	0.9929
134.7	0.9919
134.8	0.9915
134.9	0.9917
135	0.9934
135.1	0.9938
135.2	0.9935
135.3	0.9931
135.4	0.9922
135.5	0.9937
135.6	0.994
135.7	0.9943
135.8	0.9937
135.9	0.9944
136	0.993
136.1	0.992
136.2	0.9933
136.3	0.9937
136.4	0.9929
136.5	0.9925
136.6	0.9936
136.7	0.9919
136.8	0.9917
136.9	0.9914
137	0.9938
137.1	0.9936
137.2	0.9945
137.3	0.9923
137.4	0.9924
137.5	0.9936
137.6	0.9935
137.7	0.9941
137.8	0.9935
137.9	0.993
138	0.9929
138.1	0.9928
138.2	0.9934
138.3	0.9935
138.4	0.9947
138.5	0.9937
138.6	0.9921
138.7	0.992
138.8	0.9935
138.9	0.9932
139	0.9926
139.1	0.9926
139.2	0.9929
139.3	0.9935
139.4	0.9934
139.5	0.9952
139.6	0.9943
139.7	0.9933
139.8	0.9925
139.9	0.9941
140	0.9935
140.1	0.9941
140.2	0.9941
140.3	0.9926
140.4	0.9905
140.5	0.9906
140.6	0.9938
140.7	0.9939
140.8	0.9933
140.9	0.9943
141	0.9939
141.1	0.9937
141.2	0.9941
141.3	0.9935
141.4	0.9937
141.5	0.9937
141.6	0.9923
141.7	0.9929
141.8	0.9945
141.9	0.994
142	0.9942
142.1	0.9936
142.2	0.9935
142.3	0.9947
142.4	0.995
142.5	0.9959
142.6	0.9936
142.7	0.9937
142.8	0.9933
142.9	0.995
143	0.9939
143.1	0.9933
143.2	0.9951
143.3	0.9958
143.4	0.9939
143.5	0.9933
143.6	0.9937
143.7	0.9943
143.8	0.9942
143.9	0.9926
144	0.994
144.1	0.9937
144.2	0.9937
144.3	0.9937
144.4	0.994
144.5	0.9939
144.6	0.9949
144.7	0.994
144.8	0.9948
144.9	0.994
145	0.9926
145.1	0.9944
145.2	0.9948
145.3	0.9936
145.4	0.9936
145.5	0.9947
145.6	0.9929
145.7	0.9933
145.8	0.9947
145.9	0.9937
146	0.994
146.1	0.9943
146.2	0.9943
146.3	0.9937
146.4	0.9955
146.5	0.9953
146.6	0.9949
146.7	0.9937
146.8	0.9946
146.9	0.9934
147	0.9944
147.1	0.9943
147.2	0.9944
147.3	0.9939
147.4	0.9937
147.5	0.9948
147.6	0.9948
147.7	0.9941
147.8	0.9957
147.9	0.9951
148	0.9943
148.1	0.9943
148.2	0.9945
148.3	0.9949
148.4	0.9944
148.5	0.9956
148.6	0.9944
148.7	0.9953
148.8	0.9933
148.9	0.9934
149	0.9943
149.1	0.9944
149.2	0.9935
149.3	0.9938
149.4	0.9943
149.5	0.9949
149.6	0.9953
149.7	0.9945
149.8	0.9945
149.9	0.993
150	0.9941
150.1	0.9951
150.2	0.9944
150.3	0.994
150.4	0.9935
150.5	0.9955
150.6	0.9942
150.7	0.9941
150.8	0.9944
150.9	0.9945
151	0.9942
151.1	0.9936
151.2	0.9947
151.3	0.9948
151.4	0.9938
151.5	0.9935
151.6	0.9935
151.7	0.9947
151.8	0.9941
151.9	0.9937
152	0.9944
152.1	0.9955
152.2	0.995
152.3	0.9933
152.4	0.9948
152.5	0.9955
152.6	0.9955
152.7	0.9946
152.8	0.9951
152.9	0.9947
153	0.9939
153.1	0.994
153.2	0.9944
153.3	0.9949
153.4	0.9948
153.5	0.9945
153.6	0.9952
153.7	0.9948
153.8	0.9949
153.9	0.995
154	0.9949
154.1	0.9952
154.2	0.9951
154.3	0.9956
154.4	0.9951
154.5	0.9954
154.6	0.994
154.7	0.9944
154.8	0.9943
154.9	0.9946
155	0.9948
155.1	0.9949
155.2	0.9947
155.3	0.996
155.4	0.9954
155.5	0.9956
155.6	0.9949
155.7	0.9938
155.8	0.9931
155.9	0.9951
156	0.995
156.1	0.9945
156.2	0.9952
156.3	0.9943
156.4	0.9948
156.5	0.9961
156.6	0.9961
156.7	0.996
156.8	0.9957
156.9	0.995
157	0.9953
157.1	0.9949
157.2	0.9956
157.3	0.9951
157.4	0.995
157.5	0.9943
157.6	0.9951
157.7	0.9949
157.8	0.9953
157.9	0.9947
158	0.9957
158.1	0.9949
158.2	0.9965
158.3	0.9948
158.4	0.9947
158.5	0.9935
158.6	0.9937
158.7	0.9945
158.8	0.9941
158.9	0.9923
159	0.994
159.1	0.9948
159.2	0.9954
159.3	0.9952
159.4	0.9962
159.5	0.9964
159.6	0.9959
159.7	0.9963
159.8	0.9958
159.9	0.9959
160	0.9965
160.1	0.9967
160.2	0.9958
160.3	0.9962
160.4	0.9954
160.5	0.995
160.6	0.995
160.7	0.9956
160.8	0.9949
160.9	0.9948
161	0.9955
161.1	0.9943
161.2	0.9956
161.3	0.9953
161.4	0.9948
161.5	0.9956
161.6	0.9959
161.7	0.9954
161.8	0.996
161.9	0.9948
162	0.9952
162.1	0.9958
162.2	0.9965
162.3	0.9958
162.4	0.9961
162.5	0.9968
162.6	0.9962
162.7	0.9962
162.8	0.9957
162.9	0.9953
163	0.996
163.1	0.9949
163.2	0.9935
163.3	0.9947
163.4	0.995
163.5	0.9949
163.6	0.9952
163.7	0.9958
163.8	0.9956
163.9	0.9957
164	0.9946
164.1	0.9952
164.2	0.9956
164.3	0.9957
164.4	0.9947
164.5	0.9942
164.6	0.9954
164.7	0.9951
164.8	0.9959
164.9	0.9962
165	0.9958
165.1	0.9958
165.2	0.9965
165.3	0.9955
165.4	0.9956
165.5	0.9964
165.6	0.9956
165.7	0.9952
165.8	0.9966
165.9	0.9955
166	0.9962
166.1	0.9958
166.2	0.9956
166.3	0.996
166.4	0.995
166.5	0.9958
166.6	0.9953
166.7	0.995
166.8	0.9953
166.9	0.9955
167	0.9968
167.1	0.9948
167.2	0.9951
167.3	0.9949
167.4	0.9956
167.5	0.9957
167.6	0.9945
167.7	0.9936
167.8	0.9961
167.9	0.9956
168	0.9951
168.1	0.9943
168.2	0.9959
168.3	0.9954
168.4	0.995
168.5	0.9958
168.6	0.9943
168.7	0.9949
168.8	0.9953
168.9	0.9961
169	0.9956
169.1	0.9959
169.2	0.9963
169.3	0.9954
169.4	0.9957
169.5	0.9962
169.6	0.9956
169.7	0.9951
169.8	0.9955
169.9	0.9966
170	0.9954
170.1	0.9963
170.2	0.995
170.3	0.9943
170.4	0.9959
170.5	0.9966
170.6	0.9948
170.7	0.9953
170.8	0.9944
170.9	0.9943
171	0.9951
171.1	0.9961
171.2	0.9963
171.3	0.9961
171.4	0.996
171.5	0.996
171.6	0.9955
171.7	0.9959
171.8	0.9954
171.9	0.9959
172	0.9961
172.1	0.9965
172.2	0.9959
172.3	0.9959
172.4	0.9946
172.5	0.9949
172.6	0.9953
172.7	0.9943
172.8	0.9956
172.9	0.9947
173	0.9949
173.1	0.995
173.2	0.9952
173.3	0.9957
173.4	0.9947
173.5	0.9942
173.6	0.9946
173.7	0.9957
173.8	0.9956
173.9	0.995
174	0.9948
174.1	0.9947
174.2	0.995
174.3	0.9953
174.4	0.9949
174.5	0.9939
174.6	0.9954
174.7	0.9947
174.8	0.9949
174.9	0.9947
175	0.9957
175.1	0.995
175.2	0.9946
175.3	0.9956
175.4	0.9955
175.5	0.9954
175.6	0.9953
175.7	0.9956
175.8	0.9968
175.9	0.9963
176	0.9962
176.1	0.9953
176.2	0.9957
176.3	0.9965
176.4	0.9948
176.5	0.996
176.6	0.996
176.7	0.9949
176.8	0.9965
176.9	0.9957
177	0.996
177.1	0.9959
177.2	0.9958
177.3	0.9942
177.4	0.9952
177.5	0.9955
177.6	0.9957
177.7	0.9955
177.8	0.995
177.9	0.9958
178	0.9955
178.1	0.9953
178.2	0.9958
178.3	0.9961
178.4	0.9953
178.5	0.9949
178.6	0.9953
178.7	0.9951
178.8	0.9967
178.9	0.9962
179	0.9946
179.1	0.9954
179.2	0.9961
179.3	0.9948
179.4	0.9945
179.5	0.9948
179.6	0.9949
179.7	0.9954
179.8	0.9948
179.9	0.9953
180	0.9953
180.1	0.9948
180.2	0.9947
180.3	0.9951
180.4	0.9956
180.5	0.9953
180.6	0.9951
180.7	0.9942
180.8	0.9948
180.9	0.9951
181	0.9959
181.1	0.996
181.2	0.9957
181.3	0.9963
181.4	0.9952
181.5	0.9954
181.6	0.9957
181.7	0.9947
181.8	0.9942
181.9	0.9949
182	0.9942
182.1	0.996
182.2	0.9965
182.3	0.9968
182.4	0.9947
182.5	0.9949
182.6	0.9954
182.7	0.9959
182.8	0.9954
182.9	0.9954
183	0.995
183.1	0.9947
183.2	0.9956
183.3	0.9955
183.4	0.9963
183.5	0.995
183.6	0.9953
183.7	0.9945
183.8	0.9961
183.9	0.9964
184	0.9957
184.1	0.9958
184.2	0.9953
184.3	0.9941
184.4	0.9957
184.5	0.9958
184.6	0.996
184.7	0.9953
184.8	0.9954
184.9	0.995
185	0.9955
185.1	0.9953
185.2	0.9958
185.3	0.9955
185.4	0.9955
185.5	0.9949
185.6	0.995
185.7	0.9945
185.8	0.994
185.9	0.9947
186	0.9951
186.1	0.9951
186.2	0.9954
186.3	0.9948
186.4	0.9954
186.5	0.9949
186.6	0.9956
186.7	0.9959
186.8	0.9955
186.9	0.996
187	0.9951
187.1	0.9955
187.2	0.9963
187.3	0.9964
187.4	0.9956
187.5	0.9947
187.6	0.9956
187.7	0.996
187.8	0.9954
187.9	0.9964
188	0.9953
188.1	0.9947
188.2	0.9957
188.3	0.996
188.4	0.9962
188.5	0.9968
188.6	0.9953
188.7	0.9946
188.8	0.9954
188.9	0.996
189	0.9952
189.1	0.9956
189.2	0.9963
189.3	0.9956
189.4	0.9954
189.5	0.9959
189.6	0.9951
189.7	0.9954
189.8	0.9959
189.9	0.9962
190	0.9951
190.1	0.9959
190.2	0.995
190.3	0.9953
190.4	0.996
190.5	0.9956
190.6	0.9957
190.7	0.9949
190.8	0.996
190.9	0.9947
191	0.9959
191.1	0.9964
191.2	0.9965
191.3	0.9961
191.4	0.9967
191.5	0.9958
191.6	0.9949
191.7	0.9958
191.8	0.9957
191.9	0.996
192	0.9956
192.1	0.9955
192.2	0.9958
192.3	0.9953
192.4	0.9955
192.5	0.9958
192.6	0.9957
192.7	0.9948
192.8	0.995
192.9	0.9954
193	0.9969
193.1	0.9962
193.2	0.9951
193.3	0.9951
193.4	0.9954
193.5	0.9947
193.6	0.9943
193.7	0.995
193.8	0.995
193.9	0.9958
194	0.9946
194.1	0.994
194.2	0.9955
194.3	0.9956
194.4	0.9965
194.5	0.9958
194.6	0.9956
194.7	0.996
194.8	0.9966
194.9	0.9951
195	0.9952
195.1	0.9952
195.2	0.9954
195.3	0.995
195.4	0.996
195.5	0.9947
195.6	0.9946
195.7	0.995
195.8	0.9955
195.9	0.9961
196	0.9954
196.1	0.9956
196.2	0.9959
196.3	0.9948
196.4	0.9942
196.5	0.9945
196.6	0.9944
196.7	0.9957
196.8	0.9951
196.9	0.9951
197	0.9966
197.1	0.995
197.2	0.9952
197.3	0.9954
197.4	0.9953
197.5	0.9963
197.6	0.9944
197.7	0.9945
197.8	0.9944
197.9	0.9953
198	0.9945
198.1	0.995
198.2	0.995
198.3	0.9954
198.4	0.995
198.5	0.9954
198.6	0.996
198.7	0.995
198.8	0.9949
198.9	0.9945
199	0.9949
199.1	0.9955
199.2	0.9955
199.3	0.9955
199.4	0.9951
199.5	0.9956
199.6	0.9954
199.7	0.9954
199.8	0.9961
199.9	0.9948
200	0.9958
[truncated: 14,000 more rows]
