# Supplementary material for: Bayesian inference of kinetic schemes for ion channels by Kalman filtering
Source: eLife journal article supplement (doi:10.7554/elife.62714), 2022-05-04
Supplement: fig4-data3 [file 1_Sim_N_5000_Strom_MW.xlsx]

## Sheet: Tabelle1
0.1	0
0.2	0
0.3	0
0.4	0
0.5	0
0.6	0
0.7	0
0.8	0
0.9	0
1	0
1.1	0
1.2	0
1.3	0
1.4	0
1.5	0
1.6	0
1.7	0
1.8	0
1.9	0
2	0
2.1	0
2.2	0
2.3	0
2.4	0
2.5	0
2.6	0
2.7	0
2.8	0
2.9	0
3	0
3.1	0
3.2	0
3.3	0
3.4	0
3.5	0
3.6	0
3.7	0
3.8	0
3.9	0
4	0
4.1	0
4.2	0
4.3	0
4.4	0
4.5	0
4.6	0
4.7	0
4.8	0
4.9	0
5	0
5.1	0
5.2	0
5.3	0
5.4	0
5.5	0
5.6	0
5.7	0
5.8	0
5.9	0
6	0
6.1	0
6.2	0
6.3	0
6.4	0
6.5	0
6.6	0
6.7	0
6.8	0
6.9	0
7	0
7.1	0
7.2	0
7.3	0
7.4	0
7.5	0
7.6	0
7.7	0
7.8	0
7.9	0
8	0
8.1	0
8.2	0
8.3	0
8.4	0
8.5	0
8.6	0
8.7	0
8.8	0
8.9	0
9	0
9.1	0
9.2	0
9.3	0
9.4	0
9.5	0
9.6	0
9.7	0
9.8	0
9.9	0
10	0
10.1	0
10.2	0
10.3	0
10.4	0
10.5	0
10.6	0
10.7	0
10.8	0
10.9	0
11	0
11.1	0
11.2	0
11.3	0
11.4	0
11.5	0
11.6	0
11.7	0
11.8	0
11.9	0
12	0
12.1	0
12.2	0
12.3	0
12.4	0
12.5	0
12.6	0
12.7	0
12.8	0
12.9	0
13	0
13.1	0
13.2	0
13.3	0
13.4	0
13.5	0
13.6	0
13.7	0
13.8	0
13.9	0
14	0
14.1	0
14.2	0
14.3	0
14.4	0
14.5	0
14.6	0
14.7	0
14.8	0
14.9	0
15	0
15.1	0
15.2	0
15.3	0
15.4	0
15.5	0
15.6	0
15.7	0
15.8	0
15.9	0
16	0
16.1	0
16.2	0
16.3	0
16.4	0
16.5	0
16.6	0
16.7	0
16.8	0
16.9	0
17	0
17.1	0
17.2	0
17.3	0
17.4	0
17.5	0
17.6	0
17.7	0
17.8	0
17.9	0
18	0
18.1	0
18.2	0
18.3	0
18.4	0
18.5	0
18.6	0
18.7	0
18.8	0
18.9	0
19	0
19.1	0
19.2	0
19.3	0
19.4	0
19.5	0
19.6	0
19.7	0
19.8	0
19.9	0
20	0
20.1	0
20.2	0
20.3	0
20.4	0
20.5	0
20.6	0
20.7	0
20.8	0
20.9	0
21	0
21.1	0
21.2	0
21.3	0
21.4	0
21.5	0
21.6	0
21.7	0
21.8	0
21.9	0
22	0
22.1	0
22.2	0
22.3	0
22.4	0
22.5	0
22.6	0
22.7	0
22.8	0
22.9	0
23	0
23.1	0
23.2	0
23.3	0
23.4	0
23.5	0
23.6	0
23.7	0
23.8	0
23.9	0
24	0
24.1	0
24.2	0
24.3	0
24.4	0
24.5	0
24.6	0
24.7	0
24.8	0
24.9	0
25	0
25.1	0
25.2	0
25.3	0
25.4	0
25.5	0
25.6	0
25.7	0
25.8	0
25.9	0
26	0
26.1	0
26.2	0
26.3	0
26.4	0
26.5	0
26.6	0
26.7	0
26.8	0
26.9	0
27	0
27.1	0
27.2	0
27.3	0
27.4	0
27.5	0
27.6	0
27.7	0
27.8	0
27.9	0
28	0
28.1	0
28.2	0
28.3	0
28.4	0
28.5	0
28.6	0
28.7	0
28.8	0
28.9	0
29	0
29.1	0
29.2	0
29.3	0
29.4	0
29.5	0
29.6	0
29.7	0
29.8	0
29.9	0
30	0
30.1	0
30.2	0
30.3	0
30.4	0
30.5	0
30.6	0
30.7	0
30.8	0
30.9	0
31	0
31.1	0
31.2	0
31.3	0
31.4	0
31.5	0
31.6	0
31.7	0
31.8	0
31.9	0
32	0
32.1	0
32.2	0
32.3	0
32.4	0
32.5	0
32.6	0
32.7	0
32.8	0
32.9	0
33	0
33.1	0
33.2	0
33.3	0
33.4	0
33.5	0
33.6	0
33.7	0
33.8	0
33.9	0
34	0
34.1	0
34.2	0
34.3	0
34.4	0
34.5	0
34.6	0
34.7	0
34.8	0
34.9	0
35	0
35.1	0
35.2	0
35.3	0
35.4	0
35.5	0
35.6	0
35.7	0
35.8	0
35.9	0
36	0
36.1	0
36.2	0
36.3	0
36.4	0
36.5	0
36.6	0
36.7	0
36.8	0
36.9	0
37	0
37.1	0
37.2	0
37.3	0
37.4	0
37.5	0
37.6	0
37.7	0
37.8	0
37.9	0
38	0
38.1	0
38.2	0
38.3	0
38.4	0
38.5	0
38.6	0
38.7	0
38.8	0
38.9	0
39	0
39.1	0
39.2	0
39.3	0
39.4	0
39.5	0
39.6	0
39.7	0
39.8	0
39.9	0
40	0
40.1	0
40.2	0
40.3	0
40.4	0
40.5	0
40.6	0
40.7	0
40.8	0
40.9	0
41	0
41.1	0
41.2	0
41.3	0
41.4	0
41.5	0
41.6	0
41.7	0
41.8	0
41.9	0
42	0
42.1	0
42.2	0
42.3	0
42.4	0
42.5	0
42.6	0
42.7	0
42.8	0
42.9	0
43	0
43.1	0
43.2	0
43.3	0
43.4	0
43.5	0
43.6	0
43.7	0
43.8	0
43.9	0
44	0
44.1	0
44.2	0
44.3	0
44.4	0
44.5	0
44.6	0
44.7	0
44.8	0
44.9	0
45	0
45.1	0
45.2	0
45.3	0
45.4	0
45.5	0
45.6	0
45.7	0
45.8	0
45.9	0
46	0
46.1	0
46.2	0
46.3	0
46.4	0
46.5	0
46.6	0
46.7	0
46.8	0
46.9	0
47	0
47.1	0
47.2	0
47.3	0
47.4	0
47.5	0
47.6	0
47.7	0
47.8	0
47.9	0
48	0
48.1	0
48.2	0
48.3	0
48.4	0
48.5	0
48.6	0
48.7	0
48.8	0
48.9	0
49	0
49.1	0
49.2	0
49.3	0
49.4	0
49.5	0
49.6	0
49.7	0
49.8	0
49.9	0
50	0
50.1	0
50.2	0
50.3	0
50.4	0
50.5	0
50.6	0
50.7	0
50.8	0
50.9	0
51	0
51.1	0
51.2	0
51.3	0
51.4	0
51.5	0
51.6	0
51.7	0
51.8	0
51.9	0
52	0
52.1	0
52.2	0
52.3	0
52.4	0
52.5	0
52.6	0
52.7	0
52.8	0
52.9	0
53	0
53.1	0
53.2	0
53.3	0
53.4	0
53.5	0
53.6	0
53.7	0
53.8	0
53.9	0
54	0
54.1	0
54.2	0
54.3	0
54.4	0
54.5	0
54.6	0
54.7	0
54.8	0
54.9	0
55	0
55.1	0
55.2	0
55.3	0
55.4	0
55.5	0
55.6	0
55.7	0
55.8	0
55.9	0
56	0
56.1	0
56.2	0
56.3	0
56.4	0
56.5	0
56.6	0
56.7	0
56.8	0
56.9	0
57	0
57.1	0
57.2	0
57.3	0
57.4	0
57.5	0
57.6	0
57.7	0
57.8	0
57.9	0
58	0
58.1	0
58.2	0
58.3	0
58.4	0
58.5	0
58.6	0
58.7	0
58.8	0
58.9	0
59	0
59.1	0
59.2	0
59.3	0
59.4	0
59.5	0
59.6	0
59.7	0
59.8	0
59.9	0
60	0
60.1	0
60.2	0
60.3	0
60.4	0
60.5	0
60.6	0
60.7	0
60.8	0
60.9	0
61	0
61.1	0
61.2	0
61.3	0
61.4	0
61.5	0
61.6	0
61.7	0
61.8	0
61.9	0
62	0
62.1	0
62.2	0
62.3	0
62.4	0
62.5	0
62.6	0
62.7	0
62.8	0
62.9	0
63	0
63.1	0
63.2	0
63.3	0
63.4	0
63.5	0
63.6	0
63.7	0
63.8	0
63.9	0
64	0
64.1	0
64.2	0
64.3	0
64.4	0
64.5	0
64.6	0
64.7	0
64.8	0
64.9	0
65	0
65.1	0
65.2	0
65.3	0
65.4	0
65.5	0
65.6	0
65.7	0
65.8	0
65.9	0
66	0
66.1	0
66.2	0
66.3	0
66.4	0
66.5	0
66.6	0
66.7	0
66.8	0
66.9	0
67	0
67.1	0
67.2	0
67.3	0
67.4	0
67.5	0
67.6	0
67.7	0
67.8	0
67.9	0
68	0
68.1	0
68.2	0
68.3	0
68.4	0
68.5	0
68.6	0
68.7	0
68.8	0
68.9	0
69	0
69.1	0
69.2	0
69.3	0
69.4	0
69.5	0
69.6	0
69.7	0
69.8	0
69.9	0
70	0
70.1	0
70.2	0
70.3	0
70.4	0
70.5	0
70.6	0
70.7	0
70.8	0
70.9	0
71	0
71.1	0
71.2	0
71.3	0
71.4	0
71.5	0
71.6	0
71.7	0
71.8	0
71.9	0
72	0
72.1	0
72.2	0
72.3	0
72.4	0
72.5	0
72.6	0
72.7	0
72.8	0
72.9	0
73	0
73.1	0
73.2	0
73.3	0
73.4	0
73.5	0
73.6	0
73.7	0
73.8	0
73.9	0
74	0
74.1	0
74.2	0
74.3	0
74.4	0
74.5	0
74.6	0
74.7	0
74.8	0
74.9	0
75	0
75.1	0
75.2	0
75.3	0
75.4	0
75.5	0
75.6	0
75.7	0
75.8	0
75.9	0
76	0
76.1	0
76.2	0
76.3	0
76.4	0
76.5	0
76.6	0
76.7	0
76.8	0
76.9	0
77	0
77.1	0
77.2	0
77.3	0
77.4	0
77.5	0
77.6	0
77.7	0
77.8	0
77.9	0
78	0
78.1	0
78.2	0
78.3	0
78.4	0
78.5	0
78.6	0
78.7	0
78.8	0
78.9	0
79	0
79.1	0
79.2	0
79.3	0
79.4	0
79.5	0
79.6	0
79.7	0
79.8	0
79.9	0
80	0
80.1	0
80.2	0
80.3	0
80.4	0
80.5	0
80.6	0
80.7	0
80.8	0
80.9	0
81	0
81.1	0
81.2	0
81.3	0
81.4	0
81.5	0
81.6	0
81.7	0
81.8	0
81.9	0
82	0
82.1	0
82.2	0
82.3	0
82.4	0
82.5	0
82.6	0
82.7	0
82.8	0
82.9	0
83	0
83.1	0
83.2	0
83.3	0
83.4	0
83.5	0
83.6	0
83.7	0
83.8	0
83.9	0
84	0
84.1	0
84.2	0
84.3	0
84.4	0
84.5	0
84.6	0
84.7	0
84.8	0
84.9	0
85	0
85.1	0
85.2	0
85.3	0
85.4	0
85.5	0
85.6	0
85.7	0
85.8	0
85.9	0
86	0
86.1	0
86.2	0
86.3	0
86.4	0
86.5	0
86.6	0
86.7	0
86.8	0
86.9	0
87	0
87.1	0
87.2	0
87.3	0
87.4	0
87.5	0
87.6	0
87.7	0
87.8	0
87.9	0
88	0
88.1	0
88.2	0
88.3	0
88.4	0
88.5	0
88.6	0
88.7	0
88.8	0
88.9	0
89	0
89.1	0
89.2	0
89.3	0
89.4	0
89.5	0
89.6	0
89.7	0
89.8	0
89.9	0
90	0
90.1	0
90.2	0
90.3	0
90.4	0
90.5	0
90.6	0
90.7	0
90.8	0
90.9	0
91	0
91.1	0
91.2	0
91.3	0
91.4	0
91.5	0
91.6	0
91.7	0
91.8	0
91.9	0
92	0
92.1	0
92.2	0
92.3	0
92.4	0
92.5	0
92.6	0
92.7	0
92.8	0
92.9	0
93	0
93.1	0
93.2	0
93.3	0
93.4	0
93.5	0
93.6	0
93.7	0
93.8	0
93.9	0
94	0
94.1	0
94.2	0
94.3	0
94.4	0
94.5	0
94.6	0
94.7	0
94.8	0
94.9	0
95	0
95.1	0
95.2	0
95.3	0
95.4	0
95.5	0
95.6	0
95.7	0
95.8	0
95.9	0
96	0
96.1	0
96.2	0
96.3	0
96.4	0
96.5	0
96.6	0
96.7	0
96.8	0
96.9	0
97	0
97.1	0
97.2	0
97.3	0
97.4	0
97.5	0
97.6	0
97.7	0
97.8	0
97.9	0
98	0
98.1	0
98.2	0
98.3	0
98.4	0
98.5	0
98.6	0
98.7	0
98.8	0
98.9	0
99	0
99.1	0
99.2	0
99.3	0
99.4	0
99.5	0
99.6	0
99.7	0
99.8	0
99.9	0
100	0
100.1	0.0012
100.2	0.003
100.3	0.0086
100.4	0.014
100.5	0.0196
100.6	0.0236
100.7	0.028
100.8	0.032
100.9	0.036
101	0.042
101.1	0.0468
101.2	0.0524
101.3	0.057
101.4	0.0616
101.5	0.0646
101.6	0.068
101.7	0.0732
101.8	0.0772
101.9	0.0824
102	0.085
102.1	0.0886
102.2	0.0928
102.3	0.097
102.4	0.102
102.5	0.1068
102.6	0.1102
102.7	0.1144
102.8	0.1174
102.9	0.1208
103	0.126
103.1	0.1294
103.2	0.1334
103.3	0.1384
103.4	0.1418
103.5	0.145
103.6	0.1526
103.7	0.157
103.8	0.1608
103.9	0.166
104	0.1696
104.1	0.174
104.2	0.1766
104.3	0.1808
104.4	0.1858
104.5	0.189
104.6	0.1938
104.7	0.1976
104.8	0.2024
104.9	0.2058
105	0.2098
105.1	0.2144
105.2	0.2186
105.3	0.2214
105.4	0.2244
105.5	0.2276
105.6	0.2304
105.7	0.2332
105.8	0.2376
105.9	0.2406
106	0.243
106.1	0.2464
106.2	0.2492
106.3	0.252
106.4	0.2554
106.5	0.2594
106.6	0.2632
106.7	0.2662
106.8	0.2694
106.9	0.272
107	0.2736
107.1	0.2774
107.2	0.2802
107.3	0.2848
107.4	0.2872
107.5	0.2888
107.6	0.2916
107.7	0.2936
107.8	0.2956
107.9	0.298
108	0.3002
108.1	0.3036
108.2	0.3056
108.3	0.3084
108.4	0.3112
108.5	0.315
108.6	0.3176
108.7	0.3204
108.8	0.3242
108.9	0.329
109	0.3316
109.1	0.335
109.2	0.3376
109.3	0.341
109.4	0.344
109.5	0.347
109.6	0.3502
109.7	0.3532
109.8	0.3554
109.9	0.3586
110	0.36
110.1	0.3616
110.2	0.3638
110.3	0.367
110.4	0.3706
110.5	0.3718
110.6	0.3752
110.7	0.376
110.8	0.3788
110.9	0.38
111	0.3822
111.1	0.3842
111.2	0.3862
111.3	0.3898
111.4	0.3922
111.5	0.3968
111.6	0.3986
111.7	0.4016
111.8	0.4048
111.9	0.4094
112	0.4126
112.1	0.4158
112.2	0.4196
112.3	0.4232
112.4	0.4256
112.5	0.4266
112.6	0.4292
112.7	0.4318
112.8	0.4344
112.9	0.4368
113	0.438
113.1	0.4424
113.2	0.4446
113.3	0.4468
113.4	0.4476
113.5	0.4496
113.6	0.4518
113.7	0.4554
113.8	0.4582
113.9	0.4604
114	0.4632
114.1	0.466
114.2	0.4676
114.3	0.47
114.4	0.4726
114.5	0.4748
114.6	0.4768
114.7	0.4794
114.8	0.4812
114.9	0.4842
115	0.487
115.1	0.4882
115.2	0.4892
115.3	0.4908
115.4	0.494
115.5	0.4958
115.6	0.4976
115.7	0.4992
115.8	0.5004
115.9	0.502
116	0.503
116.1	0.505
116.2	0.5066
116.3	0.508
116.4	0.5094
116.5	0.5114
116.6	0.5134
116.7	0.5148
116.8	0.5176
116.9	0.5204
117	0.5216
117.1	0.5226
117.2	0.525
117.3	0.5252
117.4	0.5252
117.5	0.5274
117.6	0.529
117.7	0.5302
117.8	0.533
117.9	0.5342
118	0.5352
118.1	0.5356
118.2	0.538
118.3	0.5392
118.4	0.5412
118.5	0.5446
118.6	0.5466
118.7	0.5482
118.8	0.549
118.9	0.5498
119	0.5506
119.1	0.5524
119.2	0.5546
119.3	0.5562
119.4	0.5586
119.5	0.5604
119.6	0.5614
119.7	0.563
119.8	0.5652
119.9	0.5674
120	0.5694
120.1	0.5704
120.2	0.572
120.3	0.5728
120.4	0.574
120.5	0.5758
120.6	0.5774
120.7	0.578
120.8	0.5788
120.9	0.5798
121	0.5812
121.1	0.5826
121.2	0.5832
121.3	0.5844
121.4	0.5858
121.5	0.5874
121.6	0.5892
121.7	0.5908
121.8	0.5914
121.9	0.592
122	0.5934
122.1	0.5944
122.2	0.596
122.3	0.5972
122.4	0.5988
122.5	0.6018
122.6	0.6028
122.7	0.6056
122.8	0.6074
122.9	0.6084
123	0.6106
123.1	0.6128
123.2	0.6134
123.3	0.6154
123.4	0.6164
123.5	0.6186
123.6	0.6214
123.7	0.6226
123.8	0.6238
123.9	0.6252
124	0.6264
124.1	0.6278
124.2	0.6294
124.3	0.6312
124.4	0.631
124.5	0.6328
124.6	0.6358
124.7	0.6368
124.8	0.6382
124.9	0.6386
125	0.6394
125.1	0.6402
125.2	0.6412
125.3	0.6426
125.4	0.6428
125.5	0.6454
125.6	0.6464
125.7	0.6472
125.8	0.6504
125.9	0.651
126	0.6522
126.1	0.6532
126.2	0.6534
126.3	0.6536
126.4	0.6532
126.5	0.655
126.6	0.6576
126.7	0.658
126.8	0.66
126.9	0.6604
127	0.6612
127.1	0.6624
127.2	0.6634
127.3	0.6652
127.4	0.6664
127.5	0.6686
127.6	0.67
127.7	0.6714
127.8	0.671
127.9	0.6722
128	0.6722
128.1	0.6728
128.2	0.6728
128.3	0.6738
128.4	0.674
128.5	0.6748
128.6	0.6772
128.7	0.6766
128.8	0.6758
128.9	0.6762
129	0.6776
129.1	0.6776
129.2	0.6772
129.3	0.6784
129.4	0.6792
129.5	0.6798
129.6	0.6802
129.7	0.6812
129.8	0.6824
129.9	0.6822
130	0.6832
130.1	0.6852
130.2	0.6858
130.3	0.6862
130.4	0.6862
130.5	0.6866
130.6	0.687
130.7	0.686
130.8	0.6872
130.9	0.6882
131	0.6888
131.1	0.6894
131.2	0.69
131.3	0.6902
131.4	0.6916
131.5	0.6926
131.6	0.6928
131.7	0.6934
131.8	0.6942
131.9	0.6946
132	0.6958
132.1	0.6968
132.2	0.6974
132.3	0.6982
132.4	0.699
132.5	0.7014
132.6	0.7026
132.7	0.7038
132.8	0.7048
132.9	0.7058
133	0.7066
133.1	0.7068
133.2	0.7072
133.3	0.7076
133.4	0.7076
133.5	0.7098
133.6	0.7106
133.7	0.71
133.8	0.7104
133.9	0.7112
134	0.7114
134.1	0.7114
134.2	0.7114
134.3	0.7124
134.4	0.7126
134.5	0.7138
134.6	0.7144
134.7	0.7154
134.8	0.716
134.9	0.7162
135	0.7164
135.1	0.7176
135.2	0.7178
135.3	0.718
135.4	0.718
135.5	0.7182
135.6	0.7194
135.7	0.7208
135.8	0.7216
135.9	0.7222
136	0.7226
136.1	0.724
136.2	0.7248
136.3	0.7254
136.4	0.7254
136.5	0.7264
136.6	0.7272
136.7	0.7284
136.8	0.7294
136.9	0.7302
137	0.7308
137.1	0.7318
137.2	0.731
137.3	0.7318
137.4	0.732
137.5	0.7326
137.6	0.734
137.7	0.7342
137.8	0.7342
137.9	0.735
138	0.7358
138.1	0.736
138.2	0.7364
138.3	0.7372
138.4	0.7382
138.5	0.7398
138.6	0.7398
138.7	0.7406
138.8	0.7406
138.9	0.7412
139	0.741
139.1	0.7416
139.2	0.7424
139.3	0.7422
139.4	0.7438
139.5	0.744
139.6	0.7444
139.7	0.7452
139.8	0.7458
139.9	0.7462
140	0.7462
140.1	0.7472
140.2	0.7474
140.3	0.7478
140.4	0.7492
140.5	0.749
140.6	0.7496
140.7	0.7508
140.8	0.7516
140.9	0.7516
141	0.7518
141.1	0.752
141.2	0.7518
141.3	0.752
141.4	0.7536
141.5	0.7532
141.6	0.7542
141.7	0.7546
141.8	0.7542
141.9	0.754
142	0.7544
142.1	0.7554
142.2	0.7566
142.3	0.7568
142.4	0.756
142.5	0.7568
142.6	0.7558
142.7	0.7562
142.8	0.7564
142.9	0.757
143	0.757
143.1	0.7574
143.2	0.758
143.3	0.7586
143.4	0.7586
143.5	0.7588
143.6	0.758
143.7	0.7574
143.8	0.7588
143.9	0.7596
144	0.76
144.1	0.7604
144.2	0.7606
144.3	0.7606
144.4	0.7612
144.5	0.7618
144.6	0.762
144.7	0.7612
144.8	0.762
144.9	0.7634
145	0.7654
145.1	0.7656
145.2	0.7654
145.3	0.7658
145.4	0.767
145.5	0.768
145.6	0.767
145.7	0.7676
145.8	0.7676
145.9	0.7678
146	0.7674
146.1	0.7682
146.2	0.768
146.3	0.7676
146.4	0.7694
146.5	0.7704
146.6	0.771
146.7	0.7718
146.8	0.7736
146.9	0.7746
147	0.7754
147.1	0.7762
147.2	0.7766
147.3	0.7768
147.4	0.7772
147.5	0.7778
147.6	0.7784
147.7	0.7796
147.8	0.7808
147.9	0.7812
148	0.7818
148.1	0.7826
148.2	0.7834
148.3	0.7834
148.4	0.7834
148.5	0.7844
148.6	0.7852
148.7	0.7848
148.8	0.7848
148.9	0.7856
149	0.7858
149.1	0.7852
149.2	0.785
149.3	0.7842
149.4	0.7846
149.5	0.7838
149.6	0.7848
149.7	0.7846
149.8	0.784
149.9	0.7836
150	0.7836
150.1	0.7836
150.2	0.7836
150.3	0.7824
150.4	0.7826
150.5	0.7818
150.6	0.7826
150.7	0.783
150.8	0.7844
150.9	0.7842
151	0.7844
151.1	0.7852
151.2	0.7858
151.3	0.7864
151.4	0.7876
151.5	0.7874
151.6	0.7872
151.7	0.7872
151.8	0.7864
151.9	0.7876
152	0.787
152.1	0.788
152.2	0.7882
152.3	0.7876
152.4	0.787
152.5	0.7874
152.6	0.7878
152.7	0.7884
152.8	0.7884
152.9	0.7886
153	0.789
153.1	0.79
153.2	0.7906
153.3	0.7912
153.4	0.7916
153.5	0.792
153.6	0.7926
153.7	0.793
153.8	0.7944
153.9	0.7938
154	0.7938
154.1	0.794
154.2	0.7946
154.3	0.7936
154.4	0.7946
154.5	0.7946
154.6	0.7938
154.7	0.7934
154.8	0.7934
154.9	0.794
155	0.794
155.1	0.7942
155.2	0.7946
155.3	0.7952
155.4	0.7948
155.5	0.7938
155.6	0.7946
155.7	0.795
155.8	0.7954
155.9	0.7958
156	0.7962
156.1	0.7962
156.2	0.7954
156.3	0.7966
156.4	0.7958
156.5	0.7956
156.6	0.7956
156.7	0.7956
156.8	0.7962
156.9	0.7966
157	0.7968
157.1	0.7968
157.2	0.7982
157.3	0.7986
157.4	0.7982
157.5	0.7984
157.6	0.7978
157.7	0.7974
157.8	0.7976
157.9	0.7982
158	0.7988
158.1	0.7992
158.2	0.7992
158.3	0.8
158.4	0.8
158.5	0.8006
158.6	0.8014
158.7	0.8018
158.8	0.8028
158.9	0.8034
159	0.8046
159.1	0.8056
159.2	0.8058
159.3	0.806
159.4	0.8046
159.5	0.804
159.6	0.8054
159.7	0.806
159.8	0.8056
159.9	0.8062
160	0.8072
160.1	0.8084
160.2	0.8084
160.3	0.8088
160.4	0.8088
160.5	0.8088
160.6	0.809
160.7	0.809
160.8	0.8094
160.9	0.81
161	0.8098
161.1	0.8098
161.2	0.8098
161.3	0.8096
161.4	0.8098
161.5	0.8102
161.6	0.8108
161.7	0.8108
161.8	0.811
161.9	0.8104
162	0.811
162.1	0.8114
162.2	0.812
162.3	0.8122
162.4	0.8128
162.5	0.8132
162.6	0.813
162.7	0.813
162.8	0.8134
162.9	0.813
163	0.8124
163.1	0.8128
163.2	0.8126
163.3	0.8122
163.4	0.8126
163.5	0.8128
163.6	0.8124
163.7	0.8118
163.8	0.813
163.9	0.8132
164	0.8134
164.1	0.8138
164.2	0.8134
164.3	0.8134
164.4	0.8134
164.5	0.814
164.6	0.8148
164.7	0.8142
164.8	0.814
164.9	0.8142
165	0.814
165.1	0.815
165.2	0.8152
165.3	0.815
165.4	0.8152
165.5	0.8152
165.6	0.8156
165.7	0.8158
165.8	0.8152
165.9	0.8152
166	0.8148
166.1	0.8148
166.2	0.8148
166.3	0.8142
166.4	0.8142
166.5	0.8154
166.6	0.8158
166.7	0.8156
166.8	0.8156
166.9	0.8152
167	0.8154
167.1	0.8156
167.2	0.8158
167.3	0.8158
167.4	0.816
167.5	0.8168
167.6	0.8168
167.7	0.8166
167.8	0.8162
167.9	0.8166
168	0.8166
168.1	0.816
168.2	0.8156
168.3	0.8166
168.4	0.8178
168.5	0.8178
168.6	0.818
168.7	0.8178
168.8	0.8178
168.9	0.8158
169	0.8158
169.1	0.8152
169.2	0.8152
169.3	0.8144
169.4	0.8142
169.5	0.8134
169.6	0.8138
169.7	0.8144
169.8	0.8146
169.9	0.8142
170	0.8136
170.1	0.813
170.2	0.813
170.3	0.8128
170.4	0.8124
170.5	0.8126
170.6	0.8134
170.7	0.8134
170.8	0.8134
170.9	0.8134
171	0.8132
171.1	0.813
171.2	0.8128
171.3	0.8126
171.4	0.8136
171.5	0.814
171.6	0.8136
171.7	0.8132
171.8	0.8138
171.9	0.814
172	0.8144
172.1	0.8142
172.2	0.8144
172.3	0.814
172.4	0.8146
172.5	0.8142
172.6	0.814
172.7	0.8134
172.8	0.8132
172.9	0.813
173	0.8134
173.1	0.8124
173.2	0.8126
173.3	0.8124
173.4	0.8132
173.5	0.8122
173.6	0.812
173.7	0.8122
173.8	0.8126
173.9	0.8124
174	0.8136
174.1	0.8136
174.2	0.813
174.3	0.8126
174.4	0.8128
174.5	0.813
174.6	0.8134
174.7	0.8138
174.8	0.8126
174.9	0.8128
175	0.8126
175.1	0.8122
175.2	0.8128
175.3	0.8124
175.4	0.814
175.5	0.8144
175.6	0.8138
175.7	0.8146
175.8	0.814
175.9	0.814
176	0.8142
176.1	0.8144
176.2	0.8148
176.3	0.8156
176.4	0.8156
176.5	0.8158
176.6	0.8162
176.7	0.8172
176.8	0.8182
176.9	0.8172
177	0.8176
177.1	0.818
177.2	0.8186
177.3	0.8198
177.4	0.82
177.5	0.8214
177.6	0.8208
177.7	0.8216
177.8	0.8218
177.9	0.822
178	0.8224
178.1	0.8222
178.2	0.8226
178.3	0.823
178.4	0.8222
178.5	0.8216
178.6	0.8216
178.7	0.8212
178.8	0.821
178.9	0.8212
179	0.8216
179.1	0.8212
179.2	0.8212
179.3	0.8214
179.4	0.8208
179.5	0.8208
179.6	0.8206
179.7	0.8214
179.8	0.8214
179.9	0.8208
180	0.8198
180.1	0.8198
180.2	0.8198
180.3	0.8198
180.4	0.8188
180.5	0.8188
180.6	0.8198
180.7	0.8176
180.8	0.8178
180.9	0.8184
181	0.8186
181.1	0.8184
181.2	0.8182
181.3	0.819
181.4	0.8192
181.5	0.8194
181.6	0.819
181.7	0.8184
181.8	0.8174
181.9	0.8174
182	0.8178
182.1	0.8184
182.2	0.8186
182.3	0.8188
182.4	0.8184
182.5	0.8186
182.6	0.8194
182.7	0.819
182.8	0.8186
182.9	0.819
183	0.8194
183.1	0.8206
183.2	0.8208
183.3	0.8202
183.4	0.8196
183.5	0.8202
183.6	0.82
183.7	0.8208
183.8	0.8208
183.9	0.8214
184	0.8218
184.1	0.823
184.2	0.8226
184.3	0.822
184.4	0.822
184.5	0.8218
184.6	0.8218
184.7	0.8222
184.8	0.822
184.9	0.8218
185	0.822
185.1	0.8218
185.2	0.821
185.3	0.8208
185.4	0.8206
185.5	0.8198
185.6	0.8208
185.7	0.8198
185.8	0.8196
185.9	0.8202
186	0.8202
186.1	0.8194
186.2	0.8194
186.3	0.8188
186.4	0.8194
186.5	0.8184
186.6	0.8178
186.7	0.8188
186.8	0.8188
186.9	0.8186
187	0.818
187.1	0.8178
187.2	0.8178
187.3	0.818
187.4	0.8182
187.5	0.8182
187.6	0.8184
187.7	0.8188
187.8	0.8194
187.9	0.8188
188	0.8198
188.1	0.8204
188.2	0.8196
188.3	0.82
188.4	0.82
188.5	0.8198
188.6	0.8212
188.7	0.8202
188.8	0.8204
188.9	0.8202
189	0.8206
189.1	0.821
189.2	0.8206
189.3	0.8206
189.4	0.8204
189.5	0.8196
189.6	0.8194
189.7	0.8196
189.8	0.8196
189.9	0.8202
190	0.8202
190.1	0.821
190.2	0.8218
190.3	0.8208
190.4	0.8208
190.5	0.821
190.6	0.8204
190.7	0.8206
190.8	0.8212
190.9	0.8222
191	0.8222
191.1	0.8216
191.2	0.8208
191.3	0.8198
191.4	0.8198
191.5	0.8196
191.6	0.8192
191.7	0.819
191.8	0.8192
191.9	0.8196
192	0.8186
192.1	0.8184
192.2	0.8188
192.3	0.8198
192.4	0.8192
192.5	0.8202
192.6	0.8208
192.7	0.8208
192.8	0.8208
192.9	0.821
193	0.821
193.1	0.8214
193.2	0.8214
193.3	0.8206
193.4	0.8218
193.5	0.8222
193.6	0.8214
193.7	0.822
193.8	0.8216
193.9	0.822
194	0.8224
194.1	0.823
194.2	0.8238
194.3	0.8234
194.4	0.824
194.5	0.8238
194.6	0.8246
194.7	0.8242
194.8	0.8246
194.9	0.8254
195	0.8246
195.1	0.825
195.2	0.8232
195.3	0.8238
195.4	0.8228
195.5	0.8228
195.6	0.824
195.7	0.8238
195.8	0.824
195.9	0.8238
196	0.8244
196.1	0.824
196.2	0.824
196.3	0.8244
196.4	0.8252
196.5	0.8246
196.6	0.8242
196.7	0.8248
196.8	0.824
196.9	0.8242
197	0.8254
197.1	0.826
197.2	0.826
197.3	0.826
197.4	0.8254
197.5	0.8264
197.6	0.8256
197.7	0.8262
197.8	0.8248
197.9	0.8234
198	0.8234
198.1	0.8232
198.2	0.8234
198.3	0.8232
198.4	0.823
198.5	0.823
198.6	0.823
198.7	0.8232
198.8	0.8242
198.9	0.823
199	0.8226
199.1	0.8218
199.2	0.821
199.3	0.8212
199.4	0.8218
199.5	0.8218
199.6	0.823
199.7	0.824
199.8	0.8232
199.9	0.8234
200	0.823
[truncated: 14,000 more rows]
