# Supplementary material for: Bayesian inference of kinetic schemes for ion channels by Kalman filtering
Source: eLife journal article supplement (doi:10.7554/elife.62714), 2022-05-04
Supplement: fig4-data3 [file 1_Sim_N_6000_Fluor_MW_32M.xlsx]

## Sheet: Tabelle1
0.1	0
0.2	0
0.3	0
0.4	0
0.5	0
0.6	0
0.7	0
0.8	0
0.9	0
1	0
1.1	0
1.2	0
1.3	0
1.4	0
1.5	0
1.6	0
1.7	0
1.8	0
1.9	0
2	0
2.1	0
2.2	0
2.3	0
2.4	0
2.5	0
2.6	0
2.7	0
2.8	0
2.9	0
3	0
3.1	0
3.2	0
3.3	0
3.4	0
3.5	0
3.6	0
3.7	0
3.8	0
3.9	0
4	0
4.1	0
4.2	0
4.3	0
4.4	0
4.5	0
4.6	0
4.7	0
4.8	0
4.9	0
5	0
5.1	0
5.2	0
5.3	0
5.4	0
5.5	0
5.6	0
5.7	0
5.8	0
5.9	0
6	0
6.1	0
6.2	0
6.3	0
6.4	0
6.5	0
6.6	0
6.7	0
6.8	0
6.9	0
7	0
7.1	0
7.2	0
7.3	0
7.4	0
7.5	0
7.6	0
7.7	0
7.8	0
7.9	0
8	0
8.1	0
8.2	0
8.3	0
8.4	0
8.5	0
8.6	0
8.7	0
8.8	0
8.9	0
9	0
9.1	0
9.2	0
9.3	0
9.4	0
9.5	0
9.6	0
9.7	0
9.8	0
9.9	0
10	0
10.1	0
10.2	0
10.3	0
10.4	0
10.5	0
10.6	0
10.7	0
10.8	0
10.9	0
11	0
11.1	0
11.2	0
11.3	0
11.4	0
11.5	0
11.6	0
11.7	0
11.8	0
11.9	0
12	0
12.1	0
12.2	0
12.3	0
12.4	0
12.5	0
12.6	0
12.7	0
12.8	0
12.9	0
13	0
13.1	0
13.2	0
13.3	0
13.4	0
13.5	0
13.6	0
13.7	0
13.8	0
13.9	0
14	0
14.1	0
14.2	0
14.3	0
14.4	0
14.5	0
14.6	0
14.7	0
14.8	0
14.9	0
15	0
15.1	0
15.2	0
15.3	0
15.4	0
15.5	0
15.6	0
15.7	0
15.8	0
15.9	0
16	0
16.1	0
16.2	0
16.3	0
16.4	0
16.5	0
16.6	0
16.7	0
16.8	0
16.9	0
17	0
17.1	0
17.2	0
17.3	0
17.4	0
17.5	0
17.6	0
17.7	0
17.8	0
17.9	0
18	0
18.1	0
18.2	0
18.3	0
18.4	0
18.5	0
18.6	0
18.7	0
18.8	0
18.9	0
19	0
19.1	0
19.2	0
19.3	0
19.4	0
19.5	0
19.6	0
19.7	0
19.8	0
19.9	0
20	0
20.1	0
20.2	0
20.3	0
20.4	0
20.5	0
20.6	0
20.7	0
20.8	0
20.9	0
21	0
21.1	0
21.2	0
21.3	0
21.4	0
21.5	0
21.6	0
21.7	0
21.8	0
21.9	0
22	0
22.1	0
22.2	0
22.3	0
22.4	0
22.5	0
22.6	0
22.7	0
22.8	0
22.9	0
23	0
23.1	0
23.2	0
23.3	0
23.4	0
23.5	0
23.6	0
23.7	0
23.8	0
23.9	0
24	0
24.1	0
24.2	0
24.3	0
24.4	0
24.5	0
24.6	0
24.7	0
24.8	0
24.9	0
25	0
25.1	0
25.2	0
25.3	0
25.4	0
25.5	0
25.6	0
25.7	0
25.8	0
25.9	0
26	0
26.1	0
26.2	0
26.3	0
26.4	0
26.5	0
26.6	0
26.7	0
26.8	0
26.9	0
27	0
27.1	0
27.2	0
27.3	0
27.4	0
27.5	0
27.6	0
27.7	0
27.8	0
27.9	0
28	0
28.1	0
28.2	0
28.3	0
28.4	0
28.5	0
28.6	0
28.7	0
28.8	0
28.9	0
29	0
29.1	0
29.2	0
29.3	0
29.4	0
29.5	0
29.6	0
29.7	0
29.8	0
29.9	0
30	0
30.1	0
30.2	0
30.3	0
30.4	0
30.5	0
30.6	0
30.7	0
30.8	0
30.9	0
31	0
31.1	0
31.2	0
31.3	0
31.4	0
31.5	0
31.6	0
31.7	0
31.8	0
31.9	0
32	0
32.1	0
32.2	0
32.3	0
32.4	0
32.5	0
32.6	0
32.7	0
32.8	0
32.9	0
33	0
33.1	0
33.2	0
33.3	0
33.4	0
33.5	0
33.6	0
33.7	0
33.8	0
33.9	0
34	0
34.1	0
34.2	0
34.3	0
34.4	0
34.5	0
34.6	0
34.7	0
34.8	0
34.9	0
35	0
35.1	0
35.2	0
35.3	0
35.4	0
35.5	0
35.6	0
35.7	0
35.8	0
35.9	0
36	0
36.1	0
36.2	0
36.3	0
36.4	0
36.5	0
36.6	0
36.7	0
36.8	0
36.9	0
37	0
37.1	0
37.2	0
37.3	0
37.4	0
37.5	0
37.6	0
37.7	0
37.8	0
37.9	0
38	0
38.1	0
38.2	0
38.3	0
38.4	0
38.5	0
38.6	0
38.7	0
38.8	0
38.9	0
39	0
39.1	0
39.2	0
39.3	0
39.4	0
39.5	0
39.6	0
39.7	0
39.8	0
39.9	0
40	0
40.1	0
40.2	0
40.3	0
40.4	0
40.5	0
40.6	0
40.7	0
40.8	0
40.9	0
41	0
41.1	0
41.2	0
41.3	0
41.4	0
41.5	0
41.6	0
41.7	0
41.8	0
41.9	0
42	0
42.1	0
42.2	0
42.3	0
42.4	0
42.5	0
42.6	0
42.7	0
42.8	0
42.9	0
43	0
43.1	0
43.2	0
43.3	0
43.4	0
43.5	0
43.6	0
43.7	0
43.8	0
43.9	0
44	0
44.1	0
44.2	0
44.3	0
44.4	0
44.5	0
44.6	0
44.7	0
44.8	0
44.9	0
45	0
45.1	0
45.2	0
45.3	0
45.4	0
45.5	0
45.6	0
45.7	0
45.8	0
45.9	0
46	0
46.1	0
46.2	0
46.3	0
46.4	0
46.5	0
46.6	0
46.7	0
46.8	0
46.9	0
47	0
47.1	0
47.2	0
47.3	0
47.4	0
47.5	0
47.6	0
47.7	0
47.8	0
47.9	0
48	0
48.1	0
48.2	0
48.3	0
48.4	0
48.5	0
48.6	0
48.7	0
48.8	0
48.9	0
49	0
49.1	0
49.2	0
49.3	0
49.4	0
49.5	0
49.6	0
49.7	0
49.8	0
49.9	0
50	0
50.1	0
50.2	0
50.3	0
50.4	0
50.5	0
50.6	0
50.7	0
50.8	0
50.9	0
51	0
51.1	0
51.2	0
51.3	0
51.4	0
51.5	0
51.6	0
51.7	0
51.8	0
51.9	0
52	0
52.1	0
52.2	0
52.3	0
52.4	0
52.5	0
52.6	0
52.7	0
52.8	0
52.9	0
53	0
53.1	0
53.2	0
53.3	0
53.4	0
53.5	0
53.6	0
53.7	0
53.8	0
53.9	0
54	0
54.1	0
54.2	0
54.3	0
54.4	0
54.5	0
54.6	0
54.7	0
54.8	0
54.9	0
55	0
55.1	0
55.2	0
55.3	0
55.4	0
55.5	0
55.6	0
55.7	0
55.8	0
55.9	0
56	0
56.1	0
56.2	0
56.3	0
56.4	0
56.5	0
56.6	0
56.7	0
56.8	0
56.9	0
57	0
57.1	0
57.2	0
57.3	0
57.4	0
57.5	0
57.6	0
57.7	0
57.8	0
57.9	0
58	0
58.1	0
58.2	0
58.3	0
58.4	0
58.5	0
58.6	0
58.7	0
58.8	0
58.9	0
59	0
59.1	0
59.2	0
59.3	0
59.4	0
59.5	0
59.6	0
59.7	0
59.8	0
59.9	0
60	0
60.1	0
60.2	0
60.3	0
60.4	0
60.5	0
60.6	0
60.7	0
60.8	0
60.9	0
61	0
61.1	0
61.2	0
61.3	0
61.4	0
61.5	0
61.6	0
61.7	0
61.8	0
61.9	0
62	0
62.1	0
62.2	0
62.3	0
62.4	0
62.5	0
62.6	0
62.7	0
62.8	0
62.9	0
63	0
63.1	0
63.2	0
63.3	0
63.4	0
63.5	0
63.6	0
63.7	0
63.8	0
63.9	0
64	0
64.1	0
64.2	0
64.3	0
64.4	0
64.5	0
64.6	0
64.7	0
64.8	0
64.9	0
65	0
65.1	0
65.2	0
65.3	0
65.4	0
65.5	0
65.6	0
65.7	0
65.8	0
65.9	0
66	0
66.1	0
66.2	0
66.3	0
66.4	0
66.5	0
66.6	0
66.7	0
66.8	0
66.9	0
67	0
67.1	0
67.2	0
67.3	0
67.4	0
67.5	0
67.6	0
67.7	0
67.8	0
67.9	0
68	0
68.1	0
68.2	0
68.3	0
68.4	0
68.5	0
68.6	0
68.7	0
68.8	0
68.9	0
69	0
69.1	0
69.2	0
69.3	0
69.4	0
69.5	0
69.6	0
69.7	0
69.8	0
69.9	0
70	0
70.1	0
70.2	0
70.3	0
70.4	0
70.5	0
70.6	0
70.7	0
70.8	0
70.9	0
71	0
71.1	0
71.2	0
71.3	0
71.4	0
71.5	0
71.6	0
71.7	0
71.8	0
71.9	0
72	0
72.1	0
72.2	0
72.3	0
72.4	0
72.5	0
72.6	0
72.7	0
72.8	0
72.9	0
73	0
73.1	0
73.2	0
73.3	0
73.4	0
73.5	0
73.6	0
73.7	0
73.8	0
73.9	0
74	0
74.1	0
74.2	0
74.3	0
74.4	0
74.5	0
74.6	0
74.7	0
74.8	0
74.9	0
75	0
75.1	0
75.2	0
75.3	0
75.4	0
75.5	0
75.6	0
75.7	0
75.8	0
75.9	0
76	0
76.1	0
76.2	0
76.3	0
76.4	0
76.5	0
76.6	0
76.7	0
76.8	0
76.9	0
77	0
77.1	0
77.2	0
77.3	0
77.4	0
77.5	0
77.6	0
77.7	0
77.8	0
77.9	0
78	0
78.1	0
78.2	0
78.3	0
78.4	0
78.5	0
78.6	0
78.7	0
78.8	0
78.9	0
79	0
79.1	0
79.2	0
79.3	0
79.4	0
79.5	0
79.6	0
79.7	0
79.8	0
79.9	0
80	0
80.1	0
80.2	0
80.3	0
80.4	0
80.5	0
80.6	0
80.7	0
80.8	0
80.9	0
81	0
81.1	0
81.2	0
81.3	0
81.4	0
81.5	0
81.6	0
81.7	0
81.8	0
81.9	0
82	0
82.1	0
82.2	0
82.3	0
82.4	0
82.5	0
82.6	0
82.7	0
82.8	0
82.9	0
83	0
83.1	0
83.2	0
83.3	0
83.4	0
83.5	0
83.6	0
83.7	0
83.8	0
83.9	0
84	0
84.1	0
84.2	0
84.3	0
84.4	0
84.5	0
84.6	0
84.7	0
84.8	0
84.9	0
85	0
85.1	0
85.2	0
85.3	0
85.4	0
85.5	0
85.6	0
85.7	0
85.8	0
85.9	0
86	0
86.1	0
86.2	0
86.3	0
86.4	0
86.5	0
86.6	0
86.7	0
86.8	0
86.9	0
87	0
87.1	0
87.2	0
87.3	0
87.4	0
87.5	0
87.6	0
87.7	0
87.8	0
87.9	0
88	0
88.1	0
88.2	0
88.3	0
88.4	0
88.5	0
88.6	0
88.7	0
88.8	0
88.9	0
89	0
89.1	0
89.2	0
89.3	0
89.4	0
89.5	0
89.6	0
89.7	0
89.8	0
89.9	0
90	0
90.1	0
90.2	0
90.3	0
90.4	0
90.5	0
90.6	0
90.7	0
90.8	0
90.9	0
91	0
91.1	0
91.2	0
91.3	0
91.4	0
91.5	0
91.6	0
91.7	0
91.8	0
91.9	0
92	0
92.1	0
92.2	0
92.3	0
92.4	0
92.5	0
92.6	0
92.7	0
92.8	0
92.9	0
93	0
93.1	0
93.2	0
93.3	0
93.4	0
93.5	0
93.6	0
93.7	0
93.8	0
93.9	0
94	0
94.1	0
94.2	0
94.3	0
94.4	0
94.5	0
94.6	0
94.7	0
94.8	0
94.9	0
95	0
95.1	0
95.2	0
95.3	0
95.4	0
95.5	0
95.6	0
95.7	0
95.8	0
95.9	0
96	0
96.1	0
96.2	0
96.3	0
96.4	0
96.5	0
96.6	0
96.7	0
96.8	0
96.9	0
97	0
97.1	0
97.2	0
97.3	0
97.4	0
97.5	0
97.6	0
97.7	0
97.8	0
97.9	0
98	0
98.1	0
98.2	0
98.3	0
98.4	0
98.5	0
98.6	0
98.7	0
98.8	0
98.9	0
99	0
99.1	0
99.2	0
99.3	0
99.4	0
99.5	0
99.6	0
99.7	0
99.8	0
99.9	0
100	0
100.1	0.730083
100.2	0.88575
100.3	0.941333
100.4	0.959917
100.5	0.968167
100.6	0.973417
100.7	0.97675
100.8	0.975917
100.9	0.975833
101	0.975167
101.1	0.976083
101.2	0.976
101.3	0.978167
101.4	0.977
101.5	0.978
101.6	0.979667
101.7	0.97675
101.8	0.976083
101.9	0.973
102	0.9755
102.1	0.978
102.2	0.978333
102.3	0.977833
102.4	0.97475
102.5	0.975333
102.6	0.976167
102.7	0.977833
102.8	0.97725
102.9	0.979
103	0.978667
103.1	0.97825
103.2	0.976333
103.3	0.976
103.4	0.977
103.5	0.9785
103.6	0.978167
103.7	0.977417
103.8	0.978167
103.9	0.977833
104	0.977167
104.1	0.978333
104.2	0.978917
104.3	0.980167
104.4	0.979083
104.5	0.978417
104.6	0.980667
104.7	0.980417
104.8	0.980333
104.9	0.98075
105	0.981583
105.1	0.9825
105.2	0.98075
105.3	0.98025
105.4	0.978667
105.5	0.980167
105.6	0.980333
105.7	0.981917
105.8	0.9815
105.9	0.98125
106	0.981583
106.1	0.98025
106.2	0.981167
106.3	0.9795
106.4	0.979583
106.5	0.979917
106.6	0.982
106.7	0.980667
106.8	0.981
106.9	0.9825
107	0.981
107.1	0.981417
107.2	0.981417
107.3	0.983167
107.4	0.98375
107.5	0.984083
107.6	0.982333
107.7	0.982917
107.8	0.982333
107.9	0.98175
108	0.981667
108.1	0.981083
108.2	0.981667
108.3	0.9825
108.4	0.983167
108.5	0.983083
108.6	0.984833
108.7	0.9835
108.8	0.98325
108.9	0.98375
109	0.98175
109.1	0.983667
109.2	0.981917
109.3	0.98375
109.4	0.984333
109.5	0.9825
109.6	0.983
109.7	0.981583
109.8	0.983333
109.9	0.983833
110	0.985417
110.1	0.984667
110.2	0.984833
110.3	0.98525
110.4	0.982917
110.5	0.9835
110.6	0.982833
110.7	0.9835
110.8	0.982333
110.9	0.984583
111	0.983917
111.1	0.983417
111.2	0.985333
111.3	0.985417
111.4	0.985417
111.5	0.9875
111.6	0.985667
111.7	0.988083
111.8	0.984083
111.9	0.985833
112	0.98475
112.1	0.986167
112.2	0.984583
112.3	0.984667
112.4	0.985167
112.5	0.987417
112.6	0.987
112.7	0.9855
112.8	0.986583
112.9	0.985417
113	0.984167
113.1	0.987583
113.2	0.98675
113.3	0.984667
113.4	0.984917
113.5	0.984667
113.6	0.985917
113.7	0.986333
113.8	0.98575
113.9	0.986083
114	0.984917
114.1	0.985583
114.2	0.985083
114.3	0.986583
114.4	0.986333
114.5	0.985667
114.6	0.98625
114.7	0.987333
114.8	0.985833
114.9	0.985917
115	0.986083
115.1	0.985917
115.2	0.983917
115.3	0.98725
115.4	0.98775
115.5	0.986917
115.6	0.986917
115.7	0.98575
115.8	0.987
115.9	0.98675
116	0.988
116.1	0.98975
116.2	0.98925
116.3	0.987667
116.4	0.98825
116.5	0.986
116.6	0.986667
116.7	0.988583
116.8	0.987833
116.9	0.98925
117	0.987583
117.1	0.988417
117.2	0.98875
117.3	0.988583
117.4	0.9875
117.5	0.987917
117.6	0.988667
117.7	0.98875
117.8	0.98925
117.9	0.989
118	0.9885
118.1	0.98875
118.2	0.987917
118.3	0.9885
118.4	0.989167
118.5	0.988333
118.6	0.987917
118.7	0.988833
118.8	0.990583
118.9	0.990417
119	0.989
119.1	0.9885
119.2	0.989167
119.3	0.988083
119.4	0.988083
119.5	0.988917
119.6	0.98925
119.7	0.989083
119.8	0.98875
119.9	0.989917
120	0.988083
120.1	0.988083
120.2	0.98875
120.3	0.9885
120.4	0.989167
120.5	0.987417
120.6	0.988
120.7	0.987917
120.8	0.98725
120.9	0.989417
121	0.987833
121.1	0.988333
121.2	0.987917
121.3	0.989
121.4	0.98825
121.5	0.989167
121.6	0.990417
121.7	0.98975
121.8	0.988667
121.9	0.986917
122	0.989167
122.1	0.9885
122.2	0.989083
122.3	0.988
122.4	0.990417
122.5	0.989917
122.6	0.989667
122.7	0.98975
122.8	0.98975
122.9	0.989583
123	0.988167
123.1	0.9905
123.2	0.990833
123.3	0.991667
123.4	0.990583
123.5	0.990917
123.6	0.99
123.7	0.990167
123.8	0.9905
123.9	0.991333
124	0.989583
124.1	0.989583
124.2	0.989917
124.3	0.989583
124.4	0.99075
124.5	0.990167
124.6	0.990083
124.7	0.991333
124.8	0.990083
124.9	0.99
125	0.989917
125.1	0.990667
125.2	0.9905
125.3	0.990083
125.4	0.990083
125.5	0.991667
125.6	0.991833
125.7	0.9905
125.8	0.98975
125.9	0.99025
126	0.991
126.1	0.9915
126.2	0.99125
126.3	0.99175
126.4	0.989667
126.5	0.99175
126.6	0.99125
126.7	0.9905
126.8	0.990083
126.9	0.99025
127	0.991167
127.1	0.990833
127.2	0.990833
127.3	0.991667
127.4	0.991
127.5	0.992167
127.6	0.991833
127.7	0.9915
127.8	0.990167
127.9	0.991
128	0.990667
128.1	0.992
128.2	0.991833
128.3	0.991417
128.4	0.9925
128.5	0.991417
128.6	0.991667
128.7	0.9925
128.8	0.991417
128.9	0.991167
129	0.992
129.1	0.992583
129.2	0.9915
129.3	0.993167
129.4	0.991833
129.5	0.991083
129.6	0.991833
129.7	0.990333
129.8	0.991
129.9	0.989833
130	0.99075
130.1	0.99225
130.2	0.991333
130.3	0.991667
130.4	0.991167
130.5	0.990833
130.6	0.991667
130.7	0.99275
130.8	0.99225
130.9	0.992917
131	0.993083
131.1	0.991667
131.2	0.992583
131.3	0.992083
131.4	0.992917
131.5	0.991583
131.6	0.9925
131.7	0.99275
131.8	0.992917
131.9	0.992333
132	0.991333
132.1	0.992167
132.2	0.992167
132.3	0.993583
132.4	0.992083
132.5	0.9925
132.6	0.99225
132.7	0.992417
132.8	0.992833
132.9	0.992
133	0.991833
133.1	0.991917
133.2	0.992167
133.3	0.992333
133.4	0.991583
133.5	0.99125
133.6	0.992917
133.7	0.99225
133.8	0.992167
133.9	0.991
134	0.99125
134.1	0.992333
134.2	0.991833
134.3	0.99225
134.4	0.991833
134.5	0.991083
134.6	0.992583
134.7	0.992583
134.8	0.99275
134.9	0.993083
135	0.99225
135.1	0.992
135.2	0.992833
135.3	0.993417
135.4	0.992917
135.5	0.992917
135.6	0.9925
135.7	0.993
135.8	0.993833
135.9	0.993417
136	0.992583
136.1	0.991917
136.2	0.9925
136.3	0.99225
136.4	0.99275
136.5	0.993083
136.6	0.99175
136.7	0.993833
136.8	0.993583
136.9	0.994
137	0.993917
137.1	0.992167
137.2	0.99225
137.3	0.992333
137.4	0.992333
137.5	0.993417
137.6	0.992083
137.7	0.992417
137.8	0.99275
137.9	0.993333
138	0.99325
138.1	0.994083
138.2	0.994167
138.3	0.994
138.4	0.993167
138.5	0.991833
138.6	0.993083
138.7	0.993083
138.8	0.992667
138.9	0.993083
139	0.994
139.1	0.993167
139.2	0.994917
139.3	0.992833
139.4	0.99375
139.5	0.993833
139.6	0.99325
139.7	0.992917
139.8	0.992917
139.9	0.992667
140	0.993
140.1	0.993
140.2	0.992833
140.3	0.992667
140.4	0.99225
140.5	0.99325
140.6	0.992917
140.7	0.995167
140.8	0.994417
140.9	0.992833
141	0.9925
141.1	0.992417
141.2	0.992833
141.3	0.992833
141.4	0.993083
141.5	0.993167
141.6	0.99425
141.7	0.993333
141.8	0.992833
141.9	0.99225
142	0.993
142.1	0.992583
142.2	0.992333
142.3	0.993333
142.4	0.993583
142.5	0.994667
142.6	0.994167
142.7	0.993917
142.8	0.993083
142.9	0.992167
143	0.99425
143.1	0.993917
143.2	0.99325
143.3	0.99375
143.4	0.993833
143.5	0.9945
143.6	0.99475
143.7	0.994333
143.8	0.993583
143.9	0.994083
144	0.99375
144.1	0.993083
144.2	0.993583
144.3	0.994083
144.4	0.9935
144.5	0.9945
144.6	0.993583
144.7	0.994167
144.8	0.993083
144.9	0.993167
145	0.99375
145.1	0.992583
145.2	0.993167
145.3	0.994917
145.4	0.993917
145.5	0.992667
145.6	0.994083
145.7	0.992917
145.8	0.992667
145.9	0.99325
146	0.992917
146.1	0.993833
146.2	0.99425
146.3	0.995083
146.4	0.993833
146.5	0.9945
146.6	0.99425
146.7	0.9945
146.8	0.9945
146.9	0.993167
147	0.99425
147.1	0.994333
147.2	0.9945
147.3	0.993583
147.4	0.993917
147.5	0.994667
147.6	0.994417
147.7	0.994333
147.8	0.993667
147.9	0.994083
148	0.994167
148.1	0.994
148.2	0.994083
148.3	0.993917
148.4	0.994417
148.5	0.994333
148.6	0.994167
148.7	0.994833
148.8	0.994333
148.9	0.994083
149	0.994167
149.1	0.994667
149.2	0.994417
149.3	0.99425
149.4	0.993833
149.5	0.995083
149.6	0.994583
149.7	0.995
149.8	0.99525
149.9	0.993833
150	0.994833
150.1	0.99575
150.2	0.995333
150.3	0.994
150.4	0.995583
150.5	0.995333
150.6	0.994667
150.7	0.994833
150.8	0.994917
150.9	0.995
151	0.994583
151.1	0.99375
151.2	0.993583
151.3	0.99375
151.4	0.9945
151.5	0.994917
151.6	0.994417
151.7	0.994417
151.8	0.995083
151.9	0.994917
152	0.994667
152.1	0.99425
152.2	0.994083
152.3	0.9945
152.4	0.994917
152.5	0.99425
152.6	0.994417
152.7	0.9945
152.8	0.994583
152.9	0.994333
153	0.994833
153.1	0.9935
153.2	0.993667
153.3	0.993333
153.4	0.994583
153.5	0.995583
153.6	0.993333
153.7	0.9935
153.8	0.994167
153.9	0.99425
154	0.994083
154.1	0.995
154.2	0.995667
154.3	0.99575
154.4	0.995417
154.5	0.994
154.6	0.993
154.7	0.994
154.8	0.99475
154.9	0.994333
155	0.994083
155.1	0.99525
155.2	0.995167
155.3	0.995167
155.4	0.995333
155.5	0.99425
155.6	0.993833
155.7	0.99425
155.8	0.994583
155.9	0.994167
156	0.99425
156.1	0.994167
156.2	0.995083
156.3	0.99525
156.4	0.994333
156.5	0.994667
156.6	0.994417
156.7	0.994167
156.8	0.994083
156.9	0.99575
157	0.9955
157.1	0.995833
157.2	0.995917
157.3	0.995417
157.4	0.995417
157.5	0.994583
157.6	0.9945
157.7	0.994833
157.8	0.9945
157.9	0.994833
158	0.993917
158.1	0.994417
158.2	0.994417
158.3	0.994
158.4	0.993583
158.5	0.995667
158.6	0.994167
158.7	0.994167
158.8	0.993917
158.9	0.995417
159	0.994667
159.1	0.994833
159.2	0.995417
159.3	0.995167
159.4	0.995333
159.5	0.996
159.6	0.996333
159.7	0.995667
159.8	0.995917
159.9	0.99525
160	0.994167
160.1	0.995083
160.2	0.994583
160.3	0.994417
160.4	0.994667
160.5	0.995417
160.6	0.994417
160.7	0.995
160.8	0.9945
160.9	0.99475
161	0.994583
161.1	0.99525
161.2	0.995417
161.3	0.9945
161.4	0.995083
161.5	0.995333
161.6	0.994083
161.7	0.994667
161.8	0.995167
161.9	0.9945
162	0.995083
162.1	0.994583
162.2	0.994667
162.3	0.994833
162.4	0.996
162.5	0.9965
162.6	0.994833
162.7	0.995417
162.8	0.994167
162.9	0.994417
163	0.994417
163.1	0.9955
163.2	0.995
163.3	0.996083
163.4	0.996083
163.5	0.995583
163.6	0.995917
163.7	0.994583
163.8	0.994667
163.9	0.994583
164	0.994667
164.1	0.994667
164.2	0.995417
164.3	0.99525
164.4	0.994333
164.5	0.995333
164.6	0.995583
164.7	0.995167
164.8	0.995583
164.9	0.995667
165	0.995167
165.1	0.994667
165.2	0.994917
165.3	0.99475
165.4	0.994667
165.5	0.9945
165.6	0.995167
165.7	0.994833
165.8	0.9955
165.9	0.995083
166	0.995
166.1	0.995083
166.2	0.995083
166.3	0.99525
166.4	0.994667
166.5	0.99475
166.6	0.995583
166.7	0.995583
166.8	0.99575
166.9	0.99525
167	0.994333
167.1	0.99525
167.2	0.995167
167.3	0.995917
167.4	0.99425
167.5	0.99425
167.6	0.995
167.7	0.995083
167.8	0.993917
167.9	0.994833
168	0.996167
168.1	0.995167
168.2	0.99475
168.3	0.995417
168.4	0.996417
168.5	0.996167
168.6	0.9955
168.7	0.995833
168.8	0.996
168.9	0.995583
169	0.994333
169.1	0.9945
169.2	0.996
169.3	0.995667
169.4	0.99525
169.5	0.994917
169.6	0.995417
169.7	0.994917
169.8	0.995167
169.9	0.995
170	0.994167
170.1	0.996167
170.2	0.995
170.3	0.994667
170.4	0.995917
170.5	0.994917
170.6	0.996083
170.7	0.994833
170.8	0.994833
170.9	0.9955
171	0.99525
171.1	0.995333
171.2	0.99525
171.3	0.995583
171.4	0.994583
171.5	0.994167
171.6	0.995167
171.7	0.995333
171.8	0.99475
171.9	0.994917
172	0.9965
172.1	0.996417
172.2	0.99625
172.3	0.995
172.4	0.99575
172.5	0.996417
172.6	0.9965
172.7	0.996583
172.8	0.994667
172.9	0.995917
173	0.995667
173.1	0.995833
173.2	0.995417
173.3	0.995167
173.4	0.99525
173.5	0.9955
173.6	0.994667
173.7	0.99425
173.8	0.995
173.9	0.9945
174	0.99475
174.1	0.995333
174.2	0.995583
174.3	0.99475
174.4	0.9955
174.5	0.99525
174.6	0.994833
174.7	0.995083
174.8	0.99525
174.9	0.995417
175	0.995083
175.1	0.9955
175.2	0.995
175.3	0.995167
175.4	0.99525
175.5	0.995167
175.6	0.995083
175.7	0.996
175.8	0.996
175.9	0.994833
176	0.994333
176.1	0.995417
176.2	0.996167
176.3	0.99475
176.4	0.994
176.5	0.995
176.6	0.994333
176.7	0.994833
176.8	0.994917
176.9	0.995583
177	0.99525
177.1	0.995667
177.2	0.995417
177.3	0.99625
177.4	0.996583
177.5	0.996
177.6	0.994333
177.7	0.995583
177.8	0.99625
177.9	0.995
178	0.995167
178.1	0.995833
178.2	0.995583
178.3	0.995917
178.4	0.99625
178.5	0.99575
178.6	0.996667
178.7	0.996583
178.8	0.996417
178.9	0.995083
179	0.995
179.1	0.994083
179.2	0.994583
179.3	0.99425
179.4	0.994583
179.5	0.995083
179.6	0.99475
179.7	0.995167
179.8	0.995833
179.9	0.995667
180	0.996083
180.1	0.99575
180.2	0.9965
180.3	0.99575
180.4	0.995833
180.5	0.99475
180.6	0.994417
180.7	0.994833
180.8	0.995333
180.9	0.99625
181	0.995583
181.1	0.995333
181.2	0.9955
181.3	0.996917
181.4	0.995667
181.5	0.9955
181.6	0.995833
181.7	0.996333
181.8	0.99575
181.9	0.997083
182	0.995083
182.1	0.996
182.2	0.995333
182.3	0.9955
182.4	0.995083
182.5	0.995417
182.6	0.995917
182.7	0.996417
182.8	0.996083
182.9	0.996083
183	0.996583
183.1	0.99625
183.2	0.995833
183.3	0.995333
183.4	0.99625
183.5	0.99625
183.6	0.996167
183.7	0.997083
183.8	0.996667
183.9	0.9945
184	0.995833
184.1	0.994667
184.2	0.994667
184.3	0.995833
184.4	0.99475
184.5	0.995417
184.6	0.994667
184.7	0.996333
184.8	0.996583
184.9	0.996333
185	0.99575
185.1	0.995
185.2	0.995
185.3	0.995333
185.4	0.995333
185.5	0.994333
185.6	0.9945
185.7	0.994917
185.8	0.996667
185.9	0.99625
186	0.99525
186.1	0.995833
186.2	0.995333
186.3	0.995333
186.4	0.995333
186.5	0.995
186.6	0.994167
186.7	0.99425
186.8	0.9945
186.9	0.99525
187	0.9955
187.1	0.994917
187.2	0.994583
187.3	0.996583
187.4	0.996417
187.5	0.9945
187.6	0.993583
187.7	0.9955
187.8	0.995667
187.9	0.993833
188	0.993833
188.1	0.993833
188.2	0.994
188.3	0.994417
188.4	0.994833
188.5	0.99475
188.6	0.99475
188.7	0.99525
188.8	0.995583
188.9	0.994833
189	0.994917
189.1	0.99375
189.2	0.995583
189.3	0.995833
189.4	0.996167
189.5	0.995833
189.6	0.995333
189.7	0.995667
189.8	0.995667
189.9	0.9955
190	0.995583
190.1	0.99675
190.2	0.996083
190.3	0.9955
190.4	0.99575
190.5	0.995167
190.6	0.995417
190.7	0.99525
190.8	0.994917
190.9	0.99475
191	0.996333
191.1	0.995167
191.2	0.995833
191.3	0.99525
191.4	0.995667
191.5	0.995667
191.6	0.995583
191.7	0.995917
191.8	0.996083
191.9	0.9955
192	0.99475
192.1	0.996333
192.2	0.996083
192.3	0.9955
192.4	0.995917
192.5	0.994583
192.6	0.99475
192.7	0.996
192.8	0.996167
192.9	0.994833
193	0.995833
193.1	0.995583
193.2	0.996167
193.3	0.997083
193.4	0.996
193.5	0.995583
193.6	0.995583
193.7	0.995333
193.8	0.996083
193.9	0.995833
194	0.995667
194.1	0.99625
194.2	0.996
194.3	0.995333
194.4	0.995333
194.5	0.995583
194.6	0.9955
194.7	0.996
194.8	0.99575
194.9	0.995583
195	0.995583
195.1	0.994583
195.2	0.994833
195.3	0.995
195.4	0.995
195.5	0.9955
195.6	0.994833
195.7	0.995333
195.8	0.995
195.9	0.995667
196	0.995667
196.1	0.995667
196.2	0.994917
196.3	0.995333
196.4	0.995917
196.5	0.995917
196.6	0.995167
196.7	0.9955
196.8	0.994917
196.9	0.99525
197	0.995417
197.1	0.99625
197.2	0.99625
197.3	0.9955
197.4	0.996167
197.5	0.994333
197.6	0.995333
197.7	0.995667
197.8	0.996
197.9	0.9965
198	0.996083
198.1	0.995333
198.2	0.995583
198.3	0.996083
198.4	0.99675
198.5	0.995667
198.6	0.995833
198.7	0.995
198.8	0.995167
198.9	0.99625
199	0.996167
199.1	0.996333
199.2	0.99525
199.3	0.995
199.4	0.995167
199.5	0.9945
199.6	0.99475
199.7	0.995667
199.8	0.995167
199.9	0.995083
200	0.995833
[truncated: 14,000 more rows]
