# Supplementary material for: Bayesian inference of kinetic schemes for ion channels by Kalman filtering
Source: eLife journal article supplement (doi:10.7554/elife.62714), 2022-05-04
Supplement: fig4-data3 [file 1_Sim_N_6000_Strom_MW_32M.xlsx]

## Sheet: Tabelle1
0.1	0
0.2	0
0.3	0
0.4	0
0.5	0
0.6	0
0.7	0
0.8	0
0.9	0
1	0
1.1	0
1.2	0
1.3	0
1.4	0
1.5	0
1.6	0
1.7	0
1.8	0
1.9	0
2	0
2.1	0
2.2	0
2.3	0
2.4	0
2.5	0
2.6	0
2.7	0
2.8	0
2.9	0
3	0
3.1	0
3.2	0
3.3	0
3.4	0
3.5	0
3.6	0
3.7	0
3.8	0
3.9	0
4	0
4.1	0
4.2	0
4.3	0
4.4	0
4.5	0
4.6	0
4.7	0
4.8	0
4.9	0
5	0
5.1	0
5.2	0
5.3	0
5.4	0
5.5	0
5.6	0
5.7	0
5.8	0
5.9	0
6	0
6.1	0
6.2	0
6.3	0
6.4	0
6.5	0
6.6	0
6.7	0
6.8	0
6.9	0
7	0
7.1	0
7.2	0
7.3	0
7.4	0
7.5	0
7.6	0
7.7	0
7.8	0
7.9	0
8	0
8.1	0
8.2	0
8.3	0
8.4	0
8.5	0
8.6	0
8.7	0
8.8	0
8.9	0
9	0
9.1	0
9.2	0
9.3	0
9.4	0
9.5	0
9.6	0
9.7	0
9.8	0
9.9	0
10	0
10.1	0
10.2	0
10.3	0
10.4	0
10.5	0
10.6	0
10.7	0
10.8	0
10.9	0
11	0
11.1	0
11.2	0
11.3	0
11.4	0
11.5	0
11.6	0
11.7	0
11.8	0
11.9	0
12	0
12.1	0
12.2	0
12.3	0
12.4	0
12.5	0
12.6	0
12.7	0
12.8	0
12.9	0
13	0
13.1	0
13.2	0
13.3	0
13.4	0
13.5	0
13.6	0
13.7	0
13.8	0
13.9	0
14	0
14.1	0
14.2	0
14.3	0
14.4	0
14.5	0
14.6	0
14.7	0
14.8	0
14.9	0
15	0
15.1	0
15.2	0
15.3	0
15.4	0
15.5	0
15.6	0
15.7	0
15.8	0
15.9	0
16	0
16.1	0
16.2	0
16.3	0
16.4	0
16.5	0
16.6	0
16.7	0
16.8	0
16.9	0
17	0
17.1	0
17.2	0
17.3	0
17.4	0
17.5	0
17.6	0
17.7	0
17.8	0
17.9	0
18	0
18.1	0
18.2	0
18.3	0
18.4	0
18.5	0
18.6	0
18.7	0
18.8	0
18.9	0
19	0
19.1	0
19.2	0
19.3	0
19.4	0
19.5	0
19.6	0
19.7	0
19.8	0
19.9	0
20	0
20.1	0
20.2	0
20.3	0
20.4	0
20.5	0
20.6	0
20.7	0
20.8	0
20.9	0
21	0
21.1	0
21.2	0
21.3	0
21.4	0
21.5	0
21.6	0
21.7	0
21.8	0
21.9	0
22	0
22.1	0
22.2	0
22.3	0
22.4	0
22.5	0
22.6	0
22.7	0
22.8	0
22.9	0
23	0
23.1	0
23.2	0
23.3	0
23.4	0
23.5	0
23.6	0
23.7	0
23.8	0
23.9	0
24	0
24.1	0
24.2	0
24.3	0
24.4	0
24.5	0
24.6	0
24.7	0
24.8	0
24.9	0
25	0
25.1	0
25.2	0
25.3	0
25.4	0
25.5	0
25.6	0
25.7	0
25.8	0
25.9	0
26	0
26.1	0
26.2	0
26.3	0
26.4	0
26.5	0
26.6	0
26.7	0
26.8	0
26.9	0
27	0
27.1	0
27.2	0
27.3	0
27.4	0
27.5	0
27.6	0
27.7	0
27.8	0
27.9	0
28	0
28.1	0
28.2	0
28.3	0
28.4	0
28.5	0
28.6	0
28.7	0
28.8	0
28.9	0
29	0
29.1	0
29.2	0
29.3	0
29.4	0
29.5	0
29.6	0
29.7	0
29.8	0
29.9	0
30	0
30.1	0
30.2	0
30.3	0
30.4	0
30.5	0
30.6	0
30.7	0
30.8	0
30.9	0
31	0
31.1	0
31.2	0
31.3	0
31.4	0
31.5	0
31.6	0
31.7	0
31.8	0
31.9	0
32	0
32.1	0
32.2	0
32.3	0
32.4	0
32.5	0
32.6	0
32.7	0
32.8	0
32.9	0
33	0
33.1	0
33.2	0
33.3	0
33.4	0
33.5	0
33.6	0
33.7	0
33.8	0
33.9	0
34	0
34.1	0
34.2	0
34.3	0
34.4	0
34.5	0
34.6	0
34.7	0
34.8	0
34.9	0
35	0
35.1	0
35.2	0
35.3	0
35.4	0
35.5	0
35.6	0
35.7	0
35.8	0
35.9	0
36	0
36.1	0
36.2	0
36.3	0
36.4	0
36.5	0
36.6	0
36.7	0
36.8	0
36.9	0
37	0
37.1	0
37.2	0
37.3	0
37.4	0
37.5	0
37.6	0
37.7	0
37.8	0
37.9	0
38	0
38.1	0
38.2	0
38.3	0
38.4	0
38.5	0
38.6	0
38.7	0
38.8	0
38.9	0
39	0
39.1	0
39.2	0
39.3	0
39.4	0
39.5	0
39.6	0
39.7	0
39.8	0
39.9	0
40	0
40.1	0
40.2	0
40.3	0
40.4	0
40.5	0
40.6	0
40.7	0
40.8	0
40.9	0
41	0
41.1	0
41.2	0
41.3	0
41.4	0
41.5	0
41.6	0
41.7	0
41.8	0
41.9	0
42	0
42.1	0
42.2	0
42.3	0
42.4	0
42.5	0
42.6	0
42.7	0
42.8	0
42.9	0
43	0
43.1	0
43.2	0
43.3	0
43.4	0
43.5	0
43.6	0
43.7	0
43.8	0
43.9	0
44	0
44.1	0
44.2	0
44.3	0
44.4	0
44.5	0
44.6	0
44.7	0
44.8	0
44.9	0
45	0
45.1	0
45.2	0
45.3	0
45.4	0
45.5	0
45.6	0
45.7	0
45.8	0
45.9	0
46	0
46.1	0
46.2	0
46.3	0
46.4	0
46.5	0
46.6	0
46.7	0
46.8	0
46.9	0
47	0
47.1	0
47.2	0
47.3	0
47.4	0
47.5	0
47.6	0
47.7	0
47.8	0
47.9	0
48	0
48.1	0
48.2	0
48.3	0
48.4	0
48.5	0
48.6	0
48.7	0
48.8	0
48.9	0
49	0
49.1	0
49.2	0
49.3	0
49.4	0
49.5	0
49.6	0
49.7	0
49.8	0
49.9	0
50	0
50.1	0
50.2	0
50.3	0
50.4	0
50.5	0
50.6	0
50.7	0
50.8	0
50.9	0
51	0
51.1	0
51.2	0
51.3	0
51.4	0
51.5	0
51.6	0
51.7	0
51.8	0
51.9	0
52	0
52.1	0
52.2	0
52.3	0
52.4	0
52.5	0
52.6	0
52.7	0
52.8	0
52.9	0
53	0
53.1	0
53.2	0
53.3	0
53.4	0
53.5	0
53.6	0
53.7	0
53.8	0
53.9	0
54	0
54.1	0
54.2	0
54.3	0
54.4	0
54.5	0
54.6	0
54.7	0
54.8	0
54.9	0
55	0
55.1	0
55.2	0
55.3	0
55.4	0
55.5	0
55.6	0
55.7	0
55.8	0
55.9	0
56	0
56.1	0
56.2	0
56.3	0
56.4	0
56.5	0
56.6	0
56.7	0
56.8	0
56.9	0
57	0
57.1	0
57.2	0
57.3	0
57.4	0
57.5	0
57.6	0
57.7	0
57.8	0
57.9	0
58	0
58.1	0
58.2	0
58.3	0
58.4	0
58.5	0
58.6	0
58.7	0
58.8	0
58.9	0
59	0
59.1	0
59.2	0
59.3	0
59.4	0
59.5	0
59.6	0
59.7	0
59.8	0
59.9	0
60	0
60.1	0
60.2	0
60.3	0
60.4	0
60.5	0
60.6	0
60.7	0
60.8	0
60.9	0
61	0
61.1	0
61.2	0
61.3	0
61.4	0
61.5	0
61.6	0
61.7	0
61.8	0
61.9	0
62	0
62.1	0
62.2	0
62.3	0
62.4	0
62.5	0
62.6	0
62.7	0
62.8	0
62.9	0
63	0
63.1	0
63.2	0
63.3	0
63.4	0
63.5	0
63.6	0
63.7	0
63.8	0
63.9	0
64	0
64.1	0
64.2	0
64.3	0
64.4	0
64.5	0
64.6	0
64.7	0
64.8	0
64.9	0
65	0
65.1	0
65.2	0
65.3	0
65.4	0
65.5	0
65.6	0
65.7	0
65.8	0
65.9	0
66	0
66.1	0
66.2	0
66.3	0
66.4	0
66.5	0
66.6	0
66.7	0
66.8	0
66.9	0
67	0
67.1	0
67.2	0
67.3	0
67.4	0
67.5	0
67.6	0
67.7	0
67.8	0
67.9	0
68	0
68.1	0
68.2	0
68.3	0
68.4	0
68.5	0
68.6	0
68.7	0
68.8	0
68.9	0
69	0
69.1	0
69.2	0
69.3	0
69.4	0
69.5	0
69.6	0
69.7	0
69.8	0
69.9	0
70	0
70.1	0
70.2	0
70.3	0
70.4	0
70.5	0
70.6	0
70.7	0
70.8	0
70.9	0
71	0
71.1	0
71.2	0
71.3	0
71.4	0
71.5	0
71.6	0
71.7	0
71.8	0
71.9	0
72	0
72.1	0
72.2	0
72.3	0
72.4	0
72.5	0
72.6	0
72.7	0
72.8	0
72.9	0
73	0
73.1	0
73.2	0
73.3	0
73.4	0
73.5	0
73.6	0
73.7	0
73.8	0
73.9	0
74	0
74.1	0
74.2	0
74.3	0
74.4	0
74.5	0
74.6	0
74.7	0
74.8	0
74.9	0
75	0
75.1	0
75.2	0
75.3	0
75.4	0
75.5	0
75.6	0
75.7	0
75.8	0
75.9	0
76	0
76.1	0
76.2	0
76.3	0
76.4	0
76.5	0
76.6	0
76.7	0
76.8	0
76.9	0
77	0
77.1	0
77.2	0
77.3	0
77.4	0
77.5	0
77.6	0
77.7	0
77.8	0
77.9	0
78	0
78.1	0
78.2	0
78.3	0
78.4	0
78.5	0
78.6	0
78.7	0
78.8	0
78.9	0
79	0
79.1	0
79.2	0
79.3	0
79.4	0
79.5	0
79.6	0
79.7	0
79.8	0
79.9	0
80	0
80.1	0
80.2	0
80.3	0
80.4	0
80.5	0
80.6	0
80.7	0
80.8	0
80.9	0
81	0
81.1	0
81.2	0
81.3	0
81.4	0
81.5	0
81.6	0
81.7	0
81.8	0
81.9	0
82	0
82.1	0
82.2	0
82.3	0
82.4	0
82.5	0
82.6	0
82.7	0
82.8	0
82.9	0
83	0
83.1	0
83.2	0
83.3	0
83.4	0
83.5	0
83.6	0
83.7	0
83.8	0
83.9	0
84	0
84.1	0
84.2	0
84.3	0
84.4	0
84.5	0
84.6	0
84.7	0
84.8	0
84.9	0
85	0
85.1	0
85.2	0
85.3	0
85.4	0
85.5	0
85.6	0
85.7	0
85.8	0
85.9	0
86	0
86.1	0
86.2	0
86.3	0
86.4	0
86.5	0
86.6	0
86.7	0
86.8	0
86.9	0
87	0
87.1	0
87.2	0
87.3	0
87.4	0
87.5	0
87.6	0
87.7	0
87.8	0
87.9	0
88	0
88.1	0
88.2	0
88.3	0
88.4	0
88.5	0
88.6	0
88.7	0
88.8	0
88.9	0
89	0
89.1	0
89.2	0
89.3	0
89.4	0
89.5	0
89.6	0
89.7	0
89.8	0
89.9	0
90	0
90.1	0
90.2	0
90.3	0
90.4	0
90.5	0
90.6	0
90.7	0
90.8	0
90.9	0
91	0
91.1	0
91.2	0
91.3	0
91.4	0
91.5	0
91.6	0
91.7	0
91.8	0
91.9	0
92	0
92.1	0
92.2	0
92.3	0
92.4	0
92.5	0
92.6	0
92.7	0
92.8	0
92.9	0
93	0
93.1	0
93.2	0
93.3	0
93.4	0
93.5	0
93.6	0
93.7	0
93.8	0
93.9	0
94	0
94.1	0
94.2	0
94.3	0
94.4	0
94.5	0
94.6	0
94.7	0
94.8	0
94.9	0
95	0
95.1	0
95.2	0
95.3	0
95.4	0
95.5	0
95.6	0
95.7	0
95.8	0
95.9	0
96	0
96.1	0
96.2	0
96.3	0
96.4	0
96.5	0
96.6	0
96.7	0
96.8	0
96.9	0
97	0
97.1	0
97.2	0
97.3	0
97.4	0
97.5	0
97.6	0
97.7	0
97.8	0
97.9	0
98	0
98.1	0
98.2	0
98.3	0
98.4	0
98.5	0
98.6	0
98.7	0
98.8	0
98.9	0
99	0
99.1	0
99.2	0
99.3	0
99.4	0
99.5	0
99.6	0
99.7	0
99.8	0
99.9	0
100	0
100.1	0.0005
100.2	0.00416667
100.3	0.00766667
100.4	0.0116667
100.5	0.017
100.6	0.0213333
100.7	0.026
100.8	0.029
100.9	0.0333333
101	0.0388333
101.1	0.0428333
101.2	0.0465
101.3	0.0511667
101.4	0.055
101.5	0.0601667
101.6	0.063
101.7	0.0678333
101.8	0.0718333
101.9	0.076
102	0.0806667
102.1	0.0843333
102.2	0.0886667
102.3	0.0916667
102.4	0.094
102.5	0.0978333
102.6	0.101833
102.7	0.105667
102.8	0.110833
102.9	0.114833
103	0.118167
103.1	0.123
103.2	0.126667
103.3	0.130667
103.4	0.135333
103.5	0.138667
103.6	0.142667
103.7	0.145333
103.8	0.151
103.9	0.155167
104	0.158167
104.1	0.1605
104.2	0.165
104.3	0.169833
104.4	0.173167
104.5	0.176333
104.6	0.18
104.7	0.183333
104.8	0.186833
104.9	0.191
105	0.1945
105.1	0.1985
105.2	0.201833
105.3	0.2055
105.4	0.209333
105.5	0.212
105.6	0.216333
105.7	0.218833
105.8	0.221
105.9	0.2255
106	0.228667
106.1	0.232
106.2	0.234333
106.3	0.238333
106.4	0.242
106.5	0.246167
106.6	0.249
106.7	0.252167
106.8	0.254667
106.9	0.2565
107	0.259
107.1	0.2635
107.2	0.267333
107.3	0.2715
107.4	0.274333
107.5	0.277833
107.6	0.2815
107.7	0.284833
107.8	0.287333
107.9	0.289833
108	0.292667
108.1	0.294833
108.2	0.2965
108.3	0.2995
108.4	0.303
108.5	0.3065
108.6	0.308833
108.7	0.312
108.8	0.315833
108.9	0.318333
109	0.322333
109.1	0.324333
109.2	0.326333
109.3	0.329833
109.4	0.332167
109.5	0.335333
109.6	0.338167
109.7	0.340333
109.8	0.343333
109.9	0.346333
110	0.349333
110.1	0.350833
110.2	0.354667
110.3	0.3585
110.4	0.361333
110.5	0.3635
110.6	0.366167
110.7	0.368
110.8	0.369833
110.9	0.373
111	0.3755
111.1	0.378667
111.2	0.381
111.3	0.383167
111.4	0.386167
111.5	0.386833
111.6	0.3895
111.7	0.390833
111.8	0.393667
111.9	0.397167
112	0.399333
112.1	0.400833
112.2	0.403667
112.3	0.405333
112.4	0.407
112.5	0.409833
112.6	0.413167
112.7	0.415167
112.8	0.4175
112.9	0.418667
113	0.420167
113.1	0.423
113.2	0.4255
113.3	0.427333
113.4	0.429333
113.5	0.431833
113.6	0.434
113.7	0.4355
113.8	0.436833
113.9	0.438833
114	0.440167
114.1	0.442667
114.2	0.443333
114.3	0.445667
114.4	0.448667
114.5	0.451167
114.6	0.453833
114.7	0.457333
114.8	0.460167
114.9	0.463333
115	0.465
115.1	0.467167
115.2	0.468667
115.3	0.47
115.4	0.4725
115.5	0.474833
115.6	0.477
115.7	0.478833
115.8	0.4815
115.9	0.4835
116	0.486
116.1	0.489
116.2	0.490833
116.3	0.494333
116.4	0.496
116.5	0.497167
116.6	0.499
116.7	0.499833
116.8	0.502333
116.9	0.504
117	0.506833
117.1	0.508333
117.2	0.510833
117.3	0.513
117.4	0.515333
117.5	0.516667
117.6	0.518333
117.7	0.520167
117.8	0.522167
117.9	0.524333
118	0.526333
118.1	0.528333
118.2	0.53
118.3	0.5315
118.4	0.532333
118.5	0.534167
118.6	0.535833
118.7	0.537
118.8	0.537833
118.9	0.540167
119	0.541333
119.1	0.5425
119.2	0.543833
119.3	0.545167
119.4	0.546
119.5	0.5475
119.6	0.549
119.7	0.551333
119.8	0.551667
119.9	0.552667
120	0.554167
120.1	0.5555
120.2	0.556333
120.3	0.557667
120.4	0.559333
120.5	0.560333
120.6	0.562333
120.7	0.563833
120.8	0.565833
120.9	0.567167
121	0.568833
121.1	0.570333
121.2	0.571833
121.3	0.573833
121.4	0.575333
121.5	0.576667
121.6	0.5785
121.7	0.579333
121.8	0.581667
121.9	0.583
122	0.584833
122.1	0.586
122.2	0.586833
122.3	0.588667
122.4	0.589833
122.5	0.5915
122.6	0.5945
122.7	0.595333
122.8	0.598167
122.9	0.599833
123	0.6015
123.1	0.603167
123.2	0.604333
123.3	0.605667
123.4	0.606167
123.5	0.607
123.6	0.608
123.7	0.61
123.8	0.61
123.9	0.612167
124	0.612833
124.1	0.612167
124.2	0.612667
124.3	0.614
124.4	0.615
124.5	0.616
124.6	0.6175
124.7	0.618833
124.8	0.620667
124.9	0.6205
125	0.621333
125.1	0.6225
125.2	0.623333
125.3	0.624
125.4	0.626167
125.5	0.626667
125.6	0.627167
125.7	0.628667
125.8	0.629667
125.9	0.630333
126	0.629833
126.1	0.630833
126.2	0.632333
126.3	0.6335
126.4	0.634167
126.5	0.6345
126.6	0.6355
126.7	0.638
126.8	0.6385
126.9	0.639667
127	0.640167
127.1	0.6415
127.2	0.642667
127.3	0.642833
127.4	0.642667
127.5	0.643333
127.6	0.644833
127.7	0.645333
127.8	0.647
127.9	0.6475
128	0.648667
128.1	0.649667
128.2	0.650167
128.3	0.651167
128.4	0.6525
128.5	0.653
128.6	0.654833
128.7	0.655
128.8	0.6565
128.9	0.657833
129	0.659333
129.1	0.659833
129.2	0.659833
129.3	0.66
129.4	0.662167
129.5	0.664333
129.6	0.665
129.7	0.666
129.8	0.666833
129.9	0.666833
130	0.6675
130.1	0.669
130.2	0.669667
130.3	0.669833
130.4	0.669333
130.5	0.670833
130.6	0.671833
130.7	0.6715
130.8	0.672
130.9	0.672167
131	0.6725
131.1	0.672667
131.2	0.6735
131.3	0.674
131.4	0.675
131.5	0.6755
131.6	0.676333
131.7	0.677833
131.8	0.677833
131.9	0.678333
132	0.678167
132.1	0.679833
132.2	0.6805
132.3	0.681167
132.4	0.681667
132.5	0.682833
132.6	0.683167
132.7	0.6835
132.8	0.684333
132.9	0.686333
133	0.686833
133.1	0.688167
133.2	0.6895
133.3	0.690167
133.4	0.691333
133.5	0.692333
133.6	0.692833
133.7	0.693833
133.8	0.694167
133.9	0.694333
134	0.6945
134.1	0.695
134.2	0.695
134.3	0.696
134.4	0.696333
134.5	0.696667
134.6	0.697
134.7	0.697833
134.8	0.698667
134.9	0.699833
135	0.7005
135.1	0.701
135.2	0.701667
135.3	0.7025
135.4	0.702667
135.5	0.703167
135.6	0.704667
135.7	0.704333
135.8	0.705167
135.9	0.705667
136	0.706167
136.1	0.706333
136.2	0.706333
136.3	0.707333
136.4	0.7085
136.5	0.7095
136.6	0.7105
136.7	0.711
136.8	0.711667
136.9	0.7125
137	0.713667
137.1	0.714833
137.2	0.715
137.3	0.715167
137.4	0.716
137.5	0.717
137.6	0.716833
137.7	0.7165
137.8	0.716667
137.9	0.7175
138	0.7175
138.1	0.717167
138.2	0.717833
138.3	0.717833
138.4	0.718333
138.5	0.7185
138.6	0.718667
138.7	0.719333
138.8	0.719167
138.9	0.721333
139	0.7215
139.1	0.722667
139.2	0.723833
139.3	0.725
139.4	0.7265
139.5	0.727833
139.6	0.7275
139.7	0.727833
139.8	0.729167
139.9	0.7295
140	0.729667
140.1	0.73
140.2	0.730333
140.3	0.730333
140.4	0.731
140.5	0.731
140.6	0.731833
140.7	0.7315
140.8	0.732333
140.9	0.732833
141	0.7335
141.1	0.734167
141.2	0.734
141.3	0.734
141.4	0.734167
141.5	0.734833
141.6	0.736
141.7	0.7365
141.8	0.737333
141.9	0.738167
142	0.738333
142.1	0.738
142.2	0.738
142.3	0.739
142.4	0.739833
142.5	0.740167
142.6	0.740167
142.7	0.741167
142.8	0.741833
142.9	0.742667
143	0.742667
143.1	0.743667
143.2	0.744167
143.3	0.745667
143.4	0.746333
143.5	0.7475
143.6	0.747833
143.7	0.748667
143.8	0.748833
143.9	0.748833
144	0.749333
144.1	0.750167
144.2	0.749833
144.3	0.7505
144.4	0.751167
144.5	0.7515
144.6	0.750833
144.7	0.7505
144.8	0.751167
144.9	0.752
145	0.751667
145.1	0.7525
145.2	0.754333
145.3	0.7545
145.4	0.754833
145.5	0.755333
145.6	0.7565
145.7	0.757667
145.8	0.758
145.9	0.7585
146	0.758833
146.1	0.759333
146.2	0.7605
146.3	0.760833
146.4	0.762833
146.5	0.763833
146.6	0.763667
146.7	0.763167
146.8	0.762333
146.9	0.763667
147	0.764
147.1	0.764333
147.2	0.765167
147.3	0.764667
147.4	0.765667
147.5	0.7655
147.6	0.767167
147.7	0.768667
147.8	0.7695
147.9	0.769667
148	0.770667
148.1	0.770833
148.2	0.770333
148.3	0.770333
148.4	0.770667
148.5	0.7715
148.6	0.772667
148.7	0.7725
148.8	0.772833
148.9	0.772667
149	0.772
149.1	0.772167
149.2	0.7725
149.3	0.773
149.4	0.772667
149.5	0.773333
149.6	0.774333
149.7	0.774833
149.8	0.774167
149.9	0.774833
150	0.7745
150.1	0.775167
150.2	0.775
150.3	0.7755
150.4	0.776333
150.5	0.776
150.6	0.7765
150.7	0.777
150.8	0.778
150.9	0.778333
151	0.779167
151.1	0.778833
151.2	0.779667
151.3	0.780333
151.4	0.78
151.5	0.780167
151.6	0.781167
151.7	0.780667
151.8	0.780333
151.9	0.780167
152	0.7805
152.1	0.780833
152.2	0.782
152.3	0.781667
152.4	0.781
152.5	0.7805
152.6	0.781
152.7	0.7805
152.8	0.780667
152.9	0.781167
153	0.780833
153.1	0.781167
153.2	0.782
153.3	0.781833
153.4	0.782333
153.5	0.781667
153.6	0.781833
153.7	0.782167
153.8	0.7825
153.9	0.783167
154	0.783167
154.1	0.784167
154.2	0.784833
154.3	0.7855
154.4	0.7865
154.5	0.7865
154.6	0.787
154.7	0.787167
154.8	0.787667
154.9	0.788
155	0.788
155.1	0.788167
155.2	0.789
155.3	0.788833
155.4	0.789167
155.5	0.789
155.6	0.788833
155.7	0.788667
155.8	0.788167
155.9	0.788333
156	0.788
156.1	0.788167
156.2	0.789
156.3	0.790167
156.4	0.791
156.5	0.791
156.6	0.791167
156.7	0.790833
156.8	0.792667
156.9	0.792833
157	0.792167
157.1	0.792
157.2	0.7925
157.3	0.791833
157.4	0.791667
157.5	0.791167
157.6	0.791333
157.7	0.792333
157.8	0.793167
157.9	0.793667
158	0.7945
158.1	0.7945
158.2	0.794167
158.3	0.795
158.4	0.795
158.5	0.795833
158.6	0.795833
158.7	0.796
158.8	0.797833
158.9	0.798
159	0.797
159.1	0.798333
159.2	0.798167
159.3	0.798667
159.4	0.798667
159.5	0.798833
159.6	0.7995
159.7	0.799833
159.8	0.8
159.9	0.799833
160	0.799333
160.1	0.7985
160.2	0.797833
160.3	0.797333
160.4	0.797833
160.5	0.799333
160.6	0.799167
160.7	0.798833
160.8	0.8
160.9	0.800333
161	0.8
161.1	0.799833
161.2	0.800333
161.3	0.800667
161.4	0.800833
161.5	0.8005
161.6	0.8005
161.7	0.801167
161.8	0.801167
161.9	0.800833
162	0.801
162.1	0.801167
162.2	0.801
162.3	0.800167
162.4	0.800333
162.5	0.800333
162.6	0.8005
162.7	0.800333
162.8	0.7995
162.9	0.8
163	0.8005
163.1	0.800833
163.2	0.8005
163.3	0.801167
163.4	0.800833
163.5	0.801333
163.6	0.801667
163.7	0.802333
163.8	0.802
163.9	0.802167
164	0.802
164.1	0.801333
164.2	0.801333
164.3	0.802
164.4	0.801167
164.5	0.801333
164.6	0.801667
164.7	0.802
164.8	0.801833
164.9	0.801333
165	0.802167
165.1	0.801667
165.2	0.802
165.3	0.801167
165.4	0.801667
165.5	0.801667
165.6	0.801667
165.7	0.802667
165.8	0.802667
165.9	0.803
166	0.804
166.1	0.804
166.2	0.8035
166.3	0.804167
166.4	0.803833
166.5	0.803667
166.6	0.804833
166.7	0.804833
166.8	0.804667
166.9	0.8045
167	0.804167
167.1	0.803833
167.2	0.803667
167.3	0.804333
167.4	0.804333
167.5	0.803833
167.6	0.804
167.7	0.804167
167.8	0.804333
167.9	0.804667
168	0.805167
168.1	0.805667
168.2	0.804833
168.3	0.805333
168.4	0.805
168.5	0.805333
168.6	0.8055
168.7	0.805667
168.8	0.806167
168.9	0.805833
169	0.8065
169.1	0.805833
169.2	0.8065
169.3	0.806833
169.4	0.806333
169.5	0.806167
169.6	0.807333
169.7	0.8075
169.8	0.8075
169.9	0.807333
170	0.807167
170.1	0.806833
170.2	0.807167
170.3	0.807833
170.4	0.808
170.5	0.807667
170.6	0.807
170.7	0.806167
170.8	0.807833
170.9	0.808167
171	0.808667
171.1	0.809167
171.2	0.81
171.3	0.810333
171.4	0.810333
171.5	0.810333
171.6	0.810833
171.7	0.809833
171.8	0.809333
171.9	0.809833
172	0.811
172.1	0.809833
172.2	0.8095
172.3	0.809167
172.4	0.809667
172.5	0.810167
172.6	0.811
172.7	0.812167
172.8	0.811667
172.9	0.8115
173	0.812
173.1	0.812333
173.2	0.811833
173.3	0.811833
173.4	0.811667
173.5	0.811667
173.6	0.812
173.7	0.812333
173.8	0.8125
173.9	0.812833
174	0.813833
174.1	0.8135
174.2	0.813667
174.3	0.813833
174.4	0.813667
174.5	0.814333
174.6	0.814
174.7	0.814833
174.8	0.815167
174.9	0.816333
175	0.816167
175.1	0.816667
175.2	0.816167
175.3	0.8155
175.4	0.816167
175.5	0.816
175.6	0.816333
175.7	0.815667
175.8	0.816
175.9	0.816167
176	0.816167
176.1	0.815667
176.2	0.816
176.3	0.816333
176.4	0.816667
176.5	0.816833
176.6	0.815833
176.7	0.815833
176.8	0.815667
176.9	0.815
177	0.8145
177.1	0.814667
177.2	0.814
177.3	0.813833
177.4	0.813
177.5	0.8125
177.6	0.812333
177.7	0.812667
177.8	0.812167
177.9	0.812167
178	0.812833
178.1	0.8125
178.2	0.812
178.3	0.812333
178.4	0.812333
178.5	0.813
178.6	0.8135
178.7	0.814
178.8	0.813833
178.9	0.813833
179	0.813667
179.1	0.813667
179.2	0.813833
179.3	0.8135
179.4	0.813833
179.5	0.813833
179.6	0.813167
179.7	0.8135
179.8	0.813833
179.9	0.8145
180	0.815
180.1	0.814333
180.2	0.8145
180.3	0.813667
180.4	0.815
180.5	0.815333
180.6	0.816333
180.7	0.815833
180.8	0.8155
180.9	0.8145
181	0.814833
181.1	0.817167
181.2	0.818
181.3	0.818167
181.4	0.818
181.5	0.817667
181.6	0.817833
181.7	0.818667
181.8	0.818667
181.9	0.818
182	0.8185
182.1	0.819167
182.2	0.818333
182.3	0.818167
182.4	0.818
182.5	0.8185
182.6	0.819167
182.7	0.819333
182.8	0.8195
182.9	0.819333
183	0.819333
183.1	0.819833
183.2	0.820167
183.3	0.819833
183.4	0.820167
183.5	0.820333
183.6	0.820833
183.7	0.82
183.8	0.8195
183.9	0.82
184	0.819
184.1	0.818167
184.2	0.817667
184.3	0.818
184.4	0.818667
184.5	0.818167
184.6	0.819167
184.7	0.818167
184.8	0.818167
184.9	0.818167
185	0.817667
185.1	0.818667
185.2	0.819167
185.3	0.818667
185.4	0.818
185.5	0.817667
185.6	0.817167
185.7	0.8175
185.8	0.8185
185.9	0.8195
186	0.819333
186.1	0.819833
186.2	0.8195
186.3	0.82
186.4	0.820333
186.5	0.819333
186.6	0.8195
186.7	0.819833
186.8	0.8205
186.9	0.820167
187	0.821
187.1	0.820667
187.2	0.820833
187.3	0.821333
187.4	0.821167
187.5	0.821833
187.6	0.822167
187.7	0.821833
187.8	0.821833
187.9	0.821833
188	0.8225
188.1	0.822167
188.2	0.821167
188.3	0.820833
188.4	0.821833
188.5	0.821667
188.6	0.821667
188.7	0.822167
188.8	0.8225
188.9	0.823167
189	0.823
189.1	0.8235
189.2	0.8235
189.3	0.822833
189.4	0.8225
189.5	0.822667
189.6	0.822167
189.7	0.822167
189.8	0.822833
189.9	0.823
190	0.823833
190.1	0.823667
190.2	0.824
190.3	0.824333
190.4	0.8245
190.5	0.824
190.6	0.8235
190.7	0.824333
190.8	0.824
190.9	0.823333
191	0.823167
191.1	0.821833
191.2	0.820833
191.3	0.821333
191.4	0.822333
191.5	0.8225
191.6	0.822167
191.7	0.822333
191.8	0.823333
191.9	0.823833
192	0.824167
192.1	0.824333
192.2	0.824333
192.3	0.8245
192.4	0.823833
192.5	0.8235
192.6	0.8235
192.7	0.823833
192.8	0.824
192.9	0.8245
193	0.825
193.1	0.825667
193.2	0.825833
193.3	0.8255
193.4	0.825167
193.5	0.825167
193.6	0.825333
193.7	0.825833
193.8	0.825
193.9	0.824333
194	0.825
194.1	0.824833
194.2	0.824667
194.3	0.825
194.4	0.824
194.5	0.823667
194.6	0.8245
194.7	0.824833
194.8	0.823833
194.9	0.824167
195	0.824167
195.1	0.824167
195.2	0.824
195.3	0.823333
195.4	0.822667
195.5	0.8225
195.6	0.821833
195.7	0.821667
195.8	0.821167
195.9	0.821833
196	0.822167
196.1	0.822833
196.2	0.823333
196.3	0.823
196.4	0.822667
196.5	0.822167
196.6	0.8215
196.7	0.820833
196.8	0.821667
196.9	0.821167
197	0.821833
197.1	0.821333
197.2	0.823
197.3	0.823167
197.4	0.823333
197.5	0.823
197.6	0.823
197.7	0.823333
197.8	0.823167
197.9	0.8225
198	0.822333
198.1	0.821833
198.2	0.8225
198.3	0.822667
198.4	0.823333
198.5	0.8235
198.6	0.822833
198.7	0.822
198.8	0.822
198.9	0.821667
199	0.822
199.1	0.822333
199.2	0.821833
199.3	0.8215
199.4	0.8225
199.5	0.822667
199.6	0.823667
199.7	0.823
199.8	0.823
199.9	0.822833
200	0.822
[truncated: 14,000 more rows]
