# Supplementary material for: Bayesian inference of kinetic schemes for ion channels by Kalman filtering
Source: eLife journal article supplement (doi:10.7554/elife.62714), 2022-05-04
Supplement: fig4-data3 [file 1_Sim_N_7000_Fluor_MW_32M.xlsx]

## Sheet: Tabelle1
0.1	0
0.2	0
0.3	0
0.4	0
0.5	0
0.6	0
0.7	0
0.8	0
0.9	0
1	0
1.1	0
1.2	0
1.3	0
1.4	0
1.5	0
1.6	0
1.7	0
1.8	0
1.9	0
2	0
2.1	0
2.2	0
2.3	0
2.4	0
2.5	0
2.6	0
2.7	0
2.8	0
2.9	0
3	0
3.1	0
3.2	0
3.3	0
3.4	0
3.5	0
3.6	0
3.7	0
3.8	0
3.9	0
4	0
4.1	0
4.2	0
4.3	0
4.4	0
4.5	0
4.6	0
4.7	0
4.8	0
4.9	0
5	0
5.1	0
5.2	0
5.3	0
5.4	0
5.5	0
5.6	0
5.7	0
5.8	0
5.9	0
6	0
6.1	0
6.2	0
6.3	0
6.4	0
6.5	0
6.6	0
6.7	0
6.8	0
6.9	0
7	0
7.1	0
7.2	0
7.3	0
7.4	0
7.5	0
7.6	0
7.7	0
7.8	0
7.9	0
8	0
8.1	0
8.2	0
8.3	0
8.4	0
8.5	0
8.6	0
8.7	0
8.8	0
8.9	0
9	0
9.1	0
9.2	0
9.3	0
9.4	0
9.5	0
9.6	0
9.7	0
9.8	0
9.9	0
10	0
10.1	0
10.2	0
10.3	0
10.4	0
10.5	0
10.6	0
10.7	0
10.8	0
10.9	0
11	0
11.1	0
11.2	0
11.3	0
11.4	0
11.5	0
11.6	0
11.7	0
11.8	0
11.9	0
12	0
12.1	0
12.2	0
12.3	0
12.4	0
12.5	0
12.6	0
12.7	0
12.8	0
12.9	0
13	0
13.1	0
13.2	0
13.3	0
13.4	0
13.5	0
13.6	0
13.7	0
13.8	0
13.9	0
14	0
14.1	0
14.2	0
14.3	0
14.4	0
14.5	0
14.6	0
14.7	0
14.8	0
14.9	0
15	0
15.1	0
15.2	0
15.3	0
15.4	0
15.5	0
15.6	0
15.7	0
15.8	0
15.9	0
16	0
16.1	0
16.2	0
16.3	0
16.4	0
16.5	0
16.6	0
16.7	0
16.8	0
16.9	0
17	0
17.1	0
17.2	0
17.3	0
17.4	0
17.5	0
17.6	0
17.7	0
17.8	0
17.9	0
18	0
18.1	0
18.2	0
18.3	0
18.4	0
18.5	0
18.6	0
18.7	0
18.8	0
18.9	0
19	0
19.1	0
19.2	0
19.3	0
19.4	0
19.5	0
19.6	0
19.7	0
19.8	0
19.9	0
20	0
20.1	0
20.2	0
20.3	0
20.4	0
20.5	0
20.6	0
20.7	0
20.8	0
20.9	0
21	0
21.1	0
21.2	0
21.3	0
21.4	0
21.5	0
21.6	0
21.7	0
21.8	0
21.9	0
22	0
22.1	0
22.2	0
22.3	0
22.4	0
22.5	0
22.6	0
22.7	0
22.8	0
22.9	0
23	0
23.1	0
23.2	0
23.3	0
23.4	0
23.5	0
23.6	0
23.7	0
23.8	0
23.9	0
24	0
24.1	0
24.2	0
24.3	0
24.4	0
24.5	0
24.6	0
24.7	0
24.8	0
24.9	0
25	0
25.1	0
25.2	0
25.3	0
25.4	0
25.5	0
25.6	0
25.7	0
25.8	0
25.9	0
26	0
26.1	0
26.2	0
26.3	0
26.4	0
26.5	0
26.6	0
26.7	0
26.8	0
26.9	0
27	0
27.1	0
27.2	0
27.3	0
27.4	0
27.5	0
27.6	0
27.7	0
27.8	0
27.9	0
28	0
28.1	0
28.2	0
28.3	0
28.4	0
28.5	0
28.6	0
28.7	0
28.8	0
28.9	0
29	0
29.1	0
29.2	0
29.3	0
29.4	0
29.5	0
29.6	0
29.7	0
29.8	0
29.9	0
30	0
30.1	0
30.2	0
30.3	0
30.4	0
30.5	0
30.6	0
30.7	0
30.8	0
30.9	0
31	0
31.1	0
31.2	0
31.3	0
31.4	0
31.5	0
31.6	0
31.7	0
31.8	0
31.9	0
32	0
32.1	0
32.2	0
32.3	0
32.4	0
32.5	0
32.6	0
32.7	0
32.8	0
32.9	0
33	0
33.1	0
33.2	0
33.3	0
33.4	0
33.5	0
33.6	0
33.7	0
33.8	0
33.9	0
34	0
34.1	0
34.2	0
34.3	0
34.4	0
34.5	0
34.6	0
34.7	0
34.8	0
34.9	0
35	0
35.1	0
35.2	0
35.3	0
35.4	0
35.5	0
35.6	0
35.7	0
35.8	0
35.9	0
36	0
36.1	0
36.2	0
36.3	0
36.4	0
36.5	0
36.6	0
36.7	0
36.8	0
36.9	0
37	0
37.1	0
37.2	0
37.3	0
37.4	0
37.5	0
37.6	0
37.7	0
37.8	0
37.9	0
38	0
38.1	0
38.2	0
38.3	0
38.4	0
38.5	0
38.6	0
38.7	0
38.8	0
38.9	0
39	0
39.1	0
39.2	0
39.3	0
39.4	0
39.5	0
39.6	0
39.7	0
39.8	0
39.9	0
40	0
40.1	0
40.2	0
40.3	0
40.4	0
40.5	0
40.6	0
40.7	0
40.8	0
40.9	0
41	0
41.1	0
41.2	0
41.3	0
41.4	0
41.5	0
41.6	0
41.7	0
41.8	0
41.9	0
42	0
42.1	0
42.2	0
42.3	0
42.4	0
42.5	0
42.6	0
42.7	0
42.8	0
42.9	0
43	0
43.1	0
43.2	0
43.3	0
43.4	0
43.5	0
43.6	0
43.7	0
43.8	0
43.9	0
44	0
44.1	0
44.2	0
44.3	0
44.4	0
44.5	0
44.6	0
44.7	0
44.8	0
44.9	0
45	0
45.1	0
45.2	0
45.3	0
45.4	0
45.5	0
45.6	0
45.7	0
45.8	0
45.9	0
46	0
46.1	0
46.2	0
46.3	0
46.4	0
46.5	0
46.6	0
46.7	0
46.8	0
46.9	0
47	0
47.1	0
47.2	0
47.3	0
47.4	0
47.5	0
47.6	0
47.7	0
47.8	0
47.9	0
48	0
48.1	0
48.2	0
48.3	0
48.4	0
48.5	0
48.6	0
48.7	0
48.8	0
48.9	0
49	0
49.1	0
49.2	0
49.3	0
49.4	0
49.5	0
49.6	0
49.7	0
49.8	0
49.9	0
50	0
50.1	0
50.2	0
50.3	0
50.4	0
50.5	0
50.6	0
50.7	0
50.8	0
50.9	0
51	0
51.1	0
51.2	0
51.3	0
51.4	0
51.5	0
51.6	0
51.7	0
51.8	0
51.9	0
52	0
52.1	0
52.2	0
52.3	0
52.4	0
52.5	0
52.6	0
52.7	0
52.8	0
52.9	0
53	0
53.1	0
53.2	0
53.3	0
53.4	0
53.5	0
53.6	0
53.7	0
53.8	0
53.9	0
54	0
54.1	0
54.2	0
54.3	0
54.4	0
54.5	0
54.6	0
54.7	0
54.8	0
54.9	0
55	0
55.1	0
55.2	0
55.3	0
55.4	0
55.5	0
55.6	0
55.7	0
55.8	0
55.9	0
56	0
56.1	0
56.2	0
56.3	0
56.4	0
56.5	0
56.6	0
56.7	0
56.8	0
56.9	0
57	0
57.1	0
57.2	0
57.3	0
57.4	0
57.5	0
57.6	0
57.7	0
57.8	0
57.9	0
58	0
58.1	0
58.2	0
58.3	0
58.4	0
58.5	0
58.6	0
58.7	0
58.8	0
58.9	0
59	0
59.1	0
59.2	0
59.3	0
59.4	0
59.5	0
59.6	0
59.7	0
59.8	0
59.9	0
60	0
60.1	0
60.2	0
60.3	0
60.4	0
60.5	0
60.6	0
60.7	0
60.8	0
60.9	0
61	0
61.1	0
61.2	0
61.3	0
61.4	0
61.5	0
61.6	0
61.7	0
61.8	0
61.9	0
62	0
62.1	0
62.2	0
62.3	0
62.4	0
62.5	0
62.6	0
62.7	0
62.8	0
62.9	0
63	0
63.1	0
63.2	0
63.3	0
63.4	0
63.5	0
63.6	0
63.7	0
63.8	0
63.9	0
64	0
64.1	0
64.2	0
64.3	0
64.4	0
64.5	0
64.6	0
64.7	0
64.8	0
64.9	0
65	0
65.1	0
65.2	0
65.3	0
65.4	0
65.5	0
65.6	0
65.7	0
65.8	0
65.9	0
66	0
66.1	0
66.2	0
66.3	0
66.4	0
66.5	0
66.6	0
66.7	0
66.8	0
66.9	0
67	0
67.1	0
67.2	0
67.3	0
67.4	0
67.5	0
67.6	0
67.7	0
67.8	0
67.9	0
68	0
68.1	0
68.2	0
68.3	0
68.4	0
68.5	0
68.6	0
68.7	0
68.8	0
68.9	0
69	0
69.1	0
69.2	0
69.3	0
69.4	0
69.5	0
69.6	0
69.7	0
69.8	0
69.9	0
70	0
70.1	0
70.2	0
70.3	0
70.4	0
70.5	0
70.6	0
70.7	0
70.8	0
70.9	0
71	0
71.1	0
71.2	0
71.3	0
71.4	0
71.5	0
71.6	0
71.7	0
71.8	0
71.9	0
72	0
72.1	0
72.2	0
72.3	0
72.4	0
72.5	0
72.6	0
72.7	0
72.8	0
72.9	0
73	0
73.1	0
73.2	0
73.3	0
73.4	0
73.5	0
73.6	0
73.7	0
73.8	0
73.9	0
74	0
74.1	0
74.2	0
74.3	0
74.4	0
74.5	0
74.6	0
74.7	0
74.8	0
74.9	0
75	0
75.1	0
75.2	0
75.3	0
75.4	0
75.5	0
75.6	0
75.7	0
75.8	0
75.9	0
76	0
76.1	0
76.2	0
76.3	0
76.4	0
76.5	0
76.6	0
76.7	0
76.8	0
76.9	0
77	0
77.1	0
77.2	0
77.3	0
77.4	0
77.5	0
77.6	0
77.7	0
77.8	0
77.9	0
78	0
78.1	0
78.2	0
78.3	0
78.4	0
78.5	0
78.6	0
78.7	0
78.8	0
78.9	0
79	0
79.1	0
79.2	0
79.3	0
79.4	0
79.5	0
79.6	0
79.7	0
79.8	0
79.9	0
80	0
80.1	0
80.2	0
80.3	0
80.4	0
80.5	0
80.6	0
80.7	0
80.8	0
80.9	0
81	0
81.1	0
81.2	0
81.3	0
81.4	0
81.5	0
81.6	0
81.7	0
81.8	0
81.9	0
82	0
82.1	0
82.2	0
82.3	0
82.4	0
82.5	0
82.6	0
82.7	0
82.8	0
82.9	0
83	0
83.1	0
83.2	0
83.3	0
83.4	0
83.5	0
83.6	0
83.7	0
83.8	0
83.9	0
84	0
84.1	0
84.2	0
84.3	0
84.4	0
84.5	0
84.6	0
84.7	0
84.8	0
84.9	0
85	0
85.1	0
85.2	0
85.3	0
85.4	0
85.5	0
85.6	0
85.7	0
85.8	0
85.9	0
86	0
86.1	0
86.2	0
86.3	0
86.4	0
86.5	0
86.6	0
86.7	0
86.8	0
86.9	0
87	0
87.1	0
87.2	0
87.3	0
87.4	0
87.5	0
87.6	0
87.7	0
87.8	0
87.9	0
88	0
88.1	0
88.2	0
88.3	0
88.4	0
88.5	0
88.6	0
88.7	0
88.8	0
88.9	0
89	0
89.1	0
89.2	0
89.3	0
89.4	0
89.5	0
89.6	0
89.7	0
89.8	0
89.9	0
90	0
90.1	0
90.2	0
90.3	0
90.4	0
90.5	0
90.6	0
90.7	0
90.8	0
90.9	0
91	0
91.1	0
91.2	0
91.3	0
91.4	0
91.5	0
91.6	0
91.7	0
91.8	0
91.9	0
92	0
92.1	0
92.2	0
92.3	0
92.4	0
92.5	0
92.6	0
92.7	0
92.8	0
92.9	0
93	0
93.1	0
93.2	0
93.3	0
93.4	0
93.5	0
93.6	0
93.7	0
93.8	0
93.9	0
94	0
94.1	0
94.2	0
94.3	0
94.4	0
94.5	0
94.6	0
94.7	0
94.8	0
94.9	0
95	0
95.1	0
95.2	0
95.3	0
95.4	0
95.5	0
95.6	0
95.7	0
95.8	0
95.9	0
96	0
96.1	0
96.2	0
96.3	0
96.4	0
96.5	0
96.6	0
96.7	0
96.8	0
96.9	0
97	0
97.1	0
97.2	0
97.3	0
97.4	0
97.5	0
97.6	0
97.7	0
97.8	0
97.9	0
98	0
98.1	0
98.2	0
98.3	0
98.4	0
98.5	0
98.6	0
98.7	0
98.8	0
98.9	0
99	0
99.1	0
99.2	0
99.3	0
99.4	0
99.5	0
99.6	0
99.7	0
99.8	0
99.9	0
100	0
100.1	0.735714
100.2	0.891286
100.3	0.947571
100.4	0.964143
100.5	0.971143
100.6	0.974071
100.7	0.975
100.8	0.975643
100.9	0.975214
101	0.974
101.1	0.9755
101.2	0.976429
101.3	0.975786
101.4	0.977071
101.5	0.976143
101.6	0.9765
101.7	0.976357
101.8	0.976643
101.9	0.975857
102	0.976857
102.1	0.9775
102.2	0.978714
102.3	0.977714
102.4	0.977571
102.5	0.978143
102.6	0.977143
102.7	0.978786
102.8	0.978786
102.9	0.977857
103	0.9785
103.1	0.980357
103.2	0.976357
103.3	0.978714
103.4	0.979286
103.5	0.977071
103.6	0.978786
103.7	0.978286
103.8	0.978571
103.9	0.980857
104	0.978571
104.1	0.9795
104.2	0.979
104.3	0.980357
104.4	0.98
104.5	0.980429
104.6	0.981357
104.7	0.980143
104.8	0.980429
104.9	0.979786
105	0.979071
105.1	0.978571
105.2	0.980214
105.3	0.979857
105.4	0.981071
105.5	0.980929
105.6	0.9815
105.7	0.982
105.8	0.981
105.9	0.981857
106	0.980429
106.1	0.980643
106.2	0.980571
106.3	0.98
106.4	0.981071
106.5	0.980143
106.6	0.980286
106.7	0.980357
106.8	0.981786
106.9	0.982357
107	0.980357
107.1	0.981286
107.2	0.981429
107.3	0.982214
107.4	0.980071
107.5	0.982714
107.6	0.983
107.7	0.981071
107.8	0.981071
107.9	0.983214
108	0.985071
108.1	0.982643
108.2	0.982286
108.3	0.983143
108.4	0.984
108.5	0.982857
108.6	0.983071
108.7	0.9835
108.8	0.982714
108.9	0.983
109	0.983286
109.1	0.981643
109.2	0.984
109.3	0.983071
109.4	0.982714
109.5	0.983214
109.6	0.983857
109.7	0.985143
109.8	0.981786
109.9	0.984071
110	0.9845
110.1	0.985286
110.2	0.985143
110.3	0.985071
110.4	0.982286
110.5	0.983143
110.6	0.9845
110.7	0.983857
110.8	0.985
110.9	0.983857
111	0.9855
111.1	0.983857
111.2	0.983571
111.3	0.984929
111.4	0.984
111.5	0.9845
111.6	0.984286
111.7	0.985071
111.8	0.984571
111.9	0.985929
112	0.986071
112.1	0.987071
112.2	0.985214
112.3	0.985786
112.4	0.985286
112.5	0.985714
112.6	0.985929
112.7	0.985286
112.8	0.985143
112.9	0.986143
113	0.985643
113.1	0.985857
113.2	0.9845
113.3	0.985071
113.4	0.985143
113.5	0.984357
113.6	0.985
113.7	0.984357
113.8	0.984429
113.9	0.985071
114	0.985643
114.1	0.987143
114.2	0.986643
114.3	0.986857
114.4	0.986143
114.5	0.986357
114.6	0.986786
114.7	0.987643
114.8	0.988357
114.9	0.989
115	0.988357
115.1	0.988714
115.2	0.987214
115.3	0.986786
115.4	0.986786
115.5	0.985786
115.6	0.987643
115.7	0.987214
115.8	0.988143
115.9	0.988214
116	0.988
116.1	0.988643
116.2	0.988429
116.3	0.987714
116.4	0.987214
116.5	0.987786
116.6	0.987571
116.7	0.987643
116.8	0.989143
116.9	0.988429
117	0.987643
117.1	0.988714
117.2	0.986929
117.3	0.986214
117.4	0.985571
117.5	0.985643
117.6	0.986857
117.7	0.987
117.8	0.987
117.9	0.987714
118	0.988
118.1	0.988643
118.2	0.989214
118.3	0.988071
118.4	0.986857
118.5	0.9875
118.6	0.988286
118.7	0.988286
118.8	0.9885
118.9	0.988214
119	0.989357
119.1	0.989571
119.2	0.989714
119.3	0.989857
119.4	0.989143
119.5	0.988857
119.6	0.990571
119.7	0.988571
119.8	0.989857
119.9	0.990571
120	0.988929
120.1	0.989357
120.2	0.989214
120.3	0.989429
120.4	0.989786
120.5	0.988929
120.6	0.988286
120.7	0.988643
120.8	0.988429
120.9	0.989786
121	0.99
121.1	0.988143
121.2	0.989357
121.3	0.989
121.4	0.9875
121.5	0.988357
121.6	0.987929
121.7	0.988857
121.8	0.990643
121.9	0.990286
122	0.989071
122.1	0.989071
122.2	0.989714
122.3	0.990714
122.4	0.991286
122.5	0.991214
122.6	0.990071
122.7	0.990071
122.8	0.990429
122.9	0.988286
123	0.989643
123.1	0.990571
123.2	0.990214
123.3	0.989286
123.4	0.990214
123.5	0.988286
123.6	0.989857
123.7	0.989429
123.8	0.991786
123.9	0.990643
124	0.991071
124.1	0.990071
124.2	0.990857
124.3	0.990143
124.4	0.990714
124.5	0.991857
124.6	0.990357
124.7	0.989571
124.8	0.990357
124.9	0.990143
125	0.989357
125.1	0.991214
125.2	0.990571
125.3	0.991571
125.4	0.992286
125.5	0.990857
125.6	0.9895
125.7	0.991429
125.8	0.990429
125.9	0.990214
126	0.991714
126.1	0.990929
126.2	0.991571
126.3	0.990857
126.4	0.991571
126.5	0.991143
126.6	0.991286
126.7	0.991643
126.8	0.992071
126.9	0.991214
127	0.990643
127.1	0.992143
127.2	0.992786
127.3	0.991071
127.4	0.990571
127.5	0.991214
127.6	0.991286
127.7	0.991357
127.8	0.991143
127.9	0.992214
128	0.992714
128.1	0.991643
128.2	0.990143
128.3	0.9905
128.4	0.991429
128.5	0.991357
128.6	0.9905
128.7	0.991357
128.8	0.991786
128.9	0.990929
129	0.990214
129.1	0.991071
129.2	0.991071
129.3	0.990857
129.4	0.992143
129.5	0.990929
129.6	0.990643
129.7	0.991429
129.8	0.991714
129.9	0.992429
130	0.992429
130.1	0.992929
130.2	0.992143
130.3	0.992571
130.4	0.992929
130.5	0.993143
130.6	0.992429
130.7	0.991571
130.8	0.991571
130.9	0.992786
131	0.992857
131.1	0.991786
131.2	0.990857
131.3	0.991714
131.4	0.992929
131.5	0.992
131.6	0.992929
131.7	0.992786
131.8	0.992857
131.9	0.992357
132	0.993071
132.1	0.993286
132.2	0.994071
132.3	0.993429
132.4	0.992071
132.5	0.992286
132.6	0.9935
132.7	0.993143
132.8	0.991929
132.9	0.992429
133	0.992214
133.1	0.992929
133.2	0.992929
133.3	0.993214
133.4	0.991571
133.5	0.9925
133.6	0.992929
133.7	0.9925
133.8	0.993071
133.9	0.992571
134	0.993
134.1	0.993214
134.2	0.991714
134.3	0.991286
134.4	0.992
134.5	0.992929
134.6	0.9935
134.7	0.994
134.8	0.993429
134.9	0.994143
135	0.992643
135.1	0.993429
135.2	0.993286
135.3	0.993143
135.4	0.9935
135.5	0.994357
135.6	0.994071
135.7	0.992714
135.8	0.991714
135.9	0.992643
136	0.992643
136.1	0.993571
136.2	0.992786
136.3	0.992571
136.4	0.992929
136.5	0.993143
136.6	0.993
136.7	0.993571
136.8	0.993429
136.9	0.992429
137	0.993786
137.1	0.993786
137.2	0.9925
137.3	0.9925
137.4	0.991857
137.5	0.992714
137.6	0.993214
137.7	0.993071
137.8	0.993286
137.9	0.993643
138	0.994
138.1	0.992143
138.2	0.993429
138.3	0.994357
138.4	0.994643
138.5	0.994571
138.6	0.995
138.7	0.993714
138.8	0.993357
138.9	0.994143
139	0.994
139.1	0.994071
139.2	0.993143
139.3	0.993357
139.4	0.993857
139.5	0.994643
139.6	0.993214
139.7	0.992714
139.8	0.9935
139.9	0.992857
140	0.992429
140.1	0.993143
140.2	0.992857
140.3	0.992714
140.4	0.992786
140.5	0.994286
140.6	0.993714
140.7	0.992714
140.8	0.9935
140.9	0.993929
141	0.993929
141.1	0.994643
141.2	0.993857
141.3	0.993214
141.4	0.993357
141.5	0.993643
141.6	0.992786
141.7	0.992857
141.8	0.993357
141.9	0.993643
142	0.994071
142.1	0.994214
142.2	0.993857
142.3	0.9945
142.4	0.994929
142.5	0.994286
142.6	0.994643
142.7	0.994357
142.8	0.993429
142.9	0.993929
143	0.994286
143.1	0.994071
143.2	0.992786
143.3	0.993357
143.4	0.993
143.5	0.993929
143.6	0.994
143.7	0.9945
143.8	0.993857
143.9	0.993786
144	0.993286
144.1	0.994
144.2	0.994071
144.3	0.994429
144.4	0.994071
144.5	0.993929
144.6	0.995071
144.7	0.994286
144.8	0.993857
144.9	0.993071
145	0.993143
145.1	0.993929
145.2	0.9935
145.3	0.993643
145.4	0.994357
145.5	0.994
145.6	0.993286
145.7	0.993857
145.8	0.994
145.9	0.994214
146	0.993714
146.1	0.993643
146.2	0.993714
146.3	0.994786
146.4	0.994357
146.5	0.994571
146.6	0.994643
146.7	0.993143
146.8	0.992929
146.9	0.993429
147	0.993571
147.1	0.994714
147.2	0.994
147.3	0.993929
147.4	0.994714
147.5	0.994143
147.6	0.994857
147.7	0.9945
147.8	0.994643
147.9	0.994929
148	0.994714
148.1	0.994214
148.2	0.994429
148.3	0.9945
148.4	0.9935
148.5	0.993214
148.6	0.993929
148.7	0.994357
148.8	0.994429
148.9	0.994429
149	0.994786
149.1	0.994286
149.2	0.995571
149.3	0.994643
149.4	0.993571
149.5	0.993571
149.6	0.994429
149.7	0.994214
149.8	0.994429
149.9	0.994214
150	0.993857
150.1	0.993929
150.2	0.993429
150.3	0.994357
150.4	0.994929
150.5	0.995143
150.6	0.995714
150.7	0.995429
150.8	0.994
150.9	0.993643
151	0.994357
151.1	0.994786
151.2	0.995357
151.3	0.9955
151.4	0.995286
151.5	0.995714
151.6	0.995214
151.7	0.994571
151.8	0.995429
151.9	0.994286
152	0.994143
152.1	0.994429
152.2	0.995071
152.3	0.995214
152.4	0.994786
152.5	0.994
152.6	0.994643
152.7	0.995143
152.8	0.994714
152.9	0.994571
153	0.994643
153.1	0.994643
153.2	0.995143
153.3	0.996286
153.4	0.996214
153.5	0.994929
153.6	0.994857
153.7	0.994429
153.8	0.994929
153.9	0.994643
154	0.995571
154.1	0.994714
154.2	0.995214
154.3	0.995286
154.4	0.995786
154.5	0.995429
154.6	0.994929
154.7	0.994286
154.8	0.994286
154.9	0.994786
155	0.9945
155.1	0.995071
155.2	0.994571
155.3	0.993643
155.4	0.993714
155.5	0.994714
155.6	0.994857
155.7	0.995571
155.8	0.994929
155.9	0.994429
156	0.996
156.1	0.996
156.2	0.995286
156.3	0.995286
156.4	0.9955
156.5	0.995571
156.6	0.995429
156.7	0.995857
156.8	0.994071
156.9	0.995357
157	0.995143
157.1	0.995357
157.2	0.993786
157.3	0.994643
157.4	0.995571
157.5	0.995357
157.6	0.995357
157.7	0.995
157.8	0.994714
157.9	0.994857
158	0.996
158.1	0.994571
158.2	0.995357
158.3	0.995643
158.4	0.996143
158.5	0.995286
158.6	0.995643
158.7	0.994786
158.8	0.995
158.9	0.994143
159	0.994214
159.1	0.994571
159.2	0.994857
159.3	0.9955
159.4	0.995143
159.5	0.995214
159.6	0.994786
159.7	0.994857
159.8	0.994071
159.9	0.994786
160	0.994286
160.1	0.995429
160.2	0.994429
160.3	0.995071
160.4	0.994643
160.5	0.994571
160.6	0.994286
160.7	0.995786
160.8	0.994571
160.9	0.994643
161	0.994786
161.1	0.995357
161.2	0.9945
161.3	0.994214
161.4	0.995429
161.5	0.995071
161.6	0.995571
161.7	0.996714
161.8	0.996071
161.9	0.995143
162	0.994643
162.1	0.995571
162.2	0.994571
162.3	0.994071
162.4	0.993429
162.5	0.995071
162.6	0.995571
162.7	0.996
162.8	0.995714
162.9	0.995357
163	0.995286
163.1	0.995071
163.2	0.995714
163.3	0.995214
163.4	0.995929
163.5	0.995143
163.6	0.995143
163.7	0.994857
163.8	0.994643
163.9	0.995143
164	0.995286
164.1	0.995643
164.2	0.995643
164.3	0.994786
164.4	0.995071
164.5	0.994643
164.6	0.995
164.7	0.995071
164.8	0.994786
164.9	0.995571
165	0.995429
165.1	0.994643
165.2	0.994714
165.3	0.994071
165.4	0.995714
165.5	0.994571
165.6	0.995357
165.7	0.9955
165.8	0.9955
165.9	0.995429
166	0.994714
166.1	0.995643
166.2	0.995214
166.3	0.995214
166.4	0.996071
166.5	0.994286
166.6	0.994929
166.7	0.995286
166.8	0.995214
166.9	0.996214
167	0.995857
167.1	0.995786
167.2	0.995857
167.3	0.996071
167.4	0.995643
167.5	0.995214
167.6	0.996
167.7	0.995143
167.8	0.995
167.9	0.995143
168	0.995286
168.1	0.994286
168.2	0.994929
168.3	0.995857
168.4	0.9955
168.5	0.995143
168.6	0.995
168.7	0.994357
168.8	0.995071
168.9	0.994786
169	0.994929
169.1	0.994857
169.2	0.994643
169.3	0.995929
169.4	0.995857
169.5	0.995143
169.6	0.995857
169.7	0.995286
169.8	0.995071
169.9	0.995429
170	0.995214
170.1	0.995286
170.2	0.995357
170.3	0.995857
170.4	0.996429
170.5	0.995571
170.6	0.995214
170.7	0.995429
170.8	0.995643
170.9	0.995571
171	0.995857
171.1	0.996357
171.2	0.996214
171.3	0.996214
171.4	0.995071
171.5	0.994857
171.6	0.994857
171.7	0.9955
171.8	0.995857
171.9	0.995714
172	0.9955
172.1	0.995857
172.2	0.996214
172.3	0.994786
172.4	0.994714
172.5	0.995214
172.6	0.995929
172.7	0.996
172.8	0.995929
172.9	0.995571
173	0.995143
173.1	0.994786
173.2	0.9945
173.3	0.995643
173.4	0.995786
173.5	0.995429
173.6	0.994643
173.7	0.994857
173.8	0.995929
173.9	0.996429
174	0.995786
174.1	0.995571
174.2	0.995286
174.3	0.995357
174.4	0.995786
174.5	0.995643
174.6	0.995857
174.7	0.995143
174.8	0.995214
174.9	0.995571
175	0.996143
175.1	0.996286
175.2	0.995714
175.3	0.995929
175.4	0.995857
175.5	0.995643
175.6	0.994786
175.7	0.995571
175.8	0.9955
175.9	0.9955
176	0.996071
176.1	0.995643
176.2	0.995429
176.3	0.994714
176.4	0.995286
176.5	0.994643
176.6	0.995214
176.7	0.995643
176.8	0.9955
176.9	0.995643
177	0.995357
177.1	0.995786
177.2	0.996
177.3	0.996429
177.4	0.995786
177.5	0.995071
177.6	0.995786
177.7	0.995286
177.8	0.995714
177.9	0.995071
178	0.995714
178.1	0.995643
178.2	0.995429
178.3	0.994929
178.4	0.995357
178.5	0.995857
178.6	0.995571
178.7	0.996143
178.8	0.996429
178.9	0.995929
179	0.995357
179.1	0.995857
179.2	0.995571
179.3	0.995643
179.4	0.995071
179.5	0.996071
179.6	0.995429
179.7	0.994429
179.8	0.995071
179.9	0.995357
180	0.995857
180.1	0.996286
180.2	0.9955
180.3	0.995857
180.4	0.995286
180.5	0.995071
180.6	0.995857
180.7	0.995786
180.8	0.995786
180.9	0.995714
181	0.995929
181.1	0.996214
181.2	0.995214
181.3	0.9955
181.4	0.994286
181.5	0.995143
181.6	0.995143
181.7	0.996
181.8	0.996214
181.9	0.995714
182	0.995857
182.1	0.9955
182.2	0.995786
182.3	0.995143
182.4	0.996
182.5	0.995929
182.6	0.995286
182.7	0.995429
182.8	0.995429
182.9	0.995214
183	0.996143
183.1	0.996143
183.2	0.996643
183.3	0.996357
183.4	0.995714
183.5	0.995857
183.6	0.996143
183.7	0.995857
183.8	0.996357
183.9	0.995571
184	0.9955
184.1	0.9955
184.2	0.995929
184.3	0.996071
184.4	0.996143
184.5	0.996286
184.6	0.9955
184.7	0.996
184.8	0.994857
184.9	0.995357
185	0.995643
185.1	0.995714
185.2	0.996143
185.3	0.995571
185.4	0.994929
185.5	0.995643
185.6	0.996
185.7	0.9965
185.8	0.996071
185.9	0.995929
186	0.996
186.1	0.996143
186.2	0.996071
186.3	0.995071
186.4	0.995357
186.5	0.994929
186.6	0.994714
186.7	0.994714
186.8	0.995643
186.9	0.996
187	0.995643
187.1	0.995857
187.2	0.995857
187.3	0.995571
187.4	0.995786
187.5	0.995571
187.6	0.996571
187.7	0.996286
187.8	0.994857
187.9	0.994857
188	0.996286
188.1	0.9955
188.2	0.9955
188.3	0.996214
188.4	0.996071
188.5	0.996
188.6	0.995071
188.7	0.995
188.8	0.995
188.9	0.995643
189	0.9955
189.1	0.995929
189.2	0.995857
189.3	0.994286
189.4	0.995571
189.5	0.995786
189.6	0.996214
189.7	0.996643
189.8	0.995786
189.9	0.995429
190	0.995857
190.1	0.995071
190.2	0.995714
190.3	0.995214
190.4	0.994786
190.5	0.995929
190.6	0.995143
190.7	0.995929
190.8	0.996786
190.9	0.995643
191	0.9955
191.1	0.995429
191.2	0.995643
191.3	0.995714
191.4	0.996071
191.5	0.994643
191.6	0.995429
191.7	0.9955
191.8	0.995571
191.9	0.995929
192	0.996643
192.1	0.996357
192.2	0.996
192.3	0.996
192.4	0.994857
192.5	0.994857
192.6	0.995571
192.7	0.995714
192.8	0.994286
192.9	0.9955
193	0.996214
193.1	0.996
193.2	0.995857
193.3	0.995714
193.4	0.996429
193.5	0.995857
193.6	0.994643
193.7	0.994357
193.8	0.994929
193.9	0.994571
194	0.994643
194.1	0.995286
194.2	0.995786
194.3	0.995929
194.4	0.994714
194.5	0.995571
194.6	0.995786
194.7	0.996429
194.8	0.995429
194.9	0.994071
195	0.995286
195.1	0.995143
195.2	0.995071
195.3	0.995
195.4	0.9955
195.5	0.9955
195.6	0.995143
195.7	0.995
195.8	0.995286
195.9	0.994429
196	0.994929
196.1	0.996286
196.2	0.996643
196.3	0.996286
196.4	0.996786
196.5	0.995571
196.6	0.995571
196.7	0.995214
196.8	0.995214
196.9	0.9965
197	0.995786
197.1	0.996071
197.2	0.995286
197.3	0.995429
197.4	0.995571
197.5	0.995786
197.6	0.9965
197.7	0.995929
197.8	0.996286
197.9	0.995786
198	0.9965
198.1	0.995786
198.2	0.995071
198.3	0.995929
198.4	0.996071
198.5	0.9955
198.6	0.995357
198.7	0.995714
198.8	0.996286
198.9	0.996429
199	0.9955
199.1	0.996214
199.2	0.995357
199.3	0.995786
199.4	0.995143
199.5	0.995143
199.6	0.9955
199.7	0.995929
199.8	0.995357
199.9	0.995286
200	0.995714
[truncated: 14,000 more rows]
