# Supplementary material for: Bayesian inference of kinetic schemes for ion channels by Kalman filtering
Source: eLife journal article supplement (doi:10.7554/elife.62714), 2022-05-04
Supplement: fig4-data3 [file 1_Sim_N_7000_Strom_MW_32M.xlsx]

## Sheet: Tabelle1
0.1	0
0.2	0
0.3	0
0.4	0
0.5	0
0.6	0
0.7	0
0.8	0
0.9	0
1	0
1.1	0
1.2	0
1.3	0
1.4	0
1.5	0
1.6	0
1.7	0
1.8	0
1.9	0
2	0
2.1	0
2.2	0
2.3	0
2.4	0
2.5	0
2.6	0
2.7	0
2.8	0
2.9	0
3	0
3.1	0
3.2	0
3.3	0
3.4	0
3.5	0
3.6	0
3.7	0
3.8	0
3.9	0
4	0
4.1	0
4.2	0
4.3	0
4.4	0
4.5	0
4.6	0
4.7	0
4.8	0
4.9	0
5	0
5.1	0
5.2	0
5.3	0
5.4	0
5.5	0
5.6	0
5.7	0
5.8	0
5.9	0
6	0
6.1	0
6.2	0
6.3	0
6.4	0
6.5	0
6.6	0
6.7	0
6.8	0
6.9	0
7	0
7.1	0
7.2	0
7.3	0
7.4	0
7.5	0
7.6	0
7.7	0
7.8	0
7.9	0
8	0
8.1	0
8.2	0
8.3	0
8.4	0
8.5	0
8.6	0
8.7	0
8.8	0
8.9	0
9	0
9.1	0
9.2	0
9.3	0
9.4	0
9.5	0
9.6	0
9.7	0
9.8	0
9.9	0
10	0
10.1	0
10.2	0
10.3	0
10.4	0
10.5	0
10.6	0
10.7	0
10.8	0
10.9	0
11	0
11.1	0
11.2	0
11.3	0
11.4	0
11.5	0
11.6	0
11.7	0
11.8	0
11.9	0
12	0
12.1	0
12.2	0
12.3	0
12.4	0
12.5	0
12.6	0
12.7	0
12.8	0
12.9	0
13	0
13.1	0
13.2	0
13.3	0
13.4	0
13.5	0
13.6	0
13.7	0
13.8	0
13.9	0
14	0
14.1	0
14.2	0
14.3	0
14.4	0
14.5	0
14.6	0
14.7	0
14.8	0
14.9	0
15	0
15.1	0
15.2	0
15.3	0
15.4	0
15.5	0
15.6	0
15.7	0
15.8	0
15.9	0
16	0
16.1	0
16.2	0
16.3	0
16.4	0
16.5	0
16.6	0
16.7	0
16.8	0
16.9	0
17	0
17.1	0
17.2	0
17.3	0
17.4	0
17.5	0
17.6	0
17.7	0
17.8	0
17.9	0
18	0
18.1	0
18.2	0
18.3	0
18.4	0
18.5	0
18.6	0
18.7	0
18.8	0
18.9	0
19	0
19.1	0
19.2	0
19.3	0
19.4	0
19.5	0
19.6	0
19.7	0
19.8	0
19.9	0
20	0
20.1	0
20.2	0
20.3	0
20.4	0
20.5	0
20.6	0
20.7	0
20.8	0
20.9	0
21	0
21.1	0
21.2	0
21.3	0
21.4	0
21.5	0
21.6	0
21.7	0
21.8	0
21.9	0
22	0
22.1	0
22.2	0
22.3	0
22.4	0
22.5	0
22.6	0
22.7	0
22.8	0
22.9	0
23	0
23.1	0
23.2	0
23.3	0
23.4	0
23.5	0
23.6	0
23.7	0
23.8	0
23.9	0
24	0
24.1	0
24.2	0
24.3	0
24.4	0
24.5	0
24.6	0
24.7	0
24.8	0
24.9	0
25	0
25.1	0
25.2	0
25.3	0
25.4	0
25.5	0
25.6	0
25.7	0
25.8	0
25.9	0
26	0
26.1	0
26.2	0
26.3	0
26.4	0
26.5	0
26.6	0
26.7	0
26.8	0
26.9	0
27	0
27.1	0
27.2	0
27.3	0
27.4	0
27.5	0
27.6	0
27.7	0
27.8	0
27.9	0
28	0
28.1	0
28.2	0
28.3	0
28.4	0
28.5	0
28.6	0
28.7	0
28.8	0
28.9	0
29	0
29.1	0
29.2	0
29.3	0
29.4	0
29.5	0
29.6	0
29.7	0
29.8	0
29.9	0
30	0
30.1	0
30.2	0
30.3	0
30.4	0
30.5	0
30.6	0
30.7	0
30.8	0
30.9	0
31	0
31.1	0
31.2	0
31.3	0
31.4	0
31.5	0
31.6	0
31.7	0
31.8	0
31.9	0
32	0
32.1	0
32.2	0
32.3	0
32.4	0
32.5	0
32.6	0
32.7	0
32.8	0
32.9	0
33	0
33.1	0
33.2	0
33.3	0
33.4	0
33.5	0
33.6	0
33.7	0
33.8	0
33.9	0
34	0
34.1	0
34.2	0
34.3	0
34.4	0
34.5	0
34.6	0
34.7	0
34.8	0
34.9	0
35	0
35.1	0
35.2	0
35.3	0
35.4	0
35.5	0
35.6	0
35.7	0
35.8	0
35.9	0
36	0
36.1	0
36.2	0
36.3	0
36.4	0
36.5	0
36.6	0
36.7	0
36.8	0
36.9	0
37	0
37.1	0
37.2	0
37.3	0
37.4	0
37.5	0
37.6	0
37.7	0
37.8	0
37.9	0
38	0
38.1	0
38.2	0
38.3	0
38.4	0
38.5	0
38.6	0
38.7	0
38.8	0
38.9	0
39	0
39.1	0
39.2	0
39.3	0
39.4	0
39.5	0
39.6	0
39.7	0
39.8	0
39.9	0
40	0
40.1	0
40.2	0
40.3	0
40.4	0
40.5	0
40.6	0
40.7	0
40.8	0
40.9	0
41	0
41.1	0
41.2	0
41.3	0
41.4	0
41.5	0
41.6	0
41.7	0
41.8	0
41.9	0
42	0
42.1	0
42.2	0
42.3	0
42.4	0
42.5	0
42.6	0
42.7	0
42.8	0
42.9	0
43	0
43.1	0
43.2	0
43.3	0
43.4	0
43.5	0
43.6	0
43.7	0
43.8	0
43.9	0
44	0
44.1	0
44.2	0
44.3	0
44.4	0
44.5	0
44.6	0
44.7	0
44.8	0
44.9	0
45	0
45.1	0
45.2	0
45.3	0
45.4	0
45.5	0
45.6	0
45.7	0
45.8	0
45.9	0
46	0
46.1	0
46.2	0
46.3	0
46.4	0
46.5	0
46.6	0
46.7	0
46.8	0
46.9	0
47	0
47.1	0
47.2	0
47.3	0
47.4	0
47.5	0
47.6	0
47.7	0
47.8	0
47.9	0
48	0
48.1	0
48.2	0
48.3	0
48.4	0
48.5	0
48.6	0
48.7	0
48.8	0
48.9	0
49	0
49.1	0
49.2	0
49.3	0
49.4	0
49.5	0
49.6	0
49.7	0
49.8	0
49.9	0
50	0
50.1	0
50.2	0
50.3	0
50.4	0
50.5	0
50.6	0
50.7	0
50.8	0
50.9	0
51	0
51.1	0
51.2	0
51.3	0
51.4	0
51.5	0
51.6	0
51.7	0
51.8	0
51.9	0
52	0
52.1	0
52.2	0
52.3	0
52.4	0
52.5	0
52.6	0
52.7	0
52.8	0
52.9	0
53	0
53.1	0
53.2	0
53.3	0
53.4	0
53.5	0
53.6	0
53.7	0
53.8	0
53.9	0
54	0
54.1	0
54.2	0
54.3	0
54.4	0
54.5	0
54.6	0
54.7	0
54.8	0
54.9	0
55	0
55.1	0
55.2	0
55.3	0
55.4	0
55.5	0
55.6	0
55.7	0
55.8	0
55.9	0
56	0
56.1	0
56.2	0
56.3	0
56.4	0
56.5	0
56.6	0
56.7	0
56.8	0
56.9	0
57	0
57.1	0
57.2	0
57.3	0
57.4	0
57.5	0
57.6	0
57.7	0
57.8	0
57.9	0
58	0
58.1	0
58.2	0
58.3	0
58.4	0
58.5	0
58.6	0
58.7	0
58.8	0
58.9	0
59	0
59.1	0
59.2	0
59.3	0
59.4	0
59.5	0
59.6	0
59.7	0
59.8	0
59.9	0
60	0
60.1	0
60.2	0
60.3	0
60.4	0
60.5	0
60.6	0
60.7	0
60.8	0
60.9	0
61	0
61.1	0
61.2	0
61.3	0
61.4	0
61.5	0
61.6	0
61.7	0
61.8	0
61.9	0
62	0
62.1	0
62.2	0
62.3	0
62.4	0
62.5	0
62.6	0
62.7	0
62.8	0
62.9	0
63	0
63.1	0
63.2	0
63.3	0
63.4	0
63.5	0
63.6	0
63.7	0
63.8	0
63.9	0
64	0
64.1	0
64.2	0
64.3	0
64.4	0
64.5	0
64.6	0
64.7	0
64.8	0
64.9	0
65	0
65.1	0
65.2	0
65.3	0
65.4	0
65.5	0
65.6	0
65.7	0
65.8	0
65.9	0
66	0
66.1	0
66.2	0
66.3	0
66.4	0
66.5	0
66.6	0
66.7	0
66.8	0
66.9	0
67	0
67.1	0
67.2	0
67.3	0
67.4	0
67.5	0
67.6	0
67.7	0
67.8	0
67.9	0
68	0
68.1	0
68.2	0
68.3	0
68.4	0
68.5	0
68.6	0
68.7	0
68.8	0
68.9	0
69	0
69.1	0
69.2	0
69.3	0
69.4	0
69.5	0
69.6	0
69.7	0
69.8	0
69.9	0
70	0
70.1	0
70.2	0
70.3	0
70.4	0
70.5	0
70.6	0
70.7	0
70.8	0
70.9	0
71	0
71.1	0
71.2	0
71.3	0
71.4	0
71.5	0
71.6	0
71.7	0
71.8	0
71.9	0
72	0
72.1	0
72.2	0
72.3	0
72.4	0
72.5	0
72.6	0
72.7	0
72.8	0
72.9	0
73	0
73.1	0
73.2	0
73.3	0
73.4	0
73.5	0
73.6	0
73.7	0
73.8	0
73.9	0
74	0
74.1	0
74.2	0
74.3	0
74.4	0
74.5	0
74.6	0
74.7	0
74.8	0
74.9	0
75	0
75.1	0
75.2	0
75.3	0
75.4	0
75.5	0
75.6	0
75.7	0
75.8	0
75.9	0
76	0
76.1	0
76.2	0
76.3	0
76.4	0
76.5	0
76.6	0
76.7	0
76.8	0
76.9	0
77	0
77.1	0
77.2	0
77.3	0
77.4	0
77.5	0
77.6	0
77.7	0
77.8	0
77.9	0
78	0
78.1	0
78.2	0
78.3	0
78.4	0
78.5	0
78.6	0
78.7	0
78.8	0
78.9	0
79	0
79.1	0
79.2	0
79.3	0
79.4	0
79.5	0
79.6	0
79.7	0
79.8	0
79.9	0
80	0
80.1	0
80.2	0
80.3	0
80.4	0
80.5	0
80.6	0
80.7	0
80.8	0
80.9	0
81	0
81.1	0
81.2	0
81.3	0
81.4	0
81.5	0
81.6	0
81.7	0
81.8	0
81.9	0
82	0
82.1	0
82.2	0
82.3	0
82.4	0
82.5	0
82.6	0
82.7	0
82.8	0
82.9	0
83	0
83.1	0
83.2	0
83.3	0
83.4	0
83.5	0
83.6	0
83.7	0
83.8	0
83.9	0
84	0
84.1	0
84.2	0
84.3	0
84.4	0
84.5	0
84.6	0
84.7	0
84.8	0
84.9	0
85	0
85.1	0
85.2	0
85.3	0
85.4	0
85.5	0
85.6	0
85.7	0
85.8	0
85.9	0
86	0
86.1	0
86.2	0
86.3	0
86.4	0
86.5	0
86.6	0
86.7	0
86.8	0
86.9	0
87	0
87.1	0
87.2	0
87.3	0
87.4	0
87.5	0
87.6	0
87.7	0
87.8	0
87.9	0
88	0
88.1	0
88.2	0
88.3	0
88.4	0
88.5	0
88.6	0
88.7	0
88.8	0
88.9	0
89	0
89.1	0
89.2	0
89.3	0
89.4	0
89.5	0
89.6	0
89.7	0
89.8	0
89.9	0
90	0
90.1	0
90.2	0
90.3	0
90.4	0
90.5	0
90.6	0
90.7	0
90.8	0
90.9	0
91	0
91.1	0
91.2	0
91.3	0
91.4	0
91.5	0
91.6	0
91.7	0
91.8	0
91.9	0
92	0
92.1	0
92.2	0
92.3	0
92.4	0
92.5	0
92.6	0
92.7	0
92.8	0
92.9	0
93	0
93.1	0
93.2	0
93.3	0
93.4	0
93.5	0
93.6	0
93.7	0
93.8	0
93.9	0
94	0
94.1	0
94.2	0
94.3	0
94.4	0
94.5	0
94.6	0
94.7	0
94.8	0
94.9	0
95	0
95.1	0
95.2	0
95.3	0
95.4	0
95.5	0
95.6	0
95.7	0
95.8	0
95.9	0
96	0
96.1	0
96.2	0
96.3	0
96.4	0
96.5	0
96.6	0
96.7	0
96.8	0
96.9	0
97	0
97.1	0
97.2	0
97.3	0
97.4	0
97.5	0
97.6	0
97.7	0
97.8	0
97.9	0
98	0
98.1	0
98.2	0
98.3	0
98.4	0
98.5	0
98.6	0
98.7	0
98.8	0
98.9	0
99	0
99.1	0
99.2	0
99.3	0
99.4	0
99.5	0
99.6	0
99.7	0
99.8	0
99.9	0
100	0
100.1	0.000857143
100.2	0.00371429
100.3	0.00871429
100.4	0.0134286
100.5	0.0181429
100.6	0.0228571
100.7	0.0267143
100.8	0.0317143
100.9	0.0368571
101	0.0417143
101.1	0.0477143
101.2	0.0537143
101.3	0.0572857
101.4	0.0614286
101.5	0.0662857
101.6	0.0711429
101.7	0.0747143
101.8	0.0785714
101.9	0.0831429
102	0.0885714
102.1	0.0925714
102.2	0.098
102.3	0.102143
102.4	0.106
102.5	0.111143
102.6	0.114857
102.7	0.118857
102.8	0.124714
102.9	0.130286
103	0.133286
103.1	0.137714
103.2	0.141857
103.3	0.145143
103.4	0.148714
103.5	0.151429
103.6	0.155286
103.7	0.158714
103.8	0.164429
103.9	0.168857
104	0.173143
104.1	0.176
104.2	0.180286
104.3	0.184857
104.4	0.188143
104.5	0.192143
104.6	0.196
104.7	0.199857
104.8	0.202714
104.9	0.206
105	0.209429
105.1	0.213429
105.2	0.216429
105.3	0.219
105.4	0.223143
105.5	0.225571
105.6	0.228857
105.7	0.232143
105.8	0.235429
105.9	0.239857
106	0.242143
106.1	0.244857
106.2	0.251714
106.3	0.257286
106.4	0.261714
106.5	0.264286
106.6	0.266286
106.7	0.268286
106.8	0.270571
106.9	0.273429
107	0.276714
107.1	0.279143
107.2	0.282
107.3	0.284714
107.4	0.287571
107.5	0.290857
107.6	0.294429
107.7	0.296571
107.8	0.300571
107.9	0.303857
108	0.305571
108.1	0.308143
108.2	0.310143
108.3	0.311714
108.4	0.314286
108.5	0.315714
108.6	0.319286
108.7	0.322429
108.8	0.325714
108.9	0.329143
109	0.332429
109.1	0.335714
109.2	0.338143
109.3	0.340714
109.4	0.344143
109.5	0.345857
109.6	0.348
109.7	0.350143
109.8	0.352571
109.9	0.354143
110	0.356571
110.1	0.358714
110.2	0.362571
110.3	0.366857
110.4	0.368571
110.5	0.371286
110.6	0.373286
110.7	0.375857
110.8	0.378286
110.9	0.381
111	0.382429
111.1	0.385143
111.2	0.386286
111.3	0.389714
111.4	0.391286
111.5	0.392857
111.6	0.395286
111.7	0.397714
111.8	0.399
111.9	0.401714
112	0.404
112.1	0.408143
112.2	0.411714
112.3	0.413143
112.4	0.416429
112.5	0.42
112.6	0.422857
112.7	0.425857
112.8	0.427143
112.9	0.429143
113	0.430571
113.1	0.432286
113.2	0.434143
113.3	0.437
113.4	0.438143
113.5	0.440857
113.6	0.442286
113.7	0.445143
113.8	0.447
113.9	0.448571
114	0.451429
114.1	0.452857
114.2	0.454714
114.3	0.456714
114.4	0.459571
114.5	0.460143
114.6	0.461714
114.7	0.463286
114.8	0.466286
114.9	0.468286
115	0.472
115.1	0.474
115.2	0.476571
115.3	0.477571
115.4	0.479714
115.5	0.481
115.6	0.482
115.7	0.482857
115.8	0.485429
115.9	0.488
116	0.490143
116.1	0.492
116.2	0.493571
116.3	0.495571
116.4	0.497571
116.5	0.5
116.6	0.502
116.7	0.503429
116.8	0.506429
116.9	0.509143
117	0.510429
117.1	0.512
117.2	0.513429
117.3	0.514857
117.4	0.517286
117.5	0.518
117.6	0.519143
117.7	0.521
117.8	0.523
117.9	0.524429
118	0.526714
118.1	0.528286
118.2	0.529286
118.3	0.531
118.4	0.532429
118.5	0.534714
118.6	0.535286
118.7	0.537714
118.8	0.539
118.9	0.541429
119	0.543
119.1	0.545286
119.2	0.548429
119.3	0.549143
119.4	0.550143
119.5	0.551714
119.6	0.553286
119.7	0.555857
119.8	0.557286
119.9	0.559571
120	0.561571
120.1	0.563143
120.2	0.565143
120.3	0.566143
120.4	0.567571
120.5	0.570143
120.6	0.571714
120.7	0.574286
120.8	0.576143
120.9	0.578143
121	0.580857
121.1	0.582286
121.2	0.583429
121.3	0.584714
121.4	0.585571
121.5	0.587714
121.6	0.588571
121.7	0.589714
121.8	0.590857
121.9	0.593429
122	0.594429
122.1	0.595286
122.2	0.596857
122.3	0.599
122.4	0.600286
122.5	0.602143
122.6	0.602857
122.7	0.603714
122.8	0.604714
122.9	0.605571
123	0.606857
123.1	0.607571
123.2	0.608429
123.3	0.609429
123.4	0.610714
123.5	0.611714
123.6	0.612714
123.7	0.614571
123.8	0.615143
123.9	0.616
124	0.616714
124.1	0.618143
124.2	0.618857
124.3	0.620286
124.4	0.620857
124.5	0.622429
124.6	0.623143
124.7	0.624429
124.8	0.625714
124.9	0.626
125	0.627429
125.1	0.628286
125.2	0.629571
125.3	0.631286
125.4	0.632714
125.5	0.634
125.6	0.635286
125.7	0.635571
125.8	0.636286
125.9	0.637714
126	0.638286
126.1	0.639
126.2	0.640286
126.3	0.640429
126.4	0.641714
126.5	0.643571
126.6	0.643571
126.7	0.643571
126.8	0.645286
126.9	0.647571
127	0.648714
127.1	0.649571
127.2	0.651143
127.3	0.652143
127.4	0.653143
127.5	0.653857
127.6	0.655429
127.7	0.656429
127.8	0.657714
127.9	0.658429
128	0.659857
128.1	0.660429
128.2	0.661
128.3	0.660714
128.4	0.662286
128.5	0.663286
128.6	0.664571
128.7	0.664429
128.8	0.664857
128.9	0.666286
129	0.667429
129.1	0.669286
129.2	0.669714
129.3	0.670286
129.4	0.670857
129.5	0.671429
129.6	0.673714
129.7	0.674714
129.8	0.674571
129.9	0.675
130	0.675714
130.1	0.676571
130.2	0.677571
130.3	0.679143
130.4	0.680714
130.5	0.682
130.6	0.682429
130.7	0.683143
130.8	0.684429
130.9	0.685286
131	0.685571
131.1	0.687
131.2	0.687714
131.3	0.687714
131.4	0.688429
131.5	0.689
131.6	0.689857
131.7	0.69
131.8	0.691
131.9	0.692
132	0.693286
132.1	0.693857
132.2	0.694714
132.3	0.694714
132.4	0.694714
132.5	0.694857
132.6	0.696286
132.7	0.696571
132.8	0.697286
132.9	0.698
133	0.698571
133.1	0.698571
133.2	0.699143
133.3	0.699571
133.4	0.700143
133.5	0.701571
133.6	0.701429
133.7	0.703
133.8	0.703429
133.9	0.703571
134	0.704286
134.1	0.705429
134.2	0.705429
134.3	0.705429
134.4	0.706143
134.5	0.707143
134.6	0.707286
134.7	0.708714
134.8	0.709571
134.9	0.71
135	0.710429
135.1	0.710857
135.2	0.711143
135.3	0.711286
135.4	0.712143
135.5	0.713286
135.6	0.713143
135.7	0.713286
135.8	0.713857
135.9	0.715
136	0.716286
136.1	0.717
136.2	0.718
136.3	0.718143
136.4	0.718286
136.5	0.719
136.6	0.719857
136.7	0.720857
136.8	0.721143
136.9	0.721143
137	0.722
137.1	0.722571
137.2	0.722857
137.3	0.723571
137.4	0.724714
137.5	0.724857
137.6	0.725286
137.7	0.726143
137.8	0.726857
137.9	0.726714
138	0.727286
138.1	0.728571
138.2	0.729714
138.3	0.730286
138.4	0.729857
138.5	0.730571
138.6	0.731286
138.7	0.732
138.8	0.733429
138.9	0.734
139	0.734286
139.1	0.735714
139.2	0.734857
139.3	0.735286
139.4	0.736429
139.5	0.737
139.6	0.737
139.7	0.736571
139.8	0.737
139.9	0.737143
140	0.737429
140.1	0.738571
140.2	0.738429
140.3	0.739143
140.4	0.739143
140.5	0.740143
140.6	0.741571
140.7	0.742143
140.8	0.742714
140.9	0.743
141	0.743714
141.1	0.744714
141.2	0.744714
141.3	0.745286
141.4	0.745429
141.5	0.745857
141.6	0.747143
141.7	0.747714
141.8	0.748571
141.9	0.749286
142	0.749571
142.1	0.750286
142.2	0.751143
142.3	0.752714
142.4	0.753143
142.5	0.753857
142.6	0.754429
142.7	0.754857
142.8	0.755286
142.9	0.757286
143	0.757857
143.1	0.758286
143.2	0.759286
143.3	0.760286
143.4	0.760429
143.5	0.761286
143.6	0.761
143.7	0.761143
143.8	0.761143
143.9	0.761857
144	0.762143
144.1	0.763286
144.2	0.763714
144.3	0.763429
144.4	0.763143
144.5	0.762571
144.6	0.762714
144.7	0.762571
144.8	0.762714
144.9	0.763143
145	0.763143
145.1	0.763
145.2	0.763
145.3	0.763
145.4	0.763143
145.5	0.764429
145.6	0.764857
145.7	0.765714
145.8	0.766714
145.9	0.765857
146	0.766
146.1	0.766429
146.2	0.766714
146.3	0.767429
146.4	0.767571
146.5	0.768286
146.6	0.768143
146.7	0.767857
146.8	0.767714
146.9	0.768429
147	0.768286
147.1	0.768286
147.2	0.768286
147.3	0.769429
147.4	0.769857
147.5	0.770571
147.6	0.771286
147.7	0.772143
147.8	0.772857
147.9	0.773571
148	0.774429
148.1	0.774571
148.2	0.774429
148.3	0.775143
148.4	0.775571
148.5	0.776
148.6	0.776286
148.7	0.776286
148.8	0.776714
148.9	0.777571
149	0.777143
149.1	0.776857
149.2	0.777571
149.3	0.778
149.4	0.777143
149.5	0.777286
149.6	0.777
149.7	0.777429
149.8	0.778
149.9	0.779143
150	0.779143
150.1	0.779571
150.2	0.779429
150.3	0.78
150.4	0.781286
150.5	0.782429
150.6	0.782857
150.7	0.782714
150.8	0.782
150.9	0.782286
151	0.783286
151.1	0.783714
151.2	0.784571
151.3	0.785429
151.4	0.785286
151.5	0.785714
151.6	0.785286
151.7	0.786
151.8	0.786143
151.9	0.786286
152	0.786429
152.1	0.786857
152.2	0.787429
152.3	0.787571
152.4	0.788571
152.5	0.788714
152.6	0.789
152.7	0.789714
152.8	0.790143
152.9	0.791
153	0.791143
153.1	0.791286
153.2	0.790143
153.3	0.791
153.4	0.790571
153.5	0.791429
153.6	0.792
153.7	0.792714
153.8	0.792571
153.9	0.792714
154	0.793
154.1	0.792714
154.2	0.792286
154.3	0.793714
154.4	0.794143
154.5	0.793857
154.6	0.794286
154.7	0.793429
154.8	0.793286
154.9	0.793
155	0.793857
155.1	0.794
155.2	0.794714
155.3	0.794571
155.4	0.795143
155.5	0.796
155.6	0.795857
155.7	0.796143
155.8	0.796286
155.9	0.797143
156	0.796286
156.1	0.795714
156.2	0.795857
156.3	0.796571
156.4	0.796286
156.5	0.796286
156.6	0.795857
156.7	0.796286
156.8	0.795714
156.9	0.795286
157	0.795714
157.1	0.795429
157.2	0.796429
157.3	0.796857
157.4	0.797429
157.5	0.797429
157.6	0.797286
157.7	0.798
157.8	0.798143
157.9	0.797857
158	0.798571
158.1	0.798
158.2	0.798286
158.3	0.798
158.4	0.798857
158.5	0.799143
158.6	0.799571
158.7	0.799571
158.8	0.799429
158.9	0.798857
159	0.799429
159.1	0.799714
159.2	0.799714
159.3	0.800143
159.4	0.801
159.5	0.801714
159.6	0.802
159.7	0.802571
159.8	0.803143
159.9	0.804
160	0.803714
160.1	0.803857
160.2	0.803857
160.3	0.803714
160.4	0.804429
160.5	0.804429
160.6	0.804857
160.7	0.804857
160.8	0.805286
160.9	0.805429
161	0.805
161.1	0.805
161.2	0.805
161.3	0.805714
161.4	0.805714
161.5	0.806
161.6	0.806571
161.7	0.806286
161.8	0.806714
161.9	0.808
162	0.807857
162.1	0.808286
162.2	0.808714
162.3	0.808714
162.4	0.808714
162.5	0.809143
162.6	0.809286
162.7	0.810143
162.8	0.809857
162.9	0.809714
163	0.809714
163.1	0.810143
163.2	0.810286
163.3	0.811143
163.4	0.810857
163.5	0.810714
163.6	0.811714
163.7	0.812143
163.8	0.811429
163.9	0.812857
164	0.813
164.1	0.812857
164.2	0.813
164.3	0.812714
164.4	0.813
164.5	0.813429
164.6	0.813571
164.7	0.813286
164.8	0.813714
164.9	0.814571
165	0.814714
165.1	0.815429
165.2	0.815143
165.3	0.815571
165.4	0.815
165.5	0.815714
165.6	0.815286
165.7	0.814429
165.8	0.813571
165.9	0.813143
166	0.813571
166.1	0.813714
166.2	0.814143
166.3	0.814857
166.4	0.815571
166.5	0.816143
166.6	0.816143
166.7	0.816286
166.8	0.816
166.9	0.816
167	0.815
167.1	0.814429
167.2	0.814286
167.3	0.814571
167.4	0.814714
167.5	0.813857
167.6	0.814
167.7	0.814429
167.8	0.814286
167.9	0.815429
168	0.815143
168.1	0.815714
168.2	0.815571
168.3	0.815857
168.4	0.816429
168.5	0.816857
168.6	0.816714
168.7	0.816714
168.8	0.817571
168.9	0.818143
169	0.818286
169.1	0.818714
169.2	0.817571
169.3	0.817286
169.4	0.818143
169.5	0.818286
169.6	0.818857
169.7	0.818857
169.8	0.818714
169.9	0.818857
170	0.818429
170.1	0.818714
170.2	0.819143
170.3	0.818857
170.4	0.819571
170.5	0.819429
170.6	0.819714
170.7	0.819429
170.8	0.819714
170.9	0.82
171	0.820571
171.1	0.821286
171.2	0.821714
171.3	0.821571
171.4	0.821429
171.5	0.821143
171.6	0.820714
171.7	0.820714
171.8	0.820286
171.9	0.820286
172	0.820429
172.1	0.820429
172.2	0.821143
172.3	0.821571
172.4	0.822143
172.5	0.822857
172.6	0.823143
172.7	0.824143
172.8	0.824286
172.9	0.825429
173	0.825143
173.1	0.825857
173.2	0.825857
173.3	0.826
173.4	0.825714
173.5	0.826286
173.6	0.826143
173.7	0.826
173.8	0.825857
173.9	0.825286
174	0.825857
174.1	0.825429
174.2	0.825571
174.3	0.825429
174.4	0.825143
174.5	0.825
174.6	0.825429
174.7	0.826
174.8	0.825571
174.9	0.826286
175	0.826286
175.1	0.825143
175.2	0.825143
175.3	0.824286
175.4	0.824714
175.5	0.824571
175.6	0.825143
175.7	0.824857
175.8	0.823143
175.9	0.822857
176	0.822714
176.1	0.823286
176.2	0.823143
176.3	0.823143
176.4	0.822857
176.5	0.823
176.6	0.822571
176.7	0.822571
176.8	0.823571
176.9	0.823857
177	0.823143
177.1	0.822714
177.2	0.822857
177.3	0.823429
177.4	0.823714
177.5	0.824286
177.6	0.824714
177.7	0.824857
177.8	0.824143
177.9	0.824857
178	0.825
178.1	0.825857
178.2	0.826
178.3	0.826714
178.4	0.826286
178.5	0.825286
178.6	0.824857
178.7	0.824571
178.8	0.824286
178.9	0.824857
179	0.825429
179.1	0.825
179.2	0.825714
179.3	0.825714
179.4	0.825286
179.5	0.825429
179.6	0.825429
179.7	0.825143
179.8	0.825714
179.9	0.825429
180	0.825857
180.1	0.825571
180.2	0.825
180.3	0.825286
180.4	0.825143
180.5	0.825
180.6	0.825714
180.7	0.825429
180.8	0.825714
180.9	0.825429
181	0.825857
181.1	0.825714
181.2	0.826143
181.3	0.826143
181.4	0.826429
181.5	0.826429
181.6	0.826286
181.7	0.826286
181.8	0.826571
181.9	0.826571
182	0.827143
182.1	0.826857
182.2	0.827143
182.3	0.827429
182.4	0.828286
182.5	0.827714
182.6	0.827857
182.7	0.828143
182.8	0.828857
182.9	0.828429
183	0.827857
183.1	0.828857
183.2	0.829429
183.3	0.828857
183.4	0.828143
183.5	0.827571
183.6	0.827714
183.7	0.827286
183.8	0.827286
183.9	0.826429
184	0.826857
184.1	0.827286
184.2	0.827286
184.3	0.826571
184.4	0.827286
184.5	0.827143
184.6	0.827429
184.7	0.827286
184.8	0.826857
184.9	0.825714
185	0.826143
185.1	0.826429
185.2	0.826429
185.3	0.825429
185.4	0.825571
185.5	0.826714
185.6	0.826714
185.7	0.826857
185.8	0.826143
185.9	0.825714
186	0.825571
186.1	0.826143
186.2	0.826429
186.3	0.826429
186.4	0.826286
186.5	0.826571
186.6	0.826571
186.7	0.826714
186.8	0.826857
186.9	0.827286
187	0.827286
187.1	0.826714
187.2	0.827
187.3	0.827
187.4	0.827
187.5	0.827286
187.6	0.827143
187.7	0.826286
187.8	0.825714
187.9	0.825571
188	0.825429
188.1	0.825
188.2	0.824286
188.3	0.824571
188.4	0.824857
188.5	0.825286
188.6	0.825143
188.7	0.825714
188.8	0.825714
188.9	0.827429
189	0.827429
189.1	0.827571
189.2	0.828143
189.3	0.828571
189.4	0.828143
189.5	0.828143
189.6	0.828714
189.7	0.829286
189.8	0.829714
189.9	0.829429
190	0.828857
190.1	0.829286
190.2	0.829
190.3	0.828857
190.4	0.828857
190.5	0.828571
190.6	0.827571
190.7	0.827429
190.8	0.827286
190.9	0.826571
191	0.826286
191.1	0.826143
191.2	0.825143
191.3	0.825714
191.4	0.825857
191.5	0.825857
191.6	0.826286
191.7	0.826857
191.8	0.826
191.9	0.826571
192	0.826
192.1	0.826286
192.2	0.826
192.3	0.826286
192.4	0.826571
192.5	0.826571
192.6	0.826571
192.7	0.826571
192.8	0.826714
192.9	0.827714
193	0.827714
193.1	0.828
193.2	0.827429
193.3	0.827286
193.4	0.826286
193.5	0.826714
193.6	0.827286
193.7	0.826571
193.8	0.827571
193.9	0.828143
194	0.828429
194.1	0.828143
194.2	0.827571
194.3	0.827857
194.4	0.827143
194.5	0.826857
194.6	0.826714
194.7	0.826286
194.8	0.826429
194.9	0.825857
195	0.824857
195.1	0.824429
195.2	0.824714
195.3	0.824143
195.4	0.824
195.5	0.823429
195.6	0.823429
195.7	0.823857
195.8	0.824286
195.9	0.824429
196	0.823714
196.1	0.823571
196.2	0.823143
196.3	0.823143
196.4	0.823571
196.5	0.823571
196.6	0.823714
196.7	0.823429
196.8	0.824
196.9	0.823571
197	0.824143
197.1	0.824143
197.2	0.824143
197.3	0.824
197.4	0.823429
197.5	0.823571
197.6	0.823429
197.7	0.823286
197.8	0.822857
197.9	0.823143
198	0.822714
198.1	0.822714
198.2	0.822714
198.3	0.823143
198.4	0.823
198.5	0.822714
198.6	0.824
198.7	0.824571
198.8	0.824143
198.9	0.824429
199	0.825143
199.1	0.826286
199.2	0.826857
199.3	0.827429
199.4	0.827714
199.5	0.827714
199.6	0.827714
199.7	0.827714
199.8	0.827714
199.9	0.827286
200	0.827714
[truncated: 14,000 more rows]
