# Supplementary material for: Bayesian inference of kinetic schemes for ion channels by Kalman filtering
Source: eLife journal article supplement (doi:10.7554/elife.62714), 2022-05-04
Supplement: fig4-data3 [file 1_Sim_N_10000_Fluor_MW.xlsx]

## Sheet: Tabelle1
0.1	0
0.2	0
0.3	0
0.4	0
0.5	0
0.6	0
0.7	0
0.8	0
0.9	0
1	0
1.1	0
1.2	0
1.3	0
1.4	0
1.5	0
1.6	0
1.7	0
1.8	0
1.9	0
2	0
2.1	0
2.2	0
2.3	0
2.4	0
2.5	0
2.6	0
2.7	0
2.8	0
2.9	0
3	0
3.1	0
3.2	0
3.3	0
3.4	0
3.5	0
3.6	0
3.7	0
3.8	0
3.9	0
4	0
4.1	0
4.2	0
4.3	0
4.4	0
4.5	0
4.6	0
4.7	0
4.8	0
4.9	0
5	0
5.1	0
5.2	0
5.3	0
5.4	0
5.5	0
5.6	0
5.7	0
5.8	0
5.9	0
6	0
6.1	0
6.2	0
6.3	0
6.4	0
6.5	0
6.6	0
6.7	0
6.8	0
6.9	0
7	0
7.1	0
7.2	0
7.3	0
7.4	0
7.5	0
7.6	0
7.7	0
7.8	0
7.9	0
8	0
8.1	0
8.2	0
8.3	0
8.4	0
8.5	0
8.6	0
8.7	0
8.8	0
8.9	0
9	0
9.1	0
9.2	0
9.3	0
9.4	0
9.5	0
9.6	0
9.7	0
9.8	0
9.9	0
10	0
10.1	0
10.2	0
10.3	0
10.4	0
10.5	0
10.6	0
10.7	0
10.8	0
10.9	0
11	0
11.1	0
11.2	0
11.3	0
11.4	0
11.5	0
11.6	0
11.7	0
11.8	0
11.9	0
12	0
12.1	0
12.2	0
12.3	0
12.4	0
12.5	0
12.6	0
12.7	0
12.8	0
12.9	0
13	0
13.1	0
13.2	0
13.3	0
13.4	0
13.5	0
13.6	0
13.7	0
13.8	0
13.9	0
14	0
14.1	0
14.2	0
14.3	0
14.4	0
14.5	0
14.6	0
14.7	0
14.8	0
14.9	0
15	0
15.1	0
15.2	0
15.3	0
15.4	0
15.5	0
15.6	0
15.7	0
15.8	0
15.9	0
16	0
16.1	0
16.2	0
16.3	0
16.4	0
16.5	0
16.6	0
16.7	0
16.8	0
16.9	0
17	0
17.1	0
17.2	0
17.3	0
17.4	0
17.5	0
17.6	0
17.7	0
17.8	0
17.9	0
18	0
18.1	0
18.2	0
18.3	0
18.4	0
18.5	0
18.6	0
18.7	0
18.8	0
18.9	0
19	0
19.1	0
19.2	0
19.3	0
19.4	0
19.5	0
19.6	0
19.7	0
19.8	0
19.9	0
20	0
20.1	0
20.2	0
20.3	0
20.4	0
20.5	0
20.6	0
20.7	0
20.8	0
20.9	0
21	0
21.1	0
21.2	0
21.3	0
21.4	0
21.5	0
21.6	0
21.7	0
21.8	0
21.9	0
22	0
22.1	0
22.2	0
22.3	0
22.4	0
22.5	0
22.6	0
22.7	0
22.8	0
22.9	0
23	0
23.1	0
23.2	0
23.3	0
23.4	0
23.5	0
23.6	0
23.7	0
23.8	0
23.9	0
24	0
24.1	0
24.2	0
24.3	0
24.4	0
24.5	0
24.6	0
24.7	0
24.8	0
24.9	0
25	0
25.1	0
25.2	0
25.3	0
25.4	0
25.5	0
25.6	0
25.7	0
25.8	0
25.9	0
26	0
26.1	0
26.2	0
26.3	0
26.4	0
26.5	0
26.6	0
26.7	0
26.8	0
26.9	0
27	0
27.1	0
27.2	0
27.3	0
27.4	0
27.5	0
27.6	0
27.7	0
27.8	0
27.9	0
28	0
28.1	0
28.2	0
28.3	0
28.4	0
28.5	0
28.6	0
28.7	0
28.8	0
28.9	0
29	0
29.1	0
29.2	0
29.3	0
29.4	0
29.5	0
29.6	0
29.7	0
29.8	0
29.9	0
30	0
30.1	0
30.2	0
30.3	0
30.4	0
30.5	0
30.6	0
30.7	0
30.8	0
30.9	0
31	0
31.1	0
31.2	0
31.3	0
31.4	0
31.5	0
31.6	0
31.7	0
31.8	0
31.9	0
32	0
32.1	0
32.2	0
32.3	0
32.4	0
32.5	0
32.6	0
32.7	0
32.8	0
32.9	0
33	0
33.1	0
33.2	0
33.3	0
33.4	0
33.5	0
33.6	0
33.7	0
33.8	0
33.9	0
34	0
34.1	0
34.2	0
34.3	0
34.4	0
34.5	0
34.6	0
34.7	0
34.8	0
34.9	0
35	0
35.1	0
35.2	0
35.3	0
35.4	0
35.5	0
35.6	0
35.7	0
35.8	0
35.9	0
36	0
36.1	0
36.2	0
36.3	0
36.4	0
36.5	0
36.6	0
36.7	0
36.8	0
36.9	0
37	0
37.1	0
37.2	0
37.3	0
37.4	0
37.5	0
37.6	0
37.7	0
37.8	0
37.9	0
38	0
38.1	0
38.2	0
38.3	0
38.4	0
38.5	0
38.6	0
38.7	0
38.8	0
38.9	0
39	0
39.1	0
39.2	0
39.3	0
39.4	0
39.5	0
39.6	0
39.7	0
39.8	0
39.9	0
40	0
40.1	0
40.2	0
40.3	0
40.4	0
40.5	0
40.6	0
40.7	0
40.8	0
40.9	0
41	0
41.1	0
41.2	0
41.3	0
41.4	0
41.5	0
41.6	0
41.7	0
41.8	0
41.9	0
42	0
42.1	0
42.2	0
42.3	0
42.4	0
42.5	0
42.6	0
42.7	0
42.8	0
42.9	0
43	0
43.1	0
43.2	0
43.3	0
43.4	0
43.5	0
43.6	0
43.7	0
43.8	0
43.9	0
44	0
44.1	0
44.2	0
44.3	0
44.4	0
44.5	0
44.6	0
44.7	0
44.8	0
44.9	0
45	0
45.1	0
45.2	0
45.3	0
45.4	0
45.5	0
45.6	0
45.7	0
45.8	0
45.9	0
46	0
46.1	0
46.2	0
46.3	0
46.4	0
46.5	0
46.6	0
46.7	0
46.8	0
46.9	0
47	0
47.1	0
47.2	0
47.3	0
47.4	0
47.5	0
47.6	0
47.7	0
47.8	0
47.9	0
48	0
48.1	0
48.2	0
48.3	0
48.4	0
48.5	0
48.6	0
48.7	0
48.8	0
48.9	0
49	0
49.1	0
49.2	0
49.3	0
49.4	0
49.5	0
49.6	0
49.7	0
49.8	0
49.9	0
50	0
50.1	0
50.2	0
50.3	0
50.4	0
50.5	0
50.6	0
50.7	0
50.8	0
50.9	0
51	0
51.1	0
51.2	0
51.3	0
51.4	0
51.5	0
51.6	0
51.7	0
51.8	0
51.9	0
52	0
52.1	0
52.2	0
52.3	0
52.4	0
52.5	0
52.6	0
52.7	0
52.8	0
52.9	0
53	0
53.1	0
53.2	0
53.3	0
53.4	0
53.5	0
53.6	0
53.7	0
53.8	0
53.9	0
54	0
54.1	0
54.2	0
54.3	0
54.4	0
54.5	0
54.6	0
54.7	0
54.8	0
54.9	0
55	0
55.1	0
55.2	0
55.3	0
55.4	0
55.5	0
55.6	0
55.7	0
55.8	0
55.9	0
56	0
56.1	0
56.2	0
56.3	0
56.4	0
56.5	0
56.6	0
56.7	0
56.8	0
56.9	0
57	0
57.1	0
57.2	0
57.3	0
57.4	0
57.5	0
57.6	0
57.7	0
57.8	0
57.9	0
58	0
58.1	0
58.2	0
58.3	0
58.4	0
58.5	0
58.6	0
58.7	0
58.8	0
58.9	0
59	0
59.1	0
59.2	0
59.3	0
59.4	0
59.5	0
59.6	0
59.7	0
59.8	0
59.9	0
60	0
60.1	0
60.2	0
60.3	0
60.4	0
60.5	0
60.6	0
60.7	0
60.8	0
60.9	0
61	0
61.1	0
61.2	0
61.3	0
61.4	0
61.5	0
61.6	0
61.7	0
61.8	0
61.9	0
62	0
62.1	0
62.2	0
62.3	0
62.4	0
62.5	0
62.6	0
62.7	0
62.8	0
62.9	0
63	0
63.1	0
63.2	0
63.3	0
63.4	0
63.5	0
63.6	0
63.7	0
63.8	0
63.9	0
64	0
64.1	0
64.2	0
64.3	0
64.4	0
64.5	0
64.6	0
64.7	0
64.8	0
64.9	0
65	0
65.1	0
65.2	0
65.3	0
65.4	0
65.5	0
65.6	0
65.7	0
65.8	0
65.9	0
66	0
66.1	0
66.2	0
66.3	0
66.4	0
66.5	0
66.6	0
66.7	0
66.8	0
66.9	0
67	0
67.1	0
67.2	0
67.3	0
67.4	0
67.5	0
67.6	0
67.7	0
67.8	0
67.9	0
68	0
68.1	0
68.2	0
68.3	0
68.4	0
68.5	0
68.6	0
68.7	0
68.8	0
68.9	0
69	0
69.1	0
69.2	0
69.3	0
69.4	0
69.5	0
69.6	0
69.7	0
69.8	0
69.9	0
70	0
70.1	0
70.2	0
70.3	0
70.4	0
70.5	0
70.6	0
70.7	0
70.8	0
70.9	0
71	0
71.1	0
71.2	0
71.3	0
71.4	0
71.5	0
71.6	0
71.7	0
71.8	0
71.9	0
72	0
72.1	0
72.2	0
72.3	0
72.4	0
72.5	0
72.6	0
72.7	0
72.8	0
72.9	0
73	0
73.1	0
73.2	0
73.3	0
73.4	0
73.5	0
73.6	0
73.7	0
73.8	0
73.9	0
74	0
74.1	0
74.2	0
74.3	0
74.4	0
74.5	0
74.6	0
74.7	0
74.8	0
74.9	0
75	0
75.1	0
75.2	0
75.3	0
75.4	0
75.5	0
75.6	0
75.7	0
75.8	0
75.9	0
76	0
76.1	0
76.2	0
76.3	0
76.4	0
76.5	0
76.6	0
76.7	0
76.8	0
76.9	0
77	0
77.1	0
77.2	0
77.3	0
77.4	0
77.5	0
77.6	0
77.7	0
77.8	0
77.9	0
78	0
78.1	0
78.2	0
78.3	0
78.4	0
78.5	0
78.6	0
78.7	0
78.8	0
78.9	0
79	0
79.1	0
79.2	0
79.3	0
79.4	0
79.5	0
79.6	0
79.7	0
79.8	0
79.9	0
80	0
80.1	0
80.2	0
80.3	0
80.4	0
80.5	0
80.6	0
80.7	0
80.8	0
80.9	0
81	0
81.1	0
81.2	0
81.3	0
81.4	0
81.5	0
81.6	0
81.7	0
81.8	0
81.9	0
82	0
82.1	0
82.2	0
82.3	0
82.4	0
82.5	0
82.6	0
82.7	0
82.8	0
82.9	0
83	0
83.1	0
83.2	0
83.3	0
83.4	0
83.5	0
83.6	0
83.7	0
83.8	0
83.9	0
84	0
84.1	0
84.2	0
84.3	0
84.4	0
84.5	0
84.6	0
84.7	0
84.8	0
84.9	0
85	0
85.1	0
85.2	0
85.3	0
85.4	0
85.5	0
85.6	0
85.7	0
85.8	0
85.9	0
86	0
86.1	0
86.2	0
86.3	0
86.4	0
86.5	0
86.6	0
86.7	0
86.8	0
86.9	0
87	0
87.1	0
87.2	0
87.3	0
87.4	0
87.5	0
87.6	0
87.7	0
87.8	0
87.9	0
88	0
88.1	0
88.2	0
88.3	0
88.4	0
88.5	0
88.6	0
88.7	0
88.8	0
88.9	0
89	0
89.1	0
89.2	0
89.3	0
89.4	0
89.5	0
89.6	0
89.7	0
89.8	0
89.9	0
90	0
90.1	0
90.2	0
90.3	0
90.4	0
90.5	0
90.6	0
90.7	0
90.8	0
90.9	0
91	0
91.1	0
91.2	0
91.3	0
91.4	0
91.5	0
91.6	0
91.7	0
91.8	0
91.9	0
92	0
92.1	0
92.2	0
92.3	0
92.4	0
92.5	0
92.6	0
92.7	0
92.8	0
92.9	0
93	0
93.1	0
93.2	0
93.3	0
93.4	0
93.5	0
93.6	0
93.7	0
93.8	0
93.9	0
94	0
94.1	0
94.2	0
94.3	0
94.4	0
94.5	0
94.6	0
94.7	0
94.8	0
94.9	0
95	0
95.1	0
95.2	0
95.3	0
95.4	0
95.5	0
95.6	0
95.7	0
95.8	0
95.9	0
96	0
96.1	0
96.2	0
96.3	0
96.4	0
96.5	0
96.6	0
96.7	0
96.8	0
96.9	0
97	0
97.1	0
97.2	0
97.3	0
97.4	0
97.5	0
97.6	0
97.7	0
97.8	0
97.9	0
98	0
98.1	0
98.2	0
98.3	0
98.4	0
98.5	0
98.6	0
98.7	0
98.8	0
98.9	0
99	0
99.1	0
99.2	0
99.3	0
99.4	0
99.5	0
99.6	0
99.7	0
99.8	0
99.9	0
100	0
100.1	0.732
100.2	0.88995
100.3	0.9438
100.4	0.96315
100.5	0.96995
100.6	0.9734
100.7	0.9749
100.8	0.97475
100.9	0.97675
101	0.97725
101.1	0.9763
101.2	0.97665
101.3	0.97615
101.4	0.97625
101.5	0.97635
101.6	0.9792
101.7	0.9758
101.8	0.97765
101.9	0.9783
102	0.97695
102.1	0.97675
102.2	0.9768
102.3	0.975
102.4	0.97515
102.5	0.97835
102.6	0.9772
102.7	0.977
102.8	0.977
102.9	0.9777
103	0.9781
103.1	0.97675
103.2	0.97905
103.3	0.9781
103.4	0.97755
103.5	0.978
103.6	0.97985
103.7	0.97915
103.8	0.98035
103.9	0.9804
104	0.9791
104.1	0.97885
104.2	0.97945
104.3	0.97995
104.4	0.98075
104.5	0.97955
104.6	0.97835
104.7	0.97975
104.8	0.9805
104.9	0.98075
105	0.98025
105.1	0.9799
105.2	0.9795
105.3	0.97885
105.4	0.98025
105.5	0.981
105.6	0.98235
105.7	0.9813
105.8	0.98
105.9	0.9789
106	0.97875
106.1	0.9822
106.2	0.9796
106.3	0.97985
106.4	0.98045
106.5	0.98195
106.6	0.9818
106.7	0.9816
106.8	0.98225
106.9	0.982
107	0.98295
107.1	0.9831
107.2	0.982
107.3	0.98145
107.4	0.9817
107.5	0.98395
107.6	0.98195
107.7	0.9826
107.8	0.9821
107.9	0.9812
108	0.9807
108.1	0.9819
108.2	0.98395
108.3	0.98235
108.4	0.98425
108.5	0.98395
108.6	0.98415
108.7	0.98265
108.8	0.9841
108.9	0.9835
109	0.9826
109.1	0.9835
109.2	0.98345
109.3	0.98295
109.4	0.9838
109.5	0.9831
109.6	0.983
109.7	0.98325
109.8	0.98485
109.9	0.9835
110	0.9859
110.1	0.98425
110.2	0.9825
110.3	0.98465
110.4	0.98455
110.5	0.98445
110.6	0.98635
110.7	0.98435
110.8	0.98385
110.9	0.9846
111	0.9846
111.1	0.9859
111.2	0.98545
111.3	0.98495
111.4	0.9851
111.5	0.98395
111.6	0.98355
111.7	0.9847
111.8	0.9846
111.9	0.98535
112	0.985
112.1	0.9853
112.2	0.9856
112.3	0.9857
112.4	0.98535
112.5	0.9857
112.6	0.985
112.7	0.9859
112.8	0.9853
112.9	0.98575
113	0.98535
113.1	0.986
113.2	0.98605
113.3	0.9858
113.4	0.98705
113.5	0.98705
113.6	0.98665
113.7	0.98595
113.8	0.9857
113.9	0.98625
114	0.98705
114.1	0.9872
114.2	0.98795
114.3	0.9876
114.4	0.9867
114.5	0.9874
114.6	0.98755
114.7	0.98805
114.8	0.98445
114.9	0.986
115	0.98815
115.1	0.98755
115.2	0.9863
115.3	0.9871
115.4	0.9874
115.5	0.98875
115.6	0.98815
115.7	0.98845
115.8	0.98715
115.9	0.98745
116	0.9863
116.1	0.9871
116.2	0.9861
116.3	0.9884
116.4	0.9871
116.5	0.9883
116.6	0.98905
116.7	0.9879
116.8	0.98675
116.9	0.98855
117	0.98845
117.1	0.9874
117.2	0.98745
117.3	0.98845
117.4	0.98895
117.5	0.9899
117.6	0.98925
117.7	0.98785
117.8	0.9883
117.9	0.98845
118	0.9873
118.1	0.9886
118.2	0.9881
118.3	0.9881
118.4	0.9895
118.5	0.9869
118.6	0.98805
118.7	0.98775
118.8	0.9873
118.9	0.98785
119	0.9881
119.1	0.9887
119.2	0.98765
119.3	0.98715
119.4	0.9872
119.5	0.98805
119.6	0.98965
119.7	0.98995
119.8	0.9889
119.9	0.9897
120	0.98875
120.1	0.98975
120.2	0.99015
120.3	0.9905
120.4	0.99015
120.5	0.98875
120.6	0.9893
120.7	0.98995
120.8	0.98915
120.9	0.9907
121	0.989
121.1	0.9905
121.2	0.9905
121.3	0.98935
121.4	0.9892
121.5	0.99055
121.6	0.9903
121.7	0.9894
121.8	0.98965
121.9	0.9905
122	0.99075
122.1	0.99035
122.2	0.9903
122.3	0.99025
122.4	0.9909
122.5	0.9907
122.6	0.99005
122.7	0.98975
122.8	0.98925
122.9	0.9896
123	0.9893
123.1	0.99045
123.2	0.9901
123.3	0.9899
123.4	0.99005
123.5	0.9908
123.6	0.99075
123.7	0.99035
123.8	0.99085
123.9	0.99075
124	0.99
124.1	0.9911
124.2	0.99065
124.3	0.99115
124.4	0.9902
124.5	0.9911
124.6	0.99045
124.7	0.99165
124.8	0.9902
124.9	0.9898
125	0.98965
125.1	0.99065
125.2	0.9916
125.3	0.9911
125.4	0.9907
125.5	0.99175
125.6	0.9911
125.7	0.99115
125.8	0.99065
125.9	0.99085
126	0.9906
126.1	0.9915
126.2	0.99185
126.3	0.9926
126.4	0.9908
126.5	0.9913
126.6	0.9911
126.7	0.9913
126.8	0.9921
126.9	0.9914
127	0.99255
127.1	0.99195
127.2	0.9918
127.3	0.9921
127.4	0.99195
127.5	0.992
127.6	0.9916
127.7	0.99225
127.8	0.9911
127.9	0.99115
128	0.9913
128.1	0.99125
128.2	0.99
128.3	0.99055
128.4	0.9915
128.5	0.99065
128.6	0.9901
128.7	0.9911
128.8	0.99175
128.9	0.9917
129	0.9913
129.1	0.9928
129.2	0.9929
129.3	0.9916
129.4	0.99165
129.5	0.991
129.6	0.9908
129.7	0.99085
129.8	0.99035
129.9	0.9927
130	0.99255
130.1	0.99155
130.2	0.99185
130.3	0.99245
130.4	0.9919
130.5	0.99275
130.6	0.993
130.7	0.99235
130.8	0.992
130.9	0.9913
131	0.9927
131.1	0.9917
131.2	0.9914
131.3	0.99275
131.4	0.99245
131.5	0.99275
131.6	0.9919
131.7	0.99105
131.8	0.9912
131.9	0.99175
132	0.9909
132.1	0.99235
132.2	0.99225
132.3	0.99395
132.4	0.99235
132.5	0.99255
132.6	0.99255
132.7	0.9917
132.8	0.99115
132.9	0.99255
133	0.99245
133.1	0.99215
133.2	0.9932
133.3	0.9936
133.4	0.9935
133.5	0.9932
133.6	0.99325
133.7	0.99275
133.8	0.99245
133.9	0.99295
134	0.9916
134.1	0.99225
134.2	0.9927
134.3	0.9925
134.4	0.9925
134.5	0.99215
134.6	0.9933
134.7	0.9939
134.8	0.9931
134.9	0.99265
135	0.9917
135.1	0.99215
135.2	0.99305
135.3	0.9922
135.4	0.9919
135.5	0.99205
135.6	0.99425
135.7	0.9928
135.8	0.9926
135.9	0.99305
136	0.99365
136.1	0.99305
136.2	0.99265
136.3	0.9932
136.4	0.99325
136.5	0.9927
136.6	0.99325
136.7	0.99345
136.8	0.9921
136.9	0.9933
137	0.99365
137.1	0.9933
137.2	0.994
137.3	0.99355
137.4	0.99325
137.5	0.9939
137.6	0.99335
137.7	0.99375
137.8	0.99245
137.9	0.99265
138	0.9933
138.1	0.9933
138.2	0.9925
138.3	0.99195
138.4	0.99275
138.5	0.994
138.6	0.9944
138.7	0.9936
138.8	0.9935
138.9	0.99265
139	0.9933
139.1	0.99395
139.2	0.9937
139.3	0.9937
139.4	0.99455
139.5	0.99465
139.6	0.99255
139.7	0.9935
139.8	0.9937
139.9	0.99355
140	0.9942
140.1	0.99355
140.2	0.99285
140.3	0.99355
140.4	0.9933
140.5	0.99395
140.6	0.9933
140.7	0.99335
140.8	0.994
140.9	0.9943
141	0.9942
141.1	0.99355
141.2	0.993
141.3	0.9936
141.4	0.99355
141.5	0.99425
141.6	0.99395
141.7	0.9939
141.8	0.99445
141.9	0.9939
142	0.9943
142.1	0.9943
142.2	0.9932
142.3	0.99385
142.4	0.9933
142.5	0.9939
142.6	0.99405
142.7	0.9942
142.8	0.99405
142.9	0.99455
143	0.99425
143.1	0.9944
143.2	0.9944
143.3	0.9936
143.4	0.99385
143.5	0.99365
143.6	0.994
143.7	0.99425
143.8	0.9941
143.9	0.99405
144	0.99325
144.1	0.99485
144.2	0.99435
144.3	0.99495
144.4	0.9944
144.5	0.9947
144.6	0.9942
144.7	0.99415
144.8	0.99485
144.9	0.9946
145	0.9946
145.1	0.9942
145.2	0.9942
145.3	0.99385
145.4	0.9942
145.5	0.99405
145.6	0.99475
145.7	0.9937
145.8	0.9946
145.9	0.99445
146	0.99525
146.1	0.9944
146.2	0.9938
146.3	0.99425
146.4	0.9939
146.5	0.994
146.6	0.9939
146.7	0.99335
146.8	0.99445
146.9	0.99455
147	0.9948
147.1	0.99485
147.2	0.9937
147.3	0.9946
147.4	0.9938
147.5	0.99415
147.6	0.99335
147.7	0.99405
147.8	0.9945
147.9	0.99495
148	0.99465
148.1	0.99455
148.2	0.99455
148.3	0.99515
148.4	0.9949
148.5	0.9946
148.6	0.99375
148.7	0.99405
148.8	0.99355
148.9	0.9943
149	0.9954
149.1	0.99465
149.2	0.9947
149.3	0.9938
149.4	0.99415
149.5	0.9943
149.6	0.99495
149.7	0.99465
149.8	0.99455
149.9	0.99545
150	0.99565
150.1	0.99515
150.2	0.9944
150.3	0.9948
150.4	0.99445
150.5	0.9944
150.6	0.99425
150.7	0.994
150.8	0.9941
150.9	0.9937
151	0.99525
151.1	0.99485
151.2	0.99555
151.3	0.9952
151.4	0.9949
151.5	0.9949
151.6	0.99485
151.7	0.9945
151.8	0.99475
151.9	0.99435
152	0.9944
152.1	0.99405
152.2	0.99455
152.3	0.9954
152.4	0.9953
152.5	0.9945
152.6	0.9949
152.7	0.99425
152.8	0.9949
152.9	0.99465
153	0.99525
153.1	0.99535
153.2	0.99475
153.3	0.9943
153.4	0.9942
153.5	0.9947
153.6	0.99475
153.7	0.9955
153.8	0.99505
153.9	0.9949
154	0.9945
154.1	0.9948
154.2	0.99435
154.3	0.9947
154.4	0.9956
154.5	0.99535
154.6	0.99485
154.7	0.99495
154.8	0.99435
154.9	0.9945
155	0.99445
155.1	0.9948
155.2	0.99425
155.3	0.99545
155.4	0.9951
155.5	0.99505
155.6	0.9957
155.7	0.9944
155.8	0.9948
155.9	0.99595
156	0.99475
156.1	0.9944
156.2	0.99435
156.3	0.99395
156.4	0.99435
156.5	0.99485
156.6	0.99595
156.7	0.99525
156.8	0.9951
156.9	0.99545
157	0.9956
157.1	0.99525
157.2	0.99525
157.3	0.9951
157.4	0.9949
157.5	0.9948
157.6	0.9944
157.7	0.9945
157.8	0.9939
157.9	0.9929
158	0.99515
158.1	0.99495
158.2	0.99415
158.3	0.99435
158.4	0.99535
158.5	0.996
158.6	0.99495
158.7	0.99575
158.8	0.995
158.9	0.9953
159	0.99485
159.1	0.99465
159.2	0.99555
159.3	0.99515
159.4	0.9955
159.5	0.9952
159.6	0.99415
159.7	0.9933
159.8	0.99505
159.9	0.99515
160	0.9954
160.1	0.9948
160.2	0.9952
160.3	0.9954
160.4	0.9962
160.5	0.9962
160.6	0.99485
160.7	0.99495
160.8	0.9943
160.9	0.99525
161	0.9949
161.1	0.99515
161.2	0.99525
161.3	0.99595
161.4	0.99615
161.5	0.9952
161.6	0.995
161.7	0.99565
161.8	0.9944
161.9	0.99515
162	0.9948
162.1	0.995
162.2	0.99515
162.3	0.994
162.4	0.9949
162.5	0.99455
162.6	0.99465
162.7	0.9942
162.8	0.9948
162.9	0.9949
163	0.99445
163.1	0.99475
163.2	0.99515
163.3	0.99405
163.4	0.99475
163.5	0.9954
163.6	0.9954
163.7	0.9947
163.8	0.9951
163.9	0.9951
164	0.99575
164.1	0.99545
164.2	0.99475
164.3	0.99505
164.4	0.99605
164.5	0.99595
164.6	0.99525
164.7	0.99475
164.8	0.9952
164.9	0.99575
165	0.99525
165.1	0.9959
165.2	0.9962
165.3	0.9957
165.4	0.99585
165.5	0.99545
165.6	0.995
165.7	0.99465
165.8	0.9955
165.9	0.99505
166	0.9958
166.1	0.9952
166.2	0.99565
166.3	0.9963
166.4	0.9955
166.5	0.9951
166.6	0.995
166.7	0.9954
166.8	0.99545
166.9	0.9949
167	0.99495
167.1	0.9957
167.2	0.99575
167.3	0.9946
167.4	0.9947
167.5	0.99445
167.6	0.99415
167.7	0.99515
167.8	0.9952
167.9	0.9953
168	0.9948
168.1	0.9952
168.2	0.99495
168.3	0.9944
168.4	0.99475
168.5	0.99525
168.6	0.9955
168.7	0.99525
168.8	0.99575
168.9	0.9955
169	0.9956
169.1	0.99555
169.2	0.99595
169.3	0.99585
169.4	0.9966
169.5	0.99655
169.6	0.9964
169.7	0.99545
169.8	0.99555
169.9	0.9949
170	0.9949
170.1	0.99495
170.2	0.9955
170.3	0.99505
170.4	0.99435
170.5	0.99455
170.6	0.99515
170.7	0.9949
170.8	0.99485
170.9	0.9958
171	0.9958
171.1	0.99535
171.2	0.99585
171.3	0.99565
171.4	0.9949
171.5	0.99405
171.6	0.9958
171.7	0.9952
171.8	0.99585
171.9	0.99525
172	0.99515
172.1	0.9949
172.2	0.9951
172.3	0.99575
172.4	0.9954
172.5	0.9955
172.6	0.99525
172.7	0.9958
172.8	0.9963
172.9	0.9957
173	0.99575
173.1	0.99575
173.2	0.99525
173.3	0.9953
173.4	0.99495
173.5	0.9947
173.6	0.9953
173.7	0.99465
173.8	0.9945
173.9	0.99495
174	0.99455
174.1	0.99495
174.2	0.99525
174.3	0.9955
174.4	0.9957
174.5	0.99545
174.6	0.99565
174.7	0.9954
174.8	0.995
174.9	0.99545
175	0.9952
175.1	0.99505
175.2	0.9957
175.3	0.9958
175.4	0.99625
175.5	0.996
175.6	0.9957
175.7	0.996
175.8	0.99605
175.9	0.9959
176	0.9956
176.1	0.99515
176.2	0.99455
176.3	0.99535
176.4	0.9952
176.5	0.99555
176.6	0.9959
176.7	0.9961
176.8	0.99555
176.9	0.9958
177	0.99525
177.1	0.99515
177.2	0.99405
177.3	0.99495
177.4	0.996
177.5	0.99495
177.6	0.99465
177.7	0.9957
177.8	0.99485
177.9	0.9947
178	0.996
178.1	0.99605
178.2	0.9963
178.3	0.99615
178.4	0.99595
178.5	0.9956
178.6	0.99525
178.7	0.9955
178.8	0.9956
178.9	0.99535
179	0.99505
179.1	0.99545
179.2	0.99595
179.3	0.9952
179.4	0.9942
179.5	0.99465
179.6	0.9945
179.7	0.9953
179.8	0.99485
179.9	0.9951
180	0.99455
180.1	0.99515
180.2	0.9951
180.3	0.9962
180.4	0.99595
180.5	0.99585
180.6	0.99505
180.7	0.99425
180.8	0.9952
180.9	0.9952
181	0.99585
181.1	0.99585
181.2	0.99515
181.3	0.99615
181.4	0.9961
181.5	0.9953
181.6	0.99495
181.7	0.99495
181.8	0.99465
181.9	0.9961
182	0.9954
182.1	0.99495
182.2	0.9948
182.3	0.99475
182.4	0.9947
182.5	0.99495
182.6	0.99555
182.7	0.9955
182.8	0.99595
182.9	0.9957
183	0.99555
183.1	0.99615
183.2	0.9954
183.3	0.995
183.4	0.9952
183.5	0.9957
183.6	0.9955
183.7	0.9963
183.8	0.9957
183.9	0.9956
184	0.9956
184.1	0.99625
184.2	0.99525
184.3	0.99565
184.4	0.99565
184.5	0.9956
184.6	0.99525
184.7	0.99535
184.8	0.99485
184.9	0.9953
185	0.9949
185.1	0.99525
185.2	0.9955
185.3	0.9958
185.4	0.9955
185.5	0.9954
185.6	0.99555
185.7	0.9952
185.8	0.9962
185.9	0.9954
186	0.99575
186.1	0.9961
186.2	0.99615
186.3	0.99625
186.4	0.9961
186.5	0.99625
186.6	0.99555
186.7	0.9955
186.8	0.995
186.9	0.99505
187	0.99515
187.1	0.9954
187.2	0.9963
187.3	0.99575
187.4	0.99635
187.5	0.9953
187.6	0.99575
187.7	0.99555
187.8	0.99465
187.9	0.99535
188	0.99545
188.1	0.9959
188.2	0.9959
188.3	0.9958
188.4	0.9952
188.5	0.9955
188.6	0.99605
188.7	0.9958
188.8	0.9959
188.9	0.9955
189	0.99535
189.1	0.99585
189.2	0.99605
189.3	0.9956
189.4	0.995
189.5	0.9948
189.6	0.9952
189.7	0.99585
189.8	0.996
189.9	0.9956
190	0.9958
190.1	0.99505
190.2	0.9951
190.3	0.99495
190.4	0.99445
190.5	0.99515
190.6	0.99565
190.7	0.9955
190.8	0.9954
190.9	0.99665
191	0.9959
191.1	0.99535
191.2	0.9957
191.3	0.99635
191.4	0.99555
191.5	0.9962
191.6	0.99575
191.7	0.99585
191.8	0.99565
191.9	0.99665
192	0.99615
192.1	0.99555
192.2	0.9965
192.3	0.99565
192.4	0.9956
192.5	0.99555
192.6	0.9946
192.7	0.995
192.8	0.99585
192.9	0.9956
193	0.9959
193.1	0.996
193.2	0.99555
193.3	0.99545
193.4	0.99525
193.5	0.9952
193.6	0.99555
193.7	0.996
193.8	0.99605
193.9	0.9953
194	0.99625
194.1	0.9963
194.2	0.99615
194.3	0.9956
194.4	0.9957
194.5	0.9959
194.6	0.99615
194.7	0.9956
194.8	0.9958
194.9	0.9952
195	0.99545
195.1	0.99435
195.2	0.995
195.3	0.99625
195.4	0.9954
195.5	0.99585
195.6	0.99575
195.7	0.99615
195.8	0.99615
195.9	0.99545
196	0.99595
196.1	0.99575
196.2	0.99655
196.3	0.9957
196.4	0.99525
196.5	0.9954
196.6	0.9948
196.7	0.99515
196.8	0.9952
196.9	0.9952
197	0.9958
197.1	0.99585
197.2	0.9966
197.3	0.9964
197.4	0.9964
197.5	0.9956
197.6	0.9958
197.7	0.99555
197.8	0.996
197.9	0.996
198	0.9957
198.1	0.9961
198.2	0.9951
198.3	0.99555
198.4	0.99535
198.5	0.99585
198.6	0.99605
198.7	0.99615
198.8	0.99615
198.9	0.9963
199	0.99605
199.1	0.9951
199.2	0.9957
199.3	0.99535
199.4	0.99585
199.5	0.99595
199.6	0.99595
199.7	0.99625
199.8	0.99555
199.9	0.9953
200	0.9965
[truncated: 14,000 more rows]
