# Supplementary material for: Bayesian inference of kinetic schemes for ion channels by Kalman filtering
Source: eLife journal article supplement (doi:10.7554/elife.62714), 2022-05-04
Supplement: fig4-data3 [file 1_Sim_N_10000_Strom_MW.xlsx]

## Sheet: Tabelle1
0.1	0
0.2	0
0.3	0
0.4	0
0.5	0
0.6	0
0.7	0
0.8	0
0.9	0
1	0
1.1	0
1.2	0
1.3	0
1.4	0
1.5	0
1.6	0
1.7	0
1.8	0
1.9	0
2	0
2.1	0
2.2	0
2.3	0
2.4	0
2.5	0
2.6	0
2.7	0
2.8	0
2.9	0
3	0
3.1	0
3.2	0
3.3	0
3.4	0
3.5	0
3.6	0
3.7	0
3.8	0
3.9	0
4	0
4.1	0
4.2	0
4.3	0
4.4	0
4.5	0
4.6	0
4.7	0
4.8	0
4.9	0
5	0
5.1	0
5.2	0
5.3	0
5.4	0
5.5	0
5.6	0
5.7	0
5.8	0
5.9	0
6	0
6.1	0
6.2	0
6.3	0
6.4	0
6.5	0
6.6	0
6.7	0
6.8	0
6.9	0
7	0
7.1	0
7.2	0
7.3	0
7.4	0
7.5	0
7.6	0
7.7	0
7.8	0
7.9	0
8	0
8.1	0
8.2	0
8.3	0
8.4	0
8.5	0
8.6	0
8.7	0
8.8	0
8.9	0
9	0
9.1	0
9.2	0
9.3	0
9.4	0
9.5	0
9.6	0
9.7	0
9.8	0
9.9	0
10	0
10.1	0
10.2	0
10.3	0
10.4	0
10.5	0
10.6	0
10.7	0
10.8	0
10.9	0
11	0
11.1	0
11.2	0
11.3	0
11.4	0
11.5	0
11.6	0
11.7	0
11.8	0
11.9	0
12	0
12.1	0
12.2	0
12.3	0
12.4	0
12.5	0
12.6	0
12.7	0
12.8	0
12.9	0
13	0
13.1	0
13.2	0
13.3	0
13.4	0
13.5	0
13.6	0
13.7	0
13.8	0
13.9	0
14	0
14.1	0
14.2	0
14.3	0
14.4	0
14.5	0
14.6	0
14.7	0
14.8	0
14.9	0
15	0
15.1	0
15.2	0
15.3	0
15.4	0
15.5	0
15.6	0
15.7	0
15.8	0
15.9	0
16	0
16.1	0
16.2	0
16.3	0
16.4	0
16.5	0
16.6	0
16.7	0
16.8	0
16.9	0
17	0
17.1	0
17.2	0
17.3	0
17.4	0
17.5	0
17.6	0
17.7	0
17.8	0
17.9	0
18	0
18.1	0
18.2	0
18.3	0
18.4	0
18.5	0
18.6	0
18.7	0
18.8	0
18.9	0
19	0
19.1	0
19.2	0
19.3	0
19.4	0
19.5	0
19.6	0
19.7	0
19.8	0
19.9	0
20	0
20.1	0
20.2	0
20.3	0
20.4	0
20.5	0
20.6	0
20.7	0
20.8	0
20.9	0
21	0
21.1	0
21.2	0
21.3	0
21.4	0
21.5	0
21.6	0
21.7	0
21.8	0
21.9	0
22	0
22.1	0
22.2	0
22.3	0
22.4	0
22.5	0
22.6	0
22.7	0
22.8	0
22.9	0
23	0
23.1	0
23.2	0
23.3	0
23.4	0
23.5	0
23.6	0
23.7	0
23.8	0
23.9	0
24	0
24.1	0
24.2	0
24.3	0
24.4	0
24.5	0
24.6	0
24.7	0
24.8	0
24.9	0
25	0
25.1	0
25.2	0
25.3	0
25.4	0
25.5	0
25.6	0
25.7	0
25.8	0
25.9	0
26	0
26.1	0
26.2	0
26.3	0
26.4	0
26.5	0
26.6	0
26.7	0
26.8	0
26.9	0
27	0
27.1	0
27.2	0
27.3	0
27.4	0
27.5	0
27.6	0
27.7	0
27.8	0
27.9	0
28	0
28.1	0
28.2	0
28.3	0
28.4	0
28.5	0
28.6	0
28.7	0
28.8	0
28.9	0
29	0
29.1	0
29.2	0
29.3	0
29.4	0
29.5	0
29.6	0
29.7	0
29.8	0
29.9	0
30	0
30.1	0
30.2	0
30.3	0
30.4	0
30.5	0
30.6	0
30.7	0
30.8	0
30.9	0
31	0
31.1	0
31.2	0
31.3	0
31.4	0
31.5	0
31.6	0
31.7	0
31.8	0
31.9	0
32	0
32.1	0
32.2	0
32.3	0
32.4	0
32.5	0
32.6	0
32.7	0
32.8	0
32.9	0
33	0
33.1	0
33.2	0
33.3	0
33.4	0
33.5	0
33.6	0
33.7	0
33.8	0
33.9	0
34	0
34.1	0
34.2	0
34.3	0
34.4	0
34.5	0
34.6	0
34.7	0
34.8	0
34.9	0
35	0
35.1	0
35.2	0
35.3	0
35.4	0
35.5	0
35.6	0
35.7	0
35.8	0
35.9	0
36	0
36.1	0
36.2	0
36.3	0
36.4	0
36.5	0
36.6	0
36.7	0
36.8	0
36.9	0
37	0
37.1	0
37.2	0
37.3	0
37.4	0
37.5	0
37.6	0
37.7	0
37.8	0
37.9	0
38	0
38.1	0
38.2	0
38.3	0
38.4	0
38.5	0
38.6	0
38.7	0
38.8	0
38.9	0
39	0
39.1	0
39.2	0
39.3	0
39.4	0
39.5	0
39.6	0
39.7	0
39.8	0
39.9	0
40	0
40.1	0
40.2	0
40.3	0
40.4	0
40.5	0
40.6	0
40.7	0
40.8	0
40.9	0
41	0
41.1	0
41.2	0
41.3	0
41.4	0
41.5	0
41.6	0
41.7	0
41.8	0
41.9	0
42	0
42.1	0
42.2	0
42.3	0
42.4	0
42.5	0
42.6	0
42.7	0
42.8	0
42.9	0
43	0
43.1	0
43.2	0
43.3	0
43.4	0
43.5	0
43.6	0
43.7	0
43.8	0
43.9	0
44	0
44.1	0
44.2	0
44.3	0
44.4	0
44.5	0
44.6	0
44.7	0
44.8	0
44.9	0
45	0
45.1	0
45.2	0
45.3	0
45.4	0
45.5	0
45.6	0
45.7	0
45.8	0
45.9	0
46	0
46.1	0
46.2	0
46.3	0
46.4	0
46.5	0
46.6	0
46.7	0
46.8	0
46.9	0
47	0
47.1	0
47.2	0
47.3	0
47.4	0
47.5	0
47.6	0
47.7	0
47.8	0
47.9	0
48	0
48.1	0
48.2	0
48.3	0
48.4	0
48.5	0
48.6	0
48.7	0
48.8	0
48.9	0
49	0
49.1	0
49.2	0
49.3	0
49.4	0
49.5	0
49.6	0
49.7	0
49.8	0
49.9	0
50	0
50.1	0
50.2	0
50.3	0
50.4	0
50.5	0
50.6	0
50.7	0
50.8	0
50.9	0
51	0
51.1	0
51.2	0
51.3	0
51.4	0
51.5	0
51.6	0
51.7	0
51.8	0
51.9	0
52	0
52.1	0
52.2	0
52.3	0
52.4	0
52.5	0
52.6	0
52.7	0
52.8	0
52.9	0
53	0
53.1	0
53.2	0
53.3	0
53.4	0
53.5	0
53.6	0
53.7	0
53.8	0
53.9	0
54	0
54.1	0
54.2	0
54.3	0
54.4	0
54.5	0
54.6	0
54.7	0
54.8	0
54.9	0
55	0
55.1	0
55.2	0
55.3	0
55.4	0
55.5	0
55.6	0
55.7	0
55.8	0
55.9	0
56	0
56.1	0
56.2	0
56.3	0
56.4	0
56.5	0
56.6	0
56.7	0
56.8	0
56.9	0
57	0
57.1	0
57.2	0
57.3	0
57.4	0
57.5	0
57.6	0
57.7	0
57.8	0
57.9	0
58	0
58.1	0
58.2	0
58.3	0
58.4	0
58.5	0
58.6	0
58.7	0
58.8	0
58.9	0
59	0
59.1	0
59.2	0
59.3	0
59.4	0
59.5	0
59.6	0
59.7	0
59.8	0
59.9	0
60	0
60.1	0
60.2	0
60.3	0
60.4	0
60.5	0
60.6	0
60.7	0
60.8	0
60.9	0
61	0
61.1	0
61.2	0
61.3	0
61.4	0
61.5	0
61.6	0
61.7	0
61.8	0
61.9	0
62	0
62.1	0
62.2	0
62.3	0
62.4	0
62.5	0
62.6	0
62.7	0
62.8	0
62.9	0
63	0
63.1	0
63.2	0
63.3	0
63.4	0
63.5	0
63.6	0
63.7	0
63.8	0
63.9	0
64	0
64.1	0
64.2	0
64.3	0
64.4	0
64.5	0
64.6	0
64.7	0
64.8	0
64.9	0
65	0
65.1	0
65.2	0
65.3	0
65.4	0
65.5	0
65.6	0
65.7	0
65.8	0
65.9	0
66	0
66.1	0
66.2	0
66.3	0
66.4	0
66.5	0
66.6	0
66.7	0
66.8	0
66.9	0
67	0
67.1	0
67.2	0
67.3	0
67.4	0
67.5	0
67.6	0
67.7	0
67.8	0
67.9	0
68	0
68.1	0
68.2	0
68.3	0
68.4	0
68.5	0
68.6	0
68.7	0
68.8	0
68.9	0
69	0
69.1	0
69.2	0
69.3	0
69.4	0
69.5	0
69.6	0
69.7	0
69.8	0
69.9	0
70	0
70.1	0
70.2	0
70.3	0
70.4	0
70.5	0
70.6	0
70.7	0
70.8	0
70.9	0
71	0
71.1	0
71.2	0
71.3	0
71.4	0
71.5	0
71.6	0
71.7	0
71.8	0
71.9	0
72	0
72.1	0
72.2	0
72.3	0
72.4	0
72.5	0
72.6	0
72.7	0
72.8	0
72.9	0
73	0
73.1	0
73.2	0
73.3	0
73.4	0
73.5	0
73.6	0
73.7	0
73.8	0
73.9	0
74	0
74.1	0
74.2	0
74.3	0
74.4	0
74.5	0
74.6	0
74.7	0
74.8	0
74.9	0
75	0
75.1	0
75.2	0
75.3	0
75.4	0
75.5	0
75.6	0
75.7	0
75.8	0
75.9	0
76	0
76.1	0
76.2	0
76.3	0
76.4	0
76.5	0
76.6	0
76.7	0
76.8	0
76.9	0
77	0
77.1	0
77.2	0
77.3	0
77.4	0
77.5	0
77.6	0
77.7	0
77.8	0
77.9	0
78	0
78.1	0
78.2	0
78.3	0
78.4	0
78.5	0
78.6	0
78.7	0
78.8	0
78.9	0
79	0
79.1	0
79.2	0
79.3	0
79.4	0
79.5	0
79.6	0
79.7	0
79.8	0
79.9	0
80	0
80.1	0
80.2	0
80.3	0
80.4	0
80.5	0
80.6	0
80.7	0
80.8	0
80.9	0
81	0
81.1	0
81.2	0
81.3	0
81.4	0
81.5	0
81.6	0
81.7	0
81.8	0
81.9	0
82	0
82.1	0
82.2	0
82.3	0
82.4	0
82.5	0
82.6	0
82.7	0
82.8	0
82.9	0
83	0
83.1	0
83.2	0
83.3	0
83.4	0
83.5	0
83.6	0
83.7	0
83.8	0
83.9	0
84	0
84.1	0
84.2	0
84.3	0
84.4	0
84.5	0
84.6	0
84.7	0
84.8	0
84.9	0
85	0
85.1	0
85.2	0
85.3	0
85.4	0
85.5	0
85.6	0
85.7	0
85.8	0
85.9	0
86	0
86.1	0
86.2	0
86.3	0
86.4	0
86.5	0
86.6	0
86.7	0
86.8	0
86.9	0
87	0
87.1	0
87.2	0
87.3	0
87.4	0
87.5	0
87.6	0
87.7	0
87.8	0
87.9	0
88	0
88.1	0
88.2	0
88.3	0
88.4	0
88.5	0
88.6	0
88.7	0
88.8	0
88.9	0
89	0
89.1	0
89.2	0
89.3	0
89.4	0
89.5	0
89.6	0
89.7	0
89.8	0
89.9	0
90	0
90.1	0
90.2	0
90.3	0
90.4	0
90.5	0
90.6	0
90.7	0
90.8	0
90.9	0
91	0
91.1	0
91.2	0
91.3	0
91.4	0
91.5	0
91.6	0
91.7	0
91.8	0
91.9	0
92	0
92.1	0
92.2	0
92.3	0
92.4	0
92.5	0
92.6	0
92.7	0
92.8	0
92.9	0
93	0
93.1	0
93.2	0
93.3	0
93.4	0
93.5	0
93.6	0
93.7	0
93.8	0
93.9	0
94	0
94.1	0
94.2	0
94.3	0
94.4	0
94.5	0
94.6	0
94.7	0
94.8	0
94.9	0
95	0
95.1	0
95.2	0
95.3	0
95.4	0
95.5	0
95.6	0
95.7	0
95.8	0
95.9	0
96	0
96.1	0
96.2	0
96.3	0
96.4	0
96.5	0
96.6	0
96.7	0
96.8	0
96.9	0
97	0
97.1	0
97.2	0
97.3	0
97.4	0
97.5	0
97.6	0
97.7	0
97.8	0
97.9	0
98	0
98.1	0
98.2	0
98.3	0
98.4	0
98.5	0
98.6	0
98.7	0
98.8	0
98.9	0
99	0
99.1	0
99.2	0
99.3	0
99.4	0
99.5	0
99.6	0
99.7	0
99.8	0
99.9	0
100	0
100.1	0.0013
100.2	0.0048
100.3	0.0084
100.4	0.0127
100.5	0.018
100.6	0.0231
100.7	0.0281
100.8	0.0329
100.9	0.0374
101	0.0416
101.1	0.0464
101.2	0.0505
101.3	0.0551
101.4	0.0603
101.5	0.0654
101.6	0.0707
101.7	0.0765
101.8	0.0805
101.9	0.0858
102	0.091
102.1	0.0958
102.2	0.0992
102.3	0.1032
102.4	0.1067
102.5	0.1127
102.6	0.1172
102.7	0.1209
102.8	0.1255
102.9	0.1287
103	0.1325
103.1	0.1363
103.2	0.1397
103.3	0.1428
103.4	0.1467
103.5	0.1511
103.6	0.1551
103.7	0.1592
103.8	0.1627
103.9	0.1664
104	0.1701
104.1	0.1753
104.2	0.1795
104.3	0.1828
104.4	0.1876
104.5	0.1915
104.6	0.195
104.7	0.1988
104.8	0.203
104.9	0.2074
105	0.2111
105.1	0.2147
105.2	0.2179
105.3	0.2213
105.4	0.2241
105.5	0.2275
105.6	0.2311
105.7	0.2358
105.8	0.24
105.9	0.2437
106	0.2466
106.1	0.2501
106.2	0.2541
106.3	0.257
106.4	0.2601
106.5	0.2633
106.6	0.2665
106.7	0.2702
106.8	0.2742
106.9	0.2787
107	0.2819
107.1	0.2848
107.2	0.2879
107.3	0.2898
107.4	0.293
107.5	0.2953
107.6	0.298
107.7	0.3008
107.8	0.3046
107.9	0.3083
108	0.3107
108.1	0.3127
108.2	0.3157
108.3	0.3196
108.4	0.3228
108.5	0.3262
108.6	0.3292
108.7	0.3317
108.8	0.335
108.9	0.3376
109	0.341
109.1	0.3434
109.2	0.3458
109.3	0.349
109.4	0.3524
109.5	0.3564
109.6	0.3588
109.7	0.3622
109.8	0.3649
109.9	0.3671
110	0.3695
110.1	0.3719
110.2	0.3741
110.3	0.3767
110.4	0.3784
110.5	0.3808
110.6	0.3827
110.7	0.3861
110.8	0.3887
110.9	0.3906
111	0.3928
111.1	0.3948
111.2	0.3975
111.3	0.3999
111.4	0.4022
111.5	0.405
111.6	0.4075
111.7	0.4091
111.8	0.4114
111.9	0.4143
112	0.4163
112.1	0.4188
112.2	0.4206
112.3	0.4233
112.4	0.4256
112.5	0.4284
112.6	0.4303
112.7	0.4318
112.8	0.4348
112.9	0.4367
113	0.439
113.1	0.4405
113.2	0.4423
113.3	0.4446
113.4	0.4468
113.5	0.4489
113.6	0.4513
113.7	0.4535
113.8	0.4546
113.9	0.4559
114	0.4585
114.1	0.4598
114.2	0.4616
114.3	0.4644
114.4	0.4675
114.5	0.4693
114.6	0.4715
114.7	0.4728
114.8	0.4746
114.9	0.4767
115	0.4782
115.1	0.4797
115.2	0.4812
115.3	0.4832
115.4	0.4855
115.5	0.4873
115.6	0.4888
115.7	0.4905
115.8	0.4924
115.9	0.4941
116	0.4957
116.1	0.496
116.2	0.4972
116.3	0.4993
116.4	0.5006
116.5	0.5035
116.6	0.5054
116.7	0.508
116.8	0.5102
116.9	0.5116
117	0.5133
117.1	0.515
117.2	0.5166
117.3	0.5182
117.4	0.5201
117.5	0.5215
117.6	0.5229
117.7	0.5252
117.8	0.5276
117.9	0.5292
118	0.5313
118.1	0.5327
118.2	0.5341
118.3	0.535
118.4	0.5372
118.5	0.5384
118.6	0.5405
118.7	0.5417
118.8	0.5431
118.9	0.5448
119	0.5464
119.1	0.5489
119.2	0.5509
119.3	0.5526
119.4	0.5543
119.5	0.5566
119.6	0.5586
119.7	0.5602
119.8	0.5619
119.9	0.5626
120	0.5641
120.1	0.5657
120.2	0.5678
120.3	0.5685
120.4	0.5707
120.5	0.5724
120.6	0.5742
120.7	0.5752
120.8	0.5762
120.9	0.5776
121	0.5791
121.1	0.5804
121.2	0.5822
121.3	0.5838
121.4	0.5852
121.5	0.5871
121.6	0.5888
121.7	0.5897
121.8	0.5914
121.9	0.5927
122	0.594
122.1	0.5952
122.2	0.5977
122.3	0.5995
122.4	0.6015
122.5	0.603
122.6	0.6045
122.7	0.606
122.8	0.6074
122.9	0.6091
123	0.6098
123.1	0.6108
123.2	0.6121
123.3	0.6139
123.4	0.615
123.5	0.6162
123.6	0.6174
123.7	0.6186
123.8	0.6202
123.9	0.6224
124	0.6242
124.1	0.6253
124.2	0.6272
124.3	0.6286
124.4	0.629
124.5	0.6295
124.6	0.6303
124.7	0.6311
124.8	0.6316
124.9	0.6336
125	0.6343
125.1	0.636
125.2	0.6368
125.3	0.637
125.4	0.6379
125.5	0.6391
125.6	0.6402
125.7	0.6408
125.8	0.642
125.9	0.643
126	0.6449
126.1	0.6453
126.2	0.6463
126.3	0.6472
126.4	0.6486
126.5	0.6494
126.6	0.6507
126.7	0.6518
126.8	0.653
126.9	0.6539
127	0.6551
127.1	0.6577
127.2	0.659
127.3	0.66
127.4	0.6615
127.5	0.6618
127.6	0.6634
127.7	0.6637
127.8	0.665
127.9	0.6657
128	0.6669
128.1	0.667
128.2	0.6674
128.3	0.6689
128.4	0.6697
128.5	0.6709
128.6	0.6717
128.7	0.6726
128.8	0.674
128.9	0.6749
129	0.6762
129.1	0.6778
129.2	0.6783
129.3	0.6793
129.4	0.6794
129.5	0.6802
129.6	0.6803
129.7	0.6806
129.8	0.681
129.9	0.682
130	0.683
130.1	0.6838
130.2	0.6843
130.3	0.685
130.4	0.6852
130.5	0.6865
130.6	0.6871
130.7	0.6881
130.8	0.689
130.9	0.6896
131	0.6902
131.1	0.6905
131.2	0.6918
131.3	0.6928
131.4	0.6938
131.5	0.6941
131.6	0.6944
131.7	0.6951
131.8	0.6958
131.9	0.6969
132	0.6975
132.1	0.6975
132.2	0.6984
132.3	0.6992
132.4	0.7006
132.5	0.7012
132.6	0.7015
132.7	0.7022
132.8	0.7031
132.9	0.7033
133	0.7052
133.1	0.7051
133.2	0.7056
133.3	0.7057
133.4	0.7067
133.5	0.707
133.6	0.7073
133.7	0.7093
133.8	0.7096
133.9	0.7107
134	0.7112
134.1	0.7118
134.2	0.7122
134.3	0.7123
134.4	0.7131
134.5	0.7135
134.6	0.7141
134.7	0.7146
134.8	0.715
134.9	0.7163
135	0.7169
135.1	0.7175
135.2	0.7179
135.3	0.718
135.4	0.7187
135.5	0.7194
135.6	0.7206
135.7	0.7218
135.8	0.722
135.9	0.7237
136	0.7247
136.1	0.7255
136.2	0.7262
136.3	0.7272
136.4	0.7274
136.5	0.7277
136.6	0.7279
136.7	0.7287
136.8	0.7292
136.9	0.7296
137	0.7299
137.1	0.7302
137.2	0.7312
137.3	0.7323
137.4	0.7335
137.5	0.7337
137.6	0.7336
137.7	0.7342
137.8	0.7344
137.9	0.7356
138	0.737
138.1	0.7385
138.2	0.739
138.3	0.7388
138.4	0.739
138.5	0.7401
138.6	0.7406
138.7	0.7411
138.8	0.7411
138.9	0.7409
139	0.7416
139.1	0.7413
139.2	0.7418
139.3	0.7416
139.4	0.7417
139.5	0.7422
139.6	0.7427
139.7	0.7431
139.8	0.7431
139.9	0.7439
140	0.7441
140.1	0.7452
140.2	0.746
140.3	0.7464
140.4	0.7472
140.5	0.7478
140.6	0.7478
140.7	0.7486
140.8	0.7491
140.9	0.75
141	0.7509
141.1	0.7515
141.2	0.7518
141.3	0.7521
141.4	0.7531
141.5	0.7535
141.6	0.7545
141.7	0.755
141.8	0.7559
141.9	0.7563
142	0.7566
142.1	0.7566
142.2	0.757
142.3	0.7571
142.4	0.7576
142.5	0.7584
142.6	0.7585
142.7	0.7598
142.8	0.7602
142.9	0.7609
143	0.7621
143.1	0.763
143.2	0.7637
143.3	0.7641
143.4	0.7648
143.5	0.7649
143.6	0.7649
143.7	0.7649
143.8	0.7656
143.9	0.7659
144	0.7667
144.1	0.7667
144.2	0.7672
144.3	0.7675
144.4	0.7678
144.5	0.7678
144.6	0.7685
144.7	0.7687
144.8	0.7692
144.9	0.7696
145	0.7702
145.1	0.7702
145.2	0.7698
145.3	0.7701
145.4	0.7699
145.5	0.7703
145.6	0.7709
145.7	0.7712
145.8	0.7711
145.9	0.7711
146	0.7715
146.1	0.7711
146.2	0.7713
146.3	0.7716
146.4	0.7725
146.5	0.7731
146.6	0.774
146.7	0.7744
146.8	0.7746
146.9	0.7746
147	0.775
147.1	0.7758
147.2	0.7762
147.3	0.7763
147.4	0.7767
147.5	0.7769
147.6	0.7766
147.7	0.7769
147.8	0.7767
147.9	0.7765
148	0.7776
148.1	0.7788
148.2	0.7791
148.3	0.7788
148.4	0.7798
148.5	0.7808
148.6	0.7809
148.7	0.7813
148.8	0.7812
148.9	0.782
149	0.7822
149.1	0.7817
149.2	0.7828
149.3	0.7828
149.4	0.7828
149.5	0.7832
149.6	0.7835
149.7	0.7835
149.8	0.7836
149.9	0.7845
150	0.7842
150.1	0.7848
150.2	0.7852
150.3	0.7853
150.4	0.785
150.5	0.7857
150.6	0.7853
150.7	0.785
150.8	0.7856
150.9	0.7855
151	0.7856
151.1	0.7853
151.2	0.7858
151.3	0.7857
151.4	0.7857
151.5	0.7858
151.6	0.7863
151.7	0.7863
151.8	0.7858
151.9	0.7854
152	0.7856
152.1	0.7856
152.2	0.7864
152.3	0.7872
152.4	0.7882
152.5	0.7883
152.6	0.7875
152.7	0.7881
152.8	0.788
152.9	0.7885
153	0.7885
153.1	0.7887
153.2	0.7889
153.3	0.7889
153.4	0.789
153.5	0.7888
153.6	0.7889
153.7	0.7896
153.8	0.7896
153.9	0.7897
154	0.7902
154.1	0.7906
154.2	0.7914
154.3	0.7907
154.4	0.791
154.5	0.7917
154.6	0.7924
154.7	0.7928
154.8	0.7928
154.9	0.793
155	0.7928
155.1	0.793
155.2	0.7931
155.3	0.7937
155.4	0.7938
155.5	0.794
155.6	0.794
155.7	0.7939
155.8	0.7946
155.9	0.7948
156	0.7944
156.1	0.7947
156.2	0.7951
156.3	0.796
156.4	0.7958
156.5	0.7962
156.6	0.7964
156.7	0.7964
156.8	0.7961
156.9	0.796
157	0.7964
157.1	0.7973
157.2	0.7971
157.3	0.7972
157.4	0.7974
157.5	0.7976
157.6	0.7976
157.7	0.7974
157.8	0.7973
157.9	0.7981
158	0.7973
158.1	0.7972
158.2	0.7974
158.3	0.798
158.4	0.7979
158.5	0.798
158.6	0.7984
158.7	0.7983
158.8	0.7986
158.9	0.799
159	0.7992
159.1	0.7988
159.2	0.7985
159.3	0.7995
159.4	0.8
159.5	0.7999
159.6	0.8003
159.7	0.8004
159.8	0.7998
159.9	0.7998
160	0.8003
160.1	0.8004
160.2	0.8015
160.3	0.8013
160.4	0.801
160.5	0.8014
160.6	0.8011
160.7	0.8021
160.8	0.8023
160.9	0.8029
161	0.8033
161.1	0.8034
161.2	0.8039
161.3	0.8043
161.4	0.8047
161.5	0.8053
161.6	0.8048
161.7	0.8051
161.8	0.805
161.9	0.8051
162	0.8054
162.1	0.8054
162.2	0.8059
162.3	0.8063
162.4	0.8062
162.5	0.8058
162.6	0.8063
162.7	0.8068
162.8	0.8064
162.9	0.8072
163	0.8071
163.1	0.8069
163.2	0.8073
163.3	0.8076
163.4	0.8078
163.5	0.8078
163.6	0.8077
163.7	0.8077
163.8	0.8076
163.9	0.8076
164	0.8081
164.1	0.8085
164.2	0.8086
164.3	0.8088
164.4	0.8084
164.5	0.8079
164.6	0.8081
164.7	0.8079
164.8	0.8076
164.9	0.8075
165	0.8073
165.1	0.8068
165.2	0.8075
165.3	0.8073
165.4	0.8073
165.5	0.8077
165.6	0.8071
165.7	0.8079
165.8	0.8079
165.9	0.808
166	0.8076
166.1	0.8077
166.2	0.807
166.3	0.8075
166.4	0.8077
166.5	0.8078
166.6	0.8085
166.7	0.8078
166.8	0.8077
166.9	0.808
167	0.8078
167.1	0.8082
167.2	0.808
167.3	0.8079
167.4	0.8075
167.5	0.8069
167.6	0.8069
167.7	0.8074
167.8	0.8067
167.9	0.8074
168	0.8075
168.1	0.8083
168.2	0.8078
168.3	0.808
168.4	0.8084
168.5	0.8092
168.6	0.8094
168.7	0.8097
168.8	0.8104
168.9	0.8107
169	0.8106
169.1	0.8117
169.2	0.8117
169.3	0.8119
169.4	0.8117
169.5	0.8126
169.6	0.8131
169.7	0.8129
169.8	0.8133
169.9	0.8138
170	0.8134
170.1	0.8142
170.2	0.8144
170.3	0.8145
170.4	0.8144
170.5	0.8139
170.6	0.8139
170.7	0.8135
170.8	0.8141
170.9	0.8142
171	0.8145
171.1	0.8145
171.2	0.8144
171.3	0.8144
171.4	0.8143
171.5	0.814
171.6	0.8137
171.7	0.8135
171.8	0.8134
171.9	0.8134
172	0.813
172.1	0.8138
172.2	0.8134
172.3	0.8131
172.4	0.8132
172.5	0.8132
172.6	0.8131
172.7	0.8132
172.8	0.8129
172.9	0.8126
173	0.8125
173.1	0.8123
173.2	0.8124
173.3	0.8126
173.4	0.8126
173.5	0.8125
173.6	0.8124
173.7	0.8115
173.8	0.8112
173.9	0.8114
174	0.811
174.1	0.8125
174.2	0.8125
174.3	0.8128
174.4	0.8126
174.5	0.813
174.6	0.8135
174.7	0.8142
174.8	0.8142
174.9	0.8143
175	0.8142
175.1	0.814
175.2	0.8143
175.3	0.8152
175.4	0.8154
175.5	0.8159
175.6	0.8158
175.7	0.8156
175.8	0.8152
175.9	0.815
176	0.8152
176.1	0.8152
176.2	0.8154
176.3	0.8157
176.4	0.8155
176.5	0.8157
176.6	0.8154
176.7	0.8153
176.8	0.8148
176.9	0.816
177	0.8158
177.1	0.8163
177.2	0.8167
177.3	0.8172
177.4	0.8171
177.5	0.8164
177.6	0.8166
177.7	0.8167
177.8	0.8169
177.9	0.8171
178	0.8174
178.1	0.8184
178.2	0.818
178.3	0.8178
178.4	0.8185
178.5	0.818
178.6	0.8174
178.7	0.8178
178.8	0.8186
178.9	0.8187
179	0.8192
179.1	0.8196
179.2	0.8193
179.3	0.819
179.4	0.8197
179.5	0.8193
179.6	0.8193
179.7	0.8197
179.8	0.8199
179.9	0.8205
180	0.8205
180.1	0.8212
180.2	0.8214
180.3	0.821
180.4	0.8214
180.5	0.8221
180.6	0.8224
180.7	0.8226
180.8	0.8225
180.9	0.8227
181	0.8227
181.1	0.8235
181.2	0.8238
181.3	0.8238
181.4	0.8237
181.5	0.8231
181.6	0.8229
181.7	0.8226
181.8	0.8224
181.9	0.8228
182	0.8234
182.1	0.8238
182.2	0.824
182.3	0.8234
182.4	0.8238
182.5	0.8238
182.6	0.8235
182.7	0.8233
182.8	0.8238
182.9	0.8237
183	0.824
183.1	0.8246
183.2	0.8251
183.3	0.825
183.4	0.8254
183.5	0.8244
183.6	0.8234
183.7	0.8238
183.8	0.8233
183.9	0.8236
184	0.8228
184.1	0.823
184.2	0.8228
184.3	0.8227
184.4	0.8228
184.5	0.8222
184.6	0.8234
184.7	0.8239
184.8	0.824
184.9	0.8237
185	0.8231
185.1	0.8239
185.2	0.824
185.3	0.8241
185.4	0.8238
185.5	0.8245
185.6	0.825
185.7	0.8245
185.8	0.8233
185.9	0.8238
186	0.8239
186.1	0.8246
186.2	0.8244
186.3	0.8249
186.4	0.8248
186.5	0.8256
186.6	0.8256
186.7	0.8257
186.8	0.8262
186.9	0.8263
187	0.8261
187.1	0.8262
187.2	0.8257
187.3	0.825
187.4	0.8245
187.5	0.8249
187.6	0.8242
187.7	0.8245
187.8	0.8252
187.9	0.8251
188	0.8248
188.1	0.8252
188.2	0.8256
188.3	0.8261
188.4	0.8263
188.5	0.8263
188.6	0.8265
188.7	0.827
188.8	0.8274
188.9	0.8278
189	0.8275
189.1	0.8269
189.2	0.8262
189.3	0.826
189.4	0.8263
189.5	0.8265
189.6	0.8269
189.7	0.8263
189.8	0.8261
189.9	0.8263
190	0.8263
190.1	0.8269
190.2	0.8281
190.3	0.8282
190.4	0.8284
190.5	0.8283
190.6	0.8287
190.7	0.8286
190.8	0.828
190.9	0.828
191	0.8278
191.1	0.8277
191.2	0.8281
191.3	0.8288
191.4	0.8281
191.5	0.8278
191.6	0.8275
191.7	0.8277
191.8	0.8277
191.9	0.827
192	0.8273
192.1	0.8271
192.2	0.8277
192.3	0.8278
192.4	0.828
192.5	0.8278
192.6	0.8281
192.7	0.8281
192.8	0.8278
192.9	0.8274
193	0.8277
193.1	0.8273
193.2	0.8268
193.3	0.8272
193.4	0.8275
193.5	0.8276
193.6	0.8278
193.7	0.828
193.8	0.8278
193.9	0.8276
194	0.8274
194.1	0.8275
194.2	0.8276
194.3	0.8279
194.4	0.8278
194.5	0.8275
194.6	0.8277
194.7	0.8278
194.8	0.8282
194.9	0.828
195	0.8279
195.1	0.828
195.2	0.8286
195.3	0.8285
195.4	0.8282
195.5	0.8278
195.6	0.828
195.7	0.8274
195.8	0.8271
195.9	0.8271
196	0.8277
196.1	0.8276
196.2	0.8278
196.3	0.8278
196.4	0.8286
196.5	0.8283
196.6	0.8285
196.7	0.8284
196.8	0.828
196.9	0.828
197	0.828
197.1	0.8288
197.2	0.8286
197.3	0.8294
197.4	0.8295
197.5	0.8302
197.6	0.8307
197.7	0.8311
197.8	0.831
197.9	0.8318
198	0.8321
198.1	0.8319
198.2	0.832
198.3	0.8315
198.4	0.8313
198.5	0.832
198.6	0.8318
198.7	0.8311
198.8	0.8318
198.9	0.8314
199	0.8316
199.1	0.8316
199.2	0.8319
199.3	0.8324
199.4	0.8326
199.5	0.8326
199.6	0.8319
199.7	0.8316
199.8	0.8325
199.9	0.8327
200	0.832
[truncated: 14,000 more rows]
