# Supplementary material for: Bayesian inference of kinetic schemes for ion channels by Kalman filtering
Source: eLife journal article supplement (doi:10.7554/elife.62714), 2022-05-04
Supplement: fig4-data3 [file 1_Sim_N_20000_Fluor_MW_32M.xlsx]

## Sheet: Tabelle1
0.1	0
0.2	0
0.3	0
0.4	0
0.5	0
0.6	0
0.7	0
0.8	0
0.9	0
1	0
1.1	0
1.2	0
1.3	0
1.4	0
1.5	0
1.6	0
1.7	0
1.8	0
1.9	0
2	0
2.1	0
2.2	0
2.3	0
2.4	0
2.5	0
2.6	0
2.7	0
2.8	0
2.9	0
3	0
3.1	0
3.2	0
3.3	0
3.4	0
3.5	0
3.6	0
3.7	0
3.8	0
3.9	0
4	0
4.1	0
4.2	0
4.3	0
4.4	0
4.5	0
4.6	0
4.7	0
4.8	0
4.9	0
5	0
5.1	0
5.2	0
5.3	0
5.4	0
5.5	0
5.6	0
5.7	0
5.8	0
5.9	0
6	0
6.1	0
6.2	0
6.3	0
6.4	0
6.5	0
6.6	0
6.7	0
6.8	0
6.9	0
7	0
7.1	0
7.2	0
7.3	0
7.4	0
7.5	0
7.6	0
7.7	0
7.8	0
7.9	0
8	0
8.1	0
8.2	0
8.3	0
8.4	0
8.5	0
8.6	0
8.7	0
8.8	0
8.9	0
9	0
9.1	0
9.2	0
9.3	0
9.4	0
9.5	0
9.6	0
9.7	0
9.8	0
9.9	0
10	0
10.1	0
10.2	0
10.3	0
10.4	0
10.5	0
10.6	0
10.7	0
10.8	0
10.9	0
11	0
11.1	0
11.2	0
11.3	0
11.4	0
11.5	0
11.6	0
11.7	0
11.8	0
11.9	0
12	0
12.1	0
12.2	0
12.3	0
12.4	0
12.5	0
12.6	0
12.7	0
12.8	0
12.9	0
13	0
13.1	0
13.2	0
13.3	0
13.4	0
13.5	0
13.6	0
13.7	0
13.8	0
13.9	0
14	0
14.1	0
14.2	0
14.3	0
14.4	0
14.5	0
14.6	0
14.7	0
14.8	0
14.9	0
15	0
15.1	0
15.2	0
15.3	0
15.4	0
15.5	0
15.6	0
15.7	0
15.8	0
15.9	0
16	0
16.1	0
16.2	0
16.3	0
16.4	0
16.5	0
16.6	0
16.7	0
16.8	0
16.9	0
17	0
17.1	0
17.2	0
17.3	0
17.4	0
17.5	0
17.6	0
17.7	0
17.8	0
17.9	0
18	0
18.1	0
18.2	0
18.3	0
18.4	0
18.5	0
18.6	0
18.7	0
18.8	0
18.9	0
19	0
19.1	0
19.2	0
19.3	0
19.4	0
19.5	0
19.6	0
19.7	0
19.8	0
19.9	0
20	0
20.1	0
20.2	0
20.3	0
20.4	0
20.5	0
20.6	0
20.7	0
20.8	0
20.9	0
21	0
21.1	0
21.2	0
21.3	0
21.4	0
21.5	0
21.6	0
21.7	0
21.8	0
21.9	0
22	0
22.1	0
22.2	0
22.3	0
22.4	0
22.5	0
22.6	0
22.7	0
22.8	0
22.9	0
23	0
23.1	0
23.2	0
23.3	0
23.4	0
23.5	0
23.6	0
23.7	0
23.8	0
23.9	0
24	0
24.1	0
24.2	0
24.3	0
24.4	0
24.5	0
24.6	0
24.7	0
24.8	0
24.9	0
25	0
25.1	0
25.2	0
25.3	0
25.4	0
25.5	0
25.6	0
25.7	0
25.8	0
25.9	0
26	0
26.1	0
26.2	0
26.3	0
26.4	0
26.5	0
26.6	0
26.7	0
26.8	0
26.9	0
27	0
27.1	0
27.2	0
27.3	0
27.4	0
27.5	0
27.6	0
27.7	0
27.8	0
27.9	0
28	0
28.1	0
28.2	0
28.3	0
28.4	0
28.5	0
28.6	0
28.7	0
28.8	0
28.9	0
29	0
29.1	0
29.2	0
29.3	0
29.4	0
29.5	0
29.6	0
29.7	0
29.8	0
29.9	0
30	0
30.1	0
30.2	0
30.3	0
30.4	0
30.5	0
30.6	0
30.7	0
30.8	0
30.9	0
31	0
31.1	0
31.2	0
31.3	0
31.4	0
31.5	0
31.6	0
31.7	0
31.8	0
31.9	0
32	0
32.1	0
32.2	0
32.3	0
32.4	0
32.5	0
32.6	0
32.7	0
32.8	0
32.9	0
33	0
33.1	0
33.2	0
33.3	0
33.4	0
33.5	0
33.6	0
33.7	0
33.8	0
33.9	0
34	0
34.1	0
34.2	0
34.3	0
34.4	0
34.5	0
34.6	0
34.7	0
34.8	0
34.9	0
35	0
35.1	0
35.2	0
35.3	0
35.4	0
35.5	0
35.6	0
35.7	0
35.8	0
35.9	0
36	0
36.1	0
36.2	0
36.3	0
36.4	0
36.5	0
36.6	0
36.7	0
36.8	0
36.9	0
37	0
37.1	0
37.2	0
37.3	0
37.4	0
37.5	0
37.6	0
37.7	0
37.8	0
37.9	0
38	0
38.1	0
38.2	0
38.3	0
38.4	0
38.5	0
38.6	0
38.7	0
38.8	0
38.9	0
39	0
39.1	0
39.2	0
39.3	0
39.4	0
39.5	0
39.6	0
39.7	0
39.8	0
39.9	0
40	0
40.1	0
40.2	0
40.3	0
40.4	0
40.5	0
40.6	0
40.7	0
40.8	0
40.9	0
41	0
41.1	0
41.2	0
41.3	0
41.4	0
41.5	0
41.6	0
41.7	0
41.8	0
41.9	0
42	0
42.1	0
42.2	0
42.3	0
42.4	0
42.5	0
42.6	0
42.7	0
42.8	0
42.9	0
43	0
43.1	0
43.2	0
43.3	0
43.4	0
43.5	0
43.6	0
43.7	0
43.8	0
43.9	0
44	0
44.1	0
44.2	0
44.3	0
44.4	0
44.5	0
44.6	0
44.7	0
44.8	0
44.9	0
45	0
45.1	0
45.2	0
45.3	0
45.4	0
45.5	0
45.6	0
45.7	0
45.8	0
45.9	0
46	0
46.1	0
46.2	0
46.3	0
46.4	0
46.5	0
46.6	0
46.7	0
46.8	0
46.9	0
47	0
47.1	0
47.2	0
47.3	0
47.4	0
47.5	0
47.6	0
47.7	0
47.8	0
47.9	0
48	0
48.1	0
48.2	0
48.3	0
48.4	0
48.5	0
48.6	0
48.7	0
48.8	0
48.9	0
49	0
49.1	0
49.2	0
49.3	0
49.4	0
49.5	0
49.6	0
49.7	0
49.8	0
49.9	0
50	0
50.1	0
50.2	0
50.3	0
50.4	0
50.5	0
50.6	0
50.7	0
50.8	0
50.9	0
51	0
51.1	0
51.2	0
51.3	0
51.4	0
51.5	0
51.6	0
51.7	0
51.8	0
51.9	0
52	0
52.1	0
52.2	0
52.3	0
52.4	0
52.5	0
52.6	0
52.7	0
52.8	0
52.9	0
53	0
53.1	0
53.2	0
53.3	0
53.4	0
53.5	0
53.6	0
53.7	0
53.8	0
53.9	0
54	0
54.1	0
54.2	0
54.3	0
54.4	0
54.5	0
54.6	0
54.7	0
54.8	0
54.9	0
55	0
55.1	0
55.2	0
55.3	0
55.4	0
55.5	0
55.6	0
55.7	0
55.8	0
55.9	0
56	0
56.1	0
56.2	0
56.3	0
56.4	0
56.5	0
56.6	0
56.7	0
56.8	0
56.9	0
57	0
57.1	0
57.2	0
57.3	0
57.4	0
57.5	0
57.6	0
57.7	0
57.8	0
57.9	0
58	0
58.1	0
58.2	0
58.3	0
58.4	0
58.5	0
58.6	0
58.7	0
58.8	0
58.9	0
59	0
59.1	0
59.2	0
59.3	0
59.4	0
59.5	0
59.6	0
59.7	0
59.8	0
59.9	0
60	0
60.1	0
60.2	0
60.3	0
60.4	0
60.5	0
60.6	0
60.7	0
60.8	0
60.9	0
61	0
61.1	0
61.2	0
61.3	0
61.4	0
61.5	0
61.6	0
61.7	0
61.8	0
61.9	0
62	0
62.1	0
62.2	0
62.3	0
62.4	0
62.5	0
62.6	0
62.7	0
62.8	0
62.9	0
63	0
63.1	0
63.2	0
63.3	0
63.4	0
63.5	0
63.6	0
63.7	0
63.8	0
63.9	0
64	0
64.1	0
64.2	0
64.3	0
64.4	0
64.5	0
64.6	0
64.7	0
64.8	0
64.9	0
65	0
65.1	0
65.2	0
65.3	0
65.4	0
65.5	0
65.6	0
65.7	0
65.8	0
65.9	0
66	0
66.1	0
66.2	0
66.3	0
66.4	0
66.5	0
66.6	0
66.7	0
66.8	0
66.9	0
67	0
67.1	0
67.2	0
67.3	0
67.4	0
67.5	0
67.6	0
67.7	0
67.8	0
67.9	0
68	0
68.1	0
68.2	0
68.3	0
68.4	0
68.5	0
68.6	0
68.7	0
68.8	0
68.9	0
69	0
69.1	0
69.2	0
69.3	0
69.4	0
69.5	0
69.6	0
69.7	0
69.8	0
69.9	0
70	0
70.1	0
70.2	0
70.3	0
70.4	0
70.5	0
70.6	0
70.7	0
70.8	0
70.9	0
71	0
71.1	0
71.2	0
71.3	0
71.4	0
71.5	0
71.6	0
71.7	0
71.8	0
71.9	0
72	0
72.1	0
72.2	0
72.3	0
72.4	0
72.5	0
72.6	0
72.7	0
72.8	0
72.9	0
73	0
73.1	0
73.2	0
73.3	0
73.4	0
73.5	0
73.6	0
73.7	0
73.8	0
73.9	0
74	0
74.1	0
74.2	0
74.3	0
74.4	0
74.5	0
74.6	0
74.7	0
74.8	0
74.9	0
75	0
75.1	0
75.2	0
75.3	0
75.4	0
75.5	0
75.6	0
75.7	0
75.8	0
75.9	0
76	0
76.1	0
76.2	0
76.3	0
76.4	0
76.5	0
76.6	0
76.7	0
76.8	0
76.9	0
77	0
77.1	0
77.2	0
77.3	0
77.4	0
77.5	0
77.6	0
77.7	0
77.8	0
77.9	0
78	0
78.1	0
78.2	0
78.3	0
78.4	0
78.5	0
78.6	0
78.7	0
78.8	0
78.9	0
79	0
79.1	0
79.2	0
79.3	0
79.4	0
79.5	0
79.6	0
79.7	0
79.8	0
79.9	0
80	0
80.1	0
80.2	0
80.3	0
80.4	0
80.5	0
80.6	0
80.7	0
80.8	0
80.9	0
81	0
81.1	0
81.2	0
81.3	0
81.4	0
81.5	0
81.6	0
81.7	0
81.8	0
81.9	0
82	0
82.1	0
82.2	0
82.3	0
82.4	0
82.5	0
82.6	0
82.7	0
82.8	0
82.9	0
83	0
83.1	0
83.2	0
83.3	0
83.4	0
83.5	0
83.6	0
83.7	0
83.8	0
83.9	0
84	0
84.1	0
84.2	0
84.3	0
84.4	0
84.5	0
84.6	0
84.7	0
84.8	0
84.9	0
85	0
85.1	0
85.2	0
85.3	0
85.4	0
85.5	0
85.6	0
85.7	0
85.8	0
85.9	0
86	0
86.1	0
86.2	0
86.3	0
86.4	0
86.5	0
86.6	0
86.7	0
86.8	0
86.9	0
87	0
87.1	0
87.2	0
87.3	0
87.4	0
87.5	0
87.6	0
87.7	0
87.8	0
87.9	0
88	0
88.1	0
88.2	0
88.3	0
88.4	0
88.5	0
88.6	0
88.7	0
88.8	0
88.9	0
89	0
89.1	0
89.2	0
89.3	0
89.4	0
89.5	0
89.6	0
89.7	0
89.8	0
89.9	0
90	0
90.1	0
90.2	0
90.3	0
90.4	0
90.5	0
90.6	0
90.7	0
90.8	0
90.9	0
91	0
91.1	0
91.2	0
91.3	0
91.4	0
91.5	0
91.6	0
91.7	0
91.8	0
91.9	0
92	0
92.1	0
92.2	0
92.3	0
92.4	0
92.5	0
92.6	0
92.7	0
92.8	0
92.9	0
93	0
93.1	0
93.2	0
93.3	0
93.4	0
93.5	0
93.6	0
93.7	0
93.8	0
93.9	0
94	0
94.1	0
94.2	0
94.3	0
94.4	0
94.5	0
94.6	0
94.7	0
94.8	0
94.9	0
95	0
95.1	0
95.2	0
95.3	0
95.4	0
95.5	0
95.6	0
95.7	0
95.8	0
95.9	0
96	0
96.1	0
96.2	0
96.3	0
96.4	0
96.5	0
96.6	0
96.7	0
96.8	0
96.9	0
97	0
97.1	0
97.2	0
97.3	0
97.4	0
97.5	0
97.6	0
97.7	0
97.8	0
97.9	0
98	0
98.1	0
98.2	0
98.3	0
98.4	0
98.5	0
98.6	0
98.7	0
98.8	0
98.9	0
99	0
99.1	0
99.2	0
99.3	0
99.4	0
99.5	0
99.6	0
99.7	0
99.8	0
99.9	0
100	0
100.1	0.731275
100.2	0.88825
100.3	0.943975
100.4	0.962825
100.5	0.9711
100.6	0.97445
100.7	0.97425
100.8	0.97435
100.9	0.975475
101	0.9754
101.1	0.976575
101.2	0.97655
101.3	0.9766
101.4	0.9761
101.5	0.976925
101.6	0.977975
101.7	0.977425
101.8	0.9774
101.9	0.9767
102	0.9766
102.1	0.977175
102.2	0.977225
102.3	0.978125
102.4	0.976825
102.5	0.97755
102.6	0.97845
102.7	0.977575
102.8	0.97695
102.9	0.978525
103	0.9787
103.1	0.97665
103.2	0.977825
103.3	0.9783
103.4	0.978025
103.5	0.978175
103.6	0.979675
103.7	0.978575
103.8	0.978425
103.9	0.978825
104	0.978725
104.1	0.97885
104.2	0.979025
104.3	0.980225
104.4	0.979375
104.5	0.9797
104.6	0.98025
104.7	0.980125
104.8	0.9792
104.9	0.97945
105	0.98025
105.1	0.979175
105.2	0.980525
105.3	0.981275
105.4	0.981575
105.5	0.980525
105.6	0.98105
105.7	0.980925
105.8	0.98105
105.9	0.9805
106	0.9807
106.1	0.981475
106.2	0.981475
106.3	0.9818
106.4	0.9816
106.5	0.980975
106.6	0.981475
106.7	0.982125
106.8	0.9819
106.9	0.9812
107	0.98195
107.1	0.9818
107.2	0.981825
107.3	0.98115
107.4	0.9819
107.5	0.981925
107.6	0.9826
107.7	0.982775
107.8	0.98255
107.9	0.98145
108	0.983025
108.1	0.9828
108.2	0.983725
108.3	0.98375
108.4	0.9844
108.5	0.983925
108.6	0.98365
108.7	0.984475
108.8	0.9841
108.9	0.983425
109	0.983175
109.1	0.984175
109.2	0.98465
109.3	0.983775
109.4	0.98355
109.5	0.984075
109.6	0.984775
109.7	0.98455
109.8	0.98425
109.9	0.984325
110	0.9836
110.1	0.98425
110.2	0.984375
110.3	0.983125
110.4	0.983975
110.5	0.985425
110.6	0.9853
110.7	0.985175
110.8	0.985
110.9	0.984325
111	0.985375
111.1	0.98535
111.2	0.985025
111.3	0.9856
111.4	0.98595
111.5	0.985975
111.6	0.985225
111.7	0.985125
111.8	0.984475
111.9	0.985525
112	0.9858
112.1	0.98625
112.2	0.986125
112.3	0.986475
112.4	0.98585
112.5	0.985325
112.6	0.9863
112.7	0.985925
112.8	0.98545
112.9	0.985675
113	0.98555
113.1	0.985375
113.2	0.98555
113.3	0.98515
113.4	0.98535
113.5	0.98545
113.6	0.98655
113.7	0.9859
113.8	0.98595
113.9	0.986325
114	0.986225
114.1	0.986925
114.2	0.9873
114.3	0.98705
114.4	0.98655
114.5	0.986925
114.6	0.98745
114.7	0.987975
114.8	0.986325
114.9	0.986525
115	0.98765
115.1	0.98725
115.2	0.988325
115.3	0.98745
115.4	0.988375
115.5	0.986925
115.6	0.9881
115.7	0.987775
115.8	0.986975
115.9	0.9871
116	0.987375
116.1	0.9878
116.2	0.988575
116.3	0.98815
116.4	0.9881
116.5	0.988725
116.6	0.988575
116.7	0.988025
116.8	0.988475
116.9	0.987725
117	0.987625
117.1	0.98765
117.2	0.987675
117.3	0.98765
117.4	0.988175
117.5	0.988425
117.6	0.988875
117.7	0.988925
117.8	0.98845
117.9	0.98845
118	0.98825
118.1	0.9887
118.2	0.9891
118.3	0.988675
118.4	0.98935
118.5	0.988225
118.6	0.988675
118.7	0.989025
118.8	0.988625
118.9	0.98885
119	0.988325
119.1	0.989
119.2	0.9885
119.3	0.987875
119.4	0.98885
119.5	0.988975
119.6	0.988775
119.7	0.989175
119.8	0.989225
119.9	0.988575
120	0.98925
120.1	0.989325
120.2	0.98895
120.3	0.98885
120.4	0.989525
120.5	0.989675
120.6	0.99
120.7	0.989225
120.8	0.989
120.9	0.99
121	0.9901
121.1	0.98855
121.2	0.9884
121.3	0.988825
121.4	0.989125
121.5	0.989175
121.6	0.98975
121.7	0.990275
121.8	0.9899
121.9	0.989825
122	0.98995
122.1	0.989475
122.2	0.9894
122.3	0.989875
122.4	0.989725
122.5	0.98965
122.6	0.989225
122.7	0.989975
122.8	0.98995
122.9	0.99
123	0.99035
123.1	0.99015
123.2	0.9894
123.3	0.989725
123.4	0.989375
123.5	0.9903
123.6	0.9904
123.7	0.990275
123.8	0.990875
123.9	0.990825
124	0.99
124.1	0.990325
124.2	0.990575
124.3	0.990675
124.4	0.990725
124.5	0.9908
124.6	0.99055
124.7	0.990275
124.8	0.99
124.9	0.989475
125	0.9907
125.1	0.9911
125.2	0.991425
125.3	0.9916
125.4	0.991525
125.5	0.991
125.6	0.990425
125.7	0.98995
125.8	0.99035
125.9	0.9909
126	0.99125
126.1	0.991225
126.2	0.991825
126.3	0.9911
126.4	0.99045
126.5	0.99095
126.6	0.991075
126.7	0.9915
126.8	0.990825
126.9	0.991725
127	0.9924
127.1	0.99175
127.2	0.99135
127.3	0.99095
127.4	0.99095
127.5	0.9908
127.6	0.990475
127.7	0.99105
127.8	0.9912
127.9	0.991975
128	0.9918
128.1	0.991375
128.2	0.99195
128.3	0.99175
128.4	0.99205
128.5	0.9922
128.6	0.992675
128.7	0.991875
128.8	0.9922
128.9	0.99215
129	0.9919
129.1	0.992125
129.2	0.9923
129.3	0.9919
129.4	0.992325
129.5	0.9926
129.6	0.992525
129.7	0.992475
129.8	0.99185
129.9	0.991525
130	0.9921
130.1	0.992075
130.2	0.991525
130.3	0.9919
130.4	0.99135
130.5	0.991475
130.6	0.9915
130.7	0.991825
130.8	0.992
130.9	0.99205
131	0.99235
131.1	0.9922
131.2	0.9914
131.3	0.9917
131.4	0.9915
131.5	0.992275
131.6	0.992
131.7	0.9924
131.8	0.991775
131.9	0.9915
132	0.9919
132.1	0.992875
132.2	0.9924
132.3	0.993
132.4	0.992725
132.5	0.99185
132.6	0.99165
132.7	0.99175
132.8	0.992625
132.9	0.99265
133	0.99225
133.1	0.992125
133.2	0.992125
133.3	0.991875
133.4	0.9923
133.5	0.9918
133.6	0.992125
133.7	0.99255
133.8	0.991825
133.9	0.991975
134	0.993175
134.1	0.99225
134.2	0.99225
134.3	0.992125
134.4	0.9923
134.5	0.9917
134.6	0.991575
134.7	0.992325
134.8	0.992425
134.9	0.993575
135	0.9933
135.1	0.992825
135.2	0.9924
135.3	0.993
135.4	0.99275
135.5	0.992425
135.6	0.9933
135.7	0.993075
135.8	0.992175
135.9	0.992775
136	0.992575
136.1	0.99355
136.2	0.993325
136.3	0.99205
136.4	0.992425
136.5	0.99275
136.6	0.992425
136.7	0.993325
136.8	0.99315
136.9	0.99335
137	0.9923
137.1	0.992425
137.2	0.992625
137.3	0.9935
137.4	0.9932
137.5	0.99335
137.6	0.993725
137.7	0.993275
137.8	0.9929
137.9	0.9935
138	0.9927
138.1	0.993
138.2	0.99335
138.3	0.992825
138.4	0.9939
138.5	0.993525
138.6	0.993525
138.7	0.993375
138.8	0.9933
138.9	0.99275
139	0.9928
139.1	0.99285
139.2	0.99285
139.3	0.993825
139.4	0.993675
139.5	0.992525
139.6	0.99265
139.7	0.992725
139.8	0.99315
139.9	0.993125
140	0.993575
140.1	0.99335
140.2	0.993375
140.3	0.9938
140.4	0.993875
140.5	0.993525
140.6	0.994125
140.7	0.99345
140.8	0.99315
140.9	0.993825
141	0.99395
141.1	0.993825
141.2	0.9931
141.3	0.993175
141.4	0.9933
141.5	0.993675
141.6	0.993825
141.7	0.9941
141.8	0.99325
141.9	0.9939
142	0.9939
142.1	0.99305
142.2	0.993475
142.3	0.9931
142.4	0.99335
142.5	0.99335
142.6	0.99405
142.7	0.993625
142.8	0.99385
142.9	0.99435
143	0.9939
143.1	0.994
143.2	0.993175
143.3	0.99375
143.4	0.993475
143.5	0.994725
143.6	0.993775
143.7	0.9939
143.8	0.994025
143.9	0.993675
144	0.99405
144.1	0.993875
144.2	0.994075
144.3	0.99405
144.4	0.9944
144.5	0.9942
144.6	0.993875
144.7	0.99405
144.8	0.994225
144.9	0.994
145	0.994125
145.1	0.99445
145.2	0.994275
145.3	0.994025
145.4	0.994225
145.5	0.994325
145.6	0.9944
145.7	0.9939
145.8	0.99445
145.9	0.994375
146	0.993875
146.1	0.994075
146.2	0.994275
146.3	0.994325
146.4	0.994025
146.5	0.9941
146.6	0.993575
146.7	0.993925
146.8	0.994125
146.9	0.99405
147	0.994625
147.1	0.9945
147.2	0.9941
147.3	0.994475
147.4	0.993875
147.5	0.994575
147.6	0.994675
147.7	0.99415
147.8	0.9945
147.9	0.99395
148	0.99405
148.1	0.99405
148.2	0.99385
148.3	0.994275
148.4	0.994675
148.5	0.99495
148.6	0.994625
148.7	0.994875
148.8	0.9944
148.9	0.99405
149	0.9941
149.1	0.9942
149.2	0.99425
149.3	0.995175
149.4	0.994075
149.5	0.9943
149.6	0.994225
149.7	0.994275
149.8	0.9945
149.9	0.9944
150	0.9942
150.1	0.99425
150.2	0.994425
150.3	0.99465
150.4	0.9943
150.5	0.994125
150.6	0.994125
150.7	0.994425
150.8	0.9949
150.9	0.994325
151	0.995125
151.1	0.994775
151.2	0.994775
151.3	0.9948
151.4	0.99455
151.5	0.994525
151.6	0.9945
151.7	0.994825
151.8	0.99525
151.9	0.99445
152	0.9948
152.1	0.994625
152.2	0.994675
152.3	0.99475
152.4	0.995125
152.5	0.994975
152.6	0.995475
152.7	0.994725
152.8	0.99425
152.9	0.9947
153	0.99505
153.1	0.9947
153.2	0.995075
153.3	0.9941
153.4	0.99395
153.5	0.9945
153.6	0.99445
153.7	0.994325
153.8	0.995475
153.9	0.994725
154	0.994925
154.1	0.99475
154.2	0.9952
154.3	0.994875
154.4	0.99415
154.5	0.9942
154.6	0.99435
154.7	0.994275
154.8	0.9943
154.9	0.9946
155	0.995075
155.1	0.995125
155.2	0.994775
155.3	0.994525
155.4	0.9948
155.5	0.994475
155.6	0.994475
155.7	0.9944
155.8	0.994925
155.9	0.99485
156	0.994575
156.1	0.995175
156.2	0.994725
156.3	0.994675
156.4	0.994225
156.5	0.994925
156.6	0.994475
156.7	0.9953
156.8	0.9948
156.9	0.9946
157	0.99435
157.1	0.99455
157.2	0.994525
157.3	0.9947
157.4	0.995025
157.5	0.9946
157.6	0.995075
157.7	0.994125
157.8	0.9941
157.9	0.994925
158	0.995425
158.1	0.9948
158.2	0.99455
158.3	0.994725
158.4	0.99445
158.5	0.9947
158.6	0.99485
158.7	0.994925
158.8	0.995025
158.9	0.995475
159	0.99525
159.1	0.995375
159.2	0.9952
159.3	0.994775
159.4	0.994675
159.5	0.99485
159.6	0.99525
159.7	0.9958
159.8	0.995225
159.9	0.99525
160	0.995
160.1	0.9944
160.2	0.99445
160.3	0.995425
160.4	0.99475
160.5	0.995175
160.6	0.9954
160.7	0.99525
160.8	0.99485
160.9	0.994475
161	0.994975
161.1	0.995225
161.2	0.994775
161.3	0.994225
161.4	0.994375
161.5	0.994775
161.6	0.9942
161.7	0.99415
161.8	0.994825
161.9	0.9949
162	0.9951
162.1	0.994925
162.2	0.994725
162.3	0.99465
162.4	0.994925
162.5	0.994775
162.6	0.994575
162.7	0.994675
162.8	0.994675
162.9	0.9949
163	0.994875
163.1	0.99445
163.2	0.9946
163.3	0.9951
163.4	0.99515
163.5	0.994975
163.6	0.994675
163.7	0.99495
163.8	0.99535
163.9	0.9954
164	0.9949
164.1	0.994975
164.2	0.995225
164.3	0.99525
164.4	0.9952
164.5	0.995175
164.6	0.995075
164.7	0.9956
164.8	0.9959
164.9	0.995325
165	0.995125
165.1	0.994775
165.2	0.994975
165.3	0.995025
165.4	0.995275
165.5	0.994825
165.6	0.994675
165.7	0.99465
165.8	0.9946
165.9	0.995025
166	0.994875
166.1	0.9954
166.2	0.995025
166.3	0.995125
166.4	0.995475
166.5	0.99505
166.6	0.99515
166.7	0.995275
166.8	0.99545
166.9	0.9952
167	0.995075
167.1	0.9952
167.2	0.994775
167.3	0.99505
167.4	0.995075
167.5	0.994975
167.6	0.995225
167.7	0.99525
167.8	0.9948
167.9	0.994775
168	0.99495
168.1	0.995175
168.2	0.995275
168.3	0.995475
168.4	0.99545
168.5	0.99475
168.6	0.995125
168.7	0.99535
168.8	0.994925
168.9	0.99495
169	0.9954
169.1	0.995025
169.2	0.995275
169.3	0.9951
169.4	0.995825
169.5	0.995
169.6	0.9945
169.7	0.9951
169.8	0.995175
169.9	0.995225
170	0.99545
170.1	0.995425
170.2	0.9957
170.3	0.99525
170.4	0.9956
170.5	0.994875
170.6	0.9954
170.7	0.995625
170.8	0.99485
170.9	0.995125
171	0.995525
171.1	0.995375
171.2	0.99515
171.3	0.995225
171.4	0.995325
171.5	0.995625
171.6	0.99565
171.7	0.995525
171.8	0.99485
171.9	0.995125
172	0.995075
172.1	0.995175
172.2	0.994975
172.3	0.995725
172.4	0.995275
172.5	0.9951
172.6	0.994725
172.7	0.994975
172.8	0.99545
172.9	0.9952
173	0.9951
173.1	0.994925
173.2	0.9946
173.3	0.994925
173.4	0.9955
173.5	0.9951
173.6	0.9956
173.7	0.9958
173.8	0.9955
173.9	0.9952
174	0.99525
174.1	0.995225
174.2	0.99475
174.3	0.995325
174.4	0.99555
174.5	0.995625
174.6	0.99525
174.7	0.9947
174.8	0.9952
174.9	0.995125
175	0.9951
175.1	0.994975
175.2	0.99535
175.3	0.9951
175.4	0.99555
175.5	0.995025
175.6	0.994875
175.7	0.994875
175.8	0.995725
175.9	0.995575
176	0.9951
176.1	0.99515
176.2	0.9952
176.3	0.9953
176.4	0.995825
176.5	0.995175
176.6	0.9951
176.7	0.99535
176.8	0.995525
176.9	0.995075
177	0.99465
177.1	0.9949
177.2	0.995275
177.3	0.995475
177.4	0.99525
177.5	0.9957
177.6	0.995425
177.7	0.995675
177.8	0.995325
177.9	0.99585
178	0.99525
178.1	0.9952
178.2	0.9958
178.3	0.995325
178.4	0.9951
178.5	0.995375
178.6	0.99595
178.7	0.9952
178.8	0.9955
178.9	0.9956
179	0.995625
179.1	0.995775
179.2	0.995675
179.3	0.9948
179.4	0.99535
179.5	0.99515
179.6	0.995275
179.7	0.995125
179.8	0.99585
179.9	0.99585
180	0.995875
180.1	0.99585
180.2	0.995525
180.3	0.99555
180.4	0.9958
180.5	0.9955
180.6	0.99535
180.7	0.995775
180.8	0.995525
180.9	0.995325
181	0.99535
181.1	0.9954
181.2	0.995575
181.3	0.995325
181.4	0.9954
181.5	0.9952
181.6	0.995075
181.7	0.995275
181.8	0.99495
181.9	0.9951
182	0.995025
182.1	0.995125
182.2	0.9947
182.3	0.99525
182.4	0.9956
182.5	0.995025
182.6	0.99535
182.7	0.9953
182.8	0.995175
182.9	0.99485
183	0.995125
183.1	0.995
183.2	0.995375
183.3	0.995025
183.4	0.994575
183.5	0.99525
183.6	0.995075
183.7	0.99545
183.8	0.995525
183.9	0.995425
184	0.995125
184.1	0.9949
184.2	0.995075
184.3	0.9952
184.4	0.9956
184.5	0.994775
184.6	0.994875
184.7	0.9955
184.8	0.99575
184.9	0.99575
185	0.9953
185.1	0.995775
185.2	0.996
185.3	0.995275
185.4	0.99595
185.5	0.9955
185.6	0.995525
185.7	0.996
185.8	0.9957
185.9	0.9953
186	0.995625
186.1	0.99565
186.2	0.9955
186.3	0.995075
186.4	0.99515
186.5	0.99495
186.6	0.9955
186.7	0.9955
186.8	0.9953
186.9	0.99585
187	0.995625
187.1	0.995625
187.2	0.995425
187.3	0.995125
187.4	0.9953
187.5	0.99535
187.6	0.9953
187.7	0.9953
187.8	0.9955
187.9	0.99545
188	0.995825
188.1	0.9957
188.2	0.9959
188.3	0.99585
188.4	0.9952
188.5	0.9954
188.6	0.995575
188.7	0.995175
188.8	0.995875
188.9	0.995675
189	0.99535
189.1	0.995675
189.2	0.996
189.3	0.99585
189.4	0.995625
189.5	0.995275
189.6	0.99485
189.7	0.995625
189.8	0.995025
189.9	0.99545
190	0.995475
190.1	0.995825
190.2	0.995425
190.3	0.994975
190.4	0.994925
190.5	0.9949
190.6	0.995575
190.7	0.9954
190.8	0.99575
190.9	0.995725
191	0.995625
191.1	0.996125
191.2	0.99545
191.3	0.995625
191.4	0.9954
191.5	0.99515
191.6	0.995125
191.7	0.99495
191.8	0.9949
191.9	0.9955
192	0.995525
192.1	0.99495
192.2	0.995175
192.3	0.99565
192.4	0.9957
192.5	0.9954
192.6	0.995175
192.7	0.99555
192.8	0.995175
192.9	0.9954
193	0.9952
193.1	0.995575
193.2	0.9955
193.3	0.995525
193.4	0.995375
193.5	0.9951
193.6	0.995625
193.7	0.99565
193.8	0.995375
193.9	0.995425
194	0.99505
194.1	0.995325
194.2	0.995275
194.3	0.995275
194.4	0.995
194.5	0.995575
194.6	0.995675
194.7	0.99575
194.8	0.99565
194.9	0.995325
195	0.996175
195.1	0.99605
195.2	0.995125
195.3	0.9957
195.4	0.995625
195.5	0.99565
195.6	0.99545
195.7	0.99505
195.8	0.9949
195.9	0.99445
196	0.99575
196.1	0.9952
196.2	0.99475
196.3	0.9955
196.4	0.9956
196.5	0.995825
196.6	0.995875
196.7	0.99585
196.8	0.99555
196.9	0.995425
197	0.995475
197.1	0.995675
197.2	0.9955
197.3	0.995
197.4	0.995525
197.5	0.995575
197.6	0.9957
197.7	0.995525
197.8	0.995525
197.9	0.9953
198	0.996
198.1	0.995375
198.2	0.995125
198.3	0.996025
198.4	0.995625
198.5	0.99635
198.6	0.995975
198.7	0.995375
198.8	0.995675
198.9	0.996075
199	0.996125
199.1	0.995325
199.2	0.9951
199.3	0.9953
199.4	0.995475
199.5	0.99575
199.6	0.995625
199.7	0.9958
199.8	0.995375
199.9	0.99565
200	0.995125
[truncated: 14,000 more rows]
