# Supplementary material for: Bayesian inference of kinetic schemes for ion channels by Kalman filtering
Source: eLife journal article supplement (doi:10.7554/elife.62714), 2022-05-04
Supplement: fig4-data3 [file 1_Sim_N_20000_Strom_MW_32M.xlsx]

## Sheet: Tabelle1
0.1	0
0.2	0
0.3	0
0.4	0
0.5	0
0.6	0
0.7	0
0.8	0
0.9	0
1	0
1.1	0
1.2	0
1.3	0
1.4	0
1.5	0
1.6	0
1.7	0
1.8	0
1.9	0
2	0
2.1	0
2.2	0
2.3	0
2.4	0
2.5	0
2.6	0
2.7	0
2.8	0
2.9	0
3	0
3.1	0
3.2	0
3.3	0
3.4	0
3.5	0
3.6	0
3.7	0
3.8	0
3.9	0
4	0
4.1	0
4.2	0
4.3	0
4.4	0
4.5	0
4.6	0
4.7	0
4.8	0
4.9	0
5	0
5.1	0
5.2	0
5.3	0
5.4	0
5.5	0
5.6	0
5.7	0
5.8	0
5.9	0
6	0
6.1	0
6.2	0
6.3	0
6.4	0
6.5	0
6.6	0
6.7	0
6.8	0
6.9	0
7	0
7.1	0
7.2	0
7.3	0
7.4	0
7.5	0
7.6	0
7.7	0
7.8	0
7.9	0
8	0
8.1	0
8.2	0
8.3	0
8.4	0
8.5	0
8.6	0
8.7	0
8.8	0
8.9	0
9	0
9.1	0
9.2	0
9.3	0
9.4	0
9.5	0
9.6	0
9.7	0
9.8	0
9.9	0
10	0
10.1	0
10.2	0
10.3	0
10.4	0
10.5	0
10.6	0
10.7	0
10.8	0
10.9	0
11	0
11.1	0
11.2	0
11.3	0
11.4	0
11.5	0
11.6	0
11.7	0
11.8	0
11.9	0
12	0
12.1	0
12.2	0
12.3	0
12.4	0
12.5	0
12.6	0
12.7	0
12.8	0
12.9	0
13	0
13.1	0
13.2	0
13.3	0
13.4	0
13.5	0
13.6	0
13.7	0
13.8	0
13.9	0
14	0
14.1	0
14.2	0
14.3	0
14.4	0
14.5	0
14.6	0
14.7	0
14.8	0
14.9	0
15	0
15.1	0
15.2	0
15.3	0
15.4	0
15.5	0
15.6	0
15.7	0
15.8	0
15.9	0
16	0
16.1	0
16.2	0
16.3	0
16.4	0
16.5	0
16.6	0
16.7	0
16.8	0
16.9	0
17	0
17.1	0
17.2	0
17.3	0
17.4	0
17.5	0
17.6	0
17.7	0
17.8	0
17.9	0
18	0
18.1	0
18.2	0
18.3	0
18.4	0
18.5	0
18.6	0
18.7	0
18.8	0
18.9	0
19	0
19.1	0
19.2	0
19.3	0
19.4	0
19.5	0
19.6	0
19.7	0
19.8	0
19.9	0
20	0
20.1	0
20.2	0
20.3	0
20.4	0
20.5	0
20.6	0
20.7	0
20.8	0
20.9	0
21	0
21.1	0
21.2	0
21.3	0
21.4	0
21.5	0
21.6	0
21.7	0
21.8	0
21.9	0
22	0
22.1	0
22.2	0
22.3	0
22.4	0
22.5	0
22.6	0
22.7	0
22.8	0
22.9	0
23	0
23.1	0
23.2	0
23.3	0
23.4	0
23.5	0
23.6	0
23.7	0
23.8	0
23.9	0
24	0
24.1	0
24.2	0
24.3	0
24.4	0
24.5	0
24.6	0
24.7	0
24.8	0
24.9	0
25	0
25.1	0
25.2	0
25.3	0
25.4	0
25.5	0
25.6	0
25.7	0
25.8	0
25.9	0
26	0
26.1	0
26.2	0
26.3	0
26.4	0
26.5	0
26.6	0
26.7	0
26.8	0
26.9	0
27	0
27.1	0
27.2	0
27.3	0
27.4	0
27.5	0
27.6	0
27.7	0
27.8	0
27.9	0
28	0
28.1	0
28.2	0
28.3	0
28.4	0
28.5	0
28.6	0
28.7	0
28.8	0
28.9	0
29	0
29.1	0
29.2	0
29.3	0
29.4	0
29.5	0
29.6	0
29.7	0
29.8	0
29.9	0
30	0
30.1	0
30.2	0
30.3	0
30.4	0
30.5	0
30.6	0
30.7	0
30.8	0
30.9	0
31	0
31.1	0
31.2	0
31.3	0
31.4	0
31.5	0
31.6	0
31.7	0
31.8	0
31.9	0
32	0
32.1	0
32.2	0
32.3	0
32.4	0
32.5	0
32.6	0
32.7	0
32.8	0
32.9	0
33	0
33.1	0
33.2	0
33.3	0
33.4	0
33.5	0
33.6	0
33.7	0
33.8	0
33.9	0
34	0
34.1	0
34.2	0
34.3	0
34.4	0
34.5	0
34.6	0
34.7	0
34.8	0
34.9	0
35	0
35.1	0
35.2	0
35.3	0
35.4	0
35.5	0
35.6	0
35.7	0
35.8	0
35.9	0
36	0
36.1	0
36.2	0
36.3	0
36.4	0
36.5	0
36.6	0
36.7	0
36.8	0
36.9	0
37	0
37.1	0
37.2	0
37.3	0
37.4	0
37.5	0
37.6	0
37.7	0
37.8	0
37.9	0
38	0
38.1	0
38.2	0
38.3	0
38.4	0
38.5	0
38.6	0
38.7	0
38.8	0
38.9	0
39	0
39.1	0
39.2	0
39.3	0
39.4	0
39.5	0
39.6	0
39.7	0
39.8	0
39.9	0
40	0
40.1	0
40.2	0
40.3	0
40.4	0
40.5	0
40.6	0
40.7	0
40.8	0
40.9	0
41	0
41.1	0
41.2	0
41.3	0
41.4	0
41.5	0
41.6	0
41.7	0
41.8	0
41.9	0
42	0
42.1	0
42.2	0
42.3	0
42.4	0
42.5	0
42.6	0
42.7	0
42.8	0
42.9	0
43	0
43.1	0
43.2	0
43.3	0
43.4	0
43.5	0
43.6	0
43.7	0
43.8	0
43.9	0
44	0
44.1	0
44.2	0
44.3	0
44.4	0
44.5	0
44.6	0
44.7	0
44.8	0
44.9	0
45	0
45.1	0
45.2	0
45.3	0
45.4	0
45.5	0
45.6	0
45.7	0
45.8	0
45.9	0
46	0
46.1	0
46.2	0
46.3	0
46.4	0
46.5	0
46.6	0
46.7	0
46.8	0
46.9	0
47	0
47.1	0
47.2	0
47.3	0
47.4	0
47.5	0
47.6	0
47.7	0
47.8	0
47.9	0
48	0
48.1	0
48.2	0
48.3	0
48.4	0
48.5	0
48.6	0
48.7	0
48.8	0
48.9	0
49	0
49.1	0
49.2	0
49.3	0
49.4	0
49.5	0
49.6	0
49.7	0
49.8	0
49.9	0
50	0
50.1	0
50.2	0
50.3	0
50.4	0
50.5	0
50.6	0
50.7	0
50.8	0
50.9	0
51	0
51.1	0
51.2	0
51.3	0
51.4	0
51.5	0
51.6	0
51.7	0
51.8	0
51.9	0
52	0
52.1	0
52.2	0
52.3	0
52.4	0
52.5	0
52.6	0
52.7	0
52.8	0
52.9	0
53	0
53.1	0
53.2	0
53.3	0
53.4	0
53.5	0
53.6	0
53.7	0
53.8	0
53.9	0
54	0
54.1	0
54.2	0
54.3	0
54.4	0
54.5	0
54.6	0
54.7	0
54.8	0
54.9	0
55	0
55.1	0
55.2	0
55.3	0
55.4	0
55.5	0
55.6	0
55.7	0
55.8	0
55.9	0
56	0
56.1	0
56.2	0
56.3	0
56.4	0
56.5	0
56.6	0
56.7	0
56.8	0
56.9	0
57	0
57.1	0
57.2	0
57.3	0
57.4	0
57.5	0
57.6	0
57.7	0
57.8	0
57.9	0
58	0
58.1	0
58.2	0
58.3	0
58.4	0
58.5	0
58.6	0
58.7	0
58.8	0
58.9	0
59	0
59.1	0
59.2	0
59.3	0
59.4	0
59.5	0
59.6	0
59.7	0
59.8	0
59.9	0
60	0
60.1	0
60.2	0
60.3	0
60.4	0
60.5	0
60.6	0
60.7	0
60.8	0
60.9	0
61	0
61.1	0
61.2	0
61.3	0
61.4	0
61.5	0
61.6	0
61.7	0
61.8	0
61.9	0
62	0
62.1	0
62.2	0
62.3	0
62.4	0
62.5	0
62.6	0
62.7	0
62.8	0
62.9	0
63	0
63.1	0
63.2	0
63.3	0
63.4	0
63.5	0
63.6	0
63.7	0
63.8	0
63.9	0
64	0
64.1	0
64.2	0
64.3	0
64.4	0
64.5	0
64.6	0
64.7	0
64.8	0
64.9	0
65	0
65.1	0
65.2	0
65.3	0
65.4	0
65.5	0
65.6	0
65.7	0
65.8	0
65.9	0
66	0
66.1	0
66.2	0
66.3	0
66.4	0
66.5	0
66.6	0
66.7	0
66.8	0
66.9	0
67	0
67.1	0
67.2	0
67.3	0
67.4	0
67.5	0
67.6	0
67.7	0
67.8	0
67.9	0
68	0
68.1	0
68.2	0
68.3	0
68.4	0
68.5	0
68.6	0
68.7	0
68.8	0
68.9	0
69	0
69.1	0
69.2	0
69.3	0
69.4	0
69.5	0
69.6	0
69.7	0
69.8	0
69.9	0
70	0
70.1	0
70.2	0
70.3	0
70.4	0
70.5	0
70.6	0
70.7	0
70.8	0
70.9	0
71	0
71.1	0
71.2	0
71.3	0
71.4	0
71.5	0
71.6	0
71.7	0
71.8	0
71.9	0
72	0
72.1	0
72.2	0
72.3	0
72.4	0
72.5	0
72.6	0
72.7	0
72.8	0
72.9	0
73	0
73.1	0
73.2	0
73.3	0
73.4	0
73.5	0
73.6	0
73.7	0
73.8	0
73.9	0
74	0
74.1	0
74.2	0
74.3	0
74.4	0
74.5	0
74.6	0
74.7	0
74.8	0
74.9	0
75	0
75.1	0
75.2	0
75.3	0
75.4	0
75.5	0
75.6	0
75.7	0
75.8	0
75.9	0
76	0
76.1	0
76.2	0
76.3	0
76.4	0
76.5	0
76.6	0
76.7	0
76.8	0
76.9	0
77	0
77.1	0
77.2	0
77.3	0
77.4	0
77.5	0
77.6	0
77.7	0
77.8	0
77.9	0
78	0
78.1	0
78.2	0
78.3	0
78.4	0
78.5	0
78.6	0
78.7	0
78.8	0
78.9	0
79	0
79.1	0
79.2	0
79.3	0
79.4	0
79.5	0
79.6	0
79.7	0
79.8	0
79.9	0
80	0
80.1	0
80.2	0
80.3	0
80.4	0
80.5	0
80.6	0
80.7	0
80.8	0
80.9	0
81	0
81.1	0
81.2	0
81.3	0
81.4	0
81.5	0
81.6	0
81.7	0
81.8	0
81.9	0
82	0
82.1	0
82.2	0
82.3	0
82.4	0
82.5	0
82.6	0
82.7	0
82.8	0
82.9	0
83	0
83.1	0
83.2	0
83.3	0
83.4	0
83.5	0
83.6	0
83.7	0
83.8	0
83.9	0
84	0
84.1	0
84.2	0
84.3	0
84.4	0
84.5	0
84.6	0
84.7	0
84.8	0
84.9	0
85	0
85.1	0
85.2	0
85.3	0
85.4	0
85.5	0
85.6	0
85.7	0
85.8	0
85.9	0
86	0
86.1	0
86.2	0
86.3	0
86.4	0
86.5	0
86.6	0
86.7	0
86.8	0
86.9	0
87	0
87.1	0
87.2	0
87.3	0
87.4	0
87.5	0
87.6	0
87.7	0
87.8	0
87.9	0
88	0
88.1	0
88.2	0
88.3	0
88.4	0
88.5	0
88.6	0
88.7	0
88.8	0
88.9	0
89	0
89.1	0
89.2	0
89.3	0
89.4	0
89.5	0
89.6	0
89.7	0
89.8	0
89.9	0
90	0
90.1	0
90.2	0
90.3	0
90.4	0
90.5	0
90.6	0
90.7	0
90.8	0
90.9	0
91	0
91.1	0
91.2	0
91.3	0
91.4	0
91.5	0
91.6	0
91.7	0
91.8	0
91.9	0
92	0
92.1	0
92.2	0
92.3	0
92.4	0
92.5	0
92.6	0
92.7	0
92.8	0
92.9	0
93	0
93.1	0
93.2	0
93.3	0
93.4	0
93.5	0
93.6	0
93.7	0
93.8	0
93.9	0
94	0
94.1	0
94.2	0
94.3	0
94.4	0
94.5	0
94.6	0
94.7	0
94.8	0
94.9	0
95	0
95.1	0
95.2	0
95.3	0
95.4	0
95.5	0
95.6	0
95.7	0
95.8	0
95.9	0
96	0
96.1	0
96.2	0
96.3	0
96.4	0
96.5	0
96.6	0
96.7	0
96.8	0
96.9	0
97	0
97.1	0
97.2	0
97.3	0
97.4	0
97.5	0
97.6	0
97.7	0
97.8	0
97.9	0
98	0
98.1	0
98.2	0
98.3	0
98.4	0
98.5	0
98.6	0
98.7	0
98.8	0
98.9	0
99	0
99.1	0
99.2	0
99.3	0
99.4	0
99.5	0
99.6	0
99.7	0
99.8	0
99.9	0
100	0
100.1	0.00105
100.2	0.00385
100.3	0.00755
100.4	0.01165
100.5	0.01665
100.6	0.02045
100.7	0.0248
100.8	0.0289
100.9	0.0338
101	0.0383
101.1	0.0433
101.2	0.0475
101.3	0.05185
101.4	0.0558
101.5	0.06035
101.6	0.06515
101.7	0.07075
101.8	0.0746
101.9	0.0785
102	0.08405
102.1	0.08935
102.2	0.0926
102.3	0.09735
102.4	0.10165
102.5	0.10575
102.6	0.1107
102.7	0.1153
102.8	0.11915
102.9	0.1238
103	0.1288
103.1	0.1327
103.2	0.13635
103.3	0.14065
103.4	0.1447
103.5	0.1492
103.6	0.1535
103.7	0.1577
103.8	0.1618
103.9	0.16585
104	0.17065
104.1	0.1744
104.2	0.17785
104.3	0.18175
104.4	0.1859
104.5	0.18895
104.6	0.1922
104.7	0.19595
104.8	0.1996
104.9	0.2028
105	0.207
105.1	0.2106
105.2	0.21415
105.3	0.2177
105.4	0.22095
105.5	0.2241
105.6	0.2281
105.7	0.2317
105.8	0.23525
105.9	0.2385
106	0.24195
106.1	0.24585
106.2	0.2499
106.3	0.25295
106.4	0.25585
106.5	0.2589
106.6	0.2618
106.7	0.2653
106.8	0.2683
106.9	0.27165
107	0.2754
107.1	0.2783
107.2	0.28095
107.3	0.2846
107.4	0.28735
107.5	0.2905
107.6	0.29405
107.7	0.29735
107.8	0.3005
107.9	0.3034
108	0.3061
108.1	0.30915
108.2	0.3119
108.3	0.3147
108.4	0.31775
108.5	0.3213
108.6	0.3246
108.7	0.32775
108.8	0.33115
108.9	0.3338
109	0.3364
109.1	0.339
109.2	0.3427
109.3	0.34525
109.4	0.34855
109.5	0.3509
109.6	0.354
109.7	0.35685
109.8	0.359
109.9	0.3615
110	0.3647
110.1	0.36765
110.2	0.3702
110.3	0.37275
110.4	0.37555
110.5	0.37845
110.6	0.381
110.7	0.384
110.8	0.38605
110.9	0.38905
111	0.39135
111.1	0.3936
111.2	0.39635
111.3	0.39875
111.4	0.4011
111.5	0.40325
111.6	0.40595
111.7	0.40865
111.8	0.4117
111.9	0.4143
112	0.4167
112.1	0.41925
112.2	0.42175
112.3	0.4251
112.4	0.4273
112.5	0.42895
112.6	0.43135
112.7	0.43335
112.8	0.4357
112.9	0.4384
113	0.44015
113.1	0.4421
113.2	0.4443
113.3	0.4456
113.4	0.4471
113.5	0.44915
113.6	0.45085
113.7	0.45305
113.8	0.4551
113.9	0.45735
114	0.45915
114.1	0.46165
114.2	0.4636
114.3	0.4661
114.4	0.4687
114.5	0.4711
114.6	0.4731
114.7	0.4752
114.8	0.47705
114.9	0.4789
115	0.48095
115.1	0.48335
115.2	0.486
115.3	0.4879
115.4	0.4909
115.5	0.49185
115.6	0.4937
115.7	0.495
115.8	0.49745
115.9	0.4993
116	0.50095
116.1	0.50225
116.2	0.5041
116.3	0.5055
116.4	0.50765
116.5	0.5094
116.6	0.51085
116.7	0.5129
116.8	0.515
116.9	0.5167
117	0.5186
117.1	0.52055
117.2	0.5222
117.3	0.52385
117.4	0.5258
117.5	0.52705
117.6	0.5294
117.7	0.5307
117.8	0.5322
117.9	0.53465
118	0.5358
118.1	0.537
118.2	0.5377
118.3	0.539
118.4	0.54075
118.5	0.5429
118.6	0.54425
118.7	0.5458
118.8	0.5474
118.9	0.5494
119	0.5505
119.1	0.55215
119.2	0.5533
119.3	0.55515
119.4	0.5563
119.5	0.5578
119.6	0.55965
119.7	0.5615
119.8	0.5627
119.9	0.56415
120	0.5651
120.1	0.56595
120.2	0.5676
120.3	0.56945
120.4	0.57055
120.5	0.5725
120.6	0.57375
120.7	0.5758
120.8	0.57675
120.9	0.57825
121	0.5801
121.1	0.58145
121.2	0.5824
121.3	0.5833
121.4	0.58485
121.5	0.5864
121.6	0.58755
121.7	0.5888
121.8	0.59005
121.9	0.5913
122	0.59275
122.1	0.5934
122.2	0.5951
122.3	0.59655
122.4	0.59835
122.5	0.5989
122.6	0.59965
122.7	0.60085
122.8	0.60215
122.9	0.60285
123	0.60435
123.1	0.6057
123.2	0.60715
123.3	0.60895
123.4	0.60975
123.5	0.6108
123.6	0.61225
123.7	0.6135
123.8	0.61465
123.9	0.6156
124	0.6171
124.1	0.6176
124.2	0.6186
124.3	0.61975
124.4	0.62105
124.5	0.62215
124.6	0.623
124.7	0.6242
124.8	0.6253
124.9	0.626
125	0.6271
125.1	0.6282
125.2	0.6296
125.3	0.6304
125.4	0.6315
125.5	0.633
125.6	0.6337
125.7	0.6346
125.8	0.63625
125.9	0.63735
126	0.6378
126.1	0.6394
126.2	0.6409
126.3	0.64225
126.4	0.64335
126.5	0.6448
126.6	0.6462
126.7	0.6472
126.8	0.6479
126.9	0.6485
127	0.64955
127.1	0.65125
127.2	0.6522
127.3	0.65315
127.4	0.65355
127.5	0.65455
127.6	0.6556
127.7	0.6571
127.8	0.6581
127.9	0.65855
128	0.6591
128.1	0.6599
128.2	0.6606
128.3	0.66105
128.4	0.66205
128.5	0.66305
128.6	0.664
128.7	0.6652
128.8	0.66625
128.9	0.6665
129	0.66715
129.1	0.66775
129.2	0.6685
129.3	0.66945
129.4	0.6703
129.5	0.67135
129.6	0.67255
129.7	0.67325
129.8	0.6741
129.9	0.6745
130	0.67555
130.1	0.67635
130.2	0.67735
130.3	0.67835
130.4	0.6795
130.5	0.68045
130.6	0.6815
130.7	0.6823
130.8	0.68325
130.9	0.6836
131	0.6837
131.1	0.6847
131.2	0.6851
131.3	0.6854
131.4	0.68655
131.5	0.6865
131.6	0.68805
131.7	0.68855
131.8	0.6892
131.9	0.69015
132	0.6909
132.1	0.69185
132.2	0.6925
132.3	0.6934
132.4	0.69365
132.5	0.6941
132.6	0.6949
132.7	0.69575
132.8	0.69645
132.9	0.69705
133	0.6974
133.1	0.69845
133.2	0.69945
133.3	0.70035
133.4	0.7015
133.5	0.7016
133.6	0.70215
133.7	0.70235
133.8	0.70375
133.9	0.7048
134	0.70535
134.1	0.70625
134.2	0.70735
134.3	0.70795
134.4	0.70885
134.5	0.7102
134.6	0.7111
134.7	0.71145
134.8	0.712
134.9	0.7128
135	0.7129
135.1	0.71365
135.2	0.7142
135.3	0.715
135.4	0.716
135.5	0.71635
135.6	0.71695
135.7	0.71735
135.8	0.71835
135.9	0.71905
136	0.71955
136.1	0.7203
136.2	0.7211
136.3	0.72165
136.4	0.7222
136.5	0.72285
136.6	0.7233
136.7	0.7239
136.8	0.7242
136.9	0.72445
137	0.72495
137.1	0.7256
137.2	0.7263
137.3	0.72705
137.4	0.72725
137.5	0.72795
137.6	0.7284
137.7	0.72845
137.8	0.72935
137.9	0.73005
138	0.73085
138.1	0.7316
138.2	0.73145
138.3	0.732
138.4	0.73225
138.5	0.7332
138.6	0.73355
138.7	0.7343
138.8	0.73505
138.9	0.73565
139	0.73585
139.1	0.73615
139.2	0.7366
139.3	0.737
139.4	0.73695
139.5	0.73725
139.6	0.73755
139.7	0.738
139.8	0.7388
139.9	0.73955
140	0.7395
140.1	0.74015
140.2	0.74025
140.3	0.74045
140.4	0.7409
140.5	0.7411
140.6	0.74145
140.7	0.74155
140.8	0.74255
140.9	0.74325
141	0.7436
141.1	0.7439
141.2	0.74415
141.3	0.74485
141.4	0.74495
141.5	0.74525
141.6	0.74585
141.7	0.74635
141.8	0.74655
141.9	0.7469
142	0.74755
142.1	0.7477
142.2	0.74835
142.3	0.74895
142.4	0.74975
142.5	0.7502
142.6	0.7509
142.7	0.7522
142.8	0.75235
142.9	0.7528
143	0.75375
143.1	0.75355
143.2	0.75305
143.3	0.7534
143.4	0.7539
143.5	0.7542
143.6	0.755
143.7	0.7552
143.8	0.7554
143.9	0.75545
144	0.7559
144.1	0.75645
144.2	0.7569
144.3	0.7574
144.4	0.7578
144.5	0.75865
144.6	0.7591
144.7	0.7597
144.8	0.76035
144.9	0.7609
145	0.76145
145.1	0.762
145.2	0.7625
145.3	0.76295
145.4	0.76345
145.5	0.7642
145.6	0.7643
145.7	0.7648
145.8	0.7647
145.9	0.7655
146	0.76575
146.1	0.766
146.2	0.76615
146.3	0.76655
146.4	0.76675
146.5	0.76685
146.6	0.768
146.7	0.76855
146.8	0.7688
146.9	0.76865
147	0.7697
147.1	0.76975
147.2	0.7702
147.3	0.77035
147.4	0.7706
147.5	0.7711
147.6	0.77185
147.7	0.7722
147.8	0.77305
147.9	0.7732
148	0.77365
148.1	0.7744
148.2	0.77435
148.3	0.77465
148.4	0.7745
148.5	0.77525
148.6	0.77515
148.7	0.77615
148.8	0.77665
148.9	0.77675
149	0.77745
149.1	0.7774
149.2	0.7776
149.3	0.778
149.4	0.7783
149.5	0.77835
149.6	0.77855
149.7	0.77875
149.8	0.7789
149.9	0.77935
150	0.7799
150.1	0.78035
150.2	0.78065
150.3	0.78055
150.4	0.7807
150.5	0.78065
150.6	0.7806
150.7	0.7804
150.8	0.7803
150.9	0.78025
151	0.781
151.1	0.7813
151.2	0.78135
151.3	0.78155
151.4	0.7816
151.5	0.78165
151.6	0.7816
151.7	0.7815
151.8	0.78135
151.9	0.7815
152	0.7819
152.1	0.7823
152.2	0.78245
152.3	0.7829
152.4	0.7831
152.5	0.7835
152.6	0.78405
152.7	0.78395
152.8	0.78435
152.9	0.7846
153	0.78535
153.1	0.78565
153.2	0.7856
153.3	0.7862
153.4	0.78645
153.5	0.78705
153.6	0.787
153.7	0.78755
153.8	0.7877
153.9	0.78795
154	0.78795
154.1	0.7884
154.2	0.78855
154.3	0.7892
154.4	0.78945
154.5	0.7898
154.6	0.79
154.7	0.7897
154.8	0.7905
154.9	0.7912
155	0.7916
155.1	0.7922
155.2	0.7924
155.3	0.7923
155.4	0.79235
155.5	0.79275
155.6	0.79225
155.7	0.79235
155.8	0.7925
155.9	0.7924
156	0.7921
156.1	0.79235
156.2	0.7927
156.3	0.7927
156.4	0.79305
156.5	0.7927
156.6	0.79275
156.7	0.7934
156.8	0.7936
156.9	0.7938
157	0.79395
157.1	0.7938
157.2	0.7938
157.3	0.794
157.4	0.79385
157.5	0.7938
157.6	0.7938
157.7	0.794
157.8	0.79355
157.9	0.7938
158	0.7939
158.1	0.7939
158.2	0.79435
158.3	0.79445
158.4	0.7943
158.5	0.79485
158.6	0.7951
158.7	0.7955
158.8	0.79565
158.9	0.79565
159	0.79605
159.1	0.79545
159.2	0.79505
159.3	0.7955
159.4	0.79565
159.5	0.79555
159.6	0.7958
159.7	0.79595
159.8	0.7965
159.9	0.79595
160	0.7966
160.1	0.79615
160.2	0.79665
160.3	0.797
160.4	0.7976
160.5	0.79725
160.6	0.79715
160.7	0.79645
160.8	0.7966
160.9	0.79655
161	0.79685
161.1	0.7967
161.2	0.79765
161.3	0.79805
161.4	0.79815
161.5	0.79835
161.6	0.7987
161.7	0.79915
161.8	0.7995
161.9	0.79925
162	0.7993
162.1	0.79925
162.2	0.79905
162.3	0.7993
162.4	0.7989
162.5	0.79945
162.6	0.79955
162.7	0.799
162.8	0.79935
162.9	0.7997
163	0.79955
163.1	0.7994
163.2	0.79925
163.3	0.7991
163.4	0.799
163.5	0.7985
163.6	0.7987
163.7	0.79875
163.8	0.79865
163.9	0.79905
164	0.79945
164.1	0.7993
164.2	0.7995
164.3	0.7994
164.4	0.79985
164.5	0.79985
164.6	0.8002
164.7	0.8
164.8	0.8001
164.9	0.7997
165	0.7999
165.1	0.79995
165.2	0.8
165.3	0.8001
165.4	0.8005
165.5	0.80075
165.6	0.80055
165.7	0.8013
165.8	0.8013
165.9	0.80185
166	0.8022
166.1	0.8024
166.2	0.80245
166.3	0.80255
166.4	0.8022
166.5	0.8028
166.6	0.80285
166.7	0.8033
166.8	0.8036
166.9	0.80375
167	0.80375
167.1	0.8035
167.2	0.80335
167.3	0.80345
167.4	0.80375
167.5	0.80445
167.6	0.80465
167.7	0.8047
167.8	0.80445
167.9	0.8044
168	0.80475
168.1	0.8044
168.2	0.805
168.3	0.8054
168.4	0.80535
168.5	0.8053
168.6	0.8054
168.7	0.80515
168.8	0.8054
168.9	0.8056
169	0.8062
169.1	0.806
169.2	0.8058
169.3	0.80555
169.4	0.80565
169.5	0.8058
169.6	0.80635
169.7	0.80575
169.8	0.80545
169.9	0.80575
170	0.80585
170.1	0.80625
170.2	0.80635
170.3	0.80675
170.4	0.80675
170.5	0.8064
170.6	0.80675
170.7	0.80705
170.8	0.80725
170.9	0.80765
171	0.8078
171.1	0.80725
171.2	0.8077
171.3	0.8081
171.4	0.8083
171.5	0.8087
171.6	0.80835
171.7	0.8086
171.8	0.8086
171.9	0.80855
172	0.8091
172.1	0.8092
172.2	0.80955
172.3	0.80925
172.4	0.8097
172.5	0.80975
172.6	0.81025
172.7	0.81025
172.8	0.81055
172.9	0.8106
173	0.8101
173.1	0.80995
173.2	0.81005
173.3	0.8102
173.4	0.8102
173.5	0.81035
173.6	0.81025
173.7	0.8097
173.8	0.80955
173.9	0.8094
174	0.80965
174.1	0.80965
174.2	0.80985
174.3	0.8097
174.4	0.8094
174.5	0.8096
174.6	0.80945
174.7	0.80935
174.8	0.80955
174.9	0.80935
175	0.80895
175.1	0.8092
175.2	0.80925
175.3	0.8097
175.4	0.80985
175.5	0.8101
175.6	0.8101
175.7	0.8099
175.8	0.80965
175.9	0.8097
176	0.80985
176.1	0.8102
176.2	0.8101
176.3	0.8099
176.4	0.8101
176.5	0.8096
176.6	0.80965
176.7	0.81075
176.8	0.8115
176.9	0.81145
177	0.81185
177.1	0.81195
177.2	0.81165
177.3	0.81135
177.4	0.8114
177.5	0.81175
177.6	0.81185
177.7	0.812
177.8	0.8121
177.9	0.8124
178	0.8129
178.1	0.81305
178.2	0.8133
178.3	0.8134
178.4	0.8132
178.5	0.8133
178.6	0.8138
178.7	0.8145
178.8	0.81415
178.9	0.8145
179	0.815
179.1	0.81485
179.2	0.8147
179.3	0.8148
179.4	0.8154
179.5	0.8153
179.6	0.816
179.7	0.8159
179.8	0.81625
179.9	0.8164
180	0.8166
180.1	0.8169
180.2	0.81665
180.3	0.8162
180.4	0.81615
180.5	0.81605
180.6	0.8157
180.7	0.8154
180.8	0.8154
180.9	0.81555
181	0.816
181.1	0.816
181.2	0.81555
181.3	0.8153
181.4	0.81525
181.5	0.815
181.6	0.81555
181.7	0.81555
181.8	0.81535
181.9	0.81505
182	0.81495
182.1	0.81475
182.2	0.81435
182.3	0.81445
182.4	0.81465
182.5	0.81455
182.6	0.81505
182.7	0.8152
182.8	0.8148
182.9	0.8149
183	0.8149
183.1	0.81455
183.2	0.81415
183.3	0.8141
183.4	0.8141
183.5	0.8145
183.6	0.81455
183.7	0.81475
183.8	0.8153
183.9	0.81565
184	0.81625
184.1	0.8163
184.2	0.81605
184.3	0.8162
184.4	0.8164
184.5	0.81695
184.6	0.81665
184.7	0.81615
184.8	0.8159
184.9	0.8157
185	0.81525
185.1	0.81475
185.2	0.81495
185.3	0.8145
185.4	0.8148
185.5	0.8151
185.6	0.8153
185.7	0.81545
185.8	0.816
185.9	0.8158
186	0.8159
186.1	0.81595
186.2	0.816
186.3	0.816
186.4	0.816
186.5	0.8166
186.6	0.81685
186.7	0.81725
186.8	0.81705
186.9	0.817
187	0.81695
187.1	0.8173
187.2	0.81715
187.3	0.81715
187.4	0.81695
187.5	0.81655
187.6	0.8167
187.7	0.81675
187.8	0.8165
187.9	0.81645
188	0.8167
188.1	0.8167
188.2	0.8165
188.3	0.8159
188.4	0.8156
188.5	0.8159
188.6	0.81575
188.7	0.8156
188.8	0.8159
188.9	0.81605
189	0.81595
189.1	0.81615
189.2	0.8163
189.3	0.81645
189.4	0.81665
189.5	0.81695
189.6	0.8173
189.7	0.81715
189.8	0.817
189.9	0.8164
190	0.8163
190.1	0.8166
190.2	0.8169
190.3	0.816
190.4	0.8159
190.5	0.8152
190.6	0.81485
190.7	0.8149
190.8	0.81465
190.9	0.8142
191	0.81425
191.1	0.81415
191.2	0.8141
191.3	0.81445
191.4	0.81425
191.5	0.814
191.6	0.81405
191.7	0.81435
191.8	0.8144
191.9	0.81445
192	0.81485
192.1	0.8145
192.2	0.81465
192.3	0.81415
192.4	0.81415
192.5	0.8142
192.6	0.8145
192.7	0.8141
192.8	0.8148
192.9	0.8151
193	0.8149
193.1	0.8149
193.2	0.81505
193.3	0.81495
193.4	0.8148
193.5	0.8149
193.6	0.81465
193.7	0.8146
193.8	0.8142
193.9	0.81445
194	0.81465
194.1	0.8149
194.2	0.815
194.3	0.81495
194.4	0.81445
194.5	0.8147
194.6	0.8144
194.7	0.8142
194.8	0.8145
194.9	0.8146
195	0.81495
195.1	0.81465
195.2	0.81475
195.3	0.81445
195.4	0.8147
195.5	0.81465
195.6	0.81505
195.7	0.8154
195.8	0.81585
195.9	0.8163
196	0.8165
196.1	0.8173
196.2	0.81755
196.3	0.81755
196.4	0.8175
196.5	0.81755
196.6	0.8176
196.7	0.81785
196.8	0.81785
196.9	0.818
197	0.81795
197.1	0.8183
197.2	0.81815
197.3	0.81885
197.4	0.81925
197.5	0.8191
197.6	0.8187
197.7	0.81885
197.8	0.81845
197.9	0.81875
198	0.8191
198.1	0.81895
198.2	0.81885
198.3	0.81895
198.4	0.81915
198.5	0.81955
198.6	0.81935
198.7	0.8195
198.8	0.8198
198.9	0.82015
199	0.82005
199.1	0.8202
199.2	0.81995
199.3	0.81995
199.4	0.8204
199.5	0.8207
199.6	0.82095
199.7	0.8211
199.8	0.82115
199.9	0.8216
200	0.8215
[truncated: 14,000 more rows]
