# Supplementary material for: Bayesian inference of kinetic schemes for ion channels by Kalman filtering
Source: eLife journal article supplement (doi:10.7554/elife.62714), 2022-05-04
Supplement: fig4-data3 [file 1_Sim_N_50000_Fluor_MW_32M.xlsx]

## Sheet: 32 M
0.1	0
0.2	0
0.3	0
0.4	0
0.5	0
0.6	0
0.7	0
0.8	0
0.9	0
1	0
1.1	0
1.2	0
1.3	0
1.4	0
1.5	0
1.6	0
1.7	0
1.8	0
1.9	0
2	0
2.1	0
2.2	0
2.3	0
2.4	0
2.5	0
2.6	0
2.7	0
2.8	0
2.9	0
3	0
3.1	0
3.2	0
3.3	0
3.4	0
3.5	0
3.6	0
3.7	0
3.8	0
3.9	0
4	0
4.1	0
4.2	0
4.3	0
4.4	0
4.5	0
4.6	0
4.7	0
4.8	0
4.9	0
5	0
5.1	0
5.2	0
5.3	0
5.4	0
5.5	0
5.6	0
5.7	0
5.8	0
5.9	0
6	0
6.1	0
6.2	0
6.3	0
6.4	0
6.5	0
6.6	0
6.7	0
6.8	0
6.9	0
7	0
7.1	0
7.2	0
7.3	0
7.4	0
7.5	0
7.6	0
7.7	0
7.8	0
7.9	0
8	0
8.1	0
8.2	0
8.3	0
8.4	0
8.5	0
8.6	0
8.7	0
8.8	0
8.9	0
9	0
9.1	0
9.2	0
9.3	0
9.4	0
9.5	0
9.6	0
9.7	0
9.8	0
9.9	0
10	0
10.1	0
10.2	0
10.3	0
10.4	0
10.5	0
10.6	0
10.7	0
10.8	0
10.9	0
11	0
11.1	0
11.2	0
11.3	0
11.4	0
11.5	0
11.6	0
11.7	0
11.8	0
11.9	0
12	0
12.1	0
12.2	0
12.3	0
12.4	0
12.5	0
12.6	0
12.7	0
12.8	0
12.9	0
13	0
13.1	0
13.2	0
13.3	0
13.4	0
13.5	0
13.6	0
13.7	0
13.8	0
13.9	0
14	0
14.1	0
14.2	0
14.3	0
14.4	0
14.5	0
14.6	0
14.7	0
14.8	0
14.9	0
15	0
15.1	0
15.2	0
15.3	0
15.4	0
15.5	0
15.6	0
15.7	0
15.8	0
15.9	0
16	0
16.1	0
16.2	0
16.3	0
16.4	0
16.5	0
16.6	0
16.7	0
16.8	0
16.9	0
17	0
17.1	0
17.2	0
17.3	0
17.4	0
17.5	0
17.6	0
17.7	0
17.8	0
17.9	0
18	0
18.1	0
18.2	0
18.3	0
18.4	0
18.5	0
18.6	0
18.7	0
18.8	0
18.9	0
19	0
19.1	0
19.2	0
19.3	0
19.4	0
19.5	0
19.6	0
19.7	0
19.8	0
19.9	0
20	0
20.1	0
20.2	0
20.3	0
20.4	0
20.5	0
20.6	0
20.7	0
20.8	0
20.9	0
21	0
21.1	0
21.2	0
21.3	0
21.4	0
21.5	0
21.6	0
21.7	0
21.8	0
21.9	0
22	0
22.1	0
22.2	0
22.3	0
22.4	0
22.5	0
22.6	0
22.7	0
22.8	0
22.9	0
23	0
23.1	0
23.2	0
23.3	0
23.4	0
23.5	0
23.6	0
23.7	0
23.8	0
23.9	0
24	0
24.1	0
24.2	0
24.3	0
24.4	0
24.5	0
24.6	0
24.7	0
24.8	0
24.9	0
25	0
25.1	0
25.2	0
25.3	0
25.4	0
25.5	0
25.6	0
25.7	0
25.8	0
25.9	0
26	0
26.1	0
26.2	0
26.3	0
26.4	0
26.5	0
26.6	0
26.7	0
26.8	0
26.9	0
27	0
27.1	0
27.2	0
27.3	0
27.4	0
27.5	0
27.6	0
27.7	0
27.8	0
27.9	0
28	0
28.1	0
28.2	0
28.3	0
28.4	0
28.5	0
28.6	0
28.7	0
28.8	0
28.9	0
29	0
29.1	0
29.2	0
29.3	0
29.4	0
29.5	0
29.6	0
29.7	0
29.8	0
29.9	0
30	0
30.1	0
30.2	0
30.3	0
30.4	0
30.5	0
30.6	0
30.7	0
30.8	0
30.9	0
31	0
31.1	0
31.2	0
31.3	0
31.4	0
31.5	0
31.6	0
31.7	0
31.8	0
31.9	0
32	0
32.1	0
32.2	0
32.3	0
32.4	0
32.5	0
32.6	0
32.7	0
32.8	0
32.9	0
33	0
33.1	0
33.2	0
33.3	0
33.4	0
33.5	0
33.6	0
33.7	0
33.8	0
33.9	0
34	0
34.1	0
34.2	0
34.3	0
34.4	0
34.5	0
34.6	0
34.7	0
34.8	0
34.9	0
35	0
35.1	0
35.2	0
35.3	0
35.4	0
35.5	0
35.6	0
35.7	0
35.8	0
35.9	0
36	0
36.1	0
36.2	0
36.3	0
36.4	0
36.5	0
36.6	0
36.7	0
36.8	0
36.9	0
37	0
37.1	0
37.2	0
37.3	0
37.4	0
37.5	0
37.6	0
37.7	0
37.8	0
37.9	0
38	0
38.1	0
38.2	0
38.3	0
38.4	0
38.5	0
38.6	0
38.7	0
38.8	0
38.9	0
39	0
39.1	0
39.2	0
39.3	0
39.4	0
39.5	0
39.6	0
39.7	0
39.8	0
39.9	0
40	0
40.1	0
40.2	0
40.3	0
40.4	0
40.5	0
40.6	0
40.7	0
40.8	0
40.9	0
41	0
41.1	0
41.2	0
41.3	0
41.4	0
41.5	0
41.6	0
41.7	0
41.8	0
41.9	0
42	0
42.1	0
42.2	0
42.3	0
42.4	0
42.5	0
42.6	0
42.7	0
42.8	0
42.9	0
43	0
43.1	0
43.2	0
43.3	0
43.4	0
43.5	0
43.6	0
43.7	0
43.8	0
43.9	0
44	0
44.1	0
44.2	0
44.3	0
44.4	0
44.5	0
44.6	0
44.7	0
44.8	0
44.9	0
45	0
45.1	0
45.2	0
45.3	0
45.4	0
45.5	0
45.6	0
45.7	0
45.8	0
45.9	0
46	0
46.1	0
46.2	0
46.3	0
46.4	0
46.5	0
46.6	0
46.7	0
46.8	0
46.9	0
47	0
47.1	0
47.2	0
47.3	0
47.4	0
47.5	0
47.6	0
47.7	0
47.8	0
47.9	0
48	0
48.1	0
48.2	0
48.3	0
48.4	0
48.5	0
48.6	0
48.7	0
48.8	0
48.9	0
49	0
49.1	0
49.2	0
49.3	0
49.4	0
49.5	0
49.6	0
49.7	0
49.8	0
49.9	0
50	0
50.1	0
50.2	0
50.3	0
50.4	0
50.5	0
50.6	0
50.7	0
50.8	0
50.9	0
51	0
51.1	0
51.2	0
51.3	0
51.4	0
51.5	0
51.6	0
51.7	0
51.8	0
51.9	0
52	0
52.1	0
52.2	0
52.3	0
52.4	0
52.5	0
52.6	0
52.7	0
52.8	0
52.9	0
53	0
53.1	0
53.2	0
53.3	0
53.4	0
53.5	0
53.6	0
53.7	0
53.8	0
53.9	0
54	0
54.1	0
54.2	0
54.3	0
54.4	0
54.5	0
54.6	0
54.7	0
54.8	0
54.9	0
55	0
55.1	0
55.2	0
55.3	0
55.4	0
55.5	0
55.6	0
55.7	0
55.8	0
55.9	0
56	0
56.1	0
56.2	0
56.3	0
56.4	0
56.5	0
56.6	0
56.7	0
56.8	0
56.9	0
57	0
57.1	0
57.2	0
57.3	0
57.4	0
57.5	0
57.6	0
57.7	0
57.8	0
57.9	0
58	0
58.1	0
58.2	0
58.3	0
58.4	0
58.5	0
58.6	0
58.7	0
58.8	0
58.9	0
59	0
59.1	0
59.2	0
59.3	0
59.4	0
59.5	0
59.6	0
59.7	0
59.8	0
59.9	0
60	0
60.1	0
60.2	0
60.3	0
60.4	0
60.5	0
60.6	0
60.7	0
60.8	0
60.9	0
61	0
61.1	0
61.2	0
61.3	0
61.4	0
61.5	0
61.6	0
61.7	0
61.8	0
61.9	0
62	0
62.1	0
62.2	0
62.3	0
62.4	0
62.5	0
62.6	0
62.7	0
62.8	0
62.9	0
63	0
63.1	0
63.2	0
63.3	0
63.4	0
63.5	0
63.6	0
63.7	0
63.8	0
63.9	0
64	0
64.1	0
64.2	0
64.3	0
64.4	0
64.5	0
64.6	0
64.7	0
64.8	0
64.9	0
65	0
65.1	0
65.2	0
65.3	0
65.4	0
65.5	0
65.6	0
65.7	0
65.8	0
65.9	0
66	0
66.1	0
66.2	0
66.3	0
66.4	0
66.5	0
66.6	0
66.7	0
66.8	0
66.9	0
67	0
67.1	0
67.2	0
67.3	0
67.4	0
67.5	0
67.6	0
67.7	0
67.8	0
67.9	0
68	0
68.1	0
68.2	0
68.3	0
68.4	0
68.5	0
68.6	0
68.7	0
68.8	0
68.9	0
69	0
69.1	0
69.2	0
69.3	0
69.4	0
69.5	0
69.6	0
69.7	0
69.8	0
69.9	0
70	0
70.1	0
70.2	0
70.3	0
70.4	0
70.5	0
70.6	0
70.7	0
70.8	0
70.9	0
71	0
71.1	0
71.2	0
71.3	0
71.4	0
71.5	0
71.6	0
71.7	0
71.8	0
71.9	0
72	0
72.1	0
72.2	0
72.3	0
72.4	0
72.5	0
72.6	0
72.7	0
72.8	0
72.9	0
73	0
73.1	0
73.2	0
73.3	0
73.4	0
73.5	0
73.6	0
73.7	0
73.8	0
73.9	0
74	0
74.1	0
74.2	0
74.3	0
74.4	0
74.5	0
74.6	0
74.7	0
74.8	0
74.9	0
75	0
75.1	0
75.2	0
75.3	0
75.4	0
75.5	0
75.6	0
75.7	0
75.8	0
75.9	0
76	0
76.1	0
76.2	0
76.3	0
76.4	0
76.5	0
76.6	0
76.7	0
76.8	0
76.9	0
77	0
77.1	0
77.2	0
77.3	0
77.4	0
77.5	0
77.6	0
77.7	0
77.8	0
77.9	0
78	0
78.1	0
78.2	0
78.3	0
78.4	0
78.5	0
78.6	0
78.7	0
78.8	0
78.9	0
79	0
79.1	0
79.2	0
79.3	0
79.4	0
79.5	0
79.6	0
79.7	0
79.8	0
79.9	0
80	0
80.1	0
80.2	0
80.3	0
80.4	0
80.5	0
80.6	0
80.7	0
80.8	0
80.9	0
81	0
81.1	0
81.2	0
81.3	0
81.4	0
81.5	0
81.6	0
81.7	0
81.8	0
81.9	0
82	0
82.1	0
82.2	0
82.3	0
82.4	0
82.5	0
82.6	0
82.7	0
82.8	0
82.9	0
83	0
83.1	0
83.2	0
83.3	0
83.4	0
83.5	0
83.6	0
83.7	0
83.8	0
83.9	0
84	0
84.1	0
84.2	0
84.3	0
84.4	0
84.5	0
84.6	0
84.7	0
84.8	0
84.9	0
85	0
85.1	0
85.2	0
85.3	0
85.4	0
85.5	0
85.6	0
85.7	0
85.8	0
85.9	0
86	0
86.1	0
86.2	0
86.3	0
86.4	0
86.5	0
86.6	0
86.7	0
86.8	0
86.9	0
87	0
87.1	0
87.2	0
87.3	0
87.4	0
87.5	0
87.6	0
87.7	0
87.8	0
87.9	0
88	0
88.1	0
88.2	0
88.3	0
88.4	0
88.5	0
88.6	0
88.7	0
88.8	0
88.9	0
89	0
89.1	0
89.2	0
89.3	0
89.4	0
89.5	0
89.6	0
89.7	0
89.8	0
89.9	0
90	0
90.1	0
90.2	0
90.3	0
90.4	0
90.5	0
90.6	0
90.7	0
90.8	0
90.9	0
91	0
91.1	0
91.2	0
91.3	0
91.4	0
91.5	0
91.6	0
91.7	0
91.8	0
91.9	0
92	0
92.1	0
92.2	0
92.3	0
92.4	0
92.5	0
92.6	0
92.7	0
92.8	0
92.9	0
93	0
93.1	0
93.2	0
93.3	0
93.4	0
93.5	0
93.6	0
93.7	0
93.8	0
93.9	0
94	0
94.1	0
94.2	0
94.3	0
94.4	0
94.5	0
94.6	0
94.7	0
94.8	0
94.9	0
95	0
95.1	0
95.2	0
95.3	0
95.4	0
95.5	0
95.6	0
95.7	0
95.8	0
95.9	0
96	0
96.1	0
96.2	0
96.3	0
96.4	0
96.5	0
96.6	0
96.7	0
96.8	0
96.9	0
97	0
97.1	0
97.2	0
97.3	0
97.4	0
97.5	0
97.6	0
97.7	0
97.8	0
97.9	0
98	0
98.1	0
98.2	0
98.3	0
98.4	0
98.5	0
98.6	0
98.7	0
98.8	0
98.9	0
99	0
99.1	0
99.2	0
99.3	0
99.4	0
99.5	0
99.6	0
99.7	0
99.8	0
99.9	0
100	0
100.1	0.73316
100.2	0.8894
100.3	0.94352
100.4	0.9639
100.5	0.97102
100.6	0.9747
100.7	0.97564
100.8	0.97539
100.9	0.97675
101	0.9761
101.1	0.97659
101.2	0.97561
101.3	0.97691
101.4	0.97603
101.5	0.97591
101.6	0.97659
101.7	0.97601
101.8	0.97603
101.9	0.97674
102	0.97714
102.1	0.97691
102.2	0.97664
102.3	0.97723
102.4	0.97776
102.5	0.97806
102.6	0.97797
102.7	0.97803
102.8	0.97833
102.9	0.97856
103	0.97874
103.1	0.97818
103.2	0.97767
103.3	0.97853
103.4	0.97828
103.5	0.97863
103.6	0.97894
103.7	0.97876
103.8	0.97893
103.9	0.97875
104	0.97886
104.1	0.97881
104.2	0.97928
104.3	0.9793
104.4	0.98004
104.5	0.97902
104.6	0.97886
104.7	0.97906
104.8	0.98016
104.9	0.98034
105	0.9796
105.1	0.9801
105.2	0.98022
105.3	0.98001
105.4	0.9803
105.5	0.98024
105.6	0.98051
105.7	0.98075
105.8	0.98128
105.9	0.98057
106	0.98138
106.1	0.98123
106.2	0.98169
106.3	0.98054
106.4	0.98151
106.5	0.98165
106.6	0.98094
106.7	0.98153
106.8	0.98151
106.9	0.98106
107	0.9822
107.1	0.98178
107.2	0.98203
107.3	0.98289
107.4	0.98178
107.5	0.98123
107.6	0.98212
107.7	0.98183
107.8	0.98159
107.9	0.98176
108	0.98182
108.1	0.98173
108.2	0.98245
108.3	0.9831
108.4	0.98311
108.5	0.98346
108.6	0.98354
108.7	0.98327
108.8	0.98316
108.9	0.98331
109	0.98396
109.1	0.98321
109.2	0.98351
109.3	0.98359
109.4	0.98352
109.5	0.98364
109.6	0.98384
109.7	0.98364
109.8	0.98365
109.9	0.98423
110	0.98317
110.1	0.98367
110.2	0.98373
110.3	0.98383
110.4	0.98471
110.5	0.9841
110.6	0.98428
110.7	0.98391
110.8	0.98403
110.9	0.98518
111	0.98548
111.1	0.98534
111.2	0.9846
111.3	0.98503
111.4	0.98503
111.5	0.98507
111.6	0.98529
111.7	0.98422
111.8	0.98535
111.9	0.986
112	0.98577
112.1	0.98542
112.2	0.98554
112.3	0.98584
112.4	0.98556
112.5	0.98572
112.6	0.98629
112.7	0.9855
112.8	0.98563
112.9	0.98582
113	0.98615
113.1	0.98557
113.2	0.98544
113.3	0.98554
113.4	0.98578
113.5	0.98616
113.6	0.98607
113.7	0.98656
113.8	0.986
113.9	0.98672
114	0.98656
114.1	0.98624
114.2	0.98652
114.3	0.98619
114.4	0.987
114.5	0.98678
114.6	0.98633
114.7	0.98639
114.8	0.98637
114.9	0.98694
115	0.98672
115.1	0.98683
115.2	0.98656
115.3	0.98695
115.4	0.98681
115.5	0.98744
115.6	0.98738
115.7	0.98693
115.8	0.98674
115.9	0.98733
116	0.98731
116.1	0.98684
116.2	0.98672
116.3	0.98709
116.4	0.98768
116.5	0.98773
116.6	0.98722
116.7	0.98736
116.8	0.98721
116.9	0.98708
117	0.98782
117.1	0.98803
117.2	0.98741
117.3	0.98782
117.4	0.98888
117.5	0.98851
117.6	0.98833
117.7	0.98783
117.8	0.98876
117.9	0.98852
118	0.98843
118.1	0.98839
118.2	0.98863
118.3	0.98831
118.4	0.98866
118.5	0.98887
118.6	0.98871
118.7	0.98847
118.8	0.98833
118.9	0.98865
119	0.9885
119.1	0.9883
119.2	0.98853
119.3	0.98824
119.4	0.98926
119.5	0.98879
119.6	0.98914
119.7	0.98906
119.8	0.98954
119.9	0.98918
120	0.98966
120.1	0.98926
120.2	0.98868
120.3	0.98853
120.4	0.98886
120.5	0.98906
120.6	0.98989
120.7	0.98931
120.8	0.9893
120.9	0.98973
121	0.98913
121.1	0.98926
121.2	0.98941
121.3	0.98958
121.4	0.99021
121.5	0.98999
121.6	0.98934
121.7	0.98938
121.8	0.98958
121.9	0.98996
122	0.98956
122.1	0.98973
122.2	0.98991
122.3	0.98928
122.4	0.98965
122.5	0.98988
122.6	0.99046
122.7	0.99047
122.8	0.99023
122.9	0.98991
123	0.98996
123.1	0.98978
123.2	0.99005
123.3	0.99069
123.4	0.98997
123.5	0.98985
123.6	0.99016
123.7	0.99024
123.8	0.99013
123.9	0.99041
124	0.99016
124.1	0.99048
124.2	0.99089
124.3	0.99094
124.4	0.99094
124.5	0.99061
124.6	0.99022
124.7	0.99031
124.8	0.99076
124.9	0.99068
125	0.991
125.1	0.99021
125.2	0.99067
125.3	0.991
125.4	0.99103
125.5	0.99079
125.6	0.99089
125.7	0.99094
125.8	0.99096
125.9	0.99094
126	0.99061
126.1	0.99104
126.2	0.99064
126.3	0.99109
126.4	0.9916
126.5	0.99123
126.6	0.9914
126.7	0.99092
126.8	0.99107
126.9	0.99147
127	0.99144
127.1	0.99081
127.2	0.99125
127.3	0.99138
127.4	0.99163
127.5	0.99182
127.6	0.99152
127.7	0.99162
127.8	0.99169
127.9	0.99163
128	0.99194
128.1	0.99174
128.2	0.99194
128.3	0.992
128.4	0.99206
128.5	0.99189
128.6	0.99193
128.7	0.99189
128.8	0.99199
128.9	0.99197
129	0.99197
129.1	0.99129
129.2	0.99168
129.3	0.99133
129.4	0.99122
129.5	0.99114
129.6	0.99153
129.7	0.9917
129.8	0.99239
129.9	0.99218
130	0.99246
130.1	0.99195
130.2	0.99206
130.3	0.99177
130.4	0.99197
130.5	0.99219
130.6	0.99176
130.7	0.99241
130.8	0.99259
130.9	0.99185
131	0.99221
131.1	0.99258
131.2	0.99261
131.3	0.99237
131.4	0.9926
131.5	0.99235
131.6	0.99212
131.7	0.99222
131.8	0.99237
131.9	0.99234
132	0.99246
132.1	0.9925
132.2	0.9926
132.3	0.99225
132.4	0.99241
132.5	0.99235
132.6	0.99256
132.7	0.99252
132.8	0.99281
132.9	0.99235
133	0.99243
133.1	0.9925
133.2	0.99247
133.3	0.9923
133.4	0.99239
133.5	0.99243
133.6	0.99299
133.7	0.99284
133.8	0.99262
133.9	0.99261
134	0.99234
134.1	0.99274
134.2	0.99255
134.3	0.99233
134.4	0.99236
134.5	0.99271
134.6	0.99297
134.7	0.99257
134.8	0.99303
134.9	0.99291
135	0.99298
135.1	0.9927
135.2	0.99272
135.3	0.99326
135.4	0.99276
135.5	0.99293
135.6	0.99318
135.7	0.99276
135.8	0.993
135.9	0.99309
136	0.99266
136.1	0.99262
136.2	0.99254
136.3	0.99301
136.4	0.99318
136.5	0.99316
136.6	0.99263
136.7	0.99313
136.8	0.99319
136.9	0.99322
137	0.99303
137.1	0.99352
137.2	0.99359
137.3	0.99305
137.4	0.99303
137.5	0.99303
137.6	0.99325
137.7	0.99318
137.8	0.99332
137.9	0.99302
138	0.99294
138.1	0.99321
138.2	0.99381
138.3	0.99323
138.4	0.99363
138.5	0.99347
138.6	0.99355
138.7	0.99328
138.8	0.99322
138.9	0.99333
139	0.99353
139.1	0.99323
139.2	0.99361
139.3	0.99377
139.4	0.99375
139.5	0.9936
139.6	0.99347
139.7	0.99361
139.8	0.99373
139.9	0.9938
140	0.99406
140.1	0.99363
140.2	0.99375
140.3	0.99334
140.4	0.99309
140.5	0.99361
140.6	0.99354
140.7	0.99386
140.8	0.99406
140.9	0.99372
141	0.99357
141.1	0.99349
141.2	0.99359
141.3	0.99359
141.4	0.99364
141.5	0.99353
141.6	0.99366
141.7	0.99374
141.8	0.99367
141.9	0.99384
142	0.9941
142.1	0.99356
142.2	0.99319
142.3	0.99353
142.4	0.99447
142.5	0.99403
142.6	0.99369
142.7	0.99351
142.8	0.99384
142.9	0.99379
143	0.99385
143.1	0.99418
143.2	0.99435
143.3	0.9943
143.4	0.99406
143.5	0.99364
143.6	0.99362
143.7	0.99389
143.8	0.99371
143.9	0.99401
144	0.9938
144.1	0.99377
144.2	0.99449
144.3	0.99433
144.4	0.99436
144.5	0.99412
144.6	0.99405
144.7	0.99401
144.8	0.99418
144.9	0.99403
145	0.99421
145.1	0.99395
145.2	0.99419
145.3	0.99399
145.4	0.99408
145.5	0.99396
145.6	0.99406
145.7	0.99421
145.8	0.99455
145.9	0.99445
146	0.99402
146.1	0.99383
146.2	0.99388
146.3	0.99404
146.4	0.99408
146.5	0.99407
146.6	0.99378
146.7	0.99412
146.8	0.99399
146.9	0.99407
147	0.99438
147.1	0.99416
147.2	0.99399
147.3	0.99414
147.4	0.99428
147.5	0.99447
147.6	0.99467
147.7	0.9944
147.8	0.99429
147.9	0.99447
148	0.99441
148.1	0.99474
148.2	0.99448
148.3	0.99491
148.4	0.99493
148.5	0.99456
148.6	0.99461
148.7	0.99404
148.8	0.99426
148.9	0.9944
149	0.99406
149.1	0.9943
149.2	0.99466
149.3	0.99464
149.4	0.99455
149.5	0.99457
149.6	0.9944
149.7	0.99427
149.8	0.99449
149.9	0.99451
150	0.99464
150.1	0.99449
150.2	0.99477
150.3	0.99485
150.4	0.99478
150.5	0.99482
150.6	0.99444
150.7	0.99492
150.8	0.99482
150.9	0.99467
151	0.99472
151.1	0.99474
151.2	0.99487
151.3	0.9944
151.4	0.99439
151.5	0.99463
151.6	0.99458
151.7	0.99463
151.8	0.99472
151.9	0.99503
152	0.99477
152.1	0.99513
152.2	0.9952
152.3	0.99513
152.4	0.99472
152.5	0.99492
152.6	0.99502
152.7	0.99527
152.8	0.9949
152.9	0.99502
153	0.99473
153.1	0.99472
153.2	0.99475
153.3	0.99482
153.4	0.99498
153.5	0.99451
153.6	0.99481
153.7	0.99474
153.8	0.99477
153.9	0.99501
154	0.99483
154.1	0.99517
154.2	0.99487
154.3	0.99454
154.4	0.99451
154.5	0.99502
154.6	0.9948
154.7	0.99458
154.8	0.99509
154.9	0.99497
155	0.99478
155.1	0.99488
155.2	0.99491
155.3	0.99541
155.4	0.99509
155.5	0.99483
155.6	0.99481
155.7	0.99473
155.8	0.99507
155.9	0.99483
156	0.99443
156.1	0.99484
156.2	0.99505
156.3	0.9953
156.4	0.99525
156.5	0.99524
156.6	0.99531
156.7	0.99538
156.8	0.9945
156.9	0.99488
157	0.99476
157.1	0.9949
157.2	0.99519
157.3	0.99501
157.4	0.99483
157.5	0.99514
157.6	0.99499
157.7	0.99509
157.8	0.99525
157.9	0.99514
158	0.99489
158.1	0.99473
158.2	0.99516
158.3	0.99495
158.4	0.99482
158.5	0.99478
158.6	0.99462
158.7	0.99503
158.8	0.99531
158.9	0.99495
159	0.99504
159.1	0.9949
159.2	0.99479
159.3	0.99505
159.4	0.99506
159.5	0.99519
159.6	0.99539
159.7	0.99512
159.8	0.99511
159.9	0.99489
160	0.995
160.1	0.99523
160.2	0.99491
160.3	0.99487
160.4	0.99487
160.5	0.9951
160.6	0.99498
160.7	0.99498
160.8	0.99499
160.9	0.99517
161	0.99504
161.1	0.99506
161.2	0.995
161.3	0.99495
161.4	0.99507
161.5	0.995
161.6	0.99533
161.7	0.99527
161.8	0.99536
161.9	0.99525
162	0.99499
162.1	0.99546
162.2	0.99525
162.3	0.9953
162.4	0.99527
162.5	0.99528
162.6	0.99479
162.7	0.99503
162.8	0.995
162.9	0.99506
163	0.99455
163.1	0.99467
163.2	0.99499
163.3	0.99521
163.4	0.99502
163.5	0.99509
163.6	0.99479
163.7	0.99464
163.8	0.99495
163.9	0.99496
164	0.99509
164.1	0.99508
164.2	0.99497
164.3	0.99497
164.4	0.99535
164.5	0.99525
164.6	0.99504
164.7	0.99465
164.8	0.99484
164.9	0.99485
165	0.99524
165.1	0.99513
165.2	0.9952
165.3	0.99548
165.4	0.99545
165.5	0.99527
165.6	0.99536
165.7	0.9954
165.8	0.99543
165.9	0.99527
166	0.99516
166.1	0.99494
166.2	0.9955
166.3	0.99555
166.4	0.99537
166.5	0.99525
166.6	0.99523
166.7	0.99506
166.8	0.99529
166.9	0.99499
167	0.99525
167.1	0.99489
167.2	0.99524
167.3	0.99515
167.4	0.99492
167.5	0.99506
167.6	0.99501
167.7	0.99501
167.8	0.99515
167.9	0.99515
168	0.99535
168.1	0.99516
168.2	0.99517
168.3	0.99514
168.4	0.99523
168.5	0.99499
168.6	0.99496
168.7	0.99486
168.8	0.99492
168.9	0.99497
169	0.99535
169.1	0.99495
169.2	0.99512
169.3	0.99516
169.4	0.99527
169.5	0.99526
169.6	0.99513
169.7	0.99538
169.8	0.99512
169.9	0.99536
170	0.99538
170.1	0.99535
170.2	0.99531
170.3	0.99517
170.4	0.99476
170.5	0.99521
170.6	0.99521
170.7	0.99516
170.8	0.99476
170.9	0.99493
171	0.99541
171.1	0.99518
171.2	0.99533
171.3	0.99546
171.4	0.99568
171.5	0.9955
171.6	0.9956
171.7	0.99525
171.8	0.99555
171.9	0.9953
172	0.9953
172.1	0.99536
172.2	0.99531
172.3	0.99512
172.4	0.99535
172.5	0.99537
172.6	0.9951
172.7	0.99536
172.8	0.99509
172.9	0.99542
173	0.99567
173.1	0.99597
173.2	0.99555
173.3	0.99564
173.4	0.99526
173.5	0.99547
173.6	0.99563
173.7	0.99501
173.8	0.99513
173.9	0.99552
174	0.99568
174.1	0.99557
174.2	0.99558
174.3	0.99556
174.4	0.99517
174.5	0.99528
174.6	0.99518
174.7	0.9952
174.8	0.99538
174.9	0.99553
175	0.99524
175.1	0.99533
175.2	0.99544
175.3	0.99545
175.4	0.99561
175.5	0.99535
175.6	0.99526
175.7	0.99527
175.8	0.99551
175.9	0.99517
176	0.99562
176.1	0.99559
176.2	0.99531
176.3	0.99529
176.4	0.99578
176.5	0.9959
176.6	0.99564
176.7	0.99564
176.8	0.99557
176.9	0.99543
177	0.99571
177.1	0.99553
177.2	0.9952
177.3	0.99525
177.4	0.99579
177.5	0.99559
177.6	0.99554
177.7	0.99564
177.8	0.99557
177.9	0.99551
178	0.99544
178.1	0.99532
178.2	0.99543
178.3	0.99519
178.4	0.99519
178.5	0.9953
178.6	0.99534
178.7	0.99511
178.8	0.99545
178.9	0.99549
179	0.9955
179.1	0.99545
179.2	0.99551
179.3	0.99538
179.4	0.9954
179.5	0.99558
179.6	0.9955
179.7	0.99569
179.8	0.99567
179.9	0.99573
180	0.99501
180.1	0.9958
180.2	0.99541
180.3	0.99592
180.4	0.99586
180.5	0.99542
180.6	0.99561
180.7	0.99581
180.8	0.99565
180.9	0.99559
181	0.99538
181.1	0.99564
181.2	0.99561
181.3	0.99556
181.4	0.99571
181.5	0.99551
181.6	0.99555
181.7	0.99575
181.8	0.99559
181.9	0.99527
182	0.99511
182.1	0.99535
182.2	0.99555
182.3	0.99557
182.4	0.99552
182.5	0.99561
182.6	0.99564
182.7	0.99608
182.8	0.99569
182.9	0.99542
183	0.99564
183.1	0.99568
183.2	0.99583
183.3	0.99542
183.4	0.99558
183.5	0.99551
183.6	0.9951
183.7	0.99521
183.8	0.99561
183.9	0.99573
184	0.99562
184.1	0.99545
184.2	0.99559
184.3	0.99562
184.4	0.99583
184.5	0.99582
184.6	0.99565
184.7	0.99554
184.8	0.99555
184.9	0.99578
185	0.99539
185.1	0.9954
185.2	0.99556
185.3	0.99581
185.4	0.99557
185.5	0.99523
185.6	0.99551
185.7	0.99544
185.8	0.99584
185.9	0.99545
186	0.99591
186.1	0.99554
186.2	0.99526
186.3	0.99559
186.4	0.9952
186.5	0.99536
186.6	0.99542
186.7	0.99571
186.8	0.99555
186.9	0.99512
187	0.99553
187.1	0.99543
187.2	0.99561
187.3	0.99576
187.4	0.99557
187.5	0.99568
187.6	0.99579
187.7	0.9954
187.8	0.99538
187.9	0.99553
188	0.99563
188.1	0.99573
188.2	0.99554
188.3	0.99555
188.4	0.99562
188.5	0.99547
188.6	0.99559
188.7	0.99568
188.8	0.99558
188.9	0.99564
189	0.99536
189.1	0.99555
189.2	0.99557
189.3	0.99549
189.4	0.99587
189.5	0.99557
189.6	0.99538
189.7	0.99609
189.8	0.99605
189.9	0.99547
190	0.99564
190.1	0.99604
190.2	0.99574
190.3	0.99541
190.4	0.99551
190.5	0.99606
190.6	0.99542
190.7	0.99524
190.8	0.99525
190.9	0.9955
191	0.99581
191.1	0.99601
191.2	0.99589
191.3	0.99557
191.4	0.99549
191.5	0.99571
191.6	0.99571
191.7	0.9954
191.8	0.99519
191.9	0.9955
192	0.99571
192.1	0.99588
192.2	0.99552
192.3	0.99558
192.4	0.99548
192.5	0.99556
192.6	0.99582
192.7	0.99588
192.8	0.99602
192.9	0.99559
193	0.99627
193.1	0.996
193.2	0.99571
193.3	0.99556
193.4	0.99576
193.5	0.99571
193.6	0.99604
193.7	0.99574
193.8	0.99586
193.9	0.99573
194	0.99541
194.1	0.99564
194.2	0.99556
194.3	0.99556
194.4	0.99544
194.5	0.99566
194.6	0.99577
194.7	0.99586
194.8	0.99573
194.9	0.99564
195	0.99577
195.1	0.99582
195.2	0.99549
195.3	0.99546
195.4	0.99572
195.5	0.99564
195.6	0.99543
195.7	0.99551
195.8	0.99562
195.9	0.99585
196	0.99592
196.1	0.99576
196.2	0.99553
196.3	0.99593
196.4	0.99589
196.5	0.99563
196.6	0.99574
196.7	0.9955
196.8	0.99561
196.9	0.99566
197	0.99596
197.1	0.99578
197.2	0.9958
197.3	0.99512
197.4	0.99526
197.5	0.99536
197.6	0.99562
197.7	0.9958
197.8	0.9955
197.9	0.99592
198	0.99542
198.1	0.99546
198.2	0.99572
198.3	0.99569
198.4	0.99556
198.5	0.99569
198.6	0.99518
198.7	0.99541
198.8	0.99538
198.9	0.99551
199	0.9952
199.1	0.99554
199.2	0.99576
199.3	0.99607
199.4	0.99587
199.5	0.99547
199.6	0.9956
199.7	0.99578
199.8	0.99564
199.9	0.99568
200	0.9956
[truncated: 14,000 more rows]
