# Supplementary material for: Bayesian inference of kinetic schemes for ion channels by Kalman filtering
Source: eLife journal article supplement (doi:10.7554/elife.62714), 2022-05-04
Supplement: fig4-data3 [file 1_Sim_N_50000_Strom_MW_32M.xlsx]

## Sheet: 32 M
0.1	0
0.2	0
0.3	0
0.4	0
0.5	0
0.6	0
0.7	0
0.8	0
0.9	0
1	0
1.1	0
1.2	0
1.3	0
1.4	0
1.5	0
1.6	0
1.7	0
1.8	0
1.9	0
2	0
2.1	0
2.2	0
2.3	0
2.4	0
2.5	0
2.6	0
2.7	0
2.8	0
2.9	0
3	0
3.1	0
3.2	0
3.3	0
3.4	0
3.5	0
3.6	0
3.7	0
3.8	0
3.9	0
4	0
4.1	0
4.2	0
4.3	0
4.4	0
4.5	0
4.6	0
4.7	0
4.8	0
4.9	0
5	0
5.1	0
5.2	0
5.3	0
5.4	0
5.5	0
5.6	0
5.7	0
5.8	0
5.9	0
6	0
6.1	0
6.2	0
6.3	0
6.4	0
6.5	0
6.6	0
6.7	0
6.8	0
6.9	0
7	0
7.1	0
7.2	0
7.3	0
7.4	0
7.5	0
7.6	0
7.7	0
7.8	0
7.9	0
8	0
8.1	0
8.2	0
8.3	0
8.4	0
8.5	0
8.6	0
8.7	0
8.8	0
8.9	0
9	0
9.1	0
9.2	0
9.3	0
9.4	0
9.5	0
9.6	0
9.7	0
9.8	0
9.9	0
10	0
10.1	0
10.2	0
10.3	0
10.4	0
10.5	0
10.6	0
10.7	0
10.8	0
10.9	0
11	0
11.1	0
11.2	0
11.3	0
11.4	0
11.5	0
11.6	0
11.7	0
11.8	0
11.9	0
12	0
12.1	0
12.2	0
12.3	0
12.4	0
12.5	0
12.6	0
12.7	0
12.8	0
12.9	0
13	0
13.1	0
13.2	0
13.3	0
13.4	0
13.5	0
13.6	0
13.7	0
13.8	0
13.9	0
14	0
14.1	0
14.2	0
14.3	0
14.4	0
14.5	0
14.6	0
14.7	0
14.8	0
14.9	0
15	0
15.1	0
15.2	0
15.3	0
15.4	0
15.5	0
15.6	0
15.7	0
15.8	0
15.9	0
16	0
16.1	0
16.2	0
16.3	0
16.4	0
16.5	0
16.6	0
16.7	0
16.8	0
16.9	0
17	0
17.1	0
17.2	0
17.3	0
17.4	0
17.5	0
17.6	0
17.7	0
17.8	0
17.9	0
18	0
18.1	0
18.2	0
18.3	0
18.4	0
18.5	0
18.6	0
18.7	0
18.8	0
18.9	0
19	0
19.1	0
19.2	0
19.3	0
19.4	0
19.5	0
19.6	0
19.7	0
19.8	0
19.9	0
20	0
20.1	0
20.2	0
20.3	0
20.4	0
20.5	0
20.6	0
20.7	0
20.8	0
20.9	0
21	0
21.1	0
21.2	0
21.3	0
21.4	0
21.5	0
21.6	0
21.7	0
21.8	0
21.9	0
22	0
22.1	0
22.2	0
22.3	0
22.4	0
22.5	0
22.6	0
22.7	0
22.8	0
22.9	0
23	0
23.1	0
23.2	0
23.3	0
23.4	0
23.5	0
23.6	0
23.7	0
23.8	0
23.9	0
24	0
24.1	0
24.2	0
24.3	0
24.4	0
24.5	0
24.6	0
24.7	0
24.8	0
24.9	0
25	0
25.1	0
25.2	0
25.3	0
25.4	0
25.5	0
25.6	0
25.7	0
25.8	0
25.9	0
26	0
26.1	0
26.2	0
26.3	0
26.4	0
26.5	0
26.6	0
26.7	0
26.8	0
26.9	0
27	0
27.1	0
27.2	0
27.3	0
27.4	0
27.5	0
27.6	0
27.7	0
27.8	0
27.9	0
28	0
28.1	0
28.2	0
28.3	0
28.4	0
28.5	0
28.6	0
28.7	0
28.8	0
28.9	0
29	0
29.1	0
29.2	0
29.3	0
29.4	0
29.5	0
29.6	0
29.7	0
29.8	0
29.9	0
30	0
30.1	0
30.2	0
30.3	0
30.4	0
30.5	0
30.6	0
30.7	0
30.8	0
30.9	0
31	0
31.1	0
31.2	0
31.3	0
31.4	0
31.5	0
31.6	0
31.7	0
31.8	0
31.9	0
32	0
32.1	0
32.2	0
32.3	0
32.4	0
32.5	0
32.6	0
32.7	0
32.8	0
32.9	0
33	0
33.1	0
33.2	0
33.3	0
33.4	0
33.5	0
33.6	0
33.7	0
33.8	0
33.9	0
34	0
34.1	0
34.2	0
34.3	0
34.4	0
34.5	0
34.6	0
34.7	0
34.8	0
34.9	0
35	0
35.1	0
35.2	0
35.3	0
35.4	0
35.5	0
35.6	0
35.7	0
35.8	0
35.9	0
36	0
36.1	0
36.2	0
36.3	0
36.4	0
36.5	0
36.6	0
36.7	0
36.8	0
36.9	0
37	0
37.1	0
37.2	0
37.3	0
37.4	0
37.5	0
37.6	0
37.7	0
37.8	0
37.9	0
38	0
38.1	0
38.2	0
38.3	0
38.4	0
38.5	0
38.6	0
38.7	0
38.8	0
38.9	0
39	0
39.1	0
39.2	0
39.3	0
39.4	0
39.5	0
39.6	0
39.7	0
39.8	0
39.9	0
40	0
40.1	0
40.2	0
40.3	0
40.4	0
40.5	0
40.6	0
40.7	0
40.8	0
40.9	0
41	0
41.1	0
41.2	0
41.3	0
41.4	0
41.5	0
41.6	0
41.7	0
41.8	0
41.9	0
42	0
42.1	0
42.2	0
42.3	0
42.4	0
42.5	0
42.6	0
42.7	0
42.8	0
42.9	0
43	0
43.1	0
43.2	0
43.3	0
43.4	0
43.5	0
43.6	0
43.7	0
43.8	0
43.9	0
44	0
44.1	0
44.2	0
44.3	0
44.4	0
44.5	0
44.6	0
44.7	0
44.8	0
44.9	0
45	0
45.1	0
45.2	0
45.3	0
45.4	0
45.5	0
45.6	0
45.7	0
45.8	0
45.9	0
46	0
46.1	0
46.2	0
46.3	0
46.4	0
46.5	0
46.6	0
46.7	0
46.8	0
46.9	0
47	0
47.1	0
47.2	0
47.3	0
47.4	0
47.5	0
47.6	0
47.7	0
47.8	0
47.9	0
48	0
48.1	0
48.2	0
48.3	0
48.4	0
48.5	0
48.6	0
48.7	0
48.8	0
48.9	0
49	0
49.1	0
49.2	0
49.3	0
49.4	0
49.5	0
49.6	0
49.7	0
49.8	0
49.9	0
50	0
50.1	0
50.2	0
50.3	0
50.4	0
50.5	0
50.6	0
50.7	0
50.8	0
50.9	0
51	0
51.1	0
51.2	0
51.3	0
51.4	0
51.5	0
51.6	0
51.7	0
51.8	0
51.9	0
52	0
52.1	0
52.2	0
52.3	0
52.4	0
52.5	0
52.6	0
52.7	0
52.8	0
52.9	0
53	0
53.1	0
53.2	0
53.3	0
53.4	0
53.5	0
53.6	0
53.7	0
53.8	0
53.9	0
54	0
54.1	0
54.2	0
54.3	0
54.4	0
54.5	0
54.6	0
54.7	0
54.8	0
54.9	0
55	0
55.1	0
55.2	0
55.3	0
55.4	0
55.5	0
55.6	0
55.7	0
55.8	0
55.9	0
56	0
56.1	0
56.2	0
56.3	0
56.4	0
56.5	0
56.6	0
56.7	0
56.8	0
56.9	0
57	0
57.1	0
57.2	0
57.3	0
57.4	0
57.5	0
57.6	0
57.7	0
57.8	0
57.9	0
58	0
58.1	0
58.2	0
58.3	0
58.4	0
58.5	0
58.6	0
58.7	0
58.8	0
58.9	0
59	0
59.1	0
59.2	0
59.3	0
59.4	0
59.5	0
59.6	0
59.7	0
59.8	0
59.9	0
60	0
60.1	0
60.2	0
60.3	0
60.4	0
60.5	0
60.6	0
60.7	0
60.8	0
60.9	0
61	0
61.1	0
61.2	0
61.3	0
61.4	0
61.5	0
61.6	0
61.7	0
61.8	0
61.9	0
62	0
62.1	0
62.2	0
62.3	0
62.4	0
62.5	0
62.6	0
62.7	0
62.8	0
62.9	0
63	0
63.1	0
63.2	0
63.3	0
63.4	0
63.5	0
63.6	0
63.7	0
63.8	0
63.9	0
64	0
64.1	0
64.2	0
64.3	0
64.4	0
64.5	0
64.6	0
64.7	0
64.8	0
64.9	0
65	0
65.1	0
65.2	0
65.3	0
65.4	0
65.5	0
65.6	0
65.7	0
65.8	0
65.9	0
66	0
66.1	0
66.2	0
66.3	0
66.4	0
66.5	0
66.6	0
66.7	0
66.8	0
66.9	0
67	0
67.1	0
67.2	0
67.3	0
67.4	0
67.5	0
67.6	0
67.7	0
67.8	0
67.9	0
68	0
68.1	0
68.2	0
68.3	0
68.4	0
68.5	0
68.6	0
68.7	0
68.8	0
68.9	0
69	0
69.1	0
69.2	0
69.3	0
69.4	0
69.5	0
69.6	0
69.7	0
69.8	0
69.9	0
70	0
70.1	0
70.2	0
70.3	0
70.4	0
70.5	0
70.6	0
70.7	0
70.8	0
70.9	0
71	0
71.1	0
71.2	0
71.3	0
71.4	0
71.5	0
71.6	0
71.7	0
71.8	0
71.9	0
72	0
72.1	0
72.2	0
72.3	0
72.4	0
72.5	0
72.6	0
72.7	0
72.8	0
72.9	0
73	0
73.1	0
73.2	0
73.3	0
73.4	0
73.5	0
73.6	0
73.7	0
73.8	0
73.9	0
74	0
74.1	0
74.2	0
74.3	0
74.4	0
74.5	0
74.6	0
74.7	0
74.8	0
74.9	0
75	0
75.1	0
75.2	0
75.3	0
75.4	0
75.5	0
75.6	0
75.7	0
75.8	0
75.9	0
76	0
76.1	0
76.2	0
76.3	0
76.4	0
76.5	0
76.6	0
76.7	0
76.8	0
76.9	0
77	0
77.1	0
77.2	0
77.3	0
77.4	0
77.5	0
77.6	0
77.7	0
77.8	0
77.9	0
78	0
78.1	0
78.2	0
78.3	0
78.4	0
78.5	0
78.6	0
78.7	0
78.8	0
78.9	0
79	0
79.1	0
79.2	0
79.3	0
79.4	0
79.5	0
79.6	0
79.7	0
79.8	0
79.9	0
80	0
80.1	0
80.2	0
80.3	0
80.4	0
80.5	0
80.6	0
80.7	0
80.8	0
80.9	0
81	0
81.1	0
81.2	0
81.3	0
81.4	0
81.5	0
81.6	0
81.7	0
81.8	0
81.9	0
82	0
82.1	0
82.2	0
82.3	0
82.4	0
82.5	0
82.6	0
82.7	0
82.8	0
82.9	0
83	0
83.1	0
83.2	0
83.3	0
83.4	0
83.5	0
83.6	0
83.7	0
83.8	0
83.9	0
84	0
84.1	0
84.2	0
84.3	0
84.4	0
84.5	0
84.6	0
84.7	0
84.8	0
84.9	0
85	0
85.1	0
85.2	0
85.3	0
85.4	0
85.5	0
85.6	0
85.7	0
85.8	0
85.9	0
86	0
86.1	0
86.2	0
86.3	0
86.4	0
86.5	0
86.6	0
86.7	0
86.8	0
86.9	0
87	0
87.1	0
87.2	0
87.3	0
87.4	0
87.5	0
87.6	0
87.7	0
87.8	0
87.9	0
88	0
88.1	0
88.2	0
88.3	0
88.4	0
88.5	0
88.6	0
88.7	0
88.8	0
88.9	0
89	0
89.1	0
89.2	0
89.3	0
89.4	0
89.5	0
89.6	0
89.7	0
89.8	0
89.9	0
90	0
90.1	0
90.2	0
90.3	0
90.4	0
90.5	0
90.6	0
90.7	0
90.8	0
90.9	0
91	0
91.1	0
91.2	0
91.3	0
91.4	0
91.5	0
91.6	0
91.7	0
91.8	0
91.9	0
92	0
92.1	0
92.2	0
92.3	0
92.4	0
92.5	0
92.6	0
92.7	0
92.8	0
92.9	0
93	0
93.1	0
93.2	0
93.3	0
93.4	0
93.5	0
93.6	0
93.7	0
93.8	0
93.9	0
94	0
94.1	0
94.2	0
94.3	0
94.4	0
94.5	0
94.6	0
94.7	0
94.8	0
94.9	0
95	0
95.1	0
95.2	0
95.3	0
95.4	0
95.5	0
95.6	0
95.7	0
95.8	0
95.9	0
96	0
96.1	0
96.2	0
96.3	0
96.4	0
96.5	0
96.6	0
96.7	0
96.8	0
96.9	0
97	0
97.1	0
97.2	0
97.3	0
97.4	0
97.5	0
97.6	0
97.7	0
97.8	0
97.9	0
98	0
98.1	0
98.2	0
98.3	0
98.4	0
98.5	0
98.6	0
98.7	0
98.8	0
98.9	0
99	0
99.1	0
99.2	0
99.3	0
99.4	0
99.5	0
99.6	0
99.7	0
99.8	0
99.9	0
100	0
100.1	0.001
100.2	0.00418
100.3	0.00842
100.4	0.01266
100.5	0.01752
100.6	0.02198
100.7	0.02628
100.8	0.0303
100.9	0.03482
101	0.03948
101.1	0.04396
101.2	0.04824
101.3	0.05224
101.4	0.05644
101.5	0.0604
101.6	0.0644
101.7	0.0689
101.8	0.07366
101.9	0.0778
102	0.08222
102.1	0.08652
102.2	0.09066
102.3	0.09524
102.4	0.09928
102.5	0.10344
102.6	0.10762
102.7	0.11178
102.8	0.11544
102.9	0.11938
103	0.12316
103.1	0.12698
103.2	0.13122
103.3	0.1349
103.4	0.13856
103.5	0.14234
103.6	0.14576
103.7	0.14932
103.8	0.1538
103.9	0.1576
104	0.1613
104.1	0.1648
104.2	0.16868
104.3	0.1721
104.4	0.17634
104.5	0.18012
104.6	0.18364
104.7	0.18766
104.8	0.19146
104.9	0.195
105	0.19864
105.1	0.2019
105.2	0.20564
105.3	0.20896
105.4	0.21268
105.5	0.2159
105.6	0.21942
105.7	0.22316
105.8	0.2271
105.9	0.23056
106	0.23336
106.1	0.23704
106.2	0.24004
106.3	0.24352
106.4	0.24638
106.5	0.24984
106.6	0.25338
106.7	0.25664
106.8	0.25964
106.9	0.26334
107	0.26628
107.1	0.26976
107.2	0.2735
107.3	0.27644
107.4	0.27986
107.5	0.28302
107.6	0.28594
107.7	0.28948
107.8	0.29272
107.9	0.29554
108	0.298
108.1	0.30126
108.2	0.30434
108.3	0.30714
108.4	0.30982
108.5	0.31306
108.6	0.31584
108.7	0.31854
108.8	0.32136
108.9	0.32398
109	0.32678
109.1	0.32996
109.2	0.3329
109.3	0.33602
109.4	0.33868
109.5	0.3422
109.6	0.34516
109.7	0.34784
109.8	0.35064
109.9	0.35344
110	0.35688
110.1	0.35924
110.2	0.3619
110.3	0.36422
110.4	0.36672
110.5	0.36954
110.6	0.37192
110.7	0.37436
110.8	0.37708
110.9	0.37944
111	0.38238
111.1	0.38512
111.2	0.3877
111.3	0.3903
111.4	0.39244
111.5	0.39534
111.6	0.39742
111.7	0.40004
111.8	0.40228
111.9	0.40468
112	0.4071
112.1	0.40942
112.2	0.41182
112.3	0.41434
112.4	0.41644
112.5	0.4189
112.6	0.42156
112.7	0.42412
112.8	0.4262
112.9	0.42786
113	0.4299
113.1	0.43224
113.2	0.43422
113.3	0.43688
113.4	0.43894
113.5	0.4413
113.6	0.44386
113.7	0.44618
113.8	0.44842
113.9	0.45046
114	0.45246
114.1	0.45476
114.2	0.4572
114.3	0.45926
114.4	0.46148
114.5	0.46382
114.6	0.46578
114.7	0.46772
114.8	0.46986
114.9	0.47214
115	0.47404
115.1	0.47616
115.2	0.47818
115.3	0.48032
115.4	0.482
115.5	0.48442
115.6	0.4861
115.7	0.4883
115.8	0.48982
115.9	0.49178
116	0.49394
116.1	0.49552
116.2	0.49758
116.3	0.49976
116.4	0.50174
116.5	0.50366
116.6	0.50554
116.7	0.50704
116.8	0.50848
116.9	0.51018
117	0.5121
117.1	0.51394
117.2	0.51584
117.3	0.51752
117.4	0.5194
117.5	0.521
117.6	0.52242
117.7	0.5246
117.8	0.52658
117.9	0.52798
118	0.52994
118.1	0.53146
118.2	0.53304
118.3	0.53476
118.4	0.53664
118.5	0.53874
118.6	0.54042
118.7	0.54234
118.8	0.54374
118.9	0.5458
119	0.5471
119.1	0.54848
119.2	0.54992
119.3	0.55144
119.4	0.5534
119.5	0.5552
119.6	0.55658
119.7	0.55786
119.8	0.55926
119.9	0.56098
120	0.56216
120.1	0.56348
120.2	0.56508
120.3	0.56644
120.4	0.56818
120.5	0.56978
120.6	0.57112
120.7	0.57298
120.8	0.57416
120.9	0.5754
121	0.57686
121.1	0.57866
121.2	0.5806
121.3	0.58182
121.4	0.58288
121.5	0.5845
121.6	0.58604
121.7	0.58754
121.8	0.58914
121.9	0.59056
122	0.59204
122.1	0.59302
122.2	0.59448
122.3	0.596
122.4	0.5972
122.5	0.5983
122.6	0.59948
122.7	0.6009
122.8	0.60238
122.9	0.60372
123	0.60476
123.1	0.6059
123.2	0.607
123.3	0.60834
123.4	0.60926
123.5	0.6103
123.6	0.61114
123.7	0.6123
123.8	0.61332
123.9	0.6147
124	0.61584
124.1	0.61686
124.2	0.6182
124.3	0.61944
124.4	0.62058
124.5	0.62158
124.6	0.62316
124.7	0.6245
124.8	0.62546
124.9	0.6268
125	0.62872
125.1	0.6296
125.2	0.6308
125.3	0.63172
125.4	0.63292
125.5	0.63382
125.6	0.63506
125.7	0.63606
125.8	0.63692
125.9	0.63788
126	0.63914
126.1	0.64032
126.2	0.64148
126.3	0.64226
126.4	0.64318
126.5	0.64416
126.6	0.645
126.7	0.64608
126.8	0.64726
126.9	0.64818
127	0.64926
127.1	0.65016
127.2	0.65094
127.3	0.65224
127.4	0.65308
127.5	0.65428
127.6	0.6549
127.7	0.65618
127.8	0.65704
127.9	0.65816
128	0.65926
128.1	0.66028
128.2	0.66108
128.3	0.66196
128.4	0.66318
128.5	0.66384
128.6	0.66496
128.7	0.66604
128.8	0.6665
128.9	0.66726
129	0.66824
129.1	0.66902
129.2	0.66996
129.3	0.67094
129.4	0.67202
129.5	0.67276
129.6	0.67358
129.7	0.67436
129.8	0.67534
129.9	0.67602
130	0.67676
130.1	0.6777
130.2	0.67836
130.3	0.67938
130.4	0.68044
130.5	0.68158
130.6	0.68248
130.7	0.68358
130.8	0.68448
130.9	0.68546
131	0.68624
131.1	0.687
131.2	0.68784
131.3	0.68904
131.4	0.69006
131.5	0.69108
131.6	0.69164
131.7	0.69262
131.8	0.69324
131.9	0.69394
132	0.69476
132.1	0.69574
132.2	0.69646
132.3	0.6968
132.4	0.69726
132.5	0.6976
132.6	0.69822
132.7	0.69934
132.8	0.69984
132.9	0.70068
133	0.70122
133.1	0.7019
133.2	0.70224
133.3	0.7029
133.4	0.70344
133.5	0.70404
133.6	0.70494
133.7	0.70576
133.8	0.7063
133.9	0.70692
134	0.70754
134.1	0.70784
134.2	0.70824
134.3	0.70902
134.4	0.70942
134.5	0.7102
134.6	0.7112
134.7	0.71172
134.8	0.71228
134.9	0.71296
135	0.71356
135.1	0.71452
135.2	0.71544
135.3	0.7159
135.4	0.71632
135.5	0.7172
135.6	0.7181
135.7	0.7187
135.8	0.71954
135.9	0.71982
136	0.72012
136.1	0.72098
136.2	0.72148
136.3	0.72208
136.4	0.72284
136.5	0.72314
136.6	0.7235
136.7	0.72442
136.8	0.72476
136.9	0.72504
137	0.72592
137.1	0.72658
137.2	0.72712
137.3	0.72756
137.4	0.72824
137.5	0.72892
137.6	0.7292
137.7	0.72976
137.8	0.73052
137.9	0.73108
138	0.73182
138.1	0.73254
138.2	0.73296
138.3	0.73336
138.4	0.73362
138.5	0.73424
138.6	0.73476
138.7	0.7354
138.8	0.73598
138.9	0.73642
139	0.73668
139.1	0.73698
139.2	0.73744
139.3	0.73814
139.4	0.73862
139.5	0.73896
139.6	0.73946
139.7	0.73986
139.8	0.73972
139.9	0.7401
140	0.74044
140.1	0.74078
140.2	0.74126
140.3	0.74168
140.4	0.74254
140.5	0.74274
140.6	0.74338
140.7	0.74366
140.8	0.74434
140.9	0.7452
141	0.74582
141.1	0.74642
141.2	0.74676
141.3	0.7471
141.4	0.7478
141.5	0.7484
141.6	0.74884
141.7	0.74928
141.8	0.74956
141.9	0.7499
142	0.75048
142.1	0.75088
142.2	0.7513
142.3	0.75156
142.4	0.7522
142.5	0.75252
142.6	0.75312
142.7	0.75372
142.8	0.75402
142.9	0.75444
143	0.75494
143.1	0.7551
143.2	0.75568
143.3	0.75596
143.4	0.75668
143.5	0.75708
143.6	0.75754
143.7	0.75786
143.8	0.75832
143.9	0.75852
144	0.75892
144.1	0.75958
144.2	0.75996
144.3	0.76046
144.4	0.76124
144.5	0.7614
144.6	0.76166
144.7	0.76206
144.8	0.76284
144.9	0.76308
145	0.7635
145.1	0.76378
145.2	0.76422
145.3	0.76478
145.4	0.76498
145.5	0.7652
145.6	0.76548
145.7	0.76578
145.8	0.76594
145.9	0.76598
146	0.7662
146.1	0.76656
146.2	0.76716
146.3	0.76732
146.4	0.7676
146.5	0.76816
146.6	0.76858
146.7	0.76912
146.8	0.76938
146.9	0.7696
147	0.76976
147.1	0.77002
147.2	0.77044
147.3	0.77078
147.4	0.77136
147.5	0.77198
147.6	0.77214
147.7	0.77232
147.8	0.7727
147.9	0.77358
148	0.77408
148.1	0.77442
148.2	0.77444
148.3	0.77484
148.4	0.77484
148.5	0.77496
148.6	0.7756
148.7	0.7758
148.8	0.77594
148.9	0.77634
149	0.77692
149.1	0.77736
149.2	0.7776
149.3	0.77806
149.4	0.778
149.5	0.77836
149.6	0.77828
149.7	0.77884
149.8	0.77896
149.9	0.77936
150	0.77988
150.1	0.78026
150.2	0.78024
150.3	0.78112
150.4	0.78146
150.5	0.78172
150.6	0.78188
150.7	0.78206
150.8	0.78252
150.9	0.78272
151	0.78278
151.1	0.7831
151.2	0.78352
151.3	0.78394
151.4	0.78456
151.5	0.78554
151.6	0.78616
151.7	0.78652
151.8	0.78692
151.9	0.78704
152	0.78772
152.1	0.78818
152.2	0.7885
152.3	0.7887
152.4	0.78882
152.5	0.7892
152.6	0.78926
152.7	0.78958
152.8	0.78944
152.9	0.78978
153	0.79012
153.1	0.78992
153.2	0.7903
153.3	0.79056
153.4	0.7909
153.5	0.79102
153.6	0.79144
153.7	0.79146
153.8	0.79208
153.9	0.79246
154	0.7929
154.1	0.79322
154.2	0.79374
154.3	0.79394
154.4	0.79386
154.5	0.79416
154.6	0.79456
154.7	0.7947
154.8	0.79476
154.9	0.79476
155	0.79442
155.1	0.79448
155.2	0.79438
155.3	0.79476
155.4	0.79486
155.5	0.79498
155.6	0.79546
155.7	0.79546
155.8	0.79558
155.9	0.79558
156	0.7957
156.1	0.79596
156.2	0.79614
156.3	0.79626
156.4	0.79648
156.5	0.79698
156.6	0.7974
156.7	0.79776
156.8	0.7978
156.9	0.79826
157	0.79826
157.1	0.79854
157.2	0.79862
157.3	0.79868
157.4	0.79902
157.5	0.7992
157.6	0.79918
157.7	0.79912
157.8	0.799
157.9	0.79932
158	0.7993
158.1	0.79928
158.2	0.79928
158.3	0.79934
158.4	0.79966
158.5	0.80032
158.6	0.80068
158.7	0.80072
158.8	0.801
158.9	0.80064
159	0.80084
159.1	0.80102
159.2	0.80138
159.3	0.80142
159.4	0.8017
159.5	0.80158
159.6	0.80132
159.7	0.80128
159.8	0.80146
159.9	0.80164
160	0.80172
160.1	0.80168
160.2	0.8017
160.3	0.80202
160.4	0.80236
160.5	0.80248
160.6	0.80268
160.7	0.803
160.8	0.80312
160.9	0.80312
161	0.80334
161.1	0.80388
161.2	0.80418
161.3	0.80426
161.4	0.80434
161.5	0.80456
161.6	0.80442
161.7	0.8044
161.8	0.80448
161.9	0.80458
162	0.80488
162.1	0.80504
162.2	0.80496
162.3	0.80506
162.4	0.80536
162.5	0.80556
162.6	0.80564
162.7	0.80566
162.8	0.80594
162.9	0.8058
163	0.80574
163.1	0.8058
163.2	0.80568
163.3	0.80566
163.4	0.80574
163.5	0.80616
163.6	0.80612
163.7	0.80596
163.8	0.80624
163.9	0.80642
164	0.80634
164.1	0.80654
164.2	0.80652
164.3	0.80648
164.4	0.80666
164.5	0.80698
164.6	0.80686
164.7	0.80682
164.8	0.8071
164.9	0.80696
165	0.80728
165.1	0.80726
165.2	0.80742
165.3	0.80772
165.4	0.8078
165.5	0.80808
165.6	0.80836
165.7	0.8082
165.8	0.80842
165.9	0.80846
166	0.80848
166.1	0.8085
166.2	0.80876
166.3	0.80888
166.4	0.8091
166.5	0.80908
166.6	0.80914
166.7	0.80908
166.8	0.80904
166.9	0.80932
167	0.80946
167.1	0.80964
167.2	0.80958
167.3	0.80958
167.4	0.80984
167.5	0.80996
167.6	0.8099
167.7	0.80992
167.8	0.81002
167.9	0.81
168	0.81014
168.1	0.8106
168.2	0.81048
168.3	0.8107
168.4	0.811
168.5	0.81126
168.6	0.81152
168.7	0.81188
168.8	0.8122
168.9	0.81232
169	0.81202
169.1	0.81186
169.2	0.81206
169.3	0.8124
169.4	0.8124
169.5	0.81248
169.6	0.81238
169.7	0.81258
169.8	0.8125
169.9	0.81268
170	0.81286
170.1	0.81336
170.2	0.8135
170.3	0.81354
170.4	0.81362
170.5	0.81346
170.6	0.8136
170.7	0.8135
170.8	0.81368
170.9	0.81352
171	0.8138
171.1	0.81406
171.2	0.8141
171.3	0.81442
171.4	0.81442
171.5	0.81464
171.6	0.81454
171.7	0.8147
171.8	0.81498
171.9	0.81482
172	0.81498
172.1	0.81534
172.2	0.81558
172.3	0.81568
172.4	0.81584
172.5	0.81606
172.6	0.81604
172.7	0.81604
172.8	0.81636
172.9	0.81626
173	0.81618
173.1	0.81642
173.2	0.81652
173.3	0.81662
173.4	0.81628
173.5	0.81654
173.6	0.81678
173.7	0.81686
173.8	0.81688
173.9	0.8167
174	0.81666
174.1	0.81666
174.2	0.81686
174.3	0.81668
174.4	0.81656
174.5	0.81662
174.6	0.81666
174.7	0.81678
174.8	0.81686
174.9	0.81682
175	0.81672
175.1	0.81686
175.2	0.81674
175.3	0.81696
175.4	0.81702
175.5	0.81668
175.6	0.81694
175.7	0.81692
175.8	0.8172
175.9	0.81728
176	0.81724
176.1	0.81738
176.2	0.81736
176.3	0.81742
176.4	0.81746
176.5	0.81744
176.6	0.8178
176.7	0.81808
176.8	0.81808
176.9	0.81822
177	0.81854
177.1	0.81832
177.2	0.81844
177.3	0.81828
177.4	0.81848
177.5	0.81838
177.6	0.81838
177.7	0.81872
177.8	0.81902
177.9	0.81924
178	0.81904
178.1	0.81924
178.2	0.81942
178.3	0.8194
178.4	0.81934
178.5	0.81932
178.6	0.81916
178.7	0.8193
178.8	0.8194
178.9	0.8194
179	0.81946
179.1	0.81956
179.2	0.81974
179.3	0.81998
179.4	0.81986
179.5	0.8202
179.6	0.8201
179.7	0.81982
179.8	0.81992
179.9	0.8201
180	0.82008
180.1	0.81984
180.2	0.82018
180.3	0.8205
180.4	0.82048
180.5	0.82036
180.6	0.82058
180.7	0.82072
180.8	0.82082
180.9	0.82124
181	0.82124
181.1	0.82118
181.2	0.8213
181.3	0.82152
181.4	0.82154
181.5	0.8216
181.6	0.82174
181.7	0.82196
181.8	0.82188
181.9	0.82184
182	0.82184
182.1	0.82206
182.2	0.82172
182.3	0.82158
182.4	0.82164
182.5	0.82168
182.6	0.8219
182.7	0.82204
182.8	0.82208
182.9	0.8222
183	0.82212
183.1	0.82222
183.2	0.82226
183.3	0.82222
183.4	0.82236
183.5	0.82246
183.6	0.8226
183.7	0.8228
183.8	0.82274
183.9	0.82252
184	0.82258
184.1	0.82268
184.2	0.82262
184.3	0.82266
184.4	0.82246
184.5	0.82244
184.6	0.82246
184.7	0.8227
184.8	0.82252
184.9	0.82264
185	0.82258
185.1	0.8228
185.2	0.82264
185.3	0.82268
185.4	0.82274
185.5	0.82284
185.6	0.82288
185.7	0.82286
185.8	0.8229
185.9	0.82292
186	0.82286
186.1	0.82286
186.2	0.82302
186.3	0.82302
186.4	0.82292
186.5	0.82268
186.6	0.82252
186.7	0.82244
186.8	0.82262
186.9	0.82274
187	0.82278
187.1	0.82302
187.2	0.82334
187.3	0.82342
187.4	0.82342
187.5	0.82302
187.6	0.82314
187.7	0.82362
187.8	0.8236
187.9	0.82356
188	0.8237
188.1	0.82362
188.2	0.82346
188.3	0.8237
188.4	0.82388
188.5	0.8242
188.6	0.82418
188.7	0.82432
188.8	0.82444
188.9	0.82466
189	0.82484
189.1	0.82462
189.2	0.8249
189.3	0.82486
189.4	0.82488
189.5	0.82482
189.6	0.8249
189.7	0.82518
189.8	0.8251
189.9	0.82488
190	0.8247
190.1	0.82506
190.2	0.82494
190.3	0.82534
190.4	0.82518
190.5	0.82522
190.6	0.82544
190.7	0.82548
190.8	0.8255
190.9	0.8253
191	0.82538
191.1	0.82538
191.2	0.82522
191.3	0.825
191.4	0.82492
191.5	0.82496
191.6	0.82492
191.7	0.8247
191.8	0.82492
191.9	0.82472
192	0.82496
192.1	0.8249
192.2	0.825
192.3	0.8251
192.4	0.82516
192.5	0.82502
192.6	0.82492
192.7	0.82498
192.8	0.82494
192.9	0.82514
193	0.82512
193.1	0.82512
193.2	0.8249
193.3	0.8246
193.4	0.82426
193.5	0.82416
193.6	0.82414
193.7	0.8243
193.8	0.82424
193.9	0.82452
194	0.82474
194.1	0.82468
194.2	0.8247
194.3	0.82462
194.4	0.8247
194.5	0.82478
194.6	0.82476
194.7	0.82464
194.8	0.82438
194.9	0.82456
195	0.82466
195.1	0.82482
195.2	0.82468
195.3	0.82468
195.4	0.8245
195.5	0.82438
195.6	0.8243
195.7	0.82418
195.8	0.82398
195.9	0.8241
196	0.82436
196.1	0.82426
196.2	0.82428
196.3	0.82462
196.4	0.82474
196.5	0.82464
196.6	0.82458
196.7	0.82482
196.8	0.82474
196.9	0.82476
197	0.82468
197.1	0.8245
197.2	0.82426
197.3	0.82412
197.4	0.82444
197.5	0.82408
197.6	0.82392
197.7	0.8238
197.8	0.82374
197.9	0.82374
198	0.82378
198.1	0.82358
198.2	0.82376
198.3	0.82402
198.4	0.82398
198.5	0.8241
198.6	0.8244
198.7	0.82454
198.8	0.82464
198.9	0.82446
199	0.82472
199.1	0.8247
199.2	0.82468
199.3	0.8247
199.4	0.82484
199.5	0.8249
199.6	0.82484
199.7	0.82486
199.8	0.82504
199.9	0.82514
200	0.82482
[truncated: 14,000 more rows]
