# Supplementary material for: Bayesian inference of kinetic schemes for ion channels by Kalman filtering
Source: eLife journal article supplement (doi:10.7554/elife.62714), 2022-05-04
Supplement: fig4-data4 [file 1_Sim_N_80_Fluor_MW.xlsx]

## Sheet: 8 M
0.1	0
0.2	0
0.3	0
0.4	0
0.5	0
0.6	0
0.7	0
0.8	0
0.9	0
1	0
1.1	0
1.2	0
1.3	0
1.4	0
1.5	0
1.6	0
1.7	0
1.8	0
1.9	0
2	0
2.1	0
2.2	0
2.3	0
2.4	0
2.5	0
2.6	0
2.7	0
2.8	0
2.9	0
3	0
3.1	0
3.2	0
3.3	0
3.4	0
3.5	0
3.6	0
3.7	0
3.8	0
3.9	0
4	0
4.1	0
4.2	0
4.3	0
4.4	0
4.5	0
4.6	0
4.7	0
4.8	0
4.9	0
5	0
5.1	0
5.2	0
5.3	0
5.4	0
5.5	0
5.6	0
5.7	0
5.8	0
5.9	0
6	0
6.1	0
6.2	0
6.3	0
6.4	0
6.5	0
6.6	0
6.7	0
6.8	0
6.9	0
7	0
7.1	0
7.2	0
7.3	0
7.4	0
7.5	0
7.6	0
7.7	0
7.8	0
7.9	0
8	0
8.1	0
8.2	0
8.3	0
8.4	0
8.5	0
8.6	0
8.7	0
8.8	0
8.9	0
9	0
9.1	0
9.2	0
9.3	0
9.4	0
9.5	0
9.6	0
9.7	0
9.8	0
9.9	0
10	0
10.1	0
10.2	0
10.3	0
10.4	0
10.5	0
10.6	0
10.7	0
10.8	0
10.9	0
11	0
11.1	0
11.2	0
11.3	0
11.4	0
11.5	0
11.6	0
11.7	0
11.8	0
11.9	0
12	0
12.1	0
12.2	0
12.3	0
12.4	0
12.5	0
12.6	0
12.7	0
12.8	0
12.9	0
13	0
13.1	0
13.2	0
13.3	0
13.4	0
13.5	0
13.6	0
13.7	0
13.8	0
13.9	0
14	0
14.1	0
14.2	0
14.3	0
14.4	0
14.5	0
14.6	0
14.7	0
14.8	0
14.9	0
15	0
15.1	0
15.2	0
15.3	0
15.4	0
15.5	0
15.6	0
15.7	0
15.8	0
15.9	0
16	0
16.1	0
16.2	0
16.3	0
16.4	0
16.5	0
16.6	0
16.7	0
16.8	0
16.9	0
17	0
17.1	0
17.2	0
17.3	0
17.4	0
17.5	0
17.6	0
17.7	0
17.8	0
17.9	0
18	0
18.1	0
18.2	0
18.3	0
18.4	0
18.5	0
18.6	0
18.7	0
18.8	0
18.9	0
19	0
19.1	0
19.2	0
19.3	0
19.4	0
19.5	0
19.6	0
19.7	0
19.8	0
19.9	0
20	0
20.1	0
20.2	0
20.3	0
20.4	0
20.5	0
20.6	0
20.7	0
20.8	0
20.9	0
21	0
21.1	0
21.2	0
21.3	0
21.4	0
21.5	0
21.6	0
21.7	0
21.8	0
21.9	0
22	0
22.1	0
22.2	0
22.3	0
22.4	0
22.5	0
22.6	0
22.7	0
22.8	0
22.9	0
23	0
23.1	0
23.2	0
23.3	0
23.4	0
23.5	0
23.6	0
23.7	0
23.8	0
23.9	0
24	0
24.1	0
24.2	0
24.3	0
24.4	0
24.5	0
24.6	0
24.7	0
24.8	0
24.9	0
25	0
25.1	0
25.2	0
25.3	0
25.4	0
25.5	0
25.6	0
25.7	0
25.8	0
25.9	0
26	0
26.1	0
26.2	0
26.3	0
26.4	0
26.5	0
26.6	0
26.7	0
26.8	0
26.9	0
27	0
27.1	0
27.2	0
27.3	0
27.4	0
27.5	0
27.6	0
27.7	0
27.8	0
27.9	0
28	0
28.1	0
28.2	0
28.3	0
28.4	0
28.5	0
28.6	0
28.7	0
28.8	0
28.9	0
29	0
29.1	0
29.2	0
29.3	0
29.4	0
29.5	0
29.6	0
29.7	0
29.8	0
29.9	0
30	0
30.1	0
30.2	0
30.3	0
30.4	0
30.5	0
30.6	0
30.7	0
30.8	0
30.9	0
31	0
31.1	0
31.2	0
31.3	0
31.4	0
31.5	0
31.6	0
31.7	0
31.8	0
31.9	0
32	0
32.1	0
32.2	0
32.3	0
32.4	0
32.5	0
32.6	0
32.7	0
32.8	0
32.9	0
33	0
33.1	0
33.2	0
33.3	0
33.4	0
33.5	0
33.6	0
33.7	0
33.8	0
33.9	0
34	0
34.1	0
34.2	0
34.3	0
34.4	0
34.5	0
34.6	0
34.7	0
34.8	0
34.9	0
35	0
35.1	0
35.2	0
35.3	0
35.4	0
35.5	0
35.6	0
35.7	0
35.8	0
35.9	0
36	0
36.1	0
36.2	0
36.3	0
36.4	0
36.5	0
36.6	0
36.7	0
36.8	0
36.9	0
37	0
37.1	0
37.2	0
37.3	0
37.4	0
37.5	0
37.6	0
37.7	0
37.8	0
37.9	0
38	0
38.1	0
38.2	0
38.3	0
38.4	0
38.5	0
38.6	0
38.7	0
38.8	0
38.9	0
39	0
39.1	0
39.2	0
39.3	0
39.4	0
39.5	0
39.6	0
39.7	0
39.8	0
39.9	0
40	0
40.1	0
40.2	0
40.3	0
40.4	0
40.5	0
40.6	0
40.7	0
40.8	0
40.9	0
41	0
41.1	0
41.2	0
41.3	0
41.4	0
41.5	0
41.6	0
41.7	0
41.8	0
41.9	0
42	0
42.1	0
42.2	0
42.3	0
42.4	0
42.5	0
42.6	0
42.7	0
42.8	0
42.9	0
43	0
43.1	0
43.2	0
43.3	0
43.4	0
43.5	0
43.6	0
43.7	0
43.8	0
43.9	0
44	0
44.1	0
44.2	0
44.3	0
44.4	0
44.5	0
44.6	0
44.7	0
44.8	0
44.9	0
45	0
45.1	0
45.2	0
45.3	0
45.4	0
45.5	0
45.6	0
45.7	0
45.8	0
45.9	0
46	0
46.1	0
46.2	0
46.3	0
46.4	0
46.5	0
46.6	0
46.7	0
46.8	0
46.9	0
47	0
47.1	0
47.2	0
47.3	0
47.4	0
47.5	0
47.6	0
47.7	0
47.8	0
47.9	0
48	0
48.1	0
48.2	0
48.3	0
48.4	0
48.5	0
48.6	0
48.7	0
48.8	0
48.9	0
49	0
49.1	0
49.2	0
49.3	0
49.4	0
49.5	0
49.6	0
49.7	0
49.8	0
49.9	0
50	0
50.1	0
50.2	0
50.3	0
50.4	0
50.5	0
50.6	0
50.7	0
50.8	0
50.9	0
51	0
51.1	0
51.2	0
51.3	0
51.4	0
51.5	0
51.6	0
51.7	0
51.8	0
51.9	0
52	0
52.1	0
52.2	0
52.3	0
52.4	0
52.5	0
52.6	0
52.7	0
52.8	0
52.9	0
53	0
53.1	0
53.2	0
53.3	0
53.4	0
53.5	0
53.6	0
53.7	0
53.8	0
53.9	0
54	0
54.1	0
54.2	0
54.3	0
54.4	0
54.5	0
54.6	0
54.7	0
54.8	0
54.9	0
55	0
55.1	0
55.2	0
55.3	0
55.4	0
55.5	0
55.6	0
55.7	0
55.8	0
55.9	0
56	0
56.1	0
56.2	0
56.3	0
56.4	0
56.5	0
56.6	0
56.7	0
56.8	0
56.9	0
57	0
57.1	0
57.2	0
57.3	0
57.4	0
57.5	0
57.6	0
57.7	0
57.8	0
57.9	0
58	0
58.1	0
58.2	0
58.3	0
58.4	0
58.5	0
58.6	0
58.7	0
58.8	0
58.9	0
59	0
59.1	0
59.2	0
59.3	0
59.4	0
59.5	0
59.6	0
59.7	0
59.8	0
59.9	0
60	0
60.1	0
60.2	0
60.3	0
60.4	0
60.5	0
60.6	0
60.7	0
60.8	0
60.9	0
61	0
61.1	0
61.2	0
61.3	0
61.4	0
61.5	0
61.6	0
61.7	0
61.8	0
61.9	0
62	0
62.1	0
62.2	0
62.3	0
62.4	0
62.5	0
62.6	0
62.7	0
62.8	0
62.9	0
63	0
63.1	0
63.2	0
63.3	0
63.4	0
63.5	0
63.6	0
63.7	0
63.8	0
63.9	0
64	0
64.1	0
64.2	0
64.3	0
64.4	0
64.5	0
64.6	0
64.7	0
64.8	0
64.9	0
65	0
65.1	0
65.2	0
65.3	0
65.4	0
65.5	0
65.6	0
65.7	0
65.8	0
65.9	0
66	0
66.1	0
66.2	0
66.3	0
66.4	0
66.5	0
66.6	0
66.7	0
66.8	0
66.9	0
67	0
67.1	0
67.2	0
67.3	0
67.4	0
67.5	0
67.6	0
67.7	0
67.8	0
67.9	0
68	0
68.1	0
68.2	0
68.3	0
68.4	0
68.5	0
68.6	0
68.7	0
68.8	0
68.9	0
69	0
69.1	0
69.2	0
69.3	0
69.4	0
69.5	0
69.6	0
69.7	0
69.8	0
69.9	0
70	0
70.1	0
70.2	0
70.3	0
70.4	0
70.5	0
70.6	0
70.7	0
70.8	0
70.9	0
71	0
71.1	0
71.2	0
71.3	0
71.4	0
71.5	0
71.6	0
71.7	0
71.8	0
71.9	0
72	0
72.1	0
72.2	0
72.3	0
72.4	0
72.5	0
72.6	0
72.7	0
72.8	0
72.9	0
73	0
73.1	0
73.2	0
73.3	0
73.4	0
73.5	0
73.6	0
73.7	0
73.8	0
73.9	0
74	0
74.1	0
74.2	0
74.3	0
74.4	0
74.5	0
74.6	0
74.7	0
74.8	0
74.9	0
75	0
75.1	0
75.2	0
75.3	0
75.4	0
75.5	0
75.6	0
75.7	0
75.8	0
75.9	0
76	0
76.1	0
76.2	0
76.3	0
76.4	0
76.5	0
76.6	0
76.7	0
76.8	0
76.9	0
77	0
77.1	0
77.2	0
77.3	0
77.4	0
77.5	0
77.6	0
77.7	0
77.8	0
77.9	0
78	0
78.1	0
78.2	0
78.3	0
78.4	0
78.5	0
78.6	0
78.7	0
78.8	0
78.9	0
79	0
79.1	0
79.2	0
79.3	0
79.4	0
79.5	0
79.6	0
79.7	0
79.8	0
79.9	0
80	0
80.1	0
80.2	0
80.3	0
80.4	0
80.5	0
80.6	0
80.7	0
80.8	0
80.9	0
81	0
81.1	0
81.2	0
81.3	0
81.4	0
81.5	0
81.6	0
81.7	0
81.8	0
81.9	0
82	0
82.1	0
82.2	0
82.3	0
82.4	0
82.5	0
82.6	0
82.7	0
82.8	0
82.9	0
83	0
83.1	0
83.2	0
83.3	0
83.4	0
83.5	0
83.6	0
83.7	0
83.8	0
83.9	0
84	0
84.1	0
84.2	0
84.3	0
84.4	0
84.5	0
84.6	0
84.7	0
84.8	0
84.9	0
85	0
85.1	0
85.2	0
85.3	0
85.4	0
85.5	0
85.6	0
85.7	0
85.8	0
85.9	0
86	0
86.1	0
86.2	0
86.3	0
86.4	0
86.5	0
86.6	0
86.7	0
86.8	0
86.9	0
87	0
87.1	0
87.2	0
87.3	0
87.4	0
87.5	0
87.6	0
87.7	0
87.8	0
87.9	0
88	0
88.1	0
88.2	0
88.3	0
88.4	0
88.5	0
88.6	0
88.7	0
88.8	0
88.9	0
89	0
89.1	0
89.2	0
89.3	0
89.4	0
89.5	0
89.6	0
89.7	0
89.8	0
89.9	0
90	0
90.1	0
90.2	0
90.3	0
90.4	0
90.5	0
90.6	0
90.7	0
90.8	0
90.9	0
91	0
91.1	0
91.2	0
91.3	0
91.4	0
91.5	0
91.6	0
91.7	0
91.8	0
91.9	0
92	0
92.1	0
92.2	0
92.3	0
92.4	0
92.5	0
92.6	0
92.7	0
92.8	0
92.9	0
93	0
93.1	0
93.2	0
93.3	0
93.4	0
93.5	0
93.6	0
93.7	0
93.8	0
93.9	0
94	0
94.1	0
94.2	0
94.3	0
94.4	0
94.5	0
94.6	0
94.7	0
94.8	0
94.9	0
95	0
95.1	0
95.2	0
95.3	0
95.4	0
95.5	0
95.6	0
95.7	0
95.8	0
95.9	0
96	0
96.1	0
96.2	0
96.3	0
96.4	0
96.5	0
96.6	0
96.7	0
96.8	0
96.9	0
97	0
97.1	0
97.2	0
97.3	0
97.4	0
97.5	0
97.6	0
97.7	0
97.8	0
97.9	0
98	0
98.1	0
98.2	0
98.3	0
98.4	0
98.5	0
98.6	0
98.7	0
98.8	0
98.9	0
99	0
99.1	0
99.2	0
99.3	0
99.4	0
99.5	0
99.6	0
99.7	0
99.8	0
99.9	0
100	0
100.1	0.33125
100.2	0.53125
100.3	0.63125
100.4	0.75
100.5	0.7875
100.6	0.79375
100.7	0.825
100.8	0.83125
100.9	0.86875
101	0.8625
101.1	0.85625
101.2	0.8875
101.3	0.9
101.4	0.89375
101.5	0.9
101.6	0.925
101.7	0.925
101.8	0.94375
101.9	0.95625
102	0.9375
102.1	0.9375
102.2	0.925
102.3	0.90625
102.4	0.9125
102.5	0.93125
102.6	0.94375
102.7	0.94375
102.8	0.925
102.9	0.9125
103	0.93125
103.1	0.95625
103.2	0.94375
103.3	0.95
103.4	0.9625
103.5	0.96875
103.6	0.9625
103.7	0.9625
103.8	0.96875
103.9	0.95
104	0.925
104.1	0.95
104.2	0.95625
104.3	0.96875
104.4	0.95
104.5	0.93125
104.6	0.925
104.7	0.91875
104.8	0.90625
104.9	0.90625
105	0.91875
105.1	0.9375
105.2	0.94375
105.3	0.94375
105.4	0.93125
105.5	0.9375
105.6	0.94375
105.7	0.93125
105.8	0.93125
105.9	0.925
106	0.9375
106.1	0.93125
106.2	0.9
106.3	0.90625
106.4	0.91875
106.5	0.91875
106.6	0.9375
106.7	0.95
106.8	0.94375
106.9	0.925
107	0.9375
107.1	0.9375
107.2	0.9375
107.3	0.925
107.4	0.91875
107.5	0.925
107.6	0.9375
107.7	0.90625
107.8	0.90625
107.9	0.90625
108	0.9125
108.1	0.93125
108.2	0.94375
108.3	0.96875
108.4	0.95
108.5	0.95
108.6	0.9625
108.7	0.9625
108.8	0.975
108.9	0.9625
109	0.95625
109.1	0.95
109.2	0.95625
109.3	0.9625
109.4	0.975
109.5	0.96875
109.6	0.95
109.7	0.94375
109.8	0.925
109.9	0.93125
110	0.93125
110.1	0.9375
110.2	0.9375
110.3	0.94375
110.4	0.94375
110.5	0.94375
110.6	0.9375
110.7	0.925
110.8	0.93125
110.9	0.9375
111	0.95625
111.1	0.95625
111.2	0.94375
111.3	0.93125
111.4	0.93125
111.5	0.94375
111.6	0.9375
111.7	0.9375
111.8	0.93125
111.9	0.94375
112	0.94375
112.1	0.925
112.2	0.925
112.3	0.9375
112.4	0.94375
112.5	0.9625
112.6	0.95
112.7	0.95625
112.8	0.95
112.9	0.95625
113	0.94375
113.1	0.94375
113.2	0.90625
113.3	0.89375
113.4	0.90625
113.5	0.925
113.6	0.94375
113.7	0.94375
113.8	0.96875
113.9	0.96875
114	0.96875
114.1	0.95625
114.2	0.95625
114.3	0.9375
114.4	0.94375
114.5	0.95
114.6	0.95625
114.7	0.95625
114.8	0.9625
114.9	0.96875
115	0.96875
115.1	0.975
115.2	0.95625
115.3	0.9625
115.4	0.95
115.5	0.9375
115.6	0.93125
115.7	0.925
115.8	0.95625
115.9	0.95625
116	0.9375
116.1	0.94375
116.2	0.94375
116.3	0.93125
116.4	0.93125
116.5	0.93125
116.6	0.9
116.7	0.91875
116.8	0.9125
116.9	0.9125
117	0.93125
117.1	0.91875
117.2	0.925
117.3	0.93125
117.4	0.94375
117.5	0.94375
117.6	0.93125
117.7	0.93125
117.8	0.93125
117.9	0.94375
118	0.9375
118.1	0.9375
118.2	0.95
118.3	0.9625
118.4	0.975
118.5	0.9625
118.6	0.96875
118.7	0.95
118.8	0.9375
118.9	0.94375
119	0.95625
119.1	0.9625
119.2	0.95
119.3	0.9375
119.4	0.9375
119.5	0.94375
119.6	0.975
119.7	0.95625
119.8	0.96875
119.9	0.975
120	0.975
120.1	0.975
120.2	0.9625
120.3	0.9625
120.4	0.9625
120.5	0.9625
120.6	0.95
120.7	0.96875
120.8	0.96875
120.9	0.975
121	0.9625
121.1	0.9625
121.2	0.95625
121.3	0.96875
121.4	0.96875
121.5	0.95625
121.6	0.95625
121.7	0.94375
121.8	0.95
121.9	0.95625
122	0.95
122.1	0.95625
122.2	0.95
122.3	0.95625
122.4	0.95625
122.5	0.96875
122.6	0.9625
122.7	0.95
122.8	0.94375
122.9	0.94375
123	0.94375
123.1	0.95625
123.2	0.96875
123.3	0.98125
123.4	0.9875
123.5	0.9875
123.6	0.9875
123.7	0.99375
123.8	0.9875
123.9	0.9875
124	0.95625
124.1	0.96875
124.2	0.9625
124.3	0.9375
124.4	0.95
124.5	0.975
124.6	0.96875
124.7	0.9625
124.8	0.975
124.9	0.98125
125	0.96875
125.1	0.95625
125.2	0.9625
125.3	0.9625
125.4	0.9625
125.5	0.9625
125.6	0.96875
125.7	0.98125
125.8	0.98125
125.9	0.96875
126	0.96875
126.1	0.95625
126.2	0.9375
126.3	0.9375
126.4	0.94375
126.5	0.95625
126.6	0.96875
126.7	0.975
126.8	0.96875
126.9	0.98125
127	0.9875
127.1	0.975
127.2	0.99375
127.3	0.99375
127.4	0.99375
127.5	0.96875
127.6	0.975
127.7	0.96875
127.8	0.96875
127.9	0.95
128	0.9625
128.1	0.95625
128.2	0.9625
128.3	0.96875
128.4	0.975
128.5	0.975
128.6	0.98125
128.7	0.9625
128.8	0.9625
128.9	0.9625
129	0.98125
129.1	0.975
129.2	0.9625
129.3	0.975
129.4	0.975
129.5	0.96875
129.6	0.975
129.7	0.96875
129.8	0.9625
129.9	0.95625
130	0.9625
130.1	0.95625
130.2	0.9625
130.3	0.9625
130.4	0.9625
130.5	0.96875
130.6	0.96875
130.7	0.975
130.8	0.96875
130.9	0.96875
131	0.975
131.1	0.9625
131.2	0.95625
131.3	0.975
131.4	0.96875
131.5	0.96875
131.6	0.98125
131.7	0.975
131.8	0.975
131.9	0.9625
132	0.975
132.1	0.96875
132.2	0.96875
132.3	0.9625
132.4	0.975
132.5	0.975
132.6	0.98125
132.7	0.975
132.8	0.96875
132.9	0.9625
133	0.96875
133.1	0.9875
133.2	0.98125
133.3	0.975
133.4	0.98125
133.5	0.96875
133.6	0.9625
133.7	0.95625
133.8	0.95625
133.9	0.9625
134	0.9625
134.1	0.9625
134.2	0.95625
134.3	0.9625
134.4	0.9625
134.5	0.9625
134.6	0.9625
134.7	0.975
134.8	0.975
134.9	0.975
135	0.99375
135.1	0.9875
135.2	0.9875
135.3	0.9875
135.4	0.9875
135.5	0.98125
135.6	0.98125
135.7	0.98125
135.8	0.98125
135.9	0.975
136	0.95625
136.1	0.95625
136.2	0.95625
136.3	0.95625
136.4	0.94375
136.5	0.95625
136.6	0.9625
136.7	0.975
136.8	0.975
136.9	0.96875
137	0.9625
137.1	0.96875
137.2	0.975
137.3	0.95625
137.4	0.95625
137.5	0.9625
137.6	0.9625
137.7	0.9625
137.8	0.96875
137.9	0.96875
138	0.9625
138.1	0.96875
138.2	0.975
138.3	0.96875
138.4	0.96875
138.5	0.98125
138.6	0.98125
138.7	0.99375
138.8	1
138.9	1
139	0.98125
139.1	0.9875
139.2	0.99375
139.3	0.99375
139.4	0.9875
139.5	0.9875
139.6	0.9875
139.7	0.98125
139.8	0.99375
139.9	0.99375
140	0.9875
140.1	0.98125
140.2	0.9875
140.3	0.98125
140.4	0.96875
140.5	0.95625
140.6	0.9625
140.7	0.9625
140.8	0.96875
140.9	0.95625
141	0.96875
141.1	0.975
141.2	0.98125
141.3	0.9875
141.4	0.9875
141.5	0.9875
141.6	0.9875
141.7	0.9875
141.8	0.99375
141.9	0.98125
142	0.975
142.1	0.975
142.2	0.98125
142.3	0.98125
142.4	0.98125
142.5	0.96875
142.6	0.95625
142.7	0.95625
142.8	0.96875
142.9	0.96875
143	0.975
143.1	0.975
143.2	0.975
143.3	0.975
143.4	0.975
143.5	0.975
143.6	0.975
143.7	0.975
143.8	0.98125
143.9	0.96875
144	0.96875
144.1	0.96875
144.2	0.975
144.3	0.98125
144.4	1
144.5	0.99375
144.6	0.9875
144.7	0.975
144.8	0.98125
144.9	0.98125
145	0.98125
145.1	0.98125
145.2	0.99375
145.3	0.99375
145.4	0.99375
145.5	0.98125
145.6	0.975
145.7	0.98125
145.8	0.9875
145.9	0.99375
146	0.99375
146.1	0.99375
146.2	0.98125
146.3	0.975
146.4	0.98125
146.5	0.98125
146.6	0.975
146.7	0.96875
146.8	0.96875
146.9	0.96875
147	0.96875
147.1	0.98125
147.2	0.98125
147.3	0.975
147.4	0.98125
147.5	0.98125
147.6	0.96875
147.7	0.9625
147.8	0.95
147.9	0.9625
148	0.9625
148.1	0.9625
148.2	0.9625
148.3	0.9625
148.4	0.9625
148.5	0.975
148.6	0.975
148.7	0.98125
148.8	0.975
148.9	0.98125
149	0.98125
149.1	0.98125
149.2	0.9875
149.3	0.9875
149.4	0.99375
149.5	0.99375
149.6	0.9875
149.7	0.9875
149.8	0.98125
149.9	0.98125
150	0.9875
150.1	0.98125
150.2	0.98125
150.3	0.975
150.4	0.99375
150.5	0.99375
150.6	0.99375
150.7	0.9875
150.8	0.9875
150.9	0.975
151	0.975
151.1	0.96875
151.2	0.975
151.3	0.975
151.4	0.975
151.5	0.96875
151.6	0.96875
151.7	0.95625
151.8	0.95
151.9	0.95625
152	0.96875
152.1	0.9625
152.2	0.9625
152.3	0.9625
152.4	0.9625
152.5	0.95625
152.6	0.975
152.7	0.975
152.8	0.98125
152.9	0.975
153	0.98125
153.1	0.9875
153.2	0.98125
153.3	0.975
153.4	0.98125
153.5	0.9875
153.6	0.9875
153.7	0.98125
153.8	0.96875
153.9	0.98125
154	0.9875
154.1	0.98125
154.2	0.98125
154.3	0.98125
154.4	0.975
154.5	0.98125
154.6	0.98125
154.7	0.98125
154.8	0.975
154.9	0.98125
155	0.98125
155.1	0.9875
155.2	0.9875
155.3	0.98125
155.4	0.9875
155.5	0.9875
155.6	0.9875
155.7	0.98125
155.8	0.9875
155.9	0.975
156	0.975
156.1	0.98125
156.2	0.9875
156.3	0.99375
156.4	0.98125
156.5	0.98125
156.6	0.98125
156.7	0.98125
156.8	0.9875
156.9	0.9875
157	0.99375
157.1	0.99375
157.2	0.9875
157.3	0.99375
157.4	0.9875
157.5	0.9875
157.6	0.9875
157.7	0.9875
157.8	0.99375
157.9	0.99375
158	1
158.1	0.99375
158.2	0.99375
158.3	0.99375
158.4	1
158.5	1
158.6	1
158.7	1
158.8	1
158.9	1
159	1
159.1	0.99375
159.2	0.9875
159.3	0.98125
159.4	0.98125
159.5	0.98125
159.6	0.975
159.7	0.98125
159.8	0.9875
159.9	0.99375
160	1
160.1	0.99375
160.2	0.9875
160.3	0.99375
160.4	0.98125
160.5	0.975
160.6	0.98125
160.7	0.9875
160.8	0.9875
160.9	0.99375
161	0.99375
161.1	0.99375
161.2	0.9875
161.3	0.9875
161.4	0.9875
161.5	0.9875
161.6	0.98125
161.7	0.98125
161.8	0.98125
161.9	0.9875
162	0.9875
162.1	0.98125
162.2	0.975
162.3	0.98125
162.4	0.98125
162.5	0.98125
162.6	0.98125
162.7	0.98125
162.8	0.98125
162.9	0.9875
163	0.9875
163.1	0.9875
163.2	0.9875
163.3	0.9875
163.4	0.96875
163.5	0.96875
163.6	0.96875
163.7	0.98125
163.8	0.98125
163.9	0.98125
164	0.975
164.1	0.96875
164.2	0.9875
164.3	0.975
164.4	0.975
164.5	0.975
164.6	0.975
164.7	0.9625
164.8	0.975
164.9	0.975
165	0.98125
165.1	0.98125
165.2	0.98125
165.3	0.98125
165.4	0.98125
165.5	0.98125
165.6	0.9875
165.7	0.98125
165.8	0.98125
165.9	0.98125
166	0.98125
166.1	0.98125
166.2	0.9875
166.3	0.98125
166.4	0.98125
166.5	0.98125
166.6	0.9875
166.7	0.99375
166.8	0.99375
166.9	1
167	1
167.1	1
167.2	1
167.3	0.9875
167.4	0.9875
167.5	0.9875
167.6	0.98125
167.7	0.98125
167.8	0.98125
167.9	0.96875
168	0.96875
168.1	0.96875
168.2	0.975
168.3	0.98125
168.4	0.9875
168.5	0.975
168.6	0.98125
168.7	0.96875
168.8	0.975
168.9	0.96875
169	0.96875
169.1	0.9625
169.2	0.96875
169.3	0.975
169.4	0.975
169.5	0.975
169.6	0.98125
169.7	0.98125
169.8	0.98125
169.9	0.975
170	0.98125
170.1	0.96875
170.2	0.96875
170.3	0.975
170.4	0.98125
170.5	0.98125
170.6	0.98125
170.7	0.99375
170.8	0.99375
170.9	1
171	1
171.1	1
171.2	0.98125
171.3	0.975
171.4	0.99375
171.5	0.99375
171.6	0.9875
171.7	0.98125
171.8	0.9875
171.9	0.98125
172	0.98125
172.1	0.9875
172.2	0.99375
172.3	0.99375
172.4	0.975
172.5	0.975
172.6	0.98125
172.7	0.99375
172.8	0.99375
172.9	0.99375
173	0.9875
173.1	0.9875
173.2	0.99375
173.3	0.975
173.4	0.975
173.5	0.975
173.6	0.9875
173.7	0.98125
173.8	0.9875
173.9	0.9875
174	0.98125
174.1	0.99375
174.2	0.99375
174.3	1
174.4	1
174.5	1
174.6	0.99375
174.7	0.99375
174.8	0.9875
174.9	0.98125
175	0.98125
175.1	0.9875
175.2	0.9875
175.3	0.99375
175.4	1
175.5	1
175.6	0.99375
175.7	1
175.8	0.99375
175.9	0.99375
176	0.9875
176.1	0.9875
176.2	0.9875
176.3	0.98125
176.4	0.98125
176.5	0.98125
176.6	0.9875
176.7	0.96875
176.8	0.96875
176.9	0.975
177	0.98125
177.1	0.98125
177.2	0.96875
177.3	0.975
177.4	0.96875
177.5	0.975
177.6	0.9875
177.7	0.975
177.8	0.98125
177.9	0.98125
178	0.9875
178.1	0.9875
178.2	0.98125
178.3	1
178.4	0.9875
178.5	0.9875
178.6	0.99375
178.7	0.9875
178.8	0.975
178.9	0.96875
179	0.96875
179.1	0.96875
179.2	0.9625
179.3	0.96875
179.4	0.96875
179.5	0.975
179.6	0.96875
179.7	0.98125
179.8	0.975
179.9	0.975
180	0.975
180.1	0.975
180.2	0.975
180.3	0.975
180.4	0.96875
180.5	0.96875
180.6	0.9625
180.7	0.9625
180.8	0.9625
180.9	0.96875
181	0.975
181.1	0.9875
181.2	0.98125
181.3	0.98125
181.4	0.9875
181.5	0.99375
181.6	0.99375
181.7	0.99375
181.8	0.9875
181.9	0.98125
182	0.98125
182.1	0.9875
182.2	0.99375
182.3	1
182.4	0.99375
182.5	0.98125
182.6	0.9875
182.7	0.99375
182.8	0.99375
182.9	0.9875
183	0.9875
183.1	0.99375
183.2	0.99375
183.3	0.99375
183.4	1
183.5	1
183.6	1
183.7	0.99375
183.8	1
183.9	0.99375
184	0.9875
184.1	0.9875
184.2	0.98125
184.3	0.98125
184.4	0.98125
184.5	0.98125
184.6	0.975
184.7	0.96875
184.8	0.975
184.9	0.96875
185	0.95625
185.1	0.95625
185.2	0.9625
185.3	0.9625
185.4	0.9625
185.5	0.96875
185.6	0.975
185.7	0.9875
185.8	0.9875
185.9	0.9875
186	0.98125
186.1	0.98125
186.2	0.98125
186.3	0.98125
186.4	0.975
186.5	0.98125
186.6	0.98125
186.7	0.98125
186.8	0.98125
186.9	0.98125
187	0.975
187.1	0.9875
187.2	0.9875
187.3	0.98125
187.4	0.9875
187.5	0.9875
187.6	0.9875
187.7	0.99375
187.8	0.99375
187.9	0.99375
188	0.98125
188.1	0.98125
188.2	0.9875
188.3	0.98125
188.4	0.9875
188.5	0.99375
188.6	1
188.7	0.99375
188.8	0.9875
188.9	0.9875
189	0.9875
189.1	0.98125
189.2	0.98125
189.3	0.96875
189.4	0.98125
189.5	0.9875
189.6	0.9875
189.7	0.9875
189.8	0.9875
189.9	0.98125
190	0.975
190.1	0.98125
190.2	0.9875
190.3	0.98125
190.4	0.975
190.5	0.98125
190.6	0.98125
190.7	0.98125
190.8	0.975
190.9	0.975
191	0.98125
191.1	0.98125
191.2	0.9875
191.3	0.9875
191.4	0.9875
191.5	0.98125
191.6	0.98125
191.7	0.975
191.8	0.98125
191.9	0.9875
192	0.99375
192.1	0.9875
192.2	0.9875
192.3	1
192.4	0.99375
192.5	0.98125
192.6	0.98125
192.7	0.9875
192.8	0.98125
192.9	0.98125
193	0.9875
193.1	0.98125
193.2	0.98125
193.3	0.975
193.4	0.98125
193.5	0.975
193.6	0.98125
193.7	0.98125
193.8	0.975
193.9	0.98125
194	0.96875
194.1	0.9625
194.2	0.96875
194.3	0.96875
194.4	0.96875
194.5	0.96875
194.6	0.975
194.7	0.975
194.8	0.975
194.9	0.98125
195	0.99375
195.1	0.9875
195.2	0.98125
195.3	0.975
195.4	0.9875
195.5	0.9875
195.6	0.9875
195.7	0.975
195.8	0.96875
195.9	0.975
196	0.96875
196.1	0.975
196.2	0.9875
196.3	0.98125
196.4	0.96875
196.5	0.975
196.6	0.9875
196.7	0.9625
196.8	0.9625
196.9	0.95625
197	0.9625
197.1	0.95625
197.2	0.9625
197.3	0.98125
197.4	0.9625
197.5	0.96875
197.6	0.98125
197.7	0.98125
197.8	0.98125
197.9	0.98125
198	0.99375
198.1	0.98125
198.2	0.98125
198.3	0.975
198.4	0.98125
198.5	0.9875
198.6	0.98125
198.7	0.98125
198.8	0.9875
198.9	0.975
199	0.96875
199.1	0.98125
199.2	0.975
199.3	0.98125
199.4	0.975
199.5	0.975
199.6	0.9875
199.7	0.98125
199.8	0.98125
199.9	0.98125
200	0.98125
[truncated: 14,000 more rows]
