# Supplementary material for: Bayesian inference of kinetic schemes for ion channels by Kalman filtering
Source: eLife journal article supplement (doi:10.7554/elife.62714), 2022-05-04
Supplement: fig4-data4 [file 1_Sim_N_80_Strom_MW.xlsx]

## Sheet: 8 M
0.1	0
0.2	0
0.3	0
0.4	0
0.5	0
0.6	0
0.7	0
0.8	0
0.9	0
1	0
1.1	0
1.2	0
1.3	0
1.4	0
1.5	0
1.6	0
1.7	0
1.8	0
1.9	0
2	0
2.1	0
2.2	0
2.3	0
2.4	0
2.5	0
2.6	0
2.7	0
2.8	0
2.9	0
3	0
3.1	0
3.2	0
3.3	0
3.4	0
3.5	0
3.6	0
3.7	0
3.8	0
3.9	0
4	0
4.1	0
4.2	0
4.3	0
4.4	0
4.5	0
4.6	0
4.7	0
4.8	0
4.9	0
5	0
5.1	0
5.2	0
5.3	0
5.4	0
5.5	0
5.6	0
5.7	0
5.8	0
5.9	0
6	0
6.1	0
6.2	0
6.3	0
6.4	0
6.5	0
6.6	0
6.7	0
6.8	0
6.9	0
7	0
7.1	0
7.2	0
7.3	0
7.4	0
7.5	0
7.6	0
7.7	0
7.8	0
7.9	0
8	0
8.1	0
8.2	0
8.3	0
8.4	0
8.5	0
8.6	0
8.7	0
8.8	0
8.9	0
9	0
9.1	0
9.2	0
9.3	0
9.4	0
9.5	0
9.6	0
9.7	0
9.8	0
9.9	0
10	0
10.1	0
10.2	0
10.3	0
10.4	0
10.5	0
10.6	0
10.7	0
10.8	0
10.9	0
11	0
11.1	0
11.2	0
11.3	0
11.4	0
11.5	0
11.6	0
11.7	0
11.8	0
11.9	0
12	0
12.1	0
12.2	0
12.3	0
12.4	0
12.5	0
12.6	0
12.7	0
12.8	0
12.9	0
13	0
13.1	0
13.2	0
13.3	0
13.4	0
13.5	0
13.6	0
13.7	0
13.8	0
13.9	0
14	0
14.1	0
14.2	0
14.3	0
14.4	0
14.5	0
14.6	0
14.7	0
14.8	0
14.9	0
15	0
15.1	0
15.2	0
15.3	0
15.4	0
15.5	0
15.6	0
15.7	0
15.8	0
15.9	0
16	0
16.1	0
16.2	0
16.3	0
16.4	0
16.5	0
16.6	0
16.7	0
16.8	0
16.9	0
17	0
17.1	0
17.2	0
17.3	0
17.4	0
17.5	0
17.6	0
17.7	0
17.8	0
17.9	0
18	0
18.1	0
18.2	0
18.3	0
18.4	0
18.5	0
18.6	0
18.7	0
18.8	0
18.9	0
19	0
19.1	0
19.2	0
19.3	0
19.4	0
19.5	0
19.6	0
19.7	0
19.8	0
19.9	0
20	0
20.1	0
20.2	0
20.3	0
20.4	0
20.5	0
20.6	0
20.7	0
20.8	0
20.9	0
21	0
21.1	0
21.2	0
21.3	0
21.4	0
21.5	0
21.6	0
21.7	0
21.8	0
21.9	0
22	0
22.1	0
22.2	0
22.3	0
22.4	0
22.5	0
22.6	0
22.7	0
22.8	0
22.9	0
23	0
23.1	0
23.2	0
23.3	0
23.4	0
23.5	0
23.6	0
23.7	0
23.8	0
23.9	0
24	0
24.1	0
24.2	0
24.3	0
24.4	0
24.5	0
24.6	0
24.7	0
24.8	0
24.9	0
25	0
25.1	0
25.2	0
25.3	0
25.4	0
25.5	0
25.6	0
25.7	0
25.8	0
25.9	0
26	0
26.1	0
26.2	0
26.3	0
26.4	0
26.5	0
26.6	0
26.7	0
26.8	0
26.9	0
27	0
27.1	0
27.2	0
27.3	0
27.4	0
27.5	0
27.6	0
27.7	0
27.8	0
27.9	0
28	0
28.1	0
28.2	0
28.3	0
28.4	0
28.5	0
28.6	0
28.7	0
28.8	0
28.9	0
29	0
29.1	0
29.2	0
29.3	0
29.4	0
29.5	0
29.6	0
29.7	0
29.8	0
29.9	0
30	0
30.1	0
30.2	0
30.3	0
30.4	0
30.5	0
30.6	0
30.7	0
30.8	0
30.9	0
31	0
31.1	0
31.2	0
31.3	0
31.4	0
31.5	0
31.6	0
31.7	0
31.8	0
31.9	0
32	0
32.1	0
32.2	0
32.3	0
32.4	0
32.5	0
32.6	0
32.7	0
32.8	0
32.9	0
33	0
33.1	0
33.2	0
33.3	0
33.4	0
33.5	0
33.6	0
33.7	0
33.8	0
33.9	0
34	0
34.1	0
34.2	0
34.3	0
34.4	0
34.5	0
34.6	0
34.7	0
34.8	0
34.9	0
35	0
35.1	0
35.2	0
35.3	0
35.4	0
35.5	0
35.6	0
35.7	0
35.8	0
35.9	0
36	0
36.1	0
36.2	0
36.3	0
36.4	0
36.5	0
36.6	0
36.7	0
36.8	0
36.9	0
37	0
37.1	0
37.2	0
37.3	0
37.4	0
37.5	0
37.6	0
37.7	0
37.8	0
37.9	0
38	0
38.1	0
38.2	0
38.3	0
38.4	0
38.5	0
38.6	0
38.7	0
38.8	0
38.9	0
39	0
39.1	0
39.2	0
39.3	0
39.4	0
39.5	0
39.6	0
39.7	0
39.8	0
39.9	0
40	0
40.1	0
40.2	0
40.3	0
40.4	0
40.5	0
40.6	0
40.7	0
40.8	0
40.9	0
41	0
41.1	0
41.2	0
41.3	0
41.4	0
41.5	0
41.6	0
41.7	0
41.8	0
41.9	0
42	0
42.1	0
42.2	0
42.3	0
42.4	0
42.5	0
42.6	0
42.7	0
42.8	0
42.9	0
43	0
43.1	0
43.2	0
43.3	0
43.4	0
43.5	0
43.6	0
43.7	0
43.8	0
43.9	0
44	0
44.1	0
44.2	0
44.3	0
44.4	0
44.5	0
44.6	0
44.7	0
44.8	0
44.9	0
45	0
45.1	0
45.2	0
45.3	0
45.4	0
45.5	0
45.6	0
45.7	0
45.8	0
45.9	0
46	0
46.1	0
46.2	0
46.3	0
46.4	0
46.5	0
46.6	0
46.7	0
46.8	0
46.9	0
47	0
47.1	0
47.2	0
47.3	0
47.4	0
47.5	0
47.6	0
47.7	0
47.8	0
47.9	0
48	0
48.1	0
48.2	0
48.3	0
48.4	0
48.5	0
48.6	0
48.7	0
48.8	0
48.9	0
49	0
49.1	0
49.2	0
49.3	0
49.4	0
49.5	0
49.6	0
49.7	0
49.8	0
49.9	0
50	0
50.1	0
50.2	0
50.3	0
50.4	0
50.5	0
50.6	0
50.7	0
50.8	0
50.9	0
51	0
51.1	0
51.2	0
51.3	0
51.4	0
51.5	0
51.6	0
51.7	0
51.8	0
51.9	0
52	0
52.1	0
52.2	0
52.3	0
52.4	0
52.5	0
52.6	0
52.7	0
52.8	0
52.9	0
53	0
53.1	0
53.2	0
53.3	0
53.4	0
53.5	0
53.6	0
53.7	0
53.8	0
53.9	0
54	0
54.1	0
54.2	0
54.3	0
54.4	0
54.5	0
54.6	0
54.7	0
54.8	0
54.9	0
55	0
55.1	0
55.2	0
55.3	0
55.4	0
55.5	0
55.6	0
55.7	0
55.8	0
55.9	0
56	0
56.1	0
56.2	0
56.3	0
56.4	0
56.5	0
56.6	0
56.7	0
56.8	0
56.9	0
57	0
57.1	0
57.2	0
57.3	0
57.4	0
57.5	0
57.6	0
57.7	0
57.8	0
57.9	0
58	0
58.1	0
58.2	0
58.3	0
58.4	0
58.5	0
58.6	0
58.7	0
58.8	0
58.9	0
59	0
59.1	0
59.2	0
59.3	0
59.4	0
59.5	0
59.6	0
59.7	0
59.8	0
59.9	0
60	0
60.1	0
60.2	0
60.3	0
60.4	0
60.5	0
60.6	0
60.7	0
60.8	0
60.9	0
61	0
61.1	0
61.2	0
61.3	0
61.4	0
61.5	0
61.6	0
61.7	0
61.8	0
61.9	0
62	0
62.1	0
62.2	0
62.3	0
62.4	0
62.5	0
62.6	0
62.7	0
62.8	0
62.9	0
63	0
63.1	0
63.2	0
63.3	0
63.4	0
63.5	0
63.6	0
63.7	0
63.8	0
63.9	0
64	0
64.1	0
64.2	0
64.3	0
64.4	0
64.5	0
64.6	0
64.7	0
64.8	0
64.9	0
65	0
65.1	0
65.2	0
65.3	0
65.4	0
65.5	0
65.6	0
65.7	0
65.8	0
65.9	0
66	0
66.1	0
66.2	0
66.3	0
66.4	0
66.5	0
66.6	0
66.7	0
66.8	0
66.9	0
67	0
67.1	0
67.2	0
67.3	0
67.4	0
67.5	0
67.6	0
67.7	0
67.8	0
67.9	0
68	0
68.1	0
68.2	0
68.3	0
68.4	0
68.5	0
68.6	0
68.7	0
68.8	0
68.9	0
69	0
69.1	0
69.2	0
69.3	0
69.4	0
69.5	0
69.6	0
69.7	0
69.8	0
69.9	0
70	0
70.1	0
70.2	0
70.3	0
70.4	0
70.5	0
70.6	0
70.7	0
70.8	0
70.9	0
71	0
71.1	0
71.2	0
71.3	0
71.4	0
71.5	0
71.6	0
71.7	0
71.8	0
71.9	0
72	0
72.1	0
72.2	0
72.3	0
72.4	0
72.5	0
72.6	0
72.7	0
72.8	0
72.9	0
73	0
73.1	0
73.2	0
73.3	0
73.4	0
73.5	0
73.6	0
73.7	0
73.8	0
73.9	0
74	0
74.1	0
74.2	0
74.3	0
74.4	0
74.5	0
74.6	0
74.7	0
74.8	0
74.9	0
75	0
75.1	0
75.2	0
75.3	0
75.4	0
75.5	0
75.6	0
75.7	0
75.8	0
75.9	0
76	0
76.1	0
76.2	0
76.3	0
76.4	0
76.5	0
76.6	0
76.7	0
76.8	0
76.9	0
77	0
77.1	0
77.2	0
77.3	0
77.4	0
77.5	0
77.6	0
77.7	0
77.8	0
77.9	0
78	0
78.1	0
78.2	0
78.3	0
78.4	0
78.5	0
78.6	0
78.7	0
78.8	0
78.9	0
79	0
79.1	0
79.2	0
79.3	0
79.4	0
79.5	0
79.6	0
79.7	0
79.8	0
79.9	0
80	0
80.1	0
80.2	0
80.3	0
80.4	0
80.5	0
80.6	0
80.7	0
80.8	0
80.9	0
81	0
81.1	0
81.2	0
81.3	0
81.4	0
81.5	0
81.6	0
81.7	0
81.8	0
81.9	0
82	0
82.1	0
82.2	0
82.3	0
82.4	0
82.5	0
82.6	0
82.7	0
82.8	0
82.9	0
83	0
83.1	0
83.2	0
83.3	0
83.4	0
83.5	0
83.6	0
83.7	0
83.8	0
83.9	0
84	0
84.1	0
84.2	0
84.3	0
84.4	0
84.5	0
84.6	0
84.7	0
84.8	0
84.9	0
85	0
85.1	0
85.2	0
85.3	0
85.4	0
85.5	0
85.6	0
85.7	0
85.8	0
85.9	0
86	0
86.1	0
86.2	0
86.3	0
86.4	0
86.5	0
86.6	0
86.7	0
86.8	0
86.9	0
87	0
87.1	0
87.2	0
87.3	0
87.4	0
87.5	0
87.6	0
87.7	0
87.8	0
87.9	0
88	0
88.1	0
88.2	0
88.3	0
88.4	0
88.5	0
88.6	0
88.7	0
88.8	0
88.9	0
89	0
89.1	0
89.2	0
89.3	0
89.4	0
89.5	0
89.6	0
89.7	0
89.8	0
89.9	0
90	0
90.1	0
90.2	0
90.3	0
90.4	0
90.5	0
90.6	0
90.7	0
90.8	0
90.9	0
91	0
91.1	0
91.2	0
91.3	0
91.4	0
91.5	0
91.6	0
91.7	0
91.8	0
91.9	0
92	0
92.1	0
92.2	0
92.3	0
92.4	0
92.5	0
92.6	0
92.7	0
92.8	0
92.9	0
93	0
93.1	0
93.2	0
93.3	0
93.4	0
93.5	0
93.6	0
93.7	0
93.8	0
93.9	0
94	0
94.1	0
94.2	0
94.3	0
94.4	0
94.5	0
94.6	0
94.7	0
94.8	0
94.9	0
95	0
95.1	0
95.2	0
95.3	0
95.4	0
95.5	0
95.6	0
95.7	0
95.8	0
95.9	0
96	0
96.1	0
96.2	0
96.3	0
96.4	0
96.5	0
96.6	0
96.7	0
96.8	0
96.9	0
97	0
97.1	0
97.2	0
97.3	0
97.4	0
97.5	0
97.6	0
97.7	0
97.8	0
97.9	0
98	0
98.1	0
98.2	0
98.3	0
98.4	0
98.5	0
98.6	0
98.7	0
98.8	0
98.9	0
99	0
99.1	0
99.2	0
99.3	0
99.4	0
99.5	0
99.6	0
99.7	0
99.8	0
99.9	0
100	0
100.1	0
100.2	0.0125
100.3	0.0125
100.4	0.025
100.5	0.025
100.6	0.025
100.7	0.025
100.8	0.0375
100.9	0.0375
101	0.0375
101.1	0.05
101.2	0.05
101.3	0.05
101.4	0.05
101.5	0.0625
101.6	0.0625
101.7	0.0625
101.8	0.0625
101.9	0.075
102	0.075
102.1	0.075
102.2	0.1
102.3	0.1
102.4	0.1
102.5	0.125
102.6	0.125
102.7	0.125
102.8	0.125
102.9	0.125
103	0.1375
103.1	0.1375
103.2	0.1375
103.3	0.15
103.4	0.175
103.5	0.1875
103.6	0.2
103.7	0.2
103.8	0.2125
103.9	0.225
104	0.225
104.1	0.2375
104.2	0.2375
104.3	0.2375
104.4	0.2375
104.5	0.25
104.6	0.25
104.7	0.25
104.8	0.25
104.9	0.25
105	0.25
105.1	0.25
105.2	0.2625
105.3	0.2625
105.4	0.2625
105.5	0.275
105.6	0.275
105.7	0.275
105.8	0.275
105.9	0.275
106	0.275
106.1	0.275
106.2	0.275
106.3	0.275
106.4	0.275
106.5	0.275
106.6	0.275
106.7	0.275
106.8	0.275
106.9	0.275
107	0.275
107.1	0.275
107.2	0.275
107.3	0.275
107.4	0.2875
107.5	0.2875
107.6	0.2875
107.7	0.2875
107.8	0.2875
107.9	0.2875
108	0.2875
108.1	0.3
108.2	0.3
108.3	0.3
108.4	0.3
108.5	0.3
108.6	0.2875
108.7	0.2875
108.8	0.2875
108.9	0.3125
109	0.3125
109.1	0.3125
109.2	0.3
109.3	0.3
109.4	0.3
109.5	0.3
109.6	0.3125
109.7	0.3125
109.8	0.3125
109.9	0.325
110	0.325
110.1	0.325
110.2	0.325
110.3	0.3375
110.4	0.375
110.5	0.375
110.6	0.375
110.7	0.375
110.8	0.375
110.9	0.375
111	0.375
111.1	0.375
111.2	0.375
111.3	0.3875
111.4	0.4
111.5	0.4
111.6	0.4125
111.7	0.4
111.8	0.4
111.9	0.4125
112	0.4125
112.1	0.4125
112.2	0.4125
112.3	0.4125
112.4	0.4125
112.5	0.4125
112.6	0.425
112.7	0.425
112.8	0.425
112.9	0.425
113	0.425
113.1	0.425
113.2	0.4375
113.3	0.4375
113.4	0.4375
113.5	0.4375
113.6	0.4375
113.7	0.4375
113.8	0.4375
113.9	0.4375
114	0.45
114.1	0.45
114.2	0.45
114.3	0.4625
114.4	0.4625
114.5	0.4625
114.6	0.4625
114.7	0.4625
114.8	0.475
114.9	0.475
115	0.475
115.1	0.475
115.2	0.475
115.3	0.475
115.4	0.475
115.5	0.475
115.6	0.4875
115.7	0.4875
115.8	0.4875
115.9	0.4875
116	0.4875
116.1	0.4875
116.2	0.4875
116.3	0.4875
116.4	0.4875
116.5	0.4875
116.6	0.4875
116.7	0.4875
116.8	0.4875
116.9	0.475
117	0.475
117.1	0.475
117.2	0.475
117.3	0.475
117.4	0.475
117.5	0.475
117.6	0.475
117.7	0.475
117.8	0.475
117.9	0.475
118	0.475
118.1	0.475
118.2	0.475
118.3	0.475
118.4	0.475
118.5	0.4875
118.6	0.4875
118.7	0.4875
118.8	0.4875
118.9	0.4875
119	0.4875
119.1	0.4875
119.2	0.475
119.3	0.475
119.4	0.475
119.5	0.475
119.6	0.475
119.7	0.475
119.8	0.475
119.9	0.4875
120	0.5
120.1	0.5
120.2	0.5
120.3	0.5125
120.4	0.5125
120.5	0.5125
120.6	0.5125
120.7	0.525
120.8	0.5375
120.9	0.55
121	0.55
121.1	0.5625
121.2	0.5625
121.3	0.5625
121.4	0.55
121.5	0.55
121.6	0.55
121.7	0.55
121.8	0.55
121.9	0.55
122	0.55
122.1	0.55
122.2	0.55
122.3	0.55
122.4	0.5375
122.5	0.5375
122.6	0.5375
122.7	0.55
122.8	0.55
122.9	0.55
123	0.55
123.1	0.55
123.2	0.5625
123.3	0.5625
123.4	0.5625
123.5	0.5625
123.6	0.5625
123.7	0.575
123.8	0.575
123.9	0.575
124	0.575
124.1	0.575
124.2	0.5875
124.3	0.5875
124.4	0.5875
124.5	0.5875
124.6	0.5875
124.7	0.5875
124.8	0.625
124.9	0.625
125	0.625
125.1	0.625
125.2	0.625
125.3	0.625
125.4	0.625
125.5	0.625
125.6	0.6375
125.7	0.6375
125.8	0.625
125.9	0.625
126	0.625
126.1	0.625
126.2	0.625
126.3	0.625
126.4	0.625
126.5	0.625
126.6	0.625
126.7	0.625
126.8	0.625
126.9	0.625
127	0.625
127.1	0.625
127.2	0.6375
127.3	0.625
127.4	0.625
127.5	0.625
127.6	0.6375
127.7	0.6375
127.8	0.6375
127.9	0.6375
128	0.65
128.1	0.65
128.2	0.65
128.3	0.65
128.4	0.65
128.5	0.65
128.6	0.65
128.7	0.65
128.8	0.65
128.9	0.65
129	0.65
129.1	0.65
129.2	0.65
129.3	0.65
129.4	0.65
129.5	0.65
129.6	0.65
129.7	0.65
129.8	0.65
129.9	0.65
130	0.6625
130.1	0.6625
130.2	0.6625
130.3	0.6625
130.4	0.6625
130.5	0.6625
130.6	0.6625
130.7	0.6625
130.8	0.6625
130.9	0.6625
131	0.6625
131.1	0.6625
131.2	0.6625
131.3	0.6625
131.4	0.6625
131.5	0.6625
131.6	0.6625
131.7	0.6625
131.8	0.6625
131.9	0.6625
132	0.6625
132.1	0.6625
132.2	0.6625
132.3	0.6625
132.4	0.6625
132.5	0.6625
132.6	0.6625
132.7	0.6625
132.8	0.6625
132.9	0.6625
133	0.675
133.1	0.675
133.2	0.675
133.3	0.675
133.4	0.675
133.5	0.675
133.6	0.6625
133.7	0.675
133.8	0.675
133.9	0.6875
134	0.6875
134.1	0.6875
134.2	0.6875
134.3	0.6875
134.4	0.6875
134.5	0.6875
134.6	0.6875
134.7	0.6875
134.8	0.6875
134.9	0.6875
135	0.675
135.1	0.675
135.2	0.675
135.3	0.675
135.4	0.675
135.5	0.675
135.6	0.675
135.7	0.675
135.8	0.675
135.9	0.675
136	0.675
136.1	0.675
136.2	0.675
136.3	0.675
136.4	0.675
136.5	0.675
136.6	0.675
136.7	0.675
136.8	0.675
136.9	0.675
137	0.675
137.1	0.675
137.2	0.675
137.3	0.675
137.4	0.675
137.5	0.675
137.6	0.675
137.7	0.675
137.8	0.675
137.9	0.675
138	0.675
138.1	0.6875
138.2	0.6875
138.3	0.7
138.4	0.7
138.5	0.7
138.6	0.7125
138.7	0.7125
138.8	0.7375
138.9	0.7375
139	0.7375
139.1	0.7375
139.2	0.75
139.3	0.75
139.4	0.75
139.5	0.75
139.6	0.75
139.7	0.75
139.8	0.75
139.9	0.75
140	0.75
140.1	0.75
140.2	0.75
140.3	0.7375
140.4	0.7375
140.5	0.7375
140.6	0.7375
140.7	0.75
140.8	0.75
140.9	0.75
141	0.75
141.1	0.75
141.2	0.75
141.3	0.75
141.4	0.75
141.5	0.75
141.6	0.75
141.7	0.7625
141.8	0.7625
141.9	0.775
142	0.7875
142.1	0.7875
142.2	0.7875
142.3	0.8
142.4	0.8
142.5	0.8125
142.6	0.8125
142.7	0.8125
142.8	0.8
142.9	0.8
143	0.8
143.1	0.8125
143.2	0.8125
143.3	0.8125
143.4	0.8125
143.5	0.8125
143.6	0.8125
143.7	0.8
143.8	0.8
143.9	0.8
144	0.8
144.1	0.8
144.2	0.8
144.3	0.8
144.4	0.8
144.5	0.8
144.6	0.8
144.7	0.8
144.8	0.8
144.9	0.7875
145	0.7875
145.1	0.7875
145.2	0.775
145.3	0.775
145.4	0.775
145.5	0.775
145.6	0.775
145.7	0.775
145.8	0.775
145.9	0.775
146	0.775
146.1	0.775
146.2	0.775
146.3	0.7625
146.4	0.7625
146.5	0.7625
146.6	0.7625
146.7	0.7625
146.8	0.7625
146.9	0.7625
147	0.7625
147.1	0.7625
147.2	0.7625
147.3	0.7625
147.4	0.7625
147.5	0.7625
147.6	0.7625
147.7	0.7625
147.8	0.7625
147.9	0.7625
148	0.7625
148.1	0.775
148.2	0.775
148.3	0.775
148.4	0.775
148.5	0.775
148.6	0.775
148.7	0.775
148.8	0.775
148.9	0.775
149	0.775
149.1	0.775
149.2	0.775
149.3	0.775
149.4	0.775
149.5	0.775
149.6	0.775
149.7	0.775
149.8	0.775
149.9	0.775
150	0.7625
150.1	0.75
150.2	0.75
150.3	0.75
150.4	0.75
150.5	0.75
150.6	0.75
150.7	0.75
150.8	0.75
150.9	0.7625
151	0.7625
151.1	0.7625
151.2	0.7625
151.3	0.75
151.4	0.75
151.5	0.7625
151.6	0.7625
151.7	0.7625
151.8	0.7625
151.9	0.7625
152	0.7625
152.1	0.7625
152.2	0.7625
152.3	0.7625
152.4	0.7625
152.5	0.7625
152.6	0.7625
152.7	0.7625
152.8	0.7625
152.9	0.7625
153	0.7625
153.1	0.7625
153.2	0.7625
153.3	0.7625
153.4	0.7625
153.5	0.7625
153.6	0.7625
153.7	0.7625
153.8	0.7625
153.9	0.7625
154	0.7625
154.1	0.7625
154.2	0.7625
154.3	0.7625
154.4	0.7625
154.5	0.775
154.6	0.7875
154.7	0.7875
154.8	0.775
154.9	0.7625
155	0.7625
155.1	0.7625
155.2	0.7625
155.3	0.7625
155.4	0.7625
155.5	0.7625
155.6	0.7625
155.7	0.7625
155.8	0.775
155.9	0.775
156	0.775
156.1	0.775
156.2	0.775
156.3	0.775
156.4	0.775
156.5	0.775
156.6	0.775
156.7	0.7625
156.8	0.7625
156.9	0.7625
157	0.7625
157.1	0.7625
157.2	0.7625
157.3	0.7625
157.4	0.7625
157.5	0.7625
157.6	0.7625
157.7	0.7625
157.8	0.7625
157.9	0.7625
158	0.7625
158.1	0.7625
158.2	0.7625
158.3	0.7625
158.4	0.7625
158.5	0.775
158.6	0.775
158.7	0.7875
158.8	0.8
158.9	0.8
159	0.8125
159.1	0.8125
159.2	0.8
159.3	0.8
159.4	0.8
159.5	0.8
159.6	0.7875
159.7	0.7875
159.8	0.7875
159.9	0.7875
160	0.7875
160.1	0.7875
160.2	0.775
160.3	0.775
160.4	0.775
160.5	0.775
160.6	0.7875
160.7	0.7875
160.8	0.7875
160.9	0.7875
161	0.7875
161.1	0.7875
161.2	0.7875
161.3	0.7875
161.4	0.7875
161.5	0.775
161.6	0.7625
161.7	0.7625
161.8	0.7625
161.9	0.7625
162	0.7625
162.1	0.7625
162.2	0.7625
162.3	0.7625
162.4	0.7625
162.5	0.775
162.6	0.775
162.7	0.775
162.8	0.775
162.9	0.775
163	0.775
163.1	0.775
163.2	0.775
163.3	0.775
163.4	0.775
163.5	0.775
163.6	0.775
163.7	0.775
163.8	0.775
163.9	0.7625
164	0.7625
164.1	0.75
164.2	0.75
164.3	0.7625
164.4	0.7625
164.5	0.7625
164.6	0.7625
164.7	0.775
164.8	0.775
164.9	0.775
165	0.7875
165.1	0.7875
165.2	0.8
165.3	0.8
165.4	0.8
165.5	0.7875
165.6	0.7875
165.7	0.8
165.8	0.8
165.9	0.8
166	0.8
166.1	0.8
166.2	0.8
166.3	0.8
166.4	0.8
166.5	0.8
166.6	0.8
166.7	0.8
166.8	0.8
166.9	0.8
167	0.8
167.1	0.8
167.2	0.7875
167.3	0.7875
167.4	0.7875
167.5	0.7875
167.6	0.7875
167.7	0.7875
167.8	0.7875
167.9	0.7875
168	0.7875
168.1	0.7875
168.2	0.8
168.3	0.8
168.4	0.8
168.5	0.8
168.6	0.8
168.7	0.8
168.8	0.8
168.9	0.8
169	0.8
169.1	0.8
169.2	0.8
169.3	0.8
169.4	0.8
169.5	0.8
169.6	0.8
169.7	0.8
169.8	0.8
169.9	0.8
170	0.8
170.1	0.8
170.2	0.8
170.3	0.8
170.4	0.8
170.5	0.8
170.6	0.8
170.7	0.8
170.8	0.8
170.9	0.8
171	0.8
171.1	0.8
171.2	0.8
171.3	0.8
171.4	0.8
171.5	0.8
171.6	0.8
171.7	0.8
171.8	0.8
171.9	0.8
172	0.8
172.1	0.8
172.2	0.8
172.3	0.8
172.4	0.8
172.5	0.8
172.6	0.8
172.7	0.8
172.8	0.8
172.9	0.8125
173	0.8
173.1	0.8
173.2	0.8
173.3	0.8
173.4	0.8
173.5	0.8
173.6	0.8
173.7	0.8
173.8	0.8
173.9	0.8
174	0.7875
174.1	0.7875
174.2	0.8
174.3	0.8
174.4	0.8
174.5	0.8
174.6	0.8
174.7	0.8
174.8	0.8
174.9	0.8
175	0.8
175.1	0.8
175.2	0.8
175.3	0.8
175.4	0.8
175.5	0.8
175.6	0.8
175.7	0.8
175.8	0.8
175.9	0.8
176	0.8
176.1	0.8
176.2	0.8
176.3	0.8
176.4	0.8
176.5	0.8
176.6	0.8
176.7	0.8
176.8	0.8
176.9	0.8
177	0.8
177.1	0.8
177.2	0.8
177.3	0.8
177.4	0.8
177.5	0.8
177.6	0.8
177.7	0.8
177.8	0.8
177.9	0.8
178	0.8
178.1	0.8
178.2	0.8
178.3	0.8
178.4	0.8
178.5	0.8
178.6	0.8
178.7	0.8
178.8	0.8
178.9	0.8
179	0.7875
179.1	0.7875
179.2	0.7875
179.3	0.7875
179.4	0.7875
179.5	0.775
179.6	0.775
179.7	0.775
179.8	0.775
179.9	0.775
180	0.775
180.1	0.775
180.2	0.775
180.3	0.775
180.4	0.775
180.5	0.775
180.6	0.775
180.7	0.775
180.8	0.775
180.9	0.775
181	0.775
181.1	0.775
181.2	0.775
181.3	0.775
181.4	0.775
181.5	0.7625
181.6	0.7625
181.7	0.7625
181.8	0.7625
181.9	0.7625
182	0.7625
182.1	0.7625
182.2	0.7625
182.3	0.7625
182.4	0.7625
182.5	0.7625
182.6	0.775
182.7	0.775
182.8	0.775
182.9	0.7875
183	0.7875
183.1	0.7875
183.2	0.7875
183.3	0.7875
183.4	0.7875
183.5	0.7875
183.6	0.7875
183.7	0.7875
183.8	0.7875
183.9	0.7875
184	0.7875
184.1	0.7875
184.2	0.7875
184.3	0.7875
184.4	0.7875
184.5	0.7875
184.6	0.7875
184.7	0.7875
184.8	0.7875
184.9	0.7875
185	0.7875
185.1	0.7875
185.2	0.7875
185.3	0.7875
185.4	0.7875
185.5	0.7875
185.6	0.7875
185.7	0.775
185.8	0.775
185.9	0.775
186	0.775
186.1	0.775
186.2	0.775
186.3	0.775
186.4	0.775
186.5	0.7625
186.6	0.7625
186.7	0.7625
186.8	0.7625
186.9	0.7625
187	0.7625
187.1	0.7625
187.2	0.75
187.3	0.75
187.4	0.75
187.5	0.75
187.6	0.75
187.7	0.75
187.8	0.75
187.9	0.75
188	0.75
188.1	0.7625
188.2	0.7625
188.3	0.7875
188.4	0.8
188.5	0.8
188.6	0.8125
188.7	0.8125
188.8	0.8125
188.9	0.8125
189	0.8125
189.1	0.8125
189.2	0.8125
189.3	0.8125
189.4	0.8125
189.5	0.8125
189.6	0.8125
189.7	0.8125
189.8	0.8125
189.9	0.825
190	0.825
190.1	0.825
190.2	0.825
190.3	0.825
190.4	0.825
190.5	0.825
190.6	0.825
190.7	0.825
190.8	0.8125
190.9	0.8125
191	0.8125
191.1	0.8125
191.2	0.8125
191.3	0.8125
191.4	0.8125
191.5	0.8
191.6	0.8
191.7	0.8
191.8	0.8
191.9	0.7875
192	0.7875
192.1	0.775
192.2	0.7625
192.3	0.7625
192.4	0.775
192.5	0.775
192.6	0.775
192.7	0.775
192.8	0.775
192.9	0.775
193	0.7875
193.1	0.7875
193.2	0.7875
193.3	0.7875
193.4	0.7875
193.5	0.7625
193.6	0.7625
193.7	0.7625
193.8	0.7625
193.9	0.7625
194	0.7625
194.1	0.7625
194.2	0.75
194.3	0.75
194.4	0.75
194.5	0.75
194.6	0.75
194.7	0.75
194.8	0.75
194.9	0.75
195	0.75
195.1	0.75
195.2	0.75
195.3	0.75
195.4	0.75
195.5	0.75
195.6	0.75
195.7	0.75
195.8	0.75
195.9	0.75
196	0.75
196.1	0.75
196.2	0.75
196.3	0.75
196.4	0.75
196.5	0.75
196.6	0.75
196.7	0.75
196.8	0.75
196.9	0.75
197	0.75
197.1	0.75
197.2	0.75
197.3	0.75
197.4	0.75
197.5	0.75
197.6	0.75
197.7	0.7375
197.8	0.7375
197.9	0.7375
198	0.7375
198.1	0.7375
198.2	0.7375
198.3	0.7375
198.4	0.75
198.5	0.75
198.6	0.75
198.7	0.75
198.8	0.75
198.9	0.7625
199	0.7625
199.1	0.7625
199.2	0.7625
199.3	0.7625
199.4	0.7625
199.5	0.7625
199.6	0.775
199.7	0.775
199.8	0.775
199.9	0.775
200	0.775
[truncated: 14,000 more rows]
