# Supplementary material for: Bayesian inference of kinetic schemes for ion channels by Kalman filtering
Source: eLife journal article supplement (doi:10.7554/elife.62714), 2022-05-04
Supplement: fig4-data4 [file 1_Sim_N_100_Fluor_MW.xlsx]

## Sheet: Tabelle1
0.1	0
0.2	0
0.3	0
0.4	0
0.5	0
0.6	0
0.7	0
0.8	0
0.9	0
1	0
1.1	0
1.2	0
1.3	0
1.4	0
1.5	0
1.6	0
1.7	0
1.8	0
1.9	0
2	0
2.1	0
2.2	0
2.3	0
2.4	0
2.5	0
2.6	0
2.7	0
2.8	0
2.9	0
3	0
3.1	0
3.2	0
3.3	0
3.4	0
3.5	0
3.6	0
3.7	0
3.8	0
3.9	0
4	0
4.1	0
4.2	0
4.3	0
4.4	0
4.5	0
4.6	0
4.7	0
4.8	0
4.9	0
5	0
5.1	0
5.2	0
5.3	0
5.4	0
5.5	0
5.6	0
5.7	0
5.8	0
5.9	0
6	0
6.1	0
6.2	0
6.3	0
6.4	0
6.5	0
6.6	0
6.7	0
6.8	0
6.9	0
7	0
7.1	0
7.2	0
7.3	0
7.4	0
7.5	0
7.6	0
7.7	0
7.8	0
7.9	0
8	0
8.1	0
8.2	0
8.3	0
8.4	0
8.5	0
8.6	0
8.7	0
8.8	0
8.9	0
9	0
9.1	0
9.2	0
9.3	0
9.4	0
9.5	0
9.6	0
9.7	0
9.8	0
9.9	0
10	0
10.1	0
10.2	0
10.3	0
10.4	0
10.5	0
10.6	0
10.7	0
10.8	0
10.9	0
11	0
11.1	0
11.2	0
11.3	0
11.4	0
11.5	0
11.6	0
11.7	0
11.8	0
11.9	0
12	0
12.1	0
12.2	0
12.3	0
12.4	0
12.5	0
12.6	0
12.7	0
12.8	0
12.9	0
13	0
13.1	0
13.2	0
13.3	0
13.4	0
13.5	0
13.6	0
13.7	0
13.8	0
13.9	0
14	0
14.1	0
14.2	0
14.3	0
14.4	0
14.5	0
14.6	0
14.7	0
14.8	0
14.9	0
15	0
15.1	0
15.2	0
15.3	0
15.4	0
15.5	0
15.6	0
15.7	0
15.8	0
15.9	0
16	0
16.1	0
16.2	0
16.3	0
16.4	0
16.5	0
16.6	0
16.7	0
16.8	0
16.9	0
17	0
17.1	0
17.2	0
17.3	0
17.4	0
17.5	0
17.6	0
17.7	0
17.8	0
17.9	0
18	0
18.1	0
18.2	0
18.3	0
18.4	0
18.5	0
18.6	0
18.7	0
18.8	0
18.9	0
19	0
19.1	0
19.2	0
19.3	0
19.4	0
19.5	0
19.6	0
19.7	0
19.8	0
19.9	0
20	0
20.1	0
20.2	0
20.3	0
20.4	0
20.5	0
20.6	0
20.7	0
20.8	0
20.9	0
21	0
21.1	0
21.2	0
21.3	0
21.4	0
21.5	0
21.6	0
21.7	0
21.8	0
21.9	0
22	0
22.1	0
22.2	0
22.3	0
22.4	0
22.5	0
22.6	0
22.7	0
22.8	0
22.9	0
23	0
23.1	0
23.2	0
23.3	0
23.4	0
23.5	0
23.6	0
23.7	0
23.8	0
23.9	0
24	0
24.1	0
24.2	0
24.3	0
24.4	0
24.5	0
24.6	0
24.7	0
24.8	0
24.9	0
25	0
25.1	0
25.2	0
25.3	0
25.4	0
25.5	0
25.6	0
25.7	0
25.8	0
25.9	0
26	0
26.1	0
26.2	0
26.3	0
26.4	0
26.5	0
26.6	0
26.7	0
26.8	0
26.9	0
27	0
27.1	0
27.2	0
27.3	0
27.4	0
27.5	0
27.6	0
27.7	0
27.8	0
27.9	0
28	0
28.1	0
28.2	0
28.3	0
28.4	0
28.5	0
28.6	0
28.7	0
28.8	0
28.9	0
29	0
29.1	0
29.2	0
29.3	0
29.4	0
29.5	0
29.6	0
29.7	0
29.8	0
29.9	0
30	0
30.1	0
30.2	0
30.3	0
30.4	0
30.5	0
30.6	0
30.7	0
30.8	0
30.9	0
31	0
31.1	0
31.2	0
31.3	0
31.4	0
31.5	0
31.6	0
31.7	0
31.8	0
31.9	0
32	0
32.1	0
32.2	0
32.3	0
32.4	0
32.5	0
32.6	0
32.7	0
32.8	0
32.9	0
33	0
33.1	0
33.2	0
33.3	0
33.4	0
33.5	0
33.6	0
33.7	0
33.8	0
33.9	0
34	0
34.1	0
34.2	0
34.3	0
34.4	0
34.5	0
34.6	0
34.7	0
34.8	0
34.9	0
35	0
35.1	0
35.2	0
35.3	0
35.4	0
35.5	0
35.6	0
35.7	0
35.8	0
35.9	0
36	0
36.1	0
36.2	0
36.3	0
36.4	0
36.5	0
36.6	0
36.7	0
36.8	0
36.9	0
37	0
37.1	0
37.2	0
37.3	0
37.4	0
37.5	0
37.6	0
37.7	0
37.8	0
37.9	0
38	0
38.1	0
38.2	0
38.3	0
38.4	0
38.5	0
38.6	0
38.7	0
38.8	0
38.9	0
39	0
39.1	0
39.2	0
39.3	0
39.4	0
39.5	0
39.6	0
39.7	0
39.8	0
39.9	0
40	0
40.1	0
40.2	0
40.3	0
40.4	0
40.5	0
40.6	0
40.7	0
40.8	0
40.9	0
41	0
41.1	0
41.2	0
41.3	0
41.4	0
41.5	0
41.6	0
41.7	0
41.8	0
41.9	0
42	0
42.1	0
42.2	0
42.3	0
42.4	0
42.5	0
42.6	0
42.7	0
42.8	0
42.9	0
43	0
43.1	0
43.2	0
43.3	0
43.4	0
43.5	0
43.6	0
43.7	0
43.8	0
43.9	0
44	0
44.1	0
44.2	0
44.3	0
44.4	0
44.5	0
44.6	0
44.7	0
44.8	0
44.9	0
45	0
45.1	0
45.2	0
45.3	0
45.4	0
45.5	0
45.6	0
45.7	0
45.8	0
45.9	0
46	0
46.1	0
46.2	0
46.3	0
46.4	0
46.5	0
46.6	0
46.7	0
46.8	0
46.9	0
47	0
47.1	0
47.2	0
47.3	0
47.4	0
47.5	0
47.6	0
47.7	0
47.8	0
47.9	0
48	0
48.1	0
48.2	0
48.3	0
48.4	0
48.5	0
48.6	0
48.7	0
48.8	0
48.9	0
49	0
49.1	0
49.2	0
49.3	0
49.4	0
49.5	0
49.6	0
49.7	0
49.8	0
49.9	0
50	0
50.1	0
50.2	0
50.3	0
50.4	0
50.5	0
50.6	0
50.7	0
50.8	0
50.9	0
51	0
51.1	0
51.2	0
51.3	0
51.4	0
51.5	0
51.6	0
51.7	0
51.8	0
51.9	0
52	0
52.1	0
52.2	0
52.3	0
52.4	0
52.5	0
52.6	0
52.7	0
52.8	0
52.9	0
53	0
53.1	0
53.2	0
53.3	0
53.4	0
53.5	0
53.6	0
53.7	0
53.8	0
53.9	0
54	0
54.1	0
54.2	0
54.3	0
54.4	0
54.5	0
54.6	0
54.7	0
54.8	0
54.9	0
55	0
55.1	0
55.2	0
55.3	0
55.4	0
55.5	0
55.6	0
55.7	0
55.8	0
55.9	0
56	0
56.1	0
56.2	0
56.3	0
56.4	0
56.5	0
56.6	0
56.7	0
56.8	0
56.9	0
57	0
57.1	0
57.2	0
57.3	0
57.4	0
57.5	0
57.6	0
57.7	0
57.8	0
57.9	0
58	0
58.1	0
58.2	0
58.3	0
58.4	0
58.5	0
58.6	0
58.7	0
58.8	0
58.9	0
59	0
59.1	0
59.2	0
59.3	0
59.4	0
59.5	0
59.6	0
59.7	0
59.8	0
59.9	0
60	0
60.1	0
60.2	0
60.3	0
60.4	0
60.5	0
60.6	0
60.7	0
60.8	0
60.9	0
61	0
61.1	0
61.2	0
61.3	0
61.4	0
61.5	0
61.6	0
61.7	0
61.8	0
61.9	0
62	0
62.1	0
62.2	0
62.3	0
62.4	0
62.5	0
62.6	0
62.7	0
62.8	0
62.9	0
63	0
63.1	0
63.2	0
63.3	0
63.4	0
63.5	0
63.6	0
63.7	0
63.8	0
63.9	0
64	0
64.1	0
64.2	0
64.3	0
64.4	0
64.5	0
64.6	0
64.7	0
64.8	0
64.9	0
65	0
65.1	0
65.2	0
65.3	0
65.4	0
65.5	0
65.6	0
65.7	0
65.8	0
65.9	0
66	0
66.1	0
66.2	0
66.3	0
66.4	0
66.5	0
66.6	0
66.7	0
66.8	0
66.9	0
67	0
67.1	0
67.2	0
67.3	0
67.4	0
67.5	0
67.6	0
67.7	0
67.8	0
67.9	0
68	0
68.1	0
68.2	0
68.3	0
68.4	0
68.5	0
68.6	0
68.7	0
68.8	0
68.9	0
69	0
69.1	0
69.2	0
69.3	0
69.4	0
69.5	0
69.6	0
69.7	0
69.8	0
69.9	0
70	0
70.1	0
70.2	0
70.3	0
70.4	0
70.5	0
70.6	0
70.7	0
70.8	0
70.9	0
71	0
71.1	0
71.2	0
71.3	0
71.4	0
71.5	0
71.6	0
71.7	0
71.8	0
71.9	0
72	0
72.1	0
72.2	0
72.3	0
72.4	0
72.5	0
72.6	0
72.7	0
72.8	0
72.9	0
73	0
73.1	0
73.2	0
73.3	0
73.4	0
73.5	0
73.6	0
73.7	0
73.8	0
73.9	0
74	0
74.1	0
74.2	0
74.3	0
74.4	0
74.5	0
74.6	0
74.7	0
74.8	0
74.9	0
75	0
75.1	0
75.2	0
75.3	0
75.4	0
75.5	0
75.6	0
75.7	0
75.8	0
75.9	0
76	0
76.1	0
76.2	0
76.3	0
76.4	0
76.5	0
76.6	0
76.7	0
76.8	0
76.9	0
77	0
77.1	0
77.2	0
77.3	0
77.4	0
77.5	0
77.6	0
77.7	0
77.8	0
77.9	0
78	0
78.1	0
78.2	0
78.3	0
78.4	0
78.5	0
78.6	0
78.7	0
78.8	0
78.9	0
79	0
79.1	0
79.2	0
79.3	0
79.4	0
79.5	0
79.6	0
79.7	0
79.8	0
79.9	0
80	0
80.1	0
80.2	0
80.3	0
80.4	0
80.5	0
80.6	0
80.7	0
80.8	0
80.9	0
81	0
81.1	0
81.2	0
81.3	0
81.4	0
81.5	0
81.6	0
81.7	0
81.8	0
81.9	0
82	0
82.1	0
82.2	0
82.3	0
82.4	0
82.5	0
82.6	0
82.7	0
82.8	0
82.9	0
83	0
83.1	0
83.2	0
83.3	0
83.4	0
83.5	0
83.6	0
83.7	0
83.8	0
83.9	0
84	0
84.1	0
84.2	0
84.3	0
84.4	0
84.5	0
84.6	0
84.7	0
84.8	0
84.9	0
85	0
85.1	0
85.2	0
85.3	0
85.4	0
85.5	0
85.6	0
85.7	0
85.8	0
85.9	0
86	0
86.1	0
86.2	0
86.3	0
86.4	0
86.5	0
86.6	0
86.7	0
86.8	0
86.9	0
87	0
87.1	0
87.2	0
87.3	0
87.4	0
87.5	0
87.6	0
87.7	0
87.8	0
87.9	0
88	0
88.1	0
88.2	0
88.3	0
88.4	0
88.5	0
88.6	0
88.7	0
88.8	0
88.9	0
89	0
89.1	0
89.2	0
89.3	0
89.4	0
89.5	0
89.6	0
89.7	0
89.8	0
89.9	0
90	0
90.1	0
90.2	0
90.3	0
90.4	0
90.5	0
90.6	0
90.7	0
90.8	0
90.9	0
91	0
91.1	0
91.2	0
91.3	0
91.4	0
91.5	0
91.6	0
91.7	0
91.8	0
91.9	0
92	0
92.1	0
92.2	0
92.3	0
92.4	0
92.5	0
92.6	0
92.7	0
92.8	0
92.9	0
93	0
93.1	0
93.2	0
93.3	0
93.4	0
93.5	0
93.6	0
93.7	0
93.8	0
93.9	0
94	0
94.1	0
94.2	0
94.3	0
94.4	0
94.5	0
94.6	0
94.7	0
94.8	0
94.9	0
95	0
95.1	0
95.2	0
95.3	0
95.4	0
95.5	0
95.6	0
95.7	0
95.8	0
95.9	0
96	0
96.1	0
96.2	0
96.3	0
96.4	0
96.5	0
96.6	0
96.7	0
96.8	0
96.9	0
97	0
97.1	0
97.2	0
97.3	0
97.4	0
97.5	0
97.6	0
97.7	0
97.8	0
97.9	0
98	0
98.1	0
98.2	0
98.3	0
98.4	0
98.5	0
98.6	0
98.7	0
98.8	0
98.9	0
99	0
99.1	0
99.2	0
99.3	0
99.4	0
99.5	0
99.6	0
99.7	0
99.8	0
99.9	0
100	0
100.1	0.335
100.2	0.485
100.3	0.605
100.4	0.675
100.5	0.72
100.6	0.73
100.7	0.79
100.8	0.84
100.9	0.825
101	0.875
101.1	0.91
101.2	0.915
101.3	0.9
101.4	0.895
101.5	0.9
101.6	0.895
101.7	0.915
101.8	0.915
101.9	0.91
102	0.935
102.1	0.92
102.2	0.93
102.3	0.91
102.4	0.92
102.5	0.935
102.6	0.935
102.7	0.945
102.8	0.94
102.9	0.93
103	0.91
103.1	0.915
103.2	0.915
103.3	0.895
103.4	0.905
103.5	0.915
103.6	0.93
103.7	0.91
103.8	0.9
103.9	0.92
104	0.955
104.1	0.96
104.2	0.94
104.3	0.94
104.4	0.955
104.5	0.95
104.6	0.935
104.7	0.94
104.8	0.935
104.9	0.915
105	0.925
105.1	0.935
105.2	0.935
105.3	0.935
105.4	0.945
105.5	0.935
105.6	0.96
105.7	0.945
105.8	0.935
105.9	0.93
106	0.925
106.1	0.9
106.2	0.895
106.3	0.91
106.4	0.92
106.5	0.935
106.6	0.92
106.7	0.905
106.8	0.895
106.9	0.91
107	0.925
107.1	0.93
107.2	0.925
107.3	0.93
107.4	0.93
107.5	0.95
107.6	0.94
107.7	0.925
107.8	0.94
107.9	0.935
108	0.935
108.1	0.92
108.2	0.915
108.3	0.915
108.4	0.905
108.5	0.93
108.6	0.935
108.7	0.93
108.8	0.945
108.9	0.935
109	0.93
109.1	0.94
109.2	0.925
109.3	0.955
109.4	0.955
109.5	0.935
109.6	0.95
109.7	0.925
109.8	0.93
109.9	0.915
110	0.925
110.1	0.93
110.2	0.95
110.3	0.935
110.4	0.95
110.5	0.955
110.6	0.955
110.7	0.94
110.8	0.955
110.9	0.95
111	0.955
111.1	0.95
111.2	0.94
111.3	0.925
111.4	0.925
111.5	0.935
111.6	0.94
111.7	0.95
111.8	0.935
111.9	0.945
112	0.94
112.1	0.96
112.2	0.955
112.3	0.945
112.4	0.945
112.5	0.955
112.6	0.94
112.7	0.95
112.8	0.92
112.9	0.92
113	0.93
113.1	0.925
113.2	0.94
113.3	0.935
113.4	0.945
113.5	0.96
113.6	0.965
113.7	0.955
113.8	0.955
113.9	0.965
114	0.94
114.1	0.95
114.2	0.93
114.3	0.935
114.4	0.95
114.5	0.945
114.6	0.94
114.7	0.95
114.8	0.93
114.9	0.92
115	0.925
115.1	0.94
115.2	0.935
115.3	0.93
115.4	0.94
115.5	0.925
115.6	0.935
115.7	0.94
115.8	0.94
115.9	0.95
116	0.94
116.1	0.94
116.2	0.935
116.3	0.93
116.4	0.94
116.5	0.935
116.6	0.945
116.7	0.95
116.8	0.945
116.9	0.945
117	0.955
117.1	0.955
117.2	0.95
117.3	0.945
117.4	0.925
117.5	0.92
117.6	0.935
117.7	0.93
117.8	0.94
117.9	0.935
118	0.94
118.1	0.955
118.2	0.95
118.3	0.95
118.4	0.94
118.5	0.95
118.6	0.93
118.7	0.92
118.8	0.91
118.9	0.895
119	0.925
119.1	0.92
119.2	0.925
119.3	0.935
119.4	0.94
119.5	0.94
119.6	0.94
119.7	0.935
119.8	0.94
119.9	0.94
120	0.96
120.1	0.96
120.2	0.95
120.3	0.95
120.4	0.95
120.5	0.935
120.6	0.925
120.7	0.93
120.8	0.945
120.9	0.955
121	0.96
121.1	0.96
121.2	0.97
121.3	0.965
121.4	0.975
121.5	0.96
121.6	0.95
121.7	0.95
121.8	0.955
121.9	0.955
122	0.96
122.1	0.965
122.2	0.96
122.3	0.955
122.4	0.94
122.5	0.95
122.6	0.96
122.7	0.955
122.8	0.975
122.9	0.96
123	0.965
123.1	0.96
123.2	0.965
123.3	0.96
123.4	0.955
123.5	0.95
123.6	0.95
123.7	0.945
123.8	0.945
123.9	0.955
124	0.955
124.1	0.95
124.2	0.95
124.3	0.955
124.4	0.935
124.5	0.925
124.6	0.93
124.7	0.94
124.8	0.93
124.9	0.925
125	0.94
125.1	0.945
125.2	0.94
125.3	0.93
125.4	0.935
125.5	0.94
125.6	0.945
125.7	0.95
125.8	0.97
125.9	0.975
126	0.97
126.1	0.98
126.2	0.955
126.3	0.95
126.4	0.95
126.5	0.945
126.6	0.945
126.7	0.95
126.8	0.94
126.9	0.93
127	0.955
127.1	0.95
127.2	0.955
127.3	0.97
127.4	0.96
127.5	0.96
127.6	0.965
127.7	0.96
127.8	0.97
127.9	0.965
128	0.96
128.1	0.96
128.2	0.96
128.3	0.955
128.4	0.97
128.5	0.97
128.6	0.975
128.7	0.975
128.8	0.97
128.9	0.96
129	0.95
129.1	0.96
129.2	0.96
129.3	0.95
129.4	0.96
129.5	0.955
129.6	0.96
129.7	0.97
129.8	0.975
129.9	0.965
130	0.965
130.1	0.955
130.2	0.965
130.3	0.97
130.4	0.955
130.5	0.97
130.6	0.965
130.7	0.97
130.8	0.965
130.9	0.97
131	0.975
131.1	0.965
131.2	0.98
131.3	0.98
131.4	0.98
131.5	0.985
131.6	0.98
131.7	0.99
131.8	0.985
131.9	0.975
132	0.98
132.1	0.975
132.2	0.975
132.3	0.975
132.4	0.97
132.5	0.985
132.6	0.97
132.7	0.955
132.8	0.97
132.9	0.955
133	0.96
133.1	0.97
133.2	0.965
133.3	0.97
133.4	0.96
133.5	0.945
133.6	0.945
133.7	0.94
133.8	0.945
133.9	0.95
134	0.965
134.1	0.96
134.2	0.98
134.3	0.985
134.4	0.975
134.5	0.97
134.6	0.97
134.7	0.97
134.8	0.96
134.9	0.975
135	0.96
135.1	0.965
135.2	0.965
135.3	0.95
135.4	0.96
135.5	0.96
135.6	0.965
135.7	0.955
135.8	0.965
135.9	0.97
136	0.985
136.1	0.98
136.2	0.975
136.3	0.97
136.4	0.97
136.5	0.96
136.6	0.96
136.7	0.965
136.8	0.97
136.9	0.965
137	0.97
137.1	0.965
137.2	0.975
137.3	0.965
137.4	0.975
137.5	0.965
137.6	0.975
137.7	0.97
137.8	0.975
137.9	0.97
138	0.975
138.1	0.965
138.2	0.965
138.3	0.955
138.4	0.96
138.5	0.965
138.6	0.985
138.7	0.985
138.8	0.98
138.9	0.97
139	0.96
139.1	0.965
139.2	0.975
139.3	0.98
139.4	0.985
139.5	0.98
139.6	0.975
139.7	0.98
139.8	0.98
139.9	0.98
140	0.975
140.1	0.985
140.2	0.985
140.3	0.985
140.4	0.98
140.5	0.975
140.6	0.98
140.7	0.98
140.8	0.995
140.9	0.99
141	0.99
141.1	0.99
141.2	0.985
141.3	0.98
141.4	0.975
141.5	0.98
141.6	0.98
141.7	0.975
141.8	0.985
141.9	0.985
142	0.98
142.1	0.975
142.2	0.98
142.3	0.975
142.4	0.98
142.5	0.975
142.6	0.975
142.7	0.975
142.8	0.965
142.9	0.96
143	0.95
143.1	0.965
143.2	0.965
143.3	0.965
143.4	0.965
143.5	0.965
143.6	0.97
143.7	0.965
143.8	0.965
143.9	0.955
144	0.96
144.1	0.96
144.2	0.975
144.3	0.98
144.4	0.975
144.5	0.965
144.6	0.965
144.7	0.97
144.8	0.955
144.9	0.96
145	0.965
145.1	0.965
145.2	0.97
145.3	0.965
145.4	0.97
145.5	0.965
145.6	0.965
145.7	0.97
145.8	0.97
145.9	0.965
146	0.975
146.1	0.98
146.2	0.97
146.3	0.975
146.4	0.965
146.5	0.965
146.6	0.955
146.7	0.95
146.8	0.97
146.9	0.96
147	0.955
147.1	0.955
147.2	0.955
147.3	0.97
147.4	0.975
147.5	0.96
147.6	0.97
147.7	0.985
147.8	0.975
147.9	0.965
148	0.965
148.1	0.965
148.2	0.96
148.3	0.96
148.4	0.975
148.5	0.975
148.6	0.975
148.7	0.96
148.8	0.96
148.9	0.965
149	0.945
149.1	0.96
149.2	0.95
149.3	0.955
149.4	0.955
149.5	0.945
149.6	0.945
149.7	0.94
149.8	0.94
149.9	0.94
150	0.965
150.1	0.965
150.2	0.95
150.3	0.965
150.4	0.965
150.5	0.97
150.6	0.96
150.7	0.95
150.8	0.97
150.9	0.975
151	0.98
151.1	0.975
151.2	0.975
151.3	0.98
151.4	0.97
151.5	0.97
151.6	0.97
151.7	0.965
151.8	0.965
151.9	0.95
152	0.96
152.1	0.97
152.2	0.98
152.3	0.975
152.4	0.975
152.5	0.975
152.6	0.975
152.7	0.98
152.8	0.98
152.9	0.98
153	0.985
153.1	0.985
153.2	0.975
153.3	0.97
153.4	0.965
153.5	0.97
153.6	0.99
153.7	0.995
153.8	0.99
153.9	0.99
154	0.995
154.1	0.995
154.2	0.99
154.3	0.995
154.4	0.99
154.5	0.99
154.6	0.995
154.7	0.985
154.8	0.98
154.9	0.985
155	0.98
155.1	0.97
155.2	0.98
155.3	0.98
155.4	0.98
155.5	0.975
155.6	0.975
155.7	0.98
155.8	0.97
155.9	0.975
156	0.985
156.1	0.99
156.2	0.975
156.3	0.98
156.4	0.985
156.5	0.985
156.6	0.985
156.7	0.975
156.8	0.985
156.9	0.99
157	0.98
157.1	0.975
157.2	0.985
157.3	0.985
157.4	0.985
157.5	0.985
157.6	1
157.7	0.985
157.8	0.975
157.9	0.98
158	0.975
158.1	0.985
158.2	0.985
158.3	0.99
158.4	0.99
158.5	0.99
158.6	0.985
158.7	0.985
158.8	0.985
158.9	0.97
159	0.975
159.1	0.98
159.2	0.985
159.3	0.985
159.4	0.995
159.5	0.995
159.6	0.975
159.7	0.98
159.8	0.975
159.9	0.98
160	0.985
160.1	0.985
160.2	0.97
160.3	0.965
160.4	0.96
160.5	0.95
160.6	0.955
160.7	0.975
160.8	0.975
160.9	0.97
161	0.985
161.1	0.98
161.2	0.985
161.3	0.99
161.4	0.985
161.5	0.985
161.6	0.985
161.7	0.98
161.8	0.98
161.9	0.98
162	0.99
162.1	0.98
162.2	0.98
162.3	0.975
162.4	0.97
162.5	0.97
162.6	0.975
162.7	0.975
162.8	0.975
162.9	0.98
163	0.98
163.1	0.975
163.2	0.975
163.3	0.97
163.4	0.98
163.5	0.98
163.6	0.98
163.7	0.99
163.8	0.975
163.9	0.97
164	0.98
164.1	0.975
164.2	0.965
164.3	0.985
164.4	0.995
164.5	0.99
164.6	0.99
164.7	0.985
164.8	0.975
164.9	0.985
165	0.985
165.1	0.975
165.2	0.97
165.3	0.98
165.4	0.98
165.5	0.98
165.6	0.98
165.7	0.98
165.8	0.98
165.9	0.99
166	0.99
166.1	0.985
166.2	0.985
166.3	0.99
166.4	0.985
166.5	0.985
166.6	0.99
166.7	0.985
166.8	0.99
166.9	0.995
167	0.99
167.1	0.985
167.2	0.98
167.3	0.985
167.4	0.985
167.5	0.99
167.6	0.99
167.7	0.99
167.8	0.99
167.9	0.99
168	0.985
168.1	0.985
168.2	0.99
168.3	0.98
168.4	0.975
168.5	0.97
168.6	0.98
168.7	0.985
168.8	0.985
168.9	0.975
169	0.98
169.1	0.99
169.2	0.99
169.3	0.995
169.4	0.995
169.5	1
169.6	0.995
169.7	0.995
169.8	0.975
169.9	0.975
170	0.97
170.1	0.97
170.2	0.98
170.3	0.98
170.4	0.985
170.5	0.98
170.6	0.98
170.7	0.98
170.8	0.985
170.9	0.975
171	0.975
171.1	0.98
171.2	0.975
171.3	0.97
171.4	0.975
171.5	0.975
171.6	0.975
171.7	0.98
171.8	0.98
171.9	0.97
172	0.97
172.1	0.965
172.2	0.96
172.3	0.965
172.4	0.97
172.5	0.97
172.6	0.975
172.7	0.975
172.8	0.97
172.9	0.97
173	0.97
173.1	0.97
173.2	0.97
173.3	0.98
173.4	0.965
173.5	0.975
173.6	0.975
173.7	0.98
173.8	0.985
173.9	0.99
174	0.99
174.1	0.985
174.2	0.985
174.3	0.985
174.4	0.99
174.5	0.995
174.6	0.99
174.7	0.985
174.8	0.985
174.9	0.985
175	0.99
175.1	0.985
175.2	0.98
175.3	0.98
175.4	0.985
175.5	0.975
175.6	0.98
175.7	0.985
175.8	0.985
175.9	0.99
176	0.985
176.1	0.985
176.2	0.98
176.3	0.985
176.4	0.99
176.5	0.98
176.6	0.975
176.7	0.98
176.8	0.98
176.9	0.975
177	0.98
177.1	0.98
177.2	0.975
177.3	0.97
177.4	0.975
177.5	0.975
177.6	0.975
177.7	0.975
177.8	0.97
177.9	0.975
178	0.99
178.1	0.985
178.2	0.985
178.3	0.99
178.4	0.985
178.5	0.98
178.6	0.985
178.7	0.98
178.8	0.985
178.9	0.975
179	0.98
179.1	0.975
179.2	0.98
179.3	0.98
179.4	0.97
179.5	0.97
179.6	0.98
179.7	0.985
179.8	0.985
179.9	0.98
180	0.98
180.1	0.985
180.2	0.985
180.3	0.98
180.4	0.985
180.5	0.99
180.6	0.99
180.7	0.995
180.8	0.985
180.9	0.985
181	0.98
181.1	0.975
181.2	0.985
181.3	0.985
181.4	0.975
181.5	0.98
181.6	0.975
181.7	0.985
181.8	0.985
181.9	0.98
182	0.98
182.1	0.98
182.2	0.975
182.3	0.97
182.4	0.97
182.5	0.97
182.6	0.965
182.7	0.97
182.8	0.98
182.9	0.98
183	0.985
183.1	0.98
183.2	0.98
183.3	0.98
183.4	0.98
183.5	0.985
183.6	0.975
183.7	0.97
183.8	0.97
183.9	0.97
184	0.965
184.1	0.97
184.2	0.98
184.3	0.98
184.4	0.985
184.5	0.99
184.6	0.985
184.7	0.985
184.8	0.99
184.9	0.99
185	0.975
185.1	0.975
185.2	0.98
185.3	0.985
185.4	0.975
185.5	0.985
185.6	0.975
185.7	0.97
185.8	0.97
185.9	0.96
186	0.96
186.1	0.97
186.2	0.98
186.3	0.98
186.4	0.985
186.5	0.99
186.6	0.99
186.7	0.995
186.8	0.995
186.9	1
187	0.99
187.1	0.99
187.2	0.985
187.3	0.98
187.4	0.98
187.5	0.985
187.6	0.985
187.7	0.985
187.8	0.985
187.9	0.99
188	0.995
188.1	0.995
188.2	0.995
188.3	0.99
188.4	0.985
188.5	0.985
188.6	0.985
188.7	0.985
188.8	0.985
188.9	0.985
189	0.99
189.1	0.99
189.2	0.995
189.3	0.995
189.4	1
189.5	1
189.6	0.99
189.7	0.98
189.8	0.99
189.9	0.97
190	0.98
190.1	0.98
190.2	0.98
190.3	0.985
190.4	0.98
190.5	0.98
190.6	0.98
190.7	0.975
190.8	0.98
190.9	0.975
191	0.975
191.1	0.975
191.2	0.98
191.3	0.985
191.4	0.98
191.5	0.975
191.6	0.975
191.7	0.97
191.8	0.97
191.9	0.97
192	0.965
192.1	0.96
192.2	0.96
192.3	0.96
192.4	0.95
192.5	0.95
192.6	0.955
192.7	0.975
192.8	0.97
192.9	0.97
193	0.98
193.1	0.985
193.2	0.98
193.3	0.98
193.4	0.99
193.5	0.985
193.6	0.985
193.7	0.985
193.8	0.99
193.9	0.985
194	0.98
194.1	0.975
194.2	0.98
194.3	0.98
194.4	0.985
194.5	0.975
194.6	0.985
194.7	0.985
194.8	0.995
194.9	1
195	0.99
195.1	0.985
195.2	0.985
195.3	0.97
195.4	0.985
195.5	0.985
195.6	0.99
195.7	0.98
195.8	0.975
195.9	0.975
196	0.98
196.1	0.98
196.2	0.98
196.3	0.975
196.4	0.98
196.5	0.975
196.6	0.985
196.7	0.975
196.8	0.97
196.9	0.975
197	0.975
197.1	0.98
197.2	0.98
197.3	0.975
197.4	0.97
197.5	0.97
197.6	0.97
197.7	0.975
197.8	0.985
197.9	0.985
198	0.985
198.1	0.99
198.2	1
198.3	0.995
198.4	0.995
198.5	0.99
198.6	0.985
198.7	0.985
198.8	0.985
198.9	0.985
199	0.975
199.1	0.97
199.2	0.975
199.3	0.985
199.4	0.98
199.5	0.98
199.6	0.99
199.7	0.995
199.8	0.995
199.9	0.995
200	0.99
[truncated: 14,000 more rows]
