# Supplementary material for: Bayesian inference of kinetic schemes for ion channels by Kalman filtering
Source: eLife journal article supplement (doi:10.7554/elife.62714), 2022-05-04
Supplement: fig4-data4 [file 1_Sim_N_100_theor_Fluor_Werte.xlsx]

## Sheet: Tabelle1
0.1	0
0.2	0
0.3	0
0.4	0
0.5	0
0.6	0
0.7	0
0.8	0
0.9	0
1	0
1.1	0
1.2	0
1.3	0
1.4	0
1.5	0
1.6	0
1.7	0
1.8	0
1.9	0
2	0
2.1	0
2.2	0
2.3	0
2.4	0
2.5	0
2.6	0
2.7	0
2.8	0
2.9	0
3	0
3.1	0
3.2	0
3.3	0
3.4	0
3.5	0
3.6	0
3.7	0
3.8	0
3.9	0
4	0
4.1	0
4.2	0
4.3	0
4.4	0
4.5	0
4.6	0
4.7	0
4.8	0
4.9	0
5	0
5.1	0
5.2	0
5.3	0
5.4	0
5.5	0
5.6	0
5.7	0
5.8	0
5.9	0
6	0
6.1	0
6.2	0
6.3	0
6.4	0
6.5	0
6.6	0
6.7	0
6.8	0
6.9	0
7	0
7.1	0
7.2	0
7.3	0
7.4	0
7.5	0
7.6	0
7.7	0
7.8	0
7.9	0
8	0
8.1	0
8.2	0
8.3	0
8.4	0
8.5	0
8.6	0
8.7	0
8.8	0
8.9	0
9	0
9.1	0
9.2	0
9.3	0
9.4	0
9.5	0
9.6	0
9.7	0
9.8	0
9.9	0
10	0
10.1	0
10.2	0
10.3	0
10.4	0
10.5	0
10.6	0
10.7	0
10.8	0
10.9	0
11	0
11.1	0
11.2	0
11.3	0
11.4	0
11.5	0
11.6	0
11.7	0
11.8	0
11.9	0
12	0
12.1	0
12.2	0
12.3	0
12.4	0
12.5	0
12.6	0
12.7	0
12.8	0
12.9	0
13	0
13.1	0
13.2	0
13.3	0
13.4	0
13.5	0
13.6	0
13.7	0
13.8	0
13.9	0
14	0
14.1	0
14.2	0
14.3	0
14.4	0
14.5	0
14.6	0
14.7	0
14.8	0
14.9	0
15	0
15.1	0
15.2	0
15.3	0
15.4	0
15.5	0
15.6	0
15.7	0
15.8	0
15.9	0
16	0
16.1	0
16.2	0
16.3	0
16.4	0
16.5	0
16.6	0
16.7	0
16.8	0
16.9	0
17	0
17.1	0
17.2	0
17.3	0
17.4	0
17.5	0
17.6	0
17.7	0
17.8	0
17.9	0
18	0
18.1	0
18.2	0
18.3	0
18.4	0
18.5	0
18.6	0
18.7	0
18.8	0
18.9	0
19	0
19.1	0
19.2	0
19.3	0
19.4	0
19.5	0
19.6	0
19.7	0
19.8	0
19.9	0
20	0
20.1	0
20.2	0
20.3	0
20.4	0
20.5	0
20.6	0
20.7	0
20.8	0
20.9	0
21	0
21.1	0
21.2	0
21.3	0
21.4	0
21.5	0
21.6	0
21.7	0
21.8	0
21.9	0
22	0
22.1	0
22.2	0
22.3	0
22.4	0
22.5	0
22.6	0
22.7	0
22.8	0
22.9	0
23	0
23.1	0
23.2	0
23.3	0
23.4	0
23.5	0
23.6	0
23.7	0
23.8	0
23.9	0
24	0
24.1	0
24.2	0
24.3	0
24.4	0
24.5	0
24.6	0
24.7	0
24.8	0
24.9	0
25	0
25.1	0
25.2	0
25.3	0
25.4	0
25.5	0
25.6	0
25.7	0
25.8	0
25.9	0
26	0
26.1	0
26.2	0
26.3	0
26.4	0
26.5	0
26.6	0
26.7	0
26.8	0
26.9	0
27	0
27.1	0
27.2	0
27.3	0
27.4	0
27.5	0
27.6	0
27.7	0
27.8	0
27.9	0
28	0
28.1	0
28.2	0
28.3	0
28.4	0
28.5	0
28.6	0
28.7	0
28.8	0
28.9	0
29	0
29.1	0
29.2	0
29.3	0
29.4	0
29.5	0
29.6	0
29.7	0
29.8	0
29.9	0
30	0
30.1	0
30.2	0
30.3	0
30.4	0
30.5	0
30.6	0
30.7	0
30.8	0
30.9	0
31	0
31.1	0
31.2	0
31.3	0
31.4	0
31.5	0
31.6	0
31.7	0
31.8	0
31.9	0
32	0
32.1	0
32.2	0
32.3	0
32.4	0
32.5	0
32.6	0
32.7	0
32.8	0
32.9	0
33	0
33.1	0
33.2	0
33.3	0
33.4	0
33.5	0
33.6	0
33.7	0
33.8	0
33.9	0
34	0
34.1	0
34.2	0
34.3	0
34.4	0
34.5	0
34.6	0
34.7	0
34.8	0
34.9	0
35	0
35.1	0
35.2	0
35.3	0
35.4	0
35.5	0
35.6	0
35.7	0
35.8	0
35.9	0
36	0
36.1	0
36.2	0
36.3	0
36.4	0
36.5	0
36.6	0
36.7	0
36.8	0
36.9	0
37	0
37.1	0
37.2	0
37.3	0
37.4	0
37.5	0
37.6	0
37.7	0
37.8	0
37.9	0
38	0
38.1	0
38.2	0
38.3	0
38.4	0
38.5	0
38.6	0
38.7	0
38.8	0
38.9	0
39	0
39.1	0
39.2	0
39.3	0
39.4	0
39.5	0
39.6	0
39.7	0
39.8	0
39.9	0
40	0
40.1	0
40.2	0
40.3	0
40.4	0
40.5	0
40.6	0
40.7	0
40.8	0
40.9	0
41	0
41.1	0
41.2	0
41.3	0
41.4	0
41.5	0
41.6	0
41.7	0
41.8	0
41.9	0
42	0
42.1	0
42.2	0
42.3	0
42.4	0
42.5	0
42.6	0
42.7	0
42.8	0
42.9	0
43	0
43.1	0
43.2	0
43.3	0
43.4	0
43.5	0
43.6	0
43.7	0
43.8	0
43.9	0
44	0
44.1	0
44.2	0
44.3	0
44.4	0
44.5	0
44.6	0
44.7	0
44.8	0
44.9	0
45	0
45.1	0
45.2	0
45.3	0
45.4	0
45.5	0
45.6	0
45.7	0
45.8	0
45.9	0
46	0
46.1	0
46.2	0
46.3	0
46.4	0
46.5	0
46.6	0
46.7	0
46.8	0
46.9	0
47	0
47.1	0
47.2	0
47.3	0
47.4	0
47.5	0
47.6	0
47.7	0
47.8	0
47.9	0
48	0
48.1	0
48.2	0
48.3	0
48.4	0
48.5	0
48.6	0
48.7	0
48.8	0
48.9	0
49	0
49.1	0
49.2	0
49.3	0
49.4	0
49.5	0
49.6	0
49.7	0
49.8	0
49.9	0
50	0
50.1	0
50.2	0
50.3	0
50.4	0
50.5	0
50.6	0
50.7	0
50.8	0
50.9	0
51	0
51.1	0
51.2	0
51.3	0
51.4	0
51.5	0
51.6	0
51.7	0
51.8	0
51.9	0
52	0
52.1	0
52.2	0
52.3	0
52.4	0
52.5	0
52.6	0
52.7	0
52.8	0
52.9	0
53	0
53.1	0
53.2	0
53.3	0
53.4	0
53.5	0
53.6	0
53.7	0
53.8	0
53.9	0
54	0
54.1	0
54.2	0
54.3	0
54.4	0
54.5	0
54.6	0
54.7	0
54.8	0
54.9	0
55	0
55.1	0
55.2	0
55.3	0
55.4	0
55.5	0
55.6	0
55.7	0
55.8	0
55.9	0
56	0
56.1	0
56.2	0
56.3	0
56.4	0
56.5	0
56.6	0
56.7	0
56.8	0
56.9	0
57	0
57.1	0
57.2	0
57.3	0
57.4	0
57.5	0
57.6	0
57.7	0
57.8	0
57.9	0
58	0
58.1	0
58.2	0
58.3	0
58.4	0
58.5	0
58.6	0
58.7	0
58.8	0
58.9	0
59	0
59.1	0
59.2	0
59.3	0
59.4	0
59.5	0
59.6	0
59.7	0
59.8	0
59.9	0
60	0
60.1	0
60.2	0
60.3	0
60.4	0
60.5	0
60.6	0
60.7	0
60.8	0
60.9	0
61	0
61.1	0
61.2	0
61.3	0
61.4	0
61.5	0
61.6	0
61.7	0
61.8	0
61.9	0
62	0
62.1	0
62.2	0
62.3	0
62.4	0
62.5	0
62.6	0
62.7	0
62.8	0
62.9	0
63	0
63.1	0
63.2	0
63.3	0
63.4	0
63.5	0
63.6	0
63.7	0
63.8	0
63.9	0
64	0
64.1	0
64.2	0
64.3	0
64.4	0
64.5	0
64.6	0
64.7	0
64.8	0
64.9	0
65	0
65.1	0
65.2	0
65.3	0
65.4	0
65.5	0
65.6	0
65.7	0
65.8	0
65.9	0
66	0
66.1	0
66.2	0
66.3	0
66.4	0
66.5	0
66.6	0
66.7	0
66.8	0
66.9	0
67	0
67.1	0
67.2	0
67.3	0
67.4	0
67.5	0
67.6	0
67.7	0
67.8	0
67.9	0
68	0
68.1	0
68.2	0
68.3	0
68.4	0
68.5	0
68.6	0
68.7	0
68.8	0
68.9	0
69	0
69.1	0
69.2	0
69.3	0
69.4	0
69.5	0
69.6	0
69.7	0
69.8	0
69.9	0
70	0
70.1	0
70.2	0
70.3	0
70.4	0
70.5	0
70.6	0
70.7	0
70.8	0
70.9	0
71	0
71.1	0
71.2	0
71.3	0
71.4	0
71.5	0
71.6	0
71.7	0
71.8	0
71.9	0
72	0
72.1	0
72.2	0
72.3	0
72.4	0
72.5	0
72.6	0
72.7	0
72.8	0
72.9	0
73	0
73.1	0
73.2	0
73.3	0
73.4	0
73.5	0
73.6	0
73.7	0
73.8	0
73.9	0
74	0
74.1	0
74.2	0
74.3	0
74.4	0
74.5	0
74.6	0
74.7	0
74.8	0
74.9	0
75	0
75.1	0
75.2	0
75.3	0
75.4	0
75.5	0
75.6	0
75.7	0
75.8	0
75.9	0
76	0
76.1	0
76.2	0
76.3	0
76.4	0
76.5	0
76.6	0
76.7	0
76.8	0
76.9	0
77	0
77.1	0
77.2	0
77.3	0
77.4	0
77.5	0
77.6	0
77.7	0
77.8	0
77.9	0
78	0
78.1	0
78.2	0
78.3	0
78.4	0
78.5	0
78.6	0
78.7	0
78.8	0
78.9	0
79	0
79.1	0
79.2	0
79.3	0
79.4	0
79.5	0
79.6	0
79.7	0
79.8	0
79.9	0
80	0
80.1	0
80.2	0
80.3	0
80.4	0
80.5	0
80.6	0
80.7	0
80.8	0
80.9	0
81	0
81.1	0
81.2	0
81.3	0
81.4	0
81.5	0
81.6	0
81.7	0
81.8	0
81.9	0
82	0
82.1	0
82.2	0
82.3	0
82.4	0
82.5	0
82.6	0
82.7	0
82.8	0
82.9	0
83	0
83.1	0
83.2	0
83.3	0
83.4	0
83.5	0
83.6	0
83.7	0
83.8	0
83.9	0
84	0
84.1	0
84.2	0
84.3	0
84.4	0
84.5	0
84.6	0
84.7	0
84.8	0
84.9	0
85	0
85.1	0
85.2	0
85.3	0
85.4	0
85.5	0
85.6	0
85.7	0
85.8	0
85.9	0
86	0
86.1	0
86.2	0
86.3	0
86.4	0
86.5	0
86.6	0
86.7	0
86.8	0
86.9	0
87	0
87.1	0
87.2	0
87.3	0
87.4	0
87.5	0
87.6	0
87.7	0
87.8	0
87.9	0
88	0
88.1	0
88.2	0
88.3	0
88.4	0
88.5	0
88.6	0
88.7	0
88.8	0
88.9	0
89	0
89.1	0
89.2	0
89.3	0
89.4	0
89.5	0
89.6	0
89.7	0
89.8	0
89.9	0
90	0
90.1	0
90.2	0
90.3	0
90.4	0
90.5	0
90.6	0
90.7	0
90.8	0
90.9	0
91	0
91.1	0
91.2	0
91.3	0
91.4	0
91.5	0
91.6	0
91.7	0
91.8	0
91.9	0
92	0
92.1	0
92.2	0
92.3	0
92.4	0
92.5	0
92.6	0
92.7	0
92.8	0
92.9	0
93	0
93.1	0
93.2	0
93.3	0
93.4	0
93.5	0
93.6	0
93.7	0
93.8	0
93.9	0
94	0
94.1	0
94.2	0
94.3	0
94.4	0
94.5	0
94.6	0
94.7	0
94.8	0
94.9	0
95	0
95.1	0
95.2	0
95.3	0
95.4	0
95.5	0
95.6	0
95.7	0
95.8	0
95.9	0
96	0
96.1	0
96.2	0
96.3	0
96.4	0
96.5	0
96.6	0
96.7	0
96.8	0
96.9	0
97	0
97.1	0
97.2	0
97.3	0
97.4	0
97.5	0
97.6	0
97.7	0
97.8	0
97.9	0
98	0
98.1	0
98.2	0
98.3	0
98.4	0
98.5	0
98.6	0
98.7	0
98.8	0
98.9	0
99	0
99.1	0
99.2	0
99.3	0
99.4	0
99.5	0
99.6	0
99.7	0
99.8	0
99.9	0
100	0
100.1	0.345993
100.2	0.531902
100.3	0.643607
100.4	0.716977
100.5	0.768137
100.6	0.805107
100.7	0.832365
100.8	0.85269
100.9	0.867946
101	0.87945
101.1	0.888156
101.2	0.894771
101.3	0.899819
101.4	0.903692
101.5	0.906684
101.6	0.909014
101.7	0.910847
101.8	0.912307
101.9	0.913487
102	0.914456
102.1	0.915266
102.2	0.915957
102.3	0.916558
102.4	0.917091
102.5	0.917573
102.6	0.918016
102.7	0.918429
102.8	0.91882
102.9	0.919193
103	0.919552
103.1	0.919902
103.2	0.920242
103.3	0.920577
103.4	0.920905
103.5	0.92123
103.6	0.921551
103.7	0.921868
103.8	0.922183
103.9	0.922495
104	0.922805
104.1	0.923113
104.2	0.923419
104.3	0.923723
104.4	0.924026
104.5	0.924326
104.6	0.924625
104.7	0.924923
104.8	0.925219
104.9	0.925513
105	0.925806
105.1	0.926097
105.2	0.926387
105.3	0.926675
105.4	0.926962
105.5	0.927247
105.6	0.927531
105.7	0.927813
105.8	0.928094
105.9	0.928374
106	0.928652
106.1	0.928928
106.2	0.929204
106.3	0.929477
106.4	0.92975
106.5	0.930021
106.6	0.930291
106.7	0.930559
106.8	0.930826
106.9	0.931091
107	0.931356
107.1	0.931618
107.2	0.93188
107.3	0.93214
107.4	0.932399
107.5	0.932656
107.6	0.932913
107.7	0.933168
107.8	0.933421
107.9	0.933673
108	0.933925
108.1	0.934174
108.2	0.934423
108.3	0.93467
108.4	0.934916
108.5	0.935161
108.6	0.935404
108.7	0.935646
108.8	0.935887
108.9	0.936127
109	0.936365
109.1	0.936603
109.2	0.936839
109.3	0.937074
109.4	0.937307
109.5	0.93754
109.6	0.937771
109.7	0.938001
109.8	0.93823
109.9	0.938458
110	0.938685
110.1	0.93891
110.2	0.939134
110.3	0.939357
110.4	0.93958
110.5	0.9398
110.6	0.94002
110.7	0.940239
110.8	0.940456
110.9	0.940673
111	0.940888
111.1	0.941102
111.2	0.941315
111.3	0.941527
111.4	0.941738
111.5	0.941948
111.6	0.942157
111.7	0.942365
111.8	0.942572
111.9	0.942777
112	0.942982
112.1	0.943185
112.2	0.943388
112.3	0.943589
112.4	0.94379
112.5	0.943989
112.6	0.944188
112.7	0.944385
112.8	0.944581
112.9	0.944777
113	0.944971
113.1	0.945164
113.2	0.945357
113.3	0.945548
113.4	0.945739
113.5	0.945928
113.6	0.946117
113.7	0.946304
113.8	0.946491
113.9	0.946676
114	0.946861
114.1	0.947045
114.2	0.947228
114.3	0.94741
114.4	0.94759
114.5	0.947771
114.6	0.94795
114.7	0.948128
114.8	0.948305
114.9	0.948481
115	0.948657
115.1	0.948832
115.2	0.949005
115.3	0.949178
115.4	0.94935
115.5	0.949521
115.6	0.949691
115.7	0.94986
115.8	0.950029
115.9	0.950197
116	0.950363
116.1	0.950529
116.2	0.950694
116.3	0.950858
116.4	0.951022
116.5	0.951184
116.6	0.951346
116.7	0.951507
116.8	0.951667
116.9	0.951826
117	0.951984
117.1	0.952142
117.2	0.952299
117.3	0.952455
117.4	0.95261
117.5	0.952765
117.6	0.952918
117.7	0.953071
117.8	0.953223
117.9	0.953374
118	0.953525
118.1	0.953675
118.2	0.953824
118.3	0.953972
118.4	0.954119
118.5	0.954266
118.6	0.954412
118.7	0.954557
118.8	0.954702
118.9	0.954845
119	0.954988
119.1	0.955131
119.2	0.955272
119.3	0.955413
119.4	0.955553
119.5	0.955693
119.6	0.955831
119.7	0.955969
119.8	0.956107
119.9	0.956243
120	0.956379
120.1	0.956514
120.2	0.956649
120.3	0.956783
120.4	0.956916
120.5	0.957048
120.6	0.95718
120.7	0.957311
120.8	0.957441
120.9	0.957571
121	0.9577
121.1	0.957829
121.2	0.957957
121.3	0.958084
121.4	0.95821
121.5	0.958336
121.6	0.958461
121.7	0.958586
121.8	0.95871
121.9	0.958833
122	0.958956
122.1	0.959078
122.2	0.959199
122.3	0.95932
122.4	0.95944
122.5	0.95956
122.6	0.959679
122.7	0.959797
122.8	0.959915
122.9	0.960032
123	0.960148
123.1	0.960264
123.2	0.96038
123.3	0.960495
123.4	0.960609
123.5	0.960722
123.6	0.960835
123.7	0.960948
123.8	0.96106
123.9	0.961171
124	0.961282
124.1	0.961392
124.2	0.961502
124.3	0.961611
124.4	0.961719
124.5	0.961827
124.6	0.961934
124.7	0.962041
124.8	0.962148
124.9	0.962253
125	0.962359
125.1	0.962463
125.2	0.962567
125.3	0.962671
125.4	0.962774
125.5	0.962877
125.6	0.962979
125.7	0.96308
125.8	0.963181
125.9	0.963282
126	0.963382
126.1	0.963481
126.2	0.96358
126.3	0.963679
126.4	0.963777
126.5	0.963874
126.6	0.963971
126.7	0.964067
126.8	0.964163
126.9	0.964259
127	0.964354
127.1	0.964448
127.2	0.964542
127.3	0.964636
127.4	0.964729
127.5	0.964822
127.6	0.964914
127.7	0.965005
127.8	0.965097
127.9	0.965187
128	0.965277
128.1	0.965367
128.2	0.965457
128.3	0.965545
128.4	0.965634
128.5	0.965722
128.6	0.965809
128.7	0.965896
128.8	0.965983
128.9	0.966069
129	0.966155
129.1	0.96624
129.2	0.966325
129.3	0.96641
129.4	0.966494
129.5	0.966577
129.6	0.96666
129.7	0.966743
129.8	0.966826
129.9	0.966907
130	0.966989
130.1	0.96707
130.2	0.967151
130.3	0.967231
130.4	0.967311
130.5	0.96739
130.6	0.967469
130.7	0.967548
130.8	0.967626
130.9	0.967704
131	0.967781
131.1	0.967858
131.2	0.967935
131.3	0.968011
131.4	0.968087
131.5	0.968162
131.6	0.968237
131.7	0.968312
131.8	0.968386
131.9	0.96846
132	0.968534
132.1	0.968607
132.2	0.96868
132.3	0.968752
132.4	0.968824
132.5	0.968896
132.6	0.968967
132.7	0.969038
132.8	0.969109
132.9	0.969179
133	0.969249
133.1	0.969319
133.2	0.969388
133.3	0.969457
133.4	0.969525
133.5	0.969593
133.6	0.969661
133.7	0.969728
133.8	0.969795
133.9	0.969862
134	0.969929
134.1	0.969995
134.2	0.97006
134.3	0.970126
134.4	0.970191
134.5	0.970256
134.6	0.97032
134.7	0.970384
134.8	0.970448
134.9	0.970511
135	0.970574
135.1	0.970637
135.2	0.9707
135.3	0.970762
135.4	0.970823
135.5	0.970885
135.6	0.970946
135.7	0.971007
135.8	0.971068
135.9	0.971128
136	0.971188
136.1	0.971247
136.2	0.971307
136.3	0.971366
136.4	0.971425
136.5	0.971483
136.6	0.971541
136.7	0.971599
136.8	0.971656
136.9	0.971714
137	0.971771
137.1	0.971827
137.2	0.971884
137.3	0.97194
137.4	0.971996
137.5	0.972051
137.6	0.972106
137.7	0.972161
137.8	0.972216
137.9	0.97227
138	0.972324
138.1	0.972378
138.2	0.972432
138.3	0.972485
138.4	0.972538
138.5	0.972591
138.6	0.972643
138.7	0.972696
138.8	0.972748
138.9	0.972799
139	0.972851
139.1	0.972902
139.2	0.972953
139.3	0.973003
139.4	0.973054
139.5	0.973104
139.6	0.973154
139.7	0.973203
139.8	0.973253
139.9	0.973302
140	0.973351
140.1	0.973399
140.2	0.973448
140.3	0.973496
140.4	0.973544
140.5	0.973591
140.6	0.973639
140.7	0.973686
140.8	0.973733
140.9	0.973779
141	0.973826
141.1	0.973872
141.2	0.973918
141.3	0.973964
141.4	0.974009
141.5	0.974054
141.6	0.974099
141.7	0.974144
141.8	0.974189
141.9	0.974233
142	0.974277
142.1	0.974321
142.2	0.974365
142.3	0.974408
142.4	0.974451
142.5	0.974494
142.6	0.974537
142.7	0.97458
142.8	0.974622
142.9	0.974664
143	0.974706
143.1	0.974748
143.2	0.974789
143.3	0.97483
143.4	0.974871
143.5	0.974912
143.6	0.974953
143.7	0.974993
143.8	0.975034
143.9	0.975074
144	0.975113
144.1	0.975153
144.2	0.975192
144.3	0.975232
144.4	0.975271
144.5	0.975309
144.6	0.975348
144.7	0.975386
144.8	0.975425
144.9	0.975463
145	0.975501
145.1	0.975538
145.2	0.975576
145.3	0.975613
145.4	0.97565
145.5	0.975687
145.6	0.975723
145.7	0.97576
145.8	0.975796
145.9	0.975832
146	0.975868
146.1	0.975904
146.2	0.97594
146.3	0.975975
146.4	0.97601
146.5	0.976045
146.6	0.97608
146.7	0.976115
146.8	0.976149
146.9	0.976184
147	0.976218
147.1	0.976252
147.2	0.976286
147.3	0.976319
147.4	0.976353
147.5	0.976386
147.6	0.976419
147.7	0.976452
147.8	0.976485
147.9	0.976517
148	0.97655
148.1	0.976582
148.2	0.976614
148.3	0.976646
148.4	0.976678
148.5	0.97671
148.6	0.976741
148.7	0.976772
148.8	0.976804
148.9	0.976835
149	0.976865
149.1	0.976896
149.2	0.976927
149.3	0.976957
149.4	0.976987
149.5	0.977017
149.6	0.977047
149.7	0.977077
149.8	0.977107
149.9	0.977136
150	0.977165
150.1	0.977194
150.2	0.977223
150.3	0.977252
150.4	0.977281
150.5	0.977309
150.6	0.977338
150.7	0.977366
150.8	0.977394
150.9	0.977422
151	0.97745
151.1	0.977478
151.2	0.977505
151.3	0.977533
151.4	0.97756
151.5	0.977587
151.6	0.977614
151.7	0.977641
151.8	0.977668
151.9	0.977694
152	0.977721
152.1	0.977747
152.2	0.977773
152.3	0.977799
152.4	0.977825
152.5	0.977851
152.6	0.977877
152.7	0.977902
152.8	0.977927
152.9	0.977953
153	0.977978
153.1	0.978003
153.2	0.978028
153.3	0.978052
153.4	0.978077
153.5	0.978102
153.6	0.978126
153.7	0.97815
153.8	0.978174
153.9	0.978198
154	0.978222
154.1	0.978246
154.2	0.97827
154.3	0.978293
154.4	0.978316
154.5	0.97834
154.6	0.978363
154.7	0.978386
154.8	0.978409
154.9	0.978432
155	0.978454
155.1	0.978477
155.2	0.978499
155.3	0.978522
155.4	0.978544
155.5	0.978566
155.6	0.978588
155.7	0.97861
155.8	0.978632
155.9	0.978653
156	0.978675
156.1	0.978696
156.2	0.978718
156.3	0.978739
156.4	0.97876
156.5	0.978781
156.6	0.978802
156.7	0.978823
156.8	0.978843
156.9	0.978864
157	0.978884
157.1	0.978905
157.2	0.978925
157.3	0.978945
157.4	0.978965
157.5	0.978985
157.6	0.979005
157.7	0.979025
157.8	0.979045
157.9	0.979064
158	0.979084
158.1	0.979103
158.2	0.979122
158.3	0.979141
158.4	0.97916
158.5	0.979179
158.6	0.979198
158.7	0.979217
158.8	0.979236
158.9	0.979254
159	0.979273
159.1	0.979291
159.2	0.979309
159.3	0.979328
159.4	0.979346
159.5	0.979364
159.6	0.979382
159.7	0.9794
159.8	0.979417
159.9	0.979435
160	0.979453
160.1	0.97947
160.2	0.979487
160.3	0.979505
160.4	0.979522
160.5	0.979539
160.6	0.979556
160.7	0.979573
160.8	0.97959
160.9	0.979607
161	0.979623
161.1	0.97964
161.2	0.979656
161.3	0.979673
161.4	0.979689
161.5	0.979706
161.6	0.979722
161.7	0.979738
161.8	0.979754
161.9	0.97977
162	0.979786
162.1	0.979801
162.2	0.979817
162.3	0.979833
162.4	0.979848
162.5	0.979864
162.6	0.979879
162.7	0.979894
162.8	0.97991
162.9	0.979925
163	0.97994
163.1	0.979955
163.2	0.97997
163.3	0.979985
163.4	0.979999
163.5	0.980014
163.6	0.980029
163.7	0.980043
163.8	0.980058
163.9	0.980072
164	0.980086
164.1	0.980101
164.2	0.980115
164.3	0.980129
164.4	0.980143
164.5	0.980157
164.6	0.980171
164.7	0.980184
164.8	0.980198
164.9	0.980212
165	0.980225
165.1	0.980239
165.2	0.980252
165.3	0.980266
165.4	0.980279
165.5	0.980292
165.6	0.980306
165.7	0.980319
165.8	0.980332
165.9	0.980345
166	0.980358
166.1	0.980371
166.2	0.980383
166.3	0.980396
166.4	0.980409
166.5	0.980421
166.6	0.980434
166.7	0.980446
166.8	0.980459
166.9	0.980471
167	0.980483
167.1	0.980496
167.2	0.980508
167.3	0.98052
167.4	0.980532
167.5	0.980544
167.6	0.980556
167.7	0.980568
167.8	0.980579
167.9	0.980591
168	0.980603
168.1	0.980614
168.2	0.980626
168.3	0.980637
168.4	0.980649
168.5	0.98066
168.6	0.980672
168.7	0.980683
168.8	0.980694
168.9	0.980705
169	0.980716
169.1	0.980727
169.2	0.980738
169.3	0.980749
169.4	0.98076
169.5	0.980771
169.6	0.980782
169.7	0.980792
169.8	0.980803
169.9	0.980813
170	0.980824
170.1	0.980834
170.2	0.980845
170.3	0.980855
170.4	0.980866
170.5	0.980876
170.6	0.980886
170.7	0.980896
170.8	0.980906
170.9	0.980916
171	0.980926
171.1	0.980936
171.2	0.980946
171.3	0.980956
171.4	0.980966
171.5	0.980976
171.6	0.980985
171.7	0.980995
171.8	0.981005
171.9	0.981014
172	0.981024
172.1	0.981033
172.2	0.981043
172.3	0.981052
172.4	0.981061
172.5	0.981071
172.6	0.98108
172.7	0.981089
172.8	0.981098
172.9	0.981107
173	0.981116
173.1	0.981125
173.2	0.981134
173.3	0.981143
173.4	0.981152
173.5	0.981161
173.6	0.981169
173.7	0.981178
173.8	0.981187
173.9	0.981195
174	0.981204
174.1	0.981213
174.2	0.981221
174.3	0.98123
174.4	0.981238
174.5	0.981246
174.6	0.981255
174.7	0.981263
174.8	0.981271
174.9	0.981279
175	0.981287
175.1	0.981296
175.2	0.981304
175.3	0.981312
175.4	0.98132
175.5	0.981328
175.6	0.981336
175.7	0.981343
175.8	0.981351
175.9	0.981359
176	0.981367
176.1	0.981374
176.2	0.981382
176.3	0.98139
176.4	0.981397
176.5	0.981405
176.6	0.981412
176.7	0.98142
176.8	0.981427
176.9	0.981435
177	0.981442
177.1	0.981449
177.2	0.981457
177.3	0.981464
177.4	0.981471
177.5	0.981478
177.6	0.981486
177.7	0.981493
177.8	0.9815
177.9	0.981507
178	0.981514
178.1	0.981521
178.2	0.981528
178.3	0.981534
178.4	0.981541
178.5	0.981548
178.6	0.981555
178.7	0.981562
178.8	0.981568
178.9	0.981575
179	0.981582
179.1	0.981588
179.2	0.981595
179.3	0.981601
179.4	0.981608
179.5	0.981614
179.6	0.981621
179.7	0.981627
179.8	0.981634
179.9	0.98164
180	0.981646
180.1	0.981653
180.2	0.981659
180.3	0.981665
180.4	0.981671
180.5	0.981677
180.6	0.981684
180.7	0.98169
180.8	0.981696
180.9	0.981702
181	0.981708
181.1	0.981714
181.2	0.98172
181.3	0.981726
181.4	0.981731
181.5	0.981737
181.6	0.981743
181.7	0.981749
181.8	0.981755
181.9	0.98176
182	0.981766
182.1	0.981772
182.2	0.981777
182.3	0.981783
182.4	0.981789
182.5	0.981794
182.6	0.9818
182.7	0.981805
182.8	0.981811
182.9	0.981816
183	0.981822
183.1	0.981827
183.2	0.981832
183.3	0.981838
183.4	0.981843
183.5	0.981848
183.6	0.981853
183.7	0.981859
183.8	0.981864
183.9	0.981869
184	0.981874
184.1	0.981879
184.2	0.981884
184.3	0.98189
184.4	0.981895
184.5	0.9819
184.6	0.981905
184.7	0.98191
184.8	0.981914
184.9	0.981919
185	0.981924
185.1	0.981929
185.2	0.981934
185.3	0.981939
185.4	0.981944
185.5	0.981948
185.6	0.981953
185.7	0.981958
185.8	0.981963
185.9	0.981967
186	0.981972
186.1	0.981976
186.2	0.981981
186.3	0.981986
186.4	0.98199
186.5	0.981995
186.6	0.981999
186.7	0.982004
186.8	0.982008
186.9	0.982013
187	0.982017
187.1	0.982021
187.2	0.982026
187.3	0.98203
187.4	0.982034
187.5	0.982039
187.6	0.982043
187.7	0.982047
187.8	0.982052
187.9	0.982056
188	0.98206
188.1	0.982064
188.2	0.982068
188.3	0.982072
188.4	0.982076
188.5	0.982081
188.6	0.982085
188.7	0.982089
188.8	0.982093
188.9	0.982097
189	0.982101
189.1	0.982105
189.2	0.982109
189.3	0.982113
189.4	0.982116
189.5	0.98212
189.6	0.982124
189.7	0.982128
189.8	0.982132
189.9	0.982136
190	0.982139
190.1	0.982143
190.2	0.982147
190.3	0.982151
190.4	0.982154
190.5	0.982158
190.6	0.982162
190.7	0.982165
190.8	0.982169
190.9	0.982173
191	0.982176
191.1	0.98218
191.2	0.982183
191.3	0.982187
191.4	0.98219
191.5	0.982194
191.6	0.982197
191.7	0.982201
191.8	0.982204
191.9	0.982208
192	0.982211
192.1	0.982215
192.2	0.982218
192.3	0.982221
192.4	0.982225
192.5	0.982228
192.6	0.982231
192.7	0.982235
192.8	0.982238
192.9	0.982241
193	0.982245
193.1	0.982248
193.2	0.982251
193.3	0.982254
193.4	0.982257
193.5	0.98226
193.6	0.982264
193.7	0.982267
193.8	0.98227
193.9	0.982273
194	0.982276
194.1	0.982279
194.2	0.982282
194.3	0.982285
194.4	0.982288
194.5	0.982291
194.6	0.982294
194.7	0.982297
194.8	0.9823
194.9	0.982303
195	0.982306
195.1	0.982309
195.2	0.982312
195.3	0.982315
195.4	0.982318
195.5	0.982321
195.6	0.982323
195.7	0.982326
195.8	0.982329
195.9	0.982332
196	0.982335
196.1	0.982337
196.2	0.98234
196.3	0.982343
196.4	0.982346
196.5	0.982348
196.6	0.982351
196.7	0.982354
196.8	0.982356
196.9	0.982359
197	0.982362
197.1	0.982364
197.2	0.982367
197.3	0.98237
197.4	0.982372
197.5	0.982375
197.6	0.982377
197.7	0.98238
197.8	0.982382
197.9	0.982385
198	0.982387
198.1	0.98239
198.2	0.982392
198.3	0.982395
198.4	0.982397
198.5	0.9824
198.6	0.982402
198.7	0.982405
198.8	0.982407
198.9	0.98241
199	0.982412
199.1	0.982414
199.2	0.982417
199.3	0.982419
199.4	0.982421
199.5	0.982424
199.6	0.982426
199.7	0.982428
199.8	0.982431
199.9	0.982433
200	0.982435
[truncated: 14,000 more rows]
