# Supplementary material for: Bayesian inference of kinetic schemes for ion channels by Kalman filtering
Source: eLife journal article supplement (doi:10.7554/elife.62714), 2022-05-04
Supplement: fig4-data4 [file 1_Sim_N_200_Fluor_MW_8M.xlsx]

## Sheet: 8 M
0.1	0
0.2	0
0.3	0
0.4	0
0.5	0
0.6	0
0.7	0
0.8	0
0.9	0
1	0
1.1	0
1.2	0
1.3	0
1.4	0
1.5	0
1.6	0
1.7	0
1.8	0
1.9	0
2	0
2.1	0
2.2	0
2.3	0
2.4	0
2.5	0
2.6	0
2.7	0
2.8	0
2.9	0
3	0
3.1	0
3.2	0
3.3	0
3.4	0
3.5	0
3.6	0
3.7	0
3.8	0
3.9	0
4	0
4.1	0
4.2	0
4.3	0
4.4	0
4.5	0
4.6	0
4.7	0
4.8	0
4.9	0
5	0
5.1	0
5.2	0
5.3	0
5.4	0
5.5	0
5.6	0
5.7	0
5.8	0
5.9	0
6	0
6.1	0
6.2	0
6.3	0
6.4	0
6.5	0
6.6	0
6.7	0
6.8	0
6.9	0
7	0
7.1	0
7.2	0
7.3	0
7.4	0
7.5	0
7.6	0
7.7	0
7.8	0
7.9	0
8	0
8.1	0
8.2	0
8.3	0
8.4	0
8.5	0
8.6	0
8.7	0
8.8	0
8.9	0
9	0
9.1	0
9.2	0
9.3	0
9.4	0
9.5	0
9.6	0
9.7	0
9.8	0
9.9	0
10	0
10.1	0
10.2	0
10.3	0
10.4	0
10.5	0
10.6	0
10.7	0
10.8	0
10.9	0
11	0
11.1	0
11.2	0
11.3	0
11.4	0
11.5	0
11.6	0
11.7	0
11.8	0
11.9	0
12	0
12.1	0
12.2	0
12.3	0
12.4	0
12.5	0
12.6	0
12.7	0
12.8	0
12.9	0
13	0
13.1	0
13.2	0
13.3	0
13.4	0
13.5	0
13.6	0
13.7	0
13.8	0
13.9	0
14	0
14.1	0
14.2	0
14.3	0
14.4	0
14.5	0
14.6	0
14.7	0
14.8	0
14.9	0
15	0
15.1	0
15.2	0
15.3	0
15.4	0
15.5	0
15.6	0
15.7	0
15.8	0
15.9	0
16	0
16.1	0
16.2	0
16.3	0
16.4	0
16.5	0
16.6	0
16.7	0
16.8	0
16.9	0
17	0
17.1	0
17.2	0
17.3	0
17.4	0
17.5	0
17.6	0
17.7	0
17.8	0
17.9	0
18	0
18.1	0
18.2	0
18.3	0
18.4	0
18.5	0
18.6	0
18.7	0
18.8	0
18.9	0
19	0
19.1	0
19.2	0
19.3	0
19.4	0
19.5	0
19.6	0
19.7	0
19.8	0
19.9	0
20	0
20.1	0
20.2	0
20.3	0
20.4	0
20.5	0
20.6	0
20.7	0
20.8	0
20.9	0
21	0
21.1	0
21.2	0
21.3	0
21.4	0
21.5	0
21.6	0
21.7	0
21.8	0
21.9	0
22	0
22.1	0
22.2	0
22.3	0
22.4	0
22.5	0
22.6	0
22.7	0
22.8	0
22.9	0
23	0
23.1	0
23.2	0
23.3	0
23.4	0
23.5	0
23.6	0
23.7	0
23.8	0
23.9	0
24	0
24.1	0
24.2	0
24.3	0
24.4	0
24.5	0
24.6	0
24.7	0
24.8	0
24.9	0
25	0
25.1	0
25.2	0
25.3	0
25.4	0
25.5	0
25.6	0
25.7	0
25.8	0
25.9	0
26	0
26.1	0
26.2	0
26.3	0
26.4	0
26.5	0
26.6	0
26.7	0
26.8	0
26.9	0
27	0
27.1	0
27.2	0
27.3	0
27.4	0
27.5	0
27.6	0
27.7	0
27.8	0
27.9	0
28	0
28.1	0
28.2	0
28.3	0
28.4	0
28.5	0
28.6	0
28.7	0
28.8	0
28.9	0
29	0
29.1	0
29.2	0
29.3	0
29.4	0
29.5	0
29.6	0
29.7	0
29.8	0
29.9	0
30	0
30.1	0
30.2	0
30.3	0
30.4	0
30.5	0
30.6	0
30.7	0
30.8	0
30.9	0
31	0
31.1	0
31.2	0
31.3	0
31.4	0
31.5	0
31.6	0
31.7	0
31.8	0
31.9	0
32	0
32.1	0
32.2	0
32.3	0
32.4	0
32.5	0
32.6	0
32.7	0
32.8	0
32.9	0
33	0
33.1	0
33.2	0
33.3	0
33.4	0
33.5	0
33.6	0
33.7	0
33.8	0
33.9	0
34	0
34.1	0
34.2	0
34.3	0
34.4	0
34.5	0
34.6	0
34.7	0
34.8	0
34.9	0
35	0
35.1	0
35.2	0
35.3	0
35.4	0
35.5	0
35.6	0
35.7	0
35.8	0
35.9	0
36	0
36.1	0
36.2	0
36.3	0
36.4	0
36.5	0
36.6	0
36.7	0
36.8	0
36.9	0
37	0
37.1	0
37.2	0
37.3	0
37.4	0
37.5	0
37.6	0
37.7	0
37.8	0
37.9	0
38	0
38.1	0
38.2	0
38.3	0
38.4	0
38.5	0
38.6	0
38.7	0
38.8	0
38.9	0
39	0
39.1	0
39.2	0
39.3	0
39.4	0
39.5	0
39.6	0
39.7	0
39.8	0
39.9	0
40	0
40.1	0
40.2	0
40.3	0
40.4	0
40.5	0
40.6	0
40.7	0
40.8	0
40.9	0
41	0
41.1	0
41.2	0
41.3	0
41.4	0
41.5	0
41.6	0
41.7	0
41.8	0
41.9	0
42	0
42.1	0
42.2	0
42.3	0
42.4	0
42.5	0
42.6	0
42.7	0
42.8	0
42.9	0
43	0
43.1	0
43.2	0
43.3	0
43.4	0
43.5	0
43.6	0
43.7	0
43.8	0
43.9	0
44	0
44.1	0
44.2	0
44.3	0
44.4	0
44.5	0
44.6	0
44.7	0
44.8	0
44.9	0
45	0
45.1	0
45.2	0
45.3	0
45.4	0
45.5	0
45.6	0
45.7	0
45.8	0
45.9	0
46	0
46.1	0
46.2	0
46.3	0
46.4	0
46.5	0
46.6	0
46.7	0
46.8	0
46.9	0
47	0
47.1	0
47.2	0
47.3	0
47.4	0
47.5	0
47.6	0
47.7	0
47.8	0
47.9	0
48	0
48.1	0
48.2	0
48.3	0
48.4	0
48.5	0
48.6	0
48.7	0
48.8	0
48.9	0
49	0
49.1	0
49.2	0
49.3	0
49.4	0
49.5	0
49.6	0
49.7	0
49.8	0
49.9	0
50	0
50.1	0
50.2	0
50.3	0
50.4	0
50.5	0
50.6	0
50.7	0
50.8	0
50.9	0
51	0
51.1	0
51.2	0
51.3	0
51.4	0
51.5	0
51.6	0
51.7	0
51.8	0
51.9	0
52	0
52.1	0
52.2	0
52.3	0
52.4	0
52.5	0
52.6	0
52.7	0
52.8	0
52.9	0
53	0
53.1	0
53.2	0
53.3	0
53.4	0
53.5	0
53.6	0
53.7	0
53.8	0
53.9	0
54	0
54.1	0
54.2	0
54.3	0
54.4	0
54.5	0
54.6	0
54.7	0
54.8	0
54.9	0
55	0
55.1	0
55.2	0
55.3	0
55.4	0
55.5	0
55.6	0
55.7	0
55.8	0
55.9	0
56	0
56.1	0
56.2	0
56.3	0
56.4	0
56.5	0
56.6	0
56.7	0
56.8	0
56.9	0
57	0
57.1	0
57.2	0
57.3	0
57.4	0
57.5	0
57.6	0
57.7	0
57.8	0
57.9	0
58	0
58.1	0
58.2	0
58.3	0
58.4	0
58.5	0
58.6	0
58.7	0
58.8	0
58.9	0
59	0
59.1	0
59.2	0
59.3	0
59.4	0
59.5	0
59.6	0
59.7	0
59.8	0
59.9	0
60	0
60.1	0
60.2	0
60.3	0
60.4	0
60.5	0
60.6	0
60.7	0
60.8	0
60.9	0
61	0
61.1	0
61.2	0
61.3	0
61.4	0
61.5	0
61.6	0
61.7	0
61.8	0
61.9	0
62	0
62.1	0
62.2	0
62.3	0
62.4	0
62.5	0
62.6	0
62.7	0
62.8	0
62.9	0
63	0
63.1	0
63.2	0
63.3	0
63.4	0
63.5	0
63.6	0
63.7	0
63.8	0
63.9	0
64	0
64.1	0
64.2	0
64.3	0
64.4	0
64.5	0
64.6	0
64.7	0
64.8	0
64.9	0
65	0
65.1	0
65.2	0
65.3	0
65.4	0
65.5	0
65.6	0
65.7	0
65.8	0
65.9	0
66	0
66.1	0
66.2	0
66.3	0
66.4	0
66.5	0
66.6	0
66.7	0
66.8	0
66.9	0
67	0
67.1	0
67.2	0
67.3	0
67.4	0
67.5	0
67.6	0
67.7	0
67.8	0
67.9	0
68	0
68.1	0
68.2	0
68.3	0
68.4	0
68.5	0
68.6	0
68.7	0
68.8	0
68.9	0
69	0
69.1	0
69.2	0
69.3	0
69.4	0
69.5	0
69.6	0
69.7	0
69.8	0
69.9	0
70	0
70.1	0
70.2	0
70.3	0
70.4	0
70.5	0
70.6	0
70.7	0
70.8	0
70.9	0
71	0
71.1	0
71.2	0
71.3	0
71.4	0
71.5	0
71.6	0
71.7	0
71.8	0
71.9	0
72	0
72.1	0
72.2	0
72.3	0
72.4	0
72.5	0
72.6	0
72.7	0
72.8	0
72.9	0
73	0
73.1	0
73.2	0
73.3	0
73.4	0
73.5	0
73.6	0
73.7	0
73.8	0
73.9	0
74	0
74.1	0
74.2	0
74.3	0
74.4	0
74.5	0
74.6	0
74.7	0
74.8	0
74.9	0
75	0
75.1	0
75.2	0
75.3	0
75.4	0
75.5	0
75.6	0
75.7	0
75.8	0
75.9	0
76	0
76.1	0
76.2	0
76.3	0
76.4	0
76.5	0
76.6	0
76.7	0
76.8	0
76.9	0
77	0
77.1	0
77.2	0
77.3	0
77.4	0
77.5	0
77.6	0
77.7	0
77.8	0
77.9	0
78	0
78.1	0
78.2	0
78.3	0
78.4	0
78.5	0
78.6	0
78.7	0
78.8	0
78.9	0
79	0
79.1	0
79.2	0
79.3	0
79.4	0
79.5	0
79.6	0
79.7	0
79.8	0
79.9	0
80	0
80.1	0
80.2	0
80.3	0
80.4	0
80.5	0
80.6	0
80.7	0
80.8	0
80.9	0
81	0
81.1	0
81.2	0
81.3	0
81.4	0
81.5	0
81.6	0
81.7	0
81.8	0
81.9	0
82	0
82.1	0
82.2	0
82.3	0
82.4	0
82.5	0
82.6	0
82.7	0
82.8	0
82.9	0
83	0
83.1	0
83.2	0
83.3	0
83.4	0
83.5	0
83.6	0
83.7	0
83.8	0
83.9	0
84	0
84.1	0
84.2	0
84.3	0
84.4	0
84.5	0
84.6	0
84.7	0
84.8	0
84.9	0
85	0
85.1	0
85.2	0
85.3	0
85.4	0
85.5	0
85.6	0
85.7	0
85.8	0
85.9	0
86	0
86.1	0
86.2	0
86.3	0
86.4	0
86.5	0
86.6	0
86.7	0
86.8	0
86.9	0
87	0
87.1	0
87.2	0
87.3	0
87.4	0
87.5	0
87.6	0
87.7	0
87.8	0
87.9	0
88	0
88.1	0
88.2	0
88.3	0
88.4	0
88.5	0
88.6	0
88.7	0
88.8	0
88.9	0
89	0
89.1	0
89.2	0
89.3	0
89.4	0
89.5	0
89.6	0
89.7	0
89.8	0
89.9	0
90	0
90.1	0
90.2	0
90.3	0
90.4	0
90.5	0
90.6	0
90.7	0
90.8	0
90.9	0
91	0
91.1	0
91.2	0
91.3	0
91.4	0
91.5	0
91.6	0
91.7	0
91.8	0
91.9	0
92	0
92.1	0
92.2	0
92.3	0
92.4	0
92.5	0
92.6	0
92.7	0
92.8	0
92.9	0
93	0
93.1	0
93.2	0
93.3	0
93.4	0
93.5	0
93.6	0
93.7	0
93.8	0
93.9	0
94	0
94.1	0
94.2	0
94.3	0
94.4	0
94.5	0
94.6	0
94.7	0
94.8	0
94.9	0
95	0
95.1	0
95.2	0
95.3	0
95.4	0
95.5	0
95.6	0
95.7	0
95.8	0
95.9	0
96	0
96.1	0
96.2	0
96.3	0
96.4	0
96.5	0
96.6	0
96.7	0
96.8	0
96.9	0
97	0
97.1	0
97.2	0
97.3	0
97.4	0
97.5	0
97.6	0
97.7	0
97.8	0
97.9	0
98	0
98.1	0
98.2	0
98.3	0
98.4	0
98.5	0
98.6	0
98.7	0
98.8	0
98.9	0
99	0
99.1	0
99.2	0
99.3	0
99.4	0
99.5	0
99.6	0
99.7	0
99.8	0
99.9	0
100	0
100.1	0.345
100.2	0.5175
100.3	0.615
100.4	0.68
100.5	0.735
100.6	0.7925
100.7	0.8125
100.8	0.8275
100.9	0.865
101	0.89
101.1	0.9025
101.2	0.9075
101.3	0.9125
101.4	0.9275
101.5	0.9275
101.6	0.9275
101.7	0.925
101.8	0.9275
101.9	0.935
102	0.94
102.1	0.9425
102.2	0.9325
102.3	0.9325
102.4	0.9325
102.5	0.93
102.6	0.935
102.7	0.9425
102.8	0.93
102.9	0.945
103	0.9425
103.1	0.95
103.2	0.9525
103.3	0.9375
103.4	0.935
103.5	0.935
103.6	0.925
103.7	0.9275
103.8	0.92
103.9	0.9075
104	0.91
104.1	0.9125
104.2	0.915
104.3	0.915
104.4	0.9275
104.5	0.915
104.6	0.925
104.7	0.935
104.8	0.925
104.9	0.92
105	0.92
105.1	0.925
105.2	0.9225
105.3	0.9275
105.4	0.93
105.5	0.9225
105.6	0.9125
105.7	0.92
105.8	0.9275
105.9	0.9225
106	0.935
106.1	0.93
106.2	0.9175
106.3	0.91
106.4	0.92
106.5	0.9175
106.6	0.9075
106.7	0.93
106.8	0.915
106.9	0.915
107	0.9225
107.1	0.92
107.2	0.9075
107.3	0.92
107.4	0.94
107.5	0.9325
107.6	0.925
107.7	0.91
107.8	0.9125
107.9	0.92
108	0.9325
108.1	0.9275
108.2	0.925
108.3	0.9175
108.4	0.92
108.5	0.915
108.6	0.9125
108.7	0.9325
108.8	0.94
108.9	0.93
109	0.9225
109.1	0.9275
109.2	0.93
109.3	0.95
109.4	0.9525
109.5	0.96
109.6	0.9525
109.7	0.9475
109.8	0.945
109.9	0.94
110	0.93
110.1	0.93
110.2	0.9375
110.3	0.9375
110.4	0.9275
110.5	0.925
110.6	0.9375
110.7	0.94
110.8	0.94
110.9	0.94
111	0.9475
111.1	0.9525
111.2	0.955
111.3	0.95
111.4	0.9475
111.5	0.9475
111.6	0.94
111.7	0.94
111.8	0.9425
111.9	0.945
112	0.94
112.1	0.9275
112.2	0.9375
112.3	0.9475
112.4	0.95
112.5	0.9475
112.6	0.935
112.7	0.9425
112.8	0.9525
112.9	0.955
113	0.9475
113.1	0.94
113.2	0.9375
113.3	0.9375
113.4	0.9325
113.5	0.9375
113.6	0.93
113.7	0.9325
113.8	0.9325
113.9	0.9475
114	0.9475
114.1	0.945
114.2	0.9525
114.3	0.9575
114.4	0.9525
114.5	0.9475
114.6	0.95
114.7	0.9575
114.8	0.9525
114.9	0.965
115	0.9575
115.1	0.9625
115.2	0.9525
115.3	0.9575
115.4	0.96
115.5	0.9675
115.6	0.97
115.7	0.9625
115.8	0.975
115.9	0.975
116	0.97
116.1	0.97
116.2	0.9625
116.3	0.9475
116.4	0.9625
116.5	0.96
116.6	0.9525
116.7	0.945
116.8	0.9425
116.9	0.9375
117	0.945
117.1	0.9525
117.2	0.9575
117.3	0.965
117.4	0.965
117.5	0.9625
117.6	0.955
117.7	0.95
117.8	0.9475
117.9	0.95
118	0.955
118.1	0.9625
118.2	0.97
118.3	0.975
118.4	0.975
118.5	0.9575
118.6	0.9675
118.7	0.9675
118.8	0.98
118.9	0.9775
119	0.9775
119.1	0.98
119.2	0.975
119.3	0.975
119.4	0.9675
119.5	0.97
119.6	0.985
119.7	0.975
119.8	0.9725
119.9	0.9775
120	0.98
120.1	0.9725
120.2	0.97
120.3	0.965
120.4	0.9525
120.5	0.9575
120.6	0.95
120.7	0.9475
120.8	0.955
120.9	0.955
121	0.95
121.1	0.95
121.2	0.9475
121.3	0.95
121.4	0.9525
121.5	0.955
121.6	0.9575
121.7	0.9625
121.8	0.9675
121.9	0.96
122	0.955
122.1	0.9575
122.2	0.9625
122.3	0.9575
122.4	0.9575
122.5	0.95
122.6	0.9525
122.7	0.955
122.8	0.9575
122.9	0.9625
123	0.965
123.1	0.965
123.2	0.965
123.3	0.965
123.4	0.96
123.5	0.97
123.6	0.9625
123.7	0.965
123.8	0.97
123.9	0.9725
124	0.965
124.1	0.96
124.2	0.96
124.3	0.9525
124.4	0.9575
124.5	0.9675
124.6	0.97
124.7	0.975
124.8	0.975
124.9	0.975
125	0.96
125.1	0.97
125.2	0.97
125.3	0.9725
125.4	0.97
125.5	0.9775
125.6	0.9775
125.7	0.9725
125.8	0.9575
125.9	0.9525
126	0.955
126.1	0.9575
126.2	0.965
126.3	0.96
126.4	0.955
126.5	0.9575
126.6	0.955
126.7	0.9625
126.8	0.965
126.9	0.9675
127	0.9575
127.1	0.9575
127.2	0.965
127.3	0.965
127.4	0.97
127.5	0.965
127.6	0.955
127.7	0.96
127.8	0.96
127.9	0.9575
128	0.9575
128.1	0.96
128.2	0.9575
128.3	0.9525
128.4	0.9525
128.5	0.9575
128.6	0.965
128.7	0.9675
128.8	0.965
128.9	0.9625
129	0.96
129.1	0.95
129.2	0.955
129.3	0.9625
129.4	0.96
129.5	0.9625
129.6	0.965
129.7	0.9625
129.8	0.9625
129.9	0.9675
130	0.97
130.1	0.9675
130.2	0.9675
130.3	0.97
130.4	0.9625
130.5	0.96
130.6	0.96
130.7	0.96
130.8	0.955
130.9	0.9525
131	0.95
131.1	0.9475
131.2	0.95
131.3	0.965
131.4	0.96
131.5	0.9625
131.6	0.965
131.7	0.9625
131.8	0.965
131.9	0.955
132	0.965
132.1	0.97
132.2	0.9725
132.3	0.9725
132.4	0.98
132.5	0.975
132.6	0.9725
132.7	0.9775
132.8	0.9775
132.9	0.975
133	0.9875
133.1	0.9875
133.2	0.975
133.3	0.97
133.4	0.9725
133.5	0.9625
133.6	0.9725
133.7	0.965
133.8	0.965
133.9	0.965
134	0.9725
134.1	0.965
134.2	0.9625
134.3	0.9675
134.4	0.97
134.5	0.9725
134.6	0.97
134.7	0.9725
134.8	0.9725
134.9	0.975
135	0.9775
135.1	0.9775
135.2	0.97
135.3	0.9725
135.4	0.9775
135.5	0.975
135.6	0.965
135.7	0.96
135.8	0.9575
135.9	0.965
136	0.955
136.1	0.9625
136.2	0.9625
136.3	0.9625
136.4	0.96
136.5	0.9575
136.6	0.965
136.7	0.965
136.8	0.965
136.9	0.965
137	0.9625
137.1	0.965
137.2	0.9775
137.3	0.97
137.4	0.9625
137.5	0.98
137.6	0.9725
137.7	0.9675
137.8	0.97
137.9	0.9675
138	0.96
138.1	0.9575
138.2	0.9525
138.3	0.9675
138.4	0.9725
138.5	0.97
138.6	0.9725
138.7	0.9775
138.8	0.97
138.9	0.975
139	0.9775
139.1	0.975
139.2	0.9675
139.3	0.9575
139.4	0.955
139.5	0.96
139.6	0.96
139.7	0.9575
139.8	0.9625
139.9	0.965
140	0.9575
140.1	0.9675
140.2	0.9625
140.3	0.955
140.4	0.955
140.5	0.965
140.6	0.9725
140.7	0.975
140.8	0.9775
140.9	0.975
141	0.9725
141.1	0.975
141.2	0.9725
141.3	0.975
141.4	0.98
141.5	0.9875
141.6	0.9825
141.7	0.98
141.8	0.98
141.9	0.975
142	0.9725
142.1	0.96
142.2	0.965
142.3	0.965
142.4	0.965
142.5	0.96
142.6	0.96
142.7	0.9625
142.8	0.9675
142.9	0.9675
143	0.975
143.1	0.98
143.2	0.9825
143.3	0.9875
143.4	0.985
143.5	0.99
143.6	0.98
143.7	0.9775
143.8	0.9725
143.9	0.965
144	0.9625
144.1	0.9625
144.2	0.9575
144.3	0.9675
144.4	0.97
144.5	0.975
144.6	0.9775
144.7	0.97
144.8	0.9775
144.9	0.9725
145	0.975
145.1	0.98
145.2	0.9825
145.3	0.9825
145.4	0.9775
145.5	0.9775
145.6	0.9775
145.7	0.9725
145.8	0.9725
145.9	0.975
146	0.975
146.1	0.9725
146.2	0.98
146.3	0.975
146.4	0.9675
146.5	0.98
146.6	0.98
146.7	0.98
146.8	0.985
146.9	0.9825
147	0.9875
147.1	0.9925
147.2	0.9925
147.3	0.9925
147.4	0.9875
147.5	0.985
147.6	0.98
147.7	0.97
147.8	0.9675
147.9	0.9625
148	0.9675
148.1	0.9675
148.2	0.9725
148.3	0.98
148.4	0.9825
148.5	0.98
148.6	0.985
148.7	0.98
148.8	0.98
148.9	0.9825
149	0.975
149.1	0.9725
149.2	0.9725
149.3	0.9725
149.4	0.985
149.5	0.9825
149.6	0.985
149.7	0.985
149.8	0.985
149.9	0.99
150	0.995
150.1	0.995
150.2	1
150.3	0.9925
150.4	0.9975
150.5	0.99
150.6	0.985
150.7	0.985
150.8	0.975
150.9	0.9775
151	0.9775
151.1	0.98
151.2	0.9875
151.3	0.985
151.4	0.9825
151.5	0.9875
151.6	0.985
151.7	0.9875
151.8	0.99
151.9	0.9925
152	0.9875
152.1	0.985
152.2	0.985
152.3	0.985
152.4	0.9825
152.5	0.99
152.6	0.9875
152.7	0.9875
152.8	0.985
152.9	0.9775
153	0.985
153.1	0.9875
153.2	0.9775
153.3	0.9775
153.4	0.98
153.5	0.98
153.6	0.9875
153.7	0.9875
153.8	0.9825
153.9	0.98
154	0.9825
154.1	0.9725
154.2	0.98
154.3	0.98
154.4	0.98
154.5	0.98
154.6	0.985
154.7	0.9825
154.8	0.9825
154.9	0.9825
155	0.98
155.1	0.985
155.2	0.9875
155.3	0.985
155.4	0.9825
155.5	0.985
155.6	0.98
155.7	0.9775
155.8	0.985
155.9	0.98
156	0.985
156.1	0.99
156.2	0.99
156.3	0.985
156.4	0.9875
156.5	0.9875
156.6	0.9825
156.7	0.98
156.8	0.9775
156.9	0.9825
157	0.99
157.1	0.995
157.2	0.9925
157.3	0.99
157.4	0.985
157.5	0.9825
157.6	0.985
157.7	0.985
157.8	0.9825
157.9	0.9825
158	0.9825
158.1	0.9775
158.2	0.975
158.3	0.98
158.4	0.9775
158.5	0.9775
158.6	0.9825
158.7	0.99
158.8	0.9925
158.9	0.9925
159	0.985
159.1	0.975
159.2	0.9825
159.3	0.9825
159.4	0.9775
159.5	0.9725
159.6	0.975
159.7	0.9825
159.8	0.9925
159.9	0.99
160	0.9925
160.1	0.9875
160.2	0.98
160.3	0.9775
160.4	0.975
160.5	0.9775
160.6	0.9775
160.7	0.98
160.8	0.9775
160.9	0.975
161	0.975
161.1	0.985
161.2	0.9825
161.3	0.985
161.4	0.985
161.5	0.985
161.6	0.9825
161.7	0.99
161.8	0.985
161.9	0.9875
162	0.9875
162.1	0.985
162.2	0.985
162.3	0.99
162.4	0.985
162.5	0.985
162.6	0.985
162.7	0.9775
162.8	0.9775
162.9	0.9775
163	0.9825
163.1	0.98
163.2	0.9725
163.3	0.9725
163.4	0.975
163.5	0.9825
163.6	0.9825
163.7	0.9825
163.8	0.98
163.9	0.9825
164	0.9875
164.1	0.975
164.2	0.975
164.3	0.975
164.4	0.9725
164.5	0.9675
164.6	0.975
164.7	0.9725
164.8	0.9725
164.9	0.97
165	0.97
165.1	0.975
165.2	0.975
165.3	0.975
165.4	0.9725
165.5	0.97
165.6	0.97
165.7	0.9725
165.8	0.9675
165.9	0.965
166	0.9775
166.1	0.98
166.2	0.9775
166.3	0.98
166.4	0.9875
166.5	0.98
166.6	0.9875
166.7	0.985
166.8	0.985
166.9	0.9825
167	0.9775
167.1	0.9775
167.2	0.99
167.3	0.985
167.4	0.9775
167.5	0.9825
167.6	0.9725
167.7	0.9725
167.8	0.9825
167.9	0.97
168	0.97
168.1	0.965
168.2	0.9675
168.3	0.97
168.4	0.975
168.5	0.9725
168.6	0.98
168.7	0.9825
168.8	0.9775
168.9	0.9725
169	0.9725
169.1	0.9675
169.2	0.965
169.3	0.965
169.4	0.97
169.5	0.98
169.6	0.9825
169.7	0.985
169.8	0.98
169.9	0.975
170	0.97
170.1	0.97
170.2	0.9725
170.3	0.9725
170.4	0.9775
170.5	0.985
170.6	0.9875
170.7	0.9825
170.8	0.99
170.9	0.9925
171	0.99
171.1	0.9875
171.2	0.9875
171.3	0.99
171.4	0.985
171.5	0.9875
171.6	0.99
171.7	0.9825
171.8	0.99
171.9	0.9875
172	0.9875
172.1	0.9875
172.2	0.985
172.3	0.9775
172.4	0.9725
172.5	0.9775
172.6	0.98
172.7	0.9825
172.8	0.9825
172.9	0.98
173	0.98
173.1	0.98
173.2	0.9825
173.3	0.9825
173.4	0.9825
173.5	0.975
173.6	0.98
173.7	0.97
173.8	0.98
173.9	0.9775
174	0.975
174.1	0.975
174.2	0.985
174.3	0.9825
174.4	0.9875
174.5	0.9825
174.6	0.9825
174.7	0.98
174.8	0.98
174.9	0.975
175	0.97
175.1	0.9825
175.2	0.9825
175.3	0.9875
175.4	0.9825
175.5	0.985
175.6	0.985
175.7	0.9875
175.8	0.9825
175.9	0.985
176	0.98
176.1	0.97
176.2	0.9775
176.3	0.9725
176.4	0.975
176.5	0.98
176.6	0.98
176.7	0.975
176.8	0.975
176.9	0.9725
177	0.9675
177.1	0.97
177.2	0.975
177.3	0.9725
177.4	0.9675
177.5	0.97
177.6	0.975
177.7	0.975
177.8	0.97
177.9	0.975
178	0.9825
178.1	0.9825
178.2	0.985
178.3	0.99
178.4	0.99
178.5	0.9925
178.6	0.99
178.7	0.9875
178.8	0.9825
178.9	0.985
179	0.98
179.1	0.98
179.2	0.9825
179.3	0.9875
179.4	0.985
179.5	0.9875
179.6	0.98
179.7	0.9875
179.8	0.99
179.9	0.995
180	0.995
180.1	0.9925
180.2	0.99
180.3	0.99
180.4	0.995
180.5	0.99
180.6	0.9825
180.7	0.9825
180.8	0.98
180.9	0.985
181	0.985
181.1	0.9875
181.2	0.985
181.3	0.985
181.4	0.9825
181.5	0.9875
181.6	0.9875
181.7	0.9875
181.8	0.9875
181.9	0.99
182	0.99
182.1	0.99
182.2	0.99
182.3	0.995
182.4	0.99
182.5	0.9875
182.6	0.9825
182.7	0.98
182.8	0.9775
182.9	0.9775
183	0.975
183.1	0.98
183.2	0.9875
183.3	0.9875
183.4	0.9825
183.5	0.985
183.6	0.9825
183.7	0.9925
183.8	0.9925
183.9	0.9925
184	0.9875
184.1	0.98
184.2	0.9775
184.3	0.985
184.4	0.9875
184.5	0.9875
184.6	0.9875
184.7	0.985
184.8	0.99
184.9	0.9825
185	0.98
185.1	0.9825
185.2	0.985
185.3	0.99
185.4	0.9875
185.5	0.99
185.6	0.99
185.7	0.99
185.8	0.9875
185.9	0.9825
186	0.9825
186.1	0.985
186.2	0.9825
186.3	0.985
186.4	0.98
186.5	0.9775
186.6	0.9775
186.7	0.975
186.8	0.9775
186.9	0.98
187	0.9825
187.1	0.9825
187.2	0.985
187.3	0.9825
187.4	0.9825
187.5	0.98
187.6	0.98
187.7	0.9775
187.8	0.9825
187.9	0.9825
188	0.9825
188.1	0.9775
188.2	0.9875
188.3	0.9875
188.4	0.9875
188.5	0.9825
188.6	0.985
188.7	0.9825
188.8	0.9875
188.9	0.985
189	0.985
189.1	0.9825
189.2	0.9825
189.3	0.9775
189.4	0.98
189.5	0.98
189.6	0.975
189.7	0.98
189.8	0.985
189.9	0.9825
190	0.9825
190.1	0.9875
190.2	0.985
190.3	0.9875
190.4	0.9825
190.5	0.985
190.6	0.9875
190.7	0.9875
190.8	0.985
190.9	0.985
191	0.9875
191.1	0.985
191.2	0.985
191.3	0.985
191.4	0.985
191.5	0.985
191.6	0.985
191.7	0.9775
191.8	0.985
191.9	0.9825
192	0.9875
192.1	0.985
192.2	0.9775
192.3	0.9825
192.4	0.9825
192.5	0.98
192.6	0.9775
192.7	0.985
192.8	0.98
192.9	0.985
193	0.9875
193.1	0.985
193.2	0.9825
193.3	0.9775
193.4	0.985
193.5	0.9775
193.6	0.985
193.7	0.9875
193.8	0.9925
193.9	0.9925
194	0.9875
194.1	0.98
194.2	0.985
194.3	0.9875
194.4	0.98
194.5	0.9875
194.6	0.985
194.7	0.985
194.8	0.9875
194.9	0.9775
195	0.9725
195.1	0.9725
195.2	0.975
195.3	0.975
195.4	0.9875
195.5	0.9875
195.6	0.9875
195.7	0.9875
195.8	0.9875
195.9	0.99
196	0.99
196.1	0.99
196.2	0.9875
196.3	0.99
196.4	0.985
196.5	0.98
196.6	0.9825
196.7	0.975
196.8	0.9725
196.9	0.97
197	0.9675
197.1	0.975
197.2	0.9725
197.3	0.9825
197.4	0.975
197.5	0.975
197.6	0.98
197.7	0.98
197.8	0.985
197.9	0.985
198	0.985
198.1	0.985
198.2	0.99
198.3	0.99
198.4	0.99
198.5	0.9875
198.6	0.9875
198.7	0.985
198.8	0.99
198.9	0.985
199	0.985
199.1	0.99
199.2	0.98
199.3	0.98
199.4	0.98
199.5	0.9775
199.6	0.975
199.7	0.9775
199.8	0.9775
199.9	0.97
200	0.975
[truncated: 14,000 more rows]
