# Supplementary material for: Bayesian inference of kinetic schemes for ion channels by Kalman filtering
Source: eLife journal article supplement (doi:10.7554/elife.62714), 2022-05-04
Supplement: fig4-data4 [file 1_Sim_N_200_Strom_MW_8M.xlsx]

## Sheet: 8 M
0.1	0
0.2	0
0.3	0
0.4	0
0.5	0
0.6	0
0.7	0
0.8	0
0.9	0
1	0
1.1	0
1.2	0
1.3	0
1.4	0
1.5	0
1.6	0
1.7	0
1.8	0
1.9	0
2	0
2.1	0
2.2	0
2.3	0
2.4	0
2.5	0
2.6	0
2.7	0
2.8	0
2.9	0
3	0
3.1	0
3.2	0
3.3	0
3.4	0
3.5	0
3.6	0
3.7	0
3.8	0
3.9	0
4	0
4.1	0
4.2	0
4.3	0
4.4	0
4.5	0
4.6	0
4.7	0
4.8	0
4.9	0
5	0
5.1	0
5.2	0
5.3	0
5.4	0
5.5	0
5.6	0
5.7	0
5.8	0
5.9	0
6	0
6.1	0
6.2	0
6.3	0
6.4	0
6.5	0
6.6	0
6.7	0
6.8	0
6.9	0
7	0
7.1	0
7.2	0
7.3	0
7.4	0
7.5	0
7.6	0
7.7	0
7.8	0
7.9	0
8	0
8.1	0
8.2	0
8.3	0
8.4	0
8.5	0
8.6	0
8.7	0
8.8	0
8.9	0
9	0
9.1	0
9.2	0
9.3	0
9.4	0
9.5	0
9.6	0
9.7	0
9.8	0
9.9	0
10	0
10.1	0
10.2	0
10.3	0
10.4	0
10.5	0
10.6	0
10.7	0
10.8	0
10.9	0
11	0
11.1	0
11.2	0
11.3	0
11.4	0
11.5	0
11.6	0
11.7	0
11.8	0
11.9	0
12	0
12.1	0
12.2	0
12.3	0
12.4	0
12.5	0
12.6	0
12.7	0
12.8	0
12.9	0
13	0
13.1	0
13.2	0
13.3	0
13.4	0
13.5	0
13.6	0
13.7	0
13.8	0
13.9	0
14	0
14.1	0
14.2	0
14.3	0
14.4	0
14.5	0
14.6	0
14.7	0
14.8	0
14.9	0
15	0
15.1	0
15.2	0
15.3	0
15.4	0
15.5	0
15.6	0
15.7	0
15.8	0
15.9	0
16	0
16.1	0
16.2	0
16.3	0
16.4	0
16.5	0
16.6	0
16.7	0
16.8	0
16.9	0
17	0
17.1	0
17.2	0
17.3	0
17.4	0
17.5	0
17.6	0
17.7	0
17.8	0
17.9	0
18	0
18.1	0
18.2	0
18.3	0
18.4	0
18.5	0
18.6	0
18.7	0
18.8	0
18.9	0
19	0
19.1	0
19.2	0
19.3	0
19.4	0
19.5	0
19.6	0
19.7	0
19.8	0
19.9	0
20	0
20.1	0
20.2	0
20.3	0
20.4	0
20.5	0
20.6	0
20.7	0
20.8	0
20.9	0
21	0
21.1	0
21.2	0
21.3	0
21.4	0
21.5	0
21.6	0
21.7	0
21.8	0
21.9	0
22	0
22.1	0
22.2	0
22.3	0
22.4	0
22.5	0
22.6	0
22.7	0
22.8	0
22.9	0
23	0
23.1	0
23.2	0
23.3	0
23.4	0
23.5	0
23.6	0
23.7	0
23.8	0
23.9	0
24	0
24.1	0
24.2	0
24.3	0
24.4	0
24.5	0
24.6	0
24.7	0
24.8	0
24.9	0
25	0
25.1	0
25.2	0
25.3	0
25.4	0
25.5	0
25.6	0
25.7	0
25.8	0
25.9	0
26	0
26.1	0
26.2	0
26.3	0
26.4	0
26.5	0
26.6	0
26.7	0
26.8	0
26.9	0
27	0
27.1	0
27.2	0
27.3	0
27.4	0
27.5	0
27.6	0
27.7	0
27.8	0
27.9	0
28	0
28.1	0
28.2	0
28.3	0
28.4	0
28.5	0
28.6	0
28.7	0
28.8	0
28.9	0
29	0
29.1	0
29.2	0
29.3	0
29.4	0
29.5	0
29.6	0
29.7	0
29.8	0
29.9	0
30	0
30.1	0
30.2	0
30.3	0
30.4	0
30.5	0
30.6	0
30.7	0
30.8	0
30.9	0
31	0
31.1	0
31.2	0
31.3	0
31.4	0
31.5	0
31.6	0
31.7	0
31.8	0
31.9	0
32	0
32.1	0
32.2	0
32.3	0
32.4	0
32.5	0
32.6	0
32.7	0
32.8	0
32.9	0
33	0
33.1	0
33.2	0
33.3	0
33.4	0
33.5	0
33.6	0
33.7	0
33.8	0
33.9	0
34	0
34.1	0
34.2	0
34.3	0
34.4	0
34.5	0
34.6	0
34.7	0
34.8	0
34.9	0
35	0
35.1	0
35.2	0
35.3	0
35.4	0
35.5	0
35.6	0
35.7	0
35.8	0
35.9	0
36	0
36.1	0
36.2	0
36.3	0
36.4	0
36.5	0
36.6	0
36.7	0
36.8	0
36.9	0
37	0
37.1	0
37.2	0
37.3	0
37.4	0
37.5	0
37.6	0
37.7	0
37.8	0
37.9	0
38	0
38.1	0
38.2	0
38.3	0
38.4	0
38.5	0
38.6	0
38.7	0
38.8	0
38.9	0
39	0
39.1	0
39.2	0
39.3	0
39.4	0
39.5	0
39.6	0
39.7	0
39.8	0
39.9	0
40	0
40.1	0
40.2	0
40.3	0
40.4	0
40.5	0
40.6	0
40.7	0
40.8	0
40.9	0
41	0
41.1	0
41.2	0
41.3	0
41.4	0
41.5	0
41.6	0
41.7	0
41.8	0
41.9	0
42	0
42.1	0
42.2	0
42.3	0
42.4	0
42.5	0
42.6	0
42.7	0
42.8	0
42.9	0
43	0
43.1	0
43.2	0
43.3	0
43.4	0
43.5	0
43.6	0
43.7	0
43.8	0
43.9	0
44	0
44.1	0
44.2	0
44.3	0
44.4	0
44.5	0
44.6	0
44.7	0
44.8	0
44.9	0
45	0
45.1	0
45.2	0
45.3	0
45.4	0
45.5	0
45.6	0
45.7	0
45.8	0
45.9	0
46	0
46.1	0
46.2	0
46.3	0
46.4	0
46.5	0
46.6	0
46.7	0
46.8	0
46.9	0
47	0
47.1	0
47.2	0
47.3	0
47.4	0
47.5	0
47.6	0
47.7	0
47.8	0
47.9	0
48	0
48.1	0
48.2	0
48.3	0
48.4	0
48.5	0
48.6	0
48.7	0
48.8	0
48.9	0
49	0
49.1	0
49.2	0
49.3	0
49.4	0
49.5	0
49.6	0
49.7	0
49.8	0
49.9	0
50	0
50.1	0
50.2	0
50.3	0
50.4	0
50.5	0
50.6	0
50.7	0
50.8	0
50.9	0
51	0
51.1	0
51.2	0
51.3	0
51.4	0
51.5	0
51.6	0
51.7	0
51.8	0
51.9	0
52	0
52.1	0
52.2	0
52.3	0
52.4	0
52.5	0
52.6	0
52.7	0
52.8	0
52.9	0
53	0
53.1	0
53.2	0
53.3	0
53.4	0
53.5	0
53.6	0
53.7	0
53.8	0
53.9	0
54	0
54.1	0
54.2	0
54.3	0
54.4	0
54.5	0
54.6	0
54.7	0
54.8	0
54.9	0
55	0
55.1	0
55.2	0
55.3	0
55.4	0
55.5	0
55.6	0
55.7	0
55.8	0
55.9	0
56	0
56.1	0
56.2	0
56.3	0
56.4	0
56.5	0
56.6	0
56.7	0
56.8	0
56.9	0
57	0
57.1	0
57.2	0
57.3	0
57.4	0
57.5	0
57.6	0
57.7	0
57.8	0
57.9	0
58	0
58.1	0
58.2	0
58.3	0
58.4	0
58.5	0
58.6	0
58.7	0
58.8	0
58.9	0
59	0
59.1	0
59.2	0
59.3	0
59.4	0
59.5	0
59.6	0
59.7	0
59.8	0
59.9	0
60	0
60.1	0
60.2	0
60.3	0
60.4	0
60.5	0
60.6	0
60.7	0
60.8	0
60.9	0
61	0
61.1	0
61.2	0
61.3	0
61.4	0
61.5	0
61.6	0
61.7	0
61.8	0
61.9	0
62	0
62.1	0
62.2	0
62.3	0
62.4	0
62.5	0
62.6	0
62.7	0
62.8	0
62.9	0
63	0
63.1	0
63.2	0
63.3	0
63.4	0
63.5	0
63.6	0
63.7	0
63.8	0
63.9	0
64	0
64.1	0
64.2	0
64.3	0
64.4	0
64.5	0
64.6	0
64.7	0
64.8	0
64.9	0
65	0
65.1	0
65.2	0
65.3	0
65.4	0
65.5	0
65.6	0
65.7	0
65.8	0
65.9	0
66	0
66.1	0
66.2	0
66.3	0
66.4	0
66.5	0
66.6	0
66.7	0
66.8	0
66.9	0
67	0
67.1	0
67.2	0
67.3	0
67.4	0
67.5	0
67.6	0
67.7	0
67.8	0
67.9	0
68	0
68.1	0
68.2	0
68.3	0
68.4	0
68.5	0
68.6	0
68.7	0
68.8	0
68.9	0
69	0
69.1	0
69.2	0
69.3	0
69.4	0
69.5	0
69.6	0
69.7	0
69.8	0
69.9	0
70	0
70.1	0
70.2	0
70.3	0
70.4	0
70.5	0
70.6	0
70.7	0
70.8	0
70.9	0
71	0
71.1	0
71.2	0
71.3	0
71.4	0
71.5	0
71.6	0
71.7	0
71.8	0
71.9	0
72	0
72.1	0
72.2	0
72.3	0
72.4	0
72.5	0
72.6	0
72.7	0
72.8	0
72.9	0
73	0
73.1	0
73.2	0
73.3	0
73.4	0
73.5	0
73.6	0
73.7	0
73.8	0
73.9	0
74	0
74.1	0
74.2	0
74.3	0
74.4	0
74.5	0
74.6	0
74.7	0
74.8	0
74.9	0
75	0
75.1	0
75.2	0
75.3	0
75.4	0
75.5	0
75.6	0
75.7	0
75.8	0
75.9	0
76	0
76.1	0
76.2	0
76.3	0
76.4	0
76.5	0
76.6	0
76.7	0
76.8	0
76.9	0
77	0
77.1	0
77.2	0
77.3	0
77.4	0
77.5	0
77.6	0
77.7	0
77.8	0
77.9	0
78	0
78.1	0
78.2	0
78.3	0
78.4	0
78.5	0
78.6	0
78.7	0
78.8	0
78.9	0
79	0
79.1	0
79.2	0
79.3	0
79.4	0
79.5	0
79.6	0
79.7	0
79.8	0
79.9	0
80	0
80.1	0
80.2	0
80.3	0
80.4	0
80.5	0
80.6	0
80.7	0
80.8	0
80.9	0
81	0
81.1	0
81.2	0
81.3	0
81.4	0
81.5	0
81.6	0
81.7	0
81.8	0
81.9	0
82	0
82.1	0
82.2	0
82.3	0
82.4	0
82.5	0
82.6	0
82.7	0
82.8	0
82.9	0
83	0
83.1	0
83.2	0
83.3	0
83.4	0
83.5	0
83.6	0
83.7	0
83.8	0
83.9	0
84	0
84.1	0
84.2	0
84.3	0
84.4	0
84.5	0
84.6	0
84.7	0
84.8	0
84.9	0
85	0
85.1	0
85.2	0
85.3	0
85.4	0
85.5	0
85.6	0
85.7	0
85.8	0
85.9	0
86	0
86.1	0
86.2	0
86.3	0
86.4	0
86.5	0
86.6	0
86.7	0
86.8	0
86.9	0
87	0
87.1	0
87.2	0
87.3	0
87.4	0
87.5	0
87.6	0
87.7	0
87.8	0
87.9	0
88	0
88.1	0
88.2	0
88.3	0
88.4	0
88.5	0
88.6	0
88.7	0
88.8	0
88.9	0
89	0
89.1	0
89.2	0
89.3	0
89.4	0
89.5	0
89.6	0
89.7	0
89.8	0
89.9	0
90	0
90.1	0
90.2	0
90.3	0
90.4	0
90.5	0
90.6	0
90.7	0
90.8	0
90.9	0
91	0
91.1	0
91.2	0
91.3	0
91.4	0
91.5	0
91.6	0
91.7	0
91.8	0
91.9	0
92	0
92.1	0
92.2	0
92.3	0
92.4	0
92.5	0
92.6	0
92.7	0
92.8	0
92.9	0
93	0
93.1	0
93.2	0
93.3	0
93.4	0
93.5	0
93.6	0
93.7	0
93.8	0
93.9	0
94	0
94.1	0
94.2	0
94.3	0
94.4	0
94.5	0
94.6	0
94.7	0
94.8	0
94.9	0
95	0
95.1	0
95.2	0
95.3	0
95.4	0
95.5	0
95.6	0
95.7	0
95.8	0
95.9	0
96	0
96.1	0
96.2	0
96.3	0
96.4	0
96.5	0
96.6	0
96.7	0
96.8	0
96.9	0
97	0
97.1	0
97.2	0
97.3	0
97.4	0
97.5	0
97.6	0
97.7	0
97.8	0
97.9	0
98	0
98.1	0
98.2	0
98.3	0
98.4	0
98.5	0
98.6	0
98.7	0
98.8	0
98.9	0
99	0
99.1	0
99.2	0
99.3	0
99.4	0
99.5	0
99.6	0
99.7	0
99.8	0
99.9	0
100	0
100.1	0
100.2	0.005
100.3	0.005
100.4	0.005
100.5	0.005
100.6	0.005
100.7	0.005
100.8	0.005
100.9	0.015
101	0.015
101.1	0.015
101.2	0.015
101.3	0.015
101.4	0.015
101.5	0.015
101.6	0.03
101.7	0.035
101.8	0.035
101.9	0.04
102	0.04
102.1	0.055
102.2	0.06
102.3	0.07
102.4	0.075
102.5	0.075
102.6	0.075
102.7	0.075
102.8	0.08
102.9	0.08
103	0.085
103.1	0.09
103.2	0.09
103.3	0.09
103.4	0.105
103.5	0.115
103.6	0.12
103.7	0.12
103.8	0.12
103.9	0.115
104	0.12
104.1	0.135
104.2	0.145
104.3	0.155
104.4	0.155
104.5	0.165
104.6	0.17
104.7	0.17
104.8	0.17
104.9	0.17
105	0.17
105.1	0.17
105.2	0.17
105.3	0.18
105.4	0.185
105.5	0.185
105.6	0.19
105.7	0.19
105.8	0.19
105.9	0.2
106	0.2
106.1	0.2
106.2	0.2
106.3	0.2
106.4	0.2
106.5	0.2
106.6	0.21
106.7	0.215
106.8	0.22
106.9	0.22
107	0.235
107.1	0.235
107.2	0.24
107.3	0.25
107.4	0.255
107.5	0.26
107.6	0.265
107.7	0.27
107.8	0.275
107.9	0.28
108	0.28
108.1	0.29
108.2	0.29
108.3	0.29
108.4	0.295
108.5	0.295
108.6	0.295
108.7	0.3
108.8	0.3
108.9	0.305
109	0.305
109.1	0.305
109.2	0.305
109.3	0.305
109.4	0.305
109.5	0.31
109.6	0.31
109.7	0.31
109.8	0.31
109.9	0.315
110	0.32
110.1	0.32
110.2	0.325
110.3	0.33
110.4	0.335
110.5	0.34
110.6	0.34
110.7	0.345
110.8	0.345
110.9	0.35
111	0.35
111.1	0.355
111.2	0.36
111.3	0.36
111.4	0.36
111.5	0.36
111.6	0.365
111.7	0.37
111.8	0.375
111.9	0.38
112	0.38
112.1	0.38
112.2	0.385
112.3	0.385
112.4	0.385
112.5	0.39
112.6	0.4
112.7	0.4
112.8	0.405
112.9	0.405
113	0.405
113.1	0.41
113.2	0.42
113.3	0.42
113.4	0.42
113.5	0.42
113.6	0.42
113.7	0.42
113.8	0.425
113.9	0.425
114	0.43
114.1	0.43
114.2	0.43
114.3	0.43
114.4	0.43
114.5	0.43
114.6	0.43
114.7	0.43
114.8	0.43
114.9	0.43
115	0.43
115.1	0.43
115.2	0.43
115.3	0.435
115.4	0.445
115.5	0.45
115.6	0.455
115.7	0.46
115.8	0.465
115.9	0.47
116	0.47
116.1	0.47
116.2	0.475
116.3	0.475
116.4	0.475
116.5	0.475
116.6	0.475
116.7	0.475
116.8	0.48
116.9	0.48
117	0.48
117.1	0.48
117.2	0.485
117.3	0.49
117.4	0.49
117.5	0.49
117.6	0.49
117.7	0.49
117.8	0.49
117.9	0.49
118	0.49
118.1	0.485
118.2	0.485
118.3	0.485
118.4	0.495
118.5	0.5
118.6	0.51
118.7	0.51
118.8	0.51
118.9	0.52
119	0.52
119.1	0.525
119.2	0.52
119.3	0.52
119.4	0.52
119.5	0.52
119.6	0.52
119.7	0.52
119.8	0.52
119.9	0.525
120	0.535
120.1	0.54
120.2	0.545
120.3	0.545
120.4	0.54
120.5	0.545
120.6	0.55
120.7	0.55
120.8	0.55
120.9	0.555
121	0.555
121.1	0.555
121.2	0.555
121.3	0.555
121.4	0.555
121.5	0.55
121.6	0.55
121.7	0.56
121.8	0.565
121.9	0.56
122	0.565
122.1	0.56
122.2	0.56
122.3	0.555
122.4	0.555
122.5	0.555
122.6	0.555
122.7	0.555
122.8	0.555
122.9	0.555
123	0.555
123.1	0.555
123.2	0.56
123.3	0.56
123.4	0.56
123.5	0.565
123.6	0.565
123.7	0.565
123.8	0.57
123.9	0.57
124	0.57
124.1	0.57
124.2	0.57
124.3	0.57
124.4	0.57
124.5	0.57
124.6	0.57
124.7	0.57
124.8	0.585
124.9	0.585
125	0.585
125.1	0.585
125.2	0.585
125.3	0.59
125.4	0.595
125.5	0.595
125.6	0.595
125.7	0.595
125.8	0.6
125.9	0.6
126	0.6
126.1	0.605
126.2	0.605
126.3	0.605
126.4	0.605
126.5	0.605
126.6	0.61
126.7	0.605
126.8	0.605
126.9	0.61
127	0.615
127.1	0.615
127.2	0.62
127.3	0.62
127.4	0.62
127.5	0.62
127.6	0.625
127.7	0.625
127.8	0.625
127.9	0.625
128	0.625
128.1	0.625
128.2	0.63
128.3	0.63
128.4	0.63
128.5	0.63
128.6	0.625
128.7	0.625
128.8	0.62
128.9	0.625
129	0.625
129.1	0.625
129.2	0.625
129.3	0.625
129.4	0.625
129.5	0.625
129.6	0.625
129.7	0.635
129.8	0.635
129.9	0.635
130	0.635
130.1	0.635
130.2	0.635
130.3	0.635
130.4	0.635
130.5	0.64
130.6	0.64
130.7	0.64
130.8	0.64
130.9	0.64
131	0.635
131.1	0.635
131.2	0.635
131.3	0.635
131.4	0.625
131.5	0.625
131.6	0.625
131.7	0.625
131.8	0.625
131.9	0.625
132	0.62
132.1	0.625
132.2	0.63
132.3	0.64
132.4	0.64
132.5	0.64
132.6	0.64
132.7	0.64
132.8	0.64
132.9	0.64
133	0.645
133.1	0.645
133.2	0.645
133.3	0.65
133.4	0.645
133.5	0.645
133.6	0.645
133.7	0.65
133.8	0.655
133.9	0.655
134	0.655
134.1	0.655
134.2	0.655
134.3	0.66
134.4	0.66
134.5	0.66
134.6	0.66
134.7	0.665
134.8	0.67
134.9	0.67
135	0.675
135.1	0.675
135.2	0.68
135.3	0.685
135.4	0.685
135.5	0.675
135.6	0.675
135.7	0.675
135.8	0.675
135.9	0.675
136	0.675
136.1	0.675
136.2	0.675
136.3	0.675
136.4	0.675
136.5	0.675
136.6	0.675
136.7	0.675
136.8	0.675
136.9	0.68
137	0.68
137.1	0.68
137.2	0.68
137.3	0.68
137.4	0.68
137.5	0.68
137.6	0.68
137.7	0.68
137.8	0.68
137.9	0.68
138	0.68
138.1	0.685
138.2	0.685
138.3	0.685
138.4	0.68
138.5	0.68
138.6	0.685
138.7	0.69
138.8	0.695
138.9	0.695
139	0.7
139.1	0.7
139.2	0.7
139.3	0.7
139.4	0.705
139.5	0.705
139.6	0.705
139.7	0.705
139.8	0.705
139.9	0.705
140	0.7
140.1	0.7
140.2	0.695
140.3	0.7
140.4	0.7
140.5	0.7
140.6	0.7
140.7	0.7
140.8	0.7
140.9	0.705
141	0.705
141.1	0.705
141.2	0.7
141.3	0.7
141.4	0.7
141.5	0.705
141.6	0.705
141.7	0.71
141.8	0.71
141.9	0.715
142	0.715
142.1	0.715
142.2	0.72
142.3	0.725
142.4	0.725
142.5	0.725
142.6	0.72
142.7	0.72
142.8	0.72
142.9	0.725
143	0.725
143.1	0.725
143.2	0.725
143.3	0.725
143.4	0.725
143.5	0.725
143.6	0.725
143.7	0.72
143.8	0.72
143.9	0.72
144	0.715
144.1	0.715
144.2	0.715
144.3	0.715
144.4	0.715
144.5	0.715
144.6	0.72
144.7	0.72
144.8	0.72
144.9	0.715
145	0.715
145.1	0.71
145.2	0.705
145.3	0.71
145.4	0.71
145.5	0.715
145.6	0.715
145.7	0.71
145.8	0.715
145.9	0.715
146	0.715
146.1	0.715
146.2	0.715
146.3	0.715
146.4	0.72
146.5	0.72
146.6	0.725
146.7	0.725
146.8	0.73
146.9	0.735
147	0.735
147.1	0.735
147.2	0.74
147.3	0.74
147.4	0.74
147.5	0.74
147.6	0.745
147.7	0.745
147.8	0.745
147.9	0.745
148	0.745
148.1	0.745
148.2	0.74
148.3	0.74
148.4	0.74
148.5	0.74
148.6	0.745
148.7	0.745
148.8	0.75
148.9	0.755
149	0.765
149.1	0.77
149.2	0.77
149.3	0.775
149.4	0.775
149.5	0.775
149.6	0.775
149.7	0.775
149.8	0.775
149.9	0.78
150	0.78
150.1	0.78
150.2	0.78
150.3	0.785
150.4	0.785
150.5	0.785
150.6	0.785
150.7	0.785
150.8	0.78
150.9	0.785
151	0.785
151.1	0.785
151.2	0.79
151.3	0.79
151.4	0.79
151.5	0.79
151.6	0.79
151.7	0.79
151.8	0.79
151.9	0.79
152	0.79
152.1	0.79
152.2	0.79
152.3	0.79
152.4	0.79
152.5	0.79
152.6	0.79
152.7	0.79
152.8	0.79
152.9	0.785
153	0.785
153.1	0.785
153.2	0.785
153.3	0.785
153.4	0.785
153.5	0.785
153.6	0.785
153.7	0.785
153.8	0.785
153.9	0.785
154	0.785
154.1	0.785
154.2	0.785
154.3	0.785
154.4	0.785
154.5	0.785
154.6	0.79
154.7	0.79
154.8	0.8
154.9	0.805
155	0.805
155.1	0.805
155.2	0.805
155.3	0.805
155.4	0.81
155.5	0.81
155.6	0.81
155.7	0.805
155.8	0.805
155.9	0.805
156	0.805
156.1	0.805
156.2	0.805
156.3	0.8
156.4	0.8
156.5	0.8
156.6	0.805
156.7	0.805
156.8	0.805
156.9	0.805
157	0.805
157.1	0.805
157.2	0.805
157.3	0.805
157.4	0.8
157.5	0.8
157.6	0.8
157.7	0.805
157.8	0.8
157.9	0.8
158	0.8
158.1	0.8
158.2	0.8
158.3	0.8
158.4	0.8
158.5	0.81
158.6	0.81
158.7	0.82
158.8	0.815
158.9	0.815
159	0.815
159.1	0.815
159.2	0.815
159.3	0.815
159.4	0.815
159.5	0.815
159.6	0.815
159.7	0.815
159.8	0.82
159.9	0.82
160	0.82
160.1	0.82
160.2	0.82
160.3	0.82
160.4	0.825
160.5	0.825
160.6	0.825
160.7	0.825
160.8	0.825
160.9	0.82
161	0.82
161.1	0.82
161.2	0.82
161.3	0.82
161.4	0.815
161.5	0.81
161.6	0.81
161.7	0.81
161.8	0.805
161.9	0.805
162	0.805
162.1	0.805
162.2	0.805
162.3	0.805
162.4	0.805
162.5	0.805
162.6	0.805
162.7	0.805
162.8	0.805
162.9	0.805
163	0.805
163.1	0.805
163.2	0.805
163.3	0.8
163.4	0.8
163.5	0.8
163.6	0.79
163.7	0.79
163.8	0.79
163.9	0.79
164	0.795
164.1	0.79
164.2	0.79
164.3	0.79
164.4	0.78
164.5	0.775
164.6	0.775
164.7	0.775
164.8	0.78
164.9	0.78
165	0.775
165.1	0.775
165.2	0.77
165.3	0.77
165.4	0.77
165.5	0.765
165.6	0.77
165.7	0.77
165.8	0.77
165.9	0.77
166	0.77
166.1	0.775
166.2	0.775
166.3	0.775
166.4	0.78
166.5	0.775
166.6	0.775
166.7	0.775
166.8	0.775
166.9	0.78
167	0.775
167.1	0.775
167.2	0.77
167.3	0.77
167.4	0.77
167.5	0.77
167.6	0.77
167.7	0.775
167.8	0.775
167.9	0.775
168	0.77
168.1	0.77
168.2	0.775
168.3	0.775
168.4	0.77
168.5	0.77
168.6	0.77
168.7	0.77
168.8	0.775
168.9	0.775
169	0.775
169.1	0.775
169.2	0.775
169.3	0.775
169.4	0.77
169.5	0.77
169.6	0.77
169.7	0.775
169.8	0.78
169.9	0.78
170	0.78
170.1	0.78
170.2	0.78
170.3	0.775
170.4	0.775
170.5	0.775
170.6	0.775
170.7	0.775
170.8	0.775
170.9	0.775
171	0.775
171.1	0.78
171.2	0.78
171.3	0.775
171.4	0.775
171.5	0.775
171.6	0.775
171.7	0.775
171.8	0.775
171.9	0.775
172	0.775
172.1	0.775
172.2	0.775
172.3	0.775
172.4	0.78
172.5	0.78
172.6	0.78
172.7	0.78
172.8	0.775
172.9	0.78
173	0.785
173.1	0.785
173.2	0.785
173.3	0.785
173.4	0.785
173.5	0.785
173.6	0.785
173.7	0.785
173.8	0.785
173.9	0.785
174	0.79
174.1	0.79
174.2	0.795
174.3	0.795
174.4	0.795
174.5	0.795
174.6	0.795
174.7	0.795
174.8	0.795
174.9	0.795
175	0.795
175.1	0.795
175.2	0.795
175.3	0.79
175.4	0.79
175.5	0.785
175.6	0.785
175.7	0.785
175.8	0.785
175.9	0.785
176	0.785
176.1	0.785
176.2	0.785
176.3	0.785
176.4	0.785
176.5	0.79
176.6	0.79
176.7	0.79
176.8	0.79
176.9	0.795
177	0.79
177.1	0.795
177.2	0.8
177.3	0.8
177.4	0.8
177.5	0.8
177.6	0.805
177.7	0.805
177.8	0.805
177.9	0.805
178	0.805
178.1	0.805
178.2	0.8
178.3	0.805
178.4	0.805
178.5	0.805
178.6	0.8
178.7	0.8
178.8	0.795
178.9	0.795
179	0.795
179.1	0.795
179.2	0.795
179.3	0.8
179.4	0.8
179.5	0.795
179.6	0.795
179.7	0.795
179.8	0.795
179.9	0.8
180	0.805
180.1	0.805
180.2	0.805
180.3	0.805
180.4	0.8
180.5	0.8
180.6	0.8
180.7	0.8
180.8	0.8
180.9	0.8
181	0.8
181.1	0.805
181.2	0.8
181.3	0.795
181.4	0.795
181.5	0.79
181.6	0.785
181.7	0.78
181.8	0.78
181.9	0.78
182	0.78
182.1	0.785
182.2	0.785
182.3	0.785
182.4	0.795
182.5	0.795
182.6	0.8
182.7	0.8
182.8	0.8
182.9	0.805
183	0.805
183.1	0.805
183.2	0.805
183.3	0.805
183.4	0.8
183.5	0.8
183.6	0.8
183.7	0.805
183.8	0.805
183.9	0.805
184	0.805
184.1	0.805
184.2	0.8
184.3	0.805
184.4	0.8
184.5	0.8
184.6	0.805
184.7	0.8
184.8	0.805
184.9	0.805
185	0.8
185.1	0.8
185.2	0.795
185.3	0.795
185.4	0.8
185.5	0.8
185.6	0.8
185.7	0.8
185.8	0.8
185.9	0.8
186	0.8
186.1	0.8
186.2	0.805
186.3	0.805
186.4	0.8
186.5	0.79
186.6	0.795
186.7	0.795
186.8	0.79
186.9	0.79
187	0.79
187.1	0.785
187.2	0.78
187.3	0.78
187.4	0.78
187.5	0.78
187.6	0.785
187.7	0.785
187.8	0.785
187.9	0.785
188	0.79
188.1	0.79
188.2	0.79
188.3	0.795
188.4	0.8
188.5	0.8
188.6	0.8
188.7	0.8
188.8	0.8
188.9	0.795
189	0.795
189.1	0.795
189.2	0.795
189.3	0.79
189.4	0.795
189.5	0.79
189.6	0.79
189.7	0.78
189.8	0.78
189.9	0.785
190	0.785
190.1	0.785
190.2	0.78
190.3	0.78
190.4	0.78
190.5	0.78
190.6	0.785
190.7	0.79
190.8	0.79
190.9	0.795
191	0.8
191.1	0.795
191.2	0.795
191.3	0.795
191.4	0.795
191.5	0.795
191.6	0.795
191.7	0.795
191.8	0.795
191.9	0.79
192	0.78
192.1	0.775
192.2	0.775
192.3	0.775
192.4	0.775
192.5	0.78
192.6	0.78
192.7	0.78
192.8	0.78
192.9	0.78
193	0.785
193.1	0.785
193.2	0.785
193.3	0.785
193.4	0.78
193.5	0.775
193.6	0.775
193.7	0.775
193.8	0.78
193.9	0.78
194	0.78
194.1	0.78
194.2	0.775
194.3	0.775
194.4	0.78
194.5	0.775
194.6	0.775
194.7	0.775
194.8	0.775
194.9	0.775
195	0.78
195.1	0.78
195.2	0.78
195.3	0.78
195.4	0.79
195.5	0.79
195.6	0.79
195.7	0.785
195.8	0.785
195.9	0.785
196	0.785
196.1	0.785
196.2	0.785
196.3	0.785
196.4	0.785
196.5	0.785
196.6	0.785
196.7	0.785
196.8	0.785
196.9	0.785
197	0.785
197.1	0.78
197.2	0.78
197.3	0.78
197.4	0.78
197.5	0.785
197.6	0.785
197.7	0.785
197.8	0.79
197.9	0.79
198	0.79
198.1	0.79
198.2	0.79
198.3	0.79
198.4	0.795
198.5	0.795
198.6	0.795
198.7	0.795
198.8	0.795
198.9	0.795
199	0.795
199.1	0.795
199.2	0.795
199.3	0.8
199.4	0.8
199.5	0.8
199.6	0.8
199.7	0.8
199.8	0.8
199.9	0.8
200	0.8
[truncated: 14,000 more rows]
