# Supplementary material for: Bayesian inference of kinetic schemes for ion channels by Kalman filtering
Source: eLife journal article supplement (doi:10.7554/elife.62714), 2022-05-04
Supplement: fig4-data4 [file 1_Sim_N_400_Fluor_MW_8M.xlsx]

## Sheet: 8 M
0.1	0
0.2	0
0.3	0
0.4	0
0.5	0
0.6	0
0.7	0
0.8	0
0.9	0
1	0
1.1	0
1.2	0
1.3	0
1.4	0
1.5	0
1.6	0
1.7	0
1.8	0
1.9	0
2	0
2.1	0
2.2	0
2.3	0
2.4	0
2.5	0
2.6	0
2.7	0
2.8	0
2.9	0
3	0
3.1	0
3.2	0
3.3	0
3.4	0
3.5	0
3.6	0
3.7	0
3.8	0
3.9	0
4	0
4.1	0
4.2	0
4.3	0
4.4	0
4.5	0
4.6	0
4.7	0
4.8	0
4.9	0
5	0
5.1	0
5.2	0
5.3	0
5.4	0
5.5	0
5.6	0
5.7	0
5.8	0
5.9	0
6	0
6.1	0
6.2	0
6.3	0
6.4	0
6.5	0
6.6	0
6.7	0
6.8	0
6.9	0
7	0
7.1	0
7.2	0
7.3	0
7.4	0
7.5	0
7.6	0
7.7	0
7.8	0
7.9	0
8	0
8.1	0
8.2	0
8.3	0
8.4	0
8.5	0
8.6	0
8.7	0
8.8	0
8.9	0
9	0
9.1	0
9.2	0
9.3	0
9.4	0
9.5	0
9.6	0
9.7	0
9.8	0
9.9	0
10	0
10.1	0
10.2	0
10.3	0
10.4	0
10.5	0
10.6	0
10.7	0
10.8	0
10.9	0
11	0
11.1	0
11.2	0
11.3	0
11.4	0
11.5	0
11.6	0
11.7	0
11.8	0
11.9	0
12	0
12.1	0
12.2	0
12.3	0
12.4	0
12.5	0
12.6	0
12.7	0
12.8	0
12.9	0
13	0
13.1	0
13.2	0
13.3	0
13.4	0
13.5	0
13.6	0
13.7	0
13.8	0
13.9	0
14	0
14.1	0
14.2	0
14.3	0
14.4	0
14.5	0
14.6	0
14.7	0
14.8	0
14.9	0
15	0
15.1	0
15.2	0
15.3	0
15.4	0
15.5	0
15.6	0
15.7	0
15.8	0
15.9	0
16	0
16.1	0
16.2	0
16.3	0
16.4	0
16.5	0
16.6	0
16.7	0
16.8	0
16.9	0
17	0
17.1	0
17.2	0
17.3	0
17.4	0
17.5	0
17.6	0
17.7	0
17.8	0
17.9	0
18	0
18.1	0
18.2	0
18.3	0
18.4	0
18.5	0
18.6	0
18.7	0
18.8	0
18.9	0
19	0
19.1	0
19.2	0
19.3	0
19.4	0
19.5	0
19.6	0
19.7	0
19.8	0
19.9	0
20	0
20.1	0
20.2	0
20.3	0
20.4	0
20.5	0
20.6	0
20.7	0
20.8	0
20.9	0
21	0
21.1	0
21.2	0
21.3	0
21.4	0
21.5	0
21.6	0
21.7	0
21.8	0
21.9	0
22	0
22.1	0
22.2	0
22.3	0
22.4	0
22.5	0
22.6	0
22.7	0
22.8	0
22.9	0
23	0
23.1	0
23.2	0
23.3	0
23.4	0
23.5	0
23.6	0
23.7	0
23.8	0
23.9	0
24	0
24.1	0
24.2	0
24.3	0
24.4	0
24.5	0
24.6	0
24.7	0
24.8	0
24.9	0
25	0
25.1	0
25.2	0
25.3	0
25.4	0
25.5	0
25.6	0
25.7	0
25.8	0
25.9	0
26	0
26.1	0
26.2	0
26.3	0
26.4	0
26.5	0
26.6	0
26.7	0
26.8	0
26.9	0
27	0
27.1	0
27.2	0
27.3	0
27.4	0
27.5	0
27.6	0
27.7	0
27.8	0
27.9	0
28	0
28.1	0
28.2	0
28.3	0
28.4	0
28.5	0
28.6	0
28.7	0
28.8	0
28.9	0
29	0
29.1	0
29.2	0
29.3	0
29.4	0
29.5	0
29.6	0
29.7	0
29.8	0
29.9	0
30	0
30.1	0
30.2	0
30.3	0
30.4	0
30.5	0
30.6	0
30.7	0
30.8	0
30.9	0
31	0
31.1	0
31.2	0
31.3	0
31.4	0
31.5	0
31.6	0
31.7	0
31.8	0
31.9	0
32	0
32.1	0
32.2	0
32.3	0
32.4	0
32.5	0
32.6	0
32.7	0
32.8	0
32.9	0
33	0
33.1	0
33.2	0
33.3	0
33.4	0
33.5	0
33.6	0
33.7	0
33.8	0
33.9	0
34	0
34.1	0
34.2	0
34.3	0
34.4	0
34.5	0
34.6	0
34.7	0
34.8	0
34.9	0
35	0
35.1	0
35.2	0
35.3	0
35.4	0
35.5	0
35.6	0
35.7	0
35.8	0
35.9	0
36	0
36.1	0
36.2	0
36.3	0
36.4	0
36.5	0
36.6	0
36.7	0
36.8	0
36.9	0
37	0
37.1	0
37.2	0
37.3	0
37.4	0
37.5	0
37.6	0
37.7	0
37.8	0
37.9	0
38	0
38.1	0
38.2	0
38.3	0
38.4	0
38.5	0
38.6	0
38.7	0
38.8	0
38.9	0
39	0
39.1	0
39.2	0
39.3	0
39.4	0
39.5	0
39.6	0
39.7	0
39.8	0
39.9	0
40	0
40.1	0
40.2	0
40.3	0
40.4	0
40.5	0
40.6	0
40.7	0
40.8	0
40.9	0
41	0
41.1	0
41.2	0
41.3	0
41.4	0
41.5	0
41.6	0
41.7	0
41.8	0
41.9	0
42	0
42.1	0
42.2	0
42.3	0
42.4	0
42.5	0
42.6	0
42.7	0
42.8	0
42.9	0
43	0
43.1	0
43.2	0
43.3	0
43.4	0
43.5	0
43.6	0
43.7	0
43.8	0
43.9	0
44	0
44.1	0
44.2	0
44.3	0
44.4	0
44.5	0
44.6	0
44.7	0
44.8	0
44.9	0
45	0
45.1	0
45.2	0
45.3	0
45.4	0
45.5	0
45.6	0
45.7	0
45.8	0
45.9	0
46	0
46.1	0
46.2	0
46.3	0
46.4	0
46.5	0
46.6	0
46.7	0
46.8	0
46.9	0
47	0
47.1	0
47.2	0
47.3	0
47.4	0
47.5	0
47.6	0
47.7	0
47.8	0
47.9	0
48	0
48.1	0
48.2	0
48.3	0
48.4	0
48.5	0
48.6	0
48.7	0
48.8	0
48.9	0
49	0
49.1	0
49.2	0
49.3	0
49.4	0
49.5	0
49.6	0
49.7	0
49.8	0
49.9	0
50	0
50.1	0
50.2	0
50.3	0
50.4	0
50.5	0
50.6	0
50.7	0
50.8	0
50.9	0
51	0
51.1	0
51.2	0
51.3	0
51.4	0
51.5	0
51.6	0
51.7	0
51.8	0
51.9	0
52	0
52.1	0
52.2	0
52.3	0
52.4	0
52.5	0
52.6	0
52.7	0
52.8	0
52.9	0
53	0
53.1	0
53.2	0
53.3	0
53.4	0
53.5	0
53.6	0
53.7	0
53.8	0
53.9	0
54	0
54.1	0
54.2	0
54.3	0
54.4	0
54.5	0
54.6	0
54.7	0
54.8	0
54.9	0
55	0
55.1	0
55.2	0
55.3	0
55.4	0
55.5	0
55.6	0
55.7	0
55.8	0
55.9	0
56	0
56.1	0
56.2	0
56.3	0
56.4	0
56.5	0
56.6	0
56.7	0
56.8	0
56.9	0
57	0
57.1	0
57.2	0
57.3	0
57.4	0
57.5	0
57.6	0
57.7	0
57.8	0
57.9	0
58	0
58.1	0
58.2	0
58.3	0
58.4	0
58.5	0
58.6	0
58.7	0
58.8	0
58.9	0
59	0
59.1	0
59.2	0
59.3	0
59.4	0
59.5	0
59.6	0
59.7	0
59.8	0
59.9	0
60	0
60.1	0
60.2	0
60.3	0
60.4	0
60.5	0
60.6	0
60.7	0
60.8	0
60.9	0
61	0
61.1	0
61.2	0
61.3	0
61.4	0
61.5	0
61.6	0
61.7	0
61.8	0
61.9	0
62	0
62.1	0
62.2	0
62.3	0
62.4	0
62.5	0
62.6	0
62.7	0
62.8	0
62.9	0
63	0
63.1	0
63.2	0
63.3	0
63.4	0
63.5	0
63.6	0
63.7	0
63.8	0
63.9	0
64	0
64.1	0
64.2	0
64.3	0
64.4	0
64.5	0
64.6	0
64.7	0
64.8	0
64.9	0
65	0
65.1	0
65.2	0
65.3	0
65.4	0
65.5	0
65.6	0
65.7	0
65.8	0
65.9	0
66	0
66.1	0
66.2	0
66.3	0
66.4	0
66.5	0
66.6	0
66.7	0
66.8	0
66.9	0
67	0
67.1	0
67.2	0
67.3	0
67.4	0
67.5	0
67.6	0
67.7	0
67.8	0
67.9	0
68	0
68.1	0
68.2	0
68.3	0
68.4	0
68.5	0
68.6	0
68.7	0
68.8	0
68.9	0
69	0
69.1	0
69.2	0
69.3	0
69.4	0
69.5	0
69.6	0
69.7	0
69.8	0
69.9	0
70	0
70.1	0
70.2	0
70.3	0
70.4	0
70.5	0
70.6	0
70.7	0
70.8	0
70.9	0
71	0
71.1	0
71.2	0
71.3	0
71.4	0
71.5	0
71.6	0
71.7	0
71.8	0
71.9	0
72	0
72.1	0
72.2	0
72.3	0
72.4	0
72.5	0
72.6	0
72.7	0
72.8	0
72.9	0
73	0
73.1	0
73.2	0
73.3	0
73.4	0
73.5	0
73.6	0
73.7	0
73.8	0
73.9	0
74	0
74.1	0
74.2	0
74.3	0
74.4	0
74.5	0
74.6	0
74.7	0
74.8	0
74.9	0
75	0
75.1	0
75.2	0
75.3	0
75.4	0
75.5	0
75.6	0
75.7	0
75.8	0
75.9	0
76	0
76.1	0
76.2	0
76.3	0
76.4	0
76.5	0
76.6	0
76.7	0
76.8	0
76.9	0
77	0
77.1	0
77.2	0
77.3	0
77.4	0
77.5	0
77.6	0
77.7	0
77.8	0
77.9	0
78	0
78.1	0
78.2	0
78.3	0
78.4	0
78.5	0
78.6	0
78.7	0
78.8	0
78.9	0
79	0
79.1	0
79.2	0
79.3	0
79.4	0
79.5	0
79.6	0
79.7	0
79.8	0
79.9	0
80	0
80.1	0
80.2	0
80.3	0
80.4	0
80.5	0
80.6	0
80.7	0
80.8	0
80.9	0
81	0
81.1	0
81.2	0
81.3	0
81.4	0
81.5	0
81.6	0
81.7	0
81.8	0
81.9	0
82	0
82.1	0
82.2	0
82.3	0
82.4	0
82.5	0
82.6	0
82.7	0
82.8	0
82.9	0
83	0
83.1	0
83.2	0
83.3	0
83.4	0
83.5	0
83.6	0
83.7	0
83.8	0
83.9	0
84	0
84.1	0
84.2	0
84.3	0
84.4	0
84.5	0
84.6	0
84.7	0
84.8	0
84.9	0
85	0
85.1	0
85.2	0
85.3	0
85.4	0
85.5	0
85.6	0
85.7	0
85.8	0
85.9	0
86	0
86.1	0
86.2	0
86.3	0
86.4	0
86.5	0
86.6	0
86.7	0
86.8	0
86.9	0
87	0
87.1	0
87.2	0
87.3	0
87.4	0
87.5	0
87.6	0
87.7	0
87.8	0
87.9	0
88	0
88.1	0
88.2	0
88.3	0
88.4	0
88.5	0
88.6	0
88.7	0
88.8	0
88.9	0
89	0
89.1	0
89.2	0
89.3	0
89.4	0
89.5	0
89.6	0
89.7	0
89.8	0
89.9	0
90	0
90.1	0
90.2	0
90.3	0
90.4	0
90.5	0
90.6	0
90.7	0
90.8	0
90.9	0
91	0
91.1	0
91.2	0
91.3	0
91.4	0
91.5	0
91.6	0
91.7	0
91.8	0
91.9	0
92	0
92.1	0
92.2	0
92.3	0
92.4	0
92.5	0
92.6	0
92.7	0
92.8	0
92.9	0
93	0
93.1	0
93.2	0
93.3	0
93.4	0
93.5	0
93.6	0
93.7	0
93.8	0
93.9	0
94	0
94.1	0
94.2	0
94.3	0
94.4	0
94.5	0
94.6	0
94.7	0
94.8	0
94.9	0
95	0
95.1	0
95.2	0
95.3	0
95.4	0
95.5	0
95.6	0
95.7	0
95.8	0
95.9	0
96	0
96.1	0
96.2	0
96.3	0
96.4	0
96.5	0
96.6	0
96.7	0
96.8	0
96.9	0
97	0
97.1	0
97.2	0
97.3	0
97.4	0
97.5	0
97.6	0
97.7	0
97.8	0
97.9	0
98	0
98.1	0
98.2	0
98.3	0
98.4	0
98.5	0
98.6	0
98.7	0
98.8	0
98.9	0
99	0
99.1	0
99.2	0
99.3	0
99.4	0
99.5	0
99.6	0
99.7	0
99.8	0
99.9	0
100	0
100.1	0.3275
100.2	0.52125
100.3	0.6325
100.4	0.7225
100.5	0.7725
100.6	0.8075
100.7	0.82375
100.8	0.84125
100.9	0.85625
101	0.8625
101.1	0.87125
101.2	0.88375
101.3	0.8925
101.4	0.90625
101.5	0.90625
101.6	0.9075
101.7	0.90625
101.8	0.9075
101.9	0.905
102	0.9175
102.1	0.92
102.2	0.9275
102.3	0.9375
102.4	0.92875
102.5	0.935
102.6	0.935
102.7	0.92875
102.8	0.935
102.9	0.9275
103	0.9275
103.1	0.925
103.2	0.93125
103.3	0.935
103.4	0.9275
103.5	0.925
103.6	0.9225
103.7	0.9225
103.8	0.92125
103.9	0.915
104	0.92375
104.1	0.92125
104.2	0.9175
104.3	0.925
104.4	0.93125
104.5	0.9225
104.6	0.915
104.7	0.91
104.8	0.92125
104.9	0.9225
105	0.9275
105.1	0.91125
105.2	0.91375
105.3	0.93125
105.4	0.9325
105.5	0.93
105.6	0.94375
105.7	0.94125
105.8	0.94875
105.9	0.95
106	0.9425
106.1	0.94375
106.2	0.9425
106.3	0.93
106.4	0.92875
106.5	0.9325
106.6	0.93375
106.7	0.93125
106.8	0.9325
106.9	0.93625
107	0.93375
107.1	0.93875
107.2	0.94125
107.3	0.94125
107.4	0.93625
107.5	0.9275
107.6	0.92875
107.7	0.93125
107.8	0.92625
107.9	0.9325
108	0.9375
108.1	0.935
108.2	0.94625
108.3	0.94375
108.4	0.94125
108.5	0.9375
108.6	0.9225
108.7	0.93375
108.8	0.9325
108.9	0.93875
109	0.9325
109.1	0.93875
109.2	0.93625
109.3	0.93125
109.4	0.93125
109.5	0.945
109.6	0.94625
109.7	0.9525
109.8	0.945
109.9	0.95
110	0.955
110.1	0.9625
110.2	0.96125
110.3	0.97125
110.4	0.96375
110.5	0.9475
110.6	0.95125
110.7	0.94875
110.8	0.94375
110.9	0.95375
111	0.955
111.1	0.94875
111.2	0.9425
111.3	0.94125
111.4	0.93875
111.5	0.93875
111.6	0.945
111.7	0.94375
111.8	0.94125
111.9	0.9375
112	0.95375
112.1	0.95
112.2	0.94625
112.3	0.94
112.4	0.94125
112.5	0.95125
112.6	0.945
112.7	0.9475
112.8	0.9375
112.9	0.94375
113	0.96125
113.1	0.95875
113.2	0.9625
113.3	0.96125
113.4	0.96375
113.5	0.96125
113.6	0.96125
113.7	0.94875
113.8	0.94375
113.9	0.945
114	0.94125
114.1	0.94
114.2	0.94375
114.3	0.94
114.4	0.94375
114.5	0.94625
114.6	0.94625
114.7	0.95375
114.8	0.95
114.9	0.955
115	0.955
115.1	0.95875
115.2	0.96
115.3	0.955
115.4	0.9525
115.5	0.95
115.6	0.94375
115.7	0.94375
115.8	0.94375
115.9	0.955
116	0.95375
116.1	0.95875
116.2	0.96
116.3	0.96
116.4	0.95375
116.5	0.95625
116.6	0.95625
116.7	0.955
116.8	0.9475
116.9	0.9425
117	0.94625
117.1	0.945
117.2	0.945
117.3	0.94125
117.4	0.95
117.5	0.95375
117.6	0.95
117.7	0.95375
117.8	0.9625
117.9	0.96625
118	0.9675
118.1	0.9725
118.2	0.9675
118.3	0.9725
118.4	0.9625
118.5	0.9675
118.6	0.9675
118.7	0.9675
118.8	0.96375
118.9	0.955
119	0.95875
119.1	0.96375
119.2	0.9625
119.3	0.9625
119.4	0.96375
119.5	0.95625
119.6	0.9525
119.7	0.96375
119.8	0.9725
119.9	0.965
120	0.965
120.1	0.9575
120.2	0.955
120.3	0.95125
120.4	0.945
120.5	0.95
120.6	0.945
120.7	0.95375
120.8	0.94375
120.9	0.9425
121	0.9475
121.1	0.94875
121.2	0.96375
121.3	0.965
121.4	0.96
121.5	0.96
121.6	0.965
121.7	0.96875
121.8	0.97
121.9	0.96875
122	0.96875
122.1	0.97
122.2	0.97
122.3	0.97625
122.4	0.9725
122.5	0.96625
122.6	0.96875
122.7	0.9675
122.8	0.9725
122.9	0.975
123	0.965
123.1	0.96
123.2	0.9625
123.3	0.9625
123.4	0.965
123.5	0.97
123.6	0.95875
123.7	0.95625
123.8	0.96
123.9	0.96375
124	0.96625
124.1	0.96125
124.2	0.96
124.3	0.96
124.4	0.955
124.5	0.95375
124.6	0.9575
124.7	0.95375
124.8	0.955
124.9	0.96
125	0.95875
125.1	0.965
125.2	0.9575
125.3	0.95125
125.4	0.95875
125.5	0.9575
125.6	0.965
125.7	0.9675
125.8	0.96625
125.9	0.97
126	0.96375
126.1	0.96625
126.2	0.965
126.3	0.96875
126.4	0.965
126.5	0.96
126.6	0.95375
126.7	0.95375
126.8	0.9575
126.9	0.96125
127	0.96375
127.1	0.96
127.2	0.9625
127.3	0.9575
127.4	0.96
127.5	0.96375
127.6	0.96375
127.7	0.96125
127.8	0.965
127.9	0.9625
128	0.97125
128.1	0.96375
128.2	0.96625
128.3	0.9675
128.4	0.9675
128.5	0.96875
128.6	0.96625
128.7	0.9725
128.8	0.975
128.9	0.97125
129	0.9675
129.1	0.95875
129.2	0.95625
129.3	0.96375
129.4	0.9675
129.5	0.9725
129.6	0.97875
129.7	0.9825
129.8	0.975
129.9	0.98
130	0.98125
130.1	0.9825
130.2	0.97125
130.3	0.97
130.4	0.97
130.5	0.9725
130.6	0.97375
130.7	0.9725
130.8	0.9775
130.9	0.96875
131	0.965
131.1	0.9625
131.2	0.9675
131.3	0.965
131.4	0.96375
131.5	0.9675
131.6	0.96625
131.7	0.96625
131.8	0.9575
131.9	0.965
132	0.97
132.1	0.96375
132.2	0.96875
132.3	0.96375
132.4	0.96375
132.5	0.96875
132.6	0.96625
132.7	0.96875
132.8	0.96625
132.9	0.965
133	0.96625
133.1	0.965
133.2	0.965
133.3	0.96375
133.4	0.96375
133.5	0.965
133.6	0.9675
133.7	0.96625
133.8	0.9625
133.9	0.965
134	0.965
134.1	0.96625
134.2	0.96875
134.3	0.96625
134.4	0.965
134.5	0.97125
134.6	0.97125
134.7	0.9725
134.8	0.97125
134.9	0.9725
135	0.9775
135.1	0.98
135.2	0.9775
135.3	0.97625
135.4	0.98
135.5	0.97375
135.6	0.9775
135.7	0.98
135.8	0.9775
135.9	0.97625
136	0.97875
136.1	0.97375
136.2	0.96875
136.3	0.96
136.4	0.9625
136.5	0.9575
136.6	0.97
136.7	0.975
136.8	0.9725
136.9	0.975
137	0.9625
137.1	0.9675
137.2	0.97375
137.3	0.96875
137.4	0.9725
137.5	0.96375
137.6	0.96875
137.7	0.96375
137.8	0.97
137.9	0.975
138	0.9725
138.1	0.97625
138.2	0.98
138.3	0.98125
138.4	0.98
138.5	0.9775
138.6	0.975
138.7	0.97375
138.8	0.9725
138.9	0.97375
139	0.975
139.1	0.975
139.2	0.97625
139.3	0.975
139.4	0.975
139.5	0.9775
139.6	0.97375
139.7	0.9725
139.8	0.97875
139.9	0.97625
140	0.97875
140.1	0.97625
140.2	0.9725
140.3	0.97125
140.4	0.975
140.5	0.975
140.6	0.97375
140.7	0.98
140.8	0.97375
140.9	0.97
141	0.97125
141.1	0.9725
141.2	0.97625
141.3	0.97625
141.4	0.97875
141.5	0.98
141.6	0.98125
141.7	0.97875
141.8	0.97875
141.9	0.97875
142	0.98
142.1	0.9825
142.2	0.97125
142.3	0.975
142.4	0.975
142.5	0.975
142.6	0.97125
142.7	0.97125
142.8	0.96625
142.9	0.97
143	0.96875
143.1	0.97375
143.2	0.9775
143.3	0.9725
143.4	0.97
143.5	0.97375
143.6	0.9675
143.7	0.97
143.8	0.96375
143.9	0.9725
144	0.97375
144.1	0.97625
144.2	0.97625
144.3	0.9775
144.4	0.97875
144.5	0.98125
144.6	0.975
144.7	0.9725
144.8	0.975
144.9	0.97375
145	0.97625
145.1	0.975
145.2	0.97375
145.3	0.9775
145.4	0.9725
145.5	0.96875
145.6	0.96875
145.7	0.97125
145.8	0.9775
145.9	0.9725
146	0.975
146.1	0.975
146.2	0.97375
146.3	0.9675
146.4	0.96875
146.5	0.965
146.6	0.9675
146.7	0.96625
146.8	0.97
146.9	0.97125
147	0.9725
147.1	0.97625
147.2	0.97125
147.3	0.975
147.4	0.97375
147.5	0.9825
147.6	0.985
147.7	0.9875
147.8	0.985
147.9	0.985
148	0.9825
148.1	0.985
148.2	0.9875
148.3	0.98375
148.4	0.98
148.5	0.98125
148.6	0.9825
148.7	0.98125
148.8	0.98
148.9	0.98
149	0.97875
149.1	0.9775
149.2	0.98125
149.3	0.98125
149.4	0.98125
149.5	0.9775
149.6	0.98
149.7	0.98375
149.8	0.98
149.9	0.98125
150	0.97625
150.1	0.98125
150.2	0.9825
150.3	0.98375
150.4	0.98
150.5	0.9775
150.6	0.98125
150.7	0.98375
150.8	0.98375
150.9	0.98125
151	0.9825
151.1	0.98125
151.2	0.98125
151.3	0.9825
151.4	0.98375
151.5	0.98125
151.6	0.985
151.7	0.98875
151.8	0.99
151.9	0.98625
152	0.98625
152.1	0.98625
152.2	0.98625
152.3	0.985
152.4	0.98
152.5	0.975
152.6	0.9725
152.7	0.97625
152.8	0.9725
152.9	0.975
153	0.975
153.1	0.97625
153.2	0.9825
153.3	0.98
153.4	0.9825
153.5	0.98375
153.6	0.98625
153.7	0.98
153.8	0.98375
153.9	0.98125
154	0.9775
154.1	0.97375
154.2	0.97125
154.3	0.97125
154.4	0.9725
154.5	0.9775
154.6	0.97625
154.7	0.98
154.8	0.9825
154.9	0.9825
155	0.98375
155.1	0.98375
155.2	0.98375
155.3	0.98125
155.4	0.9775
155.5	0.975
155.6	0.97625
155.7	0.97875
155.8	0.97875
155.9	0.98125
156	0.975
156.1	0.9825
156.2	0.98125
156.3	0.98125
156.4	0.98
156.5	0.9775
156.6	0.98
156.7	0.975
156.8	0.97625
156.9	0.9775
157	0.9775
157.1	0.98375
157.2	0.98
157.3	0.98125
157.4	0.9825
157.5	0.9825
157.6	0.97875
157.7	0.9725
157.8	0.97625
157.9	0.98
158	0.9825
158.1	0.9825
158.2	0.98625
158.3	0.9875
158.4	0.98875
158.5	0.98125
158.6	0.98125
158.7	0.98
158.8	0.9825
158.9	0.98
159	0.9825
159.1	0.98375
159.2	0.985
159.3	0.98375
159.4	0.97625
159.5	0.97375
159.6	0.98375
159.7	0.9825
159.8	0.98375
159.9	0.97875
160	0.97875
160.1	0.98375
160.2	0.9825
160.3	0.9825
160.4	0.9825
160.5	0.98625
160.6	0.98
160.7	0.9775
160.8	0.97875
160.9	0.9825
161	0.97875
161.1	0.97875
161.2	0.98
161.3	0.98
161.4	0.9775
161.5	0.97625
161.6	0.97125
161.7	0.9725
161.8	0.96875
161.9	0.9725
162	0.97375
162.1	0.975
162.2	0.975
162.3	0.97875
162.4	0.98
162.5	0.9825
162.6	0.98
162.7	0.9825
162.8	0.985
162.9	0.98375
163	0.9825
163.1	0.98125
163.2	0.97875
163.3	0.98375
163.4	0.98625
163.5	0.98375
163.6	0.98
163.7	0.9875
163.8	0.9875
163.9	0.9825
164	0.985
164.1	0.98125
164.2	0.985
164.3	0.9825
164.4	0.97875
164.5	0.97625
164.6	0.975
164.7	0.9725
164.8	0.97125
164.9	0.97625
165	0.97625
165.1	0.97375
165.2	0.975
165.3	0.97625
165.4	0.98125
165.5	0.985
165.6	0.98
165.7	0.97875
165.8	0.9825
165.9	0.9825
166	0.98625
166.1	0.9825
166.2	0.98125
166.3	0.9775
166.4	0.98125
166.5	0.9775
166.6	0.97
166.7	0.97375
166.8	0.98
166.9	0.98125
167	0.97875
167.1	0.97375
167.2	0.975
167.3	0.98375
167.4	0.98625
167.5	0.98125
167.6	0.98
167.7	0.97875
167.8	0.9775
167.9	0.9775
168	0.9825
168.1	0.97875
168.2	0.98
168.3	0.98
168.4	0.98125
168.5	0.97625
168.6	0.97875
168.7	0.98
168.8	0.98375
168.9	0.9825
169	0.97875
169.1	0.9825
169.2	0.98375
169.3	0.98375
169.4	0.98375
169.5	0.98375
169.6	0.9825
169.7	0.98875
169.8	0.98375
169.9	0.97625
170	0.97625
170.1	0.9725
170.2	0.9725
170.3	0.97375
170.4	0.97875
170.5	0.97875
170.6	0.98125
170.7	0.9825
170.8	0.98125
170.9	0.98125
171	0.98
171.1	0.975
171.2	0.9725
171.3	0.98
171.4	0.98125
171.5	0.9825
171.6	0.98
171.7	0.98125
171.8	0.98
171.9	0.98
172	0.98125
172.1	0.97875
172.2	0.9825
172.3	0.98125
172.4	0.98375
172.5	0.98125
172.6	0.97875
172.7	0.985
172.8	0.98375
172.9	0.9775
173	0.97625
173.1	0.97875
173.2	0.975
173.3	0.97125
173.4	0.9725
173.5	0.9775
173.6	0.98125
173.7	0.98
173.8	0.98
173.9	0.98
174	0.985
174.1	0.98125
174.2	0.97875
174.3	0.98125
174.4	0.9825
174.5	0.98125
174.6	0.9875
174.7	0.985
174.8	0.9825
174.9	0.98
175	0.975
175.1	0.975
175.2	0.975
175.3	0.98
175.4	0.98
175.5	0.98
175.6	0.98
175.7	0.98375
175.8	0.98875
175.9	0.9875
176	0.9825
176.1	0.98
176.2	0.97375
176.3	0.97375
176.4	0.97625
176.5	0.9775
176.6	0.9775
176.7	0.97625
176.8	0.975
176.9	0.97125
177	0.9675
177.1	0.97
177.2	0.9775
177.3	0.97875
177.4	0.9775
177.5	0.97625
177.6	0.97625
177.7	0.97625
177.8	0.97375
177.9	0.9725
178	0.97625
178.1	0.9725
178.2	0.97375
178.3	0.9775
178.4	0.9825
178.5	0.975
178.6	0.97625
178.7	0.98
178.8	0.97875
178.9	0.98
179	0.975
179.1	0.9675
179.2	0.97125
179.3	0.97375
179.4	0.98
179.5	0.9775
179.6	0.97625
179.7	0.97125
179.8	0.9725
179.9	0.98
180	0.98
180.1	0.97875
180.2	0.98125
180.3	0.97875
180.4	0.9775
180.5	0.98
180.6	0.97875
180.7	0.98125
180.8	0.97625
180.9	0.9825
181	0.98
181.1	0.97875
181.2	0.9725
181.3	0.9725
181.4	0.97125
181.5	0.9725
181.6	0.975
181.7	0.98125
181.8	0.9775
181.9	0.97625
182	0.975
182.1	0.98
182.2	0.9775
182.3	0.97625
182.4	0.9775
182.5	0.97625
182.6	0.975
182.7	0.97875
182.8	0.985
182.9	0.98
183	0.98
183.1	0.9825
183.2	0.975
183.3	0.97375
183.4	0.97875
183.5	0.97625
183.6	0.97875
183.7	0.9725
183.8	0.9775
183.9	0.97875
184	0.98625
184.1	0.985
184.2	0.9875
184.3	0.9875
184.4	0.985
184.5	0.9875
184.6	0.98625
184.7	0.985
184.8	0.98625
184.9	0.98375
185	0.9825
185.1	0.97625
185.2	0.975
185.3	0.9725
185.4	0.9675
185.5	0.96625
185.6	0.965
185.7	0.97
185.8	0.96875
185.9	0.9725
186	0.97375
186.1	0.9775
186.2	0.9825
186.3	0.98125
186.4	0.9825
186.5	0.985
186.6	0.97875
186.7	0.985
186.8	0.98125
186.9	0.98125
187	0.9825
187.1	0.97875
187.2	0.97625
187.3	0.97375
187.4	0.97375
187.5	0.97625
187.6	0.9775
187.7	0.97375
187.8	0.9725
187.9	0.97625
188	0.9775
188.1	0.9775
188.2	0.97625
188.3	0.98
188.4	0.98375
188.5	0.98125
188.6	0.9875
188.7	0.99125
188.8	0.995
188.9	0.9925
189	0.99
189.1	0.99125
189.2	0.9825
189.3	0.97875
189.4	0.9825
189.5	0.9775
189.6	0.9775
189.7	0.9775
189.8	0.98375
189.9	0.98125
190	0.985
190.1	0.98375
190.2	0.985
190.3	0.98625
190.4	0.98375
190.5	0.985
190.6	0.98625
190.7	0.98625
190.8	0.98875
190.9	0.9825
191	0.97875
191.1	0.97625
191.2	0.9775
191.3	0.97875
191.4	0.9775
191.5	0.975
191.6	0.98125
191.7	0.97875
191.8	0.975
191.9	0.97125
192	0.97625
192.1	0.975
192.2	0.9775
192.3	0.9725
192.4	0.9725
192.5	0.97875
192.6	0.98125
192.7	0.9775
192.8	0.97875
192.9	0.9825
193	0.9825
193.1	0.98375
193.2	0.98625
193.3	0.98375
193.4	0.97875
193.5	0.98125
193.6	0.97875
193.7	0.9825
193.8	0.98375
193.9	0.98125
194	0.97875
194.1	0.975
194.2	0.97625
194.3	0.9775
194.4	0.98375
194.5	0.9825
194.6	0.98125
194.7	0.985
194.8	0.98375
194.9	0.98375
195	0.9875
195.1	0.98375
195.2	0.98375
195.3	0.9875
195.4	0.98625
195.5	0.9875
195.6	0.98625
195.7	0.98625
195.8	0.98125
195.9	0.98375
196	0.9825
196.1	0.98375
196.2	0.98375
196.3	0.97875
196.4	0.9825
196.5	0.98125
196.6	0.98125
196.7	0.97875
196.8	0.98375
196.9	0.98
197	0.97875
197.1	0.985
197.2	0.9825
197.3	0.985
197.4	0.98375
197.5	0.9775
197.6	0.98125
197.7	0.98375
197.8	0.9825
197.9	0.98
198	0.985
198.1	0.985
198.2	0.985
198.3	0.98625
198.4	0.985
198.5	0.98625
198.6	0.9825
198.7	0.985
198.8	0.98125
198.9	0.97375
199	0.98
199.1	0.97875
199.2	0.98125
199.3	0.98125
199.4	0.9825
199.5	0.985
199.6	0.98875
199.7	0.9875
199.8	0.98375
199.9	0.98125
200	0.985
[truncated: 14,000 more rows]
