# Supplementary material for: Bayesian inference of kinetic schemes for ion channels by Kalman filtering
Source: eLife journal article supplement (doi:10.7554/elife.62714), 2022-05-04
Supplement: fig4-data4 [file 1_Sim_N_400_Strom_MW_8M.xlsx]

## Sheet: 8 M
0.1	0
0.2	0
0.3	0
0.4	0
0.5	0
0.6	0
0.7	0
0.8	0
0.9	0
1	0
1.1	0
1.2	0
1.3	0
1.4	0
1.5	0
1.6	0
1.7	0
1.8	0
1.9	0
2	0
2.1	0
2.2	0
2.3	0
2.4	0
2.5	0
2.6	0
2.7	0
2.8	0
2.9	0
3	0
3.1	0
3.2	0
3.3	0
3.4	0
3.5	0
3.6	0
3.7	0
3.8	0
3.9	0
4	0
4.1	0
4.2	0
4.3	0
4.4	0
4.5	0
4.6	0
4.7	0
4.8	0
4.9	0
5	0
5.1	0
5.2	0
5.3	0
5.4	0
5.5	0
5.6	0
5.7	0
5.8	0
5.9	0
6	0
6.1	0
6.2	0
6.3	0
6.4	0
6.5	0
6.6	0
6.7	0
6.8	0
6.9	0
7	0
7.1	0
7.2	0
7.3	0
7.4	0
7.5	0
7.6	0
7.7	0
7.8	0
7.9	0
8	0
8.1	0
8.2	0
8.3	0
8.4	0
8.5	0
8.6	0
8.7	0
8.8	0
8.9	0
9	0
9.1	0
9.2	0
9.3	0
9.4	0
9.5	0
9.6	0
9.7	0
9.8	0
9.9	0
10	0
10.1	0
10.2	0
10.3	0
10.4	0
10.5	0
10.6	0
10.7	0
10.8	0
10.9	0
11	0
11.1	0
11.2	0
11.3	0
11.4	0
11.5	0
11.6	0
11.7	0
11.8	0
11.9	0
12	0
12.1	0
12.2	0
12.3	0
12.4	0
12.5	0
12.6	0
12.7	0
12.8	0
12.9	0
13	0
13.1	0
13.2	0
13.3	0
13.4	0
13.5	0
13.6	0
13.7	0
13.8	0
13.9	0
14	0
14.1	0
14.2	0
14.3	0
14.4	0
14.5	0
14.6	0
14.7	0
14.8	0
14.9	0
15	0
15.1	0
15.2	0
15.3	0
15.4	0
15.5	0
15.6	0
15.7	0
15.8	0
15.9	0
16	0
16.1	0
16.2	0
16.3	0
16.4	0
16.5	0
16.6	0
16.7	0
16.8	0
16.9	0
17	0
17.1	0
17.2	0
17.3	0
17.4	0
17.5	0
17.6	0
17.7	0
17.8	0
17.9	0
18	0
18.1	0
18.2	0
18.3	0
18.4	0
18.5	0
18.6	0
18.7	0
18.8	0
18.9	0
19	0
19.1	0
19.2	0
19.3	0
19.4	0
19.5	0
19.6	0
19.7	0
19.8	0
19.9	0
20	0
20.1	0
20.2	0
20.3	0
20.4	0
20.5	0
20.6	0
20.7	0
20.8	0
20.9	0
21	0
21.1	0
21.2	0
21.3	0
21.4	0
21.5	0
21.6	0
21.7	0
21.8	0
21.9	0
22	0
22.1	0
22.2	0
22.3	0
22.4	0
22.5	0
22.6	0
22.7	0
22.8	0
22.9	0
23	0
23.1	0
23.2	0
23.3	0
23.4	0
23.5	0
23.6	0
23.7	0
23.8	0
23.9	0
24	0
24.1	0
24.2	0
24.3	0
24.4	0
24.5	0
24.6	0
24.7	0
24.8	0
24.9	0
25	0
25.1	0
25.2	0
25.3	0
25.4	0
25.5	0
25.6	0
25.7	0
25.8	0
25.9	0
26	0
26.1	0
26.2	0
26.3	0
26.4	0
26.5	0
26.6	0
26.7	0
26.8	0
26.9	0
27	0
27.1	0
27.2	0
27.3	0
27.4	0
27.5	0
27.6	0
27.7	0
27.8	0
27.9	0
28	0
28.1	0
28.2	0
28.3	0
28.4	0
28.5	0
28.6	0
28.7	0
28.8	0
28.9	0
29	0
29.1	0
29.2	0
29.3	0
29.4	0
29.5	0
29.6	0
29.7	0
29.8	0
29.9	0
30	0
30.1	0
30.2	0
30.3	0
30.4	0
30.5	0
30.6	0
30.7	0
30.8	0
30.9	0
31	0
31.1	0
31.2	0
31.3	0
31.4	0
31.5	0
31.6	0
31.7	0
31.8	0
31.9	0
32	0
32.1	0
32.2	0
32.3	0
32.4	0
32.5	0
32.6	0
32.7	0
32.8	0
32.9	0
33	0
33.1	0
33.2	0
33.3	0
33.4	0
33.5	0
33.6	0
33.7	0
33.8	0
33.9	0
34	0
34.1	0
34.2	0
34.3	0
34.4	0
34.5	0
34.6	0
34.7	0
34.8	0
34.9	0
35	0
35.1	0
35.2	0
35.3	0
35.4	0
35.5	0
35.6	0
35.7	0
35.8	0
35.9	0
36	0
36.1	0
36.2	0
36.3	0
36.4	0
36.5	0
36.6	0
36.7	0
36.8	0
36.9	0
37	0
37.1	0
37.2	0
37.3	0
37.4	0
37.5	0
37.6	0
37.7	0
37.8	0
37.9	0
38	0
38.1	0
38.2	0
38.3	0
38.4	0
38.5	0
38.6	0
38.7	0
38.8	0
38.9	0
39	0
39.1	0
39.2	0
39.3	0
39.4	0
39.5	0
39.6	0
39.7	0
39.8	0
39.9	0
40	0
40.1	0
40.2	0
40.3	0
40.4	0
40.5	0
40.6	0
40.7	0
40.8	0
40.9	0
41	0
41.1	0
41.2	0
41.3	0
41.4	0
41.5	0
41.6	0
41.7	0
41.8	0
41.9	0
42	0
42.1	0
42.2	0
42.3	0
42.4	0
42.5	0
42.6	0
42.7	0
42.8	0
42.9	0
43	0
43.1	0
43.2	0
43.3	0
43.4	0
43.5	0
43.6	0
43.7	0
43.8	0
43.9	0
44	0
44.1	0
44.2	0
44.3	0
44.4	0
44.5	0
44.6	0
44.7	0
44.8	0
44.9	0
45	0
45.1	0
45.2	0
45.3	0
45.4	0
45.5	0
45.6	0
45.7	0
45.8	0
45.9	0
46	0
46.1	0
46.2	0
46.3	0
46.4	0
46.5	0
46.6	0
46.7	0
46.8	0
46.9	0
47	0
47.1	0
47.2	0
47.3	0
47.4	0
47.5	0
47.6	0
47.7	0
47.8	0
47.9	0
48	0
48.1	0
48.2	0
48.3	0
48.4	0
48.5	0
48.6	0
48.7	0
48.8	0
48.9	0
49	0
49.1	0
49.2	0
49.3	0
49.4	0
49.5	0
49.6	0
49.7	0
49.8	0
49.9	0
50	0
50.1	0
50.2	0
50.3	0
50.4	0
50.5	0
50.6	0
50.7	0
50.8	0
50.9	0
51	0
51.1	0
51.2	0
51.3	0
51.4	0
51.5	0
51.6	0
51.7	0
51.8	0
51.9	0
52	0
52.1	0
52.2	0
52.3	0
52.4	0
52.5	0
52.6	0
52.7	0
52.8	0
52.9	0
53	0
53.1	0
53.2	0
53.3	0
53.4	0
53.5	0
53.6	0
53.7	0
53.8	0
53.9	0
54	0
54.1	0
54.2	0
54.3	0
54.4	0
54.5	0
54.6	0
54.7	0
54.8	0
54.9	0
55	0
55.1	0
55.2	0
55.3	0
55.4	0
55.5	0
55.6	0
55.7	0
55.8	0
55.9	0
56	0
56.1	0
56.2	0
56.3	0
56.4	0
56.5	0
56.6	0
56.7	0
56.8	0
56.9	0
57	0
57.1	0
57.2	0
57.3	0
57.4	0
57.5	0
57.6	0
57.7	0
57.8	0
57.9	0
58	0
58.1	0
58.2	0
58.3	0
58.4	0
58.5	0
58.6	0
58.7	0
58.8	0
58.9	0
59	0
59.1	0
59.2	0
59.3	0
59.4	0
59.5	0
59.6	0
59.7	0
59.8	0
59.9	0
60	0
60.1	0
60.2	0
60.3	0
60.4	0
60.5	0
60.6	0
60.7	0
60.8	0
60.9	0
61	0
61.1	0
61.2	0
61.3	0
61.4	0
61.5	0
61.6	0
61.7	0
61.8	0
61.9	0
62	0
62.1	0
62.2	0
62.3	0
62.4	0
62.5	0
62.6	0
62.7	0
62.8	0
62.9	0
63	0
63.1	0
63.2	0
63.3	0
63.4	0
63.5	0
63.6	0
63.7	0
63.8	0
63.9	0
64	0
64.1	0
64.2	0
64.3	0
64.4	0
64.5	0
64.6	0
64.7	0
64.8	0
64.9	0
65	0
65.1	0
65.2	0
65.3	0
65.4	0
65.5	0
65.6	0
65.7	0
65.8	0
65.9	0
66	0
66.1	0
66.2	0
66.3	0
66.4	0
66.5	0
66.6	0
66.7	0
66.8	0
66.9	0
67	0
67.1	0
67.2	0
67.3	0
67.4	0
67.5	0
67.6	0
67.7	0
67.8	0
67.9	0
68	0
68.1	0
68.2	0
68.3	0
68.4	0
68.5	0
68.6	0
68.7	0
68.8	0
68.9	0
69	0
69.1	0
69.2	0
69.3	0
69.4	0
69.5	0
69.6	0
69.7	0
69.8	0
69.9	0
70	0
70.1	0
70.2	0
70.3	0
70.4	0
70.5	0
70.6	0
70.7	0
70.8	0
70.9	0
71	0
71.1	0
71.2	0
71.3	0
71.4	0
71.5	0
71.6	0
71.7	0
71.8	0
71.9	0
72	0
72.1	0
72.2	0
72.3	0
72.4	0
72.5	0
72.6	0
72.7	0
72.8	0
72.9	0
73	0
73.1	0
73.2	0
73.3	0
73.4	0
73.5	0
73.6	0
73.7	0
73.8	0
73.9	0
74	0
74.1	0
74.2	0
74.3	0
74.4	0
74.5	0
74.6	0
74.7	0
74.8	0
74.9	0
75	0
75.1	0
75.2	0
75.3	0
75.4	0
75.5	0
75.6	0
75.7	0
75.8	0
75.9	0
76	0
76.1	0
76.2	0
76.3	0
76.4	0
76.5	0
76.6	0
76.7	0
76.8	0
76.9	0
77	0
77.1	0
77.2	0
77.3	0
77.4	0
77.5	0
77.6	0
77.7	0
77.8	0
77.9	0
78	0
78.1	0
78.2	0
78.3	0
78.4	0
78.5	0
78.6	0
78.7	0
78.8	0
78.9	0
79	0
79.1	0
79.2	0
79.3	0
79.4	0
79.5	0
79.6	0
79.7	0
79.8	0
79.9	0
80	0
80.1	0
80.2	0
80.3	0
80.4	0
80.5	0
80.6	0
80.7	0
80.8	0
80.9	0
81	0
81.1	0
81.2	0
81.3	0
81.4	0
81.5	0
81.6	0
81.7	0
81.8	0
81.9	0
82	0
82.1	0
82.2	0
82.3	0
82.4	0
82.5	0
82.6	0
82.7	0
82.8	0
82.9	0
83	0
83.1	0
83.2	0
83.3	0
83.4	0
83.5	0
83.6	0
83.7	0
83.8	0
83.9	0
84	0
84.1	0
84.2	0
84.3	0
84.4	0
84.5	0
84.6	0
84.7	0
84.8	0
84.9	0
85	0
85.1	0
85.2	0
85.3	0
85.4	0
85.5	0
85.6	0
85.7	0
85.8	0
85.9	0
86	0
86.1	0
86.2	0
86.3	0
86.4	0
86.5	0
86.6	0
86.7	0
86.8	0
86.9	0
87	0
87.1	0
87.2	0
87.3	0
87.4	0
87.5	0
87.6	0
87.7	0
87.8	0
87.9	0
88	0
88.1	0
88.2	0
88.3	0
88.4	0
88.5	0
88.6	0
88.7	0
88.8	0
88.9	0
89	0
89.1	0
89.2	0
89.3	0
89.4	0
89.5	0
89.6	0
89.7	0
89.8	0
89.9	0
90	0
90.1	0
90.2	0
90.3	0
90.4	0
90.5	0
90.6	0
90.7	0
90.8	0
90.9	0
91	0
91.1	0
91.2	0
91.3	0
91.4	0
91.5	0
91.6	0
91.7	0
91.8	0
91.9	0
92	0
92.1	0
92.2	0
92.3	0
92.4	0
92.5	0
92.6	0
92.7	0
92.8	0
92.9	0
93	0
93.1	0
93.2	0
93.3	0
93.4	0
93.5	0
93.6	0
93.7	0
93.8	0
93.9	0
94	0
94.1	0
94.2	0
94.3	0
94.4	0
94.5	0
94.6	0
94.7	0
94.8	0
94.9	0
95	0
95.1	0
95.2	0
95.3	0
95.4	0
95.5	0
95.6	0
95.7	0
95.8	0
95.9	0
96	0
96.1	0
96.2	0
96.3	0
96.4	0
96.5	0
96.6	0
96.7	0
96.8	0
96.9	0
97	0
97.1	0
97.2	0
97.3	0
97.4	0
97.5	0
97.6	0
97.7	0
97.8	0
97.9	0
98	0
98.1	0
98.2	0
98.3	0
98.4	0
98.5	0
98.6	0
98.7	0
98.8	0
98.9	0
99	0
99.1	0
99.2	0
99.3	0
99.4	0
99.5	0
99.6	0
99.7	0
99.8	0
99.9	0
100	0
100.1	0
100.2	0.0025
100.3	0.005
100.4	0.0075
100.5	0.0075
100.6	0.0075
100.7	0.0075
100.8	0.0125
100.9	0.015
101	0.0175
101.1	0.0175
101.2	0.0225
101.3	0.0275
101.4	0.03
101.5	0.0325
101.6	0.04
101.7	0.045
101.8	0.0525
101.9	0.055
102	0.06
102.1	0.0625
102.2	0.0625
102.3	0.065
102.4	0.0725
102.5	0.0775
102.6	0.0775
102.7	0.0825
102.8	0.0825
102.9	0.085
103	0.09
103.1	0.0975
103.2	0.1075
103.3	0.1075
103.4	0.1125
103.5	0.115
103.6	0.125
103.7	0.125
103.8	0.1325
103.9	0.135
104	0.14
104.1	0.15
104.2	0.155
104.3	0.155
104.4	0.16
104.5	0.1625
104.6	0.16
104.7	0.1625
104.8	0.1675
104.9	0.1725
105	0.1725
105.1	0.18
105.2	0.1875
105.3	0.19
105.4	0.1975
105.5	0.21
105.6	0.2125
105.7	0.2125
105.8	0.22
105.9	0.225
106	0.225
106.1	0.2275
106.2	0.225
106.3	0.2325
106.4	0.235
106.5	0.2375
106.6	0.2375
106.7	0.24
106.8	0.245
106.9	0.2475
107	0.25
107.1	0.2575
107.2	0.26
107.3	0.26
107.4	0.265
107.5	0.275
107.6	0.28
107.7	0.28
107.8	0.2875
107.9	0.2925
108	0.29
108.1	0.295
108.2	0.2975
108.3	0.3
108.4	0.3025
108.5	0.3075
108.6	0.3075
108.7	0.31
108.8	0.31
108.9	0.3125
109	0.3125
109.1	0.3175
109.2	0.3175
109.3	0.3225
109.4	0.3225
109.5	0.325
109.6	0.3275
109.7	0.33
109.8	0.33
109.9	0.33
110	0.33
110.1	0.3325
110.2	0.335
110.3	0.335
110.4	0.335
110.5	0.3375
110.6	0.3375
110.7	0.34
110.8	0.34
110.9	0.34
111	0.34
111.1	0.3375
111.2	0.34
111.3	0.3425
111.4	0.345
111.5	0.3475
111.6	0.345
111.7	0.3475
111.8	0.3475
111.9	0.3475
112	0.3525
112.1	0.35
112.2	0.355
112.3	0.355
112.4	0.3625
112.5	0.3625
112.6	0.3625
112.7	0.3625
112.8	0.3625
112.9	0.3625
113	0.365
113.1	0.3675
113.2	0.37
113.3	0.375
113.4	0.375
113.5	0.375
113.6	0.3775
113.7	0.3775
113.8	0.3775
113.9	0.3775
114	0.38
114.1	0.38
114.2	0.3825
114.3	0.39
114.4	0.395
114.5	0.395
114.6	0.395
114.7	0.4
114.8	0.4075
114.9	0.4075
115	0.41
115.1	0.41
115.2	0.4125
115.3	0.42
115.4	0.425
115.5	0.4275
115.6	0.43
115.7	0.43
115.8	0.43
115.9	0.4275
116	0.43
116.1	0.435
116.2	0.44
116.3	0.445
116.4	0.4475
116.5	0.4475
116.6	0.4475
116.7	0.4475
116.8	0.455
116.9	0.455
117	0.46
117.1	0.4625
117.2	0.465
117.3	0.465
117.4	0.475
117.5	0.475
117.6	0.475
117.7	0.475
117.8	0.475
117.9	0.48
118	0.485
118.1	0.485
118.2	0.4825
118.3	0.4875
118.4	0.4875
118.5	0.4875
118.6	0.495
118.7	0.495
118.8	0.4975
118.9	0.5
119	0.5025
119.1	0.5025
119.2	0.5025
119.3	0.5025
119.4	0.5075
119.5	0.51
119.6	0.5125
119.7	0.5175
119.8	0.5225
119.9	0.525
120	0.53
120.1	0.5325
120.2	0.5325
120.3	0.535
120.4	0.53
120.5	0.53
120.6	0.53
120.7	0.5275
120.8	0.53
120.9	0.535
121	0.5375
121.1	0.54
121.2	0.5425
121.3	0.5425
121.4	0.5425
121.5	0.54
121.6	0.54
121.7	0.5375
121.8	0.5375
121.9	0.5375
122	0.5375
122.1	0.54
122.2	0.54
122.3	0.5425
122.4	0.5425
122.5	0.5425
122.6	0.5425
122.7	0.54
122.8	0.5425
122.9	0.5425
123	0.5425
123.1	0.545
123.2	0.5425
123.3	0.5425
123.4	0.5425
123.5	0.545
123.6	0.55
123.7	0.5575
123.8	0.56
123.9	0.56
124	0.56
124.1	0.56
124.2	0.5675
124.3	0.5675
124.4	0.575
124.5	0.5775
124.6	0.58
124.7	0.5825
124.8	0.5825
124.9	0.58
125	0.58
125.1	0.5875
125.2	0.5875
125.3	0.5875
125.4	0.5925
125.5	0.59
125.6	0.5925
125.7	0.5925
125.8	0.5975
125.9	0.6
126	0.6025
126.1	0.6
126.2	0.6
126.3	0.6025
126.4	0.605
126.5	0.6075
126.6	0.605
126.7	0.61
126.8	0.6125
126.9	0.6125
127	0.6125
127.1	0.6125
127.2	0.615
127.3	0.6125
127.4	0.615
127.5	0.615
127.6	0.615
127.7	0.6175
127.8	0.6175
127.9	0.6125
128	0.615
128.1	0.615
128.2	0.615
128.3	0.615
128.4	0.6175
128.5	0.62
128.6	0.6225
128.7	0.6225
128.8	0.6225
128.9	0.6225
129	0.625
129.1	0.625
129.2	0.625
129.3	0.6275
129.4	0.6275
129.5	0.6275
129.6	0.6275
129.7	0.63
129.8	0.6325
129.9	0.63
130	0.6325
130.1	0.635
130.2	0.635
130.3	0.6375
130.4	0.6375
130.5	0.63
130.6	0.63
130.7	0.635
130.8	0.6325
130.9	0.63
131	0.635
131.1	0.635
131.2	0.635
131.3	0.635
131.4	0.635
131.5	0.64
131.6	0.64
131.7	0.64
131.8	0.6425
131.9	0.6425
132	0.645
132.1	0.645
132.2	0.645
132.3	0.645
132.4	0.65
132.5	0.65
132.6	0.655
132.7	0.655
132.8	0.6575
132.9	0.6575
133	0.6575
133.1	0.66
133.2	0.66
133.3	0.66
133.4	0.6575
133.5	0.6575
133.6	0.6575
133.7	0.6575
133.8	0.6625
133.9	0.6625
134	0.665
134.1	0.665
134.2	0.6725
134.3	0.67
134.4	0.67
134.5	0.6675
134.6	0.6675
134.7	0.6675
134.8	0.67
134.9	0.67
135	0.6725
135.1	0.675
135.2	0.675
135.3	0.675
135.4	0.675
135.5	0.6775
135.6	0.6775
135.7	0.675
135.8	0.6725
135.9	0.6775
136	0.6775
136.1	0.6775
136.2	0.68
136.3	0.68
136.4	0.6825
136.5	0.6825
136.6	0.68
136.7	0.68
136.8	0.685
136.9	0.685
137	0.685
137.1	0.685
137.2	0.6825
137.3	0.6825
137.4	0.6825
137.5	0.6875
137.6	0.6875
137.7	0.685
137.8	0.685
137.9	0.695
138	0.6975
138.1	0.7
138.2	0.7
138.3	0.7025
138.4	0.7025
138.5	0.7025
138.6	0.7
138.7	0.7
138.8	0.7
138.9	0.7
139	0.705
139.1	0.705
139.2	0.705
139.3	0.705
139.4	0.705
139.5	0.705
139.6	0.7075
139.7	0.7075
139.8	0.71
139.9	0.71
140	0.71
140.1	0.7075
140.2	0.7075
140.3	0.7075
140.4	0.7125
140.5	0.715
140.6	0.715
140.7	0.715
140.8	0.715
140.9	0.7125
141	0.7125
141.1	0.71
141.2	0.71
141.3	0.7075
141.4	0.7075
141.5	0.7075
141.6	0.71
141.7	0.7125
141.8	0.7125
141.9	0.7125
142	0.7125
142.1	0.7125
142.2	0.7125
142.3	0.7125
142.4	0.715
142.5	0.715
142.6	0.7175
142.7	0.7125
142.8	0.7125
142.9	0.7175
143	0.7175
143.1	0.715
143.2	0.715
143.3	0.7175
143.4	0.7175
143.5	0.7175
143.6	0.715
143.7	0.715
143.8	0.7175
143.9	0.715
144	0.7125
144.1	0.7125
144.2	0.7175
144.3	0.7175
144.4	0.72
144.5	0.7225
144.6	0.7225
144.7	0.7225
144.8	0.725
144.9	0.725
145	0.7275
145.1	0.7275
145.2	0.7275
145.3	0.7275
145.4	0.7275
145.5	0.735
145.6	0.7375
145.7	0.735
145.8	0.7325
145.9	0.7325
146	0.7325
146.1	0.735
146.2	0.7375
146.3	0.74
146.4	0.7425
146.5	0.745
146.6	0.7475
146.7	0.7475
146.8	0.7525
146.9	0.7525
147	0.755
147.1	0.755
147.2	0.7525
147.3	0.755
147.4	0.7575
147.5	0.7575
147.6	0.7575
147.7	0.7575
147.8	0.76
147.9	0.76
148	0.76
148.1	0.76
148.2	0.76
148.3	0.76
148.4	0.76
148.5	0.7625
148.6	0.765
148.7	0.765
148.8	0.765
148.9	0.7675
149	0.775
149.1	0.775
149.2	0.775
149.3	0.7725
149.4	0.775
149.5	0.7775
149.6	0.7775
149.7	0.7775
149.8	0.7775
149.9	0.7825
150	0.7825
150.1	0.785
150.2	0.785
150.3	0.79
150.4	0.79
150.5	0.7875
150.6	0.785
150.7	0.785
150.8	0.785
150.9	0.785
151	0.7875
151.1	0.7875
151.2	0.7875
151.3	0.7875
151.4	0.7875
151.5	0.7875
151.6	0.785
151.7	0.7825
151.8	0.78
151.9	0.7825
152	0.7825
152.1	0.7825
152.2	0.78
152.3	0.775
152.4	0.7775
152.5	0.7775
152.6	0.775
152.7	0.775
152.8	0.775
152.9	0.775
153	0.7725
153.1	0.77
153.2	0.77
153.3	0.77
153.4	0.77
153.5	0.77
153.6	0.77
153.7	0.7675
153.8	0.765
153.9	0.7625
154	0.7625
154.1	0.765
154.2	0.7675
154.3	0.7675
154.4	0.77
154.5	0.77
154.6	0.7675
154.7	0.765
154.8	0.765
154.9	0.77
155	0.77
155.1	0.77
155.2	0.77
155.3	0.77
155.4	0.7675
155.5	0.7675
155.6	0.7675
155.7	0.77
155.8	0.77
155.9	0.77
156	0.77
156.1	0.775
156.2	0.7725
156.3	0.7725
156.4	0.775
156.5	0.775
156.6	0.775
156.7	0.775
156.8	0.775
156.9	0.7725
157	0.7725
157.1	0.7725
157.2	0.775
157.3	0.7775
157.4	0.7775
157.5	0.775
157.6	0.775
157.7	0.775
157.8	0.775
157.9	0.775
158	0.7775
158.1	0.775
158.2	0.775
158.3	0.7775
158.4	0.7775
158.5	0.78
158.6	0.7775
158.7	0.7775
158.8	0.7775
158.9	0.7775
159	0.7775
159.1	0.7775
159.2	0.7775
159.3	0.7825
159.4	0.7825
159.5	0.7825
159.6	0.7825
159.7	0.78
159.8	0.78
159.9	0.7775
160	0.78
160.1	0.7825
160.2	0.7825
160.3	0.7825
160.4	0.7825
160.5	0.785
160.6	0.785
160.7	0.7875
160.8	0.785
160.9	0.785
161	0.7825
161.1	0.7825
161.2	0.7825
161.3	0.785
161.4	0.785
161.5	0.785
161.6	0.785
161.7	0.785
161.8	0.785
161.9	0.785
162	0.7825
162.1	0.7825
162.2	0.7825
162.3	0.78
162.4	0.78
162.5	0.78
162.6	0.7775
162.7	0.78
162.8	0.78
162.9	0.7775
163	0.7775
163.1	0.775
163.2	0.7775
163.3	0.7775
163.4	0.7725
163.5	0.7725
163.6	0.7725
163.7	0.77
163.8	0.77
163.9	0.77
164	0.77
164.1	0.7725
164.2	0.77
164.3	0.77
164.4	0.7725
164.5	0.7675
164.6	0.765
164.7	0.7675
164.8	0.765
164.9	0.765
165	0.7625
165.1	0.7675
165.2	0.7675
165.3	0.7675
165.4	0.7675
165.5	0.7675
165.6	0.77
165.7	0.77
165.8	0.77
165.9	0.7675
166	0.7675
166.1	0.765
166.2	0.7675
166.3	0.765
166.4	0.7675
166.5	0.7675
166.6	0.7675
166.7	0.765
166.8	0.7675
166.9	0.7675
167	0.7675
167.1	0.7675
167.2	0.765
167.3	0.7725
167.4	0.775
167.5	0.77
167.6	0.77
167.7	0.77
167.8	0.77
167.9	0.7725
168	0.775
168.1	0.775
168.2	0.775
168.3	0.775
168.4	0.7725
168.5	0.775
168.6	0.775
168.7	0.775
168.8	0.7725
168.9	0.775
169	0.7725
169.1	0.7725
169.2	0.7725
169.3	0.7725
169.4	0.7725
169.5	0.7725
169.6	0.7725
169.7	0.7725
169.8	0.7725
169.9	0.775
170	0.7725
170.1	0.7725
170.2	0.7725
170.3	0.7725
170.4	0.7725
170.5	0.77
170.6	0.7675
170.7	0.765
170.8	0.7625
170.9	0.76
171	0.76
171.1	0.7575
171.2	0.7575
171.3	0.7575
171.4	0.755
171.5	0.755
171.6	0.7525
171.7	0.75
171.8	0.75
171.9	0.75
172	0.7475
172.1	0.7475
172.2	0.745
172.3	0.745
172.4	0.7475
172.5	0.7475
172.6	0.75
172.7	0.75
172.8	0.75
172.9	0.75
173	0.75
173.1	0.75
173.2	0.7475
173.3	0.75
173.4	0.75
173.5	0.75
173.6	0.75
173.7	0.7525
173.8	0.7525
173.9	0.7475
174	0.7475
174.1	0.745
174.2	0.745
174.3	0.7475
174.4	0.7475
174.5	0.75
174.6	0.7525
174.7	0.7525
174.8	0.7525
174.9	0.75
175	0.7525
175.1	0.7525
175.2	0.7525
175.3	0.7525
175.4	0.7525
175.5	0.75
175.6	0.75
175.7	0.75
175.8	0.75
175.9	0.7525
176	0.7525
176.1	0.7525
176.2	0.755
176.3	0.755
176.4	0.755
176.5	0.7525
176.6	0.7525
176.7	0.7525
176.8	0.7525
176.9	0.75
177	0.75
177.1	0.75
177.2	0.75
177.3	0.7475
177.4	0.7475
177.5	0.7425
177.6	0.7425
177.7	0.745
177.8	0.7475
177.9	0.7475
178	0.7475
178.1	0.745
178.2	0.745
178.3	0.745
178.4	0.745
178.5	0.7425
178.6	0.7425
178.7	0.74
178.8	0.74
178.9	0.74
179	0.74
179.1	0.74
179.2	0.7425
179.3	0.74
179.4	0.74
179.5	0.74
179.6	0.74
179.7	0.745
179.8	0.745
179.9	0.7425
180	0.745
180.1	0.745
180.2	0.745
180.3	0.745
180.4	0.745
180.5	0.745
180.6	0.7475
180.7	0.745
180.8	0.745
180.9	0.745
181	0.7475
181.1	0.7475
181.2	0.7475
181.3	0.75
181.4	0.7475
181.5	0.7475
181.6	0.75
181.7	0.7525
181.8	0.7525
181.9	0.7525
182	0.7525
182.1	0.7525
182.2	0.7525
182.3	0.7525
182.4	0.755
182.5	0.7525
182.6	0.7525
182.7	0.75
182.8	0.7525
182.9	0.7525
183	0.7525
183.1	0.7525
183.2	0.75
183.3	0.7525
183.4	0.7575
183.5	0.7575
183.6	0.7625
183.7	0.76
183.8	0.76
183.9	0.7575
184	0.76
184.1	0.7625
184.2	0.7625
184.3	0.7625
184.4	0.76
184.5	0.76
184.6	0.7625
184.7	0.7625
184.8	0.7625
184.9	0.7625
185	0.7625
185.1	0.7625
185.2	0.765
185.3	0.765
185.4	0.765
185.5	0.765
185.6	0.7675
185.7	0.7625
185.8	0.7625
185.9	0.7625
186	0.7625
186.1	0.7625
186.2	0.76
186.3	0.76
186.4	0.765
186.5	0.765
186.6	0.76
186.7	0.76
186.8	0.76
186.9	0.76
187	0.76
187.1	0.7625
187.2	0.7625
187.3	0.76
187.4	0.76
187.5	0.755
187.6	0.755
187.7	0.755
187.8	0.755
187.9	0.7575
188	0.7575
188.1	0.7575
188.2	0.76
188.3	0.7575
188.4	0.76
188.5	0.7575
188.6	0.76
188.7	0.76
188.8	0.7625
188.9	0.76
189	0.76
189.1	0.76
189.2	0.76
189.3	0.7625
189.4	0.76
189.5	0.76
189.6	0.76
189.7	0.7625
189.8	0.76
189.9	0.7625
190	0.7625
190.1	0.7625
190.2	0.7625
190.3	0.765
190.4	0.7575
190.5	0.755
190.6	0.7575
190.7	0.7575
190.8	0.755
190.9	0.7575
191	0.755
191.1	0.7575
191.2	0.7575
191.3	0.7575
191.4	0.76
191.5	0.76
191.6	0.76
191.7	0.7625
191.8	0.7625
191.9	0.7625
192	0.765
192.1	0.765
192.2	0.7675
192.3	0.7725
192.4	0.7675
192.5	0.7675
192.6	0.77
192.7	0.77
192.8	0.7725
192.9	0.7675
193	0.77
193.1	0.77
193.2	0.7725
193.3	0.7725
193.4	0.775
193.5	0.7775
193.6	0.775
193.7	0.775
193.8	0.7725
193.9	0.775
194	0.775
194.1	0.775
194.2	0.775
194.3	0.775
194.4	0.775
194.5	0.77
194.6	0.77
194.7	0.7725
194.8	0.7725
194.9	0.775
195	0.7725
195.1	0.7775
195.2	0.775
195.3	0.775
195.4	0.775
195.5	0.775
195.6	0.775
195.7	0.7775
195.8	0.775
195.9	0.77
196	0.7725
196.1	0.7725
196.2	0.7725
196.3	0.7725
196.4	0.7725
196.5	0.7725
196.6	0.7725
196.7	0.7725
196.8	0.775
196.9	0.775
197	0.7775
197.1	0.78
197.2	0.78
197.3	0.78
197.4	0.78
197.5	0.78
197.6	0.7775
197.7	0.7775
197.8	0.7775
197.9	0.7825
198	0.7825
198.1	0.785
198.2	0.785
198.3	0.785
198.4	0.78
198.5	0.7825
198.6	0.7825
198.7	0.7825
198.8	0.78
198.9	0.7825
199	0.785
199.1	0.785
199.2	0.7825
199.3	0.7825
199.4	0.785
199.5	0.785
199.6	0.785
199.7	0.785
199.8	0.785
199.9	0.7875
200	0.785
[truncated: 14,000 more rows]
