# Supplementary material for: Bayesian inference of kinetic schemes for ion channels by Kalman filtering
Source: eLife journal article supplement (doi:10.7554/elife.62714), 2022-05-04
Supplement: fig4-data4 [file 1_Sim_N_500_Fluor_MW.xlsx]

## Sheet: Tabelle1
0.1	0
0.2	0
0.3	0
0.4	0
0.5	0
0.6	0
0.7	0
0.8	0
0.9	0
1	0
1.1	0
1.2	0
1.3	0
1.4	0
1.5	0
1.6	0
1.7	0
1.8	0
1.9	0
2	0
2.1	0
2.2	0
2.3	0
2.4	0
2.5	0
2.6	0
2.7	0
2.8	0
2.9	0
3	0
3.1	0
3.2	0
3.3	0
3.4	0
3.5	0
3.6	0
3.7	0
3.8	0
3.9	0
4	0
4.1	0
4.2	0
4.3	0
4.4	0
4.5	0
4.6	0
4.7	0
4.8	0
4.9	0
5	0
5.1	0
5.2	0
5.3	0
5.4	0
5.5	0
5.6	0
5.7	0
5.8	0
5.9	0
6	0
6.1	0
6.2	0
6.3	0
6.4	0
6.5	0
6.6	0
6.7	0
6.8	0
6.9	0
7	0
7.1	0
7.2	0
7.3	0
7.4	0
7.5	0
7.6	0
7.7	0
7.8	0
7.9	0
8	0
8.1	0
8.2	0
8.3	0
8.4	0
8.5	0
8.6	0
8.7	0
8.8	0
8.9	0
9	0
9.1	0
9.2	0
9.3	0
9.4	0
9.5	0
9.6	0
9.7	0
9.8	0
9.9	0
10	0
10.1	0
10.2	0
10.3	0
10.4	0
10.5	0
10.6	0
10.7	0
10.8	0
10.9	0
11	0
11.1	0
11.2	0
11.3	0
11.4	0
11.5	0
11.6	0
11.7	0
11.8	0
11.9	0
12	0
12.1	0
12.2	0
12.3	0
12.4	0
12.5	0
12.6	0
12.7	0
12.8	0
12.9	0
13	0
13.1	0
13.2	0
13.3	0
13.4	0
13.5	0
13.6	0
13.7	0
13.8	0
13.9	0
14	0
14.1	0
14.2	0
14.3	0
14.4	0
14.5	0
14.6	0
14.7	0
14.8	0
14.9	0
15	0
15.1	0
15.2	0
15.3	0
15.4	0
15.5	0
15.6	0
15.7	0
15.8	0
15.9	0
16	0
16.1	0
16.2	0
16.3	0
16.4	0
16.5	0
16.6	0
16.7	0
16.8	0
16.9	0
17	0
17.1	0
17.2	0
17.3	0
17.4	0
17.5	0
17.6	0
17.7	0
17.8	0
17.9	0
18	0
18.1	0
18.2	0
18.3	0
18.4	0
18.5	0
18.6	0
18.7	0
18.8	0
18.9	0
19	0
19.1	0
19.2	0
19.3	0
19.4	0
19.5	0
19.6	0
19.7	0
19.8	0
19.9	0
20	0
20.1	0
20.2	0
20.3	0
20.4	0
20.5	0
20.6	0
20.7	0
20.8	0
20.9	0
21	0
21.1	0
21.2	0
21.3	0
21.4	0
21.5	0
21.6	0
21.7	0
21.8	0
21.9	0
22	0
22.1	0
22.2	0
22.3	0
22.4	0
22.5	0
22.6	0
22.7	0
22.8	0
22.9	0
23	0
23.1	0
23.2	0
23.3	0
23.4	0
23.5	0
23.6	0
23.7	0
23.8	0
23.9	0
24	0
24.1	0
24.2	0
24.3	0
24.4	0
24.5	0
24.6	0
24.7	0
24.8	0
24.9	0
25	0
25.1	0
25.2	0
25.3	0
25.4	0
25.5	0
25.6	0
25.7	0
25.8	0
25.9	0
26	0
26.1	0
26.2	0
26.3	0
26.4	0
26.5	0
26.6	0
26.7	0
26.8	0
26.9	0
27	0
27.1	0
27.2	0
27.3	0
27.4	0
27.5	0
27.6	0
27.7	0
27.8	0
27.9	0
28	0
28.1	0
28.2	0
28.3	0
28.4	0
28.5	0
28.6	0
28.7	0
28.8	0
28.9	0
29	0
29.1	0
29.2	0
29.3	0
29.4	0
29.5	0
29.6	0
29.7	0
29.8	0
29.9	0
30	0
30.1	0
30.2	0
30.3	0
30.4	0
30.5	0
30.6	0
30.7	0
30.8	0
30.9	0
31	0
31.1	0
31.2	0
31.3	0
31.4	0
31.5	0
31.6	0
31.7	0
31.8	0
31.9	0
32	0
32.1	0
32.2	0
32.3	0
32.4	0
32.5	0
32.6	0
32.7	0
32.8	0
32.9	0
33	0
33.1	0
33.2	0
33.3	0
33.4	0
33.5	0
33.6	0
33.7	0
33.8	0
33.9	0
34	0
34.1	0
34.2	0
34.3	0
34.4	0
34.5	0
34.6	0
34.7	0
34.8	0
34.9	0
35	0
35.1	0
35.2	0
35.3	0
35.4	0
35.5	0
35.6	0
35.7	0
35.8	0
35.9	0
36	0
36.1	0
36.2	0
36.3	0
36.4	0
36.5	0
36.6	0
36.7	0
36.8	0
36.9	0
37	0
37.1	0
37.2	0
37.3	0
37.4	0
37.5	0
37.6	0
37.7	0
37.8	0
37.9	0
38	0
38.1	0
38.2	0
38.3	0
38.4	0
38.5	0
38.6	0
38.7	0
38.8	0
38.9	0
39	0
39.1	0
39.2	0
39.3	0
39.4	0
39.5	0
39.6	0
39.7	0
39.8	0
39.9	0
40	0
40.1	0
40.2	0
40.3	0
40.4	0
40.5	0
40.6	0
40.7	0
40.8	0
40.9	0
41	0
41.1	0
41.2	0
41.3	0
41.4	0
41.5	0
41.6	0
41.7	0
41.8	0
41.9	0
42	0
42.1	0
42.2	0
42.3	0
42.4	0
42.5	0
42.6	0
42.7	0
42.8	0
42.9	0
43	0
43.1	0
43.2	0
43.3	0
43.4	0
43.5	0
43.6	0
43.7	0
43.8	0
43.9	0
44	0
44.1	0
44.2	0
44.3	0
44.4	0
44.5	0
44.6	0
44.7	0
44.8	0
44.9	0
45	0
45.1	0
45.2	0
45.3	0
45.4	0
45.5	0
45.6	0
45.7	0
45.8	0
45.9	0
46	0
46.1	0
46.2	0
46.3	0
46.4	0
46.5	0
46.6	0
46.7	0
46.8	0
46.9	0
47	0
47.1	0
47.2	0
47.3	0
47.4	0
47.5	0
47.6	0
47.7	0
47.8	0
47.9	0
48	0
48.1	0
48.2	0
48.3	0
48.4	0
48.5	0
48.6	0
48.7	0
48.8	0
48.9	0
49	0
49.1	0
49.2	0
49.3	0
49.4	0
49.5	0
49.6	0
49.7	0
49.8	0
49.9	0
50	0
50.1	0
50.2	0
50.3	0
50.4	0
50.5	0
50.6	0
50.7	0
50.8	0
50.9	0
51	0
51.1	0
51.2	0
51.3	0
51.4	0
51.5	0
51.6	0
51.7	0
51.8	0
51.9	0
52	0
52.1	0
52.2	0
52.3	0
52.4	0
52.5	0
52.6	0
52.7	0
52.8	0
52.9	0
53	0
53.1	0
53.2	0
53.3	0
53.4	0
53.5	0
53.6	0
53.7	0
53.8	0
53.9	0
54	0
54.1	0
54.2	0
54.3	0
54.4	0
54.5	0
54.6	0
54.7	0
54.8	0
54.9	0
55	0
55.1	0
55.2	0
55.3	0
55.4	0
55.5	0
55.6	0
55.7	0
55.8	0
55.9	0
56	0
56.1	0
56.2	0
56.3	0
56.4	0
56.5	0
56.6	0
56.7	0
56.8	0
56.9	0
57	0
57.1	0
57.2	0
57.3	0
57.4	0
57.5	0
57.6	0
57.7	0
57.8	0
57.9	0
58	0
58.1	0
58.2	0
58.3	0
58.4	0
58.5	0
58.6	0
58.7	0
58.8	0
58.9	0
59	0
59.1	0
59.2	0
59.3	0
59.4	0
59.5	0
59.6	0
59.7	0
59.8	0
59.9	0
60	0
60.1	0
60.2	0
60.3	0
60.4	0
60.5	0
60.6	0
60.7	0
60.8	0
60.9	0
61	0
61.1	0
61.2	0
61.3	0
61.4	0
61.5	0
61.6	0
61.7	0
61.8	0
61.9	0
62	0
62.1	0
62.2	0
62.3	0
62.4	0
62.5	0
62.6	0
62.7	0
62.8	0
62.9	0
63	0
63.1	0
63.2	0
63.3	0
63.4	0
63.5	0
63.6	0
63.7	0
63.8	0
63.9	0
64	0
64.1	0
64.2	0
64.3	0
64.4	0
64.5	0
64.6	0
64.7	0
64.8	0
64.9	0
65	0
65.1	0
65.2	0
65.3	0
65.4	0
65.5	0
65.6	0
65.7	0
65.8	0
65.9	0
66	0
66.1	0
66.2	0
66.3	0
66.4	0
66.5	0
66.6	0
66.7	0
66.8	0
66.9	0
67	0
67.1	0
67.2	0
67.3	0
67.4	0
67.5	0
67.6	0
67.7	0
67.8	0
67.9	0
68	0
68.1	0
68.2	0
68.3	0
68.4	0
68.5	0
68.6	0
68.7	0
68.8	0
68.9	0
69	0
69.1	0
69.2	0
69.3	0
69.4	0
69.5	0
69.6	0
69.7	0
69.8	0
69.9	0
70	0
70.1	0
70.2	0
70.3	0
70.4	0
70.5	0
70.6	0
70.7	0
70.8	0
70.9	0
71	0
71.1	0
71.2	0
71.3	0
71.4	0
71.5	0
71.6	0
71.7	0
71.8	0
71.9	0
72	0
72.1	0
72.2	0
72.3	0
72.4	0
72.5	0
72.6	0
72.7	0
72.8	0
72.9	0
73	0
73.1	0
73.2	0
73.3	0
73.4	0
73.5	0
73.6	0
73.7	0
73.8	0
73.9	0
74	0
74.1	0
74.2	0
74.3	0
74.4	0
74.5	0
74.6	0
74.7	0
74.8	0
74.9	0
75	0
75.1	0
75.2	0
75.3	0
75.4	0
75.5	0
75.6	0
75.7	0
75.8	0
75.9	0
76	0
76.1	0
76.2	0
76.3	0
76.4	0
76.5	0
76.6	0
76.7	0
76.8	0
76.9	0
77	0
77.1	0
77.2	0
77.3	0
77.4	0
77.5	0
77.6	0
77.7	0
77.8	0
77.9	0
78	0
78.1	0
78.2	0
78.3	0
78.4	0
78.5	0
78.6	0
78.7	0
78.8	0
78.9	0
79	0
79.1	0
79.2	0
79.3	0
79.4	0
79.5	0
79.6	0
79.7	0
79.8	0
79.9	0
80	0
80.1	0
80.2	0
80.3	0
80.4	0
80.5	0
80.6	0
80.7	0
80.8	0
80.9	0
81	0
81.1	0
81.2	0
81.3	0
81.4	0
81.5	0
81.6	0
81.7	0
81.8	0
81.9	0
82	0
82.1	0
82.2	0
82.3	0
82.4	0
82.5	0
82.6	0
82.7	0
82.8	0
82.9	0
83	0
83.1	0
83.2	0
83.3	0
83.4	0
83.5	0
83.6	0
83.7	0
83.8	0
83.9	0
84	0
84.1	0
84.2	0
84.3	0
84.4	0
84.5	0
84.6	0
84.7	0
84.8	0
84.9	0
85	0
85.1	0
85.2	0
85.3	0
85.4	0
85.5	0
85.6	0
85.7	0
85.8	0
85.9	0
86	0
86.1	0
86.2	0
86.3	0
86.4	0
86.5	0
86.6	0
86.7	0
86.8	0
86.9	0
87	0
87.1	0
87.2	0
87.3	0
87.4	0
87.5	0
87.6	0
87.7	0
87.8	0
87.9	0
88	0
88.1	0
88.2	0
88.3	0
88.4	0
88.5	0
88.6	0
88.7	0
88.8	0
88.9	0
89	0
89.1	0
89.2	0
89.3	0
89.4	0
89.5	0
89.6	0
89.7	0
89.8	0
89.9	0
90	0
90.1	0
90.2	0
90.3	0
90.4	0
90.5	0
90.6	0
90.7	0
90.8	0
90.9	0
91	0
91.1	0
91.2	0
91.3	0
91.4	0
91.5	0
91.6	0
91.7	0
91.8	0
91.9	0
92	0
92.1	0
92.2	0
92.3	0
92.4	0
92.5	0
92.6	0
92.7	0
92.8	0
92.9	0
93	0
93.1	0
93.2	0
93.3	0
93.4	0
93.5	0
93.6	0
93.7	0
93.8	0
93.9	0
94	0
94.1	0
94.2	0
94.3	0
94.4	0
94.5	0
94.6	0
94.7	0
94.8	0
94.9	0
95	0
95.1	0
95.2	0
95.3	0
95.4	0
95.5	0
95.6	0
95.7	0
95.8	0
95.9	0
96	0
96.1	0
96.2	0
96.3	0
96.4	0
96.5	0
96.6	0
96.7	0
96.8	0
96.9	0
97	0
97.1	0
97.2	0
97.3	0
97.4	0
97.5	0
97.6	0
97.7	0
97.8	0
97.9	0
98	0
98.1	0
98.2	0
98.3	0
98.4	0
98.5	0
98.6	0
98.7	0
98.8	0
98.9	0
99	0
99.1	0
99.2	0
99.3	0
99.4	0
99.5	0
99.6	0
99.7	0
99.8	0
99.9	0
100	0
100.1	0.356
100.2	0.553
100.3	0.655
100.4	0.724
100.5	0.78
100.6	0.808
100.7	0.825
100.8	0.845
100.9	0.863
101	0.868
101.1	0.862
101.2	0.88
101.3	0.895
101.4	0.896
101.5	0.901
101.6	0.895
101.7	0.895
101.8	0.897
101.9	0.901
102	0.909
102.1	0.91
102.2	0.912
102.3	0.915
102.4	0.92
102.5	0.918
102.6	0.915
102.7	0.923
102.8	0.926
102.9	0.927
103	0.932
103.1	0.936
103.2	0.939
103.3	0.925
103.4	0.916
103.5	0.925
103.6	0.919
103.7	0.918
103.8	0.925
103.9	0.924
104	0.928
104.1	0.933
104.2	0.935
104.3	0.925
104.4	0.921
104.5	0.928
104.6	0.936
104.7	0.934
104.8	0.936
104.9	0.935
105	0.933
105.1	0.924
105.2	0.93
105.3	0.933
105.4	0.934
105.5	0.931
105.6	0.945
105.7	0.937
105.8	0.935
105.9	0.935
106	0.93
106.1	0.932
106.2	0.93
106.3	0.932
106.4	0.93
106.5	0.936
106.6	0.939
106.7	0.937
106.8	0.937
106.9	0.937
107	0.929
107.1	0.93
107.2	0.938
107.3	0.943
107.4	0.941
107.5	0.944
107.6	0.939
107.7	0.951
107.8	0.943
107.9	0.941
108	0.941
108.1	0.938
108.2	0.942
108.3	0.931
108.4	0.941
108.5	0.94
108.6	0.939
108.7	0.946
108.8	0.936
108.9	0.934
109	0.942
109.1	0.942
109.2	0.94
109.3	0.941
109.4	0.941
109.5	0.932
109.6	0.936
109.7	0.938
109.8	0.942
109.9	0.941
110	0.939
110.1	0.94
110.2	0.937
110.3	0.933
110.4	0.942
110.5	0.932
110.6	0.936
110.7	0.927
110.8	0.931
110.9	0.936
111	0.94
111.1	0.938
111.2	0.934
111.3	0.932
111.4	0.932
111.5	0.937
111.6	0.946
111.7	0.955
111.8	0.953
111.9	0.95
112	0.941
112.1	0.939
112.2	0.941
112.3	0.939
112.4	0.938
112.5	0.936
112.6	0.944
112.7	0.943
112.8	0.949
112.9	0.945
113	0.947
113.1	0.946
113.2	0.945
113.3	0.94
113.4	0.945
113.5	0.941
113.6	0.945
113.7	0.949
113.8	0.953
113.9	0.954
114	0.953
114.1	0.962
114.2	0.968
114.3	0.965
114.4	0.962
114.5	0.958
114.6	0.956
114.7	0.952
114.8	0.95
114.9	0.952
115	0.951
115.1	0.956
115.2	0.956
115.3	0.957
115.4	0.957
115.5	0.961
115.6	0.952
115.7	0.958
115.8	0.947
115.9	0.946
116	0.947
116.1	0.956
116.2	0.955
116.3	0.953
116.4	0.953
116.5	0.95
116.6	0.956
116.7	0.958
116.8	0.952
116.9	0.953
117	0.957
117.1	0.956
117.2	0.96
117.3	0.953
117.4	0.954
117.5	0.953
117.6	0.956
117.7	0.954
117.8	0.958
117.9	0.95
118	0.951
118.1	0.953
118.2	0.953
118.3	0.953
118.4	0.956
118.5	0.955
118.6	0.958
118.7	0.964
118.8	0.963
118.9	0.962
119	0.957
119.1	0.961
119.2	0.956
119.3	0.955
119.4	0.956
119.5	0.954
119.6	0.956
119.7	0.956
119.8	0.955
119.9	0.959
120	0.965
120.1	0.963
120.2	0.96
120.3	0.964
120.4	0.966
120.5	0.967
120.6	0.966
120.7	0.964
120.8	0.967
120.9	0.968
121	0.962
121.1	0.962
121.2	0.959
121.3	0.958
121.4	0.962
121.5	0.964
121.6	0.966
121.7	0.966
121.8	0.956
121.9	0.961
122	0.963
122.1	0.968
122.2	0.968
122.3	0.97
122.4	0.964
122.5	0.972
122.6	0.974
122.7	0.969
122.8	0.97
122.9	0.972
123	0.975
123.1	0.974
123.2	0.974
123.3	0.976
123.4	0.975
123.5	0.978
123.6	0.981
123.7	0.978
123.8	0.979
123.9	0.975
124	0.972
124.1	0.975
124.2	0.98
124.3	0.977
124.4	0.971
124.5	0.964
124.6	0.965
124.7	0.962
124.8	0.965
124.9	0.963
125	0.971
125.1	0.971
125.2	0.975
125.3	0.973
125.4	0.972
125.5	0.968
125.6	0.961
125.7	0.962
125.8	0.968
125.9	0.973
126	0.972
126.1	0.968
126.2	0.969
126.3	0.975
126.4	0.972
126.5	0.97
126.6	0.966
126.7	0.969
126.8	0.974
126.9	0.969
127	0.97
127.1	0.975
127.2	0.974
127.3	0.973
127.4	0.97
127.5	0.961
127.6	0.958
127.7	0.963
127.8	0.967
127.9	0.968
128	0.968
128.1	0.969
128.2	0.968
128.3	0.966
128.4	0.966
128.5	0.966
128.6	0.963
128.7	0.964
128.8	0.962
128.9	0.966
129	0.964
129.1	0.965
129.2	0.968
129.3	0.969
129.4	0.966
129.5	0.968
129.6	0.963
129.7	0.964
129.8	0.96
129.9	0.959
130	0.968
130.1	0.968
130.2	0.973
130.3	0.976
130.4	0.968
130.5	0.971
130.6	0.964
130.7	0.965
130.8	0.969
130.9	0.969
131	0.965
131.1	0.967
131.2	0.973
131.3	0.98
131.4	0.979
131.5	0.977
131.6	0.985
131.7	0.985
131.8	0.982
131.9	0.976
132	0.972
132.1	0.972
132.2	0.973
132.3	0.971
132.4	0.971
132.5	0.97
132.6	0.965
132.7	0.969
132.8	0.963
132.9	0.966
133	0.966
133.1	0.969
133.2	0.968
133.3	0.971
133.4	0.979
133.5	0.975
133.6	0.979
133.7	0.971
133.8	0.973
133.9	0.971
134	0.968
134.1	0.962
134.2	0.964
134.3	0.968
134.4	0.967
134.5	0.967
134.6	0.973
134.7	0.972
134.8	0.976
134.9	0.975
135	0.977
135.1	0.975
135.2	0.974
135.3	0.975
135.4	0.973
135.5	0.976
135.6	0.982
135.7	0.979
135.8	0.982
135.9	0.984
136	0.976
136.1	0.981
136.2	0.98
136.3	0.978
136.4	0.971
136.5	0.972
136.6	0.973
136.7	0.974
136.8	0.984
136.9	0.982
137	0.983
137.1	0.983
137.2	0.98
137.3	0.974
137.4	0.977
137.5	0.975
137.6	0.972
137.7	0.981
137.8	0.984
137.9	0.98
138	0.977
138.1	0.976
138.2	0.98
138.3	0.979
138.4	0.979
138.5	0.977
138.6	0.98
138.7	0.982
138.8	0.985
138.9	0.983
139	0.983
139.1	0.977
139.2	0.981
139.3	0.982
139.4	0.978
139.5	0.979
139.6	0.973
139.7	0.972
139.8	0.977
139.9	0.976
140	0.976
140.1	0.972
140.2	0.974
140.3	0.974
140.4	0.968
140.5	0.973
140.6	0.976
140.7	0.969
140.8	0.972
140.9	0.974
141	0.979
141.1	0.978
141.2	0.982
141.3	0.981
141.4	0.979
141.5	0.984
141.6	0.98
141.7	0.976
141.8	0.977
141.9	0.979
142	0.977
142.1	0.979
142.2	0.972
142.3	0.975
142.4	0.977
142.5	0.975
142.6	0.974
142.7	0.97
142.8	0.977
142.9	0.976
143	0.976
143.1	0.978
143.2	0.979
143.3	0.98
143.4	0.984
143.5	0.986
143.6	0.985
143.7	0.987
143.8	0.986
143.9	0.98
144	0.977
144.1	0.977
144.2	0.98
144.3	0.981
144.4	0.981
144.5	0.981
144.6	0.98
144.7	0.977
144.8	0.974
144.9	0.977
145	0.978
145.1	0.977
145.2	0.979
145.3	0.977
145.4	0.981
145.5	0.974
145.6	0.973
145.7	0.975
145.8	0.976
145.9	0.976
146	0.98
146.1	0.977
146.2	0.976
146.3	0.975
146.4	0.976
146.5	0.981
146.6	0.977
146.7	0.978
146.8	0.975
146.9	0.981
147	0.982
147.1	0.984
147.2	0.979
147.3	0.984
147.4	0.983
147.5	0.981
147.6	0.981
147.7	0.98
147.8	0.98
147.9	0.982
148	0.986
148.1	0.984
148.2	0.979
148.3	0.979
148.4	0.973
148.5	0.978
148.6	0.98
148.7	0.98
148.8	0.977
148.9	0.973
149	0.97
149.1	0.965
149.2	0.971
149.3	0.968
149.4	0.973
149.5	0.971
149.6	0.974
149.7	0.977
149.8	0.981
149.9	0.982
150	0.978
150.1	0.978
150.2	0.982
150.3	0.986
150.4	0.986
150.5	0.984
150.6	0.985
150.7	0.98
150.8	0.978
150.9	0.972
151	0.974
151.1	0.98
151.2	0.981
151.3	0.978
151.4	0.986
151.5	0.982
151.6	0.977
151.7	0.977
151.8	0.976
151.9	0.977
152	0.974
152.1	0.973
152.2	0.981
152.3	0.976
152.4	0.976
152.5	0.981
152.6	0.983
152.7	0.99
152.8	0.987
152.9	0.986
153	0.984
153.1	0.984
153.2	0.987
153.3	0.987
153.4	0.985
153.5	0.985
153.6	0.979
153.7	0.978
153.8	0.978
153.9	0.98
154	0.984
154.1	0.979
154.2	0.973
154.3	0.972
154.4	0.973
154.5	0.976
154.6	0.977
154.7	0.978
154.8	0.982
154.9	0.981
155	0.981
155.1	0.984
155.2	0.985
155.3	0.982
155.4	0.982
155.5	0.982
155.6	0.981
155.7	0.976
155.8	0.98
155.9	0.978
156	0.982
156.1	0.98
156.2	0.98
156.3	0.979
156.4	0.976
156.5	0.98
156.6	0.978
156.7	0.975
156.8	0.977
156.9	0.973
157	0.976
157.1	0.976
157.2	0.979
157.3	0.978
157.4	0.977
157.5	0.978
157.6	0.978
157.7	0.978
157.8	0.981
157.9	0.984
158	0.985
158.1	0.984
158.2	0.984
158.3	0.985
158.4	0.984
158.5	0.984
158.6	0.987
158.7	0.984
158.8	0.985
158.9	0.988
159	0.985
159.1	0.985
159.2	0.983
159.3	0.986
159.4	0.984
159.5	0.984
159.6	0.986
159.7	0.982
159.8	0.982
159.9	0.981
160	0.986
160.1	0.986
160.2	0.981
160.3	0.976
160.4	0.974
160.5	0.974
160.6	0.977
160.7	0.98
160.8	0.979
160.9	0.978
161	0.982
161.1	0.983
161.2	0.981
161.3	0.977
161.4	0.979
161.5	0.978
161.6	0.98
161.7	0.981
161.8	0.975
161.9	0.978
162	0.982
162.1	0.98
162.2	0.984
162.3	0.984
162.4	0.982
162.5	0.982
162.6	0.98
162.7	0.982
162.8	0.985
162.9	0.981
163	0.98
163.1	0.984
163.2	0.982
163.3	0.982
163.4	0.977
163.5	0.977
163.6	0.981
163.7	0.983
163.8	0.982
163.9	0.977
164	0.979
164.1	0.981
164.2	0.983
164.3	0.986
164.4	0.984
164.5	0.984
164.6	0.986
164.7	0.981
164.8	0.979
164.9	0.981
165	0.979
165.1	0.978
165.2	0.977
165.3	0.975
165.4	0.977
165.5	0.978
165.6	0.981
165.7	0.982
165.8	0.982
165.9	0.977
166	0.977
166.1	0.975
166.2	0.976
166.3	0.975
166.4	0.973
166.5	0.969
166.6	0.978
166.7	0.982
166.8	0.983
166.9	0.984
167	0.979
167.1	0.978
167.2	0.979
167.3	0.98
167.4	0.984
167.5	0.978
167.6	0.974
167.7	0.977
167.8	0.975
167.9	0.978
168	0.977
168.1	0.98
168.2	0.984
168.3	0.987
168.4	0.984
168.5	0.98
168.6	0.979
168.7	0.978
168.8	0.976
168.9	0.98
169	0.982
169.1	0.981
169.2	0.984
169.3	0.982
169.4	0.981
169.5	0.978
169.6	0.981
169.7	0.975
169.8	0.981
169.9	0.983
170	0.986
170.1	0.984
170.2	0.982
170.3	0.98
170.4	0.982
170.5	0.98
170.6	0.978
170.7	0.978
170.8	0.975
170.9	0.977
171	0.978
171.1	0.979
171.2	0.981
171.3	0.978
171.4	0.977
171.5	0.976
171.6	0.972
171.7	0.967
171.8	0.97
171.9	0.971
172	0.968
172.1	0.967
172.2	0.973
172.3	0.976
172.4	0.976
172.5	0.978
172.6	0.977
172.7	0.979
172.8	0.982
172.9	0.982
173	0.98
173.1	0.977
173.2	0.974
173.3	0.971
173.4	0.975
173.5	0.978
173.6	0.978
173.7	0.976
173.8	0.974
173.9	0.974
174	0.973
174.1	0.974
174.2	0.972
174.3	0.977
174.4	0.978
174.5	0.979
174.6	0.981
174.7	0.977
174.8	0.979
174.9	0.984
175	0.978
175.1	0.979
175.2	0.984
175.3	0.984
175.4	0.985
175.5	0.981
175.6	0.979
175.7	0.976
175.8	0.98
175.9	0.98
176	0.982
176.1	0.98
176.2	0.98
176.3	0.981
176.4	0.983
176.5	0.984
176.6	0.985
176.7	0.979
176.8	0.982
176.9	0.977
177	0.978
177.1	0.979
177.2	0.979
177.3	0.979
177.4	0.979
177.5	0.981
177.6	0.977
177.7	0.981
177.8	0.981
177.9	0.983
178	0.982
178.1	0.982
178.2	0.986
178.3	0.985
178.4	0.986
178.5	0.987
178.6	0.986
178.7	0.986
178.8	0.983
178.9	0.985
179	0.986
179.1	0.991
179.2	0.988
179.3	0.987
179.4	0.978
179.5	0.979
179.6	0.977
179.7	0.978
179.8	0.977
179.9	0.978
180	0.977
180.1	0.978
180.2	0.98
180.3	0.979
180.4	0.979
180.5	0.98
180.6	0.978
180.7	0.977
180.8	0.974
180.9	0.979
181	0.981
181.1	0.978
181.2	0.98
181.3	0.981
181.4	0.98
181.5	0.978
181.6	0.972
181.7	0.976
181.8	0.978
181.9	0.98
182	0.979
182.1	0.979
182.2	0.985
182.3	0.984
182.4	0.979
182.5	0.977
182.6	0.978
182.7	0.981
182.8	0.981
182.9	0.98
183	0.981
183.1	0.977
183.2	0.98
183.3	0.978
183.4	0.972
183.5	0.978
183.6	0.98
183.7	0.983
183.8	0.98
183.9	0.976
184	0.977
184.1	0.978
184.2	0.977
184.3	0.98
184.4	0.979
184.5	0.977
184.6	0.979
184.7	0.983
184.8	0.982
184.9	0.982
185	0.989
185.1	0.988
185.2	0.986
185.3	0.987
185.4	0.984
185.5	0.981
185.6	0.981
185.7	0.979
185.8	0.977
185.9	0.979
186	0.979
186.1	0.98
186.2	0.979
186.3	0.975
186.4	0.974
186.5	0.972
186.6	0.977
186.7	0.978
186.8	0.98
186.9	0.981
187	0.979
187.1	0.987
187.2	0.984
187.3	0.978
187.4	0.975
187.5	0.975
187.6	0.98
187.7	0.978
187.8	0.98
187.9	0.977
188	0.98
188.1	0.976
188.2	0.977
188.3	0.975
188.4	0.978
188.5	0.976
188.6	0.977
188.7	0.978
188.8	0.978
188.9	0.981
189	0.986
189.1	0.985
189.2	0.982
189.3	0.98
189.4	0.98
189.5	0.982
189.6	0.983
189.7	0.983
189.8	0.985
189.9	0.981
190	0.981
190.1	0.987
190.2	0.989
190.3	0.986
190.4	0.984
190.5	0.983
190.6	0.985
190.7	0.984
190.8	0.986
190.9	0.99
191	0.99
191.1	0.988
191.2	0.982
191.3	0.985
191.4	0.986
191.5	0.986
191.6	0.983
191.7	0.982
191.8	0.979
191.9	0.982
192	0.981
192.1	0.982
192.2	0.987
192.3	0.982
192.4	0.986
192.5	0.983
192.6	0.979
192.7	0.976
192.8	0.976
192.9	0.977
193	0.975
193.1	0.976
193.2	0.976
193.3	0.971
193.4	0.973
193.5	0.974
193.6	0.974
193.7	0.978
193.8	0.98
193.9	0.981
194	0.982
194.1	0.984
194.2	0.985
194.3	0.985
194.4	0.988
194.5	0.987
194.6	0.984
194.7	0.983
194.8	0.985
194.9	0.986
195	0.985
195.1	0.986
195.2	0.982
195.3	0.983
195.4	0.984
195.5	0.984
195.6	0.983
195.7	0.988
195.8	0.983
195.9	0.986
196	0.986
196.1	0.984
196.2	0.986
196.3	0.983
196.4	0.983
196.5	0.981
196.6	0.983
196.7	0.983
196.8	0.982
196.9	0.981
197	0.979
197.1	0.98
197.2	0.977
197.3	0.979
197.4	0.974
197.5	0.984
197.6	0.984
197.7	0.981
197.8	0.983
197.9	0.985
198	0.982
198.1	0.979
198.2	0.978
198.3	0.979
198.4	0.978
198.5	0.976
198.6	0.975
198.7	0.979
198.8	0.983
198.9	0.988
199	0.987
199.1	0.988
199.2	0.985
199.3	0.983
199.4	0.985
199.5	0.987
199.6	0.986
199.7	0.987
199.8	0.983
199.9	0.981
200	0.983
[truncated: 14,000 more rows]
