# Supplementary material for: Bayesian inference of kinetic schemes for ion channels by Kalman filtering
Source: eLife journal article supplement (doi:10.7554/elife.62714), 2022-05-04
Supplement: fig4-data4 [file 1_Sim_N_500_Strom_MW.xlsx]

## Sheet: Tabelle1
0.1	0
0.2	0
0.3	0
0.4	0
0.5	0
0.6	0
0.7	0
0.8	0
0.9	0
1	0
1.1	0
1.2	0
1.3	0
1.4	0
1.5	0
1.6	0
1.7	0
1.8	0
1.9	0
2	0
2.1	0
2.2	0
2.3	0
2.4	0
2.5	0
2.6	0
2.7	0
2.8	0
2.9	0
3	0
3.1	0
3.2	0
3.3	0
3.4	0
3.5	0
3.6	0
3.7	0
3.8	0
3.9	0
4	0
4.1	0
4.2	0
4.3	0
4.4	0
4.5	0
4.6	0
4.7	0
4.8	0
4.9	0
5	0
5.1	0
5.2	0
5.3	0
5.4	0
5.5	0
5.6	0
5.7	0
5.8	0
5.9	0
6	0
6.1	0
6.2	0
6.3	0
6.4	0
6.5	0
6.6	0
6.7	0
6.8	0
6.9	0
7	0
7.1	0
7.2	0
7.3	0
7.4	0
7.5	0
7.6	0
7.7	0
7.8	0
7.9	0
8	0
8.1	0
8.2	0
8.3	0
8.4	0
8.5	0
8.6	0
8.7	0
8.8	0
8.9	0
9	0
9.1	0
9.2	0
9.3	0
9.4	0
9.5	0
9.6	0
9.7	0
9.8	0
9.9	0
10	0
10.1	0
10.2	0
10.3	0
10.4	0
10.5	0
10.6	0
10.7	0
10.8	0
10.9	0
11	0
11.1	0
11.2	0
11.3	0
11.4	0
11.5	0
11.6	0
11.7	0
11.8	0
11.9	0
12	0
12.1	0
12.2	0
12.3	0
12.4	0
12.5	0
12.6	0
12.7	0
12.8	0
12.9	0
13	0
13.1	0
13.2	0
13.3	0
13.4	0
13.5	0
13.6	0
13.7	0
13.8	0
13.9	0
14	0
14.1	0
14.2	0
14.3	0
14.4	0
14.5	0
14.6	0
14.7	0
14.8	0
14.9	0
15	0
15.1	0
15.2	0
15.3	0
15.4	0
15.5	0
15.6	0
15.7	0
15.8	0
15.9	0
16	0
16.1	0
16.2	0
16.3	0
16.4	0
16.5	0
16.6	0
16.7	0
16.8	0
16.9	0
17	0
17.1	0
17.2	0
17.3	0
17.4	0
17.5	0
17.6	0
17.7	0
17.8	0
17.9	0
18	0
18.1	0
18.2	0
18.3	0
18.4	0
18.5	0
18.6	0
18.7	0
18.8	0
18.9	0
19	0
19.1	0
19.2	0
19.3	0
19.4	0
19.5	0
19.6	0
19.7	0
19.8	0
19.9	0
20	0
20.1	0
20.2	0
20.3	0
20.4	0
20.5	0
20.6	0
20.7	0
20.8	0
20.9	0
21	0
21.1	0
21.2	0
21.3	0
21.4	0
21.5	0
21.6	0
21.7	0
21.8	0
21.9	0
22	0
22.1	0
22.2	0
22.3	0
22.4	0
22.5	0
22.6	0
22.7	0
22.8	0
22.9	0
23	0
23.1	0
23.2	0
23.3	0
23.4	0
23.5	0
23.6	0
23.7	0
23.8	0
23.9	0
24	0
24.1	0
24.2	0
24.3	0
24.4	0
24.5	0
24.6	0
24.7	0
24.8	0
24.9	0
25	0
25.1	0
25.2	0
25.3	0
25.4	0
25.5	0
25.6	0
25.7	0
25.8	0
25.9	0
26	0
26.1	0
26.2	0
26.3	0
26.4	0
26.5	0
26.6	0
26.7	0
26.8	0
26.9	0
27	0
27.1	0
27.2	0
27.3	0
27.4	0
27.5	0
27.6	0
27.7	0
27.8	0
27.9	0
28	0
28.1	0
28.2	0
28.3	0
28.4	0
28.5	0
28.6	0
28.7	0
28.8	0
28.9	0
29	0
29.1	0
29.2	0
29.3	0
29.4	0
29.5	0
29.6	0
29.7	0
29.8	0
29.9	0
30	0
30.1	0
30.2	0
30.3	0
30.4	0
30.5	0
30.6	0
30.7	0
30.8	0
30.9	0
31	0
31.1	0
31.2	0
31.3	0
31.4	0
31.5	0
31.6	0
31.7	0
31.8	0
31.9	0
32	0
32.1	0
32.2	0
32.3	0
32.4	0
32.5	0
32.6	0
32.7	0
32.8	0
32.9	0
33	0
33.1	0
33.2	0
33.3	0
33.4	0
33.5	0
33.6	0
33.7	0
33.8	0
33.9	0
34	0
34.1	0
34.2	0
34.3	0
34.4	0
34.5	0
34.6	0
34.7	0
34.8	0
34.9	0
35	0
35.1	0
35.2	0
35.3	0
35.4	0
35.5	0
35.6	0
35.7	0
35.8	0
35.9	0
36	0
36.1	0
36.2	0
36.3	0
36.4	0
36.5	0
36.6	0
36.7	0
36.8	0
36.9	0
37	0
37.1	0
37.2	0
37.3	0
37.4	0
37.5	0
37.6	0
37.7	0
37.8	0
37.9	0
38	0
38.1	0
38.2	0
38.3	0
38.4	0
38.5	0
38.6	0
38.7	0
38.8	0
38.9	0
39	0
39.1	0
39.2	0
39.3	0
39.4	0
39.5	0
39.6	0
39.7	0
39.8	0
39.9	0
40	0
40.1	0
40.2	0
40.3	0
40.4	0
40.5	0
40.6	0
40.7	0
40.8	0
40.9	0
41	0
41.1	0
41.2	0
41.3	0
41.4	0
41.5	0
41.6	0
41.7	0
41.8	0
41.9	0
42	0
42.1	0
42.2	0
42.3	0
42.4	0
42.5	0
42.6	0
42.7	0
42.8	0
42.9	0
43	0
43.1	0
43.2	0
43.3	0
43.4	0
43.5	0
43.6	0
43.7	0
43.8	0
43.9	0
44	0
44.1	0
44.2	0
44.3	0
44.4	0
44.5	0
44.6	0
44.7	0
44.8	0
44.9	0
45	0
45.1	0
45.2	0
45.3	0
45.4	0
45.5	0
45.6	0
45.7	0
45.8	0
45.9	0
46	0
46.1	0
46.2	0
46.3	0
46.4	0
46.5	0
46.6	0
46.7	0
46.8	0
46.9	0
47	0
47.1	0
47.2	0
47.3	0
47.4	0
47.5	0
47.6	0
47.7	0
47.8	0
47.9	0
48	0
48.1	0
48.2	0
48.3	0
48.4	0
48.5	0
48.6	0
48.7	0
48.8	0
48.9	0
49	0
49.1	0
49.2	0
49.3	0
49.4	0
49.5	0
49.6	0
49.7	0
49.8	0
49.9	0
50	0
50.1	0
50.2	0
50.3	0
50.4	0
50.5	0
50.6	0
50.7	0
50.8	0
50.9	0
51	0
51.1	0
51.2	0
51.3	0
51.4	0
51.5	0
51.6	0
51.7	0
51.8	0
51.9	0
52	0
52.1	0
52.2	0
52.3	0
52.4	0
52.5	0
52.6	0
52.7	0
52.8	0
52.9	0
53	0
53.1	0
53.2	0
53.3	0
53.4	0
53.5	0
53.6	0
53.7	0
53.8	0
53.9	0
54	0
54.1	0
54.2	0
54.3	0
54.4	0
54.5	0
54.6	0
54.7	0
54.8	0
54.9	0
55	0
55.1	0
55.2	0
55.3	0
55.4	0
55.5	0
55.6	0
55.7	0
55.8	0
55.9	0
56	0
56.1	0
56.2	0
56.3	0
56.4	0
56.5	0
56.6	0
56.7	0
56.8	0
56.9	0
57	0
57.1	0
57.2	0
57.3	0
57.4	0
57.5	0
57.6	0
57.7	0
57.8	0
57.9	0
58	0
58.1	0
58.2	0
58.3	0
58.4	0
58.5	0
58.6	0
58.7	0
58.8	0
58.9	0
59	0
59.1	0
59.2	0
59.3	0
59.4	0
59.5	0
59.6	0
59.7	0
59.8	0
59.9	0
60	0
60.1	0
60.2	0
60.3	0
60.4	0
60.5	0
60.6	0
60.7	0
60.8	0
60.9	0
61	0
61.1	0
61.2	0
61.3	0
61.4	0
61.5	0
61.6	0
61.7	0
61.8	0
61.9	0
62	0
62.1	0
62.2	0
62.3	0
62.4	0
62.5	0
62.6	0
62.7	0
62.8	0
62.9	0
63	0
63.1	0
63.2	0
63.3	0
63.4	0
63.5	0
63.6	0
63.7	0
63.8	0
63.9	0
64	0
64.1	0
64.2	0
64.3	0
64.4	0
64.5	0
64.6	0
64.7	0
64.8	0
64.9	0
65	0
65.1	0
65.2	0
65.3	0
65.4	0
65.5	0
65.6	0
65.7	0
65.8	0
65.9	0
66	0
66.1	0
66.2	0
66.3	0
66.4	0
66.5	0
66.6	0
66.7	0
66.8	0
66.9	0
67	0
67.1	0
67.2	0
67.3	0
67.4	0
67.5	0
67.6	0
67.7	0
67.8	0
67.9	0
68	0
68.1	0
68.2	0
68.3	0
68.4	0
68.5	0
68.6	0
68.7	0
68.8	0
68.9	0
69	0
69.1	0
69.2	0
69.3	0
69.4	0
69.5	0
69.6	0
69.7	0
69.8	0
69.9	0
70	0
70.1	0
70.2	0
70.3	0
70.4	0
70.5	0
70.6	0
70.7	0
70.8	0
70.9	0
71	0
71.1	0
71.2	0
71.3	0
71.4	0
71.5	0
71.6	0
71.7	0
71.8	0
71.9	0
72	0
72.1	0
72.2	0
72.3	0
72.4	0
72.5	0
72.6	0
72.7	0
72.8	0
72.9	0
73	0
73.1	0
73.2	0
73.3	0
73.4	0
73.5	0
73.6	0
73.7	0
73.8	0
73.9	0
74	0
74.1	0
74.2	0
74.3	0
74.4	0
74.5	0
74.6	0
74.7	0
74.8	0
74.9	0
75	0
75.1	0
75.2	0
75.3	0
75.4	0
75.5	0
75.6	0
75.7	0
75.8	0
75.9	0
76	0
76.1	0
76.2	0
76.3	0
76.4	0
76.5	0
76.6	0
76.7	0
76.8	0
76.9	0
77	0
77.1	0
77.2	0
77.3	0
77.4	0
77.5	0
77.6	0
77.7	0
77.8	0
77.9	0
78	0
78.1	0
78.2	0
78.3	0
78.4	0
78.5	0
78.6	0
78.7	0
78.8	0
78.9	0
79	0
79.1	0
79.2	0
79.3	0
79.4	0
79.5	0
79.6	0
79.7	0
79.8	0
79.9	0
80	0
80.1	0
80.2	0
80.3	0
80.4	0
80.5	0
80.6	0
80.7	0
80.8	0
80.9	0
81	0
81.1	0
81.2	0
81.3	0
81.4	0
81.5	0
81.6	0
81.7	0
81.8	0
81.9	0
82	0
82.1	0
82.2	0
82.3	0
82.4	0
82.5	0
82.6	0
82.7	0
82.8	0
82.9	0
83	0
83.1	0
83.2	0
83.3	0
83.4	0
83.5	0
83.6	0
83.7	0
83.8	0
83.9	0
84	0
84.1	0
84.2	0
84.3	0
84.4	0
84.5	0
84.6	0
84.7	0
84.8	0
84.9	0
85	0
85.1	0
85.2	0
85.3	0
85.4	0
85.5	0
85.6	0
85.7	0
85.8	0
85.9	0
86	0
86.1	0
86.2	0
86.3	0
86.4	0
86.5	0
86.6	0
86.7	0
86.8	0
86.9	0
87	0
87.1	0
87.2	0
87.3	0
87.4	0
87.5	0
87.6	0
87.7	0
87.8	0
87.9	0
88	0
88.1	0
88.2	0
88.3	0
88.4	0
88.5	0
88.6	0
88.7	0
88.8	0
88.9	0
89	0
89.1	0
89.2	0
89.3	0
89.4	0
89.5	0
89.6	0
89.7	0
89.8	0
89.9	0
90	0
90.1	0
90.2	0
90.3	0
90.4	0
90.5	0
90.6	0
90.7	0
90.8	0
90.9	0
91	0
91.1	0
91.2	0
91.3	0
91.4	0
91.5	0
91.6	0
91.7	0
91.8	0
91.9	0
92	0
92.1	0
92.2	0
92.3	0
92.4	0
92.5	0
92.6	0
92.7	0
92.8	0
92.9	0
93	0
93.1	0
93.2	0
93.3	0
93.4	0
93.5	0
93.6	0
93.7	0
93.8	0
93.9	0
94	0
94.1	0
94.2	0
94.3	0
94.4	0
94.5	0
94.6	0
94.7	0
94.8	0
94.9	0
95	0
95.1	0
95.2	0
95.3	0
95.4	0
95.5	0
95.6	0
95.7	0
95.8	0
95.9	0
96	0
96.1	0
96.2	0
96.3	0
96.4	0
96.5	0
96.6	0
96.7	0
96.8	0
96.9	0
97	0
97.1	0
97.2	0
97.3	0
97.4	0
97.5	0
97.6	0
97.7	0
97.8	0
97.9	0
98	0
98.1	0
98.2	0
98.3	0
98.4	0
98.5	0
98.6	0
98.7	0
98.8	0
98.9	0
99	0
99.1	0
99.2	0
99.3	0
99.4	0
99.5	0
99.6	0
99.7	0
99.8	0
99.9	0
100	0
100.1	0
100.2	0
100.3	0.002
100.4	0.012
100.5	0.02
100.6	0.026
100.7	0.026
100.8	0.026
100.9	0.03
101	0.032
101.1	0.038
101.2	0.042
101.3	0.046
101.4	0.052
101.5	0.058
101.6	0.062
101.7	0.066
101.8	0.072
101.9	0.074
102	0.08
102.1	0.082
102.2	0.082
102.3	0.084
102.4	0.084
102.5	0.09
102.6	0.098
102.7	0.112
102.8	0.116
102.9	0.12
103	0.126
103.1	0.128
103.2	0.128
103.3	0.132
103.4	0.138
103.5	0.144
103.6	0.148
103.7	0.156
103.8	0.162
103.9	0.162
104	0.166
104.1	0.17
104.2	0.172
104.3	0.176
104.4	0.18
104.5	0.184
104.6	0.19
104.7	0.192
104.8	0.196
104.9	0.196
105	0.198
105.1	0.202
105.2	0.206
105.3	0.206
105.4	0.214
105.5	0.214
105.6	0.218
105.7	0.222
105.8	0.222
105.9	0.222
106	0.222
106.1	0.222
106.2	0.23
106.3	0.232
106.4	0.236
106.5	0.236
106.6	0.238
106.7	0.244
106.8	0.256
106.9	0.258
107	0.26
107.1	0.264
107.2	0.266
107.3	0.266
107.4	0.27
107.5	0.272
107.6	0.274
107.7	0.276
107.8	0.278
107.9	0.28
108	0.286
108.1	0.288
108.2	0.288
108.3	0.29
108.4	0.292
108.5	0.294
108.6	0.294
108.7	0.298
108.8	0.302
108.9	0.304
109	0.304
109.1	0.304
109.2	0.302
109.3	0.302
109.4	0.306
109.5	0.31
109.6	0.312
109.7	0.316
109.8	0.322
109.9	0.322
110	0.326
110.1	0.33
110.2	0.33
110.3	0.33
110.4	0.334
110.5	0.336
110.6	0.338
110.7	0.342
110.8	0.342
110.9	0.342
111	0.346
111.1	0.35
111.2	0.354
111.3	0.356
111.4	0.354
111.5	0.354
111.6	0.354
111.7	0.356
111.8	0.366
111.9	0.368
112	0.374
112.1	0.376
112.2	0.374
112.3	0.376
112.4	0.384
112.5	0.384
112.6	0.39
112.7	0.392
112.8	0.398
112.9	0.402
113	0.404
113.1	0.408
113.2	0.414
113.3	0.418
113.4	0.422
113.5	0.428
113.6	0.43
113.7	0.432
113.8	0.434
113.9	0.436
114	0.44
114.1	0.444
114.2	0.448
114.3	0.45
114.4	0.452
114.5	0.452
114.6	0.452
114.7	0.45
114.8	0.452
114.9	0.454
115	0.456
115.1	0.458
115.2	0.462
115.3	0.466
115.4	0.468
115.5	0.47
115.6	0.472
115.7	0.478
115.8	0.478
115.9	0.48
116	0.48
116.1	0.48
116.2	0.48
116.3	0.482
116.4	0.484
116.5	0.488
116.6	0.49
116.7	0.49
116.8	0.49
116.9	0.494
117	0.494
117.1	0.5
117.2	0.504
117.3	0.51
117.4	0.512
117.5	0.512
117.6	0.514
117.7	0.518
117.8	0.518
117.9	0.52
118	0.52
118.1	0.52
118.2	0.518
118.3	0.518
118.4	0.516
118.5	0.522
118.6	0.524
118.7	0.524
118.8	0.526
118.9	0.532
119	0.532
119.1	0.534
119.2	0.534
119.3	0.534
119.4	0.534
119.5	0.54
119.6	0.54
119.7	0.54
119.8	0.542
119.9	0.544
120	0.544
120.1	0.544
120.2	0.548
120.3	0.55
120.4	0.554
120.5	0.558
120.6	0.558
120.7	0.562
120.8	0.562
120.9	0.562
121	0.564
121.1	0.566
121.2	0.564
121.3	0.566
121.4	0.57
121.5	0.572
121.6	0.574
121.7	0.574
121.8	0.574
121.9	0.576
122	0.576
122.1	0.576
122.2	0.58
122.3	0.582
122.4	0.584
122.5	0.586
122.6	0.586
122.7	0.588
122.8	0.588
122.9	0.59
123	0.594
123.1	0.594
123.2	0.598
123.3	0.598
123.4	0.602
123.5	0.604
123.6	0.606
123.7	0.606
123.8	0.606
123.9	0.604
124	0.61
124.1	0.61
124.2	0.612
124.3	0.612
124.4	0.616
124.5	0.616
124.6	0.62
124.7	0.62
124.8	0.62
124.9	0.62
125	0.62
125.1	0.62
125.2	0.622
125.3	0.622
125.4	0.624
125.5	0.624
125.6	0.622
125.7	0.624
125.8	0.624
125.9	0.628
126	0.632
126.1	0.628
126.2	0.632
126.3	0.634
126.4	0.632
126.5	0.634
126.6	0.634
126.7	0.634
126.8	0.632
126.9	0.63
127	0.628
127.1	0.626
127.2	0.63
127.3	0.63
127.4	0.636
127.5	0.642
127.6	0.642
127.7	0.642
127.8	0.642
127.9	0.644
128	0.644
128.1	0.644
128.2	0.646
128.3	0.648
128.4	0.65
128.5	0.652
128.6	0.652
128.7	0.65
128.8	0.652
128.9	0.654
129	0.654
129.1	0.654
129.2	0.654
129.3	0.654
129.4	0.656
129.5	0.656
129.6	0.656
129.7	0.656
129.8	0.66
129.9	0.66
130	0.66
130.1	0.66
130.2	0.662
130.3	0.664
130.4	0.664
130.5	0.668
130.6	0.668
130.7	0.668
130.8	0.67
130.9	0.67
131	0.674
131.1	0.67
131.2	0.668
131.3	0.668
131.4	0.67
131.5	0.67
131.6	0.67
131.7	0.67
131.8	0.67
131.9	0.672
132	0.674
132.1	0.674
132.2	0.674
132.3	0.678
132.4	0.678
132.5	0.678
132.6	0.68
132.7	0.682
132.8	0.684
132.9	0.686
133	0.684
133.1	0.686
133.2	0.688
133.3	0.684
133.4	0.688
133.5	0.688
133.6	0.688
133.7	0.686
133.8	0.688
133.9	0.688
134	0.688
134.1	0.69
134.2	0.696
134.3	0.698
134.4	0.698
134.5	0.7
134.6	0.702
134.7	0.706
134.8	0.706
134.9	0.706
135	0.71
135.1	0.712
135.2	0.712
135.3	0.712
135.4	0.712
135.5	0.716
135.6	0.722
135.7	0.722
135.8	0.722
135.9	0.722
136	0.722
136.1	0.724
136.2	0.724
136.3	0.724
136.4	0.724
136.5	0.724
136.6	0.726
136.7	0.722
136.8	0.726
136.9	0.722
137	0.724
137.1	0.724
137.2	0.724
137.3	0.724
137.4	0.726
137.5	0.726
137.6	0.73
137.7	0.732
137.8	0.732
137.9	0.732
138	0.732
138.1	0.736
138.2	0.736
138.3	0.738
138.4	0.74
138.5	0.74
138.6	0.74
138.7	0.74
138.8	0.742
138.9	0.74
139	0.74
139.1	0.74
139.2	0.74
139.3	0.742
139.4	0.744
139.5	0.744
139.6	0.742
139.7	0.742
139.8	0.742
139.9	0.74
140	0.74
140.1	0.744
140.2	0.744
140.3	0.744
140.4	0.744
140.5	0.744
140.6	0.744
140.7	0.742
140.8	0.744
140.9	0.744
141	0.742
141.1	0.74
141.2	0.744
141.3	0.744
141.4	0.744
141.5	0.744
141.6	0.742
141.7	0.742
141.8	0.746
141.9	0.746
142	0.748
142.1	0.748
142.2	0.748
142.3	0.75
142.4	0.75
142.5	0.752
142.6	0.752
142.7	0.752
142.8	0.752
142.9	0.752
143	0.752
143.1	0.754
143.2	0.756
143.3	0.756
143.4	0.756
143.5	0.758
143.6	0.76
143.7	0.754
143.8	0.756
143.9	0.756
144	0.754
144.1	0.752
144.2	0.752
144.3	0.75
144.4	0.75
144.5	0.754
144.6	0.748
144.7	0.748
144.8	0.75
144.9	0.748
145	0.748
145.1	0.752
145.2	0.752
145.3	0.754
145.4	0.75
145.5	0.75
145.6	0.75
145.7	0.754
145.8	0.754
145.9	0.752
146	0.75
146.1	0.75
146.2	0.75
146.3	0.752
146.4	0.754
146.5	0.752
146.6	0.75
146.7	0.748
146.8	0.748
146.9	0.748
147	0.746
147.1	0.748
147.2	0.748
147.3	0.748
147.4	0.75
147.5	0.754
147.6	0.754
147.7	0.752
147.8	0.752
147.9	0.754
148	0.756
148.1	0.754
148.2	0.754
148.3	0.756
148.4	0.756
148.5	0.76
148.6	0.762
148.7	0.764
148.8	0.766
148.9	0.768
149	0.768
149.1	0.77
149.2	0.77
149.3	0.774
149.4	0.774
149.5	0.778
149.6	0.78
149.7	0.782
149.8	0.782
149.9	0.782
150	0.78
150.1	0.78
150.2	0.784
150.3	0.784
150.4	0.782
150.5	0.78
150.6	0.78
150.7	0.778
150.8	0.778
150.9	0.776
151	0.772
151.1	0.772
151.2	0.774
151.3	0.774
151.4	0.778
151.5	0.782
151.6	0.784
151.7	0.788
151.8	0.79
151.9	0.788
152	0.79
152.1	0.79
152.2	0.79
152.3	0.794
152.4	0.792
152.5	0.792
152.6	0.792
152.7	0.792
152.8	0.792
152.9	0.792
153	0.79
153.1	0.788
153.2	0.786
153.3	0.788
153.4	0.79
153.5	0.788
153.6	0.786
153.7	0.786
153.8	0.786
153.9	0.786
154	0.788
154.1	0.79
154.2	0.792
154.3	0.788
154.4	0.788
154.5	0.79
154.6	0.79
154.7	0.79
154.8	0.79
154.9	0.79
155	0.786
155.1	0.786
155.2	0.786
155.3	0.786
155.4	0.79
155.5	0.788
155.6	0.79
155.7	0.79
155.8	0.79
155.9	0.79
156	0.786
156.1	0.786
156.2	0.786
156.3	0.784
156.4	0.784
156.5	0.784
156.6	0.78
156.7	0.78
156.8	0.778
156.9	0.78
157	0.78
157.1	0.78
157.2	0.776
157.3	0.776
157.4	0.778
157.5	0.778
157.6	0.778
157.7	0.782
157.8	0.782
157.9	0.782
158	0.782
158.1	0.782
158.2	0.78
158.3	0.782
158.4	0.784
158.5	0.782
158.6	0.78
158.7	0.778
158.8	0.78
158.9	0.778
159	0.78
159.1	0.78
159.2	0.78
159.3	0.778
159.4	0.778
159.5	0.782
159.6	0.784
159.7	0.784
159.8	0.786
159.9	0.788
160	0.786
160.1	0.784
160.2	0.786
160.3	0.784
160.4	0.784
160.5	0.784
160.6	0.784
160.7	0.784
160.8	0.782
160.9	0.784
161	0.784
161.1	0.784
161.2	0.782
161.3	0.782
161.4	0.784
161.5	0.782
161.6	0.782
161.7	0.784
161.8	0.784
161.9	0.784
162	0.784
162.1	0.786
162.2	0.788
162.3	0.792
162.4	0.788
162.5	0.786
162.6	0.786
162.7	0.786
162.8	0.786
162.9	0.786
163	0.786
163.1	0.786
163.2	0.786
163.3	0.786
163.4	0.788
163.5	0.786
163.6	0.786
163.7	0.784
163.8	0.784
163.9	0.782
164	0.782
164.1	0.78
164.2	0.782
164.3	0.784
164.4	0.782
164.5	0.782
164.6	0.786
164.7	0.786
164.8	0.786
164.9	0.786
165	0.784
165.1	0.782
165.2	0.782
165.3	0.782
165.4	0.782
165.5	0.78
165.6	0.78
165.7	0.778
165.8	0.778
165.9	0.778
166	0.778
166.1	0.776
166.2	0.776
166.3	0.776
166.4	0.774
166.5	0.772
166.6	0.77
166.7	0.77
166.8	0.774
166.9	0.774
167	0.772
167.1	0.774
167.2	0.774
167.3	0.77
167.4	0.768
167.5	0.77
167.6	0.77
167.7	0.77
167.8	0.772
167.9	0.772
168	0.772
168.1	0.772
168.2	0.772
168.3	0.772
168.4	0.772
168.5	0.774
168.6	0.772
168.7	0.772
168.8	0.772
168.9	0.772
169	0.77
169.1	0.772
169.2	0.772
169.3	0.77
169.4	0.772
169.5	0.774
169.6	0.77
169.7	0.77
169.8	0.768
169.9	0.77
170	0.768
170.1	0.766
170.2	0.762
170.3	0.766
170.4	0.766
170.5	0.766
170.6	0.766
170.7	0.768
170.8	0.766
170.9	0.766
171	0.766
171.1	0.766
171.2	0.766
171.3	0.768
171.4	0.768
171.5	0.768
171.6	0.766
171.7	0.766
171.8	0.768
171.9	0.768
172	0.77
172.1	0.768
172.2	0.77
172.3	0.772
172.4	0.772
172.5	0.768
172.6	0.766
172.7	0.766
172.8	0.766
172.9	0.762
173	0.762
173.1	0.76
173.2	0.76
173.3	0.76
173.4	0.76
173.5	0.764
173.6	0.762
173.7	0.764
173.8	0.764
173.9	0.764
174	0.766
174.1	0.766
174.2	0.766
174.3	0.766
174.4	0.768
174.5	0.766
174.6	0.766
174.7	0.768
174.8	0.766
174.9	0.768
175	0.768
175.1	0.768
175.2	0.766
175.3	0.766
175.4	0.766
175.5	0.766
175.6	0.768
175.7	0.768
175.8	0.768
175.9	0.768
176	0.768
176.1	0.77
176.2	0.768
176.3	0.768
176.4	0.77
176.5	0.772
176.6	0.772
176.7	0.772
176.8	0.772
176.9	0.768
177	0.766
177.1	0.766
177.2	0.764
177.3	0.768
177.4	0.77
177.5	0.77
177.6	0.768
177.7	0.768
177.8	0.768
177.9	0.768
178	0.768
178.1	0.766
178.2	0.766
178.3	0.766
178.4	0.768
178.5	0.77
178.6	0.772
178.7	0.772
178.8	0.772
178.9	0.774
179	0.774
179.1	0.774
179.2	0.774
179.3	0.772
179.4	0.772
179.5	0.772
179.6	0.774
179.7	0.774
179.8	0.774
179.9	0.776
180	0.776
180.1	0.772
180.2	0.772
180.3	0.77
180.4	0.772
180.5	0.772
180.6	0.772
180.7	0.776
180.8	0.778
180.9	0.776
181	0.774
181.1	0.774
181.2	0.774
181.3	0.772
181.4	0.772
181.5	0.772
181.6	0.772
181.7	0.772
181.8	0.776
181.9	0.778
182	0.778
182.1	0.778
182.2	0.78
182.3	0.78
182.4	0.78
182.5	0.782
182.6	0.78
182.7	0.78
182.8	0.778
182.9	0.776
183	0.774
183.1	0.776
183.2	0.776
183.3	0.776
183.4	0.778
183.5	0.78
183.6	0.78
183.7	0.78
183.8	0.782
183.9	0.784
184	0.784
184.1	0.786
184.2	0.782
184.3	0.784
184.4	0.784
184.5	0.784
184.6	0.784
184.7	0.784
184.8	0.784
184.9	0.782
185	0.782
185.1	0.786
185.2	0.786
185.3	0.788
185.4	0.788
185.5	0.79
185.6	0.788
185.7	0.788
185.8	0.788
185.9	0.79
186	0.79
186.1	0.79
186.2	0.788
186.3	0.788
186.4	0.788
186.5	0.788
186.6	0.794
186.7	0.794
186.8	0.792
186.9	0.792
187	0.79
187.1	0.788
187.2	0.788
187.3	0.79
187.4	0.794
187.5	0.794
187.6	0.794
187.7	0.794
187.8	0.794
187.9	0.794
188	0.794
188.1	0.794
188.2	0.794
188.3	0.796
188.4	0.796
188.5	0.798
188.6	0.798
188.7	0.798
188.8	0.798
188.9	0.798
189	0.8
189.1	0.8
189.2	0.8
189.3	0.8
189.4	0.802
189.5	0.8
189.6	0.798
189.7	0.8
189.8	0.798
189.9	0.798
190	0.796
190.1	0.796
190.2	0.794
190.3	0.794
190.4	0.794
190.5	0.794
190.6	0.794
190.7	0.794
190.8	0.794
190.9	0.794
191	0.794
191.1	0.794
191.2	0.792
191.3	0.792
191.4	0.792
191.5	0.792
191.6	0.796
191.7	0.796
191.8	0.796
191.9	0.796
192	0.796
192.1	0.794
192.2	0.794
192.3	0.794
192.4	0.792
192.5	0.79
192.6	0.792
192.7	0.792
192.8	0.79
192.9	0.79
193	0.79
193.1	0.788
193.2	0.786
193.3	0.784
193.4	0.784
193.5	0.784
193.6	0.784
193.7	0.782
193.8	0.782
193.9	0.782
194	0.782
194.1	0.784
194.2	0.784
194.3	0.784
194.4	0.784
194.5	0.786
194.6	0.786
194.7	0.79
194.8	0.792
194.9	0.788
195	0.788
195.1	0.788
195.2	0.788
195.3	0.79
195.4	0.792
195.5	0.792
195.6	0.796
195.7	0.796
195.8	0.798
195.9	0.8
196	0.798
196.1	0.798
196.2	0.798
196.3	0.794
196.4	0.794
196.5	0.79
196.6	0.79
196.7	0.79
196.8	0.79
196.9	0.788
197	0.788
197.1	0.786
197.2	0.786
197.3	0.786
197.4	0.786
197.5	0.786
197.6	0.786
197.7	0.788
197.8	0.79
197.9	0.79
198	0.792
198.1	0.792
198.2	0.792
198.3	0.79
198.4	0.79
198.5	0.788
198.6	0.788
198.7	0.792
198.8	0.792
198.9	0.792
199	0.792
199.1	0.792
199.2	0.796
199.3	0.8
199.4	0.802
199.5	0.8
199.6	0.802
199.7	0.802
199.8	0.804
199.9	0.806
200	0.806
[truncated: 14,000 more rows]
