# Supplementary material for: Bayesian inference of kinetic schemes for ion channels by Kalman filtering
Source: eLife journal article supplement (doi:10.7554/elife.62714), 2022-05-04
Supplement: fig4-data4 [file 1_Sim_N_800_Fluor_MW_8M.xlsx]

## Sheet: Tabelle1
0.1	0
0.2	0
0.3	0
0.4	0
0.5	0
0.6	0
0.7	0
0.8	0
0.9	0
1	0
1.1	0
1.2	0
1.3	0
1.4	0
1.5	0
1.6	0
1.7	0
1.8	0
1.9	0
2	0
2.1	0
2.2	0
2.3	0
2.4	0
2.5	0
2.6	0
2.7	0
2.8	0
2.9	0
3	0
3.1	0
3.2	0
3.3	0
3.4	0
3.5	0
3.6	0
3.7	0
3.8	0
3.9	0
4	0
4.1	0
4.2	0
4.3	0
4.4	0
4.5	0
4.6	0
4.7	0
4.8	0
4.9	0
5	0
5.1	0
5.2	0
5.3	0
5.4	0
5.5	0
5.6	0
5.7	0
5.8	0
5.9	0
6	0
6.1	0
6.2	0
6.3	0
6.4	0
6.5	0
6.6	0
6.7	0
6.8	0
6.9	0
7	0
7.1	0
7.2	0
7.3	0
7.4	0
7.5	0
7.6	0
7.7	0
7.8	0
7.9	0
8	0
8.1	0
8.2	0
8.3	0
8.4	0
8.5	0
8.6	0
8.7	0
8.8	0
8.9	0
9	0
9.1	0
9.2	0
9.3	0
9.4	0
9.5	0
9.6	0
9.7	0
9.8	0
9.9	0
10	0
10.1	0
10.2	0
10.3	0
10.4	0
10.5	0
10.6	0
10.7	0
10.8	0
10.9	0
11	0
11.1	0
11.2	0
11.3	0
11.4	0
11.5	0
11.6	0
11.7	0
11.8	0
11.9	0
12	0
12.1	0
12.2	0
12.3	0
12.4	0
12.5	0
12.6	0
12.7	0
12.8	0
12.9	0
13	0
13.1	0
13.2	0
13.3	0
13.4	0
13.5	0
13.6	0
13.7	0
13.8	0
13.9	0
14	0
14.1	0
14.2	0
14.3	0
14.4	0
14.5	0
14.6	0
14.7	0
14.8	0
14.9	0
15	0
15.1	0
15.2	0
15.3	0
15.4	0
15.5	0
15.6	0
15.7	0
15.8	0
15.9	0
16	0
16.1	0
16.2	0
16.3	0
16.4	0
16.5	0
16.6	0
16.7	0
16.8	0
16.9	0
17	0
17.1	0
17.2	0
17.3	0
17.4	0
17.5	0
17.6	0
17.7	0
17.8	0
17.9	0
18	0
18.1	0
18.2	0
18.3	0
18.4	0
18.5	0
18.6	0
18.7	0
18.8	0
18.9	0
19	0
19.1	0
19.2	0
19.3	0
19.4	0
19.5	0
19.6	0
19.7	0
19.8	0
19.9	0
20	0
20.1	0
20.2	0
20.3	0
20.4	0
20.5	0
20.6	0
20.7	0
20.8	0
20.9	0
21	0
21.1	0
21.2	0
21.3	0
21.4	0
21.5	0
21.6	0
21.7	0
21.8	0
21.9	0
22	0
22.1	0
22.2	0
22.3	0
22.4	0
22.5	0
22.6	0
22.7	0
22.8	0
22.9	0
23	0
23.1	0
23.2	0
23.3	0
23.4	0
23.5	0
23.6	0
23.7	0
23.8	0
23.9	0
24	0
24.1	0
24.2	0
24.3	0
24.4	0
24.5	0
24.6	0
24.7	0
24.8	0
24.9	0
25	0
25.1	0
25.2	0
25.3	0
25.4	0
25.5	0
25.6	0
25.7	0
25.8	0
25.9	0
26	0
26.1	0
26.2	0
26.3	0
26.4	0
26.5	0
26.6	0
26.7	0
26.8	0
26.9	0
27	0
27.1	0
27.2	0
27.3	0
27.4	0
27.5	0
27.6	0
27.7	0
27.8	0
27.9	0
28	0
28.1	0
28.2	0
28.3	0
28.4	0
28.5	0
28.6	0
28.7	0
28.8	0
28.9	0
29	0
29.1	0
29.2	0
29.3	0
29.4	0
29.5	0
29.6	0
29.7	0
29.8	0
29.9	0
30	0
30.1	0
30.2	0
30.3	0
30.4	0
30.5	0
30.6	0
30.7	0
30.8	0
30.9	0
31	0
31.1	0
31.2	0
31.3	0
31.4	0
31.5	0
31.6	0
31.7	0
31.8	0
31.9	0
32	0
32.1	0
32.2	0
32.3	0
32.4	0
32.5	0
32.6	0
32.7	0
32.8	0
32.9	0
33	0
33.1	0
33.2	0
33.3	0
33.4	0
33.5	0
33.6	0
33.7	0
33.8	0
33.9	0
34	0
34.1	0
34.2	0
34.3	0
34.4	0
34.5	0
34.6	0
34.7	0
34.8	0
34.9	0
35	0
35.1	0
35.2	0
35.3	0
35.4	0
35.5	0
35.6	0
35.7	0
35.8	0
35.9	0
36	0
36.1	0
36.2	0
36.3	0
36.4	0
36.5	0
36.6	0
36.7	0
36.8	0
36.9	0
37	0
37.1	0
37.2	0
37.3	0
37.4	0
37.5	0
37.6	0
37.7	0
37.8	0
37.9	0
38	0
38.1	0
38.2	0
38.3	0
38.4	0
38.5	0
38.6	0
38.7	0
38.8	0
38.9	0
39	0
39.1	0
39.2	0
39.3	0
39.4	0
39.5	0
39.6	0
39.7	0
39.8	0
39.9	0
40	0
40.1	0
40.2	0
40.3	0
40.4	0
40.5	0
40.6	0
40.7	0
40.8	0
40.9	0
41	0
41.1	0
41.2	0
41.3	0
41.4	0
41.5	0
41.6	0
41.7	0
41.8	0
41.9	0
42	0
42.1	0
42.2	0
42.3	0
42.4	0
42.5	0
42.6	0
42.7	0
42.8	0
42.9	0
43	0
43.1	0
43.2	0
43.3	0
43.4	0
43.5	0
43.6	0
43.7	0
43.8	0
43.9	0
44	0
44.1	0
44.2	0
44.3	0
44.4	0
44.5	0
44.6	0
44.7	0
44.8	0
44.9	0
45	0
45.1	0
45.2	0
45.3	0
45.4	0
45.5	0
45.6	0
45.7	0
45.8	0
45.9	0
46	0
46.1	0
46.2	0
46.3	0
46.4	0
46.5	0
46.6	0
46.7	0
46.8	0
46.9	0
47	0
47.1	0
47.2	0
47.3	0
47.4	0
47.5	0
47.6	0
47.7	0
47.8	0
47.9	0
48	0
48.1	0
48.2	0
48.3	0
48.4	0
48.5	0
48.6	0
48.7	0
48.8	0
48.9	0
49	0
49.1	0
49.2	0
49.3	0
49.4	0
49.5	0
49.6	0
49.7	0
49.8	0
49.9	0
50	0
50.1	0
50.2	0
50.3	0
50.4	0
50.5	0
50.6	0
50.7	0
50.8	0
50.9	0
51	0
51.1	0
51.2	0
51.3	0
51.4	0
51.5	0
51.6	0
51.7	0
51.8	0
51.9	0
52	0
52.1	0
52.2	0
52.3	0
52.4	0
52.5	0
52.6	0
52.7	0
52.8	0
52.9	0
53	0
53.1	0
53.2	0
53.3	0
53.4	0
53.5	0
53.6	0
53.7	0
53.8	0
53.9	0
54	0
54.1	0
54.2	0
54.3	0
54.4	0
54.5	0
54.6	0
54.7	0
54.8	0
54.9	0
55	0
55.1	0
55.2	0
55.3	0
55.4	0
55.5	0
55.6	0
55.7	0
55.8	0
55.9	0
56	0
56.1	0
56.2	0
56.3	0
56.4	0
56.5	0
56.6	0
56.7	0
56.8	0
56.9	0
57	0
57.1	0
57.2	0
57.3	0
57.4	0
57.5	0
57.6	0
57.7	0
57.8	0
57.9	0
58	0
58.1	0
58.2	0
58.3	0
58.4	0
58.5	0
58.6	0
58.7	0
58.8	0
58.9	0
59	0
59.1	0
59.2	0
59.3	0
59.4	0
59.5	0
59.6	0
59.7	0
59.8	0
59.9	0
60	0
60.1	0
60.2	0
60.3	0
60.4	0
60.5	0
60.6	0
60.7	0
60.8	0
60.9	0
61	0
61.1	0
61.2	0
61.3	0
61.4	0
61.5	0
61.6	0
61.7	0
61.8	0
61.9	0
62	0
62.1	0
62.2	0
62.3	0
62.4	0
62.5	0
62.6	0
62.7	0
62.8	0
62.9	0
63	0
63.1	0
63.2	0
63.3	0
63.4	0
63.5	0
63.6	0
63.7	0
63.8	0
63.9	0
64	0
64.1	0
64.2	0
64.3	0
64.4	0
64.5	0
64.6	0
64.7	0
64.8	0
64.9	0
65	0
65.1	0
65.2	0
65.3	0
65.4	0
65.5	0
65.6	0
65.7	0
65.8	0
65.9	0
66	0
66.1	0
66.2	0
66.3	0
66.4	0
66.5	0
66.6	0
66.7	0
66.8	0
66.9	0
67	0
67.1	0
67.2	0
67.3	0
67.4	0
67.5	0
67.6	0
67.7	0
67.8	0
67.9	0
68	0
68.1	0
68.2	0
68.3	0
68.4	0
68.5	0
68.6	0
68.7	0
68.8	0
68.9	0
69	0
69.1	0
69.2	0
69.3	0
69.4	0
69.5	0
69.6	0
69.7	0
69.8	0
69.9	0
70	0
70.1	0
70.2	0
70.3	0
70.4	0
70.5	0
70.6	0
70.7	0
70.8	0
70.9	0
71	0
71.1	0
71.2	0
71.3	0
71.4	0
71.5	0
71.6	0
71.7	0
71.8	0
71.9	0
72	0
72.1	0
72.2	0
72.3	0
72.4	0
72.5	0
72.6	0
72.7	0
72.8	0
72.9	0
73	0
73.1	0
73.2	0
73.3	0
73.4	0
73.5	0
73.6	0
73.7	0
73.8	0
73.9	0
74	0
74.1	0
74.2	0
74.3	0
74.4	0
74.5	0
74.6	0
74.7	0
74.8	0
74.9	0
75	0
75.1	0
75.2	0
75.3	0
75.4	0
75.5	0
75.6	0
75.7	0
75.8	0
75.9	0
76	0
76.1	0
76.2	0
76.3	0
76.4	0
76.5	0
76.6	0
76.7	0
76.8	0
76.9	0
77	0
77.1	0
77.2	0
77.3	0
77.4	0
77.5	0
77.6	0
77.7	0
77.8	0
77.9	0
78	0
78.1	0
78.2	0
78.3	0
78.4	0
78.5	0
78.6	0
78.7	0
78.8	0
78.9	0
79	0
79.1	0
79.2	0
79.3	0
79.4	0
79.5	0
79.6	0
79.7	0
79.8	0
79.9	0
80	0
80.1	0
80.2	0
80.3	0
80.4	0
80.5	0
80.6	0
80.7	0
80.8	0
80.9	0
81	0
81.1	0
81.2	0
81.3	0
81.4	0
81.5	0
81.6	0
81.7	0
81.8	0
81.9	0
82	0
82.1	0
82.2	0
82.3	0
82.4	0
82.5	0
82.6	0
82.7	0
82.8	0
82.9	0
83	0
83.1	0
83.2	0
83.3	0
83.4	0
83.5	0
83.6	0
83.7	0
83.8	0
83.9	0
84	0
84.1	0
84.2	0
84.3	0
84.4	0
84.5	0
84.6	0
84.7	0
84.8	0
84.9	0
85	0
85.1	0
85.2	0
85.3	0
85.4	0
85.5	0
85.6	0
85.7	0
85.8	0
85.9	0
86	0
86.1	0
86.2	0
86.3	0
86.4	0
86.5	0
86.6	0
86.7	0
86.8	0
86.9	0
87	0
87.1	0
87.2	0
87.3	0
87.4	0
87.5	0
87.6	0
87.7	0
87.8	0
87.9	0
88	0
88.1	0
88.2	0
88.3	0
88.4	0
88.5	0
88.6	0
88.7	0
88.8	0
88.9	0
89	0
89.1	0
89.2	0
89.3	0
89.4	0
89.5	0
89.6	0
89.7	0
89.8	0
89.9	0
90	0
90.1	0
90.2	0
90.3	0
90.4	0
90.5	0
90.6	0
90.7	0
90.8	0
90.9	0
91	0
91.1	0
91.2	0
91.3	0
91.4	0
91.5	0
91.6	0
91.7	0
91.8	0
91.9	0
92	0
92.1	0
92.2	0
92.3	0
92.4	0
92.5	0
92.6	0
92.7	0
92.8	0
92.9	0
93	0
93.1	0
93.2	0
93.3	0
93.4	0
93.5	0
93.6	0
93.7	0
93.8	0
93.9	0
94	0
94.1	0
94.2	0
94.3	0
94.4	0
94.5	0
94.6	0
94.7	0
94.8	0
94.9	0
95	0
95.1	0
95.2	0
95.3	0
95.4	0
95.5	0
95.6	0
95.7	0
95.8	0
95.9	0
96	0
96.1	0
96.2	0
96.3	0
96.4	0
96.5	0
96.6	0
96.7	0
96.8	0
96.9	0
97	0
97.1	0
97.2	0
97.3	0
97.4	0
97.5	0
97.6	0
97.7	0
97.8	0
97.9	0
98	0
98.1	0
98.2	0
98.3	0
98.4	0
98.5	0
98.6	0
98.7	0
98.8	0
98.9	0
99	0
99.1	0
99.2	0
99.3	0
99.4	0
99.5	0
99.6	0
99.7	0
99.8	0
99.9	0
100	0
100.1	0.3425
100.2	0.51625
100.3	0.63375
100.4	0.705
100.5	0.75625
100.6	0.79875
100.7	0.818125
100.8	0.836875
100.9	0.85125
101	0.86
101.1	0.875
101.2	0.87875
101.3	0.893125
101.4	0.899375
101.5	0.901875
101.6	0.89625
101.7	0.896875
101.8	0.904375
101.9	0.910625
102	0.909375
102.1	0.910625
102.2	0.913125
102.3	0.91375
102.4	0.91
102.5	0.90875
102.6	0.914375
102.7	0.914375
102.8	0.921875
102.9	0.916875
103	0.916875
103.1	0.921875
103.2	0.92375
103.3	0.92625
103.4	0.925625
103.5	0.920625
103.6	0.923125
103.7	0.925
103.8	0.9275
103.9	0.9325
104	0.92875
104.1	0.929375
104.2	0.935
104.3	0.935625
104.4	0.935
104.5	0.929375
104.6	0.928125
104.7	0.920625
104.8	0.92625
104.9	0.925625
105	0.92375
105.1	0.9175
105.2	0.919375
105.3	0.915625
105.4	0.92
105.5	0.915625
105.6	0.918125
105.7	0.925
105.8	0.928125
105.9	0.92375
106	0.9225
106.1	0.93
106.2	0.9275
106.3	0.9225
106.4	0.9225
106.5	0.9175
106.6	0.919375
106.7	0.931875
106.8	0.935
106.9	0.93
107	0.93
107.1	0.930625
107.2	0.933125
107.3	0.938125
107.4	0.936875
107.5	0.9275
107.6	0.925
107.7	0.9325
107.8	0.936875
107.9	0.938125
108	0.935
108.1	0.938125
108.2	0.935
108.3	0.931875
108.4	0.94
108.5	0.939375
108.6	0.940625
108.7	0.935
108.8	0.935625
108.9	0.935
109	0.93125
109.1	0.9325
109.2	0.93125
109.3	0.936875
109.4	0.936875
109.5	0.938125
109.6	0.936875
109.7	0.9375
109.8	0.94125
109.9	0.93875
110	0.9425
110.1	0.94
110.2	0.9425
110.3	0.93875
110.4	0.938125
110.5	0.936875
110.6	0.938125
110.7	0.939375
110.8	0.939375
110.9	0.936875
111	0.933125
111.1	0.935
111.2	0.936875
111.3	0.93875
111.4	0.93875
111.5	0.94125
111.6	0.940625
111.7	0.945
111.8	0.95
111.9	0.951875
112	0.956875
112.1	0.956875
112.2	0.953125
112.3	0.95
112.4	0.94625
112.5	0.940625
112.6	0.9375
112.7	0.941875
112.8	0.940625
112.9	0.935
113	0.941875
113.1	0.941875
113.2	0.94625
113.3	0.95125
113.4	0.9475
113.5	0.946875
113.6	0.943125
113.7	0.943125
113.8	0.935
113.9	0.94
114	0.94375
114.1	0.94625
114.2	0.950625
114.3	0.95125
114.4	0.949375
114.5	0.9475
114.6	0.949375
114.7	0.949375
114.8	0.95375
114.9	0.955
115	0.954375
115.1	0.95375
115.2	0.95125
115.3	0.94375
115.4	0.940625
115.5	0.95
115.6	0.945625
115.7	0.951875
115.8	0.949375
115.9	0.9475
116	0.949375
116.1	0.945625
116.2	0.95375
116.3	0.950625
116.4	0.9525
116.5	0.94875
116.6	0.948125
116.7	0.94875
116.8	0.95
116.9	0.948125
117	0.950625
117.1	0.94625
117.2	0.943125
117.3	0.944375
117.4	0.945625
117.5	0.945
117.6	0.946875
117.7	0.945
117.8	0.95125
117.9	0.95
118	0.95625
118.1	0.954375
118.2	0.950625
118.3	0.953125
118.4	0.951875
118.5	0.945625
118.6	0.9475
118.7	0.95
118.8	0.949375
118.9	0.95
119	0.950625
119.1	0.95375
119.2	0.95
119.3	0.948125
119.4	0.94875
119.5	0.95625
119.6	0.95625
119.7	0.94875
119.8	0.95125
119.9	0.955
120	0.958125
120.1	0.96
120.2	0.96125
120.3	0.958125
120.4	0.96
120.5	0.964375
120.6	0.963125
120.7	0.958125
120.8	0.960625
120.9	0.960625
121	0.969375
121.1	0.966875
121.2	0.9625
121.3	0.961875
121.4	0.959375
121.5	0.95875
121.6	0.9625
121.7	0.961875
121.8	0.95875
121.9	0.958125
122	0.959375
122.1	0.96125
122.2	0.95875
122.3	0.963125
122.4	0.965
122.5	0.965
122.6	0.961875
122.7	0.96375
122.8	0.964375
122.9	0.9625
123	0.9625
123.1	0.955625
123.2	0.961875
123.3	0.9625
123.4	0.96125
123.5	0.96
123.6	0.96
123.7	0.95125
123.8	0.954375
123.9	0.95375
124	0.949375
124.1	0.950625
124.2	0.95125
124.3	0.954375
124.4	0.9525
124.5	0.9525
124.6	0.9575
124.7	0.96
124.8	0.960625
124.9	0.96
125	0.9625
125.1	0.964375
125.2	0.9625
125.3	0.95875
125.4	0.954375
125.5	0.96
125.6	0.961875
125.7	0.96625
125.8	0.96625
125.9	0.963125
126	0.96375
126.1	0.968125
126.2	0.965
126.3	0.964375
126.4	0.9625
126.5	0.964375
126.6	0.96625
126.7	0.96875
126.8	0.970625
126.9	0.965625
127	0.964375
127.1	0.966875
127.2	0.964375
127.3	0.96375
127.4	0.965625
127.5	0.96625
127.6	0.96625
127.7	0.96375
127.8	0.959375
127.9	0.96125
128	0.965
128.1	0.965
128.2	0.96875
128.3	0.97125
128.4	0.97375
128.5	0.965625
128.6	0.966875
128.7	0.97
128.8	0.966875
128.9	0.9675
129	0.965
129.1	0.961875
129.2	0.961875
129.3	0.96375
129.4	0.9675
129.5	0.963125
129.6	0.963125
129.7	0.96625
129.8	0.973125
129.9	0.970625
130	0.96875
130.1	0.964375
130.2	0.966875
130.3	0.96375
130.4	0.96
130.5	0.965
130.6	0.969375
130.7	0.965
130.8	0.965
130.9	0.96375
131	0.9675
131.1	0.97
131.2	0.97125
131.3	0.9725
131.4	0.97375
131.5	0.974375
131.6	0.96625
131.7	0.97
131.8	0.97
131.9	0.966875
132	0.96375
132.1	0.96625
132.2	0.968125
132.3	0.97
132.4	0.975
132.5	0.97625
132.6	0.9725
132.7	0.96875
132.8	0.973125
132.9	0.975625
133	0.97375
133.1	0.974375
133.2	0.973125
133.3	0.973125
133.4	0.968125
133.5	0.97
133.6	0.9725
133.7	0.971875
133.8	0.968125
133.9	0.970625
134	0.97125
134.1	0.971875
134.2	0.975625
134.3	0.975
134.4	0.9675
134.5	0.96875
134.6	0.965
134.7	0.97
134.8	0.96625
134.9	0.969375
135	0.97125
135.1	0.975
135.2	0.975625
135.3	0.9725
135.4	0.971875
135.5	0.974375
135.6	0.971875
135.7	0.973125
135.8	0.968125
135.9	0.968125
136	0.966875
136.1	0.965625
136.2	0.965
136.3	0.965
136.4	0.96625
136.5	0.9675
136.6	0.965625
136.7	0.9675
136.8	0.966875
136.9	0.968125
137	0.968125
137.1	0.9675
137.2	0.968125
137.3	0.96875
137.4	0.97
137.5	0.97375
137.6	0.973125
137.7	0.971875
137.8	0.97
137.9	0.9725
138	0.97
138.1	0.965625
138.2	0.97125
138.3	0.969375
138.4	0.973125
138.5	0.97625
138.6	0.97875
138.7	0.979375
138.8	0.978125
138.9	0.97875
139	0.975
139.1	0.974375
139.2	0.975
139.3	0.975625
139.4	0.98
139.5	0.9775
139.6	0.974375
139.7	0.971875
139.8	0.973125
139.9	0.970625
140	0.968125
140.1	0.965
140.2	0.9675
140.3	0.96125
140.4	0.9675
140.5	0.974375
140.6	0.97375
140.7	0.97125
140.8	0.974375
140.9	0.976875
141	0.975625
141.1	0.97625
141.2	0.975
141.3	0.9775
141.4	0.979375
141.5	0.979375
141.6	0.980625
141.7	0.97875
141.8	0.975625
141.9	0.97125
142	0.9675
142.1	0.971875
142.2	0.9725
142.3	0.9725
142.4	0.9775
142.5	0.974375
142.6	0.9725
142.7	0.976875
142.8	0.975625
142.9	0.97
143	0.97125
143.1	0.97125
143.2	0.97
143.3	0.97125
143.4	0.975625
143.5	0.97
143.6	0.970625
143.7	0.97125
143.8	0.969375
143.9	0.97375
144	0.97375
144.1	0.970625
144.2	0.975
144.3	0.97375
144.4	0.97625
144.5	0.97875
144.6	0.981875
144.7	0.983125
144.8	0.98
144.9	0.976875
145	0.97375
145.1	0.975
145.2	0.97125
145.3	0.974375
145.4	0.973125
145.5	0.973125
145.6	0.975625
145.7	0.976875
145.8	0.975625
145.9	0.976875
146	0.97625
146.1	0.9775
146.2	0.974375
146.3	0.9775
146.4	0.980625
146.5	0.980625
146.6	0.975
146.7	0.9725
146.8	0.976875
146.9	0.979375
147	0.975625
147.1	0.976875
147.2	0.97875
147.3	0.97625
147.4	0.976875
147.5	0.97875
147.6	0.976875
147.7	0.980625
147.8	0.97875
147.9	0.979375
148	0.978125
148.1	0.97875
148.2	0.978125
148.3	0.97875
148.4	0.97625
148.5	0.974375
148.6	0.9775
148.7	0.975
148.8	0.974375
148.9	0.970625
149	0.969375
149.1	0.971875
149.2	0.971875
149.3	0.9725
149.4	0.971875
149.5	0.974375
149.6	0.974375
149.7	0.975
149.8	0.9775
149.9	0.979375
150	0.980625
150.1	0.981875
150.2	0.979375
150.3	0.975625
150.4	0.9725
150.5	0.97875
150.6	0.98
150.7	0.97625
150.8	0.9775
150.9	0.974375
151	0.97625
151.1	0.976875
151.2	0.975625
151.3	0.975625
151.4	0.975
151.5	0.97875
151.6	0.978125
151.7	0.979375
151.8	0.975625
151.9	0.978125
152	0.981875
152.1	0.976875
152.2	0.97625
152.3	0.97125
152.4	0.97125
152.5	0.975
152.6	0.975
152.7	0.973125
152.8	0.97625
152.9	0.973125
153	0.97375
153.1	0.975625
153.2	0.974375
153.3	0.973125
153.4	0.975625
153.5	0.976875
153.6	0.9775
153.7	0.98125
153.8	0.981875
153.9	0.980625
154	0.98
154.1	0.979375
154.2	0.978125
154.3	0.979375
154.4	0.980625
154.5	0.9825
154.6	0.97875
154.7	0.978125
154.8	0.976875
154.9	0.976875
155	0.976875
155.1	0.976875
155.2	0.981875
155.3	0.983125
155.4	0.984375
155.5	0.983125
155.6	0.985625
155.7	0.98625
155.8	0.98375
155.9	0.983125
156	0.979375
156.1	0.9775
156.2	0.974375
156.3	0.971875
156.4	0.97375
156.5	0.97375
156.6	0.976875
156.7	0.975
156.8	0.975
156.9	0.974375
157	0.976875
157.1	0.9775
157.2	0.978125
157.3	0.97625
157.4	0.980625
157.5	0.980625
157.6	0.98125
157.7	0.980625
157.8	0.98
157.9	0.97625
158	0.976875
158.1	0.979375
158.2	0.9775
158.3	0.978125
158.4	0.9775
158.5	0.981875
158.6	0.98
158.7	0.98125
158.8	0.98125
158.9	0.980625
159	0.980625
159.1	0.980625
159.2	0.9825
159.3	0.985
159.4	0.984375
159.5	0.98125
159.6	0.98125
159.7	0.978125
159.8	0.978125
159.9	0.978125
160	0.979375
160.1	0.975625
160.2	0.971875
160.3	0.974375
160.4	0.9775
160.5	0.98
160.6	0.979375
160.7	0.985
160.8	0.984375
160.9	0.984375
161	0.9825
161.1	0.98625
161.2	0.98375
161.3	0.98375
161.4	0.980625
161.5	0.9775
161.6	0.98125
161.7	0.976875
161.8	0.9775
161.9	0.978125
162	0.978125
162.1	0.98125
162.2	0.98
162.3	0.98375
162.4	0.9825
162.5	0.98125
162.6	0.98375
162.7	0.98
162.8	0.981875
162.9	0.97875
163	0.980625
163.1	0.975
163.2	0.97625
163.3	0.97625
163.4	0.978125
163.5	0.9775
163.6	0.979375
163.7	0.980625
163.8	0.980625
163.9	0.979375
164	0.980625
164.1	0.978125
164.2	0.9825
164.3	0.983125
164.4	0.98
164.5	0.979375
164.6	0.97625
164.7	0.975625
164.8	0.98125
164.9	0.98375
165	0.981875
165.1	0.98
165.2	0.97625
165.3	0.98125
165.4	0.9775
165.5	0.975625
165.6	0.9775
165.7	0.976875
165.8	0.979375
165.9	0.981875
166	0.98125
166.1	0.98125
166.2	0.980625
166.3	0.979375
166.4	0.978125
166.5	0.97375
166.6	0.9775
166.7	0.9775
166.8	0.97125
166.9	0.97375
167	0.975
167.1	0.975
167.2	0.97875
167.3	0.974375
167.4	0.9775
167.5	0.97625
167.6	0.97625
167.7	0.97875
167.8	0.98
167.9	0.98125
168	0.983125
168.1	0.98125
168.2	0.979375
168.3	0.98125
168.4	0.9825
168.5	0.9825
168.6	0.98125
168.7	0.97875
168.8	0.9775
168.9	0.978125
169	0.978125
169.1	0.97375
169.2	0.975625
169.3	0.97625
169.4	0.97625
169.5	0.97875
169.6	0.975625
169.7	0.974375
169.8	0.975625
169.9	0.981875
170	0.979375
170.1	0.976875
170.2	0.97875
170.3	0.98125
170.4	0.981875
170.5	0.981875
170.6	0.98
170.7	0.98625
170.8	0.983125
170.9	0.9825
171	0.985
171.1	0.98375
171.2	0.978125
171.3	0.978125
171.4	0.979375
171.5	0.97875
171.6	0.98125
171.7	0.9825
171.8	0.9825
171.9	0.984375
172	0.984375
172.1	0.985625
172.2	0.984375
172.3	0.985625
172.4	0.981875
172.5	0.98
172.6	0.976875
172.7	0.976875
172.8	0.975625
172.9	0.97875
173	0.981875
173.1	0.979375
173.2	0.98
173.3	0.981875
173.4	0.984375
173.5	0.985
173.6	0.98625
173.7	0.985625
173.8	0.984375
173.9	0.984375
174	0.980625
174.1	0.983125
174.2	0.97875
174.3	0.980625
174.4	0.97875
174.5	0.97875
174.6	0.975625
174.7	0.9775
174.8	0.9775
174.9	0.97875
175	0.9775
175.1	0.980625
175.2	0.98
175.3	0.979375
175.4	0.98125
175.5	0.9825
175.6	0.983125
175.7	0.984375
175.8	0.983125
175.9	0.980625
176	0.98375
176.1	0.984375
176.2	0.9875
176.3	0.985
176.4	0.98625
176.5	0.983125
176.6	0.98625
176.7	0.98625
176.8	0.98375
176.9	0.984375
177	0.98
177.1	0.975625
177.2	0.98
177.3	0.98
177.4	0.97625
177.5	0.979375
177.6	0.979375
177.7	0.975625
177.8	0.978125
177.9	0.98
178	0.980625
178.1	0.98125
178.2	0.980625
178.3	0.98
178.4	0.981875
178.5	0.9825
178.6	0.98125
178.7	0.97875
178.8	0.975625
178.9	0.97875
179	0.98
179.1	0.983125
179.2	0.98375
179.3	0.980625
179.4	0.97875
179.5	0.981875
179.6	0.98375
179.7	0.98375
179.8	0.983125
179.9	0.984375
180	0.983125
180.1	0.9825
180.2	0.98
180.3	0.98
180.4	0.98125
180.5	0.984375
180.6	0.98625
180.7	0.981875
180.8	0.98125
180.9	0.98125
181	0.979375
181.1	0.97625
181.2	0.980625
181.3	0.986875
181.4	0.9875
181.5	0.985625
181.6	0.985625
181.7	0.9875
181.8	0.985625
181.9	0.983125
182	0.98
182.1	0.98
182.2	0.9825
182.3	0.983125
182.4	0.981875
182.5	0.976875
182.6	0.975625
182.7	0.97875
182.8	0.9775
182.9	0.9825
183	0.98
183.1	0.98
183.2	0.980625
183.3	0.9825
183.4	0.983125
183.5	0.98375
183.6	0.98375
183.7	0.98375
183.8	0.9825
183.9	0.980625
184	0.978125
184.1	0.981875
184.2	0.981875
184.3	0.98
184.4	0.981875
184.5	0.97875
184.6	0.981875
184.7	0.985
184.8	0.9825
184.9	0.98375
185	0.980625
185.1	0.9825
185.2	0.98125
185.3	0.98
185.4	0.976875
185.5	0.980625
185.6	0.980625
185.7	0.985
185.8	0.98375
185.9	0.984375
186	0.98
186.1	0.98
186.2	0.973125
186.3	0.978125
186.4	0.9825
186.5	0.979375
186.6	0.980625
186.7	0.985625
186.8	0.98125
186.9	0.97875
187	0.979375
187.1	0.9775
187.2	0.975625
187.3	0.976875
187.4	0.9775
187.5	0.97875
187.6	0.9775
187.7	0.97875
187.8	0.9775
187.9	0.9775
188	0.9775
188.1	0.979375
188.2	0.978125
188.3	0.9775
188.4	0.976875
188.5	0.98125
188.6	0.981875
188.7	0.983125
188.8	0.98
188.9	0.981875
189	0.98
189.1	0.97875
189.2	0.9775
189.3	0.979375
189.4	0.981875
189.5	0.98
189.6	0.979375
189.7	0.98
189.8	0.981875
189.9	0.981875
190	0.98
190.1	0.976875
190.2	0.978125
190.3	0.9775
190.4	0.978125
190.5	0.98125
190.6	0.98
190.7	0.98125
190.8	0.983125
190.9	0.98375
191	0.981875
191.1	0.98375
191.2	0.98125
191.3	0.979375
191.4	0.983125
191.5	0.981875
191.6	0.97875
191.7	0.9775
191.8	0.976875
191.9	0.9775
192	0.975625
192.1	0.975625
192.2	0.97625
192.3	0.97625
192.4	0.97875
192.5	0.976875
192.6	0.976875
192.7	0.97625
192.8	0.97875
192.9	0.98375
193	0.98125
193.1	0.984375
193.2	0.983125
193.3	0.980625
193.4	0.98375
193.5	0.980625
193.6	0.979375
193.7	0.98125
193.8	0.979375
193.9	0.983125
194	0.981875
194.1	0.983125
194.2	0.9825
194.3	0.981875
194.4	0.98125
194.5	0.984375
194.6	0.98375
194.7	0.98375
194.8	0.980625
194.9	0.981875
195	0.98125
195.1	0.9825
195.2	0.98
195.3	0.9825
195.4	0.985625
195.5	0.9875
195.6	0.983125
195.7	0.983125
195.8	0.98625
195.9	0.984375
196	0.98375
196.1	0.9825
196.2	0.980625
196.3	0.980625
196.4	0.981875
196.5	0.979375
196.6	0.978125
196.7	0.978125
196.8	0.98
196.9	0.975
197	0.976875
197.1	0.9775
197.2	0.980625
197.3	0.981875
197.4	0.980625
197.5	0.981875
197.6	0.980625
197.7	0.981875
197.8	0.9825
197.9	0.97875
198	0.980625
198.1	0.9825
198.2	0.984375
198.3	0.98625
198.4	0.985625
198.5	0.98375
198.6	0.983125
198.7	0.98375
198.8	0.98375
198.9	0.98375
199	0.981875
199.1	0.984375
199.2	0.984375
199.3	0.986875
199.4	0.98375
199.5	0.98375
199.6	0.983125
199.7	0.984375
199.8	0.981875
199.9	0.983125
200	0.980625
[truncated: 14,000 more rows]
