# Supplementary material for: Bayesian inference of kinetic schemes for ion channels by Kalman filtering
Source: eLife journal article supplement (doi:10.7554/elife.62714), 2022-05-04
Supplement: fig4-data4 [file 1_Sim_N_800_Strom_MW_8M.xlsx]

## Sheet: Tabelle1
0.1	0
0.2	0
0.3	0
0.4	0
0.5	0
0.6	0
0.7	0
0.8	0
0.9	0
1	0
1.1	0
1.2	0
1.3	0
1.4	0
1.5	0
1.6	0
1.7	0
1.8	0
1.9	0
2	0
2.1	0
2.2	0
2.3	0
2.4	0
2.5	0
2.6	0
2.7	0
2.8	0
2.9	0
3	0
3.1	0
3.2	0
3.3	0
3.4	0
3.5	0
3.6	0
3.7	0
3.8	0
3.9	0
4	0
4.1	0
4.2	0
4.3	0
4.4	0
4.5	0
4.6	0
4.7	0
4.8	0
4.9	0
5	0
5.1	0
5.2	0
5.3	0
5.4	0
5.5	0
5.6	0
5.7	0
5.8	0
5.9	0
6	0
6.1	0
6.2	0
6.3	0
6.4	0
6.5	0
6.6	0
6.7	0
6.8	0
6.9	0
7	0
7.1	0
7.2	0
7.3	0
7.4	0
7.5	0
7.6	0
7.7	0
7.8	0
7.9	0
8	0
8.1	0
8.2	0
8.3	0
8.4	0
8.5	0
8.6	0
8.7	0
8.8	0
8.9	0
9	0
9.1	0
9.2	0
9.3	0
9.4	0
9.5	0
9.6	0
9.7	0
9.8	0
9.9	0
10	0
10.1	0
10.2	0
10.3	0
10.4	0
10.5	0
10.6	0
10.7	0
10.8	0
10.9	0
11	0
11.1	0
11.2	0
11.3	0
11.4	0
11.5	0
11.6	0
11.7	0
11.8	0
11.9	0
12	0
12.1	0
12.2	0
12.3	0
12.4	0
12.5	0
12.6	0
12.7	0
12.8	0
12.9	0
13	0
13.1	0
13.2	0
13.3	0
13.4	0
13.5	0
13.6	0
13.7	0
13.8	0
13.9	0
14	0
14.1	0
14.2	0
14.3	0
14.4	0
14.5	0
14.6	0
14.7	0
14.8	0
14.9	0
15	0
15.1	0
15.2	0
15.3	0
15.4	0
15.5	0
15.6	0
15.7	0
15.8	0
15.9	0
16	0
16.1	0
16.2	0
16.3	0
16.4	0
16.5	0
16.6	0
16.7	0
16.8	0
16.9	0
17	0
17.1	0
17.2	0
17.3	0
17.4	0
17.5	0
17.6	0
17.7	0
17.8	0
17.9	0
18	0
18.1	0
18.2	0
18.3	0
18.4	0
18.5	0
18.6	0
18.7	0
18.8	0
18.9	0
19	0
19.1	0
19.2	0
19.3	0
19.4	0
19.5	0
19.6	0
19.7	0
19.8	0
19.9	0
20	0
20.1	0
20.2	0
20.3	0
20.4	0
20.5	0
20.6	0
20.7	0
20.8	0
20.9	0
21	0
21.1	0
21.2	0
21.3	0
21.4	0
21.5	0
21.6	0
21.7	0
21.8	0
21.9	0
22	0
22.1	0
22.2	0
22.3	0
22.4	0
22.5	0
22.6	0
22.7	0
22.8	0
22.9	0
23	0
23.1	0
23.2	0
23.3	0
23.4	0
23.5	0
23.6	0
23.7	0
23.8	0
23.9	0
24	0
24.1	0
24.2	0
24.3	0
24.4	0
24.5	0
24.6	0
24.7	0
24.8	0
24.9	0
25	0
25.1	0
25.2	0
25.3	0
25.4	0
25.5	0
25.6	0
25.7	0
25.8	0
25.9	0
26	0
26.1	0
26.2	0
26.3	0
26.4	0
26.5	0
26.6	0
26.7	0
26.8	0
26.9	0
27	0
27.1	0
27.2	0
27.3	0
27.4	0
27.5	0
27.6	0
27.7	0
27.8	0
27.9	0
28	0
28.1	0
28.2	0
28.3	0
28.4	0
28.5	0
28.6	0
28.7	0
28.8	0
28.9	0
29	0
29.1	0
29.2	0
29.3	0
29.4	0
29.5	0
29.6	0
29.7	0
29.8	0
29.9	0
30	0
30.1	0
30.2	0
30.3	0
30.4	0
30.5	0
30.6	0
30.7	0
30.8	0
30.9	0
31	0
31.1	0
31.2	0
31.3	0
31.4	0
31.5	0
31.6	0
31.7	0
31.8	0
31.9	0
32	0
32.1	0
32.2	0
32.3	0
32.4	0
32.5	0
32.6	0
32.7	0
32.8	0
32.9	0
33	0
33.1	0
33.2	0
33.3	0
33.4	0
33.5	0
33.6	0
33.7	0
33.8	0
33.9	0
34	0
34.1	0
34.2	0
34.3	0
34.4	0
34.5	0
34.6	0
34.7	0
34.8	0
34.9	0
35	0
35.1	0
35.2	0
35.3	0
35.4	0
35.5	0
35.6	0
35.7	0
35.8	0
35.9	0
36	0
36.1	0
36.2	0
36.3	0
36.4	0
36.5	0
36.6	0
36.7	0
36.8	0
36.9	0
37	0
37.1	0
37.2	0
37.3	0
37.4	0
37.5	0
37.6	0
37.7	0
37.8	0
37.9	0
38	0
38.1	0
38.2	0
38.3	0
38.4	0
38.5	0
38.6	0
38.7	0
38.8	0
38.9	0
39	0
39.1	0
39.2	0
39.3	0
39.4	0
39.5	0
39.6	0
39.7	0
39.8	0
39.9	0
40	0
40.1	0
40.2	0
40.3	0
40.4	0
40.5	0
40.6	0
40.7	0
40.8	0
40.9	0
41	0
41.1	0
41.2	0
41.3	0
41.4	0
41.5	0
41.6	0
41.7	0
41.8	0
41.9	0
42	0
42.1	0
42.2	0
42.3	0
42.4	0
42.5	0
42.6	0
42.7	0
42.8	0
42.9	0
43	0
43.1	0
43.2	0
43.3	0
43.4	0
43.5	0
43.6	0
43.7	0
43.8	0
43.9	0
44	0
44.1	0
44.2	0
44.3	0
44.4	0
44.5	0
44.6	0
44.7	0
44.8	0
44.9	0
45	0
45.1	0
45.2	0
45.3	0
45.4	0
45.5	0
45.6	0
45.7	0
45.8	0
45.9	0
46	0
46.1	0
46.2	0
46.3	0
46.4	0
46.5	0
46.6	0
46.7	0
46.8	0
46.9	0
47	0
47.1	0
47.2	0
47.3	0
47.4	0
47.5	0
47.6	0
47.7	0
47.8	0
47.9	0
48	0
48.1	0
48.2	0
48.3	0
48.4	0
48.5	0
48.6	0
48.7	0
48.8	0
48.9	0
49	0
49.1	0
49.2	0
49.3	0
49.4	0
49.5	0
49.6	0
49.7	0
49.8	0
49.9	0
50	0
50.1	0
50.2	0
50.3	0
50.4	0
50.5	0
50.6	0
50.7	0
50.8	0
50.9	0
51	0
51.1	0
51.2	0
51.3	0
51.4	0
51.5	0
51.6	0
51.7	0
51.8	0
51.9	0
52	0
52.1	0
52.2	0
52.3	0
52.4	0
52.5	0
52.6	0
52.7	0
52.8	0
52.9	0
53	0
53.1	0
53.2	0
53.3	0
53.4	0
53.5	0
53.6	0
53.7	0
53.8	0
53.9	0
54	0
54.1	0
54.2	0
54.3	0
54.4	0
54.5	0
54.6	0
54.7	0
54.8	0
54.9	0
55	0
55.1	0
55.2	0
55.3	0
55.4	0
55.5	0
55.6	0
55.7	0
55.8	0
55.9	0
56	0
56.1	0
56.2	0
56.3	0
56.4	0
56.5	0
56.6	0
56.7	0
56.8	0
56.9	0
57	0
57.1	0
57.2	0
57.3	0
57.4	0
57.5	0
57.6	0
57.7	0
57.8	0
57.9	0
58	0
58.1	0
58.2	0
58.3	0
58.4	0
58.5	0
58.6	0
58.7	0
58.8	0
58.9	0
59	0
59.1	0
59.2	0
59.3	0
59.4	0
59.5	0
59.6	0
59.7	0
59.8	0
59.9	0
60	0
60.1	0
60.2	0
60.3	0
60.4	0
60.5	0
60.6	0
60.7	0
60.8	0
60.9	0
61	0
61.1	0
61.2	0
61.3	0
61.4	0
61.5	0
61.6	0
61.7	0
61.8	0
61.9	0
62	0
62.1	0
62.2	0
62.3	0
62.4	0
62.5	0
62.6	0
62.7	0
62.8	0
62.9	0
63	0
63.1	0
63.2	0
63.3	0
63.4	0
63.5	0
63.6	0
63.7	0
63.8	0
63.9	0
64	0
64.1	0
64.2	0
64.3	0
64.4	0
64.5	0
64.6	0
64.7	0
64.8	0
64.9	0
65	0
65.1	0
65.2	0
65.3	0
65.4	0
65.5	0
65.6	0
65.7	0
65.8	0
65.9	0
66	0
66.1	0
66.2	0
66.3	0
66.4	0
66.5	0
66.6	0
66.7	0
66.8	0
66.9	0
67	0
67.1	0
67.2	0
67.3	0
67.4	0
67.5	0
67.6	0
67.7	0
67.8	0
67.9	0
68	0
68.1	0
68.2	0
68.3	0
68.4	0
68.5	0
68.6	0
68.7	0
68.8	0
68.9	0
69	0
69.1	0
69.2	0
69.3	0
69.4	0
69.5	0
69.6	0
69.7	0
69.8	0
69.9	0
70	0
70.1	0
70.2	0
70.3	0
70.4	0
70.5	0
70.6	0
70.7	0
70.8	0
70.9	0
71	0
71.1	0
71.2	0
71.3	0
71.4	0
71.5	0
71.6	0
71.7	0
71.8	0
71.9	0
72	0
72.1	0
72.2	0
72.3	0
72.4	0
72.5	0
72.6	0
72.7	0
72.8	0
72.9	0
73	0
73.1	0
73.2	0
73.3	0
73.4	0
73.5	0
73.6	0
73.7	0
73.8	0
73.9	0
74	0
74.1	0
74.2	0
74.3	0
74.4	0
74.5	0
74.6	0
74.7	0
74.8	0
74.9	0
75	0
75.1	0
75.2	0
75.3	0
75.4	0
75.5	0
75.6	0
75.7	0
75.8	0
75.9	0
76	0
76.1	0
76.2	0
76.3	0
76.4	0
76.5	0
76.6	0
76.7	0
76.8	0
76.9	0
77	0
77.1	0
77.2	0
77.3	0
77.4	0
77.5	0
77.6	0
77.7	0
77.8	0
77.9	0
78	0
78.1	0
78.2	0
78.3	0
78.4	0
78.5	0
78.6	0
78.7	0
78.8	0
78.9	0
79	0
79.1	0
79.2	0
79.3	0
79.4	0
79.5	0
79.6	0
79.7	0
79.8	0
79.9	0
80	0
80.1	0
80.2	0
80.3	0
80.4	0
80.5	0
80.6	0
80.7	0
80.8	0
80.9	0
81	0
81.1	0
81.2	0
81.3	0
81.4	0
81.5	0
81.6	0
81.7	0
81.8	0
81.9	0
82	0
82.1	0
82.2	0
82.3	0
82.4	0
82.5	0
82.6	0
82.7	0
82.8	0
82.9	0
83	0
83.1	0
83.2	0
83.3	0
83.4	0
83.5	0
83.6	0
83.7	0
83.8	0
83.9	0
84	0
84.1	0
84.2	0
84.3	0
84.4	0
84.5	0
84.6	0
84.7	0
84.8	0
84.9	0
85	0
85.1	0
85.2	0
85.3	0
85.4	0
85.5	0
85.6	0
85.7	0
85.8	0
85.9	0
86	0
86.1	0
86.2	0
86.3	0
86.4	0
86.5	0
86.6	0
86.7	0
86.8	0
86.9	0
87	0
87.1	0
87.2	0
87.3	0
87.4	0
87.5	0
87.6	0
87.7	0
87.8	0
87.9	0
88	0
88.1	0
88.2	0
88.3	0
88.4	0
88.5	0
88.6	0
88.7	0
88.8	0
88.9	0
89	0
89.1	0
89.2	0
89.3	0
89.4	0
89.5	0
89.6	0
89.7	0
89.8	0
89.9	0
90	0
90.1	0
90.2	0
90.3	0
90.4	0
90.5	0
90.6	0
90.7	0
90.8	0
90.9	0
91	0
91.1	0
91.2	0
91.3	0
91.4	0
91.5	0
91.6	0
91.7	0
91.8	0
91.9	0
92	0
92.1	0
92.2	0
92.3	0
92.4	0
92.5	0
92.6	0
92.7	0
92.8	0
92.9	0
93	0
93.1	0
93.2	0
93.3	0
93.4	0
93.5	0
93.6	0
93.7	0
93.8	0
93.9	0
94	0
94.1	0
94.2	0
94.3	0
94.4	0
94.5	0
94.6	0
94.7	0
94.8	0
94.9	0
95	0
95.1	0
95.2	0
95.3	0
95.4	0
95.5	0
95.6	0
95.7	0
95.8	0
95.9	0
96	0
96.1	0
96.2	0
96.3	0
96.4	0
96.5	0
96.6	0
96.7	0
96.8	0
96.9	0
97	0
97.1	0
97.2	0
97.3	0
97.4	0
97.5	0
97.6	0
97.7	0
97.8	0
97.9	0
98	0
98.1	0
98.2	0
98.3	0
98.4	0
98.5	0
98.6	0
98.7	0
98.8	0
98.9	0
99	0
99.1	0
99.2	0
99.3	0
99.4	0
99.5	0
99.6	0
99.7	0
99.8	0
99.9	0
100	0
100.1	0
100.2	0
100.3	0
100.4	0.00125
100.5	0.005
100.6	0.0075
100.7	0.01375
100.8	0.02
100.9	0.02125
101	0.0225
101.1	0.02625
101.2	0.02875
101.3	0.03
101.4	0.0325
101.5	0.04125
101.6	0.04625
101.7	0.05125
101.8	0.0575
101.9	0.05875
102	0.06
102.1	0.06125
102.2	0.06125
102.3	0.06625
102.4	0.06875
102.5	0.0725
102.6	0.07875
102.7	0.0825
102.8	0.08625
102.9	0.0925
103	0.09375
103.1	0.095
103.2	0.1025
103.3	0.10375
103.4	0.1075
103.5	0.11125
103.6	0.115
103.7	0.11875
103.8	0.12
103.9	0.1225
104	0.12375
104.1	0.12625
104.2	0.13
104.3	0.13625
104.4	0.1375
104.5	0.1425
104.6	0.145
104.7	0.14875
104.8	0.15
104.9	0.15375
105	0.155
105.1	0.16
105.2	0.1625
105.3	0.165
105.4	0.16875
105.5	0.175
105.6	0.17875
105.7	0.18125
105.8	0.18125
105.9	0.18625
106	0.18875
106.1	0.19125
106.2	0.195
106.3	0.19625
106.4	0.2025
106.5	0.20375
106.6	0.2075
106.7	0.21125
106.8	0.21625
106.9	0.2225
107	0.22375
107.1	0.22875
107.2	0.23375
107.3	0.2375
107.4	0.24
107.5	0.24125
107.6	0.245
107.7	0.2475
107.8	0.2475
107.9	0.24875
108	0.25125
108.1	0.25375
108.2	0.25625
108.3	0.26
108.4	0.2625
108.5	0.2675
108.6	0.27
108.7	0.27375
108.8	0.275
108.9	0.2775
109	0.28
109.1	0.28
109.2	0.28125
109.3	0.28625
109.4	0.2875
109.5	0.2875
109.6	0.2925
109.7	0.3
109.8	0.30375
109.9	0.30875
110	0.31125
110.1	0.3125
110.2	0.31375
110.3	0.31625
110.4	0.32
110.5	0.32125
110.6	0.3225
110.7	0.325
110.8	0.32625
110.9	0.32875
111	0.33125
111.1	0.3325
111.2	0.335
111.3	0.33625
111.4	0.335
111.5	0.33625
111.6	0.3375
111.7	0.34
111.8	0.3425
111.9	0.34375
112	0.34625
112.1	0.34875
112.2	0.355
112.3	0.3575
112.4	0.35875
112.5	0.35875
112.6	0.3625
112.7	0.365
112.8	0.37
112.9	0.37125
113	0.3725
113.1	0.37125
113.2	0.3725
113.3	0.37375
113.4	0.375
113.5	0.3775
113.6	0.38
113.7	0.3825
113.8	0.3825
113.9	0.39
114	0.39
114.1	0.39125
114.2	0.3925
114.3	0.3925
114.4	0.39375
114.5	0.395
114.6	0.3975
114.7	0.3975
114.8	0.3975
114.9	0.3975
115	0.39875
115.1	0.40125
115.2	0.40375
115.3	0.40375
115.4	0.405
115.5	0.4075
115.6	0.41125
115.7	0.41125
115.8	0.41375
115.9	0.415
116	0.41625
116.1	0.41875
116.2	0.42
116.3	0.42
116.4	0.4225
116.5	0.42375
116.6	0.4275
116.7	0.42875
116.8	0.42875
116.9	0.43125
117	0.4325
117.1	0.435
117.2	0.4375
117.3	0.44125
117.4	0.4425
117.5	0.4425
117.6	0.44375
117.7	0.445
117.8	0.44625
117.9	0.44875
118	0.45
118.1	0.45125
118.2	0.4525
118.3	0.45375
118.4	0.455
118.5	0.45875
118.6	0.46
118.7	0.46875
118.8	0.47375
118.9	0.47625
119	0.48
119.1	0.4825
119.2	0.4825
119.3	0.4875
119.4	0.4875
119.5	0.49
119.6	0.49125
119.7	0.49375
119.8	0.49625
119.9	0.4975
120	0.50125
120.1	0.49875
120.2	0.50125
120.3	0.50625
120.4	0.50875
120.5	0.50875
120.6	0.5075
120.7	0.50875
120.8	0.51
120.9	0.50875
121	0.51
121.1	0.51125
121.2	0.51375
121.3	0.515
121.4	0.515
121.5	0.515
121.6	0.51625
121.7	0.51625
121.8	0.51625
121.9	0.5175
122	0.51875
122.1	0.52375
122.2	0.525
122.3	0.53125
122.4	0.5325
122.5	0.53875
122.6	0.54125
122.7	0.545
122.8	0.55
122.9	0.54875
123	0.5525
123.1	0.5525
123.2	0.555
123.3	0.55875
123.4	0.56
123.5	0.56
123.6	0.56
123.7	0.55875
123.8	0.55875
123.9	0.56
124	0.56
124.1	0.56
124.2	0.5625
124.3	0.565
124.4	0.565
124.5	0.5675
124.6	0.57
124.7	0.57125
124.8	0.57
124.9	0.57125
125	0.57
125.1	0.57125
125.2	0.57125
125.3	0.57125
125.4	0.57125
125.5	0.57625
125.6	0.57625
125.7	0.575
125.8	0.57625
125.9	0.57875
126	0.58
126.1	0.58125
126.2	0.5825
126.3	0.58375
126.4	0.585
126.5	0.585
126.6	0.5875
126.7	0.585
126.8	0.58625
126.9	0.58625
127	0.58625
127.1	0.59
127.2	0.5925
127.3	0.59375
127.4	0.5975
127.5	0.59875
127.6	0.6
127.7	0.60375
127.8	0.60625
127.9	0.60625
128	0.60875
128.1	0.60875
128.2	0.61
128.3	0.61125
128.4	0.61125
128.5	0.61125
128.6	0.61375
128.7	0.6175
128.8	0.6175
128.9	0.6175
129	0.6175
129.1	0.6175
129.2	0.62
129.3	0.62
129.4	0.6225
129.5	0.62375
129.6	0.62375
129.7	0.62375
129.8	0.625
129.9	0.6275
130	0.62875
130.1	0.63125
130.2	0.63375
130.3	0.63375
130.4	0.63625
130.5	0.6375
130.6	0.6375
130.7	0.63875
130.8	0.63875
130.9	0.63875
131	0.6425
131.1	0.6425
131.2	0.64375
131.3	0.645
131.4	0.645
131.5	0.645
131.6	0.6475
131.7	0.64875
131.8	0.65
131.9	0.6525
132	0.655
132.1	0.65875
132.2	0.65625
132.3	0.65875
132.4	0.66
132.5	0.66125
132.6	0.6625
132.7	0.66125
132.8	0.665
132.9	0.66375
133	0.66375
133.1	0.665
133.2	0.665
133.3	0.6625
133.4	0.6625
133.5	0.66125
133.6	0.66125
133.7	0.6625
133.8	0.66125
133.9	0.66125
134	0.66
134.1	0.66125
134.2	0.66125
134.3	0.6625
134.4	0.6625
134.5	0.66125
134.6	0.6625
134.7	0.6625
134.8	0.6625
134.9	0.66625
135	0.66625
135.1	0.6675
135.2	0.66875
135.3	0.67
135.4	0.67
135.5	0.67125
135.6	0.67
135.7	0.67
135.8	0.6675
135.9	0.6675
136	0.665
136.1	0.665
136.2	0.665
136.3	0.6625
136.4	0.66375
136.5	0.665
136.6	0.66375
136.7	0.6625
136.8	0.66375
136.9	0.665
137	0.66875
137.1	0.66875
137.2	0.67
137.3	0.67125
137.4	0.66875
137.5	0.6725
137.6	0.67125
137.7	0.67375
137.8	0.6725
137.9	0.675
138	0.67625
138.1	0.675
138.2	0.67625
138.3	0.67875
138.4	0.67875
138.5	0.67875
138.6	0.67875
138.7	0.67875
138.8	0.67875
138.9	0.6825
139	0.6825
139.1	0.68375
139.2	0.68375
139.3	0.6825
139.4	0.68625
139.5	0.685
139.6	0.68375
139.7	0.685
139.8	0.68375
139.9	0.68375
140	0.68375
140.1	0.685
140.2	0.685
140.3	0.6875
140.4	0.68875
140.5	0.6875
140.6	0.68625
140.7	0.685
140.8	0.68625
140.9	0.68625
141	0.68625
141.1	0.6875
141.2	0.68875
141.3	0.68875
141.4	0.68875
141.5	0.68875
141.6	0.69
141.7	0.6925
141.8	0.6925
141.9	0.69125
142	0.6925
142.1	0.6925
142.2	0.6925
142.3	0.6925
142.4	0.69375
142.5	0.6925
142.6	0.695
142.7	0.69375
142.8	0.6925
142.9	0.6925
143	0.68875
143.1	0.68875
143.2	0.69125
143.3	0.7
143.4	0.7025
143.5	0.7025
143.6	0.70375
143.7	0.70375
143.8	0.7025
143.9	0.70375
144	0.70375
144.1	0.7025
144.2	0.705
144.3	0.705
144.4	0.705
144.5	0.705
144.6	0.705
144.7	0.705
144.8	0.705
144.9	0.70625
145	0.70625
145.1	0.7075
145.2	0.70625
145.3	0.7075
145.4	0.7075
145.5	0.7075
145.6	0.70875
145.7	0.71
145.8	0.7125
145.9	0.71125
146	0.70875
146.1	0.7075
146.2	0.71
146.3	0.71
146.4	0.70875
146.5	0.70875
146.6	0.7075
146.7	0.70625
146.8	0.70625
146.9	0.70625
147	0.7075
147.1	0.70875
147.2	0.70875
147.3	0.70875
147.4	0.71
147.5	0.71625
147.6	0.71625
147.7	0.72
147.8	0.7175
147.9	0.71875
148	0.72
148.1	0.71875
148.2	0.72
148.3	0.71875
148.4	0.71875
148.5	0.72
148.6	0.71875
148.7	0.72
148.8	0.72
148.9	0.72125
149	0.72125
149.1	0.72125
149.2	0.72
149.3	0.72125
149.4	0.72125
149.5	0.72125
149.6	0.72125
149.7	0.7225
149.8	0.72375
149.9	0.72375
150	0.7225
150.1	0.72375
150.2	0.725
150.3	0.725
150.4	0.72625
150.5	0.7275
150.6	0.72875
150.7	0.72875
150.8	0.7275
150.9	0.72875
151	0.73
151.1	0.73
151.2	0.73125
151.3	0.73125
151.4	0.73125
151.5	0.73125
151.6	0.73125
151.7	0.7325
151.8	0.73375
151.9	0.735
152	0.73875
152.1	0.7375
152.2	0.7375
152.3	0.7375
152.4	0.7375
152.5	0.73875
152.6	0.73875
152.7	0.74
152.8	0.74
152.9	0.74
153	0.73875
153.1	0.7375
153.2	0.73625
153.3	0.73875
153.4	0.74
153.5	0.7425
153.6	0.7425
153.7	0.74125
153.8	0.74375
153.9	0.7425
154	0.7425
154.1	0.745
154.2	0.74625
154.3	0.74625
154.4	0.74875
154.5	0.74875
154.6	0.74875
154.7	0.7475
154.8	0.7475
154.9	0.745
155	0.745
155.1	0.74625
155.2	0.7475
155.3	0.7475
155.4	0.7475
155.5	0.7475
155.6	0.74625
155.7	0.745
155.8	0.745
155.9	0.74125
156	0.74
156.1	0.74
156.2	0.74125
156.3	0.7425
156.4	0.74375
156.5	0.745
156.6	0.745
156.7	0.745
156.8	0.745
156.9	0.75
157	0.7525
157.1	0.75125
157.2	0.7525
157.3	0.75125
157.4	0.7525
157.5	0.755
157.6	0.75625
157.7	0.75625
157.8	0.75625
157.9	0.755
158	0.75625
158.1	0.7575
158.2	0.76125
158.3	0.7625
158.4	0.76125
158.5	0.76375
158.6	0.76375
158.7	0.7625
158.8	0.76125
158.9	0.76
159	0.7575
159.1	0.75625
159.2	0.755
159.3	0.755
159.4	0.7575
159.5	0.7575
159.6	0.75875
159.7	0.76125
159.8	0.76125
159.9	0.7625
160	0.76375
160.1	0.76375
160.2	0.7625
160.3	0.76375
160.4	0.76625
160.5	0.76625
160.6	0.765
160.7	0.765
160.8	0.76875
160.9	0.77
161	0.7725
161.1	0.7725
161.2	0.7725
161.3	0.7725
161.4	0.7725
161.5	0.77375
161.6	0.7725
161.7	0.77375
161.8	0.77625
161.9	0.7775
162	0.7775
162.1	0.7775
162.2	0.7775
162.3	0.7775
162.4	0.7775
162.5	0.775
162.6	0.775
162.7	0.775
162.8	0.77375
162.9	0.7725
163	0.7725
163.1	0.77125
163.2	0.77
163.3	0.77
163.4	0.77
163.5	0.77125
163.6	0.77125
163.7	0.77
163.8	0.77
163.9	0.77125
164	0.77125
164.1	0.77125
164.2	0.77
164.3	0.77
164.4	0.77
164.5	0.77
164.6	0.77125
164.7	0.77125
164.8	0.7725
164.9	0.77125
165	0.77
165.1	0.77125
165.2	0.76625
165.3	0.765
165.4	0.76375
165.5	0.765
165.6	0.7675
165.7	0.77
165.8	0.77
165.9	0.76875
166	0.76625
166.1	0.77
166.2	0.77
166.3	0.77125
166.4	0.77375
166.5	0.7725
166.6	0.775
166.7	0.77625
166.8	0.77625
166.9	0.775
167	0.77625
167.1	0.77625
167.2	0.77375
167.3	0.77375
167.4	0.77375
167.5	0.775
167.6	0.77625
167.7	0.7775
167.8	0.7775
167.9	0.7775
168	0.7775
168.1	0.775
168.2	0.77625
168.3	0.775
168.4	0.775
168.5	0.775
168.6	0.77375
168.7	0.77375
168.8	0.77375
168.9	0.775
169	0.77625
169.1	0.7775
169.2	0.78
169.3	0.78125
169.4	0.78125
169.5	0.78125
169.6	0.77875
169.7	0.77875
169.8	0.77875
169.9	0.78125
170	0.78
170.1	0.78
170.2	0.78
170.3	0.77875
170.4	0.77625
170.5	0.77625
170.6	0.77625
170.7	0.775
170.8	0.775
170.9	0.775
171	0.7775
171.1	0.78
171.2	0.78
171.3	0.78125
171.4	0.78
171.5	0.77875
171.6	0.78
171.7	0.78125
171.8	0.78125
171.9	0.7825
172	0.78
172.1	0.78
172.2	0.78
172.3	0.77875
172.4	0.78
172.5	0.78
172.6	0.78
172.7	0.78125
172.8	0.78
172.9	0.7825
173	0.78125
173.1	0.78125
173.2	0.77875
173.3	0.7775
173.4	0.775
173.5	0.77375
173.6	0.77375
173.7	0.775
173.8	0.77625
173.9	0.77375
174	0.775
174.1	0.77375
174.2	0.7725
174.3	0.775
174.4	0.775
174.5	0.77625
174.6	0.7775
174.7	0.77875
174.8	0.77625
174.9	0.7775
175	0.77375
175.1	0.775
175.2	0.77375
175.3	0.7725
175.4	0.7725
175.5	0.77375
175.6	0.77375
175.7	0.775
175.8	0.775
175.9	0.77375
176	0.775
176.1	0.775
176.2	0.77625
176.3	0.7775
176.4	0.7775
176.5	0.77625
176.6	0.7775
176.7	0.77875
176.8	0.78
176.9	0.77875
177	0.77875
177.1	0.7775
177.2	0.78
177.3	0.78
177.4	0.78125
177.5	0.78125
177.6	0.78375
177.7	0.78375
177.8	0.7825
177.9	0.7825
178	0.78125
178.1	0.78125
178.2	0.78125
178.3	0.7825
178.4	0.78
178.5	0.78125
178.6	0.78
178.7	0.7825
178.8	0.785
178.9	0.785
179	0.78625
179.1	0.7875
179.2	0.7875
179.3	0.785
179.4	0.7875
179.5	0.78875
179.6	0.7875
179.7	0.78625
179.8	0.7875
179.9	0.78625
180	0.7875
180.1	0.78625
180.2	0.7875
180.3	0.78625
180.4	0.7875
180.5	0.785
180.6	0.7875
180.7	0.7875
180.8	0.78625
180.9	0.78625
181	0.7875
181.1	0.7875
181.2	0.78625
181.3	0.7875
181.4	0.79
181.5	0.79125
181.6	0.79125
181.7	0.79
181.8	0.79
181.9	0.78875
182	0.78625
182.1	0.78625
182.2	0.78625
182.3	0.7825
182.4	0.7825
182.5	0.7825
182.6	0.7825
182.7	0.78375
182.8	0.7825
182.9	0.7825
183	0.7825
183.1	0.78125
183.2	0.78125
183.3	0.7825
183.4	0.78125
183.5	0.7825
183.6	0.7825
183.7	0.7825
183.8	0.78375
183.9	0.78625
184	0.78625
184.1	0.78625
184.2	0.78875
184.3	0.78875
184.4	0.78875
184.5	0.7875
184.6	0.7875
184.7	0.7875
184.8	0.7875
184.9	0.7875
185	0.7875
185.1	0.7875
185.2	0.78875
185.3	0.79
185.4	0.78875
185.5	0.79
185.6	0.78875
185.7	0.78625
185.8	0.78375
185.9	0.785
186	0.785
186.1	0.78375
186.2	0.785
186.3	0.78625
186.4	0.785
186.5	0.78375
186.6	0.78375
186.7	0.78375
186.8	0.785
186.9	0.7875
187	0.78875
187.1	0.7875
187.2	0.78625
187.3	0.78625
187.4	0.78625
187.5	0.785
187.6	0.78625
187.7	0.78375
187.8	0.7825
187.9	0.78125
188	0.78
188.1	0.78
188.2	0.78
188.3	0.78
188.4	0.78125
188.5	0.78125
188.6	0.7825
188.7	0.78375
188.8	0.7825
188.9	0.7825
189	0.78375
189.1	0.78375
189.2	0.78
189.3	0.78125
189.4	0.78125
189.5	0.78
189.6	0.78
189.7	0.77875
189.8	0.77625
189.9	0.77375
190	0.77625
190.1	0.7775
190.2	0.7775
190.3	0.77875
190.4	0.7775
190.5	0.7775
190.6	0.7775
190.7	0.7775
190.8	0.775
190.9	0.775
191	0.77625
191.1	0.7775
191.2	0.77875
191.3	0.7775
191.4	0.77875
191.5	0.77875
191.6	0.77875
191.7	0.78
191.8	0.77625
191.9	0.77625
192	0.77625
192.1	0.77625
192.2	0.77625
192.3	0.77625
192.4	0.77875
192.5	0.77875
192.6	0.78
192.7	0.78125
192.8	0.7825
192.9	0.78375
193	0.78625
193.1	0.78375
193.2	0.78625
193.3	0.785
193.4	0.78375
193.5	0.7825
193.6	0.7825
193.7	0.78375
193.8	0.78625
193.9	0.785
194	0.78375
194.1	0.78375
194.2	0.785
194.3	0.785
194.4	0.7825
194.5	0.785
194.6	0.7875
194.7	0.7875
194.8	0.78875
194.9	0.78875
195	0.78875
195.1	0.78875
195.2	0.78625
195.3	0.78625
195.4	0.78875
195.5	0.79
195.6	0.7925
195.7	0.7925
195.8	0.79125
195.9	0.7925
196	0.79375
196.1	0.795
196.2	0.79375
196.3	0.7925
196.4	0.79375
196.5	0.79375
196.6	0.795
196.7	0.79375
196.8	0.79125
196.9	0.79125
197	0.7925
197.1	0.79125
197.2	0.79
197.3	0.79
197.4	0.78875
197.5	0.7875
197.6	0.7875
197.7	0.7875
197.8	0.78875
197.9	0.78875
198	0.78875
198.1	0.79125
198.2	0.79
198.3	0.79125
198.4	0.79375
198.5	0.79625
198.6	0.7975
198.7	0.79625
198.8	0.7975
198.9	0.80125
199	0.80125
199.1	0.80375
199.2	0.805
199.3	0.805
199.4	0.805
199.5	0.8025
199.6	0.80375
199.7	0.80125
199.8	0.8
199.9	0.8
200	0.80125
[truncated: 14,000 more rows]
