# Supplementary material for: Bayesian inference of kinetic schemes for ion channels by Kalman filtering
Source: eLife journal article supplement (doi:10.7554/elife.62714), 2022-05-04
Supplement: fig4-data4 [file 1_Sim_N_1500_Fluor_MW_8M.xlsx]

## Sheet: Tabelle1
0.1	0
0.2	0
0.3	0
0.4	0
0.5	0
0.6	0
0.7	0
0.8	0
0.9	0
1	0
1.1	0
1.2	0
1.3	0
1.4	0
1.5	0
1.6	0
1.7	0
1.8	0
1.9	0
2	0
2.1	0
2.2	0
2.3	0
2.4	0
2.5	0
2.6	0
2.7	0
2.8	0
2.9	0
3	0
3.1	0
3.2	0
3.3	0
3.4	0
3.5	0
3.6	0
3.7	0
3.8	0
3.9	0
4	0
4.1	0
4.2	0
4.3	0
4.4	0
4.5	0
4.6	0
4.7	0
4.8	0
4.9	0
5	0
5.1	0
5.2	0
5.3	0
5.4	0
5.5	0
5.6	0
5.7	0
5.8	0
5.9	0
6	0
6.1	0
6.2	0
6.3	0
6.4	0
6.5	0
6.6	0
6.7	0
6.8	0
6.9	0
7	0
7.1	0
7.2	0
7.3	0
7.4	0
7.5	0
7.6	0
7.7	0
7.8	0
7.9	0
8	0
8.1	0
8.2	0
8.3	0
8.4	0
8.5	0
8.6	0
8.7	0
8.8	0
8.9	0
9	0
9.1	0
9.2	0
9.3	0
9.4	0
9.5	0
9.6	0
9.7	0
9.8	0
9.9	0
10	0
10.1	0
10.2	0
10.3	0
10.4	0
10.5	0
10.6	0
10.7	0
10.8	0
10.9	0
11	0
11.1	0
11.2	0
11.3	0
11.4	0
11.5	0
11.6	0
11.7	0
11.8	0
11.9	0
12	0
12.1	0
12.2	0
12.3	0
12.4	0
12.5	0
12.6	0
12.7	0
12.8	0
12.9	0
13	0
13.1	0
13.2	0
13.3	0
13.4	0
13.5	0
13.6	0
13.7	0
13.8	0
13.9	0
14	0
14.1	0
14.2	0
14.3	0
14.4	0
14.5	0
14.6	0
14.7	0
14.8	0
14.9	0
15	0
15.1	0
15.2	0
15.3	0
15.4	0
15.5	0
15.6	0
15.7	0
15.8	0
15.9	0
16	0
16.1	0
16.2	0
16.3	0
16.4	0
16.5	0
16.6	0
16.7	0
16.8	0
16.9	0
17	0
17.1	0
17.2	0
17.3	0
17.4	0
17.5	0
17.6	0
17.7	0
17.8	0
17.9	0
18	0
18.1	0
18.2	0
18.3	0
18.4	0
18.5	0
18.6	0
18.7	0
18.8	0
18.9	0
19	0
19.1	0
19.2	0
19.3	0
19.4	0
19.5	0
19.6	0
19.7	0
19.8	0
19.9	0
20	0
20.1	0
20.2	0
20.3	0
20.4	0
20.5	0
20.6	0
20.7	0
20.8	0
20.9	0
21	0
21.1	0
21.2	0
21.3	0
21.4	0
21.5	0
21.6	0
21.7	0
21.8	0
21.9	0
22	0
22.1	0
22.2	0
22.3	0
22.4	0
22.5	0
22.6	0
22.7	0
22.8	0
22.9	0
23	0
23.1	0
23.2	0
23.3	0
23.4	0
23.5	0
23.6	0
23.7	0
23.8	0
23.9	0
24	0
24.1	0
24.2	0
24.3	0
24.4	0
24.5	0
24.6	0
24.7	0
24.8	0
24.9	0
25	0
25.1	0
25.2	0
25.3	0
25.4	0
25.5	0
25.6	0
25.7	0
25.8	0
25.9	0
26	0
26.1	0
26.2	0
26.3	0
26.4	0
26.5	0
26.6	0
26.7	0
26.8	0
26.9	0
27	0
27.1	0
27.2	0
27.3	0
27.4	0
27.5	0
27.6	0
27.7	0
27.8	0
27.9	0
28	0
28.1	0
28.2	0
28.3	0
28.4	0
28.5	0
28.6	0
28.7	0
28.8	0
28.9	0
29	0
29.1	0
29.2	0
29.3	0
29.4	0
29.5	0
29.6	0
29.7	0
29.8	0
29.9	0
30	0
30.1	0
30.2	0
30.3	0
30.4	0
30.5	0
30.6	0
30.7	0
30.8	0
30.9	0
31	0
31.1	0
31.2	0
31.3	0
31.4	0
31.5	0
31.6	0
31.7	0
31.8	0
31.9	0
32	0
32.1	0
32.2	0
32.3	0
32.4	0
32.5	0
32.6	0
32.7	0
32.8	0
32.9	0
33	0
33.1	0
33.2	0
33.3	0
33.4	0
33.5	0
33.6	0
33.7	0
33.8	0
33.9	0
34	0
34.1	0
34.2	0
34.3	0
34.4	0
34.5	0
34.6	0
34.7	0
34.8	0
34.9	0
35	0
35.1	0
35.2	0
35.3	0
35.4	0
35.5	0
35.6	0
35.7	0
35.8	0
35.9	0
36	0
36.1	0
36.2	0
36.3	0
36.4	0
36.5	0
36.6	0
36.7	0
36.8	0
36.9	0
37	0
37.1	0
37.2	0
37.3	0
37.4	0
37.5	0
37.6	0
37.7	0
37.8	0
37.9	0
38	0
38.1	0
38.2	0
38.3	0
38.4	0
38.5	0
38.6	0
38.7	0
38.8	0
38.9	0
39	0
39.1	0
39.2	0
39.3	0
39.4	0
39.5	0
39.6	0
39.7	0
39.8	0
39.9	0
40	0
40.1	0
40.2	0
40.3	0
40.4	0
40.5	0
40.6	0
40.7	0
40.8	0
40.9	0
41	0
41.1	0
41.2	0
41.3	0
41.4	0
41.5	0
41.6	0
41.7	0
41.8	0
41.9	0
42	0
42.1	0
42.2	0
42.3	0
42.4	0
42.5	0
42.6	0
42.7	0
42.8	0
42.9	0
43	0
43.1	0
43.2	0
43.3	0
43.4	0
43.5	0
43.6	0
43.7	0
43.8	0
43.9	0
44	0
44.1	0
44.2	0
44.3	0
44.4	0
44.5	0
44.6	0
44.7	0
44.8	0
44.9	0
45	0
45.1	0
45.2	0
45.3	0
45.4	0
45.5	0
45.6	0
45.7	0
45.8	0
45.9	0
46	0
46.1	0
46.2	0
46.3	0
46.4	0
46.5	0
46.6	0
46.7	0
46.8	0
46.9	0
47	0
47.1	0
47.2	0
47.3	0
47.4	0
47.5	0
47.6	0
47.7	0
47.8	0
47.9	0
48	0
48.1	0
48.2	0
48.3	0
48.4	0
48.5	0
48.6	0
48.7	0
48.8	0
48.9	0
49	0
49.1	0
49.2	0
49.3	0
49.4	0
49.5	0
49.6	0
49.7	0
49.8	0
49.9	0
50	0
50.1	0
50.2	0
50.3	0
50.4	0
50.5	0
50.6	0
50.7	0
50.8	0
50.9	0
51	0
51.1	0
51.2	0
51.3	0
51.4	0
51.5	0
51.6	0
51.7	0
51.8	0
51.9	0
52	0
52.1	0
52.2	0
52.3	0
52.4	0
52.5	0
52.6	0
52.7	0
52.8	0
52.9	0
53	0
53.1	0
53.2	0
53.3	0
53.4	0
53.5	0
53.6	0
53.7	0
53.8	0
53.9	0
54	0
54.1	0
54.2	0
54.3	0
54.4	0
54.5	0
54.6	0
54.7	0
54.8	0
54.9	0
55	0
55.1	0
55.2	0
55.3	0
55.4	0
55.5	0
55.6	0
55.7	0
55.8	0
55.9	0
56	0
56.1	0
56.2	0
56.3	0
56.4	0
56.5	0
56.6	0
56.7	0
56.8	0
56.9	0
57	0
57.1	0
57.2	0
57.3	0
57.4	0
57.5	0
57.6	0
57.7	0
57.8	0
57.9	0
58	0
58.1	0
58.2	0
58.3	0
58.4	0
58.5	0
58.6	0
58.7	0
58.8	0
58.9	0
59	0
59.1	0
59.2	0
59.3	0
59.4	0
59.5	0
59.6	0
59.7	0
59.8	0
59.9	0
60	0
60.1	0
60.2	0
60.3	0
60.4	0
60.5	0
60.6	0
60.7	0
60.8	0
60.9	0
61	0
61.1	0
61.2	0
61.3	0
61.4	0
61.5	0
61.6	0
61.7	0
61.8	0
61.9	0
62	0
62.1	0
62.2	0
62.3	0
62.4	0
62.5	0
62.6	0
62.7	0
62.8	0
62.9	0
63	0
63.1	0
63.2	0
63.3	0
63.4	0
63.5	0
63.6	0
63.7	0
63.8	0
63.9	0
64	0
64.1	0
64.2	0
64.3	0
64.4	0
64.5	0
64.6	0
64.7	0
64.8	0
64.9	0
65	0
65.1	0
65.2	0
65.3	0
65.4	0
65.5	0
65.6	0
65.7	0
65.8	0
65.9	0
66	0
66.1	0
66.2	0
66.3	0
66.4	0
66.5	0
66.6	0
66.7	0
66.8	0
66.9	0
67	0
67.1	0
67.2	0
67.3	0
67.4	0
67.5	0
67.6	0
67.7	0
67.8	0
67.9	0
68	0
68.1	0
68.2	0
68.3	0
68.4	0
68.5	0
68.6	0
68.7	0
68.8	0
68.9	0
69	0
69.1	0
69.2	0
69.3	0
69.4	0
69.5	0
69.6	0
69.7	0
69.8	0
69.9	0
70	0
70.1	0
70.2	0
70.3	0
70.4	0
70.5	0
70.6	0
70.7	0
70.8	0
70.9	0
71	0
71.1	0
71.2	0
71.3	0
71.4	0
71.5	0
71.6	0
71.7	0
71.8	0
71.9	0
72	0
72.1	0
72.2	0
72.3	0
72.4	0
72.5	0
72.6	0
72.7	0
72.8	0
72.9	0
73	0
73.1	0
73.2	0
73.3	0
73.4	0
73.5	0
73.6	0
73.7	0
73.8	0
73.9	0
74	0
74.1	0
74.2	0
74.3	0
74.4	0
74.5	0
74.6	0
74.7	0
74.8	0
74.9	0
75	0
75.1	0
75.2	0
75.3	0
75.4	0
75.5	0
75.6	0
75.7	0
75.8	0
75.9	0
76	0
76.1	0
76.2	0
76.3	0
76.4	0
76.5	0
76.6	0
76.7	0
76.8	0
76.9	0
77	0
77.1	0
77.2	0
77.3	0
77.4	0
77.5	0
77.6	0
77.7	0
77.8	0
77.9	0
78	0
78.1	0
78.2	0
78.3	0
78.4	0
78.5	0
78.6	0
78.7	0
78.8	0
78.9	0
79	0
79.1	0
79.2	0
79.3	0
79.4	0
79.5	0
79.6	0
79.7	0
79.8	0
79.9	0
80	0
80.1	0
80.2	0
80.3	0
80.4	0
80.5	0
80.6	0
80.7	0
80.8	0
80.9	0
81	0
81.1	0
81.2	0
81.3	0
81.4	0
81.5	0
81.6	0
81.7	0
81.8	0
81.9	0
82	0
82.1	0
82.2	0
82.3	0
82.4	0
82.5	0
82.6	0
82.7	0
82.8	0
82.9	0
83	0
83.1	0
83.2	0
83.3	0
83.4	0
83.5	0
83.6	0
83.7	0
83.8	0
83.9	0
84	0
84.1	0
84.2	0
84.3	0
84.4	0
84.5	0
84.6	0
84.7	0
84.8	0
84.9	0
85	0
85.1	0
85.2	0
85.3	0
85.4	0
85.5	0
85.6	0
85.7	0
85.8	0
85.9	0
86	0
86.1	0
86.2	0
86.3	0
86.4	0
86.5	0
86.6	0
86.7	0
86.8	0
86.9	0
87	0
87.1	0
87.2	0
87.3	0
87.4	0
87.5	0
87.6	0
87.7	0
87.8	0
87.9	0
88	0
88.1	0
88.2	0
88.3	0
88.4	0
88.5	0
88.6	0
88.7	0
88.8	0
88.9	0
89	0
89.1	0
89.2	0
89.3	0
89.4	0
89.5	0
89.6	0
89.7	0
89.8	0
89.9	0
90	0
90.1	0
90.2	0
90.3	0
90.4	0
90.5	0
90.6	0
90.7	0
90.8	0
90.9	0
91	0
91.1	0
91.2	0
91.3	0
91.4	0
91.5	0
91.6	0
91.7	0
91.8	0
91.9	0
92	0
92.1	0
92.2	0
92.3	0
92.4	0
92.5	0
92.6	0
92.7	0
92.8	0
92.9	0
93	0
93.1	0
93.2	0
93.3	0
93.4	0
93.5	0
93.6	0
93.7	0
93.8	0
93.9	0
94	0
94.1	0
94.2	0
94.3	0
94.4	0
94.5	0
94.6	0
94.7	0
94.8	0
94.9	0
95	0
95.1	0
95.2	0
95.3	0
95.4	0
95.5	0
95.6	0
95.7	0
95.8	0
95.9	0
96	0
96.1	0
96.2	0
96.3	0
96.4	0
96.5	0
96.6	0
96.7	0
96.8	0
96.9	0
97	0
97.1	0
97.2	0
97.3	0
97.4	0
97.5	0
97.6	0
97.7	0
97.8	0
97.9	0
98	0
98.1	0
98.2	0
98.3	0
98.4	0
98.5	0
98.6	0
98.7	0
98.8	0
98.9	0
99	0
99.1	0
99.2	0
99.3	0
99.4	0
99.5	0
99.6	0
99.7	0
99.8	0
99.9	0
100	0
100.1	0.335667
100.2	0.521
100.3	0.636667
100.4	0.714333
100.5	0.761667
100.6	0.796333
100.7	0.826667
100.8	0.849667
100.9	0.865333
101	0.876667
101.1	0.883333
101.2	0.890333
101.3	0.893667
101.4	0.900667
101.5	0.905667
101.6	0.904
101.7	0.903
101.8	0.905667
101.9	0.910667
102	0.909
102.1	0.915
102.2	0.922
102.3	0.923
102.4	0.926
102.5	0.923333
102.6	0.92
102.7	0.917333
102.8	0.915333
102.9	0.916333
103	0.918333
103.1	0.926
103.2	0.923333
103.3	0.917
103.4	0.917333
103.5	0.917667
103.6	0.919
103.7	0.923333
103.8	0.926
103.9	0.930667
104	0.929667
104.1	0.933
104.2	0.929667
104.3	0.932667
104.4	0.930333
104.5	0.931333
104.6	0.933667
104.7	0.930333
104.8	0.930667
104.9	0.928333
105	0.927333
105.1	0.927
105.2	0.927667
105.3	0.927
105.4	0.924
105.5	0.924333
105.6	0.925333
105.7	0.932333
105.8	0.933333
105.9	0.933667
106	0.93
106.1	0.931333
106.2	0.933667
106.3	0.938333
106.4	0.933667
106.5	0.936333
106.6	0.934333
106.7	0.934
106.8	0.928
106.9	0.929333
107	0.929
107.1	0.934333
107.2	0.935667
107.3	0.936667
107.4	0.936
107.5	0.939333
107.6	0.939333
107.7	0.940667
107.8	0.936
107.9	0.936333
108	0.935667
108.1	0.933333
108.2	0.936
108.3	0.931333
108.4	0.938
108.5	0.941333
108.6	0.94
108.7	0.938333
108.8	0.94
108.9	0.935333
109	0.935333
109.1	0.930333
109.2	0.933667
109.3	0.938333
109.4	0.938333
109.5	0.940333
109.6	0.932333
109.7	0.934667
109.8	0.935667
109.9	0.941667
110	0.94
110.1	0.946
110.2	0.945667
110.3	0.942667
110.4	0.938333
110.5	0.943333
110.6	0.944
110.7	0.945333
110.8	0.939333
110.9	0.944
111	0.942667
111.1	0.94
111.2	0.942667
111.3	0.947333
111.4	0.943667
111.5	0.943333
111.6	0.943
111.7	0.942667
111.8	0.941667
111.9	0.937667
112	0.939333
112.1	0.937
112.2	0.936667
112.3	0.935
112.4	0.939667
112.5	0.941333
112.6	0.938667
112.7	0.939667
112.8	0.94
112.9	0.945667
113	0.942333
113.1	0.939667
113.2	0.937667
113.3	0.943667
113.4	0.945
113.5	0.945667
113.6	0.947
113.7	0.944667
113.8	0.948333
113.9	0.947
114	0.941333
114.1	0.940667
114.2	0.941
114.3	0.938
114.4	0.942333
114.5	0.941333
114.6	0.942
114.7	0.941
114.8	0.943667
114.9	0.942
115	0.941333
115.1	0.94
115.2	0.945
115.3	0.948667
115.4	0.947333
115.5	0.95
115.6	0.954333
115.7	0.951667
115.8	0.948667
115.9	0.95
116	0.948333
116.1	0.949667
116.2	0.948333
116.3	0.943333
116.4	0.945333
116.5	0.945
116.6	0.945
116.7	0.949
116.8	0.95
116.9	0.953667
117	0.951333
117.1	0.951
117.2	0.952
117.3	0.950667
117.4	0.955
117.5	0.95
117.6	0.952
117.7	0.955667
117.8	0.956333
117.9	0.952333
118	0.955333
118.1	0.958333
118.2	0.955667
118.3	0.954
118.4	0.957667
118.5	0.956667
118.6	0.954667
118.7	0.955
118.8	0.959
118.9	0.957667
119	0.955333
119.1	0.953
119.2	0.956667
119.3	0.954333
119.4	0.958667
119.5	0.955
119.6	0.955
119.7	0.954333
119.8	0.954333
119.9	0.952
120	0.955333
120.1	0.956667
120.2	0.956333
120.3	0.955667
120.4	0.956667
120.5	0.955667
120.6	0.949667
120.7	0.953667
120.8	0.958333
120.9	0.956
121	0.959
121.1	0.954
121.2	0.953333
121.3	0.950667
121.4	0.955333
121.5	0.959
121.6	0.961
121.7	0.962
121.8	0.961333
121.9	0.961333
122	0.961333
122.1	0.964333
122.2	0.962
122.3	0.963333
122.4	0.96
122.5	0.958667
122.6	0.957667
122.7	0.956667
122.8	0.959667
122.9	0.960333
123	0.96
123.1	0.96
123.2	0.960333
123.3	0.957
123.4	0.957667
123.5	0.952333
123.6	0.953333
123.7	0.957667
123.8	0.960333
123.9	0.958667
124	0.957667
124.1	0.958
124.2	0.958
124.3	0.957667
124.4	0.96
124.5	0.962667
124.6	0.962333
124.7	0.964333
124.8	0.958667
124.9	0.959333
125	0.959667
125.1	0.956333
125.2	0.954
125.3	0.954333
125.4	0.957
125.5	0.958667
125.6	0.956333
125.7	0.956
125.8	0.958
125.9	0.959333
126	0.954667
126.1	0.954
126.2	0.955333
126.3	0.959333
126.4	0.960667
126.5	0.961
126.6	0.965333
126.7	0.963667
126.8	0.963
126.9	0.961333
127	0.964
127.1	0.963333
127.2	0.964333
127.3	0.961333
127.4	0.962333
127.5	0.967
127.6	0.967667
127.7	0.97
127.8	0.968667
127.9	0.966
128	0.964
128.1	0.964333
128.2	0.962333
128.3	0.961667
128.4	0.961333
128.5	0.961667
128.6	0.962333
128.7	0.965667
128.8	0.966667
128.9	0.968667
129	0.968
129.1	0.966667
129.2	0.96
129.3	0.963667
129.4	0.959667
129.5	0.960333
129.6	0.961333
129.7	0.967333
129.8	0.965667
129.9	0.964
130	0.962
130.1	0.965333
130.2	0.966667
130.3	0.968667
130.4	0.971667
130.5	0.970333
130.6	0.968333
130.7	0.967667
130.8	0.969333
130.9	0.966667
131	0.968
131.1	0.966667
131.2	0.967333
131.3	0.963333
131.4	0.963333
131.5	0.966333
131.6	0.965667
131.7	0.965333
131.8	0.961333
131.9	0.964333
132	0.963
132.1	0.966333
132.2	0.966333
132.3	0.962333
132.4	0.965667
132.5	0.970667
132.6	0.968
132.7	0.965667
132.8	0.97
132.9	0.972333
133	0.972
133.1	0.967333
133.2	0.967667
133.3	0.969333
133.4	0.967667
133.5	0.970667
133.6	0.968333
133.7	0.969
133.8	0.968333
133.9	0.968333
134	0.970333
134.1	0.971667
134.2	0.970333
134.3	0.969333
134.4	0.970333
134.5	0.972333
134.6	0.970333
134.7	0.967333
134.8	0.968333
134.9	0.972667
135	0.971333
135.1	0.973333
135.2	0.972667
135.3	0.974
135.4	0.971333
135.5	0.972
135.6	0.970667
135.7	0.966667
135.8	0.965667
135.9	0.965333
136	0.968667
136.1	0.970333
136.2	0.969333
136.3	0.97
136.4	0.971
136.5	0.972333
136.6	0.972
136.7	0.972333
136.8	0.97
136.9	0.966333
137	0.968333
137.1	0.969333
137.2	0.969667
137.3	0.969333
137.4	0.967
137.5	0.966667
137.6	0.972
137.7	0.972
137.8	0.968
137.9	0.969
138	0.968
138.1	0.967
138.2	0.969667
138.3	0.972
138.4	0.972333
138.5	0.976
138.6	0.976333
138.7	0.974
138.8	0.973
138.9	0.973
139	0.973
139.1	0.971333
139.2	0.969
139.3	0.968667
139.4	0.969
139.5	0.971333
139.6	0.970667
139.7	0.971333
139.8	0.97
139.9	0.971667
140	0.968667
140.1	0.971667
140.2	0.971
140.3	0.971333
140.4	0.969
140.5	0.969667
140.6	0.969333
140.7	0.971333
140.8	0.97
140.9	0.975
141	0.974333
141.1	0.971333
141.2	0.973333
141.3	0.973667
141.4	0.974333
141.5	0.972
141.6	0.972667
141.7	0.971
141.8	0.971667
141.9	0.969667
142	0.967667
142.1	0.969667
142.2	0.970667
142.3	0.973
142.4	0.972
142.5	0.974333
142.6	0.974333
142.7	0.973667
142.8	0.976
142.9	0.976333
143	0.974333
143.1	0.976333
143.2	0.978
143.3	0.977333
143.4	0.979
143.5	0.977333
143.6	0.974
143.7	0.972333
143.8	0.97
143.9	0.973
144	0.971667
144.1	0.971667
144.2	0.972667
144.3	0.971667
144.4	0.970667
144.5	0.972667
144.6	0.973
144.7	0.972667
144.8	0.976
144.9	0.976
145	0.977667
145.1	0.977
145.2	0.977
145.3	0.975333
145.4	0.979
145.5	0.977
145.6	0.977
145.7	0.977
145.8	0.978
145.9	0.978667
146	0.978333
146.1	0.976333
146.2	0.979667
146.3	0.977667
146.4	0.977
146.5	0.981333
146.6	0.976667
146.7	0.975667
146.8	0.975667
146.9	0.974333
147	0.973
147.1	0.973667
147.2	0.973
147.3	0.974667
147.4	0.975667
147.5	0.976
147.6	0.976667
147.7	0.976333
147.8	0.976
147.9	0.975333
148	0.976667
148.1	0.978
148.2	0.979333
148.3	0.979333
148.4	0.979
148.5	0.979333
148.6	0.976333
148.7	0.976667
148.8	0.973
148.9	0.977
149	0.976333
149.1	0.977333
149.2	0.977333
149.3	0.978
149.4	0.980333
149.5	0.981
149.6	0.98
149.7	0.978667
149.8	0.974333
149.9	0.972667
150	0.975333
150.1	0.976333
150.2	0.977
150.3	0.978333
150.4	0.976667
150.5	0.977667
150.6	0.981
150.7	0.978333
150.8	0.976333
150.9	0.976333
151	0.975
151.1	0.975333
151.2	0.975667
151.3	0.972333
151.4	0.973
151.5	0.974333
151.6	0.975333
151.7	0.975667
151.8	0.975333
151.9	0.977667
152	0.979
152.1	0.975333
152.2	0.974667
152.3	0.975667
152.4	0.975667
152.5	0.976
152.6	0.977
152.7	0.978
152.8	0.974667
152.9	0.973
153	0.974667
153.1	0.976667
153.2	0.979
153.3	0.978333
153.4	0.978
153.5	0.980667
153.6	0.981333
153.7	0.979
153.8	0.981667
153.9	0.980333
154	0.977333
154.1	0.979
154.2	0.978
154.3	0.973667
154.4	0.973
154.5	0.973667
154.6	0.975333
154.7	0.977667
154.8	0.981
154.9	0.979
155	0.980667
155.1	0.979333
155.2	0.977667
155.3	0.977
155.4	0.973
155.5	0.973
155.6	0.973
155.7	0.977333
155.8	0.978667
155.9	0.977
156	0.975667
156.1	0.975333
156.2	0.975333
156.3	0.975333
156.4	0.974333
156.5	0.975333
156.6	0.976333
156.7	0.977
156.8	0.978667
156.9	0.98
157	0.978667
157.1	0.981333
157.2	0.981
157.3	0.982333
157.4	0.982
157.5	0.979667
157.6	0.979333
157.7	0.978
157.8	0.982333
157.9	0.982667
158	0.979667
158.1	0.980667
158.2	0.977333
158.3	0.978
158.4	0.977333
158.5	0.98
158.6	0.977667
158.7	0.973667
158.8	0.976667
158.9	0.978667
159	0.977
159.1	0.980667
159.2	0.980667
159.3	0.977
159.4	0.976667
159.5	0.978667
159.6	0.977667
159.7	0.977
159.8	0.978333
159.9	0.978
160	0.981
160.1	0.983333
160.2	0.980667
160.3	0.982667
160.4	0.981
160.5	0.978333
160.6	0.979667
160.7	0.977333
160.8	0.974
160.9	0.973
161	0.975333
161.1	0.975333
161.2	0.975333
161.3	0.974333
161.4	0.974667
161.5	0.976333
161.6	0.982
161.7	0.983
161.8	0.980667
161.9	0.978333
162	0.981
162.1	0.978667
162.2	0.978333
162.3	0.979667
162.4	0.977333
162.5	0.978333
162.6	0.977
162.7	0.978667
162.8	0.979
162.9	0.976333
163	0.978
163.1	0.979667
163.2	0.978
163.3	0.98
163.4	0.981333
163.5	0.979667
163.6	0.979333
163.7	0.979667
163.8	0.978667
163.9	0.980667
164	0.980333
164.1	0.98
164.2	0.981333
164.3	0.984333
164.4	0.981667
164.5	0.981333
164.6	0.983
164.7	0.982
164.8	0.979667
164.9	0.979
165	0.977667
165.1	0.980333
165.2	0.982
165.3	0.982333
165.4	0.981
165.5	0.984
165.6	0.986
165.7	0.985333
165.8	0.982333
165.9	0.983
166	0.981667
166.1	0.978667
166.2	0.98
166.3	0.979
166.4	0.981
166.5	0.981667
166.6	0.981333
166.7	0.979
166.8	0.976
166.9	0.975333
167	0.977333
167.1	0.979667
167.2	0.981667
167.3	0.981333
167.4	0.983333
167.5	0.984333
167.6	0.982
167.7	0.982667
167.8	0.983333
167.9	0.985
168	0.983333
168.1	0.980667
168.2	0.978333
168.3	0.979
168.4	0.980667
168.5	0.981
168.6	0.980667
168.7	0.980667
168.8	0.981333
168.9	0.981
169	0.982667
169.1	0.982
169.2	0.979667
169.3	0.977667
169.4	0.98
169.5	0.981
169.6	0.981667
169.7	0.983667
169.8	0.979667
169.9	0.982
170	0.983333
170.1	0.979333
170.2	0.979333
170.3	0.983333
170.4	0.983
170.5	0.985333
170.6	0.983
170.7	0.980667
170.8	0.983
170.9	0.984
171	0.983333
171.1	0.981667
171.2	0.98
171.3	0.978333
171.4	0.982667
171.5	0.982333
171.6	0.982333
171.7	0.983
171.8	0.981333
171.9	0.983667
172	0.983
172.1	0.981333
172.2	0.983
172.3	0.982667
172.4	0.982333
172.5	0.984333
172.6	0.983333
172.7	0.981333
172.8	0.981667
172.9	0.982333
173	0.983333
173.1	0.984
173.2	0.980333
173.3	0.980667
173.4	0.980333
173.5	0.981
173.6	0.979667
173.7	0.979
173.8	0.979333
173.9	0.979667
174	0.982
174.1	0.979667
174.2	0.981667
174.3	0.981333
174.4	0.978333
174.5	0.979333
174.6	0.978
174.7	0.977
174.8	0.976667
174.9	0.978
175	0.979333
175.1	0.978667
175.2	0.981333
175.3	0.98
175.4	0.981
175.5	0.979667
175.6	0.979667
175.7	0.982667
175.8	0.984667
175.9	0.984667
176	0.984667
176.1	0.986
176.2	0.984
176.3	0.983667
176.4	0.984333
176.5	0.984333
176.6	0.983
176.7	0.984
176.8	0.984667
176.9	0.982333
177	0.982333
177.1	0.982667
177.2	0.981667
177.3	0.982
177.4	0.984333
177.5	0.985
177.6	0.982667
177.7	0.982
177.8	0.982667
177.9	0.982
178	0.982667
178.1	0.983333
178.2	0.982
178.3	0.980333
178.4	0.981667
178.5	0.982333
178.6	0.983333
178.7	0.983667
178.8	0.983
178.9	0.982667
179	0.983667
179.1	0.985333
179.2	0.986333
179.3	0.984667
179.4	0.984333
179.5	0.982667
179.6	0.981
179.7	0.979333
179.8	0.978667
179.9	0.978667
180	0.978
180.1	0.981
180.2	0.982333
180.3	0.985
180.4	0.984333
180.5	0.985667
180.6	0.983667
180.7	0.983
180.8	0.984
180.9	0.984
181	0.985
181.1	0.983
181.2	0.983333
181.3	0.986667
181.4	0.986333
181.5	0.983333
181.6	0.982
181.7	0.985
181.8	0.986
181.9	0.982667
182	0.983667
182.1	0.982333
182.2	0.980667
182.3	0.982667
182.4	0.984
182.5	0.986
182.6	0.986667
182.7	0.984333
182.8	0.980667
182.9	0.983
183	0.981333
183.1	0.982333
183.2	0.979333
183.3	0.980667
183.4	0.98
183.5	0.980333
183.6	0.980333
183.7	0.979
183.8	0.981667
183.9	0.983667
184	0.981333
184.1	0.981333
184.2	0.982667
184.3	0.981
184.4	0.981333
184.5	0.984
184.6	0.983333
184.7	0.984333
184.8	0.984333
184.9	0.981
185	0.982667
185.1	0.981333
185.2	0.979667
185.3	0.979333
185.4	0.980667
185.5	0.982
185.6	0.981667
185.7	0.980667
185.8	0.981667
185.9	0.982
186	0.983
186.1	0.981
186.2	0.980667
186.3	0.979333
186.4	0.981333
186.5	0.980667
186.6	0.982667
186.7	0.983333
186.8	0.983
186.9	0.983
187	0.983
187.1	0.984333
187.2	0.984667
187.3	0.983667
187.4	0.983
187.5	0.981
187.6	0.979
187.7	0.978
187.8	0.975667
187.9	0.978667
188	0.979
188.1	0.978333
188.2	0.978667
188.3	0.979
188.4	0.979667
188.5	0.980667
188.6	0.983667
188.7	0.983333
188.8	0.983667
188.9	0.985
189	0.983
189.1	0.98
189.2	0.982333
189.3	0.981
189.4	0.981
189.5	0.979667
189.6	0.974333
189.7	0.978
189.8	0.98
189.9	0.979333
190	0.977
190.1	0.978333
190.2	0.976
190.3	0.978333
190.4	0.981667
190.5	0.979333
190.6	0.981667
190.7	0.983
190.8	0.984667
190.9	0.984
191	0.984333
191.1	0.982667
191.2	0.982333
191.3	0.983667
191.4	0.986
191.5	0.986333
191.6	0.984667
191.7	0.984333
191.8	0.984667
191.9	0.985667
192	0.985
192.1	0.984333
192.2	0.984667
192.3	0.986
192.4	0.984
192.5	0.984
192.6	0.982
192.7	0.981667
192.8	0.983
192.9	0.983667
193	0.982
193.1	0.983
193.2	0.984333
193.3	0.984333
193.4	0.983
193.5	0.983667
193.6	0.981667
193.7	0.981333
193.8	0.980667
193.9	0.981667
194	0.980667
194.1	0.979
194.2	0.98
194.3	0.981333
194.4	0.983333
194.5	0.985667
194.6	0.985667
194.7	0.984333
194.8	0.980333
194.9	0.981333
195	0.982
195.1	0.980667
195.2	0.980333
195.3	0.981
195.4	0.983333
195.5	0.983
195.6	0.985
195.7	0.985333
195.8	0.984667
195.9	0.984667
196	0.982
196.1	0.982333
196.2	0.982333
196.3	0.982333
196.4	0.983
196.5	0.983667
196.6	0.982667
196.7	0.982
196.8	0.980667
196.9	0.979667
197	0.981667
197.1	0.982333
197.2	0.983667
197.3	0.982333
197.4	0.982333
197.5	0.983
197.6	0.983
197.7	0.983
197.8	0.983333
197.9	0.984667
198	0.983
198.1	0.985667
198.2	0.985
198.3	0.983667
198.4	0.983667
198.5	0.981333
198.6	0.981
198.7	0.980333
198.8	0.984
198.9	0.982667
199	0.984333
199.1	0.983
199.2	0.984333
199.3	0.982333
199.4	0.982333
199.5	0.978
199.6	0.979
199.7	0.979
199.8	0.980667
199.9	0.981667
200	0.982667
[truncated: 14,000 more rows]
