# Supplementary material for: Bayesian inference of kinetic schemes for ion channels by Kalman filtering
Source: eLife journal article supplement (doi:10.7554/elife.62714), 2022-05-04
Supplement: fig4-data4 [file 1_Sim_N_1500_Strom_MW_8M.xlsx]

## Sheet: Tabelle1
0.1	0
0.2	0
0.3	0
0.4	0
0.5	0
0.6	0
0.7	0
0.8	0
0.9	0
1	0
1.1	0
1.2	0
1.3	0
1.4	0
1.5	0
1.6	0
1.7	0
1.8	0
1.9	0
2	0
2.1	0
2.2	0
2.3	0
2.4	0
2.5	0
2.6	0
2.7	0
2.8	0
2.9	0
3	0
3.1	0
3.2	0
3.3	0
3.4	0
3.5	0
3.6	0
3.7	0
3.8	0
3.9	0
4	0
4.1	0
4.2	0
4.3	0
4.4	0
4.5	0
4.6	0
4.7	0
4.8	0
4.9	0
5	0
5.1	0
5.2	0
5.3	0
5.4	0
5.5	0
5.6	0
5.7	0
5.8	0
5.9	0
6	0
6.1	0
6.2	0
6.3	0
6.4	0
6.5	0
6.6	0
6.7	0
6.8	0
6.9	0
7	0
7.1	0
7.2	0
7.3	0
7.4	0
7.5	0
7.6	0
7.7	0
7.8	0
7.9	0
8	0
8.1	0
8.2	0
8.3	0
8.4	0
8.5	0
8.6	0
8.7	0
8.8	0
8.9	0
9	0
9.1	0
9.2	0
9.3	0
9.4	0
9.5	0
9.6	0
9.7	0
9.8	0
9.9	0
10	0
10.1	0
10.2	0
10.3	0
10.4	0
10.5	0
10.6	0
10.7	0
10.8	0
10.9	0
11	0
11.1	0
11.2	0
11.3	0
11.4	0
11.5	0
11.6	0
11.7	0
11.8	0
11.9	0
12	0
12.1	0
12.2	0
12.3	0
12.4	0
12.5	0
12.6	0
12.7	0
12.8	0
12.9	0
13	0
13.1	0
13.2	0
13.3	0
13.4	0
13.5	0
13.6	0
13.7	0
13.8	0
13.9	0
14	0
14.1	0
14.2	0
14.3	0
14.4	0
14.5	0
14.6	0
14.7	0
14.8	0
14.9	0
15	0
15.1	0
15.2	0
15.3	0
15.4	0
15.5	0
15.6	0
15.7	0
15.8	0
15.9	0
16	0
16.1	0
16.2	0
16.3	0
16.4	0
16.5	0
16.6	0
16.7	0
16.8	0
16.9	0
17	0
17.1	0
17.2	0
17.3	0
17.4	0
17.5	0
17.6	0
17.7	0
17.8	0
17.9	0
18	0
18.1	0
18.2	0
18.3	0
18.4	0
18.5	0
18.6	0
18.7	0
18.8	0
18.9	0
19	0
19.1	0
19.2	0
19.3	0
19.4	0
19.5	0
19.6	0
19.7	0
19.8	0
19.9	0
20	0
20.1	0
20.2	0
20.3	0
20.4	0
20.5	0
20.6	0
20.7	0
20.8	0
20.9	0
21	0
21.1	0
21.2	0
21.3	0
21.4	0
21.5	0
21.6	0
21.7	0
21.8	0
21.9	0
22	0
22.1	0
22.2	0
22.3	0
22.4	0
22.5	0
22.6	0
22.7	0
22.8	0
22.9	0
23	0
23.1	0
23.2	0
23.3	0
23.4	0
23.5	0
23.6	0
23.7	0
23.8	0
23.9	0
24	0
24.1	0
24.2	0
24.3	0
24.4	0
24.5	0
24.6	0
24.7	0
24.8	0
24.9	0
25	0
25.1	0
25.2	0
25.3	0
25.4	0
25.5	0
25.6	0
25.7	0
25.8	0
25.9	0
26	0
26.1	0
26.2	0
26.3	0
26.4	0
26.5	0
26.6	0
26.7	0
26.8	0
26.9	0
27	0
27.1	0
27.2	0
27.3	0
27.4	0
27.5	0
27.6	0
27.7	0
27.8	0
27.9	0
28	0
28.1	0
28.2	0
28.3	0
28.4	0
28.5	0
28.6	0
28.7	0
28.8	0
28.9	0
29	0
29.1	0
29.2	0
29.3	0
29.4	0
29.5	0
29.6	0
29.7	0
29.8	0
29.9	0
30	0
30.1	0
30.2	0
30.3	0
30.4	0
30.5	0
30.6	0
30.7	0
30.8	0
30.9	0
31	0
31.1	0
31.2	0
31.3	0
31.4	0
31.5	0
31.6	0
31.7	0
31.8	0
31.9	0
32	0
32.1	0
32.2	0
32.3	0
32.4	0
32.5	0
32.6	0
32.7	0
32.8	0
32.9	0
33	0
33.1	0
33.2	0
33.3	0
33.4	0
33.5	0
33.6	0
33.7	0
33.8	0
33.9	0
34	0
34.1	0
34.2	0
34.3	0
34.4	0
34.5	0
34.6	0
34.7	0
34.8	0
34.9	0
35	0
35.1	0
35.2	0
35.3	0
35.4	0
35.5	0
35.6	0
35.7	0
35.8	0
35.9	0
36	0
36.1	0
36.2	0
36.3	0
36.4	0
36.5	0
36.6	0
36.7	0
36.8	0
36.9	0
37	0
37.1	0
37.2	0
37.3	0
37.4	0
37.5	0
37.6	0
37.7	0
37.8	0
37.9	0
38	0
38.1	0
38.2	0
38.3	0
38.4	0
38.5	0
38.6	0
38.7	0
38.8	0
38.9	0
39	0
39.1	0
39.2	0
39.3	0
39.4	0
39.5	0
39.6	0
39.7	0
39.8	0
39.9	0
40	0
40.1	0
40.2	0
40.3	0
40.4	0
40.5	0
40.6	0
40.7	0
40.8	0
40.9	0
41	0
41.1	0
41.2	0
41.3	0
41.4	0
41.5	0
41.6	0
41.7	0
41.8	0
41.9	0
42	0
42.1	0
42.2	0
42.3	0
42.4	0
42.5	0
42.6	0
42.7	0
42.8	0
42.9	0
43	0
43.1	0
43.2	0
43.3	0
43.4	0
43.5	0
43.6	0
43.7	0
43.8	0
43.9	0
44	0
44.1	0
44.2	0
44.3	0
44.4	0
44.5	0
44.6	0
44.7	0
44.8	0
44.9	0
45	0
45.1	0
45.2	0
45.3	0
45.4	0
45.5	0
45.6	0
45.7	0
45.8	0
45.9	0
46	0
46.1	0
46.2	0
46.3	0
46.4	0
46.5	0
46.6	0
46.7	0
46.8	0
46.9	0
47	0
47.1	0
47.2	0
47.3	0
47.4	0
47.5	0
47.6	0
47.7	0
47.8	0
47.9	0
48	0
48.1	0
48.2	0
48.3	0
48.4	0
48.5	0
48.6	0
48.7	0
48.8	0
48.9	0
49	0
49.1	0
49.2	0
49.3	0
49.4	0
49.5	0
49.6	0
49.7	0
49.8	0
49.9	0
50	0
50.1	0
50.2	0
50.3	0
50.4	0
50.5	0
50.6	0
50.7	0
50.8	0
50.9	0
51	0
51.1	0
51.2	0
51.3	0
51.4	0
51.5	0
51.6	0
51.7	0
51.8	0
51.9	0
52	0
52.1	0
52.2	0
52.3	0
52.4	0
52.5	0
52.6	0
52.7	0
52.8	0
52.9	0
53	0
53.1	0
53.2	0
53.3	0
53.4	0
53.5	0
53.6	0
53.7	0
53.8	0
53.9	0
54	0
54.1	0
54.2	0
54.3	0
54.4	0
54.5	0
54.6	0
54.7	0
54.8	0
54.9	0
55	0
55.1	0
55.2	0
55.3	0
55.4	0
55.5	0
55.6	0
55.7	0
55.8	0
55.9	0
56	0
56.1	0
56.2	0
56.3	0
56.4	0
56.5	0
56.6	0
56.7	0
56.8	0
56.9	0
57	0
57.1	0
57.2	0
57.3	0
57.4	0
57.5	0
57.6	0
57.7	0
57.8	0
57.9	0
58	0
58.1	0
58.2	0
58.3	0
58.4	0
58.5	0
58.6	0
58.7	0
58.8	0
58.9	0
59	0
59.1	0
59.2	0
59.3	0
59.4	0
59.5	0
59.6	0
59.7	0
59.8	0
59.9	0
60	0
60.1	0
60.2	0
60.3	0
60.4	0
60.5	0
60.6	0
60.7	0
60.8	0
60.9	0
61	0
61.1	0
61.2	0
61.3	0
61.4	0
61.5	0
61.6	0
61.7	0
61.8	0
61.9	0
62	0
62.1	0
62.2	0
62.3	0
62.4	0
62.5	0
62.6	0
62.7	0
62.8	0
62.9	0
63	0
63.1	0
63.2	0
63.3	0
63.4	0
63.5	0
63.6	0
63.7	0
63.8	0
63.9	0
64	0
64.1	0
64.2	0
64.3	0
64.4	0
64.5	0
64.6	0
64.7	0
64.8	0
64.9	0
65	0
65.1	0
65.2	0
65.3	0
65.4	0
65.5	0
65.6	0
65.7	0
65.8	0
65.9	0
66	0
66.1	0
66.2	0
66.3	0
66.4	0
66.5	0
66.6	0
66.7	0
66.8	0
66.9	0
67	0
67.1	0
67.2	0
67.3	0
67.4	0
67.5	0
67.6	0
67.7	0
67.8	0
67.9	0
68	0
68.1	0
68.2	0
68.3	0
68.4	0
68.5	0
68.6	0
68.7	0
68.8	0
68.9	0
69	0
69.1	0
69.2	0
69.3	0
69.4	0
69.5	0
69.6	0
69.7	0
69.8	0
69.9	0
70	0
70.1	0
70.2	0
70.3	0
70.4	0
70.5	0
70.6	0
70.7	0
70.8	0
70.9	0
71	0
71.1	0
71.2	0
71.3	0
71.4	0
71.5	0
71.6	0
71.7	0
71.8	0
71.9	0
72	0
72.1	0
72.2	0
72.3	0
72.4	0
72.5	0
72.6	0
72.7	0
72.8	0
72.9	0
73	0
73.1	0
73.2	0
73.3	0
73.4	0
73.5	0
73.6	0
73.7	0
73.8	0
73.9	0
74	0
74.1	0
74.2	0
74.3	0
74.4	0
74.5	0
74.6	0
74.7	0
74.8	0
74.9	0
75	0
75.1	0
75.2	0
75.3	0
75.4	0
75.5	0
75.6	0
75.7	0
75.8	0
75.9	0
76	0
76.1	0
76.2	0
76.3	0
76.4	0
76.5	0
76.6	0
76.7	0
76.8	0
76.9	0
77	0
77.1	0
77.2	0
77.3	0
77.4	0
77.5	0
77.6	0
77.7	0
77.8	0
77.9	0
78	0
78.1	0
78.2	0
78.3	0
78.4	0
78.5	0
78.6	0
78.7	0
78.8	0
78.9	0
79	0
79.1	0
79.2	0
79.3	0
79.4	0
79.5	0
79.6	0
79.7	0
79.8	0
79.9	0
80	0
80.1	0
80.2	0
80.3	0
80.4	0
80.5	0
80.6	0
80.7	0
80.8	0
80.9	0
81	0
81.1	0
81.2	0
81.3	0
81.4	0
81.5	0
81.6	0
81.7	0
81.8	0
81.9	0
82	0
82.1	0
82.2	0
82.3	0
82.4	0
82.5	0
82.6	0
82.7	0
82.8	0
82.9	0
83	0
83.1	0
83.2	0
83.3	0
83.4	0
83.5	0
83.6	0
83.7	0
83.8	0
83.9	0
84	0
84.1	0
84.2	0
84.3	0
84.4	0
84.5	0
84.6	0
84.7	0
84.8	0
84.9	0
85	0
85.1	0
85.2	0
85.3	0
85.4	0
85.5	0
85.6	0
85.7	0
85.8	0
85.9	0
86	0
86.1	0
86.2	0
86.3	0
86.4	0
86.5	0
86.6	0
86.7	0
86.8	0
86.9	0
87	0
87.1	0
87.2	0
87.3	0
87.4	0
87.5	0
87.6	0
87.7	0
87.8	0
87.9	0
88	0
88.1	0
88.2	0
88.3	0
88.4	0
88.5	0
88.6	0
88.7	0
88.8	0
88.9	0
89	0
89.1	0
89.2	0
89.3	0
89.4	0
89.5	0
89.6	0
89.7	0
89.8	0
89.9	0
90	0
90.1	0
90.2	0
90.3	0
90.4	0
90.5	0
90.6	0
90.7	0
90.8	0
90.9	0
91	0
91.1	0
91.2	0
91.3	0
91.4	0
91.5	0
91.6	0
91.7	0
91.8	0
91.9	0
92	0
92.1	0
92.2	0
92.3	0
92.4	0
92.5	0
92.6	0
92.7	0
92.8	0
92.9	0
93	0
93.1	0
93.2	0
93.3	0
93.4	0
93.5	0
93.6	0
93.7	0
93.8	0
93.9	0
94	0
94.1	0
94.2	0
94.3	0
94.4	0
94.5	0
94.6	0
94.7	0
94.8	0
94.9	0
95	0
95.1	0
95.2	0
95.3	0
95.4	0
95.5	0
95.6	0
95.7	0
95.8	0
95.9	0
96	0
96.1	0
96.2	0
96.3	0
96.4	0
96.5	0
96.6	0
96.7	0
96.8	0
96.9	0
97	0
97.1	0
97.2	0
97.3	0
97.4	0
97.5	0
97.6	0
97.7	0
97.8	0
97.9	0
98	0
98.1	0
98.2	0
98.3	0
98.4	0
98.5	0
98.6	0
98.7	0
98.8	0
98.9	0
99	0
99.1	0
99.2	0
99.3	0
99.4	0
99.5	0
99.6	0
99.7	0
99.8	0
99.9	0
100	0
100.1	0
100.2	0.000666667
100.3	0.00133333
100.4	0.00266667
100.5	0.006
100.6	0.012
100.7	0.0173333
100.8	0.0206667
100.9	0.026
101	0.03
101.1	0.0313333
101.2	0.036
101.3	0.038
101.4	0.0413333
101.5	0.044
101.6	0.048
101.7	0.054
101.8	0.0606667
101.9	0.0653333
102	0.0686667
102.1	0.0713333
102.2	0.076
102.3	0.0793333
102.4	0.082
102.5	0.0853333
102.6	0.0886667
102.7	0.0926667
102.8	0.0953333
102.9	0.0986667
103	0.103333
103.1	0.105333
103.2	0.108
103.3	0.108667
103.4	0.112
103.5	0.115333
103.6	0.12
103.7	0.124
103.8	0.128
103.9	0.13
104	0.130667
104.1	0.133333
104.2	0.134
104.3	0.136667
104.4	0.142667
104.5	0.145333
104.6	0.148
104.7	0.151333
104.8	0.154667
104.9	0.158
105	0.162
105.1	0.165333
105.2	0.17
105.3	0.171333
105.4	0.174667
105.5	0.180667
105.6	0.183333
105.7	0.185333
105.8	0.189333
105.9	0.191333
106	0.195333
106.1	0.196667
106.2	0.2
106.3	0.202667
106.4	0.207333
106.5	0.208667
106.6	0.212667
106.7	0.215333
106.8	0.218667
106.9	0.222667
107	0.225333
107.1	0.23
107.2	0.232667
107.3	0.238
107.4	0.243333
107.5	0.246667
107.6	0.246667
107.7	0.248
107.8	0.252
107.9	0.254
108	0.258667
108.1	0.262
108.2	0.262667
108.3	0.267333
108.4	0.27
108.5	0.274
108.6	0.274
108.7	0.278667
108.8	0.28
108.9	0.283333
109	0.285333
109.1	0.288667
109.2	0.292
109.3	0.296
109.4	0.298667
109.5	0.300667
109.6	0.304
109.7	0.307333
109.8	0.308667
109.9	0.311333
110	0.315333
110.1	0.32
110.2	0.321333
110.3	0.321333
110.4	0.322667
110.5	0.324667
110.6	0.326
110.7	0.328667
110.8	0.331333
110.9	0.333333
111	0.334667
111.1	0.334667
111.2	0.338
111.3	0.339333
111.4	0.343333
111.5	0.343333
111.6	0.344667
111.7	0.346667
111.8	0.349333
111.9	0.352
112	0.355333
112.1	0.360667
112.2	0.364667
112.3	0.368
112.4	0.370667
112.5	0.37
112.6	0.372
112.7	0.372
112.8	0.374
112.9	0.376667
113	0.378
113.1	0.378667
113.2	0.38
113.3	0.379333
113.4	0.381333
113.5	0.384
113.6	0.384667
113.7	0.385333
113.8	0.386667
113.9	0.388
114	0.389333
114.1	0.392667
114.2	0.394
114.3	0.396
114.4	0.398
114.5	0.4
114.6	0.401333
114.7	0.406667
114.8	0.408
114.9	0.409333
115	0.413333
115.1	0.414667
115.2	0.418
115.3	0.42
115.4	0.421333
115.5	0.424
115.6	0.424667
115.7	0.426
115.8	0.427333
115.9	0.426
116	0.426667
116.1	0.430667
116.2	0.432
116.3	0.434667
116.4	0.437333
116.5	0.438667
116.6	0.438
116.7	0.442
116.8	0.442
116.9	0.444667
117	0.444667
117.1	0.445333
117.2	0.446
117.3	0.45
117.4	0.452
117.5	0.455333
117.6	0.457333
117.7	0.461333
117.8	0.464
117.9	0.468
118	0.468
118.1	0.468667
118.2	0.473333
118.3	0.475333
118.4	0.475333
118.5	0.476667
118.6	0.479333
118.7	0.480667
118.8	0.484667
118.9	0.486667
119	0.486667
119.1	0.487333
119.2	0.486667
119.3	0.487333
119.4	0.489333
119.5	0.492
119.6	0.492667
119.7	0.494667
119.8	0.495333
119.9	0.498667
120	0.498667
120.1	0.498667
120.2	0.501333
120.3	0.504667
120.4	0.506667
120.5	0.506667
120.6	0.506667
120.7	0.507333
120.8	0.510667
120.9	0.511333
121	0.514
121.1	0.515333
121.2	0.516667
121.3	0.517333
121.4	0.52
121.5	0.521333
121.6	0.522
121.7	0.524667
121.8	0.528
121.9	0.528667
122	0.530667
122.1	0.533333
122.2	0.533333
122.3	0.534667
122.4	0.535333
122.5	0.538
122.6	0.54
122.7	0.540667
122.8	0.542
122.9	0.543333
123	0.544
123.1	0.544
123.2	0.543333
123.3	0.547333
123.4	0.548667
123.5	0.55
123.6	0.551333
123.7	0.552667
123.8	0.553333
123.9	0.553333
124	0.552667
124.1	0.554
124.2	0.554667
124.3	0.558
124.4	0.558
124.5	0.56
124.6	0.560667
124.7	0.562667
124.8	0.564
124.9	0.566
125	0.568
125.1	0.570667
125.2	0.572
125.3	0.572667
125.4	0.574667
125.5	0.577333
125.6	0.577333
125.7	0.579333
125.8	0.578
125.9	0.578667
126	0.579333
126.1	0.58
126.2	0.58
126.3	0.58
126.4	0.580667
126.5	0.582
126.6	0.584
126.7	0.584667
126.8	0.586
126.9	0.588
127	0.589333
127.1	0.588
127.2	0.589333
127.3	0.589333
127.4	0.588
127.5	0.589333
127.6	0.592
127.7	0.594
127.8	0.594
127.9	0.592
128	0.592667
128.1	0.593333
128.2	0.596
128.3	0.596
128.4	0.596667
128.5	0.598
128.6	0.597333
128.7	0.598667
128.8	0.600667
128.9	0.602667
129	0.602
129.1	0.602
129.2	0.601333
129.3	0.600667
129.4	0.600667
129.5	0.600667
129.6	0.601333
129.7	0.602667
129.8	0.605333
129.9	0.606
130	0.606
130.1	0.607333
130.2	0.606667
130.3	0.606667
130.4	0.608
130.5	0.608667
130.6	0.610667
130.7	0.613333
130.8	0.614
130.9	0.616
131	0.616667
131.1	0.618
131.2	0.622
131.3	0.622667
131.4	0.624
131.5	0.626667
131.6	0.627333
131.7	0.628667
131.8	0.630667
131.9	0.631333
132	0.634
132.1	0.634
132.2	0.635333
132.3	0.636667
132.4	0.636
132.5	0.636667
132.6	0.637333
132.7	0.638667
132.8	0.640667
132.9	0.641333
133	0.642
133.1	0.643333
133.2	0.642
133.3	0.641333
133.4	0.64
133.5	0.642
133.6	0.642667
133.7	0.642
133.8	0.644667
133.9	0.646
134	0.648
134.1	0.649333
134.2	0.648
134.3	0.65
134.4	0.647333
134.5	0.648667
134.6	0.647333
134.7	0.65
134.8	0.648667
134.9	0.649333
135	0.649333
135.1	0.650667
135.2	0.65
135.3	0.651333
135.4	0.652
135.5	0.652
135.6	0.653333
135.7	0.654
135.8	0.656667
135.9	0.656
136	0.656667
136.1	0.658
136.2	0.658
136.3	0.661333
136.4	0.662
136.5	0.662
136.6	0.663333
136.7	0.665333
136.8	0.664667
136.9	0.664667
137	0.663333
137.1	0.664
137.2	0.665333
137.3	0.664667
137.4	0.662667
137.5	0.663333
137.6	0.664
137.7	0.664
137.8	0.668667
137.9	0.67
138	0.672667
138.1	0.672667
138.2	0.672
138.3	0.67
138.4	0.668667
138.5	0.669333
138.6	0.669333
138.7	0.67
138.8	0.672667
138.9	0.673333
139	0.675333
139.1	0.68
139.2	0.681333
139.3	0.682667
139.4	0.683333
139.5	0.682667
139.6	0.683333
139.7	0.682
139.8	0.682667
139.9	0.684
140	0.684
140.1	0.685333
140.2	0.687333
140.3	0.688
140.4	0.688
140.5	0.69
140.6	0.690667
140.7	0.69
140.8	0.69
140.9	0.691333
141	0.692
141.1	0.694
141.2	0.694
141.3	0.694
141.4	0.694667
141.5	0.695333
141.6	0.695333
141.7	0.697333
141.8	0.696667
141.9	0.698667
142	0.7
142.1	0.700667
142.2	0.701333
142.3	0.700667
142.4	0.701333
142.5	0.700667
142.6	0.702
142.7	0.702
142.8	0.702
142.9	0.702667
143	0.702
143.1	0.704
143.2	0.704667
143.3	0.706
143.4	0.707333
143.5	0.709333
143.6	0.709333
143.7	0.711333
143.8	0.712
143.9	0.713333
144	0.713333
144.1	0.712667
144.2	0.714
144.3	0.712667
144.4	0.712667
144.5	0.713333
144.6	0.715333
144.7	0.714
144.8	0.716
144.9	0.717333
145	0.717333
145.1	0.717333
145.2	0.716
145.3	0.717333
145.4	0.718
145.5	0.718
145.6	0.719333
145.7	0.719333
145.8	0.719333
145.9	0.718667
146	0.72
146.1	0.722667
146.2	0.723333
146.3	0.723333
146.4	0.724
146.5	0.725333
146.6	0.726
146.7	0.726
146.8	0.727333
146.9	0.728
147	0.729333
147.1	0.728667
147.2	0.73
147.3	0.729333
147.4	0.730667
147.5	0.731333
147.6	0.732667
147.7	0.734
147.8	0.736667
147.9	0.736667
148	0.735333
148.1	0.732667
148.2	0.732667
148.3	0.732667
148.4	0.734
148.5	0.734667
148.6	0.736
148.7	0.735333
148.8	0.736
148.9	0.736667
149	0.736667
149.1	0.736667
149.2	0.737333
149.3	0.737333
149.4	0.738
149.5	0.736667
149.6	0.737333
149.7	0.736667
149.8	0.736667
149.9	0.738667
150	0.737333
150.1	0.738667
150.2	0.739333
150.3	0.739333
150.4	0.74
150.5	0.740667
150.6	0.740667
150.7	0.74
150.8	0.738
150.9	0.739333
151	0.74
151.1	0.74
151.2	0.74
151.3	0.74
151.4	0.738667
151.5	0.74
151.6	0.74
151.7	0.741333
151.8	0.741333
151.9	0.740667
152	0.741333
152.1	0.741333
152.2	0.742
152.3	0.744
152.4	0.743333
152.5	0.743333
152.6	0.742667
152.7	0.744
152.8	0.741333
152.9	0.742667
153	0.744667
153.1	0.745333
153.2	0.745333
153.3	0.744667
153.4	0.746667
153.5	0.748667
153.6	0.749333
153.7	0.749333
153.8	0.751333
153.9	0.754667
154	0.756
154.1	0.756
154.2	0.758667
154.3	0.758
154.4	0.758
154.5	0.758
154.6	0.758
154.7	0.757333
154.8	0.757333
154.9	0.757333
155	0.757333
155.1	0.758
155.2	0.758667
155.3	0.758
155.4	0.758
155.5	0.758
155.6	0.757333
155.7	0.756667
155.8	0.755333
155.9	0.756667
156	0.756667
156.1	0.757333
156.2	0.758667
156.3	0.760667
156.4	0.760667
156.5	0.761333
156.6	0.761333
156.7	0.761333
156.8	0.763333
156.9	0.763333
157	0.764667
157.1	0.762667
157.2	0.764667
157.3	0.764
157.4	0.763333
157.5	0.762667
157.6	0.764
157.7	0.762667
157.8	0.762667
157.9	0.760667
158	0.762
158.1	0.761333
158.2	0.76
158.3	0.761333
158.4	0.760667
158.5	0.760667
158.6	0.76
158.7	0.759333
158.8	0.761333
158.9	0.762
159	0.762667
159.1	0.762667
159.2	0.764667
159.3	0.764
159.4	0.763333
159.5	0.762
159.6	0.763333
159.7	0.765333
159.8	0.764667
159.9	0.762667
160	0.764
160.1	0.764
160.2	0.764
160.3	0.765333
160.4	0.765333
160.5	0.766667
160.6	0.766
160.7	0.765333
160.8	0.766667
160.9	0.766667
161	0.764667
161.1	0.764
161.2	0.764
161.3	0.764667
161.4	0.766
161.5	0.766667
161.6	0.766667
161.7	0.768
161.8	0.768
161.9	0.768
162	0.767333
162.1	0.768
162.2	0.768667
162.3	0.768667
162.4	0.768667
162.5	0.769333
162.6	0.771333
162.7	0.771333
162.8	0.770667
162.9	0.772
163	0.772667
163.1	0.772667
163.2	0.773333
163.3	0.773333
163.4	0.773333
163.5	0.773333
163.6	0.773333
163.7	0.774
163.8	0.775333
163.9	0.775333
164	0.777333
164.1	0.777333
164.2	0.779333
164.3	0.78
164.4	0.78
164.5	0.780667
164.6	0.779333
164.7	0.780667
164.8	0.781333
164.9	0.782667
165	0.782
165.1	0.782
165.2	0.780667
165.3	0.780667
165.4	0.78
165.5	0.781333
165.6	0.782
165.7	0.782
165.8	0.782667
165.9	0.782
166	0.782667
166.1	0.783333
166.2	0.782667
166.3	0.782667
166.4	0.783333
166.5	0.784667
166.6	0.786
166.7	0.786667
166.8	0.785333
166.9	0.786
167	0.785333
167.1	0.786667
167.2	0.787333
167.3	0.788
167.4	0.788
167.5	0.788
167.6	0.788
167.7	0.787333
167.8	0.788
167.9	0.788667
168	0.788
168.1	0.788
168.2	0.788
168.3	0.788667
168.4	0.79
168.5	0.790667
168.6	0.792
168.7	0.790667
168.8	0.79
168.9	0.789333
169	0.789333
169.1	0.789333
169.2	0.790667
169.3	0.79
169.4	0.791333
169.5	0.792
169.6	0.792
169.7	0.792
169.8	0.793333
169.9	0.794667
170	0.793333
170.1	0.793333
170.2	0.791333
170.3	0.791333
170.4	0.792
170.5	0.790667
170.6	0.790667
170.7	0.79
170.8	0.789333
170.9	0.787333
171	0.787333
171.1	0.787333
171.2	0.788
171.3	0.787333
171.4	0.789333
171.5	0.789333
171.6	0.791333
171.7	0.790667
171.8	0.79
171.9	0.79
172	0.789333
172.1	0.789333
172.2	0.790667
172.3	0.790667
172.4	0.792
172.5	0.792
172.6	0.790667
172.7	0.791333
172.8	0.792667
172.9	0.794
173	0.793333
173.1	0.793333
173.2	0.794
173.3	0.794
173.4	0.792667
173.5	0.793333
173.6	0.793333
173.7	0.794
173.8	0.795333
173.9	0.795333
174	0.796
174.1	0.795333
174.2	0.794
174.3	0.794667
174.4	0.794
174.5	0.794667
174.6	0.795333
174.7	0.794667
174.8	0.794
174.9	0.794667
175	0.794667
175.1	0.794
175.2	0.794
175.3	0.795333
175.4	0.795333
175.5	0.795333
175.6	0.794667
175.7	0.794
175.8	0.793333
175.9	0.792
176	0.791333
176.1	0.791333
176.2	0.794
176.3	0.792667
176.4	0.79
176.5	0.790667
176.6	0.790667
176.7	0.791333
176.8	0.791333
176.9	0.793333
177	0.793333
177.1	0.792667
177.2	0.792667
177.3	0.792
177.4	0.792
177.5	0.791333
177.6	0.792
177.7	0.792
177.8	0.793333
177.9	0.794667
178	0.794667
178.1	0.795333
178.2	0.792667
178.3	0.793333
178.4	0.794
178.5	0.795333
178.6	0.794667
178.7	0.794667
178.8	0.794
178.9	0.793333
179	0.794
179.1	0.792
179.2	0.794
179.3	0.796
179.4	0.796
179.5	0.793333
179.6	0.793333
179.7	0.793333
179.8	0.792667
179.9	0.793333
180	0.793333
180.1	0.795333
180.2	0.794667
180.3	0.794667
180.4	0.795333
180.5	0.796
180.6	0.796667
180.7	0.797333
180.8	0.797333
180.9	0.798
181	0.796667
181.1	0.796667
181.2	0.796667
181.3	0.796667
181.4	0.796
181.5	0.794667
181.6	0.797333
181.7	0.799333
181.8	0.800667
181.9	0.803333
182	0.803333
182.1	0.802667
182.2	0.802667
182.3	0.802667
182.4	0.803333
182.5	0.800667
182.6	0.800667
182.7	0.802667
182.8	0.802667
182.9	0.8
183	0.802667
183.1	0.802
183.2	0.802667
183.3	0.802667
183.4	0.804
183.5	0.804667
183.6	0.803333
183.7	0.802667
183.8	0.802
183.9	0.799333
184	0.799333
184.1	0.798667
184.2	0.798667
184.3	0.798
184.4	0.797333
184.5	0.8
184.6	0.8
184.7	0.8
184.8	0.798667
184.9	0.798
185	0.797333
185.1	0.797333
185.2	0.798
185.3	0.798
185.4	0.796667
185.5	0.796
185.6	0.796667
185.7	0.797333
185.8	0.798
185.9	0.798667
186	0.798667
186.1	0.799333
186.2	0.798667
186.3	0.798
186.4	0.799333
186.5	0.798
186.6	0.797333
186.7	0.797333
186.8	0.796
186.9	0.796667
187	0.797333
187.1	0.797333
187.2	0.798667
187.3	0.796667
187.4	0.796
187.5	0.796
187.6	0.794667
187.7	0.793333
187.8	0.793333
187.9	0.793333
188	0.792667
188.1	0.793333
188.2	0.794667
188.3	0.794
188.4	0.795333
188.5	0.796
188.6	0.795333
188.7	0.796667
188.8	0.797333
188.9	0.798667
189	0.798667
189.1	0.800667
189.2	0.802
189.3	0.802
189.4	0.802
189.5	0.802667
189.6	0.802
189.7	0.802
189.8	0.801333
189.9	0.801333
190	0.800667
190.1	0.801333
190.2	0.801333
190.3	0.801333
190.4	0.800667
190.5	0.8
190.6	0.800667
190.7	0.8
190.8	0.799333
190.9	0.8
191	0.800667
191.1	0.800667
191.2	0.800667
191.3	0.801333
191.4	0.802
191.5	0.801333
191.6	0.801333
191.7	0.801333
191.8	0.802
191.9	0.801333
192	0.801333
192.1	0.802
192.2	0.804
192.3	0.804
192.4	0.804667
192.5	0.803333
192.6	0.801333
192.7	0.802667
192.8	0.802667
192.9	0.804
193	0.802667
193.1	0.801333
193.2	0.800667
193.3	0.8
193.4	0.799333
193.5	0.799333
193.6	0.8
193.7	0.8
193.8	0.802
193.9	0.801333
194	0.802
194.1	0.804
194.2	0.802
194.3	0.801333
194.4	0.8
194.5	0.799333
194.6	0.800667
194.7	0.798667
194.8	0.798
194.9	0.797333
195	0.799333
195.1	0.8
195.2	0.8
195.3	0.801333
195.4	0.800667
195.5	0.802
195.6	0.801333
195.7	0.802667
195.8	0.801333
195.9	0.800667
196	0.800667
196.1	0.800667
196.2	0.802
196.3	0.802
196.4	0.802
196.5	0.802
196.6	0.801333
196.7	0.800667
196.8	0.800667
196.9	0.800667
197	0.8
197.1	0.798667
197.2	0.798667
197.3	0.798
197.4	0.798667
197.5	0.798667
197.6	0.800667
197.7	0.8
197.8	0.8
197.9	0.798667
198	0.8
198.1	0.802
198.2	0.806
198.3	0.806
198.4	0.804
198.5	0.803333
198.6	0.802
198.7	0.801333
198.8	0.800667
198.9	0.798
199	0.798
199.1	0.798
199.2	0.798667
199.3	0.799333
199.4	0.8
199.5	0.800667
199.6	0.800667
199.7	0.799333
199.8	0.798667
199.9	0.798
200	0.798
[truncated: 14,000 more rows]
