# Supplementary material for: Bayesian inference of kinetic schemes for ion channels by Kalman filtering
Source: eLife journal article supplement (doi:10.7554/elife.62714), 2022-05-04
Supplement: fig4-data4 [file 1_Sim_N_2000_Fluor_MW.xlsx]

## Sheet: Tabelle1
0.1	0
0.2	0
0.3	0
0.4	0
0.5	0
0.6	0
0.7	0
0.8	0
0.9	0
1	0
1.1	0
1.2	0
1.3	0
1.4	0
1.5	0
1.6	0
1.7	0
1.8	0
1.9	0
2	0
2.1	0
2.2	0
2.3	0
2.4	0
2.5	0
2.6	0
2.7	0
2.8	0
2.9	0
3	0
3.1	0
3.2	0
3.3	0
3.4	0
3.5	0
3.6	0
3.7	0
3.8	0
3.9	0
4	0
4.1	0
4.2	0
4.3	0
4.4	0
4.5	0
4.6	0
4.7	0
4.8	0
4.9	0
5	0
5.1	0
5.2	0
5.3	0
5.4	0
5.5	0
5.6	0
5.7	0
5.8	0
5.9	0
6	0
6.1	0
6.2	0
6.3	0
6.4	0
6.5	0
6.6	0
6.7	0
6.8	0
6.9	0
7	0
7.1	0
7.2	0
7.3	0
7.4	0
7.5	0
7.6	0
7.7	0
7.8	0
7.9	0
8	0
8.1	0
8.2	0
8.3	0
8.4	0
8.5	0
8.6	0
8.7	0
8.8	0
8.9	0
9	0
9.1	0
9.2	0
9.3	0
9.4	0
9.5	0
9.6	0
9.7	0
9.8	0
9.9	0
10	0
10.1	0
10.2	0
10.3	0
10.4	0
10.5	0
10.6	0
10.7	0
10.8	0
10.9	0
11	0
11.1	0
11.2	0
11.3	0
11.4	0
11.5	0
11.6	0
11.7	0
11.8	0
11.9	0
12	0
12.1	0
12.2	0
12.3	0
12.4	0
12.5	0
12.6	0
12.7	0
12.8	0
12.9	0
13	0
13.1	0
13.2	0
13.3	0
13.4	0
13.5	0
13.6	0
13.7	0
13.8	0
13.9	0
14	0
14.1	0
14.2	0
14.3	0
14.4	0
14.5	0
14.6	0
14.7	0
14.8	0
14.9	0
15	0
15.1	0
15.2	0
15.3	0
15.4	0
15.5	0
15.6	0
15.7	0
15.8	0
15.9	0
16	0
16.1	0
16.2	0
16.3	0
16.4	0
16.5	0
16.6	0
16.7	0
16.8	0
16.9	0
17	0
17.1	0
17.2	0
17.3	0
17.4	0
17.5	0
17.6	0
17.7	0
17.8	0
17.9	0
18	0
18.1	0
18.2	0
18.3	0
18.4	0
18.5	0
18.6	0
18.7	0
18.8	0
18.9	0
19	0
19.1	0
19.2	0
19.3	0
19.4	0
19.5	0
19.6	0
19.7	0
19.8	0
19.9	0
20	0
20.1	0
20.2	0
20.3	0
20.4	0
20.5	0
20.6	0
20.7	0
20.8	0
20.9	0
21	0
21.1	0
21.2	0
21.3	0
21.4	0
21.5	0
21.6	0
21.7	0
21.8	0
21.9	0
22	0
22.1	0
22.2	0
22.3	0
22.4	0
22.5	0
22.6	0
22.7	0
22.8	0
22.9	0
23	0
23.1	0
23.2	0
23.3	0
23.4	0
23.5	0
23.6	0
23.7	0
23.8	0
23.9	0
24	0
24.1	0
24.2	0
24.3	0
24.4	0
24.5	0
24.6	0
24.7	0
24.8	0
24.9	0
25	0
25.1	0
25.2	0
25.3	0
25.4	0
25.5	0
25.6	0
25.7	0
25.8	0
25.9	0
26	0
26.1	0
26.2	0
26.3	0
26.4	0
26.5	0
26.6	0
26.7	0
26.8	0
26.9	0
27	0
27.1	0
27.2	0
27.3	0
27.4	0
27.5	0
27.6	0
27.7	0
27.8	0
27.9	0
28	0
28.1	0
28.2	0
28.3	0
28.4	0
28.5	0
28.6	0
28.7	0
28.8	0
28.9	0
29	0
29.1	0
29.2	0
29.3	0
29.4	0
29.5	0
29.6	0
29.7	0
29.8	0
29.9	0
30	0
30.1	0
30.2	0
30.3	0
30.4	0
30.5	0
30.6	0
30.7	0
30.8	0
30.9	0
31	0
31.1	0
31.2	0
31.3	0
31.4	0
31.5	0
31.6	0
31.7	0
31.8	0
31.9	0
32	0
32.1	0
32.2	0
32.3	0
32.4	0
32.5	0
32.6	0
32.7	0
32.8	0
32.9	0
33	0
33.1	0
33.2	0
33.3	0
33.4	0
33.5	0
33.6	0
33.7	0
33.8	0
33.9	0
34	0
34.1	0
34.2	0
34.3	0
34.4	0
34.5	0
34.6	0
34.7	0
34.8	0
34.9	0
35	0
35.1	0
35.2	0
35.3	0
35.4	0
35.5	0
35.6	0
35.7	0
35.8	0
35.9	0
36	0
36.1	0
36.2	0
36.3	0
36.4	0
36.5	0
36.6	0
36.7	0
36.8	0
36.9	0
37	0
37.1	0
37.2	0
37.3	0
37.4	0
37.5	0
37.6	0
37.7	0
37.8	0
37.9	0
38	0
38.1	0
38.2	0
38.3	0
38.4	0
38.5	0
38.6	0
38.7	0
38.8	0
38.9	0
39	0
39.1	0
39.2	0
39.3	0
39.4	0
39.5	0
39.6	0
39.7	0
39.8	0
39.9	0
40	0
40.1	0
40.2	0
40.3	0
40.4	0
40.5	0
40.6	0
40.7	0
40.8	0
40.9	0
41	0
41.1	0
41.2	0
41.3	0
41.4	0
41.5	0
41.6	0
41.7	0
41.8	0
41.9	0
42	0
42.1	0
42.2	0
42.3	0
42.4	0
42.5	0
42.6	0
42.7	0
42.8	0
42.9	0
43	0
43.1	0
43.2	0
43.3	0
43.4	0
43.5	0
43.6	0
43.7	0
43.8	0
43.9	0
44	0
44.1	0
44.2	0
44.3	0
44.4	0
44.5	0
44.6	0
44.7	0
44.8	0
44.9	0
45	0
45.1	0
45.2	0
45.3	0
45.4	0
45.5	0
45.6	0
45.7	0
45.8	0
45.9	0
46	0
46.1	0
46.2	0
46.3	0
46.4	0
46.5	0
46.6	0
46.7	0
46.8	0
46.9	0
47	0
47.1	0
47.2	0
47.3	0
47.4	0
47.5	0
47.6	0
47.7	0
47.8	0
47.9	0
48	0
48.1	0
48.2	0
48.3	0
48.4	0
48.5	0
48.6	0
48.7	0
48.8	0
48.9	0
49	0
49.1	0
49.2	0
49.3	0
49.4	0
49.5	0
49.6	0
49.7	0
49.8	0
49.9	0
50	0
50.1	0
50.2	0
50.3	0
50.4	0
50.5	0
50.6	0
50.7	0
50.8	0
50.9	0
51	0
51.1	0
51.2	0
51.3	0
51.4	0
51.5	0
51.6	0
51.7	0
51.8	0
51.9	0
52	0
52.1	0
52.2	0
52.3	0
52.4	0
52.5	0
52.6	0
52.7	0
52.8	0
52.9	0
53	0
53.1	0
53.2	0
53.3	0
53.4	0
53.5	0
53.6	0
53.7	0
53.8	0
53.9	0
54	0
54.1	0
54.2	0
54.3	0
54.4	0
54.5	0
54.6	0
54.7	0
54.8	0
54.9	0
55	0
55.1	0
55.2	0
55.3	0
55.4	0
55.5	0
55.6	0
55.7	0
55.8	0
55.9	0
56	0
56.1	0
56.2	0
56.3	0
56.4	0
56.5	0
56.6	0
56.7	0
56.8	0
56.9	0
57	0
57.1	0
57.2	0
57.3	0
57.4	0
57.5	0
57.6	0
57.7	0
57.8	0
57.9	0
58	0
58.1	0
58.2	0
58.3	0
58.4	0
58.5	0
58.6	0
58.7	0
58.8	0
58.9	0
59	0
59.1	0
59.2	0
59.3	0
59.4	0
59.5	0
59.6	0
59.7	0
59.8	0
59.9	0
60	0
60.1	0
60.2	0
60.3	0
60.4	0
60.5	0
60.6	0
60.7	0
60.8	0
60.9	0
61	0
61.1	0
61.2	0
61.3	0
61.4	0
61.5	0
61.6	0
61.7	0
61.8	0
61.9	0
62	0
62.1	0
62.2	0
62.3	0
62.4	0
62.5	0
62.6	0
62.7	0
62.8	0
62.9	0
63	0
63.1	0
63.2	0
63.3	0
63.4	0
63.5	0
63.6	0
63.7	0
63.8	0
63.9	0
64	0
64.1	0
64.2	0
64.3	0
64.4	0
64.5	0
64.6	0
64.7	0
64.8	0
64.9	0
65	0
65.1	0
65.2	0
65.3	0
65.4	0
65.5	0
65.6	0
65.7	0
65.8	0
65.9	0
66	0
66.1	0
66.2	0
66.3	0
66.4	0
66.5	0
66.6	0
66.7	0
66.8	0
66.9	0
67	0
67.1	0
67.2	0
67.3	0
67.4	0
67.5	0
67.6	0
67.7	0
67.8	0
67.9	0
68	0
68.1	0
68.2	0
68.3	0
68.4	0
68.5	0
68.6	0
68.7	0
68.8	0
68.9	0
69	0
69.1	0
69.2	0
69.3	0
69.4	0
69.5	0
69.6	0
69.7	0
69.8	0
69.9	0
70	0
70.1	0
70.2	0
70.3	0
70.4	0
70.5	0
70.6	0
70.7	0
70.8	0
70.9	0
71	0
71.1	0
71.2	0
71.3	0
71.4	0
71.5	0
71.6	0
71.7	0
71.8	0
71.9	0
72	0
72.1	0
72.2	0
72.3	0
72.4	0
72.5	0
72.6	0
72.7	0
72.8	0
72.9	0
73	0
73.1	0
73.2	0
73.3	0
73.4	0
73.5	0
73.6	0
73.7	0
73.8	0
73.9	0
74	0
74.1	0
74.2	0
74.3	0
74.4	0
74.5	0
74.6	0
74.7	0
74.8	0
74.9	0
75	0
75.1	0
75.2	0
75.3	0
75.4	0
75.5	0
75.6	0
75.7	0
75.8	0
75.9	0
76	0
76.1	0
76.2	0
76.3	0
76.4	0
76.5	0
76.6	0
76.7	0
76.8	0
76.9	0
77	0
77.1	0
77.2	0
77.3	0
77.4	0
77.5	0
77.6	0
77.7	0
77.8	0
77.9	0
78	0
78.1	0
78.2	0
78.3	0
78.4	0
78.5	0
78.6	0
78.7	0
78.8	0
78.9	0
79	0
79.1	0
79.2	0
79.3	0
79.4	0
79.5	0
79.6	0
79.7	0
79.8	0
79.9	0
80	0
80.1	0
80.2	0
80.3	0
80.4	0
80.5	0
80.6	0
80.7	0
80.8	0
80.9	0
81	0
81.1	0
81.2	0
81.3	0
81.4	0
81.5	0
81.6	0
81.7	0
81.8	0
81.9	0
82	0
82.1	0
82.2	0
82.3	0
82.4	0
82.5	0
82.6	0
82.7	0
82.8	0
82.9	0
83	0
83.1	0
83.2	0
83.3	0
83.4	0
83.5	0
83.6	0
83.7	0
83.8	0
83.9	0
84	0
84.1	0
84.2	0
84.3	0
84.4	0
84.5	0
84.6	0
84.7	0
84.8	0
84.9	0
85	0
85.1	0
85.2	0
85.3	0
85.4	0
85.5	0
85.6	0
85.7	0
85.8	0
85.9	0
86	0
86.1	0
86.2	0
86.3	0
86.4	0
86.5	0
86.6	0
86.7	0
86.8	0
86.9	0
87	0
87.1	0
87.2	0
87.3	0
87.4	0
87.5	0
87.6	0
87.7	0
87.8	0
87.9	0
88	0
88.1	0
88.2	0
88.3	0
88.4	0
88.5	0
88.6	0
88.7	0
88.8	0
88.9	0
89	0
89.1	0
89.2	0
89.3	0
89.4	0
89.5	0
89.6	0
89.7	0
89.8	0
89.9	0
90	0
90.1	0
90.2	0
90.3	0
90.4	0
90.5	0
90.6	0
90.7	0
90.8	0
90.9	0
91	0
91.1	0
91.2	0
91.3	0
91.4	0
91.5	0
91.6	0
91.7	0
91.8	0
91.9	0
92	0
92.1	0
92.2	0
92.3	0
92.4	0
92.5	0
92.6	0
92.7	0
92.8	0
92.9	0
93	0
93.1	0
93.2	0
93.3	0
93.4	0
93.5	0
93.6	0
93.7	0
93.8	0
93.9	0
94	0
94.1	0
94.2	0
94.3	0
94.4	0
94.5	0
94.6	0
94.7	0
94.8	0
94.9	0
95	0
95.1	0
95.2	0
95.3	0
95.4	0
95.5	0
95.6	0
95.7	0
95.8	0
95.9	0
96	0
96.1	0
96.2	0
96.3	0
96.4	0
96.5	0
96.6	0
96.7	0
96.8	0
96.9	0
97	0
97.1	0
97.2	0
97.3	0
97.4	0
97.5	0
97.6	0
97.7	0
97.8	0
97.9	0
98	0
98.1	0
98.2	0
98.3	0
98.4	0
98.5	0
98.6	0
98.7	0
98.8	0
98.9	0
99	0
99.1	0
99.2	0
99.3	0
99.4	0
99.5	0
99.6	0
99.7	0
99.8	0
99.9	0
100	0
100.1	0.35375
100.2	0.53075
100.3	0.645
100.4	0.71275
100.5	0.76475
100.6	0.79775
100.7	0.8285
100.8	0.84875
100.9	0.865
101	0.88225
101.1	0.8935
101.2	0.8995
101.3	0.9
101.4	0.9015
101.5	0.90775
101.6	0.9085
101.7	0.9105
101.8	0.91275
101.9	0.91725
102	0.9235
102.1	0.923
102.2	0.9255
102.3	0.9235
102.4	0.92
102.5	0.923
102.6	0.92275
102.7	0.9245
102.8	0.92225
102.9	0.92425
103	0.9255
103.1	0.92625
103.2	0.927
103.3	0.927
103.4	0.9285
103.5	0.92875
103.6	0.92975
103.7	0.9285
103.8	0.92375
103.9	0.922
104	0.92275
104.1	0.925
104.2	0.924
104.3	0.92525
104.4	0.927
104.5	0.9245
104.6	0.92075
104.7	0.92175
104.8	0.923
104.9	0.925
105	0.92675
105.1	0.93175
105.2	0.93075
105.3	0.93125
105.4	0.9295
105.5	0.92925
105.6	0.92975
105.7	0.93075
105.8	0.9335
105.9	0.931
106	0.934
106.1	0.932
106.2	0.92825
106.3	0.93075
106.4	0.93025
106.5	0.927
106.6	0.92525
106.7	0.92825
106.8	0.93125
106.9	0.933
107	0.9365
107.1	0.93675
107.2	0.932
107.3	0.93025
107.4	0.92975
107.5	0.93225
107.6	0.9335
107.7	0.92675
107.8	0.925
107.9	0.926
108	0.93
108.1	0.929
108.2	0.9295
108.3	0.93325
108.4	0.93475
108.5	0.937
108.6	0.9405
108.7	0.93725
108.8	0.941
108.9	0.93825
109	0.93875
109.1	0.93725
109.2	0.93225
109.3	0.93875
109.4	0.9375
109.5	0.94125
109.6	0.9405
109.7	0.936
109.8	0.937
109.9	0.9365
110	0.93875
110.1	0.93575
110.2	0.93925
110.3	0.94275
110.4	0.9415
110.5	0.943
110.6	0.9435
110.7	0.94075
110.8	0.94475
110.9	0.941
111	0.9435
111.1	0.94325
111.2	0.9445
111.3	0.94375
111.4	0.94725
111.5	0.9485
111.6	0.9485
111.7	0.95025
111.8	0.94675
111.9	0.9475
112	0.94375
112.1	0.94325
112.2	0.943
112.3	0.9425
112.4	0.9435
112.5	0.9465
112.6	0.94125
112.7	0.94275
112.8	0.94275
112.9	0.94375
113	0.94325
113.1	0.9425
113.2	0.938
113.3	0.93975
113.4	0.94375
113.5	0.944
113.6	0.9425
113.7	0.94575
113.8	0.94875
113.9	0.95175
114	0.951
114.1	0.95025
114.2	0.948
114.3	0.94575
114.4	0.94675
114.5	0.94675
114.6	0.9485
114.7	0.95075
114.8	0.946
114.9	0.95
115	0.95125
115.1	0.95225
115.2	0.952
115.3	0.9525
115.4	0.95275
115.5	0.95325
115.6	0.953
115.7	0.95375
115.8	0.95375
115.9	0.95275
116	0.95475
116.1	0.956
116.2	0.95025
116.3	0.95125
116.4	0.9515
116.5	0.95125
116.6	0.95275
116.7	0.953
116.8	0.9535
116.9	0.95025
117	0.9525
117.1	0.951
117.2	0.94675
117.3	0.94875
117.4	0.9475
117.5	0.9485
117.6	0.94775
117.7	0.94525
117.8	0.944
117.9	0.95075
118	0.95375
118.1	0.9565
118.2	0.9555
118.3	0.957
118.4	0.9545
118.5	0.954
118.6	0.95025
118.7	0.9525
118.8	0.95375
118.9	0.953
119	0.957
119.1	0.95925
119.2	0.962
119.3	0.96425
119.4	0.96225
119.5	0.96025
119.6	0.95825
119.7	0.957
119.8	0.95925
119.9	0.962
120	0.96375
120.1	0.9665
120.2	0.964
120.3	0.96275
120.4	0.95875
120.5	0.95925
120.6	0.95875
120.7	0.962
120.8	0.96375
120.9	0.962
121	0.95775
121.1	0.95775
121.2	0.96025
121.3	0.96425
121.4	0.9635
121.5	0.96125
121.6	0.96225
121.7	0.9615
121.8	0.962
121.9	0.96025
122	0.963
122.1	0.96375
122.2	0.96125
122.3	0.96025
122.4	0.9605
122.5	0.96175
122.6	0.95825
122.7	0.96125
122.8	0.964
122.9	0.9635
123	0.962
123.1	0.96475
123.2	0.9655
123.3	0.96425
123.4	0.96375
123.5	0.96275
123.6	0.96475
123.7	0.9655
123.8	0.965
123.9	0.96575
124	0.964
124.1	0.964
124.2	0.9635
124.3	0.9605
124.4	0.96125
124.5	0.96075
124.6	0.96225
124.7	0.964
124.8	0.96425
124.9	0.964
125	0.96425
125.1	0.9645
125.2	0.96425
125.3	0.9645
125.4	0.965
125.5	0.96675
125.6	0.96675
125.7	0.96775
125.8	0.965
125.9	0.96625
126	0.96525
126.1	0.96325
126.2	0.9615
126.3	0.95925
126.4	0.957
126.5	0.95775
126.6	0.95825
126.7	0.9595
126.8	0.95925
126.9	0.96175
127	0.9645
127.1	0.9635
127.2	0.9595
127.3	0.962
127.4	0.96375
127.5	0.96125
127.6	0.963
127.7	0.96
127.8	0.961
127.9	0.96
128	0.963
128.1	0.96325
128.2	0.96625
128.3	0.96625
128.4	0.96625
128.5	0.9675
128.6	0.96825
128.7	0.968
128.8	0.966
128.9	0.966
129	0.96575
129.1	0.96775
129.2	0.96725
129.3	0.9655
129.4	0.966
129.5	0.96725
129.6	0.96875
129.7	0.96925
129.8	0.96625
129.9	0.9685
130	0.9715
130.1	0.96825
130.2	0.969
130.3	0.9725
130.4	0.96925
130.5	0.971
130.6	0.96775
130.7	0.97125
130.8	0.97125
130.9	0.96975
131	0.971
131.1	0.97
131.2	0.97325
131.3	0.9735
131.4	0.9725
131.5	0.971
131.6	0.9725
131.7	0.97125
131.8	0.972
131.9	0.96875
132	0.97175
132.1	0.9705
132.2	0.973
132.3	0.972
132.4	0.974
132.5	0.97425
132.6	0.97225
132.7	0.96925
132.8	0.96925
132.9	0.969
133	0.9705
133.1	0.97275
133.2	0.9705
133.3	0.97175
133.4	0.9705
133.5	0.96725
133.6	0.96875
133.7	0.96825
133.8	0.96825
133.9	0.969
134	0.96975
134.1	0.971
134.2	0.974
134.3	0.974
134.4	0.97175
134.5	0.97375
134.6	0.972
134.7	0.974
134.8	0.97225
134.9	0.9715
135	0.97375
135.1	0.97275
135.2	0.971
135.3	0.97025
135.4	0.97
135.5	0.97125
135.6	0.971
135.7	0.9705
135.8	0.97
135.9	0.97075
136	0.9715
136.1	0.971
136.2	0.97175
136.3	0.972
136.4	0.97025
136.5	0.9695
136.6	0.972
136.7	0.97225
136.8	0.97275
136.9	0.97575
137	0.97375
137.1	0.9755
137.2	0.9755
137.3	0.97125
137.4	0.97075
137.5	0.9735
137.6	0.974
137.7	0.97325
137.8	0.9705
137.9	0.96775
138	0.96925
138.1	0.969
138.2	0.96975
138.3	0.9735
138.4	0.97525
138.5	0.97325
138.6	0.97425
138.7	0.9745
138.8	0.9735
138.9	0.97575
139	0.973
139.1	0.9725
139.2	0.97575
139.3	0.97425
139.4	0.9725
139.5	0.97325
139.6	0.9725
139.7	0.97225
139.8	0.971
139.9	0.97125
140	0.9705
140.1	0.97075
140.2	0.971
140.3	0.97225
140.4	0.972
140.5	0.97225
140.6	0.9715
140.7	0.9705
140.8	0.97075
140.9	0.97075
141	0.97475
141.1	0.978
141.2	0.97725
141.3	0.9785
141.4	0.97675
141.5	0.97775
141.6	0.979
141.7	0.97875
141.8	0.97925
141.9	0.97725
142	0.977
142.1	0.97325
142.2	0.97525
142.3	0.975
142.4	0.9735
142.5	0.97025
142.6	0.9695
142.7	0.968
142.8	0.972
142.9	0.97325
143	0.97575
143.1	0.97625
143.2	0.97575
143.3	0.9755
143.4	0.9745
143.5	0.97375
143.6	0.9735
143.7	0.973
143.8	0.9715
143.9	0.968
144	0.96925
144.1	0.9695
144.2	0.974
144.3	0.97525
144.4	0.97825
144.5	0.97925
144.6	0.97975
144.7	0.9785
144.8	0.978
144.9	0.97675
145	0.97825
145.1	0.97825
145.2	0.97875
145.3	0.9795
145.4	0.97625
145.5	0.9775
145.6	0.979
145.7	0.97875
145.8	0.97675
145.9	0.9775
146	0.97975
146.1	0.98
146.2	0.9785
146.3	0.97675
146.4	0.977
146.5	0.978
146.6	0.97575
146.7	0.976
146.8	0.979
146.9	0.97675
147	0.9765
147.1	0.9765
147.2	0.97625
147.3	0.97925
147.4	0.97925
147.5	0.97875
147.6	0.9775
147.7	0.97825
147.8	0.97475
147.9	0.9735
148	0.975
148.1	0.976
148.2	0.97425
148.3	0.9755
148.4	0.97675
148.5	0.97825
148.6	0.97775
148.7	0.97575
148.8	0.976
148.9	0.9765
149	0.9725
149.1	0.9725
149.2	0.9735
149.3	0.97475
149.4	0.9755
149.5	0.9755
149.6	0.97775
149.7	0.97825
149.8	0.979
149.9	0.98
150	0.981
150.1	0.9775
150.2	0.9765
150.3	0.975
150.4	0.97725
150.5	0.97625
150.6	0.97625
150.7	0.9755
150.8	0.97475
150.9	0.97575
151	0.977
151.1	0.978
151.2	0.98175
151.3	0.981
151.4	0.9775
151.5	0.97825
151.6	0.98
151.7	0.98125
151.8	0.97975
151.9	0.97875
152	0.9785
152.1	0.97975
152.2	0.97975
152.3	0.97975
152.4	0.98
152.5	0.98075
152.6	0.98
152.7	0.97975
152.8	0.981
152.9	0.98025
153	0.979
153.1	0.97775
153.2	0.979
153.3	0.98125
153.4	0.9805
153.5	0.9815
153.6	0.9805
153.7	0.9815
153.8	0.982
153.9	0.98125
154	0.98225
154.1	0.98175
154.2	0.98375
154.3	0.98375
154.4	0.98275
154.5	0.98175
154.6	0.981
154.7	0.97975
154.8	0.97775
154.9	0.97825
155	0.97825
155.1	0.9785
155.2	0.97925
155.3	0.97675
155.4	0.97725
155.5	0.97675
155.6	0.97375
155.7	0.97375
155.8	0.97425
155.9	0.9765
156	0.98025
156.1	0.98175
156.2	0.97725
156.3	0.97775
156.4	0.98075
156.5	0.97875
156.6	0.9785
156.7	0.97725
156.8	0.97825
156.9	0.98
157	0.982
157.1	0.98325
157.2	0.9825
157.3	0.9805
157.4	0.981
157.5	0.98175
157.6	0.98375
157.7	0.98125
157.8	0.97925
157.9	0.97975
158	0.97975
158.1	0.9795
158.2	0.97775
158.3	0.97825
158.4	0.9795
158.5	0.9805
158.6	0.979
158.7	0.97875
158.8	0.9795
158.9	0.98075
159	0.9795
159.1	0.97825
159.2	0.98025
159.3	0.98025
159.4	0.9835
159.5	0.98225
159.6	0.97975
159.7	0.98125
159.8	0.98275
159.9	0.98175
160	0.98075
160.1	0.98075
160.2	0.97975
160.3	0.97925
160.4	0.97975
160.5	0.97775
160.6	0.97775
160.7	0.98
160.8	0.979
160.9	0.97925
161	0.97975
161.1	0.98125
161.2	0.98225
161.3	0.9815
161.4	0.98225
161.5	0.98275
161.6	0.982
161.7	0.98025
161.8	0.9825
161.9	0.98275
162	0.983
162.1	0.9815
162.2	0.97975
162.3	0.98075
162.4	0.97975
162.5	0.97875
162.6	0.98
162.7	0.98
162.8	0.982
162.9	0.9835
163	0.984
163.1	0.98425
163.2	0.98225
163.3	0.98225
163.4	0.983
163.5	0.983
163.6	0.98325
163.7	0.98175
163.8	0.9815
163.9	0.9825
164	0.983
164.1	0.98
164.2	0.98
164.3	0.98175
164.4	0.9815
164.5	0.981
164.6	0.981
164.7	0.9795
164.8	0.979
164.9	0.979
165	0.97775
165.1	0.978
165.2	0.97725
165.3	0.97925
165.4	0.97825
165.5	0.9785
165.6	0.9785
165.7	0.979
165.8	0.9795
165.9	0.98
166	0.9815
166.1	0.9815
166.2	0.981
166.3	0.982
166.4	0.98225
166.5	0.982
166.6	0.98175
166.7	0.9815
166.8	0.98125
166.9	0.982
167	0.9825
167.1	0.98225
167.2	0.9835
167.3	0.98175
167.4	0.98175
167.5	0.9825
167.6	0.98075
167.7	0.97975
167.8	0.98125
167.9	0.98
168	0.97725
168.1	0.9795
168.2	0.978
168.3	0.97875
168.4	0.98025
168.5	0.97975
168.6	0.981
168.7	0.982
168.8	0.98275
168.9	0.98125
169	0.982
169.1	0.98075
169.2	0.98075
169.3	0.981
169.4	0.98075
169.5	0.98125
169.6	0.98125
169.7	0.9815
169.8	0.981
169.9	0.98
170	0.9805
170.1	0.9795
170.2	0.98125
170.3	0.9835
170.4	0.98375
170.5	0.98275
170.6	0.98325
170.7	0.98275
170.8	0.98325
170.9	0.98525
171	0.985
171.1	0.98425
171.2	0.9855
171.3	0.9855
171.4	0.984
171.5	0.9845
171.6	0.98375
171.7	0.9835
171.8	0.9845
171.9	0.98325
172	0.981
172.1	0.9805
172.2	0.98125
172.3	0.98125
172.4	0.98025
172.5	0.97975
172.6	0.978
172.7	0.97925
172.8	0.9795
172.9	0.979
173	0.979
173.1	0.98025
173.2	0.981
173.3	0.98
173.4	0.98025
173.5	0.98
173.6	0.98175
173.7	0.9815
173.8	0.98275
173.9	0.982
174	0.9825
174.1	0.98375
174.2	0.9835
174.3	0.98475
174.4	0.986
174.5	0.98625
174.6	0.98425
174.7	0.9835
174.8	0.98325
174.9	0.98025
175	0.981
175.1	0.98
175.2	0.979
175.3	0.98175
175.4	0.98075
175.5	0.983
175.6	0.98475
175.7	0.98625
175.8	0.9855
175.9	0.9845
176	0.98325
176.1	0.98175
176.2	0.9805
176.3	0.98075
176.4	0.982
176.5	0.98175
176.6	0.98225
176.7	0.98275
176.8	0.9825
176.9	0.984
177	0.98475
177.1	0.9845
177.2	0.98425
177.3	0.98375
177.4	0.984
177.5	0.98325
177.6	0.98125
177.7	0.98025
177.8	0.97925
177.9	0.98275
178	0.98125
178.1	0.981
178.2	0.983
178.3	0.98425
178.4	0.982
178.5	0.98525
178.6	0.98375
178.7	0.98325
178.8	0.9815
178.9	0.9805
179	0.98125
179.1	0.98125
179.2	0.97925
179.3	0.98
179.4	0.9775
179.5	0.978
179.6	0.98
179.7	0.981
179.8	0.9825
179.9	0.98275
180	0.98325
180.1	0.983
180.2	0.98125
180.3	0.98275
180.4	0.983
180.5	0.98375
180.6	0.981
180.7	0.98225
180.8	0.98
180.9	0.9795
181	0.98025
181.1	0.98175
181.2	0.98075
181.3	0.9815
181.4	0.98325
181.5	0.985
181.6	0.9845
181.7	0.98475
181.8	0.983
181.9	0.9835
182	0.982
182.1	0.98225
182.2	0.983
182.3	0.983
182.4	0.98325
182.5	0.98075
182.6	0.981
182.7	0.98025
182.8	0.97975
182.9	0.9785
183	0.9785
183.1	0.97875
183.2	0.98025
183.3	0.97825
183.4	0.98025
183.5	0.98275
183.6	0.98225
183.7	0.98125
183.8	0.98325
183.9	0.9825
184	0.98275
184.1	0.98175
184.2	0.9785
184.3	0.98025
184.4	0.982
184.5	0.98475
184.6	0.98525
184.7	0.9865
184.8	0.98525
184.9	0.98425
185	0.983
185.1	0.98175
185.2	0.98475
185.3	0.98525
185.4	0.98325
185.5	0.98525
185.6	0.98525
185.7	0.984
185.8	0.98375
185.9	0.98325
186	0.98175
186.1	0.98175
186.2	0.9825
186.3	0.983
186.4	0.9835
186.5	0.98375
186.6	0.983
186.7	0.9815
186.8	0.98025
186.9	0.97975
187	0.9805
187.1	0.98175
187.2	0.9835
187.3	0.98275
187.4	0.981
187.5	0.98075
187.6	0.98075
187.7	0.97975
187.8	0.98125
187.9	0.9805
188	0.9815
188.1	0.983
188.2	0.9835
188.3	0.98525
188.4	0.98325
188.5	0.9835
188.6	0.9835
188.7	0.984
188.8	0.98375
188.9	0.98325
189	0.983
189.1	0.97925
189.2	0.98075
189.3	0.97925
189.4	0.97975
189.5	0.982
189.6	0.983
189.7	0.98175
189.8	0.98375
189.9	0.9825
190	0.982
190.1	0.98325
190.2	0.9805
190.3	0.9825
190.4	0.98325
190.5	0.985
190.6	0.984
190.7	0.98375
190.8	0.98425
190.9	0.985
191	0.98525
191.1	0.98325
191.2	0.984
191.3	0.983
191.4	0.984
191.5	0.98425
191.6	0.98375
191.7	0.982
191.8	0.98375
191.9	0.98375
192	0.984
192.1	0.9835
192.2	0.9825
192.3	0.98175
192.4	0.9805
192.5	0.98075
192.6	0.9805
192.7	0.98025
192.8	0.9795
192.9	0.98
193	0.98175
193.1	0.98225
193.2	0.9815
193.3	0.982
193.4	0.983
193.5	0.98075
193.6	0.983
193.7	0.982
193.8	0.98225
193.9	0.9825
194	0.981
194.1	0.98
194.2	0.981
194.3	0.98125
194.4	0.982
194.5	0.98275
194.6	0.98225
194.7	0.98225
194.8	0.9825
194.9	0.9825
195	0.981
195.1	0.97925
195.2	0.9805
195.3	0.97925
195.4	0.98075
195.5	0.9805
195.6	0.97925
195.7	0.9775
195.8	0.9775
195.9	0.97775
196	0.9805
196.1	0.9815
196.2	0.982
196.3	0.981
196.4	0.9805
196.5	0.9825
196.6	0.983
196.7	0.9825
196.8	0.98
196.9	0.97975
197	0.98275
197.1	0.97975
197.2	0.98225
197.3	0.9835
197.4	0.98275
197.5	0.98225
197.6	0.984
197.7	0.98325
197.8	0.9855
197.9	0.985
198	0.98675
198.1	0.9855
198.2	0.987
198.3	0.986
198.4	0.98575
198.5	0.98375
198.6	0.983
198.7	0.98375
198.8	0.98525
198.9	0.98675
199	0.98575
199.1	0.985
199.2	0.98125
199.3	0.98125
199.4	0.98025
199.5	0.98175
199.6	0.982
199.7	0.981
199.8	0.983
199.9	0.98225
200	0.98225
[truncated: 14,000 more rows]
