# Supplementary material for: Bayesian inference of kinetic schemes for ion channels by Kalman filtering
Source: eLife journal article supplement (doi:10.7554/elife.62714), 2022-05-04
Supplement: fig4-data4 [file 1_Sim_N_2000_Strom_MW.xlsx]

## Sheet: Tabelle1
0.1	0
0.2	0
0.3	0
0.4	0
0.5	0
0.6	0
0.7	0
0.8	0
0.9	0
1	0
1.1	0
1.2	0
1.3	0
1.4	0
1.5	0
1.6	0
1.7	0
1.8	0
1.9	0
2	0
2.1	0
2.2	0
2.3	0
2.4	0
2.5	0
2.6	0
2.7	0
2.8	0
2.9	0
3	0
3.1	0
3.2	0
3.3	0
3.4	0
3.5	0
3.6	0
3.7	0
3.8	0
3.9	0
4	0
4.1	0
4.2	0
4.3	0
4.4	0
4.5	0
4.6	0
4.7	0
4.8	0
4.9	0
5	0
5.1	0
5.2	0
5.3	0
5.4	0
5.5	0
5.6	0
5.7	0
5.8	0
5.9	0
6	0
6.1	0
6.2	0
6.3	0
6.4	0
6.5	0
6.6	0
6.7	0
6.8	0
6.9	0
7	0
7.1	0
7.2	0
7.3	0
7.4	0
7.5	0
7.6	0
7.7	0
7.8	0
7.9	0
8	0
8.1	0
8.2	0
8.3	0
8.4	0
8.5	0
8.6	0
8.7	0
8.8	0
8.9	0
9	0
9.1	0
9.2	0
9.3	0
9.4	0
9.5	0
9.6	0
9.7	0
9.8	0
9.9	0
10	0
10.1	0
10.2	0
10.3	0
10.4	0
10.5	0
10.6	0
10.7	0
10.8	0
10.9	0
11	0
11.1	0
11.2	0
11.3	0
11.4	0
11.5	0
11.6	0
11.7	0
11.8	0
11.9	0
12	0
12.1	0
12.2	0
12.3	0
12.4	0
12.5	0
12.6	0
12.7	0
12.8	0
12.9	0
13	0
13.1	0
13.2	0
13.3	0
13.4	0
13.5	0
13.6	0
13.7	0
13.8	0
13.9	0
14	0
14.1	0
14.2	0
14.3	0
14.4	0
14.5	0
14.6	0
14.7	0
14.8	0
14.9	0
15	0
15.1	0
15.2	0
15.3	0
15.4	0
15.5	0
15.6	0
15.7	0
15.8	0
15.9	0
16	0
16.1	0
16.2	0
16.3	0
16.4	0
16.5	0
16.6	0
16.7	0
16.8	0
16.9	0
17	0
17.1	0
17.2	0
17.3	0
17.4	0
17.5	0
17.6	0
17.7	0
17.8	0
17.9	0
18	0
18.1	0
18.2	0
18.3	0
18.4	0
18.5	0
18.6	0
18.7	0
18.8	0
18.9	0
19	0
19.1	0
19.2	0
19.3	0
19.4	0
19.5	0
19.6	0
19.7	0
19.8	0
19.9	0
20	0
20.1	0
20.2	0
20.3	0
20.4	0
20.5	0
20.6	0
20.7	0
20.8	0
20.9	0
21	0
21.1	0
21.2	0
21.3	0
21.4	0
21.5	0
21.6	0
21.7	0
21.8	0
21.9	0
22	0
22.1	0
22.2	0
22.3	0
22.4	0
22.5	0
22.6	0
22.7	0
22.8	0
22.9	0
23	0
23.1	0
23.2	0
23.3	0
23.4	0
23.5	0
23.6	0
23.7	0
23.8	0
23.9	0
24	0
24.1	0
24.2	0
24.3	0
24.4	0
24.5	0
24.6	0
24.7	0
24.8	0
24.9	0
25	0
25.1	0
25.2	0
25.3	0
25.4	0
25.5	0
25.6	0
25.7	0
25.8	0
25.9	0
26	0
26.1	0
26.2	0
26.3	0
26.4	0
26.5	0
26.6	0
26.7	0
26.8	0
26.9	0
27	0
27.1	0
27.2	0
27.3	0
27.4	0
27.5	0
27.6	0
27.7	0
27.8	0
27.9	0
28	0
28.1	0
28.2	0
28.3	0
28.4	0
28.5	0
28.6	0
28.7	0
28.8	0
28.9	0
29	0
29.1	0
29.2	0
29.3	0
29.4	0
29.5	0
29.6	0
29.7	0
29.8	0
29.9	0
30	0
30.1	0
30.2	0
30.3	0
30.4	0
30.5	0
30.6	0
30.7	0
30.8	0
30.9	0
31	0
31.1	0
31.2	0
31.3	0
31.4	0
31.5	0
31.6	0
31.7	0
31.8	0
31.9	0
32	0
32.1	0
32.2	0
32.3	0
32.4	0
32.5	0
32.6	0
32.7	0
32.8	0
32.9	0
33	0
33.1	0
33.2	0
33.3	0
33.4	0
33.5	0
33.6	0
33.7	0
33.8	0
33.9	0
34	0
34.1	0
34.2	0
34.3	0
34.4	0
34.5	0
34.6	0
34.7	0
34.8	0
34.9	0
35	0
35.1	0
35.2	0
35.3	0
35.4	0
35.5	0
35.6	0
35.7	0
35.8	0
35.9	0
36	0
36.1	0
36.2	0
36.3	0
36.4	0
36.5	0
36.6	0
36.7	0
36.8	0
36.9	0
37	0
37.1	0
37.2	0
37.3	0
37.4	0
37.5	0
37.6	0
37.7	0
37.8	0
37.9	0
38	0
38.1	0
38.2	0
38.3	0
38.4	0
38.5	0
38.6	0
38.7	0
38.8	0
38.9	0
39	0
39.1	0
39.2	0
39.3	0
39.4	0
39.5	0
39.6	0
39.7	0
39.8	0
39.9	0
40	0
40.1	0
40.2	0
40.3	0
40.4	0
40.5	0
40.6	0
40.7	0
40.8	0
40.9	0
41	0
41.1	0
41.2	0
41.3	0
41.4	0
41.5	0
41.6	0
41.7	0
41.8	0
41.9	0
42	0
42.1	0
42.2	0
42.3	0
42.4	0
42.5	0
42.6	0
42.7	0
42.8	0
42.9	0
43	0
43.1	0
43.2	0
43.3	0
43.4	0
43.5	0
43.6	0
43.7	0
43.8	0
43.9	0
44	0
44.1	0
44.2	0
44.3	0
44.4	0
44.5	0
44.6	0
44.7	0
44.8	0
44.9	0
45	0
45.1	0
45.2	0
45.3	0
45.4	0
45.5	0
45.6	0
45.7	0
45.8	0
45.9	0
46	0
46.1	0
46.2	0
46.3	0
46.4	0
46.5	0
46.6	0
46.7	0
46.8	0
46.9	0
47	0
47.1	0
47.2	0
47.3	0
47.4	0
47.5	0
47.6	0
47.7	0
47.8	0
47.9	0
48	0
48.1	0
48.2	0
48.3	0
48.4	0
48.5	0
48.6	0
48.7	0
48.8	0
48.9	0
49	0
49.1	0
49.2	0
49.3	0
49.4	0
49.5	0
49.6	0
49.7	0
49.8	0
49.9	0
50	0
50.1	0
50.2	0
50.3	0
50.4	0
50.5	0
50.6	0
50.7	0
50.8	0
50.9	0
51	0
51.1	0
51.2	0
51.3	0
51.4	0
51.5	0
51.6	0
51.7	0
51.8	0
51.9	0
52	0
52.1	0
52.2	0
52.3	0
52.4	0
52.5	0
52.6	0
52.7	0
52.8	0
52.9	0
53	0
53.1	0
53.2	0
53.3	0
53.4	0
53.5	0
53.6	0
53.7	0
53.8	0
53.9	0
54	0
54.1	0
54.2	0
54.3	0
54.4	0
54.5	0
54.6	0
54.7	0
54.8	0
54.9	0
55	0
55.1	0
55.2	0
55.3	0
55.4	0
55.5	0
55.6	0
55.7	0
55.8	0
55.9	0
56	0
56.1	0
56.2	0
56.3	0
56.4	0
56.5	0
56.6	0
56.7	0
56.8	0
56.9	0
57	0
57.1	0
57.2	0
57.3	0
57.4	0
57.5	0
57.6	0
57.7	0
57.8	0
57.9	0
58	0
58.1	0
58.2	0
58.3	0
58.4	0
58.5	0
58.6	0
58.7	0
58.8	0
58.9	0
59	0
59.1	0
59.2	0
59.3	0
59.4	0
59.5	0
59.6	0
59.7	0
59.8	0
59.9	0
60	0
60.1	0
60.2	0
60.3	0
60.4	0
60.5	0
60.6	0
60.7	0
60.8	0
60.9	0
61	0
61.1	0
61.2	0
61.3	0
61.4	0
61.5	0
61.6	0
61.7	0
61.8	0
61.9	0
62	0
62.1	0
62.2	0
62.3	0
62.4	0
62.5	0
62.6	0
62.7	0
62.8	0
62.9	0
63	0
63.1	0
63.2	0
63.3	0
63.4	0
63.5	0
63.6	0
63.7	0
63.8	0
63.9	0
64	0
64.1	0
64.2	0
64.3	0
64.4	0
64.5	0
64.6	0
64.7	0
64.8	0
64.9	0
65	0
65.1	0
65.2	0
65.3	0
65.4	0
65.5	0
65.6	0
65.7	0
65.8	0
65.9	0
66	0
66.1	0
66.2	0
66.3	0
66.4	0
66.5	0
66.6	0
66.7	0
66.8	0
66.9	0
67	0
67.1	0
67.2	0
67.3	0
67.4	0
67.5	0
67.6	0
67.7	0
67.8	0
67.9	0
68	0
68.1	0
68.2	0
68.3	0
68.4	0
68.5	0
68.6	0
68.7	0
68.8	0
68.9	0
69	0
69.1	0
69.2	0
69.3	0
69.4	0
69.5	0
69.6	0
69.7	0
69.8	0
69.9	0
70	0
70.1	0
70.2	0
70.3	0
70.4	0
70.5	0
70.6	0
70.7	0
70.8	0
70.9	0
71	0
71.1	0
71.2	0
71.3	0
71.4	0
71.5	0
71.6	0
71.7	0
71.8	0
71.9	0
72	0
72.1	0
72.2	0
72.3	0
72.4	0
72.5	0
72.6	0
72.7	0
72.8	0
72.9	0
73	0
73.1	0
73.2	0
73.3	0
73.4	0
73.5	0
73.6	0
73.7	0
73.8	0
73.9	0
74	0
74.1	0
74.2	0
74.3	0
74.4	0
74.5	0
74.6	0
74.7	0
74.8	0
74.9	0
75	0
75.1	0
75.2	0
75.3	0
75.4	0
75.5	0
75.6	0
75.7	0
75.8	0
75.9	0
76	0
76.1	0
76.2	0
76.3	0
76.4	0
76.5	0
76.6	0
76.7	0
76.8	0
76.9	0
77	0
77.1	0
77.2	0
77.3	0
77.4	0
77.5	0
77.6	0
77.7	0
77.8	0
77.9	0
78	0
78.1	0
78.2	0
78.3	0
78.4	0
78.5	0
78.6	0
78.7	0
78.8	0
78.9	0
79	0
79.1	0
79.2	0
79.3	0
79.4	0
79.5	0
79.6	0
79.7	0
79.8	0
79.9	0
80	0
80.1	0
80.2	0
80.3	0
80.4	0
80.5	0
80.6	0
80.7	0
80.8	0
80.9	0
81	0
81.1	0
81.2	0
81.3	0
81.4	0
81.5	0
81.6	0
81.7	0
81.8	0
81.9	0
82	0
82.1	0
82.2	0
82.3	0
82.4	0
82.5	0
82.6	0
82.7	0
82.8	0
82.9	0
83	0
83.1	0
83.2	0
83.3	0
83.4	0
83.5	0
83.6	0
83.7	0
83.8	0
83.9	0
84	0
84.1	0
84.2	0
84.3	0
84.4	0
84.5	0
84.6	0
84.7	0
84.8	0
84.9	0
85	0
85.1	0
85.2	0
85.3	0
85.4	0
85.5	0
85.6	0
85.7	0
85.8	0
85.9	0
86	0
86.1	0
86.2	0
86.3	0
86.4	0
86.5	0
86.6	0
86.7	0
86.8	0
86.9	0
87	0
87.1	0
87.2	0
87.3	0
87.4	0
87.5	0
87.6	0
87.7	0
87.8	0
87.9	0
88	0
88.1	0
88.2	0
88.3	0
88.4	0
88.5	0
88.6	0
88.7	0
88.8	0
88.9	0
89	0
89.1	0
89.2	0
89.3	0
89.4	0
89.5	0
89.6	0
89.7	0
89.8	0
89.9	0
90	0
90.1	0
90.2	0
90.3	0
90.4	0
90.5	0
90.6	0
90.7	0
90.8	0
90.9	0
91	0
91.1	0
91.2	0
91.3	0
91.4	0
91.5	0
91.6	0
91.7	0
91.8	0
91.9	0
92	0
92.1	0
92.2	0
92.3	0
92.4	0
92.5	0
92.6	0
92.7	0
92.8	0
92.9	0
93	0
93.1	0
93.2	0
93.3	0
93.4	0
93.5	0
93.6	0
93.7	0
93.8	0
93.9	0
94	0
94.1	0
94.2	0
94.3	0
94.4	0
94.5	0
94.6	0
94.7	0
94.8	0
94.9	0
95	0
95.1	0
95.2	0
95.3	0
95.4	0
95.5	0
95.6	0
95.7	0
95.8	0
95.9	0
96	0
96.1	0
96.2	0
96.3	0
96.4	0
96.5	0
96.6	0
96.7	0
96.8	0
96.9	0
97	0
97.1	0
97.2	0
97.3	0
97.4	0
97.5	0
97.6	0
97.7	0
97.8	0
97.9	0
98	0
98.1	0
98.2	0
98.3	0
98.4	0
98.5	0
98.6	0
98.7	0
98.8	0
98.9	0
99	0
99.1	0
99.2	0
99.3	0
99.4	0
99.5	0
99.6	0
99.7	0
99.8	0
99.9	0
100	0
100.1	0
100.2	0.0005
100.3	0.003
100.4	0.007
100.5	0.009
100.6	0.013
100.7	0.0175
100.8	0.0205
100.9	0.0265
101	0.028
101.1	0.0325
101.2	0.034
101.3	0.036
101.4	0.0385
101.5	0.042
101.6	0.047
101.7	0.0515
101.8	0.052
101.9	0.055
102	0.0595
102.1	0.0635
102.2	0.0675
102.3	0.0725
102.4	0.0745
102.5	0.077
102.6	0.08
102.7	0.0825
102.8	0.0865
102.9	0.092
103	0.0975
103.1	0.1025
103.2	0.1075
103.3	0.111
103.4	0.1175
103.5	0.1195
103.6	0.124
103.7	0.1275
103.8	0.13
103.9	0.1325
104	0.136
104.1	0.141
104.2	0.1455
104.3	0.1485
104.4	0.1515
104.5	0.157
104.6	0.1615
104.7	0.1645
104.8	0.1645
104.9	0.1655
105	0.1665
105.1	0.1705
105.2	0.1735
105.3	0.18
105.4	0.1825
105.5	0.1855
105.6	0.189
105.7	0.1925
105.8	0.199
105.9	0.2045
106	0.207
106.1	0.21
106.2	0.215
106.3	0.216
106.4	0.2185
106.5	0.2195
106.6	0.2245
106.7	0.227
106.8	0.2295
106.9	0.232
107	0.2365
107.1	0.238
107.2	0.24
107.3	0.2425
107.4	0.2435
107.5	0.245
107.6	0.2485
107.7	0.252
107.8	0.2545
107.9	0.2575
108	0.2595
108.1	0.263
108.2	0.2685
108.3	0.271
108.4	0.2735
108.5	0.2745
108.6	0.275
108.7	0.2775
108.8	0.28
108.9	0.285
109	0.2865
109.1	0.2885
109.2	0.2925
109.3	0.2955
109.4	0.298
109.5	0.302
109.6	0.3065
109.7	0.3065
109.8	0.307
109.9	0.311
110	0.314
110.1	0.3175
110.2	0.319
110.3	0.3215
110.4	0.327
110.5	0.328
110.6	0.331
110.7	0.3345
110.8	0.338
110.9	0.3395
111	0.3405
111.1	0.3415
111.2	0.3425
111.3	0.347
111.4	0.3495
111.5	0.3525
111.6	0.3525
111.7	0.353
111.8	0.3545
111.9	0.3565
112	0.359
112.1	0.3595
112.2	0.3625
112.3	0.365
112.4	0.37
112.5	0.3735
112.6	0.3785
112.7	0.3795
112.8	0.381
112.9	0.3845
113	0.387
113.1	0.388
113.2	0.392
113.3	0.394
113.4	0.395
113.5	0.3955
113.6	0.398
113.7	0.4025
113.8	0.403
113.9	0.407
114	0.4105
114.1	0.411
114.2	0.4135
114.3	0.416
114.4	0.418
114.5	0.419
114.6	0.421
114.7	0.421
114.8	0.4235
114.9	0.4275
115	0.429
115.1	0.4295
115.2	0.4315
115.3	0.434
115.4	0.4345
115.5	0.4365
115.6	0.4385
115.7	0.4415
115.8	0.4455
115.9	0.448
116	0.45
116.1	0.4515
116.2	0.4525
116.3	0.4545
116.4	0.457
116.5	0.4585
116.6	0.46
116.7	0.462
116.8	0.4645
116.9	0.4665
117	0.4685
117.1	0.4705
117.2	0.474
117.3	0.4755
117.4	0.4755
117.5	0.477
117.6	0.478
117.7	0.481
117.8	0.482
117.9	0.483
118	0.484
118.1	0.485
118.2	0.4855
118.3	0.487
118.4	0.4895
118.5	0.492
118.6	0.493
118.7	0.493
118.8	0.496
118.9	0.499
119	0.5005
119.1	0.503
119.2	0.5035
119.3	0.504
119.4	0.505
119.5	0.507
119.6	0.5085
119.7	0.5115
119.8	0.5135
119.9	0.516
120	0.5175
120.1	0.5185
120.2	0.52
120.3	0.522
120.4	0.523
120.5	0.5245
120.6	0.528
120.7	0.5295
120.8	0.531
120.9	0.534
121	0.538
121.1	0.5395
121.2	0.5405
121.3	0.5415
121.4	0.543
121.5	0.542
121.6	0.5435
121.7	0.5445
121.8	0.545
121.9	0.5455
122	0.549
122.1	0.5475
122.2	0.548
122.3	0.5485
122.4	0.5495
122.5	0.55
122.6	0.5515
122.7	0.5515
122.8	0.554
122.9	0.5545
123	0.5565
123.1	0.5585
123.2	0.5605
123.3	0.5605
123.4	0.562
123.5	0.564
123.6	0.5645
123.7	0.5655
123.8	0.567
123.9	0.5675
124	0.569
124.1	0.569
124.2	0.57
124.3	0.5705
124.4	0.571
124.5	0.5705
124.6	0.5745
124.7	0.577
124.8	0.582
124.9	0.584
125	0.5845
125.1	0.586
125.2	0.588
125.3	0.5905
125.4	0.592
125.5	0.591
125.6	0.593
125.7	0.5945
125.8	0.596
125.9	0.5965
126	0.597
126.1	0.5975
126.2	0.5975
126.3	0.598
126.4	0.5985
126.5	0.599
126.6	0.5995
126.7	0.601
126.8	0.6045
126.9	0.6075
127	0.6085
127.1	0.6085
127.2	0.6095
127.3	0.6105
127.4	0.6105
127.5	0.61
127.6	0.6125
127.7	0.613
127.8	0.614
127.9	0.614
128	0.6165
128.1	0.618
128.2	0.6205
128.3	0.622
128.4	0.626
128.5	0.626
128.6	0.6255
128.7	0.6255
128.8	0.626
128.9	0.6265
129	0.628
129.1	0.6295
129.2	0.6295
129.3	0.629
129.4	0.6305
129.5	0.6325
129.6	0.634
129.7	0.636
129.8	0.6375
129.9	0.638
130	0.639
130.1	0.638
130.2	0.64
130.3	0.6425
130.4	0.644
130.5	0.644
130.6	0.645
130.7	0.646
130.8	0.6465
130.9	0.6465
131	0.647
131.1	0.649
131.2	0.65
131.3	0.652
131.4	0.651
131.5	0.652
131.6	0.654
131.7	0.6545
131.8	0.654
131.9	0.6565
132	0.6575
132.1	0.6585
132.2	0.659
132.3	0.6605
132.4	0.662
132.5	0.663
132.6	0.6645
132.7	0.6645
132.8	0.664
132.9	0.6645
133	0.6655
133.1	0.666
133.2	0.6665
133.3	0.6665
133.4	0.6665
133.5	0.6675
133.6	0.668
133.7	0.6695
133.8	0.671
133.9	0.672
134	0.6735
134.1	0.6755
134.2	0.6755
134.3	0.6765
134.4	0.6785
134.5	0.6775
134.6	0.6785
134.7	0.6785
134.8	0.6805
134.9	0.681
135	0.681
135.1	0.681
135.2	0.681
135.3	0.682
135.4	0.6815
135.5	0.6805
135.6	0.681
135.7	0.6815
135.8	0.681
135.9	0.681
136	0.681
136.1	0.682
136.2	0.683
136.3	0.6835
136.4	0.6845
136.5	0.685
136.6	0.687
136.7	0.688
136.8	0.6895
136.9	0.69
137	0.689
137.1	0.6895
137.2	0.6905
137.3	0.692
137.4	0.692
137.5	0.693
137.6	0.694
137.7	0.695
137.8	0.6955
137.9	0.6965
138	0.697
138.1	0.6985
138.2	0.6985
138.3	0.7
138.4	0.7015
138.5	0.7015
138.6	0.7025
138.7	0.7025
138.8	0.7035
138.9	0.704
139	0.705
139.1	0.706
139.2	0.708
139.3	0.7065
139.4	0.707
139.5	0.7085
139.6	0.708
139.7	0.7085
139.8	0.709
139.9	0.71
140	0.7085
140.1	0.7085
140.2	0.709
140.3	0.709
140.4	0.709
140.5	0.711
140.6	0.711
140.7	0.712
140.8	0.7125
140.9	0.714
141	0.7145
141.1	0.715
141.2	0.716
141.3	0.716
141.4	0.7155
141.5	0.715
141.6	0.715
141.7	0.716
141.8	0.7165
141.9	0.7165
142	0.718
142.1	0.718
142.2	0.7205
142.3	0.7215
142.4	0.722
142.5	0.723
142.6	0.722
142.7	0.724
142.8	0.7245
142.9	0.7255
143	0.7265
143.1	0.7275
143.2	0.7285
143.3	0.73
143.4	0.7305
143.5	0.731
143.6	0.7305
143.7	0.7325
143.8	0.7325
143.9	0.733
144	0.7335
144.1	0.733
144.2	0.7335
144.3	0.733
144.4	0.734
144.5	0.735
144.6	0.7355
144.7	0.7355
144.8	0.7355
144.9	0.7355
145	0.7355
145.1	0.736
145.2	0.7355
145.3	0.7355
145.4	0.735
145.5	0.737
145.6	0.739
145.7	0.738
145.8	0.739
145.9	0.7385
146	0.7385
146.1	0.7395
146.2	0.742
146.3	0.741
146.4	0.743
146.5	0.7425
146.6	0.7415
146.7	0.742
146.8	0.742
146.9	0.742
147	0.7415
147.1	0.7405
147.2	0.741
147.3	0.74
147.4	0.74
147.5	0.741
147.6	0.7415
147.7	0.742
147.8	0.7415
147.9	0.7425
148	0.743
148.1	0.745
148.2	0.745
148.3	0.7445
148.4	0.7445
148.5	0.7445
148.6	0.745
148.7	0.746
148.8	0.7475
148.9	0.746
149	0.747
149.1	0.748
149.2	0.748
149.3	0.7495
149.4	0.751
149.5	0.752
149.6	0.752
149.7	0.7515
149.8	0.751
149.9	0.751
150	0.7525
150.1	0.7515
150.2	0.7525
150.3	0.7535
150.4	0.754
150.5	0.755
150.6	0.7565
150.7	0.756
150.8	0.757
150.9	0.7565
151	0.7555
151.1	0.7555
151.2	0.7555
151.3	0.7545
151.4	0.758
151.5	0.7595
151.6	0.76
151.7	0.761
151.8	0.7615
151.9	0.762
152	0.761
152.1	0.7615
152.2	0.762
152.3	0.7635
152.4	0.763
152.5	0.763
152.6	0.7635
152.7	0.7635
152.8	0.763
152.9	0.763
153	0.7635
153.1	0.765
153.2	0.7665
153.3	0.767
153.4	0.767
153.5	0.767
153.6	0.7675
153.7	0.768
153.8	0.769
153.9	0.7685
154	0.7685
154.1	0.7685
154.2	0.768
154.3	0.7685
154.4	0.769
154.5	0.769
154.6	0.7695
154.7	0.77
154.8	0.7705
154.9	0.77
155	0.7705
155.1	0.771
155.2	0.772
155.3	0.772
155.4	0.7735
155.5	0.774
155.6	0.775
155.7	0.7745
155.8	0.7755
155.9	0.774
156	0.776
156.1	0.776
156.2	0.776
156.3	0.776
156.4	0.776
156.5	0.776
156.6	0.774
156.7	0.773
156.8	0.773
156.9	0.7725
157	0.774
157.1	0.774
157.2	0.7745
157.3	0.775
157.4	0.7755
157.5	0.776
157.6	0.7755
157.7	0.7765
157.8	0.7765
157.9	0.777
158	0.7775
158.1	0.7775
158.2	0.777
158.3	0.7765
158.4	0.7785
158.5	0.7805
158.6	0.782
158.7	0.7835
158.8	0.7835
158.9	0.7845
159	0.7845
159.1	0.7845
159.2	0.784
159.3	0.785
159.4	0.784
159.5	0.7855
159.6	0.785
159.7	0.7845
159.8	0.7865
159.9	0.7865
160	0.786
160.1	0.785
160.2	0.7845
160.3	0.785
160.4	0.784
160.5	0.784
160.6	0.7855
160.7	0.787
160.8	0.787
160.9	0.7865
161	0.7865
161.1	0.7865
161.2	0.788
161.3	0.789
161.4	0.7885
161.5	0.788
161.6	0.7875
161.7	0.7875
161.8	0.7875
161.9	0.788
162	0.789
162.1	0.7895
162.2	0.7895
162.3	0.7895
162.4	0.788
162.5	0.788
162.6	0.7885
162.7	0.7875
162.8	0.7865
162.9	0.786
163	0.7855
163.1	0.7875
163.2	0.787
163.3	0.7865
163.4	0.786
163.5	0.7865
163.6	0.7845
163.7	0.7845
163.8	0.784
163.9	0.7835
164	0.785
164.1	0.7835
164.2	0.7835
164.3	0.784
164.4	0.7835
164.5	0.783
164.6	0.785
164.7	0.786
164.8	0.787
164.9	0.786
165	0.787
165.1	0.7875
165.2	0.7885
165.3	0.7885
165.4	0.7875
165.5	0.7855
165.6	0.786
165.7	0.7885
165.8	0.7895
165.9	0.7905
166	0.7905
166.1	0.7915
166.2	0.791
166.3	0.7905
166.4	0.792
166.5	0.7905
166.6	0.792
166.7	0.7925
166.8	0.7925
166.9	0.7935
167	0.7925
167.1	0.793
167.2	0.792
167.3	0.7905
167.4	0.7905
167.5	0.7895
167.6	0.79
167.7	0.7905
167.8	0.79
167.9	0.79
168	0.7895
168.1	0.7895
168.2	0.79
168.3	0.7895
168.4	0.79
168.5	0.789
168.6	0.79
168.7	0.789
168.8	0.7895
168.9	0.7905
169	0.791
169.1	0.7925
169.2	0.7935
169.3	0.794
169.4	0.7935
169.5	0.7925
169.6	0.793
169.7	0.7945
169.8	0.7945
169.9	0.7945
170	0.794
170.1	0.7955
170.2	0.7955
170.3	0.796
170.4	0.7945
170.5	0.795
170.6	0.796
170.7	0.794
170.8	0.793
170.9	0.7925
171	0.7915
171.1	0.792
171.2	0.7935
171.3	0.7935
171.4	0.793
171.5	0.793
171.6	0.794
171.7	0.7935
171.8	0.7925
171.9	0.793
172	0.7915
172.1	0.791
172.2	0.79
172.3	0.79
172.4	0.7915
172.5	0.7915
172.6	0.791
172.7	0.79
172.8	0.7905
172.9	0.79
173	0.7905
173.1	0.7915
173.2	0.7905
173.3	0.7915
173.4	0.791
173.5	0.791
173.6	0.7915
173.7	0.7915
173.8	0.7915
173.9	0.792
174	0.791
174.1	0.7905
174.2	0.793
174.3	0.7935
174.4	0.7935
174.5	0.7945
174.6	0.794
174.7	0.794
174.8	0.7935
174.9	0.7955
175	0.793
175.1	0.7925
175.2	0.7925
175.3	0.792
175.4	0.792
175.5	0.792
175.6	0.792
175.7	0.792
175.8	0.791
175.9	0.792
176	0.792
176.1	0.7915
176.2	0.7915
176.3	0.7925
176.4	0.793
176.5	0.793
176.6	0.793
176.7	0.793
176.8	0.7935
176.9	0.794
177	0.794
177.1	0.795
177.2	0.796
177.3	0.796
177.4	0.795
177.5	0.794
177.6	0.794
177.7	0.794
177.8	0.7945
177.9	0.795
178	0.7945
178.1	0.795
178.2	0.796
178.3	0.797
178.4	0.796
178.5	0.796
178.6	0.796
178.7	0.796
178.8	0.7945
178.9	0.7955
179	0.795
179.1	0.7955
179.2	0.7945
179.3	0.7955
179.4	0.7955
179.5	0.795
179.6	0.7945
179.7	0.7945
179.8	0.795
179.9	0.7955
180	0.796
180.1	0.7955
180.2	0.795
180.3	0.796
180.4	0.796
180.5	0.7965
180.6	0.796
180.7	0.797
180.8	0.797
180.9	0.7975
181	0.798
181.1	0.7985
181.2	0.7975
181.3	0.7965
181.4	0.7975
181.5	0.7965
181.6	0.796
181.7	0.794
181.8	0.792
181.9	0.792
182	0.793
182.1	0.7935
182.2	0.794
182.3	0.7935
182.4	0.7935
182.5	0.7945
182.6	0.794
182.7	0.794
182.8	0.794
182.9	0.7955
183	0.7955
183.1	0.794
183.2	0.794
183.3	0.7945
183.4	0.7935
183.5	0.794
183.6	0.7945
183.7	0.796
183.8	0.797
183.9	0.796
184	0.7955
184.1	0.7955
184.2	0.7945
184.3	0.7955
184.4	0.794
184.5	0.794
184.6	0.7945
184.7	0.7925
184.8	0.794
184.9	0.794
185	0.794
185.1	0.793
185.2	0.792
185.3	0.7925
185.4	0.793
185.5	0.7935
185.6	0.7925
185.7	0.7925
185.8	0.7925
185.9	0.7955
186	0.7965
186.1	0.7965
186.2	0.797
186.3	0.796
186.4	0.7955
186.5	0.795
186.6	0.7955
186.7	0.7955
186.8	0.794
186.9	0.793
187	0.794
187.1	0.792
187.2	0.7905
187.3	0.792
187.4	0.7925
187.5	0.791
187.6	0.791
187.7	0.79
187.8	0.791
187.9	0.791
188	0.7905
188.1	0.791
188.2	0.792
188.3	0.793
188.4	0.7935
188.5	0.7935
188.6	0.7945
188.7	0.7955
188.8	0.795
188.9	0.7945
189	0.795
189.1	0.7945
189.2	0.7965
189.3	0.797
189.4	0.796
189.5	0.794
189.6	0.793
189.7	0.7915
189.8	0.7925
189.9	0.792
190	0.793
190.1	0.7935
190.2	0.7925
190.3	0.7925
190.4	0.792
190.5	0.792
190.6	0.793
190.7	0.794
190.8	0.795
190.9	0.797
191	0.7985
191.1	0.799
191.2	0.8
191.3	0.7985
191.4	0.799
191.5	0.7985
191.6	0.8
191.7	0.7995
191.8	0.799
191.9	0.798
192	0.7975
192.1	0.7955
192.2	0.7945
192.3	0.7935
192.4	0.7955
192.5	0.796
192.6	0.7945
192.7	0.795
192.8	0.7945
192.9	0.7945
193	0.796
193.1	0.7955
193.2	0.796
193.3	0.795
193.4	0.7945
193.5	0.7935
193.6	0.7935
193.7	0.793
193.8	0.7945
193.9	0.793
194	0.7935
194.1	0.7915
194.2	0.7915
194.3	0.7915
194.4	0.7935
194.5	0.792
194.6	0.793
194.7	0.7915
194.8	0.7905
194.9	0.792
195	0.7925
195.1	0.792
195.2	0.7935
195.3	0.7935
195.4	0.795
195.5	0.7955
195.6	0.796
195.7	0.7965
195.8	0.7955
195.9	0.7955
196	0.7955
196.1	0.794
196.2	0.7935
196.3	0.7925
196.4	0.793
196.5	0.7935
196.6	0.793
196.7	0.7925
196.8	0.794
196.9	0.795
197	0.7975
197.1	0.7975
197.2	0.797
197.3	0.7965
197.4	0.7975
197.5	0.7985
197.6	0.8
197.7	0.799
197.8	0.7995
197.9	0.7995
198	0.7995
198.1	0.7995
198.2	0.7995
198.3	0.8
198.4	0.8005
198.5	0.8005
198.6	0.8015
198.7	0.8015
198.8	0.802
198.9	0.8025
199	0.8025
199.1	0.8005
199.2	0.8
199.3	0.801
199.4	0.8005
199.5	0.8
199.6	0.8
199.7	0.8015
199.8	0.802
199.9	0.802
200	0.8025
[truncated: 14,000 more rows]
