# Supplementary material for: Bayesian inference of kinetic schemes for ion channels by Kalman filtering
Source: eLife journal article supplement (doi:10.7554/elife.62714), 2022-05-04
Supplement: fig4-data4 [file 1_Sim_N_2000_theor_Strom_Werte.xlsx]

## Sheet: Tabelle1
0.1	0
0.2	0
0.3	0
0.4	0
0.5	0
0.6	0
0.7	0
0.8	0
0.9	0
1	0
1.1	0
1.2	0
1.3	0
1.4	0
1.5	0
1.6	0
1.7	0
1.8	0
1.9	0
2	0
2.1	0
2.2	0
2.3	0
2.4	0
2.5	0
2.6	0
2.7	0
2.8	0
2.9	0
3	0
3.1	0
3.2	0
3.3	0
3.4	0
3.5	0
3.6	0
3.7	0
3.8	0
3.9	0
4	0
4.1	0
4.2	0
4.3	0
4.4	0
4.5	0
4.6	0
4.7	0
4.8	0
4.9	0
5	0
5.1	0
5.2	0
5.3	0
5.4	0
5.5	0
5.6	0
5.7	0
5.8	0
5.9	0
6	0
6.1	0
6.2	0
6.3	0
6.4	0
6.5	0
6.6	0
6.7	0
6.8	0
6.9	0
7	0
7.1	0
7.2	0
7.3	0
7.4	0
7.5	0
7.6	0
7.7	0
7.8	0
7.9	0
8	0
8.1	0
8.2	0
8.3	0
8.4	0
8.5	0
8.6	0
8.7	0
8.8	0
8.9	0
9	0
9.1	0
9.2	0
9.3	0
9.4	0
9.5	0
9.6	0
9.7	0
9.8	0
9.9	0
10	0
10.1	0
10.2	0
10.3	0
10.4	0
10.5	0
10.6	0
10.7	0
10.8	0
10.9	0
11	0
11.1	0
11.2	0
11.3	0
11.4	0
11.5	0
11.6	0
11.7	0
11.8	0
11.9	0
12	0
12.1	0
12.2	0
12.3	0
12.4	0
12.5	0
12.6	0
12.7	0
12.8	0
12.9	0
13	0
13.1	0
13.2	0
13.3	0
13.4	0
13.5	0
13.6	0
13.7	0
13.8	0
13.9	0
14	0
14.1	0
14.2	0
14.3	0
14.4	0
14.5	0
14.6	0
14.7	0
14.8	0
14.9	0
15	0
15.1	0
15.2	0
15.3	0
15.4	0
15.5	0
15.6	0
15.7	0
15.8	0
15.9	0
16	0
16.1	0
16.2	0
16.3	0
16.4	0
16.5	0
16.6	0
16.7	0
16.8	0
16.9	0
17	0
17.1	0
17.2	0
17.3	0
17.4	0
17.5	0
17.6	0
17.7	0
17.8	0
17.9	0
18	0
18.1	0
18.2	0
18.3	0
18.4	0
18.5	0
18.6	0
18.7	0
18.8	0
18.9	0
19	0
19.1	0
19.2	0
19.3	0
19.4	0
19.5	0
19.6	0
19.7	0
19.8	0
19.9	0
20	0
20.1	0
20.2	0
20.3	0
20.4	0
20.5	0
20.6	0
20.7	0
20.8	0
20.9	0
21	0
21.1	0
21.2	0
21.3	0
21.4	0
21.5	0
21.6	0
21.7	0
21.8	0
21.9	0
22	0
22.1	0
22.2	0
22.3	0
22.4	0
22.5	0
22.6	0
22.7	0
22.8	0
22.9	0
23	0
23.1	0
23.2	0
23.3	0
23.4	0
23.5	0
23.6	0
23.7	0
23.8	0
23.9	0
24	0
24.1	0
24.2	0
24.3	0
24.4	0
24.5	0
24.6	0
24.7	0
24.8	0
24.9	0
25	0
25.1	0
25.2	0
25.3	0
25.4	0
25.5	0
25.6	0
25.7	0
25.8	0
25.9	0
26	0
26.1	0
26.2	0
26.3	0
26.4	0
26.5	0
26.6	0
26.7	0
26.8	0
26.9	0
27	0
27.1	0
27.2	0
27.3	0
27.4	0
27.5	0
27.6	0
27.7	0
27.8	0
27.9	0
28	0
28.1	0
28.2	0
28.3	0
28.4	0
28.5	0
28.6	0
28.7	0
28.8	0
28.9	0
29	0
29.1	0
29.2	0
29.3	0
29.4	0
29.5	0
29.6	0
29.7	0
29.8	0
29.9	0
30	0
30.1	0
30.2	0
30.3	0
30.4	0
30.5	0
30.6	0
30.7	0
30.8	0
30.9	0
31	0
31.1	0
31.2	0
31.3	0
31.4	0
31.5	0
31.6	0
31.7	0
31.8	0
31.9	0
32	0
32.1	0
32.2	0
32.3	0
32.4	0
32.5	0
32.6	0
32.7	0
32.8	0
32.9	0
33	0
33.1	0
33.2	0
33.3	0
33.4	0
33.5	0
33.6	0
33.7	0
33.8	0
33.9	0
34	0
34.1	0
34.2	0
34.3	0
34.4	0
34.5	0
34.6	0
34.7	0
34.8	0
34.9	0
35	0
35.1	0
35.2	0
35.3	0
35.4	0
35.5	0
35.6	0
35.7	0
35.8	0
35.9	0
36	0
36.1	0
36.2	0
36.3	0
36.4	0
36.5	0
36.6	0
36.7	0
36.8	0
36.9	0
37	0
37.1	0
37.2	0
37.3	0
37.4	0
37.5	0
37.6	0
37.7	0
37.8	0
37.9	0
38	0
38.1	0
38.2	0
38.3	0
38.4	0
38.5	0
38.6	0
38.7	0
38.8	0
38.9	0
39	0
39.1	0
39.2	0
39.3	0
39.4	0
39.5	0
39.6	0
39.7	0
39.8	0
39.9	0
40	0
40.1	0
40.2	0
40.3	0
40.4	0
40.5	0
40.6	0
40.7	0
40.8	0
40.9	0
41	0
41.1	0
41.2	0
41.3	0
41.4	0
41.5	0
41.6	0
41.7	0
41.8	0
41.9	0
42	0
42.1	0
42.2	0
42.3	0
42.4	0
42.5	0
42.6	0
42.7	0
42.8	0
42.9	0
43	0
43.1	0
43.2	0
43.3	0
43.4	0
43.5	0
43.6	0
43.7	0
43.8	0
43.9	0
44	0
44.1	0
44.2	0
44.3	0
44.4	0
44.5	0
44.6	0
44.7	0
44.8	0
44.9	0
45	0
45.1	0
45.2	0
45.3	0
45.4	0
45.5	0
45.6	0
45.7	0
45.8	0
45.9	0
46	0
46.1	0
46.2	0
46.3	0
46.4	0
46.5	0
46.6	0
46.7	0
46.8	0
46.9	0
47	0
47.1	0
47.2	0
47.3	0
47.4	0
47.5	0
47.6	0
47.7	0
47.8	0
47.9	0
48	0
48.1	0
48.2	0
48.3	0
48.4	0
48.5	0
48.6	0
48.7	0
48.8	0
48.9	0
49	0
49.1	0
49.2	0
49.3	0
49.4	0
49.5	0
49.6	0
49.7	0
49.8	0
49.9	0
50	0
50.1	0
50.2	0
50.3	0
50.4	0
50.5	0
50.6	0
50.7	0
50.8	0
50.9	0
51	0
51.1	0
51.2	0
51.3	0
51.4	0
51.5	0
51.6	0
51.7	0
51.8	0
51.9	0
52	0
52.1	0
52.2	0
52.3	0
52.4	0
52.5	0
52.6	0
52.7	0
52.8	0
52.9	0
53	0
53.1	0
53.2	0
53.3	0
53.4	0
53.5	0
53.6	0
53.7	0
53.8	0
53.9	0
54	0
54.1	0
54.2	0
54.3	0
54.4	0
54.5	0
54.6	0
54.7	0
54.8	0
54.9	0
55	0
55.1	0
55.2	0
55.3	0
55.4	0
55.5	0
55.6	0
55.7	0
55.8	0
55.9	0
56	0
56.1	0
56.2	0
56.3	0
56.4	0
56.5	0
56.6	0
56.7	0
56.8	0
56.9	0
57	0
57.1	0
57.2	0
57.3	0
57.4	0
57.5	0
57.6	0
57.7	0
57.8	0
57.9	0
58	0
58.1	0
58.2	0
58.3	0
58.4	0
58.5	0
58.6	0
58.7	0
58.8	0
58.9	0
59	0
59.1	0
59.2	0
59.3	0
59.4	0
59.5	0
59.6	0
59.7	0
59.8	0
59.9	0
60	0
60.1	0
60.2	0
60.3	0
60.4	0
60.5	0
60.6	0
60.7	0
60.8	0
60.9	0
61	0
61.1	0
61.2	0
61.3	0
61.4	0
61.5	0
61.6	0
61.7	0
61.8	0
61.9	0
62	0
62.1	0
62.2	0
62.3	0
62.4	0
62.5	0
62.6	0
62.7	0
62.8	0
62.9	0
63	0
63.1	0
63.2	0
63.3	0
63.4	0
63.5	0
63.6	0
63.7	0
63.8	0
63.9	0
64	0
64.1	0
64.2	0
64.3	0
64.4	0
64.5	0
64.6	0
64.7	0
64.8	0
64.9	0
65	0
65.1	0
65.2	0
65.3	0
65.4	0
65.5	0
65.6	0
65.7	0
65.8	0
65.9	0
66	0
66.1	0
66.2	0
66.3	0
66.4	0
66.5	0
66.6	0
66.7	0
66.8	0
66.9	0
67	0
67.1	0
67.2	0
67.3	0
67.4	0
67.5	0
67.6	0
67.7	0
67.8	0
67.9	0
68	0
68.1	0
68.2	0
68.3	0
68.4	0
68.5	0
68.6	0
68.7	0
68.8	0
68.9	0
69	0
69.1	0
69.2	0
69.3	0
69.4	0
69.5	0
69.6	0
69.7	0
69.8	0
69.9	0
70	0
70.1	0
70.2	0
70.3	0
70.4	0
70.5	0
70.6	0
70.7	0
70.8	0
70.9	0
71	0
71.1	0
71.2	0
71.3	0
71.4	0
71.5	0
71.6	0
71.7	0
71.8	0
71.9	0
72	0
72.1	0
72.2	0
72.3	0
72.4	0
72.5	0
72.6	0
72.7	0
72.8	0
72.9	0
73	0
73.1	0
73.2	0
73.3	0
73.4	0
73.5	0
73.6	0
73.7	0
73.8	0
73.9	0
74	0
74.1	0
74.2	0
74.3	0
74.4	0
74.5	0
74.6	0
74.7	0
74.8	0
74.9	0
75	0
75.1	0
75.2	0
75.3	0
75.4	0
75.5	0
75.6	0
75.7	0
75.8	0
75.9	0
76	0
76.1	0
76.2	0
76.3	0
76.4	0
76.5	0
76.6	0
76.7	0
76.8	0
76.9	0
77	0
77.1	0
77.2	0
77.3	0
77.4	0
77.5	0
77.6	0
77.7	0
77.8	0
77.9	0
78	0
78.1	0
78.2	0
78.3	0
78.4	0
78.5	0
78.6	0
78.7	0
78.8	0
78.9	0
79	0
79.1	0
79.2	0
79.3	0
79.4	0
79.5	0
79.6	0
79.7	0
79.8	0
79.9	0
80	0
80.1	0
80.2	0
80.3	0
80.4	0
80.5	0
80.6	0
80.7	0
80.8	0
80.9	0
81	0
81.1	0
81.2	0
81.3	0
81.4	0
81.5	0
81.6	0
81.7	0
81.8	0
81.9	0
82	0
82.1	0
82.2	0
82.3	0
82.4	0
82.5	0
82.6	0
82.7	0
82.8	0
82.9	0
83	0
83.1	0
83.2	0
83.3	0
83.4	0
83.5	0
83.6	0
83.7	0
83.8	0
83.9	0
84	0
84.1	0
84.2	0
84.3	0
84.4	0
84.5	0
84.6	0
84.7	0
84.8	0
84.9	0
85	0
85.1	0
85.2	0
85.3	0
85.4	0
85.5	0
85.6	0
85.7	0
85.8	0
85.9	0
86	0
86.1	0
86.2	0
86.3	0
86.4	0
86.5	0
86.6	0
86.7	0
86.8	0
86.9	0
87	0
87.1	0
87.2	0
87.3	0
87.4	0
87.5	0
87.6	0
87.7	0
87.8	0
87.9	0
88	0
88.1	0
88.2	0
88.3	0
88.4	0
88.5	0
88.6	0
88.7	0
88.8	0
88.9	0
89	0
89.1	0
89.2	0
89.3	0
89.4	0
89.5	0
89.6	0
89.7	0
89.8	0
89.9	0
90	0
90.1	0
90.2	0
90.3	0
90.4	0
90.5	0
90.6	0
90.7	0
90.8	0
90.9	0
91	0
91.1	0
91.2	0
91.3	0
91.4	0
91.5	0
91.6	0
91.7	0
91.8	0
91.9	0
92	0
92.1	0
92.2	0
92.3	0
92.4	0
92.5	0
92.6	0
92.7	0
92.8	0
92.9	0
93	0
93.1	0
93.2	0
93.3	0
93.4	0
93.5	0
93.6	0
93.7	0
93.8	0
93.9	0
94	0
94.1	0
94.2	0
94.3	0
94.4	0
94.5	0
94.6	0
94.7	0
94.8	0
94.9	0
95	0
95.1	0
95.2	0
95.3	0
95.4	0
95.5	0
95.6	0
95.7	0
95.8	0
95.9	0
96	0
96.1	0
96.2	0
96.3	0
96.4	0
96.5	0
96.6	0
96.7	0
96.8	0
96.9	0
97	0
97.1	0
97.2	0
97.3	0
97.4	0
97.5	0
97.6	0
97.7	0
97.8	0
97.9	0
98	0
98.1	0
98.2	0
98.3	0
98.4	0
98.5	0
98.6	0
98.7	0
98.8	0
98.9	0
99	0
99.1	0
99.2	0
99.3	0
99.4	0
99.5	0
99.6	0
99.7	0
99.8	0
99.9	0
100	0
100.1	0.000142042
100.2	0.000864365
100.3	0.00227363
100.4	0.00429007
100.5	0.00679348
100.6	0.00967091
100.7	0.012829
100.8	0.0161946
100.9	0.0197115
101	0.0233371
101.1	0.0270393
101.2	0.030794
101.3	0.0345832
101.4	0.0383933
101.5	0.0422141
101.6	0.046038
101.7	0.0498594
101.8	0.0536741
101.9	0.0574788
102	0.0612713
102.1	0.0650499
102.2	0.0688132
102.3	0.0725603
102.4	0.0762906
102.5	0.0800036
102.6	0.0836988
102.7	0.0873763
102.8	0.0910356
102.9	0.0946769
103	0.0982999
103.1	0.101905
103.2	0.105492
103.3	0.10906
103.4	0.112611
103.5	0.116143
103.6	0.119658
103.7	0.123154
103.8	0.126633
103.9	0.130094
104	0.133538
104.1	0.136964
104.2	0.140372
104.3	0.143764
104.4	0.147137
104.5	0.150494
104.6	0.153833
104.7	0.157156
104.8	0.160461
104.9	0.16375
105	0.167022
105.1	0.170277
105.2	0.173516
105.3	0.176738
105.4	0.179943
105.5	0.183133
105.6	0.186306
105.7	0.189463
105.8	0.192603
105.9	0.195728
106	0.198837
106.1	0.20193
106.2	0.205007
106.3	0.208068
106.4	0.211114
106.5	0.214144
106.6	0.217159
106.7	0.220158
106.8	0.223143
106.9	0.226111
107	0.229065
107.1	0.232004
107.2	0.234928
107.3	0.237836
107.4	0.24073
107.5	0.243609
107.6	0.246474
107.7	0.249324
107.8	0.252159
107.9	0.25498
108	0.257786
108.1	0.260579
108.2	0.263356
108.3	0.26612
108.4	0.26887
108.5	0.271605
108.6	0.274327
108.7	0.277035
108.8	0.279729
108.9	0.282409
109	0.285076
109.1	0.287728
109.2	0.290368
109.3	0.292994
109.4	0.295606
109.5	0.298205
109.6	0.300791
109.7	0.303364
109.8	0.305924
109.9	0.30847
110	0.311004
110.1	0.313525
110.2	0.316032
110.3	0.318527
110.4	0.32101
110.5	0.323479
110.6	0.325936
110.7	0.328381
110.8	0.330813
110.9	0.333232
111	0.33564
111.1	0.338035
111.2	0.340417
111.3	0.342788
111.4	0.345146
111.5	0.347493
111.6	0.349827
111.7	0.35215
111.8	0.354461
111.9	0.35676
112	0.359047
112.1	0.361322
112.2	0.363586
112.3	0.365839
112.4	0.36808
112.5	0.370309
112.6	0.372527
112.7	0.374734
112.8	0.37693
112.9	0.379114
113	0.381287
113.1	0.383449
113.2	0.3856
113.3	0.38774
113.4	0.389869
113.5	0.391988
113.6	0.394095
113.7	0.396192
113.8	0.398278
113.9	0.400353
114	0.402418
114.1	0.404473
114.2	0.406516
114.3	0.40855
114.4	0.410573
114.5	0.412585
114.6	0.414588
114.7	0.41658
114.8	0.418562
114.9	0.420534
115	0.422496
115.1	0.424448
115.2	0.42639
115.3	0.428322
115.4	0.430244
115.5	0.432156
115.6	0.434059
115.7	0.435951
115.8	0.437835
115.9	0.439708
116	0.441572
116.1	0.443427
116.2	0.445272
116.3	0.447108
116.4	0.448934
116.5	0.450751
116.6	0.452559
116.7	0.454357
116.8	0.456146
116.9	0.457927
117	0.459698
117.1	0.46146
117.2	0.463213
117.3	0.464957
117.4	0.466692
117.5	0.468419
117.6	0.470136
117.7	0.471845
117.8	0.473545
117.9	0.475236
118	0.476919
118.1	0.478593
118.2	0.480259
118.3	0.481916
118.4	0.483565
118.5	0.485205
118.6	0.486837
118.7	0.488461
118.8	0.490076
118.9	0.491683
119	0.493282
119.1	0.494873
119.2	0.496455
119.3	0.49803
119.4	0.499597
119.5	0.501155
119.6	0.502706
119.7	0.504248
119.8	0.505783
119.9	0.50731
120	0.508829
120.1	0.510341
120.2	0.511844
120.3	0.51334
120.4	0.514829
120.5	0.516309
120.6	0.517783
120.7	0.519248
120.8	0.520707
120.9	0.522158
121	0.523601
121.1	0.525037
121.2	0.526466
121.3	0.527887
121.4	0.529301
121.5	0.530708
121.6	0.532108
121.7	0.533501
121.8	0.534886
121.9	0.536265
122	0.537636
122.1	0.539001
122.2	0.540358
122.3	0.541709
122.4	0.543052
122.5	0.544389
122.6	0.545719
122.7	0.547042
122.8	0.548359
122.9	0.549669
123	0.550972
123.1	0.552268
123.2	0.553558
123.3	0.554841
123.4	0.556118
123.5	0.557388
123.6	0.558652
123.7	0.559909
123.8	0.56116
123.9	0.562404
124	0.563642
124.1	0.564874
124.2	0.5661
124.3	0.567319
124.4	0.568532
124.5	0.569739
124.6	0.570939
124.7	0.572134
124.8	0.573322
124.9	0.574505
125	0.575681
125.1	0.576851
125.2	0.578016
125.3	0.579174
125.4	0.580327
125.5	0.581473
125.6	0.582614
125.7	0.583749
125.8	0.584878
125.9	0.586002
126	0.58712
126.1	0.588232
126.2	0.589338
126.3	0.590439
126.4	0.591534
126.5	0.592623
126.6	0.593707
126.7	0.594785
126.8	0.595858
126.9	0.596926
127	0.597988
127.1	0.599044
127.2	0.600095
127.3	0.601141
127.4	0.602182
127.5	0.603217
127.6	0.604247
127.7	0.605271
127.8	0.606291
127.9	0.607305
128	0.608314
128.1	0.609318
128.2	0.610317
128.3	0.61131
128.4	0.612299
128.5	0.613282
128.6	0.614261
128.7	0.615234
128.8	0.616203
128.9	0.617167
129	0.618125
129.1	0.619079
129.2	0.620028
129.3	0.620972
129.4	0.621912
129.5	0.622846
129.6	0.623776
129.7	0.624701
129.8	0.625621
129.9	0.626537
130	0.627448
130.1	0.628354
130.2	0.629255
130.3	0.630152
130.4	0.631045
130.5	0.631933
130.6	0.632816
130.7	0.633695
130.8	0.634569
130.9	0.635439
131	0.636305
131.1	0.637166
131.2	0.638023
131.3	0.638875
131.4	0.639723
131.5	0.640567
131.6	0.641406
131.7	0.642241
131.8	0.643072
131.9	0.643898
132	0.644721
132.1	0.645539
132.2	0.646353
132.3	0.647163
132.4	0.647968
132.5	0.64877
132.6	0.649567
132.7	0.650361
132.8	0.65115
132.9	0.651935
133	0.652717
133.1	0.653494
133.2	0.654267
133.3	0.655037
133.4	0.655802
133.5	0.656564
133.6	0.657322
133.7	0.658076
133.8	0.658826
133.9	0.659572
134	0.660314
134.1	0.661053
134.2	0.661788
134.3	0.662519
134.4	0.663246
134.5	0.66397
134.6	0.664689
134.7	0.665406
134.8	0.666118
134.9	0.666827
135	0.667533
135.1	0.668234
135.2	0.668933
135.3	0.669627
135.4	0.670318
135.5	0.671006
135.6	0.67169
135.7	0.67237
135.8	0.673048
135.9	0.673721
136	0.674391
136.1	0.675058
136.2	0.675721
136.3	0.676381
136.4	0.677038
136.5	0.677691
136.6	0.678341
136.7	0.678988
136.8	0.679631
136.9	0.680271
137	0.680908
137.1	0.681542
137.2	0.682172
137.3	0.682799
137.4	0.683423
137.5	0.684043
137.6	0.684661
137.7	0.685275
137.8	0.685887
137.9	0.686495
138	0.6871
138.1	0.687702
138.2	0.688301
138.3	0.688896
138.4	0.689489
138.5	0.690079
138.6	0.690666
138.7	0.691249
138.8	0.69183
138.9	0.692408
139	0.692983
139.1	0.693555
139.2	0.694124
139.3	0.69469
139.4	0.695253
139.5	0.695813
139.6	0.696371
139.7	0.696926
139.8	0.697477
139.9	0.698026
140	0.698573
140.1	0.699116
140.2	0.699657
140.3	0.700194
140.4	0.70073
140.5	0.701262
140.6	0.701792
140.7	0.702319
140.8	0.702843
140.9	0.703365
141	0.703883
141.1	0.7044
141.2	0.704913
141.3	0.705425
141.4	0.705933
141.5	0.706439
141.6	0.706942
141.7	0.707443
141.8	0.707941
141.9	0.708437
142	0.70893
142.1	0.70942
142.2	0.709908
142.3	0.710394
142.4	0.710877
142.5	0.711358
142.6	0.711836
142.7	0.712312
142.8	0.712785
142.9	0.713256
143	0.713724
143.1	0.71419
143.2	0.714654
143.3	0.715115
143.4	0.715574
143.5	0.716031
143.6	0.716485
143.7	0.716937
143.8	0.717387
143.9	0.717835
144	0.71828
144.1	0.718723
144.2	0.719163
144.3	0.719602
144.4	0.720038
144.5	0.720472
144.6	0.720903
144.7	0.721333
144.8	0.72176
144.9	0.722185
145	0.722608
145.1	0.723029
145.2	0.723447
145.3	0.723864
145.4	0.724278
145.5	0.724691
145.6	0.725101
145.7	0.725509
145.8	0.725915
145.9	0.726319
146	0.726721
146.1	0.72712
146.2	0.727518
146.3	0.727914
146.4	0.728308
146.5	0.728699
146.6	0.729089
146.7	0.729477
146.8	0.729862
146.9	0.730246
147	0.730628
147.1	0.731008
147.2	0.731386
147.3	0.731762
147.4	0.732136
147.5	0.732508
147.6	0.732878
147.7	0.733247
147.8	0.733613
147.9	0.733978
148	0.734341
148.1	0.734702
148.2	0.735061
148.3	0.735418
148.4	0.735773
148.5	0.736127
148.6	0.736479
148.7	0.736829
148.8	0.737177
148.9	0.737524
149	0.737868
149.1	0.738211
149.2	0.738552
149.3	0.738892
149.4	0.73923
149.5	0.739566
149.6	0.7399
149.7	0.740232
149.8	0.740563
149.9	0.740892
150	0.74122
150.1	0.741546
150.2	0.74187
150.3	0.742192
150.4	0.742513
150.5	0.742833
150.6	0.74315
150.7	0.743466
150.8	0.74378
150.9	0.744093
151	0.744404
151.1	0.744714
151.2	0.745022
151.3	0.745328
151.4	0.745633
151.5	0.745937
151.6	0.746238
151.7	0.746539
151.8	0.746837
151.9	0.747135
152	0.74743
152.1	0.747724
152.2	0.748017
152.3	0.748308
152.4	0.748598
152.5	0.748886
152.6	0.749173
152.7	0.749458
152.8	0.749742
152.9	0.750024
153	0.750305
153.1	0.750585
153.2	0.750863
153.3	0.751139
153.4	0.751414
153.5	0.751688
153.6	0.751961
153.7	0.752232
153.8	0.752501
153.9	0.75277
154	0.753037
154.1	0.753302
154.2	0.753566
154.3	0.753829
154.4	0.754091
154.5	0.754351
154.6	0.75461
154.7	0.754867
154.8	0.755123
154.9	0.755378
155	0.755632
155.1	0.755884
155.2	0.756135
155.3	0.756385
155.4	0.756633
155.5	0.756881
155.6	0.757127
155.7	0.757371
155.8	0.757615
155.9	0.757857
156	0.758098
156.1	0.758338
156.2	0.758576
156.3	0.758813
156.4	0.759049
156.5	0.759284
156.6	0.759518
156.7	0.75975
156.8	0.759982
156.9	0.760212
157	0.760441
157.1	0.760669
157.2	0.760895
157.3	0.761121
157.4	0.761345
157.5	0.761568
157.6	0.76179
157.7	0.762011
157.8	0.762231
157.9	0.762449
158	0.762667
158.1	0.762883
158.2	0.763099
158.3	0.763313
158.4	0.763526
158.5	0.763738
158.6	0.763949
158.7	0.764159
158.8	0.764368
158.9	0.764575
159	0.764782
159.1	0.764988
159.2	0.765192
159.3	0.765396
159.4	0.765598
159.5	0.7658
159.6	0.766
159.7	0.7662
159.8	0.766398
159.9	0.766595
160	0.766792
160.1	0.766987
160.2	0.767182
160.3	0.767375
160.4	0.767567
160.5	0.767759
160.6	0.767949
160.7	0.768139
160.8	0.768327
160.9	0.768515
161	0.768701
161.1	0.768887
161.2	0.769072
161.3	0.769255
161.4	0.769438
161.5	0.76962
161.6	0.769801
161.7	0.769981
161.8	0.77016
161.9	0.770338
162	0.770516
162.1	0.770692
162.2	0.770867
162.3	0.771042
162.4	0.771216
162.5	0.771388
162.6	0.77156
162.7	0.771731
162.8	0.771902
162.9	0.772071
163	0.772239
163.1	0.772407
163.2	0.772574
163.3	0.77274
163.4	0.772905
163.5	0.773069
163.6	0.773232
163.7	0.773395
163.8	0.773556
163.9	0.773717
164	0.773877
164.1	0.774036
164.2	0.774195
164.3	0.774352
164.4	0.774509
164.5	0.774665
164.6	0.77482
164.7	0.774975
164.8	0.775129
164.9	0.775281
165	0.775433
165.1	0.775585
165.2	0.775735
165.3	0.775885
165.4	0.776034
165.5	0.776182
165.6	0.77633
165.7	0.776476
165.8	0.776622
165.9	0.776768
166	0.776912
166.1	0.777056
166.2	0.777199
166.3	0.777341
166.4	0.777483
166.5	0.777623
166.6	0.777764
166.7	0.777903
166.8	0.778042
166.9	0.77818
167	0.778317
167.1	0.778453
167.2	0.778589
167.3	0.778725
167.4	0.778859
167.5	0.778993
167.6	0.779126
167.7	0.779258
167.8	0.77939
167.9	0.779521
168	0.779652
168.1	0.779781
168.2	0.779911
168.3	0.780039
168.4	0.780167
168.5	0.780294
168.6	0.78042
168.7	0.780546
168.8	0.780672
168.9	0.780796
169	0.78092
169.1	0.781043
169.2	0.781166
169.3	0.781288
169.4	0.781409
169.5	0.78153
169.6	0.78165
169.7	0.78177
169.8	0.781889
169.9	0.782007
170	0.782125
170.1	0.782242
170.2	0.782359
170.3	0.782475
170.4	0.78259
170.5	0.782705
170.6	0.782819
170.7	0.782933
170.8	0.783046
170.9	0.783158
171	0.78327
171.1	0.783381
171.2	0.783492
171.3	0.783602
171.4	0.783712
171.5	0.783821
171.6	0.783929
171.7	0.784037
171.8	0.784145
171.9	0.784252
172	0.784358
172.1	0.784464
172.2	0.784569
172.3	0.784673
172.4	0.784778
172.5	0.784881
172.6	0.784984
172.7	0.785087
172.8	0.785189
172.9	0.78529
173	0.785391
173.1	0.785492
173.2	0.785592
173.3	0.785691
173.4	0.78579
173.5	0.785889
173.6	0.785987
173.7	0.786084
173.8	0.786181
173.9	0.786278
174	0.786374
174.1	0.786469
174.2	0.786564
174.3	0.786658
174.4	0.786753
174.5	0.786846
174.6	0.786939
174.7	0.787032
174.8	0.787124
174.9	0.787215
175	0.787307
175.1	0.787397
175.2	0.787488
175.3	0.787577
175.4	0.787667
175.5	0.787756
175.6	0.787844
175.7	0.787932
175.8	0.78802
175.9	0.788107
176	0.788193
176.1	0.788279
176.2	0.788365
176.3	0.78845
176.4	0.788535
176.5	0.78862
176.6	0.788704
176.7	0.788787
176.8	0.788871
176.9	0.788953
177	0.789036
177.1	0.789117
177.2	0.789199
177.3	0.78928
177.4	0.789361
177.5	0.789441
177.6	0.789521
177.7	0.7896
177.8	0.789679
177.9	0.789758
178	0.789836
178.1	0.789914
178.2	0.789991
178.3	0.790068
178.4	0.790145
178.5	0.790221
178.6	0.790297
178.7	0.790372
178.8	0.790447
178.9	0.790522
179	0.790596
179.1	0.79067
179.2	0.790744
179.3	0.790817
179.4	0.79089
179.5	0.790962
179.6	0.791034
179.7	0.791106
179.8	0.791177
179.9	0.791248
180	0.791319
180.1	0.791389
180.2	0.791459
180.3	0.791529
180.4	0.791598
180.5	0.791667
180.6	0.791735
180.7	0.791803
180.8	0.791871
180.9	0.791938
181	0.792006
181.1	0.792072
181.2	0.792139
181.3	0.792205
181.4	0.79227
181.5	0.792336
181.6	0.792401
181.7	0.792466
181.8	0.79253
181.9	0.792594
182	0.792658
182.1	0.792721
182.2	0.792784
182.3	0.792847
182.4	0.79291
182.5	0.792972
182.6	0.793033
182.7	0.793095
182.8	0.793156
182.9	0.793217
183	0.793278
183.1	0.793338
183.2	0.793398
183.3	0.793457
183.4	0.793517
183.5	0.793576
183.6	0.793635
183.7	0.793693
183.8	0.793751
183.9	0.793809
184	0.793866
184.1	0.793924
184.2	0.793981
184.3	0.794037
184.4	0.794094
184.5	0.79415
184.6	0.794206
184.7	0.794261
184.8	0.794316
184.9	0.794371
185	0.794426
185.1	0.79448
185.2	0.794534
185.3	0.794588
185.4	0.794642
185.5	0.794695
185.6	0.794748
185.7	0.794801
185.8	0.794853
185.9	0.794906
186	0.794958
186.1	0.795009
186.2	0.795061
186.3	0.795112
186.4	0.795163
186.5	0.795213
186.6	0.795264
186.7	0.795314
186.8	0.795364
186.9	0.795413
187	0.795463
187.1	0.795512
187.2	0.795561
187.3	0.795609
187.4	0.795658
187.5	0.795706
187.6	0.795754
187.7	0.795801
187.8	0.795849
187.9	0.795896
188	0.795943
188.1	0.795989
188.2	0.796036
188.3	0.796082
188.4	0.796128
188.5	0.796173
188.6	0.796219
188.7	0.796264
188.8	0.796309
188.9	0.796354
189	0.796399
189.1	0.796443
189.2	0.796487
189.3	0.796531
189.4	0.796575
189.5	0.796618
189.6	0.796661
189.7	0.796704
189.8	0.796747
189.9	0.796789
190	0.796832
190.1	0.796874
190.2	0.796916
190.3	0.796958
190.4	0.796999
190.5	0.79704
190.6	0.797081
190.7	0.797122
190.8	0.797163
190.9	0.797203
191	0.797243
191.1	0.797283
191.2	0.797323
191.3	0.797363
191.4	0.797402
191.5	0.797442
191.6	0.797481
191.7	0.797519
191.8	0.797558
191.9	0.797596
192	0.797635
192.1	0.797673
192.2	0.79771
192.3	0.797748
192.4	0.797786
192.5	0.797823
192.6	0.79786
192.7	0.797897
192.8	0.797933
192.9	0.79797
193	0.798006
193.1	0.798042
193.2	0.798078
193.3	0.798114
193.4	0.79815
193.5	0.798185
193.6	0.79822
193.7	0.798255
193.8	0.79829
193.9	0.798325
194	0.798359
194.1	0.798394
194.2	0.798428
194.3	0.798462
194.4	0.798496
194.5	0.798529
194.6	0.798563
194.7	0.798596
194.8	0.798629
194.9	0.798662
195	0.798695
195.1	0.798727
195.2	0.79876
195.3	0.798792
195.4	0.798824
195.5	0.798856
195.6	0.798888
195.7	0.79892
195.8	0.798951
195.9	0.798982
196	0.799014
196.1	0.799045
196.2	0.799075
196.3	0.799106
196.4	0.799137
196.5	0.799167
196.6	0.799197
196.7	0.799227
196.8	0.799257
196.9	0.799287
197	0.799316
197.1	0.799346
197.2	0.799375
197.3	0.799404
197.4	0.799433
197.5	0.799462
197.6	0.799491
197.7	0.799519
197.8	0.799548
197.9	0.799576
198	0.799604
198.1	0.799632
198.2	0.79966
198.3	0.799688
198.4	0.799715
198.5	0.799743
198.6	0.79977
198.7	0.799797
198.8	0.799824
198.9	0.799851
199	0.799878
199.1	0.799904
199.2	0.799931
199.3	0.799957
199.4	0.799983
199.5	0.800009
199.6	0.800035
199.7	0.800061
199.8	0.800086
199.9	0.800112
200	0.800137
[truncated: 14,000 more rows]
