# Supplementary material for: Bayesian inference of kinetic schemes for ion channels by Kalman filtering
Source: eLife journal article supplement (doi:10.7554/elife.62714), 2022-05-04
Supplement: fig4-data4 [file 1_Sim_N_3000_Fluor_MW_8M.xlsx]

## Sheet: Tabelle1
0.1	0
0.2	0
0.3	0
0.4	0
0.5	0
0.6	0
0.7	0
0.8	0
0.9	0
1	0
1.1	0
1.2	0
1.3	0
1.4	0
1.5	0
1.6	0
1.7	0
1.8	0
1.9	0
2	0
2.1	0
2.2	0
2.3	0
2.4	0
2.5	0
2.6	0
2.7	0
2.8	0
2.9	0
3	0
3.1	0
3.2	0
3.3	0
3.4	0
3.5	0
3.6	0
3.7	0
3.8	0
3.9	0
4	0
4.1	0
4.2	0
4.3	0
4.4	0
4.5	0
4.6	0
4.7	0
4.8	0
4.9	0
5	0
5.1	0
5.2	0
5.3	0
5.4	0
5.5	0
5.6	0
5.7	0
5.8	0
5.9	0
6	0
6.1	0
6.2	0
6.3	0
6.4	0
6.5	0
6.6	0
6.7	0
6.8	0
6.9	0
7	0
7.1	0
7.2	0
7.3	0
7.4	0
7.5	0
7.6	0
7.7	0
7.8	0
7.9	0
8	0
8.1	0
8.2	0
8.3	0
8.4	0
8.5	0
8.6	0
8.7	0
8.8	0
8.9	0
9	0
9.1	0
9.2	0
9.3	0
9.4	0
9.5	0
9.6	0
9.7	0
9.8	0
9.9	0
10	0
10.1	0
10.2	0
10.3	0
10.4	0
10.5	0
10.6	0
10.7	0
10.8	0
10.9	0
11	0
11.1	0
11.2	0
11.3	0
11.4	0
11.5	0
11.6	0
11.7	0
11.8	0
11.9	0
12	0
12.1	0
12.2	0
12.3	0
12.4	0
12.5	0
12.6	0
12.7	0
12.8	0
12.9	0
13	0
13.1	0
13.2	0
13.3	0
13.4	0
13.5	0
13.6	0
13.7	0
13.8	0
13.9	0
14	0
14.1	0
14.2	0
14.3	0
14.4	0
14.5	0
14.6	0
14.7	0
14.8	0
14.9	0
15	0
15.1	0
15.2	0
15.3	0
15.4	0
15.5	0
15.6	0
15.7	0
15.8	0
15.9	0
16	0
16.1	0
16.2	0
16.3	0
16.4	0
16.5	0
16.6	0
16.7	0
16.8	0
16.9	0
17	0
17.1	0
17.2	0
17.3	0
17.4	0
17.5	0
17.6	0
17.7	0
17.8	0
17.9	0
18	0
18.1	0
18.2	0
18.3	0
18.4	0
18.5	0
18.6	0
18.7	0
18.8	0
18.9	0
19	0
19.1	0
19.2	0
19.3	0
19.4	0
19.5	0
19.6	0
19.7	0
19.8	0
19.9	0
20	0
20.1	0
20.2	0
20.3	0
20.4	0
20.5	0
20.6	0
20.7	0
20.8	0
20.9	0
21	0
21.1	0
21.2	0
21.3	0
21.4	0
21.5	0
21.6	0
21.7	0
21.8	0
21.9	0
22	0
22.1	0
22.2	0
22.3	0
22.4	0
22.5	0
22.6	0
22.7	0
22.8	0
22.9	0
23	0
23.1	0
23.2	0
23.3	0
23.4	0
23.5	0
23.6	0
23.7	0
23.8	0
23.9	0
24	0
24.1	0
24.2	0
24.3	0
24.4	0
24.5	0
24.6	0
24.7	0
24.8	0
24.9	0
25	0
25.1	0
25.2	0
25.3	0
25.4	0
25.5	0
25.6	0
25.7	0
25.8	0
25.9	0
26	0
26.1	0
26.2	0
26.3	0
26.4	0
26.5	0
26.6	0
26.7	0
26.8	0
26.9	0
27	0
27.1	0
27.2	0
27.3	0
27.4	0
27.5	0
27.6	0
27.7	0
27.8	0
27.9	0
28	0
28.1	0
28.2	0
28.3	0
28.4	0
28.5	0
28.6	0
28.7	0
28.8	0
28.9	0
29	0
29.1	0
29.2	0
29.3	0
29.4	0
29.5	0
29.6	0
29.7	0
29.8	0
29.9	0
30	0
30.1	0
30.2	0
30.3	0
30.4	0
30.5	0
30.6	0
30.7	0
30.8	0
30.9	0
31	0
31.1	0
31.2	0
31.3	0
31.4	0
31.5	0
31.6	0
31.7	0
31.8	0
31.9	0
32	0
32.1	0
32.2	0
32.3	0
32.4	0
32.5	0
32.6	0
32.7	0
32.8	0
32.9	0
33	0
33.1	0
33.2	0
33.3	0
33.4	0
33.5	0
33.6	0
33.7	0
33.8	0
33.9	0
34	0
34.1	0
34.2	0
34.3	0
34.4	0
34.5	0
34.6	0
34.7	0
34.8	0
34.9	0
35	0
35.1	0
35.2	0
35.3	0
35.4	0
35.5	0
35.6	0
35.7	0
35.8	0
35.9	0
36	0
36.1	0
36.2	0
36.3	0
36.4	0
36.5	0
36.6	0
36.7	0
36.8	0
36.9	0
37	0
37.1	0
37.2	0
37.3	0
37.4	0
37.5	0
37.6	0
37.7	0
37.8	0
37.9	0
38	0
38.1	0
38.2	0
38.3	0
38.4	0
38.5	0
38.6	0
38.7	0
38.8	0
38.9	0
39	0
39.1	0
39.2	0
39.3	0
39.4	0
39.5	0
39.6	0
39.7	0
39.8	0
39.9	0
40	0
40.1	0
40.2	0
40.3	0
40.4	0
40.5	0
40.6	0
40.7	0
40.8	0
40.9	0
41	0
41.1	0
41.2	0
41.3	0
41.4	0
41.5	0
41.6	0
41.7	0
41.8	0
41.9	0
42	0
42.1	0
42.2	0
42.3	0
42.4	0
42.5	0
42.6	0
42.7	0
42.8	0
42.9	0
43	0
43.1	0
43.2	0
43.3	0
43.4	0
43.5	0
43.6	0
43.7	0
43.8	0
43.9	0
44	0
44.1	0
44.2	0
44.3	0
44.4	0
44.5	0
44.6	0
44.7	0
44.8	0
44.9	0
45	0
45.1	0
45.2	0
45.3	0
45.4	0
45.5	0
45.6	0
45.7	0
45.8	0
45.9	0
46	0
46.1	0
46.2	0
46.3	0
46.4	0
46.5	0
46.6	0
46.7	0
46.8	0
46.9	0
47	0
47.1	0
47.2	0
47.3	0
47.4	0
47.5	0
47.6	0
47.7	0
47.8	0
47.9	0
48	0
48.1	0
48.2	0
48.3	0
48.4	0
48.5	0
48.6	0
48.7	0
48.8	0
48.9	0
49	0
49.1	0
49.2	0
49.3	0
49.4	0
49.5	0
49.6	0
49.7	0
49.8	0
49.9	0
50	0
50.1	0
50.2	0
50.3	0
50.4	0
50.5	0
50.6	0
50.7	0
50.8	0
50.9	0
51	0
51.1	0
51.2	0
51.3	0
51.4	0
51.5	0
51.6	0
51.7	0
51.8	0
51.9	0
52	0
52.1	0
52.2	0
52.3	0
52.4	0
52.5	0
52.6	0
52.7	0
52.8	0
52.9	0
53	0
53.1	0
53.2	0
53.3	0
53.4	0
53.5	0
53.6	0
53.7	0
53.8	0
53.9	0
54	0
54.1	0
54.2	0
54.3	0
54.4	0
54.5	0
54.6	0
54.7	0
54.8	0
54.9	0
55	0
55.1	0
55.2	0
55.3	0
55.4	0
55.5	0
55.6	0
55.7	0
55.8	0
55.9	0
56	0
56.1	0
56.2	0
56.3	0
56.4	0
56.5	0
56.6	0
56.7	0
56.8	0
56.9	0
57	0
57.1	0
57.2	0
57.3	0
57.4	0
57.5	0
57.6	0
57.7	0
57.8	0
57.9	0
58	0
58.1	0
58.2	0
58.3	0
58.4	0
58.5	0
58.6	0
58.7	0
58.8	0
58.9	0
59	0
59.1	0
59.2	0
59.3	0
59.4	0
59.5	0
59.6	0
59.7	0
59.8	0
59.9	0
60	0
60.1	0
60.2	0
60.3	0
60.4	0
60.5	0
60.6	0
60.7	0
60.8	0
60.9	0
61	0
61.1	0
61.2	0
61.3	0
61.4	0
61.5	0
61.6	0
61.7	0
61.8	0
61.9	0
62	0
62.1	0
62.2	0
62.3	0
62.4	0
62.5	0
62.6	0
62.7	0
62.8	0
62.9	0
63	0
63.1	0
63.2	0
63.3	0
63.4	0
63.5	0
63.6	0
63.7	0
63.8	0
63.9	0
64	0
64.1	0
64.2	0
64.3	0
64.4	0
64.5	0
64.6	0
64.7	0
64.8	0
64.9	0
65	0
65.1	0
65.2	0
65.3	0
65.4	0
65.5	0
65.6	0
65.7	0
65.8	0
65.9	0
66	0
66.1	0
66.2	0
66.3	0
66.4	0
66.5	0
66.6	0
66.7	0
66.8	0
66.9	0
67	0
67.1	0
67.2	0
67.3	0
67.4	0
67.5	0
67.6	0
67.7	0
67.8	0
67.9	0
68	0
68.1	0
68.2	0
68.3	0
68.4	0
68.5	0
68.6	0
68.7	0
68.8	0
68.9	0
69	0
69.1	0
69.2	0
69.3	0
69.4	0
69.5	0
69.6	0
69.7	0
69.8	0
69.9	0
70	0
70.1	0
70.2	0
70.3	0
70.4	0
70.5	0
70.6	0
70.7	0
70.8	0
70.9	0
71	0
71.1	0
71.2	0
71.3	0
71.4	0
71.5	0
71.6	0
71.7	0
71.8	0
71.9	0
72	0
72.1	0
72.2	0
72.3	0
72.4	0
72.5	0
72.6	0
72.7	0
72.8	0
72.9	0
73	0
73.1	0
73.2	0
73.3	0
73.4	0
73.5	0
73.6	0
73.7	0
73.8	0
73.9	0
74	0
74.1	0
74.2	0
74.3	0
74.4	0
74.5	0
74.6	0
74.7	0
74.8	0
74.9	0
75	0
75.1	0
75.2	0
75.3	0
75.4	0
75.5	0
75.6	0
75.7	0
75.8	0
75.9	0
76	0
76.1	0
76.2	0
76.3	0
76.4	0
76.5	0
76.6	0
76.7	0
76.8	0
76.9	0
77	0
77.1	0
77.2	0
77.3	0
77.4	0
77.5	0
77.6	0
77.7	0
77.8	0
77.9	0
78	0
78.1	0
78.2	0
78.3	0
78.4	0
78.5	0
78.6	0
78.7	0
78.8	0
78.9	0
79	0
79.1	0
79.2	0
79.3	0
79.4	0
79.5	0
79.6	0
79.7	0
79.8	0
79.9	0
80	0
80.1	0
80.2	0
80.3	0
80.4	0
80.5	0
80.6	0
80.7	0
80.8	0
80.9	0
81	0
81.1	0
81.2	0
81.3	0
81.4	0
81.5	0
81.6	0
81.7	0
81.8	0
81.9	0
82	0
82.1	0
82.2	0
82.3	0
82.4	0
82.5	0
82.6	0
82.7	0
82.8	0
82.9	0
83	0
83.1	0
83.2	0
83.3	0
83.4	0
83.5	0
83.6	0
83.7	0
83.8	0
83.9	0
84	0
84.1	0
84.2	0
84.3	0
84.4	0
84.5	0
84.6	0
84.7	0
84.8	0
84.9	0
85	0
85.1	0
85.2	0
85.3	0
85.4	0
85.5	0
85.6	0
85.7	0
85.8	0
85.9	0
86	0
86.1	0
86.2	0
86.3	0
86.4	0
86.5	0
86.6	0
86.7	0
86.8	0
86.9	0
87	0
87.1	0
87.2	0
87.3	0
87.4	0
87.5	0
87.6	0
87.7	0
87.8	0
87.9	0
88	0
88.1	0
88.2	0
88.3	0
88.4	0
88.5	0
88.6	0
88.7	0
88.8	0
88.9	0
89	0
89.1	0
89.2	0
89.3	0
89.4	0
89.5	0
89.6	0
89.7	0
89.8	0
89.9	0
90	0
90.1	0
90.2	0
90.3	0
90.4	0
90.5	0
90.6	0
90.7	0
90.8	0
90.9	0
91	0
91.1	0
91.2	0
91.3	0
91.4	0
91.5	0
91.6	0
91.7	0
91.8	0
91.9	0
92	0
92.1	0
92.2	0
92.3	0
92.4	0
92.5	0
92.6	0
92.7	0
92.8	0
92.9	0
93	0
93.1	0
93.2	0
93.3	0
93.4	0
93.5	0
93.6	0
93.7	0
93.8	0
93.9	0
94	0
94.1	0
94.2	0
94.3	0
94.4	0
94.5	0
94.6	0
94.7	0
94.8	0
94.9	0
95	0
95.1	0
95.2	0
95.3	0
95.4	0
95.5	0
95.6	0
95.7	0
95.8	0
95.9	0
96	0
96.1	0
96.2	0
96.3	0
96.4	0
96.5	0
96.6	0
96.7	0
96.8	0
96.9	0
97	0
97.1	0
97.2	0
97.3	0
97.4	0
97.5	0
97.6	0
97.7	0
97.8	0
97.9	0
98	0
98.1	0
98.2	0
98.3	0
98.4	0
98.5	0
98.6	0
98.7	0
98.8	0
98.9	0
99	0
99.1	0
99.2	0
99.3	0
99.4	0
99.5	0
99.6	0
99.7	0
99.8	0
99.9	0
100	0
100.1	0.3465
100.2	0.536167
100.3	0.650667
100.4	0.724667
100.5	0.772833
100.6	0.806167
100.7	0.8345
100.8	0.8555
100.9	0.8755
101	0.886
101.1	0.891667
101.2	0.896833
101.3	0.900333
101.4	0.902833
101.5	0.907667
101.6	0.913167
101.7	0.9165
101.8	0.911333
101.9	0.912667
102	0.911667
102.1	0.915
102.2	0.915833
102.3	0.9155
102.4	0.9175
102.5	0.913667
102.6	0.917333
102.7	0.9175
102.8	0.922167
102.9	0.924167
103	0.919333
103.1	0.919167
103.2	0.919167
103.3	0.918333
103.4	0.9205
103.5	0.920667
103.6	0.918833
103.7	0.921167
103.8	0.920833
103.9	0.922
104	0.921833
104.1	0.923667
104.2	0.924667
104.3	0.924333
104.4	0.922667
104.5	0.926
104.6	0.926667
104.7	0.927333
104.8	0.926833
104.9	0.927
105	0.926667
105.1	0.9295
105.2	0.928833
105.3	0.927833
105.4	0.929333
105.5	0.9265
105.6	0.924333
105.7	0.923167
105.8	0.9275
105.9	0.924833
106	0.923667
106.1	0.924167
106.2	0.925
106.3	0.925333
106.4	0.928167
106.5	0.931
106.6	0.929333
106.7	0.930333
106.8	0.9305
106.9	0.930833
107	0.930833
107.1	0.929167
107.2	0.930333
107.3	0.9325
107.4	0.929833
107.5	0.934
107.6	0.934167
107.7	0.936167
107.8	0.938333
107.9	0.938167
108	0.940833
108.1	0.942
108.2	0.939167
108.3	0.937167
108.4	0.937667
108.5	0.935333
108.6	0.937667
108.7	0.937
108.8	0.938
108.9	0.9365
109	0.937333
109.1	0.937833
109.2	0.938167
109.3	0.934667
109.4	0.935167
109.5	0.937
109.6	0.9405
109.7	0.9435
109.8	0.941333
109.9	0.9415
110	0.945
110.1	0.945333
110.2	0.940333
110.3	0.941667
110.4	0.942
110.5	0.943
110.6	0.945333
110.7	0.943333
110.8	0.944333
110.9	0.9425
111	0.944167
111.1	0.9435
111.2	0.9405
111.3	0.939833
111.4	0.939167
111.5	0.9385
111.6	0.9385
111.7	0.939
111.8	0.941833
111.9	0.942167
112	0.939833
112.1	0.940167
112.2	0.941
112.3	0.940667
112.4	0.941833
112.5	0.946833
112.6	0.946
112.7	0.943333
112.8	0.9425
112.9	0.943833
113	0.943
113.1	0.944667
113.2	0.943
113.3	0.943667
113.4	0.94
113.5	0.942833
113.6	0.943167
113.7	0.943833
113.8	0.945667
113.9	0.948333
114	0.946667
114.1	0.947
114.2	0.947833
114.3	0.944333
114.4	0.946167
114.5	0.9465
114.6	0.9485
114.7	0.95
114.8	0.949667
114.9	0.950167
115	0.944833
115.1	0.944333
115.2	0.945667
115.3	0.946667
115.4	0.9465
115.5	0.945833
115.6	0.946167
115.7	0.9475
115.8	0.947667
115.9	0.951333
116	0.951667
116.1	0.948667
116.2	0.950667
116.3	0.953833
116.4	0.95
116.5	0.949333
116.6	0.949667
116.7	0.9475
116.8	0.946833
116.9	0.945667
117	0.945667
117.1	0.948333
117.2	0.947
117.3	0.949167
117.4	0.951167
117.5	0.9485
117.6	0.949833
117.7	0.950333
117.8	0.951833
117.9	0.9525
118	0.953
118.1	0.953167
118.2	0.951667
118.3	0.950833
118.4	0.951333
118.5	0.951333
118.6	0.9515
118.7	0.950667
118.8	0.952
118.9	0.951333
119	0.951833
119.1	0.955167
119.2	0.955333
119.3	0.956333
119.4	0.954
119.5	0.954
119.6	0.956333
119.7	0.9545
119.8	0.9525
119.9	0.954667
120	0.952833
120.1	0.954667
120.2	0.953667
120.3	0.954667
120.4	0.9555
120.5	0.957667
120.6	0.956833
120.7	0.955667
120.8	0.957833
120.9	0.961
121	0.960833
121.1	0.959167
121.2	0.9575
121.3	0.956667
121.4	0.955833
121.5	0.957
121.6	0.956167
121.7	0.956333
121.8	0.957833
121.9	0.956667
122	0.957667
122.1	0.958
122.2	0.959667
122.3	0.958167
122.4	0.957667
122.5	0.954167
122.6	0.955
122.7	0.958667
122.8	0.961833
122.9	0.962167
123	0.962333
123.1	0.9595
123.2	0.961
123.3	0.960333
123.4	0.960667
123.5	0.959
123.6	0.9595
123.7	0.959333
123.8	0.959
123.9	0.961167
124	0.962167
124.1	0.960167
124.2	0.961
124.3	0.961167
124.4	0.960333
124.5	0.96
124.6	0.961167
124.7	0.962833
124.8	0.963333
124.9	0.965667
125	0.966333
125.1	0.9665
125.2	0.967167
125.3	0.968333
125.4	0.9685
125.5	0.965833
125.6	0.967333
125.7	0.9655
125.8	0.968333
125.9	0.966167
126	0.967
126.1	0.965333
126.2	0.965667
126.3	0.966667
126.4	0.965333
126.5	0.965333
126.6	0.965833
126.7	0.967833
126.8	0.968333
126.9	0.966667
127	0.966167
127.1	0.964667
127.2	0.9665
127.3	0.968
127.4	0.967
127.5	0.967167
127.6	0.967167
127.7	0.965833
127.8	0.963167
127.9	0.963167
128	0.964167
128.1	0.964
128.2	0.965167
128.3	0.967167
128.4	0.967167
128.5	0.969
128.6	0.968167
128.7	0.9675
128.8	0.965667
128.9	0.966333
129	0.968167
129.1	0.9675
129.2	0.965
129.3	0.965833
129.4	0.966
129.5	0.966167
129.6	0.964167
129.7	0.967167
129.8	0.965667
129.9	0.967333
130	0.9675
130.1	0.968833
130.2	0.968833
130.3	0.9675
130.4	0.967333
130.5	0.968167
130.6	0.969167
130.7	0.971
130.8	0.971333
130.9	0.969167
131	0.968333
131.1	0.967
131.2	0.9675
131.3	0.967167
131.4	0.967
131.5	0.968
131.6	0.969833
131.7	0.9705
131.8	0.967833
131.9	0.968
132	0.968
132.1	0.967167
132.2	0.967667
132.3	0.967
132.4	0.968167
132.5	0.968333
132.6	0.967333
132.7	0.968333
132.8	0.97
132.9	0.97
133	0.969667
133.1	0.973167
133.2	0.972333
133.3	0.970333
133.4	0.970167
133.5	0.969833
133.6	0.972167
133.7	0.9695
133.8	0.97
133.9	0.97
134	0.967833
134.1	0.969833
134.2	0.970833
134.3	0.971333
134.4	0.971333
134.5	0.9695
134.6	0.969333
134.7	0.967333
134.8	0.968833
134.9	0.968167
135	0.971167
135.1	0.9715
135.2	0.9715
135.3	0.973833
135.4	0.973833
135.5	0.975333
135.6	0.975
135.7	0.975
135.8	0.976667
135.9	0.975167
136	0.9735
136.1	0.974
136.2	0.974667
136.3	0.975
136.4	0.972667
136.5	0.972667
136.6	0.9725
136.7	0.973833
136.8	0.975333
136.9	0.975667
137	0.973667
137.1	0.975167
137.2	0.975333
137.3	0.973833
137.4	0.974167
137.5	0.972333
137.6	0.974833
137.7	0.975167
137.8	0.973667
137.9	0.974167
138	0.973667
138.1	0.972667
138.2	0.974167
138.3	0.976
138.4	0.977333
138.5	0.975167
138.6	0.973167
138.7	0.973167
138.8	0.9715
138.9	0.972667
139	0.972333
139.1	0.976667
139.2	0.975
139.3	0.972833
139.4	0.972333
139.5	0.972
139.6	0.973667
139.7	0.972833
139.8	0.974
139.9	0.976333
140	0.976167
140.1	0.976333
140.2	0.9745
140.3	0.974833
140.4	0.974333
140.5	0.974
140.6	0.975333
140.7	0.976
140.8	0.9765
140.9	0.978333
141	0.9775
141.1	0.976667
141.2	0.975333
141.3	0.975833
141.4	0.975833
141.5	0.975333
141.6	0.974333
141.7	0.9745
141.8	0.975167
141.9	0.978333
142	0.976167
142.1	0.977333
142.2	0.977167
142.3	0.976833
142.4	0.976667
142.5	0.974667
142.6	0.972167
142.7	0.973667
142.8	0.976333
142.9	0.975
143	0.975
143.1	0.975167
143.2	0.974667
143.3	0.976
143.4	0.975333
143.5	0.9765
143.6	0.977
143.7	0.9775
143.8	0.978333
143.9	0.978833
144	0.978333
144.1	0.977
144.2	0.976167
144.3	0.9755
144.4	0.976667
144.5	0.976167
144.6	0.978
144.7	0.975333
144.8	0.975
144.9	0.973833
145	0.972667
145.1	0.972333
145.2	0.973
145.3	0.973
145.4	0.975667
145.5	0.975167
145.6	0.972
145.7	0.971167
145.8	0.9715
145.9	0.974167
146	0.9765
146.1	0.973333
146.2	0.973667
146.3	0.977667
146.4	0.977833
146.5	0.977167
146.6	0.977
146.7	0.976667
146.8	0.975667
146.9	0.979
147	0.979333
147.1	0.978333
147.2	0.976333
147.3	0.976833
147.4	0.974833
147.5	0.976
147.6	0.976667
147.7	0.9765
147.8	0.977
147.9	0.976
148	0.9755
148.1	0.976667
148.2	0.976667
148.3	0.977833
148.4	0.977833
148.5	0.978167
148.6	0.977
148.7	0.978
148.8	0.977667
148.9	0.9755
149	0.9765
149.1	0.9775
149.2	0.9745
149.3	0.9755
149.4	0.976167
149.5	0.977167
149.6	0.977833
149.7	0.9775
149.8	0.978167
149.9	0.979167
150	0.978333
150.1	0.976667
150.2	0.972667
150.3	0.973333
150.4	0.9745
150.5	0.976
150.6	0.976333
150.7	0.977333
150.8	0.978333
150.9	0.979
151	0.976
151.1	0.976333
151.2	0.9785
151.3	0.978833
151.4	0.977667
151.5	0.977333
151.6	0.977167
151.7	0.9765
151.8	0.9745
151.9	0.975
152	0.976333
152.1	0.975333
152.2	0.976167
152.3	0.978667
152.4	0.978833
152.5	0.979333
152.6	0.979333
152.7	0.976833
152.8	0.978667
152.9	0.978667
153	0.9815
153.1	0.979833
153.2	0.98
153.3	0.979833
153.4	0.9775
153.5	0.979333
153.6	0.978833
153.7	0.979833
153.8	0.979667
153.9	0.977167
154	0.979
154.1	0.980833
154.2	0.980667
154.3	0.980833
154.4	0.980333
154.5	0.980667
154.6	0.979333
154.7	0.9785
154.8	0.977167
154.9	0.9775
155	0.978167
155.1	0.9785
155.2	0.9785
155.3	0.9775
155.4	0.979167
155.5	0.979333
155.6	0.977667
155.7	0.975833
155.8	0.978
155.9	0.977167
156	0.977667
156.1	0.979833
156.2	0.979833
156.3	0.978667
156.4	0.9775
156.5	0.9775
156.6	0.976167
156.7	0.977333
156.8	0.977333
156.9	0.976333
157	0.975167
157.1	0.975667
157.2	0.977
157.3	0.978
157.4	0.979
157.5	0.978667
157.6	0.9775
157.7	0.977667
157.8	0.978333
157.9	0.978333
158	0.978
158.1	0.979333
158.2	0.981
158.3	0.98
158.4	0.981167
158.5	0.98
158.6	0.981333
158.7	0.980833
158.8	0.979167
158.9	0.978
159	0.977833
159.1	0.979167
159.2	0.98
159.3	0.98
159.4	0.980333
159.5	0.979333
159.6	0.980333
159.7	0.979333
159.8	0.98
159.9	0.978333
160	0.979167
160.1	0.979
160.2	0.979333
160.3	0.978833
160.4	0.979
160.5	0.9785
160.6	0.980833
160.7	0.980833
160.8	0.9805
160.9	0.979833
161	0.9775
161.1	0.975667
161.2	0.976333
161.3	0.978333
161.4	0.979
161.5	0.980167
161.6	0.981167
161.7	0.981333
161.8	0.982333
161.9	0.9805
162	0.981333
162.1	0.980167
162.2	0.979667
162.3	0.977833
162.4	0.978833
162.5	0.9815
162.6	0.981833
162.7	0.981
162.8	0.978
162.9	0.978167
163	0.976833
163.1	0.979167
163.2	0.980333
163.3	0.980333
163.4	0.980833
163.5	0.979
163.6	0.979167
163.7	0.977833
163.8	0.976333
163.9	0.977833
164	0.98
164.1	0.9795
164.2	0.979167
164.3	0.978333
164.4	0.979167
164.5	0.980833
164.6	0.9795
164.7	0.979667
164.8	0.978333
164.9	0.979
165	0.979833
165.1	0.979667
165.2	0.979333
165.3	0.9785
165.4	0.979167
165.5	0.979667
165.6	0.978833
165.7	0.980667
165.8	0.980667
165.9	0.979167
166	0.9795
166.1	0.978
166.2	0.9795
166.3	0.979333
166.4	0.978833
166.5	0.979
166.6	0.979333
166.7	0.976667
166.8	0.978
166.9	0.979167
167	0.98
167.1	0.980167
167.2	0.980667
167.3	0.9785
167.4	0.98
167.5	0.9795
167.6	0.979333
167.7	0.9785
167.8	0.980167
167.9	0.9795
168	0.980833
168.1	0.981833
168.2	0.981667
168.3	0.984167
168.4	0.982
168.5	0.981
168.6	0.9805
168.7	0.978
168.8	0.978333
168.9	0.981667
169	0.983167
169.1	0.982833
169.2	0.981167
169.3	0.983167
169.4	0.983833
169.5	0.984167
169.6	0.983833
169.7	0.981833
169.8	0.980333
169.9	0.9805
170	0.981167
170.1	0.983333
170.2	0.980833
170.3	0.979833
170.4	0.980167
170.5	0.979333
170.6	0.979
170.7	0.978833
170.8	0.978833
170.9	0.979333
171	0.9765
171.1	0.9775
171.2	0.979167
171.3	0.981667
171.4	0.982667
171.5	0.984
171.6	0.985167
171.7	0.983333
171.8	0.981167
171.9	0.9805
172	0.979833
172.1	0.978333
172.2	0.980333
172.3	0.9795
172.4	0.978
172.5	0.978833
172.6	0.979667
172.7	0.981833
172.8	0.982333
172.9	0.9815
173	0.9825
173.1	0.981333
173.2	0.982333
173.3	0.982333
173.4	0.979
173.5	0.980667
173.6	0.98
173.7	0.979333
173.8	0.979667
173.9	0.978333
174	0.979667
174.1	0.979167
174.2	0.979
174.3	0.98
174.4	0.979667
174.5	0.9775
174.6	0.977833
174.7	0.979
174.8	0.979333
174.9	0.9785
175	0.979
175.1	0.978333
175.2	0.9775
175.3	0.9765
175.4	0.978667
175.5	0.979167
175.6	0.979667
175.7	0.978667
175.8	0.9795
175.9	0.980667
176	0.982667
176.1	0.983
176.2	0.983
176.3	0.982167
176.4	0.983167
176.5	0.983
176.6	0.982667
176.7	0.982333
176.8	0.982833
176.9	0.982167
177	0.981
177.1	0.981333
177.2	0.981167
177.3	0.981167
177.4	0.981833
177.5	0.981
177.6	0.9805
177.7	0.980667
177.8	0.979167
177.9	0.980667
178	0.980667
178.1	0.979833
178.2	0.980167
178.3	0.9815
178.4	0.981
178.5	0.981667
178.6	0.981333
178.7	0.9835
178.8	0.983333
178.9	0.981833
179	0.982667
179.1	0.983667
179.2	0.983833
179.3	0.982167
179.4	0.982833
179.5	0.981833
179.6	0.981
179.7	0.980833
179.8	0.979667
179.9	0.980333
180	0.981
180.1	0.982167
180.2	0.983333
180.3	0.981667
180.4	0.9825
180.5	0.983333
180.6	0.982
180.7	0.979833
180.8	0.980167
180.9	0.981333
181	0.982333
181.1	0.982167
181.2	0.983167
181.3	0.981667
181.4	0.980667
181.5	0.981
181.6	0.982
181.7	0.981167
181.8	0.979667
181.9	0.978333
182	0.979167
182.1	0.982167
182.2	0.981667
182.3	0.981833
182.4	0.981
182.5	0.979667
182.6	0.9795
182.7	0.981833
182.8	0.982167
182.9	0.980833
183	0.982333
183.1	0.982333
183.2	0.982667
183.3	0.980833
183.4	0.982333
183.5	0.983333
183.6	0.984833
183.7	0.982333
183.8	0.981333
183.9	0.983667
184	0.982167
184.1	0.981667
184.2	0.979
184.3	0.982
184.4	0.981667
184.5	0.982167
184.6	0.981
184.7	0.981667
184.8	0.9805
184.9	0.9815
185	0.983
185.1	0.981333
185.2	0.98
185.3	0.980167
185.4	0.981
185.5	0.9815
185.6	0.981833
185.7	0.978333
185.8	0.981
185.9	0.980333
186	0.982333
186.1	0.982833
186.2	0.9825
186.3	0.981833
186.4	0.979333
186.5	0.9805
186.6	0.978333
186.7	0.977833
186.8	0.979667
186.9	0.979667
187	0.9805
187.1	0.980667
187.2	0.979333
187.3	0.982
187.4	0.982833
187.5	0.983167
187.6	0.9835
187.7	0.982167
187.8	0.981
187.9	0.980167
188	0.9815
188.1	0.9825
188.2	0.984
188.3	0.9845
188.4	0.985
188.5	0.982167
188.6	0.982667
188.7	0.982667
188.8	0.982167
188.9	0.983667
189	0.984167
189.1	0.9825
189.2	0.981333
189.3	0.98
189.4	0.981167
189.5	0.983167
189.6	0.983167
189.7	0.982833
189.8	0.982333
189.9	0.983333
190	0.982833
190.1	0.983833
190.2	0.983167
190.3	0.984333
190.4	0.984
190.5	0.983333
190.6	0.982833
190.7	0.982333
190.8	0.9815
190.9	0.983667
191	0.983
191.1	0.982167
191.2	0.983
191.3	0.9835
191.4	0.984333
191.5	0.984333
191.6	0.9845
191.7	0.985
191.8	0.9845
191.9	0.9845
192	0.984
192.1	0.983333
192.2	0.983333
192.3	0.982667
192.4	0.982167
192.5	0.981167
192.6	0.982
192.7	0.981333
192.8	0.981667
192.9	0.9815
193	0.9825
193.1	0.983
193.2	0.980333
193.3	0.981833
193.4	0.982333
193.5	0.982833
193.6	0.983
193.7	0.983833
193.8	0.982833
193.9	0.983667
194	0.983667
194.1	0.982833
194.2	0.9835
194.3	0.983167
194.4	0.9825
194.5	0.981833
194.6	0.983167
194.7	0.980167
194.8	0.978667
194.9	0.979
195	0.9805
195.1	0.9825
195.2	0.983
195.3	0.981333
195.4	0.9825
195.5	0.982833
195.6	0.980833
195.7	0.9815
195.8	0.9815
195.9	0.98
196	0.981667
196.1	0.9815
196.2	0.9825
196.3	0.984
196.4	0.983667
196.5	0.984667
196.6	0.9835
196.7	0.984
196.8	0.983333
196.9	0.982333
197	0.983333
197.1	0.984833
197.2	0.985
197.3	0.983667
197.4	0.985167
197.5	0.9845
197.6	0.9835
197.7	0.9825
197.8	0.982333
197.9	0.983167
198	0.984333
198.1	0.985833
198.2	0.985167
198.3	0.985167
198.4	0.985333
198.5	0.9835
198.6	0.982667
198.7	0.983
198.8	0.985
198.9	0.983
199	0.983333
199.1	0.984
199.2	0.982167
199.3	0.980667
199.4	0.9805
199.5	0.982
199.6	0.983333
199.7	0.984667
199.8	0.985833
199.9	0.987
200	0.986667
[truncated: 14,000 more rows]
