# Supplementary material for: Bayesian inference of kinetic schemes for ion channels by Kalman filtering
Source: eLife journal article supplement (doi:10.7554/elife.62714), 2022-05-04
Supplement: fig4-data4 [file 1_Sim_N_3000_Strom_MW_8M.xlsx]

## Sheet: Tabelle1
0.1	0
0.2	0
0.3	0
0.4	0
0.5	0
0.6	0
0.7	0
0.8	0
0.9	0
1	0
1.1	0
1.2	0
1.3	0
1.4	0
1.5	0
1.6	0
1.7	0
1.8	0
1.9	0
2	0
2.1	0
2.2	0
2.3	0
2.4	0
2.5	0
2.6	0
2.7	0
2.8	0
2.9	0
3	0
3.1	0
3.2	0
3.3	0
3.4	0
3.5	0
3.6	0
3.7	0
3.8	0
3.9	0
4	0
4.1	0
4.2	0
4.3	0
4.4	0
4.5	0
4.6	0
4.7	0
4.8	0
4.9	0
5	0
5.1	0
5.2	0
5.3	0
5.4	0
5.5	0
5.6	0
5.7	0
5.8	0
5.9	0
6	0
6.1	0
6.2	0
6.3	0
6.4	0
6.5	0
6.6	0
6.7	0
6.8	0
6.9	0
7	0
7.1	0
7.2	0
7.3	0
7.4	0
7.5	0
7.6	0
7.7	0
7.8	0
7.9	0
8	0
8.1	0
8.2	0
8.3	0
8.4	0
8.5	0
8.6	0
8.7	0
8.8	0
8.9	0
9	0
9.1	0
9.2	0
9.3	0
9.4	0
9.5	0
9.6	0
9.7	0
9.8	0
9.9	0
10	0
10.1	0
10.2	0
10.3	0
10.4	0
10.5	0
10.6	0
10.7	0
10.8	0
10.9	0
11	0
11.1	0
11.2	0
11.3	0
11.4	0
11.5	0
11.6	0
11.7	0
11.8	0
11.9	0
12	0
12.1	0
12.2	0
12.3	0
12.4	0
12.5	0
12.6	0
12.7	0
12.8	0
12.9	0
13	0
13.1	0
13.2	0
13.3	0
13.4	0
13.5	0
13.6	0
13.7	0
13.8	0
13.9	0
14	0
14.1	0
14.2	0
14.3	0
14.4	0
14.5	0
14.6	0
14.7	0
14.8	0
14.9	0
15	0
15.1	0
15.2	0
15.3	0
15.4	0
15.5	0
15.6	0
15.7	0
15.8	0
15.9	0
16	0
16.1	0
16.2	0
16.3	0
16.4	0
16.5	0
16.6	0
16.7	0
16.8	0
16.9	0
17	0
17.1	0
17.2	0
17.3	0
17.4	0
17.5	0
17.6	0
17.7	0
17.8	0
17.9	0
18	0
18.1	0
18.2	0
18.3	0
18.4	0
18.5	0
18.6	0
18.7	0
18.8	0
18.9	0
19	0
19.1	0
19.2	0
19.3	0
19.4	0
19.5	0
19.6	0
19.7	0
19.8	0
19.9	0
20	0
20.1	0
20.2	0
20.3	0
20.4	0
20.5	0
20.6	0
20.7	0
20.8	0
20.9	0
21	0
21.1	0
21.2	0
21.3	0
21.4	0
21.5	0
21.6	0
21.7	0
21.8	0
21.9	0
22	0
22.1	0
22.2	0
22.3	0
22.4	0
22.5	0
22.6	0
22.7	0
22.8	0
22.9	0
23	0
23.1	0
23.2	0
23.3	0
23.4	0
23.5	0
23.6	0
23.7	0
23.8	0
23.9	0
24	0
24.1	0
24.2	0
24.3	0
24.4	0
24.5	0
24.6	0
24.7	0
24.8	0
24.9	0
25	0
25.1	0
25.2	0
25.3	0
25.4	0
25.5	0
25.6	0
25.7	0
25.8	0
25.9	0
26	0
26.1	0
26.2	0
26.3	0
26.4	0
26.5	0
26.6	0
26.7	0
26.8	0
26.9	0
27	0
27.1	0
27.2	0
27.3	0
27.4	0
27.5	0
27.6	0
27.7	0
27.8	0
27.9	0
28	0
28.1	0
28.2	0
28.3	0
28.4	0
28.5	0
28.6	0
28.7	0
28.8	0
28.9	0
29	0
29.1	0
29.2	0
29.3	0
29.4	0
29.5	0
29.6	0
29.7	0
29.8	0
29.9	0
30	0
30.1	0
30.2	0
30.3	0
30.4	0
30.5	0
30.6	0
30.7	0
30.8	0
30.9	0
31	0
31.1	0
31.2	0
31.3	0
31.4	0
31.5	0
31.6	0
31.7	0
31.8	0
31.9	0
32	0
32.1	0
32.2	0
32.3	0
32.4	0
32.5	0
32.6	0
32.7	0
32.8	0
32.9	0
33	0
33.1	0
33.2	0
33.3	0
33.4	0
33.5	0
33.6	0
33.7	0
33.8	0
33.9	0
34	0
34.1	0
34.2	0
34.3	0
34.4	0
34.5	0
34.6	0
34.7	0
34.8	0
34.9	0
35	0
35.1	0
35.2	0
35.3	0
35.4	0
35.5	0
35.6	0
35.7	0
35.8	0
35.9	0
36	0
36.1	0
36.2	0
36.3	0
36.4	0
36.5	0
36.6	0
36.7	0
36.8	0
36.9	0
37	0
37.1	0
37.2	0
37.3	0
37.4	0
37.5	0
37.6	0
37.7	0
37.8	0
37.9	0
38	0
38.1	0
38.2	0
38.3	0
38.4	0
38.5	0
38.6	0
38.7	0
38.8	0
38.9	0
39	0
39.1	0
39.2	0
39.3	0
39.4	0
39.5	0
39.6	0
39.7	0
39.8	0
39.9	0
40	0
40.1	0
40.2	0
40.3	0
40.4	0
40.5	0
40.6	0
40.7	0
40.8	0
40.9	0
41	0
41.1	0
41.2	0
41.3	0
41.4	0
41.5	0
41.6	0
41.7	0
41.8	0
41.9	0
42	0
42.1	0
42.2	0
42.3	0
42.4	0
42.5	0
42.6	0
42.7	0
42.8	0
42.9	0
43	0
43.1	0
43.2	0
43.3	0
43.4	0
43.5	0
43.6	0
43.7	0
43.8	0
43.9	0
44	0
44.1	0
44.2	0
44.3	0
44.4	0
44.5	0
44.6	0
44.7	0
44.8	0
44.9	0
45	0
45.1	0
45.2	0
45.3	0
45.4	0
45.5	0
45.6	0
45.7	0
45.8	0
45.9	0
46	0
46.1	0
46.2	0
46.3	0
46.4	0
46.5	0
46.6	0
46.7	0
46.8	0
46.9	0
47	0
47.1	0
47.2	0
47.3	0
47.4	0
47.5	0
47.6	0
47.7	0
47.8	0
47.9	0
48	0
48.1	0
48.2	0
48.3	0
48.4	0
48.5	0
48.6	0
48.7	0
48.8	0
48.9	0
49	0
49.1	0
49.2	0
49.3	0
49.4	0
49.5	0
49.6	0
49.7	0
49.8	0
49.9	0
50	0
50.1	0
50.2	0
50.3	0
50.4	0
50.5	0
50.6	0
50.7	0
50.8	0
50.9	0
51	0
51.1	0
51.2	0
51.3	0
51.4	0
51.5	0
51.6	0
51.7	0
51.8	0
51.9	0
52	0
52.1	0
52.2	0
52.3	0
52.4	0
52.5	0
52.6	0
52.7	0
52.8	0
52.9	0
53	0
53.1	0
53.2	0
53.3	0
53.4	0
53.5	0
53.6	0
53.7	0
53.8	0
53.9	0
54	0
54.1	0
54.2	0
54.3	0
54.4	0
54.5	0
54.6	0
54.7	0
54.8	0
54.9	0
55	0
55.1	0
55.2	0
55.3	0
55.4	0
55.5	0
55.6	0
55.7	0
55.8	0
55.9	0
56	0
56.1	0
56.2	0
56.3	0
56.4	0
56.5	0
56.6	0
56.7	0
56.8	0
56.9	0
57	0
57.1	0
57.2	0
57.3	0
57.4	0
57.5	0
57.6	0
57.7	0
57.8	0
57.9	0
58	0
58.1	0
58.2	0
58.3	0
58.4	0
58.5	0
58.6	0
58.7	0
58.8	0
58.9	0
59	0
59.1	0
59.2	0
59.3	0
59.4	0
59.5	0
59.6	0
59.7	0
59.8	0
59.9	0
60	0
60.1	0
60.2	0
60.3	0
60.4	0
60.5	0
60.6	0
60.7	0
60.8	0
60.9	0
61	0
61.1	0
61.2	0
61.3	0
61.4	0
61.5	0
61.6	0
61.7	0
61.8	0
61.9	0
62	0
62.1	0
62.2	0
62.3	0
62.4	0
62.5	0
62.6	0
62.7	0
62.8	0
62.9	0
63	0
63.1	0
63.2	0
63.3	0
63.4	0
63.5	0
63.6	0
63.7	0
63.8	0
63.9	0
64	0
64.1	0
64.2	0
64.3	0
64.4	0
64.5	0
64.6	0
64.7	0
64.8	0
64.9	0
65	0
65.1	0
65.2	0
65.3	0
65.4	0
65.5	0
65.6	0
65.7	0
65.8	0
65.9	0
66	0
66.1	0
66.2	0
66.3	0
66.4	0
66.5	0
66.6	0
66.7	0
66.8	0
66.9	0
67	0
67.1	0
67.2	0
67.3	0
67.4	0
67.5	0
67.6	0
67.7	0
67.8	0
67.9	0
68	0
68.1	0
68.2	0
68.3	0
68.4	0
68.5	0
68.6	0
68.7	0
68.8	0
68.9	0
69	0
69.1	0
69.2	0
69.3	0
69.4	0
69.5	0
69.6	0
69.7	0
69.8	0
69.9	0
70	0
70.1	0
70.2	0
70.3	0
70.4	0
70.5	0
70.6	0
70.7	0
70.8	0
70.9	0
71	0
71.1	0
71.2	0
71.3	0
71.4	0
71.5	0
71.6	0
71.7	0
71.8	0
71.9	0
72	0
72.1	0
72.2	0
72.3	0
72.4	0
72.5	0
72.6	0
72.7	0
72.8	0
72.9	0
73	0
73.1	0
73.2	0
73.3	0
73.4	0
73.5	0
73.6	0
73.7	0
73.8	0
73.9	0
74	0
74.1	0
74.2	0
74.3	0
74.4	0
74.5	0
74.6	0
74.7	0
74.8	0
74.9	0
75	0
75.1	0
75.2	0
75.3	0
75.4	0
75.5	0
75.6	0
75.7	0
75.8	0
75.9	0
76	0
76.1	0
76.2	0
76.3	0
76.4	0
76.5	0
76.6	0
76.7	0
76.8	0
76.9	0
77	0
77.1	0
77.2	0
77.3	0
77.4	0
77.5	0
77.6	0
77.7	0
77.8	0
77.9	0
78	0
78.1	0
78.2	0
78.3	0
78.4	0
78.5	0
78.6	0
78.7	0
78.8	0
78.9	0
79	0
79.1	0
79.2	0
79.3	0
79.4	0
79.5	0
79.6	0
79.7	0
79.8	0
79.9	0
80	0
80.1	0
80.2	0
80.3	0
80.4	0
80.5	0
80.6	0
80.7	0
80.8	0
80.9	0
81	0
81.1	0
81.2	0
81.3	0
81.4	0
81.5	0
81.6	0
81.7	0
81.8	0
81.9	0
82	0
82.1	0
82.2	0
82.3	0
82.4	0
82.5	0
82.6	0
82.7	0
82.8	0
82.9	0
83	0
83.1	0
83.2	0
83.3	0
83.4	0
83.5	0
83.6	0
83.7	0
83.8	0
83.9	0
84	0
84.1	0
84.2	0
84.3	0
84.4	0
84.5	0
84.6	0
84.7	0
84.8	0
84.9	0
85	0
85.1	0
85.2	0
85.3	0
85.4	0
85.5	0
85.6	0
85.7	0
85.8	0
85.9	0
86	0
86.1	0
86.2	0
86.3	0
86.4	0
86.5	0
86.6	0
86.7	0
86.8	0
86.9	0
87	0
87.1	0
87.2	0
87.3	0
87.4	0
87.5	0
87.6	0
87.7	0
87.8	0
87.9	0
88	0
88.1	0
88.2	0
88.3	0
88.4	0
88.5	0
88.6	0
88.7	0
88.8	0
88.9	0
89	0
89.1	0
89.2	0
89.3	0
89.4	0
89.5	0
89.6	0
89.7	0
89.8	0
89.9	0
90	0
90.1	0
90.2	0
90.3	0
90.4	0
90.5	0
90.6	0
90.7	0
90.8	0
90.9	0
91	0
91.1	0
91.2	0
91.3	0
91.4	0
91.5	0
91.6	0
91.7	0
91.8	0
91.9	0
92	0
92.1	0
92.2	0
92.3	0
92.4	0
92.5	0
92.6	0
92.7	0
92.8	0
92.9	0
93	0
93.1	0
93.2	0
93.3	0
93.4	0
93.5	0
93.6	0
93.7	0
93.8	0
93.9	0
94	0
94.1	0
94.2	0
94.3	0
94.4	0
94.5	0
94.6	0
94.7	0
94.8	0
94.9	0
95	0
95.1	0
95.2	0
95.3	0
95.4	0
95.5	0
95.6	0
95.7	0
95.8	0
95.9	0
96	0
96.1	0
96.2	0
96.3	0
96.4	0
96.5	0
96.6	0
96.7	0
96.8	0
96.9	0
97	0
97.1	0
97.2	0
97.3	0
97.4	0
97.5	0
97.6	0
97.7	0
97.8	0
97.9	0
98	0
98.1	0
98.2	0
98.3	0
98.4	0
98.5	0
98.6	0
98.7	0
98.8	0
98.9	0
99	0
99.1	0
99.2	0
99.3	0
99.4	0
99.5	0
99.6	0
99.7	0
99.8	0
99.9	0
100	0
100.1	0
100.2	0.000666667
100.3	0.00233333
100.4	0.00466667
100.5	0.00866667
100.6	0.011
100.7	0.0133333
100.8	0.0166667
100.9	0.0213333
101	0.025
101.1	0.0276667
101.2	0.0313333
101.3	0.0343333
101.4	0.038
101.5	0.042
101.6	0.0453333
101.7	0.0496667
101.8	0.0523333
101.9	0.055
102	0.0563333
102.1	0.061
102.2	0.0653333
102.3	0.0703333
102.4	0.0733333
102.5	0.0766667
102.6	0.0786667
102.7	0.0823333
102.8	0.087
102.9	0.0916667
103	0.0973333
103.1	0.1
103.2	0.102667
103.3	0.106333
103.4	0.11
103.5	0.112667
103.6	0.116667
103.7	0.119667
103.8	0.122333
103.9	0.126667
104	0.128667
104.1	0.134
104.2	0.136
104.3	0.141333
104.4	0.147
104.5	0.149667
104.6	0.152
104.7	0.155667
104.8	0.158333
104.9	0.162333
105	0.166
105.1	0.170667
105.2	0.172333
105.3	0.175667
105.4	0.179
105.5	0.183333
105.6	0.185667
105.7	0.189333
105.8	0.194667
105.9	0.198
106	0.201333
106.1	0.204333
106.2	0.208667
106.3	0.211333
106.4	0.215667
106.5	0.217333
106.6	0.222
106.7	0.225
106.8	0.229333
106.9	0.232
107	0.233333
107.1	0.238
107.2	0.239667
107.3	0.242
107.4	0.245
107.5	0.249333
107.6	0.252
107.7	0.253333
107.8	0.256333
107.9	0.257667
108	0.26
108.1	0.263333
108.2	0.265
108.3	0.268
108.4	0.271333
108.5	0.274
108.6	0.276667
108.7	0.279667
108.8	0.281333
108.9	0.284
109	0.286333
109.1	0.288667
109.2	0.292
109.3	0.294333
109.4	0.296333
109.5	0.298
109.6	0.3
109.7	0.301667
109.8	0.305
109.9	0.307667
110	0.308667
110.1	0.310667
110.2	0.313333
110.3	0.316
110.4	0.318333
110.5	0.320333
110.6	0.322667
110.7	0.324667
110.8	0.326
110.9	0.328667
111	0.331
111.1	0.333333
111.2	0.337
111.3	0.338
111.4	0.340333
111.5	0.342333
111.6	0.344667
111.7	0.348333
111.8	0.350333
111.9	0.352
112	0.354
112.1	0.355667
112.2	0.357333
112.3	0.361
112.4	0.361333
112.5	0.365667
112.6	0.368
112.7	0.368667
112.8	0.370667
112.9	0.373333
113	0.375667
113.1	0.376667
113.2	0.378333
113.3	0.380667
113.4	0.384667
113.5	0.386667
113.6	0.388333
113.7	0.390667
113.8	0.393667
113.9	0.397333
114	0.400667
114.1	0.403
114.2	0.404333
114.3	0.405667
114.4	0.408
114.5	0.410667
114.6	0.412667
114.7	0.415
114.8	0.415333
114.9	0.415667
115	0.417667
115.1	0.421
115.2	0.422667
115.3	0.425
115.4	0.427333
115.5	0.429
115.6	0.43
115.7	0.431
115.8	0.433667
115.9	0.435333
116	0.436667
116.1	0.438667
116.2	0.439667
116.3	0.440667
116.4	0.441667
116.5	0.443333
116.6	0.447333
116.7	0.449
116.8	0.450667
116.9	0.455667
117	0.457333
117.1	0.459667
117.2	0.461333
117.3	0.462333
117.4	0.463333
117.5	0.465333
117.6	0.467333
117.7	0.469333
117.8	0.470333
117.9	0.472
118	0.473667
118.1	0.474667
118.2	0.476333
118.3	0.479667
118.4	0.481
118.5	0.481333
118.6	0.482667
118.7	0.485333
118.8	0.486333
118.9	0.488333
119	0.489667
119.1	0.491333
119.2	0.493
119.3	0.494
119.4	0.495667
119.5	0.496
119.6	0.499333
119.7	0.500333
119.8	0.5
119.9	0.500333
120	0.501333
120.1	0.503667
120.2	0.507
120.3	0.509
120.4	0.511667
120.5	0.512667
120.6	0.514667
120.7	0.515333
120.8	0.517
120.9	0.519667
121	0.520667
121.1	0.521
121.2	0.522667
121.3	0.522333
121.4	0.524333
121.5	0.527
121.6	0.529333
121.7	0.531
121.8	0.531333
121.9	0.533
122	0.534667
122.1	0.535
122.2	0.536333
122.3	0.537333
122.4	0.537333
122.5	0.54
122.6	0.541333
122.7	0.544333
122.8	0.547333
122.9	0.549333
123	0.552
123.1	0.553333
123.2	0.556
123.3	0.556667
123.4	0.557333
123.5	0.558667
123.6	0.560333
123.7	0.561667
123.8	0.563333
123.9	0.564
124	0.565
124.1	0.566333
124.2	0.568
124.3	0.567333
124.4	0.569
124.5	0.569667
124.6	0.571667
124.7	0.572667
124.8	0.576
124.9	0.577333
125	0.579
125.1	0.581333
125.2	0.582333
125.3	0.582333
125.4	0.585667
125.5	0.586333
125.6	0.588
125.7	0.588667
125.8	0.589333
125.9	0.589333
126	0.590333
126.1	0.591333
126.2	0.590667
126.3	0.591667
126.4	0.593667
126.5	0.594
126.6	0.595667
126.7	0.596333
126.8	0.597
126.9	0.598667
127	0.600667
127.1	0.601667
127.2	0.601
127.3	0.601333
127.4	0.604333
127.5	0.604
127.6	0.604667
127.7	0.606
127.8	0.605667
127.9	0.607
128	0.607667
128.1	0.610333
128.2	0.611667
128.3	0.614
128.4	0.614
128.5	0.615
128.6	0.615667
128.7	0.618333
128.8	0.619667
128.9	0.622333
129	0.623667
129.1	0.625333
129.2	0.626333
129.3	0.627333
129.4	0.630333
129.5	0.631
129.6	0.631667
129.7	0.633667
129.8	0.634667
129.9	0.637
130	0.639333
130.1	0.641
130.2	0.641333
130.3	0.642
130.4	0.642333
130.5	0.641667
130.6	0.641
130.7	0.642
130.8	0.643667
130.9	0.645667
131	0.646
131.1	0.646333
131.2	0.649
131.3	0.650667
131.4	0.651333
131.5	0.652333
131.6	0.652333
131.7	0.654
131.8	0.654
131.9	0.655333
132	0.656333
132.1	0.657333
132.2	0.658333
132.3	0.659
132.4	0.66
132.5	0.660667
132.6	0.661667
132.7	0.662667
132.8	0.664333
132.9	0.665667
133	0.666333
133.1	0.667
133.2	0.668667
133.3	0.671
133.4	0.671333
133.5	0.674667
133.6	0.675
133.7	0.674333
133.8	0.675667
133.9	0.677
134	0.676667
134.1	0.677
134.2	0.677333
134.3	0.677333
134.4	0.677
134.5	0.678333
134.6	0.678
134.7	0.678333
134.8	0.679
134.9	0.680333
135	0.681333
135.1	0.681667
135.2	0.683
135.3	0.685333
135.4	0.685333
135.5	0.687333
135.6	0.687
135.7	0.688
135.8	0.690333
135.9	0.691
136	0.691333
136.1	0.690667
136.2	0.693333
136.3	0.693333
136.4	0.693333
136.5	0.693667
136.6	0.695667
136.7	0.696667
136.8	0.697667
136.9	0.697667
137	0.699
137.1	0.700333
137.2	0.701
137.3	0.701333
137.4	0.700667
137.5	0.703333
137.6	0.702667
137.7	0.702
137.8	0.701333
137.9	0.701333
138	0.702
138.1	0.701
138.2	0.702
138.3	0.702333
138.4	0.702667
138.5	0.701667
138.6	0.702333
138.7	0.703667
138.8	0.705667
138.9	0.706
139	0.707333
139.1	0.709
139.2	0.708667
139.3	0.707667
139.4	0.708
139.5	0.708
139.6	0.709
139.7	0.709667
139.8	0.709
139.9	0.710333
140	0.710333
140.1	0.710333
140.2	0.712
140.3	0.712333
140.4	0.712667
140.5	0.713667
140.6	0.713667
140.7	0.714333
140.8	0.715333
140.9	0.715
141	0.715333
141.1	0.715333
141.2	0.715333
141.3	0.716333
141.4	0.717333
141.5	0.717667
141.6	0.717333
141.7	0.717333
141.8	0.718
141.9	0.719
142	0.718667
142.1	0.719667
142.2	0.72
142.3	0.721
142.4	0.721333
142.5	0.722333
142.6	0.723333
142.7	0.725333
142.8	0.725667
142.9	0.727667
143	0.728333
143.1	0.728667
143.2	0.729667
143.3	0.730667
143.4	0.729667
143.5	0.729333
143.6	0.73
143.7	0.731333
143.8	0.731667
143.9	0.731667
144	0.731333
144.1	0.732333
144.2	0.731333
144.3	0.732333
144.4	0.733
144.5	0.733333
144.6	0.734667
144.7	0.734
144.8	0.732667
144.9	0.731667
145	0.732
145.1	0.731667
145.2	0.732333
145.3	0.732333
145.4	0.733
145.5	0.732667
145.6	0.732
145.7	0.732
145.8	0.733333
145.9	0.734
146	0.736
146.1	0.736
146.2	0.735667
146.3	0.736333
146.4	0.735667
146.5	0.737333
146.6	0.737333
146.7	0.738
146.8	0.738667
146.9	0.739667
147	0.739
147.1	0.739
147.2	0.738333
147.3	0.739
147.4	0.739667
147.5	0.739
147.6	0.739333
147.7	0.74
147.8	0.739667
147.9	0.74
148	0.738333
148.1	0.739333
148.2	0.740333
148.3	0.740667
148.4	0.740667
148.5	0.740333
148.6	0.740667
148.7	0.741
148.8	0.740333
148.9	0.741333
149	0.741
149.1	0.742
149.2	0.741667
149.3	0.741333
149.4	0.742333
149.5	0.743
149.6	0.745333
149.7	0.746
149.8	0.745667
149.9	0.746333
150	0.748
150.1	0.748
150.2	0.749
150.3	0.75
150.4	0.75
150.5	0.750333
150.6	0.750333
150.7	0.751333
150.8	0.752333
150.9	0.753
151	0.753333
151.1	0.752667
151.2	0.752667
151.3	0.754
151.4	0.753667
151.5	0.753667
151.6	0.754333
151.7	0.754667
151.8	0.755
151.9	0.755667
152	0.756333
152.1	0.757
152.2	0.757333
152.3	0.756667
152.4	0.756
152.5	0.757
152.6	0.755667
152.7	0.756667
152.8	0.757667
152.9	0.758333
153	0.759333
153.1	0.758333
153.2	0.758
153.3	0.759333
153.4	0.758667
153.5	0.757667
153.6	0.756667
153.7	0.756333
153.8	0.758333
153.9	0.757333
154	0.757
154.1	0.757
154.2	0.757
154.3	0.757
154.4	0.757667
154.5	0.756667
154.6	0.758
154.7	0.758667
154.8	0.76
154.9	0.759333
155	0.758667
155.1	0.759
155.2	0.760667
155.3	0.759333
155.4	0.757667
155.5	0.757333
155.6	0.757
155.7	0.756667
155.8	0.756333
155.9	0.757667
156	0.758
156.1	0.758333
156.2	0.758667
156.3	0.76
156.4	0.761
156.5	0.761333
156.6	0.762
156.7	0.762333
156.8	0.762667
156.9	0.764333
157	0.765
157.1	0.765
157.2	0.766
157.3	0.766333
157.4	0.766
157.5	0.768
157.6	0.768
157.7	0.767667
157.8	0.768333
157.9	0.768
158	0.768333
158.1	0.768333
158.2	0.768333
158.3	0.768
158.4	0.767333
158.5	0.766667
158.6	0.767
158.7	0.767
158.8	0.767
158.9	0.768
159	0.768
159.1	0.767
159.2	0.766
159.3	0.766667
159.4	0.767333
159.5	0.769333
159.6	0.769333
159.7	0.77
159.8	0.77
159.9	0.769333
160	0.770667
160.1	0.770333
160.2	0.77
160.3	0.769667
160.4	0.769
160.5	0.768667
160.6	0.768667
160.7	0.767333
160.8	0.767
160.9	0.767667
161	0.768333
161.1	0.767333
161.2	0.767667
161.3	0.768333
161.4	0.768
161.5	0.768333
161.6	0.767667
161.7	0.767667
161.8	0.768
161.9	0.768667
162	0.769
162.1	0.767333
162.2	0.767333
162.3	0.766667
162.4	0.766333
162.5	0.767333
162.6	0.767333
162.7	0.767667
162.8	0.768667
162.9	0.769667
163	0.769
163.1	0.767667
163.2	0.768
163.3	0.769333
163.4	0.769333
163.5	0.767
163.6	0.767667
163.7	0.769
163.8	0.769333
163.9	0.77
164	0.769667
164.1	0.768667
164.2	0.77
164.3	0.770667
164.4	0.770667
164.5	0.770667
164.6	0.771
164.7	0.77
164.8	0.77
164.9	0.770333
165	0.77
165.1	0.769
165.2	0.767667
165.3	0.768
165.4	0.767667
165.5	0.768
165.6	0.767
165.7	0.769
165.8	0.769
165.9	0.768667
166	0.769
166.1	0.77
166.2	0.77
166.3	0.771
166.4	0.772333
166.5	0.772333
166.6	0.770333
166.7	0.771
166.8	0.770667
166.9	0.771
167	0.770667
167.1	0.771667
167.2	0.771
167.3	0.771667
167.4	0.770333
167.5	0.770333
167.6	0.771333
167.7	0.770333
167.8	0.77
167.9	0.77
168	0.769333
168.1	0.771333
168.2	0.772667
168.3	0.773333
168.4	0.772667
168.5	0.773333
168.6	0.772667
168.7	0.773333
168.8	0.773
168.9	0.773667
169	0.774667
169.1	0.775
169.2	0.774
169.3	0.775667
169.4	0.775667
169.5	0.776333
169.6	0.776667
169.7	0.776667
169.8	0.777333
169.9	0.775333
170	0.775333
170.1	0.775333
170.2	0.775667
170.3	0.775333
170.4	0.775
170.5	0.776
170.6	0.776333
170.7	0.777333
170.8	0.777667
170.9	0.779
171	0.780667
171.1	0.780333
171.2	0.780333
171.3	0.78
171.4	0.779
171.5	0.778667
171.6	0.779667
171.7	0.779667
171.8	0.779333
171.9	0.78
172	0.779333
172.1	0.779333
172.2	0.779667
172.3	0.780667
172.4	0.781667
172.5	0.781333
172.6	0.783667
172.7	0.784667
172.8	0.785
172.9	0.783667
173	0.782
173.1	0.781333
173.2	0.782
173.3	0.782333
173.4	0.783333
173.5	0.783
173.6	0.784667
173.7	0.783333
173.8	0.783667
173.9	0.784
174	0.783333
174.1	0.783333
174.2	0.782667
174.3	0.783
174.4	0.782333
174.5	0.782333
174.6	0.781333
174.7	0.780667
174.8	0.781333
174.9	0.782333
175	0.783333
175.1	0.783333
175.2	0.784333
175.3	0.784333
175.4	0.785
175.5	0.783667
175.6	0.784
175.7	0.784667
175.8	0.783667
175.9	0.782667
176	0.782333
176.1	0.782667
176.2	0.782667
176.3	0.783667
176.4	0.784333
176.5	0.785667
176.6	0.786333
176.7	0.786333
176.8	0.787333
176.9	0.787667
177	0.787667
177.1	0.787333
177.2	0.787333
177.3	0.787333
177.4	0.787333
177.5	0.786667
177.6	0.787
177.7	0.787
177.8	0.787667
177.9	0.788667
178	0.789333
178.1	0.788333
178.2	0.788333
178.3	0.787
178.4	0.787667
178.5	0.787667
178.6	0.786667
178.7	0.787667
178.8	0.787
178.9	0.788667
179	0.789667
179.1	0.790333
179.2	0.790667
179.3	0.791
179.4	0.790333
179.5	0.791
179.6	0.789333
179.7	0.790667
179.8	0.791667
179.9	0.790667
180	0.791
180.1	0.791
180.2	0.791667
180.3	0.791333
180.4	0.791333
180.5	0.790667
180.6	0.789333
180.7	0.788667
180.8	0.787333
180.9	0.788
181	0.788
181.1	0.788333
181.2	0.787333
181.3	0.787667
181.4	0.785667
181.5	0.784
181.6	0.784333
181.7	0.783667
181.8	0.785
181.9	0.786
182	0.785
182.1	0.785333
182.2	0.786
182.3	0.785333
182.4	0.787
182.5	0.786
182.6	0.786333
182.7	0.785
182.8	0.785333
182.9	0.786667
183	0.785667
183.1	0.786333
183.2	0.787667
183.3	0.788667
183.4	0.788
183.5	0.788333
183.6	0.787333
183.7	0.787333
183.8	0.786667
183.9	0.785333
184	0.786
184.1	0.785667
184.2	0.786
184.3	0.785333
184.4	0.786
184.5	0.786333
184.6	0.786667
184.7	0.787
184.8	0.788667
184.9	0.788667
185	0.788333
185.1	0.786333
185.2	0.786667
185.3	0.786
185.4	0.786333
185.5	0.787
185.6	0.786667
185.7	0.787333
185.8	0.787667
185.9	0.787333
186	0.787
186.1	0.786333
186.2	0.786667
186.3	0.787
186.4	0.788
186.5	0.788333
186.6	0.789
186.7	0.788667
186.8	0.789
186.9	0.789333
187	0.789667
187.1	0.79
187.2	0.790667
187.3	0.789667
187.4	0.789667
187.5	0.79
187.6	0.791
187.7	0.790667
187.8	0.791333
187.9	0.792333
188	0.791333
188.1	0.792
188.2	0.792667
188.3	0.792333
188.4	0.793
188.5	0.793667
188.6	0.793667
188.7	0.794333
188.8	0.795667
188.9	0.796
189	0.797333
189.1	0.796333
189.2	0.796333
189.3	0.798333
189.4	0.798667
189.5	0.798667
189.6	0.798667
189.7	0.799667
189.8	0.799
189.9	0.799333
190	0.800667
190.1	0.801333
190.2	0.801333
190.3	0.801333
190.4	0.801333
190.5	0.802
190.6	0.801667
190.7	0.802
190.8	0.801333
190.9	0.802
191	0.802
191.1	0.802667
191.2	0.802667
191.3	0.803667
191.4	0.804333
191.5	0.805667
191.6	0.806667
191.7	0.806
191.8	0.805667
191.9	0.805
192	0.804333
192.1	0.803667
192.2	0.802333
192.3	0.802667
192.4	0.803333
192.5	0.802667
192.6	0.803
192.7	0.803333
192.8	0.803667
192.9	0.804
193	0.804333
193.1	0.803333
193.2	0.802667
193.3	0.802
193.4	0.802333
193.5	0.802
193.6	0.802
193.7	0.801667
193.8	0.803
193.9	0.802
194	0.802667
194.1	0.803333
194.2	0.804
194.3	0.804333
194.4	0.802667
194.5	0.802667
194.6	0.801333
194.7	0.801667
194.8	0.801333
194.9	0.802
195	0.802333
195.1	0.802333
195.2	0.802
195.3	0.804
195.4	0.803667
195.5	0.803667
195.6	0.803667
195.7	0.803333
195.8	0.802667
195.9	0.802667
196	0.802667
196.1	0.801667
196.2	0.801667
196.3	0.802
196.4	0.802333
196.5	0.802
196.6	0.802
196.7	0.801667
196.8	0.801667
196.9	0.802
197	0.801333
197.1	0.801
197.2	0.800333
197.3	0.801333
197.4	0.801333
197.5	0.801333
197.6	0.801
197.7	0.800333
197.8	0.801
197.9	0.802
198	0.802
198.1	0.802333
198.2	0.800333
198.3	0.800333
198.4	0.800667
198.5	0.801667
198.6	0.800333
198.7	0.800667
198.8	0.800667
198.9	0.800333
199	0.8
199.1	0.799
199.2	0.799667
199.3	0.800667
199.4	0.801
199.5	0.8
199.6	0.800333
199.7	0.801333
199.8	0.801333
199.9	0.801333
200	0.8
[truncated: 14,000 more rows]
