# Supplementary material for: Bayesian inference of kinetic schemes for ion channels by Kalman filtering
Source: eLife journal article supplement (doi:10.7554/elife.62714), 2022-05-04
Supplement: fig4-data4 [file 1_Sim_N_4000_Fluor_MW_8M.xlsx]

## Sheet: Tabelle1
0.1	0
0.2	0
0.3	0
0.4	0
0.5	0
0.6	0
0.7	0
0.8	0
0.9	0
1	0
1.1	0
1.2	0
1.3	0
1.4	0
1.5	0
1.6	0
1.7	0
1.8	0
1.9	0
2	0
2.1	0
2.2	0
2.3	0
2.4	0
2.5	0
2.6	0
2.7	0
2.8	0
2.9	0
3	0
3.1	0
3.2	0
3.3	0
3.4	0
3.5	0
3.6	0
3.7	0
3.8	0
3.9	0
4	0
4.1	0
4.2	0
4.3	0
4.4	0
4.5	0
4.6	0
4.7	0
4.8	0
4.9	0
5	0
5.1	0
5.2	0
5.3	0
5.4	0
5.5	0
5.6	0
5.7	0
5.8	0
5.9	0
6	0
6.1	0
6.2	0
6.3	0
6.4	0
6.5	0
6.6	0
6.7	0
6.8	0
6.9	0
7	0
7.1	0
7.2	0
7.3	0
7.4	0
7.5	0
7.6	0
7.7	0
7.8	0
7.9	0
8	0
8.1	0
8.2	0
8.3	0
8.4	0
8.5	0
8.6	0
8.7	0
8.8	0
8.9	0
9	0
9.1	0
9.2	0
9.3	0
9.4	0
9.5	0
9.6	0
9.7	0
9.8	0
9.9	0
10	0
10.1	0
10.2	0
10.3	0
10.4	0
10.5	0
10.6	0
10.7	0
10.8	0
10.9	0
11	0
11.1	0
11.2	0
11.3	0
11.4	0
11.5	0
11.6	0
11.7	0
11.8	0
11.9	0
12	0
12.1	0
12.2	0
12.3	0
12.4	0
12.5	0
12.6	0
12.7	0
12.8	0
12.9	0
13	0
13.1	0
13.2	0
13.3	0
13.4	0
13.5	0
13.6	0
13.7	0
13.8	0
13.9	0
14	0
14.1	0
14.2	0
14.3	0
14.4	0
14.5	0
14.6	0
14.7	0
14.8	0
14.9	0
15	0
15.1	0
15.2	0
15.3	0
15.4	0
15.5	0
15.6	0
15.7	0
15.8	0
15.9	0
16	0
16.1	0
16.2	0
16.3	0
16.4	0
16.5	0
16.6	0
16.7	0
16.8	0
16.9	0
17	0
17.1	0
17.2	0
17.3	0
17.4	0
17.5	0
17.6	0
17.7	0
17.8	0
17.9	0
18	0
18.1	0
18.2	0
18.3	0
18.4	0
18.5	0
18.6	0
18.7	0
18.8	0
18.9	0
19	0
19.1	0
19.2	0
19.3	0
19.4	0
19.5	0
19.6	0
19.7	0
19.8	0
19.9	0
20	0
20.1	0
20.2	0
20.3	0
20.4	0
20.5	0
20.6	0
20.7	0
20.8	0
20.9	0
21	0
21.1	0
21.2	0
21.3	0
21.4	0
21.5	0
21.6	0
21.7	0
21.8	0
21.9	0
22	0
22.1	0
22.2	0
22.3	0
22.4	0
22.5	0
22.6	0
22.7	0
22.8	0
22.9	0
23	0
23.1	0
23.2	0
23.3	0
23.4	0
23.5	0
23.6	0
23.7	0
23.8	0
23.9	0
24	0
24.1	0
24.2	0
24.3	0
24.4	0
24.5	0
24.6	0
24.7	0
24.8	0
24.9	0
25	0
25.1	0
25.2	0
25.3	0
25.4	0
25.5	0
25.6	0
25.7	0
25.8	0
25.9	0
26	0
26.1	0
26.2	0
26.3	0
26.4	0
26.5	0
26.6	0
26.7	0
26.8	0
26.9	0
27	0
27.1	0
27.2	0
27.3	0
27.4	0
27.5	0
27.6	0
27.7	0
27.8	0
27.9	0
28	0
28.1	0
28.2	0
28.3	0
28.4	0
28.5	0
28.6	0
28.7	0
28.8	0
28.9	0
29	0
29.1	0
29.2	0
29.3	0
29.4	0
29.5	0
29.6	0
29.7	0
29.8	0
29.9	0
30	0
30.1	0
30.2	0
30.3	0
30.4	0
30.5	0
30.6	0
30.7	0
30.8	0
30.9	0
31	0
31.1	0
31.2	0
31.3	0
31.4	0
31.5	0
31.6	0
31.7	0
31.8	0
31.9	0
32	0
32.1	0
32.2	0
32.3	0
32.4	0
32.5	0
32.6	0
32.7	0
32.8	0
32.9	0
33	0
33.1	0
33.2	0
33.3	0
33.4	0
33.5	0
33.6	0
33.7	0
33.8	0
33.9	0
34	0
34.1	0
34.2	0
34.3	0
34.4	0
34.5	0
34.6	0
34.7	0
34.8	0
34.9	0
35	0
35.1	0
35.2	0
35.3	0
35.4	0
35.5	0
35.6	0
35.7	0
35.8	0
35.9	0
36	0
36.1	0
36.2	0
36.3	0
36.4	0
36.5	0
36.6	0
36.7	0
36.8	0
36.9	0
37	0
37.1	0
37.2	0
37.3	0
37.4	0
37.5	0
37.6	0
37.7	0
37.8	0
37.9	0
38	0
38.1	0
38.2	0
38.3	0
38.4	0
38.5	0
38.6	0
38.7	0
38.8	0
38.9	0
39	0
39.1	0
39.2	0
39.3	0
39.4	0
39.5	0
39.6	0
39.7	0
39.8	0
39.9	0
40	0
40.1	0
40.2	0
40.3	0
40.4	0
40.5	0
40.6	0
40.7	0
40.8	0
40.9	0
41	0
41.1	0
41.2	0
41.3	0
41.4	0
41.5	0
41.6	0
41.7	0
41.8	0
41.9	0
42	0
42.1	0
42.2	0
42.3	0
42.4	0
42.5	0
42.6	0
42.7	0
42.8	0
42.9	0
43	0
43.1	0
43.2	0
43.3	0
43.4	0
43.5	0
43.6	0
43.7	0
43.8	0
43.9	0
44	0
44.1	0
44.2	0
44.3	0
44.4	0
44.5	0
44.6	0
44.7	0
44.8	0
44.9	0
45	0
45.1	0
45.2	0
45.3	0
45.4	0
45.5	0
45.6	0
45.7	0
45.8	0
45.9	0
46	0
46.1	0
46.2	0
46.3	0
46.4	0
46.5	0
46.6	0
46.7	0
46.8	0
46.9	0
47	0
47.1	0
47.2	0
47.3	0
47.4	0
47.5	0
47.6	0
47.7	0
47.8	0
47.9	0
48	0
48.1	0
48.2	0
48.3	0
48.4	0
48.5	0
48.6	0
48.7	0
48.8	0
48.9	0
49	0
49.1	0
49.2	0
49.3	0
49.4	0
49.5	0
49.6	0
49.7	0
49.8	0
49.9	0
50	0
50.1	0
50.2	0
50.3	0
50.4	0
50.5	0
50.6	0
50.7	0
50.8	0
50.9	0
51	0
51.1	0
51.2	0
51.3	0
51.4	0
51.5	0
51.6	0
51.7	0
51.8	0
51.9	0
52	0
52.1	0
52.2	0
52.3	0
52.4	0
52.5	0
52.6	0
52.7	0
52.8	0
52.9	0
53	0
53.1	0
53.2	0
53.3	0
53.4	0
53.5	0
53.6	0
53.7	0
53.8	0
53.9	0
54	0
54.1	0
54.2	0
54.3	0
54.4	0
54.5	0
54.6	0
54.7	0
54.8	0
54.9	0
55	0
55.1	0
55.2	0
55.3	0
55.4	0
55.5	0
55.6	0
55.7	0
55.8	0
55.9	0
56	0
56.1	0
56.2	0
56.3	0
56.4	0
56.5	0
56.6	0
56.7	0
56.8	0
56.9	0
57	0
57.1	0
57.2	0
57.3	0
57.4	0
57.5	0
57.6	0
57.7	0
57.8	0
57.9	0
58	0
58.1	0
58.2	0
58.3	0
58.4	0
58.5	0
58.6	0
58.7	0
58.8	0
58.9	0
59	0
59.1	0
59.2	0
59.3	0
59.4	0
59.5	0
59.6	0
59.7	0
59.8	0
59.9	0
60	0
60.1	0
60.2	0
60.3	0
60.4	0
60.5	0
60.6	0
60.7	0
60.8	0
60.9	0
61	0
61.1	0
61.2	0
61.3	0
61.4	0
61.5	0
61.6	0
61.7	0
61.8	0
61.9	0
62	0
62.1	0
62.2	0
62.3	0
62.4	0
62.5	0
62.6	0
62.7	0
62.8	0
62.9	0
63	0
63.1	0
63.2	0
63.3	0
63.4	0
63.5	0
63.6	0
63.7	0
63.8	0
63.9	0
64	0
64.1	0
64.2	0
64.3	0
64.4	0
64.5	0
64.6	0
64.7	0
64.8	0
64.9	0
65	0
65.1	0
65.2	0
65.3	0
65.4	0
65.5	0
65.6	0
65.7	0
65.8	0
65.9	0
66	0
66.1	0
66.2	0
66.3	0
66.4	0
66.5	0
66.6	0
66.7	0
66.8	0
66.9	0
67	0
67.1	0
67.2	0
67.3	0
67.4	0
67.5	0
67.6	0
67.7	0
67.8	0
67.9	0
68	0
68.1	0
68.2	0
68.3	0
68.4	0
68.5	0
68.6	0
68.7	0
68.8	0
68.9	0
69	0
69.1	0
69.2	0
69.3	0
69.4	0
69.5	0
69.6	0
69.7	0
69.8	0
69.9	0
70	0
70.1	0
70.2	0
70.3	0
70.4	0
70.5	0
70.6	0
70.7	0
70.8	0
70.9	0
71	0
71.1	0
71.2	0
71.3	0
71.4	0
71.5	0
71.6	0
71.7	0
71.8	0
71.9	0
72	0
72.1	0
72.2	0
72.3	0
72.4	0
72.5	0
72.6	0
72.7	0
72.8	0
72.9	0
73	0
73.1	0
73.2	0
73.3	0
73.4	0
73.5	0
73.6	0
73.7	0
73.8	0
73.9	0
74	0
74.1	0
74.2	0
74.3	0
74.4	0
74.5	0
74.6	0
74.7	0
74.8	0
74.9	0
75	0
75.1	0
75.2	0
75.3	0
75.4	0
75.5	0
75.6	0
75.7	0
75.8	0
75.9	0
76	0
76.1	0
76.2	0
76.3	0
76.4	0
76.5	0
76.6	0
76.7	0
76.8	0
76.9	0
77	0
77.1	0
77.2	0
77.3	0
77.4	0
77.5	0
77.6	0
77.7	0
77.8	0
77.9	0
78	0
78.1	0
78.2	0
78.3	0
78.4	0
78.5	0
78.6	0
78.7	0
78.8	0
78.9	0
79	0
79.1	0
79.2	0
79.3	0
79.4	0
79.5	0
79.6	0
79.7	0
79.8	0
79.9	0
80	0
80.1	0
80.2	0
80.3	0
80.4	0
80.5	0
80.6	0
80.7	0
80.8	0
80.9	0
81	0
81.1	0
81.2	0
81.3	0
81.4	0
81.5	0
81.6	0
81.7	0
81.8	0
81.9	0
82	0
82.1	0
82.2	0
82.3	0
82.4	0
82.5	0
82.6	0
82.7	0
82.8	0
82.9	0
83	0
83.1	0
83.2	0
83.3	0
83.4	0
83.5	0
83.6	0
83.7	0
83.8	0
83.9	0
84	0
84.1	0
84.2	0
84.3	0
84.4	0
84.5	0
84.6	0
84.7	0
84.8	0
84.9	0
85	0
85.1	0
85.2	0
85.3	0
85.4	0
85.5	0
85.6	0
85.7	0
85.8	0
85.9	0
86	0
86.1	0
86.2	0
86.3	0
86.4	0
86.5	0
86.6	0
86.7	0
86.8	0
86.9	0
87	0
87.1	0
87.2	0
87.3	0
87.4	0
87.5	0
87.6	0
87.7	0
87.8	0
87.9	0
88	0
88.1	0
88.2	0
88.3	0
88.4	0
88.5	0
88.6	0
88.7	0
88.8	0
88.9	0
89	0
89.1	0
89.2	0
89.3	0
89.4	0
89.5	0
89.6	0
89.7	0
89.8	0
89.9	0
90	0
90.1	0
90.2	0
90.3	0
90.4	0
90.5	0
90.6	0
90.7	0
90.8	0
90.9	0
91	0
91.1	0
91.2	0
91.3	0
91.4	0
91.5	0
91.6	0
91.7	0
91.8	0
91.9	0
92	0
92.1	0
92.2	0
92.3	0
92.4	0
92.5	0
92.6	0
92.7	0
92.8	0
92.9	0
93	0
93.1	0
93.2	0
93.3	0
93.4	0
93.5	0
93.6	0
93.7	0
93.8	0
93.9	0
94	0
94.1	0
94.2	0
94.3	0
94.4	0
94.5	0
94.6	0
94.7	0
94.8	0
94.9	0
95	0
95.1	0
95.2	0
95.3	0
95.4	0
95.5	0
95.6	0
95.7	0
95.8	0
95.9	0
96	0
96.1	0
96.2	0
96.3	0
96.4	0
96.5	0
96.6	0
96.7	0
96.8	0
96.9	0
97	0
97.1	0
97.2	0
97.3	0
97.4	0
97.5	0
97.6	0
97.7	0
97.8	0
97.9	0
98	0
98.1	0
98.2	0
98.3	0
98.4	0
98.5	0
98.6	0
98.7	0
98.8	0
98.9	0
99	0
99.1	0
99.2	0
99.3	0
99.4	0
99.5	0
99.6	0
99.7	0
99.8	0
99.9	0
100	0
100.1	0.3455
100.2	0.530625
100.3	0.649
100.4	0.720375
100.5	0.77525
100.6	0.807625
100.7	0.833
100.8	0.850625
100.9	0.866875
101	0.88125
101.1	0.892
101.2	0.89725
101.3	0.899
101.4	0.904125
101.5	0.9085
101.6	0.9105
101.7	0.91175
101.8	0.915
101.9	0.91275
102	0.91575
102.1	0.914875
102.2	0.917125
102.3	0.918
102.4	0.92025
102.5	0.918375
102.6	0.922
102.7	0.92225
102.8	0.922
102.9	0.921125
103	0.919375
103.1	0.915375
103.2	0.91525
103.3	0.91925
103.4	0.922875
103.5	0.92225
103.6	0.920375
103.7	0.919125
103.8	0.922625
103.9	0.922125
104	0.921625
104.1	0.919625
104.2	0.917125
104.3	0.917
104.4	0.9175
104.5	0.921625
104.6	0.922375
104.7	0.923375
104.8	0.923625
104.9	0.924375
105	0.926875
105.1	0.923625
105.2	0.925875
105.3	0.9265
105.4	0.9295
105.5	0.92975
105.6	0.92925
105.7	0.93125
105.8	0.92925
105.9	0.927625
106	0.9275
106.1	0.928125
106.2	0.93225
106.3	0.92925
106.4	0.929
106.5	0.929625
106.6	0.933
106.7	0.932875
106.8	0.93325
106.9	0.93325
107	0.93575
107.1	0.937625
107.2	0.9355
107.3	0.936375
107.4	0.935375
107.5	0.934375
107.6	0.933125
107.7	0.933875
107.8	0.93325
107.9	0.933125
108	0.935375
108.1	0.935125
108.2	0.936625
108.3	0.936875
108.4	0.9345
108.5	0.93475
108.6	0.934
108.7	0.932625
108.8	0.934875
108.9	0.934625
109	0.936375
109.1	0.937125
109.2	0.93525
109.3	0.938625
109.4	0.9365
109.5	0.936875
109.6	0.935375
109.7	0.93825
109.8	0.93875
109.9	0.939
110	0.93825
110.1	0.94
110.2	0.938875
110.3	0.939375
110.4	0.937
110.5	0.940625
110.6	0.93975
110.7	0.939375
110.8	0.93975
110.9	0.940375
111	0.9405
111.1	0.943625
111.2	0.942125
111.3	0.939875
111.4	0.943875
111.5	0.9415
111.6	0.943875
111.7	0.943125
111.8	0.944875
111.9	0.943625
112	0.942375
112.1	0.945375
112.2	0.944375
112.3	0.942875
112.4	0.94275
112.5	0.9395
112.6	0.938
112.7	0.94025
112.8	0.94225
112.9	0.942875
113	0.9435
113.1	0.941125
113.2	0.941625
113.3	0.945
113.4	0.9455
113.5	0.945875
113.6	0.94675
113.7	0.947125
113.8	0.94625
113.9	0.94775
114	0.949
114.1	0.948625
114.2	0.947
114.3	0.94875
114.4	0.948
114.5	0.950875
114.6	0.951
114.7	0.95025
114.8	0.9505
114.9	0.949375
115	0.947875
115.1	0.946125
115.2	0.946
115.3	0.945
115.4	0.94525
115.5	0.947375
115.6	0.948625
115.7	0.95125
115.8	0.947875
115.9	0.95025
116	0.949625
116.1	0.948625
116.2	0.94875
116.3	0.94625
116.4	0.94825
116.5	0.94675
116.6	0.944875
116.7	0.9465
116.8	0.946625
116.9	0.946375
117	0.948125
117.1	0.949125
117.2	0.951875
117.3	0.950875
117.4	0.950625
117.5	0.94825
117.6	0.9495
117.7	0.95075
117.8	0.951625
117.9	0.95675
118	0.957
118.1	0.956
118.2	0.957875
118.3	0.95425
118.4	0.954875
118.5	0.95325
118.6	0.951625
118.7	0.953125
118.8	0.9565
118.9	0.9575
119	0.95625
119.1	0.956375
119.2	0.957
119.3	0.954625
119.4	0.954625
119.5	0.95575
119.6	0.953
119.7	0.9545
119.8	0.9515
119.9	0.951875
120	0.951375
120.1	0.95325
120.2	0.95375
120.3	0.954125
120.4	0.956125
120.5	0.9565
120.6	0.957875
120.7	0.958
120.8	0.958
120.9	0.95825
121	0.9555
121.1	0.9555
121.2	0.95575
121.3	0.956375
121.4	0.9575
121.5	0.9575
121.6	0.9555
121.7	0.956375
121.8	0.957375
121.9	0.958
122	0.958125
122.1	0.959
122.2	0.9585
122.3	0.959625
122.4	0.95875
122.5	0.9595
122.6	0.96225
122.7	0.962125
122.8	0.960125
122.9	0.95975
123	0.959375
123.1	0.95775
123.2	0.9605
123.3	0.958625
123.4	0.95725
123.5	0.957
123.6	0.957625
123.7	0.959875
123.8	0.963375
123.9	0.962875
124	0.96475
124.1	0.962875
124.2	0.96225
124.3	0.9615
124.4	0.96175
124.5	0.962
124.6	0.9615
124.7	0.964125
124.8	0.962
124.9	0.96225
125	0.961375
125.1	0.961
125.2	0.961625
125.3	0.961625
125.4	0.959875
125.5	0.960625
125.6	0.96175
125.7	0.960375
125.8	0.957625
125.9	0.959625
126	0.959625
126.1	0.96075
126.2	0.96025
126.3	0.96175
126.4	0.96225
126.5	0.962875
126.6	0.9625
126.7	0.96325
126.8	0.962
126.9	0.963625
127	0.96425
127.1	0.966375
127.2	0.966625
127.3	0.965
127.4	0.96525
127.5	0.964625
127.6	0.96425
127.7	0.96625
127.8	0.968
127.9	0.96875
128	0.967875
128.1	0.967875
128.2	0.965125
128.3	0.964875
128.4	0.963625
128.5	0.9635
128.6	0.962375
128.7	0.96325
128.8	0.9615
128.9	0.964875
129	0.966625
129.1	0.96625
129.2	0.96675
129.3	0.968375
129.4	0.968125
129.5	0.966625
129.6	0.96725
129.7	0.968625
129.8	0.96825
129.9	0.9665
130	0.96775
130.1	0.967625
130.2	0.968375
130.3	0.96825
130.4	0.968
130.5	0.968
130.6	0.96775
130.7	0.967125
130.8	0.966625
130.9	0.968375
131	0.970125
131.1	0.97
131.2	0.970875
131.3	0.970375
131.4	0.969375
131.5	0.969375
131.6	0.968875
131.7	0.966875
131.8	0.968125
131.9	0.96875
132	0.9685
132.1	0.96925
132.2	0.969
132.3	0.970875
132.4	0.969625
132.5	0.96825
132.6	0.97
132.7	0.970625
132.8	0.970625
132.9	0.968625
133	0.968625
133.1	0.969125
133.2	0.97175
133.3	0.970875
133.4	0.9725
133.5	0.973875
133.6	0.974
133.7	0.97375
133.8	0.974625
133.9	0.973
134	0.9745
134.1	0.9715
134.2	0.971125
134.3	0.970375
134.4	0.969375
134.5	0.9695
134.6	0.969125
134.7	0.9695
134.8	0.969
134.9	0.9705
135	0.970125
135.1	0.969875
135.2	0.969375
135.3	0.97
135.4	0.9715
135.5	0.972
135.6	0.97225
135.7	0.97425
135.8	0.97275
135.9	0.97175
136	0.97025
136.1	0.9715
136.2	0.972
136.3	0.97075
136.4	0.970625
136.5	0.972625
136.6	0.9735
136.7	0.972375
136.8	0.97125
136.9	0.97225
137	0.970375
137.1	0.972125
137.2	0.970625
137.3	0.970875
137.4	0.971
137.5	0.971875
137.6	0.971125
137.7	0.971125
137.8	0.970125
137.9	0.97025
138	0.970875
138.1	0.97225
138.2	0.972875
138.3	0.972875
138.4	0.974375
138.5	0.97575
138.6	0.97625
138.7	0.97525
138.8	0.974375
138.9	0.972625
139	0.972625
139.1	0.971625
139.2	0.97225
139.3	0.9735
139.4	0.97275
139.5	0.973
139.6	0.9735
139.7	0.973125
139.8	0.9735
139.9	0.97375
140	0.972
140.1	0.973125
140.2	0.974125
140.3	0.973
140.4	0.972625
140.5	0.974375
140.6	0.97475
140.7	0.9755
140.8	0.974625
140.9	0.9735
141	0.97225
141.1	0.9735
141.2	0.972875
141.3	0.97225
141.4	0.9725
141.5	0.97425
141.6	0.9765
141.7	0.978
141.8	0.978375
141.9	0.979625
142	0.97825
142.1	0.976
142.2	0.975
142.3	0.977875
142.4	0.976625
142.5	0.975625
142.6	0.974625
142.7	0.97525
142.8	0.974625
142.9	0.974
143	0.976
143.1	0.9745
143.2	0.974875
143.3	0.976
143.4	0.9775
143.5	0.97775
143.6	0.976625
143.7	0.97525
143.8	0.974875
143.9	0.9755
144	0.975375
144.1	0.97575
144.2	0.9745
144.3	0.97475
144.4	0.976625
144.5	0.9755
144.6	0.975
144.7	0.97575
144.8	0.97525
144.9	0.974625
145	0.975625
145.1	0.9755
145.2	0.975125
145.3	0.975375
145.4	0.976625
145.5	0.977375
145.6	0.97775
145.7	0.978625
145.8	0.979625
145.9	0.979
146	0.978125
146.1	0.978125
146.2	0.977
146.3	0.978
146.4	0.977625
146.5	0.978
146.6	0.975625
146.7	0.97575
146.8	0.9755
146.9	0.976375
147	0.9765
147.1	0.975
147.2	0.975375
147.3	0.9755
147.4	0.976
147.5	0.9765
147.6	0.98025
147.7	0.980625
147.8	0.97825
147.9	0.977375
148	0.978125
148.1	0.975625
148.2	0.97475
148.3	0.97425
148.4	0.97325
148.5	0.973625
148.6	0.974875
148.7	0.977
148.8	0.97825
148.9	0.977625
149	0.9775
149.1	0.979125
149.2	0.97775
149.3	0.978875
149.4	0.978875
149.5	0.979
149.6	0.97925
149.7	0.97725
149.8	0.978625
149.9	0.977375
150	0.976125
150.1	0.977
150.2	0.978125
150.3	0.97775
150.4	0.977
150.5	0.977625
150.6	0.978125
150.7	0.976375
150.8	0.97725
150.9	0.978
151	0.979375
151.1	0.979875
151.2	0.97975
151.3	0.97925
151.4	0.98
151.5	0.979375
151.6	0.9795
151.7	0.979125
151.8	0.978125
151.9	0.97975
152	0.977
152.1	0.978125
152.2	0.978
152.3	0.979875
152.4	0.979625
152.5	0.97975
152.6	0.97975
152.7	0.978
152.8	0.9775
152.9	0.9765
153	0.976375
153.1	0.977
153.2	0.97775
153.3	0.978375
153.4	0.979375
153.5	0.979875
153.6	0.9785
153.7	0.9795
153.8	0.978
153.9	0.97675
154	0.9775
154.1	0.978375
154.2	0.979
154.3	0.9805
154.4	0.979125
154.5	0.978125
154.6	0.9785
154.7	0.97725
154.8	0.97875
154.9	0.979125
155	0.979125
155.1	0.979375
155.2	0.979875
155.3	0.98075
155.4	0.981
155.5	0.9795
155.6	0.980625
155.7	0.981375
155.8	0.98175
155.9	0.98025
156	0.979125
156.1	0.97975
156.2	0.97925
156.3	0.981125
156.4	0.979125
156.5	0.97725
156.6	0.977
156.7	0.977625
156.8	0.9765
156.9	0.97775
157	0.979625
157.1	0.97925
157.2	0.9785
157.3	0.97775
157.4	0.978
157.5	0.979875
157.6	0.981375
157.7	0.981875
157.8	0.982
157.9	0.982125
158	0.98125
158.1	0.98175
158.2	0.980875
158.3	0.978375
158.4	0.97975
158.5	0.980375
158.6	0.979
158.7	0.98025
158.8	0.97875
158.9	0.9795
159	0.980375
159.1	0.980375
159.2	0.980625
159.3	0.979625
159.4	0.97975
159.5	0.979375
159.6	0.979875
159.7	0.980875
159.8	0.979875
159.9	0.9805
160	0.980375
160.1	0.98075
160.2	0.97975
160.3	0.980625
160.4	0.980125
160.5	0.981
160.6	0.982
160.7	0.9805
160.8	0.97925
160.9	0.98075
161	0.980125
161.1	0.979875
161.2	0.979
161.3	0.97875
161.4	0.97925
161.5	0.98075
161.6	0.979375
161.7	0.9785
161.8	0.979125
161.9	0.980375
162	0.98275
162.1	0.982375
162.2	0.98225
162.3	0.9825
162.4	0.982875
162.5	0.98175
162.6	0.980875
162.7	0.98075
162.8	0.980625
162.9	0.980625
163	0.98075
163.1	0.982125
163.2	0.981375
163.3	0.98225
163.4	0.9815
163.5	0.980625
163.6	0.98075
163.7	0.980625
163.8	0.980125
163.9	0.97975
164	0.978625
164.1	0.979375
164.2	0.97875
164.3	0.97775
164.4	0.978125
164.5	0.977625
164.6	0.97775
164.7	0.978125
164.8	0.977375
164.9	0.978375
165	0.979125
165.1	0.978625
165.2	0.979125
165.3	0.980625
165.4	0.981
165.5	0.980875
165.6	0.982875
165.7	0.983375
165.8	0.982625
165.9	0.981625
166	0.982
166.1	0.981125
166.2	0.982
166.3	0.983625
166.4	0.982625
166.5	0.982375
166.6	0.979875
166.7	0.980375
166.8	0.981625
166.9	0.979375
167	0.98025
167.1	0.9815
167.2	0.98225
167.3	0.982625
167.4	0.984125
167.5	0.984
167.6	0.98325
167.7	0.981125
167.8	0.979
167.9	0.977625
168	0.97925
168.1	0.98
168.2	0.978875
168.3	0.978875
168.4	0.980875
168.5	0.982
168.6	0.982375
168.7	0.982625
168.8	0.983
168.9	0.983625
169	0.984
169.1	0.98275
169.2	0.981125
169.3	0.982375
169.4	0.981875
169.5	0.980375
169.6	0.981625
169.7	0.98175
169.8	0.98275
169.9	0.981625
170	0.981375
170.1	0.979625
170.2	0.98025
170.3	0.9815
170.4	0.981125
170.5	0.98
170.6	0.979625
170.7	0.9805
170.8	0.980375
170.9	0.9805
171	0.981
171.1	0.9815
171.2	0.981875
171.3	0.98225
171.4	0.98125
171.5	0.9795
171.6	0.977625
171.7	0.976625
171.8	0.979625
171.9	0.980375
172	0.98075
172.1	0.98125
172.2	0.9835
172.3	0.984625
172.4	0.982125
172.5	0.980625
172.6	0.980625
172.7	0.9805
172.8	0.980375
172.9	0.97925
173	0.9785
173.1	0.979875
173.2	0.980125
173.3	0.981125
173.4	0.982375
173.5	0.983125
173.6	0.983375
173.7	0.98325
173.8	0.9835
173.9	0.98475
174	0.9845
174.1	0.9845
174.2	0.98375
174.3	0.983125
174.4	0.9825
174.5	0.982375
174.6	0.981875
174.7	0.980375
174.8	0.982
174.9	0.981875
175	0.98175
175.1	0.9815
175.2	0.98225
175.3	0.98375
175.4	0.98425
175.5	0.9835
175.6	0.98375
175.7	0.98425
175.8	0.982625
175.9	0.982
176	0.9835
176.1	0.983625
176.2	0.982375
176.3	0.9825
176.4	0.983375
176.5	0.982375
176.6	0.984375
176.7	0.98325
176.8	0.982875
176.9	0.98325
177	0.9825
177.1	0.98325
177.2	0.984875
177.3	0.983875
177.4	0.982375
177.5	0.98175
177.6	0.98275
177.7	0.982
177.8	0.982375
177.9	0.981875
178	0.982125
178.1	0.982125
178.2	0.98325
178.3	0.98275
178.4	0.981125
178.5	0.98125
178.6	0.9795
178.7	0.978625
178.8	0.979
178.9	0.97875
179	0.978875
179.1	0.979875
179.2	0.981
179.3	0.981625
179.4	0.9825
179.5	0.9825
179.6	0.9825
179.7	0.98375
179.8	0.982375
179.9	0.982
180	0.982625
180.1	0.982875
180.2	0.98225
180.3	0.982125
180.4	0.982
180.5	0.982875
180.6	0.982875
180.7	0.981375
180.8	0.98175
180.9	0.980625
181	0.98175
181.1	0.982125
181.2	0.981625
181.3	0.983
181.4	0.983
181.5	0.98325
181.6	0.983875
181.7	0.98275
181.8	0.98325
181.9	0.984375
182	0.98425
182.1	0.984625
182.2	0.984
182.3	0.984875
182.4	0.984875
182.5	0.98325
182.6	0.9845
182.7	0.983625
182.8	0.98375
182.9	0.98425
183	0.984375
183.1	0.9855
183.2	0.985125
183.3	0.984
183.4	0.984625
183.5	0.984375
183.6	0.984125
183.7	0.98425
183.8	0.98375
183.9	0.984125
184	0.984125
184.1	0.98425
184.2	0.98425
184.3	0.983875
184.4	0.984375
184.5	0.984375
184.6	0.982375
184.7	0.983
184.8	0.98175
184.9	0.982875
185	0.982
185.1	0.982875
185.2	0.982125
185.3	0.982625
185.4	0.982125
185.5	0.9825
185.6	0.982125
185.7	0.982375
185.8	0.983
185.9	0.981375
186	0.981625
186.1	0.981625
186.2	0.981
186.3	0.981625
186.4	0.981375
186.5	0.98125
186.6	0.981625
186.7	0.98275
186.8	0.98375
186.9	0.98575
187	0.984375
187.1	0.984625
187.2	0.98625
187.3	0.985875
187.4	0.984125
187.5	0.9845
187.6	0.98425
187.7	0.98375
187.8	0.983375
187.9	0.983625
188	0.9835
188.1	0.98325
188.2	0.983375
188.3	0.983
188.4	0.982125
188.5	0.9825
188.6	0.982875
188.7	0.982
188.8	0.982625
188.9	0.98475
189	0.984125
189.1	0.98425
189.2	0.983125
189.3	0.982875
189.4	0.98275
189.5	0.98275
189.6	0.982875
189.7	0.984625
189.8	0.98375
189.9	0.98425
190	0.984625
190.1	0.984
190.2	0.985125
190.3	0.983
190.4	0.983
190.5	0.982125
190.6	0.9815
190.7	0.981875
190.8	0.982125
190.9	0.983375
191	0.982875
191.1	0.984875
191.2	0.984125
191.3	0.9835
191.4	0.984125
191.5	0.983625
191.6	0.98325
191.7	0.983
191.8	0.9815
191.9	0.98275
192	0.98175
192.1	0.981625
192.2	0.98275
192.3	0.9835
192.4	0.98425
192.5	0.983875
192.6	0.9855
192.7	0.984625
192.8	0.982875
192.9	0.983
193	0.983125
193.1	0.984125
193.2	0.983
193.3	0.980625
193.4	0.980375
193.5	0.980875
193.6	0.979875
193.7	0.980625
193.8	0.979125
193.9	0.980875
194	0.98175
194.1	0.98175
194.2	0.982
194.3	0.982875
194.4	0.984125
194.5	0.98425
194.6	0.983875
194.7	0.983375
194.8	0.98175
194.9	0.982875
195	0.983
195.1	0.982375
195.2	0.982125
195.3	0.98125
195.4	0.981375
195.5	0.98025
195.6	0.980625
195.7	0.97975
195.8	0.98075
195.9	0.9815
196	0.979875
196.1	0.981375
196.2	0.981625
196.3	0.981875
196.4	0.983375
196.5	0.9835
196.6	0.98275
196.7	0.982375
196.8	0.982125
196.9	0.984875
197	0.983875
197.1	0.983125
197.2	0.98325
197.3	0.983375
197.4	0.9815
197.5	0.9825
197.6	0.982125
197.7	0.98175
197.8	0.980875
197.9	0.9795
198	0.98075
198.1	0.9835
198.2	0.9825
198.3	0.982875
198.4	0.98375
198.5	0.983875
198.6	0.984125
198.7	0.983875
198.8	0.9845
198.9	0.98475
199	0.985
199.1	0.9835
199.2	0.983125
199.3	0.98475
199.4	0.983625
199.5	0.984
199.6	0.983375
199.7	0.983625
199.8	0.98425
199.9	0.983375
200	0.983875
[truncated: 14,000 more rows]
