# Supplementary material for: Bayesian inference of kinetic schemes for ion channels by Kalman filtering
Source: eLife journal article supplement (doi:10.7554/elife.62714), 2022-05-04
Supplement: fig4-data4 [file 1_Sim_N_4000_Strom_MW_8M.xlsx]

## Sheet: Tabelle1
0.1	0
0.2	0
0.3	0
0.4	0
0.5	0
0.6	0
0.7	0
0.8	0
0.9	0
1	0
1.1	0
1.2	0
1.3	0
1.4	0
1.5	0
1.6	0
1.7	0
1.8	0
1.9	0
2	0
2.1	0
2.2	0
2.3	0
2.4	0
2.5	0
2.6	0
2.7	0
2.8	0
2.9	0
3	0
3.1	0
3.2	0
3.3	0
3.4	0
3.5	0
3.6	0
3.7	0
3.8	0
3.9	0
4	0
4.1	0
4.2	0
4.3	0
4.4	0
4.5	0
4.6	0
4.7	0
4.8	0
4.9	0
5	0
5.1	0
5.2	0
5.3	0
5.4	0
5.5	0
5.6	0
5.7	0
5.8	0
5.9	0
6	0
6.1	0
6.2	0
6.3	0
6.4	0
6.5	0
6.6	0
6.7	0
6.8	0
6.9	0
7	0
7.1	0
7.2	0
7.3	0
7.4	0
7.5	0
7.6	0
7.7	0
7.8	0
7.9	0
8	0
8.1	0
8.2	0
8.3	0
8.4	0
8.5	0
8.6	0
8.7	0
8.8	0
8.9	0
9	0
9.1	0
9.2	0
9.3	0
9.4	0
9.5	0
9.6	0
9.7	0
9.8	0
9.9	0
10	0
10.1	0
10.2	0
10.3	0
10.4	0
10.5	0
10.6	0
10.7	0
10.8	0
10.9	0
11	0
11.1	0
11.2	0
11.3	0
11.4	0
11.5	0
11.6	0
11.7	0
11.8	0
11.9	0
12	0
12.1	0
12.2	0
12.3	0
12.4	0
12.5	0
12.6	0
12.7	0
12.8	0
12.9	0
13	0
13.1	0
13.2	0
13.3	0
13.4	0
13.5	0
13.6	0
13.7	0
13.8	0
13.9	0
14	0
14.1	0
14.2	0
14.3	0
14.4	0
14.5	0
14.6	0
14.7	0
14.8	0
14.9	0
15	0
15.1	0
15.2	0
15.3	0
15.4	0
15.5	0
15.6	0
15.7	0
15.8	0
15.9	0
16	0
16.1	0
16.2	0
16.3	0
16.4	0
16.5	0
16.6	0
16.7	0
16.8	0
16.9	0
17	0
17.1	0
17.2	0
17.3	0
17.4	0
17.5	0
17.6	0
17.7	0
17.8	0
17.9	0
18	0
18.1	0
18.2	0
18.3	0
18.4	0
18.5	0
18.6	0
18.7	0
18.8	0
18.9	0
19	0
19.1	0
19.2	0
19.3	0
19.4	0
19.5	0
19.6	0
19.7	0
19.8	0
19.9	0
20	0
20.1	0
20.2	0
20.3	0
20.4	0
20.5	0
20.6	0
20.7	0
20.8	0
20.9	0
21	0
21.1	0
21.2	0
21.3	0
21.4	0
21.5	0
21.6	0
21.7	0
21.8	0
21.9	0
22	0
22.1	0
22.2	0
22.3	0
22.4	0
22.5	0
22.6	0
22.7	0
22.8	0
22.9	0
23	0
23.1	0
23.2	0
23.3	0
23.4	0
23.5	0
23.6	0
23.7	0
23.8	0
23.9	0
24	0
24.1	0
24.2	0
24.3	0
24.4	0
24.5	0
24.6	0
24.7	0
24.8	0
24.9	0
25	0
25.1	0
25.2	0
25.3	0
25.4	0
25.5	0
25.6	0
25.7	0
25.8	0
25.9	0
26	0
26.1	0
26.2	0
26.3	0
26.4	0
26.5	0
26.6	0
26.7	0
26.8	0
26.9	0
27	0
27.1	0
27.2	0
27.3	0
27.4	0
27.5	0
27.6	0
27.7	0
27.8	0
27.9	0
28	0
28.1	0
28.2	0
28.3	0
28.4	0
28.5	0
28.6	0
28.7	0
28.8	0
28.9	0
29	0
29.1	0
29.2	0
29.3	0
29.4	0
29.5	0
29.6	0
29.7	0
29.8	0
29.9	0
30	0
30.1	0
30.2	0
30.3	0
30.4	0
30.5	0
30.6	0
30.7	0
30.8	0
30.9	0
31	0
31.1	0
31.2	0
31.3	0
31.4	0
31.5	0
31.6	0
31.7	0
31.8	0
31.9	0
32	0
32.1	0
32.2	0
32.3	0
32.4	0
32.5	0
32.6	0
32.7	0
32.8	0
32.9	0
33	0
33.1	0
33.2	0
33.3	0
33.4	0
33.5	0
33.6	0
33.7	0
33.8	0
33.9	0
34	0
34.1	0
34.2	0
34.3	0
34.4	0
34.5	0
34.6	0
34.7	0
34.8	0
34.9	0
35	0
35.1	0
35.2	0
35.3	0
35.4	0
35.5	0
35.6	0
35.7	0
35.8	0
35.9	0
36	0
36.1	0
36.2	0
36.3	0
36.4	0
36.5	0
36.6	0
36.7	0
36.8	0
36.9	0
37	0
37.1	0
37.2	0
37.3	0
37.4	0
37.5	0
37.6	0
37.7	0
37.8	0
37.9	0
38	0
38.1	0
38.2	0
38.3	0
38.4	0
38.5	0
38.6	0
38.7	0
38.8	0
38.9	0
39	0
39.1	0
39.2	0
39.3	0
39.4	0
39.5	0
39.6	0
39.7	0
39.8	0
39.9	0
40	0
40.1	0
40.2	0
40.3	0
40.4	0
40.5	0
40.6	0
40.7	0
40.8	0
40.9	0
41	0
41.1	0
41.2	0
41.3	0
41.4	0
41.5	0
41.6	0
41.7	0
41.8	0
41.9	0
42	0
42.1	0
42.2	0
42.3	0
42.4	0
42.5	0
42.6	0
42.7	0
42.8	0
42.9	0
43	0
43.1	0
43.2	0
43.3	0
43.4	0
43.5	0
43.6	0
43.7	0
43.8	0
43.9	0
44	0
44.1	0
44.2	0
44.3	0
44.4	0
44.5	0
44.6	0
44.7	0
44.8	0
44.9	0
45	0
45.1	0
45.2	0
45.3	0
45.4	0
45.5	0
45.6	0
45.7	0
45.8	0
45.9	0
46	0
46.1	0
46.2	0
46.3	0
46.4	0
46.5	0
46.6	0
46.7	0
46.8	0
46.9	0
47	0
47.1	0
47.2	0
47.3	0
47.4	0
47.5	0
47.6	0
47.7	0
47.8	0
47.9	0
48	0
48.1	0
48.2	0
48.3	0
48.4	0
48.5	0
48.6	0
48.7	0
48.8	0
48.9	0
49	0
49.1	0
49.2	0
49.3	0
49.4	0
49.5	0
49.6	0
49.7	0
49.8	0
49.9	0
50	0
50.1	0
50.2	0
50.3	0
50.4	0
50.5	0
50.6	0
50.7	0
50.8	0
50.9	0
51	0
51.1	0
51.2	0
51.3	0
51.4	0
51.5	0
51.6	0
51.7	0
51.8	0
51.9	0
52	0
52.1	0
52.2	0
52.3	0
52.4	0
52.5	0
52.6	0
52.7	0
52.8	0
52.9	0
53	0
53.1	0
53.2	0
53.3	0
53.4	0
53.5	0
53.6	0
53.7	0
53.8	0
53.9	0
54	0
54.1	0
54.2	0
54.3	0
54.4	0
54.5	0
54.6	0
54.7	0
54.8	0
54.9	0
55	0
55.1	0
55.2	0
55.3	0
55.4	0
55.5	0
55.6	0
55.7	0
55.8	0
55.9	0
56	0
56.1	0
56.2	0
56.3	0
56.4	0
56.5	0
56.6	0
56.7	0
56.8	0
56.9	0
57	0
57.1	0
57.2	0
57.3	0
57.4	0
57.5	0
57.6	0
57.7	0
57.8	0
57.9	0
58	0
58.1	0
58.2	0
58.3	0
58.4	0
58.5	0
58.6	0
58.7	0
58.8	0
58.9	0
59	0
59.1	0
59.2	0
59.3	0
59.4	0
59.5	0
59.6	0
59.7	0
59.8	0
59.9	0
60	0
60.1	0
60.2	0
60.3	0
60.4	0
60.5	0
60.6	0
60.7	0
60.8	0
60.9	0
61	0
61.1	0
61.2	0
61.3	0
61.4	0
61.5	0
61.6	0
61.7	0
61.8	0
61.9	0
62	0
62.1	0
62.2	0
62.3	0
62.4	0
62.5	0
62.6	0
62.7	0
62.8	0
62.9	0
63	0
63.1	0
63.2	0
63.3	0
63.4	0
63.5	0
63.6	0
63.7	0
63.8	0
63.9	0
64	0
64.1	0
64.2	0
64.3	0
64.4	0
64.5	0
64.6	0
64.7	0
64.8	0
64.9	0
65	0
65.1	0
65.2	0
65.3	0
65.4	0
65.5	0
65.6	0
65.7	0
65.8	0
65.9	0
66	0
66.1	0
66.2	0
66.3	0
66.4	0
66.5	0
66.6	0
66.7	0
66.8	0
66.9	0
67	0
67.1	0
67.2	0
67.3	0
67.4	0
67.5	0
67.6	0
67.7	0
67.8	0
67.9	0
68	0
68.1	0
68.2	0
68.3	0
68.4	0
68.5	0
68.6	0
68.7	0
68.8	0
68.9	0
69	0
69.1	0
69.2	0
69.3	0
69.4	0
69.5	0
69.6	0
69.7	0
69.8	0
69.9	0
70	0
70.1	0
70.2	0
70.3	0
70.4	0
70.5	0
70.6	0
70.7	0
70.8	0
70.9	0
71	0
71.1	0
71.2	0
71.3	0
71.4	0
71.5	0
71.6	0
71.7	0
71.8	0
71.9	0
72	0
72.1	0
72.2	0
72.3	0
72.4	0
72.5	0
72.6	0
72.7	0
72.8	0
72.9	0
73	0
73.1	0
73.2	0
73.3	0
73.4	0
73.5	0
73.6	0
73.7	0
73.8	0
73.9	0
74	0
74.1	0
74.2	0
74.3	0
74.4	0
74.5	0
74.6	0
74.7	0
74.8	0
74.9	0
75	0
75.1	0
75.2	0
75.3	0
75.4	0
75.5	0
75.6	0
75.7	0
75.8	0
75.9	0
76	0
76.1	0
76.2	0
76.3	0
76.4	0
76.5	0
76.6	0
76.7	0
76.8	0
76.9	0
77	0
77.1	0
77.2	0
77.3	0
77.4	0
77.5	0
77.6	0
77.7	0
77.8	0
77.9	0
78	0
78.1	0
78.2	0
78.3	0
78.4	0
78.5	0
78.6	0
78.7	0
78.8	0
78.9	0
79	0
79.1	0
79.2	0
79.3	0
79.4	0
79.5	0
79.6	0
79.7	0
79.8	0
79.9	0
80	0
80.1	0
80.2	0
80.3	0
80.4	0
80.5	0
80.6	0
80.7	0
80.8	0
80.9	0
81	0
81.1	0
81.2	0
81.3	0
81.4	0
81.5	0
81.6	0
81.7	0
81.8	0
81.9	0
82	0
82.1	0
82.2	0
82.3	0
82.4	0
82.5	0
82.6	0
82.7	0
82.8	0
82.9	0
83	0
83.1	0
83.2	0
83.3	0
83.4	0
83.5	0
83.6	0
83.7	0
83.8	0
83.9	0
84	0
84.1	0
84.2	0
84.3	0
84.4	0
84.5	0
84.6	0
84.7	0
84.8	0
84.9	0
85	0
85.1	0
85.2	0
85.3	0
85.4	0
85.5	0
85.6	0
85.7	0
85.8	0
85.9	0
86	0
86.1	0
86.2	0
86.3	0
86.4	0
86.5	0
86.6	0
86.7	0
86.8	0
86.9	0
87	0
87.1	0
87.2	0
87.3	0
87.4	0
87.5	0
87.6	0
87.7	0
87.8	0
87.9	0
88	0
88.1	0
88.2	0
88.3	0
88.4	0
88.5	0
88.6	0
88.7	0
88.8	0
88.9	0
89	0
89.1	0
89.2	0
89.3	0
89.4	0
89.5	0
89.6	0
89.7	0
89.8	0
89.9	0
90	0
90.1	0
90.2	0
90.3	0
90.4	0
90.5	0
90.6	0
90.7	0
90.8	0
90.9	0
91	0
91.1	0
91.2	0
91.3	0
91.4	0
91.5	0
91.6	0
91.7	0
91.8	0
91.9	0
92	0
92.1	0
92.2	0
92.3	0
92.4	0
92.5	0
92.6	0
92.7	0
92.8	0
92.9	0
93	0
93.1	0
93.2	0
93.3	0
93.4	0
93.5	0
93.6	0
93.7	0
93.8	0
93.9	0
94	0
94.1	0
94.2	0
94.3	0
94.4	0
94.5	0
94.6	0
94.7	0
94.8	0
94.9	0
95	0
95.1	0
95.2	0
95.3	0
95.4	0
95.5	0
95.6	0
95.7	0
95.8	0
95.9	0
96	0
96.1	0
96.2	0
96.3	0
96.4	0
96.5	0
96.6	0
96.7	0
96.8	0
96.9	0
97	0
97.1	0
97.2	0
97.3	0
97.4	0
97.5	0
97.6	0
97.7	0
97.8	0
97.9	0
98	0
98.1	0
98.2	0
98.3	0
98.4	0
98.5	0
98.6	0
98.7	0
98.8	0
98.9	0
99	0
99.1	0
99.2	0
99.3	0
99.4	0
99.5	0
99.6	0
99.7	0
99.8	0
99.9	0
100	0
100.1	0
100.2	0.001
100.3	0.002
100.4	0.00425
100.5	0.00725
100.6	0.00925
100.7	0.01275
100.8	0.01525
100.9	0.01725
101	0.0195
101.1	0.0225
101.2	0.02525
101.3	0.0285
101.4	0.033
101.5	0.037
101.6	0.043
101.7	0.0455
101.8	0.04825
101.9	0.05325
102	0.05775
102.1	0.0635
102.2	0.068
102.3	0.0725
102.4	0.077
102.5	0.0795
102.6	0.0835
102.7	0.088
102.8	0.0915
102.9	0.09475
103	0.0975
103.1	0.1025
103.2	0.107
103.3	0.1105
103.4	0.11375
103.5	0.11675
103.6	0.11975
103.7	0.12475
103.8	0.128
103.9	0.1325
104	0.13775
104.1	0.14025
104.2	0.1445
104.3	0.1485
104.4	0.1515
104.5	0.154
104.6	0.15825
104.7	0.16025
104.8	0.16375
104.9	0.16725
105	0.16925
105.1	0.173
105.2	0.1785
105.3	0.181
105.4	0.18525
105.5	0.19025
105.6	0.19425
105.7	0.197
105.8	0.19975
105.9	0.20475
106	0.2075
106.1	0.211
106.2	0.2135
106.3	0.2175
106.4	0.2215
106.5	0.225
106.6	0.229
106.7	0.233
106.8	0.23725
106.9	0.2405
107	0.24375
107.1	0.24575
107.2	0.24825
107.3	0.2515
107.4	0.253
107.5	0.2545
107.6	0.25525
107.7	0.2585
107.8	0.25875
107.9	0.26125
108	0.263
108.1	0.266
108.2	0.2685
108.3	0.27275
108.4	0.2755
108.5	0.2765
108.6	0.27925
108.7	0.28225
108.8	0.2855
108.9	0.28775
109	0.28975
109.1	0.29275
109.2	0.2945
109.3	0.29675
109.4	0.29925
109.5	0.29975
109.6	0.30375
109.7	0.30725
109.8	0.3085
109.9	0.31
110	0.3115
110.1	0.313
110.2	0.316
110.3	0.31925
110.4	0.321
110.5	0.3235
110.6	0.325
110.7	0.328
110.8	0.32975
110.9	0.3335
111	0.33725
111.1	0.3395
111.2	0.3425
111.3	0.34625
111.4	0.34875
111.5	0.3505
111.6	0.353
111.7	0.35475
111.8	0.3565
111.9	0.35875
112	0.36275
112.1	0.3645
112.2	0.3655
112.3	0.36775
112.4	0.37225
112.5	0.37425
112.6	0.376
112.7	0.378
112.8	0.382
112.9	0.38275
113	0.385
113.1	0.3865
113.2	0.3885
113.3	0.3905
113.4	0.39275
113.5	0.395
113.6	0.39575
113.7	0.3975
113.8	0.39875
113.9	0.39975
114	0.403
114.1	0.405
114.2	0.40675
114.3	0.4075
114.4	0.40975
114.5	0.41225
114.6	0.41375
114.7	0.41575
114.8	0.41625
114.9	0.418
115	0.42175
115.1	0.4235
115.2	0.4255
115.3	0.42825
115.4	0.43
115.5	0.432
115.6	0.4345
115.7	0.43725
115.8	0.43875
115.9	0.442
116	0.44425
116.1	0.44525
116.2	0.44775
116.3	0.4495
116.4	0.45125
116.5	0.4535
116.6	0.45575
116.7	0.457
116.8	0.4585
116.9	0.46075
117	0.46125
117.1	0.46175
117.2	0.463
117.3	0.46425
117.4	0.4655
117.5	0.467
117.6	0.468
117.7	0.47075
117.8	0.47275
117.9	0.4745
118	0.47525
118.1	0.47525
118.2	0.47725
118.3	0.47875
118.4	0.48175
118.5	0.48275
118.6	0.4835
118.7	0.48375
118.8	0.4845
118.9	0.48625
119	0.4875
119.1	0.48925
119.2	0.4915
119.3	0.49275
119.4	0.4945
119.5	0.4975
119.6	0.499
119.7	0.49925
119.8	0.5005
119.9	0.50225
120	0.504
120.1	0.5065
120.2	0.508
120.3	0.50875
120.4	0.51075
120.5	0.51225
120.6	0.51375
120.7	0.51475
120.8	0.51675
120.9	0.51825
121	0.52
121.1	0.5225
121.2	0.5225
121.3	0.525
121.4	0.527
121.5	0.5285
121.6	0.53025
121.7	0.531
121.8	0.53175
121.9	0.53225
122	0.5335
122.1	0.5355
122.2	0.53775
122.3	0.53925
122.4	0.5405
122.5	0.54175
122.6	0.5425
122.7	0.5435
122.8	0.54425
122.9	0.54625
123	0.548
123.1	0.5495
123.2	0.552
123.3	0.55275
123.4	0.55325
123.5	0.55375
123.6	0.5555
123.7	0.5565
123.8	0.5585
123.9	0.56
124	0.56125
124.1	0.5625
124.2	0.5625
124.3	0.56325
124.4	0.56475
124.5	0.5665
124.6	0.56825
124.7	0.5685
124.8	0.57075
124.9	0.573
125	0.57425
125.1	0.5745
125.2	0.5755
125.3	0.57625
125.4	0.578
125.5	0.57875
125.6	0.57925
125.7	0.58
125.8	0.58175
125.9	0.58325
126	0.5845
126.1	0.58525
126.2	0.58675
126.3	0.58875
126.4	0.58975
126.5	0.591
126.6	0.59275
126.7	0.59375
126.8	0.59425
126.9	0.5955
127	0.59575
127.1	0.59675
127.2	0.59775
127.3	0.5995
127.4	0.601
127.5	0.60175
127.6	0.60425
127.7	0.60575
127.8	0.60725
127.9	0.61075
128	0.61075
128.1	0.61225
128.2	0.61475
128.3	0.61525
128.4	0.61675
128.5	0.61675
128.6	0.6165
128.7	0.61625
128.8	0.6175
128.9	0.61825
129	0.62
129.1	0.62
129.2	0.6215
129.3	0.62325
129.4	0.62475
129.5	0.6245
129.6	0.62575
129.7	0.62675
129.8	0.62675
129.9	0.62825
130	0.62925
130.1	0.629
130.2	0.629
130.3	0.6305
130.4	0.632
130.5	0.63275
130.6	0.63325
130.7	0.63475
130.8	0.63625
130.9	0.639
131	0.64025
131.1	0.63875
131.2	0.64075
131.3	0.641
131.4	0.642
131.5	0.64275
131.6	0.64325
131.7	0.64375
131.8	0.64325
131.9	0.645
132	0.646
132.1	0.64775
132.2	0.648
132.3	0.6495
132.4	0.65
132.5	0.65125
132.6	0.6515
132.7	0.6515
132.8	0.6525
132.9	0.6535
133	0.653
133.1	0.65475
133.2	0.65575
133.3	0.65625
133.4	0.65575
133.5	0.65775
133.6	0.6585
133.7	0.65875
133.8	0.66
133.9	0.662
134	0.6625
134.1	0.66225
134.2	0.66375
134.3	0.66375
134.4	0.66525
134.5	0.6665
134.6	0.669
134.7	0.671
134.8	0.6715
134.9	0.672
135	0.67175
135.1	0.67225
135.2	0.6725
135.3	0.674
135.4	0.675
135.5	0.67675
135.6	0.678
135.7	0.67875
135.8	0.6785
135.9	0.6785
136	0.679
136.1	0.6795
136.2	0.6805
136.3	0.68125
136.4	0.682
136.5	0.6835
136.6	0.6845
136.7	0.68425
136.8	0.68475
136.9	0.6855
137	0.68675
137.1	0.68775
137.2	0.6875
137.3	0.68775
137.4	0.68925
137.5	0.69
137.6	0.68975
137.7	0.69025
137.8	0.6905
137.9	0.6905
138	0.69075
138.1	0.69075
138.2	0.691
138.3	0.69225
138.4	0.6925
138.5	0.69275
138.6	0.69275
138.7	0.69375
138.8	0.694
138.9	0.694
139	0.69375
139.1	0.6935
139.2	0.69325
139.3	0.6935
139.4	0.6935
139.5	0.69525
139.6	0.69575
139.7	0.69625
139.8	0.69675
139.9	0.69775
140	0.69925
140.1	0.6995
140.2	0.6995
140.3	0.6995
140.4	0.701
140.5	0.70125
140.6	0.703
140.7	0.70425
140.8	0.70475
140.9	0.70575
141	0.707
141.1	0.708
141.2	0.7085
141.3	0.70825
141.4	0.7095
141.5	0.70825
141.6	0.709
141.7	0.7095
141.8	0.70925
141.9	0.70975
142	0.7105
142.1	0.71
142.2	0.71
142.3	0.71075
142.4	0.71025
142.5	0.709
142.6	0.70975
142.7	0.71075
142.8	0.711
142.9	0.7125
143	0.713
143.1	0.71275
143.2	0.71425
143.3	0.7145
143.4	0.716
143.5	0.716
143.6	0.717
143.7	0.7175
143.8	0.71775
143.9	0.71825
144	0.71875
144.1	0.71975
144.2	0.72075
144.3	0.72175
144.4	0.722
144.5	0.72275
144.6	0.72225
144.7	0.723
144.8	0.72375
144.9	0.7245
145	0.7245
145.1	0.725
145.2	0.7255
145.3	0.72575
145.4	0.726
145.5	0.72575
145.6	0.72575
145.7	0.726
145.8	0.72775
145.9	0.728
146	0.72825
146.1	0.7285
146.2	0.72975
146.3	0.731
146.4	0.73075
146.5	0.73175
146.6	0.732
146.7	0.732
146.8	0.73275
146.9	0.73325
147	0.7345
147.1	0.73425
147.2	0.7345
147.3	0.73525
147.4	0.73575
147.5	0.736
147.6	0.73575
147.7	0.736
147.8	0.736
147.9	0.7365
148	0.737
148.1	0.73625
148.2	0.73675
148.3	0.73675
148.4	0.73725
148.5	0.73775
148.6	0.738
148.7	0.73825
148.8	0.739
148.9	0.7385
149	0.73925
149.1	0.7385
149.2	0.73875
149.3	0.73975
149.4	0.74
149.5	0.741
149.6	0.741
149.7	0.74175
149.8	0.74175
149.9	0.7435
150	0.74475
150.1	0.7455
150.2	0.74475
150.3	0.747
150.4	0.747
150.5	0.747
150.6	0.748
150.7	0.748
150.8	0.74725
150.9	0.7475
151	0.74825
151.1	0.7475
151.2	0.74775
151.3	0.74825
151.4	0.74975
151.5	0.7495
151.6	0.7505
151.7	0.75
151.8	0.7505
151.9	0.75125
152	0.751
152.1	0.75125
152.2	0.75225
152.3	0.75175
152.4	0.7525
152.5	0.7525
152.6	0.7525
152.7	0.753
152.8	0.75475
152.9	0.75575
153	0.75525
153.1	0.75575
153.2	0.756
153.3	0.75775
153.4	0.7585
153.5	0.75875
153.6	0.7595
153.7	0.75975
153.8	0.76
153.9	0.7605
154	0.76225
154.1	0.76175
154.2	0.76275
154.3	0.763
154.4	0.7635
154.5	0.7635
154.6	0.76325
154.7	0.7645
154.8	0.76475
154.9	0.76575
155	0.766
155.1	0.76525
155.2	0.76575
155.3	0.76475
155.4	0.76475
155.5	0.76525
155.6	0.7655
155.7	0.7655
155.8	0.76675
155.9	0.76625
156	0.76625
156.1	0.76675
156.2	0.76675
156.3	0.76625
156.4	0.76575
156.5	0.76575
156.6	0.76425
156.7	0.764
156.8	0.76425
156.9	0.765
157	0.76475
157.1	0.76575
157.2	0.76575
157.3	0.766
157.4	0.7665
157.5	0.76675
157.6	0.76675
157.7	0.767
157.8	0.7665
157.9	0.76675
158	0.767
158.1	0.7675
158.2	0.7675
158.3	0.767
158.4	0.768
158.5	0.76725
158.6	0.7675
158.7	0.7675
158.8	0.768
158.9	0.7685
159	0.769
159.1	0.76875
159.2	0.7695
159.3	0.769
159.4	0.77
159.5	0.771
159.6	0.77075
159.7	0.771
159.8	0.772
159.9	0.7725
160	0.77275
160.1	0.77275
160.2	0.77175
160.3	0.7725
160.4	0.772
160.5	0.77175
160.6	0.77225
160.7	0.77225
160.8	0.77275
160.9	0.77425
161	0.7745
161.1	0.77425
161.2	0.77425
161.3	0.77375
161.4	0.77425
161.5	0.77475
161.6	0.77475
161.7	0.77425
161.8	0.77425
161.9	0.77425
162	0.7755
162.1	0.775
162.2	0.776
162.3	0.77625
162.4	0.777
162.5	0.777
162.6	0.778
162.7	0.7775
162.8	0.77775
162.9	0.77775
163	0.77775
163.1	0.77775
163.2	0.77925
163.3	0.7785
163.4	0.77875
163.5	0.77975
163.6	0.77925
163.7	0.78
163.8	0.78
163.9	0.779
164	0.78
164.1	0.77975
164.2	0.78025
164.3	0.78
164.4	0.78
164.5	0.78
164.6	0.781
164.7	0.78125
164.8	0.7815
164.9	0.78225
165	0.7825
165.1	0.7825
165.2	0.78225
165.3	0.783
165.4	0.78425
165.5	0.785
165.6	0.78525
165.7	0.78525
165.8	0.78575
165.9	0.78525
166	0.785
166.1	0.7845
166.2	0.78475
166.3	0.78425
166.4	0.78375
166.5	0.78325
166.6	0.78275
166.7	0.783
166.8	0.784
166.9	0.786
167	0.78625
167.1	0.7865
167.2	0.78625
167.3	0.78625
167.4	0.78575
167.5	0.7875
167.6	0.78775
167.7	0.78825
167.8	0.78725
167.9	0.7875
168	0.7875
168.1	0.7875
168.2	0.78825
168.3	0.7875
168.4	0.78775
168.5	0.788
168.6	0.7875
168.7	0.78725
168.8	0.78675
168.9	0.788
169	0.78775
169.1	0.787
169.2	0.78875
169.3	0.789
169.4	0.7895
169.5	0.7905
169.6	0.7905
169.7	0.79125
169.8	0.79025
169.9	0.79125
170	0.79175
170.1	0.792
170.2	0.79225
170.3	0.79225
170.4	0.7925
170.5	0.7925
170.6	0.79225
170.7	0.79225
170.8	0.79175
170.9	0.79125
171	0.79
171.1	0.78875
171.2	0.788
171.3	0.7885
171.4	0.79
171.5	0.78975
171.6	0.79075
171.7	0.7915
171.8	0.791
171.9	0.791
172	0.79175
172.1	0.79125
172.2	0.791
172.3	0.7915
172.4	0.79225
172.5	0.79175
172.6	0.79175
172.7	0.7915
172.8	0.7915
172.9	0.791
173	0.79025
173.1	0.79075
173.2	0.791
173.3	0.791
173.4	0.7905
173.5	0.791
173.6	0.79125
173.7	0.79
173.8	0.7905
173.9	0.791
174	0.79075
174.1	0.79025
174.2	0.7905
174.3	0.7905
174.4	0.79075
174.5	0.7905
174.6	0.791
174.7	0.791
174.8	0.79075
174.9	0.793
175	0.79375
175.1	0.79425
175.2	0.795
175.3	0.7945
175.4	0.795
175.5	0.79525
175.6	0.79575
175.7	0.79625
175.8	0.79625
175.9	0.79575
176	0.7955
176.1	0.795
176.2	0.79575
176.3	0.79525
176.4	0.79475
176.5	0.79425
176.6	0.794
176.7	0.79425
176.8	0.794
176.9	0.79425
177	0.7955
177.1	0.79575
177.2	0.79575
177.3	0.79525
177.4	0.79475
177.5	0.79475
177.6	0.79425
177.7	0.79325
177.8	0.793
177.9	0.793
178	0.79325
178.1	0.79275
178.2	0.79375
178.3	0.79375
178.4	0.79475
178.5	0.7955
178.6	0.795
178.7	0.796
178.8	0.79575
178.9	0.797
179	0.798
179.1	0.79875
179.2	0.79925
179.3	0.799
179.4	0.8
179.5	0.8
179.6	0.80075
179.7	0.80025
179.8	0.80075
179.9	0.80075
180	0.801
180.1	0.8015
180.2	0.80175
180.3	0.80225
180.4	0.80175
180.5	0.80125
180.6	0.80125
180.7	0.802
180.8	0.803
180.9	0.8035
181	0.80225
181.1	0.802
181.2	0.80225
181.3	0.8025
181.4	0.8025
181.5	0.80375
181.6	0.80375
181.7	0.804
181.8	0.80425
181.9	0.80475
182	0.804
182.1	0.8045
182.2	0.80475
182.3	0.8045
182.4	0.80475
182.5	0.80575
182.6	0.80575
182.7	0.8055
182.8	0.8055
182.9	0.8055
183	0.80525
183.1	0.8055
183.2	0.8055
183.3	0.8055
183.4	0.80525
183.5	0.80625
183.6	0.80625
183.7	0.8055
183.8	0.80625
183.9	0.8065
184	0.8075
184.1	0.80675
184.2	0.80625
184.3	0.8065
184.4	0.80625
184.5	0.8065
184.6	0.80625
184.7	0.806
184.8	0.806
184.9	0.8055
185	0.80525
185.1	0.8055
185.2	0.805
185.3	0.80425
185.4	0.80475
185.5	0.8055
185.6	0.80525
185.7	0.8055
185.8	0.8055
185.9	0.8055
186	0.80475
186.1	0.80475
186.2	0.80475
186.3	0.805
186.4	0.80525
186.5	0.80525
186.6	0.80475
186.7	0.8045
186.8	0.805
186.9	0.80525
187	0.80675
187.1	0.807
187.2	0.80575
187.3	0.80575
187.4	0.80675
187.5	0.80725
187.6	0.808
187.7	0.808
187.8	0.8085
187.9	0.809
188	0.8085
188.1	0.80875
188.2	0.808
188.3	0.808
188.4	0.808
188.5	0.808
188.6	0.8095
188.7	0.809
188.8	0.80875
188.9	0.808
189	0.8085
189.1	0.80925
189.2	0.80925
189.3	0.80775
189.4	0.8085
189.5	0.8085
189.6	0.80875
189.7	0.80825
189.8	0.80775
189.9	0.80825
190	0.80925
190.1	0.81025
190.2	0.81
190.3	0.8095
190.4	0.80825
190.5	0.80875
190.6	0.809
190.7	0.80825
190.8	0.80825
190.9	0.808
191	0.808
191.1	0.80775
191.2	0.8085
191.3	0.808
191.4	0.80875
191.5	0.8085
191.6	0.80875
191.7	0.80825
191.8	0.808
191.9	0.808
192	0.8075
192.1	0.807
192.2	0.8075
192.3	0.80675
192.4	0.8075
192.5	0.807
192.6	0.806
192.7	0.806
192.8	0.80525
192.9	0.80475
193	0.80375
193.1	0.80325
193.2	0.8035
193.3	0.80325
193.4	0.80325
193.5	0.80375
193.6	0.80425
193.7	0.804
193.8	0.80325
193.9	0.803
194	0.803
194.1	0.80275
194.2	0.80225
194.3	0.80175
194.4	0.80175
194.5	0.80225
194.6	0.803
194.7	0.80225
194.8	0.802
194.9	0.80175
195	0.80125
195.1	0.8
195.2	0.79925
195.3	0.7995
195.4	0.8
195.5	0.79975
195.6	0.80075
195.7	0.80175
195.8	0.8015
195.9	0.80075
196	0.8005
196.1	0.802
196.2	0.802
196.3	0.80125
196.4	0.80225
196.5	0.80275
196.6	0.80125
196.7	0.801
196.8	0.80075
196.9	0.80075
197	0.8015
197.1	0.80175
197.2	0.803
197.3	0.80225
197.4	0.8035
197.5	0.80325
197.6	0.804
197.7	0.80375
197.8	0.804
197.9	0.80425
198	0.805
198.1	0.8045
198.2	0.80525
198.3	0.80475
198.4	0.8045
198.5	0.80575
198.6	0.8055
198.7	0.805
198.8	0.805
198.9	0.80475
199	0.80375
199.1	0.804
199.2	0.80425
199.3	0.80475
199.4	0.80525
199.5	0.80625
199.6	0.806
199.7	0.80625
199.8	0.80675
199.9	0.808
200	0.80725
[truncated: 14,000 more rows]
