# Supplementary material for: Bayesian inference of kinetic schemes for ion channels by Kalman filtering
Source: eLife journal article supplement (doi:10.7554/elife.62714), 2022-05-04
Supplement: fig4-data4 [file 1_Sim_N_5000_Fluor_MW.xlsx]

## Sheet: Tabelle1
0.1	0
0.2	0
0.3	0
0.4	0
0.5	0
0.6	0
0.7	0
0.8	0
0.9	0
1	0
1.1	0
1.2	0
1.3	0
1.4	0
1.5	0
1.6	0
1.7	0
1.8	0
1.9	0
2	0
2.1	0
2.2	0
2.3	0
2.4	0
2.5	0
2.6	0
2.7	0
2.8	0
2.9	0
3	0
3.1	0
3.2	0
3.3	0
3.4	0
3.5	0
3.6	0
3.7	0
3.8	0
3.9	0
4	0
4.1	0
4.2	0
4.3	0
4.4	0
4.5	0
4.6	0
4.7	0
4.8	0
4.9	0
5	0
5.1	0
5.2	0
5.3	0
5.4	0
5.5	0
5.6	0
5.7	0
5.8	0
5.9	0
6	0
6.1	0
6.2	0
6.3	0
6.4	0
6.5	0
6.6	0
6.7	0
6.8	0
6.9	0
7	0
7.1	0
7.2	0
7.3	0
7.4	0
7.5	0
7.6	0
7.7	0
7.8	0
7.9	0
8	0
8.1	0
8.2	0
8.3	0
8.4	0
8.5	0
8.6	0
8.7	0
8.8	0
8.9	0
9	0
9.1	0
9.2	0
9.3	0
9.4	0
9.5	0
9.6	0
9.7	0
9.8	0
9.9	0
10	0
10.1	0
10.2	0
10.3	0
10.4	0
10.5	0
10.6	0
10.7	0
10.8	0
10.9	0
11	0
11.1	0
11.2	0
11.3	0
11.4	0
11.5	0
11.6	0
11.7	0
11.8	0
11.9	0
12	0
12.1	0
12.2	0
12.3	0
12.4	0
12.5	0
12.6	0
12.7	0
12.8	0
12.9	0
13	0
13.1	0
13.2	0
13.3	0
13.4	0
13.5	0
13.6	0
13.7	0
13.8	0
13.9	0
14	0
14.1	0
14.2	0
14.3	0
14.4	0
14.5	0
14.6	0
14.7	0
14.8	0
14.9	0
15	0
15.1	0
15.2	0
15.3	0
15.4	0
15.5	0
15.6	0
15.7	0
15.8	0
15.9	0
16	0
16.1	0
16.2	0
16.3	0
16.4	0
16.5	0
16.6	0
16.7	0
16.8	0
16.9	0
17	0
17.1	0
17.2	0
17.3	0
17.4	0
17.5	0
17.6	0
17.7	0
17.8	0
17.9	0
18	0
18.1	0
18.2	0
18.3	0
18.4	0
18.5	0
18.6	0
18.7	0
18.8	0
18.9	0
19	0
19.1	0
19.2	0
19.3	0
19.4	0
19.5	0
19.6	0
19.7	0
19.8	0
19.9	0
20	0
20.1	0
20.2	0
20.3	0
20.4	0
20.5	0
20.6	0
20.7	0
20.8	0
20.9	0
21	0
21.1	0
21.2	0
21.3	0
21.4	0
21.5	0
21.6	0
21.7	0
21.8	0
21.9	0
22	0
22.1	0
22.2	0
22.3	0
22.4	0
22.5	0
22.6	0
22.7	0
22.8	0
22.9	0
23	0
23.1	0
23.2	0
23.3	0
23.4	0
23.5	0
23.6	0
23.7	0
23.8	0
23.9	0
24	0
24.1	0
24.2	0
24.3	0
24.4	0
24.5	0
24.6	0
24.7	0
24.8	0
24.9	0
25	0
25.1	0
25.2	0
25.3	0
25.4	0
25.5	0
25.6	0
25.7	0
25.8	0
25.9	0
26	0
26.1	0
26.2	0
26.3	0
26.4	0
26.5	0
26.6	0
26.7	0
26.8	0
26.9	0
27	0
27.1	0
27.2	0
27.3	0
27.4	0
27.5	0
27.6	0
27.7	0
27.8	0
27.9	0
28	0
28.1	0
28.2	0
28.3	0
28.4	0
28.5	0
28.6	0
28.7	0
28.8	0
28.9	0
29	0
29.1	0
29.2	0
29.3	0
29.4	0
29.5	0
29.6	0
29.7	0
29.8	0
29.9	0
30	0
30.1	0
30.2	0
30.3	0
30.4	0
30.5	0
30.6	0
30.7	0
30.8	0
30.9	0
31	0
31.1	0
31.2	0
31.3	0
31.4	0
31.5	0
31.6	0
31.7	0
31.8	0
31.9	0
32	0
32.1	0
32.2	0
32.3	0
32.4	0
32.5	0
32.6	0
32.7	0
32.8	0
32.9	0
33	0
33.1	0
33.2	0
33.3	0
33.4	0
33.5	0
33.6	0
33.7	0
33.8	0
33.9	0
34	0
34.1	0
34.2	0
34.3	0
34.4	0
34.5	0
34.6	0
34.7	0
34.8	0
34.9	0
35	0
35.1	0
35.2	0
35.3	0
35.4	0
35.5	0
35.6	0
35.7	0
35.8	0
35.9	0
36	0
36.1	0
36.2	0
36.3	0
36.4	0
36.5	0
36.6	0
36.7	0
36.8	0
36.9	0
37	0
37.1	0
37.2	0
37.3	0
37.4	0
37.5	0
37.6	0
37.7	0
37.8	0
37.9	0
38	0
38.1	0
38.2	0
38.3	0
38.4	0
38.5	0
38.6	0
38.7	0
38.8	0
38.9	0
39	0
39.1	0
39.2	0
39.3	0
39.4	0
39.5	0
39.6	0
39.7	0
39.8	0
39.9	0
40	0
40.1	0
40.2	0
40.3	0
40.4	0
40.5	0
40.6	0
40.7	0
40.8	0
40.9	0
41	0
41.1	0
41.2	0
41.3	0
41.4	0
41.5	0
41.6	0
41.7	0
41.8	0
41.9	0
42	0
42.1	0
42.2	0
42.3	0
42.4	0
42.5	0
42.6	0
42.7	0
42.8	0
42.9	0
43	0
43.1	0
43.2	0
43.3	0
43.4	0
43.5	0
43.6	0
43.7	0
43.8	0
43.9	0
44	0
44.1	0
44.2	0
44.3	0
44.4	0
44.5	0
44.6	0
44.7	0
44.8	0
44.9	0
45	0
45.1	0
45.2	0
45.3	0
45.4	0
45.5	0
45.6	0
45.7	0
45.8	0
45.9	0
46	0
46.1	0
46.2	0
46.3	0
46.4	0
46.5	0
46.6	0
46.7	0
46.8	0
46.9	0
47	0
47.1	0
47.2	0
47.3	0
47.4	0
47.5	0
47.6	0
47.7	0
47.8	0
47.9	0
48	0
48.1	0
48.2	0
48.3	0
48.4	0
48.5	0
48.6	0
48.7	0
48.8	0
48.9	0
49	0
49.1	0
49.2	0
49.3	0
49.4	0
49.5	0
49.6	0
49.7	0
49.8	0
49.9	0
50	0
50.1	0
50.2	0
50.3	0
50.4	0
50.5	0
50.6	0
50.7	0
50.8	0
50.9	0
51	0
51.1	0
51.2	0
51.3	0
51.4	0
51.5	0
51.6	0
51.7	0
51.8	0
51.9	0
52	0
52.1	0
52.2	0
52.3	0
52.4	0
52.5	0
52.6	0
52.7	0
52.8	0
52.9	0
53	0
53.1	0
53.2	0
53.3	0
53.4	0
53.5	0
53.6	0
53.7	0
53.8	0
53.9	0
54	0
54.1	0
54.2	0
54.3	0
54.4	0
54.5	0
54.6	0
54.7	0
54.8	0
54.9	0
55	0
55.1	0
55.2	0
55.3	0
55.4	0
55.5	0
55.6	0
55.7	0
55.8	0
55.9	0
56	0
56.1	0
56.2	0
56.3	0
56.4	0
56.5	0
56.6	0
56.7	0
56.8	0
56.9	0
57	0
57.1	0
57.2	0
57.3	0
57.4	0
57.5	0
57.6	0
57.7	0
57.8	0
57.9	0
58	0
58.1	0
58.2	0
58.3	0
58.4	0
58.5	0
58.6	0
58.7	0
58.8	0
58.9	0
59	0
59.1	0
59.2	0
59.3	0
59.4	0
59.5	0
59.6	0
59.7	0
59.8	0
59.9	0
60	0
60.1	0
60.2	0
60.3	0
60.4	0
60.5	0
60.6	0
60.7	0
60.8	0
60.9	0
61	0
61.1	0
61.2	0
61.3	0
61.4	0
61.5	0
61.6	0
61.7	0
61.8	0
61.9	0
62	0
62.1	0
62.2	0
62.3	0
62.4	0
62.5	0
62.6	0
62.7	0
62.8	0
62.9	0
63	0
63.1	0
63.2	0
63.3	0
63.4	0
63.5	0
63.6	0
63.7	0
63.8	0
63.9	0
64	0
64.1	0
64.2	0
64.3	0
64.4	0
64.5	0
64.6	0
64.7	0
64.8	0
64.9	0
65	0
65.1	0
65.2	0
65.3	0
65.4	0
65.5	0
65.6	0
65.7	0
65.8	0
65.9	0
66	0
66.1	0
66.2	0
66.3	0
66.4	0
66.5	0
66.6	0
66.7	0
66.8	0
66.9	0
67	0
67.1	0
67.2	0
67.3	0
67.4	0
67.5	0
67.6	0
67.7	0
67.8	0
67.9	0
68	0
68.1	0
68.2	0
68.3	0
68.4	0
68.5	0
68.6	0
68.7	0
68.8	0
68.9	0
69	0
69.1	0
69.2	0
69.3	0
69.4	0
69.5	0
69.6	0
69.7	0
69.8	0
69.9	0
70	0
70.1	0
70.2	0
70.3	0
70.4	0
70.5	0
70.6	0
70.7	0
70.8	0
70.9	0
71	0
71.1	0
71.2	0
71.3	0
71.4	0
71.5	0
71.6	0
71.7	0
71.8	0
71.9	0
72	0
72.1	0
72.2	0
72.3	0
72.4	0
72.5	0
72.6	0
72.7	0
72.8	0
72.9	0
73	0
73.1	0
73.2	0
73.3	0
73.4	0
73.5	0
73.6	0
73.7	0
73.8	0
73.9	0
74	0
74.1	0
74.2	0
74.3	0
74.4	0
74.5	0
74.6	0
74.7	0
74.8	0
74.9	0
75	0
75.1	0
75.2	0
75.3	0
75.4	0
75.5	0
75.6	0
75.7	0
75.8	0
75.9	0
76	0
76.1	0
76.2	0
76.3	0
76.4	0
76.5	0
76.6	0
76.7	0
76.8	0
76.9	0
77	0
77.1	0
77.2	0
77.3	0
77.4	0
77.5	0
77.6	0
77.7	0
77.8	0
77.9	0
78	0
78.1	0
78.2	0
78.3	0
78.4	0
78.5	0
78.6	0
78.7	0
78.8	0
78.9	0
79	0
79.1	0
79.2	0
79.3	0
79.4	0
79.5	0
79.6	0
79.7	0
79.8	0
79.9	0
80	0
80.1	0
80.2	0
80.3	0
80.4	0
80.5	0
80.6	0
80.7	0
80.8	0
80.9	0
81	0
81.1	0
81.2	0
81.3	0
81.4	0
81.5	0
81.6	0
81.7	0
81.8	0
81.9	0
82	0
82.1	0
82.2	0
82.3	0
82.4	0
82.5	0
82.6	0
82.7	0
82.8	0
82.9	0
83	0
83.1	0
83.2	0
83.3	0
83.4	0
83.5	0
83.6	0
83.7	0
83.8	0
83.9	0
84	0
84.1	0
84.2	0
84.3	0
84.4	0
84.5	0
84.6	0
84.7	0
84.8	0
84.9	0
85	0
85.1	0
85.2	0
85.3	0
85.4	0
85.5	0
85.6	0
85.7	0
85.8	0
85.9	0
86	0
86.1	0
86.2	0
86.3	0
86.4	0
86.5	0
86.6	0
86.7	0
86.8	0
86.9	0
87	0
87.1	0
87.2	0
87.3	0
87.4	0
87.5	0
87.6	0
87.7	0
87.8	0
87.9	0
88	0
88.1	0
88.2	0
88.3	0
88.4	0
88.5	0
88.6	0
88.7	0
88.8	0
88.9	0
89	0
89.1	0
89.2	0
89.3	0
89.4	0
89.5	0
89.6	0
89.7	0
89.8	0
89.9	0
90	0
90.1	0
90.2	0
90.3	0
90.4	0
90.5	0
90.6	0
90.7	0
90.8	0
90.9	0
91	0
91.1	0
91.2	0
91.3	0
91.4	0
91.5	0
91.6	0
91.7	0
91.8	0
91.9	0
92	0
92.1	0
92.2	0
92.3	0
92.4	0
92.5	0
92.6	0
92.7	0
92.8	0
92.9	0
93	0
93.1	0
93.2	0
93.3	0
93.4	0
93.5	0
93.6	0
93.7	0
93.8	0
93.9	0
94	0
94.1	0
94.2	0
94.3	0
94.4	0
94.5	0
94.6	0
94.7	0
94.8	0
94.9	0
95	0
95.1	0
95.2	0
95.3	0
95.4	0
95.5	0
95.6	0
95.7	0
95.8	0
95.9	0
96	0
96.1	0
96.2	0
96.3	0
96.4	0
96.5	0
96.6	0
96.7	0
96.8	0
96.9	0
97	0
97.1	0
97.2	0
97.3	0
97.4	0
97.5	0
97.6	0
97.7	0
97.8	0
97.9	0
98	0
98.1	0
98.2	0
98.3	0
98.4	0
98.5	0
98.6	0
98.7	0
98.8	0
98.9	0
99	0
99.1	0
99.2	0
99.3	0
99.4	0
99.5	0
99.6	0
99.7	0
99.8	0
99.9	0
100	0
100.1	0.35
100.2	0.538
100.3	0.6411
100.4	0.7149
100.5	0.7635
100.6	0.8011
100.7	0.8281
100.8	0.852
100.9	0.8655
101	0.8765
101.1	0.8858
101.2	0.8956
101.3	0.9015
101.4	0.9069
101.5	0.9105
101.6	0.9135
101.7	0.9183
101.8	0.9185
101.9	0.92
102	0.918
102.1	0.9169
102.2	0.9196
102.3	0.9208
102.4	0.9195
102.5	0.9179
102.6	0.9177
102.7	0.9172
102.8	0.9189
102.9	0.9195
103	0.9185
103.1	0.9199
103.2	0.9195
103.3	0.9167
103.4	0.9158
103.5	0.915
103.6	0.9163
103.7	0.9165
103.8	0.9188
103.9	0.9182
104	0.9206
104.1	0.9193
104.2	0.9208
104.3	0.9176
104.4	0.9183
104.5	0.9219
104.6	0.9208
104.7	0.9208
104.8	0.9243
104.9	0.9228
105	0.9261
105.1	0.9282
105.2	0.929
105.3	0.9274
105.4	0.9266
105.5	0.9273
105.6	0.9277
105.7	0.9303
105.8	0.9287
105.9	0.9292
106	0.9279
106.1	0.9268
106.2	0.9279
106.3	0.9279
106.4	0.928
106.5	0.9291
106.6	0.9269
106.7	0.9264
106.8	0.9286
106.9	0.9299
107	0.9306
107.1	0.9307
107.2	0.9332
107.3	0.9319
107.4	0.9341
107.5	0.9339
107.6	0.934
107.7	0.9337
107.8	0.9349
107.9	0.9344
108	0.9355
108.1	0.9333
108.2	0.9318
108.3	0.9304
108.4	0.9312
108.5	0.9347
108.6	0.9359
108.7	0.9372
108.8	0.9358
108.9	0.938
109	0.9396
109.1	0.9401
109.2	0.9378
109.3	0.9369
109.4	0.9385
109.5	0.9376
109.6	0.9357
109.7	0.9385
109.8	0.9384
109.9	0.9367
110	0.939
110.1	0.9377
110.2	0.9385
110.3	0.9389
110.4	0.938
110.5	0.9397
110.6	0.9423
110.7	0.9418
110.8	0.9443
110.9	0.9422
111	0.9395
111.1	0.9386
111.2	0.9394
111.3	0.9397
111.4	0.939
111.5	0.9392
111.6	0.9397
111.7	0.941
111.8	0.9421
111.9	0.9411
112	0.9449
112.1	0.945
112.2	0.9451
112.3	0.9417
112.4	0.9448
112.5	0.9473
112.6	0.9494
112.7	0.9491
112.8	0.9471
112.9	0.9465
113	0.9451
113.1	0.9456
113.2	0.9445
113.3	0.9426
113.4	0.9429
113.5	0.942
113.6	0.9445
113.7	0.9415
113.8	0.9413
113.9	0.9451
114	0.9447
114.1	0.9478
114.2	0.9482
114.3	0.946
114.4	0.9443
114.5	0.9441
114.6	0.9452
114.7	0.9464
114.8	0.9462
114.9	0.9463
115	0.9488
115.1	0.9501
115.2	0.9486
115.3	0.9469
115.4	0.949
115.5	0.9501
115.6	0.9498
115.7	0.9507
115.8	0.9491
115.9	0.9499
116	0.9487
116.1	0.9484
116.2	0.9494
116.3	0.95
116.4	0.9515
116.5	0.9519
116.6	0.9537
116.7	0.9537
116.8	0.9538
116.9	0.9497
117	0.9496
117.1	0.9508
117.2	0.953
117.3	0.9524
117.4	0.9512
117.5	0.9535
117.6	0.955
117.7	0.9542
117.8	0.9517
117.9	0.9531
118	0.9564
118.1	0.9569
118.2	0.9577
118.3	0.956
118.4	0.9551
118.5	0.9547
118.6	0.9549
118.7	0.9547
118.8	0.9551
118.9	0.9529
119	0.9499
119.1	0.9517
119.2	0.9515
119.3	0.9515
119.4	0.9538
119.5	0.956
119.6	0.9575
119.7	0.9589
119.8	0.9598
119.9	0.9584
120	0.9584
120.1	0.9581
120.2	0.9569
120.3	0.9573
120.4	0.9583
120.5	0.9588
120.6	0.9606
120.7	0.9596
120.8	0.9576
120.9	0.9597
121	0.9591
121.1	0.9593
121.2	0.9599
121.3	0.9597
121.4	0.9585
121.5	0.9585
121.6	0.9592
121.7	0.9569
121.8	0.9581
121.9	0.9583
122	0.9597
122.1	0.9589
122.2	0.9607
122.3	0.9615
122.4	0.9626
122.5	0.9613
122.6	0.9608
122.7	0.9589
122.8	0.957
122.9	0.9567
123	0.9587
123.1	0.9589
123.2	0.9602
123.3	0.9614
123.4	0.9603
123.5	0.9625
123.6	0.9606
123.7	0.9608
123.8	0.9598
123.9	0.9606
124	0.9604
124.1	0.9614
124.2	0.9631
124.3	0.9623
124.4	0.9625
124.5	0.9651
124.6	0.9641
124.7	0.9651
124.8	0.9634
124.9	0.9638
125	0.9637
125.1	0.9625
125.2	0.9617
125.3	0.9628
125.4	0.9626
125.5	0.963
125.6	0.9638
125.7	0.9632
125.8	0.9645
125.9	0.9664
126	0.9673
126.1	0.9679
126.2	0.9647
126.3	0.9637
126.4	0.9645
126.5	0.9652
126.6	0.9646
126.7	0.9646
126.8	0.9658
126.9	0.9647
127	0.9642
127.1	0.9658
127.2	0.9661
127.3	0.9648
127.4	0.9643
127.5	0.9628
127.6	0.9645
127.7	0.9647
127.8	0.9622
127.9	0.9634
128	0.9669
128.1	0.9663
128.2	0.9682
128.3	0.9686
128.4	0.9651
128.5	0.9663
128.6	0.9663
128.7	0.9677
128.8	0.9684
128.9	0.9682
129	0.9692
129.1	0.9691
129.2	0.9694
129.3	0.9691
129.4	0.9677
129.5	0.9668
129.6	0.9669
129.7	0.9681
129.8	0.9693
129.9	0.9688
130	0.9698
130.1	0.969
130.2	0.9682
130.3	0.9668
130.4	0.9662
130.5	0.9674
130.6	0.9676
130.7	0.9669
130.8	0.9669
130.9	0.9676
131	0.9653
131.1	0.9664
131.2	0.9675
131.3	0.9681
131.4	0.969
131.5	0.9671
131.6	0.9685
131.7	0.9685
131.8	0.9684
131.9	0.9698
132	0.9689
132.1	0.9699
132.2	0.9701
132.3	0.9685
132.4	0.9687
132.5	0.969
132.6	0.9699
132.7	0.9717
132.8	0.9694
132.9	0.972
133	0.9703
133.1	0.9706
133.2	0.971
133.3	0.971
133.4	0.9725
133.5	0.9712
133.6	0.972
133.7	0.9712
133.8	0.972
133.9	0.9707
134	0.9697
134.1	0.9698
134.2	0.9705
134.3	0.9685
134.4	0.9689
134.5	0.9715
134.6	0.9701
134.7	0.9691
134.8	0.9702
134.9	0.9703
135	0.9723
135.1	0.9717
135.2	0.9719
135.3	0.972
135.4	0.9725
135.5	0.9724
135.6	0.9724
135.7	0.9718
135.8	0.9728
135.9	0.9725
136	0.9725
136.1	0.972
136.2	0.9724
136.3	0.9734
136.4	0.9716
136.5	0.9705
136.6	0.9703
136.7	0.9691
136.8	0.9704
136.9	0.9703
137	0.9699
137.1	0.9715
137.2	0.9733
137.3	0.9735
137.4	0.9728
137.5	0.9711
137.6	0.9701
137.7	0.9695
137.8	0.9691
137.9	0.9703
138	0.9724
138.1	0.9719
138.2	0.9724
138.3	0.9693
138.4	0.9703
138.5	0.9696
138.6	0.9686
138.7	0.968
138.8	0.9691
138.9	0.9702
139	0.9708
139.1	0.9706
139.2	0.9731
139.3	0.9732
139.4	0.9711
139.5	0.973
139.6	0.9735
139.7	0.9737
139.8	0.9723
139.9	0.9731
140	0.9722
140.1	0.9731
140.2	0.9724
140.3	0.974
140.4	0.9729
140.5	0.9735
140.6	0.9738
140.7	0.9752
140.8	0.9743
140.9	0.9748
141	0.9756
141.1	0.975
141.2	0.9743
141.3	0.9749
141.4	0.9753
141.5	0.9748
141.6	0.9746
141.7	0.9754
141.8	0.9749
141.9	0.975
142	0.974
142.1	0.9747
142.2	0.9733
142.3	0.9731
142.4	0.9733
142.5	0.9735
142.6	0.973
142.7	0.9732
142.8	0.9727
142.9	0.9717
143	0.972
143.1	0.973
143.2	0.9719
143.3	0.9728
143.4	0.973
143.5	0.9726
143.6	0.9721
143.7	0.974
143.8	0.9741
143.9	0.9763
144	0.9753
144.1	0.9748
144.2	0.9744
144.3	0.9759
144.4	0.9757
144.5	0.9755
144.6	0.975
144.7	0.9754
144.8	0.9749
144.9	0.9737
145	0.9716
145.1	0.9719
145.2	0.9714
145.3	0.9711
145.4	0.9721
145.5	0.9713
145.6	0.9726
145.7	0.9724
145.8	0.975
145.9	0.9756
146	0.9753
146.1	0.977
146.2	0.977
146.3	0.9767
146.4	0.9767
146.5	0.9756
146.6	0.9748
146.7	0.9765
146.8	0.9775
146.9	0.978
147	0.976
147.1	0.9777
147.2	0.9772
147.3	0.9754
147.4	0.975
147.5	0.9764
147.6	0.9777
147.7	0.9777
147.8	0.9762
147.9	0.9765
148	0.9758
148.1	0.9755
148.2	0.9756
148.3	0.9746
148.4	0.9745
148.5	0.9753
148.6	0.9766
148.7	0.9751
148.8	0.9755
148.9	0.9765
149	0.9781
149.1	0.9778
149.2	0.9778
149.3	0.9775
149.4	0.9771
149.5	0.9776
149.6	0.9756
149.7	0.9752
149.8	0.9746
149.9	0.9732
150	0.9739
150.1	0.9752
150.2	0.9758
150.3	0.9761
150.4	0.9767
150.5	0.9761
150.6	0.9761
150.7	0.9766
150.8	0.9774
150.9	0.9776
151	0.9803
151.1	0.9778
151.2	0.9776
151.3	0.9774
151.4	0.9762
151.5	0.9765
151.6	0.9748
151.7	0.9749
151.8	0.9735
151.9	0.9742
152	0.9752
152.1	0.9753
152.2	0.9757
152.3	0.9735
152.4	0.9755
152.5	0.9767
152.6	0.976
152.7	0.9759
152.8	0.9746
152.9	0.9751
153	0.9745
153.1	0.974
153.2	0.9759
153.3	0.9767
153.4	0.9773
153.5	0.9767
153.6	0.9768
153.7	0.9772
153.8	0.9788
153.9	0.9792
154	0.9792
154.1	0.9788
154.2	0.98
154.3	0.9799
154.4	0.9812
154.5	0.9812
154.6	0.9812
154.7	0.9807
154.8	0.9798
154.9	0.9792
155	0.9791
155.1	0.9783
155.2	0.9785
155.3	0.979
155.4	0.9781
155.5	0.9781
155.6	0.9774
155.7	0.9767
155.8	0.976
155.9	0.9755
156	0.9751
156.1	0.9759
156.2	0.9774
156.3	0.9774
156.4	0.9772
156.5	0.9768
156.6	0.9782
156.7	0.9777
156.8	0.9771
156.9	0.978
157	0.9801
157.1	0.9809
157.2	0.9791
157.3	0.9793
157.4	0.9803
157.5	0.9808
157.6	0.9805
157.7	0.9802
157.8	0.9807
157.9	0.9814
158	0.9808
158.1	0.9802
158.2	0.9792
158.3	0.9794
158.4	0.9791
158.5	0.9787
158.6	0.9788
158.7	0.9786
158.8	0.9784
158.9	0.9797
159	0.9785
159.1	0.9815
159.2	0.9817
159.3	0.9814
159.4	0.9794
159.5	0.9784
159.6	0.9781
159.7	0.9796
159.8	0.9813
159.9	0.9804
160	0.9797
160.1	0.9797
160.2	0.9793
160.3	0.98
160.4	0.9802
160.5	0.9792
160.6	0.9804
160.7	0.9815
160.8	0.9811
160.9	0.9791
161	0.9797
161.1	0.9801
161.2	0.9792
161.3	0.9791
161.4	0.9789
161.5	0.979
161.6	0.9779
161.7	0.9766
161.8	0.9772
161.9	0.9788
162	0.9809
162.1	0.9799
162.2	0.9793
162.3	0.9809
162.4	0.9798
162.5	0.9797
162.6	0.9783
162.7	0.979
162.8	0.9789
162.9	0.9798
163	0.9812
163.1	0.98
163.2	0.9794
163.3	0.9791
163.4	0.9791
163.5	0.9795
163.6	0.9783
163.7	0.9782
163.8	0.9782
163.9	0.9786
164	0.978
164.1	0.9783
164.2	0.9796
164.3	0.9793
164.4	0.9783
164.5	0.9777
164.6	0.9795
164.7	0.9805
164.8	0.9806
164.9	0.9796
165	0.979
165.1	0.9795
165.2	0.9808
165.3	0.9803
165.4	0.9811
165.5	0.9805
165.6	0.9801
165.7	0.9796
165.8	0.9792
165.9	0.978
166	0.9786
166.1	0.979
166.2	0.9807
166.3	0.9788
166.4	0.9786
166.5	0.9799
166.6	0.9783
166.7	0.9784
166.8	0.9796
166.9	0.9804
167	0.9813
167.1	0.981
167.2	0.9813
167.3	0.9811
167.4	0.9824
167.5	0.9821
167.6	0.9818
167.7	0.9812
167.8	0.9811
167.9	0.9803
168	0.9817
168.1	0.9827
168.2	0.9808
168.3	0.9813
168.4	0.9807
168.5	0.9813
168.6	0.9818
168.7	0.9821
168.8	0.9816
168.9	0.9808
169	0.98
169.1	0.9798
169.2	0.98
169.3	0.9804
169.4	0.9794
169.5	0.9794
169.6	0.9782
169.7	0.9786
169.8	0.9779
169.9	0.9777
170	0.9785
170.1	0.9784
170.2	0.9805
170.3	0.9799
170.4	0.9809
170.5	0.9806
170.6	0.981
170.7	0.9818
170.8	0.9828
170.9	0.9818
171	0.9814
171.1	0.9811
171.2	0.9818
171.3	0.9821
171.4	0.9831
171.5	0.9828
171.6	0.982
171.7	0.9821
171.8	0.983
171.9	0.9824
172	0.9821
172.1	0.9813
172.2	0.9812
172.3	0.9815
172.4	0.9813
172.5	0.9813
172.6	0.9806
172.7	0.9806
172.8	0.9828
172.9	0.9823
173	0.9825
173.1	0.9814
173.2	0.9827
173.3	0.982
173.4	0.9822
173.5	0.9828
173.6	0.9824
173.7	0.9822
173.8	0.9816
173.9	0.9806
174	0.982
174.1	0.9819
174.2	0.9815
174.3	0.9817
174.4	0.9802
174.5	0.9806
174.6	0.9822
174.7	0.9815
174.8	0.9808
174.9	0.9811
175	0.9817
175.1	0.9809
175.2	0.9817
175.3	0.9818
175.4	0.9823
175.5	0.9811
175.6	0.9819
175.7	0.9809
175.8	0.9822
175.9	0.9823
176	0.9826
176.1	0.9815
176.2	0.9809
176.3	0.9815
176.4	0.9803
176.5	0.9805
176.6	0.9811
176.7	0.981
176.8	0.9822
176.9	0.9825
177	0.9821
177.1	0.9815
177.2	0.9823
177.3	0.9828
177.4	0.9832
177.5	0.9809
177.6	0.9796
177.7	0.9807
177.8	0.9807
177.9	0.9803
178	0.9824
178.1	0.9824
178.2	0.9814
178.3	0.9807
178.4	0.9806
178.5	0.9799
178.6	0.981
178.7	0.9824
178.8	0.9816
178.9	0.9819
179	0.9825
179.1	0.9819
179.2	0.9815
179.3	0.9802
179.4	0.9813
179.5	0.9826
179.6	0.9828
179.7	0.983
179.8	0.982
179.9	0.9832
180	0.9828
180.1	0.9832
180.2	0.9839
180.3	0.9826
180.4	0.9809
180.5	0.9806
180.6	0.9811
180.7	0.9817
180.8	0.9815
180.9	0.9817
181	0.9809
181.1	0.9806
181.2	0.9797
181.3	0.9803
181.4	0.9807
181.5	0.9811
181.6	0.9816
181.7	0.9814
181.8	0.9815
181.9	0.9816
182	0.9814
182.1	0.9818
182.2	0.982
182.3	0.9816
182.4	0.9814
182.5	0.982
182.6	0.9835
182.7	0.985
182.8	0.9844
182.9	0.9824
183	0.9812
183.1	0.9809
183.2	0.9817
183.3	0.9824
183.4	0.9818
183.5	0.981
183.6	0.982
183.7	0.982
183.8	0.9812
183.9	0.9808
184	0.9805
184.1	0.9805
184.2	0.9798
184.3	0.9804
184.4	0.9813
184.5	0.9802
184.6	0.9814
184.7	0.9815
184.8	0.9827
184.9	0.9814
185	0.9816
185.1	0.9822
185.2	0.9816
185.3	0.9816
185.4	0.9818
185.5	0.9808
185.6	0.9808
185.7	0.9795
185.8	0.9785
185.9	0.9787
186	0.9793
186.1	0.9781
186.2	0.978
186.3	0.9799
186.4	0.9819
186.5	0.9822
186.6	0.9819
186.7	0.9822
186.8	0.9832
186.9	0.9837
187	0.9837
187.1	0.9844
187.2	0.9843
187.3	0.9841
187.4	0.9847
187.5	0.9847
187.6	0.9846
187.7	0.9836
187.8	0.9835
187.9	0.9829
188	0.9828
188.1	0.9827
188.2	0.9834
188.3	0.9839
188.4	0.9841
188.5	0.9818
188.6	0.9812
188.7	0.9808
188.8	0.9823
188.9	0.9818
189	0.9822
189.1	0.9817
189.2	0.9805
189.3	0.9791
189.4	0.9797
189.5	0.9814
189.6	0.9804
189.7	0.9807
189.8	0.9805
189.9	0.9813
190	0.9804
190.1	0.9786
190.2	0.9788
190.3	0.9789
190.4	0.979
190.5	0.9794
190.6	0.9809
190.7	0.9799
190.8	0.9801
190.9	0.9795
191	0.9802
191.1	0.9814
191.2	0.9823
191.3	0.9814
191.4	0.983
191.5	0.9828
191.6	0.9804
191.7	0.982
191.8	0.9815
191.9	0.9824
192	0.9813
192.1	0.9811
192.2	0.9823
192.3	0.9828
192.4	0.9825
192.5	0.9826
192.6	0.9827
192.7	0.9826
192.8	0.9822
192.9	0.9831
193	0.9828
193.1	0.9831
193.2	0.9827
193.3	0.9821
193.4	0.9817
193.5	0.9841
193.6	0.9826
193.7	0.9832
193.8	0.9843
193.9	0.9836
194	0.9834
194.1	0.9828
194.2	0.9835
194.3	0.984
194.4	0.9831
194.5	0.9832
194.6	0.9837
194.7	0.9838
194.8	0.9831
194.9	0.9823
195	0.9831
195.1	0.983
195.2	0.9832
195.3	0.9838
195.4	0.9834
195.5	0.983
195.6	0.9837
195.7	0.9819
195.8	0.9826
195.9	0.9829
196	0.9835
196.1	0.9837
196.2	0.9835
196.3	0.9845
196.4	0.9851
196.5	0.984
196.6	0.9834
196.7	0.9834
196.8	0.9823
196.9	0.9821
197	0.9823
197.1	0.9824
197.2	0.9827
197.3	0.9808
197.4	0.982
197.5	0.9824
197.6	0.9811
197.7	0.9822
197.8	0.9819
197.9	0.9804
198	0.9814
198.1	0.9821
198.2	0.983
198.3	0.9827
198.4	0.9812
198.5	0.9833
198.6	0.9825
198.7	0.9823
198.8	0.9832
198.9	0.9835
199	0.9829
199.1	0.982
199.2	0.9813
199.3	0.9812
199.4	0.9815
199.5	0.9825
199.6	0.9805
199.7	0.9809
199.8	0.9811
199.9	0.9819
200	0.9828
[truncated: 14,000 more rows]
