# Supplementary material for: Bayesian inference of kinetic schemes for ion channels by Kalman filtering
Source: eLife journal article supplement (doi:10.7554/elife.62714), 2022-05-04
Supplement: fig4-data4 [file 1_Sim_N_5000_Strom_MW.xlsx]

## Sheet: Tabelle1
0.1	0
0.2	0
0.3	0
0.4	0
0.5	0
0.6	0
0.7	0
0.8	0
0.9	0
1	0
1.1	0
1.2	0
1.3	0
1.4	0
1.5	0
1.6	0
1.7	0
1.8	0
1.9	0
2	0
2.1	0
2.2	0
2.3	0
2.4	0
2.5	0
2.6	0
2.7	0
2.8	0
2.9	0
3	0
3.1	0
3.2	0
3.3	0
3.4	0
3.5	0
3.6	0
3.7	0
3.8	0
3.9	0
4	0
4.1	0
4.2	0
4.3	0
4.4	0
4.5	0
4.6	0
4.7	0
4.8	0
4.9	0
5	0
5.1	0
5.2	0
5.3	0
5.4	0
5.5	0
5.6	0
5.7	0
5.8	0
5.9	0
6	0
6.1	0
6.2	0
6.3	0
6.4	0
6.5	0
6.6	0
6.7	0
6.8	0
6.9	0
7	0
7.1	0
7.2	0
7.3	0
7.4	0
7.5	0
7.6	0
7.7	0
7.8	0
7.9	0
8	0
8.1	0
8.2	0
8.3	0
8.4	0
8.5	0
8.6	0
8.7	0
8.8	0
8.9	0
9	0
9.1	0
9.2	0
9.3	0
9.4	0
9.5	0
9.6	0
9.7	0
9.8	0
9.9	0
10	0
10.1	0
10.2	0
10.3	0
10.4	0
10.5	0
10.6	0
10.7	0
10.8	0
10.9	0
11	0
11.1	0
11.2	0
11.3	0
11.4	0
11.5	0
11.6	0
11.7	0
11.8	0
11.9	0
12	0
12.1	0
12.2	0
12.3	0
12.4	0
12.5	0
12.6	0
12.7	0
12.8	0
12.9	0
13	0
13.1	0
13.2	0
13.3	0
13.4	0
13.5	0
13.6	0
13.7	0
13.8	0
13.9	0
14	0
14.1	0
14.2	0
14.3	0
14.4	0
14.5	0
14.6	0
14.7	0
14.8	0
14.9	0
15	0
15.1	0
15.2	0
15.3	0
15.4	0
15.5	0
15.6	0
15.7	0
15.8	0
15.9	0
16	0
16.1	0
16.2	0
16.3	0
16.4	0
16.5	0
16.6	0
16.7	0
16.8	0
16.9	0
17	0
17.1	0
17.2	0
17.3	0
17.4	0
17.5	0
17.6	0
17.7	0
17.8	0
17.9	0
18	0
18.1	0
18.2	0
18.3	0
18.4	0
18.5	0
18.6	0
18.7	0
18.8	0
18.9	0
19	0
19.1	0
19.2	0
19.3	0
19.4	0
19.5	0
19.6	0
19.7	0
19.8	0
19.9	0
20	0
20.1	0
20.2	0
20.3	0
20.4	0
20.5	0
20.6	0
20.7	0
20.8	0
20.9	0
21	0
21.1	0
21.2	0
21.3	0
21.4	0
21.5	0
21.6	0
21.7	0
21.8	0
21.9	0
22	0
22.1	0
22.2	0
22.3	0
22.4	0
22.5	0
22.6	0
22.7	0
22.8	0
22.9	0
23	0
23.1	0
23.2	0
23.3	0
23.4	0
23.5	0
23.6	0
23.7	0
23.8	0
23.9	0
24	0
24.1	0
24.2	0
24.3	0
24.4	0
24.5	0
24.6	0
24.7	0
24.8	0
24.9	0
25	0
25.1	0
25.2	0
25.3	0
25.4	0
25.5	0
25.6	0
25.7	0
25.8	0
25.9	0
26	0
26.1	0
26.2	0
26.3	0
26.4	0
26.5	0
26.6	0
26.7	0
26.8	0
26.9	0
27	0
27.1	0
27.2	0
27.3	0
27.4	0
27.5	0
27.6	0
27.7	0
27.8	0
27.9	0
28	0
28.1	0
28.2	0
28.3	0
28.4	0
28.5	0
28.6	0
28.7	0
28.8	0
28.9	0
29	0
29.1	0
29.2	0
29.3	0
29.4	0
29.5	0
29.6	0
29.7	0
29.8	0
29.9	0
30	0
30.1	0
30.2	0
30.3	0
30.4	0
30.5	0
30.6	0
30.7	0
30.8	0
30.9	0
31	0
31.1	0
31.2	0
31.3	0
31.4	0
31.5	0
31.6	0
31.7	0
31.8	0
31.9	0
32	0
32.1	0
32.2	0
32.3	0
32.4	0
32.5	0
32.6	0
32.7	0
32.8	0
32.9	0
33	0
33.1	0
33.2	0
33.3	0
33.4	0
33.5	0
33.6	0
33.7	0
33.8	0
33.9	0
34	0
34.1	0
34.2	0
34.3	0
34.4	0
34.5	0
34.6	0
34.7	0
34.8	0
34.9	0
35	0
35.1	0
35.2	0
35.3	0
35.4	0
35.5	0
35.6	0
35.7	0
35.8	0
35.9	0
36	0
36.1	0
36.2	0
36.3	0
36.4	0
36.5	0
36.6	0
36.7	0
36.8	0
36.9	0
37	0
37.1	0
37.2	0
37.3	0
37.4	0
37.5	0
37.6	0
37.7	0
37.8	0
37.9	0
38	0
38.1	0
38.2	0
38.3	0
38.4	0
38.5	0
38.6	0
38.7	0
38.8	0
38.9	0
39	0
39.1	0
39.2	0
39.3	0
39.4	0
39.5	0
39.6	0
39.7	0
39.8	0
39.9	0
40	0
40.1	0
40.2	0
40.3	0
40.4	0
40.5	0
40.6	0
40.7	0
40.8	0
40.9	0
41	0
41.1	0
41.2	0
41.3	0
41.4	0
41.5	0
41.6	0
41.7	0
41.8	0
41.9	0
42	0
42.1	0
42.2	0
42.3	0
42.4	0
42.5	0
42.6	0
42.7	0
42.8	0
42.9	0
43	0
43.1	0
43.2	0
43.3	0
43.4	0
43.5	0
43.6	0
43.7	0
43.8	0
43.9	0
44	0
44.1	0
44.2	0
44.3	0
44.4	0
44.5	0
44.6	0
44.7	0
44.8	0
44.9	0
45	0
45.1	0
45.2	0
45.3	0
45.4	0
45.5	0
45.6	0
45.7	0
45.8	0
45.9	0
46	0
46.1	0
46.2	0
46.3	0
46.4	0
46.5	0
46.6	0
46.7	0
46.8	0
46.9	0
47	0
47.1	0
47.2	0
47.3	0
47.4	0
47.5	0
47.6	0
47.7	0
47.8	0
47.9	0
48	0
48.1	0
48.2	0
48.3	0
48.4	0
48.5	0
48.6	0
48.7	0
48.8	0
48.9	0
49	0
49.1	0
49.2	0
49.3	0
49.4	0
49.5	0
49.6	0
49.7	0
49.8	0
49.9	0
50	0
50.1	0
50.2	0
50.3	0
50.4	0
50.5	0
50.6	0
50.7	0
50.8	0
50.9	0
51	0
51.1	0
51.2	0
51.3	0
51.4	0
51.5	0
51.6	0
51.7	0
51.8	0
51.9	0
52	0
52.1	0
52.2	0
52.3	0
52.4	0
52.5	0
52.6	0
52.7	0
52.8	0
52.9	0
53	0
53.1	0
53.2	0
53.3	0
53.4	0
53.5	0
53.6	0
53.7	0
53.8	0
53.9	0
54	0
54.1	0
54.2	0
54.3	0
54.4	0
54.5	0
54.6	0
54.7	0
54.8	0
54.9	0
55	0
55.1	0
55.2	0
55.3	0
55.4	0
55.5	0
55.6	0
55.7	0
55.8	0
55.9	0
56	0
56.1	0
56.2	0
56.3	0
56.4	0
56.5	0
56.6	0
56.7	0
56.8	0
56.9	0
57	0
57.1	0
57.2	0
57.3	0
57.4	0
57.5	0
57.6	0
57.7	0
57.8	0
57.9	0
58	0
58.1	0
58.2	0
58.3	0
58.4	0
58.5	0
58.6	0
58.7	0
58.8	0
58.9	0
59	0
59.1	0
59.2	0
59.3	0
59.4	0
59.5	0
59.6	0
59.7	0
59.8	0
59.9	0
60	0
60.1	0
60.2	0
60.3	0
60.4	0
60.5	0
60.6	0
60.7	0
60.8	0
60.9	0
61	0
61.1	0
61.2	0
61.3	0
61.4	0
61.5	0
61.6	0
61.7	0
61.8	0
61.9	0
62	0
62.1	0
62.2	0
62.3	0
62.4	0
62.5	0
62.6	0
62.7	0
62.8	0
62.9	0
63	0
63.1	0
63.2	0
63.3	0
63.4	0
63.5	0
63.6	0
63.7	0
63.8	0
63.9	0
64	0
64.1	0
64.2	0
64.3	0
64.4	0
64.5	0
64.6	0
64.7	0
64.8	0
64.9	0
65	0
65.1	0
65.2	0
65.3	0
65.4	0
65.5	0
65.6	0
65.7	0
65.8	0
65.9	0
66	0
66.1	0
66.2	0
66.3	0
66.4	0
66.5	0
66.6	0
66.7	0
66.8	0
66.9	0
67	0
67.1	0
67.2	0
67.3	0
67.4	0
67.5	0
67.6	0
67.7	0
67.8	0
67.9	0
68	0
68.1	0
68.2	0
68.3	0
68.4	0
68.5	0
68.6	0
68.7	0
68.8	0
68.9	0
69	0
69.1	0
69.2	0
69.3	0
69.4	0
69.5	0
69.6	0
69.7	0
69.8	0
69.9	0
70	0
70.1	0
70.2	0
70.3	0
70.4	0
70.5	0
70.6	0
70.7	0
70.8	0
70.9	0
71	0
71.1	0
71.2	0
71.3	0
71.4	0
71.5	0
71.6	0
71.7	0
71.8	0
71.9	0
72	0
72.1	0
72.2	0
72.3	0
72.4	0
72.5	0
72.6	0
72.7	0
72.8	0
72.9	0
73	0
73.1	0
73.2	0
73.3	0
73.4	0
73.5	0
73.6	0
73.7	0
73.8	0
73.9	0
74	0
74.1	0
74.2	0
74.3	0
74.4	0
74.5	0
74.6	0
74.7	0
74.8	0
74.9	0
75	0
75.1	0
75.2	0
75.3	0
75.4	0
75.5	0
75.6	0
75.7	0
75.8	0
75.9	0
76	0
76.1	0
76.2	0
76.3	0
76.4	0
76.5	0
76.6	0
76.7	0
76.8	0
76.9	0
77	0
77.1	0
77.2	0
77.3	0
77.4	0
77.5	0
77.6	0
77.7	0
77.8	0
77.9	0
78	0
78.1	0
78.2	0
78.3	0
78.4	0
78.5	0
78.6	0
78.7	0
78.8	0
78.9	0
79	0
79.1	0
79.2	0
79.3	0
79.4	0
79.5	0
79.6	0
79.7	0
79.8	0
79.9	0
80	0
80.1	0
80.2	0
80.3	0
80.4	0
80.5	0
80.6	0
80.7	0
80.8	0
80.9	0
81	0
81.1	0
81.2	0
81.3	0
81.4	0
81.5	0
81.6	0
81.7	0
81.8	0
81.9	0
82	0
82.1	0
82.2	0
82.3	0
82.4	0
82.5	0
82.6	0
82.7	0
82.8	0
82.9	0
83	0
83.1	0
83.2	0
83.3	0
83.4	0
83.5	0
83.6	0
83.7	0
83.8	0
83.9	0
84	0
84.1	0
84.2	0
84.3	0
84.4	0
84.5	0
84.6	0
84.7	0
84.8	0
84.9	0
85	0
85.1	0
85.2	0
85.3	0
85.4	0
85.5	0
85.6	0
85.7	0
85.8	0
85.9	0
86	0
86.1	0
86.2	0
86.3	0
86.4	0
86.5	0
86.6	0
86.7	0
86.8	0
86.9	0
87	0
87.1	0
87.2	0
87.3	0
87.4	0
87.5	0
87.6	0
87.7	0
87.8	0
87.9	0
88	0
88.1	0
88.2	0
88.3	0
88.4	0
88.5	0
88.6	0
88.7	0
88.8	0
88.9	0
89	0
89.1	0
89.2	0
89.3	0
89.4	0
89.5	0
89.6	0
89.7	0
89.8	0
89.9	0
90	0
90.1	0
90.2	0
90.3	0
90.4	0
90.5	0
90.6	0
90.7	0
90.8	0
90.9	0
91	0
91.1	0
91.2	0
91.3	0
91.4	0
91.5	0
91.6	0
91.7	0
91.8	0
91.9	0
92	0
92.1	0
92.2	0
92.3	0
92.4	0
92.5	0
92.6	0
92.7	0
92.8	0
92.9	0
93	0
93.1	0
93.2	0
93.3	0
93.4	0
93.5	0
93.6	0
93.7	0
93.8	0
93.9	0
94	0
94.1	0
94.2	0
94.3	0
94.4	0
94.5	0
94.6	0
94.7	0
94.8	0
94.9	0
95	0
95.1	0
95.2	0
95.3	0
95.4	0
95.5	0
95.6	0
95.7	0
95.8	0
95.9	0
96	0
96.1	0
96.2	0
96.3	0
96.4	0
96.5	0
96.6	0
96.7	0
96.8	0
96.9	0
97	0
97.1	0
97.2	0
97.3	0
97.4	0
97.5	0
97.6	0
97.7	0
97.8	0
97.9	0
98	0
98.1	0
98.2	0
98.3	0
98.4	0
98.5	0
98.6	0
98.7	0
98.8	0
98.9	0
99	0
99.1	0
99.2	0
99.3	0
99.4	0
99.5	0
99.6	0
99.7	0
99.8	0
99.9	0
100	0
100.1	0.0002
100.2	0.001
100.3	0.0022
100.4	0.0042
100.5	0.0064
100.6	0.0084
100.7	0.0118
100.8	0.0148
100.9	0.0188
101	0.0236
101.1	0.027
101.2	0.0306
101.3	0.0348
101.4	0.039
101.5	0.0424
101.6	0.0458
101.7	0.0502
101.8	0.0544
101.9	0.059
102	0.0626
102.1	0.0668
102.2	0.0696
102.3	0.0728
102.4	0.0768
102.5	0.0802
102.6	0.084
102.7	0.0882
102.8	0.0922
102.9	0.0952
103	0.0986
103.1	0.1018
103.2	0.1052
103.3	0.109
103.4	0.111
103.5	0.1138
103.6	0.1164
103.7	0.1186
103.8	0.1206
103.9	0.1236
104	0.1284
104.1	0.1308
104.2	0.134
104.3	0.1386
104.4	0.1416
104.5	0.1458
104.6	0.151
104.7	0.1554
104.8	0.1564
104.9	0.1594
105	0.1638
105.1	0.1698
105.2	0.1728
105.3	0.1758
105.4	0.1788
105.5	0.1816
105.6	0.1848
105.7	0.1876
105.8	0.1906
105.9	0.1926
106	0.1974
106.1	0.1996
106.2	0.2036
106.3	0.2068
106.4	0.21
106.5	0.2124
106.6	0.2154
106.7	0.2188
106.8	0.223
106.9	0.2276
107	0.23
107.1	0.2334
107.2	0.2362
107.3	0.2396
107.4	0.2422
107.5	0.246
107.6	0.2494
107.7	0.2524
107.8	0.2562
107.9	0.2586
108	0.261
108.1	0.2646
108.2	0.268
108.3	0.2726
108.4	0.2738
108.5	0.2746
108.6	0.2776
108.7	0.2794
108.8	0.2824
108.9	0.2846
109	0.2888
109.1	0.2918
109.2	0.2938
109.3	0.295
109.4	0.2976
109.5	0.3012
109.6	0.3028
109.7	0.3064
109.8	0.3084
109.9	0.3108
110	0.3126
110.1	0.3148
110.2	0.3172
110.3	0.3184
110.4	0.3206
110.5	0.324
110.6	0.3266
110.7	0.329
110.8	0.3322
110.9	0.336
111	0.3372
111.1	0.34
111.2	0.343
111.3	0.3446
111.4	0.346
111.5	0.3476
111.6	0.35
111.7	0.3532
111.8	0.3568
111.9	0.3584
112	0.3606
112.1	0.3634
112.2	0.3654
112.3	0.3672
112.4	0.3704
112.5	0.3732
112.6	0.3744
112.7	0.375
112.8	0.377
112.9	0.3794
113	0.3814
113.1	0.3836
113.2	0.3866
113.3	0.3884
113.4	0.3914
113.5	0.3922
113.6	0.3954
113.7	0.3978
113.8	0.4004
113.9	0.4026
114	0.4042
114.1	0.4062
114.2	0.4072
114.3	0.4106
114.4	0.4128
114.5	0.4138
114.6	0.416
114.7	0.4178
114.8	0.4192
114.9	0.4198
115	0.4212
115.1	0.4228
115.2	0.4236
115.3	0.425
115.4	0.428
115.5	0.4308
115.6	0.4322
115.7	0.4338
115.8	0.4354
115.9	0.4372
116	0.4394
116.1	0.441
116.2	0.4426
116.3	0.445
116.4	0.4466
116.5	0.4474
116.6	0.4484
116.7	0.4494
116.8	0.4512
116.9	0.4536
117	0.4562
117.1	0.4568
117.2	0.4578
117.3	0.4612
117.4	0.4626
117.5	0.4644
117.6	0.4656
117.7	0.4664
117.8	0.4684
117.9	0.471
118	0.4732
118.1	0.4752
118.2	0.4768
118.3	0.4784
118.4	0.4798
118.5	0.4802
118.6	0.4814
118.7	0.4836
118.8	0.4856
118.9	0.487
119	0.4884
119.1	0.49
119.2	0.4914
119.3	0.4932
119.4	0.4944
119.5	0.4954
119.6	0.496
119.7	0.4978
119.8	0.5006
119.9	0.5016
120	0.5034
120.1	0.505
120.2	0.5056
120.3	0.5066
120.4	0.5092
120.5	0.5108
120.6	0.512
120.7	0.5132
120.8	0.5152
120.9	0.5176
121	0.5184
121.1	0.5198
121.2	0.5226
121.3	0.5234
121.4	0.5248
121.5	0.5266
121.6	0.5276
121.7	0.5278
121.8	0.5298
121.9	0.5314
122	0.533
122.1	0.5358
122.2	0.5382
122.3	0.5388
122.4	0.5404
122.5	0.542
122.6	0.5436
122.7	0.545
122.8	0.5464
122.9	0.5476
123	0.5492
123.1	0.551
123.2	0.5526
123.3	0.5536
123.4	0.5536
123.5	0.5552
123.6	0.5562
123.7	0.5578
123.8	0.5592
123.9	0.5612
124	0.5636
124.1	0.5654
124.2	0.5672
124.3	0.5694
124.4	0.571
124.5	0.5728
124.6	0.5732
124.7	0.5748
124.8	0.5758
124.9	0.5768
125	0.5786
125.1	0.5798
125.2	0.5822
125.3	0.583
125.4	0.585
125.5	0.586
125.6	0.5882
125.7	0.5892
125.8	0.5934
125.9	0.5942
126	0.5954
126.1	0.5962
126.2	0.5968
126.3	0.5982
126.4	0.5992
126.5	0.5996
126.6	0.6008
126.7	0.6024
126.8	0.603
126.9	0.6044
127	0.6062
127.1	0.6068
127.2	0.6086
127.3	0.609
127.4	0.6108
127.5	0.6124
127.6	0.6136
127.7	0.6146
127.8	0.6152
127.9	0.6162
128	0.6166
128.1	0.6182
128.2	0.619
128.3	0.6198
128.4	0.6214
128.5	0.6226
128.6	0.6238
128.7	0.624
128.8	0.6244
128.9	0.626
129	0.6258
129.1	0.6282
129.2	0.6298
129.3	0.6312
129.4	0.6324
129.5	0.6342
129.6	0.635
129.7	0.6348
129.8	0.6364
129.9	0.6356
130	0.6372
130.1	0.6372
130.2	0.639
130.3	0.6394
130.4	0.6406
130.5	0.6416
130.6	0.6434
130.7	0.6442
130.8	0.6448
130.9	0.6454
131	0.6464
131.1	0.6472
131.2	0.6478
131.3	0.6474
131.4	0.6486
131.5	0.6506
131.6	0.6512
131.7	0.6522
131.8	0.6534
131.9	0.6542
132	0.6548
132.1	0.655
132.2	0.6558
132.3	0.6558
132.4	0.6568
132.5	0.6566
132.6	0.656
132.7	0.658
132.8	0.6596
132.9	0.6606
133	0.6608
133.1	0.6616
133.2	0.6626
133.3	0.6634
133.4	0.6634
133.5	0.6634
133.6	0.6646
133.7	0.665
133.8	0.6656
133.9	0.6666
134	0.668
134.1	0.6686
134.2	0.6696
134.3	0.6706
134.4	0.6714
134.5	0.6722
134.6	0.673
134.7	0.674
134.8	0.6742
134.9	0.6744
135	0.6752
135.1	0.6748
135.2	0.6744
135.3	0.6756
135.4	0.6766
135.5	0.6766
135.6	0.6774
135.7	0.679
135.8	0.6804
135.9	0.6812
136	0.6814
136.1	0.6806
136.2	0.6808
136.3	0.6816
136.4	0.6822
136.5	0.6822
136.6	0.6822
136.7	0.682
136.8	0.6816
136.9	0.6812
137	0.6816
137.1	0.6826
137.2	0.6828
137.3	0.6842
137.4	0.6858
137.5	0.6858
137.6	0.6866
137.7	0.6866
137.8	0.6874
137.9	0.6874
138	0.6882
138.1	0.6898
138.2	0.69
138.3	0.69
138.4	0.6902
138.5	0.691
138.6	0.6912
138.7	0.6924
138.8	0.6926
138.9	0.6936
139	0.6936
139.1	0.694
139.2	0.6954
139.3	0.6956
139.4	0.695
139.5	0.6954
139.6	0.6968
139.7	0.6964
139.8	0.6964
139.9	0.6968
140	0.697
140.1	0.697
140.2	0.6972
140.3	0.6976
140.4	0.698
140.5	0.698
140.6	0.698
140.7	0.698
140.8	0.6994
140.9	0.6994
141	0.6992
141.1	0.6998
141.2	0.701
141.3	0.701
141.4	0.7018
141.5	0.7014
141.6	0.702
141.7	0.7022
141.8	0.7026
141.9	0.7046
142	0.7056
142.1	0.7064
142.2	0.7068
142.3	0.7066
142.4	0.7084
142.5	0.7094
142.6	0.7102
142.7	0.7102
142.8	0.711
142.9	0.711
143	0.7114
143.1	0.712
143.2	0.713
143.3	0.7134
143.4	0.7132
143.5	0.7132
143.6	0.7138
143.7	0.7152
143.8	0.7156
143.9	0.7162
144	0.7176
144.1	0.7178
144.2	0.718
144.3	0.7182
144.4	0.7186
144.5	0.7196
144.6	0.7198
144.7	0.7194
144.8	0.72
144.9	0.7202
145	0.7212
145.1	0.721
145.2	0.7212
145.3	0.7204
145.4	0.7206
145.5	0.7214
145.6	0.7216
145.7	0.722
145.8	0.7226
145.9	0.723
146	0.7226
146.1	0.723
146.2	0.7238
146.3	0.7242
146.4	0.7246
146.5	0.7258
146.6	0.7268
146.7	0.7262
146.8	0.7266
146.9	0.726
147	0.727
147.1	0.7284
147.2	0.729
147.3	0.728
147.4	0.729
147.5	0.7302
147.6	0.7308
147.7	0.7318
147.8	0.7316
147.9	0.7322
148	0.7326
148.1	0.7328
148.2	0.7322
148.3	0.7328
148.4	0.733
148.5	0.734
148.6	0.7342
148.7	0.7338
148.8	0.7332
148.9	0.7338
149	0.7344
149.1	0.7352
149.2	0.7358
149.3	0.7362
149.4	0.7368
149.5	0.7372
149.6	0.7366
149.7	0.7368
149.8	0.7368
149.9	0.7374
150	0.7372
150.1	0.7378
150.2	0.7374
150.3	0.7386
150.4	0.7386
150.5	0.7392
150.6	0.7392
150.7	0.741
150.8	0.741
150.9	0.741
151	0.741
151.1	0.7412
151.2	0.7414
151.3	0.741
151.4	0.7414
151.5	0.7408
151.6	0.7396
151.7	0.7398
151.8	0.7404
151.9	0.7404
152	0.741
152.1	0.7414
152.2	0.741
152.3	0.7404
152.4	0.7412
152.5	0.7422
152.6	0.7426
152.7	0.7428
152.8	0.7446
152.9	0.746
153	0.7466
153.1	0.7468
153.2	0.747
153.3	0.7466
153.4	0.7476
153.5	0.748
153.6	0.7478
153.7	0.7476
153.8	0.7464
153.9	0.747
154	0.7466
154.1	0.7476
154.2	0.7486
154.3	0.7492
154.4	0.7488
154.5	0.7486
154.6	0.7486
154.7	0.7486
154.8	0.7494
154.9	0.7496
155	0.751
155.1	0.7516
155.2	0.7518
155.3	0.752
155.4	0.7524
155.5	0.7526
155.6	0.7528
155.7	0.7534
155.8	0.7526
155.9	0.753
156	0.7534
156.1	0.755
156.2	0.7558
156.3	0.7572
156.4	0.7576
156.5	0.7582
156.6	0.7574
156.7	0.7576
156.8	0.7574
156.9	0.7582
157	0.7588
157.1	0.7584
157.2	0.7584
157.3	0.7578
157.4	0.7572
157.5	0.7578
157.6	0.7586
157.7	0.7598
157.8	0.7604
157.9	0.7602
158	0.7602
158.1	0.7598
158.2	0.7596
158.3	0.7592
158.4	0.7596
158.5	0.7596
158.6	0.7592
158.7	0.7604
158.8	0.7604
158.9	0.7606
159	0.7606
159.1	0.7606
159.2	0.7596
159.3	0.7616
159.4	0.7622
159.5	0.7628
159.6	0.763
159.7	0.7632
159.8	0.763
159.9	0.7628
160	0.7622
160.1	0.7626
160.2	0.7628
160.3	0.7628
160.4	0.762
160.5	0.7628
160.6	0.7626
160.7	0.7624
160.8	0.762
160.9	0.763
161	0.763
161.1	0.7634
161.2	0.7632
161.3	0.7632
161.4	0.7626
161.5	0.7628
161.6	0.7638
161.7	0.7638
161.8	0.7638
161.9	0.764
162	0.7644
162.1	0.7658
162.2	0.7664
162.3	0.7672
162.4	0.7678
162.5	0.7676
162.6	0.7668
162.7	0.7674
162.8	0.7674
162.9	0.7668
163	0.767
163.1	0.7664
163.2	0.7674
163.3	0.7688
163.4	0.7678
163.5	0.768
163.6	0.7674
163.7	0.768
163.8	0.7696
163.9	0.77
164	0.77
164.1	0.7702
164.2	0.7714
164.3	0.7708
164.4	0.7712
164.5	0.7722
164.6	0.7724
164.7	0.7722
164.8	0.7734
164.9	0.7732
165	0.7732
165.1	0.7738
165.2	0.7738
165.3	0.7742
165.4	0.7746
165.5	0.7742
165.6	0.7742
165.7	0.7746
165.8	0.7744
165.9	0.774
166	0.774
166.1	0.7744
166.2	0.7754
166.3	0.7754
166.4	0.775
166.5	0.7754
166.6	0.7756
166.7	0.775
166.8	0.774
166.9	0.774
167	0.7742
167.1	0.7732
167.2	0.7726
167.3	0.772
167.4	0.7726
167.5	0.7726
167.6	0.7734
167.7	0.7736
167.8	0.7738
167.9	0.7732
168	0.7736
168.1	0.7742
168.2	0.7744
168.3	0.7744
168.4	0.7746
168.5	0.7746
168.6	0.775
168.7	0.7756
168.8	0.7754
168.9	0.7754
169	0.7758
169.1	0.7768
169.2	0.7762
169.3	0.7762
169.4	0.7766
169.5	0.7756
169.6	0.7756
169.7	0.7764
169.8	0.7764
169.9	0.777
170	0.778
170.1	0.7796
170.2	0.7792
170.3	0.7796
170.4	0.7796
170.5	0.78
170.6	0.7804
170.7	0.7812
170.8	0.7822
170.9	0.782
171	0.7814
171.1	0.7812
171.2	0.7828
171.3	0.7826
171.4	0.783
171.5	0.783
171.6	0.7836
171.7	0.784
171.8	0.7854
171.9	0.7856
172	0.7864
172.1	0.7866
172.2	0.7856
172.3	0.7862
172.4	0.7866
172.5	0.7882
172.6	0.7888
172.7	0.7898
172.8	0.7902
172.9	0.7898
173	0.7902
173.1	0.7902
173.2	0.7902
173.3	0.7912
173.4	0.7912
173.5	0.7908
173.6	0.7904
173.7	0.7898
173.8	0.7894
173.9	0.7906
174	0.791
174.1	0.7902
174.2	0.7906
174.3	0.791
174.4	0.791
174.5	0.7908
174.6	0.7914
174.7	0.7918
174.8	0.7924
174.9	0.7918
175	0.7916
175.1	0.7904
175.2	0.7904
175.3	0.7894
175.4	0.7886
175.5	0.7896
175.6	0.789
175.7	0.788
175.8	0.7892
175.9	0.7898
176	0.79
176.1	0.7906
176.2	0.7902
176.3	0.7908
176.4	0.7914
176.5	0.7918
176.6	0.7912
176.7	0.7916
176.8	0.7914
176.9	0.792
177	0.791
177.1	0.7918
177.2	0.7906
177.3	0.7914
177.4	0.7912
177.5	0.7916
177.6	0.792
177.7	0.792
177.8	0.7916
177.9	0.7916
178	0.7912
178.1	0.7906
178.2	0.7914
178.3	0.7914
178.4	0.792
178.5	0.793
178.6	0.7922
178.7	0.7924
178.8	0.7922
178.9	0.793
179	0.7926
179.1	0.792
179.2	0.792
179.3	0.791
179.4	0.791
179.5	0.7904
179.6	0.7904
179.7	0.791
179.8	0.7906
179.9	0.7912
180	0.7908
180.1	0.7902
180.2	0.7908
180.3	0.7908
180.4	0.7908
180.5	0.792
180.6	0.7916
180.7	0.7922
180.8	0.7918
180.9	0.7914
181	0.7916
181.1	0.791
181.2	0.7898
181.3	0.791
181.4	0.7918
181.5	0.7912
181.6	0.7906
181.7	0.7906
181.8	0.7902
181.9	0.7908
182	0.7926
182.1	0.792
182.2	0.7922
182.3	0.792
182.4	0.7922
182.5	0.7922
182.6	0.7926
182.7	0.7926
182.8	0.7924
182.9	0.7926
183	0.7914
183.1	0.792
183.2	0.7932
183.3	0.7932
183.4	0.7934
183.5	0.7932
183.6	0.7936
183.7	0.7944
183.8	0.7938
183.9	0.7938
184	0.7944
184.1	0.7944
184.2	0.795
184.3	0.7952
184.4	0.7958
184.5	0.7956
184.6	0.7958
184.7	0.7962
184.8	0.796
184.9	0.7962
185	0.7968
185.1	0.7966
185.2	0.7962
185.3	0.796
185.4	0.7968
185.5	0.7962
185.6	0.7958
185.7	0.7964
185.8	0.7958
185.9	0.7964
186	0.7964
186.1	0.7966
186.2	0.797
186.3	0.7976
186.4	0.7972
186.5	0.7972
186.6	0.7978
186.7	0.798
186.8	0.7978
186.9	0.7988
187	0.7994
187.1	0.7998
187.2	0.8004
187.3	0.8006
187.4	0.8
187.5	0.8
187.6	0.7994
187.7	0.8004
187.8	0.7996
187.9	0.7994
188	0.7996
188.1	0.799
188.2	0.799
188.3	0.7994
188.4	0.7996
188.5	0.7996
188.6	0.7992
188.7	0.799
188.8	0.8
188.9	0.7996
189	0.7994
189.1	0.7984
189.2	0.798
189.3	0.7984
189.4	0.7978
189.5	0.7976
189.6	0.7984
189.7	0.7986
189.8	0.7988
189.9	0.7986
190	0.7978
190.1	0.7972
190.2	0.7974
190.3	0.797
190.4	0.7954
190.5	0.7948
190.6	0.7944
190.7	0.7944
190.8	0.7934
190.9	0.7936
191	0.7944
191.1	0.795
191.2	0.7952
191.3	0.7944
191.4	0.794
191.5	0.7942
191.6	0.7944
191.7	0.7948
191.8	0.7946
191.9	0.7942
192	0.7942
192.1	0.7934
192.2	0.7938
192.3	0.7946
192.4	0.794
192.5	0.7944
192.6	0.7942
192.7	0.7936
192.8	0.7936
192.9	0.7936
193	0.7934
193.1	0.794
193.2	0.7944
193.3	0.7936
193.4	0.7944
193.5	0.794
193.6	0.7938
193.7	0.7942
193.8	0.7946
193.9	0.7946
194	0.7934
194.1	0.7932
194.2	0.7938
194.3	0.794
194.4	0.7938
194.5	0.7934
194.6	0.7936
194.7	0.7918
194.8	0.792
194.9	0.7928
195	0.7946
195.1	0.795
195.2	0.795
195.3	0.7952
195.4	0.7958
195.5	0.7964
195.6	0.7976
195.7	0.7972
195.8	0.7974
195.9	0.797
196	0.7976
196.1	0.7966
196.2	0.7956
196.3	0.796
196.4	0.796
196.5	0.7966
196.6	0.796
196.7	0.7958
196.8	0.7956
196.9	0.795
197	0.7948
197.1	0.7954
197.2	0.796
197.3	0.7958
197.4	0.7958
197.5	0.796
197.6	0.7964
197.7	0.797
197.8	0.7964
197.9	0.797
198	0.7974
198.1	0.7976
198.2	0.797
198.3	0.7978
198.4	0.7986
198.5	0.7988
198.6	0.7996
198.7	0.7998
198.8	0.8008
198.9	0.801
199	0.801
199.1	0.801
199.2	0.8002
199.3	0.8002
199.4	0.8
199.5	0.7998
199.6	0.7994
199.7	0.8002
199.8	0.8
199.9	0.8008
200	0.801
[truncated: 14,000 more rows]
