# Supplementary material for: Bayesian inference of kinetic schemes for ion channels by Kalman filtering
Source: eLife journal article supplement (doi:10.7554/elife.62714), 2022-05-04
Supplement: fig4-data4 [file 1_Sim_N_6000_Fluor_MW_8M.xlsx]

## Sheet: Tabelle1
0.1	0
0.2	0
0.3	0
0.4	0
0.5	0
0.6	0
0.7	0
0.8	0
0.9	0
1	0
1.1	0
1.2	0
1.3	0
1.4	0
1.5	0
1.6	0
1.7	0
1.8	0
1.9	0
2	0
2.1	0
2.2	0
2.3	0
2.4	0
2.5	0
2.6	0
2.7	0
2.8	0
2.9	0
3	0
3.1	0
3.2	0
3.3	0
3.4	0
3.5	0
3.6	0
3.7	0
3.8	0
3.9	0
4	0
4.1	0
4.2	0
4.3	0
4.4	0
4.5	0
4.6	0
4.7	0
4.8	0
4.9	0
5	0
5.1	0
5.2	0
5.3	0
5.4	0
5.5	0
5.6	0
5.7	0
5.8	0
5.9	0
6	0
6.1	0
6.2	0
6.3	0
6.4	0
6.5	0
6.6	0
6.7	0
6.8	0
6.9	0
7	0
7.1	0
7.2	0
7.3	0
7.4	0
7.5	0
7.6	0
7.7	0
7.8	0
7.9	0
8	0
8.1	0
8.2	0
8.3	0
8.4	0
8.5	0
8.6	0
8.7	0
8.8	0
8.9	0
9	0
9.1	0
9.2	0
9.3	0
9.4	0
9.5	0
9.6	0
9.7	0
9.8	0
9.9	0
10	0
10.1	0
10.2	0
10.3	0
10.4	0
10.5	0
10.6	0
10.7	0
10.8	0
10.9	0
11	0
11.1	0
11.2	0
11.3	0
11.4	0
11.5	0
11.6	0
11.7	0
11.8	0
11.9	0
12	0
12.1	0
12.2	0
12.3	0
12.4	0
12.5	0
12.6	0
12.7	0
12.8	0
12.9	0
13	0
13.1	0
13.2	0
13.3	0
13.4	0
13.5	0
13.6	0
13.7	0
13.8	0
13.9	0
14	0
14.1	0
14.2	0
14.3	0
14.4	0
14.5	0
14.6	0
14.7	0
14.8	0
14.9	0
15	0
15.1	0
15.2	0
15.3	0
15.4	0
15.5	0
15.6	0
15.7	0
15.8	0
15.9	0
16	0
16.1	0
16.2	0
16.3	0
16.4	0
16.5	0
16.6	0
16.7	0
16.8	0
16.9	0
17	0
17.1	0
17.2	0
17.3	0
17.4	0
17.5	0
17.6	0
17.7	0
17.8	0
17.9	0
18	0
18.1	0
18.2	0
18.3	0
18.4	0
18.5	0
18.6	0
18.7	0
18.8	0
18.9	0
19	0
19.1	0
19.2	0
19.3	0
19.4	0
19.5	0
19.6	0
19.7	0
19.8	0
19.9	0
20	0
20.1	0
20.2	0
20.3	0
20.4	0
20.5	0
20.6	0
20.7	0
20.8	0
20.9	0
21	0
21.1	0
21.2	0
21.3	0
21.4	0
21.5	0
21.6	0
21.7	0
21.8	0
21.9	0
22	0
22.1	0
22.2	0
22.3	0
22.4	0
22.5	0
22.6	0
22.7	0
22.8	0
22.9	0
23	0
23.1	0
23.2	0
23.3	0
23.4	0
23.5	0
23.6	0
23.7	0
23.8	0
23.9	0
24	0
24.1	0
24.2	0
24.3	0
24.4	0
24.5	0
24.6	0
24.7	0
24.8	0
24.9	0
25	0
25.1	0
25.2	0
25.3	0
25.4	0
25.5	0
25.6	0
25.7	0
25.8	0
25.9	0
26	0
26.1	0
26.2	0
26.3	0
26.4	0
26.5	0
26.6	0
26.7	0
26.8	0
26.9	0
27	0
27.1	0
27.2	0
27.3	0
27.4	0
27.5	0
27.6	0
27.7	0
27.8	0
27.9	0
28	0
28.1	0
28.2	0
28.3	0
28.4	0
28.5	0
28.6	0
28.7	0
28.8	0
28.9	0
29	0
29.1	0
29.2	0
29.3	0
29.4	0
29.5	0
29.6	0
29.7	0
29.8	0
29.9	0
30	0
30.1	0
30.2	0
30.3	0
30.4	0
30.5	0
30.6	0
30.7	0
30.8	0
30.9	0
31	0
31.1	0
31.2	0
31.3	0
31.4	0
31.5	0
31.6	0
31.7	0
31.8	0
31.9	0
32	0
32.1	0
32.2	0
32.3	0
32.4	0
32.5	0
32.6	0
32.7	0
32.8	0
32.9	0
33	0
33.1	0
33.2	0
33.3	0
33.4	0
33.5	0
33.6	0
33.7	0
33.8	0
33.9	0
34	0
34.1	0
34.2	0
34.3	0
34.4	0
34.5	0
34.6	0
34.7	0
34.8	0
34.9	0
35	0
35.1	0
35.2	0
35.3	0
35.4	0
35.5	0
35.6	0
35.7	0
35.8	0
35.9	0
36	0
36.1	0
36.2	0
36.3	0
36.4	0
36.5	0
36.6	0
36.7	0
36.8	0
36.9	0
37	0
37.1	0
37.2	0
37.3	0
37.4	0
37.5	0
37.6	0
37.7	0
37.8	0
37.9	0
38	0
38.1	0
38.2	0
38.3	0
38.4	0
38.5	0
38.6	0
38.7	0
38.8	0
38.9	0
39	0
39.1	0
39.2	0
39.3	0
39.4	0
39.5	0
39.6	0
39.7	0
39.8	0
39.9	0
40	0
40.1	0
40.2	0
40.3	0
40.4	0
40.5	0
40.6	0
40.7	0
40.8	0
40.9	0
41	0
41.1	0
41.2	0
41.3	0
41.4	0
41.5	0
41.6	0
41.7	0
41.8	0
41.9	0
42	0
42.1	0
42.2	0
42.3	0
42.4	0
42.5	0
42.6	0
42.7	0
42.8	0
42.9	0
43	0
43.1	0
43.2	0
43.3	0
43.4	0
43.5	0
43.6	0
43.7	0
43.8	0
43.9	0
44	0
44.1	0
44.2	0
44.3	0
44.4	0
44.5	0
44.6	0
44.7	0
44.8	0
44.9	0
45	0
45.1	0
45.2	0
45.3	0
45.4	0
45.5	0
45.6	0
45.7	0
45.8	0
45.9	0
46	0
46.1	0
46.2	0
46.3	0
46.4	0
46.5	0
46.6	0
46.7	0
46.8	0
46.9	0
47	0
47.1	0
47.2	0
47.3	0
47.4	0
47.5	0
47.6	0
47.7	0
47.8	0
47.9	0
48	0
48.1	0
48.2	0
48.3	0
48.4	0
48.5	0
48.6	0
48.7	0
48.8	0
48.9	0
49	0
49.1	0
49.2	0
49.3	0
49.4	0
49.5	0
49.6	0
49.7	0
49.8	0
49.9	0
50	0
50.1	0
50.2	0
50.3	0
50.4	0
50.5	0
50.6	0
50.7	0
50.8	0
50.9	0
51	0
51.1	0
51.2	0
51.3	0
51.4	0
51.5	0
51.6	0
51.7	0
51.8	0
51.9	0
52	0
52.1	0
52.2	0
52.3	0
52.4	0
52.5	0
52.6	0
52.7	0
52.8	0
52.9	0
53	0
53.1	0
53.2	0
53.3	0
53.4	0
53.5	0
53.6	0
53.7	0
53.8	0
53.9	0
54	0
54.1	0
54.2	0
54.3	0
54.4	0
54.5	0
54.6	0
54.7	0
54.8	0
54.9	0
55	0
55.1	0
55.2	0
55.3	0
55.4	0
55.5	0
55.6	0
55.7	0
55.8	0
55.9	0
56	0
56.1	0
56.2	0
56.3	0
56.4	0
56.5	0
56.6	0
56.7	0
56.8	0
56.9	0
57	0
57.1	0
57.2	0
57.3	0
57.4	0
57.5	0
57.6	0
57.7	0
57.8	0
57.9	0
58	0
58.1	0
58.2	0
58.3	0
58.4	0
58.5	0
58.6	0
58.7	0
58.8	0
58.9	0
59	0
59.1	0
59.2	0
59.3	0
59.4	0
59.5	0
59.6	0
59.7	0
59.8	0
59.9	0
60	0
60.1	0
60.2	0
60.3	0
60.4	0
60.5	0
60.6	0
60.7	0
60.8	0
60.9	0
61	0
61.1	0
61.2	0
61.3	0
61.4	0
61.5	0
61.6	0
61.7	0
61.8	0
61.9	0
62	0
62.1	0
62.2	0
62.3	0
62.4	0
62.5	0
62.6	0
62.7	0
62.8	0
62.9	0
63	0
63.1	0
63.2	0
63.3	0
63.4	0
63.5	0
63.6	0
63.7	0
63.8	0
63.9	0
64	0
64.1	0
64.2	0
64.3	0
64.4	0
64.5	0
64.6	0
64.7	0
64.8	0
64.9	0
65	0
65.1	0
65.2	0
65.3	0
65.4	0
65.5	0
65.6	0
65.7	0
65.8	0
65.9	0
66	0
66.1	0
66.2	0
66.3	0
66.4	0
66.5	0
66.6	0
66.7	0
66.8	0
66.9	0
67	0
67.1	0
67.2	0
67.3	0
67.4	0
67.5	0
67.6	0
67.7	0
67.8	0
67.9	0
68	0
68.1	0
68.2	0
68.3	0
68.4	0
68.5	0
68.6	0
68.7	0
68.8	0
68.9	0
69	0
69.1	0
69.2	0
69.3	0
69.4	0
69.5	0
69.6	0
69.7	0
69.8	0
69.9	0
70	0
70.1	0
70.2	0
70.3	0
70.4	0
70.5	0
70.6	0
70.7	0
70.8	0
70.9	0
71	0
71.1	0
71.2	0
71.3	0
71.4	0
71.5	0
71.6	0
71.7	0
71.8	0
71.9	0
72	0
72.1	0
72.2	0
72.3	0
72.4	0
72.5	0
72.6	0
72.7	0
72.8	0
72.9	0
73	0
73.1	0
73.2	0
73.3	0
73.4	0
73.5	0
73.6	0
73.7	0
73.8	0
73.9	0
74	0
74.1	0
74.2	0
74.3	0
74.4	0
74.5	0
74.6	0
74.7	0
74.8	0
74.9	0
75	0
75.1	0
75.2	0
75.3	0
75.4	0
75.5	0
75.6	0
75.7	0
75.8	0
75.9	0
76	0
76.1	0
76.2	0
76.3	0
76.4	0
76.5	0
76.6	0
76.7	0
76.8	0
76.9	0
77	0
77.1	0
77.2	0
77.3	0
77.4	0
77.5	0
77.6	0
77.7	0
77.8	0
77.9	0
78	0
78.1	0
78.2	0
78.3	0
78.4	0
78.5	0
78.6	0
78.7	0
78.8	0
78.9	0
79	0
79.1	0
79.2	0
79.3	0
79.4	0
79.5	0
79.6	0
79.7	0
79.8	0
79.9	0
80	0
80.1	0
80.2	0
80.3	0
80.4	0
80.5	0
80.6	0
80.7	0
80.8	0
80.9	0
81	0
81.1	0
81.2	0
81.3	0
81.4	0
81.5	0
81.6	0
81.7	0
81.8	0
81.9	0
82	0
82.1	0
82.2	0
82.3	0
82.4	0
82.5	0
82.6	0
82.7	0
82.8	0
82.9	0
83	0
83.1	0
83.2	0
83.3	0
83.4	0
83.5	0
83.6	0
83.7	0
83.8	0
83.9	0
84	0
84.1	0
84.2	0
84.3	0
84.4	0
84.5	0
84.6	0
84.7	0
84.8	0
84.9	0
85	0
85.1	0
85.2	0
85.3	0
85.4	0
85.5	0
85.6	0
85.7	0
85.8	0
85.9	0
86	0
86.1	0
86.2	0
86.3	0
86.4	0
86.5	0
86.6	0
86.7	0
86.8	0
86.9	0
87	0
87.1	0
87.2	0
87.3	0
87.4	0
87.5	0
87.6	0
87.7	0
87.8	0
87.9	0
88	0
88.1	0
88.2	0
88.3	0
88.4	0
88.5	0
88.6	0
88.7	0
88.8	0
88.9	0
89	0
89.1	0
89.2	0
89.3	0
89.4	0
89.5	0
89.6	0
89.7	0
89.8	0
89.9	0
90	0
90.1	0
90.2	0
90.3	0
90.4	0
90.5	0
90.6	0
90.7	0
90.8	0
90.9	0
91	0
91.1	0
91.2	0
91.3	0
91.4	0
91.5	0
91.6	0
91.7	0
91.8	0
91.9	0
92	0
92.1	0
92.2	0
92.3	0
92.4	0
92.5	0
92.6	0
92.7	0
92.8	0
92.9	0
93	0
93.1	0
93.2	0
93.3	0
93.4	0
93.5	0
93.6	0
93.7	0
93.8	0
93.9	0
94	0
94.1	0
94.2	0
94.3	0
94.4	0
94.5	0
94.6	0
94.7	0
94.8	0
94.9	0
95	0
95.1	0
95.2	0
95.3	0
95.4	0
95.5	0
95.6	0
95.7	0
95.8	0
95.9	0
96	0
96.1	0
96.2	0
96.3	0
96.4	0
96.5	0
96.6	0
96.7	0
96.8	0
96.9	0
97	0
97.1	0
97.2	0
97.3	0
97.4	0
97.5	0
97.6	0
97.7	0
97.8	0
97.9	0
98	0
98.1	0
98.2	0
98.3	0
98.4	0
98.5	0
98.6	0
98.7	0
98.8	0
98.9	0
99	0
99.1	0
99.2	0
99.3	0
99.4	0
99.5	0
99.6	0
99.7	0
99.8	0
99.9	0
100	0
100.1	0.34025
100.2	0.530333
100.3	0.641333
100.4	0.7145
100.5	0.765083
100.6	0.805667
100.7	0.831333
100.8	0.851333
100.9	0.86725
101	0.876917
101.1	0.884833
101.2	0.891167
101.3	0.89625
101.4	0.9025
101.5	0.905833
101.6	0.907083
101.7	0.906833
101.8	0.908667
101.9	0.911167
102	0.9125
102.1	0.911167
102.2	0.911
102.3	0.912583
102.4	0.91475
102.5	0.913833
102.6	0.91675
102.7	0.917333
102.8	0.919083
102.9	0.92075
103	0.921083
103.1	0.920917
103.2	0.920833
103.3	0.920167
103.4	0.921833
103.5	0.922333
103.6	0.921333
103.7	0.91975
103.8	0.921417
103.9	0.921
104	0.922417
104.1	0.921833
104.2	0.92275
104.3	0.920917
104.4	0.923417
104.5	0.922917
104.6	0.925
104.7	0.925167
104.8	0.927667
104.9	0.927417
105	0.928083
105.1	0.928083
105.2	0.930917
105.3	0.928917
105.4	0.925333
105.5	0.927167
105.6	0.929
105.7	0.930083
105.8	0.9295
105.9	0.930667
106	0.927333
106.1	0.925833
106.2	0.92625
106.3	0.9275
106.4	0.931833
106.5	0.930833
106.6	0.93125
106.7	0.931083
106.8	0.930167
106.9	0.929417
107	0.928
107.1	0.927083
107.2	0.928917
107.3	0.929667
107.4	0.931417
107.5	0.928917
107.6	0.93175
107.7	0.930417
107.8	0.930833
107.9	0.93125
108	0.931583
108.1	0.932083
108.2	0.930833
108.3	0.930167
108.4	0.93075
108.5	0.928917
108.6	0.929167
108.7	0.930917
108.8	0.931833
108.9	0.932833
109	0.93
109.1	0.930667
109.2	0.933083
109.3	0.93475
109.4	0.939583
109.5	0.937
109.6	0.939333
109.7	0.936583
109.8	0.937917
109.9	0.937333
110	0.938333
110.1	0.939833
110.2	0.940083
110.3	0.9415
110.4	0.942167
110.5	0.941167
110.6	0.941
110.7	0.9425
110.8	0.938917
110.9	0.939083
111	0.941083
111.1	0.9405
111.2	0.941833
111.3	0.943167
111.4	0.942333
111.5	0.9415
111.6	0.940667
111.7	0.94
111.8	0.938833
111.9	0.94025
112	0.939917
112.1	0.940083
112.2	0.942667
112.3	0.94375
112.4	0.9435
112.5	0.942833
112.6	0.943
112.7	0.941833
112.8	0.942333
112.9	0.94425
113	0.945083
113.1	0.9445
113.2	0.9445
113.3	0.945667
113.4	0.9465
113.5	0.94625
113.6	0.94625
113.7	0.9475
113.8	0.947917
113.9	0.948083
114	0.948083
114.1	0.949417
114.2	0.9495
114.3	0.949917
114.4	0.947417
114.5	0.949333
114.6	0.949333
114.7	0.949167
114.8	0.948917
114.9	0.948
115	0.949167
115.1	0.949083
115.2	0.951417
115.3	0.951
115.4	0.95175
115.5	0.952083
115.6	0.950917
115.7	0.952
115.8	0.952333
115.9	0.951833
116	0.95125
116.1	0.951083
116.2	0.951917
116.3	0.950583
116.4	0.950417
116.5	0.94975
116.6	0.95125
116.7	0.950833
116.8	0.950917
116.9	0.95175
117	0.952583
117.1	0.955917
117.2	0.955083
117.3	0.9545
117.4	0.95625
117.5	0.954583
117.6	0.956
117.7	0.955333
117.8	0.954917
117.9	0.955583
118	0.953
118.1	0.953
118.2	0.952917
118.3	0.953667
118.4	0.9555
118.5	0.954917
118.6	0.9545
118.7	0.9555
118.8	0.957083
118.9	0.954583
119	0.955
119.1	0.956333
119.2	0.956917
119.3	0.956
119.4	0.955167
119.5	0.955583
119.6	0.954583
119.7	0.953833
119.8	0.9535
119.9	0.95625
120	0.956833
120.1	0.956833
120.2	0.957833
120.3	0.956083
120.4	0.95725
120.5	0.957
120.6	0.95875
120.7	0.957167
120.8	0.957167
120.9	0.955667
121	0.956667
121.1	0.957167
121.2	0.956833
121.3	0.9565
121.4	0.958
121.5	0.959417
121.6	0.960917
121.7	0.958833
121.8	0.960417
121.9	0.961667
122	0.960917
122.1	0.96175
122.2	0.960333
122.3	0.960667
122.4	0.960333
122.5	0.95975
122.6	0.959333
122.7	0.958667
122.8	0.958917
122.9	0.959917
123	0.960083
123.1	0.96125
123.2	0.960167
123.3	0.962167
123.4	0.963
123.5	0.965333
123.6	0.965583
123.7	0.96325
123.8	0.963833
123.9	0.96325
124	0.963083
124.1	0.960583
124.2	0.961
124.3	0.96175
124.4	0.96125
124.5	0.963167
124.6	0.962
124.7	0.962333
124.8	0.962083
124.9	0.96425
125	0.963083
125.1	0.962833
125.2	0.963417
125.3	0.965167
125.4	0.963833
125.5	0.965333
125.6	0.963333
125.7	0.96325
125.8	0.962417
125.9	0.961583
126	0.963167
126.1	0.964
126.2	0.964
126.3	0.963833
126.4	0.965667
126.5	0.965917
126.6	0.965667
126.7	0.966917
126.8	0.967583
126.9	0.967083
127	0.968583
127.1	0.968333
127.2	0.9685
127.3	0.96825
127.4	0.968583
127.5	0.96825
127.6	0.967583
127.7	0.966667
127.8	0.965083
127.9	0.967
128	0.96575
128.1	0.966833
128.2	0.966167
128.3	0.96425
128.4	0.963833
128.5	0.965333
128.6	0.965417
128.7	0.967333
128.8	0.966833
128.9	0.967667
129	0.966
129.1	0.966917
129.2	0.96775
129.3	0.968167
129.4	0.966917
129.5	0.967083
129.6	0.967583
129.7	0.968667
129.8	0.970083
129.9	0.970167
130	0.968583
130.1	0.969083
130.2	0.96875
130.3	0.968083
130.4	0.968333
130.5	0.966917
130.6	0.967333
130.7	0.965917
130.8	0.968
130.9	0.968917
131	0.96775
131.1	0.967583
131.2	0.9665
131.3	0.968083
131.4	0.967167
131.5	0.96975
131.6	0.96775
131.7	0.968583
131.8	0.968917
131.9	0.96875
132	0.970333
132.1	0.9695
132.2	0.970917
132.3	0.970917
132.4	0.97075
132.5	0.970583
132.6	0.9705
132.7	0.969417
132.8	0.969167
132.9	0.96875
133	0.969833
133.1	0.9695
133.2	0.970833
133.3	0.96875
133.4	0.968833
133.5	0.9685
133.6	0.9695
133.7	0.968917
133.8	0.9695
133.9	0.97075
134	0.973417
134.1	0.973833
134.2	0.972917
134.3	0.97175
134.4	0.971333
134.5	0.97075
134.6	0.970083
134.7	0.971583
134.8	0.972083
134.9	0.969833
135	0.97
135.1	0.9695
135.2	0.9695
135.3	0.9695
135.4	0.971
135.5	0.971417
135.6	0.971167
135.7	0.969333
135.8	0.968833
135.9	0.971417
136	0.971417
136.1	0.972083
136.2	0.973083
136.3	0.972417
136.4	0.97075
136.5	0.970167
136.6	0.971333
136.7	0.970333
136.8	0.970417
136.9	0.96925
137	0.970917
137.1	0.970667
137.2	0.9705
137.3	0.970917
137.4	0.9695
137.5	0.970667
137.6	0.972333
137.7	0.97275
137.8	0.97325
137.9	0.972333
138	0.9715
138.1	0.971833
138.2	0.972583
138.3	0.971917
138.4	0.970667
138.5	0.97025
138.6	0.971
138.7	0.972417
138.8	0.971333
138.9	0.97125
139	0.971333
139.1	0.971417
139.2	0.971667
139.3	0.972083
139.4	0.9725
139.5	0.97175
139.6	0.97275
139.7	0.974
139.8	0.974417
139.9	0.9735
140	0.973167
140.1	0.974083
140.2	0.973917
140.3	0.974083
140.4	0.975917
140.5	0.97525
140.6	0.972833
140.7	0.974
140.8	0.974
140.9	0.975
141	0.975333
141.1	0.973667
141.2	0.975583
141.3	0.974
141.4	0.974667
141.5	0.97475
141.6	0.975417
141.7	0.97575
141.8	0.975583
141.9	0.974583
142	0.974583
142.1	0.973417
142.2	0.974667
142.3	0.973
142.4	0.973
142.5	0.9745
142.6	0.9745
142.7	0.973667
142.8	0.973833
142.9	0.9745
143	0.974833
143.1	0.974167
143.2	0.974583
143.3	0.9755
143.4	0.976667
143.5	0.975333
143.6	0.976417
143.7	0.975667
143.8	0.97525
143.9	0.974667
144	0.9765
144.1	0.977083
144.2	0.977333
144.3	0.97725
144.4	0.976167
144.5	0.975583
144.6	0.976917
144.7	0.977
144.8	0.9765
144.9	0.975917
145	0.97675
145.1	0.974333
145.2	0.97675
145.3	0.97525
145.4	0.974417
145.5	0.973667
145.6	0.974167
145.7	0.975083
145.8	0.975167
145.9	0.976
146	0.977
146.1	0.976583
146.2	0.977417
146.3	0.978083
146.4	0.977083
146.5	0.977167
146.6	0.976417
146.7	0.974917
146.8	0.976667
146.9	0.97825
147	0.979083
147.1	0.978667
147.2	0.97925
147.3	0.976833
147.4	0.974083
147.5	0.975
147.6	0.97675
147.7	0.976583
147.8	0.976
147.9	0.976
148	0.975417
148.1	0.975667
148.2	0.975
148.3	0.974083
148.4	0.974917
148.5	0.97525
148.6	0.975583
148.7	0.975417
148.8	0.974833
148.9	0.976417
149	0.976167
149.1	0.976833
149.2	0.977583
149.3	0.97675
149.4	0.976167
149.5	0.977333
149.6	0.976083
149.7	0.976417
149.8	0.976167
149.9	0.976917
150	0.97625
150.1	0.97625
150.2	0.974167
150.3	0.974917
150.4	0.974083
150.5	0.974417
150.6	0.975083
150.7	0.976417
150.8	0.977583
150.9	0.97675
151	0.97625
151.1	0.9765
151.2	0.977
151.3	0.976083
151.4	0.976667
151.5	0.97775
151.6	0.976917
151.7	0.97675
151.8	0.97725
151.9	0.977083
152	0.97775
152.1	0.977583
152.2	0.977583
152.3	0.97725
152.4	0.978333
152.5	0.978667
152.6	0.978
152.7	0.978167
152.8	0.979083
152.9	0.978583
153	0.97875
153.1	0.977917
153.2	0.97875
153.3	0.980833
153.4	0.980167
153.5	0.979417
153.6	0.97775
153.7	0.9775
153.8	0.979
153.9	0.979417
154	0.979417
154.1	0.978333
154.2	0.979167
154.3	0.9785
154.4	0.979083
154.5	0.979917
154.6	0.98
154.7	0.979167
154.8	0.979833
154.9	0.978083
155	0.977583
155.1	0.97725
155.2	0.977083
155.3	0.976083
155.4	0.976833
155.5	0.978417
155.6	0.9775
155.7	0.977833
155.8	0.9785
155.9	0.979
156	0.978583
156.1	0.977583
156.2	0.978083
156.3	0.977417
156.4	0.977333
156.5	0.978167
156.6	0.9775
156.7	0.978167
156.8	0.977917
156.9	0.977583
157	0.977417
157.1	0.979
157.2	0.977833
157.3	0.978417
157.4	0.98
157.5	0.979583
157.6	0.978333
157.7	0.978667
157.8	0.977667
157.9	0.979167
158	0.97975
158.1	0.9795
158.2	0.9805
158.3	0.979833
158.4	0.978417
158.5	0.977333
158.6	0.97825
158.7	0.9785
158.8	0.978333
158.9	0.9785
159	0.97875
159.1	0.977583
159.2	0.977583
159.3	0.979583
159.4	0.979833
159.5	0.979917
159.6	0.979833
159.7	0.979167
159.8	0.9785
159.9	0.978583
160	0.978167
160.1	0.979333
160.2	0.98025
160.3	0.977917
160.4	0.979083
160.5	0.980167
160.6	0.98075
160.7	0.980833
160.8	0.981667
160.9	0.981667
161	0.981
161.1	0.980417
161.2	0.981333
161.3	0.981083
161.4	0.979583
161.5	0.978667
161.6	0.979417
161.7	0.981
161.8	0.981
161.9	0.981167
162	0.980417
162.1	0.980167
162.2	0.979917
162.3	0.979333
162.4	0.977667
162.5	0.977
162.6	0.976583
162.7	0.977583
162.8	0.978417
162.9	0.980083
163	0.980833
163.1	0.9805
163.2	0.980083
163.3	0.97975
163.4	0.978
163.5	0.9775
163.6	0.978167
163.7	0.977833
163.8	0.9795
163.9	0.978833
164	0.97875
164.1	0.979583
164.2	0.97975
164.3	0.97925
164.4	0.980167
164.5	0.978667
164.6	0.97975
164.7	0.9805
164.8	0.980583
164.9	0.981333
165	0.980917
165.1	0.98175
165.2	0.9825
165.3	0.9815
165.4	0.9815
165.5	0.979833
165.6	0.980583
165.7	0.981
165.8	0.980917
165.9	0.9805
166	0.98025
166.1	0.980083
166.2	0.979167
166.3	0.97925
166.4	0.97975
166.5	0.98075
166.6	0.97975
166.7	0.980583
166.8	0.98025
166.9	0.980583
167	0.981333
167.1	0.979833
167.2	0.979917
167.3	0.979167
167.4	0.979083
167.5	0.979917
167.6	0.981167
167.7	0.981167
167.8	0.980833
167.9	0.981
168	0.980917
168.1	0.980333
168.2	0.981167
168.3	0.981
168.4	0.980667
168.5	0.981583
168.6	0.981083
168.7	0.98175
168.8	0.981833
168.9	0.982917
169	0.98175
169.1	0.982
169.2	0.98175
169.3	0.981417
169.4	0.980917
169.5	0.980083
169.6	0.980417
169.7	0.980833
169.8	0.9815
169.9	0.982167
170	0.981667
170.1	0.98075
170.2	0.980083
170.3	0.979583
170.4	0.979583
170.5	0.981167
170.6	0.981417
170.7	0.982417
170.8	0.980833
170.9	0.98
171	0.9805
171.1	0.980833
171.2	0.980083
171.3	0.98025
171.4	0.979167
171.5	0.979083
171.6	0.97925
171.7	0.98075
171.8	0.979667
171.9	0.981667
172	0.981917
172.1	0.98125
172.2	0.98075
172.3	0.980583
172.4	0.978917
172.5	0.979
172.6	0.9785
172.7	0.98
172.8	0.98125
172.9	0.980583
173	0.981417
173.1	0.982583
173.2	0.98175
173.3	0.98175
173.4	0.982667
173.5	0.981667
173.6	0.9825
173.7	0.981833
173.8	0.982
173.9	0.982083
174	0.982583
174.1	0.982917
174.2	0.9825
174.3	0.982833
174.4	0.981917
174.5	0.982
174.6	0.98225
174.7	0.981167
174.8	0.981167
174.9	0.981417
175	0.98325
175.1	0.983833
175.2	0.98325
175.3	0.981167
175.4	0.9805
175.5	0.979917
175.6	0.981417
175.7	0.98125
175.8	0.98125
175.9	0.981333
176	0.980917
176.1	0.979583
176.2	0.981083
176.3	0.980583
176.4	0.980917
176.5	0.981333
176.6	0.981
176.7	0.981833
176.8	0.982667
176.9	0.98225
177	0.981083
177.1	0.980083
177.2	0.981
177.3	0.981667
177.4	0.979583
177.5	0.979417
177.6	0.980583
177.7	0.980833
177.8	0.982167
177.9	0.9815
178	0.981
178.1	0.982083
178.2	0.98025
178.3	0.97975
178.4	0.979167
178.5	0.979333
178.6	0.979833
178.7	0.979583
178.8	0.979333
178.9	0.98
179	0.979
179.1	0.979917
179.2	0.980833
179.3	0.979917
179.4	0.980333
179.5	0.98125
179.6	0.982167
179.7	0.982
179.8	0.98175
179.9	0.980333
180	0.980167
180.1	0.980083
180.2	0.980667
180.3	0.980167
180.4	0.980917
180.5	0.98175
180.6	0.981667
180.7	0.981833
180.8	0.98275
180.9	0.983083
181	0.982833
181.1	0.982667
181.2	0.9835
181.3	0.983583
181.4	0.9805
181.5	0.979917
181.6	0.980833
181.7	0.981417
181.8	0.982417
181.9	0.98125
182	0.981167
182.1	0.9815
182.2	0.981417
182.3	0.982583
182.4	0.981583
182.5	0.982167
182.6	0.98325
182.7	0.982333
182.8	0.981583
182.9	0.981
183	0.982333
183.1	0.983167
183.2	0.982417
183.3	0.983083
183.4	0.983167
183.5	0.98325
183.6	0.983667
183.7	0.982833
183.8	0.982
183.9	0.981583
184	0.981667
184.1	0.9815
184.2	0.980083
184.3	0.981667
184.4	0.980333
184.5	0.981167
184.6	0.98225
184.7	0.982083
184.8	0.98275
184.9	0.98375
185	0.982833
185.1	0.981917
185.2	0.981417
185.3	0.982083
185.4	0.980833
185.5	0.980833
185.6	0.981667
185.7	0.980333
185.8	0.981167
185.9	0.981917
186	0.982333
186.1	0.98275
186.2	0.982167
186.3	0.98275
186.4	0.98275
186.5	0.9835
186.6	0.9825
186.7	0.982917
186.8	0.981833
186.9	0.982
187	0.982083
187.1	0.98125
187.2	0.983583
187.3	0.98325
187.4	0.9835
187.5	0.9825
187.6	0.983083
187.7	0.983417
187.8	0.98075
187.9	0.981083
188	0.981167
188.1	0.981
188.2	0.98125
188.3	0.980583
188.4	0.981333
188.5	0.982167
188.6	0.982167
188.7	0.982417
188.8	0.982917
188.9	0.982667
189	0.981833
189.1	0.981917
189.2	0.982167
189.3	0.981417
189.4	0.98075
189.5	0.980583
189.6	0.979917
189.7	0.980833
189.8	0.98025
189.9	0.9805
190	0.980583
190.1	0.9805
190.2	0.981667
190.3	0.981417
190.4	0.981
190.5	0.98025
190.6	0.980417
190.7	0.981333
190.8	0.981667
190.9	0.982417
191	0.980417
191.1	0.980417
191.2	0.980333
191.3	0.979917
191.4	0.979167
191.5	0.9795
191.6	0.98
191.7	0.979
191.8	0.98
191.9	0.979917
192	0.981667
192.1	0.981333
192.2	0.982
192.3	0.9825
192.4	0.981917
192.5	0.981167
192.6	0.98075
192.7	0.9815
192.8	0.981417
192.9	0.981333
193	0.979
193.1	0.979083
193.2	0.977417
193.3	0.97775
193.4	0.978
193.5	0.97875
193.6	0.979
193.7	0.98075
193.8	0.979583
193.9	0.980083
194	0.980917
194.1	0.981083
194.2	0.981667
194.3	0.980417
194.4	0.98025
194.5	0.981917
194.6	0.9815
194.7	0.980667
194.8	0.98025
194.9	0.981583
195	0.982083
195.1	0.9815
195.2	0.981417
195.3	0.97975
195.4	0.980583
195.5	0.981
195.6	0.981333
195.7	0.981083
195.8	0.982167
195.9	0.981583
196	0.981667
196.1	0.981167
196.2	0.981583
196.3	0.98125
196.4	0.982
196.5	0.981917
196.6	0.981583
196.7	0.981
196.8	0.980833
196.9	0.98025
197	0.980417
197.1	0.982167
197.2	0.983083
197.3	0.98275
197.4	0.98425
197.5	0.983333
197.6	0.982583
197.7	0.983417
197.8	0.983
197.9	0.982
198	0.981833
198.1	0.982667
198.2	0.982583
198.3	0.98325
198.4	0.983333
198.5	0.981583
198.6	0.982417
198.7	0.98275
198.8	0.982
198.9	0.9815
199	0.981333
199.1	0.980917
199.2	0.98175
199.3	0.980833
199.4	0.981333
199.5	0.98125
199.6	0.980583
199.7	0.981417
199.8	0.9815
199.9	0.981667
200	0.98125
[truncated: 14,000 more rows]
