# Supplementary material for: Bayesian inference of kinetic schemes for ion channels by Kalman filtering
Source: eLife journal article supplement (doi:10.7554/elife.62714), 2022-05-04
Supplement: fig4-data4 [file 1_Sim_N_6000_Strom_MW_8M.xlsx]

## Sheet: Tabelle1
0.1	0
0.2	0
0.3	0
0.4	0
0.5	0
0.6	0
0.7	0
0.8	0
0.9	0
1	0
1.1	0
1.2	0
1.3	0
1.4	0
1.5	0
1.6	0
1.7	0
1.8	0
1.9	0
2	0
2.1	0
2.2	0
2.3	0
2.4	0
2.5	0
2.6	0
2.7	0
2.8	0
2.9	0
3	0
3.1	0
3.2	0
3.3	0
3.4	0
3.5	0
3.6	0
3.7	0
3.8	0
3.9	0
4	0
4.1	0
4.2	0
4.3	0
4.4	0
4.5	0
4.6	0
4.7	0
4.8	0
4.9	0
5	0
5.1	0
5.2	0
5.3	0
5.4	0
5.5	0
5.6	0
5.7	0
5.8	0
5.9	0
6	0
6.1	0
6.2	0
6.3	0
6.4	0
6.5	0
6.6	0
6.7	0
6.8	0
6.9	0
7	0
7.1	0
7.2	0
7.3	0
7.4	0
7.5	0
7.6	0
7.7	0
7.8	0
7.9	0
8	0
8.1	0
8.2	0
8.3	0
8.4	0
8.5	0
8.6	0
8.7	0
8.8	0
8.9	0
9	0
9.1	0
9.2	0
9.3	0
9.4	0
9.5	0
9.6	0
9.7	0
9.8	0
9.9	0
10	0
10.1	0
10.2	0
10.3	0
10.4	0
10.5	0
10.6	0
10.7	0
10.8	0
10.9	0
11	0
11.1	0
11.2	0
11.3	0
11.4	0
11.5	0
11.6	0
11.7	0
11.8	0
11.9	0
12	0
12.1	0
12.2	0
12.3	0
12.4	0
12.5	0
12.6	0
12.7	0
12.8	0
12.9	0
13	0
13.1	0
13.2	0
13.3	0
13.4	0
13.5	0
13.6	0
13.7	0
13.8	0
13.9	0
14	0
14.1	0
14.2	0
14.3	0
14.4	0
14.5	0
14.6	0
14.7	0
14.8	0
14.9	0
15	0
15.1	0
15.2	0
15.3	0
15.4	0
15.5	0
15.6	0
15.7	0
15.8	0
15.9	0
16	0
16.1	0
16.2	0
16.3	0
16.4	0
16.5	0
16.6	0
16.7	0
16.8	0
16.9	0
17	0
17.1	0
17.2	0
17.3	0
17.4	0
17.5	0
17.6	0
17.7	0
17.8	0
17.9	0
18	0
18.1	0
18.2	0
18.3	0
18.4	0
18.5	0
18.6	0
18.7	0
18.8	0
18.9	0
19	0
19.1	0
19.2	0
19.3	0
19.4	0
19.5	0
19.6	0
19.7	0
19.8	0
19.9	0
20	0
20.1	0
20.2	0
20.3	0
20.4	0
20.5	0
20.6	0
20.7	0
20.8	0
20.9	0
21	0
21.1	0
21.2	0
21.3	0
21.4	0
21.5	0
21.6	0
21.7	0
21.8	0
21.9	0
22	0
22.1	0
22.2	0
22.3	0
22.4	0
22.5	0
22.6	0
22.7	0
22.8	0
22.9	0
23	0
23.1	0
23.2	0
23.3	0
23.4	0
23.5	0
23.6	0
23.7	0
23.8	0
23.9	0
24	0
24.1	0
24.2	0
24.3	0
24.4	0
24.5	0
24.6	0
24.7	0
24.8	0
24.9	0
25	0
25.1	0
25.2	0
25.3	0
25.4	0
25.5	0
25.6	0
25.7	0
25.8	0
25.9	0
26	0
26.1	0
26.2	0
26.3	0
26.4	0
26.5	0
26.6	0
26.7	0
26.8	0
26.9	0
27	0
27.1	0
27.2	0
27.3	0
27.4	0
27.5	0
27.6	0
27.7	0
27.8	0
27.9	0
28	0
28.1	0
28.2	0
28.3	0
28.4	0
28.5	0
28.6	0
28.7	0
28.8	0
28.9	0
29	0
29.1	0
29.2	0
29.3	0
29.4	0
29.5	0
29.6	0
29.7	0
29.8	0
29.9	0
30	0
30.1	0
30.2	0
30.3	0
30.4	0
30.5	0
30.6	0
30.7	0
30.8	0
30.9	0
31	0
31.1	0
31.2	0
31.3	0
31.4	0
31.5	0
31.6	0
31.7	0
31.8	0
31.9	0
32	0
32.1	0
32.2	0
32.3	0
32.4	0
32.5	0
32.6	0
32.7	0
32.8	0
32.9	0
33	0
33.1	0
33.2	0
33.3	0
33.4	0
33.5	0
33.6	0
33.7	0
33.8	0
33.9	0
34	0
34.1	0
34.2	0
34.3	0
34.4	0
34.5	0
34.6	0
34.7	0
34.8	0
34.9	0
35	0
35.1	0
35.2	0
35.3	0
35.4	0
35.5	0
35.6	0
35.7	0
35.8	0
35.9	0
36	0
36.1	0
36.2	0
36.3	0
36.4	0
36.5	0
36.6	0
36.7	0
36.8	0
36.9	0
37	0
37.1	0
37.2	0
37.3	0
37.4	0
37.5	0
37.6	0
37.7	0
37.8	0
37.9	0
38	0
38.1	0
38.2	0
38.3	0
38.4	0
38.5	0
38.6	0
38.7	0
38.8	0
38.9	0
39	0
39.1	0
39.2	0
39.3	0
39.4	0
39.5	0
39.6	0
39.7	0
39.8	0
39.9	0
40	0
40.1	0
40.2	0
40.3	0
40.4	0
40.5	0
40.6	0
40.7	0
40.8	0
40.9	0
41	0
41.1	0
41.2	0
41.3	0
41.4	0
41.5	0
41.6	0
41.7	0
41.8	0
41.9	0
42	0
42.1	0
42.2	0
42.3	0
42.4	0
42.5	0
42.6	0
42.7	0
42.8	0
42.9	0
43	0
43.1	0
43.2	0
43.3	0
43.4	0
43.5	0
43.6	0
43.7	0
43.8	0
43.9	0
44	0
44.1	0
44.2	0
44.3	0
44.4	0
44.5	0
44.6	0
44.7	0
44.8	0
44.9	0
45	0
45.1	0
45.2	0
45.3	0
45.4	0
45.5	0
45.6	0
45.7	0
45.8	0
45.9	0
46	0
46.1	0
46.2	0
46.3	0
46.4	0
46.5	0
46.6	0
46.7	0
46.8	0
46.9	0
47	0
47.1	0
47.2	0
47.3	0
47.4	0
47.5	0
47.6	0
47.7	0
47.8	0
47.9	0
48	0
48.1	0
48.2	0
48.3	0
48.4	0
48.5	0
48.6	0
48.7	0
48.8	0
48.9	0
49	0
49.1	0
49.2	0
49.3	0
49.4	0
49.5	0
49.6	0
49.7	0
49.8	0
49.9	0
50	0
50.1	0
50.2	0
50.3	0
50.4	0
50.5	0
50.6	0
50.7	0
50.8	0
50.9	0
51	0
51.1	0
51.2	0
51.3	0
51.4	0
51.5	0
51.6	0
51.7	0
51.8	0
51.9	0
52	0
52.1	0
52.2	0
52.3	0
52.4	0
52.5	0
52.6	0
52.7	0
52.8	0
52.9	0
53	0
53.1	0
53.2	0
53.3	0
53.4	0
53.5	0
53.6	0
53.7	0
53.8	0
53.9	0
54	0
54.1	0
54.2	0
54.3	0
54.4	0
54.5	0
54.6	0
54.7	0
54.8	0
54.9	0
55	0
55.1	0
55.2	0
55.3	0
55.4	0
55.5	0
55.6	0
55.7	0
55.8	0
55.9	0
56	0
56.1	0
56.2	0
56.3	0
56.4	0
56.5	0
56.6	0
56.7	0
56.8	0
56.9	0
57	0
57.1	0
57.2	0
57.3	0
57.4	0
57.5	0
57.6	0
57.7	0
57.8	0
57.9	0
58	0
58.1	0
58.2	0
58.3	0
58.4	0
58.5	0
58.6	0
58.7	0
58.8	0
58.9	0
59	0
59.1	0
59.2	0
59.3	0
59.4	0
59.5	0
59.6	0
59.7	0
59.8	0
59.9	0
60	0
60.1	0
60.2	0
60.3	0
60.4	0
60.5	0
60.6	0
60.7	0
60.8	0
60.9	0
61	0
61.1	0
61.2	0
61.3	0
61.4	0
61.5	0
61.6	0
61.7	0
61.8	0
61.9	0
62	0
62.1	0
62.2	0
62.3	0
62.4	0
62.5	0
62.6	0
62.7	0
62.8	0
62.9	0
63	0
63.1	0
63.2	0
63.3	0
63.4	0
63.5	0
63.6	0
63.7	0
63.8	0
63.9	0
64	0
64.1	0
64.2	0
64.3	0
64.4	0
64.5	0
64.6	0
64.7	0
64.8	0
64.9	0
65	0
65.1	0
65.2	0
65.3	0
65.4	0
65.5	0
65.6	0
65.7	0
65.8	0
65.9	0
66	0
66.1	0
66.2	0
66.3	0
66.4	0
66.5	0
66.6	0
66.7	0
66.8	0
66.9	0
67	0
67.1	0
67.2	0
67.3	0
67.4	0
67.5	0
67.6	0
67.7	0
67.8	0
67.9	0
68	0
68.1	0
68.2	0
68.3	0
68.4	0
68.5	0
68.6	0
68.7	0
68.8	0
68.9	0
69	0
69.1	0
69.2	0
69.3	0
69.4	0
69.5	0
69.6	0
69.7	0
69.8	0
69.9	0
70	0
70.1	0
70.2	0
70.3	0
70.4	0
70.5	0
70.6	0
70.7	0
70.8	0
70.9	0
71	0
71.1	0
71.2	0
71.3	0
71.4	0
71.5	0
71.6	0
71.7	0
71.8	0
71.9	0
72	0
72.1	0
72.2	0
72.3	0
72.4	0
72.5	0
72.6	0
72.7	0
72.8	0
72.9	0
73	0
73.1	0
73.2	0
73.3	0
73.4	0
73.5	0
73.6	0
73.7	0
73.8	0
73.9	0
74	0
74.1	0
74.2	0
74.3	0
74.4	0
74.5	0
74.6	0
74.7	0
74.8	0
74.9	0
75	0
75.1	0
75.2	0
75.3	0
75.4	0
75.5	0
75.6	0
75.7	0
75.8	0
75.9	0
76	0
76.1	0
76.2	0
76.3	0
76.4	0
76.5	0
76.6	0
76.7	0
76.8	0
76.9	0
77	0
77.1	0
77.2	0
77.3	0
77.4	0
77.5	0
77.6	0
77.7	0
77.8	0
77.9	0
78	0
78.1	0
78.2	0
78.3	0
78.4	0
78.5	0
78.6	0
78.7	0
78.8	0
78.9	0
79	0
79.1	0
79.2	0
79.3	0
79.4	0
79.5	0
79.6	0
79.7	0
79.8	0
79.9	0
80	0
80.1	0
80.2	0
80.3	0
80.4	0
80.5	0
80.6	0
80.7	0
80.8	0
80.9	0
81	0
81.1	0
81.2	0
81.3	0
81.4	0
81.5	0
81.6	0
81.7	0
81.8	0
81.9	0
82	0
82.1	0
82.2	0
82.3	0
82.4	0
82.5	0
82.6	0
82.7	0
82.8	0
82.9	0
83	0
83.1	0
83.2	0
83.3	0
83.4	0
83.5	0
83.6	0
83.7	0
83.8	0
83.9	0
84	0
84.1	0
84.2	0
84.3	0
84.4	0
84.5	0
84.6	0
84.7	0
84.8	0
84.9	0
85	0
85.1	0
85.2	0
85.3	0
85.4	0
85.5	0
85.6	0
85.7	0
85.8	0
85.9	0
86	0
86.1	0
86.2	0
86.3	0
86.4	0
86.5	0
86.6	0
86.7	0
86.8	0
86.9	0
87	0
87.1	0
87.2	0
87.3	0
87.4	0
87.5	0
87.6	0
87.7	0
87.8	0
87.9	0
88	0
88.1	0
88.2	0
88.3	0
88.4	0
88.5	0
88.6	0
88.7	0
88.8	0
88.9	0
89	0
89.1	0
89.2	0
89.3	0
89.4	0
89.5	0
89.6	0
89.7	0
89.8	0
89.9	0
90	0
90.1	0
90.2	0
90.3	0
90.4	0
90.5	0
90.6	0
90.7	0
90.8	0
90.9	0
91	0
91.1	0
91.2	0
91.3	0
91.4	0
91.5	0
91.6	0
91.7	0
91.8	0
91.9	0
92	0
92.1	0
92.2	0
92.3	0
92.4	0
92.5	0
92.6	0
92.7	0
92.8	0
92.9	0
93	0
93.1	0
93.2	0
93.3	0
93.4	0
93.5	0
93.6	0
93.7	0
93.8	0
93.9	0
94	0
94.1	0
94.2	0
94.3	0
94.4	0
94.5	0
94.6	0
94.7	0
94.8	0
94.9	0
95	0
95.1	0
95.2	0
95.3	0
95.4	0
95.5	0
95.6	0
95.7	0
95.8	0
95.9	0
96	0
96.1	0
96.2	0
96.3	0
96.4	0
96.5	0
96.6	0
96.7	0
96.8	0
96.9	0
97	0
97.1	0
97.2	0
97.3	0
97.4	0
97.5	0
97.6	0
97.7	0
97.8	0
97.9	0
98	0
98.1	0
98.2	0
98.3	0
98.4	0
98.5	0
98.6	0
98.7	0
98.8	0
98.9	0
99	0
99.1	0
99.2	0
99.3	0
99.4	0
99.5	0
99.6	0
99.7	0
99.8	0
99.9	0
100	0
100.1	0
100.2	0.0005
100.3	0.002
100.4	0.00466667
100.5	0.0075
100.6	0.0103333
100.7	0.0123333
100.8	0.015
100.9	0.0166667
101	0.0205
101.1	0.0241667
101.2	0.027
101.3	0.0316667
101.4	0.0361667
101.5	0.0391667
101.6	0.0435
101.7	0.0478333
101.8	0.0538333
101.9	0.0583333
102	0.0613333
102.1	0.0645
102.2	0.0683333
102.3	0.073
102.4	0.0766667
102.5	0.0808333
102.6	0.0856667
102.7	0.0891667
102.8	0.091
102.9	0.0928333
103	0.0968333
103.1	0.101
103.2	0.106167
103.3	0.109333
103.4	0.112833
103.5	0.117167
103.6	0.121
103.7	0.124833
103.8	0.129167
103.9	0.133833
104	0.137167
104.1	0.139833
104.2	0.143667
104.3	0.146167
104.4	0.149667
104.5	0.152333
104.6	0.157
104.7	0.159333
104.8	0.161833
104.9	0.165
105	0.168333
105.1	0.1735
105.2	0.1755
105.3	0.1785
105.4	0.1815
105.5	0.185167
105.6	0.188
105.7	0.190833
105.8	0.194
105.9	0.197333
106	0.201167
106.1	0.204
106.2	0.207667
106.3	0.209667
106.4	0.213167
106.5	0.217333
106.6	0.220833
106.7	0.223833
106.8	0.225333
106.9	0.2285
107	0.231
107.1	0.233167
107.2	0.237167
107.3	0.240833
107.4	0.244333
107.5	0.246667
107.6	0.249833
107.7	0.251833
107.8	0.254833
107.9	0.257167
108	0.259667
108.1	0.262833
108.2	0.2655
108.3	0.268167
108.4	0.270833
108.5	0.2745
108.6	0.276833
108.7	0.279
108.8	0.281833
108.9	0.2855
109	0.288167
109.1	0.291333
109.2	0.2945
109.3	0.298167
109.4	0.301833
109.5	0.303333
109.6	0.304833
109.7	0.3065
109.8	0.308667
109.9	0.310833
110	0.312833
110.1	0.315
110.2	0.317333
110.3	0.319667
110.4	0.322
110.5	0.324333
110.6	0.3265
110.7	0.329
110.8	0.332333
110.9	0.334667
111	0.336333
111.1	0.338667
111.2	0.341167
111.3	0.343333
111.4	0.345667
111.5	0.347833
111.6	0.3505
111.7	0.3525
111.8	0.354667
111.9	0.355667
112	0.358833
112.1	0.360667
112.2	0.363833
112.3	0.365167
112.4	0.368667
112.5	0.371833
112.6	0.373
112.7	0.3745
112.8	0.3765
112.9	0.378333
113	0.38
113.1	0.383
113.2	0.385667
113.3	0.388333
113.4	0.390667
113.5	0.393333
113.6	0.395667
113.7	0.397167
113.8	0.4
113.9	0.402167
114	0.404
114.1	0.406833
114.2	0.409
114.3	0.411833
114.4	0.4135
114.5	0.414333
114.6	0.416833
114.7	0.417833
114.8	0.4195
114.9	0.420333
115	0.423833
115.1	0.426667
115.2	0.429167
115.3	0.430833
115.4	0.433167
115.5	0.435
115.6	0.438
115.7	0.440667
115.8	0.443667
115.9	0.445333
116	0.448
116.1	0.45
116.2	0.450667
116.3	0.453333
116.4	0.455333
116.5	0.458167
116.6	0.46
116.7	0.462333
116.8	0.4635
116.9	0.463833
117	0.4645
117.1	0.466167
117.2	0.467667
117.3	0.469
117.4	0.470667
117.5	0.471833
117.6	0.472833
117.7	0.473667
117.8	0.476667
117.9	0.478333
118	0.480167
118.1	0.481667
118.2	0.481833
118.3	0.483333
118.4	0.485833
118.5	0.488
118.6	0.488833
118.7	0.491667
118.8	0.494
118.9	0.4955
119	0.498167
119.1	0.4995
119.2	0.501333
119.3	0.5035
119.4	0.504167
119.5	0.505167
119.6	0.507
119.7	0.509
119.8	0.509667
119.9	0.5115
120	0.5135
120.1	0.514667
120.2	0.516667
120.3	0.517833
120.4	0.518833
120.5	0.519667
120.6	0.522
120.7	0.524833
120.8	0.525833
120.9	0.527667
121	0.529333
121.1	0.529833
121.2	0.531833
121.3	0.534667
121.4	0.535833
121.5	0.5365
121.6	0.537833
121.7	0.539833
121.8	0.540833
121.9	0.542
122	0.543667
122.1	0.545833
122.2	0.547667
122.3	0.548333
122.4	0.549167
122.5	0.551
122.6	0.553167
122.7	0.554167
122.8	0.555
122.9	0.555667
123	0.558
123.1	0.558333
123.2	0.56
123.3	0.561
123.4	0.562333
123.5	0.563833
123.6	0.5645
123.7	0.564833
123.8	0.566333
123.9	0.568667
124	0.570333
124.1	0.570667
124.2	0.572667
124.3	0.574
124.4	0.575333
124.5	0.577
124.6	0.578
124.7	0.5795
124.8	0.579833
124.9	0.581333
125	0.582
125.1	0.583
125.2	0.583333
125.3	0.585167
125.4	0.586333
125.5	0.5875
125.6	0.588167
125.7	0.589667
125.8	0.590833
125.9	0.591167
126	0.5915
126.1	0.5925
126.2	0.594833
126.3	0.597
126.4	0.598833
126.5	0.599333
126.6	0.6
126.7	0.602
126.8	0.603
126.9	0.604
127	0.604833
127.1	0.604833
127.2	0.605667
127.3	0.6065
127.4	0.607833
127.5	0.6095
127.6	0.610167
127.7	0.610833
127.8	0.611667
127.9	0.612833
128	0.614833
128.1	0.6165
128.2	0.617833
128.3	0.6185
128.4	0.619167
128.5	0.620333
128.6	0.6215
128.7	0.622667
128.8	0.623167
128.9	0.624333
129	0.625
129.1	0.625167
129.2	0.626167
129.3	0.627667
129.4	0.6285
129.5	0.627833
129.6	0.6285
129.7	0.629
129.8	0.6295
129.9	0.630333
130	0.63
130.1	0.631333
130.2	0.633333
130.3	0.634667
130.4	0.635167
130.5	0.636667
130.6	0.638
130.7	0.638833
130.8	0.639167
130.9	0.64
131	0.641167
131.1	0.641667
131.2	0.6425
131.3	0.643
131.4	0.644
131.5	0.644667
131.6	0.646833
131.7	0.648
131.8	0.648167
131.9	0.649
132	0.649333
132.1	0.650167
132.2	0.650167
132.3	0.651833
132.4	0.652833
132.5	0.653167
132.6	0.655
132.7	0.656333
132.8	0.657
132.9	0.6565
133	0.658
133.1	0.6595
133.2	0.661
133.3	0.662
133.4	0.6635
133.5	0.664167
133.6	0.665
133.7	0.665833
133.8	0.667167
133.9	0.6675
134	0.669
134.1	0.669667
134.2	0.6695
134.3	0.6705
134.4	0.670667
134.5	0.669833
134.6	0.671
134.7	0.671833
134.8	0.672833
134.9	0.673833
135	0.674667
135.1	0.675833
135.2	0.676667
135.3	0.6775
135.4	0.677667
135.5	0.678
135.6	0.678167
135.7	0.68
135.8	0.681333
135.9	0.681167
136	0.681833
136.1	0.682833
136.2	0.683
136.3	0.6825
136.4	0.682833
136.5	0.6835
136.6	0.684
136.7	0.684167
136.8	0.684833
136.9	0.685167
137	0.6855
137.1	0.685333
137.2	0.685667
137.3	0.686167
137.4	0.686167
137.5	0.6865
137.6	0.686
137.7	0.687333
137.8	0.6875
137.9	0.688
138	0.688667
138.1	0.689333
138.2	0.689333
138.3	0.6895
138.4	0.690333
138.5	0.691333
138.6	0.6925
138.7	0.692667
138.8	0.692833
138.9	0.693667
139	0.694833
139.1	0.695333
139.2	0.695333
139.3	0.695833
139.4	0.696833
139.5	0.696833
139.6	0.6975
139.7	0.698833
139.8	0.700333
139.9	0.701167
140	0.701167
140.1	0.702167
140.2	0.702667
140.3	0.703
140.4	0.703333
140.5	0.7035
140.6	0.704167
140.7	0.704333
140.8	0.706333
140.9	0.7065
141	0.707333
141.1	0.707667
141.2	0.708333
141.3	0.707833
141.4	0.709
141.5	0.7105
141.6	0.710333
141.7	0.7115
141.8	0.712
141.9	0.712667
142	0.713
142.1	0.713833
142.2	0.7145
142.3	0.714833
142.4	0.715167
142.5	0.715833
142.6	0.716333
142.7	0.716833
142.8	0.717833
142.9	0.7175
143	0.717833
143.1	0.718833
143.2	0.719
143.3	0.719333
143.4	0.719833
143.5	0.721
143.6	0.721
143.7	0.7215
143.8	0.722167
143.9	0.723167
144	0.722667
144.1	0.724
144.2	0.724333
144.3	0.724167
144.4	0.724
144.5	0.724833
144.6	0.726
144.7	0.726333
144.8	0.726667
144.9	0.727167
145	0.728
145.1	0.728333
145.2	0.728333
145.3	0.729167
145.4	0.730167
145.5	0.730833
145.6	0.730833
145.7	0.731
145.8	0.731333
145.9	0.731167
146	0.731
146.1	0.730667
146.2	0.731167
146.3	0.732333
146.4	0.732667
146.5	0.732833
146.6	0.732333
146.7	0.732833
146.8	0.733333
146.9	0.7335
147	0.734333
147.1	0.734833
147.2	0.734167
147.3	0.734333
147.4	0.735
147.5	0.735167
147.6	0.735667
147.7	0.736333
147.8	0.736
147.9	0.735333
148	0.735667
148.1	0.736167
148.2	0.736833
148.3	0.737
148.4	0.737167
148.5	0.737
148.6	0.736833
148.7	0.737
148.8	0.736833
148.9	0.736833
149	0.7375
149.1	0.738167
149.2	0.738667
149.3	0.7385
149.4	0.739333
149.5	0.739167
149.6	0.739333
149.7	0.740667
149.8	0.740667
149.9	0.740833
150	0.740833
150.1	0.740667
150.2	0.741667
150.3	0.742167
150.4	0.742667
150.5	0.744
150.6	0.743833
150.7	0.743333
150.8	0.744167
150.9	0.744833
151	0.745333
151.1	0.746167
151.2	0.746
151.3	0.745667
151.4	0.745333
151.5	0.746167
151.6	0.746333
151.7	0.7465
151.8	0.7475
151.9	0.747833
152	0.7485
152.1	0.749333
152.2	0.7495
152.3	0.75
152.4	0.75
152.5	0.750167
152.6	0.750833
152.7	0.750667
152.8	0.750667
152.9	0.751333
153	0.7505
153.1	0.750167
153.2	0.7505
153.3	0.751167
153.4	0.750833
153.5	0.751
153.6	0.7515
153.7	0.751333
153.8	0.7505
153.9	0.750667
154	0.750333
154.1	0.751333
154.2	0.7515
154.3	0.752
154.4	0.751833
154.5	0.752333
154.6	0.752167
154.7	0.752167
154.8	0.752667
154.9	0.753833
155	0.753333
155.1	0.753167
155.2	0.754167
155.3	0.7545
155.4	0.754667
155.5	0.755
155.6	0.755
155.7	0.755167
155.8	0.755833
155.9	0.756833
156	0.758167
156.1	0.758833
156.2	0.759167
156.3	0.759
156.4	0.759167
156.5	0.7595
156.6	0.758333
156.7	0.758333
156.8	0.758167
156.9	0.758167
157	0.758833
157.1	0.7595
157.2	0.76
157.3	0.76
157.4	0.759667
157.5	0.759667
157.6	0.7595
157.7	0.7595
157.8	0.76
157.9	0.7605
158	0.761167
158.1	0.761833
158.2	0.7625
158.3	0.762833
158.4	0.763667
158.5	0.763667
158.6	0.764333
158.7	0.764667
158.8	0.764833
158.9	0.765667
159	0.766667
159.1	0.767
159.2	0.7665
159.3	0.766167
159.4	0.766333
159.5	0.767
159.6	0.767333
159.7	0.767667
159.8	0.767667
159.9	0.768167
160	0.768167
160.1	0.769
160.2	0.768833
160.3	0.769667
160.4	0.770667
160.5	0.770333
160.6	0.772
160.7	0.772333
160.8	0.772333
160.9	0.7715
161	0.771667
161.1	0.771667
161.2	0.7715
161.3	0.772167
161.4	0.7725
161.5	0.7735
161.6	0.773833
161.7	0.773
161.8	0.773
161.9	0.773833
162	0.774167
162.1	0.773833
162.2	0.773333
162.3	0.772667
162.4	0.773333
162.5	0.773333
162.6	0.773167
162.7	0.772833
162.8	0.773167
162.9	0.772833
163	0.773667
163.1	0.7735
163.2	0.773333
163.3	0.773333
163.4	0.7745
163.5	0.774333
163.6	0.774667
163.7	0.774833
163.8	0.774333
163.9	0.775
164	0.774833
164.1	0.776333
164.2	0.7765
164.3	0.7775
164.4	0.777833
164.5	0.777667
164.6	0.778167
164.7	0.778333
164.8	0.7785
164.9	0.779167
165	0.779167
165.1	0.7795
165.2	0.7795
165.3	0.7795
165.4	0.779667
165.5	0.7805
165.6	0.780667
165.7	0.7815
165.8	0.7815
165.9	0.781167
166	0.780333
166.1	0.780167
166.2	0.779833
166.3	0.779333
166.4	0.780167
166.5	0.7805
166.6	0.780667
166.7	0.779667
166.8	0.7815
166.9	0.781167
167	0.782
167.1	0.782333
167.2	0.782667
167.3	0.782167
167.4	0.7815
167.5	0.7815
167.6	0.782333
167.7	0.782333
167.8	0.7835
167.9	0.7835
168	0.783667
168.1	0.783
168.2	0.784333
168.3	0.783833
168.4	0.783833
168.5	0.784667
168.6	0.784667
168.7	0.785
168.8	0.785
168.9	0.785333
169	0.784833
169.1	0.7845
169.2	0.783667
169.3	0.7825
169.4	0.782
169.5	0.781333
169.6	0.781833
169.7	0.781667
169.8	0.781833
169.9	0.782167
170	0.782667
170.1	0.7835
170.2	0.7835
170.3	0.782833
170.4	0.7825
170.5	0.7835
170.6	0.783333
170.7	0.783167
170.8	0.784
170.9	0.784333
171	0.784
171.1	0.784667
171.2	0.7835
171.3	0.783833
171.4	0.7845
171.5	0.784833
171.6	0.785
171.7	0.784667
171.8	0.785167
171.9	0.7845
172	0.784667
172.1	0.784333
172.2	0.786
172.3	0.786167
172.4	0.785833
172.5	0.785667
172.6	0.7855
172.7	0.7865
172.8	0.787
172.9	0.787333
173	0.787333
173.1	0.787667
173.2	0.788
173.3	0.788333
173.4	0.787833
173.5	0.788
173.6	0.787667
173.7	0.788
173.8	0.7875
173.9	0.787833
174	0.788333
174.1	0.7885
174.2	0.788667
174.3	0.788
174.4	0.789167
174.5	0.790333
174.6	0.790167
174.7	0.790167
174.8	0.7905
174.9	0.790333
175	0.789833
175.1	0.789833
175.2	0.7895
175.3	0.789333
175.4	0.789167
175.5	0.788667
175.6	0.788667
175.7	0.788833
175.8	0.788
175.9	0.7885
176	0.7885
176.1	0.7885
176.2	0.788833
176.3	0.789333
176.4	0.788167
176.5	0.787667
176.6	0.788333
176.7	0.7885
176.8	0.788
176.9	0.7875
177	0.787167
177.1	0.787667
177.2	0.787
177.3	0.786667
177.4	0.786167
177.5	0.785833
177.6	0.786667
177.7	0.786667
177.8	0.7865
177.9	0.786833
178	0.7885
178.1	0.787667
178.2	0.786833
178.3	0.787333
178.4	0.787167
178.5	0.787667
178.6	0.787167
178.7	0.786667
178.8	0.785833
178.9	0.786667
179	0.786333
179.1	0.786
179.2	0.7855
179.3	0.7855
179.4	0.785833
179.5	0.786
179.6	0.786
179.7	0.787167
179.8	0.786833
179.9	0.787
180	0.787167
180.1	0.7875
180.2	0.787667
180.3	0.786833
180.4	0.7865
180.5	0.786667
180.6	0.786833
180.7	0.7865
180.8	0.786167
180.9	0.7865
181	0.7865
181.1	0.788
181.2	0.789
181.3	0.789333
181.4	0.789667
181.5	0.7895
181.6	0.789167
181.7	0.789667
181.8	0.790333
181.9	0.790167
182	0.7905
182.1	0.7915
182.2	0.7915
182.3	0.7915
182.4	0.789667
182.5	0.789333
182.6	0.789667
182.7	0.790667
182.8	0.7905
182.9	0.790167
183	0.7905
183.1	0.790667
183.2	0.790333
183.3	0.790333
183.4	0.789667
183.5	0.789167
183.6	0.789833
183.7	0.7895
183.8	0.79
183.9	0.7905
184	0.790333
184.1	0.790667
184.2	0.790833
184.3	0.791333
184.4	0.7915
184.5	0.791167
184.6	0.790667
184.7	0.790333
184.8	0.7905
184.9	0.790333
185	0.790333
185.1	0.790833
185.2	0.791
185.3	0.791667
185.4	0.791833
185.5	0.792667
185.6	0.793
185.7	0.793
185.8	0.792833
185.9	0.792167
186	0.7925
186.1	0.792333
186.2	0.791667
186.3	0.791333
186.4	0.791833
186.5	0.791333
186.6	0.791667
186.7	0.791667
186.8	0.792167
186.9	0.792333
187	0.793333
187.1	0.793333
187.2	0.793667
187.3	0.793333
187.4	0.793167
187.5	0.793167
187.6	0.793833
187.7	0.794
187.8	0.794167
187.9	0.793333
188	0.792167
188.1	0.792167
188.2	0.792333
188.3	0.792
188.4	0.791667
188.5	0.791667
188.6	0.792333
188.7	0.7915
188.8	0.791
188.9	0.791833
189	0.7915
189.1	0.7925
189.2	0.792
189.3	0.791333
189.4	0.790833
189.5	0.790667
189.6	0.7905
189.7	0.791167
189.8	0.791333
189.9	0.7915
190	0.791333
190.1	0.7915
190.2	0.791667
190.3	0.791833
190.4	0.791667
190.5	0.791833
190.6	0.7915
190.7	0.791167
190.8	0.792333
190.9	0.793
191	0.792333
191.1	0.791833
191.2	0.791333
191.3	0.791167
191.4	0.7915
191.5	0.791833
191.6	0.792333
191.7	0.792667
191.8	0.793167
191.9	0.792833
192	0.792
192.1	0.792667
192.2	0.793667
192.3	0.7935
192.4	0.794333
192.5	0.7945
192.6	0.794167
192.7	0.794333
192.8	0.7945
192.9	0.7945
193	0.794
193.1	0.794833
193.2	0.794333
193.3	0.796167
193.4	0.7965
193.5	0.796667
193.6	0.796833
193.7	0.7965
193.8	0.796833
193.9	0.796333
194	0.796667
194.1	0.7965
194.2	0.796333
194.3	0.797667
194.4	0.797333
194.5	0.797
194.6	0.796833
194.7	0.797167
194.8	0.7965
194.9	0.796833
195	0.796167
195.1	0.795833
195.2	0.795667
195.3	0.795167
195.4	0.795
195.5	0.795
195.6	0.7945
195.7	0.794667
195.8	0.795167
195.9	0.794667
196	0.794
196.1	0.793667
196.2	0.794167
196.3	0.794667
196.4	0.794667
196.5	0.794
196.6	0.7935
196.7	0.793833
196.8	0.793833
196.9	0.7935
197	0.793667
197.1	0.794
197.2	0.793333
197.3	0.794
197.4	0.7945
197.5	0.795
197.6	0.7945
197.7	0.795333
197.8	0.794667
197.9	0.794
198	0.793167
198.1	0.793833
198.2	0.792833
198.3	0.792667
198.4	0.792833
198.5	0.792333
198.6	0.792
198.7	0.792167
198.8	0.791167
198.9	0.7915
199	0.7915
199.1	0.792167
199.2	0.792167
199.3	0.791833
199.4	0.791
199.5	0.79
199.6	0.7895
199.7	0.7905
199.8	0.790667
199.9	0.7905
200	0.790667
[truncated: 14,000 more rows]
