# Supplementary material for: Bayesian inference of kinetic schemes for ion channels by Kalman filtering
Source: eLife journal article supplement (doi:10.7554/elife.62714), 2022-05-04
Supplement: fig4-data4 [file 1_Sim_N_7000_Fluor_MW_8M.xlsx]

## Sheet: Tabelle1
0.1	0
0.2	0
0.3	0
0.4	0
0.5	0
0.6	0
0.7	0
0.8	0
0.9	0
1	0
1.1	0
1.2	0
1.3	0
1.4	0
1.5	0
1.6	0
1.7	0
1.8	0
1.9	0
2	0
2.1	0
2.2	0
2.3	0
2.4	0
2.5	0
2.6	0
2.7	0
2.8	0
2.9	0
3	0
3.1	0
3.2	0
3.3	0
3.4	0
3.5	0
3.6	0
3.7	0
3.8	0
3.9	0
4	0
4.1	0
4.2	0
4.3	0
4.4	0
4.5	0
4.6	0
4.7	0
4.8	0
4.9	0
5	0
5.1	0
5.2	0
5.3	0
5.4	0
5.5	0
5.6	0
5.7	0
5.8	0
5.9	0
6	0
6.1	0
6.2	0
6.3	0
6.4	0
6.5	0
6.6	0
6.7	0
6.8	0
6.9	0
7	0
7.1	0
7.2	0
7.3	0
7.4	0
7.5	0
7.6	0
7.7	0
7.8	0
7.9	0
8	0
8.1	0
8.2	0
8.3	0
8.4	0
8.5	0
8.6	0
8.7	0
8.8	0
8.9	0
9	0
9.1	0
9.2	0
9.3	0
9.4	0
9.5	0
9.6	0
9.7	0
9.8	0
9.9	0
10	0
10.1	0
10.2	0
10.3	0
10.4	0
10.5	0
10.6	0
10.7	0
10.8	0
10.9	0
11	0
11.1	0
11.2	0
11.3	0
11.4	0
11.5	0
11.6	0
11.7	0
11.8	0
11.9	0
12	0
12.1	0
12.2	0
12.3	0
12.4	0
12.5	0
12.6	0
12.7	0
12.8	0
12.9	0
13	0
13.1	0
13.2	0
13.3	0
13.4	0
13.5	0
13.6	0
13.7	0
13.8	0
13.9	0
14	0
14.1	0
14.2	0
14.3	0
14.4	0
14.5	0
14.6	0
14.7	0
14.8	0
14.9	0
15	0
15.1	0
15.2	0
15.3	0
15.4	0
15.5	0
15.6	0
15.7	0
15.8	0
15.9	0
16	0
16.1	0
16.2	0
16.3	0
16.4	0
16.5	0
16.6	0
16.7	0
16.8	0
16.9	0
17	0
17.1	0
17.2	0
17.3	0
17.4	0
17.5	0
17.6	0
17.7	0
17.8	0
17.9	0
18	0
18.1	0
18.2	0
18.3	0
18.4	0
18.5	0
18.6	0
18.7	0
18.8	0
18.9	0
19	0
19.1	0
19.2	0
19.3	0
19.4	0
19.5	0
19.6	0
19.7	0
19.8	0
19.9	0
20	0
20.1	0
20.2	0
20.3	0
20.4	0
20.5	0
20.6	0
20.7	0
20.8	0
20.9	0
21	0
21.1	0
21.2	0
21.3	0
21.4	0
21.5	0
21.6	0
21.7	0
21.8	0
21.9	0
22	0
22.1	0
22.2	0
22.3	0
22.4	0
22.5	0
22.6	0
22.7	0
22.8	0
22.9	0
23	0
23.1	0
23.2	0
23.3	0
23.4	0
23.5	0
23.6	0
23.7	0
23.8	0
23.9	0
24	0
24.1	0
24.2	0
24.3	0
24.4	0
24.5	0
24.6	0
24.7	0
24.8	0
24.9	0
25	0
25.1	0
25.2	0
25.3	0
25.4	0
25.5	0
25.6	0
25.7	0
25.8	0
25.9	0
26	0
26.1	0
26.2	0
26.3	0
26.4	0
26.5	0
26.6	0
26.7	0
26.8	0
26.9	0
27	0
27.1	0
27.2	0
27.3	0
27.4	0
27.5	0
27.6	0
27.7	0
27.8	0
27.9	0
28	0
28.1	0
28.2	0
28.3	0
28.4	0
28.5	0
28.6	0
28.7	0
28.8	0
28.9	0
29	0
29.1	0
29.2	0
29.3	0
29.4	0
29.5	0
29.6	0
29.7	0
29.8	0
29.9	0
30	0
30.1	0
30.2	0
30.3	0
30.4	0
30.5	0
30.6	0
30.7	0
30.8	0
30.9	0
31	0
31.1	0
31.2	0
31.3	0
31.4	0
31.5	0
31.6	0
31.7	0
31.8	0
31.9	0
32	0
32.1	0
32.2	0
32.3	0
32.4	0
32.5	0
32.6	0
32.7	0
32.8	0
32.9	0
33	0
33.1	0
33.2	0
33.3	0
33.4	0
33.5	0
33.6	0
33.7	0
33.8	0
33.9	0
34	0
34.1	0
34.2	0
34.3	0
34.4	0
34.5	0
34.6	0
34.7	0
34.8	0
34.9	0
35	0
35.1	0
35.2	0
35.3	0
35.4	0
35.5	0
35.6	0
35.7	0
35.8	0
35.9	0
36	0
36.1	0
36.2	0
36.3	0
36.4	0
36.5	0
36.6	0
36.7	0
36.8	0
36.9	0
37	0
37.1	0
37.2	0
37.3	0
37.4	0
37.5	0
37.6	0
37.7	0
37.8	0
37.9	0
38	0
38.1	0
38.2	0
38.3	0
38.4	0
38.5	0
38.6	0
38.7	0
38.8	0
38.9	0
39	0
39.1	0
39.2	0
39.3	0
39.4	0
39.5	0
39.6	0
39.7	0
39.8	0
39.9	0
40	0
40.1	0
40.2	0
40.3	0
40.4	0
40.5	0
40.6	0
40.7	0
40.8	0
40.9	0
41	0
41.1	0
41.2	0
41.3	0
41.4	0
41.5	0
41.6	0
41.7	0
41.8	0
41.9	0
42	0
42.1	0
42.2	0
42.3	0
42.4	0
42.5	0
42.6	0
42.7	0
42.8	0
42.9	0
43	0
43.1	0
43.2	0
43.3	0
43.4	0
43.5	0
43.6	0
43.7	0
43.8	0
43.9	0
44	0
44.1	0
44.2	0
44.3	0
44.4	0
44.5	0
44.6	0
44.7	0
44.8	0
44.9	0
45	0
45.1	0
45.2	0
45.3	0
45.4	0
45.5	0
45.6	0
45.7	0
45.8	0
45.9	0
46	0
46.1	0
46.2	0
46.3	0
46.4	0
46.5	0
46.6	0
46.7	0
46.8	0
46.9	0
47	0
47.1	0
47.2	0
47.3	0
47.4	0
47.5	0
47.6	0
47.7	0
47.8	0
47.9	0
48	0
48.1	0
48.2	0
48.3	0
48.4	0
48.5	0
48.6	0
48.7	0
48.8	0
48.9	0
49	0
49.1	0
49.2	0
49.3	0
49.4	0
49.5	0
49.6	0
49.7	0
49.8	0
49.9	0
50	0
50.1	0
50.2	0
50.3	0
50.4	0
50.5	0
50.6	0
50.7	0
50.8	0
50.9	0
51	0
51.1	0
51.2	0
51.3	0
51.4	0
51.5	0
51.6	0
51.7	0
51.8	0
51.9	0
52	0
52.1	0
52.2	0
52.3	0
52.4	0
52.5	0
52.6	0
52.7	0
52.8	0
52.9	0
53	0
53.1	0
53.2	0
53.3	0
53.4	0
53.5	0
53.6	0
53.7	0
53.8	0
53.9	0
54	0
54.1	0
54.2	0
54.3	0
54.4	0
54.5	0
54.6	0
54.7	0
54.8	0
54.9	0
55	0
55.1	0
55.2	0
55.3	0
55.4	0
55.5	0
55.6	0
55.7	0
55.8	0
55.9	0
56	0
56.1	0
56.2	0
56.3	0
56.4	0
56.5	0
56.6	0
56.7	0
56.8	0
56.9	0
57	0
57.1	0
57.2	0
57.3	0
57.4	0
57.5	0
57.6	0
57.7	0
57.8	0
57.9	0
58	0
58.1	0
58.2	0
58.3	0
58.4	0
58.5	0
58.6	0
58.7	0
58.8	0
58.9	0
59	0
59.1	0
59.2	0
59.3	0
59.4	0
59.5	0
59.6	0
59.7	0
59.8	0
59.9	0
60	0
60.1	0
60.2	0
60.3	0
60.4	0
60.5	0
60.6	0
60.7	0
60.8	0
60.9	0
61	0
61.1	0
61.2	0
61.3	0
61.4	0
61.5	0
61.6	0
61.7	0
61.8	0
61.9	0
62	0
62.1	0
62.2	0
62.3	0
62.4	0
62.5	0
62.6	0
62.7	0
62.8	0
62.9	0
63	0
63.1	0
63.2	0
63.3	0
63.4	0
63.5	0
63.6	0
63.7	0
63.8	0
63.9	0
64	0
64.1	0
64.2	0
64.3	0
64.4	0
64.5	0
64.6	0
64.7	0
64.8	0
64.9	0
65	0
65.1	0
65.2	0
65.3	0
65.4	0
65.5	0
65.6	0
65.7	0
65.8	0
65.9	0
66	0
66.1	0
66.2	0
66.3	0
66.4	0
66.5	0
66.6	0
66.7	0
66.8	0
66.9	0
67	0
67.1	0
67.2	0
67.3	0
67.4	0
67.5	0
67.6	0
67.7	0
67.8	0
67.9	0
68	0
68.1	0
68.2	0
68.3	0
68.4	0
68.5	0
68.6	0
68.7	0
68.8	0
68.9	0
69	0
69.1	0
69.2	0
69.3	0
69.4	0
69.5	0
69.6	0
69.7	0
69.8	0
69.9	0
70	0
70.1	0
70.2	0
70.3	0
70.4	0
70.5	0
70.6	0
70.7	0
70.8	0
70.9	0
71	0
71.1	0
71.2	0
71.3	0
71.4	0
71.5	0
71.6	0
71.7	0
71.8	0
71.9	0
72	0
72.1	0
72.2	0
72.3	0
72.4	0
72.5	0
72.6	0
72.7	0
72.8	0
72.9	0
73	0
73.1	0
73.2	0
73.3	0
73.4	0
73.5	0
73.6	0
73.7	0
73.8	0
73.9	0
74	0
74.1	0
74.2	0
74.3	0
74.4	0
74.5	0
74.6	0
74.7	0
74.8	0
74.9	0
75	0
75.1	0
75.2	0
75.3	0
75.4	0
75.5	0
75.6	0
75.7	0
75.8	0
75.9	0
76	0
76.1	0
76.2	0
76.3	0
76.4	0
76.5	0
76.6	0
76.7	0
76.8	0
76.9	0
77	0
77.1	0
77.2	0
77.3	0
77.4	0
77.5	0
77.6	0
77.7	0
77.8	0
77.9	0
78	0
78.1	0
78.2	0
78.3	0
78.4	0
78.5	0
78.6	0
78.7	0
78.8	0
78.9	0
79	0
79.1	0
79.2	0
79.3	0
79.4	0
79.5	0
79.6	0
79.7	0
79.8	0
79.9	0
80	0
80.1	0
80.2	0
80.3	0
80.4	0
80.5	0
80.6	0
80.7	0
80.8	0
80.9	0
81	0
81.1	0
81.2	0
81.3	0
81.4	0
81.5	0
81.6	0
81.7	0
81.8	0
81.9	0
82	0
82.1	0
82.2	0
82.3	0
82.4	0
82.5	0
82.6	0
82.7	0
82.8	0
82.9	0
83	0
83.1	0
83.2	0
83.3	0
83.4	0
83.5	0
83.6	0
83.7	0
83.8	0
83.9	0
84	0
84.1	0
84.2	0
84.3	0
84.4	0
84.5	0
84.6	0
84.7	0
84.8	0
84.9	0
85	0
85.1	0
85.2	0
85.3	0
85.4	0
85.5	0
85.6	0
85.7	0
85.8	0
85.9	0
86	0
86.1	0
86.2	0
86.3	0
86.4	0
86.5	0
86.6	0
86.7	0
86.8	0
86.9	0
87	0
87.1	0
87.2	0
87.3	0
87.4	0
87.5	0
87.6	0
87.7	0
87.8	0
87.9	0
88	0
88.1	0
88.2	0
88.3	0
88.4	0
88.5	0
88.6	0
88.7	0
88.8	0
88.9	0
89	0
89.1	0
89.2	0
89.3	0
89.4	0
89.5	0
89.6	0
89.7	0
89.8	0
89.9	0
90	0
90.1	0
90.2	0
90.3	0
90.4	0
90.5	0
90.6	0
90.7	0
90.8	0
90.9	0
91	0
91.1	0
91.2	0
91.3	0
91.4	0
91.5	0
91.6	0
91.7	0
91.8	0
91.9	0
92	0
92.1	0
92.2	0
92.3	0
92.4	0
92.5	0
92.6	0
92.7	0
92.8	0
92.9	0
93	0
93.1	0
93.2	0
93.3	0
93.4	0
93.5	0
93.6	0
93.7	0
93.8	0
93.9	0
94	0
94.1	0
94.2	0
94.3	0
94.4	0
94.5	0
94.6	0
94.7	0
94.8	0
94.9	0
95	0
95.1	0
95.2	0
95.3	0
95.4	0
95.5	0
95.6	0
95.7	0
95.8	0
95.9	0
96	0
96.1	0
96.2	0
96.3	0
96.4	0
96.5	0
96.6	0
96.7	0
96.8	0
96.9	0
97	0
97.1	0
97.2	0
97.3	0
97.4	0
97.5	0
97.6	0
97.7	0
97.8	0
97.9	0
98	0
98.1	0
98.2	0
98.3	0
98.4	0
98.5	0
98.6	0
98.7	0
98.8	0
98.9	0
99	0
99.1	0
99.2	0
99.3	0
99.4	0
99.5	0
99.6	0
99.7	0
99.8	0
99.9	0
100	0
100.1	0.347571
100.2	0.529357
100.3	0.644714
100.4	0.718
100.5	0.7705
100.6	0.807143
100.7	0.832857
100.8	0.854214
100.9	0.869214
101	0.880143
101.1	0.886286
101.2	0.892786
101.3	0.899643
101.4	0.904143
101.5	0.906643
101.6	0.908643
101.7	0.910857
101.8	0.911
101.9	0.910571
102	0.913643
102.1	0.914714
102.2	0.915
102.3	0.913071
102.4	0.914786
102.5	0.915
102.6	0.916929
102.7	0.919571
102.8	0.9225
102.9	0.924929
103	0.924286
103.1	0.924643
103.2	0.92
103.3	0.921929
103.4	0.921643
103.5	0.9235
103.6	0.923286
103.7	0.9265
103.8	0.925929
103.9	0.922929
104	0.925429
104.1	0.925857
104.2	0.925786
104.3	0.926143
104.4	0.928929
104.5	0.927571
104.6	0.925714
104.7	0.926429
104.8	0.925857
104.9	0.9255
105	0.926357
105.1	0.925643
105.2	0.928786
105.3	0.928714
105.4	0.928357
105.5	0.928786
105.6	0.927929
105.7	0.926143
105.8	0.926071
105.9	0.926214
106	0.926429
106.1	0.925857
106.2	0.9245
106.3	0.928357
106.4	0.928714
106.5	0.932
106.6	0.930714
106.7	0.930429
106.8	0.929286
106.9	0.928643
107	0.930643
107.1	0.932143
107.2	0.933571
107.3	0.934071
107.4	0.932714
107.5	0.932571
107.6	0.934
107.7	0.935071
107.8	0.935071
107.9	0.933286
108	0.934143
108.1	0.934286
108.2	0.9365
108.3	0.936214
108.4	0.936571
108.5	0.937214
108.6	0.936429
108.7	0.935929
108.8	0.937429
108.9	0.937786
109	0.937643
109.1	0.937214
109.2	0.934643
109.3	0.935071
109.4	0.935286
109.5	0.935786
109.6	0.936643
109.7	0.938429
109.8	0.937143
109.9	0.938571
110	0.937857
110.1	0.938357
110.2	0.938786
110.3	0.939071
110.4	0.939
110.5	0.939786
110.6	0.939857
110.7	0.938857
110.8	0.941071
110.9	0.939857
111	0.941
111.1	0.942286
111.2	0.940429
111.3	0.941571
111.4	0.940571
111.5	0.9395
111.6	0.939571
111.7	0.941571
111.8	0.940071
111.9	0.943071
112	0.942286
112.1	0.941571
112.2	0.941214
112.3	0.942714
112.4	0.942143
112.5	0.944429
112.6	0.944929
112.7	0.944
112.8	0.9455
112.9	0.946
113	0.945857
113.1	0.945929
113.2	0.945929
113.3	0.946357
113.4	0.9465
113.5	0.946571
113.6	0.946214
113.7	0.947571
113.8	0.946786
113.9	0.945786
114	0.946857
114.1	0.947214
114.2	0.947143
114.3	0.945857
114.4	0.945643
114.5	0.945786
114.6	0.945857
114.7	0.945786
114.8	0.945857
114.9	0.946214
115	0.946429
115.1	0.947929
115.2	0.947357
115.3	0.947429
115.4	0.948214
115.5	0.949
115.6	0.949786
115.7	0.951286
115.8	0.950357
115.9	0.951786
116	0.952643
116.1	0.953786
116.2	0.952429
116.3	0.953857
116.4	0.952714
116.5	0.954143
116.6	0.953
116.7	0.9535
116.8	0.954571
116.9	0.956429
117	0.955071
117.1	0.955357
117.2	0.954714
117.3	0.954929
117.4	0.952643
117.5	0.951143
117.6	0.952429
117.7	0.952357
117.8	0.953071
117.9	0.954357
118	0.954929
118.1	0.954857
118.2	0.954071
118.3	0.956357
118.4	0.955
118.5	0.955714
118.6	0.953571
118.7	0.953857
118.8	0.954286
118.9	0.953643
119	0.953214
119.1	0.954357
119.2	0.955071
119.3	0.955929
119.4	0.955571
119.5	0.957357
119.6	0.957286
119.7	0.9565
119.8	0.956714
119.9	0.957857
120	0.959857
120.1	0.959429
120.2	0.957
120.3	0.957
120.4	0.956214
120.5	0.955143
120.6	0.957214
120.7	0.958071
120.8	0.957643
120.9	0.959643
121	0.959357
121.1	0.960357
121.2	0.958214
121.3	0.956643
121.4	0.959571
121.5	0.959071
121.6	0.959857
121.7	0.960286
121.8	0.960357
121.9	0.961929
122	0.960214
122.1	0.959214
122.2	0.9595
122.3	0.959286
122.4	0.958714
122.5	0.959143
122.6	0.960429
122.7	0.960357
122.8	0.959286
122.9	0.959429
123	0.959929
123.1	0.959286
123.2	0.960857
123.3	0.961214
123.4	0.961571
123.5	0.960429
123.6	0.961571
123.7	0.963286
123.8	0.962714
123.9	0.96
124	0.958214
124.1	0.958714
124.2	0.959786
124.3	0.959571
124.4	0.960857
124.5	0.961857
124.6	0.962857
124.7	0.962786
124.8	0.965143
124.9	0.963714
125	0.961929
125.1	0.961643
125.2	0.958786
125.3	0.959929
125.4	0.959357
125.5	0.960429
125.6	0.959214
125.7	0.961643
125.8	0.961143
125.9	0.960571
126	0.961143
126.1	0.962357
126.2	0.963143
126.3	0.964286
126.4	0.962929
126.5	0.962286
126.6	0.962286
126.7	0.963857
126.8	0.963714
126.9	0.963214
127	0.964929
127.1	0.965786
127.2	0.9645
127.3	0.965286
127.4	0.966143
127.5	0.966429
127.6	0.966
127.7	0.963071
127.8	0.963286
127.9	0.963714
128	0.963214
128.1	0.963857
128.2	0.965071
128.3	0.965786
128.4	0.966071
128.5	0.966357
128.6	0.965357
128.7	0.965429
128.8	0.965214
128.9	0.965571
129	0.964071
129.1	0.964143
129.2	0.964929
129.3	0.9655
129.4	0.965857
129.5	0.966143
129.6	0.963786
129.7	0.963357
129.8	0.965
129.9	0.965071
130	0.965214
130.1	0.967571
130.2	0.966857
130.3	0.966786
130.4	0.967357
130.5	0.9685
130.6	0.967857
130.7	0.967786
130.8	0.967214
130.9	0.967071
131	0.967071
131.1	0.967929
131.2	0.967786
131.3	0.967429
131.4	0.966786
131.5	0.967643
131.6	0.968286
131.7	0.968714
131.8	0.968214
131.9	0.967357
132	0.966786
132.1	0.966571
132.2	0.968
132.3	0.968643
132.4	0.968357
132.5	0.968
132.6	0.967786
132.7	0.967714
132.8	0.967643
132.9	0.968571
133	0.969
133.1	0.969071
133.2	0.970286
133.3	0.970786
133.4	0.969571
133.5	0.9695
133.6	0.968857
133.7	0.968429
133.8	0.968429
133.9	0.967286
134	0.967929
134.1	0.967929
134.2	0.967786
134.3	0.967214
134.4	0.968071
134.5	0.968071
134.6	0.968286
134.7	0.968
134.8	0.970786
134.9	0.970357
135	0.9695
135.1	0.970714
135.2	0.970429
135.3	0.969571
135.4	0.968214
135.5	0.970786
135.6	0.969
135.7	0.967929
135.8	0.968714
135.9	0.967857
136	0.966643
136.1	0.967571
136.2	0.969143
136.3	0.969071
136.4	0.9685
136.5	0.970429
136.6	0.971857
136.7	0.970929
136.8	0.971571
136.9	0.9715
137	0.971857
137.1	0.972714
137.2	0.972786
137.3	0.973714
137.4	0.973071
137.5	0.972857
137.6	0.973929
137.7	0.9745
137.8	0.975714
137.9	0.975
138	0.975
138.1	0.974643
138.2	0.974643
138.3	0.974
138.4	0.973857
138.5	0.974286
138.6	0.974357
138.7	0.973
138.8	0.972571
138.9	0.973071
139	0.973286
139.1	0.9725
139.2	0.970786
139.3	0.970214
139.4	0.969786
139.5	0.970214
139.6	0.9695
139.7	0.969929
139.8	0.969929
139.9	0.970071
140	0.971929
140.1	0.972643
140.2	0.973071
140.3	0.972429
140.4	0.974357
140.5	0.974857
140.6	0.974786
140.7	0.975071
140.8	0.974714
140.9	0.973357
141	0.974071
141.1	0.973929
141.2	0.9745
141.3	0.973786
141.4	0.9745
141.5	0.973929
141.6	0.975071
141.7	0.973643
141.8	0.975929
141.9	0.975571
142	0.975571
142.1	0.975214
142.2	0.973857
142.3	0.973714
142.4	0.974786
142.5	0.974786
142.6	0.975
142.7	0.974429
142.8	0.973286
142.9	0.974214
143	0.975071
143.1	0.976357
143.2	0.974071
143.3	0.973286
143.4	0.974214
143.5	0.974357
143.6	0.973714
143.7	0.974071
143.8	0.973286
143.9	0.972143
144	0.971429
144.1	0.972071
144.2	0.971929
144.3	0.972643
144.4	0.973
144.5	0.972714
144.6	0.974357
144.7	0.974429
144.8	0.973429
144.9	0.974071
145	0.975643
145.1	0.975786
145.2	0.976143
145.3	0.976143
145.4	0.975929
145.5	0.974357
145.6	0.973643
145.7	0.973714
145.8	0.974786
145.9	0.975143
146	0.975643
146.1	0.975929
146.2	0.976143
146.3	0.977643
146.4	0.976143
146.5	0.975571
146.6	0.975857
146.7	0.9755
146.8	0.9745
146.9	0.975143
147	0.976357
147.1	0.976643
147.2	0.975
147.3	0.974571
147.4	0.975286
147.5	0.975357
147.6	0.976071
147.7	0.976571
147.8	0.975357
147.9	0.974857
148	0.975071
148.1	0.974786
148.2	0.974857
148.3	0.976214
148.4	0.976357
148.5	0.975571
148.6	0.976786
148.7	0.975571
148.8	0.975857
148.9	0.975571
149	0.974643
149.1	0.975071
149.2	0.976143
149.3	0.977357
149.4	0.976857
149.5	0.975714
149.6	0.976286
149.7	0.9765
149.8	0.976857
149.9	0.977071
150	0.976786
150.1	0.977214
150.2	0.977214
150.3	0.977643
150.4	0.976714
150.5	0.976286
150.6	0.976
150.7	0.977143
150.8	0.978
150.9	0.978143
151	0.978071
151.1	0.977357
151.2	0.977286
151.3	0.976357
151.4	0.977071
151.5	0.976786
151.6	0.974857
151.7	0.974643
151.8	0.975571
151.9	0.977143
152	0.976786
152.1	0.978571
152.2	0.979143
152.3	0.9785
152.4	0.979214
152.5	0.978071
152.6	0.977571
152.7	0.978071
152.8	0.978214
152.9	0.976429
153	0.975643
153.1	0.976286
153.2	0.976357
153.3	0.976571
153.4	0.977429
153.5	0.977929
153.6	0.9775
153.7	0.979286
153.8	0.978286
153.9	0.978143
154	0.977286
154.1	0.977357
154.2	0.978143
154.3	0.977714
154.4	0.977929
154.5	0.977571
154.6	0.978214
154.7	0.978857
154.8	0.979286
154.9	0.978714
155	0.978857
155.1	0.980143
155.2	0.979071
155.3	0.980214
155.4	0.979929
155.5	0.980643
155.6	0.980286
155.7	0.978786
155.8	0.979571
155.9	0.979571
156	0.979357
156.1	0.978643
156.2	0.977
156.3	0.977071
156.4	0.978714
156.5	0.978286
156.6	0.977929
156.7	0.977571
156.8	0.979214
156.9	0.978357
157	0.9775
157.1	0.978071
157.2	0.978714
157.3	0.979714
157.4	0.979143
157.5	0.978571
157.6	0.980143
157.7	0.979143
157.8	0.978071
157.9	0.977929
158	0.978643
158.1	0.978214
158.2	0.979071
158.3	0.977357
158.4	0.977643
158.5	0.977643
158.6	0.977786
158.7	0.978786
158.8	0.978571
158.9	0.977571
159	0.978786
159.1	0.978714
159.2	0.978429
159.3	0.979643
159.4	0.979643
159.5	0.979429
159.6	0.980214
159.7	0.980143
159.8	0.978643
159.9	0.978571
160	0.979714
160.1	0.979929
160.2	0.978357
160.3	0.978429
160.4	0.980429
160.5	0.979929
160.6	0.980143
160.7	0.980643
160.8	0.9795
160.9	0.979286
161	0.979071
161.1	0.979857
161.2	0.979
161.3	0.978429
161.4	0.978357
161.5	0.979429
161.6	0.9785
161.7	0.978786
161.8	0.979857
161.9	0.981286
162	0.980857
162.1	0.98
162.2	0.98
162.3	0.980571
162.4	0.980714
162.5	0.979214
162.6	0.979929
162.7	0.979429
162.8	0.9795
162.9	0.980214
163	0.980714
163.1	0.979429
163.2	0.978929
163.3	0.977357
163.4	0.978
163.5	0.977929
163.6	0.977929
163.7	0.978857
163.8	0.980071
163.9	0.980857
164	0.980286
164.1	0.980357
164.2	0.980286
164.3	0.979429
164.4	0.979786
164.5	0.980571
164.6	0.980857
164.7	0.982
164.8	0.980357
164.9	0.9805
165	0.980214
165.1	0.980286
165.2	0.980786
165.3	0.980571
165.4	0.981
165.5	0.980214
165.6	0.980429
165.7	0.979214
165.8	0.980714
165.9	0.980214
166	0.981357
166.1	0.980429
166.2	0.980786
166.3	0.980643
166.4	0.9805
166.5	0.979786
166.6	0.979786
166.7	0.978714
166.8	0.978214
166.9	0.979571
167	0.979571
167.1	0.980929
167.2	0.981286
167.3	0.9815
167.4	0.981143
167.5	0.980214
167.6	0.979714
167.7	0.979071
167.8	0.977571
167.9	0.978
168	0.979286
168.1	0.979714
168.2	0.979
168.3	0.979429
168.4	0.978143
168.5	0.979
168.6	0.979571
168.7	0.979929
168.8	0.979571
168.9	0.980786
169	0.98
169.1	0.980071
169.2	0.980929
169.3	0.980857
169.4	0.980286
169.5	0.981
169.6	0.980714
169.7	0.980714
169.8	0.981786
169.9	0.979857
170	0.979857
170.1	0.980071
170.2	0.978714
170.3	0.9785
170.4	0.978786
170.5	0.979643
170.6	0.979429
170.7	0.980071
170.8	0.980786
170.9	0.980571
171	0.980071
171.1	0.980429
171.2	0.981786
171.3	0.982357
171.4	0.981429
171.5	0.980143
171.6	0.980143
171.7	0.979857
171.8	0.980143
171.9	0.9805
172	0.981857
172.1	0.981643
172.2	0.981786
172.3	0.982929
172.4	0.981571
172.5	0.982571
172.6	0.982643
172.7	0.981929
172.8	0.981
172.9	0.9815
173	0.982429
173.1	0.981071
173.2	0.980286
173.3	0.979357
173.4	0.979286
173.5	0.979286
173.6	0.9785
173.7	0.977571
173.8	0.977143
173.9	0.977143
174	0.978214
174.1	0.979786
174.2	0.980643
174.3	0.981286
174.4	0.980714
174.5	0.980643
174.6	0.981357
174.7	0.980571
174.8	0.980429
174.9	0.980714
175	0.980286
175.1	0.980357
175.2	0.981143
175.3	0.982357
175.4	0.983357
175.5	0.983214
175.6	0.982571
175.7	0.982
175.8	0.981714
175.9	0.9805
176	0.980929
176.1	0.980643
176.2	0.980071
176.3	0.980071
176.4	0.980286
176.5	0.981
176.6	0.981357
176.7	0.982143
176.8	0.982214
176.9	0.981929
177	0.981429
177.1	0.982071
177.2	0.983143
177.3	0.983143
177.4	0.983071
177.5	0.983071
177.6	0.983286
177.7	0.982643
177.8	0.982929
177.9	0.982214
178	0.983071
178.1	0.982357
178.2	0.982357
178.3	0.982786
178.4	0.982643
178.5	0.983071
178.6	0.982786
178.7	0.981
178.8	0.9815
178.9	0.981571
179	0.981214
179.1	0.982357
179.2	0.981714
179.3	0.982286
179.4	0.982071
179.5	0.981643
179.6	0.982357
179.7	0.982786
179.8	0.983929
179.9	0.983714
180	0.981929
180.1	0.981357
180.2	0.981286
180.3	0.980714
180.4	0.981214
180.5	0.981643
180.6	0.980571
180.7	0.980714
180.8	0.9805
180.9	0.981786
181	0.9825
181.1	0.982286
181.2	0.982286
181.3	0.9815
181.4	0.982143
181.5	0.981857
181.6	0.981214
181.7	0.980857
181.8	0.980357
181.9	0.980929
182	0.981286
182.1	0.980571
182.2	0.981786
182.3	0.981143
182.4	0.981857
182.5	0.981071
182.6	0.981071
182.7	0.981571
182.8	0.981929
182.9	0.983214
183	0.9825
183.1	0.982714
183.2	0.982929
183.3	0.980929
183.4	0.980929
183.5	0.981714
183.6	0.980286
183.7	0.980786
183.8	0.981286
183.9	0.980714
184	0.9795
184.1	0.980286
184.2	0.980071
184.3	0.980857
184.4	0.980571
184.5	0.981429
184.6	0.982
184.7	0.981714
184.8	0.982643
184.9	0.983214
185	0.983071
185.1	0.982714
185.2	0.982214
185.3	0.981286
185.4	0.9825
185.5	0.982286
185.6	0.981357
185.7	0.981357
185.8	0.982071
185.9	0.982214
186	0.982571
186.1	0.982
186.2	0.981929
186.3	0.982286
186.4	0.983786
186.5	0.984
186.6	0.983286
186.7	0.983286
186.8	0.981714
186.9	0.980857
187	0.980786
187.1	0.980357
187.2	0.980786
187.3	0.981214
187.4	0.981214
187.5	0.9815
187.6	0.981
187.7	0.981143
187.8	0.980857
187.9	0.981857
188	0.981143
188.1	0.98
188.2	0.9825
188.3	0.982143
188.4	0.981571
188.5	0.981286
188.6	0.980643
188.7	0.980643
188.8	0.981714
188.9	0.981571
189	0.982214
189.1	0.982643
189.2	0.984
189.3	0.984
189.4	0.983714
189.5	0.982214
189.6	0.982143
189.7	0.981786
189.8	0.980357
189.9	0.980214
190	0.980571
190.1	0.9805
190.2	0.982071
190.3	0.982143
190.4	0.982286
190.5	0.981286
190.6	0.981071
190.7	0.981429
190.8	0.982429
190.9	0.982929
191	0.982929
191.1	0.982857
191.2	0.9825
191.3	0.9825
191.4	0.981571
191.5	0.981643
191.6	0.981357
191.7	0.980643
191.8	0.981286
191.9	0.981714
192	0.982714
192.1	0.982429
192.2	0.980714
192.3	0.981714
192.4	0.981286
192.5	0.982571
192.6	0.982143
192.7	0.982214
192.8	0.981929
192.9	0.983143
193	0.983214
193.1	0.984357
193.2	0.984071
193.3	0.984143
193.4	0.983643
193.5	0.983
193.6	0.982571
193.7	0.981357
193.8	0.982286
193.9	0.982286
194	0.979929
194.1	0.98
194.2	0.981
194.3	0.981143
194.4	0.982071
194.5	0.981286
194.6	0.982357
194.7	0.982143
194.8	0.983071
194.9	0.982643
195	0.982357
195.1	0.981857
195.2	0.982214
195.3	0.981643
195.4	0.981071
195.5	0.982643
195.6	0.983786
195.7	0.983929
195.8	0.983357
195.9	0.982286
196	0.983071
196.1	0.984071
196.2	0.984571
196.3	0.984643
196.4	0.983857
196.5	0.983714
196.6	0.983929
196.7	0.983786
196.8	0.982214
196.9	0.982929
197	0.983143
197.1	0.983571
197.2	0.9835
197.3	0.983
197.4	0.983071
197.5	0.984071
197.6	0.984
197.7	0.983929
197.8	0.983429
197.9	0.982714
198	0.983571
198.1	0.982857
198.2	0.981714
198.3	0.981214
198.4	0.981786
198.5	0.982
198.6	0.981929
198.7	0.981714
198.8	0.981714
198.9	0.981857
199	0.982857
199.1	0.982143
199.2	0.981929
199.3	0.9825
199.4	0.982286
199.5	0.982643
199.6	0.982857
199.7	0.983714
199.8	0.983857
199.9	0.983429
200	0.983143
[truncated: 14,000 more rows]
