# Supplementary material for: Bayesian inference of kinetic schemes for ion channels by Kalman filtering
Source: eLife journal article supplement (doi:10.7554/elife.62714), 2022-05-04
Supplement: fig4-data4 [file 1_Sim_N_7000_Strom_MW_8M.xlsx]

## Sheet: Tabelle1
0.1	0
0.2	0
0.3	0
0.4	0
0.5	0
0.6	0
0.7	0
0.8	0
0.9	0
1	0
1.1	0
1.2	0
1.3	0
1.4	0
1.5	0
1.6	0
1.7	0
1.8	0
1.9	0
2	0
2.1	0
2.2	0
2.3	0
2.4	0
2.5	0
2.6	0
2.7	0
2.8	0
2.9	0
3	0
3.1	0
3.2	0
3.3	0
3.4	0
3.5	0
3.6	0
3.7	0
3.8	0
3.9	0
4	0
4.1	0
4.2	0
4.3	0
4.4	0
4.5	0
4.6	0
4.7	0
4.8	0
4.9	0
5	0
5.1	0
5.2	0
5.3	0
5.4	0
5.5	0
5.6	0
5.7	0
5.8	0
5.9	0
6	0
6.1	0
6.2	0
6.3	0
6.4	0
6.5	0
6.6	0
6.7	0
6.8	0
6.9	0
7	0
7.1	0
7.2	0
7.3	0
7.4	0
7.5	0
7.6	0
7.7	0
7.8	0
7.9	0
8	0
8.1	0
8.2	0
8.3	0
8.4	0
8.5	0
8.6	0
8.7	0
8.8	0
8.9	0
9	0
9.1	0
9.2	0
9.3	0
9.4	0
9.5	0
9.6	0
9.7	0
9.8	0
9.9	0
10	0
10.1	0
10.2	0
10.3	0
10.4	0
10.5	0
10.6	0
10.7	0
10.8	0
10.9	0
11	0
11.1	0
11.2	0
11.3	0
11.4	0
11.5	0
11.6	0
11.7	0
11.8	0
11.9	0
12	0
12.1	0
12.2	0
12.3	0
12.4	0
12.5	0
12.6	0
12.7	0
12.8	0
12.9	0
13	0
13.1	0
13.2	0
13.3	0
13.4	0
13.5	0
13.6	0
13.7	0
13.8	0
13.9	0
14	0
14.1	0
14.2	0
14.3	0
14.4	0
14.5	0
14.6	0
14.7	0
14.8	0
14.9	0
15	0
15.1	0
15.2	0
15.3	0
15.4	0
15.5	0
15.6	0
15.7	0
15.8	0
15.9	0
16	0
16.1	0
16.2	0
16.3	0
16.4	0
16.5	0
16.6	0
16.7	0
16.8	0
16.9	0
17	0
17.1	0
17.2	0
17.3	0
17.4	0
17.5	0
17.6	0
17.7	0
17.8	0
17.9	0
18	0
18.1	0
18.2	0
18.3	0
18.4	0
18.5	0
18.6	0
18.7	0
18.8	0
18.9	0
19	0
19.1	0
19.2	0
19.3	0
19.4	0
19.5	0
19.6	0
19.7	0
19.8	0
19.9	0
20	0
20.1	0
20.2	0
20.3	0
20.4	0
20.5	0
20.6	0
20.7	0
20.8	0
20.9	0
21	0
21.1	0
21.2	0
21.3	0
21.4	0
21.5	0
21.6	0
21.7	0
21.8	0
21.9	0
22	0
22.1	0
22.2	0
22.3	0
22.4	0
22.5	0
22.6	0
22.7	0
22.8	0
22.9	0
23	0
23.1	0
23.2	0
23.3	0
23.4	0
23.5	0
23.6	0
23.7	0
23.8	0
23.9	0
24	0
24.1	0
24.2	0
24.3	0
24.4	0
24.5	0
24.6	0
24.7	0
24.8	0
24.9	0
25	0
25.1	0
25.2	0
25.3	0
25.4	0
25.5	0
25.6	0
25.7	0
25.8	0
25.9	0
26	0
26.1	0
26.2	0
26.3	0
26.4	0
26.5	0
26.6	0
26.7	0
26.8	0
26.9	0
27	0
27.1	0
27.2	0
27.3	0
27.4	0
27.5	0
27.6	0
27.7	0
27.8	0
27.9	0
28	0
28.1	0
28.2	0
28.3	0
28.4	0
28.5	0
28.6	0
28.7	0
28.8	0
28.9	0
29	0
29.1	0
29.2	0
29.3	0
29.4	0
29.5	0
29.6	0
29.7	0
29.8	0
29.9	0
30	0
30.1	0
30.2	0
30.3	0
30.4	0
30.5	0
30.6	0
30.7	0
30.8	0
30.9	0
31	0
31.1	0
31.2	0
31.3	0
31.4	0
31.5	0
31.6	0
31.7	0
31.8	0
31.9	0
32	0
32.1	0
32.2	0
32.3	0
32.4	0
32.5	0
32.6	0
32.7	0
32.8	0
32.9	0
33	0
33.1	0
33.2	0
33.3	0
33.4	0
33.5	0
33.6	0
33.7	0
33.8	0
33.9	0
34	0
34.1	0
34.2	0
34.3	0
34.4	0
34.5	0
34.6	0
34.7	0
34.8	0
34.9	0
35	0
35.1	0
35.2	0
35.3	0
35.4	0
35.5	0
35.6	0
35.7	0
35.8	0
35.9	0
36	0
36.1	0
36.2	0
36.3	0
36.4	0
36.5	0
36.6	0
36.7	0
36.8	0
36.9	0
37	0
37.1	0
37.2	0
37.3	0
37.4	0
37.5	0
37.6	0
37.7	0
37.8	0
37.9	0
38	0
38.1	0
38.2	0
38.3	0
38.4	0
38.5	0
38.6	0
38.7	0
38.8	0
38.9	0
39	0
39.1	0
39.2	0
39.3	0
39.4	0
39.5	0
39.6	0
39.7	0
39.8	0
39.9	0
40	0
40.1	0
40.2	0
40.3	0
40.4	0
40.5	0
40.6	0
40.7	0
40.8	0
40.9	0
41	0
41.1	0
41.2	0
41.3	0
41.4	0
41.5	0
41.6	0
41.7	0
41.8	0
41.9	0
42	0
42.1	0
42.2	0
42.3	0
42.4	0
42.5	0
42.6	0
42.7	0
42.8	0
42.9	0
43	0
43.1	0
43.2	0
43.3	0
43.4	0
43.5	0
43.6	0
43.7	0
43.8	0
43.9	0
44	0
44.1	0
44.2	0
44.3	0
44.4	0
44.5	0
44.6	0
44.7	0
44.8	0
44.9	0
45	0
45.1	0
45.2	0
45.3	0
45.4	0
45.5	0
45.6	0
45.7	0
45.8	0
45.9	0
46	0
46.1	0
46.2	0
46.3	0
46.4	0
46.5	0
46.6	0
46.7	0
46.8	0
46.9	0
47	0
47.1	0
47.2	0
47.3	0
47.4	0
47.5	0
47.6	0
47.7	0
47.8	0
47.9	0
48	0
48.1	0
48.2	0
48.3	0
48.4	0
48.5	0
48.6	0
48.7	0
48.8	0
48.9	0
49	0
49.1	0
49.2	0
49.3	0
49.4	0
49.5	0
49.6	0
49.7	0
49.8	0
49.9	0
50	0
50.1	0
50.2	0
50.3	0
50.4	0
50.5	0
50.6	0
50.7	0
50.8	0
50.9	0
51	0
51.1	0
51.2	0
51.3	0
51.4	0
51.5	0
51.6	0
51.7	0
51.8	0
51.9	0
52	0
52.1	0
52.2	0
52.3	0
52.4	0
52.5	0
52.6	0
52.7	0
52.8	0
52.9	0
53	0
53.1	0
53.2	0
53.3	0
53.4	0
53.5	0
53.6	0
53.7	0
53.8	0
53.9	0
54	0
54.1	0
54.2	0
54.3	0
54.4	0
54.5	0
54.6	0
54.7	0
54.8	0
54.9	0
55	0
55.1	0
55.2	0
55.3	0
55.4	0
55.5	0
55.6	0
55.7	0
55.8	0
55.9	0
56	0
56.1	0
56.2	0
56.3	0
56.4	0
56.5	0
56.6	0
56.7	0
56.8	0
56.9	0
57	0
57.1	0
57.2	0
57.3	0
57.4	0
57.5	0
57.6	0
57.7	0
57.8	0
57.9	0
58	0
58.1	0
58.2	0
58.3	0
58.4	0
58.5	0
58.6	0
58.7	0
58.8	0
58.9	0
59	0
59.1	0
59.2	0
59.3	0
59.4	0
59.5	0
59.6	0
59.7	0
59.8	0
59.9	0
60	0
60.1	0
60.2	0
60.3	0
60.4	0
60.5	0
60.6	0
60.7	0
60.8	0
60.9	0
61	0
61.1	0
61.2	0
61.3	0
61.4	0
61.5	0
61.6	0
61.7	0
61.8	0
61.9	0
62	0
62.1	0
62.2	0
62.3	0
62.4	0
62.5	0
62.6	0
62.7	0
62.8	0
62.9	0
63	0
63.1	0
63.2	0
63.3	0
63.4	0
63.5	0
63.6	0
63.7	0
63.8	0
63.9	0
64	0
64.1	0
64.2	0
64.3	0
64.4	0
64.5	0
64.6	0
64.7	0
64.8	0
64.9	0
65	0
65.1	0
65.2	0
65.3	0
65.4	0
65.5	0
65.6	0
65.7	0
65.8	0
65.9	0
66	0
66.1	0
66.2	0
66.3	0
66.4	0
66.5	0
66.6	0
66.7	0
66.8	0
66.9	0
67	0
67.1	0
67.2	0
67.3	0
67.4	0
67.5	0
67.6	0
67.7	0
67.8	0
67.9	0
68	0
68.1	0
68.2	0
68.3	0
68.4	0
68.5	0
68.6	0
68.7	0
68.8	0
68.9	0
69	0
69.1	0
69.2	0
69.3	0
69.4	0
69.5	0
69.6	0
69.7	0
69.8	0
69.9	0
70	0
70.1	0
70.2	0
70.3	0
70.4	0
70.5	0
70.6	0
70.7	0
70.8	0
70.9	0
71	0
71.1	0
71.2	0
71.3	0
71.4	0
71.5	0
71.6	0
71.7	0
71.8	0
71.9	0
72	0
72.1	0
72.2	0
72.3	0
72.4	0
72.5	0
72.6	0
72.7	0
72.8	0
72.9	0
73	0
73.1	0
73.2	0
73.3	0
73.4	0
73.5	0
73.6	0
73.7	0
73.8	0
73.9	0
74	0
74.1	0
74.2	0
74.3	0
74.4	0
74.5	0
74.6	0
74.7	0
74.8	0
74.9	0
75	0
75.1	0
75.2	0
75.3	0
75.4	0
75.5	0
75.6	0
75.7	0
75.8	0
75.9	0
76	0
76.1	0
76.2	0
76.3	0
76.4	0
76.5	0
76.6	0
76.7	0
76.8	0
76.9	0
77	0
77.1	0
77.2	0
77.3	0
77.4	0
77.5	0
77.6	0
77.7	0
77.8	0
77.9	0
78	0
78.1	0
78.2	0
78.3	0
78.4	0
78.5	0
78.6	0
78.7	0
78.8	0
78.9	0
79	0
79.1	0
79.2	0
79.3	0
79.4	0
79.5	0
79.6	0
79.7	0
79.8	0
79.9	0
80	0
80.1	0
80.2	0
80.3	0
80.4	0
80.5	0
80.6	0
80.7	0
80.8	0
80.9	0
81	0
81.1	0
81.2	0
81.3	0
81.4	0
81.5	0
81.6	0
81.7	0
81.8	0
81.9	0
82	0
82.1	0
82.2	0
82.3	0
82.4	0
82.5	0
82.6	0
82.7	0
82.8	0
82.9	0
83	0
83.1	0
83.2	0
83.3	0
83.4	0
83.5	0
83.6	0
83.7	0
83.8	0
83.9	0
84	0
84.1	0
84.2	0
84.3	0
84.4	0
84.5	0
84.6	0
84.7	0
84.8	0
84.9	0
85	0
85.1	0
85.2	0
85.3	0
85.4	0
85.5	0
85.6	0
85.7	0
85.8	0
85.9	0
86	0
86.1	0
86.2	0
86.3	0
86.4	0
86.5	0
86.6	0
86.7	0
86.8	0
86.9	0
87	0
87.1	0
87.2	0
87.3	0
87.4	0
87.5	0
87.6	0
87.7	0
87.8	0
87.9	0
88	0
88.1	0
88.2	0
88.3	0
88.4	0
88.5	0
88.6	0
88.7	0
88.8	0
88.9	0
89	0
89.1	0
89.2	0
89.3	0
89.4	0
89.5	0
89.6	0
89.7	0
89.8	0
89.9	0
90	0
90.1	0
90.2	0
90.3	0
90.4	0
90.5	0
90.6	0
90.7	0
90.8	0
90.9	0
91	0
91.1	0
91.2	0
91.3	0
91.4	0
91.5	0
91.6	0
91.7	0
91.8	0
91.9	0
92	0
92.1	0
92.2	0
92.3	0
92.4	0
92.5	0
92.6	0
92.7	0
92.8	0
92.9	0
93	0
93.1	0
93.2	0
93.3	0
93.4	0
93.5	0
93.6	0
93.7	0
93.8	0
93.9	0
94	0
94.1	0
94.2	0
94.3	0
94.4	0
94.5	0
94.6	0
94.7	0
94.8	0
94.9	0
95	0
95.1	0
95.2	0
95.3	0
95.4	0
95.5	0
95.6	0
95.7	0
95.8	0
95.9	0
96	0
96.1	0
96.2	0
96.3	0
96.4	0
96.5	0
96.6	0
96.7	0
96.8	0
96.9	0
97	0
97.1	0
97.2	0
97.3	0
97.4	0
97.5	0
97.6	0
97.7	0
97.8	0
97.9	0
98	0
98.1	0
98.2	0
98.3	0
98.4	0
98.5	0
98.6	0
98.7	0
98.8	0
98.9	0
99	0
99.1	0
99.2	0
99.3	0
99.4	0
99.5	0
99.6	0
99.7	0
99.8	0
99.9	0
100	0
100.1	0.000142857
100.2	0.00128571
100.3	0.00228571
100.4	0.005
100.5	0.00828571
100.6	0.0117143
100.7	0.0164286
100.8	0.0208571
100.9	0.0244286
101	0.0268571
101.1	0.03
101.2	0.0332857
101.3	0.0367143
101.4	0.0407143
101.5	0.0448571
101.6	0.0497143
101.7	0.055
101.8	0.0594286
101.9	0.063
102	0.0671429
102.1	0.0712857
102.2	0.0754286
102.3	0.0797143
102.4	0.0845714
102.5	0.088
102.6	0.0921429
102.7	0.0964286
102.8	0.1
102.9	0.102286
103	0.104714
103.1	0.107286
103.2	0.110857
103.3	0.114714
103.4	0.119143
103.5	0.123429
103.6	0.126714
103.7	0.129143
103.8	0.133429
103.9	0.136714
104	0.139571
104.1	0.143429
104.2	0.147143
104.3	0.150286
104.4	0.153571
104.5	0.157
104.6	0.159429
104.7	0.163857
104.8	0.168286
104.9	0.171714
105	0.174429
105.1	0.177
105.2	0.179857
105.3	0.183143
105.4	0.186429
105.5	0.19
105.6	0.194
105.7	0.197286
105.8	0.200143
105.9	0.203
106	0.206
106.1	0.208714
106.2	0.211429
106.3	0.214571
106.4	0.217286
106.5	0.221143
106.6	0.223714
106.7	0.227714
106.8	0.231
106.9	0.233857
107	0.236143
107.1	0.238286
107.2	0.242
107.3	0.245857
107.4	0.248429
107.5	0.253143
107.6	0.255
107.7	0.257429
107.8	0.259571
107.9	0.262429
108	0.264286
108.1	0.266143
108.2	0.268
108.3	0.27
108.4	0.271714
108.5	0.273286
108.6	0.276857
108.7	0.279429
108.8	0.283429
108.9	0.286
109	0.287714
109.1	0.291286
109.2	0.293857
109.3	0.295429
109.4	0.296857
109.5	0.298429
109.6	0.300571
109.7	0.304286
109.8	0.307714
109.9	0.310857
110	0.314
110.1	0.317143
110.2	0.320571
110.3	0.323
110.4	0.326286
110.5	0.328571
110.6	0.331
110.7	0.333
110.8	0.338286
110.9	0.341
111	0.343857
111.1	0.346143
111.2	0.348286
111.3	0.350429
111.4	0.352571
111.5	0.355429
111.6	0.358286
111.7	0.360143
111.8	0.361857
111.9	0.364286
112	0.366429
112.1	0.368429
112.2	0.370571
112.3	0.372571
112.4	0.374714
112.5	0.376429
112.6	0.377714
112.7	0.380143
112.8	0.382571
112.9	0.384714
113	0.387429
113.1	0.389429
113.2	0.390429
113.3	0.392286
113.4	0.394857
113.5	0.397143
113.6	0.400714
113.7	0.403571
113.8	0.405571
113.9	0.407
114	0.410286
114.1	0.412429
114.2	0.414286
114.3	0.417714
114.4	0.419286
114.5	0.421286
114.6	0.422857
114.7	0.425286
114.8	0.426286
114.9	0.429
115	0.431
115.1	0.433571
115.2	0.435286
115.3	0.436714
115.4	0.438286
115.5	0.440714
115.6	0.442429
115.7	0.443857
115.8	0.444571
115.9	0.446143
116	0.447857
116.1	0.449571
116.2	0.451571
116.3	0.453
116.4	0.454714
116.5	0.455857
116.6	0.456857
116.7	0.458
116.8	0.459429
116.9	0.46
117	0.460714
117.1	0.463429
117.2	0.466
117.3	0.467
117.4	0.468429
117.5	0.471143
117.6	0.472714
117.7	0.473571
117.8	0.474286
117.9	0.476
118	0.478143
118.1	0.480143
118.2	0.482714
118.3	0.485714
118.4	0.488
118.5	0.490286
118.6	0.492143
118.7	0.493
118.8	0.494714
118.9	0.496571
119	0.498143
119.1	0.500286
119.2	0.501
119.3	0.502714
119.4	0.504429
119.5	0.506143
119.6	0.507714
119.7	0.510571
119.8	0.511714
119.9	0.513
120	0.514571
120.1	0.516714
120.2	0.517857
120.3	0.520286
120.4	0.521429
120.5	0.522286
120.6	0.524143
120.7	0.525286
120.8	0.526571
120.9	0.528
121	0.530286
121.1	0.531
121.2	0.531714
121.3	0.533
121.4	0.534429
121.5	0.535857
121.6	0.537429
121.7	0.538143
121.8	0.539143
121.9	0.539286
122	0.540286
122.1	0.541143
122.2	0.542429
122.3	0.543714
122.4	0.545571
122.5	0.548429
122.6	0.55
122.7	0.551571
122.8	0.552429
122.9	0.552286
123	0.552714
123.1	0.553571
123.2	0.554857
123.3	0.557857
123.4	0.559286
123.5	0.559571
123.6	0.561286
123.7	0.562
123.8	0.563714
123.9	0.564857
124	0.565714
124.1	0.567
124.2	0.567857
124.3	0.568143
124.4	0.569429
124.5	0.57
124.6	0.570143
124.7	0.571429
124.8	0.573143
124.9	0.573714
125	0.575286
125.1	0.576
125.2	0.577857
125.3	0.578714
125.4	0.580571
125.5	0.582
125.6	0.582714
125.7	0.583571
125.8	0.584
125.9	0.586571
126	0.586429
126.1	0.587143
126.2	0.588286
126.3	0.589286
126.4	0.589857
126.5	0.590571
126.6	0.591857
126.7	0.593143
126.8	0.593571
126.9	0.595
127	0.596429
127.1	0.597429
127.2	0.598429
127.3	0.599429
127.4	0.600714
127.5	0.600429
127.6	0.601429
127.7	0.602
127.8	0.603286
127.9	0.605
128	0.604714
128.1	0.605571
128.2	0.607
128.3	0.607143
128.4	0.607714
128.5	0.608714
128.6	0.608857
128.7	0.609
128.8	0.609429
128.9	0.610857
129	0.611571
129.1	0.612714
129.2	0.613857
129.3	0.614714
129.4	0.615286
129.5	0.616286
129.6	0.616714
129.7	0.618143
129.8	0.618286
129.9	0.618571
130	0.618714
130.1	0.619143
130.2	0.619571
130.3	0.621714
130.4	0.622857
130.5	0.623143
130.6	0.624429
130.7	0.624429
130.8	0.625
130.9	0.626143
131	0.626857
131.1	0.628857
131.2	0.629714
131.3	0.630857
131.4	0.632286
131.5	0.633
131.6	0.633571
131.7	0.634571
131.8	0.636571
131.9	0.637714
132	0.638429
132.1	0.638286
132.2	0.638571
132.3	0.639571
132.4	0.639571
132.5	0.640286
132.6	0.641
132.7	0.642
132.8	0.643571
132.9	0.644714
133	0.645
133.1	0.645286
133.2	0.646
133.3	0.647571
133.4	0.648143
133.5	0.648143
133.6	0.649
133.7	0.650143
133.8	0.650571
133.9	0.651714
134	0.653
134.1	0.652571
134.2	0.653857
134.3	0.655429
134.4	0.656857
134.5	0.657429
134.6	0.657571
134.7	0.658857
134.8	0.660143
134.9	0.660286
135	0.660143
135.1	0.660286
135.2	0.660714
135.3	0.661
135.4	0.661
135.5	0.661857
135.6	0.662857
135.7	0.664429
135.8	0.665571
135.9	0.666857
136	0.667286
136.1	0.668429
136.2	0.669143
136.3	0.669857
136.4	0.671286
136.5	0.672
136.6	0.673
136.7	0.673714
136.8	0.674286
136.9	0.675143
137	0.675286
137.1	0.676571
137.2	0.677143
137.3	0.678
137.4	0.678714
137.5	0.678714
137.6	0.679286
137.7	0.680429
137.8	0.681143
137.9	0.682143
138	0.681714
138.1	0.682
138.2	0.682857
138.3	0.683429
138.4	0.684429
138.5	0.684571
138.6	0.684714
138.7	0.685
138.8	0.685714
138.9	0.686857
139	0.686714
139.1	0.687143
139.2	0.687857
139.3	0.688143
139.4	0.688857
139.5	0.689571
139.6	0.690143
139.7	0.690857
139.8	0.691714
139.9	0.692143
140	0.692286
140.1	0.692571
140.2	0.693571
140.3	0.693714
140.4	0.694429
140.5	0.694857
140.6	0.695571
140.7	0.695714
140.8	0.696
140.9	0.696429
141	0.696286
141.1	0.696571
141.2	0.697429
141.3	0.698857
141.4	0.699714
141.5	0.700143
141.6	0.700429
141.7	0.700571
141.8	0.702143
141.9	0.702286
142	0.703
142.1	0.704571
142.2	0.704714
142.3	0.706571
142.4	0.707143
142.5	0.708
142.6	0.708714
142.7	0.708
142.8	0.708429
142.9	0.708857
143	0.710143
143.1	0.711
143.2	0.711857
143.3	0.713
143.4	0.713286
143.5	0.713857
143.6	0.714429
143.7	0.715143
143.8	0.715714
143.9	0.716286
144	0.717286
144.1	0.718286
144.2	0.718429
144.3	0.719714
144.4	0.719857
144.5	0.720143
144.6	0.719714
144.7	0.721571
144.8	0.723
144.9	0.723143
145	0.723857
145.1	0.724286
145.2	0.724714
145.3	0.725571
145.4	0.726429
145.5	0.727143
145.6	0.727429
145.7	0.727857
145.8	0.728
145.9	0.728286
146	0.729143
146.1	0.729714
146.2	0.730286
146.3	0.731
146.4	0.731286
146.5	0.731714
146.6	0.731429
146.7	0.732714
146.8	0.733286
146.9	0.734286
147	0.734143
147.1	0.734
147.2	0.734571
147.3	0.735143
147.4	0.735571
147.5	0.734857
147.6	0.734571
147.7	0.734286
147.8	0.734429
147.9	0.734286
148	0.734857
148.1	0.734571
148.2	0.735429
148.3	0.734857
148.4	0.734714
148.5	0.735429
148.6	0.736429
148.7	0.737429
148.8	0.738571
148.9	0.738571
149	0.739
149.1	0.739
149.2	0.739
149.3	0.739
149.4	0.739714
149.5	0.739429
149.6	0.739143
149.7	0.739714
149.8	0.739
149.9	0.738571
150	0.738714
150.1	0.737857
150.2	0.739143
150.3	0.738571
150.4	0.739714
150.5	0.739714
150.6	0.740714
150.7	0.741143
150.8	0.741286
150.9	0.741429
151	0.742429
151.1	0.743571
151.2	0.744286
151.3	0.744714
151.4	0.744857
151.5	0.744857
151.6	0.744857
151.7	0.744571
151.8	0.745143
151.9	0.745571
152	0.745857
152.1	0.746286
152.2	0.746143
152.3	0.747143
152.4	0.747714
152.5	0.748714
152.6	0.748857
152.7	0.749571
152.8	0.749286
152.9	0.749571
153	0.749286
153.1	0.749429
153.2	0.749429
153.3	0.750429
153.4	0.749857
153.5	0.749571
153.6	0.749143
153.7	0.749143
153.8	0.749
153.9	0.749429
154	0.749
154.1	0.749714
154.2	0.749714
154.3	0.750429
154.4	0.750857
154.5	0.750857
154.6	0.750857
154.7	0.751
154.8	0.751286
154.9	0.751286
155	0.751286
155.1	0.751286
155.2	0.751857
155.3	0.752714
155.4	0.752857
155.5	0.753286
155.6	0.753571
155.7	0.753714
155.8	0.754
155.9	0.754
156	0.754143
156.1	0.755286
156.2	0.754571
156.3	0.755429
156.4	0.756143
156.5	0.757
156.6	0.756714
156.7	0.756429
156.8	0.756571
156.9	0.757
157	0.757857
157.1	0.758143
157.2	0.757857
157.3	0.757571
157.4	0.757571
157.5	0.757714
157.6	0.757429
157.7	0.756429
157.8	0.756143
157.9	0.755857
158	0.756
158.1	0.756429
158.2	0.756571
158.3	0.756286
158.4	0.756429
158.5	0.756571
158.6	0.756857
158.7	0.757429
158.8	0.757286
158.9	0.757
159	0.757
159.1	0.758143
159.2	0.758286
159.3	0.758143
159.4	0.759429
159.5	0.759714
159.6	0.760571
159.7	0.760143
159.8	0.761
159.9	0.760857
160	0.762571
160.1	0.762857
160.2	0.763286
160.3	0.763857
160.4	0.763857
160.5	0.764143
160.6	0.764857
160.7	0.765857
160.8	0.766714
160.9	0.766857
161	0.768143
161.1	0.768143
161.2	0.767857
161.3	0.768429
161.4	0.768286
161.5	0.768143
161.6	0.768143
161.7	0.768571
161.8	0.768286
161.9	0.768143
162	0.767429
162.1	0.767286
162.2	0.767
162.3	0.767286
162.4	0.767857
162.5	0.767571
162.6	0.768
162.7	0.768714
162.8	0.767714
162.9	0.767714
163	0.767714
163.1	0.768
163.2	0.767286
163.3	0.767571
163.4	0.767714
163.5	0.768
163.6	0.768143
163.7	0.768714
163.8	0.768429
163.9	0.769143
164	0.769714
164.1	0.770429
164.2	0.770286
164.3	0.77
164.4	0.770143
164.5	0.769857
164.6	0.770143
164.7	0.769714
164.8	0.770857
164.9	0.770857
165	0.770714
165.1	0.771143
165.2	0.771143
165.3	0.771429
165.4	0.771
165.5	0.771
165.6	0.770714
165.7	0.771286
165.8	0.772143
165.9	0.773143
166	0.773286
166.1	0.773143
166.2	0.773429
166.3	0.774143
166.4	0.774
166.5	0.774857
166.6	0.774857
166.7	0.774857
166.8	0.775
166.9	0.775
167	0.775714
167.1	0.776429
167.2	0.777286
167.3	0.777286
167.4	0.776571
167.5	0.776571
167.6	0.776857
167.7	0.776714
167.8	0.777571
167.9	0.777429
168	0.777857
168.1	0.778286
168.2	0.778429
168.3	0.778857
168.4	0.779143
168.5	0.78
168.6	0.779429
168.7	0.78
168.8	0.779571
168.9	0.779714
169	0.780857
169.1	0.780714
169.2	0.781286
169.3	0.781143
169.4	0.782
169.5	0.781571
169.6	0.782143
169.7	0.782429
169.8	0.782143
169.9	0.782143
170	0.781857
170.1	0.780857
170.2	0.781
170.3	0.781714
170.4	0.782286
170.5	0.782429
170.6	0.782857
170.7	0.783143
170.8	0.782714
170.9	0.783
171	0.782714
171.1	0.782857
171.2	0.781714
171.3	0.781429
171.4	0.783143
171.5	0.783143
171.6	0.782857
171.7	0.782857
171.8	0.783286
171.9	0.783714
172	0.783571
172.1	0.783857
172.2	0.783429
172.3	0.783571
172.4	0.783857
172.5	0.783286
172.6	0.784286
172.7	0.783571
172.8	0.783
172.9	0.783714
173	0.783857
173.1	0.783286
173.2	0.783286
173.3	0.782857
173.4	0.782571
173.5	0.782429
173.6	0.783143
173.7	0.783571
173.8	0.783429
173.9	0.783571
174	0.783143
174.1	0.783429
174.2	0.783857
174.3	0.783286
174.4	0.783714
174.5	0.783714
174.6	0.784143
174.7	0.784857
174.8	0.785
174.9	0.785286
175	0.785571
175.1	0.785857
175.2	0.785857
175.3	0.786429
175.4	0.786286
175.5	0.787
175.6	0.786714
175.7	0.787429
175.8	0.788143
175.9	0.788
176	0.788429
176.1	0.788429
176.2	0.789429
176.3	0.789571
176.4	0.789714
176.5	0.789286
176.6	0.789857
176.7	0.790143
176.8	0.790286
176.9	0.791143
177	0.790714
177.1	0.790571
177.2	0.791429
177.3	0.792
177.4	0.791143
177.5	0.790571
177.6	0.790714
177.7	0.790857
177.8	0.791143
177.9	0.791
178	0.791143
178.1	0.791286
178.2	0.792429
178.3	0.792857
178.4	0.793429
178.5	0.794
178.6	0.794286
178.7	0.794571
178.8	0.794143
178.9	0.794571
179	0.794571
179.1	0.794571
179.2	0.794143
179.3	0.794714
179.4	0.794714
179.5	0.794571
179.6	0.794714
179.7	0.795
179.8	0.795143
179.9	0.795143
180	0.794429
180.1	0.793714
180.2	0.794286
180.3	0.794286
180.4	0.794143
180.5	0.794571
180.6	0.794429
180.7	0.794857
180.8	0.794429
180.9	0.794286
181	0.794857
181.1	0.794429
181.2	0.794286
181.3	0.794714
181.4	0.795143
181.5	0.795
181.6	0.795286
181.7	0.794571
181.8	0.794429
181.9	0.794286
182	0.795429
182.1	0.795571
182.2	0.796286
182.3	0.796429
182.4	0.796429
182.5	0.795286
182.6	0.795429
182.7	0.795286
182.8	0.795
182.9	0.795571
183	0.795
183.1	0.794571
183.2	0.794571
183.3	0.794857
183.4	0.794857
183.5	0.794571
183.6	0.794143
183.7	0.793429
183.8	0.793857
183.9	0.793429
184	0.793429
184.1	0.793286
184.2	0.793571
184.3	0.793857
184.4	0.794143
184.5	0.794143
184.6	0.793714
184.7	0.793857
184.8	0.794857
184.9	0.795
185	0.795
185.1	0.794714
185.2	0.794143
185.3	0.794429
185.4	0.794571
185.5	0.794857
185.6	0.794857
185.7	0.795286
185.8	0.794429
185.9	0.794571
186	0.794286
186.1	0.794571
186.2	0.793857
186.3	0.794286
186.4	0.794286
186.5	0.794
186.6	0.793714
186.7	0.793286
186.8	0.793286
186.9	0.794
187	0.794286
187.1	0.793429
187.2	0.793286
187.3	0.793143
187.4	0.793571
187.5	0.794143
187.6	0.794143
187.7	0.794571
187.8	0.793571
187.9	0.793
188	0.793286
188.1	0.792857
188.2	0.793
188.3	0.792714
188.4	0.792857
188.5	0.793143
188.6	0.794
188.7	0.795857
188.8	0.795857
188.9	0.796143
189	0.795857
189.1	0.795429
189.2	0.795286
189.3	0.795714
189.4	0.795714
189.5	0.795429
189.6	0.796571
189.7	0.795286
189.8	0.795571
189.9	0.795714
190	0.795571
190.1	0.794857
190.2	0.794857
190.3	0.794714
190.4	0.795286
190.5	0.795714
190.6	0.795857
190.7	0.796
190.8	0.795714
190.9	0.796
191	0.795714
191.1	0.795
191.2	0.795
191.3	0.795714
191.4	0.796
191.5	0.796143
191.6	0.796857
191.7	0.797
191.8	0.797
191.9	0.797143
192	0.797143
192.1	0.796714
192.2	0.796714
192.3	0.796571
192.4	0.796714
192.5	0.798
192.6	0.798571
192.7	0.798857
192.8	0.798571
192.9	0.798143
193	0.798571
193.1	0.798857
193.2	0.798286
193.3	0.797714
193.4	0.797571
193.5	0.798
193.6	0.797429
193.7	0.797286
193.8	0.797286
193.9	0.797143
194	0.796857
194.1	0.796
194.2	0.796286
194.3	0.796429
194.4	0.795857
194.5	0.795714
194.6	0.795714
194.7	0.794714
194.8	0.794571
194.9	0.794571
195	0.795286
195.1	0.794714
195.2	0.795429
195.3	0.796714
195.4	0.797
195.5	0.796571
195.6	0.795857
195.7	0.796143
195.8	0.796286
195.9	0.796714
196	0.796571
196.1	0.796857
196.2	0.797143
196.3	0.797
196.4	0.797571
196.5	0.797286
196.6	0.797714
196.7	0.797571
196.8	0.798714
196.9	0.798286
197	0.798286
197.1	0.798143
197.2	0.798143
197.3	0.799143
197.4	0.798714
197.5	0.798571
197.6	0.798143
197.7	0.798571
197.8	0.799143
197.9	0.797714
198	0.798429
198.1	0.798714
198.2	0.798286
198.3	0.798286
198.4	0.799
198.5	0.799714
198.6	0.800143
198.7	0.800857
198.8	0.800714
198.9	0.800429
199	0.800143
199.1	0.800571
199.2	0.800571
199.3	0.801286
199.4	0.801714
199.5	0.801429
199.6	0.801143
199.7	0.801
199.8	0.801286
199.9	0.801286
200	0.801286
[truncated: 14,000 more rows]
