# Supplementary material for: Bayesian inference of kinetic schemes for ion channels by Kalman filtering
Source: eLife journal article supplement (doi:10.7554/elife.62714), 2022-05-04
Supplement: fig4-data4 [file 1_Sim_N_10000_Fluor_MW.xlsx]

## Sheet: Tabelle1
0.1	0
0.2	0
0.3	0
0.4	0
0.5	0
0.6	0
0.7	0
0.8	0
0.9	0
1	0
1.1	0
1.2	0
1.3	0
1.4	0
1.5	0
1.6	0
1.7	0
1.8	0
1.9	0
2	0
2.1	0
2.2	0
2.3	0
2.4	0
2.5	0
2.6	0
2.7	0
2.8	0
2.9	0
3	0
3.1	0
3.2	0
3.3	0
3.4	0
3.5	0
3.6	0
3.7	0
3.8	0
3.9	0
4	0
4.1	0
4.2	0
4.3	0
4.4	0
4.5	0
4.6	0
4.7	0
4.8	0
4.9	0
5	0
5.1	0
5.2	0
5.3	0
5.4	0
5.5	0
5.6	0
5.7	0
5.8	0
5.9	0
6	0
6.1	0
6.2	0
6.3	0
6.4	0
6.5	0
6.6	0
6.7	0
6.8	0
6.9	0
7	0
7.1	0
7.2	0
7.3	0
7.4	0
7.5	0
7.6	0
7.7	0
7.8	0
7.9	0
8	0
8.1	0
8.2	0
8.3	0
8.4	0
8.5	0
8.6	0
8.7	0
8.8	0
8.9	0
9	0
9.1	0
9.2	0
9.3	0
9.4	0
9.5	0
9.6	0
9.7	0
9.8	0
9.9	0
10	0
10.1	0
10.2	0
10.3	0
10.4	0
10.5	0
10.6	0
10.7	0
10.8	0
10.9	0
11	0
11.1	0
11.2	0
11.3	0
11.4	0
11.5	0
11.6	0
11.7	0
11.8	0
11.9	0
12	0
12.1	0
12.2	0
12.3	0
12.4	0
12.5	0
12.6	0
12.7	0
12.8	0
12.9	0
13	0
13.1	0
13.2	0
13.3	0
13.4	0
13.5	0
13.6	0
13.7	0
13.8	0
13.9	0
14	0
14.1	0
14.2	0
14.3	0
14.4	0
14.5	0
14.6	0
14.7	0
14.8	0
14.9	0
15	0
15.1	0
15.2	0
15.3	0
15.4	0
15.5	0
15.6	0
15.7	0
15.8	0
15.9	0
16	0
16.1	0
16.2	0
16.3	0
16.4	0
16.5	0
16.6	0
16.7	0
16.8	0
16.9	0
17	0
17.1	0
17.2	0
17.3	0
17.4	0
17.5	0
17.6	0
17.7	0
17.8	0
17.9	0
18	0
18.1	0
18.2	0
18.3	0
18.4	0
18.5	0
18.6	0
18.7	0
18.8	0
18.9	0
19	0
19.1	0
19.2	0
19.3	0
19.4	0
19.5	0
19.6	0
19.7	0
19.8	0
19.9	0
20	0
20.1	0
20.2	0
20.3	0
20.4	0
20.5	0
20.6	0
20.7	0
20.8	0
20.9	0
21	0
21.1	0
21.2	0
21.3	0
21.4	0
21.5	0
21.6	0
21.7	0
21.8	0
21.9	0
22	0
22.1	0
22.2	0
22.3	0
22.4	0
22.5	0
22.6	0
22.7	0
22.8	0
22.9	0
23	0
23.1	0
23.2	0
23.3	0
23.4	0
23.5	0
23.6	0
23.7	0
23.8	0
23.9	0
24	0
24.1	0
24.2	0
24.3	0
24.4	0
24.5	0
24.6	0
24.7	0
24.8	0
24.9	0
25	0
25.1	0
25.2	0
25.3	0
25.4	0
25.5	0
25.6	0
25.7	0
25.8	0
25.9	0
26	0
26.1	0
26.2	0
26.3	0
26.4	0
26.5	0
26.6	0
26.7	0
26.8	0
26.9	0
27	0
27.1	0
27.2	0
27.3	0
27.4	0
27.5	0
27.6	0
27.7	0
27.8	0
27.9	0
28	0
28.1	0
28.2	0
28.3	0
28.4	0
28.5	0
28.6	0
28.7	0
28.8	0
28.9	0
29	0
29.1	0
29.2	0
29.3	0
29.4	0
29.5	0
29.6	0
29.7	0
29.8	0
29.9	0
30	0
30.1	0
30.2	0
30.3	0
30.4	0
30.5	0
30.6	0
30.7	0
30.8	0
30.9	0
31	0
31.1	0
31.2	0
31.3	0
31.4	0
31.5	0
31.6	0
31.7	0
31.8	0
31.9	0
32	0
32.1	0
32.2	0
32.3	0
32.4	0
32.5	0
32.6	0
32.7	0
32.8	0
32.9	0
33	0
33.1	0
33.2	0
33.3	0
33.4	0
33.5	0
33.6	0
33.7	0
33.8	0
33.9	0
34	0
34.1	0
34.2	0
34.3	0
34.4	0
34.5	0
34.6	0
34.7	0
34.8	0
34.9	0
35	0
35.1	0
35.2	0
35.3	0
35.4	0
35.5	0
35.6	0
35.7	0
35.8	0
35.9	0
36	0
36.1	0
36.2	0
36.3	0
36.4	0
36.5	0
36.6	0
36.7	0
36.8	0
36.9	0
37	0
37.1	0
37.2	0
37.3	0
37.4	0
37.5	0
37.6	0
37.7	0
37.8	0
37.9	0
38	0
38.1	0
38.2	0
38.3	0
38.4	0
38.5	0
38.6	0
38.7	0
38.8	0
38.9	0
39	0
39.1	0
39.2	0
39.3	0
39.4	0
39.5	0
39.6	0
39.7	0
39.8	0
39.9	0
40	0
40.1	0
40.2	0
40.3	0
40.4	0
40.5	0
40.6	0
40.7	0
40.8	0
40.9	0
41	0
41.1	0
41.2	0
41.3	0
41.4	0
41.5	0
41.6	0
41.7	0
41.8	0
41.9	0
42	0
42.1	0
42.2	0
42.3	0
42.4	0
42.5	0
42.6	0
42.7	0
42.8	0
42.9	0
43	0
43.1	0
43.2	0
43.3	0
43.4	0
43.5	0
43.6	0
43.7	0
43.8	0
43.9	0
44	0
44.1	0
44.2	0
44.3	0
44.4	0
44.5	0
44.6	0
44.7	0
44.8	0
44.9	0
45	0
45.1	0
45.2	0
45.3	0
45.4	0
45.5	0
45.6	0
45.7	0
45.8	0
45.9	0
46	0
46.1	0
46.2	0
46.3	0
46.4	0
46.5	0
46.6	0
46.7	0
46.8	0
46.9	0
47	0
47.1	0
47.2	0
47.3	0
47.4	0
47.5	0
47.6	0
47.7	0
47.8	0
47.9	0
48	0
48.1	0
48.2	0
48.3	0
48.4	0
48.5	0
48.6	0
48.7	0
48.8	0
48.9	0
49	0
49.1	0
49.2	0
49.3	0
49.4	0
49.5	0
49.6	0
49.7	0
49.8	0
49.9	0
50	0
50.1	0
50.2	0
50.3	0
50.4	0
50.5	0
50.6	0
50.7	0
50.8	0
50.9	0
51	0
51.1	0
51.2	0
51.3	0
51.4	0
51.5	0
51.6	0
51.7	0
51.8	0
51.9	0
52	0
52.1	0
52.2	0
52.3	0
52.4	0
52.5	0
52.6	0
52.7	0
52.8	0
52.9	0
53	0
53.1	0
53.2	0
53.3	0
53.4	0
53.5	0
53.6	0
53.7	0
53.8	0
53.9	0
54	0
54.1	0
54.2	0
54.3	0
54.4	0
54.5	0
54.6	0
54.7	0
54.8	0
54.9	0
55	0
55.1	0
55.2	0
55.3	0
55.4	0
55.5	0
55.6	0
55.7	0
55.8	0
55.9	0
56	0
56.1	0
56.2	0
56.3	0
56.4	0
56.5	0
56.6	0
56.7	0
56.8	0
56.9	0
57	0
57.1	0
57.2	0
57.3	0
57.4	0
57.5	0
57.6	0
57.7	0
57.8	0
57.9	0
58	0
58.1	0
58.2	0
58.3	0
58.4	0
58.5	0
58.6	0
58.7	0
58.8	0
58.9	0
59	0
59.1	0
59.2	0
59.3	0
59.4	0
59.5	0
59.6	0
59.7	0
59.8	0
59.9	0
60	0
60.1	0
60.2	0
60.3	0
60.4	0
60.5	0
60.6	0
60.7	0
60.8	0
60.9	0
61	0
61.1	0
61.2	0
61.3	0
61.4	0
61.5	0
61.6	0
61.7	0
61.8	0
61.9	0
62	0
62.1	0
62.2	0
62.3	0
62.4	0
62.5	0
62.6	0
62.7	0
62.8	0
62.9	0
63	0
63.1	0
63.2	0
63.3	0
63.4	0
63.5	0
63.6	0
63.7	0
63.8	0
63.9	0
64	0
64.1	0
64.2	0
64.3	0
64.4	0
64.5	0
64.6	0
64.7	0
64.8	0
64.9	0
65	0
65.1	0
65.2	0
65.3	0
65.4	0
65.5	0
65.6	0
65.7	0
65.8	0
65.9	0
66	0
66.1	0
66.2	0
66.3	0
66.4	0
66.5	0
66.6	0
66.7	0
66.8	0
66.9	0
67	0
67.1	0
67.2	0
67.3	0
67.4	0
67.5	0
67.6	0
67.7	0
67.8	0
67.9	0
68	0
68.1	0
68.2	0
68.3	0
68.4	0
68.5	0
68.6	0
68.7	0
68.8	0
68.9	0
69	0
69.1	0
69.2	0
69.3	0
69.4	0
69.5	0
69.6	0
69.7	0
69.8	0
69.9	0
70	0
70.1	0
70.2	0
70.3	0
70.4	0
70.5	0
70.6	0
70.7	0
70.8	0
70.9	0
71	0
71.1	0
71.2	0
71.3	0
71.4	0
71.5	0
71.6	0
71.7	0
71.8	0
71.9	0
72	0
72.1	0
72.2	0
72.3	0
72.4	0
72.5	0
72.6	0
72.7	0
72.8	0
72.9	0
73	0
73.1	0
73.2	0
73.3	0
73.4	0
73.5	0
73.6	0
73.7	0
73.8	0
73.9	0
74	0
74.1	0
74.2	0
74.3	0
74.4	0
74.5	0
74.6	0
74.7	0
74.8	0
74.9	0
75	0
75.1	0
75.2	0
75.3	0
75.4	0
75.5	0
75.6	0
75.7	0
75.8	0
75.9	0
76	0
76.1	0
76.2	0
76.3	0
76.4	0
76.5	0
76.6	0
76.7	0
76.8	0
76.9	0
77	0
77.1	0
77.2	0
77.3	0
77.4	0
77.5	0
77.6	0
77.7	0
77.8	0
77.9	0
78	0
78.1	0
78.2	0
78.3	0
78.4	0
78.5	0
78.6	0
78.7	0
78.8	0
78.9	0
79	0
79.1	0
79.2	0
79.3	0
79.4	0
79.5	0
79.6	0
79.7	0
79.8	0
79.9	0
80	0
80.1	0
80.2	0
80.3	0
80.4	0
80.5	0
80.6	0
80.7	0
80.8	0
80.9	0
81	0
81.1	0
81.2	0
81.3	0
81.4	0
81.5	0
81.6	0
81.7	0
81.8	0
81.9	0
82	0
82.1	0
82.2	0
82.3	0
82.4	0
82.5	0
82.6	0
82.7	0
82.8	0
82.9	0
83	0
83.1	0
83.2	0
83.3	0
83.4	0
83.5	0
83.6	0
83.7	0
83.8	0
83.9	0
84	0
84.1	0
84.2	0
84.3	0
84.4	0
84.5	0
84.6	0
84.7	0
84.8	0
84.9	0
85	0
85.1	0
85.2	0
85.3	0
85.4	0
85.5	0
85.6	0
85.7	0
85.8	0
85.9	0
86	0
86.1	0
86.2	0
86.3	0
86.4	0
86.5	0
86.6	0
86.7	0
86.8	0
86.9	0
87	0
87.1	0
87.2	0
87.3	0
87.4	0
87.5	0
87.6	0
87.7	0
87.8	0
87.9	0
88	0
88.1	0
88.2	0
88.3	0
88.4	0
88.5	0
88.6	0
88.7	0
88.8	0
88.9	0
89	0
89.1	0
89.2	0
89.3	0
89.4	0
89.5	0
89.6	0
89.7	0
89.8	0
89.9	0
90	0
90.1	0
90.2	0
90.3	0
90.4	0
90.5	0
90.6	0
90.7	0
90.8	0
90.9	0
91	0
91.1	0
91.2	0
91.3	0
91.4	0
91.5	0
91.6	0
91.7	0
91.8	0
91.9	0
92	0
92.1	0
92.2	0
92.3	0
92.4	0
92.5	0
92.6	0
92.7	0
92.8	0
92.9	0
93	0
93.1	0
93.2	0
93.3	0
93.4	0
93.5	0
93.6	0
93.7	0
93.8	0
93.9	0
94	0
94.1	0
94.2	0
94.3	0
94.4	0
94.5	0
94.6	0
94.7	0
94.8	0
94.9	0
95	0
95.1	0
95.2	0
95.3	0
95.4	0
95.5	0
95.6	0
95.7	0
95.8	0
95.9	0
96	0
96.1	0
96.2	0
96.3	0
96.4	0
96.5	0
96.6	0
96.7	0
96.8	0
96.9	0
97	0
97.1	0
97.2	0
97.3	0
97.4	0
97.5	0
97.6	0
97.7	0
97.8	0
97.9	0
98	0
98.1	0
98.2	0
98.3	0
98.4	0
98.5	0
98.6	0
98.7	0
98.8	0
98.9	0
99	0
99.1	0
99.2	0
99.3	0
99.4	0
99.5	0
99.6	0
99.7	0
99.8	0
99.9	0
100	0
100.1	0.34225
100.2	0.5284
100.3	0.641
100.4	0.71915
100.5	0.7738
100.6	0.80625
100.7	0.8311
100.8	0.84865
100.9	0.86625
101	0.8784
101.1	0.8864
101.2	0.89505
101.3	0.8992
101.4	0.90475
101.5	0.9062
101.6	0.9057
101.7	0.90805
101.8	0.9101
101.9	0.91155
102	0.915
102.1	0.9172
102.2	0.9157
102.3	0.9186
102.4	0.9174
102.5	0.9192
102.6	0.92095
102.7	0.92075
102.8	0.9206
102.9	0.9213
103	0.9203
103.1	0.9192
103.2	0.91905
103.3	0.9198
103.4	0.9207
103.5	0.91975
103.6	0.92055
103.7	0.92165
103.8	0.92325
103.9	0.9231
104	0.92335
104.1	0.92195
104.2	0.9213
104.3	0.91985
104.4	0.9185
104.5	0.91965
104.6	0.9206
104.7	0.92315
104.8	0.92365
104.9	0.92515
105	0.92425
105.1	0.92455
105.2	0.924
105.3	0.9251
105.4	0.9277
105.5	0.9262
105.6	0.92575
105.7	0.92555
105.8	0.92455
105.9	0.9252
106	0.92595
106.1	0.9264
106.2	0.9287
106.3	0.92925
106.4	0.92895
106.5	0.9286
106.6	0.92875
106.7	0.9278
106.8	0.92645
106.9	0.9286
107	0.93
107.1	0.92885
107.2	0.9309
107.3	0.93105
107.4	0.93135
107.5	0.9321
107.6	0.93275
107.7	0.93335
107.8	0.9338
107.9	0.9329
108	0.93345
108.1	0.93515
108.2	0.9368
108.3	0.93845
108.4	0.9392
108.5	0.93725
108.6	0.93625
108.7	0.9377
108.8	0.9372
108.9	0.9387
109	0.9381
109.1	0.93935
109.2	0.9393
109.3	0.93955
109.4	0.9363
109.5	0.9363
109.6	0.9369
109.7	0.93735
109.8	0.9371
109.9	0.938
110	0.93865
110.1	0.93675
110.2	0.93635
110.3	0.93725
110.4	0.93835
110.5	0.93855
110.6	0.93665
110.7	0.9381
110.8	0.9407
110.9	0.9405
111	0.9425
111.1	0.94335
111.2	0.9439
111.3	0.9442
111.4	0.94515
111.5	0.9456
111.6	0.94525
111.7	0.9452
111.8	0.9456
111.9	0.9455
112	0.94555
112.1	0.94545
112.2	0.94455
112.3	0.9452
112.4	0.94565
112.5	0.9458
112.6	0.94565
112.7	0.946
112.8	0.9452
112.9	0.94795
113	0.9477
113.1	0.94845
113.2	0.94675
113.3	0.94585
113.4	0.94725
113.5	0.94605
113.6	0.9464
113.7	0.9449
113.8	0.9467
113.9	0.94715
114	0.94645
114.1	0.94905
114.2	0.9497
114.3	0.9502
114.4	0.9484
114.5	0.9472
114.6	0.94725
114.7	0.94655
114.8	0.94785
114.9	0.94885
115	0.94865
115.1	0.949
115.2	0.94885
115.3	0.94985
115.4	0.94875
115.5	0.9484
115.6	0.9491
115.7	0.9485
115.8	0.9491
115.9	0.9481
116	0.94915
116.1	0.9493
116.2	0.94945
116.3	0.95085
116.4	0.95125
116.5	0.95115
116.6	0.9507
116.7	0.95005
116.8	0.94895
116.9	0.9504
117	0.95
117.1	0.95075
117.2	0.95035
117.3	0.95215
117.4	0.95205
117.5	0.9525
117.6	0.9521
117.7	0.95265
117.8	0.9535
117.9	0.95335
118	0.953
118.1	0.95375
118.2	0.95305
118.3	0.95295
118.4	0.95185
118.5	0.9531
118.6	0.9518
118.7	0.95345
118.8	0.95275
118.9	0.95415
119	0.95445
119.1	0.95415
119.2	0.95365
119.3	0.9551
119.4	0.95575
119.5	0.9553
119.6	0.9575
119.7	0.95675
119.8	0.9563
119.9	0.95645
120	0.95615
120.1	0.95695
120.2	0.9567
120.3	0.9567
120.4	0.9585
120.5	0.95935
120.6	0.95865
120.7	0.9589
120.8	0.95815
120.9	0.9589
121	0.96015
121.1	0.95885
121.2	0.95845
121.3	0.9568
121.4	0.9558
121.5	0.9561
121.6	0.9569
121.7	0.95705
121.8	0.9586
121.9	0.959
122	0.9607
122.1	0.95925
122.2	0.9603
122.3	0.95995
122.4	0.95995
122.5	0.9595
122.6	0.95955
122.7	0.96015
122.8	0.9606
122.9	0.9616
123	0.96205
123.1	0.9626
123.2	0.9627
123.3	0.96135
123.4	0.96115
123.5	0.96195
123.6	0.96275
123.7	0.9625
123.8	0.96195
123.9	0.9636
124	0.96115
124.1	0.9609
124.2	0.9629
124.3	0.9618
124.4	0.96325
124.5	0.9628
124.6	0.9622
124.7	0.9624
124.8	0.9638
124.9	0.96275
125	0.96395
125.1	0.962
125.2	0.96325
125.3	0.96345
125.4	0.9629
125.5	0.9621
125.6	0.9637
125.7	0.96305
125.8	0.96325
125.9	0.9624
126	0.9613
126.1	0.9631
126.2	0.96475
126.3	0.96495
126.4	0.96515
126.5	0.96575
126.6	0.96435
126.7	0.96455
126.8	0.9647
126.9	0.9647
127	0.9653
127.1	0.96495
127.2	0.9632
127.3	0.96505
127.4	0.9652
127.5	0.96515
127.6	0.9646
127.7	0.96515
127.8	0.9669
127.9	0.96745
128	0.96695
128.1	0.96735
128.2	0.96765
128.3	0.9684
128.4	0.96705
128.5	0.9672
128.6	0.9646
128.7	0.9654
128.8	0.96565
128.9	0.9649
129	0.9668
129.1	0.9666
129.2	0.9683
129.3	0.9677
129.4	0.9678
129.5	0.9678
129.6	0.96575
129.7	0.9664
129.8	0.9658
129.9	0.96665
130	0.96695
130.1	0.96665
130.2	0.9668
130.3	0.96645
130.4	0.9663
130.5	0.9669
130.6	0.9665
130.7	0.9667
130.8	0.967
130.9	0.9661
131	0.96585
131.1	0.9659
131.2	0.9668
131.3	0.9676
131.4	0.9682
131.5	0.96725
131.6	0.96885
131.7	0.96775
131.8	0.96915
131.9	0.96915
132	0.96995
132.1	0.96925
132.2	0.9689
132.3	0.96925
132.4	0.96845
132.5	0.96875
132.6	0.96825
132.7	0.96835
132.8	0.96835
132.9	0.9689
133	0.96865
133.1	0.9689
133.2	0.9703
133.3	0.9705
133.4	0.97025
133.5	0.97045
133.6	0.97015
133.7	0.9696
133.8	0.97045
133.9	0.9703
134	0.9705
134.1	0.9699
134.2	0.97125
134.3	0.9706
134.4	0.971
134.5	0.97085
134.6	0.97095
134.7	0.96965
134.8	0.96955
134.9	0.9697
135	0.97015
135.1	0.97025
135.2	0.9709
135.3	0.971
135.4	0.97155
135.5	0.9717
135.6	0.97075
135.7	0.9721
135.8	0.9717
135.9	0.9734
136	0.97225
136.1	0.97115
136.2	0.9708
136.3	0.9713
136.4	0.9701
136.5	0.9695
136.6	0.9693
136.7	0.9697
136.8	0.97035
136.9	0.97045
137	0.9713
137.1	0.97175
137.2	0.97215
137.3	0.9732
137.4	0.97355
137.5	0.97305
137.6	0.973
137.7	0.9739
137.8	0.97345
137.9	0.97225
138	0.9711
138.1	0.9705
138.2	0.97115
138.3	0.9705
138.4	0.9715
138.5	0.97255
138.6	0.97385
138.7	0.9721
138.8	0.97205
138.9	0.97115
139	0.97165
139.1	0.9712
139.2	0.97225
139.3	0.97155
139.4	0.9717
139.5	0.97175
139.6	0.97115
139.7	0.97005
139.8	0.9705
139.9	0.97195
140	0.972
140.1	0.9719
140.2	0.97205
140.3	0.9723
140.4	0.97365
140.5	0.9727
140.6	0.9731
140.7	0.97265
140.8	0.97195
140.9	0.9713
141	0.97105
141.1	0.972
141.2	0.97325
141.3	0.97345
141.4	0.97445
141.5	0.97505
141.6	0.9743
141.7	0.9741
141.8	0.97265
141.9	0.97255
142	0.9732
142.1	0.97405
142.2	0.97425
142.3	0.97365
142.4	0.9738
142.5	0.97475
142.6	0.9737
142.7	0.97365
142.8	0.97445
142.9	0.9744
143	0.9746
143.1	0.9752
143.2	0.97625
143.3	0.97675
143.4	0.97605
143.5	0.9764
143.6	0.97625
143.7	0.97625
143.8	0.9761
143.9	0.9759
144	0.9757
144.1	0.9756
144.2	0.97365
144.3	0.97285
144.4	0.97385
144.5	0.97385
144.6	0.9751
144.7	0.9756
144.8	0.9762
144.9	0.9761
145	0.97695
145.1	0.97635
145.2	0.975
145.3	0.97555
145.4	0.97485
145.5	0.97625
145.6	0.97635
145.7	0.9758
145.8	0.97675
145.9	0.97595
146	0.9764
146.1	0.97665
146.2	0.97665
146.3	0.9775
146.4	0.97685
146.5	0.9768
146.6	0.9775
146.7	0.9779
146.8	0.9766
146.9	0.9751
147	0.97535
147.1	0.9767
147.2	0.97585
147.3	0.9769
147.4	0.9773
147.5	0.97755
147.6	0.9774
147.7	0.97675
147.8	0.97605
147.9	0.9759
148	0.9762
148.1	0.9773
148.2	0.97825
148.3	0.97795
148.4	0.97765
148.5	0.9769
148.6	0.9778
148.7	0.97865
148.8	0.9786
148.9	0.9779
149	0.97775
149.1	0.97755
149.2	0.97705
149.3	0.9768
149.4	0.97605
149.5	0.97665
149.6	0.9761
149.7	0.9763
149.8	0.9763
149.9	0.9782
150	0.97815
150.1	0.978
150.2	0.97865
150.3	0.97825
150.4	0.97755
150.5	0.9766
150.6	0.97725
150.7	0.9759
150.8	0.97645
150.9	0.9765
151	0.97795
151.1	0.97975
151.2	0.97885
151.3	0.9792
151.4	0.97815
151.5	0.9777
151.6	0.9788
151.7	0.97825
151.8	0.97805
151.9	0.9773
152	0.97845
152.1	0.97945
152.2	0.97805
152.3	0.97815
152.4	0.9801
152.5	0.9797
152.6	0.9791
152.7	0.9785
152.8	0.9776
152.9	0.97815
153	0.97845
153.1	0.97865
153.2	0.9785
153.3	0.9774
153.4	0.9777
153.5	0.97855
153.6	0.97855
153.7	0.9777
153.8	0.9776
153.9	0.97695
154	0.9781
154.1	0.97835
154.2	0.9784
154.3	0.97845
154.4	0.9781
154.5	0.9783
154.6	0.9786
154.7	0.97945
154.8	0.97875
154.9	0.9786
155	0.97845
155.1	0.97815
155.2	0.97815
155.3	0.97785
155.4	0.97815
155.5	0.97785
155.6	0.9773
155.7	0.97715
155.8	0.97825
155.9	0.9783
156	0.97745
156.1	0.9781
156.2	0.97915
156.3	0.97895
156.4	0.9785
156.5	0.97945
156.6	0.9794
156.7	0.97935
156.8	0.97965
156.9	0.97835
157	0.97895
157.1	0.97965
157.2	0.97965
157.3	0.98015
157.4	0.97945
157.5	0.97935
157.6	0.9798
157.7	0.9788
157.8	0.97865
157.9	0.9792
158	0.97945
158.1	0.979
158.2	0.97795
158.3	0.97835
158.4	0.97805
158.5	0.9777
158.6	0.97705
158.7	0.9773
158.8	0.9778
158.9	0.97835
159	0.9785
159.1	0.9779
159.2	0.9787
159.3	0.97795
159.4	0.97945
159.5	0.9802
159.6	0.98075
159.7	0.98085
159.8	0.98105
159.9	0.9806
160	0.9807
160.1	0.9813
160.2	0.9811
160.3	0.9802
160.4	0.98035
160.5	0.9806
160.6	0.9809
160.7	0.98
160.8	0.97995
160.9	0.98025
161	0.9803
161.1	0.9803
161.2	0.98065
161.3	0.9808
161.4	0.9814
161.5	0.981
161.6	0.98115
161.7	0.98005
161.8	0.9798
161.9	0.9801
162	0.97925
162.1	0.9799
162.2	0.9803
162.3	0.98065
162.4	0.98145
162.5	0.98035
162.6	0.97975
162.7	0.9798
162.8	0.98065
162.9	0.98075
163	0.98105
163.1	0.98155
163.2	0.98195
163.3	0.9822
163.4	0.9811
163.5	0.9813
163.6	0.9806
163.7	0.98015
163.8	0.98055
163.9	0.9803
164	0.97975
164.1	0.97965
164.2	0.9798
164.3	0.97955
164.4	0.9802
164.5	0.97995
164.6	0.9801
164.7	0.9799
164.8	0.98075
164.9	0.97965
165	0.9793
165.1	0.97925
165.2	0.9786
165.3	0.97815
165.4	0.97905
165.5	0.9796
165.6	0.9798
165.7	0.9806
165.8	0.9811
165.9	0.9804
166	0.98145
166.1	0.9809
166.2	0.9801
166.3	0.9816
166.4	0.9813
166.5	0.9816
166.6	0.9824
166.7	0.98265
166.8	0.9827
166.9	0.9821
167	0.9817
167.1	0.9809
167.2	0.9803
167.3	0.9795
167.4	0.97995
167.5	0.97995
167.6	0.9796
167.7	0.98055
167.8	0.97995
167.9	0.97995
168	0.9806
168.1	0.98
168.2	0.9801
168.3	0.98115
168.4	0.9801
168.5	0.98055
168.6	0.9808
168.7	0.9805
168.8	0.9803
168.9	0.98035
169	0.9809
169.1	0.98245
169.2	0.98105
169.3	0.98105
169.4	0.98115
169.5	0.98135
169.6	0.9816
169.7	0.9803
169.8	0.9804
169.9	0.98005
170	0.98005
170.1	0.9801
170.2	0.97995
170.3	0.9802
170.4	0.98065
170.5	0.97955
170.6	0.9796
170.7	0.97995
170.8	0.98
170.9	0.98105
171	0.9814
171.1	0.9819
171.2	0.98165
171.3	0.98095
171.4	0.98165
171.5	0.98115
171.6	0.9819
171.7	0.98245
171.8	0.9828
171.9	0.98155
172	0.9816
172.1	0.98125
172.2	0.98225
172.3	0.9825
172.4	0.98165
172.5	0.9826
172.6	0.9825
172.7	0.9816
172.8	0.9811
172.9	0.98145
173	0.9812
173.1	0.981
173.2	0.98195
173.3	0.98175
173.4	0.9817
173.5	0.9822
173.6	0.9821
173.7	0.9822
173.8	0.98265
173.9	0.9818
174	0.9815
174.1	0.9819
174.2	0.98225
174.3	0.98175
174.4	0.98155
174.5	0.9813
174.6	0.98025
174.7	0.9805
174.8	0.98035
174.9	0.97995
175	0.9814
175.1	0.98145
175.2	0.982
175.3	0.98175
175.4	0.9816
175.5	0.9818
175.6	0.9816
175.7	0.9821
175.8	0.9822
175.9	0.9821
176	0.9827
176.1	0.9825
176.2	0.98155
176.3	0.98165
176.4	0.98215
176.5	0.9818
176.6	0.9811
176.7	0.98135
176.8	0.9811
176.9	0.9807
177	0.98195
177.1	0.98245
177.2	0.9816
177.3	0.9811
177.4	0.98025
177.5	0.9806
177.6	0.98105
177.7	0.98105
177.8	0.981
177.9	0.9808
178	0.98045
178.1	0.9807
178.2	0.97985
178.3	0.98
178.4	0.98045
178.5	0.97995
178.6	0.9804
178.7	0.98055
178.8	0.98105
178.9	0.9813
179	0.98155
179.1	0.98185
179.2	0.982
179.3	0.98195
179.4	0.98185
179.5	0.98135
179.6	0.98075
179.7	0.98065
179.8	0.98135
179.9	0.98195
180	0.98265
180.1	0.98225
180.2	0.9815
180.3	0.9816
180.4	0.98215
180.5	0.98285
180.6	0.98225
180.7	0.98225
180.8	0.98225
180.9	0.9821
181	0.98205
181.1	0.98205
181.2	0.9811
181.3	0.98225
181.4	0.98225
181.5	0.9814
181.6	0.98195
181.7	0.98115
181.8	0.981
181.9	0.98235
182	0.9824
182.1	0.9823
182.2	0.9817
182.3	0.98215
182.4	0.9826
182.5	0.982
182.6	0.98115
182.7	0.98125
182.8	0.9815
182.9	0.9817
183	0.98165
183.1	0.98135
183.2	0.98145
183.3	0.9815
183.4	0.9804
183.5	0.9802
183.6	0.9816
183.7	0.9813
183.8	0.98115
183.9	0.98145
184	0.98185
184.1	0.98105
184.2	0.9812
184.3	0.9815
184.4	0.98145
184.5	0.9826
184.6	0.9822
184.7	0.9821
184.8	0.98335
184.9	0.983
185	0.9824
185.1	0.98215
185.2	0.9821
185.3	0.98155
185.4	0.98185
185.5	0.98195
185.6	0.98195
185.7	0.9812
185.8	0.9815
185.9	0.9812
186	0.98095
186.1	0.9817
186.2	0.9817
186.3	0.9822
186.4	0.98195
186.5	0.98305
186.6	0.983
186.7	0.9819
186.8	0.9824
186.9	0.9823
187	0.9823
187.1	0.98265
187.2	0.98265
187.3	0.98165
187.4	0.9815
187.5	0.9819
187.6	0.98175
187.7	0.9825
187.8	0.9825
187.9	0.98325
188	0.98295
188.1	0.98245
188.2	0.9824
188.3	0.98315
188.4	0.9833
188.5	0.98275
188.6	0.9826
188.7	0.98275
188.8	0.98275
188.9	0.98245
189	0.9823
189.1	0.98255
189.2	0.98295
189.3	0.98305
189.4	0.9825
189.5	0.98195
189.6	0.9825
189.7	0.9834
189.8	0.98355
189.9	0.9832
190	0.9838
190.1	0.9829
190.2	0.98295
190.3	0.9836
190.4	0.98455
190.5	0.98425
190.6	0.9837
190.7	0.98425
190.8	0.9841
190.9	0.98395
191	0.9836
191.1	0.98375
191.2	0.98335
191.3	0.98405
191.4	0.984
191.5	0.9845
191.6	0.98395
191.7	0.98395
191.8	0.98355
191.9	0.98305
192	0.98335
192.1	0.9825
192.2	0.9816
192.3	0.98065
192.4	0.9807
192.5	0.98165
192.6	0.98225
192.7	0.9819
192.8	0.982
192.9	0.98275
193	0.98225
193.1	0.9821
193.2	0.983
193.3	0.9834
193.4	0.9826
193.5	0.98285
193.6	0.9825
193.7	0.98225
193.8	0.983
193.9	0.9829
194	0.98325
194.1	0.9826
194.2	0.9822
194.3	0.98155
194.4	0.9814
194.5	0.9811
194.6	0.9813
194.7	0.9816
194.8	0.9816
194.9	0.9813
195	0.9817
195.1	0.9802
195.2	0.9808
195.3	0.9806
195.4	0.9813
195.5	0.98245
195.6	0.9824
195.7	0.9834
195.8	0.984
195.9	0.9839
196	0.98425
196.1	0.98485
196.2	0.9831
196.3	0.98405
196.4	0.98415
196.5	0.98365
196.6	0.9841
196.7	0.98395
196.8	0.98355
196.9	0.98305
197	0.9827
197.1	0.9834
197.2	0.98275
197.3	0.98315
197.4	0.98315
197.5	0.98375
197.6	0.9846
197.7	0.98485
197.8	0.98445
197.9	0.98375
198	0.9833
198.1	0.98425
198.2	0.98395
198.3	0.9824
198.4	0.98145
198.5	0.98165
198.6	0.98095
198.7	0.98045
198.8	0.9817
198.9	0.9801
199	0.98105
199.1	0.9817
199.2	0.98215
199.3	0.9828
199.4	0.98265
199.5	0.9827
199.6	0.98295
199.7	0.9835
199.8	0.9841
199.9	0.9836
200	0.9837
[truncated: 14,000 more rows]
