# Supplementary material for: Bayesian inference of kinetic schemes for ion channels by Kalman filtering
Source: eLife journal article supplement (doi:10.7554/elife.62714), 2022-05-04
Supplement: fig4-data4 [file 1_Sim_N_10000_Strom_MW.xlsx]

## Sheet: Tabelle1
0.1	0
0.2	0
0.3	0
0.4	0
0.5	0
0.6	0
0.7	0
0.8	0
0.9	0
1	0
1.1	0
1.2	0
1.3	0
1.4	0
1.5	0
1.6	0
1.7	0
1.8	0
1.9	0
2	0
2.1	0
2.2	0
2.3	0
2.4	0
2.5	0
2.6	0
2.7	0
2.8	0
2.9	0
3	0
3.1	0
3.2	0
3.3	0
3.4	0
3.5	0
3.6	0
3.7	0
3.8	0
3.9	0
4	0
4.1	0
4.2	0
4.3	0
4.4	0
4.5	0
4.6	0
4.7	0
4.8	0
4.9	0
5	0
5.1	0
5.2	0
5.3	0
5.4	0
5.5	0
5.6	0
5.7	0
5.8	0
5.9	0
6	0
6.1	0
6.2	0
6.3	0
6.4	0
6.5	0
6.6	0
6.7	0
6.8	0
6.9	0
7	0
7.1	0
7.2	0
7.3	0
7.4	0
7.5	0
7.6	0
7.7	0
7.8	0
7.9	0
8	0
8.1	0
8.2	0
8.3	0
8.4	0
8.5	0
8.6	0
8.7	0
8.8	0
8.9	0
9	0
9.1	0
9.2	0
9.3	0
9.4	0
9.5	0
9.6	0
9.7	0
9.8	0
9.9	0
10	0
10.1	0
10.2	0
10.3	0
10.4	0
10.5	0
10.6	0
10.7	0
10.8	0
10.9	0
11	0
11.1	0
11.2	0
11.3	0
11.4	0
11.5	0
11.6	0
11.7	0
11.8	0
11.9	0
12	0
12.1	0
12.2	0
12.3	0
12.4	0
12.5	0
12.6	0
12.7	0
12.8	0
12.9	0
13	0
13.1	0
13.2	0
13.3	0
13.4	0
13.5	0
13.6	0
13.7	0
13.8	0
13.9	0
14	0
14.1	0
14.2	0
14.3	0
14.4	0
14.5	0
14.6	0
14.7	0
14.8	0
14.9	0
15	0
15.1	0
15.2	0
15.3	0
15.4	0
15.5	0
15.6	0
15.7	0
15.8	0
15.9	0
16	0
16.1	0
16.2	0
16.3	0
16.4	0
16.5	0
16.6	0
16.7	0
16.8	0
16.9	0
17	0
17.1	0
17.2	0
17.3	0
17.4	0
17.5	0
17.6	0
17.7	0
17.8	0
17.9	0
18	0
18.1	0
18.2	0
18.3	0
18.4	0
18.5	0
18.6	0
18.7	0
18.8	0
18.9	0
19	0
19.1	0
19.2	0
19.3	0
19.4	0
19.5	0
19.6	0
19.7	0
19.8	0
19.9	0
20	0
20.1	0
20.2	0
20.3	0
20.4	0
20.5	0
20.6	0
20.7	0
20.8	0
20.9	0
21	0
21.1	0
21.2	0
21.3	0
21.4	0
21.5	0
21.6	0
21.7	0
21.8	0
21.9	0
22	0
22.1	0
22.2	0
22.3	0
22.4	0
22.5	0
22.6	0
22.7	0
22.8	0
22.9	0
23	0
23.1	0
23.2	0
23.3	0
23.4	0
23.5	0
23.6	0
23.7	0
23.8	0
23.9	0
24	0
24.1	0
24.2	0
24.3	0
24.4	0
24.5	0
24.6	0
24.7	0
24.8	0
24.9	0
25	0
25.1	0
25.2	0
25.3	0
25.4	0
25.5	0
25.6	0
25.7	0
25.8	0
25.9	0
26	0
26.1	0
26.2	0
26.3	0
26.4	0
26.5	0
26.6	0
26.7	0
26.8	0
26.9	0
27	0
27.1	0
27.2	0
27.3	0
27.4	0
27.5	0
27.6	0
27.7	0
27.8	0
27.9	0
28	0
28.1	0
28.2	0
28.3	0
28.4	0
28.5	0
28.6	0
28.7	0
28.8	0
28.9	0
29	0
29.1	0
29.2	0
29.3	0
29.4	0
29.5	0
29.6	0
29.7	0
29.8	0
29.9	0
30	0
30.1	0
30.2	0
30.3	0
30.4	0
30.5	0
30.6	0
30.7	0
30.8	0
30.9	0
31	0
31.1	0
31.2	0
31.3	0
31.4	0
31.5	0
31.6	0
31.7	0
31.8	0
31.9	0
32	0
32.1	0
32.2	0
32.3	0
32.4	0
32.5	0
32.6	0
32.7	0
32.8	0
32.9	0
33	0
33.1	0
33.2	0
33.3	0
33.4	0
33.5	0
33.6	0
33.7	0
33.8	0
33.9	0
34	0
34.1	0
34.2	0
34.3	0
34.4	0
34.5	0
34.6	0
34.7	0
34.8	0
34.9	0
35	0
35.1	0
35.2	0
35.3	0
35.4	0
35.5	0
35.6	0
35.7	0
35.8	0
35.9	0
36	0
36.1	0
36.2	0
36.3	0
36.4	0
36.5	0
36.6	0
36.7	0
36.8	0
36.9	0
37	0
37.1	0
37.2	0
37.3	0
37.4	0
37.5	0
37.6	0
37.7	0
37.8	0
37.9	0
38	0
38.1	0
38.2	0
38.3	0
38.4	0
38.5	0
38.6	0
38.7	0
38.8	0
38.9	0
39	0
39.1	0
39.2	0
39.3	0
39.4	0
39.5	0
39.6	0
39.7	0
39.8	0
39.9	0
40	0
40.1	0
40.2	0
40.3	0
40.4	0
40.5	0
40.6	0
40.7	0
40.8	0
40.9	0
41	0
41.1	0
41.2	0
41.3	0
41.4	0
41.5	0
41.6	0
41.7	0
41.8	0
41.9	0
42	0
42.1	0
42.2	0
42.3	0
42.4	0
42.5	0
42.6	0
42.7	0
42.8	0
42.9	0
43	0
43.1	0
43.2	0
43.3	0
43.4	0
43.5	0
43.6	0
43.7	0
43.8	0
43.9	0
44	0
44.1	0
44.2	0
44.3	0
44.4	0
44.5	0
44.6	0
44.7	0
44.8	0
44.9	0
45	0
45.1	0
45.2	0
45.3	0
45.4	0
45.5	0
45.6	0
45.7	0
45.8	0
45.9	0
46	0
46.1	0
46.2	0
46.3	0
46.4	0
46.5	0
46.6	0
46.7	0
46.8	0
46.9	0
47	0
47.1	0
47.2	0
47.3	0
47.4	0
47.5	0
47.6	0
47.7	0
47.8	0
47.9	0
48	0
48.1	0
48.2	0
48.3	0
48.4	0
48.5	0
48.6	0
48.7	0
48.8	0
48.9	0
49	0
49.1	0
49.2	0
49.3	0
49.4	0
49.5	0
49.6	0
49.7	0
49.8	0
49.9	0
50	0
50.1	0
50.2	0
50.3	0
50.4	0
50.5	0
50.6	0
50.7	0
50.8	0
50.9	0
51	0
51.1	0
51.2	0
51.3	0
51.4	0
51.5	0
51.6	0
51.7	0
51.8	0
51.9	0
52	0
52.1	0
52.2	0
52.3	0
52.4	0
52.5	0
52.6	0
52.7	0
52.8	0
52.9	0
53	0
53.1	0
53.2	0
53.3	0
53.4	0
53.5	0
53.6	0
53.7	0
53.8	0
53.9	0
54	0
54.1	0
54.2	0
54.3	0
54.4	0
54.5	0
54.6	0
54.7	0
54.8	0
54.9	0
55	0
55.1	0
55.2	0
55.3	0
55.4	0
55.5	0
55.6	0
55.7	0
55.8	0
55.9	0
56	0
56.1	0
56.2	0
56.3	0
56.4	0
56.5	0
56.6	0
56.7	0
56.8	0
56.9	0
57	0
57.1	0
57.2	0
57.3	0
57.4	0
57.5	0
57.6	0
57.7	0
57.8	0
57.9	0
58	0
58.1	0
58.2	0
58.3	0
58.4	0
58.5	0
58.6	0
58.7	0
58.8	0
58.9	0
59	0
59.1	0
59.2	0
59.3	0
59.4	0
59.5	0
59.6	0
59.7	0
59.8	0
59.9	0
60	0
60.1	0
60.2	0
60.3	0
60.4	0
60.5	0
60.6	0
60.7	0
60.8	0
60.9	0
61	0
61.1	0
61.2	0
61.3	0
61.4	0
61.5	0
61.6	0
61.7	0
61.8	0
61.9	0
62	0
62.1	0
62.2	0
62.3	0
62.4	0
62.5	0
62.6	0
62.7	0
62.8	0
62.9	0
63	0
63.1	0
63.2	0
63.3	0
63.4	0
63.5	0
63.6	0
63.7	0
63.8	0
63.9	0
64	0
64.1	0
64.2	0
64.3	0
64.4	0
64.5	0
64.6	0
64.7	0
64.8	0
64.9	0
65	0
65.1	0
65.2	0
65.3	0
65.4	0
65.5	0
65.6	0
65.7	0
65.8	0
65.9	0
66	0
66.1	0
66.2	0
66.3	0
66.4	0
66.5	0
66.6	0
66.7	0
66.8	0
66.9	0
67	0
67.1	0
67.2	0
67.3	0
67.4	0
67.5	0
67.6	0
67.7	0
67.8	0
67.9	0
68	0
68.1	0
68.2	0
68.3	0
68.4	0
68.5	0
68.6	0
68.7	0
68.8	0
68.9	0
69	0
69.1	0
69.2	0
69.3	0
69.4	0
69.5	0
69.6	0
69.7	0
69.8	0
69.9	0
70	0
70.1	0
70.2	0
70.3	0
70.4	0
70.5	0
70.6	0
70.7	0
70.8	0
70.9	0
71	0
71.1	0
71.2	0
71.3	0
71.4	0
71.5	0
71.6	0
71.7	0
71.8	0
71.9	0
72	0
72.1	0
72.2	0
72.3	0
72.4	0
72.5	0
72.6	0
72.7	0
72.8	0
72.9	0
73	0
73.1	0
73.2	0
73.3	0
73.4	0
73.5	0
73.6	0
73.7	0
73.8	0
73.9	0
74	0
74.1	0
74.2	0
74.3	0
74.4	0
74.5	0
74.6	0
74.7	0
74.8	0
74.9	0
75	0
75.1	0
75.2	0
75.3	0
75.4	0
75.5	0
75.6	0
75.7	0
75.8	0
75.9	0
76	0
76.1	0
76.2	0
76.3	0
76.4	0
76.5	0
76.6	0
76.7	0
76.8	0
76.9	0
77	0
77.1	0
77.2	0
77.3	0
77.4	0
77.5	0
77.6	0
77.7	0
77.8	0
77.9	0
78	0
78.1	0
78.2	0
78.3	0
78.4	0
78.5	0
78.6	0
78.7	0
78.8	0
78.9	0
79	0
79.1	0
79.2	0
79.3	0
79.4	0
79.5	0
79.6	0
79.7	0
79.8	0
79.9	0
80	0
80.1	0
80.2	0
80.3	0
80.4	0
80.5	0
80.6	0
80.7	0
80.8	0
80.9	0
81	0
81.1	0
81.2	0
81.3	0
81.4	0
81.5	0
81.6	0
81.7	0
81.8	0
81.9	0
82	0
82.1	0
82.2	0
82.3	0
82.4	0
82.5	0
82.6	0
82.7	0
82.8	0
82.9	0
83	0
83.1	0
83.2	0
83.3	0
83.4	0
83.5	0
83.6	0
83.7	0
83.8	0
83.9	0
84	0
84.1	0
84.2	0
84.3	0
84.4	0
84.5	0
84.6	0
84.7	0
84.8	0
84.9	0
85	0
85.1	0
85.2	0
85.3	0
85.4	0
85.5	0
85.6	0
85.7	0
85.8	0
85.9	0
86	0
86.1	0
86.2	0
86.3	0
86.4	0
86.5	0
86.6	0
86.7	0
86.8	0
86.9	0
87	0
87.1	0
87.2	0
87.3	0
87.4	0
87.5	0
87.6	0
87.7	0
87.8	0
87.9	0
88	0
88.1	0
88.2	0
88.3	0
88.4	0
88.5	0
88.6	0
88.7	0
88.8	0
88.9	0
89	0
89.1	0
89.2	0
89.3	0
89.4	0
89.5	0
89.6	0
89.7	0
89.8	0
89.9	0
90	0
90.1	0
90.2	0
90.3	0
90.4	0
90.5	0
90.6	0
90.7	0
90.8	0
90.9	0
91	0
91.1	0
91.2	0
91.3	0
91.4	0
91.5	0
91.6	0
91.7	0
91.8	0
91.9	0
92	0
92.1	0
92.2	0
92.3	0
92.4	0
92.5	0
92.6	0
92.7	0
92.8	0
92.9	0
93	0
93.1	0
93.2	0
93.3	0
93.4	0
93.5	0
93.6	0
93.7	0
93.8	0
93.9	0
94	0
94.1	0
94.2	0
94.3	0
94.4	0
94.5	0
94.6	0
94.7	0
94.8	0
94.9	0
95	0
95.1	0
95.2	0
95.3	0
95.4	0
95.5	0
95.6	0
95.7	0
95.8	0
95.9	0
96	0
96.1	0
96.2	0
96.3	0
96.4	0
96.5	0
96.6	0
96.7	0
96.8	0
96.9	0
97	0
97.1	0
97.2	0
97.3	0
97.4	0
97.5	0
97.6	0
97.7	0
97.8	0
97.9	0
98	0
98.1	0
98.2	0
98.3	0
98.4	0
98.5	0
98.6	0
98.7	0
98.8	0
98.9	0
99	0
99.1	0
99.2	0
99.3	0
99.4	0
99.5	0
99.6	0
99.7	0
99.8	0
99.9	0
100	0
100.1	0.0002
100.2	0.001
100.3	0.0019
100.4	0.0035
100.5	0.0062
100.6	0.0082
100.7	0.0112
100.8	0.0147
100.9	0.018
101	0.0214
101.1	0.0249
101.2	0.0276
101.3	0.0322
101.4	0.0371
101.5	0.0409
101.6	0.0449
101.7	0.0489
101.8	0.0528
101.9	0.0569
102	0.0596
102.1	0.0631
102.2	0.0669
102.3	0.0704
102.4	0.0741
102.5	0.0777
102.6	0.0822
102.7	0.0846
102.8	0.0885
102.9	0.0917
103	0.0965
103.1	0.0985
103.2	0.1013
103.3	0.1056
103.4	0.1088
103.5	0.1126
103.6	0.1154
103.7	0.119
103.8	0.1223
103.9	0.126
104	0.1289
104.1	0.133
104.2	0.1363
104.3	0.1396
104.4	0.1432
104.5	0.1477
104.6	0.1513
104.7	0.1563
104.8	0.1593
104.9	0.1629
105	0.1667
105.1	0.1697
105.2	0.172
105.3	0.1756
105.4	0.1795
105.5	0.1828
105.6	0.1855
105.7	0.1905
105.8	0.1937
105.9	0.1975
106	0.2004
106.1	0.2045
106.2	0.207
106.3	0.2098
106.4	0.2119
106.5	0.2146
106.6	0.2175
106.7	0.2212
106.8	0.2245
106.9	0.2273
107	0.2298
107.1	0.2331
107.2	0.2364
107.3	0.2395
107.4	0.2424
107.5	0.2445
107.6	0.2474
107.7	0.2499
107.8	0.2524
107.9	0.2553
108	0.2572
108.1	0.2606
108.2	0.263
108.3	0.2658
108.4	0.2697
108.5	0.273
108.6	0.2763
108.7	0.2785
108.8	0.2808
108.9	0.2832
109	0.2858
109.1	0.2881
109.2	0.2904
109.3	0.2934
109.4	0.2961
109.5	0.2989
109.6	0.3017
109.7	0.3046
109.8	0.3072
109.9	0.3101
110	0.3136
110.1	0.3166
110.2	0.3196
110.3	0.322
110.4	0.3243
110.5	0.327
110.6	0.3288
110.7	0.3308
110.8	0.3334
110.9	0.3359
111	0.3382
111.1	0.3416
111.2	0.3429
111.3	0.3461
111.4	0.3493
111.5	0.3508
111.6	0.3532
111.7	0.3555
111.8	0.3585
111.9	0.3614
112	0.3633
112.1	0.3662
112.2	0.3682
112.3	0.3701
112.4	0.3725
112.5	0.3748
112.6	0.3771
112.7	0.379
112.8	0.3809
112.9	0.3837
113	0.3855
113.1	0.3881
113.2	0.3903
113.3	0.3922
113.4	0.3941
113.5	0.3968
113.6	0.3986
113.7	0.4012
113.8	0.4039
113.9	0.4052
114	0.4064
114.1	0.4096
114.2	0.4114
114.3	0.4133
114.4	0.4148
114.5	0.4166
114.6	0.419
114.7	0.4208
114.8	0.4229
114.9	0.4242
115	0.4258
115.1	0.4276
115.2	0.4288
115.3	0.4305
115.4	0.4326
115.5	0.4341
115.6	0.435
115.7	0.4371
115.8	0.4391
115.9	0.4407
116	0.4426
116.1	0.4445
116.2	0.4461
116.3	0.4486
116.4	0.4504
116.5	0.4527
116.6	0.4547
116.7	0.457
116.8	0.4595
116.9	0.4621
117	0.4637
117.1	0.4652
117.2	0.4662
117.3	0.4675
117.4	0.4689
117.5	0.4701
117.6	0.4711
117.7	0.4727
117.8	0.4745
117.9	0.4759
118	0.4777
118.1	0.4784
118.2	0.4796
118.3	0.4817
118.4	0.4826
118.5	0.484
118.6	0.4863
118.7	0.4872
118.8	0.4889
118.9	0.4899
119	0.4913
119.1	0.4924
119.2	0.4945
119.3	0.4965
119.4	0.4984
119.5	0.5008
119.6	0.5031
119.7	0.5041
119.8	0.505
119.9	0.5068
120	0.5091
120.1	0.5109
120.2	0.5126
120.3	0.5147
120.4	0.5165
120.5	0.5187
120.6	0.5198
120.7	0.5219
120.8	0.5226
120.9	0.5245
121	0.5271
121.1	0.5274
121.2	0.529
121.3	0.5305
121.4	0.5323
121.5	0.5337
121.6	0.5355
121.7	0.5382
121.8	0.5394
121.9	0.5396
122	0.541
122.1	0.5434
122.2	0.5443
122.3	0.5455
122.4	0.5466
122.5	0.5482
122.6	0.5502
122.7	0.552
122.8	0.5527
122.9	0.5546
123	0.5559
123.1	0.5567
123.2	0.5576
123.3	0.5594
123.4	0.561
123.5	0.5621
123.6	0.5633
123.7	0.5651
123.8	0.5659
123.9	0.5682
124	0.5694
124.1	0.5708
124.2	0.5723
124.3	0.5735
124.4	0.5756
124.5	0.5763
124.6	0.5762
124.7	0.5775
124.8	0.5786
124.9	0.5798
125	0.5804
125.1	0.5819
125.2	0.5825
125.3	0.5836
125.4	0.585
125.5	0.5867
125.6	0.5873
125.7	0.5887
125.8	0.5887
125.9	0.5904
126	0.5914
126.1	0.5926
126.2	0.5941
126.3	0.5954
126.4	0.5957
126.5	0.5974
126.6	0.5986
126.7	0.5992
126.8	0.6002
126.9	0.6017
127	0.603
127.1	0.6047
127.2	0.6056
127.3	0.6066
127.4	0.607
127.5	0.6084
127.6	0.6094
127.7	0.6093
127.8	0.6108
127.9	0.6126
128	0.6139
128.1	0.6151
128.2	0.6163
128.3	0.6173
128.4	0.6183
128.5	0.6196
128.6	0.6203
128.7	0.6206
128.8	0.6213
128.9	0.6215
129	0.6226
129.1	0.6233
129.2	0.624
129.3	0.6253
129.4	0.6268
129.5	0.6277
129.6	0.6282
129.7	0.6294
129.8	0.6301
129.9	0.6302
130	0.6296
130.1	0.6303
130.2	0.6311
130.3	0.6318
130.4	0.6329
130.5	0.6345
130.6	0.6358
130.7	0.637
130.8	0.6377
130.9	0.6381
131	0.6391
131.1	0.64
131.2	0.6408
131.3	0.6409
131.4	0.6414
131.5	0.6431
131.6	0.6443
131.7	0.6448
131.8	0.6449
131.9	0.6455
132	0.6465
132.1	0.647
132.2	0.6479
132.3	0.6484
132.4	0.6492
132.5	0.6494
132.6	0.6504
132.7	0.6512
132.8	0.6519
132.9	0.6531
133	0.654
133.1	0.6546
133.2	0.6558
133.3	0.6567
133.4	0.6567
133.5	0.6583
133.6	0.6588
133.7	0.6594
133.8	0.6605
133.9	0.6616
134	0.6625
134.1	0.663
134.2	0.6638
134.3	0.665
134.4	0.6652
134.5	0.6657
134.6	0.6661
134.7	0.6663
134.8	0.6668
134.9	0.6676
135	0.6683
135.1	0.6692
135.2	0.6703
135.3	0.6722
135.4	0.6722
135.5	0.6731
135.6	0.6737
135.7	0.6744
135.8	0.6747
135.9	0.6753
136	0.6758
136.1	0.6765
136.2	0.6775
136.3	0.6775
136.4	0.6786
136.5	0.6789
136.6	0.6798
136.7	0.6796
136.8	0.68
136.9	0.6809
137	0.6816
137.1	0.6813
137.2	0.6816
137.3	0.6823
137.4	0.6823
137.5	0.6822
137.6	0.6825
137.7	0.6824
137.8	0.6833
137.9	0.6837
138	0.6838
138.1	0.6844
138.2	0.6855
138.3	0.6861
138.4	0.6867
138.5	0.6878
138.6	0.6883
138.7	0.6887
138.8	0.6892
138.9	0.6898
139	0.6902
139.1	0.6904
139.2	0.6914
139.3	0.693
139.4	0.6929
139.5	0.6937
139.6	0.6939
139.7	0.6946
139.8	0.6951
139.9	0.6955
140	0.6962
140.1	0.6967
140.2	0.6965
140.3	0.6964
140.4	0.697
140.5	0.6976
140.6	0.6979
140.7	0.6984
140.8	0.6991
140.9	0.7003
141	0.7006
141.1	0.7016
141.2	0.7018
141.3	0.7028
141.4	0.704
141.5	0.7049
141.6	0.7059
141.7	0.7066
141.8	0.7069
141.9	0.7073
142	0.7084
142.1	0.7088
142.2	0.7097
142.3	0.7106
142.4	0.7113
142.5	0.7117
142.6	0.7121
142.7	0.7126
142.8	0.7131
142.9	0.7135
143	0.7143
143.1	0.7145
143.2	0.7138
143.3	0.7151
143.4	0.7155
143.5	0.7161
143.6	0.7161
143.7	0.7163
143.8	0.7165
143.9	0.7172
144	0.7179
144.1	0.7183
144.2	0.7193
144.3	0.7198
144.4	0.7206
144.5	0.7212
144.6	0.7222
144.7	0.7229
144.8	0.7231
144.9	0.7231
145	0.7235
145.1	0.7244
145.2	0.7249
145.3	0.7254
145.4	0.7257
145.5	0.7261
145.6	0.7263
145.7	0.727
145.8	0.7275
145.9	0.7281
146	0.728
146.1	0.7296
146.2	0.7302
146.3	0.7302
146.4	0.7307
146.5	0.731
146.6	0.731
146.7	0.7314
146.8	0.7321
146.9	0.7318
147	0.732
147.1	0.7322
147.2	0.7325
147.3	0.7324
147.4	0.7323
147.5	0.7323
147.6	0.7326
147.7	0.7325
147.8	0.7334
147.9	0.7335
148	0.7337
148.1	0.7348
148.2	0.7349
148.3	0.7348
148.4	0.7346
148.5	0.735
148.6	0.7357
148.7	0.7364
148.8	0.7368
148.9	0.7374
149	0.7374
149.1	0.7377
149.2	0.7379
149.3	0.7382
149.4	0.7386
149.5	0.7383
149.6	0.7385
149.7	0.7395
149.8	0.7403
149.9	0.7402
150	0.7406
150.1	0.742
150.2	0.7423
150.3	0.7427
150.4	0.7439
150.5	0.7443
150.6	0.7454
150.7	0.7455
150.8	0.7461
150.9	0.7462
151	0.7467
151.1	0.7469
151.2	0.7471
151.3	0.7477
151.4	0.7477
151.5	0.7482
151.6	0.7485
151.7	0.7484
151.8	0.7487
151.9	0.7498
152	0.7502
152.1	0.7501
152.2	0.7497
152.3	0.7496
152.4	0.7491
152.5	0.7497
152.6	0.7493
152.7	0.7498
152.8	0.7496
152.9	0.7499
153	0.7505
153.1	0.7515
153.2	0.7512
153.3	0.7513
153.4	0.7513
153.5	0.7522
153.6	0.7528
153.7	0.7529
153.8	0.7524
153.9	0.7525
154	0.753
154.1	0.7538
154.2	0.7539
154.3	0.7537
154.4	0.7538
154.5	0.754
154.6	0.7539
154.7	0.7545
154.8	0.7545
154.9	0.7546
155	0.7551
155.1	0.7551
155.2	0.7558
155.3	0.7563
155.4	0.7561
155.5	0.7563
155.6	0.7566
155.7	0.7579
155.8	0.7584
155.9	0.7591
156	0.7584
156.1	0.7591
156.2	0.7589
156.3	0.7596
156.4	0.7595
156.5	0.7601
156.6	0.7606
156.7	0.7616
156.8	0.7617
156.9	0.7617
157	0.7619
157.1	0.7624
157.2	0.7626
157.3	0.7632
157.4	0.7633
157.5	0.7636
157.6	0.7646
157.7	0.7649
157.8	0.7659
157.9	0.766
158	0.7661
158.1	0.7667
158.2	0.7671
158.3	0.7675
158.4	0.7676
158.5	0.7673
158.6	0.7674
158.7	0.7677
158.8	0.7681
158.9	0.7674
159	0.7672
159.1	0.7677
159.2	0.768
159.3	0.768
159.4	0.7684
159.5	0.7691
159.6	0.7688
159.7	0.7688
159.8	0.7687
159.9	0.7688
160	0.7687
160.1	0.7691
160.2	0.7686
160.3	0.7685
160.4	0.7688
160.5	0.7698
160.6	0.7692
160.7	0.7688
160.8	0.7686
160.9	0.7688
161	0.7693
161.1	0.7685
161.2	0.7684
161.3	0.7688
161.4	0.7691
161.5	0.769
161.6	0.77
161.7	0.7706
161.8	0.771
161.9	0.7716
162	0.7718
162.1	0.7722
162.2	0.7722
162.3	0.7725
162.4	0.7729
162.5	0.7732
162.6	0.7736
162.7	0.7735
162.8	0.774
162.9	0.7741
163	0.7745
163.1	0.7744
163.2	0.7745
163.3	0.7743
163.4	0.7739
163.5	0.7745
163.6	0.7748
163.7	0.7753
163.8	0.7752
163.9	0.7746
164	0.775
164.1	0.7748
164.2	0.7746
164.3	0.7745
164.4	0.7751
164.5	0.7758
164.6	0.7756
164.7	0.7747
164.8	0.7744
164.9	0.7746
165	0.775
165.1	0.7757
165.2	0.7755
165.3	0.7753
165.4	0.7754
165.5	0.7757
165.6	0.7766
165.7	0.777
165.8	0.7772
165.9	0.7772
166	0.7777
166.1	0.7776
166.2	0.7776
166.3	0.7773
166.4	0.7769
166.5	0.777
166.6	0.7768
166.7	0.777
166.8	0.7778
166.9	0.7782
167	0.778
167.1	0.7778
167.2	0.7779
167.3	0.7778
167.4	0.7779
167.5	0.7778
167.6	0.7778
167.7	0.7778
167.8	0.7782
167.9	0.7784
168	0.7785
168.1	0.7788
168.2	0.7785
168.3	0.7792
168.4	0.7797
168.5	0.779
168.6	0.7793
168.7	0.78
168.8	0.7799
168.9	0.7807
169	0.7809
169.1	0.7811
169.2	0.7811
169.3	0.7812
169.4	0.781
169.5	0.781
169.6	0.7808
169.7	0.78
169.8	0.7804
169.9	0.7797
170	0.7802
170.1	0.7796
170.2	0.78
170.3	0.7799
170.4	0.7805
170.5	0.7806
170.6	0.7809
170.7	0.7817
170.8	0.7825
170.9	0.7828
171	0.7832
171.1	0.7838
171.2	0.785
171.3	0.7851
171.4	0.7851
171.5	0.7854
171.6	0.7851
171.7	0.7854
171.8	0.7858
171.9	0.7864
172	0.7861
172.1	0.7867
172.2	0.7869
172.3	0.787
172.4	0.7872
172.5	0.7873
172.6	0.787
172.7	0.7868
172.8	0.7871
172.9	0.7876
173	0.7872
173.1	0.7875
173.2	0.7873
173.3	0.7876
173.4	0.7883
173.5	0.7891
173.6	0.7889
173.7	0.7887
173.8	0.7889
173.9	0.7893
174	0.7891
174.1	0.7888
174.2	0.7882
174.3	0.7882
174.4	0.7882
174.5	0.7878
174.6	0.7878
174.7	0.7875
174.8	0.7869
174.9	0.7867
175	0.7859
175.1	0.7857
175.2	0.7858
175.3	0.7856
175.4	0.7865
175.5	0.7862
175.6	0.7865
175.7	0.786
175.8	0.7866
175.9	0.7873
176	0.7871
176.1	0.7872
176.2	0.7865
176.3	0.7871
176.4	0.7867
176.5	0.7863
176.6	0.786
176.7	0.7864
176.8	0.787
176.9	0.7867
177	0.7868
177.1	0.7871
177.2	0.7874
177.3	0.7882
177.4	0.7884
177.5	0.7875
177.6	0.7879
177.7	0.7872
177.8	0.7874
177.9	0.7886
178	0.7887
178.1	0.7894
178.2	0.7899
178.3	0.7896
178.4	0.7898
178.5	0.7903
178.6	0.791
178.7	0.7913
178.8	0.7919
178.9	0.7913
179	0.7911
179.1	0.7911
179.2	0.7915
179.3	0.7909
179.4	0.7909
179.5	0.791
179.6	0.7908
179.7	0.7914
179.8	0.7928
179.9	0.793
180	0.7931
180.1	0.7933
180.2	0.793
180.3	0.7929
180.4	0.7927
180.5	0.7927
180.6	0.7931
180.7	0.793
180.8	0.7937
180.9	0.794
181	0.7941
181.1	0.7941
181.2	0.7941
181.3	0.7938
181.4	0.793
181.5	0.7929
181.6	0.7928
181.7	0.7933
181.8	0.7931
181.9	0.7929
182	0.7936
182.1	0.7939
182.2	0.7945
182.3	0.7948
182.4	0.795
182.5	0.7947
182.6	0.7948
182.7	0.7947
182.8	0.7949
182.9	0.7948
183	0.795
183.1	0.7951
183.2	0.7953
183.3	0.7951
183.4	0.7953
183.5	0.7959
183.6	0.7956
183.7	0.7949
183.8	0.7942
183.9	0.7942
184	0.7943
184.1	0.7932
184.2	0.7933
184.3	0.7933
184.4	0.7943
184.5	0.7949
184.6	0.7947
184.7	0.7946
184.8	0.795
184.9	0.7949
185	0.7953
185.1	0.7958
185.2	0.7959
185.3	0.7961
185.4	0.796
185.5	0.7962
185.6	0.7957
185.7	0.7957
185.8	0.7953
185.9	0.7959
186	0.7957
186.1	0.7957
186.2	0.7964
186.3	0.797
186.4	0.7972
186.5	0.7971
186.6	0.7964
186.7	0.7959
186.8	0.7959
186.9	0.7965
187	0.7965
187.1	0.7964
187.2	0.7965
187.3	0.7968
187.4	0.7969
187.5	0.7972
187.6	0.7978
187.7	0.7979
187.8	0.7978
187.9	0.7979
188	0.7981
188.1	0.7984
188.2	0.7989
188.3	0.7991
188.4	0.7993
188.5	0.7997
188.6	0.8001
188.7	0.801
188.8	0.8017
188.9	0.8018
189	0.8012
189.1	0.8009
189.2	0.8018
189.3	0.802
189.4	0.8017
189.5	0.8017
189.6	0.8018
189.7	0.8015
189.8	0.8016
189.9	0.8012
190	0.801
190.1	0.8009
190.2	0.8011
190.3	0.8012
190.4	0.8014
190.5	0.8023
190.6	0.8016
190.7	0.8017
190.8	0.8018
190.9	0.8014
191	0.8015
191.1	0.8012
191.2	0.8013
191.3	0.801
191.4	0.801
191.5	0.8014
191.6	0.8014
191.7	0.8011
191.8	0.8017
191.9	0.8015
192	0.8015
192.1	0.8017
192.2	0.8012
192.3	0.801
192.4	0.8008
192.5	0.8011
192.6	0.8012
192.7	0.8011
192.8	0.8008
192.9	0.8005
193	0.7999
193.1	0.7997
193.2	0.7993
193.3	0.7989
193.4	0.7994
193.5	0.7993
193.6	0.7994
193.7	0.7996
193.8	0.7998
193.9	0.8004
194	0.8001
194.1	0.8002
194.2	0.8001
194.3	0.7996
194.4	0.7998
194.5	0.7991
194.6	0.7989
194.7	0.799
194.8	0.7993
194.9	0.7992
195	0.8001
195.1	0.8005
195.2	0.7995
195.3	0.7998
195.4	0.8003
195.5	0.8002
195.6	0.8001
195.7	0.7995
195.8	0.7999
195.9	0.7997
196	0.7994
196.1	0.7993
196.2	0.7998
196.3	0.7991
196.4	0.8
196.5	0.7996
196.6	0.8003
196.7	0.8
196.8	0.7996
196.9	0.8002
197	0.7999
197.1	0.8007
197.2	0.8006
197.3	0.8004
197.4	0.8003
197.5	0.8004
197.6	0.8008
197.7	0.8015
197.8	0.8014
197.9	0.8009
198	0.8006
198.1	0.8003
198.2	0.7997
198.3	0.8004
198.4	0.8005
198.5	0.8004
198.6	0.801
198.7	0.801
198.8	0.8011
198.9	0.8022
199	0.8018
199.1	0.8027
199.2	0.8023
199.3	0.8017
199.4	0.8016
199.5	0.8015
199.6	0.8018
199.7	0.8021
199.8	0.8019
199.9	0.8021
200	0.802
[truncated: 14,000 more rows]
