# Supplementary material for: Bayesian inference of kinetic schemes for ion channels by Kalman filtering
Source: eLife journal article supplement (doi:10.7554/elife.62714), 2022-05-04
Supplement: fig4-data4 [file 1_Sim_N_20000_Fluor_MW_8M.xlsx]

## Sheet: Tabelle1
0.1	0
0.2	0
0.3	0
0.4	0
0.5	0
0.6	0
0.7	0
0.8	0
0.9	0
1	0
1.1	0
1.2	0
1.3	0
1.4	0
1.5	0
1.6	0
1.7	0
1.8	0
1.9	0
2	0
2.1	0
2.2	0
2.3	0
2.4	0
2.5	0
2.6	0
2.7	0
2.8	0
2.9	0
3	0
3.1	0
3.2	0
3.3	0
3.4	0
3.5	0
3.6	0
3.7	0
3.8	0
3.9	0
4	0
4.1	0
4.2	0
4.3	0
4.4	0
4.5	0
4.6	0
4.7	0
4.8	0
4.9	0
5	0
5.1	0
5.2	0
5.3	0
5.4	0
5.5	0
5.6	0
5.7	0
5.8	0
5.9	0
6	0
6.1	0
6.2	0
6.3	0
6.4	0
6.5	0
6.6	0
6.7	0
6.8	0
6.9	0
7	0
7.1	0
7.2	0
7.3	0
7.4	0
7.5	0
7.6	0
7.7	0
7.8	0
7.9	0
8	0
8.1	0
8.2	0
8.3	0
8.4	0
8.5	0
8.6	0
8.7	0
8.8	0
8.9	0
9	0
9.1	0
9.2	0
9.3	0
9.4	0
9.5	0
9.6	0
9.7	0
9.8	0
9.9	0
10	0
10.1	0
10.2	0
10.3	0
10.4	0
10.5	0
10.6	0
10.7	0
10.8	0
10.9	0
11	0
11.1	0
11.2	0
11.3	0
11.4	0
11.5	0
11.6	0
11.7	0
11.8	0
11.9	0
12	0
12.1	0
12.2	0
12.3	0
12.4	0
12.5	0
12.6	0
12.7	0
12.8	0
12.9	0
13	0
13.1	0
13.2	0
13.3	0
13.4	0
13.5	0
13.6	0
13.7	0
13.8	0
13.9	0
14	0
14.1	0
14.2	0
14.3	0
14.4	0
14.5	0
14.6	0
14.7	0
14.8	0
14.9	0
15	0
15.1	0
15.2	0
15.3	0
15.4	0
15.5	0
15.6	0
15.7	0
15.8	0
15.9	0
16	0
16.1	0
16.2	0
16.3	0
16.4	0
16.5	0
16.6	0
16.7	0
16.8	0
16.9	0
17	0
17.1	0
17.2	0
17.3	0
17.4	0
17.5	0
17.6	0
17.7	0
17.8	0
17.9	0
18	0
18.1	0
18.2	0
18.3	0
18.4	0
18.5	0
18.6	0
18.7	0
18.8	0
18.9	0
19	0
19.1	0
19.2	0
19.3	0
19.4	0
19.5	0
19.6	0
19.7	0
19.8	0
19.9	0
20	0
20.1	0
20.2	0
20.3	0
20.4	0
20.5	0
20.6	0
20.7	0
20.8	0
20.9	0
21	0
21.1	0
21.2	0
21.3	0
21.4	0
21.5	0
21.6	0
21.7	0
21.8	0
21.9	0
22	0
22.1	0
22.2	0
22.3	0
22.4	0
22.5	0
22.6	0
22.7	0
22.8	0
22.9	0
23	0
23.1	0
23.2	0
23.3	0
23.4	0
23.5	0
23.6	0
23.7	0
23.8	0
23.9	0
24	0
24.1	0
24.2	0
24.3	0
24.4	0
24.5	0
24.6	0
24.7	0
24.8	0
24.9	0
25	0
25.1	0
25.2	0
25.3	0
25.4	0
25.5	0
25.6	0
25.7	0
25.8	0
25.9	0
26	0
26.1	0
26.2	0
26.3	0
26.4	0
26.5	0
26.6	0
26.7	0
26.8	0
26.9	0
27	0
27.1	0
27.2	0
27.3	0
27.4	0
27.5	0
27.6	0
27.7	0
27.8	0
27.9	0
28	0
28.1	0
28.2	0
28.3	0
28.4	0
28.5	0
28.6	0
28.7	0
28.8	0
28.9	0
29	0
29.1	0
29.2	0
29.3	0
29.4	0
29.5	0
29.6	0
29.7	0
29.8	0
29.9	0
30	0
30.1	0
30.2	0
30.3	0
30.4	0
30.5	0
30.6	0
30.7	0
30.8	0
30.9	0
31	0
31.1	0
31.2	0
31.3	0
31.4	0
31.5	0
31.6	0
31.7	0
31.8	0
31.9	0
32	0
32.1	0
32.2	0
32.3	0
32.4	0
32.5	0
32.6	0
32.7	0
32.8	0
32.9	0
33	0
33.1	0
33.2	0
33.3	0
33.4	0
33.5	0
33.6	0
33.7	0
33.8	0
33.9	0
34	0
34.1	0
34.2	0
34.3	0
34.4	0
34.5	0
34.6	0
34.7	0
34.8	0
34.9	0
35	0
35.1	0
35.2	0
35.3	0
35.4	0
35.5	0
35.6	0
35.7	0
35.8	0
35.9	0
36	0
36.1	0
36.2	0
36.3	0
36.4	0
36.5	0
36.6	0
36.7	0
36.8	0
36.9	0
37	0
37.1	0
37.2	0
37.3	0
37.4	0
37.5	0
37.6	0
37.7	0
37.8	0
37.9	0
38	0
38.1	0
38.2	0
38.3	0
38.4	0
38.5	0
38.6	0
38.7	0
38.8	0
38.9	0
39	0
39.1	0
39.2	0
39.3	0
39.4	0
39.5	0
39.6	0
39.7	0
39.8	0
39.9	0
40	0
40.1	0
40.2	0
40.3	0
40.4	0
40.5	0
40.6	0
40.7	0
40.8	0
40.9	0
41	0
41.1	0
41.2	0
41.3	0
41.4	0
41.5	0
41.6	0
41.7	0
41.8	0
41.9	0
42	0
42.1	0
42.2	0
42.3	0
42.4	0
42.5	0
42.6	0
42.7	0
42.8	0
42.9	0
43	0
43.1	0
43.2	0
43.3	0
43.4	0
43.5	0
43.6	0
43.7	0
43.8	0
43.9	0
44	0
44.1	0
44.2	0
44.3	0
44.4	0
44.5	0
44.6	0
44.7	0
44.8	0
44.9	0
45	0
45.1	0
45.2	0
45.3	0
45.4	0
45.5	0
45.6	0
45.7	0
45.8	0
45.9	0
46	0
46.1	0
46.2	0
46.3	0
46.4	0
46.5	0
46.6	0
46.7	0
46.8	0
46.9	0
47	0
47.1	0
47.2	0
47.3	0
47.4	0
47.5	0
47.6	0
47.7	0
47.8	0
47.9	0
48	0
48.1	0
48.2	0
48.3	0
48.4	0
48.5	0
48.6	0
48.7	0
48.8	0
48.9	0
49	0
49.1	0
49.2	0
49.3	0
49.4	0
49.5	0
49.6	0
49.7	0
49.8	0
49.9	0
50	0
50.1	0
50.2	0
50.3	0
50.4	0
50.5	0
50.6	0
50.7	0
50.8	0
50.9	0
51	0
51.1	0
51.2	0
51.3	0
51.4	0
51.5	0
51.6	0
51.7	0
51.8	0
51.9	0
52	0
52.1	0
52.2	0
52.3	0
52.4	0
52.5	0
52.6	0
52.7	0
52.8	0
52.9	0
53	0
53.1	0
53.2	0
53.3	0
53.4	0
53.5	0
53.6	0
53.7	0
53.8	0
53.9	0
54	0
54.1	0
54.2	0
54.3	0
54.4	0
54.5	0
54.6	0
54.7	0
54.8	0
54.9	0
55	0
55.1	0
55.2	0
55.3	0
55.4	0
55.5	0
55.6	0
55.7	0
55.8	0
55.9	0
56	0
56.1	0
56.2	0
56.3	0
56.4	0
56.5	0
56.6	0
56.7	0
56.8	0
56.9	0
57	0
57.1	0
57.2	0
57.3	0
57.4	0
57.5	0
57.6	0
57.7	0
57.8	0
57.9	0
58	0
58.1	0
58.2	0
58.3	0
58.4	0
58.5	0
58.6	0
58.7	0
58.8	0
58.9	0
59	0
59.1	0
59.2	0
59.3	0
59.4	0
59.5	0
59.6	0
59.7	0
59.8	0
59.9	0
60	0
60.1	0
60.2	0
60.3	0
60.4	0
60.5	0
60.6	0
60.7	0
60.8	0
60.9	0
61	0
61.1	0
61.2	0
61.3	0
61.4	0
61.5	0
61.6	0
61.7	0
61.8	0
61.9	0
62	0
62.1	0
62.2	0
62.3	0
62.4	0
62.5	0
62.6	0
62.7	0
62.8	0
62.9	0
63	0
63.1	0
63.2	0
63.3	0
63.4	0
63.5	0
63.6	0
63.7	0
63.8	0
63.9	0
64	0
64.1	0
64.2	0
64.3	0
64.4	0
64.5	0
64.6	0
64.7	0
64.8	0
64.9	0
65	0
65.1	0
65.2	0
65.3	0
65.4	0
65.5	0
65.6	0
65.7	0
65.8	0
65.9	0
66	0
66.1	0
66.2	0
66.3	0
66.4	0
66.5	0
66.6	0
66.7	0
66.8	0
66.9	0
67	0
67.1	0
67.2	0
67.3	0
67.4	0
67.5	0
67.6	0
67.7	0
67.8	0
67.9	0
68	0
68.1	0
68.2	0
68.3	0
68.4	0
68.5	0
68.6	0
68.7	0
68.8	0
68.9	0
69	0
69.1	0
69.2	0
69.3	0
69.4	0
69.5	0
69.6	0
69.7	0
69.8	0
69.9	0
70	0
70.1	0
70.2	0
70.3	0
70.4	0
70.5	0
70.6	0
70.7	0
70.8	0
70.9	0
71	0
71.1	0
71.2	0
71.3	0
71.4	0
71.5	0
71.6	0
71.7	0
71.8	0
71.9	0
72	0
72.1	0
72.2	0
72.3	0
72.4	0
72.5	0
72.6	0
72.7	0
72.8	0
72.9	0
73	0
73.1	0
73.2	0
73.3	0
73.4	0
73.5	0
73.6	0
73.7	0
73.8	0
73.9	0
74	0
74.1	0
74.2	0
74.3	0
74.4	0
74.5	0
74.6	0
74.7	0
74.8	0
74.9	0
75	0
75.1	0
75.2	0
75.3	0
75.4	0
75.5	0
75.6	0
75.7	0
75.8	0
75.9	0
76	0
76.1	0
76.2	0
76.3	0
76.4	0
76.5	0
76.6	0
76.7	0
76.8	0
76.9	0
77	0
77.1	0
77.2	0
77.3	0
77.4	0
77.5	0
77.6	0
77.7	0
77.8	0
77.9	0
78	0
78.1	0
78.2	0
78.3	0
78.4	0
78.5	0
78.6	0
78.7	0
78.8	0
78.9	0
79	0
79.1	0
79.2	0
79.3	0
79.4	0
79.5	0
79.6	0
79.7	0
79.8	0
79.9	0
80	0
80.1	0
80.2	0
80.3	0
80.4	0
80.5	0
80.6	0
80.7	0
80.8	0
80.9	0
81	0
81.1	0
81.2	0
81.3	0
81.4	0
81.5	0
81.6	0
81.7	0
81.8	0
81.9	0
82	0
82.1	0
82.2	0
82.3	0
82.4	0
82.5	0
82.6	0
82.7	0
82.8	0
82.9	0
83	0
83.1	0
83.2	0
83.3	0
83.4	0
83.5	0
83.6	0
83.7	0
83.8	0
83.9	0
84	0
84.1	0
84.2	0
84.3	0
84.4	0
84.5	0
84.6	0
84.7	0
84.8	0
84.9	0
85	0
85.1	0
85.2	0
85.3	0
85.4	0
85.5	0
85.6	0
85.7	0
85.8	0
85.9	0
86	0
86.1	0
86.2	0
86.3	0
86.4	0
86.5	0
86.6	0
86.7	0
86.8	0
86.9	0
87	0
87.1	0
87.2	0
87.3	0
87.4	0
87.5	0
87.6	0
87.7	0
87.8	0
87.9	0
88	0
88.1	0
88.2	0
88.3	0
88.4	0
88.5	0
88.6	0
88.7	0
88.8	0
88.9	0
89	0
89.1	0
89.2	0
89.3	0
89.4	0
89.5	0
89.6	0
89.7	0
89.8	0
89.9	0
90	0
90.1	0
90.2	0
90.3	0
90.4	0
90.5	0
90.6	0
90.7	0
90.8	0
90.9	0
91	0
91.1	0
91.2	0
91.3	0
91.4	0
91.5	0
91.6	0
91.7	0
91.8	0
91.9	0
92	0
92.1	0
92.2	0
92.3	0
92.4	0
92.5	0
92.6	0
92.7	0
92.8	0
92.9	0
93	0
93.1	0
93.2	0
93.3	0
93.4	0
93.5	0
93.6	0
93.7	0
93.8	0
93.9	0
94	0
94.1	0
94.2	0
94.3	0
94.4	0
94.5	0
94.6	0
94.7	0
94.8	0
94.9	0
95	0
95.1	0
95.2	0
95.3	0
95.4	0
95.5	0
95.6	0
95.7	0
95.8	0
95.9	0
96	0
96.1	0
96.2	0
96.3	0
96.4	0
96.5	0
96.6	0
96.7	0
96.8	0
96.9	0
97	0
97.1	0
97.2	0
97.3	0
97.4	0
97.5	0
97.6	0
97.7	0
97.8	0
97.9	0
98	0
98.1	0
98.2	0
98.3	0
98.4	0
98.5	0
98.6	0
98.7	0
98.8	0
98.9	0
99	0
99.1	0
99.2	0
99.3	0
99.4	0
99.5	0
99.6	0
99.7	0
99.8	0
99.9	0
100	0
100.1	0.35005
100.2	0.535925
100.3	0.6487
100.4	0.720675
100.5	0.7715
100.6	0.807225
100.7	0.834025
100.8	0.853125
100.9	0.867625
101	0.878975
101.1	0.88785
101.2	0.893525
101.3	0.899675
101.4	0.90325
101.5	0.90685
101.6	0.9104
101.7	0.912075
101.8	0.91415
101.9	0.9168
102	0.91575
102.1	0.9154
102.2	0.9166
102.3	0.91595
102.4	0.9165
102.5	0.9175
102.6	0.91885
102.7	0.919875
102.8	0.92
102.9	0.9191
103	0.919625
103.1	0.92005
103.2	0.92025
103.3	0.9213
103.4	0.921
103.5	0.921225
103.6	0.919875
103.7	0.92175
103.8	0.9214
103.9	0.922175
104	0.923375
104.1	0.923875
104.2	0.92305
104.3	0.924475
104.4	0.9257
104.5	0.926225
104.6	0.9251
104.7	0.926525
104.8	0.9276
104.9	0.92705
105	0.9266
105.1	0.926675
105.2	0.9279
105.3	0.926275
105.4	0.926525
105.5	0.925325
105.6	0.9258
105.7	0.926275
105.8	0.927075
105.9	0.92725
106	0.928025
106.1	0.92885
106.2	0.929225
106.3	0.929625
106.4	0.929825
106.5	0.92935
106.6	0.9304
106.7	0.9305
106.8	0.93115
106.9	0.931275
107	0.932275
107.1	0.933625
107.2	0.933275
107.3	0.93275
107.4	0.9331
107.5	0.9333
107.6	0.9342
107.7	0.93445
107.8	0.934175
107.9	0.933225
108	0.933475
108.1	0.93455
108.2	0.935575
108.3	0.93605
108.4	0.935275
108.5	0.935075
108.6	0.935
108.7	0.934825
108.8	0.93515
108.9	0.934875
109	0.9351
109.1	0.935775
109.2	0.935775
109.3	0.937375
109.4	0.93815
109.5	0.9387
109.6	0.938275
109.7	0.938225
109.8	0.93855
109.9	0.9389
110	0.939
110.1	0.9382
110.2	0.938325
110.3	0.937425
110.4	0.938075
110.5	0.938925
110.6	0.939325
110.7	0.939525
110.8	0.9402
110.9	0.939175
111	0.939925
111.1	0.941175
111.2	0.941075
111.3	0.941625
111.4	0.94155
111.5	0.94215
111.6	0.941175
111.7	0.942075
111.8	0.941375
111.9	0.942325
112	0.941175
112.1	0.94265
112.2	0.941525
112.3	0.94245
112.4	0.941875
112.5	0.942725
112.6	0.94465
112.7	0.943675
112.8	0.944575
112.9	0.94565
113	0.9465
113.1	0.94595
113.2	0.946125
113.3	0.947025
113.4	0.94695
113.5	0.94775
113.6	0.948575
113.7	0.9485
113.8	0.949425
113.9	0.949625
114	0.94875
114.1	0.9493
114.2	0.95025
114.3	0.94895
114.4	0.947875
114.5	0.946625
114.6	0.9467
114.7	0.948075
114.8	0.94875
114.9	0.950025
115	0.950075
115.1	0.949
115.2	0.950425
115.3	0.949775
115.4	0.9496
115.5	0.950475
115.6	0.9492
115.7	0.94985
115.8	0.9501
115.9	0.9509
116	0.9497
116.1	0.950375
116.2	0.9498
116.3	0.95145
116.4	0.95145
116.5	0.950625
116.6	0.94995
116.7	0.9496
116.8	0.949525
116.9	0.950275
117	0.9515
117.1	0.952025
117.2	0.950725
117.3	0.9517
117.4	0.95355
117.5	0.95405
117.6	0.95355
117.7	0.953975
117.8	0.95345
117.9	0.953875
118	0.954075
118.1	0.954175
118.2	0.95365
118.3	0.954525
118.4	0.954275
118.5	0.95335
118.6	0.954725
118.7	0.9549
118.8	0.954
118.9	0.954175
119	0.9545
119.1	0.954975
119.2	0.95505
119.3	0.9546
119.4	0.9554
119.5	0.955575
119.6	0.956075
119.7	0.956625
119.8	0.956875
119.9	0.95655
120	0.95565
120.1	0.956825
120.2	0.955875
120.3	0.956375
120.4	0.95615
120.5	0.95665
120.6	0.957325
120.7	0.957525
120.8	0.958325
120.9	0.95815
121	0.9586
121.1	0.959025
121.2	0.959025
121.3	0.95945
121.4	0.9599
121.5	0.95965
121.6	0.959475
121.7	0.9583
121.8	0.958975
121.9	0.959175
122	0.9598
122.1	0.9598
122.2	0.95915
122.3	0.958925
122.4	0.9583
122.5	0.959125
122.6	0.959975
122.7	0.96005
122.8	0.961525
122.9	0.9614
123	0.961125
123.1	0.960575
123.2	0.9626
123.3	0.962525
123.4	0.962175
123.5	0.961975
123.6	0.96205
123.7	0.9611
123.8	0.96085
123.9	0.960775
124	0.960575
124.1	0.9616
124.2	0.9623
124.3	0.962325
124.4	0.9628
124.5	0.962425
124.6	0.962725
124.7	0.963225
124.8	0.9637
124.9	0.96385
125	0.9629
125.1	0.962175
125.2	0.9622
125.3	0.961925
125.4	0.9622
125.5	0.962425
125.6	0.96375
125.7	0.96355
125.8	0.96395
125.9	0.963825
126	0.96335
126.1	0.963775
126.2	0.96335
126.3	0.9637
126.4	0.96435
126.5	0.964475
126.6	0.963775
126.7	0.963975
126.8	0.9636
126.9	0.96405
127	0.9642
127.1	0.964875
127.2	0.965
127.3	0.96595
127.4	0.966125
127.5	0.9648
127.6	0.96435
127.7	0.964575
127.8	0.964225
127.9	0.964775
128	0.965325
128.1	0.965025
128.2	0.965025
128.3	0.965525
128.4	0.96605
128.5	0.9673
128.6	0.9675
128.7	0.9679
128.8	0.967875
128.9	0.9669
129	0.96705
129.1	0.967275
129.2	0.968475
129.3	0.968625
129.4	0.96805
129.5	0.967
129.6	0.966425
129.7	0.967075
129.8	0.966525
129.9	0.967675
130	0.9675
130.1	0.966275
130.2	0.96625
130.3	0.966475
130.4	0.967225
130.5	0.966875
130.6	0.967375
130.7	0.9669
130.8	0.966825
130.9	0.9666
131	0.96735
131.1	0.967875
131.2	0.96885
131.3	0.969425
131.4	0.9681
131.5	0.969425
131.6	0.969975
131.7	0.970725
131.8	0.9701
131.9	0.969525
132	0.9696
132.1	0.968625
132.2	0.968975
132.3	0.96855
132.4	0.968025
132.5	0.96865
132.6	0.9685
132.7	0.96835
132.8	0.9691
132.9	0.9691
133	0.970175
133.1	0.97025
133.2	0.970525
133.3	0.97055
133.4	0.969225
133.5	0.969
133.6	0.96985
133.7	0.9693
133.8	0.96825
133.9	0.968275
134	0.96915
134.1	0.9697
134.2	0.9705
134.3	0.970575
134.4	0.9705
134.5	0.969925
134.6	0.9703
134.7	0.970375
134.8	0.969275
134.9	0.96935
135	0.969175
135.1	0.969575
135.2	0.97005
135.3	0.969725
135.4	0.969075
135.5	0.970325
135.6	0.970975
135.7	0.9712
135.8	0.9719
135.9	0.9717
136	0.971375
136.1	0.971
136.2	0.97015
136.3	0.97075
136.4	0.97175
136.5	0.972025
136.6	0.971825
136.7	0.971425
136.8	0.97175
136.9	0.972325
137	0.972625
137.1	0.97155
137.2	0.972425
137.3	0.972775
137.4	0.9729
137.5	0.97305
137.6	0.972525
137.7	0.9726
137.8	0.972425
137.9	0.9723
138	0.9732
138.1	0.9736
138.2	0.97365
138.3	0.973375
138.4	0.974125
138.5	0.9739
138.6	0.973575
138.7	0.97255
138.8	0.9726
138.9	0.97315
139	0.97365
139.1	0.97225
139.2	0.97125
139.3	0.972175
139.4	0.97215
139.5	0.972825
139.6	0.9728
139.7	0.973025
139.8	0.97285
139.9	0.972975
140	0.974975
140.1	0.974875
140.2	0.975
140.3	0.97445
140.4	0.97425
140.5	0.97425
140.6	0.9746
140.7	0.974525
140.8	0.97405
140.9	0.9746
141	0.973925
141.1	0.974275
141.2	0.9747
141.3	0.97525
141.4	0.9747
141.5	0.974775
141.6	0.974425
141.7	0.975575
141.8	0.975025
141.9	0.975475
142	0.9761
142.1	0.975425
142.2	0.97455
142.3	0.97455
142.4	0.974675
142.5	0.97465
142.6	0.975
142.7	0.974825
142.8	0.975
142.9	0.97485
143	0.9746
143.1	0.9756
143.2	0.97535
143.3	0.975425
143.4	0.974675
143.5	0.974875
143.6	0.9749
143.7	0.9745
143.8	0.9739
143.9	0.97435
144	0.9751
144.1	0.975725
144.2	0.97525
144.3	0.974675
144.4	0.9751
144.5	0.9755
144.6	0.975175
144.7	0.97435
144.8	0.97385
144.9	0.974675
145	0.97445
145.1	0.975275
145.2	0.97565
145.3	0.9754
145.4	0.97615
145.5	0.97605
145.6	0.976775
145.7	0.977625
145.8	0.977425
145.9	0.977175
146	0.97715
146.1	0.977075
146.2	0.976575
146.3	0.9766
146.4	0.976325
146.5	0.97655
146.6	0.976
146.7	0.97585
146.8	0.9764
146.9	0.9763
147	0.976375
147.1	0.97535
147.2	0.97615
147.3	0.976275
147.4	0.976
147.5	0.9756
147.6	0.975575
147.7	0.976725
147.8	0.97615
147.9	0.97625
148	0.9767
148.1	0.977175
148.2	0.977475
148.3	0.9778
148.4	0.978
148.5	0.977925
148.6	0.97715
148.7	0.9769
148.8	0.9767
148.9	0.977225
149	0.9769
149.1	0.97675
149.2	0.977275
149.3	0.97685
149.4	0.97715
149.5	0.977475
149.6	0.9776
149.7	0.978175
149.8	0.977275
149.9	0.977025
150	0.97745
150.1	0.97685
150.2	0.977425
150.3	0.9783
150.4	0.9776
150.5	0.97775
150.6	0.9776
150.7	0.9775
150.8	0.9784
150.9	0.97825
151	0.978075
151.1	0.977575
151.2	0.977575
151.3	0.97735
151.4	0.978525
151.5	0.9786
151.6	0.978075
151.7	0.9784
151.8	0.97855
151.9	0.9778
152	0.97785
152.1	0.97845
152.2	0.97825
152.3	0.97795
152.4	0.9779
152.5	0.9789
152.6	0.978725
152.7	0.9784
152.8	0.9791
152.9	0.978575
153	0.979125
153.1	0.978675
153.2	0.978425
153.3	0.978
153.4	0.977475
153.5	0.9771
153.6	0.976725
153.7	0.977625
153.8	0.977675
153.9	0.97795
154	0.9779
154.1	0.978225
154.2	0.978125
154.3	0.978475
154.4	0.97855
154.5	0.97905
154.6	0.979225
154.7	0.97845
154.8	0.977675
154.9	0.9778
155	0.978225
155.1	0.97815
155.2	0.9784
155.3	0.977975
155.4	0.9783
155.5	0.97795
155.6	0.977825
155.7	0.97805
155.8	0.977525
155.9	0.9774
156	0.978675
156.1	0.979
156.2	0.97965
156.3	0.979625
156.4	0.979075
156.5	0.97915
156.6	0.978975
156.7	0.979325
156.8	0.97925
156.9	0.979275
157	0.9793
157.1	0.97875
157.2	0.979175
157.3	0.97835
157.4	0.978875
157.5	0.978875
157.6	0.9794
157.7	0.9794
157.8	0.978875
157.9	0.978825
158	0.97895
158.1	0.979425
158.2	0.979575
158.3	0.979575
158.4	0.9791
158.5	0.9791
158.6	0.97935
158.7	0.979225
158.8	0.97945
158.9	0.97955
159	0.979225
159.1	0.979675
159.2	0.9803
159.3	0.980175
159.4	0.9808
159.5	0.9807
159.6	0.97995
159.7	0.9802
159.8	0.9802
159.9	0.97965
160	0.979525
160.1	0.979375
160.2	0.979975
160.3	0.979525
160.4	0.98065
160.5	0.980475
160.6	0.980375
160.7	0.979975
160.8	0.9799
160.9	0.979825
161	0.979075
161.1	0.9789
161.2	0.978325
161.3	0.978175
161.4	0.97785
161.5	0.9784
161.6	0.978625
161.7	0.9787
161.8	0.97865
161.9	0.979
162	0.9794
162.1	0.97905
162.2	0.978925
162.3	0.9788
162.4	0.97785
162.5	0.97785
162.6	0.97785
162.7	0.97795
162.8	0.977825
162.9	0.978
163	0.9781
163.1	0.977825
163.2	0.978525
163.3	0.9789
163.4	0.9791
163.5	0.97885
163.6	0.978575
163.7	0.978375
163.8	0.978975
163.9	0.9795
164	0.979275
164.1	0.97975
164.2	0.979825
164.3	0.979325
164.4	0.979025
164.5	0.9799
164.6	0.9797
164.7	0.97955
164.8	0.979675
164.9	0.979825
165	0.980575
165.1	0.98025
165.2	0.980525
165.3	0.980475
165.4	0.980125
165.5	0.979925
165.6	0.9801
165.7	0.979525
165.8	0.98005
165.9	0.980425
166	0.980275
166.1	0.98015
166.2	0.9804
166.3	0.980475
166.4	0.97975
166.5	0.980375
166.6	0.980875
166.7	0.9812
166.8	0.9812
166.9	0.980425
167	0.980125
167.1	0.98005
167.2	0.979325
167.3	0.97955
167.4	0.9801
167.5	0.980175
167.6	0.979575
167.7	0.980125
167.8	0.979875
167.9	0.980525
168	0.980475
168.1	0.98055
168.2	0.98
168.3	0.981075
168.4	0.981
168.5	0.98055
168.6	0.98025
168.7	0.980575
168.8	0.9802
168.9	0.9811
169	0.98065
169.1	0.981025
169.2	0.9811
169.3	0.981275
169.4	0.980975
169.5	0.980825
169.6	0.980525
169.7	0.98135
169.8	0.981225
169.9	0.981425
170	0.9812
170.1	0.9813
170.2	0.9809
170.3	0.980475
170.4	0.980825
170.5	0.980175
170.6	0.980325
170.7	0.98035
170.8	0.98035
170.9	0.98055
171	0.981175
171.1	0.98175
171.2	0.981
171.3	0.980975
171.4	0.9811
171.5	0.98175
171.6	0.98135
171.7	0.981325
171.8	0.980625
171.9	0.98035
172	0.9806
172.1	0.980825
172.2	0.982075
172.3	0.98215
172.4	0.981825
172.5	0.981
172.6	0.980625
172.7	0.980625
172.8	0.9798
172.9	0.97915
173	0.979525
173.1	0.979675
173.2	0.98
173.3	0.98005
173.4	0.980075
173.5	0.98145
173.6	0.9812
173.7	0.980825
173.8	0.981275
173.9	0.98145
174	0.981025
174.1	0.98165
174.2	0.98135
174.3	0.9822
174.4	0.98205
174.5	0.981225
174.6	0.981225
174.7	0.98075
174.8	0.981175
174.9	0.981575
175	0.981525
175.1	0.981625
175.2	0.9823
175.3	0.98265
175.4	0.9826
175.5	0.9828
175.6	0.982475
175.7	0.982725
175.8	0.98165
175.9	0.981325
176	0.981775
176.1	0.982075
176.2	0.98145
176.3	0.981375
176.4	0.9815
176.5	0.981025
176.6	0.981325
176.7	0.9814
176.8	0.98175
176.9	0.98155
177	0.98175
177.1	0.982025
177.2	0.9817
177.3	0.981875
177.4	0.98045
177.5	0.9805
177.6	0.98055
177.7	0.980925
177.8	0.980775
177.9	0.980725
178	0.98085
178.1	0.981
178.2	0.9812
178.3	0.981625
178.4	0.981975
178.5	0.98235
178.6	0.98205
178.7	0.982575
178.8	0.98255
178.9	0.9814
179	0.981775
179.1	0.9824
179.2	0.982425
179.3	0.98165
179.4	0.981875
179.5	0.981675
179.6	0.981275
179.7	0.981075
179.8	0.981875
179.9	0.9819
180	0.98305
180.1	0.982725
180.2	0.982325
180.3	0.98195
180.4	0.981875
180.5	0.98165
180.6	0.98285
180.7	0.98315
180.8	0.98355
180.9	0.9833
181	0.983125
181.1	0.98285
181.2	0.982925
181.3	0.982225
181.4	0.982325
181.5	0.98205
181.6	0.982
181.7	0.981375
181.8	0.981775
181.9	0.981625
182	0.981875
182.1	0.9818
182.2	0.981925
182.3	0.982
182.4	0.982725
182.5	0.982
182.6	0.9824
182.7	0.9821
182.8	0.98265
182.9	0.98225
183	0.982375
183.1	0.982275
183.2	0.982275
183.3	0.98295
183.4	0.981975
183.5	0.981575
183.6	0.98155
183.7	0.98115
183.8	0.981475
183.9	0.9811
184	0.98145
184.1	0.981325
184.2	0.9819
184.3	0.982225
184.4	0.9812
184.5	0.9817
184.6	0.982225
184.7	0.98215
184.8	0.98175
184.9	0.98195
185	0.9816
185.1	0.9818
185.2	0.981825
185.3	0.98225
185.4	0.98235
185.5	0.9819
185.6	0.9816
185.7	0.98135
185.8	0.981675
185.9	0.9814
186	0.9819
186.1	0.981725
186.2	0.981025
186.3	0.981175
186.4	0.9813
186.5	0.98235
186.6	0.9814
186.7	0.981975
186.8	0.9821
186.9	0.9816
187	0.98235
187.1	0.982025
187.2	0.982425
187.3	0.982875
187.4	0.982275
187.5	0.98205
187.6	0.981975
187.7	0.98225
187.8	0.9819
187.9	0.981575
188	0.982425
188.1	0.982
188.2	0.9821
188.3	0.981725
188.4	0.9818
188.5	0.981225
188.6	0.98145
188.7	0.98195
188.8	0.9818
188.9	0.981875
189	0.98175
189.1	0.98155
189.2	0.98205
189.3	0.981725
189.4	0.981725
189.5	0.98155
189.6	0.981625
189.7	0.98125
189.8	0.980275
189.9	0.980625
190	0.9802
190.1	0.980925
190.2	0.980525
190.3	0.980475
190.4	0.9805
190.5	0.98025
190.6	0.980675
190.7	0.9813
190.8	0.98155
190.9	0.981325
191	0.9818
191.1	0.981725
191.2	0.981375
191.3	0.98195
191.4	0.982475
191.5	0.9812
191.6	0.9817
191.7	0.981775
191.8	0.98195
191.9	0.9814
192	0.982675
192.1	0.982675
192.2	0.982925
192.3	0.982025
192.4	0.981525
192.5	0.98175
192.6	0.982125
192.7	0.9819
192.8	0.9812
192.9	0.981125
193	0.9815
193.1	0.981975
193.2	0.982375
193.3	0.982225
193.4	0.982425
193.5	0.9824
193.6	0.981375
193.7	0.981375
193.8	0.981375
193.9	0.981825
194	0.981925
194.1	0.981675
194.2	0.98135
194.3	0.981225
194.4	0.9813
194.5	0.98155
194.6	0.982575
194.7	0.982625
194.8	0.9822
194.9	0.981975
195	0.981525
195.1	0.98245
195.2	0.9823
195.3	0.982
195.4	0.98195
195.5	0.981525
195.6	0.981625
195.7	0.981725
195.8	0.980725
195.9	0.9812
196	0.9811
196.1	0.981175
196.2	0.9812
196.3	0.9821
196.4	0.982625
196.5	0.982125
196.6	0.982
196.7	0.98165
196.8	0.981625
196.9	0.981925
197	0.982475
197.1	0.9822
197.2	0.98195
197.3	0.98235
197.4	0.982275
197.5	0.98245
197.6	0.981625
197.7	0.981925
197.8	0.9815
197.9	0.98145
198	0.981175
198.1	0.98215
198.2	0.98145
198.3	0.981075
198.4	0.981025
198.5	0.9807
198.6	0.981225
198.7	0.981575
198.8	0.98155
198.9	0.98215
199	0.98225
199.1	0.9818
199.2	0.98175
199.3	0.981825
199.4	0.980925
199.5	0.9806
199.6	0.98065
199.7	0.98125
199.8	0.980525
199.9	0.980425
200	0.9804
[truncated: 14,000 more rows]
