# Supplementary material for: Bayesian inference of kinetic schemes for ion channels by Kalman filtering
Source: eLife journal article supplement (doi:10.7554/elife.62714), 2022-05-04
Supplement: fig4-data4 [file 1_Sim_N_20000_Strom_MW_8M.xlsx]

## Sheet: Tabelle1
0.1	0
0.2	0
0.3	0
0.4	0
0.5	0
0.6	0
0.7	0
0.8	0
0.9	0
1	0
1.1	0
1.2	0
1.3	0
1.4	0
1.5	0
1.6	0
1.7	0
1.8	0
1.9	0
2	0
2.1	0
2.2	0
2.3	0
2.4	0
2.5	0
2.6	0
2.7	0
2.8	0
2.9	0
3	0
3.1	0
3.2	0
3.3	0
3.4	0
3.5	0
3.6	0
3.7	0
3.8	0
3.9	0
4	0
4.1	0
4.2	0
4.3	0
4.4	0
4.5	0
4.6	0
4.7	0
4.8	0
4.9	0
5	0
5.1	0
5.2	0
5.3	0
5.4	0
5.5	0
5.6	0
5.7	0
5.8	0
5.9	0
6	0
6.1	0
6.2	0
6.3	0
6.4	0
6.5	0
6.6	0
6.7	0
6.8	0
6.9	0
7	0
7.1	0
7.2	0
7.3	0
7.4	0
7.5	0
7.6	0
7.7	0
7.8	0
7.9	0
8	0
8.1	0
8.2	0
8.3	0
8.4	0
8.5	0
8.6	0
8.7	0
8.8	0
8.9	0
9	0
9.1	0
9.2	0
9.3	0
9.4	0
9.5	0
9.6	0
9.7	0
9.8	0
9.9	0
10	0
10.1	0
10.2	0
10.3	0
10.4	0
10.5	0
10.6	0
10.7	0
10.8	0
10.9	0
11	0
11.1	0
11.2	0
11.3	0
11.4	0
11.5	0
11.6	0
11.7	0
11.8	0
11.9	0
12	0
12.1	0
12.2	0
12.3	0
12.4	0
12.5	0
12.6	0
12.7	0
12.8	0
12.9	0
13	0
13.1	0
13.2	0
13.3	0
13.4	0
13.5	0
13.6	0
13.7	0
13.8	0
13.9	0
14	0
14.1	0
14.2	0
14.3	0
14.4	0
14.5	0
14.6	0
14.7	0
14.8	0
14.9	0
15	0
15.1	0
15.2	0
15.3	0
15.4	0
15.5	0
15.6	0
15.7	0
15.8	0
15.9	0
16	0
16.1	0
16.2	0
16.3	0
16.4	0
16.5	0
16.6	0
16.7	0
16.8	0
16.9	0
17	0
17.1	0
17.2	0
17.3	0
17.4	0
17.5	0
17.6	0
17.7	0
17.8	0
17.9	0
18	0
18.1	0
18.2	0
18.3	0
18.4	0
18.5	0
18.6	0
18.7	0
18.8	0
18.9	0
19	0
19.1	0
19.2	0
19.3	0
19.4	0
19.5	0
19.6	0
19.7	0
19.8	0
19.9	0
20	0
20.1	0
20.2	0
20.3	0
20.4	0
20.5	0
20.6	0
20.7	0
20.8	0
20.9	0
21	0
21.1	0
21.2	0
21.3	0
21.4	0
21.5	0
21.6	0
21.7	0
21.8	0
21.9	0
22	0
22.1	0
22.2	0
22.3	0
22.4	0
22.5	0
22.6	0
22.7	0
22.8	0
22.9	0
23	0
23.1	0
23.2	0
23.3	0
23.4	0
23.5	0
23.6	0
23.7	0
23.8	0
23.9	0
24	0
24.1	0
24.2	0
24.3	0
24.4	0
24.5	0
24.6	0
24.7	0
24.8	0
24.9	0
25	0
25.1	0
25.2	0
25.3	0
25.4	0
25.5	0
25.6	0
25.7	0
25.8	0
25.9	0
26	0
26.1	0
26.2	0
26.3	0
26.4	0
26.5	0
26.6	0
26.7	0
26.8	0
26.9	0
27	0
27.1	0
27.2	0
27.3	0
27.4	0
27.5	0
27.6	0
27.7	0
27.8	0
27.9	0
28	0
28.1	0
28.2	0
28.3	0
28.4	0
28.5	0
28.6	0
28.7	0
28.8	0
28.9	0
29	0
29.1	0
29.2	0
29.3	0
29.4	0
29.5	0
29.6	0
29.7	0
29.8	0
29.9	0
30	0
30.1	0
30.2	0
30.3	0
30.4	0
30.5	0
30.6	0
30.7	0
30.8	0
30.9	0
31	0
31.1	0
31.2	0
31.3	0
31.4	0
31.5	0
31.6	0
31.7	0
31.8	0
31.9	0
32	0
32.1	0
32.2	0
32.3	0
32.4	0
32.5	0
32.6	0
32.7	0
32.8	0
32.9	0
33	0
33.1	0
33.2	0
33.3	0
33.4	0
33.5	0
33.6	0
33.7	0
33.8	0
33.9	0
34	0
34.1	0
34.2	0
34.3	0
34.4	0
34.5	0
34.6	0
34.7	0
34.8	0
34.9	0
35	0
35.1	0
35.2	0
35.3	0
35.4	0
35.5	0
35.6	0
35.7	0
35.8	0
35.9	0
36	0
36.1	0
36.2	0
36.3	0
36.4	0
36.5	0
36.6	0
36.7	0
36.8	0
36.9	0
37	0
37.1	0
37.2	0
37.3	0
37.4	0
37.5	0
37.6	0
37.7	0
37.8	0
37.9	0
38	0
38.1	0
38.2	0
38.3	0
38.4	0
38.5	0
38.6	0
38.7	0
38.8	0
38.9	0
39	0
39.1	0
39.2	0
39.3	0
39.4	0
39.5	0
39.6	0
39.7	0
39.8	0
39.9	0
40	0
40.1	0
40.2	0
40.3	0
40.4	0
40.5	0
40.6	0
40.7	0
40.8	0
40.9	0
41	0
41.1	0
41.2	0
41.3	0
41.4	0
41.5	0
41.6	0
41.7	0
41.8	0
41.9	0
42	0
42.1	0
42.2	0
42.3	0
42.4	0
42.5	0
42.6	0
42.7	0
42.8	0
42.9	0
43	0
43.1	0
43.2	0
43.3	0
43.4	0
43.5	0
43.6	0
43.7	0
43.8	0
43.9	0
44	0
44.1	0
44.2	0
44.3	0
44.4	0
44.5	0
44.6	0
44.7	0
44.8	0
44.9	0
45	0
45.1	0
45.2	0
45.3	0
45.4	0
45.5	0
45.6	0
45.7	0
45.8	0
45.9	0
46	0
46.1	0
46.2	0
46.3	0
46.4	0
46.5	0
46.6	0
46.7	0
46.8	0
46.9	0
47	0
47.1	0
47.2	0
47.3	0
47.4	0
47.5	0
47.6	0
47.7	0
47.8	0
47.9	0
48	0
48.1	0
48.2	0
48.3	0
48.4	0
48.5	0
48.6	0
48.7	0
48.8	0
48.9	0
49	0
49.1	0
49.2	0
49.3	0
49.4	0
49.5	0
49.6	0
49.7	0
49.8	0
49.9	0
50	0
50.1	0
50.2	0
50.3	0
50.4	0
50.5	0
50.6	0
50.7	0
50.8	0
50.9	0
51	0
51.1	0
51.2	0
51.3	0
51.4	0
51.5	0
51.6	0
51.7	0
51.8	0
51.9	0
52	0
52.1	0
52.2	0
52.3	0
52.4	0
52.5	0
52.6	0
52.7	0
52.8	0
52.9	0
53	0
53.1	0
53.2	0
53.3	0
53.4	0
53.5	0
53.6	0
53.7	0
53.8	0
53.9	0
54	0
54.1	0
54.2	0
54.3	0
54.4	0
54.5	0
54.6	0
54.7	0
54.8	0
54.9	0
55	0
55.1	0
55.2	0
55.3	0
55.4	0
55.5	0
55.6	0
55.7	0
55.8	0
55.9	0
56	0
56.1	0
56.2	0
56.3	0
56.4	0
56.5	0
56.6	0
56.7	0
56.8	0
56.9	0
57	0
57.1	0
57.2	0
57.3	0
57.4	0
57.5	0
57.6	0
57.7	0
57.8	0
57.9	0
58	0
58.1	0
58.2	0
58.3	0
58.4	0
58.5	0
58.6	0
58.7	0
58.8	0
58.9	0
59	0
59.1	0
59.2	0
59.3	0
59.4	0
59.5	0
59.6	0
59.7	0
59.8	0
59.9	0
60	0
60.1	0
60.2	0
60.3	0
60.4	0
60.5	0
60.6	0
60.7	0
60.8	0
60.9	0
61	0
61.1	0
61.2	0
61.3	0
61.4	0
61.5	0
61.6	0
61.7	0
61.8	0
61.9	0
62	0
62.1	0
62.2	0
62.3	0
62.4	0
62.5	0
62.6	0
62.7	0
62.8	0
62.9	0
63	0
63.1	0
63.2	0
63.3	0
63.4	0
63.5	0
63.6	0
63.7	0
63.8	0
63.9	0
64	0
64.1	0
64.2	0
64.3	0
64.4	0
64.5	0
64.6	0
64.7	0
64.8	0
64.9	0
65	0
65.1	0
65.2	0
65.3	0
65.4	0
65.5	0
65.6	0
65.7	0
65.8	0
65.9	0
66	0
66.1	0
66.2	0
66.3	0
66.4	0
66.5	0
66.6	0
66.7	0
66.8	0
66.9	0
67	0
67.1	0
67.2	0
67.3	0
67.4	0
67.5	0
67.6	0
67.7	0
67.8	0
67.9	0
68	0
68.1	0
68.2	0
68.3	0
68.4	0
68.5	0
68.6	0
68.7	0
68.8	0
68.9	0
69	0
69.1	0
69.2	0
69.3	0
69.4	0
69.5	0
69.6	0
69.7	0
69.8	0
69.9	0
70	0
70.1	0
70.2	0
70.3	0
70.4	0
70.5	0
70.6	0
70.7	0
70.8	0
70.9	0
71	0
71.1	0
71.2	0
71.3	0
71.4	0
71.5	0
71.6	0
71.7	0
71.8	0
71.9	0
72	0
72.1	0
72.2	0
72.3	0
72.4	0
72.5	0
72.6	0
72.7	0
72.8	0
72.9	0
73	0
73.1	0
73.2	0
73.3	0
73.4	0
73.5	0
73.6	0
73.7	0
73.8	0
73.9	0
74	0
74.1	0
74.2	0
74.3	0
74.4	0
74.5	0
74.6	0
74.7	0
74.8	0
74.9	0
75	0
75.1	0
75.2	0
75.3	0
75.4	0
75.5	0
75.6	0
75.7	0
75.8	0
75.9	0
76	0
76.1	0
76.2	0
76.3	0
76.4	0
76.5	0
76.6	0
76.7	0
76.8	0
76.9	0
77	0
77.1	0
77.2	0
77.3	0
77.4	0
77.5	0
77.6	0
77.7	0
77.8	0
77.9	0
78	0
78.1	0
78.2	0
78.3	0
78.4	0
78.5	0
78.6	0
78.7	0
78.8	0
78.9	0
79	0
79.1	0
79.2	0
79.3	0
79.4	0
79.5	0
79.6	0
79.7	0
79.8	0
79.9	0
80	0
80.1	0
80.2	0
80.3	0
80.4	0
80.5	0
80.6	0
80.7	0
80.8	0
80.9	0
81	0
81.1	0
81.2	0
81.3	0
81.4	0
81.5	0
81.6	0
81.7	0
81.8	0
81.9	0
82	0
82.1	0
82.2	0
82.3	0
82.4	0
82.5	0
82.6	0
82.7	0
82.8	0
82.9	0
83	0
83.1	0
83.2	0
83.3	0
83.4	0
83.5	0
83.6	0
83.7	0
83.8	0
83.9	0
84	0
84.1	0
84.2	0
84.3	0
84.4	0
84.5	0
84.6	0
84.7	0
84.8	0
84.9	0
85	0
85.1	0
85.2	0
85.3	0
85.4	0
85.5	0
85.6	0
85.7	0
85.8	0
85.9	0
86	0
86.1	0
86.2	0
86.3	0
86.4	0
86.5	0
86.6	0
86.7	0
86.8	0
86.9	0
87	0
87.1	0
87.2	0
87.3	0
87.4	0
87.5	0
87.6	0
87.7	0
87.8	0
87.9	0
88	0
88.1	0
88.2	0
88.3	0
88.4	0
88.5	0
88.6	0
88.7	0
88.8	0
88.9	0
89	0
89.1	0
89.2	0
89.3	0
89.4	0
89.5	0
89.6	0
89.7	0
89.8	0
89.9	0
90	0
90.1	0
90.2	0
90.3	0
90.4	0
90.5	0
90.6	0
90.7	0
90.8	0
90.9	0
91	0
91.1	0
91.2	0
91.3	0
91.4	0
91.5	0
91.6	0
91.7	0
91.8	0
91.9	0
92	0
92.1	0
92.2	0
92.3	0
92.4	0
92.5	0
92.6	0
92.7	0
92.8	0
92.9	0
93	0
93.1	0
93.2	0
93.3	0
93.4	0
93.5	0
93.6	0
93.7	0
93.8	0
93.9	0
94	0
94.1	0
94.2	0
94.3	0
94.4	0
94.5	0
94.6	0
94.7	0
94.8	0
94.9	0
95	0
95.1	0
95.2	0
95.3	0
95.4	0
95.5	0
95.6	0
95.7	0
95.8	0
95.9	0
96	0
96.1	0
96.2	0
96.3	0
96.4	0
96.5	0
96.6	0
96.7	0
96.8	0
96.9	0
97	0
97.1	0
97.2	0
97.3	0
97.4	0
97.5	0
97.6	0
97.7	0
97.8	0
97.9	0
98	0
98.1	0
98.2	0
98.3	0
98.4	0
98.5	0
98.6	0
98.7	0
98.8	0
98.9	0
99	0
99.1	0
99.2	0
99.3	0
99.4	0
99.5	0
99.6	0
99.7	0
99.8	0
99.9	0
100	0
100.1	0.00025
100.2	0.00095
100.3	0.0024
100.4	0.0047
100.5	0.00725
100.6	0.01025
100.7	0.0134
100.8	0.01665
100.9	0.0203
101	0.02415
101.1	0.02755
101.2	0.0318
101.3	0.0362
101.4	0.0398
101.5	0.04345
101.6	0.04695
101.7	0.05075
101.8	0.05425
101.9	0.05775
102	0.06125
102.1	0.06465
102.2	0.0681
102.3	0.07255
102.4	0.07645
102.5	0.08015
102.6	0.0841
102.7	0.0879
102.8	0.09185
102.9	0.09655
103	0.0996
103.1	0.10365
103.2	0.1072
103.3	0.111
103.4	0.1142
103.5	0.1175
103.6	0.12175
103.7	0.1251
103.8	0.1291
103.9	0.1322
104	0.13575
104.1	0.13905
104.2	0.14185
104.3	0.1459
104.4	0.14905
104.5	0.152
104.6	0.1553
104.7	0.1584
104.8	0.162
104.9	0.1655
105	0.1686
105.1	0.1715
105.2	0.1756
105.3	0.17905
105.4	0.1816
105.5	0.1852
105.6	0.1885
105.7	0.19185
105.8	0.1957
105.9	0.19895
106	0.2025
106.1	0.2063
106.2	0.21025
106.3	0.21265
106.4	0.2159
106.5	0.21855
106.6	0.2213
106.7	0.2246
106.8	0.22755
106.9	0.23015
107	0.23315
107.1	0.2358
107.2	0.2391
107.3	0.24255
107.4	0.24585
107.5	0.24835
107.6	0.251
107.7	0.254
107.8	0.2571
107.9	0.2599
108	0.2621
108.1	0.2644
108.2	0.2675
108.3	0.27
108.4	0.2728
108.5	0.27515
108.6	0.2777
108.7	0.28035
108.8	0.28255
108.9	0.28605
109	0.28815
109.1	0.2907
109.2	0.29335
109.3	0.29605
109.4	0.2984
109.5	0.30065
109.6	0.3031
109.7	0.3062
109.8	0.3092
109.9	0.3114
110	0.31425
110.1	0.3165
110.2	0.31915
110.3	0.3213
110.4	0.32355
110.5	0.3255
110.6	0.32835
110.7	0.33145
110.8	0.33315
110.9	0.33525
111	0.33705
111.1	0.3394
111.2	0.34205
111.3	0.3452
111.4	0.3479
111.5	0.35015
111.6	0.3527
111.7	0.3547
111.8	0.35715
111.9	0.3593
112	0.36195
112.1	0.3642
112.2	0.3666
112.3	0.3689
112.4	0.37065
112.5	0.3728
112.6	0.37465
112.7	0.37655
112.8	0.37865
112.9	0.38125
113	0.3828
113.1	0.3852
113.2	0.38735
113.3	0.38905
113.4	0.3906
113.5	0.3925
113.6	0.3948
113.7	0.3964
113.8	0.3984
113.9	0.40125
114	0.403
114.1	0.40575
114.2	0.40775
114.3	0.41055
114.4	0.4122
114.5	0.41415
114.6	0.41625
114.7	0.41795
114.8	0.4203
114.9	0.42205
115	0.4234
115.1	0.4246
115.2	0.4267
115.3	0.4283
115.4	0.4297
115.5	0.4319
115.6	0.4336
115.7	0.4359
115.8	0.43835
115.9	0.4399
116	0.44145
116.1	0.44335
116.2	0.44555
116.3	0.4478
116.4	0.4495
116.5	0.45145
116.6	0.453
116.7	0.45465
116.8	0.4562
116.9	0.4578
117	0.4595
117.1	0.46105
117.2	0.4625
117.3	0.46375
117.4	0.4658
117.5	0.46755
117.6	0.4695
117.7	0.471
117.8	0.4728
117.9	0.47465
118	0.4761
118.1	0.47785
118.2	0.4795
118.3	0.4809
118.4	0.48315
118.5	0.4843
118.6	0.48605
118.7	0.48745
118.8	0.48885
118.9	0.4907
119	0.4925
119.1	0.49425
119.2	0.4953
119.3	0.49685
119.4	0.4985
119.5	0.5006
119.6	0.50155
119.7	0.5038
119.8	0.50545
119.9	0.50715
120	0.5095
120.1	0.5112
120.2	0.5129
120.3	0.51435
120.4	0.51555
120.5	0.51635
120.6	0.5178
120.7	0.52005
120.8	0.5216
120.9	0.5231
121	0.5244
121.1	0.52575
121.2	0.52725
121.3	0.5293
121.4	0.53085
121.5	0.5328
121.6	0.5343
121.7	0.53515
121.8	0.5362
121.9	0.5383
122	0.53915
122.1	0.54025
122.2	0.542
122.3	0.54315
122.4	0.5443
122.5	0.54515
122.6	0.5469
122.7	0.54785
122.8	0.54935
122.9	0.55085
123	0.5521
123.1	0.5535
123.2	0.55535
123.3	0.55635
123.4	0.55835
123.5	0.56045
123.6	0.5617
123.7	0.5626
123.8	0.5636
123.9	0.5648
124	0.56625
124.1	0.56825
124.2	0.5698
124.3	0.5709
124.4	0.5722
124.5	0.57345
124.6	0.57485
124.7	0.5762
124.8	0.5772
124.9	0.5782
125	0.57975
125.1	0.58135
125.2	0.5822
125.3	0.5829
125.4	0.58445
125.5	0.58555
125.6	0.5871
125.7	0.58825
125.8	0.58955
125.9	0.5912
126	0.592
126.1	0.59255
126.2	0.5933
126.3	0.59445
126.4	0.5953
126.5	0.59605
126.6	0.597
126.7	0.59835
126.8	0.59945
126.9	0.60055
127	0.60185
127.1	0.6031
127.2	0.6043
127.3	0.60515
127.4	0.60605
127.5	0.6074
127.6	0.60875
127.7	0.60915
127.8	0.6105
127.9	0.61135
128	0.6123
128.1	0.6129
128.2	0.61365
128.3	0.61455
128.4	0.6157
128.5	0.6166
128.6	0.61755
128.7	0.6187
128.8	0.6201
128.9	0.6207
129	0.62145
129.1	0.62185
129.2	0.6229
129.3	0.62345
129.4	0.6243
129.5	0.6252
129.6	0.62555
129.7	0.6264
129.8	0.6271
129.9	0.6283
130	0.6291
130.1	0.62965
130.2	0.63035
130.3	0.631
130.4	0.6321
130.5	0.6329
130.6	0.6339
130.7	0.63485
130.8	0.6357
130.9	0.6369
131	0.6375
131.1	0.63845
131.2	0.6394
131.3	0.6404
131.4	0.6415
131.5	0.6427
131.6	0.6442
131.7	0.6449
131.8	0.64565
131.9	0.6463
132	0.6468
132.1	0.64745
132.2	0.64875
132.3	0.6493
132.4	0.64985
132.5	0.65105
132.6	0.6516
132.7	0.65195
132.8	0.65315
132.9	0.6541
133	0.655
133.1	0.6554
133.2	0.65625
133.3	0.6572
133.4	0.6582
133.5	0.65905
133.6	0.65955
133.7	0.66015
133.8	0.66075
133.9	0.66125
134	0.6619
134.1	0.66245
134.2	0.6631
134.3	0.66445
134.4	0.6657
134.5	0.6666
134.6	0.6671
134.7	0.66835
134.8	0.669
134.9	0.66985
135	0.67065
135.1	0.6713
135.2	0.6719
135.3	0.6725
135.4	0.67265
135.5	0.67325
135.6	0.6733
135.7	0.6738
135.8	0.6744
135.9	0.6747
136	0.67605
136.1	0.6766
136.2	0.67705
136.3	0.67805
136.4	0.6787
136.5	0.6793
136.6	0.67975
136.7	0.68045
136.8	0.68165
136.9	0.68195
137	0.6831
137.1	0.6841
137.2	0.6847
137.3	0.685
137.4	0.68635
137.5	0.68635
137.6	0.6867
137.7	0.68735
137.8	0.68775
137.9	0.68835
138	0.68855
138.1	0.68925
138.2	0.68975
138.3	0.6905
138.4	0.69105
138.5	0.6914
138.6	0.69175
138.7	0.69245
138.8	0.6929
138.9	0.69375
139	0.69405
139.1	0.6951
139.2	0.6954
139.3	0.6963
139.4	0.69665
139.5	0.6971
139.6	0.69755
139.7	0.69845
139.8	0.6985
139.9	0.6991
140	0.69955
140.1	0.7002
140.2	0.7002
140.3	0.7006
140.4	0.7011
140.5	0.7018
140.6	0.7024
140.7	0.7028
140.8	0.70315
140.9	0.70405
141	0.70465
141.1	0.7054
141.2	0.70655
141.3	0.70725
141.4	0.7082
141.5	0.7086
141.6	0.7091
141.7	0.7093
141.8	0.7096
141.9	0.7098
142	0.71035
142.1	0.71075
142.2	0.71135
142.3	0.7116
142.4	0.7122
142.5	0.7125
142.6	0.7127
142.7	0.71315
142.8	0.7127
142.9	0.71305
143	0.7135
143.1	0.71455
143.2	0.7151
143.3	0.716
143.4	0.7174
143.5	0.7179
143.6	0.7186
143.7	0.7188
143.8	0.71955
143.9	0.7201
144	0.7208
144.1	0.721
144.2	0.72135
144.3	0.72215
144.4	0.72265
144.5	0.7228
144.6	0.723
144.7	0.72315
144.8	0.7233
144.9	0.72295
145	0.72385
145.1	0.72425
145.2	0.7247
145.3	0.7252
145.4	0.7253
145.5	0.72545
145.6	0.72575
145.7	0.72675
145.8	0.7271
145.9	0.7275
146	0.7282
146.1	0.72875
146.2	0.72905
146.3	0.7292
146.4	0.72985
146.5	0.73015
146.6	0.73035
146.7	0.73085
146.8	0.73135
146.9	0.7313
147	0.73145
147.1	0.73155
147.2	0.7321
147.3	0.7328
147.4	0.7335
147.5	0.734
147.6	0.73425
147.7	0.73485
147.8	0.7353
147.9	0.73525
148	0.7354
148.1	0.7357
148.2	0.7359
148.3	0.73625
148.4	0.736
148.5	0.73655
148.6	0.7367
148.7	0.7369
148.8	0.7372
148.9	0.73835
149	0.73865
149.1	0.73875
149.2	0.739
149.3	0.7392
149.4	0.73905
149.5	0.7397
149.6	0.7393
149.7	0.73965
149.8	0.7402
149.9	0.7405
150	0.7407
150.1	0.7409
150.2	0.74145
150.3	0.74135
150.4	0.74135
150.5	0.74155
150.6	0.7415
150.7	0.742
150.8	0.74245
150.9	0.74265
151	0.7431
151.1	0.7433
151.2	0.74365
151.3	0.74415
151.4	0.74445
151.5	0.745
151.6	0.74525
151.7	0.74535
151.8	0.74575
151.9	0.74675
152	0.74745
152.1	0.7474
152.2	0.7474
152.3	0.7476
152.4	0.748
152.5	0.7481
152.6	0.7482
152.7	0.74845
152.8	0.749
152.9	0.74945
153	0.74945
153.1	0.75
153.2	0.7498
153.3	0.74955
153.4	0.75
153.5	0.7503
153.6	0.7501
153.7	0.7501
153.8	0.75075
153.9	0.75145
154	0.75165
154.1	0.7522
154.2	0.75215
154.3	0.7527
154.4	0.7531
154.5	0.75345
154.6	0.75405
154.7	0.75445
154.8	0.7544
154.9	0.75485
155	0.7552
155.1	0.7555
155.2	0.75565
155.3	0.7558
155.4	0.75615
155.5	0.75675
155.6	0.7575
155.7	0.7582
155.8	0.75795
155.9	0.75835
156	0.7588
156.1	0.7592
156.2	0.75925
156.3	0.75925
156.4	0.75895
156.5	0.7592
156.6	0.7597
156.7	0.76
156.8	0.761
156.9	0.76175
157	0.7619
157.1	0.76205
157.2	0.7619
157.3	0.76195
157.4	0.76135
157.5	0.7617
157.6	0.76245
157.7	0.7626
157.8	0.76295
157.9	0.76315
158	0.76345
158.1	0.7636
158.2	0.76365
158.3	0.76365
158.4	0.7634
158.5	0.7639
158.6	0.7643
158.7	0.76445
158.8	0.7647
158.9	0.7648
159	0.76495
159.1	0.76545
159.2	0.7655
159.3	0.7658
159.4	0.7658
159.5	0.7663
159.6	0.76665
159.7	0.76635
159.8	0.7662
159.9	0.76635
160	0.7663
160.1	0.7662
160.2	0.7661
160.3	0.76625
160.4	0.7664
160.5	0.76605
160.6	0.76635
160.7	0.7664
160.8	0.7669
160.9	0.76715
161	0.7672
161.1	0.76715
161.2	0.76735
161.3	0.7675
161.4	0.7674
161.5	0.76785
161.6	0.76765
161.7	0.7678
161.8	0.7678
161.9	0.76785
162	0.7682
162.1	0.76805
162.2	0.768
162.3	0.7678
162.4	0.768
162.5	0.7685
162.6	0.7689
162.7	0.7689
162.8	0.769
162.9	0.7693
163	0.7698
163.1	0.7702
163.2	0.7703
163.3	0.77
163.4	0.77
163.5	0.77075
163.6	0.7709
163.7	0.7713
163.8	0.77135
163.9	0.7715
164	0.7719
164.1	0.7728
164.2	0.7733
164.3	0.7733
164.4	0.7729
164.5	0.7725
164.6	0.77255
164.7	0.77215
164.8	0.77205
164.9	0.7726
165	0.7728
165.1	0.77295
165.2	0.77325
165.3	0.7737
165.4	0.7737
165.5	0.774
165.6	0.7737
165.7	0.7738
165.8	0.774
165.9	0.77415
166	0.7741
166.1	0.77385
166.2	0.77395
166.3	0.77405
166.4	0.774
166.5	0.77435
166.6	0.7746
166.7	0.77485
166.8	0.77565
166.9	0.7756
167	0.77575
167.1	0.77565
167.2	0.77555
167.3	0.77555
167.4	0.77535
167.5	0.77545
167.6	0.7756
167.7	0.77595
167.8	0.77635
167.9	0.77665
168	0.777
168.1	0.7773
168.2	0.77755
168.3	0.7776
168.4	0.7785
168.5	0.77925
168.6	0.7794
168.7	0.78
168.8	0.78
168.9	0.78005
169	0.77985
169.1	0.78
169.2	0.7798
169.3	0.7796
169.4	0.77975
169.5	0.7798
169.6	0.78005
169.7	0.78005
169.8	0.78025
169.9	0.78085
170	0.7808
170.1	0.78115
170.2	0.78065
170.3	0.78085
170.4	0.7814
170.5	0.78205
170.6	0.78185
170.7	0.7818
170.8	0.7822
170.9	0.782
171	0.78175
171.1	0.78215
171.2	0.7825
171.3	0.78235
171.4	0.78185
171.5	0.78215
171.6	0.78185
171.7	0.7825
171.8	0.7824
171.9	0.7824
172	0.78305
172.1	0.7834
172.2	0.7837
172.3	0.7837
172.4	0.78385
172.5	0.7844
172.6	0.7842
172.7	0.7835
172.8	0.7844
172.9	0.7842
173	0.7845
173.1	0.784
173.2	0.78435
173.3	0.78455
173.4	0.78525
173.5	0.7854
173.6	0.7854
173.7	0.78495
173.8	0.7851
173.9	0.7853
174	0.7857
174.1	0.7859
174.2	0.7858
174.3	0.78615
174.4	0.7856
174.5	0.7859
174.6	0.78595
174.7	0.7859
174.8	0.7859
174.9	0.7865
175	0.78675
175.1	0.7869
175.2	0.78735
175.3	0.7874
175.4	0.78725
175.5	0.7873
175.6	0.7876
175.7	0.7876
175.8	0.7872
175.9	0.78725
176	0.7871
176.1	0.7872
176.2	0.7876
176.3	0.7872
176.4	0.78695
176.5	0.78705
176.6	0.78685
176.7	0.78725
176.8	0.7873
176.9	0.78745
177	0.7876
177.1	0.7879
177.2	0.78815
177.3	0.78845
177.4	0.78865
177.5	0.7887
177.6	0.78905
177.7	0.78965
177.8	0.79025
177.9	0.7905
178	0.79075
178.1	0.7914
178.2	0.7919
178.3	0.79165
178.4	0.7916
178.5	0.7923
178.6	0.79205
178.7	0.79185
178.8	0.79205
178.9	0.7922
179	0.79195
179.1	0.7925
179.2	0.7922
179.3	0.7923
179.4	0.79255
179.5	0.7929
179.6	0.7928
179.7	0.7926
179.8	0.7923
179.9	0.7926
180	0.7922
180.1	0.79235
180.2	0.792
180.3	0.7919
180.4	0.7917
180.5	0.79155
180.6	0.7919
180.7	0.7923
180.8	0.79265
180.9	0.7927
181	0.79295
181.1	0.79275
181.2	0.79295
181.3	0.7929
181.4	0.7927
181.5	0.7929
181.6	0.79305
181.7	0.7932
181.8	0.7935
181.9	0.7935
182	0.7936
182.1	0.7931
182.2	0.7923
182.3	0.7926
182.4	0.7925
182.5	0.7928
182.6	0.79285
182.7	0.7928
182.8	0.79265
182.9	0.79235
183	0.7923
183.1	0.7929
183.2	0.7931
183.3	0.79325
183.4	0.79355
183.5	0.7936
183.6	0.7936
183.7	0.79365
183.8	0.79395
183.9	0.79355
184	0.79395
184.1	0.79455
184.2	0.79465
184.3	0.7946
184.4	0.7944
184.5	0.7947
184.6	0.795
184.7	0.79505
184.8	0.7954
184.9	0.79525
185	0.79555
185.1	0.7953
185.2	0.79485
185.3	0.79495
185.4	0.79515
185.5	0.7946
185.6	0.7945
185.7	0.7945
185.8	0.7948
185.9	0.79465
186	0.79455
186.1	0.79445
186.2	0.79395
186.3	0.79415
186.4	0.79435
186.5	0.79405
186.6	0.7938
186.7	0.7934
186.8	0.79295
186.9	0.79315
187	0.79295
187.1	0.79325
187.2	0.7931
187.3	0.79355
187.4	0.7935
187.5	0.79305
187.6	0.79295
187.7	0.793
187.8	0.7929
187.9	0.79325
188	0.7937
188.1	0.7937
188.2	0.7933
188.3	0.79345
188.4	0.7939
188.5	0.79365
188.6	0.79405
188.7	0.79345
188.8	0.79375
188.9	0.7935
189	0.79365
189.1	0.7941
189.2	0.79425
189.3	0.79455
189.4	0.79475
189.5	0.7951
189.6	0.79455
189.7	0.79445
189.8	0.7944
189.9	0.79445
190	0.7945
190.1	0.7947
190.2	0.7945
190.3	0.7948
190.4	0.7947
190.5	0.79515
190.6	0.79565
190.7	0.79565
190.8	0.79545
190.9	0.7954
191	0.7955
191.1	0.7953
191.2	0.7954
191.3	0.79555
191.4	0.7955
191.5	0.7957
191.6	0.7952
191.7	0.79545
191.8	0.79535
191.9	0.7954
192	0.79565
192.1	0.7958
192.2	0.7959
192.3	0.7959
192.4	0.7957
192.5	0.7956
192.6	0.7956
192.7	0.7955
192.8	0.79575
192.9	0.7958
193	0.79565
193.1	0.79585
193.2	0.79605
193.3	0.79585
193.4	0.7956
193.5	0.7954
193.6	0.7952
193.7	0.7956
193.8	0.79585
193.9	0.79595
194	0.79575
194.1	0.79545
194.2	0.7959
194.3	0.7957
194.4	0.79535
194.5	0.7951
194.6	0.79475
194.7	0.79455
194.8	0.7947
194.9	0.7943
195	0.7946
195.1	0.79515
195.2	0.7953
195.3	0.7952
195.4	0.79475
195.5	0.79435
195.6	0.79485
195.7	0.7949
195.8	0.79565
195.9	0.7956
196	0.7954
196.1	0.79525
196.2	0.79535
196.3	0.7958
196.4	0.79615
196.5	0.79645
196.6	0.79625
196.7	0.79575
196.8	0.7959
196.9	0.7957
197	0.79565
197.1	0.79585
197.2	0.795
197.3	0.79465
197.4	0.79455
197.5	0.79425
197.6	0.7938
197.7	0.79375
197.8	0.7932
197.9	0.79355
198	0.7937
198.1	0.79335
198.2	0.79375
198.3	0.7941
198.4	0.7941
198.5	0.794
198.6	0.79405
198.7	0.7939
198.8	0.7939
198.9	0.7944
199	0.79505
199.1	0.7949
199.2	0.795
199.3	0.79495
199.4	0.79485
199.5	0.79475
199.6	0.795
199.7	0.7956
199.8	0.79595
199.9	0.7957
200	0.79555
[truncated: 14,000 more rows]
