# Supplementary material for: Bayesian inference of kinetic schemes for ion channels by Kalman filtering
Source: eLife journal article supplement (doi:10.7554/elife.62714), 2022-05-04
Supplement: fig4-data4 [file 1_Sim_N_50000_Fluor_MW_8M.xlsx]

## Sheet: 8 M
0.1	0
0.2	0
0.3	0
0.4	0
0.5	0
0.6	0
0.7	0
0.8	0
0.9	0
1	0
1.1	0
1.2	0
1.3	0
1.4	0
1.5	0
1.6	0
1.7	0
1.8	0
1.9	0
2	0
2.1	0
2.2	0
2.3	0
2.4	0
2.5	0
2.6	0
2.7	0
2.8	0
2.9	0
3	0
3.1	0
3.2	0
3.3	0
3.4	0
3.5	0
3.6	0
3.7	0
3.8	0
3.9	0
4	0
4.1	0
4.2	0
4.3	0
4.4	0
4.5	0
4.6	0
4.7	0
4.8	0
4.9	0
5	0
5.1	0
5.2	0
5.3	0
5.4	0
5.5	0
5.6	0
5.7	0
5.8	0
5.9	0
6	0
6.1	0
6.2	0
6.3	0
6.4	0
6.5	0
6.6	0
6.7	0
6.8	0
6.9	0
7	0
7.1	0
7.2	0
7.3	0
7.4	0
7.5	0
7.6	0
7.7	0
7.8	0
7.9	0
8	0
8.1	0
8.2	0
8.3	0
8.4	0
8.5	0
8.6	0
8.7	0
8.8	0
8.9	0
9	0
9.1	0
9.2	0
9.3	0
9.4	0
9.5	0
9.6	0
9.7	0
9.8	0
9.9	0
10	0
10.1	0
10.2	0
10.3	0
10.4	0
10.5	0
10.6	0
10.7	0
10.8	0
10.9	0
11	0
11.1	0
11.2	0
11.3	0
11.4	0
11.5	0
11.6	0
11.7	0
11.8	0
11.9	0
12	0
12.1	0
12.2	0
12.3	0
12.4	0
12.5	0
12.6	0
12.7	0
12.8	0
12.9	0
13	0
13.1	0
13.2	0
13.3	0
13.4	0
13.5	0
13.6	0
13.7	0
13.8	0
13.9	0
14	0
14.1	0
14.2	0
14.3	0
14.4	0
14.5	0
14.6	0
14.7	0
14.8	0
14.9	0
15	0
15.1	0
15.2	0
15.3	0
15.4	0
15.5	0
15.6	0
15.7	0
15.8	0
15.9	0
16	0
16.1	0
16.2	0
16.3	0
16.4	0
16.5	0
16.6	0
16.7	0
16.8	0
16.9	0
17	0
17.1	0
17.2	0
17.3	0
17.4	0
17.5	0
17.6	0
17.7	0
17.8	0
17.9	0
18	0
18.1	0
18.2	0
18.3	0
18.4	0
18.5	0
18.6	0
18.7	0
18.8	0
18.9	0
19	0
19.1	0
19.2	0
19.3	0
19.4	0
19.5	0
19.6	0
19.7	0
19.8	0
19.9	0
20	0
20.1	0
20.2	0
20.3	0
20.4	0
20.5	0
20.6	0
20.7	0
20.8	0
20.9	0
21	0
21.1	0
21.2	0
21.3	0
21.4	0
21.5	0
21.6	0
21.7	0
21.8	0
21.9	0
22	0
22.1	0
22.2	0
22.3	0
22.4	0
22.5	0
22.6	0
22.7	0
22.8	0
22.9	0
23	0
23.1	0
23.2	0
23.3	0
23.4	0
23.5	0
23.6	0
23.7	0
23.8	0
23.9	0
24	0
24.1	0
24.2	0
24.3	0
24.4	0
24.5	0
24.6	0
24.7	0
24.8	0
24.9	0
25	0
25.1	0
25.2	0
25.3	0
25.4	0
25.5	0
25.6	0
25.7	0
25.8	0
25.9	0
26	0
26.1	0
26.2	0
26.3	0
26.4	0
26.5	0
26.6	0
26.7	0
26.8	0
26.9	0
27	0
27.1	0
27.2	0
27.3	0
27.4	0
27.5	0
27.6	0
27.7	0
27.8	0
27.9	0
28	0
28.1	0
28.2	0
28.3	0
28.4	0
28.5	0
28.6	0
28.7	0
28.8	0
28.9	0
29	0
29.1	0
29.2	0
29.3	0
29.4	0
29.5	0
29.6	0
29.7	0
29.8	0
29.9	0
30	0
30.1	0
30.2	0
30.3	0
30.4	0
30.5	0
30.6	0
30.7	0
30.8	0
30.9	0
31	0
31.1	0
31.2	0
31.3	0
31.4	0
31.5	0
31.6	0
31.7	0
31.8	0
31.9	0
32	0
32.1	0
32.2	0
32.3	0
32.4	0
32.5	0
32.6	0
32.7	0
32.8	0
32.9	0
33	0
33.1	0
33.2	0
33.3	0
33.4	0
33.5	0
33.6	0
33.7	0
33.8	0
33.9	0
34	0
34.1	0
34.2	0
34.3	0
34.4	0
34.5	0
34.6	0
34.7	0
34.8	0
34.9	0
35	0
35.1	0
35.2	0
35.3	0
35.4	0
35.5	0
35.6	0
35.7	0
35.8	0
35.9	0
36	0
36.1	0
36.2	0
36.3	0
36.4	0
36.5	0
36.6	0
36.7	0
36.8	0
36.9	0
37	0
37.1	0
37.2	0
37.3	0
37.4	0
37.5	0
37.6	0
37.7	0
37.8	0
37.9	0
38	0
38.1	0
38.2	0
38.3	0
38.4	0
38.5	0
38.6	0
38.7	0
38.8	0
38.9	0
39	0
39.1	0
39.2	0
39.3	0
39.4	0
39.5	0
39.6	0
39.7	0
39.8	0
39.9	0
40	0
40.1	0
40.2	0
40.3	0
40.4	0
40.5	0
40.6	0
40.7	0
40.8	0
40.9	0
41	0
41.1	0
41.2	0
41.3	0
41.4	0
41.5	0
41.6	0
41.7	0
41.8	0
41.9	0
42	0
42.1	0
42.2	0
42.3	0
42.4	0
42.5	0
42.6	0
42.7	0
42.8	0
42.9	0
43	0
43.1	0
43.2	0
43.3	0
43.4	0
43.5	0
43.6	0
43.7	0
43.8	0
43.9	0
44	0
44.1	0
44.2	0
44.3	0
44.4	0
44.5	0
44.6	0
44.7	0
44.8	0
44.9	0
45	0
45.1	0
45.2	0
45.3	0
45.4	0
45.5	0
45.6	0
45.7	0
45.8	0
45.9	0
46	0
46.1	0
46.2	0
46.3	0
46.4	0
46.5	0
46.6	0
46.7	0
46.8	0
46.9	0
47	0
47.1	0
47.2	0
47.3	0
47.4	0
47.5	0
47.6	0
47.7	0
47.8	0
47.9	0
48	0
48.1	0
48.2	0
48.3	0
48.4	0
48.5	0
48.6	0
48.7	0
48.8	0
48.9	0
49	0
49.1	0
49.2	0
49.3	0
49.4	0
49.5	0
49.6	0
49.7	0
49.8	0
49.9	0
50	0
50.1	0
50.2	0
50.3	0
50.4	0
50.5	0
50.6	0
50.7	0
50.8	0
50.9	0
51	0
51.1	0
51.2	0
51.3	0
51.4	0
51.5	0
51.6	0
51.7	0
51.8	0
51.9	0
52	0
52.1	0
52.2	0
52.3	0
52.4	0
52.5	0
52.6	0
52.7	0
52.8	0
52.9	0
53	0
53.1	0
53.2	0
53.3	0
53.4	0
53.5	0
53.6	0
53.7	0
53.8	0
53.9	0
54	0
54.1	0
54.2	0
54.3	0
54.4	0
54.5	0
54.6	0
54.7	0
54.8	0
54.9	0
55	0
55.1	0
55.2	0
55.3	0
55.4	0
55.5	0
55.6	0
55.7	0
55.8	0
55.9	0
56	0
56.1	0
56.2	0
56.3	0
56.4	0
56.5	0
56.6	0
56.7	0
56.8	0
56.9	0
57	0
57.1	0
57.2	0
57.3	0
57.4	0
57.5	0
57.6	0
57.7	0
57.8	0
57.9	0
58	0
58.1	0
58.2	0
58.3	0
58.4	0
58.5	0
58.6	0
58.7	0
58.8	0
58.9	0
59	0
59.1	0
59.2	0
59.3	0
59.4	0
59.5	0
59.6	0
59.7	0
59.8	0
59.9	0
60	0
60.1	0
60.2	0
60.3	0
60.4	0
60.5	0
60.6	0
60.7	0
60.8	0
60.9	0
61	0
61.1	0
61.2	0
61.3	0
61.4	0
61.5	0
61.6	0
61.7	0
61.8	0
61.9	0
62	0
62.1	0
62.2	0
62.3	0
62.4	0
62.5	0
62.6	0
62.7	0
62.8	0
62.9	0
63	0
63.1	0
63.2	0
63.3	0
63.4	0
63.5	0
63.6	0
63.7	0
63.8	0
63.9	0
64	0
64.1	0
64.2	0
64.3	0
64.4	0
64.5	0
64.6	0
64.7	0
64.8	0
64.9	0
65	0
65.1	0
65.2	0
65.3	0
65.4	0
65.5	0
65.6	0
65.7	0
65.8	0
65.9	0
66	0
66.1	0
66.2	0
66.3	0
66.4	0
66.5	0
66.6	0
66.7	0
66.8	0
66.9	0
67	0
67.1	0
67.2	0
67.3	0
67.4	0
67.5	0
67.6	0
67.7	0
67.8	0
67.9	0
68	0
68.1	0
68.2	0
68.3	0
68.4	0
68.5	0
68.6	0
68.7	0
68.8	0
68.9	0
69	0
69.1	0
69.2	0
69.3	0
69.4	0
69.5	0
69.6	0
69.7	0
69.8	0
69.9	0
70	0
70.1	0
70.2	0
70.3	0
70.4	0
70.5	0
70.6	0
70.7	0
70.8	0
70.9	0
71	0
71.1	0
71.2	0
71.3	0
71.4	0
71.5	0
71.6	0
71.7	0
71.8	0
71.9	0
72	0
72.1	0
72.2	0
72.3	0
72.4	0
72.5	0
72.6	0
72.7	0
72.8	0
72.9	0
73	0
73.1	0
73.2	0
73.3	0
73.4	0
73.5	0
73.6	0
73.7	0
73.8	0
73.9	0
74	0
74.1	0
74.2	0
74.3	0
74.4	0
74.5	0
74.6	0
74.7	0
74.8	0
74.9	0
75	0
75.1	0
75.2	0
75.3	0
75.4	0
75.5	0
75.6	0
75.7	0
75.8	0
75.9	0
76	0
76.1	0
76.2	0
76.3	0
76.4	0
76.5	0
76.6	0
76.7	0
76.8	0
76.9	0
77	0
77.1	0
77.2	0
77.3	0
77.4	0
77.5	0
77.6	0
77.7	0
77.8	0
77.9	0
78	0
78.1	0
78.2	0
78.3	0
78.4	0
78.5	0
78.6	0
78.7	0
78.8	0
78.9	0
79	0
79.1	0
79.2	0
79.3	0
79.4	0
79.5	0
79.6	0
79.7	0
79.8	0
79.9	0
80	0
80.1	0
80.2	0
80.3	0
80.4	0
80.5	0
80.6	0
80.7	0
80.8	0
80.9	0
81	0
81.1	0
81.2	0
81.3	0
81.4	0
81.5	0
81.6	0
81.7	0
81.8	0
81.9	0
82	0
82.1	0
82.2	0
82.3	0
82.4	0
82.5	0
82.6	0
82.7	0
82.8	0
82.9	0
83	0
83.1	0
83.2	0
83.3	0
83.4	0
83.5	0
83.6	0
83.7	0
83.8	0
83.9	0
84	0
84.1	0
84.2	0
84.3	0
84.4	0
84.5	0
84.6	0
84.7	0
84.8	0
84.9	0
85	0
85.1	0
85.2	0
85.3	0
85.4	0
85.5	0
85.6	0
85.7	0
85.8	0
85.9	0
86	0
86.1	0
86.2	0
86.3	0
86.4	0
86.5	0
86.6	0
86.7	0
86.8	0
86.9	0
87	0
87.1	0
87.2	0
87.3	0
87.4	0
87.5	0
87.6	0
87.7	0
87.8	0
87.9	0
88	0
88.1	0
88.2	0
88.3	0
88.4	0
88.5	0
88.6	0
88.7	0
88.8	0
88.9	0
89	0
89.1	0
89.2	0
89.3	0
89.4	0
89.5	0
89.6	0
89.7	0
89.8	0
89.9	0
90	0
90.1	0
90.2	0
90.3	0
90.4	0
90.5	0
90.6	0
90.7	0
90.8	0
90.9	0
91	0
91.1	0
91.2	0
91.3	0
91.4	0
91.5	0
91.6	0
91.7	0
91.8	0
91.9	0
92	0
92.1	0
92.2	0
92.3	0
92.4	0
92.5	0
92.6	0
92.7	0
92.8	0
92.9	0
93	0
93.1	0
93.2	0
93.3	0
93.4	0
93.5	0
93.6	0
93.7	0
93.8	0
93.9	0
94	0
94.1	0
94.2	0
94.3	0
94.4	0
94.5	0
94.6	0
94.7	0
94.8	0
94.9	0
95	0
95.1	0
95.2	0
95.3	0
95.4	0
95.5	0
95.6	0
95.7	0
95.8	0
95.9	0
96	0
96.1	0
96.2	0
96.3	0
96.4	0
96.5	0
96.6	0
96.7	0
96.8	0
96.9	0
97	0
97.1	0
97.2	0
97.3	0
97.4	0
97.5	0
97.6	0
97.7	0
97.8	0
97.9	0
98	0
98.1	0
98.2	0
98.3	0
98.4	0
98.5	0
98.6	0
98.7	0
98.8	0
98.9	0
99	0
99.1	0
99.2	0
99.3	0
99.4	0
99.5	0
99.6	0
99.7	0
99.8	0
99.9	0
100	0
100.1	0.3469
100.2	0.53206
100.3	0.64091
100.4	0.7152
100.5	0.7663
100.6	0.80296
100.7	0.8302
100.8	0.85046
100.9	0.86524
101	0.8769
101.1	0.88502
101.2	0.89223
101.3	0.89792
101.4	0.90207
101.5	0.90531
101.6	0.90844
101.7	0.91026
101.8	0.91198
101.9	0.91305
102	0.9149
102.1	0.91552
102.2	0.91632
102.3	0.91693
102.4	0.91742
102.5	0.91756
102.6	0.91726
102.7	0.91746
102.8	0.91697
102.9	0.91781
103	0.91881
103.1	0.91988
103.2	0.92057
103.3	0.92099
103.4	0.9214
103.5	0.92117
103.6	0.92047
103.7	0.9213
103.8	0.92132
103.9	0.92182
104	0.92224
104.1	0.92267
104.2	0.92251
104.3	0.92307
104.4	0.92461
104.5	0.92421
104.6	0.92466
104.7	0.92552
104.8	0.9246
104.9	0.92487
105	0.92556
105.1	0.92607
105.2	0.92608
105.3	0.92564
105.4	0.92653
105.5	0.92746
105.6	0.92714
105.7	0.92762
105.8	0.92852
105.9	0.92849
106	0.92851
106.1	0.9281
106.2	0.92874
106.3	0.92872
106.4	0.92996
106.5	0.93077
106.6	0.92989
106.7	0.93049
106.8	0.93122
106.9	0.9319
107	0.93297
107.1	0.93272
107.2	0.93275
107.3	0.93328
107.4	0.93282
107.5	0.93372
107.6	0.93243
107.7	0.93203
107.8	0.93359
107.9	0.93354
108	0.93307
108.1	0.93367
108.2	0.9342
108.3	0.93502
108.4	0.93546
108.5	0.93614
108.6	0.93612
108.7	0.93641
108.8	0.93705
108.9	0.9377
109	0.93732
109.1	0.93707
109.2	0.93717
109.3	0.93766
109.4	0.9371
109.5	0.93815
109.6	0.93783
109.7	0.93811
109.8	0.93865
109.9	0.93946
110	0.93896
110.1	0.93895
110.2	0.93989
110.3	0.94052
110.4	0.94004
110.5	0.94037
110.6	0.94064
110.7	0.941
110.8	0.94136
110.9	0.94161
111	0.94137
111.1	0.94221
111.2	0.94192
111.3	0.94191
111.4	0.94265
111.5	0.94238
111.6	0.94166
111.7	0.94115
111.8	0.94219
111.9	0.94298
112	0.94371
112.1	0.94437
112.2	0.94378
112.3	0.94324
112.4	0.94337
112.5	0.94328
112.6	0.9438
112.7	0.94387
112.8	0.94372
112.9	0.94403
113	0.94466
113.1	0.94502
113.2	0.94488
113.3	0.9455
113.4	0.94542
113.5	0.94629
113.6	0.94644
113.7	0.94664
113.8	0.94677
113.9	0.9471
114	0.94691
114.1	0.94642
114.2	0.94637
114.3	0.94667
114.4	0.9468
114.5	0.94724
114.6	0.94827
114.7	0.94823
114.8	0.94897
114.9	0.94938
115	0.94961
115.1	0.9487
115.2	0.94905
115.3	0.94948
115.4	0.9498
115.5	0.94921
115.6	0.94986
115.7	0.94981
115.8	0.94934
115.9	0.94901
116	0.94923
116.1	0.9499
116.2	0.95036
116.3	0.9504
116.4	0.95115
116.5	0.95078
116.6	0.95129
116.7	0.95131
116.8	0.95154
116.9	0.95175
117	0.95173
117.1	0.95238
117.2	0.95222
117.3	0.95254
117.4	0.95345
117.5	0.95312
117.6	0.9532
117.7	0.95338
117.8	0.95311
117.9	0.95336
118	0.9529
118.1	0.9534
118.2	0.95373
118.3	0.95382
118.4	0.9532
118.5	0.95366
118.6	0.95434
118.7	0.95461
118.8	0.95442
118.9	0.95493
119	0.95579
119.1	0.95607
119.2	0.95616
119.3	0.95631
119.4	0.95602
119.5	0.95579
119.6	0.95596
119.7	0.95672
119.8	0.95701
119.9	0.95687
120	0.95698
120.1	0.95683
120.2	0.95722
120.3	0.95659
120.4	0.95717
120.5	0.95686
120.6	0.95645
120.7	0.95641
120.8	0.95697
120.9	0.95645
121	0.95638
121.1	0.95689
121.2	0.95753
121.3	0.95795
121.4	0.95773
121.5	0.95809
121.6	0.95801
121.7	0.95733
121.8	0.9578
121.9	0.95847
122	0.95838
122.1	0.95847
122.2	0.95882
122.3	0.95926
122.4	0.95961
122.5	0.95921
122.6	0.95915
122.7	0.95927
122.8	0.95943
122.9	0.95903
123	0.95916
123.1	0.959
123.2	0.95963
123.3	0.95996
123.4	0.96039
123.5	0.96134
123.6	0.961
123.7	0.96147
123.8	0.96191
123.9	0.9615
124	0.96149
124.1	0.96139
124.2	0.96192
124.3	0.96227
124.4	0.96224
124.5	0.96234
124.6	0.96194
124.7	0.96159
124.8	0.96166
124.9	0.96137
125	0.96138
125.1	0.96144
125.2	0.96228
125.3	0.96249
125.4	0.96195
125.5	0.96141
125.6	0.96233
125.7	0.96266
125.8	0.96268
125.9	0.96323
126	0.96294
126.1	0.96277
126.2	0.96332
126.3	0.96335
126.4	0.96362
126.5	0.96376
126.6	0.96456
126.7	0.96423
126.8	0.96457
126.9	0.96397
127	0.9641
127.1	0.96415
127.2	0.96359
127.3	0.96359
127.4	0.96379
127.5	0.96432
127.6	0.96475
127.7	0.96521
127.8	0.96524
127.9	0.96541
128	0.96529
128.1	0.96512
128.2	0.96513
128.3	0.96546
128.4	0.96594
128.5	0.9657
128.6	0.96558
128.7	0.965
128.8	0.96617
128.9	0.96611
129	0.96675
129.1	0.9665
129.2	0.96633
129.3	0.96604
129.4	0.96606
129.5	0.96624
129.6	0.96627
129.7	0.96597
129.8	0.96622
129.9	0.96615
130	0.96685
130.1	0.96722
130.2	0.9675
130.3	0.96729
130.4	0.96741
130.5	0.96781
130.6	0.96746
130.7	0.9673
130.8	0.96836
130.9	0.96762
131	0.96765
131.1	0.96788
131.2	0.96773
131.3	0.96762
131.4	0.96785
131.5	0.9675
131.6	0.96711
131.7	0.96702
131.8	0.96701
131.9	0.96821
132	0.96862
132.1	0.96779
132.2	0.96822
132.3	0.96843
132.4	0.9683
132.5	0.96795
132.6	0.96827
132.7	0.96908
132.8	0.96935
132.9	0.96901
133	0.9691
133.1	0.96939
133.2	0.9692
133.3	0.96973
133.4	0.9699
133.5	0.96961
133.6	0.9695
133.7	0.96965
133.8	0.96989
133.9	0.96973
134	0.96995
134.1	0.97028
134.2	0.97021
134.3	0.97009
134.4	0.96969
134.5	0.97
134.6	0.97022
134.7	0.96954
134.8	0.96955
134.9	0.9696
135	0.97022
135.1	0.96997
135.2	0.97023
135.3	0.96998
135.4	0.97049
135.5	0.97051
135.6	0.97034
135.7	0.97042
135.8	0.97137
135.9	0.97165
136	0.97156
136.1	0.97171
136.2	0.97167
136.3	0.97208
136.4	0.97212
136.5	0.97213
136.6	0.97207
136.7	0.97215
136.8	0.97208
136.9	0.97195
137	0.97232
137.1	0.97224
137.2	0.97237
137.3	0.97273
137.4	0.97231
137.5	0.97185
137.6	0.97217
137.7	0.97231
137.8	0.97206
137.9	0.97186
138	0.97227
138.1	0.97216
138.2	0.97237
138.3	0.97221
138.4	0.97271
138.5	0.97336
138.6	0.97325
138.7	0.97268
138.8	0.97269
138.9	0.97265
139	0.97217
139.1	0.97278
139.2	0.97291
139.3	0.97305
139.4	0.97315
139.5	0.97401
139.6	0.97353
139.7	0.97385
139.8	0.97382
139.9	0.97361
140	0.97371
140.1	0.97366
140.2	0.97389
140.3	0.97407
140.4	0.97433
140.5	0.97413
140.6	0.97377
140.7	0.97395
140.8	0.97377
140.9	0.97378
141	0.97388
141.1	0.97407
141.2	0.97368
141.3	0.9731
141.4	0.97356
141.5	0.97388
141.6	0.9741
141.7	0.97403
141.8	0.97439
141.9	0.97418
142	0.97446
142.1	0.9747
142.2	0.97406
142.3	0.97482
142.4	0.97465
142.5	0.97483
142.6	0.97463
142.7	0.97453
142.8	0.97491
142.9	0.97474
143	0.97519
143.1	0.97514
143.2	0.97518
143.3	0.97491
143.4	0.97466
143.5	0.97471
143.6	0.97468
143.7	0.9749
143.8	0.97494
143.9	0.97497
144	0.97476
144.1	0.97508
144.2	0.97482
144.3	0.97527
144.4	0.97532
144.5	0.97544
144.6	0.97539
144.7	0.97575
144.8	0.97575
144.9	0.97518
145	0.97552
145.1	0.97574
145.2	0.97629
145.3	0.97609
145.4	0.97628
145.5	0.97586
145.6	0.97671
145.7	0.97646
145.8	0.97609
145.9	0.97612
146	0.97605
146.1	0.97612
146.2	0.97622
146.3	0.97608
146.4	0.97609
146.5	0.976
146.6	0.97621
146.7	0.97643
146.8	0.97701
146.9	0.97656
147	0.97656
147.1	0.97677
147.2	0.97646
147.3	0.97639
147.4	0.97638
147.5	0.97644
147.6	0.97652
147.7	0.97647
147.8	0.9767
147.9	0.97636
148	0.97663
148.1	0.9765
148.2	0.97607
148.3	0.9759
148.4	0.97612
148.5	0.97609
148.6	0.97614
148.7	0.97631
148.8	0.97675
148.9	0.97683
149	0.97675
149.1	0.97692
149.2	0.97676
149.3	0.97726
149.4	0.97728
149.5	0.9767
149.6	0.97678
149.7	0.97669
149.8	0.97683
149.9	0.97646
150	0.97651
150.1	0.97641
150.2	0.97639
150.3	0.97668
150.4	0.97683
150.5	0.97692
150.6	0.97717
150.7	0.97746
150.8	0.97753
150.9	0.97777
151	0.97805
151.1	0.97766
151.2	0.97764
151.3	0.97769
151.4	0.9777
151.5	0.97784
151.6	0.9782
151.7	0.97836
151.8	0.97815
151.9	0.97779
152	0.9779
152.1	0.97765
152.2	0.97773
152.3	0.97763
152.4	0.97706
152.5	0.97711
152.6	0.97761
152.7	0.97769
152.8	0.97751
152.9	0.97801
153	0.97785
153.1	0.97775
153.2	0.97839
153.3	0.97876
153.4	0.97841
153.5	0.97853
153.6	0.97852
153.7	0.97866
153.8	0.97823
153.9	0.97806
154	0.97792
154.1	0.97786
154.2	0.97786
154.3	0.978
154.4	0.97773
154.5	0.97831
154.6	0.97846
154.7	0.9783
154.8	0.97848
154.9	0.97848
155	0.97891
155.1	0.97873
155.2	0.97852
155.3	0.97891
155.4	0.97876
155.5	0.97843
155.6	0.97837
155.7	0.97835
155.8	0.9786
155.9	0.97886
156	0.97912
156.1	0.97899
156.2	0.97948
156.3	0.97941
156.4	0.97932
156.5	0.97875
156.6	0.97892
156.7	0.97932
156.8	0.9788
156.9	0.9789
157	0.97855
157.1	0.97884
157.2	0.97901
157.3	0.9789
157.4	0.97926
157.5	0.97967
157.6	0.97974
157.7	0.97944
157.8	0.97972
157.9	0.97922
158	0.97926
158.1	0.97932
158.2	0.97993
158.3	0.97996
158.4	0.97946
158.5	0.97949
158.6	0.97958
158.7	0.97951
158.8	0.97952
158.9	0.97955
159	0.9798
159.1	0.97989
159.2	0.97931
159.3	0.97905
159.4	0.97913
159.5	0.97928
159.6	0.97907
159.7	0.97907
159.8	0.97928
159.9	0.97908
160	0.97864
160.1	0.97882
160.2	0.97829
160.3	0.97899
160.4	0.97884
160.5	0.97884
160.6	0.97889
160.7	0.97909
160.8	0.97961
160.9	0.97998
161	0.98041
161.1	0.98003
161.2	0.97997
161.3	0.98
161.4	0.9802
161.5	0.97993
161.6	0.98015
161.7	0.98002
161.8	0.97978
161.9	0.98005
162	0.97993
162.1	0.97967
162.2	0.97969
162.3	0.97948
162.4	0.97986
162.5	0.97973
162.6	0.97965
162.7	0.97978
162.8	0.97988
162.9	0.98014
163	0.98073
163.1	0.9806
163.2	0.98068
163.3	0.98027
163.4	0.98032
163.5	0.98021
163.6	0.98034
163.7	0.98018
163.8	0.98019
163.9	0.97939
164	0.97941
164.1	0.97949
164.2	0.98
164.3	0.98004
164.4	0.98045
164.5	0.98074
164.6	0.98057
164.7	0.98037
164.8	0.98039
164.9	0.98034
165	0.98068
165.1	0.98077
165.2	0.98074
165.3	0.98054
165.4	0.98062
165.5	0.98065
165.6	0.98125
165.7	0.98084
165.8	0.98066
165.9	0.98051
166	0.98049
166.1	0.98026
166.2	0.98035
166.3	0.98026
166.4	0.98025
166.5	0.98059
166.6	0.98095
166.7	0.98119
166.8	0.98116
166.9	0.98131
167	0.98108
167.1	0.98087
167.2	0.98065
167.3	0.98031
167.4	0.98089
167.5	0.9808
167.6	0.98072
167.7	0.98011
167.8	0.98005
167.9	0.97985
168	0.9804
168.1	0.98041
168.2	0.98069
168.3	0.98073
168.4	0.9806
168.5	0.98093
168.6	0.9811
168.7	0.98131
168.8	0.98143
168.9	0.98169
169	0.98127
169.1	0.98086
169.2	0.98057
169.3	0.98028
169.4	0.98014
169.5	0.98027
169.6	0.98043
169.7	0.98076
169.8	0.98044
169.9	0.98016
170	0.98052
170.1	0.9805
170.2	0.98012
170.3	0.98053
170.4	0.98083
170.5	0.98037
170.6	0.98027
170.7	0.98089
170.8	0.98065
170.9	0.98095
171	0.98151
171.1	0.98165
171.2	0.98126
171.3	0.98158
171.4	0.98119
171.5	0.98123
171.6	0.98087
171.7	0.98084
171.8	0.98097
171.9	0.98087
172	0.98063
172.1	0.98042
172.2	0.98053
172.3	0.98047
172.4	0.98052
172.5	0.98034
172.6	0.98061
172.7	0.98055
172.8	0.98106
172.9	0.98114
173	0.98094
173.1	0.98112
173.2	0.98115
173.3	0.98069
173.4	0.98039
173.5	0.98081
173.6	0.98098
173.7	0.98108
173.8	0.98108
173.9	0.98078
174	0.9808
174.1	0.98109
174.2	0.98104
174.3	0.9812
174.4	0.98114
174.5	0.98118
174.6	0.98105
174.7	0.98082
174.8	0.98106
174.9	0.98078
175	0.98077
175.1	0.98102
175.2	0.98117
175.3	0.98113
175.4	0.98095
175.5	0.98089
175.6	0.98081
175.7	0.98093
175.8	0.98093
175.9	0.9806
176	0.98063
176.1	0.98042
176.2	0.98067
176.3	0.98114
176.4	0.98141
176.5	0.98181
176.6	0.98142
176.7	0.9813
176.8	0.98135
176.9	0.98138
177	0.98102
177.1	0.98102
177.2	0.98143
177.3	0.98133
177.4	0.98141
177.5	0.98187
177.6	0.98146
177.7	0.98154
177.8	0.98179
177.9	0.98192
178	0.98169
178.1	0.98244
178.2	0.98201
178.3	0.98221
178.4	0.98179
178.5	0.98225
178.6	0.98195
178.7	0.98108
178.8	0.98111
178.9	0.98137
179	0.98111
179.1	0.981
179.2	0.98151
179.3	0.98124
179.4	0.98149
179.5	0.98119
179.6	0.98145
179.7	0.9817
179.8	0.98186
179.9	0.98172
180	0.98171
180.1	0.98175
180.2	0.98169
180.3	0.98179
180.4	0.98132
180.5	0.98124
180.6	0.98135
180.7	0.98172
180.8	0.98145
180.9	0.98169
181	0.98163
181.1	0.98169
181.2	0.98174
181.3	0.98154
181.4	0.9814
181.5	0.98162
181.6	0.98158
181.7	0.98133
181.8	0.98111
181.9	0.98113
182	0.98165
182.1	0.98172
182.2	0.98189
182.3	0.98175
182.4	0.98231
182.5	0.98199
182.6	0.98186
182.7	0.98158
182.8	0.98182
182.9	0.98161
183	0.98168
183.1	0.98166
183.2	0.98157
183.3	0.98189
183.4	0.98154
183.5	0.98097
183.6	0.98048
183.7	0.98084
183.8	0.98111
183.9	0.981
184	0.98075
184.1	0.98123
184.2	0.98095
184.3	0.98131
184.4	0.98144
184.5	0.98142
184.6	0.98203
184.7	0.98177
184.8	0.98147
184.9	0.98151
185	0.9819
185.1	0.98166
185.2	0.98165
185.3	0.9819
185.4	0.98149
185.5	0.98133
185.6	0.98153
185.7	0.98216
185.8	0.98228
185.9	0.98236
186	0.98194
186.1	0.9816
186.2	0.98171
186.3	0.98179
186.4	0.98182
186.5	0.98171
186.6	0.98146
186.7	0.98125
186.8	0.98117
186.9	0.98115
187	0.98156
187.1	0.98176
187.2	0.98171
187.3	0.9819
187.4	0.9817
187.5	0.98163
187.6	0.98192
187.7	0.98219
187.8	0.98211
187.9	0.98193
188	0.98207
188.1	0.98241
188.2	0.98222
188.3	0.98237
188.4	0.9819
188.5	0.98204
188.6	0.98216
188.7	0.98198
188.8	0.9822
188.9	0.98234
189	0.98187
189.1	0.9811
189.2	0.98149
189.3	0.98125
189.4	0.98151
189.5	0.98186
189.6	0.98224
189.7	0.98192
189.8	0.98204
189.9	0.98218
190	0.98195
190.1	0.98192
190.2	0.98193
190.3	0.98189
190.4	0.98181
190.5	0.98157
190.6	0.98161
190.7	0.98157
190.8	0.98202
190.9	0.98215
191	0.98244
191.1	0.98203
191.2	0.98214
191.3	0.98206
191.4	0.98218
191.5	0.98241
191.6	0.98208
191.7	0.98256
191.8	0.98259
191.9	0.98262
192	0.98257
192.1	0.98236
192.2	0.98226
192.3	0.98284
192.4	0.98277
192.5	0.98276
192.6	0.98237
192.7	0.98246
192.8	0.98207
192.9	0.98177
193	0.98168
193.1	0.9816
193.2	0.98122
193.3	0.98127
193.4	0.98132
193.5	0.98162
193.6	0.98199
193.7	0.98172
193.8	0.98189
193.9	0.9821
194	0.98206
194.1	0.98219
194.2	0.98231
194.3	0.98289
194.4	0.9825
194.5	0.98243
194.6	0.98263
194.7	0.98272
194.8	0.98232
194.9	0.98208
195	0.98249
195.1	0.98241
195.2	0.98254
195.3	0.98232
195.4	0.98254
195.5	0.98286
195.6	0.98272
195.7	0.98267
195.8	0.98284
195.9	0.98253
196	0.98279
196.1	0.98264
196.2	0.98281
196.3	0.98282
196.4	0.98258
196.5	0.98258
196.6	0.98241
196.7	0.98253
196.8	0.98237
196.9	0.98223
197	0.98223
197.1	0.98193
197.2	0.98222
197.3	0.98238
197.4	0.98196
197.5	0.98212
197.6	0.98257
197.7	0.98245
197.8	0.98287
197.9	0.98268
198	0.98249
198.1	0.9819
198.2	0.98211
198.3	0.98232
198.4	0.98229
198.5	0.98255
198.6	0.98252
198.7	0.98279
198.8	0.98288
198.9	0.98278
199	0.98289
199.1	0.9829
199.2	0.98264
199.3	0.98273
199.4	0.98228
199.5	0.98198
199.6	0.98264
199.7	0.98259
199.8	0.98271
199.9	0.98229
200	0.98197
[truncated: 14,000 more rows]
