# Supplementary material for: Bayesian inference of kinetic schemes for ion channels by Kalman filtering
Source: eLife journal article supplement (doi:10.7554/elife.62714), 2022-05-04
Supplement: fig4-data4 [file 1_Sim_N_50000_Strom_MW_8M.xlsx]

## Sheet: 8 M
0.1	0
0.2	0
0.3	0
0.4	0
0.5	0
0.6	0
0.7	0
0.8	0
0.9	0
1	0
1.1	0
1.2	0
1.3	0
1.4	0
1.5	0
1.6	0
1.7	0
1.8	0
1.9	0
2	0
2.1	0
2.2	0
2.3	0
2.4	0
2.5	0
2.6	0
2.7	0
2.8	0
2.9	0
3	0
3.1	0
3.2	0
3.3	0
3.4	0
3.5	0
3.6	0
3.7	0
3.8	0
3.9	0
4	0
4.1	0
4.2	0
4.3	0
4.4	0
4.5	0
4.6	0
4.7	0
4.8	0
4.9	0
5	0
5.1	0
5.2	0
5.3	0
5.4	0
5.5	0
5.6	0
5.7	0
5.8	0
5.9	0
6	0
6.1	0
6.2	0
6.3	0
6.4	0
6.5	0
6.6	0
6.7	0
6.8	0
6.9	0
7	0
7.1	0
7.2	0
7.3	0
7.4	0
7.5	0
7.6	0
7.7	0
7.8	0
7.9	0
8	0
8.1	0
8.2	0
8.3	0
8.4	0
8.5	0
8.6	0
8.7	0
8.8	0
8.9	0
9	0
9.1	0
9.2	0
9.3	0
9.4	0
9.5	0
9.6	0
9.7	0
9.8	0
9.9	0
10	0
10.1	0
10.2	0
10.3	0
10.4	0
10.5	0
10.6	0
10.7	0
10.8	0
10.9	0
11	0
11.1	0
11.2	0
11.3	0
11.4	0
11.5	0
11.6	0
11.7	0
11.8	0
11.9	0
12	0
12.1	0
12.2	0
12.3	0
12.4	0
12.5	0
12.6	0
12.7	0
12.8	0
12.9	0
13	0
13.1	0
13.2	0
13.3	0
13.4	0
13.5	0
13.6	0
13.7	0
13.8	0
13.9	0
14	0
14.1	0
14.2	0
14.3	0
14.4	0
14.5	0
14.6	0
14.7	0
14.8	0
14.9	0
15	0
15.1	0
15.2	0
15.3	0
15.4	0
15.5	0
15.6	0
15.7	0
15.8	0
15.9	0
16	0
16.1	0
16.2	0
16.3	0
16.4	0
16.5	0
16.6	0
16.7	0
16.8	0
16.9	0
17	0
17.1	0
17.2	0
17.3	0
17.4	0
17.5	0
17.6	0
17.7	0
17.8	0
17.9	0
18	0
18.1	0
18.2	0
18.3	0
18.4	0
18.5	0
18.6	0
18.7	0
18.8	0
18.9	0
19	0
19.1	0
19.2	0
19.3	0
19.4	0
19.5	0
19.6	0
19.7	0
19.8	0
19.9	0
20	0
20.1	0
20.2	0
20.3	0
20.4	0
20.5	0
20.6	0
20.7	0
20.8	0
20.9	0
21	0
21.1	0
21.2	0
21.3	0
21.4	0
21.5	0
21.6	0
21.7	0
21.8	0
21.9	0
22	0
22.1	0
22.2	0
22.3	0
22.4	0
22.5	0
22.6	0
22.7	0
22.8	0
22.9	0
23	0
23.1	0
23.2	0
23.3	0
23.4	0
23.5	0
23.6	0
23.7	0
23.8	0
23.9	0
24	0
24.1	0
24.2	0
24.3	0
24.4	0
24.5	0
24.6	0
24.7	0
24.8	0
24.9	0
25	0
25.1	0
25.2	0
25.3	0
25.4	0
25.5	0
25.6	0
25.7	0
25.8	0
25.9	0
26	0
26.1	0
26.2	0
26.3	0
26.4	0
26.5	0
26.6	0
26.7	0
26.8	0
26.9	0
27	0
27.1	0
27.2	0
27.3	0
27.4	0
27.5	0
27.6	0
27.7	0
27.8	0
27.9	0
28	0
28.1	0
28.2	0
28.3	0
28.4	0
28.5	0
28.6	0
28.7	0
28.8	0
28.9	0
29	0
29.1	0
29.2	0
29.3	0
29.4	0
29.5	0
29.6	0
29.7	0
29.8	0
29.9	0
30	0
30.1	0
30.2	0
30.3	0
30.4	0
30.5	0
30.6	0
30.7	0
30.8	0
30.9	0
31	0
31.1	0
31.2	0
31.3	0
31.4	0
31.5	0
31.6	0
31.7	0
31.8	0
31.9	0
32	0
32.1	0
32.2	0
32.3	0
32.4	0
32.5	0
32.6	0
32.7	0
32.8	0
32.9	0
33	0
33.1	0
33.2	0
33.3	0
33.4	0
33.5	0
33.6	0
33.7	0
33.8	0
33.9	0
34	0
34.1	0
34.2	0
34.3	0
34.4	0
34.5	0
34.6	0
34.7	0
34.8	0
34.9	0
35	0
35.1	0
35.2	0
35.3	0
35.4	0
35.5	0
35.6	0
35.7	0
35.8	0
35.9	0
36	0
36.1	0
36.2	0
36.3	0
36.4	0
36.5	0
36.6	0
36.7	0
36.8	0
36.9	0
37	0
37.1	0
37.2	0
37.3	0
37.4	0
37.5	0
37.6	0
37.7	0
37.8	0
37.9	0
38	0
38.1	0
38.2	0
38.3	0
38.4	0
38.5	0
38.6	0
38.7	0
38.8	0
38.9	0
39	0
39.1	0
39.2	0
39.3	0
39.4	0
39.5	0
39.6	0
39.7	0
39.8	0
39.9	0
40	0
40.1	0
40.2	0
40.3	0
40.4	0
40.5	0
40.6	0
40.7	0
40.8	0
40.9	0
41	0
41.1	0
41.2	0
41.3	0
41.4	0
41.5	0
41.6	0
41.7	0
41.8	0
41.9	0
42	0
42.1	0
42.2	0
42.3	0
42.4	0
42.5	0
42.6	0
42.7	0
42.8	0
42.9	0
43	0
43.1	0
43.2	0
43.3	0
43.4	0
43.5	0
43.6	0
43.7	0
43.8	0
43.9	0
44	0
44.1	0
44.2	0
44.3	0
44.4	0
44.5	0
44.6	0
44.7	0
44.8	0
44.9	0
45	0
45.1	0
45.2	0
45.3	0
45.4	0
45.5	0
45.6	0
45.7	0
45.8	0
45.9	0
46	0
46.1	0
46.2	0
46.3	0
46.4	0
46.5	0
46.6	0
46.7	0
46.8	0
46.9	0
47	0
47.1	0
47.2	0
47.3	0
47.4	0
47.5	0
47.6	0
47.7	0
47.8	0
47.9	0
48	0
48.1	0
48.2	0
48.3	0
48.4	0
48.5	0
48.6	0
48.7	0
48.8	0
48.9	0
49	0
49.1	0
49.2	0
49.3	0
49.4	0
49.5	0
49.6	0
49.7	0
49.8	0
49.9	0
50	0
50.1	0
50.2	0
50.3	0
50.4	0
50.5	0
50.6	0
50.7	0
50.8	0
50.9	0
51	0
51.1	0
51.2	0
51.3	0
51.4	0
51.5	0
51.6	0
51.7	0
51.8	0
51.9	0
52	0
52.1	0
52.2	0
52.3	0
52.4	0
52.5	0
52.6	0
52.7	0
52.8	0
52.9	0
53	0
53.1	0
53.2	0
53.3	0
53.4	0
53.5	0
53.6	0
53.7	0
53.8	0
53.9	0
54	0
54.1	0
54.2	0
54.3	0
54.4	0
54.5	0
54.6	0
54.7	0
54.8	0
54.9	0
55	0
55.1	0
55.2	0
55.3	0
55.4	0
55.5	0
55.6	0
55.7	0
55.8	0
55.9	0
56	0
56.1	0
56.2	0
56.3	0
56.4	0
56.5	0
56.6	0
56.7	0
56.8	0
56.9	0
57	0
57.1	0
57.2	0
57.3	0
57.4	0
57.5	0
57.6	0
57.7	0
57.8	0
57.9	0
58	0
58.1	0
58.2	0
58.3	0
58.4	0
58.5	0
58.6	0
58.7	0
58.8	0
58.9	0
59	0
59.1	0
59.2	0
59.3	0
59.4	0
59.5	0
59.6	0
59.7	0
59.8	0
59.9	0
60	0
60.1	0
60.2	0
60.3	0
60.4	0
60.5	0
60.6	0
60.7	0
60.8	0
60.9	0
61	0
61.1	0
61.2	0
61.3	0
61.4	0
61.5	0
61.6	0
61.7	0
61.8	0
61.9	0
62	0
62.1	0
62.2	0
62.3	0
62.4	0
62.5	0
62.6	0
62.7	0
62.8	0
62.9	0
63	0
63.1	0
63.2	0
63.3	0
63.4	0
63.5	0
63.6	0
63.7	0
63.8	0
63.9	0
64	0
64.1	0
64.2	0
64.3	0
64.4	0
64.5	0
64.6	0
64.7	0
64.8	0
64.9	0
65	0
65.1	0
65.2	0
65.3	0
65.4	0
65.5	0
65.6	0
65.7	0
65.8	0
65.9	0
66	0
66.1	0
66.2	0
66.3	0
66.4	0
66.5	0
66.6	0
66.7	0
66.8	0
66.9	0
67	0
67.1	0
67.2	0
67.3	0
67.4	0
67.5	0
67.6	0
67.7	0
67.8	0
67.9	0
68	0
68.1	0
68.2	0
68.3	0
68.4	0
68.5	0
68.6	0
68.7	0
68.8	0
68.9	0
69	0
69.1	0
69.2	0
69.3	0
69.4	0
69.5	0
69.6	0
69.7	0
69.8	0
69.9	0
70	0
70.1	0
70.2	0
70.3	0
70.4	0
70.5	0
70.6	0
70.7	0
70.8	0
70.9	0
71	0
71.1	0
71.2	0
71.3	0
71.4	0
71.5	0
71.6	0
71.7	0
71.8	0
71.9	0
72	0
72.1	0
72.2	0
72.3	0
72.4	0
72.5	0
72.6	0
72.7	0
72.8	0
72.9	0
73	0
73.1	0
73.2	0
73.3	0
73.4	0
73.5	0
73.6	0
73.7	0
73.8	0
73.9	0
74	0
74.1	0
74.2	0
74.3	0
74.4	0
74.5	0
74.6	0
74.7	0
74.8	0
74.9	0
75	0
75.1	0
75.2	0
75.3	0
75.4	0
75.5	0
75.6	0
75.7	0
75.8	0
75.9	0
76	0
76.1	0
76.2	0
76.3	0
76.4	0
76.5	0
76.6	0
76.7	0
76.8	0
76.9	0
77	0
77.1	0
77.2	0
77.3	0
77.4	0
77.5	0
77.6	0
77.7	0
77.8	0
77.9	0
78	0
78.1	0
78.2	0
78.3	0
78.4	0
78.5	0
78.6	0
78.7	0
78.8	0
78.9	0
79	0
79.1	0
79.2	0
79.3	0
79.4	0
79.5	0
79.6	0
79.7	0
79.8	0
79.9	0
80	0
80.1	0
80.2	0
80.3	0
80.4	0
80.5	0
80.6	0
80.7	0
80.8	0
80.9	0
81	0
81.1	0
81.2	0
81.3	0
81.4	0
81.5	0
81.6	0
81.7	0
81.8	0
81.9	0
82	0
82.1	0
82.2	0
82.3	0
82.4	0
82.5	0
82.6	0
82.7	0
82.8	0
82.9	0
83	0
83.1	0
83.2	0
83.3	0
83.4	0
83.5	0
83.6	0
83.7	0
83.8	0
83.9	0
84	0
84.1	0
84.2	0
84.3	0
84.4	0
84.5	0
84.6	0
84.7	0
84.8	0
84.9	0
85	0
85.1	0
85.2	0
85.3	0
85.4	0
85.5	0
85.6	0
85.7	0
85.8	0
85.9	0
86	0
86.1	0
86.2	0
86.3	0
86.4	0
86.5	0
86.6	0
86.7	0
86.8	0
86.9	0
87	0
87.1	0
87.2	0
87.3	0
87.4	0
87.5	0
87.6	0
87.7	0
87.8	0
87.9	0
88	0
88.1	0
88.2	0
88.3	0
88.4	0
88.5	0
88.6	0
88.7	0
88.8	0
88.9	0
89	0
89.1	0
89.2	0
89.3	0
89.4	0
89.5	0
89.6	0
89.7	0
89.8	0
89.9	0
90	0
90.1	0
90.2	0
90.3	0
90.4	0
90.5	0
90.6	0
90.7	0
90.8	0
90.9	0
91	0
91.1	0
91.2	0
91.3	0
91.4	0
91.5	0
91.6	0
91.7	0
91.8	0
91.9	0
92	0
92.1	0
92.2	0
92.3	0
92.4	0
92.5	0
92.6	0
92.7	0
92.8	0
92.9	0
93	0
93.1	0
93.2	0
93.3	0
93.4	0
93.5	0
93.6	0
93.7	0
93.8	0
93.9	0
94	0
94.1	0
94.2	0
94.3	0
94.4	0
94.5	0
94.6	0
94.7	0
94.8	0
94.9	0
95	0
95.1	0
95.2	0
95.3	0
95.4	0
95.5	0
95.6	0
95.7	0
95.8	0
95.9	0
96	0
96.1	0
96.2	0
96.3	0
96.4	0
96.5	0
96.6	0
96.7	0
96.8	0
96.9	0
97	0
97.1	0
97.2	0
97.3	0
97.4	0
97.5	0
97.6	0
97.7	0
97.8	0
97.9	0
98	0
98.1	0
98.2	0
98.3	0
98.4	0
98.5	0
98.6	0
98.7	0
98.8	0
98.9	0
99	0
99.1	0
99.2	0
99.3	0
99.4	0
99.5	0
99.6	0
99.7	0
99.8	0
99.9	0
100	0
100.1	8e-05
100.2	0.00084
100.3	0.00216
100.4	0.00414
100.5	0.0066
100.6	0.00938
100.7	0.01216
100.8	0.01536
100.9	0.01882
101	0.02276
101.1	0.02654
101.2	0.03024
101.3	0.03406
101.4	0.03774
101.5	0.04136
101.6	0.04554
101.7	0.0493
101.8	0.05334
101.9	0.0571
102	0.06098
102.1	0.06462
102.2	0.0683
102.3	0.072
102.4	0.07586
102.5	0.07992
102.6	0.0839
102.7	0.0876
102.8	0.09076
102.9	0.09484
103	0.09868
103.1	0.10208
103.2	0.10548
103.3	0.10892
103.4	0.11226
103.5	0.1162
103.6	0.11954
103.7	0.1232
103.8	0.12678
103.9	0.1307
104	0.1343
104.1	0.138
104.2	0.14108
104.3	0.14512
104.4	0.14828
104.5	0.15172
104.6	0.15526
104.7	0.15852
104.8	0.16174
104.9	0.16496
105	0.16812
105.1	0.17186
105.2	0.17518
105.3	0.1785
105.4	0.18158
105.5	0.18536
105.6	0.1886
105.7	0.19176
105.8	0.1946
105.9	0.19792
106	0.2011
106.1	0.20374
106.2	0.20672
106.3	0.20944
106.4	0.2125
106.5	0.21548
106.6	0.21826
106.7	0.22092
106.8	0.22432
106.9	0.22752
107	0.2305
107.1	0.23354
107.2	0.23634
107.3	0.23976
107.4	0.2422
107.5	0.24524
107.6	0.24834
107.7	0.2515
107.8	0.25482
107.9	0.25758
108	0.26062
108.1	0.26328
108.2	0.26594
108.3	0.2683
108.4	0.2709
108.5	0.27386
108.6	0.27624
108.7	0.27962
108.8	0.28218
108.9	0.28504
109	0.28748
109.1	0.29004
109.2	0.29284
109.3	0.29562
109.4	0.29824
109.5	0.30076
109.6	0.30312
109.7	0.30566
109.8	0.3082
109.9	0.31058
110	0.3131
110.1	0.31578
110.2	0.31844
110.3	0.32094
110.4	0.32298
110.5	0.32548
110.6	0.3276
110.7	0.33008
110.8	0.33254
110.9	0.33492
111	0.33746
111.1	0.33978
111.2	0.3424
111.3	0.34492
111.4	0.34712
111.5	0.34954
111.6	0.3517
111.7	0.35416
111.8	0.35592
111.9	0.35854
112	0.36088
112.1	0.36312
112.2	0.36524
112.3	0.36722
112.4	0.36974
112.5	0.37228
112.6	0.37478
112.7	0.37678
112.8	0.37944
112.9	0.38148
113	0.38378
113.1	0.38596
113.2	0.38822
113.3	0.39016
113.4	0.3922
113.5	0.39464
113.6	0.3971
113.7	0.39916
113.8	0.4012
113.9	0.40318
114	0.40536
114.1	0.40742
114.2	0.4095
114.3	0.41148
114.4	0.4138
114.5	0.41582
114.6	0.41768
114.7	0.4197
114.8	0.42166
114.9	0.42338
115	0.42522
115.1	0.42728
115.2	0.4295
115.3	0.43146
115.4	0.43378
115.5	0.43524
115.6	0.43736
115.7	0.43876
115.8	0.44064
115.9	0.44258
116	0.44464
116.1	0.44628
116.2	0.44812
116.3	0.44996
116.4	0.4512
116.5	0.45282
116.6	0.45464
116.7	0.45672
116.8	0.45864
116.9	0.46052
117	0.46204
117.1	0.4642
117.2	0.46586
117.3	0.46698
117.4	0.46884
117.5	0.47082
117.6	0.47224
117.7	0.47422
117.8	0.4754
117.9	0.47672
118	0.4784
118.1	0.4804
118.2	0.48224
118.3	0.48394
118.4	0.48546
118.5	0.48712
118.6	0.48876
118.7	0.49064
118.8	0.4922
118.9	0.49358
119	0.49534
119.1	0.49692
119.2	0.49858
119.3	0.50056
119.4	0.50234
119.5	0.50366
119.6	0.50512
119.7	0.50708
119.8	0.50842
119.9	0.50988
120	0.51104
120.1	0.51262
120.2	0.51402
120.3	0.51512
120.4	0.51658
120.5	0.51788
120.6	0.51912
120.7	0.52066
120.8	0.5223
120.9	0.52378
121	0.52478
121.1	0.52622
121.2	0.5277
121.3	0.52942
121.4	0.53064
121.5	0.53216
121.6	0.53328
121.7	0.53452
121.8	0.53602
121.9	0.53758
122	0.53874
122.1	0.54
122.2	0.5413
122.3	0.54254
122.4	0.5438
122.5	0.54532
122.6	0.5466
122.7	0.54816
122.8	0.5495
122.9	0.55094
123	0.5521
123.1	0.55374
123.2	0.55528
123.3	0.5568
123.4	0.55806
123.5	0.55924
123.6	0.56082
123.7	0.56218
123.8	0.56342
123.9	0.56472
124	0.56606
124.1	0.56714
124.2	0.5684
124.3	0.56938
124.4	0.57044
124.5	0.57154
124.6	0.5726
124.7	0.5738
124.8	0.57496
124.9	0.5763
125	0.57748
125.1	0.579
125.2	0.57988
125.3	0.58064
125.4	0.58178
125.5	0.58272
125.6	0.5838
125.7	0.58488
125.8	0.58578
125.9	0.58658
126	0.58736
126.1	0.5886
126.2	0.58966
126.3	0.59066
126.4	0.59164
126.5	0.59272
126.6	0.59376
126.7	0.59474
126.8	0.5957
126.9	0.59694
127	0.59844
127.1	0.59964
127.2	0.60088
127.3	0.60188
127.4	0.60314
127.5	0.60434
127.6	0.60528
127.7	0.60608
127.8	0.6069
127.9	0.6082
128	0.60894
128.1	0.60986
128.2	0.61102
128.3	0.61228
128.4	0.61324
128.5	0.61382
128.6	0.61446
128.7	0.61572
128.8	0.61682
128.9	0.61786
129	0.61884
129.1	0.61974
129.2	0.62048
129.3	0.62144
129.4	0.62228
129.5	0.62334
129.6	0.62438
129.7	0.62512
129.8	0.62582
129.9	0.62648
130	0.62734
130.1	0.62844
130.2	0.62904
130.3	0.62988
130.4	0.63088
130.5	0.63208
130.6	0.6332
130.7	0.63398
130.8	0.63486
130.9	0.6357
131	0.6365
131.1	0.63748
131.2	0.6383
131.3	0.63916
131.4	0.63966
131.5	0.64084
131.6	0.64158
131.7	0.64228
131.8	0.64302
131.9	0.6435
132	0.64422
132.1	0.64508
132.2	0.64622
132.3	0.64694
132.4	0.64776
132.5	0.64878
132.6	0.64986
132.7	0.65062
132.8	0.65158
132.9	0.65258
133	0.65344
133.1	0.65434
133.2	0.65544
133.3	0.65612
133.4	0.65662
133.5	0.65734
133.6	0.65812
133.7	0.65908
133.8	0.6597
133.9	0.66044
134	0.66084
134.1	0.66158
134.2	0.66246
134.3	0.66328
134.4	0.66406
134.5	0.66472
134.6	0.66528
134.7	0.666
134.8	0.66722
134.9	0.66794
135	0.6685
135.1	0.66926
135.2	0.66972
135.3	0.67052
135.4	0.67128
135.5	0.67196
135.6	0.67276
135.7	0.67366
135.8	0.67454
135.9	0.67512
136	0.67558
136.1	0.67622
136.2	0.6769
136.3	0.67782
136.4	0.6787
136.5	0.67924
136.6	0.67942
136.7	0.67998
136.8	0.68092
136.9	0.68154
137	0.68188
137.1	0.68216
137.2	0.68312
137.3	0.68366
137.4	0.68382
137.5	0.68422
137.6	0.68448
137.7	0.68536
137.8	0.6857
137.9	0.68662
138	0.6875
138.1	0.68822
138.2	0.6886
138.3	0.6894
138.4	0.69
138.5	0.6905
138.6	0.69108
138.7	0.6917
138.8	0.69242
138.9	0.69308
139	0.69364
139.1	0.69398
139.2	0.69462
139.3	0.69526
139.4	0.69586
139.5	0.69616
139.6	0.69658
139.7	0.69746
139.8	0.6979
139.9	0.69864
140	0.6991
140.1	0.69956
140.2	0.70024
140.3	0.70072
140.4	0.7009
140.5	0.70122
140.6	0.7019
140.7	0.70238
140.8	0.70294
140.9	0.70352
141	0.70402
141.1	0.70474
141.2	0.70478
141.3	0.70548
141.4	0.70606
141.5	0.70664
141.6	0.70718
141.7	0.7075
141.8	0.70778
141.9	0.70852
142	0.70898
142.1	0.7092
142.2	0.70982
142.3	0.71086
142.4	0.7114
142.5	0.71146
142.6	0.71208
142.7	0.71226
142.8	0.71294
142.9	0.71314
143	0.71388
143.1	0.71428
143.2	0.71472
143.3	0.71502
143.4	0.71554
143.5	0.71636
143.6	0.71688
143.7	0.7176
143.8	0.71814
143.9	0.71886
144	0.7195
144.1	0.71976
144.2	0.72014
144.3	0.72064
144.4	0.72092
144.5	0.72132
144.6	0.72182
144.7	0.72262
144.8	0.72296
144.9	0.72344
145	0.72446
145.1	0.72454
145.2	0.72492
145.3	0.72534
145.4	0.72606
145.5	0.72652
145.6	0.72712
145.7	0.72742
145.8	0.72768
145.9	0.72798
146	0.72844
146.1	0.7289
146.2	0.72938
146.3	0.72974
146.4	0.73026
146.5	0.73052
146.6	0.73078
146.7	0.7311
146.8	0.73174
146.9	0.73206
147	0.73222
147.1	0.73232
147.2	0.73268
147.3	0.73312
147.4	0.73386
147.5	0.73448
147.6	0.73458
147.7	0.73488
147.8	0.73522
147.9	0.73584
148	0.73624
148.1	0.73686
148.2	0.73728
148.3	0.73728
148.4	0.73764
148.5	0.73824
148.6	0.73838
148.7	0.73834
148.8	0.73892
148.9	0.73942
149	0.73956
149.1	0.73968
149.2	0.74026
149.3	0.74038
149.4	0.74018
149.5	0.74028
149.6	0.7407
149.7	0.74086
149.8	0.74074
149.9	0.74094
150	0.7414
150.1	0.7419
150.2	0.74196
150.3	0.74214
150.4	0.74252
150.5	0.74284
150.6	0.74282
150.7	0.74336
150.8	0.74362
150.9	0.74416
151	0.74454
151.1	0.74478
151.2	0.74546
151.3	0.74584
151.4	0.74616
151.5	0.7465
151.6	0.74676
151.7	0.7469
151.8	0.74758
151.9	0.74742
152	0.74756
152.1	0.74776
152.2	0.74808
152.3	0.74844
152.4	0.7488
152.5	0.74884
152.6	0.74918
152.7	0.74988
152.8	0.75014
152.9	0.75072
153	0.75112
153.1	0.75114
153.2	0.75112
153.3	0.75142
153.4	0.7516
153.5	0.75184
153.6	0.75224
153.7	0.7522
153.8	0.75236
153.9	0.75266
154	0.7527
154.1	0.75296
154.2	0.75316
154.3	0.75342
154.4	0.75366
154.5	0.75378
154.6	0.7537
154.7	0.75378
154.8	0.7544
154.9	0.75478
155	0.75466
155.1	0.7546
155.2	0.75482
155.3	0.75494
155.4	0.7551
155.5	0.75546
155.6	0.75582
155.7	0.75592
155.8	0.75636
155.9	0.75672
156	0.75706
156.1	0.75722
156.2	0.75748
156.3	0.75806
156.4	0.75826
156.5	0.75864
156.6	0.75886
156.7	0.75882
156.8	0.75924
156.9	0.75956
157	0.7599
157.1	0.7603
157.2	0.76062
157.3	0.76108
157.4	0.7614
157.5	0.76126
157.6	0.76152
157.7	0.76164
157.8	0.7621
157.9	0.76252
158	0.76256
158.1	0.76272
158.2	0.76332
158.3	0.76378
158.4	0.76402
158.5	0.7645
158.6	0.76482
158.7	0.76516
158.8	0.7653
158.9	0.76532
159	0.76574
159.1	0.76618
159.2	0.76656
159.3	0.76692
159.4	0.7672
159.5	0.76728
159.6	0.76734
159.7	0.76782
159.8	0.76786
159.9	0.76818
160	0.7682
160.1	0.7685
160.2	0.76858
160.3	0.76874
160.4	0.76892
160.5	0.76882
160.6	0.76914
160.7	0.76932
160.8	0.76946
160.9	0.77002
161	0.77048
161.1	0.77066
161.2	0.7708
161.3	0.77084
161.4	0.77106
161.5	0.77158
161.6	0.77176
161.7	0.77196
161.8	0.77228
161.9	0.77238
162	0.77246
162.1	0.77272
162.2	0.7727
162.3	0.77276
162.4	0.77276
162.5	0.77328
162.6	0.77352
162.7	0.77382
162.8	0.77378
162.9	0.77404
163	0.77424
163.1	0.77436
163.2	0.77456
163.3	0.77476
163.4	0.77504
163.5	0.77542
163.6	0.77574
163.7	0.7757
163.8	0.77586
163.9	0.77614
164	0.77634
164.1	0.77656
164.2	0.77696
164.3	0.77714
164.4	0.77734
164.5	0.77744
164.6	0.77734
164.7	0.77754
164.8	0.77724
164.9	0.7772
165	0.7773
165.1	0.77714
165.2	0.77716
165.3	0.77736
165.4	0.7779
165.5	0.77802
165.6	0.77804
165.7	0.7783
165.8	0.77826
165.9	0.7784
166	0.77874
166.1	0.77892
166.2	0.77902
166.3	0.77902
166.4	0.77906
166.5	0.7788
166.6	0.77876
166.7	0.77888
166.8	0.77882
166.9	0.77886
167	0.77926
167.1	0.77932
167.2	0.7794
167.3	0.77972
167.4	0.7798
167.5	0.7802
167.6	0.78018
167.7	0.78046
167.8	0.78036
167.9	0.78062
168	0.78064
168.1	0.7809
168.2	0.78092
168.3	0.78116
168.4	0.78138
168.5	0.78136
168.6	0.78158
168.7	0.78224
168.8	0.782
168.9	0.78216
169	0.78216
169.1	0.78218
169.2	0.78198
169.3	0.78208
169.4	0.78212
169.5	0.78208
169.6	0.78226
169.7	0.78236
169.8	0.7822
169.9	0.78214
170	0.78212
170.1	0.78196
170.2	0.78194
170.3	0.78206
170.4	0.7824
170.5	0.78256
170.6	0.78244
170.7	0.7825
170.8	0.78242
170.9	0.7824
171	0.78262
171.1	0.78294
171.2	0.78304
171.3	0.78368
171.4	0.78398
171.5	0.78394
171.6	0.784
171.7	0.784
171.8	0.78422
171.9	0.78452
172	0.78466
172.1	0.78478
172.2	0.78482
172.3	0.78484
172.4	0.78508
172.5	0.78486
172.6	0.78504
172.7	0.78512
172.8	0.78496
172.9	0.78552
173	0.78566
173.1	0.78588
173.2	0.7862
173.3	0.78648
173.4	0.78664
173.5	0.78652
173.6	0.78632
173.7	0.78652
173.8	0.78642
173.9	0.78674
174	0.78696
174.1	0.78692
174.2	0.78706
174.3	0.78734
174.4	0.78738
174.5	0.78758
174.6	0.78758
174.7	0.7879
174.8	0.78794
174.9	0.78794
175	0.78804
175.1	0.78804
175.2	0.78786
175.3	0.78814
175.4	0.7881
175.5	0.78848
175.6	0.78838
175.7	0.78838
175.8	0.7884
175.9	0.7884
176	0.78836
176.1	0.78818
176.2	0.78794
176.3	0.78784
176.4	0.788
176.5	0.78804
176.6	0.7884
176.7	0.7882
176.8	0.7885
176.9	0.78894
177	0.78898
177.1	0.78912
177.2	0.78934
177.3	0.7894
177.4	0.78948
177.5	0.7896
177.6	0.78982
177.7	0.79012
177.8	0.78994
177.9	0.78998
178	0.7901
178.1	0.79006
178.2	0.79018
178.3	0.79042
178.4	0.79094
178.5	0.79108
178.6	0.79112
178.7	0.79098
178.8	0.7911
178.9	0.7909
179	0.79096
179.1	0.7913
179.2	0.79114
179.3	0.79112
179.4	0.79096
179.5	0.79088
179.6	0.79114
179.7	0.79116
179.8	0.79148
179.9	0.7917
180	0.79146
180.1	0.79122
180.2	0.79142
180.3	0.7914
180.4	0.7915
180.5	0.79154
180.6	0.79138
180.7	0.7917
180.8	0.79168
180.9	0.79182
181	0.79208
181.1	0.79204
181.2	0.79214
181.3	0.79212
181.4	0.7924
181.5	0.79224
181.6	0.79248
181.7	0.79256
181.8	0.79238
181.9	0.79238
182	0.79236
182.1	0.79248
182.2	0.79274
182.3	0.79258
182.4	0.79254
182.5	0.79272
182.6	0.79264
182.7	0.79268
182.8	0.79268
182.9	0.79266
183	0.7929
183.1	0.79288
183.2	0.79268
183.3	0.79278
183.4	0.79282
183.5	0.79314
183.6	0.79322
183.7	0.79336
183.8	0.79336
183.9	0.79336
184	0.7932
184.1	0.79332
184.2	0.79346
184.3	0.79332
184.4	0.79322
184.5	0.79294
184.6	0.79318
184.7	0.79344
184.8	0.79352
184.9	0.79332
185	0.7937
185.1	0.79356
185.2	0.79394
185.3	0.79412
185.4	0.79422
185.5	0.79406
185.6	0.79428
185.7	0.79402
185.8	0.79376
185.9	0.79412
186	0.79414
186.1	0.79384
186.2	0.7939
186.3	0.79364
186.4	0.79364
186.5	0.79346
186.6	0.79356
186.7	0.79354
186.8	0.79356
186.9	0.79364
187	0.79402
187.1	0.79436
187.2	0.7946
187.3	0.7947
187.4	0.79472
187.5	0.79526
187.6	0.79516
187.7	0.79532
187.8	0.79536
187.9	0.79528
188	0.79508
188.1	0.79512
188.2	0.79534
188.3	0.79538
188.4	0.79526
188.5	0.79546
188.6	0.79538
188.7	0.79518
188.8	0.7949
188.9	0.79498
189	0.79522
189.1	0.79504
189.2	0.79514
189.3	0.79526
189.4	0.79536
189.5	0.79528
189.6	0.79544
189.7	0.7954
189.8	0.7956
189.9	0.79604
190	0.79628
190.1	0.79614
190.2	0.79612
190.3	0.7963
190.4	0.79634
190.5	0.79654
190.6	0.79702
190.7	0.79708
190.8	0.79718
190.9	0.79732
191	0.79738
191.1	0.7975
191.2	0.7976
191.3	0.79792
191.4	0.79786
191.5	0.79788
191.6	0.79804
191.7	0.79808
191.8	0.7982
191.9	0.79822
192	0.79836
192.1	0.79828
192.2	0.79838
192.3	0.79838
192.4	0.79848
192.5	0.79836
192.6	0.7985
192.7	0.79848
192.8	0.79858
192.9	0.79872
193	0.79866
193.1	0.79896
193.2	0.79906
193.3	0.79912
193.4	0.79914
193.5	0.79896
193.6	0.7992
193.7	0.79906
193.8	0.79928
193.9	0.7993
194	0.79922
194.1	0.79926
194.2	0.7993
194.3	0.79942
194.4	0.79958
194.5	0.79948
194.6	0.79944
194.7	0.7995
194.8	0.79952
194.9	0.7994
195	0.79972
195.1	0.7996
195.2	0.7999
195.3	0.80004
195.4	0.79998
195.5	0.80006
195.6	0.80026
195.7	0.8002
195.8	0.80048
195.9	0.80058
196	0.80048
196.1	0.80052
196.2	0.8005
196.3	0.8008
196.4	0.80072
196.5	0.80084
196.6	0.80108
196.7	0.80118
196.8	0.80122
196.9	0.80138
197	0.80134
197.1	0.80128
197.2	0.80176
197.3	0.8017
197.4	0.80158
197.5	0.80146
197.6	0.80144
197.7	0.80156
197.8	0.80154
197.9	0.80146
198	0.80134
198.1	0.80118
198.2	0.80112
198.3	0.80116
198.4	0.80128
198.5	0.80128
198.6	0.80136
198.7	0.80112
198.8	0.80108
198.9	0.80122
199	0.80132
199.1	0.80116
199.2	0.80106
199.3	0.80078
199.4	0.80082
199.5	0.8008
199.6	0.80062
199.7	0.80044
199.8	0.80054
199.9	0.80056
200	0.8011
[truncated: 14,000 more rows]
