# Supplementary material for: Bayesian inference of kinetic schemes for ion channels by Kalman filtering
Source: eLife journal article supplement (doi:10.7554/elife.62714), 2022-05-04
Supplement: fig4-data5 [file 1_Sim_N_80_Fluor_MW.xlsx]

## Sheet: 4 M
0.1	0
0.2	0
0.3	0
0.4	0
0.5	0
0.6	0
0.7	0
0.8	0
0.9	0
1	0
1.1	0
1.2	0
1.3	0
1.4	0
1.5	0
1.6	0
1.7	0
1.8	0
1.9	0
2	0
2.1	0
2.2	0
2.3	0
2.4	0
2.5	0
2.6	0
2.7	0
2.8	0
2.9	0
3	0
3.1	0
3.2	0
3.3	0
3.4	0
3.5	0
3.6	0
3.7	0
3.8	0
3.9	0
4	0
4.1	0
4.2	0
4.3	0
4.4	0
4.5	0
4.6	0
4.7	0
4.8	0
4.9	0
5	0
5.1	0
5.2	0
5.3	0
5.4	0
5.5	0
5.6	0
5.7	0
5.8	0
5.9	0
6	0
6.1	0
6.2	0
6.3	0
6.4	0
6.5	0
6.6	0
6.7	0
6.8	0
6.9	0
7	0
7.1	0
7.2	0
7.3	0
7.4	0
7.5	0
7.6	0
7.7	0
7.8	0
7.9	0
8	0
8.1	0
8.2	0
8.3	0
8.4	0
8.5	0
8.6	0
8.7	0
8.8	0
8.9	0
9	0
9.1	0
9.2	0
9.3	0
9.4	0
9.5	0
9.6	0
9.7	0
9.8	0
9.9	0
10	0
10.1	0
10.2	0
10.3	0
10.4	0
10.5	0
10.6	0
10.7	0
10.8	0
10.9	0
11	0
11.1	0
11.2	0
11.3	0
11.4	0
11.5	0
11.6	0
11.7	0
11.8	0
11.9	0
12	0
12.1	0
12.2	0
12.3	0
12.4	0
12.5	0
12.6	0
12.7	0
12.8	0
12.9	0
13	0
13.1	0
13.2	0
13.3	0
13.4	0
13.5	0
13.6	0
13.7	0
13.8	0
13.9	0
14	0
14.1	0
14.2	0
14.3	0
14.4	0
14.5	0
14.6	0
14.7	0
14.8	0
14.9	0
15	0
15.1	0
15.2	0
15.3	0
15.4	0
15.5	0
15.6	0
15.7	0
15.8	0
15.9	0
16	0
16.1	0
16.2	0
16.3	0
16.4	0
16.5	0
16.6	0
16.7	0
16.8	0
16.9	0
17	0
17.1	0
17.2	0
17.3	0
17.4	0
17.5	0
17.6	0
17.7	0
17.8	0
17.9	0
18	0
18.1	0
18.2	0
18.3	0
18.4	0
18.5	0
18.6	0
18.7	0
18.8	0
18.9	0
19	0
19.1	0
19.2	0
19.3	0
19.4	0
19.5	0
19.6	0
19.7	0
19.8	0
19.9	0
20	0
20.1	0
20.2	0
20.3	0
20.4	0
20.5	0
20.6	0
20.7	0
20.8	0
20.9	0
21	0
21.1	0
21.2	0
21.3	0
21.4	0
21.5	0
21.6	0
21.7	0
21.8	0
21.9	0
22	0
22.1	0
22.2	0
22.3	0
22.4	0
22.5	0
22.6	0
22.7	0
22.8	0
22.9	0
23	0
23.1	0
23.2	0
23.3	0
23.4	0
23.5	0
23.6	0
23.7	0
23.8	0
23.9	0
24	0
24.1	0
24.2	0
24.3	0
24.4	0
24.5	0
24.6	0
24.7	0
24.8	0
24.9	0
25	0
25.1	0
25.2	0
25.3	0
25.4	0
25.5	0
25.6	0
25.7	0
25.8	0
25.9	0
26	0
26.1	0
26.2	0
26.3	0
26.4	0
26.5	0
26.6	0
26.7	0
26.8	0
26.9	0
27	0
27.1	0
27.2	0
27.3	0
27.4	0
27.5	0
27.6	0
27.7	0
27.8	0
27.9	0
28	0
28.1	0
28.2	0
28.3	0
28.4	0
28.5	0
28.6	0
28.7	0
28.8	0
28.9	0
29	0
29.1	0
29.2	0
29.3	0
29.4	0
29.5	0
29.6	0
29.7	0
29.8	0
29.9	0
30	0
30.1	0
30.2	0
30.3	0
30.4	0
30.5	0
30.6	0
30.7	0
30.8	0
30.9	0
31	0
31.1	0
31.2	0
31.3	0
31.4	0
31.5	0
31.6	0
31.7	0
31.8	0
31.9	0
32	0
32.1	0
32.2	0
32.3	0
32.4	0
32.5	0
32.6	0
32.7	0
32.8	0
32.9	0
33	0
33.1	0
33.2	0
33.3	0
33.4	0
33.5	0
33.6	0
33.7	0
33.8	0
33.9	0
34	0
34.1	0
34.2	0
34.3	0
34.4	0
34.5	0
34.6	0
34.7	0
34.8	0
34.9	0
35	0
35.1	0
35.2	0
35.3	0
35.4	0
35.5	0
35.6	0
35.7	0
35.8	0
35.9	0
36	0
36.1	0
36.2	0
36.3	0
36.4	0
36.5	0
36.6	0
36.7	0
36.8	0
36.9	0
37	0
37.1	0
37.2	0
37.3	0
37.4	0
37.5	0
37.6	0
37.7	0
37.8	0
37.9	0
38	0
38.1	0
38.2	0
38.3	0
38.4	0
38.5	0
38.6	0
38.7	0
38.8	0
38.9	0
39	0
39.1	0
39.2	0
39.3	0
39.4	0
39.5	0
39.6	0
39.7	0
39.8	0
39.9	0
40	0
40.1	0
40.2	0
40.3	0
40.4	0
40.5	0
40.6	0
40.7	0
40.8	0
40.9	0
41	0
41.1	0
41.2	0
41.3	0
41.4	0
41.5	0
41.6	0
41.7	0
41.8	0
41.9	0
42	0
42.1	0
42.2	0
42.3	0
42.4	0
42.5	0
42.6	0
42.7	0
42.8	0
42.9	0
43	0
43.1	0
43.2	0
43.3	0
43.4	0
43.5	0
43.6	0
43.7	0
43.8	0
43.9	0
44	0
44.1	0
44.2	0
44.3	0
44.4	0
44.5	0
44.6	0
44.7	0
44.8	0
44.9	0
45	0
45.1	0
45.2	0
45.3	0
45.4	0
45.5	0
45.6	0
45.7	0
45.8	0
45.9	0
46	0
46.1	0
46.2	0
46.3	0
46.4	0
46.5	0
46.6	0
46.7	0
46.8	0
46.9	0
47	0
47.1	0
47.2	0
47.3	0
47.4	0
47.5	0
47.6	0
47.7	0
47.8	0
47.9	0
48	0
48.1	0
48.2	0
48.3	0
48.4	0
48.5	0
48.6	0
48.7	0
48.8	0
48.9	0
49	0
49.1	0
49.2	0
49.3	0
49.4	0
49.5	0
49.6	0
49.7	0
49.8	0
49.9	0
50	0
50.1	0
50.2	0
50.3	0
50.4	0
50.5	0
50.6	0
50.7	0
50.8	0
50.9	0
51	0
51.1	0
51.2	0
51.3	0
51.4	0
51.5	0
51.6	0
51.7	0
51.8	0
51.9	0
52	0
52.1	0
52.2	0
52.3	0
52.4	0
52.5	0
52.6	0
52.7	0
52.8	0
52.9	0
53	0
53.1	0
53.2	0
53.3	0
53.4	0
53.5	0
53.6	0
53.7	0
53.8	0
53.9	0
54	0
54.1	0
54.2	0
54.3	0
54.4	0
54.5	0
54.6	0
54.7	0
54.8	0
54.9	0
55	0
55.1	0
55.2	0
55.3	0
55.4	0
55.5	0
55.6	0
55.7	0
55.8	0
55.9	0
56	0
56.1	0
56.2	0
56.3	0
56.4	0
56.5	0
56.6	0
56.7	0
56.8	0
56.9	0
57	0
57.1	0
57.2	0
57.3	0
57.4	0
57.5	0
57.6	0
57.7	0
57.8	0
57.9	0
58	0
58.1	0
58.2	0
58.3	0
58.4	0
58.5	0
58.6	0
58.7	0
58.8	0
58.9	0
59	0
59.1	0
59.2	0
59.3	0
59.4	0
59.5	0
59.6	0
59.7	0
59.8	0
59.9	0
60	0
60.1	0
60.2	0
60.3	0
60.4	0
60.5	0
60.6	0
60.7	0
60.8	0
60.9	0
61	0
61.1	0
61.2	0
61.3	0
61.4	0
61.5	0
61.6	0
61.7	0
61.8	0
61.9	0
62	0
62.1	0
62.2	0
62.3	0
62.4	0
62.5	0
62.6	0
62.7	0
62.8	0
62.9	0
63	0
63.1	0
63.2	0
63.3	0
63.4	0
63.5	0
63.6	0
63.7	0
63.8	0
63.9	0
64	0
64.1	0
64.2	0
64.3	0
64.4	0
64.5	0
64.6	0
64.7	0
64.8	0
64.9	0
65	0
65.1	0
65.2	0
65.3	0
65.4	0
65.5	0
65.6	0
65.7	0
65.8	0
65.9	0
66	0
66.1	0
66.2	0
66.3	0
66.4	0
66.5	0
66.6	0
66.7	0
66.8	0
66.9	0
67	0
67.1	0
67.2	0
67.3	0
67.4	0
67.5	0
67.6	0
67.7	0
67.8	0
67.9	0
68	0
68.1	0
68.2	0
68.3	0
68.4	0
68.5	0
68.6	0
68.7	0
68.8	0
68.9	0
69	0
69.1	0
69.2	0
69.3	0
69.4	0
69.5	0
69.6	0
69.7	0
69.8	0
69.9	0
70	0
70.1	0
70.2	0
70.3	0
70.4	0
70.5	0
70.6	0
70.7	0
70.8	0
70.9	0
71	0
71.1	0
71.2	0
71.3	0
71.4	0
71.5	0
71.6	0
71.7	0
71.8	0
71.9	0
72	0
72.1	0
72.2	0
72.3	0
72.4	0
72.5	0
72.6	0
72.7	0
72.8	0
72.9	0
73	0
73.1	0
73.2	0
73.3	0
73.4	0
73.5	0
73.6	0
73.7	0
73.8	0
73.9	0
74	0
74.1	0
74.2	0
74.3	0
74.4	0
74.5	0
74.6	0
74.7	0
74.8	0
74.9	0
75	0
75.1	0
75.2	0
75.3	0
75.4	0
75.5	0
75.6	0
75.7	0
75.8	0
75.9	0
76	0
76.1	0
76.2	0
76.3	0
76.4	0
76.5	0
76.6	0
76.7	0
76.8	0
76.9	0
77	0
77.1	0
77.2	0
77.3	0
77.4	0
77.5	0
77.6	0
77.7	0
77.8	0
77.9	0
78	0
78.1	0
78.2	0
78.3	0
78.4	0
78.5	0
78.6	0
78.7	0
78.8	0
78.9	0
79	0
79.1	0
79.2	0
79.3	0
79.4	0
79.5	0
79.6	0
79.7	0
79.8	0
79.9	0
80	0
80.1	0
80.2	0
80.3	0
80.4	0
80.5	0
80.6	0
80.7	0
80.8	0
80.9	0
81	0
81.1	0
81.2	0
81.3	0
81.4	0
81.5	0
81.6	0
81.7	0
81.8	0
81.9	0
82	0
82.1	0
82.2	0
82.3	0
82.4	0
82.5	0
82.6	0
82.7	0
82.8	0
82.9	0
83	0
83.1	0
83.2	0
83.3	0
83.4	0
83.5	0
83.6	0
83.7	0
83.8	0
83.9	0
84	0
84.1	0
84.2	0
84.3	0
84.4	0
84.5	0
84.6	0
84.7	0
84.8	0
84.9	0
85	0
85.1	0
85.2	0
85.3	0
85.4	0
85.5	0
85.6	0
85.7	0
85.8	0
85.9	0
86	0
86.1	0
86.2	0
86.3	0
86.4	0
86.5	0
86.6	0
86.7	0
86.8	0
86.9	0
87	0
87.1	0
87.2	0
87.3	0
87.4	0
87.5	0
87.6	0
87.7	0
87.8	0
87.9	0
88	0
88.1	0
88.2	0
88.3	0
88.4	0
88.5	0
88.6	0
88.7	0
88.8	0
88.9	0
89	0
89.1	0
89.2	0
89.3	0
89.4	0
89.5	0
89.6	0
89.7	0
89.8	0
89.9	0
90	0
90.1	0
90.2	0
90.3	0
90.4	0
90.5	0
90.6	0
90.7	0
90.8	0
90.9	0
91	0
91.1	0
91.2	0
91.3	0
91.4	0
91.5	0
91.6	0
91.7	0
91.8	0
91.9	0
92	0
92.1	0
92.2	0
92.3	0
92.4	0
92.5	0
92.6	0
92.7	0
92.8	0
92.9	0
93	0
93.1	0
93.2	0
93.3	0
93.4	0
93.5	0
93.6	0
93.7	0
93.8	0
93.9	0
94	0
94.1	0
94.2	0
94.3	0
94.4	0
94.5	0
94.6	0
94.7	0
94.8	0
94.9	0
95	0
95.1	0
95.2	0
95.3	0
95.4	0
95.5	0
95.6	0
95.7	0
95.8	0
95.9	0
96	0
96.1	0
96.2	0
96.3	0
96.4	0
96.5	0
96.6	0
96.7	0
96.8	0
96.9	0
97	0
97.1	0
97.2	0
97.3	0
97.4	0
97.5	0
97.6	0
97.7	0
97.8	0
97.9	0
98	0
98.1	0
98.2	0
98.3	0
98.4	0
98.5	0
98.6	0
98.7	0
98.8	0
98.9	0
99	0
99.1	0
99.2	0
99.3	0
99.4	0
99.5	0
99.6	0
99.7	0
99.8	0
99.9	0
100	0
100.1	0.20625
100.2	0.3625
100.3	0.46875
100.4	0.51875
100.5	0.55625
100.6	0.56875
100.7	0.63125
100.8	0.675
100.9	0.725
101	0.73125
101.1	0.7375
101.2	0.75
101.3	0.7625
101.4	0.7875
101.5	0.79375
101.6	0.8
101.7	0.80625
101.8	0.84375
101.9	0.85
102	0.85625
102.1	0.85625
102.2	0.86875
102.3	0.88125
102.4	0.86875
102.5	0.88125
102.6	0.875
102.7	0.8625
102.8	0.86875
102.9	0.85625
103	0.85625
103.1	0.8625
103.2	0.85625
103.3	0.875
103.4	0.85625
103.5	0.8375
103.6	0.8625
103.7	0.86875
103.8	0.8375
103.9	0.8375
104	0.85
104.1	0.85625
104.2	0.84375
104.3	0.8625
104.4	0.86875
104.5	0.88125
104.6	0.8625
104.7	0.85625
104.8	0.83125
104.9	0.80625
105	0.81875
105.1	0.8375
105.2	0.83125
105.3	0.8375
105.4	0.825
105.5	0.81875
105.6	0.83125
105.7	0.83125
105.8	0.84375
105.9	0.85625
106	0.84375
106.1	0.875
106.2	0.8625
106.3	0.86875
106.4	0.875
106.5	0.8875
106.6	0.8875
106.7	0.88125
106.8	0.86875
106.9	0.875
107	0.89375
107.1	0.9
107.2	0.89375
107.3	0.9
107.4	0.8875
107.5	0.9
107.6	0.91875
107.7	0.9125
107.8	0.89375
107.9	0.875
108	0.875
108.1	0.8625
108.2	0.8625
108.3	0.85
108.4	0.85
108.5	0.8375
108.6	0.84375
108.7	0.825
108.8	0.8375
108.9	0.84375
109	0.825
109.1	0.83125
109.2	0.8375
109.3	0.8625
109.4	0.85625
109.5	0.85
109.6	0.84375
109.7	0.8375
109.8	0.8375
109.9	0.84375
110	0.84375
110.1	0.8375
110.2	0.85625
110.3	0.85625
110.4	0.86875
110.5	0.86875
110.6	0.8625
110.7	0.8625
110.8	0.86875
110.9	0.8875
111	0.89375
111.1	0.9
111.2	0.9125
111.3	0.9
111.4	0.9
111.5	0.9
111.6	0.8875
111.7	0.86875
111.8	0.875
111.9	0.88125
112	0.8875
112.1	0.86875
112.2	0.85625
112.3	0.8625
112.4	0.85625
112.5	0.86875
112.6	0.85625
112.7	0.85625
112.8	0.85625
112.9	0.84375
113	0.85
113.1	0.8625
113.2	0.8875
113.3	0.89375
113.4	0.88125
113.5	0.86875
113.6	0.875
113.7	0.89375
113.8	0.89375
113.9	0.9
114	0.8875
114.1	0.91875
114.2	0.9125
114.3	0.9125
114.4	0.90625
114.5	0.89375
114.6	0.88125
114.7	0.9
114.8	0.9
114.9	0.90625
115	0.9
115.1	0.89375
115.2	0.90625
115.3	0.9125
115.4	0.91875
115.5	0.93125
115.6	0.93125
115.7	0.925
115.8	0.9125
115.9	0.9125
116	0.9
116.1	0.8875
116.2	0.88125
116.3	0.88125
116.4	0.88125
116.5	0.88125
116.6	0.89375
116.7	0.9
116.8	0.9
116.9	0.9
117	0.9125
117.1	0.9125
117.2	0.91875
117.3	0.925
117.4	0.93125
117.5	0.9375
117.6	0.9375
117.7	0.9125
117.8	0.9125
117.9	0.9125
118	0.9375
118.1	0.9
118.2	0.9
118.3	0.91875
118.4	0.91875
118.5	0.93125
118.6	0.9125
118.7	0.91875
118.8	0.91875
118.9	0.91875
119	0.9
119.1	0.8875
119.2	0.9
119.3	0.925
119.4	0.93125
119.5	0.91875
119.6	0.9125
119.7	0.90625
119.8	0.91875
119.9	0.9
120	0.90625
120.1	0.9125
120.2	0.9
120.3	0.90625
120.4	0.9
120.5	0.925
120.6	0.9125
120.7	0.89375
120.8	0.90625
120.9	0.9
121	0.925
121.1	0.9125
121.2	0.91875
121.3	0.9375
121.4	0.93125
121.5	0.925
121.6	0.9375
121.7	0.94375
121.8	0.94375
121.9	0.94375
122	0.9375
122.1	0.9375
122.2	0.925
122.3	0.93125
122.4	0.91875
122.5	0.91875
122.6	0.925
122.7	0.91875
122.8	0.925
122.9	0.925
123	0.93125
123.1	0.925
123.2	0.925
123.3	0.9125
123.4	0.9125
123.5	0.925
123.6	0.90625
123.7	0.90625
123.8	0.875
123.9	0.88125
124	0.88125
124.1	0.9125
124.2	0.9125
124.3	0.9125
124.4	0.91875
124.5	0.925
124.6	0.925
124.7	0.93125
124.8	0.9375
124.9	0.9625
125	0.95625
125.1	0.9625
125.2	0.93125
125.3	0.925
125.4	0.91875
125.5	0.91875
125.6	0.90625
125.7	0.90625
125.8	0.9
125.9	0.90625
126	0.93125
126.1	0.94375
126.2	0.9375
126.3	0.94375
126.4	0.93125
126.5	0.9375
126.6	0.9375
126.7	0.9375
126.8	0.93125
126.9	0.90625
127	0.9125
127.1	0.90625
127.2	0.9
127.3	0.8875
127.4	0.88125
127.5	0.8875
127.6	0.88125
127.7	0.88125
127.8	0.89375
127.9	0.89375
128	0.9
128.1	0.91875
128.2	0.91875
128.3	0.93125
128.4	0.925
128.5	0.91875
128.6	0.9375
128.7	0.94375
128.8	0.9375
128.9	0.93125
129	0.93125
129.1	0.93125
129.2	0.93125
129.3	0.925
129.4	0.91875
129.5	0.925
129.6	0.91875
129.7	0.925
129.8	0.9375
129.9	0.9375
130	0.9375
130.1	0.9375
130.2	0.925
130.3	0.9375
130.4	0.93125
130.5	0.93125
130.6	0.91875
130.7	0.9125
130.8	0.91875
130.9	0.93125
131	0.9125
131.1	0.91875
131.2	0.9375
131.3	0.9375
131.4	0.925
131.5	0.89375
131.6	0.91875
131.7	0.9125
131.8	0.9125
131.9	0.91875
132	0.91875
132.1	0.91875
132.2	0.9125
132.3	0.925
132.4	0.93125
132.5	0.95
132.6	0.9375
132.7	0.93125
132.8	0.94375
132.9	0.95625
133	0.9625
133.1	0.95625
133.2	0.94375
133.3	0.95
133.4	0.95
133.5	0.95
133.6	0.94375
133.7	0.9625
133.8	0.95
133.9	0.9375
134	0.95
134.1	0.94375
134.2	0.94375
134.3	0.95
134.4	0.95
134.5	0.95
134.6	0.95
134.7	0.95
134.8	0.94375
134.9	0.9375
135	0.9375
135.1	0.925
135.2	0.925
135.3	0.93125
135.4	0.91875
135.5	0.93125
135.6	0.93125
135.7	0.91875
135.8	0.925
135.9	0.925
136	0.9375
136.1	0.925
136.2	0.9375
136.3	0.9375
136.4	0.93125
136.5	0.91875
136.6	0.93125
136.7	0.925
136.8	0.9125
136.9	0.9125
137	0.91875
137.1	0.9125
137.2	0.91875
137.3	0.9375
137.4	0.9375
137.5	0.94375
137.6	0.95
137.7	0.95
137.8	0.95
137.9	0.95
138	0.94375
138.1	0.94375
138.2	0.95625
138.3	0.9625
138.4	0.95625
138.5	0.9625
138.6	0.975
138.7	0.96875
138.8	0.95625
138.9	0.95625
139	0.95
139.1	0.95
139.2	0.9375
139.3	0.9375
139.4	0.9375
139.5	0.9375
139.6	0.93125
139.7	0.93125
139.8	0.95
139.9	0.94375
140	0.9375
140.1	0.9375
140.2	0.93125
140.3	0.94375
140.4	0.94375
140.5	0.94375
140.6	0.94375
140.7	0.95625
140.8	0.94375
140.9	0.93125
141	0.9125
141.1	0.9125
141.2	0.925
141.3	0.91875
141.4	0.91875
141.5	0.91875
141.6	0.93125
141.7	0.925
141.8	0.925
141.9	0.925
142	0.925
142.1	0.91875
142.2	0.91875
142.3	0.925
142.4	0.93125
142.5	0.9375
142.6	0.9375
142.7	0.93125
142.8	0.94375
142.9	0.95
143	0.95
143.1	0.9375
143.2	0.94375
143.3	0.9375
143.4	0.93125
143.5	0.93125
143.6	0.925
143.7	0.9125
143.8	0.91875
143.9	0.91875
144	0.91875
144.1	0.91875
144.2	0.91875
144.3	0.91875
144.4	0.93125
144.5	0.93125
144.6	0.93125
144.7	0.9375
144.8	0.925
144.9	0.91875
145	0.925
145.1	0.9375
145.2	0.94375
145.3	0.95
145.4	0.95625
145.5	0.96875
145.6	0.9625
145.7	0.9625
145.8	0.95625
145.9	0.95625
146	0.95625
146.1	0.95625
146.2	0.9625
146.3	0.95
146.4	0.95625
146.5	0.95
146.6	0.9625
146.7	0.9625
146.8	0.95
146.9	0.9625
147	0.9625
147.1	0.9625
147.2	0.96875
147.3	0.975
147.4	0.96875
147.5	0.95625
147.6	0.95625
147.7	0.94375
147.8	0.94375
147.9	0.93125
148	0.93125
148.1	0.93125
148.2	0.925
148.3	0.94375
148.4	0.94375
148.5	0.96875
148.6	0.9625
148.7	0.96875
148.8	0.94375
148.9	0.95625
149	0.95625
149.1	0.9625
149.2	0.94375
149.3	0.94375
149.4	0.94375
149.5	0.9375
149.6	0.94375
149.7	0.94375
149.8	0.94375
149.9	0.93125
150	0.93125
150.1	0.93125
150.2	0.93125
150.3	0.93125
150.4	0.95
150.5	0.94375
150.6	0.95625
150.7	0.95625
150.8	0.95
150.9	0.9375
151	0.9375
151.1	0.9375
151.2	0.9375
151.3	0.94375
151.4	0.95
151.5	0.9625
151.6	0.9625
151.7	0.9625
151.8	0.96875
151.9	0.9625
152	0.95625
152.1	0.95625
152.2	0.95
152.3	0.95
152.4	0.94375
152.5	0.925
152.6	0.91875
152.7	0.93125
152.8	0.925
152.9	0.925
153	0.925
153.1	0.94375
153.2	0.9375
153.3	0.94375
153.4	0.91875
153.5	0.925
153.6	0.925
153.7	0.91875
153.8	0.925
153.9	0.94375
154	0.95
154.1	0.96875
154.2	0.95625
154.3	0.95
154.4	0.95
154.5	0.95625
154.6	0.95625
154.7	0.94375
154.8	0.95625
154.9	0.95
155	0.95
155.1	0.94375
155.2	0.94375
155.3	0.95
155.4	0.95
155.5	0.95
155.6	0.95
155.7	0.95
155.8	0.95625
155.9	0.95625
156	0.95625
156.1	0.96875
156.2	0.975
156.3	0.98125
156.4	0.975
156.5	0.96875
156.6	0.9625
156.7	0.95
156.8	0.9375
156.9	0.93125
157	0.93125
157.1	0.93125
157.2	0.95
157.3	0.95
157.4	0.9375
157.5	0.9375
157.6	0.95
157.7	0.94375
157.8	0.9375
157.9	0.95
158	0.95
158.1	0.95
158.2	0.9625
158.3	0.9625
158.4	0.95
158.5	0.975
158.6	0.975
158.7	0.975
158.8	0.96875
158.9	0.95625
159	0.95625
159.1	0.95625
159.2	0.9625
159.3	0.9625
159.4	0.975
159.5	0.975
159.6	0.975
159.7	0.975
159.8	0.98125
159.9	0.98125
160	0.96875
160.1	0.9625
160.2	0.9625
160.3	0.9625
160.4	0.9625
160.5	0.95
160.6	0.9375
160.7	0.9375
160.8	0.94375
160.9	0.94375
161	0.95625
161.1	0.95625
161.2	0.95625
161.3	0.9625
161.4	0.95625
161.5	0.9625
161.6	0.95
161.7	0.95
161.8	0.9625
161.9	0.96875
162	0.975
162.1	0.9625
162.2	0.9625
162.3	0.96875
162.4	0.9625
162.5	0.95625
162.6	0.9625
162.7	0.9625
162.8	0.9625
162.9	0.94375
163	0.9375
163.1	0.93125
163.2	0.9375
163.3	0.94375
163.4	0.925
163.5	0.95
163.6	0.95625
163.7	0.95625
163.8	0.95625
163.9	0.9625
164	0.96875
164.1	0.96875
164.2	0.9625
164.3	0.96875
164.4	0.96875
164.5	0.98125
164.6	0.9875
164.7	0.9875
164.8	0.99375
164.9	0.9875
165	0.98125
165.1	0.96875
165.2	0.975
165.3	0.98125
165.4	0.975
165.5	0.96875
165.6	0.95625
165.7	0.9625
165.8	0.9625
165.9	0.9625
166	0.9625
166.1	0.975
166.2	0.975
166.3	0.98125
166.4	0.98125
166.5	0.975
166.6	0.96875
166.7	0.96875
166.8	0.96875
166.9	0.96875
167	0.96875
167.1	0.9625
167.2	0.9625
167.3	0.9625
167.4	0.9625
167.5	0.9625
167.6	0.98125
167.7	0.9875
167.8	0.9875
167.9	0.98125
168	0.98125
168.1	0.975
168.2	0.98125
168.3	0.975
168.4	0.9625
168.5	0.9625
168.6	0.96875
168.7	0.95625
168.8	0.9625
168.9	0.9625
169	0.95625
169.1	0.9625
169.2	0.95625
169.3	0.95625
169.4	0.95625
169.5	0.975
169.6	0.975
169.7	0.96875
169.8	0.975
169.9	0.9625
170	0.96875
170.1	0.96875
170.2	0.9625
170.3	0.9625
170.4	0.96875
170.5	0.96875
170.6	0.975
170.7	0.98125
170.8	0.9875
170.9	0.99375
171	1
171.1	0.99375
171.2	0.9875
171.3	0.98125
171.4	0.98125
171.5	0.975
171.6	0.975
171.7	0.975
171.8	0.98125
171.9	0.9875
172	0.99375
172.1	0.99375
172.2	0.99375
172.3	0.99375
172.4	0.99375
172.5	0.9875
172.6	0.9875
172.7	0.98125
172.8	0.98125
172.9	0.975
173	0.9875
173.1	0.9875
173.2	0.98125
173.3	0.98125
173.4	0.975
173.5	0.98125
173.6	0.98125
173.7	0.9875
173.8	0.9875
173.9	0.98125
174	0.975
174.1	0.9625
174.2	0.96875
174.3	0.975
174.4	0.96875
174.5	0.96875
174.6	0.96875
174.7	0.96875
174.8	0.9625
174.9	0.96875
175	0.975
175.1	0.98125
175.2	0.98125
175.3	0.975
175.4	0.975
175.5	0.975
175.6	0.9625
175.7	0.9625
175.8	0.95
175.9	0.95625
176	0.96875
176.1	0.975
176.2	0.96875
176.3	0.9625
176.4	0.95625
176.5	0.95625
176.6	0.95625
176.7	0.9625
176.8	0.98125
176.9	0.96875
177	0.9625
177.1	0.975
177.2	0.96875
177.3	0.96875
177.4	0.96875
177.5	0.98125
177.6	0.975
177.7	0.975
177.8	0.9625
177.9	0.95
178	0.95625
178.1	0.95
178.2	0.95
178.3	0.95625
178.4	0.94375
178.5	0.95
178.6	0.95
178.7	0.96875
178.8	0.96875
178.9	0.975
179	0.95625
179.1	0.94375
179.2	0.94375
179.3	0.9375
179.4	0.94375
179.5	0.94375
179.6	0.95625
179.7	0.94375
179.8	0.9375
179.9	0.95625
180	0.95625
180.1	0.95
180.2	0.93125
180.3	0.93125
180.4	0.93125
180.5	0.93125
180.6	0.9375
180.7	0.93125
180.8	0.93125
180.9	0.925
181	0.94375
181.1	0.95
181.2	0.95625
181.3	0.95625
181.4	0.95
181.5	0.95625
181.6	0.95
181.7	0.95
181.8	0.9375
181.9	0.9375
182	0.9375
182.1	0.94375
182.2	0.94375
182.3	0.95625
182.4	0.95
182.5	0.95625
182.6	0.94375
182.7	0.9625
182.8	0.96875
182.9	0.96875
183	0.96875
183.1	0.9625
183.2	0.95
183.3	0.95625
183.4	0.95625
183.5	0.95625
183.6	0.95625
183.7	0.95625
183.8	0.9625
183.9	0.9625
184	0.95625
184.1	0.94375
184.2	0.95625
184.3	0.9375
184.4	0.94375
184.5	0.95
184.6	0.9625
184.7	0.95
184.8	0.9375
184.9	0.93125
185	0.94375
185.1	0.95625
185.2	0.9625
185.3	0.95625
185.4	0.95625
185.5	0.95625
185.6	0.95625
185.7	0.95625
185.8	0.95625
185.9	0.95625
186	0.95
186.1	0.95625
186.2	0.9625
186.3	0.95625
186.4	0.95625
186.5	0.95625
186.6	0.9625
186.7	0.96875
186.8	0.96875
186.9	0.96875
187	0.9625
187.1	0.95625
187.2	0.95625
187.3	0.96875
187.4	0.9625
187.5	0.95625
187.6	0.95625
187.7	0.9625
187.8	0.96875
187.9	0.975
188	0.975
188.1	0.975
188.2	0.98125
188.3	0.98125
188.4	0.98125
188.5	0.98125
188.6	0.98125
188.7	0.975
188.8	0.96875
188.9	0.96875
189	0.96875
189.1	0.96875
189.2	0.96875
189.3	0.9625
189.4	0.96875
189.5	0.975
189.6	0.98125
189.7	0.98125
189.8	0.98125
189.9	0.98125
190	0.98125
190.1	0.9875
190.2	0.9875
190.3	0.9875
190.4	0.9875
190.5	0.9875
190.6	0.9875
190.7	0.9875
190.8	0.975
190.9	0.96875
191	0.9625
191.1	0.9625
191.2	0.9625
191.3	0.96875
191.4	0.96875
191.5	0.975
191.6	0.98125
191.7	0.975
191.8	0.98125
191.9	0.98125
192	0.98125
192.1	0.98125
192.2	0.98125
192.3	0.96875
192.4	0.96875
192.5	0.96875
192.6	0.98125
192.7	0.9875
192.8	0.99375
192.9	0.98125
193	0.9875
193.1	0.98125
193.2	0.975
193.3	0.96875
193.4	0.975
193.5	0.975
193.6	0.9625
193.7	0.9625
193.8	0.9625
193.9	0.95625
194	0.95
194.1	0.9625
194.2	0.9625
194.3	0.95625
194.4	0.9625
194.5	0.96875
194.6	0.96875
194.7	0.96875
194.8	0.96875
194.9	0.96875
195	0.95625
195.1	0.95
195.2	0.95
195.3	0.95625
195.4	0.9625
195.5	0.95625
195.6	0.95625
195.7	0.9625
195.8	0.96875
195.9	0.9625
196	0.96875
196.1	0.95625
196.2	0.95625
196.3	0.9625
196.4	0.95625
196.5	0.9625
196.6	0.95625
196.7	0.96875
196.8	0.975
196.9	0.96875
197	0.96875
197.1	0.98125
197.2	0.96875
197.3	0.9625
197.4	0.9625
197.5	0.95
197.6	0.96875
197.7	0.96875
197.8	0.96875
197.9	0.96875
198	0.975
198.1	0.975
198.2	0.975
198.3	0.975
198.4	0.96875
198.5	0.96875
198.6	0.95
198.7	0.95625
198.8	0.95625
198.9	0.96875
199	0.9625
199.1	0.95625
199.2	0.9625
199.3	0.9625
199.4	0.95625
199.5	0.95625
199.6	0.9625
199.7	0.96875
199.8	0.9625
199.9	0.9625
200	0.96875
[truncated: 14,000 more rows]
