# Supplementary material for: Bayesian inference of kinetic schemes for ion channels by Kalman filtering
Source: eLife journal article supplement (doi:10.7554/elife.62714), 2022-05-04
Supplement: fig4-data5 [file 1_Sim_N_80_Strom_MW.xlsx]

## Sheet: 4 M
0.1	0
0.2	0
0.3	0
0.4	0
0.5	0
0.6	0
0.7	0
0.8	0
0.9	0
1	0
1.1	0
1.2	0
1.3	0
1.4	0
1.5	0
1.6	0
1.7	0
1.8	0
1.9	0
2	0
2.1	0
2.2	0
2.3	0
2.4	0
2.5	0
2.6	0
2.7	0
2.8	0
2.9	0
3	0
3.1	0
3.2	0
3.3	0
3.4	0
3.5	0
3.6	0
3.7	0
3.8	0
3.9	0
4	0
4.1	0
4.2	0
4.3	0
4.4	0
4.5	0
4.6	0
4.7	0
4.8	0
4.9	0
5	0
5.1	0
5.2	0
5.3	0
5.4	0
5.5	0
5.6	0
5.7	0
5.8	0
5.9	0
6	0
6.1	0
6.2	0
6.3	0
6.4	0
6.5	0
6.6	0
6.7	0
6.8	0
6.9	0
7	0
7.1	0
7.2	0
7.3	0
7.4	0
7.5	0
7.6	0
7.7	0
7.8	0
7.9	0
8	0
8.1	0
8.2	0
8.3	0
8.4	0
8.5	0
8.6	0
8.7	0
8.8	0
8.9	0
9	0
9.1	0
9.2	0
9.3	0
9.4	0
9.5	0
9.6	0
9.7	0
9.8	0
9.9	0
10	0
10.1	0
10.2	0
10.3	0
10.4	0
10.5	0
10.6	0
10.7	0
10.8	0
10.9	0
11	0
11.1	0
11.2	0
11.3	0
11.4	0
11.5	0
11.6	0
11.7	0
11.8	0
11.9	0
12	0
12.1	0
12.2	0
12.3	0
12.4	0
12.5	0
12.6	0
12.7	0
12.8	0
12.9	0
13	0
13.1	0
13.2	0
13.3	0
13.4	0
13.5	0
13.6	0
13.7	0
13.8	0
13.9	0
14	0
14.1	0
14.2	0
14.3	0
14.4	0
14.5	0
14.6	0
14.7	0
14.8	0
14.9	0
15	0
15.1	0
15.2	0
15.3	0
15.4	0
15.5	0
15.6	0
15.7	0
15.8	0
15.9	0
16	0
16.1	0
16.2	0
16.3	0
16.4	0
16.5	0
16.6	0
16.7	0
16.8	0
16.9	0
17	0
17.1	0
17.2	0
17.3	0
17.4	0
17.5	0
17.6	0
17.7	0
17.8	0
17.9	0
18	0
18.1	0
18.2	0
18.3	0
18.4	0
18.5	0
18.6	0
18.7	0
18.8	0
18.9	0
19	0
19.1	0
19.2	0
19.3	0
19.4	0
19.5	0
19.6	0
19.7	0
19.8	0
19.9	0
20	0
20.1	0
20.2	0
20.3	0
20.4	0
20.5	0
20.6	0
20.7	0
20.8	0
20.9	0
21	0
21.1	0
21.2	0
21.3	0
21.4	0
21.5	0
21.6	0
21.7	0
21.8	0
21.9	0
22	0
22.1	0
22.2	0
22.3	0
22.4	0
22.5	0
22.6	0
22.7	0
22.8	0
22.9	0
23	0
23.1	0
23.2	0
23.3	0
23.4	0
23.5	0
23.6	0
23.7	0
23.8	0
23.9	0
24	0
24.1	0
24.2	0
24.3	0
24.4	0
24.5	0
24.6	0
24.7	0
24.8	0
24.9	0
25	0
25.1	0
25.2	0
25.3	0
25.4	0
25.5	0
25.6	0
25.7	0
25.8	0
25.9	0
26	0
26.1	0
26.2	0
26.3	0
26.4	0
26.5	0
26.6	0
26.7	0
26.8	0
26.9	0
27	0
27.1	0
27.2	0
27.3	0
27.4	0
27.5	0
27.6	0
27.7	0
27.8	0
27.9	0
28	0
28.1	0
28.2	0
28.3	0
28.4	0
28.5	0
28.6	0
28.7	0
28.8	0
28.9	0
29	0
29.1	0
29.2	0
29.3	0
29.4	0
29.5	0
29.6	0
29.7	0
29.8	0
29.9	0
30	0
30.1	0
30.2	0
30.3	0
30.4	0
30.5	0
30.6	0
30.7	0
30.8	0
30.9	0
31	0
31.1	0
31.2	0
31.3	0
31.4	0
31.5	0
31.6	0
31.7	0
31.8	0
31.9	0
32	0
32.1	0
32.2	0
32.3	0
32.4	0
32.5	0
32.6	0
32.7	0
32.8	0
32.9	0
33	0
33.1	0
33.2	0
33.3	0
33.4	0
33.5	0
33.6	0
33.7	0
33.8	0
33.9	0
34	0
34.1	0
34.2	0
34.3	0
34.4	0
34.5	0
34.6	0
34.7	0
34.8	0
34.9	0
35	0
35.1	0
35.2	0
35.3	0
35.4	0
35.5	0
35.6	0
35.7	0
35.8	0
35.9	0
36	0
36.1	0
36.2	0
36.3	0
36.4	0
36.5	0
36.6	0
36.7	0
36.8	0
36.9	0
37	0
37.1	0
37.2	0
37.3	0
37.4	0
37.5	0
37.6	0
37.7	0
37.8	0
37.9	0
38	0
38.1	0
38.2	0
38.3	0
38.4	0
38.5	0
38.6	0
38.7	0
38.8	0
38.9	0
39	0
39.1	0
39.2	0
39.3	0
39.4	0
39.5	0
39.6	0
39.7	0
39.8	0
39.9	0
40	0
40.1	0
40.2	0
40.3	0
40.4	0
40.5	0
40.6	0
40.7	0
40.8	0
40.9	0
41	0
41.1	0
41.2	0
41.3	0
41.4	0
41.5	0
41.6	0
41.7	0
41.8	0
41.9	0
42	0
42.1	0
42.2	0
42.3	0
42.4	0
42.5	0
42.6	0
42.7	0
42.8	0
42.9	0
43	0
43.1	0
43.2	0
43.3	0
43.4	0
43.5	0
43.6	0
43.7	0
43.8	0
43.9	0
44	0
44.1	0
44.2	0
44.3	0
44.4	0
44.5	0
44.6	0
44.7	0
44.8	0
44.9	0
45	0
45.1	0
45.2	0
45.3	0
45.4	0
45.5	0
45.6	0
45.7	0
45.8	0
45.9	0
46	0
46.1	0
46.2	0
46.3	0
46.4	0
46.5	0
46.6	0
46.7	0
46.8	0
46.9	0
47	0
47.1	0
47.2	0
47.3	0
47.4	0
47.5	0
47.6	0
47.7	0
47.8	0
47.9	0
48	0
48.1	0
48.2	0
48.3	0
48.4	0
48.5	0
48.6	0
48.7	0
48.8	0
48.9	0
49	0
49.1	0
49.2	0
49.3	0
49.4	0
49.5	0
49.6	0
49.7	0
49.8	0
49.9	0
50	0
50.1	0
50.2	0
50.3	0
50.4	0
50.5	0
50.6	0
50.7	0
50.8	0
50.9	0
51	0
51.1	0
51.2	0
51.3	0
51.4	0
51.5	0
51.6	0
51.7	0
51.8	0
51.9	0
52	0
52.1	0
52.2	0
52.3	0
52.4	0
52.5	0
52.6	0
52.7	0
52.8	0
52.9	0
53	0
53.1	0
53.2	0
53.3	0
53.4	0
53.5	0
53.6	0
53.7	0
53.8	0
53.9	0
54	0
54.1	0
54.2	0
54.3	0
54.4	0
54.5	0
54.6	0
54.7	0
54.8	0
54.9	0
55	0
55.1	0
55.2	0
55.3	0
55.4	0
55.5	0
55.6	0
55.7	0
55.8	0
55.9	0
56	0
56.1	0
56.2	0
56.3	0
56.4	0
56.5	0
56.6	0
56.7	0
56.8	0
56.9	0
57	0
57.1	0
57.2	0
57.3	0
57.4	0
57.5	0
57.6	0
57.7	0
57.8	0
57.9	0
58	0
58.1	0
58.2	0
58.3	0
58.4	0
58.5	0
58.6	0
58.7	0
58.8	0
58.9	0
59	0
59.1	0
59.2	0
59.3	0
59.4	0
59.5	0
59.6	0
59.7	0
59.8	0
59.9	0
60	0
60.1	0
60.2	0
60.3	0
60.4	0
60.5	0
60.6	0
60.7	0
60.8	0
60.9	0
61	0
61.1	0
61.2	0
61.3	0
61.4	0
61.5	0
61.6	0
61.7	0
61.8	0
61.9	0
62	0
62.1	0
62.2	0
62.3	0
62.4	0
62.5	0
62.6	0
62.7	0
62.8	0
62.9	0
63	0
63.1	0
63.2	0
63.3	0
63.4	0
63.5	0
63.6	0
63.7	0
63.8	0
63.9	0
64	0
64.1	0
64.2	0
64.3	0
64.4	0
64.5	0
64.6	0
64.7	0
64.8	0
64.9	0
65	0
65.1	0
65.2	0
65.3	0
65.4	0
65.5	0
65.6	0
65.7	0
65.8	0
65.9	0
66	0
66.1	0
66.2	0
66.3	0
66.4	0
66.5	0
66.6	0
66.7	0
66.8	0
66.9	0
67	0
67.1	0
67.2	0
67.3	0
67.4	0
67.5	0
67.6	0
67.7	0
67.8	0
67.9	0
68	0
68.1	0
68.2	0
68.3	0
68.4	0
68.5	0
68.6	0
68.7	0
68.8	0
68.9	0
69	0
69.1	0
69.2	0
69.3	0
69.4	0
69.5	0
69.6	0
69.7	0
69.8	0
69.9	0
70	0
70.1	0
70.2	0
70.3	0
70.4	0
70.5	0
70.6	0
70.7	0
70.8	0
70.9	0
71	0
71.1	0
71.2	0
71.3	0
71.4	0
71.5	0
71.6	0
71.7	0
71.8	0
71.9	0
72	0
72.1	0
72.2	0
72.3	0
72.4	0
72.5	0
72.6	0
72.7	0
72.8	0
72.9	0
73	0
73.1	0
73.2	0
73.3	0
73.4	0
73.5	0
73.6	0
73.7	0
73.8	0
73.9	0
74	0
74.1	0
74.2	0
74.3	0
74.4	0
74.5	0
74.6	0
74.7	0
74.8	0
74.9	0
75	0
75.1	0
75.2	0
75.3	0
75.4	0
75.5	0
75.6	0
75.7	0
75.8	0
75.9	0
76	0
76.1	0
76.2	0
76.3	0
76.4	0
76.5	0
76.6	0
76.7	0
76.8	0
76.9	0
77	0
77.1	0
77.2	0
77.3	0
77.4	0
77.5	0
77.6	0
77.7	0
77.8	0
77.9	0
78	0
78.1	0
78.2	0
78.3	0
78.4	0
78.5	0
78.6	0
78.7	0
78.8	0
78.9	0
79	0
79.1	0
79.2	0
79.3	0
79.4	0
79.5	0
79.6	0
79.7	0
79.8	0
79.9	0
80	0
80.1	0
80.2	0
80.3	0
80.4	0
80.5	0
80.6	0
80.7	0
80.8	0
80.9	0
81	0
81.1	0
81.2	0
81.3	0
81.4	0
81.5	0
81.6	0
81.7	0
81.8	0
81.9	0
82	0
82.1	0
82.2	0
82.3	0
82.4	0
82.5	0
82.6	0
82.7	0
82.8	0
82.9	0
83	0
83.1	0
83.2	0
83.3	0
83.4	0
83.5	0
83.6	0
83.7	0
83.8	0
83.9	0
84	0
84.1	0
84.2	0
84.3	0
84.4	0
84.5	0
84.6	0
84.7	0
84.8	0
84.9	0
85	0
85.1	0
85.2	0
85.3	0
85.4	0
85.5	0
85.6	0
85.7	0
85.8	0
85.9	0
86	0
86.1	0
86.2	0
86.3	0
86.4	0
86.5	0
86.6	0
86.7	0
86.8	0
86.9	0
87	0
87.1	0
87.2	0
87.3	0
87.4	0
87.5	0
87.6	0
87.7	0
87.8	0
87.9	0
88	0
88.1	0
88.2	0
88.3	0
88.4	0
88.5	0
88.6	0
88.7	0
88.8	0
88.9	0
89	0
89.1	0
89.2	0
89.3	0
89.4	0
89.5	0
89.6	0
89.7	0
89.8	0
89.9	0
90	0
90.1	0
90.2	0
90.3	0
90.4	0
90.5	0
90.6	0
90.7	0
90.8	0
90.9	0
91	0
91.1	0
91.2	0
91.3	0
91.4	0
91.5	0
91.6	0
91.7	0
91.8	0
91.9	0
92	0
92.1	0
92.2	0
92.3	0
92.4	0
92.5	0
92.6	0
92.7	0
92.8	0
92.9	0
93	0
93.1	0
93.2	0
93.3	0
93.4	0
93.5	0
93.6	0
93.7	0
93.8	0
93.9	0
94	0
94.1	0
94.2	0
94.3	0
94.4	0
94.5	0
94.6	0
94.7	0
94.8	0
94.9	0
95	0
95.1	0
95.2	0
95.3	0
95.4	0
95.5	0
95.6	0
95.7	0
95.8	0
95.9	0
96	0
96.1	0
96.2	0
96.3	0
96.4	0
96.5	0
96.6	0
96.7	0
96.8	0
96.9	0
97	0
97.1	0
97.2	0
97.3	0
97.4	0
97.5	0
97.6	0
97.7	0
97.8	0
97.9	0
98	0
98.1	0
98.2	0
98.3	0
98.4	0
98.5	0
98.6	0
98.7	0
98.8	0
98.9	0
99	0
99.1	0
99.2	0
99.3	0
99.4	0
99.5	0
99.6	0
99.7	0
99.8	0
99.9	0
100	0
100.1	0
100.2	0
100.3	0
100.4	0
100.5	0
100.6	0
100.7	0
100.8	0
100.9	0
101	0
101.1	0
101.2	0
101.3	0
101.4	0
101.5	0
101.6	0
101.7	0
101.8	0
101.9	0
102	0.0125
102.1	0.025
102.2	0.0375
102.3	0.0375
102.4	0.05
102.5	0.05
102.6	0.05
102.7	0.0625
102.8	0.0625
102.9	0.0625
103	0.0625
103.1	0.0625
103.2	0.0625
103.3	0.0625
103.4	0.0625
103.5	0.0625
103.6	0.0625
103.7	0.0625
103.8	0.075
103.9	0.075
104	0.0875
104.1	0.0875
104.2	0.0875
104.3	0.0875
104.4	0.0875
104.5	0.0875
104.6	0.0875
104.7	0.0875
104.8	0.1
104.9	0.1
105	0.1
105.1	0.1
105.2	0.1
105.3	0.1
105.4	0.1
105.5	0.1125
105.6	0.1125
105.7	0.1125
105.8	0.1125
105.9	0.1125
106	0.1125
106.1	0.125
106.2	0.125
106.3	0.125
106.4	0.125
106.5	0.125
106.6	0.1375
106.7	0.1375
106.8	0.1375
106.9	0.15
107	0.15
107.1	0.15
107.2	0.1625
107.3	0.1625
107.4	0.175
107.5	0.175
107.6	0.175
107.7	0.175
107.8	0.175
107.9	0.1625
108	0.1625
108.1	0.175
108.2	0.175
108.3	0.175
108.4	0.175
108.5	0.175
108.6	0.175
108.7	0.1875
108.8	0.2
108.9	0.2125
109	0.2125
109.1	0.2125
109.2	0.225
109.3	0.225
109.4	0.225
109.5	0.225
109.6	0.225
109.7	0.225
109.8	0.225
109.9	0.2375
110	0.2375
110.1	0.2375
110.2	0.2375
110.3	0.2375
110.4	0.2375
110.5	0.25
110.6	0.25
110.7	0.25
110.8	0.25
110.9	0.2625
111	0.2625
111.1	0.2625
111.2	0.2625
111.3	0.2625
111.4	0.2625
111.5	0.2625
111.6	0.2625
111.7	0.2625
111.8	0.2625
111.9	0.2625
112	0.2625
112.1	0.2625
112.2	0.2625
112.3	0.2625
112.4	0.2625
112.5	0.2625
112.6	0.2875
112.7	0.2875
112.8	0.2875
112.9	0.3
113	0.3
113.1	0.3
113.2	0.3
113.3	0.3
113.4	0.3
113.5	0.3
113.6	0.3
113.7	0.3
113.8	0.3
113.9	0.3
114	0.2875
114.1	0.2875
114.2	0.2875
114.3	0.3
114.4	0.3
114.5	0.3
114.6	0.3
114.7	0.325
114.8	0.325
114.9	0.3375
115	0.3375
115.1	0.3375
115.2	0.3375
115.3	0.3375
115.4	0.3375
115.5	0.35
115.6	0.35
115.7	0.35
115.8	0.3625
115.9	0.3625
116	0.3625
116.1	0.3625
116.2	0.3625
116.3	0.3625
116.4	0.3625
116.5	0.35
116.6	0.35
116.7	0.35
116.8	0.35
116.9	0.35
117	0.35
117.1	0.35
117.2	0.3625
117.3	0.3625
117.4	0.3625
117.5	0.35
117.6	0.35
117.7	0.35
117.8	0.35
117.9	0.35
118	0.35
118.1	0.35
118.2	0.3625
118.3	0.3625
118.4	0.3625
118.5	0.3625
118.6	0.3625
118.7	0.3625
118.8	0.3625
118.9	0.375
119	0.375
119.1	0.375
119.2	0.375
119.3	0.375
119.4	0.375
119.5	0.375
119.6	0.375
119.7	0.375
119.8	0.4
119.9	0.4
120	0.4
120.1	0.4
120.2	0.4
120.3	0.4
120.4	0.4
120.5	0.4
120.6	0.4
120.7	0.4
120.8	0.4
120.9	0.4
121	0.4
121.1	0.4
121.2	0.4125
121.3	0.4125
121.4	0.425
121.5	0.425
121.6	0.425
121.7	0.425
121.8	0.425
121.9	0.425
122	0.425
122.1	0.425
122.2	0.425
122.3	0.4375
122.4	0.4375
122.5	0.4375
122.6	0.4375
122.7	0.4375
122.8	0.4375
122.9	0.4375
123	0.425
123.1	0.425
123.2	0.425
123.3	0.425
123.4	0.425
123.5	0.425
123.6	0.4125
123.7	0.4125
123.8	0.425
123.9	0.425
124	0.4375
124.1	0.4375
124.2	0.4375
124.3	0.45
124.4	0.45
124.5	0.45
124.6	0.45
124.7	0.4625
124.8	0.4625
124.9	0.4625
125	0.4625
125.1	0.4625
125.2	0.4625
125.3	0.475
125.4	0.475
125.5	0.475
125.6	0.475
125.7	0.475
125.8	0.475
125.9	0.475
126	0.475
126.1	0.475
126.2	0.475
126.3	0.475
126.4	0.475
126.5	0.475
126.6	0.475
126.7	0.475
126.8	0.475
126.9	0.475
127	0.475
127.1	0.475
127.2	0.475
127.3	0.475
127.4	0.4875
127.5	0.4875
127.6	0.5
127.7	0.5
127.8	0.5
127.9	0.5
128	0.5
128.1	0.5
128.2	0.5
128.3	0.5
128.4	0.5
128.5	0.5125
128.6	0.5125
128.7	0.525
128.8	0.525
128.9	0.525
129	0.525
129.1	0.525
129.2	0.5125
129.3	0.5125
129.4	0.5125
129.5	0.525
129.6	0.525
129.7	0.525
129.8	0.525
129.9	0.525
130	0.5375
130.1	0.55
130.2	0.55
130.3	0.55
130.4	0.55
130.5	0.55
130.6	0.55
130.7	0.55
130.8	0.55
130.9	0.5625
131	0.5625
131.1	0.5625
131.2	0.5625
131.3	0.5625
131.4	0.5625
131.5	0.5625
131.6	0.5625
131.7	0.5625
131.8	0.5625
131.9	0.5625
132	0.575
132.1	0.575
132.2	0.575
132.3	0.575
132.4	0.5625
132.5	0.5625
132.6	0.5625
132.7	0.5625
132.8	0.5625
132.9	0.5625
133	0.5625
133.1	0.575
133.2	0.575
133.3	0.575
133.4	0.575
133.5	0.575
133.6	0.575
133.7	0.575
133.8	0.575
133.9	0.575
134	0.575
134.1	0.575
134.2	0.575
134.3	0.575
134.4	0.575
134.5	0.575
134.6	0.575
134.7	0.575
134.8	0.575
134.9	0.575
135	0.575
135.1	0.575
135.2	0.575
135.3	0.5625
135.4	0.5625
135.5	0.5625
135.6	0.5625
135.7	0.5625
135.8	0.575
135.9	0.575
136	0.575
136.1	0.575
136.2	0.575
136.3	0.5875
136.4	0.5875
136.5	0.5875
136.6	0.5875
136.7	0.5875
136.8	0.5875
136.9	0.5875
137	0.5875
137.1	0.5875
137.2	0.6
137.3	0.6
137.4	0.5875
137.5	0.5875
137.6	0.5875
137.7	0.5875
137.8	0.6
137.9	0.6125
138	0.6125
138.1	0.6125
138.2	0.6125
138.3	0.6
138.4	0.6
138.5	0.6
138.6	0.6
138.7	0.6
138.8	0.6
138.9	0.6
139	0.6
139.1	0.6
139.2	0.6
139.3	0.6
139.4	0.6
139.5	0.6
139.6	0.5875
139.7	0.5875
139.8	0.5875
139.9	0.5875
140	0.5875
140.1	0.6
140.2	0.6
140.3	0.6
140.4	0.6125
140.5	0.6125
140.6	0.6125
140.7	0.6125
140.8	0.6125
140.9	0.6125
141	0.6125
141.1	0.6125
141.2	0.6125
141.3	0.6125
141.4	0.6125
141.5	0.6125
141.6	0.625
141.7	0.625
141.8	0.625
141.9	0.6375
142	0.6375
142.1	0.6375
142.2	0.6375
142.3	0.6375
142.4	0.6375
142.5	0.6375
142.6	0.6375
142.7	0.6375
142.8	0.65
142.9	0.65
143	0.65
143.1	0.65
143.2	0.65
143.3	0.65
143.4	0.6375
143.5	0.65
143.6	0.65
143.7	0.6375
143.8	0.6375
143.9	0.6375
144	0.6375
144.1	0.6375
144.2	0.6375
144.3	0.6375
144.4	0.6375
144.5	0.625
144.6	0.6375
144.7	0.6375
144.8	0.6375
144.9	0.6375
145	0.6375
145.1	0.6375
145.2	0.6375
145.3	0.6375
145.4	0.6375
145.5	0.6375
145.6	0.6375
145.7	0.6375
145.8	0.6375
145.9	0.625
146	0.625
146.1	0.625
146.2	0.625
146.3	0.6375
146.4	0.6375
146.5	0.6375
146.6	0.6375
146.7	0.6375
146.8	0.6375
146.9	0.6375
147	0.6375
147.1	0.65
147.2	0.65
147.3	0.65
147.4	0.65
147.5	0.6625
147.6	0.6625
147.7	0.6625
147.8	0.6625
147.9	0.675
148	0.675
148.1	0.675
148.2	0.675
148.3	0.675
148.4	0.675
148.5	0.675
148.6	0.675
148.7	0.675
148.8	0.675
148.9	0.675
149	0.675
149.1	0.6875
149.2	0.675
149.3	0.675
149.4	0.675
149.5	0.675
149.6	0.675
149.7	0.675
149.8	0.675
149.9	0.675
150	0.6875
150.1	0.6875
150.2	0.6875
150.3	0.6875
150.4	0.6875
150.5	0.6875
150.6	0.6875
150.7	0.6875
150.8	0.6875
150.9	0.6875
151	0.6875
151.1	0.6875
151.2	0.6875
151.3	0.6875
151.4	0.6875
151.5	0.6875
151.6	0.6875
151.7	0.6875
151.8	0.6875
151.9	0.6875
152	0.6875
152.1	0.6875
152.2	0.6875
152.3	0.7
152.4	0.7
152.5	0.7
152.6	0.7
152.7	0.7
152.8	0.7
152.9	0.7
153	0.7
153.1	0.7
153.2	0.7
153.3	0.7
153.4	0.7
153.5	0.7
153.6	0.7
153.7	0.7
153.8	0.7
153.9	0.7
154	0.7
154.1	0.7
154.2	0.6875
154.3	0.675
154.4	0.675
154.5	0.675
154.6	0.675
154.7	0.675
154.8	0.6875
154.9	0.6875
155	0.6875
155.1	0.6875
155.2	0.6875
155.3	0.675
155.4	0.6625
155.5	0.6625
155.6	0.6625
155.7	0.6625
155.8	0.65
155.9	0.675
156	0.675
156.1	0.675
156.2	0.675
156.3	0.6875
156.4	0.6875
156.5	0.7
156.6	0.7
156.7	0.7
156.8	0.7
156.9	0.7
157	0.7
157.1	0.7
157.2	0.7
157.3	0.7
157.4	0.7
157.5	0.7
157.6	0.7
157.7	0.7
157.8	0.7
157.9	0.7
158	0.7
158.1	0.7
158.2	0.7
158.3	0.7
158.4	0.7
158.5	0.7
158.6	0.7125
158.7	0.7125
158.8	0.7125
158.9	0.7125
159	0.7125
159.1	0.7125
159.2	0.7125
159.3	0.7125
159.4	0.725
159.5	0.725
159.6	0.725
159.7	0.725
159.8	0.725
159.9	0.7375
160	0.7375
160.1	0.7375
160.2	0.7375
160.3	0.7375
160.4	0.7375
160.5	0.7375
160.6	0.75
160.7	0.75
160.8	0.75
160.9	0.75
161	0.7625
161.1	0.775
161.2	0.775
161.3	0.775
161.4	0.775
161.5	0.7875
161.6	0.775
161.7	0.775
161.8	0.775
161.9	0.775
162	0.775
162.1	0.775
162.2	0.775
162.3	0.775
162.4	0.775
162.5	0.7625
162.6	0.7625
162.7	0.7625
162.8	0.7625
162.9	0.7625
163	0.7625
163.1	0.7625
163.2	0.775
163.3	0.775
163.4	0.775
163.5	0.775
163.6	0.775
163.7	0.775
163.8	0.775
163.9	0.775
164	0.775
164.1	0.775
164.2	0.775
164.3	0.775
164.4	0.775
164.5	0.775
164.6	0.7875
164.7	0.7875
164.8	0.775
164.9	0.775
165	0.775
165.1	0.775
165.2	0.775
165.3	0.775
165.4	0.775
165.5	0.775
165.6	0.775
165.7	0.775
165.8	0.775
165.9	0.775
166	0.775
166.1	0.775
166.2	0.775
166.3	0.775
166.4	0.775
166.5	0.775
166.6	0.775
166.7	0.775
166.8	0.775
166.9	0.775
167	0.775
167.1	0.775
167.2	0.775
167.3	0.775
167.4	0.775
167.5	0.775
167.6	0.775
167.7	0.775
167.8	0.7625
167.9	0.7625
168	0.75
168.1	0.75
168.2	0.75
168.3	0.75
168.4	0.75
168.5	0.7625
168.6	0.7625
168.7	0.7625
168.8	0.7625
168.9	0.7625
169	0.7625
169.1	0.7625
169.2	0.7625
169.3	0.7625
169.4	0.7625
169.5	0.7625
169.6	0.7625
169.7	0.7625
169.8	0.7625
169.9	0.7625
170	0.7625
170.1	0.7625
170.2	0.7625
170.3	0.7625
170.4	0.7625
170.5	0.7625
170.6	0.7625
170.7	0.7625
170.8	0.7625
170.9	0.75
171	0.7625
171.1	0.7625
171.2	0.775
171.3	0.775
171.4	0.7625
171.5	0.7625
171.6	0.7625
171.7	0.7625
171.8	0.7625
171.9	0.7625
172	0.7625
172.1	0.7625
172.2	0.7625
172.3	0.75
172.4	0.75
172.5	0.75
172.6	0.75
172.7	0.75
172.8	0.75
172.9	0.75
173	0.75
173.1	0.75
173.2	0.75
173.3	0.75
173.4	0.75
173.5	0.75
173.6	0.75
173.7	0.75
173.8	0.7375
173.9	0.7375
174	0.75
174.1	0.75
174.2	0.75
174.3	0.75
174.4	0.75
174.5	0.75
174.6	0.75
174.7	0.75
174.8	0.75
174.9	0.75
175	0.75
175.1	0.75
175.2	0.75
175.3	0.75
175.4	0.75
175.5	0.75
175.6	0.75
175.7	0.75
175.8	0.75
175.9	0.75
176	0.75
176.1	0.7375
176.2	0.7375
176.3	0.7375
176.4	0.7375
176.5	0.7375
176.6	0.7375
176.7	0.7375
176.8	0.7375
176.9	0.75
177	0.75
177.1	0.75
177.2	0.75
177.3	0.7375
177.4	0.75
177.5	0.75
177.6	0.75
177.7	0.75
177.8	0.75
177.9	0.75
178	0.75
178.1	0.75
178.2	0.75
178.3	0.75
178.4	0.75
178.5	0.75
178.6	0.75
178.7	0.75
178.8	0.75
178.9	0.75
179	0.75
179.1	0.75
179.2	0.75
179.3	0.75
179.4	0.75
179.5	0.75
179.6	0.75
179.7	0.75
179.8	0.75
179.9	0.7625
180	0.7625
180.1	0.7625
180.2	0.75
180.3	0.75
180.4	0.75
180.5	0.75
180.6	0.75
180.7	0.75
180.8	0.75
180.9	0.75
181	0.75
181.1	0.75
181.2	0.75
181.3	0.75
181.4	0.75
181.5	0.75
181.6	0.75
181.7	0.75
181.8	0.75
181.9	0.75
182	0.75
182.1	0.75
182.2	0.75
182.3	0.75
182.4	0.75
182.5	0.7625
182.6	0.7625
182.7	0.7625
182.8	0.7625
182.9	0.7625
183	0.7625
183.1	0.7625
183.2	0.7625
183.3	0.7625
183.4	0.7625
183.5	0.7625
183.6	0.7625
183.7	0.75
183.8	0.75
183.9	0.75
184	0.7375
184.1	0.75
184.2	0.75
184.3	0.75
184.4	0.7625
184.5	0.7625
184.6	0.7625
184.7	0.7625
184.8	0.7625
184.9	0.7625
185	0.7625
185.1	0.7625
185.2	0.7625
185.3	0.7625
185.4	0.7625
185.5	0.7875
185.6	0.7875
185.7	0.7875
185.8	0.7875
185.9	0.7875
186	0.7875
186.1	0.7875
186.2	0.7875
186.3	0.7875
186.4	0.7875
186.5	0.7875
186.6	0.7875
186.7	0.7875
186.8	0.7875
186.9	0.7875
187	0.7875
187.1	0.7875
187.2	0.7875
187.3	0.8
187.4	0.8
187.5	0.8
187.6	0.8
187.7	0.8
187.8	0.8
187.9	0.8125
188	0.8125
188.1	0.825
188.2	0.825
188.3	0.825
188.4	0.825
188.5	0.825
188.6	0.825
188.7	0.825
188.8	0.825
188.9	0.825
189	0.825
189.1	0.825
189.2	0.825
189.3	0.825
189.4	0.825
189.5	0.825
189.6	0.825
189.7	0.825
189.8	0.825
189.9	0.8
190	0.8
190.1	0.8
190.2	0.8
190.3	0.8
190.4	0.8
190.5	0.8
190.6	0.8
190.7	0.8
190.8	0.8
190.9	0.8
191	0.8
191.1	0.8
191.2	0.8
191.3	0.8
191.4	0.8
191.5	0.8
191.6	0.8
191.7	0.8
191.8	0.8
191.9	0.8
192	0.8
192.1	0.8
192.2	0.8
192.3	0.8
192.4	0.7875
192.5	0.7875
192.6	0.7875
192.7	0.7875
192.8	0.7875
192.9	0.7875
193	0.7875
193.1	0.7875
193.2	0.7875
193.3	0.7875
193.4	0.7875
193.5	0.7875
193.6	0.7875
193.7	0.7875
193.8	0.7875
193.9	0.7875
194	0.7875
194.1	0.7875
194.2	0.7875
194.3	0.7875
194.4	0.7875
194.5	0.7875
194.6	0.7875
194.7	0.7875
194.8	0.7875
194.9	0.7875
195	0.7875
195.1	0.7875
195.2	0.775
195.3	0.775
195.4	0.775
195.5	0.775
195.6	0.7875
195.7	0.7875
195.8	0.7875
195.9	0.7875
196	0.8
196.1	0.8
196.2	0.8
196.3	0.8
196.4	0.8
196.5	0.8
196.6	0.8
196.7	0.8
196.8	0.8
196.9	0.8
197	0.7875
197.1	0.7875
197.2	0.7875
197.3	0.7875
197.4	0.7875
197.5	0.7875
197.6	0.7875
197.7	0.7875
197.8	0.775
197.9	0.775
198	0.775
198.1	0.775
198.2	0.775
198.3	0.775
198.4	0.775
198.5	0.775
198.6	0.775
198.7	0.775
198.8	0.775
198.9	0.775
199	0.775
199.1	0.775
199.2	0.775
199.3	0.775
199.4	0.775
199.5	0.775
199.6	0.775
199.7	0.775
199.8	0.775
199.9	0.775
200	0.775
[truncated: 14,000 more rows]
