# Supplementary material for: Bayesian inference of kinetic schemes for ion channels by Kalman filtering
Source: eLife journal article supplement (doi:10.7554/elife.62714), 2022-05-04
Supplement: fig4-data5 [file 1_Sim_N_100_Fluor_MW.xlsx]

## Sheet: Tabelle1
0.1	0
0.2	0
0.3	0
0.4	0
0.5	0
0.6	0
0.7	0
0.8	0
0.9	0
1	0
1.1	0
1.2	0
1.3	0
1.4	0
1.5	0
1.6	0
1.7	0
1.8	0
1.9	0
2	0
2.1	0
2.2	0
2.3	0
2.4	0
2.5	0
2.6	0
2.7	0
2.8	0
2.9	0
3	0
3.1	0
3.2	0
3.3	0
3.4	0
3.5	0
3.6	0
3.7	0
3.8	0
3.9	0
4	0
4.1	0
4.2	0
4.3	0
4.4	0
4.5	0
4.6	0
4.7	0
4.8	0
4.9	0
5	0
5.1	0
5.2	0
5.3	0
5.4	0
5.5	0
5.6	0
5.7	0
5.8	0
5.9	0
6	0
6.1	0
6.2	0
6.3	0
6.4	0
6.5	0
6.6	0
6.7	0
6.8	0
6.9	0
7	0
7.1	0
7.2	0
7.3	0
7.4	0
7.5	0
7.6	0
7.7	0
7.8	0
7.9	0
8	0
8.1	0
8.2	0
8.3	0
8.4	0
8.5	0
8.6	0
8.7	0
8.8	0
8.9	0
9	0
9.1	0
9.2	0
9.3	0
9.4	0
9.5	0
9.6	0
9.7	0
9.8	0
9.9	0
10	0
10.1	0
10.2	0
10.3	0
10.4	0
10.5	0
10.6	0
10.7	0
10.8	0
10.9	0
11	0
11.1	0
11.2	0
11.3	0
11.4	0
11.5	0
11.6	0
11.7	0
11.8	0
11.9	0
12	0
12.1	0
12.2	0
12.3	0
12.4	0
12.5	0
12.6	0
12.7	0
12.8	0
12.9	0
13	0
13.1	0
13.2	0
13.3	0
13.4	0
13.5	0
13.6	0
13.7	0
13.8	0
13.9	0
14	0
14.1	0
14.2	0
14.3	0
14.4	0
14.5	0
14.6	0
14.7	0
14.8	0
14.9	0
15	0
15.1	0
15.2	0
15.3	0
15.4	0
15.5	0
15.6	0
15.7	0
15.8	0
15.9	0
16	0
16.1	0
16.2	0
16.3	0
16.4	0
16.5	0
16.6	0
16.7	0
16.8	0
16.9	0
17	0
17.1	0
17.2	0
17.3	0
17.4	0
17.5	0
17.6	0
17.7	0
17.8	0
17.9	0
18	0
18.1	0
18.2	0
18.3	0
18.4	0
18.5	0
18.6	0
18.7	0
18.8	0
18.9	0
19	0
19.1	0
19.2	0
19.3	0
19.4	0
19.5	0
19.6	0
19.7	0
19.8	0
19.9	0
20	0
20.1	0
20.2	0
20.3	0
20.4	0
20.5	0
20.6	0
20.7	0
20.8	0
20.9	0
21	0
21.1	0
21.2	0
21.3	0
21.4	0
21.5	0
21.6	0
21.7	0
21.8	0
21.9	0
22	0
22.1	0
22.2	0
22.3	0
22.4	0
22.5	0
22.6	0
22.7	0
22.8	0
22.9	0
23	0
23.1	0
23.2	0
23.3	0
23.4	0
23.5	0
23.6	0
23.7	0
23.8	0
23.9	0
24	0
24.1	0
24.2	0
24.3	0
24.4	0
24.5	0
24.6	0
24.7	0
24.8	0
24.9	0
25	0
25.1	0
25.2	0
25.3	0
25.4	0
25.5	0
25.6	0
25.7	0
25.8	0
25.9	0
26	0
26.1	0
26.2	0
26.3	0
26.4	0
26.5	0
26.6	0
26.7	0
26.8	0
26.9	0
27	0
27.1	0
27.2	0
27.3	0
27.4	0
27.5	0
27.6	0
27.7	0
27.8	0
27.9	0
28	0
28.1	0
28.2	0
28.3	0
28.4	0
28.5	0
28.6	0
28.7	0
28.8	0
28.9	0
29	0
29.1	0
29.2	0
29.3	0
29.4	0
29.5	0
29.6	0
29.7	0
29.8	0
29.9	0
30	0
30.1	0
30.2	0
30.3	0
30.4	0
30.5	0
30.6	0
30.7	0
30.8	0
30.9	0
31	0
31.1	0
31.2	0
31.3	0
31.4	0
31.5	0
31.6	0
31.7	0
31.8	0
31.9	0
32	0
32.1	0
32.2	0
32.3	0
32.4	0
32.5	0
32.6	0
32.7	0
32.8	0
32.9	0
33	0
33.1	0
33.2	0
33.3	0
33.4	0
33.5	0
33.6	0
33.7	0
33.8	0
33.9	0
34	0
34.1	0
34.2	0
34.3	0
34.4	0
34.5	0
34.6	0
34.7	0
34.8	0
34.9	0
35	0
35.1	0
35.2	0
35.3	0
35.4	0
35.5	0
35.6	0
35.7	0
35.8	0
35.9	0
36	0
36.1	0
36.2	0
36.3	0
36.4	0
36.5	0
36.6	0
36.7	0
36.8	0
36.9	0
37	0
37.1	0
37.2	0
37.3	0
37.4	0
37.5	0
37.6	0
37.7	0
37.8	0
37.9	0
38	0
38.1	0
38.2	0
38.3	0
38.4	0
38.5	0
38.6	0
38.7	0
38.8	0
38.9	0
39	0
39.1	0
39.2	0
39.3	0
39.4	0
39.5	0
39.6	0
39.7	0
39.8	0
39.9	0
40	0
40.1	0
40.2	0
40.3	0
40.4	0
40.5	0
40.6	0
40.7	0
40.8	0
40.9	0
41	0
41.1	0
41.2	0
41.3	0
41.4	0
41.5	0
41.6	0
41.7	0
41.8	0
41.9	0
42	0
42.1	0
42.2	0
42.3	0
42.4	0
42.5	0
42.6	0
42.7	0
42.8	0
42.9	0
43	0
43.1	0
43.2	0
43.3	0
43.4	0
43.5	0
43.6	0
43.7	0
43.8	0
43.9	0
44	0
44.1	0
44.2	0
44.3	0
44.4	0
44.5	0
44.6	0
44.7	0
44.8	0
44.9	0
45	0
45.1	0
45.2	0
45.3	0
45.4	0
45.5	0
45.6	0
45.7	0
45.8	0
45.9	0
46	0
46.1	0
46.2	0
46.3	0
46.4	0
46.5	0
46.6	0
46.7	0
46.8	0
46.9	0
47	0
47.1	0
47.2	0
47.3	0
47.4	0
47.5	0
47.6	0
47.7	0
47.8	0
47.9	0
48	0
48.1	0
48.2	0
48.3	0
48.4	0
48.5	0
48.6	0
48.7	0
48.8	0
48.9	0
49	0
49.1	0
49.2	0
49.3	0
49.4	0
49.5	0
49.6	0
49.7	0
49.8	0
49.9	0
50	0
50.1	0
50.2	0
50.3	0
50.4	0
50.5	0
50.6	0
50.7	0
50.8	0
50.9	0
51	0
51.1	0
51.2	0
51.3	0
51.4	0
51.5	0
51.6	0
51.7	0
51.8	0
51.9	0
52	0
52.1	0
52.2	0
52.3	0
52.4	0
52.5	0
52.6	0
52.7	0
52.8	0
52.9	0
53	0
53.1	0
53.2	0
53.3	0
53.4	0
53.5	0
53.6	0
53.7	0
53.8	0
53.9	0
54	0
54.1	0
54.2	0
54.3	0
54.4	0
54.5	0
54.6	0
54.7	0
54.8	0
54.9	0
55	0
55.1	0
55.2	0
55.3	0
55.4	0
55.5	0
55.6	0
55.7	0
55.8	0
55.9	0
56	0
56.1	0
56.2	0
56.3	0
56.4	0
56.5	0
56.6	0
56.7	0
56.8	0
56.9	0
57	0
57.1	0
57.2	0
57.3	0
57.4	0
57.5	0
57.6	0
57.7	0
57.8	0
57.9	0
58	0
58.1	0
58.2	0
58.3	0
58.4	0
58.5	0
58.6	0
58.7	0
58.8	0
58.9	0
59	0
59.1	0
59.2	0
59.3	0
59.4	0
59.5	0
59.6	0
59.7	0
59.8	0
59.9	0
60	0
60.1	0
60.2	0
60.3	0
60.4	0
60.5	0
60.6	0
60.7	0
60.8	0
60.9	0
61	0
61.1	0
61.2	0
61.3	0
61.4	0
61.5	0
61.6	0
61.7	0
61.8	0
61.9	0
62	0
62.1	0
62.2	0
62.3	0
62.4	0
62.5	0
62.6	0
62.7	0
62.8	0
62.9	0
63	0
63.1	0
63.2	0
63.3	0
63.4	0
63.5	0
63.6	0
63.7	0
63.8	0
63.9	0
64	0
64.1	0
64.2	0
64.3	0
64.4	0
64.5	0
64.6	0
64.7	0
64.8	0
64.9	0
65	0
65.1	0
65.2	0
65.3	0
65.4	0
65.5	0
65.6	0
65.7	0
65.8	0
65.9	0
66	0
66.1	0
66.2	0
66.3	0
66.4	0
66.5	0
66.6	0
66.7	0
66.8	0
66.9	0
67	0
67.1	0
67.2	0
67.3	0
67.4	0
67.5	0
67.6	0
67.7	0
67.8	0
67.9	0
68	0
68.1	0
68.2	0
68.3	0
68.4	0
68.5	0
68.6	0
68.7	0
68.8	0
68.9	0
69	0
69.1	0
69.2	0
69.3	0
69.4	0
69.5	0
69.6	0
69.7	0
69.8	0
69.9	0
70	0
70.1	0
70.2	0
70.3	0
70.4	0
70.5	0
70.6	0
70.7	0
70.8	0
70.9	0
71	0
71.1	0
71.2	0
71.3	0
71.4	0
71.5	0
71.6	0
71.7	0
71.8	0
71.9	0
72	0
72.1	0
72.2	0
72.3	0
72.4	0
72.5	0
72.6	0
72.7	0
72.8	0
72.9	0
73	0
73.1	0
73.2	0
73.3	0
73.4	0
73.5	0
73.6	0
73.7	0
73.8	0
73.9	0
74	0
74.1	0
74.2	0
74.3	0
74.4	0
74.5	0
74.6	0
74.7	0
74.8	0
74.9	0
75	0
75.1	0
75.2	0
75.3	0
75.4	0
75.5	0
75.6	0
75.7	0
75.8	0
75.9	0
76	0
76.1	0
76.2	0
76.3	0
76.4	0
76.5	0
76.6	0
76.7	0
76.8	0
76.9	0
77	0
77.1	0
77.2	0
77.3	0
77.4	0
77.5	0
77.6	0
77.7	0
77.8	0
77.9	0
78	0
78.1	0
78.2	0
78.3	0
78.4	0
78.5	0
78.6	0
78.7	0
78.8	0
78.9	0
79	0
79.1	0
79.2	0
79.3	0
79.4	0
79.5	0
79.6	0
79.7	0
79.8	0
79.9	0
80	0
80.1	0
80.2	0
80.3	0
80.4	0
80.5	0
80.6	0
80.7	0
80.8	0
80.9	0
81	0
81.1	0
81.2	0
81.3	0
81.4	0
81.5	0
81.6	0
81.7	0
81.8	0
81.9	0
82	0
82.1	0
82.2	0
82.3	0
82.4	0
82.5	0
82.6	0
82.7	0
82.8	0
82.9	0
83	0
83.1	0
83.2	0
83.3	0
83.4	0
83.5	0
83.6	0
83.7	0
83.8	0
83.9	0
84	0
84.1	0
84.2	0
84.3	0
84.4	0
84.5	0
84.6	0
84.7	0
84.8	0
84.9	0
85	0
85.1	0
85.2	0
85.3	0
85.4	0
85.5	0
85.6	0
85.7	0
85.8	0
85.9	0
86	0
86.1	0
86.2	0
86.3	0
86.4	0
86.5	0
86.6	0
86.7	0
86.8	0
86.9	0
87	0
87.1	0
87.2	0
87.3	0
87.4	0
87.5	0
87.6	0
87.7	0
87.8	0
87.9	0
88	0
88.1	0
88.2	0
88.3	0
88.4	0
88.5	0
88.6	0
88.7	0
88.8	0
88.9	0
89	0
89.1	0
89.2	0
89.3	0
89.4	0
89.5	0
89.6	0
89.7	0
89.8	0
89.9	0
90	0
90.1	0
90.2	0
90.3	0
90.4	0
90.5	0
90.6	0
90.7	0
90.8	0
90.9	0
91	0
91.1	0
91.2	0
91.3	0
91.4	0
91.5	0
91.6	0
91.7	0
91.8	0
91.9	0
92	0
92.1	0
92.2	0
92.3	0
92.4	0
92.5	0
92.6	0
92.7	0
92.8	0
92.9	0
93	0
93.1	0
93.2	0
93.3	0
93.4	0
93.5	0
93.6	0
93.7	0
93.8	0
93.9	0
94	0
94.1	0
94.2	0
94.3	0
94.4	0
94.5	0
94.6	0
94.7	0
94.8	0
94.9	0
95	0
95.1	0
95.2	0
95.3	0
95.4	0
95.5	0
95.6	0
95.7	0
95.8	0
95.9	0
96	0
96.1	0
96.2	0
96.3	0
96.4	0
96.5	0
96.6	0
96.7	0
96.8	0
96.9	0
97	0
97.1	0
97.2	0
97.3	0
97.4	0
97.5	0
97.6	0
97.7	0
97.8	0
97.9	0
98	0
98.1	0
98.2	0
98.3	0
98.4	0
98.5	0
98.6	0
98.7	0
98.8	0
98.9	0
99	0
99.1	0
99.2	0
99.3	0
99.4	0
99.5	0
99.6	0
99.7	0
99.8	0
99.9	0
100	0
100.1	0.2
100.2	0.3
100.3	0.39
100.4	0.45
100.5	0.53
100.6	0.58
100.7	0.63
100.8	0.65
100.9	0.685
101	0.705
101.1	0.74
101.2	0.735
101.3	0.765
101.4	0.79
101.5	0.765
101.6	0.77
101.7	0.79
101.8	0.815
101.9	0.815
102	0.82
102.1	0.8
102.2	0.79
102.3	0.81
102.4	0.825
102.5	0.83
102.6	0.855
102.7	0.85
102.8	0.855
102.9	0.855
103	0.84
103.1	0.855
103.2	0.83
103.3	0.86
103.4	0.885
103.5	0.855
103.6	0.855
103.7	0.84
103.8	0.86
103.9	0.865
104	0.88
104.1	0.885
104.2	0.865
104.3	0.885
104.4	0.875
104.5	0.885
104.6	0.87
104.7	0.83
104.8	0.825
104.9	0.815
105	0.825
105.1	0.845
105.2	0.84
105.3	0.84
105.4	0.83
105.5	0.84
105.6	0.85
105.7	0.855
105.8	0.86
105.9	0.87
106	0.865
106.1	0.865
106.2	0.87
106.3	0.89
106.4	0.875
106.5	0.88
106.6	0.895
106.7	0.89
106.8	0.885
106.9	0.885
107	0.885
107.1	0.88
107.2	0.875
107.3	0.87
107.4	0.87
107.5	0.865
107.6	0.87
107.7	0.885
107.8	0.875
107.9	0.885
108	0.89
108.1	0.9
108.2	0.9
108.3	0.9
108.4	0.905
108.5	0.915
108.6	0.915
108.7	0.905
108.8	0.91
108.9	0.9
109	0.905
109.1	0.9
109.2	0.91
109.3	0.895
109.4	0.905
109.5	0.9
109.6	0.93
109.7	0.94
109.8	0.94
109.9	0.945
110	0.925
110.1	0.905
110.2	0.905
110.3	0.905
110.4	0.89
110.5	0.88
110.6	0.885
110.7	0.9
110.8	0.89
110.9	0.89
111	0.865
111.1	0.89
111.2	0.885
111.3	0.895
111.4	0.895
111.5	0.895
111.6	0.875
111.7	0.885
111.8	0.91
111.9	0.905
112	0.9
112.1	0.88
112.2	0.875
112.3	0.875
112.4	0.875
112.5	0.875
112.6	0.87
112.7	0.87
112.8	0.88
112.9	0.88
113	0.895
113.1	0.91
113.2	0.905
113.3	0.925
113.4	0.925
113.5	0.935
113.6	0.95
113.7	0.945
113.8	0.94
113.9	0.94
114	0.93
114.1	0.925
114.2	0.915
114.3	0.915
114.4	0.905
114.5	0.905
114.6	0.895
114.7	0.91
114.8	0.91
114.9	0.92
115	0.93
115.1	0.915
115.2	0.92
115.3	0.915
115.4	0.92
115.5	0.92
115.6	0.915
115.7	0.91
115.8	0.905
115.9	0.91
116	0.915
116.1	0.9
116.2	0.905
116.3	0.89
116.4	0.9
116.5	0.895
116.6	0.9
116.7	0.89
116.8	0.9
116.9	0.895
117	0.9
117.1	0.91
117.2	0.91
117.3	0.93
117.4	0.935
117.5	0.945
117.6	0.935
117.7	0.925
117.8	0.91
117.9	0.92
118	0.92
118.1	0.925
118.2	0.92
118.3	0.935
118.4	0.95
118.5	0.95
118.6	0.94
118.7	0.935
118.8	0.935
118.9	0.925
119	0.92
119.1	0.925
119.2	0.92
119.3	0.92
119.4	0.915
119.5	0.915
119.6	0.91
119.7	0.905
119.8	0.925
119.9	0.92
120	0.915
120.1	0.91
120.2	0.92
120.3	0.92
120.4	0.925
120.5	0.925
120.6	0.905
120.7	0.905
120.8	0.895
120.9	0.9
121	0.895
121.1	0.9
121.2	0.91
121.3	0.91
121.4	0.925
121.5	0.925
121.6	0.925
121.7	0.91
121.8	0.905
121.9	0.9
122	0.89
122.1	0.885
122.2	0.89
122.3	0.9
122.4	0.91
122.5	0.91
122.6	0.915
122.7	0.905
122.8	0.9
122.9	0.905
123	0.905
123.1	0.905
123.2	0.91
123.3	0.91
123.4	0.925
123.5	0.93
123.6	0.95
123.7	0.945
123.8	0.945
123.9	0.945
124	0.965
124.1	0.965
124.2	0.95
124.3	0.95
124.4	0.935
124.5	0.925
124.6	0.925
124.7	0.93
124.8	0.92
124.9	0.905
125	0.895
125.1	0.88
125.2	0.89
125.3	0.89
125.4	0.915
125.5	0.92
125.6	0.915
125.7	0.915
125.8	0.93
125.9	0.91
126	0.9
126.1	0.9
126.2	0.905
126.3	0.915
126.4	0.92
126.5	0.925
126.6	0.925
126.7	0.93
126.8	0.93
126.9	0.93
127	0.925
127.1	0.935
127.2	0.93
127.3	0.935
127.4	0.925
127.5	0.92
127.6	0.905
127.7	0.915
127.8	0.915
127.9	0.925
128	0.935
128.1	0.94
128.2	0.94
128.3	0.95
128.4	0.93
128.5	0.935
128.6	0.925
128.7	0.925
128.8	0.935
128.9	0.94
129	0.935
129.1	0.93
129.2	0.935
129.3	0.94
129.4	0.945
129.5	0.95
129.6	0.935
129.7	0.95
129.8	0.96
129.9	0.96
130	0.95
130.1	0.95
130.2	0.945
130.3	0.955
130.4	0.945
130.5	0.96
130.6	0.97
130.7	0.97
130.8	0.965
130.9	0.965
131	0.95
131.1	0.95
131.2	0.96
131.3	0.95
131.4	0.965
131.5	0.96
131.6	0.97
131.7	0.965
131.8	0.965
131.9	0.96
132	0.955
132.1	0.965
132.2	0.95
132.3	0.945
132.4	0.95
132.5	0.95
132.6	0.955
132.7	0.955
132.8	0.96
132.9	0.97
133	0.975
133.1	0.98
133.2	0.965
133.3	0.965
133.4	0.965
133.5	0.955
133.6	0.95
133.7	0.955
133.8	0.93
133.9	0.93
134	0.92
134.1	0.92
134.2	0.925
134.3	0.935
134.4	0.94
134.5	0.945
134.6	0.945
134.7	0.935
134.8	0.925
134.9	0.93
135	0.925
135.1	0.945
135.2	0.95
135.3	0.95
135.4	0.945
135.5	0.955
135.6	0.965
135.7	0.975
135.8	0.97
135.9	0.955
136	0.955
136.1	0.94
136.2	0.935
136.3	0.95
136.4	0.95
136.5	0.95
136.6	0.95
136.7	0.96
136.8	0.965
136.9	0.965
137	0.955
137.1	0.945
137.2	0.95
137.3	0.95
137.4	0.95
137.5	0.95
137.6	0.955
137.7	0.95
137.8	0.955
137.9	0.96
138	0.955
138.1	0.955
138.2	0.96
138.3	0.965
138.4	0.97
138.5	0.975
138.6	0.965
138.7	0.96
138.8	0.965
138.9	0.965
139	0.96
139.1	0.96
139.2	0.96
139.3	0.965
139.4	0.965
139.5	0.98
139.6	0.98
139.7	0.98
139.8	0.97
139.9	0.97
140	0.97
140.1	0.97
140.2	0.965
140.3	0.97
140.4	0.96
140.5	0.955
140.6	0.96
140.7	0.965
140.8	0.96
140.9	0.96
141	0.965
141.1	0.965
141.2	0.96
141.3	0.955
141.4	0.955
141.5	0.95
141.6	0.96
141.7	0.955
141.8	0.965
141.9	0.965
142	0.97
142.1	0.97
142.2	0.965
142.3	0.965
142.4	0.975
142.5	0.97
142.6	0.97
142.7	0.975
142.8	0.965
142.9	0.965
143	0.96
143.1	0.97
143.2	0.97
143.3	0.97
143.4	0.955
143.5	0.945
143.6	0.945
143.7	0.955
143.8	0.955
143.9	0.96
144	0.96
144.1	0.955
144.2	0.96
144.3	0.96
144.4	0.97
144.5	0.96
144.6	0.96
144.7	0.955
144.8	0.95
144.9	0.95
145	0.945
145.1	0.955
145.2	0.955
145.3	0.96
145.4	0.955
145.5	0.96
145.6	0.955
145.7	0.965
145.8	0.97
145.9	0.965
146	0.965
146.1	0.965
146.2	0.975
146.3	0.965
146.4	0.975
146.5	0.975
146.6	0.98
146.7	0.975
146.8	0.965
146.9	0.96
147	0.96
147.1	0.96
147.2	0.965
147.3	0.965
147.4	0.97
147.5	0.97
147.6	0.98
147.7	0.975
147.8	0.975
147.9	0.97
148	0.965
148.1	0.955
148.2	0.96
148.3	0.97
148.4	0.97
148.5	0.975
148.6	0.955
148.7	0.95
148.8	0.95
148.9	0.945
149	0.94
149.1	0.935
149.2	0.945
149.3	0.955
149.4	0.95
149.5	0.95
149.6	0.95
149.7	0.945
149.8	0.945
149.9	0.945
150	0.935
150.1	0.955
150.2	0.955
150.3	0.95
150.4	0.95
150.5	0.955
150.6	0.965
150.7	0.96
150.8	0.96
150.9	0.96
151	0.955
151.1	0.955
151.2	0.95
151.3	0.955
151.4	0.96
151.5	0.955
151.6	0.955
151.7	0.955
151.8	0.95
151.9	0.95
152	0.94
152.1	0.94
152.2	0.94
152.3	0.94
152.4	0.945
152.5	0.96
152.6	0.965
152.7	0.965
152.8	0.965
152.9	0.96
153	0.95
153.1	0.955
153.2	0.95
153.3	0.95
153.4	0.955
153.5	0.965
153.6	0.965
153.7	0.965
153.8	0.965
153.9	0.975
154	0.975
154.1	0.98
154.2	0.98
154.3	0.985
154.4	0.985
154.5	0.985
154.6	0.98
154.7	0.975
154.8	0.975
154.9	0.97
155	0.97
155.1	0.96
155.2	0.95
155.3	0.95
155.4	0.955
155.5	0.96
155.6	0.96
155.7	0.97
155.8	0.965
155.9	0.965
156	0.965
156.1	0.965
156.2	0.965
156.3	0.975
156.4	0.98
156.5	0.98
156.6	0.975
156.7	0.975
156.8	0.98
156.9	0.975
157	0.965
157.1	0.965
157.2	0.96
157.3	0.955
157.4	0.96
157.5	0.96
157.6	0.96
157.7	0.96
157.8	0.96
157.9	0.97
158	0.965
158.1	0.965
158.2	0.965
158.3	0.96
158.4	0.96
158.5	0.97
158.6	0.955
158.7	0.955
158.8	0.955
158.9	0.95
159	0.955
159.1	0.965
159.2	0.975
159.3	0.975
159.4	0.975
159.5	0.975
159.6	0.97
159.7	0.975
159.8	0.975
159.9	0.97
160	0.975
160.1	0.97
160.2	0.97
160.3	0.97
160.4	0.965
160.5	0.96
160.6	0.96
160.7	0.965
160.8	0.965
160.9	0.97
161	0.965
161.1	0.955
161.2	0.955
161.3	0.955
161.4	0.95
161.5	0.955
161.6	0.95
161.7	0.955
161.8	0.965
161.9	0.965
162	0.965
162.1	0.97
162.2	0.965
162.3	0.965
162.4	0.965
162.5	0.975
162.6	0.965
162.7	0.95
162.8	0.95
162.9	0.96
163	0.965
163.1	0.955
163.2	0.965
163.3	0.98
163.4	0.975
163.5	0.97
163.6	0.96
163.7	0.955
163.8	0.955
163.9	0.96
164	0.97
164.1	0.975
164.2	0.98
164.3	0.975
164.4	0.96
164.5	0.96
164.6	0.965
164.7	0.965
164.8	0.96
164.9	0.96
165	0.965
165.1	0.965
165.2	0.965
165.3	0.96
165.4	0.96
165.5	0.955
165.6	0.955
165.7	0.965
165.8	0.96
165.9	0.955
166	0.95
166.1	0.96
166.2	0.955
166.3	0.955
166.4	0.955
166.5	0.955
166.6	0.95
166.7	0.945
166.8	0.95
166.9	0.945
167	0.94
167.1	0.94
167.2	0.945
167.3	0.955
167.4	0.975
167.5	0.975
167.6	0.98
167.7	0.98
167.8	0.985
167.9	0.97
168	0.98
168.1	0.975
168.2	0.98
168.3	0.98
168.4	0.98
168.5	0.98
168.6	0.98
168.7	0.98
168.8	0.975
168.9	0.98
169	0.98
169.1	0.975
169.2	0.97
169.3	0.96
169.4	0.975
169.5	0.98
169.6	0.975
169.7	0.975
169.8	0.975
169.9	0.965
170	0.955
170.1	0.965
170.2	0.975
170.3	0.98
170.4	0.98
170.5	0.985
170.6	0.985
170.7	0.985
170.8	0.98
170.9	0.98
171	0.98
171.1	0.985
171.2	0.98
171.3	0.98
171.4	0.975
171.5	0.975
171.6	0.97
171.7	0.96
171.8	0.96
171.9	0.96
172	0.97
172.1	0.97
172.2	0.96
172.3	0.955
172.4	0.96
172.5	0.96
172.6	0.965
172.7	0.96
172.8	0.98
172.9	0.98
173	0.98
173.1	0.985
173.2	0.98
173.3	0.985
173.4	0.975
173.5	0.975
173.6	0.98
173.7	0.975
173.8	0.98
173.9	0.985
174	0.99
174.1	0.965
174.2	0.965
174.3	0.975
174.4	0.98
174.5	0.97
174.6	0.97
174.7	0.975
174.8	0.98
174.9	0.975
175	0.97
175.1	0.98
175.2	0.975
175.3	0.97
175.4	0.97
175.5	0.965
175.6	0.97
175.7	0.965
175.8	0.975
175.9	0.975
176	0.975
176.1	0.98
176.2	0.97
176.3	0.965
176.4	0.965
176.5	0.96
176.6	0.96
176.7	0.96
176.8	0.96
176.9	0.96
177	0.95
177.1	0.945
177.2	0.95
177.3	0.95
177.4	0.965
177.5	0.965
177.6	0.965
177.7	0.965
177.8	0.965
177.9	0.97
178	0.965
178.1	0.96
178.2	0.965
178.3	0.97
178.4	0.975
178.5	0.975
178.6	0.975
178.7	0.975
178.8	0.97
178.9	0.965
179	0.955
179.1	0.96
179.2	0.955
179.3	0.95
179.4	0.955
179.5	0.96
179.6	0.95
179.7	0.95
179.8	0.95
179.9	0.95
180	0.955
180.1	0.955
180.2	0.955
180.3	0.95
180.4	0.945
180.5	0.945
180.6	0.95
180.7	0.945
180.8	0.94
180.9	0.95
181	0.945
181.1	0.95
181.2	0.955
181.3	0.96
181.4	0.975
181.5	0.975
181.6	0.965
181.7	0.965
181.8	0.97
181.9	0.96
182	0.965
182.1	0.97
182.2	0.97
182.3	0.97
182.4	0.965
182.5	0.955
182.6	0.975
182.7	0.975
182.8	0.975
182.9	0.975
183	0.97
183.1	0.975
183.2	0.98
183.3	0.975
183.4	0.975
183.5	0.975
183.6	0.975
183.7	0.98
183.8	0.985
183.9	0.975
184	0.95
184.1	0.96
184.2	0.965
184.3	0.97
184.4	0.97
184.5	0.97
184.6	0.965
184.7	0.965
184.8	0.955
184.9	0.955
185	0.96
185.1	0.96
185.2	0.955
185.3	0.945
185.4	0.94
185.5	0.945
185.6	0.96
185.7	0.955
185.8	0.97
185.9	0.965
186	0.98
186.1	0.97
186.2	0.97
186.3	0.97
186.4	0.965
186.5	0.965
186.6	0.975
186.7	0.975
186.8	0.97
186.9	0.97
187	0.965
187.1	0.97
187.2	0.965
187.3	0.955
187.4	0.965
187.5	0.965
187.6	0.96
187.7	0.97
187.8	0.98
187.9	0.99
188	0.985
188.1	0.985
188.2	0.985
188.3	0.98
188.4	0.975
188.5	0.97
188.6	0.965
188.7	0.96
188.8	0.965
188.9	0.96
189	0.97
189.1	0.965
189.2	0.975
189.3	0.98
189.4	0.98
189.5	0.97
189.6	0.97
189.7	0.965
189.8	0.97
189.9	0.98
190	0.98
190.1	0.975
190.2	0.98
190.3	0.98
190.4	0.98
190.5	0.98
190.6	0.98
190.7	0.98
190.8	0.98
190.9	0.975
191	0.965
191.1	0.97
191.2	0.97
191.3	0.96
191.4	0.96
191.5	0.965
191.6	0.975
191.7	0.98
191.8	0.98
191.9	0.975
192	0.975
192.1	0.975
192.2	0.97
192.3	0.96
192.4	0.965
192.5	0.965
192.6	0.965
192.7	0.97
192.8	0.975
192.9	0.97
193	0.97
193.1	0.97
193.2	0.97
193.3	0.97
193.4	0.985
193.5	0.985
193.6	0.98
193.7	0.97
193.8	0.965
193.9	0.95
194	0.95
194.1	0.95
194.2	0.95
194.3	0.965
194.4	0.96
194.5	0.965
194.6	0.965
194.7	0.955
194.8	0.955
194.9	0.94
195	0.935
195.1	0.94
195.2	0.925
195.3	0.925
195.4	0.935
195.5	0.93
195.6	0.94
195.7	0.96
195.8	0.965
195.9	0.965
196	0.955
196.1	0.945
196.2	0.945
196.3	0.955
196.4	0.96
196.5	0.955
196.6	0.965
196.7	0.96
196.8	0.945
196.9	0.945
197	0.945
197.1	0.945
197.2	0.94
197.3	0.935
197.4	0.935
197.5	0.935
197.6	0.945
197.7	0.955
197.8	0.965
197.9	0.965
198	0.965
198.1	0.96
198.2	0.975
198.3	0.975
198.4	0.97
198.5	0.96
198.6	0.955
198.7	0.955
198.8	0.965
198.9	0.965
199	0.96
199.1	0.96
199.2	0.96
199.3	0.955
199.4	0.96
199.5	0.97
199.6	0.95
199.7	0.955
199.8	0.945
199.9	0.945
200	0.96
[truncated: 14,000 more rows]
