# Supplementary material for: Bayesian inference of kinetic schemes for ion channels by Kalman filtering
Source: eLife journal article supplement (doi:10.7554/elife.62714), 2022-05-04
Supplement: fig4-data5 [file 1_Sim_N_100_theor_Fluor_Werte.xlsx]

## Sheet: Tabelle1
0.1	0
0.2	0
0.3	0
0.4	0
0.5	0
0.6	0
0.7	0
0.8	0
0.9	0
1	0
1.1	0
1.2	0
1.3	0
1.4	0
1.5	0
1.6	0
1.7	0
1.8	0
1.9	0
2	0
2.1	0
2.2	0
2.3	0
2.4	0
2.5	0
2.6	0
2.7	0
2.8	0
2.9	0
3	0
3.1	0
3.2	0
3.3	0
3.4	0
3.5	0
3.6	0
3.7	0
3.8	0
3.9	0
4	0
4.1	0
4.2	0
4.3	0
4.4	0
4.5	0
4.6	0
4.7	0
4.8	0
4.9	0
5	0
5.1	0
5.2	0
5.3	0
5.4	0
5.5	0
5.6	0
5.7	0
5.8	0
5.9	0
6	0
6.1	0
6.2	0
6.3	0
6.4	0
6.5	0
6.6	0
6.7	0
6.8	0
6.9	0
7	0
7.1	0
7.2	0
7.3	0
7.4	0
7.5	0
7.6	0
7.7	0
7.8	0
7.9	0
8	0
8.1	0
8.2	0
8.3	0
8.4	0
8.5	0
8.6	0
8.7	0
8.8	0
8.9	0
9	0
9.1	0
9.2	0
9.3	0
9.4	0
9.5	0
9.6	0
9.7	0
9.8	0
9.9	0
10	0
10.1	0
10.2	0
10.3	0
10.4	0
10.5	0
10.6	0
10.7	0
10.8	0
10.9	0
11	0
11.1	0
11.2	0
11.3	0
11.4	0
11.5	0
11.6	0
11.7	0
11.8	0
11.9	0
12	0
12.1	0
12.2	0
12.3	0
12.4	0
12.5	0
12.6	0
12.7	0
12.8	0
12.9	0
13	0
13.1	0
13.2	0
13.3	0
13.4	0
13.5	0
13.6	0
13.7	0
13.8	0
13.9	0
14	0
14.1	0
14.2	0
14.3	0
14.4	0
14.5	0
14.6	0
14.7	0
14.8	0
14.9	0
15	0
15.1	0
15.2	0
15.3	0
15.4	0
15.5	0
15.6	0
15.7	0
15.8	0
15.9	0
16	0
16.1	0
16.2	0
16.3	0
16.4	0
16.5	0
16.6	0
16.7	0
16.8	0
16.9	0
17	0
17.1	0
17.2	0
17.3	0
17.4	0
17.5	0
17.6	0
17.7	0
17.8	0
17.9	0
18	0
18.1	0
18.2	0
18.3	0
18.4	0
18.5	0
18.6	0
18.7	0
18.8	0
18.9	0
19	0
19.1	0
19.2	0
19.3	0
19.4	0
19.5	0
19.6	0
19.7	0
19.8	0
19.9	0
20	0
20.1	0
20.2	0
20.3	0
20.4	0
20.5	0
20.6	0
20.7	0
20.8	0
20.9	0
21	0
21.1	0
21.2	0
21.3	0
21.4	0
21.5	0
21.6	0
21.7	0
21.8	0
21.9	0
22	0
22.1	0
22.2	0
22.3	0
22.4	0
22.5	0
22.6	0
22.7	0
22.8	0
22.9	0
23	0
23.1	0
23.2	0
23.3	0
23.4	0
23.5	0
23.6	0
23.7	0
23.8	0
23.9	0
24	0
24.1	0
24.2	0
24.3	0
24.4	0
24.5	0
24.6	0
24.7	0
24.8	0
24.9	0
25	0
25.1	0
25.2	0
25.3	0
25.4	0
25.5	0
25.6	0
25.7	0
25.8	0
25.9	0
26	0
26.1	0
26.2	0
26.3	0
26.4	0
26.5	0
26.6	0
26.7	0
26.8	0
26.9	0
27	0
27.1	0
27.2	0
27.3	0
27.4	0
27.5	0
27.6	0
27.7	0
27.8	0
27.9	0
28	0
28.1	0
28.2	0
28.3	0
28.4	0
28.5	0
28.6	0
28.7	0
28.8	0
28.9	0
29	0
29.1	0
29.2	0
29.3	0
29.4	0
29.5	0
29.6	0
29.7	0
29.8	0
29.9	0
30	0
30.1	0
30.2	0
30.3	0
30.4	0
30.5	0
30.6	0
30.7	0
30.8	0
30.9	0
31	0
31.1	0
31.2	0
31.3	0
31.4	0
31.5	0
31.6	0
31.7	0
31.8	0
31.9	0
32	0
32.1	0
32.2	0
32.3	0
32.4	0
32.5	0
32.6	0
32.7	0
32.8	0
32.9	0
33	0
33.1	0
33.2	0
33.3	0
33.4	0
33.5	0
33.6	0
33.7	0
33.8	0
33.9	0
34	0
34.1	0
34.2	0
34.3	0
34.4	0
34.5	0
34.6	0
34.7	0
34.8	0
34.9	0
35	0
35.1	0
35.2	0
35.3	0
35.4	0
35.5	0
35.6	0
35.7	0
35.8	0
35.9	0
36	0
36.1	0
36.2	0
36.3	0
36.4	0
36.5	0
36.6	0
36.7	0
36.8	0
36.9	0
37	0
37.1	0
37.2	0
37.3	0
37.4	0
37.5	0
37.6	0
37.7	0
37.8	0
37.9	0
38	0
38.1	0
38.2	0
38.3	0
38.4	0
38.5	0
38.6	0
38.7	0
38.8	0
38.9	0
39	0
39.1	0
39.2	0
39.3	0
39.4	0
39.5	0
39.6	0
39.7	0
39.8	0
39.9	0
40	0
40.1	0
40.2	0
40.3	0
40.4	0
40.5	0
40.6	0
40.7	0
40.8	0
40.9	0
41	0
41.1	0
41.2	0
41.3	0
41.4	0
41.5	0
41.6	0
41.7	0
41.8	0
41.9	0
42	0
42.1	0
42.2	0
42.3	0
42.4	0
42.5	0
42.6	0
42.7	0
42.8	0
42.9	0
43	0
43.1	0
43.2	0
43.3	0
43.4	0
43.5	0
43.6	0
43.7	0
43.8	0
43.9	0
44	0
44.1	0
44.2	0
44.3	0
44.4	0
44.5	0
44.6	0
44.7	0
44.8	0
44.9	0
45	0
45.1	0
45.2	0
45.3	0
45.4	0
45.5	0
45.6	0
45.7	0
45.8	0
45.9	0
46	0
46.1	0
46.2	0
46.3	0
46.4	0
46.5	0
46.6	0
46.7	0
46.8	0
46.9	0
47	0
47.1	0
47.2	0
47.3	0
47.4	0
47.5	0
47.6	0
47.7	0
47.8	0
47.9	0
48	0
48.1	0
48.2	0
48.3	0
48.4	0
48.5	0
48.6	0
48.7	0
48.8	0
48.9	0
49	0
49.1	0
49.2	0
49.3	0
49.4	0
49.5	0
49.6	0
49.7	0
49.8	0
49.9	0
50	0
50.1	0
50.2	0
50.3	0
50.4	0
50.5	0
50.6	0
50.7	0
50.8	0
50.9	0
51	0
51.1	0
51.2	0
51.3	0
51.4	0
51.5	0
51.6	0
51.7	0
51.8	0
51.9	0
52	0
52.1	0
52.2	0
52.3	0
52.4	0
52.5	0
52.6	0
52.7	0
52.8	0
52.9	0
53	0
53.1	0
53.2	0
53.3	0
53.4	0
53.5	0
53.6	0
53.7	0
53.8	0
53.9	0
54	0
54.1	0
54.2	0
54.3	0
54.4	0
54.5	0
54.6	0
54.7	0
54.8	0
54.9	0
55	0
55.1	0
55.2	0
55.3	0
55.4	0
55.5	0
55.6	0
55.7	0
55.8	0
55.9	0
56	0
56.1	0
56.2	0
56.3	0
56.4	0
56.5	0
56.6	0
56.7	0
56.8	0
56.9	0
57	0
57.1	0
57.2	0
57.3	0
57.4	0
57.5	0
57.6	0
57.7	0
57.8	0
57.9	0
58	0
58.1	0
58.2	0
58.3	0
58.4	0
58.5	0
58.6	0
58.7	0
58.8	0
58.9	0
59	0
59.1	0
59.2	0
59.3	0
59.4	0
59.5	0
59.6	0
59.7	0
59.8	0
59.9	0
60	0
60.1	0
60.2	0
60.3	0
60.4	0
60.5	0
60.6	0
60.7	0
60.8	0
60.9	0
61	0
61.1	0
61.2	0
61.3	0
61.4	0
61.5	0
61.6	0
61.7	0
61.8	0
61.9	0
62	0
62.1	0
62.2	0
62.3	0
62.4	0
62.5	0
62.6	0
62.7	0
62.8	0
62.9	0
63	0
63.1	0
63.2	0
63.3	0
63.4	0
63.5	0
63.6	0
63.7	0
63.8	0
63.9	0
64	0
64.1	0
64.2	0
64.3	0
64.4	0
64.5	0
64.6	0
64.7	0
64.8	0
64.9	0
65	0
65.1	0
65.2	0
65.3	0
65.4	0
65.5	0
65.6	0
65.7	0
65.8	0
65.9	0
66	0
66.1	0
66.2	0
66.3	0
66.4	0
66.5	0
66.6	0
66.7	0
66.8	0
66.9	0
67	0
67.1	0
67.2	0
67.3	0
67.4	0
67.5	0
67.6	0
67.7	0
67.8	0
67.9	0
68	0
68.1	0
68.2	0
68.3	0
68.4	0
68.5	0
68.6	0
68.7	0
68.8	0
68.9	0
69	0
69.1	0
69.2	0
69.3	0
69.4	0
69.5	0
69.6	0
69.7	0
69.8	0
69.9	0
70	0
70.1	0
70.2	0
70.3	0
70.4	0
70.5	0
70.6	0
70.7	0
70.8	0
70.9	0
71	0
71.1	0
71.2	0
71.3	0
71.4	0
71.5	0
71.6	0
71.7	0
71.8	0
71.9	0
72	0
72.1	0
72.2	0
72.3	0
72.4	0
72.5	0
72.6	0
72.7	0
72.8	0
72.9	0
73	0
73.1	0
73.2	0
73.3	0
73.4	0
73.5	0
73.6	0
73.7	0
73.8	0
73.9	0
74	0
74.1	0
74.2	0
74.3	0
74.4	0
74.5	0
74.6	0
74.7	0
74.8	0
74.9	0
75	0
75.1	0
75.2	0
75.3	0
75.4	0
75.5	0
75.6	0
75.7	0
75.8	0
75.9	0
76	0
76.1	0
76.2	0
76.3	0
76.4	0
76.5	0
76.6	0
76.7	0
76.8	0
76.9	0
77	0
77.1	0
77.2	0
77.3	0
77.4	0
77.5	0
77.6	0
77.7	0
77.8	0
77.9	0
78	0
78.1	0
78.2	0
78.3	0
78.4	0
78.5	0
78.6	0
78.7	0
78.8	0
78.9	0
79	0
79.1	0
79.2	0
79.3	0
79.4	0
79.5	0
79.6	0
79.7	0
79.8	0
79.9	0
80	0
80.1	0
80.2	0
80.3	0
80.4	0
80.5	0
80.6	0
80.7	0
80.8	0
80.9	0
81	0
81.1	0
81.2	0
81.3	0
81.4	0
81.5	0
81.6	0
81.7	0
81.8	0
81.9	0
82	0
82.1	0
82.2	0
82.3	0
82.4	0
82.5	0
82.6	0
82.7	0
82.8	0
82.9	0
83	0
83.1	0
83.2	0
83.3	0
83.4	0
83.5	0
83.6	0
83.7	0
83.8	0
83.9	0
84	0
84.1	0
84.2	0
84.3	0
84.4	0
84.5	0
84.6	0
84.7	0
84.8	0
84.9	0
85	0
85.1	0
85.2	0
85.3	0
85.4	0
85.5	0
85.6	0
85.7	0
85.8	0
85.9	0
86	0
86.1	0
86.2	0
86.3	0
86.4	0
86.5	0
86.6	0
86.7	0
86.8	0
86.9	0
87	0
87.1	0
87.2	0
87.3	0
87.4	0
87.5	0
87.6	0
87.7	0
87.8	0
87.9	0
88	0
88.1	0
88.2	0
88.3	0
88.4	0
88.5	0
88.6	0
88.7	0
88.8	0
88.9	0
89	0
89.1	0
89.2	0
89.3	0
89.4	0
89.5	0
89.6	0
89.7	0
89.8	0
89.9	0
90	0
90.1	0
90.2	0
90.3	0
90.4	0
90.5	0
90.6	0
90.7	0
90.8	0
90.9	0
91	0
91.1	0
91.2	0
91.3	0
91.4	0
91.5	0
91.6	0
91.7	0
91.8	0
91.9	0
92	0
92.1	0
92.2	0
92.3	0
92.4	0
92.5	0
92.6	0
92.7	0
92.8	0
92.9	0
93	0
93.1	0
93.2	0
93.3	0
93.4	0
93.5	0
93.6	0
93.7	0
93.8	0
93.9	0
94	0
94.1	0
94.2	0
94.3	0
94.4	0
94.5	0
94.6	0
94.7	0
94.8	0
94.9	0
95	0
95.1	0
95.2	0
95.3	0
95.4	0
95.5	0
95.6	0
95.7	0
95.8	0
95.9	0
96	0
96.1	0
96.2	0
96.3	0
96.4	0
96.5	0
96.6	0
96.7	0
96.8	0
96.9	0
97	0
97.1	0
97.2	0
97.3	0
97.4	0
97.5	0
97.6	0
97.7	0
97.8	0
97.9	0
98	0
98.1	0
98.2	0
98.3	0
98.4	0
98.5	0
98.6	0
98.7	0
98.8	0
98.9	0
99	0
99.1	0
99.2	0
99.3	0
99.4	0
99.5	0
99.6	0
99.7	0
99.8	0
99.9	0
100	0
100.1	0.201387
100.2	0.344061
100.3	0.447879
100.4	0.525428
100.5	0.584785
100.6	0.631212
100.7	0.668204
100.8	0.698132
100.9	0.722644
101	0.742918
101.1	0.759815
101.2	0.773983
101.3	0.785922
101.4	0.796022
101.5	0.804597
101.6	0.811898
101.7	0.818134
101.8	0.823474
101.9	0.828061
102	0.832014
102.1	0.835431
102.2	0.838396
102.3	0.840979
102.4	0.843239
102.5	0.845226
102.6	0.846981
102.7	0.848541
102.8	0.849934
102.9	0.851188
103	0.852322
103.1	0.853354
103.2	0.854302
103.3	0.855176
103.4	0.855988
103.5	0.856748
103.6	0.857463
103.7	0.85814
103.8	0.858784
103.9	0.8594
104	0.859992
104.1	0.860563
104.2	0.861117
104.3	0.861656
104.4	0.862181
104.5	0.862695
104.6	0.863199
104.7	0.863694
104.8	0.864181
104.9	0.864661
105	0.865136
105.1	0.865604
105.2	0.866068
105.3	0.866528
105.4	0.866983
105.5	0.867435
105.6	0.867883
105.7	0.868328
105.8	0.86877
105.9	0.869209
106	0.869646
106.1	0.87008
106.2	0.870511
106.3	0.87094
106.4	0.871367
106.5	0.871791
106.6	0.872214
106.7	0.872634
106.8	0.873052
106.9	0.873468
107	0.873882
107.1	0.874295
107.2	0.874705
107.3	0.875113
107.4	0.87552
107.5	0.875924
107.6	0.876327
107.7	0.876728
107.8	0.877127
107.9	0.877524
108	0.87792
108.1	0.878313
108.2	0.878705
108.3	0.879095
108.4	0.879484
108.5	0.87987
108.6	0.880255
108.7	0.880639
108.8	0.88102
108.9	0.8814
109	0.881778
109.1	0.882154
109.2	0.882529
109.3	0.882902
109.4	0.883273
109.5	0.883643
109.6	0.884011
109.7	0.884378
109.8	0.884742
109.9	0.885106
110	0.885467
110.1	0.885827
110.2	0.886185
110.3	0.886542
110.4	0.886897
110.5	0.887251
110.6	0.887603
110.7	0.887953
110.8	0.888302
110.9	0.888649
111	0.888995
111.1	0.889339
111.2	0.889682
111.3	0.890023
111.4	0.890363
111.5	0.890701
111.6	0.891037
111.7	0.891373
111.8	0.891706
111.9	0.892038
112	0.892369
112.1	0.892698
112.2	0.893026
112.3	0.893352
112.4	0.893677
112.5	0.894
112.6	0.894322
112.7	0.894643
112.8	0.894962
112.9	0.895279
113	0.895595
113.1	0.89591
113.2	0.896224
113.3	0.896536
113.4	0.896846
113.5	0.897155
113.6	0.897463
113.7	0.89777
113.8	0.898075
113.9	0.898379
114	0.898681
114.1	0.898982
114.2	0.899282
114.3	0.89958
114.4	0.899877
114.5	0.900173
114.6	0.900467
114.7	0.90076
114.8	0.901052
114.9	0.901342
115	0.901632
115.1	0.90192
115.2	0.902206
115.3	0.902491
115.4	0.902776
115.5	0.903058
115.6	0.90334
115.7	0.90362
115.8	0.903899
115.9	0.904177
116	0.904453
116.1	0.904729
116.2	0.905003
116.3	0.905276
116.4	0.905547
116.5	0.905818
116.6	0.906087
116.7	0.906355
116.8	0.906622
116.9	0.906888
117	0.907152
117.1	0.907415
117.2	0.907677
117.3	0.907938
117.4	0.908198
117.5	0.908457
117.6	0.908714
117.7	0.90897
117.8	0.909226
117.9	0.90948
118	0.909733
118.1	0.909984
118.2	0.910235
118.3	0.910485
118.4	0.910733
118.5	0.91098
118.6	0.911227
118.7	0.911472
118.8	0.911716
118.9	0.911959
119	0.912201
119.1	0.912441
119.2	0.912681
119.3	0.91292
119.4	0.913157
119.5	0.913394
119.6	0.913629
119.7	0.913864
119.8	0.914097
119.9	0.914329
120	0.914561
120.1	0.914791
120.2	0.91502
120.3	0.915248
120.4	0.915476
120.5	0.915702
120.6	0.915927
120.7	0.916151
120.8	0.916374
120.9	0.916596
121	0.916818
121.1	0.917038
121.2	0.917257
121.3	0.917475
121.4	0.917693
121.5	0.917909
121.6	0.918124
121.7	0.918339
121.8	0.918552
121.9	0.918764
122	0.918976
122.1	0.919187
122.2	0.919396
122.3	0.919605
122.4	0.919813
122.5	0.92002
122.6	0.920226
122.7	0.920431
122.8	0.920635
122.9	0.920838
123	0.92104
123.1	0.921242
123.2	0.921442
123.3	0.921642
123.4	0.92184
123.5	0.922038
123.6	0.922235
123.7	0.922431
123.8	0.922626
123.9	0.922821
124	0.923014
124.1	0.923207
124.2	0.923398
124.3	0.923589
124.4	0.923779
124.5	0.923968
124.6	0.924157
124.7	0.924344
124.8	0.924531
124.9	0.924717
125	0.924902
125.1	0.925086
125.2	0.925269
125.3	0.925452
125.4	0.925634
125.5	0.925814
125.6	0.925995
125.7	0.926174
125.8	0.926352
125.9	0.92653
126	0.926707
126.1	0.926883
126.2	0.927058
126.3	0.927233
126.4	0.927407
126.5	0.92758
126.6	0.927752
126.7	0.927924
126.8	0.928094
126.9	0.928264
127	0.928433
127.1	0.928602
127.2	0.928769
127.3	0.928936
127.4	0.929103
127.5	0.929268
127.6	0.929433
127.7	0.929597
127.8	0.92976
127.9	0.929923
128	0.930084
128.1	0.930245
128.2	0.930406
128.3	0.930565
128.4	0.930724
128.5	0.930883
128.6	0.93104
128.7	0.931197
128.8	0.931353
128.9	0.931508
129	0.931663
129.1	0.931817
129.2	0.931971
129.3	0.932123
129.4	0.932275
129.5	0.932427
129.6	0.932577
129.7	0.932727
129.8	0.932876
129.9	0.933025
130	0.933173
130.1	0.93332
130.2	0.933467
130.3	0.933613
130.4	0.933758
130.5	0.933903
130.6	0.934047
130.7	0.934191
130.8	0.934333
130.9	0.934475
131	0.934617
131.1	0.934758
131.2	0.934898
131.3	0.935038
131.4	0.935177
131.5	0.935315
131.6	0.935453
131.7	0.93559
131.8	0.935727
131.9	0.935862
132	0.935998
132.1	0.936132
132.2	0.936267
132.3	0.9364
132.4	0.936533
132.5	0.936665
132.6	0.936797
132.7	0.936928
132.8	0.937059
132.9	0.937189
133	0.937318
133.1	0.937447
133.2	0.937575
133.3	0.937703
133.4	0.93783
133.5	0.937957
133.6	0.938083
133.7	0.938208
133.8	0.938333
133.9	0.938457
134	0.938581
134.1	0.938704
134.2	0.938827
134.3	0.938949
134.4	0.939071
134.5	0.939192
134.6	0.939312
134.7	0.939432
134.8	0.939552
134.9	0.93967
135	0.939789
135.1	0.939907
135.2	0.940024
135.3	0.940141
135.4	0.940257
135.5	0.940373
135.6	0.940488
135.7	0.940603
135.8	0.940717
135.9	0.94083
136	0.940944
136.1	0.941056
136.2	0.941168
136.3	0.94128
136.4	0.941391
136.5	0.941502
136.6	0.941612
136.7	0.941722
136.8	0.941831
136.9	0.94194
137	0.942048
137.1	0.942156
137.2	0.942263
137.3	0.94237
137.4	0.942476
137.5	0.942582
137.6	0.942687
137.7	0.942792
137.8	0.942897
137.9	0.943001
138	0.943104
138.1	0.943207
138.2	0.94331
138.3	0.943412
138.4	0.943514
138.5	0.943615
138.6	0.943716
138.7	0.943816
138.8	0.943916
138.9	0.944015
139	0.944114
139.1	0.944213
139.2	0.944311
139.3	0.944409
139.4	0.944506
139.5	0.944603
139.6	0.944699
139.7	0.944795
139.8	0.944891
139.9	0.944986
140	0.94508
140.1	0.945174
140.2	0.945268
140.3	0.945362
140.4	0.945455
140.5	0.945547
140.6	0.945639
140.7	0.945731
140.8	0.945823
140.9	0.945913
141	0.946004
141.1	0.946094
141.2	0.946184
141.3	0.946273
141.4	0.946362
141.5	0.946451
141.6	0.946539
141.7	0.946626
141.8	0.946714
141.9	0.946801
142	0.946887
142.1	0.946974
142.2	0.947059
142.3	0.947145
142.4	0.94723
142.5	0.947314
142.6	0.947399
142.7	0.947483
142.8	0.947566
142.9	0.947649
143	0.947732
143.1	0.947815
143.2	0.947897
143.3	0.947978
143.4	0.94806
143.5	0.948141
143.6	0.948221
143.7	0.948301
143.8	0.948381
143.9	0.948461
144	0.94854
144.1	0.948619
144.2	0.948697
144.3	0.948775
144.4	0.948853
144.5	0.948931
144.6	0.949008
144.7	0.949084
144.8	0.949161
144.9	0.949237
145	0.949313
145.1	0.949388
145.2	0.949463
145.3	0.949538
145.4	0.949612
145.5	0.949686
145.6	0.94976
145.7	0.949833
145.8	0.949906
145.9	0.949979
146	0.950051
146.1	0.950124
146.2	0.950195
146.3	0.950267
146.4	0.950338
146.5	0.950409
146.6	0.950479
146.7	0.950549
146.8	0.950619
146.9	0.950689
147	0.950758
147.1	0.950827
147.2	0.950896
147.3	0.950964
147.4	0.951032
147.5	0.9511
147.6	0.951167
147.7	0.951234
147.8	0.951301
147.9	0.951368
148	0.951434
148.1	0.9515
148.2	0.951565
148.3	0.951631
148.4	0.951696
148.5	0.95176
148.6	0.951825
148.7	0.951889
148.8	0.951953
148.9	0.952017
149	0.95208
149.1	0.952143
149.2	0.952206
149.3	0.952268
149.4	0.95233
149.5	0.952392
149.6	0.952454
149.7	0.952515
149.8	0.952576
149.9	0.952637
150	0.952698
150.1	0.952758
150.2	0.952818
150.3	0.952878
150.4	0.952937
150.5	0.952997
150.6	0.953056
150.7	0.953114
150.8	0.953173
150.9	0.953231
151	0.953289
151.1	0.953346
151.2	0.953404
151.3	0.953461
151.4	0.953518
151.5	0.953575
151.6	0.953631
151.7	0.953687
151.8	0.953743
151.9	0.953799
152	0.953854
152.1	0.953909
152.2	0.953964
152.3	0.954019
152.4	0.954073
152.5	0.954127
152.6	0.954181
152.7	0.954235
152.8	0.954288
152.9	0.954341
153	0.954394
153.1	0.954447
153.2	0.9545
153.3	0.954552
153.4	0.954604
153.5	0.954656
153.6	0.954707
153.7	0.954759
153.8	0.95481
153.9	0.954861
154	0.954911
154.1	0.954962
154.2	0.955012
154.3	0.955062
154.4	0.955112
154.5	0.955161
154.6	0.95521
154.7	0.95526
154.8	0.955308
154.9	0.955357
155	0.955405
155.1	0.955454
155.2	0.955502
155.3	0.95555
155.4	0.955597
155.5	0.955644
155.6	0.955692
155.7	0.955739
155.8	0.955785
155.9	0.955832
156	0.955878
156.1	0.955924
156.2	0.95597
156.3	0.956016
156.4	0.956061
156.5	0.956107
156.6	0.956152
156.7	0.956197
156.8	0.956241
156.9	0.956286
157	0.95633
157.1	0.956374
157.2	0.956418
157.3	0.956462
157.4	0.956505
157.5	0.956549
157.6	0.956592
157.7	0.956635
157.8	0.956678
157.9	0.95672
158	0.956762
158.1	0.956805
158.2	0.956847
158.3	0.956888
158.4	0.95693
158.5	0.956971
158.6	0.957013
158.7	0.957054
158.8	0.957095
158.9	0.957135
159	0.957176
159.1	0.957216
159.2	0.957256
159.3	0.957296
159.4	0.957336
159.5	0.957376
159.6	0.957415
159.7	0.957454
159.8	0.957494
159.9	0.957532
160	0.957571
160.1	0.95761
160.2	0.957648
160.3	0.957686
160.4	0.957724
160.5	0.957762
160.6	0.9578
160.7	0.957838
160.8	0.957875
160.9	0.957912
161	0.957949
161.1	0.957986
161.2	0.958023
161.3	0.958059
161.4	0.958096
161.5	0.958132
161.6	0.958168
161.7	0.958204
161.8	0.95824
161.9	0.958275
162	0.958311
162.1	0.958346
162.2	0.958381
162.3	0.958416
162.4	0.958451
162.5	0.958486
162.6	0.95852
162.7	0.958554
162.8	0.958589
162.9	0.958623
163	0.958657
163.1	0.95869
163.2	0.958724
163.3	0.958757
163.4	0.958791
163.5	0.958824
163.6	0.958857
163.7	0.95889
163.8	0.958922
163.9	0.958955
164	0.958987
164.1	0.959019
164.2	0.959052
164.3	0.959084
164.4	0.959115
164.5	0.959147
164.6	0.959179
164.7	0.95921
164.8	0.959241
164.9	0.959272
165	0.959303
165.1	0.959334
165.2	0.959365
165.3	0.959396
165.4	0.959426
165.5	0.959456
165.6	0.959486
165.7	0.959516
165.8	0.959546
165.9	0.959576
166	0.959606
166.1	0.959635
166.2	0.959665
166.3	0.959694
166.4	0.959723
166.5	0.959752
166.6	0.959781
166.7	0.95981
166.8	0.959838
166.9	0.959867
167	0.959895
167.1	0.959923
167.2	0.959951
167.3	0.959979
167.4	0.960007
167.5	0.960035
167.6	0.960062
167.7	0.96009
167.8	0.960117
167.9	0.960144
168	0.960172
168.1	0.960198
168.2	0.960225
168.3	0.960252
168.4	0.960279
168.5	0.960305
168.6	0.960332
168.7	0.960358
168.8	0.960384
168.9	0.96041
169	0.960436
169.1	0.960462
169.2	0.960487
169.3	0.960513
169.4	0.960538
169.5	0.960564
169.6	0.960589
169.7	0.960614
169.8	0.960639
169.9	0.960664
170	0.960689
170.1	0.960714
170.2	0.960738
170.3	0.960763
170.4	0.960787
170.5	0.960811
170.6	0.960835
170.7	0.960859
170.8	0.960883
170.9	0.960907
171	0.960931
171.1	0.960954
171.2	0.960978
171.3	0.961001
171.4	0.961025
171.5	0.961048
171.6	0.961071
171.7	0.961094
171.8	0.961117
171.9	0.961139
172	0.961162
172.1	0.961185
172.2	0.961207
172.3	0.961229
172.4	0.961252
172.5	0.961274
172.6	0.961296
172.7	0.961318
172.8	0.96134
172.9	0.961362
173	0.961383
173.1	0.961405
173.2	0.961426
173.3	0.961448
173.4	0.961469
173.5	0.96149
173.6	0.961511
173.7	0.961532
173.8	0.961553
173.9	0.961574
174	0.961595
174.1	0.961615
174.2	0.961636
174.3	0.961656
174.4	0.961677
174.5	0.961697
174.6	0.961717
174.7	0.961737
174.8	0.961757
174.9	0.961777
175	0.961797
175.1	0.961817
175.2	0.961836
175.3	0.961856
175.4	0.961875
175.5	0.961895
175.6	0.961914
175.7	0.961933
175.8	0.961952
175.9	0.961972
176	0.961991
176.1	0.962009
176.2	0.962028
176.3	0.962047
176.4	0.962065
176.5	0.962084
176.6	0.962102
176.7	0.962121
176.8	0.962139
176.9	0.962157
177	0.962176
177.1	0.962194
177.2	0.962212
177.3	0.962229
177.4	0.962247
177.5	0.962265
177.6	0.962283
177.7	0.9623
177.8	0.962318
177.9	0.962335
178	0.962352
178.1	0.96237
178.2	0.962387
178.3	0.962404
178.4	0.962421
178.5	0.962438
178.6	0.962455
178.7	0.962472
178.8	0.962488
178.9	0.962505
179	0.962522
179.1	0.962538
179.2	0.962555
179.3	0.962571
179.4	0.962587
179.5	0.962603
179.6	0.96262
179.7	0.962636
179.8	0.962652
179.9	0.962668
180	0.962683
180.1	0.962699
180.2	0.962715
180.3	0.962731
180.4	0.962746
180.5	0.962762
180.6	0.962777
180.7	0.962792
180.8	0.962808
180.9	0.962823
181	0.962838
181.1	0.962853
181.2	0.962868
181.3	0.962883
181.4	0.962898
181.5	0.962913
181.6	0.962928
181.7	0.962942
181.8	0.962957
181.9	0.962972
182	0.962986
182.1	0.963001
182.2	0.963015
182.3	0.963029
182.4	0.963043
182.5	0.963058
182.6	0.963072
182.7	0.963086
182.8	0.9631
182.9	0.963114
183	0.963128
183.1	0.963141
183.2	0.963155
183.3	0.963169
183.4	0.963182
183.5	0.963196
183.6	0.96321
183.7	0.963223
183.8	0.963236
183.9	0.96325
184	0.963263
184.1	0.963276
184.2	0.963289
184.3	0.963302
184.4	0.963315
184.5	0.963328
184.6	0.963341
184.7	0.963354
184.8	0.963367
184.9	0.96338
185	0.963392
185.1	0.963405
185.2	0.963418
185.3	0.96343
185.4	0.963443
185.5	0.963455
185.6	0.963467
185.7	0.96348
185.8	0.963492
185.9	0.963504
186	0.963516
186.1	0.963528
186.2	0.96354
186.3	0.963552
186.4	0.963564
186.5	0.963576
186.6	0.963588
186.7	0.9636
186.8	0.963611
186.9	0.963623
187	0.963634
187.1	0.963646
187.2	0.963658
187.3	0.963669
187.4	0.96368
187.5	0.963692
187.6	0.963703
187.7	0.963714
187.8	0.963725
187.9	0.963737
188	0.963748
188.1	0.963759
188.2	0.96377
188.3	0.963781
188.4	0.963792
188.5	0.963802
188.6	0.963813
188.7	0.963824
188.8	0.963835
188.9	0.963845
189	0.963856
189.1	0.963866
189.2	0.963877
189.3	0.963887
189.4	0.963898
189.5	0.963908
189.6	0.963919
189.7	0.963929
189.8	0.963939
189.9	0.963949
190	0.963959
190.1	0.96397
190.2	0.96398
190.3	0.96399
190.4	0.964
190.5	0.964009
190.6	0.964019
190.7	0.964029
190.8	0.964039
190.9	0.964049
191	0.964058
191.1	0.964068
191.2	0.964078
191.3	0.964087
191.4	0.964097
191.5	0.964106
191.6	0.964116
191.7	0.964125
191.8	0.964134
191.9	0.964144
192	0.964153
192.1	0.964162
192.2	0.964171
192.3	0.964181
192.4	0.96419
192.5	0.964199
192.6	0.964208
192.7	0.964217
192.8	0.964226
192.9	0.964235
193	0.964244
193.1	0.964252
193.2	0.964261
193.3	0.96427
193.4	0.964279
193.5	0.964287
193.6	0.964296
193.7	0.964305
193.8	0.964313
193.9	0.964322
194	0.96433
194.1	0.964339
194.2	0.964347
194.3	0.964355
194.4	0.964364
194.5	0.964372
194.6	0.96438
194.7	0.964389
194.8	0.964397
194.9	0.964405
195	0.964413
195.1	0.964421
195.2	0.964429
195.3	0.964437
195.4	0.964445
195.5	0.964453
195.6	0.964461
195.7	0.964469
195.8	0.964477
195.9	0.964484
196	0.964492
196.1	0.9645
196.2	0.964508
196.3	0.964515
196.4	0.964523
196.5	0.96453
196.6	0.964538
196.7	0.964545
196.8	0.964553
196.9	0.96456
197	0.964568
197.1	0.964575
197.2	0.964583
197.3	0.96459
197.4	0.964597
197.5	0.964604
197.6	0.964612
197.7	0.964619
197.8	0.964626
197.9	0.964633
198	0.96464
198.1	0.964647
198.2	0.964654
198.3	0.964661
198.4	0.964668
198.5	0.964675
198.6	0.964682
198.7	0.964689
198.8	0.964696
198.9	0.964703
199	0.964709
199.1	0.964716
199.2	0.964723
199.3	0.96473
199.4	0.964736
199.5	0.964743
199.6	0.96475
199.7	0.964756
199.8	0.964763
199.9	0.964769
200	0.964776
[truncated: 14,000 more rows]
