# Supplementary material for: Bayesian inference of kinetic schemes for ion channels by Kalman filtering
Source: eLife journal article supplement (doi:10.7554/elife.62714), 2022-05-04
Supplement: fig4-data5 [file 1_Sim_N_100_theor_Strom_Werte.xlsx]

## Sheet: Tabelle1
0.1	0
0.2	0
0.3	0
0.4	0
0.5	0
0.6	0
0.7	0
0.8	0
0.9	0
1	0
1.1	0
1.2	0
1.3	0
1.4	0
1.5	0
1.6	0
1.7	0
1.8	0
1.9	0
2	0
2.1	0
2.2	0
2.3	0
2.4	0
2.5	0
2.6	0
2.7	0
2.8	0
2.9	0
3	0
3.1	0
3.2	0
3.3	0
3.4	0
3.5	0
3.6	0
3.7	0
3.8	0
3.9	0
4	0
4.1	0
4.2	0
4.3	0
4.4	0
4.5	0
4.6	0
4.7	0
4.8	0
4.9	0
5	0
5.1	0
5.2	0
5.3	0
5.4	0
5.5	0
5.6	0
5.7	0
5.8	0
5.9	0
6	0
6.1	0
6.2	0
6.3	0
6.4	0
6.5	0
6.6	0
6.7	0
6.8	0
6.9	0
7	0
7.1	0
7.2	0
7.3	0
7.4	0
7.5	0
7.6	0
7.7	0
7.8	0
7.9	0
8	0
8.1	0
8.2	0
8.3	0
8.4	0
8.5	0
8.6	0
8.7	0
8.8	0
8.9	0
9	0
9.1	0
9.2	0
9.3	0
9.4	0
9.5	0
9.6	0
9.7	0
9.8	0
9.9	0
10	0
10.1	0
10.2	0
10.3	0
10.4	0
10.5	0
10.6	0
10.7	0
10.8	0
10.9	0
11	0
11.1	0
11.2	0
11.3	0
11.4	0
11.5	0
11.6	0
11.7	0
11.8	0
11.9	0
12	0
12.1	0
12.2	0
12.3	0
12.4	0
12.5	0
12.6	0
12.7	0
12.8	0
12.9	0
13	0
13.1	0
13.2	0
13.3	0
13.4	0
13.5	0
13.6	0
13.7	0
13.8	0
13.9	0
14	0
14.1	0
14.2	0
14.3	0
14.4	0
14.5	0
14.6	0
14.7	0
14.8	0
14.9	0
15	0
15.1	0
15.2	0
15.3	0
15.4	0
15.5	0
15.6	0
15.7	0
15.8	0
15.9	0
16	0
16.1	0
16.2	0
16.3	0
16.4	0
16.5	0
16.6	0
16.7	0
16.8	0
16.9	0
17	0
17.1	0
17.2	0
17.3	0
17.4	0
17.5	0
17.6	0
17.7	0
17.8	0
17.9	0
18	0
18.1	0
18.2	0
18.3	0
18.4	0
18.5	0
18.6	0
18.7	0
18.8	0
18.9	0
19	0
19.1	0
19.2	0
19.3	0
19.4	0
19.5	0
19.6	0
19.7	0
19.8	0
19.9	0
20	0
20.1	0
20.2	0
20.3	0
20.4	0
20.5	0
20.6	0
20.7	0
20.8	0
20.9	0
21	0
21.1	0
21.2	0
21.3	0
21.4	0
21.5	0
21.6	0
21.7	0
21.8	0
21.9	0
22	0
22.1	0
22.2	0
22.3	0
22.4	0
22.5	0
22.6	0
22.7	0
22.8	0
22.9	0
23	0
23.1	0
23.2	0
23.3	0
23.4	0
23.5	0
23.6	0
23.7	0
23.8	0
23.9	0
24	0
24.1	0
24.2	0
24.3	0
24.4	0
24.5	0
24.6	0
24.7	0
24.8	0
24.9	0
25	0
25.1	0
25.2	0
25.3	0
25.4	0
25.5	0
25.6	0
25.7	0
25.8	0
25.9	0
26	0
26.1	0
26.2	0
26.3	0
26.4	0
26.5	0
26.6	0
26.7	0
26.8	0
26.9	0
27	0
27.1	0
27.2	0
27.3	0
27.4	0
27.5	0
27.6	0
27.7	0
27.8	0
27.9	0
28	0
28.1	0
28.2	0
28.3	0
28.4	0
28.5	0
28.6	0
28.7	0
28.8	0
28.9	0
29	0
29.1	0
29.2	0
29.3	0
29.4	0
29.5	0
29.6	0
29.7	0
29.8	0
29.9	0
30	0
30.1	0
30.2	0
30.3	0
30.4	0
30.5	0
30.6	0
30.7	0
30.8	0
30.9	0
31	0
31.1	0
31.2	0
31.3	0
31.4	0
31.5	0
31.6	0
31.7	0
31.8	0
31.9	0
32	0
32.1	0
32.2	0
32.3	0
32.4	0
32.5	0
32.6	0
32.7	0
32.8	0
32.9	0
33	0
33.1	0
33.2	0
33.3	0
33.4	0
33.5	0
33.6	0
33.7	0
33.8	0
33.9	0
34	0
34.1	0
34.2	0
34.3	0
34.4	0
34.5	0
34.6	0
34.7	0
34.8	0
34.9	0
35	0
35.1	0
35.2	0
35.3	0
35.4	0
35.5	0
35.6	0
35.7	0
35.8	0
35.9	0
36	0
36.1	0
36.2	0
36.3	0
36.4	0
36.5	0
36.6	0
36.7	0
36.8	0
36.9	0
37	0
37.1	0
37.2	0
37.3	0
37.4	0
37.5	0
37.6	0
37.7	0
37.8	0
37.9	0
38	0
38.1	0
38.2	0
38.3	0
38.4	0
38.5	0
38.6	0
38.7	0
38.8	0
38.9	0
39	0
39.1	0
39.2	0
39.3	0
39.4	0
39.5	0
39.6	0
39.7	0
39.8	0
39.9	0
40	0
40.1	0
40.2	0
40.3	0
40.4	0
40.5	0
40.6	0
40.7	0
40.8	0
40.9	0
41	0
41.1	0
41.2	0
41.3	0
41.4	0
41.5	0
41.6	0
41.7	0
41.8	0
41.9	0
42	0
42.1	0
42.2	0
42.3	0
42.4	0
42.5	0
42.6	0
42.7	0
42.8	0
42.9	0
43	0
43.1	0
43.2	0
43.3	0
43.4	0
43.5	0
43.6	0
43.7	0
43.8	0
43.9	0
44	0
44.1	0
44.2	0
44.3	0
44.4	0
44.5	0
44.6	0
44.7	0
44.8	0
44.9	0
45	0
45.1	0
45.2	0
45.3	0
45.4	0
45.5	0
45.6	0
45.7	0
45.8	0
45.9	0
46	0
46.1	0
46.2	0
46.3	0
46.4	0
46.5	0
46.6	0
46.7	0
46.8	0
46.9	0
47	0
47.1	0
47.2	0
47.3	0
47.4	0
47.5	0
47.6	0
47.7	0
47.8	0
47.9	0
48	0
48.1	0
48.2	0
48.3	0
48.4	0
48.5	0
48.6	0
48.7	0
48.8	0
48.9	0
49	0
49.1	0
49.2	0
49.3	0
49.4	0
49.5	0
49.6	0
49.7	0
49.8	0
49.9	0
50	0
50.1	0
50.2	0
50.3	0
50.4	0
50.5	0
50.6	0
50.7	0
50.8	0
50.9	0
51	0
51.1	0
51.2	0
51.3	0
51.4	0
51.5	0
51.6	0
51.7	0
51.8	0
51.9	0
52	0
52.1	0
52.2	0
52.3	0
52.4	0
52.5	0
52.6	0
52.7	0
52.8	0
52.9	0
53	0
53.1	0
53.2	0
53.3	0
53.4	0
53.5	0
53.6	0
53.7	0
53.8	0
53.9	0
54	0
54.1	0
54.2	0
54.3	0
54.4	0
54.5	0
54.6	0
54.7	0
54.8	0
54.9	0
55	0
55.1	0
55.2	0
55.3	0
55.4	0
55.5	0
55.6	0
55.7	0
55.8	0
55.9	0
56	0
56.1	0
56.2	0
56.3	0
56.4	0
56.5	0
56.6	0
56.7	0
56.8	0
56.9	0
57	0
57.1	0
57.2	0
57.3	0
57.4	0
57.5	0
57.6	0
57.7	0
57.8	0
57.9	0
58	0
58.1	0
58.2	0
58.3	0
58.4	0
58.5	0
58.6	0
58.7	0
58.8	0
58.9	0
59	0
59.1	0
59.2	0
59.3	0
59.4	0
59.5	0
59.6	0
59.7	0
59.8	0
59.9	0
60	0
60.1	0
60.2	0
60.3	0
60.4	0
60.5	0
60.6	0
60.7	0
60.8	0
60.9	0
61	0
61.1	0
61.2	0
61.3	0
61.4	0
61.5	0
61.6	0
61.7	0
61.8	0
61.9	0
62	0
62.1	0
62.2	0
62.3	0
62.4	0
62.5	0
62.6	0
62.7	0
62.8	0
62.9	0
63	0
63.1	0
63.2	0
63.3	0
63.4	0
63.5	0
63.6	0
63.7	0
63.8	0
63.9	0
64	0
64.1	0
64.2	0
64.3	0
64.4	0
64.5	0
64.6	0
64.7	0
64.8	0
64.9	0
65	0
65.1	0
65.2	0
65.3	0
65.4	0
65.5	0
65.6	0
65.7	0
65.8	0
65.9	0
66	0
66.1	0
66.2	0
66.3	0
66.4	0
66.5	0
66.6	0
66.7	0
66.8	0
66.9	0
67	0
67.1	0
67.2	0
67.3	0
67.4	0
67.5	0
67.6	0
67.7	0
67.8	0
67.9	0
68	0
68.1	0
68.2	0
68.3	0
68.4	0
68.5	0
68.6	0
68.7	0
68.8	0
68.9	0
69	0
69.1	0
69.2	0
69.3	0
69.4	0
69.5	0
69.6	0
69.7	0
69.8	0
69.9	0
70	0
70.1	0
70.2	0
70.3	0
70.4	0
70.5	0
70.6	0
70.7	0
70.8	0
70.9	0
71	0
71.1	0
71.2	0
71.3	0
71.4	0
71.5	0
71.6	0
71.7	0
71.8	0
71.9	0
72	0
72.1	0
72.2	0
72.3	0
72.4	0
72.5	0
72.6	0
72.7	0
72.8	0
72.9	0
73	0
73.1	0
73.2	0
73.3	0
73.4	0
73.5	0
73.6	0
73.7	0
73.8	0
73.9	0
74	0
74.1	0
74.2	0
74.3	0
74.4	0
74.5	0
74.6	0
74.7	0
74.8	0
74.9	0
75	0
75.1	0
75.2	0
75.3	0
75.4	0
75.5	0
75.6	0
75.7	0
75.8	0
75.9	0
76	0
76.1	0
76.2	0
76.3	0
76.4	0
76.5	0
76.6	0
76.7	0
76.8	0
76.9	0
77	0
77.1	0
77.2	0
77.3	0
77.4	0
77.5	0
77.6	0
77.7	0
77.8	0
77.9	0
78	0
78.1	0
78.2	0
78.3	0
78.4	0
78.5	0
78.6	0
78.7	0
78.8	0
78.9	0
79	0
79.1	0
79.2	0
79.3	0
79.4	0
79.5	0
79.6	0
79.7	0
79.8	0
79.9	0
80	0
80.1	0
80.2	0
80.3	0
80.4	0
80.5	0
80.6	0
80.7	0
80.8	0
80.9	0
81	0
81.1	0
81.2	0
81.3	0
81.4	0
81.5	0
81.6	0
81.7	0
81.8	0
81.9	0
82	0
82.1	0
82.2	0
82.3	0
82.4	0
82.5	0
82.6	0
82.7	0
82.8	0
82.9	0
83	0
83.1	0
83.2	0
83.3	0
83.4	0
83.5	0
83.6	0
83.7	0
83.8	0
83.9	0
84	0
84.1	0
84.2	0
84.3	0
84.4	0
84.5	0
84.6	0
84.7	0
84.8	0
84.9	0
85	0
85.1	0
85.2	0
85.3	0
85.4	0
85.5	0
85.6	0
85.7	0
85.8	0
85.9	0
86	0
86.1	0
86.2	0
86.3	0
86.4	0
86.5	0
86.6	0
86.7	0
86.8	0
86.9	0
87	0
87.1	0
87.2	0
87.3	0
87.4	0
87.5	0
87.6	0
87.7	0
87.8	0
87.9	0
88	0
88.1	0
88.2	0
88.3	0
88.4	0
88.5	0
88.6	0
88.7	0
88.8	0
88.9	0
89	0
89.1	0
89.2	0
89.3	0
89.4	0
89.5	0
89.6	0
89.7	0
89.8	0
89.9	0
90	0
90.1	0
90.2	0
90.3	0
90.4	0
90.5	0
90.6	0
90.7	0
90.8	0
90.9	0
91	0
91.1	0
91.2	0
91.3	0
91.4	0
91.5	0
91.6	0
91.7	0
91.8	0
91.9	0
92	0
92.1	0
92.2	0
92.3	0
92.4	0
92.5	0
92.6	0
92.7	0
92.8	0
92.9	0
93	0
93.1	0
93.2	0
93.3	0
93.4	0
93.5	0
93.6	0
93.7	0
93.8	0
93.9	0
94	0
94.1	0
94.2	0
94.3	0
94.4	0
94.5	0
94.6	0
94.7	0
94.8	0
94.9	0
95	0
95.1	0
95.2	0
95.3	0
95.4	0
95.5	0
95.6	0
95.7	0
95.8	0
95.9	0
96	0
96.1	0
96.2	0
96.3	0
96.4	0
96.5	0
96.6	0
96.7	0
96.8	0
96.9	0
97	0
97.1	0
97.2	0
97.3	0
97.4	0
97.5	0
97.6	0
97.7	0
97.8	0
97.9	0
98	0
98.1	0
98.2	0
98.3	0
98.4	0
98.5	0
98.6	0
98.7	0
98.8	0
98.9	0
99	0
99.1	0
99.2	0
99.3	0
99.4	0
99.5	0
99.6	0
99.7	0
99.8	0
99.9	0
100	0
100.1	4.07989e-05
100.2	0.000279545
100.3	0.000813867
100.4	0.00167543
100.5	0.00285995
100.6	0.00434487
100.7	0.00609953
100.8	0.00809098
100.9	0.010287
101	0.0126579
101.1	0.0151768
101.2	0.01782
101.3	0.0205669
101.4	0.0233999
101.5	0.0263037
101.6	0.0292654
101.7	0.0322737
101.8	0.0353195
101.9	0.0383946
102	0.0414924
102.1	0.0446071
102.2	0.047734
102.3	0.0508689
102.4	0.0540085
102.5	0.0571498
102.6	0.0602905
102.7	0.0634284
102.8	0.0665618
102.9	0.0696893
103	0.0728097
103.1	0.0759219
103.2	0.0790251
103.3	0.0821186
103.4	0.0852018
103.5	0.0882741
103.6	0.0913353
103.7	0.0943849
103.8	0.0974228
103.9	0.100449
104	0.103462
104.1	0.106463
104.2	0.109452
104.3	0.112428
104.4	0.115392
104.5	0.118343
104.6	0.121281
104.7	0.124206
104.8	0.127119
104.9	0.130019
105	0.132907
105.1	0.135782
105.2	0.138644
105.3	0.141493
105.4	0.14433
105.5	0.147154
105.6	0.149966
105.7	0.152766
105.8	0.155553
105.9	0.158327
106	0.16109
106.1	0.16384
106.2	0.166578
106.3	0.169303
106.4	0.172017
106.5	0.174718
106.6	0.177407
106.7	0.180085
106.8	0.18275
106.9	0.185404
107	0.188046
107.1	0.190676
107.2	0.193294
107.3	0.195901
107.4	0.198496
107.5	0.20108
107.6	0.203652
107.7	0.206212
107.8	0.208761
107.9	0.211299
108	0.213825
108.1	0.216341
108.2	0.218845
108.3	0.221337
108.4	0.223819
108.5	0.22629
108.6	0.22875
108.7	0.231198
108.8	0.233636
108.9	0.236063
109	0.238479
109.1	0.240884
109.2	0.243279
109.3	0.245663
109.4	0.248036
109.5	0.250399
109.6	0.252751
109.7	0.255093
109.8	0.257424
109.9	0.259745
110	0.262056
110.1	0.264356
110.2	0.266646
110.3	0.268926
110.4	0.271195
110.5	0.273455
110.6	0.275704
110.7	0.277944
110.8	0.280173
110.9	0.282393
111	0.284602
111.1	0.286802
111.2	0.288992
111.3	0.291172
111.4	0.293343
111.5	0.295503
111.6	0.297655
111.7	0.299796
111.8	0.301928
111.9	0.304051
112	0.306164
112.1	0.308267
112.2	0.310362
112.3	0.312447
112.4	0.314522
112.5	0.316589
112.6	0.318646
112.7	0.320694
112.8	0.322733
112.9	0.324763
113	0.326783
113.1	0.328795
113.2	0.330798
113.3	0.332792
113.4	0.334777
113.5	0.336753
113.6	0.33872
113.7	0.340679
113.8	0.342629
113.9	0.34457
114	0.346502
114.1	0.348426
114.2	0.350342
114.3	0.352248
114.4	0.354147
114.5	0.356036
114.6	0.357918
114.7	0.359791
114.8	0.361656
114.9	0.363512
115	0.36536
115.1	0.3672
115.2	0.369031
115.3	0.370855
115.4	0.37267
115.5	0.374477
115.6	0.376277
115.7	0.378068
115.8	0.379851
115.9	0.381626
116	0.383394
116.1	0.385153
116.2	0.386905
116.3	0.388649
116.4	0.390385
116.5	0.392113
116.6	0.393833
116.7	0.395546
116.8	0.397252
116.9	0.398949
117	0.40064
117.1	0.402322
117.2	0.403997
117.3	0.405665
117.4	0.407325
117.5	0.408978
117.6	0.410623
117.7	0.412261
117.8	0.413892
117.9	0.415516
118	0.417132
118.1	0.418741
118.2	0.420343
118.3	0.421938
118.4	0.423525
118.5	0.425106
118.6	0.42668
118.7	0.428246
118.8	0.429806
118.9	0.431358
119	0.432904
119.1	0.434443
119.2	0.435975
119.3	0.4375
119.4	0.439018
119.5	0.44053
119.6	0.442035
119.7	0.443533
119.8	0.445024
119.9	0.446509
120	0.447987
120.1	0.449459
120.2	0.450924
120.3	0.452382
120.4	0.453834
120.5	0.45528
120.6	0.456719
120.7	0.458151
120.8	0.459578
120.9	0.460998
121	0.462411
121.1	0.463818
121.2	0.465219
121.3	0.466614
121.4	0.468003
121.5	0.469385
121.6	0.470761
121.7	0.472131
121.8	0.473495
121.9	0.474853
122	0.476205
122.1	0.477551
122.2	0.478891
122.3	0.480225
122.4	0.481552
122.5	0.482874
122.6	0.484191
122.7	0.485501
122.8	0.486805
122.9	0.488104
123	0.489397
123.1	0.490684
123.2	0.491965
123.3	0.49324
123.4	0.49451
123.5	0.495774
123.6	0.497033
123.7	0.498286
123.8	0.499533
123.9	0.500775
124	0.502012
124.1	0.503242
124.2	0.504468
124.3	0.505688
124.4	0.506902
124.5	0.508111
124.6	0.509315
124.7	0.510513
124.8	0.511706
124.9	0.512893
125	0.514076
125.1	0.515253
125.2	0.516424
125.3	0.517591
125.4	0.518752
125.5	0.519909
125.6	0.52106
125.7	0.522205
125.8	0.523346
125.9	0.524482
126	0.525613
126.1	0.526738
126.2	0.527859
126.3	0.528974
126.4	0.530085
126.5	0.531191
126.6	0.532291
126.7	0.533387
126.8	0.534478
126.9	0.535564
127	0.536646
127.1	0.537722
127.2	0.538794
127.3	0.539861
127.4	0.540923
127.5	0.54198
127.6	0.543033
127.7	0.544081
127.8	0.545124
127.9	0.546163
128	0.547197
128.1	0.548226
128.2	0.549251
128.3	0.550271
128.4	0.551287
128.5	0.552298
128.6	0.553305
128.7	0.554307
128.8	0.555305
128.9	0.556298
129	0.557287
129.1	0.558271
129.2	0.559251
129.3	0.560227
129.4	0.561198
129.5	0.562165
129.6	0.563128
129.7	0.564086
129.8	0.56504
129.9	0.56599
130	0.566936
130.1	0.567877
130.2	0.568815
130.3	0.569748
130.4	0.570677
130.5	0.571601
130.6	0.572522
130.7	0.573439
130.8	0.574351
130.9	0.575259
131	0.576164
131.1	0.577064
131.2	0.57796
131.3	0.578853
131.4	0.579741
131.5	0.580625
131.6	0.581506
131.7	0.582382
131.8	0.583255
131.9	0.584124
132	0.584988
132.1	0.585849
132.2	0.586707
132.3	0.58756
132.4	0.588409
132.5	0.589255
132.6	0.590097
132.7	0.590935
132.8	0.59177
132.9	0.592601
133	0.593428
133.1	0.594251
133.2	0.595071
133.3	0.595887
133.4	0.596699
133.5	0.597508
133.6	0.598313
133.7	0.599115
133.8	0.599913
133.9	0.600707
134	0.601498
134.1	0.602285
134.2	0.603069
134.3	0.60385
134.4	0.604627
134.5	0.6054
134.6	0.60617
134.7	0.606937
134.8	0.6077
134.9	0.60846
135	0.609216
135.1	0.609969
135.2	0.610719
135.3	0.611465
135.4	0.612208
135.5	0.612948
135.6	0.613684
135.7	0.614417
135.8	0.615147
135.9	0.615873
136	0.616597
136.1	0.617317
136.2	0.618034
136.3	0.618747
136.4	0.619458
136.5	0.620165
136.6	0.620869
136.7	0.621571
136.8	0.622268
136.9	0.622963
137	0.623655
137.1	0.624344
137.2	0.625029
137.3	0.625712
137.4	0.626391
137.5	0.627068
137.6	0.627741
137.7	0.628412
137.8	0.629079
137.9	0.629743
138	0.630405
138.1	0.631064
138.2	0.631719
138.3	0.632372
138.4	0.633022
138.5	0.633669
138.6	0.634313
138.7	0.634954
138.8	0.635592
138.9	0.636227
139	0.63686
139.1	0.63749
139.2	0.638117
139.3	0.638741
139.4	0.639362
139.5	0.639981
139.6	0.640597
139.7	0.64121
139.8	0.641821
139.9	0.642428
140	0.643033
140.1	0.643635
140.2	0.644235
140.3	0.644832
140.4	0.645426
140.5	0.646018
140.6	0.646607
140.7	0.647193
140.8	0.647777
140.9	0.648358
141	0.648937
141.1	0.649513
141.2	0.650086
141.3	0.650657
141.4	0.651225
141.5	0.651791
141.6	0.652354
141.7	0.652915
141.8	0.653473
141.9	0.654029
142	0.654582
142.1	0.655133
142.2	0.655681
142.3	0.656227
142.4	0.656771
142.5	0.657312
142.6	0.65785
142.7	0.658387
142.8	0.65892
142.9	0.659452
143	0.659981
143.1	0.660508
143.2	0.661032
143.3	0.661554
143.4	0.662074
143.5	0.662591
143.6	0.663106
143.7	0.663619
143.8	0.66413
143.9	0.664638
144	0.665144
144.1	0.665648
144.2	0.666149
144.3	0.666649
144.4	0.667146
144.5	0.66764
144.6	0.668133
144.7	0.668623
144.8	0.669112
144.9	0.669598
145	0.670082
145.1	0.670563
145.2	0.671043
145.3	0.67152
145.4	0.671996
145.5	0.672469
145.6	0.67294
145.7	0.673409
145.8	0.673876
145.9	0.674341
146	0.674803
146.1	0.675264
146.2	0.675723
146.3	0.676179
146.4	0.676634
146.5	0.677086
146.6	0.677537
146.7	0.677985
146.8	0.678432
146.9	0.678876
147	0.679319
147.1	0.679759
147.2	0.680198
147.3	0.680635
147.4	0.681069
147.5	0.681502
147.6	0.681933
147.7	0.682362
147.8	0.682789
147.9	0.683214
148	0.683637
148.1	0.684058
148.2	0.684478
148.3	0.684895
148.4	0.685311
148.5	0.685725
148.6	0.686137
148.7	0.686547
148.8	0.686956
148.9	0.687362
149	0.687767
149.1	0.68817
149.2	0.688571
149.3	0.68897
149.4	0.689368
149.5	0.689763
149.6	0.690157
149.7	0.69055
149.8	0.69094
149.9	0.691329
150	0.691716
150.1	0.692101
150.2	0.692485
150.3	0.692867
150.4	0.693247
150.5	0.693625
150.6	0.694002
150.7	0.694377
150.8	0.694751
150.9	0.695123
151	0.695493
151.1	0.695861
151.2	0.696228
151.3	0.696593
151.4	0.696957
151.5	0.697319
151.6	0.697679
151.7	0.698038
151.8	0.698395
151.9	0.69875
152	0.699104
152.1	0.699457
152.2	0.699808
152.3	0.700157
152.4	0.700505
152.5	0.700851
152.6	0.701195
152.7	0.701538
152.8	0.70188
152.9	0.70222
153	0.702558
153.1	0.702895
153.2	0.703231
153.3	0.703565
153.4	0.703897
153.5	0.704228
153.6	0.704558
153.7	0.704886
153.8	0.705213
153.9	0.705538
154	0.705861
154.1	0.706184
154.2	0.706504
154.3	0.706824
154.4	0.707142
154.5	0.707458
154.6	0.707774
154.7	0.708087
154.8	0.7084
154.9	0.708711
155	0.70902
155.1	0.709328
155.2	0.709635
155.3	0.709941
155.4	0.710245
155.5	0.710547
155.6	0.710849
155.7	0.711149
155.8	0.711447
155.9	0.711745
156	0.712041
156.1	0.712336
156.2	0.712629
156.3	0.712921
156.4	0.713212
156.5	0.713501
156.6	0.71379
156.7	0.714077
156.8	0.714362
156.9	0.714647
157	0.71493
157.1	0.715212
157.2	0.715492
157.3	0.715771
157.4	0.71605
157.5	0.716326
157.6	0.716602
157.7	0.716876
157.8	0.71715
157.9	0.717422
158	0.717692
158.1	0.717962
158.2	0.71823
158.3	0.718497
158.4	0.718763
158.5	0.719028
158.6	0.719292
158.7	0.719554
158.8	0.719815
158.9	0.720075
159	0.720334
159.1	0.720592
159.2	0.720849
159.3	0.721104
159.4	0.721358
159.5	0.721612
159.6	0.721864
159.7	0.722115
159.8	0.722364
159.9	0.722613
160	0.722861
160.1	0.723107
160.2	0.723353
160.3	0.723597
160.4	0.72384
160.5	0.724082
160.6	0.724323
160.7	0.724563
160.8	0.724802
160.9	0.72504
161	0.725277
161.1	0.725513
161.2	0.725747
161.3	0.725981
161.4	0.726213
161.5	0.726445
161.6	0.726676
161.7	0.726905
161.8	0.727134
161.9	0.727361
162	0.727587
162.1	0.727813
162.2	0.728037
162.3	0.728261
162.4	0.728483
162.5	0.728705
162.6	0.728925
162.7	0.729144
162.8	0.729363
162.9	0.72958
163	0.729797
163.1	0.730013
163.2	0.730227
163.3	0.730441
163.4	0.730654
163.5	0.730865
163.6	0.731076
163.7	0.731286
163.8	0.731495
163.9	0.731703
164	0.73191
164.1	0.732116
164.2	0.732322
164.3	0.732526
164.4	0.732729
164.5	0.732932
164.6	0.733133
164.7	0.733334
164.8	0.733534
164.9	0.733733
165	0.733931
165.1	0.734128
165.2	0.734324
165.3	0.73452
165.4	0.734714
165.5	0.734908
165.6	0.735101
165.7	0.735293
165.8	0.735484
165.9	0.735674
166	0.735863
166.1	0.736052
166.2	0.73624
166.3	0.736427
166.4	0.736613
166.5	0.736798
166.6	0.736982
166.7	0.737166
166.8	0.737349
166.9	0.73753
167	0.737712
167.1	0.737892
167.2	0.738071
167.3	0.73825
167.4	0.738428
167.5	0.738605
167.6	0.738781
167.7	0.738957
167.8	0.739132
167.9	0.739306
168	0.739479
168.1	0.739651
168.2	0.739823
168.3	0.739994
168.4	0.740164
168.5	0.740333
168.6	0.740502
168.7	0.74067
168.8	0.740837
168.9	0.741003
169	0.741169
169.1	0.741334
169.2	0.741498
169.3	0.741662
169.4	0.741824
169.5	0.741986
169.6	0.742148
169.7	0.742308
169.8	0.742468
169.9	0.742627
170	0.742785
170.1	0.742943
170.2	0.7431
170.3	0.743256
170.4	0.743412
170.5	0.743567
170.6	0.743721
170.7	0.743875
170.8	0.744027
170.9	0.74418
171	0.744331
171.1	0.744482
171.2	0.744632
171.3	0.744782
171.4	0.74493
171.5	0.745078
171.6	0.745226
171.7	0.745373
171.8	0.745519
171.9	0.745664
172	0.745809
172.1	0.745953
172.2	0.746097
172.3	0.74624
172.4	0.746382
172.5	0.746524
172.6	0.746665
172.7	0.746805
172.8	0.746945
172.9	0.747084
173	0.747223
173.1	0.747361
173.2	0.747498
173.3	0.747635
173.4	0.747771
173.5	0.747906
173.6	0.748041
173.7	0.748176
173.8	0.748309
173.9	0.748442
174	0.748575
174.1	0.748707
174.2	0.748838
174.3	0.748969
174.4	0.749099
174.5	0.749228
174.6	0.749357
174.7	0.749486
174.8	0.749614
174.9	0.749741
175	0.749868
175.1	0.749994
175.2	0.750119
175.3	0.750244
175.4	0.750369
175.5	0.750493
175.6	0.750616
175.7	0.750739
175.8	0.750861
175.9	0.750983
176	0.751104
176.1	0.751224
176.2	0.751345
176.3	0.751464
176.4	0.751583
176.5	0.751702
176.6	0.75182
176.7	0.751937
176.8	0.752054
176.9	0.75217
177	0.752286
177.1	0.752402
177.2	0.752516
177.3	0.752631
177.4	0.752745
177.5	0.752858
177.6	0.752971
177.7	0.753083
177.8	0.753195
177.9	0.753306
178	0.753417
178.1	0.753527
178.2	0.753637
178.3	0.753746
178.4	0.753855
178.5	0.753964
178.6	0.754071
178.7	0.754179
178.8	0.754286
178.9	0.754392
179	0.754498
179.1	0.754604
179.2	0.754709
179.3	0.754813
179.4	0.754917
179.5	0.755021
179.6	0.755124
179.7	0.755227
179.8	0.755329
179.9	0.755431
180	0.755532
180.1	0.755633
180.2	0.755733
180.3	0.755833
180.4	0.755933
180.5	0.756032
180.6	0.756131
180.7	0.756229
180.8	0.756327
180.9	0.756424
181	0.756521
181.1	0.756617
181.2	0.756714
181.3	0.756809
181.4	0.756904
181.5	0.756999
181.6	0.757093
181.7	0.757187
181.8	0.757281
181.9	0.757374
182	0.757467
182.1	0.757559
182.2	0.757651
182.3	0.757742
182.4	0.757833
182.5	0.757924
182.6	0.758014
182.7	0.758104
182.8	0.758193
182.9	0.758282
183	0.758371
183.1	0.758459
183.2	0.758547
183.3	0.758635
183.4	0.758722
183.5	0.758808
183.6	0.758895
183.7	0.75898
183.8	0.759066
183.9	0.759151
184	0.759236
184.1	0.75932
184.2	0.759404
184.3	0.759488
184.4	0.759571
184.5	0.759654
184.6	0.759737
184.7	0.759819
184.8	0.7599
184.9	0.759982
185	0.760063
185.1	0.760144
185.2	0.760224
185.3	0.760304
185.4	0.760384
185.5	0.760463
185.6	0.760542
185.7	0.76062
185.8	0.760698
185.9	0.760776
186	0.760854
186.1	0.760931
186.2	0.761008
186.3	0.761084
186.4	0.76116
186.5	0.761236
186.6	0.761312
186.7	0.761387
186.8	0.761462
186.9	0.761536
187	0.76161
187.1	0.761684
187.2	0.761757
187.3	0.761831
187.4	0.761903
187.5	0.761976
187.6	0.762048
187.7	0.76212
187.8	0.762191
187.9	0.762263
188	0.762334
188.1	0.762404
188.2	0.762474
188.3	0.762544
188.4	0.762614
188.5	0.762683
188.6	0.762752
188.7	0.762821
188.8	0.762889
188.9	0.762958
189	0.763025
189.1	0.763093
189.2	0.76316
189.3	0.763227
189.4	0.763293
189.5	0.76336
189.6	0.763426
189.7	0.763491
189.8	0.763557
189.9	0.763622
190	0.763687
190.1	0.763751
190.2	0.763816
190.3	0.76388
190.4	0.763943
190.5	0.764007
190.6	0.76407
190.7	0.764133
190.8	0.764195
190.9	0.764257
191	0.764319
191.1	0.764381
191.2	0.764443
191.3	0.764504
191.4	0.764565
191.5	0.764625
191.6	0.764686
191.7	0.764746
191.8	0.764806
191.9	0.764865
192	0.764924
192.1	0.764983
192.2	0.765042
192.3	0.765101
192.4	0.765159
192.5	0.765217
192.6	0.765275
192.7	0.765332
192.8	0.765389
192.9	0.765446
193	0.765503
193.1	0.765559
193.2	0.765616
193.3	0.765672
193.4	0.765727
193.5	0.765783
193.6	0.765838
193.7	0.765893
193.8	0.765948
193.9	0.766002
194	0.766056
194.1	0.76611
194.2	0.766164
194.3	0.766217
194.4	0.766271
194.5	0.766324
194.6	0.766377
194.7	0.766429
194.8	0.766481
194.9	0.766534
195	0.766585
195.1	0.766637
195.2	0.766688
195.3	0.76674
195.4	0.76679
195.5	0.766841
195.6	0.766892
195.7	0.766942
195.8	0.766992
195.9	0.767042
196	0.767091
196.1	0.767141
196.2	0.76719
196.3	0.767239
196.4	0.767288
196.5	0.767336
196.6	0.767384
196.7	0.767432
196.8	0.76748
196.9	0.767528
197	0.767575
197.1	0.767622
197.2	0.767669
197.3	0.767716
197.4	0.767763
197.5	0.767809
197.6	0.767855
197.7	0.767901
197.8	0.767947
197.9	0.767993
198	0.768038
198.1	0.768083
198.2	0.768128
198.3	0.768173
198.4	0.768217
198.5	0.768262
198.6	0.768306
198.7	0.76835
198.8	0.768394
198.9	0.768437
199	0.768481
199.1	0.768524
199.2	0.768567
199.3	0.768609
199.4	0.768652
199.5	0.768694
199.6	0.768737
199.7	0.768779
199.8	0.768821
199.9	0.768862
200	0.768904
[truncated: 14,000 more rows]
