# Supplementary material for: Bayesian inference of kinetic schemes for ion channels by Kalman filtering
Source: eLife journal article supplement (doi:10.7554/elife.62714), 2022-05-04
Supplement: fig4-data5 [file 1_Sim_N_200_Fluor_MW_4M.xlsx]

## Sheet: 4 M
0.1	0
0.2	0
0.3	0
0.4	0
0.5	0
0.6	0
0.7	0
0.8	0
0.9	0
1	0
1.1	0
1.2	0
1.3	0
1.4	0
1.5	0
1.6	0
1.7	0
1.8	0
1.9	0
2	0
2.1	0
2.2	0
2.3	0
2.4	0
2.5	0
2.6	0
2.7	0
2.8	0
2.9	0
3	0
3.1	0
3.2	0
3.3	0
3.4	0
3.5	0
3.6	0
3.7	0
3.8	0
3.9	0
4	0
4.1	0
4.2	0
4.3	0
4.4	0
4.5	0
4.6	0
4.7	0
4.8	0
4.9	0
5	0
5.1	0
5.2	0
5.3	0
5.4	0
5.5	0
5.6	0
5.7	0
5.8	0
5.9	0
6	0
6.1	0
6.2	0
6.3	0
6.4	0
6.5	0
6.6	0
6.7	0
6.8	0
6.9	0
7	0
7.1	0
7.2	0
7.3	0
7.4	0
7.5	0
7.6	0
7.7	0
7.8	0
7.9	0
8	0
8.1	0
8.2	0
8.3	0
8.4	0
8.5	0
8.6	0
8.7	0
8.8	0
8.9	0
9	0
9.1	0
9.2	0
9.3	0
9.4	0
9.5	0
9.6	0
9.7	0
9.8	0
9.9	0
10	0
10.1	0
10.2	0
10.3	0
10.4	0
10.5	0
10.6	0
10.7	0
10.8	0
10.9	0
11	0
11.1	0
11.2	0
11.3	0
11.4	0
11.5	0
11.6	0
11.7	0
11.8	0
11.9	0
12	0
12.1	0
12.2	0
12.3	0
12.4	0
12.5	0
12.6	0
12.7	0
12.8	0
12.9	0
13	0
13.1	0
13.2	0
13.3	0
13.4	0
13.5	0
13.6	0
13.7	0
13.8	0
13.9	0
14	0
14.1	0
14.2	0
14.3	0
14.4	0
14.5	0
14.6	0
14.7	0
14.8	0
14.9	0
15	0
15.1	0
15.2	0
15.3	0
15.4	0
15.5	0
15.6	0
15.7	0
15.8	0
15.9	0
16	0
16.1	0
16.2	0
16.3	0
16.4	0
16.5	0
16.6	0
16.7	0
16.8	0
16.9	0
17	0
17.1	0
17.2	0
17.3	0
17.4	0
17.5	0
17.6	0
17.7	0
17.8	0
17.9	0
18	0
18.1	0
18.2	0
18.3	0
18.4	0
18.5	0
18.6	0
18.7	0
18.8	0
18.9	0
19	0
19.1	0
19.2	0
19.3	0
19.4	0
19.5	0
19.6	0
19.7	0
19.8	0
19.9	0
20	0
20.1	0
20.2	0
20.3	0
20.4	0
20.5	0
20.6	0
20.7	0
20.8	0
20.9	0
21	0
21.1	0
21.2	0
21.3	0
21.4	0
21.5	0
21.6	0
21.7	0
21.8	0
21.9	0
22	0
22.1	0
22.2	0
22.3	0
22.4	0
22.5	0
22.6	0
22.7	0
22.8	0
22.9	0
23	0
23.1	0
23.2	0
23.3	0
23.4	0
23.5	0
23.6	0
23.7	0
23.8	0
23.9	0
24	0
24.1	0
24.2	0
24.3	0
24.4	0
24.5	0
24.6	0
24.7	0
24.8	0
24.9	0
25	0
25.1	0
25.2	0
25.3	0
25.4	0
25.5	0
25.6	0
25.7	0
25.8	0
25.9	0
26	0
26.1	0
26.2	0
26.3	0
26.4	0
26.5	0
26.6	0
26.7	0
26.8	0
26.9	0
27	0
27.1	0
27.2	0
27.3	0
27.4	0
27.5	0
27.6	0
27.7	0
27.8	0
27.9	0
28	0
28.1	0
28.2	0
28.3	0
28.4	0
28.5	0
28.6	0
28.7	0
28.8	0
28.9	0
29	0
29.1	0
29.2	0
29.3	0
29.4	0
29.5	0
29.6	0
29.7	0
29.8	0
29.9	0
30	0
30.1	0
30.2	0
30.3	0
30.4	0
30.5	0
30.6	0
30.7	0
30.8	0
30.9	0
31	0
31.1	0
31.2	0
31.3	0
31.4	0
31.5	0
31.6	0
31.7	0
31.8	0
31.9	0
32	0
32.1	0
32.2	0
32.3	0
32.4	0
32.5	0
32.6	0
32.7	0
32.8	0
32.9	0
33	0
33.1	0
33.2	0
33.3	0
33.4	0
33.5	0
33.6	0
33.7	0
33.8	0
33.9	0
34	0
34.1	0
34.2	0
34.3	0
34.4	0
34.5	0
34.6	0
34.7	0
34.8	0
34.9	0
35	0
35.1	0
35.2	0
35.3	0
35.4	0
35.5	0
35.6	0
35.7	0
35.8	0
35.9	0
36	0
36.1	0
36.2	0
36.3	0
36.4	0
36.5	0
36.6	0
36.7	0
36.8	0
36.9	0
37	0
37.1	0
37.2	0
37.3	0
37.4	0
37.5	0
37.6	0
37.7	0
37.8	0
37.9	0
38	0
38.1	0
38.2	0
38.3	0
38.4	0
38.5	0
38.6	0
38.7	0
38.8	0
38.9	0
39	0
39.1	0
39.2	0
39.3	0
39.4	0
39.5	0
39.6	0
39.7	0
39.8	0
39.9	0
40	0
40.1	0
40.2	0
40.3	0
40.4	0
40.5	0
40.6	0
40.7	0
40.8	0
40.9	0
41	0
41.1	0
41.2	0
41.3	0
41.4	0
41.5	0
41.6	0
41.7	0
41.8	0
41.9	0
42	0
42.1	0
42.2	0
42.3	0
42.4	0
42.5	0
42.6	0
42.7	0
42.8	0
42.9	0
43	0
43.1	0
43.2	0
43.3	0
43.4	0
43.5	0
43.6	0
43.7	0
43.8	0
43.9	0
44	0
44.1	0
44.2	0
44.3	0
44.4	0
44.5	0
44.6	0
44.7	0
44.8	0
44.9	0
45	0
45.1	0
45.2	0
45.3	0
45.4	0
45.5	0
45.6	0
45.7	0
45.8	0
45.9	0
46	0
46.1	0
46.2	0
46.3	0
46.4	0
46.5	0
46.6	0
46.7	0
46.8	0
46.9	0
47	0
47.1	0
47.2	0
47.3	0
47.4	0
47.5	0
47.6	0
47.7	0
47.8	0
47.9	0
48	0
48.1	0
48.2	0
48.3	0
48.4	0
48.5	0
48.6	0
48.7	0
48.8	0
48.9	0
49	0
49.1	0
49.2	0
49.3	0
49.4	0
49.5	0
49.6	0
49.7	0
49.8	0
49.9	0
50	0
50.1	0
50.2	0
50.3	0
50.4	0
50.5	0
50.6	0
50.7	0
50.8	0
50.9	0
51	0
51.1	0
51.2	0
51.3	0
51.4	0
51.5	0
51.6	0
51.7	0
51.8	0
51.9	0
52	0
52.1	0
52.2	0
52.3	0
52.4	0
52.5	0
52.6	0
52.7	0
52.8	0
52.9	0
53	0
53.1	0
53.2	0
53.3	0
53.4	0
53.5	0
53.6	0
53.7	0
53.8	0
53.9	0
54	0
54.1	0
54.2	0
54.3	0
54.4	0
54.5	0
54.6	0
54.7	0
54.8	0
54.9	0
55	0
55.1	0
55.2	0
55.3	0
55.4	0
55.5	0
55.6	0
55.7	0
55.8	0
55.9	0
56	0
56.1	0
56.2	0
56.3	0
56.4	0
56.5	0
56.6	0
56.7	0
56.8	0
56.9	0
57	0
57.1	0
57.2	0
57.3	0
57.4	0
57.5	0
57.6	0
57.7	0
57.8	0
57.9	0
58	0
58.1	0
58.2	0
58.3	0
58.4	0
58.5	0
58.6	0
58.7	0
58.8	0
58.9	0
59	0
59.1	0
59.2	0
59.3	0
59.4	0
59.5	0
59.6	0
59.7	0
59.8	0
59.9	0
60	0
60.1	0
60.2	0
60.3	0
60.4	0
60.5	0
60.6	0
60.7	0
60.8	0
60.9	0
61	0
61.1	0
61.2	0
61.3	0
61.4	0
61.5	0
61.6	0
61.7	0
61.8	0
61.9	0
62	0
62.1	0
62.2	0
62.3	0
62.4	0
62.5	0
62.6	0
62.7	0
62.8	0
62.9	0
63	0
63.1	0
63.2	0
63.3	0
63.4	0
63.5	0
63.6	0
63.7	0
63.8	0
63.9	0
64	0
64.1	0
64.2	0
64.3	0
64.4	0
64.5	0
64.6	0
64.7	0
64.8	0
64.9	0
65	0
65.1	0
65.2	0
65.3	0
65.4	0
65.5	0
65.6	0
65.7	0
65.8	0
65.9	0
66	0
66.1	0
66.2	0
66.3	0
66.4	0
66.5	0
66.6	0
66.7	0
66.8	0
66.9	0
67	0
67.1	0
67.2	0
67.3	0
67.4	0
67.5	0
67.6	0
67.7	0
67.8	0
67.9	0
68	0
68.1	0
68.2	0
68.3	0
68.4	0
68.5	0
68.6	0
68.7	0
68.8	0
68.9	0
69	0
69.1	0
69.2	0
69.3	0
69.4	0
69.5	0
69.6	0
69.7	0
69.8	0
69.9	0
70	0
70.1	0
70.2	0
70.3	0
70.4	0
70.5	0
70.6	0
70.7	0
70.8	0
70.9	0
71	0
71.1	0
71.2	0
71.3	0
71.4	0
71.5	0
71.6	0
71.7	0
71.8	0
71.9	0
72	0
72.1	0
72.2	0
72.3	0
72.4	0
72.5	0
72.6	0
72.7	0
72.8	0
72.9	0
73	0
73.1	0
73.2	0
73.3	0
73.4	0
73.5	0
73.6	0
73.7	0
73.8	0
73.9	0
74	0
74.1	0
74.2	0
74.3	0
74.4	0
74.5	0
74.6	0
74.7	0
74.8	0
74.9	0
75	0
75.1	0
75.2	0
75.3	0
75.4	0
75.5	0
75.6	0
75.7	0
75.8	0
75.9	0
76	0
76.1	0
76.2	0
76.3	0
76.4	0
76.5	0
76.6	0
76.7	0
76.8	0
76.9	0
77	0
77.1	0
77.2	0
77.3	0
77.4	0
77.5	0
77.6	0
77.7	0
77.8	0
77.9	0
78	0
78.1	0
78.2	0
78.3	0
78.4	0
78.5	0
78.6	0
78.7	0
78.8	0
78.9	0
79	0
79.1	0
79.2	0
79.3	0
79.4	0
79.5	0
79.6	0
79.7	0
79.8	0
79.9	0
80	0
80.1	0
80.2	0
80.3	0
80.4	0
80.5	0
80.6	0
80.7	0
80.8	0
80.9	0
81	0
81.1	0
81.2	0
81.3	0
81.4	0
81.5	0
81.6	0
81.7	0
81.8	0
81.9	0
82	0
82.1	0
82.2	0
82.3	0
82.4	0
82.5	0
82.6	0
82.7	0
82.8	0
82.9	0
83	0
83.1	0
83.2	0
83.3	0
83.4	0
83.5	0
83.6	0
83.7	0
83.8	0
83.9	0
84	0
84.1	0
84.2	0
84.3	0
84.4	0
84.5	0
84.6	0
84.7	0
84.8	0
84.9	0
85	0
85.1	0
85.2	0
85.3	0
85.4	0
85.5	0
85.6	0
85.7	0
85.8	0
85.9	0
86	0
86.1	0
86.2	0
86.3	0
86.4	0
86.5	0
86.6	0
86.7	0
86.8	0
86.9	0
87	0
87.1	0
87.2	0
87.3	0
87.4	0
87.5	0
87.6	0
87.7	0
87.8	0
87.9	0
88	0
88.1	0
88.2	0
88.3	0
88.4	0
88.5	0
88.6	0
88.7	0
88.8	0
88.9	0
89	0
89.1	0
89.2	0
89.3	0
89.4	0
89.5	0
89.6	0
89.7	0
89.8	0
89.9	0
90	0
90.1	0
90.2	0
90.3	0
90.4	0
90.5	0
90.6	0
90.7	0
90.8	0
90.9	0
91	0
91.1	0
91.2	0
91.3	0
91.4	0
91.5	0
91.6	0
91.7	0
91.8	0
91.9	0
92	0
92.1	0
92.2	0
92.3	0
92.4	0
92.5	0
92.6	0
92.7	0
92.8	0
92.9	0
93	0
93.1	0
93.2	0
93.3	0
93.4	0
93.5	0
93.6	0
93.7	0
93.8	0
93.9	0
94	0
94.1	0
94.2	0
94.3	0
94.4	0
94.5	0
94.6	0
94.7	0
94.8	0
94.9	0
95	0
95.1	0
95.2	0
95.3	0
95.4	0
95.5	0
95.6	0
95.7	0
95.8	0
95.9	0
96	0
96.1	0
96.2	0
96.3	0
96.4	0
96.5	0
96.6	0
96.7	0
96.8	0
96.9	0
97	0
97.1	0
97.2	0
97.3	0
97.4	0
97.5	0
97.6	0
97.7	0
97.8	0
97.9	0
98	0
98.1	0
98.2	0
98.3	0
98.4	0
98.5	0
98.6	0
98.7	0
98.8	0
98.9	0
99	0
99.1	0
99.2	0
99.3	0
99.4	0
99.5	0
99.6	0
99.7	0
99.8	0
99.9	0
100	0
100.1	0.2025
100.2	0.3375
100.3	0.455
100.4	0.5125
100.5	0.585
100.6	0.6375
100.7	0.695
100.8	0.7075
100.9	0.7325
101	0.7375
101.1	0.7475
101.2	0.755
101.3	0.7625
101.4	0.7825
101.5	0.8
101.6	0.8175
101.7	0.8225
101.8	0.8075
101.9	0.8325
102	0.83
102.1	0.8375
102.2	0.8325
102.3	0.835
102.4	0.83
102.5	0.8425
102.6	0.83
102.7	0.8425
102.8	0.84
102.9	0.84
103	0.835
103.1	0.845
103.2	0.8575
103.3	0.87
103.4	0.875
103.5	0.8575
103.6	0.865
103.7	0.8675
103.8	0.8525
103.9	0.835
104	0.8275
104.1	0.8375
104.2	0.83
104.3	0.8225
104.4	0.8275
104.5	0.8275
104.6	0.83
104.7	0.835
104.8	0.85
104.9	0.8575
105	0.8625
105.1	0.855
105.2	0.8475
105.3	0.835
105.4	0.8475
105.5	0.85
105.6	0.85
105.7	0.855
105.8	0.8625
105.9	0.845
106	0.8525
106.1	0.8625
106.2	0.87
106.3	0.88
106.4	0.8775
106.5	0.865
106.6	0.875
106.7	0.8725
106.8	0.865
106.9	0.8675
107	0.865
107.1	0.86
107.2	0.8575
107.3	0.8675
107.4	0.8625
107.5	0.8525
107.6	0.8725
107.7	0.875
107.8	0.885
107.9	0.8775
108	0.8875
108.1	0.8825
108.2	0.87
108.3	0.87
108.4	0.8725
108.5	0.885
108.6	0.8825
108.7	0.8925
108.8	0.9
108.9	0.8925
109	0.8925
109.1	0.8925
109.2	0.9
109.3	0.905
109.4	0.89
109.5	0.89
109.6	0.8775
109.7	0.875
109.8	0.88
109.9	0.885
110	0.8825
110.1	0.875
110.2	0.875
110.3	0.87
110.4	0.87
110.5	0.8575
110.6	0.8575
110.7	0.8525
110.8	0.88
110.9	0.8925
111	0.8925
111.1	0.8925
111.2	0.895
111.3	0.8925
111.4	0.8875
111.5	0.895
111.6	0.915
111.7	0.9075
111.8	0.9125
111.9	0.9075
112	0.8975
112.1	0.9
112.2	0.9175
112.3	0.9225
112.4	0.93
112.5	0.9175
112.6	0.9275
112.7	0.93
112.8	0.93
112.9	0.9325
113	0.935
113.1	0.925
113.2	0.92
113.3	0.93
113.4	0.9375
113.5	0.9475
113.6	0.9525
113.7	0.9375
113.8	0.9275
113.9	0.93
114	0.93
114.1	0.9225
114.2	0.9175
114.3	0.925
114.4	0.925
114.5	0.93
114.6	0.9425
114.7	0.94
114.8	0.9275
114.9	0.9225
115	0.92
115.1	0.9075
115.2	0.9225
115.3	0.9275
115.4	0.935
115.5	0.9275
115.6	0.9175
115.7	0.9225
115.8	0.925
115.9	0.9175
116	0.9125
116.1	0.9125
116.2	0.9175
116.3	0.925
116.4	0.925
116.5	0.94
116.6	0.9425
116.7	0.94
116.8	0.94
116.9	0.94
117	0.9375
117.1	0.945
117.2	0.9425
117.3	0.95
117.4	0.9475
117.5	0.94
117.6	0.9375
117.7	0.935
117.8	0.9275
117.9	0.925
118	0.9275
118.1	0.925
118.2	0.915
118.3	0.9325
118.4	0.9325
118.5	0.9225
118.6	0.9125
118.7	0.91
118.8	0.9
118.9	0.89
119	0.8875
119.1	0.885
119.2	0.8875
119.3	0.89
119.4	0.8925
119.5	0.9
119.6	0.8975
119.7	0.9075
119.8	0.91
119.9	0.91
120	0.915
120.1	0.9125
120.2	0.905
120.3	0.9075
120.4	0.915
120.5	0.905
120.6	0.9025
120.7	0.9125
120.8	0.9225
120.9	0.925
121	0.9275
121.1	0.935
121.2	0.925
121.3	0.9175
121.4	0.9075
121.5	0.9075
121.6	0.905
121.7	0.915
121.8	0.9125
121.9	0.92
122	0.915
122.1	0.92
122.2	0.93
122.3	0.93
122.4	0.93
122.5	0.9275
122.6	0.9275
122.7	0.925
122.8	0.9275
122.9	0.9175
123	0.93
123.1	0.9375
123.2	0.9375
123.3	0.9375
123.4	0.9375
123.5	0.9375
123.6	0.94
123.7	0.935
123.8	0.9225
123.9	0.915
124	0.9225
124.1	0.9325
124.2	0.9325
124.3	0.9375
124.4	0.935
124.5	0.93
124.6	0.9325
124.7	0.9275
124.8	0.9225
124.9	0.92
125	0.9175
125.1	0.9125
125.2	0.92
125.3	0.925
125.4	0.925
125.5	0.9275
125.6	0.9225
125.7	0.9225
125.8	0.91
125.9	0.9225
126	0.925
126.1	0.925
126.2	0.9225
126.3	0.93
126.4	0.935
126.5	0.925
126.6	0.92
126.7	0.9275
126.8	0.93
126.9	0.9375
127	0.94
127.1	0.94
127.2	0.9375
127.3	0.95
127.4	0.9525
127.5	0.9475
127.6	0.94
127.7	0.9375
127.8	0.9325
127.9	0.93
128	0.9325
128.1	0.9275
128.2	0.9175
128.3	0.9325
128.4	0.9425
128.5	0.9375
128.6	0.935
128.7	0.9525
128.8	0.9525
128.9	0.95
129	0.9475
129.1	0.955
129.2	0.9575
129.3	0.9575
129.4	0.955
129.5	0.955
129.6	0.95
129.7	0.95
129.8	0.96
129.9	0.9525
130	0.955
130.1	0.955
130.2	0.9575
130.3	0.96
130.4	0.96
130.5	0.9525
130.6	0.9475
130.7	0.945
130.8	0.95
130.9	0.9475
131	0.9425
131.1	0.9425
131.2	0.9475
131.3	0.945
131.4	0.9475
131.5	0.9525
131.6	0.955
131.7	0.9575
131.8	0.9525
131.9	0.9425
132	0.95
132.1	0.9425
132.2	0.9475
132.3	0.94
132.4	0.945
132.5	0.9475
132.6	0.95
132.7	0.9575
132.8	0.955
132.9	0.955
133	0.955
133.1	0.955
133.2	0.96
133.3	0.96
133.4	0.9525
133.5	0.9475
133.6	0.9525
133.7	0.9475
133.8	0.94
133.9	0.935
134	0.9325
134.1	0.94
134.2	0.9475
134.3	0.95
134.4	0.9525
134.5	0.945
134.6	0.9475
134.7	0.95
134.8	0.9525
134.9	0.9525
135	0.9475
135.1	0.9425
135.2	0.94
135.3	0.945
135.4	0.9375
135.5	0.9475
135.6	0.9625
135.7	0.96
135.8	0.9675
135.9	0.9625
136	0.9625
136.1	0.9625
136.2	0.9575
136.3	0.9525
136.4	0.9475
136.5	0.95
136.6	0.9375
136.7	0.94
136.8	0.94
136.9	0.9425
137	0.9425
137.1	0.935
137.2	0.9325
137.3	0.9375
137.4	0.94
137.5	0.94
137.6	0.94
137.7	0.9525
137.8	0.9575
137.9	0.9575
138	0.9525
138.1	0.95
138.2	0.9475
138.3	0.9525
138.4	0.9525
138.5	0.9525
138.6	0.95
138.7	0.955
138.8	0.9525
138.9	0.9575
139	0.9575
139.1	0.96
139.2	0.96
139.3	0.96
139.4	0.9525
139.5	0.9575
139.6	0.9575
139.7	0.9575
139.8	0.9625
139.9	0.96
140	0.9575
140.1	0.955
140.2	0.955
140.3	0.9525
140.4	0.9625
140.5	0.96
140.6	0.9525
140.7	0.95
140.8	0.9575
140.9	0.9525
141	0.9525
141.1	0.95
141.2	0.945
141.3	0.9475
141.4	0.9525
141.5	0.9475
141.6	0.945
141.7	0.9475
141.8	0.9475
141.9	0.9475
142	0.95
142.1	0.945
142.2	0.94
142.3	0.94
142.4	0.945
142.5	0.9375
142.6	0.945
142.7	0.9425
142.8	0.9475
142.9	0.9525
143	0.955
143.1	0.955
143.2	0.9625
143.3	0.955
143.4	0.965
143.5	0.9625
143.6	0.965
143.7	0.9675
143.8	0.975
143.9	0.9725
144	0.9675
144.1	0.965
144.2	0.9675
144.3	0.97
144.4	0.9675
144.5	0.965
144.6	0.96
144.7	0.9575
144.8	0.96
144.9	0.965
145	0.96
145.1	0.9625
145.2	0.97
145.3	0.9725
145.4	0.9725
145.5	0.975
145.6	0.97
145.7	0.97
145.8	0.9675
145.9	0.965
146	0.96
146.1	0.9575
146.2	0.965
146.3	0.9575
146.4	0.955
146.5	0.96
146.6	0.965
146.7	0.9675
146.8	0.9675
146.9	0.965
147	0.96
147.1	0.96
147.2	0.96
147.3	0.9575
147.4	0.965
147.5	0.96
147.6	0.9625
147.7	0.9675
147.8	0.965
147.9	0.9625
148	0.955
148.1	0.9525
148.2	0.9475
148.3	0.95
148.4	0.955
148.5	0.9625
148.6	0.965
148.7	0.96
148.8	0.96
148.9	0.9575
149	0.96
149.1	0.965
149.2	0.9675
149.3	0.965
149.4	0.9625
149.5	0.9625
149.6	0.9575
149.7	0.9525
149.8	0.955
149.9	0.9475
150	0.96
150.1	0.9625
150.2	0.9625
150.3	0.955
150.4	0.9575
150.5	0.9575
150.6	0.96
150.7	0.965
150.8	0.97
150.9	0.9725
151	0.975
151.1	0.975
151.2	0.975
151.3	0.97
151.4	0.96
151.5	0.9675
151.6	0.9675
151.7	0.965
151.8	0.97
151.9	0.9725
152	0.975
152.1	0.9675
152.2	0.965
152.3	0.9625
152.4	0.9625
152.5	0.96
152.6	0.96
152.7	0.9575
152.8	0.955
152.9	0.9525
153	0.9475
153.1	0.9425
153.2	0.945
153.3	0.94
153.4	0.9525
153.5	0.9475
153.6	0.95
153.7	0.9475
153.8	0.9525
153.9	0.955
154	0.9575
154.1	0.96
154.2	0.9625
154.3	0.97
154.4	0.97
154.5	0.97
154.6	0.9725
154.7	0.9775
154.8	0.9775
154.9	0.98
155	0.9775
155.1	0.975
155.2	0.975
155.3	0.9775
155.4	0.9775
155.5	0.9825
155.6	0.98
155.7	0.98
155.8	0.975
155.9	0.9775
156	0.9775
156.1	0.975
156.2	0.975
156.3	0.9775
156.4	0.975
156.5	0.97
156.6	0.9675
156.7	0.97
156.8	0.97
156.9	0.975
157	0.97
157.1	0.9625
157.2	0.97
157.3	0.9675
157.4	0.97
157.5	0.965
157.6	0.965
157.7	0.97
157.8	0.9675
157.9	0.9625
158	0.96
158.1	0.9575
158.2	0.965
158.3	0.9575
158.4	0.9575
158.5	0.9525
158.6	0.9525
158.7	0.9525
158.8	0.9525
158.9	0.9575
159	0.9575
159.1	0.965
159.2	0.9625
159.3	0.9675
159.4	0.9725
159.5	0.9675
159.6	0.9675
159.7	0.965
159.8	0.9625
159.9	0.9625
160	0.9625
160.1	0.965
160.2	0.9625
160.3	0.9675
160.4	0.9625
160.5	0.965
160.6	0.96
160.7	0.96
160.8	0.96
160.9	0.9475
161	0.9475
161.1	0.95
161.2	0.95
161.3	0.95
161.4	0.95
161.5	0.955
161.6	0.955
161.7	0.9575
161.8	0.9625
161.9	0.96
162	0.965
162.1	0.9675
162.2	0.965
162.3	0.9625
162.4	0.96
162.5	0.9575
162.6	0.9575
162.7	0.9625
162.8	0.9625
162.9	0.9675
163	0.9625
163.1	0.9575
163.2	0.965
163.3	0.955
163.4	0.95
163.5	0.9525
163.6	0.95
163.7	0.9525
163.8	0.9525
163.9	0.9575
164	0.9575
164.1	0.965
164.2	0.965
164.3	0.9575
164.4	0.9575
164.5	0.9625
164.6	0.9625
164.7	0.9575
164.8	0.9625
164.9	0.9625
165	0.96
165.1	0.96
165.2	0.965
165.3	0.965
165.4	0.965
165.5	0.965
165.6	0.9625
165.7	0.96
165.8	0.9575
165.9	0.9575
166	0.9625
166.1	0.9625
166.2	0.9575
166.3	0.9575
166.4	0.965
166.5	0.9675
166.6	0.97
166.7	0.97
166.8	0.97
166.9	0.96
167	0.965
167.1	0.965
167.2	0.965
167.3	0.965
167.4	0.9625
167.5	0.96
167.6	0.9625
167.7	0.9625
167.8	0.965
167.9	0.96
168	0.9525
168.1	0.95
168.2	0.95
168.3	0.9525
168.4	0.955
168.5	0.9675
168.6	0.9625
168.7	0.97
168.8	0.9725
168.9	0.97
169	0.9625
169.1	0.965
169.2	0.96
169.3	0.96
169.4	0.9575
169.5	0.95
169.6	0.96
169.7	0.9675
169.8	0.97
169.9	0.9675
170	0.965
170.1	0.9625
170.2	0.965
170.3	0.965
170.4	0.9625
170.5	0.9625
170.6	0.9625
170.7	0.96
170.8	0.9625
170.9	0.965
171	0.9725
171.1	0.9725
171.2	0.97
171.3	0.965
171.4	0.9675
171.5	0.9675
171.6	0.9625
171.7	0.97
171.8	0.9675
171.9	0.9575
172	0.9625
172.1	0.9625
172.2	0.9575
172.3	0.965
172.4	0.9675
172.5	0.9675
172.6	0.9575
172.7	0.96
172.8	0.9575
172.9	0.955
173	0.96
173.1	0.9675
173.2	0.96
173.3	0.9725
173.4	0.9775
173.5	0.98
173.6	0.98
173.7	0.98
173.8	0.9825
173.9	0.9775
174	0.9725
174.1	0.9575
174.2	0.955
174.3	0.9525
174.4	0.9475
174.5	0.9575
174.6	0.955
174.7	0.9525
174.8	0.955
174.9	0.955
175	0.955
175.1	0.955
175.2	0.9575
175.3	0.96
175.4	0.9575
175.5	0.9575
175.6	0.965
175.7	0.965
175.8	0.9625
175.9	0.9625
176	0.9625
176.1	0.965
176.2	0.965
176.3	0.965
176.4	0.9625
176.5	0.9675
176.6	0.96
176.7	0.9575
176.8	0.9575
176.9	0.965
177	0.965
177.1	0.965
177.2	0.9625
177.3	0.9675
177.4	0.9675
177.5	0.965
177.6	0.965
177.7	0.9675
177.8	0.9725
177.9	0.975
178	0.9725
178.1	0.97
178.2	0.9675
178.3	0.98
178.4	0.9775
178.5	0.9875
178.6	0.985
178.7	0.9825
178.8	0.9875
178.9	0.985
179	0.9825
179.1	0.9825
179.2	0.98
179.3	0.975
179.4	0.965
179.5	0.9625
179.6	0.9575
179.7	0.965
179.8	0.955
179.9	0.9525
180	0.9475
180.1	0.955
180.2	0.965
180.3	0.9675
180.4	0.9625
180.5	0.97
180.6	0.9675
180.7	0.9625
180.8	0.955
180.9	0.955
181	0.9575
181.1	0.9625
181.2	0.9675
181.3	0.9625
181.4	0.97
181.5	0.9675
181.6	0.9625
181.7	0.965
181.8	0.9625
181.9	0.9625
182	0.9675
182.1	0.9675
182.2	0.975
182.3	0.98
182.4	0.98
182.5	0.98
182.6	0.9725
182.7	0.965
182.8	0.965
182.9	0.9575
183	0.96
183.1	0.9625
183.2	0.9625
183.3	0.9625
183.4	0.9675
183.5	0.96
183.6	0.96
183.7	0.9725
183.8	0.9775
183.9	0.98
184	0.98
184.1	0.9775
184.2	0.9775
184.3	0.9825
184.4	0.9775
184.5	0.9675
184.6	0.9675
184.7	0.9675
184.8	0.9675
184.9	0.965
185	0.965
185.1	0.965
185.2	0.965
185.3	0.965
185.4	0.9625
185.5	0.965
185.6	0.9675
185.7	0.9675
185.8	0.965
185.9	0.965
186	0.9625
186.1	0.96
186.2	0.96
186.3	0.965
186.4	0.97
186.5	0.9675
186.6	0.965
186.7	0.9625
186.8	0.9575
186.9	0.965
187	0.9675
187.1	0.9625
187.2	0.965
187.3	0.965
187.4	0.9625
187.5	0.965
187.6	0.9625
187.7	0.9575
187.8	0.965
187.9	0.9675
188	0.965
188.1	0.9625
188.2	0.9625
188.3	0.96
188.4	0.9575
188.5	0.965
188.6	0.96
188.7	0.96
188.8	0.955
188.9	0.96
189	0.9575
189.1	0.96
189.2	0.965
189.3	0.97
189.4	0.9775
189.5	0.98
189.6	0.9775
189.7	0.9775
189.8	0.9725
189.9	0.97
190	0.9675
190.1	0.9625
190.2	0.9625
190.3	0.9675
190.4	0.9675
190.5	0.965
190.6	0.9675
190.7	0.965
190.8	0.9575
190.9	0.9625
191	0.9625
191.1	0.9625
191.2	0.955
191.3	0.9525
191.4	0.9525
191.5	0.955
191.6	0.9525
191.7	0.9525
191.8	0.9525
191.9	0.9625
192	0.9675
192.1	0.965
192.2	0.97
192.3	0.9675
192.4	0.97
192.5	0.96
192.6	0.9675
192.7	0.9675
192.8	0.97
192.9	0.97
193	0.9725
193.1	0.9725
193.2	0.9775
193.3	0.9775
193.4	0.985
193.5	0.99
193.6	0.9825
193.7	0.9775
193.8	0.9725
193.9	0.9675
194	0.9675
194.1	0.9675
194.2	0.96
194.3	0.965
194.4	0.965
194.5	0.9625
194.6	0.9675
194.7	0.9575
194.8	0.9575
194.9	0.96
195	0.9575
195.1	0.9575
195.2	0.955
195.3	0.9525
195.4	0.9575
195.5	0.955
195.6	0.9575
195.7	0.96
195.8	0.9625
195.9	0.965
196	0.97
196.1	0.9725
196.2	0.965
196.3	0.9675
196.4	0.9625
196.5	0.97
196.6	0.97
196.7	0.975
196.8	0.9725
196.9	0.9725
197	0.97
197.1	0.965
197.2	0.965
197.3	0.965
197.4	0.97
197.5	0.965
197.6	0.9625
197.7	0.9725
197.8	0.9675
197.9	0.97
198	0.9675
198.1	0.965
198.2	0.96
198.3	0.96
198.4	0.9675
198.5	0.9725
198.6	0.965
198.7	0.96
198.8	0.9625
198.9	0.965
199	0.9625
199.1	0.96
199.2	0.9575
199.3	0.955
199.4	0.9525
199.5	0.9575
199.6	0.9625
199.7	0.97
199.8	0.9675
199.9	0.9675
200	0.97
[truncated: 14,000 more rows]
