# Supplementary material for: Bayesian inference of kinetic schemes for ion channels by Kalman filtering
Source: eLife journal article supplement (doi:10.7554/elife.62714), 2022-05-04
Supplement: fig4-data5 [file 1_Sim_N_200_Strom_MW_4M.xlsx]

## Sheet: 4 M
0.1	0
0.2	0
0.3	0
0.4	0
0.5	0
0.6	0
0.7	0
0.8	0
0.9	0
1	0
1.1	0
1.2	0
1.3	0
1.4	0
1.5	0
1.6	0
1.7	0
1.8	0
1.9	0
2	0
2.1	0
2.2	0
2.3	0
2.4	0
2.5	0
2.6	0
2.7	0
2.8	0
2.9	0
3	0
3.1	0
3.2	0
3.3	0
3.4	0
3.5	0
3.6	0
3.7	0
3.8	0
3.9	0
4	0
4.1	0
4.2	0
4.3	0
4.4	0
4.5	0
4.6	0
4.7	0
4.8	0
4.9	0
5	0
5.1	0
5.2	0
5.3	0
5.4	0
5.5	0
5.6	0
5.7	0
5.8	0
5.9	0
6	0
6.1	0
6.2	0
6.3	0
6.4	0
6.5	0
6.6	0
6.7	0
6.8	0
6.9	0
7	0
7.1	0
7.2	0
7.3	0
7.4	0
7.5	0
7.6	0
7.7	0
7.8	0
7.9	0
8	0
8.1	0
8.2	0
8.3	0
8.4	0
8.5	0
8.6	0
8.7	0
8.8	0
8.9	0
9	0
9.1	0
9.2	0
9.3	0
9.4	0
9.5	0
9.6	0
9.7	0
9.8	0
9.9	0
10	0
10.1	0
10.2	0
10.3	0
10.4	0
10.5	0
10.6	0
10.7	0
10.8	0
10.9	0
11	0
11.1	0
11.2	0
11.3	0
11.4	0
11.5	0
11.6	0
11.7	0
11.8	0
11.9	0
12	0
12.1	0
12.2	0
12.3	0
12.4	0
12.5	0
12.6	0
12.7	0
12.8	0
12.9	0
13	0
13.1	0
13.2	0
13.3	0
13.4	0
13.5	0
13.6	0
13.7	0
13.8	0
13.9	0
14	0
14.1	0
14.2	0
14.3	0
14.4	0
14.5	0
14.6	0
14.7	0
14.8	0
14.9	0
15	0
15.1	0
15.2	0
15.3	0
15.4	0
15.5	0
15.6	0
15.7	0
15.8	0
15.9	0
16	0
16.1	0
16.2	0
16.3	0
16.4	0
16.5	0
16.6	0
16.7	0
16.8	0
16.9	0
17	0
17.1	0
17.2	0
17.3	0
17.4	0
17.5	0
17.6	0
17.7	0
17.8	0
17.9	0
18	0
18.1	0
18.2	0
18.3	0
18.4	0
18.5	0
18.6	0
18.7	0
18.8	0
18.9	0
19	0
19.1	0
19.2	0
19.3	0
19.4	0
19.5	0
19.6	0
19.7	0
19.8	0
19.9	0
20	0
20.1	0
20.2	0
20.3	0
20.4	0
20.5	0
20.6	0
20.7	0
20.8	0
20.9	0
21	0
21.1	0
21.2	0
21.3	0
21.4	0
21.5	0
21.6	0
21.7	0
21.8	0
21.9	0
22	0
22.1	0
22.2	0
22.3	0
22.4	0
22.5	0
22.6	0
22.7	0
22.8	0
22.9	0
23	0
23.1	0
23.2	0
23.3	0
23.4	0
23.5	0
23.6	0
23.7	0
23.8	0
23.9	0
24	0
24.1	0
24.2	0
24.3	0
24.4	0
24.5	0
24.6	0
24.7	0
24.8	0
24.9	0
25	0
25.1	0
25.2	0
25.3	0
25.4	0
25.5	0
25.6	0
25.7	0
25.8	0
25.9	0
26	0
26.1	0
26.2	0
26.3	0
26.4	0
26.5	0
26.6	0
26.7	0
26.8	0
26.9	0
27	0
27.1	0
27.2	0
27.3	0
27.4	0
27.5	0
27.6	0
27.7	0
27.8	0
27.9	0
28	0
28.1	0
28.2	0
28.3	0
28.4	0
28.5	0
28.6	0
28.7	0
28.8	0
28.9	0
29	0
29.1	0
29.2	0
29.3	0
29.4	0
29.5	0
29.6	0
29.7	0
29.8	0
29.9	0
30	0
30.1	0
30.2	0
30.3	0
30.4	0
30.5	0
30.6	0
30.7	0
30.8	0
30.9	0
31	0
31.1	0
31.2	0
31.3	0
31.4	0
31.5	0
31.6	0
31.7	0
31.8	0
31.9	0
32	0
32.1	0
32.2	0
32.3	0
32.4	0
32.5	0
32.6	0
32.7	0
32.8	0
32.9	0
33	0
33.1	0
33.2	0
33.3	0
33.4	0
33.5	0
33.6	0
33.7	0
33.8	0
33.9	0
34	0
34.1	0
34.2	0
34.3	0
34.4	0
34.5	0
34.6	0
34.7	0
34.8	0
34.9	0
35	0
35.1	0
35.2	0
35.3	0
35.4	0
35.5	0
35.6	0
35.7	0
35.8	0
35.9	0
36	0
36.1	0
36.2	0
36.3	0
36.4	0
36.5	0
36.6	0
36.7	0
36.8	0
36.9	0
37	0
37.1	0
37.2	0
37.3	0
37.4	0
37.5	0
37.6	0
37.7	0
37.8	0
37.9	0
38	0
38.1	0
38.2	0
38.3	0
38.4	0
38.5	0
38.6	0
38.7	0
38.8	0
38.9	0
39	0
39.1	0
39.2	0
39.3	0
39.4	0
39.5	0
39.6	0
39.7	0
39.8	0
39.9	0
40	0
40.1	0
40.2	0
40.3	0
40.4	0
40.5	0
40.6	0
40.7	0
40.8	0
40.9	0
41	0
41.1	0
41.2	0
41.3	0
41.4	0
41.5	0
41.6	0
41.7	0
41.8	0
41.9	0
42	0
42.1	0
42.2	0
42.3	0
42.4	0
42.5	0
42.6	0
42.7	0
42.8	0
42.9	0
43	0
43.1	0
43.2	0
43.3	0
43.4	0
43.5	0
43.6	0
43.7	0
43.8	0
43.9	0
44	0
44.1	0
44.2	0
44.3	0
44.4	0
44.5	0
44.6	0
44.7	0
44.8	0
44.9	0
45	0
45.1	0
45.2	0
45.3	0
45.4	0
45.5	0
45.6	0
45.7	0
45.8	0
45.9	0
46	0
46.1	0
46.2	0
46.3	0
46.4	0
46.5	0
46.6	0
46.7	0
46.8	0
46.9	0
47	0
47.1	0
47.2	0
47.3	0
47.4	0
47.5	0
47.6	0
47.7	0
47.8	0
47.9	0
48	0
48.1	0
48.2	0
48.3	0
48.4	0
48.5	0
48.6	0
48.7	0
48.8	0
48.9	0
49	0
49.1	0
49.2	0
49.3	0
49.4	0
49.5	0
49.6	0
49.7	0
49.8	0
49.9	0
50	0
50.1	0
50.2	0
50.3	0
50.4	0
50.5	0
50.6	0
50.7	0
50.8	0
50.9	0
51	0
51.1	0
51.2	0
51.3	0
51.4	0
51.5	0
51.6	0
51.7	0
51.8	0
51.9	0
52	0
52.1	0
52.2	0
52.3	0
52.4	0
52.5	0
52.6	0
52.7	0
52.8	0
52.9	0
53	0
53.1	0
53.2	0
53.3	0
53.4	0
53.5	0
53.6	0
53.7	0
53.8	0
53.9	0
54	0
54.1	0
54.2	0
54.3	0
54.4	0
54.5	0
54.6	0
54.7	0
54.8	0
54.9	0
55	0
55.1	0
55.2	0
55.3	0
55.4	0
55.5	0
55.6	0
55.7	0
55.8	0
55.9	0
56	0
56.1	0
56.2	0
56.3	0
56.4	0
56.5	0
56.6	0
56.7	0
56.8	0
56.9	0
57	0
57.1	0
57.2	0
57.3	0
57.4	0
57.5	0
57.6	0
57.7	0
57.8	0
57.9	0
58	0
58.1	0
58.2	0
58.3	0
58.4	0
58.5	0
58.6	0
58.7	0
58.8	0
58.9	0
59	0
59.1	0
59.2	0
59.3	0
59.4	0
59.5	0
59.6	0
59.7	0
59.8	0
59.9	0
60	0
60.1	0
60.2	0
60.3	0
60.4	0
60.5	0
60.6	0
60.7	0
60.8	0
60.9	0
61	0
61.1	0
61.2	0
61.3	0
61.4	0
61.5	0
61.6	0
61.7	0
61.8	0
61.9	0
62	0
62.1	0
62.2	0
62.3	0
62.4	0
62.5	0
62.6	0
62.7	0
62.8	0
62.9	0
63	0
63.1	0
63.2	0
63.3	0
63.4	0
63.5	0
63.6	0
63.7	0
63.8	0
63.9	0
64	0
64.1	0
64.2	0
64.3	0
64.4	0
64.5	0
64.6	0
64.7	0
64.8	0
64.9	0
65	0
65.1	0
65.2	0
65.3	0
65.4	0
65.5	0
65.6	0
65.7	0
65.8	0
65.9	0
66	0
66.1	0
66.2	0
66.3	0
66.4	0
66.5	0
66.6	0
66.7	0
66.8	0
66.9	0
67	0
67.1	0
67.2	0
67.3	0
67.4	0
67.5	0
67.6	0
67.7	0
67.8	0
67.9	0
68	0
68.1	0
68.2	0
68.3	0
68.4	0
68.5	0
68.6	0
68.7	0
68.8	0
68.9	0
69	0
69.1	0
69.2	0
69.3	0
69.4	0
69.5	0
69.6	0
69.7	0
69.8	0
69.9	0
70	0
70.1	0
70.2	0
70.3	0
70.4	0
70.5	0
70.6	0
70.7	0
70.8	0
70.9	0
71	0
71.1	0
71.2	0
71.3	0
71.4	0
71.5	0
71.6	0
71.7	0
71.8	0
71.9	0
72	0
72.1	0
72.2	0
72.3	0
72.4	0
72.5	0
72.6	0
72.7	0
72.8	0
72.9	0
73	0
73.1	0
73.2	0
73.3	0
73.4	0
73.5	0
73.6	0
73.7	0
73.8	0
73.9	0
74	0
74.1	0
74.2	0
74.3	0
74.4	0
74.5	0
74.6	0
74.7	0
74.8	0
74.9	0
75	0
75.1	0
75.2	0
75.3	0
75.4	0
75.5	0
75.6	0
75.7	0
75.8	0
75.9	0
76	0
76.1	0
76.2	0
76.3	0
76.4	0
76.5	0
76.6	0
76.7	0
76.8	0
76.9	0
77	0
77.1	0
77.2	0
77.3	0
77.4	0
77.5	0
77.6	0
77.7	0
77.8	0
77.9	0
78	0
78.1	0
78.2	0
78.3	0
78.4	0
78.5	0
78.6	0
78.7	0
78.8	0
78.9	0
79	0
79.1	0
79.2	0
79.3	0
79.4	0
79.5	0
79.6	0
79.7	0
79.8	0
79.9	0
80	0
80.1	0
80.2	0
80.3	0
80.4	0
80.5	0
80.6	0
80.7	0
80.8	0
80.9	0
81	0
81.1	0
81.2	0
81.3	0
81.4	0
81.5	0
81.6	0
81.7	0
81.8	0
81.9	0
82	0
82.1	0
82.2	0
82.3	0
82.4	0
82.5	0
82.6	0
82.7	0
82.8	0
82.9	0
83	0
83.1	0
83.2	0
83.3	0
83.4	0
83.5	0
83.6	0
83.7	0
83.8	0
83.9	0
84	0
84.1	0
84.2	0
84.3	0
84.4	0
84.5	0
84.6	0
84.7	0
84.8	0
84.9	0
85	0
85.1	0
85.2	0
85.3	0
85.4	0
85.5	0
85.6	0
85.7	0
85.8	0
85.9	0
86	0
86.1	0
86.2	0
86.3	0
86.4	0
86.5	0
86.6	0
86.7	0
86.8	0
86.9	0
87	0
87.1	0
87.2	0
87.3	0
87.4	0
87.5	0
87.6	0
87.7	0
87.8	0
87.9	0
88	0
88.1	0
88.2	0
88.3	0
88.4	0
88.5	0
88.6	0
88.7	0
88.8	0
88.9	0
89	0
89.1	0
89.2	0
89.3	0
89.4	0
89.5	0
89.6	0
89.7	0
89.8	0
89.9	0
90	0
90.1	0
90.2	0
90.3	0
90.4	0
90.5	0
90.6	0
90.7	0
90.8	0
90.9	0
91	0
91.1	0
91.2	0
91.3	0
91.4	0
91.5	0
91.6	0
91.7	0
91.8	0
91.9	0
92	0
92.1	0
92.2	0
92.3	0
92.4	0
92.5	0
92.6	0
92.7	0
92.8	0
92.9	0
93	0
93.1	0
93.2	0
93.3	0
93.4	0
93.5	0
93.6	0
93.7	0
93.8	0
93.9	0
94	0
94.1	0
94.2	0
94.3	0
94.4	0
94.5	0
94.6	0
94.7	0
94.8	0
94.9	0
95	0
95.1	0
95.2	0
95.3	0
95.4	0
95.5	0
95.6	0
95.7	0
95.8	0
95.9	0
96	0
96.1	0
96.2	0
96.3	0
96.4	0
96.5	0
96.6	0
96.7	0
96.8	0
96.9	0
97	0
97.1	0
97.2	0
97.3	0
97.4	0
97.5	0
97.6	0
97.7	0
97.8	0
97.9	0
98	0
98.1	0
98.2	0
98.3	0
98.4	0
98.5	0
98.6	0
98.7	0
98.8	0
98.9	0
99	0
99.1	0
99.2	0
99.3	0
99.4	0
99.5	0
99.6	0
99.7	0
99.8	0
99.9	0
100	0
100.1	0
100.2	0
100.3	0
100.4	0
100.5	0
100.6	0
100.7	0
100.8	0
100.9	0.005
101	0.005
101.1	0.005
101.2	0.005
101.3	0.005
101.4	0.01
101.5	0.01
101.6	0.02
101.7	0.02
101.8	0.02
101.9	0.02
102	0.025
102.1	0.03
102.2	0.035
102.3	0.035
102.4	0.035
102.5	0.04
102.6	0.04
102.7	0.045
102.8	0.05
102.9	0.06
103	0.07
103.1	0.075
103.2	0.08
103.3	0.08
103.4	0.085
103.5	0.095
103.6	0.095
103.7	0.095
103.8	0.1
103.9	0.105
104	0.105
104.1	0.11
104.2	0.115
104.3	0.125
104.4	0.13
104.5	0.13
104.6	0.13
104.7	0.13
104.8	0.13
104.9	0.135
105	0.14
105.1	0.14
105.2	0.14
105.3	0.14
105.4	0.145
105.5	0.145
105.6	0.155
105.7	0.15
105.8	0.155
105.9	0.16
106	0.16
106.1	0.16
106.2	0.175
106.3	0.18
106.4	0.19
106.5	0.195
106.6	0.21
106.7	0.215
106.8	0.22
106.9	0.22
107	0.22
107.1	0.225
107.2	0.225
107.3	0.23
107.4	0.245
107.5	0.245
107.6	0.25
107.7	0.25
107.8	0.27
107.9	0.27
108	0.27
108.1	0.28
108.2	0.28
108.3	0.28
108.4	0.28
108.5	0.28
108.6	0.285
108.7	0.285
108.8	0.285
108.9	0.285
109	0.285
109.1	0.28
109.2	0.28
109.3	0.28
109.4	0.28
109.5	0.28
109.6	0.285
109.7	0.285
109.8	0.285
109.9	0.285
110	0.285
110.1	0.285
110.2	0.28
110.3	0.28
110.4	0.28
110.5	0.29
110.6	0.295
110.7	0.3
110.8	0.31
110.9	0.32
111	0.315
111.1	0.315
111.2	0.32
111.3	0.32
111.4	0.325
111.5	0.335
111.6	0.335
111.7	0.335
111.8	0.335
111.9	0.335
112	0.34
112.1	0.35
112.2	0.35
112.3	0.35
112.4	0.35
112.5	0.35
112.6	0.355
112.7	0.355
112.8	0.355
112.9	0.355
113	0.355
113.1	0.355
113.2	0.37
113.3	0.375
113.4	0.38
113.5	0.39
113.6	0.39
113.7	0.39
113.8	0.39
113.9	0.39
114	0.395
114.1	0.4
114.2	0.4
114.3	0.4
114.4	0.4
114.5	0.4
114.6	0.405
114.7	0.405
114.8	0.41
114.9	0.41
115	0.41
115.1	0.415
115.2	0.415
115.3	0.415
115.4	0.415
115.5	0.425
115.6	0.43
115.7	0.43
115.8	0.43
115.9	0.435
116	0.435
116.1	0.44
116.2	0.44
116.3	0.44
116.4	0.44
116.5	0.44
116.6	0.44
116.7	0.44
116.8	0.44
116.9	0.445
117	0.445
117.1	0.445
117.2	0.455
117.3	0.455
117.4	0.465
117.5	0.465
117.6	0.465
117.7	0.47
117.8	0.47
117.9	0.47
118	0.47
118.1	0.47
118.2	0.47
118.3	0.465
118.4	0.465
118.5	0.465
118.6	0.465
118.7	0.47
118.8	0.47
118.9	0.47
119	0.47
119.1	0.475
119.2	0.475
119.3	0.48
119.4	0.485
119.5	0.495
119.6	0.495
119.7	0.495
119.8	0.5
119.9	0.505
120	0.505
120.1	0.505
120.2	0.505
120.3	0.51
120.4	0.51
120.5	0.51
120.6	0.515
120.7	0.52
120.8	0.52
120.9	0.52
121	0.52
121.1	0.525
121.2	0.525
121.3	0.525
121.4	0.525
121.5	0.525
121.6	0.525
121.7	0.52
121.8	0.525
121.9	0.525
122	0.525
122.1	0.525
122.2	0.525
122.3	0.53
122.4	0.53
122.5	0.53
122.6	0.53
122.7	0.535
122.8	0.535
122.9	0.535
123	0.535
123.1	0.54
123.2	0.54
123.3	0.545
123.4	0.545
123.5	0.55
123.6	0.555
123.7	0.55
123.8	0.55
123.9	0.555
124	0.56
124.1	0.56
124.2	0.56
124.3	0.56
124.4	0.56
124.5	0.56
124.6	0.56
124.7	0.56
124.8	0.56
124.9	0.56
125	0.56
125.1	0.56
125.2	0.56
125.3	0.56
125.4	0.565
125.5	0.57
125.6	0.56
125.7	0.56
125.8	0.56
125.9	0.56
126	0.565
126.1	0.57
126.2	0.575
126.3	0.575
126.4	0.575
126.5	0.575
126.6	0.585
126.7	0.585
126.8	0.585
126.9	0.585
127	0.585
127.1	0.585
127.2	0.59
127.3	0.59
127.4	0.6
127.5	0.605
127.6	0.605
127.7	0.61
127.8	0.615
127.9	0.615
128	0.615
128.1	0.61
128.2	0.615
128.3	0.615
128.4	0.615
128.5	0.62
128.6	0.62
128.7	0.62
128.8	0.62
128.9	0.62
129	0.62
129.1	0.63
129.2	0.635
129.3	0.635
129.4	0.63
129.5	0.63
129.6	0.64
129.7	0.645
129.8	0.645
129.9	0.65
130	0.65
130.1	0.65
130.2	0.65
130.3	0.65
130.4	0.65
130.5	0.65
130.6	0.65
130.7	0.655
130.8	0.66
130.9	0.66
131	0.665
131.1	0.665
131.2	0.66
131.3	0.66
131.4	0.66
131.5	0.655
131.6	0.65
131.7	0.65
131.8	0.655
131.9	0.655
132	0.655
132.1	0.655
132.2	0.655
132.3	0.655
132.4	0.655
132.5	0.66
132.6	0.655
132.7	0.655
132.8	0.655
132.9	0.655
133	0.66
133.1	0.66
133.2	0.665
133.3	0.665
133.4	0.665
133.5	0.665
133.6	0.665
133.7	0.665
133.8	0.665
133.9	0.67
134	0.675
134.1	0.685
134.2	0.68
134.3	0.68
134.4	0.68
134.5	0.685
134.6	0.685
134.7	0.68
134.8	0.68
134.9	0.68
135	0.68
135.1	0.68
135.2	0.68
135.3	0.68
135.4	0.675
135.5	0.675
135.6	0.675
135.7	0.68
135.8	0.68
135.9	0.68
136	0.685
136.1	0.685
136.2	0.69
136.3	0.695
136.4	0.695
136.5	0.7
136.6	0.7
136.7	0.7
136.8	0.7
136.9	0.705
137	0.705
137.1	0.705
137.2	0.705
137.3	0.705
137.4	0.71
137.5	0.71
137.6	0.71
137.7	0.71
137.8	0.71
137.9	0.71
138	0.71
138.1	0.71
138.2	0.72
138.3	0.72
138.4	0.715
138.5	0.715
138.6	0.71
138.7	0.71
138.8	0.71
138.9	0.71
139	0.715
139.1	0.715
139.2	0.715
139.3	0.715
139.4	0.71
139.5	0.71
139.6	0.715
139.7	0.715
139.8	0.715
139.9	0.715
140	0.715
140.1	0.72
140.2	0.725
140.3	0.725
140.4	0.725
140.5	0.725
140.6	0.725
140.7	0.725
140.8	0.725
140.9	0.72
141	0.72
141.1	0.72
141.2	0.72
141.3	0.72
141.4	0.725
141.5	0.72
141.6	0.72
141.7	0.725
141.8	0.72
141.9	0.72
142	0.72
142.1	0.72
142.2	0.72
142.3	0.72
142.4	0.72
142.5	0.72
142.6	0.72
142.7	0.72
142.8	0.72
142.9	0.72
143	0.72
143.1	0.72
143.2	0.725
143.3	0.725
143.4	0.72
143.5	0.72
143.6	0.72
143.7	0.72
143.8	0.72
143.9	0.715
144	0.715
144.1	0.715
144.2	0.715
144.3	0.715
144.4	0.715
144.5	0.72
144.6	0.72
144.7	0.725
144.8	0.725
144.9	0.725
145	0.725
145.1	0.73
145.2	0.73
145.3	0.73
145.4	0.73
145.5	0.73
145.6	0.73
145.7	0.73
145.8	0.73
145.9	0.73
146	0.73
146.1	0.73
146.2	0.725
146.3	0.73
146.4	0.73
146.5	0.725
146.6	0.725
146.7	0.725
146.8	0.725
146.9	0.73
147	0.73
147.1	0.73
147.2	0.73
147.3	0.73
147.4	0.73
147.5	0.735
147.6	0.74
147.7	0.735
147.8	0.735
147.9	0.735
148	0.74
148.1	0.745
148.2	0.745
148.3	0.745
148.4	0.745
148.5	0.745
148.6	0.745
148.7	0.745
148.8	0.745
148.9	0.745
149	0.745
149.1	0.745
149.2	0.74
149.3	0.74
149.4	0.74
149.5	0.745
149.6	0.745
149.7	0.745
149.8	0.745
149.9	0.745
150	0.745
150.1	0.745
150.2	0.745
150.3	0.745
150.4	0.74
150.5	0.74
150.6	0.74
150.7	0.74
150.8	0.75
150.9	0.755
151	0.755
151.1	0.755
151.2	0.75
151.3	0.74
151.4	0.74
151.5	0.745
151.6	0.745
151.7	0.745
151.8	0.745
151.9	0.75
152	0.75
152.1	0.755
152.2	0.755
152.3	0.755
152.4	0.755
152.5	0.755
152.6	0.755
152.7	0.755
152.8	0.755
152.9	0.755
153	0.755
153.1	0.755
153.2	0.755
153.3	0.755
153.4	0.755
153.5	0.755
153.6	0.755
153.7	0.76
153.8	0.76
153.9	0.76
154	0.76
154.1	0.765
154.2	0.765
154.3	0.765
154.4	0.77
154.5	0.77
154.6	0.77
154.7	0.77
154.8	0.77
154.9	0.77
155	0.775
155.1	0.775
155.2	0.775
155.3	0.775
155.4	0.77
155.5	0.77
155.6	0.765
155.7	0.76
155.8	0.76
155.9	0.76
156	0.765
156.1	0.765
156.2	0.765
156.3	0.765
156.4	0.77
156.5	0.765
156.6	0.765
156.7	0.765
156.8	0.765
156.9	0.765
157	0.76
157.1	0.76
157.2	0.765
157.3	0.765
157.4	0.765
157.5	0.765
157.6	0.765
157.7	0.76
157.8	0.76
157.9	0.76
158	0.76
158.1	0.76
158.2	0.76
158.3	0.755
158.4	0.75
158.5	0.755
158.6	0.755
158.7	0.76
158.8	0.76
158.9	0.755
159	0.75
159.1	0.76
159.2	0.76
159.3	0.76
159.4	0.765
159.5	0.76
159.6	0.76
159.7	0.76
159.8	0.76
159.9	0.765
160	0.76
160.1	0.76
160.2	0.76
160.3	0.76
160.4	0.76
160.5	0.76
160.6	0.76
160.7	0.76
160.8	0.76
160.9	0.76
161	0.76
161.1	0.76
161.2	0.76
161.3	0.76
161.4	0.76
161.5	0.765
161.6	0.765
161.7	0.765
161.8	0.76
161.9	0.76
162	0.765
162.1	0.765
162.2	0.765
162.3	0.765
162.4	0.765
162.5	0.765
162.6	0.765
162.7	0.765
162.8	0.765
162.9	0.765
163	0.76
163.1	0.76
163.2	0.76
163.3	0.76
163.4	0.765
163.5	0.765
163.6	0.765
163.7	0.765
163.8	0.765
163.9	0.76
164	0.76
164.1	0.76
164.2	0.76
164.3	0.755
164.4	0.755
164.5	0.755
164.6	0.755
164.7	0.755
164.8	0.76
164.9	0.765
165	0.765
165.1	0.765
165.2	0.765
165.3	0.765
165.4	0.76
165.5	0.76
165.6	0.76
165.7	0.76
165.8	0.76
165.9	0.76
166	0.765
166.1	0.765
166.2	0.765
166.3	0.765
166.4	0.77
166.5	0.77
166.6	0.77
166.7	0.765
166.8	0.765
166.9	0.765
167	0.765
167.1	0.765
167.2	0.765
167.3	0.765
167.4	0.765
167.5	0.765
167.6	0.765
167.7	0.775
167.8	0.77
167.9	0.77
168	0.775
168.1	0.775
168.2	0.77
168.3	0.77
168.4	0.77
168.5	0.77
168.6	0.765
168.7	0.765
168.8	0.76
168.9	0.76
169	0.755
169.1	0.755
169.2	0.75
169.3	0.755
169.4	0.755
169.5	0.755
169.6	0.755
169.7	0.755
169.8	0.755
169.9	0.76
170	0.765
170.1	0.77
170.2	0.765
170.3	0.765
170.4	0.765
170.5	0.77
170.6	0.77
170.7	0.775
170.8	0.775
170.9	0.775
171	0.775
171.1	0.775
171.2	0.775
171.3	0.775
171.4	0.78
171.5	0.78
171.6	0.785
171.7	0.785
171.8	0.78
171.9	0.78
172	0.78
172.1	0.78
172.2	0.775
172.3	0.785
172.4	0.79
172.5	0.785
172.6	0.785
172.7	0.785
172.8	0.785
172.9	0.775
173	0.775
173.1	0.775
173.2	0.78
173.3	0.78
173.4	0.775
173.5	0.775
173.6	0.77
173.7	0.77
173.8	0.77
173.9	0.77
174	0.77
174.1	0.77
174.2	0.77
174.3	0.77
174.4	0.77
174.5	0.77
174.6	0.77
174.7	0.77
174.8	0.77
174.9	0.77
175	0.765
175.1	0.765
175.2	0.765
175.3	0.765
175.4	0.765
175.5	0.765
175.6	0.765
175.7	0.765
175.8	0.765
175.9	0.765
176	0.765
176.1	0.765
176.2	0.765
176.3	0.765
176.4	0.765
176.5	0.765
176.6	0.77
176.7	0.77
176.8	0.77
176.9	0.77
177	0.77
177.1	0.77
177.2	0.77
177.3	0.765
177.4	0.765
177.5	0.765
177.6	0.765
177.7	0.77
177.8	0.77
177.9	0.77
178	0.77
178.1	0.765
178.2	0.765
178.3	0.76
178.4	0.76
178.5	0.76
178.6	0.76
178.7	0.755
178.8	0.755
178.9	0.75
179	0.75
179.1	0.75
179.2	0.75
179.3	0.75
179.4	0.75
179.5	0.745
179.6	0.745
179.7	0.75
179.8	0.755
179.9	0.755
180	0.755
180.1	0.76
180.2	0.76
180.3	0.76
180.4	0.76
180.5	0.765
180.6	0.765
180.7	0.765
180.8	0.765
180.9	0.765
181	0.765
181.1	0.77
181.2	0.77
181.3	0.77
181.4	0.77
181.5	0.765
181.6	0.765
181.7	0.765
181.8	0.765
181.9	0.765
182	0.765
182.1	0.765
182.2	0.765
182.3	0.765
182.4	0.765
182.5	0.765
182.6	0.765
182.7	0.765
182.8	0.76
182.9	0.76
183	0.76
183.1	0.76
183.2	0.76
183.3	0.76
183.4	0.76
183.5	0.76
183.6	0.76
183.7	0.76
183.8	0.76
183.9	0.76
184	0.765
184.1	0.765
184.2	0.765
184.3	0.765
184.4	0.765
184.5	0.77
184.6	0.765
184.7	0.765
184.8	0.765
184.9	0.76
185	0.75
185.1	0.75
185.2	0.75
185.3	0.75
185.4	0.745
185.5	0.75
185.6	0.75
185.7	0.755
185.8	0.755
185.9	0.755
186	0.755
186.1	0.765
186.2	0.765
186.3	0.76
186.4	0.76
186.5	0.76
186.6	0.77
186.7	0.77
186.8	0.765
186.9	0.77
187	0.77
187.1	0.77
187.2	0.765
187.3	0.765
187.4	0.76
187.5	0.77
187.6	0.77
187.7	0.77
187.8	0.77
187.9	0.775
188	0.775
188.1	0.775
188.2	0.775
188.3	0.775
188.4	0.775
188.5	0.775
188.6	0.775
188.7	0.775
188.8	0.775
188.9	0.775
189	0.775
189.1	0.775
189.2	0.78
189.3	0.78
189.4	0.78
189.5	0.78
189.6	0.78
189.7	0.78
189.8	0.785
189.9	0.78
190	0.78
190.1	0.78
190.2	0.78
190.3	0.78
190.4	0.78
190.5	0.78
190.6	0.78
190.7	0.78
190.8	0.78
190.9	0.78
191	0.78
191.1	0.78
191.2	0.78
191.3	0.78
191.4	0.775
191.5	0.775
191.6	0.775
191.7	0.775
191.8	0.775
191.9	0.77
192	0.77
192.1	0.77
192.2	0.77
192.3	0.775
192.4	0.775
192.5	0.775
192.6	0.775
192.7	0.77
192.8	0.77
192.9	0.77
193	0.77
193.1	0.775
193.2	0.775
193.3	0.775
193.4	0.78
193.5	0.78
193.6	0.78
193.7	0.78
193.8	0.78
193.9	0.78
194	0.78
194.1	0.78
194.2	0.775
194.3	0.785
194.4	0.79
194.5	0.79
194.6	0.79
194.7	0.79
194.8	0.79
194.9	0.79
195	0.79
195.1	0.79
195.2	0.79
195.3	0.79
195.4	0.79
195.5	0.79
195.6	0.79
195.7	0.78
195.8	0.77
195.9	0.77
196	0.77
196.1	0.77
196.2	0.77
196.3	0.775
196.4	0.775
196.5	0.775
196.6	0.775
196.7	0.77
196.8	0.77
196.9	0.77
197	0.77
197.1	0.77
197.2	0.77
197.3	0.77
197.4	0.77
197.5	0.77
197.6	0.77
197.7	0.765
197.8	0.765
197.9	0.76
198	0.765
198.1	0.765
198.2	0.765
198.3	0.765
198.4	0.765
198.5	0.765
198.6	0.765
198.7	0.765
198.8	0.77
198.9	0.77
199	0.775
199.1	0.775
199.2	0.77
199.3	0.765
199.4	0.77
199.5	0.77
199.6	0.77
199.7	0.77
199.8	0.77
199.9	0.77
200	0.77
[truncated: 14,000 more rows]
