# Supplementary material for: Bayesian inference of kinetic schemes for ion channels by Kalman filtering
Source: eLife journal article supplement (doi:10.7554/elife.62714), 2022-05-04
Supplement: fig4-data5 [file 1_Sim_N_400_Fluor_MW_4M.xlsx]

## Sheet: 4 M
0.1	0
0.2	0
0.3	0
0.4	0
0.5	0
0.6	0
0.7	0
0.8	0
0.9	0
1	0
1.1	0
1.2	0
1.3	0
1.4	0
1.5	0
1.6	0
1.7	0
1.8	0
1.9	0
2	0
2.1	0
2.2	0
2.3	0
2.4	0
2.5	0
2.6	0
2.7	0
2.8	0
2.9	0
3	0
3.1	0
3.2	0
3.3	0
3.4	0
3.5	0
3.6	0
3.7	0
3.8	0
3.9	0
4	0
4.1	0
4.2	0
4.3	0
4.4	0
4.5	0
4.6	0
4.7	0
4.8	0
4.9	0
5	0
5.1	0
5.2	0
5.3	0
5.4	0
5.5	0
5.6	0
5.7	0
5.8	0
5.9	0
6	0
6.1	0
6.2	0
6.3	0
6.4	0
6.5	0
6.6	0
6.7	0
6.8	0
6.9	0
7	0
7.1	0
7.2	0
7.3	0
7.4	0
7.5	0
7.6	0
7.7	0
7.8	0
7.9	0
8	0
8.1	0
8.2	0
8.3	0
8.4	0
8.5	0
8.6	0
8.7	0
8.8	0
8.9	0
9	0
9.1	0
9.2	0
9.3	0
9.4	0
9.5	0
9.6	0
9.7	0
9.8	0
9.9	0
10	0
10.1	0
10.2	0
10.3	0
10.4	0
10.5	0
10.6	0
10.7	0
10.8	0
10.9	0
11	0
11.1	0
11.2	0
11.3	0
11.4	0
11.5	0
11.6	0
11.7	0
11.8	0
11.9	0
12	0
12.1	0
12.2	0
12.3	0
12.4	0
12.5	0
12.6	0
12.7	0
12.8	0
12.9	0
13	0
13.1	0
13.2	0
13.3	0
13.4	0
13.5	0
13.6	0
13.7	0
13.8	0
13.9	0
14	0
14.1	0
14.2	0
14.3	0
14.4	0
14.5	0
14.6	0
14.7	0
14.8	0
14.9	0
15	0
15.1	0
15.2	0
15.3	0
15.4	0
15.5	0
15.6	0
15.7	0
15.8	0
15.9	0
16	0
16.1	0
16.2	0
16.3	0
16.4	0
16.5	0
16.6	0
16.7	0
16.8	0
16.9	0
17	0
17.1	0
17.2	0
17.3	0
17.4	0
17.5	0
17.6	0
17.7	0
17.8	0
17.9	0
18	0
18.1	0
18.2	0
18.3	0
18.4	0
18.5	0
18.6	0
18.7	0
18.8	0
18.9	0
19	0
19.1	0
19.2	0
19.3	0
19.4	0
19.5	0
19.6	0
19.7	0
19.8	0
19.9	0
20	0
20.1	0
20.2	0
20.3	0
20.4	0
20.5	0
20.6	0
20.7	0
20.8	0
20.9	0
21	0
21.1	0
21.2	0
21.3	0
21.4	0
21.5	0
21.6	0
21.7	0
21.8	0
21.9	0
22	0
22.1	0
22.2	0
22.3	0
22.4	0
22.5	0
22.6	0
22.7	0
22.8	0
22.9	0
23	0
23.1	0
23.2	0
23.3	0
23.4	0
23.5	0
23.6	0
23.7	0
23.8	0
23.9	0
24	0
24.1	0
24.2	0
24.3	0
24.4	0
24.5	0
24.6	0
24.7	0
24.8	0
24.9	0
25	0
25.1	0
25.2	0
25.3	0
25.4	0
25.5	0
25.6	0
25.7	0
25.8	0
25.9	0
26	0
26.1	0
26.2	0
26.3	0
26.4	0
26.5	0
26.6	0
26.7	0
26.8	0
26.9	0
27	0
27.1	0
27.2	0
27.3	0
27.4	0
27.5	0
27.6	0
27.7	0
27.8	0
27.9	0
28	0
28.1	0
28.2	0
28.3	0
28.4	0
28.5	0
28.6	0
28.7	0
28.8	0
28.9	0
29	0
29.1	0
29.2	0
29.3	0
29.4	0
29.5	0
29.6	0
29.7	0
29.8	0
29.9	0
30	0
30.1	0
30.2	0
30.3	0
30.4	0
30.5	0
30.6	0
30.7	0
30.8	0
30.9	0
31	0
31.1	0
31.2	0
31.3	0
31.4	0
31.5	0
31.6	0
31.7	0
31.8	0
31.9	0
32	0
32.1	0
32.2	0
32.3	0
32.4	0
32.5	0
32.6	0
32.7	0
32.8	0
32.9	0
33	0
33.1	0
33.2	0
33.3	0
33.4	0
33.5	0
33.6	0
33.7	0
33.8	0
33.9	0
34	0
34.1	0
34.2	0
34.3	0
34.4	0
34.5	0
34.6	0
34.7	0
34.8	0
34.9	0
35	0
35.1	0
35.2	0
35.3	0
35.4	0
35.5	0
35.6	0
35.7	0
35.8	0
35.9	0
36	0
36.1	0
36.2	0
36.3	0
36.4	0
36.5	0
36.6	0
36.7	0
36.8	0
36.9	0
37	0
37.1	0
37.2	0
37.3	0
37.4	0
37.5	0
37.6	0
37.7	0
37.8	0
37.9	0
38	0
38.1	0
38.2	0
38.3	0
38.4	0
38.5	0
38.6	0
38.7	0
38.8	0
38.9	0
39	0
39.1	0
39.2	0
39.3	0
39.4	0
39.5	0
39.6	0
39.7	0
39.8	0
39.9	0
40	0
40.1	0
40.2	0
40.3	0
40.4	0
40.5	0
40.6	0
40.7	0
40.8	0
40.9	0
41	0
41.1	0
41.2	0
41.3	0
41.4	0
41.5	0
41.6	0
41.7	0
41.8	0
41.9	0
42	0
42.1	0
42.2	0
42.3	0
42.4	0
42.5	0
42.6	0
42.7	0
42.8	0
42.9	0
43	0
43.1	0
43.2	0
43.3	0
43.4	0
43.5	0
43.6	0
43.7	0
43.8	0
43.9	0
44	0
44.1	0
44.2	0
44.3	0
44.4	0
44.5	0
44.6	0
44.7	0
44.8	0
44.9	0
45	0
45.1	0
45.2	0
45.3	0
45.4	0
45.5	0
45.6	0
45.7	0
45.8	0
45.9	0
46	0
46.1	0
46.2	0
46.3	0
46.4	0
46.5	0
46.6	0
46.7	0
46.8	0
46.9	0
47	0
47.1	0
47.2	0
47.3	0
47.4	0
47.5	0
47.6	0
47.7	0
47.8	0
47.9	0
48	0
48.1	0
48.2	0
48.3	0
48.4	0
48.5	0
48.6	0
48.7	0
48.8	0
48.9	0
49	0
49.1	0
49.2	0
49.3	0
49.4	0
49.5	0
49.6	0
49.7	0
49.8	0
49.9	0
50	0
50.1	0
50.2	0
50.3	0
50.4	0
50.5	0
50.6	0
50.7	0
50.8	0
50.9	0
51	0
51.1	0
51.2	0
51.3	0
51.4	0
51.5	0
51.6	0
51.7	0
51.8	0
51.9	0
52	0
52.1	0
52.2	0
52.3	0
52.4	0
52.5	0
52.6	0
52.7	0
52.8	0
52.9	0
53	0
53.1	0
53.2	0
53.3	0
53.4	0
53.5	0
53.6	0
53.7	0
53.8	0
53.9	0
54	0
54.1	0
54.2	0
54.3	0
54.4	0
54.5	0
54.6	0
54.7	0
54.8	0
54.9	0
55	0
55.1	0
55.2	0
55.3	0
55.4	0
55.5	0
55.6	0
55.7	0
55.8	0
55.9	0
56	0
56.1	0
56.2	0
56.3	0
56.4	0
56.5	0
56.6	0
56.7	0
56.8	0
56.9	0
57	0
57.1	0
57.2	0
57.3	0
57.4	0
57.5	0
57.6	0
57.7	0
57.8	0
57.9	0
58	0
58.1	0
58.2	0
58.3	0
58.4	0
58.5	0
58.6	0
58.7	0
58.8	0
58.9	0
59	0
59.1	0
59.2	0
59.3	0
59.4	0
59.5	0
59.6	0
59.7	0
59.8	0
59.9	0
60	0
60.1	0
60.2	0
60.3	0
60.4	0
60.5	0
60.6	0
60.7	0
60.8	0
60.9	0
61	0
61.1	0
61.2	0
61.3	0
61.4	0
61.5	0
61.6	0
61.7	0
61.8	0
61.9	0
62	0
62.1	0
62.2	0
62.3	0
62.4	0
62.5	0
62.6	0
62.7	0
62.8	0
62.9	0
63	0
63.1	0
63.2	0
63.3	0
63.4	0
63.5	0
63.6	0
63.7	0
63.8	0
63.9	0
64	0
64.1	0
64.2	0
64.3	0
64.4	0
64.5	0
64.6	0
64.7	0
64.8	0
64.9	0
65	0
65.1	0
65.2	0
65.3	0
65.4	0
65.5	0
65.6	0
65.7	0
65.8	0
65.9	0
66	0
66.1	0
66.2	0
66.3	0
66.4	0
66.5	0
66.6	0
66.7	0
66.8	0
66.9	0
67	0
67.1	0
67.2	0
67.3	0
67.4	0
67.5	0
67.6	0
67.7	0
67.8	0
67.9	0
68	0
68.1	0
68.2	0
68.3	0
68.4	0
68.5	0
68.6	0
68.7	0
68.8	0
68.9	0
69	0
69.1	0
69.2	0
69.3	0
69.4	0
69.5	0
69.6	0
69.7	0
69.8	0
69.9	0
70	0
70.1	0
70.2	0
70.3	0
70.4	0
70.5	0
70.6	0
70.7	0
70.8	0
70.9	0
71	0
71.1	0
71.2	0
71.3	0
71.4	0
71.5	0
71.6	0
71.7	0
71.8	0
71.9	0
72	0
72.1	0
72.2	0
72.3	0
72.4	0
72.5	0
72.6	0
72.7	0
72.8	0
72.9	0
73	0
73.1	0
73.2	0
73.3	0
73.4	0
73.5	0
73.6	0
73.7	0
73.8	0
73.9	0
74	0
74.1	0
74.2	0
74.3	0
74.4	0
74.5	0
74.6	0
74.7	0
74.8	0
74.9	0
75	0
75.1	0
75.2	0
75.3	0
75.4	0
75.5	0
75.6	0
75.7	0
75.8	0
75.9	0
76	0
76.1	0
76.2	0
76.3	0
76.4	0
76.5	0
76.6	0
76.7	0
76.8	0
76.9	0
77	0
77.1	0
77.2	0
77.3	0
77.4	0
77.5	0
77.6	0
77.7	0
77.8	0
77.9	0
78	0
78.1	0
78.2	0
78.3	0
78.4	0
78.5	0
78.6	0
78.7	0
78.8	0
78.9	0
79	0
79.1	0
79.2	0
79.3	0
79.4	0
79.5	0
79.6	0
79.7	0
79.8	0
79.9	0
80	0
80.1	0
80.2	0
80.3	0
80.4	0
80.5	0
80.6	0
80.7	0
80.8	0
80.9	0
81	0
81.1	0
81.2	0
81.3	0
81.4	0
81.5	0
81.6	0
81.7	0
81.8	0
81.9	0
82	0
82.1	0
82.2	0
82.3	0
82.4	0
82.5	0
82.6	0
82.7	0
82.8	0
82.9	0
83	0
83.1	0
83.2	0
83.3	0
83.4	0
83.5	0
83.6	0
83.7	0
83.8	0
83.9	0
84	0
84.1	0
84.2	0
84.3	0
84.4	0
84.5	0
84.6	0
84.7	0
84.8	0
84.9	0
85	0
85.1	0
85.2	0
85.3	0
85.4	0
85.5	0
85.6	0
85.7	0
85.8	0
85.9	0
86	0
86.1	0
86.2	0
86.3	0
86.4	0
86.5	0
86.6	0
86.7	0
86.8	0
86.9	0
87	0
87.1	0
87.2	0
87.3	0
87.4	0
87.5	0
87.6	0
87.7	0
87.8	0
87.9	0
88	0
88.1	0
88.2	0
88.3	0
88.4	0
88.5	0
88.6	0
88.7	0
88.8	0
88.9	0
89	0
89.1	0
89.2	0
89.3	0
89.4	0
89.5	0
89.6	0
89.7	0
89.8	0
89.9	0
90	0
90.1	0
90.2	0
90.3	0
90.4	0
90.5	0
90.6	0
90.7	0
90.8	0
90.9	0
91	0
91.1	0
91.2	0
91.3	0
91.4	0
91.5	0
91.6	0
91.7	0
91.8	0
91.9	0
92	0
92.1	0
92.2	0
92.3	0
92.4	0
92.5	0
92.6	0
92.7	0
92.8	0
92.9	0
93	0
93.1	0
93.2	0
93.3	0
93.4	0
93.5	0
93.6	0
93.7	0
93.8	0
93.9	0
94	0
94.1	0
94.2	0
94.3	0
94.4	0
94.5	0
94.6	0
94.7	0
94.8	0
94.9	0
95	0
95.1	0
95.2	0
95.3	0
95.4	0
95.5	0
95.6	0
95.7	0
95.8	0
95.9	0
96	0
96.1	0
96.2	0
96.3	0
96.4	0
96.5	0
96.6	0
96.7	0
96.8	0
96.9	0
97	0
97.1	0
97.2	0
97.3	0
97.4	0
97.5	0
97.6	0
97.7	0
97.8	0
97.9	0
98	0
98.1	0
98.2	0
98.3	0
98.4	0
98.5	0
98.6	0
98.7	0
98.8	0
98.9	0
99	0
99.1	0
99.2	0
99.3	0
99.4	0
99.5	0
99.6	0
99.7	0
99.8	0
99.9	0
100	0
100.1	0.21125
100.2	0.335
100.3	0.44625
100.4	0.515
100.5	0.57125
100.6	0.61875
100.7	0.66
100.8	0.68625
100.9	0.70375
101	0.72
101.1	0.74625
101.2	0.76
101.3	0.78125
101.4	0.795
101.5	0.80625
101.6	0.81625
101.7	0.81125
101.8	0.82875
101.9	0.83125
102	0.835
102.1	0.83375
102.2	0.85
102.3	0.84125
102.4	0.84125
102.5	0.8375
102.6	0.84375
102.7	0.85
102.8	0.84375
102.9	0.85125
103	0.86
103.1	0.8575
103.2	0.865
103.3	0.86
103.4	0.86125
103.5	0.85875
103.6	0.865
103.7	0.8625
103.8	0.8625
103.9	0.87625
104	0.8775
104.1	0.88375
104.2	0.8875
104.3	0.88125
104.4	0.8775
104.5	0.8625
104.6	0.8675
104.7	0.875
104.8	0.8675
104.9	0.86625
105	0.86375
105.1	0.8625
105.2	0.855
105.3	0.86125
105.4	0.8675
105.5	0.86125
105.6	0.855
105.7	0.85625
105.8	0.86
105.9	0.855
106	0.86375
106.1	0.87125
106.2	0.875
106.3	0.8725
106.4	0.875
106.5	0.875
106.6	0.87625
106.7	0.88125
106.8	0.87875
106.9	0.87875
107	0.87375
107.1	0.8775
107.2	0.88875
107.3	0.87875
107.4	0.88
107.5	0.885
107.6	0.885
107.7	0.88
107.8	0.87625
107.9	0.87375
108	0.8825
108.1	0.89125
108.2	0.88875
108.3	0.89125
108.4	0.8925
108.5	0.8925
108.6	0.8925
108.7	0.89875
108.8	0.885
108.9	0.87875
109	0.875
109.1	0.88125
109.2	0.88125
109.3	0.88
109.4	0.8775
109.5	0.88
109.6	0.87625
109.7	0.87875
109.8	0.865
109.9	0.8675
110	0.88
110.1	0.88875
110.2	0.8925
110.3	0.88875
110.4	0.89
110.5	0.89
110.6	0.8925
110.7	0.895
110.8	0.895
110.9	0.90125
111	0.8925
111.1	0.8925
111.2	0.89375
111.3	0.89
111.4	0.89
111.5	0.89125
111.6	0.89875
111.7	0.9075
111.8	0.9075
111.9	0.9
112	0.90125
112.1	0.8975
112.2	0.8925
112.3	0.9
112.4	0.89875
112.5	0.89875
112.6	0.8925
112.7	0.88125
112.8	0.88375
112.9	0.8875
113	0.885
113.1	0.88875
113.2	0.8875
113.3	0.89125
113.4	0.89875
113.5	0.895
113.6	0.895
113.7	0.8925
113.8	0.9025
113.9	0.90375
114	0.90875
114.1	0.91
114.2	0.905
114.3	0.9
114.4	0.90375
114.5	0.89625
114.6	0.89375
114.7	0.89
114.8	0.88625
114.9	0.89375
115	0.89
115.1	0.885
115.2	0.88125
115.3	0.88875
115.4	0.89125
115.5	0.8925
115.6	0.895
115.7	0.9
115.8	0.9
115.9	0.9025
116	0.90625
116.1	0.9
116.2	0.8925
116.3	0.8875
116.4	0.9
116.5	0.89625
116.6	0.89625
116.7	0.9025
116.8	0.90625
116.9	0.9175
117	0.91625
117.1	0.9125
117.2	0.91625
117.3	0.91625
117.4	0.91
117.5	0.90125
117.6	0.9025
117.7	0.90625
117.8	0.8975
117.9	0.90875
118	0.9025
118.1	0.9
118.2	0.90375
118.3	0.90125
118.4	0.90125
118.5	0.90125
118.6	0.8975
118.7	0.8975
118.8	0.88625
118.9	0.8925
119	0.89625
119.1	0.89375
119.2	0.895
119.3	0.895
119.4	0.90125
119.5	0.89625
119.6	0.90125
119.7	0.9025
119.8	0.90625
119.9	0.9025
120	0.9
120.1	0.91
120.2	0.91875
120.3	0.92
120.4	0.9175
120.5	0.91875
120.6	0.91875
120.7	0.92625
120.8	0.92375
120.9	0.9275
121	0.92625
121.1	0.9175
121.2	0.91125
121.3	0.9175
121.4	0.91125
121.5	0.915
121.6	0.91125
121.7	0.91375
121.8	0.915
121.9	0.91625
122	0.9275
122.1	0.9225
122.2	0.92625
122.3	0.925
122.4	0.92625
122.5	0.92125
122.6	0.92
122.7	0.9175
122.8	0.92125
122.9	0.9275
123	0.925
123.1	0.9275
123.2	0.93
123.3	0.925
123.4	0.92875
123.5	0.925
123.6	0.925
123.7	0.9175
123.8	0.91375
123.9	0.91125
124	0.90875
124.1	0.91125
124.2	0.9125
124.3	0.9125
124.4	0.9075
124.5	0.905
124.6	0.9125
124.7	0.9125
124.8	0.91125
124.9	0.91625
125	0.91125
125.1	0.9125
125.2	0.9125
125.3	0.92125
125.4	0.92125
125.5	0.925
125.6	0.92625
125.7	0.915
125.8	0.92
125.9	0.9225
126	0.92125
126.1	0.93
126.2	0.93375
126.3	0.9275
126.4	0.93375
126.5	0.94125
126.6	0.94125
126.7	0.94375
126.8	0.94625
126.9	0.9375
127	0.9375
127.1	0.94
127.2	0.94125
127.3	0.93875
127.4	0.9375
127.5	0.9375
127.6	0.9375
127.7	0.93625
127.8	0.935
127.9	0.945
128	0.9275
128.1	0.93375
128.2	0.93125
128.3	0.9275
128.4	0.925
128.5	0.93125
128.6	0.93
128.7	0.935
128.8	0.9325
128.9	0.93
129	0.9275
129.1	0.9275
129.2	0.9275
129.3	0.92375
129.4	0.925
129.5	0.92625
129.6	0.92875
129.7	0.93
129.8	0.92625
129.9	0.92625
130	0.92125
130.1	0.925
130.2	0.92375
130.3	0.9225
130.4	0.9275
130.5	0.92875
130.6	0.92625
130.7	0.93625
130.8	0.93125
130.9	0.93
131	0.93625
131.1	0.9325
131.2	0.93125
131.3	0.9375
131.4	0.93625
131.5	0.93625
131.6	0.93625
131.7	0.94125
131.8	0.94125
131.9	0.945
132	0.945
132.1	0.94
132.2	0.94
132.3	0.945
132.4	0.93875
132.5	0.94625
132.6	0.94375
132.7	0.9425
132.8	0.94
132.9	0.94125
133	0.94625
133.1	0.94375
133.2	0.95125
133.3	0.94625
133.4	0.94375
133.5	0.9425
133.6	0.94375
133.7	0.94625
133.8	0.9475
133.9	0.9525
134	0.95125
134.1	0.9475
134.2	0.9425
134.3	0.9375
134.4	0.9375
134.5	0.93625
134.6	0.935
134.7	0.935
134.8	0.9325
134.9	0.935
135	0.93875
135.1	0.94375
135.2	0.945
135.3	0.9475
135.4	0.94625
135.5	0.9425
135.6	0.945
135.7	0.9425
135.8	0.94625
135.9	0.94875
136	0.94
136.1	0.94
136.2	0.9375
136.3	0.93125
136.4	0.93375
136.5	0.93
136.6	0.93375
136.7	0.93375
136.8	0.93375
136.9	0.9375
137	0.94
137.1	0.94125
137.2	0.9425
137.3	0.94875
137.4	0.9475
137.5	0.9475
137.6	0.9475
137.7	0.95375
137.8	0.95375
137.9	0.94875
138	0.9525
138.1	0.95375
138.2	0.96
138.3	0.95875
138.4	0.9625
138.5	0.96125
138.6	0.965
138.7	0.9625
138.8	0.9575
138.9	0.95625
139	0.95625
139.1	0.95125
139.2	0.95125
139.3	0.9475
139.4	0.9475
139.5	0.94875
139.6	0.9475
139.7	0.94875
139.8	0.94875
139.9	0.94375
140	0.945
140.1	0.94625
140.2	0.94625
140.3	0.9475
140.4	0.95125
140.5	0.9475
140.6	0.945
140.7	0.94875
140.8	0.95375
140.9	0.9525
141	0.9475
141.1	0.9425
141.2	0.9425
141.3	0.9375
141.4	0.9425
141.5	0.945
141.6	0.95125
141.7	0.9525
141.8	0.95125
141.9	0.96125
142	0.96875
142.1	0.97
142.2	0.96625
142.3	0.95875
142.4	0.96
142.5	0.955
142.6	0.96
142.7	0.95625
142.8	0.955
142.9	0.95375
143	0.95625
143.1	0.955
143.2	0.955
143.3	0.95375
143.4	0.945
143.5	0.945
143.6	0.95
143.7	0.95
143.8	0.9525
143.9	0.95125
144	0.955
144.1	0.955
144.2	0.95625
144.3	0.94875
144.4	0.945
144.5	0.94875
144.6	0.95
144.7	0.95125
144.8	0.95375
144.9	0.95125
145	0.94875
145.1	0.95125
145.2	0.95125
145.3	0.95
145.4	0.94625
145.5	0.94625
145.6	0.9425
145.7	0.9425
145.8	0.94125
145.9	0.945
146	0.95375
146.1	0.95375
146.2	0.9525
146.3	0.95375
146.4	0.9525
146.5	0.945
146.6	0.94625
146.7	0.9475
146.8	0.9475
146.9	0.95
147	0.9475
147.1	0.94875
147.2	0.9525
147.3	0.9475
147.4	0.94375
147.5	0.94625
147.6	0.95
147.7	0.95625
147.8	0.95625
147.9	0.95375
148	0.955
148.1	0.9575
148.2	0.96
148.3	0.95375
148.4	0.95
148.5	0.94875
148.6	0.9525
148.7	0.95125
148.8	0.95625
148.9	0.9525
149	0.95625
149.1	0.9475
149.2	0.95
149.3	0.95375
149.4	0.955
149.5	0.96
149.6	0.95875
149.7	0.95875
149.8	0.9525
149.9	0.9475
150	0.94375
150.1	0.9425
150.2	0.9475
150.3	0.94875
150.4	0.9475
150.5	0.9475
150.6	0.95375
150.7	0.95875
150.8	0.95875
150.9	0.9625
151	0.95875
151.1	0.96
151.2	0.96
151.3	0.95625
151.4	0.96
151.5	0.96375
151.6	0.96375
151.7	0.96
151.8	0.9525
151.9	0.96
152	0.9575
152.1	0.95625
152.2	0.9575
152.3	0.95375
152.4	0.96125
152.5	0.96125
152.6	0.95625
152.7	0.95875
152.8	0.95375
152.9	0.955
153	0.96125
153.1	0.95875
153.2	0.95375
153.3	0.95125
153.4	0.9525
153.5	0.95
153.6	0.95125
153.7	0.95
153.8	0.95
153.9	0.94375
154	0.95
154.1	0.95125
154.2	0.955
154.3	0.95625
154.4	0.95
154.5	0.9525
154.6	0.95
154.7	0.95125
154.8	0.95
154.9	0.9525
155	0.9475
155.1	0.945
155.2	0.94625
155.3	0.95125
155.4	0.95375
155.5	0.95375
155.6	0.95375
155.7	0.955
155.8	0.9475
155.9	0.95375
156	0.96
156.1	0.96125
156.2	0.96875
156.3	0.9675
156.4	0.97
156.5	0.96625
156.6	0.96125
156.7	0.95875
156.8	0.96
156.9	0.955
157	0.95875
157.1	0.9625
157.2	0.96
157.3	0.95875
157.4	0.9575
157.5	0.96375
157.6	0.96375
157.7	0.9625
157.8	0.95875
157.9	0.9575
158	0.96375
158.1	0.9725
158.2	0.97125
158.3	0.97
158.4	0.96875
158.5	0.97125
158.6	0.97
158.7	0.965
158.8	0.96875
158.9	0.9675
159	0.97
159.1	0.9625
159.2	0.9625
159.3	0.96125
159.4	0.96125
159.5	0.95875
159.6	0.9625
159.7	0.96375
159.8	0.96
159.9	0.95875
160	0.955
160.1	0.95375
160.2	0.95375
160.3	0.955
160.4	0.95125
160.5	0.95125
160.6	0.9575
160.7	0.955
160.8	0.9575
160.9	0.9525
161	0.95375
161.1	0.955
161.2	0.94875
161.3	0.94625
161.4	0.9475
161.5	0.945
161.6	0.94625
161.7	0.9425
161.8	0.94375
161.9	0.9425
162	0.94125
162.1	0.9475
162.2	0.94625
162.3	0.9525
162.4	0.9525
162.5	0.95
162.6	0.9525
162.7	0.95625
162.8	0.955
162.9	0.9575
163	0.95875
163.1	0.9575
163.2	0.96125
163.3	0.96375
163.4	0.96625
163.5	0.96375
163.6	0.96125
163.7	0.96
163.8	0.9575
163.9	0.9575
164	0.95625
164.1	0.9575
164.2	0.95875
164.3	0.955
164.4	0.95625
164.5	0.96
164.6	0.9575
164.7	0.9575
164.8	0.95625
164.9	0.95625
165	0.96
165.1	0.95125
165.2	0.95
165.3	0.9525
165.4	0.95125
165.5	0.95
165.6	0.95375
165.7	0.95625
165.8	0.955
165.9	0.96
166	0.9575
166.1	0.9625
166.2	0.96
166.3	0.96125
166.4	0.95625
166.5	0.955
166.6	0.95875
166.7	0.95625
166.8	0.9575
166.9	0.95875
167	0.95625
167.1	0.9575
167.2	0.955
167.3	0.95875
167.4	0.96
167.5	0.9625
167.6	0.96125
167.7	0.96125
167.8	0.96375
167.9	0.96375
168	0.96625
168.1	0.96375
168.2	0.96375
168.3	0.95625
168.4	0.955
168.5	0.955
168.6	0.9575
168.7	0.95875
168.8	0.96375
168.9	0.96625
169	0.9675
169.1	0.96375
169.2	0.9625
169.3	0.96625
169.4	0.96125
169.5	0.9625
169.6	0.96
169.7	0.95875
169.8	0.9575
169.9	0.96
170	0.96125
170.1	0.96
170.2	0.9625
170.3	0.955
170.4	0.95375
170.5	0.95625
170.6	0.95375
170.7	0.9575
170.8	0.9575
170.9	0.96125
171	0.95875
171.1	0.95625
171.2	0.955
171.3	0.9525
171.4	0.95
171.5	0.9525
171.6	0.9525
171.7	0.95125
171.8	0.94875
171.9	0.95375
172	0.95125
172.1	0.9525
172.2	0.955
172.3	0.955
172.4	0.95875
172.5	0.96125
172.6	0.96125
172.7	0.95875
172.8	0.95875
172.9	0.96375
173	0.96
173.1	0.9575
173.2	0.96
173.3	0.96125
173.4	0.96375
173.5	0.96125
173.6	0.95875
173.7	0.95625
173.8	0.955
173.9	0.95875
174	0.95875
174.1	0.96125
174.2	0.96375
174.3	0.965
174.4	0.965
174.5	0.9675
174.6	0.96875
174.7	0.9675
174.8	0.965
174.9	0.965
175	0.96875
175.1	0.96625
175.2	0.96125
175.3	0.95875
175.4	0.9575
175.5	0.95375
175.6	0.95125
175.7	0.95625
175.8	0.95875
175.9	0.96125
176	0.9625
176.1	0.965
176.2	0.9625
176.3	0.965
176.4	0.965
176.5	0.96125
176.6	0.96125
176.7	0.9625
176.8	0.96
176.9	0.96
177	0.95375
177.1	0.9575
177.2	0.9575
177.3	0.9575
177.4	0.95875
177.5	0.96
177.6	0.965
177.7	0.9675
177.8	0.96625
177.9	0.965
178	0.9625
178.1	0.96125
178.2	0.96375
178.3	0.96625
178.4	0.96125
178.5	0.96
178.6	0.95875
178.7	0.95875
178.8	0.9575
178.9	0.9575
179	0.95375
179.1	0.9575
179.2	0.96125
179.3	0.96125
179.4	0.96125
179.5	0.96
179.6	0.95875
179.7	0.9625
179.8	0.96125
179.9	0.96
180	0.96
180.1	0.96
180.2	0.96625
180.3	0.9675
180.4	0.95875
180.5	0.95875
180.6	0.96
180.7	0.96125
180.8	0.9525
180.9	0.9525
181	0.95125
181.1	0.95125
181.2	0.9575
181.3	0.955
181.4	0.95125
181.5	0.9525
181.6	0.9525
181.7	0.9525
181.8	0.95875
181.9	0.9525
182	0.95375
182.1	0.95125
182.2	0.9575
182.3	0.96125
182.4	0.96125
182.5	0.96
182.6	0.96
182.7	0.96
182.8	0.9575
182.9	0.96125
183	0.965
183.1	0.9675
183.2	0.96625
183.3	0.9725
183.4	0.9675
183.5	0.96625
183.6	0.96
183.7	0.96125
183.8	0.955
183.9	0.95625
184	0.9575
184.1	0.9575
184.2	0.955
184.3	0.955
184.4	0.95875
184.5	0.955
184.6	0.95875
184.7	0.96125
184.8	0.95625
184.9	0.955
185	0.94875
185.1	0.9525
185.2	0.95625
185.3	0.9625
185.4	0.9625
185.5	0.96125
185.6	0.96375
185.7	0.97
185.8	0.965
185.9	0.9725
186	0.9675
186.1	0.965
186.2	0.96375
186.3	0.96875
186.4	0.9725
186.5	0.97125
186.6	0.96875
186.7	0.9675
186.8	0.96875
186.9	0.97
187	0.97125
187.1	0.96875
187.2	0.965
187.3	0.9625
187.4	0.9625
187.5	0.9675
187.6	0.9675
187.7	0.96
187.8	0.95375
187.9	0.9575
188	0.955
188.1	0.95875
188.2	0.95625
188.3	0.96
188.4	0.9625
188.5	0.97
188.6	0.96875
188.7	0.9675
188.8	0.965
188.9	0.96375
189	0.96375
189.1	0.9625
189.2	0.96
189.3	0.95875
189.4	0.95875
189.5	0.9625
189.6	0.9625
189.7	0.965
189.8	0.965
189.9	0.96875
190	0.96375
190.1	0.96375
190.2	0.96
190.3	0.9575
190.4	0.95125
190.5	0.95875
190.6	0.96125
190.7	0.9625
190.8	0.9575
190.9	0.95875
191	0.9625
191.1	0.965
191.2	0.96125
191.3	0.96
191.4	0.96
191.5	0.9575
191.6	0.96
191.7	0.96625
191.8	0.9675
191.9	0.9675
192	0.96875
192.1	0.965
192.2	0.9625
192.3	0.95625
192.4	0.96
192.5	0.9575
192.6	0.96375
192.7	0.97125
192.8	0.9625
192.9	0.96375
193	0.96
193.1	0.96125
193.2	0.96625
193.3	0.9625
193.4	0.95875
193.5	0.95875
193.6	0.9525
193.7	0.96375
193.8	0.96125
193.9	0.9625
194	0.9625
194.1	0.96125
194.2	0.9525
194.3	0.9625
194.4	0.95875
194.5	0.96
194.6	0.96625
194.7	0.96625
194.8	0.9625
194.9	0.96375
195	0.96625
195.1	0.96625
195.2	0.96625
195.3	0.9675
195.4	0.97375
195.5	0.97625
195.6	0.975
195.7	0.9725
195.8	0.9725
195.9	0.96625
196	0.96375
196.1	0.965
196.2	0.96
196.3	0.95875
196.4	0.95625
196.5	0.95625
196.6	0.9575
196.7	0.955
196.8	0.95375
196.9	0.9525
197	0.9575
197.1	0.95875
197.2	0.96
197.3	0.96
197.4	0.96375
197.5	0.95875
197.6	0.95875
197.7	0.9575
197.8	0.96
197.9	0.96125
198	0.9575
198.1	0.95375
198.2	0.95375
198.3	0.95375
198.4	0.95
198.5	0.94875
198.6	0.9475
198.7	0.95
198.8	0.9525
198.9	0.9575
199	0.9575
199.1	0.9575
199.2	0.95875
199.3	0.96
199.4	0.95875
199.5	0.96
199.6	0.9625
199.7	0.9625
199.8	0.9675
199.9	0.97
200	0.9675
[truncated: 14,000 more rows]
