# Supplementary material for: Bayesian inference of kinetic schemes for ion channels by Kalman filtering
Source: eLife journal article supplement (doi:10.7554/elife.62714), 2022-05-04
Supplement: fig4-data5 [file 1_Sim_N_400_Strom_MW_4M.xlsx]

## Sheet: 4 M
0.1	0
0.2	0
0.3	0
0.4	0
0.5	0
0.6	0
0.7	0
0.8	0
0.9	0
1	0
1.1	0
1.2	0
1.3	0
1.4	0
1.5	0
1.6	0
1.7	0
1.8	0
1.9	0
2	0
2.1	0
2.2	0
2.3	0
2.4	0
2.5	0
2.6	0
2.7	0
2.8	0
2.9	0
3	0
3.1	0
3.2	0
3.3	0
3.4	0
3.5	0
3.6	0
3.7	0
3.8	0
3.9	0
4	0
4.1	0
4.2	0
4.3	0
4.4	0
4.5	0
4.6	0
4.7	0
4.8	0
4.9	0
5	0
5.1	0
5.2	0
5.3	0
5.4	0
5.5	0
5.6	0
5.7	0
5.8	0
5.9	0
6	0
6.1	0
6.2	0
6.3	0
6.4	0
6.5	0
6.6	0
6.7	0
6.8	0
6.9	0
7	0
7.1	0
7.2	0
7.3	0
7.4	0
7.5	0
7.6	0
7.7	0
7.8	0
7.9	0
8	0
8.1	0
8.2	0
8.3	0
8.4	0
8.5	0
8.6	0
8.7	0
8.8	0
8.9	0
9	0
9.1	0
9.2	0
9.3	0
9.4	0
9.5	0
9.6	0
9.7	0
9.8	0
9.9	0
10	0
10.1	0
10.2	0
10.3	0
10.4	0
10.5	0
10.6	0
10.7	0
10.8	0
10.9	0
11	0
11.1	0
11.2	0
11.3	0
11.4	0
11.5	0
11.6	0
11.7	0
11.8	0
11.9	0
12	0
12.1	0
12.2	0
12.3	0
12.4	0
12.5	0
12.6	0
12.7	0
12.8	0
12.9	0
13	0
13.1	0
13.2	0
13.3	0
13.4	0
13.5	0
13.6	0
13.7	0
13.8	0
13.9	0
14	0
14.1	0
14.2	0
14.3	0
14.4	0
14.5	0
14.6	0
14.7	0
14.8	0
14.9	0
15	0
15.1	0
15.2	0
15.3	0
15.4	0
15.5	0
15.6	0
15.7	0
15.8	0
15.9	0
16	0
16.1	0
16.2	0
16.3	0
16.4	0
16.5	0
16.6	0
16.7	0
16.8	0
16.9	0
17	0
17.1	0
17.2	0
17.3	0
17.4	0
17.5	0
17.6	0
17.7	0
17.8	0
17.9	0
18	0
18.1	0
18.2	0
18.3	0
18.4	0
18.5	0
18.6	0
18.7	0
18.8	0
18.9	0
19	0
19.1	0
19.2	0
19.3	0
19.4	0
19.5	0
19.6	0
19.7	0
19.8	0
19.9	0
20	0
20.1	0
20.2	0
20.3	0
20.4	0
20.5	0
20.6	0
20.7	0
20.8	0
20.9	0
21	0
21.1	0
21.2	0
21.3	0
21.4	0
21.5	0
21.6	0
21.7	0
21.8	0
21.9	0
22	0
22.1	0
22.2	0
22.3	0
22.4	0
22.5	0
22.6	0
22.7	0
22.8	0
22.9	0
23	0
23.1	0
23.2	0
23.3	0
23.4	0
23.5	0
23.6	0
23.7	0
23.8	0
23.9	0
24	0
24.1	0
24.2	0
24.3	0
24.4	0
24.5	0
24.6	0
24.7	0
24.8	0
24.9	0
25	0
25.1	0
25.2	0
25.3	0
25.4	0
25.5	0
25.6	0
25.7	0
25.8	0
25.9	0
26	0
26.1	0
26.2	0
26.3	0
26.4	0
26.5	0
26.6	0
26.7	0
26.8	0
26.9	0
27	0
27.1	0
27.2	0
27.3	0
27.4	0
27.5	0
27.6	0
27.7	0
27.8	0
27.9	0
28	0
28.1	0
28.2	0
28.3	0
28.4	0
28.5	0
28.6	0
28.7	0
28.8	0
28.9	0
29	0
29.1	0
29.2	0
29.3	0
29.4	0
29.5	0
29.6	0
29.7	0
29.8	0
29.9	0
30	0
30.1	0
30.2	0
30.3	0
30.4	0
30.5	0
30.6	0
30.7	0
30.8	0
30.9	0
31	0
31.1	0
31.2	0
31.3	0
31.4	0
31.5	0
31.6	0
31.7	0
31.8	0
31.9	0
32	0
32.1	0
32.2	0
32.3	0
32.4	0
32.5	0
32.6	0
32.7	0
32.8	0
32.9	0
33	0
33.1	0
33.2	0
33.3	0
33.4	0
33.5	0
33.6	0
33.7	0
33.8	0
33.9	0
34	0
34.1	0
34.2	0
34.3	0
34.4	0
34.5	0
34.6	0
34.7	0
34.8	0
34.9	0
35	0
35.1	0
35.2	0
35.3	0
35.4	0
35.5	0
35.6	0
35.7	0
35.8	0
35.9	0
36	0
36.1	0
36.2	0
36.3	0
36.4	0
36.5	0
36.6	0
36.7	0
36.8	0
36.9	0
37	0
37.1	0
37.2	0
37.3	0
37.4	0
37.5	0
37.6	0
37.7	0
37.8	0
37.9	0
38	0
38.1	0
38.2	0
38.3	0
38.4	0
38.5	0
38.6	0
38.7	0
38.8	0
38.9	0
39	0
39.1	0
39.2	0
39.3	0
39.4	0
39.5	0
39.6	0
39.7	0
39.8	0
39.9	0
40	0
40.1	0
40.2	0
40.3	0
40.4	0
40.5	0
40.6	0
40.7	0
40.8	0
40.9	0
41	0
41.1	0
41.2	0
41.3	0
41.4	0
41.5	0
41.6	0
41.7	0
41.8	0
41.9	0
42	0
42.1	0
42.2	0
42.3	0
42.4	0
42.5	0
42.6	0
42.7	0
42.8	0
42.9	0
43	0
43.1	0
43.2	0
43.3	0
43.4	0
43.5	0
43.6	0
43.7	0
43.8	0
43.9	0
44	0
44.1	0
44.2	0
44.3	0
44.4	0
44.5	0
44.6	0
44.7	0
44.8	0
44.9	0
45	0
45.1	0
45.2	0
45.3	0
45.4	0
45.5	0
45.6	0
45.7	0
45.8	0
45.9	0
46	0
46.1	0
46.2	0
46.3	0
46.4	0
46.5	0
46.6	0
46.7	0
46.8	0
46.9	0
47	0
47.1	0
47.2	0
47.3	0
47.4	0
47.5	0
47.6	0
47.7	0
47.8	0
47.9	0
48	0
48.1	0
48.2	0
48.3	0
48.4	0
48.5	0
48.6	0
48.7	0
48.8	0
48.9	0
49	0
49.1	0
49.2	0
49.3	0
49.4	0
49.5	0
49.6	0
49.7	0
49.8	0
49.9	0
50	0
50.1	0
50.2	0
50.3	0
50.4	0
50.5	0
50.6	0
50.7	0
50.8	0
50.9	0
51	0
51.1	0
51.2	0
51.3	0
51.4	0
51.5	0
51.6	0
51.7	0
51.8	0
51.9	0
52	0
52.1	0
52.2	0
52.3	0
52.4	0
52.5	0
52.6	0
52.7	0
52.8	0
52.9	0
53	0
53.1	0
53.2	0
53.3	0
53.4	0
53.5	0
53.6	0
53.7	0
53.8	0
53.9	0
54	0
54.1	0
54.2	0
54.3	0
54.4	0
54.5	0
54.6	0
54.7	0
54.8	0
54.9	0
55	0
55.1	0
55.2	0
55.3	0
55.4	0
55.5	0
55.6	0
55.7	0
55.8	0
55.9	0
56	0
56.1	0
56.2	0
56.3	0
56.4	0
56.5	0
56.6	0
56.7	0
56.8	0
56.9	0
57	0
57.1	0
57.2	0
57.3	0
57.4	0
57.5	0
57.6	0
57.7	0
57.8	0
57.9	0
58	0
58.1	0
58.2	0
58.3	0
58.4	0
58.5	0
58.6	0
58.7	0
58.8	0
58.9	0
59	0
59.1	0
59.2	0
59.3	0
59.4	0
59.5	0
59.6	0
59.7	0
59.8	0
59.9	0
60	0
60.1	0
60.2	0
60.3	0
60.4	0
60.5	0
60.6	0
60.7	0
60.8	0
60.9	0
61	0
61.1	0
61.2	0
61.3	0
61.4	0
61.5	0
61.6	0
61.7	0
61.8	0
61.9	0
62	0
62.1	0
62.2	0
62.3	0
62.4	0
62.5	0
62.6	0
62.7	0
62.8	0
62.9	0
63	0
63.1	0
63.2	0
63.3	0
63.4	0
63.5	0
63.6	0
63.7	0
63.8	0
63.9	0
64	0
64.1	0
64.2	0
64.3	0
64.4	0
64.5	0
64.6	0
64.7	0
64.8	0
64.9	0
65	0
65.1	0
65.2	0
65.3	0
65.4	0
65.5	0
65.6	0
65.7	0
65.8	0
65.9	0
66	0
66.1	0
66.2	0
66.3	0
66.4	0
66.5	0
66.6	0
66.7	0
66.8	0
66.9	0
67	0
67.1	0
67.2	0
67.3	0
67.4	0
67.5	0
67.6	0
67.7	0
67.8	0
67.9	0
68	0
68.1	0
68.2	0
68.3	0
68.4	0
68.5	0
68.6	0
68.7	0
68.8	0
68.9	0
69	0
69.1	0
69.2	0
69.3	0
69.4	0
69.5	0
69.6	0
69.7	0
69.8	0
69.9	0
70	0
70.1	0
70.2	0
70.3	0
70.4	0
70.5	0
70.6	0
70.7	0
70.8	0
70.9	0
71	0
71.1	0
71.2	0
71.3	0
71.4	0
71.5	0
71.6	0
71.7	0
71.8	0
71.9	0
72	0
72.1	0
72.2	0
72.3	0
72.4	0
72.5	0
72.6	0
72.7	0
72.8	0
72.9	0
73	0
73.1	0
73.2	0
73.3	0
73.4	0
73.5	0
73.6	0
73.7	0
73.8	0
73.9	0
74	0
74.1	0
74.2	0
74.3	0
74.4	0
74.5	0
74.6	0
74.7	0
74.8	0
74.9	0
75	0
75.1	0
75.2	0
75.3	0
75.4	0
75.5	0
75.6	0
75.7	0
75.8	0
75.9	0
76	0
76.1	0
76.2	0
76.3	0
76.4	0
76.5	0
76.6	0
76.7	0
76.8	0
76.9	0
77	0
77.1	0
77.2	0
77.3	0
77.4	0
77.5	0
77.6	0
77.7	0
77.8	0
77.9	0
78	0
78.1	0
78.2	0
78.3	0
78.4	0
78.5	0
78.6	0
78.7	0
78.8	0
78.9	0
79	0
79.1	0
79.2	0
79.3	0
79.4	0
79.5	0
79.6	0
79.7	0
79.8	0
79.9	0
80	0
80.1	0
80.2	0
80.3	0
80.4	0
80.5	0
80.6	0
80.7	0
80.8	0
80.9	0
81	0
81.1	0
81.2	0
81.3	0
81.4	0
81.5	0
81.6	0
81.7	0
81.8	0
81.9	0
82	0
82.1	0
82.2	0
82.3	0
82.4	0
82.5	0
82.6	0
82.7	0
82.8	0
82.9	0
83	0
83.1	0
83.2	0
83.3	0
83.4	0
83.5	0
83.6	0
83.7	0
83.8	0
83.9	0
84	0
84.1	0
84.2	0
84.3	0
84.4	0
84.5	0
84.6	0
84.7	0
84.8	0
84.9	0
85	0
85.1	0
85.2	0
85.3	0
85.4	0
85.5	0
85.6	0
85.7	0
85.8	0
85.9	0
86	0
86.1	0
86.2	0
86.3	0
86.4	0
86.5	0
86.6	0
86.7	0
86.8	0
86.9	0
87	0
87.1	0
87.2	0
87.3	0
87.4	0
87.5	0
87.6	0
87.7	0
87.8	0
87.9	0
88	0
88.1	0
88.2	0
88.3	0
88.4	0
88.5	0
88.6	0
88.7	0
88.8	0
88.9	0
89	0
89.1	0
89.2	0
89.3	0
89.4	0
89.5	0
89.6	0
89.7	0
89.8	0
89.9	0
90	0
90.1	0
90.2	0
90.3	0
90.4	0
90.5	0
90.6	0
90.7	0
90.8	0
90.9	0
91	0
91.1	0
91.2	0
91.3	0
91.4	0
91.5	0
91.6	0
91.7	0
91.8	0
91.9	0
92	0
92.1	0
92.2	0
92.3	0
92.4	0
92.5	0
92.6	0
92.7	0
92.8	0
92.9	0
93	0
93.1	0
93.2	0
93.3	0
93.4	0
93.5	0
93.6	0
93.7	0
93.8	0
93.9	0
94	0
94.1	0
94.2	0
94.3	0
94.4	0
94.5	0
94.6	0
94.7	0
94.8	0
94.9	0
95	0
95.1	0
95.2	0
95.3	0
95.4	0
95.5	0
95.6	0
95.7	0
95.8	0
95.9	0
96	0
96.1	0
96.2	0
96.3	0
96.4	0
96.5	0
96.6	0
96.7	0
96.8	0
96.9	0
97	0
97.1	0
97.2	0
97.3	0
97.4	0
97.5	0
97.6	0
97.7	0
97.8	0
97.9	0
98	0
98.1	0
98.2	0
98.3	0
98.4	0
98.5	0
98.6	0
98.7	0
98.8	0
98.9	0
99	0
99.1	0
99.2	0
99.3	0
99.4	0
99.5	0
99.6	0
99.7	0
99.8	0
99.9	0
100	0
100.1	0
100.2	0
100.3	0.0025
100.4	0.005
100.5	0.01
100.6	0.01
100.7	0.0125
100.8	0.0125
100.9	0.0125
101	0.015
101.1	0.0175
101.2	0.0225
101.3	0.0225
101.4	0.025
101.5	0.0275
101.6	0.0325
101.7	0.035
101.8	0.0375
101.9	0.04
102	0.0425
102.1	0.05
102.2	0.0525
102.3	0.0575
102.4	0.0575
102.5	0.06
102.6	0.0675
102.7	0.0675
102.8	0.0775
102.9	0.085
103	0.0875
103.1	0.09
103.2	0.09
103.3	0.0925
103.4	0.0975
103.5	0.1025
103.6	0.1025
103.7	0.1025
103.8	0.1025
103.9	0.105
104	0.1075
104.1	0.1075
104.2	0.1125
104.3	0.115
104.4	0.1175
104.5	0.12
104.6	0.1225
104.7	0.1225
104.8	0.13
104.9	0.1325
105	0.135
105.1	0.1375
105.2	0.1425
105.3	0.145
105.4	0.15
105.5	0.15
105.6	0.15
105.7	0.15
105.8	0.1575
105.9	0.1625
106	0.165
106.1	0.1675
106.2	0.17
106.3	0.17
106.4	0.1775
106.5	0.1825
106.6	0.18
106.7	0.1825
106.8	0.1825
106.9	0.1825
107	0.19
107.1	0.1925
107.2	0.1925
107.3	0.195
107.4	0.2025
107.5	0.2
107.6	0.2
107.7	0.2025
107.8	0.205
107.9	0.2125
108	0.215
108.1	0.215
108.2	0.2175
108.3	0.22
108.4	0.225
108.5	0.225
108.6	0.225
108.7	0.23
108.8	0.2325
108.9	0.235
109	0.235
109.1	0.2375
109.2	0.2375
109.3	0.24
109.4	0.2475
109.5	0.2525
109.6	0.2575
109.7	0.26
109.8	0.2625
109.9	0.2625
110	0.2625
110.1	0.27
110.2	0.2675
110.3	0.2675
110.4	0.2675
110.5	0.27
110.6	0.2675
110.7	0.2675
110.8	0.2675
110.9	0.27
111	0.2725
111.1	0.2725
111.2	0.27
111.3	0.27
111.4	0.2725
111.5	0.2725
111.6	0.2725
111.7	0.275
111.8	0.28
111.9	0.2825
112	0.2825
112.1	0.2825
112.2	0.2925
112.3	0.2925
112.4	0.295
112.5	0.295
112.6	0.2975
112.7	0.3
112.8	0.3
112.9	0.3
113	0.3025
113.1	0.305
113.2	0.31
113.3	0.315
113.4	0.315
113.5	0.3225
113.6	0.3225
113.7	0.325
113.8	0.325
113.9	0.3275
114	0.3275
114.1	0.3275
114.2	0.325
114.3	0.325
114.4	0.3275
114.5	0.3275
114.6	0.3325
114.7	0.3375
114.8	0.34
114.9	0.3425
115	0.345
115.1	0.3475
115.2	0.355
115.3	0.355
115.4	0.355
115.5	0.36
115.6	0.3625
115.7	0.3625
115.8	0.3675
115.9	0.37
116	0.375
116.1	0.38
116.2	0.385
116.3	0.385
116.4	0.385
116.5	0.3875
116.6	0.3875
116.7	0.39
116.8	0.39
116.9	0.39
117	0.395
117.1	0.395
117.2	0.395
117.3	0.395
117.4	0.3975
117.5	0.3975
117.6	0.3975
117.7	0.4
117.8	0.405
117.9	0.4075
118	0.4075
118.1	0.4075
118.2	0.4075
118.3	0.4075
118.4	0.4125
118.5	0.4125
118.6	0.415
118.7	0.4175
118.8	0.4175
118.9	0.42
119	0.42
119.1	0.42
119.2	0.4225
119.3	0.425
119.4	0.425
119.5	0.4275
119.6	0.4275
119.7	0.43
119.8	0.43
119.9	0.4325
120	0.4275
120.1	0.4325
120.2	0.435
120.3	0.4375
120.4	0.4375
120.5	0.44
120.6	0.4425
120.7	0.4425
120.8	0.4425
120.9	0.4425
121	0.445
121.1	0.445
121.2	0.4475
121.3	0.45
121.4	0.4525
121.5	0.4575
121.6	0.46
121.7	0.46
121.8	0.4625
121.9	0.4625
122	0.465
122.1	0.465
122.2	0.4625
122.3	0.465
122.4	0.47
122.5	0.475
122.6	0.4775
122.7	0.4775
122.8	0.4775
122.9	0.4775
123	0.4775
123.1	0.4825
123.2	0.4825
123.3	0.485
123.4	0.485
123.5	0.485
123.6	0.485
123.7	0.49
123.8	0.49
123.9	0.49
124	0.49
124.1	0.4925
124.2	0.49
124.3	0.49
124.4	0.49
124.5	0.4925
124.6	0.495
124.7	0.5
124.8	0.5
124.9	0.5025
125	0.5025
125.1	0.5025
125.2	0.51
125.3	0.5125
125.4	0.5175
125.5	0.5225
125.6	0.525
125.7	0.525
125.8	0.5275
125.9	0.5325
126	0.535
126.1	0.5375
126.2	0.5375
126.3	0.5375
126.4	0.54
126.5	0.5425
126.6	0.5425
126.7	0.5475
126.8	0.545
126.9	0.545
127	0.5475
127.1	0.55
127.2	0.55
127.3	0.55
127.4	0.555
127.5	0.5625
127.6	0.5625
127.7	0.5625
127.8	0.5625
127.9	0.5625
128	0.5625
128.1	0.565
128.2	0.565
128.3	0.5675
128.4	0.575
128.5	0.5725
128.6	0.5775
128.7	0.5775
128.8	0.58
128.9	0.58
129	0.585
129.1	0.5825
129.2	0.585
129.3	0.5875
129.4	0.59
129.5	0.5925
129.6	0.595
129.7	0.595
129.8	0.595
129.9	0.6
130	0.5975
130.1	0.595
130.2	0.595
130.3	0.5975
130.4	0.595
130.5	0.595
130.6	0.595
130.7	0.5975
130.8	0.5975
130.9	0.5975
131	0.5975
131.1	0.5975
131.2	0.6
131.3	0.6025
131.4	0.6025
131.5	0.6
131.6	0.6025
131.7	0.6
131.8	0.6
131.9	0.5975
132	0.5975
132.1	0.595
132.2	0.595
132.3	0.5975
132.4	0.595
132.5	0.5975
132.6	0.6
132.7	0.605
132.8	0.605
132.9	0.605
133	0.6075
133.1	0.61
133.2	0.61
133.3	0.61
133.4	0.61
133.5	0.61
133.6	0.6125
133.7	0.6125
133.8	0.6125
133.9	0.615
134	0.6175
134.1	0.62
134.2	0.625
134.3	0.625
134.4	0.6275
134.5	0.6275
134.6	0.6275
134.7	0.6275
134.8	0.6275
134.9	0.63
135	0.63
135.1	0.63
135.2	0.635
135.3	0.635
135.4	0.6375
135.5	0.6375
135.6	0.6375
135.7	0.64
135.8	0.64
135.9	0.64
136	0.64
136.1	0.64
136.2	0.64
136.3	0.64
136.4	0.64
136.5	0.64
136.6	0.6425
136.7	0.6475
136.8	0.6525
136.9	0.6575
137	0.6575
137.1	0.6625
137.2	0.665
137.3	0.6725
137.4	0.6725
137.5	0.6725
137.6	0.6725
137.7	0.6725
137.8	0.675
137.9	0.675
138	0.6775
138.1	0.68
138.2	0.6825
138.3	0.6825
138.4	0.6825
138.5	0.6825
138.6	0.685
138.7	0.6875
138.8	0.69
138.9	0.6925
139	0.6925
139.1	0.69
139.2	0.69
139.3	0.6875
139.4	0.6875
139.5	0.69
139.6	0.69
139.7	0.69
139.8	0.6875
139.9	0.6875
140	0.69
140.1	0.69
140.2	0.6875
140.3	0.685
140.4	0.685
140.5	0.685
140.6	0.685
140.7	0.685
140.8	0.6875
140.9	0.6875
141	0.69
141.1	0.69
141.2	0.6925
141.3	0.6925
141.4	0.6925
141.5	0.695
141.6	0.6925
141.7	0.695
141.8	0.6975
141.9	0.6975
142	0.6975
142.1	0.6975
142.2	0.705
142.3	0.705
142.4	0.7025
142.5	0.7025
142.6	0.7025
142.7	0.7025
142.8	0.7025
142.9	0.7
143	0.7025
143.1	0.7025
143.2	0.7025
143.3	0.7025
143.4	0.7025
143.5	0.7025
143.6	0.6975
143.7	0.6975
143.8	0.6975
143.9	0.7
144	0.6975
144.1	0.6925
144.2	0.6875
144.3	0.69
144.4	0.6875
144.5	0.69
144.6	0.69
144.7	0.69
144.8	0.69
144.9	0.69
145	0.6925
145.1	0.6875
145.2	0.6875
145.3	0.6875
145.4	0.685
145.5	0.6825
145.6	0.6825
145.7	0.6825
145.8	0.6825
145.9	0.68
146	0.6825
146.1	0.6825
146.2	0.685
146.3	0.685
146.4	0.6825
146.5	0.685
146.6	0.6825
146.7	0.68
146.8	0.68
146.9	0.68
147	0.685
147.1	0.685
147.2	0.685
147.3	0.69
147.4	0.6925
147.5	0.6925
147.6	0.6925
147.7	0.6925
147.8	0.6925
147.9	0.69
148	0.69
148.1	0.6925
148.2	0.695
148.3	0.695
148.4	0.695
148.5	0.6975
148.6	0.6975
148.7	0.6975
148.8	0.6975
148.9	0.695
149	0.695
149.1	0.6925
149.2	0.69
149.3	0.69
149.4	0.69
149.5	0.69
149.6	0.69
149.7	0.69
149.8	0.6925
149.9	0.6925
150	0.6925
150.1	0.6925
150.2	0.69
150.3	0.6875
150.4	0.69
150.5	0.69
150.6	0.69
150.7	0.6925
150.8	0.695
150.9	0.6975
151	0.7
151.1	0.7025
151.2	0.705
151.3	0.705
151.4	0.705
151.5	0.7075
151.6	0.7075
151.7	0.7075
151.8	0.7075
151.9	0.71
152	0.71
152.1	0.71
152.2	0.71
152.3	0.705
152.4	0.705
152.5	0.7025
152.6	0.7
152.7	0.7025
152.8	0.7025
152.9	0.7025
153	0.7075
153.1	0.705
153.2	0.705
153.3	0.705
153.4	0.705
153.5	0.705
153.6	0.71
153.7	0.7075
153.8	0.7075
153.9	0.7075
154	0.7075
154.1	0.7075
154.2	0.7125
154.3	0.715
154.4	0.715
154.5	0.7125
154.6	0.715
154.7	0.7125
154.8	0.7125
154.9	0.71
155	0.7125
155.1	0.7125
155.2	0.7125
155.3	0.7125
155.4	0.7075
155.5	0.705
155.6	0.705
155.7	0.705
155.8	0.705
155.9	0.705
156	0.705
156.1	0.705
156.2	0.7075
156.3	0.7075
156.4	0.7075
156.5	0.7075
156.6	0.7075
156.7	0.71
156.8	0.7125
156.9	0.7125
157	0.7125
157.1	0.7125
157.2	0.7125
157.3	0.7125
157.4	0.7125
157.5	0.715
157.6	0.7175
157.7	0.7175
157.8	0.72
157.9	0.7175
158	0.7175
158.1	0.72
158.2	0.72
158.3	0.7175
158.4	0.725
158.5	0.7275
158.6	0.725
158.7	0.7225
158.8	0.7225
158.9	0.725
159	0.725
159.1	0.72
159.2	0.7225
159.3	0.7225
159.4	0.725
159.5	0.725
159.6	0.7225
159.7	0.7225
159.8	0.725
159.9	0.725
160	0.7225
160.1	0.7275
160.2	0.7275
160.3	0.7325
160.4	0.7325
160.5	0.7325
160.6	0.73
160.7	0.73
160.8	0.73
160.9	0.73
161	0.73
161.1	0.7325
161.2	0.735
161.3	0.73
161.4	0.7275
161.5	0.7275
161.6	0.7275
161.7	0.7275
161.8	0.725
161.9	0.7275
162	0.7225
162.1	0.7225
162.2	0.7225
162.3	0.7225
162.4	0.7175
162.5	0.7175
162.6	0.72
162.7	0.7225
162.8	0.7225
162.9	0.72
163	0.7225
163.1	0.7225
163.2	0.7225
163.3	0.7225
163.4	0.725
163.5	0.725
163.6	0.725
163.7	0.7275
163.8	0.7275
163.9	0.73
164	0.7275
164.1	0.7275
164.2	0.7275
164.3	0.73
164.4	0.7275
164.5	0.725
164.6	0.725
164.7	0.7225
164.8	0.725
164.9	0.725
165	0.7225
165.1	0.7225
165.2	0.7225
165.3	0.7225
165.4	0.725
165.5	0.725
165.6	0.725
165.7	0.7225
165.8	0.7225
165.9	0.7225
166	0.725
166.1	0.7275
166.2	0.73
166.3	0.7275
166.4	0.7275
166.5	0.7275
166.6	0.73
166.7	0.73
166.8	0.73
166.9	0.73
167	0.73
167.1	0.73
167.2	0.7275
167.3	0.7275
167.4	0.7275
167.5	0.73
167.6	0.73
167.7	0.73
167.8	0.73
167.9	0.7325
168	0.73
168.1	0.73
168.2	0.73
168.3	0.73
168.4	0.73
168.5	0.73
168.6	0.73
168.7	0.73
168.8	0.735
168.9	0.7375
169	0.7375
169.1	0.7375
169.2	0.7375
169.3	0.7375
169.4	0.745
169.5	0.7425
169.6	0.7425
169.7	0.74
169.8	0.7425
169.9	0.7425
170	0.7425
170.1	0.7425
170.2	0.745
170.3	0.745
170.4	0.745
170.5	0.7425
170.6	0.7425
170.7	0.745
170.8	0.745
170.9	0.7475
171	0.7475
171.1	0.75
171.2	0.75
171.3	0.75
171.4	0.75
171.5	0.7475
171.6	0.7475
171.7	0.7475
171.8	0.745
171.9	0.745
172	0.745
172.1	0.745
172.2	0.745
172.3	0.7425
172.4	0.7425
172.5	0.7425
172.6	0.7475
172.7	0.7475
172.8	0.75
172.9	0.75
173	0.75
173.1	0.75
173.2	0.75
173.3	0.75
173.4	0.75
173.5	0.7525
173.6	0.75
173.7	0.7475
173.8	0.7475
173.9	0.7475
174	0.7475
174.1	0.7475
174.2	0.7525
174.3	0.755
174.4	0.7575
174.5	0.7575
174.6	0.7525
174.7	0.7525
174.8	0.7525
174.9	0.75
175	0.7475
175.1	0.7475
175.2	0.75
175.3	0.75
175.4	0.7475
175.5	0.7475
175.6	0.7475
175.7	0.7475
175.8	0.7475
175.9	0.7525
176	0.7525
176.1	0.755
176.2	0.75
176.3	0.7475
176.4	0.7475
176.5	0.7425
176.6	0.7425
176.7	0.745
176.8	0.745
176.9	0.7425
177	0.745
177.1	0.7475
177.2	0.7475
177.3	0.7475
177.4	0.7475
177.5	0.7475
177.6	0.75
177.7	0.7475
177.8	0.7475
177.9	0.7475
178	0.745
178.1	0.745
178.2	0.745
178.3	0.745
178.4	0.745
178.5	0.745
178.6	0.74
178.7	0.74
178.8	0.74
178.9	0.7375
179	0.74
179.1	0.7425
179.2	0.7425
179.3	0.7425
179.4	0.7425
179.5	0.7425
179.6	0.7425
179.7	0.7425
179.8	0.7425
179.9	0.7425
180	0.74
180.1	0.7425
180.2	0.74
180.3	0.74
180.4	0.7375
180.5	0.7375
180.6	0.7375
180.7	0.7375
180.8	0.7375
180.9	0.7375
181	0.74
181.1	0.74
181.2	0.7425
181.3	0.745
181.4	0.7425
181.5	0.745
181.6	0.7475
181.7	0.75
181.8	0.7525
181.9	0.75
182	0.75
182.1	0.7525
182.2	0.76
182.3	0.76
182.4	0.76
182.5	0.7575
182.6	0.76
182.7	0.76
182.8	0.7625
182.9	0.765
183	0.7675
183.1	0.765
183.2	0.765
183.3	0.7675
183.4	0.765
183.5	0.7675
183.6	0.765
183.7	0.76
183.8	0.76
183.9	0.7575
184	0.7575
184.1	0.7575
184.2	0.7575
184.3	0.755
184.4	0.7575
184.5	0.7575
184.6	0.755
184.7	0.755
184.8	0.755
184.9	0.755
185	0.755
185.1	0.7525
185.2	0.75
185.3	0.7475
185.4	0.745
185.5	0.7425
185.6	0.7425
185.7	0.745
185.8	0.745
185.9	0.745
186	0.745
186.1	0.745
186.2	0.7475
186.3	0.745
186.4	0.7475
186.5	0.75
186.6	0.75
186.7	0.7525
186.8	0.755
186.9	0.755
187	0.755
187.1	0.755
187.2	0.755
187.3	0.755
187.4	0.755
187.5	0.7575
187.6	0.755
187.7	0.7525
187.8	0.7525
187.9	0.7525
188	0.755
188.1	0.755
188.2	0.755
188.3	0.755
188.4	0.755
188.5	0.7575
188.6	0.755
188.7	0.7575
188.8	0.76
188.9	0.7625
189	0.7625
189.1	0.7625
189.2	0.7625
189.3	0.76
189.4	0.76
189.5	0.76
189.6	0.76
189.7	0.76
189.8	0.7575
189.9	0.755
190	0.7525
190.1	0.7525
190.2	0.7525
190.3	0.75
190.4	0.7475
190.5	0.75
190.6	0.75
190.7	0.75
190.8	0.75
190.9	0.7475
191	0.7475
191.1	0.745
191.2	0.745
191.3	0.7475
191.4	0.7475
191.5	0.7475
191.6	0.7475
191.7	0.7525
191.8	0.7575
191.9	0.7575
192	0.7575
192.1	0.7575
192.2	0.7575
192.3	0.7575
192.4	0.7575
192.5	0.7575
192.6	0.755
192.7	0.7525
192.8	0.7525
192.9	0.7525
193	0.755
193.1	0.7525
193.2	0.7525
193.3	0.755
193.4	0.7575
193.5	0.7575
193.6	0.7575
193.7	0.7575
193.8	0.7575
193.9	0.755
194	0.7525
194.1	0.75
194.2	0.7475
194.3	0.7475
194.4	0.745
194.5	0.745
194.6	0.745
194.7	0.7475
194.8	0.7475
194.9	0.7475
195	0.7475
195.1	0.745
195.2	0.74
195.3	0.7425
195.4	0.7425
195.5	0.745
195.6	0.745
195.7	0.745
195.8	0.7475
195.9	0.745
196	0.7475
196.1	0.7475
196.2	0.7475
196.3	0.7475
196.4	0.7475
196.5	0.7475
196.6	0.75
196.7	0.7475
196.8	0.7475
196.9	0.75
197	0.755
197.1	0.755
197.2	0.755
197.3	0.7575
197.4	0.7575
197.5	0.7625
197.6	0.7625
197.7	0.765
197.8	0.765
197.9	0.7625
198	0.7625
198.1	0.7625
198.2	0.7625
198.3	0.765
198.4	0.7625
198.5	0.7625
198.6	0.7625
198.7	0.7625
198.8	0.7625
198.9	0.7625
199	0.7625
199.1	0.7575
199.2	0.7625
199.3	0.7625
199.4	0.76
199.5	0.765
199.6	0.765
199.7	0.765
199.8	0.765
199.9	0.7675
200	0.765
[truncated: 14,000 more rows]
