# Supplementary material for: Bayesian inference of kinetic schemes for ion channels by Kalman filtering
Source: eLife journal article supplement (doi:10.7554/elife.62714), 2022-05-04
Supplement: fig4-data5 [file 1_Sim_N_500_Fluor_MW.xlsx]

## Sheet: Tabelle1
0.1	0
0.2	0
0.3	0
0.4	0
0.5	0
0.6	0
0.7	0
0.8	0
0.9	0
1	0
1.1	0
1.2	0
1.3	0
1.4	0
1.5	0
1.6	0
1.7	0
1.8	0
1.9	0
2	0
2.1	0
2.2	0
2.3	0
2.4	0
2.5	0
2.6	0
2.7	0
2.8	0
2.9	0
3	0
3.1	0
3.2	0
3.3	0
3.4	0
3.5	0
3.6	0
3.7	0
3.8	0
3.9	0
4	0
4.1	0
4.2	0
4.3	0
4.4	0
4.5	0
4.6	0
4.7	0
4.8	0
4.9	0
5	0
5.1	0
5.2	0
5.3	0
5.4	0
5.5	0
5.6	0
5.7	0
5.8	0
5.9	0
6	0
6.1	0
6.2	0
6.3	0
6.4	0
6.5	0
6.6	0
6.7	0
6.8	0
6.9	0
7	0
7.1	0
7.2	0
7.3	0
7.4	0
7.5	0
7.6	0
7.7	0
7.8	0
7.9	0
8	0
8.1	0
8.2	0
8.3	0
8.4	0
8.5	0
8.6	0
8.7	0
8.8	0
8.9	0
9	0
9.1	0
9.2	0
9.3	0
9.4	0
9.5	0
9.6	0
9.7	0
9.8	0
9.9	0
10	0
10.1	0
10.2	0
10.3	0
10.4	0
10.5	0
10.6	0
10.7	0
10.8	0
10.9	0
11	0
11.1	0
11.2	0
11.3	0
11.4	0
11.5	0
11.6	0
11.7	0
11.8	0
11.9	0
12	0
12.1	0
12.2	0
12.3	0
12.4	0
12.5	0
12.6	0
12.7	0
12.8	0
12.9	0
13	0
13.1	0
13.2	0
13.3	0
13.4	0
13.5	0
13.6	0
13.7	0
13.8	0
13.9	0
14	0
14.1	0
14.2	0
14.3	0
14.4	0
14.5	0
14.6	0
14.7	0
14.8	0
14.9	0
15	0
15.1	0
15.2	0
15.3	0
15.4	0
15.5	0
15.6	0
15.7	0
15.8	0
15.9	0
16	0
16.1	0
16.2	0
16.3	0
16.4	0
16.5	0
16.6	0
16.7	0
16.8	0
16.9	0
17	0
17.1	0
17.2	0
17.3	0
17.4	0
17.5	0
17.6	0
17.7	0
17.8	0
17.9	0
18	0
18.1	0
18.2	0
18.3	0
18.4	0
18.5	0
18.6	0
18.7	0
18.8	0
18.9	0
19	0
19.1	0
19.2	0
19.3	0
19.4	0
19.5	0
19.6	0
19.7	0
19.8	0
19.9	0
20	0
20.1	0
20.2	0
20.3	0
20.4	0
20.5	0
20.6	0
20.7	0
20.8	0
20.9	0
21	0
21.1	0
21.2	0
21.3	0
21.4	0
21.5	0
21.6	0
21.7	0
21.8	0
21.9	0
22	0
22.1	0
22.2	0
22.3	0
22.4	0
22.5	0
22.6	0
22.7	0
22.8	0
22.9	0
23	0
23.1	0
23.2	0
23.3	0
23.4	0
23.5	0
23.6	0
23.7	0
23.8	0
23.9	0
24	0
24.1	0
24.2	0
24.3	0
24.4	0
24.5	0
24.6	0
24.7	0
24.8	0
24.9	0
25	0
25.1	0
25.2	0
25.3	0
25.4	0
25.5	0
25.6	0
25.7	0
25.8	0
25.9	0
26	0
26.1	0
26.2	0
26.3	0
26.4	0
26.5	0
26.6	0
26.7	0
26.8	0
26.9	0
27	0
27.1	0
27.2	0
27.3	0
27.4	0
27.5	0
27.6	0
27.7	0
27.8	0
27.9	0
28	0
28.1	0
28.2	0
28.3	0
28.4	0
28.5	0
28.6	0
28.7	0
28.8	0
28.9	0
29	0
29.1	0
29.2	0
29.3	0
29.4	0
29.5	0
29.6	0
29.7	0
29.8	0
29.9	0
30	0
30.1	0
30.2	0
30.3	0
30.4	0
30.5	0
30.6	0
30.7	0
30.8	0
30.9	0
31	0
31.1	0
31.2	0
31.3	0
31.4	0
31.5	0
31.6	0
31.7	0
31.8	0
31.9	0
32	0
32.1	0
32.2	0
32.3	0
32.4	0
32.5	0
32.6	0
32.7	0
32.8	0
32.9	0
33	0
33.1	0
33.2	0
33.3	0
33.4	0
33.5	0
33.6	0
33.7	0
33.8	0
33.9	0
34	0
34.1	0
34.2	0
34.3	0
34.4	0
34.5	0
34.6	0
34.7	0
34.8	0
34.9	0
35	0
35.1	0
35.2	0
35.3	0
35.4	0
35.5	0
35.6	0
35.7	0
35.8	0
35.9	0
36	0
36.1	0
36.2	0
36.3	0
36.4	0
36.5	0
36.6	0
36.7	0
36.8	0
36.9	0
37	0
37.1	0
37.2	0
37.3	0
37.4	0
37.5	0
37.6	0
37.7	0
37.8	0
37.9	0
38	0
38.1	0
38.2	0
38.3	0
38.4	0
38.5	0
38.6	0
38.7	0
38.8	0
38.9	0
39	0
39.1	0
39.2	0
39.3	0
39.4	0
39.5	0
39.6	0
39.7	0
39.8	0
39.9	0
40	0
40.1	0
40.2	0
40.3	0
40.4	0
40.5	0
40.6	0
40.7	0
40.8	0
40.9	0
41	0
41.1	0
41.2	0
41.3	0
41.4	0
41.5	0
41.6	0
41.7	0
41.8	0
41.9	0
42	0
42.1	0
42.2	0
42.3	0
42.4	0
42.5	0
42.6	0
42.7	0
42.8	0
42.9	0
43	0
43.1	0
43.2	0
43.3	0
43.4	0
43.5	0
43.6	0
43.7	0
43.8	0
43.9	0
44	0
44.1	0
44.2	0
44.3	0
44.4	0
44.5	0
44.6	0
44.7	0
44.8	0
44.9	0
45	0
45.1	0
45.2	0
45.3	0
45.4	0
45.5	0
45.6	0
45.7	0
45.8	0
45.9	0
46	0
46.1	0
46.2	0
46.3	0
46.4	0
46.5	0
46.6	0
46.7	0
46.8	0
46.9	0
47	0
47.1	0
47.2	0
47.3	0
47.4	0
47.5	0
47.6	0
47.7	0
47.8	0
47.9	0
48	0
48.1	0
48.2	0
48.3	0
48.4	0
48.5	0
48.6	0
48.7	0
48.8	0
48.9	0
49	0
49.1	0
49.2	0
49.3	0
49.4	0
49.5	0
49.6	0
49.7	0
49.8	0
49.9	0
50	0
50.1	0
50.2	0
50.3	0
50.4	0
50.5	0
50.6	0
50.7	0
50.8	0
50.9	0
51	0
51.1	0
51.2	0
51.3	0
51.4	0
51.5	0
51.6	0
51.7	0
51.8	0
51.9	0
52	0
52.1	0
52.2	0
52.3	0
52.4	0
52.5	0
52.6	0
52.7	0
52.8	0
52.9	0
53	0
53.1	0
53.2	0
53.3	0
53.4	0
53.5	0
53.6	0
53.7	0
53.8	0
53.9	0
54	0
54.1	0
54.2	0
54.3	0
54.4	0
54.5	0
54.6	0
54.7	0
54.8	0
54.9	0
55	0
55.1	0
55.2	0
55.3	0
55.4	0
55.5	0
55.6	0
55.7	0
55.8	0
55.9	0
56	0
56.1	0
56.2	0
56.3	0
56.4	0
56.5	0
56.6	0
56.7	0
56.8	0
56.9	0
57	0
57.1	0
57.2	0
57.3	0
57.4	0
57.5	0
57.6	0
57.7	0
57.8	0
57.9	0
58	0
58.1	0
58.2	0
58.3	0
58.4	0
58.5	0
58.6	0
58.7	0
58.8	0
58.9	0
59	0
59.1	0
59.2	0
59.3	0
59.4	0
59.5	0
59.6	0
59.7	0
59.8	0
59.9	0
60	0
60.1	0
60.2	0
60.3	0
60.4	0
60.5	0
60.6	0
60.7	0
60.8	0
60.9	0
61	0
61.1	0
61.2	0
61.3	0
61.4	0
61.5	0
61.6	0
61.7	0
61.8	0
61.9	0
62	0
62.1	0
62.2	0
62.3	0
62.4	0
62.5	0
62.6	0
62.7	0
62.8	0
62.9	0
63	0
63.1	0
63.2	0
63.3	0
63.4	0
63.5	0
63.6	0
63.7	0
63.8	0
63.9	0
64	0
64.1	0
64.2	0
64.3	0
64.4	0
64.5	0
64.6	0
64.7	0
64.8	0
64.9	0
65	0
65.1	0
65.2	0
65.3	0
65.4	0
65.5	0
65.6	0
65.7	0
65.8	0
65.9	0
66	0
66.1	0
66.2	0
66.3	0
66.4	0
66.5	0
66.6	0
66.7	0
66.8	0
66.9	0
67	0
67.1	0
67.2	0
67.3	0
67.4	0
67.5	0
67.6	0
67.7	0
67.8	0
67.9	0
68	0
68.1	0
68.2	0
68.3	0
68.4	0
68.5	0
68.6	0
68.7	0
68.8	0
68.9	0
69	0
69.1	0
69.2	0
69.3	0
69.4	0
69.5	0
69.6	0
69.7	0
69.8	0
69.9	0
70	0
70.1	0
70.2	0
70.3	0
70.4	0
70.5	0
70.6	0
70.7	0
70.8	0
70.9	0
71	0
71.1	0
71.2	0
71.3	0
71.4	0
71.5	0
71.6	0
71.7	0
71.8	0
71.9	0
72	0
72.1	0
72.2	0
72.3	0
72.4	0
72.5	0
72.6	0
72.7	0
72.8	0
72.9	0
73	0
73.1	0
73.2	0
73.3	0
73.4	0
73.5	0
73.6	0
73.7	0
73.8	0
73.9	0
74	0
74.1	0
74.2	0
74.3	0
74.4	0
74.5	0
74.6	0
74.7	0
74.8	0
74.9	0
75	0
75.1	0
75.2	0
75.3	0
75.4	0
75.5	0
75.6	0
75.7	0
75.8	0
75.9	0
76	0
76.1	0
76.2	0
76.3	0
76.4	0
76.5	0
76.6	0
76.7	0
76.8	0
76.9	0
77	0
77.1	0
77.2	0
77.3	0
77.4	0
77.5	0
77.6	0
77.7	0
77.8	0
77.9	0
78	0
78.1	0
78.2	0
78.3	0
78.4	0
78.5	0
78.6	0
78.7	0
78.8	0
78.9	0
79	0
79.1	0
79.2	0
79.3	0
79.4	0
79.5	0
79.6	0
79.7	0
79.8	0
79.9	0
80	0
80.1	0
80.2	0
80.3	0
80.4	0
80.5	0
80.6	0
80.7	0
80.8	0
80.9	0
81	0
81.1	0
81.2	0
81.3	0
81.4	0
81.5	0
81.6	0
81.7	0
81.8	0
81.9	0
82	0
82.1	0
82.2	0
82.3	0
82.4	0
82.5	0
82.6	0
82.7	0
82.8	0
82.9	0
83	0
83.1	0
83.2	0
83.3	0
83.4	0
83.5	0
83.6	0
83.7	0
83.8	0
83.9	0
84	0
84.1	0
84.2	0
84.3	0
84.4	0
84.5	0
84.6	0
84.7	0
84.8	0
84.9	0
85	0
85.1	0
85.2	0
85.3	0
85.4	0
85.5	0
85.6	0
85.7	0
85.8	0
85.9	0
86	0
86.1	0
86.2	0
86.3	0
86.4	0
86.5	0
86.6	0
86.7	0
86.8	0
86.9	0
87	0
87.1	0
87.2	0
87.3	0
87.4	0
87.5	0
87.6	0
87.7	0
87.8	0
87.9	0
88	0
88.1	0
88.2	0
88.3	0
88.4	0
88.5	0
88.6	0
88.7	0
88.8	0
88.9	0
89	0
89.1	0
89.2	0
89.3	0
89.4	0
89.5	0
89.6	0
89.7	0
89.8	0
89.9	0
90	0
90.1	0
90.2	0
90.3	0
90.4	0
90.5	0
90.6	0
90.7	0
90.8	0
90.9	0
91	0
91.1	0
91.2	0
91.3	0
91.4	0
91.5	0
91.6	0
91.7	0
91.8	0
91.9	0
92	0
92.1	0
92.2	0
92.3	0
92.4	0
92.5	0
92.6	0
92.7	0
92.8	0
92.9	0
93	0
93.1	0
93.2	0
93.3	0
93.4	0
93.5	0
93.6	0
93.7	0
93.8	0
93.9	0
94	0
94.1	0
94.2	0
94.3	0
94.4	0
94.5	0
94.6	0
94.7	0
94.8	0
94.9	0
95	0
95.1	0
95.2	0
95.3	0
95.4	0
95.5	0
95.6	0
95.7	0
95.8	0
95.9	0
96	0
96.1	0
96.2	0
96.3	0
96.4	0
96.5	0
96.6	0
96.7	0
96.8	0
96.9	0
97	0
97.1	0
97.2	0
97.3	0
97.4	0
97.5	0
97.6	0
97.7	0
97.8	0
97.9	0
98	0
98.1	0
98.2	0
98.3	0
98.4	0
98.5	0
98.6	0
98.7	0
98.8	0
98.9	0
99	0
99.1	0
99.2	0
99.3	0
99.4	0
99.5	0
99.6	0
99.7	0
99.8	0
99.9	0
100	0
100.1	0.184
100.2	0.336
100.3	0.423
100.4	0.522
100.5	0.58
100.6	0.632
100.7	0.672
100.8	0.696
100.9	0.727
101	0.76
101.1	0.778
101.2	0.79
101.3	0.795
101.4	0.804
101.5	0.813
101.6	0.82
101.7	0.819
101.8	0.821
101.9	0.831
102	0.821
102.1	0.823
102.2	0.824
102.3	0.829
102.4	0.839
102.5	0.833
102.6	0.839
102.7	0.85
102.8	0.862
102.9	0.866
103	0.866
103.1	0.867
103.2	0.863
103.3	0.869
103.4	0.86
103.5	0.861
103.6	0.853
103.7	0.845
103.8	0.845
103.9	0.853
104	0.853
104.1	0.849
104.2	0.851
104.3	0.849
104.4	0.851
104.5	0.856
104.6	0.851
104.7	0.856
104.8	0.856
104.9	0.855
105	0.853
105.1	0.86
105.2	0.866
105.3	0.864
105.4	0.87
105.5	0.87
105.6	0.864
105.7	0.867
105.8	0.86
105.9	0.872
106	0.876
106.1	0.873
106.2	0.873
106.3	0.874
106.4	0.875
106.5	0.882
106.6	0.885
106.7	0.879
106.8	0.872
106.9	0.876
107	0.875
107.1	0.878
107.2	0.882
107.3	0.883
107.4	0.887
107.5	0.882
107.6	0.891
107.7	0.898
107.8	0.886
107.9	0.884
108	0.885
108.1	0.888
108.2	0.886
108.3	0.888
108.4	0.892
108.5	0.896
108.6	0.894
108.7	0.893
108.8	0.889
108.9	0.891
109	0.886
109.1	0.882
109.2	0.889
109.3	0.891
109.4	0.891
109.5	0.893
109.6	0.884
109.7	0.88
109.8	0.885
109.9	0.885
110	0.882
110.1	0.888
110.2	0.888
110.3	0.883
110.4	0.88
110.5	0.881
110.6	0.874
110.7	0.879
110.8	0.875
110.9	0.887
111	0.886
111.1	0.885
111.2	0.883
111.3	0.884
111.4	0.886
111.5	0.89
111.6	0.899
111.7	0.892
111.8	0.878
111.9	0.886
112	0.882
112.1	0.885
112.2	0.878
112.3	0.867
112.4	0.872
112.5	0.873
112.6	0.883
112.7	0.885
112.8	0.885
112.9	0.892
113	0.892
113.1	0.894
113.2	0.9
113.3	0.902
113.4	0.904
113.5	0.896
113.6	0.895
113.7	0.893
113.8	0.893
113.9	0.89
114	0.895
114.1	0.901
114.2	0.904
114.3	0.913
114.4	0.907
114.5	0.909
114.6	0.914
114.7	0.901
114.8	0.902
114.9	0.91
115	0.921
115.1	0.911
115.2	0.909
115.3	0.907
115.4	0.912
115.5	0.902
115.6	0.9
115.7	0.903
115.8	0.901
115.9	0.911
116	0.905
116.1	0.909
116.2	0.906
116.3	0.903
116.4	0.899
116.5	0.908
116.6	0.907
116.7	0.915
116.8	0.909
116.9	0.916
117	0.91
117.1	0.909
117.2	0.905
117.3	0.91
117.4	0.914
117.5	0.918
117.6	0.921
117.7	0.919
117.8	0.915
117.9	0.924
118	0.922
118.1	0.922
118.2	0.93
118.3	0.933
118.4	0.922
118.5	0.92
118.6	0.915
118.7	0.913
118.8	0.909
118.9	0.916
119	0.912
119.1	0.911
119.2	0.908
119.3	0.907
119.4	0.906
119.5	0.909
119.6	0.911
119.7	0.914
119.8	0.916
119.9	0.92
120	0.919
120.1	0.915
120.2	0.916
120.3	0.915
120.4	0.908
120.5	0.907
120.6	0.902
120.7	0.906
120.8	0.908
120.9	0.905
121	0.902
121.1	0.905
121.2	0.909
121.3	0.911
121.4	0.907
121.5	0.905
121.6	0.907
121.7	0.914
121.8	0.918
121.9	0.921
122	0.919
122.1	0.924
122.2	0.924
122.3	0.925
122.4	0.926
122.5	0.926
122.6	0.921
122.7	0.925
122.8	0.916
122.9	0.913
123	0.919
123.1	0.923
123.2	0.92
123.3	0.923
123.4	0.929
123.5	0.923
123.6	0.93
123.7	0.924
123.8	0.921
123.9	0.918
124	0.92
124.1	0.919
124.2	0.921
124.3	0.92
124.4	0.915
124.5	0.915
124.6	0.911
124.7	0.908
124.8	0.918
124.9	0.918
125	0.913
125.1	0.909
125.2	0.913
125.3	0.901
125.4	0.898
125.5	0.894
125.6	0.893
125.7	0.894
125.8	0.9
125.9	0.9
126	0.903
126.1	0.9
126.2	0.906
126.3	0.913
126.4	0.914
126.5	0.923
126.6	0.917
126.7	0.918
126.8	0.922
126.9	0.915
127	0.92
127.1	0.924
127.2	0.926
127.3	0.922
127.4	0.921
127.5	0.928
127.6	0.933
127.7	0.934
127.8	0.936
127.9	0.933
128	0.926
128.1	0.929
128.2	0.93
128.3	0.926
128.4	0.927
128.5	0.927
128.6	0.925
128.7	0.926
128.8	0.925
128.9	0.932
129	0.936
129.1	0.932
129.2	0.926
129.3	0.921
129.4	0.921
129.5	0.923
129.6	0.921
129.7	0.918
129.8	0.926
129.9	0.927
130	0.917
130.1	0.921
130.2	0.92
130.3	0.923
130.4	0.929
130.5	0.925
130.6	0.918
130.7	0.919
130.8	0.917
130.9	0.919
131	0.923
131.1	0.922
131.2	0.922
131.3	0.926
131.4	0.925
131.5	0.925
131.6	0.922
131.7	0.93
131.8	0.935
131.9	0.934
132	0.935
132.1	0.932
132.2	0.936
132.3	0.934
132.4	0.932
132.5	0.928
132.6	0.922
132.7	0.923
132.8	0.917
132.9	0.918
133	0.925
133.1	0.93
133.2	0.93
133.3	0.94
133.4	0.941
133.5	0.942
133.6	0.937
133.7	0.937
133.8	0.938
133.9	0.94
134	0.932
134.1	0.928
134.2	0.929
134.3	0.929
134.4	0.931
134.5	0.927
134.6	0.925
134.7	0.919
134.8	0.92
134.9	0.927
135	0.927
135.1	0.932
135.2	0.929
135.3	0.934
135.4	0.935
135.5	0.93
135.6	0.934
135.7	0.935
135.8	0.934
135.9	0.936
136	0.937
136.1	0.939
136.2	0.935
136.3	0.937
136.4	0.936
136.5	0.935
136.6	0.933
136.7	0.935
136.8	0.93
136.9	0.934
137	0.935
137.1	0.936
137.2	0.933
137.3	0.939
137.4	0.939
137.5	0.936
137.6	0.939
137.7	0.94
137.8	0.941
137.9	0.941
138	0.942
138.1	0.946
138.2	0.944
138.3	0.945
138.4	0.946
138.5	0.952
138.6	0.953
138.7	0.95
138.8	0.952
138.9	0.955
139	0.952
139.1	0.949
139.2	0.944
139.3	0.943
139.4	0.945
139.5	0.946
139.6	0.944
139.7	0.94
139.8	0.939
139.9	0.938
140	0.941
140.1	0.942
140.2	0.938
140.3	0.942
140.4	0.941
140.5	0.945
140.6	0.942
140.7	0.943
140.8	0.946
140.9	0.942
141	0.944
141.1	0.944
141.2	0.941
141.3	0.95
141.4	0.952
141.5	0.955
141.6	0.952
141.7	0.949
141.8	0.948
141.9	0.945
142	0.942
142.1	0.944
142.2	0.942
142.3	0.939
142.4	0.934
142.5	0.93
142.6	0.926
142.7	0.931
142.8	0.935
142.9	0.936
143	0.93
143.1	0.933
143.2	0.931
143.3	0.939
143.4	0.937
143.5	0.937
143.6	0.941
143.7	0.941
143.8	0.945
143.9	0.951
144	0.953
144.1	0.951
144.2	0.944
144.3	0.938
144.4	0.941
144.5	0.942
144.6	0.939
144.7	0.946
144.8	0.947
144.9	0.947
145	0.947
145.1	0.949
145.2	0.953
145.3	0.949
145.4	0.947
145.5	0.948
145.6	0.949
145.7	0.955
145.8	0.956
145.9	0.958
146	0.955
146.1	0.961
146.2	0.959
146.3	0.962
146.4	0.955
146.5	0.95
146.6	0.948
146.7	0.949
146.8	0.949
146.9	0.948
147	0.95
147.1	0.951
147.2	0.945
147.3	0.944
147.4	0.945
147.5	0.939
147.6	0.944
147.7	0.948
147.8	0.956
147.9	0.955
148	0.954
148.1	0.951
148.2	0.945
148.3	0.944
148.4	0.937
148.5	0.941
148.6	0.94
148.7	0.938
148.8	0.937
148.9	0.936
149	0.935
149.1	0.935
149.2	0.932
149.3	0.93
149.4	0.929
149.5	0.926
149.6	0.927
149.7	0.936
149.8	0.938
149.9	0.938
150	0.938
150.1	0.936
150.2	0.94
150.3	0.947
150.4	0.948
150.5	0.948
150.6	0.95
150.7	0.952
150.8	0.949
150.9	0.949
151	0.953
151.1	0.951
151.2	0.955
151.3	0.954
151.4	0.956
151.5	0.953
151.6	0.955
151.7	0.952
151.8	0.957
151.9	0.956
152	0.952
152.1	0.949
152.2	0.953
152.3	0.951
152.4	0.953
152.5	0.95
152.6	0.951
152.7	0.956
152.8	0.958
152.9	0.956
153	0.957
153.1	0.955
153.2	0.951
153.3	0.949
153.4	0.952
153.5	0.956
153.6	0.959
153.7	0.959
153.8	0.959
153.9	0.963
154	0.962
154.1	0.962
154.2	0.965
154.3	0.968
154.4	0.969
154.5	0.968
154.6	0.966
154.7	0.963
154.8	0.962
154.9	0.957
155	0.953
155.1	0.952
155.2	0.955
155.3	0.958
155.4	0.964
155.5	0.965
155.6	0.962
155.7	0.958
155.8	0.956
155.9	0.955
156	0.957
156.1	0.952
156.2	0.947
156.3	0.947
156.4	0.943
156.5	0.952
156.6	0.952
156.7	0.952
156.8	0.952
156.9	0.956
157	0.956
157.1	0.955
157.2	0.958
157.3	0.961
157.4	0.959
157.5	0.96
157.6	0.962
157.7	0.963
157.8	0.957
157.9	0.958
158	0.957
158.1	0.959
158.2	0.964
158.3	0.964
158.4	0.962
158.5	0.962
158.6	0.96
158.7	0.957
158.8	0.956
158.9	0.963
159	0.954
159.1	0.956
159.2	0.954
159.3	0.955
159.4	0.953
159.5	0.953
159.6	0.951
159.7	0.955
159.8	0.955
159.9	0.954
160	0.948
160.1	0.946
160.2	0.952
160.3	0.95
160.4	0.954
160.5	0.947
160.6	0.944
160.7	0.948
160.8	0.953
160.9	0.951
161	0.949
161.1	0.952
161.2	0.952
161.3	0.954
161.4	0.958
161.5	0.961
161.6	0.961
161.7	0.961
161.8	0.961
161.9	0.956
162	0.954
162.1	0.955
162.2	0.953
162.3	0.953
162.4	0.956
162.5	0.955
162.6	0.955
162.7	0.952
162.8	0.954
162.9	0.956
163	0.952
163.1	0.952
163.2	0.953
163.3	0.949
163.4	0.949
163.5	0.951
163.6	0.951
163.7	0.951
163.8	0.951
163.9	0.955
164	0.953
164.1	0.953
164.2	0.958
164.3	0.956
164.4	0.96
164.5	0.965
164.6	0.968
164.7	0.967
164.8	0.969
164.9	0.965
165	0.959
165.1	0.954
165.2	0.957
165.3	0.958
165.4	0.954
165.5	0.957
165.6	0.957
165.7	0.953
165.8	0.954
165.9	0.959
166	0.959
166.1	0.959
166.2	0.958
166.3	0.955
166.4	0.953
166.5	0.954
166.6	0.955
166.7	0.96
166.8	0.961
166.9	0.961
167	0.962
167.1	0.963
167.2	0.968
167.3	0.966
167.4	0.968
167.5	0.964
167.6	0.961
167.7	0.958
167.8	0.956
167.9	0.951
168	0.95
168.1	0.949
168.2	0.956
168.3	0.957
168.4	0.96
168.5	0.961
168.6	0.96
168.7	0.954
168.8	0.954
168.9	0.954
169	0.95
169.1	0.949
169.2	0.949
169.3	0.947
169.4	0.946
169.5	0.943
169.6	0.948
169.7	0.953
169.8	0.952
169.9	0.955
170	0.957
170.1	0.957
170.2	0.959
170.3	0.954
170.4	0.951
170.5	0.956
170.6	0.954
170.7	0.952
170.8	0.949
170.9	0.946
171	0.95
171.1	0.949
171.2	0.947
171.3	0.946
171.4	0.95
171.5	0.949
171.6	0.95
171.7	0.95
171.8	0.948
171.9	0.945
172	0.944
172.1	0.95
172.2	0.952
172.3	0.953
172.4	0.956
172.5	0.958
172.6	0.96
172.7	0.959
172.8	0.959
172.9	0.956
173	0.957
173.1	0.956
173.2	0.96
173.3	0.959
173.4	0.955
173.5	0.958
173.6	0.953
173.7	0.955
173.8	0.953
173.9	0.954
174	0.955
174.1	0.957
174.2	0.96
174.3	0.959
174.4	0.967
174.5	0.966
174.6	0.967
174.7	0.963
174.8	0.966
174.9	0.968
175	0.968
175.1	0.967
175.2	0.968
175.3	0.964
175.4	0.962
175.5	0.96
175.6	0.958
175.7	0.957
175.8	0.952
175.9	0.957
176	0.959
176.1	0.958
176.2	0.96
176.3	0.963
176.4	0.966
176.5	0.967
176.6	0.962
176.7	0.962
176.8	0.966
176.9	0.96
177	0.957
177.1	0.959
177.2	0.962
177.3	0.965
177.4	0.966
177.5	0.969
177.6	0.97
177.7	0.967
177.8	0.964
177.9	0.967
178	0.966
178.1	0.967
178.2	0.964
178.3	0.964
178.4	0.958
178.5	0.96
178.6	0.956
178.7	0.953
178.8	0.954
178.9	0.95
179	0.949
179.1	0.953
179.2	0.95
179.3	0.954
179.4	0.952
179.5	0.955
179.6	0.957
179.7	0.959
179.8	0.955
179.9	0.958
180	0.963
180.1	0.961
180.2	0.961
180.3	0.959
180.4	0.966
180.5	0.963
180.6	0.967
180.7	0.965
180.8	0.967
180.9	0.966
181	0.966
181.1	0.965
181.2	0.967
181.3	0.965
181.4	0.963
181.5	0.963
181.6	0.964
181.7	0.964
181.8	0.961
181.9	0.961
182	0.958
182.1	0.962
182.2	0.963
182.3	0.964
182.4	0.96
182.5	0.96
182.6	0.956
182.7	0.958
182.8	0.961
182.9	0.96
183	0.959
183.1	0.964
183.2	0.958
183.3	0.96
183.4	0.956
183.5	0.961
183.6	0.964
183.7	0.956
183.8	0.955
183.9	0.957
184	0.957
184.1	0.961
184.2	0.967
184.3	0.966
184.4	0.962
184.5	0.968
184.6	0.968
184.7	0.97
184.8	0.976
184.9	0.974
185	0.969
185.1	0.966
185.2	0.962
185.3	0.959
185.4	0.959
185.5	0.959
185.6	0.956
185.7	0.955
185.8	0.954
185.9	0.956
186	0.96
186.1	0.958
186.2	0.96
186.3	0.963
186.4	0.96
186.5	0.963
186.6	0.961
186.7	0.958
186.8	0.957
186.9	0.958
187	0.959
187.1	0.955
187.2	0.962
187.3	0.957
187.4	0.956
187.5	0.956
187.6	0.953
187.7	0.952
187.8	0.948
187.9	0.95
188	0.949
188.1	0.954
188.2	0.954
188.3	0.955
188.4	0.952
188.5	0.955
188.6	0.958
188.7	0.959
188.8	0.954
188.9	0.957
189	0.962
189.1	0.964
189.2	0.966
189.3	0.966
189.4	0.965
189.5	0.965
189.6	0.964
189.7	0.965
189.8	0.967
189.9	0.968
190	0.967
190.1	0.968
190.2	0.97
190.3	0.964
190.4	0.962
190.5	0.963
190.6	0.962
190.7	0.961
190.8	0.964
190.9	0.966
191	0.968
191.1	0.963
191.2	0.961
191.3	0.96
191.4	0.961
191.5	0.963
191.6	0.957
191.7	0.958
191.8	0.954
191.9	0.954
192	0.961
192.1	0.961
192.2	0.959
192.3	0.966
192.4	0.963
192.5	0.96
192.6	0.96
192.7	0.957
192.8	0.951
192.9	0.952
193	0.955
193.1	0.957
193.2	0.96
193.3	0.963
193.4	0.961
193.5	0.96
193.6	0.955
193.7	0.954
193.8	0.957
193.9	0.955
194	0.953
194.1	0.953
194.2	0.954
194.3	0.956
194.4	0.957
194.5	0.957
194.6	0.959
194.7	0.961
194.8	0.962
194.9	0.96
195	0.958
195.1	0.96
195.2	0.96
195.3	0.96
195.4	0.956
195.5	0.958
195.6	0.956
195.7	0.956
195.8	0.958
195.9	0.955
196	0.955
196.1	0.955
196.2	0.96
196.3	0.96
196.4	0.957
196.5	0.955
196.6	0.954
196.7	0.955
196.8	0.954
196.9	0.955
197	0.954
197.1	0.952
197.2	0.952
197.3	0.953
197.4	0.955
197.5	0.959
197.6	0.964
197.7	0.965
197.8	0.968
197.9	0.97
198	0.965
198.1	0.962
198.2	0.96
198.3	0.959
198.4	0.96
198.5	0.961
198.6	0.96
198.7	0.963
198.8	0.961
198.9	0.961
199	0.958
199.1	0.957
199.2	0.955
199.3	0.962
199.4	0.959
199.5	0.96
199.6	0.956
199.7	0.955
199.8	0.957
199.9	0.956
200	0.957
[truncated: 14,000 more rows]
