# Supplementary material for: Bayesian inference of kinetic schemes for ion channels by Kalman filtering
Source: eLife journal article supplement (doi:10.7554/elife.62714), 2022-05-04
Supplement: fig4-data5 [file 1_Sim_N_500_Strom_MW.xlsx]

## Sheet: Tabelle1
0.1	0
0.2	0
0.3	0
0.4	0
0.5	0
0.6	0
0.7	0
0.8	0
0.9	0
1	0
1.1	0
1.2	0
1.3	0
1.4	0
1.5	0
1.6	0
1.7	0
1.8	0
1.9	0
2	0
2.1	0
2.2	0
2.3	0
2.4	0
2.5	0
2.6	0
2.7	0
2.8	0
2.9	0
3	0
3.1	0
3.2	0
3.3	0
3.4	0
3.5	0
3.6	0
3.7	0
3.8	0
3.9	0
4	0
4.1	0
4.2	0
4.3	0
4.4	0
4.5	0
4.6	0
4.7	0
4.8	0
4.9	0
5	0
5.1	0
5.2	0
5.3	0
5.4	0
5.5	0
5.6	0
5.7	0
5.8	0
5.9	0
6	0
6.1	0
6.2	0
6.3	0
6.4	0
6.5	0
6.6	0
6.7	0
6.8	0
6.9	0
7	0
7.1	0
7.2	0
7.3	0
7.4	0
7.5	0
7.6	0
7.7	0
7.8	0
7.9	0
8	0
8.1	0
8.2	0
8.3	0
8.4	0
8.5	0
8.6	0
8.7	0
8.8	0
8.9	0
9	0
9.1	0
9.2	0
9.3	0
9.4	0
9.5	0
9.6	0
9.7	0
9.8	0
9.9	0
10	0
10.1	0
10.2	0
10.3	0
10.4	0
10.5	0
10.6	0
10.7	0
10.8	0
10.9	0
11	0
11.1	0
11.2	0
11.3	0
11.4	0
11.5	0
11.6	0
11.7	0
11.8	0
11.9	0
12	0
12.1	0
12.2	0
12.3	0
12.4	0
12.5	0
12.6	0
12.7	0
12.8	0
12.9	0
13	0
13.1	0
13.2	0
13.3	0
13.4	0
13.5	0
13.6	0
13.7	0
13.8	0
13.9	0
14	0
14.1	0
14.2	0
14.3	0
14.4	0
14.5	0
14.6	0
14.7	0
14.8	0
14.9	0
15	0
15.1	0
15.2	0
15.3	0
15.4	0
15.5	0
15.6	0
15.7	0
15.8	0
15.9	0
16	0
16.1	0
16.2	0
16.3	0
16.4	0
16.5	0
16.6	0
16.7	0
16.8	0
16.9	0
17	0
17.1	0
17.2	0
17.3	0
17.4	0
17.5	0
17.6	0
17.7	0
17.8	0
17.9	0
18	0
18.1	0
18.2	0
18.3	0
18.4	0
18.5	0
18.6	0
18.7	0
18.8	0
18.9	0
19	0
19.1	0
19.2	0
19.3	0
19.4	0
19.5	0
19.6	0
19.7	0
19.8	0
19.9	0
20	0
20.1	0
20.2	0
20.3	0
20.4	0
20.5	0
20.6	0
20.7	0
20.8	0
20.9	0
21	0
21.1	0
21.2	0
21.3	0
21.4	0
21.5	0
21.6	0
21.7	0
21.8	0
21.9	0
22	0
22.1	0
22.2	0
22.3	0
22.4	0
22.5	0
22.6	0
22.7	0
22.8	0
22.9	0
23	0
23.1	0
23.2	0
23.3	0
23.4	0
23.5	0
23.6	0
23.7	0
23.8	0
23.9	0
24	0
24.1	0
24.2	0
24.3	0
24.4	0
24.5	0
24.6	0
24.7	0
24.8	0
24.9	0
25	0
25.1	0
25.2	0
25.3	0
25.4	0
25.5	0
25.6	0
25.7	0
25.8	0
25.9	0
26	0
26.1	0
26.2	0
26.3	0
26.4	0
26.5	0
26.6	0
26.7	0
26.8	0
26.9	0
27	0
27.1	0
27.2	0
27.3	0
27.4	0
27.5	0
27.6	0
27.7	0
27.8	0
27.9	0
28	0
28.1	0
28.2	0
28.3	0
28.4	0
28.5	0
28.6	0
28.7	0
28.8	0
28.9	0
29	0
29.1	0
29.2	0
29.3	0
29.4	0
29.5	0
29.6	0
29.7	0
29.8	0
29.9	0
30	0
30.1	0
30.2	0
30.3	0
30.4	0
30.5	0
30.6	0
30.7	0
30.8	0
30.9	0
31	0
31.1	0
31.2	0
31.3	0
31.4	0
31.5	0
31.6	0
31.7	0
31.8	0
31.9	0
32	0
32.1	0
32.2	0
32.3	0
32.4	0
32.5	0
32.6	0
32.7	0
32.8	0
32.9	0
33	0
33.1	0
33.2	0
33.3	0
33.4	0
33.5	0
33.6	0
33.7	0
33.8	0
33.9	0
34	0
34.1	0
34.2	0
34.3	0
34.4	0
34.5	0
34.6	0
34.7	0
34.8	0
34.9	0
35	0
35.1	0
35.2	0
35.3	0
35.4	0
35.5	0
35.6	0
35.7	0
35.8	0
35.9	0
36	0
36.1	0
36.2	0
36.3	0
36.4	0
36.5	0
36.6	0
36.7	0
36.8	0
36.9	0
37	0
37.1	0
37.2	0
37.3	0
37.4	0
37.5	0
37.6	0
37.7	0
37.8	0
37.9	0
38	0
38.1	0
38.2	0
38.3	0
38.4	0
38.5	0
38.6	0
38.7	0
38.8	0
38.9	0
39	0
39.1	0
39.2	0
39.3	0
39.4	0
39.5	0
39.6	0
39.7	0
39.8	0
39.9	0
40	0
40.1	0
40.2	0
40.3	0
40.4	0
40.5	0
40.6	0
40.7	0
40.8	0
40.9	0
41	0
41.1	0
41.2	0
41.3	0
41.4	0
41.5	0
41.6	0
41.7	0
41.8	0
41.9	0
42	0
42.1	0
42.2	0
42.3	0
42.4	0
42.5	0
42.6	0
42.7	0
42.8	0
42.9	0
43	0
43.1	0
43.2	0
43.3	0
43.4	0
43.5	0
43.6	0
43.7	0
43.8	0
43.9	0
44	0
44.1	0
44.2	0
44.3	0
44.4	0
44.5	0
44.6	0
44.7	0
44.8	0
44.9	0
45	0
45.1	0
45.2	0
45.3	0
45.4	0
45.5	0
45.6	0
45.7	0
45.8	0
45.9	0
46	0
46.1	0
46.2	0
46.3	0
46.4	0
46.5	0
46.6	0
46.7	0
46.8	0
46.9	0
47	0
47.1	0
47.2	0
47.3	0
47.4	0
47.5	0
47.6	0
47.7	0
47.8	0
47.9	0
48	0
48.1	0
48.2	0
48.3	0
48.4	0
48.5	0
48.6	0
48.7	0
48.8	0
48.9	0
49	0
49.1	0
49.2	0
49.3	0
49.4	0
49.5	0
49.6	0
49.7	0
49.8	0
49.9	0
50	0
50.1	0
50.2	0
50.3	0
50.4	0
50.5	0
50.6	0
50.7	0
50.8	0
50.9	0
51	0
51.1	0
51.2	0
51.3	0
51.4	0
51.5	0
51.6	0
51.7	0
51.8	0
51.9	0
52	0
52.1	0
52.2	0
52.3	0
52.4	0
52.5	0
52.6	0
52.7	0
52.8	0
52.9	0
53	0
53.1	0
53.2	0
53.3	0
53.4	0
53.5	0
53.6	0
53.7	0
53.8	0
53.9	0
54	0
54.1	0
54.2	0
54.3	0
54.4	0
54.5	0
54.6	0
54.7	0
54.8	0
54.9	0
55	0
55.1	0
55.2	0
55.3	0
55.4	0
55.5	0
55.6	0
55.7	0
55.8	0
55.9	0
56	0
56.1	0
56.2	0
56.3	0
56.4	0
56.5	0
56.6	0
56.7	0
56.8	0
56.9	0
57	0
57.1	0
57.2	0
57.3	0
57.4	0
57.5	0
57.6	0
57.7	0
57.8	0
57.9	0
58	0
58.1	0
58.2	0
58.3	0
58.4	0
58.5	0
58.6	0
58.7	0
58.8	0
58.9	0
59	0
59.1	0
59.2	0
59.3	0
59.4	0
59.5	0
59.6	0
59.7	0
59.8	0
59.9	0
60	0
60.1	0
60.2	0
60.3	0
60.4	0
60.5	0
60.6	0
60.7	0
60.8	0
60.9	0
61	0
61.1	0
61.2	0
61.3	0
61.4	0
61.5	0
61.6	0
61.7	0
61.8	0
61.9	0
62	0
62.1	0
62.2	0
62.3	0
62.4	0
62.5	0
62.6	0
62.7	0
62.8	0
62.9	0
63	0
63.1	0
63.2	0
63.3	0
63.4	0
63.5	0
63.6	0
63.7	0
63.8	0
63.9	0
64	0
64.1	0
64.2	0
64.3	0
64.4	0
64.5	0
64.6	0
64.7	0
64.8	0
64.9	0
65	0
65.1	0
65.2	0
65.3	0
65.4	0
65.5	0
65.6	0
65.7	0
65.8	0
65.9	0
66	0
66.1	0
66.2	0
66.3	0
66.4	0
66.5	0
66.6	0
66.7	0
66.8	0
66.9	0
67	0
67.1	0
67.2	0
67.3	0
67.4	0
67.5	0
67.6	0
67.7	0
67.8	0
67.9	0
68	0
68.1	0
68.2	0
68.3	0
68.4	0
68.5	0
68.6	0
68.7	0
68.8	0
68.9	0
69	0
69.1	0
69.2	0
69.3	0
69.4	0
69.5	0
69.6	0
69.7	0
69.8	0
69.9	0
70	0
70.1	0
70.2	0
70.3	0
70.4	0
70.5	0
70.6	0
70.7	0
70.8	0
70.9	0
71	0
71.1	0
71.2	0
71.3	0
71.4	0
71.5	0
71.6	0
71.7	0
71.8	0
71.9	0
72	0
72.1	0
72.2	0
72.3	0
72.4	0
72.5	0
72.6	0
72.7	0
72.8	0
72.9	0
73	0
73.1	0
73.2	0
73.3	0
73.4	0
73.5	0
73.6	0
73.7	0
73.8	0
73.9	0
74	0
74.1	0
74.2	0
74.3	0
74.4	0
74.5	0
74.6	0
74.7	0
74.8	0
74.9	0
75	0
75.1	0
75.2	0
75.3	0
75.4	0
75.5	0
75.6	0
75.7	0
75.8	0
75.9	0
76	0
76.1	0
76.2	0
76.3	0
76.4	0
76.5	0
76.6	0
76.7	0
76.8	0
76.9	0
77	0
77.1	0
77.2	0
77.3	0
77.4	0
77.5	0
77.6	0
77.7	0
77.8	0
77.9	0
78	0
78.1	0
78.2	0
78.3	0
78.4	0
78.5	0
78.6	0
78.7	0
78.8	0
78.9	0
79	0
79.1	0
79.2	0
79.3	0
79.4	0
79.5	0
79.6	0
79.7	0
79.8	0
79.9	0
80	0
80.1	0
80.2	0
80.3	0
80.4	0
80.5	0
80.6	0
80.7	0
80.8	0
80.9	0
81	0
81.1	0
81.2	0
81.3	0
81.4	0
81.5	0
81.6	0
81.7	0
81.8	0
81.9	0
82	0
82.1	0
82.2	0
82.3	0
82.4	0
82.5	0
82.6	0
82.7	0
82.8	0
82.9	0
83	0
83.1	0
83.2	0
83.3	0
83.4	0
83.5	0
83.6	0
83.7	0
83.8	0
83.9	0
84	0
84.1	0
84.2	0
84.3	0
84.4	0
84.5	0
84.6	0
84.7	0
84.8	0
84.9	0
85	0
85.1	0
85.2	0
85.3	0
85.4	0
85.5	0
85.6	0
85.7	0
85.8	0
85.9	0
86	0
86.1	0
86.2	0
86.3	0
86.4	0
86.5	0
86.6	0
86.7	0
86.8	0
86.9	0
87	0
87.1	0
87.2	0
87.3	0
87.4	0
87.5	0
87.6	0
87.7	0
87.8	0
87.9	0
88	0
88.1	0
88.2	0
88.3	0
88.4	0
88.5	0
88.6	0
88.7	0
88.8	0
88.9	0
89	0
89.1	0
89.2	0
89.3	0
89.4	0
89.5	0
89.6	0
89.7	0
89.8	0
89.9	0
90	0
90.1	0
90.2	0
90.3	0
90.4	0
90.5	0
90.6	0
90.7	0
90.8	0
90.9	0
91	0
91.1	0
91.2	0
91.3	0
91.4	0
91.5	0
91.6	0
91.7	0
91.8	0
91.9	0
92	0
92.1	0
92.2	0
92.3	0
92.4	0
92.5	0
92.6	0
92.7	0
92.8	0
92.9	0
93	0
93.1	0
93.2	0
93.3	0
93.4	0
93.5	0
93.6	0
93.7	0
93.8	0
93.9	0
94	0
94.1	0
94.2	0
94.3	0
94.4	0
94.5	0
94.6	0
94.7	0
94.8	0
94.9	0
95	0
95.1	0
95.2	0
95.3	0
95.4	0
95.5	0
95.6	0
95.7	0
95.8	0
95.9	0
96	0
96.1	0
96.2	0
96.3	0
96.4	0
96.5	0
96.6	0
96.7	0
96.8	0
96.9	0
97	0
97.1	0
97.2	0
97.3	0
97.4	0
97.5	0
97.6	0
97.7	0
97.8	0
97.9	0
98	0
98.1	0
98.2	0
98.3	0
98.4	0
98.5	0
98.6	0
98.7	0
98.8	0
98.9	0
99	0
99.1	0
99.2	0
99.3	0
99.4	0
99.5	0
99.6	0
99.7	0
99.8	0
99.9	0
100	0
100.1	0
100.2	0
100.3	0.002
100.4	0.002
100.5	0.002
100.6	0.004
100.7	0.006
100.8	0.006
100.9	0.006
101	0.01
101.1	0.01
101.2	0.014
101.3	0.02
101.4	0.022
101.5	0.026
101.6	0.03
101.7	0.036
101.8	0.036
101.9	0.038
102	0.038
102.1	0.04
102.2	0.042
102.3	0.042
102.4	0.046
102.5	0.048
102.6	0.05
102.7	0.052
102.8	0.052
102.9	0.062
103	0.068
103.1	0.068
103.2	0.07
103.3	0.07
103.4	0.07
103.5	0.07
103.6	0.072
103.7	0.076
103.8	0.082
103.9	0.084
104	0.09
104.1	0.094
104.2	0.098
104.3	0.098
104.4	0.104
104.5	0.108
104.6	0.112
104.7	0.114
104.8	0.114
104.9	0.116
105	0.12
105.1	0.124
105.2	0.126
105.3	0.126
105.4	0.138
105.5	0.144
105.6	0.146
105.7	0.146
105.8	0.15
105.9	0.156
106	0.158
106.1	0.162
106.2	0.162
106.3	0.164
106.4	0.166
106.5	0.172
106.6	0.174
106.7	0.178
106.8	0.182
106.9	0.184
107	0.184
107.1	0.184
107.2	0.184
107.3	0.184
107.4	0.184
107.5	0.186
107.6	0.188
107.7	0.19
107.8	0.192
107.9	0.196
108	0.202
108.1	0.208
108.2	0.212
108.3	0.214
108.4	0.216
108.5	0.216
108.6	0.218
108.7	0.218
108.8	0.218
108.9	0.22
109	0.22
109.1	0.224
109.2	0.226
109.3	0.228
109.4	0.232
109.5	0.238
109.6	0.242
109.7	0.242
109.8	0.242
109.9	0.248
110	0.252
110.1	0.256
110.2	0.258
110.3	0.264
110.4	0.266
110.5	0.272
110.6	0.278
110.7	0.284
110.8	0.284
110.9	0.288
111	0.292
111.1	0.292
111.2	0.294
111.3	0.294
111.4	0.294
111.5	0.294
111.6	0.296
111.7	0.296
111.8	0.298
111.9	0.304
112	0.308
112.1	0.308
112.2	0.312
112.3	0.312
112.4	0.316
112.5	0.316
112.6	0.314
112.7	0.318
112.8	0.32
112.9	0.32
113	0.326
113.1	0.326
113.2	0.33
113.3	0.332
113.4	0.332
113.5	0.334
113.6	0.334
113.7	0.34
113.8	0.342
113.9	0.34
114	0.344
114.1	0.344
114.2	0.35
114.3	0.35
114.4	0.354
114.5	0.356
114.6	0.362
114.7	0.362
114.8	0.364
114.9	0.366
115	0.368
115.1	0.374
115.2	0.378
115.3	0.376
115.4	0.378
115.5	0.382
115.6	0.384
115.7	0.388
115.8	0.388
115.9	0.39
116	0.392
116.1	0.394
116.2	0.396
116.3	0.396
116.4	0.4
116.5	0.402
116.6	0.406
116.7	0.406
116.8	0.402
116.9	0.4
117	0.402
117.1	0.404
117.2	0.406
117.3	0.408
117.4	0.41
117.5	0.408
117.6	0.414
117.7	0.416
117.8	0.416
117.9	0.416
118	0.418
118.1	0.418
118.2	0.418
118.3	0.418
118.4	0.422
118.5	0.422
118.6	0.422
118.7	0.422
118.8	0.422
118.9	0.422
119	0.424
119.1	0.424
119.2	0.426
119.3	0.426
119.4	0.426
119.5	0.43
119.6	0.43
119.7	0.43
119.8	0.43
119.9	0.43
120	0.432
120.1	0.434
120.2	0.438
120.3	0.442
120.4	0.444
120.5	0.444
120.6	0.448
120.7	0.448
120.8	0.448
120.9	0.45
121	0.452
121.1	0.452
121.2	0.452
121.3	0.45
121.4	0.448
121.5	0.45
121.6	0.45
121.7	0.452
121.8	0.456
121.9	0.458
122	0.458
122.1	0.458
122.2	0.46
122.3	0.46
122.4	0.46
122.5	0.46
122.6	0.46
122.7	0.462
122.8	0.462
122.9	0.466
123	0.472
123.1	0.472
123.2	0.472
123.3	0.472
123.4	0.472
123.5	0.472
123.6	0.474
123.7	0.478
123.8	0.478
123.9	0.478
124	0.476
124.1	0.478
124.2	0.478
124.3	0.478
124.4	0.48
124.5	0.48
124.6	0.478
124.7	0.478
124.8	0.478
124.9	0.478
125	0.48
125.1	0.48
125.2	0.48
125.3	0.482
125.4	0.484
125.5	0.482
125.6	0.482
125.7	0.482
125.8	0.482
125.9	0.484
126	0.486
126.1	0.488
126.2	0.492
126.3	0.498
126.4	0.496
126.5	0.5
126.6	0.5
126.7	0.502
126.8	0.5
126.9	0.502
127	0.502
127.1	0.504
127.2	0.504
127.3	0.508
127.4	0.51
127.5	0.51
127.6	0.508
127.7	0.508
127.8	0.506
127.9	0.51
128	0.514
128.1	0.516
128.2	0.518
128.3	0.518
128.4	0.518
128.5	0.522
128.6	0.522
128.7	0.526
128.8	0.526
128.9	0.526
129	0.528
129.1	0.526
129.2	0.526
129.3	0.526
129.4	0.526
129.5	0.53
129.6	0.53
129.7	0.53
129.8	0.532
129.9	0.532
130	0.536
130.1	0.536
130.2	0.536
130.3	0.532
130.4	0.534
130.5	0.532
130.6	0.532
130.7	0.532
130.8	0.534
130.9	0.536
131	0.536
131.1	0.534
131.2	0.536
131.3	0.536
131.4	0.538
131.5	0.538
131.6	0.536
131.7	0.534
131.8	0.536
131.9	0.538
132	0.538
132.1	0.54
132.2	0.542
132.3	0.542
132.4	0.544
132.5	0.548
132.6	0.546
132.7	0.548
132.8	0.552
132.9	0.552
133	0.554
133.1	0.556
133.2	0.558
133.3	0.558
133.4	0.558
133.5	0.564
133.6	0.564
133.7	0.564
133.8	0.568
133.9	0.57
134	0.57
134.1	0.572
134.2	0.574
134.3	0.576
134.4	0.576
134.5	0.578
134.6	0.58
134.7	0.58
134.8	0.582
134.9	0.582
135	0.584
135.1	0.584
135.2	0.582
135.3	0.582
135.4	0.584
135.5	0.586
135.6	0.586
135.7	0.586
135.8	0.588
135.9	0.588
136	0.59
136.1	0.588
136.2	0.592
136.3	0.596
136.4	0.598
136.5	0.6
136.6	0.598
136.7	0.598
136.8	0.6
136.9	0.602
137	0.602
137.1	0.602
137.2	0.6
137.3	0.6
137.4	0.6
137.5	0.602
137.6	0.598
137.7	0.6
137.8	0.602
137.9	0.602
138	0.602
138.1	0.602
138.2	0.604
138.3	0.604
138.4	0.61
138.5	0.614
138.6	0.616
138.7	0.616
138.8	0.62
138.9	0.62
139	0.62
139.1	0.62
139.2	0.62
139.3	0.62
139.4	0.622
139.5	0.622
139.6	0.624
139.7	0.624
139.8	0.624
139.9	0.624
140	0.624
140.1	0.624
140.2	0.624
140.3	0.624
140.4	0.628
140.5	0.626
140.6	0.628
140.7	0.626
140.8	0.626
140.9	0.63
141	0.632
141.1	0.632
141.2	0.632
141.3	0.632
141.4	0.636
141.5	0.634
141.6	0.638
141.7	0.638
141.8	0.644
141.9	0.644
142	0.646
142.1	0.646
142.2	0.65
142.3	0.652
142.4	0.65
142.5	0.648
142.6	0.65
142.7	0.654
142.8	0.654
142.9	0.654
143	0.652
143.1	0.652
143.2	0.654
143.3	0.654
143.4	0.654
143.5	0.654
143.6	0.654
143.7	0.656
143.8	0.654
143.9	0.654
144	0.656
144.1	0.658
144.2	0.66
144.3	0.662
144.4	0.658
144.5	0.66
144.6	0.664
144.7	0.662
144.8	0.66
144.9	0.658
145	0.658
145.1	0.66
145.2	0.66
145.3	0.658
145.4	0.658
145.5	0.658
145.6	0.658
145.7	0.656
145.8	0.656
145.9	0.656
146	0.656
146.1	0.658
146.2	0.656
146.3	0.656
146.4	0.656
146.5	0.656
146.6	0.656
146.7	0.656
146.8	0.656
146.9	0.654
147	0.652
147.1	0.652
147.2	0.652
147.3	0.652
147.4	0.654
147.5	0.656
147.6	0.654
147.7	0.658
147.8	0.662
147.9	0.66
148	0.662
148.1	0.662
148.2	0.662
148.3	0.662
148.4	0.662
148.5	0.664
148.6	0.666
148.7	0.666
148.8	0.664
148.9	0.664
149	0.666
149.1	0.668
149.2	0.672
149.3	0.672
149.4	0.672
149.5	0.672
149.6	0.678
149.7	0.678
149.8	0.676
149.9	0.676
150	0.676
150.1	0.678
150.2	0.676
150.3	0.676
150.4	0.676
150.5	0.678
150.6	0.68
150.7	0.676
150.8	0.678
150.9	0.678
151	0.678
151.1	0.678
151.2	0.678
151.3	0.678
151.4	0.676
151.5	0.676
151.6	0.678
151.7	0.678
151.8	0.678
151.9	0.68
152	0.68
152.1	0.682
152.2	0.684
152.3	0.684
152.4	0.686
152.5	0.684
152.6	0.684
152.7	0.684
152.8	0.688
152.9	0.692
153	0.692
153.1	0.692
153.2	0.694
153.3	0.694
153.4	0.7
153.5	0.702
153.6	0.7
153.7	0.702
153.8	0.702
153.9	0.7
154	0.7
154.1	0.704
154.2	0.704
154.3	0.704
154.4	0.702
154.5	0.702
154.6	0.702
154.7	0.706
154.8	0.704
154.9	0.7
155	0.704
155.1	0.704
155.2	0.706
155.3	0.706
155.4	0.708
155.5	0.71
155.6	0.71
155.7	0.71
155.8	0.71
155.9	0.706
156	0.708
156.1	0.71
156.2	0.71
156.3	0.712
156.4	0.716
156.5	0.716
156.6	0.716
156.7	0.72
156.8	0.722
156.9	0.72
157	0.718
157.1	0.718
157.2	0.718
157.3	0.72
157.4	0.722
157.5	0.724
157.6	0.726
157.7	0.73
157.8	0.732
157.9	0.732
158	0.73
158.1	0.73
158.2	0.73
158.3	0.724
158.4	0.724
158.5	0.718
158.6	0.718
158.7	0.718
158.8	0.714
158.9	0.714
159	0.714
159.1	0.714
159.2	0.716
159.3	0.718
159.4	0.722
159.5	0.722
159.6	0.722
159.7	0.722
159.8	0.722
159.9	0.724
160	0.728
160.1	0.728
160.2	0.724
160.3	0.726
160.4	0.724
160.5	0.724
160.6	0.724
160.7	0.724
160.8	0.724
160.9	0.726
161	0.726
161.1	0.726
161.2	0.726
161.3	0.73
161.4	0.728
161.5	0.728
161.6	0.724
161.7	0.724
161.8	0.724
161.9	0.724
162	0.722
162.1	0.722
162.2	0.722
162.3	0.722
162.4	0.72
162.5	0.718
162.6	0.718
162.7	0.72
162.8	0.72
162.9	0.72
163	0.72
163.1	0.72
163.2	0.72
163.3	0.72
163.4	0.718
163.5	0.718
163.6	0.718
163.7	0.718
163.8	0.72
163.9	0.72
164	0.72
164.1	0.72
164.2	0.72
164.3	0.722
164.4	0.722
164.5	0.722
164.6	0.722
164.7	0.724
164.8	0.722
164.9	0.722
165	0.724
165.1	0.724
165.2	0.726
165.3	0.726
165.4	0.726
165.5	0.726
165.6	0.724
165.7	0.724
165.8	0.724
165.9	0.722
166	0.722
166.1	0.722
166.2	0.722
166.3	0.718
166.4	0.718
166.5	0.718
166.6	0.72
166.7	0.72
166.8	0.72
166.9	0.722
167	0.722
167.1	0.72
167.2	0.722
167.3	0.726
167.4	0.722
167.5	0.722
167.6	0.724
167.7	0.726
167.8	0.724
167.9	0.722
168	0.72
168.1	0.722
168.2	0.724
168.3	0.724
168.4	0.724
168.5	0.724
168.6	0.726
168.7	0.726
168.8	0.726
168.9	0.724
169	0.722
169.1	0.722
169.2	0.722
169.3	0.722
169.4	0.72
169.5	0.722
169.6	0.722
169.7	0.722
169.8	0.724
169.9	0.726
170	0.722
170.1	0.722
170.2	0.722
170.3	0.722
170.4	0.724
170.5	0.724
170.6	0.728
170.7	0.728
170.8	0.726
170.9	0.726
171	0.724
171.1	0.722
171.2	0.72
171.3	0.72
171.4	0.72
171.5	0.718
171.6	0.716
171.7	0.716
171.8	0.718
171.9	0.72
172	0.72
172.1	0.72
172.2	0.722
172.3	0.72
172.4	0.72
172.5	0.718
172.6	0.716
172.7	0.716
172.8	0.718
172.9	0.718
173	0.72
173.1	0.72
173.2	0.72
173.3	0.722
173.4	0.726
173.5	0.728
173.6	0.73
173.7	0.734
173.8	0.732
173.9	0.732
174	0.732
174.1	0.732
174.2	0.732
174.3	0.732
174.4	0.73
174.5	0.73
174.6	0.73
174.7	0.73
174.8	0.734
174.9	0.736
175	0.732
175.1	0.73
175.2	0.734
175.3	0.736
175.4	0.738
175.5	0.738
175.6	0.74
175.7	0.742
175.8	0.742
175.9	0.748
176	0.748
176.1	0.744
176.2	0.744
176.3	0.742
176.4	0.742
176.5	0.74
176.6	0.74
176.7	0.74
176.8	0.742
176.9	0.742
177	0.744
177.1	0.744
177.2	0.742
177.3	0.742
177.4	0.744
177.5	0.744
177.6	0.744
177.7	0.748
177.8	0.746
177.9	0.746
178	0.744
178.1	0.744
178.2	0.74
178.3	0.738
178.4	0.74
178.5	0.742
178.6	0.74
178.7	0.74
178.8	0.738
178.9	0.738
179	0.738
179.1	0.738
179.2	0.736
179.3	0.736
179.4	0.736
179.5	0.736
179.6	0.736
179.7	0.736
179.8	0.736
179.9	0.734
180	0.738
180.1	0.738
180.2	0.738
180.3	0.738
180.4	0.74
180.5	0.738
180.6	0.74
180.7	0.738
180.8	0.736
180.9	0.736
181	0.736
181.1	0.734
181.2	0.736
181.3	0.738
181.4	0.734
181.5	0.734
181.6	0.734
181.7	0.734
181.8	0.732
181.9	0.732
182	0.734
182.1	0.732
182.2	0.734
182.3	0.73
182.4	0.73
182.5	0.73
182.6	0.728
182.7	0.732
182.8	0.73
182.9	0.728
183	0.728
183.1	0.726
183.2	0.726
183.3	0.726
183.4	0.726
183.5	0.726
183.6	0.726
183.7	0.728
183.8	0.726
183.9	0.73
184	0.73
184.1	0.73
184.2	0.73
184.3	0.732
184.4	0.736
184.5	0.732
184.6	0.73
184.7	0.728
184.8	0.726
184.9	0.726
185	0.724
185.1	0.724
185.2	0.724
185.3	0.722
185.4	0.722
185.5	0.722
185.6	0.722
185.7	0.724
185.8	0.716
185.9	0.714
186	0.712
186.1	0.712
186.2	0.712
186.3	0.714
186.4	0.714
186.5	0.714
186.6	0.714
186.7	0.716
186.8	0.718
186.9	0.722
187	0.722
187.1	0.722
187.2	0.722
187.3	0.724
187.4	0.728
187.5	0.728
187.6	0.726
187.7	0.726
187.8	0.726
187.9	0.726
188	0.726
188.1	0.726
188.2	0.724
188.3	0.724
188.4	0.724
188.5	0.724
188.6	0.726
188.7	0.728
188.8	0.728
188.9	0.732
189	0.734
189.1	0.734
189.2	0.732
189.3	0.732
189.4	0.732
189.5	0.732
189.6	0.732
189.7	0.732
189.8	0.732
189.9	0.732
190	0.728
190.1	0.728
190.2	0.728
190.3	0.728
190.4	0.724
190.5	0.724
190.6	0.724
190.7	0.726
190.8	0.726
190.9	0.728
191	0.726
191.1	0.726
191.2	0.724
191.3	0.724
191.4	0.722
191.5	0.722
191.6	0.722
191.7	0.72
191.8	0.722
191.9	0.72
192	0.724
192.1	0.724
192.2	0.722
192.3	0.72
192.4	0.72
192.5	0.722
192.6	0.722
192.7	0.722
192.8	0.724
192.9	0.726
193	0.726
193.1	0.728
193.2	0.726
193.3	0.726
193.4	0.728
193.5	0.726
193.6	0.726
193.7	0.728
193.8	0.726
193.9	0.726
194	0.73
194.1	0.734
194.2	0.732
194.3	0.734
194.4	0.734
194.5	0.734
194.6	0.734
194.7	0.736
194.8	0.736
194.9	0.736
195	0.738
195.1	0.74
195.2	0.742
195.3	0.742
195.4	0.738
195.5	0.738
195.6	0.74
195.7	0.74
195.8	0.74
195.9	0.74
196	0.736
196.1	0.736
196.2	0.736
196.3	0.736
196.4	0.736
196.5	0.738
196.6	0.736
196.7	0.736
196.8	0.736
196.9	0.736
197	0.734
197.1	0.736
197.2	0.736
197.3	0.734
197.4	0.734
197.5	0.732
197.6	0.734
197.7	0.734
197.8	0.734
197.9	0.734
198	0.736
198.1	0.734
198.2	0.736
198.3	0.736
198.4	0.736
198.5	0.734
198.6	0.734
198.7	0.736
198.8	0.736
198.9	0.736
199	0.734
199.1	0.738
199.2	0.74
199.3	0.742
199.4	0.744
199.5	0.746
199.6	0.748
199.7	0.75
199.8	0.752
199.9	0.752
200	0.752
[truncated: 14,000 more rows]
