# Supplementary material for: Bayesian inference of kinetic schemes for ion channels by Kalman filtering
Source: eLife journal article supplement (doi:10.7554/elife.62714), 2022-05-04
Supplement: fig4-data5 [file 1_Sim_N_800_Fluor_MW_4M.xlsx]

## Sheet: Tabelle1
0.1	0
0.2	0
0.3	0
0.4	0
0.5	0
0.6	0
0.7	0
0.8	0
0.9	0
1	0
1.1	0
1.2	0
1.3	0
1.4	0
1.5	0
1.6	0
1.7	0
1.8	0
1.9	0
2	0
2.1	0
2.2	0
2.3	0
2.4	0
2.5	0
2.6	0
2.7	0
2.8	0
2.9	0
3	0
3.1	0
3.2	0
3.3	0
3.4	0
3.5	0
3.6	0
3.7	0
3.8	0
3.9	0
4	0
4.1	0
4.2	0
4.3	0
4.4	0
4.5	0
4.6	0
4.7	0
4.8	0
4.9	0
5	0
5.1	0
5.2	0
5.3	0
5.4	0
5.5	0
5.6	0
5.7	0
5.8	0
5.9	0
6	0
6.1	0
6.2	0
6.3	0
6.4	0
6.5	0
6.6	0
6.7	0
6.8	0
6.9	0
7	0
7.1	0
7.2	0
7.3	0
7.4	0
7.5	0
7.6	0
7.7	0
7.8	0
7.9	0
8	0
8.1	0
8.2	0
8.3	0
8.4	0
8.5	0
8.6	0
8.7	0
8.8	0
8.9	0
9	0
9.1	0
9.2	0
9.3	0
9.4	0
9.5	0
9.6	0
9.7	0
9.8	0
9.9	0
10	0
10.1	0
10.2	0
10.3	0
10.4	0
10.5	0
10.6	0
10.7	0
10.8	0
10.9	0
11	0
11.1	0
11.2	0
11.3	0
11.4	0
11.5	0
11.6	0
11.7	0
11.8	0
11.9	0
12	0
12.1	0
12.2	0
12.3	0
12.4	0
12.5	0
12.6	0
12.7	0
12.8	0
12.9	0
13	0
13.1	0
13.2	0
13.3	0
13.4	0
13.5	0
13.6	0
13.7	0
13.8	0
13.9	0
14	0
14.1	0
14.2	0
14.3	0
14.4	0
14.5	0
14.6	0
14.7	0
14.8	0
14.9	0
15	0
15.1	0
15.2	0
15.3	0
15.4	0
15.5	0
15.6	0
15.7	0
15.8	0
15.9	0
16	0
16.1	0
16.2	0
16.3	0
16.4	0
16.5	0
16.6	0
16.7	0
16.8	0
16.9	0
17	0
17.1	0
17.2	0
17.3	0
17.4	0
17.5	0
17.6	0
17.7	0
17.8	0
17.9	0
18	0
18.1	0
18.2	0
18.3	0
18.4	0
18.5	0
18.6	0
18.7	0
18.8	0
18.9	0
19	0
19.1	0
19.2	0
19.3	0
19.4	0
19.5	0
19.6	0
19.7	0
19.8	0
19.9	0
20	0
20.1	0
20.2	0
20.3	0
20.4	0
20.5	0
20.6	0
20.7	0
20.8	0
20.9	0
21	0
21.1	0
21.2	0
21.3	0
21.4	0
21.5	0
21.6	0
21.7	0
21.8	0
21.9	0
22	0
22.1	0
22.2	0
22.3	0
22.4	0
22.5	0
22.6	0
22.7	0
22.8	0
22.9	0
23	0
23.1	0
23.2	0
23.3	0
23.4	0
23.5	0
23.6	0
23.7	0
23.8	0
23.9	0
24	0
24.1	0
24.2	0
24.3	0
24.4	0
24.5	0
24.6	0
24.7	0
24.8	0
24.9	0
25	0
25.1	0
25.2	0
25.3	0
25.4	0
25.5	0
25.6	0
25.7	0
25.8	0
25.9	0
26	0
26.1	0
26.2	0
26.3	0
26.4	0
26.5	0
26.6	0
26.7	0
26.8	0
26.9	0
27	0
27.1	0
27.2	0
27.3	0
27.4	0
27.5	0
27.6	0
27.7	0
27.8	0
27.9	0
28	0
28.1	0
28.2	0
28.3	0
28.4	0
28.5	0
28.6	0
28.7	0
28.8	0
28.9	0
29	0
29.1	0
29.2	0
29.3	0
29.4	0
29.5	0
29.6	0
29.7	0
29.8	0
29.9	0
30	0
30.1	0
30.2	0
30.3	0
30.4	0
30.5	0
30.6	0
30.7	0
30.8	0
30.9	0
31	0
31.1	0
31.2	0
31.3	0
31.4	0
31.5	0
31.6	0
31.7	0
31.8	0
31.9	0
32	0
32.1	0
32.2	0
32.3	0
32.4	0
32.5	0
32.6	0
32.7	0
32.8	0
32.9	0
33	0
33.1	0
33.2	0
33.3	0
33.4	0
33.5	0
33.6	0
33.7	0
33.8	0
33.9	0
34	0
34.1	0
34.2	0
34.3	0
34.4	0
34.5	0
34.6	0
34.7	0
34.8	0
34.9	0
35	0
35.1	0
35.2	0
35.3	0
35.4	0
35.5	0
35.6	0
35.7	0
35.8	0
35.9	0
36	0
36.1	0
36.2	0
36.3	0
36.4	0
36.5	0
36.6	0
36.7	0
36.8	0
36.9	0
37	0
37.1	0
37.2	0
37.3	0
37.4	0
37.5	0
37.6	0
37.7	0
37.8	0
37.9	0
38	0
38.1	0
38.2	0
38.3	0
38.4	0
38.5	0
38.6	0
38.7	0
38.8	0
38.9	0
39	0
39.1	0
39.2	0
39.3	0
39.4	0
39.5	0
39.6	0
39.7	0
39.8	0
39.9	0
40	0
40.1	0
40.2	0
40.3	0
40.4	0
40.5	0
40.6	0
40.7	0
40.8	0
40.9	0
41	0
41.1	0
41.2	0
41.3	0
41.4	0
41.5	0
41.6	0
41.7	0
41.8	0
41.9	0
42	0
42.1	0
42.2	0
42.3	0
42.4	0
42.5	0
42.6	0
42.7	0
42.8	0
42.9	0
43	0
43.1	0
43.2	0
43.3	0
43.4	0
43.5	0
43.6	0
43.7	0
43.8	0
43.9	0
44	0
44.1	0
44.2	0
44.3	0
44.4	0
44.5	0
44.6	0
44.7	0
44.8	0
44.9	0
45	0
45.1	0
45.2	0
45.3	0
45.4	0
45.5	0
45.6	0
45.7	0
45.8	0
45.9	0
46	0
46.1	0
46.2	0
46.3	0
46.4	0
46.5	0
46.6	0
46.7	0
46.8	0
46.9	0
47	0
47.1	0
47.2	0
47.3	0
47.4	0
47.5	0
47.6	0
47.7	0
47.8	0
47.9	0
48	0
48.1	0
48.2	0
48.3	0
48.4	0
48.5	0
48.6	0
48.7	0
48.8	0
48.9	0
49	0
49.1	0
49.2	0
49.3	0
49.4	0
49.5	0
49.6	0
49.7	0
49.8	0
49.9	0
50	0
50.1	0
50.2	0
50.3	0
50.4	0
50.5	0
50.6	0
50.7	0
50.8	0
50.9	0
51	0
51.1	0
51.2	0
51.3	0
51.4	0
51.5	0
51.6	0
51.7	0
51.8	0
51.9	0
52	0
52.1	0
52.2	0
52.3	0
52.4	0
52.5	0
52.6	0
52.7	0
52.8	0
52.9	0
53	0
53.1	0
53.2	0
53.3	0
53.4	0
53.5	0
53.6	0
53.7	0
53.8	0
53.9	0
54	0
54.1	0
54.2	0
54.3	0
54.4	0
54.5	0
54.6	0
54.7	0
54.8	0
54.9	0
55	0
55.1	0
55.2	0
55.3	0
55.4	0
55.5	0
55.6	0
55.7	0
55.8	0
55.9	0
56	0
56.1	0
56.2	0
56.3	0
56.4	0
56.5	0
56.6	0
56.7	0
56.8	0
56.9	0
57	0
57.1	0
57.2	0
57.3	0
57.4	0
57.5	0
57.6	0
57.7	0
57.8	0
57.9	0
58	0
58.1	0
58.2	0
58.3	0
58.4	0
58.5	0
58.6	0
58.7	0
58.8	0
58.9	0
59	0
59.1	0
59.2	0
59.3	0
59.4	0
59.5	0
59.6	0
59.7	0
59.8	0
59.9	0
60	0
60.1	0
60.2	0
60.3	0
60.4	0
60.5	0
60.6	0
60.7	0
60.8	0
60.9	0
61	0
61.1	0
61.2	0
61.3	0
61.4	0
61.5	0
61.6	0
61.7	0
61.8	0
61.9	0
62	0
62.1	0
62.2	0
62.3	0
62.4	0
62.5	0
62.6	0
62.7	0
62.8	0
62.9	0
63	0
63.1	0
63.2	0
63.3	0
63.4	0
63.5	0
63.6	0
63.7	0
63.8	0
63.9	0
64	0
64.1	0
64.2	0
64.3	0
64.4	0
64.5	0
64.6	0
64.7	0
64.8	0
64.9	0
65	0
65.1	0
65.2	0
65.3	0
65.4	0
65.5	0
65.6	0
65.7	0
65.8	0
65.9	0
66	0
66.1	0
66.2	0
66.3	0
66.4	0
66.5	0
66.6	0
66.7	0
66.8	0
66.9	0
67	0
67.1	0
67.2	0
67.3	0
67.4	0
67.5	0
67.6	0
67.7	0
67.8	0
67.9	0
68	0
68.1	0
68.2	0
68.3	0
68.4	0
68.5	0
68.6	0
68.7	0
68.8	0
68.9	0
69	0
69.1	0
69.2	0
69.3	0
69.4	0
69.5	0
69.6	0
69.7	0
69.8	0
69.9	0
70	0
70.1	0
70.2	0
70.3	0
70.4	0
70.5	0
70.6	0
70.7	0
70.8	0
70.9	0
71	0
71.1	0
71.2	0
71.3	0
71.4	0
71.5	0
71.6	0
71.7	0
71.8	0
71.9	0
72	0
72.1	0
72.2	0
72.3	0
72.4	0
72.5	0
72.6	0
72.7	0
72.8	0
72.9	0
73	0
73.1	0
73.2	0
73.3	0
73.4	0
73.5	0
73.6	0
73.7	0
73.8	0
73.9	0
74	0
74.1	0
74.2	0
74.3	0
74.4	0
74.5	0
74.6	0
74.7	0
74.8	0
74.9	0
75	0
75.1	0
75.2	0
75.3	0
75.4	0
75.5	0
75.6	0
75.7	0
75.8	0
75.9	0
76	0
76.1	0
76.2	0
76.3	0
76.4	0
76.5	0
76.6	0
76.7	0
76.8	0
76.9	0
77	0
77.1	0
77.2	0
77.3	0
77.4	0
77.5	0
77.6	0
77.7	0
77.8	0
77.9	0
78	0
78.1	0
78.2	0
78.3	0
78.4	0
78.5	0
78.6	0
78.7	0
78.8	0
78.9	0
79	0
79.1	0
79.2	0
79.3	0
79.4	0
79.5	0
79.6	0
79.7	0
79.8	0
79.9	0
80	0
80.1	0
80.2	0
80.3	0
80.4	0
80.5	0
80.6	0
80.7	0
80.8	0
80.9	0
81	0
81.1	0
81.2	0
81.3	0
81.4	0
81.5	0
81.6	0
81.7	0
81.8	0
81.9	0
82	0
82.1	0
82.2	0
82.3	0
82.4	0
82.5	0
82.6	0
82.7	0
82.8	0
82.9	0
83	0
83.1	0
83.2	0
83.3	0
83.4	0
83.5	0
83.6	0
83.7	0
83.8	0
83.9	0
84	0
84.1	0
84.2	0
84.3	0
84.4	0
84.5	0
84.6	0
84.7	0
84.8	0
84.9	0
85	0
85.1	0
85.2	0
85.3	0
85.4	0
85.5	0
85.6	0
85.7	0
85.8	0
85.9	0
86	0
86.1	0
86.2	0
86.3	0
86.4	0
86.5	0
86.6	0
86.7	0
86.8	0
86.9	0
87	0
87.1	0
87.2	0
87.3	0
87.4	0
87.5	0
87.6	0
87.7	0
87.8	0
87.9	0
88	0
88.1	0
88.2	0
88.3	0
88.4	0
88.5	0
88.6	0
88.7	0
88.8	0
88.9	0
89	0
89.1	0
89.2	0
89.3	0
89.4	0
89.5	0
89.6	0
89.7	0
89.8	0
89.9	0
90	0
90.1	0
90.2	0
90.3	0
90.4	0
90.5	0
90.6	0
90.7	0
90.8	0
90.9	0
91	0
91.1	0
91.2	0
91.3	0
91.4	0
91.5	0
91.6	0
91.7	0
91.8	0
91.9	0
92	0
92.1	0
92.2	0
92.3	0
92.4	0
92.5	0
92.6	0
92.7	0
92.8	0
92.9	0
93	0
93.1	0
93.2	0
93.3	0
93.4	0
93.5	0
93.6	0
93.7	0
93.8	0
93.9	0
94	0
94.1	0
94.2	0
94.3	0
94.4	0
94.5	0
94.6	0
94.7	0
94.8	0
94.9	0
95	0
95.1	0
95.2	0
95.3	0
95.4	0
95.5	0
95.6	0
95.7	0
95.8	0
95.9	0
96	0
96.1	0
96.2	0
96.3	0
96.4	0
96.5	0
96.6	0
96.7	0
96.8	0
96.9	0
97	0
97.1	0
97.2	0
97.3	0
97.4	0
97.5	0
97.6	0
97.7	0
97.8	0
97.9	0
98	0
98.1	0
98.2	0
98.3	0
98.4	0
98.5	0
98.6	0
98.7	0
98.8	0
98.9	0
99	0
99.1	0
99.2	0
99.3	0
99.4	0
99.5	0
99.6	0
99.7	0
99.8	0
99.9	0
100	0
100.1	0.204375
100.2	0.338125
100.3	0.44
100.4	0.51625
100.5	0.589375
100.6	0.634375
100.7	0.675
100.8	0.70125
100.9	0.7225
101	0.743125
101.1	0.761875
101.2	0.775625
101.3	0.784375
101.4	0.803125
101.5	0.816875
101.6	0.826875
101.7	0.828125
101.8	0.831875
101.9	0.838125
102	0.8375
102.1	0.841875
102.2	0.845625
102.3	0.8525
102.4	0.85
102.5	0.855
102.6	0.855
102.7	0.8525
102.8	0.858125
102.9	0.851875
103	0.855
103.1	0.85875
103.2	0.85875
103.3	0.856875
103.4	0.859375
103.5	0.861875
103.6	0.856875
103.7	0.858125
103.8	0.858125
103.9	0.855625
104	0.855
104.1	0.855625
104.2	0.855625
104.3	0.855
104.4	0.855625
104.5	0.86125
104.6	0.85625
104.7	0.855625
104.8	0.858125
104.9	0.856875
105	0.861875
105.1	0.8575
105.2	0.86
105.3	0.861875
105.4	0.86375
105.5	0.86375
105.6	0.858125
105.7	0.860625
105.8	0.86875
105.9	0.86875
106	0.87375
106.1	0.873125
106.2	0.869375
106.3	0.870625
106.4	0.868125
106.5	0.868125
106.6	0.865
106.7	0.866875
106.8	0.87125
106.9	0.8675
107	0.87
107.1	0.870625
107.2	0.86875
107.3	0.873125
107.4	0.875
107.5	0.88125
107.6	0.884375
107.7	0.881875
107.8	0.883125
107.9	0.88625
108	0.880625
108.1	0.88
108.2	0.88375
108.3	0.890625
108.4	0.885625
108.5	0.8825
108.6	0.881875
108.7	0.880625
108.8	0.875625
108.9	0.876875
109	0.88125
109.1	0.8825
109.2	0.88
109.3	0.883125
109.4	0.884375
109.5	0.885625
109.6	0.885
109.7	0.88875
109.8	0.884375
109.9	0.875625
110	0.879375
110.1	0.880625
110.2	0.885
110.3	0.88125
110.4	0.885625
110.5	0.886875
110.6	0.89125
110.7	0.89
110.8	0.886875
110.9	0.889375
111	0.885625
111.1	0.89
111.2	0.8925
111.3	0.893125
111.4	0.890625
111.5	0.895625
111.6	0.893125
111.7	0.895
111.8	0.891875
111.9	0.8925
112	0.895625
112.1	0.8975
112.2	0.894375
112.3	0.900625
112.4	0.903125
112.5	0.905
112.6	0.906875
112.7	0.901875
112.8	0.90125
112.9	0.901875
113	0.89875
113.1	0.89625
113.2	0.896875
113.3	0.90125
113.4	0.9025
113.5	0.90125
113.6	0.904375
113.7	0.911875
113.8	0.90875
113.9	0.9
114	0.9
114.1	0.898125
114.2	0.906875
114.3	0.90625
114.4	0.91
114.5	0.911875
114.6	0.914375
114.7	0.916875
114.8	0.92
114.9	0.92125
115	0.91875
115.1	0.918125
115.2	0.915625
115.3	0.9125
115.4	0.91
115.5	0.90875
115.6	0.91375
115.7	0.915625
115.8	0.914375
115.9	0.91
116	0.91125
116.1	0.91125
116.2	0.914375
116.3	0.915625
116.4	0.914375
116.5	0.914375
116.6	0.914375
116.7	0.910625
116.8	0.91375
116.9	0.91625
117	0.919375
117.1	0.918125
117.2	0.914375
117.3	0.91375
117.4	0.914375
117.5	0.919375
117.6	0.921875
117.7	0.921875
117.8	0.9225
117.9	0.915625
118	0.9175
118.1	0.913125
118.2	0.908125
118.3	0.90625
118.4	0.899375
118.5	0.90375
118.6	0.905
118.7	0.90625
118.8	0.90375
118.9	0.903125
119	0.906875
119.1	0.905625
119.2	0.9025
119.3	0.905625
119.4	0.915625
119.5	0.9125
119.6	0.909375
119.7	0.91375
119.8	0.915
119.9	0.915625
120	0.91875
120.1	0.9225
120.2	0.920625
120.3	0.920625
120.4	0.92
120.5	0.92375
120.6	0.924375
120.7	0.92375
120.8	0.92625
120.9	0.92625
121	0.92375
121.1	0.920625
121.2	0.9275
121.3	0.93
121.4	0.934375
121.5	0.93375
121.6	0.935
121.7	0.9325
121.8	0.93375
121.9	0.929375
122	0.92
122.1	0.92
122.2	0.918125
122.3	0.91875
122.4	0.91625
122.5	0.9175
122.6	0.9175
122.7	0.91625
122.8	0.918125
122.9	0.91875
123	0.921875
123.1	0.92625
123.2	0.92375
123.3	0.92625
123.4	0.921875
123.5	0.92625
123.6	0.9225
123.7	0.92375
123.8	0.925625
123.9	0.929375
124	0.93375
124.1	0.9325
124.2	0.93125
124.3	0.93125
124.4	0.9275
124.5	0.9225
124.6	0.92625
124.7	0.923125
124.8	0.921875
124.9	0.923125
125	0.92625
125.1	0.925625
125.2	0.925
125.3	0.92875
125.4	0.93125
125.5	0.928125
125.6	0.93625
125.7	0.941875
125.8	0.939375
125.9	0.9375
126	0.9375
126.1	0.940625
126.2	0.935
126.3	0.939375
126.4	0.935
126.5	0.93625
126.6	0.93875
126.7	0.936875
126.8	0.935625
126.9	0.935625
127	0.930625
127.1	0.931875
127.2	0.93375
127.3	0.933125
127.4	0.935
127.5	0.936875
127.6	0.935
127.7	0.9375
127.8	0.9325
127.9	0.93625
128	0.934375
128.1	0.934375
128.2	0.93125
128.3	0.936875
128.4	0.941875
128.5	0.945
128.6	0.945
128.7	0.9425
128.8	0.94125
128.9	0.9375
129	0.939375
129.1	0.935625
129.2	0.93
129.3	0.930625
129.4	0.93
129.5	0.93125
129.6	0.931875
129.7	0.93
129.8	0.9275
129.9	0.928125
130	0.93375
130.1	0.94
130.2	0.938125
130.3	0.94125
130.4	0.938125
130.5	0.93875
130.6	0.938125
130.7	0.93375
130.8	0.934375
130.9	0.94
131	0.94125
131.1	0.936875
131.2	0.934375
131.3	0.93625
131.4	0.938125
131.5	0.941875
131.6	0.93875
131.7	0.9425
131.8	0.941875
131.9	0.944375
132	0.940625
132.1	0.94125
132.2	0.94
132.3	0.935
132.4	0.934375
132.5	0.93625
132.6	0.939375
132.7	0.93375
132.8	0.935625
132.9	0.933125
133	0.93375
133.1	0.936875
133.2	0.934375
133.3	0.934375
133.4	0.9375
133.5	0.94
133.6	0.938125
133.7	0.938125
133.8	0.938125
133.9	0.935625
134	0.934375
134.1	0.936875
134.2	0.935
134.3	0.933125
134.4	0.930625
134.5	0.92875
134.6	0.93125
134.7	0.93375
134.8	0.934375
134.9	0.93875
135	0.936875
135.1	0.93875
135.2	0.9375
135.3	0.939375
135.4	0.943125
135.5	0.9475
135.6	0.945
135.7	0.9475
135.8	0.946875
135.9	0.945
136	0.944375
136.1	0.945625
136.2	0.949375
136.3	0.94625
136.4	0.945625
136.5	0.944375
136.6	0.94125
136.7	0.94375
136.8	0.944375
136.9	0.93875
137	0.93875
137.1	0.940625
137.2	0.941875
137.3	0.945625
137.4	0.944375
137.5	0.948125
137.6	0.94875
137.7	0.94875
137.8	0.9475
137.9	0.945625
138	0.9475
138.1	0.950625
138.2	0.948125
138.3	0.94625
138.4	0.9425
138.5	0.941875
138.6	0.945
138.7	0.944375
138.8	0.945625
138.9	0.945625
139	0.946875
139.1	0.945
139.2	0.94875
139.3	0.946875
139.4	0.94125
139.5	0.940625
139.6	0.94375
139.7	0.9425
139.8	0.944375
139.9	0.945625
140	0.944375
140.1	0.948125
140.2	0.94875
140.3	0.948125
140.4	0.9475
140.5	0.946875
140.6	0.94625
140.7	0.945
140.8	0.945
140.9	0.946875
141	0.946875
141.1	0.95125
141.2	0.953125
141.3	0.949375
141.4	0.9525
141.5	0.95
141.6	0.953125
141.7	0.9525
141.8	0.95625
141.9	0.955625
142	0.953125
142.1	0.95375
142.2	0.95375
142.3	0.955625
142.4	0.951875
142.5	0.9575
142.6	0.95
142.7	0.94875
142.8	0.94875
142.9	0.949375
143	0.954375
143.1	0.955625
143.2	0.95875
143.3	0.963125
143.4	0.96125
143.5	0.963125
143.6	0.960625
143.7	0.958125
143.8	0.958125
143.9	0.953125
144	0.955
144.1	0.949375
144.2	0.948125
144.3	0.94875
144.4	0.949375
144.5	0.9525
144.6	0.953125
144.7	0.9525
144.8	0.953125
144.9	0.95125
145	0.95125
145.1	0.9525
145.2	0.95375
145.3	0.950625
145.4	0.949375
145.5	0.950625
145.6	0.948125
145.7	0.945625
145.8	0.9475
145.9	0.953125
146	0.953125
146.1	0.953125
146.2	0.955625
146.3	0.9575
146.4	0.9625
146.5	0.956875
146.6	0.955
146.7	0.955
146.8	0.95375
146.9	0.953125
147	0.9525
147.1	0.95125
147.2	0.94875
147.3	0.94875
147.4	0.95125
147.5	0.954375
147.6	0.9525
147.7	0.95
147.8	0.944375
147.9	0.943125
148	0.94
148.1	0.940625
148.2	0.9425
148.3	0.94125
148.4	0.9425
148.5	0.9475
148.6	0.94875
148.7	0.9475
148.8	0.94625
148.9	0.94875
149	0.949375
149.1	0.9525
149.2	0.951875
149.3	0.953125
149.4	0.951875
149.5	0.951875
149.6	0.955625
149.7	0.95875
149.8	0.956875
149.9	0.956875
150	0.96125
150.1	0.96
150.2	0.961875
150.3	0.96
150.4	0.9575
150.5	0.9575
150.6	0.9575
150.7	0.958125
150.8	0.959375
150.9	0.961875
151	0.960625
151.1	0.958125
151.2	0.956875
151.3	0.95125
151.4	0.95125
151.5	0.95375
151.6	0.95
151.7	0.950625
151.8	0.9525
151.9	0.954375
152	0.95125
152.1	0.95375
152.2	0.95125
152.3	0.9525
152.4	0.951875
152.5	0.95125
152.6	0.946875
152.7	0.95
152.8	0.95
152.9	0.955
153	0.95875
153.1	0.9525
153.2	0.94875
153.3	0.951875
153.4	0.958125
153.5	0.9575
153.6	0.960625
153.7	0.9625
153.8	0.961875
153.9	0.963125
154	0.9625
154.1	0.960625
154.2	0.9625
154.3	0.9625
154.4	0.961875
154.5	0.960625
154.6	0.959375
154.7	0.961875
154.8	0.955
154.9	0.96
155	0.960625
155.1	0.960625
155.2	0.960625
155.3	0.958125
155.4	0.963125
155.5	0.96375
155.6	0.96
155.7	0.95875
155.8	0.95625
155.9	0.955
156	0.95875
156.1	0.9575
156.2	0.954375
156.3	0.956875
156.4	0.955
156.5	0.951875
156.6	0.95125
156.7	0.950625
156.8	0.95125
156.9	0.95125
157	0.95125
157.1	0.953125
157.2	0.9575
157.3	0.95875
157.4	0.955625
157.5	0.95375
157.6	0.953125
157.7	0.954375
157.8	0.958125
157.9	0.96125
158	0.96125
158.1	0.95875
158.2	0.955625
158.3	0.96
158.4	0.960625
158.5	0.959375
158.6	0.95875
158.7	0.96125
158.8	0.96
158.9	0.95625
159	0.95875
159.1	0.955625
159.2	0.95375
159.3	0.955
159.4	0.959375
159.5	0.958125
159.6	0.9575
159.7	0.959375
159.8	0.956875
159.9	0.955
160	0.949375
160.1	0.951875
160.2	0.951875
160.3	0.955
160.4	0.95375
160.5	0.958125
160.6	0.955
160.7	0.95
160.8	0.955
160.9	0.955625
161	0.956875
161.1	0.955
161.2	0.9575
161.3	0.960625
161.4	0.9625
161.5	0.9575
161.6	0.955625
161.7	0.95875
161.8	0.96
161.9	0.96
162	0.956875
162.1	0.958125
162.2	0.959375
162.3	0.96
162.4	0.95625
162.5	0.95625
162.6	0.961875
162.7	0.960625
162.8	0.961875
162.9	0.9625
163	0.960625
163.1	0.9625
163.2	0.965625
163.3	0.961875
163.4	0.960625
163.5	0.96125
163.6	0.95875
163.7	0.959375
163.8	0.956875
163.9	0.96
164	0.961875
164.1	0.9625
164.2	0.95875
164.3	0.9575
164.4	0.95875
164.5	0.96
164.6	0.96
164.7	0.963125
164.8	0.963125
164.9	0.9625
165	0.95875
165.1	0.956875
165.2	0.9525
165.3	0.953125
165.4	0.953125
165.5	0.95
165.6	0.951875
165.7	0.955625
165.8	0.9575
165.9	0.95875
166	0.955625
166.1	0.954375
166.2	0.954375
166.3	0.9575
166.4	0.95625
166.5	0.954375
166.6	0.96
166.7	0.963125
166.8	0.96125
166.9	0.9625
167	0.959375
167.1	0.961875
167.2	0.959375
167.3	0.963125
167.4	0.958125
167.5	0.955625
167.6	0.95625
167.7	0.955
167.8	0.95625
167.9	0.9525
168	0.95625
168.1	0.9575
168.2	0.961875
168.3	0.9625
168.4	0.96375
168.5	0.960625
168.6	0.9675
168.7	0.963125
168.8	0.961875
168.9	0.96
169	0.96
169.1	0.958125
169.2	0.959375
169.3	0.958125
169.4	0.9575
169.5	0.96
169.6	0.959375
169.7	0.96
169.8	0.956875
169.9	0.95875
170	0.953125
170.1	0.951875
170.2	0.955
170.3	0.9575
170.4	0.95875
170.5	0.960625
170.6	0.959375
170.7	0.96
170.8	0.9625
170.9	0.963125
171	0.963125
171.1	0.961875
171.2	0.963125
171.3	0.96125
171.4	0.9625
171.5	0.9575
171.6	0.959375
171.7	0.959375
171.8	0.960625
171.9	0.9625
172	0.96375
172.1	0.965625
172.2	0.966875
172.3	0.9675
172.4	0.966875
172.5	0.96375
172.6	0.96125
172.7	0.963125
172.8	0.968125
172.9	0.969375
173	0.9675
173.1	0.96625
173.2	0.964375
173.3	0.963125
173.4	0.959375
173.5	0.959375
173.6	0.95875
173.7	0.96
173.8	0.96
173.9	0.959375
174	0.956875
174.1	0.958125
174.2	0.9575
174.3	0.955625
174.4	0.95625
174.5	0.95375
174.6	0.955625
174.7	0.95375
174.8	0.951875
174.9	0.9525
175	0.95125
175.1	0.9525
175.2	0.951875
175.3	0.95125
175.4	0.955
175.5	0.956875
175.6	0.96
175.7	0.959375
175.8	0.96125
175.9	0.961875
176	0.96
176.1	0.958125
176.2	0.955
176.3	0.955625
176.4	0.95625
176.5	0.9575
176.6	0.9575
176.7	0.958125
176.8	0.9625
176.9	0.965
177	0.964375
177.1	0.965
177.2	0.964375
177.3	0.9625
177.4	0.9625
177.5	0.965
177.6	0.965
177.7	0.96375
177.8	0.96375
177.9	0.960625
178	0.9625
178.1	0.961875
178.2	0.961875
178.3	0.96
178.4	0.961875
178.5	0.964375
178.6	0.96375
178.7	0.963125
178.8	0.960625
178.9	0.960625
179	0.954375
179.1	0.954375
179.2	0.955
179.3	0.95375
179.4	0.956875
179.5	0.96
179.6	0.9575
179.7	0.963125
179.8	0.96
179.9	0.961875
180	0.960625
180.1	0.960625
180.2	0.963125
180.3	0.96
180.4	0.959375
180.5	0.95875
180.6	0.956875
180.7	0.956875
180.8	0.960625
180.9	0.9625
181	0.960625
181.1	0.96
181.2	0.95875
181.3	0.955625
181.4	0.955
181.5	0.95625
181.6	0.9575
181.7	0.95625
181.8	0.961875
181.9	0.958125
182	0.9575
182.1	0.956875
182.2	0.96
182.3	0.959375
182.4	0.961875
182.5	0.965625
182.6	0.965625
182.7	0.963125
182.8	0.966875
182.9	0.963125
183	0.963125
183.1	0.96125
183.2	0.95625
183.3	0.95625
183.4	0.954375
183.5	0.958125
183.6	0.959375
183.7	0.9575
183.8	0.961875
183.9	0.958125
184	0.960625
184.1	0.963125
184.2	0.961875
184.3	0.959375
184.4	0.96375
184.5	0.965625
184.6	0.96375
184.7	0.963125
184.8	0.9625
184.9	0.97
185	0.969375
185.1	0.970625
185.2	0.973125
185.3	0.9725
185.4	0.970625
185.5	0.970625
185.6	0.968125
185.7	0.96875
185.8	0.964375
185.9	0.96
186	0.956875
186.1	0.9575
186.2	0.958125
186.3	0.960625
186.4	0.95875
186.5	0.95625
186.6	0.954375
186.7	0.95875
186.8	0.958125
186.9	0.953125
187	0.953125
187.1	0.95125
187.2	0.954375
187.3	0.955
187.4	0.955625
187.5	0.955625
187.6	0.954375
187.7	0.953125
187.8	0.954375
187.9	0.956875
188	0.96
188.1	0.96
188.2	0.959375
188.3	0.956875
188.4	0.955
188.5	0.9525
188.6	0.953125
188.7	0.954375
188.8	0.9575
188.9	0.9575
189	0.960625
189.1	0.96
189.2	0.96125
189.3	0.9625
189.4	0.96125
189.5	0.96125
189.6	0.959375
189.7	0.95875
189.8	0.955625
189.9	0.954375
190	0.95625
190.1	0.96
190.2	0.959375
190.3	0.958125
190.4	0.95625
190.5	0.956875
190.6	0.95625
190.7	0.956875
190.8	0.95375
190.9	0.951875
191	0.9525
191.1	0.9525
191.2	0.95625
191.3	0.959375
191.4	0.961875
191.5	0.96125
191.6	0.961875
191.7	0.96
191.8	0.9625
191.9	0.965
192	0.9675
192.1	0.97125
192.2	0.969375
192.3	0.965625
192.4	0.961875
192.5	0.9625
192.6	0.956875
192.7	0.955
192.8	0.96
192.9	0.963125
193	0.96375
193.1	0.963125
193.2	0.964375
193.3	0.964375
193.4	0.960625
193.5	0.96125
193.6	0.958125
193.7	0.959375
193.8	0.96125
193.9	0.95875
194	0.959375
194.1	0.960625
194.2	0.95875
194.3	0.9575
194.4	0.9625
194.5	0.964375
194.6	0.963125
194.7	0.965
194.8	0.9675
194.9	0.966875
195	0.96625
195.1	0.968125
195.2	0.965
195.3	0.9625
195.4	0.95875
195.5	0.95875
195.6	0.959375
195.7	0.96
195.8	0.95875
195.9	0.96375
196	0.963125
196.1	0.958125
196.2	0.95875
196.3	0.9575
196.4	0.95625
196.5	0.958125
196.6	0.95875
196.7	0.96
196.8	0.966875
196.9	0.963125
197	0.9625
197.1	0.964375
197.2	0.96125
197.3	0.963125
197.4	0.9625
197.5	0.960625
197.6	0.96125
197.7	0.96375
197.8	0.9675
197.9	0.965
198	0.965625
198.1	0.96625
198.2	0.96875
198.3	0.965625
198.4	0.96875
198.5	0.968125
198.6	0.96625
198.7	0.96375
198.8	0.961875
198.9	0.958125
199	0.958125
199.1	0.959375
199.2	0.961875
199.3	0.963125
199.4	0.96125
199.5	0.96125
199.6	0.96
199.7	0.96375
199.8	0.961875
199.9	0.96375
200	0.963125
[truncated: 14,000 more rows]
