# Supplementary material for: Bayesian inference of kinetic schemes for ion channels by Kalman filtering
Source: eLife journal article supplement (doi:10.7554/elife.62714), 2022-05-04
Supplement: fig4-data5 [file 1_Sim_N_800_Strom_MW_4M.xlsx]

## Sheet: Tabelle1
0.1	0
0.2	0
0.3	0
0.4	0
0.5	0
0.6	0
0.7	0
0.8	0
0.9	0
1	0
1.1	0
1.2	0
1.3	0
1.4	0
1.5	0
1.6	0
1.7	0
1.8	0
1.9	0
2	0
2.1	0
2.2	0
2.3	0
2.4	0
2.5	0
2.6	0
2.7	0
2.8	0
2.9	0
3	0
3.1	0
3.2	0
3.3	0
3.4	0
3.5	0
3.6	0
3.7	0
3.8	0
3.9	0
4	0
4.1	0
4.2	0
4.3	0
4.4	0
4.5	0
4.6	0
4.7	0
4.8	0
4.9	0
5	0
5.1	0
5.2	0
5.3	0
5.4	0
5.5	0
5.6	0
5.7	0
5.8	0
5.9	0
6	0
6.1	0
6.2	0
6.3	0
6.4	0
6.5	0
6.6	0
6.7	0
6.8	0
6.9	0
7	0
7.1	0
7.2	0
7.3	0
7.4	0
7.5	0
7.6	0
7.7	0
7.8	0
7.9	0
8	0
8.1	0
8.2	0
8.3	0
8.4	0
8.5	0
8.6	0
8.7	0
8.8	0
8.9	0
9	0
9.1	0
9.2	0
9.3	0
9.4	0
9.5	0
9.6	0
9.7	0
9.8	0
9.9	0
10	0
10.1	0
10.2	0
10.3	0
10.4	0
10.5	0
10.6	0
10.7	0
10.8	0
10.9	0
11	0
11.1	0
11.2	0
11.3	0
11.4	0
11.5	0
11.6	0
11.7	0
11.8	0
11.9	0
12	0
12.1	0
12.2	0
12.3	0
12.4	0
12.5	0
12.6	0
12.7	0
12.8	0
12.9	0
13	0
13.1	0
13.2	0
13.3	0
13.4	0
13.5	0
13.6	0
13.7	0
13.8	0
13.9	0
14	0
14.1	0
14.2	0
14.3	0
14.4	0
14.5	0
14.6	0
14.7	0
14.8	0
14.9	0
15	0
15.1	0
15.2	0
15.3	0
15.4	0
15.5	0
15.6	0
15.7	0
15.8	0
15.9	0
16	0
16.1	0
16.2	0
16.3	0
16.4	0
16.5	0
16.6	0
16.7	0
16.8	0
16.9	0
17	0
17.1	0
17.2	0
17.3	0
17.4	0
17.5	0
17.6	0
17.7	0
17.8	0
17.9	0
18	0
18.1	0
18.2	0
18.3	0
18.4	0
18.5	0
18.6	0
18.7	0
18.8	0
18.9	0
19	0
19.1	0
19.2	0
19.3	0
19.4	0
19.5	0
19.6	0
19.7	0
19.8	0
19.9	0
20	0
20.1	0
20.2	0
20.3	0
20.4	0
20.5	0
20.6	0
20.7	0
20.8	0
20.9	0
21	0
21.1	0
21.2	0
21.3	0
21.4	0
21.5	0
21.6	0
21.7	0
21.8	0
21.9	0
22	0
22.1	0
22.2	0
22.3	0
22.4	0
22.5	0
22.6	0
22.7	0
22.8	0
22.9	0
23	0
23.1	0
23.2	0
23.3	0
23.4	0
23.5	0
23.6	0
23.7	0
23.8	0
23.9	0
24	0
24.1	0
24.2	0
24.3	0
24.4	0
24.5	0
24.6	0
24.7	0
24.8	0
24.9	0
25	0
25.1	0
25.2	0
25.3	0
25.4	0
25.5	0
25.6	0
25.7	0
25.8	0
25.9	0
26	0
26.1	0
26.2	0
26.3	0
26.4	0
26.5	0
26.6	0
26.7	0
26.8	0
26.9	0
27	0
27.1	0
27.2	0
27.3	0
27.4	0
27.5	0
27.6	0
27.7	0
27.8	0
27.9	0
28	0
28.1	0
28.2	0
28.3	0
28.4	0
28.5	0
28.6	0
28.7	0
28.8	0
28.9	0
29	0
29.1	0
29.2	0
29.3	0
29.4	0
29.5	0
29.6	0
29.7	0
29.8	0
29.9	0
30	0
30.1	0
30.2	0
30.3	0
30.4	0
30.5	0
30.6	0
30.7	0
30.8	0
30.9	0
31	0
31.1	0
31.2	0
31.3	0
31.4	0
31.5	0
31.6	0
31.7	0
31.8	0
31.9	0
32	0
32.1	0
32.2	0
32.3	0
32.4	0
32.5	0
32.6	0
32.7	0
32.8	0
32.9	0
33	0
33.1	0
33.2	0
33.3	0
33.4	0
33.5	0
33.6	0
33.7	0
33.8	0
33.9	0
34	0
34.1	0
34.2	0
34.3	0
34.4	0
34.5	0
34.6	0
34.7	0
34.8	0
34.9	0
35	0
35.1	0
35.2	0
35.3	0
35.4	0
35.5	0
35.6	0
35.7	0
35.8	0
35.9	0
36	0
36.1	0
36.2	0
36.3	0
36.4	0
36.5	0
36.6	0
36.7	0
36.8	0
36.9	0
37	0
37.1	0
37.2	0
37.3	0
37.4	0
37.5	0
37.6	0
37.7	0
37.8	0
37.9	0
38	0
38.1	0
38.2	0
38.3	0
38.4	0
38.5	0
38.6	0
38.7	0
38.8	0
38.9	0
39	0
39.1	0
39.2	0
39.3	0
39.4	0
39.5	0
39.6	0
39.7	0
39.8	0
39.9	0
40	0
40.1	0
40.2	0
40.3	0
40.4	0
40.5	0
40.6	0
40.7	0
40.8	0
40.9	0
41	0
41.1	0
41.2	0
41.3	0
41.4	0
41.5	0
41.6	0
41.7	0
41.8	0
41.9	0
42	0
42.1	0
42.2	0
42.3	0
42.4	0
42.5	0
42.6	0
42.7	0
42.8	0
42.9	0
43	0
43.1	0
43.2	0
43.3	0
43.4	0
43.5	0
43.6	0
43.7	0
43.8	0
43.9	0
44	0
44.1	0
44.2	0
44.3	0
44.4	0
44.5	0
44.6	0
44.7	0
44.8	0
44.9	0
45	0
45.1	0
45.2	0
45.3	0
45.4	0
45.5	0
45.6	0
45.7	0
45.8	0
45.9	0
46	0
46.1	0
46.2	0
46.3	0
46.4	0
46.5	0
46.6	0
46.7	0
46.8	0
46.9	0
47	0
47.1	0
47.2	0
47.3	0
47.4	0
47.5	0
47.6	0
47.7	0
47.8	0
47.9	0
48	0
48.1	0
48.2	0
48.3	0
48.4	0
48.5	0
48.6	0
48.7	0
48.8	0
48.9	0
49	0
49.1	0
49.2	0
49.3	0
49.4	0
49.5	0
49.6	0
49.7	0
49.8	0
49.9	0
50	0
50.1	0
50.2	0
50.3	0
50.4	0
50.5	0
50.6	0
50.7	0
50.8	0
50.9	0
51	0
51.1	0
51.2	0
51.3	0
51.4	0
51.5	0
51.6	0
51.7	0
51.8	0
51.9	0
52	0
52.1	0
52.2	0
52.3	0
52.4	0
52.5	0
52.6	0
52.7	0
52.8	0
52.9	0
53	0
53.1	0
53.2	0
53.3	0
53.4	0
53.5	0
53.6	0
53.7	0
53.8	0
53.9	0
54	0
54.1	0
54.2	0
54.3	0
54.4	0
54.5	0
54.6	0
54.7	0
54.8	0
54.9	0
55	0
55.1	0
55.2	0
55.3	0
55.4	0
55.5	0
55.6	0
55.7	0
55.8	0
55.9	0
56	0
56.1	0
56.2	0
56.3	0
56.4	0
56.5	0
56.6	0
56.7	0
56.8	0
56.9	0
57	0
57.1	0
57.2	0
57.3	0
57.4	0
57.5	0
57.6	0
57.7	0
57.8	0
57.9	0
58	0
58.1	0
58.2	0
58.3	0
58.4	0
58.5	0
58.6	0
58.7	0
58.8	0
58.9	0
59	0
59.1	0
59.2	0
59.3	0
59.4	0
59.5	0
59.6	0
59.7	0
59.8	0
59.9	0
60	0
60.1	0
60.2	0
60.3	0
60.4	0
60.5	0
60.6	0
60.7	0
60.8	0
60.9	0
61	0
61.1	0
61.2	0
61.3	0
61.4	0
61.5	0
61.6	0
61.7	0
61.8	0
61.9	0
62	0
62.1	0
62.2	0
62.3	0
62.4	0
62.5	0
62.6	0
62.7	0
62.8	0
62.9	0
63	0
63.1	0
63.2	0
63.3	0
63.4	0
63.5	0
63.6	0
63.7	0
63.8	0
63.9	0
64	0
64.1	0
64.2	0
64.3	0
64.4	0
64.5	0
64.6	0
64.7	0
64.8	0
64.9	0
65	0
65.1	0
65.2	0
65.3	0
65.4	0
65.5	0
65.6	0
65.7	0
65.8	0
65.9	0
66	0
66.1	0
66.2	0
66.3	0
66.4	0
66.5	0
66.6	0
66.7	0
66.8	0
66.9	0
67	0
67.1	0
67.2	0
67.3	0
67.4	0
67.5	0
67.6	0
67.7	0
67.8	0
67.9	0
68	0
68.1	0
68.2	0
68.3	0
68.4	0
68.5	0
68.6	0
68.7	0
68.8	0
68.9	0
69	0
69.1	0
69.2	0
69.3	0
69.4	0
69.5	0
69.6	0
69.7	0
69.8	0
69.9	0
70	0
70.1	0
70.2	0
70.3	0
70.4	0
70.5	0
70.6	0
70.7	0
70.8	0
70.9	0
71	0
71.1	0
71.2	0
71.3	0
71.4	0
71.5	0
71.6	0
71.7	0
71.8	0
71.9	0
72	0
72.1	0
72.2	0
72.3	0
72.4	0
72.5	0
72.6	0
72.7	0
72.8	0
72.9	0
73	0
73.1	0
73.2	0
73.3	0
73.4	0
73.5	0
73.6	0
73.7	0
73.8	0
73.9	0
74	0
74.1	0
74.2	0
74.3	0
74.4	0
74.5	0
74.6	0
74.7	0
74.8	0
74.9	0
75	0
75.1	0
75.2	0
75.3	0
75.4	0
75.5	0
75.6	0
75.7	0
75.8	0
75.9	0
76	0
76.1	0
76.2	0
76.3	0
76.4	0
76.5	0
76.6	0
76.7	0
76.8	0
76.9	0
77	0
77.1	0
77.2	0
77.3	0
77.4	0
77.5	0
77.6	0
77.7	0
77.8	0
77.9	0
78	0
78.1	0
78.2	0
78.3	0
78.4	0
78.5	0
78.6	0
78.7	0
78.8	0
78.9	0
79	0
79.1	0
79.2	0
79.3	0
79.4	0
79.5	0
79.6	0
79.7	0
79.8	0
79.9	0
80	0
80.1	0
80.2	0
80.3	0
80.4	0
80.5	0
80.6	0
80.7	0
80.8	0
80.9	0
81	0
81.1	0
81.2	0
81.3	0
81.4	0
81.5	0
81.6	0
81.7	0
81.8	0
81.9	0
82	0
82.1	0
82.2	0
82.3	0
82.4	0
82.5	0
82.6	0
82.7	0
82.8	0
82.9	0
83	0
83.1	0
83.2	0
83.3	0
83.4	0
83.5	0
83.6	0
83.7	0
83.8	0
83.9	0
84	0
84.1	0
84.2	0
84.3	0
84.4	0
84.5	0
84.6	0
84.7	0
84.8	0
84.9	0
85	0
85.1	0
85.2	0
85.3	0
85.4	0
85.5	0
85.6	0
85.7	0
85.8	0
85.9	0
86	0
86.1	0
86.2	0
86.3	0
86.4	0
86.5	0
86.6	0
86.7	0
86.8	0
86.9	0
87	0
87.1	0
87.2	0
87.3	0
87.4	0
87.5	0
87.6	0
87.7	0
87.8	0
87.9	0
88	0
88.1	0
88.2	0
88.3	0
88.4	0
88.5	0
88.6	0
88.7	0
88.8	0
88.9	0
89	0
89.1	0
89.2	0
89.3	0
89.4	0
89.5	0
89.6	0
89.7	0
89.8	0
89.9	0
90	0
90.1	0
90.2	0
90.3	0
90.4	0
90.5	0
90.6	0
90.7	0
90.8	0
90.9	0
91	0
91.1	0
91.2	0
91.3	0
91.4	0
91.5	0
91.6	0
91.7	0
91.8	0
91.9	0
92	0
92.1	0
92.2	0
92.3	0
92.4	0
92.5	0
92.6	0
92.7	0
92.8	0
92.9	0
93	0
93.1	0
93.2	0
93.3	0
93.4	0
93.5	0
93.6	0
93.7	0
93.8	0
93.9	0
94	0
94.1	0
94.2	0
94.3	0
94.4	0
94.5	0
94.6	0
94.7	0
94.8	0
94.9	0
95	0
95.1	0
95.2	0
95.3	0
95.4	0
95.5	0
95.6	0
95.7	0
95.8	0
95.9	0
96	0
96.1	0
96.2	0
96.3	0
96.4	0
96.5	0
96.6	0
96.7	0
96.8	0
96.9	0
97	0
97.1	0
97.2	0
97.3	0
97.4	0
97.5	0
97.6	0
97.7	0
97.8	0
97.9	0
98	0
98.1	0
98.2	0
98.3	0
98.4	0
98.5	0
98.6	0
98.7	0
98.8	0
98.9	0
99	0
99.1	0
99.2	0
99.3	0
99.4	0
99.5	0
99.6	0
99.7	0
99.8	0
99.9	0
100	0
100.1	0
100.2	0
100.3	0.00125
100.4	0.0025
100.5	0.00625
100.6	0.00875
100.7	0.00875
100.8	0.00875
100.9	0.01125
101	0.01375
101.1	0.01875
101.2	0.0225
101.3	0.02625
101.4	0.0275
101.5	0.02875
101.6	0.03
101.7	0.03
101.8	0.03
101.9	0.0325
102	0.03375
102.1	0.03875
102.2	0.04375
102.3	0.05125
102.4	0.05625
102.5	0.0575
102.6	0.06125
102.7	0.06125
102.8	0.0625
102.9	0.0675
103	0.0675
103.1	0.07125
103.2	0.0725
103.3	0.08125
103.4	0.085
103.5	0.08625
103.6	0.09
103.7	0.09375
103.8	0.09875
103.9	0.1
104	0.105
104.1	0.1075
104.2	0.10875
104.3	0.11125
104.4	0.115
104.5	0.12
104.6	0.1225
104.7	0.125
104.8	0.1275
104.9	0.13125
105	0.135
105.1	0.14125
105.2	0.14375
105.3	0.1475
105.4	0.15
105.5	0.1525
105.6	0.15375
105.7	0.15375
105.8	0.155
105.9	0.15875
106	0.16125
106.1	0.16625
106.2	0.17
106.3	0.1725
106.4	0.17625
106.5	0.1775
106.6	0.1775
106.7	0.18
106.8	0.18375
106.9	0.1875
107	0.19125
107.1	0.19125
107.2	0.195
107.3	0.19625
107.4	0.20125
107.5	0.205
107.6	0.2075
107.7	0.21
107.8	0.215
107.9	0.2175
108	0.2225
108.1	0.2225
108.2	0.22375
108.3	0.22625
108.4	0.22625
108.5	0.22875
108.6	0.23
108.7	0.23125
108.8	0.23625
108.9	0.2375
109	0.24
109.1	0.24
109.2	0.24
109.3	0.24125
109.4	0.245
109.5	0.2475
109.6	0.25
109.7	0.2525
109.8	0.25375
109.9	0.26
110	0.2625
110.1	0.26625
110.2	0.27
110.3	0.275
110.4	0.2825
110.5	0.285
110.6	0.28875
110.7	0.29625
110.8	0.2975
110.9	0.3025
111	0.30125
111.1	0.30375
111.2	0.30375
111.3	0.305
111.4	0.30875
111.5	0.31125
111.6	0.31125
111.7	0.31625
111.8	0.31875
111.9	0.32125
112	0.32375
112.1	0.32625
112.2	0.3275
112.3	0.32875
112.4	0.32875
112.5	0.33
112.6	0.33
112.7	0.335
112.8	0.33625
112.9	0.34
113	0.34
113.1	0.34125
113.2	0.34375
113.3	0.34625
113.4	0.34625
113.5	0.3475
113.6	0.34875
113.7	0.35125
113.8	0.36
113.9	0.3625
114	0.365
114.1	0.36625
114.2	0.36875
114.3	0.36875
114.4	0.37
114.5	0.37125
114.6	0.375
114.7	0.3775
114.8	0.38
114.9	0.38125
115	0.38625
115.1	0.38875
115.2	0.39
115.3	0.3925
115.4	0.3925
115.5	0.39125
115.6	0.3975
115.7	0.39875
115.8	0.39875
115.9	0.40375
116	0.40375
116.1	0.40625
116.2	0.4075
116.3	0.40875
116.4	0.40875
116.5	0.40875
116.6	0.40875
116.7	0.4075
116.8	0.41125
116.9	0.415
117	0.41625
117.1	0.41625
117.2	0.41625
117.3	0.4175
117.4	0.42
117.5	0.42
117.6	0.42125
117.7	0.42125
117.8	0.41875
117.9	0.4175
118	0.4225
118.1	0.42625
118.2	0.42875
118.3	0.43125
118.4	0.43125
118.5	0.43375
118.6	0.435
118.7	0.435
118.8	0.435
118.9	0.43875
119	0.44
119.1	0.44125
119.2	0.44125
119.3	0.44
119.4	0.4425
119.5	0.4425
119.6	0.4475
119.7	0.445
119.8	0.4475
119.9	0.45125
120	0.45375
120.1	0.45625
120.2	0.46
120.3	0.46125
120.4	0.46125
120.5	0.46375
120.6	0.46375
120.7	0.46875
120.8	0.47
120.9	0.4725
121	0.47625
121.1	0.47625
121.2	0.4775
121.3	0.48
121.4	0.48
121.5	0.47875
121.6	0.47875
121.7	0.47625
121.8	0.47875
121.9	0.47875
122	0.47875
122.1	0.4825
122.2	0.48375
122.3	0.48875
122.4	0.485
122.5	0.4875
122.6	0.49125
122.7	0.4925
122.8	0.495
122.9	0.495
123	0.4975
123.1	0.5
123.2	0.5025
123.3	0.50375
123.4	0.5025
123.5	0.505
123.6	0.505
123.7	0.50625
123.8	0.50875
123.9	0.50875
124	0.51
124.1	0.515
124.2	0.515
124.3	0.52
124.4	0.52125
124.5	0.5225
124.6	0.52375
124.7	0.525
124.8	0.525
124.9	0.52375
125	0.525
125.1	0.53
125.2	0.5375
125.3	0.535
125.4	0.535
125.5	0.53625
125.6	0.5375
125.7	0.5375
125.8	0.53625
125.9	0.54
126	0.53875
126.1	0.54
126.2	0.54
126.3	0.5425
126.4	0.5425
126.5	0.54375
126.6	0.5425
126.7	0.5425
126.8	0.54
126.9	0.54
127	0.5425
127.1	0.54125
127.2	0.5425
127.3	0.54375
127.4	0.545
127.5	0.54375
127.6	0.545
127.7	0.54875
127.8	0.54875
127.9	0.54875
128	0.55
128.1	0.55125
128.2	0.5525
128.3	0.5525
128.4	0.555
128.5	0.5575
128.6	0.5575
128.7	0.5575
128.8	0.55625
128.9	0.5575
129	0.56
129.1	0.56375
129.2	0.56625
129.3	0.56625
129.4	0.56625
129.5	0.565
129.6	0.56375
129.7	0.57125
129.8	0.5725
129.9	0.57625
130	0.5775
130.1	0.57875
130.2	0.58125
130.3	0.58
130.4	0.58
130.5	0.5825
130.6	0.5825
130.7	0.58375
130.8	0.585
130.9	0.585
131	0.585
131.1	0.58625
131.2	0.58875
131.3	0.59
131.4	0.59375
131.5	0.59375
131.6	0.595
131.7	0.5975
131.8	0.5975
131.9	0.59625
132	0.5975
132.1	0.5975
132.2	0.59625
132.3	0.5975
132.4	0.59875
132.5	0.60125
132.6	0.6
132.7	0.60125
132.8	0.60125
132.9	0.6
133	0.6
133.1	0.6025
133.2	0.6025
133.3	0.60125
133.4	0.605
133.5	0.605
133.6	0.6075
133.7	0.6075
133.8	0.60625
133.9	0.60625
134	0.605
134.1	0.60625
134.2	0.60875
134.3	0.60875
134.4	0.60875
134.5	0.60875
134.6	0.61
134.7	0.6125
134.8	0.615
134.9	0.615
135	0.61625
135.1	0.6175
135.2	0.62
135.3	0.62
135.4	0.61875
135.5	0.61875
135.6	0.62375
135.7	0.6225
135.8	0.6225
135.9	0.62375
136	0.6275
136.1	0.62375
136.2	0.62375
136.3	0.62375
136.4	0.6225
136.5	0.625
136.6	0.62375
136.7	0.625
136.8	0.625
136.9	0.6275
137	0.62875
137.1	0.62875
137.2	0.62875
137.3	0.62875
137.4	0.63125
137.5	0.63125
137.6	0.63125
137.7	0.63375
137.8	0.63375
137.9	0.63375
138	0.63375
138.1	0.63375
138.2	0.63625
138.3	0.6375
138.4	0.64
138.5	0.64
138.6	0.64
138.7	0.645
138.8	0.645
138.9	0.645
139	0.64125
139.1	0.645
139.2	0.64375
139.3	0.64375
139.4	0.64375
139.5	0.64375
139.6	0.64375
139.7	0.6425
139.8	0.645
139.9	0.645
140	0.6475
140.1	0.64875
140.2	0.64625
140.3	0.64625
140.4	0.64625
140.5	0.65
140.6	0.6525
140.7	0.655
140.8	0.65625
140.9	0.655
141	0.6575
141.1	0.66
141.2	0.66
141.3	0.65875
141.4	0.65875
141.5	0.66
141.6	0.6625
141.7	0.66625
141.8	0.6675
141.9	0.66875
142	0.66875
142.1	0.67
142.2	0.66875
142.3	0.66875
142.4	0.67
142.5	0.66875
142.6	0.6675
142.7	0.665
142.8	0.66375
142.9	0.66375
143	0.665
143.1	0.66625
143.2	0.66875
143.3	0.6725
143.4	0.67125
143.5	0.67125
143.6	0.6725
143.7	0.6725
143.8	0.6725
143.9	0.675
144	0.67625
144.1	0.6775
144.2	0.67875
144.3	0.67875
144.4	0.67875
144.5	0.67875
144.6	0.6775
144.7	0.675
144.8	0.675
144.9	0.67375
145	0.675
145.1	0.67375
145.2	0.67375
145.3	0.67375
145.4	0.67375
145.5	0.67875
145.6	0.67875
145.7	0.67875
145.8	0.67875
145.9	0.67875
146	0.6775
146.1	0.6775
146.2	0.67625
146.3	0.67625
146.4	0.6775
146.5	0.67875
146.6	0.68
146.7	0.68125
146.8	0.67875
146.9	0.67875
147	0.6775
147.1	0.6775
147.2	0.68125
147.3	0.6825
147.4	0.6825
147.5	0.6825
147.6	0.68375
147.7	0.68125
147.8	0.68375
147.9	0.68375
148	0.6825
148.1	0.68125
148.2	0.68125
148.3	0.68375
148.4	0.685
148.5	0.685
148.6	0.68625
148.7	0.68625
148.8	0.68625
148.9	0.6875
149	0.68875
149.1	0.69
149.2	0.6925
149.3	0.69375
149.4	0.69375
149.5	0.695
149.6	0.69625
149.7	0.69625
149.8	0.69625
149.9	0.6975
150	0.6975
150.1	0.69875
150.2	0.7
150.3	0.69875
150.4	0.69875
150.5	0.7
150.6	0.7
150.7	0.70125
150.8	0.70125
150.9	0.7025
151	0.70125
151.1	0.7
151.2	0.69875
151.3	0.69875
151.4	0.6975
151.5	0.70125
151.6	0.70625
151.7	0.7075
151.8	0.7075
151.9	0.70625
152	0.70625
152.1	0.70625
152.2	0.70625
152.3	0.70875
152.4	0.7075
152.5	0.705
152.6	0.70625
152.7	0.70625
152.8	0.70625
152.9	0.7075
153	0.7075
153.1	0.70875
153.2	0.71
153.3	0.71
153.4	0.7125
153.5	0.7125
153.6	0.71375
153.7	0.71625
153.8	0.71625
153.9	0.7175
154	0.71625
154.1	0.715
154.2	0.71625
154.3	0.715
154.4	0.71375
154.5	0.7125
154.6	0.7125
154.7	0.7125
154.8	0.71375
154.9	0.715
155	0.71625
155.1	0.71625
155.2	0.71375
155.3	0.71375
155.4	0.71375
155.5	0.71625
155.6	0.71375
155.7	0.7175
155.8	0.71625
155.9	0.71375
156	0.71375
156.1	0.715
156.2	0.71625
156.3	0.7175
156.4	0.7175
156.5	0.71625
156.6	0.71625
156.7	0.71625
156.8	0.71625
156.9	0.7175
157	0.71875
157.1	0.71875
157.2	0.71875
157.3	0.72125
157.4	0.72125
157.5	0.72375
157.6	0.72375
157.7	0.725
157.8	0.725
157.9	0.72625
158	0.72625
158.1	0.7275
158.2	0.72625
158.3	0.72625
158.4	0.725
158.5	0.725
158.6	0.72625
158.7	0.725
158.8	0.72375
158.9	0.725
159	0.725
159.1	0.725
159.2	0.72625
159.3	0.725
159.4	0.72375
159.5	0.725
159.6	0.725
159.7	0.72375
159.8	0.72375
159.9	0.72375
160	0.72375
160.1	0.72125
160.2	0.72
160.3	0.72125
160.4	0.72
160.5	0.71875
160.6	0.71875
160.7	0.71875
160.8	0.72
160.9	0.72
161	0.72125
161.1	0.72375
161.2	0.72375
161.3	0.7225
161.4	0.7225
161.5	0.71875
161.6	0.71875
161.7	0.71875
161.8	0.7175
161.9	0.7175
162	0.72
162.1	0.72125
162.2	0.7225
162.3	0.7225
162.4	0.72
162.5	0.72125
162.6	0.7275
162.7	0.7275
162.8	0.72875
162.9	0.72875
163	0.72625
163.1	0.72625
163.2	0.725
163.3	0.72625
163.4	0.725
163.5	0.72375
163.6	0.725
163.7	0.72375
163.8	0.72375
163.9	0.72375
164	0.725
164.1	0.7225
164.2	0.7225
164.3	0.7225
164.4	0.72125
164.5	0.72
164.6	0.72
164.7	0.72
164.8	0.72
164.9	0.72
165	0.72125
165.1	0.72125
165.2	0.72375
165.3	0.72375
165.4	0.72375
165.5	0.725
165.6	0.72375
165.7	0.72375
165.8	0.72375
165.9	0.72375
166	0.72375
166.1	0.725
166.2	0.72375
166.3	0.725
166.4	0.725
166.5	0.7225
166.6	0.72375
166.7	0.725
166.8	0.725
166.9	0.725
167	0.725
167.1	0.725
167.2	0.725
167.3	0.725
167.4	0.725
167.5	0.72625
167.6	0.725
167.7	0.72625
167.8	0.72625
167.9	0.72625
168	0.72625
168.1	0.72625
168.2	0.72625
168.3	0.725
168.4	0.725
168.5	0.725
168.6	0.725
168.7	0.725
168.8	0.72625
168.9	0.7275
169	0.7275
169.1	0.72875
169.2	0.7275
169.3	0.72875
169.4	0.73
169.5	0.73
169.6	0.73125
169.7	0.73125
169.8	0.7325
169.9	0.73625
170	0.73625
170.1	0.7375
170.2	0.73875
170.3	0.73875
170.4	0.73875
170.5	0.74
170.6	0.7425
170.7	0.74
170.8	0.73875
170.9	0.74
171	0.74125
171.1	0.74125
171.2	0.74125
171.3	0.74125
171.4	0.74125
171.5	0.745
171.6	0.74375
171.7	0.74375
171.8	0.745
171.9	0.745
172	0.745
172.1	0.745
172.2	0.745
172.3	0.745
172.4	0.74625
172.5	0.74375
172.6	0.74375
172.7	0.7425
172.8	0.74375
172.9	0.74375
173	0.7425
173.1	0.74375
173.2	0.7425
173.3	0.74625
173.4	0.74625
173.5	0.7475
173.6	0.7475
173.7	0.7475
173.8	0.7475
173.9	0.75
174	0.74875
174.1	0.74625
174.2	0.745
174.3	0.745
174.4	0.7475
174.5	0.7475
174.6	0.7475
174.7	0.74875
174.8	0.75
174.9	0.74875
175	0.7475
175.1	0.74875
175.2	0.74875
175.3	0.75
175.4	0.75125
175.5	0.75
175.6	0.7525
175.7	0.7525
175.8	0.75375
175.9	0.755
176	0.755
176.1	0.755
176.2	0.75625
176.3	0.75875
176.4	0.76125
176.5	0.76125
176.6	0.7625
176.7	0.7625
176.8	0.76375
176.9	0.7625
177	0.7625
177.1	0.76
177.2	0.75875
177.3	0.76
177.4	0.7625
177.5	0.7625
177.6	0.76125
177.7	0.7625
177.8	0.76125
177.9	0.75625
178	0.7525
178.1	0.75
178.2	0.74875
178.3	0.7475
178.4	0.7475
178.5	0.74875
178.6	0.74875
178.7	0.74875
178.8	0.74875
178.9	0.74875
179	0.74875
179.1	0.75
179.2	0.75
179.3	0.75
179.4	0.74875
179.5	0.74875
179.6	0.75
179.7	0.75
179.8	0.74875
179.9	0.75
180	0.75
180.1	0.75
180.2	0.74625
180.3	0.7475
180.4	0.7475
180.5	0.7475
180.6	0.74625
180.7	0.74625
180.8	0.74625
180.9	0.74625
181	0.74625
181.1	0.7425
181.2	0.7475
181.3	0.7475
181.4	0.74625
181.5	0.7475
181.6	0.74625
181.7	0.7475
181.8	0.74625
181.9	0.74625
182	0.74625
182.1	0.74625
182.2	0.74375
182.3	0.74375
182.4	0.74375
182.5	0.745
182.6	0.74625
182.7	0.74375
182.8	0.74375
182.9	0.745
183	0.74625
183.1	0.745
183.2	0.745
183.3	0.74375
183.4	0.745
183.5	0.74375
183.6	0.745
183.7	0.7425
183.8	0.74125
183.9	0.74
184	0.74125
184.1	0.74375
184.2	0.745
184.3	0.745
184.4	0.74625
184.5	0.74875
184.6	0.74875
184.7	0.74625
184.8	0.74875
184.9	0.74625
185	0.74625
185.1	0.745
185.2	0.745
185.3	0.745
185.4	0.745
185.5	0.745
185.6	0.74375
185.7	0.74375
185.8	0.7425
185.9	0.7425
186	0.745
186.1	0.7475
186.2	0.7475
186.3	0.7475
186.4	0.7475
186.5	0.7475
186.6	0.74625
186.7	0.7475
186.8	0.7475
186.9	0.74625
187	0.7475
187.1	0.74875
187.2	0.74875
187.3	0.74875
187.4	0.74875
187.5	0.745
187.6	0.74375
187.7	0.74375
187.8	0.745
187.9	0.74375
188	0.74375
188.1	0.74375
188.2	0.745
188.3	0.74375
188.4	0.745
188.5	0.74625
188.6	0.74875
188.7	0.75
188.8	0.7475
188.9	0.75
189	0.75125
189.1	0.75
189.2	0.75
189.3	0.75
189.4	0.75
189.5	0.75
189.6	0.74875
189.7	0.74875
189.8	0.7475
189.9	0.74625
190	0.74625
190.1	0.74625
190.2	0.7475
190.3	0.7475
190.4	0.74875
190.5	0.74875
190.6	0.75
190.7	0.75375
190.8	0.75125
190.9	0.75
191	0.74625
191.1	0.74875
191.2	0.7475
191.3	0.74875
191.4	0.74875
191.5	0.74875
191.6	0.74875
191.7	0.74875
191.8	0.75
191.9	0.75125
192	0.75
192.1	0.74875
192.2	0.75125
192.3	0.75
192.4	0.75
192.5	0.74875
192.6	0.7475
192.7	0.74875
192.8	0.75
192.9	0.75
193	0.75
193.1	0.74875
193.2	0.74875
193.3	0.74875
193.4	0.75
193.5	0.75
193.6	0.75
193.7	0.75125
193.8	0.75125
193.9	0.75375
194	0.75625
194.1	0.755
194.2	0.75625
194.3	0.755
194.4	0.75625
194.5	0.75625
194.6	0.75625
194.7	0.75625
194.8	0.75375
194.9	0.755
195	0.75375
195.1	0.75625
195.2	0.755
195.3	0.75375
195.4	0.75375
195.5	0.7525
195.6	0.7525
195.7	0.75375
195.8	0.755
195.9	0.75375
196	0.75375
196.1	0.755
196.2	0.75625
196.3	0.75625
196.4	0.7575
196.5	0.7575
196.6	0.75625
196.7	0.755
196.8	0.75375
196.9	0.75375
197	0.755
197.1	0.755
197.2	0.75375
197.3	0.755
197.4	0.75625
197.5	0.7575
197.6	0.75875
197.7	0.76
197.8	0.76125
197.9	0.7625
198	0.76125
198.1	0.76125
198.2	0.76
198.3	0.76125
198.4	0.76
198.5	0.75875
198.6	0.75875
198.7	0.75625
198.8	0.7575
198.9	0.75875
199	0.75875
199.1	0.7625
199.2	0.76125
199.3	0.76375
199.4	0.765
199.5	0.76375
199.6	0.76375
199.7	0.76125
199.8	0.75875
199.9	0.75875
200	0.75875
[truncated: 14,000 more rows]
