# Supplementary material for: Bayesian inference of kinetic schemes for ion channels by Kalman filtering
Source: eLife journal article supplement (doi:10.7554/elife.62714), 2022-05-04
Supplement: fig4-data5 [file 1_Sim_N_1500_Fluor_MW_4M.xlsx]

## Sheet: Tabelle1
0.1	0
0.2	0
0.3	0
0.4	0
0.5	0
0.6	0
0.7	0
0.8	0
0.9	0
1	0
1.1	0
1.2	0
1.3	0
1.4	0
1.5	0
1.6	0
1.7	0
1.8	0
1.9	0
2	0
2.1	0
2.2	0
2.3	0
2.4	0
2.5	0
2.6	0
2.7	0
2.8	0
2.9	0
3	0
3.1	0
3.2	0
3.3	0
3.4	0
3.5	0
3.6	0
3.7	0
3.8	0
3.9	0
4	0
4.1	0
4.2	0
4.3	0
4.4	0
4.5	0
4.6	0
4.7	0
4.8	0
4.9	0
5	0
5.1	0
5.2	0
5.3	0
5.4	0
5.5	0
5.6	0
5.7	0
5.8	0
5.9	0
6	0
6.1	0
6.2	0
6.3	0
6.4	0
6.5	0
6.6	0
6.7	0
6.8	0
6.9	0
7	0
7.1	0
7.2	0
7.3	0
7.4	0
7.5	0
7.6	0
7.7	0
7.8	0
7.9	0
8	0
8.1	0
8.2	0
8.3	0
8.4	0
8.5	0
8.6	0
8.7	0
8.8	0
8.9	0
9	0
9.1	0
9.2	0
9.3	0
9.4	0
9.5	0
9.6	0
9.7	0
9.8	0
9.9	0
10	0
10.1	0
10.2	0
10.3	0
10.4	0
10.5	0
10.6	0
10.7	0
10.8	0
10.9	0
11	0
11.1	0
11.2	0
11.3	0
11.4	0
11.5	0
11.6	0
11.7	0
11.8	0
11.9	0
12	0
12.1	0
12.2	0
12.3	0
12.4	0
12.5	0
12.6	0
12.7	0
12.8	0
12.9	0
13	0
13.1	0
13.2	0
13.3	0
13.4	0
13.5	0
13.6	0
13.7	0
13.8	0
13.9	0
14	0
14.1	0
14.2	0
14.3	0
14.4	0
14.5	0
14.6	0
14.7	0
14.8	0
14.9	0
15	0
15.1	0
15.2	0
15.3	0
15.4	0
15.5	0
15.6	0
15.7	0
15.8	0
15.9	0
16	0
16.1	0
16.2	0
16.3	0
16.4	0
16.5	0
16.6	0
16.7	0
16.8	0
16.9	0
17	0
17.1	0
17.2	0
17.3	0
17.4	0
17.5	0
17.6	0
17.7	0
17.8	0
17.9	0
18	0
18.1	0
18.2	0
18.3	0
18.4	0
18.5	0
18.6	0
18.7	0
18.8	0
18.9	0
19	0
19.1	0
19.2	0
19.3	0
19.4	0
19.5	0
19.6	0
19.7	0
19.8	0
19.9	0
20	0
20.1	0
20.2	0
20.3	0
20.4	0
20.5	0
20.6	0
20.7	0
20.8	0
20.9	0
21	0
21.1	0
21.2	0
21.3	0
21.4	0
21.5	0
21.6	0
21.7	0
21.8	0
21.9	0
22	0
22.1	0
22.2	0
22.3	0
22.4	0
22.5	0
22.6	0
22.7	0
22.8	0
22.9	0
23	0
23.1	0
23.2	0
23.3	0
23.4	0
23.5	0
23.6	0
23.7	0
23.8	0
23.9	0
24	0
24.1	0
24.2	0
24.3	0
24.4	0
24.5	0
24.6	0
24.7	0
24.8	0
24.9	0
25	0
25.1	0
25.2	0
25.3	0
25.4	0
25.5	0
25.6	0
25.7	0
25.8	0
25.9	0
26	0
26.1	0
26.2	0
26.3	0
26.4	0
26.5	0
26.6	0
26.7	0
26.8	0
26.9	0
27	0
27.1	0
27.2	0
27.3	0
27.4	0
27.5	0
27.6	0
27.7	0
27.8	0
27.9	0
28	0
28.1	0
28.2	0
28.3	0
28.4	0
28.5	0
28.6	0
28.7	0
28.8	0
28.9	0
29	0
29.1	0
29.2	0
29.3	0
29.4	0
29.5	0
29.6	0
29.7	0
29.8	0
29.9	0
30	0
30.1	0
30.2	0
30.3	0
30.4	0
30.5	0
30.6	0
30.7	0
30.8	0
30.9	0
31	0
31.1	0
31.2	0
31.3	0
31.4	0
31.5	0
31.6	0
31.7	0
31.8	0
31.9	0
32	0
32.1	0
32.2	0
32.3	0
32.4	0
32.5	0
32.6	0
32.7	0
32.8	0
32.9	0
33	0
33.1	0
33.2	0
33.3	0
33.4	0
33.5	0
33.6	0
33.7	0
33.8	0
33.9	0
34	0
34.1	0
34.2	0
34.3	0
34.4	0
34.5	0
34.6	0
34.7	0
34.8	0
34.9	0
35	0
35.1	0
35.2	0
35.3	0
35.4	0
35.5	0
35.6	0
35.7	0
35.8	0
35.9	0
36	0
36.1	0
36.2	0
36.3	0
36.4	0
36.5	0
36.6	0
36.7	0
36.8	0
36.9	0
37	0
37.1	0
37.2	0
37.3	0
37.4	0
37.5	0
37.6	0
37.7	0
37.8	0
37.9	0
38	0
38.1	0
38.2	0
38.3	0
38.4	0
38.5	0
38.6	0
38.7	0
38.8	0
38.9	0
39	0
39.1	0
39.2	0
39.3	0
39.4	0
39.5	0
39.6	0
39.7	0
39.8	0
39.9	0
40	0
40.1	0
40.2	0
40.3	0
40.4	0
40.5	0
40.6	0
40.7	0
40.8	0
40.9	0
41	0
41.1	0
41.2	0
41.3	0
41.4	0
41.5	0
41.6	0
41.7	0
41.8	0
41.9	0
42	0
42.1	0
42.2	0
42.3	0
42.4	0
42.5	0
42.6	0
42.7	0
42.8	0
42.9	0
43	0
43.1	0
43.2	0
43.3	0
43.4	0
43.5	0
43.6	0
43.7	0
43.8	0
43.9	0
44	0
44.1	0
44.2	0
44.3	0
44.4	0
44.5	0
44.6	0
44.7	0
44.8	0
44.9	0
45	0
45.1	0
45.2	0
45.3	0
45.4	0
45.5	0
45.6	0
45.7	0
45.8	0
45.9	0
46	0
46.1	0
46.2	0
46.3	0
46.4	0
46.5	0
46.6	0
46.7	0
46.8	0
46.9	0
47	0
47.1	0
47.2	0
47.3	0
47.4	0
47.5	0
47.6	0
47.7	0
47.8	0
47.9	0
48	0
48.1	0
48.2	0
48.3	0
48.4	0
48.5	0
48.6	0
48.7	0
48.8	0
48.9	0
49	0
49.1	0
49.2	0
49.3	0
49.4	0
49.5	0
49.6	0
49.7	0
49.8	0
49.9	0
50	0
50.1	0
50.2	0
50.3	0
50.4	0
50.5	0
50.6	0
50.7	0
50.8	0
50.9	0
51	0
51.1	0
51.2	0
51.3	0
51.4	0
51.5	0
51.6	0
51.7	0
51.8	0
51.9	0
52	0
52.1	0
52.2	0
52.3	0
52.4	0
52.5	0
52.6	0
52.7	0
52.8	0
52.9	0
53	0
53.1	0
53.2	0
53.3	0
53.4	0
53.5	0
53.6	0
53.7	0
53.8	0
53.9	0
54	0
54.1	0
54.2	0
54.3	0
54.4	0
54.5	0
54.6	0
54.7	0
54.8	0
54.9	0
55	0
55.1	0
55.2	0
55.3	0
55.4	0
55.5	0
55.6	0
55.7	0
55.8	0
55.9	0
56	0
56.1	0
56.2	0
56.3	0
56.4	0
56.5	0
56.6	0
56.7	0
56.8	0
56.9	0
57	0
57.1	0
57.2	0
57.3	0
57.4	0
57.5	0
57.6	0
57.7	0
57.8	0
57.9	0
58	0
58.1	0
58.2	0
58.3	0
58.4	0
58.5	0
58.6	0
58.7	0
58.8	0
58.9	0
59	0
59.1	0
59.2	0
59.3	0
59.4	0
59.5	0
59.6	0
59.7	0
59.8	0
59.9	0
60	0
60.1	0
60.2	0
60.3	0
60.4	0
60.5	0
60.6	0
60.7	0
60.8	0
60.9	0
61	0
61.1	0
61.2	0
61.3	0
61.4	0
61.5	0
61.6	0
61.7	0
61.8	0
61.9	0
62	0
62.1	0
62.2	0
62.3	0
62.4	0
62.5	0
62.6	0
62.7	0
62.8	0
62.9	0
63	0
63.1	0
63.2	0
63.3	0
63.4	0
63.5	0
63.6	0
63.7	0
63.8	0
63.9	0
64	0
64.1	0
64.2	0
64.3	0
64.4	0
64.5	0
64.6	0
64.7	0
64.8	0
64.9	0
65	0
65.1	0
65.2	0
65.3	0
65.4	0
65.5	0
65.6	0
65.7	0
65.8	0
65.9	0
66	0
66.1	0
66.2	0
66.3	0
66.4	0
66.5	0
66.6	0
66.7	0
66.8	0
66.9	0
67	0
67.1	0
67.2	0
67.3	0
67.4	0
67.5	0
67.6	0
67.7	0
67.8	0
67.9	0
68	0
68.1	0
68.2	0
68.3	0
68.4	0
68.5	0
68.6	0
68.7	0
68.8	0
68.9	0
69	0
69.1	0
69.2	0
69.3	0
69.4	0
69.5	0
69.6	0
69.7	0
69.8	0
69.9	0
70	0
70.1	0
70.2	0
70.3	0
70.4	0
70.5	0
70.6	0
70.7	0
70.8	0
70.9	0
71	0
71.1	0
71.2	0
71.3	0
71.4	0
71.5	0
71.6	0
71.7	0
71.8	0
71.9	0
72	0
72.1	0
72.2	0
72.3	0
72.4	0
72.5	0
72.6	0
72.7	0
72.8	0
72.9	0
73	0
73.1	0
73.2	0
73.3	0
73.4	0
73.5	0
73.6	0
73.7	0
73.8	0
73.9	0
74	0
74.1	0
74.2	0
74.3	0
74.4	0
74.5	0
74.6	0
74.7	0
74.8	0
74.9	0
75	0
75.1	0
75.2	0
75.3	0
75.4	0
75.5	0
75.6	0
75.7	0
75.8	0
75.9	0
76	0
76.1	0
76.2	0
76.3	0
76.4	0
76.5	0
76.6	0
76.7	0
76.8	0
76.9	0
77	0
77.1	0
77.2	0
77.3	0
77.4	0
77.5	0
77.6	0
77.7	0
77.8	0
77.9	0
78	0
78.1	0
78.2	0
78.3	0
78.4	0
78.5	0
78.6	0
78.7	0
78.8	0
78.9	0
79	0
79.1	0
79.2	0
79.3	0
79.4	0
79.5	0
79.6	0
79.7	0
79.8	0
79.9	0
80	0
80.1	0
80.2	0
80.3	0
80.4	0
80.5	0
80.6	0
80.7	0
80.8	0
80.9	0
81	0
81.1	0
81.2	0
81.3	0
81.4	0
81.5	0
81.6	0
81.7	0
81.8	0
81.9	0
82	0
82.1	0
82.2	0
82.3	0
82.4	0
82.5	0
82.6	0
82.7	0
82.8	0
82.9	0
83	0
83.1	0
83.2	0
83.3	0
83.4	0
83.5	0
83.6	0
83.7	0
83.8	0
83.9	0
84	0
84.1	0
84.2	0
84.3	0
84.4	0
84.5	0
84.6	0
84.7	0
84.8	0
84.9	0
85	0
85.1	0
85.2	0
85.3	0
85.4	0
85.5	0
85.6	0
85.7	0
85.8	0
85.9	0
86	0
86.1	0
86.2	0
86.3	0
86.4	0
86.5	0
86.6	0
86.7	0
86.8	0
86.9	0
87	0
87.1	0
87.2	0
87.3	0
87.4	0
87.5	0
87.6	0
87.7	0
87.8	0
87.9	0
88	0
88.1	0
88.2	0
88.3	0
88.4	0
88.5	0
88.6	0
88.7	0
88.8	0
88.9	0
89	0
89.1	0
89.2	0
89.3	0
89.4	0
89.5	0
89.6	0
89.7	0
89.8	0
89.9	0
90	0
90.1	0
90.2	0
90.3	0
90.4	0
90.5	0
90.6	0
90.7	0
90.8	0
90.9	0
91	0
91.1	0
91.2	0
91.3	0
91.4	0
91.5	0
91.6	0
91.7	0
91.8	0
91.9	0
92	0
92.1	0
92.2	0
92.3	0
92.4	0
92.5	0
92.6	0
92.7	0
92.8	0
92.9	0
93	0
93.1	0
93.2	0
93.3	0
93.4	0
93.5	0
93.6	0
93.7	0
93.8	0
93.9	0
94	0
94.1	0
94.2	0
94.3	0
94.4	0
94.5	0
94.6	0
94.7	0
94.8	0
94.9	0
95	0
95.1	0
95.2	0
95.3	0
95.4	0
95.5	0
95.6	0
95.7	0
95.8	0
95.9	0
96	0
96.1	0
96.2	0
96.3	0
96.4	0
96.5	0
96.6	0
96.7	0
96.8	0
96.9	0
97	0
97.1	0
97.2	0
97.3	0
97.4	0
97.5	0
97.6	0
97.7	0
97.8	0
97.9	0
98	0
98.1	0
98.2	0
98.3	0
98.4	0
98.5	0
98.6	0
98.7	0
98.8	0
98.9	0
99	0
99.1	0
99.2	0
99.3	0
99.4	0
99.5	0
99.6	0
99.7	0
99.8	0
99.9	0
100	0
100.1	0.196667
100.2	0.345667
100.3	0.445
100.4	0.535333
100.5	0.587
100.6	0.638667
100.7	0.673333
100.8	0.702
100.9	0.725333
101	0.748333
101.1	0.764
101.2	0.781333
101.3	0.794333
101.4	0.799667
101.5	0.807333
101.6	0.810333
101.7	0.818667
101.8	0.822667
101.9	0.826667
102	0.823667
102.1	0.831333
102.2	0.84
102.3	0.843333
102.4	0.845
102.5	0.845
102.6	0.848
102.7	0.842
102.8	0.844667
102.9	0.844333
103	0.847333
103.1	0.848
103.2	0.848
103.3	0.846667
103.4	0.847667
103.5	0.849
103.6	0.850667
103.7	0.852333
103.8	0.856667
103.9	0.855333
104	0.854
104.1	0.860333
104.2	0.864667
104.3	0.869
104.4	0.868667
104.5	0.864
104.6	0.861667
104.7	0.866333
104.8	0.867
104.9	0.865333
105	0.861
105.1	0.857
105.2	0.861
105.3	0.866667
105.4	0.872667
105.5	0.874667
105.6	0.879
105.7	0.879
105.8	0.876333
105.9	0.875333
106	0.873667
106.1	0.872667
106.2	0.871667
106.3	0.867333
106.4	0.864333
106.5	0.862333
106.6	0.857
106.7	0.86
106.8	0.855
106.9	0.856667
107	0.861667
107.1	0.863
107.2	0.873
107.3	0.881
107.4	0.879
107.5	0.879
107.6	0.883
107.7	0.882667
107.8	0.88
107.9	0.876333
108	0.880667
108.1	0.878
108.2	0.875667
108.3	0.873333
108.4	0.875667
108.5	0.875333
108.6	0.872333
108.7	0.876667
108.8	0.881667
108.9	0.883
109	0.881333
109.1	0.881333
109.2	0.88
109.3	0.879333
109.4	0.877667
109.5	0.881
109.6	0.883667
109.7	0.885333
109.8	0.886667
109.9	0.886667
110	0.893
110.1	0.895333
110.2	0.895333
110.3	0.900333
110.4	0.898333
110.5	0.898
110.6	0.891667
110.7	0.895
110.8	0.894333
110.9	0.893667
111	0.897667
111.1	0.896667
111.2	0.897333
111.3	0.896667
111.4	0.898667
111.5	0.899
111.6	0.896
111.7	0.901667
111.8	0.904667
111.9	0.899667
112	0.899
112.1	0.901667
112.2	0.897333
112.3	0.898667
112.4	0.902
112.5	0.898667
112.6	0.903667
112.7	0.901333
112.8	0.904
112.9	0.906
113	0.906
113.1	0.908333
113.2	0.906
113.3	0.904667
113.4	0.905667
113.5	0.902333
113.6	0.897333
113.7	0.903667
113.8	0.897
113.9	0.897
114	0.898667
114.1	0.901
114.2	0.903667
114.3	0.903333
114.4	0.905
114.5	0.902333
114.6	0.902
114.7	0.903667
114.8	0.906
114.9	0.904
115	0.903667
115.1	0.908
115.2	0.907333
115.3	0.908667
115.4	0.909667
115.5	0.911333
115.6	0.911
115.7	0.911333
115.8	0.912
115.9	0.915
116	0.913
116.1	0.914667
116.2	0.913
116.3	0.914667
116.4	0.913
116.5	0.912
116.6	0.917
116.7	0.915
116.8	0.914667
116.9	0.919333
117	0.918
117.1	0.918
117.2	0.917
117.3	0.918
117.4	0.916
117.5	0.917
117.6	0.915667
117.7	0.911667
117.8	0.911667
117.9	0.91
118	0.91
118.1	0.913333
118.2	0.916
118.3	0.918333
118.4	0.919667
118.5	0.921333
118.6	0.92
118.7	0.919333
118.8	0.920333
118.9	0.919333
119	0.919667
119.1	0.920667
119.2	0.924333
119.3	0.927333
119.4	0.926
119.5	0.922333
119.6	0.928
119.7	0.928
119.8	0.920667
119.9	0.921667
120	0.919667
120.1	0.916667
120.2	0.916333
120.3	0.914333
120.4	0.910333
120.5	0.912667
120.6	0.909667
120.7	0.914
120.8	0.919
120.9	0.923
121	0.917667
121.1	0.921
121.2	0.922
121.3	0.921333
121.4	0.920333
121.5	0.924667
121.6	0.924333
121.7	0.924
121.8	0.927
121.9	0.924
122	0.926
122.1	0.925
122.2	0.923
122.3	0.924333
122.4	0.922667
122.5	0.922333
122.6	0.923333
122.7	0.923333
122.8	0.924
122.9	0.929333
123	0.925667
123.1	0.924667
123.2	0.927
123.3	0.926
123.4	0.926667
123.5	0.923667
123.6	0.922
123.7	0.925
123.8	0.929
123.9	0.930333
124	0.927
124.1	0.928333
124.2	0.93
124.3	0.928667
124.4	0.930333
124.5	0.927
124.6	0.928333
124.7	0.924667
124.8	0.927
124.9	0.925333
125	0.927333
125.1	0.931667
125.2	0.93
125.3	0.928
125.4	0.926333
125.5	0.923333
125.6	0.924333
125.7	0.92
125.8	0.921
125.9	0.923667
126	0.924
126.1	0.924667
126.2	0.921
126.3	0.922333
126.4	0.927
126.5	0.925
126.6	0.926667
126.7	0.921667
126.8	0.925333
126.9	0.925
127	0.927
127.1	0.925
127.2	0.928333
127.3	0.928
127.4	0.929667
127.5	0.928667
127.6	0.931667
127.7	0.929667
127.8	0.933
127.9	0.934
128	0.932667
128.1	0.928667
128.2	0.923667
128.3	0.923667
128.4	0.927667
128.5	0.928333
128.6	0.931333
128.7	0.933667
128.8	0.931667
128.9	0.932667
129	0.933667
129.1	0.932333
129.2	0.935
129.3	0.935667
129.4	0.938
129.5	0.938333
129.6	0.940667
129.7	0.938333
129.8	0.939667
129.9	0.94
130	0.938333
130.1	0.938333
130.2	0.937667
130.3	0.939333
130.4	0.940667
130.5	0.941333
130.6	0.939
130.7	0.938333
130.8	0.938
130.9	0.935667
131	0.936
131.1	0.937
131.2	0.941667
131.3	0.941667
131.4	0.942667
131.5	0.942667
131.6	0.939
131.7	0.943667
131.8	0.944
131.9	0.943
132	0.942667
132.1	0.938333
132.2	0.939333
132.3	0.938333
132.4	0.937333
132.5	0.939
132.6	0.939
132.7	0.941333
132.8	0.938
132.9	0.937667
133	0.940333
133.1	0.94
133.2	0.936667
133.3	0.94
133.4	0.939667
133.5	0.936667
133.6	0.937333
133.7	0.936667
133.8	0.935333
133.9	0.937667
134	0.937667
134.1	0.937
134.2	0.935333
134.3	0.936333
134.4	0.935333
134.5	0.939
134.6	0.940667
134.7	0.939667
134.8	0.941333
134.9	0.939333
135	0.94
135.1	0.944333
135.2	0.946
135.3	0.948333
135.4	0.947667
135.5	0.944
135.6	0.943
135.7	0.943667
135.8	0.943667
135.9	0.946333
136	0.945667
136.1	0.943333
136.2	0.942333
136.3	0.945333
136.4	0.944333
136.5	0.942333
136.6	0.942667
136.7	0.943667
136.8	0.943
136.9	0.943
137	0.944
137.1	0.943333
137.2	0.943
137.3	0.942667
137.4	0.938333
137.5	0.939333
137.6	0.942333
137.7	0.942333
137.8	0.943667
137.9	0.944333
138	0.944
138.1	0.941333
138.2	0.941333
138.3	0.942
138.4	0.938
138.5	0.938
138.6	0.938333
138.7	0.941
138.8	0.940667
138.9	0.941
139	0.940667
139.1	0.94
139.2	0.941
139.3	0.942333
139.4	0.939
139.5	0.94
139.6	0.943333
139.7	0.944
139.8	0.945333
139.9	0.945333
140	0.942667
140.1	0.943
140.2	0.948333
140.3	0.947667
140.4	0.951
140.5	0.950667
140.6	0.951
140.7	0.948667
140.8	0.95
140.9	0.950333
141	0.946667
141.1	0.946
141.2	0.95
141.3	0.950667
141.4	0.949667
141.5	0.949
141.6	0.949667
141.7	0.947
141.8	0.950333
141.9	0.948667
142	0.947333
142.1	0.948
142.2	0.948
142.3	0.949
142.4	0.948667
142.5	0.946667
142.6	0.95
142.7	0.949
142.8	0.946
142.9	0.941667
143	0.942
143.1	0.943
143.2	0.948333
143.3	0.951333
143.4	0.953667
143.5	0.953333
143.6	0.954
143.7	0.951333
143.8	0.952667
143.9	0.953
144	0.949
144.1	0.948
144.2	0.949667
144.3	0.948
144.4	0.948333
144.5	0.949333
144.6	0.949333
144.7	0.948333
144.8	0.947667
144.9	0.947333
145	0.95
145.1	0.950667
145.2	0.950333
145.3	0.952
145.4	0.954
145.5	0.951667
145.6	0.953333
145.7	0.953667
145.8	0.952333
145.9	0.950667
146	0.951333
146.1	0.951667
146.2	0.949
146.3	0.951333
146.4	0.950333
146.5	0.949333
146.6	0.951
146.7	0.947333
146.8	0.948
146.9	0.948
147	0.951
147.1	0.952
147.2	0.952
147.3	0.954333
147.4	0.956
147.5	0.955333
147.6	0.956
147.7	0.957
147.8	0.953333
147.9	0.952333
148	0.951667
148.1	0.953667
148.2	0.955667
148.3	0.956333
148.4	0.956
148.5	0.961
148.6	0.959333
148.7	0.958333
148.8	0.958667
148.9	0.958667
149	0.960667
149.1	0.958667
149.2	0.956333
149.3	0.957667
149.4	0.959333
149.5	0.957667
149.6	0.958333
149.7	0.956333
149.8	0.953667
149.9	0.953
150	0.953667
150.1	0.955
150.2	0.954667
150.3	0.954333
150.4	0.957
150.5	0.956333
150.6	0.953667
150.7	0.954333
150.8	0.956
150.9	0.956333
151	0.956
151.1	0.955
151.2	0.956667
151.3	0.957333
151.4	0.958
151.5	0.956
151.6	0.954667
151.7	0.953333
151.8	0.958
151.9	0.958667
152	0.956333
152.1	0.955667
152.2	0.955
152.3	0.953333
152.4	0.954
152.5	0.954667
152.6	0.952333
152.7	0.956
152.8	0.955
152.9	0.955
153	0.956667
153.1	0.957333
153.2	0.958667
153.3	0.959333
153.4	0.959
153.5	0.960667
153.6	0.956667
153.7	0.953667
153.8	0.954333
153.9	0.953667
154	0.952667
154.1	0.954333
154.2	0.955
154.3	0.954
154.4	0.952333
154.5	0.953
154.6	0.952333
154.7	0.952667
154.8	0.955667
154.9	0.957
155	0.958
155.1	0.956667
155.2	0.957
155.3	0.953667
155.4	0.955
155.5	0.956333
155.6	0.958667
155.7	0.96
155.8	0.960667
155.9	0.961
156	0.963
156.1	0.962
156.2	0.962
156.3	0.963667
156.4	0.963333
156.5	0.962667
156.6	0.957
156.7	0.958333
156.8	0.958667
156.9	0.956667
157	0.959333
157.1	0.958667
157.2	0.955333
157.3	0.954667
157.4	0.955333
157.5	0.956667
157.6	0.959333
157.7	0.957
157.8	0.952667
157.9	0.953333
158	0.954667
158.1	0.954333
158.2	0.954333
158.3	0.952667
158.4	0.953
158.5	0.953333
158.6	0.954667
158.7	0.957
158.8	0.957
158.9	0.955667
159	0.956333
159.1	0.955333
159.2	0.958667
159.3	0.960667
159.4	0.960333
159.5	0.959
159.6	0.958667
159.7	0.958667
159.8	0.958333
159.9	0.955667
160	0.955
160.1	0.957667
160.2	0.955
160.3	0.956
160.4	0.956
160.5	0.956667
160.6	0.958333
160.7	0.959
160.8	0.961333
160.9	0.962667
161	0.962
161.1	0.960667
161.2	0.958
161.3	0.957
161.4	0.958667
161.5	0.959333
161.6	0.958333
161.7	0.960667
161.8	0.961333
161.9	0.960667
162	0.958667
162.1	0.958333
162.2	0.957
162.3	0.960333
162.4	0.962667
162.5	0.962333
162.6	0.959333
162.7	0.957667
162.8	0.959667
162.9	0.959
163	0.958333
163.1	0.961333
163.2	0.964
163.3	0.963667
163.4	0.961667
163.5	0.962667
163.6	0.962333
163.7	0.961667
163.8	0.964
163.9	0.962667
164	0.964333
164.1	0.965
164.2	0.960667
164.3	0.958333
164.4	0.957
164.5	0.958667
164.6	0.958333
164.7	0.960333
164.8	0.96
164.9	0.961333
165	0.96
165.1	0.961
165.2	0.962667
165.3	0.959667
165.4	0.958
165.5	0.96
165.6	0.961667
165.7	0.961333
165.8	0.958667
165.9	0.959
166	0.956
166.1	0.957333
166.2	0.957667
166.3	0.953
166.4	0.953667
166.5	0.954667
166.6	0.953333
166.7	0.953667
166.8	0.955667
166.9	0.954667
167	0.955667
167.1	0.955667
167.2	0.956667
167.3	0.954667
167.4	0.956333
167.5	0.952667
167.6	0.956
167.7	0.955667
167.8	0.956667
167.9	0.959
168	0.958333
168.1	0.958667
168.2	0.956
168.3	0.955667
168.4	0.957333
168.5	0.957667
168.6	0.955667
168.7	0.956
168.8	0.959667
168.9	0.961
169	0.964
169.1	0.964333
169.2	0.964333
169.3	0.963
169.4	0.961
169.5	0.961
169.6	0.963
169.7	0.960667
169.8	0.959
169.9	0.959333
170	0.955
170.1	0.956333
170.2	0.956
170.3	0.954
170.4	0.956333
170.5	0.955333
170.6	0.955667
170.7	0.957667
170.8	0.956333
170.9	0.955667
171	0.955667
171.1	0.959333
171.2	0.958
171.3	0.959
171.4	0.957
171.5	0.959
171.6	0.959
171.7	0.962
171.8	0.961667
171.9	0.959333
172	0.958333
172.1	0.956333
172.2	0.955
172.3	0.955667
172.4	0.956333
172.5	0.959
172.6	0.959
172.7	0.957667
172.8	0.957333
172.9	0.954333
173	0.955333
173.1	0.957
173.2	0.958
173.3	0.957333
173.4	0.959
173.5	0.958667
173.6	0.957333
173.7	0.961
173.8	0.960333
173.9	0.964
174	0.964667
174.1	0.963667
174.2	0.964
174.3	0.962
174.4	0.961
174.5	0.962333
174.6	0.96
174.7	0.960667
174.8	0.961333
174.9	0.961333
175	0.960333
175.1	0.959667
175.2	0.959667
175.3	0.957333
175.4	0.955333
175.5	0.958
175.6	0.96
175.7	0.961333
175.8	0.962333
175.9	0.961667
176	0.960333
176.1	0.960333
176.2	0.960667
176.3	0.960333
176.4	0.963
176.5	0.962333
176.6	0.965
176.7	0.966333
176.8	0.968667
176.9	0.966
177	0.963667
177.1	0.964667
177.2	0.965333
177.3	0.962667
177.4	0.959333
177.5	0.961
177.6	0.959667
177.7	0.958
177.8	0.957333
177.9	0.957
178	0.958667
178.1	0.958667
178.2	0.956333
178.3	0.958333
178.4	0.955667
178.5	0.958333
178.6	0.96
178.7	0.958667
178.8	0.960333
178.9	0.963
179	0.963333
179.1	0.963667
179.2	0.962667
179.3	0.961
179.4	0.961667
179.5	0.96
179.6	0.961333
179.7	0.959333
179.8	0.960333
179.9	0.956
180	0.958333
180.1	0.957667
180.2	0.96
180.3	0.961333
180.4	0.963
180.5	0.963333
180.6	0.962
180.7	0.963
180.8	0.965
180.9	0.960667
181	0.961667
181.1	0.963333
181.2	0.963
181.3	0.963333
181.4	0.966667
181.5	0.967667
181.6	0.966333
181.7	0.968667
181.8	0.966667
181.9	0.963667
182	0.962333
182.1	0.962333
182.2	0.960333
182.3	0.961
182.4	0.960667
182.5	0.959333
182.6	0.959
182.7	0.962667
182.8	0.962667
182.9	0.961333
183	0.961
183.1	0.96
183.2	0.961667
183.3	0.961667
183.4	0.959
183.5	0.960333
183.6	0.961333
183.7	0.961
183.8	0.959333
183.9	0.958333
184	0.958667
184.1	0.959
184.2	0.961333
184.3	0.961667
184.4	0.960333
184.5	0.962333
184.6	0.964667
184.7	0.966
184.8	0.968
184.9	0.966333
185	0.966
185.1	0.964667
185.2	0.965
185.3	0.963333
185.4	0.961333
185.5	0.959667
185.6	0.960667
185.7	0.961333
185.8	0.962333
185.9	0.963
186	0.963
186.1	0.965
186.2	0.963
186.3	0.961
186.4	0.961
186.5	0.956667
186.6	0.958667
186.7	0.960333
186.8	0.961333
186.9	0.959667
187	0.959667
187.1	0.961
187.2	0.958
187.3	0.958667
187.4	0.959333
187.5	0.962333
187.6	0.964
187.7	0.961333
187.8	0.954667
187.9	0.956667
188	0.958333
188.1	0.957667
188.2	0.956
188.3	0.955667
188.4	0.956667
188.5	0.958
188.6	0.960333
188.7	0.962
188.8	0.962
188.9	0.963
189	0.963
189.1	0.961667
189.2	0.962
189.3	0.959667
189.4	0.958667
189.5	0.954667
189.6	0.956667
189.7	0.956
189.8	0.96
189.9	0.960667
190	0.960667
190.1	0.96
190.2	0.959667
190.3	0.961667
190.4	0.960667
190.5	0.961667
190.6	0.962
190.7	0.960333
190.8	0.959333
190.9	0.96
191	0.960333
191.1	0.961333
191.2	0.962333
191.3	0.960333
191.4	0.96
191.5	0.959
191.6	0.961333
191.7	0.963
191.8	0.960667
191.9	0.959333
192	0.96
192.1	0.960667
192.2	0.961333
192.3	0.961
192.4	0.962667
192.5	0.962333
192.6	0.961333
192.7	0.963667
192.8	0.966
192.9	0.962
193	0.963667
193.1	0.963333
193.2	0.960667
193.3	0.962333
193.4	0.961667
193.5	0.961
193.6	0.961
193.7	0.960667
193.8	0.959
193.9	0.959333
194	0.957333
194.1	0.959
194.2	0.956667
194.3	0.957
194.4	0.960333
194.5	0.962667
194.6	0.961333
194.7	0.96
194.8	0.961667
194.9	0.963333
195	0.963
195.1	0.960667
195.2	0.959333
195.3	0.961333
195.4	0.961333
195.5	0.958
195.6	0.957667
195.7	0.956
195.8	0.957667
195.9	0.957333
196	0.96
196.1	0.962333
196.2	0.960333
196.3	0.961
196.4	0.960333
196.5	0.962667
196.6	0.961
196.7	0.961667
196.8	0.96
196.9	0.958
197	0.961
197.1	0.959
197.2	0.957667
197.3	0.959333
197.4	0.959667
197.5	0.958333
197.6	0.96
197.7	0.959333
197.8	0.960667
197.9	0.961667
198	0.964667
198.1	0.965
198.2	0.967
198.3	0.964333
198.4	0.961333
198.5	0.963333
198.6	0.964333
198.7	0.963667
198.8	0.960333
198.9	0.960333
199	0.960333
199.1	0.959667
199.2	0.958
199.3	0.959333
199.4	0.959333
199.5	0.961667
199.6	0.965333
199.7	0.965333
199.8	0.964333
199.9	0.963333
200	0.965
[truncated: 14,000 more rows]
