# Supplementary material for: Bayesian inference of kinetic schemes for ion channels by Kalman filtering
Source: eLife journal article supplement (doi:10.7554/elife.62714), 2022-05-04
Supplement: fig4-data5 [file 1_Sim_N_1500_Strom_MW_4M.xlsx]

## Sheet: Tabelle1
0.1	0
0.2	0
0.3	0
0.4	0
0.5	0
0.6	0
0.7	0
0.8	0
0.9	0
1	0
1.1	0
1.2	0
1.3	0
1.4	0
1.5	0
1.6	0
1.7	0
1.8	0
1.9	0
2	0
2.1	0
2.2	0
2.3	0
2.4	0
2.5	0
2.6	0
2.7	0
2.8	0
2.9	0
3	0
3.1	0
3.2	0
3.3	0
3.4	0
3.5	0
3.6	0
3.7	0
3.8	0
3.9	0
4	0
4.1	0
4.2	0
4.3	0
4.4	0
4.5	0
4.6	0
4.7	0
4.8	0
4.9	0
5	0
5.1	0
5.2	0
5.3	0
5.4	0
5.5	0
5.6	0
5.7	0
5.8	0
5.9	0
6	0
6.1	0
6.2	0
6.3	0
6.4	0
6.5	0
6.6	0
6.7	0
6.8	0
6.9	0
7	0
7.1	0
7.2	0
7.3	0
7.4	0
7.5	0
7.6	0
7.7	0
7.8	0
7.9	0
8	0
8.1	0
8.2	0
8.3	0
8.4	0
8.5	0
8.6	0
8.7	0
8.8	0
8.9	0
9	0
9.1	0
9.2	0
9.3	0
9.4	0
9.5	0
9.6	0
9.7	0
9.8	0
9.9	0
10	0
10.1	0
10.2	0
10.3	0
10.4	0
10.5	0
10.6	0
10.7	0
10.8	0
10.9	0
11	0
11.1	0
11.2	0
11.3	0
11.4	0
11.5	0
11.6	0
11.7	0
11.8	0
11.9	0
12	0
12.1	0
12.2	0
12.3	0
12.4	0
12.5	0
12.6	0
12.7	0
12.8	0
12.9	0
13	0
13.1	0
13.2	0
13.3	0
13.4	0
13.5	0
13.6	0
13.7	0
13.8	0
13.9	0
14	0
14.1	0
14.2	0
14.3	0
14.4	0
14.5	0
14.6	0
14.7	0
14.8	0
14.9	0
15	0
15.1	0
15.2	0
15.3	0
15.4	0
15.5	0
15.6	0
15.7	0
15.8	0
15.9	0
16	0
16.1	0
16.2	0
16.3	0
16.4	0
16.5	0
16.6	0
16.7	0
16.8	0
16.9	0
17	0
17.1	0
17.2	0
17.3	0
17.4	0
17.5	0
17.6	0
17.7	0
17.8	0
17.9	0
18	0
18.1	0
18.2	0
18.3	0
18.4	0
18.5	0
18.6	0
18.7	0
18.8	0
18.9	0
19	0
19.1	0
19.2	0
19.3	0
19.4	0
19.5	0
19.6	0
19.7	0
19.8	0
19.9	0
20	0
20.1	0
20.2	0
20.3	0
20.4	0
20.5	0
20.6	0
20.7	0
20.8	0
20.9	0
21	0
21.1	0
21.2	0
21.3	0
21.4	0
21.5	0
21.6	0
21.7	0
21.8	0
21.9	0
22	0
22.1	0
22.2	0
22.3	0
22.4	0
22.5	0
22.6	0
22.7	0
22.8	0
22.9	0
23	0
23.1	0
23.2	0
23.3	0
23.4	0
23.5	0
23.6	0
23.7	0
23.8	0
23.9	0
24	0
24.1	0
24.2	0
24.3	0
24.4	0
24.5	0
24.6	0
24.7	0
24.8	0
24.9	0
25	0
25.1	0
25.2	0
25.3	0
25.4	0
25.5	0
25.6	0
25.7	0
25.8	0
25.9	0
26	0
26.1	0
26.2	0
26.3	0
26.4	0
26.5	0
26.6	0
26.7	0
26.8	0
26.9	0
27	0
27.1	0
27.2	0
27.3	0
27.4	0
27.5	0
27.6	0
27.7	0
27.8	0
27.9	0
28	0
28.1	0
28.2	0
28.3	0
28.4	0
28.5	0
28.6	0
28.7	0
28.8	0
28.9	0
29	0
29.1	0
29.2	0
29.3	0
29.4	0
29.5	0
29.6	0
29.7	0
29.8	0
29.9	0
30	0
30.1	0
30.2	0
30.3	0
30.4	0
30.5	0
30.6	0
30.7	0
30.8	0
30.9	0
31	0
31.1	0
31.2	0
31.3	0
31.4	0
31.5	0
31.6	0
31.7	0
31.8	0
31.9	0
32	0
32.1	0
32.2	0
32.3	0
32.4	0
32.5	0
32.6	0
32.7	0
32.8	0
32.9	0
33	0
33.1	0
33.2	0
33.3	0
33.4	0
33.5	0
33.6	0
33.7	0
33.8	0
33.9	0
34	0
34.1	0
34.2	0
34.3	0
34.4	0
34.5	0
34.6	0
34.7	0
34.8	0
34.9	0
35	0
35.1	0
35.2	0
35.3	0
35.4	0
35.5	0
35.6	0
35.7	0
35.8	0
35.9	0
36	0
36.1	0
36.2	0
36.3	0
36.4	0
36.5	0
36.6	0
36.7	0
36.8	0
36.9	0
37	0
37.1	0
37.2	0
37.3	0
37.4	0
37.5	0
37.6	0
37.7	0
37.8	0
37.9	0
38	0
38.1	0
38.2	0
38.3	0
38.4	0
38.5	0
38.6	0
38.7	0
38.8	0
38.9	0
39	0
39.1	0
39.2	0
39.3	0
39.4	0
39.5	0
39.6	0
39.7	0
39.8	0
39.9	0
40	0
40.1	0
40.2	0
40.3	0
40.4	0
40.5	0
40.6	0
40.7	0
40.8	0
40.9	0
41	0
41.1	0
41.2	0
41.3	0
41.4	0
41.5	0
41.6	0
41.7	0
41.8	0
41.9	0
42	0
42.1	0
42.2	0
42.3	0
42.4	0
42.5	0
42.6	0
42.7	0
42.8	0
42.9	0
43	0
43.1	0
43.2	0
43.3	0
43.4	0
43.5	0
43.6	0
43.7	0
43.8	0
43.9	0
44	0
44.1	0
44.2	0
44.3	0
44.4	0
44.5	0
44.6	0
44.7	0
44.8	0
44.9	0
45	0
45.1	0
45.2	0
45.3	0
45.4	0
45.5	0
45.6	0
45.7	0
45.8	0
45.9	0
46	0
46.1	0
46.2	0
46.3	0
46.4	0
46.5	0
46.6	0
46.7	0
46.8	0
46.9	0
47	0
47.1	0
47.2	0
47.3	0
47.4	0
47.5	0
47.6	0
47.7	0
47.8	0
47.9	0
48	0
48.1	0
48.2	0
48.3	0
48.4	0
48.5	0
48.6	0
48.7	0
48.8	0
48.9	0
49	0
49.1	0
49.2	0
49.3	0
49.4	0
49.5	0
49.6	0
49.7	0
49.8	0
49.9	0
50	0
50.1	0
50.2	0
50.3	0
50.4	0
50.5	0
50.6	0
50.7	0
50.8	0
50.9	0
51	0
51.1	0
51.2	0
51.3	0
51.4	0
51.5	0
51.6	0
51.7	0
51.8	0
51.9	0
52	0
52.1	0
52.2	0
52.3	0
52.4	0
52.5	0
52.6	0
52.7	0
52.8	0
52.9	0
53	0
53.1	0
53.2	0
53.3	0
53.4	0
53.5	0
53.6	0
53.7	0
53.8	0
53.9	0
54	0
54.1	0
54.2	0
54.3	0
54.4	0
54.5	0
54.6	0
54.7	0
54.8	0
54.9	0
55	0
55.1	0
55.2	0
55.3	0
55.4	0
55.5	0
55.6	0
55.7	0
55.8	0
55.9	0
56	0
56.1	0
56.2	0
56.3	0
56.4	0
56.5	0
56.6	0
56.7	0
56.8	0
56.9	0
57	0
57.1	0
57.2	0
57.3	0
57.4	0
57.5	0
57.6	0
57.7	0
57.8	0
57.9	0
58	0
58.1	0
58.2	0
58.3	0
58.4	0
58.5	0
58.6	0
58.7	0
58.8	0
58.9	0
59	0
59.1	0
59.2	0
59.3	0
59.4	0
59.5	0
59.6	0
59.7	0
59.8	0
59.9	0
60	0
60.1	0
60.2	0
60.3	0
60.4	0
60.5	0
60.6	0
60.7	0
60.8	0
60.9	0
61	0
61.1	0
61.2	0
61.3	0
61.4	0
61.5	0
61.6	0
61.7	0
61.8	0
61.9	0
62	0
62.1	0
62.2	0
62.3	0
62.4	0
62.5	0
62.6	0
62.7	0
62.8	0
62.9	0
63	0
63.1	0
63.2	0
63.3	0
63.4	0
63.5	0
63.6	0
63.7	0
63.8	0
63.9	0
64	0
64.1	0
64.2	0
64.3	0
64.4	0
64.5	0
64.6	0
64.7	0
64.8	0
64.9	0
65	0
65.1	0
65.2	0
65.3	0
65.4	0
65.5	0
65.6	0
65.7	0
65.8	0
65.9	0
66	0
66.1	0
66.2	0
66.3	0
66.4	0
66.5	0
66.6	0
66.7	0
66.8	0
66.9	0
67	0
67.1	0
67.2	0
67.3	0
67.4	0
67.5	0
67.6	0
67.7	0
67.8	0
67.9	0
68	0
68.1	0
68.2	0
68.3	0
68.4	0
68.5	0
68.6	0
68.7	0
68.8	0
68.9	0
69	0
69.1	0
69.2	0
69.3	0
69.4	0
69.5	0
69.6	0
69.7	0
69.8	0
69.9	0
70	0
70.1	0
70.2	0
70.3	0
70.4	0
70.5	0
70.6	0
70.7	0
70.8	0
70.9	0
71	0
71.1	0
71.2	0
71.3	0
71.4	0
71.5	0
71.6	0
71.7	0
71.8	0
71.9	0
72	0
72.1	0
72.2	0
72.3	0
72.4	0
72.5	0
72.6	0
72.7	0
72.8	0
72.9	0
73	0
73.1	0
73.2	0
73.3	0
73.4	0
73.5	0
73.6	0
73.7	0
73.8	0
73.9	0
74	0
74.1	0
74.2	0
74.3	0
74.4	0
74.5	0
74.6	0
74.7	0
74.8	0
74.9	0
75	0
75.1	0
75.2	0
75.3	0
75.4	0
75.5	0
75.6	0
75.7	0
75.8	0
75.9	0
76	0
76.1	0
76.2	0
76.3	0
76.4	0
76.5	0
76.6	0
76.7	0
76.8	0
76.9	0
77	0
77.1	0
77.2	0
77.3	0
77.4	0
77.5	0
77.6	0
77.7	0
77.8	0
77.9	0
78	0
78.1	0
78.2	0
78.3	0
78.4	0
78.5	0
78.6	0
78.7	0
78.8	0
78.9	0
79	0
79.1	0
79.2	0
79.3	0
79.4	0
79.5	0
79.6	0
79.7	0
79.8	0
79.9	0
80	0
80.1	0
80.2	0
80.3	0
80.4	0
80.5	0
80.6	0
80.7	0
80.8	0
80.9	0
81	0
81.1	0
81.2	0
81.3	0
81.4	0
81.5	0
81.6	0
81.7	0
81.8	0
81.9	0
82	0
82.1	0
82.2	0
82.3	0
82.4	0
82.5	0
82.6	0
82.7	0
82.8	0
82.9	0
83	0
83.1	0
83.2	0
83.3	0
83.4	0
83.5	0
83.6	0
83.7	0
83.8	0
83.9	0
84	0
84.1	0
84.2	0
84.3	0
84.4	0
84.5	0
84.6	0
84.7	0
84.8	0
84.9	0
85	0
85.1	0
85.2	0
85.3	0
85.4	0
85.5	0
85.6	0
85.7	0
85.8	0
85.9	0
86	0
86.1	0
86.2	0
86.3	0
86.4	0
86.5	0
86.6	0
86.7	0
86.8	0
86.9	0
87	0
87.1	0
87.2	0
87.3	0
87.4	0
87.5	0
87.6	0
87.7	0
87.8	0
87.9	0
88	0
88.1	0
88.2	0
88.3	0
88.4	0
88.5	0
88.6	0
88.7	0
88.8	0
88.9	0
89	0
89.1	0
89.2	0
89.3	0
89.4	0
89.5	0
89.6	0
89.7	0
89.8	0
89.9	0
90	0
90.1	0
90.2	0
90.3	0
90.4	0
90.5	0
90.6	0
90.7	0
90.8	0
90.9	0
91	0
91.1	0
91.2	0
91.3	0
91.4	0
91.5	0
91.6	0
91.7	0
91.8	0
91.9	0
92	0
92.1	0
92.2	0
92.3	0
92.4	0
92.5	0
92.6	0
92.7	0
92.8	0
92.9	0
93	0
93.1	0
93.2	0
93.3	0
93.4	0
93.5	0
93.6	0
93.7	0
93.8	0
93.9	0
94	0
94.1	0
94.2	0
94.3	0
94.4	0
94.5	0
94.6	0
94.7	0
94.8	0
94.9	0
95	0
95.1	0
95.2	0
95.3	0
95.4	0
95.5	0
95.6	0
95.7	0
95.8	0
95.9	0
96	0
96.1	0
96.2	0
96.3	0
96.4	0
96.5	0
96.6	0
96.7	0
96.8	0
96.9	0
97	0
97.1	0
97.2	0
97.3	0
97.4	0
97.5	0
97.6	0
97.7	0
97.8	0
97.9	0
98	0
98.1	0
98.2	0
98.3	0
98.4	0
98.5	0
98.6	0
98.7	0
98.8	0
98.9	0
99	0
99.1	0
99.2	0
99.3	0
99.4	0
99.5	0
99.6	0
99.7	0
99.8	0
99.9	0
100	0
100.1	0
100.2	0.000666667
100.3	0.000666667
100.4	0.000666667
100.5	0.00266667
100.6	0.00533333
100.7	0.006
100.8	0.006
100.9	0.00933333
101	0.0113333
101.1	0.016
101.2	0.02
101.3	0.022
101.4	0.0246667
101.5	0.0273333
101.6	0.0286667
101.7	0.0326667
101.8	0.0346667
101.9	0.0373333
102	0.0413333
102.1	0.0426667
102.2	0.046
102.3	0.0486667
102.4	0.0513333
102.5	0.0546667
102.6	0.0566667
102.7	0.06
102.8	0.064
102.9	0.066
103	0.068
103.1	0.0713333
103.2	0.0733333
103.3	0.0753333
103.4	0.0793333
103.5	0.0826667
103.6	0.0873333
103.7	0.0906667
103.8	0.0926667
103.9	0.096
104	0.1
104.1	0.104
104.2	0.106667
104.3	0.108667
104.4	0.111333
104.5	0.115333
104.6	0.118
104.7	0.120667
104.8	0.123333
104.9	0.128667
105	0.131333
105.1	0.133333
105.2	0.136667
105.3	0.14
105.4	0.143333
105.5	0.147333
105.6	0.151333
105.7	0.152
105.8	0.158
105.9	0.163333
106	0.164667
106.1	0.166667
106.2	0.17
106.3	0.172
106.4	0.175333
106.5	0.177333
106.6	0.182
106.7	0.183333
106.8	0.189333
106.9	0.192667
107	0.195333
107.1	0.2
107.2	0.201333
107.3	0.205333
107.4	0.207333
107.5	0.211333
107.6	0.212667
107.7	0.215333
107.8	0.218
107.9	0.222
108	0.224
108.1	0.228667
108.2	0.23
108.3	0.233333
108.4	0.236
108.5	0.241333
108.6	0.244667
108.7	0.247333
108.8	0.25
108.9	0.251333
109	0.252667
109.1	0.254667
109.2	0.256
109.3	0.257333
109.4	0.259333
109.5	0.260667
109.6	0.262667
109.7	0.264667
109.8	0.27
109.9	0.273333
110	0.276
110.1	0.278
110.2	0.280667
110.3	0.283333
110.4	0.284667
110.5	0.288
110.6	0.292667
110.7	0.297333
110.8	0.302
110.9	0.305333
111	0.306667
111.1	0.309333
111.2	0.314667
111.3	0.316667
111.4	0.32
111.5	0.322
111.6	0.326
111.7	0.328667
111.8	0.328667
111.9	0.331333
112	0.331333
112.1	0.331333
112.2	0.332667
112.3	0.334
112.4	0.335333
112.5	0.336667
112.6	0.336667
112.7	0.339333
112.8	0.340667
112.9	0.342667
113	0.343333
113.1	0.345333
113.2	0.347333
113.3	0.35
113.4	0.352
113.5	0.356
113.6	0.358667
113.7	0.358
113.8	0.36
113.9	0.362
114	0.366
114.1	0.368667
114.2	0.369333
114.3	0.370667
114.4	0.374
114.5	0.376667
114.6	0.379333
114.7	0.382
114.8	0.387333
114.9	0.39
115	0.392
115.1	0.393333
115.2	0.397333
115.3	0.4
115.4	0.404
115.5	0.404667
115.6	0.408
115.7	0.410667
115.8	0.414
115.9	0.418667
116	0.419333
116.1	0.421333
116.2	0.422
116.3	0.422667
116.4	0.425333
116.5	0.426
116.6	0.426667
116.7	0.428667
116.8	0.428667
116.9	0.429333
117	0.432667
117.1	0.433333
117.2	0.435333
117.3	0.436667
117.4	0.438
117.5	0.440667
117.6	0.443333
117.7	0.443333
117.8	0.446667
117.9	0.447333
118	0.448667
118.1	0.451333
118.2	0.453333
118.3	0.454667
118.4	0.458667
118.5	0.460667
118.6	0.461333
118.7	0.464
118.8	0.466
118.9	0.468667
119	0.468667
119.1	0.470667
119.2	0.470667
119.3	0.471333
119.4	0.474667
119.5	0.476
119.6	0.476667
119.7	0.477333
119.8	0.479333
119.9	0.481333
120	0.484
120.1	0.484667
120.2	0.484667
120.3	0.488
120.4	0.488667
120.5	0.492
120.6	0.493333
120.7	0.496
120.8	0.495333
120.9	0.496
121	0.496667
121.1	0.498667
121.2	0.502
121.3	0.503333
121.4	0.503333
121.5	0.506
121.6	0.506667
121.7	0.508667
121.8	0.51
121.9	0.510667
122	0.512
122.1	0.512667
122.2	0.514
122.3	0.516
122.4	0.518667
122.5	0.519333
122.6	0.519333
122.7	0.520667
122.8	0.522667
122.9	0.522667
123	0.523333
123.1	0.522667
123.2	0.523333
123.3	0.525333
123.4	0.526667
123.5	0.528
123.6	0.528667
123.7	0.530667
123.8	0.532
123.9	0.534
124	0.535333
124.1	0.538
124.2	0.538667
124.3	0.542
124.4	0.545333
124.5	0.545333
124.6	0.545333
124.7	0.55
124.8	0.55
124.9	0.550667
125	0.551333
125.1	0.552667
125.2	0.552667
125.3	0.553333
125.4	0.554
125.5	0.552667
125.6	0.552667
125.7	0.551333
125.8	0.551333
125.9	0.552
126	0.552667
126.1	0.552667
126.2	0.554667
126.3	0.556667
126.4	0.552667
126.5	0.554667
126.6	0.556
126.7	0.557333
126.8	0.558
126.9	0.557333
127	0.558
127.1	0.558
127.2	0.559333
127.3	0.559333
127.4	0.558
127.5	0.558
127.6	0.557333
127.7	0.558
127.8	0.558667
127.9	0.560667
128	0.560667
128.1	0.56
128.2	0.560667
128.3	0.561333
128.4	0.561333
128.5	0.563333
128.6	0.565333
128.7	0.564667
128.8	0.565333
128.9	0.565333
129	0.566
129.1	0.566
129.2	0.566
129.3	0.568
129.4	0.569333
129.5	0.572
129.6	0.573333
129.7	0.576
129.8	0.578
129.9	0.579333
130	0.58
130.1	0.58
130.2	0.581333
130.3	0.584
130.4	0.586
130.5	0.584667
130.6	0.586
130.7	0.586667
130.8	0.586667
130.9	0.586667
131	0.588
131.1	0.59
131.2	0.590667
131.3	0.592667
131.4	0.590667
131.5	0.59
131.6	0.591333
131.7	0.593333
131.8	0.593333
131.9	0.596
132	0.598
132.1	0.597333
132.2	0.598667
132.3	0.598667
132.4	0.598
132.5	0.597333
132.6	0.599333
132.7	0.599333
132.8	0.601333
132.9	0.603333
133	0.603333
133.1	0.604667
133.2	0.607333
133.3	0.61
133.4	0.61
133.5	0.612
133.6	0.613333
133.7	0.614667
133.8	0.614667
133.9	0.618
134	0.62
134.1	0.622
134.2	0.622667
134.3	0.623333
134.4	0.624
134.5	0.626
134.6	0.625333
134.7	0.626
134.8	0.628
134.9	0.628
135	0.630667
135.1	0.632667
135.2	0.634
135.3	0.632
135.4	0.632667
135.5	0.632667
135.6	0.633333
135.7	0.634
135.8	0.633333
135.9	0.635333
136	0.635333
136.1	0.636
136.2	0.636
136.3	0.635333
136.4	0.635333
136.5	0.635333
136.6	0.635333
136.7	0.634667
136.8	0.635333
136.9	0.636
137	0.636
137.1	0.636667
137.2	0.636667
137.3	0.637333
137.4	0.64
137.5	0.642
137.6	0.641333
137.7	0.642
137.8	0.644
137.9	0.644667
138	0.645333
138.1	0.644667
138.2	0.644667
138.3	0.645333
138.4	0.646667
138.5	0.648667
138.6	0.651333
138.7	0.653333
138.8	0.652667
138.9	0.654
139	0.652
139.1	0.653333
139.2	0.654
139.3	0.655333
139.4	0.654667
139.5	0.654667
139.6	0.656667
139.7	0.655333
139.8	0.656
139.9	0.657333
140	0.656
140.1	0.658
140.2	0.66
140.3	0.66
140.4	0.660667
140.5	0.662667
140.6	0.66
140.7	0.659333
140.8	0.662
140.9	0.662
141	0.662667
141.1	0.665333
141.2	0.665333
141.3	0.666
141.4	0.666
141.5	0.667333
141.6	0.668
141.7	0.67
141.8	0.67
141.9	0.670667
142	0.672
142.1	0.672667
142.2	0.672667
142.3	0.675333
142.4	0.675333
142.5	0.676
142.6	0.676667
142.7	0.678
142.8	0.678667
142.9	0.68
143	0.680667
143.1	0.68
143.2	0.68
143.3	0.680667
143.4	0.682
143.5	0.683333
143.6	0.684
143.7	0.684667
143.8	0.686667
143.9	0.688667
144	0.686667
144.1	0.686667
144.2	0.688
144.3	0.688667
144.4	0.69
144.5	0.691333
144.6	0.690667
144.7	0.692
144.8	0.692667
144.9	0.692667
145	0.692667
145.1	0.693333
145.2	0.694667
145.3	0.695333
145.4	0.694667
145.5	0.694
145.6	0.692667
145.7	0.692667
145.8	0.693333
145.9	0.692
146	0.692
146.1	0.692667
146.2	0.692
146.3	0.691333
146.4	0.693333
146.5	0.693333
146.6	0.695333
146.7	0.694
146.8	0.694
146.9	0.696
147	0.696667
147.1	0.698667
147.2	0.698667
147.3	0.698667
147.4	0.7
147.5	0.698
147.6	0.697333
147.7	0.697333
147.8	0.697333
147.9	0.698
148	0.698667
148.1	0.699333
148.2	0.699333
148.3	0.701333
148.4	0.700667
148.5	0.702
148.6	0.702
148.7	0.700667
148.8	0.7
148.9	0.701333
149	0.700667
149.1	0.698
149.2	0.697333
149.3	0.697333
149.4	0.698667
149.5	0.7
149.6	0.701333
149.7	0.701333
149.8	0.702
149.9	0.702
150	0.703333
150.1	0.702667
150.2	0.702667
150.3	0.702667
150.4	0.702
150.5	0.703333
150.6	0.699333
150.7	0.699333
150.8	0.7
150.9	0.7
151	0.700667
151.1	0.702
151.2	0.701333
151.3	0.702
151.4	0.702
151.5	0.702
151.6	0.702
151.7	0.702
151.8	0.700667
151.9	0.702
152	0.704
152.1	0.705333
152.2	0.706667
152.3	0.706
152.4	0.705333
152.5	0.704667
152.6	0.704667
152.7	0.706667
152.8	0.708
152.9	0.711333
153	0.711333
153.1	0.714
153.2	0.712667
153.3	0.712
153.4	0.714
153.5	0.713333
153.6	0.714
153.7	0.714
153.8	0.713333
153.9	0.714667
154	0.714667
154.1	0.714667
154.2	0.715333
154.3	0.716667
154.4	0.718
154.5	0.717333
154.6	0.719333
154.7	0.72
154.8	0.72
154.9	0.72
155	0.720667
155.1	0.72
155.2	0.719333
155.3	0.72
155.4	0.720667
155.5	0.719333
155.6	0.719333
155.7	0.718
155.8	0.718
155.9	0.718
156	0.718667
156.1	0.72
156.2	0.72
156.3	0.721333
156.4	0.722
156.5	0.722667
156.6	0.722
156.7	0.722
156.8	0.721333
156.9	0.723333
157	0.721333
157.1	0.721333
157.2	0.721333
157.3	0.721333
157.4	0.722
157.5	0.724
157.6	0.726
157.7	0.726
157.8	0.724667
157.9	0.726
158	0.726667
158.1	0.727333
158.2	0.726
158.3	0.726
158.4	0.725333
158.5	0.724667
158.6	0.725333
158.7	0.724667
158.8	0.726
158.9	0.728667
159	0.728
159.1	0.726667
159.2	0.726
159.3	0.727333
159.4	0.728
159.5	0.726
159.6	0.728
159.7	0.728
159.8	0.729333
159.9	0.728667
160	0.729333
160.1	0.730667
160.2	0.731333
160.3	0.732
160.4	0.732667
160.5	0.731333
160.6	0.730667
160.7	0.730667
160.8	0.732
160.9	0.731333
161	0.730667
161.1	0.73
161.2	0.729333
161.3	0.730667
161.4	0.731333
161.5	0.732
161.6	0.734
161.7	0.733333
161.8	0.733333
161.9	0.732667
162	0.732667
162.1	0.732667
162.2	0.732667
162.3	0.732
162.4	0.731333
162.5	0.732
162.6	0.734
162.7	0.734667
162.8	0.736
162.9	0.734
163	0.733333
163.1	0.733333
163.2	0.734
163.3	0.734
163.4	0.733333
163.5	0.734
163.6	0.734667
163.7	0.734667
163.8	0.734667
163.9	0.732667
164	0.731333
164.1	0.732
164.2	0.732
164.3	0.732
164.4	0.732667
164.5	0.735333
164.6	0.735333
164.7	0.735333
164.8	0.735333
164.9	0.736667
165	0.734667
165.1	0.733333
165.2	0.733333
165.3	0.733333
165.4	0.733333
165.5	0.734
165.6	0.733333
165.7	0.732667
165.8	0.732667
165.9	0.732667
166	0.731333
166.1	0.732
166.2	0.732
166.3	0.732667
166.4	0.732
166.5	0.732667
166.6	0.732
166.7	0.732667
166.8	0.731333
166.9	0.731333
167	0.732
167.1	0.732
167.2	0.732667
167.3	0.733333
167.4	0.734
167.5	0.734667
167.6	0.734667
167.7	0.736
167.8	0.736667
167.9	0.735333
168	0.734
168.1	0.734667
168.2	0.734667
168.3	0.732
168.4	0.731333
168.5	0.732667
168.6	0.732
168.7	0.731333
168.8	0.732
168.9	0.730667
169	0.731333
169.1	0.728
169.2	0.728667
169.3	0.727333
169.4	0.726667
169.5	0.728667
169.6	0.728
169.7	0.728667
169.8	0.729333
169.9	0.729333
170	0.729333
170.1	0.729333
170.2	0.728667
170.3	0.73
170.4	0.731333
170.5	0.732667
170.6	0.734667
170.7	0.735333
170.8	0.735333
170.9	0.735333
171	0.734667
171.1	0.734667
171.2	0.736
171.3	0.734667
171.4	0.735333
171.5	0.735333
171.6	0.736
171.7	0.737333
171.8	0.738
171.9	0.738
172	0.738667
172.1	0.737333
172.2	0.736667
172.3	0.737333
172.4	0.738
172.5	0.738
172.6	0.738667
172.7	0.738667
172.8	0.739333
172.9	0.738
173	0.736
173.1	0.734
173.2	0.736
173.3	0.736
173.4	0.736
173.5	0.736
173.6	0.736
173.7	0.735333
173.8	0.736
173.9	0.736
174	0.735333
174.1	0.734
174.2	0.734667
174.3	0.735333
174.4	0.734667
174.5	0.734667
174.6	0.735333
174.7	0.734667
174.8	0.735333
174.9	0.734667
175	0.733333
175.1	0.734
175.2	0.734667
175.3	0.735333
175.4	0.737333
175.5	0.737333
175.6	0.738
175.7	0.738667
175.8	0.74
175.9	0.739333
176	0.738667
176.1	0.738667
176.2	0.738667
176.3	0.738
176.4	0.739333
176.5	0.739333
176.6	0.738667
176.7	0.738667
176.8	0.739333
176.9	0.74
177	0.740667
177.1	0.741333
177.2	0.741333
177.3	0.742
177.4	0.742
177.5	0.740667
177.6	0.741333
177.7	0.742
177.8	0.743333
177.9	0.746
178	0.746667
178.1	0.748667
178.2	0.747333
178.3	0.747333
178.4	0.747333
178.5	0.748667
178.6	0.749333
178.7	0.749333
178.8	0.75
178.9	0.752
179	0.750667
179.1	0.749333
179.2	0.749333
179.3	0.75
179.4	0.749333
179.5	0.75
179.6	0.75
179.7	0.749333
179.8	0.749333
179.9	0.748
180	0.75
180.1	0.750667
180.2	0.751333
180.3	0.750667
180.4	0.750667
180.5	0.750667
180.6	0.752667
180.7	0.75
180.8	0.750667
180.9	0.751333
181	0.75
181.1	0.749333
181.2	0.748667
181.3	0.748667
181.4	0.748
181.5	0.748
181.6	0.747333
181.7	0.747333
181.8	0.747333
181.9	0.748667
182	0.748667
182.1	0.75
182.2	0.75
182.3	0.748667
182.4	0.748667
182.5	0.748667
182.6	0.751333
182.7	0.752
182.8	0.752667
182.9	0.752667
183	0.754
183.1	0.755333
183.2	0.756
183.3	0.756667
183.4	0.756667
183.5	0.756667
183.6	0.757333
183.7	0.758
183.8	0.756667
183.9	0.756
184	0.758
184.1	0.758
184.2	0.758667
184.3	0.76
184.4	0.762
184.5	0.762
184.6	0.760667
184.7	0.760667
184.8	0.759333
184.9	0.758
185	0.758
185.1	0.758
185.2	0.76
185.3	0.759333
185.4	0.758667
185.5	0.758667
185.6	0.759333
185.7	0.759333
185.8	0.757333
185.9	0.757333
186	0.756
186.1	0.755333
186.2	0.755333
186.3	0.756
186.4	0.754667
186.5	0.754667
186.6	0.754667
186.7	0.755333
186.8	0.753333
186.9	0.754667
187	0.754667
187.1	0.754
187.2	0.754667
187.3	0.753333
187.4	0.753333
187.5	0.754
187.6	0.754667
187.7	0.754667
187.8	0.754667
187.9	0.751333
188	0.752
188.1	0.751333
188.2	0.752
188.3	0.752
188.4	0.751333
188.5	0.75
188.6	0.75
188.7	0.751333
188.8	0.750667
188.9	0.750667
189	0.752
189.1	0.752
189.2	0.751333
189.3	0.752667
189.4	0.752667
189.5	0.752
189.6	0.754
189.7	0.754667
189.8	0.753333
189.9	0.754
190	0.754
190.1	0.753333
190.2	0.755333
190.3	0.757333
190.4	0.758667
190.5	0.757333
190.6	0.758667
190.7	0.759333
190.8	0.761333
190.9	0.761333
191	0.762
191.1	0.762
191.2	0.761333
191.3	0.761333
191.4	0.761333
191.5	0.760667
191.6	0.762667
191.7	0.763333
191.8	0.763333
191.9	0.760667
192	0.760667
192.1	0.762667
192.2	0.763333
192.3	0.764
192.4	0.762667
192.5	0.762667
192.6	0.762
192.7	0.761333
192.8	0.76
192.9	0.758667
193	0.759333
193.1	0.756667
193.2	0.756667
193.3	0.758
193.4	0.756667
193.5	0.756
193.6	0.755333
193.7	0.754
193.8	0.753333
193.9	0.754667
194	0.756
194.1	0.756667
194.2	0.756
194.3	0.754667
194.4	0.754
194.5	0.754667
194.6	0.754
194.7	0.753333
194.8	0.754667
194.9	0.756
195	0.754667
195.1	0.755333
195.2	0.754667
195.3	0.756
195.4	0.755333
195.5	0.754
195.6	0.752
195.7	0.752
195.8	0.752
195.9	0.752
196	0.752
196.1	0.752
196.2	0.752
196.3	0.752
196.4	0.751333
196.5	0.752
196.6	0.752667
196.7	0.754
196.8	0.755333
196.9	0.756
197	0.756667
197.1	0.757333
197.2	0.756
197.3	0.754667
197.4	0.754
197.5	0.754
197.6	0.754
197.7	0.754667
197.8	0.753333
197.9	0.752667
198	0.754
198.1	0.754667
198.2	0.754667
198.3	0.754667
198.4	0.755333
198.5	0.755333
198.6	0.753333
198.7	0.752667
198.8	0.754
198.9	0.755333
199	0.754
199.1	0.754
199.2	0.754
199.3	0.754
199.4	0.754
199.5	0.754667
199.6	0.754
199.7	0.752
199.8	0.753333
199.9	0.753333
200	0.753333
[truncated: 14,000 more rows]
