# Supplementary material for: Bayesian inference of kinetic schemes for ion channels by Kalman filtering
Source: eLife journal article supplement (doi:10.7554/elife.62714), 2022-05-04
Supplement: fig4-data5 [file 1_Sim_N_2000_Fluor_MW.xlsx]

## Sheet: Tabelle1
0.1	0
0.2	0
0.3	0
0.4	0
0.5	0
0.6	0
0.7	0
0.8	0
0.9	0
1	0
1.1	0
1.2	0
1.3	0
1.4	0
1.5	0
1.6	0
1.7	0
1.8	0
1.9	0
2	0
2.1	0
2.2	0
2.3	0
2.4	0
2.5	0
2.6	0
2.7	0
2.8	0
2.9	0
3	0
3.1	0
3.2	0
3.3	0
3.4	0
3.5	0
3.6	0
3.7	0
3.8	0
3.9	0
4	0
4.1	0
4.2	0
4.3	0
4.4	0
4.5	0
4.6	0
4.7	0
4.8	0
4.9	0
5	0
5.1	0
5.2	0
5.3	0
5.4	0
5.5	0
5.6	0
5.7	0
5.8	0
5.9	0
6	0
6.1	0
6.2	0
6.3	0
6.4	0
6.5	0
6.6	0
6.7	0
6.8	0
6.9	0
7	0
7.1	0
7.2	0
7.3	0
7.4	0
7.5	0
7.6	0
7.7	0
7.8	0
7.9	0
8	0
8.1	0
8.2	0
8.3	0
8.4	0
8.5	0
8.6	0
8.7	0
8.8	0
8.9	0
9	0
9.1	0
9.2	0
9.3	0
9.4	0
9.5	0
9.6	0
9.7	0
9.8	0
9.9	0
10	0
10.1	0
10.2	0
10.3	0
10.4	0
10.5	0
10.6	0
10.7	0
10.8	0
10.9	0
11	0
11.1	0
11.2	0
11.3	0
11.4	0
11.5	0
11.6	0
11.7	0
11.8	0
11.9	0
12	0
12.1	0
12.2	0
12.3	0
12.4	0
12.5	0
12.6	0
12.7	0
12.8	0
12.9	0
13	0
13.1	0
13.2	0
13.3	0
13.4	0
13.5	0
13.6	0
13.7	0
13.8	0
13.9	0
14	0
14.1	0
14.2	0
14.3	0
14.4	0
14.5	0
14.6	0
14.7	0
14.8	0
14.9	0
15	0
15.1	0
15.2	0
15.3	0
15.4	0
15.5	0
15.6	0
15.7	0
15.8	0
15.9	0
16	0
16.1	0
16.2	0
16.3	0
16.4	0
16.5	0
16.6	0
16.7	0
16.8	0
16.9	0
17	0
17.1	0
17.2	0
17.3	0
17.4	0
17.5	0
17.6	0
17.7	0
17.8	0
17.9	0
18	0
18.1	0
18.2	0
18.3	0
18.4	0
18.5	0
18.6	0
18.7	0
18.8	0
18.9	0
19	0
19.1	0
19.2	0
19.3	0
19.4	0
19.5	0
19.6	0
19.7	0
19.8	0
19.9	0
20	0
20.1	0
20.2	0
20.3	0
20.4	0
20.5	0
20.6	0
20.7	0
20.8	0
20.9	0
21	0
21.1	0
21.2	0
21.3	0
21.4	0
21.5	0
21.6	0
21.7	0
21.8	0
21.9	0
22	0
22.1	0
22.2	0
22.3	0
22.4	0
22.5	0
22.6	0
22.7	0
22.8	0
22.9	0
23	0
23.1	0
23.2	0
23.3	0
23.4	0
23.5	0
23.6	0
23.7	0
23.8	0
23.9	0
24	0
24.1	0
24.2	0
24.3	0
24.4	0
24.5	0
24.6	0
24.7	0
24.8	0
24.9	0
25	0
25.1	0
25.2	0
25.3	0
25.4	0
25.5	0
25.6	0
25.7	0
25.8	0
25.9	0
26	0
26.1	0
26.2	0
26.3	0
26.4	0
26.5	0
26.6	0
26.7	0
26.8	0
26.9	0
27	0
27.1	0
27.2	0
27.3	0
27.4	0
27.5	0
27.6	0
27.7	0
27.8	0
27.9	0
28	0
28.1	0
28.2	0
28.3	0
28.4	0
28.5	0
28.6	0
28.7	0
28.8	0
28.9	0
29	0
29.1	0
29.2	0
29.3	0
29.4	0
29.5	0
29.6	0
29.7	0
29.8	0
29.9	0
30	0
30.1	0
30.2	0
30.3	0
30.4	0
30.5	0
30.6	0
30.7	0
30.8	0
30.9	0
31	0
31.1	0
31.2	0
31.3	0
31.4	0
31.5	0
31.6	0
31.7	0
31.8	0
31.9	0
32	0
32.1	0
32.2	0
32.3	0
32.4	0
32.5	0
32.6	0
32.7	0
32.8	0
32.9	0
33	0
33.1	0
33.2	0
33.3	0
33.4	0
33.5	0
33.6	0
33.7	0
33.8	0
33.9	0
34	0
34.1	0
34.2	0
34.3	0
34.4	0
34.5	0
34.6	0
34.7	0
34.8	0
34.9	0
35	0
35.1	0
35.2	0
35.3	0
35.4	0
35.5	0
35.6	0
35.7	0
35.8	0
35.9	0
36	0
36.1	0
36.2	0
36.3	0
36.4	0
36.5	0
36.6	0
36.7	0
36.8	0
36.9	0
37	0
37.1	0
37.2	0
37.3	0
37.4	0
37.5	0
37.6	0
37.7	0
37.8	0
37.9	0
38	0
38.1	0
38.2	0
38.3	0
38.4	0
38.5	0
38.6	0
38.7	0
38.8	0
38.9	0
39	0
39.1	0
39.2	0
39.3	0
39.4	0
39.5	0
39.6	0
39.7	0
39.8	0
39.9	0
40	0
40.1	0
40.2	0
40.3	0
40.4	0
40.5	0
40.6	0
40.7	0
40.8	0
40.9	0
41	0
41.1	0
41.2	0
41.3	0
41.4	0
41.5	0
41.6	0
41.7	0
41.8	0
41.9	0
42	0
42.1	0
42.2	0
42.3	0
42.4	0
42.5	0
42.6	0
42.7	0
42.8	0
42.9	0
43	0
43.1	0
43.2	0
43.3	0
43.4	0
43.5	0
43.6	0
43.7	0
43.8	0
43.9	0
44	0
44.1	0
44.2	0
44.3	0
44.4	0
44.5	0
44.6	0
44.7	0
44.8	0
44.9	0
45	0
45.1	0
45.2	0
45.3	0
45.4	0
45.5	0
45.6	0
45.7	0
45.8	0
45.9	0
46	0
46.1	0
46.2	0
46.3	0
46.4	0
46.5	0
46.6	0
46.7	0
46.8	0
46.9	0
47	0
47.1	0
47.2	0
47.3	0
47.4	0
47.5	0
47.6	0
47.7	0
47.8	0
47.9	0
48	0
48.1	0
48.2	0
48.3	0
48.4	0
48.5	0
48.6	0
48.7	0
48.8	0
48.9	0
49	0
49.1	0
49.2	0
49.3	0
49.4	0
49.5	0
49.6	0
49.7	0
49.8	0
49.9	0
50	0
50.1	0
50.2	0
50.3	0
50.4	0
50.5	0
50.6	0
50.7	0
50.8	0
50.9	0
51	0
51.1	0
51.2	0
51.3	0
51.4	0
51.5	0
51.6	0
51.7	0
51.8	0
51.9	0
52	0
52.1	0
52.2	0
52.3	0
52.4	0
52.5	0
52.6	0
52.7	0
52.8	0
52.9	0
53	0
53.1	0
53.2	0
53.3	0
53.4	0
53.5	0
53.6	0
53.7	0
53.8	0
53.9	0
54	0
54.1	0
54.2	0
54.3	0
54.4	0
54.5	0
54.6	0
54.7	0
54.8	0
54.9	0
55	0
55.1	0
55.2	0
55.3	0
55.4	0
55.5	0
55.6	0
55.7	0
55.8	0
55.9	0
56	0
56.1	0
56.2	0
56.3	0
56.4	0
56.5	0
56.6	0
56.7	0
56.8	0
56.9	0
57	0
57.1	0
57.2	0
57.3	0
57.4	0
57.5	0
57.6	0
57.7	0
57.8	0
57.9	0
58	0
58.1	0
58.2	0
58.3	0
58.4	0
58.5	0
58.6	0
58.7	0
58.8	0
58.9	0
59	0
59.1	0
59.2	0
59.3	0
59.4	0
59.5	0
59.6	0
59.7	0
59.8	0
59.9	0
60	0
60.1	0
60.2	0
60.3	0
60.4	0
60.5	0
60.6	0
60.7	0
60.8	0
60.9	0
61	0
61.1	0
61.2	0
61.3	0
61.4	0
61.5	0
61.6	0
61.7	0
61.8	0
61.9	0
62	0
62.1	0
62.2	0
62.3	0
62.4	0
62.5	0
62.6	0
62.7	0
62.8	0
62.9	0
63	0
63.1	0
63.2	0
63.3	0
63.4	0
63.5	0
63.6	0
63.7	0
63.8	0
63.9	0
64	0
64.1	0
64.2	0
64.3	0
64.4	0
64.5	0
64.6	0
64.7	0
64.8	0
64.9	0
65	0
65.1	0
65.2	0
65.3	0
65.4	0
65.5	0
65.6	0
65.7	0
65.8	0
65.9	0
66	0
66.1	0
66.2	0
66.3	0
66.4	0
66.5	0
66.6	0
66.7	0
66.8	0
66.9	0
67	0
67.1	0
67.2	0
67.3	0
67.4	0
67.5	0
67.6	0
67.7	0
67.8	0
67.9	0
68	0
68.1	0
68.2	0
68.3	0
68.4	0
68.5	0
68.6	0
68.7	0
68.8	0
68.9	0
69	0
69.1	0
69.2	0
69.3	0
69.4	0
69.5	0
69.6	0
69.7	0
69.8	0
69.9	0
70	0
70.1	0
70.2	0
70.3	0
70.4	0
70.5	0
70.6	0
70.7	0
70.8	0
70.9	0
71	0
71.1	0
71.2	0
71.3	0
71.4	0
71.5	0
71.6	0
71.7	0
71.8	0
71.9	0
72	0
72.1	0
72.2	0
72.3	0
72.4	0
72.5	0
72.6	0
72.7	0
72.8	0
72.9	0
73	0
73.1	0
73.2	0
73.3	0
73.4	0
73.5	0
73.6	0
73.7	0
73.8	0
73.9	0
74	0
74.1	0
74.2	0
74.3	0
74.4	0
74.5	0
74.6	0
74.7	0
74.8	0
74.9	0
75	0
75.1	0
75.2	0
75.3	0
75.4	0
75.5	0
75.6	0
75.7	0
75.8	0
75.9	0
76	0
76.1	0
76.2	0
76.3	0
76.4	0
76.5	0
76.6	0
76.7	0
76.8	0
76.9	0
77	0
77.1	0
77.2	0
77.3	0
77.4	0
77.5	0
77.6	0
77.7	0
77.8	0
77.9	0
78	0
78.1	0
78.2	0
78.3	0
78.4	0
78.5	0
78.6	0
78.7	0
78.8	0
78.9	0
79	0
79.1	0
79.2	0
79.3	0
79.4	0
79.5	0
79.6	0
79.7	0
79.8	0
79.9	0
80	0
80.1	0
80.2	0
80.3	0
80.4	0
80.5	0
80.6	0
80.7	0
80.8	0
80.9	0
81	0
81.1	0
81.2	0
81.3	0
81.4	0
81.5	0
81.6	0
81.7	0
81.8	0
81.9	0
82	0
82.1	0
82.2	0
82.3	0
82.4	0
82.5	0
82.6	0
82.7	0
82.8	0
82.9	0
83	0
83.1	0
83.2	0
83.3	0
83.4	0
83.5	0
83.6	0
83.7	0
83.8	0
83.9	0
84	0
84.1	0
84.2	0
84.3	0
84.4	0
84.5	0
84.6	0
84.7	0
84.8	0
84.9	0
85	0
85.1	0
85.2	0
85.3	0
85.4	0
85.5	0
85.6	0
85.7	0
85.8	0
85.9	0
86	0
86.1	0
86.2	0
86.3	0
86.4	0
86.5	0
86.6	0
86.7	0
86.8	0
86.9	0
87	0
87.1	0
87.2	0
87.3	0
87.4	0
87.5	0
87.6	0
87.7	0
87.8	0
87.9	0
88	0
88.1	0
88.2	0
88.3	0
88.4	0
88.5	0
88.6	0
88.7	0
88.8	0
88.9	0
89	0
89.1	0
89.2	0
89.3	0
89.4	0
89.5	0
89.6	0
89.7	0
89.8	0
89.9	0
90	0
90.1	0
90.2	0
90.3	0
90.4	0
90.5	0
90.6	0
90.7	0
90.8	0
90.9	0
91	0
91.1	0
91.2	0
91.3	0
91.4	0
91.5	0
91.6	0
91.7	0
91.8	0
91.9	0
92	0
92.1	0
92.2	0
92.3	0
92.4	0
92.5	0
92.6	0
92.7	0
92.8	0
92.9	0
93	0
93.1	0
93.2	0
93.3	0
93.4	0
93.5	0
93.6	0
93.7	0
93.8	0
93.9	0
94	0
94.1	0
94.2	0
94.3	0
94.4	0
94.5	0
94.6	0
94.7	0
94.8	0
94.9	0
95	0
95.1	0
95.2	0
95.3	0
95.4	0
95.5	0
95.6	0
95.7	0
95.8	0
95.9	0
96	0
96.1	0
96.2	0
96.3	0
96.4	0
96.5	0
96.6	0
96.7	0
96.8	0
96.9	0
97	0
97.1	0
97.2	0
97.3	0
97.4	0
97.5	0
97.6	0
97.7	0
97.8	0
97.9	0
98	0
98.1	0
98.2	0
98.3	0
98.4	0
98.5	0
98.6	0
98.7	0
98.8	0
98.9	0
99	0
99.1	0
99.2	0
99.3	0
99.4	0
99.5	0
99.6	0
99.7	0
99.8	0
99.9	0
100	0
100.1	0.206
100.2	0.35075
100.3	0.4505
100.4	0.52775
100.5	0.5845
100.6	0.631
100.7	0.662
100.8	0.69375
100.9	0.71925
101	0.73925
101.1	0.75825
101.2	0.76975
101.3	0.7825
101.4	0.7955
101.5	0.80525
101.6	0.814
101.7	0.81825
101.8	0.821
101.9	0.828
102	0.831
102.1	0.829
102.2	0.833
102.3	0.838
102.4	0.83875
102.5	0.84125
102.6	0.84375
102.7	0.847
102.8	0.849
102.9	0.84725
103	0.85
103.1	0.8515
103.2	0.8585
103.3	0.85875
103.4	0.85925
103.5	0.85575
103.6	0.857
103.7	0.851
103.8	0.85825
103.9	0.8595
104	0.8615
104.1	0.85675
104.2	0.85925
104.3	0.8595
104.4	0.86075
104.5	0.861
104.6	0.8635
104.7	0.8655
104.8	0.86475
104.9	0.86675
105	0.86725
105.1	0.8665
105.2	0.866
105.3	0.86075
105.4	0.85975
105.5	0.862
105.6	0.8635
105.7	0.862
105.8	0.86425
105.9	0.86325
106	0.8665
106.1	0.86925
106.2	0.873
106.3	0.87325
106.4	0.87775
106.5	0.881
106.6	0.8805
106.7	0.881
106.8	0.881
106.9	0.87775
107	0.8775
107.1	0.88325
107.2	0.88025
107.3	0.878
107.4	0.87475
107.5	0.8755
107.6	0.879
107.7	0.874
107.8	0.8725
107.9	0.873
108	0.87475
108.1	0.8705
108.2	0.872
108.3	0.876
108.4	0.87475
108.5	0.8775
108.6	0.87825
108.7	0.8815
108.8	0.878
108.9	0.877
109	0.874
109.1	0.8765
109.2	0.879
109.3	0.878
109.4	0.882
109.5	0.88225
109.6	0.8805
109.7	0.884
109.8	0.88275
109.9	0.88625
110	0.878
110.1	0.88175
110.2	0.88075
110.3	0.88025
110.4	0.8845
110.5	0.886
110.6	0.88725
110.7	0.89025
110.8	0.89
110.9	0.8895
111	0.8945
111.1	0.89575
111.2	0.895
111.3	0.8995
111.4	0.89575
111.5	0.8985
111.6	0.90075
111.7	0.89625
111.8	0.89825
111.9	0.90025
112	0.89725
112.1	0.90075
112.2	0.90075
112.3	0.8965
112.4	0.89675
112.5	0.89875
112.6	0.89825
112.7	0.896
112.8	0.895
112.9	0.8905
113	0.889
113.1	0.888
113.2	0.8895
113.3	0.89
113.4	0.8885
113.5	0.89
113.6	0.89625
113.7	0.898
113.8	0.89425
113.9	0.89875
114	0.89325
114.1	0.89625
114.2	0.898
114.3	0.9
114.4	0.901
114.5	0.90175
114.6	0.8975
114.7	0.9
114.8	0.90175
114.9	0.9015
115	0.90625
115.1	0.90525
115.2	0.90675
115.3	0.90575
115.4	0.90525
115.5	0.90275
115.6	0.902
115.7	0.899
115.8	0.89975
115.9	0.901
116	0.90625
116.1	0.90575
116.2	0.90375
116.3	0.903
116.4	0.90275
116.5	0.90375
116.6	0.90175
116.7	0.90375
116.8	0.90375
116.9	0.90375
117	0.904
117.1	0.90225
117.2	0.9065
117.3	0.908
117.4	0.90825
117.5	0.90975
117.6	0.909
117.7	0.90625
117.8	0.90575
117.9	0.90775
118	0.9065
118.1	0.9065
118.2	0.90425
118.3	0.90775
118.4	0.91175
118.5	0.91
118.6	0.90675
118.7	0.90775
118.8	0.9085
118.9	0.905
119	0.90725
119.1	0.9085
119.2	0.9075
119.3	0.9055
119.4	0.9095
119.5	0.9115
119.6	0.908
119.7	0.905
119.8	0.904
119.9	0.908
120	0.908
120.1	0.9085
120.2	0.91225
120.3	0.91225
120.4	0.9115
120.5	0.91325
120.6	0.912
120.7	0.91325
120.8	0.9115
120.9	0.91575
121	0.91575
121.1	0.91775
121.2	0.91775
121.3	0.9175
121.4	0.91775
121.5	0.918
121.6	0.914
121.7	0.914
121.8	0.91475
121.9	0.91725
122	0.9155
122.1	0.9135
122.2	0.91225
122.3	0.91075
122.4	0.91275
122.5	0.9125
122.6	0.91275
122.7	0.91075
122.8	0.909
122.9	0.911
123	0.911
123.1	0.9115
123.2	0.916
123.3	0.91825
123.4	0.91925
123.5	0.9165
123.6	0.91475
123.7	0.9145
123.8	0.9145
123.9	0.9145
124	0.912
124.1	0.91125
124.2	0.914
124.3	0.9165
124.4	0.91675
124.5	0.91775
124.6	0.9155
124.7	0.919
124.8	0.9195
124.9	0.91975
125	0.92
125.1	0.921
125.2	0.9215
125.3	0.92125
125.4	0.923
125.5	0.9225
125.6	0.923
125.7	0.92525
125.8	0.927
125.9	0.9255
126	0.92425
126.1	0.9255
126.2	0.9235
126.3	0.919
126.4	0.92425
126.5	0.925
126.6	0.92525
126.7	0.92375
126.8	0.923
126.9	0.925
127	0.922
127.1	0.92625
127.2	0.9295
127.3	0.926
127.4	0.92675
127.5	0.92875
127.6	0.9275
127.7	0.93175
127.8	0.934
127.9	0.93375
128	0.93225
128.1	0.92825
128.2	0.9275
128.3	0.928
128.4	0.925
128.5	0.9255
128.6	0.92675
128.7	0.9255
128.8	0.928
128.9	0.92475
129	0.92525
129.1	0.92725
129.2	0.9285
129.3	0.93025
129.4	0.929
129.5	0.92825
129.6	0.927
129.7	0.93
129.8	0.927
129.9	0.9285
130	0.92875
130.1	0.92825
130.2	0.93075
130.3	0.93075
130.4	0.9305
130.5	0.9305
130.6	0.9315
130.7	0.92875
130.8	0.93125
130.9	0.93575
131	0.93575
131.1	0.93575
131.2	0.93575
131.3	0.93425
131.4	0.93475
131.5	0.9335
131.6	0.93175
131.7	0.9315
131.8	0.932
131.9	0.932
132	0.92875
132.1	0.9305
132.2	0.9295
132.3	0.92975
132.4	0.92775
132.5	0.92625
132.6	0.92575
132.7	0.92375
132.8	0.9275
132.9	0.93025
133	0.9285
133.1	0.93
133.2	0.93175
133.3	0.932
133.4	0.93175
133.5	0.9335
133.6	0.932
133.7	0.932
133.8	0.93325
133.9	0.935
134	0.9355
134.1	0.935
134.2	0.932
134.3	0.9315
134.4	0.93225
134.5	0.9345
134.6	0.93775
134.7	0.938
134.8	0.93775
134.9	0.9395
135	0.9385
135.1	0.941
135.2	0.93975
135.3	0.93825
135.4	0.93875
135.5	0.93825
135.6	0.939
135.7	0.93825
135.8	0.9385
135.9	0.93725
136	0.93875
136.1	0.9385
136.2	0.93925
136.3	0.9365
136.4	0.9365
136.5	0.934
136.6	0.93175
136.7	0.9345
136.8	0.934
136.9	0.931
137	0.93075
137.1	0.93125
137.2	0.93625
137.3	0.9365
137.4	0.94
137.5	0.93925
137.6	0.93725
137.7	0.934
137.8	0.9345
137.9	0.937
138	0.938
138.1	0.93925
138.2	0.944
138.3	0.94475
138.4	0.9435
138.5	0.944
138.6	0.942
138.7	0.94125
138.8	0.94025
138.9	0.9385
139	0.93875
139.1	0.94075
139.2	0.93775
139.3	0.94025
139.4	0.93975
139.5	0.9405
139.6	0.94175
139.7	0.94225
139.8	0.945
139.9	0.9425
140	0.9425
140.1	0.9415
140.2	0.94125
140.3	0.94075
140.4	0.9425
140.5	0.94325
140.6	0.9465
140.7	0.9445
140.8	0.9445
140.9	0.94475
141	0.944
141.1	0.94375
141.2	0.942
141.3	0.9405
141.4	0.94225
141.5	0.94175
141.6	0.9405
141.7	0.939
141.8	0.9415
141.9	0.94325
142	0.9455
142.1	0.945
142.2	0.94475
142.3	0.9445
142.4	0.94225
142.5	0.944
142.6	0.9425
142.7	0.9415
142.8	0.94375
142.9	0.9445
143	0.9455
143.1	0.9465
143.2	0.94675
143.3	0.94675
143.4	0.9495
143.5	0.95075
143.6	0.95225
143.7	0.951
143.8	0.9505
143.9	0.95
144	0.94775
144.1	0.94725
144.2	0.9465
144.3	0.94925
144.4	0.94425
144.5	0.94575
144.6	0.947
144.7	0.9465
144.8	0.94475
144.9	0.94375
145	0.945
145.1	0.9465
145.2	0.948
145.3	0.94125
145.4	0.943
145.5	0.94475
145.6	0.94675
145.7	0.9465
145.8	0.94725
145.9	0.946
146	0.94775
146.1	0.948
146.2	0.94825
146.3	0.94525
146.4	0.944
146.5	0.94325
146.6	0.9435
146.7	0.94475
146.8	0.94725
146.9	0.9455
147	0.94575
147.1	0.9475
147.2	0.94625
147.3	0.9475
147.4	0.94825
147.5	0.94975
147.6	0.948
147.7	0.94825
147.8	0.951
147.9	0.9505
148	0.952
148.1	0.95275
148.2	0.9515
148.3	0.94975
148.4	0.94875
148.5	0.95125
148.6	0.95125
148.7	0.95
148.8	0.95
148.9	0.949
149	0.94975
149.1	0.94725
149.2	0.94725
149.3	0.944
149.4	0.9475
149.5	0.9505
149.6	0.95
149.7	0.94925
149.8	0.946
149.9	0.946
150	0.945
150.1	0.943
150.2	0.94525
150.3	0.94575
150.4	0.94525
150.5	0.9465
150.6	0.946
150.7	0.947
150.8	0.94725
150.9	0.947
151	0.94875
151.1	0.948
151.2	0.945
151.3	0.9465
151.4	0.94725
151.5	0.94575
151.6	0.94725
151.7	0.94625
151.8	0.94725
151.9	0.94575
152	0.9445
152.1	0.94725
152.2	0.948
152.3	0.9475
152.4	0.94775
152.5	0.9475
152.6	0.9515
152.7	0.95025
152.8	0.94975
152.9	0.9495
153	0.949
153.1	0.94775
153.2	0.947
153.3	0.94625
153.4	0.9455
153.5	0.94275
153.6	0.94625
153.7	0.94625
153.8	0.94575
153.9	0.9455
154	0.9475
154.1	0.9485
154.2	0.94925
154.3	0.9495
154.4	0.9495
154.5	0.952
154.6	0.9505
154.7	0.9505
154.8	0.94975
154.9	0.9505
155	0.9475
155.1	0.94675
155.2	0.94625
155.3	0.943
155.4	0.94525
155.5	0.94575
155.6	0.95075
155.7	0.94875
155.8	0.9485
155.9	0.95
156	0.94875
156.1	0.94475
156.2	0.943
156.3	0.9425
156.4	0.945
156.5	0.946
156.6	0.94625
156.7	0.94825
156.8	0.94875
156.9	0.94625
157	0.946
157.1	0.94675
157.2	0.9455
157.3	0.946
157.4	0.944
157.5	0.945
157.6	0.9455
157.7	0.94575
157.8	0.94725
157.9	0.949
158	0.95
158.1	0.95175
158.2	0.9515
158.3	0.9505
158.4	0.95
158.5	0.9515
158.6	0.951
158.7	0.95225
158.8	0.95275
158.9	0.953
159	0.952
159.1	0.949
159.2	0.94825
159.3	0.9485
159.4	0.94775
159.5	0.9485
159.6	0.94975
159.7	0.9515
159.8	0.95375
159.9	0.95325
160	0.956
160.1	0.95425
160.2	0.9535
160.3	0.95475
160.4	0.95825
160.5	0.9605
160.6	0.9585
160.7	0.9595
160.8	0.95825
160.9	0.95725
161	0.957
161.1	0.9565
161.2	0.9545
161.3	0.95625
161.4	0.95775
161.5	0.95925
161.6	0.9605
161.7	0.96025
161.8	0.95925
161.9	0.95725
162	0.95775
162.1	0.95625
162.2	0.95875
162.3	0.95725
162.4	0.9555
162.5	0.95625
162.6	0.95475
162.7	0.956
162.8	0.955
162.9	0.955
163	0.9565
163.1	0.955
163.2	0.9555
163.3	0.95725
163.4	0.95725
163.5	0.95725
163.6	0.9565
163.7	0.95675
163.8	0.95475
163.9	0.954
164	0.955
164.1	0.956
164.2	0.95325
164.3	0.95225
164.4	0.954
164.5	0.95475
164.6	0.95125
164.7	0.95225
164.8	0.952
164.9	0.955
165	0.95675
165.1	0.957
165.2	0.95725
165.3	0.9575
165.4	0.9585
165.5	0.9565
165.6	0.958
165.7	0.96025
165.8	0.9575
165.9	0.9565
166	0.9575
166.1	0.9565
166.2	0.9555
166.3	0.95525
166.4	0.956
166.5	0.957
166.6	0.96025
166.7	0.95725
166.8	0.95675
166.9	0.955
167	0.958
167.1	0.9555
167.2	0.95525
167.3	0.95625
167.4	0.95525
167.5	0.9545
167.6	0.9535
167.7	0.95475
167.8	0.9555
167.9	0.956
168	0.9545
168.1	0.95375
168.2	0.95725
168.3	0.959
168.4	0.962
168.5	0.96175
168.6	0.96075
168.7	0.95925
168.8	0.95925
168.9	0.9595
169	0.9595
169.1	0.95975
169.2	0.96075
169.3	0.96075
169.4	0.96025
169.5	0.96025
169.6	0.961
169.7	0.9615
169.8	0.96225
169.9	0.9615
170	0.96125
170.1	0.95975
170.2	0.9595
170.3	0.95775
170.4	0.95825
170.5	0.95875
170.6	0.96025
170.7	0.96225
170.8	0.962
170.9	0.96225
171	0.9595
171.1	0.95725
171.2	0.95725
171.3	0.96
171.4	0.95825
171.5	0.955
171.6	0.95475
171.7	0.95575
171.8	0.95475
171.9	0.957
172	0.956
172.1	0.9555
172.2	0.95575
172.3	0.957
172.4	0.95675
172.5	0.95725
172.6	0.9585
172.7	0.95625
172.8	0.95525
172.9	0.95675
173	0.95725
173.1	0.9565
173.2	0.95625
173.3	0.956
173.4	0.95475
173.5	0.95575
173.6	0.956
173.7	0.9535
173.8	0.9535
173.9	0.95675
174	0.9575
174.1	0.9555
174.2	0.95875
174.3	0.95775
174.4	0.95875
174.5	0.9605
174.6	0.961
174.7	0.9605
174.8	0.961
174.9	0.961
175	0.961
175.1	0.95875
175.2	0.95975
175.3	0.9605
175.4	0.95925
175.5	0.96075
175.6	0.962
175.7	0.963
175.8	0.96375
175.9	0.962
176	0.96075
176.1	0.95925
176.2	0.96025
176.3	0.96025
176.4	0.9605
176.5	0.96075
176.6	0.95925
176.7	0.958
176.8	0.95825
176.9	0.958
177	0.959
177.1	0.96125
177.2	0.9585
177.3	0.96025
177.4	0.95775
177.5	0.9575
177.6	0.95975
177.7	0.95975
177.8	0.9575
177.9	0.95525
178	0.9555
178.1	0.9545
178.2	0.9545
178.3	0.95725
178.4	0.958
178.5	0.961
178.6	0.96025
178.7	0.96125
178.8	0.96075
178.9	0.95975
179	0.95775
179.1	0.95725
179.2	0.96
179.3	0.959
179.4	0.96075
179.5	0.962
179.6	0.96125
179.7	0.962
179.8	0.96075
179.9	0.96125
180	0.96075
180.1	0.95825
180.2	0.958
180.3	0.957
180.4	0.95675
180.5	0.95675
180.6	0.9575
180.7	0.9565
180.8	0.9585
180.9	0.95975
181	0.95925
181.1	0.9595
181.2	0.95875
181.3	0.962
181.4	0.96375
181.5	0.9635
181.6	0.9605
181.7	0.961
181.8	0.9625
181.9	0.96125
182	0.9575
182.1	0.9585
182.2	0.95825
182.3	0.95925
182.4	0.95875
182.5	0.96
182.6	0.96
182.7	0.9605
182.8	0.96225
182.9	0.9625
183	0.9595
183.1	0.96175
183.2	0.9615
183.3	0.9615
183.4	0.9635
183.5	0.964
183.6	0.96325
183.7	0.96
183.8	0.96125
183.9	0.95975
184	0.96
184.1	0.96025
184.2	0.96175
184.3	0.962
184.4	0.9625
184.5	0.9625
184.6	0.96175
184.7	0.9615
184.8	0.95975
184.9	0.95925
185	0.96025
185.1	0.9565
185.2	0.95775
185.3	0.958
185.4	0.95775
185.5	0.96275
185.6	0.96275
185.7	0.96375
185.8	0.96375
185.9	0.96275
186	0.9625
186.1	0.962
186.2	0.962
186.3	0.96275
186.4	0.96425
186.5	0.96525
186.6	0.96375
186.7	0.964
186.8	0.964
186.9	0.9615
187	0.96125
187.1	0.96525
187.2	0.96375
187.3	0.9645
187.4	0.96325
187.5	0.96475
187.6	0.96525
187.7	0.96525
187.8	0.96475
187.9	0.964
188	0.96475
188.1	0.96525
188.2	0.96475
188.3	0.965
188.4	0.9655
188.5	0.96275
188.6	0.96325
188.7	0.96475
188.8	0.9625
188.9	0.96075
189	0.9615
189.1	0.9595
189.2	0.96
189.3	0.9595
189.4	0.959
189.5	0.9595
189.6	0.962
189.7	0.96175
189.8	0.96225
189.9	0.96125
190	0.962
190.1	0.9615
190.2	0.965
190.3	0.96375
190.4	0.9625
190.5	0.962
190.6	0.96475
190.7	0.96575
190.8	0.965
190.9	0.968
191	0.96625
191.1	0.96275
191.2	0.96225
191.3	0.96125
191.4	0.96175
191.5	0.9615
191.6	0.96125
191.7	0.9625
191.8	0.966
191.9	0.9655
192	0.966
192.1	0.9655
192.2	0.9655
192.3	0.965
192.4	0.967
192.5	0.96375
192.6	0.96375
192.7	0.96275
192.8	0.963
192.9	0.9615
193	0.96475
193.1	0.9645
193.2	0.96625
193.3	0.96575
193.4	0.96475
193.5	0.963
193.6	0.9645
193.7	0.96375
193.8	0.9625
193.9	0.9635
194	0.962
194.1	0.961
194.2	0.96225
194.3	0.962
194.4	0.962
194.5	0.96
194.6	0.95975
194.7	0.9625
194.8	0.961
194.9	0.95975
195	0.96125
195.1	0.96325
195.2	0.9635
195.3	0.96275
195.4	0.96125
195.5	0.96325
195.6	0.96325
195.7	0.96175
195.8	0.96075
195.9	0.9615
196	0.9605
196.1	0.961
196.2	0.9615
196.3	0.96375
196.4	0.9645
196.5	0.9655
196.6	0.96625
196.7	0.96575
196.8	0.96525
196.9	0.966
197	0.96525
197.1	0.965
197.2	0.964
197.3	0.96675
197.4	0.96575
197.5	0.9665
197.6	0.96575
197.7	0.96525
197.8	0.966
197.9	0.96575
198	0.965
198.1	0.96575
198.2	0.96475
198.3	0.9655
198.4	0.96675
198.5	0.96825
198.6	0.96575
198.7	0.96625
198.8	0.968
198.9	0.96775
199	0.96625
199.1	0.966
199.2	0.964
199.3	0.96425
199.4	0.9635
199.5	0.96425
199.6	0.96325
199.7	0.96325
199.8	0.963
199.9	0.965
200	0.96425
[truncated: 14,000 more rows]
