# Supplementary material for: Bayesian inference of kinetic schemes for ion channels by Kalman filtering
Source: eLife journal article supplement (doi:10.7554/elife.62714), 2022-05-04
Supplement: fig4-data5 [file 1_Sim_N_2000_Strom_MW.xlsx]

## Sheet: Tabelle1
0.1	0
0.2	0
0.3	0
0.4	0
0.5	0
0.6	0
0.7	0
0.8	0
0.9	0
1	0
1.1	0
1.2	0
1.3	0
1.4	0
1.5	0
1.6	0
1.7	0
1.8	0
1.9	0
2	0
2.1	0
2.2	0
2.3	0
2.4	0
2.5	0
2.6	0
2.7	0
2.8	0
2.9	0
3	0
3.1	0
3.2	0
3.3	0
3.4	0
3.5	0
3.6	0
3.7	0
3.8	0
3.9	0
4	0
4.1	0
4.2	0
4.3	0
4.4	0
4.5	0
4.6	0
4.7	0
4.8	0
4.9	0
5	0
5.1	0
5.2	0
5.3	0
5.4	0
5.5	0
5.6	0
5.7	0
5.8	0
5.9	0
6	0
6.1	0
6.2	0
6.3	0
6.4	0
6.5	0
6.6	0
6.7	0
6.8	0
6.9	0
7	0
7.1	0
7.2	0
7.3	0
7.4	0
7.5	0
7.6	0
7.7	0
7.8	0
7.9	0
8	0
8.1	0
8.2	0
8.3	0
8.4	0
8.5	0
8.6	0
8.7	0
8.8	0
8.9	0
9	0
9.1	0
9.2	0
9.3	0
9.4	0
9.5	0
9.6	0
9.7	0
9.8	0
9.9	0
10	0
10.1	0
10.2	0
10.3	0
10.4	0
10.5	0
10.6	0
10.7	0
10.8	0
10.9	0
11	0
11.1	0
11.2	0
11.3	0
11.4	0
11.5	0
11.6	0
11.7	0
11.8	0
11.9	0
12	0
12.1	0
12.2	0
12.3	0
12.4	0
12.5	0
12.6	0
12.7	0
12.8	0
12.9	0
13	0
13.1	0
13.2	0
13.3	0
13.4	0
13.5	0
13.6	0
13.7	0
13.8	0
13.9	0
14	0
14.1	0
14.2	0
14.3	0
14.4	0
14.5	0
14.6	0
14.7	0
14.8	0
14.9	0
15	0
15.1	0
15.2	0
15.3	0
15.4	0
15.5	0
15.6	0
15.7	0
15.8	0
15.9	0
16	0
16.1	0
16.2	0
16.3	0
16.4	0
16.5	0
16.6	0
16.7	0
16.8	0
16.9	0
17	0
17.1	0
17.2	0
17.3	0
17.4	0
17.5	0
17.6	0
17.7	0
17.8	0
17.9	0
18	0
18.1	0
18.2	0
18.3	0
18.4	0
18.5	0
18.6	0
18.7	0
18.8	0
18.9	0
19	0
19.1	0
19.2	0
19.3	0
19.4	0
19.5	0
19.6	0
19.7	0
19.8	0
19.9	0
20	0
20.1	0
20.2	0
20.3	0
20.4	0
20.5	0
20.6	0
20.7	0
20.8	0
20.9	0
21	0
21.1	0
21.2	0
21.3	0
21.4	0
21.5	0
21.6	0
21.7	0
21.8	0
21.9	0
22	0
22.1	0
22.2	0
22.3	0
22.4	0
22.5	0
22.6	0
22.7	0
22.8	0
22.9	0
23	0
23.1	0
23.2	0
23.3	0
23.4	0
23.5	0
23.6	0
23.7	0
23.8	0
23.9	0
24	0
24.1	0
24.2	0
24.3	0
24.4	0
24.5	0
24.6	0
24.7	0
24.8	0
24.9	0
25	0
25.1	0
25.2	0
25.3	0
25.4	0
25.5	0
25.6	0
25.7	0
25.8	0
25.9	0
26	0
26.1	0
26.2	0
26.3	0
26.4	0
26.5	0
26.6	0
26.7	0
26.8	0
26.9	0
27	0
27.1	0
27.2	0
27.3	0
27.4	0
27.5	0
27.6	0
27.7	0
27.8	0
27.9	0
28	0
28.1	0
28.2	0
28.3	0
28.4	0
28.5	0
28.6	0
28.7	0
28.8	0
28.9	0
29	0
29.1	0
29.2	0
29.3	0
29.4	0
29.5	0
29.6	0
29.7	0
29.8	0
29.9	0
30	0
30.1	0
30.2	0
30.3	0
30.4	0
30.5	0
30.6	0
30.7	0
30.8	0
30.9	0
31	0
31.1	0
31.2	0
31.3	0
31.4	0
31.5	0
31.6	0
31.7	0
31.8	0
31.9	0
32	0
32.1	0
32.2	0
32.3	0
32.4	0
32.5	0
32.6	0
32.7	0
32.8	0
32.9	0
33	0
33.1	0
33.2	0
33.3	0
33.4	0
33.5	0
33.6	0
33.7	0
33.8	0
33.9	0
34	0
34.1	0
34.2	0
34.3	0
34.4	0
34.5	0
34.6	0
34.7	0
34.8	0
34.9	0
35	0
35.1	0
35.2	0
35.3	0
35.4	0
35.5	0
35.6	0
35.7	0
35.8	0
35.9	0
36	0
36.1	0
36.2	0
36.3	0
36.4	0
36.5	0
36.6	0
36.7	0
36.8	0
36.9	0
37	0
37.1	0
37.2	0
37.3	0
37.4	0
37.5	0
37.6	0
37.7	0
37.8	0
37.9	0
38	0
38.1	0
38.2	0
38.3	0
38.4	0
38.5	0
38.6	0
38.7	0
38.8	0
38.9	0
39	0
39.1	0
39.2	0
39.3	0
39.4	0
39.5	0
39.6	0
39.7	0
39.8	0
39.9	0
40	0
40.1	0
40.2	0
40.3	0
40.4	0
40.5	0
40.6	0
40.7	0
40.8	0
40.9	0
41	0
41.1	0
41.2	0
41.3	0
41.4	0
41.5	0
41.6	0
41.7	0
41.8	0
41.9	0
42	0
42.1	0
42.2	0
42.3	0
42.4	0
42.5	0
42.6	0
42.7	0
42.8	0
42.9	0
43	0
43.1	0
43.2	0
43.3	0
43.4	0
43.5	0
43.6	0
43.7	0
43.8	0
43.9	0
44	0
44.1	0
44.2	0
44.3	0
44.4	0
44.5	0
44.6	0
44.7	0
44.8	0
44.9	0
45	0
45.1	0
45.2	0
45.3	0
45.4	0
45.5	0
45.6	0
45.7	0
45.8	0
45.9	0
46	0
46.1	0
46.2	0
46.3	0
46.4	0
46.5	0
46.6	0
46.7	0
46.8	0
46.9	0
47	0
47.1	0
47.2	0
47.3	0
47.4	0
47.5	0
47.6	0
47.7	0
47.8	0
47.9	0
48	0
48.1	0
48.2	0
48.3	0
48.4	0
48.5	0
48.6	0
48.7	0
48.8	0
48.9	0
49	0
49.1	0
49.2	0
49.3	0
49.4	0
49.5	0
49.6	0
49.7	0
49.8	0
49.9	0
50	0
50.1	0
50.2	0
50.3	0
50.4	0
50.5	0
50.6	0
50.7	0
50.8	0
50.9	0
51	0
51.1	0
51.2	0
51.3	0
51.4	0
51.5	0
51.6	0
51.7	0
51.8	0
51.9	0
52	0
52.1	0
52.2	0
52.3	0
52.4	0
52.5	0
52.6	0
52.7	0
52.8	0
52.9	0
53	0
53.1	0
53.2	0
53.3	0
53.4	0
53.5	0
53.6	0
53.7	0
53.8	0
53.9	0
54	0
54.1	0
54.2	0
54.3	0
54.4	0
54.5	0
54.6	0
54.7	0
54.8	0
54.9	0
55	0
55.1	0
55.2	0
55.3	0
55.4	0
55.5	0
55.6	0
55.7	0
55.8	0
55.9	0
56	0
56.1	0
56.2	0
56.3	0
56.4	0
56.5	0
56.6	0
56.7	0
56.8	0
56.9	0
57	0
57.1	0
57.2	0
57.3	0
57.4	0
57.5	0
57.6	0
57.7	0
57.8	0
57.9	0
58	0
58.1	0
58.2	0
58.3	0
58.4	0
58.5	0
58.6	0
58.7	0
58.8	0
58.9	0
59	0
59.1	0
59.2	0
59.3	0
59.4	0
59.5	0
59.6	0
59.7	0
59.8	0
59.9	0
60	0
60.1	0
60.2	0
60.3	0
60.4	0
60.5	0
60.6	0
60.7	0
60.8	0
60.9	0
61	0
61.1	0
61.2	0
61.3	0
61.4	0
61.5	0
61.6	0
61.7	0
61.8	0
61.9	0
62	0
62.1	0
62.2	0
62.3	0
62.4	0
62.5	0
62.6	0
62.7	0
62.8	0
62.9	0
63	0
63.1	0
63.2	0
63.3	0
63.4	0
63.5	0
63.6	0
63.7	0
63.8	0
63.9	0
64	0
64.1	0
64.2	0
64.3	0
64.4	0
64.5	0
64.6	0
64.7	0
64.8	0
64.9	0
65	0
65.1	0
65.2	0
65.3	0
65.4	0
65.5	0
65.6	0
65.7	0
65.8	0
65.9	0
66	0
66.1	0
66.2	0
66.3	0
66.4	0
66.5	0
66.6	0
66.7	0
66.8	0
66.9	0
67	0
67.1	0
67.2	0
67.3	0
67.4	0
67.5	0
67.6	0
67.7	0
67.8	0
67.9	0
68	0
68.1	0
68.2	0
68.3	0
68.4	0
68.5	0
68.6	0
68.7	0
68.8	0
68.9	0
69	0
69.1	0
69.2	0
69.3	0
69.4	0
69.5	0
69.6	0
69.7	0
69.8	0
69.9	0
70	0
70.1	0
70.2	0
70.3	0
70.4	0
70.5	0
70.6	0
70.7	0
70.8	0
70.9	0
71	0
71.1	0
71.2	0
71.3	0
71.4	0
71.5	0
71.6	0
71.7	0
71.8	0
71.9	0
72	0
72.1	0
72.2	0
72.3	0
72.4	0
72.5	0
72.6	0
72.7	0
72.8	0
72.9	0
73	0
73.1	0
73.2	0
73.3	0
73.4	0
73.5	0
73.6	0
73.7	0
73.8	0
73.9	0
74	0
74.1	0
74.2	0
74.3	0
74.4	0
74.5	0
74.6	0
74.7	0
74.8	0
74.9	0
75	0
75.1	0
75.2	0
75.3	0
75.4	0
75.5	0
75.6	0
75.7	0
75.8	0
75.9	0
76	0
76.1	0
76.2	0
76.3	0
76.4	0
76.5	0
76.6	0
76.7	0
76.8	0
76.9	0
77	0
77.1	0
77.2	0
77.3	0
77.4	0
77.5	0
77.6	0
77.7	0
77.8	0
77.9	0
78	0
78.1	0
78.2	0
78.3	0
78.4	0
78.5	0
78.6	0
78.7	0
78.8	0
78.9	0
79	0
79.1	0
79.2	0
79.3	0
79.4	0
79.5	0
79.6	0
79.7	0
79.8	0
79.9	0
80	0
80.1	0
80.2	0
80.3	0
80.4	0
80.5	0
80.6	0
80.7	0
80.8	0
80.9	0
81	0
81.1	0
81.2	0
81.3	0
81.4	0
81.5	0
81.6	0
81.7	0
81.8	0
81.9	0
82	0
82.1	0
82.2	0
82.3	0
82.4	0
82.5	0
82.6	0
82.7	0
82.8	0
82.9	0
83	0
83.1	0
83.2	0
83.3	0
83.4	0
83.5	0
83.6	0
83.7	0
83.8	0
83.9	0
84	0
84.1	0
84.2	0
84.3	0
84.4	0
84.5	0
84.6	0
84.7	0
84.8	0
84.9	0
85	0
85.1	0
85.2	0
85.3	0
85.4	0
85.5	0
85.6	0
85.7	0
85.8	0
85.9	0
86	0
86.1	0
86.2	0
86.3	0
86.4	0
86.5	0
86.6	0
86.7	0
86.8	0
86.9	0
87	0
87.1	0
87.2	0
87.3	0
87.4	0
87.5	0
87.6	0
87.7	0
87.8	0
87.9	0
88	0
88.1	0
88.2	0
88.3	0
88.4	0
88.5	0
88.6	0
88.7	0
88.8	0
88.9	0
89	0
89.1	0
89.2	0
89.3	0
89.4	0
89.5	0
89.6	0
89.7	0
89.8	0
89.9	0
90	0
90.1	0
90.2	0
90.3	0
90.4	0
90.5	0
90.6	0
90.7	0
90.8	0
90.9	0
91	0
91.1	0
91.2	0
91.3	0
91.4	0
91.5	0
91.6	0
91.7	0
91.8	0
91.9	0
92	0
92.1	0
92.2	0
92.3	0
92.4	0
92.5	0
92.6	0
92.7	0
92.8	0
92.9	0
93	0
93.1	0
93.2	0
93.3	0
93.4	0
93.5	0
93.6	0
93.7	0
93.8	0
93.9	0
94	0
94.1	0
94.2	0
94.3	0
94.4	0
94.5	0
94.6	0
94.7	0
94.8	0
94.9	0
95	0
95.1	0
95.2	0
95.3	0
95.4	0
95.5	0
95.6	0
95.7	0
95.8	0
95.9	0
96	0
96.1	0
96.2	0
96.3	0
96.4	0
96.5	0
96.6	0
96.7	0
96.8	0
96.9	0
97	0
97.1	0
97.2	0
97.3	0
97.4	0
97.5	0
97.6	0
97.7	0
97.8	0
97.9	0
98	0
98.1	0
98.2	0
98.3	0
98.4	0
98.5	0
98.6	0
98.7	0
98.8	0
98.9	0
99	0
99.1	0
99.2	0
99.3	0
99.4	0
99.5	0
99.6	0
99.7	0
99.8	0
99.9	0
100	0
100.1	0
100.2	0.0005
100.3	0.0005
100.4	0.002
100.5	0.004
100.6	0.004
100.7	0.0065
100.8	0.008
100.9	0.0095
101	0.0135
101.1	0.0165
101.2	0.0195
101.3	0.0225
101.4	0.0245
101.5	0.028
101.6	0.032
101.7	0.035
101.8	0.0375
101.9	0.0405
102	0.0415
102.1	0.046
102.2	0.047
102.3	0.0495
102.4	0.05
102.5	0.0525
102.6	0.055
102.7	0.059
102.8	0.063
102.9	0.0655
103	0.0705
103.1	0.0725
103.2	0.0735
103.3	0.0755
103.4	0.077
103.5	0.08
103.6	0.0815
103.7	0.0845
103.8	0.0875
103.9	0.091
104	0.0935
104.1	0.098
104.2	0.101
104.3	0.1025
104.4	0.105
104.5	0.11
104.6	0.113
104.7	0.1155
104.8	0.118
104.9	0.1205
105	0.124
105.1	0.1265
105.2	0.129
105.3	0.132
105.4	0.134
105.5	0.136
105.6	0.139
105.7	0.14
105.8	0.1405
105.9	0.145
106	0.1485
106.1	0.1505
106.2	0.1525
106.3	0.1565
106.4	0.158
106.5	0.1615
106.6	0.1635
106.7	0.164
106.8	0.167
106.9	0.1695
107	0.1715
107.1	0.175
107.2	0.1785
107.3	0.1825
107.4	0.184
107.5	0.189
107.6	0.1945
107.7	0.1975
107.8	0.1985
107.9	0.2
108	0.201
108.1	0.2045
108.2	0.208
108.3	0.2095
108.4	0.2135
108.5	0.217
108.6	0.2185
108.7	0.2215
108.8	0.225
108.9	0.2285
109	0.232
109.1	0.234
109.2	0.2385
109.3	0.2415
109.4	0.242
109.5	0.2445
109.6	0.248
109.7	0.252
109.8	0.254
109.9	0.257
110	0.2595
110.1	0.262
110.2	0.264
110.3	0.2645
110.4	0.2675
110.5	0.27
110.6	0.271
110.7	0.2715
110.8	0.275
110.9	0.2775
111	0.2805
111.1	0.282
111.2	0.283
111.3	0.2845
111.4	0.2845
111.5	0.285
111.6	0.287
111.7	0.291
111.8	0.292
111.9	0.296
112	0.298
112.1	0.3015
112.2	0.303
112.3	0.3045
112.4	0.3085
112.5	0.3085
112.6	0.3125
112.7	0.3135
112.8	0.3135
112.9	0.315
113	0.3155
113.1	0.316
113.2	0.317
113.3	0.3195
113.4	0.321
113.5	0.323
113.6	0.325
113.7	0.3265
113.8	0.3265
113.9	0.328
114	0.3295
114.1	0.333
114.2	0.337
114.3	0.3375
114.4	0.3405
114.5	0.343
114.6	0.345
114.7	0.3465
114.8	0.3495
114.9	0.35
115	0.3525
115.1	0.3545
115.2	0.356
115.3	0.3575
115.4	0.36
115.5	0.3625
115.6	0.3625
115.7	0.3655
115.8	0.3665
115.9	0.3685
116	0.37
116.1	0.371
116.2	0.3725
116.3	0.373
116.4	0.376
116.5	0.377
116.6	0.379
116.7	0.38
116.8	0.3815
116.9	0.383
117	0.3845
117.1	0.386
117.2	0.39
117.3	0.392
117.4	0.394
117.5	0.3955
117.6	0.3965
117.7	0.3985
117.8	0.4015
117.9	0.4015
118	0.403
118.1	0.405
118.2	0.407
118.3	0.408
118.4	0.408
118.5	0.41
118.6	0.412
118.7	0.4125
118.8	0.4125
118.9	0.4135
119	0.415
119.1	0.416
119.2	0.417
119.3	0.4195
119.4	0.421
119.5	0.4225
119.6	0.425
119.7	0.4265
119.8	0.428
119.9	0.429
120	0.431
120.1	0.433
120.2	0.433
120.3	0.435
120.4	0.4355
120.5	0.4365
120.6	0.436
120.7	0.437
120.8	0.439
120.9	0.4415
121	0.4445
121.1	0.4445
121.2	0.444
121.3	0.4455
121.4	0.448
121.5	0.448
121.6	0.449
121.7	0.4495
121.8	0.452
121.9	0.4555
122	0.4565
122.1	0.4585
122.2	0.4605
122.3	0.4615
122.4	0.4625
122.5	0.4625
122.6	0.463
122.7	0.463
122.8	0.4635
122.9	0.464
123	0.463
123.1	0.464
123.2	0.4645
123.3	0.466
123.4	0.467
123.5	0.4695
123.6	0.471
123.7	0.4725
123.8	0.4735
123.9	0.474
124	0.4735
124.1	0.4755
124.2	0.476
124.3	0.48
124.4	0.4815
124.5	0.485
124.6	0.487
124.7	0.489
124.8	0.4905
124.9	0.4905
125	0.4905
125.1	0.492
125.2	0.495
125.3	0.495
125.4	0.4965
125.5	0.4985
125.6	0.4975
125.7	0.498
125.8	0.498
125.9	0.4995
126	0.5015
126.1	0.5015
126.2	0.502
126.3	0.5035
126.4	0.504
126.5	0.5035
126.6	0.5045
126.7	0.5055
126.8	0.507
126.9	0.507
127	0.507
127.1	0.5085
127.2	0.5115
127.3	0.5135
127.4	0.514
127.5	0.5165
127.6	0.516
127.7	0.518
127.8	0.5175
127.9	0.5195
128	0.521
128.1	0.521
128.2	0.523
128.3	0.5225
128.4	0.524
128.5	0.525
128.6	0.5265
128.7	0.527
128.8	0.528
128.9	0.529
129	0.53
129.1	0.5305
129.2	0.532
129.3	0.5325
129.4	0.5335
129.5	0.537
129.6	0.5385
129.7	0.5395
129.8	0.5395
129.9	0.5395
130	0.5405
130.1	0.541
130.2	0.5415
130.3	0.5435
130.4	0.545
130.5	0.546
130.6	0.548
130.7	0.549
130.8	0.5505
130.9	0.552
131	0.5515
131.1	0.551
131.2	0.5525
131.3	0.553
131.4	0.553
131.5	0.556
131.6	0.5555
131.7	0.5555
131.8	0.5555
131.9	0.5555
132	0.557
132.1	0.557
132.2	0.558
132.3	0.558
132.4	0.5595
132.5	0.5605
132.6	0.561
132.7	0.562
132.8	0.562
132.9	0.5635
133	0.5635
133.1	0.564
133.2	0.567
133.3	0.568
133.4	0.568
133.5	0.5675
133.6	0.569
133.7	0.569
133.8	0.5715
133.9	0.5725
134	0.5725
134.1	0.5725
134.2	0.5735
134.3	0.574
134.4	0.5755
134.5	0.5755
134.6	0.575
134.7	0.5765
134.8	0.5745
134.9	0.575
135	0.5755
135.1	0.577
135.2	0.5795
135.3	0.579
135.4	0.5795
135.5	0.579
135.6	0.581
135.7	0.583
135.8	0.5835
135.9	0.582
136	0.581
136.1	0.5825
136.2	0.583
136.3	0.582
136.4	0.583
136.5	0.585
136.6	0.584
136.7	0.5845
136.8	0.5845
136.9	0.585
137	0.586
137.1	0.586
137.2	0.5855
137.3	0.585
137.4	0.5855
137.5	0.587
137.6	0.5885
137.7	0.59
137.8	0.5905
137.9	0.5905
138	0.591
138.1	0.5905
138.2	0.5915
138.3	0.591
138.4	0.59
138.5	0.593
138.6	0.5925
138.7	0.593
138.8	0.594
138.9	0.594
139	0.594
139.1	0.5935
139.2	0.595
139.3	0.5955
139.4	0.596
139.5	0.598
139.6	0.599
139.7	0.6015
139.8	0.6015
139.9	0.6025
140	0.602
140.1	0.601
140.2	0.601
140.3	0.601
140.4	0.6005
140.5	0.602
140.6	0.6015
140.7	0.6015
140.8	0.603
140.9	0.605
141	0.608
141.1	0.608
141.2	0.607
141.3	0.6085
141.4	0.6085
141.5	0.6095
141.6	0.611
141.7	0.6105
141.8	0.61
141.9	0.6095
142	0.61
142.1	0.611
142.2	0.6105
142.3	0.611
142.4	0.612
142.5	0.6125
142.6	0.613
142.7	0.613
142.8	0.614
142.9	0.613
143	0.613
143.1	0.6105
143.2	0.6135
143.3	0.615
143.4	0.616
143.5	0.6165
143.6	0.6185
143.7	0.6195
143.8	0.62
143.9	0.6195
144	0.62
144.1	0.6205
144.2	0.6225
144.3	0.6225
144.4	0.624
144.5	0.6245
144.6	0.6245
144.7	0.6265
144.8	0.628
144.9	0.628
145	0.628
145.1	0.629
145.2	0.6305
145.3	0.631
145.4	0.631
145.5	0.632
145.6	0.6325
145.7	0.633
145.8	0.6335
145.9	0.6345
146	0.6345
146.1	0.6345
146.2	0.635
146.3	0.6355
146.4	0.638
146.5	0.639
146.6	0.638
146.7	0.64
146.8	0.64
146.9	0.64
147	0.6415
147.1	0.6415
147.2	0.642
147.3	0.642
147.4	0.6395
147.5	0.641
147.6	0.641
147.7	0.6415
147.8	0.6415
147.9	0.641
148	0.643
148.1	0.645
148.2	0.646
148.3	0.646
148.4	0.6465
148.5	0.645
148.6	0.645
148.7	0.644
148.8	0.644
148.9	0.644
149	0.644
149.1	0.6445
149.2	0.6455
149.3	0.6445
149.4	0.6455
149.5	0.6475
149.6	0.647
149.7	0.6485
149.8	0.6485
149.9	0.649
150	0.65
150.1	0.6495
150.2	0.649
150.3	0.6485
150.4	0.649
150.5	0.6495
150.6	0.65
150.7	0.6495
150.8	0.6505
150.9	0.652
151	0.652
151.1	0.6515
151.2	0.652
151.3	0.653
151.4	0.6515
151.5	0.652
151.6	0.653
151.7	0.6545
151.8	0.655
151.9	0.6545
152	0.6555
152.1	0.6555
152.2	0.6555
152.3	0.656
152.4	0.656
152.5	0.656
152.6	0.657
152.7	0.657
152.8	0.6575
152.9	0.658
153	0.6575
153.1	0.657
153.2	0.6575
153.3	0.658
153.4	0.657
153.5	0.658
153.6	0.658
153.7	0.6595
153.8	0.661
153.9	0.662
154	0.664
154.1	0.6645
154.2	0.6645
154.3	0.667
154.4	0.668
154.5	0.667
154.6	0.667
154.7	0.6675
154.8	0.668
154.9	0.668
155	0.6675
155.1	0.6685
155.2	0.669
155.3	0.6695
155.4	0.6685
155.5	0.67
155.6	0.6725
155.7	0.673
155.8	0.673
155.9	0.675
156	0.677
156.1	0.6765
156.2	0.676
156.3	0.6755
156.4	0.6755
156.5	0.6765
156.6	0.678
156.7	0.678
156.8	0.679
156.9	0.68
157	0.679
157.1	0.68
157.2	0.679
157.3	0.679
157.4	0.679
157.5	0.679
157.6	0.6795
157.7	0.681
157.8	0.682
157.9	0.682
158	0.683
158.1	0.682
158.2	0.6825
158.3	0.6845
158.4	0.6855
158.5	0.685
158.6	0.687
158.7	0.6885
158.8	0.6885
158.9	0.688
159	0.6885
159.1	0.6875
159.2	0.6875
159.3	0.6895
159.4	0.689
159.5	0.689
159.6	0.6885
159.7	0.689
159.8	0.69
159.9	0.6905
160	0.6915
160.1	0.692
160.2	0.6925
160.3	0.6935
160.4	0.6935
160.5	0.693
160.6	0.694
160.7	0.695
160.8	0.6945
160.9	0.6955
161	0.695
161.1	0.6955
161.2	0.697
161.3	0.6985
161.4	0.6985
161.5	0.699
161.6	0.699
161.7	0.6995
161.8	0.6995
161.9	0.7
162	0.699
162.1	0.6985
162.2	0.7
162.3	0.7005
162.4	0.702
162.5	0.7025
162.6	0.7035
162.7	0.7015
162.8	0.702
162.9	0.702
163	0.702
163.1	0.703
163.2	0.7025
163.3	0.7025
163.4	0.7035
163.5	0.704
163.6	0.7045
163.7	0.705
163.8	0.7055
163.9	0.7055
164	0.7055
164.1	0.7065
164.2	0.7065
164.3	0.7075
164.4	0.7075
164.5	0.7085
164.6	0.709
164.7	0.709
164.8	0.709
164.9	0.71
165	0.71
165.1	0.7095
165.2	0.7085
165.3	0.7065
165.4	0.7065
165.5	0.7075
165.6	0.7075
165.7	0.707
165.8	0.7055
165.9	0.7075
166	0.709
166.1	0.71
166.2	0.71
166.3	0.7085
166.4	0.7075
166.5	0.708
166.6	0.707
166.7	0.7055
166.8	0.7075
166.9	0.7095
167	0.709
167.1	0.71
167.2	0.7105
167.3	0.711
167.4	0.7095
167.5	0.709
167.6	0.71
167.7	0.71
167.8	0.7135
167.9	0.7135
168	0.7105
168.1	0.7105
168.2	0.7095
168.3	0.712
168.4	0.712
168.5	0.714
168.6	0.7145
168.7	0.7155
168.8	0.717
168.9	0.717
169	0.718
169.1	0.7185
169.2	0.7175
169.3	0.719
169.4	0.7195
169.5	0.72
169.6	0.72
169.7	0.72
169.8	0.7195
169.9	0.7175
170	0.7175
170.1	0.718
170.2	0.7185
170.3	0.719
170.4	0.7205
170.5	0.7205
170.6	0.7195
170.7	0.719
170.8	0.7185
170.9	0.7195
171	0.7185
171.1	0.7185
171.2	0.718
171.3	0.7195
171.4	0.719
171.5	0.7175
171.6	0.718
171.7	0.719
171.8	0.7205
171.9	0.7205
172	0.72
172.1	0.721
172.2	0.72
172.3	0.72
172.4	0.7195
172.5	0.72
172.6	0.7195
172.7	0.719
172.8	0.7195
172.9	0.7205
173	0.721
173.1	0.7215
173.2	0.722
173.3	0.7225
173.4	0.7225
173.5	0.7245
173.6	0.7265
173.7	0.7265
173.8	0.7255
173.9	0.7255
174	0.7255
174.1	0.726
174.2	0.7255
174.3	0.7255
174.4	0.7265
174.5	0.7265
174.6	0.727
174.7	0.728
174.8	0.7285
174.9	0.7305
175	0.7305
175.1	0.7305
175.2	0.7315
175.3	0.7315
175.4	0.732
175.5	0.7315
175.6	0.7315
175.7	0.731
175.8	0.7325
175.9	0.7315
176	0.7315
176.1	0.731
176.2	0.732
176.3	0.732
176.4	0.7335
176.5	0.7335
176.6	0.734
176.7	0.7355
176.8	0.736
176.9	0.737
177	0.737
177.1	0.7365
177.2	0.7375
177.3	0.7365
177.4	0.7365
177.5	0.7365
177.6	0.7365
177.7	0.7365
177.8	0.7375
177.9	0.7375
178	0.738
178.1	0.7365
178.2	0.739
178.3	0.7395
178.4	0.74
178.5	0.7395
178.6	0.7405
178.7	0.7405
178.8	0.7395
178.9	0.74
179	0.741
179.1	0.74
179.2	0.742
179.3	0.741
179.4	0.7415
179.5	0.7415
179.6	0.743
179.7	0.744
179.8	0.744
179.9	0.7445
180	0.743
180.1	0.742
180.2	0.7415
180.3	0.741
180.4	0.7395
180.5	0.74
180.6	0.7385
180.7	0.737
180.8	0.7375
180.9	0.7375
181	0.739
181.1	0.739
181.2	0.7395
181.3	0.74
181.4	0.74
181.5	0.7395
181.6	0.7395
181.7	0.741
181.8	0.742
181.9	0.741
182	0.7415
182.1	0.74
182.2	0.7395
182.3	0.7395
182.4	0.741
182.5	0.7415
182.6	0.742
182.7	0.7425
182.8	0.743
182.9	0.7425
183	0.742
183.1	0.7435
183.2	0.7425
183.3	0.7425
183.4	0.7435
183.5	0.742
183.6	0.7435
183.7	0.745
183.8	0.745
183.9	0.7455
184	0.7465
184.1	0.7455
184.2	0.745
184.3	0.744
184.4	0.744
184.5	0.744
184.6	0.7445
184.7	0.7455
184.8	0.7455
184.9	0.744
185	0.7455
185.1	0.7445
185.2	0.7455
185.3	0.746
185.4	0.747
185.5	0.7475
185.6	0.747
185.7	0.747
185.8	0.7485
185.9	0.7485
186	0.749
186.1	0.7485
186.2	0.7485
186.3	0.7485
186.4	0.7495
186.5	0.7495
186.6	0.7505
186.7	0.75
186.8	0.75
186.9	0.7515
187	0.752
187.1	0.7535
187.2	0.754
187.3	0.7555
187.4	0.756
187.5	0.7555
187.6	0.7565
187.7	0.758
187.8	0.757
187.9	0.7575
188	0.757
188.1	0.757
188.2	0.7555
188.3	0.755
188.4	0.753
188.5	0.7525
188.6	0.7525
188.7	0.7525
188.8	0.7515
188.9	0.751
189	0.7505
189.1	0.75
189.2	0.75
189.3	0.7505
189.4	0.751
189.5	0.7525
189.6	0.753
189.7	0.7525
189.8	0.754
189.9	0.7535
190	0.753
190.1	0.7535
190.2	0.7525
190.3	0.752
190.4	0.752
190.5	0.7505
190.6	0.751
190.7	0.7525
190.8	0.7525
190.9	0.752
191	0.752
191.1	0.7525
191.2	0.752
191.3	0.7535
191.4	0.7555
191.5	0.755
191.6	0.756
191.7	0.7555
191.8	0.753
191.9	0.7535
192	0.754
192.1	0.753
192.2	0.754
192.3	0.755
192.4	0.7545
192.5	0.754
192.6	0.7535
192.7	0.753
192.8	0.7535
192.9	0.7545
193	0.7535
193.1	0.7535
193.2	0.754
193.3	0.7535
193.4	0.752
193.5	0.7515
193.6	0.751
193.7	0.751
193.8	0.7495
193.9	0.7505
194	0.7495
194.1	0.75
194.2	0.7495
194.3	0.7485
194.4	0.749
194.5	0.7495
194.6	0.7495
194.7	0.752
194.8	0.752
194.9	0.7535
195	0.7525
195.1	0.753
195.2	0.754
195.3	0.755
195.4	0.755
195.5	0.7555
195.6	0.7555
195.7	0.755
195.8	0.757
195.9	0.758
196	0.758
196.1	0.7595
196.2	0.76
196.3	0.7605
196.4	0.7595
196.5	0.76
196.6	0.76
196.7	0.759
196.8	0.761
196.9	0.761
197	0.7625
197.1	0.7625
197.2	0.7625
197.3	0.763
197.4	0.766
197.5	0.7655
197.6	0.7645
197.7	0.7645
197.8	0.7655
197.9	0.765
198	0.7665
198.1	0.767
198.2	0.767
198.3	0.767
198.4	0.7655
198.5	0.7665
198.6	0.766
198.7	0.7655
198.8	0.765
198.9	0.7655
199	0.7655
199.1	0.7655
199.2	0.767
199.3	0.767
199.4	0.767
199.5	0.767
199.6	0.767
199.7	0.767
199.8	0.767
199.9	0.7675
200	0.7675
[truncated: 14,000 more rows]
