# Supplementary material for: Bayesian inference of kinetic schemes for ion channels by Kalman filtering
Source: eLife journal article supplement (doi:10.7554/elife.62714), 2022-05-04
Supplement: fig4-data5 [file 1_Sim_N_3000_Fluor_MW_4M.xlsx]

## Sheet: Tabelle1
0.1	0
0.2	0
0.3	0
0.4	0
0.5	0
0.6	0
0.7	0
0.8	0
0.9	0
1	0
1.1	0
1.2	0
1.3	0
1.4	0
1.5	0
1.6	0
1.7	0
1.8	0
1.9	0
2	0
2.1	0
2.2	0
2.3	0
2.4	0
2.5	0
2.6	0
2.7	0
2.8	0
2.9	0
3	0
3.1	0
3.2	0
3.3	0
3.4	0
3.5	0
3.6	0
3.7	0
3.8	0
3.9	0
4	0
4.1	0
4.2	0
4.3	0
4.4	0
4.5	0
4.6	0
4.7	0
4.8	0
4.9	0
5	0
5.1	0
5.2	0
5.3	0
5.4	0
5.5	0
5.6	0
5.7	0
5.8	0
5.9	0
6	0
6.1	0
6.2	0
6.3	0
6.4	0
6.5	0
6.6	0
6.7	0
6.8	0
6.9	0
7	0
7.1	0
7.2	0
7.3	0
7.4	0
7.5	0
7.6	0
7.7	0
7.8	0
7.9	0
8	0
8.1	0
8.2	0
8.3	0
8.4	0
8.5	0
8.6	0
8.7	0
8.8	0
8.9	0
9	0
9.1	0
9.2	0
9.3	0
9.4	0
9.5	0
9.6	0
9.7	0
9.8	0
9.9	0
10	0
10.1	0
10.2	0
10.3	0
10.4	0
10.5	0
10.6	0
10.7	0
10.8	0
10.9	0
11	0
11.1	0
11.2	0
11.3	0
11.4	0
11.5	0
11.6	0
11.7	0
11.8	0
11.9	0
12	0
12.1	0
12.2	0
12.3	0
12.4	0
12.5	0
12.6	0
12.7	0
12.8	0
12.9	0
13	0
13.1	0
13.2	0
13.3	0
13.4	0
13.5	0
13.6	0
13.7	0
13.8	0
13.9	0
14	0
14.1	0
14.2	0
14.3	0
14.4	0
14.5	0
14.6	0
14.7	0
14.8	0
14.9	0
15	0
15.1	0
15.2	0
15.3	0
15.4	0
15.5	0
15.6	0
15.7	0
15.8	0
15.9	0
16	0
16.1	0
16.2	0
16.3	0
16.4	0
16.5	0
16.6	0
16.7	0
16.8	0
16.9	0
17	0
17.1	0
17.2	0
17.3	0
17.4	0
17.5	0
17.6	0
17.7	0
17.8	0
17.9	0
18	0
18.1	0
18.2	0
18.3	0
18.4	0
18.5	0
18.6	0
18.7	0
18.8	0
18.9	0
19	0
19.1	0
19.2	0
19.3	0
19.4	0
19.5	0
19.6	0
19.7	0
19.8	0
19.9	0
20	0
20.1	0
20.2	0
20.3	0
20.4	0
20.5	0
20.6	0
20.7	0
20.8	0
20.9	0
21	0
21.1	0
21.2	0
21.3	0
21.4	0
21.5	0
21.6	0
21.7	0
21.8	0
21.9	0
22	0
22.1	0
22.2	0
22.3	0
22.4	0
22.5	0
22.6	0
22.7	0
22.8	0
22.9	0
23	0
23.1	0
23.2	0
23.3	0
23.4	0
23.5	0
23.6	0
23.7	0
23.8	0
23.9	0
24	0
24.1	0
24.2	0
24.3	0
24.4	0
24.5	0
24.6	0
24.7	0
24.8	0
24.9	0
25	0
25.1	0
25.2	0
25.3	0
25.4	0
25.5	0
25.6	0
25.7	0
25.8	0
25.9	0
26	0
26.1	0
26.2	0
26.3	0
26.4	0
26.5	0
26.6	0
26.7	0
26.8	0
26.9	0
27	0
27.1	0
27.2	0
27.3	0
27.4	0
27.5	0
27.6	0
27.7	0
27.8	0
27.9	0
28	0
28.1	0
28.2	0
28.3	0
28.4	0
28.5	0
28.6	0
28.7	0
28.8	0
28.9	0
29	0
29.1	0
29.2	0
29.3	0
29.4	0
29.5	0
29.6	0
29.7	0
29.8	0
29.9	0
30	0
30.1	0
30.2	0
30.3	0
30.4	0
30.5	0
30.6	0
30.7	0
30.8	0
30.9	0
31	0
31.1	0
31.2	0
31.3	0
31.4	0
31.5	0
31.6	0
31.7	0
31.8	0
31.9	0
32	0
32.1	0
32.2	0
32.3	0
32.4	0
32.5	0
32.6	0
32.7	0
32.8	0
32.9	0
33	0
33.1	0
33.2	0
33.3	0
33.4	0
33.5	0
33.6	0
33.7	0
33.8	0
33.9	0
34	0
34.1	0
34.2	0
34.3	0
34.4	0
34.5	0
34.6	0
34.7	0
34.8	0
34.9	0
35	0
35.1	0
35.2	0
35.3	0
35.4	0
35.5	0
35.6	0
35.7	0
35.8	0
35.9	0
36	0
36.1	0
36.2	0
36.3	0
36.4	0
36.5	0
36.6	0
36.7	0
36.8	0
36.9	0
37	0
37.1	0
37.2	0
37.3	0
37.4	0
37.5	0
37.6	0
37.7	0
37.8	0
37.9	0
38	0
38.1	0
38.2	0
38.3	0
38.4	0
38.5	0
38.6	0
38.7	0
38.8	0
38.9	0
39	0
39.1	0
39.2	0
39.3	0
39.4	0
39.5	0
39.6	0
39.7	0
39.8	0
39.9	0
40	0
40.1	0
40.2	0
40.3	0
40.4	0
40.5	0
40.6	0
40.7	0
40.8	0
40.9	0
41	0
41.1	0
41.2	0
41.3	0
41.4	0
41.5	0
41.6	0
41.7	0
41.8	0
41.9	0
42	0
42.1	0
42.2	0
42.3	0
42.4	0
42.5	0
42.6	0
42.7	0
42.8	0
42.9	0
43	0
43.1	0
43.2	0
43.3	0
43.4	0
43.5	0
43.6	0
43.7	0
43.8	0
43.9	0
44	0
44.1	0
44.2	0
44.3	0
44.4	0
44.5	0
44.6	0
44.7	0
44.8	0
44.9	0
45	0
45.1	0
45.2	0
45.3	0
45.4	0
45.5	0
45.6	0
45.7	0
45.8	0
45.9	0
46	0
46.1	0
46.2	0
46.3	0
46.4	0
46.5	0
46.6	0
46.7	0
46.8	0
46.9	0
47	0
47.1	0
47.2	0
47.3	0
47.4	0
47.5	0
47.6	0
47.7	0
47.8	0
47.9	0
48	0
48.1	0
48.2	0
48.3	0
48.4	0
48.5	0
48.6	0
48.7	0
48.8	0
48.9	0
49	0
49.1	0
49.2	0
49.3	0
49.4	0
49.5	0
49.6	0
49.7	0
49.8	0
49.9	0
50	0
50.1	0
50.2	0
50.3	0
50.4	0
50.5	0
50.6	0
50.7	0
50.8	0
50.9	0
51	0
51.1	0
51.2	0
51.3	0
51.4	0
51.5	0
51.6	0
51.7	0
51.8	0
51.9	0
52	0
52.1	0
52.2	0
52.3	0
52.4	0
52.5	0
52.6	0
52.7	0
52.8	0
52.9	0
53	0
53.1	0
53.2	0
53.3	0
53.4	0
53.5	0
53.6	0
53.7	0
53.8	0
53.9	0
54	0
54.1	0
54.2	0
54.3	0
54.4	0
54.5	0
54.6	0
54.7	0
54.8	0
54.9	0
55	0
55.1	0
55.2	0
55.3	0
55.4	0
55.5	0
55.6	0
55.7	0
55.8	0
55.9	0
56	0
56.1	0
56.2	0
56.3	0
56.4	0
56.5	0
56.6	0
56.7	0
56.8	0
56.9	0
57	0
57.1	0
57.2	0
57.3	0
57.4	0
57.5	0
57.6	0
57.7	0
57.8	0
57.9	0
58	0
58.1	0
58.2	0
58.3	0
58.4	0
58.5	0
58.6	0
58.7	0
58.8	0
58.9	0
59	0
59.1	0
59.2	0
59.3	0
59.4	0
59.5	0
59.6	0
59.7	0
59.8	0
59.9	0
60	0
60.1	0
60.2	0
60.3	0
60.4	0
60.5	0
60.6	0
60.7	0
60.8	0
60.9	0
61	0
61.1	0
61.2	0
61.3	0
61.4	0
61.5	0
61.6	0
61.7	0
61.8	0
61.9	0
62	0
62.1	0
62.2	0
62.3	0
62.4	0
62.5	0
62.6	0
62.7	0
62.8	0
62.9	0
63	0
63.1	0
63.2	0
63.3	0
63.4	0
63.5	0
63.6	0
63.7	0
63.8	0
63.9	0
64	0
64.1	0
64.2	0
64.3	0
64.4	0
64.5	0
64.6	0
64.7	0
64.8	0
64.9	0
65	0
65.1	0
65.2	0
65.3	0
65.4	0
65.5	0
65.6	0
65.7	0
65.8	0
65.9	0
66	0
66.1	0
66.2	0
66.3	0
66.4	0
66.5	0
66.6	0
66.7	0
66.8	0
66.9	0
67	0
67.1	0
67.2	0
67.3	0
67.4	0
67.5	0
67.6	0
67.7	0
67.8	0
67.9	0
68	0
68.1	0
68.2	0
68.3	0
68.4	0
68.5	0
68.6	0
68.7	0
68.8	0
68.9	0
69	0
69.1	0
69.2	0
69.3	0
69.4	0
69.5	0
69.6	0
69.7	0
69.8	0
69.9	0
70	0
70.1	0
70.2	0
70.3	0
70.4	0
70.5	0
70.6	0
70.7	0
70.8	0
70.9	0
71	0
71.1	0
71.2	0
71.3	0
71.4	0
71.5	0
71.6	0
71.7	0
71.8	0
71.9	0
72	0
72.1	0
72.2	0
72.3	0
72.4	0
72.5	0
72.6	0
72.7	0
72.8	0
72.9	0
73	0
73.1	0
73.2	0
73.3	0
73.4	0
73.5	0
73.6	0
73.7	0
73.8	0
73.9	0
74	0
74.1	0
74.2	0
74.3	0
74.4	0
74.5	0
74.6	0
74.7	0
74.8	0
74.9	0
75	0
75.1	0
75.2	0
75.3	0
75.4	0
75.5	0
75.6	0
75.7	0
75.8	0
75.9	0
76	0
76.1	0
76.2	0
76.3	0
76.4	0
76.5	0
76.6	0
76.7	0
76.8	0
76.9	0
77	0
77.1	0
77.2	0
77.3	0
77.4	0
77.5	0
77.6	0
77.7	0
77.8	0
77.9	0
78	0
78.1	0
78.2	0
78.3	0
78.4	0
78.5	0
78.6	0
78.7	0
78.8	0
78.9	0
79	0
79.1	0
79.2	0
79.3	0
79.4	0
79.5	0
79.6	0
79.7	0
79.8	0
79.9	0
80	0
80.1	0
80.2	0
80.3	0
80.4	0
80.5	0
80.6	0
80.7	0
80.8	0
80.9	0
81	0
81.1	0
81.2	0
81.3	0
81.4	0
81.5	0
81.6	0
81.7	0
81.8	0
81.9	0
82	0
82.1	0
82.2	0
82.3	0
82.4	0
82.5	0
82.6	0
82.7	0
82.8	0
82.9	0
83	0
83.1	0
83.2	0
83.3	0
83.4	0
83.5	0
83.6	0
83.7	0
83.8	0
83.9	0
84	0
84.1	0
84.2	0
84.3	0
84.4	0
84.5	0
84.6	0
84.7	0
84.8	0
84.9	0
85	0
85.1	0
85.2	0
85.3	0
85.4	0
85.5	0
85.6	0
85.7	0
85.8	0
85.9	0
86	0
86.1	0
86.2	0
86.3	0
86.4	0
86.5	0
86.6	0
86.7	0
86.8	0
86.9	0
87	0
87.1	0
87.2	0
87.3	0
87.4	0
87.5	0
87.6	0
87.7	0
87.8	0
87.9	0
88	0
88.1	0
88.2	0
88.3	0
88.4	0
88.5	0
88.6	0
88.7	0
88.8	0
88.9	0
89	0
89.1	0
89.2	0
89.3	0
89.4	0
89.5	0
89.6	0
89.7	0
89.8	0
89.9	0
90	0
90.1	0
90.2	0
90.3	0
90.4	0
90.5	0
90.6	0
90.7	0
90.8	0
90.9	0
91	0
91.1	0
91.2	0
91.3	0
91.4	0
91.5	0
91.6	0
91.7	0
91.8	0
91.9	0
92	0
92.1	0
92.2	0
92.3	0
92.4	0
92.5	0
92.6	0
92.7	0
92.8	0
92.9	0
93	0
93.1	0
93.2	0
93.3	0
93.4	0
93.5	0
93.6	0
93.7	0
93.8	0
93.9	0
94	0
94.1	0
94.2	0
94.3	0
94.4	0
94.5	0
94.6	0
94.7	0
94.8	0
94.9	0
95	0
95.1	0
95.2	0
95.3	0
95.4	0
95.5	0
95.6	0
95.7	0
95.8	0
95.9	0
96	0
96.1	0
96.2	0
96.3	0
96.4	0
96.5	0
96.6	0
96.7	0
96.8	0
96.9	0
97	0
97.1	0
97.2	0
97.3	0
97.4	0
97.5	0
97.6	0
97.7	0
97.8	0
97.9	0
98	0
98.1	0
98.2	0
98.3	0
98.4	0
98.5	0
98.6	0
98.7	0
98.8	0
98.9	0
99	0
99.1	0
99.2	0
99.3	0
99.4	0
99.5	0
99.6	0
99.7	0
99.8	0
99.9	0
100	0
100.1	0.1975
100.2	0.341833
100.3	0.434333
100.4	0.513833
100.5	0.577
100.6	0.622167
100.7	0.661833
100.8	0.692833
100.9	0.717833
101	0.741333
101.1	0.758333
101.2	0.772667
101.3	0.787333
101.4	0.795333
101.5	0.801167
101.6	0.8085
101.7	0.813833
101.8	0.8195
101.9	0.826167
102	0.830333
102.1	0.832167
102.2	0.8345
102.3	0.842333
102.4	0.843833
102.5	0.848333
102.6	0.848167
102.7	0.851
102.8	0.849833
102.9	0.8525
103	0.855167
103.1	0.859333
103.2	0.86
103.3	0.860167
103.4	0.861333
103.5	0.861167
103.6	0.860667
103.7	0.863
103.8	0.863667
103.9	0.863667
104	0.862333
104.1	0.863833
104.2	0.8605
104.3	0.861833
104.4	0.8655
104.5	0.866667
104.6	0.868
104.7	0.866833
104.8	0.870833
104.9	0.869167
105	0.869667
105.1	0.8715
105.2	0.872333
105.3	0.871833
105.4	0.873667
105.5	0.871167
105.6	0.8675
105.7	0.8665
105.8	0.868
105.9	0.865167
106	0.8685
106.1	0.871667
106.2	0.869
106.3	0.868667
106.4	0.865667
106.5	0.864333
106.6	0.866
106.7	0.865667
106.8	0.868167
106.9	0.868167
107	0.867667
107.1	0.873667
107.2	0.873167
107.3	0.875167
107.4	0.870667
107.5	0.874833
107.6	0.875167
107.7	0.876333
107.8	0.876167
107.9	0.877167
108	0.8765
108.1	0.875833
108.2	0.877
108.3	0.88
108.4	0.880333
108.5	0.879
108.6	0.882167
108.7	0.881833
108.8	0.884167
108.9	0.888667
109	0.8895
109.1	0.890667
109.2	0.884667
109.3	0.883167
109.4	0.882667
109.5	0.8835
109.6	0.884
109.7	0.885167
109.8	0.886667
109.9	0.886167
110	0.888
110.1	0.888667
110.2	0.8885
110.3	0.886167
110.4	0.885167
110.5	0.885667
110.6	0.883667
110.7	0.883667
110.8	0.8835
110.9	0.884667
111	0.885167
111.1	0.8835
111.2	0.8855
111.3	0.8875
111.4	0.887833
111.5	0.881833
111.6	0.8835
111.7	0.884333
111.8	0.885167
111.9	0.886333
112	0.8855
112.1	0.8885
112.2	0.893333
112.3	0.893333
112.4	0.893167
112.5	0.891833
112.6	0.893833
112.7	0.896167
112.8	0.897167
112.9	0.903167
113	0.899
113.1	0.9
113.2	0.902167
113.3	0.901
113.4	0.902333
113.5	0.904167
113.6	0.904
113.7	0.901333
113.8	0.902167
113.9	0.902
114	0.9005
114.1	0.899833
114.2	0.900833
114.3	0.899667
114.4	0.900667
114.5	0.902167
114.6	0.9015
114.7	0.9015
114.8	0.900333
114.9	0.902
115	0.901833
115.1	0.9055
115.2	0.906667
115.3	0.909333
115.4	0.909333
115.5	0.9105
115.6	0.909667
115.7	0.910167
115.8	0.9065
115.9	0.904833
116	0.905667
116.1	0.906167
116.2	0.904167
116.3	0.905333
116.4	0.903333
116.5	0.905
116.6	0.902667
116.7	0.905333
116.8	0.903833
116.9	0.9075
117	0.908333
117.1	0.908833
117.2	0.9105
117.3	0.909
117.4	0.908667
117.5	0.911833
117.6	0.912
117.7	0.912667
117.8	0.910667
117.9	0.912
118	0.911833
118.1	0.913
118.2	0.91
118.3	0.911333
118.4	0.910333
118.5	0.9105
118.6	0.910167
118.7	0.9105
118.8	0.911833
118.9	0.912333
119	0.915
119.1	0.916
119.2	0.914333
119.3	0.914333
119.4	0.916833
119.5	0.918667
119.6	0.922
119.7	0.9205
119.8	0.921167
119.9	0.9225
120	0.922
120.1	0.9215
120.2	0.920333
120.3	0.920667
120.4	0.9175
120.5	0.917167
120.6	0.917167
120.7	0.916
120.8	0.914333
120.9	0.9165
121	0.913667
121.1	0.913667
121.2	0.914167
121.3	0.914
121.4	0.913167
121.5	0.9145
121.6	0.916167
121.7	0.917167
121.8	0.917333
121.9	0.919167
122	0.9185
122.1	0.919833
122.2	0.919667
122.3	0.918333
122.4	0.918167
122.5	0.918833
122.6	0.919167
122.7	0.921
122.8	0.9215
122.9	0.924667
123	0.927667
123.1	0.927833
123.2	0.931
123.3	0.932833
123.4	0.932667
123.5	0.932167
123.6	0.931833
123.7	0.931667
123.8	0.931
123.9	0.933
124	0.930333
124.1	0.930167
124.2	0.927667
124.3	0.928167
124.4	0.929833
124.5	0.930167
124.6	0.930833
124.7	0.9305
124.8	0.9295
124.9	0.930833
125	0.9285
125.1	0.9305
125.2	0.930833
125.3	0.9305
125.4	0.930833
125.5	0.931
125.6	0.929333
125.7	0.928167
125.8	0.926833
125.9	0.928333
126	0.9315
126.1	0.931167
126.2	0.932833
126.3	0.932833
126.4	0.933833
126.5	0.931833
126.6	0.931667
126.7	0.931167
126.8	0.9315
126.9	0.932
127	0.9315
127.1	0.9305
127.2	0.929333
127.3	0.932167
127.4	0.929
127.5	0.931
127.6	0.931333
127.7	0.932
127.8	0.931
127.9	0.931667
128	0.930833
128.1	0.930167
128.2	0.930667
128.3	0.93
128.4	0.93
128.5	0.929333
128.6	0.931333
128.7	0.931333
128.8	0.9305
128.9	0.931167
129	0.9345
129.1	0.934333
129.2	0.933833
129.3	0.933333
129.4	0.934
129.5	0.933667
129.6	0.935333
129.7	0.934
129.8	0.935
129.9	0.932667
130	0.931667
130.1	0.931
130.2	0.931833
130.3	0.9345
130.4	0.935833
130.5	0.937333
130.6	0.9395
130.7	0.941667
130.8	0.941
130.9	0.9405
131	0.938667
131.1	0.937667
131.2	0.940333
131.3	0.938833
131.4	0.936667
131.5	0.935
131.6	0.934333
131.7	0.937833
131.8	0.939
131.9	0.935667
132	0.9355
132.1	0.9375
132.2	0.937833
132.3	0.938667
132.4	0.938833
132.5	0.939167
132.6	0.942
132.7	0.942667
132.8	0.942833
132.9	0.942167
133	0.941833
133.1	0.9415
133.2	0.943667
133.3	0.938333
133.4	0.9415
133.5	0.941833
133.6	0.940667
133.7	0.940167
133.8	0.9415
133.9	0.9435
134	0.943667
134.1	0.945
134.2	0.944833
134.3	0.945833
134.4	0.947833
134.5	0.9495
134.6	0.9465
134.7	0.947333
134.8	0.945
134.9	0.945833
135	0.947333
135.1	0.947833
135.2	0.947833
135.3	0.947333
135.4	0.945667
135.5	0.946333
135.6	0.947
135.7	0.945333
135.8	0.943833
135.9	0.944667
136	0.945
136.1	0.9455
136.2	0.945333
136.3	0.9435
136.4	0.940667
136.5	0.9405
136.6	0.940333
136.7	0.944833
136.8	0.9445
136.9	0.945833
137	0.946667
137.1	0.945667
137.2	0.945833
137.3	0.946167
137.4	0.945333
137.5	0.947333
137.6	0.948833
137.7	0.949833
137.8	0.951833
137.9	0.952667
138	0.951167
138.1	0.949833
138.2	0.949333
138.3	0.95
138.4	0.949
138.5	0.949833
138.6	0.949833
138.7	0.950167
138.8	0.950333
138.9	0.948
139	0.950333
139.1	0.950167
139.2	0.947833
139.3	0.948667
139.4	0.9495
139.5	0.9495
139.6	0.947833
139.7	0.947333
139.8	0.9475
139.9	0.945833
140	0.943167
140.1	0.9445
140.2	0.947167
140.3	0.948
140.4	0.945
140.5	0.948333
140.6	0.949833
140.7	0.95
140.8	0.9525
140.9	0.950667
141	0.9505
141.1	0.948667
141.2	0.9495
141.3	0.950333
141.4	0.952
141.5	0.951167
141.6	0.948
141.7	0.948167
141.8	0.949833
141.9	0.9495
142	0.951667
142.1	0.953833
142.2	0.952167
142.3	0.953
142.4	0.953667
142.5	0.953167
142.6	0.952333
142.7	0.949667
142.8	0.951333
142.9	0.950667
143	0.950333
143.1	0.950667
143.2	0.952333
143.3	0.9525
143.4	0.952167
143.5	0.95
143.6	0.948667
143.7	0.9485
143.8	0.9485
143.9	0.947167
144	0.9465
144.1	0.948
144.2	0.947667
144.3	0.948833
144.4	0.948167
144.5	0.948
144.6	0.948167
144.7	0.946
144.8	0.946667
144.9	0.944333
145	0.946333
145.1	0.949
145.2	0.9505
145.3	0.952667
145.4	0.952333
145.5	0.955333
145.6	0.9545
145.7	0.955667
145.8	0.954833
145.9	0.953833
146	0.9545
146.1	0.954833
146.2	0.951833
146.3	0.951167
146.4	0.949667
146.5	0.948667
146.6	0.946167
146.7	0.9495
146.8	0.947833
146.9	0.9475
147	0.948333
147.1	0.949833
147.2	0.951
147.3	0.951333
147.4	0.951833
147.5	0.950833
147.6	0.9505
147.7	0.948833
147.8	0.9495
147.9	0.951667
148	0.950333
148.1	0.951
148.2	0.95
148.3	0.950667
148.4	0.9495
148.5	0.949333
148.6	0.950167
148.7	0.949
148.8	0.950167
148.9	0.951333
149	0.950333
149.1	0.951833
149.2	0.9535
149.3	0.952167
149.4	0.953833
149.5	0.954
149.6	0.954333
149.7	0.953667
149.8	0.952833
149.9	0.954167
150	0.952
150.1	0.952
150.2	0.950833
150.3	0.951167
150.4	0.951333
150.5	0.951167
150.6	0.951833
150.7	0.954167
150.8	0.955167
150.9	0.954833
151	0.954167
151.1	0.953333
151.2	0.954167
151.3	0.953833
151.4	0.950667
151.5	0.949833
151.6	0.949333
151.7	0.950333
151.8	0.951167
151.9	0.950167
152	0.949833
152.1	0.952833
152.2	0.953167
152.3	0.952833
152.4	0.954
152.5	0.953167
152.6	0.954333
152.7	0.954333
152.8	0.953333
152.9	0.952
153	0.950667
153.1	0.9525
153.2	0.951667
153.3	0.952333
153.4	0.9555
153.5	0.954
153.6	0.954333
153.7	0.953
153.8	0.953667
153.9	0.955
154	0.9545
154.1	0.954
154.2	0.954833
154.3	0.955167
154.4	0.954833
154.5	0.9555
154.6	0.953833
154.7	0.955
154.8	0.954333
154.9	0.954333
155	0.955333
155.1	0.956
155.2	0.958167
155.3	0.957333
155.4	0.958167
155.5	0.955167
155.6	0.956333
155.7	0.9575
155.8	0.9595
155.9	0.959
156	0.958
156.1	0.959333
156.2	0.96
156.3	0.959
156.4	0.9585
156.5	0.957833
156.6	0.9575
156.7	0.956
156.8	0.954667
156.9	0.9535
157	0.953167
157.1	0.953833
157.2	0.955
157.3	0.954333
157.4	0.955
157.5	0.957167
157.6	0.956333
157.7	0.955
157.8	0.9555
157.9	0.957
158	0.957333
158.1	0.956
158.2	0.956167
158.3	0.957167
158.4	0.959333
158.5	0.960833
158.6	0.962833
158.7	0.9625
158.8	0.961833
158.9	0.9625
159	0.961333
159.1	0.9635
159.2	0.9625
159.3	0.962
159.4	0.961667
159.5	0.9605
159.6	0.960167
159.7	0.959333
159.8	0.959667
159.9	0.958
160	0.957833
160.1	0.9575
160.2	0.957667
160.3	0.957
160.4	0.957167
160.5	0.955167
160.6	0.953833
160.7	0.9555
160.8	0.957833
160.9	0.957167
161	0.956
161.1	0.957667
161.2	0.959
161.3	0.959
161.4	0.958333
161.5	0.959667
161.6	0.961167
161.7	0.962
161.8	0.962167
161.9	0.961333
162	0.961833
162.1	0.962
162.2	0.962
162.3	0.962167
162.4	0.961667
162.5	0.960333
162.6	0.9575
162.7	0.957333
162.8	0.956333
162.9	0.954333
163	0.953667
163.1	0.954167
163.2	0.955333
163.3	0.955
163.4	0.955
163.5	0.955167
163.6	0.9535
163.7	0.953
163.8	0.952833
163.9	0.9535
164	0.9535
164.1	0.955167
164.2	0.956
164.3	0.955667
164.4	0.955167
164.5	0.954
164.6	0.953333
164.7	0.952167
164.8	0.9565
164.9	0.956167
165	0.9555
165.1	0.954833
165.2	0.954333
165.3	0.957
165.4	0.958167
165.5	0.959167
165.6	0.958333
165.7	0.960167
165.8	0.958
165.9	0.957333
166	0.956167
166.1	0.956
166.2	0.9565
166.3	0.957833
166.4	0.958667
166.5	0.9595
166.6	0.959
166.7	0.960333
166.8	0.961333
166.9	0.9595
167	0.958833
167.1	0.96
167.2	0.960667
167.3	0.962
167.4	0.9615
167.5	0.961667
167.6	0.9615
167.7	0.963
167.8	0.960667
167.9	0.96
168	0.962833
168.1	0.962333
168.2	0.963
168.3	0.9625
168.4	0.9625
168.5	0.961667
168.6	0.961833
168.7	0.958667
168.8	0.959833
168.9	0.9605
169	0.962
169.1	0.962667
169.2	0.963
169.3	0.9615
169.4	0.9615
169.5	0.962333
169.6	0.96
169.7	0.959167
169.8	0.959333
169.9	0.958667
170	0.959833
170.1	0.960167
170.2	0.960833
170.3	0.962167
170.4	0.964667
170.5	0.964333
170.6	0.962167
170.7	0.962833
170.8	0.962667
170.9	0.9625
171	0.963833
171.1	0.961667
171.2	0.9625
171.3	0.96
171.4	0.959
171.5	0.9575
171.6	0.959167
171.7	0.959
171.8	0.959333
171.9	0.959833
172	0.960667
172.1	0.962833
172.2	0.9625
172.3	0.963
172.4	0.961
172.5	0.961167
172.6	0.96
172.7	0.959333
172.8	0.958833
172.9	0.957333
173	0.957833
173.1	0.956833
173.2	0.9585
173.3	0.957833
173.4	0.956833
173.5	0.960333
173.6	0.959833
173.7	0.961667
173.8	0.9615
173.9	0.961333
174	0.962667
174.1	0.963
174.2	0.962667
174.3	0.961167
174.4	0.9595
174.5	0.959333
174.6	0.9595
174.7	0.9595
174.8	0.959167
174.9	0.96
175	0.9595
175.1	0.9595
175.2	0.9615
175.3	0.961
175.4	0.962833
175.5	0.962833
175.6	0.961833
175.7	0.958
175.8	0.958667
175.9	0.9595
176	0.96
176.1	0.960333
176.2	0.961
176.3	0.959833
176.4	0.959167
176.5	0.957833
176.6	0.959667
176.7	0.957667
176.8	0.957833
176.9	0.958833
177	0.958833
177.1	0.957833
177.2	0.958167
177.3	0.957833
177.4	0.959667
177.5	0.958167
177.6	0.959667
177.7	0.961667
177.8	0.962
177.9	0.960333
178	0.9595
178.1	0.959667
178.2	0.9615
178.3	0.962
178.4	0.961833
178.5	0.961
178.6	0.959333
178.7	0.959333
178.8	0.96
178.9	0.960167
179	0.960333
179.1	0.961
179.2	0.961333
179.3	0.9625
179.4	0.9625
179.5	0.961167
179.6	0.962167
179.7	0.962167
179.8	0.965
179.9	0.964
180	0.963167
180.1	0.9625
180.2	0.961167
180.3	0.962333
180.4	0.963
180.5	0.9635
180.6	0.963833
180.7	0.963333
180.8	0.963833
180.9	0.963333
181	0.9615
181.1	0.960833
181.2	0.960833
181.3	0.959333
181.4	0.961167
181.5	0.962667
181.6	0.963833
181.7	0.965167
181.8	0.9645
181.9	0.963833
182	0.963833
182.1	0.962
182.2	0.964
182.3	0.9655
182.4	0.961833
182.5	0.9625
182.6	0.960833
182.7	0.959333
182.8	0.959167
182.9	0.959333
183	0.958833
183.1	0.959167
183.2	0.961167
183.3	0.962
183.4	0.961667
183.5	0.962833
183.6	0.9635
183.7	0.962667
183.8	0.963
183.9	0.963833
184	0.963
184.1	0.963667
184.2	0.9615
184.3	0.961167
184.4	0.962167
184.5	0.960667
184.6	0.961167
184.7	0.9615
184.8	0.960833
184.9	0.959167
185	0.9605
185.1	0.962833
185.2	0.963333
185.3	0.9615
185.4	0.960667
185.5	0.962167
185.6	0.961667
185.7	0.960833
185.8	0.9625
185.9	0.9615
186	0.961667
186.1	0.963
186.2	0.963
186.3	0.962
186.4	0.963167
186.5	0.962333
186.6	0.962
186.7	0.962
186.8	0.9625
186.9	0.963333
187	0.964
187.1	0.961833
187.2	0.9625
187.3	0.963167
187.4	0.963833
187.5	0.965333
187.6	0.963667
187.7	0.965167
187.8	0.965833
187.9	0.9645
188	0.966
188.1	0.964667
188.2	0.9645
188.3	0.966
188.4	0.965833
188.5	0.965167
188.6	0.966333
188.7	0.964667
188.8	0.963833
188.9	0.961167
189	0.9615
189.1	0.962667
189.2	0.963
189.3	0.962
189.4	0.9605
189.5	0.959833
189.6	0.960333
189.7	0.961167
189.8	0.959833
189.9	0.96
190	0.962167
190.1	0.9625
190.2	0.961
190.3	0.9625
190.4	0.962833
190.5	0.9645
190.6	0.964333
190.7	0.964833
190.8	0.9635
190.9	0.961833
191	0.962667
191.1	0.964167
191.2	0.964167
191.3	0.966
191.4	0.964667
191.5	0.965667
191.6	0.962667
191.7	0.962333
191.8	0.962333
191.9	0.961667
192	0.961833
192.1	0.962333
192.2	0.961833
192.3	0.964
192.4	0.962333
192.5	0.9635
192.6	0.961333
192.7	0.962333
192.8	0.962833
192.9	0.9635
193	0.962833
193.1	0.9625
193.2	0.962833
193.3	0.962667
193.4	0.964667
193.5	0.964
193.6	0.963167
193.7	0.9625
193.8	0.965667
193.9	0.967
194	0.9655
194.1	0.965833
194.2	0.9645
194.3	0.965167
194.4	0.966
194.5	0.964167
194.6	0.965667
194.7	0.964667
194.8	0.964333
194.9	0.963667
195	0.965833
195.1	0.967167
195.2	0.966667
195.3	0.966167
195.4	0.965167
195.5	0.9645
195.6	0.963167
195.7	0.963
195.8	0.964167
195.9	0.9635
196	0.964
196.1	0.962667
196.2	0.962667
196.3	0.963167
196.4	0.964
196.5	0.9645
196.6	0.966
196.7	0.9665
196.8	0.965333
196.9	0.965
197	0.964333
197.1	0.964167
197.2	0.964667
197.3	0.964167
197.4	0.962667
197.5	0.963
197.6	0.964167
197.7	0.964167
197.8	0.963833
197.9	0.964
198	0.9635
198.1	0.963667
198.2	0.962333
198.3	0.962833
198.4	0.962833
198.5	0.962833
198.6	0.963333
198.7	0.963333
198.8	0.962333
198.9	0.962333
199	0.962833
199.1	0.962
199.2	0.963833
199.3	0.963833
199.4	0.964333
199.5	0.965667
199.6	0.963833
199.7	0.963667
199.8	0.963167
199.9	0.9635
200	0.964167
[truncated: 14,000 more rows]
