# Supplementary material for: Bayesian inference of kinetic schemes for ion channels by Kalman filtering
Source: eLife journal article supplement (doi:10.7554/elife.62714), 2022-05-04
Supplement: fig4-data5 [file 1_Sim_N_3000_Strom_MW_4M.xlsx]

## Sheet: Tabelle1
0.1	0
0.2	0
0.3	0
0.4	0
0.5	0
0.6	0
0.7	0
0.8	0
0.9	0
1	0
1.1	0
1.2	0
1.3	0
1.4	0
1.5	0
1.6	0
1.7	0
1.8	0
1.9	0
2	0
2.1	0
2.2	0
2.3	0
2.4	0
2.5	0
2.6	0
2.7	0
2.8	0
2.9	0
3	0
3.1	0
3.2	0
3.3	0
3.4	0
3.5	0
3.6	0
3.7	0
3.8	0
3.9	0
4	0
4.1	0
4.2	0
4.3	0
4.4	0
4.5	0
4.6	0
4.7	0
4.8	0
4.9	0
5	0
5.1	0
5.2	0
5.3	0
5.4	0
5.5	0
5.6	0
5.7	0
5.8	0
5.9	0
6	0
6.1	0
6.2	0
6.3	0
6.4	0
6.5	0
6.6	0
6.7	0
6.8	0
6.9	0
7	0
7.1	0
7.2	0
7.3	0
7.4	0
7.5	0
7.6	0
7.7	0
7.8	0
7.9	0
8	0
8.1	0
8.2	0
8.3	0
8.4	0
8.5	0
8.6	0
8.7	0
8.8	0
8.9	0
9	0
9.1	0
9.2	0
9.3	0
9.4	0
9.5	0
9.6	0
9.7	0
9.8	0
9.9	0
10	0
10.1	0
10.2	0
10.3	0
10.4	0
10.5	0
10.6	0
10.7	0
10.8	0
10.9	0
11	0
11.1	0
11.2	0
11.3	0
11.4	0
11.5	0
11.6	0
11.7	0
11.8	0
11.9	0
12	0
12.1	0
12.2	0
12.3	0
12.4	0
12.5	0
12.6	0
12.7	0
12.8	0
12.9	0
13	0
13.1	0
13.2	0
13.3	0
13.4	0
13.5	0
13.6	0
13.7	0
13.8	0
13.9	0
14	0
14.1	0
14.2	0
14.3	0
14.4	0
14.5	0
14.6	0
14.7	0
14.8	0
14.9	0
15	0
15.1	0
15.2	0
15.3	0
15.4	0
15.5	0
15.6	0
15.7	0
15.8	0
15.9	0
16	0
16.1	0
16.2	0
16.3	0
16.4	0
16.5	0
16.6	0
16.7	0
16.8	0
16.9	0
17	0
17.1	0
17.2	0
17.3	0
17.4	0
17.5	0
17.6	0
17.7	0
17.8	0
17.9	0
18	0
18.1	0
18.2	0
18.3	0
18.4	0
18.5	0
18.6	0
18.7	0
18.8	0
18.9	0
19	0
19.1	0
19.2	0
19.3	0
19.4	0
19.5	0
19.6	0
19.7	0
19.8	0
19.9	0
20	0
20.1	0
20.2	0
20.3	0
20.4	0
20.5	0
20.6	0
20.7	0
20.8	0
20.9	0
21	0
21.1	0
21.2	0
21.3	0
21.4	0
21.5	0
21.6	0
21.7	0
21.8	0
21.9	0
22	0
22.1	0
22.2	0
22.3	0
22.4	0
22.5	0
22.6	0
22.7	0
22.8	0
22.9	0
23	0
23.1	0
23.2	0
23.3	0
23.4	0
23.5	0
23.6	0
23.7	0
23.8	0
23.9	0
24	0
24.1	0
24.2	0
24.3	0
24.4	0
24.5	0
24.6	0
24.7	0
24.8	0
24.9	0
25	0
25.1	0
25.2	0
25.3	0
25.4	0
25.5	0
25.6	0
25.7	0
25.8	0
25.9	0
26	0
26.1	0
26.2	0
26.3	0
26.4	0
26.5	0
26.6	0
26.7	0
26.8	0
26.9	0
27	0
27.1	0
27.2	0
27.3	0
27.4	0
27.5	0
27.6	0
27.7	0
27.8	0
27.9	0
28	0
28.1	0
28.2	0
28.3	0
28.4	0
28.5	0
28.6	0
28.7	0
28.8	0
28.9	0
29	0
29.1	0
29.2	0
29.3	0
29.4	0
29.5	0
29.6	0
29.7	0
29.8	0
29.9	0
30	0
30.1	0
30.2	0
30.3	0
30.4	0
30.5	0
30.6	0
30.7	0
30.8	0
30.9	0
31	0
31.1	0
31.2	0
31.3	0
31.4	0
31.5	0
31.6	0
31.7	0
31.8	0
31.9	0
32	0
32.1	0
32.2	0
32.3	0
32.4	0
32.5	0
32.6	0
32.7	0
32.8	0
32.9	0
33	0
33.1	0
33.2	0
33.3	0
33.4	0
33.5	0
33.6	0
33.7	0
33.8	0
33.9	0
34	0
34.1	0
34.2	0
34.3	0
34.4	0
34.5	0
34.6	0
34.7	0
34.8	0
34.9	0
35	0
35.1	0
35.2	0
35.3	0
35.4	0
35.5	0
35.6	0
35.7	0
35.8	0
35.9	0
36	0
36.1	0
36.2	0
36.3	0
36.4	0
36.5	0
36.6	0
36.7	0
36.8	0
36.9	0
37	0
37.1	0
37.2	0
37.3	0
37.4	0
37.5	0
37.6	0
37.7	0
37.8	0
37.9	0
38	0
38.1	0
38.2	0
38.3	0
38.4	0
38.5	0
38.6	0
38.7	0
38.8	0
38.9	0
39	0
39.1	0
39.2	0
39.3	0
39.4	0
39.5	0
39.6	0
39.7	0
39.8	0
39.9	0
40	0
40.1	0
40.2	0
40.3	0
40.4	0
40.5	0
40.6	0
40.7	0
40.8	0
40.9	0
41	0
41.1	0
41.2	0
41.3	0
41.4	0
41.5	0
41.6	0
41.7	0
41.8	0
41.9	0
42	0
42.1	0
42.2	0
42.3	0
42.4	0
42.5	0
42.6	0
42.7	0
42.8	0
42.9	0
43	0
43.1	0
43.2	0
43.3	0
43.4	0
43.5	0
43.6	0
43.7	0
43.8	0
43.9	0
44	0
44.1	0
44.2	0
44.3	0
44.4	0
44.5	0
44.6	0
44.7	0
44.8	0
44.9	0
45	0
45.1	0
45.2	0
45.3	0
45.4	0
45.5	0
45.6	0
45.7	0
45.8	0
45.9	0
46	0
46.1	0
46.2	0
46.3	0
46.4	0
46.5	0
46.6	0
46.7	0
46.8	0
46.9	0
47	0
47.1	0
47.2	0
47.3	0
47.4	0
47.5	0
47.6	0
47.7	0
47.8	0
47.9	0
48	0
48.1	0
48.2	0
48.3	0
48.4	0
48.5	0
48.6	0
48.7	0
48.8	0
48.9	0
49	0
49.1	0
49.2	0
49.3	0
49.4	0
49.5	0
49.6	0
49.7	0
49.8	0
49.9	0
50	0
50.1	0
50.2	0
50.3	0
50.4	0
50.5	0
50.6	0
50.7	0
50.8	0
50.9	0
51	0
51.1	0
51.2	0
51.3	0
51.4	0
51.5	0
51.6	0
51.7	0
51.8	0
51.9	0
52	0
52.1	0
52.2	0
52.3	0
52.4	0
52.5	0
52.6	0
52.7	0
52.8	0
52.9	0
53	0
53.1	0
53.2	0
53.3	0
53.4	0
53.5	0
53.6	0
53.7	0
53.8	0
53.9	0
54	0
54.1	0
54.2	0
54.3	0
54.4	0
54.5	0
54.6	0
54.7	0
54.8	0
54.9	0
55	0
55.1	0
55.2	0
55.3	0
55.4	0
55.5	0
55.6	0
55.7	0
55.8	0
55.9	0
56	0
56.1	0
56.2	0
56.3	0
56.4	0
56.5	0
56.6	0
56.7	0
56.8	0
56.9	0
57	0
57.1	0
57.2	0
57.3	0
57.4	0
57.5	0
57.6	0
57.7	0
57.8	0
57.9	0
58	0
58.1	0
58.2	0
58.3	0
58.4	0
58.5	0
58.6	0
58.7	0
58.8	0
58.9	0
59	0
59.1	0
59.2	0
59.3	0
59.4	0
59.5	0
59.6	0
59.7	0
59.8	0
59.9	0
60	0
60.1	0
60.2	0
60.3	0
60.4	0
60.5	0
60.6	0
60.7	0
60.8	0
60.9	0
61	0
61.1	0
61.2	0
61.3	0
61.4	0
61.5	0
61.6	0
61.7	0
61.8	0
61.9	0
62	0
62.1	0
62.2	0
62.3	0
62.4	0
62.5	0
62.6	0
62.7	0
62.8	0
62.9	0
63	0
63.1	0
63.2	0
63.3	0
63.4	0
63.5	0
63.6	0
63.7	0
63.8	0
63.9	0
64	0
64.1	0
64.2	0
64.3	0
64.4	0
64.5	0
64.6	0
64.7	0
64.8	0
64.9	0
65	0
65.1	0
65.2	0
65.3	0
65.4	0
65.5	0
65.6	0
65.7	0
65.8	0
65.9	0
66	0
66.1	0
66.2	0
66.3	0
66.4	0
66.5	0
66.6	0
66.7	0
66.8	0
66.9	0
67	0
67.1	0
67.2	0
67.3	0
67.4	0
67.5	0
67.6	0
67.7	0
67.8	0
67.9	0
68	0
68.1	0
68.2	0
68.3	0
68.4	0
68.5	0
68.6	0
68.7	0
68.8	0
68.9	0
69	0
69.1	0
69.2	0
69.3	0
69.4	0
69.5	0
69.6	0
69.7	0
69.8	0
69.9	0
70	0
70.1	0
70.2	0
70.3	0
70.4	0
70.5	0
70.6	0
70.7	0
70.8	0
70.9	0
71	0
71.1	0
71.2	0
71.3	0
71.4	0
71.5	0
71.6	0
71.7	0
71.8	0
71.9	0
72	0
72.1	0
72.2	0
72.3	0
72.4	0
72.5	0
72.6	0
72.7	0
72.8	0
72.9	0
73	0
73.1	0
73.2	0
73.3	0
73.4	0
73.5	0
73.6	0
73.7	0
73.8	0
73.9	0
74	0
74.1	0
74.2	0
74.3	0
74.4	0
74.5	0
74.6	0
74.7	0
74.8	0
74.9	0
75	0
75.1	0
75.2	0
75.3	0
75.4	0
75.5	0
75.6	0
75.7	0
75.8	0
75.9	0
76	0
76.1	0
76.2	0
76.3	0
76.4	0
76.5	0
76.6	0
76.7	0
76.8	0
76.9	0
77	0
77.1	0
77.2	0
77.3	0
77.4	0
77.5	0
77.6	0
77.7	0
77.8	0
77.9	0
78	0
78.1	0
78.2	0
78.3	0
78.4	0
78.5	0
78.6	0
78.7	0
78.8	0
78.9	0
79	0
79.1	0
79.2	0
79.3	0
79.4	0
79.5	0
79.6	0
79.7	0
79.8	0
79.9	0
80	0
80.1	0
80.2	0
80.3	0
80.4	0
80.5	0
80.6	0
80.7	0
80.8	0
80.9	0
81	0
81.1	0
81.2	0
81.3	0
81.4	0
81.5	0
81.6	0
81.7	0
81.8	0
81.9	0
82	0
82.1	0
82.2	0
82.3	0
82.4	0
82.5	0
82.6	0
82.7	0
82.8	0
82.9	0
83	0
83.1	0
83.2	0
83.3	0
83.4	0
83.5	0
83.6	0
83.7	0
83.8	0
83.9	0
84	0
84.1	0
84.2	0
84.3	0
84.4	0
84.5	0
84.6	0
84.7	0
84.8	0
84.9	0
85	0
85.1	0
85.2	0
85.3	0
85.4	0
85.5	0
85.6	0
85.7	0
85.8	0
85.9	0
86	0
86.1	0
86.2	0
86.3	0
86.4	0
86.5	0
86.6	0
86.7	0
86.8	0
86.9	0
87	0
87.1	0
87.2	0
87.3	0
87.4	0
87.5	0
87.6	0
87.7	0
87.8	0
87.9	0
88	0
88.1	0
88.2	0
88.3	0
88.4	0
88.5	0
88.6	0
88.7	0
88.8	0
88.9	0
89	0
89.1	0
89.2	0
89.3	0
89.4	0
89.5	0
89.6	0
89.7	0
89.8	0
89.9	0
90	0
90.1	0
90.2	0
90.3	0
90.4	0
90.5	0
90.6	0
90.7	0
90.8	0
90.9	0
91	0
91.1	0
91.2	0
91.3	0
91.4	0
91.5	0
91.6	0
91.7	0
91.8	0
91.9	0
92	0
92.1	0
92.2	0
92.3	0
92.4	0
92.5	0
92.6	0
92.7	0
92.8	0
92.9	0
93	0
93.1	0
93.2	0
93.3	0
93.4	0
93.5	0
93.6	0
93.7	0
93.8	0
93.9	0
94	0
94.1	0
94.2	0
94.3	0
94.4	0
94.5	0
94.6	0
94.7	0
94.8	0
94.9	0
95	0
95.1	0
95.2	0
95.3	0
95.4	0
95.5	0
95.6	0
95.7	0
95.8	0
95.9	0
96	0
96.1	0
96.2	0
96.3	0
96.4	0
96.5	0
96.6	0
96.7	0
96.8	0
96.9	0
97	0
97.1	0
97.2	0
97.3	0
97.4	0
97.5	0
97.6	0
97.7	0
97.8	0
97.9	0
98	0
98.1	0
98.2	0
98.3	0
98.4	0
98.5	0
98.6	0
98.7	0
98.8	0
98.9	0
99	0
99.1	0
99.2	0
99.3	0
99.4	0
99.5	0
99.6	0
99.7	0
99.8	0
99.9	0
100	0
100.1	0.000666667
100.2	0.001
100.3	0.001
100.4	0.002
100.5	0.00233333
100.6	0.00433333
100.7	0.005
100.8	0.00866667
100.9	0.0113333
101	0.014
101.1	0.017
101.2	0.02
101.3	0.0216667
101.4	0.0243333
101.5	0.029
101.6	0.0326667
101.7	0.036
101.8	0.039
101.9	0.041
102	0.043
102.1	0.0443333
102.2	0.048
102.3	0.0523333
102.4	0.056
102.5	0.0593333
102.6	0.063
102.7	0.0673333
102.8	0.0696667
102.9	0.0716667
103	0.075
103.1	0.077
103.2	0.0803333
103.3	0.0823333
103.4	0.0856667
103.5	0.0883333
103.6	0.093
103.7	0.096
103.8	0.0996667
103.9	0.103667
104	0.107333
104.1	0.111667
104.2	0.115
104.3	0.117333
104.4	0.118
104.5	0.121
104.6	0.124333
104.7	0.126667
104.8	0.129
104.9	0.131667
105	0.136333
105.1	0.139
105.2	0.142667
105.3	0.145667
105.4	0.148667
105.5	0.150333
105.6	0.154333
105.7	0.156667
105.8	0.159333
105.9	0.161333
106	0.164
106.1	0.166333
106.2	0.169333
106.3	0.172333
106.4	0.177333
106.5	0.180333
106.6	0.182667
106.7	0.185
106.8	0.189
106.9	0.191333
107	0.193
107.1	0.195
107.2	0.197333
107.3	0.201
107.4	0.204
107.5	0.204667
107.6	0.207667
107.7	0.208667
107.8	0.21
107.9	0.212
108	0.213
108.1	0.215
108.2	0.219333
108.3	0.221333
108.4	0.224
108.5	0.226667
108.6	0.228667
108.7	0.231667
108.8	0.235
108.9	0.239
109	0.243
109.1	0.244667
109.2	0.247667
109.3	0.250333
109.4	0.253
109.5	0.254667
109.6	0.257333
109.7	0.260333
109.8	0.265
109.9	0.269
110	0.271333
110.1	0.274
110.2	0.276333
110.3	0.276667
110.4	0.279
110.5	0.281333
110.6	0.284
110.7	0.286667
110.8	0.29
110.9	0.292333
111	0.294
111.1	0.297
111.2	0.299333
111.3	0.301667
111.4	0.302333
111.5	0.304333
111.6	0.305667
111.7	0.307333
111.8	0.309333
111.9	0.313
112	0.315333
112.1	0.318333
112.2	0.320333
112.3	0.322
112.4	0.324667
112.5	0.327667
112.6	0.329
112.7	0.329333
112.8	0.333
112.9	0.334
113	0.335667
113.1	0.338333
113.2	0.339333
113.3	0.343
113.4	0.343333
113.5	0.346667
113.6	0.347333
113.7	0.349667
113.8	0.351333
113.9	0.354
114	0.357333
114.1	0.359333
114.2	0.362333
114.3	0.364667
114.4	0.366333
114.5	0.368
114.6	0.371333
114.7	0.372667
114.8	0.375
114.9	0.376333
115	0.378333
115.1	0.381
115.2	0.383333
115.3	0.385667
115.4	0.386
115.5	0.388667
115.6	0.39
115.7	0.392667
115.8	0.395
115.9	0.397
116	0.397667
116.1	0.400333
116.2	0.400333
116.3	0.401667
116.4	0.403333
116.5	0.404
116.6	0.406
116.7	0.406
116.8	0.407
116.9	0.408667
117	0.408333
117.1	0.408667
117.2	0.409
117.3	0.412333
117.4	0.414
117.5	0.414667
117.6	0.417
117.7	0.417667
117.8	0.417333
117.9	0.419333
118	0.420333
118.1	0.421667
118.2	0.424
118.3	0.424
118.4	0.425333
118.5	0.428333
118.6	0.43
118.7	0.430333
118.8	0.432333
118.9	0.432333
119	0.435
119.1	0.435
119.2	0.437667
119.3	0.438667
119.4	0.440333
119.5	0.441333
119.6	0.443
119.7	0.443667
119.8	0.446
119.9	0.448
120	0.448333
120.1	0.449667
120.2	0.452
120.3	0.455
120.4	0.456667
120.5	0.458333
120.6	0.460667
120.7	0.459667
120.8	0.461667
120.9	0.464667
121	0.467
121.1	0.468
121.2	0.469333
121.3	0.470333
121.4	0.471333
121.5	0.472667
121.6	0.474667
121.7	0.478
121.8	0.480333
121.9	0.482667
122	0.483667
122.1	0.484333
122.2	0.486333
122.3	0.488667
122.4	0.488333
122.5	0.490667
122.6	0.492667
122.7	0.493667
122.8	0.495
122.9	0.497
123	0.499667
123.1	0.502667
123.2	0.503667
123.3	0.504667
123.4	0.507
123.5	0.508
123.6	0.510333
123.7	0.514667
123.8	0.516667
123.9	0.517
124	0.517333
124.1	0.518
124.2	0.519333
124.3	0.520333
124.4	0.522667
124.5	0.525
124.6	0.526
124.7	0.528
124.8	0.529
124.9	0.531333
125	0.533
125.1	0.533333
125.2	0.534333
125.3	0.536
125.4	0.536667
125.5	0.538
125.6	0.539
125.7	0.539
125.8	0.540667
125.9	0.542
126	0.542
126.1	0.543667
126.2	0.545
126.3	0.546667
126.4	0.546333
126.5	0.547333
126.6	0.548667
126.7	0.548333
126.8	0.549333
126.9	0.549
127	0.550333
127.1	0.552333
127.2	0.553333
127.3	0.553
127.4	0.554333
127.5	0.554333
127.6	0.556
127.7	0.558333
127.8	0.559333
127.9	0.56
128	0.560667
128.1	0.562667
128.2	0.563
128.3	0.565
128.4	0.565
128.5	0.566
128.6	0.565667
128.7	0.566
128.8	0.567333
128.9	0.567667
129	0.568333
129.1	0.570333
129.2	0.569667
129.3	0.571667
129.4	0.571
129.5	0.57
129.6	0.571
129.7	0.571333
129.8	0.572667
129.9	0.574
130	0.575
130.1	0.576
130.2	0.577667
130.3	0.578333
130.4	0.579333
130.5	0.580333
130.6	0.581333
130.7	0.580667
130.8	0.581
130.9	0.583
131	0.584667
131.1	0.586333
131.2	0.588667
131.3	0.589
131.4	0.589
131.5	0.590667
131.6	0.592
131.7	0.593667
131.8	0.595667
131.9	0.596667
132	0.598
132.1	0.598667
132.2	0.599667
132.3	0.599667
132.4	0.598333
132.5	0.599333
132.6	0.6
132.7	0.601333
132.8	0.602333
132.9	0.602333
133	0.603667
133.1	0.605333
133.2	0.606333
133.3	0.607333
133.4	0.609
133.5	0.61
133.6	0.610333
133.7	0.610667
133.8	0.611
133.9	0.612
134	0.614
134.1	0.616333
134.2	0.617333
134.3	0.617
134.4	0.617667
134.5	0.619
134.6	0.618667
134.7	0.620333
134.8	0.62
134.9	0.621
135	0.623667
135.1	0.623667
135.2	0.625333
135.3	0.626333
135.4	0.627667
135.5	0.628333
135.6	0.627667
135.7	0.629
135.8	0.628667
135.9	0.628
136	0.628667
136.1	0.628667
136.2	0.628333
136.3	0.629667
136.4	0.630333
136.5	0.631333
136.6	0.632333
136.7	0.632667
136.8	0.635
136.9	0.636
137	0.636667
137.1	0.637
137.2	0.638
137.3	0.637333
137.4	0.639
137.5	0.639667
137.6	0.640667
137.7	0.641333
137.8	0.641
137.9	0.642
138	0.643667
138.1	0.645
138.2	0.645667
138.3	0.647
138.4	0.647667
138.5	0.648
138.6	0.647667
138.7	0.648
138.8	0.649333
138.9	0.65
139	0.650333
139.1	0.651
139.2	0.652
139.3	0.653
139.4	0.653
139.5	0.653333
139.6	0.654333
139.7	0.654333
139.8	0.654333
139.9	0.654333
140	0.654
140.1	0.655
140.2	0.655
140.3	0.654333
140.4	0.655667
140.5	0.655667
140.6	0.657
140.7	0.657333
140.8	0.658333
140.9	0.657333
141	0.656333
141.1	0.656333
141.2	0.656333
141.3	0.657
141.4	0.657667
141.5	0.656
141.6	0.657
141.7	0.658667
141.8	0.659333
141.9	0.659
142	0.660667
142.1	0.66
142.2	0.661333
142.3	0.662
142.4	0.662667
142.5	0.662333
142.6	0.662333
142.7	0.661667
142.8	0.661
142.9	0.661667
143	0.660667
143.1	0.661333
143.2	0.662333
143.3	0.663667
143.4	0.662667
143.5	0.662333
143.6	0.663333
143.7	0.662333
143.8	0.662667
143.9	0.663667
144	0.664333
144.1	0.666333
144.2	0.666
144.3	0.665667
144.4	0.665333
144.5	0.665333
144.6	0.665333
144.7	0.665333
144.8	0.667
144.9	0.667667
145	0.668333
145.1	0.668667
145.2	0.668667
145.3	0.669
145.4	0.668333
145.5	0.668333
145.6	0.669667
145.7	0.669667
145.8	0.670333
145.9	0.669333
146	0.670667
146.1	0.670667
146.2	0.671667
146.3	0.672333
146.4	0.672333
146.5	0.673
146.6	0.674333
146.7	0.674333
146.8	0.674
146.9	0.675333
147	0.675667
147.1	0.675667
147.2	0.676667
147.3	0.676667
147.4	0.677667
147.5	0.678333
147.6	0.679667
147.7	0.679333
147.8	0.681333
147.9	0.682
148	0.682
148.1	0.681667
148.2	0.682
148.3	0.681667
148.4	0.683
148.5	0.683333
148.6	0.683667
148.7	0.684333
148.8	0.683333
148.9	0.684
149	0.684333
149.1	0.686333
149.2	0.686667
149.3	0.686667
149.4	0.687333
149.5	0.687667
149.6	0.687333
149.7	0.687667
149.8	0.688333
149.9	0.688667
150	0.690667
150.1	0.69
150.2	0.691667
150.3	0.692667
150.4	0.693667
150.5	0.694667
150.6	0.694
150.7	0.694333
150.8	0.695667
150.9	0.696667
151	0.697
151.1	0.697333
151.2	0.697333
151.3	0.699
151.4	0.699
151.5	0.700333
151.6	0.701667
151.7	0.702667
151.8	0.702
151.9	0.702333
152	0.702
152.1	0.702667
152.2	0.702333
152.3	0.702667
152.4	0.703333
152.5	0.703333
152.6	0.703333
152.7	0.702667
152.8	0.702333
152.9	0.703333
153	0.704
153.1	0.703667
153.2	0.702
153.3	0.702667
153.4	0.704
153.5	0.704667
153.6	0.704667
153.7	0.704667
153.8	0.705333
153.9	0.707333
154	0.707333
154.1	0.709
154.2	0.708333
154.3	0.709
154.4	0.71
154.5	0.708667
154.6	0.709333
154.7	0.710333
154.8	0.710667
154.9	0.711333
155	0.712333
155.1	0.713333
155.2	0.713667
155.3	0.714
155.4	0.713667
155.5	0.713333
155.6	0.713333
155.7	0.714667
155.8	0.715
155.9	0.714333
156	0.714667
156.1	0.715333
156.2	0.715667
156.3	0.714667
156.4	0.715
156.5	0.716333
156.6	0.717
156.7	0.717333
156.8	0.717333
156.9	0.717
157	0.716667
157.1	0.717
157.2	0.718333
157.3	0.718667
157.4	0.718
157.5	0.719
157.6	0.718667
157.7	0.719333
157.8	0.719667
157.9	0.72
158	0.720667
158.1	0.721667
158.2	0.721
158.3	0.722667
158.4	0.723667
158.5	0.723333
158.6	0.724333
158.7	0.724333
158.8	0.724667
158.9	0.726333
159	0.726667
159.1	0.725667
159.2	0.726667
159.3	0.726
159.4	0.726
159.5	0.725667
159.6	0.725
159.7	0.725
159.8	0.725333
159.9	0.725
160	0.724
160.1	0.724
160.2	0.723333
160.3	0.723667
160.4	0.723333
160.5	0.723667
160.6	0.723333
160.7	0.722667
160.8	0.724
160.9	0.724667
161	0.725
161.1	0.725667
161.2	0.726
161.3	0.726667
161.4	0.727333
161.5	0.728
161.6	0.729
161.7	0.729333
161.8	0.729667
161.9	0.729667
162	0.729333
162.1	0.729333
162.2	0.729333
162.3	0.728667
162.4	0.729333
162.5	0.730667
162.6	0.730667
162.7	0.73
162.8	0.73
162.9	0.729
163	0.729667
163.1	0.729667
163.2	0.729333
163.3	0.729667
163.4	0.73
163.5	0.730667
163.6	0.730333
163.7	0.73
163.8	0.729667
163.9	0.730667
164	0.731
164.1	0.731667
164.2	0.731333
164.3	0.731667
164.4	0.732333
164.5	0.732
164.6	0.733333
164.7	0.733333
164.8	0.733333
164.9	0.733
165	0.732667
165.1	0.734
165.2	0.733
165.3	0.733
165.4	0.733
165.5	0.733333
165.6	0.731667
165.7	0.732667
165.8	0.732667
165.9	0.732333
166	0.732667
166.1	0.733
166.2	0.734
166.3	0.733667
166.4	0.731
166.5	0.732333
166.6	0.734
166.7	0.735333
166.8	0.736
166.9	0.736333
167	0.738
167.1	0.737333
167.2	0.737333
167.3	0.736667
167.4	0.737333
167.5	0.738
167.6	0.739
167.7	0.738667
167.8	0.737333
167.9	0.736667
168	0.736
168.1	0.735667
168.2	0.735333
168.3	0.734667
168.4	0.734667
168.5	0.733667
168.6	0.732667
168.7	0.734
168.8	0.733333
168.9	0.734
169	0.734333
169.1	0.734
169.2	0.734333
169.3	0.732667
169.4	0.733333
169.5	0.733667
169.6	0.734333
169.7	0.735333
169.8	0.734333
169.9	0.735333
170	0.734667
170.1	0.735667
170.2	0.736333
170.3	0.736667
170.4	0.737333
170.5	0.737333
170.6	0.736667
170.7	0.737667
170.8	0.739
170.9	0.739667
171	0.739667
171.1	0.741
171.2	0.740667
171.3	0.741667
171.4	0.740333
171.5	0.740667
171.6	0.740667
171.7	0.740667
171.8	0.741333
171.9	0.741
172	0.741
172.1	0.741667
172.2	0.741667
172.3	0.741333
172.4	0.741667
172.5	0.740667
172.6	0.741
172.7	0.741
172.8	0.742
172.9	0.743
173	0.743333
173.1	0.744
173.2	0.745333
173.3	0.745
173.4	0.744
173.5	0.744
173.6	0.744333
173.7	0.744
173.8	0.744
173.9	0.744333
174	0.744667
174.1	0.744667
174.2	0.746
174.3	0.745667
174.4	0.746667
174.5	0.747
174.6	0.747333
174.7	0.748333
174.8	0.749
174.9	0.749333
175	0.747667
175.1	0.748333
175.2	0.748
175.3	0.748333
175.4	0.748667
175.5	0.748667
175.6	0.748667
175.7	0.748333
175.8	0.748333
175.9	0.748333
176	0.748333
176.1	0.748333
176.2	0.747667
176.3	0.747
176.4	0.747
176.5	0.747
176.6	0.748
176.7	0.748
176.8	0.748667
176.9	0.749
177	0.749333
177.1	0.749333
177.2	0.749333
177.3	0.749667
177.4	0.748667
177.5	0.748667
177.6	0.748667
177.7	0.749333
177.8	0.75
177.9	0.750667
178	0.75
178.1	0.749
178.2	0.749333
178.3	0.748333
178.4	0.748667
178.5	0.749
178.6	0.749
178.7	0.75
178.8	0.751667
178.9	0.750667
179	0.749667
179.1	0.748333
179.2	0.747333
179.3	0.747667
179.4	0.747667
179.5	0.747
179.6	0.746333
179.7	0.746667
179.8	0.746333
179.9	0.746333
180	0.747333
180.1	0.746333
180.2	0.745667
180.3	0.746
180.4	0.746
180.5	0.746333
180.6	0.747
180.7	0.747667
180.8	0.747333
180.9	0.748
181	0.748333
181.1	0.749
181.2	0.749
181.3	0.748
181.4	0.748333
181.5	0.748333
181.6	0.748667
181.7	0.748
181.8	0.749333
181.9	0.750333
182	0.750667
182.1	0.751333
182.2	0.752
182.3	0.752333
182.4	0.751333
182.5	0.751667
182.6	0.752
182.7	0.752
182.8	0.751667
182.9	0.749333
183	0.749333
183.1	0.749
183.2	0.750333
183.3	0.75
183.4	0.750667
183.5	0.752667
183.6	0.753
183.7	0.753333
183.8	0.753
183.9	0.753
184	0.752333
184.1	0.751333
184.2	0.751667
184.3	0.752
184.4	0.752333
184.5	0.752667
184.6	0.752667
184.7	0.752667
184.8	0.752667
184.9	0.752333
185	0.752667
185.1	0.753333
185.2	0.752667
185.3	0.753333
185.4	0.753667
185.5	0.754
185.6	0.754
185.7	0.755333
185.8	0.755333
185.9	0.755
186	0.754333
186.1	0.754667
186.2	0.754667
186.3	0.754
186.4	0.754333
186.5	0.755
186.6	0.755
186.7	0.756333
186.8	0.757
186.9	0.758333
187	0.758
187.1	0.757
187.2	0.758
187.3	0.758
187.4	0.759
187.5	0.759333
187.6	0.759333
187.7	0.758667
187.8	0.758667
187.9	0.759333
188	0.76
188.1	0.760667
188.2	0.761333
188.3	0.760333
188.4	0.761
188.5	0.760333
188.6	0.76
188.7	0.761333
188.8	0.761333
188.9	0.761
189	0.761667
189.1	0.760667
189.2	0.762
189.3	0.761667
189.4	0.761667
189.5	0.762
189.6	0.762333
189.7	0.763
189.8	0.763667
189.9	0.763667
190	0.764333
190.1	0.764333
190.2	0.765
190.3	0.765667
190.4	0.767
190.5	0.766667
190.6	0.766667
190.7	0.768
190.8	0.769
190.9	0.769667
191	0.77
191.1	0.77
191.2	0.768
191.3	0.768667
191.4	0.768667
191.5	0.767667
191.6	0.767667
191.7	0.767333
191.8	0.767333
191.9	0.768
192	0.767667
192.1	0.768
192.2	0.767667
192.3	0.767667
192.4	0.767
192.5	0.766667
192.6	0.767
192.7	0.766333
192.8	0.765333
192.9	0.764667
193	0.765333
193.1	0.764333
193.2	0.764
193.3	0.765
193.4	0.766333
193.5	0.765667
193.6	0.766
193.7	0.766
193.8	0.767
193.9	0.767
194	0.767667
194.1	0.766667
194.2	0.767333
194.3	0.768
194.4	0.768
194.5	0.766
194.6	0.766333
194.7	0.766333
194.8	0.766333
194.9	0.767667
195	0.767667
195.1	0.767667
195.2	0.766667
195.3	0.765
195.4	0.765
195.5	0.765333
195.6	0.765667
195.7	0.765333
195.8	0.765667
195.9	0.765333
196	0.765667
196.1	0.765667
196.2	0.764333
196.3	0.764333
196.4	0.765667
196.5	0.766
196.6	0.765
196.7	0.765667
196.8	0.765
196.9	0.764333
197	0.764
197.1	0.764
197.2	0.764333
197.3	0.764333
197.4	0.764
197.5	0.764
197.6	0.764
197.7	0.763667
197.8	0.763667
197.9	0.764
198	0.764
198.1	0.764667
198.2	0.764333
198.3	0.764
198.4	0.764333
198.5	0.764333
198.6	0.765
198.7	0.764333
198.8	0.764667
198.9	0.764333
199	0.763333
199.1	0.763
199.2	0.763333
199.3	0.765
199.4	0.766
199.5	0.767333
199.6	0.767333
199.7	0.768333
199.8	0.768667
199.9	0.768333
200	0.767667
[truncated: 14,000 more rows]
