# Supplementary material for: Bayesian inference of kinetic schemes for ion channels by Kalman filtering
Source: eLife journal article supplement (doi:10.7554/elife.62714), 2022-05-04
Supplement: fig4-data5 [file 1_Sim_N_4000_Fluor_MW_4M.xlsx]

## Sheet: Tabelle1
0.1	0
0.2	0
0.3	0
0.4	0
0.5	0
0.6	0
0.7	0
0.8	0
0.9	0
1	0
1.1	0
1.2	0
1.3	0
1.4	0
1.5	0
1.6	0
1.7	0
1.8	0
1.9	0
2	0
2.1	0
2.2	0
2.3	0
2.4	0
2.5	0
2.6	0
2.7	0
2.8	0
2.9	0
3	0
3.1	0
3.2	0
3.3	0
3.4	0
3.5	0
3.6	0
3.7	0
3.8	0
3.9	0
4	0
4.1	0
4.2	0
4.3	0
4.4	0
4.5	0
4.6	0
4.7	0
4.8	0
4.9	0
5	0
5.1	0
5.2	0
5.3	0
5.4	0
5.5	0
5.6	0
5.7	0
5.8	0
5.9	0
6	0
6.1	0
6.2	0
6.3	0
6.4	0
6.5	0
6.6	0
6.7	0
6.8	0
6.9	0
7	0
7.1	0
7.2	0
7.3	0
7.4	0
7.5	0
7.6	0
7.7	0
7.8	0
7.9	0
8	0
8.1	0
8.2	0
8.3	0
8.4	0
8.5	0
8.6	0
8.7	0
8.8	0
8.9	0
9	0
9.1	0
9.2	0
9.3	0
9.4	0
9.5	0
9.6	0
9.7	0
9.8	0
9.9	0
10	0
10.1	0
10.2	0
10.3	0
10.4	0
10.5	0
10.6	0
10.7	0
10.8	0
10.9	0
11	0
11.1	0
11.2	0
11.3	0
11.4	0
11.5	0
11.6	0
11.7	0
11.8	0
11.9	0
12	0
12.1	0
12.2	0
12.3	0
12.4	0
12.5	0
12.6	0
12.7	0
12.8	0
12.9	0
13	0
13.1	0
13.2	0
13.3	0
13.4	0
13.5	0
13.6	0
13.7	0
13.8	0
13.9	0
14	0
14.1	0
14.2	0
14.3	0
14.4	0
14.5	0
14.6	0
14.7	0
14.8	0
14.9	0
15	0
15.1	0
15.2	0
15.3	0
15.4	0
15.5	0
15.6	0
15.7	0
15.8	0
15.9	0
16	0
16.1	0
16.2	0
16.3	0
16.4	0
16.5	0
16.6	0
16.7	0
16.8	0
16.9	0
17	0
17.1	0
17.2	0
17.3	0
17.4	0
17.5	0
17.6	0
17.7	0
17.8	0
17.9	0
18	0
18.1	0
18.2	0
18.3	0
18.4	0
18.5	0
18.6	0
18.7	0
18.8	0
18.9	0
19	0
19.1	0
19.2	0
19.3	0
19.4	0
19.5	0
19.6	0
19.7	0
19.8	0
19.9	0
20	0
20.1	0
20.2	0
20.3	0
20.4	0
20.5	0
20.6	0
20.7	0
20.8	0
20.9	0
21	0
21.1	0
21.2	0
21.3	0
21.4	0
21.5	0
21.6	0
21.7	0
21.8	0
21.9	0
22	0
22.1	0
22.2	0
22.3	0
22.4	0
22.5	0
22.6	0
22.7	0
22.8	0
22.9	0
23	0
23.1	0
23.2	0
23.3	0
23.4	0
23.5	0
23.6	0
23.7	0
23.8	0
23.9	0
24	0
24.1	0
24.2	0
24.3	0
24.4	0
24.5	0
24.6	0
24.7	0
24.8	0
24.9	0
25	0
25.1	0
25.2	0
25.3	0
25.4	0
25.5	0
25.6	0
25.7	0
25.8	0
25.9	0
26	0
26.1	0
26.2	0
26.3	0
26.4	0
26.5	0
26.6	0
26.7	0
26.8	0
26.9	0
27	0
27.1	0
27.2	0
27.3	0
27.4	0
27.5	0
27.6	0
27.7	0
27.8	0
27.9	0
28	0
28.1	0
28.2	0
28.3	0
28.4	0
28.5	0
28.6	0
28.7	0
28.8	0
28.9	0
29	0
29.1	0
29.2	0
29.3	0
29.4	0
29.5	0
29.6	0
29.7	0
29.8	0
29.9	0
30	0
30.1	0
30.2	0
30.3	0
30.4	0
30.5	0
30.6	0
30.7	0
30.8	0
30.9	0
31	0
31.1	0
31.2	0
31.3	0
31.4	0
31.5	0
31.6	0
31.7	0
31.8	0
31.9	0
32	0
32.1	0
32.2	0
32.3	0
32.4	0
32.5	0
32.6	0
32.7	0
32.8	0
32.9	0
33	0
33.1	0
33.2	0
33.3	0
33.4	0
33.5	0
33.6	0
33.7	0
33.8	0
33.9	0
34	0
34.1	0
34.2	0
34.3	0
34.4	0
34.5	0
34.6	0
34.7	0
34.8	0
34.9	0
35	0
35.1	0
35.2	0
35.3	0
35.4	0
35.5	0
35.6	0
35.7	0
35.8	0
35.9	0
36	0
36.1	0
36.2	0
36.3	0
36.4	0
36.5	0
36.6	0
36.7	0
36.8	0
36.9	0
37	0
37.1	0
37.2	0
37.3	0
37.4	0
37.5	0
37.6	0
37.7	0
37.8	0
37.9	0
38	0
38.1	0
38.2	0
38.3	0
38.4	0
38.5	0
38.6	0
38.7	0
38.8	0
38.9	0
39	0
39.1	0
39.2	0
39.3	0
39.4	0
39.5	0
39.6	0
39.7	0
39.8	0
39.9	0
40	0
40.1	0
40.2	0
40.3	0
40.4	0
40.5	0
40.6	0
40.7	0
40.8	0
40.9	0
41	0
41.1	0
41.2	0
41.3	0
41.4	0
41.5	0
41.6	0
41.7	0
41.8	0
41.9	0
42	0
42.1	0
42.2	0
42.3	0
42.4	0
42.5	0
42.6	0
42.7	0
42.8	0
42.9	0
43	0
43.1	0
43.2	0
43.3	0
43.4	0
43.5	0
43.6	0
43.7	0
43.8	0
43.9	0
44	0
44.1	0
44.2	0
44.3	0
44.4	0
44.5	0
44.6	0
44.7	0
44.8	0
44.9	0
45	0
45.1	0
45.2	0
45.3	0
45.4	0
45.5	0
45.6	0
45.7	0
45.8	0
45.9	0
46	0
46.1	0
46.2	0
46.3	0
46.4	0
46.5	0
46.6	0
46.7	0
46.8	0
46.9	0
47	0
47.1	0
47.2	0
47.3	0
47.4	0
47.5	0
47.6	0
47.7	0
47.8	0
47.9	0
48	0
48.1	0
48.2	0
48.3	0
48.4	0
48.5	0
48.6	0
48.7	0
48.8	0
48.9	0
49	0
49.1	0
49.2	0
49.3	0
49.4	0
49.5	0
49.6	0
49.7	0
49.8	0
49.9	0
50	0
50.1	0
50.2	0
50.3	0
50.4	0
50.5	0
50.6	0
50.7	0
50.8	0
50.9	0
51	0
51.1	0
51.2	0
51.3	0
51.4	0
51.5	0
51.6	0
51.7	0
51.8	0
51.9	0
52	0
52.1	0
52.2	0
52.3	0
52.4	0
52.5	0
52.6	0
52.7	0
52.8	0
52.9	0
53	0
53.1	0
53.2	0
53.3	0
53.4	0
53.5	0
53.6	0
53.7	0
53.8	0
53.9	0
54	0
54.1	0
54.2	0
54.3	0
54.4	0
54.5	0
54.6	0
54.7	0
54.8	0
54.9	0
55	0
55.1	0
55.2	0
55.3	0
55.4	0
55.5	0
55.6	0
55.7	0
55.8	0
55.9	0
56	0
56.1	0
56.2	0
56.3	0
56.4	0
56.5	0
56.6	0
56.7	0
56.8	0
56.9	0
57	0
57.1	0
57.2	0
57.3	0
57.4	0
57.5	0
57.6	0
57.7	0
57.8	0
57.9	0
58	0
58.1	0
58.2	0
58.3	0
58.4	0
58.5	0
58.6	0
58.7	0
58.8	0
58.9	0
59	0
59.1	0
59.2	0
59.3	0
59.4	0
59.5	0
59.6	0
59.7	0
59.8	0
59.9	0
60	0
60.1	0
60.2	0
60.3	0
60.4	0
60.5	0
60.6	0
60.7	0
60.8	0
60.9	0
61	0
61.1	0
61.2	0
61.3	0
61.4	0
61.5	0
61.6	0
61.7	0
61.8	0
61.9	0
62	0
62.1	0
62.2	0
62.3	0
62.4	0
62.5	0
62.6	0
62.7	0
62.8	0
62.9	0
63	0
63.1	0
63.2	0
63.3	0
63.4	0
63.5	0
63.6	0
63.7	0
63.8	0
63.9	0
64	0
64.1	0
64.2	0
64.3	0
64.4	0
64.5	0
64.6	0
64.7	0
64.8	0
64.9	0
65	0
65.1	0
65.2	0
65.3	0
65.4	0
65.5	0
65.6	0
65.7	0
65.8	0
65.9	0
66	0
66.1	0
66.2	0
66.3	0
66.4	0
66.5	0
66.6	0
66.7	0
66.8	0
66.9	0
67	0
67.1	0
67.2	0
67.3	0
67.4	0
67.5	0
67.6	0
67.7	0
67.8	0
67.9	0
68	0
68.1	0
68.2	0
68.3	0
68.4	0
68.5	0
68.6	0
68.7	0
68.8	0
68.9	0
69	0
69.1	0
69.2	0
69.3	0
69.4	0
69.5	0
69.6	0
69.7	0
69.8	0
69.9	0
70	0
70.1	0
70.2	0
70.3	0
70.4	0
70.5	0
70.6	0
70.7	0
70.8	0
70.9	0
71	0
71.1	0
71.2	0
71.3	0
71.4	0
71.5	0
71.6	0
71.7	0
71.8	0
71.9	0
72	0
72.1	0
72.2	0
72.3	0
72.4	0
72.5	0
72.6	0
72.7	0
72.8	0
72.9	0
73	0
73.1	0
73.2	0
73.3	0
73.4	0
73.5	0
73.6	0
73.7	0
73.8	0
73.9	0
74	0
74.1	0
74.2	0
74.3	0
74.4	0
74.5	0
74.6	0
74.7	0
74.8	0
74.9	0
75	0
75.1	0
75.2	0
75.3	0
75.4	0
75.5	0
75.6	0
75.7	0
75.8	0
75.9	0
76	0
76.1	0
76.2	0
76.3	0
76.4	0
76.5	0
76.6	0
76.7	0
76.8	0
76.9	0
77	0
77.1	0
77.2	0
77.3	0
77.4	0
77.5	0
77.6	0
77.7	0
77.8	0
77.9	0
78	0
78.1	0
78.2	0
78.3	0
78.4	0
78.5	0
78.6	0
78.7	0
78.8	0
78.9	0
79	0
79.1	0
79.2	0
79.3	0
79.4	0
79.5	0
79.6	0
79.7	0
79.8	0
79.9	0
80	0
80.1	0
80.2	0
80.3	0
80.4	0
80.5	0
80.6	0
80.7	0
80.8	0
80.9	0
81	0
81.1	0
81.2	0
81.3	0
81.4	0
81.5	0
81.6	0
81.7	0
81.8	0
81.9	0
82	0
82.1	0
82.2	0
82.3	0
82.4	0
82.5	0
82.6	0
82.7	0
82.8	0
82.9	0
83	0
83.1	0
83.2	0
83.3	0
83.4	0
83.5	0
83.6	0
83.7	0
83.8	0
83.9	0
84	0
84.1	0
84.2	0
84.3	0
84.4	0
84.5	0
84.6	0
84.7	0
84.8	0
84.9	0
85	0
85.1	0
85.2	0
85.3	0
85.4	0
85.5	0
85.6	0
85.7	0
85.8	0
85.9	0
86	0
86.1	0
86.2	0
86.3	0
86.4	0
86.5	0
86.6	0
86.7	0
86.8	0
86.9	0
87	0
87.1	0
87.2	0
87.3	0
87.4	0
87.5	0
87.6	0
87.7	0
87.8	0
87.9	0
88	0
88.1	0
88.2	0
88.3	0
88.4	0
88.5	0
88.6	0
88.7	0
88.8	0
88.9	0
89	0
89.1	0
89.2	0
89.3	0
89.4	0
89.5	0
89.6	0
89.7	0
89.8	0
89.9	0
90	0
90.1	0
90.2	0
90.3	0
90.4	0
90.5	0
90.6	0
90.7	0
90.8	0
90.9	0
91	0
91.1	0
91.2	0
91.3	0
91.4	0
91.5	0
91.6	0
91.7	0
91.8	0
91.9	0
92	0
92.1	0
92.2	0
92.3	0
92.4	0
92.5	0
92.6	0
92.7	0
92.8	0
92.9	0
93	0
93.1	0
93.2	0
93.3	0
93.4	0
93.5	0
93.6	0
93.7	0
93.8	0
93.9	0
94	0
94.1	0
94.2	0
94.3	0
94.4	0
94.5	0
94.6	0
94.7	0
94.8	0
94.9	0
95	0
95.1	0
95.2	0
95.3	0
95.4	0
95.5	0
95.6	0
95.7	0
95.8	0
95.9	0
96	0
96.1	0
96.2	0
96.3	0
96.4	0
96.5	0
96.6	0
96.7	0
96.8	0
96.9	0
97	0
97.1	0
97.2	0
97.3	0
97.4	0
97.5	0
97.6	0
97.7	0
97.8	0
97.9	0
98	0
98.1	0
98.2	0
98.3	0
98.4	0
98.5	0
98.6	0
98.7	0
98.8	0
98.9	0
99	0
99.1	0
99.2	0
99.3	0
99.4	0
99.5	0
99.6	0
99.7	0
99.8	0
99.9	0
100	0
100.1	0.19875
100.2	0.34475
100.3	0.446375
100.4	0.52375
100.5	0.583125
100.6	0.62925
100.7	0.66625
100.8	0.695375
100.9	0.723125
101	0.74075
101.1	0.756375
101.2	0.769875
101.3	0.7795
101.4	0.785625
101.5	0.794375
101.6	0.8025
101.7	0.812625
101.8	0.818
101.9	0.8205
102	0.82825
102.1	0.832375
102.2	0.834375
102.3	0.83575
102.4	0.8365
102.5	0.83825
102.6	0.838875
102.7	0.843375
102.8	0.8455
102.9	0.8455
103	0.851
103.1	0.850625
103.2	0.851
103.3	0.853875
103.4	0.852875
103.5	0.85175
103.6	0.854125
103.7	0.855375
103.8	0.85625
103.9	0.85725
104	0.8555
104.1	0.85975
104.2	0.862875
104.3	0.861375
104.4	0.864625
104.5	0.864625
104.6	0.868
104.7	0.868
104.8	0.8735
104.9	0.874
105	0.875625
105.1	0.878
105.2	0.876
105.3	0.8755
105.4	0.874375
105.5	0.871375
105.6	0.875
105.7	0.87625
105.8	0.875375
105.9	0.87525
106	0.875125
106.1	0.871
106.2	0.869625
106.3	0.87175
106.4	0.87125
106.5	0.873125
106.6	0.87225
106.7	0.873375
106.8	0.876125
106.9	0.877625
107	0.87675
107.1	0.876125
107.2	0.878875
107.3	0.881625
107.4	0.88375
107.5	0.884625
107.6	0.8855
107.7	0.885375
107.8	0.88475
107.9	0.88425
108	0.883125
108.1	0.87925
108.2	0.879
108.3	0.878125
108.4	0.88075
108.5	0.881
108.6	0.883
108.7	0.88425
108.8	0.884625
108.9	0.882
109	0.880375
109.1	0.880875
109.2	0.8835
109.3	0.885625
109.4	0.885375
109.5	0.88775
109.6	0.885875
109.7	0.889375
109.8	0.887625
109.9	0.8855
110	0.8835
110.1	0.886125
110.2	0.884375
110.3	0.885875
110.4	0.887
110.5	0.887125
110.6	0.886875
110.7	0.883
110.8	0.881375
110.9	0.880625
111	0.880625
111.1	0.882625
111.2	0.88175
111.3	0.883625
111.4	0.88275
111.5	0.8855
111.6	0.8845
111.7	0.891375
111.8	0.893
111.9	0.893875
112	0.893625
112.1	0.8925
112.2	0.89475
112.3	0.89625
112.4	0.897625
112.5	0.898875
112.6	0.898
112.7	0.89775
112.8	0.8975
112.9	0.899125
113	0.898
113.1	0.8965
113.2	0.895625
113.3	0.896
113.4	0.8985
113.5	0.899375
113.6	0.897375
113.7	0.89775
113.8	0.89425
113.9	0.89525
114	0.89675
114.1	0.894625
114.2	0.89425
114.3	0.8995
114.4	0.90025
114.5	0.897875
114.6	0.898625
114.7	0.898625
114.8	0.896
114.9	0.899125
115	0.89825
115.1	0.9005
115.2	0.8985
115.3	0.9
115.4	0.904125
115.5	0.905125
115.6	0.90475
115.7	0.90525
115.8	0.9
115.9	0.901625
116	0.904
116.1	0.907375
116.2	0.908
116.3	0.90525
116.4	0.9055
116.5	0.906125
116.6	0.904375
116.7	0.90375
116.8	0.90575
116.9	0.903375
117	0.90125
117.1	0.900125
117.2	0.904
117.3	0.904
117.4	0.905
117.5	0.908375
117.6	0.9075
117.7	0.90675
117.8	0.906875
117.9	0.909125
118	0.9075
118.1	0.908375
118.2	0.90975
118.3	0.90575
118.4	0.90775
118.5	0.905
118.6	0.907625
118.7	0.909375
118.8	0.910125
118.9	0.912875
119	0.91425
119.1	0.911625
119.2	0.91225
119.3	0.909625
119.4	0.9095
119.5	0.91225
119.6	0.91075
119.7	0.912875
119.8	0.914375
119.9	0.914625
120	0.91225
120.1	0.914625
120.2	0.914375
120.3	0.914625
120.4	0.914875
120.5	0.916875
120.6	0.918
120.7	0.916
120.8	0.917125
120.9	0.916375
121	0.919
121.1	0.91425
121.2	0.917125
121.3	0.918
121.4	0.917625
121.5	0.916
121.6	0.91625
121.7	0.914625
121.8	0.9155
121.9	0.913625
122	0.915875
122.1	0.916625
122.2	0.91675
122.3	0.916875
122.4	0.9175
122.5	0.918125
122.6	0.920125
122.7	0.92025
122.8	0.921125
122.9	0.921875
123	0.925625
123.1	0.924125
123.2	0.924
123.3	0.92475
123.4	0.92325
123.5	0.922625
123.6	0.92275
123.7	0.91925
123.8	0.91775
123.9	0.919375
124	0.922625
124.1	0.923875
124.2	0.9235
124.3	0.922375
124.4	0.920875
124.5	0.922375
124.6	0.921875
124.7	0.922125
124.8	0.922
124.9	0.92375
125	0.922
125.1	0.921625
125.2	0.924
125.3	0.924875
125.4	0.926125
125.5	0.925
125.6	0.923125
125.7	0.924375
125.8	0.923375
125.9	0.92475
126	0.924625
126.1	0.92425
126.2	0.92375
126.3	0.925
126.4	0.9255
126.5	0.927375
126.6	0.9295
126.7	0.929375
126.8	0.928875
126.9	0.927875
127	0.9315
127.1	0.93075
127.2	0.93275
127.3	0.932625
127.4	0.934
127.5	0.932375
127.6	0.9325
127.7	0.93325
127.8	0.934125
127.9	0.931625
128	0.932125
128.1	0.932875
128.2	0.930875
128.3	0.92825
128.4	0.926875
128.5	0.927625
128.6	0.9285
128.7	0.92825
128.8	0.92875
128.9	0.927625
129	0.92625
129.1	0.927875
129.2	0.928125
129.3	0.9305
129.4	0.931375
129.5	0.930375
129.6	0.9295
129.7	0.9285
129.8	0.929125
129.9	0.927875
130	0.927125
130.1	0.92875
130.2	0.930125
130.3	0.930375
130.4	0.931375
130.5	0.929375
130.6	0.92975
130.7	0.93
130.8	0.929
130.9	0.929625
131	0.9315
131.1	0.93025
131.2	0.931875
131.3	0.93175
131.4	0.933375
131.5	0.934
131.6	0.932625
131.7	0.93575
131.8	0.93525
131.9	0.934375
132	0.933875
132.1	0.935125
132.2	0.9365
132.3	0.935875
132.4	0.9375
132.5	0.9365
132.6	0.936625
132.7	0.938125
132.8	0.937
132.9	0.9365
133	0.9345
133.1	0.935625
133.2	0.938125
133.3	0.93975
133.4	0.938625
133.5	0.94
133.6	0.940625
133.7	0.941
133.8	0.940875
133.9	0.939125
134	0.938875
134.1	0.94
134.2	0.93925
134.3	0.939
134.4	0.939375
134.5	0.939125
134.6	0.939625
134.7	0.941375
134.8	0.94275
134.9	0.94325
135	0.944
135.1	0.94375
135.2	0.94475
135.3	0.944125
135.4	0.94075
135.5	0.9415
135.6	0.941875
135.7	0.939875
135.8	0.939625
135.9	0.941
136	0.943125
136.1	0.943625
136.2	0.943625
136.3	0.942625
136.4	0.941875
136.5	0.943625
136.6	0.94275
136.7	0.942875
136.8	0.942125
136.9	0.944625
137	0.944375
137.1	0.94475
137.2	0.944125
137.3	0.941625
137.4	0.94125
137.5	0.941625
137.6	0.9425
137.7	0.941
137.8	0.942375
137.9	0.94225
138	0.94075
138.1	0.941
138.2	0.94125
138.3	0.940625
138.4	0.94225
138.5	0.942
138.6	0.941875
138.7	0.940625
138.8	0.942375
138.9	0.94275
139	0.940875
139.1	0.9435
139.2	0.94475
139.3	0.943375
139.4	0.944375
139.5	0.9445
139.6	0.943
139.7	0.944625
139.8	0.9455
139.9	0.946625
140	0.9465
140.1	0.944875
140.2	0.945625
140.3	0.945125
140.4	0.944375
140.5	0.944375
140.6	0.9445
140.7	0.944375
140.8	0.943125
140.9	0.943125
141	0.94475
141.1	0.9475
141.2	0.94775
141.3	0.94725
141.4	0.945
141.5	0.945875
141.6	0.946375
141.7	0.947375
141.8	0.948375
141.9	0.949
142	0.950875
142.1	0.949375
142.2	0.9505
142.3	0.9515
142.4	0.95125
142.5	0.95175
142.6	0.949125
142.7	0.948625
142.8	0.947625
142.9	0.948
143	0.94625
143.1	0.947875
143.2	0.94925
143.3	0.9495
143.4	0.952125
143.5	0.950875
143.6	0.951875
143.7	0.952
143.8	0.9515
143.9	0.950875
144	0.95075
144.1	0.951
144.2	0.948875
144.3	0.949
144.4	0.948125
144.5	0.9475
144.6	0.948125
144.7	0.946625
144.8	0.947125
144.9	0.948
145	0.946875
145.1	0.947375
145.2	0.94725
145.3	0.94775
145.4	0.9475
145.5	0.947125
145.6	0.94775
145.7	0.947
145.8	0.94625
145.9	0.94825
146	0.94625
146.1	0.94625
146.2	0.947375
146.3	0.94775
146.4	0.9495
146.5	0.951875
146.6	0.952125
146.7	0.95075
146.8	0.951375
146.9	0.952875
147	0.95025
147.1	0.951375
147.2	0.952875
147.3	0.952125
147.4	0.951875
147.5	0.953375
147.6	0.952625
147.7	0.9515
147.8	0.95075
147.9	0.95025
148	0.949625
148.1	0.950375
148.2	0.951875
148.3	0.952875
148.4	0.95175
148.5	0.951625
148.6	0.953375
148.7	0.954125
148.8	0.954875
148.9	0.95275
149	0.9535
149.1	0.952625
149.2	0.952875
149.3	0.9535
149.4	0.955625
149.5	0.954875
149.6	0.95625
149.7	0.95575
149.8	0.9545
149.9	0.953125
150	0.95225
150.1	0.95
150.2	0.951
150.3	0.951875
150.4	0.951125
150.5	0.9525
150.6	0.951125
150.7	0.95125
150.8	0.95225
150.9	0.952375
151	0.95275
151.1	0.951125
151.2	0.9515
151.3	0.954125
151.4	0.95425
151.5	0.95275
151.6	0.953
151.7	0.952625
151.8	0.95125
151.9	0.953125
152	0.95275
152.1	0.95325
152.2	0.957
152.3	0.958125
152.4	0.958
152.5	0.957875
152.6	0.9575
152.7	0.95875
152.8	0.958875
152.9	0.95725
153	0.956
153.1	0.957
153.2	0.955875
153.3	0.95575
153.4	0.955625
153.5	0.95675
153.6	0.95625
153.7	0.955375
153.8	0.957
153.9	0.956625
154	0.958
154.1	0.95675
154.2	0.955625
154.3	0.956875
154.4	0.955125
154.5	0.954625
154.6	0.954
154.7	0.9555
154.8	0.95625
154.9	0.956125
155	0.957
155.1	0.956625
155.2	0.95825
155.3	0.95825
155.4	0.95975
155.5	0.958625
155.6	0.957125
155.7	0.957125
155.8	0.95775
155.9	0.956
156	0.95425
156.1	0.952875
156.2	0.953375
156.3	0.952
156.4	0.952
156.5	0.95225
156.6	0.953625
156.7	0.953625
156.8	0.952875
156.9	0.954
157	0.952
157.1	0.951625
157.2	0.950375
157.3	0.953
157.4	0.954625
157.5	0.954125
157.6	0.953
157.7	0.951625
157.8	0.951875
157.9	0.952
158	0.953875
158.1	0.952625
158.2	0.953125
158.3	0.953375
158.4	0.9535
158.5	0.955
158.6	0.955125
158.7	0.95475
158.8	0.956625
158.9	0.955875
159	0.956375
159.1	0.956125
159.2	0.955625
159.3	0.954625
159.4	0.954625
159.5	0.9545
159.6	0.95525
159.7	0.9565
159.8	0.95375
159.9	0.954375
160	0.953625
160.1	0.9545
160.2	0.954125
160.3	0.95275
160.4	0.953
160.5	0.954875
160.6	0.9545
160.7	0.955875
160.8	0.956125
160.9	0.955875
161	0.954875
161.1	0.95725
161.2	0.959125
161.3	0.957125
161.4	0.956875
161.5	0.95725
161.6	0.9585
161.7	0.95875
161.8	0.958
161.9	0.9575
162	0.958625
162.1	0.958
162.2	0.957875
162.3	0.956875
162.4	0.956125
162.5	0.95725
162.6	0.959
162.7	0.959875
162.8	0.959125
162.9	0.96
163	0.959125
163.1	0.958875
163.2	0.959125
163.3	0.959125
163.4	0.95625
163.5	0.957
163.6	0.95625
163.7	0.957
163.8	0.956625
163.9	0.957125
164	0.956875
164.1	0.957125
164.2	0.957625
164.3	0.957875
164.4	0.960125
164.5	0.95925
164.6	0.95875
164.7	0.9585
164.8	0.958875
164.9	0.95925
165	0.95975
165.1	0.96
165.2	0.958375
165.3	0.95775
165.4	0.957875
165.5	0.958125
165.6	0.957625
165.7	0.9575
165.8	0.955
165.9	0.9545
166	0.95625
166.1	0.955
166.2	0.956625
166.3	0.956375
166.4	0.956625
166.5	0.956875
166.6	0.956625
166.7	0.957375
166.8	0.95675
166.9	0.9565
167	0.956875
167.1	0.9565
167.2	0.958
167.3	0.96025
167.4	0.9615
167.5	0.96
167.6	0.959375
167.7	0.959875
167.8	0.959
167.9	0.957625
168	0.957125
168.1	0.95775
168.2	0.95775
168.3	0.95675
168.4	0.957125
168.5	0.955125
168.6	0.95875
168.7	0.959375
168.8	0.957125
168.9	0.95875
169	0.9585
169.1	0.96
169.2	0.95925
169.3	0.9565
169.4	0.956875
169.5	0.95875
169.6	0.959
169.7	0.9605
169.8	0.96125
169.9	0.962125
170	0.95975
170.1	0.958625
170.2	0.958875
170.3	0.959875
170.4	0.958375
170.5	0.958
170.6	0.95975
170.7	0.9605
170.8	0.961
170.9	0.96025
171	0.96025
171.1	0.960375
171.2	0.959
171.3	0.959
171.4	0.959625
171.5	0.959375
171.6	0.958625
171.7	0.95975
171.8	0.960375
171.9	0.959875
172	0.958875
172.1	0.96
172.2	0.96
172.3	0.961
172.4	0.9605
172.5	0.96175
172.6	0.96125
172.7	0.96075
172.8	0.961
172.9	0.96175
173	0.9615
173.1	0.960625
173.2	0.960375
173.3	0.96125
173.4	0.961375
173.5	0.962
173.6	0.962875
173.7	0.962875
173.8	0.964375
173.9	0.9645
174	0.964125
174.1	0.964
174.2	0.96325
174.3	0.961625
174.4	0.963125
174.5	0.96175
174.6	0.96075
174.7	0.958625
174.8	0.96025
174.9	0.961
175	0.9595
175.1	0.959375
175.2	0.960375
175.3	0.961875
175.4	0.962875
175.5	0.962125
175.6	0.9605
175.7	0.962875
175.8	0.964125
175.9	0.963375
176	0.96325
176.1	0.963375
176.2	0.962875
176.3	0.962125
176.4	0.962625
176.5	0.961125
176.6	0.9615
176.7	0.961375
176.8	0.9605
176.9	0.960125
177	0.959625
177.1	0.960875
177.2	0.961875
177.3	0.963
177.4	0.961375
177.5	0.96025
177.6	0.9595
177.7	0.9605
177.8	0.96025
177.9	0.961
178	0.96075
178.1	0.960375
178.2	0.962375
178.3	0.960875
178.4	0.960625
178.5	0.96125
178.6	0.96125
178.7	0.9605
178.8	0.95925
178.9	0.96
179	0.95975
179.1	0.959125
179.2	0.9595
179.3	0.9615
179.4	0.961375
179.5	0.961625
179.6	0.96375
179.7	0.963
179.8	0.961625
179.9	0.96275
180	0.960625
180.1	0.96
180.2	0.961125
180.3	0.961
180.4	0.961
180.5	0.9615
180.6	0.96175
180.7	0.96175
180.8	0.961875
180.9	0.963375
181	0.96375
181.1	0.963875
181.2	0.964
181.3	0.96525
181.4	0.96525
181.5	0.964625
181.6	0.965625
181.7	0.964875
181.8	0.96325
181.9	0.9655
182	0.966125
182.1	0.964
182.2	0.9645
182.3	0.9645
182.4	0.96375
182.5	0.963
182.6	0.9615
182.7	0.961
182.8	0.960875
182.9	0.960375
183	0.958375
183.1	0.957875
183.2	0.959625
183.3	0.96125
183.4	0.96
183.5	0.959875
183.6	0.962125
183.7	0.96325
183.8	0.963
183.9	0.960375
184	0.96025
184.1	0.95975
184.2	0.961875
184.3	0.96175
184.4	0.96175
184.5	0.96175
184.6	0.9625
184.7	0.962125
184.8	0.962625
184.9	0.96175
185	0.96125
185.1	0.962
185.2	0.961125
185.3	0.96325
185.4	0.9635
185.5	0.963375
185.6	0.962625
185.7	0.963
185.8	0.96275
185.9	0.96125
186	0.962375
186.1	0.96275
186.2	0.962
186.3	0.961875
186.4	0.96225
186.5	0.96375
186.6	0.963
186.7	0.9635
186.8	0.962625
186.9	0.96375
187	0.963125
187.1	0.962625
187.2	0.963125
187.3	0.963125
187.4	0.964125
187.5	0.965125
187.6	0.964
187.7	0.96325
187.8	0.96375
187.9	0.9645
188	0.963875
188.1	0.963875
188.2	0.962875
188.3	0.9625
188.4	0.9635
188.5	0.965
188.6	0.96525
188.7	0.96625
188.8	0.967
188.9	0.96825
189	0.967375
189.1	0.96575
189.2	0.96525
189.3	0.96525
189.4	0.963125
189.5	0.962875
189.6	0.96425
189.7	0.96425
189.8	0.9635
189.9	0.965625
190	0.967
190.1	0.967
190.2	0.96525
190.3	0.967125
190.4	0.96675
190.5	0.967125
190.6	0.96725
190.7	0.96725
190.8	0.966625
190.9	0.96575
191	0.966125
191.1	0.966375
191.2	0.966875
191.3	0.96675
191.4	0.966625
191.5	0.964125
191.6	0.966375
191.7	0.966375
191.8	0.965
191.9	0.965
192	0.966875
192.1	0.966875
192.2	0.967375
192.3	0.967125
192.4	0.96825
192.5	0.96525
192.6	0.9645
192.7	0.966
192.8	0.966875
192.9	0.965625
193	0.963375
193.1	0.96475
193.2	0.964125
193.3	0.964125
193.4	0.96575
193.5	0.96725
193.6	0.9665
193.7	0.967125
193.8	0.964875
193.9	0.965
194	0.96525
194.1	0.963625
194.2	0.963625
194.3	0.9625
194.4	0.96425
194.5	0.964625
194.6	0.964
194.7	0.96275
194.8	0.962
194.9	0.96225
195	0.964125
195.1	0.963875
195.2	0.96375
195.3	0.9635
195.4	0.9635
195.5	0.962875
195.6	0.9645
195.7	0.963875
195.8	0.96375
195.9	0.964125
196	0.964125
196.1	0.963625
196.2	0.963125
196.3	0.964375
196.4	0.964
196.5	0.9625
196.6	0.9615
196.7	0.959875
196.8	0.96025
196.9	0.962625
197	0.963625
197.1	0.964875
197.2	0.965
197.3	0.96425
197.4	0.964125
197.5	0.96425
197.6	0.965625
197.7	0.967
197.8	0.96775
197.9	0.96825
198	0.967
198.1	0.96625
198.2	0.9665
198.3	0.966625
198.4	0.9675
198.5	0.9675
198.6	0.96825
198.7	0.968375
198.8	0.96775
198.9	0.966625
199	0.965625
199.1	0.965
199.2	0.964625
199.3	0.96425
199.4	0.96375
199.5	0.965625
199.6	0.96575
199.7	0.968375
199.8	0.967375
199.9	0.967125
200	0.9675
[truncated: 14,000 more rows]
