# Supplementary material for: Bayesian inference of kinetic schemes for ion channels by Kalman filtering
Source: eLife journal article supplement (doi:10.7554/elife.62714), 2022-05-04
Supplement: fig4-data5 [file 1_Sim_N_4000_Strom_MW_4M.xlsx]

## Sheet: Tabelle1
0.1	0
0.2	0
0.3	0
0.4	0
0.5	0
0.6	0
0.7	0
0.8	0
0.9	0
1	0
1.1	0
1.2	0
1.3	0
1.4	0
1.5	0
1.6	0
1.7	0
1.8	0
1.9	0
2	0
2.1	0
2.2	0
2.3	0
2.4	0
2.5	0
2.6	0
2.7	0
2.8	0
2.9	0
3	0
3.1	0
3.2	0
3.3	0
3.4	0
3.5	0
3.6	0
3.7	0
3.8	0
3.9	0
4	0
4.1	0
4.2	0
4.3	0
4.4	0
4.5	0
4.6	0
4.7	0
4.8	0
4.9	0
5	0
5.1	0
5.2	0
5.3	0
5.4	0
5.5	0
5.6	0
5.7	0
5.8	0
5.9	0
6	0
6.1	0
6.2	0
6.3	0
6.4	0
6.5	0
6.6	0
6.7	0
6.8	0
6.9	0
7	0
7.1	0
7.2	0
7.3	0
7.4	0
7.5	0
7.6	0
7.7	0
7.8	0
7.9	0
8	0
8.1	0
8.2	0
8.3	0
8.4	0
8.5	0
8.6	0
8.7	0
8.8	0
8.9	0
9	0
9.1	0
9.2	0
9.3	0
9.4	0
9.5	0
9.6	0
9.7	0
9.8	0
9.9	0
10	0
10.1	0
10.2	0
10.3	0
10.4	0
10.5	0
10.6	0
10.7	0
10.8	0
10.9	0
11	0
11.1	0
11.2	0
11.3	0
11.4	0
11.5	0
11.6	0
11.7	0
11.8	0
11.9	0
12	0
12.1	0
12.2	0
12.3	0
12.4	0
12.5	0
12.6	0
12.7	0
12.8	0
12.9	0
13	0
13.1	0
13.2	0
13.3	0
13.4	0
13.5	0
13.6	0
13.7	0
13.8	0
13.9	0
14	0
14.1	0
14.2	0
14.3	0
14.4	0
14.5	0
14.6	0
14.7	0
14.8	0
14.9	0
15	0
15.1	0
15.2	0
15.3	0
15.4	0
15.5	0
15.6	0
15.7	0
15.8	0
15.9	0
16	0
16.1	0
16.2	0
16.3	0
16.4	0
16.5	0
16.6	0
16.7	0
16.8	0
16.9	0
17	0
17.1	0
17.2	0
17.3	0
17.4	0
17.5	0
17.6	0
17.7	0
17.8	0
17.9	0
18	0
18.1	0
18.2	0
18.3	0
18.4	0
18.5	0
18.6	0
18.7	0
18.8	0
18.9	0
19	0
19.1	0
19.2	0
19.3	0
19.4	0
19.5	0
19.6	0
19.7	0
19.8	0
19.9	0
20	0
20.1	0
20.2	0
20.3	0
20.4	0
20.5	0
20.6	0
20.7	0
20.8	0
20.9	0
21	0
21.1	0
21.2	0
21.3	0
21.4	0
21.5	0
21.6	0
21.7	0
21.8	0
21.9	0
22	0
22.1	0
22.2	0
22.3	0
22.4	0
22.5	0
22.6	0
22.7	0
22.8	0
22.9	0
23	0
23.1	0
23.2	0
23.3	0
23.4	0
23.5	0
23.6	0
23.7	0
23.8	0
23.9	0
24	0
24.1	0
24.2	0
24.3	0
24.4	0
24.5	0
24.6	0
24.7	0
24.8	0
24.9	0
25	0
25.1	0
25.2	0
25.3	0
25.4	0
25.5	0
25.6	0
25.7	0
25.8	0
25.9	0
26	0
26.1	0
26.2	0
26.3	0
26.4	0
26.5	0
26.6	0
26.7	0
26.8	0
26.9	0
27	0
27.1	0
27.2	0
27.3	0
27.4	0
27.5	0
27.6	0
27.7	0
27.8	0
27.9	0
28	0
28.1	0
28.2	0
28.3	0
28.4	0
28.5	0
28.6	0
28.7	0
28.8	0
28.9	0
29	0
29.1	0
29.2	0
29.3	0
29.4	0
29.5	0
29.6	0
29.7	0
29.8	0
29.9	0
30	0
30.1	0
30.2	0
30.3	0
30.4	0
30.5	0
30.6	0
30.7	0
30.8	0
30.9	0
31	0
31.1	0
31.2	0
31.3	0
31.4	0
31.5	0
31.6	0
31.7	0
31.8	0
31.9	0
32	0
32.1	0
32.2	0
32.3	0
32.4	0
32.5	0
32.6	0
32.7	0
32.8	0
32.9	0
33	0
33.1	0
33.2	0
33.3	0
33.4	0
33.5	0
33.6	0
33.7	0
33.8	0
33.9	0
34	0
34.1	0
34.2	0
34.3	0
34.4	0
34.5	0
34.6	0
34.7	0
34.8	0
34.9	0
35	0
35.1	0
35.2	0
35.3	0
35.4	0
35.5	0
35.6	0
35.7	0
35.8	0
35.9	0
36	0
36.1	0
36.2	0
36.3	0
36.4	0
36.5	0
36.6	0
36.7	0
36.8	0
36.9	0
37	0
37.1	0
37.2	0
37.3	0
37.4	0
37.5	0
37.6	0
37.7	0
37.8	0
37.9	0
38	0
38.1	0
38.2	0
38.3	0
38.4	0
38.5	0
38.6	0
38.7	0
38.8	0
38.9	0
39	0
39.1	0
39.2	0
39.3	0
39.4	0
39.5	0
39.6	0
39.7	0
39.8	0
39.9	0
40	0
40.1	0
40.2	0
40.3	0
40.4	0
40.5	0
40.6	0
40.7	0
40.8	0
40.9	0
41	0
41.1	0
41.2	0
41.3	0
41.4	0
41.5	0
41.6	0
41.7	0
41.8	0
41.9	0
42	0
42.1	0
42.2	0
42.3	0
42.4	0
42.5	0
42.6	0
42.7	0
42.8	0
42.9	0
43	0
43.1	0
43.2	0
43.3	0
43.4	0
43.5	0
43.6	0
43.7	0
43.8	0
43.9	0
44	0
44.1	0
44.2	0
44.3	0
44.4	0
44.5	0
44.6	0
44.7	0
44.8	0
44.9	0
45	0
45.1	0
45.2	0
45.3	0
45.4	0
45.5	0
45.6	0
45.7	0
45.8	0
45.9	0
46	0
46.1	0
46.2	0
46.3	0
46.4	0
46.5	0
46.6	0
46.7	0
46.8	0
46.9	0
47	0
47.1	0
47.2	0
47.3	0
47.4	0
47.5	0
47.6	0
47.7	0
47.8	0
47.9	0
48	0
48.1	0
48.2	0
48.3	0
48.4	0
48.5	0
48.6	0
48.7	0
48.8	0
48.9	0
49	0
49.1	0
49.2	0
49.3	0
49.4	0
49.5	0
49.6	0
49.7	0
49.8	0
49.9	0
50	0
50.1	0
50.2	0
50.3	0
50.4	0
50.5	0
50.6	0
50.7	0
50.8	0
50.9	0
51	0
51.1	0
51.2	0
51.3	0
51.4	0
51.5	0
51.6	0
51.7	0
51.8	0
51.9	0
52	0
52.1	0
52.2	0
52.3	0
52.4	0
52.5	0
52.6	0
52.7	0
52.8	0
52.9	0
53	0
53.1	0
53.2	0
53.3	0
53.4	0
53.5	0
53.6	0
53.7	0
53.8	0
53.9	0
54	0
54.1	0
54.2	0
54.3	0
54.4	0
54.5	0
54.6	0
54.7	0
54.8	0
54.9	0
55	0
55.1	0
55.2	0
55.3	0
55.4	0
55.5	0
55.6	0
55.7	0
55.8	0
55.9	0
56	0
56.1	0
56.2	0
56.3	0
56.4	0
56.5	0
56.6	0
56.7	0
56.8	0
56.9	0
57	0
57.1	0
57.2	0
57.3	0
57.4	0
57.5	0
57.6	0
57.7	0
57.8	0
57.9	0
58	0
58.1	0
58.2	0
58.3	0
58.4	0
58.5	0
58.6	0
58.7	0
58.8	0
58.9	0
59	0
59.1	0
59.2	0
59.3	0
59.4	0
59.5	0
59.6	0
59.7	0
59.8	0
59.9	0
60	0
60.1	0
60.2	0
60.3	0
60.4	0
60.5	0
60.6	0
60.7	0
60.8	0
60.9	0
61	0
61.1	0
61.2	0
61.3	0
61.4	0
61.5	0
61.6	0
61.7	0
61.8	0
61.9	0
62	0
62.1	0
62.2	0
62.3	0
62.4	0
62.5	0
62.6	0
62.7	0
62.8	0
62.9	0
63	0
63.1	0
63.2	0
63.3	0
63.4	0
63.5	0
63.6	0
63.7	0
63.8	0
63.9	0
64	0
64.1	0
64.2	0
64.3	0
64.4	0
64.5	0
64.6	0
64.7	0
64.8	0
64.9	0
65	0
65.1	0
65.2	0
65.3	0
65.4	0
65.5	0
65.6	0
65.7	0
65.8	0
65.9	0
66	0
66.1	0
66.2	0
66.3	0
66.4	0
66.5	0
66.6	0
66.7	0
66.8	0
66.9	0
67	0
67.1	0
67.2	0
67.3	0
67.4	0
67.5	0
67.6	0
67.7	0
67.8	0
67.9	0
68	0
68.1	0
68.2	0
68.3	0
68.4	0
68.5	0
68.6	0
68.7	0
68.8	0
68.9	0
69	0
69.1	0
69.2	0
69.3	0
69.4	0
69.5	0
69.6	0
69.7	0
69.8	0
69.9	0
70	0
70.1	0
70.2	0
70.3	0
70.4	0
70.5	0
70.6	0
70.7	0
70.8	0
70.9	0
71	0
71.1	0
71.2	0
71.3	0
71.4	0
71.5	0
71.6	0
71.7	0
71.8	0
71.9	0
72	0
72.1	0
72.2	0
72.3	0
72.4	0
72.5	0
72.6	0
72.7	0
72.8	0
72.9	0
73	0
73.1	0
73.2	0
73.3	0
73.4	0
73.5	0
73.6	0
73.7	0
73.8	0
73.9	0
74	0
74.1	0
74.2	0
74.3	0
74.4	0
74.5	0
74.6	0
74.7	0
74.8	0
74.9	0
75	0
75.1	0
75.2	0
75.3	0
75.4	0
75.5	0
75.6	0
75.7	0
75.8	0
75.9	0
76	0
76.1	0
76.2	0
76.3	0
76.4	0
76.5	0
76.6	0
76.7	0
76.8	0
76.9	0
77	0
77.1	0
77.2	0
77.3	0
77.4	0
77.5	0
77.6	0
77.7	0
77.8	0
77.9	0
78	0
78.1	0
78.2	0
78.3	0
78.4	0
78.5	0
78.6	0
78.7	0
78.8	0
78.9	0
79	0
79.1	0
79.2	0
79.3	0
79.4	0
79.5	0
79.6	0
79.7	0
79.8	0
79.9	0
80	0
80.1	0
80.2	0
80.3	0
80.4	0
80.5	0
80.6	0
80.7	0
80.8	0
80.9	0
81	0
81.1	0
81.2	0
81.3	0
81.4	0
81.5	0
81.6	0
81.7	0
81.8	0
81.9	0
82	0
82.1	0
82.2	0
82.3	0
82.4	0
82.5	0
82.6	0
82.7	0
82.8	0
82.9	0
83	0
83.1	0
83.2	0
83.3	0
83.4	0
83.5	0
83.6	0
83.7	0
83.8	0
83.9	0
84	0
84.1	0
84.2	0
84.3	0
84.4	0
84.5	0
84.6	0
84.7	0
84.8	0
84.9	0
85	0
85.1	0
85.2	0
85.3	0
85.4	0
85.5	0
85.6	0
85.7	0
85.8	0
85.9	0
86	0
86.1	0
86.2	0
86.3	0
86.4	0
86.5	0
86.6	0
86.7	0
86.8	0
86.9	0
87	0
87.1	0
87.2	0
87.3	0
87.4	0
87.5	0
87.6	0
87.7	0
87.8	0
87.9	0
88	0
88.1	0
88.2	0
88.3	0
88.4	0
88.5	0
88.6	0
88.7	0
88.8	0
88.9	0
89	0
89.1	0
89.2	0
89.3	0
89.4	0
89.5	0
89.6	0
89.7	0
89.8	0
89.9	0
90	0
90.1	0
90.2	0
90.3	0
90.4	0
90.5	0
90.6	0
90.7	0
90.8	0
90.9	0
91	0
91.1	0
91.2	0
91.3	0
91.4	0
91.5	0
91.6	0
91.7	0
91.8	0
91.9	0
92	0
92.1	0
92.2	0
92.3	0
92.4	0
92.5	0
92.6	0
92.7	0
92.8	0
92.9	0
93	0
93.1	0
93.2	0
93.3	0
93.4	0
93.5	0
93.6	0
93.7	0
93.8	0
93.9	0
94	0
94.1	0
94.2	0
94.3	0
94.4	0
94.5	0
94.6	0
94.7	0
94.8	0
94.9	0
95	0
95.1	0
95.2	0
95.3	0
95.4	0
95.5	0
95.6	0
95.7	0
95.8	0
95.9	0
96	0
96.1	0
96.2	0
96.3	0
96.4	0
96.5	0
96.6	0
96.7	0
96.8	0
96.9	0
97	0
97.1	0
97.2	0
97.3	0
97.4	0
97.5	0
97.6	0
97.7	0
97.8	0
97.9	0
98	0
98.1	0
98.2	0
98.3	0
98.4	0
98.5	0
98.6	0
98.7	0
98.8	0
98.9	0
99	0
99.1	0
99.2	0
99.3	0
99.4	0
99.5	0
99.6	0
99.7	0
99.8	0
99.9	0
100	0
100.1	0
100.2	0
100.3	0.0005
100.4	0.0005
100.5	0.002
100.6	0.00375
100.7	0.00575
100.8	0.00725
100.9	0.0095
101	0.01225
101.1	0.01575
101.2	0.018
101.3	0.02125
101.4	0.023
101.5	0.02675
101.6	0.02875
101.7	0.031
101.8	0.03525
101.9	0.03775
102	0.03975
102.1	0.0415
102.2	0.04375
102.3	0.04575
102.4	0.04875
102.5	0.052
102.6	0.054
102.7	0.05575
102.8	0.05775
102.9	0.0605
103	0.06525
103.1	0.06975
103.2	0.0725
103.3	0.07525
103.4	0.07625
103.5	0.079
103.6	0.0815
103.7	0.08425
103.8	0.088
103.9	0.0925
104	0.096
104.1	0.09775
104.2	0.101
104.3	0.104
104.4	0.107
104.5	0.1125
104.6	0.116
104.7	0.12025
104.8	0.12375
104.9	0.12575
105	0.128
105.1	0.1325
105.2	0.13475
105.3	0.13675
105.4	0.14
105.5	0.1415
105.6	0.147
105.7	0.1505
105.8	0.1525
105.9	0.15575
106	0.159
106.1	0.1625
106.2	0.165
106.3	0.16775
106.4	0.1705
106.5	0.17375
106.6	0.175
106.7	0.178
106.8	0.181
106.9	0.184
107	0.18775
107.1	0.19025
107.2	0.19325
107.3	0.195
107.4	0.19775
107.5	0.19925
107.6	0.202
107.7	0.205
107.8	0.2065
107.9	0.20825
108	0.21075
108.1	0.21375
108.2	0.21575
108.3	0.217
108.4	0.219
108.5	0.22125
108.6	0.22425
108.7	0.22625
108.8	0.22875
108.9	0.2315
109	0.23325
109.1	0.2365
109.2	0.239
109.3	0.2425
109.4	0.24475
109.5	0.24825
109.6	0.25075
109.7	0.254
109.8	0.25675
109.9	0.2595
110	0.26225
110.1	0.2645
110.2	0.2675
110.3	0.26975
110.4	0.2735
110.5	0.2745
110.6	0.276
110.7	0.27825
110.8	0.27925
110.9	0.28075
111	0.28375
111.1	0.284
111.2	0.28725
111.3	0.2895
111.4	0.2915
111.5	0.29475
111.6	0.29675
111.7	0.2985
111.8	0.30075
111.9	0.3025
112	0.30475
112.1	0.306
112.2	0.30775
112.3	0.308
112.4	0.3095
112.5	0.3115
112.6	0.3115
112.7	0.31275
112.8	0.314
112.9	0.31575
113	0.318
113.1	0.3195
113.2	0.322
113.3	0.3235
113.4	0.32625
113.5	0.32775
113.6	0.3295
113.7	0.3305
113.8	0.331
113.9	0.334
114	0.33625
114.1	0.33925
114.2	0.34125
114.3	0.34225
114.4	0.344
114.5	0.34525
114.6	0.34725
114.7	0.3495
114.8	0.351
114.9	0.35325
115	0.35625
115.1	0.358
115.2	0.36075
115.3	0.36225
115.4	0.36425
115.5	0.366
115.6	0.367
115.7	0.36975
115.8	0.37025
115.9	0.37175
116	0.37525
116.1	0.37525
116.2	0.37725
116.3	0.37925
116.4	0.38175
116.5	0.38225
116.6	0.3855
116.7	0.38575
116.8	0.3885
116.9	0.3905
117	0.393
117.1	0.3945
117.2	0.397
117.3	0.3975
117.4	0.398
117.5	0.39925
117.6	0.40125
117.7	0.403
117.8	0.40475
117.9	0.4065
118	0.409
118.1	0.411
118.2	0.41225
118.3	0.41425
118.4	0.4155
118.5	0.41775
118.6	0.41825
118.7	0.4195
118.8	0.42
118.9	0.4215
119	0.423
119.1	0.4245
119.2	0.426
119.3	0.42875
119.4	0.4295
119.5	0.43225
119.6	0.435
119.7	0.437
119.8	0.4385
119.9	0.441
120	0.4435
120.1	0.44575
120.2	0.4465
120.3	0.4485
120.4	0.45
120.5	0.451
120.6	0.4525
120.7	0.45475
120.8	0.45725
120.9	0.458
121	0.46
121.1	0.4615
121.2	0.46275
121.3	0.46475
121.4	0.46575
121.5	0.46775
121.6	0.46925
121.7	0.471
121.8	0.47175
121.9	0.47325
122	0.47475
122.1	0.4765
122.2	0.4785
122.3	0.48025
122.4	0.481
122.5	0.483
122.6	0.48375
122.7	0.48525
122.8	0.4875
122.9	0.4895
123	0.49075
123.1	0.4915
123.2	0.49275
123.3	0.49425
123.4	0.49525
123.5	0.496
123.6	0.496
123.7	0.49725
123.8	0.497
123.9	0.49725
124	0.49875
124.1	0.49975
124.2	0.5005
124.3	0.50125
124.4	0.503
124.5	0.50425
124.6	0.504
124.7	0.50425
124.8	0.50575
124.9	0.50575
125	0.50675
125.1	0.50725
125.2	0.5095
125.3	0.5115
125.4	0.5125
125.5	0.51425
125.6	0.51725
125.7	0.5175
125.8	0.51975
125.9	0.521
126	0.52275
126.1	0.52475
126.2	0.52575
126.3	0.527
126.4	0.5275
126.5	0.5285
126.6	0.52925
126.7	0.53075
126.8	0.532
126.9	0.533
127	0.53375
127.1	0.5355
127.2	0.53725
127.3	0.53875
127.4	0.539
127.5	0.5415
127.6	0.5425
127.7	0.5435
127.8	0.54425
127.9	0.54575
128	0.54575
128.1	0.54675
128.2	0.54875
128.3	0.54925
128.4	0.55025
128.5	0.55
128.6	0.55175
128.7	0.55225
128.8	0.553
128.9	0.55325
129	0.5535
129.1	0.554
129.2	0.555
129.3	0.55725
129.4	0.5585
129.5	0.5595
129.6	0.5605
129.7	0.56175
129.8	0.56275
129.9	0.563
130	0.5645
130.1	0.5665
130.2	0.56625
130.3	0.56775
130.4	0.5685
130.5	0.56825
130.6	0.56975
130.7	0.571
130.8	0.5715
130.9	0.573
131	0.5735
131.1	0.575
131.2	0.576
131.3	0.5765
131.4	0.5765
131.5	0.5775
131.6	0.57825
131.7	0.5785
131.8	0.57825
131.9	0.57875
132	0.57875
132.1	0.5805
132.2	0.582
132.3	0.583
132.4	0.58325
132.5	0.5845
132.6	0.58525
132.7	0.5855
132.8	0.587
132.9	0.58725
133	0.58775
133.1	0.5895
133.2	0.58975
133.3	0.59025
133.4	0.591
133.5	0.5915
133.6	0.59325
133.7	0.594
133.8	0.5945
133.9	0.5975
134	0.59875
134.1	0.5995
134.2	0.601
134.3	0.60175
134.4	0.60375
134.5	0.60325
134.6	0.604
134.7	0.60525
134.8	0.6065
134.9	0.607
135	0.60825
135.1	0.61025
135.2	0.61075
135.3	0.611
135.4	0.6115
135.5	0.613
135.6	0.61275
135.7	0.61325
135.8	0.61375
135.9	0.615
136	0.61625
136.1	0.6155
136.2	0.61675
136.3	0.618
136.4	0.61875
136.5	0.619
136.6	0.62
136.7	0.621
136.8	0.62075
136.9	0.622
137	0.624
137.1	0.62425
137.2	0.62425
137.3	0.626
137.4	0.62775
137.5	0.629
137.6	0.63
137.7	0.6315
137.8	0.63175
137.9	0.63225
138	0.63275
138.1	0.6335
138.2	0.6345
138.3	0.63475
138.4	0.6365
138.5	0.63825
138.6	0.6385
138.7	0.638
138.8	0.6375
138.9	0.63775
139	0.6375
139.1	0.63625
139.2	0.63675
139.3	0.6365
139.4	0.6375
139.5	0.6375
139.6	0.639
139.7	0.6405
139.8	0.64125
139.9	0.64175
140	0.643
140.1	0.64375
140.2	0.64525
140.3	0.64575
140.4	0.64725
140.5	0.648
140.6	0.65
140.7	0.65
140.8	0.651
140.9	0.651
141	0.651
141.1	0.6515
141.2	0.653
141.3	0.65275
141.4	0.65325
141.5	0.65375
141.6	0.65475
141.7	0.6565
141.8	0.65775
141.9	0.65825
142	0.65825
142.1	0.65875
142.2	0.6595
142.3	0.6605
142.4	0.66075
142.5	0.66175
142.6	0.66225
142.7	0.66275
142.8	0.66325
142.9	0.6655
143	0.66625
143.1	0.66675
143.2	0.6675
143.3	0.668
143.4	0.669
143.5	0.67075
143.6	0.6705
143.7	0.66975
143.8	0.6695
143.9	0.66875
144	0.66825
144.1	0.6695
144.2	0.67075
144.3	0.6705
144.4	0.67025
144.5	0.6715
144.6	0.67125
144.7	0.67025
144.8	0.67125
144.9	0.67125
145	0.673
145.1	0.6745
145.2	0.67575
145.3	0.6755
145.4	0.67525
145.5	0.67625
145.6	0.67575
145.7	0.67625
145.8	0.67525
145.9	0.6745
146	0.6745
146.1	0.675
146.2	0.67675
146.3	0.67675
146.4	0.6775
146.5	0.677
146.6	0.67675
146.7	0.67925
146.8	0.68025
146.9	0.68025
147	0.68175
147.1	0.682
147.2	0.68225
147.3	0.68225
147.4	0.68275
147.5	0.68325
147.6	0.684
147.7	0.68475
147.8	0.68475
147.9	0.686
148	0.68575
148.1	0.68675
148.2	0.68825
148.3	0.68825
148.4	0.6885
148.5	0.69
148.6	0.69
148.7	0.691
148.8	0.6915
148.9	0.6915
149	0.6925
149.1	0.6935
149.2	0.6945
149.3	0.69475
149.4	0.69475
149.5	0.69475
149.6	0.69425
149.7	0.694
149.8	0.693
149.9	0.694
150	0.694
150.1	0.694
150.2	0.6945
150.3	0.69475
150.4	0.696
150.5	0.696
150.6	0.69625
150.7	0.6955
150.8	0.6955
150.9	0.69625
151	0.697
151.1	0.697
151.2	0.697
151.3	0.69725
151.4	0.69875
151.5	0.69825
151.6	0.70025
151.7	0.70025
151.8	0.6995
151.9	0.7
152	0.69975
152.1	0.70075
152.2	0.7
152.3	0.70025
152.4	0.70175
152.5	0.70225
152.6	0.70175
152.7	0.70175
152.8	0.7025
152.9	0.70475
153	0.70575
153.1	0.707
153.2	0.70675
153.3	0.70725
153.4	0.70725
153.5	0.7075
153.6	0.70775
153.7	0.70775
153.8	0.70675
153.9	0.7065
154	0.707
154.1	0.7075
154.2	0.70675
154.3	0.706
154.4	0.70525
154.5	0.70525
154.6	0.7045
154.7	0.7045
154.8	0.7045
154.9	0.70475
155	0.7055
155.1	0.7055
155.2	0.7065
155.3	0.70775
155.4	0.70725
155.5	0.709
155.6	0.708
155.7	0.70775
155.8	0.7075
155.9	0.70825
156	0.70875
156.1	0.7095
156.2	0.71
156.3	0.70975
156.4	0.71
156.5	0.71125
156.6	0.712
156.7	0.712
156.8	0.71225
156.9	0.712
157	0.7125
157.1	0.713
157.2	0.713
157.3	0.71325
157.4	0.71425
157.5	0.71425
157.6	0.71475
157.7	0.71475
157.8	0.71525
157.9	0.71525
158	0.71575
158.1	0.71625
158.2	0.7155
158.3	0.71575
158.4	0.71575
158.5	0.7175
158.6	0.718
158.7	0.71825
158.8	0.7175
158.9	0.71825
159	0.719
159.1	0.7185
159.2	0.7185
159.3	0.7185
159.4	0.71925
159.5	0.7185
159.6	0.71875
159.7	0.719
159.8	0.7185
159.9	0.71875
160	0.718
160.1	0.717
160.2	0.71775
160.3	0.7175
160.4	0.71725
160.5	0.7175
160.6	0.718
160.7	0.7185
160.8	0.7185
160.9	0.719
161	0.719
161.1	0.7185
161.2	0.7185
161.3	0.719
161.4	0.72025
161.5	0.72075
161.6	0.72125
161.7	0.72175
161.8	0.72225
161.9	0.72275
162	0.723
162.1	0.724
162.2	0.7245
162.3	0.725
162.4	0.726
162.5	0.727
162.6	0.72725
162.7	0.7275
162.8	0.727
162.9	0.7275
163	0.72725
163.1	0.7275
163.2	0.7275
163.3	0.7285
163.4	0.728
163.5	0.72875
163.6	0.7285
163.7	0.72875
163.8	0.729
163.9	0.7295
164	0.7295
164.1	0.73075
164.2	0.73
164.3	0.73075
164.4	0.73125
164.5	0.73125
164.6	0.73225
164.7	0.7325
164.8	0.73225
164.9	0.73275
165	0.73275
165.1	0.733
165.2	0.73225
165.3	0.73175
165.4	0.73225
165.5	0.73375
165.6	0.7335
165.7	0.734
165.8	0.73375
165.9	0.734
166	0.73375
166.1	0.733
166.2	0.73225
166.3	0.73175
166.4	0.73175
166.5	0.7315
166.6	0.7315
166.7	0.73225
166.8	0.73125
166.9	0.73075
167	0.731
167.1	0.7315
167.2	0.73175
167.3	0.7325
167.4	0.7335
167.5	0.73325
167.6	0.7325
167.7	0.73275
167.8	0.73325
167.9	0.7325
168	0.73325
168.1	0.733
168.2	0.734
168.3	0.73375
168.4	0.7345
168.5	0.7335
168.6	0.7335
168.7	0.734
168.8	0.73325
168.9	0.73375
169	0.73425
169.1	0.734
169.2	0.73425
169.3	0.7345
169.4	0.7355
169.5	0.736
169.6	0.735
169.7	0.7355
169.8	0.736
169.9	0.73725
170	0.73875
170.1	0.7395
170.2	0.73975
170.3	0.7405
170.4	0.74025
170.5	0.73975
170.6	0.74125
170.7	0.7405
170.8	0.74075
170.9	0.741
171	0.74075
171.1	0.741
171.2	0.74125
171.3	0.741
171.4	0.7405
171.5	0.74225
171.6	0.7425
171.7	0.74275
171.8	0.74275
171.9	0.743
172	0.74375
172.1	0.74375
172.2	0.74425
172.3	0.74525
172.4	0.746
172.5	0.747
172.6	0.74675
172.7	0.74625
172.8	0.74675
172.9	0.7465
173	0.74625
173.1	0.7465
173.2	0.747
173.3	0.74725
173.4	0.747
173.5	0.747
173.6	0.7465
173.7	0.747
173.8	0.7465
173.9	0.74575
174	0.74575
174.1	0.7445
174.2	0.74475
174.3	0.74475
174.4	0.744
174.5	0.74475
174.6	0.74575
174.7	0.74575
174.8	0.7455
174.9	0.7455
175	0.7455
175.1	0.74575
175.2	0.7465
175.3	0.74675
175.4	0.74725
175.5	0.74675
175.6	0.74625
175.7	0.746
175.8	0.7455
175.9	0.7465
176	0.745
176.1	0.745
176.2	0.74525
176.3	0.7445
176.4	0.7445
176.5	0.7445
176.6	0.745
176.7	0.7445
176.8	0.74475
176.9	0.745
177	0.74425
177.1	0.745
177.2	0.74475
177.3	0.7445
177.4	0.74525
177.5	0.74425
177.6	0.74375
177.7	0.744
177.8	0.74475
177.9	0.74475
178	0.74475
178.1	0.74575
178.2	0.7455
178.3	0.7455
178.4	0.74625
178.5	0.74675
178.6	0.7465
178.7	0.7465
178.8	0.74725
178.9	0.747
179	0.74675
179.1	0.747
179.2	0.7475
179.3	0.747
179.4	0.74775
179.5	0.748
179.6	0.748
179.7	0.7485
179.8	0.749
179.9	0.74875
180	0.74925
180.1	0.74875
180.2	0.749
180.3	0.74975
180.4	0.75
180.5	0.7505
180.6	0.7495
180.7	0.75
180.8	0.74975
180.9	0.7495
181	0.74925
181.1	0.7495
181.2	0.74975
181.3	0.75
181.4	0.7505
181.5	0.7495
181.6	0.74875
181.7	0.7485
181.8	0.74875
181.9	0.74975
182	0.7495
182.1	0.75
182.2	0.75075
182.3	0.7505
182.4	0.75
182.5	0.74975
182.6	0.7495
182.7	0.74975
182.8	0.75
182.9	0.74975
183	0.74975
183.1	0.75
183.2	0.751
183.3	0.751
183.4	0.7515
183.5	0.752
183.6	0.7525
183.7	0.753
183.8	0.754
183.9	0.7545
184	0.753
184.1	0.7535
184.2	0.75325
184.3	0.75325
184.4	0.75375
184.5	0.75325
184.6	0.753
184.7	0.7525
184.8	0.7535
184.9	0.75325
185	0.75425
185.1	0.75575
185.2	0.756
185.3	0.75575
185.4	0.756
185.5	0.756
185.6	0.756
185.7	0.7575
185.8	0.75825
185.9	0.75825
186	0.75825
186.1	0.7585
186.2	0.75825
186.3	0.759
186.4	0.76
186.5	0.7595
186.6	0.75825
186.7	0.75875
186.8	0.75825
186.9	0.759
187	0.75875
187.1	0.758
187.2	0.75875
187.3	0.7595
187.4	0.76
187.5	0.76075
187.6	0.761
187.7	0.7605
187.8	0.76125
187.9	0.7625
188	0.763
188.1	0.76275
188.2	0.76275
188.3	0.76225
188.4	0.76275
188.5	0.76375
188.6	0.763
188.7	0.76425
188.8	0.76475
188.9	0.7645
189	0.76475
189.1	0.76475
189.2	0.7655
189.3	0.766
189.4	0.76525
189.5	0.7655
189.6	0.766
189.7	0.76725
189.8	0.7675
189.9	0.7675
190	0.768
190.1	0.76825
190.2	0.76925
190.3	0.7695
190.4	0.7685
190.5	0.76875
190.6	0.76925
190.7	0.76975
190.8	0.77
190.9	0.77075
191	0.77075
191.1	0.77125
191.2	0.77125
191.3	0.7715
191.4	0.773
191.5	0.77325
191.6	0.7745
191.7	0.77475
191.8	0.77525
191.9	0.77525
192	0.77525
192.1	0.77525
192.2	0.7755
192.3	0.7745
192.4	0.7735
192.5	0.77325
192.6	0.77325
192.7	0.77125
192.8	0.771
192.9	0.77025
193	0.77075
193.1	0.77225
193.2	0.77225
193.3	0.7715
193.4	0.772
193.5	0.77175
193.6	0.772
193.7	0.772
193.8	0.772
193.9	0.771
194	0.77
194.1	0.77
194.2	0.77025
194.3	0.76975
194.4	0.76975
194.5	0.77025
194.6	0.76975
194.7	0.77
194.8	0.7705
194.9	0.7705
195	0.771
195.1	0.771
195.2	0.7715
195.3	0.77175
195.4	0.77275
195.5	0.773
195.6	0.77225
195.7	0.7725
195.8	0.77175
195.9	0.7715
196	0.77175
196.1	0.7715
196.2	0.773
196.3	0.773
196.4	0.77325
196.5	0.77275
196.6	0.77275
196.7	0.772
196.8	0.77125
196.9	0.7705
197	0.77025
197.1	0.77
197.2	0.77075
197.3	0.77125
197.4	0.771
197.5	0.77175
197.6	0.773
197.7	0.77225
197.8	0.77225
197.9	0.77325
198	0.774
198.1	0.774
198.2	0.77375
198.3	0.77325
198.4	0.77325
198.5	0.77325
198.6	0.77275
198.7	0.77325
198.8	0.77325
198.9	0.77225
199	0.772
199.1	0.7715
199.2	0.771
199.3	0.7705
199.4	0.77
199.5	0.7705
199.6	0.77
199.7	0.76925
199.8	0.76925
199.9	0.76975
200	0.76975
[truncated: 14,000 more rows]
