# Supplementary material for: Bayesian inference of kinetic schemes for ion channels by Kalman filtering
Source: eLife journal article supplement (doi:10.7554/elife.62714), 2022-05-04
Supplement: fig4-data5 [file 1_Sim_N_5000_Fluor_MW.xlsx]

## Sheet: Tabelle1
0.1	0
0.2	0
0.3	0
0.4	0
0.5	0
0.6	0
0.7	0
0.8	0
0.9	0
1	0
1.1	0
1.2	0
1.3	0
1.4	0
1.5	0
1.6	0
1.7	0
1.8	0
1.9	0
2	0
2.1	0
2.2	0
2.3	0
2.4	0
2.5	0
2.6	0
2.7	0
2.8	0
2.9	0
3	0
3.1	0
3.2	0
3.3	0
3.4	0
3.5	0
3.6	0
3.7	0
3.8	0
3.9	0
4	0
4.1	0
4.2	0
4.3	0
4.4	0
4.5	0
4.6	0
4.7	0
4.8	0
4.9	0
5	0
5.1	0
5.2	0
5.3	0
5.4	0
5.5	0
5.6	0
5.7	0
5.8	0
5.9	0
6	0
6.1	0
6.2	0
6.3	0
6.4	0
6.5	0
6.6	0
6.7	0
6.8	0
6.9	0
7	0
7.1	0
7.2	0
7.3	0
7.4	0
7.5	0
7.6	0
7.7	0
7.8	0
7.9	0
8	0
8.1	0
8.2	0
8.3	0
8.4	0
8.5	0
8.6	0
8.7	0
8.8	0
8.9	0
9	0
9.1	0
9.2	0
9.3	0
9.4	0
9.5	0
9.6	0
9.7	0
9.8	0
9.9	0
10	0
10.1	0
10.2	0
10.3	0
10.4	0
10.5	0
10.6	0
10.7	0
10.8	0
10.9	0
11	0
11.1	0
11.2	0
11.3	0
11.4	0
11.5	0
11.6	0
11.7	0
11.8	0
11.9	0
12	0
12.1	0
12.2	0
12.3	0
12.4	0
12.5	0
12.6	0
12.7	0
12.8	0
12.9	0
13	0
13.1	0
13.2	0
13.3	0
13.4	0
13.5	0
13.6	0
13.7	0
13.8	0
13.9	0
14	0
14.1	0
14.2	0
14.3	0
14.4	0
14.5	0
14.6	0
14.7	0
14.8	0
14.9	0
15	0
15.1	0
15.2	0
15.3	0
15.4	0
15.5	0
15.6	0
15.7	0
15.8	0
15.9	0
16	0
16.1	0
16.2	0
16.3	0
16.4	0
16.5	0
16.6	0
16.7	0
16.8	0
16.9	0
17	0
17.1	0
17.2	0
17.3	0
17.4	0
17.5	0
17.6	0
17.7	0
17.8	0
17.9	0
18	0
18.1	0
18.2	0
18.3	0
18.4	0
18.5	0
18.6	0
18.7	0
18.8	0
18.9	0
19	0
19.1	0
19.2	0
19.3	0
19.4	0
19.5	0
19.6	0
19.7	0
19.8	0
19.9	0
20	0
20.1	0
20.2	0
20.3	0
20.4	0
20.5	0
20.6	0
20.7	0
20.8	0
20.9	0
21	0
21.1	0
21.2	0
21.3	0
21.4	0
21.5	0
21.6	0
21.7	0
21.8	0
21.9	0
22	0
22.1	0
22.2	0
22.3	0
22.4	0
22.5	0
22.6	0
22.7	0
22.8	0
22.9	0
23	0
23.1	0
23.2	0
23.3	0
23.4	0
23.5	0
23.6	0
23.7	0
23.8	0
23.9	0
24	0
24.1	0
24.2	0
24.3	0
24.4	0
24.5	0
24.6	0
24.7	0
24.8	0
24.9	0
25	0
25.1	0
25.2	0
25.3	0
25.4	0
25.5	0
25.6	0
25.7	0
25.8	0
25.9	0
26	0
26.1	0
26.2	0
26.3	0
26.4	0
26.5	0
26.6	0
26.7	0
26.8	0
26.9	0
27	0
27.1	0
27.2	0
27.3	0
27.4	0
27.5	0
27.6	0
27.7	0
27.8	0
27.9	0
28	0
28.1	0
28.2	0
28.3	0
28.4	0
28.5	0
28.6	0
28.7	0
28.8	0
28.9	0
29	0
29.1	0
29.2	0
29.3	0
29.4	0
29.5	0
29.6	0
29.7	0
29.8	0
29.9	0
30	0
30.1	0
30.2	0
30.3	0
30.4	0
30.5	0
30.6	0
30.7	0
30.8	0
30.9	0
31	0
31.1	0
31.2	0
31.3	0
31.4	0
31.5	0
31.6	0
31.7	0
31.8	0
31.9	0
32	0
32.1	0
32.2	0
32.3	0
32.4	0
32.5	0
32.6	0
32.7	0
32.8	0
32.9	0
33	0
33.1	0
33.2	0
33.3	0
33.4	0
33.5	0
33.6	0
33.7	0
33.8	0
33.9	0
34	0
34.1	0
34.2	0
34.3	0
34.4	0
34.5	0
34.6	0
34.7	0
34.8	0
34.9	0
35	0
35.1	0
35.2	0
35.3	0
35.4	0
35.5	0
35.6	0
35.7	0
35.8	0
35.9	0
36	0
36.1	0
36.2	0
36.3	0
36.4	0
36.5	0
36.6	0
36.7	0
36.8	0
36.9	0
37	0
37.1	0
37.2	0
37.3	0
37.4	0
37.5	0
37.6	0
37.7	0
37.8	0
37.9	0
38	0
38.1	0
38.2	0
38.3	0
38.4	0
38.5	0
38.6	0
38.7	0
38.8	0
38.9	0
39	0
39.1	0
39.2	0
39.3	0
39.4	0
39.5	0
39.6	0
39.7	0
39.8	0
39.9	0
40	0
40.1	0
40.2	0
40.3	0
40.4	0
40.5	0
40.6	0
40.7	0
40.8	0
40.9	0
41	0
41.1	0
41.2	0
41.3	0
41.4	0
41.5	0
41.6	0
41.7	0
41.8	0
41.9	0
42	0
42.1	0
42.2	0
42.3	0
42.4	0
42.5	0
42.6	0
42.7	0
42.8	0
42.9	0
43	0
43.1	0
43.2	0
43.3	0
43.4	0
43.5	0
43.6	0
43.7	0
43.8	0
43.9	0
44	0
44.1	0
44.2	0
44.3	0
44.4	0
44.5	0
44.6	0
44.7	0
44.8	0
44.9	0
45	0
45.1	0
45.2	0
45.3	0
45.4	0
45.5	0
45.6	0
45.7	0
45.8	0
45.9	0
46	0
46.1	0
46.2	0
46.3	0
46.4	0
46.5	0
46.6	0
46.7	0
46.8	0
46.9	0
47	0
47.1	0
47.2	0
47.3	0
47.4	0
47.5	0
47.6	0
47.7	0
47.8	0
47.9	0
48	0
48.1	0
48.2	0
48.3	0
48.4	0
48.5	0
48.6	0
48.7	0
48.8	0
48.9	0
49	0
49.1	0
49.2	0
49.3	0
49.4	0
49.5	0
49.6	0
49.7	0
49.8	0
49.9	0
50	0
50.1	0
50.2	0
50.3	0
50.4	0
50.5	0
50.6	0
50.7	0
50.8	0
50.9	0
51	0
51.1	0
51.2	0
51.3	0
51.4	0
51.5	0
51.6	0
51.7	0
51.8	0
51.9	0
52	0
52.1	0
52.2	0
52.3	0
52.4	0
52.5	0
52.6	0
52.7	0
52.8	0
52.9	0
53	0
53.1	0
53.2	0
53.3	0
53.4	0
53.5	0
53.6	0
53.7	0
53.8	0
53.9	0
54	0
54.1	0
54.2	0
54.3	0
54.4	0
54.5	0
54.6	0
54.7	0
54.8	0
54.9	0
55	0
55.1	0
55.2	0
55.3	0
55.4	0
55.5	0
55.6	0
55.7	0
55.8	0
55.9	0
56	0
56.1	0
56.2	0
56.3	0
56.4	0
56.5	0
56.6	0
56.7	0
56.8	0
56.9	0
57	0
57.1	0
57.2	0
57.3	0
57.4	0
57.5	0
57.6	0
57.7	0
57.8	0
57.9	0
58	0
58.1	0
58.2	0
58.3	0
58.4	0
58.5	0
58.6	0
58.7	0
58.8	0
58.9	0
59	0
59.1	0
59.2	0
59.3	0
59.4	0
59.5	0
59.6	0
59.7	0
59.8	0
59.9	0
60	0
60.1	0
60.2	0
60.3	0
60.4	0
60.5	0
60.6	0
60.7	0
60.8	0
60.9	0
61	0
61.1	0
61.2	0
61.3	0
61.4	0
61.5	0
61.6	0
61.7	0
61.8	0
61.9	0
62	0
62.1	0
62.2	0
62.3	0
62.4	0
62.5	0
62.6	0
62.7	0
62.8	0
62.9	0
63	0
63.1	0
63.2	0
63.3	0
63.4	0
63.5	0
63.6	0
63.7	0
63.8	0
63.9	0
64	0
64.1	0
64.2	0
64.3	0
64.4	0
64.5	0
64.6	0
64.7	0
64.8	0
64.9	0
65	0
65.1	0
65.2	0
65.3	0
65.4	0
65.5	0
65.6	0
65.7	0
65.8	0
65.9	0
66	0
66.1	0
66.2	0
66.3	0
66.4	0
66.5	0
66.6	0
66.7	0
66.8	0
66.9	0
67	0
67.1	0
67.2	0
67.3	0
67.4	0
67.5	0
67.6	0
67.7	0
67.8	0
67.9	0
68	0
68.1	0
68.2	0
68.3	0
68.4	0
68.5	0
68.6	0
68.7	0
68.8	0
68.9	0
69	0
69.1	0
69.2	0
69.3	0
69.4	0
69.5	0
69.6	0
69.7	0
69.8	0
69.9	0
70	0
70.1	0
70.2	0
70.3	0
70.4	0
70.5	0
70.6	0
70.7	0
70.8	0
70.9	0
71	0
71.1	0
71.2	0
71.3	0
71.4	0
71.5	0
71.6	0
71.7	0
71.8	0
71.9	0
72	0
72.1	0
72.2	0
72.3	0
72.4	0
72.5	0
72.6	0
72.7	0
72.8	0
72.9	0
73	0
73.1	0
73.2	0
73.3	0
73.4	0
73.5	0
73.6	0
73.7	0
73.8	0
73.9	0
74	0
74.1	0
74.2	0
74.3	0
74.4	0
74.5	0
74.6	0
74.7	0
74.8	0
74.9	0
75	0
75.1	0
75.2	0
75.3	0
75.4	0
75.5	0
75.6	0
75.7	0
75.8	0
75.9	0
76	0
76.1	0
76.2	0
76.3	0
76.4	0
76.5	0
76.6	0
76.7	0
76.8	0
76.9	0
77	0
77.1	0
77.2	0
77.3	0
77.4	0
77.5	0
77.6	0
77.7	0
77.8	0
77.9	0
78	0
78.1	0
78.2	0
78.3	0
78.4	0
78.5	0
78.6	0
78.7	0
78.8	0
78.9	0
79	0
79.1	0
79.2	0
79.3	0
79.4	0
79.5	0
79.6	0
79.7	0
79.8	0
79.9	0
80	0
80.1	0
80.2	0
80.3	0
80.4	0
80.5	0
80.6	0
80.7	0
80.8	0
80.9	0
81	0
81.1	0
81.2	0
81.3	0
81.4	0
81.5	0
81.6	0
81.7	0
81.8	0
81.9	0
82	0
82.1	0
82.2	0
82.3	0
82.4	0
82.5	0
82.6	0
82.7	0
82.8	0
82.9	0
83	0
83.1	0
83.2	0
83.3	0
83.4	0
83.5	0
83.6	0
83.7	0
83.8	0
83.9	0
84	0
84.1	0
84.2	0
84.3	0
84.4	0
84.5	0
84.6	0
84.7	0
84.8	0
84.9	0
85	0
85.1	0
85.2	0
85.3	0
85.4	0
85.5	0
85.6	0
85.7	0
85.8	0
85.9	0
86	0
86.1	0
86.2	0
86.3	0
86.4	0
86.5	0
86.6	0
86.7	0
86.8	0
86.9	0
87	0
87.1	0
87.2	0
87.3	0
87.4	0
87.5	0
87.6	0
87.7	0
87.8	0
87.9	0
88	0
88.1	0
88.2	0
88.3	0
88.4	0
88.5	0
88.6	0
88.7	0
88.8	0
88.9	0
89	0
89.1	0
89.2	0
89.3	0
89.4	0
89.5	0
89.6	0
89.7	0
89.8	0
89.9	0
90	0
90.1	0
90.2	0
90.3	0
90.4	0
90.5	0
90.6	0
90.7	0
90.8	0
90.9	0
91	0
91.1	0
91.2	0
91.3	0
91.4	0
91.5	0
91.6	0
91.7	0
91.8	0
91.9	0
92	0
92.1	0
92.2	0
92.3	0
92.4	0
92.5	0
92.6	0
92.7	0
92.8	0
92.9	0
93	0
93.1	0
93.2	0
93.3	0
93.4	0
93.5	0
93.6	0
93.7	0
93.8	0
93.9	0
94	0
94.1	0
94.2	0
94.3	0
94.4	0
94.5	0
94.6	0
94.7	0
94.8	0
94.9	0
95	0
95.1	0
95.2	0
95.3	0
95.4	0
95.5	0
95.6	0
95.7	0
95.8	0
95.9	0
96	0
96.1	0
96.2	0
96.3	0
96.4	0
96.5	0
96.6	0
96.7	0
96.8	0
96.9	0
97	0
97.1	0
97.2	0
97.3	0
97.4	0
97.5	0
97.6	0
97.7	0
97.8	0
97.9	0
98	0
98.1	0
98.2	0
98.3	0
98.4	0
98.5	0
98.6	0
98.7	0
98.8	0
98.9	0
99	0
99.1	0
99.2	0
99.3	0
99.4	0
99.5	0
99.6	0
99.7	0
99.8	0
99.9	0
100	0
100.1	0.2089
100.2	0.3515
100.3	0.4547
100.4	0.5307
100.5	0.5893
100.6	0.6333
100.7	0.6695
100.8	0.699
100.9	0.7263
101	0.7486
101.1	0.7605
101.2	0.7745
101.3	0.7879
101.4	0.7971
101.5	0.8067
101.6	0.8139
101.7	0.8186
101.8	0.8241
101.9	0.8284
102	0.8309
102.1	0.8341
102.2	0.8375
102.3	0.8386
102.4	0.8424
102.5	0.8447
102.6	0.8454
102.7	0.8469
102.8	0.8474
102.9	0.8456
103	0.8476
103.1	0.8498
103.2	0.8525
103.3	0.8561
103.4	0.8585
103.5	0.8584
103.6	0.861
103.7	0.8616
103.8	0.8644
103.9	0.8628
104	0.8632
104.1	0.8642
104.2	0.8662
104.3	0.863
104.4	0.8635
104.5	0.8616
104.6	0.8632
104.7	0.8642
104.8	0.8627
104.9	0.8639
105	0.866
105.1	0.8682
105.2	0.8708
105.3	0.8704
105.4	0.8668
105.5	0.8669
105.6	0.8676
105.7	0.8692
105.8	0.8704
105.9	0.8698
106	0.8689
106.1	0.8709
106.2	0.8703
106.3	0.8706
106.4	0.8697
106.5	0.8695
106.6	0.8698
106.7	0.8701
106.8	0.8711
106.9	0.8714
107	0.8724
107.1	0.8701
107.2	0.8684
107.3	0.8682
107.4	0.8683
107.5	0.8674
107.6	0.8682
107.7	0.8718
107.8	0.8746
107.9	0.8761
108	0.8742
108.1	0.8756
108.2	0.8745
108.3	0.876
108.4	0.8779
108.5	0.8816
108.6	0.8815
108.7	0.8839
108.8	0.8829
108.9	0.8847
109	0.8834
109.1	0.8847
109.2	0.8864
109.3	0.8861
109.4	0.8872
109.5	0.8854
109.6	0.888
109.7	0.889
109.8	0.8885
109.9	0.8883
110	0.8874
110.1	0.8854
110.2	0.8844
110.3	0.8831
110.4	0.8838
110.5	0.8873
110.6	0.8874
110.7	0.8865
110.8	0.888
110.9	0.8869
111	0.8892
111.1	0.8897
111.2	0.8908
111.3	0.889
111.4	0.8913
111.5	0.8917
111.6	0.8906
111.7	0.8902
111.8	0.8954
111.9	0.895
112	0.8946
112.1	0.895
112.2	0.8953
112.3	0.8959
112.4	0.8944
112.5	0.8974
112.6	0.897
112.7	0.8974
112.8	0.8971
112.9	0.8974
113	0.8976
113.1	0.8958
113.2	0.8953
113.3	0.8949
113.4	0.8964
113.5	0.8949
113.6	0.8979
113.7	0.8984
113.8	0.8985
113.9	0.8987
114	0.8995
114.1	0.9007
114.2	0.9001
114.3	0.9019
114.4	0.903
114.5	0.9022
114.6	0.9026
114.7	0.9031
114.8	0.9022
114.9	0.9025
115	0.9042
115.1	0.9046
115.2	0.9033
115.3	0.904
115.4	0.9041
115.5	0.9041
115.6	0.9021
115.7	0.9043
115.8	0.9025
115.9	0.9053
116	0.9073
116.1	0.9079
116.2	0.9113
116.3	0.9101
116.4	0.908
116.5	0.908
116.6	0.9099
116.7	0.9094
116.8	0.9084
116.9	0.9094
117	0.9085
117.1	0.9086
117.2	0.9082
117.3	0.9079
117.4	0.9081
117.5	0.9083
117.6	0.9092
117.7	0.91
117.8	0.9098
117.9	0.9082
118	0.9074
118.1	0.9071
118.2	0.9067
118.3	0.9069
118.4	0.9065
118.5	0.9021
118.6	0.9021
118.7	0.9051
118.8	0.907
118.9	0.907
119	0.9079
119.1	0.9075
119.2	0.9109
119.3	0.9105
119.4	0.9089
119.5	0.909
119.6	0.9093
119.7	0.9094
119.8	0.9134
119.9	0.9127
120	0.9107
120.1	0.9104
120.2	0.9081
120.3	0.9086
120.4	0.9089
120.5	0.9113
120.6	0.9132
120.7	0.9151
120.8	0.9143
120.9	0.9159
121	0.9182
121.1	0.9207
121.2	0.9225
121.3	0.921
121.4	0.9203
121.5	0.9198
121.6	0.9201
121.7	0.9188
121.8	0.9189
121.9	0.9188
122	0.9182
122.1	0.919
122.2	0.9213
122.3	0.9181
122.4	0.9193
122.5	0.9178
122.6	0.9183
122.7	0.919
122.8	0.919
122.9	0.9207
123	0.918
123.1	0.9176
123.2	0.917
123.3	0.9163
123.4	0.9169
123.5	0.9161
123.6	0.9183
123.7	0.9168
123.8	0.9175
123.9	0.9174
124	0.9176
124.1	0.9183
124.2	0.9172
124.3	0.919
124.4	0.9212
124.5	0.9225
124.6	0.9236
124.7	0.9236
124.8	0.9247
124.9	0.9258
125	0.9256
125.1	0.9245
125.2	0.9245
125.3	0.925
125.4	0.9248
125.5	0.9272
125.6	0.9278
125.7	0.927
125.8	0.9252
125.9	0.9266
126	0.9244
126.1	0.924
126.2	0.9216
126.3	0.923
126.4	0.9245
126.5	0.9246
126.6	0.9288
126.7	0.9303
126.8	0.9309
126.9	0.9305
127	0.9288
127.1	0.9285
127.2	0.9282
127.3	0.928
127.4	0.9276
127.5	0.9265
127.6	0.9268
127.7	0.9261
127.8	0.926
127.9	0.928
128	0.9277
128.1	0.9275
128.2	0.9299
128.3	0.9332
128.4	0.934
128.5	0.9357
128.6	0.936
128.7	0.9349
128.8	0.9354
128.9	0.9349
129	0.9341
129.1	0.9332
129.2	0.9325
129.3	0.9327
129.4	0.9323
129.5	0.9321
129.6	0.9324
129.7	0.9322
129.8	0.932
129.9	0.9334
130	0.935
130.1	0.9341
130.2	0.9348
130.3	0.9361
130.4	0.9365
130.5	0.9365
130.6	0.9367
130.7	0.9363
130.8	0.9364
130.9	0.9375
131	0.9376
131.1	0.9389
131.2	0.9379
131.3	0.9381
131.4	0.9386
131.5	0.9366
131.6	0.9368
131.7	0.9361
131.8	0.9354
131.9	0.935
132	0.9354
132.1	0.9357
132.2	0.9353
132.3	0.932
132.4	0.9325
132.5	0.9339
132.6	0.9344
132.7	0.9335
132.8	0.9351
132.9	0.934
133	0.9352
133.1	0.9363
133.2	0.9359
133.3	0.9357
133.4	0.938
133.5	0.9387
133.6	0.9387
133.7	0.9392
133.8	0.9386
133.9	0.9394
134	0.9393
134.1	0.9394
134.2	0.9414
134.3	0.9394
134.4	0.938
134.5	0.9388
134.6	0.9382
134.7	0.9373
134.8	0.9384
134.9	0.9382
135	0.9407
135.1	0.9413
135.2	0.941
135.3	0.9427
135.4	0.942
135.5	0.9417
135.6	0.9394
135.7	0.9401
135.8	0.9397
135.9	0.9408
136	0.9395
136.1	0.939
136.2	0.9378
136.3	0.9387
136.4	0.9392
136.5	0.9391
136.6	0.9391
136.7	0.9377
136.8	0.9368
136.9	0.9387
137	0.9379
137.1	0.9376
137.2	0.9375
137.3	0.9367
137.4	0.9379
137.5	0.9399
137.6	0.941
137.7	0.9374
137.8	0.939
137.9	0.9401
138	0.9378
138.1	0.9369
138.2	0.9387
138.3	0.9399
138.4	0.94
138.5	0.941
138.6	0.9407
138.7	0.9396
138.8	0.9403
138.9	0.9403
139	0.9417
139.1	0.9424
139.2	0.9417
139.3	0.9417
139.4	0.9415
139.5	0.9405
139.6	0.9401
139.7	0.939
139.8	0.9388
139.9	0.9406
140	0.9408
140.1	0.9411
140.2	0.9434
140.3	0.9437
140.4	0.9447
140.5	0.945
140.6	0.9452
140.7	0.9449
140.8	0.9451
140.9	0.9462
141	0.9451
141.1	0.9456
141.2	0.9428
141.3	0.9425
141.4	0.9429
141.5	0.943
141.6	0.9429
141.7	0.9457
141.8	0.945
141.9	0.9443
142	0.945
142.1	0.9461
142.2	0.9478
142.3	0.9474
142.4	0.9465
142.5	0.9454
142.6	0.9455
142.7	0.9459
142.8	0.9453
142.9	0.9464
143	0.9448
143.1	0.9445
143.2	0.9461
143.3	0.9459
143.4	0.9468
143.5	0.948
143.6	0.9482
143.7	0.9482
143.8	0.9475
143.9	0.9473
144	0.9481
144.1	0.9471
144.2	0.9475
144.3	0.9475
144.4	0.9475
144.5	0.9489
144.6	0.9495
144.7	0.9511
144.8	0.9506
144.9	0.9496
145	0.949
145.1	0.9494
145.2	0.9492
145.3	0.9487
145.4	0.9487
145.5	0.9494
145.6	0.9481
145.7	0.9479
145.8	0.9473
145.9	0.9475
146	0.9471
146.1	0.9473
146.2	0.9481
146.3	0.9473
146.4	0.9468
146.5	0.9475
146.6	0.9485
146.7	0.9493
146.8	0.9497
146.9	0.9511
147	0.9498
147.1	0.9483
147.2	0.9491
147.3	0.9498
147.4	0.9501
147.5	0.9498
147.6	0.9513
147.7	0.9532
147.8	0.9537
147.9	0.9525
148	0.9529
148.1	0.9518
148.2	0.951
148.3	0.9507
148.4	0.9508
148.5	0.9512
148.6	0.9517
148.7	0.9533
148.8	0.9519
148.9	0.9516
149	0.9525
149.1	0.9519
149.2	0.9512
149.3	0.9507
149.4	0.9506
149.5	0.9519
149.6	0.9522
149.7	0.9519
149.8	0.9512
149.9	0.9518
150	0.9524
150.1	0.952
150.2	0.9515
150.3	0.952
150.4	0.951
150.5	0.9504
150.6	0.951
150.7	0.9497
150.8	0.9494
150.9	0.9513
151	0.9531
151.1	0.9521
151.2	0.9537
151.3	0.9526
151.4	0.9529
151.5	0.9539
151.6	0.9544
151.7	0.9539
151.8	0.9539
151.9	0.9535
152	0.9537
152.1	0.9525
152.2	0.952
152.3	0.9541
152.4	0.9541
152.5	0.9538
152.6	0.9519
152.7	0.9528
152.8	0.9514
152.9	0.9508
153	0.951
153.1	0.9495
153.2	0.9507
153.3	0.9508
153.4	0.9509
153.5	0.9521
153.6	0.9524
153.7	0.9516
153.8	0.9523
153.9	0.9521
154	0.953
154.1	0.954
154.2	0.952
154.3	0.9533
154.4	0.9526
154.5	0.9533
154.6	0.9532
154.7	0.953
154.8	0.9545
154.9	0.9547
155	0.9545
155.1	0.9553
155.2	0.9549
155.3	0.9542
155.4	0.9532
155.5	0.9531
155.6	0.952
155.7	0.9513
155.8	0.9513
155.9	0.9518
156	0.9531
156.1	0.9514
156.2	0.9524
156.3	0.9527
156.4	0.9511
156.5	0.953
156.6	0.9529
156.7	0.9539
156.8	0.9551
156.9	0.9561
157	0.9558
157.1	0.9555
157.2	0.956
157.3	0.9576
157.4	0.9582
157.5	0.9581
157.6	0.9566
157.7	0.9572
157.8	0.9574
157.9	0.9569
158	0.9556
158.1	0.9537
158.2	0.9536
158.3	0.9524
158.4	0.9522
158.5	0.9525
158.6	0.9539
158.7	0.9532
158.8	0.9547
158.9	0.955
159	0.9539
159.1	0.9536
159.2	0.9528
159.3	0.9544
159.4	0.953
159.5	0.9533
159.6	0.9538
159.7	0.9559
159.8	0.9559
159.9	0.9557
160	0.9563
160.1	0.9559
160.2	0.9554
160.3	0.955
160.4	0.9546
160.5	0.9557
160.6	0.9553
160.7	0.9556
160.8	0.9544
160.9	0.9559
161	0.9549
161.1	0.9552
161.2	0.9549
161.3	0.9568
161.4	0.9568
161.5	0.9577
161.6	0.9581
161.7	0.9564
161.8	0.9553
161.9	0.9577
162	0.9559
162.1	0.9569
162.2	0.9564
162.3	0.9584
162.4	0.9571
162.5	0.9561
162.6	0.9576
162.7	0.9581
162.8	0.9563
162.9	0.9562
163	0.956
163.1	0.9573
163.2	0.9581
163.3	0.9576
163.4	0.9568
163.5	0.9574
163.6	0.9569
163.7	0.9575
163.8	0.9594
163.9	0.9596
164	0.9586
164.1	0.9591
164.2	0.9586
164.3	0.958
164.4	0.9576
164.5	0.9571
164.6	0.9565
164.7	0.9586
164.8	0.959
164.9	0.9591
165	0.9576
165.1	0.9566
165.2	0.9579
165.3	0.9594
165.4	0.9591
165.5	0.961
165.6	0.9611
165.7	0.9621
165.8	0.9626
165.9	0.9617
166	0.9611
166.1	0.9627
166.2	0.9635
166.3	0.9614
166.4	0.9627
166.5	0.9613
166.6	0.9593
166.7	0.9588
166.8	0.9575
166.9	0.9581
167	0.9574
167.1	0.9591
167.2	0.9589
167.3	0.9593
167.4	0.9595
167.5	0.9603
167.6	0.9587
167.7	0.9585
167.8	0.9598
167.9	0.9584
168	0.9589
168.1	0.9592
168.2	0.9595
168.3	0.9593
168.4	0.9597
168.5	0.9601
168.6	0.9597
168.7	0.9614
168.8	0.9605
168.9	0.9598
169	0.9597
169.1	0.9604
169.2	0.9596
169.3	0.9605
169.4	0.962
169.5	0.9615
169.6	0.9608
169.7	0.9626
169.8	0.9623
169.9	0.9622
170	0.9629
170.1	0.9622
170.2	0.9629
170.3	0.9625
170.4	0.9622
170.5	0.9618
170.6	0.9606
170.7	0.9619
170.8	0.961
170.9	0.9613
171	0.9613
171.1	0.9615
171.2	0.9615
171.3	0.9609
171.4	0.9615
171.5	0.9622
171.6	0.961
171.7	0.961
171.8	0.9589
171.9	0.9593
172	0.9588
172.1	0.9599
172.2	0.961
172.3	0.9625
172.4	0.9624
172.5	0.9646
172.6	0.9623
172.7	0.9628
172.8	0.9631
172.9	0.9631
173	0.9635
173.1	0.9624
173.2	0.9634
173.3	0.9646
173.4	0.9649
173.5	0.964
173.6	0.9625
173.7	0.9623
173.8	0.9623
173.9	0.9614
174	0.9617
174.1	0.9642
174.2	0.9633
174.3	0.963
174.4	0.9616
174.5	0.9632
174.6	0.9629
174.7	0.9639
174.8	0.964
174.9	0.9652
175	0.9654
175.1	0.965
175.2	0.9653
175.3	0.9671
175.4	0.9668
175.5	0.9651
175.6	0.9654
175.7	0.9644
175.8	0.9658
175.9	0.964
176	0.9643
176.1	0.9641
176.2	0.9637
176.3	0.9633
176.4	0.9625
176.5	0.9653
176.6	0.9647
176.7	0.9661
176.8	0.9652
176.9	0.9642
177	0.9634
177.1	0.9634
177.2	0.9638
177.3	0.9635
177.4	0.965
177.5	0.9656
177.6	0.9648
177.7	0.9648
177.8	0.9656
177.9	0.9644
178	0.9655
178.1	0.9639
178.2	0.9637
178.3	0.9626
178.4	0.9641
178.5	0.9652
178.6	0.9644
178.7	0.963
178.8	0.9621
178.9	0.9628
179	0.9648
179.1	0.9653
179.2	0.9648
179.3	0.9641
179.4	0.963
179.5	0.9643
179.6	0.9641
179.7	0.9621
179.8	0.961
179.9	0.9615
180	0.9619
180.1	0.9622
180.2	0.9616
180.3	0.9616
180.4	0.9602
180.5	0.9608
180.6	0.9613
180.7	0.9619
180.8	0.9617
180.9	0.9626
181	0.9617
181.1	0.9607
181.2	0.9611
181.3	0.9626
181.4	0.9629
181.5	0.9642
181.6	0.9641
181.7	0.9648
181.8	0.9629
181.9	0.9633
182	0.9641
182.1	0.9635
182.2	0.964
182.3	0.9653
182.4	0.9654
182.5	0.9654
182.6	0.966
182.7	0.9658
182.8	0.9663
182.9	0.9657
183	0.9647
183.1	0.9647
183.2	0.964
183.3	0.9637
183.4	0.9628
183.5	0.9627
183.6	0.9624
183.7	0.9625
183.8	0.9619
183.9	0.9639
184	0.9654
184.1	0.9658
184.2	0.9655
184.3	0.9637
184.4	0.9632
184.5	0.9642
184.6	0.9654
184.7	0.9638
184.8	0.9639
184.9	0.9661
185	0.9659
185.1	0.9664
185.2	0.9658
185.3	0.9662
185.4	0.9649
185.5	0.9652
185.6	0.9648
185.7	0.9637
185.8	0.9626
185.9	0.9635
186	0.9643
186.1	0.9666
186.2	0.9662
186.3	0.9657
186.4	0.965
186.5	0.9647
186.6	0.9646
186.7	0.9635
186.8	0.9639
186.9	0.9626
187	0.9628
187.1	0.964
187.2	0.964
187.3	0.9635
187.4	0.9637
187.5	0.9657
187.6	0.9637
187.7	0.9637
187.8	0.9632
187.9	0.9627
188	0.9627
188.1	0.962
188.2	0.9622
188.3	0.9619
188.4	0.9624
188.5	0.9626
188.6	0.9628
188.7	0.963
188.8	0.9639
188.9	0.9632
189	0.9638
189.1	0.9632
189.2	0.9636
189.3	0.9644
189.4	0.9652
189.5	0.9656
189.6	0.9656
189.7	0.965
189.8	0.966
189.9	0.9657
190	0.9662
190.1	0.9646
190.2	0.9648
190.3	0.9666
190.4	0.9643
190.5	0.9655
190.6	0.9653
190.7	0.9666
190.8	0.9667
190.9	0.9657
191	0.9661
191.1	0.9649
191.2	0.9647
191.3	0.9645
191.4	0.9649
191.5	0.9638
191.6	0.963
191.7	0.9647
191.8	0.9653
191.9	0.9664
192	0.9654
192.1	0.9668
192.2	0.9659
192.3	0.9668
192.4	0.9674
192.5	0.9676
192.6	0.9673
192.7	0.9667
192.8	0.9668
192.9	0.9662
193	0.9667
193.1	0.9672
193.2	0.9674
193.3	0.9682
193.4	0.9669
193.5	0.9669
193.6	0.9674
193.7	0.9664
193.8	0.966
193.9	0.9658
194	0.9659
194.1	0.9655
194.2	0.966
194.3	0.9661
194.4	0.9657
194.5	0.9654
194.6	0.965
194.7	0.9641
194.8	0.9648
194.9	0.9666
195	0.9666
195.1	0.9649
195.2	0.9648
195.3	0.9662
195.4	0.9655
195.5	0.966
195.6	0.9656
195.7	0.9647
195.8	0.965
195.9	0.9642
196	0.9641
196.1	0.9639
196.2	0.9636
196.3	0.9635
196.4	0.964
196.5	0.9641
196.6	0.9633
196.7	0.9619
196.8	0.9632
196.9	0.9647
197	0.9654
197.1	0.9668
197.2	0.9661
197.3	0.9655
197.4	0.9646
197.5	0.9652
197.6	0.9652
197.7	0.9639
197.8	0.9652
197.9	0.9652
198	0.9659
198.1	0.965
198.2	0.965
198.3	0.9656
198.4	0.9654
198.5	0.9661
198.6	0.966
198.7	0.9672
198.8	0.9669
198.9	0.9656
199	0.9658
199.1	0.9655
199.2	0.9663
199.3	0.9656
199.4	0.9672
199.5	0.9668
199.6	0.9678
199.7	0.9679
199.8	0.968
199.9	0.9675
200	0.9679
[truncated: 14,000 more rows]
