# Supplementary material for: Bayesian inference of kinetic schemes for ion channels by Kalman filtering
Source: eLife journal article supplement (doi:10.7554/elife.62714), 2022-05-04
Supplement: fig4-data5 [file 1_Sim_N_5000_Strom_MW.xlsx]

## Sheet: Tabelle1
0.1	0
0.2	0
0.3	0
0.4	0
0.5	0
0.6	0
0.7	0
0.8	0
0.9	0
1	0
1.1	0
1.2	0
1.3	0
1.4	0
1.5	0
1.6	0
1.7	0
1.8	0
1.9	0
2	0
2.1	0
2.2	0
2.3	0
2.4	0
2.5	0
2.6	0
2.7	0
2.8	0
2.9	0
3	0
3.1	0
3.2	0
3.3	0
3.4	0
3.5	0
3.6	0
3.7	0
3.8	0
3.9	0
4	0
4.1	0
4.2	0
4.3	0
4.4	0
4.5	0
4.6	0
4.7	0
4.8	0
4.9	0
5	0
5.1	0
5.2	0
5.3	0
5.4	0
5.5	0
5.6	0
5.7	0
5.8	0
5.9	0
6	0
6.1	0
6.2	0
6.3	0
6.4	0
6.5	0
6.6	0
6.7	0
6.8	0
6.9	0
7	0
7.1	0
7.2	0
7.3	0
7.4	0
7.5	0
7.6	0
7.7	0
7.8	0
7.9	0
8	0
8.1	0
8.2	0
8.3	0
8.4	0
8.5	0
8.6	0
8.7	0
8.8	0
8.9	0
9	0
9.1	0
9.2	0
9.3	0
9.4	0
9.5	0
9.6	0
9.7	0
9.8	0
9.9	0
10	0
10.1	0
10.2	0
10.3	0
10.4	0
10.5	0
10.6	0
10.7	0
10.8	0
10.9	0
11	0
11.1	0
11.2	0
11.3	0
11.4	0
11.5	0
11.6	0
11.7	0
11.8	0
11.9	0
12	0
12.1	0
12.2	0
12.3	0
12.4	0
12.5	0
12.6	0
12.7	0
12.8	0
12.9	0
13	0
13.1	0
13.2	0
13.3	0
13.4	0
13.5	0
13.6	0
13.7	0
13.8	0
13.9	0
14	0
14.1	0
14.2	0
14.3	0
14.4	0
14.5	0
14.6	0
14.7	0
14.8	0
14.9	0
15	0
15.1	0
15.2	0
15.3	0
15.4	0
15.5	0
15.6	0
15.7	0
15.8	0
15.9	0
16	0
16.1	0
16.2	0
16.3	0
16.4	0
16.5	0
16.6	0
16.7	0
16.8	0
16.9	0
17	0
17.1	0
17.2	0
17.3	0
17.4	0
17.5	0
17.6	0
17.7	0
17.8	0
17.9	0
18	0
18.1	0
18.2	0
18.3	0
18.4	0
18.5	0
18.6	0
18.7	0
18.8	0
18.9	0
19	0
19.1	0
19.2	0
19.3	0
19.4	0
19.5	0
19.6	0
19.7	0
19.8	0
19.9	0
20	0
20.1	0
20.2	0
20.3	0
20.4	0
20.5	0
20.6	0
20.7	0
20.8	0
20.9	0
21	0
21.1	0
21.2	0
21.3	0
21.4	0
21.5	0
21.6	0
21.7	0
21.8	0
21.9	0
22	0
22.1	0
22.2	0
22.3	0
22.4	0
22.5	0
22.6	0
22.7	0
22.8	0
22.9	0
23	0
23.1	0
23.2	0
23.3	0
23.4	0
23.5	0
23.6	0
23.7	0
23.8	0
23.9	0
24	0
24.1	0
24.2	0
24.3	0
24.4	0
24.5	0
24.6	0
24.7	0
24.8	0
24.9	0
25	0
25.1	0
25.2	0
25.3	0
25.4	0
25.5	0
25.6	0
25.7	0
25.8	0
25.9	0
26	0
26.1	0
26.2	0
26.3	0
26.4	0
26.5	0
26.6	0
26.7	0
26.8	0
26.9	0
27	0
27.1	0
27.2	0
27.3	0
27.4	0
27.5	0
27.6	0
27.7	0
27.8	0
27.9	0
28	0
28.1	0
28.2	0
28.3	0
28.4	0
28.5	0
28.6	0
28.7	0
28.8	0
28.9	0
29	0
29.1	0
29.2	0
29.3	0
29.4	0
29.5	0
29.6	0
29.7	0
29.8	0
29.9	0
30	0
30.1	0
30.2	0
30.3	0
30.4	0
30.5	0
30.6	0
30.7	0
30.8	0
30.9	0
31	0
31.1	0
31.2	0
31.3	0
31.4	0
31.5	0
31.6	0
31.7	0
31.8	0
31.9	0
32	0
32.1	0
32.2	0
32.3	0
32.4	0
32.5	0
32.6	0
32.7	0
32.8	0
32.9	0
33	0
33.1	0
33.2	0
33.3	0
33.4	0
33.5	0
33.6	0
33.7	0
33.8	0
33.9	0
34	0
34.1	0
34.2	0
34.3	0
34.4	0
34.5	0
34.6	0
34.7	0
34.8	0
34.9	0
35	0
35.1	0
35.2	0
35.3	0
35.4	0
35.5	0
35.6	0
35.7	0
35.8	0
35.9	0
36	0
36.1	0
36.2	0
36.3	0
36.4	0
36.5	0
36.6	0
36.7	0
36.8	0
36.9	0
37	0
37.1	0
37.2	0
37.3	0
37.4	0
37.5	0
37.6	0
37.7	0
37.8	0
37.9	0
38	0
38.1	0
38.2	0
38.3	0
38.4	0
38.5	0
38.6	0
38.7	0
38.8	0
38.9	0
39	0
39.1	0
39.2	0
39.3	0
39.4	0
39.5	0
39.6	0
39.7	0
39.8	0
39.9	0
40	0
40.1	0
40.2	0
40.3	0
40.4	0
40.5	0
40.6	0
40.7	0
40.8	0
40.9	0
41	0
41.1	0
41.2	0
41.3	0
41.4	0
41.5	0
41.6	0
41.7	0
41.8	0
41.9	0
42	0
42.1	0
42.2	0
42.3	0
42.4	0
42.5	0
42.6	0
42.7	0
42.8	0
42.9	0
43	0
43.1	0
43.2	0
43.3	0
43.4	0
43.5	0
43.6	0
43.7	0
43.8	0
43.9	0
44	0
44.1	0
44.2	0
44.3	0
44.4	0
44.5	0
44.6	0
44.7	0
44.8	0
44.9	0
45	0
45.1	0
45.2	0
45.3	0
45.4	0
45.5	0
45.6	0
45.7	0
45.8	0
45.9	0
46	0
46.1	0
46.2	0
46.3	0
46.4	0
46.5	0
46.6	0
46.7	0
46.8	0
46.9	0
47	0
47.1	0
47.2	0
47.3	0
47.4	0
47.5	0
47.6	0
47.7	0
47.8	0
47.9	0
48	0
48.1	0
48.2	0
48.3	0
48.4	0
48.5	0
48.6	0
48.7	0
48.8	0
48.9	0
49	0
49.1	0
49.2	0
49.3	0
49.4	0
49.5	0
49.6	0
49.7	0
49.8	0
49.9	0
50	0
50.1	0
50.2	0
50.3	0
50.4	0
50.5	0
50.6	0
50.7	0
50.8	0
50.9	0
51	0
51.1	0
51.2	0
51.3	0
51.4	0
51.5	0
51.6	0
51.7	0
51.8	0
51.9	0
52	0
52.1	0
52.2	0
52.3	0
52.4	0
52.5	0
52.6	0
52.7	0
52.8	0
52.9	0
53	0
53.1	0
53.2	0
53.3	0
53.4	0
53.5	0
53.6	0
53.7	0
53.8	0
53.9	0
54	0
54.1	0
54.2	0
54.3	0
54.4	0
54.5	0
54.6	0
54.7	0
54.8	0
54.9	0
55	0
55.1	0
55.2	0
55.3	0
55.4	0
55.5	0
55.6	0
55.7	0
55.8	0
55.9	0
56	0
56.1	0
56.2	0
56.3	0
56.4	0
56.5	0
56.6	0
56.7	0
56.8	0
56.9	0
57	0
57.1	0
57.2	0
57.3	0
57.4	0
57.5	0
57.6	0
57.7	0
57.8	0
57.9	0
58	0
58.1	0
58.2	0
58.3	0
58.4	0
58.5	0
58.6	0
58.7	0
58.8	0
58.9	0
59	0
59.1	0
59.2	0
59.3	0
59.4	0
59.5	0
59.6	0
59.7	0
59.8	0
59.9	0
60	0
60.1	0
60.2	0
60.3	0
60.4	0
60.5	0
60.6	0
60.7	0
60.8	0
60.9	0
61	0
61.1	0
61.2	0
61.3	0
61.4	0
61.5	0
61.6	0
61.7	0
61.8	0
61.9	0
62	0
62.1	0
62.2	0
62.3	0
62.4	0
62.5	0
62.6	0
62.7	0
62.8	0
62.9	0
63	0
63.1	0
63.2	0
63.3	0
63.4	0
63.5	0
63.6	0
63.7	0
63.8	0
63.9	0
64	0
64.1	0
64.2	0
64.3	0
64.4	0
64.5	0
64.6	0
64.7	0
64.8	0
64.9	0
65	0
65.1	0
65.2	0
65.3	0
65.4	0
65.5	0
65.6	0
65.7	0
65.8	0
65.9	0
66	0
66.1	0
66.2	0
66.3	0
66.4	0
66.5	0
66.6	0
66.7	0
66.8	0
66.9	0
67	0
67.1	0
67.2	0
67.3	0
67.4	0
67.5	0
67.6	0
67.7	0
67.8	0
67.9	0
68	0
68.1	0
68.2	0
68.3	0
68.4	0
68.5	0
68.6	0
68.7	0
68.8	0
68.9	0
69	0
69.1	0
69.2	0
69.3	0
69.4	0
69.5	0
69.6	0
69.7	0
69.8	0
69.9	0
70	0
70.1	0
70.2	0
70.3	0
70.4	0
70.5	0
70.6	0
70.7	0
70.8	0
70.9	0
71	0
71.1	0
71.2	0
71.3	0
71.4	0
71.5	0
71.6	0
71.7	0
71.8	0
71.9	0
72	0
72.1	0
72.2	0
72.3	0
72.4	0
72.5	0
72.6	0
72.7	0
72.8	0
72.9	0
73	0
73.1	0
73.2	0
73.3	0
73.4	0
73.5	0
73.6	0
73.7	0
73.8	0
73.9	0
74	0
74.1	0
74.2	0
74.3	0
74.4	0
74.5	0
74.6	0
74.7	0
74.8	0
74.9	0
75	0
75.1	0
75.2	0
75.3	0
75.4	0
75.5	0
75.6	0
75.7	0
75.8	0
75.9	0
76	0
76.1	0
76.2	0
76.3	0
76.4	0
76.5	0
76.6	0
76.7	0
76.8	0
76.9	0
77	0
77.1	0
77.2	0
77.3	0
77.4	0
77.5	0
77.6	0
77.7	0
77.8	0
77.9	0
78	0
78.1	0
78.2	0
78.3	0
78.4	0
78.5	0
78.6	0
78.7	0
78.8	0
78.9	0
79	0
79.1	0
79.2	0
79.3	0
79.4	0
79.5	0
79.6	0
79.7	0
79.8	0
79.9	0
80	0
80.1	0
80.2	0
80.3	0
80.4	0
80.5	0
80.6	0
80.7	0
80.8	0
80.9	0
81	0
81.1	0
81.2	0
81.3	0
81.4	0
81.5	0
81.6	0
81.7	0
81.8	0
81.9	0
82	0
82.1	0
82.2	0
82.3	0
82.4	0
82.5	0
82.6	0
82.7	0
82.8	0
82.9	0
83	0
83.1	0
83.2	0
83.3	0
83.4	0
83.5	0
83.6	0
83.7	0
83.8	0
83.9	0
84	0
84.1	0
84.2	0
84.3	0
84.4	0
84.5	0
84.6	0
84.7	0
84.8	0
84.9	0
85	0
85.1	0
85.2	0
85.3	0
85.4	0
85.5	0
85.6	0
85.7	0
85.8	0
85.9	0
86	0
86.1	0
86.2	0
86.3	0
86.4	0
86.5	0
86.6	0
86.7	0
86.8	0
86.9	0
87	0
87.1	0
87.2	0
87.3	0
87.4	0
87.5	0
87.6	0
87.7	0
87.8	0
87.9	0
88	0
88.1	0
88.2	0
88.3	0
88.4	0
88.5	0
88.6	0
88.7	0
88.8	0
88.9	0
89	0
89.1	0
89.2	0
89.3	0
89.4	0
89.5	0
89.6	0
89.7	0
89.8	0
89.9	0
90	0
90.1	0
90.2	0
90.3	0
90.4	0
90.5	0
90.6	0
90.7	0
90.8	0
90.9	0
91	0
91.1	0
91.2	0
91.3	0
91.4	0
91.5	0
91.6	0
91.7	0
91.8	0
91.9	0
92	0
92.1	0
92.2	0
92.3	0
92.4	0
92.5	0
92.6	0
92.7	0
92.8	0
92.9	0
93	0
93.1	0
93.2	0
93.3	0
93.4	0
93.5	0
93.6	0
93.7	0
93.8	0
93.9	0
94	0
94.1	0
94.2	0
94.3	0
94.4	0
94.5	0
94.6	0
94.7	0
94.8	0
94.9	0
95	0
95.1	0
95.2	0
95.3	0
95.4	0
95.5	0
95.6	0
95.7	0
95.8	0
95.9	0
96	0
96.1	0
96.2	0
96.3	0
96.4	0
96.5	0
96.6	0
96.7	0
96.8	0
96.9	0
97	0
97.1	0
97.2	0
97.3	0
97.4	0
97.5	0
97.6	0
97.7	0
97.8	0
97.9	0
98	0
98.1	0
98.2	0
98.3	0
98.4	0
98.5	0
98.6	0
98.7	0
98.8	0
98.9	0
99	0
99.1	0
99.2	0
99.3	0
99.4	0
99.5	0
99.6	0
99.7	0
99.8	0
99.9	0
100	0
100.1	0
100.2	0.0002
100.3	0.0006
100.4	0.0014
100.5	0.003
100.6	0.0054
100.7	0.0074
100.8	0.0098
100.9	0.0124
101	0.0146
101.1	0.0164
101.2	0.0184
101.3	0.021
101.4	0.0242
101.5	0.027
101.6	0.0296
101.7	0.0328
101.8	0.0372
101.9	0.0402
102	0.0442
102.1	0.0474
102.2	0.0502
102.3	0.0532
102.4	0.0562
102.5	0.0592
102.6	0.0638
102.7	0.067
102.8	0.07
102.9	0.0738
103	0.076
103.1	0.0792
103.2	0.0814
103.3	0.0858
103.4	0.0884
103.5	0.0908
103.6	0.0936
103.7	0.0968
103.8	0.1002
103.9	0.1032
104	0.1052
104.1	0.109
104.2	0.112
104.3	0.1142
104.4	0.1178
104.5	0.1206
104.6	0.1234
104.7	0.1274
104.8	0.1298
104.9	0.1344
105	0.1368
105.1	0.1402
105.2	0.143
105.3	0.1462
105.4	0.1476
105.5	0.1504
105.6	0.1534
105.7	0.1554
105.8	0.1574
105.9	0.1594
106	0.1618
106.1	0.1638
106.2	0.1662
106.3	0.1692
106.4	0.1706
106.5	0.1742
106.6	0.1778
106.7	0.1818
106.8	0.1846
106.9	0.187
107	0.1894
107.1	0.1914
107.2	0.194
107.3	0.1972
107.4	0.2
107.5	0.2032
107.6	0.2056
107.7	0.2076
107.8	0.211
107.9	0.214
108	0.2158
108.1	0.219
108.2	0.2194
108.3	0.2214
108.4	0.2232
108.5	0.2254
108.6	0.2274
108.7	0.2298
108.8	0.2328
108.9	0.2352
109	0.2368
109.1	0.2398
109.2	0.2426
109.3	0.2462
109.4	0.249
109.5	0.2518
109.6	0.2546
109.7	0.256
109.8	0.2578
109.9	0.2598
110	0.2612
110.1	0.2634
110.2	0.2646
110.3	0.2662
110.4	0.269
110.5	0.2708
110.6	0.2734
110.7	0.2764
110.8	0.279
110.9	0.2822
111	0.2844
111.1	0.286
111.2	0.2884
111.3	0.2894
111.4	0.2914
111.5	0.2938
111.6	0.2966
111.7	0.2994
111.8	0.3014
111.9	0.3032
112	0.3048
112.1	0.3062
112.2	0.3088
112.3	0.311
112.4	0.3138
112.5	0.3158
112.6	0.318
112.7	0.3188
112.8	0.3208
112.9	0.3214
113	0.3228
113.1	0.324
113.2	0.3256
113.3	0.3282
113.4	0.331
113.5	0.3324
113.6	0.3342
113.7	0.3364
113.8	0.3382
113.9	0.3398
114	0.3414
114.1	0.3426
114.2	0.3442
114.3	0.3464
114.4	0.3482
114.5	0.3502
114.6	0.3518
114.7	0.3544
114.8	0.3566
114.9	0.3594
115	0.3614
115.1	0.3636
115.2	0.365
115.3	0.3672
115.4	0.3684
115.5	0.3696
115.6	0.371
115.7	0.374
115.8	0.375
115.9	0.3772
116	0.3782
116.1	0.3788
116.2	0.3806
116.3	0.3838
116.4	0.3858
116.5	0.3872
116.6	0.3888
116.7	0.3898
116.8	0.3938
116.9	0.396
117	0.3978
117.1	0.4
117.2	0.4018
117.3	0.4038
117.4	0.405
117.5	0.406
117.6	0.4082
117.7	0.41
117.8	0.4122
117.9	0.4138
118	0.4144
118.1	0.416
118.2	0.4188
118.3	0.4214
118.4	0.4228
118.5	0.4236
118.6	0.4248
118.7	0.4244
118.8	0.4262
118.9	0.4276
119	0.429
119.1	0.4314
119.2	0.433
119.3	0.4336
119.4	0.4346
119.5	0.436
119.6	0.4368
119.7	0.438
119.8	0.441
119.9	0.4426
120	0.4436
120.1	0.4446
120.2	0.4452
120.3	0.447
120.4	0.4494
120.5	0.4506
120.6	0.4526
120.7	0.4552
120.8	0.4566
120.9	0.4574
121	0.4572
121.1	0.459
121.2	0.4606
121.3	0.4618
121.4	0.4652
121.5	0.4664
121.6	0.468
121.7	0.4692
121.8	0.4706
121.9	0.4714
122	0.4722
122.1	0.474
122.2	0.4742
122.3	0.4762
122.4	0.4774
122.5	0.4796
122.6	0.4804
122.7	0.4808
122.8	0.4822
122.9	0.4838
123	0.4852
123.1	0.4866
123.2	0.4888
123.3	0.49
123.4	0.4906
123.5	0.4922
123.6	0.4926
123.7	0.4938
123.8	0.4942
123.9	0.4948
124	0.4956
124.1	0.4976
124.2	0.5
124.3	0.502
124.4	0.5018
124.5	0.503
124.6	0.5046
124.7	0.5066
124.8	0.5074
124.9	0.5088
125	0.51
125.1	0.5106
125.2	0.511
125.3	0.5118
125.4	0.513
125.5	0.5134
125.6	0.5148
125.7	0.516
125.8	0.519
125.9	0.5194
126	0.5198
126.1	0.521
126.2	0.5226
126.3	0.5236
126.4	0.5258
126.5	0.526
126.6	0.5274
126.7	0.528
126.8	0.5286
126.9	0.53
127	0.531
127.1	0.5326
127.2	0.5334
127.3	0.5344
127.4	0.5358
127.5	0.538
127.6	0.5378
127.7	0.5392
127.8	0.5404
127.9	0.541
128	0.5416
128.1	0.5426
128.2	0.5434
128.3	0.5444
128.4	0.547
128.5	0.5484
128.6	0.5492
128.7	0.551
128.8	0.5508
128.9	0.5528
129	0.5542
129.1	0.556
129.2	0.556
129.3	0.5568
129.4	0.5564
129.5	0.5576
129.6	0.5576
129.7	0.5596
129.8	0.561
129.9	0.5616
130	0.5626
130.1	0.563
130.2	0.5634
130.3	0.565
130.4	0.5666
130.5	0.5678
130.6	0.5692
130.7	0.5708
130.8	0.572
130.9	0.5728
131	0.5748
131.1	0.5754
131.2	0.5768
131.3	0.578
131.4	0.5792
131.5	0.5798
131.6	0.5804
131.7	0.5812
131.8	0.5838
131.9	0.5846
132	0.5858
132.1	0.5866
132.2	0.5862
132.3	0.5866
132.4	0.5866
132.5	0.5874
132.6	0.5882
132.7	0.5882
132.8	0.5896
132.9	0.5906
133	0.5932
133.1	0.5932
133.2	0.5936
133.3	0.5942
133.4	0.5954
133.5	0.5964
133.6	0.598
133.7	0.599
133.8	0.5996
133.9	0.6006
134	0.6004
134.1	0.6008
134.2	0.6014
134.3	0.6038
134.4	0.6048
134.5	0.6052
134.6	0.6052
134.7	0.6064
134.8	0.6064
134.9	0.6064
135	0.6074
135.1	0.6078
135.2	0.6092
135.3	0.6094
135.4	0.6106
135.5	0.6114
135.6	0.6124
135.7	0.6126
135.8	0.613
135.9	0.6128
136	0.6128
136.1	0.6142
136.2	0.6144
136.3	0.6146
136.4	0.6142
136.5	0.6138
136.6	0.6148
136.7	0.6168
136.8	0.617
136.9	0.6176
137	0.6178
137.1	0.6186
137.2	0.6192
137.3	0.619
137.4	0.62
137.5	0.6204
137.6	0.6214
137.7	0.6222
137.8	0.6226
137.9	0.6222
138	0.6222
138.1	0.623
138.2	0.6228
138.3	0.6236
138.4	0.6246
138.5	0.625
138.6	0.6258
138.7	0.6256
138.8	0.6268
138.9	0.6272
139	0.6268
139.1	0.6274
139.2	0.6286
139.3	0.6298
139.4	0.63
139.5	0.6304
139.6	0.6304
139.7	0.6308
139.8	0.6316
139.9	0.6318
140	0.633
140.1	0.6336
140.2	0.635
140.3	0.6348
140.4	0.6362
140.5	0.6358
140.6	0.6354
140.7	0.6364
140.8	0.6378
140.9	0.6378
141	0.6392
141.1	0.6388
141.2	0.6398
141.3	0.6406
141.4	0.6414
141.5	0.6426
141.6	0.6436
141.7	0.6438
141.8	0.6438
141.9	0.6448
142	0.6446
142.1	0.644
142.2	0.6436
142.3	0.6428
142.4	0.6432
142.5	0.6438
142.6	0.6444
142.7	0.645
142.8	0.6448
142.9	0.6456
143	0.6468
143.1	0.6478
143.2	0.649
143.3	0.6502
143.4	0.652
143.5	0.6514
143.6	0.6514
143.7	0.6512
143.8	0.6524
143.9	0.6526
144	0.6526
144.1	0.6542
144.2	0.6548
144.3	0.6564
144.4	0.6568
144.5	0.6568
144.6	0.6568
144.7	0.6568
144.8	0.6574
144.9	0.6578
145	0.658
145.1	0.6582
145.2	0.6584
145.3	0.6586
145.4	0.6592
145.5	0.6596
145.6	0.6602
145.7	0.6602
145.8	0.6598
145.9	0.66
146	0.6604
146.1	0.66
146.2	0.6602
146.3	0.6612
146.4	0.6618
146.5	0.6624
146.6	0.6632
146.7	0.6634
146.8	0.664
146.9	0.6648
147	0.6648
147.1	0.6652
147.2	0.6658
147.3	0.6654
147.4	0.6662
147.5	0.6674
147.6	0.667
147.7	0.6688
147.8	0.668
147.9	0.6688
148	0.6682
148.1	0.6692
148.2	0.6688
148.3	0.6696
148.4	0.6696
148.5	0.6694
148.6	0.6702
148.7	0.671
148.8	0.6716
148.9	0.6714
149	0.6712
149.1	0.6724
149.2	0.6734
149.3	0.674
149.4	0.6738
149.5	0.6744
149.6	0.6752
149.7	0.675
149.8	0.6764
149.9	0.6768
150	0.6772
150.1	0.6786
150.2	0.6788
150.3	0.6792
150.4	0.6794
150.5	0.6798
150.6	0.6808
150.7	0.682
150.8	0.6832
150.9	0.6832
151	0.6834
151.1	0.6834
151.2	0.6844
151.3	0.6848
151.4	0.6852
151.5	0.6852
151.6	0.686
151.7	0.686
151.8	0.687
151.9	0.6878
152	0.6888
152.1	0.6878
152.2	0.6892
152.3	0.6896
152.4	0.6906
152.5	0.6914
152.6	0.6922
152.7	0.6934
152.8	0.6932
152.9	0.6946
153	0.694
153.1	0.695
153.2	0.6952
153.3	0.6956
153.4	0.6956
153.5	0.6968
153.6	0.697
153.7	0.6978
153.8	0.6984
153.9	0.6992
154	0.699
154.1	0.6994
154.2	0.6996
154.3	0.7
154.4	0.6992
154.5	0.6986
154.6	0.6992
154.7	0.7
154.8	0.7
154.9	0.6996
155	0.7002
155.1	0.7004
155.2	0.7004
155.3	0.7018
155.4	0.7026
155.5	0.7036
155.6	0.7042
155.7	0.7042
155.8	0.7036
155.9	0.7032
156	0.7034
156.1	0.7028
156.2	0.703
156.3	0.7038
156.4	0.7044
156.5	0.7056
156.6	0.7058
156.7	0.7058
156.8	0.7064
156.9	0.7064
157	0.7068
157.1	0.7066
157.2	0.7064
157.3	0.7066
157.4	0.7058
157.5	0.7066
157.6	0.7064
157.7	0.7068
157.8	0.7074
157.9	0.7078
158	0.707
158.1	0.7076
158.2	0.708
158.3	0.7076
158.4	0.7076
158.5	0.7078
158.6	0.708
158.7	0.7076
158.8	0.7074
158.9	0.7078
159	0.7082
159.1	0.7072
159.2	0.7072
159.3	0.7076
159.4	0.7084
159.5	0.7092
159.6	0.7108
159.7	0.7112
159.8	0.7118
159.9	0.7122
160	0.7132
160.1	0.7138
160.2	0.714
160.3	0.7146
160.4	0.715
160.5	0.7148
160.6	0.7148
160.7	0.7156
160.8	0.716
160.9	0.7154
161	0.716
161.1	0.7166
161.2	0.7172
161.3	0.7168
161.4	0.7166
161.5	0.7164
161.6	0.717
161.7	0.7178
161.8	0.7196
161.9	0.7188
162	0.7192
162.1	0.72
162.2	0.72
162.3	0.7208
162.4	0.7218
162.5	0.7216
162.6	0.7226
162.7	0.7228
162.8	0.724
162.9	0.725
163	0.7254
163.1	0.7258
163.2	0.7268
163.3	0.7266
163.4	0.7268
163.5	0.7264
163.6	0.7262
163.7	0.7268
163.8	0.7274
163.9	0.7282
164	0.7278
164.1	0.7286
164.2	0.7292
164.3	0.729
164.4	0.7292
164.5	0.7288
164.6	0.7292
164.7	0.7298
164.8	0.7288
164.9	0.7286
165	0.7286
165.1	0.7284
165.2	0.7298
165.3	0.7308
165.4	0.7324
165.5	0.7326
165.6	0.7328
165.7	0.732
165.8	0.7316
165.9	0.7326
166	0.732
166.1	0.7332
166.2	0.7332
166.3	0.7324
166.4	0.7318
166.5	0.7322
166.6	0.733
166.7	0.7338
166.8	0.7346
166.9	0.7348
167	0.7348
167.1	0.7342
167.2	0.734
167.3	0.7346
167.4	0.735
167.5	0.7362
167.6	0.7362
167.7	0.736
167.8	0.7362
167.9	0.7356
168	0.7362
168.1	0.7362
168.2	0.7368
168.3	0.7384
168.4	0.7388
168.5	0.7394
168.6	0.7396
168.7	0.7408
168.8	0.741
168.9	0.7416
169	0.7416
169.1	0.7422
169.2	0.7422
169.3	0.7426
169.4	0.7428
169.5	0.7434
169.6	0.7436
169.7	0.7448
169.8	0.7454
169.9	0.746
170	0.747
170.1	0.748
170.2	0.7472
170.3	0.7464
170.4	0.7468
170.5	0.7474
170.6	0.7468
170.7	0.7474
170.8	0.7486
170.9	0.7486
171	0.749
171.1	0.75
171.2	0.7504
171.3	0.7512
171.4	0.7506
171.5	0.7508
171.6	0.751
171.7	0.7516
171.8	0.7514
171.9	0.7516
172	0.751
172.1	0.7516
172.2	0.751
172.3	0.7514
172.4	0.752
172.5	0.752
172.6	0.7528
172.7	0.7528
172.8	0.7526
172.9	0.753
173	0.7538
173.1	0.7542
173.2	0.7554
173.3	0.7542
173.4	0.7542
173.5	0.7544
173.6	0.7544
173.7	0.7538
173.8	0.7542
173.9	0.754
174	0.7544
174.1	0.7538
174.2	0.755
174.3	0.7548
174.4	0.7552
174.5	0.7556
174.6	0.756
174.7	0.7556
174.8	0.7558
174.9	0.7556
175	0.7556
175.1	0.7556
175.2	0.7558
175.3	0.7548
175.4	0.7546
175.5	0.7542
175.6	0.753
175.7	0.7536
175.8	0.7538
175.9	0.7544
176	0.7546
176.1	0.7554
176.2	0.7548
176.3	0.7542
176.4	0.754
176.5	0.7544
176.6	0.7556
176.7	0.7548
176.8	0.7554
176.9	0.7552
177	0.755
177.1	0.7546
177.2	0.7544
177.3	0.7546
177.4	0.7542
177.5	0.754
177.6	0.7542
177.7	0.7542
177.8	0.7542
177.9	0.7544
178	0.755
178.1	0.7556
178.2	0.7562
178.3	0.756
178.4	0.7572
178.5	0.757
178.6	0.7574
178.7	0.759
178.8	0.7592
178.9	0.7594
179	0.7596
179.1	0.7588
179.2	0.7588
179.3	0.7586
179.4	0.7582
179.5	0.7568
179.6	0.7572
179.7	0.7582
179.8	0.7582
179.9	0.7576
180	0.757
180.1	0.7572
180.2	0.7566
180.3	0.7572
180.4	0.7586
180.5	0.7576
180.6	0.7578
180.7	0.7576
180.8	0.757
180.9	0.7572
181	0.7572
181.1	0.7584
181.2	0.7586
181.3	0.7594
181.4	0.7592
181.5	0.7592
181.6	0.7586
181.7	0.7584
181.8	0.758
181.9	0.7586
182	0.7598
182.1	0.7596
182.2	0.7596
182.3	0.7594
182.4	0.7588
182.5	0.7586
182.6	0.7586
182.7	0.7592
182.8	0.7594
182.9	0.7594
183	0.7592
183.1	0.759
183.2	0.759
183.3	0.7594
183.4	0.76
183.5	0.7604
183.6	0.7614
183.7	0.7612
183.8	0.7602
183.9	0.761
184	0.7612
184.1	0.761
184.2	0.761
184.3	0.7602
184.4	0.7602
184.5	0.7604
184.6	0.76
184.7	0.7598
184.8	0.7594
184.9	0.7594
185	0.7588
185.1	0.7588
185.2	0.7578
185.3	0.7574
185.4	0.757
185.5	0.7568
185.6	0.7568
185.7	0.7582
185.8	0.7576
185.9	0.7576
186	0.7574
186.1	0.7576
186.2	0.758
186.3	0.7586
186.4	0.758
186.5	0.7588
186.6	0.76
186.7	0.7592
186.8	0.7586
186.9	0.7598
187	0.7602
187.1	0.76
187.2	0.7606
187.3	0.7604
187.4	0.761
187.5	0.7612
187.6	0.7612
187.7	0.7604
187.8	0.7602
187.9	0.7604
188	0.7608
188.1	0.7608
188.2	0.7612
188.3	0.7606
188.4	0.76
188.5	0.7598
188.6	0.759
188.7	0.7582
188.8	0.7586
188.9	0.7586
189	0.7586
189.1	0.7588
189.2	0.759
189.3	0.7594
189.4	0.76
189.5	0.7604
189.6	0.7606
189.7	0.761
189.8	0.7608
189.9	0.7612
190	0.7616
190.1	0.762
190.2	0.7616
190.3	0.7616
190.4	0.7614
190.5	0.761
190.6	0.7606
190.7	0.7604
190.8	0.7608
190.9	0.761
191	0.7622
191.1	0.762
191.2	0.7612
191.3	0.7612
191.4	0.7612
191.5	0.7622
191.6	0.7616
191.7	0.7616
191.8	0.7628
191.9	0.7626
192	0.7634
192.1	0.7628
192.2	0.764
192.3	0.7644
192.4	0.7654
192.5	0.7658
192.6	0.767
192.7	0.7672
192.8	0.7676
192.9	0.7674
193	0.7684
193.1	0.7686
193.2	0.769
193.3	0.7682
193.4	0.7678
193.5	0.7672
193.6	0.7672
193.7	0.767
193.8	0.7672
193.9	0.7674
194	0.7684
194.1	0.7694
194.2	0.7692
194.3	0.769
194.4	0.77
194.5	0.7698
194.6	0.7684
194.7	0.7688
194.8	0.7686
194.9	0.7698
195	0.7698
195.1	0.7706
195.2	0.7706
195.3	0.771
195.4	0.7714
195.5	0.772
195.6	0.7712
195.7	0.7712
195.8	0.7714
195.9	0.7714
196	0.7716
196.1	0.7718
196.2	0.7724
196.3	0.7714
196.4	0.771
196.5	0.772
196.6	0.7722
196.7	0.7722
196.8	0.773
196.9	0.7734
197	0.7732
197.1	0.773
197.2	0.7734
197.3	0.7732
197.4	0.7742
197.5	0.774
197.6	0.7744
197.7	0.7742
197.8	0.7746
197.9	0.7744
198	0.7736
198.1	0.7738
198.2	0.7732
198.3	0.773
198.4	0.7732
198.5	0.773
198.6	0.7726
198.7	0.7724
198.8	0.7732
198.9	0.7736
199	0.7736
199.1	0.7726
199.2	0.7722
199.3	0.7736
199.4	0.7734
199.5	0.7732
199.6	0.7732
199.7	0.773
199.8	0.7728
199.9	0.7722
200	0.7722
[truncated: 14,000 more rows]
