# Supplementary material for: Bayesian inference of kinetic schemes for ion channels by Kalman filtering
Source: eLife journal article supplement (doi:10.7554/elife.62714), 2022-05-04
Supplement: fig4-data5 [file 1_Sim_N_6000_Fluor_MW_4M.xlsx]

## Sheet: Tabelle1
0.1	0
0.2	0
0.3	0
0.4	0
0.5	0
0.6	0
0.7	0
0.8	0
0.9	0
1	0
1.1	0
1.2	0
1.3	0
1.4	0
1.5	0
1.6	0
1.7	0
1.8	0
1.9	0
2	0
2.1	0
2.2	0
2.3	0
2.4	0
2.5	0
2.6	0
2.7	0
2.8	0
2.9	0
3	0
3.1	0
3.2	0
3.3	0
3.4	0
3.5	0
3.6	0
3.7	0
3.8	0
3.9	0
4	0
4.1	0
4.2	0
4.3	0
4.4	0
4.5	0
4.6	0
4.7	0
4.8	0
4.9	0
5	0
5.1	0
5.2	0
5.3	0
5.4	0
5.5	0
5.6	0
5.7	0
5.8	0
5.9	0
6	0
6.1	0
6.2	0
6.3	0
6.4	0
6.5	0
6.6	0
6.7	0
6.8	0
6.9	0
7	0
7.1	0
7.2	0
7.3	0
7.4	0
7.5	0
7.6	0
7.7	0
7.8	0
7.9	0
8	0
8.1	0
8.2	0
8.3	0
8.4	0
8.5	0
8.6	0
8.7	0
8.8	0
8.9	0
9	0
9.1	0
9.2	0
9.3	0
9.4	0
9.5	0
9.6	0
9.7	0
9.8	0
9.9	0
10	0
10.1	0
10.2	0
10.3	0
10.4	0
10.5	0
10.6	0
10.7	0
10.8	0
10.9	0
11	0
11.1	0
11.2	0
11.3	0
11.4	0
11.5	0
11.6	0
11.7	0
11.8	0
11.9	0
12	0
12.1	0
12.2	0
12.3	0
12.4	0
12.5	0
12.6	0
12.7	0
12.8	0
12.9	0
13	0
13.1	0
13.2	0
13.3	0
13.4	0
13.5	0
13.6	0
13.7	0
13.8	0
13.9	0
14	0
14.1	0
14.2	0
14.3	0
14.4	0
14.5	0
14.6	0
14.7	0
14.8	0
14.9	0
15	0
15.1	0
15.2	0
15.3	0
15.4	0
15.5	0
15.6	0
15.7	0
15.8	0
15.9	0
16	0
16.1	0
16.2	0
16.3	0
16.4	0
16.5	0
16.6	0
16.7	0
16.8	0
16.9	0
17	0
17.1	0
17.2	0
17.3	0
17.4	0
17.5	0
17.6	0
17.7	0
17.8	0
17.9	0
18	0
18.1	0
18.2	0
18.3	0
18.4	0
18.5	0
18.6	0
18.7	0
18.8	0
18.9	0
19	0
19.1	0
19.2	0
19.3	0
19.4	0
19.5	0
19.6	0
19.7	0
19.8	0
19.9	0
20	0
20.1	0
20.2	0
20.3	0
20.4	0
20.5	0
20.6	0
20.7	0
20.8	0
20.9	0
21	0
21.1	0
21.2	0
21.3	0
21.4	0
21.5	0
21.6	0
21.7	0
21.8	0
21.9	0
22	0
22.1	0
22.2	0
22.3	0
22.4	0
22.5	0
22.6	0
22.7	0
22.8	0
22.9	0
23	0
23.1	0
23.2	0
23.3	0
23.4	0
23.5	0
23.6	0
23.7	0
23.8	0
23.9	0
24	0
24.1	0
24.2	0
24.3	0
24.4	0
24.5	0
24.6	0
24.7	0
24.8	0
24.9	0
25	0
25.1	0
25.2	0
25.3	0
25.4	0
25.5	0
25.6	0
25.7	0
25.8	0
25.9	0
26	0
26.1	0
26.2	0
26.3	0
26.4	0
26.5	0
26.6	0
26.7	0
26.8	0
26.9	0
27	0
27.1	0
27.2	0
27.3	0
27.4	0
27.5	0
27.6	0
27.7	0
27.8	0
27.9	0
28	0
28.1	0
28.2	0
28.3	0
28.4	0
28.5	0
28.6	0
28.7	0
28.8	0
28.9	0
29	0
29.1	0
29.2	0
29.3	0
29.4	0
29.5	0
29.6	0
29.7	0
29.8	0
29.9	0
30	0
30.1	0
30.2	0
30.3	0
30.4	0
30.5	0
30.6	0
30.7	0
30.8	0
30.9	0
31	0
31.1	0
31.2	0
31.3	0
31.4	0
31.5	0
31.6	0
31.7	0
31.8	0
31.9	0
32	0
32.1	0
32.2	0
32.3	0
32.4	0
32.5	0
32.6	0
32.7	0
32.8	0
32.9	0
33	0
33.1	0
33.2	0
33.3	0
33.4	0
33.5	0
33.6	0
33.7	0
33.8	0
33.9	0
34	0
34.1	0
34.2	0
34.3	0
34.4	0
34.5	0
34.6	0
34.7	0
34.8	0
34.9	0
35	0
35.1	0
35.2	0
35.3	0
35.4	0
35.5	0
35.6	0
35.7	0
35.8	0
35.9	0
36	0
36.1	0
36.2	0
36.3	0
36.4	0
36.5	0
36.6	0
36.7	0
36.8	0
36.9	0
37	0
37.1	0
37.2	0
37.3	0
37.4	0
37.5	0
37.6	0
37.7	0
37.8	0
37.9	0
38	0
38.1	0
38.2	0
38.3	0
38.4	0
38.5	0
38.6	0
38.7	0
38.8	0
38.9	0
39	0
39.1	0
39.2	0
39.3	0
39.4	0
39.5	0
39.6	0
39.7	0
39.8	0
39.9	0
40	0
40.1	0
40.2	0
40.3	0
40.4	0
40.5	0
40.6	0
40.7	0
40.8	0
40.9	0
41	0
41.1	0
41.2	0
41.3	0
41.4	0
41.5	0
41.6	0
41.7	0
41.8	0
41.9	0
42	0
42.1	0
42.2	0
42.3	0
42.4	0
42.5	0
42.6	0
42.7	0
42.8	0
42.9	0
43	0
43.1	0
43.2	0
43.3	0
43.4	0
43.5	0
43.6	0
43.7	0
43.8	0
43.9	0
44	0
44.1	0
44.2	0
44.3	0
44.4	0
44.5	0
44.6	0
44.7	0
44.8	0
44.9	0
45	0
45.1	0
45.2	0
45.3	0
45.4	0
45.5	0
45.6	0
45.7	0
45.8	0
45.9	0
46	0
46.1	0
46.2	0
46.3	0
46.4	0
46.5	0
46.6	0
46.7	0
46.8	0
46.9	0
47	0
47.1	0
47.2	0
47.3	0
47.4	0
47.5	0
47.6	0
47.7	0
47.8	0
47.9	0
48	0
48.1	0
48.2	0
48.3	0
48.4	0
48.5	0
48.6	0
48.7	0
48.8	0
48.9	0
49	0
49.1	0
49.2	0
49.3	0
49.4	0
49.5	0
49.6	0
49.7	0
49.8	0
49.9	0
50	0
50.1	0
50.2	0
50.3	0
50.4	0
50.5	0
50.6	0
50.7	0
50.8	0
50.9	0
51	0
51.1	0
51.2	0
51.3	0
51.4	0
51.5	0
51.6	0
51.7	0
51.8	0
51.9	0
52	0
52.1	0
52.2	0
52.3	0
52.4	0
52.5	0
52.6	0
52.7	0
52.8	0
52.9	0
53	0
53.1	0
53.2	0
53.3	0
53.4	0
53.5	0
53.6	0
53.7	0
53.8	0
53.9	0
54	0
54.1	0
54.2	0
54.3	0
54.4	0
54.5	0
54.6	0
54.7	0
54.8	0
54.9	0
55	0
55.1	0
55.2	0
55.3	0
55.4	0
55.5	0
55.6	0
55.7	0
55.8	0
55.9	0
56	0
56.1	0
56.2	0
56.3	0
56.4	0
56.5	0
56.6	0
56.7	0
56.8	0
56.9	0
57	0
57.1	0
57.2	0
57.3	0
57.4	0
57.5	0
57.6	0
57.7	0
57.8	0
57.9	0
58	0
58.1	0
58.2	0
58.3	0
58.4	0
58.5	0
58.6	0
58.7	0
58.8	0
58.9	0
59	0
59.1	0
59.2	0
59.3	0
59.4	0
59.5	0
59.6	0
59.7	0
59.8	0
59.9	0
60	0
60.1	0
60.2	0
60.3	0
60.4	0
60.5	0
60.6	0
60.7	0
60.8	0
60.9	0
61	0
61.1	0
61.2	0
61.3	0
61.4	0
61.5	0
61.6	0
61.7	0
61.8	0
61.9	0
62	0
62.1	0
62.2	0
62.3	0
62.4	0
62.5	0
62.6	0
62.7	0
62.8	0
62.9	0
63	0
63.1	0
63.2	0
63.3	0
63.4	0
63.5	0
63.6	0
63.7	0
63.8	0
63.9	0
64	0
64.1	0
64.2	0
64.3	0
64.4	0
64.5	0
64.6	0
64.7	0
64.8	0
64.9	0
65	0
65.1	0
65.2	0
65.3	0
65.4	0
65.5	0
65.6	0
65.7	0
65.8	0
65.9	0
66	0
66.1	0
66.2	0
66.3	0
66.4	0
66.5	0
66.6	0
66.7	0
66.8	0
66.9	0
67	0
67.1	0
67.2	0
67.3	0
67.4	0
67.5	0
67.6	0
67.7	0
67.8	0
67.9	0
68	0
68.1	0
68.2	0
68.3	0
68.4	0
68.5	0
68.6	0
68.7	0
68.8	0
68.9	0
69	0
69.1	0
69.2	0
69.3	0
69.4	0
69.5	0
69.6	0
69.7	0
69.8	0
69.9	0
70	0
70.1	0
70.2	0
70.3	0
70.4	0
70.5	0
70.6	0
70.7	0
70.8	0
70.9	0
71	0
71.1	0
71.2	0
71.3	0
71.4	0
71.5	0
71.6	0
71.7	0
71.8	0
71.9	0
72	0
72.1	0
72.2	0
72.3	0
72.4	0
72.5	0
72.6	0
72.7	0
72.8	0
72.9	0
73	0
73.1	0
73.2	0
73.3	0
73.4	0
73.5	0
73.6	0
73.7	0
73.8	0
73.9	0
74	0
74.1	0
74.2	0
74.3	0
74.4	0
74.5	0
74.6	0
74.7	0
74.8	0
74.9	0
75	0
75.1	0
75.2	0
75.3	0
75.4	0
75.5	0
75.6	0
75.7	0
75.8	0
75.9	0
76	0
76.1	0
76.2	0
76.3	0
76.4	0
76.5	0
76.6	0
76.7	0
76.8	0
76.9	0
77	0
77.1	0
77.2	0
77.3	0
77.4	0
77.5	0
77.6	0
77.7	0
77.8	0
77.9	0
78	0
78.1	0
78.2	0
78.3	0
78.4	0
78.5	0
78.6	0
78.7	0
78.8	0
78.9	0
79	0
79.1	0
79.2	0
79.3	0
79.4	0
79.5	0
79.6	0
79.7	0
79.8	0
79.9	0
80	0
80.1	0
80.2	0
80.3	0
80.4	0
80.5	0
80.6	0
80.7	0
80.8	0
80.9	0
81	0
81.1	0
81.2	0
81.3	0
81.4	0
81.5	0
81.6	0
81.7	0
81.8	0
81.9	0
82	0
82.1	0
82.2	0
82.3	0
82.4	0
82.5	0
82.6	0
82.7	0
82.8	0
82.9	0
83	0
83.1	0
83.2	0
83.3	0
83.4	0
83.5	0
83.6	0
83.7	0
83.8	0
83.9	0
84	0
84.1	0
84.2	0
84.3	0
84.4	0
84.5	0
84.6	0
84.7	0
84.8	0
84.9	0
85	0
85.1	0
85.2	0
85.3	0
85.4	0
85.5	0
85.6	0
85.7	0
85.8	0
85.9	0
86	0
86.1	0
86.2	0
86.3	0
86.4	0
86.5	0
86.6	0
86.7	0
86.8	0
86.9	0
87	0
87.1	0
87.2	0
87.3	0
87.4	0
87.5	0
87.6	0
87.7	0
87.8	0
87.9	0
88	0
88.1	0
88.2	0
88.3	0
88.4	0
88.5	0
88.6	0
88.7	0
88.8	0
88.9	0
89	0
89.1	0
89.2	0
89.3	0
89.4	0
89.5	0
89.6	0
89.7	0
89.8	0
89.9	0
90	0
90.1	0
90.2	0
90.3	0
90.4	0
90.5	0
90.6	0
90.7	0
90.8	0
90.9	0
91	0
91.1	0
91.2	0
91.3	0
91.4	0
91.5	0
91.6	0
91.7	0
91.8	0
91.9	0
92	0
92.1	0
92.2	0
92.3	0
92.4	0
92.5	0
92.6	0
92.7	0
92.8	0
92.9	0
93	0
93.1	0
93.2	0
93.3	0
93.4	0
93.5	0
93.6	0
93.7	0
93.8	0
93.9	0
94	0
94.1	0
94.2	0
94.3	0
94.4	0
94.5	0
94.6	0
94.7	0
94.8	0
94.9	0
95	0
95.1	0
95.2	0
95.3	0
95.4	0
95.5	0
95.6	0
95.7	0
95.8	0
95.9	0
96	0
96.1	0
96.2	0
96.3	0
96.4	0
96.5	0
96.6	0
96.7	0
96.8	0
96.9	0
97	0
97.1	0
97.2	0
97.3	0
97.4	0
97.5	0
97.6	0
97.7	0
97.8	0
97.9	0
98	0
98.1	0
98.2	0
98.3	0
98.4	0
98.5	0
98.6	0
98.7	0
98.8	0
98.9	0
99	0
99.1	0
99.2	0
99.3	0
99.4	0
99.5	0
99.6	0
99.7	0
99.8	0
99.9	0
100	0
100.1	0.205583
100.2	0.346667
100.3	0.449417
100.4	0.52525
100.5	0.583333
100.6	0.63125
100.7	0.666583
100.8	0.692167
100.9	0.713667
101	0.736417
101.1	0.752917
101.2	0.7685
101.3	0.781167
101.4	0.793833
101.5	0.80025
101.6	0.808
101.7	0.816333
101.8	0.819
101.9	0.825083
102	0.830083
102.1	0.837083
102.2	0.8405
102.3	0.840833
102.4	0.840917
102.5	0.843167
102.6	0.843833
102.7	0.844083
102.8	0.844
102.9	0.845583
103	0.848583
103.1	0.851333
103.2	0.85275
103.3	0.852083
103.4	0.853083
103.5	0.85375
103.6	0.85425
103.7	0.855083
103.8	0.854917
103.9	0.855917
104	0.857
104.1	0.858083
104.2	0.860333
104.3	0.86075
104.4	0.861417
104.5	0.862167
104.6	0.863833
104.7	0.863917
104.8	0.86375
104.9	0.865083
105	0.866917
105.1	0.868417
105.2	0.867583
105.3	0.865667
105.4	0.867583
105.5	0.8665
105.6	0.868167
105.7	0.867667
105.8	0.866583
105.9	0.867167
106	0.867083
106.1	0.87025
106.2	0.86925
106.3	0.870833
106.4	0.86825
106.5	0.869583
106.6	0.869917
106.7	0.869917
106.8	0.868167
106.9	0.8685
107	0.87075
107.1	0.870167
107.2	0.868417
107.3	0.870667
107.4	0.871083
107.5	0.871417
107.6	0.870583
107.7	0.872833
107.8	0.8725
107.9	0.87225
108	0.872333
108.1	0.87475
108.2	0.87575
108.3	0.87375
108.4	0.873
108.5	0.871833
108.6	0.87225
108.7	0.874333
108.8	0.874417
108.9	0.875833
109	0.878
109.1	0.877083
109.2	0.877167
109.3	0.879
109.4	0.87975
109.5	0.880833
109.6	0.882333
109.7	0.8855
109.8	0.884083
109.9	0.884417
110	0.885
110.1	0.888917
110.2	0.890333
110.3	0.889583
110.4	0.889333
110.5	0.8895
110.6	0.889333
110.7	0.89025
110.8	0.890417
110.9	0.889583
111	0.887667
111.1	0.88725
111.2	0.889333
111.3	0.89
111.4	0.891583
111.5	0.889667
111.6	0.889583
111.7	0.89275
111.8	0.889167
111.9	0.890833
112	0.892167
112.1	0.892
112.2	0.89
112.3	0.892083
112.4	0.893333
112.5	0.895583
112.6	0.894917
112.7	0.8935
112.8	0.895083
112.9	0.89525
113	0.89325
113.1	0.893833
113.2	0.8955
113.3	0.895167
113.4	0.896167
113.5	0.897583
113.6	0.897583
113.7	0.897417
113.8	0.897333
113.9	0.898
114	0.901
114.1	0.902333
114.2	0.900417
114.3	0.902083
114.4	0.9035
114.5	0.901583
114.6	0.901333
114.7	0.90125
114.8	0.901583
114.9	0.90025
115	0.899667
115.1	0.900667
115.2	0.90325
115.3	0.902833
115.4	0.90525
115.5	0.9065
115.6	0.90725
115.7	0.905833
115.8	0.90425
115.9	0.904167
116	0.9055
116.1	0.906833
116.2	0.90675
116.3	0.90875
116.4	0.908083
116.5	0.908
116.6	0.907417
116.7	0.906333
116.8	0.907833
116.9	0.909167
117	0.90825
117.1	0.910333
117.2	0.908083
117.3	0.908083
117.4	0.908167
117.5	0.907167
117.6	0.907833
117.7	0.908
117.8	0.908583
117.9	0.908417
118	0.908083
118.1	0.908917
118.2	0.912667
118.3	0.910667
118.4	0.91075
118.5	0.9095
118.6	0.9095
118.7	0.909667
118.8	0.911583
118.9	0.910417
119	0.91025
119.1	0.909083
119.2	0.90775
119.3	0.908833
119.4	0.909917
119.5	0.911083
119.6	0.912667
119.7	0.911083
119.8	0.912
119.9	0.913083
120	0.910917
120.1	0.90925
120.2	0.910417
120.3	0.912667
120.4	0.912667
120.5	0.910417
120.6	0.913167
120.7	0.915333
120.8	0.914417
120.9	0.91375
121	0.91325
121.1	0.914083
121.2	0.91175
121.3	0.91125
121.4	0.909167
121.5	0.91
121.6	0.910167
121.7	0.912667
121.8	0.913167
121.9	0.913167
122	0.9145
122.1	0.91725
122.2	0.918167
122.3	0.91925
122.4	0.917917
122.5	0.918167
122.6	0.918417
122.7	0.918167
122.8	0.919167
122.9	0.919
123	0.921083
123.1	0.922167
123.2	0.922333
123.3	0.922917
123.4	0.925333
123.5	0.924917
123.6	0.926083
123.7	0.925167
123.8	0.924417
123.9	0.926
124	0.926
124.1	0.922667
124.2	0.92275
124.3	0.923833
124.4	0.922583
124.5	0.925
124.6	0.925167
124.7	0.9225
124.8	0.923167
124.9	0.92375
125	0.92325
125.1	0.924417
125.2	0.924667
125.3	0.925167
125.4	0.924917
125.5	0.925667
125.6	0.926583
125.7	0.926583
125.8	0.9285
125.9	0.930083
126	0.928333
126.1	0.929333
126.2	0.929167
126.3	0.929583
126.4	0.928917
126.5	0.92925
126.6	0.928667
126.7	0.927417
126.8	0.92775
126.9	0.929667
127	0.929417
127.1	0.929833
127.2	0.932
127.3	0.934667
127.4	0.934917
127.5	0.933667
127.6	0.933083
127.7	0.9305
127.8	0.926167
127.9	0.92675
128	0.926333
128.1	0.9275
128.2	0.92825
128.3	0.928417
128.4	0.928167
128.5	0.929083
128.6	0.928333
128.7	0.92875
128.8	0.928833
128.9	0.92875
129	0.930167
129.1	0.9315
129.2	0.931
129.3	0.931917
129.4	0.930583
129.5	0.930667
129.6	0.92825
129.7	0.930667
129.8	0.930583
129.9	0.933
130	0.934833
130.1	0.933083
130.2	0.934833
130.3	0.93225
130.4	0.933417
130.5	0.933917
130.6	0.934
130.7	0.932083
130.8	0.9345
130.9	0.934333
131	0.935167
131.1	0.933333
131.2	0.934417
131.3	0.93575
131.4	0.93575
131.5	0.937
131.6	0.937
131.7	0.937417
131.8	0.935333
131.9	0.935667
132	0.9355
132.1	0.9365
132.2	0.934667
132.3	0.934333
132.4	0.934083
132.5	0.9345
132.6	0.93625
132.7	0.935083
132.8	0.935
132.9	0.935833
133	0.93575
133.1	0.934417
133.2	0.934333
133.3	0.93675
133.4	0.934917
133.5	0.934583
133.6	0.936083
133.7	0.936417
133.8	0.934667
133.9	0.935083
134	0.934667
134.1	0.9345
134.2	0.93575
134.3	0.936
134.4	0.934583
134.5	0.935
134.6	0.935
134.7	0.936583
134.8	0.937833
134.9	0.937917
135	0.940833
135.1	0.9415
135.2	0.940167
135.3	0.938833
135.4	0.938583
135.5	0.94
135.6	0.940583
135.7	0.941167
135.8	0.941417
135.9	0.9405
136	0.94025
136.1	0.9395
136.2	0.940917
136.3	0.940167
136.4	0.940833
136.5	0.942083
136.6	0.943083
136.7	0.942583
136.8	0.941333
136.9	0.94225
137	0.942083
137.1	0.941083
137.2	0.938417
137.3	0.940833
137.4	0.941667
137.5	0.9415
137.6	0.94125
137.7	0.941
137.8	0.942417
137.9	0.943333
138	0.943583
138.1	0.942833
138.2	0.94075
138.3	0.941417
138.4	0.941167
138.5	0.94225
138.6	0.943
138.7	0.945
138.8	0.943917
138.9	0.943417
139	0.942833
139.1	0.944833
139.2	0.943083
139.3	0.9435
139.4	0.94325
139.5	0.94325
139.6	0.94475
139.7	0.944083
139.8	0.943417
139.9	0.940083
140	0.940667
140.1	0.94175
140.2	0.941167
140.3	0.942833
140.4	0.943667
140.5	0.94475
140.6	0.944833
140.7	0.943667
140.8	0.943917
140.9	0.944667
141	0.94475
141.1	0.945167
141.2	0.945333
141.3	0.946917
141.4	0.947083
141.5	0.947583
141.6	0.946333
141.7	0.945417
141.8	0.946167
141.9	0.946583
142	0.947333
142.1	0.947667
142.2	0.948417
142.3	0.948417
142.4	0.949083
142.5	0.94775
142.6	0.948083
142.7	0.948583
142.8	0.948417
142.9	0.94775
143	0.94775
143.1	0.947333
143.2	0.947583
143.3	0.948083
143.4	0.94925
143.5	0.95025
143.6	0.95
143.7	0.950167
143.8	0.949333
143.9	0.949083
144	0.949833
144.1	0.94825
144.2	0.948
144.3	0.946667
144.4	0.947667
144.5	0.946417
144.6	0.946167
144.7	0.9455
144.8	0.9465
144.9	0.945333
145	0.946417
145.1	0.947083
145.2	0.947667
145.3	0.945583
145.4	0.945333
145.5	0.947417
145.6	0.948417
145.7	0.948583
145.8	0.948417
145.9	0.948417
146	0.950667
146.1	0.9485
146.2	0.94925
146.3	0.95175
146.4	0.95125
146.5	0.95125
146.6	0.9505
146.7	0.9485
146.8	0.947667
146.9	0.946833
147	0.947583
147.1	0.950833
147.2	0.950083
147.3	0.948583
147.4	0.9485
147.5	0.949
147.6	0.949583
147.7	0.949333
147.8	0.95025
147.9	0.949917
148	0.948917
148.1	0.950417
148.2	0.952
148.3	0.952417
148.4	0.952417
148.5	0.953083
148.6	0.95225
148.7	0.9515
148.8	0.9495
148.9	0.951667
149	0.952083
149.1	0.952083
149.2	0.952917
149.3	0.953
149.4	0.953
149.5	0.951917
149.6	0.9525
149.7	0.95325
149.8	0.953667
149.9	0.951917
150	0.952
150.1	0.95125
150.2	0.952
150.3	0.952
150.4	0.952333
150.5	0.9525
150.6	0.953333
150.7	0.955333
150.8	0.955083
150.9	0.95475
151	0.953917
151.1	0.954167
151.2	0.953917
151.3	0.954
151.4	0.9545
151.5	0.955833
151.6	0.955667
151.7	0.956083
151.8	0.95525
151.9	0.9545
152	0.9535
152.1	0.9515
152.2	0.950667
152.3	0.952667
152.4	0.952917
152.5	0.953333
152.6	0.953
152.7	0.952167
152.8	0.953167
152.9	0.953167
153	0.9535
153.1	0.952917
153.2	0.9535
153.3	0.953
153.4	0.9525
153.5	0.95525
153.6	0.95575
153.7	0.955333
153.8	0.955667
153.9	0.957
154	0.956167
154.1	0.95525
154.2	0.95525
154.3	0.95675
154.4	0.9575
154.5	0.956833
154.6	0.956167
154.7	0.956833
154.8	0.956833
154.9	0.9545
155	0.954
155.1	0.954083
155.2	0.955167
155.3	0.955333
155.4	0.955583
155.5	0.955667
155.6	0.9565
155.7	0.957417
155.8	0.957167
155.9	0.957333
156	0.95875
156.1	0.95725
156.2	0.957833
156.3	0.958417
156.4	0.95875
156.5	0.956917
156.6	0.956167
156.7	0.958
156.8	0.957583
156.9	0.957333
157	0.958
157.1	0.957167
157.2	0.956583
157.3	0.955667
157.4	0.955917
157.5	0.954417
157.6	0.954167
157.7	0.954333
157.8	0.957167
157.9	0.958083
158	0.959
158.1	0.95875
158.2	0.95975
158.3	0.960667
158.4	0.9615
158.5	0.961167
158.6	0.960417
158.7	0.960417
158.8	0.961
158.9	0.958833
159	0.958
159.1	0.95725
159.2	0.957917
159.3	0.957667
159.4	0.95775
159.5	0.957417
159.6	0.958083
159.7	0.958083
159.8	0.958333
159.9	0.9575
160	0.955417
160.1	0.95525
160.2	0.957
160.3	0.958667
160.4	0.959833
160.5	0.958583
160.6	0.95975
160.7	0.9585
160.8	0.95875
160.9	0.959
161	0.959167
161.1	0.95925
161.2	0.9595
161.3	0.959667
161.4	0.957667
161.5	0.956917
161.6	0.95675
161.7	0.956
161.8	0.955833
161.9	0.954417
162	0.9535
162.1	0.955583
162.2	0.95675
162.3	0.95825
162.4	0.95875
162.5	0.958833
162.6	0.957833
162.7	0.959
162.8	0.95775
162.9	0.956667
163	0.956917
163.1	0.957167
163.2	0.956417
163.3	0.956
163.4	0.956583
163.5	0.959417
163.6	0.95975
163.7	0.96
163.8	0.961167
163.9	0.962417
164	0.9625
164.1	0.960167
164.2	0.959667
164.3	0.95975
164.4	0.960917
164.5	0.962333
164.6	0.961333
164.7	0.962167
164.8	0.962083
164.9	0.961083
165	0.961167
165.1	0.96125
165.2	0.960417
165.3	0.960417
165.4	0.959917
165.5	0.959333
165.6	0.960083
165.7	0.959417
165.8	0.958833
165.9	0.960333
166	0.959917
166.1	0.960333
166.2	0.96075
166.3	0.961167
166.4	0.961583
166.5	0.962667
166.6	0.964333
166.7	0.96275
166.8	0.962667
166.9	0.961417
167	0.962083
167.1	0.961833
167.2	0.959583
167.3	0.960167
167.4	0.960583
167.5	0.960917
167.6	0.961167
167.7	0.961833
167.8	0.962083
167.9	0.961417
168	0.96175
168.1	0.9615
168.2	0.96125
168.3	0.961833
168.4	0.962333
168.5	0.962417
168.6	0.96175
168.7	0.96175
168.8	0.962833
168.9	0.961333
169	0.960417
169.1	0.959083
169.2	0.9595
169.3	0.959417
169.4	0.957083
169.5	0.957
169.6	0.95725
169.7	0.95725
169.8	0.958
169.9	0.959333
170	0.959
170.1	0.95975
170.2	0.960333
170.3	0.960333
170.4	0.959917
170.5	0.960917
170.6	0.961333
170.7	0.96175
170.8	0.961583
170.9	0.960417
171	0.960167
171.1	0.960083
171.2	0.95925
171.3	0.958167
171.4	0.958667
171.5	0.958667
171.6	0.958083
171.7	0.959333
171.8	0.961083
171.9	0.96225
172	0.962083
172.1	0.962167
172.2	0.962833
172.3	0.962083
172.4	0.961583
172.5	0.961417
172.6	0.961583
172.7	0.961167
172.8	0.961833
172.9	0.960667
173	0.961417
173.1	0.961917
173.2	0.959917
173.3	0.961083
173.4	0.959667
173.5	0.96075
173.6	0.9605
173.7	0.959583
173.8	0.960667
173.9	0.9605
174	0.960167
174.1	0.960833
174.2	0.959667
174.3	0.960917
174.4	0.959583
174.5	0.96125
174.6	0.961167
174.7	0.96125
174.8	0.959667
174.9	0.959917
175	0.961167
175.1	0.961417
175.2	0.961167
175.3	0.96125
175.4	0.960667
175.5	0.96225
175.6	0.960583
175.7	0.961667
175.8	0.9625
175.9	0.962083
176	0.962417
176.1	0.9625
176.2	0.963167
176.3	0.962917
176.4	0.96275
176.5	0.963167
176.6	0.963417
176.7	0.9635
176.8	0.964417
176.9	0.963917
177	0.966083
177.1	0.9645
177.2	0.962833
177.3	0.962833
177.4	0.963583
177.5	0.963833
177.6	0.966
177.7	0.964917
177.8	0.966167
177.9	0.96375
178	0.963417
178.1	0.962917
178.2	0.963583
178.3	0.964083
178.4	0.963667
178.5	0.963583
178.6	0.962417
178.7	0.9625
178.8	0.962333
178.9	0.962417
179	0.961417
179.1	0.96225
179.2	0.963083
179.3	0.963917
179.4	0.963833
179.5	0.963917
179.6	0.964083
179.7	0.963083
179.8	0.963583
179.9	0.964417
180	0.964417
180.1	0.963917
180.2	0.963833
180.3	0.96325
180.4	0.9655
180.5	0.966417
180.6	0.9665
180.7	0.9665
180.8	0.964917
180.9	0.964333
181	0.96325
181.1	0.96325
181.2	0.963917
181.3	0.96325
181.4	0.962583
181.5	0.963583
181.6	0.963417
181.7	0.963417
181.8	0.9625
181.9	0.963417
182	0.964333
182.1	0.9655
182.2	0.965583
182.3	0.965083
182.4	0.965833
182.5	0.965
182.6	0.965
182.7	0.96375
182.8	0.964417
182.9	0.964
183	0.962667
183.1	0.96275
183.2	0.962833
183.3	0.962333
183.4	0.963333
183.5	0.964167
183.6	0.965583
183.7	0.964583
183.8	0.966333
183.9	0.96575
184	0.965917
184.1	0.963833
184.2	0.9645
184.3	0.9645
184.4	0.964083
184.5	0.964417
184.6	0.964333
184.7	0.96375
184.8	0.963333
184.9	0.964083
185	0.963583
185.1	0.96475
185.2	0.965167
185.3	0.966
185.4	0.966
185.5	0.966167
185.6	0.966583
185.7	0.967833
185.8	0.967083
185.9	0.966333
186	0.96675
186.1	0.966333
186.2	0.965583
186.3	0.965083
186.4	0.964917
186.5	0.964833
186.6	0.96375
186.7	0.963583
186.8	0.963417
186.9	0.965
187	0.965083
187.1	0.964083
187.2	0.964667
187.3	0.96475
187.4	0.96325
187.5	0.963167
187.6	0.963417
187.7	0.963167
187.8	0.963167
187.9	0.963083
188	0.963333
188.1	0.9625
188.2	0.962917
188.3	0.963667
188.4	0.963417
188.5	0.963667
188.6	0.9645
188.7	0.9665
188.8	0.965333
188.9	0.964667
189	0.964667
189.1	0.962833
189.2	0.96325
189.3	0.961917
189.4	0.962833
189.5	0.962833
189.6	0.964167
189.7	0.963667
189.8	0.96325
189.9	0.96275
190	0.963083
190.1	0.963333
190.2	0.962833
190.3	0.962833
190.4	0.961083
190.5	0.961917
190.6	0.963167
190.7	0.962833
190.8	0.96325
190.9	0.963583
191	0.962417
191.1	0.962667
191.2	0.963333
191.3	0.96325
191.4	0.962917
191.5	0.962917
191.6	0.96125
191.7	0.961667
191.8	0.961
191.9	0.961667
192	0.960833
192.1	0.9605
192.2	0.961083
192.3	0.961667
192.4	0.96075
192.5	0.96175
192.6	0.961667
192.7	0.962667
192.8	0.96275
192.9	0.963
193	0.963167
193.1	0.962333
193.2	0.963333
193.3	0.96375
193.4	0.962917
193.5	0.963333
193.6	0.963833
193.7	0.964833
193.8	0.962833
193.9	0.963
194	0.963833
194.1	0.9645
194.2	0.963333
194.3	0.9635
194.4	0.96325
194.5	0.963083
194.6	0.96375
194.7	0.963917
194.8	0.9655
194.9	0.964333
195	0.962833
195.1	0.96375
195.2	0.96325
195.3	0.962667
195.4	0.96275
195.5	0.963167
195.6	0.96325
195.7	0.962583
195.8	0.96325
195.9	0.963417
196	0.963667
196.1	0.9645
196.2	0.965333
196.3	0.96575
196.4	0.963917
196.5	0.96375
196.6	0.963833
196.7	0.963583
196.8	0.96425
196.9	0.962917
197	0.963167
197.1	0.963083
197.2	0.964083
197.3	0.965
197.4	0.964167
197.5	0.96475
197.6	0.9655
197.7	0.966
197.8	0.96525
197.9	0.963833
198	0.962917
198.1	0.9625
198.2	0.9635
198.3	0.964667
198.4	0.96425
198.5	0.963333
198.6	0.964
198.7	0.963583
198.8	0.964167
198.9	0.9655
199	0.964917
199.1	0.964667
199.2	0.963
199.3	0.963917
199.4	0.965917
199.5	0.966
199.6	0.966167
199.7	0.967167
199.8	0.967583
199.9	0.967667
200	0.968333
[truncated: 14,000 more rows]
