# Supplementary material for: Bayesian inference of kinetic schemes for ion channels by Kalman filtering
Source: eLife journal article supplement (doi:10.7554/elife.62714), 2022-05-04
Supplement: fig4-data5 [file 1_Sim_N_6000_Strom_MW_4M.xlsx]

## Sheet: Tabelle1
0.1	0
0.2	0
0.3	0
0.4	0
0.5	0
0.6	0
0.7	0
0.8	0
0.9	0
1	0
1.1	0
1.2	0
1.3	0
1.4	0
1.5	0
1.6	0
1.7	0
1.8	0
1.9	0
2	0
2.1	0
2.2	0
2.3	0
2.4	0
2.5	0
2.6	0
2.7	0
2.8	0
2.9	0
3	0
3.1	0
3.2	0
3.3	0
3.4	0
3.5	0
3.6	0
3.7	0
3.8	0
3.9	0
4	0
4.1	0
4.2	0
4.3	0
4.4	0
4.5	0
4.6	0
4.7	0
4.8	0
4.9	0
5	0
5.1	0
5.2	0
5.3	0
5.4	0
5.5	0
5.6	0
5.7	0
5.8	0
5.9	0
6	0
6.1	0
6.2	0
6.3	0
6.4	0
6.5	0
6.6	0
6.7	0
6.8	0
6.9	0
7	0
7.1	0
7.2	0
7.3	0
7.4	0
7.5	0
7.6	0
7.7	0
7.8	0
7.9	0
8	0
8.1	0
8.2	0
8.3	0
8.4	0
8.5	0
8.6	0
8.7	0
8.8	0
8.9	0
9	0
9.1	0
9.2	0
9.3	0
9.4	0
9.5	0
9.6	0
9.7	0
9.8	0
9.9	0
10	0
10.1	0
10.2	0
10.3	0
10.4	0
10.5	0
10.6	0
10.7	0
10.8	0
10.9	0
11	0
11.1	0
11.2	0
11.3	0
11.4	0
11.5	0
11.6	0
11.7	0
11.8	0
11.9	0
12	0
12.1	0
12.2	0
12.3	0
12.4	0
12.5	0
12.6	0
12.7	0
12.8	0
12.9	0
13	0
13.1	0
13.2	0
13.3	0
13.4	0
13.5	0
13.6	0
13.7	0
13.8	0
13.9	0
14	0
14.1	0
14.2	0
14.3	0
14.4	0
14.5	0
14.6	0
14.7	0
14.8	0
14.9	0
15	0
15.1	0
15.2	0
15.3	0
15.4	0
15.5	0
15.6	0
15.7	0
15.8	0
15.9	0
16	0
16.1	0
16.2	0
16.3	0
16.4	0
16.5	0
16.6	0
16.7	0
16.8	0
16.9	0
17	0
17.1	0
17.2	0
17.3	0
17.4	0
17.5	0
17.6	0
17.7	0
17.8	0
17.9	0
18	0
18.1	0
18.2	0
18.3	0
18.4	0
18.5	0
18.6	0
18.7	0
18.8	0
18.9	0
19	0
19.1	0
19.2	0
19.3	0
19.4	0
19.5	0
19.6	0
19.7	0
19.8	0
19.9	0
20	0
20.1	0
20.2	0
20.3	0
20.4	0
20.5	0
20.6	0
20.7	0
20.8	0
20.9	0
21	0
21.1	0
21.2	0
21.3	0
21.4	0
21.5	0
21.6	0
21.7	0
21.8	0
21.9	0
22	0
22.1	0
22.2	0
22.3	0
22.4	0
22.5	0
22.6	0
22.7	0
22.8	0
22.9	0
23	0
23.1	0
23.2	0
23.3	0
23.4	0
23.5	0
23.6	0
23.7	0
23.8	0
23.9	0
24	0
24.1	0
24.2	0
24.3	0
24.4	0
24.5	0
24.6	0
24.7	0
24.8	0
24.9	0
25	0
25.1	0
25.2	0
25.3	0
25.4	0
25.5	0
25.6	0
25.7	0
25.8	0
25.9	0
26	0
26.1	0
26.2	0
26.3	0
26.4	0
26.5	0
26.6	0
26.7	0
26.8	0
26.9	0
27	0
27.1	0
27.2	0
27.3	0
27.4	0
27.5	0
27.6	0
27.7	0
27.8	0
27.9	0
28	0
28.1	0
28.2	0
28.3	0
28.4	0
28.5	0
28.6	0
28.7	0
28.8	0
28.9	0
29	0
29.1	0
29.2	0
29.3	0
29.4	0
29.5	0
29.6	0
29.7	0
29.8	0
29.9	0
30	0
30.1	0
30.2	0
30.3	0
30.4	0
30.5	0
30.6	0
30.7	0
30.8	0
30.9	0
31	0
31.1	0
31.2	0
31.3	0
31.4	0
31.5	0
31.6	0
31.7	0
31.8	0
31.9	0
32	0
32.1	0
32.2	0
32.3	0
32.4	0
32.5	0
32.6	0
32.7	0
32.8	0
32.9	0
33	0
33.1	0
33.2	0
33.3	0
33.4	0
33.5	0
33.6	0
33.7	0
33.8	0
33.9	0
34	0
34.1	0
34.2	0
34.3	0
34.4	0
34.5	0
34.6	0
34.7	0
34.8	0
34.9	0
35	0
35.1	0
35.2	0
35.3	0
35.4	0
35.5	0
35.6	0
35.7	0
35.8	0
35.9	0
36	0
36.1	0
36.2	0
36.3	0
36.4	0
36.5	0
36.6	0
36.7	0
36.8	0
36.9	0
37	0
37.1	0
37.2	0
37.3	0
37.4	0
37.5	0
37.6	0
37.7	0
37.8	0
37.9	0
38	0
38.1	0
38.2	0
38.3	0
38.4	0
38.5	0
38.6	0
38.7	0
38.8	0
38.9	0
39	0
39.1	0
39.2	0
39.3	0
39.4	0
39.5	0
39.6	0
39.7	0
39.8	0
39.9	0
40	0
40.1	0
40.2	0
40.3	0
40.4	0
40.5	0
40.6	0
40.7	0
40.8	0
40.9	0
41	0
41.1	0
41.2	0
41.3	0
41.4	0
41.5	0
41.6	0
41.7	0
41.8	0
41.9	0
42	0
42.1	0
42.2	0
42.3	0
42.4	0
42.5	0
42.6	0
42.7	0
42.8	0
42.9	0
43	0
43.1	0
43.2	0
43.3	0
43.4	0
43.5	0
43.6	0
43.7	0
43.8	0
43.9	0
44	0
44.1	0
44.2	0
44.3	0
44.4	0
44.5	0
44.6	0
44.7	0
44.8	0
44.9	0
45	0
45.1	0
45.2	0
45.3	0
45.4	0
45.5	0
45.6	0
45.7	0
45.8	0
45.9	0
46	0
46.1	0
46.2	0
46.3	0
46.4	0
46.5	0
46.6	0
46.7	0
46.8	0
46.9	0
47	0
47.1	0
47.2	0
47.3	0
47.4	0
47.5	0
47.6	0
47.7	0
47.8	0
47.9	0
48	0
48.1	0
48.2	0
48.3	0
48.4	0
48.5	0
48.6	0
48.7	0
48.8	0
48.9	0
49	0
49.1	0
49.2	0
49.3	0
49.4	0
49.5	0
49.6	0
49.7	0
49.8	0
49.9	0
50	0
50.1	0
50.2	0
50.3	0
50.4	0
50.5	0
50.6	0
50.7	0
50.8	0
50.9	0
51	0
51.1	0
51.2	0
51.3	0
51.4	0
51.5	0
51.6	0
51.7	0
51.8	0
51.9	0
52	0
52.1	0
52.2	0
52.3	0
52.4	0
52.5	0
52.6	0
52.7	0
52.8	0
52.9	0
53	0
53.1	0
53.2	0
53.3	0
53.4	0
53.5	0
53.6	0
53.7	0
53.8	0
53.9	0
54	0
54.1	0
54.2	0
54.3	0
54.4	0
54.5	0
54.6	0
54.7	0
54.8	0
54.9	0
55	0
55.1	0
55.2	0
55.3	0
55.4	0
55.5	0
55.6	0
55.7	0
55.8	0
55.9	0
56	0
56.1	0
56.2	0
56.3	0
56.4	0
56.5	0
56.6	0
56.7	0
56.8	0
56.9	0
57	0
57.1	0
57.2	0
57.3	0
57.4	0
57.5	0
57.6	0
57.7	0
57.8	0
57.9	0
58	0
58.1	0
58.2	0
58.3	0
58.4	0
58.5	0
58.6	0
58.7	0
58.8	0
58.9	0
59	0
59.1	0
59.2	0
59.3	0
59.4	0
59.5	0
59.6	0
59.7	0
59.8	0
59.9	0
60	0
60.1	0
60.2	0
60.3	0
60.4	0
60.5	0
60.6	0
60.7	0
60.8	0
60.9	0
61	0
61.1	0
61.2	0
61.3	0
61.4	0
61.5	0
61.6	0
61.7	0
61.8	0
61.9	0
62	0
62.1	0
62.2	0
62.3	0
62.4	0
62.5	0
62.6	0
62.7	0
62.8	0
62.9	0
63	0
63.1	0
63.2	0
63.3	0
63.4	0
63.5	0
63.6	0
63.7	0
63.8	0
63.9	0
64	0
64.1	0
64.2	0
64.3	0
64.4	0
64.5	0
64.6	0
64.7	0
64.8	0
64.9	0
65	0
65.1	0
65.2	0
65.3	0
65.4	0
65.5	0
65.6	0
65.7	0
65.8	0
65.9	0
66	0
66.1	0
66.2	0
66.3	0
66.4	0
66.5	0
66.6	0
66.7	0
66.8	0
66.9	0
67	0
67.1	0
67.2	0
67.3	0
67.4	0
67.5	0
67.6	0
67.7	0
67.8	0
67.9	0
68	0
68.1	0
68.2	0
68.3	0
68.4	0
68.5	0
68.6	0
68.7	0
68.8	0
68.9	0
69	0
69.1	0
69.2	0
69.3	0
69.4	0
69.5	0
69.6	0
69.7	0
69.8	0
69.9	0
70	0
70.1	0
70.2	0
70.3	0
70.4	0
70.5	0
70.6	0
70.7	0
70.8	0
70.9	0
71	0
71.1	0
71.2	0
71.3	0
71.4	0
71.5	0
71.6	0
71.7	0
71.8	0
71.9	0
72	0
72.1	0
72.2	0
72.3	0
72.4	0
72.5	0
72.6	0
72.7	0
72.8	0
72.9	0
73	0
73.1	0
73.2	0
73.3	0
73.4	0
73.5	0
73.6	0
73.7	0
73.8	0
73.9	0
74	0
74.1	0
74.2	0
74.3	0
74.4	0
74.5	0
74.6	0
74.7	0
74.8	0
74.9	0
75	0
75.1	0
75.2	0
75.3	0
75.4	0
75.5	0
75.6	0
75.7	0
75.8	0
75.9	0
76	0
76.1	0
76.2	0
76.3	0
76.4	0
76.5	0
76.6	0
76.7	0
76.8	0
76.9	0
77	0
77.1	0
77.2	0
77.3	0
77.4	0
77.5	0
77.6	0
77.7	0
77.8	0
77.9	0
78	0
78.1	0
78.2	0
78.3	0
78.4	0
78.5	0
78.6	0
78.7	0
78.8	0
78.9	0
79	0
79.1	0
79.2	0
79.3	0
79.4	0
79.5	0
79.6	0
79.7	0
79.8	0
79.9	0
80	0
80.1	0
80.2	0
80.3	0
80.4	0
80.5	0
80.6	0
80.7	0
80.8	0
80.9	0
81	0
81.1	0
81.2	0
81.3	0
81.4	0
81.5	0
81.6	0
81.7	0
81.8	0
81.9	0
82	0
82.1	0
82.2	0
82.3	0
82.4	0
82.5	0
82.6	0
82.7	0
82.8	0
82.9	0
83	0
83.1	0
83.2	0
83.3	0
83.4	0
83.5	0
83.6	0
83.7	0
83.8	0
83.9	0
84	0
84.1	0
84.2	0
84.3	0
84.4	0
84.5	0
84.6	0
84.7	0
84.8	0
84.9	0
85	0
85.1	0
85.2	0
85.3	0
85.4	0
85.5	0
85.6	0
85.7	0
85.8	0
85.9	0
86	0
86.1	0
86.2	0
86.3	0
86.4	0
86.5	0
86.6	0
86.7	0
86.8	0
86.9	0
87	0
87.1	0
87.2	0
87.3	0
87.4	0
87.5	0
87.6	0
87.7	0
87.8	0
87.9	0
88	0
88.1	0
88.2	0
88.3	0
88.4	0
88.5	0
88.6	0
88.7	0
88.8	0
88.9	0
89	0
89.1	0
89.2	0
89.3	0
89.4	0
89.5	0
89.6	0
89.7	0
89.8	0
89.9	0
90	0
90.1	0
90.2	0
90.3	0
90.4	0
90.5	0
90.6	0
90.7	0
90.8	0
90.9	0
91	0
91.1	0
91.2	0
91.3	0
91.4	0
91.5	0
91.6	0
91.7	0
91.8	0
91.9	0
92	0
92.1	0
92.2	0
92.3	0
92.4	0
92.5	0
92.6	0
92.7	0
92.8	0
92.9	0
93	0
93.1	0
93.2	0
93.3	0
93.4	0
93.5	0
93.6	0
93.7	0
93.8	0
93.9	0
94	0
94.1	0
94.2	0
94.3	0
94.4	0
94.5	0
94.6	0
94.7	0
94.8	0
94.9	0
95	0
95.1	0
95.2	0
95.3	0
95.4	0
95.5	0
95.6	0
95.7	0
95.8	0
95.9	0
96	0
96.1	0
96.2	0
96.3	0
96.4	0
96.5	0
96.6	0
96.7	0
96.8	0
96.9	0
97	0
97.1	0
97.2	0
97.3	0
97.4	0
97.5	0
97.6	0
97.7	0
97.8	0
97.9	0
98	0
98.1	0
98.2	0
98.3	0
98.4	0
98.5	0
98.6	0
98.7	0
98.8	0
98.9	0
99	0
99.1	0
99.2	0
99.3	0
99.4	0
99.5	0
99.6	0
99.7	0
99.8	0
99.9	0
100	0
100.1	0.000166667
100.2	0.000333333
100.3	0.0015
100.4	0.00266667
100.5	0.0035
100.6	0.0055
100.7	0.00666667
100.8	0.00916667
100.9	0.0108333
101	0.0128333
101.1	0.0153333
101.2	0.018
101.3	0.02
101.4	0.0248333
101.5	0.027
101.6	0.03
101.7	0.0331667
101.8	0.037
101.9	0.0408333
102	0.0435
102.1	0.0465
102.2	0.0493333
102.3	0.0516667
102.4	0.0533333
102.5	0.0556667
102.6	0.0588333
102.7	0.062
102.8	0.065
102.9	0.0681667
103	0.0706667
103.1	0.074
103.2	0.0773333
103.3	0.0798333
103.4	0.0836667
103.5	0.0868333
103.6	0.0893333
103.7	0.0928333
103.8	0.0966667
103.9	0.1015
104	0.105
104.1	0.107167
104.2	0.110167
104.3	0.113333
104.4	0.115167
104.5	0.117833
104.6	0.121
104.7	0.1245
104.8	0.1275
104.9	0.129833
105	0.133
105.1	0.135167
105.2	0.137333
105.3	0.140333
105.4	0.143167
105.5	0.146167
105.6	0.149167
105.7	0.152167
105.8	0.154833
105.9	0.156833
106	0.159
106.1	0.1605
106.2	0.163833
106.3	0.166667
106.4	0.169833
106.5	0.171833
106.6	0.175667
106.7	0.1795
106.8	0.181333
106.9	0.185833
107	0.187333
107.1	0.189
107.2	0.190667
107.3	0.192333
107.4	0.193333
107.5	0.194667
107.6	0.197667
107.7	0.1995
107.8	0.201833
107.9	0.204667
108	0.206167
108.1	0.208833
108.2	0.211667
108.3	0.215
108.4	0.216
108.5	0.219
108.6	0.2205
108.7	0.223
108.8	0.224833
108.9	0.227167
109	0.229
109.1	0.231333
109.2	0.233333
109.3	0.235667
109.4	0.237833
109.5	0.239667
109.6	0.242167
109.7	0.2445
109.8	0.2465
109.9	0.248
110	0.251333
110.1	0.255333
110.2	0.259
110.3	0.2605
110.4	0.262667
110.5	0.265667
110.6	0.267833
110.7	0.270333
110.8	0.271333
110.9	0.2755
111	0.277833
111.1	0.2805
111.2	0.281833
111.3	0.284667
111.4	0.287667
111.5	0.290167
111.6	0.291667
111.7	0.294
111.8	0.2955
111.9	0.297333
112	0.299833
112.1	0.301833
112.2	0.303333
112.3	0.304167
112.4	0.305
112.5	0.307
112.6	0.308333
112.7	0.3105
112.8	0.311167
112.9	0.313
113	0.3155
113.1	0.316833
113.2	0.318833
113.3	0.320333
113.4	0.322
113.5	0.324167
113.6	0.327167
113.7	0.328333
113.8	0.329833
113.9	0.331333
114	0.334333
114.1	0.3365
114.2	0.3385
114.3	0.340667
114.4	0.342333
114.5	0.3445
114.6	0.3465
114.7	0.348833
114.8	0.350833
114.9	0.353
115	0.354667
115.1	0.356333
115.2	0.359167
115.3	0.361833
115.4	0.364
115.5	0.365833
115.6	0.367333
115.7	0.369333
115.8	0.3705
115.9	0.372
116	0.374167
116.1	0.375667
116.2	0.377167
116.3	0.379667
116.4	0.3825
116.5	0.383333
116.6	0.384833
116.7	0.3875
116.8	0.390167
116.9	0.392167
117	0.394667
117.1	0.397667
117.2	0.399333
117.3	0.401167
117.4	0.402167
117.5	0.403333
117.6	0.4055
117.7	0.406333
117.8	0.4075
117.9	0.409667
118	0.410667
118.1	0.4115
118.2	0.412833
118.3	0.413833
118.4	0.416
118.5	0.418333
118.6	0.420333
118.7	0.422167
118.8	0.4235
118.9	0.425
119	0.426167
119.1	0.427667
119.2	0.428833
119.3	0.429833
119.4	0.431
119.5	0.4315
119.6	0.4325
119.7	0.433
119.8	0.434667
119.9	0.436833
120	0.437667
120.1	0.439
120.2	0.439167
120.3	0.4405
120.4	0.441667
120.5	0.443833
120.6	0.445833
120.7	0.447333
120.8	0.449167
120.9	0.450667
121	0.453
121.1	0.454167
121.2	0.4555
121.3	0.4575
121.4	0.46
121.5	0.461667
121.6	0.462667
121.7	0.463667
121.8	0.465
121.9	0.466
122	0.469833
122.1	0.471833
122.2	0.472833
122.3	0.474333
122.4	0.4755
122.5	0.476333
122.6	0.477333
122.7	0.480167
122.8	0.4805
122.9	0.481833
123	0.482833
123.1	0.484833
123.2	0.485667
123.3	0.488
123.4	0.489667
123.5	0.491
123.6	0.4905
123.7	0.491667
123.8	0.493833
123.9	0.495167
124	0.496667
124.1	0.496667
124.2	0.4975
124.3	0.4995
124.4	0.501167
124.5	0.503333
124.6	0.504167
124.7	0.504
124.8	0.504333
124.9	0.507333
125	0.508333
125.1	0.509333
125.2	0.5105
125.3	0.511833
125.4	0.513333
125.5	0.514
125.6	0.5145
125.7	0.516
125.8	0.517333
125.9	0.519667
126	0.520833
126.1	0.522
126.2	0.523333
126.3	0.525
126.4	0.525167
126.5	0.526167
126.6	0.527167
126.7	0.528167
126.8	0.528833
126.9	0.529
127	0.530333
127.1	0.531167
127.2	0.533167
127.3	0.534167
127.4	0.534833
127.5	0.536
127.6	0.537
127.7	0.538
127.8	0.539167
127.9	0.5395
128	0.541333
128.1	0.542167
128.2	0.541833
128.3	0.542667
128.4	0.544
128.5	0.5445
128.6	0.545667
128.7	0.547
128.8	0.548333
128.9	0.549667
129	0.550333
129.1	0.551333
129.2	0.551667
129.3	0.5525
129.4	0.554
129.5	0.555167
129.6	0.556
129.7	0.557167
129.8	0.558
129.9	0.559667
130	0.561833
130.1	0.562833
130.2	0.5635
130.3	0.563167
130.4	0.5635
130.5	0.563833
130.6	0.564833
130.7	0.565667
130.8	0.567167
130.9	0.567667
131	0.568167
131.1	0.569667
131.2	0.570667
131.3	0.571833
131.4	0.572667
131.5	0.574167
131.6	0.574833
131.7	0.576333
131.8	0.576667
131.9	0.579
132	0.579167
132.1	0.579
132.2	0.5795
132.3	0.579667
132.4	0.580667
132.5	0.581167
132.6	0.582
132.7	0.582833
132.8	0.584333
132.9	0.585667
133	0.586
133.1	0.587167
133.2	0.587167
133.3	0.588
133.4	0.589333
133.5	0.5905
133.6	0.5925
133.7	0.593167
133.8	0.593667
133.9	0.593667
134	0.594
134.1	0.595
134.2	0.596667
134.3	0.598167
134.4	0.598667
134.5	0.5995
134.6	0.599167
134.7	0.6005
134.8	0.601167
134.9	0.601833
135	0.603333
135.1	0.6035
135.2	0.604167
135.3	0.604667
135.4	0.605167
135.5	0.606167
135.6	0.606
135.7	0.606167
135.8	0.606833
135.9	0.607667
136	0.609
136.1	0.61
136.2	0.6115
136.3	0.6125
136.4	0.6135
136.5	0.614667
136.6	0.614667
136.7	0.615
136.8	0.616833
136.9	0.617167
137	0.618667
137.1	0.620167
137.2	0.621333
137.3	0.622167
137.4	0.623167
137.5	0.624
137.6	0.6245
137.7	0.624833
137.8	0.627333
137.9	0.628167
138	0.6285
138.1	0.628167
138.2	0.628167
138.3	0.6285
138.4	0.629
138.5	0.629167
138.6	0.6295
138.7	0.6305
138.8	0.631167
138.9	0.632
139	0.6335
139.1	0.634667
139.2	0.634333
139.3	0.636
139.4	0.6365
139.5	0.637333
139.6	0.637833
139.7	0.638333
139.8	0.6385
139.9	0.638167
140	0.639833
140.1	0.640667
140.2	0.640833
140.3	0.6415
140.4	0.643333
140.5	0.643333
140.6	0.6435
140.7	0.643833
140.8	0.644667
140.9	0.644833
141	0.645833
141.1	0.6465
141.2	0.646833
141.3	0.646
141.4	0.645833
141.5	0.646167
141.6	0.646667
141.7	0.6485
141.8	0.6495
141.9	0.650167
142	0.651667
142.1	0.653
142.2	0.653167
142.3	0.654333
142.4	0.654333
142.5	0.654667
142.6	0.656167
142.7	0.657167
142.8	0.658667
142.9	0.659167
143	0.66
143.1	0.66
143.2	0.66
143.3	0.6605
143.4	0.661167
143.5	0.6625
143.6	0.663
143.7	0.664
143.8	0.664333
143.9	0.6655
144	0.665333
144.1	0.665667
144.2	0.665833
144.3	0.665833
144.4	0.6665
144.5	0.667667
144.6	0.668333
144.7	0.669
144.8	0.6705
144.9	0.6705
145	0.671333
145.1	0.671833
145.2	0.673333
145.3	0.673833
145.4	0.674
145.5	0.6745
145.6	0.673667
145.7	0.674833
145.8	0.675333
145.9	0.675833
146	0.676
146.1	0.6765
146.2	0.677167
146.3	0.677667
146.4	0.678833
146.5	0.679
146.6	0.68
146.7	0.681167
146.8	0.681333
146.9	0.681
147	0.682333
147.1	0.6825
147.2	0.682833
147.3	0.682833
147.4	0.683333
147.5	0.683
147.6	0.683167
147.7	0.683833
147.8	0.684333
147.9	0.6845
148	0.685833
148.1	0.6865
148.2	0.687
148.3	0.687667
148.4	0.687833
148.5	0.687667
148.6	0.689167
148.7	0.688667
148.8	0.688
148.9	0.687667
149	0.688667
149.1	0.688667
149.2	0.6885
149.3	0.689333
149.4	0.690667
149.5	0.6905
149.6	0.689167
149.7	0.688833
149.8	0.6885
149.9	0.688833
150	0.689167
150.1	0.6895
150.2	0.690167
150.3	0.690167
150.4	0.690167
150.5	0.6905
150.6	0.6905
150.7	0.691
150.8	0.692
150.9	0.692167
151	0.692833
151.1	0.693
151.2	0.693333
151.3	0.6935
151.4	0.693833
151.5	0.693667
151.6	0.694333
151.7	0.6945
151.8	0.694333
151.9	0.694333
152	0.695333
152.1	0.695667
152.2	0.695833
152.3	0.6965
152.4	0.697333
152.5	0.697667
152.6	0.697167
152.7	0.699
152.8	0.699
152.9	0.7
153	0.700333
153.1	0.700833
153.2	0.701167
153.3	0.701167
153.4	0.702
153.5	0.701833
153.6	0.7025
153.7	0.702333
153.8	0.704
153.9	0.704167
154	0.704667
154.1	0.705667
154.2	0.706833
154.3	0.706833
154.4	0.707167
154.5	0.707667
154.6	0.7075
154.7	0.707167
154.8	0.707
154.9	0.707167
155	0.707833
155.1	0.707833
155.2	0.707667
155.3	0.707667
155.4	0.707333
155.5	0.707833
155.6	0.7085
155.7	0.709333
155.8	0.708833
155.9	0.709
156	0.709333
156.1	0.7095
156.2	0.710667
156.3	0.710833
156.4	0.710833
156.5	0.7105
156.6	0.711667
156.7	0.7115
156.8	0.712
156.9	0.713
157	0.712833
157.1	0.7125
157.2	0.712167
157.3	0.712167
157.4	0.713
157.5	0.712667
157.6	0.712167
157.7	0.713
157.8	0.712833
157.9	0.713
158	0.713
158.1	0.713833
158.2	0.714
158.3	0.713833
158.4	0.7135
158.5	0.714167
158.6	0.713667
158.7	0.713333
158.8	0.714833
158.9	0.715
159	0.715
159.1	0.7145
159.2	0.714167
159.3	0.714667
159.4	0.714667
159.5	0.715833
159.6	0.7165
159.7	0.716667
159.8	0.715833
159.9	0.716667
160	0.717667
160.1	0.718
160.2	0.718333
160.3	0.718167
160.4	0.718833
160.5	0.719667
160.6	0.7205
160.7	0.720833
160.8	0.721833
160.9	0.722333
161	0.722333
161.1	0.723
161.2	0.723333
161.3	0.723167
161.4	0.723333
161.5	0.724333
161.6	0.724667
161.7	0.725167
161.8	0.725167
161.9	0.725667
162	0.7265
162.1	0.726833
162.2	0.727
162.3	0.727667
162.4	0.7285
162.5	0.729167
162.6	0.729833
162.7	0.729667
162.8	0.730667
162.9	0.730333
163	0.730333
163.1	0.730333
163.2	0.731
163.3	0.731
163.4	0.730833
163.5	0.7315
163.6	0.731667
163.7	0.731667
163.8	0.7315
163.9	0.731833
164	0.731333
164.1	0.731167
164.2	0.730667
164.3	0.732667
164.4	0.733167
164.5	0.7335
164.6	0.733333
164.7	0.733167
164.8	0.734333
164.9	0.7355
165	0.735833
165.1	0.735833
165.2	0.735833
165.3	0.736667
165.4	0.736667
165.5	0.736167
165.6	0.737
165.7	0.737
165.8	0.737833
165.9	0.739
166	0.739333
166.1	0.740333
166.2	0.740167
166.3	0.7405
166.4	0.740833
166.5	0.741
166.6	0.740833
166.7	0.7415
166.8	0.741333
166.9	0.741833
167	0.742333
167.1	0.741667
167.2	0.741333
167.3	0.740167
167.4	0.740167
167.5	0.739333
167.6	0.739833
167.7	0.740333
167.8	0.739167
167.9	0.739667
168	0.739667
168.1	0.7405
168.2	0.7415
168.3	0.742
168.4	0.7415
168.5	0.741833
168.6	0.7415
168.7	0.741167
168.8	0.742167
168.9	0.7415
169	0.742167
169.1	0.743
169.2	0.742667
169.3	0.742167
169.4	0.742167
169.5	0.741667
169.6	0.741167
169.7	0.7415
169.8	0.741333
169.9	0.742
170	0.741333
170.1	0.740833
170.2	0.741333
170.3	0.7415
170.4	0.7425
170.5	0.741833
170.6	0.742
170.7	0.742833
170.8	0.743333
170.9	0.744167
171	0.744167
171.1	0.744167
171.2	0.744
171.3	0.7435
171.4	0.7435
171.5	0.744
171.6	0.744667
171.7	0.744333
171.8	0.744833
171.9	0.745333
172	0.7455
172.1	0.744833
172.2	0.745167
172.3	0.7455
172.4	0.7455
172.5	0.747333
172.6	0.747167
172.7	0.7465
172.8	0.747167
172.9	0.746833
173	0.748
173.1	0.7475
173.2	0.747667
173.3	0.747833
173.4	0.7485
173.5	0.747
173.6	0.746667
173.7	0.746333
173.8	0.746667
173.9	0.747
174	0.747167
174.1	0.748333
174.2	0.748
174.3	0.747
174.4	0.7465
174.5	0.746833
174.6	0.747333
174.7	0.7475
174.8	0.748167
174.9	0.748167
175	0.748167
175.1	0.748667
175.2	0.750167
175.3	0.749667
175.4	0.749667
175.5	0.7505
175.6	0.751
175.7	0.751
175.8	0.751167
175.9	0.752
176	0.752667
176.1	0.754167
176.2	0.754833
176.3	0.754167
176.4	0.754
176.5	0.7535
176.6	0.753333
176.7	0.752833
176.8	0.753333
176.9	0.753833
177	0.754167
177.1	0.754833
177.2	0.755
177.3	0.754333
177.4	0.754667
177.5	0.755
177.6	0.755333
177.7	0.755833
177.8	0.756333
177.9	0.7575
178	0.757667
178.1	0.7565
178.2	0.756
178.3	0.755667
178.4	0.756833
178.5	0.756167
178.6	0.755333
178.7	0.7555
178.8	0.756
178.9	0.755833
179	0.7555
179.1	0.756
179.2	0.756
179.3	0.756333
179.4	0.756
179.5	0.755667
179.6	0.756333
179.7	0.757
179.8	0.756833
179.9	0.757
180	0.7575
180.1	0.758667
180.2	0.759
180.3	0.759
180.4	0.759167
180.5	0.758667
180.6	0.758333
180.7	0.759167
180.8	0.7595
180.9	0.7595
181	0.760167
181.1	0.7605
181.2	0.7605
181.3	0.760833
181.4	0.761333
181.5	0.761667
181.6	0.761
181.7	0.760833
181.8	0.760667
181.9	0.760667
182	0.760333
182.1	0.759833
182.2	0.76
182.3	0.7605
182.4	0.760167
182.5	0.760167
182.6	0.760167
182.7	0.760167
182.8	0.760667
182.9	0.761
183	0.762167
183.1	0.762
183.2	0.762167
183.3	0.761667
183.4	0.7615
183.5	0.760667
183.6	0.761
183.7	0.761
183.8	0.761833
183.9	0.7615
184	0.7615
184.1	0.7615
184.2	0.761667
184.3	0.762667
184.4	0.762833
184.5	0.761833
184.6	0.761833
184.7	0.761333
184.8	0.761667
184.9	0.761667
185	0.761667
185.1	0.7615
185.2	0.762
185.3	0.7625
185.4	0.762333
185.5	0.762167
185.6	0.761333
185.7	0.761
185.8	0.761333
185.9	0.761167
186	0.7615
186.1	0.761
186.2	0.761
186.3	0.761
186.4	0.7615
186.5	0.7615
186.6	0.761333
186.7	0.762
186.8	0.762
186.9	0.761833
187	0.7615
187.1	0.762
187.2	0.762167
187.3	0.7625
187.4	0.763
187.5	0.763667
187.6	0.764
187.7	0.764
187.8	0.763333
187.9	0.763
188	0.7625
188.1	0.7615
188.2	0.761
188.3	0.761167
188.4	0.761833
188.5	0.761667
188.6	0.762167
188.7	0.762
188.8	0.761333
188.9	0.760667
189	0.761333
189.1	0.760667
189.2	0.761333
189.3	0.760667
189.4	0.760667
189.5	0.761167
189.6	0.76
189.7	0.761167
189.8	0.761
189.9	0.760833
190	0.76
190.1	0.759333
190.2	0.7595
190.3	0.759667
190.4	0.759667
190.5	0.759667
190.6	0.76
190.7	0.759833
190.8	0.76
190.9	0.7595
191	0.76
191.1	0.760167
191.2	0.76
191.3	0.760667
191.4	0.76
191.5	0.759833
191.6	0.760333
191.7	0.760333
191.8	0.76
191.9	0.759667
192	0.759333
192.1	0.76
192.2	0.76
192.3	0.76
192.4	0.760667
192.5	0.761
192.6	0.761667
192.7	0.761833
192.8	0.762
192.9	0.762
193	0.762333
193.1	0.761667
193.2	0.7605
193.3	0.760667
193.4	0.76
193.5	0.76
193.6	0.7595
193.7	0.7595
193.8	0.759833
193.9	0.7605
194	0.760167
194.1	0.759833
194.2	0.759667
194.3	0.76
194.4	0.759667
194.5	0.76
194.6	0.760167
194.7	0.760833
194.8	0.760833
194.9	0.76
195	0.760333
195.1	0.760833
195.2	0.761
195.3	0.7615
195.4	0.761
195.5	0.7615
195.6	0.7615
195.7	0.761833
195.8	0.761167
195.9	0.760833
196	0.760333
196.1	0.760667
196.2	0.759833
196.3	0.759333
196.4	0.759333
196.5	0.7585
196.6	0.758167
196.7	0.7575
196.8	0.756833
196.9	0.757167
197	0.756333
197.1	0.756667
197.2	0.756333
197.3	0.7575
197.4	0.757333
197.5	0.757167
197.6	0.757667
197.7	0.757833
197.8	0.759167
197.9	0.759833
198	0.7605
198.1	0.760333
198.2	0.761
198.3	0.761
198.4	0.761833
198.5	0.762167
198.6	0.762667
198.7	0.763333
198.8	0.763833
198.9	0.7635
199	0.764
199.1	0.764667
199.2	0.764
199.3	0.764333
199.4	0.764
199.5	0.764333
199.6	0.7645
199.7	0.764333
199.8	0.7655
199.9	0.765833
200	0.7655
[truncated: 14,000 more rows]
