# Supplementary material for: Bayesian inference of kinetic schemes for ion channels by Kalman filtering
Source: eLife journal article supplement (doi:10.7554/elife.62714), 2022-05-04
Supplement: fig4-data5 [file 1_Sim_N_7000_Fluor_MW_4M.xlsx]

## Sheet: Tabelle1
0.1	0
0.2	0
0.3	0
0.4	0
0.5	0
0.6	0
0.7	0
0.8	0
0.9	0
1	0
1.1	0
1.2	0
1.3	0
1.4	0
1.5	0
1.6	0
1.7	0
1.8	0
1.9	0
2	0
2.1	0
2.2	0
2.3	0
2.4	0
2.5	0
2.6	0
2.7	0
2.8	0
2.9	0
3	0
3.1	0
3.2	0
3.3	0
3.4	0
3.5	0
3.6	0
3.7	0
3.8	0
3.9	0
4	0
4.1	0
4.2	0
4.3	0
4.4	0
4.5	0
4.6	0
4.7	0
4.8	0
4.9	0
5	0
5.1	0
5.2	0
5.3	0
5.4	0
5.5	0
5.6	0
5.7	0
5.8	0
5.9	0
6	0
6.1	0
6.2	0
6.3	0
6.4	0
6.5	0
6.6	0
6.7	0
6.8	0
6.9	0
7	0
7.1	0
7.2	0
7.3	0
7.4	0
7.5	0
7.6	0
7.7	0
7.8	0
7.9	0
8	0
8.1	0
8.2	0
8.3	0
8.4	0
8.5	0
8.6	0
8.7	0
8.8	0
8.9	0
9	0
9.1	0
9.2	0
9.3	0
9.4	0
9.5	0
9.6	0
9.7	0
9.8	0
9.9	0
10	0
10.1	0
10.2	0
10.3	0
10.4	0
10.5	0
10.6	0
10.7	0
10.8	0
10.9	0
11	0
11.1	0
11.2	0
11.3	0
11.4	0
11.5	0
11.6	0
11.7	0
11.8	0
11.9	0
12	0
12.1	0
12.2	0
12.3	0
12.4	0
12.5	0
12.6	0
12.7	0
12.8	0
12.9	0
13	0
13.1	0
13.2	0
13.3	0
13.4	0
13.5	0
13.6	0
13.7	0
13.8	0
13.9	0
14	0
14.1	0
14.2	0
14.3	0
14.4	0
14.5	0
14.6	0
14.7	0
14.8	0
14.9	0
15	0
15.1	0
15.2	0
15.3	0
15.4	0
15.5	0
15.6	0
15.7	0
15.8	0
15.9	0
16	0
16.1	0
16.2	0
16.3	0
16.4	0
16.5	0
16.6	0
16.7	0
16.8	0
16.9	0
17	0
17.1	0
17.2	0
17.3	0
17.4	0
17.5	0
17.6	0
17.7	0
17.8	0
17.9	0
18	0
18.1	0
18.2	0
18.3	0
18.4	0
18.5	0
18.6	0
18.7	0
18.8	0
18.9	0
19	0
19.1	0
19.2	0
19.3	0
19.4	0
19.5	0
19.6	0
19.7	0
19.8	0
19.9	0
20	0
20.1	0
20.2	0
20.3	0
20.4	0
20.5	0
20.6	0
20.7	0
20.8	0
20.9	0
21	0
21.1	0
21.2	0
21.3	0
21.4	0
21.5	0
21.6	0
21.7	0
21.8	0
21.9	0
22	0
22.1	0
22.2	0
22.3	0
22.4	0
22.5	0
22.6	0
22.7	0
22.8	0
22.9	0
23	0
23.1	0
23.2	0
23.3	0
23.4	0
23.5	0
23.6	0
23.7	0
23.8	0
23.9	0
24	0
24.1	0
24.2	0
24.3	0
24.4	0
24.5	0
24.6	0
24.7	0
24.8	0
24.9	0
25	0
25.1	0
25.2	0
25.3	0
25.4	0
25.5	0
25.6	0
25.7	0
25.8	0
25.9	0
26	0
26.1	0
26.2	0
26.3	0
26.4	0
26.5	0
26.6	0
26.7	0
26.8	0
26.9	0
27	0
27.1	0
27.2	0
27.3	0
27.4	0
27.5	0
27.6	0
27.7	0
27.8	0
27.9	0
28	0
28.1	0
28.2	0
28.3	0
28.4	0
28.5	0
28.6	0
28.7	0
28.8	0
28.9	0
29	0
29.1	0
29.2	0
29.3	0
29.4	0
29.5	0
29.6	0
29.7	0
29.8	0
29.9	0
30	0
30.1	0
30.2	0
30.3	0
30.4	0
30.5	0
30.6	0
30.7	0
30.8	0
30.9	0
31	0
31.1	0
31.2	0
31.3	0
31.4	0
31.5	0
31.6	0
31.7	0
31.8	0
31.9	0
32	0
32.1	0
32.2	0
32.3	0
32.4	0
32.5	0
32.6	0
32.7	0
32.8	0
32.9	0
33	0
33.1	0
33.2	0
33.3	0
33.4	0
33.5	0
33.6	0
33.7	0
33.8	0
33.9	0
34	0
34.1	0
34.2	0
34.3	0
34.4	0
34.5	0
34.6	0
34.7	0
34.8	0
34.9	0
35	0
35.1	0
35.2	0
35.3	0
35.4	0
35.5	0
35.6	0
35.7	0
35.8	0
35.9	0
36	0
36.1	0
36.2	0
36.3	0
36.4	0
36.5	0
36.6	0
36.7	0
36.8	0
36.9	0
37	0
37.1	0
37.2	0
37.3	0
37.4	0
37.5	0
37.6	0
37.7	0
37.8	0
37.9	0
38	0
38.1	0
38.2	0
38.3	0
38.4	0
38.5	0
38.6	0
38.7	0
38.8	0
38.9	0
39	0
39.1	0
39.2	0
39.3	0
39.4	0
39.5	0
39.6	0
39.7	0
39.8	0
39.9	0
40	0
40.1	0
40.2	0
40.3	0
40.4	0
40.5	0
40.6	0
40.7	0
40.8	0
40.9	0
41	0
41.1	0
41.2	0
41.3	0
41.4	0
41.5	0
41.6	0
41.7	0
41.8	0
41.9	0
42	0
42.1	0
42.2	0
42.3	0
42.4	0
42.5	0
42.6	0
42.7	0
42.8	0
42.9	0
43	0
43.1	0
43.2	0
43.3	0
43.4	0
43.5	0
43.6	0
43.7	0
43.8	0
43.9	0
44	0
44.1	0
44.2	0
44.3	0
44.4	0
44.5	0
44.6	0
44.7	0
44.8	0
44.9	0
45	0
45.1	0
45.2	0
45.3	0
45.4	0
45.5	0
45.6	0
45.7	0
45.8	0
45.9	0
46	0
46.1	0
46.2	0
46.3	0
46.4	0
46.5	0
46.6	0
46.7	0
46.8	0
46.9	0
47	0
47.1	0
47.2	0
47.3	0
47.4	0
47.5	0
47.6	0
47.7	0
47.8	0
47.9	0
48	0
48.1	0
48.2	0
48.3	0
48.4	0
48.5	0
48.6	0
48.7	0
48.8	0
48.9	0
49	0
49.1	0
49.2	0
49.3	0
49.4	0
49.5	0
49.6	0
49.7	0
49.8	0
49.9	0
50	0
50.1	0
50.2	0
50.3	0
50.4	0
50.5	0
50.6	0
50.7	0
50.8	0
50.9	0
51	0
51.1	0
51.2	0
51.3	0
51.4	0
51.5	0
51.6	0
51.7	0
51.8	0
51.9	0
52	0
52.1	0
52.2	0
52.3	0
52.4	0
52.5	0
52.6	0
52.7	0
52.8	0
52.9	0
53	0
53.1	0
53.2	0
53.3	0
53.4	0
53.5	0
53.6	0
53.7	0
53.8	0
53.9	0
54	0
54.1	0
54.2	0
54.3	0
54.4	0
54.5	0
54.6	0
54.7	0
54.8	0
54.9	0
55	0
55.1	0
55.2	0
55.3	0
55.4	0
55.5	0
55.6	0
55.7	0
55.8	0
55.9	0
56	0
56.1	0
56.2	0
56.3	0
56.4	0
56.5	0
56.6	0
56.7	0
56.8	0
56.9	0
57	0
57.1	0
57.2	0
57.3	0
57.4	0
57.5	0
57.6	0
57.7	0
57.8	0
57.9	0
58	0
58.1	0
58.2	0
58.3	0
58.4	0
58.5	0
58.6	0
58.7	0
58.8	0
58.9	0
59	0
59.1	0
59.2	0
59.3	0
59.4	0
59.5	0
59.6	0
59.7	0
59.8	0
59.9	0
60	0
60.1	0
60.2	0
60.3	0
60.4	0
60.5	0
60.6	0
60.7	0
60.8	0
60.9	0
61	0
61.1	0
61.2	0
61.3	0
61.4	0
61.5	0
61.6	0
61.7	0
61.8	0
61.9	0
62	0
62.1	0
62.2	0
62.3	0
62.4	0
62.5	0
62.6	0
62.7	0
62.8	0
62.9	0
63	0
63.1	0
63.2	0
63.3	0
63.4	0
63.5	0
63.6	0
63.7	0
63.8	0
63.9	0
64	0
64.1	0
64.2	0
64.3	0
64.4	0
64.5	0
64.6	0
64.7	0
64.8	0
64.9	0
65	0
65.1	0
65.2	0
65.3	0
65.4	0
65.5	0
65.6	0
65.7	0
65.8	0
65.9	0
66	0
66.1	0
66.2	0
66.3	0
66.4	0
66.5	0
66.6	0
66.7	0
66.8	0
66.9	0
67	0
67.1	0
67.2	0
67.3	0
67.4	0
67.5	0
67.6	0
67.7	0
67.8	0
67.9	0
68	0
68.1	0
68.2	0
68.3	0
68.4	0
68.5	0
68.6	0
68.7	0
68.8	0
68.9	0
69	0
69.1	0
69.2	0
69.3	0
69.4	0
69.5	0
69.6	0
69.7	0
69.8	0
69.9	0
70	0
70.1	0
70.2	0
70.3	0
70.4	0
70.5	0
70.6	0
70.7	0
70.8	0
70.9	0
71	0
71.1	0
71.2	0
71.3	0
71.4	0
71.5	0
71.6	0
71.7	0
71.8	0
71.9	0
72	0
72.1	0
72.2	0
72.3	0
72.4	0
72.5	0
72.6	0
72.7	0
72.8	0
72.9	0
73	0
73.1	0
73.2	0
73.3	0
73.4	0
73.5	0
73.6	0
73.7	0
73.8	0
73.9	0
74	0
74.1	0
74.2	0
74.3	0
74.4	0
74.5	0
74.6	0
74.7	0
74.8	0
74.9	0
75	0
75.1	0
75.2	0
75.3	0
75.4	0
75.5	0
75.6	0
75.7	0
75.8	0
75.9	0
76	0
76.1	0
76.2	0
76.3	0
76.4	0
76.5	0
76.6	0
76.7	0
76.8	0
76.9	0
77	0
77.1	0
77.2	0
77.3	0
77.4	0
77.5	0
77.6	0
77.7	0
77.8	0
77.9	0
78	0
78.1	0
78.2	0
78.3	0
78.4	0
78.5	0
78.6	0
78.7	0
78.8	0
78.9	0
79	0
79.1	0
79.2	0
79.3	0
79.4	0
79.5	0
79.6	0
79.7	0
79.8	0
79.9	0
80	0
80.1	0
80.2	0
80.3	0
80.4	0
80.5	0
80.6	0
80.7	0
80.8	0
80.9	0
81	0
81.1	0
81.2	0
81.3	0
81.4	0
81.5	0
81.6	0
81.7	0
81.8	0
81.9	0
82	0
82.1	0
82.2	0
82.3	0
82.4	0
82.5	0
82.6	0
82.7	0
82.8	0
82.9	0
83	0
83.1	0
83.2	0
83.3	0
83.4	0
83.5	0
83.6	0
83.7	0
83.8	0
83.9	0
84	0
84.1	0
84.2	0
84.3	0
84.4	0
84.5	0
84.6	0
84.7	0
84.8	0
84.9	0
85	0
85.1	0
85.2	0
85.3	0
85.4	0
85.5	0
85.6	0
85.7	0
85.8	0
85.9	0
86	0
86.1	0
86.2	0
86.3	0
86.4	0
86.5	0
86.6	0
86.7	0
86.8	0
86.9	0
87	0
87.1	0
87.2	0
87.3	0
87.4	0
87.5	0
87.6	0
87.7	0
87.8	0
87.9	0
88	0
88.1	0
88.2	0
88.3	0
88.4	0
88.5	0
88.6	0
88.7	0
88.8	0
88.9	0
89	0
89.1	0
89.2	0
89.3	0
89.4	0
89.5	0
89.6	0
89.7	0
89.8	0
89.9	0
90	0
90.1	0
90.2	0
90.3	0
90.4	0
90.5	0
90.6	0
90.7	0
90.8	0
90.9	0
91	0
91.1	0
91.2	0
91.3	0
91.4	0
91.5	0
91.6	0
91.7	0
91.8	0
91.9	0
92	0
92.1	0
92.2	0
92.3	0
92.4	0
92.5	0
92.6	0
92.7	0
92.8	0
92.9	0
93	0
93.1	0
93.2	0
93.3	0
93.4	0
93.5	0
93.6	0
93.7	0
93.8	0
93.9	0
94	0
94.1	0
94.2	0
94.3	0
94.4	0
94.5	0
94.6	0
94.7	0
94.8	0
94.9	0
95	0
95.1	0
95.2	0
95.3	0
95.4	0
95.5	0
95.6	0
95.7	0
95.8	0
95.9	0
96	0
96.1	0
96.2	0
96.3	0
96.4	0
96.5	0
96.6	0
96.7	0
96.8	0
96.9	0
97	0
97.1	0
97.2	0
97.3	0
97.4	0
97.5	0
97.6	0
97.7	0
97.8	0
97.9	0
98	0
98.1	0
98.2	0
98.3	0
98.4	0
98.5	0
98.6	0
98.7	0
98.8	0
98.9	0
99	0
99.1	0
99.2	0
99.3	0
99.4	0
99.5	0
99.6	0
99.7	0
99.8	0
99.9	0
100	0
100.1	0.202571
100.2	0.346643
100.3	0.450357
100.4	0.526929
100.5	0.584571
100.6	0.634786
100.7	0.671286
100.8	0.702286
100.9	0.725214
101	0.743786
101.1	0.758429
101.2	0.770714
101.3	0.784357
101.4	0.7955
101.5	0.805143
101.6	0.812643
101.7	0.820143
101.8	0.826286
101.9	0.831357
102	0.833786
102.1	0.836929
102.2	0.836143
102.3	0.837857
102.4	0.840429
102.5	0.845571
102.6	0.846429
102.7	0.847929
102.8	0.852
102.9	0.8535
103	0.854429
103.1	0.856214
103.2	0.859071
103.3	0.86
103.4	0.862643
103.5	0.863214
103.6	0.861143
103.7	0.860214
103.8	0.860429
103.9	0.862214
104	0.860571
104.1	0.860786
104.2	0.860071
104.3	0.861286
104.4	0.863786
104.5	0.863
104.6	0.865571
104.7	0.865143
104.8	0.864429
104.9	0.865214
105	0.866071
105.1	0.867429
105.2	0.869071
105.3	0.869286
105.4	0.868714
105.5	0.868286
105.6	0.866214
105.7	0.867643
105.8	0.867286
105.9	0.868214
106	0.871071
106.1	0.869357
106.2	0.868571
106.3	0.867786
106.4	0.869071
106.5	0.869857
106.6	0.8695
106.7	0.871571
106.8	0.870786
106.9	0.870571
107	0.871714
107.1	0.8685
107.2	0.869143
107.3	0.872714
107.4	0.873071
107.5	0.873857
107.6	0.874286
107.7	0.873857
107.8	0.877571
107.9	0.878786
108	0.882143
108.1	0.881
108.2	0.880786
108.3	0.883286
108.4	0.881429
108.5	0.881143
108.6	0.880786
108.7	0.880857
108.8	0.882
108.9	0.881786
109	0.882071
109.1	0.883429
109.2	0.884143
109.3	0.883
109.4	0.882143
109.5	0.884
109.6	0.882286
109.7	0.8835
109.8	0.8855
109.9	0.885143
110	0.882786
110.1	0.885214
110.2	0.885143
110.3	0.885286
110.4	0.885357
110.5	0.886
110.6	0.886714
110.7	0.890571
110.8	0.892429
110.9	0.893
111	0.891786
111.1	0.895214
111.2	0.895214
111.3	0.893286
111.4	0.894429
111.5	0.892357
111.6	0.891714
111.7	0.891429
111.8	0.891571
111.9	0.891071
112	0.891286
112.1	0.894071
112.2	0.894714
112.3	0.895214
112.4	0.894714
112.5	0.894714
112.6	0.892643
112.7	0.894143
112.8	0.894786
112.9	0.895357
113	0.893786
113.1	0.896714
113.2	0.897071
113.3	0.898214
113.4	0.899071
113.5	0.899143
113.6	0.898786
113.7	0.897357
113.8	0.899071
113.9	0.898857
114	0.899929
114.1	0.899571
114.2	0.898
114.3	0.895857
114.4	0.894214
114.5	0.8965
114.6	0.897357
114.7	0.897786
114.8	0.898214
114.9	0.899143
115	0.900071
115.1	0.8995
115.2	0.899357
115.3	0.901286
115.4	0.902857
115.5	0.903429
115.6	0.903857
115.7	0.902214
115.8	0.901571
115.9	0.905214
116	0.906929
116.1	0.906786
116.2	0.906143
116.3	0.903571
116.4	0.904714
116.5	0.903071
116.6	0.901143
116.7	0.901286
116.8	0.902429
116.9	0.903214
117	0.902
117.1	0.902143
117.2	0.902643
117.3	0.9035
117.4	0.905643
117.5	0.908071
117.6	0.907286
117.7	0.908357
117.8	0.909357
117.9	0.911071
118	0.910143
118.1	0.910071
118.2	0.908286
118.3	0.909071
118.4	0.911643
118.5	0.9095
118.6	0.909429
118.7	0.909714
118.8	0.909786
118.9	0.908143
119	0.909929
119.1	0.910571
119.2	0.909857
119.3	0.911071
119.4	0.912286
119.5	0.913
119.6	0.914071
119.7	0.911929
119.8	0.9135
119.9	0.913571
120	0.913857
120.1	0.915143
120.2	0.916643
120.3	0.914214
120.4	0.915571
120.5	0.917571
120.6	0.9165
120.7	0.917357
120.8	0.917143
120.9	0.918071
121	0.918571
121.1	0.918929
121.2	0.919357
121.3	0.9185
121.4	0.918143
121.5	0.916143
121.6	0.914714
121.7	0.916357
121.8	0.916214
121.9	0.918143
122	0.918714
122.1	0.9205
122.2	0.920357
122.3	0.920643
122.4	0.920643
122.5	0.921071
122.6	0.920286
122.7	0.920714
122.8	0.920286
122.9	0.920429
123	0.920786
123.1	0.921357
123.2	0.921143
123.3	0.922357
123.4	0.923
123.5	0.924929
123.6	0.925
123.7	0.924643
123.8	0.924857
123.9	0.922857
124	0.922857
124.1	0.923
124.2	0.923643
124.3	0.923
124.4	0.922357
124.5	0.923071
124.6	0.9235
124.7	0.924643
124.8	0.925429
124.9	0.926286
125	0.924929
125.1	0.926357
125.2	0.927143
125.3	0.925786
125.4	0.925857
125.5	0.925286
125.6	0.924643
125.7	0.923357
125.8	0.924786
125.9	0.926786
126	0.926571
126.1	0.927214
126.2	0.928286
126.3	0.928643
126.4	0.927929
126.5	0.928571
126.6	0.930071
126.7	0.929071
126.8	0.93
126.9	0.929429
127	0.931786
127.1	0.932143
127.2	0.931643
127.3	0.933143
127.4	0.933357
127.5	0.933929
127.6	0.932571
127.7	0.931643
127.8	0.931357
127.9	0.931857
128	0.932214
128.1	0.932286
128.2	0.932071
128.3	0.930071
128.4	0.930929
128.5	0.931286
128.6	0.9315
128.7	0.929357
128.8	0.929929
128.9	0.929214
129	0.929786
129.1	0.929571
129.2	0.929643
129.3	0.932071
129.4	0.933286
129.5	0.933929
129.6	0.933143
129.7	0.932929
129.8	0.932286
129.9	0.933214
130	0.9325
130.1	0.932357
130.2	0.932786
130.3	0.932357
130.4	0.932429
130.5	0.931929
130.6	0.931357
130.7	0.933214
130.8	0.9335
130.9	0.932714
131	0.932214
131.1	0.932
131.2	0.930643
131.3	0.930071
131.4	0.930286
131.5	0.931571
131.6	0.932357
131.7	0.932714
131.8	0.930929
131.9	0.930071
132	0.930643
132.1	0.931214
132.2	0.931857
132.3	0.933357
132.4	0.933571
132.5	0.935071
132.6	0.933
132.7	0.932143
132.8	0.9335
132.9	0.933857
133	0.935286
133.1	0.935214
133.2	0.935286
133.3	0.934571
133.4	0.933071
133.5	0.934714
133.6	0.935143
133.7	0.9355
133.8	0.934857
133.9	0.935357
134	0.933571
134.1	0.934357
134.2	0.934071
134.3	0.935429
134.4	0.936286
134.5	0.935214
134.6	0.934214
134.7	0.9355
134.8	0.936643
134.9	0.936643
135	0.935143
135.1	0.935786
135.2	0.936286
135.3	0.936357
135.4	0.937786
135.5	0.938929
135.6	0.9385
135.7	0.9385
135.8	0.939786
135.9	0.94
136	0.938786
136.1	0.9375
136.2	0.9375
136.3	0.938286
136.4	0.939286
136.5	0.939429
136.6	0.940429
136.7	0.941571
136.8	0.942286
136.9	0.943714
137	0.943429
137.1	0.942357
137.2	0.9425
137.3	0.941429
137.4	0.9415
137.5	0.941714
137.6	0.940857
137.7	0.939286
137.8	0.939786
137.9	0.940071
138	0.939286
138.1	0.940429
138.2	0.939643
138.3	0.939857
138.4	0.939214
138.5	0.9395
138.6	0.940071
138.7	0.942714
138.8	0.942643
138.9	0.944
139	0.941714
139.1	0.941571
139.2	0.941429
139.3	0.941929
139.4	0.942214
139.5	0.943071
139.6	0.943643
139.7	0.943571
139.8	0.943714
139.9	0.946286
140	0.945
140.1	0.944786
140.2	0.945357
140.3	0.945643
140.4	0.9445
140.5	0.944571
140.6	0.945214
140.7	0.944214
140.8	0.943786
140.9	0.943143
141	0.942786
141.1	0.941214
141.2	0.940929
141.3	0.942714
141.4	0.942286
141.5	0.941929
141.6	0.942429
141.7	0.942857
141.8	0.944
141.9	0.943786
142	0.942143
142.1	0.942786
142.2	0.941929
142.3	0.942571
142.4	0.943214
142.5	0.943429
142.6	0.942786
142.7	0.943
142.8	0.944571
142.9	0.947571
143	0.947071
143.1	0.947071
143.2	0.945786
143.3	0.947071
143.4	0.946286
143.5	0.946643
143.6	0.945286
143.7	0.944786
143.8	0.945857
143.9	0.945929
144	0.945571
144.1	0.9475
144.2	0.948
144.3	0.947786
144.4	0.945714
144.5	0.946071
144.6	0.946714
144.7	0.947
144.8	0.946714
144.9	0.946929
145	0.947857
145.1	0.9485
145.2	0.948214
145.3	0.948
145.4	0.948286
145.5	0.948786
145.6	0.948714
145.7	0.947214
145.8	0.947857
145.9	0.948143
146	0.950143
146.1	0.950571
146.2	0.9495
146.3	0.949786
146.4	0.9495
146.5	0.948786
146.6	0.947214
146.7	0.947571
146.8	0.947786
146.9	0.9485
147	0.949714
147.1	0.949214
147.2	0.947643
147.3	0.948571
147.4	0.949643
147.5	0.950143
147.6	0.949286
147.7	0.949643
147.8	0.949071
147.9	0.948786
148	0.948357
148.1	0.949
148.2	0.950071
148.3	0.950571
148.4	0.9505
148.5	0.950214
148.6	0.950643
148.7	0.950071
148.8	0.948643
148.9	0.949143
149	0.948714
149.1	0.949286
149.2	0.950143
149.3	0.951143
149.4	0.952429
149.5	0.952929
149.6	0.953071
149.7	0.952071
149.8	0.951143
149.9	0.952643
150	0.951786
150.1	0.950214
150.2	0.949357
150.3	0.948643
150.4	0.951286
150.5	0.950714
150.6	0.9515
150.7	0.951571
150.8	0.951357
150.9	0.952214
151	0.952286
151.1	0.952143
151.2	0.951286
151.3	0.951643
151.4	0.951071
151.5	0.952071
151.6	0.952143
151.7	0.951357
151.8	0.9505
151.9	0.951071
152	0.952429
152.1	0.953643
152.2	0.952286
152.3	0.952286
152.4	0.951571
152.5	0.951929
152.6	0.95
152.7	0.951786
152.8	0.952714
152.9	0.951643
153	0.950929
153.1	0.9515
153.2	0.951429
153.3	0.952786
153.4	0.953786
153.5	0.954714
153.6	0.955
153.7	0.955643
153.8	0.954714
153.9	0.9545
154	0.955571
154.1	0.954
154.2	0.9525
154.3	0.953
154.4	0.953786
154.5	0.953071
154.6	0.953857
154.7	0.955714
154.8	0.956143
154.9	0.9555
155	0.955357
155.1	0.955857
155.2	0.955929
155.3	0.957
155.4	0.955214
155.5	0.953286
155.6	0.954
155.7	0.9555
155.8	0.955571
155.9	0.955071
156	0.956786
156.1	0.957143
156.2	0.957357
156.3	0.956214
156.4	0.957643
156.5	0.956571
156.6	0.956143
156.7	0.956357
156.8	0.955357
156.9	0.955214
157	0.955786
157.1	0.956786
157.2	0.9575
157.3	0.957643
157.4	0.956714
157.5	0.955357
157.6	0.954286
157.7	0.953714
157.8	0.952929
157.9	0.952429
158	0.9545
158.1	0.955643
158.2	0.956643
158.3	0.9565
158.4	0.955643
158.5	0.956714
158.6	0.955786
158.7	0.954571
158.8	0.954571
158.9	0.955143
159	0.956571
159.1	0.958
159.2	0.957786
159.3	0.958
159.4	0.958143
159.5	0.958286
159.6	0.958
159.7	0.957929
159.8	0.957857
159.9	0.957714
160	0.956286
160.1	0.955143
160.2	0.955
160.3	0.956357
160.4	0.957143
160.5	0.957643
160.6	0.957143
160.7	0.956571
160.8	0.958071
160.9	0.957143
161	0.957429
161.1	0.957071
161.2	0.956357
161.3	0.954857
161.4	0.954071
161.5	0.9545
161.6	0.954214
161.7	0.955214
161.8	0.955571
161.9	0.955143
162	0.955429
162.1	0.956071
162.2	0.9565
162.3	0.957214
162.4	0.956857
162.5	0.958714
162.6	0.958643
162.7	0.960071
162.8	0.959286
162.9	0.9595
163	0.96
163.1	0.960786
163.2	0.9605
163.3	0.960214
163.4	0.960714
163.5	0.9615
163.6	0.960857
163.7	0.962286
163.8	0.962929
163.9	0.963143
164	0.962929
164.1	0.960786
164.2	0.960071
164.3	0.959929
164.4	0.958929
164.5	0.956
164.6	0.957929
164.7	0.957429
164.8	0.957857
164.9	0.957571
165	0.957643
165.1	0.957929
165.2	0.959571
165.3	0.959143
165.4	0.957643
165.5	0.957
165.6	0.958571
165.7	0.9585
165.8	0.959786
165.9	0.960214
166	0.959857
166.1	0.96
166.2	0.958857
166.3	0.958714
166.4	0.957929
166.5	0.958571
166.6	0.9585
166.7	0.958786
166.8	0.959286
166.9	0.958143
167	0.958429
167.1	0.956714
167.2	0.958429
167.3	0.959214
167.4	0.959357
167.5	0.960643
167.6	0.960143
167.7	0.959786
167.8	0.959286
167.9	0.958714
168	0.957929
168.1	0.958643
168.2	0.958357
168.3	0.959214
168.4	0.959643
168.5	0.958286
168.6	0.957571
168.7	0.958357
168.8	0.960143
168.9	0.9605
169	0.9605
169.1	0.960071
169.2	0.960357
169.3	0.959857
169.4	0.96
169.5	0.960643
169.6	0.9605
169.7	0.960643
169.8	0.959929
169.9	0.959929
170	0.960214
170.1	0.961714
170.2	0.961
170.3	0.962071
170.4	0.962357
170.5	0.961143
170.6	0.960929
170.7	0.959929
170.8	0.96
170.9	0.96
171	0.960857
171.1	0.960286
171.2	0.959571
171.3	0.959571
171.4	0.961071
171.5	0.960857
171.6	0.959857
171.7	0.959714
171.8	0.959929
171.9	0.961143
172	0.962643
172.1	0.963
172.2	0.962214
172.3	0.962286
172.4	0.963286
172.5	0.961929
172.6	0.960357
172.7	0.960857
172.8	0.9615
172.9	0.962214
173	0.962643
173.1	0.963357
173.2	0.963286
173.3	0.961571
173.4	0.9625
173.5	0.961643
173.6	0.961071
173.7	0.960786
173.8	0.962286
173.9	0.961714
174	0.961714
174.1	0.960857
174.2	0.959929
174.3	0.960643
174.4	0.961
174.5	0.9615
174.6	0.963286
174.7	0.962786
174.8	0.962
174.9	0.962
175	0.962929
175.1	0.962286
175.2	0.963286
175.3	0.963214
175.4	0.962786
175.5	0.962214
175.6	0.961429
175.7	0.961571
175.8	0.962
175.9	0.963143
176	0.963929
176.1	0.963643
176.2	0.961571
176.3	0.9615
176.4	0.962
176.5	0.961929
176.6	0.960643
176.7	0.960929
176.8	0.962071
176.9	0.962643
177	0.962
177.1	0.961714
177.2	0.960929
177.3	0.960286
177.4	0.960714
177.5	0.960929
177.6	0.963429
177.7	0.964571
177.8	0.963571
177.9	0.962286
178	0.9625
178.1	0.961786
178.2	0.962071
178.3	0.963286
178.4	0.964
178.5	0.963929
178.6	0.961929
178.7	0.963071
178.8	0.963571
178.9	0.9645
179	0.963929
179.1	0.964071
179.2	0.963357
179.3	0.965071
179.4	0.964429
179.5	0.964857
179.6	0.964429
179.7	0.963
179.8	0.963214
179.9	0.963357
180	0.962714
180.1	0.962786
180.2	0.963
180.3	0.962071
180.4	0.962071
180.5	0.962714
180.6	0.9615
180.7	0.961786
180.8	0.961
180.9	0.960857
181	0.962286
181.1	0.962714
181.2	0.961929
181.3	0.9615
181.4	0.960714
181.5	0.960143
181.6	0.959786
181.7	0.960929
181.8	0.960571
181.9	0.960357
182	0.962214
182.1	0.961429
182.2	0.961286
182.3	0.961286
182.4	0.961714
182.5	0.960929
182.6	0.961071
182.7	0.963143
182.8	0.962714
182.9	0.962214
183	0.962143
183.1	0.963357
183.2	0.9625
183.3	0.963
183.4	0.964214
183.5	0.963
183.6	0.961
183.7	0.960929
183.8	0.959643
183.9	0.960143
184	0.961071
184.1	0.961929
184.2	0.963286
184.3	0.963643
184.4	0.964143
184.5	0.965214
184.6	0.964071
184.7	0.964286
184.8	0.964643
184.9	0.963714
185	0.963429
185.1	0.962929
185.2	0.962071
185.3	0.963286
185.4	0.963214
185.5	0.964643
185.6	0.964429
185.7	0.963857
185.8	0.961429
185.9	0.962
186	0.962714
186.1	0.963143
186.2	0.964071
186.3	0.964
186.4	0.965143
186.5	0.965071
186.6	0.964429
186.7	0.962786
186.8	0.964214
186.9	0.9635
187	0.963929
187.1	0.963714
187.2	0.962214
187.3	0.962786
187.4	0.961786
187.5	0.962786
187.6	0.963357
187.7	0.962714
187.8	0.964571
187.9	0.964286
188	0.962929
188.1	0.962786
188.2	0.963786
188.3	0.963286
188.4	0.963571
188.5	0.963429
188.6	0.964429
188.7	0.964
188.8	0.964643
188.9	0.964071
189	0.965
189.1	0.964786
189.2	0.964071
189.3	0.964143
189.4	0.963857
189.5	0.963857
189.6	0.963714
189.7	0.964214
189.8	0.964214
189.9	0.963571
190	0.963357
190.1	0.963571
190.2	0.962286
190.3	0.962214
190.4	0.962286
190.5	0.962571
190.6	0.963286
190.7	0.963
190.8	0.962929
190.9	0.962357
191	0.962
191.1	0.963214
191.2	0.963214
191.3	0.962857
191.4	0.963
191.5	0.964214
191.6	0.964286
191.7	0.965357
191.8	0.965143
191.9	0.964857
192	0.964929
192.1	0.966143
192.2	0.965929
192.3	0.964714
192.4	0.963571
192.5	0.963714
192.6	0.966
192.7	0.966286
192.8	0.964929
192.9	0.964214
193	0.963214
193.1	0.963857
193.2	0.964357
193.3	0.964643
193.4	0.965357
193.5	0.964857
193.6	0.962786
193.7	0.9625
193.8	0.9615
193.9	0.962071
194	0.963643
194.1	0.963786
194.2	0.964643
194.3	0.965214
194.4	0.965286
194.5	0.964357
194.6	0.963571
194.7	0.964071
194.8	0.964286
194.9	0.963214
195	0.962357
195.1	0.962071
195.2	0.963143
195.3	0.963643
195.4	0.9625
195.5	0.963
195.6	0.964786
195.7	0.964571
195.8	0.964357
195.9	0.964929
196	0.965214
196.1	0.9645
196.2	0.964857
196.3	0.964571
196.4	0.965214
196.5	0.964214
196.6	0.965357
196.7	0.964286
196.8	0.964643
196.9	0.965429
197	0.965357
197.1	0.965286
197.2	0.965071
197.3	0.964214
197.4	0.963857
197.5	0.965286
197.6	0.965571
197.7	0.965643
197.8	0.9655
197.9	0.966429
198	0.9665
198.1	0.965857
198.2	0.964929
198.3	0.964786
198.4	0.965143
198.5	0.964286
198.6	0.965
198.7	0.965929
198.8	0.964714
198.9	0.964214
199	0.963571
199.1	0.9635
199.2	0.963929
199.3	0.962929
199.4	0.963786
199.5	0.963929
199.6	0.964214
199.7	0.963929
199.8	0.965
199.9	0.964571
200	0.964714
[truncated: 14,000 more rows]
