# Supplementary material for: Bayesian inference of kinetic schemes for ion channels by Kalman filtering
Source: eLife journal article supplement (doi:10.7554/elife.62714), 2022-05-04
Supplement: fig4-data5 [file 1_Sim_N_7000_Strom_MW_4M.xlsx]

## Sheet: Tabelle1
0.1	0
0.2	0
0.3	0
0.4	0
0.5	0
0.6	0
0.7	0
0.8	0
0.9	0
1	0
1.1	0
1.2	0
1.3	0
1.4	0
1.5	0
1.6	0
1.7	0
1.8	0
1.9	0
2	0
2.1	0
2.2	0
2.3	0
2.4	0
2.5	0
2.6	0
2.7	0
2.8	0
2.9	0
3	0
3.1	0
3.2	0
3.3	0
3.4	0
3.5	0
3.6	0
3.7	0
3.8	0
3.9	0
4	0
4.1	0
4.2	0
4.3	0
4.4	0
4.5	0
4.6	0
4.7	0
4.8	0
4.9	0
5	0
5.1	0
5.2	0
5.3	0
5.4	0
5.5	0
5.6	0
5.7	0
5.8	0
5.9	0
6	0
6.1	0
6.2	0
6.3	0
6.4	0
6.5	0
6.6	0
6.7	0
6.8	0
6.9	0
7	0
7.1	0
7.2	0
7.3	0
7.4	0
7.5	0
7.6	0
7.7	0
7.8	0
7.9	0
8	0
8.1	0
8.2	0
8.3	0
8.4	0
8.5	0
8.6	0
8.7	0
8.8	0
8.9	0
9	0
9.1	0
9.2	0
9.3	0
9.4	0
9.5	0
9.6	0
9.7	0
9.8	0
9.9	0
10	0
10.1	0
10.2	0
10.3	0
10.4	0
10.5	0
10.6	0
10.7	0
10.8	0
10.9	0
11	0
11.1	0
11.2	0
11.3	0
11.4	0
11.5	0
11.6	0
11.7	0
11.8	0
11.9	0
12	0
12.1	0
12.2	0
12.3	0
12.4	0
12.5	0
12.6	0
12.7	0
12.8	0
12.9	0
13	0
13.1	0
13.2	0
13.3	0
13.4	0
13.5	0
13.6	0
13.7	0
13.8	0
13.9	0
14	0
14.1	0
14.2	0
14.3	0
14.4	0
14.5	0
14.6	0
14.7	0
14.8	0
14.9	0
15	0
15.1	0
15.2	0
15.3	0
15.4	0
15.5	0
15.6	0
15.7	0
15.8	0
15.9	0
16	0
16.1	0
16.2	0
16.3	0
16.4	0
16.5	0
16.6	0
16.7	0
16.8	0
16.9	0
17	0
17.1	0
17.2	0
17.3	0
17.4	0
17.5	0
17.6	0
17.7	0
17.8	0
17.9	0
18	0
18.1	0
18.2	0
18.3	0
18.4	0
18.5	0
18.6	0
18.7	0
18.8	0
18.9	0
19	0
19.1	0
19.2	0
19.3	0
19.4	0
19.5	0
19.6	0
19.7	0
19.8	0
19.9	0
20	0
20.1	0
20.2	0
20.3	0
20.4	0
20.5	0
20.6	0
20.7	0
20.8	0
20.9	0
21	0
21.1	0
21.2	0
21.3	0
21.4	0
21.5	0
21.6	0
21.7	0
21.8	0
21.9	0
22	0
22.1	0
22.2	0
22.3	0
22.4	0
22.5	0
22.6	0
22.7	0
22.8	0
22.9	0
23	0
23.1	0
23.2	0
23.3	0
23.4	0
23.5	0
23.6	0
23.7	0
23.8	0
23.9	0
24	0
24.1	0
24.2	0
24.3	0
24.4	0
24.5	0
24.6	0
24.7	0
24.8	0
24.9	0
25	0
25.1	0
25.2	0
25.3	0
25.4	0
25.5	0
25.6	0
25.7	0
25.8	0
25.9	0
26	0
26.1	0
26.2	0
26.3	0
26.4	0
26.5	0
26.6	0
26.7	0
26.8	0
26.9	0
27	0
27.1	0
27.2	0
27.3	0
27.4	0
27.5	0
27.6	0
27.7	0
27.8	0
27.9	0
28	0
28.1	0
28.2	0
28.3	0
28.4	0
28.5	0
28.6	0
28.7	0
28.8	0
28.9	0
29	0
29.1	0
29.2	0
29.3	0
29.4	0
29.5	0
29.6	0
29.7	0
29.8	0
29.9	0
30	0
30.1	0
30.2	0
30.3	0
30.4	0
30.5	0
30.6	0
30.7	0
30.8	0
30.9	0
31	0
31.1	0
31.2	0
31.3	0
31.4	0
31.5	0
31.6	0
31.7	0
31.8	0
31.9	0
32	0
32.1	0
32.2	0
32.3	0
32.4	0
32.5	0
32.6	0
32.7	0
32.8	0
32.9	0
33	0
33.1	0
33.2	0
33.3	0
33.4	0
33.5	0
33.6	0
33.7	0
33.8	0
33.9	0
34	0
34.1	0
34.2	0
34.3	0
34.4	0
34.5	0
34.6	0
34.7	0
34.8	0
34.9	0
35	0
35.1	0
35.2	0
35.3	0
35.4	0
35.5	0
35.6	0
35.7	0
35.8	0
35.9	0
36	0
36.1	0
36.2	0
36.3	0
36.4	0
36.5	0
36.6	0
36.7	0
36.8	0
36.9	0
37	0
37.1	0
37.2	0
37.3	0
37.4	0
37.5	0
37.6	0
37.7	0
37.8	0
37.9	0
38	0
38.1	0
38.2	0
38.3	0
38.4	0
38.5	0
38.6	0
38.7	0
38.8	0
38.9	0
39	0
39.1	0
39.2	0
39.3	0
39.4	0
39.5	0
39.6	0
39.7	0
39.8	0
39.9	0
40	0
40.1	0
40.2	0
40.3	0
40.4	0
40.5	0
40.6	0
40.7	0
40.8	0
40.9	0
41	0
41.1	0
41.2	0
41.3	0
41.4	0
41.5	0
41.6	0
41.7	0
41.8	0
41.9	0
42	0
42.1	0
42.2	0
42.3	0
42.4	0
42.5	0
42.6	0
42.7	0
42.8	0
42.9	0
43	0
43.1	0
43.2	0
43.3	0
43.4	0
43.5	0
43.6	0
43.7	0
43.8	0
43.9	0
44	0
44.1	0
44.2	0
44.3	0
44.4	0
44.5	0
44.6	0
44.7	0
44.8	0
44.9	0
45	0
45.1	0
45.2	0
45.3	0
45.4	0
45.5	0
45.6	0
45.7	0
45.8	0
45.9	0
46	0
46.1	0
46.2	0
46.3	0
46.4	0
46.5	0
46.6	0
46.7	0
46.8	0
46.9	0
47	0
47.1	0
47.2	0
47.3	0
47.4	0
47.5	0
47.6	0
47.7	0
47.8	0
47.9	0
48	0
48.1	0
48.2	0
48.3	0
48.4	0
48.5	0
48.6	0
48.7	0
48.8	0
48.9	0
49	0
49.1	0
49.2	0
49.3	0
49.4	0
49.5	0
49.6	0
49.7	0
49.8	0
49.9	0
50	0
50.1	0
50.2	0
50.3	0
50.4	0
50.5	0
50.6	0
50.7	0
50.8	0
50.9	0
51	0
51.1	0
51.2	0
51.3	0
51.4	0
51.5	0
51.6	0
51.7	0
51.8	0
51.9	0
52	0
52.1	0
52.2	0
52.3	0
52.4	0
52.5	0
52.6	0
52.7	0
52.8	0
52.9	0
53	0
53.1	0
53.2	0
53.3	0
53.4	0
53.5	0
53.6	0
53.7	0
53.8	0
53.9	0
54	0
54.1	0
54.2	0
54.3	0
54.4	0
54.5	0
54.6	0
54.7	0
54.8	0
54.9	0
55	0
55.1	0
55.2	0
55.3	0
55.4	0
55.5	0
55.6	0
55.7	0
55.8	0
55.9	0
56	0
56.1	0
56.2	0
56.3	0
56.4	0
56.5	0
56.6	0
56.7	0
56.8	0
56.9	0
57	0
57.1	0
57.2	0
57.3	0
57.4	0
57.5	0
57.6	0
57.7	0
57.8	0
57.9	0
58	0
58.1	0
58.2	0
58.3	0
58.4	0
58.5	0
58.6	0
58.7	0
58.8	0
58.9	0
59	0
59.1	0
59.2	0
59.3	0
59.4	0
59.5	0
59.6	0
59.7	0
59.8	0
59.9	0
60	0
60.1	0
60.2	0
60.3	0
60.4	0
60.5	0
60.6	0
60.7	0
60.8	0
60.9	0
61	0
61.1	0
61.2	0
61.3	0
61.4	0
61.5	0
61.6	0
61.7	0
61.8	0
61.9	0
62	0
62.1	0
62.2	0
62.3	0
62.4	0
62.5	0
62.6	0
62.7	0
62.8	0
62.9	0
63	0
63.1	0
63.2	0
63.3	0
63.4	0
63.5	0
63.6	0
63.7	0
63.8	0
63.9	0
64	0
64.1	0
64.2	0
64.3	0
64.4	0
64.5	0
64.6	0
64.7	0
64.8	0
64.9	0
65	0
65.1	0
65.2	0
65.3	0
65.4	0
65.5	0
65.6	0
65.7	0
65.8	0
65.9	0
66	0
66.1	0
66.2	0
66.3	0
66.4	0
66.5	0
66.6	0
66.7	0
66.8	0
66.9	0
67	0
67.1	0
67.2	0
67.3	0
67.4	0
67.5	0
67.6	0
67.7	0
67.8	0
67.9	0
68	0
68.1	0
68.2	0
68.3	0
68.4	0
68.5	0
68.6	0
68.7	0
68.8	0
68.9	0
69	0
69.1	0
69.2	0
69.3	0
69.4	0
69.5	0
69.6	0
69.7	0
69.8	0
69.9	0
70	0
70.1	0
70.2	0
70.3	0
70.4	0
70.5	0
70.6	0
70.7	0
70.8	0
70.9	0
71	0
71.1	0
71.2	0
71.3	0
71.4	0
71.5	0
71.6	0
71.7	0
71.8	0
71.9	0
72	0
72.1	0
72.2	0
72.3	0
72.4	0
72.5	0
72.6	0
72.7	0
72.8	0
72.9	0
73	0
73.1	0
73.2	0
73.3	0
73.4	0
73.5	0
73.6	0
73.7	0
73.8	0
73.9	0
74	0
74.1	0
74.2	0
74.3	0
74.4	0
74.5	0
74.6	0
74.7	0
74.8	0
74.9	0
75	0
75.1	0
75.2	0
75.3	0
75.4	0
75.5	0
75.6	0
75.7	0
75.8	0
75.9	0
76	0
76.1	0
76.2	0
76.3	0
76.4	0
76.5	0
76.6	0
76.7	0
76.8	0
76.9	0
77	0
77.1	0
77.2	0
77.3	0
77.4	0
77.5	0
77.6	0
77.7	0
77.8	0
77.9	0
78	0
78.1	0
78.2	0
78.3	0
78.4	0
78.5	0
78.6	0
78.7	0
78.8	0
78.9	0
79	0
79.1	0
79.2	0
79.3	0
79.4	0
79.5	0
79.6	0
79.7	0
79.8	0
79.9	0
80	0
80.1	0
80.2	0
80.3	0
80.4	0
80.5	0
80.6	0
80.7	0
80.8	0
80.9	0
81	0
81.1	0
81.2	0
81.3	0
81.4	0
81.5	0
81.6	0
81.7	0
81.8	0
81.9	0
82	0
82.1	0
82.2	0
82.3	0
82.4	0
82.5	0
82.6	0
82.7	0
82.8	0
82.9	0
83	0
83.1	0
83.2	0
83.3	0
83.4	0
83.5	0
83.6	0
83.7	0
83.8	0
83.9	0
84	0
84.1	0
84.2	0
84.3	0
84.4	0
84.5	0
84.6	0
84.7	0
84.8	0
84.9	0
85	0
85.1	0
85.2	0
85.3	0
85.4	0
85.5	0
85.6	0
85.7	0
85.8	0
85.9	0
86	0
86.1	0
86.2	0
86.3	0
86.4	0
86.5	0
86.6	0
86.7	0
86.8	0
86.9	0
87	0
87.1	0
87.2	0
87.3	0
87.4	0
87.5	0
87.6	0
87.7	0
87.8	0
87.9	0
88	0
88.1	0
88.2	0
88.3	0
88.4	0
88.5	0
88.6	0
88.7	0
88.8	0
88.9	0
89	0
89.1	0
89.2	0
89.3	0
89.4	0
89.5	0
89.6	0
89.7	0
89.8	0
89.9	0
90	0
90.1	0
90.2	0
90.3	0
90.4	0
90.5	0
90.6	0
90.7	0
90.8	0
90.9	0
91	0
91.1	0
91.2	0
91.3	0
91.4	0
91.5	0
91.6	0
91.7	0
91.8	0
91.9	0
92	0
92.1	0
92.2	0
92.3	0
92.4	0
92.5	0
92.6	0
92.7	0
92.8	0
92.9	0
93	0
93.1	0
93.2	0
93.3	0
93.4	0
93.5	0
93.6	0
93.7	0
93.8	0
93.9	0
94	0
94.1	0
94.2	0
94.3	0
94.4	0
94.5	0
94.6	0
94.7	0
94.8	0
94.9	0
95	0
95.1	0
95.2	0
95.3	0
95.4	0
95.5	0
95.6	0
95.7	0
95.8	0
95.9	0
96	0
96.1	0
96.2	0
96.3	0
96.4	0
96.5	0
96.6	0
96.7	0
96.8	0
96.9	0
97	0
97.1	0
97.2	0
97.3	0
97.4	0
97.5	0
97.6	0
97.7	0
97.8	0
97.9	0
98	0
98.1	0
98.2	0
98.3	0
98.4	0
98.5	0
98.6	0
98.7	0
98.8	0
98.9	0
99	0
99.1	0
99.2	0
99.3	0
99.4	0
99.5	0
99.6	0
99.7	0
99.8	0
99.9	0
100	0
100.1	0
100.2	0.000285714
100.3	0.00128571
100.4	0.002
100.5	0.00371429
100.6	0.00514286
100.7	0.00714286
100.8	0.00985714
100.9	0.011
101	0.0131429
101.1	0.0154286
101.2	0.0181429
101.3	0.0207143
101.4	0.024
101.5	0.0257143
101.6	0.029
101.7	0.0312857
101.8	0.035
101.9	0.0378571
102	0.0408571
102.1	0.0428571
102.2	0.046
102.3	0.0488571
102.4	0.0521429
102.5	0.0555714
102.6	0.0582857
102.7	0.0632857
102.8	0.065
102.9	0.0681429
103	0.0704286
103.1	0.0742857
103.2	0.078
103.3	0.0804286
103.4	0.0834286
103.5	0.0877143
103.6	0.0908571
103.7	0.094
103.8	0.0982857
103.9	0.101857
104	0.105571
104.1	0.108143
104.2	0.111286
104.3	0.115143
104.4	0.118143
104.5	0.120571
104.6	0.124429
104.7	0.127714
104.8	0.130429
104.9	0.132286
105	0.135714
105.1	0.138
105.2	0.14
105.3	0.143286
105.4	0.145714
105.5	0.149143
105.6	0.151429
105.7	0.154429
105.8	0.157429
105.9	0.159714
106	0.163
106.1	0.166714
106.2	0.169571
106.3	0.174
106.4	0.176143
106.5	0.178571
106.6	0.180571
106.7	0.183286
106.8	0.186286
106.9	0.188429
107	0.191286
107.1	0.193857
107.2	0.195429
107.3	0.198286
107.4	0.2
107.5	0.201429
107.6	0.203857
107.7	0.206
107.8	0.209143
107.9	0.211857
108	0.213714
108.1	0.216429
108.2	0.218857
108.3	0.221857
108.4	0.224
108.5	0.226143
108.6	0.228143
108.7	0.231143
108.8	0.233286
108.9	0.235429
109	0.238
109.1	0.240143
109.2	0.242143
109.3	0.244571
109.4	0.245857
109.5	0.248143
109.6	0.250714
109.7	0.253143
109.8	0.257
109.9	0.259143
110	0.262143
110.1	0.265
110.2	0.268
110.3	0.27
110.4	0.272
110.5	0.273714
110.6	0.276286
110.7	0.278571
110.8	0.280143
110.9	0.282429
111	0.285429
111.1	0.287143
111.2	0.289857
111.3	0.293571
111.4	0.296143
111.5	0.298286
111.6	0.299571
111.7	0.301429
111.8	0.302
111.9	0.303857
112	0.306143
112.1	0.308143
112.2	0.309714
112.3	0.311286
112.4	0.313857
112.5	0.317571
112.6	0.319857
112.7	0.322571
112.8	0.324
112.9	0.325429
113	0.327857
113.1	0.328714
113.2	0.330286
113.3	0.330857
113.4	0.332857
113.5	0.334429
113.6	0.336286
113.7	0.338571
113.8	0.340143
113.9	0.342
114	0.344286
114.1	0.346429
114.2	0.347857
114.3	0.350143
114.4	0.351429
114.5	0.353
114.6	0.355143
114.7	0.355714
114.8	0.357286
114.9	0.359429
115	0.361857
115.1	0.362714
115.2	0.364429
115.3	0.366286
115.4	0.369286
115.5	0.370571
115.6	0.373143
115.7	0.374714
115.8	0.376143
115.9	0.377429
116	0.378857
116.1	0.380571
116.2	0.382429
116.3	0.384714
116.4	0.386286
116.5	0.387429
116.6	0.389
116.7	0.39
116.8	0.391857
116.9	0.393143
117	0.395571
117.1	0.397286
117.2	0.398857
117.3	0.400857
117.4	0.402429
117.5	0.405286
117.6	0.406286
117.7	0.407571
117.8	0.409143
117.9	0.409714
118	0.411429
118.1	0.412857
118.2	0.414857
118.3	0.416286
118.4	0.417857
118.5	0.420429
118.6	0.422714
118.7	0.423857
118.8	0.424714
118.9	0.426286
119	0.427571
119.1	0.430429
119.2	0.432714
119.3	0.434143
119.4	0.434857
119.5	0.436571
119.6	0.438
119.7	0.439286
119.8	0.441429
119.9	0.443
120	0.443857
120.1	0.446
120.2	0.447571
120.3	0.449286
120.4	0.450143
120.5	0.450857
120.6	0.451
120.7	0.453143
120.8	0.454857
120.9	0.456
121	0.457714
121.1	0.458429
121.2	0.459429
121.3	0.459857
121.4	0.461429
121.5	0.463143
121.6	0.464857
121.7	0.466429
121.8	0.467143
121.9	0.469571
122	0.471286
122.1	0.471714
122.2	0.473571
122.3	0.475857
122.4	0.478
122.5	0.481143
122.6	0.482286
122.7	0.483857
122.8	0.484571
122.9	0.485286
123	0.486714
123.1	0.487714
123.2	0.488714
123.3	0.49
123.4	0.491571
123.5	0.492714
123.6	0.494286
123.7	0.495
123.8	0.495857
123.9	0.498
124	0.499714
124.1	0.501143
124.2	0.501571
124.3	0.502143
124.4	0.503571
124.5	0.504857
124.6	0.506
124.7	0.507714
124.8	0.509714
124.9	0.511
125	0.512
125.1	0.512571
125.2	0.514286
125.3	0.515571
125.4	0.516571
125.5	0.517857
125.6	0.519286
125.7	0.519571
125.8	0.52
125.9	0.521714
126	0.522857
126.1	0.524
126.2	0.526
126.3	0.527857
126.4	0.528857
126.5	0.530714
126.6	0.530857
126.7	0.532
126.8	0.532714
126.9	0.534143
127	0.535571
127.1	0.536714
127.2	0.538143
127.3	0.539571
127.4	0.540286
127.5	0.541429
127.6	0.542286
127.7	0.542857
127.8	0.544
127.9	0.545286
128	0.546143
128.1	0.547286
128.2	0.548143
128.3	0.549286
128.4	0.550143
128.5	0.549857
128.6	0.551571
128.7	0.552714
128.8	0.554
128.9	0.556571
129	0.556571
129.1	0.557571
129.2	0.558429
129.3	0.559714
129.4	0.560571
129.5	0.561143
129.6	0.562571
129.7	0.562
129.8	0.563
129.9	0.564
130	0.563286
130.1	0.564714
130.2	0.565571
130.3	0.566571
130.4	0.567429
130.5	0.568571
130.6	0.569429
130.7	0.570429
130.8	0.571429
130.9	0.572
131	0.573714
131.1	0.575429
131.2	0.575571
131.3	0.575714
131.4	0.575714
131.5	0.576714
131.6	0.577714
131.7	0.579286
131.8	0.580429
131.9	0.581286
132	0.583
132.1	0.582857
132.2	0.584
132.3	0.584571
132.4	0.584571
132.5	0.585
132.6	0.585714
132.7	0.586429
132.8	0.586571
132.9	0.587429
133	0.588286
133.1	0.59
133.2	0.590857
133.3	0.592143
133.4	0.593
133.5	0.593429
133.6	0.595
133.7	0.595286
133.8	0.594714
133.9	0.595857
134	0.596857
134.1	0.597714
134.2	0.599571
134.3	0.599714
134.4	0.600286
134.5	0.600857
134.6	0.601286
134.7	0.603
134.8	0.604286
134.9	0.604857
135	0.605571
135.1	0.605714
135.2	0.607
135.3	0.607143
135.4	0.608
135.5	0.609
135.6	0.609714
135.7	0.610714
135.8	0.611714
135.9	0.613429
136	0.615571
136.1	0.616286
136.2	0.616
136.3	0.616286
136.4	0.617714
136.5	0.619286
136.6	0.62
136.7	0.620857
136.8	0.621857
136.9	0.623
137	0.622714
137.1	0.623571
137.2	0.623571
137.3	0.624857
137.4	0.625857
137.5	0.626714
137.6	0.627
137.7	0.628
137.8	0.629429
137.9	0.628857
138	0.630571
138.1	0.631714
138.2	0.632143
138.3	0.632143
138.4	0.633143
138.5	0.634571
138.6	0.635857
138.7	0.636714
138.8	0.636571
138.9	0.636286
139	0.636429
139.1	0.636286
139.2	0.636143
139.3	0.636429
139.4	0.637286
139.5	0.637
139.6	0.637286
139.7	0.637857
139.8	0.638
139.9	0.638714
140	0.638857
140.1	0.64
140.2	0.640286
140.3	0.640429
140.4	0.640714
140.5	0.641
140.6	0.641714
140.7	0.641429
140.8	0.642
140.9	0.642571
141	0.643286
141.1	0.643429
141.2	0.644
141.3	0.644714
141.4	0.645429
141.5	0.645571
141.6	0.646
141.7	0.647
141.8	0.647286
141.9	0.646571
142	0.647429
142.1	0.648429
142.2	0.649571
142.3	0.650286
142.4	0.652286
142.5	0.653286
142.6	0.654
142.7	0.653571
142.8	0.653714
142.9	0.654571
143	0.655286
143.1	0.656429
143.2	0.656714
143.3	0.658
143.4	0.658286
143.5	0.658286
143.6	0.658429
143.7	0.659
143.8	0.659143
143.9	0.658286
144	0.657714
144.1	0.657857
144.2	0.659571
144.3	0.660143
144.4	0.661429
144.5	0.662857
144.6	0.664
144.7	0.664857
144.8	0.665286
144.9	0.666286
145	0.667429
145.1	0.668143
145.2	0.668571
145.3	0.668286
145.4	0.668429
145.5	0.668143
145.6	0.668
145.7	0.668
145.8	0.668571
145.9	0.668429
146	0.668714
146.1	0.668143
146.2	0.668714
146.3	0.668429
146.4	0.668286
146.5	0.668714
146.6	0.669857
146.7	0.67
146.8	0.670429
146.9	0.670857
147	0.671714
147.1	0.672429
147.2	0.673
147.3	0.674143
147.4	0.674571
147.5	0.674714
147.6	0.674857
147.7	0.675286
147.8	0.675714
147.9	0.675429
148	0.676857
148.1	0.677857
148.2	0.677714
148.3	0.677143
148.4	0.677429
148.5	0.677571
148.6	0.679143
148.7	0.679857
148.8	0.680714
148.9	0.680571
149	0.680857
149.1	0.681
149.2	0.680714
149.3	0.681143
149.4	0.682286
149.5	0.682286
149.6	0.683143
149.7	0.683143
149.8	0.683143
149.9	0.683286
150	0.684429
150.1	0.685714
150.2	0.685857
150.3	0.685857
150.4	0.687
150.5	0.687571
150.6	0.687857
150.7	0.689
150.8	0.689429
150.9	0.689571
151	0.689857
151.1	0.689
151.2	0.688714
151.3	0.688429
151.4	0.69
151.5	0.690857
151.6	0.690286
151.7	0.69
151.8	0.69
151.9	0.690571
152	0.691571
152.1	0.691857
152.2	0.691571
152.3	0.691286
152.4	0.691714
152.5	0.692
152.6	0.691857
152.7	0.692143
152.8	0.692571
152.9	0.693857
153	0.693571
153.1	0.693857
153.2	0.694714
153.3	0.695143
153.4	0.696
153.5	0.696571
153.6	0.696429
153.7	0.697143
153.8	0.697571
153.9	0.698429
154	0.698286
154.1	0.698571
154.2	0.698714
154.3	0.699571
154.4	0.700429
154.5	0.700714
154.6	0.700429
154.7	0.701429
154.8	0.701714
154.9	0.702429
155	0.702286
155.1	0.703429
155.2	0.703286
155.3	0.703714
155.4	0.705143
155.5	0.705429
155.6	0.705286
155.7	0.705714
155.8	0.705143
155.9	0.706143
156	0.706714
156.1	0.706857
156.2	0.706714
156.3	0.707571
156.4	0.707857
156.5	0.707571
156.6	0.708143
156.7	0.708429
156.8	0.709
156.9	0.709714
157	0.710286
157.1	0.711
157.2	0.711
157.3	0.711286
157.4	0.710714
157.5	0.710571
157.6	0.711
157.7	0.710857
157.8	0.710571
157.9	0.710429
158	0.710857
158.1	0.711143
158.2	0.711857
158.3	0.712857
158.4	0.713571
158.5	0.713857
158.6	0.714
158.7	0.714429
158.8	0.715
158.9	0.714571
159	0.715286
159.1	0.715714
159.2	0.716714
159.3	0.717286
159.4	0.717714
159.5	0.718286
159.6	0.719429
159.7	0.720143
159.8	0.720571
159.9	0.721
160	0.721714
160.1	0.722429
160.2	0.722143
160.3	0.723429
160.4	0.724286
160.5	0.724286
160.6	0.725429
160.7	0.725714
160.8	0.725429
160.9	0.725429
161	0.725714
161.1	0.725429
161.2	0.726
161.3	0.726571
161.4	0.726571
161.5	0.726143
161.6	0.726
161.7	0.726714
161.8	0.726857
161.9	0.727714
162	0.728
162.1	0.727714
162.2	0.728143
162.3	0.728429
162.4	0.728429
162.5	0.727857
162.6	0.728571
162.7	0.729286
162.8	0.729143
162.9	0.729286
163	0.729429
163.1	0.729286
163.2	0.730429
163.3	0.730429
163.4	0.730714
163.5	0.731286
163.6	0.730571
163.7	0.729857
163.8	0.730571
163.9	0.730857
164	0.731857
164.1	0.732429
164.2	0.733286
164.3	0.733857
164.4	0.734143
164.5	0.734143
164.6	0.734857
164.7	0.735857
164.8	0.736286
164.9	0.736
165	0.735857
165.1	0.735571
165.2	0.736
165.3	0.736143
165.4	0.736429
165.5	0.737286
165.6	0.736714
165.7	0.737
165.8	0.737429
165.9	0.737857
166	0.738429
166.1	0.738429
166.2	0.738429
166.3	0.738286
166.4	0.738429
166.5	0.738286
166.6	0.738429
166.7	0.738143
166.8	0.738714
166.9	0.738286
167	0.738714
167.1	0.739286
167.2	0.739143
167.3	0.738857
167.4	0.739
167.5	0.739571
167.6	0.739143
167.7	0.739857
167.8	0.740571
167.9	0.740143
168	0.739714
168.1	0.739429
168.2	0.740143
168.3	0.740286
168.4	0.740143
168.5	0.740429
168.6	0.74
168.7	0.741714
168.8	0.742429
168.9	0.742
169	0.741286
169.1	0.741714
169.2	0.741714
169.3	0.741571
169.4	0.742429
169.5	0.743
169.6	0.743
169.7	0.744
169.8	0.743286
169.9	0.743571
170	0.743857
170.1	0.744286
170.2	0.744857
170.3	0.744714
170.4	0.745143
170.5	0.745143
170.6	0.746143
170.7	0.746571
170.8	0.745857
170.9	0.746857
171	0.747143
171.1	0.747857
171.2	0.747571
171.3	0.747429
171.4	0.747714
171.5	0.748
171.6	0.747714
171.7	0.747857
171.8	0.747286
171.9	0.746857
172	0.746429
172.1	0.746143
172.2	0.745857
172.3	0.746857
172.4	0.748
172.5	0.748
172.6	0.747571
172.7	0.747286
172.8	0.747
172.9	0.747429
173	0.746714
173.1	0.748
173.2	0.747
173.3	0.747143
173.4	0.747286
173.5	0.747857
173.6	0.747857
173.7	0.747714
173.8	0.747429
173.9	0.746714
174	0.746714
174.1	0.746143
174.2	0.746286
174.3	0.746286
174.4	0.746429
174.5	0.746857
174.6	0.747143
174.7	0.747
174.8	0.746
174.9	0.746286
175	0.746429
175.1	0.746286
175.2	0.746286
175.3	0.746429
175.4	0.747
175.5	0.746857
175.6	0.747714
175.7	0.747714
175.8	0.748
175.9	0.747143
176	0.747714
176.1	0.748143
176.2	0.747571
176.3	0.747571
176.4	0.747857
176.5	0.748143
176.6	0.748429
176.7	0.748571
176.8	0.747429
176.9	0.747429
177	0.747571
177.1	0.748143
177.2	0.748857
177.3	0.749429
177.4	0.749571
177.5	0.750286
177.6	0.750571
177.7	0.750429
177.8	0.750286
177.9	0.750286
178	0.750571
178.1	0.751143
178.2	0.751
178.3	0.751143
178.4	0.751
178.5	0.750714
178.6	0.750429
178.7	0.751143
178.8	0.751143
178.9	0.751429
179	0.751
179.1	0.750857
179.2	0.750714
179.3	0.75
179.4	0.750286
179.5	0.750571
179.6	0.750571
179.7	0.751571
179.8	0.752143
179.9	0.752143
180	0.752
180.1	0.752571
180.2	0.752429
180.3	0.752286
180.4	0.752857
180.5	0.752714
180.6	0.752143
180.7	0.752143
180.8	0.752714
180.9	0.752857
181	0.753286
181.1	0.753286
181.2	0.752286
181.3	0.751429
181.4	0.751857
181.5	0.751571
181.6	0.752286
181.7	0.753143
181.8	0.753429
181.9	0.753286
182	0.753143
182.1	0.753286
182.2	0.753571
182.3	0.753714
182.4	0.754
182.5	0.754857
182.6	0.755571
182.7	0.755429
182.8	0.755857
182.9	0.755857
183	0.755143
183.1	0.755857
183.2	0.754571
183.3	0.754571
183.4	0.755143
183.5	0.754429
183.6	0.754857
183.7	0.754714
183.8	0.754
183.9	0.753857
184	0.753286
184.1	0.753571
184.2	0.752714
184.3	0.753
184.4	0.752714
184.5	0.752571
184.6	0.753
184.7	0.752857
184.8	0.752571
184.9	0.752714
185	0.753143
185.1	0.754143
185.2	0.754
185.3	0.755
185.4	0.756
185.5	0.756
185.6	0.756143
185.7	0.756143
185.8	0.756714
185.9	0.756857
186	0.757286
186.1	0.757857
186.2	0.758286
186.3	0.758857
186.4	0.758714
186.5	0.759429
186.6	0.759571
186.7	0.760429
186.8	0.760429
186.9	0.761286
187	0.761
187.1	0.762
187.2	0.761714
187.3	0.761571
187.4	0.763
187.5	0.762857
187.6	0.762714
187.7	0.762857
187.8	0.763
187.9	0.762571
188	0.762857
188.1	0.763143
188.2	0.762714
188.3	0.763
188.4	0.763
188.5	0.763286
188.6	0.764714
188.7	0.765143
188.8	0.764714
188.9	0.764286
189	0.763714
189.1	0.763571
189.2	0.762714
189.3	0.762857
189.4	0.763143
189.5	0.762857
189.6	0.763714
189.7	0.764
189.8	0.763714
189.9	0.763857
190	0.763857
190.1	0.763143
190.2	0.763286
190.3	0.763714
190.4	0.763
190.5	0.764429
190.6	0.764286
190.7	0.764429
190.8	0.764286
190.9	0.763429
191	0.762714
191.1	0.763286
191.2	0.763286
191.3	0.763714
191.4	0.763714
191.5	0.764
191.6	0.764
191.7	0.764143
191.8	0.764857
191.9	0.764571
192	0.764429
192.1	0.764429
192.2	0.765429
192.3	0.765286
192.4	0.764571
192.5	0.765
192.6	0.764429
192.7	0.764714
192.8	0.764571
192.9	0.764714
193	0.764714
193.1	0.764714
193.2	0.764429
193.3	0.764571
193.4	0.764
193.5	0.764571
193.6	0.764857
193.7	0.765286
193.8	0.765714
193.9	0.765571
194	0.765857
194.1	0.766
194.2	0.766
194.3	0.766143
194.4	0.766714
194.5	0.766571
194.6	0.765714
194.7	0.766
194.8	0.766143
194.9	0.766714
195	0.766571
195.1	0.766
195.2	0.766286
195.3	0.766571
195.4	0.766
195.5	0.766571
195.6	0.767429
195.7	0.767857
195.8	0.768429
195.9	0.768571
196	0.768
196.1	0.768
196.2	0.767857
196.3	0.767
196.4	0.766286
196.5	0.766143
196.6	0.765286
196.7	0.765571
196.8	0.765429
196.9	0.765143
197	0.765143
197.1	0.766
197.2	0.767143
197.3	0.766714
197.4	0.766714
197.5	0.767429
197.6	0.767571
197.7	0.768714
197.8	0.768714
197.9	0.769286
198	0.769714
198.1	0.769857
198.2	0.770571
198.3	0.770714
198.4	0.771
198.5	0.770571
198.6	0.770857
198.7	0.770714
198.8	0.77
198.9	0.77
199	0.769286
199.1	0.768571
199.2	0.769571
199.3	0.77
199.4	0.769
199.5	0.768857
199.6	0.768714
199.7	0.768429
199.8	0.768714
199.9	0.769286
200	0.769
[truncated: 14,000 more rows]
