# Supplementary material for: Bayesian inference of kinetic schemes for ion channels by Kalman filtering
Source: eLife journal article supplement (doi:10.7554/elife.62714), 2022-05-04
Supplement: fig4-data5 [file 1_Sim_N_10000_Fluor_MW.xlsx]

## Sheet: Tabelle1
0.1	0
0.2	0
0.3	0
0.4	0
0.5	0
0.6	0
0.7	0
0.8	0
0.9	0
1	0
1.1	0
1.2	0
1.3	0
1.4	0
1.5	0
1.6	0
1.7	0
1.8	0
1.9	0
2	0
2.1	0
2.2	0
2.3	0
2.4	0
2.5	0
2.6	0
2.7	0
2.8	0
2.9	0
3	0
3.1	0
3.2	0
3.3	0
3.4	0
3.5	0
3.6	0
3.7	0
3.8	0
3.9	0
4	0
4.1	0
4.2	0
4.3	0
4.4	0
4.5	0
4.6	0
4.7	0
4.8	0
4.9	0
5	0
5.1	0
5.2	0
5.3	0
5.4	0
5.5	0
5.6	0
5.7	0
5.8	0
5.9	0
6	0
6.1	0
6.2	0
6.3	0
6.4	0
6.5	0
6.6	0
6.7	0
6.8	0
6.9	0
7	0
7.1	0
7.2	0
7.3	0
7.4	0
7.5	0
7.6	0
7.7	0
7.8	0
7.9	0
8	0
8.1	0
8.2	0
8.3	0
8.4	0
8.5	0
8.6	0
8.7	0
8.8	0
8.9	0
9	0
9.1	0
9.2	0
9.3	0
9.4	0
9.5	0
9.6	0
9.7	0
9.8	0
9.9	0
10	0
10.1	0
10.2	0
10.3	0
10.4	0
10.5	0
10.6	0
10.7	0
10.8	0
10.9	0
11	0
11.1	0
11.2	0
11.3	0
11.4	0
11.5	0
11.6	0
11.7	0
11.8	0
11.9	0
12	0
12.1	0
12.2	0
12.3	0
12.4	0
12.5	0
12.6	0
12.7	0
12.8	0
12.9	0
13	0
13.1	0
13.2	0
13.3	0
13.4	0
13.5	0
13.6	0
13.7	0
13.8	0
13.9	0
14	0
14.1	0
14.2	0
14.3	0
14.4	0
14.5	0
14.6	0
14.7	0
14.8	0
14.9	0
15	0
15.1	0
15.2	0
15.3	0
15.4	0
15.5	0
15.6	0
15.7	0
15.8	0
15.9	0
16	0
16.1	0
16.2	0
16.3	0
16.4	0
16.5	0
16.6	0
16.7	0
16.8	0
16.9	0
17	0
17.1	0
17.2	0
17.3	0
17.4	0
17.5	0
17.6	0
17.7	0
17.8	0
17.9	0
18	0
18.1	0
18.2	0
18.3	0
18.4	0
18.5	0
18.6	0
18.7	0
18.8	0
18.9	0
19	0
19.1	0
19.2	0
19.3	0
19.4	0
19.5	0
19.6	0
19.7	0
19.8	0
19.9	0
20	0
20.1	0
20.2	0
20.3	0
20.4	0
20.5	0
20.6	0
20.7	0
20.8	0
20.9	0
21	0
21.1	0
21.2	0
21.3	0
21.4	0
21.5	0
21.6	0
21.7	0
21.8	0
21.9	0
22	0
22.1	0
22.2	0
22.3	0
22.4	0
22.5	0
22.6	0
22.7	0
22.8	0
22.9	0
23	0
23.1	0
23.2	0
23.3	0
23.4	0
23.5	0
23.6	0
23.7	0
23.8	0
23.9	0
24	0
24.1	0
24.2	0
24.3	0
24.4	0
24.5	0
24.6	0
24.7	0
24.8	0
24.9	0
25	0
25.1	0
25.2	0
25.3	0
25.4	0
25.5	0
25.6	0
25.7	0
25.8	0
25.9	0
26	0
26.1	0
26.2	0
26.3	0
26.4	0
26.5	0
26.6	0
26.7	0
26.8	0
26.9	0
27	0
27.1	0
27.2	0
27.3	0
27.4	0
27.5	0
27.6	0
27.7	0
27.8	0
27.9	0
28	0
28.1	0
28.2	0
28.3	0
28.4	0
28.5	0
28.6	0
28.7	0
28.8	0
28.9	0
29	0
29.1	0
29.2	0
29.3	0
29.4	0
29.5	0
29.6	0
29.7	0
29.8	0
29.9	0
30	0
30.1	0
30.2	0
30.3	0
30.4	0
30.5	0
30.6	0
30.7	0
30.8	0
30.9	0
31	0
31.1	0
31.2	0
31.3	0
31.4	0
31.5	0
31.6	0
31.7	0
31.8	0
31.9	0
32	0
32.1	0
32.2	0
32.3	0
32.4	0
32.5	0
32.6	0
32.7	0
32.8	0
32.9	0
33	0
33.1	0
33.2	0
33.3	0
33.4	0
33.5	0
33.6	0
33.7	0
33.8	0
33.9	0
34	0
34.1	0
34.2	0
34.3	0
34.4	0
34.5	0
34.6	0
34.7	0
34.8	0
34.9	0
35	0
35.1	0
35.2	0
35.3	0
35.4	0
35.5	0
35.6	0
35.7	0
35.8	0
35.9	0
36	0
36.1	0
36.2	0
36.3	0
36.4	0
36.5	0
36.6	0
36.7	0
36.8	0
36.9	0
37	0
37.1	0
37.2	0
37.3	0
37.4	0
37.5	0
37.6	0
37.7	0
37.8	0
37.9	0
38	0
38.1	0
38.2	0
38.3	0
38.4	0
38.5	0
38.6	0
38.7	0
38.8	0
38.9	0
39	0
39.1	0
39.2	0
39.3	0
39.4	0
39.5	0
39.6	0
39.7	0
39.8	0
39.9	0
40	0
40.1	0
40.2	0
40.3	0
40.4	0
40.5	0
40.6	0
40.7	0
40.8	0
40.9	0
41	0
41.1	0
41.2	0
41.3	0
41.4	0
41.5	0
41.6	0
41.7	0
41.8	0
41.9	0
42	0
42.1	0
42.2	0
42.3	0
42.4	0
42.5	0
42.6	0
42.7	0
42.8	0
42.9	0
43	0
43.1	0
43.2	0
43.3	0
43.4	0
43.5	0
43.6	0
43.7	0
43.8	0
43.9	0
44	0
44.1	0
44.2	0
44.3	0
44.4	0
44.5	0
44.6	0
44.7	0
44.8	0
44.9	0
45	0
45.1	0
45.2	0
45.3	0
45.4	0
45.5	0
45.6	0
45.7	0
45.8	0
45.9	0
46	0
46.1	0
46.2	0
46.3	0
46.4	0
46.5	0
46.6	0
46.7	0
46.8	0
46.9	0
47	0
47.1	0
47.2	0
47.3	0
47.4	0
47.5	0
47.6	0
47.7	0
47.8	0
47.9	0
48	0
48.1	0
48.2	0
48.3	0
48.4	0
48.5	0
48.6	0
48.7	0
48.8	0
48.9	0
49	0
49.1	0
49.2	0
49.3	0
49.4	0
49.5	0
49.6	0
49.7	0
49.8	0
49.9	0
50	0
50.1	0
50.2	0
50.3	0
50.4	0
50.5	0
50.6	0
50.7	0
50.8	0
50.9	0
51	0
51.1	0
51.2	0
51.3	0
51.4	0
51.5	0
51.6	0
51.7	0
51.8	0
51.9	0
52	0
52.1	0
52.2	0
52.3	0
52.4	0
52.5	0
52.6	0
52.7	0
52.8	0
52.9	0
53	0
53.1	0
53.2	0
53.3	0
53.4	0
53.5	0
53.6	0
53.7	0
53.8	0
53.9	0
54	0
54.1	0
54.2	0
54.3	0
54.4	0
54.5	0
54.6	0
54.7	0
54.8	0
54.9	0
55	0
55.1	0
55.2	0
55.3	0
55.4	0
55.5	0
55.6	0
55.7	0
55.8	0
55.9	0
56	0
56.1	0
56.2	0
56.3	0
56.4	0
56.5	0
56.6	0
56.7	0
56.8	0
56.9	0
57	0
57.1	0
57.2	0
57.3	0
57.4	0
57.5	0
57.6	0
57.7	0
57.8	0
57.9	0
58	0
58.1	0
58.2	0
58.3	0
58.4	0
58.5	0
58.6	0
58.7	0
58.8	0
58.9	0
59	0
59.1	0
59.2	0
59.3	0
59.4	0
59.5	0
59.6	0
59.7	0
59.8	0
59.9	0
60	0
60.1	0
60.2	0
60.3	0
60.4	0
60.5	0
60.6	0
60.7	0
60.8	0
60.9	0
61	0
61.1	0
61.2	0
61.3	0
61.4	0
61.5	0
61.6	0
61.7	0
61.8	0
61.9	0
62	0
62.1	0
62.2	0
62.3	0
62.4	0
62.5	0
62.6	0
62.7	0
62.8	0
62.9	0
63	0
63.1	0
63.2	0
63.3	0
63.4	0
63.5	0
63.6	0
63.7	0
63.8	0
63.9	0
64	0
64.1	0
64.2	0
64.3	0
64.4	0
64.5	0
64.6	0
64.7	0
64.8	0
64.9	0
65	0
65.1	0
65.2	0
65.3	0
65.4	0
65.5	0
65.6	0
65.7	0
65.8	0
65.9	0
66	0
66.1	0
66.2	0
66.3	0
66.4	0
66.5	0
66.6	0
66.7	0
66.8	0
66.9	0
67	0
67.1	0
67.2	0
67.3	0
67.4	0
67.5	0
67.6	0
67.7	0
67.8	0
67.9	0
68	0
68.1	0
68.2	0
68.3	0
68.4	0
68.5	0
68.6	0
68.7	0
68.8	0
68.9	0
69	0
69.1	0
69.2	0
69.3	0
69.4	0
69.5	0
69.6	0
69.7	0
69.8	0
69.9	0
70	0
70.1	0
70.2	0
70.3	0
70.4	0
70.5	0
70.6	0
70.7	0
70.8	0
70.9	0
71	0
71.1	0
71.2	0
71.3	0
71.4	0
71.5	0
71.6	0
71.7	0
71.8	0
71.9	0
72	0
72.1	0
72.2	0
72.3	0
72.4	0
72.5	0
72.6	0
72.7	0
72.8	0
72.9	0
73	0
73.1	0
73.2	0
73.3	0
73.4	0
73.5	0
73.6	0
73.7	0
73.8	0
73.9	0
74	0
74.1	0
74.2	0
74.3	0
74.4	0
74.5	0
74.6	0
74.7	0
74.8	0
74.9	0
75	0
75.1	0
75.2	0
75.3	0
75.4	0
75.5	0
75.6	0
75.7	0
75.8	0
75.9	0
76	0
76.1	0
76.2	0
76.3	0
76.4	0
76.5	0
76.6	0
76.7	0
76.8	0
76.9	0
77	0
77.1	0
77.2	0
77.3	0
77.4	0
77.5	0
77.6	0
77.7	0
77.8	0
77.9	0
78	0
78.1	0
78.2	0
78.3	0
78.4	0
78.5	0
78.6	0
78.7	0
78.8	0
78.9	0
79	0
79.1	0
79.2	0
79.3	0
79.4	0
79.5	0
79.6	0
79.7	0
79.8	0
79.9	0
80	0
80.1	0
80.2	0
80.3	0
80.4	0
80.5	0
80.6	0
80.7	0
80.8	0
80.9	0
81	0
81.1	0
81.2	0
81.3	0
81.4	0
81.5	0
81.6	0
81.7	0
81.8	0
81.9	0
82	0
82.1	0
82.2	0
82.3	0
82.4	0
82.5	0
82.6	0
82.7	0
82.8	0
82.9	0
83	0
83.1	0
83.2	0
83.3	0
83.4	0
83.5	0
83.6	0
83.7	0
83.8	0
83.9	0
84	0
84.1	0
84.2	0
84.3	0
84.4	0
84.5	0
84.6	0
84.7	0
84.8	0
84.9	0
85	0
85.1	0
85.2	0
85.3	0
85.4	0
85.5	0
85.6	0
85.7	0
85.8	0
85.9	0
86	0
86.1	0
86.2	0
86.3	0
86.4	0
86.5	0
86.6	0
86.7	0
86.8	0
86.9	0
87	0
87.1	0
87.2	0
87.3	0
87.4	0
87.5	0
87.6	0
87.7	0
87.8	0
87.9	0
88	0
88.1	0
88.2	0
88.3	0
88.4	0
88.5	0
88.6	0
88.7	0
88.8	0
88.9	0
89	0
89.1	0
89.2	0
89.3	0
89.4	0
89.5	0
89.6	0
89.7	0
89.8	0
89.9	0
90	0
90.1	0
90.2	0
90.3	0
90.4	0
90.5	0
90.6	0
90.7	0
90.8	0
90.9	0
91	0
91.1	0
91.2	0
91.3	0
91.4	0
91.5	0
91.6	0
91.7	0
91.8	0
91.9	0
92	0
92.1	0
92.2	0
92.3	0
92.4	0
92.5	0
92.6	0
92.7	0
92.8	0
92.9	0
93	0
93.1	0
93.2	0
93.3	0
93.4	0
93.5	0
93.6	0
93.7	0
93.8	0
93.9	0
94	0
94.1	0
94.2	0
94.3	0
94.4	0
94.5	0
94.6	0
94.7	0
94.8	0
94.9	0
95	0
95.1	0
95.2	0
95.3	0
95.4	0
95.5	0
95.6	0
95.7	0
95.8	0
95.9	0
96	0
96.1	0
96.2	0
96.3	0
96.4	0
96.5	0
96.6	0
96.7	0
96.8	0
96.9	0
97	0
97.1	0
97.2	0
97.3	0
97.4	0
97.5	0
97.6	0
97.7	0
97.8	0
97.9	0
98	0
98.1	0
98.2	0
98.3	0
98.4	0
98.5	0
98.6	0
98.7	0
98.8	0
98.9	0
99	0
99.1	0
99.2	0
99.3	0
99.4	0
99.5	0
99.6	0
99.7	0
99.8	0
99.9	0
100	0
100.1	0.20045
100.2	0.34475
100.3	0.4467
100.4	0.52615
100.5	0.58695
100.6	0.63555
100.7	0.67265
100.8	0.70085
100.9	0.7273
101	0.74705
101.1	0.76505
101.2	0.7807
101.3	0.79215
101.4	0.79825
101.5	0.80705
101.6	0.8137
101.7	0.8169
101.8	0.82065
101.9	0.82775
102	0.8321
102.1	0.8362
102.2	0.83865
102.3	0.8424
102.4	0.84375
102.5	0.8454
102.6	0.84905
102.7	0.851
102.8	0.85215
102.9	0.8505
103	0.851
103.1	0.852
103.2	0.85445
103.3	0.85775
103.4	0.85765
103.5	0.85535
103.6	0.85635
103.7	0.85685
103.8	0.8576
103.9	0.8578
104	0.85925
104.1	0.8594
104.2	0.86155
104.3	0.8641
104.4	0.8608
104.5	0.86075
104.6	0.8617
104.7	0.8619
104.8	0.86135
104.9	0.8633
105	0.8649
105.1	0.86345
105.2	0.86405
105.3	0.86435
105.4	0.86455
105.5	0.86625
105.6	0.86695
105.7	0.86805
105.8	0.869
105.9	0.86675
106	0.8673
106.1	0.86835
106.2	0.8689
106.3	0.8708
106.4	0.8732
106.5	0.8727
106.6	0.8722
106.7	0.8723
106.8	0.87175
106.9	0.8717
107	0.873
107.1	0.87535
107.2	0.87605
107.3	0.8763
107.4	0.87595
107.5	0.87665
107.6	0.87925
107.7	0.8771
107.8	0.8755
107.9	0.87615
108	0.8758
108.1	0.8768
108.2	0.8778
108.3	0.8791
108.4	0.8783
108.5	0.88045
108.6	0.8807
108.7	0.8803
108.8	0.88045
108.9	0.8807
109	0.8812
109.1	0.88305
109.2	0.8816
109.3	0.88165
109.4	0.88165
109.5	0.88155
109.6	0.88125
109.7	0.88075
109.8	0.88345
109.9	0.8833
110	0.883
110.1	0.88365
110.2	0.8829
110.3	0.88535
110.4	0.8852
110.5	0.88585
110.6	0.8874
110.7	0.88845
110.8	0.8899
110.9	0.8905
111	0.89135
111.1	0.89345
111.2	0.8937
111.3	0.89485
111.4	0.89305
111.5	0.89335
111.6	0.89365
111.7	0.89275
111.8	0.89445
111.9	0.897
112	0.8959
112.1	0.8953
112.2	0.89685
112.3	0.896
112.4	0.89605
112.5	0.896
112.6	0.8957
112.7	0.8951
112.8	0.89555
112.9	0.8952
113	0.89705
113.1	0.89705
113.2	0.89885
113.3	0.8983
113.4	0.8982
113.5	0.8971
113.6	0.898
113.7	0.89865
113.8	0.89875
113.9	0.9009
114	0.90025
114.1	0.9019
114.2	0.901
114.3	0.9012
114.4	0.9018
114.5	0.90355
114.6	0.90155
114.7	0.90155
114.8	0.9024
114.9	0.9037
115	0.9048
115.1	0.9038
115.2	0.9034
115.3	0.9041
115.4	0.90645
115.5	0.90475
115.6	0.90345
115.7	0.90195
115.8	0.9021
115.9	0.9027
116	0.9053
116.1	0.906
116.2	0.90425
116.3	0.9045
116.4	0.90705
116.5	0.90595
116.6	0.9062
116.7	0.9064
116.8	0.908
116.9	0.90775
117	0.9092
117.1	0.90815
117.2	0.91
117.3	0.91045
117.4	0.91085
117.5	0.9128
117.6	0.9126
117.7	0.91155
117.8	0.9125
117.9	0.9124
118	0.9099
118.1	0.91
118.2	0.9095
118.3	0.9103
118.4	0.9107
118.5	0.9113
118.6	0.9097
118.7	0.9098
118.8	0.90985
118.9	0.909
119	0.90975
119.1	0.91055
119.2	0.90965
119.3	0.9081
119.4	0.9116
119.5	0.91295
119.6	0.91205
119.7	0.9118
119.8	0.9121
119.9	0.91335
120	0.91505
120.1	0.91505
120.2	0.9142
120.3	0.91445
120.4	0.9151
120.5	0.914
120.6	0.91505
120.7	0.91535
120.8	0.9154
120.9	0.9163
121	0.9171
121.1	0.91795
121.2	0.91635
121.3	0.917
121.4	0.91755
121.5	0.918
121.6	0.91755
121.7	0.9179
121.8	0.91805
121.9	0.919
122	0.9202
122.1	0.91915
122.2	0.9195
122.3	0.91895
122.4	0.9194
122.5	0.9198
122.6	0.91955
122.7	0.92095
122.8	0.92135
122.9	0.9217
123	0.92215
123.1	0.92155
123.2	0.92145
123.3	0.9232
123.4	0.9234
123.5	0.9216
123.6	0.9222
123.7	0.92155
123.8	0.92215
123.9	0.92145
124	0.9209
124.1	0.9205
124.2	0.9215
124.3	0.92285
124.4	0.9232
124.5	0.92415
124.6	0.9239
124.7	0.9238
124.8	0.92435
124.9	0.92395
125	0.92255
125.1	0.92355
125.2	0.92265
125.3	0.9227
125.4	0.9243
125.5	0.9238
125.6	0.92355
125.7	0.92565
125.8	0.926
125.9	0.9263
126	0.9259
126.1	0.9256
126.2	0.9255
126.3	0.92525
126.4	0.9274
126.5	0.92875
126.6	0.92865
126.7	0.92975
126.8	0.9288
126.9	0.92915
127	0.93
127.1	0.92995
127.2	0.93055
127.3	0.9301
127.4	0.92965
127.5	0.93045
127.6	0.9308
127.7	0.9318
127.8	0.93155
127.9	0.93105
128	0.9318
128.1	0.9306
128.2	0.93065
128.3	0.9309
128.4	0.93135
128.5	0.9316
128.6	0.9321
128.7	0.93205
128.8	0.93275
128.9	0.9314
129	0.93075
129.1	0.9302
129.2	0.92985
129.3	0.92995
129.4	0.9298
129.5	0.93135
129.6	0.93075
129.7	0.93045
129.8	0.9311
129.9	0.93145
130	0.9324
130.1	0.9328
130.2	0.9343
130.3	0.9337
130.4	0.93365
130.5	0.93505
130.6	0.93595
130.7	0.93575
130.8	0.9372
130.9	0.9376
131	0.93845
131.1	0.9376
131.2	0.9371
131.3	0.93595
131.4	0.93495
131.5	0.93345
131.6	0.9337
131.7	0.9345
131.8	0.935
131.9	0.93545
132	0.936
132.1	0.93695
132.2	0.93755
132.3	0.93715
132.4	0.93655
132.5	0.9354
132.6	0.937
132.7	0.9357
132.8	0.93565
132.9	0.93595
133	0.9355
133.1	0.93625
133.2	0.93635
133.3	0.9373
133.4	0.93565
133.5	0.93615
133.6	0.93665
133.7	0.9364
133.8	0.9378
133.9	0.93875
134	0.93865
134.1	0.9386
134.2	0.93835
134.3	0.93795
134.4	0.9379
134.5	0.9389
134.6	0.93855
134.7	0.9381
134.8	0.9391
134.9	0.9387
135	0.93815
135.1	0.93915
135.2	0.93925
135.3	0.93945
135.4	0.94
135.5	0.9392
135.6	0.93985
135.7	0.939
135.8	0.94015
135.9	0.94015
136	0.9412
136.1	0.94185
136.2	0.943
136.3	0.9426
136.4	0.94275
136.5	0.9419
136.6	0.942
136.7	0.9422
136.8	0.94105
136.9	0.9407
137	0.94195
137.1	0.9435
137.2	0.94425
137.3	0.94375
137.4	0.9438
137.5	0.9431
137.6	0.9434
137.7	0.943
137.8	0.9431
137.9	0.9431
138	0.9424
138.1	0.94205
138.2	0.9432
138.3	0.9421
138.4	0.94215
138.5	0.94165
138.6	0.94215
138.7	0.94185
138.8	0.9436
138.9	0.94375
139	0.9434
139.1	0.94355
139.2	0.94295
139.3	0.94285
139.4	0.94335
139.5	0.9437
139.6	0.94435
139.7	0.94445
139.8	0.9442
139.9	0.94465
140	0.9446
140.1	0.94405
140.2	0.94365
140.3	0.94305
140.4	0.94495
140.5	0.94575
140.6	0.946
140.7	0.94615
140.8	0.94735
140.9	0.94795
141	0.94635
141.1	0.94655
141.2	0.945
141.3	0.9441
141.4	0.9441
141.5	0.94385
141.6	0.9449
141.7	0.9454
141.8	0.9461
141.9	0.94675
142	0.94755
142.1	0.94725
142.2	0.9474
142.3	0.94755
142.4	0.947
142.5	0.94705
142.6	0.94625
142.7	0.94815
142.8	0.9481
142.9	0.94795
143	0.94995
143.1	0.9496
143.2	0.94925
143.3	0.94975
143.4	0.9491
143.5	0.9495
143.6	0.94835
143.7	0.9476
143.8	0.9482
143.9	0.94885
144	0.9484
144.1	0.9495
144.2	0.94985
144.3	0.9503
144.4	0.95035
144.5	0.95025
144.6	0.95005
144.7	0.95035
144.8	0.94875
144.9	0.94865
145	0.9498
145.1	0.94965
145.2	0.9507
145.3	0.9501
145.4	0.9506
145.5	0.95135
145.6	0.95145
145.7	0.95265
145.8	0.9519
145.9	0.951
146	0.95125
146.1	0.9512
146.2	0.9518
146.3	0.9515
146.4	0.9503
146.5	0.9492
146.6	0.95015
146.7	0.9504
146.8	0.95125
146.9	0.95
147	0.95045
147.1	0.9498
147.2	0.95075
147.3	0.95065
147.4	0.95085
147.5	0.9523
147.6	0.95195
147.7	0.95265
147.8	0.95315
147.9	0.9527
148	0.95355
148.1	0.95305
148.2	0.9531
148.3	0.95275
148.4	0.95215
148.5	0.95135
148.6	0.95175
148.7	0.95075
148.8	0.95135
148.9	0.9522
149	0.95285
149.1	0.95245
149.2	0.95255
149.3	0.9517
149.4	0.95255
149.5	0.95385
149.6	0.9537
149.7	0.9534
149.8	0.95285
149.9	0.952
150	0.95285
150.1	0.9529
150.2	0.95265
150.3	0.9533
150.4	0.9526
150.5	0.9521
150.6	0.95065
150.7	0.9508
150.8	0.9527
150.9	0.9532
151	0.9523
151.1	0.9525
151.2	0.9529
151.3	0.9532
151.4	0.95355
151.5	0.95435
151.6	0.9548
151.7	0.95485
151.8	0.95545
151.9	0.95485
152	0.9552
152.1	0.95625
152.2	0.95575
152.3	0.95475
152.4	0.9556
152.5	0.95475
152.6	0.95565
152.7	0.9552
152.8	0.955
152.9	0.95435
153	0.955
153.1	0.95475
153.2	0.95415
153.3	0.95445
153.4	0.9539
153.5	0.95415
153.6	0.9553
153.7	0.95545
153.8	0.9561
153.9	0.95605
154	0.9575
154.1	0.95635
154.2	0.9565
154.3	0.95755
154.4	0.95775
154.5	0.95815
154.6	0.95815
154.7	0.95865
154.8	0.95815
154.9	0.95855
155	0.9578
155.1	0.958
155.2	0.9581
155.3	0.9559
155.4	0.9562
155.5	0.95565
155.6	0.9569
155.7	0.95675
155.8	0.9563
155.9	0.9573
156	0.95605
156.1	0.95505
156.2	0.95485
156.3	0.9541
156.4	0.9553
156.5	0.9564
156.6	0.9562
156.7	0.95585
156.8	0.9561
156.9	0.95635
157	0.95515
157.1	0.9549
157.2	0.9553
157.3	0.9561
157.4	0.95555
157.5	0.9552
157.6	0.9556
157.7	0.9565
157.8	0.9574
157.9	0.95785
158	0.9577
158.1	0.9585
158.2	0.9586
158.3	0.9581
158.4	0.95845
158.5	0.95835
158.6	0.9584
158.7	0.9588
158.8	0.95845
158.9	0.95825
159	0.95805
159.1	0.9567
159.2	0.95755
159.3	0.9587
159.4	0.95845
159.5	0.95895
159.6	0.959
159.7	0.9596
159.8	0.95945
159.9	0.95965
160	0.9591
160.1	0.95985
160.2	0.9605
160.3	0.96
160.4	0.95945
160.5	0.9591
160.6	0.9588
160.7	0.9591
160.8	0.95975
160.9	0.9593
161	0.95975
161.1	0.95945
161.2	0.9588
161.3	0.9589
161.4	0.95955
161.5	0.96015
161.6	0.9601
161.7	0.96105
161.8	0.9605
161.9	0.95975
162	0.9597
162.1	0.9593
162.2	0.95945
162.3	0.9589
162.4	0.95905
162.5	0.95855
162.6	0.95885
162.7	0.95915
162.8	0.95985
162.9	0.95975
163	0.95895
163.1	0.95905
163.2	0.95865
163.3	0.9588
163.4	0.9584
163.5	0.958
163.6	0.9582
163.7	0.95825
163.8	0.95795
163.9	0.9577
164	0.9575
164.1	0.9565
164.2	0.9567
164.3	0.956
164.4	0.95715
164.5	0.95785
164.6	0.95775
164.7	0.9583
164.8	0.95845
164.9	0.95805
165	0.95805
165.1	0.95865
165.2	0.95825
165.3	0.95875
165.4	0.9601
165.5	0.95855
165.6	0.9582
165.7	0.959
165.8	0.95885
165.9	0.9578
166	0.95825
166.1	0.9587
166.2	0.9587
166.3	0.9593
166.4	0.9601
166.5	0.9595
166.6	0.96015
166.7	0.9584
166.8	0.95855
166.9	0.95935
167	0.95965
167.1	0.9589
167.2	0.9592
167.3	0.9593
167.4	0.9583
167.5	0.95735
167.6	0.95765
167.7	0.9581
167.8	0.9587
167.9	0.95875
168	0.95855
168.1	0.95815
168.2	0.9591
168.3	0.9589
168.4	0.95915
168.5	0.95995
168.6	0.95835
168.7	0.95815
168.8	0.95915
168.9	0.95955
169	0.9592
169.1	0.9586
169.2	0.9588
169.3	0.95965
169.4	0.96035
169.5	0.96115
169.6	0.96145
169.7	0.96095
169.8	0.96155
169.9	0.9607
170	0.9596
170.1	0.95915
170.2	0.9594
170.3	0.95985
170.4	0.96015
170.5	0.9601
170.6	0.9591
170.7	0.9596
170.8	0.9609
170.9	0.96165
171	0.9606
171.1	0.9598
171.2	0.95905
171.3	0.9595
171.4	0.95875
171.5	0.95905
171.6	0.9599
171.7	0.9611
171.8	0.96005
171.9	0.96175
172	0.96185
172.1	0.96305
172.2	0.96225
172.3	0.9625
172.4	0.9616
172.5	0.96105
172.6	0.96025
172.7	0.9605
172.8	0.9614
172.9	0.96185
173	0.9625
173.1	0.96165
173.2	0.9614
173.3	0.9618
173.4	0.96165
173.5	0.96205
173.6	0.9613
173.7	0.9601
173.8	0.9601
173.9	0.96125
174	0.9612
174.1	0.96195
174.2	0.9619
174.3	0.9621
174.4	0.9615
174.5	0.96195
174.6	0.96285
174.7	0.9628
174.8	0.9625
174.9	0.96325
175	0.9634
175.1	0.9626
175.2	0.9631
175.3	0.9629
175.4	0.96285
175.5	0.9629
175.6	0.963
175.7	0.96355
175.8	0.9636
175.9	0.9627
176	0.96275
176.1	0.9627
176.2	0.96355
176.3	0.96305
176.4	0.96285
176.5	0.9619
176.6	0.9619
176.7	0.96155
176.8	0.9612
176.9	0.96145
177	0.9616
177.1	0.9619
177.2	0.9619
177.3	0.9626
177.4	0.962
177.5	0.9625
177.6	0.9633
177.7	0.9631
177.8	0.9623
177.9	0.96185
178	0.9613
178.1	0.9617
178.2	0.96265
178.3	0.96325
178.4	0.9631
178.5	0.96395
178.6	0.9633
178.7	0.96385
178.8	0.96395
178.9	0.9636
179	0.96385
179.1	0.9632
179.2	0.9628
179.3	0.96405
179.4	0.96385
179.5	0.9638
179.6	0.963
179.7	0.9631
179.8	0.96285
179.9	0.9631
180	0.96305
180.1	0.96255
180.2	0.9625
180.3	0.9615
180.4	0.96255
180.5	0.96235
180.6	0.96235
180.7	0.96205
180.8	0.96275
180.9	0.96275
181	0.963
181.1	0.9634
181.2	0.96345
181.3	0.9639
181.4	0.96495
181.5	0.96555
181.6	0.96525
181.7	0.96545
181.8	0.9653
181.9	0.96535
182	0.96395
182.1	0.96395
182.2	0.96465
182.3	0.9653
182.4	0.9652
182.5	0.96575
182.6	0.9647
182.7	0.96455
182.8	0.96435
182.9	0.96525
183	0.96445
183.1	0.9644
183.2	0.96535
183.3	0.9652
183.4	0.9652
183.5	0.9653
183.6	0.9644
183.7	0.96365
183.8	0.96415
183.9	0.96375
184	0.9635
184.1	0.96305
184.2	0.9638
184.3	0.96375
184.4	0.96415
184.5	0.9637
184.6	0.96365
184.7	0.9637
184.8	0.9634
184.9	0.9648
185	0.96515
185.1	0.9645
185.2	0.96455
185.3	0.96475
185.4	0.96425
185.5	0.9652
185.6	0.9648
185.7	0.9647
185.8	0.9649
185.9	0.9645
186	0.964
186.1	0.96515
186.2	0.96565
186.3	0.9665
186.4	0.9671
186.5	0.96645
186.6	0.96545
186.7	0.9656
186.8	0.96445
186.9	0.965
187	0.9639
187.1	0.9644
187.2	0.96525
187.3	0.96475
187.4	0.9654
187.5	0.9659
187.6	0.96585
187.7	0.9657
187.8	0.9657
187.9	0.9662
188	0.9664
188.1	0.966
188.2	0.96535
188.3	0.9648
188.4	0.965
188.5	0.96425
188.6	0.96495
188.7	0.96525
188.8	0.965
188.9	0.96495
189	0.9651
189.1	0.96445
189.2	0.96475
189.3	0.96465
189.4	0.96415
189.5	0.96455
189.6	0.96505
189.7	0.9653
189.8	0.9656
189.9	0.9648
190	0.9652
190.1	0.9646
190.2	0.9648
190.3	0.96395
190.4	0.9635
190.5	0.96465
190.6	0.9648
190.7	0.96475
190.8	0.9655
190.9	0.96615
191	0.9651
191.1	0.96455
191.2	0.9649
191.3	0.9647
191.4	0.9648
191.5	0.9649
191.6	0.96465
191.7	0.9652
191.8	0.96535
191.9	0.9648
192	0.9647
192.1	0.96455
192.2	0.9649
192.3	0.9643
192.4	0.96465
192.5	0.96375
192.6	0.96475
192.7	0.96475
192.8	0.9646
192.9	0.9636
193	0.96445
193.1	0.96415
193.2	0.96435
193.3	0.964
193.4	0.96515
193.5	0.9657
193.6	0.9653
193.7	0.96605
193.8	0.96485
193.9	0.96465
194	0.96405
194.1	0.96325
194.2	0.96365
194.3	0.96415
194.4	0.965
194.5	0.96465
194.6	0.9647
194.7	0.9653
194.8	0.96475
194.9	0.96485
195	0.96515
195.1	0.9661
195.2	0.96565
195.3	0.966
195.4	0.9657
195.5	0.9674
195.6	0.96765
195.7	0.96625
195.8	0.966
195.9	0.96485
196	0.96535
196.1	0.96575
196.2	0.9657
196.3	0.96555
196.4	0.9656
196.5	0.9652
196.6	0.96445
196.7	0.96475
196.8	0.9641
196.9	0.96495
197	0.96495
197.1	0.96465
197.2	0.96465
197.3	0.96445
197.4	0.96445
197.5	0.9651
197.6	0.96545
197.7	0.9663
197.8	0.9665
197.9	0.9655
198	0.96545
198.1	0.9663
198.2	0.9658
198.3	0.96505
198.4	0.96565
198.5	0.9658
198.6	0.9641
198.7	0.9641
198.8	0.9641
198.9	0.96355
199	0.96375
199.1	0.96415
199.2	0.9639
199.3	0.96455
199.4	0.9643
199.5	0.9656
199.6	0.9655
199.7	0.9644
199.8	0.96455
199.9	0.9648
200	0.96435
[truncated: 14,000 more rows]
