# Supplementary material for: Bayesian inference of kinetic schemes for ion channels by Kalman filtering
Source: eLife journal article supplement (doi:10.7554/elife.62714), 2022-05-04
Supplement: fig4-data5 [file 1_Sim_N_10000_Strom_MW.xlsx]

## Sheet: Tabelle1
0.1	0
0.2	0
0.3	0
0.4	0
0.5	0
0.6	0
0.7	0
0.8	0
0.9	0
1	0
1.1	0
1.2	0
1.3	0
1.4	0
1.5	0
1.6	0
1.7	0
1.8	0
1.9	0
2	0
2.1	0
2.2	0
2.3	0
2.4	0
2.5	0
2.6	0
2.7	0
2.8	0
2.9	0
3	0
3.1	0
3.2	0
3.3	0
3.4	0
3.5	0
3.6	0
3.7	0
3.8	0
3.9	0
4	0
4.1	0
4.2	0
4.3	0
4.4	0
4.5	0
4.6	0
4.7	0
4.8	0
4.9	0
5	0
5.1	0
5.2	0
5.3	0
5.4	0
5.5	0
5.6	0
5.7	0
5.8	0
5.9	0
6	0
6.1	0
6.2	0
6.3	0
6.4	0
6.5	0
6.6	0
6.7	0
6.8	0
6.9	0
7	0
7.1	0
7.2	0
7.3	0
7.4	0
7.5	0
7.6	0
7.7	0
7.8	0
7.9	0
8	0
8.1	0
8.2	0
8.3	0
8.4	0
8.5	0
8.6	0
8.7	0
8.8	0
8.9	0
9	0
9.1	0
9.2	0
9.3	0
9.4	0
9.5	0
9.6	0
9.7	0
9.8	0
9.9	0
10	0
10.1	0
10.2	0
10.3	0
10.4	0
10.5	0
10.6	0
10.7	0
10.8	0
10.9	0
11	0
11.1	0
11.2	0
11.3	0
11.4	0
11.5	0
11.6	0
11.7	0
11.8	0
11.9	0
12	0
12.1	0
12.2	0
12.3	0
12.4	0
12.5	0
12.6	0
12.7	0
12.8	0
12.9	0
13	0
13.1	0
13.2	0
13.3	0
13.4	0
13.5	0
13.6	0
13.7	0
13.8	0
13.9	0
14	0
14.1	0
14.2	0
14.3	0
14.4	0
14.5	0
14.6	0
14.7	0
14.8	0
14.9	0
15	0
15.1	0
15.2	0
15.3	0
15.4	0
15.5	0
15.6	0
15.7	0
15.8	0
15.9	0
16	0
16.1	0
16.2	0
16.3	0
16.4	0
16.5	0
16.6	0
16.7	0
16.8	0
16.9	0
17	0
17.1	0
17.2	0
17.3	0
17.4	0
17.5	0
17.6	0
17.7	0
17.8	0
17.9	0
18	0
18.1	0
18.2	0
18.3	0
18.4	0
18.5	0
18.6	0
18.7	0
18.8	0
18.9	0
19	0
19.1	0
19.2	0
19.3	0
19.4	0
19.5	0
19.6	0
19.7	0
19.8	0
19.9	0
20	0
20.1	0
20.2	0
20.3	0
20.4	0
20.5	0
20.6	0
20.7	0
20.8	0
20.9	0
21	0
21.1	0
21.2	0
21.3	0
21.4	0
21.5	0
21.6	0
21.7	0
21.8	0
21.9	0
22	0
22.1	0
22.2	0
22.3	0
22.4	0
22.5	0
22.6	0
22.7	0
22.8	0
22.9	0
23	0
23.1	0
23.2	0
23.3	0
23.4	0
23.5	0
23.6	0
23.7	0
23.8	0
23.9	0
24	0
24.1	0
24.2	0
24.3	0
24.4	0
24.5	0
24.6	0
24.7	0
24.8	0
24.9	0
25	0
25.1	0
25.2	0
25.3	0
25.4	0
25.5	0
25.6	0
25.7	0
25.8	0
25.9	0
26	0
26.1	0
26.2	0
26.3	0
26.4	0
26.5	0
26.6	0
26.7	0
26.8	0
26.9	0
27	0
27.1	0
27.2	0
27.3	0
27.4	0
27.5	0
27.6	0
27.7	0
27.8	0
27.9	0
28	0
28.1	0
28.2	0
28.3	0
28.4	0
28.5	0
28.6	0
28.7	0
28.8	0
28.9	0
29	0
29.1	0
29.2	0
29.3	0
29.4	0
29.5	0
29.6	0
29.7	0
29.8	0
29.9	0
30	0
30.1	0
30.2	0
30.3	0
30.4	0
30.5	0
30.6	0
30.7	0
30.8	0
30.9	0
31	0
31.1	0
31.2	0
31.3	0
31.4	0
31.5	0
31.6	0
31.7	0
31.8	0
31.9	0
32	0
32.1	0
32.2	0
32.3	0
32.4	0
32.5	0
32.6	0
32.7	0
32.8	0
32.9	0
33	0
33.1	0
33.2	0
33.3	0
33.4	0
33.5	0
33.6	0
33.7	0
33.8	0
33.9	0
34	0
34.1	0
34.2	0
34.3	0
34.4	0
34.5	0
34.6	0
34.7	0
34.8	0
34.9	0
35	0
35.1	0
35.2	0
35.3	0
35.4	0
35.5	0
35.6	0
35.7	0
35.8	0
35.9	0
36	0
36.1	0
36.2	0
36.3	0
36.4	0
36.5	0
36.6	0
36.7	0
36.8	0
36.9	0
37	0
37.1	0
37.2	0
37.3	0
37.4	0
37.5	0
37.6	0
37.7	0
37.8	0
37.9	0
38	0
38.1	0
38.2	0
38.3	0
38.4	0
38.5	0
38.6	0
38.7	0
38.8	0
38.9	0
39	0
39.1	0
39.2	0
39.3	0
39.4	0
39.5	0
39.6	0
39.7	0
39.8	0
39.9	0
40	0
40.1	0
40.2	0
40.3	0
40.4	0
40.5	0
40.6	0
40.7	0
40.8	0
40.9	0
41	0
41.1	0
41.2	0
41.3	0
41.4	0
41.5	0
41.6	0
41.7	0
41.8	0
41.9	0
42	0
42.1	0
42.2	0
42.3	0
42.4	0
42.5	0
42.6	0
42.7	0
42.8	0
42.9	0
43	0
43.1	0
43.2	0
43.3	0
43.4	0
43.5	0
43.6	0
43.7	0
43.8	0
43.9	0
44	0
44.1	0
44.2	0
44.3	0
44.4	0
44.5	0
44.6	0
44.7	0
44.8	0
44.9	0
45	0
45.1	0
45.2	0
45.3	0
45.4	0
45.5	0
45.6	0
45.7	0
45.8	0
45.9	0
46	0
46.1	0
46.2	0
46.3	0
46.4	0
46.5	0
46.6	0
46.7	0
46.8	0
46.9	0
47	0
47.1	0
47.2	0
47.3	0
47.4	0
47.5	0
47.6	0
47.7	0
47.8	0
47.9	0
48	0
48.1	0
48.2	0
48.3	0
48.4	0
48.5	0
48.6	0
48.7	0
48.8	0
48.9	0
49	0
49.1	0
49.2	0
49.3	0
49.4	0
49.5	0
49.6	0
49.7	0
49.8	0
49.9	0
50	0
50.1	0
50.2	0
50.3	0
50.4	0
50.5	0
50.6	0
50.7	0
50.8	0
50.9	0
51	0
51.1	0
51.2	0
51.3	0
51.4	0
51.5	0
51.6	0
51.7	0
51.8	0
51.9	0
52	0
52.1	0
52.2	0
52.3	0
52.4	0
52.5	0
52.6	0
52.7	0
52.8	0
52.9	0
53	0
53.1	0
53.2	0
53.3	0
53.4	0
53.5	0
53.6	0
53.7	0
53.8	0
53.9	0
54	0
54.1	0
54.2	0
54.3	0
54.4	0
54.5	0
54.6	0
54.7	0
54.8	0
54.9	0
55	0
55.1	0
55.2	0
55.3	0
55.4	0
55.5	0
55.6	0
55.7	0
55.8	0
55.9	0
56	0
56.1	0
56.2	0
56.3	0
56.4	0
56.5	0
56.6	0
56.7	0
56.8	0
56.9	0
57	0
57.1	0
57.2	0
57.3	0
57.4	0
57.5	0
57.6	0
57.7	0
57.8	0
57.9	0
58	0
58.1	0
58.2	0
58.3	0
58.4	0
58.5	0
58.6	0
58.7	0
58.8	0
58.9	0
59	0
59.1	0
59.2	0
59.3	0
59.4	0
59.5	0
59.6	0
59.7	0
59.8	0
59.9	0
60	0
60.1	0
60.2	0
60.3	0
60.4	0
60.5	0
60.6	0
60.7	0
60.8	0
60.9	0
61	0
61.1	0
61.2	0
61.3	0
61.4	0
61.5	0
61.6	0
61.7	0
61.8	0
61.9	0
62	0
62.1	0
62.2	0
62.3	0
62.4	0
62.5	0
62.6	0
62.7	0
62.8	0
62.9	0
63	0
63.1	0
63.2	0
63.3	0
63.4	0
63.5	0
63.6	0
63.7	0
63.8	0
63.9	0
64	0
64.1	0
64.2	0
64.3	0
64.4	0
64.5	0
64.6	0
64.7	0
64.8	0
64.9	0
65	0
65.1	0
65.2	0
65.3	0
65.4	0
65.5	0
65.6	0
65.7	0
65.8	0
65.9	0
66	0
66.1	0
66.2	0
66.3	0
66.4	0
66.5	0
66.6	0
66.7	0
66.8	0
66.9	0
67	0
67.1	0
67.2	0
67.3	0
67.4	0
67.5	0
67.6	0
67.7	0
67.8	0
67.9	0
68	0
68.1	0
68.2	0
68.3	0
68.4	0
68.5	0
68.6	0
68.7	0
68.8	0
68.9	0
69	0
69.1	0
69.2	0
69.3	0
69.4	0
69.5	0
69.6	0
69.7	0
69.8	0
69.9	0
70	0
70.1	0
70.2	0
70.3	0
70.4	0
70.5	0
70.6	0
70.7	0
70.8	0
70.9	0
71	0
71.1	0
71.2	0
71.3	0
71.4	0
71.5	0
71.6	0
71.7	0
71.8	0
71.9	0
72	0
72.1	0
72.2	0
72.3	0
72.4	0
72.5	0
72.6	0
72.7	0
72.8	0
72.9	0
73	0
73.1	0
73.2	0
73.3	0
73.4	0
73.5	0
73.6	0
73.7	0
73.8	0
73.9	0
74	0
74.1	0
74.2	0
74.3	0
74.4	0
74.5	0
74.6	0
74.7	0
74.8	0
74.9	0
75	0
75.1	0
75.2	0
75.3	0
75.4	0
75.5	0
75.6	0
75.7	0
75.8	0
75.9	0
76	0
76.1	0
76.2	0
76.3	0
76.4	0
76.5	0
76.6	0
76.7	0
76.8	0
76.9	0
77	0
77.1	0
77.2	0
77.3	0
77.4	0
77.5	0
77.6	0
77.7	0
77.8	0
77.9	0
78	0
78.1	0
78.2	0
78.3	0
78.4	0
78.5	0
78.6	0
78.7	0
78.8	0
78.9	0
79	0
79.1	0
79.2	0
79.3	0
79.4	0
79.5	0
79.6	0
79.7	0
79.8	0
79.9	0
80	0
80.1	0
80.2	0
80.3	0
80.4	0
80.5	0
80.6	0
80.7	0
80.8	0
80.9	0
81	0
81.1	0
81.2	0
81.3	0
81.4	0
81.5	0
81.6	0
81.7	0
81.8	0
81.9	0
82	0
82.1	0
82.2	0
82.3	0
82.4	0
82.5	0
82.6	0
82.7	0
82.8	0
82.9	0
83	0
83.1	0
83.2	0
83.3	0
83.4	0
83.5	0
83.6	0
83.7	0
83.8	0
83.9	0
84	0
84.1	0
84.2	0
84.3	0
84.4	0
84.5	0
84.6	0
84.7	0
84.8	0
84.9	0
85	0
85.1	0
85.2	0
85.3	0
85.4	0
85.5	0
85.6	0
85.7	0
85.8	0
85.9	0
86	0
86.1	0
86.2	0
86.3	0
86.4	0
86.5	0
86.6	0
86.7	0
86.8	0
86.9	0
87	0
87.1	0
87.2	0
87.3	0
87.4	0
87.5	0
87.6	0
87.7	0
87.8	0
87.9	0
88	0
88.1	0
88.2	0
88.3	0
88.4	0
88.5	0
88.6	0
88.7	0
88.8	0
88.9	0
89	0
89.1	0
89.2	0
89.3	0
89.4	0
89.5	0
89.6	0
89.7	0
89.8	0
89.9	0
90	0
90.1	0
90.2	0
90.3	0
90.4	0
90.5	0
90.6	0
90.7	0
90.8	0
90.9	0
91	0
91.1	0
91.2	0
91.3	0
91.4	0
91.5	0
91.6	0
91.7	0
91.8	0
91.9	0
92	0
92.1	0
92.2	0
92.3	0
92.4	0
92.5	0
92.6	0
92.7	0
92.8	0
92.9	0
93	0
93.1	0
93.2	0
93.3	0
93.4	0
93.5	0
93.6	0
93.7	0
93.8	0
93.9	0
94	0
94.1	0
94.2	0
94.3	0
94.4	0
94.5	0
94.6	0
94.7	0
94.8	0
94.9	0
95	0
95.1	0
95.2	0
95.3	0
95.4	0
95.5	0
95.6	0
95.7	0
95.8	0
95.9	0
96	0
96.1	0
96.2	0
96.3	0
96.4	0
96.5	0
96.6	0
96.7	0
96.8	0
96.9	0
97	0
97.1	0
97.2	0
97.3	0
97.4	0
97.5	0
97.6	0
97.7	0
97.8	0
97.9	0
98	0
98.1	0
98.2	0
98.3	0
98.4	0
98.5	0
98.6	0
98.7	0
98.8	0
98.9	0
99	0
99.1	0
99.2	0
99.3	0
99.4	0
99.5	0
99.6	0
99.7	0
99.8	0
99.9	0
100	0
100.1	0
100.2	0.0005
100.3	0.0008
100.4	0.0015
100.5	0.0028
100.6	0.0041
100.7	0.0065
100.8	0.0085
100.9	0.0101
101	0.0125
101.1	0.0152
101.2	0.0182
101.3	0.0207
101.4	0.0245
101.5	0.0273
101.6	0.0307
101.7	0.0336
101.8	0.0367
101.9	0.0405
102	0.0436
102.1	0.0469
102.2	0.0493
102.3	0.0521
102.4	0.0558
102.5	0.0572
102.6	0.0603
102.7	0.064
102.8	0.0677
102.9	0.0703
103	0.0739
103.1	0.0774
103.2	0.0805
103.3	0.0828
103.4	0.085
103.5	0.0874
103.6	0.0899
103.7	0.093
103.8	0.0956
103.9	0.0982
104	0.1002
104.1	0.103
104.2	0.1066
104.3	0.11
104.4	0.1134
104.5	0.116
104.6	0.12
104.7	0.1227
104.8	0.1264
104.9	0.1286
105	0.1314
105.1	0.1345
105.2	0.1375
105.3	0.1405
105.4	0.143
105.5	0.1441
105.6	0.147
105.7	0.1508
105.8	0.1535
105.9	0.1566
106	0.1594
106.1	0.1618
106.2	0.1655
106.3	0.1678
106.4	0.1703
106.5	0.1731
106.6	0.175
106.7	0.1777
106.8	0.1797
106.9	0.1822
107	0.1846
107.1	0.1872
107.2	0.1897
107.3	0.1922
107.4	0.1946
107.5	0.1981
107.6	0.2017
107.7	0.2043
107.8	0.207
107.9	0.2094
108	0.2117
108.1	0.2145
108.2	0.2172
108.3	0.2194
108.4	0.2217
108.5	0.2246
108.6	0.227
108.7	0.2301
108.8	0.2335
108.9	0.2361
109	0.2392
109.1	0.2418
109.2	0.2448
109.3	0.2471
109.4	0.2504
109.5	0.2526
109.6	0.2549
109.7	0.2579
109.8	0.26
109.9	0.2621
110	0.2638
110.1	0.2653
110.2	0.2671
110.3	0.2696
110.4	0.2726
110.5	0.2742
110.6	0.2764
110.7	0.2784
110.8	0.2803
110.9	0.2826
111	0.2847
111.1	0.2874
111.2	0.2894
111.3	0.2907
111.4	0.2932
111.5	0.2951
111.6	0.2968
111.7	0.2995
111.8	0.3016
111.9	0.3041
112	0.3063
112.1	0.3083
112.2	0.3106
112.3	0.3127
112.4	0.3153
112.5	0.3168
112.6	0.3195
112.7	0.3212
112.8	0.3226
112.9	0.3247
113	0.3264
113.1	0.3275
113.2	0.3297
113.3	0.3316
113.4	0.3336
113.5	0.3356
113.6	0.3374
113.7	0.3401
113.8	0.342
113.9	0.3434
114	0.3451
114.1	0.3475
114.2	0.3502
114.3	0.3512
114.4	0.3532
114.5	0.3551
114.6	0.3574
114.7	0.359
114.8	0.3609
114.9	0.3622
115	0.3638
115.1	0.3657
115.2	0.3675
115.3	0.3702
115.4	0.3724
115.5	0.3746
115.6	0.3766
115.7	0.3788
115.8	0.3801
115.9	0.3826
116	0.3848
116.1	0.386
116.2	0.3874
116.3	0.3897
116.4	0.3925
116.5	0.3943
116.6	0.3961
116.7	0.3979
116.8	0.4
116.9	0.401
117	0.4026
117.1	0.404
117.2	0.4061
117.3	0.4077
117.4	0.4095
117.5	0.4108
117.6	0.4132
117.7	0.4152
117.8	0.4183
117.9	0.4189
118	0.4204
118.1	0.4225
118.2	0.4241
118.3	0.4252
118.4	0.4267
118.5	0.4281
118.6	0.4305
118.7	0.4325
118.8	0.4333
118.9	0.4354
119	0.437
119.1	0.4387
119.2	0.4396
119.3	0.4408
119.4	0.442
119.5	0.4436
119.6	0.4466
119.7	0.448
119.8	0.4494
119.9	0.4513
120	0.4529
120.1	0.454
120.2	0.4551
120.3	0.4567
120.4	0.4579
120.5	0.4592
120.6	0.4599
120.7	0.4613
120.8	0.4628
120.9	0.4642
121	0.4658
121.1	0.468
121.2	0.4685
121.3	0.4695
121.4	0.4703
121.5	0.4713
121.6	0.4722
121.7	0.4736
121.8	0.4751
121.9	0.4774
122	0.4791
122.1	0.4803
122.2	0.4816
122.3	0.4824
122.4	0.4833
122.5	0.4849
122.6	0.4863
122.7	0.4873
122.8	0.4881
122.9	0.4894
123	0.4907
123.1	0.4916
123.2	0.4926
123.3	0.4939
123.4	0.4957
123.5	0.4965
123.6	0.4981
123.7	0.499
123.8	0.5005
123.9	0.5015
124	0.502
124.1	0.5025
124.2	0.5029
124.3	0.5054
124.4	0.5062
124.5	0.5083
124.6	0.5096
124.7	0.5103
124.8	0.5114
124.9	0.5127
125	0.5141
125.1	0.515
125.2	0.5163
125.3	0.5169
125.4	0.5186
125.5	0.5193
125.6	0.5201
125.7	0.5203
125.8	0.5216
125.9	0.5233
126	0.524
126.1	0.5249
126.2	0.5265
126.3	0.5271
126.4	0.5283
126.5	0.5289
126.6	0.5304
126.7	0.5316
126.8	0.5328
126.9	0.5337
127	0.5341
127.1	0.535
127.2	0.5361
127.3	0.5374
127.4	0.5382
127.5	0.5395
127.6	0.5409
127.7	0.5419
127.8	0.5426
127.9	0.5435
128	0.5451
128.1	0.5456
128.2	0.5469
128.3	0.5471
128.4	0.5479
128.5	0.5485
128.6	0.5497
128.7	0.5512
128.8	0.5523
128.9	0.5528
129	0.5532
129.1	0.5539
129.2	0.5556
129.3	0.5566
129.4	0.5583
129.5	0.5604
129.6	0.5617
129.7	0.5626
129.8	0.5642
129.9	0.5646
130	0.565
130.1	0.566
130.2	0.5668
130.3	0.5678
130.4	0.5691
130.5	0.5693
130.6	0.5703
130.7	0.5712
130.8	0.5721
130.9	0.5728
131	0.5735
131.1	0.5745
131.2	0.5762
131.3	0.5772
131.4	0.5779
131.5	0.5788
131.6	0.5797
131.7	0.581
131.8	0.5813
131.9	0.5824
132	0.5831
132.1	0.5836
132.2	0.5841
132.3	0.5853
132.4	0.5862
132.5	0.5867
132.6	0.588
132.7	0.5886
132.8	0.59
132.9	0.5914
133	0.5924
133.1	0.593
133.2	0.5944
133.3	0.5951
133.4	0.5957
133.5	0.5959
133.6	0.5973
133.7	0.5979
133.8	0.5992
133.9	0.6001
134	0.6012
134.1	0.6011
134.2	0.6018
134.3	0.6022
134.4	0.6024
134.5	0.6033
134.6	0.6042
134.7	0.6048
134.8	0.6052
134.9	0.6066
135	0.607
135.1	0.6082
135.2	0.6086
135.3	0.6083
135.4	0.6092
135.5	0.6108
135.6	0.6118
135.7	0.6125
135.8	0.6141
135.9	0.6139
136	0.6141
136.1	0.6149
136.2	0.6156
136.3	0.6163
136.4	0.6172
136.5	0.6177
136.6	0.6186
136.7	0.6197
136.8	0.6208
136.9	0.6215
137	0.6217
137.1	0.6227
137.2	0.6231
137.3	0.6234
137.4	0.6241
137.5	0.6245
137.6	0.6256
137.7	0.6262
137.8	0.626
137.9	0.6276
138	0.6278
138.1	0.6283
138.2	0.6304
138.3	0.6303
138.4	0.6308
138.5	0.6318
138.6	0.6332
138.7	0.6338
138.8	0.6339
138.9	0.6347
139	0.6353
139.1	0.6356
139.2	0.6368
139.3	0.637
139.4	0.6371
139.5	0.638
139.6	0.6386
139.7	0.6397
139.8	0.64
139.9	0.6403
140	0.6403
140.1	0.6406
140.2	0.641
140.3	0.6424
140.4	0.6432
140.5	0.644
140.6	0.6444
140.7	0.6447
140.8	0.6446
140.9	0.645
141	0.6455
141.1	0.6461
141.2	0.6459
141.3	0.647
141.4	0.6474
141.5	0.6476
141.6	0.6481
141.7	0.6482
141.8	0.6494
141.9	0.6498
142	0.6509
142.1	0.6515
142.2	0.6528
142.3	0.6532
142.4	0.6536
142.5	0.6539
142.6	0.6547
142.7	0.6548
142.8	0.656
142.9	0.6569
143	0.6579
143.1	0.658
143.2	0.6584
143.3	0.6591
143.4	0.6598
143.5	0.6608
143.6	0.6618
143.7	0.6627
143.8	0.6639
143.9	0.6645
144	0.6654
144.1	0.6666
144.2	0.6672
144.3	0.6677
144.4	0.6691
144.5	0.6693
144.6	0.6696
144.7	0.6702
144.8	0.6709
144.9	0.671
145	0.6718
145.1	0.6718
145.2	0.6731
145.3	0.6735
145.4	0.674
145.5	0.6745
145.6	0.6747
145.7	0.6749
145.8	0.6749
145.9	0.6757
146	0.6755
146.1	0.6751
146.2	0.6755
146.3	0.6757
146.4	0.6769
146.5	0.6776
146.6	0.6779
146.7	0.6784
146.8	0.6791
146.9	0.6794
147	0.6799
147.1	0.6807
147.2	0.6808
147.3	0.6809
147.4	0.6804
147.5	0.6809
147.6	0.682
147.7	0.6827
147.8	0.6831
147.9	0.6832
148	0.6846
148.1	0.685
148.2	0.6861
148.3	0.6865
148.4	0.687
148.5	0.6869
148.6	0.6871
148.7	0.6873
148.8	0.6873
148.9	0.6876
149	0.6879
149.1	0.6885
149.2	0.6887
149.3	0.6893
149.4	0.6891
149.5	0.69
149.6	0.6904
149.7	0.6907
149.8	0.6906
149.9	0.6907
150	0.6913
150.1	0.6916
150.2	0.6919
150.3	0.6927
150.4	0.6931
150.5	0.6934
150.6	0.6939
150.7	0.6941
150.8	0.6946
150.9	0.6955
151	0.6961
151.1	0.6961
151.2	0.6968
151.3	0.6976
151.4	0.6977
151.5	0.6981
151.6	0.6991
151.7	0.6994
151.8	0.7
151.9	0.6997
152	0.6997
152.1	0.6995
152.2	0.7001
152.3	0.7001
152.4	0.7
152.5	0.7004
152.6	0.7011
152.7	0.7008
152.8	0.7011
152.9	0.701
153	0.701
153.1	0.7022
153.2	0.7028
153.3	0.703
153.4	0.703
153.5	0.7032
153.6	0.7033
153.7	0.7034
153.8	0.7037
153.9	0.7043
154	0.705
154.1	0.7057
154.2	0.7057
154.3	0.7062
154.4	0.7063
154.5	0.7067
154.6	0.7063
154.7	0.7069
154.8	0.7071
154.9	0.7077
155	0.7084
155.1	0.7088
155.2	0.7097
155.3	0.7102
155.4	0.711
155.5	0.7122
155.6	0.7129
155.7	0.7134
155.8	0.7135
155.9	0.7144
156	0.7151
156.1	0.7157
156.2	0.7157
156.3	0.7158
156.4	0.7159
156.5	0.7162
156.6	0.7171
156.7	0.7173
156.8	0.7179
156.9	0.7184
157	0.7182
157.1	0.7182
157.2	0.718
157.3	0.7181
157.4	0.718
157.5	0.7191
157.6	0.7192
157.7	0.7201
157.8	0.7205
157.9	0.7206
158	0.7216
158.1	0.7226
158.2	0.7227
158.3	0.7231
158.4	0.7234
158.5	0.7236
158.6	0.7242
158.7	0.7248
158.8	0.7244
158.9	0.7246
159	0.7251
159.1	0.7259
159.2	0.7267
159.3	0.727
159.4	0.7271
159.5	0.7276
159.6	0.7283
159.7	0.7284
159.8	0.7291
159.9	0.7291
160	0.729
160.1	0.729
160.2	0.7289
160.3	0.729
160.4	0.7288
160.5	0.7289
160.6	0.7297
160.7	0.7298
160.8	0.7293
160.9	0.7296
161	0.7299
161.1	0.73
161.2	0.7309
161.3	0.7312
161.4	0.731
161.5	0.7305
161.6	0.7307
161.7	0.7304
161.8	0.7305
161.9	0.7304
162	0.7299
162.1	0.7305
162.2	0.7306
162.3	0.7309
162.4	0.7315
162.5	0.7318
162.6	0.732
162.7	0.7315
162.8	0.7322
162.9	0.7321
163	0.7314
163.1	0.7319
163.2	0.732
163.3	0.7324
163.4	0.7329
163.5	0.7339
163.6	0.734
163.7	0.7346
163.8	0.7342
163.9	0.7343
164	0.7345
164.1	0.7345
164.2	0.7346
164.3	0.7348
164.4	0.7348
164.5	0.7351
164.6	0.7351
164.7	0.7356
164.8	0.7359
164.9	0.7362
165	0.737
165.1	0.7367
165.2	0.7369
165.3	0.7361
165.4	0.7365
165.5	0.7367
165.6	0.736
165.7	0.7359
165.8	0.7357
165.9	0.7359
166	0.7361
166.1	0.7358
166.2	0.7356
166.3	0.7356
166.4	0.7356
166.5	0.7357
166.6	0.7358
166.7	0.7352
166.8	0.7364
166.9	0.7371
167	0.7375
167.1	0.7379
167.2	0.7383
167.3	0.7386
167.4	0.739
167.5	0.7391
167.6	0.7395
167.7	0.7397
167.8	0.7405
167.9	0.741
168	0.7411
168.1	0.7413
168.2	0.7419
168.3	0.7421
168.4	0.7426
168.5	0.7432
168.6	0.7431
168.7	0.7431
168.8	0.7433
168.9	0.7435
169	0.7434
169.1	0.7435
169.2	0.743
169.3	0.7439
169.4	0.7446
169.5	0.7446
169.6	0.7449
169.7	0.7441
169.8	0.744
169.9	0.7434
170	0.7435
170.1	0.7438
170.2	0.7428
170.3	0.7432
170.4	0.7437
170.5	0.7439
170.6	0.744
170.7	0.7444
170.8	0.7443
170.9	0.7447
171	0.7441
171.1	0.7442
171.2	0.7448
171.3	0.7454
171.4	0.7452
171.5	0.745
171.6	0.7452
171.7	0.7453
171.8	0.7455
171.9	0.7454
172	0.7461
172.1	0.7461
172.2	0.7461
172.3	0.746
172.4	0.7459
172.5	0.7461
172.6	0.7467
172.7	0.7472
172.8	0.7474
172.9	0.7478
173	0.7485
173.1	0.7484
173.2	0.7491
173.3	0.7493
173.4	0.7494
173.5	0.7503
173.6	0.7507
173.7	0.7508
173.8	0.7514
173.9	0.752
174	0.7524
174.1	0.7526
174.2	0.7523
174.3	0.7525
174.4	0.7523
174.5	0.7523
174.6	0.7526
174.7	0.7528
174.8	0.7539
174.9	0.7547
175	0.7551
175.1	0.7553
175.2	0.7557
175.3	0.7558
175.4	0.7553
175.5	0.7552
175.6	0.7552
175.7	0.7551
175.8	0.7557
175.9	0.7558
176	0.7556
176.1	0.7558
176.2	0.7564
176.3	0.7564
176.4	0.7568
176.5	0.7565
176.6	0.7572
176.7	0.7571
176.8	0.7569
176.9	0.7578
177	0.7583
177.1	0.758
177.2	0.758
177.3	0.7583
177.4	0.7576
177.5	0.7582
177.6	0.7585
177.7	0.7589
177.8	0.759
177.9	0.7595
178	0.7602
178.1	0.7604
178.2	0.76
178.3	0.7602
178.4	0.7598
178.5	0.7601
178.6	0.7602
178.7	0.7602
178.8	0.7607
178.9	0.7603
179	0.7603
179.1	0.7604
179.2	0.7606
179.3	0.7599
179.4	0.7601
179.5	0.7609
179.6	0.7621
179.7	0.7628
179.8	0.7631
179.9	0.7636
180	0.7628
180.1	0.7629
180.2	0.7624
180.3	0.7623
180.4	0.7621
180.5	0.762
180.6	0.762
180.7	0.7617
180.8	0.7611
180.9	0.7615
181	0.7622
181.1	0.7624
181.2	0.7625
181.3	0.7626
181.4	0.7623
181.5	0.7618
181.6	0.7617
181.7	0.7621
181.8	0.7623
181.9	0.7618
182	0.7619
182.1	0.7619
182.2	0.7617
182.3	0.7613
182.4	0.7618
182.5	0.7618
182.6	0.7621
182.7	0.762
182.8	0.7624
182.9	0.7627
183	0.7627
183.1	0.7626
183.2	0.7632
183.3	0.7638
183.4	0.7645
183.5	0.7635
183.6	0.7641
183.7	0.7645
183.8	0.7649
183.9	0.765
184	0.7658
184.1	0.7658
184.2	0.7653
184.3	0.7656
184.4	0.7651
184.5	0.7654
184.6	0.7663
184.7	0.7667
184.8	0.7663
184.9	0.7663
185	0.7657
185.1	0.7651
185.2	0.7655
185.3	0.7653
185.4	0.7656
185.5	0.7655
185.6	0.7648
185.7	0.7657
185.8	0.7661
185.9	0.7659
186	0.7659
186.1	0.7658
186.2	0.7658
186.3	0.7658
186.4	0.7666
186.5	0.7664
186.6	0.767
186.7	0.7672
186.8	0.767
186.9	0.767
187	0.7672
187.1	0.7674
187.2	0.7675
187.3	0.7681
187.4	0.7685
187.5	0.7686
187.6	0.768
187.7	0.7686
187.8	0.7683
187.9	0.7684
188	0.7681
188.1	0.7677
188.2	0.7672
188.3	0.7668
188.4	0.767
188.5	0.7676
188.6	0.7681
188.7	0.7681
188.8	0.7681
188.9	0.768
189	0.7677
189.1	0.7675
189.2	0.7672
189.3	0.7676
189.4	0.7677
189.5	0.7679
189.6	0.7682
189.7	0.7672
189.8	0.7669
189.9	0.7669
190	0.7667
190.1	0.7672
190.2	0.767
190.3	0.7666
190.4	0.7667
190.5	0.7658
190.6	0.7656
190.7	0.7652
190.8	0.7652
190.9	0.7654
191	0.766
191.1	0.7663
191.2	0.7664
191.3	0.7668
191.4	0.7675
191.5	0.7673
191.6	0.7676
191.7	0.7676
191.8	0.7669
191.9	0.7666
192	0.7666
192.1	0.7669
192.2	0.7671
192.3	0.7672
192.4	0.7673
192.5	0.7674
192.6	0.7675
192.7	0.7671
192.8	0.7669
192.9	0.7673
193	0.7673
193.1	0.7675
193.2	0.7671
193.3	0.7668
193.4	0.7666
193.5	0.7668
193.6	0.7669
193.7	0.7669
193.8	0.7665
193.9	0.7666
194	0.7668
194.1	0.7665
194.2	0.7662
194.3	0.7667
194.4	0.7669
194.5	0.7668
194.6	0.7669
194.7	0.767
194.8	0.7677
194.9	0.768
195	0.7672
195.1	0.7672
195.2	0.7676
195.3	0.7675
195.4	0.7678
195.5	0.7678
195.6	0.7681
195.7	0.7681
195.8	0.7687
195.9	0.7695
196	0.7698
196.1	0.77
196.2	0.7702
196.3	0.7709
196.4	0.7703
196.5	0.7706
196.6	0.7711
196.7	0.7709
196.8	0.7714
196.9	0.7714
197	0.7719
197.1	0.7718
197.2	0.7721
197.3	0.772
197.4	0.7719
197.5	0.7718
197.6	0.7716
197.7	0.7707
197.8	0.7706
197.9	0.7705
198	0.7708
198.1	0.7706
198.2	0.7704
198.3	0.7702
198.4	0.7702
198.5	0.7707
198.6	0.7712
198.7	0.7712
198.8	0.7709
198.9	0.771
199	0.7717
199.1	0.7713
199.2	0.7708
199.3	0.771
199.4	0.7709
199.5	0.7706
199.6	0.7704
199.7	0.7707
199.8	0.771
199.9	0.7706
200	0.7716
[truncated: 14,000 more rows]
