# Supplementary material for: Bayesian inference of kinetic schemes for ion channels by Kalman filtering
Source: eLife journal article supplement (doi:10.7554/elife.62714), 2022-05-04
Supplement: fig4-data5 [file 1_Sim_N_20000_Fluor_MW_4M.xlsx]

## Sheet: Tabelle1
0.1	0
0.2	0
0.3	0
0.4	0
0.5	0
0.6	0
0.7	0
0.8	0
0.9	0
1	0
1.1	0
1.2	0
1.3	0
1.4	0
1.5	0
1.6	0
1.7	0
1.8	0
1.9	0
2	0
2.1	0
2.2	0
2.3	0
2.4	0
2.5	0
2.6	0
2.7	0
2.8	0
2.9	0
3	0
3.1	0
3.2	0
3.3	0
3.4	0
3.5	0
3.6	0
3.7	0
3.8	0
3.9	0
4	0
4.1	0
4.2	0
4.3	0
4.4	0
4.5	0
4.6	0
4.7	0
4.8	0
4.9	0
5	0
5.1	0
5.2	0
5.3	0
5.4	0
5.5	0
5.6	0
5.7	0
5.8	0
5.9	0
6	0
6.1	0
6.2	0
6.3	0
6.4	0
6.5	0
6.6	0
6.7	0
6.8	0
6.9	0
7	0
7.1	0
7.2	0
7.3	0
7.4	0
7.5	0
7.6	0
7.7	0
7.8	0
7.9	0
8	0
8.1	0
8.2	0
8.3	0
8.4	0
8.5	0
8.6	0
8.7	0
8.8	0
8.9	0
9	0
9.1	0
9.2	0
9.3	0
9.4	0
9.5	0
9.6	0
9.7	0
9.8	0
9.9	0
10	0
10.1	0
10.2	0
10.3	0
10.4	0
10.5	0
10.6	0
10.7	0
10.8	0
10.9	0
11	0
11.1	0
11.2	0
11.3	0
11.4	0
11.5	0
11.6	0
11.7	0
11.8	0
11.9	0
12	0
12.1	0
12.2	0
12.3	0
12.4	0
12.5	0
12.6	0
12.7	0
12.8	0
12.9	0
13	0
13.1	0
13.2	0
13.3	0
13.4	0
13.5	0
13.6	0
13.7	0
13.8	0
13.9	0
14	0
14.1	0
14.2	0
14.3	0
14.4	0
14.5	0
14.6	0
14.7	0
14.8	0
14.9	0
15	0
15.1	0
15.2	0
15.3	0
15.4	0
15.5	0
15.6	0
15.7	0
15.8	0
15.9	0
16	0
16.1	0
16.2	0
16.3	0
16.4	0
16.5	0
16.6	0
16.7	0
16.8	0
16.9	0
17	0
17.1	0
17.2	0
17.3	0
17.4	0
17.5	0
17.6	0
17.7	0
17.8	0
17.9	0
18	0
18.1	0
18.2	0
18.3	0
18.4	0
18.5	0
18.6	0
18.7	0
18.8	0
18.9	0
19	0
19.1	0
19.2	0
19.3	0
19.4	0
19.5	0
19.6	0
19.7	0
19.8	0
19.9	0
20	0
20.1	0
20.2	0
20.3	0
20.4	0
20.5	0
20.6	0
20.7	0
20.8	0
20.9	0
21	0
21.1	0
21.2	0
21.3	0
21.4	0
21.5	0
21.6	0
21.7	0
21.8	0
21.9	0
22	0
22.1	0
22.2	0
22.3	0
22.4	0
22.5	0
22.6	0
22.7	0
22.8	0
22.9	0
23	0
23.1	0
23.2	0
23.3	0
23.4	0
23.5	0
23.6	0
23.7	0
23.8	0
23.9	0
24	0
24.1	0
24.2	0
24.3	0
24.4	0
24.5	0
24.6	0
24.7	0
24.8	0
24.9	0
25	0
25.1	0
25.2	0
25.3	0
25.4	0
25.5	0
25.6	0
25.7	0
25.8	0
25.9	0
26	0
26.1	0
26.2	0
26.3	0
26.4	0
26.5	0
26.6	0
26.7	0
26.8	0
26.9	0
27	0
27.1	0
27.2	0
27.3	0
27.4	0
27.5	0
27.6	0
27.7	0
27.8	0
27.9	0
28	0
28.1	0
28.2	0
28.3	0
28.4	0
28.5	0
28.6	0
28.7	0
28.8	0
28.9	0
29	0
29.1	0
29.2	0
29.3	0
29.4	0
29.5	0
29.6	0
29.7	0
29.8	0
29.9	0
30	0
30.1	0
30.2	0
30.3	0
30.4	0
30.5	0
30.6	0
30.7	0
30.8	0
30.9	0
31	0
31.1	0
31.2	0
31.3	0
31.4	0
31.5	0
31.6	0
31.7	0
31.8	0
31.9	0
32	0
32.1	0
32.2	0
32.3	0
32.4	0
32.5	0
32.6	0
32.7	0
32.8	0
32.9	0
33	0
33.1	0
33.2	0
33.3	0
33.4	0
33.5	0
33.6	0
33.7	0
33.8	0
33.9	0
34	0
34.1	0
34.2	0
34.3	0
34.4	0
34.5	0
34.6	0
34.7	0
34.8	0
34.9	0
35	0
35.1	0
35.2	0
35.3	0
35.4	0
35.5	0
35.6	0
35.7	0
35.8	0
35.9	0
36	0
36.1	0
36.2	0
36.3	0
36.4	0
36.5	0
36.6	0
36.7	0
36.8	0
36.9	0
37	0
37.1	0
37.2	0
37.3	0
37.4	0
37.5	0
37.6	0
37.7	0
37.8	0
37.9	0
38	0
38.1	0
38.2	0
38.3	0
38.4	0
38.5	0
38.6	0
38.7	0
38.8	0
38.9	0
39	0
39.1	0
39.2	0
39.3	0
39.4	0
39.5	0
39.6	0
39.7	0
39.8	0
39.9	0
40	0
40.1	0
40.2	0
40.3	0
40.4	0
40.5	0
40.6	0
40.7	0
40.8	0
40.9	0
41	0
41.1	0
41.2	0
41.3	0
41.4	0
41.5	0
41.6	0
41.7	0
41.8	0
41.9	0
42	0
42.1	0
42.2	0
42.3	0
42.4	0
42.5	0
42.6	0
42.7	0
42.8	0
42.9	0
43	0
43.1	0
43.2	0
43.3	0
43.4	0
43.5	0
43.6	0
43.7	0
43.8	0
43.9	0
44	0
44.1	0
44.2	0
44.3	0
44.4	0
44.5	0
44.6	0
44.7	0
44.8	0
44.9	0
45	0
45.1	0
45.2	0
45.3	0
45.4	0
45.5	0
45.6	0
45.7	0
45.8	0
45.9	0
46	0
46.1	0
46.2	0
46.3	0
46.4	0
46.5	0
46.6	0
46.7	0
46.8	0
46.9	0
47	0
47.1	0
47.2	0
47.3	0
47.4	0
47.5	0
47.6	0
47.7	0
47.8	0
47.9	0
48	0
48.1	0
48.2	0
48.3	0
48.4	0
48.5	0
48.6	0
48.7	0
48.8	0
48.9	0
49	0
49.1	0
49.2	0
49.3	0
49.4	0
49.5	0
49.6	0
49.7	0
49.8	0
49.9	0
50	0
50.1	0
50.2	0
50.3	0
50.4	0
50.5	0
50.6	0
50.7	0
50.8	0
50.9	0
51	0
51.1	0
51.2	0
51.3	0
51.4	0
51.5	0
51.6	0
51.7	0
51.8	0
51.9	0
52	0
52.1	0
52.2	0
52.3	0
52.4	0
52.5	0
52.6	0
52.7	0
52.8	0
52.9	0
53	0
53.1	0
53.2	0
53.3	0
53.4	0
53.5	0
53.6	0
53.7	0
53.8	0
53.9	0
54	0
54.1	0
54.2	0
54.3	0
54.4	0
54.5	0
54.6	0
54.7	0
54.8	0
54.9	0
55	0
55.1	0
55.2	0
55.3	0
55.4	0
55.5	0
55.6	0
55.7	0
55.8	0
55.9	0
56	0
56.1	0
56.2	0
56.3	0
56.4	0
56.5	0
56.6	0
56.7	0
56.8	0
56.9	0
57	0
57.1	0
57.2	0
57.3	0
57.4	0
57.5	0
57.6	0
57.7	0
57.8	0
57.9	0
58	0
58.1	0
58.2	0
58.3	0
58.4	0
58.5	0
58.6	0
58.7	0
58.8	0
58.9	0
59	0
59.1	0
59.2	0
59.3	0
59.4	0
59.5	0
59.6	0
59.7	0
59.8	0
59.9	0
60	0
60.1	0
60.2	0
60.3	0
60.4	0
60.5	0
60.6	0
60.7	0
60.8	0
60.9	0
61	0
61.1	0
61.2	0
61.3	0
61.4	0
61.5	0
61.6	0
61.7	0
61.8	0
61.9	0
62	0
62.1	0
62.2	0
62.3	0
62.4	0
62.5	0
62.6	0
62.7	0
62.8	0
62.9	0
63	0
63.1	0
63.2	0
63.3	0
63.4	0
63.5	0
63.6	0
63.7	0
63.8	0
63.9	0
64	0
64.1	0
64.2	0
64.3	0
64.4	0
64.5	0
64.6	0
64.7	0
64.8	0
64.9	0
65	0
65.1	0
65.2	0
65.3	0
65.4	0
65.5	0
65.6	0
65.7	0
65.8	0
65.9	0
66	0
66.1	0
66.2	0
66.3	0
66.4	0
66.5	0
66.6	0
66.7	0
66.8	0
66.9	0
67	0
67.1	0
67.2	0
67.3	0
67.4	0
67.5	0
67.6	0
67.7	0
67.8	0
67.9	0
68	0
68.1	0
68.2	0
68.3	0
68.4	0
68.5	0
68.6	0
68.7	0
68.8	0
68.9	0
69	0
69.1	0
69.2	0
69.3	0
69.4	0
69.5	0
69.6	0
69.7	0
69.8	0
69.9	0
70	0
70.1	0
70.2	0
70.3	0
70.4	0
70.5	0
70.6	0
70.7	0
70.8	0
70.9	0
71	0
71.1	0
71.2	0
71.3	0
71.4	0
71.5	0
71.6	0
71.7	0
71.8	0
71.9	0
72	0
72.1	0
72.2	0
72.3	0
72.4	0
72.5	0
72.6	0
72.7	0
72.8	0
72.9	0
73	0
73.1	0
73.2	0
73.3	0
73.4	0
73.5	0
73.6	0
73.7	0
73.8	0
73.9	0
74	0
74.1	0
74.2	0
74.3	0
74.4	0
74.5	0
74.6	0
74.7	0
74.8	0
74.9	0
75	0
75.1	0
75.2	0
75.3	0
75.4	0
75.5	0
75.6	0
75.7	0
75.8	0
75.9	0
76	0
76.1	0
76.2	0
76.3	0
76.4	0
76.5	0
76.6	0
76.7	0
76.8	0
76.9	0
77	0
77.1	0
77.2	0
77.3	0
77.4	0
77.5	0
77.6	0
77.7	0
77.8	0
77.9	0
78	0
78.1	0
78.2	0
78.3	0
78.4	0
78.5	0
78.6	0
78.7	0
78.8	0
78.9	0
79	0
79.1	0
79.2	0
79.3	0
79.4	0
79.5	0
79.6	0
79.7	0
79.8	0
79.9	0
80	0
80.1	0
80.2	0
80.3	0
80.4	0
80.5	0
80.6	0
80.7	0
80.8	0
80.9	0
81	0
81.1	0
81.2	0
81.3	0
81.4	0
81.5	0
81.6	0
81.7	0
81.8	0
81.9	0
82	0
82.1	0
82.2	0
82.3	0
82.4	0
82.5	0
82.6	0
82.7	0
82.8	0
82.9	0
83	0
83.1	0
83.2	0
83.3	0
83.4	0
83.5	0
83.6	0
83.7	0
83.8	0
83.9	0
84	0
84.1	0
84.2	0
84.3	0
84.4	0
84.5	0
84.6	0
84.7	0
84.8	0
84.9	0
85	0
85.1	0
85.2	0
85.3	0
85.4	0
85.5	0
85.6	0
85.7	0
85.8	0
85.9	0
86	0
86.1	0
86.2	0
86.3	0
86.4	0
86.5	0
86.6	0
86.7	0
86.8	0
86.9	0
87	0
87.1	0
87.2	0
87.3	0
87.4	0
87.5	0
87.6	0
87.7	0
87.8	0
87.9	0
88	0
88.1	0
88.2	0
88.3	0
88.4	0
88.5	0
88.6	0
88.7	0
88.8	0
88.9	0
89	0
89.1	0
89.2	0
89.3	0
89.4	0
89.5	0
89.6	0
89.7	0
89.8	0
89.9	0
90	0
90.1	0
90.2	0
90.3	0
90.4	0
90.5	0
90.6	0
90.7	0
90.8	0
90.9	0
91	0
91.1	0
91.2	0
91.3	0
91.4	0
91.5	0
91.6	0
91.7	0
91.8	0
91.9	0
92	0
92.1	0
92.2	0
92.3	0
92.4	0
92.5	0
92.6	0
92.7	0
92.8	0
92.9	0
93	0
93.1	0
93.2	0
93.3	0
93.4	0
93.5	0
93.6	0
93.7	0
93.8	0
93.9	0
94	0
94.1	0
94.2	0
94.3	0
94.4	0
94.5	0
94.6	0
94.7	0
94.8	0
94.9	0
95	0
95.1	0
95.2	0
95.3	0
95.4	0
95.5	0
95.6	0
95.7	0
95.8	0
95.9	0
96	0
96.1	0
96.2	0
96.3	0
96.4	0
96.5	0
96.6	0
96.7	0
96.8	0
96.9	0
97	0
97.1	0
97.2	0
97.3	0
97.4	0
97.5	0
97.6	0
97.7	0
97.8	0
97.9	0
98	0
98.1	0
98.2	0
98.3	0
98.4	0
98.5	0
98.6	0
98.7	0
98.8	0
98.9	0
99	0
99.1	0
99.2	0
99.3	0
99.4	0
99.5	0
99.6	0
99.7	0
99.8	0
99.9	0
100	0
100.1	0.202125
100.2	0.3455
100.3	0.449625
100.4	0.526325
100.5	0.5869
100.6	0.6331
100.7	0.670875
100.8	0.698525
100.9	0.723
101	0.7435
101.1	0.758925
101.2	0.772725
101.3	0.78455
101.4	0.795325
101.5	0.8033
101.6	0.810175
101.7	0.81645
101.8	0.8226
101.9	0.825525
102	0.82985
102.1	0.835
102.2	0.83855
102.3	0.8404
102.4	0.8432
102.5	0.843875
102.6	0.8467
102.7	0.84755
102.8	0.849075
102.9	0.8507
103	0.851825
103.1	0.853
103.2	0.853975
103.3	0.855675
103.4	0.85765
103.5	0.85705
103.6	0.85925
103.7	0.86095
103.8	0.860625
103.9	0.861925
104	0.861575
104.1	0.861175
104.2	0.862725
104.3	0.86335
104.4	0.862
104.5	0.862225
104.6	0.862475
104.7	0.862425
104.8	0.862475
104.9	0.86435
105	0.8643
105.1	0.865325
105.2	0.864825
105.3	0.867
105.4	0.868825
105.5	0.870025
105.6	0.870525
105.7	0.8698
105.8	0.8704
105.9	0.870075
106	0.87015
106.1	0.87045
106.2	0.871675
106.3	0.87275
106.4	0.873625
106.5	0.872475
106.6	0.8716
106.7	0.8713
106.8	0.8714
106.9	0.87285
107	0.873975
107.1	0.874925
107.2	0.8751
107.3	0.875775
107.4	0.87495
107.5	0.8752
107.6	0.875575
107.7	0.8772
107.8	0.876725
107.9	0.877775
108	0.8774
108.1	0.87595
108.2	0.876475
108.3	0.87655
108.4	0.877025
108.5	0.877475
108.6	0.87785
108.7	0.879275
108.8	0.88115
108.9	0.8809
109	0.882125
109.1	0.8824
109.2	0.881925
109.3	0.88235
109.4	0.8809
109.5	0.881625
109.6	0.881425
109.7	0.88145
109.8	0.8825
109.9	0.883575
110	0.88315
110.1	0.88375
110.2	0.88565
110.3	0.88635
110.4	0.888
110.5	0.888625
110.6	0.888825
110.7	0.8902
110.8	0.8904
110.9	0.890175
111	0.89135
111.1	0.89065
111.2	0.8904
111.3	0.891075
111.4	0.8907
111.5	0.891825
111.6	0.892575
111.7	0.8941
111.8	0.8944
111.9	0.895025
112	0.894375
112.1	0.89505
112.2	0.896175
112.3	0.896075
112.4	0.89655
112.5	0.894725
112.6	0.8948
112.7	0.895325
112.8	0.89505
112.9	0.895075
113	0.896075
113.1	0.896625
113.2	0.89695
113.3	0.897225
113.4	0.89795
113.5	0.89895
113.6	0.89845
113.7	0.89745
113.8	0.89735
113.9	0.898325
114	0.898475
114.1	0.89945
114.2	0.9007
114.3	0.901
114.4	0.900175
114.5	0.901025
114.6	0.90145
114.7	0.902425
114.8	0.902625
114.9	0.90195
115	0.90115
115.1	0.9003
115.2	0.901125
115.3	0.9016
115.4	0.90245
115.5	0.9025
115.6	0.9029
115.7	0.905075
115.8	0.9055
115.9	0.90535
116	0.905275
116.1	0.9045
116.2	0.904275
116.3	0.904875
116.4	0.90555
116.5	0.907175
116.6	0.906225
116.7	0.9071
116.8	0.9069
116.9	0.9073
117	0.907125
117.1	0.909075
117.2	0.908125
117.3	0.90815
117.4	0.90865
117.5	0.908675
117.6	0.909475
117.7	0.910625
117.8	0.912275
117.9	0.9129
118	0.9134
118.1	0.913175
118.2	0.913175
118.3	0.91345
118.4	0.913075
118.5	0.913775
118.6	0.914175
118.7	0.91265
118.8	0.91195
118.9	0.910625
119	0.910175
119.1	0.910175
119.2	0.91125
119.3	0.9115
119.4	0.911875
119.5	0.911625
119.6	0.9124
119.7	0.913525
119.8	0.915025
119.9	0.914725
120	0.915225
120.1	0.91645
120.2	0.916325
120.3	0.916725
120.4	0.917025
120.5	0.917825
120.6	0.9167
120.7	0.917975
120.8	0.917925
120.9	0.9179
121	0.9194
121.1	0.91785
121.2	0.91725
121.3	0.918025
121.4	0.918675
121.5	0.91775
121.6	0.918025
121.7	0.91785
121.8	0.91805
121.9	0.917525
122	0.918475
122.1	0.91895
122.2	0.9189
122.3	0.919375
122.4	0.9193
122.5	0.91935
122.6	0.919175
122.7	0.920125
122.8	0.921
122.9	0.92125
123	0.921775
123.1	0.9215
123.2	0.921
123.3	0.922225
123.4	0.9228
123.5	0.9228
123.6	0.923775
123.7	0.922875
123.8	0.923075
123.9	0.9234
124	0.92425
124.1	0.92355
124.2	0.924475
124.3	0.923875
124.4	0.924475
124.5	0.924525
124.6	0.9248
124.7	0.9238
124.8	0.92485
124.9	0.9249
125	0.924275
125.1	0.924525
125.2	0.925475
125.3	0.92645
125.4	0.9263
125.5	0.926225
125.6	0.926625
125.7	0.926375
125.8	0.92655
125.9	0.9275
126	0.927725
126.1	0.927575
126.2	0.9273
126.3	0.927875
126.4	0.92835
126.5	0.928325
126.6	0.92845
126.7	0.92885
126.8	0.929275
126.9	0.92965
127	0.93085
127.1	0.9304
127.2	0.9309
127.3	0.931525
127.4	0.930975
127.5	0.93145
127.6	0.931475
127.7	0.931725
127.8	0.931975
127.9	0.932025
128	0.931975
128.1	0.9326
128.2	0.9326
128.3	0.932775
128.4	0.931925
128.5	0.931875
128.6	0.932
128.7	0.9321
128.8	0.93215
128.9	0.932575
129	0.932475
129.1	0.932825
129.2	0.932425
129.3	0.9324
129.4	0.932925
129.5	0.933125
129.6	0.932575
129.7	0.9325
129.8	0.93285
129.9	0.933725
130	0.933425
130.1	0.934275
130.2	0.93415
130.3	0.9354
130.4	0.93545
130.5	0.935875
130.6	0.9366
130.7	0.93525
130.8	0.9352
130.9	0.9358
131	0.9374
131.1	0.936875
131.2	0.937175
131.3	0.9363
131.4	0.9362
131.5	0.93565
131.6	0.93545
131.7	0.934225
131.8	0.934275
131.9	0.934325
132	0.9338
132.1	0.93435
132.2	0.93455
132.3	0.93605
132.4	0.936175
132.5	0.936775
132.6	0.937125
132.7	0.937475
132.8	0.937825
132.9	0.938175
133	0.93815
133.1	0.938575
133.2	0.9387
133.3	0.9388
133.4	0.939875
133.5	0.93995
133.6	0.9392
133.7	0.9394
133.8	0.939025
133.9	0.93955
134	0.93945
134.1	0.93965
134.2	0.93995
134.3	0.93965
134.4	0.94025
134.5	0.94065
134.6	0.9413
134.7	0.94135
134.8	0.941925
134.9	0.942225
135	0.94185
135.1	0.9413
135.2	0.93955
135.3	0.93975
135.4	0.93995
135.5	0.9396
135.6	0.938775
135.7	0.939175
135.8	0.939325
135.9	0.939425
136	0.93965
136.1	0.9403
136.2	0.941475
136.3	0.94195
136.4	0.94125
136.5	0.9401
136.6	0.940575
136.7	0.9407
136.8	0.94155
136.9	0.942075
137	0.94285
137.1	0.9431
137.2	0.941925
137.3	0.94225
137.4	0.942275
137.5	0.942875
137.6	0.9433
137.7	0.943825
137.8	0.9423
137.9	0.943
138	0.94305
138.1	0.943125
138.2	0.943575
138.3	0.94395
138.4	0.944575
138.5	0.9434
138.6	0.942825
138.7	0.94355
138.8	0.943875
138.9	0.9434
139	0.944075
139.1	0.945025
139.2	0.94465
139.3	0.944625
139.4	0.944125
139.5	0.9443
139.6	0.9458
139.7	0.945775
139.8	0.946725
139.9	0.9467
140	0.947575
140.1	0.94855
140.2	0.948325
140.3	0.947675
140.4	0.9472
140.5	0.94665
140.6	0.947025
140.7	0.946675
140.8	0.9466
140.9	0.94505
141	0.9451
141.1	0.94485
141.2	0.945325
141.3	0.944925
141.4	0.946075
141.5	0.947025
141.6	0.948225
141.7	0.947075
141.8	0.94755
141.9	0.947125
142	0.947625
142.1	0.94865
142.2	0.94805
142.3	0.94775
142.4	0.9479
142.5	0.947225
142.6	0.948125
142.7	0.948075
142.8	0.948
142.9	0.948125
143	0.948675
143.1	0.948375
143.2	0.948475
143.3	0.948575
143.4	0.9491
143.5	0.9485
143.6	0.94805
143.7	0.9477
143.8	0.94725
143.9	0.947475
144	0.948475
144.1	0.9483
144.2	0.94785
144.3	0.9491
144.4	0.9497
144.5	0.949725
144.6	0.9498
144.7	0.950875
144.8	0.95115
144.9	0.95085
145	0.9511
145.1	0.9503
145.2	0.95055
145.3	0.95105
145.4	0.9505
145.5	0.950175
145.6	0.9506
145.7	0.95055
145.8	0.9508
145.9	0.95115
146	0.95075
146.1	0.950425
146.2	0.95055
146.3	0.95045
146.4	0.95125
146.5	0.95105
146.6	0.9512
146.7	0.95035
146.8	0.95105
146.9	0.950675
147	0.95095
147.1	0.951725
147.2	0.951575
147.3	0.9522
147.4	0.9522
147.5	0.952775
147.6	0.95305
147.7	0.952725
147.8	0.952825
147.9	0.952925
148	0.952475
148.1	0.952575
148.2	0.95315
148.3	0.95245
148.4	0.952325
148.5	0.95245
148.6	0.951675
148.7	0.952175
148.8	0.95325
148.9	0.95345
149	0.9539
149.1	0.95335
149.2	0.95415
149.3	0.9533
149.4	0.953025
149.5	0.953425
149.6	0.953625
149.7	0.952725
149.8	0.953175
149.9	0.952775
150	0.954
150.1	0.95245
150.2	0.952975
150.3	0.952625
150.4	0.95355
150.5	0.953075
150.6	0.953275
150.7	0.95345
150.8	0.954375
150.9	0.954075
151	0.9535
151.1	0.9532
151.2	0.9536
151.3	0.953575
151.4	0.953075
151.5	0.953375
151.6	0.95325
151.7	0.95295
151.8	0.953
151.9	0.95355
152	0.953525
152.1	0.954125
152.2	0.9539
152.3	0.95455
152.4	0.9547
152.5	0.9552
152.6	0.955075
152.7	0.955075
152.8	0.95445
152.9	0.954175
153	0.9554
153.1	0.955575
153.2	0.955675
153.3	0.954975
153.4	0.95475
153.5	0.9552
153.6	0.9556
153.7	0.955675
153.8	0.95545
153.9	0.956225
154	0.9565
154.1	0.956125
154.2	0.956175
154.3	0.95575
154.4	0.95575
154.5	0.9553
154.6	0.95545
154.7	0.955925
154.8	0.955825
154.9	0.95575
155	0.955025
155.1	0.95495
155.2	0.954275
155.3	0.955375
155.4	0.95505
155.5	0.955325
155.6	0.955175
155.7	0.95595
155.8	0.956325
155.9	0.9568
156	0.957325
156.1	0.956975
156.2	0.957325
156.3	0.957025
156.4	0.9583
156.5	0.957675
156.6	0.9575
156.7	0.957
156.8	0.95685
156.9	0.957075
157	0.956575
157.1	0.9566
157.2	0.956475
157.3	0.956275
157.4	0.95625
157.5	0.95705
157.6	0.957575
157.7	0.957625
157.8	0.957475
157.9	0.95755
158	0.956875
158.1	0.95745
158.2	0.9581
158.3	0.957325
158.4	0.9573
158.5	0.9573
158.6	0.9573
158.7	0.957725
158.8	0.95805
158.9	0.957675
159	0.956925
159.1	0.957025
159.2	0.956775
159.3	0.95665
159.4	0.9572
159.5	0.957225
159.6	0.956625
159.7	0.9561
159.8	0.955975
159.9	0.95645
160	0.9574
160.1	0.957725
160.2	0.958125
160.3	0.95765
160.4	0.95675
160.5	0.957075
160.6	0.95645
160.7	0.956725
160.8	0.9573
160.9	0.95775
161	0.959125
161.1	0.9597
161.2	0.959
161.3	0.958775
161.4	0.958825
161.5	0.95895
161.6	0.958375
161.7	0.95905
161.8	0.959425
161.9	0.959575
162	0.9587
162.1	0.96
162.2	0.9596
162.3	0.959675
162.4	0.96
162.5	0.95935
162.6	0.95915
162.7	0.958575
162.8	0.9588
162.9	0.959375
163	0.95825
163.1	0.95805
163.2	0.958375
163.3	0.958225
163.4	0.957475
163.5	0.958475
163.6	0.957975
163.7	0.95775
163.8	0.958275
163.9	0.958275
164	0.9585
164.1	0.9581
164.2	0.958275
164.3	0.957925
164.4	0.95775
164.5	0.9579
164.6	0.9585
164.7	0.95885
164.8	0.958775
164.9	0.959
165	0.9589
165.1	0.95865
165.2	0.957975
165.3	0.9588
165.4	0.959025
165.5	0.959
165.6	0.958475
165.7	0.9586
165.8	0.958775
165.9	0.959025
166	0.958925
166.1	0.96005
166.2	0.9601
166.3	0.960175
166.4	0.960175
166.5	0.960125
166.6	0.959975
166.7	0.9608
166.8	0.960425
166.9	0.9598
167	0.959675
167.1	0.960025
167.2	0.959425
167.3	0.96005
167.4	0.960325
167.5	0.960325
167.6	0.96045
167.7	0.95935
167.8	0.9593
167.9	0.95915
168	0.959775
168.1	0.960225
168.2	0.960575
168.3	0.9605
168.4	0.960775
168.5	0.96105
168.6	0.961525
168.7	0.961175
168.8	0.9605
168.9	0.9601
169	0.961
169.1	0.960825
169.2	0.961
169.3	0.96055
169.4	0.960575
169.5	0.96005
169.6	0.959625
169.7	0.95975
169.8	0.959425
169.9	0.95945
170	0.960075
170.1	0.960675
170.2	0.961175
170.3	0.96165
170.4	0.961475
170.5	0.9609
170.6	0.959875
170.7	0.959775
170.8	0.959425
170.9	0.95975
171	0.960425
171.1	0.960525
171.2	0.96045
171.3	0.9604
171.4	0.959925
171.5	0.960375
171.6	0.960075
171.7	0.959975
171.8	0.9597
171.9	0.960125
172	0.959975
172.1	0.959775
172.2	0.9597
172.3	0.959925
172.4	0.9596
172.5	0.960225
172.6	0.9608
172.7	0.961025
172.8	0.960775
172.9	0.9606
173	0.961225
173.1	0.96095
173.2	0.96115
173.3	0.960075
173.4	0.96065
173.5	0.959875
173.6	0.959775
173.7	0.959975
173.8	0.960425
173.9	0.960175
174	0.9602
174.1	0.960875
174.2	0.9611
174.3	0.96185
174.4	0.96225
174.5	0.96215
174.6	0.961675
174.7	0.96225
174.8	0.962075
174.9	0.96185
175	0.961825
175.1	0.962075
175.2	0.96265
175.3	0.962525
175.4	0.960825
175.5	0.96115
175.6	0.960625
175.7	0.960625
175.8	0.960875
175.9	0.960975
176	0.96095
176.1	0.96045
176.2	0.9608
176.3	0.9604
176.4	0.960175
176.5	0.96005
176.6	0.95985
176.7	0.959575
176.8	0.9597
176.9	0.96025
177	0.9602
177.1	0.959775
177.2	0.959975
177.3	0.95965
177.4	0.959675
177.5	0.96095
177.6	0.96075
177.7	0.96105
177.8	0.96135
177.9	0.961825
178	0.961925
178.1	0.961625
178.2	0.96145
178.3	0.9615
178.4	0.961825
178.5	0.962375
178.6	0.962475
178.7	0.9619
178.8	0.962575
178.9	0.962
179	0.962325
179.1	0.96275
179.2	0.96285
179.3	0.963125
179.4	0.962275
179.5	0.9622
179.6	0.96165
179.7	0.96095
179.8	0.961575
179.9	0.96215
180	0.962625
180.1	0.9629
180.2	0.9633
180.3	0.96355
180.4	0.963675
180.5	0.963725
180.6	0.9635
180.7	0.96335
180.8	0.9633
180.9	0.9638
181	0.96325
181.1	0.96375
181.2	0.963375
181.3	0.963425
181.4	0.962475
181.5	0.962325
181.6	0.96185
181.7	0.96175
181.8	0.961725
181.9	0.9622
182	0.962625
182.1	0.96245
182.2	0.96225
182.3	0.96245
182.4	0.962375
182.5	0.962175
182.6	0.96215
182.7	0.961775
182.8	0.96105
182.9	0.961625
183	0.96215
183.1	0.962625
183.2	0.961925
183.3	0.961575
183.4	0.962075
183.5	0.962225
183.6	0.962325
183.7	0.96135
183.8	0.96185
183.9	0.96135
184	0.96125
184.1	0.96045
184.2	0.96075
184.3	0.9607
184.4	0.9609
184.5	0.9607
184.6	0.961125
184.7	0.962075
184.8	0.961875
184.9	0.961875
185	0.96225
185.1	0.962875
185.2	0.9628
185.3	0.9629
185.4	0.9625
185.5	0.962175
185.6	0.9625
185.7	0.962925
185.8	0.96295
185.9	0.9637
186	0.963325
186.1	0.963175
186.2	0.96435
186.3	0.96435
186.4	0.964175
186.5	0.9638
186.6	0.96405
186.7	0.964875
186.8	0.965025
186.9	0.963925
187	0.96335
187.1	0.963525
187.2	0.963025
187.3	0.962825
187.4	0.963
187.5	0.96325
187.6	0.96405
187.7	0.963975
187.8	0.96435
187.9	0.9642
188	0.964825
188.1	0.964575
188.2	0.964225
188.3	0.9638
188.4	0.96445
188.5	0.96395
188.6	0.9626
188.7	0.9623
188.8	0.962825
188.9	0.9633
189	0.963575
189.1	0.964325
189.2	0.9634
189.3	0.963425
189.4	0.964425
189.5	0.9648
189.6	0.96375
189.7	0.9629
189.8	0.962475
189.9	0.963175
190	0.96395
190.1	0.963825
190.2	0.964225
190.3	0.964525
190.4	0.9641
190.5	0.9646
190.6	0.96375
190.7	0.964475
190.8	0.9646
190.9	0.964425
191	0.9648
191.1	0.9645
191.2	0.96485
191.3	0.964125
191.4	0.963625
191.5	0.963375
191.6	0.963525
191.7	0.9635
191.8	0.963525
191.9	0.963125
192	0.963475
192.1	0.964125
192.2	0.96425
192.3	0.964675
192.4	0.96465
192.5	0.96395
192.6	0.96415
192.7	0.964125
192.8	0.964275
192.9	0.964825
193	0.965025
193.1	0.9656
193.2	0.9651
193.3	0.9643
193.4	0.9632
193.5	0.9633
193.6	0.9641
193.7	0.964675
193.8	0.964825
193.9	0.964775
194	0.964475
194.1	0.964225
194.2	0.964175
194.3	0.963925
194.4	0.963725
194.5	0.9636
194.6	0.9637
194.7	0.96315
194.8	0.963525
194.9	0.9633
195	0.964025
195.1	0.96425
195.2	0.964325
195.3	0.963675
195.4	0.96295
195.5	0.96335
195.6	0.963975
195.7	0.963575
195.8	0.964325
195.9	0.963675
196	0.96405
196.1	0.963725
196.2	0.963875
196.3	0.963475
196.4	0.963575
196.5	0.96395
196.6	0.963175
196.7	0.96325
196.8	0.963525
196.9	0.9641
197	0.963675
197.1	0.9635
197.2	0.96305
197.3	0.9636
197.4	0.963025
197.5	0.9641
197.6	0.9646
197.7	0.96445
197.8	0.964875
197.9	0.965875
198	0.965575
198.1	0.965925
198.2	0.9655
198.3	0.965675
198.4	0.965475
198.5	0.96545
198.6	0.96535
198.7	0.96515
198.8	0.965125
198.9	0.965025
199	0.96495
199.1	0.965025
199.2	0.96445
199.3	0.965525
199.4	0.965475
199.5	0.9653
199.6	0.9656
199.7	0.9656
199.8	0.965525
199.9	0.965775
200	0.965825
[truncated: 14,000 more rows]
