# Supplementary material for: Bayesian inference of kinetic schemes for ion channels by Kalman filtering
Source: eLife journal article supplement (doi:10.7554/elife.62714), 2022-05-04
Supplement: fig4-data5 [file 1_Sim_N_20000_Strom_MW_4M.xlsx]

## Sheet: Tabelle1
0.1	0
0.2	0
0.3	0
0.4	0
0.5	0
0.6	0
0.7	0
0.8	0
0.9	0
1	0
1.1	0
1.2	0
1.3	0
1.4	0
1.5	0
1.6	0
1.7	0
1.8	0
1.9	0
2	0
2.1	0
2.2	0
2.3	0
2.4	0
2.5	0
2.6	0
2.7	0
2.8	0
2.9	0
3	0
3.1	0
3.2	0
3.3	0
3.4	0
3.5	0
3.6	0
3.7	0
3.8	0
3.9	0
4	0
4.1	0
4.2	0
4.3	0
4.4	0
4.5	0
4.6	0
4.7	0
4.8	0
4.9	0
5	0
5.1	0
5.2	0
5.3	0
5.4	0
5.5	0
5.6	0
5.7	0
5.8	0
5.9	0
6	0
6.1	0
6.2	0
6.3	0
6.4	0
6.5	0
6.6	0
6.7	0
6.8	0
6.9	0
7	0
7.1	0
7.2	0
7.3	0
7.4	0
7.5	0
7.6	0
7.7	0
7.8	0
7.9	0
8	0
8.1	0
8.2	0
8.3	0
8.4	0
8.5	0
8.6	0
8.7	0
8.8	0
8.9	0
9	0
9.1	0
9.2	0
9.3	0
9.4	0
9.5	0
9.6	0
9.7	0
9.8	0
9.9	0
10	0
10.1	0
10.2	0
10.3	0
10.4	0
10.5	0
10.6	0
10.7	0
10.8	0
10.9	0
11	0
11.1	0
11.2	0
11.3	0
11.4	0
11.5	0
11.6	0
11.7	0
11.8	0
11.9	0
12	0
12.1	0
12.2	0
12.3	0
12.4	0
12.5	0
12.6	0
12.7	0
12.8	0
12.9	0
13	0
13.1	0
13.2	0
13.3	0
13.4	0
13.5	0
13.6	0
13.7	0
13.8	0
13.9	0
14	0
14.1	0
14.2	0
14.3	0
14.4	0
14.5	0
14.6	0
14.7	0
14.8	0
14.9	0
15	0
15.1	0
15.2	0
15.3	0
15.4	0
15.5	0
15.6	0
15.7	0
15.8	0
15.9	0
16	0
16.1	0
16.2	0
16.3	0
16.4	0
16.5	0
16.6	0
16.7	0
16.8	0
16.9	0
17	0
17.1	0
17.2	0
17.3	0
17.4	0
17.5	0
17.6	0
17.7	0
17.8	0
17.9	0
18	0
18.1	0
18.2	0
18.3	0
18.4	0
18.5	0
18.6	0
18.7	0
18.8	0
18.9	0
19	0
19.1	0
19.2	0
19.3	0
19.4	0
19.5	0
19.6	0
19.7	0
19.8	0
19.9	0
20	0
20.1	0
20.2	0
20.3	0
20.4	0
20.5	0
20.6	0
20.7	0
20.8	0
20.9	0
21	0
21.1	0
21.2	0
21.3	0
21.4	0
21.5	0
21.6	0
21.7	0
21.8	0
21.9	0
22	0
22.1	0
22.2	0
22.3	0
22.4	0
22.5	0
22.6	0
22.7	0
22.8	0
22.9	0
23	0
23.1	0
23.2	0
23.3	0
23.4	0
23.5	0
23.6	0
23.7	0
23.8	0
23.9	0
24	0
24.1	0
24.2	0
24.3	0
24.4	0
24.5	0
24.6	0
24.7	0
24.8	0
24.9	0
25	0
25.1	0
25.2	0
25.3	0
25.4	0
25.5	0
25.6	0
25.7	0
25.8	0
25.9	0
26	0
26.1	0
26.2	0
26.3	0
26.4	0
26.5	0
26.6	0
26.7	0
26.8	0
26.9	0
27	0
27.1	0
27.2	0
27.3	0
27.4	0
27.5	0
27.6	0
27.7	0
27.8	0
27.9	0
28	0
28.1	0
28.2	0
28.3	0
28.4	0
28.5	0
28.6	0
28.7	0
28.8	0
28.9	0
29	0
29.1	0
29.2	0
29.3	0
29.4	0
29.5	0
29.6	0
29.7	0
29.8	0
29.9	0
30	0
30.1	0
30.2	0
30.3	0
30.4	0
30.5	0
30.6	0
30.7	0
30.8	0
30.9	0
31	0
31.1	0
31.2	0
31.3	0
31.4	0
31.5	0
31.6	0
31.7	0
31.8	0
31.9	0
32	0
32.1	0
32.2	0
32.3	0
32.4	0
32.5	0
32.6	0
32.7	0
32.8	0
32.9	0
33	0
33.1	0
33.2	0
33.3	0
33.4	0
33.5	0
33.6	0
33.7	0
33.8	0
33.9	0
34	0
34.1	0
34.2	0
34.3	0
34.4	0
34.5	0
34.6	0
34.7	0
34.8	0
34.9	0
35	0
35.1	0
35.2	0
35.3	0
35.4	0
35.5	0
35.6	0
35.7	0
35.8	0
35.9	0
36	0
36.1	0
36.2	0
36.3	0
36.4	0
36.5	0
36.6	0
36.7	0
36.8	0
36.9	0
37	0
37.1	0
37.2	0
37.3	0
37.4	0
37.5	0
37.6	0
37.7	0
37.8	0
37.9	0
38	0
38.1	0
38.2	0
38.3	0
38.4	0
38.5	0
38.6	0
38.7	0
38.8	0
38.9	0
39	0
39.1	0
39.2	0
39.3	0
39.4	0
39.5	0
39.6	0
39.7	0
39.8	0
39.9	0
40	0
40.1	0
40.2	0
40.3	0
40.4	0
40.5	0
40.6	0
40.7	0
40.8	0
40.9	0
41	0
41.1	0
41.2	0
41.3	0
41.4	0
41.5	0
41.6	0
41.7	0
41.8	0
41.9	0
42	0
42.1	0
42.2	0
42.3	0
42.4	0
42.5	0
42.6	0
42.7	0
42.8	0
42.9	0
43	0
43.1	0
43.2	0
43.3	0
43.4	0
43.5	0
43.6	0
43.7	0
43.8	0
43.9	0
44	0
44.1	0
44.2	0
44.3	0
44.4	0
44.5	0
44.6	0
44.7	0
44.8	0
44.9	0
45	0
45.1	0
45.2	0
45.3	0
45.4	0
45.5	0
45.6	0
45.7	0
45.8	0
45.9	0
46	0
46.1	0
46.2	0
46.3	0
46.4	0
46.5	0
46.6	0
46.7	0
46.8	0
46.9	0
47	0
47.1	0
47.2	0
47.3	0
47.4	0
47.5	0
47.6	0
47.7	0
47.8	0
47.9	0
48	0
48.1	0
48.2	0
48.3	0
48.4	0
48.5	0
48.6	0
48.7	0
48.8	0
48.9	0
49	0
49.1	0
49.2	0
49.3	0
49.4	0
49.5	0
49.6	0
49.7	0
49.8	0
49.9	0
50	0
50.1	0
50.2	0
50.3	0
50.4	0
50.5	0
50.6	0
50.7	0
50.8	0
50.9	0
51	0
51.1	0
51.2	0
51.3	0
51.4	0
51.5	0
51.6	0
51.7	0
51.8	0
51.9	0
52	0
52.1	0
52.2	0
52.3	0
52.4	0
52.5	0
52.6	0
52.7	0
52.8	0
52.9	0
53	0
53.1	0
53.2	0
53.3	0
53.4	0
53.5	0
53.6	0
53.7	0
53.8	0
53.9	0
54	0
54.1	0
54.2	0
54.3	0
54.4	0
54.5	0
54.6	0
54.7	0
54.8	0
54.9	0
55	0
55.1	0
55.2	0
55.3	0
55.4	0
55.5	0
55.6	0
55.7	0
55.8	0
55.9	0
56	0
56.1	0
56.2	0
56.3	0
56.4	0
56.5	0
56.6	0
56.7	0
56.8	0
56.9	0
57	0
57.1	0
57.2	0
57.3	0
57.4	0
57.5	0
57.6	0
57.7	0
57.8	0
57.9	0
58	0
58.1	0
58.2	0
58.3	0
58.4	0
58.5	0
58.6	0
58.7	0
58.8	0
58.9	0
59	0
59.1	0
59.2	0
59.3	0
59.4	0
59.5	0
59.6	0
59.7	0
59.8	0
59.9	0
60	0
60.1	0
60.2	0
60.3	0
60.4	0
60.5	0
60.6	0
60.7	0
60.8	0
60.9	0
61	0
61.1	0
61.2	0
61.3	0
61.4	0
61.5	0
61.6	0
61.7	0
61.8	0
61.9	0
62	0
62.1	0
62.2	0
62.3	0
62.4	0
62.5	0
62.6	0
62.7	0
62.8	0
62.9	0
63	0
63.1	0
63.2	0
63.3	0
63.4	0
63.5	0
63.6	0
63.7	0
63.8	0
63.9	0
64	0
64.1	0
64.2	0
64.3	0
64.4	0
64.5	0
64.6	0
64.7	0
64.8	0
64.9	0
65	0
65.1	0
65.2	0
65.3	0
65.4	0
65.5	0
65.6	0
65.7	0
65.8	0
65.9	0
66	0
66.1	0
66.2	0
66.3	0
66.4	0
66.5	0
66.6	0
66.7	0
66.8	0
66.9	0
67	0
67.1	0
67.2	0
67.3	0
67.4	0
67.5	0
67.6	0
67.7	0
67.8	0
67.9	0
68	0
68.1	0
68.2	0
68.3	0
68.4	0
68.5	0
68.6	0
68.7	0
68.8	0
68.9	0
69	0
69.1	0
69.2	0
69.3	0
69.4	0
69.5	0
69.6	0
69.7	0
69.8	0
69.9	0
70	0
70.1	0
70.2	0
70.3	0
70.4	0
70.5	0
70.6	0
70.7	0
70.8	0
70.9	0
71	0
71.1	0
71.2	0
71.3	0
71.4	0
71.5	0
71.6	0
71.7	0
71.8	0
71.9	0
72	0
72.1	0
72.2	0
72.3	0
72.4	0
72.5	0
72.6	0
72.7	0
72.8	0
72.9	0
73	0
73.1	0
73.2	0
73.3	0
73.4	0
73.5	0
73.6	0
73.7	0
73.8	0
73.9	0
74	0
74.1	0
74.2	0
74.3	0
74.4	0
74.5	0
74.6	0
74.7	0
74.8	0
74.9	0
75	0
75.1	0
75.2	0
75.3	0
75.4	0
75.5	0
75.6	0
75.7	0
75.8	0
75.9	0
76	0
76.1	0
76.2	0
76.3	0
76.4	0
76.5	0
76.6	0
76.7	0
76.8	0
76.9	0
77	0
77.1	0
77.2	0
77.3	0
77.4	0
77.5	0
77.6	0
77.7	0
77.8	0
77.9	0
78	0
78.1	0
78.2	0
78.3	0
78.4	0
78.5	0
78.6	0
78.7	0
78.8	0
78.9	0
79	0
79.1	0
79.2	0
79.3	0
79.4	0
79.5	0
79.6	0
79.7	0
79.8	0
79.9	0
80	0
80.1	0
80.2	0
80.3	0
80.4	0
80.5	0
80.6	0
80.7	0
80.8	0
80.9	0
81	0
81.1	0
81.2	0
81.3	0
81.4	0
81.5	0
81.6	0
81.7	0
81.8	0
81.9	0
82	0
82.1	0
82.2	0
82.3	0
82.4	0
82.5	0
82.6	0
82.7	0
82.8	0
82.9	0
83	0
83.1	0
83.2	0
83.3	0
83.4	0
83.5	0
83.6	0
83.7	0
83.8	0
83.9	0
84	0
84.1	0
84.2	0
84.3	0
84.4	0
84.5	0
84.6	0
84.7	0
84.8	0
84.9	0
85	0
85.1	0
85.2	0
85.3	0
85.4	0
85.5	0
85.6	0
85.7	0
85.8	0
85.9	0
86	0
86.1	0
86.2	0
86.3	0
86.4	0
86.5	0
86.6	0
86.7	0
86.8	0
86.9	0
87	0
87.1	0
87.2	0
87.3	0
87.4	0
87.5	0
87.6	0
87.7	0
87.8	0
87.9	0
88	0
88.1	0
88.2	0
88.3	0
88.4	0
88.5	0
88.6	0
88.7	0
88.8	0
88.9	0
89	0
89.1	0
89.2	0
89.3	0
89.4	0
89.5	0
89.6	0
89.7	0
89.8	0
89.9	0
90	0
90.1	0
90.2	0
90.3	0
90.4	0
90.5	0
90.6	0
90.7	0
90.8	0
90.9	0
91	0
91.1	0
91.2	0
91.3	0
91.4	0
91.5	0
91.6	0
91.7	0
91.8	0
91.9	0
92	0
92.1	0
92.2	0
92.3	0
92.4	0
92.5	0
92.6	0
92.7	0
92.8	0
92.9	0
93	0
93.1	0
93.2	0
93.3	0
93.4	0
93.5	0
93.6	0
93.7	0
93.8	0
93.9	0
94	0
94.1	0
94.2	0
94.3	0
94.4	0
94.5	0
94.6	0
94.7	0
94.8	0
94.9	0
95	0
95.1	0
95.2	0
95.3	0
95.4	0
95.5	0
95.6	0
95.7	0
95.8	0
95.9	0
96	0
96.1	0
96.2	0
96.3	0
96.4	0
96.5	0
96.6	0
96.7	0
96.8	0
96.9	0
97	0
97.1	0
97.2	0
97.3	0
97.4	0
97.5	0
97.6	0
97.7	0
97.8	0
97.9	0
98	0
98.1	0
98.2	0
98.3	0
98.4	0
98.5	0
98.6	0
98.7	0
98.8	0
98.9	0
99	0
99.1	0
99.2	0
99.3	0
99.4	0
99.5	0
99.6	0
99.7	0
99.8	0
99.9	0
100	0
100.1	5e-05
100.2	0.00025
100.3	0.00095
100.4	0.0018
100.5	0.003
100.6	0.0047
100.7	0.0062
100.8	0.00815
100.9	0.0101
101	0.01285
101.1	0.0151
101.2	0.01735
101.3	0.0197
101.4	0.02185
101.5	0.0246
101.6	0.0276
101.7	0.0311
101.8	0.034
101.9	0.0368
102	0.0405
102.1	0.0431
102.2	0.04695
102.3	0.04995
102.4	0.05285
102.5	0.0552
102.6	0.05875
102.7	0.0621
102.8	0.06515
102.9	0.06845
103	0.07125
103.1	0.07375
103.2	0.0763
103.3	0.07905
103.4	0.082
103.5	0.0851
103.6	0.0881
103.7	0.0908
103.8	0.09375
103.9	0.09715
104	0.1006
104.1	0.10365
104.2	0.1064
104.3	0.1093
104.4	0.11205
104.5	0.1144
104.6	0.1174
104.7	0.1202
104.8	0.12355
104.9	0.1273
105	0.12935
105.1	0.13215
105.2	0.13495
105.3	0.13735
105.4	0.1395
105.5	0.1425
105.6	0.1455
105.7	0.14805
105.8	0.15075
105.9	0.15345
106	0.15695
106.1	0.15975
106.2	0.16375
106.3	0.16685
106.4	0.16915
106.5	0.17145
106.6	0.1749
106.7	0.1776
106.8	0.1802
106.9	0.1831
107	0.18595
107.1	0.1888
107.2	0.1918
107.3	0.1947
107.4	0.19685
107.5	0.19975
107.6	0.2021
107.7	0.20465
107.8	0.2075
107.9	0.21045
108	0.21225
108.1	0.21425
108.2	0.21745
108.3	0.2201
108.4	0.2228
108.5	0.22535
108.6	0.2279
108.7	0.2304
108.8	0.233
108.9	0.23505
109	0.2379
109.1	0.2404
109.2	0.24325
109.3	0.2455
109.4	0.24815
109.5	0.25045
109.6	0.25305
109.7	0.25565
109.8	0.25795
109.9	0.26065
110	0.26295
110.1	0.2647
110.2	0.26665
110.3	0.26895
110.4	0.27125
110.5	0.27405
110.6	0.27625
110.7	0.27925
110.8	0.2815
110.9	0.2835
111	0.2852
111.1	0.2874
111.2	0.2897
111.3	0.29225
111.4	0.2948
111.5	0.2967
111.6	0.29935
111.7	0.30095
111.8	0.30255
111.9	0.30435
112	0.3068
112.1	0.30895
112.2	0.31135
112.3	0.31395
112.4	0.3159
112.5	0.31855
112.6	0.3205
112.7	0.32205
112.8	0.32425
112.9	0.3263
113	0.32845
113.1	0.33
113.2	0.33225
113.3	0.33345
113.4	0.3352
113.5	0.33725
113.6	0.33965
113.7	0.34155
113.8	0.3437
113.9	0.3461
114	0.3476
114.1	0.3497
114.2	0.35135
114.3	0.35285
114.4	0.3547
114.5	0.3564
114.6	0.35855
114.7	0.36075
114.8	0.3625
114.9	0.3641
115	0.36635
115.1	0.36805
115.2	0.37025
115.3	0.37215
115.4	0.3745
115.5	0.3768
115.6	0.37865
115.7	0.38045
115.8	0.383
115.9	0.38475
116	0.38705
116.1	0.3886
116.2	0.38985
116.3	0.39205
116.4	0.39425
116.5	0.39605
116.6	0.3981
116.7	0.40055
116.8	0.40215
116.9	0.40335
117	0.4054
117.1	0.4069
117.2	0.40885
117.3	0.4101
117.4	0.4119
117.5	0.4131
117.6	0.41555
117.7	0.41725
117.8	0.4189
117.9	0.4206
118	0.42235
118.1	0.4238
118.2	0.4248
118.3	0.42605
118.4	0.42755
118.5	0.4295
118.6	0.43055
118.7	0.43175
118.8	0.4331
118.9	0.4347
119	0.43615
119.1	0.43785
119.2	0.43915
119.3	0.4407
119.4	0.4419
119.5	0.4437
119.6	0.44515
119.7	0.4469
119.8	0.44825
119.9	0.44955
120	0.4513
120.1	0.45335
120.2	0.4549
120.3	0.45625
120.4	0.45855
120.5	0.4602
120.6	0.4619
120.7	0.46345
120.8	0.4642
120.9	0.46555
121	0.46705
121.1	0.46785
121.2	0.4689
121.3	0.4702
121.4	0.47175
121.5	0.47315
121.6	0.47445
121.7	0.4756
121.8	0.4768
121.9	0.4782
122	0.4797
122.1	0.4806
122.2	0.48185
122.3	0.4833
122.4	0.4841
122.5	0.485
122.6	0.48605
122.7	0.48735
122.8	0.48895
122.9	0.4908
123	0.492
123.1	0.4934
123.2	0.4949
123.3	0.4965
123.4	0.4974
123.5	0.4988
123.6	0.49945
123.7	0.5006
123.8	0.5016
123.9	0.5023
124	0.50355
124.1	0.505
124.2	0.50675
124.3	0.50865
124.4	0.50965
124.5	0.51115
124.6	0.51265
124.7	0.5141
124.8	0.5157
124.9	0.51695
125	0.51805
125.1	0.5195
125.2	0.52055
125.3	0.52225
125.4	0.52355
125.5	0.52495
125.6	0.5257
125.7	0.5267
125.8	0.5279
125.9	0.5292
126	0.5306
126.1	0.5316
126.2	0.5332
126.3	0.5339
126.4	0.53505
126.5	0.5358
126.6	0.53665
126.7	0.5376
126.8	0.5383
126.9	0.5395
127	0.5405
127.1	0.5416
127.2	0.54305
127.3	0.54425
127.4	0.5454
127.5	0.5469
127.6	0.54775
127.7	0.54925
127.8	0.55
127.9	0.55145
128	0.5522
128.1	0.55295
128.2	0.55415
128.3	0.5553
128.4	0.5563
128.5	0.5569
128.6	0.55745
128.7	0.55785
128.8	0.5588
128.9	0.56025
129	0.56135
129.1	0.5622
129.2	0.5635
129.3	0.56405
129.4	0.56485
129.5	0.56555
129.6	0.5658
129.7	0.5667
129.8	0.56775
129.9	0.56825
130	0.56895
130.1	0.5702
130.2	0.57075
130.3	0.57195
130.4	0.57285
130.5	0.5742
130.6	0.5751
130.7	0.57545
130.8	0.57655
130.9	0.57715
131	0.57755
131.1	0.5776
131.2	0.5789
131.3	0.57925
131.4	0.5799
131.5	0.5806
131.6	0.5814
131.7	0.58155
131.8	0.5824
131.9	0.58345
132	0.5841
132.1	0.58505
132.2	0.5859
132.3	0.58665
132.4	0.5878
132.5	0.58875
132.6	0.5894
132.7	0.5904
132.8	0.592
132.9	0.5933
133	0.59335
133.1	0.595
133.2	0.59605
133.3	0.5976
133.4	0.59815
133.5	0.59915
133.6	0.59965
133.7	0.60005
133.8	0.60085
133.9	0.6023
134	0.6032
134.1	0.6037
134.2	0.60495
134.3	0.60555
134.4	0.60645
134.5	0.6072
134.6	0.6078
134.7	0.6085
134.8	0.6093
134.9	0.6101
135	0.611
135.1	0.6118
135.2	0.6122
135.3	0.6132
135.4	0.61405
135.5	0.61435
135.6	0.61525
135.7	0.61565
135.8	0.6165
135.9	0.6172
136	0.61755
136.1	0.61815
136.2	0.61885
136.3	0.6199
136.4	0.62045
136.5	0.62125
136.6	0.6219
136.7	0.6224
136.8	0.6234
136.9	0.62405
137	0.625
137.1	0.62585
137.2	0.6271
137.3	0.62795
137.4	0.6284
137.5	0.62885
137.6	0.6291
137.7	0.62985
137.8	0.6303
137.9	0.63095
138	0.6319
138.1	0.63245
138.2	0.6332
138.3	0.634
138.4	0.63505
138.5	0.63575
138.6	0.63595
138.7	0.63605
138.8	0.6368
138.9	0.6373
139	0.63775
139.1	0.63865
139.2	0.6394
139.3	0.6403
139.4	0.6407
139.5	0.6412
139.6	0.6424
139.7	0.64265
139.8	0.6429
139.9	0.64285
140	0.6432
140.1	0.64375
140.2	0.64435
140.3	0.6451
140.4	0.6457
140.5	0.64615
140.6	0.64655
140.7	0.6474
140.8	0.64795
140.9	0.6486
141	0.64955
141.1	0.65055
141.2	0.6509
141.3	0.6519
141.4	0.6527
141.5	0.6531
141.6	0.6535
141.7	0.65345
141.8	0.654
141.9	0.655
142	0.65555
142.1	0.6563
142.2	0.6568
142.3	0.65765
142.4	0.65855
142.5	0.65925
142.6	0.65945
142.7	0.65945
142.8	0.65965
142.9	0.6607
143	0.66115
143.1	0.66165
143.2	0.66215
143.3	0.66255
143.4	0.6633
143.5	0.6635
143.6	0.66385
143.7	0.66455
143.8	0.66505
143.9	0.66465
144	0.6648
144.1	0.6657
144.2	0.6662
144.3	0.66715
144.4	0.6676
144.5	0.6684
144.6	0.66905
144.7	0.6693
144.8	0.6696
144.9	0.6707
145	0.6713
145.1	0.6717
145.2	0.6719
145.3	0.6724
145.4	0.67375
145.5	0.6746
145.6	0.6752
145.7	0.6755
145.8	0.67585
145.9	0.6768
146	0.67695
146.1	0.67755
146.2	0.6779
146.3	0.6789
146.4	0.67925
146.5	0.6794
146.6	0.6794
146.7	0.68035
146.8	0.68075
146.9	0.6816
147	0.68195
147.1	0.68235
147.2	0.68225
147.3	0.683
147.4	0.6837
147.5	0.6839
147.6	0.68415
147.7	0.6843
147.8	0.68525
147.9	0.6851
148	0.68565
148.1	0.6859
148.2	0.68675
148.3	0.6871
148.4	0.6874
148.5	0.6881
148.6	0.68855
148.7	0.6889
148.8	0.6889
148.9	0.68935
149	0.68975
149.1	0.6899
149.2	0.6906
149.3	0.69115
149.4	0.6918
149.5	0.69195
149.6	0.692
149.7	0.69245
149.8	0.693
149.9	0.69345
150	0.6939
150.1	0.69445
150.2	0.69475
150.3	0.6951
150.4	0.6958
150.5	0.69575
150.6	0.6964
150.7	0.6965
150.8	0.69685
150.9	0.6972
151	0.6974
151.1	0.69785
151.2	0.6978
151.3	0.69805
151.4	0.69865
151.5	0.69885
151.6	0.6996
151.7	0.69995
151.8	0.7006
151.9	0.7006
152	0.701
152.1	0.7005
152.2	0.70125
152.3	0.7013
152.4	0.70225
152.5	0.7028
152.6	0.703
152.7	0.7032
152.8	0.70345
152.9	0.7042
153	0.7043
153.1	0.70485
153.2	0.70485
153.3	0.70535
153.4	0.70565
153.5	0.70615
153.6	0.7069
153.7	0.70705
153.8	0.7074
153.9	0.70745
154	0.7078
154.1	0.70775
154.2	0.70815
154.3	0.70845
154.4	0.70865
154.5	0.709
154.6	0.7095
154.7	0.7099
154.8	0.7101
154.9	0.7099
155	0.7103
155.1	0.71065
155.2	0.71045
155.3	0.7109
155.4	0.71215
155.5	0.7124
155.6	0.71315
155.7	0.71365
155.8	0.71415
155.9	0.71475
156	0.71525
156.1	0.71625
156.2	0.7164
156.3	0.71655
156.4	0.7169
156.5	0.71715
156.6	0.7181
156.7	0.718
156.8	0.71805
156.9	0.71775
157	0.7183
157.1	0.7184
157.2	0.71885
157.3	0.7193
157.4	0.7197
157.5	0.71935
157.6	0.71945
157.7	0.7197
157.8	0.72015
157.9	0.72025
158	0.72065
158.1	0.72145
158.2	0.72215
158.3	0.7222
158.4	0.72225
158.5	0.72235
158.6	0.7225
158.7	0.72245
158.8	0.7224
158.9	0.72265
159	0.7228
159.1	0.72305
159.2	0.723
159.3	0.72325
159.4	0.7229
159.5	0.723
159.6	0.7228
159.7	0.72335
159.8	0.7235
159.9	0.7243
160	0.7247
160.1	0.72515
160.2	0.72545
160.3	0.72545
160.4	0.7258
160.5	0.7262
160.6	0.72685
160.7	0.72725
160.8	0.7271
160.9	0.7274
161	0.72745
161.1	0.72765
161.2	0.7283
161.3	0.72905
161.4	0.7286
161.5	0.7283
161.6	0.72865
161.7	0.72845
161.8	0.7283
161.9	0.7288
162	0.7288
162.1	0.72895
162.2	0.7288
162.3	0.7292
162.4	0.72895
162.5	0.72905
162.6	0.72925
162.7	0.72975
162.8	0.72965
162.9	0.7297
163	0.7295
163.1	0.72965
163.2	0.72935
163.3	0.72955
163.4	0.73
163.5	0.7308
163.6	0.7308
163.7	0.73105
163.8	0.73125
163.9	0.7317
164	0.7316
164.1	0.73145
164.2	0.73205
164.3	0.7327
164.4	0.7329
164.5	0.73295
164.6	0.7331
164.7	0.73365
164.8	0.73395
164.9	0.7346
165	0.73465
165.1	0.7353
165.2	0.73605
165.3	0.73595
165.4	0.73605
165.5	0.736
165.6	0.73615
165.7	0.7368
165.8	0.7371
165.9	0.73755
166	0.7379
166.1	0.7382
166.2	0.73805
166.3	0.7386
166.4	0.7388
166.5	0.73915
166.6	0.73995
166.7	0.7399
166.8	0.7401
166.9	0.7406
167	0.74075
167.1	0.7402
167.2	0.7403
167.3	0.74035
167.4	0.74055
167.5	0.7405
167.6	0.74055
167.7	0.7405
167.8	0.7404
167.9	0.73965
168	0.73895
168.1	0.73945
168.2	0.7394
168.3	0.7396
168.4	0.7395
168.5	0.7401
168.6	0.73945
168.7	0.73975
168.8	0.73965
168.9	0.7394
169	0.7395
169.1	0.7396
169.2	0.73975
169.3	0.7397
169.4	0.7403
169.5	0.7405
169.6	0.7405
169.7	0.74005
169.8	0.7405
169.9	0.7403
170	0.74035
170.1	0.7405
170.2	0.74085
170.3	0.74075
170.4	0.74045
170.5	0.7399
170.6	0.73985
170.7	0.74025
170.8	0.7405
170.9	0.74045
171	0.74095
171.1	0.74105
171.2	0.74065
171.3	0.74065
171.4	0.7407
171.5	0.74115
171.6	0.74115
171.7	0.74185
171.8	0.74195
171.9	0.7424
172	0.74275
172.1	0.74255
172.2	0.74315
172.3	0.74335
172.4	0.7439
172.5	0.74355
172.6	0.744
172.7	0.7443
172.8	0.7442
172.9	0.744
173	0.74395
173.1	0.744
173.2	0.74405
173.3	0.74435
173.4	0.74445
173.5	0.7446
173.6	0.7451
173.7	0.745
173.8	0.7454
173.9	0.7456
174	0.7457
174.1	0.7459
174.2	0.7457
174.3	0.7458
174.4	0.74565
174.5	0.74595
174.6	0.74595
174.7	0.74565
174.8	0.746
174.9	0.7459
175	0.74575
175.1	0.7456
175.2	0.7457
175.3	0.74565
175.4	0.7464
175.5	0.74665
175.6	0.74695
175.7	0.7469
175.8	0.7472
175.9	0.74705
176	0.74625
176.1	0.7465
176.2	0.7468
176.3	0.7472
176.4	0.7477
176.5	0.7475
176.6	0.74795
176.7	0.748
176.8	0.74825
176.9	0.74785
177	0.7481
177.1	0.74805
177.2	0.74825
177.3	0.74815
177.4	0.74795
177.5	0.74825
177.6	0.74815
177.7	0.74865
177.8	0.7489
177.9	0.74885
178	0.74885
178.1	0.7495
178.2	0.74925
178.3	0.74985
178.4	0.75015
178.5	0.75025
178.6	0.75035
178.7	0.7503
178.8	0.75035
178.9	0.75025
179	0.7503
179.1	0.7505
179.2	0.7508
179.3	0.75095
179.4	0.7508
179.5	0.7509
179.6	0.7512
179.7	0.7517
179.8	0.7516
179.9	0.7516
180	0.75175
180.1	0.7516
180.2	0.75195
180.3	0.7516
180.4	0.7516
180.5	0.7517
180.6	0.75185
180.7	0.7518
180.8	0.75155
180.9	0.7514
181	0.75135
181.1	0.75155
181.2	0.75145
181.3	0.7514
181.4	0.7518
181.5	0.7518
181.6	0.7519
181.7	0.75205
181.8	0.752
181.9	0.75275
182	0.75245
182.1	0.75255
182.2	0.7529
182.3	0.75265
182.4	0.75285
182.5	0.7529
182.6	0.7533
182.7	0.75345
182.8	0.75345
182.9	0.7538
183	0.75365
183.1	0.7539
183.2	0.75385
183.3	0.75385
183.4	0.75385
183.5	0.75425
183.6	0.7546
183.7	0.75485
183.8	0.7548
183.9	0.75485
184	0.75505
184.1	0.7551
184.2	0.7554
184.3	0.7551
184.4	0.7552
184.5	0.7552
184.6	0.75515
184.7	0.7553
184.8	0.75565
184.9	0.756
185	0.75665
185.1	0.75675
185.2	0.75735
185.3	0.7571
185.4	0.75695
185.5	0.757
185.6	0.75705
185.7	0.75695
185.8	0.7567
185.9	0.7568
186	0.75695
186.1	0.7564
186.2	0.7567
186.3	0.75695
186.4	0.75705
186.5	0.7571
186.6	0.7567
186.7	0.7564
186.8	0.7568
186.9	0.7572
187	0.7571
187.1	0.75715
187.2	0.7573
187.3	0.75755
187.4	0.75785
187.5	0.75825
187.6	0.75815
187.7	0.7583
187.8	0.7583
187.9	0.7586
188	0.7591
188.1	0.75935
188.2	0.7594
188.3	0.7595
188.4	0.76015
188.5	0.7605
188.6	0.7604
188.7	0.76035
188.8	0.76125
188.9	0.7614
189	0.76125
189.1	0.76155
189.2	0.76125
189.3	0.76165
189.4	0.76145
189.5	0.76155
189.6	0.76195
189.7	0.76195
189.8	0.76195
189.9	0.7621
190	0.76245
190.1	0.76305
190.2	0.76255
190.3	0.7626
190.4	0.76295
190.5	0.76305
190.6	0.76375
190.7	0.76365
190.8	0.76435
190.9	0.76435
191	0.7644
191.1	0.7643
191.2	0.7645
191.3	0.76415
191.4	0.76435
191.5	0.7644
191.6	0.7644
191.7	0.7646
191.8	0.7649
191.9	0.7648
192	0.76475
192.1	0.76485
192.2	0.76515
192.3	0.7654
192.4	0.7653
192.5	0.76515
192.6	0.7648
192.7	0.76495
192.8	0.7649
192.9	0.7647
193	0.76445
193.1	0.76445
193.2	0.7646
193.3	0.76415
193.4	0.7637
193.5	0.764
193.6	0.76435
193.7	0.7639
193.8	0.7643
193.9	0.764
194	0.76415
194.1	0.7641
194.2	0.7642
194.3	0.76445
194.4	0.76475
194.5	0.7649
194.6	0.7649
194.7	0.7651
194.8	0.76455
194.9	0.7646
195	0.7648
195.1	0.76445
195.2	0.76475
195.3	0.76485
195.4	0.7647
195.5	0.7642
195.6	0.76415
195.7	0.76405
195.8	0.7644
195.9	0.76425
196	0.7641
196.1	0.7642
196.2	0.7641
196.3	0.76455
196.4	0.7647
196.5	0.7648
196.6	0.7646
196.7	0.7645
196.8	0.7648
196.9	0.76445
197	0.7645
197.1	0.7648
197.2	0.7648
197.3	0.76535
197.4	0.76565
197.5	0.76585
197.6	0.76595
197.7	0.7661
197.8	0.7664
197.9	0.76625
198	0.766
198.1	0.7661
198.2	0.76575
198.3	0.7658
198.4	0.7659
198.5	0.76595
198.6	0.7663
198.7	0.7664
198.8	0.7662
198.9	0.76635
199	0.76635
199.1	0.7661
199.2	0.76625
199.3	0.76645
199.4	0.7665
199.5	0.7666
199.6	0.7666
199.7	0.76685
199.8	0.7671
199.9	0.76725
200	0.76755
[truncated: 14,000 more rows]
