# Supplementary material for: Bayesian inference of kinetic schemes for ion channels by Kalman filtering
Source: eLife journal article supplement (doi:10.7554/elife.62714), 2022-05-04
Supplement: fig4-data5 [file 1_Sim_N_50000_Fluor_MW_4M.xlsx]

## Sheet: 4 M
0.1	0
0.2	0
0.3	0
0.4	0
0.5	0
0.6	0
0.7	0
0.8	0
0.9	0
1	0
1.1	0
1.2	0
1.3	0
1.4	0
1.5	0
1.6	0
1.7	0
1.8	0
1.9	0
2	0
2.1	0
2.2	0
2.3	0
2.4	0
2.5	0
2.6	0
2.7	0
2.8	0
2.9	0
3	0
3.1	0
3.2	0
3.3	0
3.4	0
3.5	0
3.6	0
3.7	0
3.8	0
3.9	0
4	0
4.1	0
4.2	0
4.3	0
4.4	0
4.5	0
4.6	0
4.7	0
4.8	0
4.9	0
5	0
5.1	0
5.2	0
5.3	0
5.4	0
5.5	0
5.6	0
5.7	0
5.8	0
5.9	0
6	0
6.1	0
6.2	0
6.3	0
6.4	0
6.5	0
6.6	0
6.7	0
6.8	0
6.9	0
7	0
7.1	0
7.2	0
7.3	0
7.4	0
7.5	0
7.6	0
7.7	0
7.8	0
7.9	0
8	0
8.1	0
8.2	0
8.3	0
8.4	0
8.5	0
8.6	0
8.7	0
8.8	0
8.9	0
9	0
9.1	0
9.2	0
9.3	0
9.4	0
9.5	0
9.6	0
9.7	0
9.8	0
9.9	0
10	0
10.1	0
10.2	0
10.3	0
10.4	0
10.5	0
10.6	0
10.7	0
10.8	0
10.9	0
11	0
11.1	0
11.2	0
11.3	0
11.4	0
11.5	0
11.6	0
11.7	0
11.8	0
11.9	0
12	0
12.1	0
12.2	0
12.3	0
12.4	0
12.5	0
12.6	0
12.7	0
12.8	0
12.9	0
13	0
13.1	0
13.2	0
13.3	0
13.4	0
13.5	0
13.6	0
13.7	0
13.8	0
13.9	0
14	0
14.1	0
14.2	0
14.3	0
14.4	0
14.5	0
14.6	0
14.7	0
14.8	0
14.9	0
15	0
15.1	0
15.2	0
15.3	0
15.4	0
15.5	0
15.6	0
15.7	0
15.8	0
15.9	0
16	0
16.1	0
16.2	0
16.3	0
16.4	0
16.5	0
16.6	0
16.7	0
16.8	0
16.9	0
17	0
17.1	0
17.2	0
17.3	0
17.4	0
17.5	0
17.6	0
17.7	0
17.8	0
17.9	0
18	0
18.1	0
18.2	0
18.3	0
18.4	0
18.5	0
18.6	0
18.7	0
18.8	0
18.9	0
19	0
19.1	0
19.2	0
19.3	0
19.4	0
19.5	0
19.6	0
19.7	0
19.8	0
19.9	0
20	0
20.1	0
20.2	0
20.3	0
20.4	0
20.5	0
20.6	0
20.7	0
20.8	0
20.9	0
21	0
21.1	0
21.2	0
21.3	0
21.4	0
21.5	0
21.6	0
21.7	0
21.8	0
21.9	0
22	0
22.1	0
22.2	0
22.3	0
22.4	0
22.5	0
22.6	0
22.7	0
22.8	0
22.9	0
23	0
23.1	0
23.2	0
23.3	0
23.4	0
23.5	0
23.6	0
23.7	0
23.8	0
23.9	0
24	0
24.1	0
24.2	0
24.3	0
24.4	0
24.5	0
24.6	0
24.7	0
24.8	0
24.9	0
25	0
25.1	0
25.2	0
25.3	0
25.4	0
25.5	0
25.6	0
25.7	0
25.8	0
25.9	0
26	0
26.1	0
26.2	0
26.3	0
26.4	0
26.5	0
26.6	0
26.7	0
26.8	0
26.9	0
27	0
27.1	0
27.2	0
27.3	0
27.4	0
27.5	0
27.6	0
27.7	0
27.8	0
27.9	0
28	0
28.1	0
28.2	0
28.3	0
28.4	0
28.5	0
28.6	0
28.7	0
28.8	0
28.9	0
29	0
29.1	0
29.2	0
29.3	0
29.4	0
29.5	0
29.6	0
29.7	0
29.8	0
29.9	0
30	0
30.1	0
30.2	0
30.3	0
30.4	0
30.5	0
30.6	0
30.7	0
30.8	0
30.9	0
31	0
31.1	0
31.2	0
31.3	0
31.4	0
31.5	0
31.6	0
31.7	0
31.8	0
31.9	0
32	0
32.1	0
32.2	0
32.3	0
32.4	0
32.5	0
32.6	0
32.7	0
32.8	0
32.9	0
33	0
33.1	0
33.2	0
33.3	0
33.4	0
33.5	0
33.6	0
33.7	0
33.8	0
33.9	0
34	0
34.1	0
34.2	0
34.3	0
34.4	0
34.5	0
34.6	0
34.7	0
34.8	0
34.9	0
35	0
35.1	0
35.2	0
35.3	0
35.4	0
35.5	0
35.6	0
35.7	0
35.8	0
35.9	0
36	0
36.1	0
36.2	0
36.3	0
36.4	0
36.5	0
36.6	0
36.7	0
36.8	0
36.9	0
37	0
37.1	0
37.2	0
37.3	0
37.4	0
37.5	0
37.6	0
37.7	0
37.8	0
37.9	0
38	0
38.1	0
38.2	0
38.3	0
38.4	0
38.5	0
38.6	0
38.7	0
38.8	0
38.9	0
39	0
39.1	0
39.2	0
39.3	0
39.4	0
39.5	0
39.6	0
39.7	0
39.8	0
39.9	0
40	0
40.1	0
40.2	0
40.3	0
40.4	0
40.5	0
40.6	0
40.7	0
40.8	0
40.9	0
41	0
41.1	0
41.2	0
41.3	0
41.4	0
41.5	0
41.6	0
41.7	0
41.8	0
41.9	0
42	0
42.1	0
42.2	0
42.3	0
42.4	0
42.5	0
42.6	0
42.7	0
42.8	0
42.9	0
43	0
43.1	0
43.2	0
43.3	0
43.4	0
43.5	0
43.6	0
43.7	0
43.8	0
43.9	0
44	0
44.1	0
44.2	0
44.3	0
44.4	0
44.5	0
44.6	0
44.7	0
44.8	0
44.9	0
45	0
45.1	0
45.2	0
45.3	0
45.4	0
45.5	0
45.6	0
45.7	0
45.8	0
45.9	0
46	0
46.1	0
46.2	0
46.3	0
46.4	0
46.5	0
46.6	0
46.7	0
46.8	0
46.9	0
47	0
47.1	0
47.2	0
47.3	0
47.4	0
47.5	0
47.6	0
47.7	0
47.8	0
47.9	0
48	0
48.1	0
48.2	0
48.3	0
48.4	0
48.5	0
48.6	0
48.7	0
48.8	0
48.9	0
49	0
49.1	0
49.2	0
49.3	0
49.4	0
49.5	0
49.6	0
49.7	0
49.8	0
49.9	0
50	0
50.1	0
50.2	0
50.3	0
50.4	0
50.5	0
50.6	0
50.7	0
50.8	0
50.9	0
51	0
51.1	0
51.2	0
51.3	0
51.4	0
51.5	0
51.6	0
51.7	0
51.8	0
51.9	0
52	0
52.1	0
52.2	0
52.3	0
52.4	0
52.5	0
52.6	0
52.7	0
52.8	0
52.9	0
53	0
53.1	0
53.2	0
53.3	0
53.4	0
53.5	0
53.6	0
53.7	0
53.8	0
53.9	0
54	0
54.1	0
54.2	0
54.3	0
54.4	0
54.5	0
54.6	0
54.7	0
54.8	0
54.9	0
55	0
55.1	0
55.2	0
55.3	0
55.4	0
55.5	0
55.6	0
55.7	0
55.8	0
55.9	0
56	0
56.1	0
56.2	0
56.3	0
56.4	0
56.5	0
56.6	0
56.7	0
56.8	0
56.9	0
57	0
57.1	0
57.2	0
57.3	0
57.4	0
57.5	0
57.6	0
57.7	0
57.8	0
57.9	0
58	0
58.1	0
58.2	0
58.3	0
58.4	0
58.5	0
58.6	0
58.7	0
58.8	0
58.9	0
59	0
59.1	0
59.2	0
59.3	0
59.4	0
59.5	0
59.6	0
59.7	0
59.8	0
59.9	0
60	0
60.1	0
60.2	0
60.3	0
60.4	0
60.5	0
60.6	0
60.7	0
60.8	0
60.9	0
61	0
61.1	0
61.2	0
61.3	0
61.4	0
61.5	0
61.6	0
61.7	0
61.8	0
61.9	0
62	0
62.1	0
62.2	0
62.3	0
62.4	0
62.5	0
62.6	0
62.7	0
62.8	0
62.9	0
63	0
63.1	0
63.2	0
63.3	0
63.4	0
63.5	0
63.6	0
63.7	0
63.8	0
63.9	0
64	0
64.1	0
64.2	0
64.3	0
64.4	0
64.5	0
64.6	0
64.7	0
64.8	0
64.9	0
65	0
65.1	0
65.2	0
65.3	0
65.4	0
65.5	0
65.6	0
65.7	0
65.8	0
65.9	0
66	0
66.1	0
66.2	0
66.3	0
66.4	0
66.5	0
66.6	0
66.7	0
66.8	0
66.9	0
67	0
67.1	0
67.2	0
67.3	0
67.4	0
67.5	0
67.6	0
67.7	0
67.8	0
67.9	0
68	0
68.1	0
68.2	0
68.3	0
68.4	0
68.5	0
68.6	0
68.7	0
68.8	0
68.9	0
69	0
69.1	0
69.2	0
69.3	0
69.4	0
69.5	0
69.6	0
69.7	0
69.8	0
69.9	0
70	0
70.1	0
70.2	0
70.3	0
70.4	0
70.5	0
70.6	0
70.7	0
70.8	0
70.9	0
71	0
71.1	0
71.2	0
71.3	0
71.4	0
71.5	0
71.6	0
71.7	0
71.8	0
71.9	0
72	0
72.1	0
72.2	0
72.3	0
72.4	0
72.5	0
72.6	0
72.7	0
72.8	0
72.9	0
73	0
73.1	0
73.2	0
73.3	0
73.4	0
73.5	0
73.6	0
73.7	0
73.8	0
73.9	0
74	0
74.1	0
74.2	0
74.3	0
74.4	0
74.5	0
74.6	0
74.7	0
74.8	0
74.9	0
75	0
75.1	0
75.2	0
75.3	0
75.4	0
75.5	0
75.6	0
75.7	0
75.8	0
75.9	0
76	0
76.1	0
76.2	0
76.3	0
76.4	0
76.5	0
76.6	0
76.7	0
76.8	0
76.9	0
77	0
77.1	0
77.2	0
77.3	0
77.4	0
77.5	0
77.6	0
77.7	0
77.8	0
77.9	0
78	0
78.1	0
78.2	0
78.3	0
78.4	0
78.5	0
78.6	0
78.7	0
78.8	0
78.9	0
79	0
79.1	0
79.2	0
79.3	0
79.4	0
79.5	0
79.6	0
79.7	0
79.8	0
79.9	0
80	0
80.1	0
80.2	0
80.3	0
80.4	0
80.5	0
80.6	0
80.7	0
80.8	0
80.9	0
81	0
81.1	0
81.2	0
81.3	0
81.4	0
81.5	0
81.6	0
81.7	0
81.8	0
81.9	0
82	0
82.1	0
82.2	0
82.3	0
82.4	0
82.5	0
82.6	0
82.7	0
82.8	0
82.9	0
83	0
83.1	0
83.2	0
83.3	0
83.4	0
83.5	0
83.6	0
83.7	0
83.8	0
83.9	0
84	0
84.1	0
84.2	0
84.3	0
84.4	0
84.5	0
84.6	0
84.7	0
84.8	0
84.9	0
85	0
85.1	0
85.2	0
85.3	0
85.4	0
85.5	0
85.6	0
85.7	0
85.8	0
85.9	0
86	0
86.1	0
86.2	0
86.3	0
86.4	0
86.5	0
86.6	0
86.7	0
86.8	0
86.9	0
87	0
87.1	0
87.2	0
87.3	0
87.4	0
87.5	0
87.6	0
87.7	0
87.8	0
87.9	0
88	0
88.1	0
88.2	0
88.3	0
88.4	0
88.5	0
88.6	0
88.7	0
88.8	0
88.9	0
89	0
89.1	0
89.2	0
89.3	0
89.4	0
89.5	0
89.6	0
89.7	0
89.8	0
89.9	0
90	0
90.1	0
90.2	0
90.3	0
90.4	0
90.5	0
90.6	0
90.7	0
90.8	0
90.9	0
91	0
91.1	0
91.2	0
91.3	0
91.4	0
91.5	0
91.6	0
91.7	0
91.8	0
91.9	0
92	0
92.1	0
92.2	0
92.3	0
92.4	0
92.5	0
92.6	0
92.7	0
92.8	0
92.9	0
93	0
93.1	0
93.2	0
93.3	0
93.4	0
93.5	0
93.6	0
93.7	0
93.8	0
93.9	0
94	0
94.1	0
94.2	0
94.3	0
94.4	0
94.5	0
94.6	0
94.7	0
94.8	0
94.9	0
95	0
95.1	0
95.2	0
95.3	0
95.4	0
95.5	0
95.6	0
95.7	0
95.8	0
95.9	0
96	0
96.1	0
96.2	0
96.3	0
96.4	0
96.5	0
96.6	0
96.7	0
96.8	0
96.9	0
97	0
97.1	0
97.2	0
97.3	0
97.4	0
97.5	0
97.6	0
97.7	0
97.8	0
97.9	0
98	0
98.1	0
98.2	0
98.3	0
98.4	0
98.5	0
98.6	0
98.7	0
98.8	0
98.9	0
99	0
99.1	0
99.2	0
99.3	0
99.4	0
99.5	0
99.6	0
99.7	0
99.8	0
99.9	0
100	0
100.1	0.20226
100.2	0.34527
100.3	0.451
100.4	0.52771
100.5	0.58636
100.6	0.63305
100.7	0.66961
100.8	0.69996
100.9	0.72341
101	0.74279
101.1	0.76121
101.2	0.7749
101.3	0.78615
101.4	0.79605
101.5	0.80403
101.6	0.81142
101.7	0.81736
101.8	0.82189
101.9	0.82696
102	0.83107
102.1	0.83382
102.2	0.83568
102.3	0.83865
102.4	0.84118
102.5	0.84297
102.6	0.84486
102.7	0.84733
102.8	0.84818
102.9	0.84934
103	0.85091
103.1	0.85228
103.2	0.85346
103.3	0.85407
103.4	0.85526
103.5	0.85677
103.6	0.85783
103.7	0.85803
103.8	0.85838
103.9	0.85884
104	0.85898
104.1	0.85914
104.2	0.86018
104.3	0.86099
104.4	0.8613
104.5	0.8615
104.6	0.86188
104.7	0.86145
104.8	0.86283
104.9	0.86343
105	0.86371
105.1	0.8647
105.2	0.86444
105.3	0.86483
105.4	0.86553
105.5	0.86621
105.6	0.86691
105.7	0.86819
105.8	0.86843
105.9	0.86854
106	0.86909
106.1	0.8688
106.2	0.86983
106.3	0.87028
106.4	0.8711
106.5	0.87173
106.6	0.87195
106.7	0.87221
106.8	0.87363
106.9	0.87379
107	0.87425
107.1	0.87517
107.2	0.87528
107.3	0.87509
107.4	0.87541
107.5	0.87606
107.6	0.87661
107.7	0.8763
107.8	0.87601
107.9	0.87778
108	0.87846
108.1	0.87858
108.2	0.87846
108.3	0.87882
108.4	0.87861
108.5	0.87859
108.6	0.87969
108.7	0.88119
108.8	0.88105
108.9	0.88162
109	0.88228
109.1	0.88256
109.2	0.88302
109.3	0.88337
109.4	0.88498
109.5	0.88477
109.6	0.88481
109.7	0.88467
109.8	0.88408
109.9	0.88481
110	0.88511
110.1	0.88488
110.2	0.88592
110.3	0.88596
110.4	0.8872
110.5	0.88807
110.6	0.88754
110.7	0.88744
110.8	0.88776
110.9	0.88821
111	0.8884
111.1	0.88855
111.2	0.88978
111.3	0.8893
111.4	0.88924
111.5	0.88998
111.6	0.89022
111.7	0.89069
111.8	0.89093
111.9	0.8919
112	0.89272
112.1	0.89258
112.2	0.89302
112.3	0.8936
112.4	0.89408
112.5	0.89409
112.6	0.8946
112.7	0.8953
112.8	0.89612
112.9	0.8954
113	0.89602
113.1	0.89629
113.2	0.89704
113.3	0.89663
113.4	0.89663
113.5	0.8965
113.6	0.89674
113.7	0.89687
113.8	0.89797
113.9	0.89874
114	0.89862
114.1	0.89917
114.2	0.89932
114.3	0.899
114.4	0.90002
114.5	0.9006
114.6	0.90037
114.7	0.90001
114.8	0.89995
114.9	0.90055
115	0.90095
115.1	0.90098
115.2	0.9017
115.3	0.90184
115.4	0.90265
115.5	0.90231
115.6	0.90277
115.7	0.90355
115.8	0.90342
115.9	0.90321
116	0.90392
116.1	0.90464
116.2	0.90501
116.3	0.90609
116.4	0.90664
116.5	0.90598
116.6	0.90591
116.7	0.90635
116.8	0.90606
116.9	0.90596
117	0.90632
117.1	0.90686
117.2	0.90676
117.3	0.90612
117.4	0.90647
117.5	0.90684
117.6	0.90791
117.7	0.90831
117.8	0.90857
117.9	0.90905
118	0.90954
118.1	0.9095
118.2	0.91022
118.3	0.90981
118.4	0.91149
118.5	0.91067
118.6	0.91169
118.7	0.91243
118.8	0.9124
118.9	0.91222
119	0.91296
119.1	0.91318
119.2	0.91382
119.3	0.91368
119.4	0.91406
119.5	0.91435
119.6	0.9147
119.7	0.91482
119.8	0.91498
119.9	0.91493
120	0.91519
120.1	0.91502
120.2	0.91537
120.3	0.91535
120.4	0.91558
120.5	0.91596
120.6	0.91583
120.7	0.91553
120.8	0.91532
120.9	0.91621
121	0.91701
121.1	0.91678
121.2	0.91675
121.3	0.91797
121.4	0.91856
121.5	0.91853
121.6	0.91834
121.7	0.91806
121.8	0.91821
121.9	0.91883
122	0.9197
122.1	0.91967
122.2	0.91981
122.3	0.91962
122.4	0.91976
122.5	0.92026
122.6	0.92028
122.7	0.9199
122.8	0.92045
122.9	0.92139
123	0.92127
123.1	0.92117
123.2	0.92199
123.3	0.92205
123.4	0.92201
123.5	0.9225
123.6	0.92259
123.7	0.9228
123.8	0.92283
123.9	0.92271
124	0.92266
124.1	0.92236
124.2	0.92235
124.3	0.92327
124.4	0.92414
124.5	0.92387
124.6	0.92427
124.7	0.9242
124.8	0.9252
124.9	0.92522
125	0.92594
125.1	0.92611
125.2	0.92593
125.3	0.92681
125.4	0.92596
125.5	0.92614
125.6	0.92597
125.7	0.92683
125.8	0.92658
125.9	0.92723
126	0.92736
126.1	0.92779
126.2	0.92758
126.3	0.92843
126.4	0.9286
126.5	0.92911
126.6	0.92884
126.7	0.92903
126.8	0.92942
126.9	0.92942
127	0.92832
127.1	0.92874
127.2	0.92893
127.3	0.92853
127.4	0.92818
127.5	0.92842
127.6	0.92874
127.7	0.9287
127.8	0.92884
127.9	0.9289
128	0.92968
128.1	0.92988
128.2	0.92987
128.3	0.9308
128.4	0.93032
128.5	0.93086
128.6	0.93041
128.7	0.93028
128.8	0.93058
128.9	0.9308
129	0.93007
129.1	0.92999
129.2	0.92991
129.3	0.93013
129.4	0.93049
129.5	0.93071
129.6	0.93077
129.7	0.93202
129.8	0.9327
129.9	0.93262
130	0.93252
130.1	0.93269
130.2	0.9334
130.3	0.93347
130.4	0.93343
130.5	0.93297
130.6	0.93287
130.7	0.93391
130.8	0.93334
130.9	0.93355
131	0.93372
131.1	0.93368
131.2	0.93411
131.3	0.93421
131.4	0.93394
131.5	0.93382
131.6	0.93352
131.7	0.93374
131.8	0.93419
131.9	0.93475
132	0.93468
132.1	0.93503
132.2	0.93554
132.3	0.93582
132.4	0.93617
132.5	0.93629
132.6	0.93663
132.7	0.9369
132.8	0.93663
132.9	0.93678
133	0.93684
133.1	0.93745
133.2	0.93762
133.3	0.9379
133.4	0.93757
133.5	0.93687
133.6	0.93769
133.7	0.93809
133.8	0.93813
133.9	0.93809
134	0.93839
134.1	0.93883
134.2	0.93855
134.3	0.93914
134.4	0.93936
134.5	0.9397
134.6	0.93946
134.7	0.94002
134.8	0.94037
134.9	0.94088
135	0.9404
135.1	0.94034
135.2	0.94023
135.3	0.94025
135.4	0.94022
135.5	0.9396
135.6	0.94026
135.7	0.94006
135.8	0.94055
135.9	0.94074
136	0.94126
136.1	0.94139
136.2	0.94147
136.3	0.94159
136.4	0.94211
136.5	0.94271
136.6	0.94259
136.7	0.9417
136.8	0.9424
136.9	0.94197
137	0.94237
137.1	0.94236
137.2	0.94213
137.3	0.9419
137.4	0.94242
137.5	0.94205
137.6	0.94289
137.7	0.94307
137.8	0.94276
137.9	0.94309
138	0.94281
138.1	0.94269
138.2	0.94327
138.3	0.94322
138.4	0.9437
138.5	0.94366
138.6	0.94413
138.7	0.94403
138.8	0.94449
138.9	0.94399
139	0.94369
139.1	0.94364
139.2	0.94363
139.3	0.94359
139.4	0.94361
139.5	0.94374
139.6	0.94453
139.7	0.94421
139.8	0.94419
139.9	0.94444
140	0.94447
140.1	0.94424
140.2	0.94463
140.3	0.9449
140.4	0.94531
140.5	0.9459
140.6	0.94515
140.7	0.94569
140.8	0.94605
140.9	0.94587
141	0.94603
141.1	0.94637
141.2	0.94639
141.3	0.94662
141.4	0.94658
141.5	0.94649
141.6	0.94657
141.7	0.94617
141.8	0.94684
141.9	0.94678
142	0.94677
142.1	0.94701
142.2	0.94674
142.3	0.94688
142.4	0.94711
142.5	0.94769
142.6	0.9474
142.7	0.94782
142.8	0.94798
142.9	0.94806
143	0.94808
143.1	0.94835
143.2	0.94831
143.3	0.94821
143.4	0.94828
143.5	0.94856
143.6	0.94908
143.7	0.9492
143.8	0.94873
143.9	0.9489
144	0.94864
144.1	0.94841
144.2	0.94878
144.3	0.94883
144.4	0.94925
144.5	0.94952
144.6	0.94945
144.7	0.94951
144.8	0.94954
144.9	0.94991
145	0.94935
145.1	0.94905
145.2	0.9495
145.3	0.94918
145.4	0.94962
145.5	0.94988
145.6	0.94963
145.7	0.9498
145.8	0.94989
145.9	0.94991
146	0.94992
146.1	0.94988
146.2	0.94983
146.3	0.94996
146.4	0.95012
146.5	0.95037
146.6	0.95068
146.7	0.95081
146.8	0.95136
146.9	0.95156
147	0.95187
147.1	0.95156
147.2	0.95134
147.3	0.95162
147.4	0.9521
147.5	0.9521
147.6	0.95196
147.7	0.95221
147.8	0.95257
147.9	0.95209
148	0.9527
148.1	0.9529
148.2	0.95292
148.3	0.95244
148.4	0.95252
148.5	0.95276
148.6	0.95259
148.7	0.9528
148.8	0.95302
148.9	0.95313
149	0.95315
149.1	0.95357
149.2	0.95329
149.3	0.95339
149.4	0.95335
149.5	0.95304
149.6	0.9533
149.7	0.95283
149.8	0.95258
149.9	0.95234
150	0.95256
150.1	0.9529
150.2	0.95311
150.3	0.95294
150.4	0.95341
150.5	0.95337
150.6	0.95418
150.7	0.95441
150.8	0.9543
150.9	0.95335
151	0.95383
151.1	0.95426
151.2	0.95432
151.3	0.95396
151.4	0.95452
151.5	0.95446
151.6	0.95436
151.7	0.95509
151.8	0.95571
151.9	0.95512
152	0.9553
152.1	0.95564
152.2	0.95605
152.3	0.95604
152.4	0.956
152.5	0.95605
152.6	0.95591
152.7	0.95533
152.8	0.95512
152.9	0.95529
153	0.95535
153.1	0.95538
153.2	0.9555
153.3	0.95504
153.4	0.95522
153.5	0.9552
153.6	0.9557
153.7	0.95613
153.8	0.9559
153.9	0.95598
154	0.95567
154.1	0.95561
154.2	0.95529
154.3	0.95539
154.4	0.95495
154.5	0.95472
154.6	0.95523
154.7	0.95524
154.8	0.95536
154.9	0.95503
155	0.95546
155.1	0.95556
155.2	0.95582
155.3	0.95556
155.4	0.95553
155.5	0.95583
155.6	0.95638
155.7	0.95636
155.8	0.95583
155.9	0.9561
156	0.95573
156.1	0.95594
156.2	0.95548
156.3	0.95626
156.4	0.95655
156.5	0.95669
156.6	0.95626
156.7	0.95621
156.8	0.95631
156.9	0.95682
157	0.95625
157.1	0.95591
157.2	0.95592
157.3	0.9565
157.4	0.95674
157.5	0.95709
157.6	0.95741
157.7	0.95798
157.8	0.9578
157.9	0.95745
158	0.95758
158.1	0.95699
158.2	0.95647
158.3	0.95659
158.4	0.95698
158.5	0.95705
158.6	0.95752
158.7	0.95725
158.8	0.95747
158.9	0.95696
159	0.95779
159.1	0.95779
159.2	0.95788
159.3	0.95794
159.4	0.958
159.5	0.95769
159.6	0.95728
159.7	0.95692
159.8	0.95718
159.9	0.95736
160	0.95744
160.1	0.95693
160.2	0.9569
160.3	0.95711
160.4	0.95717
160.5	0.95777
160.6	0.95812
160.7	0.95819
160.8	0.95806
160.9	0.95819
161	0.95808
161.1	0.95798
161.2	0.95853
161.3	0.95849
161.4	0.9581
161.5	0.95824
161.6	0.95857
161.7	0.95884
161.8	0.95911
161.9	0.959
162	0.95872
162.1	0.95911
162.2	0.95904
162.3	0.95891
162.4	0.95904
162.5	0.95916
162.6	0.95949
162.7	0.95868
162.8	0.95916
162.9	0.95943
163	0.95925
163.1	0.95904
163.2	0.95912
163.3	0.95934
163.4	0.95916
163.5	0.95893
163.6	0.95881
163.7	0.95937
163.8	0.95945
163.9	0.95939
164	0.95933
164.1	0.95932
164.2	0.95869
164.3	0.95891
164.4	0.95868
164.5	0.95897
164.6	0.95891
164.7	0.95873
164.8	0.95831
164.9	0.95873
165	0.95949
165.1	0.95943
165.2	0.95982
165.3	0.95934
165.4	0.95974
165.5	0.95993
165.6	0.95957
165.7	0.95942
165.8	0.95935
165.9	0.9594
166	0.95945
166.1	0.9595
166.2	0.96022
166.3	0.96037
166.4	0.96027
166.5	0.95994
166.6	0.96021
166.7	0.96051
166.8	0.96078
166.9	0.96084
167	0.9607
167.1	0.96044
167.2	0.96042
167.3	0.96054
167.4	0.96088
167.5	0.96077
167.6	0.96072
167.7	0.96072
167.8	0.961
167.9	0.96095
168	0.96075
168.1	0.96066
168.2	0.96098
168.3	0.96126
168.4	0.96101
168.5	0.96055
168.6	0.96019
168.7	0.96011
168.8	0.96015
168.9	0.96066
169	0.96058
169.1	0.96092
169.2	0.96094
169.3	0.96105
169.4	0.96087
169.5	0.96055
169.6	0.96069
169.7	0.96069
169.8	0.9607
169.9	0.96073
170	0.96092
170.1	0.9609
170.2	0.96081
170.3	0.96108
170.4	0.96156
170.5	0.96166
170.6	0.96193
170.7	0.96189
170.8	0.96214
170.9	0.96239
171	0.96264
171.1	0.96162
171.2	0.96204
171.3	0.9619
171.4	0.96203
171.5	0.96142
171.6	0.96179
171.7	0.96189
171.8	0.96173
171.9	0.96162
172	0.96154
172.1	0.96158
172.2	0.9617
172.3	0.962
172.4	0.9621
172.5	0.96153
172.6	0.96156
172.7	0.96159
172.8	0.96227
172.9	0.96194
173	0.96185
173.1	0.96172
173.2	0.96182
173.3	0.96177
173.4	0.96163
173.5	0.96098
173.6	0.96147
173.7	0.96162
173.8	0.96177
173.9	0.96152
174	0.9616
174.1	0.96095
174.2	0.96114
174.3	0.96107
174.4	0.96116
174.5	0.96115
174.6	0.96125
174.7	0.96161
174.8	0.96183
174.9	0.9618
175	0.9613
175.1	0.96107
175.2	0.96129
175.3	0.96159
175.4	0.96151
175.5	0.96142
175.6	0.96166
175.7	0.96198
175.8	0.96202
175.9	0.96232
176	0.96301
176.1	0.96305
176.2	0.96292
176.3	0.9627
176.4	0.96288
176.5	0.96302
176.6	0.96265
176.7	0.96257
176.8	0.9625
176.9	0.96252
177	0.96232
177.1	0.96286
177.2	0.96261
177.3	0.96287
177.4	0.96244
177.5	0.96235
177.6	0.96246
177.7	0.96272
177.8	0.96261
177.9	0.96257
178	0.96254
178.1	0.96221
178.2	0.96229
178.3	0.9627
178.4	0.96268
178.5	0.96286
178.6	0.96246
178.7	0.96269
178.8	0.96334
178.9	0.9632
179	0.96315
179.1	0.96267
179.2	0.96313
179.3	0.96303
179.4	0.96353
179.5	0.96352
179.6	0.9635
179.7	0.96338
179.8	0.96327
179.9	0.96332
180	0.96331
180.1	0.96364
180.2	0.96351
180.3	0.96309
180.4	0.96292
180.5	0.96294
180.6	0.96265
180.7	0.96249
180.8	0.96262
180.9	0.96243
181	0.96277
181.1	0.96283
181.2	0.96325
181.3	0.96306
181.4	0.96345
181.5	0.96401
181.6	0.96387
181.7	0.96331
181.8	0.96309
181.9	0.96333
182	0.9635
182.1	0.96369
182.2	0.96355
182.3	0.96378
182.4	0.96388
182.5	0.96368
182.6	0.96337
182.7	0.96333
182.8	0.96323
182.9	0.96296
183	0.96275
183.1	0.96315
183.2	0.96311
183.3	0.96321
183.4	0.96321
183.5	0.96315
183.6	0.96247
183.7	0.96254
183.8	0.96269
183.9	0.96287
184	0.9628
184.1	0.96252
184.2	0.96295
184.3	0.96349
184.4	0.96413
184.5	0.96374
184.6	0.96432
184.7	0.96416
184.8	0.96422
184.9	0.96402
185	0.96392
185.1	0.96398
185.2	0.96452
185.3	0.96411
185.4	0.9642
185.5	0.96457
185.6	0.96485
185.7	0.9648
185.8	0.96434
185.9	0.96419
186	0.96498
186.1	0.96505
186.2	0.96412
186.3	0.96434
186.4	0.96441
186.5	0.96453
186.6	0.96448
186.7	0.96429
186.8	0.96439
186.9	0.96463
187	0.96446
187.1	0.964
187.2	0.96402
187.3	0.96414
187.4	0.96432
187.5	0.9638
187.6	0.96349
187.7	0.9632
187.8	0.9634
187.9	0.96305
188	0.96283
188.1	0.963
188.2	0.96315
188.3	0.96293
188.4	0.96301
188.5	0.96304
188.6	0.96308
188.7	0.96316
188.8	0.96293
188.9	0.96288
189	0.9632
189.1	0.96331
189.2	0.96312
189.3	0.96303
189.4	0.96346
189.5	0.96322
189.6	0.96314
189.7	0.96317
189.8	0.96348
189.9	0.96388
190	0.96384
190.1	0.96363
190.2	0.96382
190.3	0.96386
190.4	0.96375
190.5	0.96417
190.6	0.96408
190.7	0.96475
190.8	0.96456
190.9	0.96433
191	0.96424
191.1	0.9643
191.2	0.96403
191.3	0.9638
191.4	0.96399
191.5	0.9637
191.6	0.96372
191.7	0.9636
191.8	0.96446
191.9	0.96439
192	0.96399
192.1	0.96358
192.2	0.96365
192.3	0.96388
192.4	0.96406
192.5	0.96403
192.6	0.96408
192.7	0.96406
192.8	0.96439
192.9	0.96457
193	0.96425
193.1	0.96467
193.2	0.96483
193.3	0.96471
193.4	0.96409
193.5	0.96425
193.6	0.96462
193.7	0.96467
193.8	0.96504
193.9	0.96483
194	0.96464
194.1	0.96422
194.2	0.96442
194.3	0.96429
194.4	0.9641
194.5	0.96418
194.6	0.96435
194.7	0.96426
194.8	0.96499
194.9	0.96495
195	0.96472
195.1	0.96501
195.2	0.96469
195.3	0.96479
195.4	0.96468
195.5	0.96498
195.6	0.96525
195.7	0.96485
195.8	0.9645
195.9	0.96476
196	0.96464
196.1	0.96456
196.2	0.96436
196.3	0.96464
196.4	0.96461
196.5	0.96451
196.6	0.96458
196.7	0.96451
196.8	0.96427
196.9	0.96438
197	0.96471
197.1	0.96558
197.2	0.96552
197.3	0.96555
197.4	0.96538
197.5	0.96493
197.6	0.96477
197.7	0.96492
197.8	0.96482
197.9	0.96513
198	0.96494
198.1	0.96492
198.2	0.96472
198.3	0.96474
198.4	0.96459
198.5	0.96453
198.6	0.96439
198.7	0.96419
198.8	0.96402
198.9	0.96416
199	0.96404
199.1	0.96365
199.2	0.9635
199.3	0.96366
199.4	0.96357
199.5	0.96389
199.6	0.96406
199.7	0.96407
199.8	0.96433
199.9	0.96423
200	0.96481
[truncated: 14,000 more rows]
