# Supplementary material for: Bayesian inference of kinetic schemes for ion channels by Kalman filtering
Source: eLife journal article supplement (doi:10.7554/elife.62714), 2022-05-04
Supplement: fig4-data5 [file 1_Sim_N_50000_Strom_MW_4M.xlsx]

## Sheet: 4 M
0.1	0
0.2	0
0.3	0
0.4	0
0.5	0
0.6	0
0.7	0
0.8	0
0.9	0
1	0
1.1	0
1.2	0
1.3	0
1.4	0
1.5	0
1.6	0
1.7	0
1.8	0
1.9	0
2	0
2.1	0
2.2	0
2.3	0
2.4	0
2.5	0
2.6	0
2.7	0
2.8	0
2.9	0
3	0
3.1	0
3.2	0
3.3	0
3.4	0
3.5	0
3.6	0
3.7	0
3.8	0
3.9	0
4	0
4.1	0
4.2	0
4.3	0
4.4	0
4.5	0
4.6	0
4.7	0
4.8	0
4.9	0
5	0
5.1	0
5.2	0
5.3	0
5.4	0
5.5	0
5.6	0
5.7	0
5.8	0
5.9	0
6	0
6.1	0
6.2	0
6.3	0
6.4	0
6.5	0
6.6	0
6.7	0
6.8	0
6.9	0
7	0
7.1	0
7.2	0
7.3	0
7.4	0
7.5	0
7.6	0
7.7	0
7.8	0
7.9	0
8	0
8.1	0
8.2	0
8.3	0
8.4	0
8.5	0
8.6	0
8.7	0
8.8	0
8.9	0
9	0
9.1	0
9.2	0
9.3	0
9.4	0
9.5	0
9.6	0
9.7	0
9.8	0
9.9	0
10	0
10.1	0
10.2	0
10.3	0
10.4	0
10.5	0
10.6	0
10.7	0
10.8	0
10.9	0
11	0
11.1	0
11.2	0
11.3	0
11.4	0
11.5	0
11.6	0
11.7	0
11.8	0
11.9	0
12	0
12.1	0
12.2	0
12.3	0
12.4	0
12.5	0
12.6	0
12.7	0
12.8	0
12.9	0
13	0
13.1	0
13.2	0
13.3	0
13.4	0
13.5	0
13.6	0
13.7	0
13.8	0
13.9	0
14	0
14.1	0
14.2	0
14.3	0
14.4	0
14.5	0
14.6	0
14.7	0
14.8	0
14.9	0
15	0
15.1	0
15.2	0
15.3	0
15.4	0
15.5	0
15.6	0
15.7	0
15.8	0
15.9	0
16	0
16.1	0
16.2	0
16.3	0
16.4	0
16.5	0
16.6	0
16.7	0
16.8	0
16.9	0
17	0
17.1	0
17.2	0
17.3	0
17.4	0
17.5	0
17.6	0
17.7	0
17.8	0
17.9	0
18	0
18.1	0
18.2	0
18.3	0
18.4	0
18.5	0
18.6	0
18.7	0
18.8	0
18.9	0
19	0
19.1	0
19.2	0
19.3	0
19.4	0
19.5	0
19.6	0
19.7	0
19.8	0
19.9	0
20	0
20.1	0
20.2	0
20.3	0
20.4	0
20.5	0
20.6	0
20.7	0
20.8	0
20.9	0
21	0
21.1	0
21.2	0
21.3	0
21.4	0
21.5	0
21.6	0
21.7	0
21.8	0
21.9	0
22	0
22.1	0
22.2	0
22.3	0
22.4	0
22.5	0
22.6	0
22.7	0
22.8	0
22.9	0
23	0
23.1	0
23.2	0
23.3	0
23.4	0
23.5	0
23.6	0
23.7	0
23.8	0
23.9	0
24	0
24.1	0
24.2	0
24.3	0
24.4	0
24.5	0
24.6	0
24.7	0
24.8	0
24.9	0
25	0
25.1	0
25.2	0
25.3	0
25.4	0
25.5	0
25.6	0
25.7	0
25.8	0
25.9	0
26	0
26.1	0
26.2	0
26.3	0
26.4	0
26.5	0
26.6	0
26.7	0
26.8	0
26.9	0
27	0
27.1	0
27.2	0
27.3	0
27.4	0
27.5	0
27.6	0
27.7	0
27.8	0
27.9	0
28	0
28.1	0
28.2	0
28.3	0
28.4	0
28.5	0
28.6	0
28.7	0
28.8	0
28.9	0
29	0
29.1	0
29.2	0
29.3	0
29.4	0
29.5	0
29.6	0
29.7	0
29.8	0
29.9	0
30	0
30.1	0
30.2	0
30.3	0
30.4	0
30.5	0
30.6	0
30.7	0
30.8	0
30.9	0
31	0
31.1	0
31.2	0
31.3	0
31.4	0
31.5	0
31.6	0
31.7	0
31.8	0
31.9	0
32	0
32.1	0
32.2	0
32.3	0
32.4	0
32.5	0
32.6	0
32.7	0
32.8	0
32.9	0
33	0
33.1	0
33.2	0
33.3	0
33.4	0
33.5	0
33.6	0
33.7	0
33.8	0
33.9	0
34	0
34.1	0
34.2	0
34.3	0
34.4	0
34.5	0
34.6	0
34.7	0
34.8	0
34.9	0
35	0
35.1	0
35.2	0
35.3	0
35.4	0
35.5	0
35.6	0
35.7	0
35.8	0
35.9	0
36	0
36.1	0
36.2	0
36.3	0
36.4	0
36.5	0
36.6	0
36.7	0
36.8	0
36.9	0
37	0
37.1	0
37.2	0
37.3	0
37.4	0
37.5	0
37.6	0
37.7	0
37.8	0
37.9	0
38	0
38.1	0
38.2	0
38.3	0
38.4	0
38.5	0
38.6	0
38.7	0
38.8	0
38.9	0
39	0
39.1	0
39.2	0
39.3	0
39.4	0
39.5	0
39.6	0
39.7	0
39.8	0
39.9	0
40	0
40.1	0
40.2	0
40.3	0
40.4	0
40.5	0
40.6	0
40.7	0
40.8	0
40.9	0
41	0
41.1	0
41.2	0
41.3	0
41.4	0
41.5	0
41.6	0
41.7	0
41.8	0
41.9	0
42	0
42.1	0
42.2	0
42.3	0
42.4	0
42.5	0
42.6	0
42.7	0
42.8	0
42.9	0
43	0
43.1	0
43.2	0
43.3	0
43.4	0
43.5	0
43.6	0
43.7	0
43.8	0
43.9	0
44	0
44.1	0
44.2	0
44.3	0
44.4	0
44.5	0
44.6	0
44.7	0
44.8	0
44.9	0
45	0
45.1	0
45.2	0
45.3	0
45.4	0
45.5	0
45.6	0
45.7	0
45.8	0
45.9	0
46	0
46.1	0
46.2	0
46.3	0
46.4	0
46.5	0
46.6	0
46.7	0
46.8	0
46.9	0
47	0
47.1	0
47.2	0
47.3	0
47.4	0
47.5	0
47.6	0
47.7	0
47.8	0
47.9	0
48	0
48.1	0
48.2	0
48.3	0
48.4	0
48.5	0
48.6	0
48.7	0
48.8	0
48.9	0
49	0
49.1	0
49.2	0
49.3	0
49.4	0
49.5	0
49.6	0
49.7	0
49.8	0
49.9	0
50	0
50.1	0
50.2	0
50.3	0
50.4	0
50.5	0
50.6	0
50.7	0
50.8	0
50.9	0
51	0
51.1	0
51.2	0
51.3	0
51.4	0
51.5	0
51.6	0
51.7	0
51.8	0
51.9	0
52	0
52.1	0
52.2	0
52.3	0
52.4	0
52.5	0
52.6	0
52.7	0
52.8	0
52.9	0
53	0
53.1	0
53.2	0
53.3	0
53.4	0
53.5	0
53.6	0
53.7	0
53.8	0
53.9	0
54	0
54.1	0
54.2	0
54.3	0
54.4	0
54.5	0
54.6	0
54.7	0
54.8	0
54.9	0
55	0
55.1	0
55.2	0
55.3	0
55.4	0
55.5	0
55.6	0
55.7	0
55.8	0
55.9	0
56	0
56.1	0
56.2	0
56.3	0
56.4	0
56.5	0
56.6	0
56.7	0
56.8	0
56.9	0
57	0
57.1	0
57.2	0
57.3	0
57.4	0
57.5	0
57.6	0
57.7	0
57.8	0
57.9	0
58	0
58.1	0
58.2	0
58.3	0
58.4	0
58.5	0
58.6	0
58.7	0
58.8	0
58.9	0
59	0
59.1	0
59.2	0
59.3	0
59.4	0
59.5	0
59.6	0
59.7	0
59.8	0
59.9	0
60	0
60.1	0
60.2	0
60.3	0
60.4	0
60.5	0
60.6	0
60.7	0
60.8	0
60.9	0
61	0
61.1	0
61.2	0
61.3	0
61.4	0
61.5	0
61.6	0
61.7	0
61.8	0
61.9	0
62	0
62.1	0
62.2	0
62.3	0
62.4	0
62.5	0
62.6	0
62.7	0
62.8	0
62.9	0
63	0
63.1	0
63.2	0
63.3	0
63.4	0
63.5	0
63.6	0
63.7	0
63.8	0
63.9	0
64	0
64.1	0
64.2	0
64.3	0
64.4	0
64.5	0
64.6	0
64.7	0
64.8	0
64.9	0
65	0
65.1	0
65.2	0
65.3	0
65.4	0
65.5	0
65.6	0
65.7	0
65.8	0
65.9	0
66	0
66.1	0
66.2	0
66.3	0
66.4	0
66.5	0
66.6	0
66.7	0
66.8	0
66.9	0
67	0
67.1	0
67.2	0
67.3	0
67.4	0
67.5	0
67.6	0
67.7	0
67.8	0
67.9	0
68	0
68.1	0
68.2	0
68.3	0
68.4	0
68.5	0
68.6	0
68.7	0
68.8	0
68.9	0
69	0
69.1	0
69.2	0
69.3	0
69.4	0
69.5	0
69.6	0
69.7	0
69.8	0
69.9	0
70	0
70.1	0
70.2	0
70.3	0
70.4	0
70.5	0
70.6	0
70.7	0
70.8	0
70.9	0
71	0
71.1	0
71.2	0
71.3	0
71.4	0
71.5	0
71.6	0
71.7	0
71.8	0
71.9	0
72	0
72.1	0
72.2	0
72.3	0
72.4	0
72.5	0
72.6	0
72.7	0
72.8	0
72.9	0
73	0
73.1	0
73.2	0
73.3	0
73.4	0
73.5	0
73.6	0
73.7	0
73.8	0
73.9	0
74	0
74.1	0
74.2	0
74.3	0
74.4	0
74.5	0
74.6	0
74.7	0
74.8	0
74.9	0
75	0
75.1	0
75.2	0
75.3	0
75.4	0
75.5	0
75.6	0
75.7	0
75.8	0
75.9	0
76	0
76.1	0
76.2	0
76.3	0
76.4	0
76.5	0
76.6	0
76.7	0
76.8	0
76.9	0
77	0
77.1	0
77.2	0
77.3	0
77.4	0
77.5	0
77.6	0
77.7	0
77.8	0
77.9	0
78	0
78.1	0
78.2	0
78.3	0
78.4	0
78.5	0
78.6	0
78.7	0
78.8	0
78.9	0
79	0
79.1	0
79.2	0
79.3	0
79.4	0
79.5	0
79.6	0
79.7	0
79.8	0
79.9	0
80	0
80.1	0
80.2	0
80.3	0
80.4	0
80.5	0
80.6	0
80.7	0
80.8	0
80.9	0
81	0
81.1	0
81.2	0
81.3	0
81.4	0
81.5	0
81.6	0
81.7	0
81.8	0
81.9	0
82	0
82.1	0
82.2	0
82.3	0
82.4	0
82.5	0
82.6	0
82.7	0
82.8	0
82.9	0
83	0
83.1	0
83.2	0
83.3	0
83.4	0
83.5	0
83.6	0
83.7	0
83.8	0
83.9	0
84	0
84.1	0
84.2	0
84.3	0
84.4	0
84.5	0
84.6	0
84.7	0
84.8	0
84.9	0
85	0
85.1	0
85.2	0
85.3	0
85.4	0
85.5	0
85.6	0
85.7	0
85.8	0
85.9	0
86	0
86.1	0
86.2	0
86.3	0
86.4	0
86.5	0
86.6	0
86.7	0
86.8	0
86.9	0
87	0
87.1	0
87.2	0
87.3	0
87.4	0
87.5	0
87.6	0
87.7	0
87.8	0
87.9	0
88	0
88.1	0
88.2	0
88.3	0
88.4	0
88.5	0
88.6	0
88.7	0
88.8	0
88.9	0
89	0
89.1	0
89.2	0
89.3	0
89.4	0
89.5	0
89.6	0
89.7	0
89.8	0
89.9	0
90	0
90.1	0
90.2	0
90.3	0
90.4	0
90.5	0
90.6	0
90.7	0
90.8	0
90.9	0
91	0
91.1	0
91.2	0
91.3	0
91.4	0
91.5	0
91.6	0
91.7	0
91.8	0
91.9	0
92	0
92.1	0
92.2	0
92.3	0
92.4	0
92.5	0
92.6	0
92.7	0
92.8	0
92.9	0
93	0
93.1	0
93.2	0
93.3	0
93.4	0
93.5	0
93.6	0
93.7	0
93.8	0
93.9	0
94	0
94.1	0
94.2	0
94.3	0
94.4	0
94.5	0
94.6	0
94.7	0
94.8	0
94.9	0
95	0
95.1	0
95.2	0
95.3	0
95.4	0
95.5	0
95.6	0
95.7	0
95.8	0
95.9	0
96	0
96.1	0
96.2	0
96.3	0
96.4	0
96.5	0
96.6	0
96.7	0
96.8	0
96.9	0
97	0
97.1	0
97.2	0
97.3	0
97.4	0
97.5	0
97.6	0
97.7	0
97.8	0
97.9	0
98	0
98.1	0
98.2	0
98.3	0
98.4	0
98.5	0
98.6	0
98.7	0
98.8	0
98.9	0
99	0
99.1	0
99.2	0
99.3	0
99.4	0
99.5	0
99.6	0
99.7	0
99.8	0
99.9	0
100	0
100.1	8e-05
100.2	0.00026
100.3	0.00078
100.4	0.00164
100.5	0.003
100.6	0.0045
100.7	0.00624
100.8	0.00788
100.9	0.01012
101	0.01268
101.1	0.0154
101.2	0.01776
101.3	0.02018
101.4	0.0229
101.5	0.02558
101.6	0.02818
101.7	0.03132
101.8	0.03426
101.9	0.03734
102	0.0407
102.1	0.044
102.2	0.04766
102.3	0.0511
102.4	0.05436
102.5	0.05778
102.6	0.06132
102.7	0.06454
102.8	0.06764
102.9	0.07096
103	0.0739
103.1	0.0767
103.2	0.07986
103.3	0.08344
103.4	0.08688
103.5	0.0902
103.6	0.09354
103.7	0.09682
103.8	0.09978
103.9	0.10296
104	0.10574
104.1	0.10834
104.2	0.1114
104.3	0.11378
104.4	0.11678
104.5	0.11952
104.6	0.12248
104.7	0.12512
104.8	0.1277
104.9	0.13042
105	0.13346
105.1	0.1361
105.2	0.13868
105.3	0.14136
105.4	0.14392
105.5	0.14662
105.6	0.1491
105.7	0.15202
105.8	0.15486
105.9	0.1577
106	0.16048
106.1	0.16318
106.2	0.1658
106.3	0.16858
106.4	0.17128
106.5	0.17398
106.6	0.17672
106.7	0.1795
106.8	0.18208
106.9	0.18488
107	0.18746
107.1	0.19028
107.2	0.19278
107.3	0.19544
107.4	0.19822
107.5	0.20096
107.6	0.2032
107.7	0.2058
107.8	0.20818
107.9	0.2108
108	0.21292
108.1	0.21516
108.2	0.21798
108.3	0.22026
108.4	0.2226
108.5	0.22486
108.6	0.22744
108.7	0.22994
108.8	0.2325
108.9	0.23524
109	0.23798
109.1	0.2401
109.2	0.2423
109.3	0.24512
109.4	0.24702
109.5	0.24936
109.6	0.25176
109.7	0.25412
109.8	0.2566
109.9	0.25924
110	0.26104
110.1	0.26344
110.2	0.2658
110.3	0.26834
110.4	0.27054
110.5	0.27302
110.6	0.27526
110.7	0.2778
110.8	0.28004
110.9	0.28194
111	0.28406
111.1	0.28624
111.2	0.28816
111.3	0.29024
111.4	0.29246
111.5	0.2946
111.6	0.29648
111.7	0.29886
111.8	0.3008
111.9	0.30314
112	0.30538
112.1	0.30748
112.2	0.3098
112.3	0.31206
112.4	0.31426
112.5	0.3161
112.6	0.31786
112.7	0.31956
112.8	0.32156
112.9	0.32348
113	0.32538
113.1	0.3272
113.2	0.32948
113.3	0.33164
113.4	0.33344
113.5	0.33556
113.6	0.33762
113.7	0.33956
113.8	0.34134
113.9	0.3432
114	0.34544
114.1	0.34732
114.2	0.34894
114.3	0.351
114.4	0.353
114.5	0.35508
114.6	0.357
114.7	0.35908
114.8	0.36082
114.9	0.3629
115	0.36472
115.1	0.36654
115.2	0.3683
115.3	0.36986
115.4	0.3716
115.5	0.3737
115.6	0.37582
115.7	0.37756
115.8	0.37942
115.9	0.38108
116	0.3831
116.1	0.38498
116.2	0.38666
116.3	0.3884
116.4	0.3898
116.5	0.39148
116.6	0.39348
116.7	0.39506
116.8	0.3967
116.9	0.39824
117	0.39984
117.1	0.40142
117.2	0.40314
117.3	0.4048
117.4	0.40678
117.5	0.40848
117.6	0.41016
117.7	0.41188
117.8	0.41366
117.9	0.41512
118	0.41674
118.1	0.41824
118.2	0.41978
118.3	0.42068
118.4	0.42224
118.5	0.42384
118.6	0.42552
118.7	0.42748
118.8	0.42922
118.9	0.43074
119	0.43236
119.1	0.43402
119.2	0.4356
119.3	0.43682
119.4	0.4383
119.5	0.4395
119.6	0.44136
119.7	0.44278
119.8	0.44406
119.9	0.44528
120	0.44704
120.1	0.44852
120.2	0.44954
120.3	0.4509
120.4	0.45262
120.5	0.45402
120.6	0.4555
120.7	0.45732
120.8	0.4588
120.9	0.46034
121	0.46196
121.1	0.46314
121.2	0.46458
121.3	0.46574
121.4	0.46726
121.5	0.46872
121.6	0.4701
121.7	0.4714
121.8	0.4723
121.9	0.47388
122	0.47498
122.1	0.47642
122.2	0.47776
122.3	0.4794
122.4	0.4808
122.5	0.482
122.6	0.48324
122.7	0.48448
122.8	0.4861
122.9	0.48746
123	0.4889
123.1	0.49
123.2	0.49084
123.3	0.49228
123.4	0.49332
123.5	0.4945
123.6	0.49588
123.7	0.49758
123.8	0.49904
123.9	0.5005
124	0.50172
124.1	0.50282
124.2	0.50432
124.3	0.5049
124.4	0.50642
124.5	0.50782
124.6	0.50918
124.7	0.51028
124.8	0.51164
124.9	0.5125
125	0.51376
125.1	0.51482
125.2	0.51602
125.3	0.51676
125.4	0.51776
125.5	0.51874
125.6	0.52004
125.7	0.52134
125.8	0.52252
125.9	0.52364
126	0.52474
126.1	0.52576
126.2	0.52726
126.3	0.52822
126.4	0.52906
126.5	0.53016
126.6	0.53106
126.7	0.53178
126.8	0.53286
126.9	0.53376
127	0.53444
127.1	0.53548
127.2	0.53656
127.3	0.53766
127.4	0.53908
127.5	0.54056
127.6	0.54148
127.7	0.54238
127.8	0.5434
127.9	0.54438
128	0.5453
128.1	0.54652
128.2	0.54754
128.3	0.54816
128.4	0.54938
128.5	0.55024
128.6	0.55128
128.7	0.55248
128.8	0.55342
128.9	0.55426
129	0.55532
129.1	0.55624
129.2	0.55714
129.3	0.55836
129.4	0.55954
129.5	0.56044
129.6	0.56134
129.7	0.56274
129.8	0.56384
129.9	0.5648
130	0.56566
130.1	0.56658
130.2	0.56744
130.3	0.56822
130.4	0.56868
130.5	0.56996
130.6	0.57054
130.7	0.57156
130.8	0.57262
130.9	0.57316
131	0.57418
131.1	0.57524
131.2	0.57628
131.3	0.57704
131.4	0.57814
131.5	0.5794
131.6	0.58032
131.7	0.5813
131.8	0.58216
131.9	0.58266
132	0.58366
132.1	0.58484
132.2	0.58578
132.3	0.58646
132.4	0.58726
132.5	0.58828
132.6	0.58938
132.7	0.59016
132.8	0.59094
132.9	0.59178
133	0.5927
133.1	0.59362
133.2	0.59458
133.3	0.59522
133.4	0.59574
133.5	0.59692
133.6	0.59792
133.7	0.59908
133.8	0.60006
133.9	0.60082
134	0.60172
134.1	0.6026
134.2	0.6034
134.3	0.60408
134.4	0.60458
134.5	0.60518
134.6	0.60572
134.7	0.60634
134.8	0.60724
134.9	0.60802
135	0.60894
135.1	0.60984
135.2	0.61058
135.3	0.61136
135.4	0.61218
135.5	0.61292
135.6	0.61346
135.7	0.61422
135.8	0.61474
135.9	0.61568
136	0.61634
136.1	0.6172
136.2	0.61758
136.3	0.61858
136.4	0.61936
136.5	0.62
136.6	0.62044
136.7	0.62128
136.8	0.62168
136.9	0.6224
137	0.62336
137.1	0.62404
137.2	0.6249
137.3	0.62584
137.4	0.62656
137.5	0.62726
137.6	0.62782
137.7	0.62838
137.8	0.62884
137.9	0.62978
138	0.6302
138.1	0.63106
138.2	0.6317
138.3	0.63226
138.4	0.6331
138.5	0.63366
138.6	0.6348
138.7	0.63526
138.8	0.6361
138.9	0.63674
139	0.63778
139.1	0.63864
139.2	0.63932
139.3	0.63982
139.4	0.6406
139.5	0.6414
139.6	0.6419
139.7	0.6427
139.8	0.64346
139.9	0.64394
140	0.64456
140.1	0.64528
140.2	0.64586
140.3	0.64622
140.4	0.64702
140.5	0.6478
140.6	0.64832
140.7	0.649
140.8	0.6494
140.9	0.65006
141	0.65094
141.1	0.6518
141.2	0.65236
141.3	0.65302
141.4	0.6536
141.5	0.65392
141.6	0.65454
141.7	0.65494
141.8	0.65532
141.9	0.6558
142	0.65626
142.1	0.65676
142.2	0.65714
142.3	0.65796
142.4	0.65876
142.5	0.65928
142.6	0.66006
142.7	0.6607
142.8	0.66118
142.9	0.6617
143	0.66212
143.1	0.66308
143.2	0.6635
143.3	0.66402
143.4	0.6645
143.5	0.66502
143.6	0.66538
143.7	0.6659
143.8	0.6665
143.9	0.66726
144	0.66768
144.1	0.66794
144.2	0.66852
144.3	0.66902
144.4	0.6699
144.5	0.67048
144.6	0.6706
144.7	0.671
144.8	0.67144
144.9	0.67194
145	0.67238
145.1	0.67288
145.2	0.67342
145.3	0.67404
145.4	0.67472
145.5	0.6752
145.6	0.6758
145.7	0.6765
145.8	0.67726
145.9	0.67782
146	0.6785
146.1	0.67864
146.2	0.6791
146.3	0.67938
146.4	0.67994
146.5	0.68068
146.6	0.68142
146.7	0.68176
146.8	0.6821
146.9	0.68264
147	0.6831
147.1	0.6833
147.2	0.6839
147.3	0.68432
147.4	0.68478
147.5	0.68504
147.6	0.68576
147.7	0.68626
147.8	0.68666
147.9	0.68726
148	0.68738
148.1	0.68778
148.2	0.68814
148.3	0.68894
148.4	0.68954
148.5	0.68976
148.6	0.69048
148.7	0.69098
148.8	0.69144
148.9	0.6916
149	0.69188
149.1	0.69236
149.2	0.69274
149.3	0.69344
149.4	0.69362
149.5	0.69422
149.6	0.69472
149.7	0.69458
149.8	0.69496
149.9	0.69548
150	0.69582
150.1	0.69622
150.2	0.69636
150.3	0.6965
150.4	0.69686
150.5	0.6972
150.6	0.69774
150.7	0.69794
150.8	0.6983
150.9	0.69852
151	0.69882
151.1	0.69946
151.2	0.69984
151.3	0.69994
151.4	0.70018
151.5	0.70074
151.6	0.7014
151.7	0.70184
151.8	0.70206
151.9	0.7024
152	0.7028
152.1	0.70344
152.2	0.70372
152.3	0.70402
152.4	0.70416
152.5	0.70462
152.6	0.70492
152.7	0.70532
152.8	0.70504
152.9	0.70518
153	0.70556
153.1	0.7058
153.2	0.70626
153.3	0.70636
153.4	0.70646
153.5	0.7069
153.6	0.7075
153.7	0.7078
153.8	0.70782
153.9	0.70776
154	0.7081
154.1	0.70858
154.2	0.70886
154.3	0.70914
154.4	0.70906
154.5	0.70938
154.6	0.7096
154.7	0.70986
154.8	0.71014
154.9	0.71042
155	0.71066
155.1	0.71104
155.2	0.71132
155.3	0.71174
155.4	0.71208
155.5	0.71224
155.6	0.71244
155.7	0.71294
155.8	0.71302
155.9	0.71344
156	0.71362
156.1	0.71398
156.2	0.71434
156.3	0.71468
156.4	0.71504
156.5	0.71532
156.6	0.71608
156.7	0.71628
156.8	0.71664
156.9	0.71676
157	0.71698
157.1	0.71724
157.2	0.71774
157.3	0.71784
157.4	0.71818
157.5	0.71858
157.6	0.7189
157.7	0.71934
157.8	0.71952
157.9	0.71956
158	0.7198
158.1	0.72022
158.2	0.72012
158.3	0.72068
158.4	0.72076
158.5	0.72084
158.6	0.72108
158.7	0.72112
158.8	0.72168
158.9	0.72202
159	0.72204
159.1	0.72212
159.2	0.7222
159.3	0.72228
159.4	0.72256
159.5	0.72282
159.6	0.72324
159.7	0.72358
159.8	0.72378
159.9	0.72392
160	0.72448
160.1	0.725
160.2	0.7252
160.3	0.7254
160.4	0.72578
160.5	0.72606
160.6	0.72626
160.7	0.72664
160.8	0.72676
160.9	0.72706
161	0.72726
161.1	0.72742
161.2	0.7274
161.3	0.72762
161.4	0.7277
161.5	0.72766
161.6	0.72798
161.7	0.72808
161.8	0.72822
161.9	0.72848
162	0.72894
162.1	0.72908
162.2	0.72938
162.3	0.72988
162.4	0.72986
162.5	0.73032
162.6	0.73048
162.7	0.73086
162.8	0.73108
162.9	0.73134
163	0.73146
163.1	0.73134
163.2	0.73132
163.3	0.73128
163.4	0.7315
163.5	0.73188
163.6	0.73222
163.7	0.73256
163.8	0.73272
163.9	0.73322
164	0.73298
164.1	0.73292
164.2	0.73308
164.3	0.73372
164.4	0.73386
164.5	0.73382
164.6	0.73374
164.7	0.734
164.8	0.73408
164.9	0.73442
165	0.73476
165.1	0.73492
165.2	0.73502
165.3	0.7352
165.4	0.73518
165.5	0.73568
165.6	0.73616
165.7	0.7365
165.8	0.73644
165.9	0.73678
166	0.73726
166.1	0.73754
166.2	0.73806
166.3	0.73814
166.4	0.73808
166.5	0.73818
166.6	0.73822
166.7	0.73846
166.8	0.73836
166.9	0.7384
167	0.73896
167.1	0.73914
167.2	0.73922
167.3	0.73932
167.4	0.73948
167.5	0.7399
167.6	0.7402
167.7	0.74032
167.8	0.7404
167.9	0.74116
168	0.7413
168.1	0.74126
168.2	0.7418
168.3	0.74176
168.4	0.7419
168.5	0.742
168.6	0.74212
168.7	0.7421
168.8	0.74202
168.9	0.7423
169	0.74262
169.1	0.74284
169.2	0.74284
169.3	0.7431
169.4	0.74344
169.5	0.74356
169.6	0.74362
169.7	0.74392
169.8	0.74426
169.9	0.74422
170	0.7447
170.1	0.74462
170.2	0.74518
170.3	0.7451
170.4	0.74526
170.5	0.74508
170.6	0.7453
170.7	0.7455
170.8	0.74556
170.9	0.7458
171	0.74584
171.1	0.74578
171.2	0.7461
171.3	0.74598
171.4	0.74586
171.5	0.74588
171.6	0.74582
171.7	0.74572
171.8	0.74578
171.9	0.74582
172	0.74614
172.1	0.74632
172.2	0.74616
172.3	0.74624
172.4	0.7463
172.5	0.74614
172.6	0.74648
172.7	0.74656
172.8	0.74702
172.9	0.74714
173	0.74742
173.1	0.74736
173.2	0.74744
173.3	0.74756
173.4	0.7477
173.5	0.74772
173.6	0.74802
173.7	0.748
173.8	0.74814
173.9	0.74794
174	0.74796
174.1	0.74836
174.2	0.74862
174.3	0.74852
174.4	0.74876
174.5	0.7489
174.6	0.74912
174.7	0.74936
174.8	0.74956
174.9	0.7497
175	0.74976
175.1	0.74978
175.2	0.74986
175.3	0.74992
175.4	0.75054
175.5	0.75052
175.6	0.7508
175.7	0.75106
175.8	0.7511
175.9	0.75138
176	0.75124
176.1	0.75102
176.2	0.75102
176.3	0.7513
176.4	0.75178
176.5	0.75214
176.6	0.75204
176.7	0.75238
176.8	0.75214
176.9	0.7525
177	0.75244
177.1	0.75264
177.2	0.75256
177.3	0.75276
177.4	0.75312
177.5	0.75294
177.6	0.75278
177.7	0.75318
177.8	0.75342
177.9	0.75358
178	0.75368
178.1	0.75398
178.2	0.75406
178.3	0.75406
178.4	0.75446
178.5	0.75456
178.6	0.75506
178.7	0.75488
178.8	0.75504
178.9	0.75522
179	0.75544
179.1	0.75578
179.2	0.75594
179.3	0.75616
179.4	0.75624
179.5	0.75642
179.6	0.75674
179.7	0.75686
179.8	0.75682
179.9	0.75688
180	0.7571
180.1	0.7571
180.2	0.7574
180.3	0.7577
180.4	0.75756
180.5	0.75768
180.6	0.7581
180.7	0.75806
180.8	0.75788
180.9	0.75806
181	0.75836
181.1	0.75854
181.2	0.75842
181.3	0.75848
181.4	0.75866
181.5	0.7588
181.6	0.7589
181.7	0.75916
181.8	0.75898
181.9	0.75918
182	0.75958
182.1	0.75938
182.2	0.75918
182.3	0.75904
182.4	0.75922
182.5	0.75928
182.6	0.75928
182.7	0.75974
182.8	0.75966
182.9	0.75978
183	0.75994
183.1	0.7599
183.2	0.76
183.3	0.75978
183.4	0.75968
183.5	0.75978
183.6	0.75952
183.7	0.75984
183.8	0.75984
183.9	0.75996
184	0.76016
184.1	0.76034
184.2	0.76038
184.3	0.76038
184.4	0.76046
184.5	0.76034
184.6	0.76044
184.7	0.76052
184.8	0.76082
184.9	0.7608
185	0.76102
185.1	0.76128
185.2	0.76132
185.3	0.76152
185.4	0.76124
185.5	0.76108
185.6	0.76098
185.7	0.7612
185.8	0.76142
185.9	0.76142
186	0.76156
186.1	0.76142
186.2	0.76112
186.3	0.76098
186.4	0.7612
186.5	0.761
186.6	0.76094
186.7	0.761
186.8	0.76108
186.9	0.7613
187	0.7615
187.1	0.76176
187.2	0.76188
187.3	0.76178
187.4	0.7622
187.5	0.76218
187.6	0.76238
187.7	0.76274
187.8	0.76274
187.9	0.7628
188	0.76296
188.1	0.7629
188.2	0.76286
188.3	0.76282
188.4	0.76278
188.5	0.76286
188.6	0.7629
188.7	0.76276
188.8	0.7626
188.9	0.76278
189	0.76278
189.1	0.7627
189.2	0.76294
189.3	0.76286
189.4	0.76262
189.5	0.76288
189.6	0.76308
189.7	0.76308
189.8	0.76338
189.9	0.76356
190	0.76374
190.1	0.76414
190.2	0.7642
190.3	0.76434
190.4	0.76432
190.5	0.7645
190.6	0.76444
190.7	0.76442
190.8	0.76436
190.9	0.76442
191	0.76448
191.1	0.76438
191.2	0.76438
191.3	0.76438
191.4	0.76428
191.5	0.76462
191.6	0.76484
191.7	0.76472
191.8	0.76502
191.9	0.76478
192	0.76484
192.1	0.76478
192.2	0.7649
192.3	0.76508
192.4	0.76522
192.5	0.76534
192.6	0.76532
192.7	0.76526
192.8	0.76558
192.9	0.76566
193	0.76574
193.1	0.7657
193.2	0.76536
193.3	0.76552
193.4	0.76558
193.5	0.7655
193.6	0.76586
193.7	0.76584
193.8	0.7658
193.9	0.7659
194	0.76584
194.1	0.76614
194.2	0.7661
194.3	0.76622
194.4	0.76638
194.5	0.76604
194.6	0.76616
194.7	0.76628
194.8	0.7662
194.9	0.76632
195	0.76642
195.1	0.76662
195.2	0.76684
195.3	0.7667
195.4	0.76664
195.5	0.76672
195.6	0.76666
195.7	0.7668
195.8	0.76676
195.9	0.7667
196	0.7671
196.1	0.76704
196.2	0.7672
196.3	0.7673
196.4	0.7674
196.5	0.76724
196.6	0.76722
196.7	0.76724
196.8	0.76722
196.9	0.7672
197	0.76728
197.1	0.7675
197.2	0.76768
197.3	0.76788
197.4	0.76796
197.5	0.76802
197.6	0.76766
197.7	0.76776
197.8	0.76772
197.9	0.76778
198	0.7678
198.1	0.76788
198.2	0.7676
198.3	0.76796
198.4	0.768
198.5	0.7682
198.6	0.76822
198.7	0.76814
198.8	0.76816
198.9	0.76844
199	0.76846
199.1	0.76878
199.2	0.76916
199.3	0.7686
199.4	0.76836
199.5	0.76828
199.6	0.76856
199.7	0.76864
199.8	0.7687
199.9	0.76868
200	0.76862
[truncated: 14,000 more rows]
