# Supplementary material for: Bayesian inference of kinetic schemes for ion channels by Kalman filtering
Source: eLife journal article supplement (doi:10.7554/elife.62714), 2022-05-04
Supplement: fig4-data6 [file 1_Sim_N_80_Fluor_MW.xlsx]

## Sheet: 1 M
0.1	0
0.2	0
0.3	0
0.4	0
0.5	0
0.6	0
0.7	0
0.8	0
0.9	0
1	0
1.1	0
1.2	0
1.3	0
1.4	0
1.5	0
1.6	0
1.7	0
1.8	0
1.9	0
2	0
2.1	0
2.2	0
2.3	0
2.4	0
2.5	0
2.6	0
2.7	0
2.8	0
2.9	0
3	0
3.1	0
3.2	0
3.3	0
3.4	0
3.5	0
3.6	0
3.7	0
3.8	0
3.9	0
4	0
4.1	0
4.2	0
4.3	0
4.4	0
4.5	0
4.6	0
4.7	0
4.8	0
4.9	0
5	0
5.1	0
5.2	0
5.3	0
5.4	0
5.5	0
5.6	0
5.7	0
5.8	0
5.9	0
6	0
6.1	0
6.2	0
6.3	0
6.4	0
6.5	0
6.6	0
6.7	0
6.8	0
6.9	0
7	0
7.1	0
7.2	0
7.3	0
7.4	0
7.5	0
7.6	0
7.7	0
7.8	0
7.9	0
8	0
8.1	0
8.2	0
8.3	0
8.4	0
8.5	0
8.6	0
8.7	0
8.8	0
8.9	0
9	0
9.1	0
9.2	0
9.3	0
9.4	0
9.5	0
9.6	0
9.7	0
9.8	0
9.9	0
10	0
10.1	0
10.2	0
10.3	0
10.4	0
10.5	0
10.6	0
10.7	0
10.8	0
10.9	0
11	0
11.1	0
11.2	0
11.3	0
11.4	0
11.5	0
11.6	0
11.7	0
11.8	0
11.9	0
12	0
12.1	0
12.2	0
12.3	0
12.4	0
12.5	0
12.6	0
12.7	0
12.8	0
12.9	0
13	0
13.1	0
13.2	0
13.3	0
13.4	0
13.5	0
13.6	0
13.7	0
13.8	0
13.9	0
14	0
14.1	0
14.2	0
14.3	0
14.4	0
14.5	0
14.6	0
14.7	0
14.8	0
14.9	0
15	0
15.1	0
15.2	0
15.3	0
15.4	0
15.5	0
15.6	0
15.7	0
15.8	0
15.9	0
16	0
16.1	0
16.2	0
16.3	0
16.4	0
16.5	0
16.6	0
16.7	0
16.8	0
16.9	0
17	0
17.1	0
17.2	0
17.3	0
17.4	0
17.5	0
17.6	0
17.7	0
17.8	0
17.9	0
18	0
18.1	0
18.2	0
18.3	0
18.4	0
18.5	0
18.6	0
18.7	0
18.8	0
18.9	0
19	0
19.1	0
19.2	0
19.3	0
19.4	0
19.5	0
19.6	0
19.7	0
19.8	0
19.9	0
20	0
20.1	0
20.2	0
20.3	0
20.4	0
20.5	0
20.6	0
20.7	0
20.8	0
20.9	0
21	0
21.1	0
21.2	0
21.3	0
21.4	0
21.5	0
21.6	0
21.7	0
21.8	0
21.9	0
22	0
22.1	0
22.2	0
22.3	0
22.4	0
22.5	0
22.6	0
22.7	0
22.8	0
22.9	0
23	0
23.1	0
23.2	0
23.3	0
23.4	0
23.5	0
23.6	0
23.7	0
23.8	0
23.9	0
24	0
24.1	0
24.2	0
24.3	0
24.4	0
24.5	0
24.6	0
24.7	0
24.8	0
24.9	0
25	0
25.1	0
25.2	0
25.3	0
25.4	0
25.5	0
25.6	0
25.7	0
25.8	0
25.9	0
26	0
26.1	0
26.2	0
26.3	0
26.4	0
26.5	0
26.6	0
26.7	0
26.8	0
26.9	0
27	0
27.1	0
27.2	0
27.3	0
27.4	0
27.5	0
27.6	0
27.7	0
27.8	0
27.9	0
28	0
28.1	0
28.2	0
28.3	0
28.4	0
28.5	0
28.6	0
28.7	0
28.8	0
28.9	0
29	0
29.1	0
29.2	0
29.3	0
29.4	0
29.5	0
29.6	0
29.7	0
29.8	0
29.9	0
30	0
30.1	0
30.2	0
30.3	0
30.4	0
30.5	0
30.6	0
30.7	0
30.8	0
30.9	0
31	0
31.1	0
31.2	0
31.3	0
31.4	0
31.5	0
31.6	0
31.7	0
31.8	0
31.9	0
32	0
32.1	0
32.2	0
32.3	0
32.4	0
32.5	0
32.6	0
32.7	0
32.8	0
32.9	0
33	0
33.1	0
33.2	0
33.3	0
33.4	0
33.5	0
33.6	0
33.7	0
33.8	0
33.9	0
34	0
34.1	0
34.2	0
34.3	0
34.4	0
34.5	0
34.6	0
34.7	0
34.8	0
34.9	0
35	0
35.1	0
35.2	0
35.3	0
35.4	0
35.5	0
35.6	0
35.7	0
35.8	0
35.9	0
36	0
36.1	0
36.2	0
36.3	0
36.4	0
36.5	0
36.6	0
36.7	0
36.8	0
36.9	0
37	0
37.1	0
37.2	0
37.3	0
37.4	0
37.5	0
37.6	0
37.7	0
37.8	0
37.9	0
38	0
38.1	0
38.2	0
38.3	0
38.4	0
38.5	0
38.6	0
38.7	0
38.8	0
38.9	0
39	0
39.1	0
39.2	0
39.3	0
39.4	0
39.5	0
39.6	0
39.7	0
39.8	0
39.9	0
40	0
40.1	0
40.2	0
40.3	0
40.4	0
40.5	0
40.6	0
40.7	0
40.8	0
40.9	0
41	0
41.1	0
41.2	0
41.3	0
41.4	0
41.5	0
41.6	0
41.7	0
41.8	0
41.9	0
42	0
42.1	0
42.2	0
42.3	0
42.4	0
42.5	0
42.6	0
42.7	0
42.8	0
42.9	0
43	0
43.1	0
43.2	0
43.3	0
43.4	0
43.5	0
43.6	0
43.7	0
43.8	0
43.9	0
44	0
44.1	0
44.2	0
44.3	0
44.4	0
44.5	0
44.6	0
44.7	0
44.8	0
44.9	0
45	0
45.1	0
45.2	0
45.3	0
45.4	0
45.5	0
45.6	0
45.7	0
45.8	0
45.9	0
46	0
46.1	0
46.2	0
46.3	0
46.4	0
46.5	0
46.6	0
46.7	0
46.8	0
46.9	0
47	0
47.1	0
47.2	0
47.3	0
47.4	0
47.5	0
47.6	0
47.7	0
47.8	0
47.9	0
48	0
48.1	0
48.2	0
48.3	0
48.4	0
48.5	0
48.6	0
48.7	0
48.8	0
48.9	0
49	0
49.1	0
49.2	0
49.3	0
49.4	0
49.5	0
49.6	0
49.7	0
49.8	0
49.9	0
50	0
50.1	0
50.2	0
50.3	0
50.4	0
50.5	0
50.6	0
50.7	0
50.8	0
50.9	0
51	0
51.1	0
51.2	0
51.3	0
51.4	0
51.5	0
51.6	0
51.7	0
51.8	0
51.9	0
52	0
52.1	0
52.2	0
52.3	0
52.4	0
52.5	0
52.6	0
52.7	0
52.8	0
52.9	0
53	0
53.1	0
53.2	0
53.3	0
53.4	0
53.5	0
53.6	0
53.7	0
53.8	0
53.9	0
54	0
54.1	0
54.2	0
54.3	0
54.4	0
54.5	0
54.6	0
54.7	0
54.8	0
54.9	0
55	0
55.1	0
55.2	0
55.3	0
55.4	0
55.5	0
55.6	0
55.7	0
55.8	0
55.9	0
56	0
56.1	0
56.2	0
56.3	0
56.4	0
56.5	0
56.6	0
56.7	0
56.8	0
56.9	0
57	0
57.1	0
57.2	0
57.3	0
57.4	0
57.5	0
57.6	0
57.7	0
57.8	0
57.9	0
58	0
58.1	0
58.2	0
58.3	0
58.4	0
58.5	0
58.6	0
58.7	0
58.8	0
58.9	0
59	0
59.1	0
59.2	0
59.3	0
59.4	0
59.5	0
59.6	0
59.7	0
59.8	0
59.9	0
60	0
60.1	0
60.2	0
60.3	0
60.4	0
60.5	0
60.6	0
60.7	0
60.8	0
60.9	0
61	0
61.1	0
61.2	0
61.3	0
61.4	0
61.5	0
61.6	0
61.7	0
61.8	0
61.9	0
62	0
62.1	0
62.2	0
62.3	0
62.4	0
62.5	0
62.6	0
62.7	0
62.8	0
62.9	0
63	0
63.1	0
63.2	0
63.3	0
63.4	0
63.5	0
63.6	0
63.7	0
63.8	0
63.9	0
64	0
64.1	0
64.2	0
64.3	0
64.4	0
64.5	0
64.6	0
64.7	0
64.8	0
64.9	0
65	0
65.1	0
65.2	0
65.3	0
65.4	0
65.5	0
65.6	0
65.7	0
65.8	0
65.9	0
66	0
66.1	0
66.2	0
66.3	0
66.4	0
66.5	0
66.6	0
66.7	0
66.8	0
66.9	0
67	0
67.1	0
67.2	0
67.3	0
67.4	0
67.5	0
67.6	0
67.7	0
67.8	0
67.9	0
68	0
68.1	0
68.2	0
68.3	0
68.4	0
68.5	0
68.6	0
68.7	0
68.8	0
68.9	0
69	0
69.1	0
69.2	0
69.3	0
69.4	0
69.5	0
69.6	0
69.7	0
69.8	0
69.9	0
70	0
70.1	0
70.2	0
70.3	0
70.4	0
70.5	0
70.6	0
70.7	0
70.8	0
70.9	0
71	0
71.1	0
71.2	0
71.3	0
71.4	0
71.5	0
71.6	0
71.7	0
71.8	0
71.9	0
72	0
72.1	0
72.2	0
72.3	0
72.4	0
72.5	0
72.6	0
72.7	0
72.8	0
72.9	0
73	0
73.1	0
73.2	0
73.3	0
73.4	0
73.5	0
73.6	0
73.7	0
73.8	0
73.9	0
74	0
74.1	0
74.2	0
74.3	0
74.4	0
74.5	0
74.6	0
74.7	0
74.8	0
74.9	0
75	0
75.1	0
75.2	0
75.3	0
75.4	0
75.5	0
75.6	0
75.7	0
75.8	0
75.9	0
76	0
76.1	0
76.2	0
76.3	0
76.4	0
76.5	0
76.6	0
76.7	0
76.8	0
76.9	0
77	0
77.1	0
77.2	0
77.3	0
77.4	0
77.5	0
77.6	0
77.7	0
77.8	0
77.9	0
78	0
78.1	0
78.2	0
78.3	0
78.4	0
78.5	0
78.6	0
78.7	0
78.8	0
78.9	0
79	0
79.1	0
79.2	0
79.3	0
79.4	0
79.5	0
79.6	0
79.7	0
79.8	0
79.9	0
80	0
80.1	0
80.2	0
80.3	0
80.4	0
80.5	0
80.6	0
80.7	0
80.8	0
80.9	0
81	0
81.1	0
81.2	0
81.3	0
81.4	0
81.5	0
81.6	0
81.7	0
81.8	0
81.9	0
82	0
82.1	0
82.2	0
82.3	0
82.4	0
82.5	0
82.6	0
82.7	0
82.8	0
82.9	0
83	0
83.1	0
83.2	0
83.3	0
83.4	0
83.5	0
83.6	0
83.7	0
83.8	0
83.9	0
84	0
84.1	0
84.2	0
84.3	0
84.4	0
84.5	0
84.6	0
84.7	0
84.8	0
84.9	0
85	0
85.1	0
85.2	0
85.3	0
85.4	0
85.5	0
85.6	0
85.7	0
85.8	0
85.9	0
86	0
86.1	0
86.2	0
86.3	0
86.4	0
86.5	0
86.6	0
86.7	0
86.8	0
86.9	0
87	0
87.1	0
87.2	0
87.3	0
87.4	0
87.5	0
87.6	0
87.7	0
87.8	0
87.9	0
88	0
88.1	0
88.2	0
88.3	0
88.4	0
88.5	0
88.6	0
88.7	0
88.8	0
88.9	0
89	0
89.1	0
89.2	0
89.3	0
89.4	0
89.5	0
89.6	0
89.7	0
89.8	0
89.9	0
90	0
90.1	0
90.2	0
90.3	0
90.4	0
90.5	0
90.6	0
90.7	0
90.8	0
90.9	0
91	0
91.1	0
91.2	0
91.3	0
91.4	0
91.5	0
91.6	0
91.7	0
91.8	0
91.9	0
92	0
92.1	0
92.2	0
92.3	0
92.4	0
92.5	0
92.6	0
92.7	0
92.8	0
92.9	0
93	0
93.1	0
93.2	0
93.3	0
93.4	0
93.5	0
93.6	0
93.7	0
93.8	0
93.9	0
94	0
94.1	0
94.2	0
94.3	0
94.4	0
94.5	0
94.6	0
94.7	0
94.8	0
94.9	0
95	0
95.1	0
95.2	0
95.3	0
95.4	0
95.5	0
95.6	0
95.7	0
95.8	0
95.9	0
96	0
96.1	0
96.2	0
96.3	0
96.4	0
96.5	0
96.6	0
96.7	0
96.8	0
96.9	0
97	0
97.1	0
97.2	0
97.3	0
97.4	0
97.5	0
97.6	0
97.7	0
97.8	0
97.9	0
98	0
98.1	0
98.2	0
98.3	0
98.4	0
98.5	0
98.6	0
98.7	0
98.8	0
98.9	0
99	0
99.1	0
99.2	0
99.3	0
99.4	0
99.5	0
99.6	0
99.7	0
99.8	0
99.9	0
100	0
100.1	0.05
100.2	0.075
100.3	0.1125
100.4	0.18125
100.5	0.21875
100.6	0.25625
100.7	0.30625
100.8	0.31875
100.9	0.35625
101	0.35625
101.1	0.38125
101.2	0.4125
101.3	0.43125
101.4	0.475
101.5	0.51875
101.6	0.51875
101.7	0.55625
101.8	0.55625
101.9	0.575
102	0.575
102.1	0.5875
102.2	0.625
102.3	0.63125
102.4	0.625
102.5	0.625
102.6	0.64375
102.7	0.64375
102.8	0.65
102.9	0.6625
103	0.675
103.1	0.6625
103.2	0.65625
103.3	0.675
103.4	0.68125
103.5	0.65625
103.6	0.63125
103.7	0.6375
103.8	0.64375
103.9	0.65625
104	0.66875
104.1	0.66875
104.2	0.6625
104.3	0.66875
104.4	0.68125
104.5	0.68125
104.6	0.675
104.7	0.65625
104.8	0.65
104.9	0.675
105	0.66875
105.1	0.6625
105.2	0.66875
105.3	0.675
105.4	0.6875
105.5	0.68125
105.6	0.70625
105.7	0.70625
105.8	0.7125
105.9	0.69375
106	0.7
106.1	0.69375
106.2	0.7125
106.3	0.71875
106.4	0.70625
106.5	0.70625
106.6	0.69375
106.7	0.6875
106.8	0.7
106.9	0.68125
107	0.66875
107.1	0.6625
107.2	0.6625
107.3	0.65625
107.4	0.6625
107.5	0.65
107.6	0.64375
107.7	0.66875
107.8	0.68125
107.9	0.675
108	0.675
108.1	0.68125
108.2	0.69375
108.3	0.69375
108.4	0.7
108.5	0.6875
108.6	0.6875
108.7	0.7
108.8	0.7125
108.9	0.7
109	0.7125
109.1	0.70625
109.2	0.6875
109.3	0.66875
109.4	0.6625
109.5	0.66875
109.6	0.675
109.7	0.6875
109.8	0.69375
109.9	0.675
110	0.68125
110.1	0.6625
110.2	0.68125
110.3	0.6875
110.4	0.675
110.5	0.69375
110.6	0.7
110.7	0.68125
110.8	0.675
110.9	0.66875
111	0.70625
111.1	0.7
111.2	0.7
111.3	0.675
111.4	0.675
111.5	0.6625
111.6	0.65625
111.7	0.675
111.8	0.6875
111.9	0.68125
112	0.675
112.1	0.6875
112.2	0.70625
112.3	0.7125
112.4	0.70625
112.5	0.7125
112.6	0.7125
112.7	0.71875
112.8	0.70625
112.9	0.71875
113	0.71875
113.1	0.70625
113.2	0.7125
113.3	0.7125
113.4	0.71875
113.5	0.71875
113.6	0.725
113.7	0.73125
113.8	0.7375
113.9	0.73125
114	0.725
114.1	0.73125
114.2	0.725
114.3	0.7125
114.4	0.7125
114.5	0.7
114.6	0.70625
114.7	0.7125
114.8	0.70625
114.9	0.7
115	0.7
115.1	0.7
115.2	0.7
115.3	0.70625
115.4	0.71875
115.5	0.7125
115.6	0.725
115.7	0.725
115.8	0.725
115.9	0.725
116	0.7
116.1	0.6875
116.2	0.68125
116.3	0.675
116.4	0.7
116.5	0.6875
116.6	0.675
116.7	0.675
116.8	0.68125
116.9	0.675
117	0.6625
117.1	0.65625
117.2	0.66875
117.3	0.66875
117.4	0.675
117.5	0.66875
117.6	0.675
117.7	0.6625
117.8	0.65
117.9	0.65
118	0.65
118.1	0.6625
118.2	0.65
118.3	0.6375
118.4	0.65
118.5	0.65
118.6	0.65625
118.7	0.65625
118.8	0.66875
118.9	0.66875
119	0.675
119.1	0.6875
119.2	0.68125
119.3	0.7
119.4	0.70625
119.5	0.68125
119.6	0.6625
119.7	0.6625
119.8	0.675
119.9	0.69375
120	0.6875
120.1	0.69375
120.2	0.69375
120.3	0.69375
120.4	0.6875
120.5	0.68125
120.6	0.68125
120.7	0.6625
120.8	0.68125
120.9	0.6875
121	0.675
121.1	0.66875
121.2	0.69375
121.3	0.70625
121.4	0.7125
121.5	0.70625
121.6	0.7
121.7	0.7
121.8	0.69375
121.9	0.71875
122	0.71875
122.1	0.725
122.2	0.73125
122.3	0.73125
122.4	0.7375
122.5	0.74375
122.6	0.74375
122.7	0.7375
122.8	0.73125
122.9	0.73125
123	0.7375
123.1	0.7375
123.2	0.75625
123.3	0.75
123.4	0.75625
123.5	0.775
123.6	0.775
123.7	0.775
123.8	0.775
123.9	0.775
124	0.78125
124.1	0.76875
124.2	0.7625
124.3	0.75
124.4	0.75
124.5	0.7625
124.6	0.7625
124.7	0.7625
124.8	0.76875
124.9	0.7625
125	0.76875
125.1	0.75625
125.2	0.75
125.3	0.7625
125.4	0.7625
125.5	0.75625
125.6	0.7625
125.7	0.76875
125.8	0.7625
125.9	0.75
126	0.75625
126.1	0.75625
126.2	0.775
126.3	0.7625
126.4	0.75625
126.5	0.75625
126.6	0.78125
126.7	0.76875
126.8	0.76875
126.9	0.7625
127	0.76875
127.1	0.7625
127.2	0.76875
127.3	0.75625
127.4	0.74375
127.5	0.73125
127.6	0.73125
127.7	0.7375
127.8	0.75625
127.9	0.75625
128	0.75625
128.1	0.76875
128.2	0.76875
128.3	0.75
128.4	0.74375
128.5	0.725
128.6	0.73125
128.7	0.74375
128.8	0.7375
128.9	0.725
129	0.725
129.1	0.725
129.2	0.725
129.3	0.7375
129.4	0.74375
129.5	0.75625
129.6	0.75625
129.7	0.75625
129.8	0.7625
129.9	0.76875
130	0.775
130.1	0.775
130.2	0.775
130.3	0.78125
130.4	0.775
130.5	0.775
130.6	0.78125
130.7	0.7875
130.8	0.79375
130.9	0.8
131	0.8
131.1	0.79375
131.2	0.79375
131.3	0.79375
131.4	0.7875
131.5	0.7875
131.6	0.7875
131.7	0.78125
131.8	0.78125
131.9	0.78125
132	0.79375
132.1	0.79375
132.2	0.79375
132.3	0.79375
132.4	0.79375
132.5	0.8
132.6	0.80625
132.7	0.8
132.8	0.81875
132.9	0.83125
133	0.81875
133.1	0.80625
133.2	0.80625
133.3	0.81875
133.4	0.81875
133.5	0.80625
133.6	0.80625
133.7	0.8125
133.8	0.83125
133.9	0.80625
134	0.80625
134.1	0.80625
134.2	0.79375
134.3	0.78125
134.4	0.78125
134.5	0.775
134.6	0.775
134.7	0.7875
134.8	0.7875
134.9	0.7875
135	0.8
135.1	0.7875
135.2	0.7875
135.3	0.78125
135.4	0.7875
135.5	0.775
135.6	0.78125
135.7	0.78125
135.8	0.78125
135.9	0.78125
136	0.78125
136.1	0.76875
136.2	0.775
136.3	0.7625
136.4	0.7625
136.5	0.75625
136.6	0.7625
136.7	0.7625
136.8	0.775
136.9	0.78125
137	0.78125
137.1	0.78125
137.2	0.78125
137.3	0.7875
137.4	0.775
137.5	0.76875
137.6	0.775
137.7	0.78125
137.8	0.78125
137.9	0.7875
138	0.8
138.1	0.79375
138.2	0.8
138.3	0.80625
138.4	0.80625
138.5	0.80625
138.6	0.80625
138.7	0.80625
138.8	0.8
138.9	0.78125
139	0.76875
139.1	0.76875
139.2	0.76875
139.3	0.775
139.4	0.76875
139.5	0.7625
139.6	0.7625
139.7	0.75625
139.8	0.76875
139.9	0.7625
140	0.76875
140.1	0.7625
140.2	0.7625
140.3	0.7625
140.4	0.7625
140.5	0.75
140.6	0.7375
140.7	0.73125
140.8	0.73125
140.9	0.71875
141	0.73125
141.1	0.73125
141.2	0.75
141.3	0.75625
141.4	0.75625
141.5	0.75625
141.6	0.7625
141.7	0.75625
141.8	0.7625
141.9	0.7625
142	0.78125
142.1	0.79375
142.2	0.79375
142.3	0.8
142.4	0.8125
142.5	0.8125
142.6	0.8
142.7	0.8
142.8	0.7875
142.9	0.79375
143	0.80625
143.1	0.8
143.2	0.8125
143.3	0.825
143.4	0.80625
143.5	0.80625
143.6	0.8
143.7	0.79375
143.8	0.79375
143.9	0.79375
144	0.79375
144.1	0.7875
144.2	0.7625
144.3	0.75625
144.4	0.75625
144.5	0.75625
144.6	0.75625
144.7	0.76875
144.8	0.775
144.9	0.775
145	0.78125
145.1	0.775
145.2	0.775
145.3	0.775
145.4	0.78125
145.5	0.775
145.6	0.775
145.7	0.76875
145.8	0.7625
145.9	0.75625
146	0.75
146.1	0.74375
146.2	0.74375
146.3	0.7375
146.4	0.74375
146.5	0.74375
146.6	0.7625
146.7	0.75625
146.8	0.76875
146.9	0.76875
147	0.76875
147.1	0.775
147.2	0.7625
147.3	0.75625
147.4	0.75625
147.5	0.76875
147.6	0.76875
147.7	0.775
147.8	0.7625
147.9	0.75
148	0.76875
148.1	0.78125
148.2	0.7875
148.3	0.79375
148.4	0.79375
148.5	0.79375
148.6	0.79375
148.7	0.79375
148.8	0.79375
148.9	0.78125
149	0.78125
149.1	0.775
149.2	0.79375
149.3	0.79375
149.4	0.775
149.5	0.78125
149.6	0.775
149.7	0.79375
149.8	0.78125
149.9	0.78125
150	0.7625
150.1	0.75
150.2	0.75625
150.3	0.75625
150.4	0.75625
150.5	0.75625
150.6	0.775
150.7	0.7625
150.8	0.75625
150.9	0.75625
151	0.7625
151.1	0.76875
151.2	0.75625
151.3	0.75625
151.4	0.75
151.5	0.75625
151.6	0.7625
151.7	0.75625
151.8	0.7625
151.9	0.75625
152	0.75625
152.1	0.7625
152.2	0.76875
152.3	0.78125
152.4	0.78125
152.5	0.79375
152.6	0.79375
152.7	0.78125
152.8	0.78125
152.9	0.76875
153	0.7625
153.1	0.7625
153.2	0.75625
153.3	0.75625
153.4	0.74375
153.5	0.74375
153.6	0.7375
153.7	0.75
153.8	0.75
153.9	0.75
154	0.75
154.1	0.75625
154.2	0.7625
154.3	0.75
154.4	0.75
154.5	0.7375
154.6	0.75625
154.7	0.75
154.8	0.75625
154.9	0.7625
155	0.76875
155.1	0.7625
155.2	0.74375
155.3	0.75625
155.4	0.75625
155.5	0.75625
155.6	0.75
155.7	0.75
155.8	0.75
155.9	0.7375
156	0.74375
156.1	0.75
156.2	0.75
156.3	0.74375
156.4	0.74375
156.5	0.73125
156.6	0.73125
156.7	0.7375
156.8	0.73125
156.9	0.74375
157	0.75625
157.1	0.75
157.2	0.74375
157.3	0.75625
157.4	0.75
157.5	0.75625
157.6	0.74375
157.7	0.74375
157.8	0.74375
157.9	0.7375
158	0.7375
158.1	0.73125
158.2	0.7625
158.3	0.7625
158.4	0.775
158.5	0.775
158.6	0.7875
158.7	0.7875
158.8	0.775
158.9	0.76875
159	0.76875
159.1	0.7625
159.2	0.7625
159.3	0.7625
159.4	0.75625
159.5	0.75625
159.6	0.75
159.7	0.75
159.8	0.74375
159.9	0.74375
160	0.7625
160.1	0.7625
160.2	0.775
160.3	0.775
160.4	0.78125
160.5	0.78125
160.6	0.78125
160.7	0.775
160.8	0.7875
160.9	0.79375
161	0.79375
161.1	0.80625
161.2	0.80625
161.3	0.81875
161.4	0.8125
161.5	0.81875
161.6	0.79375
161.7	0.8
161.8	0.7875
161.9	0.76875
162	0.76875
162.1	0.775
162.2	0.78125
162.3	0.775
162.4	0.7875
162.5	0.79375
162.6	0.8
162.7	0.8
162.8	0.8125
162.9	0.81875
163	0.81875
163.1	0.8125
163.2	0.8
163.3	0.80625
163.4	0.8125
163.5	0.83125
163.6	0.825
163.7	0.825
163.8	0.8
163.9	0.80625
164	0.80625
164.1	0.8125
164.2	0.80625
164.3	0.8
164.4	0.8
164.5	0.8
164.6	0.8
164.7	0.8
164.8	0.78125
164.9	0.7875
165	0.79375
165.1	0.7875
165.2	0.8
165.3	0.8
165.4	0.8
165.5	0.7875
165.6	0.7875
165.7	0.78125
165.8	0.7875
165.9	0.775
166	0.76875
166.1	0.78125
166.2	0.79375
166.3	0.81875
166.4	0.8125
166.5	0.80625
166.6	0.79375
166.7	0.8
166.8	0.80625
166.9	0.79375
167	0.79375
167.1	0.8125
167.2	0.8125
167.3	0.8125
167.4	0.8125
167.5	0.8125
167.6	0.8125
167.7	0.825
167.8	0.8125
167.9	0.825
168	0.825
168.1	0.83125
168.2	0.84375
168.3	0.85
168.4	0.8375
168.5	0.8375
168.6	0.8375
168.7	0.825
168.8	0.81875
168.9	0.81875
169	0.81875
169.1	0.81875
169.2	0.8125
169.3	0.825
169.4	0.8375
169.5	0.81875
169.6	0.825
169.7	0.81875
169.8	0.81875
169.9	0.825
170	0.83125
170.1	0.825
170.2	0.81875
170.3	0.825
170.4	0.83125
170.5	0.81875
170.6	0.81875
170.7	0.7875
170.8	0.775
170.9	0.775
171	0.775
171.1	0.7875
171.2	0.79375
171.3	0.78125
171.4	0.7875
171.5	0.8
171.6	0.80625
171.7	0.8125
171.8	0.80625
171.9	0.81875
172	0.80625
172.1	0.80625
172.2	0.8125
172.3	0.8125
172.4	0.8125
172.5	0.8
172.6	0.8
172.7	0.7875
172.8	0.7875
172.9	0.8
173	0.78125
173.1	0.7875
173.2	0.7875
173.3	0.79375
173.4	0.8
173.5	0.8125
173.6	0.80625
173.7	0.81875
173.8	0.8125
173.9	0.80625
174	0.81875
174.1	0.8125
174.2	0.83125
174.3	0.8375
174.4	0.83125
174.5	0.81875
174.6	0.81875
174.7	0.81875
174.8	0.83125
174.9	0.825
175	0.825
175.1	0.81875
175.2	0.81875
175.3	0.8125
175.4	0.80625
175.5	0.79375
175.6	0.78125
175.7	0.7875
175.8	0.8
175.9	0.80625
176	0.80625
176.1	0.79375
176.2	0.79375
176.3	0.79375
176.4	0.80625
176.5	0.81875
176.6	0.84375
176.7	0.84375
176.8	0.83125
176.9	0.825
177	0.83125
177.1	0.84375
177.2	0.8375
177.3	0.8375
177.4	0.83125
177.5	0.83125
177.6	0.83125
177.7	0.84375
177.8	0.8375
177.9	0.83125
178	0.84375
178.1	0.85
178.2	0.85
178.3	0.84375
178.4	0.8375
178.5	0.83125
178.6	0.825
178.7	0.81875
178.8	0.81875
178.9	0.81875
179	0.80625
179.1	0.7875
179.2	0.8
179.3	0.79375
179.4	0.80625
179.5	0.8
179.6	0.8
179.7	0.8125
179.8	0.8
179.9	0.8
180	0.80625
180.1	0.8
180.2	0.80625
180.3	0.8
180.4	0.8
180.5	0.80625
180.6	0.80625
180.7	0.79375
180.8	0.7875
180.9	0.8
181	0.80625
181.1	0.79375
181.2	0.8
181.3	0.79375
181.4	0.8
181.5	0.8
181.6	0.8
181.7	0.80625
181.8	0.80625
181.9	0.80625
182	0.80625
182.1	0.80625
182.2	0.80625
182.3	0.81875
182.4	0.80625
182.5	0.79375
182.6	0.79375
182.7	0.775
182.8	0.775
182.9	0.78125
183	0.7875
183.1	0.78125
183.2	0.79375
183.3	0.79375
183.4	0.775
183.5	0.775
183.6	0.78125
183.7	0.78125
183.8	0.775
183.9	0.775
184	0.775
184.1	0.7875
184.2	0.79375
184.3	0.7875
184.4	0.8
184.5	0.80625
184.6	0.8
184.7	0.80625
184.8	0.8375
184.9	0.825
185	0.81875
185.1	0.8125
185.2	0.8
185.3	0.8
185.4	0.825
185.5	0.8375
185.6	0.8375
185.7	0.825
185.8	0.81875
185.9	0.8
186	0.80625
186.1	0.8
186.2	0.8125
186.3	0.8125
186.4	0.80625
186.5	0.8125
186.6	0.80625
186.7	0.80625
186.8	0.80625
186.9	0.81875
187	0.825
187.1	0.8375
187.2	0.83125
187.3	0.8375
187.4	0.85625
187.5	0.85625
187.6	0.84375
187.7	0.85
187.8	0.8375
187.9	0.825
188	0.8125
188.1	0.8125
188.2	0.81875
188.3	0.81875
188.4	0.8125
188.5	0.80625
188.6	0.8
188.7	0.80625
188.8	0.80625
188.9	0.8125
189	0.81875
189.1	0.83125
189.2	0.84375
189.3	0.825
189.4	0.8375
189.5	0.84375
189.6	0.8625
189.7	0.8625
189.8	0.8625
189.9	0.86875
190	0.8625
190.1	0.85
190.2	0.85
190.3	0.8625
190.4	0.8625
190.5	0.8625
190.6	0.88125
190.7	0.8875
190.8	0.88125
190.9	0.89375
191	0.89375
191.1	0.9
191.2	0.89375
191.3	0.90625
191.4	0.88125
191.5	0.89375
191.6	0.88125
191.7	0.875
191.8	0.88125
191.9	0.875
192	0.8625
192.1	0.86875
192.2	0.86875
192.3	0.86875
192.4	0.86875
192.5	0.86875
192.6	0.85625
192.7	0.85625
192.8	0.8625
192.9	0.85625
193	0.8375
193.1	0.83125
193.2	0.84375
193.3	0.85
193.4	0.8375
193.5	0.8375
193.6	0.8375
193.7	0.81875
193.8	0.83125
193.9	0.825
194	0.8375
194.1	0.84375
194.2	0.85625
194.3	0.85625
194.4	0.84375
194.5	0.83125
194.6	0.84375
194.7	0.85
194.8	0.8375
194.9	0.84375
195	0.85
195.1	0.83125
195.2	0.8375
195.3	0.825
195.4	0.84375
195.5	0.8375
195.6	0.825
195.7	0.825
195.8	0.81875
195.9	0.81875
196	0.8125
196.1	0.81875
196.2	0.81875
196.3	0.84375
196.4	0.8375
196.5	0.825
196.6	0.81875
196.7	0.8375
196.8	0.8375
196.9	0.83125
197	0.825
197.1	0.8125
197.2	0.8125
197.3	0.8125
197.4	0.80625
197.5	0.80625
197.6	0.80625
197.7	0.8125
197.8	0.8125
197.9	0.8125
198	0.80625
198.1	0.8
198.2	0.79375
198.3	0.80625
198.4	0.79375
198.5	0.8
198.6	0.83125
198.7	0.8375
198.8	0.83125
198.9	0.85
199	0.85625
199.1	0.8625
199.2	0.8625
199.3	0.85625
199.4	0.8625
199.5	0.86875
199.6	0.88125
199.7	0.86875
199.8	0.86875
199.9	0.86875
200	0.875
[truncated: 14,000 more rows]
