# Supplementary material for: Bayesian inference of kinetic schemes for ion channels by Kalman filtering
Source: eLife journal article supplement (doi:10.7554/elife.62714), 2022-05-04
Supplement: fig4-data6 [file 1_Sim_N_80_Strom_MW.xlsx]

## Sheet: 1 M
0.1	0
0.2	0
0.3	0
0.4	0
0.5	0
0.6	0
0.7	0
0.8	0
0.9	0
1	0
1.1	0
1.2	0
1.3	0
1.4	0
1.5	0
1.6	0
1.7	0
1.8	0
1.9	0
2	0
2.1	0
2.2	0
2.3	0
2.4	0
2.5	0
2.6	0
2.7	0
2.8	0
2.9	0
3	0
3.1	0
3.2	0
3.3	0
3.4	0
3.5	0
3.6	0
3.7	0
3.8	0
3.9	0
4	0
4.1	0
4.2	0
4.3	0
4.4	0
4.5	0
4.6	0
4.7	0
4.8	0
4.9	0
5	0
5.1	0
5.2	0
5.3	0
5.4	0
5.5	0
5.6	0
5.7	0
5.8	0
5.9	0
6	0
6.1	0
6.2	0
6.3	0
6.4	0
6.5	0
6.6	0
6.7	0
6.8	0
6.9	0
7	0
7.1	0
7.2	0
7.3	0
7.4	0
7.5	0
7.6	0
7.7	0
7.8	0
7.9	0
8	0
8.1	0
8.2	0
8.3	0
8.4	0
8.5	0
8.6	0
8.7	0
8.8	0
8.9	0
9	0
9.1	0
9.2	0
9.3	0
9.4	0
9.5	0
9.6	0
9.7	0
9.8	0
9.9	0
10	0
10.1	0
10.2	0
10.3	0
10.4	0
10.5	0
10.6	0
10.7	0
10.8	0
10.9	0
11	0
11.1	0
11.2	0
11.3	0
11.4	0
11.5	0
11.6	0
11.7	0
11.8	0
11.9	0
12	0
12.1	0
12.2	0
12.3	0
12.4	0
12.5	0
12.6	0
12.7	0
12.8	0
12.9	0
13	0
13.1	0
13.2	0
13.3	0
13.4	0
13.5	0
13.6	0
13.7	0
13.8	0
13.9	0
14	0
14.1	0
14.2	0
14.3	0
14.4	0
14.5	0
14.6	0
14.7	0
14.8	0
14.9	0
15	0
15.1	0
15.2	0
15.3	0
15.4	0
15.5	0
15.6	0
15.7	0
15.8	0
15.9	0
16	0
16.1	0
16.2	0
16.3	0
16.4	0
16.5	0
16.6	0
16.7	0
16.8	0
16.9	0
17	0
17.1	0
17.2	0
17.3	0
17.4	0
17.5	0
17.6	0
17.7	0
17.8	0
17.9	0
18	0
18.1	0
18.2	0
18.3	0
18.4	0
18.5	0
18.6	0
18.7	0
18.8	0
18.9	0
19	0
19.1	0
19.2	0
19.3	0
19.4	0
19.5	0
19.6	0
19.7	0
19.8	0
19.9	0
20	0
20.1	0
20.2	0
20.3	0
20.4	0
20.5	0
20.6	0
20.7	0
20.8	0
20.9	0
21	0
21.1	0
21.2	0
21.3	0
21.4	0
21.5	0
21.6	0
21.7	0
21.8	0
21.9	0
22	0
22.1	0
22.2	0
22.3	0
22.4	0
22.5	0
22.6	0
22.7	0
22.8	0
22.9	0
23	0
23.1	0
23.2	0
23.3	0
23.4	0
23.5	0
23.6	0
23.7	0
23.8	0
23.9	0
24	0
24.1	0
24.2	0
24.3	0
24.4	0
24.5	0
24.6	0
24.7	0
24.8	0
24.9	0
25	0
25.1	0
25.2	0
25.3	0
25.4	0
25.5	0
25.6	0
25.7	0
25.8	0
25.9	0
26	0
26.1	0
26.2	0
26.3	0
26.4	0
26.5	0
26.6	0
26.7	0
26.8	0
26.9	0
27	0
27.1	0
27.2	0
27.3	0
27.4	0
27.5	0
27.6	0
27.7	0
27.8	0
27.9	0
28	0
28.1	0
28.2	0
28.3	0
28.4	0
28.5	0
28.6	0
28.7	0
28.8	0
28.9	0
29	0
29.1	0
29.2	0
29.3	0
29.4	0
29.5	0
29.6	0
29.7	0
29.8	0
29.9	0
30	0
30.1	0
30.2	0
30.3	0
30.4	0
30.5	0
30.6	0
30.7	0
30.8	0
30.9	0
31	0
31.1	0
31.2	0
31.3	0
31.4	0
31.5	0
31.6	0
31.7	0
31.8	0
31.9	0
32	0
32.1	0
32.2	0
32.3	0
32.4	0
32.5	0
32.6	0
32.7	0
32.8	0
32.9	0
33	0
33.1	0
33.2	0
33.3	0
33.4	0
33.5	0
33.6	0
33.7	0
33.8	0
33.9	0
34	0
34.1	0
34.2	0
34.3	0
34.4	0
34.5	0
34.6	0
34.7	0
34.8	0
34.9	0
35	0
35.1	0
35.2	0
35.3	0
35.4	0
35.5	0
35.6	0
35.7	0
35.8	0
35.9	0
36	0
36.1	0
36.2	0
36.3	0
36.4	0
36.5	0
36.6	0
36.7	0
36.8	0
36.9	0
37	0
37.1	0
37.2	0
37.3	0
37.4	0
37.5	0
37.6	0
37.7	0
37.8	0
37.9	0
38	0
38.1	0
38.2	0
38.3	0
38.4	0
38.5	0
38.6	0
38.7	0
38.8	0
38.9	0
39	0
39.1	0
39.2	0
39.3	0
39.4	0
39.5	0
39.6	0
39.7	0
39.8	0
39.9	0
40	0
40.1	0
40.2	0
40.3	0
40.4	0
40.5	0
40.6	0
40.7	0
40.8	0
40.9	0
41	0
41.1	0
41.2	0
41.3	0
41.4	0
41.5	0
41.6	0
41.7	0
41.8	0
41.9	0
42	0
42.1	0
42.2	0
42.3	0
42.4	0
42.5	0
42.6	0
42.7	0
42.8	0
42.9	0
43	0
43.1	0
43.2	0
43.3	0
43.4	0
43.5	0
43.6	0
43.7	0
43.8	0
43.9	0
44	0
44.1	0
44.2	0
44.3	0
44.4	0
44.5	0
44.6	0
44.7	0
44.8	0
44.9	0
45	0
45.1	0
45.2	0
45.3	0
45.4	0
45.5	0
45.6	0
45.7	0
45.8	0
45.9	0
46	0
46.1	0
46.2	0
46.3	0
46.4	0
46.5	0
46.6	0
46.7	0
46.8	0
46.9	0
47	0
47.1	0
47.2	0
47.3	0
47.4	0
47.5	0
47.6	0
47.7	0
47.8	0
47.9	0
48	0
48.1	0
48.2	0
48.3	0
48.4	0
48.5	0
48.6	0
48.7	0
48.8	0
48.9	0
49	0
49.1	0
49.2	0
49.3	0
49.4	0
49.5	0
49.6	0
49.7	0
49.8	0
49.9	0
50	0
50.1	0
50.2	0
50.3	0
50.4	0
50.5	0
50.6	0
50.7	0
50.8	0
50.9	0
51	0
51.1	0
51.2	0
51.3	0
51.4	0
51.5	0
51.6	0
51.7	0
51.8	0
51.9	0
52	0
52.1	0
52.2	0
52.3	0
52.4	0
52.5	0
52.6	0
52.7	0
52.8	0
52.9	0
53	0
53.1	0
53.2	0
53.3	0
53.4	0
53.5	0
53.6	0
53.7	0
53.8	0
53.9	0
54	0
54.1	0
54.2	0
54.3	0
54.4	0
54.5	0
54.6	0
54.7	0
54.8	0
54.9	0
55	0
55.1	0
55.2	0
55.3	0
55.4	0
55.5	0
55.6	0
55.7	0
55.8	0
55.9	0
56	0
56.1	0
56.2	0
56.3	0
56.4	0
56.5	0
56.6	0
56.7	0
56.8	0
56.9	0
57	0
57.1	0
57.2	0
57.3	0
57.4	0
57.5	0
57.6	0
57.7	0
57.8	0
57.9	0
58	0
58.1	0
58.2	0
58.3	0
58.4	0
58.5	0
58.6	0
58.7	0
58.8	0
58.9	0
59	0
59.1	0
59.2	0
59.3	0
59.4	0
59.5	0
59.6	0
59.7	0
59.8	0
59.9	0
60	0
60.1	0
60.2	0
60.3	0
60.4	0
60.5	0
60.6	0
60.7	0
60.8	0
60.9	0
61	0
61.1	0
61.2	0
61.3	0
61.4	0
61.5	0
61.6	0
61.7	0
61.8	0
61.9	0
62	0
62.1	0
62.2	0
62.3	0
62.4	0
62.5	0
62.6	0
62.7	0
62.8	0
62.9	0
63	0
63.1	0
63.2	0
63.3	0
63.4	0
63.5	0
63.6	0
63.7	0
63.8	0
63.9	0
64	0
64.1	0
64.2	0
64.3	0
64.4	0
64.5	0
64.6	0
64.7	0
64.8	0
64.9	0
65	0
65.1	0
65.2	0
65.3	0
65.4	0
65.5	0
65.6	0
65.7	0
65.8	0
65.9	0
66	0
66.1	0
66.2	0
66.3	0
66.4	0
66.5	0
66.6	0
66.7	0
66.8	0
66.9	0
67	0
67.1	0
67.2	0
67.3	0
67.4	0
67.5	0
67.6	0
67.7	0
67.8	0
67.9	0
68	0
68.1	0
68.2	0
68.3	0
68.4	0
68.5	0
68.6	0
68.7	0
68.8	0
68.9	0
69	0
69.1	0
69.2	0
69.3	0
69.4	0
69.5	0
69.6	0
69.7	0
69.8	0
69.9	0
70	0
70.1	0
70.2	0
70.3	0
70.4	0
70.5	0
70.6	0
70.7	0
70.8	0
70.9	0
71	0
71.1	0
71.2	0
71.3	0
71.4	0
71.5	0
71.6	0
71.7	0
71.8	0
71.9	0
72	0
72.1	0
72.2	0
72.3	0
72.4	0
72.5	0
72.6	0
72.7	0
72.8	0
72.9	0
73	0
73.1	0
73.2	0
73.3	0
73.4	0
73.5	0
73.6	0
73.7	0
73.8	0
73.9	0
74	0
74.1	0
74.2	0
74.3	0
74.4	0
74.5	0
74.6	0
74.7	0
74.8	0
74.9	0
75	0
75.1	0
75.2	0
75.3	0
75.4	0
75.5	0
75.6	0
75.7	0
75.8	0
75.9	0
76	0
76.1	0
76.2	0
76.3	0
76.4	0
76.5	0
76.6	0
76.7	0
76.8	0
76.9	0
77	0
77.1	0
77.2	0
77.3	0
77.4	0
77.5	0
77.6	0
77.7	0
77.8	0
77.9	0
78	0
78.1	0
78.2	0
78.3	0
78.4	0
78.5	0
78.6	0
78.7	0
78.8	0
78.9	0
79	0
79.1	0
79.2	0
79.3	0
79.4	0
79.5	0
79.6	0
79.7	0
79.8	0
79.9	0
80	0
80.1	0
80.2	0
80.3	0
80.4	0
80.5	0
80.6	0
80.7	0
80.8	0
80.9	0
81	0
81.1	0
81.2	0
81.3	0
81.4	0
81.5	0
81.6	0
81.7	0
81.8	0
81.9	0
82	0
82.1	0
82.2	0
82.3	0
82.4	0
82.5	0
82.6	0
82.7	0
82.8	0
82.9	0
83	0
83.1	0
83.2	0
83.3	0
83.4	0
83.5	0
83.6	0
83.7	0
83.8	0
83.9	0
84	0
84.1	0
84.2	0
84.3	0
84.4	0
84.5	0
84.6	0
84.7	0
84.8	0
84.9	0
85	0
85.1	0
85.2	0
85.3	0
85.4	0
85.5	0
85.6	0
85.7	0
85.8	0
85.9	0
86	0
86.1	0
86.2	0
86.3	0
86.4	0
86.5	0
86.6	0
86.7	0
86.8	0
86.9	0
87	0
87.1	0
87.2	0
87.3	0
87.4	0
87.5	0
87.6	0
87.7	0
87.8	0
87.9	0
88	0
88.1	0
88.2	0
88.3	0
88.4	0
88.5	0
88.6	0
88.7	0
88.8	0
88.9	0
89	0
89.1	0
89.2	0
89.3	0
89.4	0
89.5	0
89.6	0
89.7	0
89.8	0
89.9	0
90	0
90.1	0
90.2	0
90.3	0
90.4	0
90.5	0
90.6	0
90.7	0
90.8	0
90.9	0
91	0
91.1	0
91.2	0
91.3	0
91.4	0
91.5	0
91.6	0
91.7	0
91.8	0
91.9	0
92	0
92.1	0
92.2	0
92.3	0
92.4	0
92.5	0
92.6	0
92.7	0
92.8	0
92.9	0
93	0
93.1	0
93.2	0
93.3	0
93.4	0
93.5	0
93.6	0
93.7	0
93.8	0
93.9	0
94	0
94.1	0
94.2	0
94.3	0
94.4	0
94.5	0
94.6	0
94.7	0
94.8	0
94.9	0
95	0
95.1	0
95.2	0
95.3	0
95.4	0
95.5	0
95.6	0
95.7	0
95.8	0
95.9	0
96	0
96.1	0
96.2	0
96.3	0
96.4	0
96.5	0
96.6	0
96.7	0
96.8	0
96.9	0
97	0
97.1	0
97.2	0
97.3	0
97.4	0
97.5	0
97.6	0
97.7	0
97.8	0
97.9	0
98	0
98.1	0
98.2	0
98.3	0
98.4	0
98.5	0
98.6	0
98.7	0
98.8	0
98.9	0
99	0
99.1	0
99.2	0
99.3	0
99.4	0
99.5	0
99.6	0
99.7	0
99.8	0
99.9	0
100	0
100.1	0
100.2	0
100.3	0
100.4	0
100.5	0
100.6	0
100.7	0
100.8	0
100.9	0
101	0
101.1	0
101.2	0
101.3	0
101.4	0
101.5	0
101.6	0
101.7	0
101.8	0
101.9	0
102	0
102.1	0
102.2	0
102.3	0
102.4	0
102.5	0
102.6	0
102.7	0.0125
102.8	0.025
102.9	0.025
103	0.025
103.1	0.025
103.2	0.025
103.3	0.025
103.4	0.025
103.5	0.025
103.6	0.025
103.7	0.025
103.8	0.025
103.9	0.025
104	0.025
104.1	0.025
104.2	0.0375
104.3	0.0375
104.4	0.0375
104.5	0.0375
104.6	0.0375
104.7	0.0375
104.8	0.0375
104.9	0.0375
105	0.0375
105.1	0.0375
105.2	0.0375
105.3	0.0375
105.4	0.0375
105.5	0.0375
105.6	0.0375
105.7	0.0375
105.8	0.0375
105.9	0.0375
106	0.0375
106.1	0.0375
106.2	0.0375
106.3	0.05
106.4	0.05
106.5	0.05
106.6	0.0625
106.7	0.0625
106.8	0.0625
106.9	0.0625
107	0.075
107.1	0.075
107.2	0.075
107.3	0.075
107.4	0.0875
107.5	0.0875
107.6	0.0875
107.7	0.0875
107.8	0.0875
107.9	0.0875
108	0.0875
108.1	0.0875
108.2	0.0875
108.3	0.0875
108.4	0.0875
108.5	0.0875
108.6	0.0875
108.7	0.0875
108.8	0.0875
108.9	0.0875
109	0.0875
109.1	0.0875
109.2	0.1
109.3	0.1
109.4	0.1
109.5	0.1
109.6	0.1
109.7	0.1
109.8	0.1
109.9	0.1
110	0.1
110.1	0.1
110.2	0.1
110.3	0.1
110.4	0.1
110.5	0.1
110.6	0.1
110.7	0.1
110.8	0.1
110.9	0.1
111	0.1
111.1	0.1
111.2	0.1125
111.3	0.1125
111.4	0.1
111.5	0.1
111.6	0.1
111.7	0.1
111.8	0.1125
111.9	0.1125
112	0.1125
112.1	0.1125
112.2	0.125
112.3	0.125
112.4	0.125
112.5	0.125
112.6	0.125
112.7	0.125
112.8	0.125
112.9	0.125
113	0.125
113.1	0.125
113.2	0.125
113.3	0.125
113.4	0.125
113.5	0.125
113.6	0.125
113.7	0.125
113.8	0.125
113.9	0.1375
114	0.15
114.1	0.15
114.2	0.15
114.3	0.1625
114.4	0.1625
114.5	0.1625
114.6	0.1625
114.7	0.1625
114.8	0.1625
114.9	0.1625
115	0.1625
115.1	0.1625
115.2	0.1625
115.3	0.1625
115.4	0.175
115.5	0.175
115.6	0.175
115.7	0.175
115.8	0.175
115.9	0.1875
116	0.1875
116.1	0.1875
116.2	0.1875
116.3	0.1875
116.4	0.1875
116.5	0.1875
116.6	0.2
116.7	0.2
116.8	0.2125
116.9	0.2125
117	0.2125
117.1	0.2125
117.2	0.2125
117.3	0.2125
117.4	0.2125
117.5	0.2125
117.6	0.2125
117.7	0.2125
117.8	0.2125
117.9	0.2125
118	0.2125
118.1	0.2125
118.2	0.2125
118.3	0.2125
118.4	0.2125
118.5	0.2125
118.6	0.225
118.7	0.225
118.8	0.225
118.9	0.225
119	0.225
119.1	0.225
119.2	0.225
119.3	0.225
119.4	0.225
119.5	0.225
119.6	0.225
119.7	0.225
119.8	0.225
119.9	0.225
120	0.225
120.1	0.225
120.2	0.225
120.3	0.225
120.4	0.225
120.5	0.225
120.6	0.225
120.7	0.225
120.8	0.225
120.9	0.225
121	0.225
121.1	0.225
121.2	0.225
121.3	0.2375
121.4	0.2375
121.5	0.2375
121.6	0.2375
121.7	0.2375
121.8	0.25
121.9	0.2375
122	0.2375
122.1	0.25
122.2	0.25
122.3	0.25
122.4	0.25
122.5	0.25
122.6	0.25
122.7	0.25
122.8	0.25
122.9	0.25
123	0.25
123.1	0.2625
123.2	0.2625
123.3	0.2625
123.4	0.2625
123.5	0.2625
123.6	0.2625
123.7	0.2625
123.8	0.2625
123.9	0.2625
124	0.2625
124.1	0.2625
124.2	0.2625
124.3	0.25
124.4	0.25
124.5	0.25
124.6	0.2375
124.7	0.25
124.8	0.25
124.9	0.25
125	0.25
125.1	0.25
125.2	0.25
125.3	0.25
125.4	0.25
125.5	0.25
125.6	0.25
125.7	0.25
125.8	0.25
125.9	0.25
126	0.25
126.1	0.2625
126.2	0.2625
126.3	0.2625
126.4	0.2625
126.5	0.2625
126.6	0.2625
126.7	0.2625
126.8	0.2625
126.9	0.2625
127	0.2625
127.1	0.2625
127.2	0.275
127.3	0.275
127.4	0.275
127.5	0.275
127.6	0.275
127.7	0.275
127.8	0.275
127.9	0.275
128	0.275
128.1	0.275
128.2	0.275
128.3	0.275
128.4	0.275
128.5	0.275
128.6	0.275
128.7	0.275
128.8	0.2875
128.9	0.2875
129	0.2875
129.1	0.2875
129.2	0.2875
129.3	0.2875
129.4	0.3
129.5	0.3
129.6	0.3
129.7	0.3
129.8	0.3
129.9	0.3
130	0.3
130.1	0.3
130.2	0.3
130.3	0.3
130.4	0.3
130.5	0.3
130.6	0.3
130.7	0.3
130.8	0.3
130.9	0.3125
131	0.3125
131.1	0.3125
131.2	0.3125
131.3	0.3125
131.4	0.3125
131.5	0.3125
131.6	0.3125
131.7	0.3125
131.8	0.3125
131.9	0.3125
132	0.3125
132.1	0.3125
132.2	0.3125
132.3	0.3125
132.4	0.3125
132.5	0.3125
132.6	0.3125
132.7	0.3125
132.8	0.3125
132.9	0.3125
133	0.3125
133.1	0.3125
133.2	0.3125
133.3	0.3125
133.4	0.3125
133.5	0.3125
133.6	0.3125
133.7	0.3125
133.8	0.3125
133.9	0.3125
134	0.3125
134.1	0.3125
134.2	0.3125
134.3	0.3125
134.4	0.3125
134.5	0.3125
134.6	0.3125
134.7	0.3125
134.8	0.3125
134.9	0.3125
135	0.3125
135.1	0.3125
135.2	0.3125
135.3	0.3125
135.4	0.3125
135.5	0.3125
135.6	0.3125
135.7	0.3125
135.8	0.325
135.9	0.325
136	0.325
136.1	0.325
136.2	0.325
136.3	0.325
136.4	0.3375
136.5	0.3375
136.6	0.3375
136.7	0.3375
136.8	0.3375
136.9	0.3375
137	0.3375
137.1	0.3375
137.2	0.3375
137.3	0.3375
137.4	0.35
137.5	0.35
137.6	0.35
137.7	0.35
137.8	0.35
137.9	0.35
138	0.35
138.1	0.35
138.2	0.35
138.3	0.35
138.4	0.35
138.5	0.35
138.6	0.35
138.7	0.35
138.8	0.35
138.9	0.35
139	0.3625
139.1	0.3625
139.2	0.3625
139.3	0.3625
139.4	0.3625
139.5	0.3625
139.6	0.3625
139.7	0.3625
139.8	0.3625
139.9	0.3625
140	0.3625
140.1	0.3625
140.2	0.3625
140.3	0.3625
140.4	0.3625
140.5	0.3625
140.6	0.3625
140.7	0.3625
140.8	0.3625
140.9	0.35
141	0.35
141.1	0.35
141.2	0.35
141.3	0.35
141.4	0.35
141.5	0.35
141.6	0.35
141.7	0.35
141.8	0.35
141.9	0.35
142	0.35
142.1	0.3625
142.2	0.3625
142.3	0.3625
142.4	0.3625
142.5	0.3625
142.6	0.3625
142.7	0.3625
142.8	0.3625
142.9	0.3625
143	0.3625
143.1	0.3625
143.2	0.3625
143.3	0.3625
143.4	0.3625
143.5	0.375
143.6	0.375
143.7	0.375
143.8	0.375
143.9	0.375
144	0.375
144.1	0.375
144.2	0.375
144.3	0.375
144.4	0.375
144.5	0.375
144.6	0.375
144.7	0.375
144.8	0.375
144.9	0.375
145	0.375
145.1	0.375
145.2	0.375
145.3	0.375
145.4	0.375
145.5	0.375
145.6	0.375
145.7	0.375
145.8	0.375
145.9	0.375
146	0.375
146.1	0.375
146.2	0.375
146.3	0.375
146.4	0.375
146.5	0.375
146.6	0.375
146.7	0.375
146.8	0.375
146.9	0.375
147	0.3875
147.1	0.3875
147.2	0.3875
147.3	0.3875
147.4	0.3875
147.5	0.3875
147.6	0.3875
147.7	0.3875
147.8	0.3875
147.9	0.3875
148	0.3875
148.1	0.3875
148.2	0.3875
148.3	0.3875
148.4	0.3875
148.5	0.3875
148.6	0.3875
148.7	0.3875
148.8	0.3875
148.9	0.3875
149	0.3875
149.1	0.3875
149.2	0.3875
149.3	0.3875
149.4	0.3875
149.5	0.3875
149.6	0.3875
149.7	0.3875
149.8	0.4
149.9	0.4
150	0.4
150.1	0.4
150.2	0.4
150.3	0.3875
150.4	0.3875
150.5	0.3875
150.6	0.3875
150.7	0.3875
150.8	0.3875
150.9	0.3875
151	0.3875
151.1	0.3875
151.2	0.3875
151.3	0.3875
151.4	0.4
151.5	0.4
151.6	0.4
151.7	0.4
151.8	0.4
151.9	0.4
152	0.4
152.1	0.4
152.2	0.3875
152.3	0.3875
152.4	0.375
152.5	0.375
152.6	0.375
152.7	0.375
152.8	0.375
152.9	0.375
153	0.375
153.1	0.375
153.2	0.3625
153.3	0.3625
153.4	0.3625
153.5	0.3625
153.6	0.3625
153.7	0.3625
153.8	0.3625
153.9	0.3625
154	0.3625
154.1	0.3625
154.2	0.3625
154.3	0.375
154.4	0.375
154.5	0.375
154.6	0.375
154.7	0.375
154.8	0.375
154.9	0.375
155	0.375
155.1	0.375
155.2	0.375
155.3	0.3625
155.4	0.3625
155.5	0.3625
155.6	0.3625
155.7	0.3625
155.8	0.3625
155.9	0.35
156	0.3625
156.1	0.3625
156.2	0.375
156.3	0.375
156.4	0.3625
156.5	0.3625
156.6	0.3625
156.7	0.3625
156.8	0.3625
156.9	0.3625
157	0.3625
157.1	0.3625
157.2	0.3625
157.3	0.3625
157.4	0.3625
157.5	0.3625
157.6	0.3625
157.7	0.3625
157.8	0.3625
157.9	0.3625
158	0.3625
158.1	0.3625
158.2	0.3625
158.3	0.3625
158.4	0.3625
158.5	0.3625
158.6	0.3625
158.7	0.3625
158.8	0.3625
158.9	0.375
159	0.375
159.1	0.375
159.2	0.375
159.3	0.375
159.4	0.375
159.5	0.375
159.6	0.375
159.7	0.375
159.8	0.3875
159.9	0.3875
160	0.4
160.1	0.4
160.2	0.4
160.3	0.4
160.4	0.4
160.5	0.4
160.6	0.4
160.7	0.4
160.8	0.4
160.9	0.4
161	0.4
161.1	0.3875
161.2	0.3875
161.3	0.3875
161.4	0.3875
161.5	0.3875
161.6	0.3875
161.7	0.3875
161.8	0.3875
161.9	0.3875
162	0.3875
162.1	0.4
162.2	0.4
162.3	0.4
162.4	0.4125
162.5	0.4125
162.6	0.4125
162.7	0.425
162.8	0.425
162.9	0.4375
163	0.4375
163.1	0.4375
163.2	0.4375
163.3	0.4375
163.4	0.4375
163.5	0.4375
163.6	0.4375
163.7	0.4375
163.8	0.4375
163.9	0.4375
164	0.4375
164.1	0.4375
164.2	0.4375
164.3	0.4375
164.4	0.4375
164.5	0.45
164.6	0.45
164.7	0.45
164.8	0.45
164.9	0.45
165	0.45
165.1	0.45
165.2	0.45
165.3	0.45
165.4	0.45
165.5	0.45
165.6	0.45
165.7	0.45
165.8	0.45
165.9	0.45
166	0.45
166.1	0.45
166.2	0.45
166.3	0.45
166.4	0.45
166.5	0.45
166.6	0.45
166.7	0.45
166.8	0.45
166.9	0.45
167	0.45
167.1	0.45
167.2	0.45
167.3	0.45
167.4	0.45
167.5	0.45
167.6	0.45
167.7	0.45
167.8	0.45
167.9	0.45
168	0.45
168.1	0.45
168.2	0.45
168.3	0.45
168.4	0.45
168.5	0.45
168.6	0.45
168.7	0.4375
168.8	0.4375
168.9	0.4375
169	0.4375
169.1	0.425
169.2	0.425
169.3	0.425
169.4	0.425
169.5	0.425
169.6	0.425
169.7	0.425
169.8	0.425
169.9	0.425
170	0.425
170.1	0.425
170.2	0.425
170.3	0.425
170.4	0.425
170.5	0.425
170.6	0.425
170.7	0.425
170.8	0.425
170.9	0.4375
171	0.4375
171.1	0.4375
171.2	0.4375
171.3	0.4375
171.4	0.4375
171.5	0.4375
171.6	0.45
171.7	0.45
171.8	0.45
171.9	0.45
172	0.45
172.1	0.45
172.2	0.45
172.3	0.45
172.4	0.45
172.5	0.4375
172.6	0.4375
172.7	0.4375
172.8	0.4375
172.9	0.4375
173	0.4375
173.1	0.4375
173.2	0.4375
173.3	0.45
173.4	0.45
173.5	0.45
173.6	0.45
173.7	0.45
173.8	0.45
173.9	0.45
174	0.45
174.1	0.45
174.2	0.4375
174.3	0.4375
174.4	0.4375
174.5	0.4375
174.6	0.4375
174.7	0.4375
174.8	0.45
174.9	0.45
175	0.45
175.1	0.45
175.2	0.45
175.3	0.45
175.4	0.45
175.5	0.45
175.6	0.4625
175.7	0.4625
175.8	0.4625
175.9	0.4625
176	0.45
176.1	0.45
176.2	0.45
176.3	0.45
176.4	0.45
176.5	0.45
176.6	0.45
176.7	0.45
176.8	0.45
176.9	0.45
177	0.45
177.1	0.45
177.2	0.45
177.3	0.45
177.4	0.45
177.5	0.45
177.6	0.45
177.7	0.45
177.8	0.45
177.9	0.45
178	0.45
178.1	0.45
178.2	0.45
178.3	0.45
178.4	0.45
178.5	0.45
178.6	0.45
178.7	0.4375
178.8	0.4375
178.9	0.4375
179	0.4375
179.1	0.4375
179.2	0.4375
179.3	0.4375
179.4	0.45
179.5	0.45
179.6	0.45
179.7	0.45
179.8	0.45
179.9	0.45
180	0.4375
180.1	0.4375
180.2	0.4375
180.3	0.4375
180.4	0.4375
180.5	0.4375
180.6	0.4375
180.7	0.4375
180.8	0.4375
180.9	0.4375
181	0.4375
181.1	0.4375
181.2	0.4375
181.3	0.4375
181.4	0.4375
181.5	0.4375
181.6	0.4375
181.7	0.4375
181.8	0.4375
181.9	0.4375
182	0.4375
182.1	0.4375
182.2	0.4375
182.3	0.4375
182.4	0.4375
182.5	0.4375
182.6	0.4375
182.7	0.4375
182.8	0.4375
182.9	0.4375
183	0.4375
183.1	0.4375
183.2	0.4375
183.3	0.4375
183.4	0.4375
183.5	0.4375
183.6	0.4375
183.7	0.4375
183.8	0.4375
183.9	0.4375
184	0.4375
184.1	0.4375
184.2	0.4375
184.3	0.4375
184.4	0.4375
184.5	0.4375
184.6	0.45
184.7	0.45
184.8	0.45
184.9	0.45
185	0.45
185.1	0.45
185.2	0.45
185.3	0.45
185.4	0.45
185.5	0.45
185.6	0.45
185.7	0.45
185.8	0.45
185.9	0.45
186	0.45
186.1	0.45
186.2	0.45
186.3	0.45
186.4	0.45
186.5	0.45
186.6	0.45
186.7	0.45
186.8	0.45
186.9	0.45
187	0.45
187.1	0.45
187.2	0.45
187.3	0.45
187.4	0.45
187.5	0.45
187.6	0.45
187.7	0.4625
187.8	0.4625
187.9	0.4625
188	0.4625
188.1	0.4625
188.2	0.4625
188.3	0.4625
188.4	0.4625
188.5	0.4625
188.6	0.4625
188.7	0.4625
188.8	0.475
188.9	0.475
189	0.475
189.1	0.475
189.2	0.475
189.3	0.475
189.4	0.475
189.5	0.475
189.6	0.475
189.7	0.475
189.8	0.475
189.9	0.475
190	0.475
190.1	0.475
190.2	0.475
190.3	0.475
190.4	0.475
190.5	0.475
190.6	0.475
190.7	0.475
190.8	0.475
190.9	0.475
191	0.475
191.1	0.475
191.2	0.475
191.3	0.475
191.4	0.475
191.5	0.4625
191.6	0.45
191.7	0.45
191.8	0.45
191.9	0.45
192	0.4625
192.1	0.475
192.2	0.4875
192.3	0.4875
192.4	0.4875
192.5	0.4875
192.6	0.4875
192.7	0.4875
192.8	0.4875
192.9	0.4875
193	0.4875
193.1	0.4875
193.2	0.4875
193.3	0.4875
193.4	0.4875
193.5	0.4875
193.6	0.4875
193.7	0.475
193.8	0.475
193.9	0.4625
194	0.4625
194.1	0.475
194.2	0.475
194.3	0.475
194.4	0.475
194.5	0.475
194.6	0.475
194.7	0.475
194.8	0.475
194.9	0.475
195	0.475
195.1	0.475
195.2	0.475
195.3	0.475
195.4	0.475
195.5	0.475
195.6	0.4875
195.7	0.4875
195.8	0.4875
195.9	0.4875
196	0.4875
196.1	0.4875
196.2	0.4875
196.3	0.4875
196.4	0.5
196.5	0.5
196.6	0.5
196.7	0.5
196.8	0.5
196.9	0.5
197	0.5
197.1	0.5125
197.2	0.525
197.3	0.525
197.4	0.525
197.5	0.525
197.6	0.525
197.7	0.525
197.8	0.525
197.9	0.525
198	0.525
198.1	0.525
198.2	0.525
198.3	0.525
198.4	0.525
198.5	0.525
198.6	0.525
198.7	0.525
198.8	0.525
198.9	0.525
199	0.5125
199.1	0.5125
199.2	0.5125
199.3	0.5125
199.4	0.5125
199.5	0.5125
199.6	0.5125
199.7	0.5125
199.8	0.5125
199.9	0.525
200	0.525
[truncated: 14,000 more rows]
