# Supplementary material for: Bayesian inference of kinetic schemes for ion channels by Kalman filtering
Source: eLife journal article supplement (doi:10.7554/elife.62714), 2022-05-04
Supplement: fig4-data6 [file 1_Sim_N_100_Fluor_MW.xlsx]

## Sheet: Tabelle1
0.1	0
0.2	0
0.3	0
0.4	0
0.5	0
0.6	0
0.7	0
0.8	0
0.9	0
1	0
1.1	0
1.2	0
1.3	0
1.4	0
1.5	0
1.6	0
1.7	0
1.8	0
1.9	0
2	0
2.1	0
2.2	0
2.3	0
2.4	0
2.5	0
2.6	0
2.7	0
2.8	0
2.9	0
3	0
3.1	0
3.2	0
3.3	0
3.4	0
3.5	0
3.6	0
3.7	0
3.8	0
3.9	0
4	0
4.1	0
4.2	0
4.3	0
4.4	0
4.5	0
4.6	0
4.7	0
4.8	0
4.9	0
5	0
5.1	0
5.2	0
5.3	0
5.4	0
5.5	0
5.6	0
5.7	0
5.8	0
5.9	0
6	0
6.1	0
6.2	0
6.3	0
6.4	0
6.5	0
6.6	0
6.7	0
6.8	0
6.9	0
7	0
7.1	0
7.2	0
7.3	0
7.4	0
7.5	0
7.6	0
7.7	0
7.8	0
7.9	0
8	0
8.1	0
8.2	0
8.3	0
8.4	0
8.5	0
8.6	0
8.7	0
8.8	0
8.9	0
9	0
9.1	0
9.2	0
9.3	0
9.4	0
9.5	0
9.6	0
9.7	0
9.8	0
9.9	0
10	0
10.1	0
10.2	0
10.3	0
10.4	0
10.5	0
10.6	0
10.7	0
10.8	0
10.9	0
11	0
11.1	0
11.2	0
11.3	0
11.4	0
11.5	0
11.6	0
11.7	0
11.8	0
11.9	0
12	0
12.1	0
12.2	0
12.3	0
12.4	0
12.5	0
12.6	0
12.7	0
12.8	0
12.9	0
13	0
13.1	0
13.2	0
13.3	0
13.4	0
13.5	0
13.6	0
13.7	0
13.8	0
13.9	0
14	0
14.1	0
14.2	0
14.3	0
14.4	0
14.5	0
14.6	0
14.7	0
14.8	0
14.9	0
15	0
15.1	0
15.2	0
15.3	0
15.4	0
15.5	0
15.6	0
15.7	0
15.8	0
15.9	0
16	0
16.1	0
16.2	0
16.3	0
16.4	0
16.5	0
16.6	0
16.7	0
16.8	0
16.9	0
17	0
17.1	0
17.2	0
17.3	0
17.4	0
17.5	0
17.6	0
17.7	0
17.8	0
17.9	0
18	0
18.1	0
18.2	0
18.3	0
18.4	0
18.5	0
18.6	0
18.7	0
18.8	0
18.9	0
19	0
19.1	0
19.2	0
19.3	0
19.4	0
19.5	0
19.6	0
19.7	0
19.8	0
19.9	0
20	0
20.1	0
20.2	0
20.3	0
20.4	0
20.5	0
20.6	0
20.7	0
20.8	0
20.9	0
21	0
21.1	0
21.2	0
21.3	0
21.4	0
21.5	0
21.6	0
21.7	0
21.8	0
21.9	0
22	0
22.1	0
22.2	0
22.3	0
22.4	0
22.5	0
22.6	0
22.7	0
22.8	0
22.9	0
23	0
23.1	0
23.2	0
23.3	0
23.4	0
23.5	0
23.6	0
23.7	0
23.8	0
23.9	0
24	0
24.1	0
24.2	0
24.3	0
24.4	0
24.5	0
24.6	0
24.7	0
24.8	0
24.9	0
25	0
25.1	0
25.2	0
25.3	0
25.4	0
25.5	0
25.6	0
25.7	0
25.8	0
25.9	0
26	0
26.1	0
26.2	0
26.3	0
26.4	0
26.5	0
26.6	0
26.7	0
26.8	0
26.9	0
27	0
27.1	0
27.2	0
27.3	0
27.4	0
27.5	0
27.6	0
27.7	0
27.8	0
27.9	0
28	0
28.1	0
28.2	0
28.3	0
28.4	0
28.5	0
28.6	0
28.7	0
28.8	0
28.9	0
29	0
29.1	0
29.2	0
29.3	0
29.4	0
29.5	0
29.6	0
29.7	0
29.8	0
29.9	0
30	0
30.1	0
30.2	0
30.3	0
30.4	0
30.5	0
30.6	0
30.7	0
30.8	0
30.9	0
31	0
31.1	0
31.2	0
31.3	0
31.4	0
31.5	0
31.6	0
31.7	0
31.8	0
31.9	0
32	0
32.1	0
32.2	0
32.3	0
32.4	0
32.5	0
32.6	0
32.7	0
32.8	0
32.9	0
33	0
33.1	0
33.2	0
33.3	0
33.4	0
33.5	0
33.6	0
33.7	0
33.8	0
33.9	0
34	0
34.1	0
34.2	0
34.3	0
34.4	0
34.5	0
34.6	0
34.7	0
34.8	0
34.9	0
35	0
35.1	0
35.2	0
35.3	0
35.4	0
35.5	0
35.6	0
35.7	0
35.8	0
35.9	0
36	0
36.1	0
36.2	0
36.3	0
36.4	0
36.5	0
36.6	0
36.7	0
36.8	0
36.9	0
37	0
37.1	0
37.2	0
37.3	0
37.4	0
37.5	0
37.6	0
37.7	0
37.8	0
37.9	0
38	0
38.1	0
38.2	0
38.3	0
38.4	0
38.5	0
38.6	0
38.7	0
38.8	0
38.9	0
39	0
39.1	0
39.2	0
39.3	0
39.4	0
39.5	0
39.6	0
39.7	0
39.8	0
39.9	0
40	0
40.1	0
40.2	0
40.3	0
40.4	0
40.5	0
40.6	0
40.7	0
40.8	0
40.9	0
41	0
41.1	0
41.2	0
41.3	0
41.4	0
41.5	0
41.6	0
41.7	0
41.8	0
41.9	0
42	0
42.1	0
42.2	0
42.3	0
42.4	0
42.5	0
42.6	0
42.7	0
42.8	0
42.9	0
43	0
43.1	0
43.2	0
43.3	0
43.4	0
43.5	0
43.6	0
43.7	0
43.8	0
43.9	0
44	0
44.1	0
44.2	0
44.3	0
44.4	0
44.5	0
44.6	0
44.7	0
44.8	0
44.9	0
45	0
45.1	0
45.2	0
45.3	0
45.4	0
45.5	0
45.6	0
45.7	0
45.8	0
45.9	0
46	0
46.1	0
46.2	0
46.3	0
46.4	0
46.5	0
46.6	0
46.7	0
46.8	0
46.9	0
47	0
47.1	0
47.2	0
47.3	0
47.4	0
47.5	0
47.6	0
47.7	0
47.8	0
47.9	0
48	0
48.1	0
48.2	0
48.3	0
48.4	0
48.5	0
48.6	0
48.7	0
48.8	0
48.9	0
49	0
49.1	0
49.2	0
49.3	0
49.4	0
49.5	0
49.6	0
49.7	0
49.8	0
49.9	0
50	0
50.1	0
50.2	0
50.3	0
50.4	0
50.5	0
50.6	0
50.7	0
50.8	0
50.9	0
51	0
51.1	0
51.2	0
51.3	0
51.4	0
51.5	0
51.6	0
51.7	0
51.8	0
51.9	0
52	0
52.1	0
52.2	0
52.3	0
52.4	0
52.5	0
52.6	0
52.7	0
52.8	0
52.9	0
53	0
53.1	0
53.2	0
53.3	0
53.4	0
53.5	0
53.6	0
53.7	0
53.8	0
53.9	0
54	0
54.1	0
54.2	0
54.3	0
54.4	0
54.5	0
54.6	0
54.7	0
54.8	0
54.9	0
55	0
55.1	0
55.2	0
55.3	0
55.4	0
55.5	0
55.6	0
55.7	0
55.8	0
55.9	0
56	0
56.1	0
56.2	0
56.3	0
56.4	0
56.5	0
56.6	0
56.7	0
56.8	0
56.9	0
57	0
57.1	0
57.2	0
57.3	0
57.4	0
57.5	0
57.6	0
57.7	0
57.8	0
57.9	0
58	0
58.1	0
58.2	0
58.3	0
58.4	0
58.5	0
58.6	0
58.7	0
58.8	0
58.9	0
59	0
59.1	0
59.2	0
59.3	0
59.4	0
59.5	0
59.6	0
59.7	0
59.8	0
59.9	0
60	0
60.1	0
60.2	0
60.3	0
60.4	0
60.5	0
60.6	0
60.7	0
60.8	0
60.9	0
61	0
61.1	0
61.2	0
61.3	0
61.4	0
61.5	0
61.6	0
61.7	0
61.8	0
61.9	0
62	0
62.1	0
62.2	0
62.3	0
62.4	0
62.5	0
62.6	0
62.7	0
62.8	0
62.9	0
63	0
63.1	0
63.2	0
63.3	0
63.4	0
63.5	0
63.6	0
63.7	0
63.8	0
63.9	0
64	0
64.1	0
64.2	0
64.3	0
64.4	0
64.5	0
64.6	0
64.7	0
64.8	0
64.9	0
65	0
65.1	0
65.2	0
65.3	0
65.4	0
65.5	0
65.6	0
65.7	0
65.8	0
65.9	0
66	0
66.1	0
66.2	0
66.3	0
66.4	0
66.5	0
66.6	0
66.7	0
66.8	0
66.9	0
67	0
67.1	0
67.2	0
67.3	0
67.4	0
67.5	0
67.6	0
67.7	0
67.8	0
67.9	0
68	0
68.1	0
68.2	0
68.3	0
68.4	0
68.5	0
68.6	0
68.7	0
68.8	0
68.9	0
69	0
69.1	0
69.2	0
69.3	0
69.4	0
69.5	0
69.6	0
69.7	0
69.8	0
69.9	0
70	0
70.1	0
70.2	0
70.3	0
70.4	0
70.5	0
70.6	0
70.7	0
70.8	0
70.9	0
71	0
71.1	0
71.2	0
71.3	0
71.4	0
71.5	0
71.6	0
71.7	0
71.8	0
71.9	0
72	0
72.1	0
72.2	0
72.3	0
72.4	0
72.5	0
72.6	0
72.7	0
72.8	0
72.9	0
73	0
73.1	0
73.2	0
73.3	0
73.4	0
73.5	0
73.6	0
73.7	0
73.8	0
73.9	0
74	0
74.1	0
74.2	0
74.3	0
74.4	0
74.5	0
74.6	0
74.7	0
74.8	0
74.9	0
75	0
75.1	0
75.2	0
75.3	0
75.4	0
75.5	0
75.6	0
75.7	0
75.8	0
75.9	0
76	0
76.1	0
76.2	0
76.3	0
76.4	0
76.5	0
76.6	0
76.7	0
76.8	0
76.9	0
77	0
77.1	0
77.2	0
77.3	0
77.4	0
77.5	0
77.6	0
77.7	0
77.8	0
77.9	0
78	0
78.1	0
78.2	0
78.3	0
78.4	0
78.5	0
78.6	0
78.7	0
78.8	0
78.9	0
79	0
79.1	0
79.2	0
79.3	0
79.4	0
79.5	0
79.6	0
79.7	0
79.8	0
79.9	0
80	0
80.1	0
80.2	0
80.3	0
80.4	0
80.5	0
80.6	0
80.7	0
80.8	0
80.9	0
81	0
81.1	0
81.2	0
81.3	0
81.4	0
81.5	0
81.6	0
81.7	0
81.8	0
81.9	0
82	0
82.1	0
82.2	0
82.3	0
82.4	0
82.5	0
82.6	0
82.7	0
82.8	0
82.9	0
83	0
83.1	0
83.2	0
83.3	0
83.4	0
83.5	0
83.6	0
83.7	0
83.8	0
83.9	0
84	0
84.1	0
84.2	0
84.3	0
84.4	0
84.5	0
84.6	0
84.7	0
84.8	0
84.9	0
85	0
85.1	0
85.2	0
85.3	0
85.4	0
85.5	0
85.6	0
85.7	0
85.8	0
85.9	0
86	0
86.1	0
86.2	0
86.3	0
86.4	0
86.5	0
86.6	0
86.7	0
86.8	0
86.9	0
87	0
87.1	0
87.2	0
87.3	0
87.4	0
87.5	0
87.6	0
87.7	0
87.8	0
87.9	0
88	0
88.1	0
88.2	0
88.3	0
88.4	0
88.5	0
88.6	0
88.7	0
88.8	0
88.9	0
89	0
89.1	0
89.2	0
89.3	0
89.4	0
89.5	0
89.6	0
89.7	0
89.8	0
89.9	0
90	0
90.1	0
90.2	0
90.3	0
90.4	0
90.5	0
90.6	0
90.7	0
90.8	0
90.9	0
91	0
91.1	0
91.2	0
91.3	0
91.4	0
91.5	0
91.6	0
91.7	0
91.8	0
91.9	0
92	0
92.1	0
92.2	0
92.3	0
92.4	0
92.5	0
92.6	0
92.7	0
92.8	0
92.9	0
93	0
93.1	0
93.2	0
93.3	0
93.4	0
93.5	0
93.6	0
93.7	0
93.8	0
93.9	0
94	0
94.1	0
94.2	0
94.3	0
94.4	0
94.5	0
94.6	0
94.7	0
94.8	0
94.9	0
95	0
95.1	0
95.2	0
95.3	0
95.4	0
95.5	0
95.6	0
95.7	0
95.8	0
95.9	0
96	0
96.1	0
96.2	0
96.3	0
96.4	0
96.5	0
96.6	0
96.7	0
96.8	0
96.9	0
97	0
97.1	0
97.2	0
97.3	0
97.4	0
97.5	0
97.6	0
97.7	0
97.8	0
97.9	0
98	0
98.1	0
98.2	0
98.3	0
98.4	0
98.5	0
98.6	0
98.7	0
98.8	0
98.9	0
99	0
99.1	0
99.2	0
99.3	0
99.4	0
99.5	0
99.6	0
99.7	0
99.8	0
99.9	0
100	0
100.1	0.075
100.2	0.13
100.3	0.16
100.4	0.205
100.5	0.25
100.6	0.27
100.7	0.295
100.8	0.33
100.9	0.37
101	0.39
101.1	0.42
101.2	0.43
101.3	0.435
101.4	0.425
101.5	0.415
101.6	0.44
101.7	0.435
101.8	0.44
101.9	0.45
102	0.47
102.1	0.475
102.2	0.475
102.3	0.51
102.4	0.495
102.5	0.49
102.6	0.51
102.7	0.495
102.8	0.52
102.9	0.53
103	0.53
103.1	0.535
103.2	0.545
103.3	0.555
103.4	0.585
103.5	0.595
103.6	0.575
103.7	0.585
103.8	0.6
103.9	0.605
104	0.615
104.1	0.615
104.2	0.61
104.3	0.62
104.4	0.62
104.5	0.615
104.6	0.62
104.7	0.625
104.8	0.625
104.9	0.635
105	0.64
105.1	0.645
105.2	0.65
105.3	0.655
105.4	0.66
105.5	0.655
105.6	0.65
105.7	0.66
105.8	0.655
105.9	0.655
106	0.645
106.1	0.635
106.2	0.665
106.3	0.66
106.4	0.67
106.5	0.67
106.6	0.68
106.7	0.67
106.8	0.67
106.9	0.68
107	0.66
107.1	0.66
107.2	0.67
107.3	0.66
107.4	0.67
107.5	0.665
107.6	0.665
107.7	0.69
107.8	0.685
107.9	0.685
108	0.68
108.1	0.675
108.2	0.7
108.3	0.7
108.4	0.675
108.5	0.66
108.6	0.66
108.7	0.655
108.8	0.655
108.9	0.665
109	0.655
109.1	0.67
109.2	0.68
109.3	0.67
109.4	0.675
109.5	0.67
109.6	0.665
109.7	0.68
109.8	0.685
109.9	0.65
110	0.655
110.1	0.66
110.2	0.655
110.3	0.64
110.4	0.65
110.5	0.645
110.6	0.635
110.7	0.635
110.8	0.63
110.9	0.635
111	0.645
111.1	0.66
111.2	0.655
111.3	0.635
111.4	0.65
111.5	0.65
111.6	0.66
111.7	0.675
111.8	0.67
111.9	0.685
112	0.675
112.1	0.68
112.2	0.685
112.3	0.695
112.4	0.7
112.5	0.695
112.6	0.685
112.7	0.68
112.8	0.67
112.9	0.665
113	0.655
113.1	0.665
113.2	0.68
113.3	0.67
113.4	0.67
113.5	0.665
113.6	0.67
113.7	0.665
113.8	0.665
113.9	0.665
114	0.685
114.1	0.705
114.2	0.695
114.3	0.69
114.4	0.68
114.5	0.69
114.6	0.69
114.7	0.68
114.8	0.685
114.9	0.705
115	0.715
115.1	0.72
115.2	0.71
115.3	0.715
115.4	0.695
115.5	0.7
115.6	0.715
115.7	0.72
115.8	0.72
115.9	0.71
116	0.7
116.1	0.68
116.2	0.685
116.3	0.68
116.4	0.67
116.5	0.675
116.6	0.685
116.7	0.69
116.8	0.695
116.9	0.7
117	0.685
117.1	0.675
117.2	0.675
117.3	0.67
117.4	0.67
117.5	0.68
117.6	0.68
117.7	0.675
117.8	0.68
117.9	0.695
118	0.705
118.1	0.7
118.2	0.705
118.3	0.715
118.4	0.72
118.5	0.735
118.6	0.75
118.7	0.74
118.8	0.75
118.9	0.745
119	0.745
119.1	0.75
119.2	0.745
119.3	0.74
119.4	0.73
119.5	0.74
119.6	0.74
119.7	0.74
119.8	0.75
119.9	0.75
120	0.745
120.1	0.75
120.2	0.76
120.3	0.74
120.4	0.76
120.5	0.77
120.6	0.765
120.7	0.765
120.8	0.77
120.9	0.775
121	0.775
121.1	0.78
121.2	0.785
121.3	0.785
121.4	0.77
121.5	0.775
121.6	0.755
121.7	0.775
121.8	0.75
121.9	0.745
122	0.75
122.1	0.75
122.2	0.735
122.3	0.73
122.4	0.715
122.5	0.72
122.6	0.72
122.7	0.735
122.8	0.72
122.9	0.71
123	0.72
123.1	0.73
123.2	0.74
123.3	0.735
123.4	0.73
123.5	0.74
123.6	0.74
123.7	0.75
123.8	0.73
123.9	0.735
124	0.735
124.1	0.735
124.2	0.735
124.3	0.73
124.4	0.735
124.5	0.74
124.6	0.745
124.7	0.73
124.8	0.73
124.9	0.73
125	0.725
125.1	0.735
125.2	0.745
125.3	0.74
125.4	0.745
125.5	0.75
125.6	0.755
125.7	0.75
125.8	0.765
125.9	0.76
126	0.75
126.1	0.745
126.2	0.75
126.3	0.765
126.4	0.765
126.5	0.75
126.6	0.735
126.7	0.735
126.8	0.73
126.9	0.72
127	0.7
127.1	0.72
127.2	0.71
127.3	0.72
127.4	0.725
127.5	0.735
127.6	0.74
127.7	0.75
127.8	0.76
127.9	0.75
128	0.745
128.1	0.755
128.2	0.76
128.3	0.765
128.4	0.77
128.5	0.77
128.6	0.765
128.7	0.77
128.8	0.76
128.9	0.755
129	0.75
129.1	0.76
129.2	0.78
129.3	0.77
129.4	0.78
129.5	0.78
129.6	0.77
129.7	0.775
129.8	0.77
129.9	0.755
130	0.77
130.1	0.765
130.2	0.77
130.3	0.77
130.4	0.765
130.5	0.755
130.6	0.76
130.7	0.76
130.8	0.755
130.9	0.765
131	0.745
131.1	0.75
131.2	0.775
131.3	0.775
131.4	0.77
131.5	0.775
131.6	0.775
131.7	0.765
131.8	0.775
131.9	0.775
132	0.77
132.1	0.78
132.2	0.775
132.3	0.76
132.4	0.77
132.5	0.77
132.6	0.775
132.7	0.77
132.8	0.775
132.9	0.78
133	0.775
133.1	0.79
133.2	0.79
133.3	0.785
133.4	0.775
133.5	0.765
133.6	0.775
133.7	0.8
133.8	0.805
133.9	0.82
134	0.82
134.1	0.815
134.2	0.8
134.3	0.8
134.4	0.8
134.5	0.8
134.6	0.82
134.7	0.81
134.8	0.81
134.9	0.81
135	0.805
135.1	0.8
135.2	0.81
135.3	0.81
135.4	0.81
135.5	0.8
135.6	0.805
135.7	0.795
135.8	0.795
135.9	0.8
136	0.8
136.1	0.79
136.2	0.785
136.3	0.785
136.4	0.785
136.5	0.78
136.6	0.78
136.7	0.77
136.8	0.775
136.9	0.775
137	0.765
137.1	0.765
137.2	0.76
137.3	0.76
137.4	0.745
137.5	0.745
137.6	0.745
137.7	0.745
137.8	0.765
137.9	0.765
138	0.76
138.1	0.765
138.2	0.775
138.3	0.765
138.4	0.77
138.5	0.76
138.6	0.76
138.7	0.765
138.8	0.775
138.9	0.77
139	0.77
139.1	0.77
139.2	0.775
139.3	0.775
139.4	0.775
139.5	0.775
139.6	0.78
139.7	0.755
139.8	0.765
139.9	0.76
140	0.755
140.1	0.75
140.2	0.76
140.3	0.745
140.4	0.755
140.5	0.76
140.6	0.76
140.7	0.755
140.8	0.76
140.9	0.77
141	0.76
141.1	0.775
141.2	0.77
141.3	0.775
141.4	0.785
141.5	0.785
141.6	0.775
141.7	0.765
141.8	0.77
141.9	0.785
142	0.78
142.1	0.78
142.2	0.79
142.3	0.795
142.4	0.805
142.5	0.825
142.6	0.82
142.7	0.82
142.8	0.805
142.9	0.8
143	0.805
143.1	0.81
143.2	0.8
143.3	0.795
143.4	0.785
143.5	0.79
143.6	0.79
143.7	0.79
143.8	0.815
143.9	0.805
144	0.815
144.1	0.815
144.2	0.815
144.3	0.815
144.4	0.805
144.5	0.795
144.6	0.81
144.7	0.81
144.8	0.815
144.9	0.815
145	0.815
145.1	0.81
145.2	0.81
145.3	0.815
145.4	0.81
145.5	0.815
145.6	0.81
145.7	0.81
145.8	0.81
145.9	0.805
146	0.795
146.1	0.785
146.2	0.79
146.3	0.8
146.4	0.795
146.5	0.79
146.6	0.78
146.7	0.78
146.8	0.785
146.9	0.795
147	0.805
147.1	0.815
147.2	0.805
147.3	0.8
147.4	0.805
147.5	0.79
147.6	0.795
147.7	0.785
147.8	0.785
147.9	0.785
148	0.785
148.1	0.795
148.2	0.8
148.3	0.8
148.4	0.81
148.5	0.8
148.6	0.795
148.7	0.81
148.8	0.805
148.9	0.81
149	0.815
149.1	0.815
149.2	0.82
149.3	0.805
149.4	0.805
149.5	0.815
149.6	0.835
149.7	0.845
149.8	0.85
149.9	0.845
150	0.845
150.1	0.84
150.2	0.845
150.3	0.835
150.4	0.81
150.5	0.805
150.6	0.8
150.7	0.81
150.8	0.81
150.9	0.83
151	0.825
151.1	0.84
151.2	0.855
151.3	0.85
151.4	0.85
151.5	0.85
151.6	0.855
151.7	0.84
151.8	0.83
151.9	0.83
152	0.835
152.1	0.83
152.2	0.825
152.3	0.825
152.4	0.815
152.5	0.815
152.6	0.82
152.7	0.805
152.8	0.81
152.9	0.81
153	0.81
153.1	0.805
153.2	0.81
153.3	0.825
153.4	0.815
153.5	0.81
153.6	0.81
153.7	0.8
153.8	0.8
153.9	0.785
154	0.785
154.1	0.785
154.2	0.785
154.3	0.79
154.4	0.79
154.5	0.79
154.6	0.785
154.7	0.775
154.8	0.78
154.9	0.785
155	0.785
155.1	0.785
155.2	0.8
155.3	0.78
155.4	0.79
155.5	0.795
155.6	0.795
155.7	0.8
155.8	0.8
155.9	0.79
156	0.8
156.1	0.805
156.2	0.815
156.3	0.815
156.4	0.815
156.5	0.81
156.6	0.82
156.7	0.825
156.8	0.815
156.9	0.82
157	0.825
157.1	0.82
157.2	0.835
157.3	0.835
157.4	0.84
157.5	0.825
157.6	0.82
157.7	0.83
157.8	0.825
157.9	0.83
158	0.825
158.1	0.83
158.2	0.835
158.3	0.83
158.4	0.83
158.5	0.83
158.6	0.825
158.7	0.84
158.8	0.845
158.9	0.83
159	0.835
159.1	0.845
159.2	0.85
159.3	0.855
159.4	0.85
159.5	0.85
159.6	0.85
159.7	0.845
159.8	0.83
159.9	0.825
160	0.825
160.1	0.825
160.2	0.835
160.3	0.83
160.4	0.835
160.5	0.83
160.6	0.825
160.7	0.83
160.8	0.82
160.9	0.82
161	0.82
161.1	0.825
161.2	0.825
161.3	0.81
161.4	0.805
161.5	0.81
161.6	0.815
161.7	0.82
161.8	0.805
161.9	0.81
162	0.82
162.1	0.82
162.2	0.825
162.3	0.815
162.4	0.815
162.5	0.81
162.6	0.81
162.7	0.805
162.8	0.795
162.9	0.805
163	0.805
163.1	0.81
163.2	0.805
163.3	0.81
163.4	0.805
163.5	0.815
163.6	0.815
163.7	0.81
163.8	0.805
163.9	0.81
164	0.81
164.1	0.81
164.2	0.805
164.3	0.805
164.4	0.79
164.5	0.795
164.6	0.8
164.7	0.795
164.8	0.795
164.9	0.8
165	0.8
165.1	0.81
165.2	0.82
165.3	0.805
165.4	0.82
165.5	0.83
165.6	0.835
165.7	0.835
165.8	0.835
165.9	0.845
166	0.84
166.1	0.835
166.2	0.835
166.3	0.84
166.4	0.845
166.5	0.84
166.6	0.835
166.7	0.84
166.8	0.855
166.9	0.86
167	0.855
167.1	0.85
167.2	0.86
167.3	0.855
167.4	0.85
167.5	0.845
167.6	0.845
167.7	0.85
167.8	0.845
167.9	0.85
168	0.85
168.1	0.85
168.2	0.85
168.3	0.845
168.4	0.845
168.5	0.83
168.6	0.835
168.7	0.83
168.8	0.835
168.9	0.835
169	0.84
169.1	0.845
169.2	0.84
169.3	0.835
169.4	0.83
169.5	0.845
169.6	0.84
169.7	0.84
169.8	0.835
169.9	0.835
170	0.83
170.1	0.825
170.2	0.83
170.3	0.82
170.4	0.825
170.5	0.82
170.6	0.825
170.7	0.82
170.8	0.82
170.9	0.825
171	0.83
171.1	0.83
171.2	0.835
171.3	0.835
171.4	0.84
171.5	0.835
171.6	0.84
171.7	0.845
171.8	0.845
171.9	0.85
172	0.85
172.1	0.84
172.2	0.855
172.3	0.85
172.4	0.86
172.5	0.865
172.6	0.87
172.7	0.87
172.8	0.87
172.9	0.865
173	0.865
173.1	0.865
173.2	0.865
173.3	0.86
173.4	0.86
173.5	0.86
173.6	0.845
173.7	0.84
173.8	0.845
173.9	0.84
174	0.835
174.1	0.845
174.2	0.845
174.3	0.84
174.4	0.84
174.5	0.84
174.6	0.84
174.7	0.845
174.8	0.845
174.9	0.855
175	0.865
175.1	0.855
175.2	0.845
175.3	0.86
175.4	0.865
175.5	0.87
175.6	0.86
175.7	0.855
175.8	0.86
175.9	0.87
176	0.88
176.1	0.88
176.2	0.875
176.3	0.895
176.4	0.885
176.5	0.88
176.6	0.88
176.7	0.875
176.8	0.885
176.9	0.88
177	0.87
177.1	0.865
177.2	0.86
177.3	0.865
177.4	0.855
177.5	0.85
177.6	0.845
177.7	0.845
177.8	0.85
177.9	0.855
178	0.845
178.1	0.845
178.2	0.845
178.3	0.845
178.4	0.845
178.5	0.85
178.6	0.845
178.7	0.855
178.8	0.85
178.9	0.85
179	0.835
179.1	0.835
179.2	0.835
179.3	0.835
179.4	0.83
179.5	0.84
179.6	0.835
179.7	0.83
179.8	0.825
179.9	0.825
180	0.825
180.1	0.81
180.2	0.835
180.3	0.835
180.4	0.84
180.5	0.84
180.6	0.84
180.7	0.835
180.8	0.82
180.9	0.83
181	0.845
181.1	0.845
181.2	0.84
181.3	0.845
181.4	0.855
181.5	0.855
181.6	0.85
181.7	0.85
181.8	0.855
181.9	0.855
182	0.855
182.1	0.855
182.2	0.855
182.3	0.86
182.4	0.855
182.5	0.865
182.6	0.86
182.7	0.855
182.8	0.85
182.9	0.835
183	0.84
183.1	0.84
183.2	0.84
183.3	0.86
183.4	0.86
183.5	0.87
183.6	0.885
183.7	0.875
183.8	0.88
183.9	0.88
184	0.89
184.1	0.9
184.2	0.9
184.3	0.875
184.4	0.87
184.5	0.855
184.6	0.855
184.7	0.86
184.8	0.86
184.9	0.86
185	0.85
185.1	0.85
185.2	0.86
185.3	0.86
185.4	0.875
185.5	0.875
185.6	0.87
185.7	0.86
185.8	0.865
185.9	0.865
186	0.845
186.1	0.84
186.2	0.855
186.3	0.855
186.4	0.845
186.5	0.845
186.6	0.845
186.7	0.845
186.8	0.855
186.9	0.875
187	0.875
187.1	0.875
187.2	0.875
187.3	0.875
187.4	0.88
187.5	0.88
187.6	0.885
187.7	0.88
187.8	0.875
187.9	0.88
188	0.87
188.1	0.865
188.2	0.865
188.3	0.86
188.4	0.87
188.5	0.875
188.6	0.88
188.7	0.88
188.8	0.88
188.9	0.875
189	0.875
189.1	0.875
189.2	0.875
189.3	0.875
189.4	0.875
189.5	0.865
189.6	0.87
189.7	0.875
189.8	0.865
189.9	0.86
190	0.87
190.1	0.87
190.2	0.87
190.3	0.87
190.4	0.86
190.5	0.86
190.6	0.865
190.7	0.865
190.8	0.87
190.9	0.865
191	0.865
191.1	0.865
191.2	0.865
191.3	0.87
191.4	0.875
191.5	0.865
191.6	0.87
191.7	0.865
191.8	0.86
191.9	0.86
192	0.865
192.1	0.865
192.2	0.86
192.3	0.865
192.4	0.87
192.5	0.86
192.6	0.855
192.7	0.845
192.8	0.845
192.9	0.85
193	0.865
193.1	0.86
193.2	0.86
193.3	0.86
193.4	0.865
193.5	0.885
193.6	0.89
193.7	0.885
193.8	0.885
193.9	0.895
194	0.895
194.1	0.905
194.2	0.905
194.3	0.895
194.4	0.885
194.5	0.885
194.6	0.88
194.7	0.875
194.8	0.87
194.9	0.87
195	0.88
195.1	0.865
195.2	0.87
195.3	0.87
195.4	0.88
195.5	0.87
195.6	0.875
195.7	0.87
195.8	0.875
195.9	0.875
196	0.875
196.1	0.87
196.2	0.875
196.3	0.875
196.4	0.87
196.5	0.875
196.6	0.87
196.7	0.88
196.8	0.875
196.9	0.875
197	0.88
197.1	0.87
197.2	0.865
197.3	0.855
197.4	0.855
197.5	0.865
197.6	0.865
197.7	0.88
197.8	0.88
197.9	0.87
198	0.875
198.1	0.87
198.2	0.87
198.3	0.88
198.4	0.88
198.5	0.88
198.6	0.875
198.7	0.87
198.8	0.865
198.9	0.87
199	0.87
199.1	0.875
199.2	0.875
199.3	0.875
199.4	0.88
199.5	0.865
199.6	0.86
199.7	0.865
199.8	0.86
199.9	0.86
200	0.86
[truncated: 14,000 more rows]
