# Supplementary material for: Bayesian inference of kinetic schemes for ion channels by Kalman filtering
Source: eLife journal article supplement (doi:10.7554/elife.62714), 2022-05-04
Supplement: fig4-data6 [file 1_Sim_N_100_theor_Fluor_Werte.xlsx]

## Sheet: Tabelle1
0.1	0
0.2	0
0.3	0
0.4	0
0.5	0
0.6	0
0.7	0
0.8	0
0.9	0
1	0
1.1	0
1.2	0
1.3	0
1.4	0
1.5	0
1.6	0
1.7	0
1.8	0
1.9	0
2	0
2.1	0
2.2	0
2.3	0
2.4	0
2.5	0
2.6	0
2.7	0
2.8	0
2.9	0
3	0
3.1	0
3.2	0
3.3	0
3.4	0
3.5	0
3.6	0
3.7	0
3.8	0
3.9	0
4	0
4.1	0
4.2	0
4.3	0
4.4	0
4.5	0
4.6	0
4.7	0
4.8	0
4.9	0
5	0
5.1	0
5.2	0
5.3	0
5.4	0
5.5	0
5.6	0
5.7	0
5.8	0
5.9	0
6	0
6.1	0
6.2	0
6.3	0
6.4	0
6.5	0
6.6	0
6.7	0
6.8	0
6.9	0
7	0
7.1	0
7.2	0
7.3	0
7.4	0
7.5	0
7.6	0
7.7	0
7.8	0
7.9	0
8	0
8.1	0
8.2	0
8.3	0
8.4	0
8.5	0
8.6	0
8.7	0
8.8	0
8.9	0
9	0
9.1	0
9.2	0
9.3	0
9.4	0
9.5	0
9.6	0
9.7	0
9.8	0
9.9	0
10	0
10.1	0
10.2	0
10.3	0
10.4	0
10.5	0
10.6	0
10.7	0
10.8	0
10.9	0
11	0
11.1	0
11.2	0
11.3	0
11.4	0
11.5	0
11.6	0
11.7	0
11.8	0
11.9	0
12	0
12.1	0
12.2	0
12.3	0
12.4	0
12.5	0
12.6	0
12.7	0
12.8	0
12.9	0
13	0
13.1	0
13.2	0
13.3	0
13.4	0
13.5	0
13.6	0
13.7	0
13.8	0
13.9	0
14	0
14.1	0
14.2	0
14.3	0
14.4	0
14.5	0
14.6	0
14.7	0
14.8	0
14.9	0
15	0
15.1	0
15.2	0
15.3	0
15.4	0
15.5	0
15.6	0
15.7	0
15.8	0
15.9	0
16	0
16.1	0
16.2	0
16.3	0
16.4	0
16.5	0
16.6	0
16.7	0
16.8	0
16.9	0
17	0
17.1	0
17.2	0
17.3	0
17.4	0
17.5	0
17.6	0
17.7	0
17.8	0
17.9	0
18	0
18.1	0
18.2	0
18.3	0
18.4	0
18.5	0
18.6	0
18.7	0
18.8	0
18.9	0
19	0
19.1	0
19.2	0
19.3	0
19.4	0
19.5	0
19.6	0
19.7	0
19.8	0
19.9	0
20	0
20.1	0
20.2	0
20.3	0
20.4	0
20.5	0
20.6	0
20.7	0
20.8	0
20.9	0
21	0
21.1	0
21.2	0
21.3	0
21.4	0
21.5	0
21.6	0
21.7	0
21.8	0
21.9	0
22	0
22.1	0
22.2	0
22.3	0
22.4	0
22.5	0
22.6	0
22.7	0
22.8	0
22.9	0
23	0
23.1	0
23.2	0
23.3	0
23.4	0
23.5	0
23.6	0
23.7	0
23.8	0
23.9	0
24	0
24.1	0
24.2	0
24.3	0
24.4	0
24.5	0
24.6	0
24.7	0
24.8	0
24.9	0
25	0
25.1	0
25.2	0
25.3	0
25.4	0
25.5	0
25.6	0
25.7	0
25.8	0
25.9	0
26	0
26.1	0
26.2	0
26.3	0
26.4	0
26.5	0
26.6	0
26.7	0
26.8	0
26.9	0
27	0
27.1	0
27.2	0
27.3	0
27.4	0
27.5	0
27.6	0
27.7	0
27.8	0
27.9	0
28	0
28.1	0
28.2	0
28.3	0
28.4	0
28.5	0
28.6	0
28.7	0
28.8	0
28.9	0
29	0
29.1	0
29.2	0
29.3	0
29.4	0
29.5	0
29.6	0
29.7	0
29.8	0
29.9	0
30	0
30.1	0
30.2	0
30.3	0
30.4	0
30.5	0
30.6	0
30.7	0
30.8	0
30.9	0
31	0
31.1	0
31.2	0
31.3	0
31.4	0
31.5	0
31.6	0
31.7	0
31.8	0
31.9	0
32	0
32.1	0
32.2	0
32.3	0
32.4	0
32.5	0
32.6	0
32.7	0
32.8	0
32.9	0
33	0
33.1	0
33.2	0
33.3	0
33.4	0
33.5	0
33.6	0
33.7	0
33.8	0
33.9	0
34	0
34.1	0
34.2	0
34.3	0
34.4	0
34.5	0
34.6	0
34.7	0
34.8	0
34.9	0
35	0
35.1	0
35.2	0
35.3	0
35.4	0
35.5	0
35.6	0
35.7	0
35.8	0
35.9	0
36	0
36.1	0
36.2	0
36.3	0
36.4	0
36.5	0
36.6	0
36.7	0
36.8	0
36.9	0
37	0
37.1	0
37.2	0
37.3	0
37.4	0
37.5	0
37.6	0
37.7	0
37.8	0
37.9	0
38	0
38.1	0
38.2	0
38.3	0
38.4	0
38.5	0
38.6	0
38.7	0
38.8	0
38.9	0
39	0
39.1	0
39.2	0
39.3	0
39.4	0
39.5	0
39.6	0
39.7	0
39.8	0
39.9	0
40	0
40.1	0
40.2	0
40.3	0
40.4	0
40.5	0
40.6	0
40.7	0
40.8	0
40.9	0
41	0
41.1	0
41.2	0
41.3	0
41.4	0
41.5	0
41.6	0
41.7	0
41.8	0
41.9	0
42	0
42.1	0
42.2	0
42.3	0
42.4	0
42.5	0
42.6	0
42.7	0
42.8	0
42.9	0
43	0
43.1	0
43.2	0
43.3	0
43.4	0
43.5	0
43.6	0
43.7	0
43.8	0
43.9	0
44	0
44.1	0
44.2	0
44.3	0
44.4	0
44.5	0
44.6	0
44.7	0
44.8	0
44.9	0
45	0
45.1	0
45.2	0
45.3	0
45.4	0
45.5	0
45.6	0
45.7	0
45.8	0
45.9	0
46	0
46.1	0
46.2	0
46.3	0
46.4	0
46.5	0
46.6	0
46.7	0
46.8	0
46.9	0
47	0
47.1	0
47.2	0
47.3	0
47.4	0
47.5	0
47.6	0
47.7	0
47.8	0
47.9	0
48	0
48.1	0
48.2	0
48.3	0
48.4	0
48.5	0
48.6	0
48.7	0
48.8	0
48.9	0
49	0
49.1	0
49.2	0
49.3	0
49.4	0
49.5	0
49.6	0
49.7	0
49.8	0
49.9	0
50	0
50.1	0
50.2	0
50.3	0
50.4	0
50.5	0
50.6	0
50.7	0
50.8	0
50.9	0
51	0
51.1	0
51.2	0
51.3	0
51.4	0
51.5	0
51.6	0
51.7	0
51.8	0
51.9	0
52	0
52.1	0
52.2	0
52.3	0
52.4	0
52.5	0
52.6	0
52.7	0
52.8	0
52.9	0
53	0
53.1	0
53.2	0
53.3	0
53.4	0
53.5	0
53.6	0
53.7	0
53.8	0
53.9	0
54	0
54.1	0
54.2	0
54.3	0
54.4	0
54.5	0
54.6	0
54.7	0
54.8	0
54.9	0
55	0
55.1	0
55.2	0
55.3	0
55.4	0
55.5	0
55.6	0
55.7	0
55.8	0
55.9	0
56	0
56.1	0
56.2	0
56.3	0
56.4	0
56.5	0
56.6	0
56.7	0
56.8	0
56.9	0
57	0
57.1	0
57.2	0
57.3	0
57.4	0
57.5	0
57.6	0
57.7	0
57.8	0
57.9	0
58	0
58.1	0
58.2	0
58.3	0
58.4	0
58.5	0
58.6	0
58.7	0
58.8	0
58.9	0
59	0
59.1	0
59.2	0
59.3	0
59.4	0
59.5	0
59.6	0
59.7	0
59.8	0
59.9	0
60	0
60.1	0
60.2	0
60.3	0
60.4	0
60.5	0
60.6	0
60.7	0
60.8	0
60.9	0
61	0
61.1	0
61.2	0
61.3	0
61.4	0
61.5	0
61.6	0
61.7	0
61.8	0
61.9	0
62	0
62.1	0
62.2	0
62.3	0
62.4	0
62.5	0
62.6	0
62.7	0
62.8	0
62.9	0
63	0
63.1	0
63.2	0
63.3	0
63.4	0
63.5	0
63.6	0
63.7	0
63.8	0
63.9	0
64	0
64.1	0
64.2	0
64.3	0
64.4	0
64.5	0
64.6	0
64.7	0
64.8	0
64.9	0
65	0
65.1	0
65.2	0
65.3	0
65.4	0
65.5	0
65.6	0
65.7	0
65.8	0
65.9	0
66	0
66.1	0
66.2	0
66.3	0
66.4	0
66.5	0
66.6	0
66.7	0
66.8	0
66.9	0
67	0
67.1	0
67.2	0
67.3	0
67.4	0
67.5	0
67.6	0
67.7	0
67.8	0
67.9	0
68	0
68.1	0
68.2	0
68.3	0
68.4	0
68.5	0
68.6	0
68.7	0
68.8	0
68.9	0
69	0
69.1	0
69.2	0
69.3	0
69.4	0
69.5	0
69.6	0
69.7	0
69.8	0
69.9	0
70	0
70.1	0
70.2	0
70.3	0
70.4	0
70.5	0
70.6	0
70.7	0
70.8	0
70.9	0
71	0
71.1	0
71.2	0
71.3	0
71.4	0
71.5	0
71.6	0
71.7	0
71.8	0
71.9	0
72	0
72.1	0
72.2	0
72.3	0
72.4	0
72.5	0
72.6	0
72.7	0
72.8	0
72.9	0
73	0
73.1	0
73.2	0
73.3	0
73.4	0
73.5	0
73.6	0
73.7	0
73.8	0
73.9	0
74	0
74.1	0
74.2	0
74.3	0
74.4	0
74.5	0
74.6	0
74.7	0
74.8	0
74.9	0
75	0
75.1	0
75.2	0
75.3	0
75.4	0
75.5	0
75.6	0
75.7	0
75.8	0
75.9	0
76	0
76.1	0
76.2	0
76.3	0
76.4	0
76.5	0
76.6	0
76.7	0
76.8	0
76.9	0
77	0
77.1	0
77.2	0
77.3	0
77.4	0
77.5	0
77.6	0
77.7	0
77.8	0
77.9	0
78	0
78.1	0
78.2	0
78.3	0
78.4	0
78.5	0
78.6	0
78.7	0
78.8	0
78.9	0
79	0
79.1	0
79.2	0
79.3	0
79.4	0
79.5	0
79.6	0
79.7	0
79.8	0
79.9	0
80	0
80.1	0
80.2	0
80.3	0
80.4	0
80.5	0
80.6	0
80.7	0
80.8	0
80.9	0
81	0
81.1	0
81.2	0
81.3	0
81.4	0
81.5	0
81.6	0
81.7	0
81.8	0
81.9	0
82	0
82.1	0
82.2	0
82.3	0
82.4	0
82.5	0
82.6	0
82.7	0
82.8	0
82.9	0
83	0
83.1	0
83.2	0
83.3	0
83.4	0
83.5	0
83.6	0
83.7	0
83.8	0
83.9	0
84	0
84.1	0
84.2	0
84.3	0
84.4	0
84.5	0
84.6	0
84.7	0
84.8	0
84.9	0
85	0
85.1	0
85.2	0
85.3	0
85.4	0
85.5	0
85.6	0
85.7	0
85.8	0
85.9	0
86	0
86.1	0
86.2	0
86.3	0
86.4	0
86.5	0
86.6	0
86.7	0
86.8	0
86.9	0
87	0
87.1	0
87.2	0
87.3	0
87.4	0
87.5	0
87.6	0
87.7	0
87.8	0
87.9	0
88	0
88.1	0
88.2	0
88.3	0
88.4	0
88.5	0
88.6	0
88.7	0
88.8	0
88.9	0
89	0
89.1	0
89.2	0
89.3	0
89.4	0
89.5	0
89.6	0
89.7	0
89.8	0
89.9	0
90	0
90.1	0
90.2	0
90.3	0
90.4	0
90.5	0
90.6	0
90.7	0
90.8	0
90.9	0
91	0
91.1	0
91.2	0
91.3	0
91.4	0
91.5	0
91.6	0
91.7	0
91.8	0
91.9	0
92	0
92.1	0
92.2	0
92.3	0
92.4	0
92.5	0
92.6	0
92.7	0
92.8	0
92.9	0
93	0
93.1	0
93.2	0
93.3	0
93.4	0
93.5	0
93.6	0
93.7	0
93.8	0
93.9	0
94	0
94.1	0
94.2	0
94.3	0
94.4	0
94.5	0
94.6	0
94.7	0
94.8	0
94.9	0
95	0
95.1	0
95.2	0
95.3	0
95.4	0
95.5	0
95.6	0
95.7	0
95.8	0
95.9	0
96	0
96.1	0
96.2	0
96.3	0
96.4	0
96.5	0
96.6	0
96.7	0
96.8	0
96.9	0
97	0
97.1	0
97.2	0
97.3	0
97.4	0
97.5	0
97.6	0
97.7	0
97.8	0
97.9	0
98	0
98.1	0
98.2	0
98.3	0
98.4	0
98.5	0
98.6	0
98.7	0
98.8	0
98.9	0
99	0
99.1	0
99.2	0
99.3	0
99.4	0
99.5	0
99.6	0
99.7	0
99.8	0
99.9	0
100	0
100.1	0.0571059
100.2	0.108824
100.3	0.155703
100.4	0.198236
100.5	0.236859
100.6	0.271963
100.7	0.303896
100.8	0.332971
100.9	0.359467
101	0.383633
101.1	0.405694
101.2	0.425851
101.3	0.444283
101.4	0.461153
101.5	0.476607
101.6	0.490776
101.7	0.503778
101.8	0.515718
101.9	0.526695
102	0.536793
102.1	0.546092
102.2	0.554663
102.3	0.562569
102.4	0.569869
102.5	0.576615
102.6	0.582856
102.7	0.588634
102.8	0.59399
102.9	0.598958
103	0.603572
103.1	0.607862
103.2	0.611854
103.3	0.615573
103.4	0.619041
103.5	0.622279
103.6	0.625307
103.7	0.62814
103.8	0.630795
103.9	0.633286
104	0.635627
104.1	0.637828
104.2	0.639902
104.3	0.641858
104.4	0.643705
104.5	0.645453
104.6	0.647108
104.7	0.648679
104.8	0.650171
104.9	0.65159
105	0.652943
105.1	0.654234
105.2	0.655469
105.3	0.65665
105.4	0.657783
105.5	0.658871
105.6	0.659917
105.7	0.660924
105.8	0.661896
105.9	0.662835
106	0.663743
106.1	0.664623
106.2	0.665476
106.3	0.666305
106.4	0.667111
106.5	0.667897
106.6	0.668662
106.7	0.66941
106.8	0.670141
106.9	0.670856
107	0.671556
107.1	0.672243
107.2	0.672917
107.3	0.673579
107.4	0.67423
107.5	0.674871
107.6	0.675503
107.7	0.676125
107.8	0.676739
107.9	0.677345
108	0.677943
108.1	0.678535
108.2	0.67912
108.3	0.679699
108.4	0.680272
108.5	0.68084
108.6	0.681403
108.7	0.68196
108.8	0.682514
108.9	0.683063
109	0.683607
109.1	0.684148
109.2	0.684685
109.3	0.685219
109.4	0.685749
109.5	0.686276
109.6	0.6868
109.7	0.687322
109.8	0.68784
109.9	0.688355
110	0.688868
110.1	0.689379
110.2	0.689887
110.3	0.690393
110.4	0.690897
110.5	0.691398
110.6	0.691897
110.7	0.692395
110.8	0.69289
110.9	0.693383
111	0.693875
111.1	0.694365
111.2	0.694853
111.3	0.695339
111.4	0.695823
111.5	0.696306
111.6	0.696787
111.7	0.697267
111.8	0.697745
111.9	0.698221
112	0.698696
112.1	0.69917
112.2	0.699642
112.3	0.700112
112.4	0.700581
112.5	0.701049
112.6	0.701515
112.7	0.70198
112.8	0.702444
112.9	0.702906
113	0.703367
113.1	0.703826
113.2	0.704284
113.3	0.704741
113.4	0.705196
113.5	0.705651
113.6	0.706104
113.7	0.706555
113.8	0.707006
113.9	0.707455
114	0.707903
114.1	0.708349
114.2	0.708795
114.3	0.709239
114.4	0.709682
114.5	0.710124
114.6	0.710564
114.7	0.711003
114.8	0.711442
114.9	0.711878
115	0.712314
115.1	0.712749
115.2	0.713182
115.3	0.713614
115.4	0.714045
115.5	0.714475
115.6	0.714904
115.7	0.715332
115.8	0.715758
115.9	0.716183
116	0.716607
116.1	0.71703
116.2	0.717452
116.3	0.717873
116.4	0.718292
116.5	0.718711
116.6	0.719128
116.7	0.719544
116.8	0.71996
116.9	0.720374
117	0.720786
117.1	0.721198
117.2	0.721609
117.3	0.722019
117.4	0.722427
117.5	0.722834
117.6	0.723241
117.7	0.723646
117.8	0.72405
117.9	0.724453
118	0.724855
118.1	0.725256
118.2	0.725656
118.3	0.726055
118.4	0.726452
118.5	0.726849
118.6	0.727245
118.7	0.727639
118.8	0.728033
118.9	0.728425
119	0.728817
119.1	0.729207
119.2	0.729596
119.3	0.729985
119.4	0.730372
119.5	0.730758
119.6	0.731143
119.7	0.731527
119.8	0.731911
119.9	0.732293
120	0.732674
120.1	0.733054
120.2	0.733433
120.3	0.733811
120.4	0.734188
120.5	0.734564
120.6	0.734939
120.7	0.735313
120.8	0.735686
120.9	0.736058
121	0.736429
121.1	0.736799
121.2	0.737169
121.3	0.737537
121.4	0.737904
121.5	0.73827
121.6	0.738635
121.7	0.738999
121.8	0.739363
121.9	0.739725
122	0.740086
122.1	0.740446
122.2	0.740806
122.3	0.741164
122.4	0.741522
122.5	0.741878
122.6	0.742234
122.7	0.742589
122.8	0.742942
122.9	0.743295
123	0.743647
123.1	0.743998
123.2	0.744348
123.3	0.744697
123.4	0.745045
123.5	0.745392
123.6	0.745738
123.7	0.746083
123.8	0.746428
123.9	0.746771
124	0.747114
124.1	0.747455
124.2	0.747796
124.3	0.748136
124.4	0.748475
124.5	0.748813
124.6	0.74915
124.7	0.749486
124.8	0.749821
124.9	0.750156
125	0.750489
125.1	0.750822
125.2	0.751154
125.3	0.751485
125.4	0.751815
125.5	0.752144
125.6	0.752472
125.7	0.752799
125.8	0.753126
125.9	0.753452
126	0.753776
126.1	0.7541
126.2	0.754423
126.3	0.754745
126.4	0.755067
126.5	0.755387
126.6	0.755707
126.7	0.756026
126.8	0.756344
126.9	0.756661
127	0.756977
127.1	0.757292
127.2	0.757607
127.3	0.75792
127.4	0.758233
127.5	0.758545
127.6	0.758857
127.7	0.759167
127.8	0.759476
127.9	0.759785
128	0.760093
128.1	0.7604
128.2	0.760706
128.3	0.761012
128.4	0.761317
128.5	0.76162
128.6	0.761923
128.7	0.762226
128.8	0.762527
128.9	0.762828
129	0.763127
129.1	0.763426
129.2	0.763725
129.3	0.764022
129.4	0.764319
129.5	0.764615
129.6	0.76491
129.7	0.765204
129.8	0.765497
129.9	0.76579
130	0.766082
130.1	0.766373
130.2	0.766663
130.3	0.766953
130.4	0.767242
130.5	0.76753
130.6	0.767817
130.7	0.768104
130.8	0.768389
130.9	0.768674
131	0.768959
131.1	0.769242
131.2	0.769525
131.3	0.769807
131.4	0.770088
131.5	0.770369
131.6	0.770648
131.7	0.770927
131.8	0.771206
131.9	0.771483
132	0.77176
132.1	0.772036
132.2	0.772311
132.3	0.772586
132.4	0.772859
132.5	0.773133
132.6	0.773405
132.7	0.773677
132.8	0.773948
132.9	0.774218
133	0.774487
133.1	0.774756
133.2	0.775024
133.3	0.775291
133.4	0.775558
133.5	0.775824
133.6	0.776089
133.7	0.776354
133.8	0.776617
133.9	0.77688
134	0.777143
134.1	0.777405
134.2	0.777666
134.3	0.777926
134.4	0.778185
134.5	0.778444
134.6	0.778703
134.7	0.77896
134.8	0.779217
134.9	0.779473
135	0.779729
135.1	0.779984
135.2	0.780238
135.3	0.780491
135.4	0.780744
135.5	0.780996
135.6	0.781247
135.7	0.781498
135.8	0.781748
135.9	0.781998
136	0.782247
136.1	0.782495
136.2	0.782742
136.3	0.782989
136.4	0.783235
136.5	0.78348
136.6	0.783725
136.7	0.783969
136.8	0.784213
136.9	0.784456
137	0.784698
137.1	0.78494
137.2	0.785181
137.3	0.785421
137.4	0.785661
137.5	0.7859
137.6	0.786138
137.7	0.786376
137.8	0.786613
137.9	0.786849
138	0.787085
138.1	0.78732
138.2	0.787555
138.3	0.787789
138.4	0.788022
138.5	0.788255
138.6	0.788487
138.7	0.788719
138.8	0.78895
138.9	0.78918
139	0.789409
139.1	0.789638
139.2	0.789867
139.3	0.790095
139.4	0.790322
139.5	0.790549
139.6	0.790775
139.7	0.791
139.8	0.791225
139.9	0.791449
140	0.791673
140.1	0.791896
140.2	0.792118
140.3	0.79234
140.4	0.792561
140.5	0.792782
140.6	0.793002
140.7	0.793221
140.8	0.79344
140.9	0.793658
141	0.793876
141.1	0.794093
141.2	0.79431
141.3	0.794526
141.4	0.794741
141.5	0.794956
141.6	0.79517
141.7	0.795384
141.8	0.795597
141.9	0.79581
142	0.796022
142.1	0.796233
142.2	0.796444
142.3	0.796654
142.4	0.796864
142.5	0.797073
142.6	0.797282
142.7	0.79749
142.8	0.797698
142.9	0.797905
143	0.798111
143.1	0.798317
143.2	0.798522
143.3	0.798727
143.4	0.798931
143.5	0.799135
143.6	0.799338
143.7	0.799541
143.8	0.799743
143.9	0.799944
144	0.800145
144.1	0.800346
144.2	0.800546
144.3	0.800745
144.4	0.800944
144.5	0.801142
144.6	0.80134
144.7	0.801537
144.8	0.801734
144.9	0.80193
145	0.802126
145.1	0.802321
145.2	0.802516
145.3	0.80271
145.4	0.802904
145.5	0.803097
145.6	0.803289
145.7	0.803481
145.8	0.803673
145.9	0.803864
146	0.804055
146.1	0.804245
146.2	0.804434
146.3	0.804623
146.4	0.804812
146.5	0.805
146.6	0.805187
146.7	0.805374
146.8	0.805561
146.9	0.805747
147	0.805933
147.1	0.806118
147.2	0.806302
147.3	0.806486
147.4	0.80667
147.5	0.806853
147.6	0.807036
147.7	0.807218
147.8	0.807399
147.9	0.80758
148	0.807761
148.1	0.807941
148.2	0.808121
148.3	0.8083
148.4	0.808479
148.5	0.808657
148.6	0.808835
148.7	0.809012
148.8	0.809189
148.9	0.809366
149	0.809542
149.1	0.809717
149.2	0.809892
149.3	0.810066
149.4	0.810241
149.5	0.810414
149.6	0.810587
149.7	0.81076
149.8	0.810932
149.9	0.811104
150	0.811275
150.1	0.811446
150.2	0.811616
150.3	0.811786
150.4	0.811956
150.5	0.812125
150.6	0.812293
150.7	0.812461
150.8	0.812629
150.9	0.812796
151	0.812963
151.1	0.813129
151.2	0.813295
151.3	0.813461
151.4	0.813626
151.5	0.81379
151.6	0.813954
151.7	0.814118
151.8	0.814281
151.9	0.814444
152	0.814607
152.1	0.814769
152.2	0.81493
152.3	0.815091
152.4	0.815252
152.5	0.815412
152.6	0.815572
152.7	0.815731
152.8	0.81589
152.9	0.816049
153	0.816207
153.1	0.816365
153.2	0.816522
153.3	0.816679
153.4	0.816835
153.5	0.816991
153.6	0.817147
153.7	0.817302
153.8	0.817457
153.9	0.817611
154	0.817765
154.1	0.817919
154.2	0.818072
154.3	0.818225
154.4	0.818377
154.5	0.818529
154.6	0.81868
154.7	0.818832
154.8	0.818982
154.9	0.819133
155	0.819282
155.1	0.819432
155.2	0.819581
155.3	0.81973
155.4	0.819878
155.5	0.820026
155.6	0.820174
155.7	0.820321
155.8	0.820468
155.9	0.820614
156	0.82076
156.1	0.820905
156.2	0.821051
156.3	0.821195
156.4	0.82134
156.5	0.821484
156.6	0.821628
156.7	0.821771
156.8	0.821914
156.9	0.822056
157	0.822198
157.1	0.82234
157.2	0.822481
157.3	0.822622
157.4	0.822763
157.5	0.822903
157.6	0.823043
157.7	0.823183
157.8	0.823322
157.9	0.823461
158	0.823599
158.1	0.823737
158.2	0.823875
158.3	0.824012
158.4	0.824149
158.5	0.824285
158.6	0.824422
158.7	0.824557
158.8	0.824693
158.9	0.824828
159	0.824963
159.1	0.825097
159.2	0.825231
159.3	0.825365
159.4	0.825498
159.5	0.825631
159.6	0.825764
159.7	0.825896
159.8	0.826028
159.9	0.826159
160	0.826291
160.1	0.826422
160.2	0.826552
160.3	0.826682
160.4	0.826812
160.5	0.826941
160.6	0.827071
160.7	0.827199
160.8	0.827328
160.9	0.827456
161	0.827584
161.1	0.827711
161.2	0.827838
161.3	0.827965
161.4	0.828091
161.5	0.828217
161.6	0.828343
161.7	0.828468
161.8	0.828594
161.9	0.828718
162	0.828843
162.1	0.828967
162.2	0.82909
162.3	0.829214
162.4	0.829337
162.5	0.82946
162.6	0.829582
162.7	0.829704
162.8	0.829826
162.9	0.829947
163	0.830069
163.1	0.830189
163.2	0.83031
163.3	0.83043
163.4	0.83055
163.5	0.830669
163.6	0.830789
163.7	0.830907
163.8	0.831026
163.9	0.831144
164	0.831262
164.1	0.83138
164.2	0.831497
164.3	0.831614
164.4	0.831731
164.5	0.831847
164.6	0.831963
164.7	0.832079
164.8	0.832194
164.9	0.83231
165	0.832424
165.1	0.832539
165.2	0.832653
165.3	0.832767
165.4	0.832881
165.5	0.832994
165.6	0.833107
165.7	0.83322
165.8	0.833332
165.9	0.833444
166	0.833556
166.1	0.833668
166.2	0.833779
166.3	0.83389
166.4	0.834
166.5	0.834111
166.6	0.834221
166.7	0.83433
166.8	0.83444
166.9	0.834549
167	0.834658
167.1	0.834766
167.2	0.834875
167.3	0.834983
167.4	0.83509
167.5	0.835198
167.6	0.835305
167.7	0.835412
167.8	0.835518
167.9	0.835625
168	0.835731
168.1	0.835837
168.2	0.835942
168.3	0.836047
168.4	0.836152
168.5	0.836257
168.6	0.836361
168.7	0.836465
168.8	0.836569
168.9	0.836672
169	0.836775
169.1	0.836878
169.2	0.836981
169.3	0.837083
169.4	0.837186
169.5	0.837287
169.6	0.837389
169.7	0.83749
169.8	0.837591
169.9	0.837692
170	0.837793
170.1	0.837893
170.2	0.837993
170.3	0.838093
170.4	0.838192
170.5	0.838291
170.6	0.83839
170.7	0.838489
170.8	0.838587
170.9	0.838685
171	0.838783
171.1	0.838881
171.2	0.838978
171.3	0.839075
171.4	0.839172
171.5	0.839268
171.6	0.839365
171.7	0.839461
171.8	0.839557
171.9	0.839652
172	0.839747
172.1	0.839842
172.2	0.839937
172.3	0.840032
172.4	0.840126
172.5	0.84022
172.6	0.840314
172.7	0.840407
172.8	0.840501
172.9	0.840594
173	0.840686
173.1	0.840779
173.2	0.840871
173.3	0.840963
173.4	0.841055
173.5	0.841147
173.6	0.841238
173.7	0.841329
173.8	0.84142
173.9	0.84151
174	0.841601
174.1	0.841691
174.2	0.841781
174.3	0.84187
174.4	0.84196
174.5	0.842049
174.6	0.842138
174.7	0.842226
174.8	0.842315
174.9	0.842403
175	0.842491
175.1	0.842579
175.2	0.842666
175.3	0.842754
175.4	0.842841
175.5	0.842927
175.6	0.843014
175.7	0.8431
175.8	0.843186
175.9	0.843272
176	0.843358
176.1	0.843443
176.2	0.843529
176.3	0.843613
176.4	0.843698
176.5	0.843783
176.6	0.843867
176.7	0.843951
176.8	0.844035
176.9	0.844119
177	0.844202
177.1	0.844285
177.2	0.844368
177.3	0.844451
177.4	0.844533
177.5	0.844616
177.6	0.844698
177.7	0.84478
177.8	0.844861
177.9	0.844943
178	0.845024
178.1	0.845105
178.2	0.845186
178.3	0.845266
178.4	0.845346
178.5	0.845427
178.6	0.845506
178.7	0.845586
178.8	0.845666
178.9	0.845745
179	0.845824
179.1	0.845903
179.2	0.845982
179.3	0.84606
179.4	0.846138
179.5	0.846216
179.6	0.846294
179.7	0.846372
179.8	0.846449
179.9	0.846526
180	0.846603
180.1	0.84668
180.2	0.846757
180.3	0.846833
180.4	0.846909
180.5	0.846985
180.6	0.847061
180.7	0.847136
180.8	0.847212
180.9	0.847287
181	0.847362
181.1	0.847437
181.2	0.847511
181.3	0.847586
181.4	0.84766
181.5	0.847734
181.6	0.847807
181.7	0.847881
181.8	0.847954
181.9	0.848028
182	0.848101
182.1	0.848173
182.2	0.848246
182.3	0.848318
182.4	0.848391
182.5	0.848463
182.6	0.848534
182.7	0.848606
182.8	0.848678
182.9	0.848749
183	0.84882
183.1	0.848891
183.2	0.848961
183.3	0.849032
183.4	0.849102
183.5	0.849172
183.6	0.849242
183.7	0.849312
183.8	0.849382
183.9	0.849451
184	0.84952
184.1	0.849589
184.2	0.849658
184.3	0.849727
184.4	0.849795
184.5	0.849863
184.6	0.849932
184.7	0.849999
184.8	0.850067
184.9	0.850135
185	0.850202
185.1	0.850269
185.2	0.850336
185.3	0.850403
185.4	0.85047
185.5	0.850536
185.6	0.850603
185.7	0.850669
185.8	0.850735
185.9	0.850801
186	0.850866
186.1	0.850932
186.2	0.850997
186.3	0.851062
186.4	0.851127
186.5	0.851192
186.6	0.851256
186.7	0.851321
186.8	0.851385
186.9	0.851449
187	0.851513
187.1	0.851576
187.2	0.85164
187.3	0.851703
187.4	0.851767
187.5	0.85183
187.6	0.851892
187.7	0.851955
187.8	0.852018
187.9	0.85208
188	0.852142
188.1	0.852204
188.2	0.852266
188.3	0.852328
188.4	0.852389
188.5	0.852451
188.6	0.852512
188.7	0.852573
188.8	0.852634
188.9	0.852695
189	0.852755
189.1	0.852816
189.2	0.852876
189.3	0.852936
189.4	0.852996
189.5	0.853056
189.6	0.853115
189.7	0.853175
189.8	0.853234
189.9	0.853293
190	0.853352
190.1	0.853411
190.2	0.85347
190.3	0.853528
190.4	0.853586
190.5	0.853645
190.6	0.853703
190.7	0.85376
190.8	0.853818
190.9	0.853876
191	0.853933
191.1	0.85399
191.2	0.854048
191.3	0.854105
191.4	0.854161
191.5	0.854218
191.6	0.854275
191.7	0.854331
191.8	0.854387
191.9	0.854443
192	0.854499
192.1	0.854555
192.2	0.85461
192.3	0.854666
192.4	0.854721
192.5	0.854776
192.6	0.854831
192.7	0.854886
192.8	0.854941
192.9	0.854996
193	0.85505
193.1	0.855104
193.2	0.855158
193.3	0.855212
193.4	0.855266
193.5	0.85532
193.6	0.855374
193.7	0.855427
193.8	0.85548
193.9	0.855534
194	0.855587
194.1	0.855639
194.2	0.855692
194.3	0.855745
194.4	0.855797
194.5	0.855849
194.6	0.855902
194.7	0.855954
194.8	0.856006
194.9	0.856057
195	0.856109
195.1	0.85616
195.2	0.856212
195.3	0.856263
195.4	0.856314
195.5	0.856365
195.6	0.856416
195.7	0.856466
195.8	0.856517
195.9	0.856567
196	0.856618
196.1	0.856668
196.2	0.856718
196.3	0.856767
196.4	0.856817
196.5	0.856867
196.6	0.856916
196.7	0.856966
196.8	0.857015
196.9	0.857064
197	0.857113
197.1	0.857162
197.2	0.85721
197.3	0.857259
197.4	0.857307
197.5	0.857355
197.6	0.857404
197.7	0.857452
197.8	0.8575
197.9	0.857547
198	0.857595
198.1	0.857643
198.2	0.85769
198.3	0.857737
198.4	0.857784
198.5	0.857831
198.6	0.857878
198.7	0.857925
198.8	0.857972
198.9	0.858018
199	0.858065
199.1	0.858111
199.2	0.858157
199.3	0.858203
199.4	0.858249
199.5	0.858295
199.6	0.85834
199.7	0.858386
199.8	0.858431
199.9	0.858477
200	0.858522
[truncated: 14,000 more rows]
