# Supplementary material for: Bayesian inference of kinetic schemes for ion channels by Kalman filtering
Source: eLife journal article supplement (doi:10.7554/elife.62714), 2022-05-04
Supplement: fig4-data6 [file 1_Sim_N_100_theor_Strom_Werte.xlsx]

## Sheet: Tabelle1
0.1	0
0.2	0
0.3	0
0.4	0
0.5	0
0.6	0
0.7	0
0.8	0
0.9	0
1	0
1.1	0
1.2	0
1.3	0
1.4	0
1.5	0
1.6	0
1.7	0
1.8	0
1.9	0
2	0
2.1	0
2.2	0
2.3	0
2.4	0
2.5	0
2.6	0
2.7	0
2.8	0
2.9	0
3	0
3.1	0
3.2	0
3.3	0
3.4	0
3.5	0
3.6	0
3.7	0
3.8	0
3.9	0
4	0
4.1	0
4.2	0
4.3	0
4.4	0
4.5	0
4.6	0
4.7	0
4.8	0
4.9	0
5	0
5.1	0
5.2	0
5.3	0
5.4	0
5.5	0
5.6	0
5.7	0
5.8	0
5.9	0
6	0
6.1	0
6.2	0
6.3	0
6.4	0
6.5	0
6.6	0
6.7	0
6.8	0
6.9	0
7	0
7.1	0
7.2	0
7.3	0
7.4	0
7.5	0
7.6	0
7.7	0
7.8	0
7.9	0
8	0
8.1	0
8.2	0
8.3	0
8.4	0
8.5	0
8.6	0
8.7	0
8.8	0
8.9	0
9	0
9.1	0
9.2	0
9.3	0
9.4	0
9.5	0
9.6	0
9.7	0
9.8	0
9.9	0
10	0
10.1	0
10.2	0
10.3	0
10.4	0
10.5	0
10.6	0
10.7	0
10.8	0
10.9	0
11	0
11.1	0
11.2	0
11.3	0
11.4	0
11.5	0
11.6	0
11.7	0
11.8	0
11.9	0
12	0
12.1	0
12.2	0
12.3	0
12.4	0
12.5	0
12.6	0
12.7	0
12.8	0
12.9	0
13	0
13.1	0
13.2	0
13.3	0
13.4	0
13.5	0
13.6	0
13.7	0
13.8	0
13.9	0
14	0
14.1	0
14.2	0
14.3	0
14.4	0
14.5	0
14.6	0
14.7	0
14.8	0
14.9	0
15	0
15.1	0
15.2	0
15.3	0
15.4	0
15.5	0
15.6	0
15.7	0
15.8	0
15.9	0
16	0
16.1	0
16.2	0
16.3	0
16.4	0
16.5	0
16.6	0
16.7	0
16.8	0
16.9	0
17	0
17.1	0
17.2	0
17.3	0
17.4	0
17.5	0
17.6	0
17.7	0
17.8	0
17.9	0
18	0
18.1	0
18.2	0
18.3	0
18.4	0
18.5	0
18.6	0
18.7	0
18.8	0
18.9	0
19	0
19.1	0
19.2	0
19.3	0
19.4	0
19.5	0
19.6	0
19.7	0
19.8	0
19.9	0
20	0
20.1	0
20.2	0
20.3	0
20.4	0
20.5	0
20.6	0
20.7	0
20.8	0
20.9	0
21	0
21.1	0
21.2	0
21.3	0
21.4	0
21.5	0
21.6	0
21.7	0
21.8	0
21.9	0
22	0
22.1	0
22.2	0
22.3	0
22.4	0
22.5	0
22.6	0
22.7	0
22.8	0
22.9	0
23	0
23.1	0
23.2	0
23.3	0
23.4	0
23.5	0
23.6	0
23.7	0
23.8	0
23.9	0
24	0
24.1	0
24.2	0
24.3	0
24.4	0
24.5	0
24.6	0
24.7	0
24.8	0
24.9	0
25	0
25.1	0
25.2	0
25.3	0
25.4	0
25.5	0
25.6	0
25.7	0
25.8	0
25.9	0
26	0
26.1	0
26.2	0
26.3	0
26.4	0
26.5	0
26.6	0
26.7	0
26.8	0
26.9	0
27	0
27.1	0
27.2	0
27.3	0
27.4	0
27.5	0
27.6	0
27.7	0
27.8	0
27.9	0
28	0
28.1	0
28.2	0
28.3	0
28.4	0
28.5	0
28.6	0
28.7	0
28.8	0
28.9	0
29	0
29.1	0
29.2	0
29.3	0
29.4	0
29.5	0
29.6	0
29.7	0
29.8	0
29.9	0
30	0
30.1	0
30.2	0
30.3	0
30.4	0
30.5	0
30.6	0
30.7	0
30.8	0
30.9	0
31	0
31.1	0
31.2	0
31.3	0
31.4	0
31.5	0
31.6	0
31.7	0
31.8	0
31.9	0
32	0
32.1	0
32.2	0
32.3	0
32.4	0
32.5	0
32.6	0
32.7	0
32.8	0
32.9	0
33	0
33.1	0
33.2	0
33.3	0
33.4	0
33.5	0
33.6	0
33.7	0
33.8	0
33.9	0
34	0
34.1	0
34.2	0
34.3	0
34.4	0
34.5	0
34.6	0
34.7	0
34.8	0
34.9	0
35	0
35.1	0
35.2	0
35.3	0
35.4	0
35.5	0
35.6	0
35.7	0
35.8	0
35.9	0
36	0
36.1	0
36.2	0
36.3	0
36.4	0
36.5	0
36.6	0
36.7	0
36.8	0
36.9	0
37	0
37.1	0
37.2	0
37.3	0
37.4	0
37.5	0
37.6	0
37.7	0
37.8	0
37.9	0
38	0
38.1	0
38.2	0
38.3	0
38.4	0
38.5	0
38.6	0
38.7	0
38.8	0
38.9	0
39	0
39.1	0
39.2	0
39.3	0
39.4	0
39.5	0
39.6	0
39.7	0
39.8	0
39.9	0
40	0
40.1	0
40.2	0
40.3	0
40.4	0
40.5	0
40.6	0
40.7	0
40.8	0
40.9	0
41	0
41.1	0
41.2	0
41.3	0
41.4	0
41.5	0
41.6	0
41.7	0
41.8	0
41.9	0
42	0
42.1	0
42.2	0
42.3	0
42.4	0
42.5	0
42.6	0
42.7	0
42.8	0
42.9	0
43	0
43.1	0
43.2	0
43.3	0
43.4	0
43.5	0
43.6	0
43.7	0
43.8	0
43.9	0
44	0
44.1	0
44.2	0
44.3	0
44.4	0
44.5	0
44.6	0
44.7	0
44.8	0
44.9	0
45	0
45.1	0
45.2	0
45.3	0
45.4	0
45.5	0
45.6	0
45.7	0
45.8	0
45.9	0
46	0
46.1	0
46.2	0
46.3	0
46.4	0
46.5	0
46.6	0
46.7	0
46.8	0
46.9	0
47	0
47.1	0
47.2	0
47.3	0
47.4	0
47.5	0
47.6	0
47.7	0
47.8	0
47.9	0
48	0
48.1	0
48.2	0
48.3	0
48.4	0
48.5	0
48.6	0
48.7	0
48.8	0
48.9	0
49	0
49.1	0
49.2	0
49.3	0
49.4	0
49.5	0
49.6	0
49.7	0
49.8	0
49.9	0
50	0
50.1	0
50.2	0
50.3	0
50.4	0
50.5	0
50.6	0
50.7	0
50.8	0
50.9	0
51	0
51.1	0
51.2	0
51.3	0
51.4	0
51.5	0
51.6	0
51.7	0
51.8	0
51.9	0
52	0
52.1	0
52.2	0
52.3	0
52.4	0
52.5	0
52.6	0
52.7	0
52.8	0
52.9	0
53	0
53.1	0
53.2	0
53.3	0
53.4	0
53.5	0
53.6	0
53.7	0
53.8	0
53.9	0
54	0
54.1	0
54.2	0
54.3	0
54.4	0
54.5	0
54.6	0
54.7	0
54.8	0
54.9	0
55	0
55.1	0
55.2	0
55.3	0
55.4	0
55.5	0
55.6	0
55.7	0
55.8	0
55.9	0
56	0
56.1	0
56.2	0
56.3	0
56.4	0
56.5	0
56.6	0
56.7	0
56.8	0
56.9	0
57	0
57.1	0
57.2	0
57.3	0
57.4	0
57.5	0
57.6	0
57.7	0
57.8	0
57.9	0
58	0
58.1	0
58.2	0
58.3	0
58.4	0
58.5	0
58.6	0
58.7	0
58.8	0
58.9	0
59	0
59.1	0
59.2	0
59.3	0
59.4	0
59.5	0
59.6	0
59.7	0
59.8	0
59.9	0
60	0
60.1	0
60.2	0
60.3	0
60.4	0
60.5	0
60.6	0
60.7	0
60.8	0
60.9	0
61	0
61.1	0
61.2	0
61.3	0
61.4	0
61.5	0
61.6	0
61.7	0
61.8	0
61.9	0
62	0
62.1	0
62.2	0
62.3	0
62.4	0
62.5	0
62.6	0
62.7	0
62.8	0
62.9	0
63	0
63.1	0
63.2	0
63.3	0
63.4	0
63.5	0
63.6	0
63.7	0
63.8	0
63.9	0
64	0
64.1	0
64.2	0
64.3	0
64.4	0
64.5	0
64.6	0
64.7	0
64.8	0
64.9	0
65	0
65.1	0
65.2	0
65.3	0
65.4	0
65.5	0
65.6	0
65.7	0
65.8	0
65.9	0
66	0
66.1	0
66.2	0
66.3	0
66.4	0
66.5	0
66.6	0
66.7	0
66.8	0
66.9	0
67	0
67.1	0
67.2	0
67.3	0
67.4	0
67.5	0
67.6	0
67.7	0
67.8	0
67.9	0
68	0
68.1	0
68.2	0
68.3	0
68.4	0
68.5	0
68.6	0
68.7	0
68.8	0
68.9	0
69	0
69.1	0
69.2	0
69.3	0
69.4	0
69.5	0
69.6	0
69.7	0
69.8	0
69.9	0
70	0
70.1	0
70.2	0
70.3	0
70.4	0
70.5	0
70.6	0
70.7	0
70.8	0
70.9	0
71	0
71.1	0
71.2	0
71.3	0
71.4	0
71.5	0
71.6	0
71.7	0
71.8	0
71.9	0
72	0
72.1	0
72.2	0
72.3	0
72.4	0
72.5	0
72.6	0
72.7	0
72.8	0
72.9	0
73	0
73.1	0
73.2	0
73.3	0
73.4	0
73.5	0
73.6	0
73.7	0
73.8	0
73.9	0
74	0
74.1	0
74.2	0
74.3	0
74.4	0
74.5	0
74.6	0
74.7	0
74.8	0
74.9	0
75	0
75.1	0
75.2	0
75.3	0
75.4	0
75.5	0
75.6	0
75.7	0
75.8	0
75.9	0
76	0
76.1	0
76.2	0
76.3	0
76.4	0
76.5	0
76.6	0
76.7	0
76.8	0
76.9	0
77	0
77.1	0
77.2	0
77.3	0
77.4	0
77.5	0
77.6	0
77.7	0
77.8	0
77.9	0
78	0
78.1	0
78.2	0
78.3	0
78.4	0
78.5	0
78.6	0
78.7	0
78.8	0
78.9	0
79	0
79.1	0
79.2	0
79.3	0
79.4	0
79.5	0
79.6	0
79.7	0
79.8	0
79.9	0
80	0
80.1	0
80.2	0
80.3	0
80.4	0
80.5	0
80.6	0
80.7	0
80.8	0
80.9	0
81	0
81.1	0
81.2	0
81.3	0
81.4	0
81.5	0
81.6	0
81.7	0
81.8	0
81.9	0
82	0
82.1	0
82.2	0
82.3	0
82.4	0
82.5	0
82.6	0
82.7	0
82.8	0
82.9	0
83	0
83.1	0
83.2	0
83.3	0
83.4	0
83.5	0
83.6	0
83.7	0
83.8	0
83.9	0
84	0
84.1	0
84.2	0
84.3	0
84.4	0
84.5	0
84.6	0
84.7	0
84.8	0
84.9	0
85	0
85.1	0
85.2	0
85.3	0
85.4	0
85.5	0
85.6	0
85.7	0
85.8	0
85.9	0
86	0
86.1	0
86.2	0
86.3	0
86.4	0
86.5	0
86.6	0
86.7	0
86.8	0
86.9	0
87	0
87.1	0
87.2	0
87.3	0
87.4	0
87.5	0
87.6	0
87.7	0
87.8	0
87.9	0
88	0
88.1	0
88.2	0
88.3	0
88.4	0
88.5	0
88.6	0
88.7	0
88.8	0
88.9	0
89	0
89.1	0
89.2	0
89.3	0
89.4	0
89.5	0
89.6	0
89.7	0
89.8	0
89.9	0
90	0
90.1	0
90.2	0
90.3	0
90.4	0
90.5	0
90.6	0
90.7	0
90.8	0
90.9	0
91	0
91.1	0
91.2	0
91.3	0
91.4	0
91.5	0
91.6	0
91.7	0
91.8	0
91.9	0
92	0
92.1	0
92.2	0
92.3	0
92.4	0
92.5	0
92.6	0
92.7	0
92.8	0
92.9	0
93	0
93.1	0
93.2	0
93.3	0
93.4	0
93.5	0
93.6	0
93.7	0
93.8	0
93.9	0
94	0
94.1	0
94.2	0
94.3	0
94.4	0
94.5	0
94.6	0
94.7	0
94.8	0
94.9	0
95	0
95.1	0
95.2	0
95.3	0
95.4	0
95.5	0
95.6	0
95.7	0
95.8	0
95.9	0
96	0
96.1	0
96.2	0
96.3	0
96.4	0
96.5	0
96.6	0
96.7	0
96.8	0
96.9	0
97	0
97.1	0
97.2	0
97.3	0
97.4	0
97.5	0
97.6	0
97.7	0
97.8	0
97.9	0
98	0
98.1	0
98.2	0
98.3	0
98.4	0
98.5	0
98.6	0
98.7	0
98.8	0
98.9	0
99	0
99.1	0
99.2	0
99.3	0
99.4	0
99.5	0
99.6	0
99.7	0
99.8	0
99.9	0
100	0
100.1	2.8432e-06
100.2	2.15705e-05
100.3	6.90826e-05
100.4	0.000155486
100.5	0.000288534
100.6	0.000474004
100.7	0.000716026
100.8	0.00101736
100.9	0.00137962
101	0.0018035
101.1	0.00228893
101.2	0.00283523
101.3	0.00344124
101.4	0.00410539
101.5	0.00482584
101.6	0.00560052
101.7	0.00642721
101.8	0.00730356
101.9	0.00822719
102	0.00919567
102.1	0.0102066
102.2	0.0112575
102.3	0.012346
102.4	0.01347
102.5	0.014627
102.6	0.0158149
102.7	0.0170318
102.8	0.0182755
102.9	0.0195441
103	0.0208359
103.1	0.0221491
103.2	0.0234821
103.3	0.0248333
103.4	0.0262013
103.5	0.0275846
103.6	0.028982
103.7	0.0303923
103.8	0.0318142
103.9	0.0332468
104	0.034689
104.1	0.0361398
104.2	0.0375984
104.3	0.039064
104.4	0.0405357
104.5	0.0420129
104.6	0.0434948
104.7	0.0449809
104.8	0.0464705
104.9	0.0479632
105	0.0494584
105.1	0.0509556
105.2	0.0524544
105.3	0.0539544
105.4	0.0554553
105.5	0.0569566
105.6	0.058458
105.7	0.0599593
105.8	0.0614602
105.9	0.0629603
106	0.0644596
106.1	0.0659577
106.2	0.0674544
106.3	0.0689496
106.4	0.070443
106.5	0.0719346
106.6	0.0734241
106.7	0.0749115
106.8	0.0763966
106.9	0.0778793
107	0.0793594
107.1	0.080837
107.2	0.0823118
107.3	0.0837838
107.4	0.085253
107.5	0.0867192
107.6	0.0881824
107.7	0.0896426
107.8	0.0910997
107.9	0.0925535
108	0.0940042
108.1	0.0954516
108.2	0.0968958
108.3	0.0983366
108.4	0.0997741
108.5	0.101208
108.6	0.102639
108.7	0.104066
108.8	0.10549
108.9	0.10691
109	0.108327
109.1	0.109741
109.2	0.111151
109.3	0.112557
109.4	0.11396
109.5	0.115359
109.6	0.116755
109.7	0.118147
109.8	0.119536
109.9	0.120921
110	0.122303
110.1	0.123681
110.2	0.125055
110.3	0.126426
110.4	0.127794
110.5	0.129158
110.6	0.130518
110.7	0.131875
110.8	0.133228
110.9	0.134578
111	0.135924
111.1	0.137267
111.2	0.138606
111.3	0.139942
111.4	0.141274
111.5	0.142603
111.6	0.143928
111.7	0.145249
111.8	0.146568
111.9	0.147882
112	0.149194
112.1	0.150501
112.2	0.151806
112.3	0.153106
112.4	0.154404
112.5	0.155698
112.6	0.156988
112.7	0.158276
112.8	0.159559
112.9	0.16084
113	0.162117
113.1	0.16339
113.2	0.16466
113.3	0.165927
113.4	0.167191
113.5	0.168451
113.6	0.169707
113.7	0.170961
113.8	0.172211
113.9	0.173458
114	0.174701
114.1	0.175941
114.2	0.177178
114.3	0.178412
114.4	0.179642
114.5	0.180869
114.6	0.182093
114.7	0.183313
114.8	0.18453
114.9	0.185744
115	0.186955
115.1	0.188163
115.2	0.189367
115.3	0.190568
115.4	0.191766
115.5	0.192961
115.6	0.194153
115.7	0.195341
115.8	0.196526
115.9	0.197708
116	0.198887
116.1	0.200063
116.2	0.201236
116.3	0.202405
116.4	0.203572
116.5	0.204735
116.6	0.205895
116.7	0.207053
116.8	0.208207
116.9	0.209358
117	0.210506
117.1	0.21165
117.2	0.212792
117.3	0.213931
117.4	0.215067
117.5	0.2162
117.6	0.217329
117.7	0.218456
117.8	0.21958
117.9	0.220701
118	0.221818
118.1	0.222933
118.2	0.224045
118.3	0.225154
118.4	0.22626
118.5	0.227363
118.6	0.228463
118.7	0.22956
118.8	0.230654
118.9	0.231745
119	0.232833
119.1	0.233919
119.2	0.235001
119.3	0.236081
119.4	0.237158
119.5	0.238232
119.6	0.239303
119.7	0.240371
119.8	0.241437
119.9	0.242499
120	0.243559
120.1	0.244616
120.2	0.24567
120.3	0.246721
120.4	0.24777
120.5	0.248815
120.6	0.249858
120.7	0.250898
120.8	0.251936
120.9	0.25297
121	0.254002
121.1	0.255031
121.2	0.256058
121.3	0.257081
121.4	0.258102
121.5	0.25912
121.6	0.260136
121.7	0.261149
121.8	0.262159
121.9	0.263166
122	0.264171
122.1	0.265173
122.2	0.266172
122.3	0.267169
122.4	0.268163
122.5	0.269154
122.6	0.270143
122.7	0.271129
122.8	0.272113
122.9	0.273094
123	0.274072
123.1	0.275048
123.2	0.276021
123.3	0.276991
123.4	0.277959
123.5	0.278924
123.6	0.279887
123.7	0.280847
123.8	0.281805
123.9	0.28276
124	0.283713
124.1	0.284663
124.2	0.28561
124.3	0.286555
124.4	0.287497
124.5	0.288437
124.6	0.289375
124.7	0.29031
124.8	0.291242
124.9	0.292172
125	0.2931
125.1	0.294025
125.2	0.294947
125.3	0.295867
125.4	0.296785
125.5	0.2977
125.6	0.298613
125.7	0.299523
125.8	0.300431
125.9	0.301337
126	0.30224
126.1	0.30314
126.2	0.304039
126.3	0.304935
126.4	0.305828
126.5	0.306719
126.6	0.307608
126.7	0.308494
126.8	0.309378
126.9	0.31026
127	0.311139
127.1	0.312016
127.2	0.312891
127.3	0.313763
127.4	0.314633
127.5	0.315501
127.6	0.316367
127.7	0.31723
127.8	0.31809
127.9	0.318949
128	0.319805
128.1	0.320659
128.2	0.321511
128.3	0.32236
128.4	0.323207
128.5	0.324052
128.6	0.324895
128.7	0.325735
128.8	0.326573
128.9	0.327409
129	0.328243
129.1	0.329074
129.2	0.329903
129.3	0.33073
129.4	0.331555
129.5	0.332378
129.6	0.333198
129.7	0.334017
129.8	0.334833
129.9	0.335647
130	0.336458
130.1	0.337268
130.2	0.338075
130.3	0.338881
130.4	0.339684
130.5	0.340485
130.6	0.341284
130.7	0.34208
130.8	0.342875
130.9	0.343668
131	0.344458
131.1	0.345246
131.2	0.346033
131.3	0.346817
131.4	0.347599
131.5	0.348379
131.6	0.349156
131.7	0.349932
131.8	0.350706
131.9	0.351478
132	0.352247
132.1	0.353015
132.2	0.35378
132.3	0.354544
132.4	0.355305
132.5	0.356065
132.6	0.356822
132.7	0.357577
132.8	0.358331
132.9	0.359082
133	0.359831
133.1	0.360579
133.2	0.361324
133.3	0.362068
133.4	0.362809
133.5	0.363548
133.6	0.364286
133.7	0.365021
133.8	0.365755
133.9	0.366487
134	0.367216
134.1	0.367944
134.2	0.36867
134.3	0.369394
134.4	0.370115
134.5	0.370835
134.6	0.371554
134.7	0.37227
134.8	0.372984
134.9	0.373696
135	0.374407
135.1	0.375115
135.2	0.375822
135.3	0.376527
135.4	0.37723
135.5	0.377931
135.6	0.37863
135.7	0.379327
135.8	0.380023
135.9	0.380716
136	0.381408
136.1	0.382098
136.2	0.382786
136.3	0.383472
136.4	0.384157
136.5	0.384839
136.6	0.38552
136.7	0.386199
136.8	0.386876
136.9	0.387552
137	0.388225
137.1	0.388897
137.2	0.389567
137.3	0.390235
137.4	0.390902
137.5	0.391566
137.6	0.392229
137.7	0.39289
137.8	0.39355
137.9	0.394207
138	0.394863
138.1	0.395517
138.2	0.39617
138.3	0.39682
138.4	0.397469
138.5	0.398116
138.6	0.398762
138.7	0.399406
138.8	0.400048
138.9	0.400688
139	0.401326
139.1	0.401963
139.2	0.402599
139.3	0.403232
139.4	0.403864
139.5	0.404494
139.6	0.405123
139.7	0.405749
139.8	0.406374
139.9	0.406998
140	0.40762
140.1	0.40824
140.2	0.408858
140.3	0.409475
140.4	0.41009
140.5	0.410704
140.6	0.411316
140.7	0.411926
140.8	0.412535
140.9	0.413142
141	0.413747
141.1	0.414351
141.2	0.414953
141.3	0.415554
141.4	0.416153
141.5	0.416751
141.6	0.417346
141.7	0.417941
141.8	0.418533
141.9	0.419124
142	0.419714
142.1	0.420302
142.2	0.420888
142.3	0.421473
142.4	0.422056
142.5	0.422638
142.6	0.423218
142.7	0.423797
142.8	0.424374
142.9	0.424949
143	0.425524
143.1	0.426096
143.2	0.426667
143.3	0.427236
143.4	0.427804
143.5	0.428371
143.6	0.428936
143.7	0.429499
143.8	0.430061
143.9	0.430621
144	0.43118
144.1	0.431738
144.2	0.432294
144.3	0.432848
144.4	0.433401
144.5	0.433953
144.6	0.434503
144.7	0.435051
144.8	0.435598
144.9	0.436144
145	0.436688
145.1	0.437231
145.2	0.437772
145.3	0.438312
145.4	0.438851
145.5	0.439388
145.6	0.439923
145.7	0.440457
145.8	0.44099
145.9	0.441521
146	0.442051
146.1	0.44258
146.2	0.443107
146.3	0.443633
146.4	0.444157
146.5	0.44468
146.6	0.445201
146.7	0.445721
146.8	0.44624
146.9	0.446757
147	0.447273
147.1	0.447788
147.2	0.448301
147.3	0.448813
147.4	0.449323
147.5	0.449833
147.6	0.45034
147.7	0.450847
147.8	0.451352
147.9	0.451856
148	0.452358
148.1	0.452859
148.2	0.453359
148.3	0.453857
148.4	0.454354
148.5	0.45485
148.6	0.455344
148.7	0.455837
148.8	0.456329
148.9	0.45682
149	0.457309
149.1	0.457797
149.2	0.458283
149.3	0.458768
149.4	0.459252
149.5	0.459735
149.6	0.460217
149.7	0.460697
149.8	0.461176
149.9	0.461653
150	0.462129
150.1	0.462604
150.2	0.463078
150.3	0.463551
150.4	0.464022
150.5	0.464492
150.6	0.464961
150.7	0.465428
150.8	0.465894
150.9	0.466359
151	0.466823
151.1	0.467286
151.2	0.467747
151.3	0.468207
151.4	0.468666
151.5	0.469124
151.6	0.46958
151.7	0.470035
151.8	0.470489
151.9	0.470942
152	0.471394
152.1	0.471844
152.2	0.472293
152.3	0.472741
152.4	0.473188
152.5	0.473634
152.6	0.474078
152.7	0.474521
152.8	0.474963
152.9	0.475404
153	0.475844
153.1	0.476282
153.2	0.47672
153.3	0.477156
153.4	0.477591
153.5	0.478025
153.6	0.478457
153.7	0.478889
153.8	0.479319
153.9	0.479749
154	0.480177
154.1	0.480604
154.2	0.48103
154.3	0.481454
154.4	0.481878
154.5	0.4823
154.6	0.482722
154.7	0.483142
154.8	0.483561
154.9	0.483979
155	0.484396
155.1	0.484812
155.2	0.485226
155.3	0.48564
155.4	0.486052
155.5	0.486464
155.6	0.486874
155.7	0.487283
155.8	0.487691
155.9	0.488098
156	0.488504
156.1	0.488909
156.2	0.489313
156.3	0.489715
156.4	0.490117
156.5	0.490517
156.6	0.490917
156.7	0.491315
156.8	0.491713
156.9	0.492109
157	0.492504
157.1	0.492898
157.2	0.493291
157.3	0.493683
157.4	0.494075
157.5	0.494465
157.6	0.494853
157.7	0.495241
157.8	0.495628
157.9	0.496014
158	0.496399
158.1	0.496783
158.2	0.497166
158.3	0.497547
158.4	0.497928
158.5	0.498308
158.6	0.498687
158.7	0.499064
158.8	0.499441
158.9	0.499817
159	0.500191
159.1	0.500565
159.2	0.500938
159.3	0.501309
159.4	0.50168
159.5	0.50205
159.6	0.502419
159.7	0.502786
159.8	0.503153
159.9	0.503519
160	0.503884
160.1	0.504248
160.2	0.504611
160.3	0.504973
160.4	0.505334
160.5	0.505694
160.6	0.506053
160.7	0.506411
160.8	0.506768
160.9	0.507124
161	0.507479
161.1	0.507834
161.2	0.508187
161.3	0.50854
161.4	0.508891
161.5	0.509242
161.6	0.509591
161.7	0.50994
161.8	0.510288
161.9	0.510634
162	0.51098
162.1	0.511325
162.2	0.511669
162.3	0.512013
162.4	0.512355
162.5	0.512696
162.6	0.513037
162.7	0.513376
162.8	0.513715
162.9	0.514052
163	0.514389
163.1	0.514725
163.2	0.51506
163.3	0.515394
163.4	0.515727
163.5	0.51606
163.6	0.516391
163.7	0.516722
163.8	0.517052
163.9	0.51738
164	0.517708
164.1	0.518035
164.2	0.518362
164.3	0.518687
164.4	0.519011
164.5	0.519335
164.6	0.519658
164.7	0.51998
164.8	0.520301
164.9	0.520621
165	0.52094
165.1	0.521259
165.2	0.521576
165.3	0.521893
165.4	0.522209
165.5	0.522524
165.6	0.522838
165.7	0.523152
165.8	0.523464
165.9	0.523776
166	0.524087
166.1	0.524397
166.2	0.524706
166.3	0.525015
166.4	0.525322
166.5	0.525629
166.6	0.525935
166.7	0.52624
166.8	0.526545
166.9	0.526848
167	0.527151
167.1	0.527453
167.2	0.527754
167.3	0.528054
167.4	0.528354
167.5	0.528653
167.6	0.528951
167.7	0.529248
167.8	0.529544
167.9	0.52984
168	0.530135
168.1	0.530429
168.2	0.530722
168.3	0.531014
168.4	0.531306
168.5	0.531597
168.6	0.531887
168.7	0.532176
168.8	0.532465
168.9	0.532752
169	0.533039
169.1	0.533326
169.2	0.533611
169.3	0.533896
169.4	0.53418
169.5	0.534463
169.6	0.534746
169.7	0.535027
169.8	0.535308
169.9	0.535589
170	0.535868
170.1	0.536147
170.2	0.536425
170.3	0.536702
170.4	0.536979
170.5	0.537254
170.6	0.537529
170.7	0.537804
170.8	0.538077
170.9	0.53835
171	0.538622
171.1	0.538894
171.2	0.539164
171.3	0.539434
171.4	0.539703
171.5	0.539972
171.6	0.54024
171.7	0.540507
171.8	0.540773
171.9	0.541039
172	0.541304
172.1	0.541568
172.2	0.541832
172.3	0.542095
172.4	0.542357
172.5	0.542618
172.6	0.542879
172.7	0.543139
172.8	0.543398
172.9	0.543657
173	0.543915
173.1	0.544172
173.2	0.544429
173.3	0.544685
173.4	0.54494
173.5	0.545195
173.6	0.545449
173.7	0.545702
173.8	0.545954
173.9	0.546206
174	0.546458
174.1	0.546708
174.2	0.546958
174.3	0.547207
174.4	0.547456
174.5	0.547704
174.6	0.547951
174.7	0.548197
174.8	0.548443
174.9	0.548689
175	0.548933
175.1	0.549177
175.2	0.54942
175.3	0.549663
175.4	0.549905
175.5	0.550146
175.6	0.550387
175.7	0.550627
175.8	0.550867
175.9	0.551105
176	0.551344
176.1	0.551581
176.2	0.551818
176.3	0.552054
176.4	0.55229
176.5	0.552525
176.6	0.552759
176.7	0.552993
176.8	0.553226
176.9	0.553459
177	0.553691
177.1	0.553922
177.2	0.554153
177.3	0.554383
177.4	0.554612
177.5	0.554841
177.6	0.555069
177.7	0.555297
177.8	0.555524
177.9	0.55575
178	0.555976
178.1	0.556201
178.2	0.556426
178.3	0.55665
178.4	0.556873
178.5	0.557096
178.6	0.557318
178.7	0.55754
178.8	0.557761
178.9	0.557981
179	0.558201
179.1	0.558421
179.2	0.558639
179.3	0.558857
179.4	0.559075
179.5	0.559292
179.6	0.559508
179.7	0.559724
179.8	0.559939
179.9	0.560154
180	0.560368
180.1	0.560581
180.2	0.560794
180.3	0.561007
180.4	0.561219
180.5	0.56143
180.6	0.56164
180.7	0.561851
180.8	0.56206
180.9	0.562269
181	0.562478
181.1	0.562686
181.2	0.562893
181.3	0.5631
181.4	0.563306
181.5	0.563512
181.6	0.563717
181.7	0.563921
181.8	0.564125
181.9	0.564329
182	0.564532
182.1	0.564734
182.2	0.564936
182.3	0.565137
182.4	0.565338
182.5	0.565539
182.6	0.565738
182.7	0.565938
182.8	0.566136
182.9	0.566334
183	0.566532
183.1	0.566729
183.2	0.566926
183.3	0.567122
183.4	0.567317
183.5	0.567512
183.6	0.567707
183.7	0.567901
183.8	0.568094
183.9	0.568287
184	0.56848
184.1	0.568671
184.2	0.568863
184.3	0.569054
184.4	0.569244
184.5	0.569434
184.6	0.569623
184.7	0.569812
184.8	0.570001
184.9	0.570188
185	0.570376
185.1	0.570563
185.2	0.570749
185.3	0.570935
185.4	0.57112
185.5	0.571305
185.6	0.57149
185.7	0.571673
185.8	0.571857
185.9	0.57204
186	0.572222
186.1	0.572404
186.2	0.572586
186.3	0.572767
186.4	0.572947
186.5	0.573127
186.6	0.573307
186.7	0.573486
186.8	0.573664
186.9	0.573842
187	0.57402
187.1	0.574197
187.2	0.574374
187.3	0.57455
187.4	0.574726
187.5	0.574901
187.6	0.575076
187.7	0.57525
187.8	0.575424
187.9	0.575598
188	0.575771
188.1	0.575943
188.2	0.576115
188.3	0.576287
188.4	0.576458
188.5	0.576629
188.6	0.576799
188.7	0.576969
188.8	0.577138
188.9	0.577307
189	0.577475
189.1	0.577643
189.2	0.577811
189.3	0.577978
189.4	0.578144
189.5	0.578311
189.6	0.578476
189.7	0.578642
189.8	0.578806
189.9	0.578971
190	0.579135
190.1	0.579298
190.2	0.579462
190.3	0.579624
190.4	0.579786
190.5	0.579948
190.6	0.58011
190.7	0.580271
190.8	0.580431
190.9	0.580591
191	0.580751
191.1	0.58091
191.2	0.581069
191.3	0.581227
191.4	0.581385
191.5	0.581543
191.6	0.5817
191.7	0.581857
191.8	0.582013
191.9	0.582169
192	0.582324
192.1	0.582479
192.2	0.582634
192.3	0.582788
192.4	0.582942
192.5	0.583096
192.6	0.583249
192.7	0.583401
192.8	0.583553
192.9	0.583705
193	0.583857
193.1	0.584008
193.2	0.584158
193.3	0.584308
193.4	0.584458
193.5	0.584607
193.6	0.584756
193.7	0.584905
193.8	0.585053
193.9	0.585201
194	0.585348
194.1	0.585495
194.2	0.585642
194.3	0.585788
194.4	0.585934
194.5	0.58608
194.6	0.586225
194.7	0.586369
194.8	0.586514
194.9	0.586657
195	0.586801
195.1	0.586944
195.2	0.587087
195.3	0.587229
195.4	0.587371
195.5	0.587513
195.6	0.587654
195.7	0.587795
195.8	0.587935
195.9	0.588076
196	0.588215
196.1	0.588355
196.2	0.588494
196.3	0.588632
196.4	0.588771
196.5	0.588909
196.6	0.589046
196.7	0.589183
196.8	0.58932
196.9	0.589456
197	0.589592
197.1	0.589728
197.2	0.589864
197.3	0.589999
197.4	0.590133
197.5	0.590267
197.6	0.590401
197.7	0.590535
197.8	0.590668
197.9	0.590801
198	0.590933
198.1	0.591066
198.2	0.591197
198.3	0.591329
198.4	0.59146
198.5	0.591591
198.6	0.591721
198.7	0.591851
198.8	0.591981
198.9	0.59211
199	0.592239
199.1	0.592368
199.2	0.592496
199.3	0.592624
199.4	0.592752
199.5	0.592879
199.6	0.593006
199.7	0.593133
199.8	0.593259
199.9	0.593385
200	0.59351
[truncated: 14,000 more rows]
