# Supplementary material for: Bayesian inference of kinetic schemes for ion channels by Kalman filtering
Source: eLife journal article supplement (doi:10.7554/elife.62714), 2022-05-04
Supplement: fig4-data6 [file 1_Sim_N_200_Fluor_MW_1M.xlsx]

## Sheet: 1 M
0.1	0
0.2	0
0.3	0
0.4	0
0.5	0
0.6	0
0.7	0
0.8	0
0.9	0
1	0
1.1	0
1.2	0
1.3	0
1.4	0
1.5	0
1.6	0
1.7	0
1.8	0
1.9	0
2	0
2.1	0
2.2	0
2.3	0
2.4	0
2.5	0
2.6	0
2.7	0
2.8	0
2.9	0
3	0
3.1	0
3.2	0
3.3	0
3.4	0
3.5	0
3.6	0
3.7	0
3.8	0
3.9	0
4	0
4.1	0
4.2	0
4.3	0
4.4	0
4.5	0
4.6	0
4.7	0
4.8	0
4.9	0
5	0
5.1	0
5.2	0
5.3	0
5.4	0
5.5	0
5.6	0
5.7	0
5.8	0
5.9	0
6	0
6.1	0
6.2	0
6.3	0
6.4	0
6.5	0
6.6	0
6.7	0
6.8	0
6.9	0
7	0
7.1	0
7.2	0
7.3	0
7.4	0
7.5	0
7.6	0
7.7	0
7.8	0
7.9	0
8	0
8.1	0
8.2	0
8.3	0
8.4	0
8.5	0
8.6	0
8.7	0
8.8	0
8.9	0
9	0
9.1	0
9.2	0
9.3	0
9.4	0
9.5	0
9.6	0
9.7	0
9.8	0
9.9	0
10	0
10.1	0
10.2	0
10.3	0
10.4	0
10.5	0
10.6	0
10.7	0
10.8	0
10.9	0
11	0
11.1	0
11.2	0
11.3	0
11.4	0
11.5	0
11.6	0
11.7	0
11.8	0
11.9	0
12	0
12.1	0
12.2	0
12.3	0
12.4	0
12.5	0
12.6	0
12.7	0
12.8	0
12.9	0
13	0
13.1	0
13.2	0
13.3	0
13.4	0
13.5	0
13.6	0
13.7	0
13.8	0
13.9	0
14	0
14.1	0
14.2	0
14.3	0
14.4	0
14.5	0
14.6	0
14.7	0
14.8	0
14.9	0
15	0
15.1	0
15.2	0
15.3	0
15.4	0
15.5	0
15.6	0
15.7	0
15.8	0
15.9	0
16	0
16.1	0
16.2	0
16.3	0
16.4	0
16.5	0
16.6	0
16.7	0
16.8	0
16.9	0
17	0
17.1	0
17.2	0
17.3	0
17.4	0
17.5	0
17.6	0
17.7	0
17.8	0
17.9	0
18	0
18.1	0
18.2	0
18.3	0
18.4	0
18.5	0
18.6	0
18.7	0
18.8	0
18.9	0
19	0
19.1	0
19.2	0
19.3	0
19.4	0
19.5	0
19.6	0
19.7	0
19.8	0
19.9	0
20	0
20.1	0
20.2	0
20.3	0
20.4	0
20.5	0
20.6	0
20.7	0
20.8	0
20.9	0
21	0
21.1	0
21.2	0
21.3	0
21.4	0
21.5	0
21.6	0
21.7	0
21.8	0
21.9	0
22	0
22.1	0
22.2	0
22.3	0
22.4	0
22.5	0
22.6	0
22.7	0
22.8	0
22.9	0
23	0
23.1	0
23.2	0
23.3	0
23.4	0
23.5	0
23.6	0
23.7	0
23.8	0
23.9	0
24	0
24.1	0
24.2	0
24.3	0
24.4	0
24.5	0
24.6	0
24.7	0
24.8	0
24.9	0
25	0
25.1	0
25.2	0
25.3	0
25.4	0
25.5	0
25.6	0
25.7	0
25.8	0
25.9	0
26	0
26.1	0
26.2	0
26.3	0
26.4	0
26.5	0
26.6	0
26.7	0
26.8	0
26.9	0
27	0
27.1	0
27.2	0
27.3	0
27.4	0
27.5	0
27.6	0
27.7	0
27.8	0
27.9	0
28	0
28.1	0
28.2	0
28.3	0
28.4	0
28.5	0
28.6	0
28.7	0
28.8	0
28.9	0
29	0
29.1	0
29.2	0
29.3	0
29.4	0
29.5	0
29.6	0
29.7	0
29.8	0
29.9	0
30	0
30.1	0
30.2	0
30.3	0
30.4	0
30.5	0
30.6	0
30.7	0
30.8	0
30.9	0
31	0
31.1	0
31.2	0
31.3	0
31.4	0
31.5	0
31.6	0
31.7	0
31.8	0
31.9	0
32	0
32.1	0
32.2	0
32.3	0
32.4	0
32.5	0
32.6	0
32.7	0
32.8	0
32.9	0
33	0
33.1	0
33.2	0
33.3	0
33.4	0
33.5	0
33.6	0
33.7	0
33.8	0
33.9	0
34	0
34.1	0
34.2	0
34.3	0
34.4	0
34.5	0
34.6	0
34.7	0
34.8	0
34.9	0
35	0
35.1	0
35.2	0
35.3	0
35.4	0
35.5	0
35.6	0
35.7	0
35.8	0
35.9	0
36	0
36.1	0
36.2	0
36.3	0
36.4	0
36.5	0
36.6	0
36.7	0
36.8	0
36.9	0
37	0
37.1	0
37.2	0
37.3	0
37.4	0
37.5	0
37.6	0
37.7	0
37.8	0
37.9	0
38	0
38.1	0
38.2	0
38.3	0
38.4	0
38.5	0
38.6	0
38.7	0
38.8	0
38.9	0
39	0
39.1	0
39.2	0
39.3	0
39.4	0
39.5	0
39.6	0
39.7	0
39.8	0
39.9	0
40	0
40.1	0
40.2	0
40.3	0
40.4	0
40.5	0
40.6	0
40.7	0
40.8	0
40.9	0
41	0
41.1	0
41.2	0
41.3	0
41.4	0
41.5	0
41.6	0
41.7	0
41.8	0
41.9	0
42	0
42.1	0
42.2	0
42.3	0
42.4	0
42.5	0
42.6	0
42.7	0
42.8	0
42.9	0
43	0
43.1	0
43.2	0
43.3	0
43.4	0
43.5	0
43.6	0
43.7	0
43.8	0
43.9	0
44	0
44.1	0
44.2	0
44.3	0
44.4	0
44.5	0
44.6	0
44.7	0
44.8	0
44.9	0
45	0
45.1	0
45.2	0
45.3	0
45.4	0
45.5	0
45.6	0
45.7	0
45.8	0
45.9	0
46	0
46.1	0
46.2	0
46.3	0
46.4	0
46.5	0
46.6	0
46.7	0
46.8	0
46.9	0
47	0
47.1	0
47.2	0
47.3	0
47.4	0
47.5	0
47.6	0
47.7	0
47.8	0
47.9	0
48	0
48.1	0
48.2	0
48.3	0
48.4	0
48.5	0
48.6	0
48.7	0
48.8	0
48.9	0
49	0
49.1	0
49.2	0
49.3	0
49.4	0
49.5	0
49.6	0
49.7	0
49.8	0
49.9	0
50	0
50.1	0
50.2	0
50.3	0
50.4	0
50.5	0
50.6	0
50.7	0
50.8	0
50.9	0
51	0
51.1	0
51.2	0
51.3	0
51.4	0
51.5	0
51.6	0
51.7	0
51.8	0
51.9	0
52	0
52.1	0
52.2	0
52.3	0
52.4	0
52.5	0
52.6	0
52.7	0
52.8	0
52.9	0
53	0
53.1	0
53.2	0
53.3	0
53.4	0
53.5	0
53.6	0
53.7	0
53.8	0
53.9	0
54	0
54.1	0
54.2	0
54.3	0
54.4	0
54.5	0
54.6	0
54.7	0
54.8	0
54.9	0
55	0
55.1	0
55.2	0
55.3	0
55.4	0
55.5	0
55.6	0
55.7	0
55.8	0
55.9	0
56	0
56.1	0
56.2	0
56.3	0
56.4	0
56.5	0
56.6	0
56.7	0
56.8	0
56.9	0
57	0
57.1	0
57.2	0
57.3	0
57.4	0
57.5	0
57.6	0
57.7	0
57.8	0
57.9	0
58	0
58.1	0
58.2	0
58.3	0
58.4	0
58.5	0
58.6	0
58.7	0
58.8	0
58.9	0
59	0
59.1	0
59.2	0
59.3	0
59.4	0
59.5	0
59.6	0
59.7	0
59.8	0
59.9	0
60	0
60.1	0
60.2	0
60.3	0
60.4	0
60.5	0
60.6	0
60.7	0
60.8	0
60.9	0
61	0
61.1	0
61.2	0
61.3	0
61.4	0
61.5	0
61.6	0
61.7	0
61.8	0
61.9	0
62	0
62.1	0
62.2	0
62.3	0
62.4	0
62.5	0
62.6	0
62.7	0
62.8	0
62.9	0
63	0
63.1	0
63.2	0
63.3	0
63.4	0
63.5	0
63.6	0
63.7	0
63.8	0
63.9	0
64	0
64.1	0
64.2	0
64.3	0
64.4	0
64.5	0
64.6	0
64.7	0
64.8	0
64.9	0
65	0
65.1	0
65.2	0
65.3	0
65.4	0
65.5	0
65.6	0
65.7	0
65.8	0
65.9	0
66	0
66.1	0
66.2	0
66.3	0
66.4	0
66.5	0
66.6	0
66.7	0
66.8	0
66.9	0
67	0
67.1	0
67.2	0
67.3	0
67.4	0
67.5	0
67.6	0
67.7	0
67.8	0
67.9	0
68	0
68.1	0
68.2	0
68.3	0
68.4	0
68.5	0
68.6	0
68.7	0
68.8	0
68.9	0
69	0
69.1	0
69.2	0
69.3	0
69.4	0
69.5	0
69.6	0
69.7	0
69.8	0
69.9	0
70	0
70.1	0
70.2	0
70.3	0
70.4	0
70.5	0
70.6	0
70.7	0
70.8	0
70.9	0
71	0
71.1	0
71.2	0
71.3	0
71.4	0
71.5	0
71.6	0
71.7	0
71.8	0
71.9	0
72	0
72.1	0
72.2	0
72.3	0
72.4	0
72.5	0
72.6	0
72.7	0
72.8	0
72.9	0
73	0
73.1	0
73.2	0
73.3	0
73.4	0
73.5	0
73.6	0
73.7	0
73.8	0
73.9	0
74	0
74.1	0
74.2	0
74.3	0
74.4	0
74.5	0
74.6	0
74.7	0
74.8	0
74.9	0
75	0
75.1	0
75.2	0
75.3	0
75.4	0
75.5	0
75.6	0
75.7	0
75.8	0
75.9	0
76	0
76.1	0
76.2	0
76.3	0
76.4	0
76.5	0
76.6	0
76.7	0
76.8	0
76.9	0
77	0
77.1	0
77.2	0
77.3	0
77.4	0
77.5	0
77.6	0
77.7	0
77.8	0
77.9	0
78	0
78.1	0
78.2	0
78.3	0
78.4	0
78.5	0
78.6	0
78.7	0
78.8	0
78.9	0
79	0
79.1	0
79.2	0
79.3	0
79.4	0
79.5	0
79.6	0
79.7	0
79.8	0
79.9	0
80	0
80.1	0
80.2	0
80.3	0
80.4	0
80.5	0
80.6	0
80.7	0
80.8	0
80.9	0
81	0
81.1	0
81.2	0
81.3	0
81.4	0
81.5	0
81.6	0
81.7	0
81.8	0
81.9	0
82	0
82.1	0
82.2	0
82.3	0
82.4	0
82.5	0
82.6	0
82.7	0
82.8	0
82.9	0
83	0
83.1	0
83.2	0
83.3	0
83.4	0
83.5	0
83.6	0
83.7	0
83.8	0
83.9	0
84	0
84.1	0
84.2	0
84.3	0
84.4	0
84.5	0
84.6	0
84.7	0
84.8	0
84.9	0
85	0
85.1	0
85.2	0
85.3	0
85.4	0
85.5	0
85.6	0
85.7	0
85.8	0
85.9	0
86	0
86.1	0
86.2	0
86.3	0
86.4	0
86.5	0
86.6	0
86.7	0
86.8	0
86.9	0
87	0
87.1	0
87.2	0
87.3	0
87.4	0
87.5	0
87.6	0
87.7	0
87.8	0
87.9	0
88	0
88.1	0
88.2	0
88.3	0
88.4	0
88.5	0
88.6	0
88.7	0
88.8	0
88.9	0
89	0
89.1	0
89.2	0
89.3	0
89.4	0
89.5	0
89.6	0
89.7	0
89.8	0
89.9	0
90	0
90.1	0
90.2	0
90.3	0
90.4	0
90.5	0
90.6	0
90.7	0
90.8	0
90.9	0
91	0
91.1	0
91.2	0
91.3	0
91.4	0
91.5	0
91.6	0
91.7	0
91.8	0
91.9	0
92	0
92.1	0
92.2	0
92.3	0
92.4	0
92.5	0
92.6	0
92.7	0
92.8	0
92.9	0
93	0
93.1	0
93.2	0
93.3	0
93.4	0
93.5	0
93.6	0
93.7	0
93.8	0
93.9	0
94	0
94.1	0
94.2	0
94.3	0
94.4	0
94.5	0
94.6	0
94.7	0
94.8	0
94.9	0
95	0
95.1	0
95.2	0
95.3	0
95.4	0
95.5	0
95.6	0
95.7	0
95.8	0
95.9	0
96	0
96.1	0
96.2	0
96.3	0
96.4	0
96.5	0
96.6	0
96.7	0
96.8	0
96.9	0
97	0
97.1	0
97.2	0
97.3	0
97.4	0
97.5	0
97.6	0
97.7	0
97.8	0
97.9	0
98	0
98.1	0
98.2	0
98.3	0
98.4	0
98.5	0
98.6	0
98.7	0
98.8	0
98.9	0
99	0
99.1	0
99.2	0
99.3	0
99.4	0
99.5	0
99.6	0
99.7	0
99.8	0
99.9	0
100	0
100.1	0.055
100.2	0.1125
100.3	0.1625
100.4	0.2025
100.5	0.2525
100.6	0.275
100.7	0.3125
100.8	0.34
100.9	0.37
101	0.3975
101.1	0.4175
101.2	0.4475
101.3	0.475
101.4	0.495
101.5	0.505
101.6	0.525
101.7	0.545
101.8	0.5425
101.9	0.5475
102	0.545
102.1	0.5625
102.2	0.5825
102.3	0.5975
102.4	0.6075
102.5	0.62
102.6	0.6125
102.7	0.6275
102.8	0.625
102.9	0.63
103	0.6425
103.1	0.6525
103.2	0.6525
103.3	0.645
103.4	0.6425
103.5	0.655
103.6	0.6575
103.7	0.6675
103.8	0.6675
103.9	0.6825
104	0.6775
104.1	0.6625
104.2	0.6625
104.3	0.67
104.4	0.6675
104.5	0.6725
104.6	0.6775
104.7	0.6875
104.8	0.6875
104.9	0.685
105	0.68
105.1	0.6825
105.2	0.6825
105.3	0.68
105.4	0.67
105.5	0.68
105.6	0.675
105.7	0.685
105.8	0.6875
105.9	0.6925
106	0.7
106.1	0.695
106.2	0.7025
106.3	0.7075
106.4	0.7075
106.5	0.705
106.6	0.685
106.7	0.69
106.8	0.69
106.9	0.6925
107	0.7
107.1	0.6925
107.2	0.68
107.3	0.68
107.4	0.6775
107.5	0.6825
107.6	0.695
107.7	0.7
107.8	0.6975
107.9	0.695
108	0.6925
108.1	0.69
108.2	0.6825
108.3	0.6825
108.4	0.7025
108.5	0.7025
108.6	0.7
108.7	0.6925
108.8	0.695
108.9	0.6875
109	0.6825
109.1	0.68
109.2	0.6975
109.3	0.69
109.4	0.695
109.5	0.6975
109.6	0.6975
109.7	0.6975
109.8	0.6875
109.9	0.69
110	0.7025
110.1	0.7025
110.2	0.695
110.3	0.7
110.4	0.6975
110.5	0.6975
110.6	0.7
110.7	0.69
110.8	0.6825
110.9	0.6775
111	0.6675
111.1	0.6675
111.2	0.6725
111.3	0.6725
111.4	0.68
111.5	0.685
111.6	0.685
111.7	0.6875
111.8	0.69
111.9	0.69
112	0.6875
112.1	0.685
112.2	0.68
112.3	0.67
112.4	0.68
112.5	0.6925
112.6	0.6925
112.7	0.7
112.8	0.6925
112.9	0.6925
113	0.6825
113.1	0.6775
113.2	0.6825
113.3	0.6925
113.4	0.6925
113.5	0.7025
113.6	0.705
113.7	0.7
113.8	0.705
113.9	0.695
114	0.7025
114.1	0.7025
114.2	0.7025
114.3	0.71
114.4	0.705
114.5	0.705
114.6	0.7125
114.7	0.7075
114.8	0.7075
114.9	0.715
115	0.715
115.1	0.715
115.2	0.7225
115.3	0.735
115.4	0.7375
115.5	0.7275
115.6	0.7225
115.7	0.72
115.8	0.7275
115.9	0.7275
116	0.7325
116.1	0.7325
116.2	0.74
116.3	0.7425
116.4	0.7375
116.5	0.7425
116.6	0.74
116.7	0.735
116.8	0.72
116.9	0.735
117	0.7175
117.1	0.72
117.2	0.73
117.3	0.7225
117.4	0.71
117.5	0.7125
117.6	0.7025
117.7	0.7075
117.8	0.715
117.9	0.72
118	0.7225
118.1	0.7175
118.2	0.71
118.3	0.71
118.4	0.705
118.5	0.705
118.6	0.6975
118.7	0.695
118.8	0.695
118.9	0.695
119	0.7025
119.1	0.7125
119.2	0.7125
119.3	0.7075
119.4	0.7
119.5	0.7025
119.6	0.72
119.7	0.7175
119.8	0.7125
119.9	0.7125
120	0.7175
120.1	0.72
120.2	0.71
120.3	0.7
120.4	0.6975
120.5	0.715
120.6	0.705
120.7	0.7075
120.8	0.71
120.9	0.7075
121	0.72
121.1	0.7225
121.2	0.7325
121.3	0.73
121.4	0.725
121.5	0.7325
121.6	0.7325
121.7	0.73
121.8	0.7375
121.9	0.73
122	0.725
122.1	0.7275
122.2	0.7375
122.3	0.735
122.4	0.7375
122.5	0.74
122.6	0.7425
122.7	0.74
122.8	0.7375
122.9	0.7275
123	0.7275
123.1	0.7275
123.2	0.7275
123.3	0.73
123.4	0.7275
123.5	0.7275
123.6	0.72
123.7	0.7175
123.8	0.7125
123.9	0.72
124	0.72
124.1	0.7275
124.2	0.7275
124.3	0.72
124.4	0.7225
124.5	0.715
124.6	0.7175
124.7	0.72
124.8	0.71
124.9	0.7125
125	0.71
125.1	0.71
125.2	0.7075
125.3	0.705
125.4	0.7075
125.5	0.7125
125.6	0.7125
125.7	0.7175
125.8	0.7125
125.9	0.72
126	0.7225
126.1	0.7275
126.2	0.7375
126.3	0.735
126.4	0.7375
126.5	0.73
126.6	0.73
126.7	0.73
126.8	0.73
126.9	0.7275
127	0.735
127.1	0.74
127.2	0.74
127.3	0.73
127.4	0.73
127.5	0.7225
127.6	0.725
127.7	0.7275
127.8	0.7225
127.9	0.725
128	0.7225
128.1	0.725
128.2	0.7325
128.3	0.74
128.4	0.7575
128.5	0.755
128.6	0.7725
128.7	0.775
128.8	0.775
128.9	0.7725
129	0.775
129.1	0.7725
129.2	0.7625
129.3	0.775
129.4	0.765
129.5	0.77
129.6	0.7725
129.7	0.7775
129.8	0.785
129.9	0.785
130	0.7825
130.1	0.785
130.2	0.79
130.3	0.79
130.4	0.79
130.5	0.78
130.6	0.785
130.7	0.78
130.8	0.78
130.9	0.775
131	0.7675
131.1	0.7675
131.2	0.77
131.3	0.7675
131.4	0.7675
131.5	0.7725
131.6	0.765
131.7	0.76
131.8	0.765
131.9	0.7625
132	0.7675
132.1	0.765
132.2	0.7775
132.3	0.7725
132.4	0.7675
132.5	0.7625
132.6	0.755
132.7	0.76
132.8	0.7625
132.9	0.75
133	0.75
133.1	0.7525
133.2	0.755
133.3	0.755
133.4	0.755
133.5	0.7675
133.6	0.7675
133.7	0.7725
133.8	0.77
133.9	0.77
134	0.775
134.1	0.7825
134.2	0.7725
134.3	0.775
134.4	0.7725
134.5	0.7675
134.6	0.7725
134.7	0.7725
134.8	0.7675
134.9	0.7675
135	0.7725
135.1	0.78
135.2	0.7775
135.3	0.765
135.4	0.765
135.5	0.7675
135.6	0.77
135.7	0.775
135.8	0.7825
135.9	0.785
136	0.78
136.1	0.7775
136.2	0.77
136.3	0.7625
136.4	0.7525
136.5	0.75
136.6	0.75
136.7	0.7475
136.8	0.7475
136.9	0.7525
137	0.745
137.1	0.7475
137.2	0.7575
137.3	0.76
137.4	0.7675
137.5	0.7675
137.6	0.7725
137.7	0.77
137.8	0.765
137.9	0.7625
138	0.765
138.1	0.77
138.2	0.765
138.3	0.7675
138.4	0.7725
138.5	0.775
138.6	0.7775
138.7	0.78
138.8	0.7925
138.9	0.785
139	0.78
139.1	0.7825
139.2	0.785
139.3	0.7825
139.4	0.78
139.5	0.775
139.6	0.77
139.7	0.78
139.8	0.7725
139.9	0.7575
140	0.7625
140.1	0.765
140.2	0.76
140.3	0.7625
140.4	0.765
140.5	0.7625
140.6	0.76
140.7	0.7725
140.8	0.7725
140.9	0.78
141	0.7775
141.1	0.7775
141.2	0.7825
141.3	0.7825
141.4	0.79
141.5	0.7875
141.6	0.78
141.7	0.7875
141.8	0.79
141.9	0.7925
142	0.8
142.1	0.7975
142.2	0.795
142.3	0.8
142.4	0.7925
142.5	0.7825
142.6	0.79
142.7	0.79
142.8	0.7875
142.9	0.7925
143	0.7875
143.1	0.785
143.2	0.78
143.3	0.775
143.4	0.7675
143.5	0.7675
143.6	0.77
143.7	0.7725
143.8	0.7675
143.9	0.7675
144	0.775
144.1	0.7825
144.2	0.79
144.3	0.7875
144.4	0.79
144.5	0.7875
144.6	0.7875
144.7	0.7875
144.8	0.7925
144.9	0.795
145	0.8
145.1	0.7825
145.2	0.785
145.3	0.785
145.4	0.79
145.5	0.79
145.6	0.79
145.7	0.79
145.8	0.79
145.9	0.795
146	0.7975
146.1	0.795
146.2	0.7925
146.3	0.795
146.4	0.7875
146.5	0.7775
146.6	0.77
146.7	0.76
146.8	0.7675
146.9	0.7775
147	0.785
147.1	0.795
147.2	0.795
147.3	0.7925
147.4	0.7875
147.5	0.785
147.6	0.785
147.7	0.78
147.8	0.78
147.9	0.78
148	0.77
148.1	0.765
148.2	0.7675
148.3	0.7775
148.4	0.775
148.5	0.7775
148.6	0.7725
148.7	0.7625
148.8	0.7675
148.9	0.77
149	0.775
149.1	0.775
149.2	0.78
149.3	0.78
149.4	0.7875
149.5	0.7825
149.6	0.8
149.7	0.7925
149.8	0.79
149.9	0.7975
150	0.8025
150.1	0.805
150.2	0.805
150.3	0.8025
150.4	0.8
150.5	0.805
150.6	0.8025
150.7	0.795
150.8	0.79
150.9	0.7875
151	0.7825
151.1	0.775
151.2	0.7775
151.3	0.77
151.4	0.7725
151.5	0.7775
151.6	0.7775
151.7	0.7725
151.8	0.775
151.9	0.7675
152	0.775
152.1	0.7725
152.2	0.77
152.3	0.7825
152.4	0.785
152.5	0.795
152.6	0.7875
152.7	0.79
152.8	0.7975
152.9	0.795
153	0.8
153.1	0.8025
153.2	0.7975
153.3	0.795
153.4	0.7925
153.5	0.7825
153.6	0.78
153.7	0.7925
153.8	0.7925
153.9	0.785
154	0.7925
154.1	0.795
154.2	0.7875
154.3	0.8
154.4	0.8025
154.5	0.8075
154.6	0.8025
154.7	0.7975
154.8	0.795
154.9	0.7925
155	0.7925
155.1	0.79
155.2	0.7875
155.3	0.7775
155.4	0.775
155.5	0.7725
155.6	0.7775
155.7	0.77
155.8	0.775
155.9	0.775
156	0.785
156.1	0.7875
156.2	0.7875
156.3	0.7825
156.4	0.785
156.5	0.7925
156.6	0.7875
156.7	0.7775
156.8	0.7725
156.9	0.7775
157	0.7775
157.1	0.78
157.2	0.785
157.3	0.785
157.4	0.775
157.5	0.7775
157.6	0.7775
157.7	0.785
157.8	0.7925
157.9	0.79
158	0.7875
158.1	0.7925
158.2	0.7875
158.3	0.795
158.4	0.8
158.5	0.7925
158.6	0.79
158.7	0.795
158.8	0.7975
158.9	0.79
159	0.7875
159.1	0.785
159.2	0.7975
159.3	0.8
159.4	0.7975
159.5	0.8
159.6	0.8
159.7	0.8025
159.8	0.805
159.9	0.82
160	0.815
160.1	0.82
160.2	0.815
160.3	0.82
160.4	0.8225
160.5	0.82
160.6	0.815
160.7	0.8175
160.8	0.815
160.9	0.82
161	0.815
161.1	0.8125
161.2	0.8125
161.3	0.8125
161.4	0.8175
161.5	0.825
161.6	0.8225
161.7	0.82
161.8	0.8175
161.9	0.8175
162	0.8175
162.1	0.8125
162.2	0.81
162.3	0.8175
162.4	0.8175
162.5	0.825
162.6	0.8175
162.7	0.8125
162.8	0.815
162.9	0.815
163	0.8075
163.1	0.8125
163.2	0.8075
163.3	0.8025
163.4	0.805
163.5	0.8075
163.6	0.805
163.7	0.8225
163.8	0.83
163.9	0.83
164	0.83
164.1	0.83
164.2	0.8325
164.3	0.8375
164.4	0.8475
164.5	0.855
164.6	0.8575
164.7	0.85
164.8	0.8425
164.9	0.8425
165	0.8525
165.1	0.8625
165.2	0.8475
165.3	0.8425
165.4	0.8375
165.5	0.8425
165.6	0.835
165.7	0.83
165.8	0.83
165.9	0.825
166	0.8275
166.1	0.825
166.2	0.825
166.3	0.8275
166.4	0.82
166.5	0.8225
166.6	0.825
166.7	0.83
166.8	0.83
166.9	0.83
167	0.83
167.1	0.835
167.2	0.84
167.3	0.835
167.4	0.835
167.5	0.825
167.6	0.82
167.7	0.82
167.8	0.815
167.9	0.815
168	0.8225
168.1	0.825
168.2	0.8175
168.3	0.82
168.4	0.8125
168.5	0.82
168.6	0.815
168.7	0.8225
168.8	0.83
168.9	0.8275
169	0.8275
169.1	0.8225
169.2	0.825
169.3	0.8275
169.4	0.83
169.5	0.8275
169.6	0.8325
169.7	0.83
169.8	0.8375
169.9	0.835
170	0.8275
170.1	0.83
170.2	0.83
170.3	0.8325
170.4	0.83
170.5	0.83
170.6	0.8325
170.7	0.83
170.8	0.83
170.9	0.8325
171	0.8375
171.1	0.835
171.2	0.83
171.3	0.835
171.4	0.8325
171.5	0.8375
171.6	0.84
171.7	0.85
171.8	0.86
171.9	0.8575
172	0.86
172.1	0.86
172.2	0.86
172.3	0.86
172.4	0.8525
172.5	0.8525
172.6	0.835
172.7	0.83
172.8	0.8225
172.9	0.8175
173	0.815
173.1	0.82
173.2	0.8225
173.3	0.8225
173.4	0.82
173.5	0.83
173.6	0.83
173.7	0.825
173.8	0.8225
173.9	0.825
174	0.8325
174.1	0.8375
174.2	0.8375
174.3	0.8475
174.4	0.8475
174.5	0.8425
174.6	0.85
174.7	0.8575
174.8	0.8525
174.9	0.85
175	0.8425
175.1	0.8425
175.2	0.845
175.3	0.845
175.4	0.8425
175.5	0.8475
175.6	0.8475
175.7	0.855
175.8	0.8525
175.9	0.8525
176	0.8575
176.1	0.855
176.2	0.8575
176.3	0.86
176.4	0.8625
176.5	0.87
176.6	0.865
176.7	0.865
176.8	0.875
176.9	0.87
177	0.8675
177.1	0.8575
177.2	0.8525
177.3	0.85
177.4	0.8425
177.5	0.84
177.6	0.8375
177.7	0.8375
177.8	0.8475
177.9	0.8525
178	0.85
178.1	0.8475
178.2	0.85
178.3	0.8475
178.4	0.8575
178.5	0.86
178.6	0.865
178.7	0.875
178.8	0.865
178.9	0.865
179	0.8675
179.1	0.87
179.2	0.87
179.3	0.8625
179.4	0.87
179.5	0.87
179.6	0.865
179.7	0.855
179.8	0.85
179.9	0.85
180	0.855
180.1	0.8525
180.2	0.8525
180.3	0.85
180.4	0.8525
180.5	0.85
180.6	0.85
180.7	0.8525
180.8	0.845
180.9	0.8475
181	0.845
181.1	0.85
181.2	0.8525
181.3	0.85
181.4	0.8525
181.5	0.8525
181.6	0.855
181.7	0.8525
181.8	0.8525
181.9	0.855
182	0.8475
182.1	0.8475
182.2	0.8525
182.3	0.8575
182.4	0.86
182.5	0.8575
182.6	0.86
182.7	0.86
182.8	0.8575
182.9	0.8475
183	0.845
183.1	0.8525
183.2	0.86
183.3	0.8575
183.4	0.8525
183.5	0.8575
183.6	0.845
183.7	0.84
183.8	0.8475
183.9	0.84
184	0.84
184.1	0.845
184.2	0.8325
184.3	0.835
184.4	0.8325
184.5	0.8325
184.6	0.84
184.7	0.8375
184.8	0.835
184.9	0.835
185	0.8375
185.1	0.84
185.2	0.835
185.3	0.8425
185.4	0.8475
185.5	0.8575
185.6	0.8575
185.7	0.8625
185.8	0.86
185.9	0.86
186	0.8525
186.1	0.8475
186.2	0.84
186.3	0.85
186.4	0.86
186.5	0.85
186.6	0.8475
186.7	0.8525
186.8	0.8525
186.9	0.8475
187	0.8475
187.1	0.8425
187.2	0.84
187.3	0.8425
187.4	0.8475
187.5	0.85
187.6	0.8425
187.7	0.845
187.8	0.8425
187.9	0.8375
188	0.84
188.1	0.845
188.2	0.8475
188.3	0.8525
188.4	0.8475
188.5	0.8525
188.6	0.8625
188.7	0.8525
188.8	0.8675
188.9	0.86
189	0.8575
189.1	0.85
189.2	0.85
189.3	0.8525
189.4	0.855
189.5	0.8625
189.6	0.8625
189.7	0.8625
189.8	0.86
189.9	0.865
190	0.8575
190.1	0.8525
190.2	0.855
190.3	0.8425
190.4	0.845
190.5	0.845
190.6	0.85
190.7	0.8525
190.8	0.8525
190.9	0.8575
191	0.86
191.1	0.8575
191.2	0.855
191.3	0.85
191.4	0.8525
191.5	0.85
191.6	0.85
191.7	0.8525
191.8	0.8525
191.9	0.85
192	0.8475
192.1	0.835
192.2	0.84
192.3	0.84
192.4	0.84
192.5	0.8525
192.6	0.855
192.7	0.855
192.8	0.8625
192.9	0.86
193	0.8625
193.1	0.8625
193.2	0.86
193.3	0.86
193.4	0.85
193.5	0.8475
193.6	0.8475
193.7	0.8525
193.8	0.8425
193.9	0.8375
194	0.835
194.1	0.835
194.2	0.835
194.3	0.835
194.4	0.8325
194.5	0.835
194.6	0.835
194.7	0.8375
194.8	0.845
194.9	0.85
195	0.8575
195.1	0.86
195.2	0.8625
195.3	0.8625
195.4	0.8675
195.5	0.8675
195.6	0.87
195.7	0.865
195.8	0.865
195.9	0.8675
196	0.8625
196.1	0.8625
196.2	0.8675
196.3	0.8675
196.4	0.865
196.5	0.8625
196.6	0.86
196.7	0.8625
196.8	0.8675
196.9	0.8625
197	0.86
197.1	0.8525
197.2	0.855
197.3	0.8575
197.4	0.8675
197.5	0.8625
197.6	0.8625
197.7	0.87
197.8	0.875
197.9	0.8775
198	0.875
198.1	0.87
198.2	0.8675
198.3	0.8725
198.4	0.8675
198.5	0.8675
198.6	0.87
198.7	0.8625
198.8	0.865
198.9	0.865
199	0.8625
199.1	0.855
199.2	0.855
199.3	0.855
199.4	0.845
199.5	0.8475
199.6	0.8575
199.7	0.8625
199.8	0.8675
199.9	0.87
200	0.8725
[truncated: 14,000 more rows]
