# Supplementary material for: Bayesian inference of kinetic schemes for ion channels by Kalman filtering
Source: eLife journal article supplement (doi:10.7554/elife.62714), 2022-05-04
Supplement: fig4-data6 [file 1_Sim_N_200_Strom_MW_1M.xlsx]

## Sheet: 1 M
0.1	0
0.2	0
0.3	0
0.4	0
0.5	0
0.6	0
0.7	0
0.8	0
0.9	0
1	0
1.1	0
1.2	0
1.3	0
1.4	0
1.5	0
1.6	0
1.7	0
1.8	0
1.9	0
2	0
2.1	0
2.2	0
2.3	0
2.4	0
2.5	0
2.6	0
2.7	0
2.8	0
2.9	0
3	0
3.1	0
3.2	0
3.3	0
3.4	0
3.5	0
3.6	0
3.7	0
3.8	0
3.9	0
4	0
4.1	0
4.2	0
4.3	0
4.4	0
4.5	0
4.6	0
4.7	0
4.8	0
4.9	0
5	0
5.1	0
5.2	0
5.3	0
5.4	0
5.5	0
5.6	0
5.7	0
5.8	0
5.9	0
6	0
6.1	0
6.2	0
6.3	0
6.4	0
6.5	0
6.6	0
6.7	0
6.8	0
6.9	0
7	0
7.1	0
7.2	0
7.3	0
7.4	0
7.5	0
7.6	0
7.7	0
7.8	0
7.9	0
8	0
8.1	0
8.2	0
8.3	0
8.4	0
8.5	0
8.6	0
8.7	0
8.8	0
8.9	0
9	0
9.1	0
9.2	0
9.3	0
9.4	0
9.5	0
9.6	0
9.7	0
9.8	0
9.9	0
10	0
10.1	0
10.2	0
10.3	0
10.4	0
10.5	0
10.6	0
10.7	0
10.8	0
10.9	0
11	0
11.1	0
11.2	0
11.3	0
11.4	0
11.5	0
11.6	0
11.7	0
11.8	0
11.9	0
12	0
12.1	0
12.2	0
12.3	0
12.4	0
12.5	0
12.6	0
12.7	0
12.8	0
12.9	0
13	0
13.1	0
13.2	0
13.3	0
13.4	0
13.5	0
13.6	0
13.7	0
13.8	0
13.9	0
14	0
14.1	0
14.2	0
14.3	0
14.4	0
14.5	0
14.6	0
14.7	0
14.8	0
14.9	0
15	0
15.1	0
15.2	0
15.3	0
15.4	0
15.5	0
15.6	0
15.7	0
15.8	0
15.9	0
16	0
16.1	0
16.2	0
16.3	0
16.4	0
16.5	0
16.6	0
16.7	0
16.8	0
16.9	0
17	0
17.1	0
17.2	0
17.3	0
17.4	0
17.5	0
17.6	0
17.7	0
17.8	0
17.9	0
18	0
18.1	0
18.2	0
18.3	0
18.4	0
18.5	0
18.6	0
18.7	0
18.8	0
18.9	0
19	0
19.1	0
19.2	0
19.3	0
19.4	0
19.5	0
19.6	0
19.7	0
19.8	0
19.9	0
20	0
20.1	0
20.2	0
20.3	0
20.4	0
20.5	0
20.6	0
20.7	0
20.8	0
20.9	0
21	0
21.1	0
21.2	0
21.3	0
21.4	0
21.5	0
21.6	0
21.7	0
21.8	0
21.9	0
22	0
22.1	0
22.2	0
22.3	0
22.4	0
22.5	0
22.6	0
22.7	0
22.8	0
22.9	0
23	0
23.1	0
23.2	0
23.3	0
23.4	0
23.5	0
23.6	0
23.7	0
23.8	0
23.9	0
24	0
24.1	0
24.2	0
24.3	0
24.4	0
24.5	0
24.6	0
24.7	0
24.8	0
24.9	0
25	0
25.1	0
25.2	0
25.3	0
25.4	0
25.5	0
25.6	0
25.7	0
25.8	0
25.9	0
26	0
26.1	0
26.2	0
26.3	0
26.4	0
26.5	0
26.6	0
26.7	0
26.8	0
26.9	0
27	0
27.1	0
27.2	0
27.3	0
27.4	0
27.5	0
27.6	0
27.7	0
27.8	0
27.9	0
28	0
28.1	0
28.2	0
28.3	0
28.4	0
28.5	0
28.6	0
28.7	0
28.8	0
28.9	0
29	0
29.1	0
29.2	0
29.3	0
29.4	0
29.5	0
29.6	0
29.7	0
29.8	0
29.9	0
30	0
30.1	0
30.2	0
30.3	0
30.4	0
30.5	0
30.6	0
30.7	0
30.8	0
30.9	0
31	0
31.1	0
31.2	0
31.3	0
31.4	0
31.5	0
31.6	0
31.7	0
31.8	0
31.9	0
32	0
32.1	0
32.2	0
32.3	0
32.4	0
32.5	0
32.6	0
32.7	0
32.8	0
32.9	0
33	0
33.1	0
33.2	0
33.3	0
33.4	0
33.5	0
33.6	0
33.7	0
33.8	0
33.9	0
34	0
34.1	0
34.2	0
34.3	0
34.4	0
34.5	0
34.6	0
34.7	0
34.8	0
34.9	0
35	0
35.1	0
35.2	0
35.3	0
35.4	0
35.5	0
35.6	0
35.7	0
35.8	0
35.9	0
36	0
36.1	0
36.2	0
36.3	0
36.4	0
36.5	0
36.6	0
36.7	0
36.8	0
36.9	0
37	0
37.1	0
37.2	0
37.3	0
37.4	0
37.5	0
37.6	0
37.7	0
37.8	0
37.9	0
38	0
38.1	0
38.2	0
38.3	0
38.4	0
38.5	0
38.6	0
38.7	0
38.8	0
38.9	0
39	0
39.1	0
39.2	0
39.3	0
39.4	0
39.5	0
39.6	0
39.7	0
39.8	0
39.9	0
40	0
40.1	0
40.2	0
40.3	0
40.4	0
40.5	0
40.6	0
40.7	0
40.8	0
40.9	0
41	0
41.1	0
41.2	0
41.3	0
41.4	0
41.5	0
41.6	0
41.7	0
41.8	0
41.9	0
42	0
42.1	0
42.2	0
42.3	0
42.4	0
42.5	0
42.6	0
42.7	0
42.8	0
42.9	0
43	0
43.1	0
43.2	0
43.3	0
43.4	0
43.5	0
43.6	0
43.7	0
43.8	0
43.9	0
44	0
44.1	0
44.2	0
44.3	0
44.4	0
44.5	0
44.6	0
44.7	0
44.8	0
44.9	0
45	0
45.1	0
45.2	0
45.3	0
45.4	0
45.5	0
45.6	0
45.7	0
45.8	0
45.9	0
46	0
46.1	0
46.2	0
46.3	0
46.4	0
46.5	0
46.6	0
46.7	0
46.8	0
46.9	0
47	0
47.1	0
47.2	0
47.3	0
47.4	0
47.5	0
47.6	0
47.7	0
47.8	0
47.9	0
48	0
48.1	0
48.2	0
48.3	0
48.4	0
48.5	0
48.6	0
48.7	0
48.8	0
48.9	0
49	0
49.1	0
49.2	0
49.3	0
49.4	0
49.5	0
49.6	0
49.7	0
49.8	0
49.9	0
50	0
50.1	0
50.2	0
50.3	0
50.4	0
50.5	0
50.6	0
50.7	0
50.8	0
50.9	0
51	0
51.1	0
51.2	0
51.3	0
51.4	0
51.5	0
51.6	0
51.7	0
51.8	0
51.9	0
52	0
52.1	0
52.2	0
52.3	0
52.4	0
52.5	0
52.6	0
52.7	0
52.8	0
52.9	0
53	0
53.1	0
53.2	0
53.3	0
53.4	0
53.5	0
53.6	0
53.7	0
53.8	0
53.9	0
54	0
54.1	0
54.2	0
54.3	0
54.4	0
54.5	0
54.6	0
54.7	0
54.8	0
54.9	0
55	0
55.1	0
55.2	0
55.3	0
55.4	0
55.5	0
55.6	0
55.7	0
55.8	0
55.9	0
56	0
56.1	0
56.2	0
56.3	0
56.4	0
56.5	0
56.6	0
56.7	0
56.8	0
56.9	0
57	0
57.1	0
57.2	0
57.3	0
57.4	0
57.5	0
57.6	0
57.7	0
57.8	0
57.9	0
58	0
58.1	0
58.2	0
58.3	0
58.4	0
58.5	0
58.6	0
58.7	0
58.8	0
58.9	0
59	0
59.1	0
59.2	0
59.3	0
59.4	0
59.5	0
59.6	0
59.7	0
59.8	0
59.9	0
60	0
60.1	0
60.2	0
60.3	0
60.4	0
60.5	0
60.6	0
60.7	0
60.8	0
60.9	0
61	0
61.1	0
61.2	0
61.3	0
61.4	0
61.5	0
61.6	0
61.7	0
61.8	0
61.9	0
62	0
62.1	0
62.2	0
62.3	0
62.4	0
62.5	0
62.6	0
62.7	0
62.8	0
62.9	0
63	0
63.1	0
63.2	0
63.3	0
63.4	0
63.5	0
63.6	0
63.7	0
63.8	0
63.9	0
64	0
64.1	0
64.2	0
64.3	0
64.4	0
64.5	0
64.6	0
64.7	0
64.8	0
64.9	0
65	0
65.1	0
65.2	0
65.3	0
65.4	0
65.5	0
65.6	0
65.7	0
65.8	0
65.9	0
66	0
66.1	0
66.2	0
66.3	0
66.4	0
66.5	0
66.6	0
66.7	0
66.8	0
66.9	0
67	0
67.1	0
67.2	0
67.3	0
67.4	0
67.5	0
67.6	0
67.7	0
67.8	0
67.9	0
68	0
68.1	0
68.2	0
68.3	0
68.4	0
68.5	0
68.6	0
68.7	0
68.8	0
68.9	0
69	0
69.1	0
69.2	0
69.3	0
69.4	0
69.5	0
69.6	0
69.7	0
69.8	0
69.9	0
70	0
70.1	0
70.2	0
70.3	0
70.4	0
70.5	0
70.6	0
70.7	0
70.8	0
70.9	0
71	0
71.1	0
71.2	0
71.3	0
71.4	0
71.5	0
71.6	0
71.7	0
71.8	0
71.9	0
72	0
72.1	0
72.2	0
72.3	0
72.4	0
72.5	0
72.6	0
72.7	0
72.8	0
72.9	0
73	0
73.1	0
73.2	0
73.3	0
73.4	0
73.5	0
73.6	0
73.7	0
73.8	0
73.9	0
74	0
74.1	0
74.2	0
74.3	0
74.4	0
74.5	0
74.6	0
74.7	0
74.8	0
74.9	0
75	0
75.1	0
75.2	0
75.3	0
75.4	0
75.5	0
75.6	0
75.7	0
75.8	0
75.9	0
76	0
76.1	0
76.2	0
76.3	0
76.4	0
76.5	0
76.6	0
76.7	0
76.8	0
76.9	0
77	0
77.1	0
77.2	0
77.3	0
77.4	0
77.5	0
77.6	0
77.7	0
77.8	0
77.9	0
78	0
78.1	0
78.2	0
78.3	0
78.4	0
78.5	0
78.6	0
78.7	0
78.8	0
78.9	0
79	0
79.1	0
79.2	0
79.3	0
79.4	0
79.5	0
79.6	0
79.7	0
79.8	0
79.9	0
80	0
80.1	0
80.2	0
80.3	0
80.4	0
80.5	0
80.6	0
80.7	0
80.8	0
80.9	0
81	0
81.1	0
81.2	0
81.3	0
81.4	0
81.5	0
81.6	0
81.7	0
81.8	0
81.9	0
82	0
82.1	0
82.2	0
82.3	0
82.4	0
82.5	0
82.6	0
82.7	0
82.8	0
82.9	0
83	0
83.1	0
83.2	0
83.3	0
83.4	0
83.5	0
83.6	0
83.7	0
83.8	0
83.9	0
84	0
84.1	0
84.2	0
84.3	0
84.4	0
84.5	0
84.6	0
84.7	0
84.8	0
84.9	0
85	0
85.1	0
85.2	0
85.3	0
85.4	0
85.5	0
85.6	0
85.7	0
85.8	0
85.9	0
86	0
86.1	0
86.2	0
86.3	0
86.4	0
86.5	0
86.6	0
86.7	0
86.8	0
86.9	0
87	0
87.1	0
87.2	0
87.3	0
87.4	0
87.5	0
87.6	0
87.7	0
87.8	0
87.9	0
88	0
88.1	0
88.2	0
88.3	0
88.4	0
88.5	0
88.6	0
88.7	0
88.8	0
88.9	0
89	0
89.1	0
89.2	0
89.3	0
89.4	0
89.5	0
89.6	0
89.7	0
89.8	0
89.9	0
90	0
90.1	0
90.2	0
90.3	0
90.4	0
90.5	0
90.6	0
90.7	0
90.8	0
90.9	0
91	0
91.1	0
91.2	0
91.3	0
91.4	0
91.5	0
91.6	0
91.7	0
91.8	0
91.9	0
92	0
92.1	0
92.2	0
92.3	0
92.4	0
92.5	0
92.6	0
92.7	0
92.8	0
92.9	0
93	0
93.1	0
93.2	0
93.3	0
93.4	0
93.5	0
93.6	0
93.7	0
93.8	0
93.9	0
94	0
94.1	0
94.2	0
94.3	0
94.4	0
94.5	0
94.6	0
94.7	0
94.8	0
94.9	0
95	0
95.1	0
95.2	0
95.3	0
95.4	0
95.5	0
95.6	0
95.7	0
95.8	0
95.9	0
96	0
96.1	0
96.2	0
96.3	0
96.4	0
96.5	0
96.6	0
96.7	0
96.8	0
96.9	0
97	0
97.1	0
97.2	0
97.3	0
97.4	0
97.5	0
97.6	0
97.7	0
97.8	0
97.9	0
98	0
98.1	0
98.2	0
98.3	0
98.4	0
98.5	0
98.6	0
98.7	0
98.8	0
98.9	0
99	0
99.1	0
99.2	0
99.3	0
99.4	0
99.5	0
99.6	0
99.7	0
99.8	0
99.9	0
100	0
100.1	0
100.2	0
100.3	0
100.4	0
100.5	0
100.6	0
100.7	0
100.8	0
100.9	0
101	0
101.1	0
101.2	0
101.3	0.005
101.4	0.01
101.5	0.01
101.6	0.01
101.7	0.015
101.8	0.015
101.9	0.02
102	0.02
102.1	0.02
102.2	0.025
102.3	0.03
102.4	0.035
102.5	0.035
102.6	0.035
102.7	0.035
102.8	0.035
102.9	0.035
103	0.035
103.1	0.035
103.2	0.035
103.3	0.035
103.4	0.045
103.5	0.045
103.6	0.045
103.7	0.05
103.8	0.05
103.9	0.065
104	0.065
104.1	0.08
104.2	0.08
104.3	0.085
104.4	0.085
104.5	0.085
104.6	0.085
104.7	0.085
104.8	0.085
104.9	0.09
105	0.09
105.1	0.09
105.2	0.09
105.3	0.09
105.4	0.09
105.5	0.095
105.6	0.1
105.7	0.1
105.8	0.1
105.9	0.1
106	0.1
106.1	0.1
106.2	0.1
106.3	0.1
106.4	0.105
106.5	0.105
106.6	0.105
106.7	0.105
106.8	0.105
106.9	0.105
107	0.105
107.1	0.105
107.2	0.105
107.3	0.105
107.4	0.105
107.5	0.11
107.6	0.11
107.7	0.115
107.8	0.12
107.9	0.125
108	0.125
108.1	0.125
108.2	0.125
108.3	0.125
108.4	0.13
108.5	0.13
108.6	0.13
108.7	0.13
108.8	0.13
108.9	0.13
109	0.13
109.1	0.13
109.2	0.13
109.3	0.13
109.4	0.13
109.5	0.13
109.6	0.13
109.7	0.13
109.8	0.13
109.9	0.13
110	0.135
110.1	0.135
110.2	0.14
110.3	0.14
110.4	0.14
110.5	0.14
110.6	0.145
110.7	0.145
110.8	0.145
110.9	0.145
111	0.145
111.1	0.145
111.2	0.145
111.3	0.145
111.4	0.145
111.5	0.145
111.6	0.145
111.7	0.145
111.8	0.145
111.9	0.145
112	0.145
112.1	0.145
112.2	0.145
112.3	0.155
112.4	0.16
112.5	0.16
112.6	0.165
112.7	0.165
112.8	0.165
112.9	0.17
113	0.18
113.1	0.18
113.2	0.18
113.3	0.18
113.4	0.19
113.5	0.19
113.6	0.19
113.7	0.195
113.8	0.195
113.9	0.195
114	0.205
114.1	0.205
114.2	0.205
114.3	0.205
114.4	0.205
114.5	0.205
114.6	0.21
114.7	0.21
114.8	0.21
114.9	0.21
115	0.215
115.1	0.215
115.2	0.215
115.3	0.215
115.4	0.22
115.5	0.225
115.6	0.225
115.7	0.225
115.8	0.225
115.9	0.225
116	0.225
116.1	0.23
116.2	0.23
116.3	0.23
116.4	0.225
116.5	0.225
116.6	0.23
116.7	0.23
116.8	0.23
116.9	0.23
117	0.23
117.1	0.23
117.2	0.23
117.3	0.23
117.4	0.23
117.5	0.235
117.6	0.235
117.7	0.24
117.8	0.24
117.9	0.24
118	0.24
118.1	0.24
118.2	0.245
118.3	0.245
118.4	0.245
118.5	0.245
118.6	0.245
118.7	0.24
118.8	0.24
118.9	0.235
119	0.24
119.1	0.24
119.2	0.24
119.3	0.24
119.4	0.235
119.5	0.235
119.6	0.235
119.7	0.24
119.8	0.24
119.9	0.24
120	0.24
120.1	0.24
120.2	0.24
120.3	0.24
120.4	0.24
120.5	0.24
120.6	0.24
120.7	0.245
120.8	0.245
120.9	0.245
121	0.24
121.1	0.24
121.2	0.245
121.3	0.245
121.4	0.245
121.5	0.245
121.6	0.245
121.7	0.25
121.8	0.25
121.9	0.25
122	0.26
122.1	0.26
122.2	0.26
122.3	0.26
122.4	0.26
122.5	0.26
122.6	0.26
122.7	0.26
122.8	0.265
122.9	0.265
123	0.265
123.1	0.27
123.2	0.27
123.3	0.27
123.4	0.27
123.5	0.27
123.6	0.275
123.7	0.275
123.8	0.275
123.9	0.275
124	0.27
124.1	0.27
124.2	0.27
124.3	0.27
124.4	0.275
124.5	0.275
124.6	0.28
124.7	0.28
124.8	0.285
124.9	0.285
125	0.285
125.1	0.285
125.2	0.285
125.3	0.285
125.4	0.285
125.5	0.285
125.6	0.29
125.7	0.29
125.8	0.29
125.9	0.29
126	0.29
126.1	0.29
126.2	0.29
126.3	0.285
126.4	0.285
126.5	0.285
126.6	0.28
126.7	0.285
126.8	0.29
126.9	0.29
127	0.29
127.1	0.29
127.2	0.29
127.3	0.29
127.4	0.29
127.5	0.29
127.6	0.29
127.7	0.29
127.8	0.29
127.9	0.295
128	0.295
128.1	0.3
128.2	0.305
128.3	0.31
128.4	0.31
128.5	0.31
128.6	0.32
128.7	0.32
128.8	0.32
128.9	0.32
129	0.325
129.1	0.325
129.2	0.33
129.3	0.33
129.4	0.33
129.5	0.33
129.6	0.33
129.7	0.33
129.8	0.33
129.9	0.335
130	0.34
130.1	0.335
130.2	0.335
130.3	0.335
130.4	0.335
130.5	0.335
130.6	0.34
130.7	0.335
130.8	0.335
130.9	0.335
131	0.34
131.1	0.34
131.2	0.345
131.3	0.35
131.4	0.355
131.5	0.355
131.6	0.355
131.7	0.355
131.8	0.355
131.9	0.35
132	0.35
132.1	0.35
132.2	0.35
132.3	0.345
132.4	0.345
132.5	0.345
132.6	0.345
132.7	0.345
132.8	0.345
132.9	0.345
133	0.345
133.1	0.345
133.2	0.345
133.3	0.345
133.4	0.345
133.5	0.345
133.6	0.345
133.7	0.345
133.8	0.34
133.9	0.34
134	0.34
134.1	0.34
134.2	0.345
134.3	0.345
134.4	0.345
134.5	0.345
134.6	0.345
134.7	0.345
134.8	0.345
134.9	0.345
135	0.345
135.1	0.345
135.2	0.345
135.3	0.345
135.4	0.36
135.5	0.365
135.6	0.365
135.7	0.365
135.8	0.365
135.9	0.365
136	0.365
136.1	0.365
136.2	0.365
136.3	0.365
136.4	0.36
136.5	0.365
136.6	0.365
136.7	0.365
136.8	0.36
136.9	0.365
137	0.365
137.1	0.365
137.2	0.36
137.3	0.36
137.4	0.36
137.5	0.36
137.6	0.36
137.7	0.36
137.8	0.36
137.9	0.36
138	0.36
138.1	0.365
138.2	0.365
138.3	0.365
138.4	0.36
138.5	0.355
138.6	0.355
138.7	0.355
138.8	0.355
138.9	0.355
139	0.35
139.1	0.35
139.2	0.355
139.3	0.355
139.4	0.355
139.5	0.36
139.6	0.36
139.7	0.36
139.8	0.365
139.9	0.37
140	0.37
140.1	0.37
140.2	0.37
140.3	0.385
140.4	0.385
140.5	0.395
140.6	0.395
140.7	0.395
140.8	0.395
140.9	0.39
141	0.39
141.1	0.39
141.2	0.39
141.3	0.39
141.4	0.39
141.5	0.385
141.6	0.38
141.7	0.38
141.8	0.385
141.9	0.38
142	0.38
142.1	0.38
142.2	0.38
142.3	0.385
142.4	0.385
142.5	0.39
142.6	0.39
142.7	0.39
142.8	0.39
142.9	0.39
143	0.39
143.1	0.39
143.2	0.39
143.3	0.39
143.4	0.39
143.5	0.39
143.6	0.39
143.7	0.39
143.8	0.39
143.9	0.39
144	0.39
144.1	0.395
144.2	0.395
144.3	0.395
144.4	0.4
144.5	0.4
144.6	0.4
144.7	0.395
144.8	0.395
144.9	0.395
145	0.395
145.1	0.395
145.2	0.395
145.3	0.395
145.4	0.395
145.5	0.395
145.6	0.395
145.7	0.395
145.8	0.39
145.9	0.39
146	0.395
146.1	0.395
146.2	0.395
146.3	0.4
146.4	0.4
146.5	0.4
146.6	0.405
146.7	0.405
146.8	0.405
146.9	0.405
147	0.405
147.1	0.405
147.2	0.405
147.3	0.405
147.4	0.4
147.5	0.405
147.6	0.405
147.7	0.405
147.8	0.405
147.9	0.405
148	0.405
148.1	0.405
148.2	0.405
148.3	0.41
148.4	0.41
148.5	0.415
148.6	0.415
148.7	0.415
148.8	0.415
148.9	0.415
149	0.415
149.1	0.415
149.2	0.415
149.3	0.42
149.4	0.42
149.5	0.42
149.6	0.415
149.7	0.415
149.8	0.41
149.9	0.415
150	0.415
150.1	0.415
150.2	0.415
150.3	0.415
150.4	0.41
150.5	0.41
150.6	0.41
150.7	0.405
150.8	0.405
150.9	0.405
151	0.405
151.1	0.405
151.2	0.41
151.3	0.41
151.4	0.415
151.5	0.415
151.6	0.415
151.7	0.415
151.8	0.42
151.9	0.415
152	0.415
152.1	0.415
152.2	0.415
152.3	0.415
152.4	0.415
152.5	0.415
152.6	0.415
152.7	0.415
152.8	0.42
152.9	0.42
153	0.42
153.1	0.42
153.2	0.42
153.3	0.42
153.4	0.42
153.5	0.42
153.6	0.42
153.7	0.42
153.8	0.42
153.9	0.415
154	0.415
154.1	0.415
154.2	0.42
154.3	0.42
154.4	0.42
154.5	0.415
154.6	0.42
154.7	0.415
154.8	0.415
154.9	0.415
155	0.415
155.1	0.415
155.2	0.415
155.3	0.415
155.4	0.42
155.5	0.42
155.6	0.42
155.7	0.42
155.8	0.425
155.9	0.425
156	0.42
156.1	0.42
156.2	0.42
156.3	0.42
156.4	0.42
156.5	0.42
156.6	0.42
156.7	0.42
156.8	0.42
156.9	0.42
157	0.415
157.1	0.415
157.2	0.41
157.3	0.41
157.4	0.41
157.5	0.41
157.6	0.41
157.7	0.41
157.8	0.41
157.9	0.41
158	0.415
158.1	0.415
158.2	0.415
158.3	0.415
158.4	0.42
158.5	0.42
158.6	0.42
158.7	0.425
158.8	0.43
158.9	0.43
159	0.43
159.1	0.43
159.2	0.43
159.3	0.43
159.4	0.43
159.5	0.435
159.6	0.435
159.7	0.44
159.8	0.455
159.9	0.455
160	0.455
160.1	0.455
160.2	0.455
160.3	0.455
160.4	0.455
160.5	0.46
160.6	0.455
160.7	0.45
160.8	0.45
160.9	0.45
161	0.45
161.1	0.45
161.2	0.45
161.3	0.455
161.4	0.455
161.5	0.455
161.6	0.455
161.7	0.455
161.8	0.46
161.9	0.465
162	0.465
162.1	0.465
162.2	0.47
162.3	0.47
162.4	0.47
162.5	0.47
162.6	0.475
162.7	0.475
162.8	0.475
162.9	0.47
163	0.47
163.1	0.47
163.2	0.47
163.3	0.475
163.4	0.475
163.5	0.475
163.6	0.485
163.7	0.485
163.8	0.49
163.9	0.49
164	0.49
164.1	0.49
164.2	0.49
164.3	0.49
164.4	0.49
164.5	0.49
164.6	0.49
164.7	0.485
164.8	0.49
164.9	0.495
165	0.5
165.1	0.5
165.2	0.5
165.3	0.505
165.4	0.505
165.5	0.505
165.6	0.505
165.7	0.505
165.8	0.505
165.9	0.51
166	0.51
166.1	0.51
166.2	0.51
166.3	0.51
166.4	0.515
166.5	0.515
166.6	0.51
166.7	0.51
166.8	0.51
166.9	0.505
167	0.505
167.1	0.505
167.2	0.505
167.3	0.51
167.4	0.51
167.5	0.51
167.6	0.505
167.7	0.505
167.8	0.505
167.9	0.505
168	0.505
168.1	0.5
168.2	0.5
168.3	0.5
168.4	0.5
168.5	0.5
168.6	0.5
168.7	0.5
168.8	0.5
168.9	0.5
169	0.5
169.1	0.505
169.2	0.505
169.3	0.51
169.4	0.51
169.5	0.51
169.6	0.51
169.7	0.505
169.8	0.505
169.9	0.5
170	0.5
170.1	0.505
170.2	0.505
170.3	0.505
170.4	0.51
170.5	0.51
170.6	0.515
170.7	0.515
170.8	0.515
170.9	0.515
171	0.515
171.1	0.515
171.2	0.52
171.3	0.52
171.4	0.52
171.5	0.52
171.6	0.52
171.7	0.52
171.8	0.52
171.9	0.52
172	0.52
172.1	0.52
172.2	0.52
172.3	0.52
172.4	0.52
172.5	0.52
172.6	0.525
172.7	0.525
172.8	0.525
172.9	0.525
173	0.525
173.1	0.525
173.2	0.525
173.3	0.525
173.4	0.525
173.5	0.525
173.6	0.525
173.7	0.525
173.8	0.525
173.9	0.525
174	0.53
174.1	0.535
174.2	0.535
174.3	0.535
174.4	0.535
174.5	0.535
174.6	0.545
174.7	0.545
174.8	0.545
174.9	0.545
175	0.545
175.1	0.55
175.2	0.555
175.3	0.555
175.4	0.555
175.5	0.56
175.6	0.56
175.7	0.56
175.8	0.56
175.9	0.565
176	0.57
176.1	0.575
176.2	0.575
176.3	0.575
176.4	0.575
176.5	0.575
176.6	0.575
176.7	0.575
176.8	0.58
176.9	0.58
177	0.58
177.1	0.58
177.2	0.575
177.3	0.575
177.4	0.575
177.5	0.57
177.6	0.57
177.7	0.57
177.8	0.57
177.9	0.575
178	0.575
178.1	0.575
178.2	0.575
178.3	0.575
178.4	0.58
178.5	0.58
178.6	0.58
178.7	0.58
178.8	0.575
178.9	0.575
179	0.575
179.1	0.575
179.2	0.575
179.3	0.575
179.4	0.58
179.5	0.58
179.6	0.58
179.7	0.58
179.8	0.575
179.9	0.575
180	0.575
180.1	0.575
180.2	0.58
180.3	0.585
180.4	0.58
180.5	0.58
180.6	0.575
180.7	0.575
180.8	0.58
180.9	0.58
181	0.58
181.1	0.575
181.2	0.575
181.3	0.575
181.4	0.57
181.5	0.575
181.6	0.57
181.7	0.57
181.8	0.57
181.9	0.57
182	0.57
182.1	0.57
182.2	0.57
182.3	0.57
182.4	0.565
182.5	0.565
182.6	0.56
182.7	0.56
182.8	0.56
182.9	0.565
183	0.565
183.1	0.56
183.2	0.56
183.3	0.56
183.4	0.555
183.5	0.55
183.6	0.55
183.7	0.55
183.8	0.55
183.9	0.555
184	0.555
184.1	0.555
184.2	0.555
184.3	0.555
184.4	0.555
184.5	0.56
184.6	0.56
184.7	0.56
184.8	0.56
184.9	0.56
185	0.56
185.1	0.56
185.2	0.56
185.3	0.56
185.4	0.56
185.5	0.56
185.6	0.56
185.7	0.56
185.8	0.56
185.9	0.56
186	0.56
186.1	0.565
186.2	0.565
186.3	0.565
186.4	0.565
186.5	0.56
186.6	0.56
186.7	0.565
186.8	0.57
186.9	0.575
187	0.575
187.1	0.575
187.2	0.575
187.3	0.575
187.4	0.575
187.5	0.575
187.6	0.575
187.7	0.57
187.8	0.57
187.9	0.565
188	0.565
188.1	0.565
188.2	0.565
188.3	0.565
188.4	0.565
188.5	0.565
188.6	0.565
188.7	0.565
188.8	0.57
188.9	0.57
189	0.57
189.1	0.57
189.2	0.575
189.3	0.575
189.4	0.575
189.5	0.575
189.6	0.575
189.7	0.575
189.8	0.575
189.9	0.58
190	0.58
190.1	0.58
190.2	0.58
190.3	0.58
190.4	0.58
190.5	0.58
190.6	0.58
190.7	0.58
190.8	0.58
190.9	0.585
191	0.585
191.1	0.59
191.2	0.585
191.3	0.58
191.4	0.59
191.5	0.59
191.6	0.59
191.7	0.59
191.8	0.585
191.9	0.59
192	0.59
192.1	0.595
192.2	0.6
192.3	0.6
192.4	0.6
192.5	0.6
192.6	0.6
192.7	0.595
192.8	0.59
192.9	0.6
193	0.6
193.1	0.605
193.2	0.605
193.3	0.605
193.4	0.605
193.5	0.605
193.6	0.6
193.7	0.6
193.8	0.6
193.9	0.6
194	0.6
194.1	0.6
194.2	0.6
194.3	0.6
194.4	0.6
194.5	0.6
194.6	0.6
194.7	0.6
194.8	0.6
194.9	0.6
195	0.6
195.1	0.6
195.2	0.6
195.3	0.6
195.4	0.6
195.5	0.605
195.6	0.605
195.7	0.605
195.8	0.605
195.9	0.605
196	0.605
196.1	0.605
196.2	0.6
196.3	0.6
196.4	0.6
196.5	0.6
196.6	0.6
196.7	0.6
196.8	0.605
196.9	0.605
197	0.6
197.1	0.6
197.2	0.6
197.3	0.6
197.4	0.6
197.5	0.6
197.6	0.595
197.7	0.605
197.8	0.605
197.9	0.605
198	0.605
198.1	0.605
198.2	0.605
198.3	0.605
198.4	0.605
198.5	0.605
198.6	0.605
198.7	0.6
198.8	0.6
198.9	0.6
199	0.6
199.1	0.6
199.2	0.6
199.3	0.6
199.4	0.6
199.5	0.605
199.6	0.615
199.7	0.62
199.8	0.62
199.9	0.625
200	0.625
[truncated: 14,000 more rows]
