# Supplementary material for: Bayesian inference of kinetic schemes for ion channels by Kalman filtering
Source: eLife journal article supplement (doi:10.7554/elife.62714), 2022-05-04
Supplement: fig4-data6 [file 1_Sim_N_400_Fluor_MW_1M.xlsx]

## Sheet: 1 M
0.1	0
0.2	0
0.3	0
0.4	0
0.5	0
0.6	0
0.7	0
0.8	0
0.9	0
1	0
1.1	0
1.2	0
1.3	0
1.4	0
1.5	0
1.6	0
1.7	0
1.8	0
1.9	0
2	0
2.1	0
2.2	0
2.3	0
2.4	0
2.5	0
2.6	0
2.7	0
2.8	0
2.9	0
3	0
3.1	0
3.2	0
3.3	0
3.4	0
3.5	0
3.6	0
3.7	0
3.8	0
3.9	0
4	0
4.1	0
4.2	0
4.3	0
4.4	0
4.5	0
4.6	0
4.7	0
4.8	0
4.9	0
5	0
5.1	0
5.2	0
5.3	0
5.4	0
5.5	0
5.6	0
5.7	0
5.8	0
5.9	0
6	0
6.1	0
6.2	0
6.3	0
6.4	0
6.5	0
6.6	0
6.7	0
6.8	0
6.9	0
7	0
7.1	0
7.2	0
7.3	0
7.4	0
7.5	0
7.6	0
7.7	0
7.8	0
7.9	0
8	0
8.1	0
8.2	0
8.3	0
8.4	0
8.5	0
8.6	0
8.7	0
8.8	0
8.9	0
9	0
9.1	0
9.2	0
9.3	0
9.4	0
9.5	0
9.6	0
9.7	0
9.8	0
9.9	0
10	0
10.1	0
10.2	0
10.3	0
10.4	0
10.5	0
10.6	0
10.7	0
10.8	0
10.9	0
11	0
11.1	0
11.2	0
11.3	0
11.4	0
11.5	0
11.6	0
11.7	0
11.8	0
11.9	0
12	0
12.1	0
12.2	0
12.3	0
12.4	0
12.5	0
12.6	0
12.7	0
12.8	0
12.9	0
13	0
13.1	0
13.2	0
13.3	0
13.4	0
13.5	0
13.6	0
13.7	0
13.8	0
13.9	0
14	0
14.1	0
14.2	0
14.3	0
14.4	0
14.5	0
14.6	0
14.7	0
14.8	0
14.9	0
15	0
15.1	0
15.2	0
15.3	0
15.4	0
15.5	0
15.6	0
15.7	0
15.8	0
15.9	0
16	0
16.1	0
16.2	0
16.3	0
16.4	0
16.5	0
16.6	0
16.7	0
16.8	0
16.9	0
17	0
17.1	0
17.2	0
17.3	0
17.4	0
17.5	0
17.6	0
17.7	0
17.8	0
17.9	0
18	0
18.1	0
18.2	0
18.3	0
18.4	0
18.5	0
18.6	0
18.7	0
18.8	0
18.9	0
19	0
19.1	0
19.2	0
19.3	0
19.4	0
19.5	0
19.6	0
19.7	0
19.8	0
19.9	0
20	0
20.1	0
20.2	0
20.3	0
20.4	0
20.5	0
20.6	0
20.7	0
20.8	0
20.9	0
21	0
21.1	0
21.2	0
21.3	0
21.4	0
21.5	0
21.6	0
21.7	0
21.8	0
21.9	0
22	0
22.1	0
22.2	0
22.3	0
22.4	0
22.5	0
22.6	0
22.7	0
22.8	0
22.9	0
23	0
23.1	0
23.2	0
23.3	0
23.4	0
23.5	0
23.6	0
23.7	0
23.8	0
23.9	0
24	0
24.1	0
24.2	0
24.3	0
24.4	0
24.5	0
24.6	0
24.7	0
24.8	0
24.9	0
25	0
25.1	0
25.2	0
25.3	0
25.4	0
25.5	0
25.6	0
25.7	0
25.8	0
25.9	0
26	0
26.1	0
26.2	0
26.3	0
26.4	0
26.5	0
26.6	0
26.7	0
26.8	0
26.9	0
27	0
27.1	0
27.2	0
27.3	0
27.4	0
27.5	0
27.6	0
27.7	0
27.8	0
27.9	0
28	0
28.1	0
28.2	0
28.3	0
28.4	0
28.5	0
28.6	0
28.7	0
28.8	0
28.9	0
29	0
29.1	0
29.2	0
29.3	0
29.4	0
29.5	0
29.6	0
29.7	0
29.8	0
29.9	0
30	0
30.1	0
30.2	0
30.3	0
30.4	0
30.5	0
30.6	0
30.7	0
30.8	0
30.9	0
31	0
31.1	0
31.2	0
31.3	0
31.4	0
31.5	0
31.6	0
31.7	0
31.8	0
31.9	0
32	0
32.1	0
32.2	0
32.3	0
32.4	0
32.5	0
32.6	0
32.7	0
32.8	0
32.9	0
33	0
33.1	0
33.2	0
33.3	0
33.4	0
33.5	0
33.6	0
33.7	0
33.8	0
33.9	0
34	0
34.1	0
34.2	0
34.3	0
34.4	0
34.5	0
34.6	0
34.7	0
34.8	0
34.9	0
35	0
35.1	0
35.2	0
35.3	0
35.4	0
35.5	0
35.6	0
35.7	0
35.8	0
35.9	0
36	0
36.1	0
36.2	0
36.3	0
36.4	0
36.5	0
36.6	0
36.7	0
36.8	0
36.9	0
37	0
37.1	0
37.2	0
37.3	0
37.4	0
37.5	0
37.6	0
37.7	0
37.8	0
37.9	0
38	0
38.1	0
38.2	0
38.3	0
38.4	0
38.5	0
38.6	0
38.7	0
38.8	0
38.9	0
39	0
39.1	0
39.2	0
39.3	0
39.4	0
39.5	0
39.6	0
39.7	0
39.8	0
39.9	0
40	0
40.1	0
40.2	0
40.3	0
40.4	0
40.5	0
40.6	0
40.7	0
40.8	0
40.9	0
41	0
41.1	0
41.2	0
41.3	0
41.4	0
41.5	0
41.6	0
41.7	0
41.8	0
41.9	0
42	0
42.1	0
42.2	0
42.3	0
42.4	0
42.5	0
42.6	0
42.7	0
42.8	0
42.9	0
43	0
43.1	0
43.2	0
43.3	0
43.4	0
43.5	0
43.6	0
43.7	0
43.8	0
43.9	0
44	0
44.1	0
44.2	0
44.3	0
44.4	0
44.5	0
44.6	0
44.7	0
44.8	0
44.9	0
45	0
45.1	0
45.2	0
45.3	0
45.4	0
45.5	0
45.6	0
45.7	0
45.8	0
45.9	0
46	0
46.1	0
46.2	0
46.3	0
46.4	0
46.5	0
46.6	0
46.7	0
46.8	0
46.9	0
47	0
47.1	0
47.2	0
47.3	0
47.4	0
47.5	0
47.6	0
47.7	0
47.8	0
47.9	0
48	0
48.1	0
48.2	0
48.3	0
48.4	0
48.5	0
48.6	0
48.7	0
48.8	0
48.9	0
49	0
49.1	0
49.2	0
49.3	0
49.4	0
49.5	0
49.6	0
49.7	0
49.8	0
49.9	0
50	0
50.1	0
50.2	0
50.3	0
50.4	0
50.5	0
50.6	0
50.7	0
50.8	0
50.9	0
51	0
51.1	0
51.2	0
51.3	0
51.4	0
51.5	0
51.6	0
51.7	0
51.8	0
51.9	0
52	0
52.1	0
52.2	0
52.3	0
52.4	0
52.5	0
52.6	0
52.7	0
52.8	0
52.9	0
53	0
53.1	0
53.2	0
53.3	0
53.4	0
53.5	0
53.6	0
53.7	0
53.8	0
53.9	0
54	0
54.1	0
54.2	0
54.3	0
54.4	0
54.5	0
54.6	0
54.7	0
54.8	0
54.9	0
55	0
55.1	0
55.2	0
55.3	0
55.4	0
55.5	0
55.6	0
55.7	0
55.8	0
55.9	0
56	0
56.1	0
56.2	0
56.3	0
56.4	0
56.5	0
56.6	0
56.7	0
56.8	0
56.9	0
57	0
57.1	0
57.2	0
57.3	0
57.4	0
57.5	0
57.6	0
57.7	0
57.8	0
57.9	0
58	0
58.1	0
58.2	0
58.3	0
58.4	0
58.5	0
58.6	0
58.7	0
58.8	0
58.9	0
59	0
59.1	0
59.2	0
59.3	0
59.4	0
59.5	0
59.6	0
59.7	0
59.8	0
59.9	0
60	0
60.1	0
60.2	0
60.3	0
60.4	0
60.5	0
60.6	0
60.7	0
60.8	0
60.9	0
61	0
61.1	0
61.2	0
61.3	0
61.4	0
61.5	0
61.6	0
61.7	0
61.8	0
61.9	0
62	0
62.1	0
62.2	0
62.3	0
62.4	0
62.5	0
62.6	0
62.7	0
62.8	0
62.9	0
63	0
63.1	0
63.2	0
63.3	0
63.4	0
63.5	0
63.6	0
63.7	0
63.8	0
63.9	0
64	0
64.1	0
64.2	0
64.3	0
64.4	0
64.5	0
64.6	0
64.7	0
64.8	0
64.9	0
65	0
65.1	0
65.2	0
65.3	0
65.4	0
65.5	0
65.6	0
65.7	0
65.8	0
65.9	0
66	0
66.1	0
66.2	0
66.3	0
66.4	0
66.5	0
66.6	0
66.7	0
66.8	0
66.9	0
67	0
67.1	0
67.2	0
67.3	0
67.4	0
67.5	0
67.6	0
67.7	0
67.8	0
67.9	0
68	0
68.1	0
68.2	0
68.3	0
68.4	0
68.5	0
68.6	0
68.7	0
68.8	0
68.9	0
69	0
69.1	0
69.2	0
69.3	0
69.4	0
69.5	0
69.6	0
69.7	0
69.8	0
69.9	0
70	0
70.1	0
70.2	0
70.3	0
70.4	0
70.5	0
70.6	0
70.7	0
70.8	0
70.9	0
71	0
71.1	0
71.2	0
71.3	0
71.4	0
71.5	0
71.6	0
71.7	0
71.8	0
71.9	0
72	0
72.1	0
72.2	0
72.3	0
72.4	0
72.5	0
72.6	0
72.7	0
72.8	0
72.9	0
73	0
73.1	0
73.2	0
73.3	0
73.4	0
73.5	0
73.6	0
73.7	0
73.8	0
73.9	0
74	0
74.1	0
74.2	0
74.3	0
74.4	0
74.5	0
74.6	0
74.7	0
74.8	0
74.9	0
75	0
75.1	0
75.2	0
75.3	0
75.4	0
75.5	0
75.6	0
75.7	0
75.8	0
75.9	0
76	0
76.1	0
76.2	0
76.3	0
76.4	0
76.5	0
76.6	0
76.7	0
76.8	0
76.9	0
77	0
77.1	0
77.2	0
77.3	0
77.4	0
77.5	0
77.6	0
77.7	0
77.8	0
77.9	0
78	0
78.1	0
78.2	0
78.3	0
78.4	0
78.5	0
78.6	0
78.7	0
78.8	0
78.9	0
79	0
79.1	0
79.2	0
79.3	0
79.4	0
79.5	0
79.6	0
79.7	0
79.8	0
79.9	0
80	0
80.1	0
80.2	0
80.3	0
80.4	0
80.5	0
80.6	0
80.7	0
80.8	0
80.9	0
81	0
81.1	0
81.2	0
81.3	0
81.4	0
81.5	0
81.6	0
81.7	0
81.8	0
81.9	0
82	0
82.1	0
82.2	0
82.3	0
82.4	0
82.5	0
82.6	0
82.7	0
82.8	0
82.9	0
83	0
83.1	0
83.2	0
83.3	0
83.4	0
83.5	0
83.6	0
83.7	0
83.8	0
83.9	0
84	0
84.1	0
84.2	0
84.3	0
84.4	0
84.5	0
84.6	0
84.7	0
84.8	0
84.9	0
85	0
85.1	0
85.2	0
85.3	0
85.4	0
85.5	0
85.6	0
85.7	0
85.8	0
85.9	0
86	0
86.1	0
86.2	0
86.3	0
86.4	0
86.5	0
86.6	0
86.7	0
86.8	0
86.9	0
87	0
87.1	0
87.2	0
87.3	0
87.4	0
87.5	0
87.6	0
87.7	0
87.8	0
87.9	0
88	0
88.1	0
88.2	0
88.3	0
88.4	0
88.5	0
88.6	0
88.7	0
88.8	0
88.9	0
89	0
89.1	0
89.2	0
89.3	0
89.4	0
89.5	0
89.6	0
89.7	0
89.8	0
89.9	0
90	0
90.1	0
90.2	0
90.3	0
90.4	0
90.5	0
90.6	0
90.7	0
90.8	0
90.9	0
91	0
91.1	0
91.2	0
91.3	0
91.4	0
91.5	0
91.6	0
91.7	0
91.8	0
91.9	0
92	0
92.1	0
92.2	0
92.3	0
92.4	0
92.5	0
92.6	0
92.7	0
92.8	0
92.9	0
93	0
93.1	0
93.2	0
93.3	0
93.4	0
93.5	0
93.6	0
93.7	0
93.8	0
93.9	0
94	0
94.1	0
94.2	0
94.3	0
94.4	0
94.5	0
94.6	0
94.7	0
94.8	0
94.9	0
95	0
95.1	0
95.2	0
95.3	0
95.4	0
95.5	0
95.6	0
95.7	0
95.8	0
95.9	0
96	0
96.1	0
96.2	0
96.3	0
96.4	0
96.5	0
96.6	0
96.7	0
96.8	0
96.9	0
97	0
97.1	0
97.2	0
97.3	0
97.4	0
97.5	0
97.6	0
97.7	0
97.8	0
97.9	0
98	0
98.1	0
98.2	0
98.3	0
98.4	0
98.5	0
98.6	0
98.7	0
98.8	0
98.9	0
99	0
99.1	0
99.2	0
99.3	0
99.4	0
99.5	0
99.6	0
99.7	0
99.8	0
99.9	0
100	0
100.1	0.0575
100.2	0.115
100.3	0.15875
100.4	0.2025
100.5	0.2325
100.6	0.2675
100.7	0.29875
100.8	0.3325
100.9	0.3475
101	0.3725
101.1	0.4075
101.2	0.4225
101.3	0.44
101.4	0.4575
101.5	0.48625
101.6	0.4975
101.7	0.5075
101.8	0.5225
101.9	0.54
102	0.545
102.1	0.55125
102.2	0.555
102.3	0.56
102.4	0.55625
102.5	0.55875
102.6	0.56875
102.7	0.5675
102.8	0.57875
102.9	0.5875
103	0.5975
103.1	0.60375
103.2	0.61375
103.3	0.6225
103.4	0.61875
103.5	0.62375
103.6	0.6425
103.7	0.65125
103.8	0.64625
103.9	0.65125
104	0.6525
104.1	0.6575
104.2	0.6675
104.3	0.67
104.4	0.665
104.5	0.66625
104.6	0.6625
104.7	0.65875
104.8	0.65875
104.9	0.66125
105	0.6525
105.1	0.65625
105.2	0.6525
105.3	0.6525
105.4	0.6475
105.5	0.65
105.6	0.65125
105.7	0.655
105.8	0.66875
105.9	0.6825
106	0.68
106.1	0.675
106.2	0.66625
106.3	0.67
106.4	0.6625
106.5	0.66
106.6	0.66
106.7	0.6575
106.8	0.6625
106.9	0.66875
107	0.67875
107.1	0.67625
107.2	0.68
107.3	0.6775
107.4	0.66625
107.5	0.66625
107.6	0.6675
107.7	0.66375
107.8	0.66125
107.9	0.6675
108	0.6725
108.1	0.67625
108.2	0.68125
108.3	0.68625
108.4	0.68
108.5	0.6875
108.6	0.69375
108.7	0.69375
108.8	0.69
108.9	0.685
109	0.68125
109.1	0.685
109.2	0.69625
109.3	0.69875
109.4	0.69625
109.5	0.6975
109.6	0.695
109.7	0.68625
109.8	0.685
109.9	0.69
110	0.68125
110.1	0.6825
110.2	0.68875
110.3	0.69
110.4	0.69
110.5	0.6825
110.6	0.68125
110.7	0.68375
110.8	0.68375
110.9	0.68125
111	0.67625
111.1	0.68
111.2	0.6825
111.3	0.68625
111.4	0.695
111.5	0.6975
111.6	0.69625
111.7	0.7025
111.8	0.70375
111.9	0.7
112	0.695
112.1	0.69375
112.2	0.69375
112.3	0.695
112.4	0.7025
112.5	0.7
112.6	0.70375
112.7	0.7025
112.8	0.69875
112.9	0.6925
113	0.68875
113.1	0.695
113.2	0.695
113.3	0.69625
113.4	0.70375
113.5	0.7075
113.6	0.71625
113.7	0.71375
113.8	0.7175
113.9	0.71625
114	0.71125
114.1	0.71625
114.2	0.71125
114.3	0.72
114.4	0.72625
114.5	0.72875
114.6	0.73
114.7	0.73
114.8	0.72125
114.9	0.72375
115	0.7225
115.1	0.7275
115.2	0.725
115.3	0.7175
115.4	0.71
115.5	0.7175
115.6	0.72
115.7	0.7175
115.8	0.715
115.9	0.7125
116	0.7025
116.1	0.7075
116.2	0.71125
116.3	0.71
116.4	0.715
116.5	0.71625
116.6	0.725
116.7	0.72375
116.8	0.72375
116.9	0.725
117	0.73125
117.1	0.73375
117.2	0.73625
117.3	0.745
117.4	0.74625
117.5	0.73625
117.6	0.735
117.7	0.7325
117.8	0.725
117.9	0.71875
118	0.7225
118.1	0.72375
118.2	0.7275
118.3	0.7325
118.4	0.74375
118.5	0.73875
118.6	0.73375
118.7	0.73875
118.8	0.735
118.9	0.73125
119	0.73625
119.1	0.7425
119.2	0.745
119.3	0.73875
119.4	0.74
119.5	0.74375
119.6	0.74375
119.7	0.7375
119.8	0.74375
119.9	0.745
120	0.74875
120.1	0.75375
120.2	0.7475
120.3	0.74625
120.4	0.75125
120.5	0.745
120.6	0.74625
120.7	0.74
120.8	0.73625
120.9	0.7325
121	0.73125
121.1	0.73125
121.2	0.7425
121.3	0.745
121.4	0.73875
121.5	0.74375
121.6	0.74375
121.7	0.7475
121.8	0.75375
121.9	0.75375
122	0.74875
122.1	0.7525
122.2	0.75625
122.3	0.7575
122.4	0.75625
122.5	0.75875
122.6	0.75375
122.7	0.7525
122.8	0.7575
122.9	0.76375
123	0.765
123.1	0.7675
123.2	0.77
123.3	0.775
123.4	0.77375
123.5	0.77875
123.6	0.77625
123.7	0.775
123.8	0.78
123.9	0.7725
124	0.7725
124.1	0.76375
124.2	0.765
124.3	0.76375
124.4	0.765
124.5	0.76625
124.6	0.765
124.7	0.76
124.8	0.75875
124.9	0.75125
125	0.76125
125.1	0.765
125.2	0.76375
125.3	0.765
125.4	0.7675
125.5	0.77
125.6	0.76875
125.7	0.77125
125.8	0.77625
125.9	0.77375
126	0.775
126.1	0.77625
126.2	0.775
126.3	0.76625
126.4	0.77
126.5	0.77125
126.6	0.7625
126.7	0.765
126.8	0.7675
126.9	0.76375
127	0.76625
127.1	0.7675
127.2	0.77125
127.3	0.78125
127.4	0.785
127.5	0.78875
127.6	0.78375
127.7	0.7775
127.8	0.775
127.9	0.77
128	0.77
128.1	0.76625
128.2	0.76375
128.3	0.76375
128.4	0.7625
128.5	0.76375
128.6	0.76125
128.7	0.755
128.8	0.7625
128.9	0.7675
129	0.7675
129.1	0.77375
129.2	0.7775
129.3	0.77875
129.4	0.7875
129.5	0.7875
129.6	0.79125
129.7	0.78625
129.8	0.79125
129.9	0.78875
130	0.78375
130.1	0.7825
130.2	0.79125
130.3	0.7875
130.4	0.7825
130.5	0.78875
130.6	0.79125
130.7	0.78125
130.8	0.7775
130.9	0.77875
131	0.775
131.1	0.76875
131.2	0.7675
131.3	0.7625
131.4	0.76625
131.5	0.77
131.6	0.77375
131.7	0.7775
131.8	0.77625
131.9	0.77875
132	0.76875
132.1	0.76625
132.2	0.765
132.3	0.76625
132.4	0.7675
132.5	0.765
132.6	0.76875
132.7	0.7725
132.8	0.77125
132.9	0.77375
133	0.7725
133.1	0.77
133.2	0.77
133.3	0.77
133.4	0.77375
133.5	0.77125
133.6	0.77125
133.7	0.7675
133.8	0.76875
133.9	0.76875
134	0.7725
134.1	0.77375
134.2	0.77375
134.3	0.78125
134.4	0.79125
134.5	0.79125
134.6	0.79375
134.7	0.79125
134.8	0.795
134.9	0.7925
135	0.7925
135.1	0.78375
135.2	0.785
135.3	0.7875
135.4	0.7825
135.5	0.785
135.6	0.7825
135.7	0.78
135.8	0.78375
135.9	0.78125
136	0.78375
136.1	0.7875
136.2	0.79625
136.3	0.79
136.4	0.79
136.5	0.78875
136.6	0.78625
136.7	0.785
136.8	0.79
136.9	0.78375
137	0.79
137.1	0.79
137.2	0.78375
137.3	0.78375
137.4	0.785
137.5	0.78875
137.6	0.79125
137.7	0.79
137.8	0.795
137.9	0.79625
138	0.79875
138.1	0.79625
138.2	0.79375
138.3	0.80125
138.4	0.80125
138.5	0.79625
138.6	0.7975
138.7	0.79625
138.8	0.8
138.9	0.80375
139	0.79875
139.1	0.7925
139.2	0.78875
139.3	0.7825
139.4	0.7825
139.5	0.7825
139.6	0.78375
139.7	0.78375
139.8	0.78375
139.9	0.78625
140	0.7875
140.1	0.78875
140.2	0.7825
140.3	0.7825
140.4	0.78
140.5	0.78
140.6	0.7875
140.7	0.785
140.8	0.7925
140.9	0.79625
141	0.79875
141.1	0.8025
141.2	0.805
141.3	0.8025
141.4	0.80125
141.5	0.79875
141.6	0.79875
141.7	0.7925
141.8	0.78875
141.9	0.78875
142	0.795
142.1	0.79875
142.2	0.7975
142.3	0.79
142.4	0.7875
142.5	0.78875
142.6	0.7875
142.7	0.7875
142.8	0.785
142.9	0.78375
143	0.78375
143.1	0.78125
143.2	0.7875
143.3	0.78625
143.4	0.78375
143.5	0.78375
143.6	0.78
143.7	0.7875
143.8	0.78625
143.9	0.79375
144	0.79125
144.1	0.78375
144.2	0.7875
144.3	0.79
144.4	0.79
144.5	0.78875
144.6	0.78875
144.7	0.7925
144.8	0.795
144.9	0.795
145	0.79375
145.1	0.7975
145.2	0.8
145.3	0.795
145.4	0.7975
145.5	0.8
145.6	0.80125
145.7	0.80125
145.8	0.80125
145.9	0.8075
146	0.80625
146.1	0.80875
146.2	0.815
146.3	0.81125
146.4	0.815
146.5	0.81375
146.6	0.81
146.7	0.81
146.8	0.81125
146.9	0.81125
147	0.8125
147.1	0.81625
147.2	0.81875
147.3	0.825
147.4	0.81625
147.5	0.8125
147.6	0.82
147.7	0.81375
147.8	0.8125
147.9	0.81625
148	0.81125
148.1	0.8125
148.2	0.81625
148.3	0.81375
148.4	0.81
148.5	0.80875
148.6	0.8125
148.7	0.8175
148.8	0.82625
148.9	0.82875
149	0.8275
149.1	0.82875
149.2	0.82625
149.3	0.8275
149.4	0.82
149.5	0.8175
149.6	0.81125
149.7	0.8075
149.8	0.81125
149.9	0.81375
150	0.81375
150.1	0.81375
150.2	0.81125
150.3	0.8075
150.4	0.81
150.5	0.81125
150.6	0.81375
150.7	0.8075
150.8	0.80875
150.9	0.8175
151	0.82125
151.1	0.82
151.2	0.82
151.3	0.8225
151.4	0.82375
151.5	0.82375
151.6	0.81625
151.7	0.825
151.8	0.82125
151.9	0.82375
152	0.8225
152.1	0.82125
152.2	0.825
152.3	0.8225
152.4	0.8275
152.5	0.8225
152.6	0.8225
152.7	0.82375
152.8	0.82375
152.9	0.82125
153	0.8175
153.1	0.81875
153.2	0.8125
153.3	0.81625
153.4	0.82
153.5	0.81125
153.6	0.81125
153.7	0.8175
153.8	0.82375
153.9	0.82
154	0.81875
154.1	0.81375
154.2	0.81125
154.3	0.815
154.4	0.81375
154.5	0.81625
154.6	0.82
154.7	0.82375
154.8	0.825
154.9	0.82375
155	0.82
155.1	0.825
155.2	0.82625
155.3	0.83125
155.4	0.8275
155.5	0.83125
155.6	0.83125
155.7	0.825
155.8	0.82625
155.9	0.82625
156	0.82375
156.1	0.825
156.2	0.825
156.3	0.81875
156.4	0.815
156.5	0.815
156.6	0.815
156.7	0.815
156.8	0.8175
156.9	0.81625
157	0.81375
157.1	0.81125
157.2	0.81125
157.3	0.81625
157.4	0.815
157.5	0.8175
157.6	0.81375
157.7	0.82
157.8	0.8225
157.9	0.8225
158	0.8175
158.1	0.82125
158.2	0.81875
158.3	0.8175
158.4	0.82
158.5	0.82125
158.6	0.82375
158.7	0.82375
158.8	0.825
158.9	0.82875
159	0.82875
159.1	0.83
159.2	0.82625
159.3	0.8225
159.4	0.81875
159.5	0.815
159.6	0.8175
159.7	0.815
159.8	0.81625
159.9	0.81125
160	0.81
160.1	0.80875
160.2	0.80125
160.3	0.80875
160.4	0.805
160.5	0.8075
160.6	0.8125
160.7	0.81375
160.8	0.8125
160.9	0.82125
161	0.82125
161.1	0.82375
161.2	0.825
161.3	0.82375
161.4	0.82125
161.5	0.8225
161.6	0.81875
161.7	0.8175
161.8	0.82125
161.9	0.81875
162	0.82625
162.1	0.8275
162.2	0.82125
162.3	0.8175
162.4	0.82
162.5	0.8125
162.6	0.8125
162.7	0.81375
162.8	0.81625
162.9	0.81625
163	0.81625
163.1	0.80875
163.2	0.805
163.3	0.8075
163.4	0.80875
163.5	0.8025
163.6	0.8
163.7	0.79875
163.8	0.8025
163.9	0.80625
164	0.805
164.1	0.8025
164.2	0.80875
164.3	0.81
164.4	0.8075
164.5	0.805
164.6	0.80375
164.7	0.81
164.8	0.8
164.9	0.79875
165	0.8
165.1	0.805
165.2	0.80625
165.3	0.80875
165.4	0.81
165.5	0.8125
165.6	0.8125
165.7	0.8125
165.8	0.81
165.9	0.81125
166	0.81875
166.1	0.81625
166.2	0.82375
166.3	0.8225
166.4	0.82375
166.5	0.83125
166.6	0.82625
166.7	0.8275
166.8	0.825
166.9	0.82375
167	0.8225
167.1	0.82375
167.2	0.825
167.3	0.82625
167.4	0.825
167.5	0.82
167.6	0.81875
167.7	0.82125
167.8	0.825
167.9	0.82875
168	0.83375
168.1	0.83125
168.2	0.83375
168.3	0.8325
168.4	0.8325
168.5	0.83125
168.6	0.835
168.7	0.83625
168.8	0.8325
168.9	0.83375
169	0.84
169.1	0.83375
169.2	0.83875
169.3	0.8425
169.4	0.84375
169.5	0.845
169.6	0.845
169.7	0.84125
169.8	0.84625
169.9	0.84125
170	0.84125
170.1	0.83875
170.2	0.8375
170.3	0.84
170.4	0.8325
170.5	0.8375
170.6	0.83625
170.7	0.83625
170.8	0.83625
170.9	0.83125
171	0.83
171.1	0.8325
171.2	0.8375
171.3	0.84
171.4	0.8425
171.5	0.84375
171.6	0.84
171.7	0.84
171.8	0.84
171.9	0.84
172	0.84625
172.1	0.845
172.2	0.83625
172.3	0.84
172.4	0.83375
172.5	0.8425
172.6	0.835
172.7	0.83125
172.8	0.835
172.9	0.83
173	0.835
173.1	0.835
173.2	0.83375
173.3	0.82875
173.4	0.83125
173.5	0.835
173.6	0.8325
173.7	0.83125
173.8	0.835
173.9	0.83375
174	0.835
174.1	0.8425
174.2	0.84125
174.3	0.835
174.4	0.835
174.5	0.8325
174.6	0.8325
174.7	0.83
174.8	0.835
174.9	0.8375
175	0.83625
175.1	0.83625
175.2	0.83625
175.3	0.83625
175.4	0.83625
175.5	0.83875
175.6	0.83875
175.7	0.84
175.8	0.84
175.9	0.84125
176	0.84
176.1	0.83875
176.2	0.84375
176.3	0.8475
176.4	0.84
176.5	0.8375
176.6	0.8375
176.7	0.83625
176.8	0.8375
176.9	0.84
177	0.83875
177.1	0.8375
177.2	0.83125
177.3	0.825
177.4	0.83125
177.5	0.83125
177.6	0.83875
177.7	0.8425
177.8	0.84125
177.9	0.8425
178	0.84375
178.1	0.84875
178.2	0.84625
178.3	0.84875
178.4	0.85
178.5	0.84875
178.6	0.8475
178.7	0.845
178.8	0.8425
178.9	0.84375
179	0.8475
179.1	0.84375
179.2	0.84625
179.3	0.85625
179.4	0.85375
179.5	0.85625
179.6	0.84875
179.7	0.845
179.8	0.84
179.9	0.84125
180	0.84125
180.1	0.8425
180.2	0.84875
180.3	0.85
180.4	0.8525
180.5	0.8525
180.6	0.855
180.7	0.855
180.8	0.85125
180.9	0.85
181	0.84625
181.1	0.8475
181.2	0.8525
181.3	0.845
181.4	0.84625
181.5	0.84625
181.6	0.84875
181.7	0.85
181.8	0.84875
181.9	0.845
182	0.84125
182.1	0.84375
182.2	0.845
182.3	0.84375
182.4	0.85375
182.5	0.8525
182.6	0.84875
182.7	0.8475
182.8	0.84375
182.9	0.8375
183	0.83875
183.1	0.84125
183.2	0.84625
183.3	0.84875
183.4	0.845
183.5	0.835
183.6	0.8375
183.7	0.835
183.8	0.83625
183.9	0.84125
184	0.835
184.1	0.8425
184.2	0.8375
184.3	0.83625
184.4	0.835
184.5	0.83875
184.6	0.8425
184.7	0.84125
184.8	0.8325
184.9	0.8425
185	0.84125
185.1	0.84125
185.2	0.84375
185.3	0.84875
185.4	0.85
185.5	0.8525
185.6	0.84875
185.7	0.8425
185.8	0.8475
185.9	0.845
186	0.845
186.1	0.8475
186.2	0.84375
186.3	0.84875
186.4	0.85
186.5	0.84875
186.6	0.84625
186.7	0.84875
186.8	0.85
186.9	0.84625
187	0.8525
187.1	0.85
187.2	0.84875
187.3	0.85
187.4	0.8475
187.5	0.84375
187.6	0.85
187.7	0.85125
187.8	0.85
187.9	0.85125
188	0.8525
188.1	0.85125
188.2	0.85375
188.3	0.8525
188.4	0.85625
188.5	0.8525
188.6	0.85875
188.7	0.8575
188.8	0.8575
188.9	0.855
189	0.8625
189.1	0.8575
189.2	0.86125
189.3	0.85375
189.4	0.85375
189.5	0.85875
189.6	0.8675
189.7	0.87125
189.8	0.865
189.9	0.86625
190	0.86125
190.1	0.85625
190.2	0.855
190.3	0.85
190.4	0.85
190.5	0.85
190.6	0.85375
190.7	0.85375
190.8	0.85875
190.9	0.86
191	0.86125
191.1	0.8625
191.2	0.86125
191.3	0.85625
191.4	0.8625
191.5	0.8575
191.6	0.85875
191.7	0.855
191.8	0.84875
191.9	0.8475
192	0.845
192.1	0.845
192.2	0.8425
192.3	0.84375
192.4	0.8425
192.5	0.83875
192.6	0.845
192.7	0.84875
192.8	0.84625
192.9	0.845
193	0.8475
193.1	0.8475
193.2	0.84875
193.3	0.85125
193.4	0.84875
193.5	0.85
193.6	0.85375
193.7	0.855
193.8	0.855
193.9	0.8525
194	0.8525
194.1	0.85125
194.2	0.85
194.3	0.85125
194.4	0.85375
194.5	0.855
194.6	0.855
194.7	0.8525
194.8	0.85
194.9	0.8475
195	0.8475
195.1	0.85625
195.2	0.86
195.3	0.86125
195.4	0.85625
195.5	0.85375
195.6	0.85625
195.7	0.85875
195.8	0.8525
195.9	0.85125
196	0.855
196.1	0.86125
196.2	0.86125
196.3	0.86
196.4	0.86375
196.5	0.865
196.6	0.86375
196.7	0.86
196.8	0.86
196.9	0.86
197	0.85875
197.1	0.8525
197.2	0.85375
197.3	0.8525
197.4	0.855
197.5	0.85
197.6	0.85375
197.7	0.8575
197.8	0.85875
197.9	0.8575
198	0.86
198.1	0.85375
198.2	0.8525
198.3	0.85625
198.4	0.8575
198.5	0.85875
198.6	0.86375
198.7	0.86
198.8	0.8575
198.9	0.8525
199	0.85
199.1	0.85375
199.2	0.86
199.3	0.86375
199.4	0.855
199.5	0.8525
199.6	0.8525
199.7	0.8575
199.8	0.85625
199.9	0.85625
200	0.86
[truncated: 14,000 more rows]
