# Supplementary material for: Bayesian inference of kinetic schemes for ion channels by Kalman filtering
Source: eLife journal article supplement (doi:10.7554/elife.62714), 2022-05-04
Supplement: fig4-data6 [file 1_Sim_N_400_Strom_MW_1M.xlsx]

## Sheet: 1 M
0.1	0
0.2	0
0.3	0
0.4	0
0.5	0
0.6	0
0.7	0
0.8	0
0.9	0
1	0
1.1	0
1.2	0
1.3	0
1.4	0
1.5	0
1.6	0
1.7	0
1.8	0
1.9	0
2	0
2.1	0
2.2	0
2.3	0
2.4	0
2.5	0
2.6	0
2.7	0
2.8	0
2.9	0
3	0
3.1	0
3.2	0
3.3	0
3.4	0
3.5	0
3.6	0
3.7	0
3.8	0
3.9	0
4	0
4.1	0
4.2	0
4.3	0
4.4	0
4.5	0
4.6	0
4.7	0
4.8	0
4.9	0
5	0
5.1	0
5.2	0
5.3	0
5.4	0
5.5	0
5.6	0
5.7	0
5.8	0
5.9	0
6	0
6.1	0
6.2	0
6.3	0
6.4	0
6.5	0
6.6	0
6.7	0
6.8	0
6.9	0
7	0
7.1	0
7.2	0
7.3	0
7.4	0
7.5	0
7.6	0
7.7	0
7.8	0
7.9	0
8	0
8.1	0
8.2	0
8.3	0
8.4	0
8.5	0
8.6	0
8.7	0
8.8	0
8.9	0
9	0
9.1	0
9.2	0
9.3	0
9.4	0
9.5	0
9.6	0
9.7	0
9.8	0
9.9	0
10	0
10.1	0
10.2	0
10.3	0
10.4	0
10.5	0
10.6	0
10.7	0
10.8	0
10.9	0
11	0
11.1	0
11.2	0
11.3	0
11.4	0
11.5	0
11.6	0
11.7	0
11.8	0
11.9	0
12	0
12.1	0
12.2	0
12.3	0
12.4	0
12.5	0
12.6	0
12.7	0
12.8	0
12.9	0
13	0
13.1	0
13.2	0
13.3	0
13.4	0
13.5	0
13.6	0
13.7	0
13.8	0
13.9	0
14	0
14.1	0
14.2	0
14.3	0
14.4	0
14.5	0
14.6	0
14.7	0
14.8	0
14.9	0
15	0
15.1	0
15.2	0
15.3	0
15.4	0
15.5	0
15.6	0
15.7	0
15.8	0
15.9	0
16	0
16.1	0
16.2	0
16.3	0
16.4	0
16.5	0
16.6	0
16.7	0
16.8	0
16.9	0
17	0
17.1	0
17.2	0
17.3	0
17.4	0
17.5	0
17.6	0
17.7	0
17.8	0
17.9	0
18	0
18.1	0
18.2	0
18.3	0
18.4	0
18.5	0
18.6	0
18.7	0
18.8	0
18.9	0
19	0
19.1	0
19.2	0
19.3	0
19.4	0
19.5	0
19.6	0
19.7	0
19.8	0
19.9	0
20	0
20.1	0
20.2	0
20.3	0
20.4	0
20.5	0
20.6	0
20.7	0
20.8	0
20.9	0
21	0
21.1	0
21.2	0
21.3	0
21.4	0
21.5	0
21.6	0
21.7	0
21.8	0
21.9	0
22	0
22.1	0
22.2	0
22.3	0
22.4	0
22.5	0
22.6	0
22.7	0
22.8	0
22.9	0
23	0
23.1	0
23.2	0
23.3	0
23.4	0
23.5	0
23.6	0
23.7	0
23.8	0
23.9	0
24	0
24.1	0
24.2	0
24.3	0
24.4	0
24.5	0
24.6	0
24.7	0
24.8	0
24.9	0
25	0
25.1	0
25.2	0
25.3	0
25.4	0
25.5	0
25.6	0
25.7	0
25.8	0
25.9	0
26	0
26.1	0
26.2	0
26.3	0
26.4	0
26.5	0
26.6	0
26.7	0
26.8	0
26.9	0
27	0
27.1	0
27.2	0
27.3	0
27.4	0
27.5	0
27.6	0
27.7	0
27.8	0
27.9	0
28	0
28.1	0
28.2	0
28.3	0
28.4	0
28.5	0
28.6	0
28.7	0
28.8	0
28.9	0
29	0
29.1	0
29.2	0
29.3	0
29.4	0
29.5	0
29.6	0
29.7	0
29.8	0
29.9	0
30	0
30.1	0
30.2	0
30.3	0
30.4	0
30.5	0
30.6	0
30.7	0
30.8	0
30.9	0
31	0
31.1	0
31.2	0
31.3	0
31.4	0
31.5	0
31.6	0
31.7	0
31.8	0
31.9	0
32	0
32.1	0
32.2	0
32.3	0
32.4	0
32.5	0
32.6	0
32.7	0
32.8	0
32.9	0
33	0
33.1	0
33.2	0
33.3	0
33.4	0
33.5	0
33.6	0
33.7	0
33.8	0
33.9	0
34	0
34.1	0
34.2	0
34.3	0
34.4	0
34.5	0
34.6	0
34.7	0
34.8	0
34.9	0
35	0
35.1	0
35.2	0
35.3	0
35.4	0
35.5	0
35.6	0
35.7	0
35.8	0
35.9	0
36	0
36.1	0
36.2	0
36.3	0
36.4	0
36.5	0
36.6	0
36.7	0
36.8	0
36.9	0
37	0
37.1	0
37.2	0
37.3	0
37.4	0
37.5	0
37.6	0
37.7	0
37.8	0
37.9	0
38	0
38.1	0
38.2	0
38.3	0
38.4	0
38.5	0
38.6	0
38.7	0
38.8	0
38.9	0
39	0
39.1	0
39.2	0
39.3	0
39.4	0
39.5	0
39.6	0
39.7	0
39.8	0
39.9	0
40	0
40.1	0
40.2	0
40.3	0
40.4	0
40.5	0
40.6	0
40.7	0
40.8	0
40.9	0
41	0
41.1	0
41.2	0
41.3	0
41.4	0
41.5	0
41.6	0
41.7	0
41.8	0
41.9	0
42	0
42.1	0
42.2	0
42.3	0
42.4	0
42.5	0
42.6	0
42.7	0
42.8	0
42.9	0
43	0
43.1	0
43.2	0
43.3	0
43.4	0
43.5	0
43.6	0
43.7	0
43.8	0
43.9	0
44	0
44.1	0
44.2	0
44.3	0
44.4	0
44.5	0
44.6	0
44.7	0
44.8	0
44.9	0
45	0
45.1	0
45.2	0
45.3	0
45.4	0
45.5	0
45.6	0
45.7	0
45.8	0
45.9	0
46	0
46.1	0
46.2	0
46.3	0
46.4	0
46.5	0
46.6	0
46.7	0
46.8	0
46.9	0
47	0
47.1	0
47.2	0
47.3	0
47.4	0
47.5	0
47.6	0
47.7	0
47.8	0
47.9	0
48	0
48.1	0
48.2	0
48.3	0
48.4	0
48.5	0
48.6	0
48.7	0
48.8	0
48.9	0
49	0
49.1	0
49.2	0
49.3	0
49.4	0
49.5	0
49.6	0
49.7	0
49.8	0
49.9	0
50	0
50.1	0
50.2	0
50.3	0
50.4	0
50.5	0
50.6	0
50.7	0
50.8	0
50.9	0
51	0
51.1	0
51.2	0
51.3	0
51.4	0
51.5	0
51.6	0
51.7	0
51.8	0
51.9	0
52	0
52.1	0
52.2	0
52.3	0
52.4	0
52.5	0
52.6	0
52.7	0
52.8	0
52.9	0
53	0
53.1	0
53.2	0
53.3	0
53.4	0
53.5	0
53.6	0
53.7	0
53.8	0
53.9	0
54	0
54.1	0
54.2	0
54.3	0
54.4	0
54.5	0
54.6	0
54.7	0
54.8	0
54.9	0
55	0
55.1	0
55.2	0
55.3	0
55.4	0
55.5	0
55.6	0
55.7	0
55.8	0
55.9	0
56	0
56.1	0
56.2	0
56.3	0
56.4	0
56.5	0
56.6	0
56.7	0
56.8	0
56.9	0
57	0
57.1	0
57.2	0
57.3	0
57.4	0
57.5	0
57.6	0
57.7	0
57.8	0
57.9	0
58	0
58.1	0
58.2	0
58.3	0
58.4	0
58.5	0
58.6	0
58.7	0
58.8	0
58.9	0
59	0
59.1	0
59.2	0
59.3	0
59.4	0
59.5	0
59.6	0
59.7	0
59.8	0
59.9	0
60	0
60.1	0
60.2	0
60.3	0
60.4	0
60.5	0
60.6	0
60.7	0
60.8	0
60.9	0
61	0
61.1	0
61.2	0
61.3	0
61.4	0
61.5	0
61.6	0
61.7	0
61.8	0
61.9	0
62	0
62.1	0
62.2	0
62.3	0
62.4	0
62.5	0
62.6	0
62.7	0
62.8	0
62.9	0
63	0
63.1	0
63.2	0
63.3	0
63.4	0
63.5	0
63.6	0
63.7	0
63.8	0
63.9	0
64	0
64.1	0
64.2	0
64.3	0
64.4	0
64.5	0
64.6	0
64.7	0
64.8	0
64.9	0
65	0
65.1	0
65.2	0
65.3	0
65.4	0
65.5	0
65.6	0
65.7	0
65.8	0
65.9	0
66	0
66.1	0
66.2	0
66.3	0
66.4	0
66.5	0
66.6	0
66.7	0
66.8	0
66.9	0
67	0
67.1	0
67.2	0
67.3	0
67.4	0
67.5	0
67.6	0
67.7	0
67.8	0
67.9	0
68	0
68.1	0
68.2	0
68.3	0
68.4	0
68.5	0
68.6	0
68.7	0
68.8	0
68.9	0
69	0
69.1	0
69.2	0
69.3	0
69.4	0
69.5	0
69.6	0
69.7	0
69.8	0
69.9	0
70	0
70.1	0
70.2	0
70.3	0
70.4	0
70.5	0
70.6	0
70.7	0
70.8	0
70.9	0
71	0
71.1	0
71.2	0
71.3	0
71.4	0
71.5	0
71.6	0
71.7	0
71.8	0
71.9	0
72	0
72.1	0
72.2	0
72.3	0
72.4	0
72.5	0
72.6	0
72.7	0
72.8	0
72.9	0
73	0
73.1	0
73.2	0
73.3	0
73.4	0
73.5	0
73.6	0
73.7	0
73.8	0
73.9	0
74	0
74.1	0
74.2	0
74.3	0
74.4	0
74.5	0
74.6	0
74.7	0
74.8	0
74.9	0
75	0
75.1	0
75.2	0
75.3	0
75.4	0
75.5	0
75.6	0
75.7	0
75.8	0
75.9	0
76	0
76.1	0
76.2	0
76.3	0
76.4	0
76.5	0
76.6	0
76.7	0
76.8	0
76.9	0
77	0
77.1	0
77.2	0
77.3	0
77.4	0
77.5	0
77.6	0
77.7	0
77.8	0
77.9	0
78	0
78.1	0
78.2	0
78.3	0
78.4	0
78.5	0
78.6	0
78.7	0
78.8	0
78.9	0
79	0
79.1	0
79.2	0
79.3	0
79.4	0
79.5	0
79.6	0
79.7	0
79.8	0
79.9	0
80	0
80.1	0
80.2	0
80.3	0
80.4	0
80.5	0
80.6	0
80.7	0
80.8	0
80.9	0
81	0
81.1	0
81.2	0
81.3	0
81.4	0
81.5	0
81.6	0
81.7	0
81.8	0
81.9	0
82	0
82.1	0
82.2	0
82.3	0
82.4	0
82.5	0
82.6	0
82.7	0
82.8	0
82.9	0
83	0
83.1	0
83.2	0
83.3	0
83.4	0
83.5	0
83.6	0
83.7	0
83.8	0
83.9	0
84	0
84.1	0
84.2	0
84.3	0
84.4	0
84.5	0
84.6	0
84.7	0
84.8	0
84.9	0
85	0
85.1	0
85.2	0
85.3	0
85.4	0
85.5	0
85.6	0
85.7	0
85.8	0
85.9	0
86	0
86.1	0
86.2	0
86.3	0
86.4	0
86.5	0
86.6	0
86.7	0
86.8	0
86.9	0
87	0
87.1	0
87.2	0
87.3	0
87.4	0
87.5	0
87.6	0
87.7	0
87.8	0
87.9	0
88	0
88.1	0
88.2	0
88.3	0
88.4	0
88.5	0
88.6	0
88.7	0
88.8	0
88.9	0
89	0
89.1	0
89.2	0
89.3	0
89.4	0
89.5	0
89.6	0
89.7	0
89.8	0
89.9	0
90	0
90.1	0
90.2	0
90.3	0
90.4	0
90.5	0
90.6	0
90.7	0
90.8	0
90.9	0
91	0
91.1	0
91.2	0
91.3	0
91.4	0
91.5	0
91.6	0
91.7	0
91.8	0
91.9	0
92	0
92.1	0
92.2	0
92.3	0
92.4	0
92.5	0
92.6	0
92.7	0
92.8	0
92.9	0
93	0
93.1	0
93.2	0
93.3	0
93.4	0
93.5	0
93.6	0
93.7	0
93.8	0
93.9	0
94	0
94.1	0
94.2	0
94.3	0
94.4	0
94.5	0
94.6	0
94.7	0
94.8	0
94.9	0
95	0
95.1	0
95.2	0
95.3	0
95.4	0
95.5	0
95.6	0
95.7	0
95.8	0
95.9	0
96	0
96.1	0
96.2	0
96.3	0
96.4	0
96.5	0
96.6	0
96.7	0
96.8	0
96.9	0
97	0
97.1	0
97.2	0
97.3	0
97.4	0
97.5	0
97.6	0
97.7	0
97.8	0
97.9	0
98	0
98.1	0
98.2	0
98.3	0
98.4	0
98.5	0
98.6	0
98.7	0
98.8	0
98.9	0
99	0
99.1	0
99.2	0
99.3	0
99.4	0
99.5	0
99.6	0
99.7	0
99.8	0
99.9	0
100	0
100.1	0
100.2	0
100.3	0
100.4	0
100.5	0
100.6	0
100.7	0
100.8	0
100.9	0
101	0
101.1	0
101.2	0
101.3	0.0025
101.4	0.005
101.5	0.005
101.6	0.005
101.7	0.005
101.8	0.0075
101.9	0.0075
102	0.01
102.1	0.01
102.2	0.015
102.3	0.015
102.4	0.0175
102.5	0.0225
102.6	0.0225
102.7	0.025
102.8	0.025
102.9	0.025
103	0.0275
103.1	0.03
103.2	0.03
103.3	0.03
103.4	0.03
103.5	0.03
103.6	0.03
103.7	0.03
103.8	0.03
103.9	0.0325
104	0.0375
104.1	0.0375
104.2	0.0375
104.3	0.0375
104.4	0.04
104.5	0.04
104.6	0.04
104.7	0.0425
104.8	0.0425
104.9	0.045
105	0.045
105.1	0.045
105.2	0.045
105.3	0.045
105.4	0.0525
105.5	0.0525
105.6	0.055
105.7	0.0575
105.8	0.06
105.9	0.0575
106	0.06
106.1	0.06
106.2	0.0625
106.3	0.0625
106.4	0.0625
106.5	0.065
106.6	0.065
106.7	0.0675
106.8	0.07
106.9	0.07
107	0.0725
107.1	0.0725
107.2	0.0725
107.3	0.075
107.4	0.075
107.5	0.075
107.6	0.075
107.7	0.075
107.8	0.075
107.9	0.08
108	0.08
108.1	0.0825
108.2	0.0825
108.3	0.0825
108.4	0.085
108.5	0.09
108.6	0.09
108.7	0.09
108.8	0.0925
108.9	0.0925
109	0.095
109.1	0.0975
109.2	0.1
109.3	0.1025
109.4	0.1025
109.5	0.1025
109.6	0.105
109.7	0.105
109.8	0.1075
109.9	0.11
110	0.1125
110.1	0.115
110.2	0.12
110.3	0.1225
110.4	0.1225
110.5	0.125
110.6	0.13
110.7	0.1325
110.8	0.1325
110.9	0.13
111	0.13
111.1	0.135
111.2	0.1375
111.3	0.14
111.4	0.14
111.5	0.1425
111.6	0.1425
111.7	0.145
111.8	0.145
111.9	0.1475
112	0.1475
112.1	0.1475
112.2	0.15
112.3	0.15
112.4	0.15
112.5	0.1575
112.6	0.1575
112.7	0.1625
112.8	0.1675
112.9	0.1725
113	0.1775
113.1	0.1775
113.2	0.18
113.3	0.18
113.4	0.1775
113.5	0.18
113.6	0.18
113.7	0.18
113.8	0.18
113.9	0.1825
114	0.185
114.1	0.185
114.2	0.185
114.3	0.1875
114.4	0.1875
114.5	0.19
114.6	0.1925
114.7	0.1925
114.8	0.1925
114.9	0.1975
115	0.2
115.1	0.2
115.2	0.205
115.3	0.205
115.4	0.2075
115.5	0.2075
115.6	0.2075
115.7	0.2075
115.8	0.21
115.9	0.21
116	0.2075
116.1	0.21
116.2	0.21
116.3	0.21
116.4	0.21
116.5	0.2125
116.6	0.2125
116.7	0.2175
116.8	0.2175
116.9	0.2175
117	0.2175
117.1	0.22
117.2	0.2225
117.3	0.2225
117.4	0.225
117.5	0.225
117.6	0.225
117.7	0.2275
117.8	0.2275
117.9	0.2325
118	0.2325
118.1	0.2325
118.2	0.235
118.3	0.2325
118.4	0.235
118.5	0.2375
118.6	0.2375
118.7	0.2425
118.8	0.245
118.9	0.2475
119	0.2475
119.1	0.2475
119.2	0.25
119.3	0.2525
119.4	0.255
119.5	0.255
119.6	0.26
119.7	0.26
119.8	0.2575
119.9	0.26
120	0.2625
120.1	0.265
120.2	0.265
120.3	0.27
120.4	0.27
120.5	0.27
120.6	0.2725
120.7	0.2725
120.8	0.28
120.9	0.2825
121	0.2825
121.1	0.2825
121.2	0.2825
121.3	0.2825
121.4	0.285
121.5	0.2875
121.6	0.29
121.7	0.2925
121.8	0.295
121.9	0.295
122	0.295
122.1	0.295
122.2	0.2975
122.3	0.2975
122.4	0.2975
122.5	0.2975
122.6	0.2975
122.7	0.2975
122.8	0.2975
122.9	0.2975
123	0.2975
123.1	0.2975
123.2	0.3025
123.3	0.3025
123.4	0.3025
123.5	0.3025
123.6	0.3025
123.7	0.3025
123.8	0.305
123.9	0.305
124	0.3075
124.1	0.3075
124.2	0.3075
124.3	0.31
124.4	0.3075
124.5	0.31
124.6	0.31
124.7	0.31
124.8	0.3125
124.9	0.315
125	0.315
125.1	0.315
125.2	0.315
125.3	0.315
125.4	0.315
125.5	0.3175
125.6	0.3175
125.7	0.32
125.8	0.32
125.9	0.325
126	0.3275
126.1	0.325
126.2	0.3275
126.3	0.3275
126.4	0.3275
126.5	0.3275
126.6	0.3275
126.7	0.335
126.8	0.3375
126.9	0.34
127	0.3425
127.1	0.3425
127.2	0.34
127.3	0.3425
127.4	0.3475
127.5	0.3475
127.6	0.3475
127.7	0.3475
127.8	0.3475
127.9	0.35
128	0.35
128.1	0.35
128.2	0.35
128.3	0.3525
128.4	0.355
128.5	0.3525
128.6	0.3525
128.7	0.36
128.8	0.36
128.9	0.36
129	0.36
129.1	0.36
129.2	0.36
129.3	0.36
129.4	0.36
129.5	0.36
129.6	0.36
129.7	0.3625
129.8	0.3625
129.9	0.3625
130	0.3625
130.1	0.3625
130.2	0.3625
130.3	0.3625
130.4	0.365
130.5	0.3675
130.6	0.3675
130.7	0.3675
130.8	0.3675
130.9	0.37
131	0.37
131.1	0.37
131.2	0.37
131.3	0.37
131.4	0.37
131.5	0.37
131.6	0.37
131.7	0.3725
131.8	0.3725
131.9	0.3725
132	0.375
132.1	0.375
132.2	0.375
132.3	0.375
132.4	0.3725
132.5	0.3725
132.6	0.3725
132.7	0.375
132.8	0.375
132.9	0.375
133	0.375
133.1	0.375
133.2	0.3775
133.3	0.3775
133.4	0.3775
133.5	0.3775
133.6	0.3775
133.7	0.3775
133.8	0.3775
133.9	0.38
134	0.38
134.1	0.3825
134.2	0.3825
134.3	0.38
134.4	0.38
134.5	0.38
134.6	0.3775
134.7	0.3775
134.8	0.3775
134.9	0.375
135	0.375
135.1	0.375
135.2	0.3775
135.3	0.3775
135.4	0.38
135.5	0.3775
135.6	0.3775
135.7	0.38
135.8	0.38
135.9	0.38
136	0.3775
136.1	0.3775
136.2	0.3825
136.3	0.3825
136.4	0.385
136.5	0.385
136.6	0.385
136.7	0.385
136.8	0.385
136.9	0.3825
137	0.3825
137.1	0.385
137.2	0.3825
137.3	0.385
137.4	0.385
137.5	0.385
137.6	0.3875
137.7	0.3875
137.8	0.385
137.9	0.3875
138	0.385
138.1	0.3875
138.2	0.3875
138.3	0.3875
138.4	0.3875
138.5	0.3875
138.6	0.39
138.7	0.39
138.8	0.3925
138.9	0.3925
139	0.3925
139.1	0.395
139.2	0.395
139.3	0.4
139.4	0.4
139.5	0.4025
139.6	0.4025
139.7	0.4025
139.8	0.4025
139.9	0.4075
140	0.41
140.1	0.4125
140.2	0.415
140.3	0.415
140.4	0.415
140.5	0.4175
140.6	0.4175
140.7	0.4175
140.8	0.42
140.9	0.42
141	0.42
141.1	0.42
141.2	0.42
141.3	0.42
141.4	0.4225
141.5	0.4225
141.6	0.4225
141.7	0.425
141.8	0.425
141.9	0.425
142	0.4275
142.1	0.4275
142.2	0.4275
142.3	0.4275
142.4	0.4325
142.5	0.4325
142.6	0.435
142.7	0.4375
142.8	0.4375
142.9	0.4375
143	0.44
143.1	0.44
143.2	0.44
143.3	0.44
143.4	0.44
143.5	0.4425
143.6	0.4425
143.7	0.4425
143.8	0.4425
143.9	0.445
144	0.445
144.1	0.445
144.2	0.45
144.3	0.45
144.4	0.455
144.5	0.455
144.6	0.455
144.7	0.455
144.8	0.455
144.9	0.4575
145	0.4575
145.1	0.4575
145.2	0.46
145.3	0.4625
145.4	0.4625
145.5	0.4625
145.6	0.4625
145.7	0.465
145.8	0.465
145.9	0.465
146	0.4675
146.1	0.465
146.2	0.465
146.3	0.4675
146.4	0.4675
146.5	0.47
146.6	0.475
146.7	0.4775
146.8	0.4775
146.9	0.475
147	0.475
147.1	0.4775
147.2	0.4775
147.3	0.4775
147.4	0.4775
147.5	0.4775
147.6	0.4775
147.7	0.4775
147.8	0.4775
147.9	0.4775
148	0.475
148.1	0.4775
148.2	0.4775
148.3	0.48
148.4	0.48
148.5	0.48
148.6	0.48
148.7	0.4775
148.8	0.475
148.9	0.4775
149	0.4825
149.1	0.4825
149.2	0.4825
149.3	0.4825
149.4	0.4825
149.5	0.4825
149.6	0.4825
149.7	0.485
149.8	0.4875
149.9	0.4875
150	0.49
150.1	0.4875
150.2	0.4925
150.3	0.4925
150.4	0.4925
150.5	0.4925
150.6	0.4925
150.7	0.4925
150.8	0.4975
150.9	0.4975
151	0.4975
151.1	0.5
151.2	0.5025
151.3	0.5025
151.4	0.5025
151.5	0.505
151.6	0.505
151.7	0.5025
151.8	0.5025
151.9	0.5025
152	0.5025
152.1	0.5025
152.2	0.505
152.3	0.505
152.4	0.5075
152.5	0.5075
152.6	0.5075
152.7	0.505
152.8	0.505
152.9	0.505
153	0.5025
153.1	0.5025
153.2	0.5025
153.3	0.5025
153.4	0.5025
153.5	0.5025
153.6	0.505
153.7	0.505
153.8	0.5075
153.9	0.5075
154	0.5075
154.1	0.51
154.2	0.505
154.3	0.505
154.4	0.505
154.5	0.5025
154.6	0.505
154.7	0.5075
154.8	0.5075
154.9	0.515
155	0.515
155.1	0.515
155.2	0.51
155.3	0.51
155.4	0.5125
155.5	0.515
155.6	0.515
155.7	0.515
155.8	0.5175
155.9	0.5175
156	0.5175
156.1	0.515
156.2	0.5125
156.3	0.5125
156.4	0.515
156.5	0.515
156.6	0.515
156.7	0.5175
156.8	0.5175
156.9	0.5175
157	0.515
157.1	0.515
157.2	0.515
157.3	0.5125
157.4	0.5125
157.5	0.515
157.6	0.515
157.7	0.515
157.8	0.515
157.9	0.5175
158	0.5175
158.1	0.5175
158.2	0.515
158.3	0.515
158.4	0.5125
158.5	0.51
158.6	0.51
158.7	0.5125
158.8	0.5125
158.9	0.5125
159	0.51
159.1	0.51
159.2	0.505
159.3	0.5075
159.4	0.51
159.5	0.5125
159.6	0.5125
159.7	0.515
159.8	0.515
159.9	0.515
160	0.515
160.1	0.51
160.2	0.51
160.3	0.505
160.4	0.5025
160.5	0.5025
160.6	0.5025
160.7	0.505
160.8	0.505
160.9	0.505
161	0.5
161.1	0.5
161.2	0.5
161.3	0.5025
161.4	0.5
161.5	0.4975
161.6	0.495
161.7	0.495
161.8	0.495
161.9	0.4975
162	0.5
162.1	0.5025
162.2	0.5025
162.3	0.5025
162.4	0.505
162.5	0.5025
162.6	0.5025
162.7	0.505
162.8	0.505
162.9	0.505
163	0.505
163.1	0.505
163.2	0.5075
163.3	0.505
163.4	0.505
163.5	0.505
163.6	0.505
163.7	0.505
163.8	0.5025
163.9	0.505
164	0.505
164.1	0.505
164.2	0.505
164.3	0.505
164.4	0.505
164.5	0.505
164.6	0.5075
164.7	0.5075
164.8	0.5075
164.9	0.5075
165	0.5075
165.1	0.5075
165.2	0.5075
165.3	0.5075
165.4	0.51
165.5	0.5075
165.6	0.505
165.7	0.5025
165.8	0.5025
165.9	0.5025
166	0.5
166.1	0.5025
166.2	0.5025
166.3	0.5
166.4	0.5
166.5	0.5025
166.6	0.5025
166.7	0.5025
166.8	0.505
166.9	0.505
167	0.505
167.1	0.505
167.2	0.505
167.3	0.5075
167.4	0.5075
167.5	0.5075
167.6	0.5075
167.7	0.5075
167.8	0.5075
167.9	0.5075
168	0.5075
168.1	0.5075
168.2	0.51
168.3	0.5125
168.4	0.5125
168.5	0.51
168.6	0.5075
168.7	0.5075
168.8	0.5125
168.9	0.5125
169	0.5125
169.1	0.5125
169.2	0.5125
169.3	0.5125
169.4	0.5125
169.5	0.5125
169.6	0.515
169.7	0.5175
169.8	0.5175
169.9	0.5175
170	0.5175
170.1	0.515
170.2	0.5175
170.3	0.52
170.4	0.52
170.5	0.52
170.6	0.52
170.7	0.525
170.8	0.525
170.9	0.5225
171	0.5225
171.1	0.5225
171.2	0.525
171.3	0.525
171.4	0.5275
171.5	0.53
171.6	0.53
171.7	0.5325
171.8	0.53
171.9	0.5275
172	0.5275
172.1	0.5275
172.2	0.5275
172.3	0.5275
172.4	0.5275
172.5	0.53
172.6	0.53
172.7	0.53
172.8	0.53
172.9	0.53
173	0.53
173.1	0.5275
173.2	0.5275
173.3	0.5275
173.4	0.53
173.5	0.53
173.6	0.5325
173.7	0.5325
173.8	0.53
173.9	0.5325
174	0.53
174.1	0.53
174.2	0.5325
174.3	0.535
174.4	0.535
174.5	0.535
174.6	0.535
174.7	0.5375
174.8	0.54
174.9	0.5375
175	0.5375
175.1	0.5375
175.2	0.54
175.3	0.54
175.4	0.54
175.5	0.54
175.6	0.54
175.7	0.5375
175.8	0.5375
175.9	0.5375
176	0.5425
176.1	0.54
176.2	0.54
176.3	0.54
176.4	0.54
176.5	0.54
176.6	0.54
176.7	0.5425
176.8	0.5425
176.9	0.5425
177	0.5425
177.1	0.545
177.2	0.545
177.3	0.545
177.4	0.5425
177.5	0.5425
177.6	0.545
177.7	0.5425
177.8	0.545
177.9	0.5475
178	0.5475
178.1	0.5475
178.2	0.5475
178.3	0.545
178.4	0.545
178.5	0.5425
178.6	0.5425
178.7	0.5425
178.8	0.545
178.9	0.545
179	0.55
179.1	0.555
179.2	0.555
179.3	0.555
179.4	0.5575
179.5	0.5575
179.6	0.5575
179.7	0.5575
179.8	0.5575
179.9	0.5575
180	0.555
180.1	0.5575
180.2	0.555
180.3	0.555
180.4	0.5575
180.5	0.5575
180.6	0.5575
180.7	0.5575
180.8	0.5575
180.9	0.555
181	0.555
181.1	0.5525
181.2	0.5525
181.3	0.5575
181.4	0.555
181.5	0.5525
181.6	0.5525
181.7	0.5575
181.8	0.5575
181.9	0.5575
182	0.555
182.1	0.5575
182.2	0.5575
182.3	0.555
182.4	0.555
182.5	0.555
182.6	0.555
182.7	0.555
182.8	0.555
182.9	0.5525
183	0.5525
183.1	0.5525
183.2	0.555
183.3	0.555
183.4	0.5575
183.5	0.56
183.6	0.56
183.7	0.56
183.8	0.5575
183.9	0.56
184	0.56
184.1	0.565
184.2	0.565
184.3	0.5675
184.4	0.565
184.5	0.565
184.6	0.565
184.7	0.565
184.8	0.565
184.9	0.5625
185	0.56
185.1	0.5625
185.2	0.5675
185.3	0.5675
185.4	0.5725
185.5	0.5725
185.6	0.57
185.7	0.57
185.8	0.57
185.9	0.57
186	0.57
186.1	0.5675
186.2	0.57
186.3	0.57
186.4	0.57
186.5	0.5675
186.6	0.5675
186.7	0.5675
186.8	0.5675
186.9	0.5675
187	0.5675
187.1	0.5675
187.2	0.5675
187.3	0.5675
187.4	0.5675
187.5	0.57
187.6	0.57
187.7	0.5675
187.8	0.5675
187.9	0.5675
188	0.5675
188.1	0.565
188.2	0.565
188.3	0.5675
188.4	0.565
188.5	0.565
188.6	0.565
188.7	0.565
188.8	0.565
188.9	0.5675
189	0.5675
189.1	0.5675
189.2	0.5675
189.3	0.5675
189.4	0.5675
189.5	0.5675
189.6	0.5675
189.7	0.5675
189.8	0.5675
189.9	0.5675
190	0.57
190.1	0.57
190.2	0.5725
190.3	0.57
190.4	0.5725
190.5	0.5775
190.6	0.5775
190.7	0.5775
190.8	0.5775
190.9	0.5775
191	0.575
191.1	0.575
191.2	0.58
191.3	0.5825
191.4	0.5825
191.5	0.585
191.6	0.585
191.7	0.5825
191.8	0.585
191.9	0.585
192	0.5875
192.1	0.5875
192.2	0.5875
192.3	0.585
192.4	0.585
192.5	0.5825
192.6	0.5825
192.7	0.58
192.8	0.58
192.9	0.58
193	0.58
193.1	0.5825
193.2	0.585
193.3	0.585
193.4	0.585
193.5	0.585
193.6	0.585
193.7	0.585
193.8	0.585
193.9	0.5825
194	0.5825
194.1	0.5775
194.2	0.58
194.3	0.58
194.4	0.58
194.5	0.5775
194.6	0.5775
194.7	0.5775
194.8	0.5775
194.9	0.5775
195	0.58
195.1	0.58
195.2	0.5825
195.3	0.58
195.4	0.585
195.5	0.585
195.6	0.585
195.7	0.585
195.8	0.585
195.9	0.585
196	0.5825
196.1	0.5825
196.2	0.585
196.3	0.5825
196.4	0.585
196.5	0.585
196.6	0.5875
196.7	0.5875
196.8	0.5875
196.9	0.59
197	0.59
197.1	0.5925
197.2	0.59
197.3	0.59
197.4	0.5925
197.5	0.595
197.6	0.595
197.7	0.595
197.8	0.595
197.9	0.5975
198	0.595
198.1	0.5975
198.2	0.5975
198.3	0.5975
198.4	0.595
198.5	0.595
198.6	0.595
198.7	0.595
198.8	0.5975
198.9	0.595
199	0.595
199.1	0.595
199.2	0.595
199.3	0.5925
199.4	0.59
199.5	0.59
199.6	0.59
199.7	0.59
199.8	0.59
199.9	0.5875
200	0.585
[truncated: 14,000 more rows]
