# Supplementary material for: Bayesian inference of kinetic schemes for ion channels by Kalman filtering
Source: eLife journal article supplement (doi:10.7554/elife.62714), 2022-05-04
Supplement: fig4-data6 [file 1_Sim_N_500_Fluor_MW.xlsx]

## Sheet: Tabelle1
0.1	0
0.2	0
0.3	0
0.4	0
0.5	0
0.6	0
0.7	0
0.8	0
0.9	0
1	0
1.1	0
1.2	0
1.3	0
1.4	0
1.5	0
1.6	0
1.7	0
1.8	0
1.9	0
2	0
2.1	0
2.2	0
2.3	0
2.4	0
2.5	0
2.6	0
2.7	0
2.8	0
2.9	0
3	0
3.1	0
3.2	0
3.3	0
3.4	0
3.5	0
3.6	0
3.7	0
3.8	0
3.9	0
4	0
4.1	0
4.2	0
4.3	0
4.4	0
4.5	0
4.6	0
4.7	0
4.8	0
4.9	0
5	0
5.1	0
5.2	0
5.3	0
5.4	0
5.5	0
5.6	0
5.7	0
5.8	0
5.9	0
6	0
6.1	0
6.2	0
6.3	0
6.4	0
6.5	0
6.6	0
6.7	0
6.8	0
6.9	0
7	0
7.1	0
7.2	0
7.3	0
7.4	0
7.5	0
7.6	0
7.7	0
7.8	0
7.9	0
8	0
8.1	0
8.2	0
8.3	0
8.4	0
8.5	0
8.6	0
8.7	0
8.8	0
8.9	0
9	0
9.1	0
9.2	0
9.3	0
9.4	0
9.5	0
9.6	0
9.7	0
9.8	0
9.9	0
10	0
10.1	0
10.2	0
10.3	0
10.4	0
10.5	0
10.6	0
10.7	0
10.8	0
10.9	0
11	0
11.1	0
11.2	0
11.3	0
11.4	0
11.5	0
11.6	0
11.7	0
11.8	0
11.9	0
12	0
12.1	0
12.2	0
12.3	0
12.4	0
12.5	0
12.6	0
12.7	0
12.8	0
12.9	0
13	0
13.1	0
13.2	0
13.3	0
13.4	0
13.5	0
13.6	0
13.7	0
13.8	0
13.9	0
14	0
14.1	0
14.2	0
14.3	0
14.4	0
14.5	0
14.6	0
14.7	0
14.8	0
14.9	0
15	0
15.1	0
15.2	0
15.3	0
15.4	0
15.5	0
15.6	0
15.7	0
15.8	0
15.9	0
16	0
16.1	0
16.2	0
16.3	0
16.4	0
16.5	0
16.6	0
16.7	0
16.8	0
16.9	0
17	0
17.1	0
17.2	0
17.3	0
17.4	0
17.5	0
17.6	0
17.7	0
17.8	0
17.9	0
18	0
18.1	0
18.2	0
18.3	0
18.4	0
18.5	0
18.6	0
18.7	0
18.8	0
18.9	0
19	0
19.1	0
19.2	0
19.3	0
19.4	0
19.5	0
19.6	0
19.7	0
19.8	0
19.9	0
20	0
20.1	0
20.2	0
20.3	0
20.4	0
20.5	0
20.6	0
20.7	0
20.8	0
20.9	0
21	0
21.1	0
21.2	0
21.3	0
21.4	0
21.5	0
21.6	0
21.7	0
21.8	0
21.9	0
22	0
22.1	0
22.2	0
22.3	0
22.4	0
22.5	0
22.6	0
22.7	0
22.8	0
22.9	0
23	0
23.1	0
23.2	0
23.3	0
23.4	0
23.5	0
23.6	0
23.7	0
23.8	0
23.9	0
24	0
24.1	0
24.2	0
24.3	0
24.4	0
24.5	0
24.6	0
24.7	0
24.8	0
24.9	0
25	0
25.1	0
25.2	0
25.3	0
25.4	0
25.5	0
25.6	0
25.7	0
25.8	0
25.9	0
26	0
26.1	0
26.2	0
26.3	0
26.4	0
26.5	0
26.6	0
26.7	0
26.8	0
26.9	0
27	0
27.1	0
27.2	0
27.3	0
27.4	0
27.5	0
27.6	0
27.7	0
27.8	0
27.9	0
28	0
28.1	0
28.2	0
28.3	0
28.4	0
28.5	0
28.6	0
28.7	0
28.8	0
28.9	0
29	0
29.1	0
29.2	0
29.3	0
29.4	0
29.5	0
29.6	0
29.7	0
29.8	0
29.9	0
30	0
30.1	0
30.2	0
30.3	0
30.4	0
30.5	0
30.6	0
30.7	0
30.8	0
30.9	0
31	0
31.1	0
31.2	0
31.3	0
31.4	0
31.5	0
31.6	0
31.7	0
31.8	0
31.9	0
32	0
32.1	0
32.2	0
32.3	0
32.4	0
32.5	0
32.6	0
32.7	0
32.8	0
32.9	0
33	0
33.1	0
33.2	0
33.3	0
33.4	0
33.5	0
33.6	0
33.7	0
33.8	0
33.9	0
34	0
34.1	0
34.2	0
34.3	0
34.4	0
34.5	0
34.6	0
34.7	0
34.8	0
34.9	0
35	0
35.1	0
35.2	0
35.3	0
35.4	0
35.5	0
35.6	0
35.7	0
35.8	0
35.9	0
36	0
36.1	0
36.2	0
36.3	0
36.4	0
36.5	0
36.6	0
36.7	0
36.8	0
36.9	0
37	0
37.1	0
37.2	0
37.3	0
37.4	0
37.5	0
37.6	0
37.7	0
37.8	0
37.9	0
38	0
38.1	0
38.2	0
38.3	0
38.4	0
38.5	0
38.6	0
38.7	0
38.8	0
38.9	0
39	0
39.1	0
39.2	0
39.3	0
39.4	0
39.5	0
39.6	0
39.7	0
39.8	0
39.9	0
40	0
40.1	0
40.2	0
40.3	0
40.4	0
40.5	0
40.6	0
40.7	0
40.8	0
40.9	0
41	0
41.1	0
41.2	0
41.3	0
41.4	0
41.5	0
41.6	0
41.7	0
41.8	0
41.9	0
42	0
42.1	0
42.2	0
42.3	0
42.4	0
42.5	0
42.6	0
42.7	0
42.8	0
42.9	0
43	0
43.1	0
43.2	0
43.3	0
43.4	0
43.5	0
43.6	0
43.7	0
43.8	0
43.9	0
44	0
44.1	0
44.2	0
44.3	0
44.4	0
44.5	0
44.6	0
44.7	0
44.8	0
44.9	0
45	0
45.1	0
45.2	0
45.3	0
45.4	0
45.5	0
45.6	0
45.7	0
45.8	0
45.9	0
46	0
46.1	0
46.2	0
46.3	0
46.4	0
46.5	0
46.6	0
46.7	0
46.8	0
46.9	0
47	0
47.1	0
47.2	0
47.3	0
47.4	0
47.5	0
47.6	0
47.7	0
47.8	0
47.9	0
48	0
48.1	0
48.2	0
48.3	0
48.4	0
48.5	0
48.6	0
48.7	0
48.8	0
48.9	0
49	0
49.1	0
49.2	0
49.3	0
49.4	0
49.5	0
49.6	0
49.7	0
49.8	0
49.9	0
50	0
50.1	0
50.2	0
50.3	0
50.4	0
50.5	0
50.6	0
50.7	0
50.8	0
50.9	0
51	0
51.1	0
51.2	0
51.3	0
51.4	0
51.5	0
51.6	0
51.7	0
51.8	0
51.9	0
52	0
52.1	0
52.2	0
52.3	0
52.4	0
52.5	0
52.6	0
52.7	0
52.8	0
52.9	0
53	0
53.1	0
53.2	0
53.3	0
53.4	0
53.5	0
53.6	0
53.7	0
53.8	0
53.9	0
54	0
54.1	0
54.2	0
54.3	0
54.4	0
54.5	0
54.6	0
54.7	0
54.8	0
54.9	0
55	0
55.1	0
55.2	0
55.3	0
55.4	0
55.5	0
55.6	0
55.7	0
55.8	0
55.9	0
56	0
56.1	0
56.2	0
56.3	0
56.4	0
56.5	0
56.6	0
56.7	0
56.8	0
56.9	0
57	0
57.1	0
57.2	0
57.3	0
57.4	0
57.5	0
57.6	0
57.7	0
57.8	0
57.9	0
58	0
58.1	0
58.2	0
58.3	0
58.4	0
58.5	0
58.6	0
58.7	0
58.8	0
58.9	0
59	0
59.1	0
59.2	0
59.3	0
59.4	0
59.5	0
59.6	0
59.7	0
59.8	0
59.9	0
60	0
60.1	0
60.2	0
60.3	0
60.4	0
60.5	0
60.6	0
60.7	0
60.8	0
60.9	0
61	0
61.1	0
61.2	0
61.3	0
61.4	0
61.5	0
61.6	0
61.7	0
61.8	0
61.9	0
62	0
62.1	0
62.2	0
62.3	0
62.4	0
62.5	0
62.6	0
62.7	0
62.8	0
62.9	0
63	0
63.1	0
63.2	0
63.3	0
63.4	0
63.5	0
63.6	0
63.7	0
63.8	0
63.9	0
64	0
64.1	0
64.2	0
64.3	0
64.4	0
64.5	0
64.6	0
64.7	0
64.8	0
64.9	0
65	0
65.1	0
65.2	0
65.3	0
65.4	0
65.5	0
65.6	0
65.7	0
65.8	0
65.9	0
66	0
66.1	0
66.2	0
66.3	0
66.4	0
66.5	0
66.6	0
66.7	0
66.8	0
66.9	0
67	0
67.1	0
67.2	0
67.3	0
67.4	0
67.5	0
67.6	0
67.7	0
67.8	0
67.9	0
68	0
68.1	0
68.2	0
68.3	0
68.4	0
68.5	0
68.6	0
68.7	0
68.8	0
68.9	0
69	0
69.1	0
69.2	0
69.3	0
69.4	0
69.5	0
69.6	0
69.7	0
69.8	0
69.9	0
70	0
70.1	0
70.2	0
70.3	0
70.4	0
70.5	0
70.6	0
70.7	0
70.8	0
70.9	0
71	0
71.1	0
71.2	0
71.3	0
71.4	0
71.5	0
71.6	0
71.7	0
71.8	0
71.9	0
72	0
72.1	0
72.2	0
72.3	0
72.4	0
72.5	0
72.6	0
72.7	0
72.8	0
72.9	0
73	0
73.1	0
73.2	0
73.3	0
73.4	0
73.5	0
73.6	0
73.7	0
73.8	0
73.9	0
74	0
74.1	0
74.2	0
74.3	0
74.4	0
74.5	0
74.6	0
74.7	0
74.8	0
74.9	0
75	0
75.1	0
75.2	0
75.3	0
75.4	0
75.5	0
75.6	0
75.7	0
75.8	0
75.9	0
76	0
76.1	0
76.2	0
76.3	0
76.4	0
76.5	0
76.6	0
76.7	0
76.8	0
76.9	0
77	0
77.1	0
77.2	0
77.3	0
77.4	0
77.5	0
77.6	0
77.7	0
77.8	0
77.9	0
78	0
78.1	0
78.2	0
78.3	0
78.4	0
78.5	0
78.6	0
78.7	0
78.8	0
78.9	0
79	0
79.1	0
79.2	0
79.3	0
79.4	0
79.5	0
79.6	0
79.7	0
79.8	0
79.9	0
80	0
80.1	0
80.2	0
80.3	0
80.4	0
80.5	0
80.6	0
80.7	0
80.8	0
80.9	0
81	0
81.1	0
81.2	0
81.3	0
81.4	0
81.5	0
81.6	0
81.7	0
81.8	0
81.9	0
82	0
82.1	0
82.2	0
82.3	0
82.4	0
82.5	0
82.6	0
82.7	0
82.8	0
82.9	0
83	0
83.1	0
83.2	0
83.3	0
83.4	0
83.5	0
83.6	0
83.7	0
83.8	0
83.9	0
84	0
84.1	0
84.2	0
84.3	0
84.4	0
84.5	0
84.6	0
84.7	0
84.8	0
84.9	0
85	0
85.1	0
85.2	0
85.3	0
85.4	0
85.5	0
85.6	0
85.7	0
85.8	0
85.9	0
86	0
86.1	0
86.2	0
86.3	0
86.4	0
86.5	0
86.6	0
86.7	0
86.8	0
86.9	0
87	0
87.1	0
87.2	0
87.3	0
87.4	0
87.5	0
87.6	0
87.7	0
87.8	0
87.9	0
88	0
88.1	0
88.2	0
88.3	0
88.4	0
88.5	0
88.6	0
88.7	0
88.8	0
88.9	0
89	0
89.1	0
89.2	0
89.3	0
89.4	0
89.5	0
89.6	0
89.7	0
89.8	0
89.9	0
90	0
90.1	0
90.2	0
90.3	0
90.4	0
90.5	0
90.6	0
90.7	0
90.8	0
90.9	0
91	0
91.1	0
91.2	0
91.3	0
91.4	0
91.5	0
91.6	0
91.7	0
91.8	0
91.9	0
92	0
92.1	0
92.2	0
92.3	0
92.4	0
92.5	0
92.6	0
92.7	0
92.8	0
92.9	0
93	0
93.1	0
93.2	0
93.3	0
93.4	0
93.5	0
93.6	0
93.7	0
93.8	0
93.9	0
94	0
94.1	0
94.2	0
94.3	0
94.4	0
94.5	0
94.6	0
94.7	0
94.8	0
94.9	0
95	0
95.1	0
95.2	0
95.3	0
95.4	0
95.5	0
95.6	0
95.7	0
95.8	0
95.9	0
96	0
96.1	0
96.2	0
96.3	0
96.4	0
96.5	0
96.6	0
96.7	0
96.8	0
96.9	0
97	0
97.1	0
97.2	0
97.3	0
97.4	0
97.5	0
97.6	0
97.7	0
97.8	0
97.9	0
98	0
98.1	0
98.2	0
98.3	0
98.4	0
98.5	0
98.6	0
98.7	0
98.8	0
98.9	0
99	0
99.1	0
99.2	0
99.3	0
99.4	0
99.5	0
99.6	0
99.7	0
99.8	0
99.9	0
100	0
100.1	0.07
100.2	0.12
100.3	0.161
100.4	0.192
100.5	0.232
100.6	0.265
100.7	0.306
100.8	0.338
100.9	0.37
101	0.393
101.1	0.422
101.2	0.449
101.3	0.471
101.4	0.487
101.5	0.495
101.6	0.51
101.7	0.531
101.8	0.55
101.9	0.564
102	0.579
102.1	0.583
102.2	0.589
102.3	0.6
102.4	0.603
102.5	0.615
102.6	0.615
102.7	0.617
102.8	0.616
102.9	0.622
103	0.63
103.1	0.631
103.2	0.626
103.3	0.63
103.4	0.636
103.5	0.633
103.6	0.633
103.7	0.634
103.8	0.643
103.9	0.648
104	0.646
104.1	0.648
104.2	0.657
104.3	0.653
104.4	0.659
104.5	0.665
104.6	0.667
104.7	0.665
104.8	0.668
104.9	0.67
105	0.671
105.1	0.671
105.2	0.675
105.3	0.681
105.4	0.679
105.5	0.677
105.6	0.676
105.7	0.677
105.8	0.676
105.9	0.668
106	0.659
106.1	0.658
106.2	0.662
106.3	0.665
106.4	0.66
106.5	0.661
106.6	0.654
106.7	0.662
106.8	0.663
106.9	0.668
107	0.675
107.1	0.678
107.2	0.677
107.3	0.683
107.4	0.688
107.5	0.685
107.6	0.689
107.7	0.692
107.8	0.693
107.9	0.694
108	0.7
108.1	0.697
108.2	0.697
108.3	0.703
108.4	0.697
108.5	0.697
108.6	0.698
108.7	0.701
108.8	0.691
108.9	0.693
109	0.682
109.1	0.684
109.2	0.681
109.3	0.689
109.4	0.678
109.5	0.686
109.6	0.687
109.7	0.692
109.8	0.693
109.9	0.693
110	0.683
110.1	0.688
110.2	0.69
110.3	0.684
110.4	0.678
110.5	0.681
110.6	0.681
110.7	0.679
110.8	0.685
110.9	0.69
111	0.694
111.1	0.697
111.2	0.698
111.3	0.698
111.4	0.701
111.5	0.698
111.6	0.691
111.7	0.696
111.8	0.699
111.9	0.703
112	0.706
112.1	0.715
112.2	0.71
112.3	0.71
112.4	0.718
112.5	0.718
112.6	0.715
112.7	0.71
112.8	0.713
112.9	0.71
113	0.707
113.1	0.712
113.2	0.715
113.3	0.714
113.4	0.711
113.5	0.707
113.6	0.702
113.7	0.708
113.8	0.71
113.9	0.714
114	0.707
114.1	0.714
114.2	0.708
114.3	0.711
114.4	0.717
114.5	0.713
114.6	0.713
114.7	0.717
114.8	0.713
114.9	0.707
115	0.706
115.1	0.705
115.2	0.706
115.3	0.707
115.4	0.712
115.5	0.714
115.6	0.716
115.7	0.723
115.8	0.727
115.9	0.724
116	0.723
116.1	0.722
116.2	0.722
116.3	0.716
116.4	0.711
116.5	0.712
116.6	0.715
116.7	0.714
116.8	0.709
116.9	0.71
117	0.706
117.1	0.705
117.2	0.702
117.3	0.702
117.4	0.705
117.5	0.7
117.6	0.696
117.7	0.703
117.8	0.705
117.9	0.704
118	0.709
118.1	0.719
118.2	0.721
118.3	0.713
118.4	0.72
118.5	0.722
118.6	0.728
118.7	0.731
118.8	0.731
118.9	0.736
119	0.74
119.1	0.736
119.2	0.734
119.3	0.731
119.4	0.733
119.5	0.734
119.6	0.738
119.7	0.743
119.8	0.739
119.9	0.738
120	0.742
120.1	0.746
120.2	0.747
120.3	0.748
120.4	0.74
120.5	0.736
120.6	0.741
120.7	0.742
120.8	0.739
120.9	0.742
121	0.75
121.1	0.745
121.2	0.738
121.3	0.735
121.4	0.734
121.5	0.738
121.6	0.734
121.7	0.728
121.8	0.727
121.9	0.727
122	0.728
122.1	0.734
122.2	0.732
122.3	0.724
122.4	0.732
122.5	0.733
122.6	0.734
122.7	0.73
122.8	0.738
122.9	0.746
123	0.749
123.1	0.745
123.2	0.75
123.3	0.749
123.4	0.747
123.5	0.746
123.6	0.745
123.7	0.748
123.8	0.741
123.9	0.735
124	0.733
124.1	0.734
124.2	0.74
124.3	0.743
124.4	0.745
124.5	0.745
124.6	0.746
124.7	0.758
124.8	0.757
124.9	0.753
125	0.756
125.1	0.759
125.2	0.76
125.3	0.76
125.4	0.76
125.5	0.755
125.6	0.749
125.7	0.747
125.8	0.748
125.9	0.748
126	0.756
126.1	0.755
126.2	0.748
126.3	0.741
126.4	0.735
126.5	0.734
126.6	0.734
126.7	0.729
126.8	0.732
126.9	0.737
127	0.735
127.1	0.732
127.2	0.734
127.3	0.739
127.4	0.749
127.5	0.742
127.6	0.743
127.7	0.745
127.8	0.741
127.9	0.747
128	0.748
128.1	0.751
128.2	0.75
128.3	0.754
128.4	0.751
128.5	0.752
128.6	0.752
128.7	0.758
128.8	0.755
128.9	0.763
129	0.764
129.1	0.764
129.2	0.762
129.3	0.765
129.4	0.767
129.5	0.767
129.6	0.763
129.7	0.761
129.8	0.762
129.9	0.763
130	0.76
130.1	0.754
130.2	0.752
130.3	0.749
130.4	0.746
130.5	0.75
130.6	0.751
130.7	0.752
130.8	0.755
130.9	0.757
131	0.757
131.1	0.753
131.2	0.762
131.3	0.768
131.4	0.777
131.5	0.776
131.6	0.782
131.7	0.788
131.8	0.786
131.9	0.785
132	0.781
132.1	0.78
132.2	0.779
132.3	0.774
132.4	0.768
132.5	0.769
132.6	0.762
132.7	0.759
132.8	0.766
132.9	0.762
133	0.762
133.1	0.765
133.2	0.766
133.3	0.769
133.4	0.772
133.5	0.775
133.6	0.772
133.7	0.771
133.8	0.777
133.9	0.774
134	0.774
134.1	0.774
134.2	0.775
134.3	0.775
134.4	0.769
134.5	0.771
134.6	0.771
134.7	0.771
134.8	0.765
134.9	0.76
135	0.762
135.1	0.767
135.2	0.777
135.3	0.781
135.4	0.779
135.5	0.778
135.6	0.782
135.7	0.783
135.8	0.777
135.9	0.778
136	0.774
136.1	0.772
136.2	0.77
136.3	0.77
136.4	0.775
136.5	0.773
136.6	0.772
136.7	0.764
136.8	0.764
136.9	0.765
137	0.761
137.1	0.756
137.2	0.761
137.3	0.767
137.4	0.768
137.5	0.769
137.6	0.774
137.7	0.777
137.8	0.778
137.9	0.78
138	0.785
138.1	0.793
138.2	0.786
138.3	0.791
138.4	0.793
138.5	0.794
138.6	0.796
138.7	0.794
138.8	0.791
138.9	0.791
139	0.788
139.1	0.785
139.2	0.787
139.3	0.781
139.4	0.777
139.5	0.78
139.6	0.783
139.7	0.785
139.8	0.798
139.9	0.802
140	0.8
140.1	0.797
140.2	0.795
140.3	0.798
140.4	0.787
140.5	0.785
140.6	0.787
140.7	0.789
140.8	0.793
140.9	0.793
141	0.789
141.1	0.788
141.2	0.79
141.3	0.791
141.4	0.791
141.5	0.801
141.6	0.8
141.7	0.803
141.8	0.802
141.9	0.801
142	0.798
142.1	0.797
142.2	0.8
142.3	0.794
142.4	0.789
142.5	0.785
142.6	0.782
142.7	0.781
142.8	0.777
142.9	0.783
143	0.787
143.1	0.788
143.2	0.789
143.3	0.783
143.4	0.79
143.5	0.795
143.6	0.8
143.7	0.804
143.8	0.799
143.9	0.795
144	0.797
144.1	0.792
144.2	0.793
144.3	0.795
144.4	0.796
144.5	0.796
144.6	0.789
144.7	0.78
144.8	0.782
144.9	0.783
145	0.79
145.1	0.79
145.2	0.792
145.3	0.791
145.4	0.792
145.5	0.796
145.6	0.799
145.7	0.798
145.8	0.797
145.9	0.799
146	0.798
146.1	0.801
146.2	0.795
146.3	0.792
146.4	0.795
146.5	0.796
146.6	0.802
146.7	0.809
146.8	0.801
146.9	0.806
147	0.803
147.1	0.8
147.2	0.805
147.3	0.802
147.4	0.806
147.5	0.805
147.6	0.813
147.7	0.82
147.8	0.818
147.9	0.82
148	0.824
148.1	0.827
148.2	0.831
148.3	0.83
148.4	0.827
148.5	0.821
148.6	0.822
148.7	0.813
148.8	0.813
148.9	0.811
149	0.81
149.1	0.812
149.2	0.816
149.3	0.814
149.4	0.818
149.5	0.81
149.6	0.81
149.7	0.814
149.8	0.811
149.9	0.813
150	0.811
150.1	0.808
150.2	0.811
150.3	0.811
150.4	0.808
150.5	0.803
150.6	0.801
150.7	0.805
150.8	0.811
150.9	0.807
151	0.812
151.1	0.816
151.2	0.817
151.3	0.821
151.4	0.826
151.5	0.827
151.6	0.828
151.7	0.824
151.8	0.824
151.9	0.825
152	0.824
152.1	0.832
152.2	0.834
152.3	0.831
152.4	0.824
152.5	0.825
152.6	0.822
152.7	0.82
152.8	0.821
152.9	0.826
153	0.826
153.1	0.825
153.2	0.83
153.3	0.829
153.4	0.83
153.5	0.828
153.6	0.83
153.7	0.83
153.8	0.822
153.9	0.824
154	0.824
154.1	0.82
154.2	0.824
154.3	0.827
154.4	0.823
154.5	0.822
154.6	0.81
154.7	0.809
154.8	0.817
154.9	0.823
155	0.825
155.1	0.825
155.2	0.823
155.3	0.827
155.4	0.826
155.5	0.828
155.6	0.826
155.7	0.824
155.8	0.825
155.9	0.823
156	0.823
156.1	0.82
156.2	0.819
156.3	0.82
156.4	0.821
156.5	0.823
156.6	0.819
156.7	0.821
156.8	0.819
156.9	0.811
157	0.814
157.1	0.818
157.2	0.814
157.3	0.813
157.4	0.807
157.5	0.804
157.6	0.809
157.7	0.81
157.8	0.814
157.9	0.813
158	0.81
158.1	0.812
158.2	0.81
158.3	0.813
158.4	0.811
158.5	0.812
158.6	0.809
158.7	0.807
158.8	0.808
158.9	0.808
159	0.812
159.1	0.81
159.2	0.81
159.3	0.81
159.4	0.81
159.5	0.814
159.6	0.817
159.7	0.816
159.8	0.814
159.9	0.815
160	0.814
160.1	0.815
160.2	0.816
160.3	0.823
160.4	0.822
160.5	0.819
160.6	0.813
160.7	0.81
160.8	0.807
160.9	0.803
161	0.804
161.1	0.802
161.2	0.804
161.3	0.809
161.4	0.812
161.5	0.811
161.6	0.813
161.7	0.817
161.8	0.819
161.9	0.817
162	0.818
162.1	0.822
162.2	0.82
162.3	0.819
162.4	0.819
162.5	0.818
162.6	0.819
162.7	0.821
162.8	0.819
162.9	0.819
163	0.819
163.1	0.819
163.2	0.819
163.3	0.82
163.4	0.817
163.5	0.816
163.6	0.819
163.7	0.822
163.8	0.827
163.9	0.828
164	0.826
164.1	0.822
164.2	0.823
164.3	0.824
164.4	0.831
164.5	0.833
164.6	0.83
164.7	0.828
164.8	0.831
164.9	0.834
165	0.828
165.1	0.83
165.2	0.835
165.3	0.836
165.4	0.83
165.5	0.837
165.6	0.838
165.7	0.838
165.8	0.834
165.9	0.83
166	0.83
166.1	0.834
166.2	0.835
166.3	0.832
166.4	0.828
166.5	0.827
166.6	0.829
166.7	0.825
166.8	0.824
166.9	0.826
167	0.826
167.1	0.822
167.2	0.827
167.3	0.828
167.4	0.833
167.5	0.831
167.6	0.834
167.7	0.83
167.8	0.829
167.9	0.827
168	0.826
168.1	0.825
168.2	0.835
168.3	0.836
168.4	0.835
168.5	0.839
168.6	0.838
168.7	0.844
168.8	0.842
168.9	0.841
169	0.842
169.1	0.844
169.2	0.842
169.3	0.84
169.4	0.836
169.5	0.841
169.6	0.841
169.7	0.841
169.8	0.836
169.9	0.832
170	0.825
170.1	0.827
170.2	0.827
170.3	0.826
170.4	0.826
170.5	0.832
170.6	0.828
170.7	0.829
170.8	0.83
170.9	0.829
171	0.833
171.1	0.828
171.2	0.828
171.3	0.827
171.4	0.83
171.5	0.836
171.6	0.838
171.7	0.836
171.8	0.832
171.9	0.833
172	0.83
172.1	0.826
172.2	0.834
172.3	0.838
172.4	0.836
172.5	0.833
172.6	0.841
172.7	0.846
172.8	0.848
172.9	0.848
173	0.846
173.1	0.844
173.2	0.842
173.3	0.842
173.4	0.839
173.5	0.839
173.6	0.837
173.7	0.84
173.8	0.845
173.9	0.841
174	0.843
174.1	0.84
174.2	0.842
174.3	0.845
174.4	0.84
174.5	0.842
174.6	0.837
174.7	0.84
174.8	0.849
174.9	0.853
175	0.853
175.1	0.848
175.2	0.853
175.3	0.85
175.4	0.849
175.5	0.85
175.6	0.852
175.7	0.851
175.8	0.851
175.9	0.856
176	0.853
176.1	0.856
176.2	0.852
176.3	0.855
176.4	0.855
176.5	0.852
176.6	0.852
176.7	0.85
176.8	0.852
176.9	0.845
177	0.84
177.1	0.839
177.2	0.833
177.3	0.837
177.4	0.84
177.5	0.838
177.6	0.838
177.7	0.839
177.8	0.841
177.9	0.842
178	0.844
178.1	0.844
178.2	0.844
178.3	0.84
178.4	0.845
178.5	0.845
178.6	0.841
178.7	0.845
178.8	0.84
178.9	0.842
179	0.84
179.1	0.838
179.2	0.834
179.3	0.83
179.4	0.834
179.5	0.832
179.6	0.833
179.7	0.833
179.8	0.835
179.9	0.838
180	0.843
180.1	0.842
180.2	0.849
180.3	0.849
180.4	0.853
180.5	0.853
180.6	0.851
180.7	0.852
180.8	0.842
180.9	0.841
181	0.843
181.1	0.842
181.2	0.842
181.3	0.844
181.4	0.841
181.5	0.839
181.6	0.842
181.7	0.846
181.8	0.846
181.9	0.844
182	0.843
182.1	0.84
182.2	0.837
182.3	0.842
182.4	0.844
182.5	0.844
182.6	0.842
182.7	0.842
182.8	0.843
182.9	0.844
183	0.848
183.1	0.84
183.2	0.839
183.3	0.841
183.4	0.838
183.5	0.838
183.6	0.841
183.7	0.841
183.8	0.84
183.9	0.842
184	0.844
184.1	0.849
184.2	0.85
184.3	0.854
184.4	0.859
184.5	0.858
184.6	0.861
184.7	0.857
184.8	0.855
184.9	0.853
185	0.854
185.1	0.854
185.2	0.852
185.3	0.853
185.4	0.855
185.5	0.854
185.6	0.85
185.7	0.848
185.8	0.843
185.9	0.84
186	0.838
186.1	0.839
186.2	0.84
186.3	0.839
186.4	0.838
186.5	0.838
186.6	0.837
186.7	0.836
186.8	0.84
186.9	0.84
187	0.837
187.1	0.837
187.2	0.834
187.3	0.84
187.4	0.847
187.5	0.846
187.6	0.851
187.7	0.851
187.8	0.85
187.9	0.847
188	0.849
188.1	0.846
188.2	0.853
188.3	0.855
188.4	0.853
188.5	0.857
188.6	0.855
188.7	0.854
188.8	0.856
188.9	0.854
189	0.854
189.1	0.857
189.2	0.862
189.3	0.86
189.4	0.86
189.5	0.854
189.6	0.854
189.7	0.855
189.8	0.857
189.9	0.852
190	0.849
190.1	0.847
190.2	0.85
190.3	0.854
190.4	0.855
190.5	0.855
190.6	0.862
190.7	0.864
190.8	0.862
190.9	0.862
191	0.86
191.1	0.86
191.2	0.858
191.3	0.858
191.4	0.858
191.5	0.86
191.6	0.868
191.7	0.861
191.8	0.857
191.9	0.861
192	0.861
192.1	0.862
192.2	0.86
192.3	0.857
192.4	0.861
192.5	0.863
192.6	0.868
192.7	0.865
192.8	0.862
192.9	0.865
193	0.868
193.1	0.867
193.2	0.865
193.3	0.868
193.4	0.869
193.5	0.872
193.6	0.868
193.7	0.864
193.8	0.859
193.9	0.858
194	0.858
194.1	0.861
194.2	0.857
194.3	0.858
194.4	0.86
194.5	0.86
194.6	0.86
194.7	0.854
194.8	0.852
194.9	0.858
195	0.857
195.1	0.856
195.2	0.859
195.3	0.858
195.4	0.858
195.5	0.856
195.6	0.853
195.7	0.857
195.8	0.857
195.9	0.857
196	0.856
196.1	0.86
196.2	0.86
196.3	0.862
196.4	0.856
196.5	0.859
196.6	0.864
196.7	0.865
196.8	0.866
196.9	0.866
197	0.87
197.1	0.869
197.2	0.872
197.3	0.871
197.4	0.876
197.5	0.869
197.6	0.863
197.7	0.862
197.8	0.864
197.9	0.86
198	0.858
198.1	0.862
198.2	0.861
198.3	0.858
198.4	0.853
198.5	0.854
198.6	0.851
198.7	0.853
198.8	0.852
198.9	0.847
199	0.844
199.1	0.846
199.2	0.852
199.3	0.847
199.4	0.845
199.5	0.844
199.6	0.846
199.7	0.845
199.8	0.844
199.9	0.849
200	0.846
[truncated: 14,000 more rows]
