# Supplementary material for: Bayesian inference of kinetic schemes for ion channels by Kalman filtering
Source: eLife journal article supplement (doi:10.7554/elife.62714), 2022-05-04
Supplement: fig4-data6 [file 1_Sim_N_500_Strom_MW.xlsx]

## Sheet: Tabelle1
0.1	0
0.2	0
0.3	0
0.4	0
0.5	0
0.6	0
0.7	0
0.8	0
0.9	0
1	0
1.1	0
1.2	0
1.3	0
1.4	0
1.5	0
1.6	0
1.7	0
1.8	0
1.9	0
2	0
2.1	0
2.2	0
2.3	0
2.4	0
2.5	0
2.6	0
2.7	0
2.8	0
2.9	0
3	0
3.1	0
3.2	0
3.3	0
3.4	0
3.5	0
3.6	0
3.7	0
3.8	0
3.9	0
4	0
4.1	0
4.2	0
4.3	0
4.4	0
4.5	0
4.6	0
4.7	0
4.8	0
4.9	0
5	0
5.1	0
5.2	0
5.3	0
5.4	0
5.5	0
5.6	0
5.7	0
5.8	0
5.9	0
6	0
6.1	0
6.2	0
6.3	0
6.4	0
6.5	0
6.6	0
6.7	0
6.8	0
6.9	0
7	0
7.1	0
7.2	0
7.3	0
7.4	0
7.5	0
7.6	0
7.7	0
7.8	0
7.9	0
8	0
8.1	0
8.2	0
8.3	0
8.4	0
8.5	0
8.6	0
8.7	0
8.8	0
8.9	0
9	0
9.1	0
9.2	0
9.3	0
9.4	0
9.5	0
9.6	0
9.7	0
9.8	0
9.9	0
10	0
10.1	0
10.2	0
10.3	0
10.4	0
10.5	0
10.6	0
10.7	0
10.8	0
10.9	0
11	0
11.1	0
11.2	0
11.3	0
11.4	0
11.5	0
11.6	0
11.7	0
11.8	0
11.9	0
12	0
12.1	0
12.2	0
12.3	0
12.4	0
12.5	0
12.6	0
12.7	0
12.8	0
12.9	0
13	0
13.1	0
13.2	0
13.3	0
13.4	0
13.5	0
13.6	0
13.7	0
13.8	0
13.9	0
14	0
14.1	0
14.2	0
14.3	0
14.4	0
14.5	0
14.6	0
14.7	0
14.8	0
14.9	0
15	0
15.1	0
15.2	0
15.3	0
15.4	0
15.5	0
15.6	0
15.7	0
15.8	0
15.9	0
16	0
16.1	0
16.2	0
16.3	0
16.4	0
16.5	0
16.6	0
16.7	0
16.8	0
16.9	0
17	0
17.1	0
17.2	0
17.3	0
17.4	0
17.5	0
17.6	0
17.7	0
17.8	0
17.9	0
18	0
18.1	0
18.2	0
18.3	0
18.4	0
18.5	0
18.6	0
18.7	0
18.8	0
18.9	0
19	0
19.1	0
19.2	0
19.3	0
19.4	0
19.5	0
19.6	0
19.7	0
19.8	0
19.9	0
20	0
20.1	0
20.2	0
20.3	0
20.4	0
20.5	0
20.6	0
20.7	0
20.8	0
20.9	0
21	0
21.1	0
21.2	0
21.3	0
21.4	0
21.5	0
21.6	0
21.7	0
21.8	0
21.9	0
22	0
22.1	0
22.2	0
22.3	0
22.4	0
22.5	0
22.6	0
22.7	0
22.8	0
22.9	0
23	0
23.1	0
23.2	0
23.3	0
23.4	0
23.5	0
23.6	0
23.7	0
23.8	0
23.9	0
24	0
24.1	0
24.2	0
24.3	0
24.4	0
24.5	0
24.6	0
24.7	0
24.8	0
24.9	0
25	0
25.1	0
25.2	0
25.3	0
25.4	0
25.5	0
25.6	0
25.7	0
25.8	0
25.9	0
26	0
26.1	0
26.2	0
26.3	0
26.4	0
26.5	0
26.6	0
26.7	0
26.8	0
26.9	0
27	0
27.1	0
27.2	0
27.3	0
27.4	0
27.5	0
27.6	0
27.7	0
27.8	0
27.9	0
28	0
28.1	0
28.2	0
28.3	0
28.4	0
28.5	0
28.6	0
28.7	0
28.8	0
28.9	0
29	0
29.1	0
29.2	0
29.3	0
29.4	0
29.5	0
29.6	0
29.7	0
29.8	0
29.9	0
30	0
30.1	0
30.2	0
30.3	0
30.4	0
30.5	0
30.6	0
30.7	0
30.8	0
30.9	0
31	0
31.1	0
31.2	0
31.3	0
31.4	0
31.5	0
31.6	0
31.7	0
31.8	0
31.9	0
32	0
32.1	0
32.2	0
32.3	0
32.4	0
32.5	0
32.6	0
32.7	0
32.8	0
32.9	0
33	0
33.1	0
33.2	0
33.3	0
33.4	0
33.5	0
33.6	0
33.7	0
33.8	0
33.9	0
34	0
34.1	0
34.2	0
34.3	0
34.4	0
34.5	0
34.6	0
34.7	0
34.8	0
34.9	0
35	0
35.1	0
35.2	0
35.3	0
35.4	0
35.5	0
35.6	0
35.7	0
35.8	0
35.9	0
36	0
36.1	0
36.2	0
36.3	0
36.4	0
36.5	0
36.6	0
36.7	0
36.8	0
36.9	0
37	0
37.1	0
37.2	0
37.3	0
37.4	0
37.5	0
37.6	0
37.7	0
37.8	0
37.9	0
38	0
38.1	0
38.2	0
38.3	0
38.4	0
38.5	0
38.6	0
38.7	0
38.8	0
38.9	0
39	0
39.1	0
39.2	0
39.3	0
39.4	0
39.5	0
39.6	0
39.7	0
39.8	0
39.9	0
40	0
40.1	0
40.2	0
40.3	0
40.4	0
40.5	0
40.6	0
40.7	0
40.8	0
40.9	0
41	0
41.1	0
41.2	0
41.3	0
41.4	0
41.5	0
41.6	0
41.7	0
41.8	0
41.9	0
42	0
42.1	0
42.2	0
42.3	0
42.4	0
42.5	0
42.6	0
42.7	0
42.8	0
42.9	0
43	0
43.1	0
43.2	0
43.3	0
43.4	0
43.5	0
43.6	0
43.7	0
43.8	0
43.9	0
44	0
44.1	0
44.2	0
44.3	0
44.4	0
44.5	0
44.6	0
44.7	0
44.8	0
44.9	0
45	0
45.1	0
45.2	0
45.3	0
45.4	0
45.5	0
45.6	0
45.7	0
45.8	0
45.9	0
46	0
46.1	0
46.2	0
46.3	0
46.4	0
46.5	0
46.6	0
46.7	0
46.8	0
46.9	0
47	0
47.1	0
47.2	0
47.3	0
47.4	0
47.5	0
47.6	0
47.7	0
47.8	0
47.9	0
48	0
48.1	0
48.2	0
48.3	0
48.4	0
48.5	0
48.6	0
48.7	0
48.8	0
48.9	0
49	0
49.1	0
49.2	0
49.3	0
49.4	0
49.5	0
49.6	0
49.7	0
49.8	0
49.9	0
50	0
50.1	0
50.2	0
50.3	0
50.4	0
50.5	0
50.6	0
50.7	0
50.8	0
50.9	0
51	0
51.1	0
51.2	0
51.3	0
51.4	0
51.5	0
51.6	0
51.7	0
51.8	0
51.9	0
52	0
52.1	0
52.2	0
52.3	0
52.4	0
52.5	0
52.6	0
52.7	0
52.8	0
52.9	0
53	0
53.1	0
53.2	0
53.3	0
53.4	0
53.5	0
53.6	0
53.7	0
53.8	0
53.9	0
54	0
54.1	0
54.2	0
54.3	0
54.4	0
54.5	0
54.6	0
54.7	0
54.8	0
54.9	0
55	0
55.1	0
55.2	0
55.3	0
55.4	0
55.5	0
55.6	0
55.7	0
55.8	0
55.9	0
56	0
56.1	0
56.2	0
56.3	0
56.4	0
56.5	0
56.6	0
56.7	0
56.8	0
56.9	0
57	0
57.1	0
57.2	0
57.3	0
57.4	0
57.5	0
57.6	0
57.7	0
57.8	0
57.9	0
58	0
58.1	0
58.2	0
58.3	0
58.4	0
58.5	0
58.6	0
58.7	0
58.8	0
58.9	0
59	0
59.1	0
59.2	0
59.3	0
59.4	0
59.5	0
59.6	0
59.7	0
59.8	0
59.9	0
60	0
60.1	0
60.2	0
60.3	0
60.4	0
60.5	0
60.6	0
60.7	0
60.8	0
60.9	0
61	0
61.1	0
61.2	0
61.3	0
61.4	0
61.5	0
61.6	0
61.7	0
61.8	0
61.9	0
62	0
62.1	0
62.2	0
62.3	0
62.4	0
62.5	0
62.6	0
62.7	0
62.8	0
62.9	0
63	0
63.1	0
63.2	0
63.3	0
63.4	0
63.5	0
63.6	0
63.7	0
63.8	0
63.9	0
64	0
64.1	0
64.2	0
64.3	0
64.4	0
64.5	0
64.6	0
64.7	0
64.8	0
64.9	0
65	0
65.1	0
65.2	0
65.3	0
65.4	0
65.5	0
65.6	0
65.7	0
65.8	0
65.9	0
66	0
66.1	0
66.2	0
66.3	0
66.4	0
66.5	0
66.6	0
66.7	0
66.8	0
66.9	0
67	0
67.1	0
67.2	0
67.3	0
67.4	0
67.5	0
67.6	0
67.7	0
67.8	0
67.9	0
68	0
68.1	0
68.2	0
68.3	0
68.4	0
68.5	0
68.6	0
68.7	0
68.8	0
68.9	0
69	0
69.1	0
69.2	0
69.3	0
69.4	0
69.5	0
69.6	0
69.7	0
69.8	0
69.9	0
70	0
70.1	0
70.2	0
70.3	0
70.4	0
70.5	0
70.6	0
70.7	0
70.8	0
70.9	0
71	0
71.1	0
71.2	0
71.3	0
71.4	0
71.5	0
71.6	0
71.7	0
71.8	0
71.9	0
72	0
72.1	0
72.2	0
72.3	0
72.4	0
72.5	0
72.6	0
72.7	0
72.8	0
72.9	0
73	0
73.1	0
73.2	0
73.3	0
73.4	0
73.5	0
73.6	0
73.7	0
73.8	0
73.9	0
74	0
74.1	0
74.2	0
74.3	0
74.4	0
74.5	0
74.6	0
74.7	0
74.8	0
74.9	0
75	0
75.1	0
75.2	0
75.3	0
75.4	0
75.5	0
75.6	0
75.7	0
75.8	0
75.9	0
76	0
76.1	0
76.2	0
76.3	0
76.4	0
76.5	0
76.6	0
76.7	0
76.8	0
76.9	0
77	0
77.1	0
77.2	0
77.3	0
77.4	0
77.5	0
77.6	0
77.7	0
77.8	0
77.9	0
78	0
78.1	0
78.2	0
78.3	0
78.4	0
78.5	0
78.6	0
78.7	0
78.8	0
78.9	0
79	0
79.1	0
79.2	0
79.3	0
79.4	0
79.5	0
79.6	0
79.7	0
79.8	0
79.9	0
80	0
80.1	0
80.2	0
80.3	0
80.4	0
80.5	0
80.6	0
80.7	0
80.8	0
80.9	0
81	0
81.1	0
81.2	0
81.3	0
81.4	0
81.5	0
81.6	0
81.7	0
81.8	0
81.9	0
82	0
82.1	0
82.2	0
82.3	0
82.4	0
82.5	0
82.6	0
82.7	0
82.8	0
82.9	0
83	0
83.1	0
83.2	0
83.3	0
83.4	0
83.5	0
83.6	0
83.7	0
83.8	0
83.9	0
84	0
84.1	0
84.2	0
84.3	0
84.4	0
84.5	0
84.6	0
84.7	0
84.8	0
84.9	0
85	0
85.1	0
85.2	0
85.3	0
85.4	0
85.5	0
85.6	0
85.7	0
85.8	0
85.9	0
86	0
86.1	0
86.2	0
86.3	0
86.4	0
86.5	0
86.6	0
86.7	0
86.8	0
86.9	0
87	0
87.1	0
87.2	0
87.3	0
87.4	0
87.5	0
87.6	0
87.7	0
87.8	0
87.9	0
88	0
88.1	0
88.2	0
88.3	0
88.4	0
88.5	0
88.6	0
88.7	0
88.8	0
88.9	0
89	0
89.1	0
89.2	0
89.3	0
89.4	0
89.5	0
89.6	0
89.7	0
89.8	0
89.9	0
90	0
90.1	0
90.2	0
90.3	0
90.4	0
90.5	0
90.6	0
90.7	0
90.8	0
90.9	0
91	0
91.1	0
91.2	0
91.3	0
91.4	0
91.5	0
91.6	0
91.7	0
91.8	0
91.9	0
92	0
92.1	0
92.2	0
92.3	0
92.4	0
92.5	0
92.6	0
92.7	0
92.8	0
92.9	0
93	0
93.1	0
93.2	0
93.3	0
93.4	0
93.5	0
93.6	0
93.7	0
93.8	0
93.9	0
94	0
94.1	0
94.2	0
94.3	0
94.4	0
94.5	0
94.6	0
94.7	0
94.8	0
94.9	0
95	0
95.1	0
95.2	0
95.3	0
95.4	0
95.5	0
95.6	0
95.7	0
95.8	0
95.9	0
96	0
96.1	0
96.2	0
96.3	0
96.4	0
96.5	0
96.6	0
96.7	0
96.8	0
96.9	0
97	0
97.1	0
97.2	0
97.3	0
97.4	0
97.5	0
97.6	0
97.7	0
97.8	0
97.9	0
98	0
98.1	0
98.2	0
98.3	0
98.4	0
98.5	0
98.6	0
98.7	0
98.8	0
98.9	0
99	0
99.1	0
99.2	0
99.3	0
99.4	0
99.5	0
99.6	0
99.7	0
99.8	0
99.9	0
100	0
100.1	0
100.2	0
100.3	0
100.4	0
100.5	0
100.6	0
100.7	0
100.8	0
100.9	0
101	0.002
101.1	0.002
101.2	0.002
101.3	0.002
101.4	0.006
101.5	0.008
101.6	0.01
101.7	0.014
101.8	0.014
101.9	0.014
102	0.016
102.1	0.016
102.2	0.016
102.3	0.016
102.4	0.018
102.5	0.02
102.6	0.022
102.7	0.022
102.8	0.022
102.9	0.022
103	0.024
103.1	0.024
103.2	0.026
103.3	0.03
103.4	0.032
103.5	0.034
103.6	0.036
103.7	0.042
103.8	0.044
103.9	0.044
104	0.046
104.1	0.048
104.2	0.048
104.3	0.048
104.4	0.052
104.5	0.054
104.6	0.056
104.7	0.058
104.8	0.058
104.9	0.058
105	0.058
105.1	0.06
105.2	0.066
105.3	0.066
105.4	0.068
105.5	0.068
105.6	0.07
105.7	0.074
105.8	0.074
105.9	0.074
106	0.08
106.1	0.082
106.2	0.084
106.3	0.09
106.4	0.094
106.5	0.096
106.6	0.094
106.7	0.096
106.8	0.098
106.9	0.098
107	0.1
107.1	0.102
107.2	0.104
107.3	0.104
107.4	0.106
107.5	0.106
107.6	0.108
107.7	0.11
107.8	0.11
107.9	0.11
108	0.11
108.1	0.112
108.2	0.114
108.3	0.116
108.4	0.118
108.5	0.118
108.6	0.118
108.7	0.118
108.8	0.118
108.9	0.118
109	0.12
109.1	0.128
109.2	0.128
109.3	0.132
109.4	0.132
109.5	0.132
109.6	0.136
109.7	0.134
109.8	0.134
109.9	0.138
110	0.138
110.1	0.138
110.2	0.14
110.3	0.144
110.4	0.144
110.5	0.144
110.6	0.144
110.7	0.15
110.8	0.152
110.9	0.152
111	0.152
111.1	0.152
111.2	0.156
111.3	0.158
111.4	0.16
111.5	0.164
111.6	0.168
111.7	0.168
111.8	0.168
111.9	0.168
112	0.172
112.1	0.176
112.2	0.176
112.3	0.176
112.4	0.176
112.5	0.176
112.6	0.178
112.7	0.178
112.8	0.18
112.9	0.18
113	0.186
113.1	0.188
113.2	0.188
113.3	0.188
113.4	0.188
113.5	0.192
113.6	0.192
113.7	0.196
113.8	0.196
113.9	0.196
114	0.198
114.1	0.198
114.2	0.2
114.3	0.204
114.4	0.204
114.5	0.204
114.6	0.206
114.7	0.212
114.8	0.212
114.9	0.216
115	0.218
115.1	0.216
115.2	0.216
115.3	0.216
115.4	0.216
115.5	0.218
115.6	0.22
115.7	0.224
115.8	0.224
115.9	0.224
116	0.22
116.1	0.22
116.2	0.224
116.3	0.224
116.4	0.226
116.5	0.228
116.6	0.228
116.7	0.23
116.8	0.232
116.9	0.232
117	0.232
117.1	0.234
117.2	0.234
117.3	0.236
117.4	0.238
117.5	0.24
117.6	0.24
117.7	0.24
117.8	0.242
117.9	0.242
118	0.244
118.1	0.244
118.2	0.244
118.3	0.244
118.4	0.244
118.5	0.244
118.6	0.244
118.7	0.244
118.8	0.246
118.9	0.252
119	0.254
119.1	0.256
119.2	0.256
119.3	0.256
119.4	0.256
119.5	0.258
119.6	0.256
119.7	0.256
119.8	0.256
119.9	0.254
120	0.254
120.1	0.256
120.2	0.258
120.3	0.258
120.4	0.258
120.5	0.262
120.6	0.262
120.7	0.264
120.8	0.27
120.9	0.27
121	0.27
121.1	0.272
121.2	0.272
121.3	0.272
121.4	0.272
121.5	0.274
121.6	0.272
121.7	0.272
121.8	0.272
121.9	0.274
122	0.276
122.1	0.278
122.2	0.278
122.3	0.276
122.4	0.276
122.5	0.278
122.6	0.278
122.7	0.28
122.8	0.282
122.9	0.282
123	0.28
123.1	0.286
123.2	0.286
123.3	0.286
123.4	0.288
123.5	0.29
123.6	0.29
123.7	0.294
123.8	0.294
123.9	0.296
124	0.296
124.1	0.298
124.2	0.298
124.3	0.298
124.4	0.298
124.5	0.3
124.6	0.3
124.7	0.302
124.8	0.304
124.9	0.304
125	0.304
125.1	0.306
125.2	0.306
125.3	0.306
125.4	0.308
125.5	0.308
125.6	0.31
125.7	0.308
125.8	0.308
125.9	0.308
126	0.308
126.1	0.31
126.2	0.314
126.3	0.318
126.4	0.318
126.5	0.318
126.6	0.318
126.7	0.318
126.8	0.318
126.9	0.318
127	0.318
127.1	0.32
127.2	0.322
127.3	0.322
127.4	0.322
127.5	0.324
127.6	0.328
127.7	0.33
127.8	0.33
127.9	0.33
128	0.328
128.1	0.328
128.2	0.328
128.3	0.328
128.4	0.326
128.5	0.334
128.6	0.334
128.7	0.336
128.8	0.336
128.9	0.336
129	0.332
129.1	0.334
129.2	0.332
129.3	0.33
129.4	0.33
129.5	0.332
129.6	0.332
129.7	0.334
129.8	0.336
129.9	0.336
130	0.34
130.1	0.344
130.2	0.348
130.3	0.348
130.4	0.35
130.5	0.352
130.6	0.352
130.7	0.348
130.8	0.348
130.9	0.348
131	0.35
131.1	0.352
131.2	0.354
131.3	0.354
131.4	0.354
131.5	0.358
131.6	0.36
131.7	0.362
131.8	0.362
131.9	0.364
132	0.364
132.1	0.366
132.2	0.366
132.3	0.366
132.4	0.368
132.5	0.368
132.6	0.368
132.7	0.372
132.8	0.374
132.9	0.374
133	0.376
133.1	0.378
133.2	0.378
133.3	0.378
133.4	0.378
133.5	0.378
133.6	0.378
133.7	0.378
133.8	0.378
133.9	0.378
134	0.382
134.1	0.38
134.2	0.382
134.3	0.386
134.4	0.386
134.5	0.388
134.6	0.388
134.7	0.388
134.8	0.388
134.9	0.388
135	0.39
135.1	0.39
135.2	0.39
135.3	0.392
135.4	0.392
135.5	0.392
135.6	0.392
135.7	0.392
135.8	0.392
135.9	0.392
136	0.392
136.1	0.394
136.2	0.394
136.3	0.394
136.4	0.394
136.5	0.396
136.6	0.396
136.7	0.396
136.8	0.396
136.9	0.396
137	0.398
137.1	0.398
137.2	0.398
137.3	0.398
137.4	0.396
137.5	0.398
137.6	0.4
137.7	0.4
137.8	0.4
137.9	0.4
138	0.398
138.1	0.4
138.2	0.4
138.3	0.4
138.4	0.4
138.5	0.402
138.6	0.4
138.7	0.402
138.8	0.406
138.9	0.406
139	0.408
139.1	0.41
139.2	0.41
139.3	0.41
139.4	0.41
139.5	0.412
139.6	0.414
139.7	0.414
139.8	0.412
139.9	0.412
140	0.41
140.1	0.41
140.2	0.41
140.3	0.41
140.4	0.412
140.5	0.412
140.6	0.412
140.7	0.414
140.8	0.416
140.9	0.414
141	0.416
141.1	0.418
141.2	0.42
141.3	0.422
141.4	0.42
141.5	0.422
141.6	0.422
141.7	0.42
141.8	0.42
141.9	0.42
142	0.422
142.1	0.422
142.2	0.422
142.3	0.422
142.4	0.424
142.5	0.424
142.6	0.424
142.7	0.426
142.8	0.43
142.9	0.428
143	0.428
143.1	0.426
143.2	0.426
143.3	0.428
143.4	0.43
143.5	0.432
143.6	0.436
143.7	0.436
143.8	0.434
143.9	0.432
144	0.432
144.1	0.432
144.2	0.43
144.3	0.43
144.4	0.428
144.5	0.428
144.6	0.428
144.7	0.428
144.8	0.428
144.9	0.43
145	0.43
145.1	0.432
145.2	0.432
145.3	0.438
145.4	0.438
145.5	0.44
145.6	0.44
145.7	0.438
145.8	0.438
145.9	0.438
146	0.438
146.1	0.436
146.2	0.436
146.3	0.436
146.4	0.436
146.5	0.436
146.6	0.438
146.7	0.438
146.8	0.44
146.9	0.442
147	0.442
147.1	0.442
147.2	0.442
147.3	0.442
147.4	0.442
147.5	0.448
147.6	0.446
147.7	0.446
147.8	0.442
147.9	0.444
148	0.442
148.1	0.442
148.2	0.442
148.3	0.442
148.4	0.444
148.5	0.446
148.6	0.442
148.7	0.442
148.8	0.44
148.9	0.44
149	0.44
149.1	0.442
149.2	0.442
149.3	0.444
149.4	0.442
149.5	0.44
149.6	0.438
149.7	0.44
149.8	0.442
149.9	0.442
150	0.442
150.1	0.442
150.2	0.444
150.3	0.444
150.4	0.448
150.5	0.448
150.6	0.448
150.7	0.448
150.8	0.448
150.9	0.448
151	0.45
151.1	0.452
151.2	0.452
151.3	0.452
151.4	0.454
151.5	0.452
151.6	0.456
151.7	0.454
151.8	0.454
151.9	0.456
152	0.456
152.1	0.46
152.2	0.458
152.3	0.456
152.4	0.456
152.5	0.456
152.6	0.452
152.7	0.454
152.8	0.454
152.9	0.456
153	0.458
153.1	0.46
153.2	0.46
153.3	0.46
153.4	0.456
153.5	0.456
153.6	0.456
153.7	0.456
153.8	0.456
153.9	0.454
154	0.454
154.1	0.456
154.2	0.458
154.3	0.458
154.4	0.46
154.5	0.462
154.6	0.468
154.7	0.47
154.8	0.47
154.9	0.47
155	0.474
155.1	0.474
155.2	0.474
155.3	0.474
155.4	0.478
155.5	0.476
155.6	0.472
155.7	0.472
155.8	0.472
155.9	0.474
156	0.472
156.1	0.472
156.2	0.472
156.3	0.472
156.4	0.472
156.5	0.474
156.6	0.476
156.7	0.476
156.8	0.476
156.9	0.474
157	0.476
157.1	0.476
157.2	0.476
157.3	0.474
157.4	0.476
157.5	0.478
157.6	0.478
157.7	0.478
157.8	0.478
157.9	0.482
158	0.484
158.1	0.484
158.2	0.484
158.3	0.484
158.4	0.486
158.5	0.488
158.6	0.486
158.7	0.484
158.8	0.484
158.9	0.484
159	0.486
159.1	0.486
159.2	0.486
159.3	0.488
159.4	0.49
159.5	0.492
159.6	0.49
159.7	0.492
159.8	0.488
159.9	0.488
160	0.488
160.1	0.49
160.2	0.492
160.3	0.496
160.4	0.498
160.5	0.5
160.6	0.502
160.7	0.5
160.8	0.5
160.9	0.5
161	0.5
161.1	0.504
161.2	0.504
161.3	0.506
161.4	0.506
161.5	0.504
161.6	0.506
161.7	0.504
161.8	0.504
161.9	0.504
162	0.504
162.1	0.506
162.2	0.506
162.3	0.506
162.4	0.506
162.5	0.508
162.6	0.508
162.7	0.508
162.8	0.508
162.9	0.508
163	0.508
163.1	0.508
163.2	0.508
163.3	0.508
163.4	0.508
163.5	0.508
163.6	0.508
163.7	0.508
163.8	0.506
163.9	0.504
164	0.506
164.1	0.502
164.2	0.504
164.3	0.504
164.4	0.508
164.5	0.508
164.6	0.504
164.7	0.502
164.8	0.502
164.9	0.504
165	0.504
165.1	0.506
165.2	0.508
165.3	0.508
165.4	0.508
165.5	0.51
165.6	0.508
165.7	0.51
165.8	0.512
165.9	0.51
166	0.514
166.1	0.512
166.2	0.512
166.3	0.514
166.4	0.514
166.5	0.514
166.6	0.518
166.7	0.518
166.8	0.52
166.9	0.52
167	0.522
167.1	0.522
167.2	0.522
167.3	0.522
167.4	0.522
167.5	0.522
167.6	0.522
167.7	0.522
167.8	0.524
167.9	0.524
168	0.524
168.1	0.524
168.2	0.524
168.3	0.526
168.4	0.524
168.5	0.526
168.6	0.526
168.7	0.526
168.8	0.528
168.9	0.528
169	0.528
169.1	0.528
169.2	0.528
169.3	0.528
169.4	0.528
169.5	0.53
169.6	0.53
169.7	0.532
169.8	0.53
169.9	0.53
170	0.53
170.1	0.53
170.2	0.528
170.3	0.526
170.4	0.526
170.5	0.524
170.6	0.524
170.7	0.52
170.8	0.52
170.9	0.52
171	0.524
171.1	0.526
171.2	0.528
171.3	0.528
171.4	0.532
171.5	0.532
171.6	0.532
171.7	0.536
171.8	0.536
171.9	0.536
172	0.536
172.1	0.536
172.2	0.536
172.3	0.536
172.4	0.538
172.5	0.54
172.6	0.54
172.7	0.54
172.8	0.542
172.9	0.542
173	0.542
173.1	0.542
173.2	0.544
173.3	0.544
173.4	0.544
173.5	0.542
173.6	0.542
173.7	0.542
173.8	0.54
173.9	0.54
174	0.538
174.1	0.54
174.2	0.544
174.3	0.542
174.4	0.542
174.5	0.544
174.6	0.544
174.7	0.544
174.8	0.544
174.9	0.544
175	0.544
175.1	0.546
175.2	0.546
175.3	0.546
175.4	0.546
175.5	0.548
175.6	0.548
175.7	0.55
175.8	0.55
175.9	0.552
176	0.552
176.1	0.554
176.2	0.554
176.3	0.554
176.4	0.554
176.5	0.554
176.6	0.552
176.7	0.552
176.8	0.554
176.9	0.554
177	0.552
177.1	0.552
177.2	0.552
177.3	0.552
177.4	0.552
177.5	0.55
177.6	0.552
177.7	0.552
177.8	0.554
177.9	0.554
178	0.556
178.1	0.556
178.2	0.558
178.3	0.56
178.4	0.56
178.5	0.556
178.6	0.554
178.7	0.554
178.8	0.554
178.9	0.554
179	0.556
179.1	0.556
179.2	0.556
179.3	0.554
179.4	0.554
179.5	0.556
179.6	0.558
179.7	0.558
179.8	0.562
179.9	0.562
180	0.56
180.1	0.562
180.2	0.566
180.3	0.566
180.4	0.566
180.5	0.566
180.6	0.562
180.7	0.562
180.8	0.562
180.9	0.562
181	0.562
181.1	0.562
181.2	0.562
181.3	0.562
181.4	0.562
181.5	0.564
181.6	0.564
181.7	0.564
181.8	0.562
181.9	0.56
182	0.56
182.1	0.564
182.2	0.564
182.3	0.564
182.4	0.564
182.5	0.564
182.6	0.564
182.7	0.564
182.8	0.564
182.9	0.564
183	0.562
183.1	0.562
183.2	0.562
183.3	0.562
183.4	0.56
183.5	0.56
183.6	0.558
183.7	0.558
183.8	0.56
183.9	0.56
184	0.56
184.1	0.56
184.2	0.56
184.3	0.56
184.4	0.56
184.5	0.566
184.6	0.566
184.7	0.564
184.8	0.564
184.9	0.562
185	0.562
185.1	0.562
185.2	0.564
185.3	0.564
185.4	0.568
185.5	0.568
185.6	0.572
185.7	0.574
185.8	0.574
185.9	0.574
186	0.574
186.1	0.572
186.2	0.572
186.3	0.572
186.4	0.572
186.5	0.572
186.6	0.572
186.7	0.572
186.8	0.572
186.9	0.57
187	0.572
187.1	0.574
187.2	0.576
187.3	0.576
187.4	0.576
187.5	0.576
187.6	0.576
187.7	0.576
187.8	0.576
187.9	0.576
188	0.574
188.1	0.576
188.2	0.576
188.3	0.576
188.4	0.576
188.5	0.574
188.6	0.572
188.7	0.574
188.8	0.574
188.9	0.576
189	0.576
189.1	0.576
189.2	0.578
189.3	0.576
189.4	0.576
189.5	0.576
189.6	0.576
189.7	0.576
189.8	0.578
189.9	0.578
190	0.578
190.1	0.578
190.2	0.576
190.3	0.576
190.4	0.572
190.5	0.572
190.6	0.576
190.7	0.578
190.8	0.578
190.9	0.58
191	0.586
191.1	0.586
191.2	0.586
191.3	0.586
191.4	0.586
191.5	0.586
191.6	0.586
191.7	0.586
191.8	0.588
191.9	0.59
192	0.59
192.1	0.588
192.2	0.588
192.3	0.588
192.4	0.588
192.5	0.586
192.6	0.584
192.7	0.582
192.8	0.582
192.9	0.582
193	0.584
193.1	0.586
193.2	0.588
193.3	0.59
193.4	0.59
193.5	0.59
193.6	0.59
193.7	0.59
193.8	0.59
193.9	0.59
194	0.588
194.1	0.588
194.2	0.588
194.3	0.59
194.4	0.59
194.5	0.59
194.6	0.59
194.7	0.588
194.8	0.59
194.9	0.59
195	0.596
195.1	0.594
195.2	0.596
195.3	0.596
195.4	0.596
195.5	0.596
195.6	0.6
195.7	0.6
195.8	0.602
195.9	0.604
196	0.604
196.1	0.604
196.2	0.602
196.3	0.602
196.4	0.602
196.5	0.6
196.6	0.604
196.7	0.606
196.8	0.606
196.9	0.608
197	0.61
197.1	0.608
197.2	0.61
197.3	0.61
197.4	0.61
197.5	0.61
197.6	0.61
197.7	0.61
197.8	0.608
197.9	0.608
198	0.606
198.1	0.606
198.2	0.608
198.3	0.608
198.4	0.608
198.5	0.608
198.6	0.608
198.7	0.606
198.8	0.604
198.9	0.604
199	0.604
199.1	0.606
199.2	0.606
199.3	0.606
199.4	0.608
199.5	0.608
199.6	0.608
199.7	0.608
199.8	0.608
199.9	0.608
200	0.606
[truncated: 14,000 more rows]
