# Supplementary material for: Bayesian inference of kinetic schemes for ion channels by Kalman filtering
Source: eLife journal article supplement (doi:10.7554/elife.62714), 2022-05-04
Supplement: fig4-data6 [file 1_Sim_N_800_Fluor_MW_1M.xlsx]

## Sheet: Tabelle1
0.1	0
0.2	0
0.3	0
0.4	0
0.5	0
0.6	0
0.7	0
0.8	0
0.9	0
1	0
1.1	0
1.2	0
1.3	0
1.4	0
1.5	0
1.6	0
1.7	0
1.8	0
1.9	0
2	0
2.1	0
2.2	0
2.3	0
2.4	0
2.5	0
2.6	0
2.7	0
2.8	0
2.9	0
3	0
3.1	0
3.2	0
3.3	0
3.4	0
3.5	0
3.6	0
3.7	0
3.8	0
3.9	0
4	0
4.1	0
4.2	0
4.3	0
4.4	0
4.5	0
4.6	0
4.7	0
4.8	0
4.9	0
5	0
5.1	0
5.2	0
5.3	0
5.4	0
5.5	0
5.6	0
5.7	0
5.8	0
5.9	0
6	0
6.1	0
6.2	0
6.3	0
6.4	0
6.5	0
6.6	0
6.7	0
6.8	0
6.9	0
7	0
7.1	0
7.2	0
7.3	0
7.4	0
7.5	0
7.6	0
7.7	0
7.8	0
7.9	0
8	0
8.1	0
8.2	0
8.3	0
8.4	0
8.5	0
8.6	0
8.7	0
8.8	0
8.9	0
9	0
9.1	0
9.2	0
9.3	0
9.4	0
9.5	0
9.6	0
9.7	0
9.8	0
9.9	0
10	0
10.1	0
10.2	0
10.3	0
10.4	0
10.5	0
10.6	0
10.7	0
10.8	0
10.9	0
11	0
11.1	0
11.2	0
11.3	0
11.4	0
11.5	0
11.6	0
11.7	0
11.8	0
11.9	0
12	0
12.1	0
12.2	0
12.3	0
12.4	0
12.5	0
12.6	0
12.7	0
12.8	0
12.9	0
13	0
13.1	0
13.2	0
13.3	0
13.4	0
13.5	0
13.6	0
13.7	0
13.8	0
13.9	0
14	0
14.1	0
14.2	0
14.3	0
14.4	0
14.5	0
14.6	0
14.7	0
14.8	0
14.9	0
15	0
15.1	0
15.2	0
15.3	0
15.4	0
15.5	0
15.6	0
15.7	0
15.8	0
15.9	0
16	0
16.1	0
16.2	0
16.3	0
16.4	0
16.5	0
16.6	0
16.7	0
16.8	0
16.9	0
17	0
17.1	0
17.2	0
17.3	0
17.4	0
17.5	0
17.6	0
17.7	0
17.8	0
17.9	0
18	0
18.1	0
18.2	0
18.3	0
18.4	0
18.5	0
18.6	0
18.7	0
18.8	0
18.9	0
19	0
19.1	0
19.2	0
19.3	0
19.4	0
19.5	0
19.6	0
19.7	0
19.8	0
19.9	0
20	0
20.1	0
20.2	0
20.3	0
20.4	0
20.5	0
20.6	0
20.7	0
20.8	0
20.9	0
21	0
21.1	0
21.2	0
21.3	0
21.4	0
21.5	0
21.6	0
21.7	0
21.8	0
21.9	0
22	0
22.1	0
22.2	0
22.3	0
22.4	0
22.5	0
22.6	0
22.7	0
22.8	0
22.9	0
23	0
23.1	0
23.2	0
23.3	0
23.4	0
23.5	0
23.6	0
23.7	0
23.8	0
23.9	0
24	0
24.1	0
24.2	0
24.3	0
24.4	0
24.5	0
24.6	0
24.7	0
24.8	0
24.9	0
25	0
25.1	0
25.2	0
25.3	0
25.4	0
25.5	0
25.6	0
25.7	0
25.8	0
25.9	0
26	0
26.1	0
26.2	0
26.3	0
26.4	0
26.5	0
26.6	0
26.7	0
26.8	0
26.9	0
27	0
27.1	0
27.2	0
27.3	0
27.4	0
27.5	0
27.6	0
27.7	0
27.8	0
27.9	0
28	0
28.1	0
28.2	0
28.3	0
28.4	0
28.5	0
28.6	0
28.7	0
28.8	0
28.9	0
29	0
29.1	0
29.2	0
29.3	0
29.4	0
29.5	0
29.6	0
29.7	0
29.8	0
29.9	0
30	0
30.1	0
30.2	0
30.3	0
30.4	0
30.5	0
30.6	0
30.7	0
30.8	0
30.9	0
31	0
31.1	0
31.2	0
31.3	0
31.4	0
31.5	0
31.6	0
31.7	0
31.8	0
31.9	0
32	0
32.1	0
32.2	0
32.3	0
32.4	0
32.5	0
32.6	0
32.7	0
32.8	0
32.9	0
33	0
33.1	0
33.2	0
33.3	0
33.4	0
33.5	0
33.6	0
33.7	0
33.8	0
33.9	0
34	0
34.1	0
34.2	0
34.3	0
34.4	0
34.5	0
34.6	0
34.7	0
34.8	0
34.9	0
35	0
35.1	0
35.2	0
35.3	0
35.4	0
35.5	0
35.6	0
35.7	0
35.8	0
35.9	0
36	0
36.1	0
36.2	0
36.3	0
36.4	0
36.5	0
36.6	0
36.7	0
36.8	0
36.9	0
37	0
37.1	0
37.2	0
37.3	0
37.4	0
37.5	0
37.6	0
37.7	0
37.8	0
37.9	0
38	0
38.1	0
38.2	0
38.3	0
38.4	0
38.5	0
38.6	0
38.7	0
38.8	0
38.9	0
39	0
39.1	0
39.2	0
39.3	0
39.4	0
39.5	0
39.6	0
39.7	0
39.8	0
39.9	0
40	0
40.1	0
40.2	0
40.3	0
40.4	0
40.5	0
40.6	0
40.7	0
40.8	0
40.9	0
41	0
41.1	0
41.2	0
41.3	0
41.4	0
41.5	0
41.6	0
41.7	0
41.8	0
41.9	0
42	0
42.1	0
42.2	0
42.3	0
42.4	0
42.5	0
42.6	0
42.7	0
42.8	0
42.9	0
43	0
43.1	0
43.2	0
43.3	0
43.4	0
43.5	0
43.6	0
43.7	0
43.8	0
43.9	0
44	0
44.1	0
44.2	0
44.3	0
44.4	0
44.5	0
44.6	0
44.7	0
44.8	0
44.9	0
45	0
45.1	0
45.2	0
45.3	0
45.4	0
45.5	0
45.6	0
45.7	0
45.8	0
45.9	0
46	0
46.1	0
46.2	0
46.3	0
46.4	0
46.5	0
46.6	0
46.7	0
46.8	0
46.9	0
47	0
47.1	0
47.2	0
47.3	0
47.4	0
47.5	0
47.6	0
47.7	0
47.8	0
47.9	0
48	0
48.1	0
48.2	0
48.3	0
48.4	0
48.5	0
48.6	0
48.7	0
48.8	0
48.9	0
49	0
49.1	0
49.2	0
49.3	0
49.4	0
49.5	0
49.6	0
49.7	0
49.8	0
49.9	0
50	0
50.1	0
50.2	0
50.3	0
50.4	0
50.5	0
50.6	0
50.7	0
50.8	0
50.9	0
51	0
51.1	0
51.2	0
51.3	0
51.4	0
51.5	0
51.6	0
51.7	0
51.8	0
51.9	0
52	0
52.1	0
52.2	0
52.3	0
52.4	0
52.5	0
52.6	0
52.7	0
52.8	0
52.9	0
53	0
53.1	0
53.2	0
53.3	0
53.4	0
53.5	0
53.6	0
53.7	0
53.8	0
53.9	0
54	0
54.1	0
54.2	0
54.3	0
54.4	0
54.5	0
54.6	0
54.7	0
54.8	0
54.9	0
55	0
55.1	0
55.2	0
55.3	0
55.4	0
55.5	0
55.6	0
55.7	0
55.8	0
55.9	0
56	0
56.1	0
56.2	0
56.3	0
56.4	0
56.5	0
56.6	0
56.7	0
56.8	0
56.9	0
57	0
57.1	0
57.2	0
57.3	0
57.4	0
57.5	0
57.6	0
57.7	0
57.8	0
57.9	0
58	0
58.1	0
58.2	0
58.3	0
58.4	0
58.5	0
58.6	0
58.7	0
58.8	0
58.9	0
59	0
59.1	0
59.2	0
59.3	0
59.4	0
59.5	0
59.6	0
59.7	0
59.8	0
59.9	0
60	0
60.1	0
60.2	0
60.3	0
60.4	0
60.5	0
60.6	0
60.7	0
60.8	0
60.9	0
61	0
61.1	0
61.2	0
61.3	0
61.4	0
61.5	0
61.6	0
61.7	0
61.8	0
61.9	0
62	0
62.1	0
62.2	0
62.3	0
62.4	0
62.5	0
62.6	0
62.7	0
62.8	0
62.9	0
63	0
63.1	0
63.2	0
63.3	0
63.4	0
63.5	0
63.6	0
63.7	0
63.8	0
63.9	0
64	0
64.1	0
64.2	0
64.3	0
64.4	0
64.5	0
64.6	0
64.7	0
64.8	0
64.9	0
65	0
65.1	0
65.2	0
65.3	0
65.4	0
65.5	0
65.6	0
65.7	0
65.8	0
65.9	0
66	0
66.1	0
66.2	0
66.3	0
66.4	0
66.5	0
66.6	0
66.7	0
66.8	0
66.9	0
67	0
67.1	0
67.2	0
67.3	0
67.4	0
67.5	0
67.6	0
67.7	0
67.8	0
67.9	0
68	0
68.1	0
68.2	0
68.3	0
68.4	0
68.5	0
68.6	0
68.7	0
68.8	0
68.9	0
69	0
69.1	0
69.2	0
69.3	0
69.4	0
69.5	0
69.6	0
69.7	0
69.8	0
69.9	0
70	0
70.1	0
70.2	0
70.3	0
70.4	0
70.5	0
70.6	0
70.7	0
70.8	0
70.9	0
71	0
71.1	0
71.2	0
71.3	0
71.4	0
71.5	0
71.6	0
71.7	0
71.8	0
71.9	0
72	0
72.1	0
72.2	0
72.3	0
72.4	0
72.5	0
72.6	0
72.7	0
72.8	0
72.9	0
73	0
73.1	0
73.2	0
73.3	0
73.4	0
73.5	0
73.6	0
73.7	0
73.8	0
73.9	0
74	0
74.1	0
74.2	0
74.3	0
74.4	0
74.5	0
74.6	0
74.7	0
74.8	0
74.9	0
75	0
75.1	0
75.2	0
75.3	0
75.4	0
75.5	0
75.6	0
75.7	0
75.8	0
75.9	0
76	0
76.1	0
76.2	0
76.3	0
76.4	0
76.5	0
76.6	0
76.7	0
76.8	0
76.9	0
77	0
77.1	0
77.2	0
77.3	0
77.4	0
77.5	0
77.6	0
77.7	0
77.8	0
77.9	0
78	0
78.1	0
78.2	0
78.3	0
78.4	0
78.5	0
78.6	0
78.7	0
78.8	0
78.9	0
79	0
79.1	0
79.2	0
79.3	0
79.4	0
79.5	0
79.6	0
79.7	0
79.8	0
79.9	0
80	0
80.1	0
80.2	0
80.3	0
80.4	0
80.5	0
80.6	0
80.7	0
80.8	0
80.9	0
81	0
81.1	0
81.2	0
81.3	0
81.4	0
81.5	0
81.6	0
81.7	0
81.8	0
81.9	0
82	0
82.1	0
82.2	0
82.3	0
82.4	0
82.5	0
82.6	0
82.7	0
82.8	0
82.9	0
83	0
83.1	0
83.2	0
83.3	0
83.4	0
83.5	0
83.6	0
83.7	0
83.8	0
83.9	0
84	0
84.1	0
84.2	0
84.3	0
84.4	0
84.5	0
84.6	0
84.7	0
84.8	0
84.9	0
85	0
85.1	0
85.2	0
85.3	0
85.4	0
85.5	0
85.6	0
85.7	0
85.8	0
85.9	0
86	0
86.1	0
86.2	0
86.3	0
86.4	0
86.5	0
86.6	0
86.7	0
86.8	0
86.9	0
87	0
87.1	0
87.2	0
87.3	0
87.4	0
87.5	0
87.6	0
87.7	0
87.8	0
87.9	0
88	0
88.1	0
88.2	0
88.3	0
88.4	0
88.5	0
88.6	0
88.7	0
88.8	0
88.9	0
89	0
89.1	0
89.2	0
89.3	0
89.4	0
89.5	0
89.6	0
89.7	0
89.8	0
89.9	0
90	0
90.1	0
90.2	0
90.3	0
90.4	0
90.5	0
90.6	0
90.7	0
90.8	0
90.9	0
91	0
91.1	0
91.2	0
91.3	0
91.4	0
91.5	0
91.6	0
91.7	0
91.8	0
91.9	0
92	0
92.1	0
92.2	0
92.3	0
92.4	0
92.5	0
92.6	0
92.7	0
92.8	0
92.9	0
93	0
93.1	0
93.2	0
93.3	0
93.4	0
93.5	0
93.6	0
93.7	0
93.8	0
93.9	0
94	0
94.1	0
94.2	0
94.3	0
94.4	0
94.5	0
94.6	0
94.7	0
94.8	0
94.9	0
95	0
95.1	0
95.2	0
95.3	0
95.4	0
95.5	0
95.6	0
95.7	0
95.8	0
95.9	0
96	0
96.1	0
96.2	0
96.3	0
96.4	0
96.5	0
96.6	0
96.7	0
96.8	0
96.9	0
97	0
97.1	0
97.2	0
97.3	0
97.4	0
97.5	0
97.6	0
97.7	0
97.8	0
97.9	0
98	0
98.1	0
98.2	0
98.3	0
98.4	0
98.5	0
98.6	0
98.7	0
98.8	0
98.9	0
99	0
99.1	0
99.2	0
99.3	0
99.4	0
99.5	0
99.6	0
99.7	0
99.8	0
99.9	0
100	0
100.1	0.06125
100.2	0.10375
100.3	0.153125
100.4	0.185
100.5	0.22
100.6	0.250625
100.7	0.283125
100.8	0.315625
100.9	0.34375
101	0.36375
101.1	0.3925
101.2	0.41
101.3	0.426875
101.4	0.44375
101.5	0.458125
101.6	0.47875
101.7	0.4875
101.8	0.500625
101.9	0.51375
102	0.52375
102.1	0.5375
102.2	0.55375
102.3	0.558125
102.4	0.569375
102.5	0.576875
102.6	0.586875
102.7	0.595625
102.8	0.599375
102.9	0.6
103	0.6025
103.1	0.605625
103.2	0.610625
103.3	0.61125
103.4	0.6175
103.5	0.621875
103.6	0.621875
103.7	0.626875
103.8	0.631875
103.9	0.633125
104	0.638125
104.1	0.634375
104.2	0.638125
104.3	0.6425
104.4	0.64375
104.5	0.64375
104.6	0.638125
104.7	0.639375
104.8	0.63875
104.9	0.6425
105	0.64375
105.1	0.64875
105.2	0.644375
105.3	0.64375
105.4	0.646875
105.5	0.64875
105.6	0.64875
105.7	0.654375
105.8	0.656875
105.9	0.658125
106	0.65625
106.1	0.66
106.2	0.66
106.3	0.665
106.4	0.665625
106.5	0.66625
106.6	0.6675
106.7	0.668125
106.8	0.668125
106.9	0.663125
107	0.665625
107.1	0.664375
107.2	0.66625
107.3	0.67125
107.4	0.66625
107.5	0.6675
107.6	0.666875
107.7	0.661875
107.8	0.66125
107.9	0.65875
108	0.656875
108.1	0.663125
108.2	0.665
108.3	0.661875
108.4	0.664375
108.5	0.666875
108.6	0.668125
108.7	0.668125
108.8	0.678125
108.9	0.680625
109	0.67875
109.1	0.673125
109.2	0.673125
109.3	0.670625
109.4	0.66625
109.5	0.668125
109.6	0.6675
109.7	0.66625
109.8	0.668125
109.9	0.666875
110	0.668125
110.1	0.661875
110.2	0.66625
110.3	0.6675
110.4	0.671875
110.5	0.67875
110.6	0.676875
110.7	0.67875
110.8	0.68
110.9	0.68
111	0.680625
111.1	0.679375
111.2	0.680625
111.3	0.684375
111.4	0.683125
111.5	0.68375
111.6	0.685625
111.7	0.6825
111.8	0.686875
111.9	0.690625
112	0.68625
112.1	0.686875
112.2	0.69125
112.3	0.6925
112.4	0.69625
112.5	0.6925
112.6	0.695
112.7	0.698125
112.8	0.69625
112.9	0.695625
113	0.7
113.1	0.69625
113.2	0.69375
113.3	0.696875
113.4	0.695625
113.5	0.700625
113.6	0.705
113.7	0.7075
113.8	0.705
113.9	0.703125
114	0.70625
114.1	0.705
114.2	0.70625
114.3	0.71125
114.4	0.709375
114.5	0.705625
114.6	0.710625
114.7	0.71125
114.8	0.713125
114.9	0.71625
115	0.715625
115.1	0.714375
115.2	0.71375
115.3	0.7175
115.4	0.713125
115.5	0.71
115.6	0.711875
115.7	0.7075
115.8	0.701875
115.9	0.703125
116	0.70625
116.1	0.70625
116.2	0.706875
116.3	0.705625
116.4	0.71375
116.5	0.715
116.6	0.71625
116.7	0.71375
116.8	0.71125
116.9	0.70625
117	0.705
117.1	0.7075
117.2	0.706875
117.3	0.70125
117.4	0.699375
117.5	0.699375
117.6	0.695625
117.7	0.693125
117.8	0.6925
117.9	0.698125
118	0.70375
118.1	0.70375
118.2	0.70375
118.3	0.709375
118.4	0.713125
118.5	0.713125
118.6	0.71125
118.7	0.715625
118.8	0.715
118.9	0.7175
119	0.72125
119.1	0.71875
119.2	0.723125
119.3	0.723125
119.4	0.730625
119.5	0.730625
119.6	0.72375
119.7	0.72375
119.8	0.724375
119.9	0.7225
120	0.72125
120.1	0.723125
120.2	0.72875
120.3	0.73
120.4	0.72875
120.5	0.736875
120.6	0.739375
120.7	0.735
120.8	0.7325
120.9	0.730625
121	0.731875
121.1	0.7325
121.2	0.734375
121.3	0.734375
121.4	0.733125
121.5	0.73
121.6	0.728125
121.7	0.726875
121.8	0.730625
121.9	0.735625
122	0.7325
122.1	0.73375
122.2	0.735625
122.3	0.7425
122.4	0.7375
122.5	0.735625
122.6	0.740625
122.7	0.741875
122.8	0.743125
122.9	0.739375
123	0.73875
123.1	0.73875
123.2	0.739375
123.3	0.739375
123.4	0.74375
123.5	0.741875
123.6	0.74
123.7	0.735625
123.8	0.7425
123.9	0.74125
124	0.740625
124.1	0.735
124.2	0.735
124.3	0.73875
124.4	0.740625
124.5	0.740625
124.6	0.7425
124.7	0.74
124.8	0.74
124.9	0.738125
125	0.74125
125.1	0.74625
125.2	0.745625
125.3	0.74375
125.4	0.7425
125.5	0.744375
125.6	0.741875
125.7	0.748125
125.8	0.749375
125.9	0.7425
126	0.745625
126.1	0.745625
126.2	0.745
126.3	0.744375
126.4	0.741875
126.5	0.73875
126.6	0.741875
126.7	0.74625
126.8	0.74125
126.9	0.74125
127	0.743125
127.1	0.74625
127.2	0.749375
127.3	0.750625
127.4	0.75125
127.5	0.751875
127.6	0.750625
127.7	0.7525
127.8	0.754375
127.9	0.7575
128	0.761875
128.1	0.763125
128.2	0.758125
128.3	0.761875
128.4	0.76125
128.5	0.7625
128.6	0.76125
128.7	0.76125
128.8	0.764375
128.9	0.759375
129	0.7575
129.1	0.760625
129.2	0.761875
129.3	0.76375
129.4	0.764375
129.5	0.761875
129.6	0.763125
129.7	0.7625
129.8	0.75875
129.9	0.761875
130	0.761875
130.1	0.761875
130.2	0.75875
130.3	0.751875
130.4	0.748125
130.5	0.74625
130.6	0.75125
130.7	0.751875
130.8	0.750625
130.9	0.7525
131	0.75125
131.1	0.748125
131.2	0.755625
131.3	0.75625
131.4	0.75625
131.5	0.75875
131.6	0.7575
131.7	0.760625
131.8	0.764375
131.9	0.76625
132	0.76
132.1	0.76375
132.2	0.7675
132.3	0.774375
132.4	0.776875
132.5	0.77625
132.6	0.769375
132.7	0.7675
132.8	0.768125
132.9	0.775
133	0.77375
133.1	0.77625
133.2	0.776875
133.3	0.774375
133.4	0.770625
133.5	0.769375
133.6	0.7725
133.7	0.768125
133.8	0.766875
133.9	0.765625
134	0.760625
134.1	0.765625
134.2	0.769375
134.3	0.771875
134.4	0.77125
134.5	0.770625
134.6	0.769375
134.7	0.77
134.8	0.766875
134.9	0.766875
135	0.768125
135.1	0.76625
135.2	0.76125
135.3	0.76625
135.4	0.7725
135.5	0.773125
135.6	0.77375
135.7	0.7725
135.8	0.76875
135.9	0.776875
136	0.773125
136.1	0.7725
136.2	0.776875
136.3	0.781875
136.4	0.785625
136.5	0.786875
136.6	0.78625
136.7	0.785
136.8	0.78375
136.9	0.77625
137	0.77875
137.1	0.78125
137.2	0.78125
137.3	0.78375
137.4	0.785625
137.5	0.78625
137.6	0.78875
137.7	0.7875
137.8	0.789375
137.9	0.79375
138	0.791875
138.1	0.793125
138.2	0.7925
138.3	0.7925
138.4	0.795
138.5	0.789375
138.6	0.7875
138.7	0.786875
138.8	0.790625
138.9	0.794375
139	0.79625
139.1	0.795625
139.2	0.791875
139.3	0.789375
139.4	0.79125
139.5	0.7925
139.6	0.793125
139.7	0.786875
139.8	0.78875
139.9	0.785625
140	0.78125
140.1	0.783125
140.2	0.78625
140.3	0.78875
140.4	0.790625
140.5	0.79125
140.6	0.79125
140.7	0.790625
140.8	0.788125
140.9	0.790625
141	0.7875
141.1	0.785625
141.2	0.784375
141.3	0.78375
141.4	0.784375
141.5	0.7825
141.6	0.781875
141.7	0.781875
141.8	0.779375
141.9	0.783125
142	0.780625
142.1	0.783125
142.2	0.78125
142.3	0.78125
142.4	0.7825
142.5	0.785
142.6	0.785625
142.7	0.7875
142.8	0.78625
142.9	0.79125
143	0.79375
143.1	0.793125
143.2	0.795625
143.3	0.796875
143.4	0.801875
143.5	0.80125
143.6	0.80125
143.7	0.795625
143.8	0.793125
143.9	0.79875
144	0.799375
144.1	0.798125
144.2	0.795
144.3	0.788125
144.4	0.795625
144.5	0.794375
144.6	0.7925
144.7	0.78875
144.8	0.786875
144.9	0.78875
145	0.789375
145.1	0.79375
145.2	0.79125
145.3	0.791875
145.4	0.79
145.5	0.79375
145.6	0.79375
145.7	0.789375
145.8	0.793125
145.9	0.79125
146	0.795
146.1	0.79625
146.2	0.799375
146.3	0.79875
146.4	0.804375
146.5	0.80375
146.6	0.8025
146.7	0.80375
146.8	0.80625
146.9	0.80625
147	0.803125
147.1	0.801875
147.2	0.798125
147.3	0.79875
147.4	0.803125
147.5	0.800625
147.6	0.8025
147.7	0.803125
147.8	0.799375
147.9	0.801875
148	0.80125
148.1	0.7975
148.2	0.79875
148.3	0.8025
148.4	0.80375
148.5	0.800625
148.6	0.804375
148.7	0.80375
148.8	0.8075
148.9	0.8075
149	0.804375
149.1	0.805
149.2	0.806875
149.3	0.801875
149.4	0.8
149.5	0.800625
149.6	0.806875
149.7	0.808125
149.8	0.805625
149.9	0.805625
150	0.801875
150.1	0.79875
150.2	0.7975
150.3	0.798125
150.4	0.80125
150.5	0.7975
150.6	0.8
150.7	0.798125
150.8	0.795625
150.9	0.7925
151	0.791875
151.1	0.795625
151.2	0.79875
151.3	0.8
151.4	0.799375
151.5	0.8
151.6	0.8075
151.7	0.81
151.8	0.80875
151.9	0.813125
152	0.813125
152.1	0.8125
152.2	0.8125
152.3	0.814375
152.4	0.81375
152.5	0.81125
152.6	0.80875
152.7	0.808125
152.8	0.8075
152.9	0.805
153	0.8075
153.1	0.81
153.2	0.809375
153.3	0.81375
153.4	0.809375
153.5	0.8125
153.6	0.813125
153.7	0.815
153.8	0.816875
153.9	0.81875
154	0.8175
154.1	0.8175
154.2	0.81625
154.3	0.815
154.4	0.815625
154.5	0.814375
154.6	0.810625
154.7	0.806875
154.8	0.80625
154.9	0.809375
155	0.8075
155.1	0.80625
155.2	0.803125
155.3	0.805625
155.4	0.803125
155.5	0.80375
155.6	0.806875
155.7	0.8125
155.8	0.813125
155.9	0.813125
156	0.81375
156.1	0.81375
156.2	0.815625
156.3	0.81375
156.4	0.813125
156.5	0.80875
156.6	0.816875
156.7	0.8125
156.8	0.8075
156.9	0.808125
157	0.80875
157.1	0.8075
157.2	0.80625
157.3	0.8075
157.4	0.809375
157.5	0.80875
157.6	0.81125
157.7	0.80875
157.8	0.810625
157.9	0.80875
158	0.80875
158.1	0.811875
158.2	0.810625
158.3	0.81125
158.4	0.8125
158.5	0.815625
158.6	0.818125
158.7	0.82
158.8	0.82
158.9	0.82
159	0.82125
159.1	0.82375
159.2	0.821875
159.3	0.82
159.4	0.823125
159.5	0.826875
159.6	0.828125
159.7	0.82375
159.8	0.824375
159.9	0.821875
160	0.823125
160.1	0.823125
160.2	0.823125
160.3	0.82375
160.4	0.8225
160.5	0.819375
160.6	0.8175
160.7	0.8175
160.8	0.81875
160.9	0.818125
161	0.815
161.1	0.81625
161.2	0.8175
161.3	0.818125
161.4	0.819375
161.5	0.82125
161.6	0.818125
161.7	0.816875
161.8	0.815
161.9	0.820625
162	0.819375
162.1	0.818125
162.2	0.819375
162.3	0.821875
162.4	0.825625
162.5	0.828125
162.6	0.82875
162.7	0.831875
162.8	0.83125
162.9	0.830625
163	0.831875
163.1	0.83125
163.2	0.829375
163.3	0.83125
163.4	0.834375
163.5	0.83625
163.6	0.836875
163.7	0.838125
163.8	0.836875
163.9	0.8325
164	0.83125
164.1	0.835
164.2	0.829375
164.3	0.8275
164.4	0.8275
164.5	0.833125
164.6	0.838125
164.7	0.83625
164.8	0.834375
164.9	0.833125
165	0.835625
165.1	0.834375
165.2	0.838125
165.3	0.838125
165.4	0.836875
165.5	0.834375
165.6	0.83125
165.7	0.83375
165.8	0.8325
165.9	0.8375
166	0.8375
166.1	0.835625
166.2	0.834375
166.3	0.8375
166.4	0.835625
166.5	0.833125
166.6	0.8325
166.7	0.833125
166.8	0.834375
166.9	0.83875
167	0.839375
167.1	0.836875
167.2	0.83625
167.3	0.835625
167.4	0.8375
167.5	0.835
167.6	0.831875
167.7	0.831875
167.8	0.836875
167.9	0.835625
168	0.83375
168.1	0.83125
168.2	0.825
168.3	0.824375
168.4	0.823125
168.5	0.825
168.6	0.82875
168.7	0.830625
168.8	0.828125
168.9	0.82625
169	0.82
169.1	0.820625
169.2	0.820625
169.3	0.82125
169.4	0.82
169.5	0.823125
169.6	0.82125
169.7	0.824375
169.8	0.83
169.9	0.829375
170	0.828125
170.1	0.829375
170.2	0.83
170.3	0.82875
170.4	0.83125
170.5	0.833125
170.6	0.835
170.7	0.835
170.8	0.83375
170.9	0.83375
171	0.838125
171.1	0.835625
171.2	0.8375
171.3	0.84125
171.4	0.8425
171.5	0.841875
171.6	0.843125
171.7	0.843125
171.8	0.845625
171.9	0.8475
172	0.84625
172.1	0.84375
172.2	0.84
172.3	0.84
172.4	0.844375
172.5	0.849375
172.6	0.849375
172.7	0.846875
172.8	0.843125
172.9	0.8425
173	0.845
173.1	0.845625
173.2	0.8425
173.3	0.840625
173.4	0.843125
173.5	0.839375
173.6	0.836875
173.7	0.839375
173.8	0.8425
173.9	0.840625
174	0.839375
174.1	0.841875
174.2	0.845625
174.3	0.841875
174.4	0.8425
174.5	0.84125
174.6	0.838125
174.7	0.839375
174.8	0.84
174.9	0.838125
175	0.84375
175.1	0.840625
175.2	0.84
175.3	0.84375
175.4	0.84375
175.5	0.8425
175.6	0.844375
175.7	0.84375
175.8	0.840625
175.9	0.841875
176	0.844375
176.1	0.84625
176.2	0.848125
176.3	0.850625
176.4	0.850625
176.5	0.84875
176.6	0.851875
176.7	0.8525
176.8	0.85125
176.9	0.85375
177	0.851875
177.1	0.849375
177.2	0.845625
177.3	0.8475
177.4	0.846875
177.5	0.85
177.6	0.850625
177.7	0.84875
177.8	0.850625
177.9	0.85
178	0.849375
178.1	0.84875
178.2	0.848125
178.3	0.84875
178.4	0.843125
178.5	0.84
178.6	0.843125
178.7	0.84
178.8	0.840625
178.9	0.83875
179	0.8375
179.1	0.835625
179.2	0.83875
179.3	0.839375
179.4	0.84
179.5	0.83875
179.6	0.84
179.7	0.841875
179.8	0.84375
179.9	0.841875
180	0.849375
180.1	0.845625
180.2	0.850625
180.3	0.85
180.4	0.845625
180.5	0.845625
180.6	0.85
180.7	0.849375
180.8	0.846875
180.9	0.845625
181	0.84625
181.1	0.84625
181.2	0.845625
181.3	0.846875
181.4	0.844375
181.5	0.845
181.6	0.840625
181.7	0.839375
181.8	0.840625
181.9	0.839375
182	0.843125
182.1	0.839375
182.2	0.840625
182.3	0.840625
182.4	0.836875
182.5	0.839375
182.6	0.83875
182.7	0.841875
182.8	0.84125
182.9	0.83875
183	0.83875
183.1	0.839375
183.2	0.834375
183.3	0.834375
183.4	0.84125
183.5	0.84125
183.6	0.840625
183.7	0.836875
183.8	0.8325
183.9	0.82875
184	0.830625
184.1	0.831875
184.2	0.83375
184.3	0.83625
184.4	0.839375
184.5	0.8375
184.6	0.840625
184.7	0.84
184.8	0.84375
184.9	0.8425
185	0.84375
185.1	0.843125
185.2	0.848125
185.3	0.850625
185.4	0.84625
185.5	0.848125
185.6	0.85125
185.7	0.84875
185.8	0.85375
185.9	0.851875
186	0.85375
186.1	0.846875
186.2	0.846875
186.3	0.8475
186.4	0.846875
186.5	0.85
186.6	0.848125
186.7	0.849375
186.8	0.85125
186.9	0.8525
187	0.8525
187.1	0.8525
187.2	0.8475
187.3	0.844375
187.4	0.845
187.5	0.85
187.6	0.84875
187.7	0.84875
187.8	0.84625
187.9	0.848125
188	0.84625
188.1	0.846875
188.2	0.8475
188.3	0.841875
188.4	0.841875
188.5	0.840625
188.6	0.838125
188.7	0.838125
188.8	0.83875
188.9	0.83875
189	0.8425
189.1	0.84375
189.2	0.843125
189.3	0.843125
189.4	0.8425
189.5	0.843125
189.6	0.844375
189.7	0.844375
189.8	0.84375
189.9	0.8475
190	0.85
190.1	0.849375
190.2	0.85125
190.3	0.8525
190.4	0.854375
190.5	0.855625
190.6	0.8575
190.7	0.853125
190.8	0.8475
190.9	0.84375
191	0.848125
191.1	0.850625
191.2	0.855
191.3	0.854375
191.4	0.853125
191.5	0.858125
191.6	0.86
191.7	0.85875
191.8	0.859375
191.9	0.86
192	0.859375
192.1	0.858125
192.2	0.8575
192.3	0.855
192.4	0.855625
192.5	0.856875
192.6	0.855625
192.7	0.8525
192.8	0.855
192.9	0.854375
193	0.853125
193.1	0.855
193.2	0.8525
193.3	0.85125
193.4	0.851875
193.5	0.8525
193.6	0.855625
193.7	0.8575
193.8	0.8575
193.9	0.856875
194	0.86
194.1	0.86
194.2	0.863125
194.3	0.86125
194.4	0.855
194.5	0.85125
194.6	0.854375
194.7	0.85125
194.8	0.844375
194.9	0.85
195	0.851875
195.1	0.853125
195.2	0.855
195.3	0.854375
195.4	0.856875
195.5	0.8525
195.6	0.855
195.7	0.85375
195.8	0.858125
195.9	0.858125
196	0.8575
196.1	0.85625
196.2	0.859375
196.3	0.8575
196.4	0.855625
196.5	0.85375
196.6	0.85625
196.7	0.85375
196.8	0.851875
196.9	0.855
197	0.855625
197.1	0.853125
197.2	0.850625
197.3	0.85375
197.4	0.8525
197.5	0.85625
197.6	0.86
197.7	0.858125
197.8	0.856875
197.9	0.854375
198	0.854375
198.1	0.855625
198.2	0.853125
198.3	0.8525
198.4	0.855
198.5	0.854375
198.6	0.854375
198.7	0.85
198.8	0.850625
198.9	0.85125
199	0.8525
199.1	0.85375
199.2	0.855
199.3	0.850625
199.4	0.850625
199.5	0.8525
199.6	0.85375
199.7	0.853125
199.8	0.851875
199.9	0.854375
200	0.85375
[truncated: 14,000 more rows]
