# Supplementary material for: Bayesian inference of kinetic schemes for ion channels by Kalman filtering
Source: eLife journal article supplement (doi:10.7554/elife.62714), 2022-05-04
Supplement: fig4-data6 [file 1_Sim_N_800_Strom_MW_1M.xlsx]

## Sheet: Tabelle1
0.1	0
0.2	0
0.3	0
0.4	0
0.5	0
0.6	0
0.7	0
0.8	0
0.9	0
1	0
1.1	0
1.2	0
1.3	0
1.4	0
1.5	0
1.6	0
1.7	0
1.8	0
1.9	0
2	0
2.1	0
2.2	0
2.3	0
2.4	0
2.5	0
2.6	0
2.7	0
2.8	0
2.9	0
3	0
3.1	0
3.2	0
3.3	0
3.4	0
3.5	0
3.6	0
3.7	0
3.8	0
3.9	0
4	0
4.1	0
4.2	0
4.3	0
4.4	0
4.5	0
4.6	0
4.7	0
4.8	0
4.9	0
5	0
5.1	0
5.2	0
5.3	0
5.4	0
5.5	0
5.6	0
5.7	0
5.8	0
5.9	0
6	0
6.1	0
6.2	0
6.3	0
6.4	0
6.5	0
6.6	0
6.7	0
6.8	0
6.9	0
7	0
7.1	0
7.2	0
7.3	0
7.4	0
7.5	0
7.6	0
7.7	0
7.8	0
7.9	0
8	0
8.1	0
8.2	0
8.3	0
8.4	0
8.5	0
8.6	0
8.7	0
8.8	0
8.9	0
9	0
9.1	0
9.2	0
9.3	0
9.4	0
9.5	0
9.6	0
9.7	0
9.8	0
9.9	0
10	0
10.1	0
10.2	0
10.3	0
10.4	0
10.5	0
10.6	0
10.7	0
10.8	0
10.9	0
11	0
11.1	0
11.2	0
11.3	0
11.4	0
11.5	0
11.6	0
11.7	0
11.8	0
11.9	0
12	0
12.1	0
12.2	0
12.3	0
12.4	0
12.5	0
12.6	0
12.7	0
12.8	0
12.9	0
13	0
13.1	0
13.2	0
13.3	0
13.4	0
13.5	0
13.6	0
13.7	0
13.8	0
13.9	0
14	0
14.1	0
14.2	0
14.3	0
14.4	0
14.5	0
14.6	0
14.7	0
14.8	0
14.9	0
15	0
15.1	0
15.2	0
15.3	0
15.4	0
15.5	0
15.6	0
15.7	0
15.8	0
15.9	0
16	0
16.1	0
16.2	0
16.3	0
16.4	0
16.5	0
16.6	0
16.7	0
16.8	0
16.9	0
17	0
17.1	0
17.2	0
17.3	0
17.4	0
17.5	0
17.6	0
17.7	0
17.8	0
17.9	0
18	0
18.1	0
18.2	0
18.3	0
18.4	0
18.5	0
18.6	0
18.7	0
18.8	0
18.9	0
19	0
19.1	0
19.2	0
19.3	0
19.4	0
19.5	0
19.6	0
19.7	0
19.8	0
19.9	0
20	0
20.1	0
20.2	0
20.3	0
20.4	0
20.5	0
20.6	0
20.7	0
20.8	0
20.9	0
21	0
21.1	0
21.2	0
21.3	0
21.4	0
21.5	0
21.6	0
21.7	0
21.8	0
21.9	0
22	0
22.1	0
22.2	0
22.3	0
22.4	0
22.5	0
22.6	0
22.7	0
22.8	0
22.9	0
23	0
23.1	0
23.2	0
23.3	0
23.4	0
23.5	0
23.6	0
23.7	0
23.8	0
23.9	0
24	0
24.1	0
24.2	0
24.3	0
24.4	0
24.5	0
24.6	0
24.7	0
24.8	0
24.9	0
25	0
25.1	0
25.2	0
25.3	0
25.4	0
25.5	0
25.6	0
25.7	0
25.8	0
25.9	0
26	0
26.1	0
26.2	0
26.3	0
26.4	0
26.5	0
26.6	0
26.7	0
26.8	0
26.9	0
27	0
27.1	0
27.2	0
27.3	0
27.4	0
27.5	0
27.6	0
27.7	0
27.8	0
27.9	0
28	0
28.1	0
28.2	0
28.3	0
28.4	0
28.5	0
28.6	0
28.7	0
28.8	0
28.9	0
29	0
29.1	0
29.2	0
29.3	0
29.4	0
29.5	0
29.6	0
29.7	0
29.8	0
29.9	0
30	0
30.1	0
30.2	0
30.3	0
30.4	0
30.5	0
30.6	0
30.7	0
30.8	0
30.9	0
31	0
31.1	0
31.2	0
31.3	0
31.4	0
31.5	0
31.6	0
31.7	0
31.8	0
31.9	0
32	0
32.1	0
32.2	0
32.3	0
32.4	0
32.5	0
32.6	0
32.7	0
32.8	0
32.9	0
33	0
33.1	0
33.2	0
33.3	0
33.4	0
33.5	0
33.6	0
33.7	0
33.8	0
33.9	0
34	0
34.1	0
34.2	0
34.3	0
34.4	0
34.5	0
34.6	0
34.7	0
34.8	0
34.9	0
35	0
35.1	0
35.2	0
35.3	0
35.4	0
35.5	0
35.6	0
35.7	0
35.8	0
35.9	0
36	0
36.1	0
36.2	0
36.3	0
36.4	0
36.5	0
36.6	0
36.7	0
36.8	0
36.9	0
37	0
37.1	0
37.2	0
37.3	0
37.4	0
37.5	0
37.6	0
37.7	0
37.8	0
37.9	0
38	0
38.1	0
38.2	0
38.3	0
38.4	0
38.5	0
38.6	0
38.7	0
38.8	0
38.9	0
39	0
39.1	0
39.2	0
39.3	0
39.4	0
39.5	0
39.6	0
39.7	0
39.8	0
39.9	0
40	0
40.1	0
40.2	0
40.3	0
40.4	0
40.5	0
40.6	0
40.7	0
40.8	0
40.9	0
41	0
41.1	0
41.2	0
41.3	0
41.4	0
41.5	0
41.6	0
41.7	0
41.8	0
41.9	0
42	0
42.1	0
42.2	0
42.3	0
42.4	0
42.5	0
42.6	0
42.7	0
42.8	0
42.9	0
43	0
43.1	0
43.2	0
43.3	0
43.4	0
43.5	0
43.6	0
43.7	0
43.8	0
43.9	0
44	0
44.1	0
44.2	0
44.3	0
44.4	0
44.5	0
44.6	0
44.7	0
44.8	0
44.9	0
45	0
45.1	0
45.2	0
45.3	0
45.4	0
45.5	0
45.6	0
45.7	0
45.8	0
45.9	0
46	0
46.1	0
46.2	0
46.3	0
46.4	0
46.5	0
46.6	0
46.7	0
46.8	0
46.9	0
47	0
47.1	0
47.2	0
47.3	0
47.4	0
47.5	0
47.6	0
47.7	0
47.8	0
47.9	0
48	0
48.1	0
48.2	0
48.3	0
48.4	0
48.5	0
48.6	0
48.7	0
48.8	0
48.9	0
49	0
49.1	0
49.2	0
49.3	0
49.4	0
49.5	0
49.6	0
49.7	0
49.8	0
49.9	0
50	0
50.1	0
50.2	0
50.3	0
50.4	0
50.5	0
50.6	0
50.7	0
50.8	0
50.9	0
51	0
51.1	0
51.2	0
51.3	0
51.4	0
51.5	0
51.6	0
51.7	0
51.8	0
51.9	0
52	0
52.1	0
52.2	0
52.3	0
52.4	0
52.5	0
52.6	0
52.7	0
52.8	0
52.9	0
53	0
53.1	0
53.2	0
53.3	0
53.4	0
53.5	0
53.6	0
53.7	0
53.8	0
53.9	0
54	0
54.1	0
54.2	0
54.3	0
54.4	0
54.5	0
54.6	0
54.7	0
54.8	0
54.9	0
55	0
55.1	0
55.2	0
55.3	0
55.4	0
55.5	0
55.6	0
55.7	0
55.8	0
55.9	0
56	0
56.1	0
56.2	0
56.3	0
56.4	0
56.5	0
56.6	0
56.7	0
56.8	0
56.9	0
57	0
57.1	0
57.2	0
57.3	0
57.4	0
57.5	0
57.6	0
57.7	0
57.8	0
57.9	0
58	0
58.1	0
58.2	0
58.3	0
58.4	0
58.5	0
58.6	0
58.7	0
58.8	0
58.9	0
59	0
59.1	0
59.2	0
59.3	0
59.4	0
59.5	0
59.6	0
59.7	0
59.8	0
59.9	0
60	0
60.1	0
60.2	0
60.3	0
60.4	0
60.5	0
60.6	0
60.7	0
60.8	0
60.9	0
61	0
61.1	0
61.2	0
61.3	0
61.4	0
61.5	0
61.6	0
61.7	0
61.8	0
61.9	0
62	0
62.1	0
62.2	0
62.3	0
62.4	0
62.5	0
62.6	0
62.7	0
62.8	0
62.9	0
63	0
63.1	0
63.2	0
63.3	0
63.4	0
63.5	0
63.6	0
63.7	0
63.8	0
63.9	0
64	0
64.1	0
64.2	0
64.3	0
64.4	0
64.5	0
64.6	0
64.7	0
64.8	0
64.9	0
65	0
65.1	0
65.2	0
65.3	0
65.4	0
65.5	0
65.6	0
65.7	0
65.8	0
65.9	0
66	0
66.1	0
66.2	0
66.3	0
66.4	0
66.5	0
66.6	0
66.7	0
66.8	0
66.9	0
67	0
67.1	0
67.2	0
67.3	0
67.4	0
67.5	0
67.6	0
67.7	0
67.8	0
67.9	0
68	0
68.1	0
68.2	0
68.3	0
68.4	0
68.5	0
68.6	0
68.7	0
68.8	0
68.9	0
69	0
69.1	0
69.2	0
69.3	0
69.4	0
69.5	0
69.6	0
69.7	0
69.8	0
69.9	0
70	0
70.1	0
70.2	0
70.3	0
70.4	0
70.5	0
70.6	0
70.7	0
70.8	0
70.9	0
71	0
71.1	0
71.2	0
71.3	0
71.4	0
71.5	0
71.6	0
71.7	0
71.8	0
71.9	0
72	0
72.1	0
72.2	0
72.3	0
72.4	0
72.5	0
72.6	0
72.7	0
72.8	0
72.9	0
73	0
73.1	0
73.2	0
73.3	0
73.4	0
73.5	0
73.6	0
73.7	0
73.8	0
73.9	0
74	0
74.1	0
74.2	0
74.3	0
74.4	0
74.5	0
74.6	0
74.7	0
74.8	0
74.9	0
75	0
75.1	0
75.2	0
75.3	0
75.4	0
75.5	0
75.6	0
75.7	0
75.8	0
75.9	0
76	0
76.1	0
76.2	0
76.3	0
76.4	0
76.5	0
76.6	0
76.7	0
76.8	0
76.9	0
77	0
77.1	0
77.2	0
77.3	0
77.4	0
77.5	0
77.6	0
77.7	0
77.8	0
77.9	0
78	0
78.1	0
78.2	0
78.3	0
78.4	0
78.5	0
78.6	0
78.7	0
78.8	0
78.9	0
79	0
79.1	0
79.2	0
79.3	0
79.4	0
79.5	0
79.6	0
79.7	0
79.8	0
79.9	0
80	0
80.1	0
80.2	0
80.3	0
80.4	0
80.5	0
80.6	0
80.7	0
80.8	0
80.9	0
81	0
81.1	0
81.2	0
81.3	0
81.4	0
81.5	0
81.6	0
81.7	0
81.8	0
81.9	0
82	0
82.1	0
82.2	0
82.3	0
82.4	0
82.5	0
82.6	0
82.7	0
82.8	0
82.9	0
83	0
83.1	0
83.2	0
83.3	0
83.4	0
83.5	0
83.6	0
83.7	0
83.8	0
83.9	0
84	0
84.1	0
84.2	0
84.3	0
84.4	0
84.5	0
84.6	0
84.7	0
84.8	0
84.9	0
85	0
85.1	0
85.2	0
85.3	0
85.4	0
85.5	0
85.6	0
85.7	0
85.8	0
85.9	0
86	0
86.1	0
86.2	0
86.3	0
86.4	0
86.5	0
86.6	0
86.7	0
86.8	0
86.9	0
87	0
87.1	0
87.2	0
87.3	0
87.4	0
87.5	0
87.6	0
87.7	0
87.8	0
87.9	0
88	0
88.1	0
88.2	0
88.3	0
88.4	0
88.5	0
88.6	0
88.7	0
88.8	0
88.9	0
89	0
89.1	0
89.2	0
89.3	0
89.4	0
89.5	0
89.6	0
89.7	0
89.8	0
89.9	0
90	0
90.1	0
90.2	0
90.3	0
90.4	0
90.5	0
90.6	0
90.7	0
90.8	0
90.9	0
91	0
91.1	0
91.2	0
91.3	0
91.4	0
91.5	0
91.6	0
91.7	0
91.8	0
91.9	0
92	0
92.1	0
92.2	0
92.3	0
92.4	0
92.5	0
92.6	0
92.7	0
92.8	0
92.9	0
93	0
93.1	0
93.2	0
93.3	0
93.4	0
93.5	0
93.6	0
93.7	0
93.8	0
93.9	0
94	0
94.1	0
94.2	0
94.3	0
94.4	0
94.5	0
94.6	0
94.7	0
94.8	0
94.9	0
95	0
95.1	0
95.2	0
95.3	0
95.4	0
95.5	0
95.6	0
95.7	0
95.8	0
95.9	0
96	0
96.1	0
96.2	0
96.3	0
96.4	0
96.5	0
96.6	0
96.7	0
96.8	0
96.9	0
97	0
97.1	0
97.2	0
97.3	0
97.4	0
97.5	0
97.6	0
97.7	0
97.8	0
97.9	0
98	0
98.1	0
98.2	0
98.3	0
98.4	0
98.5	0
98.6	0
98.7	0
98.8	0
98.9	0
99	0
99.1	0
99.2	0
99.3	0
99.4	0
99.5	0
99.6	0
99.7	0
99.8	0
99.9	0
100	0
100.1	0
100.2	0
100.3	0
100.4	0
100.5	0
100.6	0.00125
100.7	0.00125
100.8	0.00125
100.9	0.0025
101	0.0025
101.1	0.0025
101.2	0.00375
101.3	0.00625
101.4	0.00625
101.5	0.00625
101.6	0.00625
101.7	0.0075
101.8	0.0075
101.9	0.00875
102	0.01
102.1	0.01
102.2	0.01
102.3	0.0125
102.4	0.015
102.5	0.01625
102.6	0.01625
102.7	0.01875
102.8	0.01875
102.9	0.0225
103	0.02375
103.1	0.02375
103.2	0.02625
103.3	0.02625
103.4	0.02625
103.5	0.0275
103.6	0.0275
103.7	0.02875
103.8	0.03
103.9	0.03375
104	0.035
104.1	0.035
104.2	0.035
104.3	0.035
104.4	0.03875
104.5	0.03875
104.6	0.04
104.7	0.04
104.8	0.04
104.9	0.04125
105	0.045
105.1	0.04625
105.2	0.05125
105.3	0.055
105.4	0.05625
105.5	0.05625
105.6	0.05625
105.7	0.0575
105.8	0.06125
105.9	0.06125
106	0.0625
106.1	0.0625
106.2	0.06375
106.3	0.06375
106.4	0.06625
106.5	0.0675
106.6	0.07
106.7	0.07
106.8	0.07125
106.9	0.07125
107	0.07375
107.1	0.07375
107.2	0.07375
107.3	0.075
107.4	0.0775
107.5	0.0775
107.6	0.07875
107.7	0.07875
107.8	0.07875
107.9	0.08125
108	0.0825
108.1	0.0825
108.2	0.08375
108.3	0.085
108.4	0.085
108.5	0.08625
108.6	0.0875
108.7	0.0875
108.8	0.0875
108.9	0.09
109	0.09375
109.1	0.09625
109.2	0.1
109.3	0.10125
109.4	0.10125
109.5	0.10125
109.6	0.10375
109.7	0.10375
109.8	0.10625
109.9	0.1075
110	0.1075
110.1	0.11
110.2	0.10875
110.3	0.10875
110.4	0.11
110.5	0.11125
110.6	0.11625
110.7	0.11625
110.8	0.11875
110.9	0.12
111	0.12125
111.1	0.1225
111.2	0.125
111.3	0.125
111.4	0.125
111.5	0.12625
111.6	0.125
111.7	0.1275
111.8	0.12875
111.9	0.12875
112	0.12875
112.1	0.12875
112.2	0.13125
112.3	0.13125
112.4	0.13125
112.5	0.13125
112.6	0.135
112.7	0.135
112.8	0.13625
112.9	0.1375
113	0.14125
113.1	0.14125
113.2	0.14375
113.3	0.1475
113.4	0.14875
113.5	0.15
113.6	0.15
113.7	0.15125
113.8	0.155
113.9	0.155
114	0.15625
114.1	0.15625
114.2	0.15875
114.3	0.16
114.4	0.16125
114.5	0.16125
114.6	0.1625
114.7	0.16375
114.8	0.165
114.9	0.165
115	0.1675
115.1	0.1725
115.2	0.175
115.3	0.175
115.4	0.175
115.5	0.17375
115.6	0.17375
115.7	0.17625
115.8	0.1775
115.9	0.17875
116	0.18
116.1	0.18
116.2	0.18125
116.3	0.1825
116.4	0.18375
116.5	0.1875
116.6	0.18875
116.7	0.19
116.8	0.1925
116.9	0.19375
117	0.19625
117.1	0.19625
117.2	0.1975
117.3	0.19625
117.4	0.19625
117.5	0.19625
117.6	0.1975
117.7	0.1975
117.8	0.19875
117.9	0.19875
118	0.20375
118.1	0.205
118.2	0.2075
118.3	0.2075
118.4	0.2075
118.5	0.2075
118.6	0.2075
118.7	0.20875
118.8	0.20875
118.9	0.21
119	0.21
119.1	0.21125
119.2	0.2125
119.3	0.2125
119.4	0.21625
119.5	0.215
119.6	0.21375
119.7	0.215
119.8	0.215
119.9	0.21875
120	0.22
120.1	0.2225
120.2	0.225
120.3	0.2275
120.4	0.2275
120.5	0.22875
120.6	0.23125
120.7	0.2325
120.8	0.23375
120.9	0.235
121	0.23875
121.1	0.23875
121.2	0.23875
121.3	0.24
121.4	0.24375
121.5	0.24625
121.6	0.24625
121.7	0.245
121.8	0.2475
121.9	0.25125
122	0.2525
122.1	0.2525
122.2	0.25375
122.3	0.255
122.4	0.2575
122.5	0.26
122.6	0.26
122.7	0.26125
122.8	0.2625
122.9	0.26375
123	0.26375
123.1	0.265
123.2	0.26375
123.3	0.265
123.4	0.26625
123.5	0.26625
123.6	0.2675
123.7	0.26875
123.8	0.27125
123.9	0.27125
124	0.2725
124.1	0.275
124.2	0.2775
124.3	0.2775
124.4	0.2775
124.5	0.27625
124.6	0.2775
124.7	0.2775
124.8	0.28125
124.9	0.28125
125	0.28125
125.1	0.2825
125.2	0.28375
125.3	0.2825
125.4	0.2825
125.5	0.28375
125.6	0.28625
125.7	0.28625
125.8	0.2875
125.9	0.2875
126	0.2875
126.1	0.2875
126.2	0.28625
126.3	0.2875
126.4	0.28875
126.5	0.28875
126.6	0.29125
126.7	0.29125
126.8	0.2925
126.9	0.29
127	0.29125
127.1	0.2925
127.2	0.295
127.3	0.295
127.4	0.29625
127.5	0.29625
127.6	0.29875
127.7	0.3
127.8	0.29875
127.9	0.2975
128	0.29875
128.1	0.3
128.2	0.30125
128.3	0.30125
128.4	0.3
128.5	0.30125
128.6	0.3025
128.7	0.305
128.8	0.30625
128.9	0.30625
129	0.30625
129.1	0.3075
129.2	0.30875
129.3	0.30875
129.4	0.31
129.5	0.31
129.6	0.31125
129.7	0.31125
129.8	0.3125
129.9	0.3125
130	0.31375
130.1	0.3175
130.2	0.32
130.3	0.32125
130.4	0.3225
130.5	0.3225
130.6	0.32375
130.7	0.32375
130.8	0.325
130.9	0.325
131	0.32375
131.1	0.3225
131.2	0.32125
131.3	0.325
131.4	0.32625
131.5	0.3275
131.6	0.32875
131.7	0.32875
131.8	0.33
131.9	0.3325
132	0.335
132.1	0.33625
132.2	0.33625
132.3	0.33625
132.4	0.33625
132.5	0.33625
132.6	0.3375
132.7	0.34125
132.8	0.34125
132.9	0.3425
133	0.3425
133.1	0.3425
133.2	0.3425
133.3	0.34125
133.4	0.34125
133.5	0.34125
133.6	0.34375
133.7	0.3475
133.8	0.34625
133.9	0.3475
134	0.3475
134.1	0.34875
134.2	0.35125
134.3	0.35
134.4	0.35125
134.5	0.35375
134.6	0.35375
134.7	0.35375
134.8	0.3525
134.9	0.35625
135	0.35625
135.1	0.35625
135.2	0.35625
135.3	0.35625
135.4	0.35375
135.5	0.35625
135.6	0.3575
135.7	0.3575
135.8	0.36
135.9	0.36
136	0.36
136.1	0.36
136.2	0.3625
136.3	0.36125
136.4	0.36125
136.5	0.3625
136.6	0.36375
136.7	0.36625
136.8	0.365
136.9	0.36375
137	0.36375
137.1	0.36625
137.2	0.36625
137.3	0.36625
137.4	0.37
137.5	0.37375
137.6	0.37625
137.7	0.37875
137.8	0.3775
137.9	0.38
138	0.37875
138.1	0.37625
138.2	0.3775
138.3	0.3775
138.4	0.3775
138.5	0.37875
138.6	0.37875
138.7	0.3775
138.8	0.38
138.9	0.38125
139	0.385
139.1	0.38625
139.2	0.38375
139.3	0.38375
139.4	0.38375
139.5	0.385
139.6	0.385
139.7	0.38625
139.8	0.3875
139.9	0.39
140	0.39125
140.1	0.3925
140.2	0.39625
140.3	0.395
140.4	0.395
140.5	0.395
140.6	0.39375
140.7	0.39375
140.8	0.39625
140.9	0.39875
141	0.40125
141.1	0.40125
141.2	0.4
141.3	0.4
141.4	0.4
141.5	0.40125
141.6	0.40125
141.7	0.40125
141.8	0.40125
141.9	0.40375
142	0.40375
142.1	0.40375
142.2	0.40375
142.3	0.40375
142.4	0.405
142.5	0.405
142.6	0.405
142.7	0.405
142.8	0.40625
142.9	0.40625
143	0.4075
143.1	0.40625
143.2	0.40625
143.3	0.40625
143.4	0.41
143.5	0.41
143.6	0.41375
143.7	0.41375
143.8	0.415
143.9	0.41625
144	0.4175
144.1	0.41875
144.2	0.41625
144.3	0.41625
144.4	0.4175
144.5	0.4175
144.6	0.42125
144.7	0.42125
144.8	0.42
144.9	0.42125
145	0.42125
145.1	0.4225
145.2	0.42375
145.3	0.42375
145.4	0.42375
145.5	0.42375
145.6	0.42375
145.7	0.425
145.8	0.4275
145.9	0.43125
146	0.43125
146.1	0.43
146.2	0.43
146.3	0.43
146.4	0.43
146.5	0.43
146.6	0.43125
146.7	0.435
146.8	0.435
146.9	0.43625
147	0.4375
147.1	0.43875
147.2	0.44125
147.3	0.44125
147.4	0.4425
147.5	0.4425
147.6	0.44375
147.7	0.44375
147.8	0.44375
147.9	0.4425
148	0.4425
148.1	0.44375
148.2	0.4425
148.3	0.44
148.4	0.44375
148.5	0.44375
148.6	0.445
148.7	0.44625
148.8	0.44875
148.9	0.4475
149	0.44625
149.1	0.44875
149.2	0.44875
149.3	0.4475
149.4	0.44625
149.5	0.44625
149.6	0.445
149.7	0.44625
149.8	0.445
149.9	0.445
150	0.44625
150.1	0.44375
150.2	0.4425
150.3	0.4425
150.4	0.44375
150.5	0.44125
150.6	0.44375
150.7	0.44375
150.8	0.44375
150.9	0.44375
151	0.44375
151.1	0.44625
151.2	0.44875
151.3	0.45
151.4	0.4525
151.5	0.45375
151.6	0.45375
151.7	0.455
151.8	0.455
151.9	0.455
152	0.455
152.1	0.455
152.2	0.45625
152.3	0.45875
152.4	0.4575
152.5	0.45625
152.6	0.45875
152.7	0.46
152.8	0.46
152.9	0.46125
153	0.46375
153.1	0.4625
153.2	0.465
153.3	0.46375
153.4	0.465
153.5	0.465
153.6	0.465
153.7	0.465
153.8	0.46625
153.9	0.46625
154	0.46625
154.1	0.46625
154.2	0.465
154.3	0.46625
154.4	0.4675
154.5	0.4675
154.6	0.4675
154.7	0.4675
154.8	0.46625
154.9	0.4675
155	0.46625
155.1	0.46875
155.2	0.46875
155.3	0.47
155.4	0.47125
155.5	0.47
155.6	0.47125
155.7	0.47
155.8	0.47
155.9	0.4725
156	0.475
156.1	0.47625
156.2	0.47625
156.3	0.47625
156.4	0.475
156.5	0.475
156.6	0.47625
156.7	0.4775
156.8	0.47625
156.9	0.4775
157	0.47875
157.1	0.47875
157.2	0.48
157.3	0.4825
157.4	0.4825
157.5	0.4825
157.6	0.4825
157.7	0.48375
157.8	0.48375
157.9	0.4825
158	0.4825
158.1	0.485
158.2	0.48625
158.3	0.48625
158.4	0.48875
158.5	0.49
158.6	0.4925
158.7	0.4925
158.8	0.4925
158.9	0.4925
159	0.49375
159.1	0.49375
159.2	0.49375
159.3	0.49375
159.4	0.49375
159.5	0.495
159.6	0.495
159.7	0.4925
159.8	0.49125
159.9	0.49125
160	0.49125
160.1	0.49125
160.2	0.49375
160.3	0.49375
160.4	0.4925
160.5	0.49125
160.6	0.49375
160.7	0.4975
160.8	0.49875
160.9	0.5
161	0.50125
161.1	0.5025
161.2	0.5025
161.3	0.50375
161.4	0.50375
161.5	0.50125
161.6	0.50125
161.7	0.50125
161.8	0.5025
161.9	0.5
162	0.5
162.1	0.5
162.2	0.5
162.3	0.5
162.4	0.50375
162.5	0.505
162.6	0.50625
162.7	0.50875
162.8	0.5075
162.9	0.50875
163	0.51
163.1	0.51125
163.2	0.5125
163.3	0.5125
163.4	0.5125
163.5	0.5125
163.6	0.51125
163.7	0.5125
163.8	0.51375
163.9	0.51375
164	0.515
164.1	0.515
164.2	0.515
164.3	0.515
164.4	0.51625
164.5	0.51625
164.6	0.5175
164.7	0.5175
164.8	0.5175
164.9	0.5175
165	0.5175
165.1	0.51625
165.2	0.51625
165.3	0.515
165.4	0.515
165.5	0.51375
165.6	0.515
165.7	0.515
165.8	0.515
165.9	0.5175
166	0.5175
166.1	0.5175
166.2	0.52
166.3	0.52
166.4	0.52125
166.5	0.52125
166.6	0.525
166.7	0.525
166.8	0.525
166.9	0.52875
167	0.52875
167.1	0.52875
167.2	0.52875
167.3	0.53125
167.4	0.5325
167.5	0.53375
167.6	0.5375
167.7	0.5375
167.8	0.5375
167.9	0.5375
168	0.5375
168.1	0.53875
168.2	0.53875
168.3	0.53875
168.4	0.53875
168.5	0.54
168.6	0.5375
168.7	0.5375
168.8	0.5375
168.9	0.5375
169	0.5375
169.1	0.5375
169.2	0.54
169.3	0.53875
169.4	0.54
169.5	0.54125
169.6	0.54125
169.7	0.5425
169.8	0.5425
169.9	0.5425
170	0.54
170.1	0.54
170.2	0.54
170.3	0.54
170.4	0.54
170.5	0.54125
170.6	0.54125
170.7	0.54
170.8	0.54125
170.9	0.54125
171	0.5425
171.1	0.5425
171.2	0.545
171.3	0.54625
171.4	0.54625
171.5	0.545
171.6	0.54375
171.7	0.5425
171.8	0.5425
171.9	0.54375
172	0.5425
172.1	0.5425
172.2	0.54125
172.3	0.5425
172.4	0.5425
172.5	0.54375
172.6	0.5425
172.7	0.54125
172.8	0.54125
172.9	0.54125
173	0.53875
173.1	0.53875
173.2	0.53875
173.3	0.5375
173.4	0.54
173.5	0.54
173.6	0.54125
173.7	0.54
173.8	0.54125
173.9	0.54125
174	0.54
174.1	0.54
174.2	0.54125
174.3	0.54125
174.4	0.5425
174.5	0.5425
174.6	0.54125
174.7	0.5425
174.8	0.54
174.9	0.54125
175	0.54125
175.1	0.54
175.2	0.54125
175.3	0.5425
175.4	0.53875
175.5	0.53625
175.6	0.53625
175.7	0.53625
175.8	0.5375
175.9	0.53625
176	0.53625
176.1	0.53625
176.2	0.53625
176.3	0.53625
176.4	0.5375
176.5	0.53875
176.6	0.53875
176.7	0.54125
176.8	0.54125
176.9	0.5425
177	0.5425
177.1	0.54375
177.2	0.54375
177.3	0.54625
177.4	0.55
177.5	0.55125
177.6	0.55125
177.7	0.55125
177.8	0.54875
177.9	0.54875
178	0.5475
178.1	0.54625
178.2	0.54875
178.3	0.55
178.4	0.55
178.5	0.54875
178.6	0.55
178.7	0.55125
178.8	0.5525
178.9	0.55625
179	0.55875
179.1	0.55875
179.2	0.55875
179.3	0.56125
179.4	0.55875
179.5	0.55875
179.6	0.56
179.7	0.56
179.8	0.55875
179.9	0.5575
180	0.55875
180.1	0.55875
180.2	0.56
180.3	0.56
180.4	0.56125
180.5	0.56125
180.6	0.5625
180.7	0.5625
180.8	0.56
180.9	0.56
181	0.56
181.1	0.56
181.2	0.56
181.3	0.56125
181.4	0.56375
181.5	0.5625
181.6	0.56375
181.7	0.56375
181.8	0.56375
181.9	0.56625
182	0.56625
182.1	0.56625
182.2	0.56625
182.3	0.565
182.4	0.565
182.5	0.56375
182.6	0.56125
182.7	0.56
182.8	0.56
182.9	0.55625
183	0.555
183.1	0.55625
183.2	0.55625
183.3	0.55875
183.4	0.5575
183.5	0.5575
183.6	0.56
183.7	0.56
183.8	0.56
183.9	0.56125
184	0.565
184.1	0.565
184.2	0.56625
184.3	0.5675
184.4	0.56625
184.5	0.56625
184.6	0.565
184.7	0.565
184.8	0.56625
184.9	0.56125
185	0.56125
185.1	0.56125
185.2	0.55875
185.3	0.56
185.4	0.5625
185.5	0.5625
185.6	0.5625
185.7	0.5625
185.8	0.56375
185.9	0.5625
186	0.5625
186.1	0.56625
186.2	0.56625
186.3	0.56625
186.4	0.56875
186.5	0.56875
186.6	0.5675
186.7	0.56625
186.8	0.57
186.9	0.57125
187	0.57125
187.1	0.57125
187.2	0.5725
187.3	0.57125
187.4	0.56875
187.5	0.5675
187.6	0.56875
187.7	0.56875
187.8	0.57
187.9	0.57375
188	0.57375
188.1	0.57625
188.2	0.575
188.3	0.575
188.4	0.575
188.5	0.57375
188.6	0.575
188.7	0.575
188.8	0.575
188.9	0.575
189	0.5775
189.1	0.57625
189.2	0.5775
189.3	0.57625
189.4	0.575
189.5	0.57375
189.6	0.575
189.7	0.575
189.8	0.575
189.9	0.57375
190	0.575
190.1	0.575
190.2	0.575
190.3	0.575
190.4	0.5725
190.5	0.57375
190.6	0.57375
190.7	0.5725
190.8	0.57125
190.9	0.57125
191	0.57375
191.1	0.5725
191.2	0.5725
191.3	0.5725
191.4	0.5725
191.5	0.57125
191.6	0.5725
191.7	0.57375
191.8	0.575
191.9	0.57375
192	0.57375
192.1	0.57125
192.2	0.575
192.3	0.57625
192.4	0.57875
192.5	0.58
192.6	0.57875
192.7	0.5775
192.8	0.5775
192.9	0.58
193	0.58
193.1	0.58
193.2	0.58125
193.3	0.58125
193.4	0.58125
193.5	0.5825
193.6	0.5825
193.7	0.58375
193.8	0.58375
193.9	0.5825
194	0.5825
194.1	0.58375
194.2	0.58375
194.3	0.5825
194.4	0.585
194.5	0.58625
194.6	0.58625
194.7	0.585
194.8	0.585
194.9	0.5825
195	0.58125
195.1	0.5825
195.2	0.58375
195.3	0.5825
195.4	0.58125
195.5	0.58125
195.6	0.58375
195.7	0.58125
195.8	0.58125
195.9	0.58
196	0.58
196.1	0.57875
196.2	0.58
196.3	0.57875
196.4	0.58
196.5	0.58
196.6	0.57875
196.7	0.5775
196.8	0.58
196.9	0.58
197	0.58
197.1	0.57875
197.2	0.57875
197.3	0.58
197.4	0.58
197.5	0.58
197.6	0.58125
197.7	0.58125
197.8	0.5825
197.9	0.58125
198	0.58125
198.1	0.58
198.2	0.58375
198.3	0.58375
198.4	0.58125
198.5	0.58125
198.6	0.58125
198.7	0.58125
198.8	0.58375
198.9	0.58375
199	0.58375
199.1	0.5825
199.2	0.5825
199.3	0.5825
199.4	0.58375
199.5	0.5825
199.6	0.58375
199.7	0.58375
199.8	0.585
199.9	0.585
200	0.585
[truncated: 14,000 more rows]
