# Supplementary material for: Bayesian inference of kinetic schemes for ion channels by Kalman filtering
Source: eLife journal article supplement (doi:10.7554/elife.62714), 2022-05-04
Supplement: fig4-data6 [file 1_Sim_N_1500_Fluor_MW_1M.xlsx]

## Sheet: Tabelle1
0.1	0
0.2	0
0.3	0
0.4	0
0.5	0
0.6	0
0.7	0
0.8	0
0.9	0
1	0
1.1	0
1.2	0
1.3	0
1.4	0
1.5	0
1.6	0
1.7	0
1.8	0
1.9	0
2	0
2.1	0
2.2	0
2.3	0
2.4	0
2.5	0
2.6	0
2.7	0
2.8	0
2.9	0
3	0
3.1	0
3.2	0
3.3	0
3.4	0
3.5	0
3.6	0
3.7	0
3.8	0
3.9	0
4	0
4.1	0
4.2	0
4.3	0
4.4	0
4.5	0
4.6	0
4.7	0
4.8	0
4.9	0
5	0
5.1	0
5.2	0
5.3	0
5.4	0
5.5	0
5.6	0
5.7	0
5.8	0
5.9	0
6	0
6.1	0
6.2	0
6.3	0
6.4	0
6.5	0
6.6	0
6.7	0
6.8	0
6.9	0
7	0
7.1	0
7.2	0
7.3	0
7.4	0
7.5	0
7.6	0
7.7	0
7.8	0
7.9	0
8	0
8.1	0
8.2	0
8.3	0
8.4	0
8.5	0
8.6	0
8.7	0
8.8	0
8.9	0
9	0
9.1	0
9.2	0
9.3	0
9.4	0
9.5	0
9.6	0
9.7	0
9.8	0
9.9	0
10	0
10.1	0
10.2	0
10.3	0
10.4	0
10.5	0
10.6	0
10.7	0
10.8	0
10.9	0
11	0
11.1	0
11.2	0
11.3	0
11.4	0
11.5	0
11.6	0
11.7	0
11.8	0
11.9	0
12	0
12.1	0
12.2	0
12.3	0
12.4	0
12.5	0
12.6	0
12.7	0
12.8	0
12.9	0
13	0
13.1	0
13.2	0
13.3	0
13.4	0
13.5	0
13.6	0
13.7	0
13.8	0
13.9	0
14	0
14.1	0
14.2	0
14.3	0
14.4	0
14.5	0
14.6	0
14.7	0
14.8	0
14.9	0
15	0
15.1	0
15.2	0
15.3	0
15.4	0
15.5	0
15.6	0
15.7	0
15.8	0
15.9	0
16	0
16.1	0
16.2	0
16.3	0
16.4	0
16.5	0
16.6	0
16.7	0
16.8	0
16.9	0
17	0
17.1	0
17.2	0
17.3	0
17.4	0
17.5	0
17.6	0
17.7	0
17.8	0
17.9	0
18	0
18.1	0
18.2	0
18.3	0
18.4	0
18.5	0
18.6	0
18.7	0
18.8	0
18.9	0
19	0
19.1	0
19.2	0
19.3	0
19.4	0
19.5	0
19.6	0
19.7	0
19.8	0
19.9	0
20	0
20.1	0
20.2	0
20.3	0
20.4	0
20.5	0
20.6	0
20.7	0
20.8	0
20.9	0
21	0
21.1	0
21.2	0
21.3	0
21.4	0
21.5	0
21.6	0
21.7	0
21.8	0
21.9	0
22	0
22.1	0
22.2	0
22.3	0
22.4	0
22.5	0
22.6	0
22.7	0
22.8	0
22.9	0
23	0
23.1	0
23.2	0
23.3	0
23.4	0
23.5	0
23.6	0
23.7	0
23.8	0
23.9	0
24	0
24.1	0
24.2	0
24.3	0
24.4	0
24.5	0
24.6	0
24.7	0
24.8	0
24.9	0
25	0
25.1	0
25.2	0
25.3	0
25.4	0
25.5	0
25.6	0
25.7	0
25.8	0
25.9	0
26	0
26.1	0
26.2	0
26.3	0
26.4	0
26.5	0
26.6	0
26.7	0
26.8	0
26.9	0
27	0
27.1	0
27.2	0
27.3	0
27.4	0
27.5	0
27.6	0
27.7	0
27.8	0
27.9	0
28	0
28.1	0
28.2	0
28.3	0
28.4	0
28.5	0
28.6	0
28.7	0
28.8	0
28.9	0
29	0
29.1	0
29.2	0
29.3	0
29.4	0
29.5	0
29.6	0
29.7	0
29.8	0
29.9	0
30	0
30.1	0
30.2	0
30.3	0
30.4	0
30.5	0
30.6	0
30.7	0
30.8	0
30.9	0
31	0
31.1	0
31.2	0
31.3	0
31.4	0
31.5	0
31.6	0
31.7	0
31.8	0
31.9	0
32	0
32.1	0
32.2	0
32.3	0
32.4	0
32.5	0
32.6	0
32.7	0
32.8	0
32.9	0
33	0
33.1	0
33.2	0
33.3	0
33.4	0
33.5	0
33.6	0
33.7	0
33.8	0
33.9	0
34	0
34.1	0
34.2	0
34.3	0
34.4	0
34.5	0
34.6	0
34.7	0
34.8	0
34.9	0
35	0
35.1	0
35.2	0
35.3	0
35.4	0
35.5	0
35.6	0
35.7	0
35.8	0
35.9	0
36	0
36.1	0
36.2	0
36.3	0
36.4	0
36.5	0
36.6	0
36.7	0
36.8	0
36.9	0
37	0
37.1	0
37.2	0
37.3	0
37.4	0
37.5	0
37.6	0
37.7	0
37.8	0
37.9	0
38	0
38.1	0
38.2	0
38.3	0
38.4	0
38.5	0
38.6	0
38.7	0
38.8	0
38.9	0
39	0
39.1	0
39.2	0
39.3	0
39.4	0
39.5	0
39.6	0
39.7	0
39.8	0
39.9	0
40	0
40.1	0
40.2	0
40.3	0
40.4	0
40.5	0
40.6	0
40.7	0
40.8	0
40.9	0
41	0
41.1	0
41.2	0
41.3	0
41.4	0
41.5	0
41.6	0
41.7	0
41.8	0
41.9	0
42	0
42.1	0
42.2	0
42.3	0
42.4	0
42.5	0
42.6	0
42.7	0
42.8	0
42.9	0
43	0
43.1	0
43.2	0
43.3	0
43.4	0
43.5	0
43.6	0
43.7	0
43.8	0
43.9	0
44	0
44.1	0
44.2	0
44.3	0
44.4	0
44.5	0
44.6	0
44.7	0
44.8	0
44.9	0
45	0
45.1	0
45.2	0
45.3	0
45.4	0
45.5	0
45.6	0
45.7	0
45.8	0
45.9	0
46	0
46.1	0
46.2	0
46.3	0
46.4	0
46.5	0
46.6	0
46.7	0
46.8	0
46.9	0
47	0
47.1	0
47.2	0
47.3	0
47.4	0
47.5	0
47.6	0
47.7	0
47.8	0
47.9	0
48	0
48.1	0
48.2	0
48.3	0
48.4	0
48.5	0
48.6	0
48.7	0
48.8	0
48.9	0
49	0
49.1	0
49.2	0
49.3	0
49.4	0
49.5	0
49.6	0
49.7	0
49.8	0
49.9	0
50	0
50.1	0
50.2	0
50.3	0
50.4	0
50.5	0
50.6	0
50.7	0
50.8	0
50.9	0
51	0
51.1	0
51.2	0
51.3	0
51.4	0
51.5	0
51.6	0
51.7	0
51.8	0
51.9	0
52	0
52.1	0
52.2	0
52.3	0
52.4	0
52.5	0
52.6	0
52.7	0
52.8	0
52.9	0
53	0
53.1	0
53.2	0
53.3	0
53.4	0
53.5	0
53.6	0
53.7	0
53.8	0
53.9	0
54	0
54.1	0
54.2	0
54.3	0
54.4	0
54.5	0
54.6	0
54.7	0
54.8	0
54.9	0
55	0
55.1	0
55.2	0
55.3	0
55.4	0
55.5	0
55.6	0
55.7	0
55.8	0
55.9	0
56	0
56.1	0
56.2	0
56.3	0
56.4	0
56.5	0
56.6	0
56.7	0
56.8	0
56.9	0
57	0
57.1	0
57.2	0
57.3	0
57.4	0
57.5	0
57.6	0
57.7	0
57.8	0
57.9	0
58	0
58.1	0
58.2	0
58.3	0
58.4	0
58.5	0
58.6	0
58.7	0
58.8	0
58.9	0
59	0
59.1	0
59.2	0
59.3	0
59.4	0
59.5	0
59.6	0
59.7	0
59.8	0
59.9	0
60	0
60.1	0
60.2	0
60.3	0
60.4	0
60.5	0
60.6	0
60.7	0
60.8	0
60.9	0
61	0
61.1	0
61.2	0
61.3	0
61.4	0
61.5	0
61.6	0
61.7	0
61.8	0
61.9	0
62	0
62.1	0
62.2	0
62.3	0
62.4	0
62.5	0
62.6	0
62.7	0
62.8	0
62.9	0
63	0
63.1	0
63.2	0
63.3	0
63.4	0
63.5	0
63.6	0
63.7	0
63.8	0
63.9	0
64	0
64.1	0
64.2	0
64.3	0
64.4	0
64.5	0
64.6	0
64.7	0
64.8	0
64.9	0
65	0
65.1	0
65.2	0
65.3	0
65.4	0
65.5	0
65.6	0
65.7	0
65.8	0
65.9	0
66	0
66.1	0
66.2	0
66.3	0
66.4	0
66.5	0
66.6	0
66.7	0
66.8	0
66.9	0
67	0
67.1	0
67.2	0
67.3	0
67.4	0
67.5	0
67.6	0
67.7	0
67.8	0
67.9	0
68	0
68.1	0
68.2	0
68.3	0
68.4	0
68.5	0
68.6	0
68.7	0
68.8	0
68.9	0
69	0
69.1	0
69.2	0
69.3	0
69.4	0
69.5	0
69.6	0
69.7	0
69.8	0
69.9	0
70	0
70.1	0
70.2	0
70.3	0
70.4	0
70.5	0
70.6	0
70.7	0
70.8	0
70.9	0
71	0
71.1	0
71.2	0
71.3	0
71.4	0
71.5	0
71.6	0
71.7	0
71.8	0
71.9	0
72	0
72.1	0
72.2	0
72.3	0
72.4	0
72.5	0
72.6	0
72.7	0
72.8	0
72.9	0
73	0
73.1	0
73.2	0
73.3	0
73.4	0
73.5	0
73.6	0
73.7	0
73.8	0
73.9	0
74	0
74.1	0
74.2	0
74.3	0
74.4	0
74.5	0
74.6	0
74.7	0
74.8	0
74.9	0
75	0
75.1	0
75.2	0
75.3	0
75.4	0
75.5	0
75.6	0
75.7	0
75.8	0
75.9	0
76	0
76.1	0
76.2	0
76.3	0
76.4	0
76.5	0
76.6	0
76.7	0
76.8	0
76.9	0
77	0
77.1	0
77.2	0
77.3	0
77.4	0
77.5	0
77.6	0
77.7	0
77.8	0
77.9	0
78	0
78.1	0
78.2	0
78.3	0
78.4	0
78.5	0
78.6	0
78.7	0
78.8	0
78.9	0
79	0
79.1	0
79.2	0
79.3	0
79.4	0
79.5	0
79.6	0
79.7	0
79.8	0
79.9	0
80	0
80.1	0
80.2	0
80.3	0
80.4	0
80.5	0
80.6	0
80.7	0
80.8	0
80.9	0
81	0
81.1	0
81.2	0
81.3	0
81.4	0
81.5	0
81.6	0
81.7	0
81.8	0
81.9	0
82	0
82.1	0
82.2	0
82.3	0
82.4	0
82.5	0
82.6	0
82.7	0
82.8	0
82.9	0
83	0
83.1	0
83.2	0
83.3	0
83.4	0
83.5	0
83.6	0
83.7	0
83.8	0
83.9	0
84	0
84.1	0
84.2	0
84.3	0
84.4	0
84.5	0
84.6	0
84.7	0
84.8	0
84.9	0
85	0
85.1	0
85.2	0
85.3	0
85.4	0
85.5	0
85.6	0
85.7	0
85.8	0
85.9	0
86	0
86.1	0
86.2	0
86.3	0
86.4	0
86.5	0
86.6	0
86.7	0
86.8	0
86.9	0
87	0
87.1	0
87.2	0
87.3	0
87.4	0
87.5	0
87.6	0
87.7	0
87.8	0
87.9	0
88	0
88.1	0
88.2	0
88.3	0
88.4	0
88.5	0
88.6	0
88.7	0
88.8	0
88.9	0
89	0
89.1	0
89.2	0
89.3	0
89.4	0
89.5	0
89.6	0
89.7	0
89.8	0
89.9	0
90	0
90.1	0
90.2	0
90.3	0
90.4	0
90.5	0
90.6	0
90.7	0
90.8	0
90.9	0
91	0
91.1	0
91.2	0
91.3	0
91.4	0
91.5	0
91.6	0
91.7	0
91.8	0
91.9	0
92	0
92.1	0
92.2	0
92.3	0
92.4	0
92.5	0
92.6	0
92.7	0
92.8	0
92.9	0
93	0
93.1	0
93.2	0
93.3	0
93.4	0
93.5	0
93.6	0
93.7	0
93.8	0
93.9	0
94	0
94.1	0
94.2	0
94.3	0
94.4	0
94.5	0
94.6	0
94.7	0
94.8	0
94.9	0
95	0
95.1	0
95.2	0
95.3	0
95.4	0
95.5	0
95.6	0
95.7	0
95.8	0
95.9	0
96	0
96.1	0
96.2	0
96.3	0
96.4	0
96.5	0
96.6	0
96.7	0
96.8	0
96.9	0
97	0
97.1	0
97.2	0
97.3	0
97.4	0
97.5	0
97.6	0
97.7	0
97.8	0
97.9	0
98	0
98.1	0
98.2	0
98.3	0
98.4	0
98.5	0
98.6	0
98.7	0
98.8	0
98.9	0
99	0
99.1	0
99.2	0
99.3	0
99.4	0
99.5	0
99.6	0
99.7	0
99.8	0
99.9	0
100	0
100.1	0.055
100.2	0.112
100.3	0.161667
100.4	0.203
100.5	0.241
100.6	0.282
100.7	0.313333
100.8	0.339667
100.9	0.372333
101	0.393667
101.1	0.414333
101.2	0.429
101.3	0.447
101.4	0.460333
101.5	0.479667
101.6	0.494
101.7	0.507333
101.8	0.521
101.9	0.532
102	0.548
102.1	0.556
102.2	0.563
102.3	0.575667
102.4	0.581667
102.5	0.586333
102.6	0.588333
102.7	0.592
102.8	0.601333
102.9	0.605333
103	0.608667
103.1	0.614667
103.2	0.616333
103.3	0.618
103.4	0.627333
103.5	0.626667
103.6	0.626
103.7	0.633333
103.8	0.637333
103.9	0.637333
104	0.642
104.1	0.645667
104.2	0.644333
104.3	0.649333
104.4	0.652
104.5	0.649667
104.6	0.646667
104.7	0.644667
104.8	0.648
104.9	0.646333
105	0.643667
105.1	0.644
105.2	0.643333
105.3	0.646333
105.4	0.649333
105.5	0.648
105.6	0.651333
105.7	0.652333
105.8	0.655
105.9	0.656
106	0.658333
106.1	0.655667
106.2	0.654667
106.3	0.657333
106.4	0.654667
106.5	0.654667
106.6	0.657
106.7	0.653
106.8	0.658333
106.9	0.661
107	0.662333
107.1	0.663333
107.2	0.669333
107.3	0.674667
107.4	0.676333
107.5	0.679333
107.6	0.679667
107.7	0.683667
107.8	0.682667
107.9	0.683333
108	0.684333
108.1	0.678667
108.2	0.679
108.3	0.680667
108.4	0.678333
108.5	0.676333
108.6	0.680667
108.7	0.680667
108.8	0.683333
108.9	0.682
109	0.677333
109.1	0.682667
109.2	0.683667
109.3	0.684
109.4	0.686333
109.5	0.687333
109.6	0.689667
109.7	0.689333
109.8	0.694333
109.9	0.697333
110	0.698
110.1	0.702667
110.2	0.699333
110.3	0.697333
110.4	0.696
110.5	0.695333
110.6	0.702
110.7	0.702333
110.8	0.700333
110.9	0.700333
111	0.699
111.1	0.7
111.2	0.700667
111.3	0.700333
111.4	0.702667
111.5	0.708
111.6	0.709
111.7	0.709667
111.8	0.711
111.9	0.709
112	0.710333
112.1	0.707
112.2	0.709333
112.3	0.708667
112.4	0.711
112.5	0.707
112.6	0.711
112.7	0.714
112.8	0.715667
112.9	0.716333
113	0.715333
113.1	0.714333
113.2	0.713333
113.3	0.709667
113.4	0.709
113.5	0.706333
113.6	0.706667
113.7	0.706667
113.8	0.713667
113.9	0.708667
114	0.710333
114.1	0.714333
114.2	0.715
114.3	0.715667
114.4	0.714333
114.5	0.715667
114.6	0.711667
114.7	0.712
114.8	0.708333
114.9	0.711667
115	0.714
115.1	0.717667
115.2	0.717
115.3	0.714667
115.4	0.715667
115.5	0.713333
115.6	0.714667
115.7	0.719
115.8	0.718
115.9	0.715
116	0.718
116.1	0.721667
116.2	0.717
116.3	0.718333
116.4	0.720667
116.5	0.720333
116.6	0.718667
116.7	0.721
116.8	0.724333
116.9	0.722333
117	0.721333
117.1	0.724
117.2	0.723667
117.3	0.726333
117.4	0.728333
117.5	0.73
117.6	0.724333
117.7	0.723667
117.8	0.727
117.9	0.728667
118	0.733
118.1	0.732667
118.2	0.734667
118.3	0.735667
118.4	0.735667
118.5	0.733
118.6	0.737
118.7	0.736
118.8	0.734333
118.9	0.735
119	0.733333
119.1	0.734667
119.2	0.737
119.3	0.740333
119.4	0.736667
119.5	0.735333
119.6	0.734
119.7	0.735333
119.8	0.735667
119.9	0.735333
120	0.738
120.1	0.739667
120.2	0.739
120.3	0.737667
120.4	0.741333
120.5	0.738667
120.6	0.743333
120.7	0.744333
120.8	0.744667
120.9	0.737
121	0.738667
121.1	0.744667
121.2	0.744333
121.3	0.741333
121.4	0.744667
121.5	0.743
121.6	0.739333
121.7	0.736667
121.8	0.737
121.9	0.738333
122	0.739
122.1	0.74
122.2	0.743333
122.3	0.745333
122.4	0.745
122.5	0.748
122.6	0.744333
122.7	0.745333
122.8	0.746
122.9	0.743667
123	0.744333
123.1	0.746333
123.2	0.746333
123.3	0.747
123.4	0.744667
123.5	0.746667
123.6	0.745
123.7	0.746
123.8	0.745333
123.9	0.746
124	0.745667
124.1	0.747333
124.2	0.744333
124.3	0.744
124.4	0.748
124.5	0.748333
124.6	0.748
124.7	0.746
124.8	0.749
124.9	0.748
125	0.744333
125.1	0.747
125.2	0.753667
125.3	0.756
125.4	0.755333
125.5	0.754
125.6	0.758667
125.7	0.756333
125.8	0.758
125.9	0.753667
126	0.752667
126.1	0.754333
126.2	0.751667
126.3	0.752667
126.4	0.754333
126.5	0.748
126.6	0.75
126.7	0.752
126.8	0.753
126.9	0.756
127	0.755
127.1	0.754333
127.2	0.753333
127.3	0.754
127.4	0.753
127.5	0.752
127.6	0.755667
127.7	0.754
127.8	0.753333
127.9	0.752
128	0.756333
128.1	0.756333
128.2	0.756
128.3	0.757
128.4	0.761667
128.5	0.759
128.6	0.758
128.7	0.754667
128.8	0.758667
128.9	0.759
129	0.757333
129.1	0.754667
129.2	0.757
129.3	0.756333
129.4	0.753
129.5	0.755333
129.6	0.754667
129.7	0.752667
129.8	0.755
129.9	0.756
130	0.758333
130.1	0.757333
130.2	0.759333
130.3	0.758667
130.4	0.756
130.5	0.756
130.6	0.756667
130.7	0.761
130.8	0.760667
130.9	0.757667
131	0.762333
131.1	0.763
131.2	0.761667
131.3	0.761
131.4	0.762667
131.5	0.761
131.6	0.761
131.7	0.759333
131.8	0.760333
131.9	0.761
132	0.761667
132.1	0.759333
132.2	0.762667
132.3	0.759333
132.4	0.761667
132.5	0.764667
132.6	0.766667
132.7	0.766667
132.8	0.767667
132.9	0.769667
133	0.770333
133.1	0.766
133.2	0.765667
133.3	0.764333
133.4	0.762667
133.5	0.763667
133.6	0.768333
133.7	0.771667
133.8	0.772667
133.9	0.772333
134	0.772667
134.1	0.770333
134.2	0.770667
134.3	0.774333
134.4	0.774333
134.5	0.777
134.6	0.778
134.7	0.776667
134.8	0.775667
134.9	0.775333
135	0.775
135.1	0.773
135.2	0.775333
135.3	0.775333
135.4	0.775
135.5	0.776333
135.6	0.774333
135.7	0.772
135.8	0.776667
135.9	0.778333
136	0.780667
136.1	0.783667
136.2	0.782667
136.3	0.779
136.4	0.778
136.5	0.779
136.6	0.779667
136.7	0.778
136.8	0.776333
136.9	0.778333
137	0.781
137.1	0.784
137.2	0.785667
137.3	0.786667
137.4	0.786667
137.5	0.787333
137.6	0.787667
137.7	0.788667
137.8	0.787
137.9	0.785
138	0.784
138.1	0.783667
138.2	0.783
138.3	0.784
138.4	0.780667
138.5	0.781667
138.6	0.781667
138.7	0.781667
138.8	0.782667
138.9	0.781667
139	0.784333
139.1	0.784667
139.2	0.787
139.3	0.790667
139.4	0.791333
139.5	0.79
139.6	0.788667
139.7	0.787
139.8	0.789333
139.9	0.789333
140	0.787333
140.1	0.784333
140.2	0.783333
140.3	0.784333
140.4	0.784667
140.5	0.784333
140.6	0.785333
140.7	0.785
140.8	0.786333
140.9	0.786
141	0.786
141.1	0.788333
141.2	0.787333
141.3	0.784667
141.4	0.792
141.5	0.791667
141.6	0.790667
141.7	0.791
141.8	0.79
141.9	0.793
142	0.793333
142.1	0.793667
142.2	0.791333
142.3	0.793
142.4	0.794667
142.5	0.795
142.6	0.794
142.7	0.789667
142.8	0.790333
142.9	0.791667
143	0.792333
143.1	0.792
143.2	0.792667
143.3	0.797
143.4	0.798
143.5	0.798667
143.6	0.801667
143.7	0.801
143.8	0.803333
143.9	0.806667
144	0.804
144.1	0.805333
144.2	0.808
144.3	0.807
144.4	0.803667
144.5	0.803
144.6	0.801
144.7	0.801667
144.8	0.798
144.9	0.796333
145	0.798
145.1	0.800333
145.2	0.803
145.3	0.805667
145.4	0.802
145.5	0.802333
145.6	0.800667
145.7	0.800667
145.8	0.801667
145.9	0.798667
146	0.797667
146.1	0.798667
146.2	0.803
146.3	0.802333
146.4	0.798333
146.5	0.804
146.6	0.804667
146.7	0.803333
146.8	0.802
146.9	0.802
147	0.8
147.1	0.8
147.2	0.800667
147.3	0.801667
147.4	0.805667
147.5	0.805
147.6	0.804
147.7	0.804333
147.8	0.803333
147.9	0.803
148	0.803667
148.1	0.802333
148.2	0.803
148.3	0.803667
148.4	0.801667
148.5	0.801333
148.6	0.801667
148.7	0.799667
148.8	0.796
148.9	0.795667
149	0.797
149.1	0.799667
149.2	0.801667
149.3	0.799667
149.4	0.798
149.5	0.799667
149.6	0.799333
149.7	0.798333
149.8	0.802667
149.9	0.803333
150	0.8
150.1	0.799667
150.2	0.803
150.3	0.802
150.4	0.802667
150.5	0.802667
150.6	0.803333
150.7	0.801
150.8	0.798
150.9	0.797
151	0.802333
151.1	0.801667
151.2	0.800333
151.3	0.800333
151.4	0.798667
151.5	0.800333
151.6	0.806333
151.7	0.801
151.8	0.801667
151.9	0.802333
152	0.800667
152.1	0.801667
152.2	0.799667
152.3	0.800333
152.4	0.801667
152.5	0.804333
152.6	0.804333
152.7	0.806333
152.8	0.809667
152.9	0.808667
153	0.807667
153.1	0.809333
153.2	0.811
153.3	0.811
153.4	0.805333
153.5	0.805
153.6	0.806333
153.7	0.806
153.8	0.806667
153.9	0.806667
154	0.807
154.1	0.805333
154.2	0.805667
154.3	0.805
154.4	0.804667
154.5	0.806333
154.6	0.808
154.7	0.808
154.8	0.809
154.9	0.812
155	0.809667
155.1	0.814
155.2	0.815667
155.3	0.817333
155.4	0.814667
155.5	0.814
155.6	0.814
155.7	0.816333
155.8	0.818333
155.9	0.822333
156	0.826
156.1	0.824667
156.2	0.824
156.3	0.824
156.4	0.825667
156.5	0.826333
156.6	0.824
156.7	0.825
156.8	0.825
156.9	0.825333
157	0.823
157.1	0.823333
157.2	0.822
157.3	0.820667
157.4	0.821
157.5	0.820667
157.6	0.821333
157.7	0.820667
157.8	0.821
157.9	0.823333
158	0.822667
158.1	0.821
158.2	0.821
158.3	0.822
158.4	0.824333
158.5	0.822667
158.6	0.822
158.7	0.823333
158.8	0.822333
158.9	0.823333
159	0.821
159.1	0.823333
159.2	0.826
159.3	0.823667
159.4	0.823
159.5	0.823
159.6	0.823667
159.7	0.827333
159.8	0.825
159.9	0.824333
160	0.822333
160.1	0.823
160.2	0.821
160.3	0.821667
160.4	0.822
160.5	0.823667
160.6	0.824333
160.7	0.822333
160.8	0.824333
160.9	0.823667
161	0.823
161.1	0.822667
161.2	0.823333
161.3	0.821667
161.4	0.823333
161.5	0.822
161.6	0.821667
161.7	0.822667
161.8	0.824667
161.9	0.826667
162	0.826667
162.1	0.827333
162.2	0.828333
162.3	0.827667
162.4	0.826
162.5	0.824
162.6	0.822
162.7	0.821
162.8	0.821333
162.9	0.821667
163	0.819333
163.1	0.821
163.2	0.819667
163.3	0.825667
163.4	0.827333
163.5	0.828
163.6	0.827
163.7	0.828
163.8	0.827333
163.9	0.830667
164	0.827
164.1	0.827333
164.2	0.829
164.3	0.826
164.4	0.825333
164.5	0.827333
164.6	0.826333
164.7	0.825
164.8	0.824333
164.9	0.824
165	0.822667
165.1	0.822667
165.2	0.825667
165.3	0.823333
165.4	0.824
165.5	0.829
165.6	0.829
165.7	0.83
165.8	0.828667
165.9	0.828333
166	0.833333
166.1	0.835333
166.2	0.832333
166.3	0.833
166.4	0.829667
166.5	0.828667
166.6	0.827667
166.7	0.825333
166.8	0.825333
166.9	0.822667
167	0.825
167.1	0.826667
167.2	0.830333
167.3	0.831667
167.4	0.832
167.5	0.834667
167.6	0.834333
167.7	0.834333
167.8	0.834667
167.9	0.832667
168	0.832333
168.1	0.830667
168.2	0.832
168.3	0.833
168.4	0.832667
168.5	0.829667
168.6	0.832667
168.7	0.834667
168.8	0.833
168.9	0.832333
169	0.828
169.1	0.826333
169.2	0.827
169.3	0.827
169.4	0.828667
169.5	0.832667
169.6	0.836667
169.7	0.838333
169.8	0.841
169.9	0.837667
170	0.839
170.1	0.838667
170.2	0.836
170.3	0.834
170.4	0.833333
170.5	0.835333
170.6	0.835333
170.7	0.835667
170.8	0.834
170.9	0.834
171	0.832667
171.1	0.83
171.2	0.831333
171.3	0.833
171.4	0.835333
171.5	0.836667
171.6	0.836333
171.7	0.834
171.8	0.833667
171.9	0.831
172	0.832333
172.1	0.835667
172.2	0.836
172.3	0.836
172.4	0.837333
172.5	0.836667
172.6	0.839
172.7	0.839333
172.8	0.834667
172.9	0.833
173	0.837333
173.1	0.834667
173.2	0.836667
173.3	0.836333
173.4	0.837
173.5	0.837333
173.6	0.839667
173.7	0.840667
173.8	0.844
173.9	0.846
174	0.843667
174.1	0.843
174.2	0.840667
174.3	0.838
174.4	0.838667
174.5	0.834333
174.6	0.835
174.7	0.835333
174.8	0.834333
174.9	0.832
175	0.831
175.1	0.833333
175.2	0.831333
175.3	0.829667
175.4	0.834
175.5	0.833
175.6	0.832
175.7	0.830667
175.8	0.832333
175.9	0.831667
176	0.831667
176.1	0.831333
176.2	0.83
176.3	0.831333
176.4	0.832667
176.5	0.831333
176.6	0.829667
176.7	0.831667
176.8	0.831333
176.9	0.832
177	0.837
177.1	0.841333
177.2	0.840667
177.3	0.839333
177.4	0.840333
177.5	0.837667
177.6	0.837333
177.7	0.838333
177.8	0.838333
177.9	0.835333
178	0.834
178.1	0.831667
178.2	0.834
178.3	0.836
178.4	0.841
178.5	0.842667
178.6	0.842667
178.7	0.845333
178.8	0.843667
178.9	0.843667
179	0.842667
179.1	0.844333
179.2	0.844333
179.3	0.844333
179.4	0.846
179.5	0.847
179.6	0.848333
179.7	0.848333
179.8	0.85
179.9	0.850667
180	0.850667
180.1	0.85
180.2	0.847667
180.3	0.849
180.4	0.843667
180.5	0.843333
180.6	0.843
180.7	0.843667
180.8	0.840667
180.9	0.839667
181	0.841333
181.1	0.842
181.2	0.843
181.3	0.842667
181.4	0.844333
181.5	0.846
181.6	0.844667
181.7	0.841
181.8	0.841
181.9	0.842
182	0.839667
182.1	0.843
182.2	0.846333
182.3	0.845333
182.4	0.847333
182.5	0.850667
182.6	0.849667
182.7	0.849
182.8	0.849667
182.9	0.850667
183	0.850333
183.1	0.853333
183.2	0.853333
183.3	0.853667
183.4	0.854333
183.5	0.857667
183.6	0.859333
183.7	0.859667
183.8	0.860667
183.9	0.86
184	0.861
184.1	0.863
184.2	0.861
184.3	0.859667
184.4	0.858333
184.5	0.857333
184.6	0.857667
184.7	0.858
184.8	0.856
184.9	0.855333
185	0.855667
185.1	0.857333
185.2	0.859
185.3	0.861
185.4	0.859333
185.5	0.857333
185.6	0.855
185.7	0.854333
185.8	0.856667
185.9	0.858333
186	0.859
186.1	0.858667
186.2	0.858333
186.3	0.855667
186.4	0.854
186.5	0.85
186.6	0.850333
186.7	0.848333
186.8	0.848667
186.9	0.85
187	0.851333
187.1	0.85
187.2	0.849333
187.3	0.850333
187.4	0.849
187.5	0.847667
187.6	0.848667
187.7	0.848
187.8	0.847667
187.9	0.846667
188	0.848
188.1	0.85
188.2	0.850667
188.3	0.850667
188.4	0.851333
188.5	0.850333
188.6	0.851333
188.7	0.854
188.8	0.857667
188.9	0.859333
189	0.859667
189.1	0.859
189.2	0.861
189.3	0.862333
189.4	0.862667
189.5	0.863667
189.6	0.862667
189.7	0.859333
189.8	0.857667
189.9	0.855333
190	0.853667
190.1	0.855
190.2	0.853333
190.3	0.853
190.4	0.852667
190.5	0.849667
190.6	0.851667
190.7	0.855
190.8	0.854
190.9	0.855333
191	0.855333
191.1	0.854667
191.2	0.853
191.3	0.849667
191.4	0.848333
191.5	0.849667
191.6	0.849
191.7	0.85
191.8	0.846333
191.9	0.846
192	0.847667
192.1	0.849333
192.2	0.848333
192.3	0.848667
192.4	0.850333
192.5	0.848333
192.6	0.848667
192.7	0.848667
192.8	0.850667
192.9	0.850333
193	0.850333
193.1	0.849
193.2	0.849333
193.3	0.846
193.4	0.845
193.5	0.843667
193.6	0.846667
193.7	0.845333
193.8	0.845
193.9	0.843667
194	0.846667
194.1	0.847667
194.2	0.847667
194.3	0.847
194.4	0.847
194.5	0.848
194.6	0.847667
194.7	0.851667
194.8	0.850333
194.9	0.849333
195	0.851
195.1	0.853333
195.2	0.853333
195.3	0.850667
195.4	0.849667
195.5	0.852667
195.6	0.854
195.7	0.852333
195.8	0.852667
195.9	0.852
196	0.855
196.1	0.857667
196.2	0.857667
196.3	0.858333
196.4	0.859333
196.5	0.86
196.6	0.862
196.7	0.864667
196.8	0.860667
196.9	0.861667
197	0.861667
197.1	0.859
197.2	0.862333
197.3	0.861
197.4	0.861333
197.5	0.862
197.6	0.860333
197.7	0.858667
197.8	0.858
197.9	0.859
198	0.861667
198.1	0.861
198.2	0.86
198.3	0.860667
198.4	0.859667
198.5	0.859
198.6	0.858667
198.7	0.858667
198.8	0.858667
198.9	0.858333
199	0.857
199.1	0.859333
199.2	0.864
199.3	0.863667
199.4	0.862
199.5	0.861667
199.6	0.860667
199.7	0.86
199.8	0.860667
199.9	0.861
200	0.860667
[truncated: 14,000 more rows]
