# Supplementary material for: Bayesian inference of kinetic schemes for ion channels by Kalman filtering
Source: eLife journal article supplement (doi:10.7554/elife.62714), 2022-05-04
Supplement: fig4-data6 [file 1_Sim_N_1500_Strom_MW_1M.xlsx]

## Sheet: Tabelle1
0.1	0
0.2	0
0.3	0
0.4	0
0.5	0
0.6	0
0.7	0
0.8	0
0.9	0
1	0
1.1	0
1.2	0
1.3	0
1.4	0
1.5	0
1.6	0
1.7	0
1.8	0
1.9	0
2	0
2.1	0
2.2	0
2.3	0
2.4	0
2.5	0
2.6	0
2.7	0
2.8	0
2.9	0
3	0
3.1	0
3.2	0
3.3	0
3.4	0
3.5	0
3.6	0
3.7	0
3.8	0
3.9	0
4	0
4.1	0
4.2	0
4.3	0
4.4	0
4.5	0
4.6	0
4.7	0
4.8	0
4.9	0
5	0
5.1	0
5.2	0
5.3	0
5.4	0
5.5	0
5.6	0
5.7	0
5.8	0
5.9	0
6	0
6.1	0
6.2	0
6.3	0
6.4	0
6.5	0
6.6	0
6.7	0
6.8	0
6.9	0
7	0
7.1	0
7.2	0
7.3	0
7.4	0
7.5	0
7.6	0
7.7	0
7.8	0
7.9	0
8	0
8.1	0
8.2	0
8.3	0
8.4	0
8.5	0
8.6	0
8.7	0
8.8	0
8.9	0
9	0
9.1	0
9.2	0
9.3	0
9.4	0
9.5	0
9.6	0
9.7	0
9.8	0
9.9	0
10	0
10.1	0
10.2	0
10.3	0
10.4	0
10.5	0
10.6	0
10.7	0
10.8	0
10.9	0
11	0
11.1	0
11.2	0
11.3	0
11.4	0
11.5	0
11.6	0
11.7	0
11.8	0
11.9	0
12	0
12.1	0
12.2	0
12.3	0
12.4	0
12.5	0
12.6	0
12.7	0
12.8	0
12.9	0
13	0
13.1	0
13.2	0
13.3	0
13.4	0
13.5	0
13.6	0
13.7	0
13.8	0
13.9	0
14	0
14.1	0
14.2	0
14.3	0
14.4	0
14.5	0
14.6	0
14.7	0
14.8	0
14.9	0
15	0
15.1	0
15.2	0
15.3	0
15.4	0
15.5	0
15.6	0
15.7	0
15.8	0
15.9	0
16	0
16.1	0
16.2	0
16.3	0
16.4	0
16.5	0
16.6	0
16.7	0
16.8	0
16.9	0
17	0
17.1	0
17.2	0
17.3	0
17.4	0
17.5	0
17.6	0
17.7	0
17.8	0
17.9	0
18	0
18.1	0
18.2	0
18.3	0
18.4	0
18.5	0
18.6	0
18.7	0
18.8	0
18.9	0
19	0
19.1	0
19.2	0
19.3	0
19.4	0
19.5	0
19.6	0
19.7	0
19.8	0
19.9	0
20	0
20.1	0
20.2	0
20.3	0
20.4	0
20.5	0
20.6	0
20.7	0
20.8	0
20.9	0
21	0
21.1	0
21.2	0
21.3	0
21.4	0
21.5	0
21.6	0
21.7	0
21.8	0
21.9	0
22	0
22.1	0
22.2	0
22.3	0
22.4	0
22.5	0
22.6	0
22.7	0
22.8	0
22.9	0
23	0
23.1	0
23.2	0
23.3	0
23.4	0
23.5	0
23.6	0
23.7	0
23.8	0
23.9	0
24	0
24.1	0
24.2	0
24.3	0
24.4	0
24.5	0
24.6	0
24.7	0
24.8	0
24.9	0
25	0
25.1	0
25.2	0
25.3	0
25.4	0
25.5	0
25.6	0
25.7	0
25.8	0
25.9	0
26	0
26.1	0
26.2	0
26.3	0
26.4	0
26.5	0
26.6	0
26.7	0
26.8	0
26.9	0
27	0
27.1	0
27.2	0
27.3	0
27.4	0
27.5	0
27.6	0
27.7	0
27.8	0
27.9	0
28	0
28.1	0
28.2	0
28.3	0
28.4	0
28.5	0
28.6	0
28.7	0
28.8	0
28.9	0
29	0
29.1	0
29.2	0
29.3	0
29.4	0
29.5	0
29.6	0
29.7	0
29.8	0
29.9	0
30	0
30.1	0
30.2	0
30.3	0
30.4	0
30.5	0
30.6	0
30.7	0
30.8	0
30.9	0
31	0
31.1	0
31.2	0
31.3	0
31.4	0
31.5	0
31.6	0
31.7	0
31.8	0
31.9	0
32	0
32.1	0
32.2	0
32.3	0
32.4	0
32.5	0
32.6	0
32.7	0
32.8	0
32.9	0
33	0
33.1	0
33.2	0
33.3	0
33.4	0
33.5	0
33.6	0
33.7	0
33.8	0
33.9	0
34	0
34.1	0
34.2	0
34.3	0
34.4	0
34.5	0
34.6	0
34.7	0
34.8	0
34.9	0
35	0
35.1	0
35.2	0
35.3	0
35.4	0
35.5	0
35.6	0
35.7	0
35.8	0
35.9	0
36	0
36.1	0
36.2	0
36.3	0
36.4	0
36.5	0
36.6	0
36.7	0
36.8	0
36.9	0
37	0
37.1	0
37.2	0
37.3	0
37.4	0
37.5	0
37.6	0
37.7	0
37.8	0
37.9	0
38	0
38.1	0
38.2	0
38.3	0
38.4	0
38.5	0
38.6	0
38.7	0
38.8	0
38.9	0
39	0
39.1	0
39.2	0
39.3	0
39.4	0
39.5	0
39.6	0
39.7	0
39.8	0
39.9	0
40	0
40.1	0
40.2	0
40.3	0
40.4	0
40.5	0
40.6	0
40.7	0
40.8	0
40.9	0
41	0
41.1	0
41.2	0
41.3	0
41.4	0
41.5	0
41.6	0
41.7	0
41.8	0
41.9	0
42	0
42.1	0
42.2	0
42.3	0
42.4	0
42.5	0
42.6	0
42.7	0
42.8	0
42.9	0
43	0
43.1	0
43.2	0
43.3	0
43.4	0
43.5	0
43.6	0
43.7	0
43.8	0
43.9	0
44	0
44.1	0
44.2	0
44.3	0
44.4	0
44.5	0
44.6	0
44.7	0
44.8	0
44.9	0
45	0
45.1	0
45.2	0
45.3	0
45.4	0
45.5	0
45.6	0
45.7	0
45.8	0
45.9	0
46	0
46.1	0
46.2	0
46.3	0
46.4	0
46.5	0
46.6	0
46.7	0
46.8	0
46.9	0
47	0
47.1	0
47.2	0
47.3	0
47.4	0
47.5	0
47.6	0
47.7	0
47.8	0
47.9	0
48	0
48.1	0
48.2	0
48.3	0
48.4	0
48.5	0
48.6	0
48.7	0
48.8	0
48.9	0
49	0
49.1	0
49.2	0
49.3	0
49.4	0
49.5	0
49.6	0
49.7	0
49.8	0
49.9	0
50	0
50.1	0
50.2	0
50.3	0
50.4	0
50.5	0
50.6	0
50.7	0
50.8	0
50.9	0
51	0
51.1	0
51.2	0
51.3	0
51.4	0
51.5	0
51.6	0
51.7	0
51.8	0
51.9	0
52	0
52.1	0
52.2	0
52.3	0
52.4	0
52.5	0
52.6	0
52.7	0
52.8	0
52.9	0
53	0
53.1	0
53.2	0
53.3	0
53.4	0
53.5	0
53.6	0
53.7	0
53.8	0
53.9	0
54	0
54.1	0
54.2	0
54.3	0
54.4	0
54.5	0
54.6	0
54.7	0
54.8	0
54.9	0
55	0
55.1	0
55.2	0
55.3	0
55.4	0
55.5	0
55.6	0
55.7	0
55.8	0
55.9	0
56	0
56.1	0
56.2	0
56.3	0
56.4	0
56.5	0
56.6	0
56.7	0
56.8	0
56.9	0
57	0
57.1	0
57.2	0
57.3	0
57.4	0
57.5	0
57.6	0
57.7	0
57.8	0
57.9	0
58	0
58.1	0
58.2	0
58.3	0
58.4	0
58.5	0
58.6	0
58.7	0
58.8	0
58.9	0
59	0
59.1	0
59.2	0
59.3	0
59.4	0
59.5	0
59.6	0
59.7	0
59.8	0
59.9	0
60	0
60.1	0
60.2	0
60.3	0
60.4	0
60.5	0
60.6	0
60.7	0
60.8	0
60.9	0
61	0
61.1	0
61.2	0
61.3	0
61.4	0
61.5	0
61.6	0
61.7	0
61.8	0
61.9	0
62	0
62.1	0
62.2	0
62.3	0
62.4	0
62.5	0
62.6	0
62.7	0
62.8	0
62.9	0
63	0
63.1	0
63.2	0
63.3	0
63.4	0
63.5	0
63.6	0
63.7	0
63.8	0
63.9	0
64	0
64.1	0
64.2	0
64.3	0
64.4	0
64.5	0
64.6	0
64.7	0
64.8	0
64.9	0
65	0
65.1	0
65.2	0
65.3	0
65.4	0
65.5	0
65.6	0
65.7	0
65.8	0
65.9	0
66	0
66.1	0
66.2	0
66.3	0
66.4	0
66.5	0
66.6	0
66.7	0
66.8	0
66.9	0
67	0
67.1	0
67.2	0
67.3	0
67.4	0
67.5	0
67.6	0
67.7	0
67.8	0
67.9	0
68	0
68.1	0
68.2	0
68.3	0
68.4	0
68.5	0
68.6	0
68.7	0
68.8	0
68.9	0
69	0
69.1	0
69.2	0
69.3	0
69.4	0
69.5	0
69.6	0
69.7	0
69.8	0
69.9	0
70	0
70.1	0
70.2	0
70.3	0
70.4	0
70.5	0
70.6	0
70.7	0
70.8	0
70.9	0
71	0
71.1	0
71.2	0
71.3	0
71.4	0
71.5	0
71.6	0
71.7	0
71.8	0
71.9	0
72	0
72.1	0
72.2	0
72.3	0
72.4	0
72.5	0
72.6	0
72.7	0
72.8	0
72.9	0
73	0
73.1	0
73.2	0
73.3	0
73.4	0
73.5	0
73.6	0
73.7	0
73.8	0
73.9	0
74	0
74.1	0
74.2	0
74.3	0
74.4	0
74.5	0
74.6	0
74.7	0
74.8	0
74.9	0
75	0
75.1	0
75.2	0
75.3	0
75.4	0
75.5	0
75.6	0
75.7	0
75.8	0
75.9	0
76	0
76.1	0
76.2	0
76.3	0
76.4	0
76.5	0
76.6	0
76.7	0
76.8	0
76.9	0
77	0
77.1	0
77.2	0
77.3	0
77.4	0
77.5	0
77.6	0
77.7	0
77.8	0
77.9	0
78	0
78.1	0
78.2	0
78.3	0
78.4	0
78.5	0
78.6	0
78.7	0
78.8	0
78.9	0
79	0
79.1	0
79.2	0
79.3	0
79.4	0
79.5	0
79.6	0
79.7	0
79.8	0
79.9	0
80	0
80.1	0
80.2	0
80.3	0
80.4	0
80.5	0
80.6	0
80.7	0
80.8	0
80.9	0
81	0
81.1	0
81.2	0
81.3	0
81.4	0
81.5	0
81.6	0
81.7	0
81.8	0
81.9	0
82	0
82.1	0
82.2	0
82.3	0
82.4	0
82.5	0
82.6	0
82.7	0
82.8	0
82.9	0
83	0
83.1	0
83.2	0
83.3	0
83.4	0
83.5	0
83.6	0
83.7	0
83.8	0
83.9	0
84	0
84.1	0
84.2	0
84.3	0
84.4	0
84.5	0
84.6	0
84.7	0
84.8	0
84.9	0
85	0
85.1	0
85.2	0
85.3	0
85.4	0
85.5	0
85.6	0
85.7	0
85.8	0
85.9	0
86	0
86.1	0
86.2	0
86.3	0
86.4	0
86.5	0
86.6	0
86.7	0
86.8	0
86.9	0
87	0
87.1	0
87.2	0
87.3	0
87.4	0
87.5	0
87.6	0
87.7	0
87.8	0
87.9	0
88	0
88.1	0
88.2	0
88.3	0
88.4	0
88.5	0
88.6	0
88.7	0
88.8	0
88.9	0
89	0
89.1	0
89.2	0
89.3	0
89.4	0
89.5	0
89.6	0
89.7	0
89.8	0
89.9	0
90	0
90.1	0
90.2	0
90.3	0
90.4	0
90.5	0
90.6	0
90.7	0
90.8	0
90.9	0
91	0
91.1	0
91.2	0
91.3	0
91.4	0
91.5	0
91.6	0
91.7	0
91.8	0
91.9	0
92	0
92.1	0
92.2	0
92.3	0
92.4	0
92.5	0
92.6	0
92.7	0
92.8	0
92.9	0
93	0
93.1	0
93.2	0
93.3	0
93.4	0
93.5	0
93.6	0
93.7	0
93.8	0
93.9	0
94	0
94.1	0
94.2	0
94.3	0
94.4	0
94.5	0
94.6	0
94.7	0
94.8	0
94.9	0
95	0
95.1	0
95.2	0
95.3	0
95.4	0
95.5	0
95.6	0
95.7	0
95.8	0
95.9	0
96	0
96.1	0
96.2	0
96.3	0
96.4	0
96.5	0
96.6	0
96.7	0
96.8	0
96.9	0
97	0
97.1	0
97.2	0
97.3	0
97.4	0
97.5	0
97.6	0
97.7	0
97.8	0
97.9	0
98	0
98.1	0
98.2	0
98.3	0
98.4	0
98.5	0
98.6	0
98.7	0
98.8	0
98.9	0
99	0
99.1	0
99.2	0
99.3	0
99.4	0
99.5	0
99.6	0
99.7	0
99.8	0
99.9	0
100	0
100.1	0
100.2	0
100.3	0
100.4	0.000666667
100.5	0.000666667
100.6	0.000666667
100.7	0.00133333
100.8	0.00133333
100.9	0.00133333
101	0.002
101.1	0.00266667
101.2	0.00333333
101.3	0.00333333
101.4	0.00466667
101.5	0.006
101.6	0.00733333
101.7	0.00733333
101.8	0.008
101.9	0.008
102	0.00866667
102.1	0.00933333
102.2	0.01
102.3	0.0113333
102.4	0.014
102.5	0.0153333
102.6	0.0166667
102.7	0.0173333
102.8	0.0173333
102.9	0.018
103	0.0186667
103.1	0.0206667
103.2	0.0213333
103.3	0.0233333
103.4	0.024
103.5	0.0246667
103.6	0.026
103.7	0.0273333
103.8	0.028
103.9	0.03
104	0.032
104.1	0.0326667
104.2	0.0353333
104.3	0.0373333
104.4	0.038
104.5	0.0413333
104.6	0.0433333
104.7	0.044
104.8	0.0453333
104.9	0.048
105	0.0493333
105.1	0.052
105.2	0.0546667
105.3	0.0566667
105.4	0.0586667
105.5	0.06
105.6	0.064
105.7	0.0653333
105.8	0.0653333
105.9	0.066
106	0.0673333
106.1	0.068
106.2	0.0686667
106.3	0.0693333
106.4	0.0706667
106.5	0.0746667
106.6	0.076
106.7	0.076
106.8	0.078
106.9	0.08
107	0.0846667
107.1	0.0873333
107.2	0.0873333
107.3	0.0886667
107.4	0.0886667
107.5	0.0893333
107.6	0.0913333
107.7	0.0926667
107.8	0.0926667
107.9	0.0953333
108	0.096
108.1	0.0973333
108.2	0.101333
108.3	0.102667
108.4	0.104
108.5	0.106
108.6	0.11
108.7	0.109333
108.8	0.110667
108.9	0.112
109	0.112667
109.1	0.115333
109.2	0.118667
109.3	0.119333
109.4	0.121333
109.5	0.122
109.6	0.124
109.7	0.124667
109.8	0.124
109.9	0.125333
110	0.125333
110.1	0.128
110.2	0.13
110.3	0.131333
110.4	0.132
110.5	0.134
110.6	0.136
110.7	0.137333
110.8	0.138667
110.9	0.141333
111	0.142667
111.1	0.144
111.2	0.146
111.3	0.146667
111.4	0.148
111.5	0.150667
111.6	0.151333
111.7	0.153333
111.8	0.156
111.9	0.158
112	0.158667
112.1	0.163333
112.2	0.164
112.3	0.166667
112.4	0.168
112.5	0.17
112.6	0.171333
112.7	0.172
112.8	0.172667
112.9	0.174
113	0.175333
113.1	0.176667
113.2	0.176667
113.3	0.176667
113.4	0.176667
113.5	0.178
113.6	0.18
113.7	0.179333
113.8	0.179333
113.9	0.179333
114	0.181333
114.1	0.182667
114.2	0.184
114.3	0.186
114.4	0.187333
114.5	0.188
114.6	0.187333
114.7	0.189333
114.8	0.19
114.9	0.192
115	0.193333
115.1	0.194
115.2	0.196
115.3	0.197333
115.4	0.198
115.5	0.198667
115.6	0.202
115.7	0.203333
115.8	0.205333
115.9	0.206
116	0.206
116.1	0.21
116.2	0.210667
116.3	0.212
116.4	0.213333
116.5	0.216
116.6	0.216
116.7	0.215333
116.8	0.217333
116.9	0.220667
117	0.223333
117.1	0.224
117.2	0.225333
117.3	0.227333
117.4	0.228
117.5	0.229333
117.6	0.229333
117.7	0.23
117.8	0.233333
117.9	0.233333
118	0.234667
118.1	0.235333
118.2	0.236667
118.3	0.238
118.4	0.236667
118.5	0.237333
118.6	0.239333
118.7	0.241333
118.8	0.243333
118.9	0.244
119	0.245333
119.1	0.246
119.2	0.248
119.3	0.25
119.4	0.252667
119.5	0.253333
119.6	0.253333
119.7	0.252667
119.8	0.253333
119.9	0.255333
120	0.255333
120.1	0.256
120.2	0.255333
120.3	0.256
120.4	0.258667
120.5	0.260667
120.6	0.261333
120.7	0.262667
120.8	0.264
120.9	0.266667
121	0.265333
121.1	0.266
121.2	0.266667
121.3	0.267333
121.4	0.269333
121.5	0.269333
121.6	0.268667
121.7	0.268667
121.8	0.27
121.9	0.27
122	0.270667
122.1	0.270667
122.2	0.272667
122.3	0.272667
122.4	0.273333
122.5	0.271333
122.6	0.272
122.7	0.272667
122.8	0.275333
122.9	0.276667
123	0.278667
123.1	0.280667
123.2	0.282
123.3	0.281333
123.4	0.280667
123.5	0.282
123.6	0.282
123.7	0.282
123.8	0.282
123.9	0.282667
124	0.284667
124.1	0.285333
124.2	0.288667
124.3	0.288667
124.4	0.288667
124.5	0.289333
124.6	0.292
124.7	0.292
124.8	0.294
124.9	0.294
125	0.294667
125.1	0.294667
125.2	0.295333
125.3	0.295333
125.4	0.297333
125.5	0.3
125.6	0.301333
125.7	0.302667
125.8	0.304
125.9	0.306
126	0.306667
126.1	0.306667
126.2	0.307333
126.3	0.309333
126.4	0.309333
126.5	0.308667
126.6	0.309333
126.7	0.309333
126.8	0.311333
126.9	0.313333
127	0.313333
127.1	0.314667
127.2	0.315333
127.3	0.316
127.4	0.315333
127.5	0.316
127.6	0.317333
127.7	0.318
127.8	0.316667
127.9	0.317333
128	0.317333
128.1	0.318
128.2	0.318
128.3	0.32
128.4	0.32
128.5	0.322667
128.6	0.324667
128.7	0.324667
128.8	0.324667
128.9	0.324667
129	0.325333
129.1	0.324667
129.2	0.325333
129.3	0.327333
129.4	0.329333
129.5	0.328667
129.6	0.328667
129.7	0.330667
129.8	0.33
129.9	0.33
130	0.332667
130.1	0.333333
130.2	0.332
130.3	0.334
130.4	0.335333
130.5	0.336
130.6	0.336667
130.7	0.336667
130.8	0.336667
130.9	0.336
131	0.336
131.1	0.337333
131.2	0.338
131.3	0.338667
131.4	0.340667
131.5	0.341333
131.6	0.340667
131.7	0.34
131.8	0.342667
131.9	0.344
132	0.344667
132.1	0.345333
132.2	0.346
132.3	0.346667
132.4	0.347333
132.5	0.348
132.6	0.348667
132.7	0.349333
132.8	0.352
132.9	0.352667
133	0.351333
133.1	0.354
133.2	0.353333
133.3	0.354667
133.4	0.354667
133.5	0.354667
133.6	0.354
133.7	0.355333
133.8	0.356667
133.9	0.358
134	0.359333
134.1	0.359333
134.2	0.359333
134.3	0.360667
134.4	0.362
134.5	0.362667
134.6	0.362667
134.7	0.366
134.8	0.366
134.9	0.366667
135	0.367333
135.1	0.368667
135.2	0.370667
135.3	0.37
135.4	0.372
135.5	0.372
135.6	0.373333
135.7	0.375333
135.8	0.376
135.9	0.376
136	0.376
136.1	0.375333
136.2	0.375333
136.3	0.378667
136.4	0.380667
136.5	0.382
136.6	0.383333
136.7	0.385333
136.8	0.384667
136.9	0.386
137	0.386667
137.1	0.388667
137.2	0.39
137.3	0.39
137.4	0.391333
137.5	0.393333
137.6	0.392667
137.7	0.392667
137.8	0.392667
137.9	0.394667
138	0.395333
138.1	0.398667
138.2	0.399333
138.3	0.401333
138.4	0.402
138.5	0.403333
138.6	0.404
138.7	0.404667
138.8	0.404
138.9	0.404667
139	0.404667
139.1	0.404667
139.2	0.404667
139.3	0.406
139.4	0.406667
139.5	0.407333
139.6	0.406667
139.7	0.406667
139.8	0.406667
139.9	0.407333
140	0.407333
140.1	0.406667
140.2	0.407333
140.3	0.408
140.4	0.407333
140.5	0.407333
140.6	0.407333
140.7	0.408667
140.8	0.408667
140.9	0.409333
141	0.410667
141.1	0.412
141.2	0.411333
141.3	0.412
141.4	0.412
141.5	0.411333
141.6	0.412667
141.7	0.412
141.8	0.412667
141.9	0.413333
142	0.415333
142.1	0.416
142.2	0.415333
142.3	0.416667
142.4	0.418
142.5	0.418
142.6	0.419333
142.7	0.419333
142.8	0.418667
142.9	0.418667
143	0.42
143.1	0.420667
143.2	0.422
143.3	0.421333
143.4	0.422
143.5	0.422667
143.6	0.423333
143.7	0.423333
143.8	0.423333
143.9	0.424
144	0.424
144.1	0.425333
144.2	0.425333
144.3	0.426
144.4	0.425333
144.5	0.425333
144.6	0.425333
144.7	0.425333
144.8	0.426
144.9	0.426
145	0.426
145.1	0.426667
145.2	0.427333
145.3	0.426
145.4	0.426667
145.5	0.427333
145.6	0.426
145.7	0.426667
145.8	0.427333
145.9	0.426667
146	0.426667
146.1	0.427333
146.2	0.428667
146.3	0.432667
146.4	0.433333
146.5	0.433333
146.6	0.434
146.7	0.433333
146.8	0.434667
146.9	0.436667
147	0.436667
147.1	0.437333
147.2	0.436667
147.3	0.437333
147.4	0.439333
147.5	0.439333
147.6	0.439333
147.7	0.44
147.8	0.440667
147.9	0.441333
148	0.442
148.1	0.443333
148.2	0.443333
148.3	0.444
148.4	0.444667
148.5	0.444667
148.6	0.444
148.7	0.444
148.8	0.443333
148.9	0.443333
149	0.444667
149.1	0.446
149.2	0.446667
149.3	0.446667
149.4	0.447333
149.5	0.448667
149.6	0.448667
149.7	0.449333
149.8	0.448667
149.9	0.449333
150	0.45
150.1	0.450667
150.2	0.45
150.3	0.450667
150.4	0.448667
150.5	0.449333
150.6	0.449333
150.7	0.449333
150.8	0.449333
150.9	0.45
151	0.451333
151.1	0.451333
151.2	0.451333
151.3	0.451333
151.4	0.451333
151.5	0.453333
151.6	0.454
151.7	0.454
151.8	0.453333
151.9	0.452667
152	0.451333
152.1	0.451333
152.2	0.450667
152.3	0.452667
152.4	0.452667
152.5	0.452667
152.6	0.452667
152.7	0.452667
152.8	0.453333
152.9	0.454
153	0.454667
153.1	0.455333
153.2	0.456667
153.3	0.457333
153.4	0.458
153.5	0.456667
153.6	0.458
153.7	0.458
153.8	0.458
153.9	0.459333
154	0.460667
154.1	0.46
154.2	0.461333
154.3	0.460667
154.4	0.461333
154.5	0.46
154.6	0.458667
154.7	0.46
154.8	0.462
154.9	0.462667
155	0.462
155.1	0.462
155.2	0.462
155.3	0.463333
155.4	0.464
155.5	0.464667
155.6	0.466
155.7	0.467333
155.8	0.468667
155.9	0.47
156	0.469333
156.1	0.468667
156.2	0.469333
156.3	0.47
156.4	0.471333
156.5	0.472667
156.6	0.475333
156.7	0.475333
156.8	0.474667
156.9	0.476667
157	0.478
157.1	0.476667
157.2	0.476667
157.3	0.476667
157.4	0.476667
157.5	0.476
157.6	0.477333
157.7	0.478
157.8	0.477333
157.9	0.478667
158	0.479333
158.1	0.482667
158.2	0.482667
158.3	0.484667
158.4	0.485333
158.5	0.484667
158.6	0.485333
158.7	0.487333
158.8	0.488667
158.9	0.489333
159	0.489333
159.1	0.489333
159.2	0.489333
159.3	0.488667
159.4	0.488667
159.5	0.488667
159.6	0.488667
159.7	0.49
159.8	0.492
159.9	0.493333
160	0.492667
160.1	0.492667
160.2	0.493333
160.3	0.494
160.4	0.495333
160.5	0.496
160.6	0.496
160.7	0.498667
160.8	0.5
160.9	0.498667
161	0.5
161.1	0.5
161.2	0.499333
161.3	0.498667
161.4	0.498667
161.5	0.5
161.6	0.501333
161.7	0.500667
161.8	0.5
161.9	0.502
162	0.504
162.1	0.504
162.2	0.503333
162.3	0.504
162.4	0.506
162.5	0.506
162.6	0.507333
162.7	0.508
162.8	0.508
162.9	0.507333
163	0.506667
163.1	0.505333
163.2	0.506667
163.3	0.506667
163.4	0.508
163.5	0.508
163.6	0.509333
163.7	0.508667
163.8	0.508
163.9	0.506667
164	0.508
164.1	0.507333
164.2	0.508
164.3	0.51
164.4	0.512
164.5	0.512667
164.6	0.511333
164.7	0.511333
164.8	0.511333
164.9	0.512
165	0.512
165.1	0.511333
165.2	0.511333
165.3	0.512
165.4	0.512667
165.5	0.513333
165.6	0.513333
165.7	0.516
165.8	0.516667
165.9	0.517333
166	0.517333
166.1	0.518667
166.2	0.519333
166.3	0.518667
166.4	0.518667
166.5	0.518667
166.6	0.519333
166.7	0.52
166.8	0.518667
166.9	0.519333
167	0.519333
167.1	0.519333
167.2	0.519333
167.3	0.519333
167.4	0.52
167.5	0.519333
167.6	0.52
167.7	0.519333
167.8	0.518
167.9	0.516667
168	0.517333
168.1	0.516667
168.2	0.518
168.3	0.518667
168.4	0.517333
168.5	0.517333
168.6	0.517333
168.7	0.518
168.8	0.517333
168.9	0.517333
169	0.515333
169.1	0.515333
169.2	0.516667
169.3	0.516667
169.4	0.515333
169.5	0.514667
169.6	0.515333
169.7	0.515333
169.8	0.515333
169.9	0.516667
170	0.517333
170.1	0.518
170.2	0.518667
170.3	0.52
170.4	0.52
170.5	0.519333
170.6	0.52
170.7	0.52
170.8	0.520667
170.9	0.522667
171	0.522667
171.1	0.524
171.2	0.524
171.3	0.524
171.4	0.524
171.5	0.524
171.6	0.526
171.7	0.526
171.8	0.526667
171.9	0.527333
172	0.528667
172.1	0.529333
172.2	0.53
172.3	0.531333
172.4	0.53
172.5	0.53
172.6	0.53
172.7	0.528667
172.8	0.528
172.9	0.528
173	0.528667
173.1	0.528667
173.2	0.531333
173.3	0.532
173.4	0.531333
173.5	0.530667
173.6	0.53
173.7	0.530667
173.8	0.532
173.9	0.531333
174	0.531333
174.1	0.531333
174.2	0.534
174.3	0.534
174.4	0.535333
174.5	0.535333
174.6	0.536
174.7	0.535333
174.8	0.535333
174.9	0.537333
175	0.538
175.1	0.538667
175.2	0.539333
175.3	0.538667
175.4	0.538667
175.5	0.538667
175.6	0.538667
175.7	0.538
175.8	0.539333
175.9	0.540667
176	0.543333
176.1	0.543333
176.2	0.544
176.3	0.543333
176.4	0.543333
176.5	0.542667
176.6	0.543333
176.7	0.542
176.8	0.542
176.9	0.543333
177	0.544
177.1	0.542667
177.2	0.543333
177.3	0.543333
177.4	0.544
177.5	0.543333
177.6	0.544667
177.7	0.544667
177.8	0.545333
177.9	0.545333
178	0.546
178.1	0.548667
178.2	0.548
178.3	0.548
178.4	0.546667
178.5	0.546667
178.6	0.547333
178.7	0.546667
178.8	0.546667
178.9	0.546667
179	0.548667
179.1	0.550667
179.2	0.551333
179.3	0.550667
179.4	0.551333
179.5	0.551333
179.6	0.552
179.7	0.552667
179.8	0.552667
179.9	0.552667
180	0.552
180.1	0.552
180.2	0.551333
180.3	0.552
180.4	0.552667
180.5	0.552667
180.6	0.554667
180.7	0.555333
180.8	0.554667
180.9	0.556
181	0.556
181.1	0.557333
181.2	0.556667
181.3	0.557333
181.4	0.558
181.5	0.558667
181.6	0.559333
181.7	0.56
181.8	0.562
181.9	0.561333
182	0.561333
182.1	0.561333
182.2	0.560667
182.3	0.561333
182.4	0.560667
182.5	0.562
182.6	0.562667
182.7	0.562
182.8	0.561333
182.9	0.562
183	0.563333
183.1	0.561333
183.2	0.562667
183.3	0.562667
183.4	0.564
183.5	0.564667
183.6	0.564
183.7	0.565333
183.8	0.567333
183.9	0.568
184	0.566
184.1	0.566
184.2	0.566
184.3	0.566667
184.4	0.567333
184.5	0.568667
184.6	0.568667
184.7	0.568
184.8	0.567333
184.9	0.567333
185	0.568667
185.1	0.568
185.2	0.569333
185.3	0.570667
185.4	0.572
185.5	0.572667
185.6	0.574667
185.7	0.574
185.8	0.574667
185.9	0.574667
186	0.574667
186.1	0.574667
186.2	0.573333
186.3	0.572667
186.4	0.572667
186.5	0.572667
186.6	0.572
186.7	0.572
186.8	0.573333
186.9	0.573333
187	0.570667
187.1	0.571333
187.2	0.570667
187.3	0.569333
187.4	0.57
187.5	0.57
187.6	0.57
187.7	0.571333
187.8	0.572
187.9	0.573333
188	0.575333
188.1	0.574667
188.2	0.575333
188.3	0.578
188.4	0.578
188.5	0.578
188.6	0.577333
188.7	0.578
188.8	0.578667
188.9	0.58
189	0.579333
189.1	0.579333
189.2	0.579333
189.3	0.579333
189.4	0.579333
189.5	0.58
189.6	0.58
189.7	0.578667
189.8	0.578
189.9	0.576667
190	0.576667
190.1	0.578
190.2	0.578667
190.3	0.577333
190.4	0.577333
190.5	0.576667
190.6	0.576667
190.7	0.576
190.8	0.575333
190.9	0.574
191	0.574667
191.1	0.573333
191.2	0.574
191.3	0.573333
191.4	0.575333
191.5	0.576
191.6	0.574667
191.7	0.574
191.8	0.572667
191.9	0.572667
192	0.570667
192.1	0.57
192.2	0.570667
192.3	0.570667
192.4	0.570667
192.5	0.57
192.6	0.569333
192.7	0.570667
192.8	0.571333
192.9	0.572
193	0.571333
193.1	0.572
193.2	0.571333
193.3	0.571333
193.4	0.571333
193.5	0.571333
193.6	0.573333
193.7	0.574
193.8	0.576667
193.9	0.575333
194	0.578
194.1	0.579333
194.2	0.579333
194.3	0.579333
194.4	0.58
194.5	0.582
194.6	0.583333
194.7	0.584
194.8	0.584
194.9	0.584667
195	0.584
195.1	0.584
195.2	0.584667
195.3	0.584
195.4	0.584667
195.5	0.584667
195.6	0.584667
195.7	0.584
195.8	0.585333
195.9	0.587333
196	0.587333
196.1	0.586667
196.2	0.586
196.3	0.585333
196.4	0.585333
196.5	0.585333
196.6	0.586
196.7	0.585333
196.8	0.584
196.9	0.584667
197	0.584667
197.1	0.584
197.2	0.584667
197.3	0.585333
197.4	0.586
197.5	0.586
197.6	0.586
197.7	0.584
197.8	0.584667
197.9	0.584667
198	0.586667
198.1	0.587333
198.2	0.587333
198.3	0.588
198.4	0.588667
198.5	0.59
198.6	0.59
198.7	0.590667
198.8	0.590667
198.9	0.590667
199	0.59
199.1	0.59
199.2	0.59
199.3	0.590667
199.4	0.590667
199.5	0.590667
199.6	0.590667
199.7	0.590667
199.8	0.589333
199.9	0.589333
200	0.590667
[truncated: 14,000 more rows]
