# Supplementary material for: Bayesian inference of kinetic schemes for ion channels by Kalman filtering
Source: eLife journal article supplement (doi:10.7554/elife.62714), 2022-05-04
Supplement: fig4-data6 [file 1_Sim_N_2000_Fluor_MW.xlsx]

## Sheet: Tabelle1
0.1	0
0.2	0
0.3	0
0.4	0
0.5	0
0.6	0
0.7	0
0.8	0
0.9	0
1	0
1.1	0
1.2	0
1.3	0
1.4	0
1.5	0
1.6	0
1.7	0
1.8	0
1.9	0
2	0
2.1	0
2.2	0
2.3	0
2.4	0
2.5	0
2.6	0
2.7	0
2.8	0
2.9	0
3	0
3.1	0
3.2	0
3.3	0
3.4	0
3.5	0
3.6	0
3.7	0
3.8	0
3.9	0
4	0
4.1	0
4.2	0
4.3	0
4.4	0
4.5	0
4.6	0
4.7	0
4.8	0
4.9	0
5	0
5.1	0
5.2	0
5.3	0
5.4	0
5.5	0
5.6	0
5.7	0
5.8	0
5.9	0
6	0
6.1	0
6.2	0
6.3	0
6.4	0
6.5	0
6.6	0
6.7	0
6.8	0
6.9	0
7	0
7.1	0
7.2	0
7.3	0
7.4	0
7.5	0
7.6	0
7.7	0
7.8	0
7.9	0
8	0
8.1	0
8.2	0
8.3	0
8.4	0
8.5	0
8.6	0
8.7	0
8.8	0
8.9	0
9	0
9.1	0
9.2	0
9.3	0
9.4	0
9.5	0
9.6	0
9.7	0
9.8	0
9.9	0
10	0
10.1	0
10.2	0
10.3	0
10.4	0
10.5	0
10.6	0
10.7	0
10.8	0
10.9	0
11	0
11.1	0
11.2	0
11.3	0
11.4	0
11.5	0
11.6	0
11.7	0
11.8	0
11.9	0
12	0
12.1	0
12.2	0
12.3	0
12.4	0
12.5	0
12.6	0
12.7	0
12.8	0
12.9	0
13	0
13.1	0
13.2	0
13.3	0
13.4	0
13.5	0
13.6	0
13.7	0
13.8	0
13.9	0
14	0
14.1	0
14.2	0
14.3	0
14.4	0
14.5	0
14.6	0
14.7	0
14.8	0
14.9	0
15	0
15.1	0
15.2	0
15.3	0
15.4	0
15.5	0
15.6	0
15.7	0
15.8	0
15.9	0
16	0
16.1	0
16.2	0
16.3	0
16.4	0
16.5	0
16.6	0
16.7	0
16.8	0
16.9	0
17	0
17.1	0
17.2	0
17.3	0
17.4	0
17.5	0
17.6	0
17.7	0
17.8	0
17.9	0
18	0
18.1	0
18.2	0
18.3	0
18.4	0
18.5	0
18.6	0
18.7	0
18.8	0
18.9	0
19	0
19.1	0
19.2	0
19.3	0
19.4	0
19.5	0
19.6	0
19.7	0
19.8	0
19.9	0
20	0
20.1	0
20.2	0
20.3	0
20.4	0
20.5	0
20.6	0
20.7	0
20.8	0
20.9	0
21	0
21.1	0
21.2	0
21.3	0
21.4	0
21.5	0
21.6	0
21.7	0
21.8	0
21.9	0
22	0
22.1	0
22.2	0
22.3	0
22.4	0
22.5	0
22.6	0
22.7	0
22.8	0
22.9	0
23	0
23.1	0
23.2	0
23.3	0
23.4	0
23.5	0
23.6	0
23.7	0
23.8	0
23.9	0
24	0
24.1	0
24.2	0
24.3	0
24.4	0
24.5	0
24.6	0
24.7	0
24.8	0
24.9	0
25	0
25.1	0
25.2	0
25.3	0
25.4	0
25.5	0
25.6	0
25.7	0
25.8	0
25.9	0
26	0
26.1	0
26.2	0
26.3	0
26.4	0
26.5	0
26.6	0
26.7	0
26.8	0
26.9	0
27	0
27.1	0
27.2	0
27.3	0
27.4	0
27.5	0
27.6	0
27.7	0
27.8	0
27.9	0
28	0
28.1	0
28.2	0
28.3	0
28.4	0
28.5	0
28.6	0
28.7	0
28.8	0
28.9	0
29	0
29.1	0
29.2	0
29.3	0
29.4	0
29.5	0
29.6	0
29.7	0
29.8	0
29.9	0
30	0
30.1	0
30.2	0
30.3	0
30.4	0
30.5	0
30.6	0
30.7	0
30.8	0
30.9	0
31	0
31.1	0
31.2	0
31.3	0
31.4	0
31.5	0
31.6	0
31.7	0
31.8	0
31.9	0
32	0
32.1	0
32.2	0
32.3	0
32.4	0
32.5	0
32.6	0
32.7	0
32.8	0
32.9	0
33	0
33.1	0
33.2	0
33.3	0
33.4	0
33.5	0
33.6	0
33.7	0
33.8	0
33.9	0
34	0
34.1	0
34.2	0
34.3	0
34.4	0
34.5	0
34.6	0
34.7	0
34.8	0
34.9	0
35	0
35.1	0
35.2	0
35.3	0
35.4	0
35.5	0
35.6	0
35.7	0
35.8	0
35.9	0
36	0
36.1	0
36.2	0
36.3	0
36.4	0
36.5	0
36.6	0
36.7	0
36.8	0
36.9	0
37	0
37.1	0
37.2	0
37.3	0
37.4	0
37.5	0
37.6	0
37.7	0
37.8	0
37.9	0
38	0
38.1	0
38.2	0
38.3	0
38.4	0
38.5	0
38.6	0
38.7	0
38.8	0
38.9	0
39	0
39.1	0
39.2	0
39.3	0
39.4	0
39.5	0
39.6	0
39.7	0
39.8	0
39.9	0
40	0
40.1	0
40.2	0
40.3	0
40.4	0
40.5	0
40.6	0
40.7	0
40.8	0
40.9	0
41	0
41.1	0
41.2	0
41.3	0
41.4	0
41.5	0
41.6	0
41.7	0
41.8	0
41.9	0
42	0
42.1	0
42.2	0
42.3	0
42.4	0
42.5	0
42.6	0
42.7	0
42.8	0
42.9	0
43	0
43.1	0
43.2	0
43.3	0
43.4	0
43.5	0
43.6	0
43.7	0
43.8	0
43.9	0
44	0
44.1	0
44.2	0
44.3	0
44.4	0
44.5	0
44.6	0
44.7	0
44.8	0
44.9	0
45	0
45.1	0
45.2	0
45.3	0
45.4	0
45.5	0
45.6	0
45.7	0
45.8	0
45.9	0
46	0
46.1	0
46.2	0
46.3	0
46.4	0
46.5	0
46.6	0
46.7	0
46.8	0
46.9	0
47	0
47.1	0
47.2	0
47.3	0
47.4	0
47.5	0
47.6	0
47.7	0
47.8	0
47.9	0
48	0
48.1	0
48.2	0
48.3	0
48.4	0
48.5	0
48.6	0
48.7	0
48.8	0
48.9	0
49	0
49.1	0
49.2	0
49.3	0
49.4	0
49.5	0
49.6	0
49.7	0
49.8	0
49.9	0
50	0
50.1	0
50.2	0
50.3	0
50.4	0
50.5	0
50.6	0
50.7	0
50.8	0
50.9	0
51	0
51.1	0
51.2	0
51.3	0
51.4	0
51.5	0
51.6	0
51.7	0
51.8	0
51.9	0
52	0
52.1	0
52.2	0
52.3	0
52.4	0
52.5	0
52.6	0
52.7	0
52.8	0
52.9	0
53	0
53.1	0
53.2	0
53.3	0
53.4	0
53.5	0
53.6	0
53.7	0
53.8	0
53.9	0
54	0
54.1	0
54.2	0
54.3	0
54.4	0
54.5	0
54.6	0
54.7	0
54.8	0
54.9	0
55	0
55.1	0
55.2	0
55.3	0
55.4	0
55.5	0
55.6	0
55.7	0
55.8	0
55.9	0
56	0
56.1	0
56.2	0
56.3	0
56.4	0
56.5	0
56.6	0
56.7	0
56.8	0
56.9	0
57	0
57.1	0
57.2	0
57.3	0
57.4	0
57.5	0
57.6	0
57.7	0
57.8	0
57.9	0
58	0
58.1	0
58.2	0
58.3	0
58.4	0
58.5	0
58.6	0
58.7	0
58.8	0
58.9	0
59	0
59.1	0
59.2	0
59.3	0
59.4	0
59.5	0
59.6	0
59.7	0
59.8	0
59.9	0
60	0
60.1	0
60.2	0
60.3	0
60.4	0
60.5	0
60.6	0
60.7	0
60.8	0
60.9	0
61	0
61.1	0
61.2	0
61.3	0
61.4	0
61.5	0
61.6	0
61.7	0
61.8	0
61.9	0
62	0
62.1	0
62.2	0
62.3	0
62.4	0
62.5	0
62.6	0
62.7	0
62.8	0
62.9	0
63	0
63.1	0
63.2	0
63.3	0
63.4	0
63.5	0
63.6	0
63.7	0
63.8	0
63.9	0
64	0
64.1	0
64.2	0
64.3	0
64.4	0
64.5	0
64.6	0
64.7	0
64.8	0
64.9	0
65	0
65.1	0
65.2	0
65.3	0
65.4	0
65.5	0
65.6	0
65.7	0
65.8	0
65.9	0
66	0
66.1	0
66.2	0
66.3	0
66.4	0
66.5	0
66.6	0
66.7	0
66.8	0
66.9	0
67	0
67.1	0
67.2	0
67.3	0
67.4	0
67.5	0
67.6	0
67.7	0
67.8	0
67.9	0
68	0
68.1	0
68.2	0
68.3	0
68.4	0
68.5	0
68.6	0
68.7	0
68.8	0
68.9	0
69	0
69.1	0
69.2	0
69.3	0
69.4	0
69.5	0
69.6	0
69.7	0
69.8	0
69.9	0
70	0
70.1	0
70.2	0
70.3	0
70.4	0
70.5	0
70.6	0
70.7	0
70.8	0
70.9	0
71	0
71.1	0
71.2	0
71.3	0
71.4	0
71.5	0
71.6	0
71.7	0
71.8	0
71.9	0
72	0
72.1	0
72.2	0
72.3	0
72.4	0
72.5	0
72.6	0
72.7	0
72.8	0
72.9	0
73	0
73.1	0
73.2	0
73.3	0
73.4	0
73.5	0
73.6	0
73.7	0
73.8	0
73.9	0
74	0
74.1	0
74.2	0
74.3	0
74.4	0
74.5	0
74.6	0
74.7	0
74.8	0
74.9	0
75	0
75.1	0
75.2	0
75.3	0
75.4	0
75.5	0
75.6	0
75.7	0
75.8	0
75.9	0
76	0
76.1	0
76.2	0
76.3	0
76.4	0
76.5	0
76.6	0
76.7	0
76.8	0
76.9	0
77	0
77.1	0
77.2	0
77.3	0
77.4	0
77.5	0
77.6	0
77.7	0
77.8	0
77.9	0
78	0
78.1	0
78.2	0
78.3	0
78.4	0
78.5	0
78.6	0
78.7	0
78.8	0
78.9	0
79	0
79.1	0
79.2	0
79.3	0
79.4	0
79.5	0
79.6	0
79.7	0
79.8	0
79.9	0
80	0
80.1	0
80.2	0
80.3	0
80.4	0
80.5	0
80.6	0
80.7	0
80.8	0
80.9	0
81	0
81.1	0
81.2	0
81.3	0
81.4	0
81.5	0
81.6	0
81.7	0
81.8	0
81.9	0
82	0
82.1	0
82.2	0
82.3	0
82.4	0
82.5	0
82.6	0
82.7	0
82.8	0
82.9	0
83	0
83.1	0
83.2	0
83.3	0
83.4	0
83.5	0
83.6	0
83.7	0
83.8	0
83.9	0
84	0
84.1	0
84.2	0
84.3	0
84.4	0
84.5	0
84.6	0
84.7	0
84.8	0
84.9	0
85	0
85.1	0
85.2	0
85.3	0
85.4	0
85.5	0
85.6	0
85.7	0
85.8	0
85.9	0
86	0
86.1	0
86.2	0
86.3	0
86.4	0
86.5	0
86.6	0
86.7	0
86.8	0
86.9	0
87	0
87.1	0
87.2	0
87.3	0
87.4	0
87.5	0
87.6	0
87.7	0
87.8	0
87.9	0
88	0
88.1	0
88.2	0
88.3	0
88.4	0
88.5	0
88.6	0
88.7	0
88.8	0
88.9	0
89	0
89.1	0
89.2	0
89.3	0
89.4	0
89.5	0
89.6	0
89.7	0
89.8	0
89.9	0
90	0
90.1	0
90.2	0
90.3	0
90.4	0
90.5	0
90.6	0
90.7	0
90.8	0
90.9	0
91	0
91.1	0
91.2	0
91.3	0
91.4	0
91.5	0
91.6	0
91.7	0
91.8	0
91.9	0
92	0
92.1	0
92.2	0
92.3	0
92.4	0
92.5	0
92.6	0
92.7	0
92.8	0
92.9	0
93	0
93.1	0
93.2	0
93.3	0
93.4	0
93.5	0
93.6	0
93.7	0
93.8	0
93.9	0
94	0
94.1	0
94.2	0
94.3	0
94.4	0
94.5	0
94.6	0
94.7	0
94.8	0
94.9	0
95	0
95.1	0
95.2	0
95.3	0
95.4	0
95.5	0
95.6	0
95.7	0
95.8	0
95.9	0
96	0
96.1	0
96.2	0
96.3	0
96.4	0
96.5	0
96.6	0
96.7	0
96.8	0
96.9	0
97	0
97.1	0
97.2	0
97.3	0
97.4	0
97.5	0
97.6	0
97.7	0
97.8	0
97.9	0
98	0
98.1	0
98.2	0
98.3	0
98.4	0
98.5	0
98.6	0
98.7	0
98.8	0
98.9	0
99	0
99.1	0
99.2	0
99.3	0
99.4	0
99.5	0
99.6	0
99.7	0
99.8	0
99.9	0
100	0
100.1	0.05425
100.2	0.105
100.3	0.15375
100.4	0.199
100.5	0.23425
100.6	0.2705
100.7	0.304
100.8	0.338
100.9	0.3685
101	0.386
101.1	0.408
101.2	0.42475
101.3	0.44275
101.4	0.4575
101.5	0.46825
101.6	0.48075
101.7	0.49325
101.8	0.50425
101.9	0.515
102	0.5255
102.1	0.53275
102.2	0.5425
102.3	0.551
102.4	0.56075
102.5	0.56625
102.6	0.5715
102.7	0.57925
102.8	0.59025
102.9	0.59275
103	0.59775
103.1	0.604
103.2	0.60975
103.3	0.6125
103.4	0.616
103.5	0.62125
103.6	0.62675
103.7	0.62825
103.8	0.633
103.9	0.636
104	0.63625
104.1	0.6395
104.2	0.6425
104.3	0.6435
104.4	0.6465
104.5	0.64875
104.6	0.652
104.7	0.654
104.8	0.65575
104.9	0.656
105	0.655
105.1	0.657
105.2	0.66125
105.3	0.66275
105.4	0.66575
105.5	0.6725
105.6	0.67025
105.7	0.67
105.8	0.67
105.9	0.668
106	0.6675
106.1	0.672
106.2	0.67075
106.3	0.66925
106.4	0.669
106.5	0.671
106.6	0.67475
106.7	0.676
106.8	0.677
106.9	0.6785
107	0.67975
107.1	0.6815
107.2	0.685
107.3	0.68725
107.4	0.687
107.5	0.6905
107.6	0.689
107.7	0.6835
107.8	0.68525
107.9	0.68275
108	0.68225
108.1	0.68275
108.2	0.6855
108.3	0.68575
108.4	0.682
108.5	0.68375
108.6	0.6795
108.7	0.68475
108.8	0.688
108.9	0.688
109	0.6895
109.1	0.69025
109.2	0.692
109.3	0.69175
109.4	0.69425
109.5	0.6955
109.6	0.698
109.7	0.69675
109.8	0.695
109.9	0.69625
110	0.69525
110.1	0.69325
110.2	0.6975
110.3	0.69775
110.4	0.69675
110.5	0.7
110.6	0.69775
110.7	0.6965
110.8	0.694
110.9	0.694
111	0.6945
111.1	0.69425
111.2	0.69775
111.3	0.6945
111.4	0.69525
111.5	0.69775
111.6	0.69775
111.7	0.6985
111.8	0.6985
111.9	0.6965
112	0.6965
112.1	0.69525
112.2	0.698
112.3	0.692
112.4	0.6895
112.5	0.688
112.6	0.69375
112.7	0.6985
112.8	0.69775
112.9	0.70225
113	0.70375
113.1	0.70475
113.2	0.70525
113.3	0.703
113.4	0.7045
113.5	0.70675
113.6	0.705
113.7	0.705
113.8	0.706
113.9	0.706
114	0.704
114.1	0.707
114.2	0.70825
114.3	0.70875
114.4	0.70925
114.5	0.70675
114.6	0.70925
114.7	0.709
114.8	0.70875
114.9	0.7115
115	0.71125
115.1	0.712
115.2	0.71325
115.3	0.71125
115.4	0.713
115.5	0.7165
115.6	0.7165
115.7	0.71475
115.8	0.71325
115.9	0.71725
116	0.7155
116.1	0.7145
116.2	0.7105
116.3	0.7125
116.4	0.7155
116.5	0.7175
116.6	0.71375
116.7	0.71975
116.8	0.71775
116.9	0.71675
117	0.71775
117.1	0.71525
117.2	0.71725
117.3	0.71525
117.4	0.71975
117.5	0.723
117.6	0.724
117.7	0.72575
117.8	0.727
117.9	0.72675
118	0.72725
118.1	0.7265
118.2	0.73025
118.3	0.727
118.4	0.727
118.5	0.72575
118.6	0.72625
118.7	0.7305
118.8	0.734
118.9	0.73075
119	0.7305
119.1	0.732
119.2	0.73225
119.3	0.7345
119.4	0.734
119.5	0.735
119.6	0.73325
119.7	0.7305
119.8	0.72825
119.9	0.7285
120	0.72775
120.1	0.72625
120.2	0.72825
120.3	0.73025
120.4	0.73325
120.5	0.7305
120.6	0.72925
120.7	0.7275
120.8	0.73
120.9	0.73175
121	0.734
121.1	0.73375
121.2	0.7355
121.3	0.73925
121.4	0.7415
121.5	0.742
121.6	0.742
121.7	0.74525
121.8	0.74575
121.9	0.74825
122	0.747
122.1	0.7465
122.2	0.746
122.3	0.744
122.4	0.74275
122.5	0.742
122.6	0.7415
122.7	0.745
122.8	0.745
122.9	0.74375
123	0.74575
123.1	0.74725
123.2	0.749
123.3	0.749
123.4	0.7525
123.5	0.753
123.6	0.75475
123.7	0.75525
123.8	0.75225
123.9	0.7515
124	0.74825
124.1	0.746
124.2	0.74675
124.3	0.74325
124.4	0.74625
124.5	0.746
124.6	0.746
124.7	0.745
124.8	0.74675
124.9	0.74525
125	0.74725
125.1	0.75
125.2	0.748
125.3	0.7475
125.4	0.74575
125.5	0.74725
125.6	0.75125
125.7	0.749
125.8	0.7495
125.9	0.7535
126	0.754
126.1	0.75125
126.2	0.751
126.3	0.75275
126.4	0.75325
126.5	0.7545
126.6	0.7555
126.7	0.753
126.8	0.7555
126.9	0.757
127	0.75875
127.1	0.759
127.2	0.75725
127.3	0.75925
127.4	0.7595
127.5	0.754
127.6	0.75375
127.7	0.7555
127.8	0.759
127.9	0.75625
128	0.75575
128.1	0.7595
128.2	0.76
128.3	0.7605
128.4	0.76
128.5	0.75825
128.6	0.75425
128.7	0.7575
128.8	0.758
128.9	0.7585
129	0.76125
129.1	0.762
129.2	0.7605
129.3	0.761
129.4	0.76275
129.5	0.7645
129.6	0.7665
129.7	0.76725
129.8	0.76575
129.9	0.7655
130	0.765
130.1	0.7655
130.2	0.762
130.3	0.765
130.4	0.76325
130.5	0.76275
130.6	0.76425
130.7	0.763
130.8	0.76525
130.9	0.76825
131	0.77075
131.1	0.773
131.2	0.77475
131.3	0.77175
131.4	0.77075
131.5	0.773
131.6	0.771
131.7	0.7735
131.8	0.77025
131.9	0.76925
132	0.768
132.1	0.77175
132.2	0.77375
132.3	0.7765
132.4	0.77575
132.5	0.7745
132.6	0.7745
132.7	0.775
132.8	0.77275
132.9	0.774
133	0.76925
133.1	0.76975
133.2	0.7695
133.3	0.768
133.4	0.76625
133.5	0.7665
133.6	0.768
133.7	0.76775
133.8	0.7665
133.9	0.768
134	0.769
134.1	0.768
134.2	0.7665
134.3	0.76875
134.4	0.77325
134.5	0.77475
134.6	0.77425
134.7	0.773
134.8	0.773
134.9	0.77175
135	0.77275
135.1	0.77575
135.2	0.77825
135.3	0.779
135.4	0.7825
135.5	0.7815
135.6	0.77975
135.7	0.7805
135.8	0.781
135.9	0.7805
136	0.77875
136.1	0.77775
136.2	0.774
136.3	0.7755
136.4	0.7795
136.5	0.78175
136.6	0.7825
136.7	0.78575
136.8	0.7855
136.9	0.78475
137	0.78425
137.1	0.78425
137.2	0.78525
137.3	0.78675
137.4	0.78875
137.5	0.78925
137.6	0.7885
137.7	0.79025
137.8	0.788
137.9	0.787
138	0.78975
138.1	0.79175
138.2	0.792
138.3	0.795
138.4	0.79575
138.5	0.79275
138.6	0.79425
138.7	0.79325
138.8	0.795
138.9	0.7935
139	0.791
139.1	0.79425
139.2	0.79325
139.3	0.79025
139.4	0.79125
139.5	0.7905
139.6	0.79
139.7	0.78925
139.8	0.7895
139.9	0.78975
140	0.79225
140.1	0.79475
140.2	0.79925
140.3	0.80025
140.4	0.8
140.5	0.80025
140.6	0.80075
140.7	0.7995
140.8	0.79775
140.9	0.79775
141	0.79775
141.1	0.79525
141.2	0.796
141.3	0.7965
141.4	0.79925
141.5	0.79675
141.6	0.796
141.7	0.79475
141.8	0.7955
141.9	0.79425
142	0.7935
142.1	0.7955
142.2	0.79575
142.3	0.794
142.4	0.7935
142.5	0.79575
142.6	0.79475
142.7	0.79325
142.8	0.79175
142.9	0.7925
143	0.794
143.1	0.79575
143.2	0.79525
143.3	0.794
143.4	0.79275
143.5	0.79175
143.6	0.79225
143.7	0.7905
143.8	0.79075
143.9	0.791
144	0.792
144.1	0.795
144.2	0.7965
144.3	0.79775
144.4	0.79825
144.5	0.79925
144.6	0.799
144.7	0.798
144.8	0.8
144.9	0.79975
145	0.8005
145.1	0.802
145.2	0.8035
145.3	0.80375
145.4	0.804
145.5	0.80175
145.6	0.8045
145.7	0.80225
145.8	0.8045
145.9	0.8065
146	0.808
146.1	0.80575
146.2	0.8075
146.3	0.80875
146.4	0.80975
146.5	0.81375
146.6	0.81375
146.7	0.81475
146.8	0.81325
146.9	0.8105
147	0.809
147.1	0.8085
147.2	0.808
147.3	0.80475
147.4	0.806
147.5	0.805
147.6	0.80625
147.7	0.8065
147.8	0.8065
147.9	0.8065
148	0.80775
148.1	0.8065
148.2	0.8035
148.3	0.806
148.4	0.80825
148.5	0.80775
148.6	0.80975
148.7	0.812
148.8	0.812
148.9	0.81175
149	0.814
149.1	0.812
149.2	0.80975
149.3	0.8085
149.4	0.806
149.5	0.80525
149.6	0.8085
149.7	0.8095
149.8	0.80875
149.9	0.809
150	0.81
150.1	0.8095
150.2	0.81025
150.3	0.81175
150.4	0.81125
150.5	0.81125
150.6	0.8105
150.7	0.8095
150.8	0.8095
150.9	0.8115
151	0.8115
151.1	0.81225
151.2	0.814
151.3	0.81325
151.4	0.81375
151.5	0.8145
151.6	0.81175
151.7	0.81125
151.8	0.81125
151.9	0.81125
152	0.8105
152.1	0.81225
152.2	0.81075
152.3	0.8125
152.4	0.81525
152.5	0.81275
152.6	0.817
152.7	0.81575
152.8	0.8195
152.9	0.819
153	0.81925
153.1	0.82125
153.2	0.81925
153.3	0.8175
153.4	0.816
153.5	0.81725
153.6	0.81475
153.7	0.813
153.8	0.815
153.9	0.8155
154	0.81825
154.1	0.81675
154.2	0.8175
154.3	0.8175
154.4	0.81625
154.5	0.8175
154.6	0.81925
154.7	0.81975
154.8	0.8185
154.9	0.81625
155	0.8185
155.1	0.817
155.2	0.815
155.3	0.8145
155.4	0.8135
155.5	0.814
155.6	0.816
155.7	0.8155
155.8	0.81375
155.9	0.81425
156	0.818
156.1	0.81875
156.2	0.821
156.3	0.817
156.4	0.81725
156.5	0.8205
156.6	0.8235
156.7	0.826
156.8	0.828
156.9	0.828
157	0.82675
157.1	0.82575
157.2	0.82575
157.3	0.82325
157.4	0.8215
157.5	0.8195
157.6	0.81775
157.7	0.81825
157.8	0.8195
157.9	0.8205
158	0.8215
158.1	0.82475
158.2	0.8265
158.3	0.82825
158.4	0.82875
158.5	0.8275
158.6	0.82725
158.7	0.8265
158.8	0.8235
158.9	0.82525
159	0.82375
159.1	0.8245
159.2	0.82525
159.3	0.82675
159.4	0.82875
159.5	0.83025
159.6	0.8325
159.7	0.83225
159.8	0.829
159.9	0.827
160	0.82525
160.1	0.82525
160.2	0.82825
160.3	0.831
160.4	0.83175
160.5	0.828
160.6	0.829
160.7	0.83075
160.8	0.833
160.9	0.83325
161	0.83425
161.1	0.83725
161.2	0.83425
161.3	0.83525
161.4	0.8315
161.5	0.83125
161.6	0.83025
161.7	0.82975
161.8	0.83075
161.9	0.829
162	0.831
162.1	0.83325
162.2	0.832
162.3	0.833
162.4	0.8315
162.5	0.83125
162.6	0.831
162.7	0.83025
162.8	0.83
162.9	0.83125
163	0.8275
163.1	0.82925
163.2	0.8285
163.3	0.8255
163.4	0.82775
163.5	0.82675
163.6	0.82525
163.7	0.825
163.8	0.8255
163.9	0.826
164	0.82675
164.1	0.8315
164.2	0.83075
164.3	0.829
164.4	0.82725
164.5	0.82775
164.6	0.82825
164.7	0.8295
164.8	0.83075
164.9	0.82925
165	0.8285
165.1	0.82725
165.2	0.8295
165.3	0.83
165.4	0.8305
165.5	0.8335
165.6	0.835
165.7	0.83425
165.8	0.83025
165.9	0.8305
166	0.831
166.1	0.829
166.2	0.8315
166.3	0.831
166.4	0.82925
166.5	0.83025
166.6	0.833
166.7	0.8335
166.8	0.83375
166.9	0.8335
167	0.836
167.1	0.83775
167.2	0.8355
167.3	0.836
167.4	0.83775
167.5	0.8355
167.6	0.837
167.7	0.83425
167.8	0.83275
167.9	0.83675
168	0.83675
168.1	0.8375
168.2	0.839
168.3	0.8385
168.4	0.8375
168.5	0.83725
168.6	0.838
168.7	0.84025
168.8	0.84225
168.9	0.8455
169	0.84575
169.1	0.84775
169.2	0.84675
169.3	0.84575
169.4	0.846
169.5	0.848
169.6	0.848
169.7	0.84875
169.8	0.85
169.9	0.84925
170	0.8475
170.1	0.84675
170.2	0.846
170.3	0.844
170.4	0.84375
170.5	0.842
170.6	0.83825
170.7	0.8375
170.8	0.83675
170.9	0.83825
171	0.83925
171.1	0.84075
171.2	0.83975
171.3	0.84025
171.4	0.83925
171.5	0.8395
171.6	0.8405
171.7	0.8395
171.8	0.84175
171.9	0.84225
172	0.84175
172.1	0.8425
172.2	0.84075
172.3	0.84075
172.4	0.83975
172.5	0.83775
172.6	0.837
172.7	0.836
172.8	0.8365
172.9	0.83275
173	0.83275
173.1	0.83425
173.2	0.8345
173.3	0.83975
173.4	0.8415
173.5	0.84175
173.6	0.84175
173.7	0.8425
173.8	0.8435
173.9	0.8405
174	0.841
174.1	0.84325
174.2	0.84225
174.3	0.8435
174.4	0.8435
174.5	0.8445
174.6	0.84425
174.7	0.844
174.8	0.8445
174.9	0.8445
175	0.845
175.1	0.84475
175.2	0.84775
175.3	0.847
175.4	0.845
175.5	0.84575
175.6	0.8435
175.7	0.8435
175.8	0.844
175.9	0.84225
176	0.842
176.1	0.84325
176.2	0.845
176.3	0.84625
176.4	0.8445
176.5	0.843
176.6	0.84075
176.7	0.8395
176.8	0.8385
176.9	0.83975
177	0.838
177.1	0.84
177.2	0.8395
177.3	0.8395
177.4	0.8405
177.5	0.8425
177.6	0.842
177.7	0.842
177.8	0.84225
177.9	0.845
178	0.84525
178.1	0.84625
178.2	0.848
178.3	0.847
178.4	0.848
178.5	0.848
178.6	0.84825
178.7	0.84675
178.8	0.8435
178.9	0.84425
179	0.843
179.1	0.84325
179.2	0.8425
179.3	0.8435
179.4	0.843
179.5	0.84125
179.6	0.8415
179.7	0.8395
179.8	0.841
179.9	0.8425
180	0.841
180.1	0.84175
180.2	0.84025
180.3	0.8385
180.4	0.84025
180.5	0.84125
180.6	0.8395
180.7	0.83925
180.8	0.84125
180.9	0.84125
181	0.838
181.1	0.8375
181.2	0.836
181.3	0.83725
181.4	0.8355
181.5	0.8375
181.6	0.836
181.7	0.835
181.8	0.836
181.9	0.838
182	0.8385
182.1	0.8425
182.2	0.845
182.3	0.845
182.4	0.845
182.5	0.845
182.6	0.84675
182.7	0.84475
182.8	0.84275
182.9	0.83975
183	0.83925
183.1	0.8405
183.2	0.84
183.3	0.8385
183.4	0.8405
183.5	0.84
183.6	0.84125
183.7	0.84325
183.8	0.8415
183.9	0.8435
184	0.84625
184.1	0.846
184.2	0.84825
184.3	0.84475
184.4	0.8455
184.5	0.8465
184.6	0.845
184.7	0.8455
184.8	0.84725
184.9	0.844
185	0.84525
185.1	0.846
185.2	0.84425
185.3	0.84375
185.4	0.842
185.5	0.84275
185.6	0.84275
185.7	0.84175
185.8	0.84275
185.9	0.84325
186	0.84325
186.1	0.84475
186.2	0.8475
186.3	0.85025
186.4	0.852
186.5	0.85325
186.6	0.85375
186.7	0.8525
186.8	0.8515
186.9	0.852
187	0.85175
187.1	0.85475
187.2	0.85425
187.3	0.8545
187.4	0.8555
187.5	0.85325
187.6	0.85325
187.7	0.852
187.8	0.8505
187.9	0.85275
188	0.85175
188.1	0.85225
188.2	0.85075
188.3	0.84875
188.4	0.848
188.5	0.84775
188.6	0.8445
188.7	0.842
188.8	0.845
188.9	0.84475
189	0.84625
189.1	0.8445
189.2	0.847
189.3	0.84675
189.4	0.84675
189.5	0.84925
189.6	0.8505
189.7	0.85075
189.8	0.84925
189.9	0.85025
190	0.8485
190.1	0.847
190.2	0.8475
190.3	0.85025
190.4	0.8545
190.5	0.85625
190.6	0.85775
190.7	0.85575
190.8	0.85475
190.9	0.854
191	0.854
191.1	0.852
191.2	0.85425
191.3	0.85375
191.4	0.8535
191.5	0.85725
191.6	0.855
191.7	0.85375
191.8	0.85275
191.9	0.84975
192	0.84775
192.1	0.851
192.2	0.85
192.3	0.848
192.4	0.84575
192.5	0.84825
192.6	0.85
192.7	0.84775
192.8	0.84725
192.9	0.84925
193	0.849
193.1	0.84775
193.2	0.847
193.3	0.84725
193.4	0.84925
193.5	0.85
193.6	0.84875
193.7	0.8525
193.8	0.854
193.9	0.85175
194	0.85075
194.1	0.8505
194.2	0.85225
194.3	0.8505
194.4	0.85175
194.5	0.852
194.6	0.85125
194.7	0.851
194.8	0.8525
194.9	0.852
195	0.8525
195.1	0.849
195.2	0.85
195.3	0.8475
195.4	0.8495
195.5	0.84725
195.6	0.84775
195.7	0.84575
195.8	0.847
195.9	0.84575
196	0.84625
196.1	0.8445
196.2	0.843
196.3	0.84425
196.4	0.8435
196.5	0.8425
196.6	0.84775
196.7	0.8465
196.8	0.8485
196.9	0.8465
197	0.8475
197.1	0.84775
197.2	0.8485
197.3	0.852
197.4	0.85025
197.5	0.84975
197.6	0.84875
197.7	0.84725
197.8	0.8485
197.9	0.848
198	0.84825
198.1	0.8495
198.2	0.849
198.3	0.8475
198.4	0.84775
198.5	0.8465
198.6	0.849
198.7	0.84925
198.8	0.84875
198.9	0.85
199	0.85025
199.1	0.84925
199.2	0.84725
199.3	0.848
199.4	0.84925
199.5	0.85075
199.6	0.8505
199.7	0.84975
199.8	0.8505
199.9	0.85325
200	0.85175
[truncated: 14,000 more rows]
