# Supplementary material for: Bayesian inference of kinetic schemes for ion channels by Kalman filtering
Source: eLife journal article supplement (doi:10.7554/elife.62714), 2022-05-04
Supplement: fig4-data6 [file 1_Sim_N_2000_Strom_MW.xlsx]

## Sheet: Tabelle1
0.1	0
0.2	0
0.3	0
0.4	0
0.5	0
0.6	0
0.7	0
0.8	0
0.9	0
1	0
1.1	0
1.2	0
1.3	0
1.4	0
1.5	0
1.6	0
1.7	0
1.8	0
1.9	0
2	0
2.1	0
2.2	0
2.3	0
2.4	0
2.5	0
2.6	0
2.7	0
2.8	0
2.9	0
3	0
3.1	0
3.2	0
3.3	0
3.4	0
3.5	0
3.6	0
3.7	0
3.8	0
3.9	0
4	0
4.1	0
4.2	0
4.3	0
4.4	0
4.5	0
4.6	0
4.7	0
4.8	0
4.9	0
5	0
5.1	0
5.2	0
5.3	0
5.4	0
5.5	0
5.6	0
5.7	0
5.8	0
5.9	0
6	0
6.1	0
6.2	0
6.3	0
6.4	0
6.5	0
6.6	0
6.7	0
6.8	0
6.9	0
7	0
7.1	0
7.2	0
7.3	0
7.4	0
7.5	0
7.6	0
7.7	0
7.8	0
7.9	0
8	0
8.1	0
8.2	0
8.3	0
8.4	0
8.5	0
8.6	0
8.7	0
8.8	0
8.9	0
9	0
9.1	0
9.2	0
9.3	0
9.4	0
9.5	0
9.6	0
9.7	0
9.8	0
9.9	0
10	0
10.1	0
10.2	0
10.3	0
10.4	0
10.5	0
10.6	0
10.7	0
10.8	0
10.9	0
11	0
11.1	0
11.2	0
11.3	0
11.4	0
11.5	0
11.6	0
11.7	0
11.8	0
11.9	0
12	0
12.1	0
12.2	0
12.3	0
12.4	0
12.5	0
12.6	0
12.7	0
12.8	0
12.9	0
13	0
13.1	0
13.2	0
13.3	0
13.4	0
13.5	0
13.6	0
13.7	0
13.8	0
13.9	0
14	0
14.1	0
14.2	0
14.3	0
14.4	0
14.5	0
14.6	0
14.7	0
14.8	0
14.9	0
15	0
15.1	0
15.2	0
15.3	0
15.4	0
15.5	0
15.6	0
15.7	0
15.8	0
15.9	0
16	0
16.1	0
16.2	0
16.3	0
16.4	0
16.5	0
16.6	0
16.7	0
16.8	0
16.9	0
17	0
17.1	0
17.2	0
17.3	0
17.4	0
17.5	0
17.6	0
17.7	0
17.8	0
17.9	0
18	0
18.1	0
18.2	0
18.3	0
18.4	0
18.5	0
18.6	0
18.7	0
18.8	0
18.9	0
19	0
19.1	0
19.2	0
19.3	0
19.4	0
19.5	0
19.6	0
19.7	0
19.8	0
19.9	0
20	0
20.1	0
20.2	0
20.3	0
20.4	0
20.5	0
20.6	0
20.7	0
20.8	0
20.9	0
21	0
21.1	0
21.2	0
21.3	0
21.4	0
21.5	0
21.6	0
21.7	0
21.8	0
21.9	0
22	0
22.1	0
22.2	0
22.3	0
22.4	0
22.5	0
22.6	0
22.7	0
22.8	0
22.9	0
23	0
23.1	0
23.2	0
23.3	0
23.4	0
23.5	0
23.6	0
23.7	0
23.8	0
23.9	0
24	0
24.1	0
24.2	0
24.3	0
24.4	0
24.5	0
24.6	0
24.7	0
24.8	0
24.9	0
25	0
25.1	0
25.2	0
25.3	0
25.4	0
25.5	0
25.6	0
25.7	0
25.8	0
25.9	0
26	0
26.1	0
26.2	0
26.3	0
26.4	0
26.5	0
26.6	0
26.7	0
26.8	0
26.9	0
27	0
27.1	0
27.2	0
27.3	0
27.4	0
27.5	0
27.6	0
27.7	0
27.8	0
27.9	0
28	0
28.1	0
28.2	0
28.3	0
28.4	0
28.5	0
28.6	0
28.7	0
28.8	0
28.9	0
29	0
29.1	0
29.2	0
29.3	0
29.4	0
29.5	0
29.6	0
29.7	0
29.8	0
29.9	0
30	0
30.1	0
30.2	0
30.3	0
30.4	0
30.5	0
30.6	0
30.7	0
30.8	0
30.9	0
31	0
31.1	0
31.2	0
31.3	0
31.4	0
31.5	0
31.6	0
31.7	0
31.8	0
31.9	0
32	0
32.1	0
32.2	0
32.3	0
32.4	0
32.5	0
32.6	0
32.7	0
32.8	0
32.9	0
33	0
33.1	0
33.2	0
33.3	0
33.4	0
33.5	0
33.6	0
33.7	0
33.8	0
33.9	0
34	0
34.1	0
34.2	0
34.3	0
34.4	0
34.5	0
34.6	0
34.7	0
34.8	0
34.9	0
35	0
35.1	0
35.2	0
35.3	0
35.4	0
35.5	0
35.6	0
35.7	0
35.8	0
35.9	0
36	0
36.1	0
36.2	0
36.3	0
36.4	0
36.5	0
36.6	0
36.7	0
36.8	0
36.9	0
37	0
37.1	0
37.2	0
37.3	0
37.4	0
37.5	0
37.6	0
37.7	0
37.8	0
37.9	0
38	0
38.1	0
38.2	0
38.3	0
38.4	0
38.5	0
38.6	0
38.7	0
38.8	0
38.9	0
39	0
39.1	0
39.2	0
39.3	0
39.4	0
39.5	0
39.6	0
39.7	0
39.8	0
39.9	0
40	0
40.1	0
40.2	0
40.3	0
40.4	0
40.5	0
40.6	0
40.7	0
40.8	0
40.9	0
41	0
41.1	0
41.2	0
41.3	0
41.4	0
41.5	0
41.6	0
41.7	0
41.8	0
41.9	0
42	0
42.1	0
42.2	0
42.3	0
42.4	0
42.5	0
42.6	0
42.7	0
42.8	0
42.9	0
43	0
43.1	0
43.2	0
43.3	0
43.4	0
43.5	0
43.6	0
43.7	0
43.8	0
43.9	0
44	0
44.1	0
44.2	0
44.3	0
44.4	0
44.5	0
44.6	0
44.7	0
44.8	0
44.9	0
45	0
45.1	0
45.2	0
45.3	0
45.4	0
45.5	0
45.6	0
45.7	0
45.8	0
45.9	0
46	0
46.1	0
46.2	0
46.3	0
46.4	0
46.5	0
46.6	0
46.7	0
46.8	0
46.9	0
47	0
47.1	0
47.2	0
47.3	0
47.4	0
47.5	0
47.6	0
47.7	0
47.8	0
47.9	0
48	0
48.1	0
48.2	0
48.3	0
48.4	0
48.5	0
48.6	0
48.7	0
48.8	0
48.9	0
49	0
49.1	0
49.2	0
49.3	0
49.4	0
49.5	0
49.6	0
49.7	0
49.8	0
49.9	0
50	0
50.1	0
50.2	0
50.3	0
50.4	0
50.5	0
50.6	0
50.7	0
50.8	0
50.9	0
51	0
51.1	0
51.2	0
51.3	0
51.4	0
51.5	0
51.6	0
51.7	0
51.8	0
51.9	0
52	0
52.1	0
52.2	0
52.3	0
52.4	0
52.5	0
52.6	0
52.7	0
52.8	0
52.9	0
53	0
53.1	0
53.2	0
53.3	0
53.4	0
53.5	0
53.6	0
53.7	0
53.8	0
53.9	0
54	0
54.1	0
54.2	0
54.3	0
54.4	0
54.5	0
54.6	0
54.7	0
54.8	0
54.9	0
55	0
55.1	0
55.2	0
55.3	0
55.4	0
55.5	0
55.6	0
55.7	0
55.8	0
55.9	0
56	0
56.1	0
56.2	0
56.3	0
56.4	0
56.5	0
56.6	0
56.7	0
56.8	0
56.9	0
57	0
57.1	0
57.2	0
57.3	0
57.4	0
57.5	0
57.6	0
57.7	0
57.8	0
57.9	0
58	0
58.1	0
58.2	0
58.3	0
58.4	0
58.5	0
58.6	0
58.7	0
58.8	0
58.9	0
59	0
59.1	0
59.2	0
59.3	0
59.4	0
59.5	0
59.6	0
59.7	0
59.8	0
59.9	0
60	0
60.1	0
60.2	0
60.3	0
60.4	0
60.5	0
60.6	0
60.7	0
60.8	0
60.9	0
61	0
61.1	0
61.2	0
61.3	0
61.4	0
61.5	0
61.6	0
61.7	0
61.8	0
61.9	0
62	0
62.1	0
62.2	0
62.3	0
62.4	0
62.5	0
62.6	0
62.7	0
62.8	0
62.9	0
63	0
63.1	0
63.2	0
63.3	0
63.4	0
63.5	0
63.6	0
63.7	0
63.8	0
63.9	0
64	0
64.1	0
64.2	0
64.3	0
64.4	0
64.5	0
64.6	0
64.7	0
64.8	0
64.9	0
65	0
65.1	0
65.2	0
65.3	0
65.4	0
65.5	0
65.6	0
65.7	0
65.8	0
65.9	0
66	0
66.1	0
66.2	0
66.3	0
66.4	0
66.5	0
66.6	0
66.7	0
66.8	0
66.9	0
67	0
67.1	0
67.2	0
67.3	0
67.4	0
67.5	0
67.6	0
67.7	0
67.8	0
67.9	0
68	0
68.1	0
68.2	0
68.3	0
68.4	0
68.5	0
68.6	0
68.7	0
68.8	0
68.9	0
69	0
69.1	0
69.2	0
69.3	0
69.4	0
69.5	0
69.6	0
69.7	0
69.8	0
69.9	0
70	0
70.1	0
70.2	0
70.3	0
70.4	0
70.5	0
70.6	0
70.7	0
70.8	0
70.9	0
71	0
71.1	0
71.2	0
71.3	0
71.4	0
71.5	0
71.6	0
71.7	0
71.8	0
71.9	0
72	0
72.1	0
72.2	0
72.3	0
72.4	0
72.5	0
72.6	0
72.7	0
72.8	0
72.9	0
73	0
73.1	0
73.2	0
73.3	0
73.4	0
73.5	0
73.6	0
73.7	0
73.8	0
73.9	0
74	0
74.1	0
74.2	0
74.3	0
74.4	0
74.5	0
74.6	0
74.7	0
74.8	0
74.9	0
75	0
75.1	0
75.2	0
75.3	0
75.4	0
75.5	0
75.6	0
75.7	0
75.8	0
75.9	0
76	0
76.1	0
76.2	0
76.3	0
76.4	0
76.5	0
76.6	0
76.7	0
76.8	0
76.9	0
77	0
77.1	0
77.2	0
77.3	0
77.4	0
77.5	0
77.6	0
77.7	0
77.8	0
77.9	0
78	0
78.1	0
78.2	0
78.3	0
78.4	0
78.5	0
78.6	0
78.7	0
78.8	0
78.9	0
79	0
79.1	0
79.2	0
79.3	0
79.4	0
79.5	0
79.6	0
79.7	0
79.8	0
79.9	0
80	0
80.1	0
80.2	0
80.3	0
80.4	0
80.5	0
80.6	0
80.7	0
80.8	0
80.9	0
81	0
81.1	0
81.2	0
81.3	0
81.4	0
81.5	0
81.6	0
81.7	0
81.8	0
81.9	0
82	0
82.1	0
82.2	0
82.3	0
82.4	0
82.5	0
82.6	0
82.7	0
82.8	0
82.9	0
83	0
83.1	0
83.2	0
83.3	0
83.4	0
83.5	0
83.6	0
83.7	0
83.8	0
83.9	0
84	0
84.1	0
84.2	0
84.3	0
84.4	0
84.5	0
84.6	0
84.7	0
84.8	0
84.9	0
85	0
85.1	0
85.2	0
85.3	0
85.4	0
85.5	0
85.6	0
85.7	0
85.8	0
85.9	0
86	0
86.1	0
86.2	0
86.3	0
86.4	0
86.5	0
86.6	0
86.7	0
86.8	0
86.9	0
87	0
87.1	0
87.2	0
87.3	0
87.4	0
87.5	0
87.6	0
87.7	0
87.8	0
87.9	0
88	0
88.1	0
88.2	0
88.3	0
88.4	0
88.5	0
88.6	0
88.7	0
88.8	0
88.9	0
89	0
89.1	0
89.2	0
89.3	0
89.4	0
89.5	0
89.6	0
89.7	0
89.8	0
89.9	0
90	0
90.1	0
90.2	0
90.3	0
90.4	0
90.5	0
90.6	0
90.7	0
90.8	0
90.9	0
91	0
91.1	0
91.2	0
91.3	0
91.4	0
91.5	0
91.6	0
91.7	0
91.8	0
91.9	0
92	0
92.1	0
92.2	0
92.3	0
92.4	0
92.5	0
92.6	0
92.7	0
92.8	0
92.9	0
93	0
93.1	0
93.2	0
93.3	0
93.4	0
93.5	0
93.6	0
93.7	0
93.8	0
93.9	0
94	0
94.1	0
94.2	0
94.3	0
94.4	0
94.5	0
94.6	0
94.7	0
94.8	0
94.9	0
95	0
95.1	0
95.2	0
95.3	0
95.4	0
95.5	0
95.6	0
95.7	0
95.8	0
95.9	0
96	0
96.1	0
96.2	0
96.3	0
96.4	0
96.5	0
96.6	0
96.7	0
96.8	0
96.9	0
97	0
97.1	0
97.2	0
97.3	0
97.4	0
97.5	0
97.6	0
97.7	0
97.8	0
97.9	0
98	0
98.1	0
98.2	0
98.3	0
98.4	0
98.5	0
98.6	0
98.7	0
98.8	0
98.9	0
99	0
99.1	0
99.2	0
99.3	0
99.4	0
99.5	0
99.6	0
99.7	0
99.8	0
99.9	0
100	0
100.1	0
100.2	0
100.3	0
100.4	0
100.5	0
100.6	0
100.7	0.001
100.8	0.0015
100.9	0.0015
101	0.0015
101.1	0.0015
101.2	0.002
101.3	0.0025
101.4	0.0035
101.5	0.0045
101.6	0.0055
101.7	0.006
101.8	0.0065
101.9	0.0075
102	0.0085
102.1	0.01
102.2	0.0115
102.3	0.012
102.4	0.0125
102.5	0.0135
102.6	0.0135
102.7	0.0145
102.8	0.015
102.9	0.015
103	0.016
103.1	0.016
103.2	0.0185
103.3	0.022
103.4	0.0235
103.5	0.024
103.6	0.0245
103.7	0.026
103.8	0.0295
103.9	0.03
104	0.0315
104.1	0.0325
104.2	0.033
104.3	0.033
104.4	0.033
104.5	0.034
104.6	0.034
104.7	0.036
104.8	0.0395
104.9	0.04
105	0.042
105.1	0.043
105.2	0.0445
105.3	0.0475
105.4	0.048
105.5	0.0515
105.6	0.0535
105.7	0.0535
105.8	0.056
105.9	0.057
106	0.059
106.1	0.0595
106.2	0.061
106.3	0.0635
106.4	0.0645
106.5	0.066
106.6	0.0675
106.7	0.0685
106.8	0.07
106.9	0.072
107	0.073
107.1	0.0745
107.2	0.076
107.3	0.078
107.4	0.079
107.5	0.08
107.6	0.081
107.7	0.0815
107.8	0.0825
107.9	0.084
108	0.0855
108.1	0.0865
108.2	0.0885
108.3	0.09
108.4	0.091
108.5	0.092
108.6	0.092
108.7	0.093
108.8	0.095
108.9	0.0955
109	0.0975
109.1	0.0985
109.2	0.101
109.3	0.1015
109.4	0.1035
109.5	0.1045
109.6	0.106
109.7	0.107
109.8	0.1075
109.9	0.109
110	0.1095
110.1	0.111
110.2	0.1125
110.3	0.113
110.4	0.115
110.5	0.1155
110.6	0.1175
110.7	0.119
110.8	0.12
110.9	0.1205
111	0.122
111.1	0.123
111.2	0.125
111.3	0.1275
111.4	0.1285
111.5	0.131
111.6	0.1325
111.7	0.134
111.8	0.138
111.9	0.139
112	0.1405
112.1	0.1415
112.2	0.1435
112.3	0.144
112.4	0.144
112.5	0.1455
112.6	0.1475
112.7	0.1485
112.8	0.1485
112.9	0.149
113	0.1505
113.1	0.153
113.2	0.1535
113.3	0.154
113.4	0.1545
113.5	0.1555
113.6	0.1585
113.7	0.1595
113.8	0.159
113.9	0.1605
114	0.162
114.1	0.165
114.2	0.1655
114.3	0.1675
114.4	0.1675
114.5	0.1665
114.6	0.1665
114.7	0.1675
114.8	0.169
114.9	0.17
115	0.1735
115.1	0.1745
115.2	0.1755
115.3	0.178
115.4	0.18
115.5	0.182
115.6	0.183
115.7	0.1845
115.8	0.1865
115.9	0.1875
116	0.1895
116.1	0.19
116.2	0.191
116.3	0.1935
116.4	0.1935
116.5	0.196
116.6	0.197
116.7	0.198
116.8	0.1985
116.9	0.2
117	0.201
117.1	0.201
117.2	0.2035
117.3	0.205
117.4	0.208
117.5	0.2085
117.6	0.209
117.7	0.211
117.8	0.2115
117.9	0.212
118	0.213
118.1	0.2145
118.2	0.215
118.3	0.2165
118.4	0.217
118.5	0.2165
118.6	0.2175
118.7	0.2195
118.8	0.221
118.9	0.223
119	0.224
119.1	0.2245
119.2	0.226
119.3	0.2265
119.4	0.2265
119.5	0.229
119.6	0.2315
119.7	0.2315
119.8	0.231
119.9	0.231
120	0.2315
120.1	0.2305
120.2	0.232
120.3	0.2335
120.4	0.2355
120.5	0.236
120.6	0.2365
120.7	0.238
120.8	0.239
120.9	0.2405
121	0.241
121.1	0.243
121.2	0.243
121.3	0.2445
121.4	0.246
121.5	0.247
121.6	0.2475
121.7	0.2515
121.8	0.253
121.9	0.253
122	0.255
122.1	0.256
122.2	0.256
122.3	0.257
122.4	0.259
122.5	0.261
122.6	0.2615
122.7	0.2615
122.8	0.2625
122.9	0.2645
123	0.2675
123.1	0.268
123.2	0.268
123.3	0.2685
123.4	0.2685
123.5	0.2705
123.6	0.27
123.7	0.271
123.8	0.2715
123.9	0.272
124	0.2735
124.1	0.274
124.2	0.274
124.3	0.276
124.4	0.277
124.5	0.278
124.6	0.28
124.7	0.281
124.8	0.281
124.9	0.281
125	0.282
125.1	0.283
125.2	0.2845
125.3	0.285
125.4	0.2845
125.5	0.2855
125.6	0.2875
125.7	0.289
125.8	0.2905
125.9	0.29
126	0.291
126.1	0.2915
126.2	0.292
126.3	0.2905
126.4	0.291
126.5	0.292
126.6	0.2935
126.7	0.2955
126.8	0.299
126.9	0.2995
127	0.3025
127.1	0.303
127.2	0.305
127.3	0.3065
127.4	0.307
127.5	0.3085
127.6	0.3095
127.7	0.31
127.8	0.3105
127.9	0.3115
128	0.312
128.1	0.3125
128.2	0.314
128.3	0.3165
128.4	0.317
128.5	0.319
128.6	0.3185
128.7	0.32
128.8	0.321
128.9	0.321
129	0.3215
129.1	0.3225
129.2	0.323
129.3	0.3225
129.4	0.325
129.5	0.3255
129.6	0.3275
129.7	0.328
129.8	0.329
129.9	0.329
130	0.3295
130.1	0.33
130.2	0.3305
130.3	0.3305
130.4	0.3315
130.5	0.331
130.6	0.333
130.7	0.334
130.8	0.3365
130.9	0.3365
131	0.337
131.1	0.3385
131.2	0.34
131.3	0.341
131.4	0.341
131.5	0.342
131.6	0.343
131.7	0.342
131.8	0.342
131.9	0.3425
132	0.3435
132.1	0.3445
132.2	0.3475
132.3	0.349
132.4	0.35
132.5	0.3505
132.6	0.352
132.7	0.3525
132.8	0.3525
132.9	0.3545
133	0.355
133.1	0.355
133.2	0.3555
133.3	0.3565
133.4	0.359
133.5	0.36
133.6	0.3605
133.7	0.3615
133.8	0.3645
133.9	0.3645
134	0.366
134.1	0.3655
134.2	0.3655
134.3	0.3655
134.4	0.3665
134.5	0.367
134.6	0.3685
134.7	0.371
134.8	0.3715
134.9	0.372
135	0.3735
135.1	0.375
135.2	0.3755
135.3	0.3745
135.4	0.3745
135.5	0.3775
135.6	0.3775
135.7	0.379
135.8	0.3785
135.9	0.379
136	0.379
136.1	0.381
136.2	0.382
136.3	0.3825
136.4	0.3845
136.5	0.3865
136.6	0.389
136.7	0.3885
136.8	0.3885
136.9	0.3875
137	0.3875
137.1	0.39
137.2	0.3915
137.3	0.392
137.4	0.3925
137.5	0.3935
137.6	0.3935
137.7	0.3945
137.8	0.3935
137.9	0.394
138	0.3945
138.1	0.3965
138.2	0.3985
138.3	0.3995
138.4	0.3995
138.5	0.4005
138.6	0.4005
138.7	0.4005
138.8	0.4015
138.9	0.4005
139	0.402
139.1	0.404
139.2	0.405
139.3	0.4065
139.4	0.406
139.5	0.4055
139.6	0.406
139.7	0.4065
139.8	0.4085
139.9	0.409
140	0.41
140.1	0.4115
140.2	0.412
140.3	0.4125
140.4	0.413
140.5	0.4135
140.6	0.4145
140.7	0.417
140.8	0.415
140.9	0.415
141	0.4155
141.1	0.4175
141.2	0.42
141.3	0.4195
141.4	0.42
141.5	0.42
141.6	0.4205
141.7	0.42
141.8	0.4205
141.9	0.422
142	0.423
142.1	0.424
142.2	0.424
142.3	0.4235
142.4	0.4245
142.5	0.4265
142.6	0.4265
142.7	0.428
142.8	0.429
142.9	0.43
143	0.4315
143.1	0.431
143.2	0.434
143.3	0.436
143.4	0.4355
143.5	0.4355
143.6	0.437
143.7	0.437
143.8	0.438
143.9	0.4385
144	0.4395
144.1	0.441
144.2	0.4435
144.3	0.444
144.4	0.4445
144.5	0.445
144.6	0.4455
144.7	0.4455
144.8	0.4455
144.9	0.446
145	0.4465
145.1	0.4465
145.2	0.448
145.3	0.448
145.4	0.4485
145.5	0.449
145.6	0.449
145.7	0.449
145.8	0.4495
145.9	0.4505
146	0.451
146.1	0.45
146.2	0.45
146.3	0.452
146.4	0.452
146.5	0.453
146.6	0.4525
146.7	0.4535
146.8	0.453
146.9	0.4525
147	0.4525
147.1	0.4525
147.2	0.4535
147.3	0.4535
147.4	0.4535
147.5	0.455
147.6	0.455
147.7	0.456
147.8	0.456
147.9	0.458
148	0.4605
148.1	0.461
148.2	0.4615
148.3	0.4625
148.4	0.4625
148.5	0.4635
148.6	0.4655
148.7	0.466
148.8	0.4665
148.9	0.4675
149	0.4675
149.1	0.4675
149.2	0.467
149.3	0.467
149.4	0.4685
149.5	0.4685
149.6	0.4685
149.7	0.4675
149.8	0.4675
149.9	0.4705
150	0.4715
150.1	0.474
150.2	0.4735
150.3	0.4725
150.4	0.472
150.5	0.472
150.6	0.472
150.7	0.4725
150.8	0.471
150.9	0.4725
151	0.4735
151.1	0.4725
151.2	0.4715
151.3	0.4725
151.4	0.4725
151.5	0.472
151.6	0.4715
151.7	0.472
151.8	0.474
151.9	0.4735
152	0.473
152.1	0.4725
152.2	0.4735
152.3	0.4735
152.4	0.474
152.5	0.4725
152.6	0.4725
152.7	0.4735
152.8	0.473
152.9	0.474
153	0.4745
153.1	0.475
153.2	0.4755
153.3	0.4755
153.4	0.4755
153.5	0.4785
153.6	0.4785
153.7	0.4795
153.8	0.4785
153.9	0.4795
154	0.4805
154.1	0.4815
154.2	0.482
154.3	0.482
154.4	0.4825
154.5	0.4825
154.6	0.483
154.7	0.4835
154.8	0.4835
154.9	0.484
155	0.485
155.1	0.484
155.2	0.485
155.3	0.4845
155.4	0.485
155.5	0.486
155.6	0.4865
155.7	0.486
155.8	0.486
155.9	0.487
156	0.4875
156.1	0.487
156.2	0.487
156.3	0.488
156.4	0.489
156.5	0.4905
156.6	0.491
156.7	0.491
156.8	0.492
156.9	0.492
157	0.493
157.1	0.493
157.2	0.494
157.3	0.4935
157.4	0.495
157.5	0.495
157.6	0.4955
157.7	0.4955
157.8	0.4975
157.9	0.4985
158	0.499
158.1	0.5
158.2	0.5005
158.3	0.501
158.4	0.5015
158.5	0.5005
158.6	0.5015
158.7	0.5025
158.8	0.5015
158.9	0.5025
159	0.5015
159.1	0.501
159.2	0.501
159.3	0.5015
159.4	0.5025
159.5	0.5035
159.6	0.504
159.7	0.5035
159.8	0.503
159.9	0.5035
160	0.503
160.1	0.5055
160.2	0.5065
160.3	0.5075
160.4	0.507
160.5	0.5075
160.6	0.5085
160.7	0.508
160.8	0.5095
160.9	0.511
161	0.511
161.1	0.5115
161.2	0.513
161.3	0.514
161.4	0.516
161.5	0.5155
161.6	0.516
161.7	0.5175
161.8	0.5175
161.9	0.5175
162	0.5165
162.1	0.5165
162.2	0.517
162.3	0.5165
162.4	0.5165
162.5	0.5165
162.6	0.515
162.7	0.515
162.8	0.515
162.9	0.5155
163	0.5155
163.1	0.5165
163.2	0.5165
163.3	0.5165
163.4	0.5165
163.5	0.5185
163.6	0.517
163.7	0.518
163.8	0.52
163.9	0.5195
164	0.519
164.1	0.519
164.2	0.519
164.3	0.52
164.4	0.521
164.5	0.5225
164.6	0.523
164.7	0.524
164.8	0.524
164.9	0.524
165	0.526
165.1	0.5255
165.2	0.5255
165.3	0.526
165.4	0.526
165.5	0.526
165.6	0.526
165.7	0.527
165.8	0.5265
165.9	0.5265
166	0.526
166.1	0.5255
166.2	0.526
166.3	0.5255
166.4	0.526
166.5	0.5265
166.6	0.5255
166.7	0.5255
166.8	0.527
166.9	0.5265
167	0.527
167.1	0.5265
167.2	0.526
167.3	0.5265
167.4	0.5265
167.5	0.5265
167.6	0.528
167.7	0.5265
167.8	0.526
167.9	0.526
168	0.5265
168.1	0.5265
168.2	0.5255
168.3	0.5255
168.4	0.527
168.5	0.5275
168.6	0.5285
168.7	0.529
168.8	0.53
168.9	0.5295
169	0.529
169.1	0.5295
169.2	0.5295
169.3	0.5295
169.4	0.5285
169.5	0.529
169.6	0.5285
169.7	0.5295
169.8	0.53
169.9	0.531
170	0.53
170.1	0.53
170.2	0.5315
170.3	0.5315
170.4	0.5335
170.5	0.5335
170.6	0.5335
170.7	0.532
170.8	0.531
170.9	0.532
171	0.532
171.1	0.5325
171.2	0.5335
171.3	0.533
171.4	0.5345
171.5	0.5345
171.6	0.5365
171.7	0.536
171.8	0.536
171.9	0.536
172	0.5355
172.1	0.5365
172.2	0.537
172.3	0.539
172.4	0.5395
172.5	0.54
172.6	0.541
172.7	0.541
172.8	0.541
172.9	0.5415
173	0.542
173.1	0.5425
173.2	0.544
173.3	0.5445
173.4	0.546
173.5	0.5465
173.6	0.5465
173.7	0.546
173.8	0.5465
173.9	0.546
174	0.5455
174.1	0.5445
174.2	0.5445
174.3	0.546
174.4	0.5465
174.5	0.547
174.6	0.547
174.7	0.549
174.8	0.5505
174.9	0.5505
175	0.55
175.1	0.55
175.2	0.5515
175.3	0.553
175.4	0.553
175.5	0.5515
175.6	0.551
175.7	0.5505
175.8	0.5505
175.9	0.551
176	0.5515
176.1	0.551
176.2	0.5505
176.3	0.551
176.4	0.55
176.5	0.5495
176.6	0.549
176.7	0.549
176.8	0.5495
176.9	0.5495
177	0.5485
177.1	0.5485
177.2	0.5485
177.3	0.5475
177.4	0.548
177.5	0.5485
177.6	0.5485
177.7	0.5485
177.8	0.5485
177.9	0.5485
178	0.55
178.1	0.5505
178.2	0.5495
178.3	0.5495
178.4	0.5495
178.5	0.55
178.6	0.549
178.7	0.5495
178.8	0.549
178.9	0.548
179	0.548
179.1	0.5485
179.2	0.548
179.3	0.549
179.4	0.5485
179.5	0.5475
179.6	0.547
179.7	0.5425
179.8	0.542
179.9	0.5425
180	0.543
180.1	0.543
180.2	0.543
180.3	0.5425
180.4	0.542
180.5	0.542
180.6	0.542
180.7	0.5405
180.8	0.54
180.9	0.5415
181	0.541
181.1	0.542
181.2	0.542
181.3	0.5425
181.4	0.543
181.5	0.5425
181.6	0.5425
181.7	0.542
181.8	0.5415
181.9	0.5425
182	0.543
182.1	0.544
182.2	0.544
182.3	0.5435
182.4	0.545
182.5	0.5465
182.6	0.5475
182.7	0.548
182.8	0.5475
182.9	0.5475
183	0.5465
183.1	0.546
183.2	0.546
183.3	0.548
183.4	0.5485
183.5	0.548
183.6	0.549
183.7	0.5495
183.8	0.55
183.9	0.5495
184	0.5495
184.1	0.5485
184.2	0.549
184.3	0.55
184.4	0.5495
184.5	0.5495
184.6	0.5505
184.7	0.551
184.8	0.5515
184.9	0.5515
185	0.5505
185.1	0.551
185.2	0.55
185.3	0.5495
185.4	0.551
185.5	0.55
185.6	0.5505
185.7	0.5505
185.8	0.55
185.9	0.551
186	0.551
186.1	0.55
186.2	0.551
186.3	0.5505
186.4	0.5515
186.5	0.552
186.6	0.552
186.7	0.5525
186.8	0.554
186.9	0.554
187	0.5525
187.1	0.553
187.2	0.552
187.3	0.5515
187.4	0.5515
187.5	0.5535
187.6	0.555
187.7	0.5555
187.8	0.5555
187.9	0.5575
188	0.558
188.1	0.558
188.2	0.5575
188.3	0.557
188.4	0.5575
188.5	0.558
188.6	0.559
188.7	0.559
188.8	0.56
188.9	0.562
189	0.5615
189.1	0.562
189.2	0.562
189.3	0.5615
189.4	0.562
189.5	0.5625
189.6	0.564
189.7	0.563
189.8	0.563
189.9	0.5635
190	0.5635
190.1	0.5635
190.2	0.5635
190.3	0.563
190.4	0.565
190.5	0.5655
190.6	0.567
190.7	0.567
190.8	0.567
190.9	0.568
191	0.5665
191.1	0.568
191.2	0.568
191.3	0.569
191.4	0.5695
191.5	0.5695
191.6	0.5705
191.7	0.572
191.8	0.5715
191.9	0.57
192	0.5695
192.1	0.57
192.2	0.5695
192.3	0.5715
192.4	0.573
192.5	0.5715
192.6	0.5715
192.7	0.5725
192.8	0.5725
192.9	0.5725
193	0.5725
193.1	0.572
193.2	0.572
193.3	0.5705
193.4	0.57
193.5	0.5705
193.6	0.5705
193.7	0.5705
193.8	0.5705
193.9	0.5715
194	0.5725
194.1	0.5725
194.2	0.5715
194.3	0.571
194.4	0.5715
194.5	0.571
194.6	0.5715
194.7	0.571
194.8	0.5715
194.9	0.572
195	0.5715
195.1	0.5705
195.2	0.5705
195.3	0.5705
195.4	0.5705
195.5	0.5705
195.6	0.57
195.7	0.569
195.8	0.569
195.9	0.5705
196	0.5705
196.1	0.57
196.2	0.57
196.3	0.5705
196.4	0.5705
196.5	0.5705
196.6	0.57
196.7	0.569
196.8	0.569
196.9	0.5695
197	0.57
197.1	0.57
197.2	0.5705
197.3	0.57
197.4	0.5695
197.5	0.5695
197.6	0.5705
197.7	0.571
197.8	0.5715
197.9	0.571
198	0.5705
198.1	0.5715
198.2	0.571
198.3	0.5715
198.4	0.5725
198.5	0.571
198.6	0.572
198.7	0.571
198.8	0.5715
198.9	0.5715
199	0.5725
199.1	0.5735
199.2	0.575
199.3	0.576
199.4	0.5745
199.5	0.574
199.6	0.575
199.7	0.575
199.8	0.575
199.9	0.575
200	0.5745
[truncated: 14,000 more rows]
