# Supplementary material for: Bayesian inference of kinetic schemes for ion channels by Kalman filtering
Source: eLife journal article supplement (doi:10.7554/elife.62714), 2022-05-04
Supplement: fig4-data6 [file 1_Sim_N_3000_Fluor_MW_1M.xlsx]

## Sheet: Tabelle1
0.1	0
0.2	0
0.3	0
0.4	0
0.5	0
0.6	0
0.7	0
0.8	0
0.9	0
1	0
1.1	0
1.2	0
1.3	0
1.4	0
1.5	0
1.6	0
1.7	0
1.8	0
1.9	0
2	0
2.1	0
2.2	0
2.3	0
2.4	0
2.5	0
2.6	0
2.7	0
2.8	0
2.9	0
3	0
3.1	0
3.2	0
3.3	0
3.4	0
3.5	0
3.6	0
3.7	0
3.8	0
3.9	0
4	0
4.1	0
4.2	0
4.3	0
4.4	0
4.5	0
4.6	0
4.7	0
4.8	0
4.9	0
5	0
5.1	0
5.2	0
5.3	0
5.4	0
5.5	0
5.6	0
5.7	0
5.8	0
5.9	0
6	0
6.1	0
6.2	0
6.3	0
6.4	0
6.5	0
6.6	0
6.7	0
6.8	0
6.9	0
7	0
7.1	0
7.2	0
7.3	0
7.4	0
7.5	0
7.6	0
7.7	0
7.8	0
7.9	0
8	0
8.1	0
8.2	0
8.3	0
8.4	0
8.5	0
8.6	0
8.7	0
8.8	0
8.9	0
9	0
9.1	0
9.2	0
9.3	0
9.4	0
9.5	0
9.6	0
9.7	0
9.8	0
9.9	0
10	0
10.1	0
10.2	0
10.3	0
10.4	0
10.5	0
10.6	0
10.7	0
10.8	0
10.9	0
11	0
11.1	0
11.2	0
11.3	0
11.4	0
11.5	0
11.6	0
11.7	0
11.8	0
11.9	0
12	0
12.1	0
12.2	0
12.3	0
12.4	0
12.5	0
12.6	0
12.7	0
12.8	0
12.9	0
13	0
13.1	0
13.2	0
13.3	0
13.4	0
13.5	0
13.6	0
13.7	0
13.8	0
13.9	0
14	0
14.1	0
14.2	0
14.3	0
14.4	0
14.5	0
14.6	0
14.7	0
14.8	0
14.9	0
15	0
15.1	0
15.2	0
15.3	0
15.4	0
15.5	0
15.6	0
15.7	0
15.8	0
15.9	0
16	0
16.1	0
16.2	0
16.3	0
16.4	0
16.5	0
16.6	0
16.7	0
16.8	0
16.9	0
17	0
17.1	0
17.2	0
17.3	0
17.4	0
17.5	0
17.6	0
17.7	0
17.8	0
17.9	0
18	0
18.1	0
18.2	0
18.3	0
18.4	0
18.5	0
18.6	0
18.7	0
18.8	0
18.9	0
19	0
19.1	0
19.2	0
19.3	0
19.4	0
19.5	0
19.6	0
19.7	0
19.8	0
19.9	0
20	0
20.1	0
20.2	0
20.3	0
20.4	0
20.5	0
20.6	0
20.7	0
20.8	0
20.9	0
21	0
21.1	0
21.2	0
21.3	0
21.4	0
21.5	0
21.6	0
21.7	0
21.8	0
21.9	0
22	0
22.1	0
22.2	0
22.3	0
22.4	0
22.5	0
22.6	0
22.7	0
22.8	0
22.9	0
23	0
23.1	0
23.2	0
23.3	0
23.4	0
23.5	0
23.6	0
23.7	0
23.8	0
23.9	0
24	0
24.1	0
24.2	0
24.3	0
24.4	0
24.5	0
24.6	0
24.7	0
24.8	0
24.9	0
25	0
25.1	0
25.2	0
25.3	0
25.4	0
25.5	0
25.6	0
25.7	0
25.8	0
25.9	0
26	0
26.1	0
26.2	0
26.3	0
26.4	0
26.5	0
26.6	0
26.7	0
26.8	0
26.9	0
27	0
27.1	0
27.2	0
27.3	0
27.4	0
27.5	0
27.6	0
27.7	0
27.8	0
27.9	0
28	0
28.1	0
28.2	0
28.3	0
28.4	0
28.5	0
28.6	0
28.7	0
28.8	0
28.9	0
29	0
29.1	0
29.2	0
29.3	0
29.4	0
29.5	0
29.6	0
29.7	0
29.8	0
29.9	0
30	0
30.1	0
30.2	0
30.3	0
30.4	0
30.5	0
30.6	0
30.7	0
30.8	0
30.9	0
31	0
31.1	0
31.2	0
31.3	0
31.4	0
31.5	0
31.6	0
31.7	0
31.8	0
31.9	0
32	0
32.1	0
32.2	0
32.3	0
32.4	0
32.5	0
32.6	0
32.7	0
32.8	0
32.9	0
33	0
33.1	0
33.2	0
33.3	0
33.4	0
33.5	0
33.6	0
33.7	0
33.8	0
33.9	0
34	0
34.1	0
34.2	0
34.3	0
34.4	0
34.5	0
34.6	0
34.7	0
34.8	0
34.9	0
35	0
35.1	0
35.2	0
35.3	0
35.4	0
35.5	0
35.6	0
35.7	0
35.8	0
35.9	0
36	0
36.1	0
36.2	0
36.3	0
36.4	0
36.5	0
36.6	0
36.7	0
36.8	0
36.9	0
37	0
37.1	0
37.2	0
37.3	0
37.4	0
37.5	0
37.6	0
37.7	0
37.8	0
37.9	0
38	0
38.1	0
38.2	0
38.3	0
38.4	0
38.5	0
38.6	0
38.7	0
38.8	0
38.9	0
39	0
39.1	0
39.2	0
39.3	0
39.4	0
39.5	0
39.6	0
39.7	0
39.8	0
39.9	0
40	0
40.1	0
40.2	0
40.3	0
40.4	0
40.5	0
40.6	0
40.7	0
40.8	0
40.9	0
41	0
41.1	0
41.2	0
41.3	0
41.4	0
41.5	0
41.6	0
41.7	0
41.8	0
41.9	0
42	0
42.1	0
42.2	0
42.3	0
42.4	0
42.5	0
42.6	0
42.7	0
42.8	0
42.9	0
43	0
43.1	0
43.2	0
43.3	0
43.4	0
43.5	0
43.6	0
43.7	0
43.8	0
43.9	0
44	0
44.1	0
44.2	0
44.3	0
44.4	0
44.5	0
44.6	0
44.7	0
44.8	0
44.9	0
45	0
45.1	0
45.2	0
45.3	0
45.4	0
45.5	0
45.6	0
45.7	0
45.8	0
45.9	0
46	0
46.1	0
46.2	0
46.3	0
46.4	0
46.5	0
46.6	0
46.7	0
46.8	0
46.9	0
47	0
47.1	0
47.2	0
47.3	0
47.4	0
47.5	0
47.6	0
47.7	0
47.8	0
47.9	0
48	0
48.1	0
48.2	0
48.3	0
48.4	0
48.5	0
48.6	0
48.7	0
48.8	0
48.9	0
49	0
49.1	0
49.2	0
49.3	0
49.4	0
49.5	0
49.6	0
49.7	0
49.8	0
49.9	0
50	0
50.1	0
50.2	0
50.3	0
50.4	0
50.5	0
50.6	0
50.7	0
50.8	0
50.9	0
51	0
51.1	0
51.2	0
51.3	0
51.4	0
51.5	0
51.6	0
51.7	0
51.8	0
51.9	0
52	0
52.1	0
52.2	0
52.3	0
52.4	0
52.5	0
52.6	0
52.7	0
52.8	0
52.9	0
53	0
53.1	0
53.2	0
53.3	0
53.4	0
53.5	0
53.6	0
53.7	0
53.8	0
53.9	0
54	0
54.1	0
54.2	0
54.3	0
54.4	0
54.5	0
54.6	0
54.7	0
54.8	0
54.9	0
55	0
55.1	0
55.2	0
55.3	0
55.4	0
55.5	0
55.6	0
55.7	0
55.8	0
55.9	0
56	0
56.1	0
56.2	0
56.3	0
56.4	0
56.5	0
56.6	0
56.7	0
56.8	0
56.9	0
57	0
57.1	0
57.2	0
57.3	0
57.4	0
57.5	0
57.6	0
57.7	0
57.8	0
57.9	0
58	0
58.1	0
58.2	0
58.3	0
58.4	0
58.5	0
58.6	0
58.7	0
58.8	0
58.9	0
59	0
59.1	0
59.2	0
59.3	0
59.4	0
59.5	0
59.6	0
59.7	0
59.8	0
59.9	0
60	0
60.1	0
60.2	0
60.3	0
60.4	0
60.5	0
60.6	0
60.7	0
60.8	0
60.9	0
61	0
61.1	0
61.2	0
61.3	0
61.4	0
61.5	0
61.6	0
61.7	0
61.8	0
61.9	0
62	0
62.1	0
62.2	0
62.3	0
62.4	0
62.5	0
62.6	0
62.7	0
62.8	0
62.9	0
63	0
63.1	0
63.2	0
63.3	0
63.4	0
63.5	0
63.6	0
63.7	0
63.8	0
63.9	0
64	0
64.1	0
64.2	0
64.3	0
64.4	0
64.5	0
64.6	0
64.7	0
64.8	0
64.9	0
65	0
65.1	0
65.2	0
65.3	0
65.4	0
65.5	0
65.6	0
65.7	0
65.8	0
65.9	0
66	0
66.1	0
66.2	0
66.3	0
66.4	0
66.5	0
66.6	0
66.7	0
66.8	0
66.9	0
67	0
67.1	0
67.2	0
67.3	0
67.4	0
67.5	0
67.6	0
67.7	0
67.8	0
67.9	0
68	0
68.1	0
68.2	0
68.3	0
68.4	0
68.5	0
68.6	0
68.7	0
68.8	0
68.9	0
69	0
69.1	0
69.2	0
69.3	0
69.4	0
69.5	0
69.6	0
69.7	0
69.8	0
69.9	0
70	0
70.1	0
70.2	0
70.3	0
70.4	0
70.5	0
70.6	0
70.7	0
70.8	0
70.9	0
71	0
71.1	0
71.2	0
71.3	0
71.4	0
71.5	0
71.6	0
71.7	0
71.8	0
71.9	0
72	0
72.1	0
72.2	0
72.3	0
72.4	0
72.5	0
72.6	0
72.7	0
72.8	0
72.9	0
73	0
73.1	0
73.2	0
73.3	0
73.4	0
73.5	0
73.6	0
73.7	0
73.8	0
73.9	0
74	0
74.1	0
74.2	0
74.3	0
74.4	0
74.5	0
74.6	0
74.7	0
74.8	0
74.9	0
75	0
75.1	0
75.2	0
75.3	0
75.4	0
75.5	0
75.6	0
75.7	0
75.8	0
75.9	0
76	0
76.1	0
76.2	0
76.3	0
76.4	0
76.5	0
76.6	0
76.7	0
76.8	0
76.9	0
77	0
77.1	0
77.2	0
77.3	0
77.4	0
77.5	0
77.6	0
77.7	0
77.8	0
77.9	0
78	0
78.1	0
78.2	0
78.3	0
78.4	0
78.5	0
78.6	0
78.7	0
78.8	0
78.9	0
79	0
79.1	0
79.2	0
79.3	0
79.4	0
79.5	0
79.6	0
79.7	0
79.8	0
79.9	0
80	0
80.1	0
80.2	0
80.3	0
80.4	0
80.5	0
80.6	0
80.7	0
80.8	0
80.9	0
81	0
81.1	0
81.2	0
81.3	0
81.4	0
81.5	0
81.6	0
81.7	0
81.8	0
81.9	0
82	0
82.1	0
82.2	0
82.3	0
82.4	0
82.5	0
82.6	0
82.7	0
82.8	0
82.9	0
83	0
83.1	0
83.2	0
83.3	0
83.4	0
83.5	0
83.6	0
83.7	0
83.8	0
83.9	0
84	0
84.1	0
84.2	0
84.3	0
84.4	0
84.5	0
84.6	0
84.7	0
84.8	0
84.9	0
85	0
85.1	0
85.2	0
85.3	0
85.4	0
85.5	0
85.6	0
85.7	0
85.8	0
85.9	0
86	0
86.1	0
86.2	0
86.3	0
86.4	0
86.5	0
86.6	0
86.7	0
86.8	0
86.9	0
87	0
87.1	0
87.2	0
87.3	0
87.4	0
87.5	0
87.6	0
87.7	0
87.8	0
87.9	0
88	0
88.1	0
88.2	0
88.3	0
88.4	0
88.5	0
88.6	0
88.7	0
88.8	0
88.9	0
89	0
89.1	0
89.2	0
89.3	0
89.4	0
89.5	0
89.6	0
89.7	0
89.8	0
89.9	0
90	0
90.1	0
90.2	0
90.3	0
90.4	0
90.5	0
90.6	0
90.7	0
90.8	0
90.9	0
91	0
91.1	0
91.2	0
91.3	0
91.4	0
91.5	0
91.6	0
91.7	0
91.8	0
91.9	0
92	0
92.1	0
92.2	0
92.3	0
92.4	0
92.5	0
92.6	0
92.7	0
92.8	0
92.9	0
93	0
93.1	0
93.2	0
93.3	0
93.4	0
93.5	0
93.6	0
93.7	0
93.8	0
93.9	0
94	0
94.1	0
94.2	0
94.3	0
94.4	0
94.5	0
94.6	0
94.7	0
94.8	0
94.9	0
95	0
95.1	0
95.2	0
95.3	0
95.4	0
95.5	0
95.6	0
95.7	0
95.8	0
95.9	0
96	0
96.1	0
96.2	0
96.3	0
96.4	0
96.5	0
96.6	0
96.7	0
96.8	0
96.9	0
97	0
97.1	0
97.2	0
97.3	0
97.4	0
97.5	0
97.6	0
97.7	0
97.8	0
97.9	0
98	0
98.1	0
98.2	0
98.3	0
98.4	0
98.5	0
98.6	0
98.7	0
98.8	0
98.9	0
99	0
99.1	0
99.2	0
99.3	0
99.4	0
99.5	0
99.6	0
99.7	0
99.8	0
99.9	0
100	0
100.1	0.0605
100.2	0.1095
100.3	0.1555
100.4	0.201833
100.5	0.239333
100.6	0.2735
100.7	0.305667
100.8	0.331833
100.9	0.359
101	0.387833
101.1	0.4115
101.2	0.428333
101.3	0.448
101.4	0.464833
101.5	0.479167
101.6	0.491333
101.7	0.506333
101.8	0.516
101.9	0.525
102	0.537667
102.1	0.546333
102.2	0.556333
102.3	0.567833
102.4	0.577167
102.5	0.5845
102.6	0.590833
102.7	0.594833
102.8	0.6
102.9	0.605167
103	0.606833
103.1	0.610333
103.2	0.611833
103.3	0.614667
103.4	0.618
103.5	0.625667
103.6	0.628833
103.7	0.635167
103.8	0.639833
103.9	0.642667
104	0.6465
104.1	0.6455
104.2	0.6435
104.3	0.6445
104.4	0.645667
104.5	0.645
104.6	0.646667
104.7	0.647
104.8	0.649667
104.9	0.6535
105	0.6545
105.1	0.655333
105.2	0.655333
105.3	0.6585
105.4	0.6615
105.5	0.662333
105.6	0.664
105.7	0.667
105.8	0.667
105.9	0.666333
106	0.667333
106.1	0.666333
106.2	0.667167
106.3	0.669667
106.4	0.6675
106.5	0.668833
106.6	0.6695
106.7	0.669
106.8	0.6695
106.9	0.671833
107	0.671167
107.1	0.672833
107.2	0.671333
107.3	0.674833
107.4	0.675833
107.5	0.676
107.6	0.676333
107.7	0.6745
107.8	0.678
107.9	0.679
108	0.675833
108.1	0.676167
108.2	0.676667
108.3	0.674667
108.4	0.678833
108.5	0.6785
108.6	0.679
108.7	0.678833
108.8	0.676667
108.9	0.679833
109	0.682167
109.1	0.681167
109.2	0.681
109.3	0.679667
109.4	0.683
109.5	0.6825
109.6	0.6855
109.7	0.685667
109.8	0.685833
109.9	0.685167
110	0.684167
110.1	0.6875
110.2	0.6885
110.3	0.6865
110.4	0.689333
110.5	0.691
110.6	0.693
110.7	0.693667
110.8	0.693
110.9	0.693
111	0.694333
111.1	0.699333
111.2	0.6995
111.3	0.696667
111.4	0.6975
111.5	0.6975
111.6	0.6985
111.7	0.697333
111.8	0.698167
111.9	0.698667
112	0.698333
112.1	0.699
112.2	0.700833
112.3	0.700667
112.4	0.700833
112.5	0.701
112.6	0.700333
112.7	0.701833
112.8	0.7015
112.9	0.7035
113	0.704667
113.1	0.705833
113.2	0.705167
113.3	0.702167
113.4	0.7045
113.5	0.7065
113.6	0.707667
113.7	0.710667
113.8	0.711167
113.9	0.71
114	0.7105
114.1	0.711167
114.2	0.710667
114.3	0.708833
114.4	0.708167
114.5	0.707833
114.6	0.709333
114.7	0.712833
114.8	0.7155
114.9	0.714667
115	0.710833
115.1	0.709
115.2	0.7075
115.3	0.7095
115.4	0.709333
115.5	0.707833
115.6	0.708333
115.7	0.708667
115.8	0.709167
115.9	0.711833
116	0.715333
116.1	0.717333
116.2	0.717667
116.3	0.717
116.4	0.717
116.5	0.719
116.6	0.718167
116.7	0.718833
116.8	0.722667
116.9	0.722
117	0.723167
117.1	0.723
117.2	0.723167
117.3	0.725
117.4	0.725167
117.5	0.723833
117.6	0.723667
117.7	0.724
117.8	0.725833
117.9	0.726167
118	0.727
118.1	0.726167
118.2	0.726333
118.3	0.726167
118.4	0.723167
118.5	0.721
118.6	0.725167
118.7	0.7255
118.8	0.7295
118.9	0.732
119	0.735
119.1	0.733167
119.2	0.733333
119.3	0.733833
119.4	0.733333
119.5	0.731
119.6	0.731
119.7	0.729667
119.8	0.7315
119.9	0.731
120	0.732167
120.1	0.732167
120.2	0.73
120.3	0.727667
120.4	0.73
120.5	0.732333
120.6	0.732167
120.7	0.733167
120.8	0.7355
120.9	0.7365
121	0.74
121.1	0.74
121.2	0.74
121.3	0.743
121.4	0.7425
121.5	0.740833
121.6	0.744333
121.7	0.746333
121.8	0.746333
121.9	0.745333
122	0.746333
122.1	0.747833
122.2	0.748167
122.3	0.748333
122.4	0.748833
122.5	0.749833
122.6	0.752167
122.7	0.753
122.8	0.752167
122.9	0.751
123	0.751333
123.1	0.752167
123.2	0.7525
123.3	0.750167
123.4	0.751333
123.5	0.750667
123.6	0.750833
123.7	0.7515
123.8	0.750167
123.9	0.752333
124	0.751333
124.1	0.7525
124.2	0.750333
124.3	0.748333
124.4	0.748333
124.5	0.748333
124.6	0.750833
124.7	0.752
124.8	0.750333
124.9	0.7515
125	0.751833
125.1	0.752
125.2	0.7505
125.3	0.751833
125.4	0.750833
125.5	0.752667
125.6	0.752167
125.7	0.7525
125.8	0.754333
125.9	0.752333
126	0.753667
126.1	0.753833
126.2	0.752167
126.3	0.7555
126.4	0.754333
126.5	0.753833
126.6	0.754833
126.7	0.758
126.8	0.755667
126.9	0.755
127	0.757667
127.1	0.758667
127.2	0.758833
127.3	0.759167
127.4	0.757333
127.5	0.757833
127.6	0.7555
127.7	0.756333
127.8	0.754333
127.9	0.753667
128	0.7515
128.1	0.755667
128.2	0.758
128.3	0.761167
128.4	0.762333
128.5	0.762333
128.6	0.759833
128.7	0.759333
128.8	0.759833
128.9	0.762
129	0.760833
129.1	0.761167
129.2	0.761833
129.3	0.762833
129.4	0.763667
129.5	0.763667
129.6	0.761833
129.7	0.763833
129.8	0.765333
129.9	0.7635
130	0.765
130.1	0.765
130.2	0.762333
130.3	0.764333
130.4	0.766167
130.5	0.767167
130.6	0.769667
130.7	0.770667
130.8	0.771833
130.9	0.772167
131	0.7715
131.1	0.769
131.2	0.768333
131.3	0.7695
131.4	0.769667
131.5	0.769333
131.6	0.770167
131.7	0.769667
131.8	0.7675
131.9	0.7665
132	0.763333
132.1	0.760833
132.2	0.760333
132.3	0.7625
132.4	0.7655
132.5	0.766167
132.6	0.767333
132.7	0.768667
132.8	0.769833
132.9	0.772167
133	0.774167
133.1	0.775
133.2	0.774167
133.3	0.772
133.4	0.771333
133.5	0.771667
133.6	0.774833
133.7	0.772167
133.8	0.773333
133.9	0.772833
134	0.774833
134.1	0.7765
134.2	0.7775
134.3	0.778333
134.4	0.774667
134.5	0.772167
134.6	0.772833
134.7	0.7735
134.8	0.774
134.9	0.775667
135	0.775167
135.1	0.776333
135.2	0.775667
135.3	0.776333
135.4	0.776
135.5	0.779167
135.6	0.779167
135.7	0.779667
135.8	0.780333
135.9	0.781
136	0.782
136.1	0.782333
136.2	0.780833
136.3	0.783
136.4	0.784833
136.5	0.785333
136.6	0.784667
136.7	0.785333
136.8	0.785333
136.9	0.786167
137	0.7875
137.1	0.7885
137.2	0.788333
137.3	0.788
137.4	0.7905
137.5	0.7925
137.6	0.791
137.7	0.7895
137.8	0.789667
137.9	0.792333
138	0.791667
138.1	0.792833
138.2	0.793333
138.3	0.792167
138.4	0.792667
138.5	0.792667
138.6	0.792333
138.7	0.7925
138.8	0.791333
138.9	0.793167
139	0.7955
139.1	0.7935
139.2	0.790833
139.3	0.792833
139.4	0.7945
139.5	0.793
139.6	0.796
139.7	0.796667
139.8	0.797667
139.9	0.7985
140	0.798833
140.1	0.798167
140.2	0.797833
140.3	0.796833
140.4	0.795833
140.5	0.7935
140.6	0.7935
140.7	0.792
140.8	0.791167
140.9	0.791333
141	0.789333
141.1	0.7905
141.2	0.790667
141.3	0.789333
141.4	0.789167
141.5	0.7885
141.6	0.7885
141.7	0.789333
141.8	0.791833
141.9	0.790833
142	0.791
142.1	0.791167
142.2	0.791833
142.3	0.792833
142.4	0.793333
142.5	0.794
142.6	0.794
142.7	0.796333
142.8	0.797333
142.9	0.798167
143	0.797833
143.1	0.799167
143.2	0.799
143.3	0.800833
143.4	0.7975
143.5	0.796833
143.6	0.7975
143.7	0.797833
143.8	0.797833
143.9	0.797333
144	0.797833
144.1	0.8
144.2	0.799333
144.3	0.800167
144.4	0.802667
144.5	0.802833
144.6	0.801833
144.7	0.8015
144.8	0.8
144.9	0.799
145	0.799167
145.1	0.7995
145.2	0.801
145.3	0.802
145.4	0.803167
145.5	0.803333
145.6	0.8045
145.7	0.803
145.8	0.803167
145.9	0.801667
146	0.8035
146.1	0.804833
146.2	0.8065
146.3	0.806833
146.4	0.807167
146.5	0.807
146.6	0.8055
146.7	0.8055
146.8	0.807167
146.9	0.809167
147	0.811
147.1	0.810167
147.2	0.809333
147.3	0.809333
147.4	0.810167
147.5	0.812333
147.6	0.813167
147.7	0.8145
147.8	0.813667
147.9	0.8155
148	0.817667
148.1	0.816
148.2	0.8165
148.3	0.817833
148.4	0.817333
148.5	0.817833
148.6	0.818
148.7	0.8185
148.8	0.816833
148.9	0.814667
149	0.815833
149.1	0.814833
149.2	0.8135
149.3	0.814167
149.4	0.814833
149.5	0.816333
149.6	0.815333
149.7	0.8175
149.8	0.819167
149.9	0.819833
150	0.819167
150.1	0.817667
150.2	0.817667
150.3	0.815667
150.4	0.812833
150.5	0.812833
150.6	0.813167
150.7	0.813667
150.8	0.813833
150.9	0.813333
151	0.813333
151.1	0.811167
151.2	0.813
151.3	0.814
151.4	0.814
151.5	0.813
151.6	0.812333
151.7	0.813833
151.8	0.8145
151.9	0.812833
152	0.813167
152.1	0.814667
152.2	0.816667
152.3	0.818333
152.4	0.817167
152.5	0.816833
152.6	0.816333
152.7	0.815333
152.8	0.816333
152.9	0.816
153	0.814667
153.1	0.8135
153.2	0.814833
153.3	0.814667
153.4	0.814667
153.5	0.813833
153.6	0.8145
153.7	0.817
153.8	0.816833
153.9	0.8175
154	0.8175
154.1	0.818333
154.2	0.8185
154.3	0.818
154.4	0.82
154.5	0.820833
154.6	0.822167
154.7	0.822333
154.8	0.8215
154.9	0.821
155	0.824333
155.1	0.823167
155.2	0.822
155.3	0.822333
155.4	0.821667
155.5	0.823167
155.6	0.822333
155.7	0.8215
155.8	0.821
155.9	0.820667
156	0.823833
156.1	0.825
156.2	0.822833
156.3	0.8235
156.4	0.823
156.5	0.822667
156.6	0.8235
156.7	0.823333
156.8	0.823667
156.9	0.822667
157	0.825
157.1	0.826
157.2	0.827333
157.3	0.826833
157.4	0.828667
157.5	0.828833
157.6	0.828667
157.7	0.8275
157.8	0.8255
157.9	0.823833
158	0.822333
158.1	0.824
158.2	0.826
158.3	0.825
158.4	0.829833
158.5	0.829333
158.6	0.8305
158.7	0.830333
158.8	0.8295
158.9	0.829167
159	0.829333
159.1	0.8285
159.2	0.828
159.3	0.828833
159.4	0.828333
159.5	0.828667
159.6	0.8285
159.7	0.828833
159.8	0.83
159.9	0.828667
160	0.827
160.1	0.829333
160.2	0.8305
160.3	0.829167
160.4	0.828667
160.5	0.828667
160.6	0.829833
160.7	0.829
160.8	0.829
160.9	0.829
161	0.830667
161.1	0.829833
161.2	0.83
161.3	0.829
161.4	0.83
161.5	0.8295
161.6	0.829167
161.7	0.828833
161.8	0.828333
161.9	0.827333
162	0.828167
162.1	0.8265
162.2	0.826667
162.3	0.826333
162.4	0.828833
162.5	0.826833
162.6	0.827833
162.7	0.8285
162.8	0.8275
162.9	0.828167
163	0.830667
163.1	0.831667
163.2	0.833667
163.3	0.833667
163.4	0.834667
163.5	0.834667
163.6	0.836333
163.7	0.835667
163.8	0.834667
163.9	0.834667
164	0.834167
164.1	0.8345
164.2	0.835833
164.3	0.835167
164.4	0.835833
164.5	0.835
164.6	0.8365
164.7	0.835
164.8	0.835333
164.9	0.833833
165	0.834
165.1	0.831167
165.2	0.833
165.3	0.8345
165.4	0.835833
165.5	0.837
165.6	0.836333
165.7	0.833833
165.8	0.833833
165.9	0.834167
166	0.833
166.1	0.833167
166.2	0.832333
166.3	0.834167
166.4	0.834333
166.5	0.836667
166.6	0.8355
166.7	0.833167
166.8	0.833
166.9	0.833167
167	0.831167
167.1	0.832833
167.2	0.832667
167.3	0.834333
167.4	0.833333
167.5	0.834
167.6	0.8355
167.7	0.836
167.8	0.835
167.9	0.8365
168	0.8375
168.1	0.837
168.2	0.8375
168.3	0.836667
168.4	0.837
168.5	0.836333
168.6	0.836833
168.7	0.8375
168.8	0.839
168.9	0.839
169	0.839167
169.1	0.838333
169.2	0.838667
169.3	0.838167
169.4	0.841333
169.5	0.839833
169.6	0.839167
169.7	0.8405
169.8	0.842333
169.9	0.843667
170	0.845
170.1	0.842833
170.2	0.842667
170.3	0.8425
170.4	0.842
170.5	0.84
170.6	0.838
170.7	0.837833
170.8	0.838333
170.9	0.838167
171	0.8375
171.1	0.839833
171.2	0.837833
171.3	0.837167
171.4	0.839167
171.5	0.839833
171.6	0.838833
171.7	0.837833
171.8	0.8385
171.9	0.837667
172	0.839
172.1	0.8385
172.2	0.8375
172.3	0.837
172.4	0.8385
172.5	0.838
172.6	0.8395
172.7	0.84
172.8	0.8405
172.9	0.839167
173	0.8395
173.1	0.8395
173.2	0.8415
173.3	0.842833
173.4	0.841333
173.5	0.841833
173.6	0.8405
173.7	0.840833
173.8	0.842667
173.9	0.8445
174	0.843833
174.1	0.842167
174.2	0.843
174.3	0.842667
174.4	0.842667
174.5	0.845
174.6	0.845333
174.7	0.8435
174.8	0.842333
174.9	0.840833
175	0.8395
175.1	0.839333
175.2	0.840167
175.3	0.844167
175.4	0.845167
175.5	0.846167
175.6	0.846667
175.7	0.845667
175.8	0.846667
175.9	0.8475
176	0.847333
176.1	0.847167
176.2	0.8505
176.3	0.849667
176.4	0.848333
176.5	0.848
176.6	0.846333
176.7	0.842667
176.8	0.8435
176.9	0.844833
177	0.846667
177.1	0.845
177.2	0.8465
177.3	0.849333
177.4	0.850167
177.5	0.848833
177.6	0.849833
177.7	0.849833
177.8	0.851333
177.9	0.852833
178	0.851167
178.1	0.851833
178.2	0.852333
178.3	0.850167
178.4	0.853167
178.5	0.854
178.6	0.852
178.7	0.852667
178.8	0.854167
178.9	0.8565
179	0.855833
179.1	0.858
179.2	0.857
179.3	0.858
179.4	0.857667
179.5	0.854333
179.6	0.8525
179.7	0.851667
179.8	0.850333
179.9	0.850333
180	0.848333
180.1	0.85
180.2	0.849833
180.3	0.8515
180.4	0.851833
180.5	0.851333
180.6	0.850667
180.7	0.851
180.8	0.849833
180.9	0.850833
181	0.852
181.1	0.850833
181.2	0.852
181.3	0.851167
181.4	0.850833
181.5	0.852333
181.6	0.852333
181.7	0.852833
181.8	0.853167
181.9	0.852
182	0.853333
182.1	0.853833
182.2	0.851333
182.3	0.850667
182.4	0.851833
182.5	0.851167
182.6	0.851667
182.7	0.851167
182.8	0.8495
182.9	0.848833
183	0.851
183.1	0.850833
183.2	0.85
183.3	0.849667
183.4	0.851333
183.5	0.850333
183.6	0.847667
183.7	0.846667
183.8	0.847667
183.9	0.8465
184	0.849167
184.1	0.8495
184.2	0.8505
184.3	0.850167
184.4	0.8495
184.5	0.848333
184.6	0.847667
184.7	0.845667
184.8	0.846
184.9	0.846333
185	0.8485
185.1	0.848167
185.2	0.847
185.3	0.848667
185.4	0.849167
185.5	0.849167
185.6	0.848333
185.7	0.850667
185.8	0.853333
185.9	0.852333
186	0.8525
186.1	0.8535
186.2	0.853167
186.3	0.8525
186.4	0.852167
186.5	0.851167
186.6	0.851333
186.7	0.852667
186.8	0.852
186.9	0.850333
187	0.848333
187.1	0.849167
187.2	0.849167
187.3	0.848833
187.4	0.849167
187.5	0.849333
187.6	0.849
187.7	0.845333
187.8	0.845833
187.9	0.846167
188	0.845667
188.1	0.848167
188.2	0.849
188.3	0.848833
188.4	0.847667
188.5	0.847833
188.6	0.847833
188.7	0.850167
188.8	0.849833
188.9	0.849167
189	0.85
189.1	0.85
189.2	0.850167
189.3	0.850667
189.4	0.852667
189.5	0.853333
189.6	0.853
189.7	0.854167
189.8	0.8525
189.9	0.852833
190	0.853
190.1	0.853167
190.2	0.85
190.3	0.849667
190.4	0.848333
190.5	0.848667
190.6	0.847667
190.7	0.848833
190.8	0.850833
190.9	0.850667
191	0.851167
191.1	0.851167
191.2	0.8515
191.3	0.854
191.4	0.854667
191.5	0.854167
191.6	0.852833
191.7	0.853667
191.8	0.856167
191.9	0.855667
192	0.854667
192.1	0.856
192.2	0.855833
192.3	0.855333
192.4	0.855167
192.5	0.855
192.6	0.854833
192.7	0.853667
192.8	0.8555
192.9	0.856833
193	0.858333
193.1	0.856667
193.2	0.858167
193.3	0.858
193.4	0.858
193.5	0.8565
193.6	0.8565
193.7	0.856833
193.8	0.856167
193.9	0.857
194	0.8555
194.1	0.856
194.2	0.8535
194.3	0.8535
194.4	0.853333
194.5	0.853167
194.6	0.850833
194.7	0.850833
194.8	0.85
194.9	0.851
195	0.851167
195.1	0.848333
195.2	0.850667
195.3	0.850667
195.4	0.851333
195.5	0.852167
195.6	0.851333
195.7	0.8495
195.8	0.849333
195.9	0.850333
196	0.851
196.1	0.8505
196.2	0.850667
196.3	0.850667
196.4	0.8515
196.5	0.849667
196.6	0.851
196.7	0.850333
196.8	0.85
196.9	0.853
197	0.854
197.1	0.853333
197.2	0.854
197.3	0.855
197.4	0.856333
197.5	0.8555
197.6	0.854167
197.7	0.8535
197.8	0.855833
197.9	0.856167
198	0.855833
198.1	0.8545
198.2	0.854667
198.3	0.852333
198.4	0.852333
198.5	0.851833
198.6	0.851833
198.7	0.8515
198.8	0.8495
198.9	0.8505
199	0.850833
199.1	0.852333
199.2	0.8515
199.3	0.851333
199.4	0.851
199.5	0.851333
199.6	0.852167
199.7	0.8515
199.8	0.852167
199.9	0.852333
200	0.853
[truncated: 14,000 more rows]
