# Supplementary material for: Bayesian inference of kinetic schemes for ion channels by Kalman filtering
Source: eLife journal article supplement (doi:10.7554/elife.62714), 2022-05-04
Supplement: fig4-data6 [file 1_Sim_N_3000_Strom_MW_1M.xlsx]

## Sheet: Tabelle1
0.1	0
0.2	0
0.3	0
0.4	0
0.5	0
0.6	0
0.7	0
0.8	0
0.9	0
1	0
1.1	0
1.2	0
1.3	0
1.4	0
1.5	0
1.6	0
1.7	0
1.8	0
1.9	0
2	0
2.1	0
2.2	0
2.3	0
2.4	0
2.5	0
2.6	0
2.7	0
2.8	0
2.9	0
3	0
3.1	0
3.2	0
3.3	0
3.4	0
3.5	0
3.6	0
3.7	0
3.8	0
3.9	0
4	0
4.1	0
4.2	0
4.3	0
4.4	0
4.5	0
4.6	0
4.7	0
4.8	0
4.9	0
5	0
5.1	0
5.2	0
5.3	0
5.4	0
5.5	0
5.6	0
5.7	0
5.8	0
5.9	0
6	0
6.1	0
6.2	0
6.3	0
6.4	0
6.5	0
6.6	0
6.7	0
6.8	0
6.9	0
7	0
7.1	0
7.2	0
7.3	0
7.4	0
7.5	0
7.6	0
7.7	0
7.8	0
7.9	0
8	0
8.1	0
8.2	0
8.3	0
8.4	0
8.5	0
8.6	0
8.7	0
8.8	0
8.9	0
9	0
9.1	0
9.2	0
9.3	0
9.4	0
9.5	0
9.6	0
9.7	0
9.8	0
9.9	0
10	0
10.1	0
10.2	0
10.3	0
10.4	0
10.5	0
10.6	0
10.7	0
10.8	0
10.9	0
11	0
11.1	0
11.2	0
11.3	0
11.4	0
11.5	0
11.6	0
11.7	0
11.8	0
11.9	0
12	0
12.1	0
12.2	0
12.3	0
12.4	0
12.5	0
12.6	0
12.7	0
12.8	0
12.9	0
13	0
13.1	0
13.2	0
13.3	0
13.4	0
13.5	0
13.6	0
13.7	0
13.8	0
13.9	0
14	0
14.1	0
14.2	0
14.3	0
14.4	0
14.5	0
14.6	0
14.7	0
14.8	0
14.9	0
15	0
15.1	0
15.2	0
15.3	0
15.4	0
15.5	0
15.6	0
15.7	0
15.8	0
15.9	0
16	0
16.1	0
16.2	0
16.3	0
16.4	0
16.5	0
16.6	0
16.7	0
16.8	0
16.9	0
17	0
17.1	0
17.2	0
17.3	0
17.4	0
17.5	0
17.6	0
17.7	0
17.8	0
17.9	0
18	0
18.1	0
18.2	0
18.3	0
18.4	0
18.5	0
18.6	0
18.7	0
18.8	0
18.9	0
19	0
19.1	0
19.2	0
19.3	0
19.4	0
19.5	0
19.6	0
19.7	0
19.8	0
19.9	0
20	0
20.1	0
20.2	0
20.3	0
20.4	0
20.5	0
20.6	0
20.7	0
20.8	0
20.9	0
21	0
21.1	0
21.2	0
21.3	0
21.4	0
21.5	0
21.6	0
21.7	0
21.8	0
21.9	0
22	0
22.1	0
22.2	0
22.3	0
22.4	0
22.5	0
22.6	0
22.7	0
22.8	0
22.9	0
23	0
23.1	0
23.2	0
23.3	0
23.4	0
23.5	0
23.6	0
23.7	0
23.8	0
23.9	0
24	0
24.1	0
24.2	0
24.3	0
24.4	0
24.5	0
24.6	0
24.7	0
24.8	0
24.9	0
25	0
25.1	0
25.2	0
25.3	0
25.4	0
25.5	0
25.6	0
25.7	0
25.8	0
25.9	0
26	0
26.1	0
26.2	0
26.3	0
26.4	0
26.5	0
26.6	0
26.7	0
26.8	0
26.9	0
27	0
27.1	0
27.2	0
27.3	0
27.4	0
27.5	0
27.6	0
27.7	0
27.8	0
27.9	0
28	0
28.1	0
28.2	0
28.3	0
28.4	0
28.5	0
28.6	0
28.7	0
28.8	0
28.9	0
29	0
29.1	0
29.2	0
29.3	0
29.4	0
29.5	0
29.6	0
29.7	0
29.8	0
29.9	0
30	0
30.1	0
30.2	0
30.3	0
30.4	0
30.5	0
30.6	0
30.7	0
30.8	0
30.9	0
31	0
31.1	0
31.2	0
31.3	0
31.4	0
31.5	0
31.6	0
31.7	0
31.8	0
31.9	0
32	0
32.1	0
32.2	0
32.3	0
32.4	0
32.5	0
32.6	0
32.7	0
32.8	0
32.9	0
33	0
33.1	0
33.2	0
33.3	0
33.4	0
33.5	0
33.6	0
33.7	0
33.8	0
33.9	0
34	0
34.1	0
34.2	0
34.3	0
34.4	0
34.5	0
34.6	0
34.7	0
34.8	0
34.9	0
35	0
35.1	0
35.2	0
35.3	0
35.4	0
35.5	0
35.6	0
35.7	0
35.8	0
35.9	0
36	0
36.1	0
36.2	0
36.3	0
36.4	0
36.5	0
36.6	0
36.7	0
36.8	0
36.9	0
37	0
37.1	0
37.2	0
37.3	0
37.4	0
37.5	0
37.6	0
37.7	0
37.8	0
37.9	0
38	0
38.1	0
38.2	0
38.3	0
38.4	0
38.5	0
38.6	0
38.7	0
38.8	0
38.9	0
39	0
39.1	0
39.2	0
39.3	0
39.4	0
39.5	0
39.6	0
39.7	0
39.8	0
39.9	0
40	0
40.1	0
40.2	0
40.3	0
40.4	0
40.5	0
40.6	0
40.7	0
40.8	0
40.9	0
41	0
41.1	0
41.2	0
41.3	0
41.4	0
41.5	0
41.6	0
41.7	0
41.8	0
41.9	0
42	0
42.1	0
42.2	0
42.3	0
42.4	0
42.5	0
42.6	0
42.7	0
42.8	0
42.9	0
43	0
43.1	0
43.2	0
43.3	0
43.4	0
43.5	0
43.6	0
43.7	0
43.8	0
43.9	0
44	0
44.1	0
44.2	0
44.3	0
44.4	0
44.5	0
44.6	0
44.7	0
44.8	0
44.9	0
45	0
45.1	0
45.2	0
45.3	0
45.4	0
45.5	0
45.6	0
45.7	0
45.8	0
45.9	0
46	0
46.1	0
46.2	0
46.3	0
46.4	0
46.5	0
46.6	0
46.7	0
46.8	0
46.9	0
47	0
47.1	0
47.2	0
47.3	0
47.4	0
47.5	0
47.6	0
47.7	0
47.8	0
47.9	0
48	0
48.1	0
48.2	0
48.3	0
48.4	0
48.5	0
48.6	0
48.7	0
48.8	0
48.9	0
49	0
49.1	0
49.2	0
49.3	0
49.4	0
49.5	0
49.6	0
49.7	0
49.8	0
49.9	0
50	0
50.1	0
50.2	0
50.3	0
50.4	0
50.5	0
50.6	0
50.7	0
50.8	0
50.9	0
51	0
51.1	0
51.2	0
51.3	0
51.4	0
51.5	0
51.6	0
51.7	0
51.8	0
51.9	0
52	0
52.1	0
52.2	0
52.3	0
52.4	0
52.5	0
52.6	0
52.7	0
52.8	0
52.9	0
53	0
53.1	0
53.2	0
53.3	0
53.4	0
53.5	0
53.6	0
53.7	0
53.8	0
53.9	0
54	0
54.1	0
54.2	0
54.3	0
54.4	0
54.5	0
54.6	0
54.7	0
54.8	0
54.9	0
55	0
55.1	0
55.2	0
55.3	0
55.4	0
55.5	0
55.6	0
55.7	0
55.8	0
55.9	0
56	0
56.1	0
56.2	0
56.3	0
56.4	0
56.5	0
56.6	0
56.7	0
56.8	0
56.9	0
57	0
57.1	0
57.2	0
57.3	0
57.4	0
57.5	0
57.6	0
57.7	0
57.8	0
57.9	0
58	0
58.1	0
58.2	0
58.3	0
58.4	0
58.5	0
58.6	0
58.7	0
58.8	0
58.9	0
59	0
59.1	0
59.2	0
59.3	0
59.4	0
59.5	0
59.6	0
59.7	0
59.8	0
59.9	0
60	0
60.1	0
60.2	0
60.3	0
60.4	0
60.5	0
60.6	0
60.7	0
60.8	0
60.9	0
61	0
61.1	0
61.2	0
61.3	0
61.4	0
61.5	0
61.6	0
61.7	0
61.8	0
61.9	0
62	0
62.1	0
62.2	0
62.3	0
62.4	0
62.5	0
62.6	0
62.7	0
62.8	0
62.9	0
63	0
63.1	0
63.2	0
63.3	0
63.4	0
63.5	0
63.6	0
63.7	0
63.8	0
63.9	0
64	0
64.1	0
64.2	0
64.3	0
64.4	0
64.5	0
64.6	0
64.7	0
64.8	0
64.9	0
65	0
65.1	0
65.2	0
65.3	0
65.4	0
65.5	0
65.6	0
65.7	0
65.8	0
65.9	0
66	0
66.1	0
66.2	0
66.3	0
66.4	0
66.5	0
66.6	0
66.7	0
66.8	0
66.9	0
67	0
67.1	0
67.2	0
67.3	0
67.4	0
67.5	0
67.6	0
67.7	0
67.8	0
67.9	0
68	0
68.1	0
68.2	0
68.3	0
68.4	0
68.5	0
68.6	0
68.7	0
68.8	0
68.9	0
69	0
69.1	0
69.2	0
69.3	0
69.4	0
69.5	0
69.6	0
69.7	0
69.8	0
69.9	0
70	0
70.1	0
70.2	0
70.3	0
70.4	0
70.5	0
70.6	0
70.7	0
70.8	0
70.9	0
71	0
71.1	0
71.2	0
71.3	0
71.4	0
71.5	0
71.6	0
71.7	0
71.8	0
71.9	0
72	0
72.1	0
72.2	0
72.3	0
72.4	0
72.5	0
72.6	0
72.7	0
72.8	0
72.9	0
73	0
73.1	0
73.2	0
73.3	0
73.4	0
73.5	0
73.6	0
73.7	0
73.8	0
73.9	0
74	0
74.1	0
74.2	0
74.3	0
74.4	0
74.5	0
74.6	0
74.7	0
74.8	0
74.9	0
75	0
75.1	0
75.2	0
75.3	0
75.4	0
75.5	0
75.6	0
75.7	0
75.8	0
75.9	0
76	0
76.1	0
76.2	0
76.3	0
76.4	0
76.5	0
76.6	0
76.7	0
76.8	0
76.9	0
77	0
77.1	0
77.2	0
77.3	0
77.4	0
77.5	0
77.6	0
77.7	0
77.8	0
77.9	0
78	0
78.1	0
78.2	0
78.3	0
78.4	0
78.5	0
78.6	0
78.7	0
78.8	0
78.9	0
79	0
79.1	0
79.2	0
79.3	0
79.4	0
79.5	0
79.6	0
79.7	0
79.8	0
79.9	0
80	0
80.1	0
80.2	0
80.3	0
80.4	0
80.5	0
80.6	0
80.7	0
80.8	0
80.9	0
81	0
81.1	0
81.2	0
81.3	0
81.4	0
81.5	0
81.6	0
81.7	0
81.8	0
81.9	0
82	0
82.1	0
82.2	0
82.3	0
82.4	0
82.5	0
82.6	0
82.7	0
82.8	0
82.9	0
83	0
83.1	0
83.2	0
83.3	0
83.4	0
83.5	0
83.6	0
83.7	0
83.8	0
83.9	0
84	0
84.1	0
84.2	0
84.3	0
84.4	0
84.5	0
84.6	0
84.7	0
84.8	0
84.9	0
85	0
85.1	0
85.2	0
85.3	0
85.4	0
85.5	0
85.6	0
85.7	0
85.8	0
85.9	0
86	0
86.1	0
86.2	0
86.3	0
86.4	0
86.5	0
86.6	0
86.7	0
86.8	0
86.9	0
87	0
87.1	0
87.2	0
87.3	0
87.4	0
87.5	0
87.6	0
87.7	0
87.8	0
87.9	0
88	0
88.1	0
88.2	0
88.3	0
88.4	0
88.5	0
88.6	0
88.7	0
88.8	0
88.9	0
89	0
89.1	0
89.2	0
89.3	0
89.4	0
89.5	0
89.6	0
89.7	0
89.8	0
89.9	0
90	0
90.1	0
90.2	0
90.3	0
90.4	0
90.5	0
90.6	0
90.7	0
90.8	0
90.9	0
91	0
91.1	0
91.2	0
91.3	0
91.4	0
91.5	0
91.6	0
91.7	0
91.8	0
91.9	0
92	0
92.1	0
92.2	0
92.3	0
92.4	0
92.5	0
92.6	0
92.7	0
92.8	0
92.9	0
93	0
93.1	0
93.2	0
93.3	0
93.4	0
93.5	0
93.6	0
93.7	0
93.8	0
93.9	0
94	0
94.1	0
94.2	0
94.3	0
94.4	0
94.5	0
94.6	0
94.7	0
94.8	0
94.9	0
95	0
95.1	0
95.2	0
95.3	0
95.4	0
95.5	0
95.6	0
95.7	0
95.8	0
95.9	0
96	0
96.1	0
96.2	0
96.3	0
96.4	0
96.5	0
96.6	0
96.7	0
96.8	0
96.9	0
97	0
97.1	0
97.2	0
97.3	0
97.4	0
97.5	0
97.6	0
97.7	0
97.8	0
97.9	0
98	0
98.1	0
98.2	0
98.3	0
98.4	0
98.5	0
98.6	0
98.7	0
98.8	0
98.9	0
99	0
99.1	0
99.2	0
99.3	0
99.4	0
99.5	0
99.6	0
99.7	0
99.8	0
99.9	0
100	0
100.1	0
100.2	0
100.3	0.000333333
100.4	0.000333333
100.5	0.000333333
100.6	0.000333333
100.7	0.000333333
100.8	0.000333333
100.9	0.000666667
101	0.00166667
101.1	0.002
101.2	0.00333333
101.3	0.00333333
101.4	0.00466667
101.5	0.005
101.6	0.00533333
101.7	0.006
101.8	0.00733333
101.9	0.009
102	0.0113333
102.1	0.0123333
102.2	0.0123333
102.3	0.014
102.4	0.0156667
102.5	0.0183333
102.6	0.019
102.7	0.0213333
102.8	0.023
102.9	0.0243333
103	0.0253333
103.1	0.026
103.2	0.0273333
103.3	0.0286667
103.4	0.03
103.5	0.031
103.6	0.0323333
103.7	0.0333333
103.8	0.0343333
103.9	0.036
104	0.0373333
104.1	0.0383333
104.2	0.0396667
104.3	0.042
104.4	0.043
104.5	0.044
104.6	0.0463333
104.7	0.048
104.8	0.0496667
104.9	0.0516667
105	0.0533333
105.1	0.055
105.2	0.0553333
105.3	0.057
105.4	0.06
105.5	0.0633333
105.6	0.0643333
105.7	0.0663333
105.8	0.068
105.9	0.0686667
106	0.07
106.1	0.072
106.2	0.074
106.3	0.074
106.4	0.0756667
106.5	0.0766667
106.6	0.078
106.7	0.08
106.8	0.0816667
106.9	0.083
107	0.084
107.1	0.086
107.2	0.0866667
107.3	0.0873333
107.4	0.09
107.5	0.0913333
107.6	0.0943333
107.7	0.097
107.8	0.099
107.9	0.101667
108	0.103
108.1	0.105667
108.2	0.108
108.3	0.109333
108.4	0.111
108.5	0.113667
108.6	0.114333
108.7	0.115667
108.8	0.116333
108.9	0.117667
109	0.119
109.1	0.119667
109.2	0.120667
109.3	0.122333
109.4	0.122
109.5	0.123
109.6	0.125667
109.7	0.127
109.8	0.128333
109.9	0.128667
110	0.130333
110.1	0.130667
110.2	0.133333
110.3	0.136
110.4	0.136667
110.5	0.14
110.6	0.141667
110.7	0.143
110.8	0.144
110.9	0.145333
111	0.145333
111.1	0.146
111.2	0.147667
111.3	0.149333
111.4	0.150667
111.5	0.150333
111.6	0.151667
111.7	0.152333
111.8	0.154
111.9	0.156333
112	0.156667
112.1	0.157667
112.2	0.159
112.3	0.159667
112.4	0.16
112.5	0.161667
112.6	0.163
112.7	0.164667
112.8	0.166
112.9	0.167667
113	0.168
113.1	0.168667
113.2	0.169
113.3	0.169333
113.4	0.169333
113.5	0.171
113.6	0.172333
113.7	0.174333
113.8	0.175
113.9	0.176
114	0.177
114.1	0.178333
114.2	0.179667
114.3	0.18
114.4	0.181667
114.5	0.184333
114.6	0.183667
114.7	0.185667
114.8	0.187
114.9	0.186667
115	0.187667
115.1	0.188333
115.2	0.188667
115.3	0.190667
115.4	0.191667
115.5	0.192333
115.6	0.194
115.7	0.195667
115.8	0.196667
115.9	0.197
116	0.198333
116.1	0.199667
116.2	0.201
116.3	0.201
116.4	0.202
116.5	0.202
116.6	0.202667
116.7	0.205
116.8	0.208
116.9	0.211
117	0.211
117.1	0.212667
117.2	0.214333
117.3	0.214667
117.4	0.215667
117.5	0.216667
117.6	0.216667
117.7	0.218333
117.8	0.219333
117.9	0.218667
118	0.219667
118.1	0.221
118.2	0.223
118.3	0.223
118.4	0.223333
118.5	0.224667
118.6	0.227
118.7	0.227667
118.8	0.229
118.9	0.230333
119	0.231667
119.1	0.232
119.2	0.232333
119.3	0.233
119.4	0.234667
119.5	0.236667
119.6	0.238
119.7	0.24
119.8	0.243333
119.9	0.244333
120	0.245
120.1	0.248
120.2	0.250667
120.3	0.251
120.4	0.251667
120.5	0.252667
120.6	0.253667
120.7	0.255
120.8	0.256333
120.9	0.257333
121	0.257667
121.1	0.258
121.2	0.259
121.3	0.261333
121.4	0.262667
121.5	0.263667
121.6	0.267
121.7	0.268
121.8	0.27
121.9	0.271333
122	0.272
122.1	0.273
122.2	0.273333
122.3	0.274333
122.4	0.275
122.5	0.276667
122.6	0.277667
122.7	0.279
122.8	0.279667
122.9	0.28
123	0.281333
123.1	0.281667
123.2	0.283667
123.3	0.285333
123.4	0.286667
123.5	0.287333
123.6	0.289333
123.7	0.291
123.8	0.292
123.9	0.292667
124	0.293667
124.1	0.294667
124.2	0.296
124.3	0.296
124.4	0.297333
124.5	0.298333
124.6	0.299
124.7	0.298667
124.8	0.299
124.9	0.298333
125	0.3
125.1	0.300333
125.2	0.300667
125.3	0.301667
125.4	0.302667
125.5	0.303
125.6	0.303
125.7	0.304667
125.8	0.305
125.9	0.306
126	0.305667
126.1	0.307
126.2	0.307333
126.3	0.308
126.4	0.309333
126.5	0.309667
126.6	0.309667
126.7	0.309667
126.8	0.310333
126.9	0.309667
127	0.309667
127.1	0.310333
127.2	0.311333
127.3	0.312
127.4	0.312333
127.5	0.313333
127.6	0.314333
127.7	0.314333
127.8	0.316667
127.9	0.318
128	0.319
128.1	0.32
128.2	0.322
128.3	0.322
128.4	0.323
128.5	0.324
128.6	0.325333
128.7	0.326333
128.8	0.327333
128.9	0.327
129	0.328333
129.1	0.33
129.2	0.331
129.3	0.331333
129.4	0.332333
129.5	0.332667
129.6	0.333
129.7	0.334
129.8	0.334667
129.9	0.336
130	0.337333
130.1	0.338667
130.2	0.339333
130.3	0.340667
130.4	0.339667
130.5	0.339333
130.6	0.340333
130.7	0.340333
130.8	0.339333
130.9	0.341
131	0.341
131.1	0.341667
131.2	0.343333
131.3	0.345333
131.4	0.346333
131.5	0.348
131.6	0.349667
131.7	0.350333
131.8	0.350333
131.9	0.350667
132	0.352333
132.1	0.352667
132.2	0.354333
132.3	0.355333
132.4	0.356667
132.5	0.357
132.6	0.357667
132.7	0.359
132.8	0.36
132.9	0.360667
133	0.361667
133.1	0.362667
133.2	0.364
133.3	0.365
133.4	0.365667
133.5	0.366
133.6	0.367
133.7	0.368333
133.8	0.368333
133.9	0.369667
134	0.370333
134.1	0.369333
134.2	0.37
134.3	0.371
134.4	0.372333
134.5	0.373
134.6	0.373667
134.7	0.373667
134.8	0.374
134.9	0.374
135	0.376
135.1	0.377667
135.2	0.379333
135.3	0.380333
135.4	0.381333
135.5	0.381667
135.6	0.381667
135.7	0.382667
135.8	0.385667
135.9	0.386333
136	0.386333
136.1	0.387333
136.2	0.388
136.3	0.388333
136.4	0.39
136.5	0.391
136.6	0.391
136.7	0.391
136.8	0.392333
136.9	0.393667
137	0.394333
137.1	0.395333
137.2	0.398
137.3	0.397667
137.4	0.399
137.5	0.4
137.6	0.400667
137.7	0.402333
137.8	0.402667
137.9	0.404333
138	0.404333
138.1	0.405667
138.2	0.406333
138.3	0.407667
138.4	0.408
138.5	0.408667
138.6	0.410333
138.7	0.41
138.8	0.409333
138.9	0.411
139	0.412333
139.1	0.412
139.2	0.412667
139.3	0.413
139.4	0.414667
139.5	0.414667
139.6	0.415333
139.7	0.416333
139.8	0.417667
139.9	0.418
140	0.419
140.1	0.419667
140.2	0.419
140.3	0.419
140.4	0.420333
140.5	0.42
140.6	0.42
140.7	0.420667
140.8	0.421
140.9	0.421333
141	0.421333
141.1	0.421333
141.2	0.421333
141.3	0.420667
141.4	0.421333
141.5	0.421
141.6	0.421
141.7	0.422
141.8	0.422333
141.9	0.423333
142	0.424
142.1	0.424667
142.2	0.424667
142.3	0.424667
142.4	0.425667
142.5	0.427333
142.6	0.428
142.7	0.428333
142.8	0.430333
142.9	0.431333
143	0.431
143.1	0.431333
143.2	0.431
143.3	0.432
143.4	0.432333
143.5	0.433
143.6	0.434333
143.7	0.435333
143.8	0.435667
143.9	0.437333
144	0.437333
144.1	0.438
144.2	0.439
144.3	0.439
144.4	0.439333
144.5	0.44
144.6	0.441
144.7	0.443333
144.8	0.443667
144.9	0.444
145	0.444667
145.1	0.446
145.2	0.446667
145.3	0.448667
145.4	0.449333
145.5	0.449667
145.6	0.450667
145.7	0.452
145.8	0.451333
145.9	0.452
146	0.452333
146.1	0.452
146.2	0.453333
146.3	0.453333
146.4	0.454667
146.5	0.453667
146.6	0.454333
146.7	0.453667
146.8	0.452667
146.9	0.453
147	0.453
147.1	0.453333
147.2	0.454333
147.3	0.453333
147.4	0.454
147.5	0.455667
147.6	0.456
147.7	0.455
147.8	0.456
147.9	0.456333
148	0.456
148.1	0.456667
148.2	0.457
148.3	0.456667
148.4	0.457333
148.5	0.457333
148.6	0.456667
148.7	0.458
148.8	0.458333
148.9	0.459333
149	0.46
149.1	0.461333
149.2	0.462667
149.3	0.463
149.4	0.462667
149.5	0.462333
149.6	0.461667
149.7	0.462333
149.8	0.462333
149.9	0.462667
150	0.463
150.1	0.463667
150.2	0.465
150.3	0.466667
150.4	0.467333
150.5	0.467
150.6	0.468
150.7	0.468667
150.8	0.470333
150.9	0.471333
151	0.471667
151.1	0.471
151.2	0.471
151.3	0.472
151.4	0.474
151.5	0.473667
151.6	0.474333
151.7	0.474667
151.8	0.475
151.9	0.474333
152	0.474333
152.1	0.474667
152.2	0.475
152.3	0.475667
152.4	0.476
152.5	0.477333
152.6	0.477333
152.7	0.477
152.8	0.477
152.9	0.478667
153	0.480333
153.1	0.481667
153.2	0.481333
153.3	0.480667
153.4	0.481667
153.5	0.482
153.6	0.482
153.7	0.483333
153.8	0.485333
153.9	0.486667
154	0.488333
154.1	0.489667
154.2	0.49
154.3	0.491
154.4	0.492
154.5	0.491667
154.6	0.492
154.7	0.493
154.8	0.493333
154.9	0.494333
155	0.495333
155.1	0.494333
155.2	0.495
155.3	0.494667
155.4	0.495333
155.5	0.495333
155.6	0.495667
155.7	0.496
155.8	0.496333
155.9	0.497333
156	0.498333
156.1	0.498
156.2	0.499
156.3	0.499667
156.4	0.501333
156.5	0.503333
156.6	0.503333
156.7	0.503333
156.8	0.502333
156.9	0.500667
157	0.500667
157.1	0.501
157.2	0.501333
157.3	0.501667
157.4	0.503
157.5	0.502667
157.6	0.502667
157.7	0.503333
157.8	0.503333
157.9	0.503333
158	0.504667
158.1	0.504
158.2	0.504333
158.3	0.505667
158.4	0.505333
158.5	0.506
158.6	0.505
158.7	0.505
158.8	0.506333
158.9	0.506
159	0.506
159.1	0.506
159.2	0.506333
159.3	0.506667
159.4	0.507333
159.5	0.508333
159.6	0.507667
159.7	0.507333
159.8	0.507
159.9	0.508
160	0.508333
160.1	0.508333
160.2	0.509333
160.3	0.509333
160.4	0.509333
160.5	0.51
160.6	0.51
160.7	0.510333
160.8	0.511
160.9	0.51
161	0.51
161.1	0.509667
161.2	0.509
161.3	0.511333
161.4	0.511
161.5	0.511
161.6	0.512333
161.7	0.513
161.8	0.513333
161.9	0.513667
162	0.513667
162.1	0.514333
162.2	0.514667
162.3	0.515
162.4	0.515
162.5	0.516
162.6	0.517
162.7	0.516333
162.8	0.517333
162.9	0.517667
163	0.518
163.1	0.518667
163.2	0.52
163.3	0.520667
163.4	0.521
163.5	0.520667
163.6	0.522
163.7	0.522333
163.8	0.521333
163.9	0.523
164	0.524
164.1	0.524667
164.2	0.524333
164.3	0.525
164.4	0.523333
164.5	0.523
164.6	0.523667
164.7	0.523333
164.8	0.523667
164.9	0.523667
165	0.523
165.1	0.523333
165.2	0.524
165.3	0.525667
165.4	0.525667
165.5	0.526667
165.6	0.527
165.7	0.527333
165.8	0.526333
165.9	0.526333
166	0.526667
166.1	0.527667
166.2	0.528667
166.3	0.528667
166.4	0.528333
166.5	0.528667
166.6	0.529
166.7	0.528667
166.8	0.529
166.9	0.529333
167	0.530667
167.1	0.530667
167.2	0.53
167.3	0.531
167.4	0.532
167.5	0.532667
167.6	0.533
167.7	0.533
167.8	0.532333
167.9	0.533333
168	0.533333
168.1	0.533667
168.2	0.533667
168.3	0.533667
168.4	0.533
168.5	0.533667
168.6	0.535
168.7	0.536
168.8	0.537333
168.9	0.538
169	0.538333
169.1	0.538333
169.2	0.538667
169.3	0.538667
169.4	0.539
169.5	0.538333
169.6	0.54
169.7	0.540667
169.8	0.540667
169.9	0.541
170	0.540667
170.1	0.540667
170.2	0.540333
170.3	0.54
170.4	0.539667
170.5	0.539667
170.6	0.539
170.7	0.538667
170.8	0.538667
170.9	0.538667
171	0.538333
171.1	0.537667
171.2	0.539
171.3	0.538667
171.4	0.539667
171.5	0.540667
171.6	0.539333
171.7	0.539
171.8	0.540667
171.9	0.540333
172	0.540667
172.1	0.539667
172.2	0.540667
172.3	0.541667
172.4	0.541333
172.5	0.541333
172.6	0.543
172.7	0.542333
172.8	0.542333
172.9	0.542333
173	0.543333
173.1	0.543333
173.2	0.543333
173.3	0.544
173.4	0.544333
173.5	0.544333
173.6	0.545333
173.7	0.547
173.8	0.548
173.9	0.548333
174	0.548
174.1	0.547667
174.2	0.547
174.3	0.546
174.4	0.545333
174.5	0.546
174.6	0.546667
174.7	0.546667
174.8	0.547
174.9	0.548667
175	0.549
175.1	0.549
175.2	0.548333
175.3	0.548333
175.4	0.549667
175.5	0.55
175.6	0.551667
175.7	0.551667
175.8	0.553
175.9	0.553667
176	0.554
176.1	0.554667
176.2	0.556
176.3	0.555667
176.4	0.555333
176.5	0.556333
176.6	0.557333
176.7	0.556667
176.8	0.556667
176.9	0.556667
177	0.556333
177.1	0.556333
177.2	0.556333
177.3	0.556
177.4	0.557333
177.5	0.558
177.6	0.559
177.7	0.559333
177.8	0.56
177.9	0.558667
178	0.558333
178.1	0.559
178.2	0.559333
178.3	0.561
178.4	0.562
178.5	0.562
178.6	0.562333
178.7	0.563
178.8	0.562
178.9	0.562333
179	0.563
179.1	0.563667
179.2	0.563667
179.3	0.563667
179.4	0.564
179.5	0.564667
179.6	0.566
179.7	0.565333
179.8	0.566
179.9	0.566
180	0.564667
180.1	0.564667
180.2	0.565667
180.3	0.565667
180.4	0.566333
180.5	0.565667
180.6	0.566333
180.7	0.566333
180.8	0.566
180.9	0.566
181	0.566333
181.1	0.565333
181.2	0.565333
181.3	0.565
181.4	0.565333
181.5	0.565333
181.6	0.566
181.7	0.566667
181.8	0.567
181.9	0.567333
182	0.567333
182.1	0.568
182.2	0.567667
182.3	0.568333
182.4	0.568333
182.5	0.567667
182.6	0.567667
182.7	0.568333
182.8	0.568333
182.9	0.568667
183	0.568333
183.1	0.567333
183.2	0.567333
183.3	0.567667
183.4	0.567
183.5	0.566667
183.6	0.566667
183.7	0.567333
183.8	0.567667
183.9	0.567333
184	0.567667
184.1	0.568333
184.2	0.567667
184.3	0.568333
184.4	0.567333
184.5	0.567
184.6	0.566333
184.7	0.567333
184.8	0.567
184.9	0.565333
185	0.567
185.1	0.567
185.2	0.567
185.3	0.569
185.4	0.568667
185.5	0.568333
185.6	0.568667
185.7	0.568
185.8	0.569333
185.9	0.569667
186	0.569667
186.1	0.570333
186.2	0.571667
186.3	0.572667
186.4	0.572
186.5	0.572667
186.6	0.573
186.7	0.574
186.8	0.574
186.9	0.574333
187	0.574
187.1	0.572667
187.2	0.572667
187.3	0.572333
187.4	0.571667
187.5	0.572
187.6	0.571333
187.7	0.571667
187.8	0.571667
187.9	0.572
188	0.571333
188.1	0.571667
188.2	0.572
188.3	0.571
188.4	0.571333
188.5	0.572
188.6	0.570667
188.7	0.570667
188.8	0.570333
188.9	0.571
189	0.571667
189.1	0.571333
189.2	0.572333
189.3	0.572333
189.4	0.573333
189.5	0.573667
189.6	0.572667
189.7	0.572333
189.8	0.571667
189.9	0.571333
190	0.571667
190.1	0.572333
190.2	0.572333
190.3	0.572333
190.4	0.571667
190.5	0.570667
190.6	0.570667
190.7	0.57
190.8	0.571
190.9	0.571667
191	0.570667
191.1	0.571333
191.2	0.570667
191.3	0.570333
191.4	0.571333
191.5	0.571
191.6	0.570667
191.7	0.572
191.8	0.573333
191.9	0.574333
192	0.574667
192.1	0.575
192.2	0.575333
192.3	0.575667
192.4	0.576
192.5	0.577667
192.6	0.577667
192.7	0.577
192.8	0.576667
192.9	0.576667
193	0.576333
193.1	0.577
193.2	0.576667
193.3	0.578
193.4	0.578
193.5	0.577333
193.6	0.577333
193.7	0.577667
193.8	0.577333
193.9	0.578333
194	0.578333
194.1	0.578
194.2	0.577333
194.3	0.577667
194.4	0.577
194.5	0.577333
194.6	0.578
194.7	0.578
194.8	0.577667
194.9	0.577333
195	0.578
195.1	0.579333
195.2	0.579333
195.3	0.578
195.4	0.578333
195.5	0.579333
195.6	0.580667
195.7	0.581333
195.8	0.582
195.9	0.581667
196	0.581
196.1	0.581
196.2	0.580333
196.3	0.579
196.4	0.579667
196.5	0.578667
196.6	0.578
196.7	0.578
196.8	0.578333
196.9	0.577333
197	0.577333
197.1	0.576667
197.2	0.576667
197.3	0.576
197.4	0.576
197.5	0.576333
197.6	0.576667
197.7	0.576667
197.8	0.576333
197.9	0.576333
198	0.576333
198.1	0.576667
198.2	0.576667
198.3	0.579
198.4	0.578
198.5	0.578
198.6	0.578
198.7	0.577333
198.8	0.577667
198.9	0.578333
199	0.578667
199.1	0.579
199.2	0.579333
199.3	0.579667
199.4	0.580667
199.5	0.581333
199.6	0.581333
199.7	0.581
199.8	0.580667
199.9	0.581
200	0.581
[truncated: 14,000 more rows]
