# Supplementary material for: Bayesian inference of kinetic schemes for ion channels by Kalman filtering
Source: eLife journal article supplement (doi:10.7554/elife.62714), 2022-05-04
Supplement: fig4-data6 [file 1_Sim_N_4000_Fluor_MW_1M.xlsx]

## Sheet: Tabelle1
0.1	0
0.2	0
0.3	0
0.4	0
0.5	0
0.6	0
0.7	0
0.8	0
0.9	0
1	0
1.1	0
1.2	0
1.3	0
1.4	0
1.5	0
1.6	0
1.7	0
1.8	0
1.9	0
2	0
2.1	0
2.2	0
2.3	0
2.4	0
2.5	0
2.6	0
2.7	0
2.8	0
2.9	0
3	0
3.1	0
3.2	0
3.3	0
3.4	0
3.5	0
3.6	0
3.7	0
3.8	0
3.9	0
4	0
4.1	0
4.2	0
4.3	0
4.4	0
4.5	0
4.6	0
4.7	0
4.8	0
4.9	0
5	0
5.1	0
5.2	0
5.3	0
5.4	0
5.5	0
5.6	0
5.7	0
5.8	0
5.9	0
6	0
6.1	0
6.2	0
6.3	0
6.4	0
6.5	0
6.6	0
6.7	0
6.8	0
6.9	0
7	0
7.1	0
7.2	0
7.3	0
7.4	0
7.5	0
7.6	0
7.7	0
7.8	0
7.9	0
8	0
8.1	0
8.2	0
8.3	0
8.4	0
8.5	0
8.6	0
8.7	0
8.8	0
8.9	0
9	0
9.1	0
9.2	0
9.3	0
9.4	0
9.5	0
9.6	0
9.7	0
9.8	0
9.9	0
10	0
10.1	0
10.2	0
10.3	0
10.4	0
10.5	0
10.6	0
10.7	0
10.8	0
10.9	0
11	0
11.1	0
11.2	0
11.3	0
11.4	0
11.5	0
11.6	0
11.7	0
11.8	0
11.9	0
12	0
12.1	0
12.2	0
12.3	0
12.4	0
12.5	0
12.6	0
12.7	0
12.8	0
12.9	0
13	0
13.1	0
13.2	0
13.3	0
13.4	0
13.5	0
13.6	0
13.7	0
13.8	0
13.9	0
14	0
14.1	0
14.2	0
14.3	0
14.4	0
14.5	0
14.6	0
14.7	0
14.8	0
14.9	0
15	0
15.1	0
15.2	0
15.3	0
15.4	0
15.5	0
15.6	0
15.7	0
15.8	0
15.9	0
16	0
16.1	0
16.2	0
16.3	0
16.4	0
16.5	0
16.6	0
16.7	0
16.8	0
16.9	0
17	0
17.1	0
17.2	0
17.3	0
17.4	0
17.5	0
17.6	0
17.7	0
17.8	0
17.9	0
18	0
18.1	0
18.2	0
18.3	0
18.4	0
18.5	0
18.6	0
18.7	0
18.8	0
18.9	0
19	0
19.1	0
19.2	0
19.3	0
19.4	0
19.5	0
19.6	0
19.7	0
19.8	0
19.9	0
20	0
20.1	0
20.2	0
20.3	0
20.4	0
20.5	0
20.6	0
20.7	0
20.8	0
20.9	0
21	0
21.1	0
21.2	0
21.3	0
21.4	0
21.5	0
21.6	0
21.7	0
21.8	0
21.9	0
22	0
22.1	0
22.2	0
22.3	0
22.4	0
22.5	0
22.6	0
22.7	0
22.8	0
22.9	0
23	0
23.1	0
23.2	0
23.3	0
23.4	0
23.5	0
23.6	0
23.7	0
23.8	0
23.9	0
24	0
24.1	0
24.2	0
24.3	0
24.4	0
24.5	0
24.6	0
24.7	0
24.8	0
24.9	0
25	0
25.1	0
25.2	0
25.3	0
25.4	0
25.5	0
25.6	0
25.7	0
25.8	0
25.9	0
26	0
26.1	0
26.2	0
26.3	0
26.4	0
26.5	0
26.6	0
26.7	0
26.8	0
26.9	0
27	0
27.1	0
27.2	0
27.3	0
27.4	0
27.5	0
27.6	0
27.7	0
27.8	0
27.9	0
28	0
28.1	0
28.2	0
28.3	0
28.4	0
28.5	0
28.6	0
28.7	0
28.8	0
28.9	0
29	0
29.1	0
29.2	0
29.3	0
29.4	0
29.5	0
29.6	0
29.7	0
29.8	0
29.9	0
30	0
30.1	0
30.2	0
30.3	0
30.4	0
30.5	0
30.6	0
30.7	0
30.8	0
30.9	0
31	0
31.1	0
31.2	0
31.3	0
31.4	0
31.5	0
31.6	0
31.7	0
31.8	0
31.9	0
32	0
32.1	0
32.2	0
32.3	0
32.4	0
32.5	0
32.6	0
32.7	0
32.8	0
32.9	0
33	0
33.1	0
33.2	0
33.3	0
33.4	0
33.5	0
33.6	0
33.7	0
33.8	0
33.9	0
34	0
34.1	0
34.2	0
34.3	0
34.4	0
34.5	0
34.6	0
34.7	0
34.8	0
34.9	0
35	0
35.1	0
35.2	0
35.3	0
35.4	0
35.5	0
35.6	0
35.7	0
35.8	0
35.9	0
36	0
36.1	0
36.2	0
36.3	0
36.4	0
36.5	0
36.6	0
36.7	0
36.8	0
36.9	0
37	0
37.1	0
37.2	0
37.3	0
37.4	0
37.5	0
37.6	0
37.7	0
37.8	0
37.9	0
38	0
38.1	0
38.2	0
38.3	0
38.4	0
38.5	0
38.6	0
38.7	0
38.8	0
38.9	0
39	0
39.1	0
39.2	0
39.3	0
39.4	0
39.5	0
39.6	0
39.7	0
39.8	0
39.9	0
40	0
40.1	0
40.2	0
40.3	0
40.4	0
40.5	0
40.6	0
40.7	0
40.8	0
40.9	0
41	0
41.1	0
41.2	0
41.3	0
41.4	0
41.5	0
41.6	0
41.7	0
41.8	0
41.9	0
42	0
42.1	0
42.2	0
42.3	0
42.4	0
42.5	0
42.6	0
42.7	0
42.8	0
42.9	0
43	0
43.1	0
43.2	0
43.3	0
43.4	0
43.5	0
43.6	0
43.7	0
43.8	0
43.9	0
44	0
44.1	0
44.2	0
44.3	0
44.4	0
44.5	0
44.6	0
44.7	0
44.8	0
44.9	0
45	0
45.1	0
45.2	0
45.3	0
45.4	0
45.5	0
45.6	0
45.7	0
45.8	0
45.9	0
46	0
46.1	0
46.2	0
46.3	0
46.4	0
46.5	0
46.6	0
46.7	0
46.8	0
46.9	0
47	0
47.1	0
47.2	0
47.3	0
47.4	0
47.5	0
47.6	0
47.7	0
47.8	0
47.9	0
48	0
48.1	0
48.2	0
48.3	0
48.4	0
48.5	0
48.6	0
48.7	0
48.8	0
48.9	0
49	0
49.1	0
49.2	0
49.3	0
49.4	0
49.5	0
49.6	0
49.7	0
49.8	0
49.9	0
50	0
50.1	0
50.2	0
50.3	0
50.4	0
50.5	0
50.6	0
50.7	0
50.8	0
50.9	0
51	0
51.1	0
51.2	0
51.3	0
51.4	0
51.5	0
51.6	0
51.7	0
51.8	0
51.9	0
52	0
52.1	0
52.2	0
52.3	0
52.4	0
52.5	0
52.6	0
52.7	0
52.8	0
52.9	0
53	0
53.1	0
53.2	0
53.3	0
53.4	0
53.5	0
53.6	0
53.7	0
53.8	0
53.9	0
54	0
54.1	0
54.2	0
54.3	0
54.4	0
54.5	0
54.6	0
54.7	0
54.8	0
54.9	0
55	0
55.1	0
55.2	0
55.3	0
55.4	0
55.5	0
55.6	0
55.7	0
55.8	0
55.9	0
56	0
56.1	0
56.2	0
56.3	0
56.4	0
56.5	0
56.6	0
56.7	0
56.8	0
56.9	0
57	0
57.1	0
57.2	0
57.3	0
57.4	0
57.5	0
57.6	0
57.7	0
57.8	0
57.9	0
58	0
58.1	0
58.2	0
58.3	0
58.4	0
58.5	0
58.6	0
58.7	0
58.8	0
58.9	0
59	0
59.1	0
59.2	0
59.3	0
59.4	0
59.5	0
59.6	0
59.7	0
59.8	0
59.9	0
60	0
60.1	0
60.2	0
60.3	0
60.4	0
60.5	0
60.6	0
60.7	0
60.8	0
60.9	0
61	0
61.1	0
61.2	0
61.3	0
61.4	0
61.5	0
61.6	0
61.7	0
61.8	0
61.9	0
62	0
62.1	0
62.2	0
62.3	0
62.4	0
62.5	0
62.6	0
62.7	0
62.8	0
62.9	0
63	0
63.1	0
63.2	0
63.3	0
63.4	0
63.5	0
63.6	0
63.7	0
63.8	0
63.9	0
64	0
64.1	0
64.2	0
64.3	0
64.4	0
64.5	0
64.6	0
64.7	0
64.8	0
64.9	0
65	0
65.1	0
65.2	0
65.3	0
65.4	0
65.5	0
65.6	0
65.7	0
65.8	0
65.9	0
66	0
66.1	0
66.2	0
66.3	0
66.4	0
66.5	0
66.6	0
66.7	0
66.8	0
66.9	0
67	0
67.1	0
67.2	0
67.3	0
67.4	0
67.5	0
67.6	0
67.7	0
67.8	0
67.9	0
68	0
68.1	0
68.2	0
68.3	0
68.4	0
68.5	0
68.6	0
68.7	0
68.8	0
68.9	0
69	0
69.1	0
69.2	0
69.3	0
69.4	0
69.5	0
69.6	0
69.7	0
69.8	0
69.9	0
70	0
70.1	0
70.2	0
70.3	0
70.4	0
70.5	0
70.6	0
70.7	0
70.8	0
70.9	0
71	0
71.1	0
71.2	0
71.3	0
71.4	0
71.5	0
71.6	0
71.7	0
71.8	0
71.9	0
72	0
72.1	0
72.2	0
72.3	0
72.4	0
72.5	0
72.6	0
72.7	0
72.8	0
72.9	0
73	0
73.1	0
73.2	0
73.3	0
73.4	0
73.5	0
73.6	0
73.7	0
73.8	0
73.9	0
74	0
74.1	0
74.2	0
74.3	0
74.4	0
74.5	0
74.6	0
74.7	0
74.8	0
74.9	0
75	0
75.1	0
75.2	0
75.3	0
75.4	0
75.5	0
75.6	0
75.7	0
75.8	0
75.9	0
76	0
76.1	0
76.2	0
76.3	0
76.4	0
76.5	0
76.6	0
76.7	0
76.8	0
76.9	0
77	0
77.1	0
77.2	0
77.3	0
77.4	0
77.5	0
77.6	0
77.7	0
77.8	0
77.9	0
78	0
78.1	0
78.2	0
78.3	0
78.4	0
78.5	0
78.6	0
78.7	0
78.8	0
78.9	0
79	0
79.1	0
79.2	0
79.3	0
79.4	0
79.5	0
79.6	0
79.7	0
79.8	0
79.9	0
80	0
80.1	0
80.2	0
80.3	0
80.4	0
80.5	0
80.6	0
80.7	0
80.8	0
80.9	0
81	0
81.1	0
81.2	0
81.3	0
81.4	0
81.5	0
81.6	0
81.7	0
81.8	0
81.9	0
82	0
82.1	0
82.2	0
82.3	0
82.4	0
82.5	0
82.6	0
82.7	0
82.8	0
82.9	0
83	0
83.1	0
83.2	0
83.3	0
83.4	0
83.5	0
83.6	0
83.7	0
83.8	0
83.9	0
84	0
84.1	0
84.2	0
84.3	0
84.4	0
84.5	0
84.6	0
84.7	0
84.8	0
84.9	0
85	0
85.1	0
85.2	0
85.3	0
85.4	0
85.5	0
85.6	0
85.7	0
85.8	0
85.9	0
86	0
86.1	0
86.2	0
86.3	0
86.4	0
86.5	0
86.6	0
86.7	0
86.8	0
86.9	0
87	0
87.1	0
87.2	0
87.3	0
87.4	0
87.5	0
87.6	0
87.7	0
87.8	0
87.9	0
88	0
88.1	0
88.2	0
88.3	0
88.4	0
88.5	0
88.6	0
88.7	0
88.8	0
88.9	0
89	0
89.1	0
89.2	0
89.3	0
89.4	0
89.5	0
89.6	0
89.7	0
89.8	0
89.9	0
90	0
90.1	0
90.2	0
90.3	0
90.4	0
90.5	0
90.6	0
90.7	0
90.8	0
90.9	0
91	0
91.1	0
91.2	0
91.3	0
91.4	0
91.5	0
91.6	0
91.7	0
91.8	0
91.9	0
92	0
92.1	0
92.2	0
92.3	0
92.4	0
92.5	0
92.6	0
92.7	0
92.8	0
92.9	0
93	0
93.1	0
93.2	0
93.3	0
93.4	0
93.5	0
93.6	0
93.7	0
93.8	0
93.9	0
94	0
94.1	0
94.2	0
94.3	0
94.4	0
94.5	0
94.6	0
94.7	0
94.8	0
94.9	0
95	0
95.1	0
95.2	0
95.3	0
95.4	0
95.5	0
95.6	0
95.7	0
95.8	0
95.9	0
96	0
96.1	0
96.2	0
96.3	0
96.4	0
96.5	0
96.6	0
96.7	0
96.8	0
96.9	0
97	0
97.1	0
97.2	0
97.3	0
97.4	0
97.5	0
97.6	0
97.7	0
97.8	0
97.9	0
98	0
98.1	0
98.2	0
98.3	0
98.4	0
98.5	0
98.6	0
98.7	0
98.8	0
98.9	0
99	0
99.1	0
99.2	0
99.3	0
99.4	0
99.5	0
99.6	0
99.7	0
99.8	0
99.9	0
100	0
100.1	0.05475
100.2	0.10675
100.3	0.154125
100.4	0.199125
100.5	0.23975
100.6	0.274625
100.7	0.305625
100.8	0.3345
100.9	0.36325
101	0.384875
101.1	0.409125
101.2	0.43375
101.3	0.45175
101.4	0.468625
101.5	0.484625
101.6	0.4995
101.7	0.513875
101.8	0.524125
101.9	0.535375
102	0.542625
102.1	0.55325
102.2	0.559375
102.3	0.565625
102.4	0.569
102.5	0.57675
102.6	0.584625
102.7	0.591375
102.8	0.597
102.9	0.601625
103	0.605625
103.1	0.608125
103.2	0.614375
103.3	0.615
103.4	0.61975
103.5	0.6245
103.6	0.628125
103.7	0.6325
103.8	0.63325
103.9	0.636125
104	0.639
104.1	0.642
104.2	0.642625
104.3	0.6435
104.4	0.64625
104.5	0.649875
104.6	0.65075
104.7	0.6515
104.8	0.653375
104.9	0.655875
105	0.656375
105.1	0.657875
105.2	0.659125
105.3	0.6635
105.4	0.664625
105.5	0.6655
105.6	0.662875
105.7	0.6655
105.8	0.6675
105.9	0.66725
106	0.667875
106.1	0.668875
106.2	0.668375
106.3	0.668375
106.4	0.67025
106.5	0.670375
106.6	0.670375
106.7	0.67275
106.8	0.672125
106.9	0.674625
107	0.67625
107.1	0.679
107.2	0.678875
107.3	0.67825
107.4	0.677625
107.5	0.679375
107.6	0.679875
107.7	0.677625
107.8	0.679
107.9	0.6795
108	0.6795
108.1	0.678875
108.2	0.682125
108.3	0.683
108.4	0.68375
108.5	0.683
108.6	0.684125
108.7	0.686625
108.8	0.686
108.9	0.687125
109	0.685875
109.1	0.684625
109.2	0.688
109.3	0.687375
109.4	0.687875
109.5	0.685
109.6	0.686375
109.7	0.686375
109.8	0.686375
109.9	0.687
110	0.68825
110.1	0.688625
110.2	0.6905
110.3	0.69175
110.4	0.69075
110.5	0.691625
110.6	0.687
110.7	0.6865
110.8	0.6875
110.9	0.68625
111	0.689625
111.1	0.68825
111.2	0.691125
111.3	0.692625
111.4	0.691125
111.5	0.6915
111.6	0.691
111.7	0.6895
111.8	0.69
111.9	0.692
112	0.692125
112.1	0.696375
112.2	0.696875
112.3	0.696875
112.4	0.697625
112.5	0.697125
112.6	0.698125
112.7	0.699375
112.8	0.70125
112.9	0.70375
113	0.705375
113.1	0.70675
113.2	0.707375
113.3	0.709
113.4	0.71025
113.5	0.709625
113.6	0.711
113.7	0.708
113.8	0.709625
113.9	0.7075
114	0.708375
114.1	0.71
114.2	0.7095
114.3	0.7105
114.4	0.713
114.5	0.71225
114.6	0.714
114.7	0.712125
114.8	0.713125
114.9	0.7125
115	0.713125
115.1	0.71225
115.2	0.71425
115.3	0.7135
115.4	0.711625
115.5	0.713
115.6	0.709875
115.7	0.710875
115.8	0.711375
115.9	0.71175
116	0.71025
116.1	0.712625
116.2	0.712
116.3	0.711875
116.4	0.712625
116.5	0.711625
116.6	0.714
116.7	0.716125
116.8	0.71775
116.9	0.71925
117	0.718875
117.1	0.718125
117.2	0.718125
117.3	0.718875
117.4	0.721
117.5	0.7205
117.6	0.720375
117.7	0.721875
117.8	0.7225
117.9	0.7205
118	0.720625
118.1	0.720125
118.2	0.723125
118.3	0.72325
118.4	0.724625
118.5	0.724
118.6	0.7245
118.7	0.724
118.8	0.727125
118.9	0.72525
119	0.726375
119.1	0.726125
119.2	0.72575
119.3	0.7255
119.4	0.727625
119.5	0.728625
119.6	0.729
119.7	0.72975
119.8	0.7315
119.9	0.73225
120	0.734875
120.1	0.73275
120.2	0.731625
120.3	0.73175
120.4	0.732625
120.5	0.731625
120.6	0.731125
120.7	0.729625
120.8	0.731375
120.9	0.73125
121	0.7325
121.1	0.736875
121.2	0.738625
121.3	0.73775
121.4	0.736625
121.5	0.737125
121.6	0.739125
121.7	0.740125
121.8	0.739875
121.9	0.739625
122	0.73975
122.1	0.740125
122.2	0.740625
122.3	0.741625
122.4	0.74225
122.5	0.744125
122.6	0.74525
122.7	0.74425
122.8	0.740875
122.9	0.740125
123	0.741375
123.1	0.74175
123.2	0.7415
123.3	0.742125
123.4	0.741125
123.5	0.742375
123.6	0.742
123.7	0.744375
123.8	0.745875
123.9	0.744375
124	0.74475
124.1	0.74375
124.2	0.742875
124.3	0.741625
124.4	0.74025
124.5	0.74
124.6	0.742625
124.7	0.742125
124.8	0.742375
124.9	0.744125
125	0.744625
125.1	0.7445
125.2	0.745375
125.3	0.74375
125.4	0.745375
125.5	0.7455
125.6	0.7465
125.7	0.745625
125.8	0.7445
125.9	0.74325
126	0.743625
126.1	0.7435
126.2	0.74475
126.3	0.74525
126.4	0.746875
126.5	0.744
126.6	0.746125
126.7	0.746375
126.8	0.74925
126.9	0.746875
127	0.748
127.1	0.7495
127.2	0.75025
127.3	0.751875
127.4	0.7525
127.5	0.752375
127.6	0.752
127.7	0.75225
127.8	0.75275
127.9	0.753125
128	0.753625
128.1	0.755125
128.2	0.75475
128.3	0.755375
128.4	0.756
128.5	0.75425
128.6	0.75525
128.7	0.754375
128.8	0.758
128.9	0.756875
129	0.7555
129.1	0.755
129.2	0.757625
129.3	0.757125
129.4	0.754875
129.5	0.754875
129.6	0.754375
129.7	0.7575
129.8	0.75775
129.9	0.758625
130	0.75875
130.1	0.759375
130.2	0.75925
130.3	0.7595
130.4	0.7605
130.5	0.760375
130.6	0.76
130.7	0.761125
130.8	0.759
130.9	0.760125
131	0.761375
131.1	0.760125
131.2	0.76225
131.3	0.7645
131.4	0.763875
131.5	0.7645
131.6	0.7655
131.7	0.76975
131.8	0.771
131.9	0.771375
132	0.77075
132.1	0.76925
132.2	0.76925
132.3	0.77125
132.4	0.772375
132.5	0.772125
132.6	0.7725
132.7	0.773
132.8	0.7735
132.9	0.773625
133	0.77125
133.1	0.77025
133.2	0.771125
133.3	0.774125
133.4	0.773125
133.5	0.771875
133.6	0.773375
133.7	0.772875
133.8	0.773125
133.9	0.772875
134	0.77325
134.1	0.774625
134.2	0.775375
134.3	0.778125
134.4	0.777125
134.5	0.775375
134.6	0.77525
134.7	0.774875
134.8	0.773875
134.9	0.773625
135	0.774625
135.1	0.77275
135.2	0.776125
135.3	0.779125
135.4	0.77775
135.5	0.77825
135.6	0.77775
135.7	0.77825
135.8	0.77975
135.9	0.778
136	0.777875
136.1	0.778125
136.2	0.78
136.3	0.77875
136.4	0.777625
136.5	0.7765
136.6	0.777125
136.7	0.774875
136.8	0.77375
136.9	0.7745
137	0.776
137.1	0.776
137.2	0.777875
137.3	0.77925
137.4	0.778625
137.5	0.77725
137.6	0.777
137.7	0.777125
137.8	0.779625
137.9	0.77925
138	0.781875
138.1	0.782
138.2	0.785375
138.3	0.785125
138.4	0.786375
138.5	0.786125
138.6	0.786625
138.7	0.787125
138.8	0.79
138.9	0.791875
139	0.7915
139.1	0.791875
139.2	0.79175
139.3	0.7925
139.4	0.791875
139.5	0.79425
139.6	0.7935
139.7	0.794125
139.8	0.793625
139.9	0.7935
140	0.794
140.1	0.795125
140.2	0.795625
140.3	0.795125
140.4	0.795625
140.5	0.79725
140.6	0.798875
140.7	0.7965
140.8	0.795375
140.9	0.79775
141	0.79825
141.1	0.79825
141.2	0.79575
141.3	0.79325
141.4	0.793875
141.5	0.7945
141.6	0.795125
141.7	0.7935
141.8	0.79675
141.9	0.7955
142	0.794625
142.1	0.7955
142.2	0.793625
142.3	0.793125
142.4	0.79375
142.5	0.794625
142.6	0.795875
142.7	0.796125
142.8	0.796125
142.9	0.797375
143	0.79975
143.1	0.79725
143.2	0.796375
143.3	0.795625
143.4	0.796625
143.5	0.796
143.6	0.797875
143.7	0.799375
143.8	0.79725
143.9	0.7995
144	0.799375
144.1	0.80025
144.2	0.79975
144.3	0.798375
144.4	0.79725
144.5	0.80025
144.6	0.801375
144.7	0.801125
144.8	0.798875
144.9	0.7975
145	0.796875
145.1	0.796
145.2	0.79475
145.3	0.793875
145.4	0.795
145.5	0.796375
145.6	0.795625
145.7	0.794625
145.8	0.793875
145.9	0.79425
146	0.795375
146.1	0.7955
146.2	0.7955
146.3	0.794125
146.4	0.797125
146.5	0.796875
146.6	0.798375
146.7	0.799125
146.8	0.801625
146.9	0.801125
147	0.801375
147.1	0.8035
147.2	0.80175
147.3	0.801125
147.4	0.801875
147.5	0.802375
147.6	0.800375
147.7	0.80025
147.8	0.800875
147.9	0.8025
148	0.802
148.1	0.800875
148.2	0.80125
148.3	0.802625
148.4	0.803
148.5	0.802625
148.6	0.803375
148.7	0.804
148.8	0.80375
148.9	0.80225
149	0.80225
149.1	0.80325
149.2	0.805375
149.3	0.805125
149.4	0.80675
149.5	0.80675
149.6	0.807375
149.7	0.809625
149.8	0.810375
149.9	0.809375
150	0.80775
150.1	0.809125
150.2	0.80875
150.3	0.809875
150.4	0.80825
150.5	0.80875
150.6	0.81125
150.7	0.810875
150.8	0.811125
150.9	0.81075
151	0.80975
151.1	0.807
151.2	0.80725
151.3	0.80725
151.4	0.806875
151.5	0.80825
151.6	0.810625
151.7	0.81175
151.8	0.813875
151.9	0.812375
152	0.812
152.1	0.81025
152.2	0.8115
152.3	0.81175
152.4	0.81125
152.5	0.811875
152.6	0.812
152.7	0.8115
152.8	0.813125
152.9	0.81175
153	0.812875
153.1	0.813
153.2	0.812125
153.3	0.8105
153.4	0.81
153.5	0.810375
153.6	0.8105
153.7	0.81
153.8	0.812875
153.9	0.815125
154	0.814
154.1	0.813875
154.2	0.81275
154.3	0.814625
154.4	0.81525
154.5	0.816125
154.6	0.815875
154.7	0.815375
154.8	0.81525
154.9	0.816375
155	0.81625
155.1	0.815375
155.2	0.815
155.3	0.815625
155.4	0.818
155.5	0.817875
155.6	0.818875
155.7	0.81775
155.8	0.818875
155.9	0.817375
156	0.81775
156.1	0.81925
156.2	0.81925
156.3	0.81975
156.4	0.819625
156.5	0.819
156.6	0.820375
156.7	0.8185
156.8	0.82025
156.9	0.822
157	0.822
157.1	0.822375
157.2	0.8235
157.3	0.823125
157.4	0.824875
157.5	0.82425
157.6	0.8235
157.7	0.823
157.8	0.82225
157.9	0.82075
158	0.8215
158.1	0.8205
158.2	0.8195
158.3	0.820875
158.4	0.819
158.5	0.819125
158.6	0.82175
158.7	0.82375
158.8	0.824
158.9	0.824
159	0.825625
159.1	0.82625
159.2	0.825625
159.3	0.82575
159.4	0.82425
159.5	0.825
159.6	0.823875
159.7	0.822625
159.8	0.822125
159.9	0.820625
160	0.82425
160.1	0.826125
160.2	0.825875
160.3	0.82525
160.4	0.825
160.5	0.824125
160.6	0.82425
160.7	0.822625
160.8	0.821875
160.9	0.820375
161	0.819625
161.1	0.819125
161.2	0.82125
161.3	0.822
161.4	0.823
161.5	0.824125
161.6	0.82475
161.7	0.823625
161.8	0.823875
161.9	0.8245
162	0.824625
162.1	0.825125
162.2	0.82625
162.3	0.82625
162.4	0.827125
162.5	0.82875
162.6	0.828375
162.7	0.828125
162.8	0.82925
162.9	0.829
163	0.82675
163.1	0.82775
163.2	0.82725
163.3	0.829125
163.4	0.829625
163.5	0.8305
163.6	0.831125
163.7	0.833
163.8	0.831375
163.9	0.831625
164	0.832125
164.1	0.83225
164.2	0.833125
164.3	0.833875
164.4	0.8335
164.5	0.832125
164.6	0.8315
164.7	0.8305
164.8	0.831125
164.9	0.8315
165	0.8325
165.1	0.83075
165.2	0.832125
165.3	0.833375
165.4	0.8325
165.5	0.83225
165.6	0.83225
165.7	0.832875
165.8	0.83375
165.9	0.8325
166	0.831625
166.1	0.833
166.2	0.83575
166.3	0.835125
166.4	0.834375
166.5	0.83275
166.6	0.832875
166.7	0.832375
166.8	0.834375
166.9	0.8335
167	0.833875
167.1	0.833875
167.2	0.834625
167.3	0.83575
167.4	0.83525
167.5	0.83525
167.6	0.83575
167.7	0.839
167.8	0.839875
167.9	0.84075
168	0.840875
168.1	0.842375
168.2	0.8415
168.3	0.84
168.4	0.840125
168.5	0.84025
168.6	0.8405
168.7	0.840125
168.8	0.83975
168.9	0.838875
169	0.838375
169.1	0.839
169.2	0.838625
169.3	0.835625
169.4	0.837375
169.5	0.836
169.6	0.83625
169.7	0.8365
169.8	0.8345
169.9	0.835375
170	0.83575
170.1	0.835625
170.2	0.8355
170.3	0.8345
170.4	0.834875
170.5	0.834125
170.6	0.83425
170.7	0.835375
170.8	0.835
170.9	0.833625
171	0.833625
171.1	0.83425
171.2	0.835625
171.3	0.834125
171.4	0.833625
171.5	0.834375
171.6	0.836
171.7	0.835
171.8	0.834875
171.9	0.836875
172	0.83725
172.1	0.838375
172.2	0.838875
172.3	0.840375
172.4	0.84325
172.5	0.842625
172.6	0.84325
172.7	0.844625
172.8	0.845
172.9	0.84325
173	0.843875
173.1	0.842
173.2	0.8445
173.3	0.844625
173.4	0.843625
173.5	0.843375
173.6	0.843125
173.7	0.8435
173.8	0.84275
173.9	0.842625
174	0.843
174.1	0.844125
174.2	0.84525
174.3	0.84575
174.4	0.8465
174.5	0.8455
174.6	0.84625
174.7	0.84675
174.8	0.84625
174.9	0.846
175	0.844125
175.1	0.842875
175.2	0.842875
175.3	0.841625
175.4	0.841125
175.5	0.84
175.6	0.8395
175.7	0.839625
175.8	0.839
175.9	0.83925
176	0.840875
176.1	0.84175
176.2	0.841375
176.3	0.83925
176.4	0.839375
176.5	0.8395
176.6	0.840125
176.7	0.842625
176.8	0.839625
176.9	0.84025
177	0.84025
177.1	0.840625
177.2	0.840375
177.3	0.841375
177.4	0.8415
177.5	0.84225
177.6	0.84375
177.7	0.8445
177.8	0.844625
177.9	0.8445
178	0.845375
178.1	0.84675
178.2	0.848
178.3	0.847375
178.4	0.84625
178.5	0.847875
178.6	0.849875
178.7	0.850625
178.8	0.851125
178.9	0.849375
179	0.84825
179.1	0.849875
179.2	0.849375
179.3	0.85025
179.4	0.851875
179.5	0.851875
179.6	0.853875
179.7	0.8555
179.8	0.85425
179.9	0.856
180	0.854375
180.1	0.854625
180.2	0.853
180.3	0.85275
180.4	0.8525
180.5	0.8515
180.6	0.851625
180.7	0.850375
180.8	0.8515
180.9	0.85125
181	0.85225
181.1	0.851375
181.2	0.85125
181.3	0.852875
181.4	0.851375
181.5	0.851
181.6	0.852
181.7	0.85325
181.8	0.854625
181.9	0.855125
182	0.852875
182.1	0.85125
182.2	0.85075
182.3	0.849
182.4	0.848
182.5	0.847375
182.6	0.847375
182.7	0.84825
182.8	0.849375
182.9	0.848
183	0.848375
183.1	0.8495
183.2	0.850625
183.3	0.850875
183.4	0.850375
183.5	0.85
183.6	0.849375
183.7	0.8505
183.8	0.851875
183.9	0.853125
184	0.85375
184.1	0.852375
184.2	0.85275
184.3	0.854125
184.4	0.854
184.5	0.85525
184.6	0.854375
184.7	0.853875
184.8	0.85475
184.9	0.854625
185	0.85675
185.1	0.856
185.2	0.855125
185.3	0.85475
185.4	0.853375
185.5	0.854375
185.6	0.855125
185.7	0.855
185.8	0.855375
185.9	0.8535
186	0.85625
186.1	0.857125
186.2	0.8565
186.3	0.85575
186.4	0.85525
186.5	0.854375
186.6	0.85275
186.7	0.851875
186.8	0.853
186.9	0.853125
187	0.8545
187.1	0.852875
187.2	0.85075
187.3	0.851
187.4	0.85125
187.5	0.852625
187.6	0.85275
187.7	0.853125
187.8	0.8545
187.9	0.85425
188	0.852875
188.1	0.854125
188.2	0.8525
188.3	0.851875
188.4	0.852125
188.5	0.852625
188.6	0.851375
188.7	0.8545
188.8	0.854625
188.9	0.853625
189	0.852
189.1	0.85175
189.2	0.8505
189.3	0.849625
189.4	0.84875
189.5	0.849125
189.6	0.85025
189.7	0.85225
189.8	0.851375
189.9	0.85175
190	0.85175
190.1	0.851625
190.2	0.852125
190.3	0.85
190.4	0.849875
190.5	0.849125
190.6	0.850625
190.7	0.850625
190.8	0.8515
190.9	0.851625
191	0.85125
191.1	0.850375
191.2	0.853
191.3	0.852125
191.4	0.852
191.5	0.851375
191.6	0.8505
191.7	0.85175
191.8	0.853375
191.9	0.852875
192	0.853
192.1	0.851875
192.2	0.851375
192.3	0.85075
192.4	0.85225
192.5	0.851375
192.6	0.85075
192.7	0.849625
192.8	0.851125
192.9	0.852375
193	0.851875
193.1	0.851875
193.2	0.851875
193.3	0.854
193.4	0.853
193.5	0.8525
193.6	0.8535
193.7	0.852875
193.8	0.852375
193.9	0.851625
194	0.852875
194.1	0.8545
194.2	0.853375
194.3	0.85425
194.4	0.854125
194.5	0.853375
194.6	0.856
194.7	0.854625
194.8	0.856
194.9	0.855
195	0.853625
195.1	0.855375
195.2	0.85675
195.3	0.857
195.4	0.857
195.5	0.857
195.6	0.85725
195.7	0.858875
195.8	0.85975
195.9	0.86075
196	0.860125
196.1	0.862
196.2	0.8635
196.3	0.863625
196.4	0.862
196.5	0.862125
196.6	0.862
196.7	0.86025
196.8	0.86
196.9	0.859625
197	0.86025
197.1	0.85975
197.2	0.8595
197.3	0.859875
197.4	0.859375
197.5	0.858
197.6	0.857375
197.7	0.8595
197.8	0.86075
197.9	0.85975
198	0.86125
198.1	0.860375
198.2	0.860375
198.3	0.8605
198.4	0.86
198.5	0.86
198.6	0.86075
198.7	0.860375
198.8	0.859875
198.9	0.858125
199	0.855625
199.1	0.855625
199.2	0.85575
199.3	0.854375
199.4	0.855
199.5	0.8555
199.6	0.8565
199.7	0.855375
199.8	0.85375
199.9	0.853625
200	0.856625
[truncated: 14,000 more rows]
