# Supplementary material for: Bayesian inference of kinetic schemes for ion channels by Kalman filtering
Source: eLife journal article supplement (doi:10.7554/elife.62714), 2022-05-04
Supplement: fig4-data6 [file 1_Sim_N_4000_Strom_MW_1M.xlsx]

## Sheet: Tabelle1
0.1	0
0.2	0
0.3	0
0.4	0
0.5	0
0.6	0
0.7	0
0.8	0
0.9	0
1	0
1.1	0
1.2	0
1.3	0
1.4	0
1.5	0
1.6	0
1.7	0
1.8	0
1.9	0
2	0
2.1	0
2.2	0
2.3	0
2.4	0
2.5	0
2.6	0
2.7	0
2.8	0
2.9	0
3	0
3.1	0
3.2	0
3.3	0
3.4	0
3.5	0
3.6	0
3.7	0
3.8	0
3.9	0
4	0
4.1	0
4.2	0
4.3	0
4.4	0
4.5	0
4.6	0
4.7	0
4.8	0
4.9	0
5	0
5.1	0
5.2	0
5.3	0
5.4	0
5.5	0
5.6	0
5.7	0
5.8	0
5.9	0
6	0
6.1	0
6.2	0
6.3	0
6.4	0
6.5	0
6.6	0
6.7	0
6.8	0
6.9	0
7	0
7.1	0
7.2	0
7.3	0
7.4	0
7.5	0
7.6	0
7.7	0
7.8	0
7.9	0
8	0
8.1	0
8.2	0
8.3	0
8.4	0
8.5	0
8.6	0
8.7	0
8.8	0
8.9	0
9	0
9.1	0
9.2	0
9.3	0
9.4	0
9.5	0
9.6	0
9.7	0
9.8	0
9.9	0
10	0
10.1	0
10.2	0
10.3	0
10.4	0
10.5	0
10.6	0
10.7	0
10.8	0
10.9	0
11	0
11.1	0
11.2	0
11.3	0
11.4	0
11.5	0
11.6	0
11.7	0
11.8	0
11.9	0
12	0
12.1	0
12.2	0
12.3	0
12.4	0
12.5	0
12.6	0
12.7	0
12.8	0
12.9	0
13	0
13.1	0
13.2	0
13.3	0
13.4	0
13.5	0
13.6	0
13.7	0
13.8	0
13.9	0
14	0
14.1	0
14.2	0
14.3	0
14.4	0
14.5	0
14.6	0
14.7	0
14.8	0
14.9	0
15	0
15.1	0
15.2	0
15.3	0
15.4	0
15.5	0
15.6	0
15.7	0
15.8	0
15.9	0
16	0
16.1	0
16.2	0
16.3	0
16.4	0
16.5	0
16.6	0
16.7	0
16.8	0
16.9	0
17	0
17.1	0
17.2	0
17.3	0
17.4	0
17.5	0
17.6	0
17.7	0
17.8	0
17.9	0
18	0
18.1	0
18.2	0
18.3	0
18.4	0
18.5	0
18.6	0
18.7	0
18.8	0
18.9	0
19	0
19.1	0
19.2	0
19.3	0
19.4	0
19.5	0
19.6	0
19.7	0
19.8	0
19.9	0
20	0
20.1	0
20.2	0
20.3	0
20.4	0
20.5	0
20.6	0
20.7	0
20.8	0
20.9	0
21	0
21.1	0
21.2	0
21.3	0
21.4	0
21.5	0
21.6	0
21.7	0
21.8	0
21.9	0
22	0
22.1	0
22.2	0
22.3	0
22.4	0
22.5	0
22.6	0
22.7	0
22.8	0
22.9	0
23	0
23.1	0
23.2	0
23.3	0
23.4	0
23.5	0
23.6	0
23.7	0
23.8	0
23.9	0
24	0
24.1	0
24.2	0
24.3	0
24.4	0
24.5	0
24.6	0
24.7	0
24.8	0
24.9	0
25	0
25.1	0
25.2	0
25.3	0
25.4	0
25.5	0
25.6	0
25.7	0
25.8	0
25.9	0
26	0
26.1	0
26.2	0
26.3	0
26.4	0
26.5	0
26.6	0
26.7	0
26.8	0
26.9	0
27	0
27.1	0
27.2	0
27.3	0
27.4	0
27.5	0
27.6	0
27.7	0
27.8	0
27.9	0
28	0
28.1	0
28.2	0
28.3	0
28.4	0
28.5	0
28.6	0
28.7	0
28.8	0
28.9	0
29	0
29.1	0
29.2	0
29.3	0
29.4	0
29.5	0
29.6	0
29.7	0
29.8	0
29.9	0
30	0
30.1	0
30.2	0
30.3	0
30.4	0
30.5	0
30.6	0
30.7	0
30.8	0
30.9	0
31	0
31.1	0
31.2	0
31.3	0
31.4	0
31.5	0
31.6	0
31.7	0
31.8	0
31.9	0
32	0
32.1	0
32.2	0
32.3	0
32.4	0
32.5	0
32.6	0
32.7	0
32.8	0
32.9	0
33	0
33.1	0
33.2	0
33.3	0
33.4	0
33.5	0
33.6	0
33.7	0
33.8	0
33.9	0
34	0
34.1	0
34.2	0
34.3	0
34.4	0
34.5	0
34.6	0
34.7	0
34.8	0
34.9	0
35	0
35.1	0
35.2	0
35.3	0
35.4	0
35.5	0
35.6	0
35.7	0
35.8	0
35.9	0
36	0
36.1	0
36.2	0
36.3	0
36.4	0
36.5	0
36.6	0
36.7	0
36.8	0
36.9	0
37	0
37.1	0
37.2	0
37.3	0
37.4	0
37.5	0
37.6	0
37.7	0
37.8	0
37.9	0
38	0
38.1	0
38.2	0
38.3	0
38.4	0
38.5	0
38.6	0
38.7	0
38.8	0
38.9	0
39	0
39.1	0
39.2	0
39.3	0
39.4	0
39.5	0
39.6	0
39.7	0
39.8	0
39.9	0
40	0
40.1	0
40.2	0
40.3	0
40.4	0
40.5	0
40.6	0
40.7	0
40.8	0
40.9	0
41	0
41.1	0
41.2	0
41.3	0
41.4	0
41.5	0
41.6	0
41.7	0
41.8	0
41.9	0
42	0
42.1	0
42.2	0
42.3	0
42.4	0
42.5	0
42.6	0
42.7	0
42.8	0
42.9	0
43	0
43.1	0
43.2	0
43.3	0
43.4	0
43.5	0
43.6	0
43.7	0
43.8	0
43.9	0
44	0
44.1	0
44.2	0
44.3	0
44.4	0
44.5	0
44.6	0
44.7	0
44.8	0
44.9	0
45	0
45.1	0
45.2	0
45.3	0
45.4	0
45.5	0
45.6	0
45.7	0
45.8	0
45.9	0
46	0
46.1	0
46.2	0
46.3	0
46.4	0
46.5	0
46.6	0
46.7	0
46.8	0
46.9	0
47	0
47.1	0
47.2	0
47.3	0
47.4	0
47.5	0
47.6	0
47.7	0
47.8	0
47.9	0
48	0
48.1	0
48.2	0
48.3	0
48.4	0
48.5	0
48.6	0
48.7	0
48.8	0
48.9	0
49	0
49.1	0
49.2	0
49.3	0
49.4	0
49.5	0
49.6	0
49.7	0
49.8	0
49.9	0
50	0
50.1	0
50.2	0
50.3	0
50.4	0
50.5	0
50.6	0
50.7	0
50.8	0
50.9	0
51	0
51.1	0
51.2	0
51.3	0
51.4	0
51.5	0
51.6	0
51.7	0
51.8	0
51.9	0
52	0
52.1	0
52.2	0
52.3	0
52.4	0
52.5	0
52.6	0
52.7	0
52.8	0
52.9	0
53	0
53.1	0
53.2	0
53.3	0
53.4	0
53.5	0
53.6	0
53.7	0
53.8	0
53.9	0
54	0
54.1	0
54.2	0
54.3	0
54.4	0
54.5	0
54.6	0
54.7	0
54.8	0
54.9	0
55	0
55.1	0
55.2	0
55.3	0
55.4	0
55.5	0
55.6	0
55.7	0
55.8	0
55.9	0
56	0
56.1	0
56.2	0
56.3	0
56.4	0
56.5	0
56.6	0
56.7	0
56.8	0
56.9	0
57	0
57.1	0
57.2	0
57.3	0
57.4	0
57.5	0
57.6	0
57.7	0
57.8	0
57.9	0
58	0
58.1	0
58.2	0
58.3	0
58.4	0
58.5	0
58.6	0
58.7	0
58.8	0
58.9	0
59	0
59.1	0
59.2	0
59.3	0
59.4	0
59.5	0
59.6	0
59.7	0
59.8	0
59.9	0
60	0
60.1	0
60.2	0
60.3	0
60.4	0
60.5	0
60.6	0
60.7	0
60.8	0
60.9	0
61	0
61.1	0
61.2	0
61.3	0
61.4	0
61.5	0
61.6	0
61.7	0
61.8	0
61.9	0
62	0
62.1	0
62.2	0
62.3	0
62.4	0
62.5	0
62.6	0
62.7	0
62.8	0
62.9	0
63	0
63.1	0
63.2	0
63.3	0
63.4	0
63.5	0
63.6	0
63.7	0
63.8	0
63.9	0
64	0
64.1	0
64.2	0
64.3	0
64.4	0
64.5	0
64.6	0
64.7	0
64.8	0
64.9	0
65	0
65.1	0
65.2	0
65.3	0
65.4	0
65.5	0
65.6	0
65.7	0
65.8	0
65.9	0
66	0
66.1	0
66.2	0
66.3	0
66.4	0
66.5	0
66.6	0
66.7	0
66.8	0
66.9	0
67	0
67.1	0
67.2	0
67.3	0
67.4	0
67.5	0
67.6	0
67.7	0
67.8	0
67.9	0
68	0
68.1	0
68.2	0
68.3	0
68.4	0
68.5	0
68.6	0
68.7	0
68.8	0
68.9	0
69	0
69.1	0
69.2	0
69.3	0
69.4	0
69.5	0
69.6	0
69.7	0
69.8	0
69.9	0
70	0
70.1	0
70.2	0
70.3	0
70.4	0
70.5	0
70.6	0
70.7	0
70.8	0
70.9	0
71	0
71.1	0
71.2	0
71.3	0
71.4	0
71.5	0
71.6	0
71.7	0
71.8	0
71.9	0
72	0
72.1	0
72.2	0
72.3	0
72.4	0
72.5	0
72.6	0
72.7	0
72.8	0
72.9	0
73	0
73.1	0
73.2	0
73.3	0
73.4	0
73.5	0
73.6	0
73.7	0
73.8	0
73.9	0
74	0
74.1	0
74.2	0
74.3	0
74.4	0
74.5	0
74.6	0
74.7	0
74.8	0
74.9	0
75	0
75.1	0
75.2	0
75.3	0
75.4	0
75.5	0
75.6	0
75.7	0
75.8	0
75.9	0
76	0
76.1	0
76.2	0
76.3	0
76.4	0
76.5	0
76.6	0
76.7	0
76.8	0
76.9	0
77	0
77.1	0
77.2	0
77.3	0
77.4	0
77.5	0
77.6	0
77.7	0
77.8	0
77.9	0
78	0
78.1	0
78.2	0
78.3	0
78.4	0
78.5	0
78.6	0
78.7	0
78.8	0
78.9	0
79	0
79.1	0
79.2	0
79.3	0
79.4	0
79.5	0
79.6	0
79.7	0
79.8	0
79.9	0
80	0
80.1	0
80.2	0
80.3	0
80.4	0
80.5	0
80.6	0
80.7	0
80.8	0
80.9	0
81	0
81.1	0
81.2	0
81.3	0
81.4	0
81.5	0
81.6	0
81.7	0
81.8	0
81.9	0
82	0
82.1	0
82.2	0
82.3	0
82.4	0
82.5	0
82.6	0
82.7	0
82.8	0
82.9	0
83	0
83.1	0
83.2	0
83.3	0
83.4	0
83.5	0
83.6	0
83.7	0
83.8	0
83.9	0
84	0
84.1	0
84.2	0
84.3	0
84.4	0
84.5	0
84.6	0
84.7	0
84.8	0
84.9	0
85	0
85.1	0
85.2	0
85.3	0
85.4	0
85.5	0
85.6	0
85.7	0
85.8	0
85.9	0
86	0
86.1	0
86.2	0
86.3	0
86.4	0
86.5	0
86.6	0
86.7	0
86.8	0
86.9	0
87	0
87.1	0
87.2	0
87.3	0
87.4	0
87.5	0
87.6	0
87.7	0
87.8	0
87.9	0
88	0
88.1	0
88.2	0
88.3	0
88.4	0
88.5	0
88.6	0
88.7	0
88.8	0
88.9	0
89	0
89.1	0
89.2	0
89.3	0
89.4	0
89.5	0
89.6	0
89.7	0
89.8	0
89.9	0
90	0
90.1	0
90.2	0
90.3	0
90.4	0
90.5	0
90.6	0
90.7	0
90.8	0
90.9	0
91	0
91.1	0
91.2	0
91.3	0
91.4	0
91.5	0
91.6	0
91.7	0
91.8	0
91.9	0
92	0
92.1	0
92.2	0
92.3	0
92.4	0
92.5	0
92.6	0
92.7	0
92.8	0
92.9	0
93	0
93.1	0
93.2	0
93.3	0
93.4	0
93.5	0
93.6	0
93.7	0
93.8	0
93.9	0
94	0
94.1	0
94.2	0
94.3	0
94.4	0
94.5	0
94.6	0
94.7	0
94.8	0
94.9	0
95	0
95.1	0
95.2	0
95.3	0
95.4	0
95.5	0
95.6	0
95.7	0
95.8	0
95.9	0
96	0
96.1	0
96.2	0
96.3	0
96.4	0
96.5	0
96.6	0
96.7	0
96.8	0
96.9	0
97	0
97.1	0
97.2	0
97.3	0
97.4	0
97.5	0
97.6	0
97.7	0
97.8	0
97.9	0
98	0
98.1	0
98.2	0
98.3	0
98.4	0
98.5	0
98.6	0
98.7	0
98.8	0
98.9	0
99	0
99.1	0
99.2	0
99.3	0
99.4	0
99.5	0
99.6	0
99.7	0
99.8	0
99.9	0
100	0
100.1	0
100.2	0
100.3	0
100.4	0
100.5	0.00025
100.6	0.00025
100.7	0.00075
100.8	0.00175
100.9	0.00175
101	0.002
101.1	0.00275
101.2	0.003
101.3	0.0035
101.4	0.0045
101.5	0.00575
101.6	0.0075
101.7	0.00825
101.8	0.009
101.9	0.0105
102	0.0115
102.1	0.01275
102.2	0.01325
102.3	0.014
102.4	0.015
102.5	0.01625
102.6	0.01675
102.7	0.01825
102.8	0.02
102.9	0.0215
103	0.0225
103.1	0.024
103.2	0.025
103.3	0.0255
103.4	0.028
103.5	0.0295
103.6	0.03075
103.7	0.03225
103.8	0.03375
103.9	0.035
104	0.03575
104.1	0.03675
104.2	0.0385
104.3	0.041
104.4	0.04275
104.5	0.04425
104.6	0.04725
104.7	0.0485
104.8	0.05075
104.9	0.051
105	0.052
105.1	0.053
105.2	0.05475
105.3	0.0565
105.4	0.05725
105.5	0.058
105.6	0.06
105.7	0.06125
105.8	0.0625
105.9	0.0645
106	0.0665
106.1	0.0685
106.2	0.07
106.3	0.071
106.4	0.0725
106.5	0.07375
106.6	0.07525
106.7	0.07675
106.8	0.0785
106.9	0.08025
107	0.0805
107.1	0.08225
107.2	0.08475
107.3	0.0865
107.4	0.0875
107.5	0.08875
107.6	0.0895
107.7	0.09125
107.8	0.0925
107.9	0.0935
108	0.09525
108.1	0.09575
108.2	0.096
108.3	0.09675
108.4	0.098
108.5	0.09975
108.6	0.10125
108.7	0.1025
108.8	0.10325
108.9	0.10425
109	0.105
109.1	0.10725
109.2	0.108
109.3	0.109
109.4	0.111
109.5	0.1135
109.6	0.115
109.7	0.11675
109.8	0.1185
109.9	0.1195
110	0.12025
110.1	0.1225
110.2	0.12375
110.3	0.1245
110.4	0.12575
110.5	0.12725
110.6	0.1295
110.7	0.131
110.8	0.132
110.9	0.13275
111	0.135
111.1	0.1355
111.2	0.13625
111.3	0.137
111.4	0.13775
111.5	0.139
111.6	0.1395
111.7	0.141
111.8	0.14225
111.9	0.1435
112	0.14625
112.1	0.14825
112.2	0.15025
112.3	0.1515
112.4	0.153
112.5	0.153
112.6	0.15375
112.7	0.15575
112.8	0.15675
112.9	0.159
113	0.1595
113.1	0.16
113.2	0.16025
113.3	0.1615
113.4	0.16375
113.5	0.16425
113.6	0.16525
113.7	0.16625
113.8	0.167
113.9	0.168
114	0.1695
114.1	0.1715
114.2	0.17225
114.3	0.1745
114.4	0.17525
114.5	0.1755
114.6	0.1775
114.7	0.179
114.8	0.17975
114.9	0.1815
115	0.182
115.1	0.1825
115.2	0.18375
115.3	0.1845
115.4	0.18725
115.5	0.18825
115.6	0.189
115.7	0.19125
115.8	0.19175
115.9	0.193
116	0.194
116.1	0.19475
116.2	0.1955
116.3	0.196
116.4	0.19775
116.5	0.198
116.6	0.2005
116.7	0.2025
116.8	0.203
116.9	0.20325
117	0.20375
117.1	0.2055
117.2	0.207
117.3	0.208
117.4	0.20925
117.5	0.21025
117.6	0.21125
117.7	0.214
117.8	0.216
117.9	0.21725
118	0.218
118.1	0.22
118.2	0.22025
118.3	0.22125
118.4	0.2225
118.5	0.2235
118.6	0.22425
118.7	0.22475
118.8	0.225
118.9	0.226
119	0.22675
119.1	0.228
119.2	0.22875
119.3	0.22975
119.4	0.23075
119.5	0.2325
119.6	0.233
119.7	0.234
119.8	0.23525
119.9	0.237
120	0.238
120.1	0.239
120.2	0.24025
120.3	0.24125
120.4	0.24225
120.5	0.243
120.6	0.24375
120.7	0.24425
120.8	0.2465
120.9	0.248
121	0.24825
121.1	0.2485
121.2	0.24975
121.3	0.25
121.4	0.251
121.5	0.25175
121.6	0.25425
121.7	0.2555
121.8	0.256
121.9	0.25675
122	0.25725
122.1	0.25925
122.2	0.261
122.3	0.262
122.4	0.263
122.5	0.26475
122.6	0.26525
122.7	0.2665
122.8	0.26625
122.9	0.2675
123	0.269
123.1	0.2695
123.2	0.27075
123.3	0.2725
123.4	0.27525
123.5	0.2765
123.6	0.27725
123.7	0.27875
123.8	0.27925
123.9	0.27975
124	0.2795
124.1	0.27925
124.2	0.28025
124.3	0.2825
124.4	0.2835
124.5	0.28525
124.6	0.286
124.7	0.2865
124.8	0.28725
124.9	0.28875
125	0.289
125.1	0.2895
125.2	0.2895
125.3	0.2895
125.4	0.28975
125.5	0.2915
125.6	0.2915
125.7	0.291
125.8	0.292
125.9	0.29325
126	0.29475
126.1	0.29575
126.2	0.2965
126.3	0.298
126.4	0.29825
126.5	0.299
126.6	0.30025
126.7	0.30075
126.8	0.3015
126.9	0.30225
127	0.30275
127.1	0.3035
127.2	0.30475
127.3	0.30575
127.4	0.30675
127.5	0.307
127.6	0.30775
127.7	0.30925
127.8	0.3105
127.9	0.3105
128	0.311
128.1	0.312
128.2	0.31325
128.3	0.3135
128.4	0.31525
128.5	0.3165
128.6	0.3165
128.7	0.316
128.8	0.31675
128.9	0.31725
129	0.317
129.1	0.3175
129.2	0.31775
129.3	0.31825
129.4	0.32
129.5	0.321
129.6	0.3225
129.7	0.32325
129.8	0.32325
129.9	0.32475
130	0.327
130.1	0.32675
130.2	0.327
130.3	0.328
130.4	0.3285
130.5	0.32875
130.6	0.3285
130.7	0.329
130.8	0.32975
130.9	0.331
131	0.33175
131.1	0.33175
131.2	0.33125
131.3	0.332
131.4	0.3345
131.5	0.3355
131.6	0.33625
131.7	0.3375
131.8	0.338
131.9	0.33875
132	0.33975
132.1	0.3405
132.2	0.3415
132.3	0.3425
132.4	0.34425
132.5	0.34475
132.6	0.34575
132.7	0.34725
132.8	0.3475
132.9	0.34875
133	0.35025
133.1	0.3515
133.2	0.3515
133.3	0.352
133.4	0.35225
133.5	0.353
133.6	0.35325
133.7	0.35375
133.8	0.35425
133.9	0.35425
134	0.35525
134.1	0.3555
134.2	0.3565
134.3	0.35825
134.4	0.35925
134.5	0.3605
134.6	0.36075
134.7	0.362
134.8	0.362
134.9	0.36325
135	0.3635
135.1	0.365
135.2	0.36475
135.3	0.3645
135.4	0.366
135.5	0.36725
135.6	0.368
135.7	0.369
135.8	0.37
135.9	0.37075
136	0.372
136.1	0.37275
136.2	0.37275
136.3	0.3725
136.4	0.373
136.5	0.37425
136.6	0.376
136.7	0.37775
136.8	0.37825
136.9	0.379
137	0.3795
137.1	0.3795
137.2	0.38025
137.3	0.38175
137.4	0.3825
137.5	0.38275
137.6	0.38325
137.7	0.3835
137.8	0.38475
137.9	0.38475
138	0.38625
138.1	0.38625
138.2	0.3865
138.3	0.38675
138.4	0.38775
138.5	0.38775
138.6	0.387
138.7	0.3865
138.8	0.38775
138.9	0.388
139	0.388
139.1	0.3885
139.2	0.389
139.3	0.3895
139.4	0.39125
139.5	0.392
139.6	0.39175
139.7	0.39325
139.8	0.394
139.9	0.39425
140	0.396
140.1	0.396
140.2	0.39775
140.3	0.39825
140.4	0.39825
140.5	0.39875
140.6	0.39975
140.7	0.401
140.8	0.40175
140.9	0.403
141	0.404
141.1	0.4045
141.2	0.40475
141.3	0.405
141.4	0.4055
141.5	0.406
141.6	0.4065
141.7	0.40725
141.8	0.40725
141.9	0.4075
142	0.407
142.1	0.40725
142.2	0.4075
142.3	0.4085
142.4	0.409
142.5	0.409
142.6	0.41075
142.7	0.4115
142.8	0.41175
142.9	0.41225
143	0.41275
143.1	0.41425
143.2	0.41525
143.3	0.41675
143.4	0.4175
143.5	0.4175
143.6	0.418
143.7	0.4195
143.8	0.419
143.9	0.4195
144	0.42025
144.1	0.421
144.2	0.42125
144.3	0.422
144.4	0.4225
144.5	0.42325
144.6	0.4245
144.7	0.426
144.8	0.4255
144.9	0.425
145	0.425
145.1	0.42525
145.2	0.42525
145.3	0.426
145.4	0.427
145.5	0.427
145.6	0.42775
145.7	0.42775
145.8	0.4285
145.9	0.42925
146	0.4295
146.1	0.42975
146.2	0.4305
146.3	0.431
146.4	0.4315
146.5	0.4325
146.6	0.4335
146.7	0.434
146.8	0.43425
146.9	0.43575
147	0.4365
147.1	0.4385
147.2	0.4385
147.3	0.438
147.4	0.43875
147.5	0.43875
147.6	0.43925
147.7	0.4385
147.8	0.43975
147.9	0.44075
148	0.4405
148.1	0.44075
148.2	0.44075
148.3	0.4415
148.4	0.4415
148.5	0.442
148.6	0.44325
148.7	0.44325
148.8	0.44225
148.9	0.4425
149	0.44325
149.1	0.44425
149.2	0.4445
149.3	0.44425
149.4	0.44475
149.5	0.445
149.6	0.445
149.7	0.44625
149.8	0.4475
149.9	0.447
150	0.44775
150.1	0.4485
150.2	0.4495
150.3	0.44975
150.4	0.44925
150.5	0.45075
150.6	0.451
150.7	0.45075
150.8	0.4505
150.9	0.4515
151	0.452
151.1	0.45275
151.2	0.45275
151.3	0.45275
151.4	0.45375
151.5	0.4535
151.6	0.455
151.7	0.4555
151.8	0.45575
151.9	0.456
152	0.457
152.1	0.45825
152.2	0.45925
152.3	0.45975
152.4	0.46025
152.5	0.46075
152.6	0.46125
152.7	0.46175
152.8	0.46175
152.9	0.46175
153	0.46225
153.1	0.46275
153.2	0.4625
153.3	0.46325
153.4	0.4635
153.5	0.46375
153.6	0.46425
153.7	0.464
153.8	0.464
153.9	0.46525
154	0.4655
154.1	0.4655
154.2	0.466
154.3	0.46525
154.4	0.466
154.5	0.466
154.6	0.467
154.7	0.467
154.8	0.4675
154.9	0.46875
155	0.4695
155.1	0.47
155.2	0.4715
155.3	0.4715
155.4	0.4725
155.5	0.47375
155.6	0.47475
155.7	0.4755
155.8	0.4765
155.9	0.47675
156	0.47775
156.1	0.4785
156.2	0.47825
156.3	0.4785
156.4	0.479
156.5	0.47975
156.6	0.4795
156.7	0.4795
156.8	0.4805
156.9	0.48075
157	0.482
157.1	0.48375
157.2	0.484
157.3	0.48475
157.4	0.48525
157.5	0.4855
157.6	0.486
157.7	0.48675
157.8	0.4865
157.9	0.4865
158	0.48725
158.1	0.48725
158.2	0.48775
158.3	0.488
158.4	0.48775
158.5	0.4885
158.6	0.48925
158.7	0.49075
158.8	0.49075
158.9	0.4915
159	0.4905
159.1	0.49075
159.2	0.491
159.3	0.49225
159.4	0.49325
159.5	0.49375
159.6	0.4935
159.7	0.494
159.8	0.4945
159.9	0.49525
160	0.4955
160.1	0.4955
160.2	0.49625
160.3	0.49675
160.4	0.49725
160.5	0.49775
160.6	0.49725
160.7	0.4975
160.8	0.498
160.9	0.4995
161	0.5
161.1	0.5
161.2	0.50075
161.3	0.50225
161.4	0.502
161.5	0.50225
161.6	0.5025
161.7	0.50375
161.8	0.50375
161.9	0.50375
162	0.50425
162.1	0.506
162.2	0.5055
162.3	0.5055
162.4	0.50575
162.5	0.506
162.6	0.507
162.7	0.508
162.8	0.50925
162.9	0.50875
163	0.51
163.1	0.51025
163.2	0.512
163.3	0.512
163.4	0.512
163.5	0.5125
163.6	0.51275
163.7	0.5135
163.8	0.51425
163.9	0.514
164	0.51475
164.1	0.514
164.2	0.51425
164.3	0.51475
164.4	0.515
164.5	0.51525
164.6	0.515
164.7	0.5155
164.8	0.51625
164.9	0.51625
165	0.51475
165.1	0.5145
165.2	0.5135
165.3	0.5135
165.4	0.51425
165.5	0.5145
165.6	0.51325
165.7	0.514
165.8	0.514
165.9	0.51425
166	0.51425
166.1	0.5145
166.2	0.514
166.3	0.51425
166.4	0.51375
166.5	0.5145
166.6	0.5165
166.7	0.51625
166.8	0.5175
166.9	0.5185
167	0.5185
167.1	0.5185
167.2	0.52
167.3	0.52
167.4	0.52025
167.5	0.52025
167.6	0.51875
167.7	0.5195
167.8	0.51975
167.9	0.5205
168	0.5205
168.1	0.52175
168.2	0.5225
168.3	0.52375
168.4	0.5245
168.5	0.52525
168.6	0.52475
168.7	0.525
168.8	0.526
168.9	0.5265
169	0.526
169.1	0.52675
169.2	0.5265
169.3	0.52775
169.4	0.528
169.5	0.52825
169.6	0.5285
169.7	0.529
169.8	0.52925
169.9	0.53025
170	0.53025
170.1	0.53075
170.2	0.53175
170.3	0.53275
170.4	0.53275
170.5	0.53325
170.6	0.5335
170.7	0.534
170.8	0.53375
170.9	0.5335
171	0.534
171.1	0.53475
171.2	0.53475
171.3	0.53525
171.4	0.535
171.5	0.5355
171.6	0.53575
171.7	0.5355
171.8	0.53575
171.9	0.53625
172	0.53725
172.1	0.538
172.2	0.53625
172.3	0.538
172.4	0.5385
172.5	0.53825
172.6	0.5395
172.7	0.54075
172.8	0.541
172.9	0.54175
173	0.5425
173.1	0.5425
173.2	0.54175
173.3	0.54225
173.4	0.5435
173.5	0.54525
173.6	0.54525
173.7	0.5455
173.8	0.54525
173.9	0.54575
174	0.546
174.1	0.54725
174.2	0.54725
174.3	0.54675
174.4	0.547
174.5	0.54625
174.6	0.547
174.7	0.54775
174.8	0.5465
174.9	0.5475
175	0.54775
175.1	0.54775
175.2	0.54775
175.3	0.54775
175.4	0.548
175.5	0.5475
175.6	0.54825
175.7	0.54825
175.8	0.54825
175.9	0.54825
176	0.54925
176.1	0.5495
176.2	0.55025
176.3	0.55
176.4	0.54975
176.5	0.54925
176.6	0.5495
176.7	0.55
176.8	0.55025
176.9	0.55175
177	0.5515
177.1	0.55225
177.2	0.55175
177.3	0.5515
177.4	0.552
177.5	0.55175
177.6	0.552
177.7	0.55275
177.8	0.55225
177.9	0.55225
178	0.55275
178.1	0.553
178.2	0.55425
178.3	0.5555
178.4	0.557
178.5	0.55775
178.6	0.558
178.7	0.557
178.8	0.557
178.9	0.557
179	0.55725
179.1	0.5585
179.2	0.55775
179.3	0.55825
179.4	0.55875
179.5	0.559
179.6	0.55975
179.7	0.5605
179.8	0.562
179.9	0.562
180	0.5625
180.1	0.56225
180.2	0.56225
180.3	0.56275
180.4	0.56375
180.5	0.565
180.6	0.565
180.7	0.565
180.8	0.56425
180.9	0.56575
181	0.56625
181.1	0.56625
181.2	0.56675
181.3	0.567
181.4	0.5685
181.5	0.568
181.6	0.5685
181.7	0.56825
181.8	0.56825
181.9	0.568
182	0.56875
182.1	0.56925
182.2	0.57
182.3	0.56975
182.4	0.56925
182.5	0.56975
182.6	0.57
182.7	0.57025
182.8	0.5705
182.9	0.5705
183	0.57075
183.1	0.57075
183.2	0.571
183.3	0.572
183.4	0.57225
183.5	0.5735
183.6	0.574
183.7	0.57425
183.8	0.5745
183.9	0.5745
184	0.575
184.1	0.57475
184.2	0.57525
184.3	0.575
184.4	0.5755
184.5	0.576
184.6	0.5755
184.7	0.576
184.8	0.57725
184.9	0.578
185	0.578
185.1	0.5775
185.2	0.5775
185.3	0.57825
185.4	0.57775
185.5	0.57775
185.6	0.57675
185.7	0.577
185.8	0.5775
185.9	0.578
186	0.5775
186.1	0.578
186.2	0.57875
186.3	0.578
186.4	0.57825
186.5	0.5785
186.6	0.57775
186.7	0.578
186.8	0.579
186.9	0.57825
187	0.5775
187.1	0.577
187.2	0.57625
187.3	0.57625
187.4	0.5765
187.5	0.57725
187.6	0.577
187.7	0.577
187.8	0.576
187.9	0.576
188	0.57675
188.1	0.57725
188.2	0.57775
188.3	0.578
188.4	0.5785
188.5	0.57825
188.6	0.579
188.7	0.579
188.8	0.5795
188.9	0.579
189	0.5795
189.1	0.57825
189.2	0.57775
189.3	0.578
189.4	0.57775
189.5	0.57775
189.6	0.57775
189.7	0.57775
189.8	0.578
189.9	0.57925
190	0.5795
190.1	0.579
190.2	0.57825
190.3	0.57925
190.4	0.57875
190.5	0.58
190.6	0.58025
190.7	0.5805
190.8	0.5805
190.9	0.581
191	0.58175
191.1	0.58275
191.2	0.58275
191.3	0.5825
191.4	0.58275
191.5	0.58375
191.6	0.58325
191.7	0.584
191.8	0.58525
191.9	0.58625
192	0.58575
192.1	0.58625
192.2	0.586
192.3	0.586
192.4	0.587
192.5	0.58675
192.6	0.58575
192.7	0.586
192.8	0.586
192.9	0.586
193	0.5865
193.1	0.58675
193.2	0.58575
193.3	0.5865
193.4	0.587
193.5	0.588
193.6	0.5885
193.7	0.58875
193.8	0.588
193.9	0.588
194	0.587
194.1	0.58725
194.2	0.5875
194.3	0.5885
194.4	0.588
194.5	0.588
194.6	0.58825
194.7	0.5875
194.8	0.58725
194.9	0.58825
195	0.58925
195.1	0.58925
195.2	0.589
195.3	0.589
195.4	0.59025
195.5	0.591
195.6	0.5915
195.7	0.59225
195.8	0.59225
195.9	0.59325
196	0.5935
196.1	0.5935
196.2	0.59375
196.3	0.59425
196.4	0.594
196.5	0.594
196.6	0.5935
196.7	0.59325
196.8	0.5925
196.9	0.59275
197	0.593
197.1	0.5935
197.2	0.594
197.3	0.59475
197.4	0.59475
197.5	0.59575
197.6	0.596
197.7	0.596
197.8	0.59575
197.9	0.5955
198	0.5965
198.1	0.59775
198.2	0.59775
198.3	0.5985
198.4	0.59825
198.5	0.5985
198.6	0.5995
198.7	0.60025
198.8	0.60025
198.9	0.6005
199	0.602
199.1	0.602
199.2	0.602
199.3	0.60125
199.4	0.6005
199.5	0.6005
199.6	0.6015
199.7	0.60175
199.8	0.60225
199.9	0.60225
200	0.60225
[truncated: 14,000 more rows]
