# Supplementary material for: Bayesian inference of kinetic schemes for ion channels by Kalman filtering
Source: eLife journal article supplement (doi:10.7554/elife.62714), 2022-05-04
Supplement: fig4-data6 [file 1_Sim_N_5000_Fluor_MW.xlsx]

## Sheet: Tabelle1
0.1	0
0.2	0
0.3	0
0.4	0
0.5	0
0.6	0
0.7	0
0.8	0
0.9	0
1	0
1.1	0
1.2	0
1.3	0
1.4	0
1.5	0
1.6	0
1.7	0
1.8	0
1.9	0
2	0
2.1	0
2.2	0
2.3	0
2.4	0
2.5	0
2.6	0
2.7	0
2.8	0
2.9	0
3	0
3.1	0
3.2	0
3.3	0
3.4	0
3.5	0
3.6	0
3.7	0
3.8	0
3.9	0
4	0
4.1	0
4.2	0
4.3	0
4.4	0
4.5	0
4.6	0
4.7	0
4.8	0
4.9	0
5	0
5.1	0
5.2	0
5.3	0
5.4	0
5.5	0
5.6	0
5.7	0
5.8	0
5.9	0
6	0
6.1	0
6.2	0
6.3	0
6.4	0
6.5	0
6.6	0
6.7	0
6.8	0
6.9	0
7	0
7.1	0
7.2	0
7.3	0
7.4	0
7.5	0
7.6	0
7.7	0
7.8	0
7.9	0
8	0
8.1	0
8.2	0
8.3	0
8.4	0
8.5	0
8.6	0
8.7	0
8.8	0
8.9	0
9	0
9.1	0
9.2	0
9.3	0
9.4	0
9.5	0
9.6	0
9.7	0
9.8	0
9.9	0
10	0
10.1	0
10.2	0
10.3	0
10.4	0
10.5	0
10.6	0
10.7	0
10.8	0
10.9	0
11	0
11.1	0
11.2	0
11.3	0
11.4	0
11.5	0
11.6	0
11.7	0
11.8	0
11.9	0
12	0
12.1	0
12.2	0
12.3	0
12.4	0
12.5	0
12.6	0
12.7	0
12.8	0
12.9	0
13	0
13.1	0
13.2	0
13.3	0
13.4	0
13.5	0
13.6	0
13.7	0
13.8	0
13.9	0
14	0
14.1	0
14.2	0
14.3	0
14.4	0
14.5	0
14.6	0
14.7	0
14.8	0
14.9	0
15	0
15.1	0
15.2	0
15.3	0
15.4	0
15.5	0
15.6	0
15.7	0
15.8	0
15.9	0
16	0
16.1	0
16.2	0
16.3	0
16.4	0
16.5	0
16.6	0
16.7	0
16.8	0
16.9	0
17	0
17.1	0
17.2	0
17.3	0
17.4	0
17.5	0
17.6	0
17.7	0
17.8	0
17.9	0
18	0
18.1	0
18.2	0
18.3	0
18.4	0
18.5	0
18.6	0
18.7	0
18.8	0
18.9	0
19	0
19.1	0
19.2	0
19.3	0
19.4	0
19.5	0
19.6	0
19.7	0
19.8	0
19.9	0
20	0
20.1	0
20.2	0
20.3	0
20.4	0
20.5	0
20.6	0
20.7	0
20.8	0
20.9	0
21	0
21.1	0
21.2	0
21.3	0
21.4	0
21.5	0
21.6	0
21.7	0
21.8	0
21.9	0
22	0
22.1	0
22.2	0
22.3	0
22.4	0
22.5	0
22.6	0
22.7	0
22.8	0
22.9	0
23	0
23.1	0
23.2	0
23.3	0
23.4	0
23.5	0
23.6	0
23.7	0
23.8	0
23.9	0
24	0
24.1	0
24.2	0
24.3	0
24.4	0
24.5	0
24.6	0
24.7	0
24.8	0
24.9	0
25	0
25.1	0
25.2	0
25.3	0
25.4	0
25.5	0
25.6	0
25.7	0
25.8	0
25.9	0
26	0
26.1	0
26.2	0
26.3	0
26.4	0
26.5	0
26.6	0
26.7	0
26.8	0
26.9	0
27	0
27.1	0
27.2	0
27.3	0
27.4	0
27.5	0
27.6	0
27.7	0
27.8	0
27.9	0
28	0
28.1	0
28.2	0
28.3	0
28.4	0
28.5	0
28.6	0
28.7	0
28.8	0
28.9	0
29	0
29.1	0
29.2	0
29.3	0
29.4	0
29.5	0
29.6	0
29.7	0
29.8	0
29.9	0
30	0
30.1	0
30.2	0
30.3	0
30.4	0
30.5	0
30.6	0
30.7	0
30.8	0
30.9	0
31	0
31.1	0
31.2	0
31.3	0
31.4	0
31.5	0
31.6	0
31.7	0
31.8	0
31.9	0
32	0
32.1	0
32.2	0
32.3	0
32.4	0
32.5	0
32.6	0
32.7	0
32.8	0
32.9	0
33	0
33.1	0
33.2	0
33.3	0
33.4	0
33.5	0
33.6	0
33.7	0
33.8	0
33.9	0
34	0
34.1	0
34.2	0
34.3	0
34.4	0
34.5	0
34.6	0
34.7	0
34.8	0
34.9	0
35	0
35.1	0
35.2	0
35.3	0
35.4	0
35.5	0
35.6	0
35.7	0
35.8	0
35.9	0
36	0
36.1	0
36.2	0
36.3	0
36.4	0
36.5	0
36.6	0
36.7	0
36.8	0
36.9	0
37	0
37.1	0
37.2	0
37.3	0
37.4	0
37.5	0
37.6	0
37.7	0
37.8	0
37.9	0
38	0
38.1	0
38.2	0
38.3	0
38.4	0
38.5	0
38.6	0
38.7	0
38.8	0
38.9	0
39	0
39.1	0
39.2	0
39.3	0
39.4	0
39.5	0
39.6	0
39.7	0
39.8	0
39.9	0
40	0
40.1	0
40.2	0
40.3	0
40.4	0
40.5	0
40.6	0
40.7	0
40.8	0
40.9	0
41	0
41.1	0
41.2	0
41.3	0
41.4	0
41.5	0
41.6	0
41.7	0
41.8	0
41.9	0
42	0
42.1	0
42.2	0
42.3	0
42.4	0
42.5	0
42.6	0
42.7	0
42.8	0
42.9	0
43	0
43.1	0
43.2	0
43.3	0
43.4	0
43.5	0
43.6	0
43.7	0
43.8	0
43.9	0
44	0
44.1	0
44.2	0
44.3	0
44.4	0
44.5	0
44.6	0
44.7	0
44.8	0
44.9	0
45	0
45.1	0
45.2	0
45.3	0
45.4	0
45.5	0
45.6	0
45.7	0
45.8	0
45.9	0
46	0
46.1	0
46.2	0
46.3	0
46.4	0
46.5	0
46.6	0
46.7	0
46.8	0
46.9	0
47	0
47.1	0
47.2	0
47.3	0
47.4	0
47.5	0
47.6	0
47.7	0
47.8	0
47.9	0
48	0
48.1	0
48.2	0
48.3	0
48.4	0
48.5	0
48.6	0
48.7	0
48.8	0
48.9	0
49	0
49.1	0
49.2	0
49.3	0
49.4	0
49.5	0
49.6	0
49.7	0
49.8	0
49.9	0
50	0
50.1	0
50.2	0
50.3	0
50.4	0
50.5	0
50.6	0
50.7	0
50.8	0
50.9	0
51	0
51.1	0
51.2	0
51.3	0
51.4	0
51.5	0
51.6	0
51.7	0
51.8	0
51.9	0
52	0
52.1	0
52.2	0
52.3	0
52.4	0
52.5	0
52.6	0
52.7	0
52.8	0
52.9	0
53	0
53.1	0
53.2	0
53.3	0
53.4	0
53.5	0
53.6	0
53.7	0
53.8	0
53.9	0
54	0
54.1	0
54.2	0
54.3	0
54.4	0
54.5	0
54.6	0
54.7	0
54.8	0
54.9	0
55	0
55.1	0
55.2	0
55.3	0
55.4	0
55.5	0
55.6	0
55.7	0
55.8	0
55.9	0
56	0
56.1	0
56.2	0
56.3	0
56.4	0
56.5	0
56.6	0
56.7	0
56.8	0
56.9	0
57	0
57.1	0
57.2	0
57.3	0
57.4	0
57.5	0
57.6	0
57.7	0
57.8	0
57.9	0
58	0
58.1	0
58.2	0
58.3	0
58.4	0
58.5	0
58.6	0
58.7	0
58.8	0
58.9	0
59	0
59.1	0
59.2	0
59.3	0
59.4	0
59.5	0
59.6	0
59.7	0
59.8	0
59.9	0
60	0
60.1	0
60.2	0
60.3	0
60.4	0
60.5	0
60.6	0
60.7	0
60.8	0
60.9	0
61	0
61.1	0
61.2	0
61.3	0
61.4	0
61.5	0
61.6	0
61.7	0
61.8	0
61.9	0
62	0
62.1	0
62.2	0
62.3	0
62.4	0
62.5	0
62.6	0
62.7	0
62.8	0
62.9	0
63	0
63.1	0
63.2	0
63.3	0
63.4	0
63.5	0
63.6	0
63.7	0
63.8	0
63.9	0
64	0
64.1	0
64.2	0
64.3	0
64.4	0
64.5	0
64.6	0
64.7	0
64.8	0
64.9	0
65	0
65.1	0
65.2	0
65.3	0
65.4	0
65.5	0
65.6	0
65.7	0
65.8	0
65.9	0
66	0
66.1	0
66.2	0
66.3	0
66.4	0
66.5	0
66.6	0
66.7	0
66.8	0
66.9	0
67	0
67.1	0
67.2	0
67.3	0
67.4	0
67.5	0
67.6	0
67.7	0
67.8	0
67.9	0
68	0
68.1	0
68.2	0
68.3	0
68.4	0
68.5	0
68.6	0
68.7	0
68.8	0
68.9	0
69	0
69.1	0
69.2	0
69.3	0
69.4	0
69.5	0
69.6	0
69.7	0
69.8	0
69.9	0
70	0
70.1	0
70.2	0
70.3	0
70.4	0
70.5	0
70.6	0
70.7	0
70.8	0
70.9	0
71	0
71.1	0
71.2	0
71.3	0
71.4	0
71.5	0
71.6	0
71.7	0
71.8	0
71.9	0
72	0
72.1	0
72.2	0
72.3	0
72.4	0
72.5	0
72.6	0
72.7	0
72.8	0
72.9	0
73	0
73.1	0
73.2	0
73.3	0
73.4	0
73.5	0
73.6	0
73.7	0
73.8	0
73.9	0
74	0
74.1	0
74.2	0
74.3	0
74.4	0
74.5	0
74.6	0
74.7	0
74.8	0
74.9	0
75	0
75.1	0
75.2	0
75.3	0
75.4	0
75.5	0
75.6	0
75.7	0
75.8	0
75.9	0
76	0
76.1	0
76.2	0
76.3	0
76.4	0
76.5	0
76.6	0
76.7	0
76.8	0
76.9	0
77	0
77.1	0
77.2	0
77.3	0
77.4	0
77.5	0
77.6	0
77.7	0
77.8	0
77.9	0
78	0
78.1	0
78.2	0
78.3	0
78.4	0
78.5	0
78.6	0
78.7	0
78.8	0
78.9	0
79	0
79.1	0
79.2	0
79.3	0
79.4	0
79.5	0
79.6	0
79.7	0
79.8	0
79.9	0
80	0
80.1	0
80.2	0
80.3	0
80.4	0
80.5	0
80.6	0
80.7	0
80.8	0
80.9	0
81	0
81.1	0
81.2	0
81.3	0
81.4	0
81.5	0
81.6	0
81.7	0
81.8	0
81.9	0
82	0
82.1	0
82.2	0
82.3	0
82.4	0
82.5	0
82.6	0
82.7	0
82.8	0
82.9	0
83	0
83.1	0
83.2	0
83.3	0
83.4	0
83.5	0
83.6	0
83.7	0
83.8	0
83.9	0
84	0
84.1	0
84.2	0
84.3	0
84.4	0
84.5	0
84.6	0
84.7	0
84.8	0
84.9	0
85	0
85.1	0
85.2	0
85.3	0
85.4	0
85.5	0
85.6	0
85.7	0
85.8	0
85.9	0
86	0
86.1	0
86.2	0
86.3	0
86.4	0
86.5	0
86.6	0
86.7	0
86.8	0
86.9	0
87	0
87.1	0
87.2	0
87.3	0
87.4	0
87.5	0
87.6	0
87.7	0
87.8	0
87.9	0
88	0
88.1	0
88.2	0
88.3	0
88.4	0
88.5	0
88.6	0
88.7	0
88.8	0
88.9	0
89	0
89.1	0
89.2	0
89.3	0
89.4	0
89.5	0
89.6	0
89.7	0
89.8	0
89.9	0
90	0
90.1	0
90.2	0
90.3	0
90.4	0
90.5	0
90.6	0
90.7	0
90.8	0
90.9	0
91	0
91.1	0
91.2	0
91.3	0
91.4	0
91.5	0
91.6	0
91.7	0
91.8	0
91.9	0
92	0
92.1	0
92.2	0
92.3	0
92.4	0
92.5	0
92.6	0
92.7	0
92.8	0
92.9	0
93	0
93.1	0
93.2	0
93.3	0
93.4	0
93.5	0
93.6	0
93.7	0
93.8	0
93.9	0
94	0
94.1	0
94.2	0
94.3	0
94.4	0
94.5	0
94.6	0
94.7	0
94.8	0
94.9	0
95	0
95.1	0
95.2	0
95.3	0
95.4	0
95.5	0
95.6	0
95.7	0
95.8	0
95.9	0
96	0
96.1	0
96.2	0
96.3	0
96.4	0
96.5	0
96.6	0
96.7	0
96.8	0
96.9	0
97	0
97.1	0
97.2	0
97.3	0
97.4	0
97.5	0
97.6	0
97.7	0
97.8	0
97.9	0
98	0
98.1	0
98.2	0
98.3	0
98.4	0
98.5	0
98.6	0
98.7	0
98.8	0
98.9	0
99	0
99.1	0
99.2	0
99.3	0
99.4	0
99.5	0
99.6	0
99.7	0
99.8	0
99.9	0
100	0
100.1	0.0579
100.2	0.1155
100.3	0.1646
100.4	0.2021
100.5	0.2422
100.6	0.2746
100.7	0.3085
100.8	0.3358
100.9	0.3609
101	0.3868
101.1	0.4095
101.2	0.4311
101.3	0.4509
101.4	0.4661
101.5	0.482
101.6	0.4954
101.7	0.5099
101.8	0.5198
101.9	0.5321
102	0.5406
102.1	0.5497
102.2	0.5587
102.3	0.5684
102.4	0.5737
102.5	0.5829
102.6	0.5881
102.7	0.5932
102.8	0.6005
102.9	0.6062
103	0.6097
103.1	0.6141
103.2	0.6169
103.3	0.6201
103.4	0.6226
103.5	0.624
103.6	0.625
103.7	0.6288
103.8	0.6316
103.9	0.636
104	0.6387
104.1	0.6397
104.2	0.6448
104.3	0.6452
104.4	0.6482
104.5	0.6483
104.6	0.651
104.7	0.6521
104.8	0.653
104.9	0.6542
105	0.6572
105.1	0.6598
105.2	0.6608
105.3	0.66
105.4	0.6615
105.5	0.6636
105.6	0.6635
105.7	0.6626
105.8	0.6624
105.9	0.6625
106	0.6625
106.1	0.6637
106.2	0.668
106.3	0.6705
106.4	0.6697
106.5	0.6701
106.6	0.6691
106.7	0.6712
106.8	0.6721
106.9	0.6726
107	0.6734
107.1	0.6744
107.2	0.6745
107.3	0.6753
107.4	0.6772
107.5	0.6768
107.6	0.6793
107.7	0.6797
107.8	0.6793
107.9	0.6812
108	0.6833
108.1	0.6819
108.2	0.682
108.3	0.6806
108.4	0.6802
108.5	0.6794
108.6	0.6801
108.7	0.6817
108.8	0.6817
108.9	0.6813
109	0.6812
109.1	0.6826
109.2	0.6834
109.3	0.6827
109.4	0.6852
109.5	0.6863
109.6	0.6872
109.7	0.687
109.8	0.6889
109.9	0.6894
110	0.69
110.1	0.6922
110.2	0.6942
110.3	0.6935
110.4	0.693
110.5	0.6952
110.6	0.6941
110.7	0.6949
110.8	0.6946
110.9	0.6935
111	0.6944
111.1	0.6957
111.2	0.6968
111.3	0.6969
111.4	0.6975
111.5	0.6956
111.6	0.6949
111.7	0.696
111.8	0.6976
111.9	0.7012
112	0.7039
112.1	0.7055
112.2	0.7077
112.3	0.7049
112.4	0.7066
112.5	0.7081
112.6	0.7087
112.7	0.7087
112.8	0.7104
112.9	0.7107
113	0.7123
113.1	0.7151
113.2	0.715
113.3	0.7139
113.4	0.7111
113.5	0.7122
113.6	0.7103
113.7	0.7115
113.8	0.7115
113.9	0.7144
114	0.7097
114.1	0.7105
114.2	0.7093
114.3	0.7106
114.4	0.7113
114.5	0.7116
114.6	0.7114
114.7	0.7115
114.8	0.7117
114.9	0.7126
115	0.713
115.1	0.7138
115.2	0.7151
115.3	0.7149
115.4	0.7139
115.5	0.715
115.6	0.7162
115.7	0.7175
115.8	0.7187
115.9	0.7198
116	0.7205
116.1	0.7216
116.2	0.7247
116.3	0.7221
116.4	0.7223
116.5	0.721
116.6	0.7235
116.7	0.7228
116.8	0.7225
116.9	0.7231
117	0.7234
117.1	0.7232
117.2	0.7266
117.3	0.7272
117.4	0.7244
117.5	0.7257
117.6	0.7262
117.7	0.7261
117.8	0.7264
117.9	0.7274
118	0.7284
118.1	0.7295
118.2	0.7292
118.3	0.7282
118.4	0.7288
118.5	0.7288
118.6	0.7284
118.7	0.729
118.8	0.7279
118.9	0.7307
119	0.7329
119.1	0.734
119.2	0.7357
119.3	0.7351
119.4	0.7352
119.5	0.737
119.6	0.7377
119.7	0.7377
119.8	0.7364
119.9	0.7362
120	0.7357
120.1	0.7368
120.2	0.7362
120.3	0.7373
120.4	0.7364
120.5	0.7355
120.6	0.7385
120.7	0.7421
120.8	0.7415
120.9	0.7426
121	0.745
121.1	0.7453
121.2	0.7454
121.3	0.745
121.4	0.7451
121.5	0.7465
121.6	0.7457
121.7	0.7443
121.8	0.7443
121.9	0.7434
122	0.7444
122.1	0.7445
122.2	0.7452
122.3	0.7431
122.4	0.7456
122.5	0.7458
122.6	0.7465
122.7	0.7469
122.8	0.7471
122.9	0.7482
123	0.7475
123.1	0.7492
123.2	0.7483
123.3	0.7483
123.4	0.7467
123.5	0.7471
123.6	0.7451
123.7	0.7456
123.8	0.7461
123.9	0.7468
124	0.7488
124.1	0.7495
124.2	0.752
124.3	0.753
124.4	0.753
124.5	0.7534
124.6	0.7553
124.7	0.7566
124.8	0.7582
124.9	0.7592
125	0.7588
125.1	0.7621
125.2	0.7604
125.3	0.7637
125.4	0.7633
125.5	0.7642
125.6	0.7639
125.7	0.7654
125.8	0.7671
125.9	0.7667
126	0.7665
126.1	0.7651
126.2	0.7639
126.3	0.7636
126.4	0.7636
126.5	0.7609
126.6	0.762
126.7	0.7611
126.8	0.7625
126.9	0.7637
127	0.766
127.1	0.7649
127.2	0.762
127.3	0.7611
127.4	0.7638
127.5	0.7625
127.6	0.7601
127.7	0.7609
127.8	0.7594
127.9	0.7612
128	0.765
128.1	0.7642
128.2	0.7631
128.3	0.7651
128.4	0.7645
128.5	0.7664
128.6	0.7666
128.7	0.7658
128.8	0.7661
128.9	0.7681
129	0.7691
129.1	0.7682
129.2	0.7684
129.3	0.7663
129.4	0.7676
129.5	0.7679
129.6	0.7681
129.7	0.7669
129.8	0.768
129.9	0.7677
130	0.7705
130.1	0.7703
130.2	0.7702
130.3	0.7704
130.4	0.7706
130.5	0.7705
130.6	0.7682
130.7	0.77
130.8	0.7695
130.9	0.7698
131	0.7688
131.1	0.7672
131.2	0.7682
131.3	0.7685
131.4	0.7683
131.5	0.7694
131.6	0.7701
131.7	0.7702
131.8	0.7709
131.9	0.7721
132	0.7711
132.1	0.7714
132.2	0.772
132.3	0.7709
132.4	0.7708
132.5	0.7692
132.6	0.7701
132.7	0.7709
132.8	0.7733
132.9	0.7742
133	0.776
133.1	0.7758
133.2	0.7766
133.3	0.7766
133.4	0.7792
133.5	0.7779
133.6	0.7777
133.7	0.7803
133.8	0.7784
133.9	0.7781
134	0.7805
134.1	0.7811
134.2	0.7809
134.3	0.7797
134.4	0.7805
134.5	0.7813
134.6	0.7832
134.7	0.7827
134.8	0.7813
134.9	0.7813
135	0.7811
135.1	0.782
135.2	0.7828
135.3	0.7842
135.4	0.7847
135.5	0.7828
135.6	0.7838
135.7	0.7841
135.8	0.784
135.9	0.7842
136	0.7845
136.1	0.7853
136.2	0.784
136.3	0.7853
136.4	0.784
136.5	0.7851
136.6	0.7841
136.7	0.7837
136.8	0.7839
136.9	0.7826
137	0.7811
137.1	0.78
137.2	0.7823
137.3	0.7829
137.4	0.784
137.5	0.7835
137.6	0.785
137.7	0.7846
137.8	0.7862
137.9	0.7854
138	0.7856
138.1	0.7888
138.2	0.7885
138.3	0.7886
138.4	0.7898
138.5	0.7886
138.6	0.7874
138.7	0.789
138.8	0.7885
138.9	0.7892
139	0.7892
139.1	0.7877
139.2	0.7884
139.3	0.788
139.4	0.7892
139.5	0.7888
139.6	0.7894
139.7	0.7913
139.8	0.7941
139.9	0.7939
140	0.795
140.1	0.7945
140.2	0.7946
140.3	0.7954
140.4	0.7941
140.5	0.7943
140.6	0.7934
140.7	0.7946
140.8	0.7936
140.9	0.7931
141	0.792
141.1	0.7931
141.2	0.7935
141.3	0.7925
141.4	0.7928
141.5	0.7939
141.6	0.7935
141.7	0.7938
141.8	0.7931
141.9	0.7938
142	0.7928
142.1	0.794
142.2	0.795
142.3	0.7953
142.4	0.796
142.5	0.7948
142.6	0.7962
142.7	0.7973
142.8	0.7972
142.9	0.7995
143	0.8
143.1	0.8011
143.2	0.801
143.3	0.8012
143.4	0.8018
143.5	0.8028
143.6	0.8045
143.7	0.8065
143.8	0.8069
143.9	0.8053
144	0.807
144.1	0.8045
144.2	0.8031
144.3	0.8017
144.4	0.8023
144.5	0.7986
144.6	0.7998
144.7	0.7997
144.8	0.7994
144.9	0.8012
145	0.8025
145.1	0.805
145.2	0.8059
145.3	0.8058
145.4	0.8081
145.5	0.8067
145.6	0.8067
145.7	0.8077
145.8	0.806
145.9	0.8061
146	0.8059
146.1	0.8064
146.2	0.8056
146.3	0.8064
146.4	0.8071
146.5	0.8058
146.6	0.8059
146.7	0.8079
146.8	0.8071
146.9	0.806
147	0.8045
147.1	0.8033
147.2	0.8052
147.3	0.805
147.4	0.8057
147.5	0.8067
147.6	0.8076
147.7	0.8102
147.8	0.8104
147.9	0.811
148	0.8111
148.1	0.8109
148.2	0.8115
148.3	0.8111
148.4	0.8096
148.5	0.8097
148.6	0.8105
148.7	0.8098
148.8	0.8097
148.9	0.8092
149	0.8086
149.1	0.8094
149.2	0.8108
149.3	0.8107
149.4	0.8117
149.5	0.8116
149.6	0.8119
149.7	0.8107
149.8	0.8116
149.9	0.8117
150	0.8124
150.1	0.8102
150.2	0.8115
150.3	0.8113
150.4	0.8116
150.5	0.8121
150.6	0.8117
150.7	0.8113
150.8	0.8126
150.9	0.8126
151	0.8141
151.1	0.814
151.2	0.8166
151.3	0.8158
151.4	0.8173
151.5	0.8168
151.6	0.816
151.7	0.8161
151.8	0.8165
151.9	0.8179
152	0.8168
152.1	0.8168
152.2	0.8173
152.3	0.8181
152.4	0.8166
152.5	0.8166
152.6	0.818
152.7	0.818
152.8	0.8189
152.9	0.8177
153	0.8175
153.1	0.8175
153.2	0.8173
153.3	0.8167
153.4	0.8174
153.5	0.8181
153.6	0.818
153.7	0.8183
153.8	0.819
153.9	0.8193
154	0.8204
154.1	0.8203
154.2	0.8217
154.3	0.822
154.4	0.8233
154.5	0.822
154.6	0.8209
154.7	0.8209
154.8	0.8226
154.9	0.8237
155	0.8242
155.1	0.8236
155.2	0.8249
155.3	0.8255
155.4	0.8245
155.5	0.8236
155.6	0.8236
155.7	0.8223
155.8	0.8229
155.9	0.8244
156	0.8229
156.1	0.8219
156.2	0.8242
156.3	0.8255
156.4	0.8244
156.5	0.8235
156.6	0.824
156.7	0.8249
156.8	0.8263
156.9	0.8287
157	0.8302
157.1	0.8291
157.2	0.8264
157.3	0.8257
157.4	0.8248
157.5	0.8235
157.6	0.8236
157.7	0.8246
157.8	0.825
157.9	0.8242
158	0.8245
158.1	0.8231
158.2	0.8239
158.3	0.8246
158.4	0.8252
158.5	0.8252
158.6	0.8231
158.7	0.8226
158.8	0.8218
158.9	0.8224
159	0.8208
159.1	0.8241
159.2	0.8245
159.3	0.8234
159.4	0.8232
159.5	0.8234
159.6	0.8219
159.7	0.8226
159.8	0.8237
159.9	0.8227
160	0.8232
160.1	0.823
160.2	0.8224
160.3	0.8234
160.4	0.8234
160.5	0.8238
160.6	0.8239
160.7	0.824
160.8	0.824
160.9	0.8259
161	0.8252
161.1	0.8242
161.2	0.8256
161.3	0.8271
161.4	0.828
161.5	0.8279
161.6	0.8285
161.7	0.8291
161.8	0.8289
161.9	0.8277
162	0.8294
162.1	0.8288
162.2	0.8275
162.3	0.8279
162.4	0.8287
162.5	0.8297
162.6	0.8306
162.7	0.8296
162.8	0.8297
162.9	0.8312
163	0.8278
163.1	0.8272
163.2	0.8259
163.3	0.8249
163.4	0.8242
163.5	0.8231
163.6	0.8251
163.7	0.827
163.8	0.8277
163.9	0.8273
164	0.828
164.1	0.8281
164.2	0.8288
164.3	0.8279
164.4	0.8288
164.5	0.8296
164.6	0.8278
164.7	0.8277
164.8	0.829
164.9	0.83
165	0.8302
165.1	0.8306
165.2	0.8311
165.3	0.831
165.4	0.8317
165.5	0.8326
165.6	0.8337
165.7	0.8332
165.8	0.8339
165.9	0.8336
166	0.8344
166.1	0.8347
166.2	0.8348
166.3	0.8342
166.4	0.8348
166.5	0.8346
166.6	0.8343
166.7	0.8351
166.8	0.8346
166.9	0.8337
167	0.8336
167.1	0.8331
167.2	0.8336
167.3	0.8353
167.4	0.8357
167.5	0.8351
167.6	0.8356
167.7	0.8353
167.8	0.834
167.9	0.8358
168	0.8355
168.1	0.8334
168.2	0.8342
168.3	0.8355
168.4	0.8361
168.5	0.8363
168.6	0.8357
168.7	0.836
168.8	0.8364
168.9	0.8389
169	0.8392
169.1	0.8391
169.2	0.8402
169.3	0.8399
169.4	0.8403
169.5	0.8398
169.6	0.8387
169.7	0.8399
169.8	0.8389
169.9	0.8401
170	0.8398
170.1	0.8401
170.2	0.8405
170.3	0.8411
170.4	0.8401
170.5	0.8399
170.6	0.8399
170.7	0.8392
170.8	0.8399
170.9	0.8397
171	0.8406
171.1	0.8398
171.2	0.8386
171.3	0.8381
171.4	0.8382
171.5	0.838
171.6	0.839
171.7	0.8388
171.8	0.8376
171.9	0.8388
172	0.8374
172.1	0.8381
172.2	0.8396
172.3	0.839
172.4	0.8394
172.5	0.8394
172.6	0.839
172.7	0.8383
172.8	0.8398
172.9	0.8394
173	0.8402
173.1	0.8409
173.2	0.8398
173.3	0.8414
173.4	0.842
173.5	0.8423
173.6	0.8436
173.7	0.8439
173.8	0.8435
173.9	0.8453
174	0.8447
174.1	0.8452
174.2	0.8452
174.3	0.8471
174.4	0.8466
174.5	0.8463
174.6	0.8449
174.7	0.8455
174.8	0.8458
174.9	0.8463
175	0.8468
175.1	0.8468
175.2	0.8482
175.3	0.8475
175.4	0.8473
175.5	0.8483
175.6	0.8486
175.7	0.8488
175.8	0.8478
175.9	0.8483
176	0.8478
176.1	0.8483
176.2	0.848
176.3	0.8485
176.4	0.848
176.5	0.8467
176.6	0.8462
176.7	0.8481
176.8	0.8477
176.9	0.8474
177	0.8475
177.1	0.8471
177.2	0.846
177.3	0.8467
177.4	0.8469
177.5	0.8471
177.6	0.8479
177.7	0.8473
177.8	0.8476
177.9	0.8475
178	0.8461
178.1	0.8469
178.2	0.8462
178.3	0.8453
178.4	0.8461
178.5	0.8458
178.6	0.845
178.7	0.8465
178.8	0.8461
178.9	0.8457
179	0.8463
179.1	0.8469
179.2	0.8455
179.3	0.8439
179.4	0.8436
179.5	0.8433
179.6	0.8449
179.7	0.8449
179.8	0.8452
179.9	0.8479
180	0.8479
180.1	0.8472
180.2	0.8454
180.3	0.8455
180.4	0.8468
180.5	0.848
180.6	0.8481
180.7	0.847
180.8	0.846
180.9	0.8444
181	0.8443
181.1	0.8446
181.2	0.844
181.3	0.8436
181.4	0.8441
181.5	0.8438
181.6	0.8457
181.7	0.8458
181.8	0.8455
181.9	0.8468
182	0.8458
182.1	0.8458
182.2	0.8459
182.3	0.8461
182.4	0.8474
182.5	0.8468
182.6	0.8469
182.7	0.8484
182.8	0.8497
182.9	0.8501
183	0.8504
183.1	0.8522
183.2	0.8529
183.3	0.8537
183.4	0.8522
183.5	0.8509
183.6	0.8507
183.7	0.8484
183.8	0.8478
183.9	0.8493
184	0.8506
184.1	0.8536
184.2	0.8532
184.3	0.8541
184.4	0.8543
184.5	0.8537
184.6	0.855
184.7	0.855
184.8	0.8541
184.9	0.8539
185	0.8544
185.1	0.8542
185.2	0.8546
185.3	0.8546
185.4	0.855
185.5	0.8546
185.6	0.8548
185.7	0.8544
185.8	0.8527
185.9	0.8536
186	0.8524
186.1	0.8529
186.2	0.8545
186.3	0.854
186.4	0.8548
186.5	0.8542
186.6	0.8531
186.7	0.8539
186.8	0.8537
186.9	0.853
187	0.8512
187.1	0.8514
187.2	0.8503
187.3	0.8501
187.4	0.8511
187.5	0.8513
187.6	0.8534
187.7	0.8531
187.8	0.8524
187.9	0.8527
188	0.8527
188.1	0.8527
188.2	0.8537
188.3	0.854
188.4	0.8536
188.5	0.8554
188.6	0.8553
188.7	0.8547
188.8	0.8555
188.9	0.8552
189	0.855
189.1	0.8549
189.2	0.8575
189.3	0.8578
189.4	0.8586
189.5	0.8584
189.6	0.8569
189.7	0.857
189.8	0.8563
189.9	0.8553
190	0.8555
190.1	0.8554
190.2	0.8552
190.3	0.8562
190.4	0.8571
190.5	0.857
190.6	0.8575
190.7	0.8576
190.8	0.8558
190.9	0.8553
191	0.8561
191.1	0.856
191.2	0.8559
191.3	0.8561
191.4	0.8564
191.5	0.8573
191.6	0.8577
191.7	0.8558
191.8	0.8554
191.9	0.8547
192	0.8543
192.1	0.8551
192.2	0.8562
192.3	0.8564
192.4	0.8575
192.5	0.8579
192.6	0.858
192.7	0.8583
192.8	0.8583
192.9	0.8577
193	0.8564
193.1	0.8561
193.2	0.8563
193.3	0.8568
193.4	0.8567
193.5	0.8577
193.6	0.8575
193.7	0.8568
193.8	0.8568
193.9	0.8549
194	0.8544
194.1	0.8556
194.2	0.8554
194.3	0.8555
194.4	0.8546
194.5	0.8549
194.6	0.8554
194.7	0.8553
194.8	0.854
194.9	0.8547
195	0.8544
195.1	0.8543
195.2	0.8538
195.3	0.8543
195.4	0.8545
195.5	0.8546
195.6	0.8549
195.7	0.856
195.8	0.8566
195.9	0.8567
196	0.8566
196.1	0.8569
196.2	0.8576
196.3	0.8584
196.4	0.8571
196.5	0.8582
196.6	0.8606
196.7	0.8603
196.8	0.8603
196.9	0.8592
197	0.8596
197.1	0.8596
197.2	0.8575
197.3	0.8581
197.4	0.8593
197.5	0.8566
197.6	0.8565
197.7	0.8576
197.8	0.8579
197.9	0.8578
198	0.8571
198.1	0.857
198.2	0.8568
198.3	0.8565
198.4	0.8568
198.5	0.8555
198.6	0.8543
198.7	0.8551
198.8	0.8539
198.9	0.8538
199	0.8548
199.1	0.8547
199.2	0.8545
199.3	0.8551
199.4	0.8579
199.5	0.8575
199.6	0.8573
199.7	0.8574
199.8	0.8589
199.9	0.8583
200	0.8584
[truncated: 14,000 more rows]
