# Supplementary material for: Bayesian inference of kinetic schemes for ion channels by Kalman filtering
Source: eLife journal article supplement (doi:10.7554/elife.62714), 2022-05-04
Supplement: fig4-data6 [file 1_Sim_N_5000_Strom_MW.xlsx]

## Sheet: Tabelle1
0.1	0
0.2	0
0.3	0
0.4	0
0.5	0
0.6	0
0.7	0
0.8	0
0.9	0
1	0
1.1	0
1.2	0
1.3	0
1.4	0
1.5	0
1.6	0
1.7	0
1.8	0
1.9	0
2	0
2.1	0
2.2	0
2.3	0
2.4	0
2.5	0
2.6	0
2.7	0
2.8	0
2.9	0
3	0
3.1	0
3.2	0
3.3	0
3.4	0
3.5	0
3.6	0
3.7	0
3.8	0
3.9	0
4	0
4.1	0
4.2	0
4.3	0
4.4	0
4.5	0
4.6	0
4.7	0
4.8	0
4.9	0
5	0
5.1	0
5.2	0
5.3	0
5.4	0
5.5	0
5.6	0
5.7	0
5.8	0
5.9	0
6	0
6.1	0
6.2	0
6.3	0
6.4	0
6.5	0
6.6	0
6.7	0
6.8	0
6.9	0
7	0
7.1	0
7.2	0
7.3	0
7.4	0
7.5	0
7.6	0
7.7	0
7.8	0
7.9	0
8	0
8.1	0
8.2	0
8.3	0
8.4	0
8.5	0
8.6	0
8.7	0
8.8	0
8.9	0
9	0
9.1	0
9.2	0
9.3	0
9.4	0
9.5	0
9.6	0
9.7	0
9.8	0
9.9	0
10	0
10.1	0
10.2	0
10.3	0
10.4	0
10.5	0
10.6	0
10.7	0
10.8	0
10.9	0
11	0
11.1	0
11.2	0
11.3	0
11.4	0
11.5	0
11.6	0
11.7	0
11.8	0
11.9	0
12	0
12.1	0
12.2	0
12.3	0
12.4	0
12.5	0
12.6	0
12.7	0
12.8	0
12.9	0
13	0
13.1	0
13.2	0
13.3	0
13.4	0
13.5	0
13.6	0
13.7	0
13.8	0
13.9	0
14	0
14.1	0
14.2	0
14.3	0
14.4	0
14.5	0
14.6	0
14.7	0
14.8	0
14.9	0
15	0
15.1	0
15.2	0
15.3	0
15.4	0
15.5	0
15.6	0
15.7	0
15.8	0
15.9	0
16	0
16.1	0
16.2	0
16.3	0
16.4	0
16.5	0
16.6	0
16.7	0
16.8	0
16.9	0
17	0
17.1	0
17.2	0
17.3	0
17.4	0
17.5	0
17.6	0
17.7	0
17.8	0
17.9	0
18	0
18.1	0
18.2	0
18.3	0
18.4	0
18.5	0
18.6	0
18.7	0
18.8	0
18.9	0
19	0
19.1	0
19.2	0
19.3	0
19.4	0
19.5	0
19.6	0
19.7	0
19.8	0
19.9	0
20	0
20.1	0
20.2	0
20.3	0
20.4	0
20.5	0
20.6	0
20.7	0
20.8	0
20.9	0
21	0
21.1	0
21.2	0
21.3	0
21.4	0
21.5	0
21.6	0
21.7	0
21.8	0
21.9	0
22	0
22.1	0
22.2	0
22.3	0
22.4	0
22.5	0
22.6	0
22.7	0
22.8	0
22.9	0
23	0
23.1	0
23.2	0
23.3	0
23.4	0
23.5	0
23.6	0
23.7	0
23.8	0
23.9	0
24	0
24.1	0
24.2	0
24.3	0
24.4	0
24.5	0
24.6	0
24.7	0
24.8	0
24.9	0
25	0
25.1	0
25.2	0
25.3	0
25.4	0
25.5	0
25.6	0
25.7	0
25.8	0
25.9	0
26	0
26.1	0
26.2	0
26.3	0
26.4	0
26.5	0
26.6	0
26.7	0
26.8	0
26.9	0
27	0
27.1	0
27.2	0
27.3	0
27.4	0
27.5	0
27.6	0
27.7	0
27.8	0
27.9	0
28	0
28.1	0
28.2	0
28.3	0
28.4	0
28.5	0
28.6	0
28.7	0
28.8	0
28.9	0
29	0
29.1	0
29.2	0
29.3	0
29.4	0
29.5	0
29.6	0
29.7	0
29.8	0
29.9	0
30	0
30.1	0
30.2	0
30.3	0
30.4	0
30.5	0
30.6	0
30.7	0
30.8	0
30.9	0
31	0
31.1	0
31.2	0
31.3	0
31.4	0
31.5	0
31.6	0
31.7	0
31.8	0
31.9	0
32	0
32.1	0
32.2	0
32.3	0
32.4	0
32.5	0
32.6	0
32.7	0
32.8	0
32.9	0
33	0
33.1	0
33.2	0
33.3	0
33.4	0
33.5	0
33.6	0
33.7	0
33.8	0
33.9	0
34	0
34.1	0
34.2	0
34.3	0
34.4	0
34.5	0
34.6	0
34.7	0
34.8	0
34.9	0
35	0
35.1	0
35.2	0
35.3	0
35.4	0
35.5	0
35.6	0
35.7	0
35.8	0
35.9	0
36	0
36.1	0
36.2	0
36.3	0
36.4	0
36.5	0
36.6	0
36.7	0
36.8	0
36.9	0
37	0
37.1	0
37.2	0
37.3	0
37.4	0
37.5	0
37.6	0
37.7	0
37.8	0
37.9	0
38	0
38.1	0
38.2	0
38.3	0
38.4	0
38.5	0
38.6	0
38.7	0
38.8	0
38.9	0
39	0
39.1	0
39.2	0
39.3	0
39.4	0
39.5	0
39.6	0
39.7	0
39.8	0
39.9	0
40	0
40.1	0
40.2	0
40.3	0
40.4	0
40.5	0
40.6	0
40.7	0
40.8	0
40.9	0
41	0
41.1	0
41.2	0
41.3	0
41.4	0
41.5	0
41.6	0
41.7	0
41.8	0
41.9	0
42	0
42.1	0
42.2	0
42.3	0
42.4	0
42.5	0
42.6	0
42.7	0
42.8	0
42.9	0
43	0
43.1	0
43.2	0
43.3	0
43.4	0
43.5	0
43.6	0
43.7	0
43.8	0
43.9	0
44	0
44.1	0
44.2	0
44.3	0
44.4	0
44.5	0
44.6	0
44.7	0
44.8	0
44.9	0
45	0
45.1	0
45.2	0
45.3	0
45.4	0
45.5	0
45.6	0
45.7	0
45.8	0
45.9	0
46	0
46.1	0
46.2	0
46.3	0
46.4	0
46.5	0
46.6	0
46.7	0
46.8	0
46.9	0
47	0
47.1	0
47.2	0
47.3	0
47.4	0
47.5	0
47.6	0
47.7	0
47.8	0
47.9	0
48	0
48.1	0
48.2	0
48.3	0
48.4	0
48.5	0
48.6	0
48.7	0
48.8	0
48.9	0
49	0
49.1	0
49.2	0
49.3	0
49.4	0
49.5	0
49.6	0
49.7	0
49.8	0
49.9	0
50	0
50.1	0
50.2	0
50.3	0
50.4	0
50.5	0
50.6	0
50.7	0
50.8	0
50.9	0
51	0
51.1	0
51.2	0
51.3	0
51.4	0
51.5	0
51.6	0
51.7	0
51.8	0
51.9	0
52	0
52.1	0
52.2	0
52.3	0
52.4	0
52.5	0
52.6	0
52.7	0
52.8	0
52.9	0
53	0
53.1	0
53.2	0
53.3	0
53.4	0
53.5	0
53.6	0
53.7	0
53.8	0
53.9	0
54	0
54.1	0
54.2	0
54.3	0
54.4	0
54.5	0
54.6	0
54.7	0
54.8	0
54.9	0
55	0
55.1	0
55.2	0
55.3	0
55.4	0
55.5	0
55.6	0
55.7	0
55.8	0
55.9	0
56	0
56.1	0
56.2	0
56.3	0
56.4	0
56.5	0
56.6	0
56.7	0
56.8	0
56.9	0
57	0
57.1	0
57.2	0
57.3	0
57.4	0
57.5	0
57.6	0
57.7	0
57.8	0
57.9	0
58	0
58.1	0
58.2	0
58.3	0
58.4	0
58.5	0
58.6	0
58.7	0
58.8	0
58.9	0
59	0
59.1	0
59.2	0
59.3	0
59.4	0
59.5	0
59.6	0
59.7	0
59.8	0
59.9	0
60	0
60.1	0
60.2	0
60.3	0
60.4	0
60.5	0
60.6	0
60.7	0
60.8	0
60.9	0
61	0
61.1	0
61.2	0
61.3	0
61.4	0
61.5	0
61.6	0
61.7	0
61.8	0
61.9	0
62	0
62.1	0
62.2	0
62.3	0
62.4	0
62.5	0
62.6	0
62.7	0
62.8	0
62.9	0
63	0
63.1	0
63.2	0
63.3	0
63.4	0
63.5	0
63.6	0
63.7	0
63.8	0
63.9	0
64	0
64.1	0
64.2	0
64.3	0
64.4	0
64.5	0
64.6	0
64.7	0
64.8	0
64.9	0
65	0
65.1	0
65.2	0
65.3	0
65.4	0
65.5	0
65.6	0
65.7	0
65.8	0
65.9	0
66	0
66.1	0
66.2	0
66.3	0
66.4	0
66.5	0
66.6	0
66.7	0
66.8	0
66.9	0
67	0
67.1	0
67.2	0
67.3	0
67.4	0
67.5	0
67.6	0
67.7	0
67.8	0
67.9	0
68	0
68.1	0
68.2	0
68.3	0
68.4	0
68.5	0
68.6	0
68.7	0
68.8	0
68.9	0
69	0
69.1	0
69.2	0
69.3	0
69.4	0
69.5	0
69.6	0
69.7	0
69.8	0
69.9	0
70	0
70.1	0
70.2	0
70.3	0
70.4	0
70.5	0
70.6	0
70.7	0
70.8	0
70.9	0
71	0
71.1	0
71.2	0
71.3	0
71.4	0
71.5	0
71.6	0
71.7	0
71.8	0
71.9	0
72	0
72.1	0
72.2	0
72.3	0
72.4	0
72.5	0
72.6	0
72.7	0
72.8	0
72.9	0
73	0
73.1	0
73.2	0
73.3	0
73.4	0
73.5	0
73.6	0
73.7	0
73.8	0
73.9	0
74	0
74.1	0
74.2	0
74.3	0
74.4	0
74.5	0
74.6	0
74.7	0
74.8	0
74.9	0
75	0
75.1	0
75.2	0
75.3	0
75.4	0
75.5	0
75.6	0
75.7	0
75.8	0
75.9	0
76	0
76.1	0
76.2	0
76.3	0
76.4	0
76.5	0
76.6	0
76.7	0
76.8	0
76.9	0
77	0
77.1	0
77.2	0
77.3	0
77.4	0
77.5	0
77.6	0
77.7	0
77.8	0
77.9	0
78	0
78.1	0
78.2	0
78.3	0
78.4	0
78.5	0
78.6	0
78.7	0
78.8	0
78.9	0
79	0
79.1	0
79.2	0
79.3	0
79.4	0
79.5	0
79.6	0
79.7	0
79.8	0
79.9	0
80	0
80.1	0
80.2	0
80.3	0
80.4	0
80.5	0
80.6	0
80.7	0
80.8	0
80.9	0
81	0
81.1	0
81.2	0
81.3	0
81.4	0
81.5	0
81.6	0
81.7	0
81.8	0
81.9	0
82	0
82.1	0
82.2	0
82.3	0
82.4	0
82.5	0
82.6	0
82.7	0
82.8	0
82.9	0
83	0
83.1	0
83.2	0
83.3	0
83.4	0
83.5	0
83.6	0
83.7	0
83.8	0
83.9	0
84	0
84.1	0
84.2	0
84.3	0
84.4	0
84.5	0
84.6	0
84.7	0
84.8	0
84.9	0
85	0
85.1	0
85.2	0
85.3	0
85.4	0
85.5	0
85.6	0
85.7	0
85.8	0
85.9	0
86	0
86.1	0
86.2	0
86.3	0
86.4	0
86.5	0
86.6	0
86.7	0
86.8	0
86.9	0
87	0
87.1	0
87.2	0
87.3	0
87.4	0
87.5	0
87.6	0
87.7	0
87.8	0
87.9	0
88	0
88.1	0
88.2	0
88.3	0
88.4	0
88.5	0
88.6	0
88.7	0
88.8	0
88.9	0
89	0
89.1	0
89.2	0
89.3	0
89.4	0
89.5	0
89.6	0
89.7	0
89.8	0
89.9	0
90	0
90.1	0
90.2	0
90.3	0
90.4	0
90.5	0
90.6	0
90.7	0
90.8	0
90.9	0
91	0
91.1	0
91.2	0
91.3	0
91.4	0
91.5	0
91.6	0
91.7	0
91.8	0
91.9	0
92	0
92.1	0
92.2	0
92.3	0
92.4	0
92.5	0
92.6	0
92.7	0
92.8	0
92.9	0
93	0
93.1	0
93.2	0
93.3	0
93.4	0
93.5	0
93.6	0
93.7	0
93.8	0
93.9	0
94	0
94.1	0
94.2	0
94.3	0
94.4	0
94.5	0
94.6	0
94.7	0
94.8	0
94.9	0
95	0
95.1	0
95.2	0
95.3	0
95.4	0
95.5	0
95.6	0
95.7	0
95.8	0
95.9	0
96	0
96.1	0
96.2	0
96.3	0
96.4	0
96.5	0
96.6	0
96.7	0
96.8	0
96.9	0
97	0
97.1	0
97.2	0
97.3	0
97.4	0
97.5	0
97.6	0
97.7	0
97.8	0
97.9	0
98	0
98.1	0
98.2	0
98.3	0
98.4	0
98.5	0
98.6	0
98.7	0
98.8	0
98.9	0
99	0
99.1	0
99.2	0
99.3	0
99.4	0
99.5	0
99.6	0
99.7	0
99.8	0
99.9	0
100	0
100.1	0
100.2	0
100.3	0
100.4	0.0002
100.5	0.0006
100.6	0.0008
100.7	0.0012
100.8	0.002
100.9	0.0028
101	0.0036
101.1	0.004
101.2	0.0048
101.3	0.0058
101.4	0.0064
101.5	0.0072
101.6	0.008
101.7	0.009
101.8	0.0098
101.9	0.0102
102	0.0112
102.1	0.012
102.2	0.013
102.3	0.0138
102.4	0.0148
102.5	0.016
102.6	0.017
102.7	0.0184
102.8	0.0198
102.9	0.021
103	0.0228
103.1	0.0234
103.2	0.025
103.3	0.0262
103.4	0.0274
103.5	0.0284
103.6	0.0302
103.7	0.0328
103.8	0.0338
103.9	0.036
104	0.0376
104.1	0.0386
104.2	0.04
104.3	0.0414
104.4	0.042
104.5	0.0434
104.6	0.0452
104.7	0.0468
104.8	0.0484
104.9	0.0506
105	0.0518
105.1	0.0534
105.2	0.0556
105.3	0.0566
105.4	0.0584
105.5	0.059
105.6	0.0602
105.7	0.0616
105.8	0.0628
105.9	0.064
106	0.066
106.1	0.0672
106.2	0.0678
106.3	0.0694
106.4	0.071
106.5	0.0724
106.6	0.0734
106.7	0.074
106.8	0.0746
106.9	0.0752
107	0.077
107.1	0.0794
107.2	0.0812
107.3	0.0822
107.4	0.0848
107.5	0.0862
107.6	0.0878
107.7	0.0886
107.8	0.0898
107.9	0.0906
108	0.0924
108.1	0.0934
108.2	0.0958
108.3	0.097
108.4	0.0976
108.5	0.099
108.6	0.1012
108.7	0.103
108.8	0.1044
108.9	0.105
109	0.107
109.1	0.1082
109.2	0.109
109.3	0.1104
109.4	0.1118
109.5	0.1128
109.6	0.115
109.7	0.116
109.8	0.1172
109.9	0.119
110	0.1196
110.1	0.1216
110.2	0.1224
110.3	0.1248
110.4	0.1266
110.5	0.1286
110.6	0.1308
110.7	0.1328
110.8	0.1346
110.9	0.1366
111	0.1384
111.1	0.1398
111.2	0.1414
111.3	0.1426
111.4	0.1436
111.5	0.146
111.6	0.1482
111.7	0.1494
111.8	0.1506
111.9	0.1522
112	0.1542
112.1	0.1552
112.2	0.1558
112.3	0.1566
112.4	0.1578
112.5	0.1592
112.6	0.1614
112.7	0.1634
112.8	0.1648
112.9	0.1664
113	0.168
113.1	0.1694
113.2	0.1698
113.3	0.1712
113.4	0.1714
113.5	0.1722
113.6	0.174
113.7	0.1764
113.8	0.177
113.9	0.1776
114	0.1786
114.1	0.1796
114.2	0.1812
114.3	0.1836
114.4	0.1838
114.5	0.1848
114.6	0.187
114.7	0.1886
114.8	0.1898
114.9	0.1918
115	0.1926
115.1	0.1958
115.2	0.197
115.3	0.1978
115.4	0.1988
115.5	0.1994
115.6	0.2006
115.7	0.2022
115.8	0.2028
115.9	0.2038
116	0.2048
116.1	0.2062
116.2	0.2084
116.3	0.2096
116.4	0.211
116.5	0.2124
116.6	0.214
116.7	0.2146
116.8	0.2166
116.9	0.2178
117	0.2184
117.1	0.2194
117.2	0.221
117.3	0.222
117.4	0.2228
117.5	0.2236
117.6	0.2244
117.7	0.2256
117.8	0.2274
117.9	0.2286
118	0.2298
118.1	0.2308
118.2	0.2316
118.3	0.2332
118.4	0.2348
118.5	0.2364
118.6	0.2372
118.7	0.2396
118.8	0.2406
118.9	0.2418
119	0.2426
119.1	0.2436
119.2	0.2448
119.3	0.2454
119.4	0.2462
119.5	0.2476
119.6	0.2476
119.7	0.2482
119.8	0.2498
119.9	0.2514
120	0.2548
120.1	0.2556
120.2	0.2568
120.3	0.257
120.4	0.2582
120.5	0.2592
120.6	0.2604
120.7	0.2606
120.8	0.262
120.9	0.262
121	0.2628
121.1	0.2636
121.2	0.2648
121.3	0.2662
121.4	0.2666
121.5	0.2674
121.6	0.2676
121.7	0.269
121.8	0.2708
121.9	0.272
122	0.2742
122.1	0.2754
122.2	0.2758
122.3	0.2772
122.4	0.2774
122.5	0.278
122.6	0.2798
122.7	0.2814
122.8	0.2826
122.9	0.284
123	0.284
123.1	0.2858
123.2	0.2874
123.3	0.2886
123.4	0.2902
123.5	0.2912
123.6	0.291
123.7	0.292
123.8	0.293
123.9	0.2938
124	0.2944
124.1	0.2962
124.2	0.2974
124.3	0.299
124.4	0.3
124.5	0.3008
124.6	0.3012
124.7	0.3024
124.8	0.3028
124.9	0.3034
125	0.305
125.1	0.3058
125.2	0.3052
125.3	0.3064
125.4	0.3072
125.5	0.308
125.6	0.309
125.7	0.3096
125.8	0.3104
125.9	0.3116
126	0.3132
126.1	0.3142
126.2	0.315
126.3	0.3164
126.4	0.3168
126.5	0.3178
126.6	0.3192
126.7	0.3194
126.8	0.3198
126.9	0.3206
127	0.3212
127.1	0.3224
127.2	0.3236
127.3	0.3236
127.4	0.3246
127.5	0.3254
127.6	0.3254
127.7	0.326
127.8	0.3272
127.9	0.3276
128	0.3276
128.1	0.3274
128.2	0.3282
128.3	0.3298
128.4	0.3302
128.5	0.3314
128.6	0.3324
128.7	0.3328
128.8	0.334
128.9	0.3352
129	0.336
129.1	0.337
129.2	0.3372
129.3	0.338
129.4	0.3386
129.5	0.3392
129.6	0.3398
129.7	0.341
129.8	0.3418
129.9	0.3418
130	0.344
130.1	0.3452
130.2	0.3468
130.3	0.3476
130.4	0.3486
130.5	0.349
130.6	0.351
130.7	0.352
130.8	0.3526
130.9	0.3534
131	0.355
131.1	0.3562
131.2	0.3578
131.3	0.3582
131.4	0.3584
131.5	0.3588
131.6	0.3602
131.7	0.3604
131.8	0.3606
131.9	0.3608
132	0.3618
132.1	0.3624
132.2	0.3628
132.3	0.363
132.4	0.3636
132.5	0.3638
132.6	0.3642
132.7	0.3652
132.8	0.3662
132.9	0.3672
133	0.3678
133.1	0.3682
133.2	0.3698
133.3	0.3702
133.4	0.3706
133.5	0.371
133.6	0.3716
133.7	0.3718
133.8	0.373
133.9	0.3738
134	0.3752
134.1	0.376
134.2	0.3762
134.3	0.3774
134.4	0.3784
134.5	0.3786
134.6	0.3794
134.7	0.3808
134.8	0.3812
134.9	0.3822
135	0.3834
135.1	0.384
135.2	0.3846
135.3	0.3846
135.4	0.385
135.5	0.3854
135.6	0.3858
135.7	0.3868
135.8	0.3878
135.9	0.3888
136	0.3896
136.1	0.3906
136.2	0.3912
136.3	0.391
136.4	0.3916
136.5	0.3918
136.6	0.393
136.7	0.3938
136.8	0.3954
136.9	0.3954
137	0.396
137.1	0.3968
137.2	0.3974
137.3	0.3972
137.4	0.3976
137.5	0.3988
137.6	0.3984
137.7	0.3986
137.8	0.3998
137.9	0.401
138	0.4008
138.1	0.4014
138.2	0.402
138.3	0.4032
138.4	0.4036
138.5	0.4042
138.6	0.404
138.7	0.4046
138.8	0.405
138.9	0.4054
139	0.4066
139.1	0.4078
139.2	0.4086
139.3	0.4096
139.4	0.4104
139.5	0.4112
139.6	0.4118
139.7	0.412
139.8	0.4118
139.9	0.4126
140	0.4128
140.1	0.4138
140.2	0.4146
140.3	0.4146
140.4	0.415
140.5	0.4152
140.6	0.4156
140.7	0.416
140.8	0.4164
140.9	0.4168
141	0.4182
141.1	0.4186
141.2	0.4186
141.3	0.4188
141.4	0.4196
141.5	0.4208
141.6	0.4212
141.7	0.4218
141.8	0.4236
141.9	0.4236
142	0.4234
142.1	0.4244
142.2	0.4254
142.3	0.4264
142.4	0.4272
142.5	0.4278
142.6	0.428
142.7	0.4284
142.8	0.4292
142.9	0.429
143	0.4296
143.1	0.43
143.2	0.4306
143.3	0.431
143.4	0.4314
143.5	0.4316
143.6	0.4334
143.7	0.4338
143.8	0.4342
143.9	0.4352
144	0.4354
144.1	0.4356
144.2	0.4362
144.3	0.4364
144.4	0.4366
144.5	0.438
144.6	0.4388
144.7	0.4392
144.8	0.4394
144.9	0.4396
145	0.4404
145.1	0.4404
145.2	0.4412
145.3	0.4418
145.4	0.442
145.5	0.4422
145.6	0.4428
145.7	0.443
145.8	0.4436
145.9	0.4444
146	0.4452
146.1	0.4456
146.2	0.4462
146.3	0.4466
146.4	0.4472
146.5	0.4478
146.6	0.4486
146.7	0.4498
146.8	0.4502
146.9	0.4506
147	0.4518
147.1	0.4526
147.2	0.4536
147.3	0.4538
147.4	0.455
147.5	0.4548
147.6	0.4546
147.7	0.455
147.8	0.4546
147.9	0.4558
148	0.4566
148.1	0.4572
148.2	0.4578
148.3	0.4588
148.4	0.4596
148.5	0.46
148.6	0.46
148.7	0.4604
148.8	0.4604
148.9	0.4604
149	0.4606
149.1	0.4618
149.2	0.4616
149.3	0.4626
149.4	0.4624
149.5	0.4624
149.6	0.4636
149.7	0.464
149.8	0.4638
149.9	0.464
150	0.4644
150.1	0.465
150.2	0.465
150.3	0.4652
150.4	0.4666
150.5	0.467
150.6	0.4676
150.7	0.4682
150.8	0.4678
150.9	0.468
151	0.4688
151.1	0.4688
151.2	0.4696
151.3	0.47
151.4	0.4708
151.5	0.4698
151.6	0.4704
151.7	0.4704
151.8	0.471
151.9	0.472
152	0.4726
152.1	0.4734
152.2	0.4736
152.3	0.474
152.4	0.474
152.5	0.474
152.6	0.4748
152.7	0.4748
152.8	0.4748
152.9	0.4752
153	0.476
153.1	0.4764
153.2	0.4766
153.3	0.4782
153.4	0.4782
153.5	0.4784
153.6	0.479
153.7	0.4788
153.8	0.4798
153.9	0.479
154	0.4794
154.1	0.4802
154.2	0.4804
154.3	0.4814
154.4	0.482
154.5	0.4826
154.6	0.484
154.7	0.4848
154.8	0.485
154.9	0.4838
155	0.4848
155.1	0.4852
155.2	0.486
155.3	0.4868
155.4	0.4868
155.5	0.4866
155.6	0.4866
155.7	0.4868
155.8	0.487
155.9	0.488
156	0.4884
156.1	0.4892
156.2	0.4888
156.3	0.4888
156.4	0.4898
156.5	0.49
156.6	0.4908
156.7	0.4912
156.8	0.4912
156.9	0.491
157	0.4906
157.1	0.4916
157.2	0.492
157.3	0.4922
157.4	0.4926
157.5	0.4934
157.6	0.494
157.7	0.4942
157.8	0.4942
157.9	0.4964
158	0.4972
158.1	0.4974
158.2	0.497
158.3	0.4958
158.4	0.4964
158.5	0.496
158.6	0.4958
158.7	0.4956
158.8	0.496
158.9	0.4964
159	0.4958
159.1	0.4964
159.2	0.4964
159.3	0.496
159.4	0.4962
159.5	0.4962
159.6	0.4966
159.7	0.4972
159.8	0.4966
159.9	0.497
160	0.4976
160.1	0.4978
160.2	0.4988
160.3	0.4992
160.4	0.5
160.5	0.5006
160.6	0.501
160.7	0.5016
160.8	0.5018
160.9	0.5022
161	0.5026
161.1	0.5032
161.2	0.5038
161.3	0.5048
161.4	0.5056
161.5	0.5056
161.6	0.5058
161.7	0.5064
161.8	0.507
161.9	0.5076
162	0.5072
162.1	0.5074
162.2	0.5084
162.3	0.5082
162.4	0.5086
162.5	0.5094
162.6	0.5096
162.7	0.5108
162.8	0.5116
162.9	0.5122
163	0.5124
163.1	0.513
163.2	0.5134
163.3	0.5136
163.4	0.514
163.5	0.5136
163.6	0.5138
163.7	0.5142
163.8	0.514
163.9	0.514
164	0.5148
164.1	0.515
164.2	0.5168
164.3	0.5168
164.4	0.518
164.5	0.5188
164.6	0.5188
164.7	0.5182
164.8	0.5188
164.9	0.519
165	0.5188
165.1	0.519
165.2	0.5194
165.3	0.5198
165.4	0.5196
165.5	0.5202
165.6	0.521
165.7	0.5216
165.8	0.5216
165.9	0.5228
166	0.5232
166.1	0.522
166.2	0.5228
166.3	0.5248
166.4	0.5248
166.5	0.5246
166.6	0.5248
166.7	0.5254
166.8	0.527
166.9	0.5282
167	0.5284
167.1	0.5282
167.2	0.5282
167.3	0.528
167.4	0.528
167.5	0.5288
167.6	0.5294
167.7	0.5288
167.8	0.5302
167.9	0.5298
168	0.5296
168.1	0.5296
168.2	0.5294
168.3	0.5304
168.4	0.5308
168.5	0.532
168.6	0.5326
168.7	0.5336
168.8	0.5342
168.9	0.5348
169	0.5348
169.1	0.5344
169.2	0.5346
169.3	0.5338
169.4	0.5346
169.5	0.5362
169.6	0.537
169.7	0.5378
169.8	0.5378
169.9	0.5388
170	0.5384
170.1	0.5384
170.2	0.5386
170.3	0.5388
170.4	0.5394
170.5	0.5392
170.6	0.5392
170.7	0.5396
170.8	0.5398
170.9	0.54
171	0.541
171.1	0.5414
171.2	0.542
171.3	0.5422
171.4	0.543
171.5	0.5428
171.6	0.5432
171.7	0.5434
171.8	0.5434
171.9	0.5434
172	0.5432
172.1	0.5436
172.2	0.5438
172.3	0.544
172.4	0.544
172.5	0.5446
172.6	0.5452
172.7	0.5452
172.8	0.546
172.9	0.5458
173	0.5462
173.1	0.5458
173.2	0.5462
173.3	0.5464
173.4	0.5466
173.5	0.546
173.6	0.5464
173.7	0.5472
173.8	0.5474
173.9	0.5478
174	0.548
174.1	0.5488
174.2	0.5492
174.3	0.5498
174.4	0.5494
174.5	0.55
174.6	0.5502
174.7	0.551
174.8	0.5512
174.9	0.5514
175	0.5518
175.1	0.5514
175.2	0.552
175.3	0.5514
175.4	0.551
175.5	0.5518
175.6	0.5518
175.7	0.552
175.8	0.5524
175.9	0.5534
176	0.5534
176.1	0.5544
176.2	0.5544
176.3	0.5546
176.4	0.5544
176.5	0.5544
176.6	0.554
176.7	0.5552
176.8	0.556
176.9	0.5564
177	0.5558
177.1	0.5566
177.2	0.5568
177.3	0.5558
177.4	0.5562
177.5	0.556
177.6	0.5562
177.7	0.5562
177.8	0.5568
177.9	0.5576
178	0.5578
178.1	0.558
178.2	0.5592
178.3	0.5594
178.4	0.5598
178.5	0.5614
178.6	0.5606
178.7	0.5602
178.8	0.5606
178.9	0.5606
179	0.56
179.1	0.5608
179.2	0.5614
179.3	0.5606
179.4	0.5608
179.5	0.561
179.6	0.5614
179.7	0.5618
179.8	0.563
179.9	0.5632
180	0.5622
180.1	0.5624
180.2	0.5624
180.3	0.5628
180.4	0.5628
180.5	0.5634
180.6	0.5634
180.7	0.5634
180.8	0.5624
180.9	0.5632
181	0.5638
181.1	0.5646
181.2	0.564
181.3	0.5636
181.4	0.564
181.5	0.5646
181.6	0.5656
181.7	0.5662
181.8	0.5662
181.9	0.5664
182	0.566
182.1	0.5666
182.2	0.5668
182.3	0.5674
182.4	0.5674
182.5	0.5672
182.6	0.5668
182.7	0.5674
182.8	0.568
182.9	0.5686
183	0.5692
183.1	0.5692
183.2	0.5698
183.3	0.5694
183.4	0.5694
183.5	0.5702
183.6	0.5708
183.7	0.5698
183.8	0.5702
183.9	0.5696
184	0.5702
184.1	0.5706
184.2	0.5708
184.3	0.5708
184.4	0.57
184.5	0.5706
184.6	0.5712
184.7	0.571
184.8	0.5716
184.9	0.5712
185	0.5722
185.1	0.5726
185.2	0.5728
185.3	0.5734
185.4	0.5746
185.5	0.575
185.6	0.5748
185.7	0.5758
185.8	0.5756
185.9	0.5758
186	0.576
186.1	0.5756
186.2	0.5758
186.3	0.5754
186.4	0.5754
186.5	0.5764
186.6	0.576
186.7	0.5758
186.8	0.5754
186.9	0.5756
187	0.5762
187.1	0.5764
187.2	0.5768
187.3	0.5772
187.4	0.5772
187.5	0.5768
187.6	0.578
187.7	0.5782
187.8	0.5784
187.9	0.5792
188	0.5798
188.1	0.58
188.2	0.5802
188.3	0.58
188.4	0.5798
188.5	0.5794
188.6	0.5794
188.7	0.58
188.8	0.5802
188.9	0.5812
189	0.5816
189.1	0.5822
189.2	0.5836
189.3	0.5832
189.4	0.5826
189.5	0.5834
189.6	0.5836
189.7	0.5838
189.8	0.5842
189.9	0.5852
190	0.5846
190.1	0.5852
190.2	0.585
190.3	0.5852
190.4	0.5846
190.5	0.5842
190.6	0.5844
190.7	0.5858
190.8	0.586
190.9	0.5872
191	0.5878
191.1	0.5876
191.2	0.587
191.3	0.5872
191.4	0.5872
191.5	0.587
191.6	0.5878
191.7	0.5876
191.8	0.5888
191.9	0.5892
192	0.5894
192.1	0.5888
192.2	0.5892
192.3	0.589
192.4	0.5882
192.5	0.5882
192.6	0.5876
192.7	0.588
192.8	0.5886
192.9	0.5898
193	0.59
193.1	0.5894
193.2	0.5888
193.3	0.5894
193.4	0.59
193.5	0.5902
193.6	0.591
193.7	0.5916
193.8	0.5922
193.9	0.5924
194	0.593
194.1	0.5934
194.2	0.594
194.3	0.5948
194.4	0.5956
194.5	0.596
194.6	0.5964
194.7	0.5958
194.8	0.596
194.9	0.5956
195	0.5962
195.1	0.5958
195.2	0.5946
195.3	0.5944
195.4	0.595
195.5	0.5946
195.6	0.5954
195.7	0.595
195.8	0.595
195.9	0.595
196	0.595
196.1	0.5944
196.2	0.594
196.3	0.5942
196.4	0.5934
196.5	0.5928
196.6	0.5924
196.7	0.5928
196.8	0.593
196.9	0.5936
197	0.594
197.1	0.594
197.2	0.5936
197.3	0.5936
197.4	0.5942
197.5	0.5942
197.6	0.5946
197.7	0.5956
197.8	0.5952
197.9	0.5952
198	0.5958
198.1	0.5962
198.2	0.5964
198.3	0.5958
198.4	0.5964
198.5	0.596
198.6	0.5964
198.7	0.5964
198.8	0.5958
198.9	0.5964
199	0.5964
199.1	0.5962
199.2	0.5964
199.3	0.5964
199.4	0.5968
199.5	0.5966
199.6	0.5964
199.7	0.5966
199.8	0.597
199.9	0.5968
200	0.5964
[truncated: 14,000 more rows]
