# Supplementary material for: Bayesian inference of kinetic schemes for ion channels by Kalman filtering
Source: eLife journal article supplement (doi:10.7554/elife.62714), 2022-05-04
Supplement: fig4-data6 [file 1_Sim_N_6000_Fluor_MW_1M.xlsx]

## Sheet: Tabelle1
0.1	0
0.2	0
0.3	0
0.4	0
0.5	0
0.6	0
0.7	0
0.8	0
0.9	0
1	0
1.1	0
1.2	0
1.3	0
1.4	0
1.5	0
1.6	0
1.7	0
1.8	0
1.9	0
2	0
2.1	0
2.2	0
2.3	0
2.4	0
2.5	0
2.6	0
2.7	0
2.8	0
2.9	0
3	0
3.1	0
3.2	0
3.3	0
3.4	0
3.5	0
3.6	0
3.7	0
3.8	0
3.9	0
4	0
4.1	0
4.2	0
4.3	0
4.4	0
4.5	0
4.6	0
4.7	0
4.8	0
4.9	0
5	0
5.1	0
5.2	0
5.3	0
5.4	0
5.5	0
5.6	0
5.7	0
5.8	0
5.9	0
6	0
6.1	0
6.2	0
6.3	0
6.4	0
6.5	0
6.6	0
6.7	0
6.8	0
6.9	0
7	0
7.1	0
7.2	0
7.3	0
7.4	0
7.5	0
7.6	0
7.7	0
7.8	0
7.9	0
8	0
8.1	0
8.2	0
8.3	0
8.4	0
8.5	0
8.6	0
8.7	0
8.8	0
8.9	0
9	0
9.1	0
9.2	0
9.3	0
9.4	0
9.5	0
9.6	0
9.7	0
9.8	0
9.9	0
10	0
10.1	0
10.2	0
10.3	0
10.4	0
10.5	0
10.6	0
10.7	0
10.8	0
10.9	0
11	0
11.1	0
11.2	0
11.3	0
11.4	0
11.5	0
11.6	0
11.7	0
11.8	0
11.9	0
12	0
12.1	0
12.2	0
12.3	0
12.4	0
12.5	0
12.6	0
12.7	0
12.8	0
12.9	0
13	0
13.1	0
13.2	0
13.3	0
13.4	0
13.5	0
13.6	0
13.7	0
13.8	0
13.9	0
14	0
14.1	0
14.2	0
14.3	0
14.4	0
14.5	0
14.6	0
14.7	0
14.8	0
14.9	0
15	0
15.1	0
15.2	0
15.3	0
15.4	0
15.5	0
15.6	0
15.7	0
15.8	0
15.9	0
16	0
16.1	0
16.2	0
16.3	0
16.4	0
16.5	0
16.6	0
16.7	0
16.8	0
16.9	0
17	0
17.1	0
17.2	0
17.3	0
17.4	0
17.5	0
17.6	0
17.7	0
17.8	0
17.9	0
18	0
18.1	0
18.2	0
18.3	0
18.4	0
18.5	0
18.6	0
18.7	0
18.8	0
18.9	0
19	0
19.1	0
19.2	0
19.3	0
19.4	0
19.5	0
19.6	0
19.7	0
19.8	0
19.9	0
20	0
20.1	0
20.2	0
20.3	0
20.4	0
20.5	0
20.6	0
20.7	0
20.8	0
20.9	0
21	0
21.1	0
21.2	0
21.3	0
21.4	0
21.5	0
21.6	0
21.7	0
21.8	0
21.9	0
22	0
22.1	0
22.2	0
22.3	0
22.4	0
22.5	0
22.6	0
22.7	0
22.8	0
22.9	0
23	0
23.1	0
23.2	0
23.3	0
23.4	0
23.5	0
23.6	0
23.7	0
23.8	0
23.9	0
24	0
24.1	0
24.2	0
24.3	0
24.4	0
24.5	0
24.6	0
24.7	0
24.8	0
24.9	0
25	0
25.1	0
25.2	0
25.3	0
25.4	0
25.5	0
25.6	0
25.7	0
25.8	0
25.9	0
26	0
26.1	0
26.2	0
26.3	0
26.4	0
26.5	0
26.6	0
26.7	0
26.8	0
26.9	0
27	0
27.1	0
27.2	0
27.3	0
27.4	0
27.5	0
27.6	0
27.7	0
27.8	0
27.9	0
28	0
28.1	0
28.2	0
28.3	0
28.4	0
28.5	0
28.6	0
28.7	0
28.8	0
28.9	0
29	0
29.1	0
29.2	0
29.3	0
29.4	0
29.5	0
29.6	0
29.7	0
29.8	0
29.9	0
30	0
30.1	0
30.2	0
30.3	0
30.4	0
30.5	0
30.6	0
30.7	0
30.8	0
30.9	0
31	0
31.1	0
31.2	0
31.3	0
31.4	0
31.5	0
31.6	0
31.7	0
31.8	0
31.9	0
32	0
32.1	0
32.2	0
32.3	0
32.4	0
32.5	0
32.6	0
32.7	0
32.8	0
32.9	0
33	0
33.1	0
33.2	0
33.3	0
33.4	0
33.5	0
33.6	0
33.7	0
33.8	0
33.9	0
34	0
34.1	0
34.2	0
34.3	0
34.4	0
34.5	0
34.6	0
34.7	0
34.8	0
34.9	0
35	0
35.1	0
35.2	0
35.3	0
35.4	0
35.5	0
35.6	0
35.7	0
35.8	0
35.9	0
36	0
36.1	0
36.2	0
36.3	0
36.4	0
36.5	0
36.6	0
36.7	0
36.8	0
36.9	0
37	0
37.1	0
37.2	0
37.3	0
37.4	0
37.5	0
37.6	0
37.7	0
37.8	0
37.9	0
38	0
38.1	0
38.2	0
38.3	0
38.4	0
38.5	0
38.6	0
38.7	0
38.8	0
38.9	0
39	0
39.1	0
39.2	0
39.3	0
39.4	0
39.5	0
39.6	0
39.7	0
39.8	0
39.9	0
40	0
40.1	0
40.2	0
40.3	0
40.4	0
40.5	0
40.6	0
40.7	0
40.8	0
40.9	0
41	0
41.1	0
41.2	0
41.3	0
41.4	0
41.5	0
41.6	0
41.7	0
41.8	0
41.9	0
42	0
42.1	0
42.2	0
42.3	0
42.4	0
42.5	0
42.6	0
42.7	0
42.8	0
42.9	0
43	0
43.1	0
43.2	0
43.3	0
43.4	0
43.5	0
43.6	0
43.7	0
43.8	0
43.9	0
44	0
44.1	0
44.2	0
44.3	0
44.4	0
44.5	0
44.6	0
44.7	0
44.8	0
44.9	0
45	0
45.1	0
45.2	0
45.3	0
45.4	0
45.5	0
45.6	0
45.7	0
45.8	0
45.9	0
46	0
46.1	0
46.2	0
46.3	0
46.4	0
46.5	0
46.6	0
46.7	0
46.8	0
46.9	0
47	0
47.1	0
47.2	0
47.3	0
47.4	0
47.5	0
47.6	0
47.7	0
47.8	0
47.9	0
48	0
48.1	0
48.2	0
48.3	0
48.4	0
48.5	0
48.6	0
48.7	0
48.8	0
48.9	0
49	0
49.1	0
49.2	0
49.3	0
49.4	0
49.5	0
49.6	0
49.7	0
49.8	0
49.9	0
50	0
50.1	0
50.2	0
50.3	0
50.4	0
50.5	0
50.6	0
50.7	0
50.8	0
50.9	0
51	0
51.1	0
51.2	0
51.3	0
51.4	0
51.5	0
51.6	0
51.7	0
51.8	0
51.9	0
52	0
52.1	0
52.2	0
52.3	0
52.4	0
52.5	0
52.6	0
52.7	0
52.8	0
52.9	0
53	0
53.1	0
53.2	0
53.3	0
53.4	0
53.5	0
53.6	0
53.7	0
53.8	0
53.9	0
54	0
54.1	0
54.2	0
54.3	0
54.4	0
54.5	0
54.6	0
54.7	0
54.8	0
54.9	0
55	0
55.1	0
55.2	0
55.3	0
55.4	0
55.5	0
55.6	0
55.7	0
55.8	0
55.9	0
56	0
56.1	0
56.2	0
56.3	0
56.4	0
56.5	0
56.6	0
56.7	0
56.8	0
56.9	0
57	0
57.1	0
57.2	0
57.3	0
57.4	0
57.5	0
57.6	0
57.7	0
57.8	0
57.9	0
58	0
58.1	0
58.2	0
58.3	0
58.4	0
58.5	0
58.6	0
58.7	0
58.8	0
58.9	0
59	0
59.1	0
59.2	0
59.3	0
59.4	0
59.5	0
59.6	0
59.7	0
59.8	0
59.9	0
60	0
60.1	0
60.2	0
60.3	0
60.4	0
60.5	0
60.6	0
60.7	0
60.8	0
60.9	0
61	0
61.1	0
61.2	0
61.3	0
61.4	0
61.5	0
61.6	0
61.7	0
61.8	0
61.9	0
62	0
62.1	0
62.2	0
62.3	0
62.4	0
62.5	0
62.6	0
62.7	0
62.8	0
62.9	0
63	0
63.1	0
63.2	0
63.3	0
63.4	0
63.5	0
63.6	0
63.7	0
63.8	0
63.9	0
64	0
64.1	0
64.2	0
64.3	0
64.4	0
64.5	0
64.6	0
64.7	0
64.8	0
64.9	0
65	0
65.1	0
65.2	0
65.3	0
65.4	0
65.5	0
65.6	0
65.7	0
65.8	0
65.9	0
66	0
66.1	0
66.2	0
66.3	0
66.4	0
66.5	0
66.6	0
66.7	0
66.8	0
66.9	0
67	0
67.1	0
67.2	0
67.3	0
67.4	0
67.5	0
67.6	0
67.7	0
67.8	0
67.9	0
68	0
68.1	0
68.2	0
68.3	0
68.4	0
68.5	0
68.6	0
68.7	0
68.8	0
68.9	0
69	0
69.1	0
69.2	0
69.3	0
69.4	0
69.5	0
69.6	0
69.7	0
69.8	0
69.9	0
70	0
70.1	0
70.2	0
70.3	0
70.4	0
70.5	0
70.6	0
70.7	0
70.8	0
70.9	0
71	0
71.1	0
71.2	0
71.3	0
71.4	0
71.5	0
71.6	0
71.7	0
71.8	0
71.9	0
72	0
72.1	0
72.2	0
72.3	0
72.4	0
72.5	0
72.6	0
72.7	0
72.8	0
72.9	0
73	0
73.1	0
73.2	0
73.3	0
73.4	0
73.5	0
73.6	0
73.7	0
73.8	0
73.9	0
74	0
74.1	0
74.2	0
74.3	0
74.4	0
74.5	0
74.6	0
74.7	0
74.8	0
74.9	0
75	0
75.1	0
75.2	0
75.3	0
75.4	0
75.5	0
75.6	0
75.7	0
75.8	0
75.9	0
76	0
76.1	0
76.2	0
76.3	0
76.4	0
76.5	0
76.6	0
76.7	0
76.8	0
76.9	0
77	0
77.1	0
77.2	0
77.3	0
77.4	0
77.5	0
77.6	0
77.7	0
77.8	0
77.9	0
78	0
78.1	0
78.2	0
78.3	0
78.4	0
78.5	0
78.6	0
78.7	0
78.8	0
78.9	0
79	0
79.1	0
79.2	0
79.3	0
79.4	0
79.5	0
79.6	0
79.7	0
79.8	0
79.9	0
80	0
80.1	0
80.2	0
80.3	0
80.4	0
80.5	0
80.6	0
80.7	0
80.8	0
80.9	0
81	0
81.1	0
81.2	0
81.3	0
81.4	0
81.5	0
81.6	0
81.7	0
81.8	0
81.9	0
82	0
82.1	0
82.2	0
82.3	0
82.4	0
82.5	0
82.6	0
82.7	0
82.8	0
82.9	0
83	0
83.1	0
83.2	0
83.3	0
83.4	0
83.5	0
83.6	0
83.7	0
83.8	0
83.9	0
84	0
84.1	0
84.2	0
84.3	0
84.4	0
84.5	0
84.6	0
84.7	0
84.8	0
84.9	0
85	0
85.1	0
85.2	0
85.3	0
85.4	0
85.5	0
85.6	0
85.7	0
85.8	0
85.9	0
86	0
86.1	0
86.2	0
86.3	0
86.4	0
86.5	0
86.6	0
86.7	0
86.8	0
86.9	0
87	0
87.1	0
87.2	0
87.3	0
87.4	0
87.5	0
87.6	0
87.7	0
87.8	0
87.9	0
88	0
88.1	0
88.2	0
88.3	0
88.4	0
88.5	0
88.6	0
88.7	0
88.8	0
88.9	0
89	0
89.1	0
89.2	0
89.3	0
89.4	0
89.5	0
89.6	0
89.7	0
89.8	0
89.9	0
90	0
90.1	0
90.2	0
90.3	0
90.4	0
90.5	0
90.6	0
90.7	0
90.8	0
90.9	0
91	0
91.1	0
91.2	0
91.3	0
91.4	0
91.5	0
91.6	0
91.7	0
91.8	0
91.9	0
92	0
92.1	0
92.2	0
92.3	0
92.4	0
92.5	0
92.6	0
92.7	0
92.8	0
92.9	0
93	0
93.1	0
93.2	0
93.3	0
93.4	0
93.5	0
93.6	0
93.7	0
93.8	0
93.9	0
94	0
94.1	0
94.2	0
94.3	0
94.4	0
94.5	0
94.6	0
94.7	0
94.8	0
94.9	0
95	0
95.1	0
95.2	0
95.3	0
95.4	0
95.5	0
95.6	0
95.7	0
95.8	0
95.9	0
96	0
96.1	0
96.2	0
96.3	0
96.4	0
96.5	0
96.6	0
96.7	0
96.8	0
96.9	0
97	0
97.1	0
97.2	0
97.3	0
97.4	0
97.5	0
97.6	0
97.7	0
97.8	0
97.9	0
98	0
98.1	0
98.2	0
98.3	0
98.4	0
98.5	0
98.6	0
98.7	0
98.8	0
98.9	0
99	0
99.1	0
99.2	0
99.3	0
99.4	0
99.5	0
99.6	0
99.7	0
99.8	0
99.9	0
100	0
100.1	0.0589167
100.2	0.112417
100.3	0.159083
100.4	0.198167
100.5	0.233167
100.6	0.270167
100.7	0.299667
100.8	0.3305
100.9	0.357667
101	0.380917
101.1	0.40475
101.2	0.425333
101.3	0.447083
101.4	0.465083
101.5	0.478833
101.6	0.490333
101.7	0.502083
101.8	0.514917
101.9	0.523417
102	0.533583
102.1	0.545
102.2	0.5535
102.3	0.559
102.4	0.56775
102.5	0.573583
102.6	0.579
102.7	0.58525
102.8	0.5875
102.9	0.59425
103	0.599917
103.1	0.60425
103.2	0.608167
103.3	0.610417
103.4	0.614167
103.5	0.617667
103.6	0.620917
103.7	0.626833
103.8	0.62975
103.9	0.632167
104	0.634
104.1	0.638167
104.2	0.64075
104.3	0.643667
104.4	0.64475
104.5	0.64825
104.6	0.651333
104.7	0.651667
104.8	0.6515
104.9	0.652333
105	0.653333
105.1	0.654917
105.2	0.658083
105.3	0.65825
105.4	0.659417
105.5	0.66025
105.6	0.663833
105.7	0.663417
105.8	0.664
105.9	0.664583
106	0.66475
106.1	0.665917
106.2	0.666083
106.3	0.66725
106.4	0.668417
106.5	0.66825
106.6	0.670917
106.7	0.6705
106.8	0.670417
106.9	0.671833
107	0.671833
107.1	0.672167
107.2	0.67225
107.3	0.673667
107.4	0.67425
107.5	0.674
107.6	0.673333
107.7	0.673333
107.8	0.673167
107.9	0.672583
108	0.6745
108.1	0.676833
108.2	0.675833
108.3	0.676167
108.4	0.676667
108.5	0.678667
108.6	0.679333
108.7	0.678417
108.8	0.677
108.9	0.678667
109	0.680917
109.1	0.681
109.2	0.68325
109.3	0.68325
109.4	0.684583
109.5	0.684
109.6	0.683917
109.7	0.684917
109.8	0.686083
109.9	0.68675
110	0.686417
110.1	0.687333
110.2	0.687583
110.3	0.687167
110.4	0.6865
110.5	0.68825
110.6	0.688417
110.7	0.6885
110.8	0.6895
110.9	0.69075
111	0.68875
111.1	0.6915
111.2	0.692
111.3	0.693333
111.4	0.693833
111.5	0.69525
111.6	0.694833
111.7	0.695583
111.8	0.697417
111.9	0.698667
112	0.699083
112.1	0.698583
112.2	0.697917
112.3	0.698583
112.4	0.6995
112.5	0.699667
112.6	0.698583
112.7	0.698833
112.8	0.696917
112.9	0.697833
113	0.69825
113.1	0.6995
113.2	0.701667
113.3	0.703917
113.4	0.70275
113.5	0.70225
113.6	0.701333
113.7	0.701833
113.8	0.699333
113.9	0.7005
114	0.703083
114.1	0.705083
114.2	0.706667
114.3	0.7075
114.4	0.708583
114.5	0.707167
114.6	0.70675
114.7	0.70725
114.8	0.708083
114.9	0.705917
115	0.7075
115.1	0.709167
115.2	0.71225
115.3	0.713083
115.4	0.716083
115.5	0.716
115.6	0.716583
115.7	0.716333
115.8	0.71575
115.9	0.718
116	0.717583
116.1	0.717417
116.2	0.716833
116.3	0.718
116.4	0.7185
116.5	0.718
116.6	0.71975
116.7	0.719917
116.8	0.721583
116.9	0.721667
117	0.721917
117.1	0.722833
117.2	0.723333
117.3	0.72425
117.4	0.7245
117.5	0.723
117.6	0.7255
117.7	0.725333
117.8	0.72575
117.9	0.725333
118	0.724417
118.1	0.724417
118.2	0.72375
118.3	0.72525
118.4	0.72425
118.5	0.726917
118.6	0.72675
118.7	0.727167
118.8	0.727167
118.9	0.726083
119	0.728167
119.1	0.726167
119.2	0.726167
119.3	0.725417
119.4	0.7275
119.5	0.7285
119.6	0.730333
119.7	0.7305
119.8	0.73025
119.9	0.730083
120	0.730583
120.1	0.73125
120.2	0.7315
120.3	0.731917
120.4	0.73
120.5	0.731333
120.6	0.731083
120.7	0.733667
120.8	0.732167
120.9	0.734583
121	0.736
121.1	0.735833
121.2	0.738833
121.3	0.7375
121.4	0.735333
121.5	0.736917
121.6	0.735583
121.7	0.73775
121.8	0.738667
121.9	0.739083
122	0.737667
122.1	0.7385
122.2	0.738083
122.3	0.738167
122.4	0.738583
122.5	0.739917
122.6	0.738917
122.7	0.738167
122.8	0.7385
122.9	0.738
123	0.740667
123.1	0.741167
123.2	0.740083
123.3	0.739917
123.4	0.741
123.5	0.742333
123.6	0.74275
123.7	0.742583
123.8	0.742667
123.9	0.741667
124	0.741833
124.1	0.74425
124.2	0.745583
124.3	0.746417
124.4	0.747
124.5	0.750083
124.6	0.750417
124.7	0.751
124.8	0.751083
124.9	0.752
125	0.753167
125.1	0.754333
125.2	0.755167
125.3	0.755667
125.4	0.755417
125.5	0.754333
125.6	0.7545
125.7	0.752583
125.8	0.752
125.9	0.752417
126	0.752833
126.1	0.751833
126.2	0.753667
126.3	0.754583
126.4	0.754917
126.5	0.756
126.6	0.75675
126.7	0.757
126.8	0.7575
126.9	0.756667
127	0.757083
127.1	0.757833
127.2	0.756917
127.3	0.757917
127.4	0.759583
127.5	0.7585
127.6	0.758
127.7	0.759417
127.8	0.76175
127.9	0.763
128	0.762667
128.1	0.760333
128.2	0.759333
128.3	0.759417
128.4	0.758417
128.5	0.7605
128.6	0.761667
128.7	0.7605
128.8	0.761
128.9	0.761417
129	0.761083
129.1	0.763583
129.2	0.76325
129.3	0.763833
129.4	0.764667
129.5	0.765333
129.6	0.765833
129.7	0.7645
129.8	0.76375
129.9	0.76425
130	0.766167
130.1	0.7655
130.2	0.7655
130.3	0.7655
130.4	0.765
130.5	0.766
130.6	0.767167
130.7	0.766
130.8	0.765417
130.9	0.76525
131	0.765667
131.1	0.7655
131.2	0.765583
131.3	0.766083
131.4	0.766
131.5	0.766167
131.6	0.765583
131.7	0.763917
131.8	0.765167
131.9	0.763667
132	0.764583
132.1	0.766333
132.2	0.767167
132.3	0.768667
132.4	0.768167
132.5	0.768083
132.6	0.767167
132.7	0.768417
132.8	0.769667
132.9	0.7695
133	0.771
133.1	0.772083
133.2	0.772083
133.3	0.771417
133.4	0.77025
133.5	0.77125
133.6	0.771083
133.7	0.773167
133.8	0.77375
133.9	0.773083
134	0.77225
134.1	0.772833
134.2	0.773083
134.3	0.774917
134.4	0.7735
134.5	0.775333
134.6	0.776167
134.7	0.776
134.8	0.77425
134.9	0.776333
135	0.775583
135.1	0.77875
135.2	0.7805
135.3	0.781917
135.4	0.782
135.5	0.782583
135.6	0.783083
135.7	0.783917
135.8	0.782833
135.9	0.783
136	0.784167
136.1	0.783083
136.2	0.782833
136.3	0.783333
136.4	0.78225
136.5	0.780917
136.6	0.780167
136.7	0.780583
136.8	0.782833
136.9	0.783417
137	0.785417
137.1	0.7865
137.2	0.786333
137.3	0.78525
137.4	0.787083
137.5	0.786333
137.6	0.785167
137.7	0.785917
137.8	0.784667
137.9	0.78575
138	0.78575
138.1	0.78725
138.2	0.786667
138.3	0.786833
138.4	0.787583
138.5	0.788417
138.6	0.78775
138.7	0.7865
138.8	0.785917
138.9	0.78575
139	0.786583
139.1	0.7875
139.2	0.7885
139.3	0.788167
139.4	0.788583
139.5	0.787333
139.6	0.787583
139.7	0.7875
139.8	0.787833
139.9	0.789667
140	0.788417
140.1	0.787417
140.2	0.789583
140.3	0.78925
140.4	0.790083
140.5	0.790417
140.6	0.790917
140.7	0.789667
140.8	0.790833
140.9	0.793167
141	0.794083
141.1	0.794
141.2	0.793833
141.3	0.7945
141.4	0.79425
141.5	0.795417
141.6	0.796333
141.7	0.796583
141.8	0.796667
141.9	0.797167
142	0.79675
142.1	0.79675
142.2	0.798083
142.3	0.796583
142.4	0.796417
142.5	0.79625
142.6	0.795417
142.7	0.793417
142.8	0.793083
142.9	0.792583
143	0.79425
143.1	0.794167
143.2	0.795167
143.3	0.795417
143.4	0.795417
143.5	0.797
143.6	0.796833
143.7	0.79625
143.8	0.796917
143.9	0.797917
144	0.79775
144.1	0.796833
144.2	0.798
144.3	0.799833
144.4	0.799167
144.5	0.800583
144.6	0.801333
144.7	0.800583
144.8	0.8005
144.9	0.801333
145	0.799917
145.1	0.8
145.2	0.801167
145.3	0.802667
145.4	0.8015
145.5	0.801
145.6	0.801667
145.7	0.803167
145.8	0.804333
145.9	0.804
146	0.80475
146.1	0.803167
146.2	0.804167
146.3	0.8035
146.4	0.802917
146.5	0.803
146.6	0.802917
146.7	0.803417
146.8	0.805083
146.9	0.805583
147	0.805333
147.1	0.80475
147.2	0.806167
147.3	0.80625
147.4	0.807583
147.5	0.80725
147.6	0.80625
147.7	0.807667
147.8	0.809083
147.9	0.808583
148	0.809
148.1	0.8085
148.2	0.80875
148.3	0.808917
148.4	0.809667
148.5	0.810333
148.6	0.81025
148.7	0.8125
148.8	0.813333
148.9	0.811917
149	0.81275
149.1	0.8135
149.2	0.813583
149.3	0.814917
149.4	0.813417
149.5	0.81325
149.6	0.811833
149.7	0.810833
149.8	0.812583
149.9	0.8115
150	0.812083
150.1	0.814083
150.2	0.814583
150.3	0.8155
150.4	0.812417
150.5	0.813333
150.6	0.813333
150.7	0.812833
150.8	0.813417
150.9	0.813083
151	0.812833
151.1	0.813417
151.2	0.813333
151.3	0.815083
151.4	0.813917
151.5	0.814583
151.6	0.815833
151.7	0.815667
151.8	0.817833
151.9	0.818333
152	0.818
152.1	0.819667
152.2	0.8195
152.3	0.818583
152.4	0.818917
152.5	0.817833
152.6	0.817417
152.7	0.817083
152.8	0.816917
152.9	0.816667
153	0.815167
153.1	0.81575
153.2	0.815667
153.3	0.816667
153.4	0.815917
153.5	0.81575
153.6	0.817417
153.7	0.817333
153.8	0.817583
153.9	0.818083
154	0.81925
154.1	0.820833
154.2	0.820333
154.3	0.818917
154.4	0.819917
154.5	0.819167
154.6	0.820167
154.7	0.82075
154.8	0.8215
154.9	0.824167
155	0.824
155.1	0.8245
155.2	0.824417
155.3	0.825333
155.4	0.823167
155.5	0.82275
155.6	0.82275
155.7	0.823333
155.8	0.82375
155.9	0.823833
156	0.823333
156.1	0.823417
156.2	0.82275
156.3	0.822333
156.4	0.823167
156.5	0.825667
156.6	0.826167
156.7	0.826083
156.8	0.826833
156.9	0.8275
157	0.826917
157.1	0.828167
157.2	0.826833
157.3	0.8255
157.4	0.825583
157.5	0.825833
157.6	0.825667
157.7	0.825667
157.8	0.826083
157.9	0.826833
158	0.8275
158.1	0.826583
158.2	0.826
158.3	0.826417
158.4	0.826333
158.5	0.82575
158.6	0.826667
158.7	0.827417
158.8	0.828083
158.9	0.827917
159	0.829917
159.1	0.83
159.2	0.830333
159.3	0.828667
159.4	0.82875
159.5	0.826
159.6	0.826667
159.7	0.827
159.8	0.828083
159.9	0.826
160	0.82525
160.1	0.825
160.2	0.825583
160.3	0.825167
160.4	0.826167
160.5	0.824917
160.6	0.825083
160.7	0.824583
160.8	0.827167
160.9	0.829083
161	0.827083
161.1	0.82825
161.2	0.828667
161.3	0.829167
161.4	0.828667
161.5	0.829167
161.6	0.829583
161.7	0.82875
161.8	0.82975
161.9	0.8305
162	0.831833
162.1	0.82975
162.2	0.830833
162.3	0.830917
162.4	0.831417
162.5	0.8305
162.6	0.83
162.7	0.830917
162.8	0.831667
162.9	0.83225
163	0.832917
163.1	0.831917
163.2	0.832083
163.3	0.831917
163.4	0.83225
163.5	0.832417
163.6	0.83425
163.7	0.835
163.8	0.833417
163.9	0.83275
164	0.83225
164.1	0.832417
164.2	0.834083
164.3	0.834
164.4	0.8345
164.5	0.83375
164.6	0.834167
164.7	0.832417
164.8	0.831333
164.9	0.831833
165	0.8325
165.1	0.832583
165.2	0.834083
165.3	0.833083
165.4	0.829833
165.5	0.829917
165.6	0.830333
165.7	0.831
165.8	0.832417
165.9	0.832583
166	0.83325
166.1	0.833083
166.2	0.832333
166.3	0.832083
166.4	0.833583
166.5	0.834333
166.6	0.836167
166.7	0.8345
166.8	0.836
166.9	0.83725
167	0.83675
167.1	0.836417
167.2	0.836083
167.3	0.835833
167.4	0.8365
167.5	0.837917
167.6	0.8375
167.7	0.83775
167.8	0.836667
167.9	0.837083
168	0.8365
168.1	0.837
168.2	0.837333
168.3	0.836667
168.4	0.835417
168.5	0.837333
168.6	0.837083
168.7	0.838333
168.8	0.84025
168.9	0.842167
169	0.842083
169.1	0.841917
169.2	0.842
169.3	0.84275
169.4	0.843083
169.5	0.842
169.6	0.840667
169.7	0.840333
169.8	0.841333
169.9	0.8395
170	0.83925
170.1	0.839667
170.2	0.837833
170.3	0.838333
170.4	0.838583
170.5	0.837667
170.6	0.8385
170.7	0.836833
170.8	0.83875
170.9	0.840167
171	0.839333
171.1	0.837833
171.2	0.837917
171.3	0.83925
171.4	0.8395
171.5	0.838167
171.6	0.83825
171.7	0.838167
171.8	0.838583
171.9	0.838833
172	0.839167
172.1	0.838917
172.2	0.839333
172.3	0.839333
172.4	0.839583
172.5	0.8395
172.6	0.840333
172.7	0.840333
172.8	0.83925
172.9	0.839583
173	0.839
173.1	0.83975
173.2	0.840667
173.3	0.842333
173.4	0.841667
173.5	0.841833
173.6	0.842
173.7	0.843083
173.8	0.841667
173.9	0.839917
174	0.839917
174.1	0.8405
174.2	0.84025
174.3	0.839667
174.4	0.840083
174.5	0.841417
174.6	0.841083
174.7	0.840333
174.8	0.842583
174.9	0.843417
175	0.842583
175.1	0.8425
175.2	0.842167
175.3	0.841833
175.4	0.8425
175.5	0.84325
175.6	0.843833
175.7	0.8445
175.8	0.844583
175.9	0.843083
176	0.842333
176.1	0.842417
176.2	0.842417
176.3	0.842167
176.4	0.843833
176.5	0.844417
176.6	0.8445
176.7	0.843667
176.8	0.84325
176.9	0.84375
177	0.843583
177.1	0.843333
177.2	0.840083
177.3	0.840333
177.4	0.841583
177.5	0.841083
177.6	0.843
177.7	0.842917
177.8	0.842833
177.9	0.843083
178	0.844583
178.1	0.846083
178.2	0.845417
178.3	0.846417
178.4	0.846917
178.5	0.847167
178.6	0.846833
178.7	0.849
178.8	0.849083
178.9	0.847667
179	0.848667
179.1	0.850333
179.2	0.849833
179.3	0.850917
179.4	0.850583
179.5	0.851083
179.6	0.850583
179.7	0.849917
179.8	0.85025
179.9	0.85075
180	0.848333
180.1	0.84875
180.2	0.847917
180.3	0.848
180.4	0.846583
180.5	0.845667
180.6	0.846917
180.7	0.84875
180.8	0.848667
180.9	0.850083
181	0.849583
181.1	0.84925
181.2	0.849583
181.3	0.850083
181.4	0.850583
181.5	0.8505
181.6	0.847667
181.7	0.849333
181.8	0.849333
181.9	0.84775
182	0.847667
182.1	0.84775
182.2	0.847333
182.3	0.847333
182.4	0.84775
182.5	0.847833
182.6	0.8475
182.7	0.847833
182.8	0.846917
182.9	0.847
183	0.848
183.1	0.847917
183.2	0.847583
183.3	0.847
183.4	0.8475
183.5	0.848083
183.6	0.847833
183.7	0.847833
183.8	0.847917
183.9	0.848333
184	0.848667
184.1	0.84975
184.2	0.848583
184.3	0.849417
184.4	0.85075
184.5	0.850417
184.6	0.848917
184.7	0.848167
184.8	0.848583
184.9	0.848167
185	0.8485
185.1	0.848417
185.2	0.849167
185.3	0.849917
185.4	0.84825
185.5	0.846833
185.6	0.847417
185.7	0.848167
185.8	0.849417
185.9	0.849583
186	0.849417
186.1	0.849333
186.2	0.849333
186.3	0.850333
186.4	0.850167
186.5	0.84925
186.6	0.84975
186.7	0.850917
186.8	0.850417
186.9	0.85
187	0.849833
187.1	0.8485
187.2	0.84925
187.3	0.850333
187.4	0.849833
187.5	0.849917
187.6	0.850667
187.7	0.851167
187.8	0.84975
187.9	0.850083
188	0.850667
188.1	0.850333
188.2	0.849083
188.3	0.849667
188.4	0.84875
188.5	0.850583
188.6	0.851833
188.7	0.851417
188.8	0.851333
188.9	0.851
189	0.852333
189.1	0.85225
189.2	0.85325
189.3	0.852917
189.4	0.851917
189.5	0.853917
189.6	0.854
189.7	0.853083
189.8	0.853
189.9	0.852167
190	0.8515
190.1	0.849583
190.2	0.851417
190.3	0.85225
190.4	0.851917
190.5	0.853417
190.6	0.85425
190.7	0.852083
190.8	0.851167
190.9	0.852667
191	0.85175
191.1	0.850167
191.2	0.8505
191.3	0.8505
191.4	0.851917
191.5	0.853333
191.6	0.85425
191.7	0.853833
191.8	0.852167
191.9	0.8535
192	0.855083
192.1	0.854917
192.2	0.854333
192.3	0.854083
192.4	0.85525
192.5	0.855167
192.6	0.853833
192.7	0.853333
192.8	0.8525
192.9	0.852833
193	0.853583
193.1	0.853833
193.2	0.854583
193.3	0.854
193.4	0.853917
193.5	0.855083
193.6	0.855417
193.7	0.855583
193.8	0.85475
193.9	0.85475
194	0.855333
194.1	0.855917
194.2	0.855417
194.3	0.856083
194.4	0.856417
194.5	0.856
194.6	0.85575
194.7	0.855583
194.8	0.8565
194.9	0.855833
195	0.854667
195.1	0.855833
195.2	0.85575
195.3	0.856417
195.4	0.854917
195.5	0.855333
195.6	0.8565
195.7	0.8555
195.8	0.856
195.9	0.855583
196	0.856167
196.1	0.857
196.2	0.8575
196.3	0.856167
196.4	0.855667
196.5	0.855
196.6	0.854333
196.7	0.853167
196.8	0.854083
196.9	0.854583
197	0.855
197.1	0.85625
197.2	0.855083
197.3	0.855
197.4	0.855083
197.5	0.85525
197.6	0.85525
197.7	0.854917
197.8	0.85575
197.9	0.857583
198	0.857167
198.1	0.855583
198.2	0.856167
198.3	0.856583
198.4	0.856167
198.5	0.855167
198.6	0.856167
198.7	0.854917
198.8	0.855167
198.9	0.856417
199	0.857
199.1	0.85775
199.2	0.8575
199.3	0.8565
199.4	0.854833
199.5	0.856333
199.6	0.85725
199.7	0.856417
199.8	0.855917
199.9	0.856333
200	0.856083
[truncated: 14,000 more rows]
