# Supplementary material for: Bayesian inference of kinetic schemes for ion channels by Kalman filtering
Source: eLife journal article supplement (doi:10.7554/elife.62714), 2022-05-04
Supplement: fig4-data6 [file 1_Sim_N_6000_Strom_MW_1M.xlsx]

## Sheet: Tabelle1
0.1	0
0.2	0
0.3	0
0.4	0
0.5	0
0.6	0
0.7	0
0.8	0
0.9	0
1	0
1.1	0
1.2	0
1.3	0
1.4	0
1.5	0
1.6	0
1.7	0
1.8	0
1.9	0
2	0
2.1	0
2.2	0
2.3	0
2.4	0
2.5	0
2.6	0
2.7	0
2.8	0
2.9	0
3	0
3.1	0
3.2	0
3.3	0
3.4	0
3.5	0
3.6	0
3.7	0
3.8	0
3.9	0
4	0
4.1	0
4.2	0
4.3	0
4.4	0
4.5	0
4.6	0
4.7	0
4.8	0
4.9	0
5	0
5.1	0
5.2	0
5.3	0
5.4	0
5.5	0
5.6	0
5.7	0
5.8	0
5.9	0
6	0
6.1	0
6.2	0
6.3	0
6.4	0
6.5	0
6.6	0
6.7	0
6.8	0
6.9	0
7	0
7.1	0
7.2	0
7.3	0
7.4	0
7.5	0
7.6	0
7.7	0
7.8	0
7.9	0
8	0
8.1	0
8.2	0
8.3	0
8.4	0
8.5	0
8.6	0
8.7	0
8.8	0
8.9	0
9	0
9.1	0
9.2	0
9.3	0
9.4	0
9.5	0
9.6	0
9.7	0
9.8	0
9.9	0
10	0
10.1	0
10.2	0
10.3	0
10.4	0
10.5	0
10.6	0
10.7	0
10.8	0
10.9	0
11	0
11.1	0
11.2	0
11.3	0
11.4	0
11.5	0
11.6	0
11.7	0
11.8	0
11.9	0
12	0
12.1	0
12.2	0
12.3	0
12.4	0
12.5	0
12.6	0
12.7	0
12.8	0
12.9	0
13	0
13.1	0
13.2	0
13.3	0
13.4	0
13.5	0
13.6	0
13.7	0
13.8	0
13.9	0
14	0
14.1	0
14.2	0
14.3	0
14.4	0
14.5	0
14.6	0
14.7	0
14.8	0
14.9	0
15	0
15.1	0
15.2	0
15.3	0
15.4	0
15.5	0
15.6	0
15.7	0
15.8	0
15.9	0
16	0
16.1	0
16.2	0
16.3	0
16.4	0
16.5	0
16.6	0
16.7	0
16.8	0
16.9	0
17	0
17.1	0
17.2	0
17.3	0
17.4	0
17.5	0
17.6	0
17.7	0
17.8	0
17.9	0
18	0
18.1	0
18.2	0
18.3	0
18.4	0
18.5	0
18.6	0
18.7	0
18.8	0
18.9	0
19	0
19.1	0
19.2	0
19.3	0
19.4	0
19.5	0
19.6	0
19.7	0
19.8	0
19.9	0
20	0
20.1	0
20.2	0
20.3	0
20.4	0
20.5	0
20.6	0
20.7	0
20.8	0
20.9	0
21	0
21.1	0
21.2	0
21.3	0
21.4	0
21.5	0
21.6	0
21.7	0
21.8	0
21.9	0
22	0
22.1	0
22.2	0
22.3	0
22.4	0
22.5	0
22.6	0
22.7	0
22.8	0
22.9	0
23	0
23.1	0
23.2	0
23.3	0
23.4	0
23.5	0
23.6	0
23.7	0
23.8	0
23.9	0
24	0
24.1	0
24.2	0
24.3	0
24.4	0
24.5	0
24.6	0
24.7	0
24.8	0
24.9	0
25	0
25.1	0
25.2	0
25.3	0
25.4	0
25.5	0
25.6	0
25.7	0
25.8	0
25.9	0
26	0
26.1	0
26.2	0
26.3	0
26.4	0
26.5	0
26.6	0
26.7	0
26.8	0
26.9	0
27	0
27.1	0
27.2	0
27.3	0
27.4	0
27.5	0
27.6	0
27.7	0
27.8	0
27.9	0
28	0
28.1	0
28.2	0
28.3	0
28.4	0
28.5	0
28.6	0
28.7	0
28.8	0
28.9	0
29	0
29.1	0
29.2	0
29.3	0
29.4	0
29.5	0
29.6	0
29.7	0
29.8	0
29.9	0
30	0
30.1	0
30.2	0
30.3	0
30.4	0
30.5	0
30.6	0
30.7	0
30.8	0
30.9	0
31	0
31.1	0
31.2	0
31.3	0
31.4	0
31.5	0
31.6	0
31.7	0
31.8	0
31.9	0
32	0
32.1	0
32.2	0
32.3	0
32.4	0
32.5	0
32.6	0
32.7	0
32.8	0
32.9	0
33	0
33.1	0
33.2	0
33.3	0
33.4	0
33.5	0
33.6	0
33.7	0
33.8	0
33.9	0
34	0
34.1	0
34.2	0
34.3	0
34.4	0
34.5	0
34.6	0
34.7	0
34.8	0
34.9	0
35	0
35.1	0
35.2	0
35.3	0
35.4	0
35.5	0
35.6	0
35.7	0
35.8	0
35.9	0
36	0
36.1	0
36.2	0
36.3	0
36.4	0
36.5	0
36.6	0
36.7	0
36.8	0
36.9	0
37	0
37.1	0
37.2	0
37.3	0
37.4	0
37.5	0
37.6	0
37.7	0
37.8	0
37.9	0
38	0
38.1	0
38.2	0
38.3	0
38.4	0
38.5	0
38.6	0
38.7	0
38.8	0
38.9	0
39	0
39.1	0
39.2	0
39.3	0
39.4	0
39.5	0
39.6	0
39.7	0
39.8	0
39.9	0
40	0
40.1	0
40.2	0
40.3	0
40.4	0
40.5	0
40.6	0
40.7	0
40.8	0
40.9	0
41	0
41.1	0
41.2	0
41.3	0
41.4	0
41.5	0
41.6	0
41.7	0
41.8	0
41.9	0
42	0
42.1	0
42.2	0
42.3	0
42.4	0
42.5	0
42.6	0
42.7	0
42.8	0
42.9	0
43	0
43.1	0
43.2	0
43.3	0
43.4	0
43.5	0
43.6	0
43.7	0
43.8	0
43.9	0
44	0
44.1	0
44.2	0
44.3	0
44.4	0
44.5	0
44.6	0
44.7	0
44.8	0
44.9	0
45	0
45.1	0
45.2	0
45.3	0
45.4	0
45.5	0
45.6	0
45.7	0
45.8	0
45.9	0
46	0
46.1	0
46.2	0
46.3	0
46.4	0
46.5	0
46.6	0
46.7	0
46.8	0
46.9	0
47	0
47.1	0
47.2	0
47.3	0
47.4	0
47.5	0
47.6	0
47.7	0
47.8	0
47.9	0
48	0
48.1	0
48.2	0
48.3	0
48.4	0
48.5	0
48.6	0
48.7	0
48.8	0
48.9	0
49	0
49.1	0
49.2	0
49.3	0
49.4	0
49.5	0
49.6	0
49.7	0
49.8	0
49.9	0
50	0
50.1	0
50.2	0
50.3	0
50.4	0
50.5	0
50.6	0
50.7	0
50.8	0
50.9	0
51	0
51.1	0
51.2	0
51.3	0
51.4	0
51.5	0
51.6	0
51.7	0
51.8	0
51.9	0
52	0
52.1	0
52.2	0
52.3	0
52.4	0
52.5	0
52.6	0
52.7	0
52.8	0
52.9	0
53	0
53.1	0
53.2	0
53.3	0
53.4	0
53.5	0
53.6	0
53.7	0
53.8	0
53.9	0
54	0
54.1	0
54.2	0
54.3	0
54.4	0
54.5	0
54.6	0
54.7	0
54.8	0
54.9	0
55	0
55.1	0
55.2	0
55.3	0
55.4	0
55.5	0
55.6	0
55.7	0
55.8	0
55.9	0
56	0
56.1	0
56.2	0
56.3	0
56.4	0
56.5	0
56.6	0
56.7	0
56.8	0
56.9	0
57	0
57.1	0
57.2	0
57.3	0
57.4	0
57.5	0
57.6	0
57.7	0
57.8	0
57.9	0
58	0
58.1	0
58.2	0
58.3	0
58.4	0
58.5	0
58.6	0
58.7	0
58.8	0
58.9	0
59	0
59.1	0
59.2	0
59.3	0
59.4	0
59.5	0
59.6	0
59.7	0
59.8	0
59.9	0
60	0
60.1	0
60.2	0
60.3	0
60.4	0
60.5	0
60.6	0
60.7	0
60.8	0
60.9	0
61	0
61.1	0
61.2	0
61.3	0
61.4	0
61.5	0
61.6	0
61.7	0
61.8	0
61.9	0
62	0
62.1	0
62.2	0
62.3	0
62.4	0
62.5	0
62.6	0
62.7	0
62.8	0
62.9	0
63	0
63.1	0
63.2	0
63.3	0
63.4	0
63.5	0
63.6	0
63.7	0
63.8	0
63.9	0
64	0
64.1	0
64.2	0
64.3	0
64.4	0
64.5	0
64.6	0
64.7	0
64.8	0
64.9	0
65	0
65.1	0
65.2	0
65.3	0
65.4	0
65.5	0
65.6	0
65.7	0
65.8	0
65.9	0
66	0
66.1	0
66.2	0
66.3	0
66.4	0
66.5	0
66.6	0
66.7	0
66.8	0
66.9	0
67	0
67.1	0
67.2	0
67.3	0
67.4	0
67.5	0
67.6	0
67.7	0
67.8	0
67.9	0
68	0
68.1	0
68.2	0
68.3	0
68.4	0
68.5	0
68.6	0
68.7	0
68.8	0
68.9	0
69	0
69.1	0
69.2	0
69.3	0
69.4	0
69.5	0
69.6	0
69.7	0
69.8	0
69.9	0
70	0
70.1	0
70.2	0
70.3	0
70.4	0
70.5	0
70.6	0
70.7	0
70.8	0
70.9	0
71	0
71.1	0
71.2	0
71.3	0
71.4	0
71.5	0
71.6	0
71.7	0
71.8	0
71.9	0
72	0
72.1	0
72.2	0
72.3	0
72.4	0
72.5	0
72.6	0
72.7	0
72.8	0
72.9	0
73	0
73.1	0
73.2	0
73.3	0
73.4	0
73.5	0
73.6	0
73.7	0
73.8	0
73.9	0
74	0
74.1	0
74.2	0
74.3	0
74.4	0
74.5	0
74.6	0
74.7	0
74.8	0
74.9	0
75	0
75.1	0
75.2	0
75.3	0
75.4	0
75.5	0
75.6	0
75.7	0
75.8	0
75.9	0
76	0
76.1	0
76.2	0
76.3	0
76.4	0
76.5	0
76.6	0
76.7	0
76.8	0
76.9	0
77	0
77.1	0
77.2	0
77.3	0
77.4	0
77.5	0
77.6	0
77.7	0
77.8	0
77.9	0
78	0
78.1	0
78.2	0
78.3	0
78.4	0
78.5	0
78.6	0
78.7	0
78.8	0
78.9	0
79	0
79.1	0
79.2	0
79.3	0
79.4	0
79.5	0
79.6	0
79.7	0
79.8	0
79.9	0
80	0
80.1	0
80.2	0
80.3	0
80.4	0
80.5	0
80.6	0
80.7	0
80.8	0
80.9	0
81	0
81.1	0
81.2	0
81.3	0
81.4	0
81.5	0
81.6	0
81.7	0
81.8	0
81.9	0
82	0
82.1	0
82.2	0
82.3	0
82.4	0
82.5	0
82.6	0
82.7	0
82.8	0
82.9	0
83	0
83.1	0
83.2	0
83.3	0
83.4	0
83.5	0
83.6	0
83.7	0
83.8	0
83.9	0
84	0
84.1	0
84.2	0
84.3	0
84.4	0
84.5	0
84.6	0
84.7	0
84.8	0
84.9	0
85	0
85.1	0
85.2	0
85.3	0
85.4	0
85.5	0
85.6	0
85.7	0
85.8	0
85.9	0
86	0
86.1	0
86.2	0
86.3	0
86.4	0
86.5	0
86.6	0
86.7	0
86.8	0
86.9	0
87	0
87.1	0
87.2	0
87.3	0
87.4	0
87.5	0
87.6	0
87.7	0
87.8	0
87.9	0
88	0
88.1	0
88.2	0
88.3	0
88.4	0
88.5	0
88.6	0
88.7	0
88.8	0
88.9	0
89	0
89.1	0
89.2	0
89.3	0
89.4	0
89.5	0
89.6	0
89.7	0
89.8	0
89.9	0
90	0
90.1	0
90.2	0
90.3	0
90.4	0
90.5	0
90.6	0
90.7	0
90.8	0
90.9	0
91	0
91.1	0
91.2	0
91.3	0
91.4	0
91.5	0
91.6	0
91.7	0
91.8	0
91.9	0
92	0
92.1	0
92.2	0
92.3	0
92.4	0
92.5	0
92.6	0
92.7	0
92.8	0
92.9	0
93	0
93.1	0
93.2	0
93.3	0
93.4	0
93.5	0
93.6	0
93.7	0
93.8	0
93.9	0
94	0
94.1	0
94.2	0
94.3	0
94.4	0
94.5	0
94.6	0
94.7	0
94.8	0
94.9	0
95	0
95.1	0
95.2	0
95.3	0
95.4	0
95.5	0
95.6	0
95.7	0
95.8	0
95.9	0
96	0
96.1	0
96.2	0
96.3	0
96.4	0
96.5	0
96.6	0
96.7	0
96.8	0
96.9	0
97	0
97.1	0
97.2	0
97.3	0
97.4	0
97.5	0
97.6	0
97.7	0
97.8	0
97.9	0
98	0
98.1	0
98.2	0
98.3	0
98.4	0
98.5	0
98.6	0
98.7	0
98.8	0
98.9	0
99	0
99.1	0
99.2	0
99.3	0
99.4	0
99.5	0
99.6	0
99.7	0
99.8	0
99.9	0
100	0
100.1	0
100.2	0
100.3	0
100.4	0.000166667
100.5	0.000166667
100.6	0.000666667
100.7	0.000666667
100.8	0.000833333
100.9	0.00116667
101	0.002
101.1	0.0025
101.2	0.00283333
101.3	0.00316667
101.4	0.00433333
101.5	0.005
101.6	0.0055
101.7	0.0065
101.8	0.00733333
101.9	0.00866667
102	0.009
102.1	0.0101667
102.2	0.0116667
102.3	0.0128333
102.4	0.0141667
102.5	0.0155
102.6	0.0166667
102.7	0.0176667
102.8	0.0188333
102.9	0.02
103	0.0215
103.1	0.0225
103.2	0.024
103.3	0.0258333
103.4	0.0275
103.5	0.0291667
103.6	0.0306667
103.7	0.0321667
103.8	0.034
103.9	0.0351667
104	0.0368333
104.1	0.0388333
104.2	0.041
104.3	0.0426667
104.4	0.0445
104.5	0.0458333
104.6	0.047
104.7	0.0478333
104.8	0.0495
104.9	0.0511667
105	0.0525
105.1	0.0545
105.2	0.056
105.3	0.0568333
105.4	0.058
105.5	0.0588333
105.6	0.0605
105.7	0.0623333
105.8	0.0633333
105.9	0.0641667
106	0.0651667
106.1	0.0665
106.2	0.0676667
106.3	0.0693333
106.4	0.0708333
106.5	0.0726667
106.6	0.0748333
106.7	0.0766667
106.8	0.0778333
106.9	0.08
107	0.0806667
107.1	0.0816667
107.2	0.0826667
107.3	0.0836667
107.4	0.0853333
107.5	0.087
107.6	0.0888333
107.7	0.0895
107.8	0.092
107.9	0.094
108	0.0951667
108.1	0.0968333
108.2	0.098
108.3	0.0998333
108.4	0.100667
108.5	0.102667
108.6	0.104333
108.7	0.106
108.8	0.107333
108.9	0.108
109	0.109667
109.1	0.110833
109.2	0.112833
109.3	0.114333
109.4	0.115833
109.5	0.117167
109.6	0.117833
109.7	0.119
109.8	0.121333
109.9	0.122667
110	0.124167
110.1	0.125167
110.2	0.127
110.3	0.128333
110.4	0.129167
110.5	0.13
110.6	0.131833
110.7	0.133167
110.8	0.134
110.9	0.135333
111	0.136333
111.1	0.137167
111.2	0.138667
111.3	0.139667
111.4	0.141
111.5	0.1425
111.6	0.144333
111.7	0.145167
111.8	0.1475
111.9	0.1495
112	0.150833
112.1	0.152167
112.2	0.154
112.3	0.155
112.4	0.155833
112.5	0.156
112.6	0.157
112.7	0.1585
112.8	0.159667
112.9	0.161
113	0.161333
113.1	0.162667
113.2	0.1635
113.3	0.1645
113.4	0.166
113.5	0.167
113.6	0.168167
113.7	0.169667
113.8	0.170333
113.9	0.171667
114	0.172167
114.1	0.1725
114.2	0.173667
114.3	0.174667
114.4	0.175833
114.5	0.176
114.6	0.1765
114.7	0.176833
114.8	0.178833
114.9	0.180333
115	0.1815
115.1	0.182167
115.2	0.182833
115.3	0.184667
115.4	0.186
115.5	0.187667
115.6	0.19
115.7	0.191
115.8	0.192333
115.9	0.193333
116	0.194833
116.1	0.197
116.2	0.197667
116.3	0.198
116.4	0.198833
116.5	0.199833
116.6	0.200667
116.7	0.201333
116.8	0.2025
116.9	0.202667
117	0.204667
117.1	0.206833
117.2	0.207167
117.3	0.208
117.4	0.210167
117.5	0.211833
117.6	0.2125
117.7	0.214
117.8	0.214833
117.9	0.215833
118	0.217
118.1	0.217333
118.2	0.218833
118.3	0.2205
118.4	0.221333
118.5	0.2225
118.6	0.2245
118.7	0.225167
118.8	0.227
118.9	0.228
119	0.229667
119.1	0.231167
119.2	0.2325
119.3	0.233167
119.4	0.233667
119.5	0.2345
119.6	0.236333
119.7	0.238333
119.8	0.240667
119.9	0.241167
120	0.241667
120.1	0.242833
120.2	0.2445
120.3	0.244833
120.4	0.245
120.5	0.245
120.6	0.246333
120.7	0.248
120.8	0.248667
120.9	0.249333
121	0.25
121.1	0.250333
121.2	0.252
121.3	0.253333
121.4	0.254167
121.5	0.255
121.6	0.255833
121.7	0.256333
121.8	0.257167
121.9	0.258167
122	0.2595
122.1	0.261
122.2	0.261667
122.3	0.262
122.4	0.2635
122.5	0.264167
122.6	0.264833
122.7	0.265833
122.8	0.2675
122.9	0.268833
123	0.27
123.1	0.271167
123.2	0.271667
123.3	0.2725
123.4	0.274667
123.5	0.274833
123.6	0.275833
123.7	0.276
123.8	0.276667
123.9	0.279
124	0.280333
124.1	0.280333
124.2	0.281167
124.3	0.282167
124.4	0.284
124.5	0.284667
124.6	0.2865
124.7	0.287833
124.8	0.288833
124.9	0.290333
125	0.2925
125.1	0.293167
125.2	0.292667
125.3	0.293167
125.4	0.293667
125.5	0.294
125.6	0.295333
125.7	0.295833
125.8	0.296333
125.9	0.2975
126	0.299
126.1	0.299167
126.2	0.2995
126.3	0.2995
126.4	0.300833
126.5	0.3015
126.6	0.302833
126.7	0.304
126.8	0.304833
126.9	0.305833
127	0.307167
127.1	0.307333
127.2	0.307833
127.3	0.309167
127.4	0.310333
127.5	0.3115
127.6	0.312833
127.7	0.312833
127.8	0.313833
127.9	0.315833
128	0.316
128.1	0.316667
128.2	0.318167
128.3	0.319167
128.4	0.319833
128.5	0.320667
128.6	0.321167
128.7	0.321667
128.8	0.3225
128.9	0.323667
129	0.324833
129.1	0.325333
129.2	0.326
129.3	0.326
129.4	0.327333
129.5	0.328
129.6	0.3285
129.7	0.329333
129.8	0.3295
129.9	0.329833
130	0.329833
130.1	0.330333
130.2	0.331
130.3	0.3315
130.4	0.332667
130.5	0.334
130.6	0.334833
130.7	0.3355
130.8	0.336333
130.9	0.337667
131	0.338333
131.1	0.3395
131.2	0.34
131.3	0.3405
131.4	0.3415
131.5	0.3425
131.6	0.3435
131.7	0.344333
131.8	0.345833
131.9	0.346833
132	0.347333
132.1	0.348333
132.2	0.349333
132.3	0.350333
132.4	0.350667
132.5	0.350833
132.6	0.351333
132.7	0.351
132.8	0.353
132.9	0.354167
133	0.3555
133.1	0.3565
133.2	0.3575
133.3	0.358167
133.4	0.359
133.5	0.3595
133.6	0.360333
133.7	0.361167
133.8	0.361167
133.9	0.361667
134	0.362667
134.1	0.363
134.2	0.3635
134.3	0.364
134.4	0.365167
134.5	0.366
134.6	0.367167
134.7	0.367667
134.8	0.368333
134.9	0.369833
135	0.370667
135.1	0.372
135.2	0.372667
135.3	0.373167
135.4	0.374667
135.5	0.375167
135.6	0.376333
135.7	0.376833
135.8	0.378333
135.9	0.379
136	0.378833
136.1	0.379833
136.2	0.380333
136.3	0.380833
136.4	0.381333
136.5	0.381833
136.6	0.382167
136.7	0.3825
136.8	0.383833
136.9	0.384833
137	0.385667
137.1	0.386167
137.2	0.387
137.3	0.387833
137.4	0.388
137.5	0.388833
137.6	0.389333
137.7	0.389833
137.8	0.389833
137.9	0.390167
138	0.391167
138.1	0.3915
138.2	0.392
138.3	0.393167
138.4	0.393667
138.5	0.394333
138.6	0.395167
138.7	0.396167
138.8	0.396333
138.9	0.397667
139	0.3995
139.1	0.4005
139.2	0.401667
139.3	0.4035
139.4	0.404333
139.5	0.405167
139.6	0.406667
139.7	0.407
139.8	0.407
139.9	0.407333
140	0.407833
140.1	0.408333
140.2	0.4085
140.3	0.408667
140.4	0.408667
140.5	0.4095
140.6	0.409833
140.7	0.4105
140.8	0.410833
140.9	0.411833
141	0.412667
141.1	0.4135
141.2	0.413833
141.3	0.4145
141.4	0.414667
141.5	0.4155
141.6	0.414667
141.7	0.414833
141.8	0.4155
141.9	0.416333
142	0.416833
142.1	0.417
142.2	0.417167
142.3	0.418167
142.4	0.4185
142.5	0.418833
142.6	0.419
142.7	0.419833
142.8	0.4215
142.9	0.421833
143	0.422333
143.1	0.423167
143.2	0.424167
143.3	0.424167
143.4	0.425333
143.5	0.426
143.6	0.4265
143.7	0.427333
143.8	0.428167
143.9	0.429333
144	0.430833
144.1	0.432167
144.2	0.433
144.3	0.433833
144.4	0.434167
144.5	0.435
144.6	0.436
144.7	0.435667
144.8	0.435833
144.9	0.436333
145	0.437833
145.1	0.438333
145.2	0.439
145.3	0.439167
145.4	0.4395
145.5	0.439667
145.6	0.4405
145.7	0.441
145.8	0.441667
145.9	0.4425
146	0.442833
146.1	0.443833
146.2	0.444167
146.3	0.445
146.4	0.4465
146.5	0.447
146.6	0.447
146.7	0.4475
146.8	0.447833
146.9	0.447667
147	0.448
147.1	0.4485
147.2	0.449333
147.3	0.4495
147.4	0.450167
147.5	0.450667
147.6	0.451667
147.7	0.452667
147.8	0.454
147.9	0.4545
148	0.456
148.1	0.457
148.2	0.457333
148.3	0.4585
148.4	0.458667
148.5	0.458667
148.6	0.46
148.7	0.460167
148.8	0.459833
148.9	0.46
149	0.461
149.1	0.462333
149.2	0.462833
149.3	0.463167
149.4	0.464
149.5	0.464333
149.6	0.464667
149.7	0.465167
149.8	0.4655
149.9	0.466167
150	0.466333
150.1	0.467
150.2	0.468167
150.3	0.468833
150.4	0.4695
150.5	0.47
150.6	0.470333
150.7	0.471
150.8	0.471167
150.9	0.470667
151	0.4715
151.1	0.471667
151.2	0.472667
151.3	0.4725
151.4	0.474
151.5	0.474167
151.6	0.474167
151.7	0.475
151.8	0.4755
151.9	0.476
152	0.477
152.1	0.477667
152.2	0.478333
152.3	0.478167
152.4	0.478833
152.5	0.48
152.6	0.4805
152.7	0.480667
152.8	0.4815
152.9	0.4815
153	0.481
153.1	0.481167
153.2	0.480833
153.3	0.481833
153.4	0.482167
153.5	0.483
153.6	0.484
153.7	0.4845
153.8	0.4845
153.9	0.4845
154	0.485
154.1	0.485167
154.2	0.4865
154.3	0.4865
154.4	0.486667
154.5	0.487167
154.6	0.488167
154.7	0.488167
154.8	0.488667
154.9	0.488167
155	0.487667
155.1	0.488667
155.2	0.488833
155.3	0.489333
155.4	0.490833
155.5	0.490833
155.6	0.491333
155.7	0.490833
155.8	0.491833
155.9	0.492
156	0.493
156.1	0.493667
156.2	0.494167
156.3	0.494333
156.4	0.494833
156.5	0.494667
156.6	0.495333
156.7	0.495167
156.8	0.4955
156.9	0.4965
157	0.4965
157.1	0.4965
157.2	0.495833
157.3	0.495833
157.4	0.496167
157.5	0.496667
157.6	0.4975
157.7	0.497167
157.8	0.497333
157.9	0.498833
158	0.498667
158.1	0.499833
158.2	0.500167
158.3	0.501333
158.4	0.5005
158.5	0.501667
158.6	0.501833
158.7	0.502
158.8	0.502667
158.9	0.5025
159	0.503833
159.1	0.503833
159.2	0.504667
159.3	0.504667
159.4	0.505
159.5	0.505333
159.6	0.506
159.7	0.506833
159.8	0.506833
159.9	0.5075
160	0.508333
160.1	0.5085
160.2	0.509167
160.3	0.509167
160.4	0.5095
160.5	0.509333
160.6	0.510167
160.7	0.510833
160.8	0.510833
160.9	0.510667
161	0.511167
161.1	0.511833
161.2	0.512667
161.3	0.512667
161.4	0.513333
161.5	0.5145
161.6	0.514833
161.7	0.514667
161.8	0.514667
161.9	0.515333
162	0.515667
162.1	0.516667
162.2	0.517667
162.3	0.517833
162.4	0.5185
162.5	0.519333
162.6	0.519
162.7	0.519333
162.8	0.520167
162.9	0.520167
163	0.520667
163.1	0.521
163.2	0.520833
163.3	0.520833
163.4	0.520667
163.5	0.521667
163.6	0.521833
163.7	0.521333
163.8	0.5215
163.9	0.522
164	0.521833
164.1	0.522333
164.2	0.523167
164.3	0.523667
164.4	0.5235
164.5	0.523167
164.6	0.5235
164.7	0.523333
164.8	0.523333
164.9	0.523333
165	0.523333
165.1	0.522833
165.2	0.523167
165.3	0.523333
165.4	0.524167
165.5	0.523833
165.6	0.523667
165.7	0.524333
165.8	0.524167
165.9	0.524667
166	0.524833
166.1	0.525167
166.2	0.5255
166.3	0.525167
166.4	0.525333
166.5	0.525333
166.6	0.5255
166.7	0.525
166.8	0.5255
166.9	0.526167
167	0.527167
167.1	0.527
167.2	0.5265
167.3	0.5265
167.4	0.527333
167.5	0.527167
167.6	0.527167
167.7	0.5265
167.8	0.526167
167.9	0.5255
168	0.525833
168.1	0.5265
168.2	0.527167
168.3	0.528833
168.4	0.53
168.5	0.530167
168.6	0.530667
168.7	0.5315
168.8	0.531333
168.9	0.531333
169	0.532
169.1	0.531667
169.2	0.532
169.3	0.533167
169.4	0.5335
169.5	0.533833
169.6	0.533667
169.7	0.5345
169.8	0.534667
169.9	0.535333
170	0.535833
170.1	0.535833
170.2	0.535667
170.3	0.535833
170.4	0.535833
170.5	0.536833
170.6	0.5365
170.7	0.5365
170.8	0.537333
170.9	0.537167
171	0.538167
171.1	0.538
171.2	0.538167
171.3	0.538167
171.4	0.538333
171.5	0.5385
171.6	0.538167
171.7	0.538833
171.8	0.539833
171.9	0.540167
172	0.5405
172.1	0.5405
172.2	0.540833
172.3	0.541167
172.4	0.541667
172.5	0.542
172.6	0.541833
172.7	0.541667
172.8	0.540667
172.9	0.540667
173	0.541167
173.1	0.541333
173.2	0.541667
173.3	0.541833
173.4	0.5415
173.5	0.541333
173.6	0.541833
173.7	0.542
173.8	0.5425
173.9	0.5435
174	0.544167
174.1	0.544333
174.2	0.5445
174.3	0.5455
174.4	0.546
174.5	0.5465
174.6	0.5465
174.7	0.547167
174.8	0.547667
174.9	0.547667
175	0.547667
175.1	0.5475
175.2	0.547667
175.3	0.548
175.4	0.547833
175.5	0.548667
175.6	0.549167
175.7	0.5495
175.8	0.549167
175.9	0.550667
176	0.5505
176.1	0.551333
176.2	0.553
176.3	0.553
176.4	0.553
176.5	0.553833
176.6	0.554
176.7	0.554
176.8	0.5535
176.9	0.5535
177	0.554
177.1	0.553833
177.2	0.554333
177.3	0.554833
177.4	0.555167
177.5	0.555667
177.6	0.5555
177.7	0.554667
177.8	0.553833
177.9	0.554
178	0.554333
178.1	0.554167
178.2	0.554
178.3	0.554833
178.4	0.554667
178.5	0.555
178.6	0.555167
178.7	0.555333
178.8	0.555
178.9	0.556
179	0.556
179.1	0.557
179.2	0.557167
179.3	0.557333
179.4	0.556833
179.5	0.556667
179.6	0.556667
179.7	0.557167
179.8	0.556833
179.9	0.556833
180	0.557167
180.1	0.557167
180.2	0.557167
180.3	0.556833
180.4	0.557667
180.5	0.558
180.6	0.558
180.7	0.558
180.8	0.558667
180.9	0.559167
181	0.559667
181.1	0.5605
181.2	0.559833
181.3	0.5595
181.4	0.559833
181.5	0.560167
181.6	0.560833
181.7	0.560833
181.8	0.561
181.9	0.561
182	0.561167
182.1	0.561
182.2	0.561667
182.3	0.561667
182.4	0.561833
182.5	0.562
182.6	0.563333
182.7	0.563333
182.8	0.562833
182.9	0.5635
183	0.564333
183.1	0.563667
183.2	0.564333
183.3	0.564667
183.4	0.564833
183.5	0.565
183.6	0.564667
183.7	0.565833
183.8	0.565333
183.9	0.565667
184	0.565833
184.1	0.565167
184.2	0.564833
184.3	0.5645
184.4	0.564833
184.5	0.565333
184.6	0.5655
184.7	0.565667
184.8	0.5655
184.9	0.565167
185	0.564667
185.1	0.564833
185.2	0.5655
185.3	0.565833
185.4	0.5665
185.5	0.566
185.6	0.566167
185.7	0.566667
185.8	0.567167
185.9	0.567667
186	0.568
186.1	0.568
186.2	0.569
186.3	0.569167
186.4	0.568667
186.5	0.569167
186.6	0.5695
186.7	0.569833
186.8	0.569333
186.9	0.569167
187	0.568833
187.1	0.5695
187.2	0.5695
187.3	0.569833
187.4	0.569333
187.5	0.569667
187.6	0.569667
187.7	0.569667
187.8	0.57
187.9	0.570167
188	0.570333
188.1	0.570167
188.2	0.570333
188.3	0.570333
188.4	0.5705
188.5	0.5715
188.6	0.572167
188.7	0.572
188.8	0.572167
188.9	0.573
189	0.573
189.1	0.573
189.2	0.5735
189.3	0.5735
189.4	0.574
189.5	0.5745
189.6	0.574833
189.7	0.574667
189.8	0.575333
189.9	0.575333
190	0.575833
190.1	0.576667
190.2	0.577833
190.3	0.5785
190.4	0.577667
190.5	0.578
190.6	0.578167
190.7	0.5775
190.8	0.578667
190.9	0.578167
191	0.578
191.1	0.577333
191.2	0.577667
191.3	0.577333
191.4	0.578
191.5	0.578167
191.6	0.577833
191.7	0.578167
191.8	0.577833
191.9	0.577333
192	0.577833
192.1	0.577667
192.2	0.578167
192.3	0.579
192.4	0.579333
192.5	0.58
192.6	0.580333
192.7	0.581
192.8	0.581333
192.9	0.581167
193	0.5825
193.1	0.583
193.2	0.582833
193.3	0.583667
193.4	0.5845
193.5	0.584333
193.6	0.5845
193.7	0.584833
193.8	0.584833
193.9	0.5845
194	0.584833
194.1	0.584667
194.2	0.584833
194.3	0.584667
194.4	0.585167
194.5	0.585
194.6	0.585167
194.7	0.5855
194.8	0.5855
194.9	0.585833
195	0.586167
195.1	0.585833
195.2	0.586833
195.3	0.588
195.4	0.588167
195.5	0.589167
195.6	0.589
195.7	0.589333
195.8	0.589
195.9	0.589667
196	0.589167
196.1	0.5895
196.2	0.5895
196.3	0.589333
196.4	0.589167
196.5	0.5895
196.6	0.5895
196.7	0.589667
196.8	0.589667
196.9	0.589333
197	0.590167
197.1	0.590167
197.2	0.5905
197.3	0.589833
197.4	0.589833
197.5	0.590333
197.6	0.59
197.7	0.59
197.8	0.589833
197.9	0.590667
198	0.591333
198.1	0.5915
198.2	0.591667
198.3	0.5915
198.4	0.591167
198.5	0.591667
198.6	0.592
198.7	0.592667
198.8	0.592
198.9	0.591833
199	0.591833
199.1	0.591833
199.2	0.5915
199.3	0.5905
199.4	0.590333
199.5	0.591
199.6	0.590833
199.7	0.590833
199.8	0.591333
199.9	0.591833
200	0.591833
[truncated: 14,000 more rows]
