# Supplementary material for: Bayesian inference of kinetic schemes for ion channels by Kalman filtering
Source: eLife journal article supplement (doi:10.7554/elife.62714), 2022-05-04
Supplement: fig4-data6 [file 1_Sim_N_7000_Fluor_MW_1M.xlsx]

## Sheet: Tabelle1
0.1	0
0.2	0
0.3	0
0.4	0
0.5	0
0.6	0
0.7	0
0.8	0
0.9	0
1	0
1.1	0
1.2	0
1.3	0
1.4	0
1.5	0
1.6	0
1.7	0
1.8	0
1.9	0
2	0
2.1	0
2.2	0
2.3	0
2.4	0
2.5	0
2.6	0
2.7	0
2.8	0
2.9	0
3	0
3.1	0
3.2	0
3.3	0
3.4	0
3.5	0
3.6	0
3.7	0
3.8	0
3.9	0
4	0
4.1	0
4.2	0
4.3	0
4.4	0
4.5	0
4.6	0
4.7	0
4.8	0
4.9	0
5	0
5.1	0
5.2	0
5.3	0
5.4	0
5.5	0
5.6	0
5.7	0
5.8	0
5.9	0
6	0
6.1	0
6.2	0
6.3	0
6.4	0
6.5	0
6.6	0
6.7	0
6.8	0
6.9	0
7	0
7.1	0
7.2	0
7.3	0
7.4	0
7.5	0
7.6	0
7.7	0
7.8	0
7.9	0
8	0
8.1	0
8.2	0
8.3	0
8.4	0
8.5	0
8.6	0
8.7	0
8.8	0
8.9	0
9	0
9.1	0
9.2	0
9.3	0
9.4	0
9.5	0
9.6	0
9.7	0
9.8	0
9.9	0
10	0
10.1	0
10.2	0
10.3	0
10.4	0
10.5	0
10.6	0
10.7	0
10.8	0
10.9	0
11	0
11.1	0
11.2	0
11.3	0
11.4	0
11.5	0
11.6	0
11.7	0
11.8	0
11.9	0
12	0
12.1	0
12.2	0
12.3	0
12.4	0
12.5	0
12.6	0
12.7	0
12.8	0
12.9	0
13	0
13.1	0
13.2	0
13.3	0
13.4	0
13.5	0
13.6	0
13.7	0
13.8	0
13.9	0
14	0
14.1	0
14.2	0
14.3	0
14.4	0
14.5	0
14.6	0
14.7	0
14.8	0
14.9	0
15	0
15.1	0
15.2	0
15.3	0
15.4	0
15.5	0
15.6	0
15.7	0
15.8	0
15.9	0
16	0
16.1	0
16.2	0
16.3	0
16.4	0
16.5	0
16.6	0
16.7	0
16.8	0
16.9	0
17	0
17.1	0
17.2	0
17.3	0
17.4	0
17.5	0
17.6	0
17.7	0
17.8	0
17.9	0
18	0
18.1	0
18.2	0
18.3	0
18.4	0
18.5	0
18.6	0
18.7	0
18.8	0
18.9	0
19	0
19.1	0
19.2	0
19.3	0
19.4	0
19.5	0
19.6	0
19.7	0
19.8	0
19.9	0
20	0
20.1	0
20.2	0
20.3	0
20.4	0
20.5	0
20.6	0
20.7	0
20.8	0
20.9	0
21	0
21.1	0
21.2	0
21.3	0
21.4	0
21.5	0
21.6	0
21.7	0
21.8	0
21.9	0
22	0
22.1	0
22.2	0
22.3	0
22.4	0
22.5	0
22.6	0
22.7	0
22.8	0
22.9	0
23	0
23.1	0
23.2	0
23.3	0
23.4	0
23.5	0
23.6	0
23.7	0
23.8	0
23.9	0
24	0
24.1	0
24.2	0
24.3	0
24.4	0
24.5	0
24.6	0
24.7	0
24.8	0
24.9	0
25	0
25.1	0
25.2	0
25.3	0
25.4	0
25.5	0
25.6	0
25.7	0
25.8	0
25.9	0
26	0
26.1	0
26.2	0
26.3	0
26.4	0
26.5	0
26.6	0
26.7	0
26.8	0
26.9	0
27	0
27.1	0
27.2	0
27.3	0
27.4	0
27.5	0
27.6	0
27.7	0
27.8	0
27.9	0
28	0
28.1	0
28.2	0
28.3	0
28.4	0
28.5	0
28.6	0
28.7	0
28.8	0
28.9	0
29	0
29.1	0
29.2	0
29.3	0
29.4	0
29.5	0
29.6	0
29.7	0
29.8	0
29.9	0
30	0
30.1	0
30.2	0
30.3	0
30.4	0
30.5	0
30.6	0
30.7	0
30.8	0
30.9	0
31	0
31.1	0
31.2	0
31.3	0
31.4	0
31.5	0
31.6	0
31.7	0
31.8	0
31.9	0
32	0
32.1	0
32.2	0
32.3	0
32.4	0
32.5	0
32.6	0
32.7	0
32.8	0
32.9	0
33	0
33.1	0
33.2	0
33.3	0
33.4	0
33.5	0
33.6	0
33.7	0
33.8	0
33.9	0
34	0
34.1	0
34.2	0
34.3	0
34.4	0
34.5	0
34.6	0
34.7	0
34.8	0
34.9	0
35	0
35.1	0
35.2	0
35.3	0
35.4	0
35.5	0
35.6	0
35.7	0
35.8	0
35.9	0
36	0
36.1	0
36.2	0
36.3	0
36.4	0
36.5	0
36.6	0
36.7	0
36.8	0
36.9	0
37	0
37.1	0
37.2	0
37.3	0
37.4	0
37.5	0
37.6	0
37.7	0
37.8	0
37.9	0
38	0
38.1	0
38.2	0
38.3	0
38.4	0
38.5	0
38.6	0
38.7	0
38.8	0
38.9	0
39	0
39.1	0
39.2	0
39.3	0
39.4	0
39.5	0
39.6	0
39.7	0
39.8	0
39.9	0
40	0
40.1	0
40.2	0
40.3	0
40.4	0
40.5	0
40.6	0
40.7	0
40.8	0
40.9	0
41	0
41.1	0
41.2	0
41.3	0
41.4	0
41.5	0
41.6	0
41.7	0
41.8	0
41.9	0
42	0
42.1	0
42.2	0
42.3	0
42.4	0
42.5	0
42.6	0
42.7	0
42.8	0
42.9	0
43	0
43.1	0
43.2	0
43.3	0
43.4	0
43.5	0
43.6	0
43.7	0
43.8	0
43.9	0
44	0
44.1	0
44.2	0
44.3	0
44.4	0
44.5	0
44.6	0
44.7	0
44.8	0
44.9	0
45	0
45.1	0
45.2	0
45.3	0
45.4	0
45.5	0
45.6	0
45.7	0
45.8	0
45.9	0
46	0
46.1	0
46.2	0
46.3	0
46.4	0
46.5	0
46.6	0
46.7	0
46.8	0
46.9	0
47	0
47.1	0
47.2	0
47.3	0
47.4	0
47.5	0
47.6	0
47.7	0
47.8	0
47.9	0
48	0
48.1	0
48.2	0
48.3	0
48.4	0
48.5	0
48.6	0
48.7	0
48.8	0
48.9	0
49	0
49.1	0
49.2	0
49.3	0
49.4	0
49.5	0
49.6	0
49.7	0
49.8	0
49.9	0
50	0
50.1	0
50.2	0
50.3	0
50.4	0
50.5	0
50.6	0
50.7	0
50.8	0
50.9	0
51	0
51.1	0
51.2	0
51.3	0
51.4	0
51.5	0
51.6	0
51.7	0
51.8	0
51.9	0
52	0
52.1	0
52.2	0
52.3	0
52.4	0
52.5	0
52.6	0
52.7	0
52.8	0
52.9	0
53	0
53.1	0
53.2	0
53.3	0
53.4	0
53.5	0
53.6	0
53.7	0
53.8	0
53.9	0
54	0
54.1	0
54.2	0
54.3	0
54.4	0
54.5	0
54.6	0
54.7	0
54.8	0
54.9	0
55	0
55.1	0
55.2	0
55.3	0
55.4	0
55.5	0
55.6	0
55.7	0
55.8	0
55.9	0
56	0
56.1	0
56.2	0
56.3	0
56.4	0
56.5	0
56.6	0
56.7	0
56.8	0
56.9	0
57	0
57.1	0
57.2	0
57.3	0
57.4	0
57.5	0
57.6	0
57.7	0
57.8	0
57.9	0
58	0
58.1	0
58.2	0
58.3	0
58.4	0
58.5	0
58.6	0
58.7	0
58.8	0
58.9	0
59	0
59.1	0
59.2	0
59.3	0
59.4	0
59.5	0
59.6	0
59.7	0
59.8	0
59.9	0
60	0
60.1	0
60.2	0
60.3	0
60.4	0
60.5	0
60.6	0
60.7	0
60.8	0
60.9	0
61	0
61.1	0
61.2	0
61.3	0
61.4	0
61.5	0
61.6	0
61.7	0
61.8	0
61.9	0
62	0
62.1	0
62.2	0
62.3	0
62.4	0
62.5	0
62.6	0
62.7	0
62.8	0
62.9	0
63	0
63.1	0
63.2	0
63.3	0
63.4	0
63.5	0
63.6	0
63.7	0
63.8	0
63.9	0
64	0
64.1	0
64.2	0
64.3	0
64.4	0
64.5	0
64.6	0
64.7	0
64.8	0
64.9	0
65	0
65.1	0
65.2	0
65.3	0
65.4	0
65.5	0
65.6	0
65.7	0
65.8	0
65.9	0
66	0
66.1	0
66.2	0
66.3	0
66.4	0
66.5	0
66.6	0
66.7	0
66.8	0
66.9	0
67	0
67.1	0
67.2	0
67.3	0
67.4	0
67.5	0
67.6	0
67.7	0
67.8	0
67.9	0
68	0
68.1	0
68.2	0
68.3	0
68.4	0
68.5	0
68.6	0
68.7	0
68.8	0
68.9	0
69	0
69.1	0
69.2	0
69.3	0
69.4	0
69.5	0
69.6	0
69.7	0
69.8	0
69.9	0
70	0
70.1	0
70.2	0
70.3	0
70.4	0
70.5	0
70.6	0
70.7	0
70.8	0
70.9	0
71	0
71.1	0
71.2	0
71.3	0
71.4	0
71.5	0
71.6	0
71.7	0
71.8	0
71.9	0
72	0
72.1	0
72.2	0
72.3	0
72.4	0
72.5	0
72.6	0
72.7	0
72.8	0
72.9	0
73	0
73.1	0
73.2	0
73.3	0
73.4	0
73.5	0
73.6	0
73.7	0
73.8	0
73.9	0
74	0
74.1	0
74.2	0
74.3	0
74.4	0
74.5	0
74.6	0
74.7	0
74.8	0
74.9	0
75	0
75.1	0
75.2	0
75.3	0
75.4	0
75.5	0
75.6	0
75.7	0
75.8	0
75.9	0
76	0
76.1	0
76.2	0
76.3	0
76.4	0
76.5	0
76.6	0
76.7	0
76.8	0
76.9	0
77	0
77.1	0
77.2	0
77.3	0
77.4	0
77.5	0
77.6	0
77.7	0
77.8	0
77.9	0
78	0
78.1	0
78.2	0
78.3	0
78.4	0
78.5	0
78.6	0
78.7	0
78.8	0
78.9	0
79	0
79.1	0
79.2	0
79.3	0
79.4	0
79.5	0
79.6	0
79.7	0
79.8	0
79.9	0
80	0
80.1	0
80.2	0
80.3	0
80.4	0
80.5	0
80.6	0
80.7	0
80.8	0
80.9	0
81	0
81.1	0
81.2	0
81.3	0
81.4	0
81.5	0
81.6	0
81.7	0
81.8	0
81.9	0
82	0
82.1	0
82.2	0
82.3	0
82.4	0
82.5	0
82.6	0
82.7	0
82.8	0
82.9	0
83	0
83.1	0
83.2	0
83.3	0
83.4	0
83.5	0
83.6	0
83.7	0
83.8	0
83.9	0
84	0
84.1	0
84.2	0
84.3	0
84.4	0
84.5	0
84.6	0
84.7	0
84.8	0
84.9	0
85	0
85.1	0
85.2	0
85.3	0
85.4	0
85.5	0
85.6	0
85.7	0
85.8	0
85.9	0
86	0
86.1	0
86.2	0
86.3	0
86.4	0
86.5	0
86.6	0
86.7	0
86.8	0
86.9	0
87	0
87.1	0
87.2	0
87.3	0
87.4	0
87.5	0
87.6	0
87.7	0
87.8	0
87.9	0
88	0
88.1	0
88.2	0
88.3	0
88.4	0
88.5	0
88.6	0
88.7	0
88.8	0
88.9	0
89	0
89.1	0
89.2	0
89.3	0
89.4	0
89.5	0
89.6	0
89.7	0
89.8	0
89.9	0
90	0
90.1	0
90.2	0
90.3	0
90.4	0
90.5	0
90.6	0
90.7	0
90.8	0
90.9	0
91	0
91.1	0
91.2	0
91.3	0
91.4	0
91.5	0
91.6	0
91.7	0
91.8	0
91.9	0
92	0
92.1	0
92.2	0
92.3	0
92.4	0
92.5	0
92.6	0
92.7	0
92.8	0
92.9	0
93	0
93.1	0
93.2	0
93.3	0
93.4	0
93.5	0
93.6	0
93.7	0
93.8	0
93.9	0
94	0
94.1	0
94.2	0
94.3	0
94.4	0
94.5	0
94.6	0
94.7	0
94.8	0
94.9	0
95	0
95.1	0
95.2	0
95.3	0
95.4	0
95.5	0
95.6	0
95.7	0
95.8	0
95.9	0
96	0
96.1	0
96.2	0
96.3	0
96.4	0
96.5	0
96.6	0
96.7	0
96.8	0
96.9	0
97	0
97.1	0
97.2	0
97.3	0
97.4	0
97.5	0
97.6	0
97.7	0
97.8	0
97.9	0
98	0
98.1	0
98.2	0
98.3	0
98.4	0
98.5	0
98.6	0
98.7	0
98.8	0
98.9	0
99	0
99.1	0
99.2	0
99.3	0
99.4	0
99.5	0
99.6	0
99.7	0
99.8	0
99.9	0
100	0
100.1	0.0591429
100.2	0.106429
100.3	0.153429
100.4	0.195786
100.5	0.237357
100.6	0.268357
100.7	0.299571
100.8	0.328214
100.9	0.354
101	0.381786
101.1	0.402429
101.2	0.421857
101.3	0.441
101.4	0.459714
101.5	0.475857
101.6	0.491357
101.7	0.506143
101.8	0.518429
101.9	0.527071
102	0.534786
102.1	0.542143
102.2	0.553643
102.3	0.562286
102.4	0.572214
102.5	0.576143
102.6	0.582071
102.7	0.587643
102.8	0.592929
102.9	0.596714
103	0.601571
103.1	0.605214
103.2	0.607571
103.3	0.611857
103.4	0.615857
103.5	0.617929
103.6	0.621786
103.7	0.624143
103.8	0.626929
103.9	0.629929
104	0.632429
104.1	0.635286
104.2	0.635929
104.3	0.640143
104.4	0.643
104.5	0.643571
104.6	0.646643
104.7	0.647429
104.8	0.647714
104.9	0.648643
105	0.648857
105.1	0.651286
105.2	0.653643
105.3	0.655786
105.4	0.656929
105.5	0.659643
105.6	0.660857
105.7	0.660286
105.8	0.660857
105.9	0.662714
106	0.665286
106.1	0.665286
106.2	0.666143
106.3	0.665214
106.4	0.667071
106.5	0.667786
106.6	0.6685
106.7	0.671214
106.8	0.672643
106.9	0.673786
107	0.676
107.1	0.675143
107.2	0.676643
107.3	0.677214
107.4	0.676786
107.5	0.676571
107.6	0.678857
107.7	0.679929
107.8	0.681
107.9	0.682286
108	0.681286
108.1	0.681643
108.2	0.682929
108.3	0.683571
108.4	0.6835
108.5	0.685429
108.6	0.685357
108.7	0.684214
108.8	0.685571
108.9	0.685714
109	0.684857
109.1	0.685571
109.2	0.686429
109.3	0.687714
109.4	0.688786
109.5	0.689357
109.6	0.690714
109.7	0.689857
109.8	0.692429
109.9	0.691929
110	0.692071
110.1	0.692929
110.2	0.693714
110.3	0.691714
110.4	0.690286
110.5	0.6905
110.6	0.690214
110.7	0.689
110.8	0.688214
110.9	0.688
111	0.689857
111.1	0.692286
111.2	0.694143
111.3	0.694857
111.4	0.696714
111.5	0.698643
111.6	0.697857
111.7	0.698
111.8	0.697
111.9	0.696357
112	0.696571
112.1	0.698357
112.2	0.701929
112.3	0.700929
112.4	0.700929
112.5	0.6995
112.6	0.698857
112.7	0.7005
112.8	0.701071
112.9	0.702714
113	0.705071
113.1	0.704571
113.2	0.704429
113.3	0.703571
113.4	0.704429
113.5	0.706071
113.6	0.706929
113.7	0.706786
113.8	0.707143
113.9	0.707714
114	0.709786
114.1	0.709714
114.2	0.711214
114.3	0.711214
114.4	0.711357
114.5	0.710429
114.6	0.711429
114.7	0.712857
114.8	0.710286
114.9	0.71
115	0.710429
115.1	0.710929
115.2	0.711286
115.3	0.711714
115.4	0.712071
115.5	0.711714
115.6	0.713643
115.7	0.716357
115.8	0.718143
115.9	0.716643
116	0.716929
116.1	0.715857
116.2	0.717071
116.3	0.716214
116.4	0.717143
116.5	0.717643
116.6	0.7185
116.7	0.7185
116.8	0.720571
116.9	0.720714
117	0.723143
117.1	0.723857
117.2	0.724857
117.3	0.726786
117.4	0.726929
117.5	0.727214
117.6	0.727571
117.7	0.728143
117.8	0.727357
117.9	0.726429
118	0.726643
118.1	0.724714
118.2	0.727857
118.3	0.728357
118.4	0.728143
118.5	0.727143
118.6	0.727357
118.7	0.728357
118.8	0.727714
118.9	0.728143
119	0.730643
119.1	0.731643
119.2	0.731929
119.3	0.7315
119.4	0.731786
119.5	0.732143
119.6	0.731286
119.7	0.731571
119.8	0.730929
119.9	0.730929
120	0.73
120.1	0.730714
120.2	0.730071
120.3	0.731
120.4	0.729714
120.5	0.730929
120.6	0.733143
120.7	0.735143
120.8	0.736214
120.9	0.737143
121	0.738571
121.1	0.738643
121.2	0.7385
121.3	0.738714
121.4	0.740571
121.5	0.741571
121.6	0.741143
121.7	0.739214
121.8	0.738143
121.9	0.739786
122	0.7395
122.1	0.742571
122.2	0.742643
122.3	0.742286
122.4	0.7405
122.5	0.742929
122.6	0.744357
122.7	0.745071
122.8	0.744643
122.9	0.745286
123	0.745929
123.1	0.746714
123.2	0.746857
123.3	0.747071
123.4	0.747929
123.5	0.748571
123.6	0.746929
123.7	0.748357
123.8	0.747714
123.9	0.748357
124	0.747929
124.1	0.749786
124.2	0.750857
124.3	0.748786
124.4	0.749571
124.5	0.749786
124.6	0.750214
124.7	0.749286
124.8	0.752071
124.9	0.754071
125	0.753786
125.1	0.7545
125.2	0.754071
125.3	0.754643
125.4	0.754286
125.5	0.752143
125.6	0.750857
125.7	0.7505
125.8	0.750143
125.9	0.751571
126	0.752
126.1	0.753357
126.2	0.753071
126.3	0.753143
126.4	0.753286
126.5	0.754571
126.6	0.756
126.7	0.756786
126.8	0.756214
126.9	0.756571
127	0.756214
127.1	0.758357
127.2	0.758786
127.3	0.759286
127.4	0.757643
127.5	0.758
127.6	0.757571
127.7	0.760571
127.8	0.760643
127.9	0.7605
128	0.760857
128.1	0.759714
128.2	0.758286
128.3	0.760071
128.4	0.759643
128.5	0.761429
128.6	0.762286
128.7	0.762357
128.8	0.762214
128.9	0.761857
129	0.762857
129.1	0.763071
129.2	0.763429
129.3	0.7635
129.4	0.761643
129.5	0.762571
129.6	0.763857
129.7	0.763714
129.8	0.765357
129.9	0.766214
130	0.766714
130.1	0.766643
130.2	0.766857
130.3	0.766429
130.4	0.765
130.5	0.767286
130.6	0.768714
130.7	0.770714
130.8	0.769857
130.9	0.768286
131	0.770071
131.1	0.771571
131.2	0.769786
131.3	0.770571
131.4	0.771786
131.5	0.772286
131.6	0.771929
131.7	0.773929
131.8	0.774429
131.9	0.773071
132	0.776071
132.1	0.774357
132.2	0.772214
132.3	0.774714
132.4	0.773071
132.5	0.772929
132.6	0.773286
132.7	0.774071
132.8	0.774357
132.9	0.776143
133	0.7755
133.1	0.775286
133.2	0.777786
133.3	0.777571
133.4	0.778143
133.5	0.779071
133.6	0.778714
133.7	0.778786
133.8	0.777429
133.9	0.778286
134	0.779357
134.1	0.779286
134.2	0.780214
134.3	0.780143
134.4	0.779643
134.5	0.7795
134.6	0.780429
134.7	0.780357
134.8	0.779786
134.9	0.780071
135	0.779286
135.1	0.780214
135.2	0.781214
135.3	0.779571
135.4	0.780286
135.5	0.780643
135.6	0.781
135.7	0.780071
135.8	0.779786
135.9	0.780143
136	0.779643
136.1	0.780571
136.2	0.7805
136.3	0.780286
136.4	0.781286
136.5	0.782
136.6	0.782714
136.7	0.783214
136.8	0.782357
136.9	0.781857
137	0.783143
137.1	0.783286
137.2	0.785286
137.3	0.786143
137.4	0.784929
137.5	0.783286
137.6	0.783929
137.7	0.784929
137.8	0.784643
137.9	0.787
138	0.788071
138.1	0.787571
138.2	0.787357
138.3	0.7885
138.4	0.786929
138.5	0.788286
138.6	0.789286
138.7	0.788929
138.8	0.788357
138.9	0.788786
139	0.788643
139.1	0.788786
139.2	0.789429
139.3	0.789714
139.4	0.79
139.5	0.789786
139.6	0.7905
139.7	0.790429
139.8	0.789571
139.9	0.789571
140	0.790643
140.1	0.790643
140.2	0.790071
140.3	0.791143
140.4	0.790571
140.5	0.791286
140.6	0.791714
140.7	0.791643
140.8	0.792571
140.9	0.794071
141	0.793714
141.1	0.791929
141.2	0.794143
141.3	0.795571
141.4	0.796571
141.5	0.796571
141.6	0.796643
141.7	0.797286
141.8	0.797857
141.9	0.7975
142	0.798
142.1	0.7985
142.2	0.798643
142.3	0.8
142.4	0.799
142.5	0.798429
142.6	0.799929
142.7	0.800429
142.8	0.799286
142.9	0.798714
143	0.798714
143.1	0.799143
143.2	0.798714
143.3	0.798071
143.4	0.797071
143.5	0.797929
143.6	0.796214
143.7	0.798143
143.8	0.798214
143.9	0.798786
144	0.7985
144.1	0.797786
144.2	0.798571
144.3	0.799214
144.4	0.799571
144.5	0.799714
144.6	0.800143
144.7	0.800929
144.8	0.802071
144.9	0.802714
145	0.802214
145.1	0.803357
145.2	0.802929
145.3	0.804214
145.4	0.8055
145.5	0.805214
145.6	0.805786
145.7	0.804357
145.8	0.804071
145.9	0.805357
146	0.806857
146.1	0.8055
146.2	0.807071
146.3	0.807071
146.4	0.809
146.5	0.807714
146.6	0.807929
146.7	0.808571
146.8	0.808214
146.9	0.808429
147	0.809
147.1	0.808214
147.2	0.807857
147.3	0.808857
147.4	0.808
147.5	0.808857
147.6	0.808357
147.7	0.8085
147.8	0.809429
147.9	0.810429
148	0.808643
148.1	0.808786
148.2	0.809786
148.3	0.810929
148.4	0.811643
148.5	0.81
148.6	0.810929
148.7	0.811857
148.8	0.8125
148.9	0.813643
149	0.814214
149.1	0.812929
149.2	0.811857
149.3	0.811143
149.4	0.811571
149.5	0.810429
149.6	0.81
149.7	0.809286
149.8	0.809286
149.9	0.809357
150	0.8105
150.1	0.810714
150.2	0.812071
150.3	0.810714
150.4	0.812571
150.5	0.813714
150.6	0.815714
150.7	0.815286
150.8	0.8145
150.9	0.814286
151	0.814
151.1	0.8145
151.2	0.814714
151.3	0.815714
151.4	0.815857
151.5	0.816571
151.6	0.817571
151.7	0.8165
151.8	0.814857
151.9	0.814
152	0.814071
152.1	0.814714
152.2	0.814286
152.3	0.814643
152.4	0.815071
152.5	0.8145
152.6	0.814571
152.7	0.814571
152.8	0.814786
152.9	0.814429
153	0.812714
153.1	0.813857
153.2	0.814
153.3	0.815857
153.4	0.815
153.5	0.815143
153.6	0.814857
153.7	0.815071
153.8	0.816214
153.9	0.8165
154	0.816857
154.1	0.815214
154.2	0.816714
154.3	0.816
154.4	0.818
154.5	0.818714
154.6	0.816929
154.7	0.817214
154.8	0.817643
154.9	0.818571
155	0.818214
155.1	0.8175
155.2	0.816786
155.3	0.816571
155.4	0.8165
155.5	0.816071
155.6	0.816857
155.7	0.816143
155.8	0.816429
155.9	0.815429
156	0.816857
156.1	0.816571
156.2	0.816786
156.3	0.816429
156.4	0.817286
156.5	0.818214
156.6	0.818214
156.7	0.818857
156.8	0.819286
156.9	0.819071
157	0.819643
157.1	0.820643
157.2	0.8205
157.3	0.820571
157.4	0.821571
157.5	0.821357
157.6	0.822071
157.7	0.822143
157.8	0.820571
157.9	0.820714
158	0.822214
158.1	0.8215
158.2	0.821
158.3	0.823
158.4	0.821786
158.5	0.821214
158.6	0.821071
158.7	0.821857
158.8	0.822571
158.9	0.822286
159	0.821071
159.1	0.821643
159.2	0.822
159.3	0.821214
159.4	0.823143
159.5	0.8235
159.6	0.823143
159.7	0.822929
159.8	0.824714
159.9	0.825214
160	0.824643
160.1	0.822857
160.2	0.823429
160.3	0.823929
160.4	0.823214
160.5	0.823714
160.6	0.822786
160.7	0.821714
160.8	0.8215
160.9	0.822643
161	0.823214
161.1	0.823214
161.2	0.822
161.3	0.821286
161.4	0.822071
161.5	0.821571
161.6	0.822571
161.7	0.823857
161.8	0.824429
161.9	0.825857
162	0.827
162.1	0.827357
162.2	0.826786
162.3	0.825
162.4	0.825
162.5	0.825143
162.6	0.824857
162.7	0.826214
162.8	0.826786
162.9	0.827429
163	0.826929
163.1	0.825786
163.2	0.825786
163.3	0.825214
163.4	0.825429
163.5	0.824786
163.6	0.825214
163.7	0.825143
163.8	0.8265
163.9	0.827214
164	0.828571
164.1	0.829286
164.2	0.830429
164.3	0.829929
164.4	0.832571
164.5	0.832286
164.6	0.8315
164.7	0.830857
164.8	0.830714
164.9	0.830643
165	0.829214
165.1	0.829714
165.2	0.830214
165.3	0.829857
165.4	0.831071
165.5	0.830857
165.6	0.831214
165.7	0.831571
165.8	0.831643
165.9	0.831929
166	0.830929
166.1	0.8325
166.2	0.832071
166.3	0.832286
166.4	0.832357
166.5	0.831929
166.6	0.8305
166.7	0.829857
166.8	0.828786
166.9	0.8295
167	0.83
167.1	0.83
167.2	0.828857
167.3	0.829929
167.4	0.829857
167.5	0.831143
167.6	0.831286
167.7	0.831357
167.8	0.8315
167.9	0.832429
168	0.832571
168.1	0.833
168.2	0.832429
168.3	0.833
168.4	0.833643
168.5	0.834714
168.6	0.835143
168.7	0.834714
168.8	0.835
168.9	0.836214
169	0.835571
169.1	0.834143
169.2	0.833429
169.3	0.833143
169.4	0.832714
169.5	0.833286
169.6	0.834714
169.7	0.834
169.8	0.834643
169.9	0.834214
170	0.834429
170.1	0.834643
170.2	0.835643
170.3	0.8345
170.4	0.834
170.5	0.834214
170.6	0.8345
170.7	0.8355
170.8	0.837214
170.9	0.836286
171	0.837214
171.1	0.837571
171.2	0.837143
171.3	0.836571
171.4	0.835571
171.5	0.835929
171.6	0.835071
171.7	0.835786
171.8	0.836
171.9	0.836714
172	0.836929
172.1	0.835357
172.2	0.837071
172.3	0.836571
172.4	0.8375
172.5	0.8375
172.6	0.837214
172.7	0.837714
172.8	0.837429
172.9	0.837
173	0.837
173.1	0.837714
173.2	0.838
173.3	0.838286
173.4	0.839
173.5	0.837214
173.6	0.837214
173.7	0.835857
173.8	0.835714
173.9	0.836286
174	0.837286
174.1	0.837143
174.2	0.836929
174.3	0.836786
174.4	0.837214
174.5	0.838
174.6	0.838214
174.7	0.8385
174.8	0.839714
174.9	0.839786
175	0.840357
175.1	0.840929
175.2	0.841143
175.3	0.842286
175.4	0.841571
175.5	0.841857
175.6	0.840143
175.7	0.840143
175.8	0.8405
175.9	0.840429
176	0.840857
176.1	0.840143
176.2	0.838857
176.3	0.839357
176.4	0.839357
176.5	0.840286
176.6	0.841214
176.7	0.841857
176.8	0.840286
176.9	0.84
177	0.840286
177.1	0.839786
177.2	0.841214
177.3	0.841786
177.4	0.841357
177.5	0.839214
177.6	0.840286
177.7	0.842286
177.8	0.841071
177.9	0.840857
178	0.841357
178.1	0.841286
178.2	0.841643
178.3	0.840714
178.4	0.841643
178.5	0.843286
178.6	0.8425
178.7	0.843929
178.8	0.843857
178.9	0.845071
179	0.844143
179.1	0.843143
179.2	0.843929
179.3	0.843143
179.4	0.842714
179.5	0.842214
179.6	0.844071
179.7	0.844214
179.8	0.845143
179.9	0.844857
180	0.844214
180.1	0.844714
180.2	0.844286
180.3	0.844214
180.4	0.845571
180.5	0.844857
180.6	0.845857
180.7	0.846571
180.8	0.846714
180.9	0.847071
181	0.845143
181.1	0.846
181.2	0.846286
181.3	0.845429
181.4	0.845714
181.5	0.845357
181.6	0.845214
181.7	0.845929
181.8	0.845714
181.9	0.846
182	0.845286
182.1	0.845286
182.2	0.844214
182.3	0.844929
182.4	0.844
182.5	0.843071
182.6	0.842929
182.7	0.844286
182.8	0.843429
182.9	0.842929
183	0.843714
183.1	0.844857
183.2	0.844571
183.3	0.844857
183.4	0.844357
183.5	0.845214
183.6	0.845571
183.7	0.846214
183.8	0.848
183.9	0.846929
184	0.846357
184.1	0.846429
184.2	0.847714
184.3	0.848143
184.4	0.848
184.5	0.847643
184.6	0.848643
184.7	0.847643
184.8	0.847
184.9	0.846857
185	0.847357
185.1	0.846714
185.2	0.845857
185.3	0.846286
185.4	0.845429
185.5	0.844571
185.6	0.844071
185.7	0.845071
185.8	0.846071
185.9	0.847071
186	0.847
186.1	0.847571
186.2	0.847143
186.3	0.8475
186.4	0.847
186.5	0.848429
186.6	0.847429
186.7	0.847429
186.8	0.846214
186.9	0.845071
187	0.845571
187.1	0.844571
187.2	0.845286
187.3	0.846143
187.4	0.847071
187.5	0.847714
187.6	0.849286
187.7	0.847571
187.8	0.848071
187.9	0.847286
188	0.847143
188.1	0.846214
188.2	0.845929
188.3	0.847286
188.4	0.847
188.5	0.8485
188.6	0.848643
188.7	0.847
188.8	0.847214
188.9	0.846857
189	0.847143
189.1	0.847786
189.2	0.848143
189.3	0.847286
189.4	0.847786
189.5	0.849643
189.6	0.850714
189.7	0.850357
189.8	0.849857
189.9	0.849929
190	0.849143
190.1	0.849643
190.2	0.848714
190.3	0.848214
190.4	0.848
190.5	0.849214
190.6	0.85
190.7	0.849857
190.8	0.850714
190.9	0.850214
191	0.849357
191.1	0.85
191.2	0.849857
191.3	0.849714
191.4	0.849357
191.5	0.848714
191.6	0.848714
191.7	0.849143
191.8	0.849929
191.9	0.851286
192	0.852143
192.1	0.849786
192.2	0.848786
192.3	0.849714
192.4	0.850357
192.5	0.850929
192.6	0.851286
192.7	0.851286
192.8	0.851857
192.9	0.851357
193	0.850643
193.1	0.850786
193.2	0.850571
193.3	0.850786
193.4	0.851857
193.5	0.852286
193.6	0.851143
193.7	0.853
193.8	0.854929
193.9	0.854571
194	0.853786
194.1	0.854143
194.2	0.853857
194.3	0.853286
194.4	0.853071
194.5	0.8535
194.6	0.852786
194.7	0.851571
194.8	0.852429
194.9	0.8535
195	0.853071
195.1	0.852357
195.2	0.851714
195.3	0.851571
195.4	0.851571
195.5	0.851143
195.6	0.852357
195.7	0.852857
195.8	0.852214
195.9	0.852071
196	0.8515
196.1	0.851786
196.2	0.852286
196.3	0.851857
196.4	0.852429
196.5	0.852643
196.6	0.852
196.7	0.852357
196.8	0.853
196.9	0.8525
197	0.8535
197.1	0.853286
197.2	0.853714
197.3	0.854071
197.4	0.854071
197.5	0.855214
197.6	0.855143
197.7	0.856786
197.8	0.856357
197.9	0.857214
198	0.857357
198.1	0.857286
198.2	0.855857
198.3	0.856286
198.4	0.856429
198.5	0.855857
198.6	0.855857
198.7	0.856071
198.8	0.857
198.9	0.856571
199	0.856786
199.1	0.857786
199.2	0.858571
199.3	0.858286
199.4	0.858714
199.5	0.858429
199.6	0.86
199.7	0.860786
199.8	0.859929
199.9	0.858571
200	0.859643
[truncated: 14,000 more rows]
