# Supplementary material for: Bayesian inference of kinetic schemes for ion channels by Kalman filtering
Source: eLife journal article supplement (doi:10.7554/elife.62714), 2022-05-04
Supplement: fig4-data6 [file 1_Sim_N_7000_Strom_MW_1M.xlsx]

## Sheet: Tabelle1
0.1	0
0.2	0
0.3	0
0.4	0
0.5	0
0.6	0
0.7	0
0.8	0
0.9	0
1	0
1.1	0
1.2	0
1.3	0
1.4	0
1.5	0
1.6	0
1.7	0
1.8	0
1.9	0
2	0
2.1	0
2.2	0
2.3	0
2.4	0
2.5	0
2.6	0
2.7	0
2.8	0
2.9	0
3	0
3.1	0
3.2	0
3.3	0
3.4	0
3.5	0
3.6	0
3.7	0
3.8	0
3.9	0
4	0
4.1	0
4.2	0
4.3	0
4.4	0
4.5	0
4.6	0
4.7	0
4.8	0
4.9	0
5	0
5.1	0
5.2	0
5.3	0
5.4	0
5.5	0
5.6	0
5.7	0
5.8	0
5.9	0
6	0
6.1	0
6.2	0
6.3	0
6.4	0
6.5	0
6.6	0
6.7	0
6.8	0
6.9	0
7	0
7.1	0
7.2	0
7.3	0
7.4	0
7.5	0
7.6	0
7.7	0
7.8	0
7.9	0
8	0
8.1	0
8.2	0
8.3	0
8.4	0
8.5	0
8.6	0
8.7	0
8.8	0
8.9	0
9	0
9.1	0
9.2	0
9.3	0
9.4	0
9.5	0
9.6	0
9.7	0
9.8	0
9.9	0
10	0
10.1	0
10.2	0
10.3	0
10.4	0
10.5	0
10.6	0
10.7	0
10.8	0
10.9	0
11	0
11.1	0
11.2	0
11.3	0
11.4	0
11.5	0
11.6	0
11.7	0
11.8	0
11.9	0
12	0
12.1	0
12.2	0
12.3	0
12.4	0
12.5	0
12.6	0
12.7	0
12.8	0
12.9	0
13	0
13.1	0
13.2	0
13.3	0
13.4	0
13.5	0
13.6	0
13.7	0
13.8	0
13.9	0
14	0
14.1	0
14.2	0
14.3	0
14.4	0
14.5	0
14.6	0
14.7	0
14.8	0
14.9	0
15	0
15.1	0
15.2	0
15.3	0
15.4	0
15.5	0
15.6	0
15.7	0
15.8	0
15.9	0
16	0
16.1	0
16.2	0
16.3	0
16.4	0
16.5	0
16.6	0
16.7	0
16.8	0
16.9	0
17	0
17.1	0
17.2	0
17.3	0
17.4	0
17.5	0
17.6	0
17.7	0
17.8	0
17.9	0
18	0
18.1	0
18.2	0
18.3	0
18.4	0
18.5	0
18.6	0
18.7	0
18.8	0
18.9	0
19	0
19.1	0
19.2	0
19.3	0
19.4	0
19.5	0
19.6	0
19.7	0
19.8	0
19.9	0
20	0
20.1	0
20.2	0
20.3	0
20.4	0
20.5	0
20.6	0
20.7	0
20.8	0
20.9	0
21	0
21.1	0
21.2	0
21.3	0
21.4	0
21.5	0
21.6	0
21.7	0
21.8	0
21.9	0
22	0
22.1	0
22.2	0
22.3	0
22.4	0
22.5	0
22.6	0
22.7	0
22.8	0
22.9	0
23	0
23.1	0
23.2	0
23.3	0
23.4	0
23.5	0
23.6	0
23.7	0
23.8	0
23.9	0
24	0
24.1	0
24.2	0
24.3	0
24.4	0
24.5	0
24.6	0
24.7	0
24.8	0
24.9	0
25	0
25.1	0
25.2	0
25.3	0
25.4	0
25.5	0
25.6	0
25.7	0
25.8	0
25.9	0
26	0
26.1	0
26.2	0
26.3	0
26.4	0
26.5	0
26.6	0
26.7	0
26.8	0
26.9	0
27	0
27.1	0
27.2	0
27.3	0
27.4	0
27.5	0
27.6	0
27.7	0
27.8	0
27.9	0
28	0
28.1	0
28.2	0
28.3	0
28.4	0
28.5	0
28.6	0
28.7	0
28.8	0
28.9	0
29	0
29.1	0
29.2	0
29.3	0
29.4	0
29.5	0
29.6	0
29.7	0
29.8	0
29.9	0
30	0
30.1	0
30.2	0
30.3	0
30.4	0
30.5	0
30.6	0
30.7	0
30.8	0
30.9	0
31	0
31.1	0
31.2	0
31.3	0
31.4	0
31.5	0
31.6	0
31.7	0
31.8	0
31.9	0
32	0
32.1	0
32.2	0
32.3	0
32.4	0
32.5	0
32.6	0
32.7	0
32.8	0
32.9	0
33	0
33.1	0
33.2	0
33.3	0
33.4	0
33.5	0
33.6	0
33.7	0
33.8	0
33.9	0
34	0
34.1	0
34.2	0
34.3	0
34.4	0
34.5	0
34.6	0
34.7	0
34.8	0
34.9	0
35	0
35.1	0
35.2	0
35.3	0
35.4	0
35.5	0
35.6	0
35.7	0
35.8	0
35.9	0
36	0
36.1	0
36.2	0
36.3	0
36.4	0
36.5	0
36.6	0
36.7	0
36.8	0
36.9	0
37	0
37.1	0
37.2	0
37.3	0
37.4	0
37.5	0
37.6	0
37.7	0
37.8	0
37.9	0
38	0
38.1	0
38.2	0
38.3	0
38.4	0
38.5	0
38.6	0
38.7	0
38.8	0
38.9	0
39	0
39.1	0
39.2	0
39.3	0
39.4	0
39.5	0
39.6	0
39.7	0
39.8	0
39.9	0
40	0
40.1	0
40.2	0
40.3	0
40.4	0
40.5	0
40.6	0
40.7	0
40.8	0
40.9	0
41	0
41.1	0
41.2	0
41.3	0
41.4	0
41.5	0
41.6	0
41.7	0
41.8	0
41.9	0
42	0
42.1	0
42.2	0
42.3	0
42.4	0
42.5	0
42.6	0
42.7	0
42.8	0
42.9	0
43	0
43.1	0
43.2	0
43.3	0
43.4	0
43.5	0
43.6	0
43.7	0
43.8	0
43.9	0
44	0
44.1	0
44.2	0
44.3	0
44.4	0
44.5	0
44.6	0
44.7	0
44.8	0
44.9	0
45	0
45.1	0
45.2	0
45.3	0
45.4	0
45.5	0
45.6	0
45.7	0
45.8	0
45.9	0
46	0
46.1	0
46.2	0
46.3	0
46.4	0
46.5	0
46.6	0
46.7	0
46.8	0
46.9	0
47	0
47.1	0
47.2	0
47.3	0
47.4	0
47.5	0
47.6	0
47.7	0
47.8	0
47.9	0
48	0
48.1	0
48.2	0
48.3	0
48.4	0
48.5	0
48.6	0
48.7	0
48.8	0
48.9	0
49	0
49.1	0
49.2	0
49.3	0
49.4	0
49.5	0
49.6	0
49.7	0
49.8	0
49.9	0
50	0
50.1	0
50.2	0
50.3	0
50.4	0
50.5	0
50.6	0
50.7	0
50.8	0
50.9	0
51	0
51.1	0
51.2	0
51.3	0
51.4	0
51.5	0
51.6	0
51.7	0
51.8	0
51.9	0
52	0
52.1	0
52.2	0
52.3	0
52.4	0
52.5	0
52.6	0
52.7	0
52.8	0
52.9	0
53	0
53.1	0
53.2	0
53.3	0
53.4	0
53.5	0
53.6	0
53.7	0
53.8	0
53.9	0
54	0
54.1	0
54.2	0
54.3	0
54.4	0
54.5	0
54.6	0
54.7	0
54.8	0
54.9	0
55	0
55.1	0
55.2	0
55.3	0
55.4	0
55.5	0
55.6	0
55.7	0
55.8	0
55.9	0
56	0
56.1	0
56.2	0
56.3	0
56.4	0
56.5	0
56.6	0
56.7	0
56.8	0
56.9	0
57	0
57.1	0
57.2	0
57.3	0
57.4	0
57.5	0
57.6	0
57.7	0
57.8	0
57.9	0
58	0
58.1	0
58.2	0
58.3	0
58.4	0
58.5	0
58.6	0
58.7	0
58.8	0
58.9	0
59	0
59.1	0
59.2	0
59.3	0
59.4	0
59.5	0
59.6	0
59.7	0
59.8	0
59.9	0
60	0
60.1	0
60.2	0
60.3	0
60.4	0
60.5	0
60.6	0
60.7	0
60.8	0
60.9	0
61	0
61.1	0
61.2	0
61.3	0
61.4	0
61.5	0
61.6	0
61.7	0
61.8	0
61.9	0
62	0
62.1	0
62.2	0
62.3	0
62.4	0
62.5	0
62.6	0
62.7	0
62.8	0
62.9	0
63	0
63.1	0
63.2	0
63.3	0
63.4	0
63.5	0
63.6	0
63.7	0
63.8	0
63.9	0
64	0
64.1	0
64.2	0
64.3	0
64.4	0
64.5	0
64.6	0
64.7	0
64.8	0
64.9	0
65	0
65.1	0
65.2	0
65.3	0
65.4	0
65.5	0
65.6	0
65.7	0
65.8	0
65.9	0
66	0
66.1	0
66.2	0
66.3	0
66.4	0
66.5	0
66.6	0
66.7	0
66.8	0
66.9	0
67	0
67.1	0
67.2	0
67.3	0
67.4	0
67.5	0
67.6	0
67.7	0
67.8	0
67.9	0
68	0
68.1	0
68.2	0
68.3	0
68.4	0
68.5	0
68.6	0
68.7	0
68.8	0
68.9	0
69	0
69.1	0
69.2	0
69.3	0
69.4	0
69.5	0
69.6	0
69.7	0
69.8	0
69.9	0
70	0
70.1	0
70.2	0
70.3	0
70.4	0
70.5	0
70.6	0
70.7	0
70.8	0
70.9	0
71	0
71.1	0
71.2	0
71.3	0
71.4	0
71.5	0
71.6	0
71.7	0
71.8	0
71.9	0
72	0
72.1	0
72.2	0
72.3	0
72.4	0
72.5	0
72.6	0
72.7	0
72.8	0
72.9	0
73	0
73.1	0
73.2	0
73.3	0
73.4	0
73.5	0
73.6	0
73.7	0
73.8	0
73.9	0
74	0
74.1	0
74.2	0
74.3	0
74.4	0
74.5	0
74.6	0
74.7	0
74.8	0
74.9	0
75	0
75.1	0
75.2	0
75.3	0
75.4	0
75.5	0
75.6	0
75.7	0
75.8	0
75.9	0
76	0
76.1	0
76.2	0
76.3	0
76.4	0
76.5	0
76.6	0
76.7	0
76.8	0
76.9	0
77	0
77.1	0
77.2	0
77.3	0
77.4	0
77.5	0
77.6	0
77.7	0
77.8	0
77.9	0
78	0
78.1	0
78.2	0
78.3	0
78.4	0
78.5	0
78.6	0
78.7	0
78.8	0
78.9	0
79	0
79.1	0
79.2	0
79.3	0
79.4	0
79.5	0
79.6	0
79.7	0
79.8	0
79.9	0
80	0
80.1	0
80.2	0
80.3	0
80.4	0
80.5	0
80.6	0
80.7	0
80.8	0
80.9	0
81	0
81.1	0
81.2	0
81.3	0
81.4	0
81.5	0
81.6	0
81.7	0
81.8	0
81.9	0
82	0
82.1	0
82.2	0
82.3	0
82.4	0
82.5	0
82.6	0
82.7	0
82.8	0
82.9	0
83	0
83.1	0
83.2	0
83.3	0
83.4	0
83.5	0
83.6	0
83.7	0
83.8	0
83.9	0
84	0
84.1	0
84.2	0
84.3	0
84.4	0
84.5	0
84.6	0
84.7	0
84.8	0
84.9	0
85	0
85.1	0
85.2	0
85.3	0
85.4	0
85.5	0
85.6	0
85.7	0
85.8	0
85.9	0
86	0
86.1	0
86.2	0
86.3	0
86.4	0
86.5	0
86.6	0
86.7	0
86.8	0
86.9	0
87	0
87.1	0
87.2	0
87.3	0
87.4	0
87.5	0
87.6	0
87.7	0
87.8	0
87.9	0
88	0
88.1	0
88.2	0
88.3	0
88.4	0
88.5	0
88.6	0
88.7	0
88.8	0
88.9	0
89	0
89.1	0
89.2	0
89.3	0
89.4	0
89.5	0
89.6	0
89.7	0
89.8	0
89.9	0
90	0
90.1	0
90.2	0
90.3	0
90.4	0
90.5	0
90.6	0
90.7	0
90.8	0
90.9	0
91	0
91.1	0
91.2	0
91.3	0
91.4	0
91.5	0
91.6	0
91.7	0
91.8	0
91.9	0
92	0
92.1	0
92.2	0
92.3	0
92.4	0
92.5	0
92.6	0
92.7	0
92.8	0
92.9	0
93	0
93.1	0
93.2	0
93.3	0
93.4	0
93.5	0
93.6	0
93.7	0
93.8	0
93.9	0
94	0
94.1	0
94.2	0
94.3	0
94.4	0
94.5	0
94.6	0
94.7	0
94.8	0
94.9	0
95	0
95.1	0
95.2	0
95.3	0
95.4	0
95.5	0
95.6	0
95.7	0
95.8	0
95.9	0
96	0
96.1	0
96.2	0
96.3	0
96.4	0
96.5	0
96.6	0
96.7	0
96.8	0
96.9	0
97	0
97.1	0
97.2	0
97.3	0
97.4	0
97.5	0
97.6	0
97.7	0
97.8	0
97.9	0
98	0
98.1	0
98.2	0
98.3	0
98.4	0
98.5	0
98.6	0
98.7	0
98.8	0
98.9	0
99	0
99.1	0
99.2	0
99.3	0
99.4	0
99.5	0
99.6	0
99.7	0
99.8	0
99.9	0
100	0
100.1	0
100.2	0.000142857
100.3	0.000285714
100.4	0.000428571
100.5	0.000571429
100.6	0.000857143
100.7	0.00142857
100.8	0.00157143
100.9	0.00171429
101	0.00228571
101.1	0.00342857
101.2	0.00414286
101.3	0.00457143
101.4	0.005
101.5	0.00585714
101.6	0.007
101.7	0.00771429
101.8	0.00814286
101.9	0.00885714
102	0.00942857
102.1	0.0105714
102.2	0.0112857
102.3	0.0122857
102.4	0.0134286
102.5	0.015
102.6	0.0161429
102.7	0.0175714
102.8	0.0181429
102.9	0.0194286
103	0.0208571
103.1	0.0218571
103.2	0.0232857
103.3	0.0247143
103.4	0.026
103.5	0.0267143
103.6	0.0282857
103.7	0.0297143
103.8	0.0315714
103.9	0.033
104	0.0355714
104.1	0.0368571
104.2	0.0381429
104.3	0.0397143
104.4	0.0418571
104.5	0.0435714
104.6	0.045
104.7	0.0457143
104.8	0.0472857
104.9	0.0477143
105	0.0484286
105.1	0.0495714
105.2	0.0522857
105.3	0.0531429
105.4	0.0547143
105.5	0.0555714
105.6	0.0574286
105.7	0.0588571
105.8	0.0605714
105.9	0.0625714
106	0.064
106.1	0.0661429
106.2	0.0678571
106.3	0.07
106.4	0.0718571
106.5	0.0741429
106.6	0.0755714
106.7	0.0767143
106.8	0.0782857
106.9	0.0794286
107	0.0807143
107.1	0.0818571
107.2	0.0828571
107.3	0.0847143
107.4	0.0865714
107.5	0.0882857
107.6	0.0908571
107.7	0.0914286
107.8	0.0931429
107.9	0.095
108	0.0962857
108.1	0.0977143
108.2	0.0995714
108.3	0.101143
108.4	0.102143
108.5	0.103429
108.6	0.104143
108.7	0.106143
108.8	0.108
108.9	0.110143
109	0.111286
109.1	0.113
109.2	0.114286
109.3	0.116
109.4	0.117857
109.5	0.118857
109.6	0.119714
109.7	0.120857
109.8	0.122143
109.9	0.123286
110	0.123857
110.1	0.125
110.2	0.126571
110.3	0.128429
110.4	0.129714
110.5	0.130857
110.6	0.132571
110.7	0.134286
110.8	0.136143
110.9	0.137286
111	0.138
111.1	0.139
111.2	0.140571
111.3	0.141
111.4	0.142857
111.5	0.144571
111.6	0.145571
111.7	0.147143
111.8	0.148571
111.9	0.150571
112	0.151571
112.1	0.152571
112.2	0.153143
112.3	0.155857
112.4	0.156714
112.5	0.156857
112.6	0.159143
112.7	0.159571
112.8	0.160857
112.9	0.162857
113	0.163857
113.1	0.165143
113.2	0.167429
113.3	0.169286
113.4	0.171
113.5	0.173
113.6	0.173714
113.7	0.175
113.8	0.176429
113.9	0.177571
114	0.179571
114.1	0.180857
114.2	0.182286
114.3	0.183429
114.4	0.184429
114.5	0.186571
114.6	0.187857
114.7	0.188714
114.8	0.190286
114.9	0.191857
115	0.193143
115.1	0.194714
115.2	0.195571
115.3	0.196571
115.4	0.197286
115.5	0.198
115.6	0.198571
115.7	0.199143
115.8	0.199714
115.9	0.200429
116	0.202
116.1	0.203571
116.2	0.204571
116.3	0.206
116.4	0.207857
116.5	0.209
116.6	0.210714
116.7	0.211714
116.8	0.213143
116.9	0.213429
117	0.214429
117.1	0.214714
117.2	0.215571
117.3	0.216857
117.4	0.217571
117.5	0.219143
117.6	0.219714
117.7	0.221571
117.8	0.222
117.9	0.223571
118	0.224857
118.1	0.225571
118.2	0.226857
118.3	0.228143
118.4	0.229286
118.5	0.230286
118.6	0.231857
118.7	0.232857
118.8	0.233571
118.9	0.234571
119	0.235571
119.1	0.237286
119.2	0.238429
119.3	0.238571
119.4	0.239143
119.5	0.240571
119.6	0.241286
119.7	0.242286
119.8	0.243
119.9	0.244571
120	0.245857
120.1	0.247143
120.2	0.248143
120.3	0.248714
120.4	0.249286
120.5	0.249714
120.6	0.250429
120.7	0.250857
120.8	0.252
120.9	0.252429
121	0.254429
121.1	0.255714
121.2	0.256714
121.3	0.257857
121.4	0.258429
121.5	0.258857
121.6	0.259714
121.7	0.260429
121.8	0.260857
121.9	0.261429
122	0.262571
122.1	0.263143
122.2	0.264429
122.3	0.265571
122.4	0.267
122.5	0.268571
122.6	0.27
122.7	0.270571
122.8	0.271286
122.9	0.272143
123	0.272429
123.1	0.274
123.2	0.275
123.3	0.275571
123.4	0.277
123.5	0.277714
123.6	0.278857
123.7	0.280143
123.8	0.281143
123.9	0.281857
124	0.282714
124.1	0.284286
124.2	0.284571
124.3	0.284714
124.4	0.285143
124.5	0.286429
124.6	0.286571
124.7	0.287429
124.8	0.289286
124.9	0.289857
125	0.291143
125.1	0.291857
125.2	0.292857
125.3	0.293429
125.4	0.294143
125.5	0.295286
125.6	0.295429
125.7	0.297143
125.8	0.298143
125.9	0.299
126	0.300143
126.1	0.301143
126.2	0.303429
126.3	0.304571
126.4	0.305143
126.5	0.305571
126.6	0.306857
126.7	0.307857
126.8	0.308429
126.9	0.309
127	0.310143
127.1	0.310857
127.2	0.312
127.3	0.312286
127.4	0.313143
127.5	0.314
127.6	0.315286
127.7	0.316
127.8	0.317143
127.9	0.319429
128	0.321
128.1	0.322143
128.2	0.322571
128.3	0.323286
128.4	0.323857
128.5	0.324429
128.6	0.324857
128.7	0.325286
128.8	0.325571
128.9	0.326857
129	0.327857
129.1	0.328571
129.2	0.329857
129.3	0.330143
129.4	0.331
129.5	0.331714
129.6	0.333
129.7	0.333
129.8	0.333429
129.9	0.334286
130	0.335429
130.1	0.336571
130.2	0.338714
130.3	0.339714
130.4	0.340143
130.5	0.340714
130.6	0.341286
130.7	0.342571
130.8	0.343143
130.9	0.344143
131	0.345143
131.1	0.345714
131.2	0.346429
131.3	0.346857
131.4	0.347143
131.5	0.348
131.6	0.348714
131.7	0.349857
131.8	0.350857
131.9	0.352
132	0.352571
132.1	0.353714
132.2	0.355286
132.3	0.357
132.4	0.357714
132.5	0.358857
132.6	0.360286
132.7	0.360857
132.8	0.361429
132.9	0.362571
133	0.362571
133.1	0.363571
133.2	0.364571
133.3	0.365
133.4	0.366
133.5	0.366429
133.6	0.367143
133.7	0.368143
133.8	0.369286
133.9	0.37
134	0.370286
134.1	0.371286
134.2	0.371571
134.3	0.372857
134.4	0.373714
134.5	0.374
134.6	0.374714
134.7	0.376
134.8	0.376286
134.9	0.376714
135	0.376857
135.1	0.377143
135.2	0.377571
135.3	0.378143
135.4	0.379429
135.5	0.380143
135.6	0.380571
135.7	0.381143
135.8	0.381571
135.9	0.381286
136	0.382143
136.1	0.382429
136.2	0.382429
136.3	0.382857
136.4	0.383714
136.5	0.385
136.6	0.385857
136.7	0.386714
136.8	0.387857
136.9	0.387714
137	0.389143
137.1	0.389429
137.2	0.390286
137.3	0.391429
137.4	0.392
137.5	0.392429
137.6	0.393143
137.7	0.394143
137.8	0.395571
137.9	0.396143
138	0.396286
138.1	0.397
138.2	0.397429
138.3	0.398
138.4	0.398571
138.5	0.399286
138.6	0.399857
138.7	0.400714
138.8	0.402
138.9	0.403286
139	0.403714
139.1	0.404857
139.2	0.405571
139.3	0.406571
139.4	0.406714
139.5	0.407571
139.6	0.407857
139.7	0.408
139.8	0.408429
139.9	0.409286
140	0.409429
140.1	0.410429
140.2	0.410571
140.3	0.411
140.4	0.411571
140.5	0.412
140.6	0.413143
140.7	0.414
140.8	0.415
140.9	0.415714
141	0.416571
141.1	0.417857
141.2	0.418
141.3	0.419143
141.4	0.419714
141.5	0.420143
141.6	0.421429
141.7	0.422714
141.8	0.423571
141.9	0.423714
142	0.423714
142.1	0.424
142.2	0.424857
142.3	0.425571
142.4	0.425714
142.5	0.426
142.6	0.427286
142.7	0.428143
142.8	0.429429
142.9	0.429571
143	0.429857
143.1	0.430571
143.2	0.430429
143.3	0.430857
143.4	0.431571
143.5	0.432714
143.6	0.433571
143.7	0.432571
143.8	0.433286
143.9	0.434857
144	0.435571
144.1	0.436429
144.2	0.436857
144.3	0.437714
144.4	0.438
144.5	0.438143
144.6	0.438429
144.7	0.438857
144.8	0.439857
144.9	0.440286
145	0.440857
145.1	0.440857
145.2	0.441714
145.3	0.443571
145.4	0.443571
145.5	0.444286
145.6	0.444429
145.7	0.445714
145.8	0.446
145.9	0.446286
146	0.447143
146.1	0.448714
146.2	0.449857
146.3	0.451
146.4	0.450714
146.5	0.451286
146.6	0.451143
146.7	0.451714
146.8	0.452286
146.9	0.453143
147	0.453143
147.1	0.453857
147.2	0.454714
147.3	0.456
147.4	0.456286
147.5	0.456714
147.6	0.456429
147.7	0.457286
147.8	0.457143
147.9	0.457429
148	0.457714
148.1	0.458143
148.2	0.458
148.3	0.457857
148.4	0.458714
148.5	0.458857
148.6	0.459
148.7	0.459571
148.8	0.459143
148.9	0.459286
149	0.459
149.1	0.459571
149.2	0.460571
149.3	0.460571
149.4	0.460857
149.5	0.461571
149.6	0.462429
149.7	0.462857
149.8	0.463714
149.9	0.464571
150	0.465143
150.1	0.465714
150.2	0.465286
150.3	0.466143
150.4	0.466714
150.5	0.467429
150.6	0.467
150.7	0.467
150.8	0.467143
150.9	0.467
151	0.467143
151.1	0.467429
151.2	0.468286
151.3	0.468286
151.4	0.468429
151.5	0.469
151.6	0.469429
151.7	0.469286
151.8	0.469857
151.9	0.469714
152	0.469571
152.1	0.469857
152.2	0.470143
152.3	0.471286
152.4	0.471857
152.5	0.472429
152.6	0.473429
152.7	0.473857
152.8	0.474714
152.9	0.475429
153	0.476
153.1	0.476286
153.2	0.476286
153.3	0.475857
153.4	0.476
153.5	0.476286
153.6	0.476429
153.7	0.476857
153.8	0.477
153.9	0.477571
154	0.477286
154.1	0.478286
154.2	0.478571
154.3	0.479
154.4	0.479143
154.5	0.479286
154.6	0.479857
154.7	0.480286
154.8	0.480714
154.9	0.481857
155	0.482714
155.1	0.482857
155.2	0.482857
155.3	0.483
155.4	0.483429
155.5	0.483
155.6	0.483286
155.7	0.483857
155.8	0.484
155.9	0.484143
156	0.484429
156.1	0.485286
156.2	0.486714
156.3	0.486714
156.4	0.487286
156.5	0.487143
156.6	0.487571
156.7	0.487857
156.8	0.487143
156.9	0.487143
157	0.487143
157.1	0.487571
157.2	0.488571
157.3	0.488857
157.4	0.488714
157.5	0.488714
157.6	0.490143
157.7	0.490857
157.8	0.491
157.9	0.492143
158	0.492286
158.1	0.492714
158.2	0.493
158.3	0.493857
158.4	0.493714
158.5	0.494
158.6	0.494
158.7	0.494143
158.8	0.494571
158.9	0.494571
159	0.494714
159.1	0.494
159.2	0.494429
159.3	0.495143
159.4	0.495714
159.5	0.496571
159.6	0.496857
159.7	0.497143
159.8	0.497714
159.9	0.498429
160	0.498429
160.1	0.498286
160.2	0.498714
160.3	0.498857
160.4	0.499143
160.5	0.498714
160.6	0.498429
160.7	0.498571
160.8	0.498571
160.9	0.497857
161	0.497714
161.1	0.498
161.2	0.497857
161.3	0.498286
161.4	0.498429
161.5	0.498857
161.6	0.499571
161.7	0.5
161.8	0.500286
161.9	0.500429
162	0.500286
162.1	0.500429
162.2	0.501429
162.3	0.501857
162.4	0.501714
162.5	0.501714
162.6	0.502429
162.7	0.502857
162.8	0.503286
162.9	0.503857
163	0.504
163.1	0.504
163.2	0.503857
163.3	0.503857
163.4	0.504286
163.5	0.504429
163.6	0.504571
163.7	0.506429
163.8	0.507286
163.9	0.507
164	0.508
164.1	0.507857
164.2	0.508143
164.3	0.508
164.4	0.508429
164.5	0.508714
164.6	0.509
164.7	0.509714
164.8	0.509714
164.9	0.51
165	0.511286
165.1	0.511714
165.2	0.511
165.3	0.511143
165.4	0.510571
165.5	0.51
165.6	0.510143
165.7	0.511
165.8	0.511857
165.9	0.511714
166	0.512
166.1	0.511429
166.2	0.511286
166.3	0.513
166.4	0.513143
166.5	0.513
166.6	0.513429
166.7	0.513429
166.8	0.513286
166.9	0.513
167	0.513571
167.1	0.514143
167.2	0.514571
167.3	0.515
167.4	0.515
167.5	0.515
167.6	0.514714
167.7	0.515
167.8	0.515143
167.9	0.515857
168	0.517571
168.1	0.517714
168.2	0.518286
168.3	0.518286
168.4	0.519286
168.5	0.519857
168.6	0.520857
168.7	0.521571
168.8	0.521
168.9	0.522
169	0.522429
169.1	0.522857
169.2	0.522714
169.3	0.521857
169.4	0.521571
169.5	0.521571
169.6	0.522143
169.7	0.521714
169.8	0.521571
169.9	0.521714
170	0.521857
170.1	0.523
170.2	0.523286
170.3	0.524429
170.4	0.525
170.5	0.525286
170.6	0.525429
170.7	0.524571
170.8	0.524857
170.9	0.524857
171	0.525286
171.1	0.525714
171.2	0.526143
171.3	0.526857
171.4	0.526714
171.5	0.527286
171.6	0.527714
171.7	0.528143
171.8	0.528571
171.9	0.529
172	0.529143
172.1	0.528571
172.2	0.528429
172.3	0.529143
172.4	0.529714
172.5	0.530571
172.6	0.531286
172.7	0.531714
172.8	0.532571
172.9	0.533143
173	0.533
173.1	0.533571
173.2	0.533429
173.3	0.534429
173.4	0.534571
173.5	0.535
173.6	0.535
173.7	0.536
173.8	0.535429
173.9	0.535714
174	0.535571
174.1	0.536143
174.2	0.536429
174.3	0.536857
174.4	0.536857
174.5	0.537143
174.6	0.537857
174.7	0.538286
174.8	0.538143
174.9	0.538857
175	0.538857
175.1	0.538429
175.2	0.539286
175.3	0.540429
175.4	0.540429
175.5	0.540857
175.6	0.541429
175.7	0.542714
175.8	0.542857
175.9	0.543571
176	0.543857
176.1	0.545143
176.2	0.544857
176.3	0.545429
176.4	0.545
176.5	0.545714
176.6	0.545714
176.7	0.545429
176.8	0.546286
176.9	0.546714
177	0.546571
177.1	0.546571
177.2	0.546286
177.3	0.546143
177.4	0.546286
177.5	0.546
177.6	0.545571
177.7	0.546
177.8	0.546286
177.9	0.546286
178	0.546
178.1	0.546714
178.2	0.546286
178.3	0.546571
178.4	0.546286
178.5	0.545857
178.6	0.546571
178.7	0.546857
178.8	0.547429
178.9	0.547714
179	0.548
179.1	0.548
179.2	0.548143
179.3	0.548714
179.4	0.548429
179.5	0.548571
179.6	0.548714
179.7	0.549286
179.8	0.549571
179.9	0.549857
180	0.55
180.1	0.550714
180.2	0.550857
180.3	0.551571
180.4	0.551857
180.5	0.552143
180.6	0.553
180.7	0.552714
180.8	0.552571
180.9	0.554
181	0.554429
181.1	0.553286
181.2	0.553429
181.3	0.554143
181.4	0.554714
181.5	0.554571
181.6	0.554286
181.7	0.555429
181.8	0.555714
181.9	0.555571
182	0.555857
182.1	0.555857
182.2	0.556143
182.3	0.556429
182.4	0.556857
182.5	0.556571
182.6	0.557143
182.7	0.557286
182.8	0.557857
182.9	0.558
183	0.558143
183.1	0.558143
183.2	0.558571
183.3	0.558429
183.4	0.558857
183.5	0.558571
183.6	0.559
183.7	0.559143
183.8	0.559286
183.9	0.559143
184	0.558857
184.1	0.559
184.2	0.559143
184.3	0.559429
184.4	0.558714
184.5	0.559143
184.6	0.560143
184.7	0.560429
184.8	0.56
184.9	0.560143
185	0.559714
185.1	0.560286
185.2	0.559857
185.3	0.56
185.4	0.559857
185.5	0.560429
185.6	0.560714
185.7	0.560857
185.8	0.561286
185.9	0.561143
186	0.561429
186.1	0.562
186.2	0.562571
186.3	0.563143
186.4	0.563571
186.5	0.564143
186.6	0.564857
186.7	0.565286
186.8	0.566
186.9	0.566286
187	0.565857
187.1	0.566143
187.2	0.565857
187.3	0.565429
187.4	0.564571
187.5	0.564429
187.6	0.564429
187.7	0.564
187.8	0.563857
187.9	0.563857
188	0.563
188.1	0.563571
188.2	0.564286
188.3	0.565571
188.4	0.565857
188.5	0.566429
188.6	0.566429
188.7	0.566857
188.8	0.566714
188.9	0.567143
189	0.567857
189.1	0.567857
189.2	0.568
189.3	0.568571
189.4	0.568714
189.5	0.568857
189.6	0.568286
189.7	0.568571
189.8	0.567571
189.9	0.567429
190	0.567571
190.1	0.567286
190.2	0.568286
190.3	0.568714
190.4	0.569571
190.5	0.569143
190.6	0.569286
190.7	0.569143
190.8	0.569429
190.9	0.569714
191	0.569857
191.1	0.569857
191.2	0.569571
191.3	0.570286
191.4	0.570286
191.5	0.570857
191.6	0.571
191.7	0.571
191.8	0.571143
191.9	0.572143
192	0.572143
192.1	0.572286
192.2	0.572286
192.3	0.572143
192.4	0.572714
192.5	0.573571
192.6	0.574143
192.7	0.574571
192.8	0.575714
192.9	0.575571
193	0.575571
193.1	0.575857
193.2	0.576429
193.3	0.576
193.4	0.576857
193.5	0.577143
193.6	0.576571
193.7	0.576143
193.8	0.576429
193.9	0.576
194	0.576571
194.1	0.576571
194.2	0.576571
194.3	0.576714
194.4	0.577286
194.5	0.577857
194.6	0.577571
194.7	0.578286
194.8	0.578429
194.9	0.579143
195	0.579143
195.1	0.579714
195.2	0.580286
195.3	0.580571
195.4	0.580571
195.5	0.580857
195.6	0.581429
195.7	0.581571
195.8	0.581143
195.9	0.580857
196	0.581
196.1	0.581571
196.2	0.581714
196.3	0.581857
196.4	0.582714
196.5	0.583143
196.6	0.583429
196.7	0.583429
196.8	0.583429
196.9	0.584
197	0.585286
197.1	0.585143
197.2	0.585429
197.3	0.585714
197.4	0.586429
197.5	0.586571
197.6	0.586571
197.7	0.586857
197.8	0.586714
197.9	0.587143
198	0.587429
198.1	0.587857
198.2	0.588143
198.3	0.589
198.4	0.589571
198.5	0.59
198.6	0.590714
198.7	0.591571
198.8	0.591286
198.9	0.591
199	0.590429
199.1	0.59
199.2	0.590143
199.3	0.59
199.4	0.590286
199.5	0.59
199.6	0.590429
199.7	0.590429
199.8	0.590857
199.9	0.591286
200	0.592286
[truncated: 14,000 more rows]
