# Supplementary material for: Bayesian inference of kinetic schemes for ion channels by Kalman filtering
Source: eLife journal article supplement (doi:10.7554/elife.62714), 2022-05-04
Supplement: fig4-data6 [file 1_Sim_N_10000_Fluor_MW.xlsx]

## Sheet: Tabelle1
0.1	0
0.2	0
0.3	0
0.4	0
0.5	0
0.6	0
0.7	0
0.8	0
0.9	0
1	0
1.1	0
1.2	0
1.3	0
1.4	0
1.5	0
1.6	0
1.7	0
1.8	0
1.9	0
2	0
2.1	0
2.2	0
2.3	0
2.4	0
2.5	0
2.6	0
2.7	0
2.8	0
2.9	0
3	0
3.1	0
3.2	0
3.3	0
3.4	0
3.5	0
3.6	0
3.7	0
3.8	0
3.9	0
4	0
4.1	0
4.2	0
4.3	0
4.4	0
4.5	0
4.6	0
4.7	0
4.8	0
4.9	0
5	0
5.1	0
5.2	0
5.3	0
5.4	0
5.5	0
5.6	0
5.7	0
5.8	0
5.9	0
6	0
6.1	0
6.2	0
6.3	0
6.4	0
6.5	0
6.6	0
6.7	0
6.8	0
6.9	0
7	0
7.1	0
7.2	0
7.3	0
7.4	0
7.5	0
7.6	0
7.7	0
7.8	0
7.9	0
8	0
8.1	0
8.2	0
8.3	0
8.4	0
8.5	0
8.6	0
8.7	0
8.8	0
8.9	0
9	0
9.1	0
9.2	0
9.3	0
9.4	0
9.5	0
9.6	0
9.7	0
9.8	0
9.9	0
10	0
10.1	0
10.2	0
10.3	0
10.4	0
10.5	0
10.6	0
10.7	0
10.8	0
10.9	0
11	0
11.1	0
11.2	0
11.3	0
11.4	0
11.5	0
11.6	0
11.7	0
11.8	0
11.9	0
12	0
12.1	0
12.2	0
12.3	0
12.4	0
12.5	0
12.6	0
12.7	0
12.8	0
12.9	0
13	0
13.1	0
13.2	0
13.3	0
13.4	0
13.5	0
13.6	0
13.7	0
13.8	0
13.9	0
14	0
14.1	0
14.2	0
14.3	0
14.4	0
14.5	0
14.6	0
14.7	0
14.8	0
14.9	0
15	0
15.1	0
15.2	0
15.3	0
15.4	0
15.5	0
15.6	0
15.7	0
15.8	0
15.9	0
16	0
16.1	0
16.2	0
16.3	0
16.4	0
16.5	0
16.6	0
16.7	0
16.8	0
16.9	0
17	0
17.1	0
17.2	0
17.3	0
17.4	0
17.5	0
17.6	0
17.7	0
17.8	0
17.9	0
18	0
18.1	0
18.2	0
18.3	0
18.4	0
18.5	0
18.6	0
18.7	0
18.8	0
18.9	0
19	0
19.1	0
19.2	0
19.3	0
19.4	0
19.5	0
19.6	0
19.7	0
19.8	0
19.9	0
20	0
20.1	0
20.2	0
20.3	0
20.4	0
20.5	0
20.6	0
20.7	0
20.8	0
20.9	0
21	0
21.1	0
21.2	0
21.3	0
21.4	0
21.5	0
21.6	0
21.7	0
21.8	0
21.9	0
22	0
22.1	0
22.2	0
22.3	0
22.4	0
22.5	0
22.6	0
22.7	0
22.8	0
22.9	0
23	0
23.1	0
23.2	0
23.3	0
23.4	0
23.5	0
23.6	0
23.7	0
23.8	0
23.9	0
24	0
24.1	0
24.2	0
24.3	0
24.4	0
24.5	0
24.6	0
24.7	0
24.8	0
24.9	0
25	0
25.1	0
25.2	0
25.3	0
25.4	0
25.5	0
25.6	0
25.7	0
25.8	0
25.9	0
26	0
26.1	0
26.2	0
26.3	0
26.4	0
26.5	0
26.6	0
26.7	0
26.8	0
26.9	0
27	0
27.1	0
27.2	0
27.3	0
27.4	0
27.5	0
27.6	0
27.7	0
27.8	0
27.9	0
28	0
28.1	0
28.2	0
28.3	0
28.4	0
28.5	0
28.6	0
28.7	0
28.8	0
28.9	0
29	0
29.1	0
29.2	0
29.3	0
29.4	0
29.5	0
29.6	0
29.7	0
29.8	0
29.9	0
30	0
30.1	0
30.2	0
30.3	0
30.4	0
30.5	0
30.6	0
30.7	0
30.8	0
30.9	0
31	0
31.1	0
31.2	0
31.3	0
31.4	0
31.5	0
31.6	0
31.7	0
31.8	0
31.9	0
32	0
32.1	0
32.2	0
32.3	0
32.4	0
32.5	0
32.6	0
32.7	0
32.8	0
32.9	0
33	0
33.1	0
33.2	0
33.3	0
33.4	0
33.5	0
33.6	0
33.7	0
33.8	0
33.9	0
34	0
34.1	0
34.2	0
34.3	0
34.4	0
34.5	0
34.6	0
34.7	0
34.8	0
34.9	0
35	0
35.1	0
35.2	0
35.3	0
35.4	0
35.5	0
35.6	0
35.7	0
35.8	0
35.9	0
36	0
36.1	0
36.2	0
36.3	0
36.4	0
36.5	0
36.6	0
36.7	0
36.8	0
36.9	0
37	0
37.1	0
37.2	0
37.3	0
37.4	0
37.5	0
37.6	0
37.7	0
37.8	0
37.9	0
38	0
38.1	0
38.2	0
38.3	0
38.4	0
38.5	0
38.6	0
38.7	0
38.8	0
38.9	0
39	0
39.1	0
39.2	0
39.3	0
39.4	0
39.5	0
39.6	0
39.7	0
39.8	0
39.9	0
40	0
40.1	0
40.2	0
40.3	0
40.4	0
40.5	0
40.6	0
40.7	0
40.8	0
40.9	0
41	0
41.1	0
41.2	0
41.3	0
41.4	0
41.5	0
41.6	0
41.7	0
41.8	0
41.9	0
42	0
42.1	0
42.2	0
42.3	0
42.4	0
42.5	0
42.6	0
42.7	0
42.8	0
42.9	0
43	0
43.1	0
43.2	0
43.3	0
43.4	0
43.5	0
43.6	0
43.7	0
43.8	0
43.9	0
44	0
44.1	0
44.2	0
44.3	0
44.4	0
44.5	0
44.6	0
44.7	0
44.8	0
44.9	0
45	0
45.1	0
45.2	0
45.3	0
45.4	0
45.5	0
45.6	0
45.7	0
45.8	0
45.9	0
46	0
46.1	0
46.2	0
46.3	0
46.4	0
46.5	0
46.6	0
46.7	0
46.8	0
46.9	0
47	0
47.1	0
47.2	0
47.3	0
47.4	0
47.5	0
47.6	0
47.7	0
47.8	0
47.9	0
48	0
48.1	0
48.2	0
48.3	0
48.4	0
48.5	0
48.6	0
48.7	0
48.8	0
48.9	0
49	0
49.1	0
49.2	0
49.3	0
49.4	0
49.5	0
49.6	0
49.7	0
49.8	0
49.9	0
50	0
50.1	0
50.2	0
50.3	0
50.4	0
50.5	0
50.6	0
50.7	0
50.8	0
50.9	0
51	0
51.1	0
51.2	0
51.3	0
51.4	0
51.5	0
51.6	0
51.7	0
51.8	0
51.9	0
52	0
52.1	0
52.2	0
52.3	0
52.4	0
52.5	0
52.6	0
52.7	0
52.8	0
52.9	0
53	0
53.1	0
53.2	0
53.3	0
53.4	0
53.5	0
53.6	0
53.7	0
53.8	0
53.9	0
54	0
54.1	0
54.2	0
54.3	0
54.4	0
54.5	0
54.6	0
54.7	0
54.8	0
54.9	0
55	0
55.1	0
55.2	0
55.3	0
55.4	0
55.5	0
55.6	0
55.7	0
55.8	0
55.9	0
56	0
56.1	0
56.2	0
56.3	0
56.4	0
56.5	0
56.6	0
56.7	0
56.8	0
56.9	0
57	0
57.1	0
57.2	0
57.3	0
57.4	0
57.5	0
57.6	0
57.7	0
57.8	0
57.9	0
58	0
58.1	0
58.2	0
58.3	0
58.4	0
58.5	0
58.6	0
58.7	0
58.8	0
58.9	0
59	0
59.1	0
59.2	0
59.3	0
59.4	0
59.5	0
59.6	0
59.7	0
59.8	0
59.9	0
60	0
60.1	0
60.2	0
60.3	0
60.4	0
60.5	0
60.6	0
60.7	0
60.8	0
60.9	0
61	0
61.1	0
61.2	0
61.3	0
61.4	0
61.5	0
61.6	0
61.7	0
61.8	0
61.9	0
62	0
62.1	0
62.2	0
62.3	0
62.4	0
62.5	0
62.6	0
62.7	0
62.8	0
62.9	0
63	0
63.1	0
63.2	0
63.3	0
63.4	0
63.5	0
63.6	0
63.7	0
63.8	0
63.9	0
64	0
64.1	0
64.2	0
64.3	0
64.4	0
64.5	0
64.6	0
64.7	0
64.8	0
64.9	0
65	0
65.1	0
65.2	0
65.3	0
65.4	0
65.5	0
65.6	0
65.7	0
65.8	0
65.9	0
66	0
66.1	0
66.2	0
66.3	0
66.4	0
66.5	0
66.6	0
66.7	0
66.8	0
66.9	0
67	0
67.1	0
67.2	0
67.3	0
67.4	0
67.5	0
67.6	0
67.7	0
67.8	0
67.9	0
68	0
68.1	0
68.2	0
68.3	0
68.4	0
68.5	0
68.6	0
68.7	0
68.8	0
68.9	0
69	0
69.1	0
69.2	0
69.3	0
69.4	0
69.5	0
69.6	0
69.7	0
69.8	0
69.9	0
70	0
70.1	0
70.2	0
70.3	0
70.4	0
70.5	0
70.6	0
70.7	0
70.8	0
70.9	0
71	0
71.1	0
71.2	0
71.3	0
71.4	0
71.5	0
71.6	0
71.7	0
71.8	0
71.9	0
72	0
72.1	0
72.2	0
72.3	0
72.4	0
72.5	0
72.6	0
72.7	0
72.8	0
72.9	0
73	0
73.1	0
73.2	0
73.3	0
73.4	0
73.5	0
73.6	0
73.7	0
73.8	0
73.9	0
74	0
74.1	0
74.2	0
74.3	0
74.4	0
74.5	0
74.6	0
74.7	0
74.8	0
74.9	0
75	0
75.1	0
75.2	0
75.3	0
75.4	0
75.5	0
75.6	0
75.7	0
75.8	0
75.9	0
76	0
76.1	0
76.2	0
76.3	0
76.4	0
76.5	0
76.6	0
76.7	0
76.8	0
76.9	0
77	0
77.1	0
77.2	0
77.3	0
77.4	0
77.5	0
77.6	0
77.7	0
77.8	0
77.9	0
78	0
78.1	0
78.2	0
78.3	0
78.4	0
78.5	0
78.6	0
78.7	0
78.8	0
78.9	0
79	0
79.1	0
79.2	0
79.3	0
79.4	0
79.5	0
79.6	0
79.7	0
79.8	0
79.9	0
80	0
80.1	0
80.2	0
80.3	0
80.4	0
80.5	0
80.6	0
80.7	0
80.8	0
80.9	0
81	0
81.1	0
81.2	0
81.3	0
81.4	0
81.5	0
81.6	0
81.7	0
81.8	0
81.9	0
82	0
82.1	0
82.2	0
82.3	0
82.4	0
82.5	0
82.6	0
82.7	0
82.8	0
82.9	0
83	0
83.1	0
83.2	0
83.3	0
83.4	0
83.5	0
83.6	0
83.7	0
83.8	0
83.9	0
84	0
84.1	0
84.2	0
84.3	0
84.4	0
84.5	0
84.6	0
84.7	0
84.8	0
84.9	0
85	0
85.1	0
85.2	0
85.3	0
85.4	0
85.5	0
85.6	0
85.7	0
85.8	0
85.9	0
86	0
86.1	0
86.2	0
86.3	0
86.4	0
86.5	0
86.6	0
86.7	0
86.8	0
86.9	0
87	0
87.1	0
87.2	0
87.3	0
87.4	0
87.5	0
87.6	0
87.7	0
87.8	0
87.9	0
88	0
88.1	0
88.2	0
88.3	0
88.4	0
88.5	0
88.6	0
88.7	0
88.8	0
88.9	0
89	0
89.1	0
89.2	0
89.3	0
89.4	0
89.5	0
89.6	0
89.7	0
89.8	0
89.9	0
90	0
90.1	0
90.2	0
90.3	0
90.4	0
90.5	0
90.6	0
90.7	0
90.8	0
90.9	0
91	0
91.1	0
91.2	0
91.3	0
91.4	0
91.5	0
91.6	0
91.7	0
91.8	0
91.9	0
92	0
92.1	0
92.2	0
92.3	0
92.4	0
92.5	0
92.6	0
92.7	0
92.8	0
92.9	0
93	0
93.1	0
93.2	0
93.3	0
93.4	0
93.5	0
93.6	0
93.7	0
93.8	0
93.9	0
94	0
94.1	0
94.2	0
94.3	0
94.4	0
94.5	0
94.6	0
94.7	0
94.8	0
94.9	0
95	0
95.1	0
95.2	0
95.3	0
95.4	0
95.5	0
95.6	0
95.7	0
95.8	0
95.9	0
96	0
96.1	0
96.2	0
96.3	0
96.4	0
96.5	0
96.6	0
96.7	0
96.8	0
96.9	0
97	0
97.1	0
97.2	0
97.3	0
97.4	0
97.5	0
97.6	0
97.7	0
97.8	0
97.9	0
98	0
98.1	0
98.2	0
98.3	0
98.4	0
98.5	0
98.6	0
98.7	0
98.8	0
98.9	0
99	0
99.1	0
99.2	0
99.3	0
99.4	0
99.5	0
99.6	0
99.7	0
99.8	0
99.9	0
100	0
100.1	0.0559
100.2	0.1071
100.3	0.1547
100.4	0.19685
100.5	0.2377
100.6	0.27275
100.7	0.30355
100.8	0.3318
100.9	0.3558
101	0.37875
101.1	0.40055
101.2	0.42205
101.3	0.44005
101.4	0.4585
101.5	0.47265
101.6	0.48725
101.7	0.4989
101.8	0.5115
101.9	0.52025
102	0.52945
102.1	0.5407
102.2	0.5489
102.3	0.5561
102.4	0.56485
102.5	0.57205
102.6	0.58095
102.7	0.58625
102.8	0.5889
102.9	0.59475
103	0.601
103.1	0.6061
103.2	0.61095
103.3	0.61495
103.4	0.61745
103.5	0.6198
103.6	0.6225
103.7	0.6253
103.8	0.627
103.9	0.6281
104	0.6324
104.1	0.63275
104.2	0.6346
104.3	0.637
104.4	0.6392
104.5	0.6414
104.6	0.6433
104.7	0.64235
104.8	0.64485
104.9	0.6456
105	0.64895
105.1	0.65225
105.2	0.65245
105.3	0.65325
105.4	0.65545
105.5	0.6573
105.6	0.65845
105.7	0.66135
105.8	0.66235
105.9	0.664
106	0.6641
106.1	0.6651
106.2	0.66555
106.3	0.66575
106.4	0.6669
106.5	0.6695
106.6	0.67015
106.7	0.6709
106.8	0.67135
106.9	0.674
107	0.67355
107.1	0.67575
107.2	0.67625
107.3	0.67695
107.4	0.6788
107.5	0.67925
107.6	0.68015
107.7	0.67985
107.8	0.68135
107.9	0.6816
108	0.6808
108.1	0.68105
108.2	0.6827
108.3	0.6825
108.4	0.6822
108.5	0.68165
108.6	0.68065
108.7	0.6784
108.8	0.67845
108.9	0.6788
109	0.6789
109.1	0.67815
109.2	0.68035
109.3	0.68185
109.4	0.68295
109.5	0.68235
109.6	0.6853
109.7	0.68485
109.8	0.68545
109.9	0.68575
110	0.68635
110.1	0.68515
110.2	0.6886
110.3	0.68805
110.4	0.6888
110.5	0.68975
110.6	0.6902
110.7	0.69155
110.8	0.69175
110.9	0.69335
111	0.69285
111.1	0.69495
111.2	0.6948
111.3	0.69465
111.4	0.6956
111.5	0.69745
111.6	0.69755
111.7	0.69735
111.8	0.699
111.9	0.69995
112	0.6998
112.1	0.70145
112.2	0.6993
112.3	0.69835
112.4	0.6986
112.5	0.6983
112.6	0.70025
112.7	0.7022
112.8	0.70275
112.9	0.70355
113	0.70585
113.1	0.70735
113.2	0.7078
113.3	0.70845
113.4	0.70775
113.5	0.7083
113.6	0.7079
113.7	0.70995
113.8	0.7107
113.9	0.7108
114	0.7127
114.1	0.7127
114.2	0.71345
114.3	0.71165
114.4	0.71165
114.5	0.7106
114.6	0.71185
114.7	0.71245
114.8	0.7141
114.9	0.71545
115	0.71605
115.1	0.7153
115.2	0.71405
115.3	0.71475
115.4	0.71535
115.5	0.71605
115.6	0.716
115.7	0.71665
115.8	0.7183
115.9	0.7197
116	0.7207
116.1	0.7208
116.2	0.7215
116.3	0.7225
116.4	0.72375
116.5	0.7245
116.6	0.7242
116.7	0.724
116.8	0.7252
116.9	0.7245
117	0.72505
117.1	0.72585
117.2	0.72505
117.3	0.72565
117.4	0.7243
117.5	0.7253
117.6	0.7234
117.7	0.724
117.8	0.72345
117.9	0.7233
118	0.7248
118.1	0.72345
118.2	0.72465
118.3	0.72555
118.4	0.72705
118.5	0.72765
118.6	0.72765
118.7	0.7271
118.8	0.7273
118.9	0.7289
119	0.7282
119.1	0.729
119.2	0.72745
119.3	0.7279
119.4	0.72985
119.5	0.7287
119.6	0.7303
119.7	0.7308
119.8	0.7317
119.9	0.73225
120	0.7313
120.1	0.73195
120.2	0.7347
120.3	0.73485
120.4	0.7348
120.5	0.7344
120.6	0.73495
120.7	0.73385
120.8	0.7344
120.9	0.734
121	0.734
121.1	0.73535
121.2	0.73675
121.3	0.73745
121.4	0.73635
121.5	0.7371
121.6	0.7376
121.7	0.73875
121.8	0.73945
121.9	0.74025
122	0.7397
122.1	0.74065
122.2	0.7412
122.3	0.7419
122.4	0.7418
122.5	0.74265
122.6	0.74275
122.7	0.74435
122.8	0.7439
122.9	0.74455
123	0.74345
123.1	0.7454
123.2	0.74515
123.3	0.7447
123.4	0.74655
123.5	0.74695
123.6	0.7459
123.7	0.7454
123.8	0.74425
123.9	0.744
124	0.745
124.1	0.74425
124.2	0.74515
124.3	0.7475
124.4	0.74685
124.5	0.7485
124.6	0.74735
124.7	0.74795
124.8	0.7476
124.9	0.74955
125	0.74975
125.1	0.75175
125.2	0.75285
125.3	0.7528
125.4	0.7537
125.5	0.75465
125.6	0.7535
125.7	0.75285
125.8	0.75085
125.9	0.7522
126	0.75255
126.1	0.75475
126.2	0.75555
126.3	0.7561
126.4	0.7559
126.5	0.75575
126.6	0.75605
126.7	0.75575
126.8	0.75595
126.9	0.7559
127	0.75575
127.1	0.75575
127.2	0.75535
127.3	0.75675
127.4	0.7583
127.5	0.75845
127.6	0.75835
127.7	0.76
127.8	0.76005
127.9	0.76015
128	0.76155
128.1	0.7618
128.2	0.76185
128.3	0.76095
128.4	0.76035
128.5	0.76105
128.6	0.76265
128.7	0.7636
128.8	0.76325
128.9	0.76205
129	0.76185
129.1	0.7624
129.2	0.76205
129.3	0.7624
129.4	0.7629
129.5	0.76355
129.6	0.76325
129.7	0.76325
129.8	0.7638
129.9	0.7639
130	0.7635
130.1	0.76475
130.2	0.7659
130.3	0.7677
130.4	0.76735
130.5	0.76905
130.6	0.769
130.7	0.76805
130.8	0.7698
130.9	0.76865
131	0.77045
131.1	0.7709
131.2	0.7717
131.3	0.7709
131.4	0.77065
131.5	0.77055
131.6	0.77005
131.7	0.77135
131.8	0.77065
131.9	0.77055
132	0.77
132.1	0.7705
132.2	0.77055
132.3	0.77155
132.4	0.7712
132.5	0.77195
132.6	0.7721
132.7	0.7719
132.8	0.77075
132.9	0.7708
133	0.77035
133.1	0.77065
133.2	0.77295
133.3	0.7738
133.4	0.7739
133.5	0.7736
133.6	0.7755
133.7	0.77455
133.8	0.77395
133.9	0.7744
134	0.77415
134.1	0.7737
134.2	0.7752
134.3	0.7753
134.4	0.77575
134.5	0.77645
134.6	0.77715
134.7	0.7771
134.8	0.7779
134.9	0.77875
135	0.7789
135.1	0.7794
135.2	0.78025
135.3	0.7796
135.4	0.77965
135.5	0.7806
135.6	0.77975
135.7	0.7799
135.8	0.7818
135.9	0.7829
136	0.7824
136.1	0.78185
136.2	0.78195
136.3	0.78295
136.4	0.7841
136.5	0.78415
136.6	0.78475
136.7	0.7846
136.8	0.78565
136.9	0.78635
137	0.78675
137.1	0.7873
137.2	0.7873
137.3	0.7892
137.4	0.78855
137.5	0.78875
137.6	0.7876
137.7	0.7871
137.8	0.78545
137.9	0.7852
138	0.7855
138.1	0.78755
138.2	0.7888
138.3	0.78985
138.4	0.78775
138.5	0.78815
138.6	0.7877
138.7	0.78815
138.8	0.7909
138.9	0.7899
139	0.79045
139.1	0.79145
139.2	0.79025
139.3	0.78915
139.4	0.78915
139.5	0.78935
139.6	0.78975
139.7	0.79025
139.8	0.79055
139.9	0.7902
140	0.79075
140.1	0.7918
140.2	0.7928
140.3	0.79195
140.4	0.79185
140.5	0.7919
140.6	0.7909
140.7	0.7905
140.8	0.7919
140.9	0.7921
141	0.79335
141.1	0.79425
141.2	0.79495
141.3	0.7947
141.4	0.79575
141.5	0.79605
141.6	0.7965
141.7	0.7976
141.8	0.7972
141.9	0.79495
142	0.79585
142.1	0.79645
142.2	0.7966
142.3	0.79725
142.4	0.79835
142.5	0.79915
142.6	0.79915
142.7	0.79875
142.8	0.7988
142.9	0.79905
143	0.79945
143.1	0.7979
143.2	0.7975
143.3	0.7978
143.4	0.79705
143.5	0.79635
143.6	0.79655
143.7	0.795
143.8	0.79585
143.9	0.79545
144	0.79565
144.1	0.79465
144.2	0.79545
144.3	0.7949
144.4	0.79505
144.5	0.79625
144.6	0.79735
144.7	0.79755
144.8	0.79835
144.9	0.79905
145	0.7996
145.1	0.79925
145.2	0.7985
145.3	0.79745
145.4	0.7986
145.5	0.7992
145.6	0.7993
145.7	0.80025
145.8	0.80015
145.9	0.8012
146	0.8016
146.1	0.802
146.2	0.8025
146.3	0.80255
146.4	0.80275
146.5	0.80085
146.6	0.8007
146.7	0.80115
146.8	0.7989
146.9	0.79935
147	0.7999
147.1	0.80025
147.2	0.80175
147.3	0.8012
147.4	0.80185
147.5	0.80185
147.6	0.8022
147.7	0.8028
147.8	0.80325
147.9	0.80345
148	0.8033
148.1	0.80445
148.2	0.80585
148.3	0.8055
148.4	0.80585
148.5	0.8058
148.6	0.80575
148.7	0.80585
148.8	0.80625
148.9	0.80745
149	0.8082
149.1	0.80915
149.2	0.80895
149.3	0.809
149.4	0.8103
149.5	0.80835
149.6	0.8075
149.7	0.80785
149.8	0.81005
149.9	0.8089
150	0.80865
150.1	0.80775
150.2	0.8076
150.3	0.8079
150.4	0.80875
150.5	0.8081
150.6	0.80715
150.7	0.80865
150.8	0.80995
150.9	0.8107
151	0.8112
151.1	0.81055
151.2	0.81035
151.3	0.8093
151.4	0.8088
151.5	0.8087
151.6	0.8073
151.7	0.80795
151.8	0.80695
151.9	0.8083
152	0.8091
152.1	0.8097
152.2	0.80935
152.3	0.8102
152.4	0.80875
152.5	0.8096
152.6	0.81025
152.7	0.81125
152.8	0.8116
152.9	0.8139
153	0.8143
153.1	0.81475
153.2	0.8151
153.3	0.8151
153.4	0.8154
153.5	0.816
153.6	0.81595
153.7	0.8158
153.8	0.81635
153.9	0.8163
154	0.81515
154.1	0.8163
154.2	0.8154
154.3	0.8154
154.4	0.81605
154.5	0.81745
154.6	0.8168
154.7	0.8155
154.8	0.8145
154.9	0.8155
155	0.81675
155.1	0.81555
155.2	0.8163
155.3	0.81645
155.4	0.8176
155.5	0.8177
155.6	0.8177
155.7	0.8161
155.8	0.81495
155.9	0.8156
156	0.81485
156.1	0.81555
156.2	0.8165
156.3	0.81725
156.4	0.81715
156.5	0.81755
156.6	0.81735
156.7	0.81605
156.8	0.81695
156.9	0.8171
157	0.8176
157.1	0.8201
157.2	0.82095
157.3	0.82075
157.4	0.8195
157.5	0.81935
157.6	0.8205
157.7	0.82055
157.8	0.8198
157.9	0.8197
158	0.821
158.1	0.8224
158.2	0.8234
158.3	0.82395
158.4	0.8232
158.5	0.82185
158.6	0.81995
158.7	0.8187
158.8	0.818
158.9	0.8188
159	0.8193
159.1	0.8189
159.2	0.8196
159.3	0.81865
159.4	0.8195
159.5	0.81875
159.6	0.8188
159.7	0.81955
159.8	0.81905
159.9	0.8199
160	0.81995
160.1	0.81975
160.2	0.8191
160.3	0.8192
160.4	0.82005
160.5	0.8197
160.6	0.82085
160.7	0.82145
160.8	0.82135
160.9	0.82205
161	0.8216
161.1	0.8218
161.2	0.823
161.3	0.82385
161.4	0.8238
161.5	0.8243
161.6	0.8251
161.7	0.82485
161.8	0.8246
161.9	0.8264
162	0.82605
162.1	0.82705
162.2	0.8271
162.3	0.8277
162.4	0.8291
162.5	0.82855
162.6	0.82875
162.7	0.8282
162.8	0.82725
162.9	0.8271
163	0.82835
163.1	0.83055
163.2	0.8301
163.3	0.83065
163.4	0.82985
163.5	0.8294
163.6	0.8292
163.7	0.8284
163.8	0.82845
163.9	0.8291
164	0.82965
164.1	0.8284
164.2	0.8293
164.3	0.82975
164.4	0.83105
164.5	0.8307
164.6	0.8315
164.7	0.8316
164.8	0.83155
164.9	0.8304
165	0.83055
165.1	0.8305
165.2	0.8318
165.3	0.83115
165.4	0.8301
165.5	0.8301
165.6	0.8303
165.7	0.82975
165.8	0.82975
165.9	0.8291
166	0.82985
166.1	0.8313
166.2	0.83105
166.3	0.83105
166.4	0.83205
166.5	0.83265
166.6	0.83215
166.7	0.83225
166.8	0.83205
166.9	0.8314
167	0.83125
167.1	0.83125
167.2	0.83155
167.3	0.83175
167.4	0.83165
167.5	0.8306
167.6	0.8309
167.7	0.83095
167.8	0.8303
167.9	0.83085
168	0.832
168.1	0.8329
168.2	0.83275
168.3	0.8337
168.4	0.83405
168.5	0.8343
168.6	0.8336
168.7	0.83385
168.8	0.8328
168.9	0.83195
169	0.83135
169.1	0.8331
169.2	0.83305
169.3	0.8332
169.4	0.83405
169.5	0.8339
169.6	0.83435
169.7	0.8342
169.8	0.835
169.9	0.83415
170	0.83435
170.1	0.8339
170.2	0.83405
170.3	0.8331
170.4	0.8332
170.5	0.8336
170.6	0.8324
170.7	0.8318
170.8	0.8318
170.9	0.8325
171	0.83255
171.1	0.8333
171.2	0.835
171.3	0.8353
171.4	0.83395
171.5	0.8347
171.6	0.83485
171.7	0.8352
171.8	0.83635
171.9	0.83675
172	0.83735
172.1	0.8373
172.2	0.83715
172.3	0.83645
172.4	0.83705
172.5	0.8374
172.6	0.8367
172.7	0.8367
172.8	0.8367
172.9	0.83605
173	0.83615
173.1	0.83615
173.2	0.8366
173.3	0.83795
173.4	0.8382
173.5	0.83775
173.6	0.83795
173.7	0.83835
173.8	0.83815
173.9	0.8378
174	0.83845
174.1	0.8403
174.2	0.84115
174.3	0.8403
174.4	0.83965
174.5	0.83975
174.6	0.84015
174.7	0.84135
174.8	0.8422
174.9	0.8419
175	0.84265
175.1	0.8421
175.2	0.8431
175.3	0.8429
175.4	0.843
175.5	0.8425
175.6	0.8425
175.7	0.8418
175.8	0.84115
175.9	0.84095
176	0.8412
176.1	0.84055
176.2	0.8409
176.3	0.8414
176.4	0.8409
176.5	0.84015
176.6	0.839
176.7	0.83965
176.8	0.8417
176.9	0.84105
177	0.84035
177.1	0.84125
177.2	0.84125
177.3	0.84115
177.4	0.8417
177.5	0.84185
177.6	0.84235
177.7	0.8436
177.8	0.8439
177.9	0.84375
178	0.84475
178.1	0.84405
178.2	0.84385
178.3	0.8435
178.4	0.8444
178.5	0.8441
178.6	0.8439
178.7	0.84245
178.8	0.8413
178.9	0.8413
179	0.84105
179.1	0.8425
179.2	0.84275
179.3	0.84285
179.4	0.84285
179.5	0.84265
179.6	0.84425
179.7	0.844
179.8	0.8436
179.9	0.8431
180	0.84345
180.1	0.84475
180.2	0.84555
180.3	0.84615
180.4	0.84545
180.5	0.844
180.6	0.84415
180.7	0.8448
180.8	0.8453
180.9	0.84445
181	0.8443
181.1	0.8429
181.2	0.8414
181.3	0.8422
181.4	0.8426
181.5	0.8426
181.6	0.84265
181.7	0.8419
181.8	0.84195
181.9	0.8417
182	0.84175
182.1	0.8426
182.2	0.8437
182.3	0.84465
182.4	0.84455
182.5	0.84595
182.6	0.8471
182.7	0.8459
182.8	0.84635
182.9	0.84575
183	0.84555
183.1	0.84575
183.2	0.84565
183.3	0.84345
183.4	0.8423
183.5	0.8424
183.6	0.84285
183.7	0.8439
183.8	0.84355
183.9	0.8444
184	0.8445
184.1	0.8441
184.2	0.8452
184.3	0.84565
184.4	0.8458
184.5	0.84545
184.6	0.84505
184.7	0.84525
184.8	0.8457
184.9	0.84545
185	0.84595
185.1	0.8466
185.2	0.8462
185.3	0.84595
185.4	0.8459
185.5	0.8465
185.6	0.84705
185.7	0.8469
185.8	0.8481
185.9	0.8476
186	0.84775
186.1	0.8473
186.2	0.8459
186.3	0.8465
186.4	0.8472
186.5	0.8479
186.6	0.84875
186.7	0.8491
186.8	0.84855
186.9	0.8488
187	0.84795
187.1	0.8476
187.2	0.8467
187.3	0.84725
187.4	0.8488
187.5	0.8495
187.6	0.8482
187.7	0.84675
187.8	0.848
187.9	0.84835
188	0.84835
188.1	0.8481
188.2	0.84855
188.3	0.84835
188.4	0.8483
188.5	0.84865
188.6	0.8498
188.7	0.84915
188.8	0.84925
188.9	0.8489
189	0.84885
189.1	0.8488
189.2	0.84905
189.3	0.84865
189.4	0.84885
189.5	0.84955
189.6	0.85035
189.7	0.8504
189.8	0.8509
189.9	0.85105
190	0.8501
190.1	0.8511
190.2	0.85175
190.3	0.85215
190.4	0.85165
190.5	0.8514
190.6	0.85145
190.7	0.8513
190.8	0.85075
190.9	0.8513
191	0.85285
191.1	0.85195
191.2	0.85195
191.3	0.8512
191.4	0.85135
191.5	0.8506
191.6	0.84985
191.7	0.85115
191.8	0.85045
191.9	0.8503
192	0.8507
192.1	0.8523
192.2	0.85295
192.3	0.8528
192.4	0.8529
192.5	0.85325
192.6	0.8542
192.7	0.8551
192.8	0.85365
192.9	0.8544
193	0.8535
193.1	0.85485
193.2	0.85515
193.3	0.8547
193.4	0.8534
193.5	0.8539
193.6	0.8545
193.7	0.85535
193.8	0.8547
193.9	0.8549
194	0.8545
194.1	0.85435
194.2	0.8546
194.3	0.85425
194.4	0.85435
194.5	0.8546
194.6	0.85545
194.7	0.85535
194.8	0.85585
194.9	0.8565
195	0.85585
195.1	0.85625
195.2	0.85605
195.3	0.85545
195.4	0.8557
195.5	0.8555
195.6	0.8561
195.7	0.85615
195.8	0.857
195.9	0.85785
196	0.85755
196.1	0.85665
196.2	0.8563
196.3	0.85675
196.4	0.8576
196.5	0.8569
196.6	0.857
196.7	0.8579
196.8	0.85755
196.9	0.8578
197	0.8574
197.1	0.85785
197.2	0.85735
197.3	0.8571
197.4	0.8574
197.5	0.85635
197.6	0.8565
197.7	0.85635
197.8	0.85595
197.9	0.85605
198	0.85545
198.1	0.85535
198.2	0.8559
198.3	0.8564
198.4	0.85575
198.5	0.85545
198.6	0.85495
198.7	0.85435
198.8	0.85535
198.9	0.8563
199	0.85645
199.1	0.85625
199.2	0.8554
199.3	0.8552
199.4	0.8541
199.5	0.8546
199.6	0.8548
199.7	0.85425
199.8	0.8549
199.9	0.855
200	0.85515
[truncated: 14,000 more rows]
