# Supplementary material for: Bayesian inference of kinetic schemes for ion channels by Kalman filtering
Source: eLife journal article supplement (doi:10.7554/elife.62714), 2022-05-04
Supplement: fig4-data6 [file 1_Sim_N_10000_Strom_MW.xlsx]

## Sheet: Tabelle1
0.1	0
0.2	0
0.3	0
0.4	0
0.5	0
0.6	0
0.7	0
0.8	0
0.9	0
1	0
1.1	0
1.2	0
1.3	0
1.4	0
1.5	0
1.6	0
1.7	0
1.8	0
1.9	0
2	0
2.1	0
2.2	0
2.3	0
2.4	0
2.5	0
2.6	0
2.7	0
2.8	0
2.9	0
3	0
3.1	0
3.2	0
3.3	0
3.4	0
3.5	0
3.6	0
3.7	0
3.8	0
3.9	0
4	0
4.1	0
4.2	0
4.3	0
4.4	0
4.5	0
4.6	0
4.7	0
4.8	0
4.9	0
5	0
5.1	0
5.2	0
5.3	0
5.4	0
5.5	0
5.6	0
5.7	0
5.8	0
5.9	0
6	0
6.1	0
6.2	0
6.3	0
6.4	0
6.5	0
6.6	0
6.7	0
6.8	0
6.9	0
7	0
7.1	0
7.2	0
7.3	0
7.4	0
7.5	0
7.6	0
7.7	0
7.8	0
7.9	0
8	0
8.1	0
8.2	0
8.3	0
8.4	0
8.5	0
8.6	0
8.7	0
8.8	0
8.9	0
9	0
9.1	0
9.2	0
9.3	0
9.4	0
9.5	0
9.6	0
9.7	0
9.8	0
9.9	0
10	0
10.1	0
10.2	0
10.3	0
10.4	0
10.5	0
10.6	0
10.7	0
10.8	0
10.9	0
11	0
11.1	0
11.2	0
11.3	0
11.4	0
11.5	0
11.6	0
11.7	0
11.8	0
11.9	0
12	0
12.1	0
12.2	0
12.3	0
12.4	0
12.5	0
12.6	0
12.7	0
12.8	0
12.9	0
13	0
13.1	0
13.2	0
13.3	0
13.4	0
13.5	0
13.6	0
13.7	0
13.8	0
13.9	0
14	0
14.1	0
14.2	0
14.3	0
14.4	0
14.5	0
14.6	0
14.7	0
14.8	0
14.9	0
15	0
15.1	0
15.2	0
15.3	0
15.4	0
15.5	0
15.6	0
15.7	0
15.8	0
15.9	0
16	0
16.1	0
16.2	0
16.3	0
16.4	0
16.5	0
16.6	0
16.7	0
16.8	0
16.9	0
17	0
17.1	0
17.2	0
17.3	0
17.4	0
17.5	0
17.6	0
17.7	0
17.8	0
17.9	0
18	0
18.1	0
18.2	0
18.3	0
18.4	0
18.5	0
18.6	0
18.7	0
18.8	0
18.9	0
19	0
19.1	0
19.2	0
19.3	0
19.4	0
19.5	0
19.6	0
19.7	0
19.8	0
19.9	0
20	0
20.1	0
20.2	0
20.3	0
20.4	0
20.5	0
20.6	0
20.7	0
20.8	0
20.9	0
21	0
21.1	0
21.2	0
21.3	0
21.4	0
21.5	0
21.6	0
21.7	0
21.8	0
21.9	0
22	0
22.1	0
22.2	0
22.3	0
22.4	0
22.5	0
22.6	0
22.7	0
22.8	0
22.9	0
23	0
23.1	0
23.2	0
23.3	0
23.4	0
23.5	0
23.6	0
23.7	0
23.8	0
23.9	0
24	0
24.1	0
24.2	0
24.3	0
24.4	0
24.5	0
24.6	0
24.7	0
24.8	0
24.9	0
25	0
25.1	0
25.2	0
25.3	0
25.4	0
25.5	0
25.6	0
25.7	0
25.8	0
25.9	0
26	0
26.1	0
26.2	0
26.3	0
26.4	0
26.5	0
26.6	0
26.7	0
26.8	0
26.9	0
27	0
27.1	0
27.2	0
27.3	0
27.4	0
27.5	0
27.6	0
27.7	0
27.8	0
27.9	0
28	0
28.1	0
28.2	0
28.3	0
28.4	0
28.5	0
28.6	0
28.7	0
28.8	0
28.9	0
29	0
29.1	0
29.2	0
29.3	0
29.4	0
29.5	0
29.6	0
29.7	0
29.8	0
29.9	0
30	0
30.1	0
30.2	0
30.3	0
30.4	0
30.5	0
30.6	0
30.7	0
30.8	0
30.9	0
31	0
31.1	0
31.2	0
31.3	0
31.4	0
31.5	0
31.6	0
31.7	0
31.8	0
31.9	0
32	0
32.1	0
32.2	0
32.3	0
32.4	0
32.5	0
32.6	0
32.7	0
32.8	0
32.9	0
33	0
33.1	0
33.2	0
33.3	0
33.4	0
33.5	0
33.6	0
33.7	0
33.8	0
33.9	0
34	0
34.1	0
34.2	0
34.3	0
34.4	0
34.5	0
34.6	0
34.7	0
34.8	0
34.9	0
35	0
35.1	0
35.2	0
35.3	0
35.4	0
35.5	0
35.6	0
35.7	0
35.8	0
35.9	0
36	0
36.1	0
36.2	0
36.3	0
36.4	0
36.5	0
36.6	0
36.7	0
36.8	0
36.9	0
37	0
37.1	0
37.2	0
37.3	0
37.4	0
37.5	0
37.6	0
37.7	0
37.8	0
37.9	0
38	0
38.1	0
38.2	0
38.3	0
38.4	0
38.5	0
38.6	0
38.7	0
38.8	0
38.9	0
39	0
39.1	0
39.2	0
39.3	0
39.4	0
39.5	0
39.6	0
39.7	0
39.8	0
39.9	0
40	0
40.1	0
40.2	0
40.3	0
40.4	0
40.5	0
40.6	0
40.7	0
40.8	0
40.9	0
41	0
41.1	0
41.2	0
41.3	0
41.4	0
41.5	0
41.6	0
41.7	0
41.8	0
41.9	0
42	0
42.1	0
42.2	0
42.3	0
42.4	0
42.5	0
42.6	0
42.7	0
42.8	0
42.9	0
43	0
43.1	0
43.2	0
43.3	0
43.4	0
43.5	0
43.6	0
43.7	0
43.8	0
43.9	0
44	0
44.1	0
44.2	0
44.3	0
44.4	0
44.5	0
44.6	0
44.7	0
44.8	0
44.9	0
45	0
45.1	0
45.2	0
45.3	0
45.4	0
45.5	0
45.6	0
45.7	0
45.8	0
45.9	0
46	0
46.1	0
46.2	0
46.3	0
46.4	0
46.5	0
46.6	0
46.7	0
46.8	0
46.9	0
47	0
47.1	0
47.2	0
47.3	0
47.4	0
47.5	0
47.6	0
47.7	0
47.8	0
47.9	0
48	0
48.1	0
48.2	0
48.3	0
48.4	0
48.5	0
48.6	0
48.7	0
48.8	0
48.9	0
49	0
49.1	0
49.2	0
49.3	0
49.4	0
49.5	0
49.6	0
49.7	0
49.8	0
49.9	0
50	0
50.1	0
50.2	0
50.3	0
50.4	0
50.5	0
50.6	0
50.7	0
50.8	0
50.9	0
51	0
51.1	0
51.2	0
51.3	0
51.4	0
51.5	0
51.6	0
51.7	0
51.8	0
51.9	0
52	0
52.1	0
52.2	0
52.3	0
52.4	0
52.5	0
52.6	0
52.7	0
52.8	0
52.9	0
53	0
53.1	0
53.2	0
53.3	0
53.4	0
53.5	0
53.6	0
53.7	0
53.8	0
53.9	0
54	0
54.1	0
54.2	0
54.3	0
54.4	0
54.5	0
54.6	0
54.7	0
54.8	0
54.9	0
55	0
55.1	0
55.2	0
55.3	0
55.4	0
55.5	0
55.6	0
55.7	0
55.8	0
55.9	0
56	0
56.1	0
56.2	0
56.3	0
56.4	0
56.5	0
56.6	0
56.7	0
56.8	0
56.9	0
57	0
57.1	0
57.2	0
57.3	0
57.4	0
57.5	0
57.6	0
57.7	0
57.8	0
57.9	0
58	0
58.1	0
58.2	0
58.3	0
58.4	0
58.5	0
58.6	0
58.7	0
58.8	0
58.9	0
59	0
59.1	0
59.2	0
59.3	0
59.4	0
59.5	0
59.6	0
59.7	0
59.8	0
59.9	0
60	0
60.1	0
60.2	0
60.3	0
60.4	0
60.5	0
60.6	0
60.7	0
60.8	0
60.9	0
61	0
61.1	0
61.2	0
61.3	0
61.4	0
61.5	0
61.6	0
61.7	0
61.8	0
61.9	0
62	0
62.1	0
62.2	0
62.3	0
62.4	0
62.5	0
62.6	0
62.7	0
62.8	0
62.9	0
63	0
63.1	0
63.2	0
63.3	0
63.4	0
63.5	0
63.6	0
63.7	0
63.8	0
63.9	0
64	0
64.1	0
64.2	0
64.3	0
64.4	0
64.5	0
64.6	0
64.7	0
64.8	0
64.9	0
65	0
65.1	0
65.2	0
65.3	0
65.4	0
65.5	0
65.6	0
65.7	0
65.8	0
65.9	0
66	0
66.1	0
66.2	0
66.3	0
66.4	0
66.5	0
66.6	0
66.7	0
66.8	0
66.9	0
67	0
67.1	0
67.2	0
67.3	0
67.4	0
67.5	0
67.6	0
67.7	0
67.8	0
67.9	0
68	0
68.1	0
68.2	0
68.3	0
68.4	0
68.5	0
68.6	0
68.7	0
68.8	0
68.9	0
69	0
69.1	0
69.2	0
69.3	0
69.4	0
69.5	0
69.6	0
69.7	0
69.8	0
69.9	0
70	0
70.1	0
70.2	0
70.3	0
70.4	0
70.5	0
70.6	0
70.7	0
70.8	0
70.9	0
71	0
71.1	0
71.2	0
71.3	0
71.4	0
71.5	0
71.6	0
71.7	0
71.8	0
71.9	0
72	0
72.1	0
72.2	0
72.3	0
72.4	0
72.5	0
72.6	0
72.7	0
72.8	0
72.9	0
73	0
73.1	0
73.2	0
73.3	0
73.4	0
73.5	0
73.6	0
73.7	0
73.8	0
73.9	0
74	0
74.1	0
74.2	0
74.3	0
74.4	0
74.5	0
74.6	0
74.7	0
74.8	0
74.9	0
75	0
75.1	0
75.2	0
75.3	0
75.4	0
75.5	0
75.6	0
75.7	0
75.8	0
75.9	0
76	0
76.1	0
76.2	0
76.3	0
76.4	0
76.5	0
76.6	0
76.7	0
76.8	0
76.9	0
77	0
77.1	0
77.2	0
77.3	0
77.4	0
77.5	0
77.6	0
77.7	0
77.8	0
77.9	0
78	0
78.1	0
78.2	0
78.3	0
78.4	0
78.5	0
78.6	0
78.7	0
78.8	0
78.9	0
79	0
79.1	0
79.2	0
79.3	0
79.4	0
79.5	0
79.6	0
79.7	0
79.8	0
79.9	0
80	0
80.1	0
80.2	0
80.3	0
80.4	0
80.5	0
80.6	0
80.7	0
80.8	0
80.9	0
81	0
81.1	0
81.2	0
81.3	0
81.4	0
81.5	0
81.6	0
81.7	0
81.8	0
81.9	0
82	0
82.1	0
82.2	0
82.3	0
82.4	0
82.5	0
82.6	0
82.7	0
82.8	0
82.9	0
83	0
83.1	0
83.2	0
83.3	0
83.4	0
83.5	0
83.6	0
83.7	0
83.8	0
83.9	0
84	0
84.1	0
84.2	0
84.3	0
84.4	0
84.5	0
84.6	0
84.7	0
84.8	0
84.9	0
85	0
85.1	0
85.2	0
85.3	0
85.4	0
85.5	0
85.6	0
85.7	0
85.8	0
85.9	0
86	0
86.1	0
86.2	0
86.3	0
86.4	0
86.5	0
86.6	0
86.7	0
86.8	0
86.9	0
87	0
87.1	0
87.2	0
87.3	0
87.4	0
87.5	0
87.6	0
87.7	0
87.8	0
87.9	0
88	0
88.1	0
88.2	0
88.3	0
88.4	0
88.5	0
88.6	0
88.7	0
88.8	0
88.9	0
89	0
89.1	0
89.2	0
89.3	0
89.4	0
89.5	0
89.6	0
89.7	0
89.8	0
89.9	0
90	0
90.1	0
90.2	0
90.3	0
90.4	0
90.5	0
90.6	0
90.7	0
90.8	0
90.9	0
91	0
91.1	0
91.2	0
91.3	0
91.4	0
91.5	0
91.6	0
91.7	0
91.8	0
91.9	0
92	0
92.1	0
92.2	0
92.3	0
92.4	0
92.5	0
92.6	0
92.7	0
92.8	0
92.9	0
93	0
93.1	0
93.2	0
93.3	0
93.4	0
93.5	0
93.6	0
93.7	0
93.8	0
93.9	0
94	0
94.1	0
94.2	0
94.3	0
94.4	0
94.5	0
94.6	0
94.7	0
94.8	0
94.9	0
95	0
95.1	0
95.2	0
95.3	0
95.4	0
95.5	0
95.6	0
95.7	0
95.8	0
95.9	0
96	0
96.1	0
96.2	0
96.3	0
96.4	0
96.5	0
96.6	0
96.7	0
96.8	0
96.9	0
97	0
97.1	0
97.2	0
97.3	0
97.4	0
97.5	0
97.6	0
97.7	0
97.8	0
97.9	0
98	0
98.1	0
98.2	0
98.3	0
98.4	0
98.5	0
98.6	0
98.7	0
98.8	0
98.9	0
99	0
99.1	0
99.2	0
99.3	0
99.4	0
99.5	0
99.6	0
99.7	0
99.8	0
99.9	0
100	0
100.1	0
100.2	0
100.3	0
100.4	0.0001
100.5	0.0004
100.6	0.0007
100.7	0.0009
100.8	0.0013
100.9	0.0017
101	0.002
101.1	0.0026
101.2	0.0028
101.3	0.0034
101.4	0.0046
101.5	0.0053
101.6	0.0057
101.7	0.0061
101.8	0.0075
101.9	0.0082
102	0.0088
102.1	0.0093
102.2	0.0099
102.3	0.0107
102.4	0.0117
102.5	0.0133
102.6	0.0144
102.7	0.0152
102.8	0.0167
102.9	0.0181
103	0.0196
103.1	0.0206
103.2	0.0217
103.3	0.0236
103.4	0.025
103.5	0.0269
103.6	0.0278
103.7	0.0291
103.8	0.031
103.9	0.0326
104	0.0342
104.1	0.0358
104.2	0.0378
104.3	0.0389
104.4	0.0404
104.5	0.0417
104.6	0.0433
104.7	0.0453
104.8	0.0467
104.9	0.0479
105	0.0495
105.1	0.0511
105.2	0.0526
105.3	0.0539
105.4	0.0558
105.5	0.0571
105.6	0.0582
105.7	0.06
105.8	0.0607
105.9	0.062
106	0.0636
106.1	0.0653
106.2	0.0678
106.3	0.0691
106.4	0.0699
106.5	0.0707
106.6	0.072
106.7	0.0736
106.8	0.0759
106.9	0.077
107	0.0793
107.1	0.0805
107.2	0.0817
107.3	0.0833
107.4	0.0849
107.5	0.0869
107.6	0.0887
107.7	0.0903
107.8	0.0914
107.9	0.0931
108	0.095
108.1	0.0967
108.2	0.0975
108.3	0.0992
108.4	0.1
108.5	0.1017
108.6	0.1031
108.7	0.105
108.8	0.1063
108.9	0.1077
109	0.1095
109.1	0.1109
109.2	0.1121
109.3	0.1142
109.4	0.1154
109.5	0.1174
109.6	0.1184
109.7	0.12
109.8	0.1223
109.9	0.1236
110	0.1244
110.1	0.1254
110.2	0.1265
110.3	0.1272
110.4	0.1283
110.5	0.1295
110.6	0.1309
110.7	0.1319
110.8	0.1331
110.9	0.1347
111	0.1353
111.1	0.1361
111.2	0.1373
111.3	0.1376
111.4	0.1392
111.5	0.1407
111.6	0.1427
111.7	0.1434
111.8	0.145
111.9	0.1464
112	0.1478
112.1	0.1495
112.2	0.1511
112.3	0.1523
112.4	0.1532
112.5	0.1544
112.6	0.1558
112.7	0.1571
112.8	0.1589
112.9	0.1601
113	0.1614
113.1	0.1624
113.2	0.1639
113.3	0.1656
113.4	0.1668
113.5	0.1686
113.6	0.1697
113.7	0.1713
113.8	0.1729
113.9	0.1748
114	0.176
114.1	0.1773
114.2	0.1787
114.3	0.1799
114.4	0.1812
114.5	0.1824
114.6	0.184
114.7	0.1849
114.8	0.1862
114.9	0.1872
115	0.1889
115.1	0.1896
115.2	0.1912
115.3	0.1929
115.4	0.1942
115.5	0.1955
115.6	0.1962
115.7	0.1975
115.8	0.199
115.9	0.2008
116	0.2025
116.1	0.2035
116.2	0.2048
116.3	0.2066
116.4	0.2075
116.5	0.2086
116.6	0.2097
116.7	0.2105
116.8	0.2112
116.9	0.2122
117	0.213
117.1	0.2143
117.2	0.216
117.3	0.2174
117.4	0.2187
117.5	0.2204
117.6	0.2213
117.7	0.2227
117.8	0.2237
117.9	0.225
118	0.2264
118.1	0.228
118.2	0.2289
118.3	0.229
118.4	0.2299
118.5	0.2316
118.6	0.2326
118.7	0.233
118.8	0.234
118.9	0.2355
119	0.2369
119.1	0.2387
119.2	0.239
119.3	0.24
119.4	0.2416
119.5	0.2427
119.6	0.2443
119.7	0.2452
119.8	0.2457
119.9	0.2464
120	0.2479
120.1	0.2485
120.2	0.2502
120.3	0.2514
120.4	0.2528
120.5	0.2535
120.6	0.2556
120.7	0.2571
120.8	0.2579
120.9	0.2588
121	0.2602
121.1	0.2617
121.2	0.2623
121.3	0.2628
121.4	0.2637
121.5	0.2654
121.6	0.2664
121.7	0.267
121.8	0.2682
121.9	0.269
122	0.2699
122.1	0.2705
122.2	0.2714
122.3	0.2722
122.4	0.273
122.5	0.2741
122.6	0.2748
122.7	0.2751
122.8	0.2768
122.9	0.2783
123	0.279
123.1	0.2799
123.2	0.28
123.3	0.2806
123.4	0.2815
123.5	0.2826
123.6	0.2839
123.7	0.2843
123.8	0.2856
123.9	0.2867
124	0.2876
124.1	0.2891
124.2	0.2899
124.3	0.2904
124.4	0.2912
124.5	0.2919
124.6	0.2921
124.7	0.2936
124.8	0.2949
124.9	0.2955
125	0.2965
125.1	0.2968
125.2	0.2978
125.3	0.2986
125.4	0.2994
125.5	0.3008
125.6	0.3012
125.7	0.3019
125.8	0.3036
125.9	0.3042
126	0.3048
126.1	0.3058
126.2	0.3068
126.3	0.3067
126.4	0.3076
126.5	0.3075
126.6	0.3083
126.7	0.3096
126.8	0.3111
126.9	0.3117
127	0.3117
127.1	0.3129
127.2	0.3137
127.3	0.3145
127.4	0.3148
127.5	0.3159
127.6	0.3169
127.7	0.3184
127.8	0.3185
127.9	0.3198
128	0.3208
128.1	0.3213
128.2	0.3225
128.3	0.3237
128.4	0.325
128.5	0.3261
128.6	0.3271
128.7	0.3277
128.8	0.3283
128.9	0.3286
129	0.329
129.1	0.3297
129.2	0.3307
129.3	0.3314
129.4	0.332
129.5	0.3333
129.6	0.3338
129.7	0.3347
129.8	0.3362
129.9	0.3373
130	0.3376
130.1	0.3379
130.2	0.3384
130.3	0.3395
130.4	0.3405
130.5	0.3416
130.6	0.3426
130.7	0.3437
130.8	0.3441
130.9	0.3451
131	0.3453
131.1	0.3458
131.2	0.3467
131.3	0.3472
131.4	0.348
131.5	0.3486
131.6	0.3489
131.7	0.3495
131.8	0.3501
131.9	0.3504
132	0.3501
132.1	0.351
132.2	0.3527
132.3	0.3534
132.4	0.3541
132.5	0.3547
132.6	0.3555
132.7	0.3563
132.8	0.3572
132.9	0.358
133	0.3591
133.1	0.3594
133.2	0.3599
133.3	0.3607
133.4	0.3615
133.5	0.3625
133.6	0.3636
133.7	0.3641
133.8	0.3651
133.9	0.3653
134	0.3665
134.1	0.3668
134.2	0.3677
134.3	0.369
134.4	0.3699
134.5	0.3704
134.6	0.3716
134.7	0.3722
134.8	0.3729
134.9	0.3737
135	0.3741
135.1	0.3746
135.2	0.375
135.3	0.3762
135.4	0.3769
135.5	0.3775
135.6	0.3788
135.7	0.3788
135.8	0.3797
135.9	0.3802
136	0.3809
136.1	0.3816
136.2	0.3827
136.3	0.3826
136.4	0.3832
136.5	0.3836
136.6	0.3843
136.7	0.385
136.8	0.3861
136.9	0.387
137	0.3872
137.1	0.3882
137.2	0.3887
137.3	0.3887
137.4	0.3887
137.5	0.3893
137.6	0.39
137.7	0.3912
137.8	0.391
137.9	0.3917
138	0.3926
138.1	0.3929
138.2	0.3937
138.3	0.3943
138.4	0.395
138.5	0.3956
138.6	0.3963
138.7	0.3968
138.8	0.3972
138.9	0.3977
139	0.3987
139.1	0.3994
139.2	0.4004
139.3	0.4017
139.4	0.4026
139.5	0.4032
139.6	0.4037
139.7	0.4044
139.8	0.4047
139.9	0.4052
140	0.4065
140.1	0.4072
140.2	0.4076
140.3	0.4084
140.4	0.4086
140.5	0.4097
140.6	0.4103
140.7	0.4104
140.8	0.4115
140.9	0.4114
141	0.4117
141.1	0.4122
141.2	0.413
141.3	0.4134
141.4	0.4142
141.5	0.415
141.6	0.4159
141.7	0.4163
141.8	0.4168
141.9	0.417
142	0.418
142.1	0.4187
142.2	0.4187
142.3	0.4194
142.4	0.4199
142.5	0.4206
142.6	0.4207
142.7	0.421
142.8	0.4215
142.9	0.4223
143	0.423
143.1	0.4234
143.2	0.4239
143.3	0.4247
143.4	0.4254
143.5	0.4256
143.6	0.4262
143.7	0.4261
143.8	0.4264
143.9	0.4267
144	0.4266
144.1	0.4269
144.2	0.428
144.3	0.4287
144.4	0.4293
144.5	0.4297
144.6	0.4306
144.7	0.4308
144.8	0.4317
144.9	0.4316
145	0.4318
145.1	0.4321
145.2	0.4333
145.3	0.4341
145.4	0.4343
145.5	0.4344
145.6	0.4344
145.7	0.4354
145.8	0.4357
145.9	0.4367
146	0.4373
146.1	0.4386
146.2	0.4381
146.3	0.4385
146.4	0.4387
146.5	0.4395
146.6	0.4393
146.7	0.4394
146.8	0.4402
146.9	0.4406
147	0.4414
147.1	0.4414
147.2	0.4422
147.3	0.4428
147.4	0.4431
147.5	0.4427
147.6	0.4431
147.7	0.4432
147.8	0.4432
147.9	0.4443
148	0.4449
148.1	0.4455
148.2	0.4463
148.3	0.4468
148.4	0.4467
148.5	0.4471
148.6	0.4475
148.7	0.4481
148.8	0.4484
148.9	0.4488
149	0.4497
149.1	0.4503
149.2	0.4509
149.3	0.4525
149.4	0.4528
149.5	0.4537
149.6	0.4542
149.7	0.4543
149.8	0.4548
149.9	0.4549
150	0.4558
150.1	0.4562
150.2	0.4564
150.3	0.4569
150.4	0.4571
150.5	0.4578
150.6	0.4582
150.7	0.4586
150.8	0.4595
150.9	0.4602
151	0.4601
151.1	0.4609
151.2	0.4614
151.3	0.4619
151.4	0.4623
151.5	0.4628
151.6	0.4627
151.7	0.4633
151.8	0.4635
151.9	0.464
152	0.4642
152.1	0.4643
152.2	0.4647
152.3	0.4653
152.4	0.4657
152.5	0.4657
152.6	0.4665
152.7	0.4674
152.8	0.4676
152.9	0.4679
153	0.4676
153.1	0.4685
153.2	0.4691
153.3	0.4694
153.4	0.4695
153.5	0.4705
153.6	0.471
153.7	0.4714
153.8	0.4717
153.9	0.4723
154	0.4726
154.1	0.4726
154.2	0.4734
154.3	0.4744
154.4	0.4744
154.5	0.4745
154.6	0.4741
154.7	0.474
154.8	0.4743
154.9	0.4748
155	0.4752
155.1	0.4754
155.2	0.4758
155.3	0.4763
155.4	0.477
155.5	0.4769
155.6	0.4775
155.7	0.4781
155.8	0.4784
155.9	0.479
156	0.4794
156.1	0.4795
156.2	0.4799
156.3	0.4804
156.4	0.4816
156.5	0.4819
156.6	0.4825
156.7	0.4829
156.8	0.4837
156.9	0.4849
157	0.4851
157.1	0.486
157.2	0.4868
157.3	0.4873
157.4	0.4871
157.5	0.4872
157.6	0.4876
157.7	0.4881
157.8	0.4887
157.9	0.4892
158	0.4895
158.1	0.4899
158.2	0.4904
158.3	0.4908
158.4	0.4912
158.5	0.4914
158.6	0.492
158.7	0.4923
158.8	0.4926
158.9	0.4927
159	0.4932
159.1	0.4943
159.2	0.4948
159.3	0.4951
159.4	0.4961
159.5	0.4969
159.6	0.4977
159.7	0.4978
159.8	0.4978
159.9	0.4979
160	0.4983
160.1	0.4987
160.2	0.4985
160.3	0.499
160.4	0.4997
160.5	0.5
160.6	0.5
160.7	0.4999
160.8	0.4999
160.9	0.4999
161	0.5007
161.1	0.5009
161.2	0.501
161.3	0.5013
161.4	0.5014
161.5	0.5021
161.6	0.5023
161.7	0.503
161.8	0.5035
161.9	0.5044
162	0.5043
162.1	0.5045
162.2	0.5044
162.3	0.5044
162.4	0.5047
162.5	0.5054
162.6	0.5062
162.7	0.5066
162.8	0.5068
162.9	0.5071
163	0.5074
163.1	0.5074
163.2	0.5075
163.3	0.5082
163.4	0.5081
163.5	0.5083
163.6	0.5089
163.7	0.5086
163.8	0.5087
163.9	0.5085
164	0.5088
164.1	0.5098
164.2	0.5099
164.3	0.5102
164.4	0.5103
164.5	0.5109
164.6	0.5111
164.7	0.512
164.8	0.5119
164.9	0.5127
165	0.513
165.1	0.5136
165.2	0.514
165.3	0.5151
165.4	0.5149
165.5	0.5153
165.6	0.5154
165.7	0.5154
165.8	0.5163
165.9	0.5163
166	0.5162
166.1	0.5159
166.2	0.5161
166.3	0.5168
166.4	0.5173
166.5	0.5179
166.6	0.519
166.7	0.5193
166.8	0.5193
166.9	0.5193
167	0.5199
167.1	0.5201
167.2	0.5203
167.3	0.5206
167.4	0.5211
167.5	0.5213
167.6	0.5212
167.7	0.5213
167.8	0.5218
167.9	0.5225
168	0.5227
168.1	0.5225
168.2	0.5226
168.3	0.5228
168.4	0.5231
168.5	0.5233
168.6	0.5237
168.7	0.5239
168.8	0.5241
168.9	0.5241
169	0.5247
169.1	0.5247
169.2	0.5254
169.3	0.5257
169.4	0.5261
169.5	0.5263
169.6	0.5266
169.7	0.5274
169.8	0.5271
169.9	0.5267
170	0.5272
170.1	0.5283
170.2	0.5285
170.3	0.5287
170.4	0.5287
170.5	0.5288
170.6	0.5288
170.7	0.5292
170.8	0.5297
170.9	0.5302
171	0.5307
171.1	0.531
171.2	0.5315
171.3	0.532
171.4	0.5322
171.5	0.5324
171.6	0.5325
171.7	0.5328
171.8	0.5328
171.9	0.5326
172	0.5326
172.1	0.5333
172.2	0.5337
172.3	0.5341
172.4	0.5345
172.5	0.5344
172.6	0.5348
172.7	0.5355
172.8	0.5355
172.9	0.5354
173	0.5357
173.1	0.5359
173.2	0.5359
173.3	0.5363
173.4	0.5361
173.5	0.5363
173.6	0.5367
173.7	0.5371
173.8	0.5372
173.9	0.5378
174	0.5381
174.1	0.5382
174.2	0.5383
174.3	0.5389
174.4	0.5396
174.5	0.54
174.6	0.5409
174.7	0.5405
174.8	0.5405
174.9	0.5406
175	0.5414
175.1	0.542
175.2	0.5425
175.3	0.5427
175.4	0.5425
175.5	0.5424
175.6	0.5423
175.7	0.5427
175.8	0.5433
175.9	0.5432
176	0.5441
176.1	0.545
176.2	0.5452
176.3	0.5453
176.4	0.5456
176.5	0.5459
176.6	0.5457
176.7	0.5459
176.8	0.5462
176.9	0.5466
177	0.5467
177.1	0.5471
177.2	0.5467
177.3	0.5465
177.4	0.5466
177.5	0.5464
177.6	0.5465
177.7	0.5472
177.8	0.5478
177.9	0.5482
178	0.5484
178.1	0.5481
178.2	0.5483
178.3	0.5483
178.4	0.548
178.5	0.5484
178.6	0.5481
178.7	0.5482
178.8	0.5481
178.9	0.5479
179	0.5478
179.1	0.5481
179.2	0.5483
179.3	0.5487
179.4	0.5488
179.5	0.5486
179.6	0.5491
179.7	0.5498
179.8	0.5496
179.9	0.5497
180	0.55
180.1	0.5499
180.2	0.5502
180.3	0.5508
180.4	0.5511
180.5	0.5508
180.6	0.5509
180.7	0.5504
180.8	0.5513
180.9	0.5517
181	0.5515
181.1	0.5519
181.2	0.5517
181.3	0.5521
181.4	0.5529
181.5	0.5532
181.6	0.5534
181.7	0.5537
181.8	0.5536
181.9	0.5542
182	0.5541
182.1	0.5543
182.2	0.5545
182.3	0.5541
182.4	0.5542
182.5	0.5545
182.6	0.5548
182.7	0.5552
182.8	0.5555
182.9	0.5554
183	0.556
183.1	0.5561
183.2	0.5562
183.3	0.5564
183.4	0.5569
183.5	0.557
183.6	0.5572
183.7	0.5578
183.8	0.5583
183.9	0.5588
184	0.5594
184.1	0.5594
184.2	0.5605
184.3	0.5609
184.4	0.5608
184.5	0.5611
184.6	0.561
184.7	0.5608
184.8	0.5615
184.9	0.5612
185	0.5612
185.1	0.5618
185.2	0.5618
185.3	0.5621
185.4	0.5628
185.5	0.5633
185.6	0.5629
185.7	0.5631
185.8	0.5633
185.9	0.5648
186	0.5648
186.1	0.5645
186.2	0.5642
186.3	0.5646
186.4	0.5654
186.5	0.5662
186.6	0.5662
186.7	0.5658
186.8	0.5663
186.9	0.5667
187	0.5674
187.1	0.5678
187.2	0.5682
187.3	0.5679
187.4	0.5686
187.5	0.5685
187.6	0.5692
187.7	0.5694
187.8	0.5691
187.9	0.5695
188	0.5696
188.1	0.5695
188.2	0.5701
188.3	0.5704
188.4	0.5701
188.5	0.5698
188.6	0.57
188.7	0.5695
188.8	0.57
188.9	0.5697
189	0.5702
189.1	0.5709
189.2	0.5711
189.3	0.5716
189.4	0.5723
189.5	0.5731
189.6	0.5732
189.7	0.5734
189.8	0.5733
189.9	0.5739
190	0.5741
190.1	0.5738
190.2	0.5735
190.3	0.5739
190.4	0.5741
190.5	0.5742
190.6	0.5733
190.7	0.5731
190.8	0.5732
190.9	0.5733
191	0.5736
191.1	0.5736
191.2	0.5743
191.3	0.5742
191.4	0.5743
191.5	0.5742
191.6	0.5746
191.7	0.5748
191.8	0.5751
191.9	0.5755
192	0.5754
192.1	0.5751
192.2	0.5756
192.3	0.5768
192.4	0.5772
192.5	0.5773
192.6	0.5773
192.7	0.5768
192.8	0.5774
192.9	0.5776
193	0.5778
193.1	0.578
193.2	0.578
193.3	0.5782
193.4	0.5783
193.5	0.5776
193.6	0.5776
193.7	0.578
193.8	0.5782
193.9	0.5782
194	0.5783
194.1	0.5781
194.2	0.5781
194.3	0.5776
194.4	0.5778
194.5	0.5781
194.6	0.5782
194.7	0.5792
194.8	0.5793
194.9	0.5797
195	0.5795
195.1	0.5793
195.2	0.5791
195.3	0.5798
195.4	0.5805
195.5	0.5807
195.6	0.5812
195.7	0.5803
195.8	0.5805
195.9	0.5809
196	0.5812
196.1	0.5818
196.2	0.582
196.3	0.5826
196.4	0.5833
196.5	0.5835
196.6	0.5829
196.7	0.583
196.8	0.5821
196.9	0.5826
197	0.5827
197.1	0.5827
197.2	0.5829
197.3	0.5827
197.4	0.5827
197.5	0.5832
197.6	0.5831
197.7	0.583
197.8	0.5831
197.9	0.5833
198	0.5838
198.1	0.5839
198.2	0.5837
198.3	0.5835
198.4	0.5839
198.5	0.5839
198.6	0.5839
198.7	0.5836
198.8	0.5838
198.9	0.5839
199	0.5838
199.1	0.5841
199.2	0.584
199.3	0.584
199.4	0.5843
199.5	0.5844
199.6	0.5845
199.7	0.585
199.8	0.5853
199.9	0.5852
200	0.5852
[truncated: 14,000 more rows]
