# Supplementary material for: Bayesian inference of kinetic schemes for ion channels by Kalman filtering
Source: eLife journal article supplement (doi:10.7554/elife.62714), 2022-05-04
Supplement: fig4-data6 [file 1_Sim_N_20000_Fluor_MW_1M.xlsx]

## Sheet: Tabelle1
0.1	0
0.2	0
0.3	0
0.4	0
0.5	0
0.6	0
0.7	0
0.8	0
0.9	0
1	0
1.1	0
1.2	0
1.3	0
1.4	0
1.5	0
1.6	0
1.7	0
1.8	0
1.9	0
2	0
2.1	0
2.2	0
2.3	0
2.4	0
2.5	0
2.6	0
2.7	0
2.8	0
2.9	0
3	0
3.1	0
3.2	0
3.3	0
3.4	0
3.5	0
3.6	0
3.7	0
3.8	0
3.9	0
4	0
4.1	0
4.2	0
4.3	0
4.4	0
4.5	0
4.6	0
4.7	0
4.8	0
4.9	0
5	0
5.1	0
5.2	0
5.3	0
5.4	0
5.5	0
5.6	0
5.7	0
5.8	0
5.9	0
6	0
6.1	0
6.2	0
6.3	0
6.4	0
6.5	0
6.6	0
6.7	0
6.8	0
6.9	0
7	0
7.1	0
7.2	0
7.3	0
7.4	0
7.5	0
7.6	0
7.7	0
7.8	0
7.9	0
8	0
8.1	0
8.2	0
8.3	0
8.4	0
8.5	0
8.6	0
8.7	0
8.8	0
8.9	0
9	0
9.1	0
9.2	0
9.3	0
9.4	0
9.5	0
9.6	0
9.7	0
9.8	0
9.9	0
10	0
10.1	0
10.2	0
10.3	0
10.4	0
10.5	0
10.6	0
10.7	0
10.8	0
10.9	0
11	0
11.1	0
11.2	0
11.3	0
11.4	0
11.5	0
11.6	0
11.7	0
11.8	0
11.9	0
12	0
12.1	0
12.2	0
12.3	0
12.4	0
12.5	0
12.6	0
12.7	0
12.8	0
12.9	0
13	0
13.1	0
13.2	0
13.3	0
13.4	0
13.5	0
13.6	0
13.7	0
13.8	0
13.9	0
14	0
14.1	0
14.2	0
14.3	0
14.4	0
14.5	0
14.6	0
14.7	0
14.8	0
14.9	0
15	0
15.1	0
15.2	0
15.3	0
15.4	0
15.5	0
15.6	0
15.7	0
15.8	0
15.9	0
16	0
16.1	0
16.2	0
16.3	0
16.4	0
16.5	0
16.6	0
16.7	0
16.8	0
16.9	0
17	0
17.1	0
17.2	0
17.3	0
17.4	0
17.5	0
17.6	0
17.7	0
17.8	0
17.9	0
18	0
18.1	0
18.2	0
18.3	0
18.4	0
18.5	0
18.6	0
18.7	0
18.8	0
18.9	0
19	0
19.1	0
19.2	0
19.3	0
19.4	0
19.5	0
19.6	0
19.7	0
19.8	0
19.9	0
20	0
20.1	0
20.2	0
20.3	0
20.4	0
20.5	0
20.6	0
20.7	0
20.8	0
20.9	0
21	0
21.1	0
21.2	0
21.3	0
21.4	0
21.5	0
21.6	0
21.7	0
21.8	0
21.9	0
22	0
22.1	0
22.2	0
22.3	0
22.4	0
22.5	0
22.6	0
22.7	0
22.8	0
22.9	0
23	0
23.1	0
23.2	0
23.3	0
23.4	0
23.5	0
23.6	0
23.7	0
23.8	0
23.9	0
24	0
24.1	0
24.2	0
24.3	0
24.4	0
24.5	0
24.6	0
24.7	0
24.8	0
24.9	0
25	0
25.1	0
25.2	0
25.3	0
25.4	0
25.5	0
25.6	0
25.7	0
25.8	0
25.9	0
26	0
26.1	0
26.2	0
26.3	0
26.4	0
26.5	0
26.6	0
26.7	0
26.8	0
26.9	0
27	0
27.1	0
27.2	0
27.3	0
27.4	0
27.5	0
27.6	0
27.7	0
27.8	0
27.9	0
28	0
28.1	0
28.2	0
28.3	0
28.4	0
28.5	0
28.6	0
28.7	0
28.8	0
28.9	0
29	0
29.1	0
29.2	0
29.3	0
29.4	0
29.5	0
29.6	0
29.7	0
29.8	0
29.9	0
30	0
30.1	0
30.2	0
30.3	0
30.4	0
30.5	0
30.6	0
30.7	0
30.8	0
30.9	0
31	0
31.1	0
31.2	0
31.3	0
31.4	0
31.5	0
31.6	0
31.7	0
31.8	0
31.9	0
32	0
32.1	0
32.2	0
32.3	0
32.4	0
32.5	0
32.6	0
32.7	0
32.8	0
32.9	0
33	0
33.1	0
33.2	0
33.3	0
33.4	0
33.5	0
33.6	0
33.7	0
33.8	0
33.9	0
34	0
34.1	0
34.2	0
34.3	0
34.4	0
34.5	0
34.6	0
34.7	0
34.8	0
34.9	0
35	0
35.1	0
35.2	0
35.3	0
35.4	0
35.5	0
35.6	0
35.7	0
35.8	0
35.9	0
36	0
36.1	0
36.2	0
36.3	0
36.4	0
36.5	0
36.6	0
36.7	0
36.8	0
36.9	0
37	0
37.1	0
37.2	0
37.3	0
37.4	0
37.5	0
37.6	0
37.7	0
37.8	0
37.9	0
38	0
38.1	0
38.2	0
38.3	0
38.4	0
38.5	0
38.6	0
38.7	0
38.8	0
38.9	0
39	0
39.1	0
39.2	0
39.3	0
39.4	0
39.5	0
39.6	0
39.7	0
39.8	0
39.9	0
40	0
40.1	0
40.2	0
40.3	0
40.4	0
40.5	0
40.6	0
40.7	0
40.8	0
40.9	0
41	0
41.1	0
41.2	0
41.3	0
41.4	0
41.5	0
41.6	0
41.7	0
41.8	0
41.9	0
42	0
42.1	0
42.2	0
42.3	0
42.4	0
42.5	0
42.6	0
42.7	0
42.8	0
42.9	0
43	0
43.1	0
43.2	0
43.3	0
43.4	0
43.5	0
43.6	0
43.7	0
43.8	0
43.9	0
44	0
44.1	0
44.2	0
44.3	0
44.4	0
44.5	0
44.6	0
44.7	0
44.8	0
44.9	0
45	0
45.1	0
45.2	0
45.3	0
45.4	0
45.5	0
45.6	0
45.7	0
45.8	0
45.9	0
46	0
46.1	0
46.2	0
46.3	0
46.4	0
46.5	0
46.6	0
46.7	0
46.8	0
46.9	0
47	0
47.1	0
47.2	0
47.3	0
47.4	0
47.5	0
47.6	0
47.7	0
47.8	0
47.9	0
48	0
48.1	0
48.2	0
48.3	0
48.4	0
48.5	0
48.6	0
48.7	0
48.8	0
48.9	0
49	0
49.1	0
49.2	0
49.3	0
49.4	0
49.5	0
49.6	0
49.7	0
49.8	0
49.9	0
50	0
50.1	0
50.2	0
50.3	0
50.4	0
50.5	0
50.6	0
50.7	0
50.8	0
50.9	0
51	0
51.1	0
51.2	0
51.3	0
51.4	0
51.5	0
51.6	0
51.7	0
51.8	0
51.9	0
52	0
52.1	0
52.2	0
52.3	0
52.4	0
52.5	0
52.6	0
52.7	0
52.8	0
52.9	0
53	0
53.1	0
53.2	0
53.3	0
53.4	0
53.5	0
53.6	0
53.7	0
53.8	0
53.9	0
54	0
54.1	0
54.2	0
54.3	0
54.4	0
54.5	0
54.6	0
54.7	0
54.8	0
54.9	0
55	0
55.1	0
55.2	0
55.3	0
55.4	0
55.5	0
55.6	0
55.7	0
55.8	0
55.9	0
56	0
56.1	0
56.2	0
56.3	0
56.4	0
56.5	0
56.6	0
56.7	0
56.8	0
56.9	0
57	0
57.1	0
57.2	0
57.3	0
57.4	0
57.5	0
57.6	0
57.7	0
57.8	0
57.9	0
58	0
58.1	0
58.2	0
58.3	0
58.4	0
58.5	0
58.6	0
58.7	0
58.8	0
58.9	0
59	0
59.1	0
59.2	0
59.3	0
59.4	0
59.5	0
59.6	0
59.7	0
59.8	0
59.9	0
60	0
60.1	0
60.2	0
60.3	0
60.4	0
60.5	0
60.6	0
60.7	0
60.8	0
60.9	0
61	0
61.1	0
61.2	0
61.3	0
61.4	0
61.5	0
61.6	0
61.7	0
61.8	0
61.9	0
62	0
62.1	0
62.2	0
62.3	0
62.4	0
62.5	0
62.6	0
62.7	0
62.8	0
62.9	0
63	0
63.1	0
63.2	0
63.3	0
63.4	0
63.5	0
63.6	0
63.7	0
63.8	0
63.9	0
64	0
64.1	0
64.2	0
64.3	0
64.4	0
64.5	0
64.6	0
64.7	0
64.8	0
64.9	0
65	0
65.1	0
65.2	0
65.3	0
65.4	0
65.5	0
65.6	0
65.7	0
65.8	0
65.9	0
66	0
66.1	0
66.2	0
66.3	0
66.4	0
66.5	0
66.6	0
66.7	0
66.8	0
66.9	0
67	0
67.1	0
67.2	0
67.3	0
67.4	0
67.5	0
67.6	0
67.7	0
67.8	0
67.9	0
68	0
68.1	0
68.2	0
68.3	0
68.4	0
68.5	0
68.6	0
68.7	0
68.8	0
68.9	0
69	0
69.1	0
69.2	0
69.3	0
69.4	0
69.5	0
69.6	0
69.7	0
69.8	0
69.9	0
70	0
70.1	0
70.2	0
70.3	0
70.4	0
70.5	0
70.6	0
70.7	0
70.8	0
70.9	0
71	0
71.1	0
71.2	0
71.3	0
71.4	0
71.5	0
71.6	0
71.7	0
71.8	0
71.9	0
72	0
72.1	0
72.2	0
72.3	0
72.4	0
72.5	0
72.6	0
72.7	0
72.8	0
72.9	0
73	0
73.1	0
73.2	0
73.3	0
73.4	0
73.5	0
73.6	0
73.7	0
73.8	0
73.9	0
74	0
74.1	0
74.2	0
74.3	0
74.4	0
74.5	0
74.6	0
74.7	0
74.8	0
74.9	0
75	0
75.1	0
75.2	0
75.3	0
75.4	0
75.5	0
75.6	0
75.7	0
75.8	0
75.9	0
76	0
76.1	0
76.2	0
76.3	0
76.4	0
76.5	0
76.6	0
76.7	0
76.8	0
76.9	0
77	0
77.1	0
77.2	0
77.3	0
77.4	0
77.5	0
77.6	0
77.7	0
77.8	0
77.9	0
78	0
78.1	0
78.2	0
78.3	0
78.4	0
78.5	0
78.6	0
78.7	0
78.8	0
78.9	0
79	0
79.1	0
79.2	0
79.3	0
79.4	0
79.5	0
79.6	0
79.7	0
79.8	0
79.9	0
80	0
80.1	0
80.2	0
80.3	0
80.4	0
80.5	0
80.6	0
80.7	0
80.8	0
80.9	0
81	0
81.1	0
81.2	0
81.3	0
81.4	0
81.5	0
81.6	0
81.7	0
81.8	0
81.9	0
82	0
82.1	0
82.2	0
82.3	0
82.4	0
82.5	0
82.6	0
82.7	0
82.8	0
82.9	0
83	0
83.1	0
83.2	0
83.3	0
83.4	0
83.5	0
83.6	0
83.7	0
83.8	0
83.9	0
84	0
84.1	0
84.2	0
84.3	0
84.4	0
84.5	0
84.6	0
84.7	0
84.8	0
84.9	0
85	0
85.1	0
85.2	0
85.3	0
85.4	0
85.5	0
85.6	0
85.7	0
85.8	0
85.9	0
86	0
86.1	0
86.2	0
86.3	0
86.4	0
86.5	0
86.6	0
86.7	0
86.8	0
86.9	0
87	0
87.1	0
87.2	0
87.3	0
87.4	0
87.5	0
87.6	0
87.7	0
87.8	0
87.9	0
88	0
88.1	0
88.2	0
88.3	0
88.4	0
88.5	0
88.6	0
88.7	0
88.8	0
88.9	0
89	0
89.1	0
89.2	0
89.3	0
89.4	0
89.5	0
89.6	0
89.7	0
89.8	0
89.9	0
90	0
90.1	0
90.2	0
90.3	0
90.4	0
90.5	0
90.6	0
90.7	0
90.8	0
90.9	0
91	0
91.1	0
91.2	0
91.3	0
91.4	0
91.5	0
91.6	0
91.7	0
91.8	0
91.9	0
92	0
92.1	0
92.2	0
92.3	0
92.4	0
92.5	0
92.6	0
92.7	0
92.8	0
92.9	0
93	0
93.1	0
93.2	0
93.3	0
93.4	0
93.5	0
93.6	0
93.7	0
93.8	0
93.9	0
94	0
94.1	0
94.2	0
94.3	0
94.4	0
94.5	0
94.6	0
94.7	0
94.8	0
94.9	0
95	0
95.1	0
95.2	0
95.3	0
95.4	0
95.5	0
95.6	0
95.7	0
95.8	0
95.9	0
96	0
96.1	0
96.2	0
96.3	0
96.4	0
96.5	0
96.6	0
96.7	0
96.8	0
96.9	0
97	0
97.1	0
97.2	0
97.3	0
97.4	0
97.5	0
97.6	0
97.7	0
97.8	0
97.9	0
98	0
98.1	0
98.2	0
98.3	0
98.4	0
98.5	0
98.6	0
98.7	0
98.8	0
98.9	0
99	0
99.1	0
99.2	0
99.3	0
99.4	0
99.5	0
99.6	0
99.7	0
99.8	0
99.9	0
100	0
100.1	0.0553
100.2	0.108325
100.3	0.155725
100.4	0.198575
100.5	0.23695
100.6	0.27105
100.7	0.305025
100.8	0.334025
100.9	0.360425
101	0.3836
101.1	0.40635
101.2	0.4258
101.3	0.444775
101.4	0.46185
101.5	0.477825
101.6	0.49185
101.7	0.504975
101.8	0.517275
101.9	0.528375
102	0.53885
102.1	0.548175
102.2	0.557675
102.3	0.565275
102.4	0.570825
102.5	0.5777
102.6	0.584275
102.7	0.589325
102.8	0.5946
102.9	0.5983
103	0.602025
103.1	0.606575
103.2	0.611925
103.3	0.61595
103.4	0.619
103.5	0.622525
103.6	0.625
103.7	0.62825
103.8	0.631675
103.9	0.63475
104	0.63585
104.1	0.638575
104.2	0.640725
104.3	0.64295
104.4	0.644975
104.5	0.646025
104.6	0.646975
104.7	0.6474
104.8	0.649175
104.9	0.650975
105	0.65335
105.1	0.65525
105.2	0.6568
105.3	0.657525
105.4	0.6593
105.5	0.660175
105.6	0.6619
105.7	0.662075
105.8	0.661975
105.9	0.66345
106	0.663675
106.1	0.66585
106.2	0.666975
106.3	0.66715
106.4	0.668025
106.5	0.668575
106.6	0.669675
106.7	0.669625
106.8	0.67005
106.9	0.671825
107	0.6729
107.1	0.67475
107.2	0.67445
107.3	0.67505
107.4	0.67585
107.5	0.675475
107.6	0.67745
107.7	0.67865
107.8	0.678475
107.9	0.6797
108	0.68045
108.1	0.680125
108.2	0.682
108.3	0.682175
108.4	0.682125
108.5	0.681775
108.6	0.682525
108.7	0.683875
108.8	0.6847
108.9	0.684525
109	0.6848
109.1	0.6861
109.2	0.686475
109.3	0.68705
109.4	0.68745
109.5	0.688275
109.6	0.68885
109.7	0.689025
109.8	0.68925
109.9	0.690675
110	0.692675
110.1	0.693475
110.2	0.6941
110.3	0.69445
110.4	0.6939
110.5	0.6942
110.6	0.694825
110.7	0.6936
110.8	0.69355
110.9	0.69375
111	0.69455
111.1	0.69655
111.2	0.696425
111.3	0.697575
111.4	0.697175
111.5	0.698225
111.6	0.6971
111.7	0.698425
111.8	0.698875
111.9	0.69915
112	0.699425
112.1	0.7005
112.2	0.700675
112.3	0.701925
112.4	0.70355
112.5	0.703325
112.6	0.70405
112.7	0.7041
112.8	0.703825
112.9	0.70445
113	0.7036
113.1	0.7039
113.2	0.704175
113.3	0.7041
113.4	0.705525
113.5	0.70535
113.6	0.705175
113.7	0.705375
113.8	0.70555
113.9	0.70685
114	0.70715
114.1	0.70845
114.2	0.708875
114.3	0.7096
114.4	0.7097
114.5	0.70995
114.6	0.710475
114.7	0.7107
114.8	0.71255
114.9	0.7125
115	0.71355
115.1	0.713525
115.2	0.713475
115.3	0.712425
115.4	0.71305
115.5	0.713375
115.6	0.715475
115.7	0.7162
115.8	0.716775
115.9	0.716775
116	0.716875
116.1	0.717525
116.2	0.7178
116.3	0.7199
116.4	0.71975
116.5	0.719625
116.6	0.71975
116.7	0.719875
116.8	0.72095
116.9	0.721475
117	0.7233
117.1	0.7234
117.2	0.7225
117.3	0.723225
117.4	0.72355
117.5	0.72515
117.6	0.7257
117.7	0.727025
117.8	0.72685
117.9	0.7269
118	0.72775
118.1	0.728525
118.2	0.7287
118.3	0.728125
118.4	0.72905
118.5	0.7294
118.6	0.72975
118.7	0.729075
118.8	0.72965
118.9	0.7285
119	0.730325
119.1	0.731275
119.2	0.731675
119.3	0.7317
119.4	0.730625
119.5	0.73045
119.6	0.731425
119.7	0.73205
119.8	0.732925
119.9	0.7335
120	0.733775
120.1	0.73245
120.2	0.732975
120.3	0.73305
120.4	0.733775
120.5	0.7326
120.6	0.7337
120.7	0.733025
120.8	0.733
120.9	0.733775
121	0.73445
121.1	0.73565
121.2	0.7365
121.3	0.73635
121.4	0.738275
121.5	0.738325
121.6	0.738225
121.7	0.7397
121.8	0.740675
121.9	0.741525
122	0.74245
122.1	0.74245
122.2	0.74315
122.3	0.7432
122.4	0.742725
122.5	0.743325
122.6	0.7442
122.7	0.744825
122.8	0.745175
122.9	0.745
123	0.745575
123.1	0.746425
123.2	0.7473
123.3	0.7476
123.4	0.747975
123.5	0.7467
123.6	0.7457
123.7	0.745975
123.8	0.746825
123.9	0.746275
124	0.7472
124.1	0.746975
124.2	0.74725
124.3	0.747675
124.4	0.747375
124.5	0.747625
124.6	0.747
124.7	0.748025
124.8	0.747975
124.9	0.749075
125	0.7483
125.1	0.749175
125.2	0.749225
125.3	0.749625
125.4	0.75105
125.5	0.752025
125.6	0.75155
125.7	0.75145
125.8	0.7515
125.9	0.751475
126	0.7524
126.1	0.752675
126.2	0.75325
126.3	0.75315
126.4	0.752475
126.5	0.75145
126.6	0.7509
126.7	0.752275
126.8	0.753575
126.9	0.753
127	0.752175
127.1	0.752425
127.2	0.752775
127.3	0.7533
127.4	0.753325
127.5	0.754475
127.6	0.75515
127.7	0.756325
127.8	0.755975
127.9	0.75695
128	0.75685
128.1	0.757475
128.2	0.75835
128.3	0.758725
128.4	0.75945
128.5	0.76035
128.6	0.7615
128.7	0.76085
128.8	0.761775
128.9	0.761875
129	0.76255
129.1	0.76325
129.2	0.76365
129.3	0.76365
129.4	0.7637
129.5	0.764575
129.6	0.76405
129.7	0.76395
129.8	0.765625
129.9	0.765925
130	0.76615
130.1	0.765225
130.2	0.764975
130.3	0.765425
130.4	0.765925
130.5	0.766425
130.6	0.766625
130.7	0.76675
130.8	0.767375
130.9	0.76885
131	0.768425
131.1	0.7691
131.2	0.77
131.3	0.771375
131.4	0.770625
131.5	0.770425
131.6	0.77135
131.7	0.771175
131.8	0.77115
131.9	0.77015
132	0.770275
132.1	0.7698
132.2	0.769625
132.3	0.770075
132.4	0.7707
132.5	0.770425
132.6	0.77095
132.7	0.7709
132.8	0.7712
132.9	0.770775
133	0.771225
133.1	0.772375
133.2	0.771825
133.3	0.771925
133.4	0.77315
133.5	0.77365
133.6	0.77325
133.7	0.7742
133.8	0.77455
133.9	0.774
134	0.774525
134.1	0.77575
134.2	0.776575
134.3	0.77665
134.4	0.7774
134.5	0.778025
134.6	0.778225
134.7	0.777675
134.8	0.778425
134.9	0.77795
135	0.778175
135.1	0.778275
135.2	0.779125
135.3	0.7791
135.4	0.780425
135.5	0.7806
135.6	0.7811
135.7	0.781175
135.8	0.780725
135.9	0.780125
136	0.779975
136.1	0.7806
136.2	0.78135
136.3	0.78265
136.4	0.782425
136.5	0.78285
136.6	0.7837
136.7	0.783275
136.8	0.783925
136.9	0.7841
137	0.7846
137.1	0.78435
137.2	0.783775
137.3	0.7844
137.4	0.7849
137.5	0.785875
137.6	0.7855
137.7	0.78545
137.8	0.7855
137.9	0.787
138	0.787275
138.1	0.787075
138.2	0.786225
138.3	0.787225
138.4	0.78705
138.5	0.787
138.6	0.7865
138.7	0.7867
138.8	0.7866
138.9	0.78725
139	0.787175
139.1	0.78765
139.2	0.787525
139.3	0.787275
139.4	0.78695
139.5	0.7869
139.6	0.78725
139.7	0.787825
139.8	0.78765
139.9	0.787025
140	0.787375
140.1	0.787625
140.2	0.78815
140.3	0.788325
140.4	0.789125
140.5	0.788475
140.6	0.78835
140.7	0.788275
140.8	0.789425
140.9	0.79085
141	0.791175
141.1	0.79125
141.2	0.790925
141.3	0.7919
141.4	0.79195
141.5	0.79245
141.6	0.792325
141.7	0.793325
141.8	0.793675
141.9	0.7941
142	0.794125
142.1	0.7961
142.2	0.7962
142.3	0.79615
142.4	0.796625
142.5	0.796875
142.6	0.79715
142.7	0.7971
142.8	0.797225
142.9	0.796525
143	0.7968
143.1	0.79695
143.2	0.797525
143.3	0.79805
143.4	0.7992
143.5	0.79945
143.6	0.80025
143.7	0.800975
143.8	0.801725
143.9	0.8024
144	0.80225
144.1	0.8025
144.2	0.80245
144.3	0.80245
144.4	0.8019
144.5	0.80225
144.6	0.8022
144.7	0.801325
144.8	0.801725
144.9	0.801925
145	0.8024
145.1	0.802425
145.2	0.802175
145.3	0.802225
145.4	0.803
145.5	0.802475
145.6	0.802225
145.7	0.802825
145.8	0.802875
145.9	0.803125
146	0.80335
146.1	0.803625
146.2	0.802825
146.3	0.803025
146.4	0.803175
146.5	0.80335
146.6	0.803425
146.7	0.804475
146.8	0.80415
146.9	0.804475
147	0.8047
147.1	0.8052
147.2	0.8055
147.3	0.805625
147.4	0.804725
147.5	0.80475
147.6	0.805575
147.7	0.80585
147.8	0.8057
147.9	0.805625
148	0.806825
148.1	0.807425
148.2	0.8076
148.3	0.8069
148.4	0.806275
148.5	0.8076
148.6	0.80795
148.7	0.807175
148.8	0.80725
148.9	0.8072
149	0.807125
149.1	0.806475
149.2	0.80705
149.3	0.806725
149.4	0.80715
149.5	0.80725
149.6	0.808125
149.7	0.808675
149.8	0.809225
149.9	0.809925
150	0.810425
150.1	0.8102
150.2	0.81065
150.3	0.810825
150.4	0.811225
150.5	0.8116
150.6	0.8118
150.7	0.812025
150.8	0.812425
150.9	0.81335
151	0.813475
151.1	0.813425
151.2	0.813975
151.3	0.8138
151.4	0.815475
151.5	0.815325
151.6	0.8149
151.7	0.81525
151.8	0.815
151.9	0.81465
152	0.814525
152.1	0.814575
152.2	0.8148
152.3	0.8153
152.4	0.815025
152.5	0.81555
152.6	0.816
152.7	0.816225
152.8	0.816075
152.9	0.81635
153	0.8161
153.1	0.81525
153.2	0.8151
153.3	0.815025
153.4	0.815825
153.5	0.816325
153.6	0.8173
153.7	0.817575
153.8	0.817375
153.9	0.817675
154	0.81755
154.1	0.81745
154.2	0.817425
154.3	0.8188
154.4	0.818475
154.5	0.818725
154.6	0.81815
154.7	0.817675
154.8	0.8175
154.9	0.8176
155	0.817275
155.1	0.81755
155.2	0.8171
155.3	0.816825
155.4	0.8176
155.5	0.81845
155.6	0.8183
155.7	0.818975
155.8	0.818925
155.9	0.82
156	0.81975
156.1	0.819825
156.2	0.820225
156.3	0.820575
156.4	0.82025
156.5	0.82005
156.6	0.821375
156.7	0.821575
156.8	0.82205
156.9	0.822925
157	0.82245
157.1	0.822675
157.2	0.822625
157.3	0.823
157.4	0.82435
157.5	0.823725
157.6	0.8238
157.7	0.824575
157.8	0.825
157.9	0.82595
158	0.826125
158.1	0.82635
158.2	0.8269
158.3	0.827325
158.4	0.827975
158.5	0.828
158.6	0.8287
158.7	0.827425
158.8	0.827625
158.9	0.8276
159	0.827475
159.1	0.8268
159.2	0.826825
159.3	0.827425
159.4	0.82725
159.5	0.82715
159.6	0.82655
159.7	0.82675
159.8	0.8265
159.9	0.827025
160	0.827525
160.1	0.8283
160.2	0.8283
160.3	0.827325
160.4	0.82695
160.5	0.827275
160.6	0.827525
160.7	0.82725
160.8	0.828
160.9	0.82795
161	0.82865
161.1	0.8276
161.2	0.8283
161.3	0.828225
161.4	0.8287
161.5	0.828325
161.6	0.828675
161.7	0.828275
161.8	0.827825
161.9	0.827025
162	0.826225
162.1	0.826025
162.2	0.826675
162.3	0.8276
162.4	0.828575
162.5	0.82905
162.6	0.8295
162.7	0.829525
162.8	0.82965
162.9	0.829
163	0.829775
163.1	0.83005
163.2	0.8295
163.3	0.830275
163.4	0.8301
163.5	0.830525
163.6	0.830875
163.7	0.830775
163.8	0.830675
163.9	0.831
164	0.832475
164.1	0.83205
164.2	0.83275
164.3	0.8335
164.4	0.833875
164.5	0.834625
164.6	0.834925
164.7	0.8359
164.8	0.8357
164.9	0.836
165	0.83525
165.1	0.835025
165.2	0.835
165.3	0.8343
165.4	0.834425
165.5	0.834325
165.6	0.834325
165.7	0.833675
165.8	0.83355
165.9	0.8346
166	0.835375
166.1	0.83465
166.2	0.83455
166.3	0.834575
166.4	0.8342
166.5	0.83465
166.6	0.834975
166.7	0.8348
166.8	0.834125
166.9	0.8341
167	0.8344
167.1	0.834675
167.2	0.83485
167.3	0.834525
167.4	0.83515
167.5	0.835075
167.6	0.835325
167.7	0.836
167.8	0.836425
167.9	0.837025
168	0.8376
168.1	0.83735
168.2	0.837975
168.3	0.837525
168.4	0.837775
168.5	0.8378
168.6	0.83735
168.7	0.8373
168.8	0.83715
168.9	0.83755
169	0.8368
169.1	0.836425
169.2	0.83655
169.3	0.836175
169.4	0.8359
169.5	0.83545
169.6	0.8364
169.7	0.836725
169.8	0.8366
169.9	0.8362
170	0.83665
170.1	0.83695
170.2	0.837275
170.3	0.83745
170.4	0.837525
170.5	0.8383
170.6	0.838675
170.7	0.838875
170.8	0.8388
170.9	0.839
171	0.83995
171.1	0.83975
171.2	0.840675
171.3	0.84125
171.4	0.841775
171.5	0.8418
171.6	0.841525
171.7	0.841325
171.8	0.84135
171.9	0.840575
172	0.839875
172.1	0.8392
172.2	0.839325
172.3	0.83965
172.4	0.839625
172.5	0.839075
172.6	0.839075
172.7	0.839375
172.8	0.8399
172.9	0.840175
173	0.8411
173.1	0.841025
173.2	0.8416
173.3	0.842325
173.4	0.842525
173.5	0.8424
173.6	0.843075
173.7	0.84325
173.8	0.843175
173.9	0.843375
174	0.84425
174.1	0.843875
174.2	0.844075
174.3	0.84345
174.4	0.8424
174.5	0.842775
174.6	0.84305
174.7	0.842875
174.8	0.8426
174.9	0.84235
175	0.842575
175.1	0.842675
175.2	0.842475
175.3	0.842625
175.4	0.843175
175.5	0.842725
175.6	0.84335
175.7	0.84325
175.8	0.842875
175.9	0.842425
176	0.842025
176.1	0.842325
176.2	0.84125
176.3	0.841275
176.4	0.84095
176.5	0.84085
176.6	0.841075
176.7	0.8407
176.8	0.84155
176.9	0.841925
177	0.8421
177.1	0.84235
177.2	0.84295
177.3	0.843425
177.4	0.8431
177.5	0.843575
177.6	0.8447
177.7	0.845075
177.8	0.845275
177.9	0.845625
178	0.8454
178.1	0.84665
178.2	0.84615
178.3	0.8461
178.4	0.846525
178.5	0.845875
178.6	0.845575
178.7	0.845825
178.8	0.845475
178.9	0.846125
179	0.84695
179.1	0.846675
179.2	0.847225
179.3	0.848075
179.4	0.848325
179.5	0.848525
179.6	0.848525
179.7	0.848225
179.8	0.84865
179.9	0.848225
180	0.848125
180.1	0.84875
180.2	0.848975
180.3	0.848975
180.4	0.849025
180.5	0.8495
180.6	0.84995
180.7	0.850225
180.8	0.84945
180.9	0.84915
181	0.8491
181.1	0.84875
181.2	0.8491
181.3	0.8489
181.4	0.849025
181.5	0.849475
181.6	0.8494
181.7	0.849125
181.8	0.849175
181.9	0.849
182	0.84875
182.1	0.84965
182.2	0.849875
182.3	0.849825
182.4	0.84965
182.5	0.849925
182.6	0.849625
182.7	0.849525
182.8	0.84965
182.9	0.8497
183	0.849575
183.1	0.84935
183.2	0.8491
183.3	0.84965
183.4	0.850275
183.5	0.851075
183.6	0.8508
183.7	0.851475
183.8	0.8519
183.9	0.852525
184	0.85315
184.1	0.85355
184.2	0.85465
184.3	0.854675
184.4	0.854025
184.5	0.8536
184.6	0.853175
184.7	0.853025
184.8	0.852725
184.9	0.852325
185	0.8523
185.1	0.8524
185.2	0.852525
185.3	0.853125
185.4	0.853375
185.5	0.85255
185.6	0.851725
185.7	0.851825
185.8	0.851825
185.9	0.851675
186	0.851325
186.1	0.852025
186.2	0.85205
186.3	0.8522
186.4	0.85215
186.5	0.852375
186.6	0.85255
186.7	0.8525
186.8	0.852825
186.9	0.85255
187	0.8525
187.1	0.8518
187.2	0.851725
187.3	0.8524
187.4	0.85215
187.5	0.851625
187.6	0.8512
187.7	0.851925
187.8	0.853175
187.9	0.853975
188	0.854475
188.1	0.85405
188.2	0.85465
188.3	0.855075
188.4	0.855575
188.5	0.8561
188.6	0.855225
188.7	0.85525
188.8	0.85475
188.9	0.855625
189	0.855175
189.1	0.85485
189.2	0.85515
189.3	0.854675
189.4	0.8549
189.5	0.85495
189.6	0.855025
189.7	0.8552
189.8	0.855525
189.9	0.85515
190	0.854575
190.1	0.8544
190.2	0.85425
190.3	0.854775
190.4	0.85555
190.5	0.855075
190.6	0.854775
190.7	0.85375
190.8	0.8532
190.9	0.85345
191	0.853375
191.1	0.8539
191.2	0.85455
191.3	0.8547
191.4	0.8552
191.5	0.85515
191.6	0.855875
191.7	0.8562
191.8	0.8564
191.9	0.856675
192	0.855825
192.1	0.855225
192.2	0.855425
192.3	0.855525
192.4	0.85515
192.5	0.854625
192.6	0.85435
192.7	0.854975
192.8	0.855975
192.9	0.85605
193	0.855425
193.1	0.85435
193.2	0.8544
193.3	0.85345
193.4	0.853325
193.5	0.853575
193.6	0.85385
193.7	0.8531
193.8	0.8536
193.9	0.8541
194	0.85415
194.1	0.8536
194.2	0.8532
194.3	0.853025
194.4	0.853575
194.5	0.8541
194.6	0.8537
194.7	0.853525
194.8	0.853075
194.9	0.8537
195	0.8542
195.1	0.8538
195.2	0.8543
195.3	0.855225
195.4	0.85525
195.5	0.8566
195.6	0.857175
195.7	0.857625
195.8	0.857575
195.9	0.8572
196	0.857625
196.1	0.857675
196.2	0.857875
196.3	0.857225
196.4	0.856575
196.5	0.857275
196.6	0.857475
196.7	0.857
196.8	0.8571
196.9	0.856925
197	0.858025
197.1	0.8578
197.2	0.8578
197.3	0.858225
197.4	0.8589
197.5	0.859075
197.6	0.858275
197.7	0.8581
197.8	0.858325
197.9	0.85885
198	0.858275
198.1	0.8577
198.2	0.858575
198.3	0.85885
198.4	0.858425
198.5	0.858825
198.6	0.858775
198.7	0.8589
198.8	0.8581
198.9	0.85755
199	0.857575
199.1	0.858125
199.2	0.85855
199.3	0.8581
199.4	0.858875
199.5	0.859
199.6	0.859125
199.7	0.858475
199.8	0.858625
199.9	0.858725
200	0.858975
[truncated: 14,000 more rows]
