# Supplementary material for: Bayesian inference of kinetic schemes for ion channels by Kalman filtering
Source: eLife journal article supplement (doi:10.7554/elife.62714), 2022-05-04
Supplement: fig4-data6 [file 1_Sim_N_20000_Strom_MW_1M.xlsx]

## Sheet: Tabelle1
0.1	0
0.2	0
0.3	0
0.4	0
0.5	0
0.6	0
0.7	0
0.8	0
0.9	0
1	0
1.1	0
1.2	0
1.3	0
1.4	0
1.5	0
1.6	0
1.7	0
1.8	0
1.9	0
2	0
2.1	0
2.2	0
2.3	0
2.4	0
2.5	0
2.6	0
2.7	0
2.8	0
2.9	0
3	0
3.1	0
3.2	0
3.3	0
3.4	0
3.5	0
3.6	0
3.7	0
3.8	0
3.9	0
4	0
4.1	0
4.2	0
4.3	0
4.4	0
4.5	0
4.6	0
4.7	0
4.8	0
4.9	0
5	0
5.1	0
5.2	0
5.3	0
5.4	0
5.5	0
5.6	0
5.7	0
5.8	0
5.9	0
6	0
6.1	0
6.2	0
6.3	0
6.4	0
6.5	0
6.6	0
6.7	0
6.8	0
6.9	0
7	0
7.1	0
7.2	0
7.3	0
7.4	0
7.5	0
7.6	0
7.7	0
7.8	0
7.9	0
8	0
8.1	0
8.2	0
8.3	0
8.4	0
8.5	0
8.6	0
8.7	0
8.8	0
8.9	0
9	0
9.1	0
9.2	0
9.3	0
9.4	0
9.5	0
9.6	0
9.7	0
9.8	0
9.9	0
10	0
10.1	0
10.2	0
10.3	0
10.4	0
10.5	0
10.6	0
10.7	0
10.8	0
10.9	0
11	0
11.1	0
11.2	0
11.3	0
11.4	0
11.5	0
11.6	0
11.7	0
11.8	0
11.9	0
12	0
12.1	0
12.2	0
12.3	0
12.4	0
12.5	0
12.6	0
12.7	0
12.8	0
12.9	0
13	0
13.1	0
13.2	0
13.3	0
13.4	0
13.5	0
13.6	0
13.7	0
13.8	0
13.9	0
14	0
14.1	0
14.2	0
14.3	0
14.4	0
14.5	0
14.6	0
14.7	0
14.8	0
14.9	0
15	0
15.1	0
15.2	0
15.3	0
15.4	0
15.5	0
15.6	0
15.7	0
15.8	0
15.9	0
16	0
16.1	0
16.2	0
16.3	0
16.4	0
16.5	0
16.6	0
16.7	0
16.8	0
16.9	0
17	0
17.1	0
17.2	0
17.3	0
17.4	0
17.5	0
17.6	0
17.7	0
17.8	0
17.9	0
18	0
18.1	0
18.2	0
18.3	0
18.4	0
18.5	0
18.6	0
18.7	0
18.8	0
18.9	0
19	0
19.1	0
19.2	0
19.3	0
19.4	0
19.5	0
19.6	0
19.7	0
19.8	0
19.9	0
20	0
20.1	0
20.2	0
20.3	0
20.4	0
20.5	0
20.6	0
20.7	0
20.8	0
20.9	0
21	0
21.1	0
21.2	0
21.3	0
21.4	0
21.5	0
21.6	0
21.7	0
21.8	0
21.9	0
22	0
22.1	0
22.2	0
22.3	0
22.4	0
22.5	0
22.6	0
22.7	0
22.8	0
22.9	0
23	0
23.1	0
23.2	0
23.3	0
23.4	0
23.5	0
23.6	0
23.7	0
23.8	0
23.9	0
24	0
24.1	0
24.2	0
24.3	0
24.4	0
24.5	0
24.6	0
24.7	0
24.8	0
24.9	0
25	0
25.1	0
25.2	0
25.3	0
25.4	0
25.5	0
25.6	0
25.7	0
25.8	0
25.9	0
26	0
26.1	0
26.2	0
26.3	0
26.4	0
26.5	0
26.6	0
26.7	0
26.8	0
26.9	0
27	0
27.1	0
27.2	0
27.3	0
27.4	0
27.5	0
27.6	0
27.7	0
27.8	0
27.9	0
28	0
28.1	0
28.2	0
28.3	0
28.4	0
28.5	0
28.6	0
28.7	0
28.8	0
28.9	0
29	0
29.1	0
29.2	0
29.3	0
29.4	0
29.5	0
29.6	0
29.7	0
29.8	0
29.9	0
30	0
30.1	0
30.2	0
30.3	0
30.4	0
30.5	0
30.6	0
30.7	0
30.8	0
30.9	0
31	0
31.1	0
31.2	0
31.3	0
31.4	0
31.5	0
31.6	0
31.7	0
31.8	0
31.9	0
32	0
32.1	0
32.2	0
32.3	0
32.4	0
32.5	0
32.6	0
32.7	0
32.8	0
32.9	0
33	0
33.1	0
33.2	0
33.3	0
33.4	0
33.5	0
33.6	0
33.7	0
33.8	0
33.9	0
34	0
34.1	0
34.2	0
34.3	0
34.4	0
34.5	0
34.6	0
34.7	0
34.8	0
34.9	0
35	0
35.1	0
35.2	0
35.3	0
35.4	0
35.5	0
35.6	0
35.7	0
35.8	0
35.9	0
36	0
36.1	0
36.2	0
36.3	0
36.4	0
36.5	0
36.6	0
36.7	0
36.8	0
36.9	0
37	0
37.1	0
37.2	0
37.3	0
37.4	0
37.5	0
37.6	0
37.7	0
37.8	0
37.9	0
38	0
38.1	0
38.2	0
38.3	0
38.4	0
38.5	0
38.6	0
38.7	0
38.8	0
38.9	0
39	0
39.1	0
39.2	0
39.3	0
39.4	0
39.5	0
39.6	0
39.7	0
39.8	0
39.9	0
40	0
40.1	0
40.2	0
40.3	0
40.4	0
40.5	0
40.6	0
40.7	0
40.8	0
40.9	0
41	0
41.1	0
41.2	0
41.3	0
41.4	0
41.5	0
41.6	0
41.7	0
41.8	0
41.9	0
42	0
42.1	0
42.2	0
42.3	0
42.4	0
42.5	0
42.6	0
42.7	0
42.8	0
42.9	0
43	0
43.1	0
43.2	0
43.3	0
43.4	0
43.5	0
43.6	0
43.7	0
43.8	0
43.9	0
44	0
44.1	0
44.2	0
44.3	0
44.4	0
44.5	0
44.6	0
44.7	0
44.8	0
44.9	0
45	0
45.1	0
45.2	0
45.3	0
45.4	0
45.5	0
45.6	0
45.7	0
45.8	0
45.9	0
46	0
46.1	0
46.2	0
46.3	0
46.4	0
46.5	0
46.6	0
46.7	0
46.8	0
46.9	0
47	0
47.1	0
47.2	0
47.3	0
47.4	0
47.5	0
47.6	0
47.7	0
47.8	0
47.9	0
48	0
48.1	0
48.2	0
48.3	0
48.4	0
48.5	0
48.6	0
48.7	0
48.8	0
48.9	0
49	0
49.1	0
49.2	0
49.3	0
49.4	0
49.5	0
49.6	0
49.7	0
49.8	0
49.9	0
50	0
50.1	0
50.2	0
50.3	0
50.4	0
50.5	0
50.6	0
50.7	0
50.8	0
50.9	0
51	0
51.1	0
51.2	0
51.3	0
51.4	0
51.5	0
51.6	0
51.7	0
51.8	0
51.9	0
52	0
52.1	0
52.2	0
52.3	0
52.4	0
52.5	0
52.6	0
52.7	0
52.8	0
52.9	0
53	0
53.1	0
53.2	0
53.3	0
53.4	0
53.5	0
53.6	0
53.7	0
53.8	0
53.9	0
54	0
54.1	0
54.2	0
54.3	0
54.4	0
54.5	0
54.6	0
54.7	0
54.8	0
54.9	0
55	0
55.1	0
55.2	0
55.3	0
55.4	0
55.5	0
55.6	0
55.7	0
55.8	0
55.9	0
56	0
56.1	0
56.2	0
56.3	0
56.4	0
56.5	0
56.6	0
56.7	0
56.8	0
56.9	0
57	0
57.1	0
57.2	0
57.3	0
57.4	0
57.5	0
57.6	0
57.7	0
57.8	0
57.9	0
58	0
58.1	0
58.2	0
58.3	0
58.4	0
58.5	0
58.6	0
58.7	0
58.8	0
58.9	0
59	0
59.1	0
59.2	0
59.3	0
59.4	0
59.5	0
59.6	0
59.7	0
59.8	0
59.9	0
60	0
60.1	0
60.2	0
60.3	0
60.4	0
60.5	0
60.6	0
60.7	0
60.8	0
60.9	0
61	0
61.1	0
61.2	0
61.3	0
61.4	0
61.5	0
61.6	0
61.7	0
61.8	0
61.9	0
62	0
62.1	0
62.2	0
62.3	0
62.4	0
62.5	0
62.6	0
62.7	0
62.8	0
62.9	0
63	0
63.1	0
63.2	0
63.3	0
63.4	0
63.5	0
63.6	0
63.7	0
63.8	0
63.9	0
64	0
64.1	0
64.2	0
64.3	0
64.4	0
64.5	0
64.6	0
64.7	0
64.8	0
64.9	0
65	0
65.1	0
65.2	0
65.3	0
65.4	0
65.5	0
65.6	0
65.7	0
65.8	0
65.9	0
66	0
66.1	0
66.2	0
66.3	0
66.4	0
66.5	0
66.6	0
66.7	0
66.8	0
66.9	0
67	0
67.1	0
67.2	0
67.3	0
67.4	0
67.5	0
67.6	0
67.7	0
67.8	0
67.9	0
68	0
68.1	0
68.2	0
68.3	0
68.4	0
68.5	0
68.6	0
68.7	0
68.8	0
68.9	0
69	0
69.1	0
69.2	0
69.3	0
69.4	0
69.5	0
69.6	0
69.7	0
69.8	0
69.9	0
70	0
70.1	0
70.2	0
70.3	0
70.4	0
70.5	0
70.6	0
70.7	0
70.8	0
70.9	0
71	0
71.1	0
71.2	0
71.3	0
71.4	0
71.5	0
71.6	0
71.7	0
71.8	0
71.9	0
72	0
72.1	0
72.2	0
72.3	0
72.4	0
72.5	0
72.6	0
72.7	0
72.8	0
72.9	0
73	0
73.1	0
73.2	0
73.3	0
73.4	0
73.5	0
73.6	0
73.7	0
73.8	0
73.9	0
74	0
74.1	0
74.2	0
74.3	0
74.4	0
74.5	0
74.6	0
74.7	0
74.8	0
74.9	0
75	0
75.1	0
75.2	0
75.3	0
75.4	0
75.5	0
75.6	0
75.7	0
75.8	0
75.9	0
76	0
76.1	0
76.2	0
76.3	0
76.4	0
76.5	0
76.6	0
76.7	0
76.8	0
76.9	0
77	0
77.1	0
77.2	0
77.3	0
77.4	0
77.5	0
77.6	0
77.7	0
77.8	0
77.9	0
78	0
78.1	0
78.2	0
78.3	0
78.4	0
78.5	0
78.6	0
78.7	0
78.8	0
78.9	0
79	0
79.1	0
79.2	0
79.3	0
79.4	0
79.5	0
79.6	0
79.7	0
79.8	0
79.9	0
80	0
80.1	0
80.2	0
80.3	0
80.4	0
80.5	0
80.6	0
80.7	0
80.8	0
80.9	0
81	0
81.1	0
81.2	0
81.3	0
81.4	0
81.5	0
81.6	0
81.7	0
81.8	0
81.9	0
82	0
82.1	0
82.2	0
82.3	0
82.4	0
82.5	0
82.6	0
82.7	0
82.8	0
82.9	0
83	0
83.1	0
83.2	0
83.3	0
83.4	0
83.5	0
83.6	0
83.7	0
83.8	0
83.9	0
84	0
84.1	0
84.2	0
84.3	0
84.4	0
84.5	0
84.6	0
84.7	0
84.8	0
84.9	0
85	0
85.1	0
85.2	0
85.3	0
85.4	0
85.5	0
85.6	0
85.7	0
85.8	0
85.9	0
86	0
86.1	0
86.2	0
86.3	0
86.4	0
86.5	0
86.6	0
86.7	0
86.8	0
86.9	0
87	0
87.1	0
87.2	0
87.3	0
87.4	0
87.5	0
87.6	0
87.7	0
87.8	0
87.9	0
88	0
88.1	0
88.2	0
88.3	0
88.4	0
88.5	0
88.6	0
88.7	0
88.8	0
88.9	0
89	0
89.1	0
89.2	0
89.3	0
89.4	0
89.5	0
89.6	0
89.7	0
89.8	0
89.9	0
90	0
90.1	0
90.2	0
90.3	0
90.4	0
90.5	0
90.6	0
90.7	0
90.8	0
90.9	0
91	0
91.1	0
91.2	0
91.3	0
91.4	0
91.5	0
91.6	0
91.7	0
91.8	0
91.9	0
92	0
92.1	0
92.2	0
92.3	0
92.4	0
92.5	0
92.6	0
92.7	0
92.8	0
92.9	0
93	0
93.1	0
93.2	0
93.3	0
93.4	0
93.5	0
93.6	0
93.7	0
93.8	0
93.9	0
94	0
94.1	0
94.2	0
94.3	0
94.4	0
94.5	0
94.6	0
94.7	0
94.8	0
94.9	0
95	0
95.1	0
95.2	0
95.3	0
95.4	0
95.5	0
95.6	0
95.7	0
95.8	0
95.9	0
96	0
96.1	0
96.2	0
96.3	0
96.4	0
96.5	0
96.6	0
96.7	0
96.8	0
96.9	0
97	0
97.1	0
97.2	0
97.3	0
97.4	0
97.5	0
97.6	0
97.7	0
97.8	0
97.9	0
98	0
98.1	0
98.2	0
98.3	0
98.4	0
98.5	0
98.6	0
98.7	0
98.8	0
98.9	0
99	0
99.1	0
99.2	0
99.3	0
99.4	0
99.5	0
99.6	0
99.7	0
99.8	0
99.9	0
100	0
100.1	0
100.2	5e-05
100.3	5e-05
100.4	5e-05
100.5	0.0003
100.6	0.00035
100.7	0.00065
100.8	0.0009
100.9	0.00145
101	0.0022
101.1	0.0027
101.2	0.0036
101.3	0.0043
101.4	0.0049
101.5	0.00545
101.6	0.00645
101.7	0.00725
101.8	0.0078
101.9	0.00895
102	0.00995
102.1	0.0107
102.2	0.01185
102.3	0.01345
102.4	0.01465
102.5	0.0159
102.6	0.0175
102.7	0.0186
102.8	0.01975
102.9	0.02125
103	0.02245
103.1	0.02485
103.2	0.02585
103.3	0.02715
103.4	0.0286
103.5	0.02975
103.6	0.0315
103.7	0.0333
103.8	0.03495
103.9	0.03645
104	0.03785
104.1	0.039
104.2	0.0399
104.3	0.04145
104.4	0.04305
104.5	0.04435
104.6	0.0453
104.7	0.04655
104.8	0.048
104.9	0.0502
105	0.05165
105.1	0.0528
105.2	0.0544
105.3	0.05565
105.4	0.05735
105.5	0.0587
105.6	0.05965
105.7	0.06155
105.8	0.06305
105.9	0.06445
106	0.0659
106.1	0.06705
106.2	0.0686
106.3	0.07005
106.4	0.07145
106.5	0.0735
106.6	0.0747
106.7	0.0761
106.8	0.07755
106.9	0.07935
107	0.0812
107.1	0.0824
107.2	0.08395
107.3	0.08515
107.4	0.087
107.5	0.0888
107.6	0.0903
107.7	0.09155
107.8	0.09345
107.9	0.0953
108	0.0966
108.1	0.09745
108.2	0.0987
108.3	0.09955
108.4	0.10135
108.5	0.1028
108.6	0.1046
108.7	0.106
108.8	0.10745
108.9	0.1091
109	0.11055
109.1	0.112
109.2	0.114
109.3	0.11555
109.4	0.11685
109.5	0.11765
109.6	0.119
109.7	0.1202
109.8	0.12175
109.9	0.1235
110	0.1251
110.1	0.1265
110.2	0.1281
110.3	0.1297
110.4	0.1317
110.5	0.13315
110.6	0.1347
110.7	0.13615
110.8	0.1377
110.9	0.1386
111	0.13965
111.1	0.14115
111.2	0.1427
111.3	0.14395
111.4	0.14495
111.5	0.14615
111.6	0.1473
111.7	0.14855
111.8	0.1498
111.9	0.1509
112	0.1519
112.1	0.15325
112.2	0.1544
112.3	0.15565
112.4	0.1574
112.5	0.1583
112.6	0.15935
112.7	0.16055
112.8	0.162
112.9	0.1631
113	0.16455
113.1	0.16555
113.2	0.16665
113.3	0.16865
113.4	0.1702
113.5	0.17095
113.6	0.17265
113.7	0.174
113.8	0.1752
113.9	0.1763
114	0.1776
114.1	0.17885
114.2	0.18055
114.3	0.1822
114.4	0.18355
114.5	0.18505
114.6	0.18575
114.7	0.18685
114.8	0.1876
114.9	0.189
115	0.18975
115.1	0.1913
115.2	0.1928
115.3	0.19415
115.4	0.19555
115.5	0.1966
115.6	0.19775
115.7	0.19925
115.8	0.20055
115.9	0.20155
116	0.20275
116.1	0.2038
116.2	0.20485
116.3	0.2062
116.4	0.2074
116.5	0.2084
116.6	0.2094
116.7	0.21055
116.8	0.21185
116.9	0.2129
117	0.21385
117.1	0.21535
117.2	0.216
117.3	0.2171
117.4	0.21805
117.5	0.21885
117.6	0.21995
117.7	0.2208
117.8	0.22215
117.9	0.2229
118	0.2238
118.1	0.2247
118.2	0.22615
118.3	0.22775
118.4	0.22855
118.5	0.22955
118.6	0.23075
118.7	0.23165
118.8	0.2331
118.9	0.23435
119	0.23595
119.1	0.237
119.2	0.23785
119.3	0.2392
119.4	0.2397
119.5	0.24075
119.6	0.24165
119.7	0.24275
119.8	0.2448
119.9	0.24585
120	0.2465
120.1	0.2472
120.2	0.24855
120.3	0.24965
120.4	0.2507
120.5	0.25155
120.6	0.2528
120.7	0.25365
120.8	0.255
120.9	0.2563
121	0.257
121.1	0.2581
121.2	0.25965
121.3	0.2608
121.4	0.2616
121.5	0.2625
121.6	0.2638
121.7	0.2647
121.8	0.26585
121.9	0.26665
122	0.2675
122.1	0.2686
122.2	0.2692
122.3	0.27055
122.4	0.27125
122.5	0.272
122.6	0.273
122.7	0.2734
122.8	0.2743
122.9	0.27545
123	0.2766
123.1	0.2779
123.2	0.27855
123.3	0.27875
123.4	0.2794
123.5	0.28015
123.6	0.2808
123.7	0.28125
123.8	0.2818
123.9	0.2825
124	0.2833
124.1	0.2838
124.2	0.28485
124.3	0.2855
124.4	0.2865
124.5	0.28785
124.6	0.28845
124.7	0.28915
124.8	0.29
124.9	0.29105
125	0.29215
125.1	0.29335
125.2	0.29375
125.3	0.2944
125.4	0.29535
125.5	0.2969
125.6	0.29735
125.7	0.2982
125.8	0.2993
125.9	0.2999
126	0.30095
126.1	0.30215
126.2	0.30345
126.3	0.30425
126.4	0.30505
126.5	0.30605
126.6	0.3069
126.7	0.3075
126.8	0.30795
126.9	0.309
127	0.3104
127.1	0.3115
127.2	0.31235
127.3	0.31315
127.4	0.31345
127.5	0.3141
127.6	0.31485
127.7	0.31595
127.8	0.317
127.9	0.3175
128	0.31825
128.1	0.3184
128.2	0.31935
128.3	0.3206
128.4	0.3214
128.5	0.322
128.6	0.3228
128.7	0.32355
128.8	0.3245
128.9	0.32555
129	0.3261
129.1	0.32695
129.2	0.32745
129.3	0.328
129.4	0.32845
129.5	0.3294
129.6	0.33005
129.7	0.3312
129.8	0.33165
129.9	0.332
130	0.3328
130.1	0.33375
130.2	0.33495
130.3	0.3359
130.4	0.33675
130.5	0.3375
130.6	0.33835
130.7	0.33925
130.8	0.3398
130.9	0.34035
131	0.34165
131.1	0.3423
131.2	0.34315
131.3	0.3439
131.4	0.3446
131.5	0.34525
131.6	0.34575
131.7	0.347
131.8	0.3476
131.9	0.3487
132	0.3498
132.1	0.35
132.2	0.3506
132.3	0.35165
132.4	0.35215
132.5	0.3531
132.6	0.3541
132.7	0.35485
132.8	0.35575
132.9	0.35645
133	0.3568
133.1	0.35745
133.2	0.3588
133.3	0.35985
133.4	0.3609
133.5	0.3617
133.6	0.3625
133.7	0.3629
133.8	0.3634
133.9	0.3639
134	0.3647
134.1	0.36565
134.2	0.3665
134.3	0.3669
134.4	0.36755
134.5	0.36845
134.6	0.3693
134.7	0.3701
134.8	0.37055
134.9	0.3715
135	0.37215
135.1	0.37305
135.2	0.37425
135.3	0.37455
135.4	0.37545
135.5	0.3761
135.6	0.3771
135.7	0.37765
135.8	0.379
135.9	0.3795
136	0.3805
136.1	0.38135
136.2	0.38225
136.3	0.38255
136.4	0.3832
136.5	0.38425
136.6	0.3849
136.7	0.3854
136.8	0.3859
136.9	0.3866
137	0.3873
137.1	0.3884
137.2	0.3889
137.3	0.38955
137.4	0.3903
137.5	0.39085
137.6	0.39135
137.7	0.39215
137.8	0.3932
137.9	0.39385
138	0.39415
138.1	0.39475
138.2	0.39515
138.3	0.39595
138.4	0.39675
138.5	0.3972
138.6	0.3974
138.7	0.3981
138.8	0.3989
138.9	0.39915
139	0.39975
139.1	0.4005
139.2	0.40145
139.3	0.4022
139.4	0.4026
139.5	0.40335
139.6	0.40375
139.7	0.4045
139.8	0.4051
139.9	0.4054
140	0.4054
140.1	0.40595
140.2	0.40665
140.3	0.4069
140.4	0.4074
140.5	0.4083
140.6	0.40885
140.7	0.40945
140.8	0.41
140.9	0.41045
141	0.41115
141.1	0.4122
141.2	0.41245
141.3	0.41315
141.4	0.41395
141.5	0.4149
141.6	0.41565
141.7	0.41635
141.8	0.41755
141.9	0.41795
142	0.4188
142.1	0.4195
142.2	0.4204
142.3	0.4209
142.4	0.42185
142.5	0.42245
142.6	0.42305
142.7	0.4244
142.8	0.42455
142.9	0.4256
143	0.42585
143.1	0.4261
143.2	0.4268
143.3	0.42695
143.4	0.4273
143.5	0.4279
143.6	0.42875
143.7	0.429
143.8	0.43
143.9	0.43045
144	0.43085
144.1	0.4311
144.2	0.43115
144.3	0.43135
144.4	0.43225
144.5	0.4329
144.6	0.4335
144.7	0.43425
144.8	0.4348
144.9	0.4354
145	0.436
145.1	0.43635
145.2	0.4373
145.3	0.43775
145.4	0.4385
145.5	0.43915
145.6	0.43955
145.7	0.4402
145.8	0.4406
145.9	0.4416
146	0.44185
146.1	0.44285
146.2	0.44335
146.3	0.4434
146.4	0.44415
146.5	0.44495
146.6	0.44565
146.7	0.4465
146.8	0.4467
146.9	0.4473
147	0.448
147.1	0.4485
147.2	0.4488
147.3	0.44915
147.4	0.45
147.5	0.45025
147.6	0.4508
147.7	0.45125
147.8	0.452
147.9	0.4524
148	0.4527
148.1	0.4529
148.2	0.45345
148.3	0.45375
148.4	0.4541
148.5	0.4547
148.6	0.45535
148.7	0.45615
148.8	0.45655
148.9	0.45735
149	0.45765
149.1	0.45805
149.2	0.45855
149.3	0.4588
149.4	0.45895
149.5	0.45965
149.6	0.46035
149.7	0.46095
149.8	0.46115
149.9	0.4617
150	0.46235
150.1	0.46265
150.2	0.46355
150.3	0.4641
150.4	0.46495
150.5	0.46555
150.6	0.46545
150.7	0.46605
150.8	0.46615
150.9	0.4668
151	0.4672
151.1	0.46715
151.2	0.46765
151.3	0.4677
151.4	0.469
151.5	0.4697
151.6	0.46995
151.7	0.46985
151.8	0.4702
151.9	0.4709
152	0.4711
152.1	0.4713
152.2	0.4718
152.3	0.4723
152.4	0.47265
152.5	0.4729
152.6	0.4736
152.7	0.4743
152.8	0.4744
152.9	0.47465
153	0.47525
153.1	0.4754
153.2	0.47565
153.3	0.4761
153.4	0.47665
153.5	0.4769
153.6	0.47705
153.7	0.47755
153.8	0.4782
153.9	0.4786
154	0.47895
154.1	0.4795
154.2	0.4799
154.3	0.48045
154.4	0.4805
154.5	0.4807
154.6	0.4813
154.7	0.48145
154.8	0.48215
154.9	0.4826
155	0.483
155.1	0.4835
155.2	0.4838
155.3	0.48455
155.4	0.48515
155.5	0.4858
155.6	0.4859
155.7	0.4862
155.8	0.4868
155.9	0.48705
156	0.48795
156.1	0.4887
156.2	0.48905
156.3	0.49
156.4	0.4904
156.5	0.4907
156.6	0.49165
156.7	0.4922
156.8	0.49245
156.9	0.49285
157	0.49305
157.1	0.49355
157.2	0.49385
157.3	0.49405
157.4	0.4943
157.5	0.49425
157.6	0.49445
157.7	0.49455
157.8	0.4949
157.9	0.4948
158	0.4952
158.1	0.496
158.2	0.49635
158.3	0.4971
158.4	0.49755
158.5	0.4983
158.6	0.49835
158.7	0.4992
158.8	0.49975
158.9	0.5003
159	0.5008
159.1	0.50095
159.2	0.50165
159.3	0.50245
159.4	0.5029
159.5	0.50315
159.6	0.50325
159.7	0.5033
159.8	0.503
159.9	0.5033
160	0.50385
160.1	0.50405
160.2	0.5045
160.3	0.50495
160.4	0.50505
160.5	0.50565
160.6	0.5059
160.7	0.50635
160.8	0.50685
160.9	0.50725
161	0.50745
161.1	0.50765
161.2	0.5079
161.3	0.50805
161.4	0.50845
161.5	0.50935
161.6	0.5098
161.7	0.51005
161.8	0.51065
161.9	0.5112
162	0.51185
162.1	0.51205
162.2	0.5116
162.3	0.5123
162.4	0.51275
162.5	0.51275
162.6	0.51305
162.7	0.5138
162.8	0.51375
162.9	0.5144
163	0.5153
163.1	0.51525
163.2	0.5159
163.3	0.5161
163.4	0.5163
163.5	0.51685
163.6	0.51745
163.7	0.51755
163.8	0.5181
163.9	0.5183
164	0.5186
164.1	0.51935
164.2	0.5196
164.3	0.5194
164.4	0.51985
164.5	0.5204
164.6	0.5207
164.7	0.52095
164.8	0.52155
164.9	0.52235
165	0.5228
165.1	0.523
165.2	0.52325
165.3	0.5236
165.4	0.5238
165.5	0.5245
165.6	0.5248
165.7	0.5251
165.8	0.52565
165.9	0.52585
166	0.52625
166.1	0.5267
166.2	0.52675
166.3	0.5269
166.4	0.5276
166.5	0.5277
166.6	0.52765
166.7	0.52785
166.8	0.5281
166.9	0.5282
167	0.5283
167.1	0.5282
167.2	0.5287
167.3	0.5292
167.4	0.5297
167.5	0.53005
167.6	0.53035
167.7	0.5309
167.8	0.5315
167.9	0.53205
168	0.5323
168.1	0.5325
168.2	0.53315
168.3	0.5342
168.4	0.53455
168.5	0.53445
168.6	0.5344
168.7	0.5349
168.8	0.5349
168.9	0.53565
169	0.53555
169.1	0.5354
169.2	0.53595
169.3	0.5361
169.4	0.5367
169.5	0.537
169.6	0.53755
169.7	0.5379
169.8	0.538
169.9	0.53825
170	0.53895
170.1	0.53945
170.2	0.53965
170.3	0.53955
170.4	0.53955
170.5	0.54
170.6	0.5406
170.7	0.54045
170.8	0.5405
170.9	0.54055
171	0.5408
171.1	0.5411
171.2	0.54125
171.3	0.54145
171.4	0.54185
171.5	0.54255
171.6	0.54325
171.7	0.5435
171.8	0.54395
171.9	0.5441
172	0.54455
172.1	0.54465
172.2	0.5449
172.3	0.54495
172.4	0.5452
172.5	0.54515
172.6	0.5455
172.7	0.54535
172.8	0.5455
172.9	0.54575
173	0.54615
173.1	0.54635
173.2	0.54675
173.3	0.54695
173.4	0.5473
173.5	0.54775
173.6	0.5482
173.7	0.54835
173.8	0.54875
173.9	0.5487
174	0.54865
174.1	0.54905
174.2	0.549
174.3	0.5497
174.4	0.54975
174.5	0.5497
174.6	0.5493
174.7	0.54955
174.8	0.54955
174.9	0.5497
175	0.5501
175.1	0.55035
175.2	0.5505
175.3	0.55115
175.4	0.5515
175.5	0.55155
175.6	0.55205
175.7	0.5521
175.8	0.55255
175.9	0.55275
176	0.55295
176.1	0.55345
176.2	0.55375
176.3	0.554
176.4	0.55415
176.5	0.5545
176.6	0.55525
176.7	0.5551
176.8	0.55545
176.9	0.55545
177	0.5556
177.1	0.5559
177.2	0.55575
177.3	0.556
177.4	0.5567
177.5	0.55695
177.6	0.5572
177.7	0.5573
177.8	0.55735
177.9	0.5578
178	0.5578
178.1	0.558
178.2	0.55845
178.3	0.5591
178.4	0.55945
178.5	0.55955
178.6	0.56
178.7	0.55975
178.8	0.5599
178.9	0.56055
179	0.561
179.1	0.56135
179.2	0.56115
179.3	0.5618
179.4	0.5616
179.5	0.56205
179.6	0.5622
179.7	0.56215
179.8	0.5624
179.9	0.56315
180	0.563
180.1	0.56315
180.2	0.56395
180.3	0.5641
180.4	0.56435
180.5	0.5644
180.6	0.5645
180.7	0.56455
180.8	0.565
180.9	0.56515
181	0.56565
181.1	0.5662
181.2	0.5662
181.3	0.5664
181.4	0.56635
181.5	0.5668
181.6	0.5668
181.7	0.56685
181.8	0.56685
181.9	0.5668
182	0.56705
182.1	0.5673
182.2	0.56805
182.3	0.5686
182.4	0.56895
182.5	0.56935
182.6	0.5698
182.7	0.56945
182.8	0.56965
182.9	0.5697
183	0.5696
183.1	0.5695
183.2	0.56965
183.3	0.5699
183.4	0.5703
183.5	0.57075
183.6	0.571
183.7	0.57105
183.8	0.57105
183.9	0.5708
184	0.5706
184.1	0.57115
184.2	0.57165
184.3	0.5715
184.4	0.5718
184.5	0.572
184.6	0.57205
184.7	0.57235
184.8	0.57285
184.9	0.57305
185	0.57325
185.1	0.57315
185.2	0.5728
185.3	0.57295
185.4	0.57325
185.5	0.5731
185.6	0.5738
185.7	0.57375
185.8	0.574
185.9	0.57445
186	0.5747
186.1	0.5749
186.2	0.57445
186.3	0.5749
186.4	0.57515
186.5	0.5751
186.6	0.5751
186.7	0.57525
186.8	0.57575
186.9	0.57565
187	0.5758
187.1	0.57645
187.2	0.57715
187.3	0.57735
187.4	0.5776
187.5	0.5779
187.6	0.57765
187.7	0.5777
187.8	0.57775
187.9	0.5778
188	0.57825
188.1	0.5782
188.2	0.57855
188.3	0.5785
188.4	0.57865
188.5	0.5791
188.6	0.57935
188.7	0.5793
188.8	0.5792
188.9	0.5794
189	0.5796
189.1	0.57985
189.2	0.5799
189.3	0.5802
189.4	0.58075
189.5	0.5809
189.6	0.5815
189.7	0.5813
189.8	0.58155
189.9	0.5821
190	0.5826
190.1	0.5825
190.2	0.5829
190.3	0.58335
190.4	0.58355
190.5	0.58355
190.6	0.5831
190.7	0.5834
190.8	0.5833
190.9	0.58355
191	0.5839
191.1	0.5839
191.2	0.58445
191.3	0.58445
191.4	0.5848
191.5	0.5851
191.6	0.5851
191.7	0.58505
191.8	0.58485
191.9	0.58485
192	0.58495
192.1	0.5847
192.2	0.58465
192.3	0.5848
192.4	0.5853
192.5	0.58515
192.6	0.58525
192.7	0.58515
192.8	0.58565
192.9	0.58585
193	0.5858
193.1	0.58605
193.2	0.5865
193.3	0.5873
193.4	0.5871
193.5	0.5876
193.6	0.58765
193.7	0.5878
193.8	0.58775
193.9	0.58805
194	0.5886
194.1	0.58865
194.2	0.58855
194.3	0.58905
194.4	0.5889
194.5	0.589
194.6	0.58885
194.7	0.589
194.8	0.58915
194.9	0.5897
195	0.58995
195.1	0.59
195.2	0.5898
195.3	0.58965
195.4	0.5898
195.5	0.59015
195.6	0.59
195.7	0.58975
195.8	0.59
195.9	0.59015
196	0.59005
196.1	0.5904
196.2	0.5906
196.3	0.59075
196.4	0.59085
196.5	0.59125
196.6	0.5916
196.7	0.59155
196.8	0.59115
196.9	0.5917
197	0.59175
197.1	0.59215
197.2	0.5927
197.3	0.5928
197.4	0.59235
197.5	0.59265
197.6	0.59295
197.7	0.593
197.8	0.5932
197.9	0.59305
198	0.59345
198.1	0.5939
198.2	0.594
198.3	0.5947
198.4	0.59445
198.5	0.5942
198.6	0.59475
198.7	0.595
198.8	0.59505
198.9	0.5949
199	0.59495
199.1	0.5953
199.2	0.59535
199.3	0.59565
199.4	0.59575
199.5	0.5957
199.6	0.59595
199.7	0.5961
199.8	0.5965
199.9	0.59635
200	0.59615
[truncated: 14,000 more rows]
