# Supplementary material for: Bayesian inference of kinetic schemes for ion channels by Kalman filtering
Source: eLife journal article supplement (doi:10.7554/elife.62714), 2022-05-04
Supplement: fig4-data6 [file 1_Sim_N_50000_Fluor_MW_1M.xlsx]

## Sheet: 1 M
0.1	0
0.2	0
0.3	0
0.4	0
0.5	0
0.6	0
0.7	0
0.8	0
0.9	0
1	0
1.1	0
1.2	0
1.3	0
1.4	0
1.5	0
1.6	0
1.7	0
1.8	0
1.9	0
2	0
2.1	0
2.2	0
2.3	0
2.4	0
2.5	0
2.6	0
2.7	0
2.8	0
2.9	0
3	0
3.1	0
3.2	0
3.3	0
3.4	0
3.5	0
3.6	0
3.7	0
3.8	0
3.9	0
4	0
4.1	0
4.2	0
4.3	0
4.4	0
4.5	0
4.6	0
4.7	0
4.8	0
4.9	0
5	0
5.1	0
5.2	0
5.3	0
5.4	0
5.5	0
5.6	0
5.7	0
5.8	0
5.9	0
6	0
6.1	0
6.2	0
6.3	0
6.4	0
6.5	0
6.6	0
6.7	0
6.8	0
6.9	0
7	0
7.1	0
7.2	0
7.3	0
7.4	0
7.5	0
7.6	0
7.7	0
7.8	0
7.9	0
8	0
8.1	0
8.2	0
8.3	0
8.4	0
8.5	0
8.6	0
8.7	0
8.8	0
8.9	0
9	0
9.1	0
9.2	0
9.3	0
9.4	0
9.5	0
9.6	0
9.7	0
9.8	0
9.9	0
10	0
10.1	0
10.2	0
10.3	0
10.4	0
10.5	0
10.6	0
10.7	0
10.8	0
10.9	0
11	0
11.1	0
11.2	0
11.3	0
11.4	0
11.5	0
11.6	0
11.7	0
11.8	0
11.9	0
12	0
12.1	0
12.2	0
12.3	0
12.4	0
12.5	0
12.6	0
12.7	0
12.8	0
12.9	0
13	0
13.1	0
13.2	0
13.3	0
13.4	0
13.5	0
13.6	0
13.7	0
13.8	0
13.9	0
14	0
14.1	0
14.2	0
14.3	0
14.4	0
14.5	0
14.6	0
14.7	0
14.8	0
14.9	0
15	0
15.1	0
15.2	0
15.3	0
15.4	0
15.5	0
15.6	0
15.7	0
15.8	0
15.9	0
16	0
16.1	0
16.2	0
16.3	0
16.4	0
16.5	0
16.6	0
16.7	0
16.8	0
16.9	0
17	0
17.1	0
17.2	0
17.3	0
17.4	0
17.5	0
17.6	0
17.7	0
17.8	0
17.9	0
18	0
18.1	0
18.2	0
18.3	0
18.4	0
18.5	0
18.6	0
18.7	0
18.8	0
18.9	0
19	0
19.1	0
19.2	0
19.3	0
19.4	0
19.5	0
19.6	0
19.7	0
19.8	0
19.9	0
20	0
20.1	0
20.2	0
20.3	0
20.4	0
20.5	0
20.6	0
20.7	0
20.8	0
20.9	0
21	0
21.1	0
21.2	0
21.3	0
21.4	0
21.5	0
21.6	0
21.7	0
21.8	0
21.9	0
22	0
22.1	0
22.2	0
22.3	0
22.4	0
22.5	0
22.6	0
22.7	0
22.8	0
22.9	0
23	0
23.1	0
23.2	0
23.3	0
23.4	0
23.5	0
23.6	0
23.7	0
23.8	0
23.9	0
24	0
24.1	0
24.2	0
24.3	0
24.4	0
24.5	0
24.6	0
24.7	0
24.8	0
24.9	0
25	0
25.1	0
25.2	0
25.3	0
25.4	0
25.5	0
25.6	0
25.7	0
25.8	0
25.9	0
26	0
26.1	0
26.2	0
26.3	0
26.4	0
26.5	0
26.6	0
26.7	0
26.8	0
26.9	0
27	0
27.1	0
27.2	0
27.3	0
27.4	0
27.5	0
27.6	0
27.7	0
27.8	0
27.9	0
28	0
28.1	0
28.2	0
28.3	0
28.4	0
28.5	0
28.6	0
28.7	0
28.8	0
28.9	0
29	0
29.1	0
29.2	0
29.3	0
29.4	0
29.5	0
29.6	0
29.7	0
29.8	0
29.9	0
30	0
30.1	0
30.2	0
30.3	0
30.4	0
30.5	0
30.6	0
30.7	0
30.8	0
30.9	0
31	0
31.1	0
31.2	0
31.3	0
31.4	0
31.5	0
31.6	0
31.7	0
31.8	0
31.9	0
32	0
32.1	0
32.2	0
32.3	0
32.4	0
32.5	0
32.6	0
32.7	0
32.8	0
32.9	0
33	0
33.1	0
33.2	0
33.3	0
33.4	0
33.5	0
33.6	0
33.7	0
33.8	0
33.9	0
34	0
34.1	0
34.2	0
34.3	0
34.4	0
34.5	0
34.6	0
34.7	0
34.8	0
34.9	0
35	0
35.1	0
35.2	0
35.3	0
35.4	0
35.5	0
35.6	0
35.7	0
35.8	0
35.9	0
36	0
36.1	0
36.2	0
36.3	0
36.4	0
36.5	0
36.6	0
36.7	0
36.8	0
36.9	0
37	0
37.1	0
37.2	0
37.3	0
37.4	0
37.5	0
37.6	0
37.7	0
37.8	0
37.9	0
38	0
38.1	0
38.2	0
38.3	0
38.4	0
38.5	0
38.6	0
38.7	0
38.8	0
38.9	0
39	0
39.1	0
39.2	0
39.3	0
39.4	0
39.5	0
39.6	0
39.7	0
39.8	0
39.9	0
40	0
40.1	0
40.2	0
40.3	0
40.4	0
40.5	0
40.6	0
40.7	0
40.8	0
40.9	0
41	0
41.1	0
41.2	0
41.3	0
41.4	0
41.5	0
41.6	0
41.7	0
41.8	0
41.9	0
42	0
42.1	0
42.2	0
42.3	0
42.4	0
42.5	0
42.6	0
42.7	0
42.8	0
42.9	0
43	0
43.1	0
43.2	0
43.3	0
43.4	0
43.5	0
43.6	0
43.7	0
43.8	0
43.9	0
44	0
44.1	0
44.2	0
44.3	0
44.4	0
44.5	0
44.6	0
44.7	0
44.8	0
44.9	0
45	0
45.1	0
45.2	0
45.3	0
45.4	0
45.5	0
45.6	0
45.7	0
45.8	0
45.9	0
46	0
46.1	0
46.2	0
46.3	0
46.4	0
46.5	0
46.6	0
46.7	0
46.8	0
46.9	0
47	0
47.1	0
47.2	0
47.3	0
47.4	0
47.5	0
47.6	0
47.7	0
47.8	0
47.9	0
48	0
48.1	0
48.2	0
48.3	0
48.4	0
48.5	0
48.6	0
48.7	0
48.8	0
48.9	0
49	0
49.1	0
49.2	0
49.3	0
49.4	0
49.5	0
49.6	0
49.7	0
49.8	0
49.9	0
50	0
50.1	0
50.2	0
50.3	0
50.4	0
50.5	0
50.6	0
50.7	0
50.8	0
50.9	0
51	0
51.1	0
51.2	0
51.3	0
51.4	0
51.5	0
51.6	0
51.7	0
51.8	0
51.9	0
52	0
52.1	0
52.2	0
52.3	0
52.4	0
52.5	0
52.6	0
52.7	0
52.8	0
52.9	0
53	0
53.1	0
53.2	0
53.3	0
53.4	0
53.5	0
53.6	0
53.7	0
53.8	0
53.9	0
54	0
54.1	0
54.2	0
54.3	0
54.4	0
54.5	0
54.6	0
54.7	0
54.8	0
54.9	0
55	0
55.1	0
55.2	0
55.3	0
55.4	0
55.5	0
55.6	0
55.7	0
55.8	0
55.9	0
56	0
56.1	0
56.2	0
56.3	0
56.4	0
56.5	0
56.6	0
56.7	0
56.8	0
56.9	0
57	0
57.1	0
57.2	0
57.3	0
57.4	0
57.5	0
57.6	0
57.7	0
57.8	0
57.9	0
58	0
58.1	0
58.2	0
58.3	0
58.4	0
58.5	0
58.6	0
58.7	0
58.8	0
58.9	0
59	0
59.1	0
59.2	0
59.3	0
59.4	0
59.5	0
59.6	0
59.7	0
59.8	0
59.9	0
60	0
60.1	0
60.2	0
60.3	0
60.4	0
60.5	0
60.6	0
60.7	0
60.8	0
60.9	0
61	0
61.1	0
61.2	0
61.3	0
61.4	0
61.5	0
61.6	0
61.7	0
61.8	0
61.9	0
62	0
62.1	0
62.2	0
62.3	0
62.4	0
62.5	0
62.6	0
62.7	0
62.8	0
62.9	0
63	0
63.1	0
63.2	0
63.3	0
63.4	0
63.5	0
63.6	0
63.7	0
63.8	0
63.9	0
64	0
64.1	0
64.2	0
64.3	0
64.4	0
64.5	0
64.6	0
64.7	0
64.8	0
64.9	0
65	0
65.1	0
65.2	0
65.3	0
65.4	0
65.5	0
65.6	0
65.7	0
65.8	0
65.9	0
66	0
66.1	0
66.2	0
66.3	0
66.4	0
66.5	0
66.6	0
66.7	0
66.8	0
66.9	0
67	0
67.1	0
67.2	0
67.3	0
67.4	0
67.5	0
67.6	0
67.7	0
67.8	0
67.9	0
68	0
68.1	0
68.2	0
68.3	0
68.4	0
68.5	0
68.6	0
68.7	0
68.8	0
68.9	0
69	0
69.1	0
69.2	0
69.3	0
69.4	0
69.5	0
69.6	0
69.7	0
69.8	0
69.9	0
70	0
70.1	0
70.2	0
70.3	0
70.4	0
70.5	0
70.6	0
70.7	0
70.8	0
70.9	0
71	0
71.1	0
71.2	0
71.3	0
71.4	0
71.5	0
71.6	0
71.7	0
71.8	0
71.9	0
72	0
72.1	0
72.2	0
72.3	0
72.4	0
72.5	0
72.6	0
72.7	0
72.8	0
72.9	0
73	0
73.1	0
73.2	0
73.3	0
73.4	0
73.5	0
73.6	0
73.7	0
73.8	0
73.9	0
74	0
74.1	0
74.2	0
74.3	0
74.4	0
74.5	0
74.6	0
74.7	0
74.8	0
74.9	0
75	0
75.1	0
75.2	0
75.3	0
75.4	0
75.5	0
75.6	0
75.7	0
75.8	0
75.9	0
76	0
76.1	0
76.2	0
76.3	0
76.4	0
76.5	0
76.6	0
76.7	0
76.8	0
76.9	0
77	0
77.1	0
77.2	0
77.3	0
77.4	0
77.5	0
77.6	0
77.7	0
77.8	0
77.9	0
78	0
78.1	0
78.2	0
78.3	0
78.4	0
78.5	0
78.6	0
78.7	0
78.8	0
78.9	0
79	0
79.1	0
79.2	0
79.3	0
79.4	0
79.5	0
79.6	0
79.7	0
79.8	0
79.9	0
80	0
80.1	0
80.2	0
80.3	0
80.4	0
80.5	0
80.6	0
80.7	0
80.8	0
80.9	0
81	0
81.1	0
81.2	0
81.3	0
81.4	0
81.5	0
81.6	0
81.7	0
81.8	0
81.9	0
82	0
82.1	0
82.2	0
82.3	0
82.4	0
82.5	0
82.6	0
82.7	0
82.8	0
82.9	0
83	0
83.1	0
83.2	0
83.3	0
83.4	0
83.5	0
83.6	0
83.7	0
83.8	0
83.9	0
84	0
84.1	0
84.2	0
84.3	0
84.4	0
84.5	0
84.6	0
84.7	0
84.8	0
84.9	0
85	0
85.1	0
85.2	0
85.3	0
85.4	0
85.5	0
85.6	0
85.7	0
85.8	0
85.9	0
86	0
86.1	0
86.2	0
86.3	0
86.4	0
86.5	0
86.6	0
86.7	0
86.8	0
86.9	0
87	0
87.1	0
87.2	0
87.3	0
87.4	0
87.5	0
87.6	0
87.7	0
87.8	0
87.9	0
88	0
88.1	0
88.2	0
88.3	0
88.4	0
88.5	0
88.6	0
88.7	0
88.8	0
88.9	0
89	0
89.1	0
89.2	0
89.3	0
89.4	0
89.5	0
89.6	0
89.7	0
89.8	0
89.9	0
90	0
90.1	0
90.2	0
90.3	0
90.4	0
90.5	0
90.6	0
90.7	0
90.8	0
90.9	0
91	0
91.1	0
91.2	0
91.3	0
91.4	0
91.5	0
91.6	0
91.7	0
91.8	0
91.9	0
92	0
92.1	0
92.2	0
92.3	0
92.4	0
92.5	0
92.6	0
92.7	0
92.8	0
92.9	0
93	0
93.1	0
93.2	0
93.3	0
93.4	0
93.5	0
93.6	0
93.7	0
93.8	0
93.9	0
94	0
94.1	0
94.2	0
94.3	0
94.4	0
94.5	0
94.6	0
94.7	0
94.8	0
94.9	0
95	0
95.1	0
95.2	0
95.3	0
95.4	0
95.5	0
95.6	0
95.7	0
95.8	0
95.9	0
96	0
96.1	0
96.2	0
96.3	0
96.4	0
96.5	0
96.6	0
96.7	0
96.8	0
96.9	0
97	0
97.1	0
97.2	0
97.3	0
97.4	0
97.5	0
97.6	0
97.7	0
97.8	0
97.9	0
98	0
98.1	0
98.2	0
98.3	0
98.4	0
98.5	0
98.6	0
98.7	0
98.8	0
98.9	0
99	0
99.1	0
99.2	0
99.3	0
99.4	0
99.5	0
99.6	0
99.7	0
99.8	0
99.9	0
100	0
100.1	0.05585
100.2	0.10803
100.3	0.15533
100.4	0.19857
100.5	0.23708
100.6	0.27279
100.7	0.30413
100.8	0.33268
100.9	0.35894
101	0.38329
101.1	0.40599
101.2	0.42591
101.3	0.44376
101.4	0.4606
101.5	0.47638
101.6	0.49021
101.7	0.50325
101.8	0.5159
101.9	0.52663
102	0.53661
102.1	0.54605
102.2	0.55441
102.3	0.56253
102.4	0.57013
102.5	0.57611
102.6	0.58228
102.7	0.5885
102.8	0.59403
102.9	0.59819
103	0.60324
103.1	0.6081
103.2	0.61215
103.3	0.61571
103.4	0.6187
103.5	0.62133
103.6	0.62406
103.7	0.6263
103.8	0.62945
103.9	0.63231
104	0.63423
104.1	0.63618
104.2	0.63923
104.3	0.64149
104.4	0.64344
104.5	0.64574
104.6	0.64688
104.7	0.64833
104.8	0.6497
104.9	0.65169
105	0.65294
105.1	0.65424
105.2	0.65523
105.3	0.65699
105.4	0.65817
105.5	0.65926
105.6	0.66028
105.7	0.6612
105.8	0.66198
105.9	0.66309
106	0.66344
106.1	0.66428
106.2	0.66548
106.3	0.66568
106.4	0.66699
106.5	0.66745
106.6	0.66828
106.7	0.66928
106.8	0.66952
106.9	0.67087
107	0.67152
107.1	0.67201
107.2	0.67216
107.3	0.67322
107.4	0.67364
107.5	0.67379
107.6	0.67469
107.7	0.67533
107.8	0.67637
107.9	0.67696
108	0.6776
108.1	0.67784
108.2	0.67937
108.3	0.68009
108.4	0.67948
108.5	0.6803
108.6	0.68089
108.7	0.68193
108.8	0.68268
108.9	0.68317
109	0.68287
109.1	0.68333
109.2	0.68372
109.3	0.6846
109.4	0.6854
109.5	0.68562
109.6	0.68623
109.7	0.68636
109.8	0.68685
109.9	0.68699
110	0.68799
110.1	0.68786
110.2	0.68813
110.3	0.68839
110.4	0.68967
110.5	0.69111
110.6	0.69201
110.7	0.69283
110.8	0.69339
110.9	0.69359
111	0.69379
111.1	0.69478
111.2	0.69504
111.3	0.69575
111.4	0.69602
111.5	0.69778
111.6	0.69785
111.7	0.69854
111.8	0.69883
111.9	0.69941
112	0.69991
112.1	0.70085
112.2	0.70212
112.3	0.7022
112.4	0.70297
112.5	0.70382
112.6	0.70463
112.7	0.70471
112.8	0.70485
112.9	0.70557
113	0.70575
113.1	0.70659
113.2	0.70668
113.3	0.7066
113.4	0.70705
113.5	0.70666
113.6	0.70697
113.7	0.70727
113.8	0.70754
113.9	0.70778
114	0.70854
114.1	0.70924
114.2	0.70979
114.3	0.70957
114.4	0.70978
114.5	0.70995
114.6	0.71066
114.7	0.71088
114.8	0.7115
114.9	0.71201
115	0.71215
115.1	0.71273
115.2	0.71324
115.3	0.71374
115.4	0.71395
115.5	0.71351
115.6	0.71367
115.7	0.71458
115.8	0.71504
115.9	0.71531
116	0.7161
116.1	0.71703
116.2	0.71702
116.3	0.7169
116.4	0.71735
116.5	0.71768
116.6	0.71851
116.7	0.71841
116.8	0.71937
116.9	0.71866
117	0.7183
117.1	0.71939
117.2	0.71964
117.3	0.72043
117.4	0.72098
117.5	0.722
117.6	0.72269
117.7	0.72284
117.8	0.7231
117.9	0.72352
118	0.72413
118.1	0.72496
118.2	0.72489
118.3	0.72578
118.4	0.72684
118.5	0.72683
118.6	0.72679
118.7	0.7273
118.8	0.72749
118.9	0.72716
119	0.72696
119.1	0.72817
119.2	0.72912
119.3	0.7296
119.4	0.7302
119.5	0.73031
119.6	0.73091
119.7	0.73144
119.8	0.73151
119.9	0.73197
120	0.73256
120.1	0.73243
120.2	0.73306
120.3	0.73306
120.4	0.73342
120.5	0.73369
120.6	0.73419
120.7	0.73526
120.8	0.73559
120.9	0.73637
121	0.73728
121.1	0.73727
121.2	0.73749
121.3	0.73777
121.4	0.73806
121.5	0.73775
121.6	0.73824
121.7	0.73854
121.8	0.73801
121.9	0.73771
122	0.73778
122.1	0.73893
122.2	0.7388
122.3	0.73886
122.4	0.73936
122.5	0.73953
122.6	0.73968
122.7	0.74032
122.8	0.74025
122.9	0.74069
123	0.74081
123.1	0.74162
123.2	0.74217
123.3	0.74275
123.4	0.74322
123.5	0.74323
123.6	0.74345
123.7	0.74381
123.8	0.74425
123.9	0.74386
124	0.74437
124.1	0.74507
124.2	0.7459
124.3	0.74618
124.4	0.74631
124.5	0.74633
124.6	0.74639
124.7	0.74738
124.8	0.74749
124.9	0.74751
125	0.74703
125.1	0.74758
125.2	0.74774
125.3	0.74838
125.4	0.74932
125.5	0.75056
125.6	0.75159
125.7	0.75156
125.8	0.75177
125.9	0.75234
126	0.75248
126.1	0.75227
126.2	0.75315
126.3	0.75368
126.4	0.7541
126.5	0.75367
126.6	0.75351
126.7	0.75449
126.8	0.75497
126.9	0.75471
127	0.755
127.1	0.75509
127.2	0.75548
127.3	0.75499
127.4	0.75505
127.5	0.75522
127.6	0.7553
127.7	0.75567
127.8	0.75645
127.9	0.75693
128	0.75726
128.1	0.75826
128.2	0.75765
128.3	0.7581
128.4	0.75788
128.5	0.75801
128.6	0.75816
128.7	0.75856
128.8	0.75904
128.9	0.75947
129	0.75984
129.1	0.75997
129.2	0.76014
129.3	0.76088
129.4	0.76026
129.5	0.76111
129.6	0.76165
129.7	0.76189
129.8	0.76243
129.9	0.76163
130	0.7623
130.1	0.76285
130.2	0.76301
130.3	0.76336
130.4	0.76384
130.5	0.76417
130.6	0.76494
130.7	0.76509
130.8	0.76608
130.9	0.76656
131	0.76734
131.1	0.76826
131.2	0.76912
131.3	0.76914
131.4	0.76945
131.5	0.7698
131.6	0.76941
131.7	0.76922
131.8	0.77008
131.9	0.77005
132	0.77089
132.1	0.77089
132.2	0.77065
132.3	0.77079
132.4	0.77122
132.5	0.77147
132.6	0.77192
132.7	0.77241
132.8	0.77263
132.9	0.7727
133	0.77284
133.1	0.77332
133.2	0.77358
133.3	0.77408
133.4	0.77461
133.5	0.77478
133.6	0.7748
133.7	0.77533
133.8	0.77531
133.9	0.77556
134	0.77572
134.1	0.77578
134.2	0.77674
134.3	0.77768
134.4	0.77791
134.5	0.77849
134.6	0.77814
134.7	0.77836
134.8	0.77851
134.9	0.77841
135	0.77905
135.1	0.77924
135.2	0.77947
135.3	0.78011
135.4	0.781
135.5	0.78089
135.6	0.78051
135.7	0.78099
135.8	0.78193
135.9	0.7819
136	0.78157
136.1	0.78255
136.2	0.78281
136.3	0.78289
136.4	0.78307
136.5	0.7841
136.6	0.78421
136.7	0.78437
136.8	0.78409
136.9	0.78381
137	0.78401
137.1	0.78478
137.2	0.78487
137.3	0.78499
137.4	0.78479
137.5	0.78465
137.6	0.78491
137.7	0.78527
137.8	0.78543
137.9	0.78615
138	0.78658
138.1	0.78689
138.2	0.78715
138.3	0.78783
138.4	0.78777
138.5	0.7881
138.6	0.78816
138.7	0.78824
138.8	0.78794
138.9	0.78882
139	0.78934
139.1	0.78917
139.2	0.78967
139.3	0.78948
139.4	0.79007
139.5	0.79019
139.6	0.7907
139.7	0.7911
139.8	0.7917
139.9	0.79151
140	0.79143
140.1	0.792
140.2	0.79197
140.3	0.79208
140.4	0.79262
140.5	0.79245
140.6	0.79239
140.7	0.79272
140.8	0.79327
140.9	0.79338
141	0.79403
141.1	0.79461
141.2	0.79454
141.3	0.79462
141.4	0.79444
141.5	0.79451
141.6	0.79523
141.7	0.79538
141.8	0.79615
141.9	0.79636
142	0.7965
142.1	0.79655
142.2	0.79717
142.3	0.79708
142.4	0.79703
142.5	0.79731
142.6	0.79745
142.7	0.79715
142.8	0.7975
142.9	0.79732
143	0.79716
143.1	0.79735
143.2	0.79743
143.3	0.7973
143.4	0.79771
143.5	0.79785
143.6	0.79796
143.7	0.79846
143.8	0.79868
143.9	0.79903
144	0.79903
144.1	0.79874
144.2	0.79907
144.3	0.79965
144.4	0.80022
144.5	0.8006
144.6	0.8003
144.7	0.80112
144.8	0.80202
144.9	0.80172
145	0.80197
145.1	0.80161
145.2	0.80181
145.3	0.80162
145.4	0.80191
145.5	0.80226
145.6	0.80308
145.7	0.80283
145.8	0.80311
145.9	0.80317
146	0.80403
146.1	0.80427
146.2	0.80499
146.3	0.80508
146.4	0.80457
146.5	0.80511
146.6	0.80442
146.7	0.80498
146.8	0.80453
146.9	0.8045
147	0.80473
147.1	0.80394
147.2	0.80383
147.3	0.80427
147.4	0.80476
147.5	0.8049
147.6	0.80526
147.7	0.80568
147.8	0.80642
147.9	0.80721
148	0.80738
148.1	0.8073
148.2	0.80743
148.3	0.80765
148.4	0.8076
148.5	0.80737
148.6	0.80725
148.7	0.80718
148.8	0.80766
148.9	0.80792
149	0.80792
149.1	0.80849
149.2	0.80864
149.3	0.80888
149.4	0.80899
149.5	0.80887
149.6	0.80894
149.7	0.80933
149.8	0.80945
149.9	0.80983
150	0.80958
150.1	0.81027
150.2	0.81079
150.3	0.8111
150.4	0.81087
150.5	0.81126
150.6	0.81198
150.7	0.81253
150.8	0.81316
150.9	0.81308
151	0.81302
151.1	0.81292
151.2	0.81365
151.3	0.81395
151.4	0.81399
151.5	0.8139
151.6	0.81407
151.7	0.81408
151.8	0.81405
151.9	0.81454
152	0.81511
152.1	0.81522
152.2	0.81527
152.3	0.81565
152.4	0.81513
152.5	0.81574
152.6	0.81559
152.7	0.81628
152.8	0.81633
152.9	0.81624
153	0.81698
153.1	0.81663
153.2	0.81644
153.3	0.81661
153.4	0.81684
153.5	0.81678
153.6	0.81715
153.7	0.817
153.8	0.81715
153.9	0.81762
154	0.81785
154.1	0.81826
154.2	0.81781
154.3	0.81777
154.4	0.81826
154.5	0.81825
154.6	0.81864
154.7	0.81869
154.8	0.81871
154.9	0.81888
155	0.81853
155.1	0.81847
155.2	0.81818
155.3	0.81902
155.4	0.81904
155.5	0.81869
155.6	0.81861
155.7	0.81946
155.8	0.81957
155.9	0.82035
156	0.82086
156.1	0.82073
156.2	0.82052
156.3	0.82071
156.4	0.82084
156.5	0.82109
156.6	0.82133
156.7	0.82171
156.8	0.82152
156.9	0.82196
157	0.82237
157.1	0.82262
157.2	0.82342
157.3	0.82379
157.4	0.82388
157.5	0.82413
157.6	0.82401
157.7	0.82435
157.8	0.82404
157.9	0.82413
158	0.82415
158.1	0.82363
158.2	0.82338
158.3	0.82416
158.4	0.82419
158.5	0.82475
158.6	0.82456
158.7	0.82452
158.8	0.82506
158.9	0.82521
159	0.82536
159.1	0.82567
159.2	0.82593
159.3	0.82621
159.4	0.82616
159.5	0.82649
159.6	0.82658
159.7	0.82664
159.8	0.82697
159.9	0.82684
160	0.82735
160.1	0.828
160.2	0.82808
160.3	0.82777
160.4	0.82812
160.5	0.82815
160.6	0.82804
160.7	0.82825
160.8	0.82856
160.9	0.82862
161	0.82855
161.1	0.82838
161.2	0.82881
161.3	0.82846
161.4	0.82898
161.5	0.82939
161.6	0.82947
161.7	0.82912
161.8	0.82933
161.9	0.82921
162	0.82883
162.1	0.82893
162.2	0.82907
162.3	0.82875
162.4	0.82987
162.5	0.83005
162.6	0.83014
162.7	0.83064
162.8	0.83074
162.9	0.83066
163	0.83061
163.1	0.83062
163.2	0.83066
163.3	0.83095
163.4	0.83137
163.5	0.83078
163.6	0.83079
163.7	0.8312
163.8	0.83187
163.9	0.83155
164	0.83159
164.1	0.83169
164.2	0.83221
164.3	0.83253
164.4	0.83241
164.5	0.83227
164.6	0.83239
164.7	0.83306
164.8	0.83315
164.9	0.83364
165	0.8334
165.1	0.83368
165.2	0.83344
165.3	0.83416
165.4	0.83476
165.5	0.83514
165.6	0.83479
165.7	0.83454
165.8	0.83485
165.9	0.83495
166	0.83528
166.1	0.83508
166.2	0.83507
166.3	0.83542
166.4	0.83556
166.5	0.83563
166.6	0.83548
166.7	0.83558
166.8	0.83526
166.9	0.83565
167	0.83597
167.1	0.83619
167.2	0.83609
167.3	0.83671
167.4	0.83626
167.5	0.83682
167.6	0.83676
167.7	0.83708
167.8	0.83713
167.9	0.83707
168	0.83704
168.1	0.83792
168.2	0.83777
168.3	0.83746
168.4	0.83736
168.5	0.8372
168.6	0.83697
168.7	0.83768
168.8	0.83834
168.9	0.83869
169	0.8385
169.1	0.83874
169.2	0.83892
169.3	0.83889
169.4	0.83908
169.5	0.83905
169.6	0.83902
169.7	0.83932
169.8	0.83941
169.9	0.83945
170	0.83926
170.1	0.83944
170.2	0.83939
170.3	0.83914
170.4	0.83895
170.5	0.83897
170.6	0.83888
170.7	0.83913
170.8	0.8386
170.9	0.83902
171	0.83925
171.1	0.83931
171.2	0.83966
171.3	0.83986
171.4	0.84015
171.5	0.84028
171.6	0.84022
171.7	0.84066
171.8	0.84065
171.9	0.84045
172	0.84047
172.1	0.84045
172.2	0.83946
172.3	0.84002
172.4	0.84012
172.5	0.8404
172.6	0.84055
172.7	0.84022
172.8	0.84036
172.9	0.84014
173	0.84044
173.1	0.84056
173.2	0.84095
173.3	0.84135
173.4	0.8413
173.5	0.84122
173.6	0.84096
173.7	0.84124
173.8	0.84136
173.9	0.84116
174	0.84145
174.1	0.84124
174.2	0.84167
174.3	0.84201
174.4	0.84178
174.5	0.84224
174.6	0.84216
174.7	0.84261
174.8	0.84266
174.9	0.84269
175	0.84258
175.1	0.84256
175.2	0.84311
175.3	0.84342
175.4	0.84344
175.5	0.84353
175.6	0.84358
175.7	0.84344
175.8	0.84362
175.9	0.84334
176	0.84315
176.1	0.84302
176.2	0.84262
176.3	0.84264
176.4	0.84302
176.5	0.84311
176.6	0.84321
176.7	0.84287
176.8	0.84284
176.9	0.84327
177	0.84326
177.1	0.84301
177.2	0.843
177.3	0.8431
177.4	0.84304
177.5	0.84323
177.6	0.84358
177.7	0.84401
177.8	0.8447
177.9	0.84541
178	0.8458
178.1	0.84556
178.2	0.84577
178.3	0.84602
178.4	0.84649
178.5	0.84693
178.6	0.84742
178.7	0.8473
178.8	0.84748
178.9	0.84736
179	0.84734
179.1	0.84765
179.2	0.84739
179.3	0.84743
179.4	0.84717
179.5	0.84707
179.6	0.84733
179.7	0.8476
179.8	0.84766
179.9	0.84755
180	0.84766
180.1	0.84745
180.2	0.84798
180.3	0.84813
180.4	0.84833
180.5	0.84874
180.6	0.84899
180.7	0.84869
180.8	0.84871
180.9	0.84878
181	0.84851
181.1	0.84862
181.2	0.84886
181.3	0.84882
181.4	0.84884
181.5	0.8488
181.6	0.84839
181.7	0.84847
181.8	0.84799
181.9	0.84737
182	0.84735
182.1	0.84752
182.2	0.84751
182.3	0.84756
182.4	0.8481
182.5	0.84794
182.6	0.84779
182.7	0.84792
182.8	0.84849
182.9	0.84848
183	0.84842
183.1	0.84893
183.2	0.84889
183.3	0.84879
183.4	0.84917
183.5	0.84944
183.6	0.84985
183.7	0.84984
183.8	0.85027
183.9	0.8505
184	0.85095
184.1	0.85049
184.2	0.85093
184.3	0.85067
184.4	0.85078
184.5	0.85063
184.6	0.85013
184.7	0.84998
184.8	0.84997
184.9	0.85016
185	0.85035
185.1	0.8511
185.2	0.85145
185.3	0.85164
185.4	0.85134
185.5	0.85118
185.6	0.85095
185.7	0.85067
185.8	0.85068
185.9	0.85072
186	0.85091
186.1	0.85099
186.2	0.85042
186.3	0.85054
186.4	0.85042
186.5	0.85058
186.6	0.85087
186.7	0.85105
186.8	0.85145
186.9	0.85138
187	0.85186
187.1	0.85181
187.2	0.85181
187.3	0.85224
187.4	0.85239
187.5	0.85203
187.6	0.85142
187.7	0.85112
187.8	0.85139
187.9	0.85151
188	0.8519
188.1	0.852
188.2	0.85217
188.3	0.85246
188.4	0.8521
188.5	0.85216
188.6	0.85204
188.7	0.85197
188.8	0.85161
188.9	0.85166
189	0.85182
189.1	0.85197
189.2	0.85206
189.3	0.85216
189.4	0.85244
189.5	0.85276
189.6	0.85245
189.7	0.85264
189.8	0.85268
189.9	0.85261
190	0.8527
190.1	0.8525
190.2	0.85276
190.3	0.85293
190.4	0.85324
190.5	0.85318
190.6	0.85328
190.7	0.85355
190.8	0.85397
190.9	0.85409
191	0.85412
191.1	0.85418
191.2	0.85426
191.3	0.85409
191.4	0.85473
191.5	0.85461
191.6	0.85461
191.7	0.85471
191.8	0.85477
191.9	0.85449
192	0.85443
192.1	0.8542
192.2	0.85461
192.3	0.85467
192.4	0.85462
192.5	0.85501
192.6	0.8554
192.7	0.85539
192.8	0.856
192.9	0.8559
193	0.85604
193.1	0.85611
193.2	0.85684
193.3	0.85663
193.4	0.85654
193.5	0.85618
193.6	0.85601
193.7	0.85551
193.8	0.85588
193.9	0.85616
194	0.85609
194.1	0.85617
194.2	0.85581
194.3	0.85581
194.4	0.85572
194.5	0.85594
194.6	0.856
194.7	0.85625
194.8	0.85635
194.9	0.85715
195	0.85727
195.1	0.857
195.2	0.85669
195.3	0.85729
195.4	0.85724
195.5	0.85676
195.6	0.85677
195.7	0.85676
195.8	0.85684
195.9	0.85658
196	0.85671
196.1	0.85651
196.2	0.85704
196.3	0.85702
196.4	0.85709
196.5	0.85681
196.6	0.85752
196.7	0.85789
196.8	0.85805
196.9	0.85771
197	0.85812
197.1	0.8575
197.2	0.85756
197.3	0.85798
197.4	0.85818
197.5	0.85865
197.6	0.85896
197.7	0.85866
197.8	0.85869
197.9	0.85864
198	0.85861
198.1	0.85857
198.2	0.85861
198.3	0.85979
198.4	0.85956
198.5	0.85968
198.6	0.86018
198.7	0.85949
198.8	0.85867
198.9	0.8579
199	0.85809
199.1	0.85878
199.2	0.85895
199.3	0.85902
199.4	0.85893
199.5	0.85838
199.6	0.85906
199.7	0.85894
199.8	0.85895
199.9	0.85885
200	0.85875
[truncated: 14,000 more rows]
