# Supplementary material for: Bayesian inference of kinetic schemes for ion channels by Kalman filtering
Source: eLife journal article supplement (doi:10.7554/elife.62714), 2022-05-04
Supplement: fig4-data6 [file 1_Sim_N_50000_Strom_MW_1M.xlsx]

## Sheet: 1 M
0.1	0
0.2	0
0.3	0
0.4	0
0.5	0
0.6	0
0.7	0
0.8	0
0.9	0
1	0
1.1	0
1.2	0
1.3	0
1.4	0
1.5	0
1.6	0
1.7	0
1.8	0
1.9	0
2	0
2.1	0
2.2	0
2.3	0
2.4	0
2.5	0
2.6	0
2.7	0
2.8	0
2.9	0
3	0
3.1	0
3.2	0
3.3	0
3.4	0
3.5	0
3.6	0
3.7	0
3.8	0
3.9	0
4	0
4.1	0
4.2	0
4.3	0
4.4	0
4.5	0
4.6	0
4.7	0
4.8	0
4.9	0
5	0
5.1	0
5.2	0
5.3	0
5.4	0
5.5	0
5.6	0
5.7	0
5.8	0
5.9	0
6	0
6.1	0
6.2	0
6.3	0
6.4	0
6.5	0
6.6	0
6.7	0
6.8	0
6.9	0
7	0
7.1	0
7.2	0
7.3	0
7.4	0
7.5	0
7.6	0
7.7	0
7.8	0
7.9	0
8	0
8.1	0
8.2	0
8.3	0
8.4	0
8.5	0
8.6	0
8.7	0
8.8	0
8.9	0
9	0
9.1	0
9.2	0
9.3	0
9.4	0
9.5	0
9.6	0
9.7	0
9.8	0
9.9	0
10	0
10.1	0
10.2	0
10.3	0
10.4	0
10.5	0
10.6	0
10.7	0
10.8	0
10.9	0
11	0
11.1	0
11.2	0
11.3	0
11.4	0
11.5	0
11.6	0
11.7	0
11.8	0
11.9	0
12	0
12.1	0
12.2	0
12.3	0
12.4	0
12.5	0
12.6	0
12.7	0
12.8	0
12.9	0
13	0
13.1	0
13.2	0
13.3	0
13.4	0
13.5	0
13.6	0
13.7	0
13.8	0
13.9	0
14	0
14.1	0
14.2	0
14.3	0
14.4	0
14.5	0
14.6	0
14.7	0
14.8	0
14.9	0
15	0
15.1	0
15.2	0
15.3	0
15.4	0
15.5	0
15.6	0
15.7	0
15.8	0
15.9	0
16	0
16.1	0
16.2	0
16.3	0
16.4	0
16.5	0
16.6	0
16.7	0
16.8	0
16.9	0
17	0
17.1	0
17.2	0
17.3	0
17.4	0
17.5	0
17.6	0
17.7	0
17.8	0
17.9	0
18	0
18.1	0
18.2	0
18.3	0
18.4	0
18.5	0
18.6	0
18.7	0
18.8	0
18.9	0
19	0
19.1	0
19.2	0
19.3	0
19.4	0
19.5	0
19.6	0
19.7	0
19.8	0
19.9	0
20	0
20.1	0
20.2	0
20.3	0
20.4	0
20.5	0
20.6	0
20.7	0
20.8	0
20.9	0
21	0
21.1	0
21.2	0
21.3	0
21.4	0
21.5	0
21.6	0
21.7	0
21.8	0
21.9	0
22	0
22.1	0
22.2	0
22.3	0
22.4	0
22.5	0
22.6	0
22.7	0
22.8	0
22.9	0
23	0
23.1	0
23.2	0
23.3	0
23.4	0
23.5	0
23.6	0
23.7	0
23.8	0
23.9	0
24	0
24.1	0
24.2	0
24.3	0
24.4	0
24.5	0
24.6	0
24.7	0
24.8	0
24.9	0
25	0
25.1	0
25.2	0
25.3	0
25.4	0
25.5	0
25.6	0
25.7	0
25.8	0
25.9	0
26	0
26.1	0
26.2	0
26.3	0
26.4	0
26.5	0
26.6	0
26.7	0
26.8	0
26.9	0
27	0
27.1	0
27.2	0
27.3	0
27.4	0
27.5	0
27.6	0
27.7	0
27.8	0
27.9	0
28	0
28.1	0
28.2	0
28.3	0
28.4	0
28.5	0
28.6	0
28.7	0
28.8	0
28.9	0
29	0
29.1	0
29.2	0
29.3	0
29.4	0
29.5	0
29.6	0
29.7	0
29.8	0
29.9	0
30	0
30.1	0
30.2	0
30.3	0
30.4	0
30.5	0
30.6	0
30.7	0
30.8	0
30.9	0
31	0
31.1	0
31.2	0
31.3	0
31.4	0
31.5	0
31.6	0
31.7	0
31.8	0
31.9	0
32	0
32.1	0
32.2	0
32.3	0
32.4	0
32.5	0
32.6	0
32.7	0
32.8	0
32.9	0
33	0
33.1	0
33.2	0
33.3	0
33.4	0
33.5	0
33.6	0
33.7	0
33.8	0
33.9	0
34	0
34.1	0
34.2	0
34.3	0
34.4	0
34.5	0
34.6	0
34.7	0
34.8	0
34.9	0
35	0
35.1	0
35.2	0
35.3	0
35.4	0
35.5	0
35.6	0
35.7	0
35.8	0
35.9	0
36	0
36.1	0
36.2	0
36.3	0
36.4	0
36.5	0
36.6	0
36.7	0
36.8	0
36.9	0
37	0
37.1	0
37.2	0
37.3	0
37.4	0
37.5	0
37.6	0
37.7	0
37.8	0
37.9	0
38	0
38.1	0
38.2	0
38.3	0
38.4	0
38.5	0
38.6	0
38.7	0
38.8	0
38.9	0
39	0
39.1	0
39.2	0
39.3	0
39.4	0
39.5	0
39.6	0
39.7	0
39.8	0
39.9	0
40	0
40.1	0
40.2	0
40.3	0
40.4	0
40.5	0
40.6	0
40.7	0
40.8	0
40.9	0
41	0
41.1	0
41.2	0
41.3	0
41.4	0
41.5	0
41.6	0
41.7	0
41.8	0
41.9	0
42	0
42.1	0
42.2	0
42.3	0
42.4	0
42.5	0
42.6	0
42.7	0
42.8	0
42.9	0
43	0
43.1	0
43.2	0
43.3	0
43.4	0
43.5	0
43.6	0
43.7	0
43.8	0
43.9	0
44	0
44.1	0
44.2	0
44.3	0
44.4	0
44.5	0
44.6	0
44.7	0
44.8	0
44.9	0
45	0
45.1	0
45.2	0
45.3	0
45.4	0
45.5	0
45.6	0
45.7	0
45.8	0
45.9	0
46	0
46.1	0
46.2	0
46.3	0
46.4	0
46.5	0
46.6	0
46.7	0
46.8	0
46.9	0
47	0
47.1	0
47.2	0
47.3	0
47.4	0
47.5	0
47.6	0
47.7	0
47.8	0
47.9	0
48	0
48.1	0
48.2	0
48.3	0
48.4	0
48.5	0
48.6	0
48.7	0
48.8	0
48.9	0
49	0
49.1	0
49.2	0
49.3	0
49.4	0
49.5	0
49.6	0
49.7	0
49.8	0
49.9	0
50	0
50.1	0
50.2	0
50.3	0
50.4	0
50.5	0
50.6	0
50.7	0
50.8	0
50.9	0
51	0
51.1	0
51.2	0
51.3	0
51.4	0
51.5	0
51.6	0
51.7	0
51.8	0
51.9	0
52	0
52.1	0
52.2	0
52.3	0
52.4	0
52.5	0
52.6	0
52.7	0
52.8	0
52.9	0
53	0
53.1	0
53.2	0
53.3	0
53.4	0
53.5	0
53.6	0
53.7	0
53.8	0
53.9	0
54	0
54.1	0
54.2	0
54.3	0
54.4	0
54.5	0
54.6	0
54.7	0
54.8	0
54.9	0
55	0
55.1	0
55.2	0
55.3	0
55.4	0
55.5	0
55.6	0
55.7	0
55.8	0
55.9	0
56	0
56.1	0
56.2	0
56.3	0
56.4	0
56.5	0
56.6	0
56.7	0
56.8	0
56.9	0
57	0
57.1	0
57.2	0
57.3	0
57.4	0
57.5	0
57.6	0
57.7	0
57.8	0
57.9	0
58	0
58.1	0
58.2	0
58.3	0
58.4	0
58.5	0
58.6	0
58.7	0
58.8	0
58.9	0
59	0
59.1	0
59.2	0
59.3	0
59.4	0
59.5	0
59.6	0
59.7	0
59.8	0
59.9	0
60	0
60.1	0
60.2	0
60.3	0
60.4	0
60.5	0
60.6	0
60.7	0
60.8	0
60.9	0
61	0
61.1	0
61.2	0
61.3	0
61.4	0
61.5	0
61.6	0
61.7	0
61.8	0
61.9	0
62	0
62.1	0
62.2	0
62.3	0
62.4	0
62.5	0
62.6	0
62.7	0
62.8	0
62.9	0
63	0
63.1	0
63.2	0
63.3	0
63.4	0
63.5	0
63.6	0
63.7	0
63.8	0
63.9	0
64	0
64.1	0
64.2	0
64.3	0
64.4	0
64.5	0
64.6	0
64.7	0
64.8	0
64.9	0
65	0
65.1	0
65.2	0
65.3	0
65.4	0
65.5	0
65.6	0
65.7	0
65.8	0
65.9	0
66	0
66.1	0
66.2	0
66.3	0
66.4	0
66.5	0
66.6	0
66.7	0
66.8	0
66.9	0
67	0
67.1	0
67.2	0
67.3	0
67.4	0
67.5	0
67.6	0
67.7	0
67.8	0
67.9	0
68	0
68.1	0
68.2	0
68.3	0
68.4	0
68.5	0
68.6	0
68.7	0
68.8	0
68.9	0
69	0
69.1	0
69.2	0
69.3	0
69.4	0
69.5	0
69.6	0
69.7	0
69.8	0
69.9	0
70	0
70.1	0
70.2	0
70.3	0
70.4	0
70.5	0
70.6	0
70.7	0
70.8	0
70.9	0
71	0
71.1	0
71.2	0
71.3	0
71.4	0
71.5	0
71.6	0
71.7	0
71.8	0
71.9	0
72	0
72.1	0
72.2	0
72.3	0
72.4	0
72.5	0
72.6	0
72.7	0
72.8	0
72.9	0
73	0
73.1	0
73.2	0
73.3	0
73.4	0
73.5	0
73.6	0
73.7	0
73.8	0
73.9	0
74	0
74.1	0
74.2	0
74.3	0
74.4	0
74.5	0
74.6	0
74.7	0
74.8	0
74.9	0
75	0
75.1	0
75.2	0
75.3	0
75.4	0
75.5	0
75.6	0
75.7	0
75.8	0
75.9	0
76	0
76.1	0
76.2	0
76.3	0
76.4	0
76.5	0
76.6	0
76.7	0
76.8	0
76.9	0
77	0
77.1	0
77.2	0
77.3	0
77.4	0
77.5	0
77.6	0
77.7	0
77.8	0
77.9	0
78	0
78.1	0
78.2	0
78.3	0
78.4	0
78.5	0
78.6	0
78.7	0
78.8	0
78.9	0
79	0
79.1	0
79.2	0
79.3	0
79.4	0
79.5	0
79.6	0
79.7	0
79.8	0
79.9	0
80	0
80.1	0
80.2	0
80.3	0
80.4	0
80.5	0
80.6	0
80.7	0
80.8	0
80.9	0
81	0
81.1	0
81.2	0
81.3	0
81.4	0
81.5	0
81.6	0
81.7	0
81.8	0
81.9	0
82	0
82.1	0
82.2	0
82.3	0
82.4	0
82.5	0
82.6	0
82.7	0
82.8	0
82.9	0
83	0
83.1	0
83.2	0
83.3	0
83.4	0
83.5	0
83.6	0
83.7	0
83.8	0
83.9	0
84	0
84.1	0
84.2	0
84.3	0
84.4	0
84.5	0
84.6	0
84.7	0
84.8	0
84.9	0
85	0
85.1	0
85.2	0
85.3	0
85.4	0
85.5	0
85.6	0
85.7	0
85.8	0
85.9	0
86	0
86.1	0
86.2	0
86.3	0
86.4	0
86.5	0
86.6	0
86.7	0
86.8	0
86.9	0
87	0
87.1	0
87.2	0
87.3	0
87.4	0
87.5	0
87.6	0
87.7	0
87.8	0
87.9	0
88	0
88.1	0
88.2	0
88.3	0
88.4	0
88.5	0
88.6	0
88.7	0
88.8	0
88.9	0
89	0
89.1	0
89.2	0
89.3	0
89.4	0
89.5	0
89.6	0
89.7	0
89.8	0
89.9	0
90	0
90.1	0
90.2	0
90.3	0
90.4	0
90.5	0
90.6	0
90.7	0
90.8	0
90.9	0
91	0
91.1	0
91.2	0
91.3	0
91.4	0
91.5	0
91.6	0
91.7	0
91.8	0
91.9	0
92	0
92.1	0
92.2	0
92.3	0
92.4	0
92.5	0
92.6	0
92.7	0
92.8	0
92.9	0
93	0
93.1	0
93.2	0
93.3	0
93.4	0
93.5	0
93.6	0
93.7	0
93.8	0
93.9	0
94	0
94.1	0
94.2	0
94.3	0
94.4	0
94.5	0
94.6	0
94.7	0
94.8	0
94.9	0
95	0
95.1	0
95.2	0
95.3	0
95.4	0
95.5	0
95.6	0
95.7	0
95.8	0
95.9	0
96	0
96.1	0
96.2	0
96.3	0
96.4	0
96.5	0
96.6	0
96.7	0
96.8	0
96.9	0
97	0
97.1	0
97.2	0
97.3	0
97.4	0
97.5	0
97.6	0
97.7	0
97.8	0
97.9	0
98	0
98.1	0
98.2	0
98.3	0
98.4	0
98.5	0
98.6	0
98.7	0
98.8	0
98.9	0
99	0
99.1	0
99.2	0
99.3	0
99.4	0
99.5	0
99.6	0
99.7	0
99.8	0
99.9	0
100	0
100.1	0
100.2	0
100.3	2e-05
100.4	0.00012
100.5	0.00034
100.6	0.00046
100.7	0.00064
100.8	0.00096
100.9	0.00144
101	0.00194
101.1	0.00236
101.2	0.00278
101.3	0.0034
101.4	0.00404
101.5	0.0046
101.6	0.00532
101.7	0.00612
101.8	0.00702
101.9	0.00796
102	0.00892
102.1	0.00992
102.2	0.01124
102.3	0.01238
102.4	0.0135
102.5	0.0146
102.6	0.01574
102.7	0.01692
102.8	0.01834
102.9	0.01972
103	0.02104
103.1	0.02256
103.2	0.02372
103.3	0.02492
103.4	0.02604
103.5	0.02706
103.6	0.0287
103.7	0.03028
103.8	0.03194
103.9	0.03328
104	0.0349
104.1	0.0363
104.2	0.03776
104.3	0.03942
104.4	0.04116
104.5	0.04242
104.6	0.04374
104.7	0.04516
104.8	0.04676
104.9	0.04816
105	0.04958
105.1	0.05124
105.2	0.05278
105.3	0.05446
105.4	0.05626
105.5	0.05758
105.6	0.05884
105.7	0.06044
105.8	0.06188
105.9	0.06316
106	0.06472
106.1	0.06638
106.2	0.0677
106.3	0.06928
106.4	0.07054
106.5	0.07214
106.6	0.0736
106.7	0.07512
106.8	0.07626
106.9	0.07778
107	0.07956
107.1	0.08114
107.2	0.08268
107.3	0.08398
107.4	0.08538
107.5	0.08706
107.6	0.08858
107.7	0.09008
107.8	0.09202
107.9	0.09316
108	0.09458
108.1	0.096
108.2	0.09728
108.3	0.09872
108.4	0.10022
108.5	0.10132
108.6	0.10314
108.7	0.10448
108.8	0.1061
108.9	0.10734
109	0.1089
109.1	0.11034
109.2	0.1118
109.3	0.1133
109.4	0.11442
109.5	0.11594
109.6	0.1176
109.7	0.11886
109.8	0.12048
109.9	0.12186
110	0.12346
110.1	0.12472
110.2	0.12652
110.3	0.12828
110.4	0.12976
110.5	0.13086
110.6	0.13198
110.7	0.1333
110.8	0.13476
110.9	0.1362
111	0.13762
111.1	0.13914
111.2	0.14022
111.3	0.14152
111.4	0.14256
111.5	0.14406
111.6	0.14562
111.7	0.14688
111.8	0.14806
111.9	0.14898
112	0.15018
112.1	0.15154
112.2	0.1526
112.3	0.15406
112.4	0.15538
112.5	0.15662
112.6	0.15772
112.7	0.15896
112.8	0.16026
112.9	0.16154
113	0.16278
113.1	0.16398
113.2	0.165
113.3	0.1665
113.4	0.16786
113.5	0.16908
113.6	0.17038
113.7	0.1714
113.8	0.17248
113.9	0.17356
114	0.17466
114.1	0.17556
114.2	0.1768
114.3	0.17814
114.4	0.17962
114.5	0.1807
114.6	0.18202
114.7	0.18306
114.8	0.18438
114.9	0.18584
115	0.18714
115.1	0.18842
115.2	0.18966
115.3	0.19092
115.4	0.19206
115.5	0.19316
115.6	0.19432
115.7	0.19524
115.8	0.19634
115.9	0.19706
116	0.19846
116.1	0.19922
116.2	0.20042
116.3	0.2017
116.4	0.20262
116.5	0.20376
116.6	0.20496
116.7	0.20618
116.8	0.20708
116.9	0.20836
117	0.20926
117.1	0.21052
117.2	0.21152
117.3	0.21278
117.4	0.2136
117.5	0.21466
117.6	0.2157
117.7	0.21678
117.8	0.21818
117.9	0.21928
118	0.22042
118.1	0.22158
118.2	0.22292
118.3	0.22392
118.4	0.22538
118.5	0.2265
118.6	0.2275
118.7	0.22864
118.8	0.22976
118.9	0.23096
119	0.23212
119.1	0.23324
119.2	0.23428
119.3	0.23546
119.4	0.23644
119.5	0.23762
119.6	0.2388
119.7	0.2399
119.8	0.241
119.9	0.24226
120	0.24326
120.1	0.24416
120.2	0.24532
120.3	0.24654
120.4	0.24766
120.5	0.24846
120.6	0.2495
120.7	0.2504
120.8	0.25128
120.9	0.25246
121	0.25336
121.1	0.25424
121.2	0.25508
121.3	0.25624
121.4	0.25732
121.5	0.25844
121.6	0.2596
121.7	0.2608
121.8	0.26184
121.9	0.26274
122	0.26354
122.1	0.26468
122.2	0.26548
122.3	0.26654
122.4	0.26758
122.5	0.26844
122.6	0.26942
122.7	0.2705
122.8	0.27118
122.9	0.27224
123	0.27338
123.1	0.27434
123.2	0.27516
123.3	0.27594
123.4	0.27666
123.5	0.27742
123.6	0.27836
123.7	0.27922
123.8	0.28008
123.9	0.2808
124	0.2816
124.1	0.28222
124.2	0.28322
124.3	0.2841
124.4	0.2851
124.5	0.2862
124.6	0.28704
124.7	0.28808
124.8	0.28876
124.9	0.2897
125	0.29052
125.1	0.29118
125.2	0.292
125.3	0.29318
125.4	0.29418
125.5	0.29512
125.6	0.29616
125.7	0.29704
125.8	0.29796
125.9	0.2985
126	0.2995
126.1	0.30042
126.2	0.3013
126.3	0.30254
126.4	0.30336
126.5	0.30428
126.6	0.30502
126.7	0.30588
126.8	0.30686
126.9	0.30758
127	0.30858
127.1	0.30942
127.2	0.31016
127.3	0.3113
127.4	0.312
127.5	0.3126
127.6	0.31342
127.7	0.31442
127.8	0.31542
127.9	0.31656
128	0.3173
128.1	0.31808
128.2	0.31892
128.3	0.3199
128.4	0.32058
128.5	0.32126
128.6	0.32186
128.7	0.3227
128.8	0.32352
128.9	0.32416
129	0.32514
129.1	0.32572
129.2	0.3264
129.3	0.32712
129.4	0.32798
129.5	0.3289
129.6	0.33008
129.7	0.33106
129.8	0.33182
129.9	0.3326
130	0.33336
130.1	0.33384
130.2	0.33456
130.3	0.33528
130.4	0.33624
130.5	0.3369
130.6	0.33762
130.7	0.3387
130.8	0.33928
130.9	0.33996
131	0.34098
131.1	0.3417
131.2	0.34258
131.3	0.34322
131.4	0.34396
131.5	0.34498
131.6	0.34574
131.7	0.3463
131.8	0.34722
131.9	0.34804
132	0.34878
132.1	0.3496
132.2	0.3506
132.3	0.35112
132.4	0.35194
132.5	0.35258
132.6	0.35344
132.7	0.35416
132.8	0.35496
132.9	0.35592
133	0.35658
133.1	0.3575
133.2	0.35808
133.3	0.35906
133.4	0.35988
133.5	0.36074
133.6	0.3614
133.7	0.36212
133.8	0.36282
133.9	0.36348
134	0.36442
134.1	0.36522
134.2	0.3662
134.3	0.3669
134.4	0.36752
134.5	0.36824
134.6	0.3692
134.7	0.36976
134.8	0.37026
134.9	0.37102
135	0.37198
135.1	0.37284
135.2	0.37328
135.3	0.3741
135.4	0.37474
135.5	0.37532
135.6	0.37646
135.7	0.37728
135.8	0.37786
135.9	0.37872
136	0.37902
136.1	0.37978
136.2	0.38064
136.3	0.38154
136.4	0.38206
136.5	0.38292
136.6	0.38364
136.7	0.38414
136.8	0.38486
136.9	0.3855
137	0.38608
137.1	0.387
137.2	0.38776
137.3	0.3884
137.4	0.3893
137.5	0.38972
137.6	0.39022
137.7	0.3911
137.8	0.392
137.9	0.39254
138	0.39346
138.1	0.39402
138.2	0.39484
138.3	0.3955
138.4	0.39598
138.5	0.3964
138.6	0.39692
138.7	0.39766
138.8	0.39838
138.9	0.3989
139	0.39942
139.1	0.40018
139.2	0.40086
139.3	0.40166
139.4	0.40206
139.5	0.40246
139.6	0.40314
139.7	0.40372
139.8	0.40448
139.9	0.40494
140	0.40524
140.1	0.40584
140.2	0.40648
140.3	0.40704
140.4	0.4076
140.5	0.4082
140.6	0.40892
140.7	0.40912
140.8	0.40978
140.9	0.41052
141	0.41112
141.1	0.41168
141.2	0.41228
141.3	0.41294
141.4	0.4135
141.5	0.41406
141.6	0.41448
141.7	0.41506
141.8	0.41594
141.9	0.41696
142	0.41812
142.1	0.41856
142.2	0.4192
142.3	0.41972
142.4	0.4203
142.5	0.42116
142.6	0.42168
142.7	0.42264
142.8	0.42332
142.9	0.42404
143	0.42442
143.1	0.425
143.2	0.42552
143.3	0.426
143.4	0.42634
143.5	0.4271
143.6	0.42778
143.7	0.42868
143.8	0.42958
143.9	0.43002
144	0.4308
144.1	0.4312
144.2	0.43166
144.3	0.43228
144.4	0.43294
144.5	0.4338
144.6	0.43426
144.7	0.4348
144.8	0.4352
144.9	0.43554
145	0.43614
145.1	0.43686
145.2	0.43742
145.3	0.4378
145.4	0.43802
145.5	0.43834
145.6	0.43874
145.7	0.43942
145.8	0.43954
145.9	0.4401
146	0.4406
146.1	0.44102
146.2	0.44184
146.3	0.44224
146.4	0.443
146.5	0.44338
146.6	0.44406
146.7	0.44458
146.8	0.44508
146.9	0.4455
147	0.44594
147.1	0.44642
147.2	0.44698
147.3	0.44746
147.4	0.44788
147.5	0.44824
147.6	0.4488
147.7	0.4493
147.8	0.44988
147.9	0.4506
148	0.451
148.1	0.45162
148.2	0.4521
148.3	0.45222
148.4	0.4524
148.5	0.45306
148.6	0.45372
148.7	0.45432
148.8	0.4548
148.9	0.45524
149	0.4556
149.1	0.45592
149.2	0.4566
149.3	0.4574
149.4	0.45802
149.5	0.4585
149.6	0.45934
149.7	0.45976
149.8	0.4601
149.9	0.46054
150	0.46092
150.1	0.46112
150.2	0.46164
150.3	0.46186
150.4	0.46256
150.5	0.46302
150.6	0.46348
150.7	0.46414
150.8	0.46422
150.9	0.4644
151	0.46488
151.1	0.46514
151.2	0.46568
151.3	0.46616
151.4	0.46702
151.5	0.46756
151.6	0.46782
151.7	0.46822
151.8	0.4689
151.9	0.4695
152	0.46972
152.1	0.46984
152.2	0.47026
152.3	0.47078
152.4	0.47134
152.5	0.47172
152.6	0.47234
152.7	0.4728
152.8	0.47318
152.9	0.47366
153	0.47452
153.1	0.47498
153.2	0.47516
153.3	0.47556
153.4	0.47618
153.5	0.47656
153.6	0.4768
153.7	0.4772
153.8	0.47792
153.9	0.47846
154	0.47896
154.1	0.4793
154.2	0.47984
154.3	0.48054
154.4	0.48094
154.5	0.48158
154.6	0.48212
154.7	0.48272
154.8	0.48314
154.9	0.48342
155	0.48364
155.1	0.48416
155.2	0.48454
155.3	0.4849
155.4	0.48528
155.5	0.48594
155.6	0.48622
155.7	0.48656
155.8	0.48702
155.9	0.48734
156	0.48768
156.1	0.48808
156.2	0.48836
156.3	0.48874
156.4	0.4889
156.5	0.48914
156.6	0.48934
156.7	0.48982
156.8	0.49014
156.9	0.4907
157	0.49118
157.1	0.49158
157.2	0.49216
157.3	0.49244
157.4	0.49296
157.5	0.4934
157.6	0.4939
157.7	0.49454
157.8	0.49502
157.9	0.49524
158	0.49546
158.1	0.49622
158.2	0.4966
158.3	0.4971
158.4	0.49728
158.5	0.49754
158.6	0.49788
158.7	0.49812
158.8	0.4982
158.9	0.4985
159	0.499
159.1	0.49928
159.2	0.4999
159.3	0.50028
159.4	0.50054
159.5	0.50082
159.6	0.5008
159.7	0.50162
159.8	0.50172
159.9	0.50216
160	0.50234
160.1	0.50298
160.2	0.50352
160.3	0.50402
160.4	0.50438
160.5	0.5047
160.6	0.5051
160.7	0.50554
160.8	0.50572
160.9	0.50612
161	0.50624
161.1	0.50676
161.2	0.50722
161.3	0.50768
161.4	0.5078
161.5	0.50828
161.6	0.5088
161.7	0.50902
161.8	0.50946
161.9	0.51018
162	0.51066
162.1	0.51114
162.2	0.51144
162.3	0.51188
162.4	0.51228
162.5	0.5128
162.6	0.51318
162.7	0.5135
162.8	0.51394
162.9	0.51442
163	0.51476
163.1	0.51492
163.2	0.5154
163.3	0.5157
163.4	0.51594
163.5	0.51658
163.6	0.51704
163.7	0.51726
163.8	0.51774
163.9	0.51814
164	0.51842
164.1	0.5188
164.2	0.5192
164.3	0.51934
164.4	0.5196
164.5	0.5199
164.6	0.5203
164.7	0.5205
164.8	0.52076
164.9	0.52078
165	0.52128
165.1	0.52148
165.2	0.52174
165.3	0.52246
165.4	0.52276
165.5	0.52316
165.6	0.52362
165.7	0.5241
165.8	0.52456
165.9	0.52448
166	0.52488
166.1	0.52548
166.2	0.5256
166.3	0.52594
166.4	0.52638
166.5	0.52658
166.6	0.52662
166.7	0.5271
166.8	0.52728
166.9	0.5274
167	0.52796
167.1	0.52846
167.2	0.52882
167.3	0.5294
167.4	0.52966
167.5	0.52984
167.6	0.5302
167.7	0.53054
167.8	0.53092
167.9	0.53116
168	0.5314
168.1	0.53182
168.2	0.53248
168.3	0.53316
168.4	0.53348
168.5	0.53374
168.6	0.53378
168.7	0.53422
168.8	0.53416
168.9	0.53456
169	0.5352
169.1	0.53542
169.2	0.53572
169.3	0.53574
169.4	0.5361
169.5	0.53634
169.6	0.53644
169.7	0.53692
169.8	0.5373
169.9	0.5376
170	0.53804
170.1	0.53808
170.2	0.5382
170.3	0.53836
170.4	0.53866
170.5	0.53894
170.6	0.53914
170.7	0.53958
170.8	0.53962
170.9	0.5397
171	0.53986
171.1	0.54032
171.2	0.54042
171.3	0.54064
171.4	0.54104
171.5	0.5414
171.6	0.54144
171.7	0.54156
171.8	0.542
171.9	0.54204
172	0.54252
172.1	0.54264
172.2	0.54274
172.3	0.54296
172.4	0.54342
172.5	0.54364
172.6	0.54384
172.7	0.5439
172.8	0.54416
172.9	0.54392
173	0.54404
173.1	0.54428
173.2	0.54466
173.3	0.54492
173.4	0.54524
173.5	0.54558
173.6	0.546
173.7	0.54644
173.8	0.5465
173.9	0.54632
174	0.54644
174.1	0.54644
174.2	0.54686
174.3	0.5473
174.4	0.5475
174.5	0.54772
174.6	0.54786
174.7	0.54802
174.8	0.54838
174.9	0.54882
175	0.54936
175.1	0.54998
175.2	0.55034
175.3	0.5509
175.4	0.551
175.5	0.55132
175.6	0.5519
175.7	0.55232
175.8	0.5524
175.9	0.55256
176	0.55268
176.1	0.55288
176.2	0.55304
176.3	0.55322
176.4	0.55308
176.5	0.55336
176.6	0.5537
176.7	0.55396
176.8	0.5543
176.9	0.55444
177	0.55482
177.1	0.555
177.2	0.55506
177.3	0.55534
177.4	0.55562
177.5	0.55558
177.6	0.5557
177.7	0.55596
177.8	0.55594
177.9	0.55636
178	0.55672
178.1	0.55704
178.2	0.55738
178.3	0.5576
178.4	0.55796
178.5	0.55812
178.6	0.55862
178.7	0.5588
178.8	0.5591
178.9	0.5591
179	0.5594
179.1	0.55956
179.2	0.55982
179.3	0.5601
179.4	0.5603
179.5	0.56074
179.6	0.56102
179.7	0.56146
179.8	0.56176
179.9	0.56204
180	0.56216
180.1	0.56234
180.2	0.56284
180.3	0.56306
180.4	0.56352
180.5	0.56378
180.6	0.56416
180.7	0.56432
180.8	0.56472
180.9	0.56482
181	0.56526
181.1	0.5656
181.2	0.5658
181.3	0.56622
181.4	0.56632
181.5	0.56668
181.6	0.56654
181.7	0.56652
181.8	0.56666
181.9	0.56694
182	0.56696
182.1	0.56694
182.2	0.56702
182.3	0.56698
182.4	0.56732
182.5	0.56758
182.6	0.56796
182.7	0.56808
182.8	0.56834
182.9	0.56856
183	0.56866
183.1	0.5687
183.2	0.56894
183.3	0.569
183.4	0.56938
183.5	0.56968
183.6	0.56986
183.7	0.57034
183.8	0.57048
183.9	0.57072
184	0.5707
184.1	0.57072
184.2	0.57102
184.3	0.57118
184.4	0.57118
184.5	0.5713
184.6	0.5716
184.7	0.57158
184.8	0.57178
184.9	0.57172
185	0.572
185.1	0.57256
185.2	0.57272
185.3	0.57282
185.4	0.573
185.5	0.57304
185.6	0.57294
185.7	0.57304
185.8	0.57366
185.9	0.5737
186	0.5739
186.1	0.57382
186.2	0.57404
186.3	0.57406
186.4	0.57444
186.5	0.57482
186.6	0.57498
186.7	0.57522
186.8	0.57542
186.9	0.57544
187	0.57564
187.1	0.57606
187.2	0.57636
187.3	0.57644
187.4	0.5765
187.5	0.5766
187.6	0.57674
187.7	0.57686
187.8	0.57706
187.9	0.57728
188	0.57748
188.1	0.5777
188.2	0.5779
188.3	0.57782
188.4	0.578
188.5	0.57824
188.6	0.57846
188.7	0.57868
188.8	0.57888
188.9	0.5787
189	0.57916
189.1	0.57932
189.2	0.5794
189.3	0.57946
189.4	0.57992
189.5	0.57992
189.6	0.58038
189.7	0.58052
189.8	0.58094
189.9	0.58126
190	0.58166
190.1	0.58178
190.2	0.58228
190.3	0.58268
190.4	0.58278
190.5	0.5827
190.6	0.58264
190.7	0.58266
190.8	0.5828
190.9	0.58294
191	0.58326
191.1	0.58344
191.2	0.58326
191.3	0.58338
191.4	0.58346
191.5	0.58368
191.6	0.58378
191.7	0.58396
191.8	0.5839
191.9	0.58408
192	0.58434
192.1	0.58462
192.2	0.58464
192.3	0.5848
192.4	0.58494
192.5	0.58522
192.6	0.58542
192.7	0.5854
192.8	0.58566
192.9	0.58572
193	0.58582
193.1	0.58598
193.2	0.58634
193.3	0.58654
193.4	0.58656
193.5	0.58696
193.6	0.58692
193.7	0.58712
193.8	0.58716
193.9	0.5872
194	0.5877
194.1	0.58816
194.2	0.58806
194.3	0.5883
194.4	0.58856
194.5	0.58872
194.6	0.58866
194.7	0.58864
194.8	0.58892
194.9	0.58896
195	0.58916
195.1	0.58908
195.2	0.5892
195.3	0.58958
195.4	0.59008
195.5	0.59046
195.6	0.59054
195.7	0.5907
195.8	0.5909
195.9	0.59086
196	0.59106
196.1	0.59124
196.2	0.5913
196.3	0.59148
196.4	0.59166
196.5	0.59188
196.6	0.59192
196.7	0.59218
196.8	0.59242
196.9	0.59248
197	0.59262
197.1	0.59268
197.2	0.59288
197.3	0.59298
197.4	0.59292
197.5	0.59276
197.6	0.59318
197.7	0.59358
197.8	0.59362
197.9	0.59356
198	0.59382
198.1	0.59434
198.2	0.59462
198.3	0.59466
198.4	0.59466
198.5	0.59486
198.6	0.5952
198.7	0.59544
198.8	0.5954
198.9	0.59546
199	0.59564
199.1	0.5957
199.2	0.59594
199.3	0.59624
199.4	0.5964
199.5	0.59658
199.6	0.59702
199.7	0.59754
199.8	0.5976
199.9	0.59754
200	0.59766
[truncated: 14,000 more rows]
