# Supplementary material for: Bayesian inference of kinetic schemes for ion channels by Kalman filtering
Source: eLife journal article supplement (doi:10.7554/elife.62714), 2022-05-04
Supplement: fig4-data7 [file 1_Sim_N_80_Fluor_MW.xlsx]

## Sheet: 2 M
0.1	0
0.2	0
0.3	0
0.4	0
0.5	0
0.6	0
0.7	0
0.8	0
0.9	0
1	0
1.1	0
1.2	0
1.3	0
1.4	0
1.5	0
1.6	0
1.7	0
1.8	0
1.9	0
2	0
2.1	0
2.2	0
2.3	0
2.4	0
2.5	0
2.6	0
2.7	0
2.8	0
2.9	0
3	0
3.1	0
3.2	0
3.3	0
3.4	0
3.5	0
3.6	0
3.7	0
3.8	0
3.9	0
4	0
4.1	0
4.2	0
4.3	0
4.4	0
4.5	0
4.6	0
4.7	0
4.8	0
4.9	0
5	0
5.1	0
5.2	0
5.3	0
5.4	0
5.5	0
5.6	0
5.7	0
5.8	0
5.9	0
6	0
6.1	0
6.2	0
6.3	0
6.4	0
6.5	0
6.6	0
6.7	0
6.8	0
6.9	0
7	0
7.1	0
7.2	0
7.3	0
7.4	0
7.5	0
7.6	0
7.7	0
7.8	0
7.9	0
8	0
8.1	0
8.2	0
8.3	0
8.4	0
8.5	0
8.6	0
8.7	0
8.8	0
8.9	0
9	0
9.1	0
9.2	0
9.3	0
9.4	0
9.5	0
9.6	0
9.7	0
9.8	0
9.9	0
10	0
10.1	0
10.2	0
10.3	0
10.4	0
10.5	0
10.6	0
10.7	0
10.8	0
10.9	0
11	0
11.1	0
11.2	0
11.3	0
11.4	0
11.5	0
11.6	0
11.7	0
11.8	0
11.9	0
12	0
12.1	0
12.2	0
12.3	0
12.4	0
12.5	0
12.6	0
12.7	0
12.8	0
12.9	0
13	0
13.1	0
13.2	0
13.3	0
13.4	0
13.5	0
13.6	0
13.7	0
13.8	0
13.9	0
14	0
14.1	0
14.2	0
14.3	0
14.4	0
14.5	0
14.6	0
14.7	0
14.8	0
14.9	0
15	0
15.1	0
15.2	0
15.3	0
15.4	0
15.5	0
15.6	0
15.7	0
15.8	0
15.9	0
16	0
16.1	0
16.2	0
16.3	0
16.4	0
16.5	0
16.6	0
16.7	0
16.8	0
16.9	0
17	0
17.1	0
17.2	0
17.3	0
17.4	0
17.5	0
17.6	0
17.7	0
17.8	0
17.9	0
18	0
18.1	0
18.2	0
18.3	0
18.4	0
18.5	0
18.6	0
18.7	0
18.8	0
18.9	0
19	0
19.1	0
19.2	0
19.3	0
19.4	0
19.5	0
19.6	0
19.7	0
19.8	0
19.9	0
20	0
20.1	0
20.2	0
20.3	0
20.4	0
20.5	0
20.6	0
20.7	0
20.8	0
20.9	0
21	0
21.1	0
21.2	0
21.3	0
21.4	0
21.5	0
21.6	0
21.7	0
21.8	0
21.9	0
22	0
22.1	0
22.2	0
22.3	0
22.4	0
22.5	0
22.6	0
22.7	0
22.8	0
22.9	0
23	0
23.1	0
23.2	0
23.3	0
23.4	0
23.5	0
23.6	0
23.7	0
23.8	0
23.9	0
24	0
24.1	0
24.2	0
24.3	0
24.4	0
24.5	0
24.6	0
24.7	0
24.8	0
24.9	0
25	0
25.1	0
25.2	0
25.3	0
25.4	0
25.5	0
25.6	0
25.7	0
25.8	0
25.9	0
26	0
26.1	0
26.2	0
26.3	0
26.4	0
26.5	0
26.6	0
26.7	0
26.8	0
26.9	0
27	0
27.1	0
27.2	0
27.3	0
27.4	0
27.5	0
27.6	0
27.7	0
27.8	0
27.9	0
28	0
28.1	0
28.2	0
28.3	0
28.4	0
28.5	0
28.6	0
28.7	0
28.8	0
28.9	0
29	0
29.1	0
29.2	0
29.3	0
29.4	0
29.5	0
29.6	0
29.7	0
29.8	0
29.9	0
30	0
30.1	0
30.2	0
30.3	0
30.4	0
30.5	0
30.6	0
30.7	0
30.8	0
30.9	0
31	0
31.1	0
31.2	0
31.3	0
31.4	0
31.5	0
31.6	0
31.7	0
31.8	0
31.9	0
32	0
32.1	0
32.2	0
32.3	0
32.4	0
32.5	0
32.6	0
32.7	0
32.8	0
32.9	0
33	0
33.1	0
33.2	0
33.3	0
33.4	0
33.5	0
33.6	0
33.7	0
33.8	0
33.9	0
34	0
34.1	0
34.2	0
34.3	0
34.4	0
34.5	0
34.6	0
34.7	0
34.8	0
34.9	0
35	0
35.1	0
35.2	0
35.3	0
35.4	0
35.5	0
35.6	0
35.7	0
35.8	0
35.9	0
36	0
36.1	0
36.2	0
36.3	0
36.4	0
36.5	0
36.6	0
36.7	0
36.8	0
36.9	0
37	0
37.1	0
37.2	0
37.3	0
37.4	0
37.5	0
37.6	0
37.7	0
37.8	0
37.9	0
38	0
38.1	0
38.2	0
38.3	0
38.4	0
38.5	0
38.6	0
38.7	0
38.8	0
38.9	0
39	0
39.1	0
39.2	0
39.3	0
39.4	0
39.5	0
39.6	0
39.7	0
39.8	0
39.9	0
40	0
40.1	0
40.2	0
40.3	0
40.4	0
40.5	0
40.6	0
40.7	0
40.8	0
40.9	0
41	0
41.1	0
41.2	0
41.3	0
41.4	0
41.5	0
41.6	0
41.7	0
41.8	0
41.9	0
42	0
42.1	0
42.2	0
42.3	0
42.4	0
42.5	0
42.6	0
42.7	0
42.8	0
42.9	0
43	0
43.1	0
43.2	0
43.3	0
43.4	0
43.5	0
43.6	0
43.7	0
43.8	0
43.9	0
44	0
44.1	0
44.2	0
44.3	0
44.4	0
44.5	0
44.6	0
44.7	0
44.8	0
44.9	0
45	0
45.1	0
45.2	0
45.3	0
45.4	0
45.5	0
45.6	0
45.7	0
45.8	0
45.9	0
46	0
46.1	0
46.2	0
46.3	0
46.4	0
46.5	0
46.6	0
46.7	0
46.8	0
46.9	0
47	0
47.1	0
47.2	0
47.3	0
47.4	0
47.5	0
47.6	0
47.7	0
47.8	0
47.9	0
48	0
48.1	0
48.2	0
48.3	0
48.4	0
48.5	0
48.6	0
48.7	0
48.8	0
48.9	0
49	0
49.1	0
49.2	0
49.3	0
49.4	0
49.5	0
49.6	0
49.7	0
49.8	0
49.9	0
50	0
50.1	0
50.2	0
50.3	0
50.4	0
50.5	0
50.6	0
50.7	0
50.8	0
50.9	0
51	0
51.1	0
51.2	0
51.3	0
51.4	0
51.5	0
51.6	0
51.7	0
51.8	0
51.9	0
52	0
52.1	0
52.2	0
52.3	0
52.4	0
52.5	0
52.6	0
52.7	0
52.8	0
52.9	0
53	0
53.1	0
53.2	0
53.3	0
53.4	0
53.5	0
53.6	0
53.7	0
53.8	0
53.9	0
54	0
54.1	0
54.2	0
54.3	0
54.4	0
54.5	0
54.6	0
54.7	0
54.8	0
54.9	0
55	0
55.1	0
55.2	0
55.3	0
55.4	0
55.5	0
55.6	0
55.7	0
55.8	0
55.9	0
56	0
56.1	0
56.2	0
56.3	0
56.4	0
56.5	0
56.6	0
56.7	0
56.8	0
56.9	0
57	0
57.1	0
57.2	0
57.3	0
57.4	0
57.5	0
57.6	0
57.7	0
57.8	0
57.9	0
58	0
58.1	0
58.2	0
58.3	0
58.4	0
58.5	0
58.6	0
58.7	0
58.8	0
58.9	0
59	0
59.1	0
59.2	0
59.3	0
59.4	0
59.5	0
59.6	0
59.7	0
59.8	0
59.9	0
60	0
60.1	0
60.2	0
60.3	0
60.4	0
60.5	0
60.6	0
60.7	0
60.8	0
60.9	0
61	0
61.1	0
61.2	0
61.3	0
61.4	0
61.5	0
61.6	0
61.7	0
61.8	0
61.9	0
62	0
62.1	0
62.2	0
62.3	0
62.4	0
62.5	0
62.6	0
62.7	0
62.8	0
62.9	0
63	0
63.1	0
63.2	0
63.3	0
63.4	0
63.5	0
63.6	0
63.7	0
63.8	0
63.9	0
64	0
64.1	0
64.2	0
64.3	0
64.4	0
64.5	0
64.6	0
64.7	0
64.8	0
64.9	0
65	0
65.1	0
65.2	0
65.3	0
65.4	0
65.5	0
65.6	0
65.7	0
65.8	0
65.9	0
66	0
66.1	0
66.2	0
66.3	0
66.4	0
66.5	0
66.6	0
66.7	0
66.8	0
66.9	0
67	0
67.1	0
67.2	0
67.3	0
67.4	0
67.5	0
67.6	0
67.7	0
67.8	0
67.9	0
68	0
68.1	0
68.2	0
68.3	0
68.4	0
68.5	0
68.6	0
68.7	0
68.8	0
68.9	0
69	0
69.1	0
69.2	0
69.3	0
69.4	0
69.5	0
69.6	0
69.7	0
69.8	0
69.9	0
70	0
70.1	0
70.2	0
70.3	0
70.4	0
70.5	0
70.6	0
70.7	0
70.8	0
70.9	0
71	0
71.1	0
71.2	0
71.3	0
71.4	0
71.5	0
71.6	0
71.7	0
71.8	0
71.9	0
72	0
72.1	0
72.2	0
72.3	0
72.4	0
72.5	0
72.6	0
72.7	0
72.8	0
72.9	0
73	0
73.1	0
73.2	0
73.3	0
73.4	0
73.5	0
73.6	0
73.7	0
73.8	0
73.9	0
74	0
74.1	0
74.2	0
74.3	0
74.4	0
74.5	0
74.6	0
74.7	0
74.8	0
74.9	0
75	0
75.1	0
75.2	0
75.3	0
75.4	0
75.5	0
75.6	0
75.7	0
75.8	0
75.9	0
76	0
76.1	0
76.2	0
76.3	0
76.4	0
76.5	0
76.6	0
76.7	0
76.8	0
76.9	0
77	0
77.1	0
77.2	0
77.3	0
77.4	0
77.5	0
77.6	0
77.7	0
77.8	0
77.9	0
78	0
78.1	0
78.2	0
78.3	0
78.4	0
78.5	0
78.6	0
78.7	0
78.8	0
78.9	0
79	0
79.1	0
79.2	0
79.3	0
79.4	0
79.5	0
79.6	0
79.7	0
79.8	0
79.9	0
80	0
80.1	0
80.2	0
80.3	0
80.4	0
80.5	0
80.6	0
80.7	0
80.8	0
80.9	0
81	0
81.1	0
81.2	0
81.3	0
81.4	0
81.5	0
81.6	0
81.7	0
81.8	0
81.9	0
82	0
82.1	0
82.2	0
82.3	0
82.4	0
82.5	0
82.6	0
82.7	0
82.8	0
82.9	0
83	0
83.1	0
83.2	0
83.3	0
83.4	0
83.5	0
83.6	0
83.7	0
83.8	0
83.9	0
84	0
84.1	0
84.2	0
84.3	0
84.4	0
84.5	0
84.6	0
84.7	0
84.8	0
84.9	0
85	0
85.1	0
85.2	0
85.3	0
85.4	0
85.5	0
85.6	0
85.7	0
85.8	0
85.9	0
86	0
86.1	0
86.2	0
86.3	0
86.4	0
86.5	0
86.6	0
86.7	0
86.8	0
86.9	0
87	0
87.1	0
87.2	0
87.3	0
87.4	0
87.5	0
87.6	0
87.7	0
87.8	0
87.9	0
88	0
88.1	0
88.2	0
88.3	0
88.4	0
88.5	0
88.6	0
88.7	0
88.8	0
88.9	0
89	0
89.1	0
89.2	0
89.3	0
89.4	0
89.5	0
89.6	0
89.7	0
89.8	0
89.9	0
90	0
90.1	0
90.2	0
90.3	0
90.4	0
90.5	0
90.6	0
90.7	0
90.8	0
90.9	0
91	0
91.1	0
91.2	0
91.3	0
91.4	0
91.5	0
91.6	0
91.7	0
91.8	0
91.9	0
92	0
92.1	0
92.2	0
92.3	0
92.4	0
92.5	0
92.6	0
92.7	0
92.8	0
92.9	0
93	0
93.1	0
93.2	0
93.3	0
93.4	0
93.5	0
93.6	0
93.7	0
93.8	0
93.9	0
94	0
94.1	0
94.2	0
94.3	0
94.4	0
94.5	0
94.6	0
94.7	0
94.8	0
94.9	0
95	0
95.1	0
95.2	0
95.3	0
95.4	0
95.5	0
95.6	0
95.7	0
95.8	0
95.9	0
96	0
96.1	0
96.2	0
96.3	0
96.4	0
96.5	0
96.6	0
96.7	0
96.8	0
96.9	0
97	0
97.1	0
97.2	0
97.3	0
97.4	0
97.5	0
97.6	0
97.7	0
97.8	0
97.9	0
98	0
98.1	0
98.2	0
98.3	0
98.4	0
98.5	0
98.6	0
98.7	0
98.8	0
98.9	0
99	0
99.1	0
99.2	0
99.3	0
99.4	0
99.5	0
99.6	0
99.7	0
99.8	0
99.9	0
100	0
100.1	0.125
100.2	0.2375
100.3	0.31875
100.4	0.35625
100.5	0.38125
100.6	0.4125
100.7	0.44375
100.8	0.48125
100.9	0.53125
101	0.54375
101.1	0.5625
101.2	0.60625
101.3	0.60625
101.4	0.6125
101.5	0.63125
101.6	0.65625
101.7	0.675
101.8	0.6875
101.9	0.7125
102	0.70625
102.1	0.73125
102.2	0.73125
102.3	0.73125
102.4	0.73125
102.5	0.75625
102.6	0.74375
102.7	0.7375
102.8	0.725
102.9	0.70625
103	0.725
103.1	0.7375
103.2	0.76875
103.3	0.7625
103.4	0.775
103.5	0.7625
103.6	0.775
103.7	0.78125
103.8	0.78125
103.9	0.775
104	0.7625
104.1	0.76875
104.2	0.8
104.3	0.775
104.4	0.76875
104.5	0.7625
104.6	0.75625
104.7	0.78125
104.8	0.78125
104.9	0.75625
105	0.75
105.1	0.76875
105.2	0.7625
105.3	0.7375
105.4	0.74375
105.5	0.74375
105.6	0.7375
105.7	0.7375
105.8	0.725
105.9	0.725
106	0.75
106.1	0.75
106.2	0.7375
106.3	0.725
106.4	0.75625
106.5	0.7625
106.6	0.7625
106.7	0.75625
106.8	0.7625
106.9	0.7625
107	0.7875
107.1	0.7875
107.2	0.775
107.3	0.79375
107.4	0.80625
107.5	0.79375
107.6	0.79375
107.7	0.79375
107.8	0.78125
107.9	0.7625
108	0.78125
108.1	0.78125
108.2	0.75625
108.3	0.75625
108.4	0.76875
108.5	0.775
108.6	0.75625
108.7	0.75625
108.8	0.7625
108.9	0.775
109	0.7625
109.1	0.775
109.2	0.775
109.3	0.76875
109.4	0.7875
109.5	0.78125
109.6	0.7625
109.7	0.76875
109.8	0.74375
109.9	0.73125
110	0.7375
110.1	0.74375
110.2	0.74375
110.3	0.75625
110.4	0.7875
110.5	0.8
110.6	0.8
110.7	0.8125
110.8	0.80625
110.9	0.81875
111	0.84375
111.1	0.85
111.2	0.8625
111.3	0.8375
111.4	0.85625
111.5	0.83125
111.6	0.83125
111.7	0.80625
111.8	0.81875
111.9	0.825
112	0.83125
112.1	0.8375
112.2	0.825
112.3	0.83125
112.4	0.81875
112.5	0.81875
112.6	0.8125
112.7	0.8125
112.8	0.8
112.9	0.79375
113	0.7875
113.1	0.8
113.2	0.78125
113.3	0.79375
113.4	0.7875
113.5	0.7875
113.6	0.8
113.7	0.8125
113.8	0.81875
113.9	0.825
114	0.825
114.1	0.83125
114.2	0.85
114.3	0.84375
114.4	0.85
114.5	0.8625
114.6	0.8625
114.7	0.86875
114.8	0.8375
114.9	0.8625
115	0.85
115.1	0.84375
115.2	0.83125
115.3	0.8375
115.4	0.85625
115.5	0.8625
115.6	0.85625
115.7	0.85625
115.8	0.85625
115.9	0.85
116	0.8625
116.1	0.875
116.2	0.8625
116.3	0.85
116.4	0.85
116.5	0.85
116.6	0.8375
116.7	0.8625
116.8	0.86875
116.9	0.85625
117	0.81875
117.1	0.80625
117.2	0.78125
117.3	0.775
117.4	0.8
117.5	0.80625
117.6	0.7875
117.7	0.7875
117.8	0.8125
117.9	0.825
118	0.8125
118.1	0.825
118.2	0.81875
118.3	0.825
118.4	0.825
118.5	0.80625
118.6	0.825
118.7	0.80625
118.8	0.80625
118.9	0.8125
119	0.825
119.1	0.825
119.2	0.81875
119.3	0.80625
119.4	0.80625
119.5	0.825
119.6	0.8375
119.7	0.85
119.8	0.8625
119.9	0.8625
120	0.85625
120.1	0.85625
120.2	0.8625
120.3	0.86875
120.4	0.86875
120.5	0.84375
120.6	0.8375
120.7	0.85
120.8	0.85
120.9	0.85
121	0.85625
121.1	0.85
121.2	0.8625
121.3	0.825
121.4	0.84375
121.5	0.85
121.6	0.84375
121.7	0.84375
121.8	0.8375
121.9	0.8375
122	0.85
122.1	0.8625
122.2	0.85625
122.3	0.84375
122.4	0.84375
122.5	0.83125
122.6	0.84375
122.7	0.84375
122.8	0.84375
122.9	0.85625
123	0.86875
123.1	0.86875
123.2	0.875
123.3	0.88125
123.4	0.8875
123.5	0.88125
123.6	0.88125
123.7	0.875
123.8	0.875
123.9	0.8625
124	0.86875
124.1	0.86875
124.2	0.86875
124.3	0.85625
124.4	0.85
124.5	0.875
124.6	0.88125
124.7	0.85625
124.8	0.85625
124.9	0.86875
125	0.875
125.1	0.875
125.2	0.875
125.3	0.88125
125.4	0.88125
125.5	0.89375
125.6	0.89375
125.7	0.89375
125.8	0.89375
125.9	0.90625
126	0.9
126.1	0.9
126.2	0.9125
126.3	0.89375
126.4	0.875
126.5	0.9
126.6	0.9
126.7	0.9
126.8	0.89375
126.9	0.9
127	0.8875
127.1	0.8875
127.2	0.8625
127.3	0.875
127.4	0.86875
127.5	0.88125
127.6	0.875
127.7	0.9
127.8	0.88125
127.9	0.875
128	0.86875
128.1	0.8625
128.2	0.86875
128.3	0.875
128.4	0.86875
128.5	0.85625
128.6	0.875
128.7	0.8875
128.8	0.8875
128.9	0.8875
129	0.875
129.1	0.8875
129.2	0.8875
129.3	0.89375
129.4	0.90625
129.5	0.9125
129.6	0.9125
129.7	0.90625
129.8	0.9
129.9	0.89375
130	0.9
130.1	0.89375
130.2	0.8875
130.3	0.88125
130.4	0.88125
130.5	0.9
130.6	0.89375
130.7	0.89375
130.8	0.8875
130.9	0.88125
131	0.9
131.1	0.88125
131.2	0.875
131.3	0.875
131.4	0.8875
131.5	0.88125
131.6	0.875
131.7	0.86875
131.8	0.86875
131.9	0.88125
132	0.89375
132.1	0.89375
132.2	0.9
132.3	0.8875
132.4	0.89375
132.5	0.89375
132.6	0.8875
132.7	0.8875
132.8	0.89375
132.9	0.89375
133	0.8875
133.1	0.8875
133.2	0.9
133.3	0.9
133.4	0.9
133.5	0.9
133.6	0.89375
133.7	0.89375
133.8	0.89375
133.9	0.89375
134	0.89375
134.1	0.9125
134.2	0.91875
134.3	0.9125
134.4	0.91875
134.5	0.925
134.6	0.93125
134.7	0.91875
134.8	0.9125
134.9	0.90625
135	0.9125
135.1	0.89375
135.2	0.875
135.3	0.8625
135.4	0.86875
135.5	0.8625
135.6	0.8625
135.7	0.85625
135.8	0.85625
135.9	0.8625
136	0.86875
136.1	0.85625
136.2	0.85625
136.3	0.85625
136.4	0.8625
136.5	0.875
136.6	0.85625
136.7	0.84375
136.8	0.8375
136.9	0.85
137	0.85
137.1	0.84375
137.2	0.84375
137.3	0.85
137.4	0.825
137.5	0.83125
137.6	0.8375
137.7	0.825
137.8	0.81875
137.9	0.8125
138	0.81875
138.1	0.83125
138.2	0.84375
138.3	0.86875
138.4	0.86875
138.5	0.875
138.6	0.86875
138.7	0.85625
138.8	0.85
138.9	0.83125
139	0.825
139.1	0.85
139.2	0.85625
139.3	0.85625
139.4	0.8625
139.5	0.86875
139.6	0.875
139.7	0.875
139.8	0.8625
139.9	0.875
140	0.86875
140.1	0.86875
140.2	0.86875
140.3	0.8625
140.4	0.85625
140.5	0.8625
140.6	0.8625
140.7	0.8625
140.8	0.85
140.9	0.8625
141	0.86875
141.1	0.8625
141.2	0.85625
141.3	0.88125
141.4	0.875
141.5	0.8625
141.6	0.875
141.7	0.875
141.8	0.86875
141.9	0.88125
142	0.8875
142.1	0.8875
142.2	0.89375
142.3	0.90625
142.4	0.90625
142.5	0.9125
142.6	0.90625
142.7	0.9
142.8	0.91875
142.9	0.91875
143	0.925
143.1	0.9125
143.2	0.9125
143.3	0.91875
143.4	0.925
143.5	0.91875
143.6	0.91875
143.7	0.925
143.8	0.91875
143.9	0.925
144	0.9125
144.1	0.9125
144.2	0.9
144.3	0.89375
144.4	0.8875
144.5	0.8875
144.6	0.88125
144.7	0.8875
144.8	0.8875
144.9	0.90625
145	0.9125
145.1	0.9125
145.2	0.93125
145.3	0.93125
145.4	0.9375
145.5	0.94375
145.6	0.94375
145.7	0.9375
145.8	0.9375
145.9	0.93125
146	0.9125
146.1	0.90625
146.2	0.8875
146.3	0.9
146.4	0.9
146.5	0.925
146.6	0.91875
146.7	0.925
146.8	0.93125
146.9	0.925
147	0.9375
147.1	0.94375
147.2	0.95625
147.3	0.94375
147.4	0.9375
147.5	0.93125
147.6	0.93125
147.7	0.91875
147.8	0.91875
147.9	0.91875
148	0.925
148.1	0.925
148.2	0.91875
148.3	0.925
148.4	0.925
148.5	0.93125
148.6	0.9375
148.7	0.9375
148.8	0.93125
148.9	0.925
149	0.925
149.1	0.925
149.2	0.91875
149.3	0.91875
149.4	0.91875
149.5	0.91875
149.6	0.91875
149.7	0.90625
149.8	0.90625
149.9	0.9
150	0.9
150.1	0.9
150.2	0.89375
150.3	0.89375
150.4	0.8875
150.5	0.8875
150.6	0.88125
150.7	0.88125
150.8	0.88125
150.9	0.88125
151	0.89375
151.1	0.9
151.2	0.9125
151.3	0.9125
151.4	0.925
151.5	0.925
151.6	0.925
151.7	0.91875
151.8	0.91875
151.9	0.91875
152	0.925
152.1	0.93125
152.2	0.91875
152.3	0.9125
152.4	0.9125
152.5	0.9125
152.6	0.9125
152.7	0.90625
152.8	0.90625
152.9	0.9
153	0.9
153.1	0.90625
153.2	0.91875
153.3	0.9125
153.4	0.90625
153.5	0.9125
153.6	0.9125
153.7	0.90625
153.8	0.90625
153.9	0.90625
154	0.9125
154.1	0.9
154.2	0.90625
154.3	0.90625
154.4	0.91875
154.5	0.9125
154.6	0.9125
154.7	0.90625
154.8	0.90625
154.9	0.89375
155	0.8875
155.1	0.8875
155.2	0.8875
155.3	0.89375
155.4	0.90625
155.5	0.90625
155.6	0.9125
155.7	0.9125
155.8	0.9125
155.9	0.93125
156	0.91875
156.1	0.91875
156.2	0.91875
156.3	0.925
156.4	0.9375
156.5	0.94375
156.6	0.93125
156.7	0.94375
156.8	0.95
156.9	0.94375
157	0.94375
157.1	0.9375
157.2	0.9375
157.3	0.94375
157.4	0.95
157.5	0.9375
157.6	0.9375
157.7	0.95
157.8	0.94375
157.9	0.95
158	0.95625
158.1	0.94375
158.2	0.94375
158.3	0.94375
158.4	0.94375
158.5	0.94375
158.6	0.94375
158.7	0.94375
158.8	0.95625
158.9	0.95625
159	0.95625
159.1	0.94375
159.2	0.95
159.3	0.95625
159.4	0.94375
159.5	0.94375
159.6	0.94375
159.7	0.93125
159.8	0.9375
159.9	0.9375
160	0.94375
160.1	0.95
160.2	0.95
160.3	0.9625
160.4	0.95625
160.5	0.95
160.6	0.95
160.7	0.95
160.8	0.9375
160.9	0.9375
161	0.94375
161.1	0.9375
161.2	0.925
161.3	0.93125
161.4	0.93125
161.5	0.925
161.6	0.925
161.7	0.925
161.8	0.9375
161.9	0.94375
162	0.94375
162.1	0.9375
162.2	0.94375
162.3	0.94375
162.4	0.94375
162.5	0.94375
162.6	0.95
162.7	0.9375
162.8	0.9375
162.9	0.925
163	0.9125
163.1	0.9125
163.2	0.925
163.3	0.93125
163.4	0.93125
163.5	0.9375
163.6	0.94375
163.7	0.9375
163.8	0.95
163.9	0.95
164	0.95
164.1	0.95625
164.2	0.95
164.3	0.95
164.4	0.95
164.5	0.95
164.6	0.95
164.7	0.94375
164.8	0.9625
164.9	0.95625
165	0.95
165.1	0.95
165.2	0.95
165.3	0.95625
165.4	0.95625
165.5	0.9625
165.6	0.95625
165.7	0.95625
165.8	0.94375
165.9	0.94375
166	0.95
166.1	0.95
166.2	0.95625
166.3	0.9625
166.4	0.9625
166.5	0.95625
166.6	0.95625
166.7	0.95625
166.8	0.9625
166.9	0.9625
167	0.9625
167.1	0.9625
167.2	0.9625
167.3	0.9625
167.4	0.9625
167.5	0.95
167.6	0.95625
167.7	0.95
167.8	0.95
167.9	0.95
168	0.95
168.1	0.95
168.2	0.94375
168.3	0.95
168.4	0.95625
168.5	0.95625
168.6	0.96875
168.7	0.95625
168.8	0.95625
168.9	0.95625
169	0.95
169.1	0.94375
169.2	0.9625
169.3	0.96875
169.4	0.96875
169.5	0.9625
169.6	0.9625
169.7	0.95625
169.8	0.95625
169.9	0.95625
170	0.95625
170.1	0.95
170.2	0.9625
170.3	0.9625
170.4	0.9625
170.5	0.95625
170.6	0.95
170.7	0.95
170.8	0.93125
170.9	0.93125
171	0.95
171.1	0.94375
171.2	0.95
171.3	0.95
171.4	0.95
171.5	0.9375
171.6	0.9375
171.7	0.9375
171.8	0.93125
171.9	0.93125
172	0.9375
172.1	0.925
172.2	0.9375
172.3	0.9375
172.4	0.94375
172.5	0.93125
172.6	0.9375
172.7	0.93125
172.8	0.9375
172.9	0.9375
173	0.9375
173.1	0.94375
173.2	0.9375
173.3	0.9375
173.4	0.9375
173.5	0.93125
173.6	0.94375
173.7	0.9375
173.8	0.9375
173.9	0.9375
174	0.9375
174.1	0.94375
174.2	0.9375
174.3	0.9375
174.4	0.93125
174.5	0.93125
174.6	0.9375
174.7	0.9375
174.8	0.925
174.9	0.925
175	0.925
175.1	0.925
175.2	0.91875
175.3	0.91875
175.4	0.925
175.5	0.925
175.6	0.9375
175.7	0.9375
175.8	0.94375
175.9	0.9375
176	0.9375
176.1	0.9375
176.2	0.93125
176.3	0.94375
176.4	0.94375
176.5	0.9375
176.6	0.9375
176.7	0.94375
176.8	0.95625
176.9	0.95
177	0.95625
177.1	0.96875
177.2	0.975
177.3	0.975
177.4	0.9625
177.5	0.94375
177.6	0.94375
177.7	0.95625
177.8	0.94375
177.9	0.93125
178	0.9375
178.1	0.9375
178.2	0.9375
178.3	0.94375
178.4	0.94375
178.5	0.9375
178.6	0.95
178.7	0.94375
178.8	0.95
178.9	0.95
179	0.95625
179.1	0.95625
179.2	0.95625
179.3	0.94375
179.4	0.93125
179.5	0.93125
179.6	0.9375
179.7	0.94375
179.8	0.94375
179.9	0.94375
180	0.94375
180.1	0.94375
180.2	0.9375
180.3	0.94375
180.4	0.95
180.5	0.94375
180.6	0.94375
180.7	0.95
180.8	0.94375
180.9	0.95
181	0.94375
181.1	0.93125
181.2	0.925
181.3	0.925
181.4	0.94375
181.5	0.94375
181.6	0.94375
181.7	0.94375
181.8	0.95
181.9	0.95625
182	0.94375
182.1	0.95
182.2	0.95
182.3	0.95625
182.4	0.9625
182.5	0.9625
182.6	0.95625
182.7	0.95
182.8	0.95625
182.9	0.95
183	0.95
183.1	0.94375
183.2	0.9375
183.3	0.94375
183.4	0.94375
183.5	0.94375
183.6	0.95
183.7	0.95
183.8	0.94375
183.9	0.95
184	0.94375
184.1	0.94375
184.2	0.94375
184.3	0.925
184.4	0.925
184.5	0.925
184.6	0.93125
184.7	0.94375
184.8	0.9375
184.9	0.93125
185	0.94375
185.1	0.94375
185.2	0.9375
185.3	0.9375
185.4	0.9375
185.5	0.93125
185.6	0.925
185.7	0.925
185.8	0.91875
185.9	0.925
186	0.9125
186.1	0.94375
186.2	0.94375
186.3	0.94375
186.4	0.95
186.5	0.94375
186.6	0.95625
186.7	0.9625
186.8	0.9625
186.9	0.9625
187	0.9625
187.1	0.95
187.2	0.9625
187.3	0.9625
187.4	0.975
187.5	0.975
187.6	0.975
187.7	0.96875
187.8	0.96875
187.9	0.9625
188	0.9625
188.1	0.9625
188.2	0.9625
188.3	0.9625
188.4	0.95
188.5	0.95
188.6	0.95
188.7	0.95
188.8	0.95625
188.9	0.9625
189	0.9625
189.1	0.96875
189.2	0.9625
189.3	0.9625
189.4	0.95625
189.5	0.9625
189.6	0.95625
189.7	0.95
189.8	0.95
189.9	0.95
190	0.93125
190.1	0.94375
190.2	0.95625
190.3	0.95625
190.4	0.95625
190.5	0.95625
190.6	0.95
190.7	0.94375
190.8	0.95
190.9	0.94375
191	0.94375
191.1	0.9375
191.2	0.9375
191.3	0.9375
191.4	0.95
191.5	0.94375
191.6	0.94375
191.7	0.94375
191.8	0.9375
191.9	0.9375
192	0.9375
192.1	0.9375
192.2	0.9375
192.3	0.94375
192.4	0.95
192.5	0.95
192.6	0.95
192.7	0.9625
192.8	0.95625
192.9	0.9625
193	0.95625
193.1	0.9625
193.2	0.95625
193.3	0.95
193.4	0.94375
193.5	0.94375
193.6	0.9375
193.7	0.94375
193.8	0.93125
193.9	0.925
194	0.93125
194.1	0.93125
194.2	0.94375
194.3	0.9375
194.4	0.93125
194.5	0.925
194.6	0.925
194.7	0.925
194.8	0.925
194.9	0.9125
195	0.91875
195.1	0.91875
195.2	0.91875
195.3	0.91875
195.4	0.91875
195.5	0.91875
195.6	0.9125
195.7	0.91875
195.8	0.91875
195.9	0.9125
196	0.9125
196.1	0.9125
196.2	0.90625
196.3	0.91875
196.4	0.925
196.5	0.9125
196.6	0.9125
196.7	0.91875
196.8	0.9125
196.9	0.91875
197	0.925
197.1	0.91875
197.2	0.91875
197.3	0.925
197.4	0.91875
197.5	0.91875
197.6	0.93125
197.7	0.93125
197.8	0.9375
197.9	0.9625
198	0.9625
198.1	0.95
198.2	0.9625
198.3	0.95625
198.4	0.95625
198.5	0.95625
198.6	0.9625
198.7	0.9625
198.8	0.95625
198.9	0.95625
199	0.95625
199.1	0.94375
199.2	0.95
199.3	0.94375
199.4	0.925
199.5	0.91875
199.6	0.9125
199.7	0.9125
199.8	0.91875
199.9	0.93125
200	0.93125
[truncated: 14,000 more rows]
