# Supplementary material for: Bayesian inference of kinetic schemes for ion channels by Kalman filtering
Source: eLife journal article supplement (doi:10.7554/elife.62714), 2022-05-04
Supplement: fig4-data7 [file 1_Sim_N_80_Strom_MW.xlsx]

## Sheet: 2 M
0.1	0
0.2	0
0.3	0
0.4	0
0.5	0
0.6	0
0.7	0
0.8	0
0.9	0
1	0
1.1	0
1.2	0
1.3	0
1.4	0
1.5	0
1.6	0
1.7	0
1.8	0
1.9	0
2	0
2.1	0
2.2	0
2.3	0
2.4	0
2.5	0
2.6	0
2.7	0
2.8	0
2.9	0
3	0
3.1	0
3.2	0
3.3	0
3.4	0
3.5	0
3.6	0
3.7	0
3.8	0
3.9	0
4	0
4.1	0
4.2	0
4.3	0
4.4	0
4.5	0
4.6	0
4.7	0
4.8	0
4.9	0
5	0
5.1	0
5.2	0
5.3	0
5.4	0
5.5	0
5.6	0
5.7	0
5.8	0
5.9	0
6	0
6.1	0
6.2	0
6.3	0
6.4	0
6.5	0
6.6	0
6.7	0
6.8	0
6.9	0
7	0
7.1	0
7.2	0
7.3	0
7.4	0
7.5	0
7.6	0
7.7	0
7.8	0
7.9	0
8	0
8.1	0
8.2	0
8.3	0
8.4	0
8.5	0
8.6	0
8.7	0
8.8	0
8.9	0
9	0
9.1	0
9.2	0
9.3	0
9.4	0
9.5	0
9.6	0
9.7	0
9.8	0
9.9	0
10	0
10.1	0
10.2	0
10.3	0
10.4	0
10.5	0
10.6	0
10.7	0
10.8	0
10.9	0
11	0
11.1	0
11.2	0
11.3	0
11.4	0
11.5	0
11.6	0
11.7	0
11.8	0
11.9	0
12	0
12.1	0
12.2	0
12.3	0
12.4	0
12.5	0
12.6	0
12.7	0
12.8	0
12.9	0
13	0
13.1	0
13.2	0
13.3	0
13.4	0
13.5	0
13.6	0
13.7	0
13.8	0
13.9	0
14	0
14.1	0
14.2	0
14.3	0
14.4	0
14.5	0
14.6	0
14.7	0
14.8	0
14.9	0
15	0
15.1	0
15.2	0
15.3	0
15.4	0
15.5	0
15.6	0
15.7	0
15.8	0
15.9	0
16	0
16.1	0
16.2	0
16.3	0
16.4	0
16.5	0
16.6	0
16.7	0
16.8	0
16.9	0
17	0
17.1	0
17.2	0
17.3	0
17.4	0
17.5	0
17.6	0
17.7	0
17.8	0
17.9	0
18	0
18.1	0
18.2	0
18.3	0
18.4	0
18.5	0
18.6	0
18.7	0
18.8	0
18.9	0
19	0
19.1	0
19.2	0
19.3	0
19.4	0
19.5	0
19.6	0
19.7	0
19.8	0
19.9	0
20	0
20.1	0
20.2	0
20.3	0
20.4	0
20.5	0
20.6	0
20.7	0
20.8	0
20.9	0
21	0
21.1	0
21.2	0
21.3	0
21.4	0
21.5	0
21.6	0
21.7	0
21.8	0
21.9	0
22	0
22.1	0
22.2	0
22.3	0
22.4	0
22.5	0
22.6	0
22.7	0
22.8	0
22.9	0
23	0
23.1	0
23.2	0
23.3	0
23.4	0
23.5	0
23.6	0
23.7	0
23.8	0
23.9	0
24	0
24.1	0
24.2	0
24.3	0
24.4	0
24.5	0
24.6	0
24.7	0
24.8	0
24.9	0
25	0
25.1	0
25.2	0
25.3	0
25.4	0
25.5	0
25.6	0
25.7	0
25.8	0
25.9	0
26	0
26.1	0
26.2	0
26.3	0
26.4	0
26.5	0
26.6	0
26.7	0
26.8	0
26.9	0
27	0
27.1	0
27.2	0
27.3	0
27.4	0
27.5	0
27.6	0
27.7	0
27.8	0
27.9	0
28	0
28.1	0
28.2	0
28.3	0
28.4	0
28.5	0
28.6	0
28.7	0
28.8	0
28.9	0
29	0
29.1	0
29.2	0
29.3	0
29.4	0
29.5	0
29.6	0
29.7	0
29.8	0
29.9	0
30	0
30.1	0
30.2	0
30.3	0
30.4	0
30.5	0
30.6	0
30.7	0
30.8	0
30.9	0
31	0
31.1	0
31.2	0
31.3	0
31.4	0
31.5	0
31.6	0
31.7	0
31.8	0
31.9	0
32	0
32.1	0
32.2	0
32.3	0
32.4	0
32.5	0
32.6	0
32.7	0
32.8	0
32.9	0
33	0
33.1	0
33.2	0
33.3	0
33.4	0
33.5	0
33.6	0
33.7	0
33.8	0
33.9	0
34	0
34.1	0
34.2	0
34.3	0
34.4	0
34.5	0
34.6	0
34.7	0
34.8	0
34.9	0
35	0
35.1	0
35.2	0
35.3	0
35.4	0
35.5	0
35.6	0
35.7	0
35.8	0
35.9	0
36	0
36.1	0
36.2	0
36.3	0
36.4	0
36.5	0
36.6	0
36.7	0
36.8	0
36.9	0
37	0
37.1	0
37.2	0
37.3	0
37.4	0
37.5	0
37.6	0
37.7	0
37.8	0
37.9	0
38	0
38.1	0
38.2	0
38.3	0
38.4	0
38.5	0
38.6	0
38.7	0
38.8	0
38.9	0
39	0
39.1	0
39.2	0
39.3	0
39.4	0
39.5	0
39.6	0
39.7	0
39.8	0
39.9	0
40	0
40.1	0
40.2	0
40.3	0
40.4	0
40.5	0
40.6	0
40.7	0
40.8	0
40.9	0
41	0
41.1	0
41.2	0
41.3	0
41.4	0
41.5	0
41.6	0
41.7	0
41.8	0
41.9	0
42	0
42.1	0
42.2	0
42.3	0
42.4	0
42.5	0
42.6	0
42.7	0
42.8	0
42.9	0
43	0
43.1	0
43.2	0
43.3	0
43.4	0
43.5	0
43.6	0
43.7	0
43.8	0
43.9	0
44	0
44.1	0
44.2	0
44.3	0
44.4	0
44.5	0
44.6	0
44.7	0
44.8	0
44.9	0
45	0
45.1	0
45.2	0
45.3	0
45.4	0
45.5	0
45.6	0
45.7	0
45.8	0
45.9	0
46	0
46.1	0
46.2	0
46.3	0
46.4	0
46.5	0
46.6	0
46.7	0
46.8	0
46.9	0
47	0
47.1	0
47.2	0
47.3	0
47.4	0
47.5	0
47.6	0
47.7	0
47.8	0
47.9	0
48	0
48.1	0
48.2	0
48.3	0
48.4	0
48.5	0
48.6	0
48.7	0
48.8	0
48.9	0
49	0
49.1	0
49.2	0
49.3	0
49.4	0
49.5	0
49.6	0
49.7	0
49.8	0
49.9	0
50	0
50.1	0
50.2	0
50.3	0
50.4	0
50.5	0
50.6	0
50.7	0
50.8	0
50.9	0
51	0
51.1	0
51.2	0
51.3	0
51.4	0
51.5	0
51.6	0
51.7	0
51.8	0
51.9	0
52	0
52.1	0
52.2	0
52.3	0
52.4	0
52.5	0
52.6	0
52.7	0
52.8	0
52.9	0
53	0
53.1	0
53.2	0
53.3	0
53.4	0
53.5	0
53.6	0
53.7	0
53.8	0
53.9	0
54	0
54.1	0
54.2	0
54.3	0
54.4	0
54.5	0
54.6	0
54.7	0
54.8	0
54.9	0
55	0
55.1	0
55.2	0
55.3	0
55.4	0
55.5	0
55.6	0
55.7	0
55.8	0
55.9	0
56	0
56.1	0
56.2	0
56.3	0
56.4	0
56.5	0
56.6	0
56.7	0
56.8	0
56.9	0
57	0
57.1	0
57.2	0
57.3	0
57.4	0
57.5	0
57.6	0
57.7	0
57.8	0
57.9	0
58	0
58.1	0
58.2	0
58.3	0
58.4	0
58.5	0
58.6	0
58.7	0
58.8	0
58.9	0
59	0
59.1	0
59.2	0
59.3	0
59.4	0
59.5	0
59.6	0
59.7	0
59.8	0
59.9	0
60	0
60.1	0
60.2	0
60.3	0
60.4	0
60.5	0
60.6	0
60.7	0
60.8	0
60.9	0
61	0
61.1	0
61.2	0
61.3	0
61.4	0
61.5	0
61.6	0
61.7	0
61.8	0
61.9	0
62	0
62.1	0
62.2	0
62.3	0
62.4	0
62.5	0
62.6	0
62.7	0
62.8	0
62.9	0
63	0
63.1	0
63.2	0
63.3	0
63.4	0
63.5	0
63.6	0
63.7	0
63.8	0
63.9	0
64	0
64.1	0
64.2	0
64.3	0
64.4	0
64.5	0
64.6	0
64.7	0
64.8	0
64.9	0
65	0
65.1	0
65.2	0
65.3	0
65.4	0
65.5	0
65.6	0
65.7	0
65.8	0
65.9	0
66	0
66.1	0
66.2	0
66.3	0
66.4	0
66.5	0
66.6	0
66.7	0
66.8	0
66.9	0
67	0
67.1	0
67.2	0
67.3	0
67.4	0
67.5	0
67.6	0
67.7	0
67.8	0
67.9	0
68	0
68.1	0
68.2	0
68.3	0
68.4	0
68.5	0
68.6	0
68.7	0
68.8	0
68.9	0
69	0
69.1	0
69.2	0
69.3	0
69.4	0
69.5	0
69.6	0
69.7	0
69.8	0
69.9	0
70	0
70.1	0
70.2	0
70.3	0
70.4	0
70.5	0
70.6	0
70.7	0
70.8	0
70.9	0
71	0
71.1	0
71.2	0
71.3	0
71.4	0
71.5	0
71.6	0
71.7	0
71.8	0
71.9	0
72	0
72.1	0
72.2	0
72.3	0
72.4	0
72.5	0
72.6	0
72.7	0
72.8	0
72.9	0
73	0
73.1	0
73.2	0
73.3	0
73.4	0
73.5	0
73.6	0
73.7	0
73.8	0
73.9	0
74	0
74.1	0
74.2	0
74.3	0
74.4	0
74.5	0
74.6	0
74.7	0
74.8	0
74.9	0
75	0
75.1	0
75.2	0
75.3	0
75.4	0
75.5	0
75.6	0
75.7	0
75.8	0
75.9	0
76	0
76.1	0
76.2	0
76.3	0
76.4	0
76.5	0
76.6	0
76.7	0
76.8	0
76.9	0
77	0
77.1	0
77.2	0
77.3	0
77.4	0
77.5	0
77.6	0
77.7	0
77.8	0
77.9	0
78	0
78.1	0
78.2	0
78.3	0
78.4	0
78.5	0
78.6	0
78.7	0
78.8	0
78.9	0
79	0
79.1	0
79.2	0
79.3	0
79.4	0
79.5	0
79.6	0
79.7	0
79.8	0
79.9	0
80	0
80.1	0
80.2	0
80.3	0
80.4	0
80.5	0
80.6	0
80.7	0
80.8	0
80.9	0
81	0
81.1	0
81.2	0
81.3	0
81.4	0
81.5	0
81.6	0
81.7	0
81.8	0
81.9	0
82	0
82.1	0
82.2	0
82.3	0
82.4	0
82.5	0
82.6	0
82.7	0
82.8	0
82.9	0
83	0
83.1	0
83.2	0
83.3	0
83.4	0
83.5	0
83.6	0
83.7	0
83.8	0
83.9	0
84	0
84.1	0
84.2	0
84.3	0
84.4	0
84.5	0
84.6	0
84.7	0
84.8	0
84.9	0
85	0
85.1	0
85.2	0
85.3	0
85.4	0
85.5	0
85.6	0
85.7	0
85.8	0
85.9	0
86	0
86.1	0
86.2	0
86.3	0
86.4	0
86.5	0
86.6	0
86.7	0
86.8	0
86.9	0
87	0
87.1	0
87.2	0
87.3	0
87.4	0
87.5	0
87.6	0
87.7	0
87.8	0
87.9	0
88	0
88.1	0
88.2	0
88.3	0
88.4	0
88.5	0
88.6	0
88.7	0
88.8	0
88.9	0
89	0
89.1	0
89.2	0
89.3	0
89.4	0
89.5	0
89.6	0
89.7	0
89.8	0
89.9	0
90	0
90.1	0
90.2	0
90.3	0
90.4	0
90.5	0
90.6	0
90.7	0
90.8	0
90.9	0
91	0
91.1	0
91.2	0
91.3	0
91.4	0
91.5	0
91.6	0
91.7	0
91.8	0
91.9	0
92	0
92.1	0
92.2	0
92.3	0
92.4	0
92.5	0
92.6	0
92.7	0
92.8	0
92.9	0
93	0
93.1	0
93.2	0
93.3	0
93.4	0
93.5	0
93.6	0
93.7	0
93.8	0
93.9	0
94	0
94.1	0
94.2	0
94.3	0
94.4	0
94.5	0
94.6	0
94.7	0
94.8	0
94.9	0
95	0
95.1	0
95.2	0
95.3	0
95.4	0
95.5	0
95.6	0
95.7	0
95.8	0
95.9	0
96	0
96.1	0
96.2	0
96.3	0
96.4	0
96.5	0
96.6	0
96.7	0
96.8	0
96.9	0
97	0
97.1	0
97.2	0
97.3	0
97.4	0
97.5	0
97.6	0
97.7	0
97.8	0
97.9	0
98	0
98.1	0
98.2	0
98.3	0
98.4	0
98.5	0
98.6	0
98.7	0
98.8	0
98.9	0
99	0
99.1	0
99.2	0
99.3	0
99.4	0
99.5	0
99.6	0
99.7	0
99.8	0
99.9	0
100	0
100.1	0
100.2	0
100.3	0
100.4	0
100.5	0
100.6	0
100.7	0
100.8	0
100.9	0
101	0
101.1	0
101.2	0
101.3	0
101.4	0.0125
101.5	0.0125
101.6	0.0125
101.7	0.0125
101.8	0.0125
101.9	0.025
102	0.025
102.1	0.025
102.2	0.025
102.3	0.025
102.4	0.05
102.5	0.05
102.6	0.05
102.7	0.05
102.8	0.05
102.9	0.05
103	0.0625
103.1	0.0625
103.2	0.0625
103.3	0.0625
103.4	0.0625
103.5	0.075
103.6	0.075
103.7	0.075
103.8	0.075
103.9	0.0875
104	0.1
104.1	0.1
104.2	0.1
104.3	0.1
104.4	0.125
104.5	0.125
104.6	0.125
104.7	0.125
104.8	0.125
104.9	0.125
105	0.125
105.1	0.125
105.2	0.125
105.3	0.125
105.4	0.125
105.5	0.125
105.6	0.125
105.7	0.125
105.8	0.1375
105.9	0.1375
106	0.1375
106.1	0.1375
106.2	0.15
106.3	0.15
106.4	0.15
106.5	0.15
106.6	0.15
106.7	0.15
106.8	0.15
106.9	0.15
107	0.15
107.1	0.15
107.2	0.15
107.3	0.15
107.4	0.15
107.5	0.15
107.6	0.1625
107.7	0.15
107.8	0.15
107.9	0.15
108	0.15
108.1	0.15
108.2	0.15
108.3	0.15
108.4	0.1625
108.5	0.1625
108.6	0.1625
108.7	0.175
108.8	0.1875
108.9	0.1875
109	0.1875
109.1	0.1875
109.2	0.2
109.3	0.2
109.4	0.2
109.5	0.2
109.6	0.2125
109.7	0.2125
109.8	0.2125
109.9	0.2125
110	0.2125
110.1	0.2125
110.2	0.2125
110.3	0.2125
110.4	0.2125
110.5	0.2125
110.6	0.2125
110.7	0.2125
110.8	0.225
110.9	0.25
111	0.2625
111.1	0.2625
111.2	0.2625
111.3	0.2625
111.4	0.2625
111.5	0.275
111.6	0.275
111.7	0.275
111.8	0.275
111.9	0.275
112	0.275
112.1	0.275
112.2	0.275
112.3	0.275
112.4	0.275
112.5	0.275
112.6	0.275
112.7	0.275
112.8	0.2875
112.9	0.2875
113	0.2875
113.1	0.275
113.2	0.275
113.3	0.2875
113.4	0.2875
113.5	0.2875
113.6	0.2875
113.7	0.2875
113.8	0.3
113.9	0.3
114	0.3
114.1	0.3
114.2	0.3
114.3	0.3
114.4	0.3
114.5	0.3
114.6	0.3
114.7	0.3
114.8	0.325
114.9	0.325
115	0.325
115.1	0.325
115.2	0.325
115.3	0.325
115.4	0.325
115.5	0.3375
115.6	0.3375
115.7	0.3375
115.8	0.35
115.9	0.35
116	0.3625
116.1	0.3625
116.2	0.3625
116.3	0.3625
116.4	0.3625
116.5	0.3625
116.6	0.3625
116.7	0.3625
116.8	0.3625
116.9	0.3625
117	0.3625
117.1	0.3625
117.2	0.3625
117.3	0.3625
117.4	0.3625
117.5	0.3625
117.6	0.3625
117.7	0.3625
117.8	0.3625
117.9	0.3625
118	0.3625
118.1	0.375
118.2	0.375
118.3	0.375
118.4	0.375
118.5	0.375
118.6	0.3875
118.7	0.4
118.8	0.4
118.9	0.4
119	0.4
119.1	0.4
119.2	0.4
119.3	0.4
119.4	0.4
119.5	0.4125
119.6	0.4125
119.7	0.4125
119.8	0.4125
119.9	0.4125
120	0.4125
120.1	0.4125
120.2	0.4125
120.3	0.4125
120.4	0.4125
120.5	0.4125
120.6	0.4125
120.7	0.4125
120.8	0.4125
120.9	0.4125
121	0.425
121.1	0.425
121.2	0.425
121.3	0.4125
121.4	0.4125
121.5	0.4125
121.6	0.4125
121.7	0.4125
121.8	0.4125
121.9	0.4125
122	0.4125
122.1	0.4125
122.2	0.425
122.3	0.4375
122.4	0.4375
122.5	0.4375
122.6	0.4375
122.7	0.4375
122.8	0.4375
122.9	0.4375
123	0.4375
123.1	0.4375
123.2	0.4375
123.3	0.45
123.4	0.45
123.5	0.45
123.6	0.45
123.7	0.45
123.8	0.45
123.9	0.4625
124	0.4625
124.1	0.475
124.2	0.475
124.3	0.475
124.4	0.4625
124.5	0.4625
124.6	0.4625
124.7	0.4625
124.8	0.4625
124.9	0.475
125	0.475
125.1	0.475
125.2	0.475
125.3	0.475
125.4	0.475
125.5	0.475
125.6	0.475
125.7	0.475
125.8	0.4875
125.9	0.4875
126	0.4875
126.1	0.4875
126.2	0.4875
126.3	0.4875
126.4	0.4875
126.5	0.4875
126.6	0.4875
126.7	0.5
126.8	0.5
126.9	0.5
127	0.5125
127.1	0.5125
127.2	0.5125
127.3	0.525
127.4	0.525
127.5	0.525
127.6	0.525
127.7	0.525
127.8	0.5125
127.9	0.5125
128	0.5
128.1	0.5
128.2	0.5
128.3	0.5
128.4	0.5
128.5	0.5125
128.6	0.5125
128.7	0.5125
128.8	0.5125
128.9	0.5125
129	0.5125
129.1	0.5125
129.2	0.5125
129.3	0.5125
129.4	0.5125
129.5	0.5125
129.6	0.5125
129.7	0.5
129.8	0.5
129.9	0.5125
130	0.525
130.1	0.525
130.2	0.525
130.3	0.525
130.4	0.525
130.5	0.5125
130.6	0.5125
130.7	0.5125
130.8	0.5125
130.9	0.5125
131	0.5125
131.1	0.5125
131.2	0.5125
131.3	0.5125
131.4	0.5125
131.5	0.5125
131.6	0.525
131.7	0.525
131.8	0.5375
131.9	0.5375
132	0.55
132.1	0.55
132.2	0.55
132.3	0.55
132.4	0.55
132.5	0.55
132.6	0.55
132.7	0.55
132.8	0.5375
132.9	0.5375
133	0.525
133.1	0.525
133.2	0.525
133.3	0.525
133.4	0.525
133.5	0.525
133.6	0.525
133.7	0.525
133.8	0.525
133.9	0.525
134	0.525
134.1	0.525
134.2	0.525
134.3	0.525
134.4	0.5125
134.5	0.5125
134.6	0.5125
134.7	0.5125
134.8	0.5125
134.9	0.5125
135	0.5125
135.1	0.5125
135.2	0.5125
135.3	0.5125
135.4	0.5125
135.5	0.5125
135.6	0.5125
135.7	0.5
135.8	0.5
135.9	0.5
136	0.5
136.1	0.5
136.2	0.5
136.3	0.4875
136.4	0.4875
136.5	0.4875
136.6	0.4875
136.7	0.4875
136.8	0.4875
136.9	0.4875
137	0.5
137.1	0.5
137.2	0.5
137.3	0.5
137.4	0.5
137.5	0.5
137.6	0.5
137.7	0.525
137.8	0.5125
137.9	0.5125
138	0.5125
138.1	0.5
138.2	0.5
138.3	0.5
138.4	0.5125
138.5	0.5125
138.6	0.5125
138.7	0.5125
138.8	0.5125
138.9	0.5125
139	0.5125
139.1	0.5125
139.2	0.5125
139.3	0.5125
139.4	0.5125
139.5	0.5125
139.6	0.5125
139.7	0.5125
139.8	0.5
139.9	0.5
140	0.5
140.1	0.5
140.2	0.5125
140.3	0.5125
140.4	0.5125
140.5	0.5125
140.6	0.5125
140.7	0.5125
140.8	0.5125
140.9	0.5125
141	0.5125
141.1	0.525
141.2	0.525
141.3	0.5375
141.4	0.5375
141.5	0.55
141.6	0.55
141.7	0.55
141.8	0.55
141.9	0.55
142	0.55
142.1	0.55
142.2	0.55
142.3	0.5625
142.4	0.575
142.5	0.5625
142.6	0.5625
142.7	0.5625
142.8	0.5625
142.9	0.5625
143	0.5625
143.1	0.5625
143.2	0.5625
143.3	0.5625
143.4	0.575
143.5	0.575
143.6	0.5875
143.7	0.5875
143.8	0.5875
143.9	0.5875
144	0.5875
144.1	0.5875
144.2	0.5875
144.3	0.5875
144.4	0.6
144.5	0.6
144.6	0.6
144.7	0.6
144.8	0.6125
144.9	0.625
145	0.6375
145.1	0.65
145.2	0.65
145.3	0.65
145.4	0.65
145.5	0.65
145.6	0.65
145.7	0.65
145.8	0.65
145.9	0.65
146	0.65
146.1	0.6375
146.2	0.6375
146.3	0.6375
146.4	0.6375
146.5	0.6375
146.6	0.6375
146.7	0.6375
146.8	0.6375
146.9	0.6375
147	0.6375
147.1	0.6375
147.2	0.6375
147.3	0.6375
147.4	0.6375
147.5	0.65
147.6	0.65
147.7	0.65
147.8	0.65
147.9	0.6625
148	0.6625
148.1	0.6625
148.2	0.6625
148.3	0.675
148.4	0.675
148.5	0.675
148.6	0.675
148.7	0.675
148.8	0.675
148.9	0.675
149	0.675
149.1	0.675
149.2	0.675
149.3	0.675
149.4	0.675
149.5	0.675
149.6	0.675
149.7	0.675
149.8	0.675
149.9	0.675
150	0.675
150.1	0.675
150.2	0.675
150.3	0.675
150.4	0.675
150.5	0.675
150.6	0.675
150.7	0.675
150.8	0.675
150.9	0.675
151	0.675
151.1	0.675
151.2	0.675
151.3	0.675
151.4	0.675
151.5	0.675
151.6	0.675
151.7	0.675
151.8	0.675
151.9	0.675
152	0.675
152.1	0.675
152.2	0.675
152.3	0.675
152.4	0.675
152.5	0.6625
152.6	0.6625
152.7	0.6625
152.8	0.6625
152.9	0.6625
153	0.6625
153.1	0.6625
153.2	0.6625
153.3	0.6625
153.4	0.6625
153.5	0.6625
153.6	0.675
153.7	0.675
153.8	0.675
153.9	0.675
154	0.675
154.1	0.675
154.2	0.675
154.3	0.675
154.4	0.675
154.5	0.675
154.6	0.675
154.7	0.675
154.8	0.675
154.9	0.6875
155	0.6875
155.1	0.6875
155.2	0.6875
155.3	0.6875
155.4	0.6875
155.5	0.6875
155.6	0.6875
155.7	0.6875
155.8	0.6875
155.9	0.6875
156	0.6875
156.1	0.6875
156.2	0.6875
156.3	0.6875
156.4	0.6875
156.5	0.6875
156.6	0.6875
156.7	0.6875
156.8	0.6875
156.9	0.6875
157	0.6875
157.1	0.6875
157.2	0.6875
157.3	0.6875
157.4	0.6875
157.5	0.6875
157.6	0.6875
157.7	0.6875
157.8	0.6875
157.9	0.6875
158	0.6875
158.1	0.6875
158.2	0.6875
158.3	0.6875
158.4	0.6875
158.5	0.6875
158.6	0.6875
158.7	0.7125
158.8	0.7125
158.9	0.7125
159	0.7125
159.1	0.7125
159.2	0.7125
159.3	0.7125
159.4	0.7125
159.5	0.7125
159.6	0.7125
159.7	0.7125
159.8	0.7125
159.9	0.725
160	0.725
160.1	0.725
160.2	0.725
160.3	0.725
160.4	0.725
160.5	0.725
160.6	0.725
160.7	0.725
160.8	0.725
160.9	0.725
161	0.725
161.1	0.725
161.2	0.725
161.3	0.725
161.4	0.725
161.5	0.725
161.6	0.725
161.7	0.725
161.8	0.725
161.9	0.7375
162	0.7375
162.1	0.7375
162.2	0.7375
162.3	0.7375
162.4	0.7375
162.5	0.7375
162.6	0.7375
162.7	0.7375
162.8	0.7375
162.9	0.7375
163	0.7375
163.1	0.75
163.2	0.75
163.3	0.75
163.4	0.75
163.5	0.75
163.6	0.75
163.7	0.75
163.8	0.75
163.9	0.75
164	0.75
164.1	0.7625
164.2	0.775
164.3	0.775
164.4	0.775
164.5	0.775
164.6	0.775
164.7	0.775
164.8	0.775
164.9	0.775
165	0.775
165.1	0.775
165.2	0.775
165.3	0.775
165.4	0.775
165.5	0.775
165.6	0.775
165.7	0.775
165.8	0.775
165.9	0.775
166	0.775
166.1	0.775
166.2	0.7625
166.3	0.7625
166.4	0.7625
166.5	0.7625
166.6	0.7625
166.7	0.7625
166.8	0.7625
166.9	0.7625
167	0.775
167.1	0.775
167.2	0.775
167.3	0.7875
167.4	0.7875
167.5	0.7875
167.6	0.7875
167.7	0.7875
167.8	0.7875
167.9	0.775
168	0.775
168.1	0.775
168.2	0.775
168.3	0.775
168.4	0.775
168.5	0.775
168.6	0.775
168.7	0.775
168.8	0.775
168.9	0.775
169	0.775
169.1	0.775
169.2	0.775
169.3	0.775
169.4	0.775
169.5	0.775
169.6	0.7625
169.7	0.7625
169.8	0.7625
169.9	0.7625
170	0.7625
170.1	0.7625
170.2	0.7625
170.3	0.7625
170.4	0.7625
170.5	0.7625
170.6	0.75
170.7	0.75
170.8	0.75
170.9	0.7625
171	0.7625
171.1	0.7625
171.2	0.7625
171.3	0.7625
171.4	0.7625
171.5	0.7625
171.6	0.775
171.7	0.775
171.8	0.775
171.9	0.775
172	0.7625
172.1	0.7625
172.2	0.7625
172.3	0.7625
172.4	0.7625
172.5	0.7625
172.6	0.7625
172.7	0.7625
172.8	0.7625
172.9	0.7625
173	0.7625
173.1	0.7625
173.2	0.7625
173.3	0.7625
173.4	0.7625
173.5	0.7625
173.6	0.7625
173.7	0.7625
173.8	0.7625
173.9	0.7625
174	0.7625
174.1	0.7625
174.2	0.7625
174.3	0.7625
174.4	0.7625
174.5	0.7625
174.6	0.775
174.7	0.775
174.8	0.775
174.9	0.775
175	0.775
175.1	0.775
175.2	0.775
175.3	0.775
175.4	0.775
175.5	0.775
175.6	0.775
175.7	0.7625
175.8	0.7625
175.9	0.7625
176	0.7625
176.1	0.7625
176.2	0.7625
176.3	0.7625
176.4	0.7625
176.5	0.7625
176.6	0.7625
176.7	0.7625
176.8	0.7625
176.9	0.7625
177	0.7625
177.1	0.7625
177.2	0.7625
177.3	0.7625
177.4	0.7625
177.5	0.7625
177.6	0.7625
177.7	0.7625
177.8	0.7625
177.9	0.7625
178	0.7625
178.1	0.7625
178.2	0.775
178.3	0.775
178.4	0.775
178.5	0.7625
178.6	0.7625
178.7	0.7625
178.8	0.7625
178.9	0.7625
179	0.7625
179.1	0.7625
179.2	0.7625
179.3	0.7625
179.4	0.7625
179.5	0.7625
179.6	0.7625
179.7	0.7625
179.8	0.7625
179.9	0.7625
180	0.7625
180.1	0.7625
180.2	0.7625
180.3	0.7625
180.4	0.7625
180.5	0.7625
180.6	0.7625
180.7	0.7625
180.8	0.7625
180.9	0.7625
181	0.7625
181.1	0.7625
181.2	0.7625
181.3	0.7625
181.4	0.7625
181.5	0.7625
181.6	0.7625
181.7	0.7625
181.8	0.7625
181.9	0.7625
182	0.7625
182.1	0.7625
182.2	0.7625
182.3	0.7625
182.4	0.7625
182.5	0.7625
182.6	0.75
182.7	0.75
182.8	0.75
182.9	0.75
183	0.75
183.1	0.75
183.2	0.75
183.3	0.75
183.4	0.75
183.5	0.75
183.6	0.75
183.7	0.75
183.8	0.75
183.9	0.75
184	0.75
184.1	0.75
184.2	0.75
184.3	0.75
184.4	0.75
184.5	0.75
184.6	0.75
184.7	0.7625
184.8	0.7625
184.9	0.7625
185	0.7625
185.1	0.7625
185.2	0.7625
185.3	0.7625
185.4	0.7625
185.5	0.7625
185.6	0.7625
185.7	0.7625
185.8	0.7625
185.9	0.7625
186	0.7625
186.1	0.7625
186.2	0.7625
186.3	0.7625
186.4	0.7625
186.5	0.775
186.6	0.775
186.7	0.775
186.8	0.775
186.9	0.775
187	0.775
187.1	0.775
187.2	0.775
187.3	0.775
187.4	0.775
187.5	0.775
187.6	0.7875
187.7	0.7875
187.8	0.7875
187.9	0.7875
188	0.8125
188.1	0.8125
188.2	0.8125
188.3	0.8125
188.4	0.8125
188.5	0.8125
188.6	0.825
188.7	0.825
188.8	0.825
188.9	0.825
189	0.8125
189.1	0.8125
189.2	0.8125
189.3	0.8125
189.4	0.8125
189.5	0.8125
189.6	0.8125
189.7	0.8
189.8	0.8
189.9	0.8
190	0.7875
190.1	0.7875
190.2	0.7875
190.3	0.7875
190.4	0.7875
190.5	0.7875
190.6	0.7875
190.7	0.7875
190.8	0.7875
190.9	0.775
191	0.7625
191.1	0.7625
191.2	0.75
191.3	0.75
191.4	0.75
191.5	0.75
191.6	0.75
191.7	0.75
191.8	0.75
191.9	0.75
192	0.75
192.1	0.75
192.2	0.75
192.3	0.75
192.4	0.75
192.5	0.75
192.6	0.75
192.7	0.75
192.8	0.75
192.9	0.75
193	0.75
193.1	0.75
193.2	0.7625
193.3	0.7625
193.4	0.7625
193.5	0.7625
193.6	0.7625
193.7	0.775
193.8	0.775
193.9	0.7625
194	0.7625
194.1	0.7625
194.2	0.7625
194.3	0.7625
194.4	0.7625
194.5	0.7625
194.6	0.7625
194.7	0.75
194.8	0.7375
194.9	0.7375
195	0.7375
195.1	0.7375
195.2	0.7375
195.3	0.7375
195.4	0.7375
195.5	0.7375
195.6	0.7375
195.7	0.7375
195.8	0.7375
195.9	0.7375
196	0.7375
196.1	0.7375
196.2	0.7375
196.3	0.7375
196.4	0.7375
196.5	0.725
196.6	0.725
196.7	0.725
196.8	0.725
196.9	0.725
197	0.7125
197.1	0.7125
197.2	0.7125
197.3	0.7125
197.4	0.7125
197.5	0.725
197.6	0.725
197.7	0.725
197.8	0.725
197.9	0.725
198	0.725
198.1	0.725
198.2	0.725
198.3	0.725
198.4	0.725
198.5	0.725
198.6	0.725
198.7	0.725
198.8	0.725
198.9	0.725
199	0.725
199.1	0.725
199.2	0.725
199.3	0.725
199.4	0.725
199.5	0.725
199.6	0.725
199.7	0.725
199.8	0.725
199.9	0.725
200	0.725
[truncated: 14,000 more rows]
