# Supplementary material for: Bayesian inference of kinetic schemes for ion channels by Kalman filtering
Source: eLife journal article supplement (doi:10.7554/elife.62714), 2022-05-04
Supplement: fig4-data7 [file 1_Sim_N_100_Fluor_MW.xlsx]

## Sheet: Tabelle1
0.1	0
0.2	0
0.3	0
0.4	0
0.5	0
0.6	0
0.7	0
0.8	0
0.9	0
1	0
1.1	0
1.2	0
1.3	0
1.4	0
1.5	0
1.6	0
1.7	0
1.8	0
1.9	0
2	0
2.1	0
2.2	0
2.3	0
2.4	0
2.5	0
2.6	0
2.7	0
2.8	0
2.9	0
3	0
3.1	0
3.2	0
3.3	0
3.4	0
3.5	0
3.6	0
3.7	0
3.8	0
3.9	0
4	0
4.1	0
4.2	0
4.3	0
4.4	0
4.5	0
4.6	0
4.7	0
4.8	0
4.9	0
5	0
5.1	0
5.2	0
5.3	0
5.4	0
5.5	0
5.6	0
5.7	0
5.8	0
5.9	0
6	0
6.1	0
6.2	0
6.3	0
6.4	0
6.5	0
6.6	0
6.7	0
6.8	0
6.9	0
7	0
7.1	0
7.2	0
7.3	0
7.4	0
7.5	0
7.6	0
7.7	0
7.8	0
7.9	0
8	0
8.1	0
8.2	0
8.3	0
8.4	0
8.5	0
8.6	0
8.7	0
8.8	0
8.9	0
9	0
9.1	0
9.2	0
9.3	0
9.4	0
9.5	0
9.6	0
9.7	0
9.8	0
9.9	0
10	0
10.1	0
10.2	0
10.3	0
10.4	0
10.5	0
10.6	0
10.7	0
10.8	0
10.9	0
11	0
11.1	0
11.2	0
11.3	0
11.4	0
11.5	0
11.6	0
11.7	0
11.8	0
11.9	0
12	0
12.1	0
12.2	0
12.3	0
12.4	0
12.5	0
12.6	0
12.7	0
12.8	0
12.9	0
13	0
13.1	0
13.2	0
13.3	0
13.4	0
13.5	0
13.6	0
13.7	0
13.8	0
13.9	0
14	0
14.1	0
14.2	0
14.3	0
14.4	0
14.5	0
14.6	0
14.7	0
14.8	0
14.9	0
15	0
15.1	0
15.2	0
15.3	0
15.4	0
15.5	0
15.6	0
15.7	0
15.8	0
15.9	0
16	0
16.1	0
16.2	0
16.3	0
16.4	0
16.5	0
16.6	0
16.7	0
16.8	0
16.9	0
17	0
17.1	0
17.2	0
17.3	0
17.4	0
17.5	0
17.6	0
17.7	0
17.8	0
17.9	0
18	0
18.1	0
18.2	0
18.3	0
18.4	0
18.5	0
18.6	0
18.7	0
18.8	0
18.9	0
19	0
19.1	0
19.2	0
19.3	0
19.4	0
19.5	0
19.6	0
19.7	0
19.8	0
19.9	0
20	0
20.1	0
20.2	0
20.3	0
20.4	0
20.5	0
20.6	0
20.7	0
20.8	0
20.9	0
21	0
21.1	0
21.2	0
21.3	0
21.4	0
21.5	0
21.6	0
21.7	0
21.8	0
21.9	0
22	0
22.1	0
22.2	0
22.3	0
22.4	0
22.5	0
22.6	0
22.7	0
22.8	0
22.9	0
23	0
23.1	0
23.2	0
23.3	0
23.4	0
23.5	0
23.6	0
23.7	0
23.8	0
23.9	0
24	0
24.1	0
24.2	0
24.3	0
24.4	0
24.5	0
24.6	0
24.7	0
24.8	0
24.9	0
25	0
25.1	0
25.2	0
25.3	0
25.4	0
25.5	0
25.6	0
25.7	0
25.8	0
25.9	0
26	0
26.1	0
26.2	0
26.3	0
26.4	0
26.5	0
26.6	0
26.7	0
26.8	0
26.9	0
27	0
27.1	0
27.2	0
27.3	0
27.4	0
27.5	0
27.6	0
27.7	0
27.8	0
27.9	0
28	0
28.1	0
28.2	0
28.3	0
28.4	0
28.5	0
28.6	0
28.7	0
28.8	0
28.9	0
29	0
29.1	0
29.2	0
29.3	0
29.4	0
29.5	0
29.6	0
29.7	0
29.8	0
29.9	0
30	0
30.1	0
30.2	0
30.3	0
30.4	0
30.5	0
30.6	0
30.7	0
30.8	0
30.9	0
31	0
31.1	0
31.2	0
31.3	0
31.4	0
31.5	0
31.6	0
31.7	0
31.8	0
31.9	0
32	0
32.1	0
32.2	0
32.3	0
32.4	0
32.5	0
32.6	0
32.7	0
32.8	0
32.9	0
33	0
33.1	0
33.2	0
33.3	0
33.4	0
33.5	0
33.6	0
33.7	0
33.8	0
33.9	0
34	0
34.1	0
34.2	0
34.3	0
34.4	0
34.5	0
34.6	0
34.7	0
34.8	0
34.9	0
35	0
35.1	0
35.2	0
35.3	0
35.4	0
35.5	0
35.6	0
35.7	0
35.8	0
35.9	0
36	0
36.1	0
36.2	0
36.3	0
36.4	0
36.5	0
36.6	0
36.7	0
36.8	0
36.9	0
37	0
37.1	0
37.2	0
37.3	0
37.4	0
37.5	0
37.6	0
37.7	0
37.8	0
37.9	0
38	0
38.1	0
38.2	0
38.3	0
38.4	0
38.5	0
38.6	0
38.7	0
38.8	0
38.9	0
39	0
39.1	0
39.2	0
39.3	0
39.4	0
39.5	0
39.6	0
39.7	0
39.8	0
39.9	0
40	0
40.1	0
40.2	0
40.3	0
40.4	0
40.5	0
40.6	0
40.7	0
40.8	0
40.9	0
41	0
41.1	0
41.2	0
41.3	0
41.4	0
41.5	0
41.6	0
41.7	0
41.8	0
41.9	0
42	0
42.1	0
42.2	0
42.3	0
42.4	0
42.5	0
42.6	0
42.7	0
42.8	0
42.9	0
43	0
43.1	0
43.2	0
43.3	0
43.4	0
43.5	0
43.6	0
43.7	0
43.8	0
43.9	0
44	0
44.1	0
44.2	0
44.3	0
44.4	0
44.5	0
44.6	0
44.7	0
44.8	0
44.9	0
45	0
45.1	0
45.2	0
45.3	0
45.4	0
45.5	0
45.6	0
45.7	0
45.8	0
45.9	0
46	0
46.1	0
46.2	0
46.3	0
46.4	0
46.5	0
46.6	0
46.7	0
46.8	0
46.9	0
47	0
47.1	0
47.2	0
47.3	0
47.4	0
47.5	0
47.6	0
47.7	0
47.8	0
47.9	0
48	0
48.1	0
48.2	0
48.3	0
48.4	0
48.5	0
48.6	0
48.7	0
48.8	0
48.9	0
49	0
49.1	0
49.2	0
49.3	0
49.4	0
49.5	0
49.6	0
49.7	0
49.8	0
49.9	0
50	0
50.1	0
50.2	0
50.3	0
50.4	0
50.5	0
50.6	0
50.7	0
50.8	0
50.9	0
51	0
51.1	0
51.2	0
51.3	0
51.4	0
51.5	0
51.6	0
51.7	0
51.8	0
51.9	0
52	0
52.1	0
52.2	0
52.3	0
52.4	0
52.5	0
52.6	0
52.7	0
52.8	0
52.9	0
53	0
53.1	0
53.2	0
53.3	0
53.4	0
53.5	0
53.6	0
53.7	0
53.8	0
53.9	0
54	0
54.1	0
54.2	0
54.3	0
54.4	0
54.5	0
54.6	0
54.7	0
54.8	0
54.9	0
55	0
55.1	0
55.2	0
55.3	0
55.4	0
55.5	0
55.6	0
55.7	0
55.8	0
55.9	0
56	0
56.1	0
56.2	0
56.3	0
56.4	0
56.5	0
56.6	0
56.7	0
56.8	0
56.9	0
57	0
57.1	0
57.2	0
57.3	0
57.4	0
57.5	0
57.6	0
57.7	0
57.8	0
57.9	0
58	0
58.1	0
58.2	0
58.3	0
58.4	0
58.5	0
58.6	0
58.7	0
58.8	0
58.9	0
59	0
59.1	0
59.2	0
59.3	0
59.4	0
59.5	0
59.6	0
59.7	0
59.8	0
59.9	0
60	0
60.1	0
60.2	0
60.3	0
60.4	0
60.5	0
60.6	0
60.7	0
60.8	0
60.9	0
61	0
61.1	0
61.2	0
61.3	0
61.4	0
61.5	0
61.6	0
61.7	0
61.8	0
61.9	0
62	0
62.1	0
62.2	0
62.3	0
62.4	0
62.5	0
62.6	0
62.7	0
62.8	0
62.9	0
63	0
63.1	0
63.2	0
63.3	0
63.4	0
63.5	0
63.6	0
63.7	0
63.8	0
63.9	0
64	0
64.1	0
64.2	0
64.3	0
64.4	0
64.5	0
64.6	0
64.7	0
64.8	0
64.9	0
65	0
65.1	0
65.2	0
65.3	0
65.4	0
65.5	0
65.6	0
65.7	0
65.8	0
65.9	0
66	0
66.1	0
66.2	0
66.3	0
66.4	0
66.5	0
66.6	0
66.7	0
66.8	0
66.9	0
67	0
67.1	0
67.2	0
67.3	0
67.4	0
67.5	0
67.6	0
67.7	0
67.8	0
67.9	0
68	0
68.1	0
68.2	0
68.3	0
68.4	0
68.5	0
68.6	0
68.7	0
68.8	0
68.9	0
69	0
69.1	0
69.2	0
69.3	0
69.4	0
69.5	0
69.6	0
69.7	0
69.8	0
69.9	0
70	0
70.1	0
70.2	0
70.3	0
70.4	0
70.5	0
70.6	0
70.7	0
70.8	0
70.9	0
71	0
71.1	0
71.2	0
71.3	0
71.4	0
71.5	0
71.6	0
71.7	0
71.8	0
71.9	0
72	0
72.1	0
72.2	0
72.3	0
72.4	0
72.5	0
72.6	0
72.7	0
72.8	0
72.9	0
73	0
73.1	0
73.2	0
73.3	0
73.4	0
73.5	0
73.6	0
73.7	0
73.8	0
73.9	0
74	0
74.1	0
74.2	0
74.3	0
74.4	0
74.5	0
74.6	0
74.7	0
74.8	0
74.9	0
75	0
75.1	0
75.2	0
75.3	0
75.4	0
75.5	0
75.6	0
75.7	0
75.8	0
75.9	0
76	0
76.1	0
76.2	0
76.3	0
76.4	0
76.5	0
76.6	0
76.7	0
76.8	0
76.9	0
77	0
77.1	0
77.2	0
77.3	0
77.4	0
77.5	0
77.6	0
77.7	0
77.8	0
77.9	0
78	0
78.1	0
78.2	0
78.3	0
78.4	0
78.5	0
78.6	0
78.7	0
78.8	0
78.9	0
79	0
79.1	0
79.2	0
79.3	0
79.4	0
79.5	0
79.6	0
79.7	0
79.8	0
79.9	0
80	0
80.1	0
80.2	0
80.3	0
80.4	0
80.5	0
80.6	0
80.7	0
80.8	0
80.9	0
81	0
81.1	0
81.2	0
81.3	0
81.4	0
81.5	0
81.6	0
81.7	0
81.8	0
81.9	0
82	0
82.1	0
82.2	0
82.3	0
82.4	0
82.5	0
82.6	0
82.7	0
82.8	0
82.9	0
83	0
83.1	0
83.2	0
83.3	0
83.4	0
83.5	0
83.6	0
83.7	0
83.8	0
83.9	0
84	0
84.1	0
84.2	0
84.3	0
84.4	0
84.5	0
84.6	0
84.7	0
84.8	0
84.9	0
85	0
85.1	0
85.2	0
85.3	0
85.4	0
85.5	0
85.6	0
85.7	0
85.8	0
85.9	0
86	0
86.1	0
86.2	0
86.3	0
86.4	0
86.5	0
86.6	0
86.7	0
86.8	0
86.9	0
87	0
87.1	0
87.2	0
87.3	0
87.4	0
87.5	0
87.6	0
87.7	0
87.8	0
87.9	0
88	0
88.1	0
88.2	0
88.3	0
88.4	0
88.5	0
88.6	0
88.7	0
88.8	0
88.9	0
89	0
89.1	0
89.2	0
89.3	0
89.4	0
89.5	0
89.6	0
89.7	0
89.8	0
89.9	0
90	0
90.1	0
90.2	0
90.3	0
90.4	0
90.5	0
90.6	0
90.7	0
90.8	0
90.9	0
91	0
91.1	0
91.2	0
91.3	0
91.4	0
91.5	0
91.6	0
91.7	0
91.8	0
91.9	0
92	0
92.1	0
92.2	0
92.3	0
92.4	0
92.5	0
92.6	0
92.7	0
92.8	0
92.9	0
93	0
93.1	0
93.2	0
93.3	0
93.4	0
93.5	0
93.6	0
93.7	0
93.8	0
93.9	0
94	0
94.1	0
94.2	0
94.3	0
94.4	0
94.5	0
94.6	0
94.7	0
94.8	0
94.9	0
95	0
95.1	0
95.2	0
95.3	0
95.4	0
95.5	0
95.6	0
95.7	0
95.8	0
95.9	0
96	0
96.1	0
96.2	0
96.3	0
96.4	0
96.5	0
96.6	0
96.7	0
96.8	0
96.9	0
97	0
97.1	0
97.2	0
97.3	0
97.4	0
97.5	0
97.6	0
97.7	0
97.8	0
97.9	0
98	0
98.1	0
98.2	0
98.3	0
98.4	0
98.5	0
98.6	0
98.7	0
98.8	0
98.9	0
99	0
99.1	0
99.2	0
99.3	0
99.4	0
99.5	0
99.6	0
99.7	0
99.8	0
99.9	0
100	0
100.1	0.075
100.2	0.175
100.3	0.24
100.4	0.31
100.5	0.345
100.6	0.385
100.7	0.42
100.8	0.475
100.9	0.53
101	0.565
101.1	0.58
101.2	0.62
101.3	0.64
101.4	0.67
101.5	0.66
101.6	0.65
101.7	0.675
101.8	0.675
101.9	0.675
102	0.675
102.1	0.705
102.2	0.695
102.3	0.705
102.4	0.72
102.5	0.72
102.6	0.725
102.7	0.725
102.8	0.73
102.9	0.745
103	0.745
103.1	0.74
103.2	0.75
103.3	0.745
103.4	0.75
103.5	0.76
103.6	0.74
103.7	0.77
103.8	0.765
103.9	0.775
104	0.785
104.1	0.79
104.2	0.8
104.3	0.8
104.4	0.81
104.5	0.805
104.6	0.795
104.7	0.785
104.8	0.775
104.9	0.76
105	0.76
105.1	0.755
105.2	0.765
105.3	0.75
105.4	0.78
105.5	0.775
105.6	0.77
105.7	0.78
105.8	0.76
105.9	0.76
106	0.765
106.1	0.785
106.2	0.79
106.3	0.79
106.4	0.795
106.5	0.795
106.6	0.795
106.7	0.81
106.8	0.805
106.9	0.805
107	0.795
107.1	0.8
107.2	0.81
107.3	0.805
107.4	0.83
107.5	0.825
107.6	0.815
107.7	0.805
107.8	0.82
107.9	0.815
108	0.83
108.1	0.8
108.2	0.795
108.3	0.8
108.4	0.795
108.5	0.78
108.6	0.77
108.7	0.77
108.8	0.795
108.9	0.81
109	0.8
109.1	0.81
109.2	0.795
109.3	0.81
109.4	0.785
109.5	0.8
109.6	0.83
109.7	0.83
109.8	0.82
109.9	0.825
110	0.83
110.1	0.83
110.2	0.84
110.3	0.865
110.4	0.875
110.5	0.88
110.6	0.865
110.7	0.84
110.8	0.855
110.9	0.84
111	0.835
111.1	0.825
111.2	0.815
111.3	0.81
111.4	0.805
111.5	0.795
111.6	0.795
111.7	0.79
111.8	0.815
111.9	0.8
112	0.8
112.1	0.805
112.2	0.8
112.3	0.81
112.4	0.82
112.5	0.81
112.6	0.82
112.7	0.825
112.8	0.835
112.9	0.835
113	0.825
113.1	0.84
113.2	0.83
113.3	0.825
113.4	0.81
113.5	0.79
113.6	0.78
113.7	0.77
113.8	0.765
113.9	0.78
114	0.795
114.1	0.805
114.2	0.835
114.3	0.83
114.4	0.83
114.5	0.83
114.6	0.79
114.7	0.805
114.8	0.815
114.9	0.81
115	0.8
115.1	0.795
115.2	0.805
115.3	0.815
115.4	0.83
115.5	0.83
115.6	0.85
115.7	0.85
115.8	0.845
115.9	0.865
116	0.875
116.1	0.875
116.2	0.86
116.3	0.86
116.4	0.865
116.5	0.87
116.6	0.875
116.7	0.88
116.8	0.87
116.9	0.86
117	0.85
117.1	0.855
117.2	0.845
117.3	0.85
117.4	0.865
117.5	0.88
117.6	0.875
117.7	0.885
117.8	0.87
117.9	0.885
118	0.875
118.1	0.865
118.2	0.88
118.3	0.88
118.4	0.88
118.5	0.87
118.6	0.865
118.7	0.87
118.8	0.87
118.9	0.885
119	0.895
119.1	0.895
119.2	0.895
119.3	0.895
119.4	0.89
119.5	0.89
119.6	0.875
119.7	0.875
119.8	0.875
119.9	0.87
120	0.875
120.1	0.865
120.2	0.86
120.3	0.86
120.4	0.865
120.5	0.875
120.6	0.885
120.7	0.885
120.8	0.875
120.9	0.88
121	0.865
121.1	0.87
121.2	0.88
121.3	0.87
121.4	0.87
121.5	0.88
121.6	0.875
121.7	0.885
121.8	0.885
121.9	0.89
122	0.9
122.1	0.88
122.2	0.875
122.3	0.86
122.4	0.865
122.5	0.865
122.6	0.87
122.7	0.84
122.8	0.855
122.9	0.84
123	0.865
123.1	0.86
123.2	0.865
123.3	0.875
123.4	0.87
123.5	0.86
123.6	0.865
123.7	0.855
123.8	0.835
123.9	0.825
124	0.825
124.1	0.83
124.2	0.825
124.3	0.82
124.4	0.82
124.5	0.81
124.6	0.81
124.7	0.81
124.8	0.805
124.9	0.81
125	0.82
125.1	0.83
125.2	0.84
125.3	0.83
125.4	0.835
125.5	0.825
125.6	0.82
125.7	0.825
125.8	0.835
125.9	0.825
126	0.84
126.1	0.845
126.2	0.835
126.3	0.84
126.4	0.845
126.5	0.845
126.6	0.84
126.7	0.845
126.8	0.84
126.9	0.845
127	0.84
127.1	0.845
127.2	0.855
127.3	0.855
127.4	0.855
127.5	0.855
127.6	0.86
127.7	0.855
127.8	0.845
127.9	0.85
128	0.85
128.1	0.855
128.2	0.855
128.3	0.87
128.4	0.865
128.5	0.865
128.6	0.87
128.7	0.87
128.8	0.87
128.9	0.87
129	0.865
129.1	0.865
129.2	0.86
129.3	0.87
129.4	0.865
129.5	0.87
129.6	0.86
129.7	0.87
129.8	0.865
129.9	0.875
130	0.895
130.1	0.895
130.2	0.875
130.3	0.88
130.4	0.865
130.5	0.875
130.6	0.89
130.7	0.9
130.8	0.89
130.9	0.89
131	0.88
131.1	0.875
131.2	0.865
131.3	0.87
131.4	0.87
131.5	0.885
131.6	0.88
131.7	0.875
131.8	0.87
131.9	0.865
132	0.86
132.1	0.865
132.2	0.88
132.3	0.885
132.4	0.88
132.5	0.89
132.6	0.885
132.7	0.91
132.8	0.91
132.9	0.915
133	0.92
133.1	0.905
133.2	0.895
133.3	0.9
133.4	0.895
133.5	0.905
133.6	0.895
133.7	0.89
133.8	0.885
133.9	0.89
134	0.885
134.1	0.885
134.2	0.875
134.3	0.885
134.4	0.875
134.5	0.88
134.6	0.88
134.7	0.87
134.8	0.875
134.9	0.87
135	0.865
135.1	0.87
135.2	0.855
135.3	0.865
135.4	0.865
135.5	0.855
135.6	0.845
135.7	0.845
135.8	0.85
135.9	0.86
136	0.85
136.1	0.85
136.2	0.85
136.3	0.86
136.4	0.86
136.5	0.86
136.6	0.87
136.7	0.865
136.8	0.87
136.9	0.865
137	0.87
137.1	0.89
137.2	0.885
137.3	0.88
137.4	0.885
137.5	0.895
137.6	0.895
137.7	0.9
137.8	0.9
137.9	0.9
138	0.895
138.1	0.89
138.2	0.885
138.3	0.88
138.4	0.89
138.5	0.89
138.6	0.89
138.7	0.88
138.8	0.875
138.9	0.895
139	0.91
139.1	0.91
139.2	0.9
139.3	0.9
139.4	0.905
139.5	0.9
139.6	0.89
139.7	0.885
139.8	0.9
139.9	0.9
140	0.91
140.1	0.915
140.2	0.91
140.3	0.9
140.4	0.895
140.5	0.9
140.6	0.905
140.7	0.905
140.8	0.91
140.9	0.905
141	0.905
141.1	0.905
141.2	0.915
141.3	0.915
141.4	0.91
141.5	0.915
141.6	0.915
141.7	0.91
141.8	0.905
141.9	0.905
142	0.905
142.1	0.905
142.2	0.895
142.3	0.9
142.4	0.885
142.5	0.89
142.6	0.89
142.7	0.895
142.8	0.885
142.9	0.88
143	0.88
143.1	0.865
143.2	0.865
143.3	0.895
143.4	0.9
143.5	0.9
143.6	0.895
143.7	0.88
143.8	0.89
143.9	0.9
144	0.9
144.1	0.895
144.2	0.895
144.3	0.895
144.4	0.885
144.5	0.89
144.6	0.89
144.7	0.88
144.8	0.89
144.9	0.9
145	0.89
145.1	0.88
145.2	0.895
145.3	0.89
145.4	0.89
145.5	0.885
145.6	0.885
145.7	0.905
145.8	0.895
145.9	0.9
146	0.9
146.1	0.9
146.2	0.895
146.3	0.885
146.4	0.89
146.5	0.89
146.6	0.895
146.7	0.905
146.8	0.89
146.9	0.91
147	0.91
147.1	0.91
147.2	0.91
147.3	0.91
147.4	0.91
147.5	0.92
147.6	0.915
147.7	0.925
147.8	0.925
147.9	0.92
148	0.92
148.1	0.915
148.2	0.915
148.3	0.915
148.4	0.91
148.5	0.895
148.6	0.89
148.7	0.89
148.8	0.895
148.9	0.89
149	0.895
149.1	0.9
149.2	0.89
149.3	0.905
149.4	0.895
149.5	0.9
149.6	0.89
149.7	0.9
149.8	0.9
149.9	0.895
150	0.885
150.1	0.885
150.2	0.9
150.3	0.915
150.4	0.92
150.5	0.915
150.6	0.905
150.7	0.9
150.8	0.905
150.9	0.895
151	0.91
151.1	0.925
151.2	0.925
151.3	0.925
151.4	0.93
151.5	0.92
151.6	0.93
151.7	0.94
151.8	0.935
151.9	0.935
152	0.945
152.1	0.945
152.2	0.945
152.3	0.93
152.4	0.93
152.5	0.935
152.6	0.935
152.7	0.935
152.8	0.94
152.9	0.935
153	0.92
153.1	0.925
153.2	0.92
153.3	0.925
153.4	0.92
153.5	0.925
153.6	0.935
153.7	0.935
153.8	0.94
153.9	0.94
154	0.935
154.1	0.935
154.2	0.945
154.3	0.94
154.4	0.93
154.5	0.925
154.6	0.93
154.7	0.93
154.8	0.925
154.9	0.93
155	0.93
155.1	0.925
155.2	0.915
155.3	0.905
155.4	0.915
155.5	0.91
155.6	0.925
155.7	0.915
155.8	0.92
155.9	0.91
156	0.915
156.1	0.91
156.2	0.92
156.3	0.915
156.4	0.915
156.5	0.91
156.6	0.91
156.7	0.915
156.8	0.925
156.9	0.92
157	0.925
157.1	0.915
157.2	0.91
157.3	0.905
157.4	0.91
157.5	0.91
157.6	0.92
157.7	0.925
157.8	0.925
157.9	0.925
158	0.925
158.1	0.92
158.2	0.915
158.3	0.91
158.4	0.915
158.5	0.91
158.6	0.905
158.7	0.905
158.8	0.91
158.9	0.92
159	0.93
159.1	0.935
159.2	0.93
159.3	0.925
159.4	0.935
159.5	0.93
159.6	0.925
159.7	0.925
159.8	0.935
159.9	0.935
160	0.935
160.1	0.945
160.2	0.94
160.3	0.93
160.4	0.94
160.5	0.925
160.6	0.92
160.7	0.92
160.8	0.92
160.9	0.92
161	0.91
161.1	0.91
161.2	0.915
161.3	0.91
161.4	0.91
161.5	0.91
161.6	0.91
161.7	0.915
161.8	0.92
161.9	0.92
162	0.92
162.1	0.92
162.2	0.915
162.3	0.92
162.4	0.915
162.5	0.92
162.6	0.925
162.7	0.93
162.8	0.92
162.9	0.925
163	0.92
163.1	0.925
163.2	0.93
163.3	0.935
163.4	0.93
163.5	0.925
163.6	0.925
163.7	0.93
163.8	0.925
163.9	0.92
164	0.92
164.1	0.905
164.2	0.91
164.3	0.91
164.4	0.91
164.5	0.915
164.6	0.91
164.7	0.915
164.8	0.915
164.9	0.91
165	0.915
165.1	0.92
165.2	0.925
165.3	0.91
165.4	0.91
165.5	0.91
165.6	0.9
165.7	0.91
165.8	0.915
165.9	0.92
166	0.925
166.1	0.925
166.2	0.93
166.3	0.935
166.4	0.935
166.5	0.93
166.6	0.93
166.7	0.95
166.8	0.94
166.9	0.95
167	0.945
167.1	0.94
167.2	0.94
167.3	0.935
167.4	0.935
167.5	0.93
167.6	0.94
167.7	0.94
167.8	0.945
167.9	0.945
168	0.94
168.1	0.93
168.2	0.915
168.3	0.91
168.4	0.915
168.5	0.92
168.6	0.92
168.7	0.92
168.8	0.925
168.9	0.93
169	0.925
169.1	0.925
169.2	0.915
169.3	0.915
169.4	0.925
169.5	0.915
169.6	0.915
169.7	0.92
169.8	0.935
169.9	0.94
170	0.94
170.1	0.94
170.2	0.94
170.3	0.935
170.4	0.925
170.5	0.93
170.6	0.935
170.7	0.93
170.8	0.915
170.9	0.925
171	0.93
171.1	0.93
171.2	0.945
171.3	0.945
171.4	0.945
171.5	0.935
171.6	0.93
171.7	0.935
171.8	0.93
171.9	0.92
172	0.925
172.1	0.945
172.2	0.94
172.3	0.93
172.4	0.93
172.5	0.935
172.6	0.94
172.7	0.95
172.8	0.945
172.9	0.95
173	0.945
173.1	0.94
173.2	0.94
173.3	0.925
173.4	0.92
173.5	0.915
173.6	0.92
173.7	0.93
173.8	0.93
173.9	0.93
174	0.93
174.1	0.925
174.2	0.935
174.3	0.93
174.4	0.93
174.5	0.94
174.6	0.94
174.7	0.94
174.8	0.91
174.9	0.905
175	0.9
175.1	0.9
175.2	0.9
175.3	0.905
175.4	0.9
175.5	0.895
175.6	0.89
175.7	0.89
175.8	0.89
175.9	0.9
176	0.905
176.1	0.91
176.2	0.91
176.3	0.925
176.4	0.925
176.5	0.925
176.6	0.935
176.7	0.94
176.8	0.935
176.9	0.93
177	0.93
177.1	0.94
177.2	0.94
177.3	0.95
177.4	0.94
177.5	0.93
177.6	0.93
177.7	0.93
177.8	0.925
177.9	0.925
178	0.91
178.1	0.915
178.2	0.915
178.3	0.91
178.4	0.92
178.5	0.93
178.6	0.93
178.7	0.935
178.8	0.925
178.9	0.91
179	0.915
179.1	0.915
179.2	0.9
179.3	0.88
179.4	0.885
179.5	0.885
179.6	0.89
179.7	0.88
179.8	0.885
179.9	0.89
180	0.885
180.1	0.88
180.2	0.875
180.3	0.895
180.4	0.9
180.5	0.905
180.6	0.89
180.7	0.895
180.8	0.89
180.9	0.905
181	0.9
181.1	0.895
181.2	0.9
181.3	0.9
181.4	0.91
181.5	0.92
181.6	0.915
181.7	0.915
181.8	0.93
181.9	0.93
182	0.92
182.1	0.91
182.2	0.905
182.3	0.91
182.4	0.93
182.5	0.93
182.6	0.925
182.7	0.92
182.8	0.93
182.9	0.92
183	0.92
183.1	0.925
183.2	0.935
183.3	0.945
183.4	0.95
183.5	0.945
183.6	0.945
183.7	0.935
183.8	0.94
183.9	0.94
184	0.94
184.1	0.92
184.2	0.94
184.3	0.94
184.4	0.93
184.5	0.925
184.6	0.925
184.7	0.925
184.8	0.92
184.9	0.92
185	0.905
185.1	0.9
185.2	0.9
185.3	0.9
185.4	0.905
185.5	0.9
185.6	0.9
185.7	0.91
185.8	0.91
185.9	0.915
186	0.925
186.1	0.93
186.2	0.925
186.3	0.935
186.4	0.92
186.5	0.915
186.6	0.91
186.7	0.92
186.8	0.93
186.9	0.935
187	0.95
187.1	0.94
187.2	0.93
187.3	0.94
187.4	0.95
187.5	0.955
187.6	0.95
187.7	0.94
187.8	0.94
187.9	0.925
188	0.93
188.1	0.925
188.2	0.925
188.3	0.93
188.4	0.93
188.5	0.93
188.6	0.935
188.7	0.92
188.8	0.925
188.9	0.925
189	0.935
189.1	0.925
189.2	0.93
189.3	0.93
189.4	0.935
189.5	0.935
189.6	0.935
189.7	0.93
189.8	0.925
189.9	0.93
190	0.935
190.1	0.935
190.2	0.935
190.3	0.93
190.4	0.93
190.5	0.925
190.6	0.92
190.7	0.925
190.8	0.915
190.9	0.925
191	0.91
191.1	0.91
191.2	0.91
191.3	0.92
191.4	0.93
191.5	0.93
191.6	0.93
191.7	0.93
191.8	0.925
191.9	0.915
192	0.915
192.1	0.925
192.2	0.925
192.3	0.935
192.4	0.94
192.5	0.93
192.6	0.93
192.7	0.94
192.8	0.93
192.9	0.925
193	0.93
193.1	0.935
193.2	0.935
193.3	0.93
193.4	0.925
193.5	0.92
193.6	0.92
193.7	0.92
193.8	0.92
193.9	0.925
194	0.925
194.1	0.93
194.2	0.93
194.3	0.915
194.4	0.915
194.5	0.9
194.6	0.91
194.7	0.905
194.8	0.905
194.9	0.905
195	0.9
195.1	0.9
195.2	0.895
195.3	0.905
195.4	0.91
195.5	0.91
195.6	0.915
195.7	0.92
195.8	0.915
195.9	0.915
196	0.905
196.1	0.9
196.2	0.9
196.3	0.905
196.4	0.91
196.5	0.905
196.6	0.91
196.7	0.915
196.8	0.92
196.9	0.92
197	0.925
197.1	0.93
197.2	0.935
197.3	0.94
197.4	0.925
197.5	0.915
197.6	0.92
197.7	0.915
197.8	0.915
197.9	0.915
198	0.91
198.1	0.915
198.2	0.925
198.3	0.93
198.4	0.925
198.5	0.915
198.6	0.915
198.7	0.915
198.8	0.915
198.9	0.915
199	0.925
199.1	0.93
199.2	0.93
199.3	0.92
199.4	0.915
199.5	0.92
199.6	0.915
199.7	0.915
199.8	0.92
199.9	0.915
200	0.92
[truncated: 14,000 more rows]
