# Supplementary material for: Bayesian inference of kinetic schemes for ion channels by Kalman filtering
Source: eLife journal article supplement (doi:10.7554/elife.62714), 2022-05-04
Supplement: fig4-data7 [file 1_Sim_N_100_theor_Fluor_Werte.xlsx]

## Sheet: Tabelle1
0.1	0
0.2	0
0.3	0
0.4	0
0.5	0
0.6	0
0.7	0
0.8	0
0.9	0
1	0
1.1	0
1.2	0
1.3	0
1.4	0
1.5	0
1.6	0
1.7	0
1.8	0
1.9	0
2	0
2.1	0
2.2	0
2.3	0
2.4	0
2.5	0
2.6	0
2.7	0
2.8	0
2.9	0
3	0
3.1	0
3.2	0
3.3	0
3.4	0
3.5	0
3.6	0
3.7	0
3.8	0
3.9	0
4	0
4.1	0
4.2	0
4.3	0
4.4	0
4.5	0
4.6	0
4.7	0
4.8	0
4.9	0
5	0
5.1	0
5.2	0
5.3	0
5.4	0
5.5	0
5.6	0
5.7	0
5.8	0
5.9	0
6	0
6.1	0
6.2	0
6.3	0
6.4	0
6.5	0
6.6	0
6.7	0
6.8	0
6.9	0
7	0
7.1	0
7.2	0
7.3	0
7.4	0
7.5	0
7.6	0
7.7	0
7.8	0
7.9	0
8	0
8.1	0
8.2	0
8.3	0
8.4	0
8.5	0
8.6	0
8.7	0
8.8	0
8.9	0
9	0
9.1	0
9.2	0
9.3	0
9.4	0
9.5	0
9.6	0
9.7	0
9.8	0
9.9	0
10	0
10.1	0
10.2	0
10.3	0
10.4	0
10.5	0
10.6	0
10.7	0
10.8	0
10.9	0
11	0
11.1	0
11.2	0
11.3	0
11.4	0
11.5	0
11.6	0
11.7	0
11.8	0
11.9	0
12	0
12.1	0
12.2	0
12.3	0
12.4	0
12.5	0
12.6	0
12.7	0
12.8	0
12.9	0
13	0
13.1	0
13.2	0
13.3	0
13.4	0
13.5	0
13.6	0
13.7	0
13.8	0
13.9	0
14	0
14.1	0
14.2	0
14.3	0
14.4	0
14.5	0
14.6	0
14.7	0
14.8	0
14.9	0
15	0
15.1	0
15.2	0
15.3	0
15.4	0
15.5	0
15.6	0
15.7	0
15.8	0
15.9	0
16	0
16.1	0
16.2	0
16.3	0
16.4	0
16.5	0
16.6	0
16.7	0
16.8	0
16.9	0
17	0
17.1	0
17.2	0
17.3	0
17.4	0
17.5	0
17.6	0
17.7	0
17.8	0
17.9	0
18	0
18.1	0
18.2	0
18.3	0
18.4	0
18.5	0
18.6	0
18.7	0
18.8	0
18.9	0
19	0
19.1	0
19.2	0
19.3	0
19.4	0
19.5	0
19.6	0
19.7	0
19.8	0
19.9	0
20	0
20.1	0
20.2	0
20.3	0
20.4	0
20.5	0
20.6	0
20.7	0
20.8	0
20.9	0
21	0
21.1	0
21.2	0
21.3	0
21.4	0
21.5	0
21.6	0
21.7	0
21.8	0
21.9	0
22	0
22.1	0
22.2	0
22.3	0
22.4	0
22.5	0
22.6	0
22.7	0
22.8	0
22.9	0
23	0
23.1	0
23.2	0
23.3	0
23.4	0
23.5	0
23.6	0
23.7	0
23.8	0
23.9	0
24	0
24.1	0
24.2	0
24.3	0
24.4	0
24.5	0
24.6	0
24.7	0
24.8	0
24.9	0
25	0
25.1	0
25.2	0
25.3	0
25.4	0
25.5	0
25.6	0
25.7	0
25.8	0
25.9	0
26	0
26.1	0
26.2	0
26.3	0
26.4	0
26.5	0
26.6	0
26.7	0
26.8	0
26.9	0
27	0
27.1	0
27.2	0
27.3	0
27.4	0
27.5	0
27.6	0
27.7	0
27.8	0
27.9	0
28	0
28.1	0
28.2	0
28.3	0
28.4	0
28.5	0
28.6	0
28.7	0
28.8	0
28.9	0
29	0
29.1	0
29.2	0
29.3	0
29.4	0
29.5	0
29.6	0
29.7	0
29.8	0
29.9	0
30	0
30.1	0
30.2	0
30.3	0
30.4	0
30.5	0
30.6	0
30.7	0
30.8	0
30.9	0
31	0
31.1	0
31.2	0
31.3	0
31.4	0
31.5	0
31.6	0
31.7	0
31.8	0
31.9	0
32	0
32.1	0
32.2	0
32.3	0
32.4	0
32.5	0
32.6	0
32.7	0
32.8	0
32.9	0
33	0
33.1	0
33.2	0
33.3	0
33.4	0
33.5	0
33.6	0
33.7	0
33.8	0
33.9	0
34	0
34.1	0
34.2	0
34.3	0
34.4	0
34.5	0
34.6	0
34.7	0
34.8	0
34.9	0
35	0
35.1	0
35.2	0
35.3	0
35.4	0
35.5	0
35.6	0
35.7	0
35.8	0
35.9	0
36	0
36.1	0
36.2	0
36.3	0
36.4	0
36.5	0
36.6	0
36.7	0
36.8	0
36.9	0
37	0
37.1	0
37.2	0
37.3	0
37.4	0
37.5	0
37.6	0
37.7	0
37.8	0
37.9	0
38	0
38.1	0
38.2	0
38.3	0
38.4	0
38.5	0
38.6	0
38.7	0
38.8	0
38.9	0
39	0
39.1	0
39.2	0
39.3	0
39.4	0
39.5	0
39.6	0
39.7	0
39.8	0
39.9	0
40	0
40.1	0
40.2	0
40.3	0
40.4	0
40.5	0
40.6	0
40.7	0
40.8	0
40.9	0
41	0
41.1	0
41.2	0
41.3	0
41.4	0
41.5	0
41.6	0
41.7	0
41.8	0
41.9	0
42	0
42.1	0
42.2	0
42.3	0
42.4	0
42.5	0
42.6	0
42.7	0
42.8	0
42.9	0
43	0
43.1	0
43.2	0
43.3	0
43.4	0
43.5	0
43.6	0
43.7	0
43.8	0
43.9	0
44	0
44.1	0
44.2	0
44.3	0
44.4	0
44.5	0
44.6	0
44.7	0
44.8	0
44.9	0
45	0
45.1	0
45.2	0
45.3	0
45.4	0
45.5	0
45.6	0
45.7	0
45.8	0
45.9	0
46	0
46.1	0
46.2	0
46.3	0
46.4	0
46.5	0
46.6	0
46.7	0
46.8	0
46.9	0
47	0
47.1	0
47.2	0
47.3	0
47.4	0
47.5	0
47.6	0
47.7	0
47.8	0
47.9	0
48	0
48.1	0
48.2	0
48.3	0
48.4	0
48.5	0
48.6	0
48.7	0
48.8	0
48.9	0
49	0
49.1	0
49.2	0
49.3	0
49.4	0
49.5	0
49.6	0
49.7	0
49.8	0
49.9	0
50	0
50.1	0
50.2	0
50.3	0
50.4	0
50.5	0
50.6	0
50.7	0
50.8	0
50.9	0
51	0
51.1	0
51.2	0
51.3	0
51.4	0
51.5	0
51.6	0
51.7	0
51.8	0
51.9	0
52	0
52.1	0
52.2	0
52.3	0
52.4	0
52.5	0
52.6	0
52.7	0
52.8	0
52.9	0
53	0
53.1	0
53.2	0
53.3	0
53.4	0
53.5	0
53.6	0
53.7	0
53.8	0
53.9	0
54	0
54.1	0
54.2	0
54.3	0
54.4	0
54.5	0
54.6	0
54.7	0
54.8	0
54.9	0
55	0
55.1	0
55.2	0
55.3	0
55.4	0
55.5	0
55.6	0
55.7	0
55.8	0
55.9	0
56	0
56.1	0
56.2	0
56.3	0
56.4	0
56.5	0
56.6	0
56.7	0
56.8	0
56.9	0
57	0
57.1	0
57.2	0
57.3	0
57.4	0
57.5	0
57.6	0
57.7	0
57.8	0
57.9	0
58	0
58.1	0
58.2	0
58.3	0
58.4	0
58.5	0
58.6	0
58.7	0
58.8	0
58.9	0
59	0
59.1	0
59.2	0
59.3	0
59.4	0
59.5	0
59.6	0
59.7	0
59.8	0
59.9	0
60	0
60.1	0
60.2	0
60.3	0
60.4	0
60.5	0
60.6	0
60.7	0
60.8	0
60.9	0
61	0
61.1	0
61.2	0
61.3	0
61.4	0
61.5	0
61.6	0
61.7	0
61.8	0
61.9	0
62	0
62.1	0
62.2	0
62.3	0
62.4	0
62.5	0
62.6	0
62.7	0
62.8	0
62.9	0
63	0
63.1	0
63.2	0
63.3	0
63.4	0
63.5	0
63.6	0
63.7	0
63.8	0
63.9	0
64	0
64.1	0
64.2	0
64.3	0
64.4	0
64.5	0
64.6	0
64.7	0
64.8	0
64.9	0
65	0
65.1	0
65.2	0
65.3	0
65.4	0
65.5	0
65.6	0
65.7	0
65.8	0
65.9	0
66	0
66.1	0
66.2	0
66.3	0
66.4	0
66.5	0
66.6	0
66.7	0
66.8	0
66.9	0
67	0
67.1	0
67.2	0
67.3	0
67.4	0
67.5	0
67.6	0
67.7	0
67.8	0
67.9	0
68	0
68.1	0
68.2	0
68.3	0
68.4	0
68.5	0
68.6	0
68.7	0
68.8	0
68.9	0
69	0
69.1	0
69.2	0
69.3	0
69.4	0
69.5	0
69.6	0
69.7	0
69.8	0
69.9	0
70	0
70.1	0
70.2	0
70.3	0
70.4	0
70.5	0
70.6	0
70.7	0
70.8	0
70.9	0
71	0
71.1	0
71.2	0
71.3	0
71.4	0
71.5	0
71.6	0
71.7	0
71.8	0
71.9	0
72	0
72.1	0
72.2	0
72.3	0
72.4	0
72.5	0
72.6	0
72.7	0
72.8	0
72.9	0
73	0
73.1	0
73.2	0
73.3	0
73.4	0
73.5	0
73.6	0
73.7	0
73.8	0
73.9	0
74	0
74.1	0
74.2	0
74.3	0
74.4	0
74.5	0
74.6	0
74.7	0
74.8	0
74.9	0
75	0
75.1	0
75.2	0
75.3	0
75.4	0
75.5	0
75.6	0
75.7	0
75.8	0
75.9	0
76	0
76.1	0
76.2	0
76.3	0
76.4	0
76.5	0
76.6	0
76.7	0
76.8	0
76.9	0
77	0
77.1	0
77.2	0
77.3	0
77.4	0
77.5	0
77.6	0
77.7	0
77.8	0
77.9	0
78	0
78.1	0
78.2	0
78.3	0
78.4	0
78.5	0
78.6	0
78.7	0
78.8	0
78.9	0
79	0
79.1	0
79.2	0
79.3	0
79.4	0
79.5	0
79.6	0
79.7	0
79.8	0
79.9	0
80	0
80.1	0
80.2	0
80.3	0
80.4	0
80.5	0
80.6	0
80.7	0
80.8	0
80.9	0
81	0
81.1	0
81.2	0
81.3	0
81.4	0
81.5	0
81.6	0
81.7	0
81.8	0
81.9	0
82	0
82.1	0
82.2	0
82.3	0
82.4	0
82.5	0
82.6	0
82.7	0
82.8	0
82.9	0
83	0
83.1	0
83.2	0
83.3	0
83.4	0
83.5	0
83.6	0
83.7	0
83.8	0
83.9	0
84	0
84.1	0
84.2	0
84.3	0
84.4	0
84.5	0
84.6	0
84.7	0
84.8	0
84.9	0
85	0
85.1	0
85.2	0
85.3	0
85.4	0
85.5	0
85.6	0
85.7	0
85.8	0
85.9	0
86	0
86.1	0
86.2	0
86.3	0
86.4	0
86.5	0
86.6	0
86.7	0
86.8	0
86.9	0
87	0
87.1	0
87.2	0
87.3	0
87.4	0
87.5	0
87.6	0
87.7	0
87.8	0
87.9	0
88	0
88.1	0
88.2	0
88.3	0
88.4	0
88.5	0
88.6	0
88.7	0
88.8	0
88.9	0
89	0
89.1	0
89.2	0
89.3	0
89.4	0
89.5	0
89.6	0
89.7	0
89.8	0
89.9	0
90	0
90.1	0
90.2	0
90.3	0
90.4	0
90.5	0
90.6	0
90.7	0
90.8	0
90.9	0
91	0
91.1	0
91.2	0
91.3	0
91.4	0
91.5	0
91.6	0
91.7	0
91.8	0
91.9	0
92	0
92.1	0
92.2	0
92.3	0
92.4	0
92.5	0
92.6	0
92.7	0
92.8	0
92.9	0
93	0
93.1	0
93.2	0
93.3	0
93.4	0
93.5	0
93.6	0
93.7	0
93.8	0
93.9	0
94	0
94.1	0
94.2	0
94.3	0
94.4	0
94.5	0
94.6	0
94.7	0
94.8	0
94.9	0
95	0
95.1	0
95.2	0
95.3	0
95.4	0
95.5	0
95.6	0
95.7	0
95.8	0
95.9	0
96	0
96.1	0
96.2	0
96.3	0
96.4	0
96.5	0
96.6	0
96.7	0
96.8	0
96.9	0
97	0
97.1	0
97.2	0
97.3	0
97.4	0
97.5	0
97.6	0
97.7	0
97.8	0
97.9	0
98	0
98.1	0
98.2	0
98.3	0
98.4	0
98.5	0
98.6	0
98.7	0
98.8	0
98.9	0
99	0
99.1	0
99.2	0
99.3	0
99.4	0
99.5	0
99.6	0
99.7	0
99.8	0
99.9	0
100	0
100.1	0.109383
100.2	0.200326
100.3	0.276356
100.4	0.340271
100.5	0.394297
100.6	0.440212
100.7	0.47944
100.8	0.513124
100.9	0.54219
101	0.567386
101.1	0.589324
101.2	0.608504
101.3	0.625337
101.4	0.640163
101.5	0.653266
101.6	0.664882
101.7	0.67521
101.8	0.684417
101.9	0.692648
102	0.700023
102.1	0.706646
102.2	0.712609
102.3	0.717987
102.4	0.72285
102.5	0.727255
102.6	0.731254
102.7	0.734893
102.8	0.73821
102.9	0.741242
103	0.744017
103.1	0.746565
103.2	0.748909
103.3	0.75107
103.4	0.753068
103.5	0.75492
103.6	0.75664
103.7	0.758243
103.8	0.759741
103.9	0.761143
104	0.762461
104.1	0.763702
104.2	0.764874
104.3	0.765985
104.4	0.76704
104.5	0.768044
104.6	0.769004
104.7	0.769922
104.8	0.770804
104.9	0.771653
105	0.772472
105.1	0.773264
105.2	0.774031
105.3	0.774776
105.4	0.775501
105.5	0.776208
105.6	0.776898
105.7	0.777573
105.8	0.778234
105.9	0.778883
106	0.77952
106.1	0.780147
106.2	0.780764
106.3	0.781373
106.4	0.781973
106.5	0.782566
106.6	0.783152
106.7	0.783732
106.8	0.784306
106.9	0.784874
107	0.785437
107.1	0.785996
107.2	0.78655
107.3	0.787099
107.4	0.787645
107.5	0.788187
107.6	0.788725
107.7	0.78926
107.8	0.789792
107.9	0.790321
108	0.790847
108.1	0.79137
108.2	0.79189
108.3	0.792408
108.4	0.792923
108.5	0.793435
108.6	0.793946
108.7	0.794453
108.8	0.794959
108.9	0.795463
109	0.795964
109.1	0.796463
109.2	0.79696
109.3	0.797455
109.4	0.797948
109.5	0.798439
109.6	0.798929
109.7	0.799416
109.8	0.799901
109.9	0.800385
110	0.800866
110.1	0.801346
110.2	0.801824
110.3	0.8023
110.4	0.802774
110.5	0.803247
110.6	0.803718
110.7	0.804187
110.8	0.804654
110.9	0.80512
111	0.805584
111.1	0.806046
111.2	0.806506
111.3	0.806965
111.4	0.807422
111.5	0.807878
111.6	0.808332
111.7	0.808784
111.8	0.809234
111.9	0.809683
112	0.810131
112.1	0.810576
112.2	0.81102
112.3	0.811463
112.4	0.811904
112.5	0.812343
112.6	0.812781
112.7	0.813217
112.8	0.813651
112.9	0.814084
113	0.814516
113.1	0.814945
113.2	0.815374
113.3	0.815801
113.4	0.816226
113.5	0.816649
113.6	0.817072
113.7	0.817492
113.8	0.817911
113.9	0.818329
114	0.818745
114.1	0.81916
114.2	0.819573
114.3	0.819985
114.4	0.820395
114.5	0.820804
114.6	0.821211
114.7	0.821617
114.8	0.822021
114.9	0.822424
115	0.822825
115.1	0.823225
115.2	0.823624
115.3	0.824021
115.4	0.824417
115.5	0.824811
115.6	0.825204
115.7	0.825595
115.8	0.825986
115.9	0.826374
116	0.826761
116.1	0.827147
116.2	0.827532
116.3	0.827915
116.4	0.828297
116.5	0.828677
116.6	0.829056
116.7	0.829434
116.8	0.82981
116.9	0.830185
117	0.830558
117.1	0.830931
117.2	0.831302
117.3	0.831671
117.4	0.832039
117.5	0.832406
117.6	0.832772
117.7	0.833136
117.8	0.833499
117.9	0.833861
118	0.834221
118.1	0.83458
118.2	0.834938
118.3	0.835295
118.4	0.83565
118.5	0.836004
118.6	0.836357
118.7	0.836708
118.8	0.837058
118.9	0.837407
119	0.837755
119.1	0.838101
119.2	0.838447
119.3	0.83879
119.4	0.839133
119.5	0.839475
119.6	0.839815
119.7	0.840154
119.8	0.840492
119.9	0.840828
120	0.841164
120.1	0.841498
120.2	0.841831
120.3	0.842163
120.4	0.842493
120.5	0.842823
120.6	0.843151
120.7	0.843478
120.8	0.843804
120.9	0.844129
121	0.844452
121.1	0.844774
121.2	0.845096
121.3	0.845416
121.4	0.845735
121.5	0.846052
121.6	0.846369
121.7	0.846685
121.8	0.846999
121.9	0.847312
122	0.847624
122.1	0.847935
122.2	0.848245
122.3	0.848554
122.4	0.848862
122.5	0.849168
122.6	0.849474
122.7	0.849778
122.8	0.850081
122.9	0.850383
123	0.850685
123.1	0.850985
123.2	0.851283
123.3	0.851581
123.4	0.851878
123.5	0.852174
123.6	0.852469
123.7	0.852762
123.8	0.853055
123.9	0.853346
124	0.853637
124.1	0.853926
124.2	0.854214
124.3	0.854502
124.4	0.854788
124.5	0.855073
124.6	0.855358
124.7	0.855641
124.8	0.855923
124.9	0.856204
125	0.856485
125.1	0.856764
125.2	0.857042
125.3	0.857319
125.4	0.857595
125.5	0.857871
125.6	0.858145
125.7	0.858418
125.8	0.85869
125.9	0.858962
126	0.859232
126.1	0.859501
126.2	0.85977
126.3	0.860037
126.4	0.860303
126.5	0.860569
126.6	0.860833
126.7	0.861097
126.8	0.86136
126.9	0.861621
127	0.861882
127.1	0.862142
127.2	0.862401
127.3	0.862659
127.4	0.862916
127.5	0.863172
127.6	0.863427
127.7	0.863681
127.8	0.863935
127.9	0.864187
128	0.864439
128.1	0.864689
128.2	0.864939
128.3	0.865188
128.4	0.865436
128.5	0.865683
128.6	0.865929
128.7	0.866175
128.8	0.866419
128.9	0.866663
129	0.866905
129.1	0.867147
129.2	0.867388
129.3	0.867628
129.4	0.867867
129.5	0.868106
129.6	0.868343
129.7	0.86858
129.8	0.868815
129.9	0.86905
130	0.869285
130.1	0.869518
130.2	0.86975
130.3	0.869982
130.4	0.870213
130.5	0.870442
130.6	0.870672
130.7	0.8709
130.8	0.871127
130.9	0.871354
131	0.87158
131.1	0.871805
131.2	0.872029
131.3	0.872252
131.4	0.872475
131.5	0.872697
131.6	0.872918
131.7	0.873138
131.8	0.873357
131.9	0.873576
132	0.873794
132.1	0.874011
132.2	0.874227
132.3	0.874443
132.4	0.874658
132.5	0.874872
132.6	0.875085
132.7	0.875297
132.8	0.875509
132.9	0.87572
133	0.87593
133.1	0.876139
133.2	0.876348
133.3	0.876556
133.4	0.876763
133.5	0.87697
133.6	0.877175
133.7	0.87738
133.8	0.877584
133.9	0.877788
134	0.877991
134.1	0.878193
134.2	0.878394
134.3	0.878594
134.4	0.878794
134.5	0.878993
134.6	0.879192
134.7	0.87939
134.8	0.879586
134.9	0.879783
135	0.879978
135.1	0.880173
135.2	0.880367
135.3	0.880561
135.4	0.880754
135.5	0.880946
135.6	0.881137
135.7	0.881328
135.8	0.881518
135.9	0.881707
136	0.881896
136.1	0.882084
136.2	0.882271
136.3	0.882458
136.4	0.882644
136.5	0.882829
136.6	0.883014
136.7	0.883198
136.8	0.883381
136.9	0.883564
137	0.883746
137.1	0.883927
137.2	0.884108
137.3	0.884288
137.4	0.884467
137.5	0.884646
137.6	0.884824
137.7	0.885002
137.8	0.885179
137.9	0.885355
138	0.88553
138.1	0.885705
138.2	0.88588
138.3	0.886053
138.4	0.886226
138.5	0.886399
138.6	0.886571
138.7	0.886742
138.8	0.886913
138.9	0.887083
139	0.887252
139.1	0.887421
139.2	0.887589
139.3	0.887756
139.4	0.887923
139.5	0.88809
139.6	0.888256
139.7	0.888421
139.8	0.888585
139.9	0.888749
140	0.888913
140.1	0.889075
140.2	0.889238
140.3	0.889399
140.4	0.88956
140.5	0.889721
140.6	0.889881
140.7	0.89004
140.8	0.890199
140.9	0.890357
141	0.890515
141.1	0.890672
141.2	0.890828
141.3	0.890984
141.4	0.89114
141.5	0.891294
141.6	0.891449
141.7	0.891602
141.8	0.891756
141.9	0.891908
142	0.89206
142.1	0.892212
142.2	0.892363
142.3	0.892513
142.4	0.892663
142.5	0.892812
142.6	0.892961
142.7	0.893109
142.8	0.893257
142.9	0.893404
143	0.893551
143.1	0.893697
143.2	0.893843
143.3	0.893988
143.4	0.894133
143.5	0.894277
143.6	0.89442
143.7	0.894563
143.8	0.894706
143.9	0.894848
144	0.894989
144.1	0.89513
144.2	0.895271
144.3	0.895411
144.4	0.89555
144.5	0.895689
144.6	0.895828
144.7	0.895966
144.8	0.896103
144.9	0.89624
145	0.896377
145.1	0.896513
145.2	0.896648
145.3	0.896784
145.4	0.896918
145.5	0.897052
145.6	0.897186
145.7	0.897319
145.8	0.897452
145.9	0.897584
146	0.897715
146.1	0.897847
146.2	0.897977
146.3	0.898108
146.4	0.898237
146.5	0.898367
146.6	0.898496
146.7	0.898624
146.8	0.898752
146.9	0.89888
147	0.899007
147.1	0.899133
147.2	0.899259
147.3	0.899385
147.4	0.89951
147.5	0.899635
147.6	0.899759
147.7	0.899883
147.8	0.900007
147.9	0.90013
148	0.900252
148.1	0.900374
148.2	0.900496
148.3	0.900617
148.4	0.900738
148.5	0.900858
148.6	0.900978
148.7	0.901098
148.8	0.901217
148.9	0.901336
149	0.901454
149.1	0.901572
149.2	0.901689
149.3	0.901806
149.4	0.901922
149.5	0.902039
149.6	0.902154
149.7	0.90227
149.8	0.902384
149.9	0.902499
150	0.902613
150.1	0.902727
150.2	0.90284
150.3	0.902953
150.4	0.903065
150.5	0.903177
150.6	0.903289
150.7	0.9034
150.8	0.903511
150.9	0.903621
151	0.903731
151.1	0.903841
151.2	0.90395
151.3	0.904059
151.4	0.904167
151.5	0.904275
151.6	0.904383
151.7	0.90449
151.8	0.904597
151.9	0.904704
152	0.90481
152.1	0.904916
152.2	0.905021
152.3	0.905126
152.4	0.905231
152.5	0.905335
152.6	0.905439
152.7	0.905542
152.8	0.905645
152.9	0.905748
153	0.905851
153.1	0.905953
153.2	0.906054
153.3	0.906156
153.4	0.906257
153.5	0.906357
153.6	0.906457
153.7	0.906557
153.8	0.906657
153.9	0.906756
154	0.906855
154.1	0.906953
154.2	0.907051
154.3	0.907149
154.4	0.907246
154.5	0.907343
154.6	0.90744
154.7	0.907536
154.8	0.907632
154.9	0.907728
155	0.907823
155.1	0.907918
155.2	0.908013
155.3	0.908107
155.4	0.908201
155.5	0.908294
155.6	0.908388
155.7	0.90848
155.8	0.908573
155.9	0.908665
156	0.908757
156.1	0.908849
156.2	0.90894
156.3	0.909031
156.4	0.909122
156.5	0.909212
156.6	0.909302
156.7	0.909391
156.8	0.909481
156.9	0.90957
157	0.909658
157.1	0.909747
157.2	0.909835
157.3	0.909923
157.4	0.91001
157.5	0.910097
157.6	0.910184
157.7	0.91027
157.8	0.910357
157.9	0.910442
158	0.910528
158.1	0.910613
158.2	0.910698
158.3	0.910783
158.4	0.910867
158.5	0.910951
158.6	0.911035
158.7	0.911118
158.8	0.911201
158.9	0.911284
159	0.911367
159.1	0.911449
159.2	0.911531
159.3	0.911612
159.4	0.911694
159.5	0.911775
159.6	0.911856
159.7	0.911936
159.8	0.912016
159.9	0.912096
160	0.912176
160.1	0.912255
160.2	0.912334
160.3	0.912413
160.4	0.912491
160.5	0.912569
160.6	0.912647
160.7	0.912725
160.8	0.912802
160.9	0.912879
161	0.912956
161.1	0.913033
161.2	0.913109
161.3	0.913185
161.4	0.913261
161.5	0.913336
161.6	0.913411
161.7	0.913486
161.8	0.913561
161.9	0.913635
162	0.913709
162.1	0.913783
162.2	0.913857
162.3	0.91393
162.4	0.914003
162.5	0.914076
162.6	0.914148
162.7	0.91422
162.8	0.914292
162.9	0.914364
163	0.914436
163.1	0.914507
163.2	0.914578
163.3	0.914648
163.4	0.914719
163.5	0.914789
163.6	0.914859
163.7	0.914929
163.8	0.914998
163.9	0.915067
164	0.915136
164.1	0.915205
164.2	0.915273
164.3	0.915342
164.4	0.91541
164.5	0.915477
164.6	0.915545
164.7	0.915612
164.8	0.915679
164.9	0.915746
165	0.915812
165.1	0.915879
165.2	0.915945
165.3	0.91601
165.4	0.916076
165.5	0.916141
165.6	0.916206
165.7	0.916271
165.8	0.916336
165.9	0.9164
166	0.916464
166.1	0.916528
166.2	0.916592
166.3	0.916655
166.4	0.916719
166.5	0.916782
166.6	0.916845
166.7	0.916907
166.8	0.916969
166.9	0.917032
167	0.917093
167.1	0.917155
167.2	0.917217
167.3	0.917278
167.4	0.917339
167.5	0.9174
167.6	0.91746
167.7	0.917521
167.8	0.917581
167.9	0.917641
168	0.9177
168.1	0.91776
168.2	0.917819
168.3	0.917878
168.4	0.917937
168.5	0.917996
168.6	0.918054
168.7	0.918112
168.8	0.91817
168.9	0.918228
169	0.918286
169.1	0.918343
169.2	0.9184
169.3	0.918457
169.4	0.918514
169.5	0.918571
169.6	0.918627
169.7	0.918683
169.8	0.918739
169.9	0.918795
170	0.91885
170.1	0.918906
170.2	0.918961
170.3	0.919016
170.4	0.919071
170.5	0.919125
170.6	0.91918
170.7	0.919234
170.8	0.919288
170.9	0.919342
171	0.919395
171.1	0.919449
171.2	0.919502
171.3	0.919555
171.4	0.919608
171.5	0.91966
171.6	0.919713
171.7	0.919765
171.8	0.919817
171.9	0.919869
172	0.919921
172.1	0.919972
172.2	0.920024
172.3	0.920075
172.4	0.920126
172.5	0.920177
172.6	0.920227
172.7	0.920278
172.8	0.920328
172.9	0.920378
173	0.920428
173.1	0.920478
173.2	0.920527
173.3	0.920576
173.4	0.920626
173.5	0.920675
173.6	0.920723
173.7	0.920772
173.8	0.920821
173.9	0.920869
174	0.920917
174.1	0.920965
174.2	0.921013
174.3	0.92106
174.4	0.921108
174.5	0.921155
174.6	0.921202
174.7	0.921249
174.8	0.921296
174.9	0.921342
175	0.921389
175.1	0.921435
175.2	0.921481
175.3	0.921527
175.4	0.921573
175.5	0.921618
175.6	0.921664
175.7	0.921709
175.8	0.921754
175.9	0.921799
176	0.921844
176.1	0.921889
176.2	0.921933
176.3	0.921977
176.4	0.922021
176.5	0.922065
176.6	0.922109
176.7	0.922153
176.8	0.922196
176.9	0.92224
177	0.922283
177.1	0.922326
177.2	0.922369
177.3	0.922412
177.4	0.922454
177.5	0.922497
177.6	0.922539
177.7	0.922581
177.8	0.922623
177.9	0.922665
178	0.922707
178.1	0.922748
178.2	0.922789
178.3	0.922831
178.4	0.922872
178.5	0.922913
178.6	0.922954
178.7	0.922994
178.8	0.923035
178.9	0.923075
179	0.923115
179.1	0.923155
179.2	0.923195
179.3	0.923235
179.4	0.923275
179.5	0.923314
179.6	0.923353
179.7	0.923393
179.8	0.923432
179.9	0.923471
180	0.923509
180.1	0.923548
180.2	0.923587
180.3	0.923625
180.4	0.923663
180.5	0.923701
180.6	0.923739
180.7	0.923777
180.8	0.923815
180.9	0.923852
181	0.92389
181.1	0.923927
181.2	0.923964
181.3	0.924001
181.4	0.924038
181.5	0.924075
181.6	0.924111
181.7	0.924148
181.8	0.924184
181.9	0.92422
182	0.924256
182.1	0.924292
182.2	0.924328
182.3	0.924364
182.4	0.9244
182.5	0.924435
182.6	0.92447
182.7	0.924506
182.8	0.924541
182.9	0.924576
183	0.92461
183.1	0.924645
183.2	0.92468
183.3	0.924714
183.4	0.924748
183.5	0.924783
183.6	0.924817
183.7	0.924851
183.8	0.924884
183.9	0.924918
184	0.924952
184.1	0.924985
184.2	0.925019
184.3	0.925052
184.4	0.925085
184.5	0.925118
184.6	0.925151
184.7	0.925184
184.8	0.925216
184.9	0.925249
185	0.925281
185.1	0.925313
185.2	0.925346
185.3	0.925378
185.4	0.92541
185.5	0.925441
185.6	0.925473
185.7	0.925505
185.8	0.925536
185.9	0.925568
186	0.925599
186.1	0.92563
186.2	0.925661
186.3	0.925692
186.4	0.925723
186.5	0.925753
186.6	0.925784
186.7	0.925814
186.8	0.925845
186.9	0.925875
187	0.925905
187.1	0.925935
187.2	0.925965
187.3	0.925995
187.4	0.926025
187.5	0.926054
187.6	0.926084
187.7	0.926113
187.8	0.926143
187.9	0.926172
188	0.926201
188.1	0.92623
188.2	0.926259
188.3	0.926288
188.4	0.926316
188.5	0.926345
188.6	0.926373
188.7	0.926402
188.8	0.92643
188.9	0.926458
189	0.926486
189.1	0.926514
189.2	0.926542
189.3	0.92657
189.4	0.926597
189.5	0.926625
189.6	0.926652
189.7	0.92668
189.8	0.926707
189.9	0.926734
190	0.926761
190.1	0.926788
190.2	0.926815
190.3	0.926842
190.4	0.926869
190.5	0.926895
190.6	0.926922
190.7	0.926948
190.8	0.926974
190.9	0.927001
191	0.927027
191.1	0.927053
191.2	0.927079
191.3	0.927104
191.4	0.92713
191.5	0.927156
191.6	0.927181
191.7	0.927207
191.8	0.927232
191.9	0.927258
192	0.927283
192.1	0.927308
192.2	0.927333
192.3	0.927358
192.4	0.927383
192.5	0.927407
192.6	0.927432
192.7	0.927457
192.8	0.927481
192.9	0.927505
193	0.92753
193.1	0.927554
193.2	0.927578
193.3	0.927602
193.4	0.927626
193.5	0.92765
193.6	0.927674
193.7	0.927697
193.8	0.927721
193.9	0.927745
194	0.927768
194.1	0.927791
194.2	0.927815
194.3	0.927838
194.4	0.927861
194.5	0.927884
194.6	0.927907
194.7	0.92793
194.8	0.927953
194.9	0.927975
195	0.927998
195.1	0.92802
195.2	0.928043
195.3	0.928065
195.4	0.928088
195.5	0.92811
195.6	0.928132
195.7	0.928154
195.8	0.928176
195.9	0.928198
196	0.92822
196.1	0.928241
196.2	0.928263
196.3	0.928285
196.4	0.928306
196.5	0.928328
196.6	0.928349
196.7	0.92837
196.8	0.928391
196.9	0.928413
197	0.928434
197.1	0.928455
197.2	0.928475
197.3	0.928496
197.4	0.928517
197.5	0.928538
197.6	0.928558
197.7	0.928579
197.8	0.928599
197.9	0.92862
198	0.92864
198.1	0.92866
198.2	0.92868
198.3	0.9287
198.4	0.92872
198.5	0.92874
198.6	0.92876
198.7	0.92878
198.8	0.9288
198.9	0.928819
199	0.928839
199.1	0.928859
199.2	0.928878
199.3	0.928897
199.4	0.928917
199.5	0.928936
199.6	0.928955
199.7	0.928974
199.8	0.928993
199.9	0.929012
200	0.929031
[truncated: 14,000 more rows]
