# Supplementary material for: Bayesian inference of kinetic schemes for ion channels by Kalman filtering
Source: eLife journal article supplement (doi:10.7554/elife.62714), 2022-05-04
Supplement: fig4-data7 [file 1_Sim_N_100_theor_Strom_Werte.xlsx]

## Sheet: Tabelle1
0.1	0
0.2	0
0.3	0
0.4	0
0.5	0
0.6	0
0.7	0
0.8	0
0.9	0
1	0
1.1	0
1.2	0
1.3	0
1.4	0
1.5	0
1.6	0
1.7	0
1.8	0
1.9	0
2	0
2.1	0
2.2	0
2.3	0
2.4	0
2.5	0
2.6	0
2.7	0
2.8	0
2.9	0
3	0
3.1	0
3.2	0
3.3	0
3.4	0
3.5	0
3.6	0
3.7	0
3.8	0
3.9	0
4	0
4.1	0
4.2	0
4.3	0
4.4	0
4.5	0
4.6	0
4.7	0
4.8	0
4.9	0
5	0
5.1	0
5.2	0
5.3	0
5.4	0
5.5	0
5.6	0
5.7	0
5.8	0
5.9	0
6	0
6.1	0
6.2	0
6.3	0
6.4	0
6.5	0
6.6	0
6.7	0
6.8	0
6.9	0
7	0
7.1	0
7.2	0
7.3	0
7.4	0
7.5	0
7.6	0
7.7	0
7.8	0
7.9	0
8	0
8.1	0
8.2	0
8.3	0
8.4	0
8.5	0
8.6	0
8.7	0
8.8	0
8.9	0
9	0
9.1	0
9.2	0
9.3	0
9.4	0
9.5	0
9.6	0
9.7	0
9.8	0
9.9	0
10	0
10.1	0
10.2	0
10.3	0
10.4	0
10.5	0
10.6	0
10.7	0
10.8	0
10.9	0
11	0
11.1	0
11.2	0
11.3	0
11.4	0
11.5	0
11.6	0
11.7	0
11.8	0
11.9	0
12	0
12.1	0
12.2	0
12.3	0
12.4	0
12.5	0
12.6	0
12.7	0
12.8	0
12.9	0
13	0
13.1	0
13.2	0
13.3	0
13.4	0
13.5	0
13.6	0
13.7	0
13.8	0
13.9	0
14	0
14.1	0
14.2	0
14.3	0
14.4	0
14.5	0
14.6	0
14.7	0
14.8	0
14.9	0
15	0
15.1	0
15.2	0
15.3	0
15.4	0
15.5	0
15.6	0
15.7	0
15.8	0
15.9	0
16	0
16.1	0
16.2	0
16.3	0
16.4	0
16.5	0
16.6	0
16.7	0
16.8	0
16.9	0
17	0
17.1	0
17.2	0
17.3	0
17.4	0
17.5	0
17.6	0
17.7	0
17.8	0
17.9	0
18	0
18.1	0
18.2	0
18.3	0
18.4	0
18.5	0
18.6	0
18.7	0
18.8	0
18.9	0
19	0
19.1	0
19.2	0
19.3	0
19.4	0
19.5	0
19.6	0
19.7	0
19.8	0
19.9	0
20	0
20.1	0
20.2	0
20.3	0
20.4	0
20.5	0
20.6	0
20.7	0
20.8	0
20.9	0
21	0
21.1	0
21.2	0
21.3	0
21.4	0
21.5	0
21.6	0
21.7	0
21.8	0
21.9	0
22	0
22.1	0
22.2	0
22.3	0
22.4	0
22.5	0
22.6	0
22.7	0
22.8	0
22.9	0
23	0
23.1	0
23.2	0
23.3	0
23.4	0
23.5	0
23.6	0
23.7	0
23.8	0
23.9	0
24	0
24.1	0
24.2	0
24.3	0
24.4	0
24.5	0
24.6	0
24.7	0
24.8	0
24.9	0
25	0
25.1	0
25.2	0
25.3	0
25.4	0
25.5	0
25.6	0
25.7	0
25.8	0
25.9	0
26	0
26.1	0
26.2	0
26.3	0
26.4	0
26.5	0
26.6	0
26.7	0
26.8	0
26.9	0
27	0
27.1	0
27.2	0
27.3	0
27.4	0
27.5	0
27.6	0
27.7	0
27.8	0
27.9	0
28	0
28.1	0
28.2	0
28.3	0
28.4	0
28.5	0
28.6	0
28.7	0
28.8	0
28.9	0
29	0
29.1	0
29.2	0
29.3	0
29.4	0
29.5	0
29.6	0
29.7	0
29.8	0
29.9	0
30	0
30.1	0
30.2	0
30.3	0
30.4	0
30.5	0
30.6	0
30.7	0
30.8	0
30.9	0
31	0
31.1	0
31.2	0
31.3	0
31.4	0
31.5	0
31.6	0
31.7	0
31.8	0
31.9	0
32	0
32.1	0
32.2	0
32.3	0
32.4	0
32.5	0
32.6	0
32.7	0
32.8	0
32.9	0
33	0
33.1	0
33.2	0
33.3	0
33.4	0
33.5	0
33.6	0
33.7	0
33.8	0
33.9	0
34	0
34.1	0
34.2	0
34.3	0
34.4	0
34.5	0
34.6	0
34.7	0
34.8	0
34.9	0
35	0
35.1	0
35.2	0
35.3	0
35.4	0
35.5	0
35.6	0
35.7	0
35.8	0
35.9	0
36	0
36.1	0
36.2	0
36.3	0
36.4	0
36.5	0
36.6	0
36.7	0
36.8	0
36.9	0
37	0
37.1	0
37.2	0
37.3	0
37.4	0
37.5	0
37.6	0
37.7	0
37.8	0
37.9	0
38	0
38.1	0
38.2	0
38.3	0
38.4	0
38.5	0
38.6	0
38.7	0
38.8	0
38.9	0
39	0
39.1	0
39.2	0
39.3	0
39.4	0
39.5	0
39.6	0
39.7	0
39.8	0
39.9	0
40	0
40.1	0
40.2	0
40.3	0
40.4	0
40.5	0
40.6	0
40.7	0
40.8	0
40.9	0
41	0
41.1	0
41.2	0
41.3	0
41.4	0
41.5	0
41.6	0
41.7	0
41.8	0
41.9	0
42	0
42.1	0
42.2	0
42.3	0
42.4	0
42.5	0
42.6	0
42.7	0
42.8	0
42.9	0
43	0
43.1	0
43.2	0
43.3	0
43.4	0
43.5	0
43.6	0
43.7	0
43.8	0
43.9	0
44	0
44.1	0
44.2	0
44.3	0
44.4	0
44.5	0
44.6	0
44.7	0
44.8	0
44.9	0
45	0
45.1	0
45.2	0
45.3	0
45.4	0
45.5	0
45.6	0
45.7	0
45.8	0
45.9	0
46	0
46.1	0
46.2	0
46.3	0
46.4	0
46.5	0
46.6	0
46.7	0
46.8	0
46.9	0
47	0
47.1	0
47.2	0
47.3	0
47.4	0
47.5	0
47.6	0
47.7	0
47.8	0
47.9	0
48	0
48.1	0
48.2	0
48.3	0
48.4	0
48.5	0
48.6	0
48.7	0
48.8	0
48.9	0
49	0
49.1	0
49.2	0
49.3	0
49.4	0
49.5	0
49.6	0
49.7	0
49.8	0
49.9	0
50	0
50.1	0
50.2	0
50.3	0
50.4	0
50.5	0
50.6	0
50.7	0
50.8	0
50.9	0
51	0
51.1	0
51.2	0
51.3	0
51.4	0
51.5	0
51.6	0
51.7	0
51.8	0
51.9	0
52	0
52.1	0
52.2	0
52.3	0
52.4	0
52.5	0
52.6	0
52.7	0
52.8	0
52.9	0
53	0
53.1	0
53.2	0
53.3	0
53.4	0
53.5	0
53.6	0
53.7	0
53.8	0
53.9	0
54	0
54.1	0
54.2	0
54.3	0
54.4	0
54.5	0
54.6	0
54.7	0
54.8	0
54.9	0
55	0
55.1	0
55.2	0
55.3	0
55.4	0
55.5	0
55.6	0
55.7	0
55.8	0
55.9	0
56	0
56.1	0
56.2	0
56.3	0
56.4	0
56.5	0
56.6	0
56.7	0
56.8	0
56.9	0
57	0
57.1	0
57.2	0
57.3	0
57.4	0
57.5	0
57.6	0
57.7	0
57.8	0
57.9	0
58	0
58.1	0
58.2	0
58.3	0
58.4	0
58.5	0
58.6	0
58.7	0
58.8	0
58.9	0
59	0
59.1	0
59.2	0
59.3	0
59.4	0
59.5	0
59.6	0
59.7	0
59.8	0
59.9	0
60	0
60.1	0
60.2	0
60.3	0
60.4	0
60.5	0
60.6	0
60.7	0
60.8	0
60.9	0
61	0
61.1	0
61.2	0
61.3	0
61.4	0
61.5	0
61.6	0
61.7	0
61.8	0
61.9	0
62	0
62.1	0
62.2	0
62.3	0
62.4	0
62.5	0
62.6	0
62.7	0
62.8	0
62.9	0
63	0
63.1	0
63.2	0
63.3	0
63.4	0
63.5	0
63.6	0
63.7	0
63.8	0
63.9	0
64	0
64.1	0
64.2	0
64.3	0
64.4	0
64.5	0
64.6	0
64.7	0
64.8	0
64.9	0
65	0
65.1	0
65.2	0
65.3	0
65.4	0
65.5	0
65.6	0
65.7	0
65.8	0
65.9	0
66	0
66.1	0
66.2	0
66.3	0
66.4	0
66.5	0
66.6	0
66.7	0
66.8	0
66.9	0
67	0
67.1	0
67.2	0
67.3	0
67.4	0
67.5	0
67.6	0
67.7	0
67.8	0
67.9	0
68	0
68.1	0
68.2	0
68.3	0
68.4	0
68.5	0
68.6	0
68.7	0
68.8	0
68.9	0
69	0
69.1	0
69.2	0
69.3	0
69.4	0
69.5	0
69.6	0
69.7	0
69.8	0
69.9	0
70	0
70.1	0
70.2	0
70.3	0
70.4	0
70.5	0
70.6	0
70.7	0
70.8	0
70.9	0
71	0
71.1	0
71.2	0
71.3	0
71.4	0
71.5	0
71.6	0
71.7	0
71.8	0
71.9	0
72	0
72.1	0
72.2	0
72.3	0
72.4	0
72.5	0
72.6	0
72.7	0
72.8	0
72.9	0
73	0
73.1	0
73.2	0
73.3	0
73.4	0
73.5	0
73.6	0
73.7	0
73.8	0
73.9	0
74	0
74.1	0
74.2	0
74.3	0
74.4	0
74.5	0
74.6	0
74.7	0
74.8	0
74.9	0
75	0
75.1	0
75.2	0
75.3	0
75.4	0
75.5	0
75.6	0
75.7	0
75.8	0
75.9	0
76	0
76.1	0
76.2	0
76.3	0
76.4	0
76.5	0
76.6	0
76.7	0
76.8	0
76.9	0
77	0
77.1	0
77.2	0
77.3	0
77.4	0
77.5	0
77.6	0
77.7	0
77.8	0
77.9	0
78	0
78.1	0
78.2	0
78.3	0
78.4	0
78.5	0
78.6	0
78.7	0
78.8	0
78.9	0
79	0
79.1	0
79.2	0
79.3	0
79.4	0
79.5	0
79.6	0
79.7	0
79.8	0
79.9	0
80	0
80.1	0
80.2	0
80.3	0
80.4	0
80.5	0
80.6	0
80.7	0
80.8	0
80.9	0
81	0
81.1	0
81.2	0
81.3	0
81.4	0
81.5	0
81.6	0
81.7	0
81.8	0
81.9	0
82	0
82.1	0
82.2	0
82.3	0
82.4	0
82.5	0
82.6	0
82.7	0
82.8	0
82.9	0
83	0
83.1	0
83.2	0
83.3	0
83.4	0
83.5	0
83.6	0
83.7	0
83.8	0
83.9	0
84	0
84.1	0
84.2	0
84.3	0
84.4	0
84.5	0
84.6	0
84.7	0
84.8	0
84.9	0
85	0
85.1	0
85.2	0
85.3	0
85.4	0
85.5	0
85.6	0
85.7	0
85.8	0
85.9	0
86	0
86.1	0
86.2	0
86.3	0
86.4	0
86.5	0
86.6	0
86.7	0
86.8	0
86.9	0
87	0
87.1	0
87.2	0
87.3	0
87.4	0
87.5	0
87.6	0
87.7	0
87.8	0
87.9	0
88	0
88.1	0
88.2	0
88.3	0
88.4	0
88.5	0
88.6	0
88.7	0
88.8	0
88.9	0
89	0
89.1	0
89.2	0
89.3	0
89.4	0
89.5	0
89.6	0
89.7	0
89.8	0
89.9	0
90	0
90.1	0
90.2	0
90.3	0
90.4	0
90.5	0
90.6	0
90.7	0
90.8	0
90.9	0
91	0
91.1	0
91.2	0
91.3	0
91.4	0
91.5	0
91.6	0
91.7	0
91.8	0
91.9	0
92	0
92.1	0
92.2	0
92.3	0
92.4	0
92.5	0
92.6	0
92.7	0
92.8	0
92.9	0
93	0
93.1	0
93.2	0
93.3	0
93.4	0
93.5	0
93.6	0
93.7	0
93.8	0
93.9	0
94	0
94.1	0
94.2	0
94.3	0
94.4	0
94.5	0
94.6	0
94.7	0
94.8	0
94.9	0
95	0
95.1	0
95.2	0
95.3	0
95.4	0
95.5	0
95.6	0
95.7	0
95.8	0
95.9	0
96	0
96.1	0
96.2	0
96.3	0
96.4	0
96.5	0
96.6	0
96.7	0
96.8	0
96.9	0
97	0
97.1	0
97.2	0
97.3	0
97.4	0
97.5	0
97.6	0
97.7	0
97.8	0
97.9	0
98	0
98.1	0
98.2	0
98.3	0
98.4	0
98.5	0
98.6	0
98.7	0
98.8	0
98.9	0
99	0
99.1	0
99.2	0
99.3	0
99.4	0
99.5	0
99.6	0
99.7	0
99.8	0
99.9	0
100	0
100.1	1.09624e-05
100.2	8.02838e-05
100.3	0.000248555
100.4	0.000541535
100.5	0.000974066
100.6	0.00155305
100.7	0.00227971
100.8	0.00315129
100.9	0.00416231
101	0.00530555
101.1	0.00657272
101.2	0.007955
101.3	0.00944337
101.4	0.0110289
101.5	0.012703
101.6	0.0144574
101.7	0.0162843
101.8	0.0181763
101.9	0.0201267
102	0.0221292
102.1	0.024178
102.2	0.0262679
102.3	0.028394
102.4	0.0305519
102.5	0.0327378
102.6	0.0349478
102.7	0.0371788
102.8	0.0394278
102.9	0.0416922
103	0.0439695
103.1	0.0462575
103.2	0.0485544
103.3	0.0508583
103.4	0.0531677
103.5	0.0554812
103.6	0.0577974
103.7	0.0601153
103.8	0.0624338
103.9	0.0647521
104	0.0670692
104.1	0.0693845
104.2	0.0716974
104.3	0.0740071
104.4	0.0763132
104.5	0.0786153
104.6	0.0809129
104.7	0.0832056
104.8	0.0854932
104.9	0.0877752
105	0.0900516
105.1	0.0923219
105.2	0.0945861
105.3	0.0968439
105.4	0.0990953
105.5	0.10134
105.6	0.103578
105.7	0.105809
105.8	0.108033
105.9	0.11025
106	0.11246
106.1	0.114662
106.2	0.116858
106.3	0.119046
106.4	0.121227
106.5	0.1234
106.6	0.125566
106.7	0.127725
106.8	0.129877
106.9	0.13202
107	0.134157
107.1	0.136286
107.2	0.138408
107.3	0.140522
107.4	0.142629
107.5	0.144728
107.6	0.146821
107.7	0.148905
107.8	0.150983
107.9	0.153053
108	0.155115
108.1	0.157171
108.2	0.159219
108.3	0.16126
108.4	0.163293
108.5	0.165319
108.6	0.167338
108.7	0.16935
108.8	0.171355
108.9	0.173352
109	0.175343
109.1	0.177326
109.2	0.179302
109.3	0.181271
109.4	0.183233
109.5	0.185188
109.6	0.187136
109.7	0.189077
109.8	0.191012
109.9	0.192939
110	0.194859
110.1	0.196772
110.2	0.198679
110.3	0.200579
110.4	0.202471
110.5	0.204358
110.6	0.206237
110.7	0.208109
110.8	0.209975
110.9	0.211835
111	0.213687
111.1	0.215533
111.2	0.217372
111.3	0.219205
111.4	0.221031
111.5	0.22285
111.6	0.224663
111.7	0.22647
111.8	0.22827
111.9	0.230063
112	0.231851
112.1	0.233631
112.2	0.235406
112.3	0.237173
112.4	0.238935
112.5	0.24069
112.6	0.242439
112.7	0.244182
112.8	0.245918
112.9	0.247649
113	0.249373
113.1	0.25109
113.2	0.252802
113.3	0.254508
113.4	0.256207
113.5	0.2579
113.6	0.259588
113.7	0.261269
113.8	0.262944
113.9	0.264613
114	0.266276
114.1	0.267933
114.2	0.269584
114.3	0.27123
114.4	0.272869
114.5	0.274503
114.6	0.27613
114.7	0.277752
114.8	0.279368
114.9	0.280978
115	0.282582
115.1	0.284181
115.2	0.285774
115.3	0.287361
115.4	0.288943
115.5	0.290518
115.6	0.292089
115.7	0.293653
115.8	0.295212
115.9	0.296765
116	0.298313
116.1	0.299855
116.2	0.301392
116.3	0.302923
116.4	0.304449
116.5	0.305969
116.6	0.307483
116.7	0.308993
116.8	0.310497
116.9	0.311995
117	0.313488
117.1	0.314976
117.2	0.316458
117.3	0.317935
117.4	0.319407
117.5	0.320873
117.6	0.322335
117.7	0.323791
117.8	0.325241
117.9	0.326687
118	0.328127
118.1	0.329562
118.2	0.330992
118.3	0.332417
118.4	0.333837
118.5	0.335252
118.6	0.336661
118.7	0.338066
118.8	0.339465
118.9	0.34086
119	0.342249
119.1	0.343634
119.2	0.345013
119.3	0.346388
119.4	0.347757
119.5	0.349122
119.6	0.350482
119.7	0.351837
119.8	0.353187
119.9	0.354532
120	0.355873
120.1	0.357208
120.2	0.358539
120.3	0.359865
120.4	0.361186
120.5	0.362503
120.6	0.363815
120.7	0.365122
120.8	0.366424
120.9	0.367722
121	0.369015
121.1	0.370303
121.2	0.371587
121.3	0.372866
121.4	0.374141
121.5	0.375411
121.6	0.376676
121.7	0.377937
121.8	0.379194
121.9	0.380446
122	0.381693
122.1	0.382936
122.2	0.384174
122.3	0.385408
122.4	0.386638
122.5	0.387863
122.6	0.389084
122.7	0.3903
122.8	0.391512
122.9	0.39272
123	0.393923
123.1	0.395122
123.2	0.396317
123.3	0.397508
123.4	0.398694
123.5	0.399876
123.6	0.401053
123.7	0.402227
123.8	0.403396
123.9	0.404561
124	0.405722
124.1	0.406879
124.2	0.408031
124.3	0.40918
124.4	0.410324
124.5	0.411464
124.6	0.4126
124.7	0.413732
124.8	0.41486
124.9	0.415984
125	0.417104
125.1	0.41822
125.2	0.419331
125.3	0.420439
125.4	0.421543
125.5	0.422643
125.6	0.423739
125.7	0.424831
125.8	0.425919
125.9	0.427003
126	0.428084
126.1	0.42916
126.2	0.430233
126.3	0.431301
126.4	0.432366
126.5	0.433427
126.6	0.434484
126.7	0.435538
126.8	0.436588
126.9	0.437633
127	0.438676
127.1	0.439714
127.2	0.440749
127.3	0.44178
127.4	0.442807
127.5	0.443831
127.6	0.44485
127.7	0.445867
127.8	0.446879
127.9	0.447888
128	0.448894
128.1	0.449895
128.2	0.450894
128.3	0.451888
128.4	0.452879
128.5	0.453867
128.6	0.45485
128.7	0.455831
128.8	0.456808
128.9	0.457781
129	0.458751
129.1	0.459717
129.2	0.46068
129.3	0.46164
129.4	0.462595
129.5	0.463548
129.6	0.464497
129.7	0.465443
129.8	0.466385
129.9	0.467324
130	0.46826
130.1	0.469192
130.2	0.470121
130.3	0.471047
130.4	0.471969
130.5	0.472888
130.6	0.473803
130.7	0.474716
130.8	0.475625
130.9	0.476531
131	0.477433
131.1	0.478332
131.2	0.479228
131.3	0.480121
131.4	0.481011
131.5	0.481897
131.6	0.482781
131.7	0.483661
131.8	0.484538
131.9	0.485412
132	0.486282
132.1	0.48715
132.2	0.488014
132.3	0.488876
132.4	0.489734
132.5	0.490589
132.6	0.491441
132.7	0.49229
132.8	0.493136
132.9	0.493979
133	0.494819
133.1	0.495656
133.2	0.49649
133.3	0.497321
133.4	0.498149
133.5	0.498974
133.6	0.499796
133.7	0.500615
133.8	0.501431
133.9	0.502244
134	0.503054
134.1	0.503862
134.2	0.504666
134.3	0.505468
134.4	0.506266
134.5	0.507062
134.6	0.507855
134.7	0.508645
134.8	0.509433
134.9	0.510217
135	0.510999
135.1	0.511778
135.2	0.512554
135.3	0.513327
135.4	0.514097
135.5	0.514865
135.6	0.51563
135.7	0.516392
135.8	0.517152
135.9	0.517909
136	0.518663
136.1	0.519414
136.2	0.520163
136.3	0.520909
136.4	0.521652
136.5	0.522392
136.6	0.52313
136.7	0.523866
136.8	0.524598
136.9	0.525328
137	0.526056
137.1	0.526781
137.2	0.527503
137.3	0.528222
137.4	0.528939
137.5	0.529654
137.6	0.530366
137.7	0.531075
137.8	0.531782
137.9	0.532486
138	0.533188
138.1	0.533887
138.2	0.534584
138.3	0.535278
138.4	0.53597
138.5	0.536659
138.6	0.537346
138.7	0.53803
138.8	0.538712
138.9	0.539391
139	0.540068
139.1	0.540743
139.2	0.541415
139.3	0.542084
139.4	0.542752
139.5	0.543417
139.6	0.544079
139.7	0.544739
139.8	0.545397
139.9	0.546052
140	0.546705
140.1	0.547356
140.2	0.548004
140.3	0.54865
140.4	0.549294
140.5	0.549936
140.6	0.550575
140.7	0.551212
140.8	0.551846
140.9	0.552478
141	0.553108
141.1	0.553736
141.2	0.554361
141.3	0.554985
141.4	0.555606
141.5	0.556224
141.6	0.556841
141.7	0.557455
141.8	0.558067
141.9	0.558677
142	0.559285
142.1	0.559891
142.2	0.560494
142.3	0.561095
142.4	0.561694
142.5	0.562291
142.6	0.562886
142.7	0.563478
142.8	0.564069
142.9	0.564657
143	0.565244
143.1	0.565828
143.2	0.56641
143.3	0.56699
143.4	0.567568
143.5	0.568143
143.6	0.568717
143.7	0.569289
143.8	0.569859
143.9	0.570426
144	0.570992
144.1	0.571555
144.2	0.572117
144.3	0.572676
144.4	0.573234
144.5	0.573789
144.6	0.574343
144.7	0.574894
144.8	0.575444
144.9	0.575991
145	0.576537
145.1	0.577081
145.2	0.577622
145.3	0.578162
145.4	0.5787
145.5	0.579236
145.6	0.57977
145.7	0.580302
145.8	0.580832
145.9	0.58136
146	0.581886
146.1	0.582411
146.2	0.582933
146.3	0.583454
146.4	0.583973
146.5	0.58449
146.6	0.585005
146.7	0.585518
146.8	0.586029
146.9	0.586539
147	0.587047
147.1	0.587553
147.2	0.588057
147.3	0.588559
147.4	0.589059
147.5	0.589558
147.6	0.590055
147.7	0.59055
147.8	0.591043
147.9	0.591535
148	0.592025
148.1	0.592513
148.2	0.592999
148.3	0.593484
148.4	0.593966
148.5	0.594448
148.6	0.594927
148.7	0.595405
148.8	0.59588
148.9	0.596355
149	0.596827
149.1	0.597298
149.2	0.597767
149.3	0.598235
149.4	0.5987
149.5	0.599164
149.6	0.599627
149.7	0.600088
149.8	0.600547
149.9	0.601004
150	0.60146
150.1	0.601914
150.2	0.602367
150.3	0.602818
150.4	0.603267
150.5	0.603715
150.6	0.604161
150.7	0.604605
150.8	0.605048
150.9	0.605489
151	0.605929
151.1	0.606367
151.2	0.606804
151.3	0.607239
151.4	0.607672
151.5	0.608104
151.6	0.608534
151.7	0.608963
151.8	0.60939
151.9	0.609816
152	0.61024
152.1	0.610663
152.2	0.611084
152.3	0.611504
152.4	0.611922
152.5	0.612339
152.6	0.612754
152.7	0.613167
152.8	0.61358
152.9	0.61399
153	0.614399
153.1	0.614807
153.2	0.615213
153.3	0.615618
153.4	0.616022
153.5	0.616424
153.6	0.616824
153.7	0.617223
153.8	0.617621
153.9	0.618017
154	0.618412
154.1	0.618805
154.2	0.619197
154.3	0.619587
154.4	0.619977
154.5	0.620364
154.6	0.620751
154.7	0.621136
154.8	0.621519
154.9	0.621901
155	0.622282
155.1	0.622662
155.2	0.62304
155.3	0.623416
155.4	0.623792
155.5	0.624166
155.6	0.624538
155.7	0.62491
155.8	0.62528
155.9	0.625649
156	0.626016
156.1	0.626382
156.2	0.626747
156.3	0.62711
156.4	0.627472
156.5	0.627833
156.6	0.628193
156.7	0.628551
156.8	0.628908
156.9	0.629263
157	0.629618
157.1	0.629971
157.2	0.630323
157.3	0.630673
157.4	0.631023
157.5	0.631371
157.6	0.631718
157.7	0.632063
157.8	0.632408
157.9	0.632751
158	0.633093
158.1	0.633433
158.2	0.633773
158.3	0.634111
158.4	0.634448
158.5	0.634784
158.6	0.635118
158.7	0.635452
158.8	0.635784
158.9	0.636115
159	0.636445
159.1	0.636773
159.2	0.637101
159.3	0.637427
159.4	0.637752
159.5	0.638076
159.6	0.638399
159.7	0.63872
159.8	0.639041
159.9	0.63936
160	0.639678
160.1	0.639995
160.2	0.640311
160.3	0.640626
160.4	0.640939
160.5	0.641252
160.6	0.641563
160.7	0.641874
160.8	0.642183
160.9	0.642491
161	0.642798
161.1	0.643104
161.2	0.643408
161.3	0.643712
161.4	0.644014
161.5	0.644316
161.6	0.644616
161.7	0.644916
161.8	0.645214
161.9	0.645511
162	0.645807
162.1	0.646102
162.2	0.646396
162.3	0.646689
162.4	0.646981
162.5	0.647272
162.6	0.647561
162.7	0.64785
162.8	0.648138
162.9	0.648424
163	0.64871
163.1	0.648995
163.2	0.649278
163.3	0.649561
163.4	0.649842
163.5	0.650123
163.6	0.650402
163.7	0.650681
163.8	0.650958
163.9	0.651235
164	0.65151
164.1	0.651785
164.2	0.652059
164.3	0.652331
164.4	0.652603
164.5	0.652873
164.6	0.653143
164.7	0.653412
164.8	0.653679
164.9	0.653946
165	0.654212
165.1	0.654477
165.2	0.654741
165.3	0.655004
165.4	0.655266
165.5	0.655527
165.6	0.655787
165.7	0.656046
165.8	0.656304
165.9	0.656562
166	0.656818
166.1	0.657074
166.2	0.657328
166.3	0.657582
166.4	0.657835
166.5	0.658087
166.6	0.658337
166.7	0.658588
166.8	0.658837
166.9	0.659085
167	0.659332
167.1	0.659579
167.2	0.659824
167.3	0.660069
167.4	0.660313
167.5	0.660556
167.6	0.660798
167.7	0.661039
167.8	0.66128
167.9	0.661519
168	0.661758
168.1	0.661995
168.2	0.662232
168.3	0.662468
168.4	0.662704
168.5	0.662938
168.6	0.663172
168.7	0.663404
168.8	0.663636
168.9	0.663867
169	0.664097
169.1	0.664327
169.2	0.664555
169.3	0.664783
169.4	0.66501
169.5	0.665236
169.6	0.665461
169.7	0.665686
169.8	0.665909
169.9	0.666132
170	0.666354
170.1	0.666576
170.2	0.666796
170.3	0.667016
170.4	0.667235
170.5	0.667453
170.6	0.66767
170.7	0.667887
170.8	0.668103
170.9	0.668318
171	0.668532
171.1	0.668745
171.2	0.668958
171.3	0.66917
171.4	0.669381
171.5	0.669591
171.6	0.669801
171.7	0.67001
171.8	0.670218
171.9	0.670426
172	0.670632
172.1	0.670838
172.2	0.671043
172.3	0.671248
172.4	0.671451
172.5	0.671654
172.6	0.671857
172.7	0.672058
172.8	0.672259
172.9	0.672459
173	0.672658
173.1	0.672857
173.2	0.673055
173.3	0.673252
173.4	0.673449
173.5	0.673645
173.6	0.67384
173.7	0.674034
173.8	0.674228
173.9	0.674421
174	0.674613
174.1	0.674805
174.2	0.674996
174.3	0.675186
174.4	0.675376
174.5	0.675565
174.6	0.675753
174.7	0.67594
174.8	0.676127
174.9	0.676313
175	0.676499
175.1	0.676684
175.2	0.676868
175.3	0.677051
175.4	0.677234
175.5	0.677417
175.6	0.677598
175.7	0.677779
175.8	0.677959
175.9	0.678139
176	0.678318
176.1	0.678496
176.2	0.678674
176.3	0.678851
176.4	0.679027
176.5	0.679203
176.6	0.679378
176.7	0.679553
176.8	0.679727
176.9	0.6799
177	0.680073
177.1	0.680245
177.2	0.680416
177.3	0.680587
177.4	0.680757
177.5	0.680927
177.6	0.681096
177.7	0.681264
177.8	0.681432
177.9	0.681599
178	0.681766
178.1	0.681932
178.2	0.682097
178.3	0.682262
178.4	0.682426
178.5	0.68259
178.6	0.682753
178.7	0.682915
178.8	0.683077
178.9	0.683238
179	0.683399
179.1	0.683559
179.2	0.683718
179.3	0.683877
179.4	0.684036
179.5	0.684194
179.6	0.684351
179.7	0.684507
179.8	0.684664
179.9	0.684819
180	0.684974
180.1	0.685129
180.2	0.685283
180.3	0.685436
180.4	0.685589
180.5	0.685741
180.6	0.685893
180.7	0.686044
180.8	0.686194
180.9	0.686344
181	0.686494
181.1	0.686643
181.2	0.686791
181.3	0.686939
181.4	0.687087
181.5	0.687234
181.6	0.68738
181.7	0.687526
181.8	0.687671
181.9	0.687816
182	0.68796
182.1	0.688104
182.2	0.688247
182.3	0.68839
182.4	0.688532
182.5	0.688674
182.6	0.688815
182.7	0.688955
182.8	0.689096
182.9	0.689235
183	0.689374
183.1	0.689513
183.2	0.689651
183.3	0.689789
183.4	0.689926
183.5	0.690063
183.6	0.690199
183.7	0.690335
183.8	0.69047
183.9	0.690605
184	0.690739
184.1	0.690873
184.2	0.691006
184.3	0.691139
184.4	0.691271
184.5	0.691403
184.6	0.691534
184.7	0.691665
184.8	0.691796
184.9	0.691925
185	0.692055
185.1	0.692184
185.2	0.692313
185.3	0.692441
185.4	0.692568
185.5	0.692696
185.6	0.692822
185.7	0.692949
185.8	0.693074
185.9	0.6932
186	0.693325
186.1	0.693449
186.2	0.693573
186.3	0.693697
186.4	0.69382
186.5	0.693943
186.6	0.694065
186.7	0.694187
186.8	0.694308
186.9	0.694429
187	0.69455
187.1	0.69467
187.2	0.694789
187.3	0.694909
187.4	0.695027
187.5	0.695146
187.6	0.695264
187.7	0.695381
187.8	0.695498
187.9	0.695615
188	0.695731
188.1	0.695847
188.2	0.695962
188.3	0.696077
188.4	0.696192
188.5	0.696306
188.6	0.69642
188.7	0.696533
188.8	0.696646
188.9	0.696759
189	0.696871
189.1	0.696983
189.2	0.697094
189.3	0.697205
189.4	0.697316
189.5	0.697426
189.6	0.697536
189.7	0.697645
189.8	0.697754
189.9	0.697862
190	0.697971
190.1	0.698078
190.2	0.698186
190.3	0.698293
190.4	0.6984
190.5	0.698506
190.6	0.698612
190.7	0.698717
190.8	0.698822
190.9	0.698927
191	0.699031
191.1	0.699135
191.2	0.699239
191.3	0.699342
191.4	0.699445
191.5	0.699548
191.6	0.69965
191.7	0.699752
191.8	0.699853
191.9	0.699954
192	0.700055
192.1	0.700155
192.2	0.700255
192.3	0.700355
192.4	0.700454
192.5	0.700553
192.6	0.700651
192.7	0.70075
192.8	0.700847
192.9	0.700945
193	0.701042
193.1	0.701139
193.2	0.701235
193.3	0.701331
193.4	0.701427
193.5	0.701522
193.6	0.701618
193.7	0.701712
193.8	0.701807
193.9	0.701901
194	0.701994
194.1	0.702088
194.2	0.702181
194.3	0.702273
194.4	0.702366
194.5	0.702458
194.6	0.70255
194.7	0.702641
194.8	0.702732
194.9	0.702823
195	0.702913
195.1	0.703003
195.2	0.703093
195.3	0.703182
195.4	0.703271
195.5	0.70336
195.6	0.703449
195.7	0.703537
195.8	0.703625
195.9	0.703712
196	0.703799
196.1	0.703886
196.2	0.703973
196.3	0.704059
196.4	0.704145
196.5	0.704231
196.6	0.704316
196.7	0.704401
196.8	0.704486
196.9	0.70457
197	0.704654
197.1	0.704738
197.2	0.704822
197.3	0.704905
197.4	0.704988
197.5	0.70507
197.6	0.705153
197.7	0.705235
197.8	0.705316
197.9	0.705398
198	0.705479
198.1	0.70556
198.2	0.70564
198.3	0.705721
198.4	0.705801
198.5	0.70588
198.6	0.70596
198.7	0.706039
198.8	0.706118
198.9	0.706196
199	0.706275
199.1	0.706353
199.2	0.70643
199.3	0.706508
199.4	0.706585
199.5	0.706662
199.6	0.706738
199.7	0.706815
199.8	0.706891
199.9	0.706967
200	0.707042
[truncated: 14,000 more rows]
