# Supplementary material for: Bayesian inference of kinetic schemes for ion channels by Kalman filtering
Source: eLife journal article supplement (doi:10.7554/elife.62714), 2022-05-04
Supplement: fig4-data7 [file 1_Sim_N_200_Fluor_MW_2M.xlsx]

## Sheet: 2 M
0.1	0
0.2	0
0.3	0
0.4	0
0.5	0
0.6	0
0.7	0
0.8	0
0.9	0
1	0
1.1	0
1.2	0
1.3	0
1.4	0
1.5	0
1.6	0
1.7	0
1.8	0
1.9	0
2	0
2.1	0
2.2	0
2.3	0
2.4	0
2.5	0
2.6	0
2.7	0
2.8	0
2.9	0
3	0
3.1	0
3.2	0
3.3	0
3.4	0
3.5	0
3.6	0
3.7	0
3.8	0
3.9	0
4	0
4.1	0
4.2	0
4.3	0
4.4	0
4.5	0
4.6	0
4.7	0
4.8	0
4.9	0
5	0
5.1	0
5.2	0
5.3	0
5.4	0
5.5	0
5.6	0
5.7	0
5.8	0
5.9	0
6	0
6.1	0
6.2	0
6.3	0
6.4	0
6.5	0
6.6	0
6.7	0
6.8	0
6.9	0
7	0
7.1	0
7.2	0
7.3	0
7.4	0
7.5	0
7.6	0
7.7	0
7.8	0
7.9	0
8	0
8.1	0
8.2	0
8.3	0
8.4	0
8.5	0
8.6	0
8.7	0
8.8	0
8.9	0
9	0
9.1	0
9.2	0
9.3	0
9.4	0
9.5	0
9.6	0
9.7	0
9.8	0
9.9	0
10	0
10.1	0
10.2	0
10.3	0
10.4	0
10.5	0
10.6	0
10.7	0
10.8	0
10.9	0
11	0
11.1	0
11.2	0
11.3	0
11.4	0
11.5	0
11.6	0
11.7	0
11.8	0
11.9	0
12	0
12.1	0
12.2	0
12.3	0
12.4	0
12.5	0
12.6	0
12.7	0
12.8	0
12.9	0
13	0
13.1	0
13.2	0
13.3	0
13.4	0
13.5	0
13.6	0
13.7	0
13.8	0
13.9	0
14	0
14.1	0
14.2	0
14.3	0
14.4	0
14.5	0
14.6	0
14.7	0
14.8	0
14.9	0
15	0
15.1	0
15.2	0
15.3	0
15.4	0
15.5	0
15.6	0
15.7	0
15.8	0
15.9	0
16	0
16.1	0
16.2	0
16.3	0
16.4	0
16.5	0
16.6	0
16.7	0
16.8	0
16.9	0
17	0
17.1	0
17.2	0
17.3	0
17.4	0
17.5	0
17.6	0
17.7	0
17.8	0
17.9	0
18	0
18.1	0
18.2	0
18.3	0
18.4	0
18.5	0
18.6	0
18.7	0
18.8	0
18.9	0
19	0
19.1	0
19.2	0
19.3	0
19.4	0
19.5	0
19.6	0
19.7	0
19.8	0
19.9	0
20	0
20.1	0
20.2	0
20.3	0
20.4	0
20.5	0
20.6	0
20.7	0
20.8	0
20.9	0
21	0
21.1	0
21.2	0
21.3	0
21.4	0
21.5	0
21.6	0
21.7	0
21.8	0
21.9	0
22	0
22.1	0
22.2	0
22.3	0
22.4	0
22.5	0
22.6	0
22.7	0
22.8	0
22.9	0
23	0
23.1	0
23.2	0
23.3	0
23.4	0
23.5	0
23.6	0
23.7	0
23.8	0
23.9	0
24	0
24.1	0
24.2	0
24.3	0
24.4	0
24.5	0
24.6	0
24.7	0
24.8	0
24.9	0
25	0
25.1	0
25.2	0
25.3	0
25.4	0
25.5	0
25.6	0
25.7	0
25.8	0
25.9	0
26	0
26.1	0
26.2	0
26.3	0
26.4	0
26.5	0
26.6	0
26.7	0
26.8	0
26.9	0
27	0
27.1	0
27.2	0
27.3	0
27.4	0
27.5	0
27.6	0
27.7	0
27.8	0
27.9	0
28	0
28.1	0
28.2	0
28.3	0
28.4	0
28.5	0
28.6	0
28.7	0
28.8	0
28.9	0
29	0
29.1	0
29.2	0
29.3	0
29.4	0
29.5	0
29.6	0
29.7	0
29.8	0
29.9	0
30	0
30.1	0
30.2	0
30.3	0
30.4	0
30.5	0
30.6	0
30.7	0
30.8	0
30.9	0
31	0
31.1	0
31.2	0
31.3	0
31.4	0
31.5	0
31.6	0
31.7	0
31.8	0
31.9	0
32	0
32.1	0
32.2	0
32.3	0
32.4	0
32.5	0
32.6	0
32.7	0
32.8	0
32.9	0
33	0
33.1	0
33.2	0
33.3	0
33.4	0
33.5	0
33.6	0
33.7	0
33.8	0
33.9	0
34	0
34.1	0
34.2	0
34.3	0
34.4	0
34.5	0
34.6	0
34.7	0
34.8	0
34.9	0
35	0
35.1	0
35.2	0
35.3	0
35.4	0
35.5	0
35.6	0
35.7	0
35.8	0
35.9	0
36	0
36.1	0
36.2	0
36.3	0
36.4	0
36.5	0
36.6	0
36.7	0
36.8	0
36.9	0
37	0
37.1	0
37.2	0
37.3	0
37.4	0
37.5	0
37.6	0
37.7	0
37.8	0
37.9	0
38	0
38.1	0
38.2	0
38.3	0
38.4	0
38.5	0
38.6	0
38.7	0
38.8	0
38.9	0
39	0
39.1	0
39.2	0
39.3	0
39.4	0
39.5	0
39.6	0
39.7	0
39.8	0
39.9	0
40	0
40.1	0
40.2	0
40.3	0
40.4	0
40.5	0
40.6	0
40.7	0
40.8	0
40.9	0
41	0
41.1	0
41.2	0
41.3	0
41.4	0
41.5	0
41.6	0
41.7	0
41.8	0
41.9	0
42	0
42.1	0
42.2	0
42.3	0
42.4	0
42.5	0
42.6	0
42.7	0
42.8	0
42.9	0
43	0
43.1	0
43.2	0
43.3	0
43.4	0
43.5	0
43.6	0
43.7	0
43.8	0
43.9	0
44	0
44.1	0
44.2	0
44.3	0
44.4	0
44.5	0
44.6	0
44.7	0
44.8	0
44.9	0
45	0
45.1	0
45.2	0
45.3	0
45.4	0
45.5	0
45.6	0
45.7	0
45.8	0
45.9	0
46	0
46.1	0
46.2	0
46.3	0
46.4	0
46.5	0
46.6	0
46.7	0
46.8	0
46.9	0
47	0
47.1	0
47.2	0
47.3	0
47.4	0
47.5	0
47.6	0
47.7	0
47.8	0
47.9	0
48	0
48.1	0
48.2	0
48.3	0
48.4	0
48.5	0
48.6	0
48.7	0
48.8	0
48.9	0
49	0
49.1	0
49.2	0
49.3	0
49.4	0
49.5	0
49.6	0
49.7	0
49.8	0
49.9	0
50	0
50.1	0
50.2	0
50.3	0
50.4	0
50.5	0
50.6	0
50.7	0
50.8	0
50.9	0
51	0
51.1	0
51.2	0
51.3	0
51.4	0
51.5	0
51.6	0
51.7	0
51.8	0
51.9	0
52	0
52.1	0
52.2	0
52.3	0
52.4	0
52.5	0
52.6	0
52.7	0
52.8	0
52.9	0
53	0
53.1	0
53.2	0
53.3	0
53.4	0
53.5	0
53.6	0
53.7	0
53.8	0
53.9	0
54	0
54.1	0
54.2	0
54.3	0
54.4	0
54.5	0
54.6	0
54.7	0
54.8	0
54.9	0
55	0
55.1	0
55.2	0
55.3	0
55.4	0
55.5	0
55.6	0
55.7	0
55.8	0
55.9	0
56	0
56.1	0
56.2	0
56.3	0
56.4	0
56.5	0
56.6	0
56.7	0
56.8	0
56.9	0
57	0
57.1	0
57.2	0
57.3	0
57.4	0
57.5	0
57.6	0
57.7	0
57.8	0
57.9	0
58	0
58.1	0
58.2	0
58.3	0
58.4	0
58.5	0
58.6	0
58.7	0
58.8	0
58.9	0
59	0
59.1	0
59.2	0
59.3	0
59.4	0
59.5	0
59.6	0
59.7	0
59.8	0
59.9	0
60	0
60.1	0
60.2	0
60.3	0
60.4	0
60.5	0
60.6	0
60.7	0
60.8	0
60.9	0
61	0
61.1	0
61.2	0
61.3	0
61.4	0
61.5	0
61.6	0
61.7	0
61.8	0
61.9	0
62	0
62.1	0
62.2	0
62.3	0
62.4	0
62.5	0
62.6	0
62.7	0
62.8	0
62.9	0
63	0
63.1	0
63.2	0
63.3	0
63.4	0
63.5	0
63.6	0
63.7	0
63.8	0
63.9	0
64	0
64.1	0
64.2	0
64.3	0
64.4	0
64.5	0
64.6	0
64.7	0
64.8	0
64.9	0
65	0
65.1	0
65.2	0
65.3	0
65.4	0
65.5	0
65.6	0
65.7	0
65.8	0
65.9	0
66	0
66.1	0
66.2	0
66.3	0
66.4	0
66.5	0
66.6	0
66.7	0
66.8	0
66.9	0
67	0
67.1	0
67.2	0
67.3	0
67.4	0
67.5	0
67.6	0
67.7	0
67.8	0
67.9	0
68	0
68.1	0
68.2	0
68.3	0
68.4	0
68.5	0
68.6	0
68.7	0
68.8	0
68.9	0
69	0
69.1	0
69.2	0
69.3	0
69.4	0
69.5	0
69.6	0
69.7	0
69.8	0
69.9	0
70	0
70.1	0
70.2	0
70.3	0
70.4	0
70.5	0
70.6	0
70.7	0
70.8	0
70.9	0
71	0
71.1	0
71.2	0
71.3	0
71.4	0
71.5	0
71.6	0
71.7	0
71.8	0
71.9	0
72	0
72.1	0
72.2	0
72.3	0
72.4	0
72.5	0
72.6	0
72.7	0
72.8	0
72.9	0
73	0
73.1	0
73.2	0
73.3	0
73.4	0
73.5	0
73.6	0
73.7	0
73.8	0
73.9	0
74	0
74.1	0
74.2	0
74.3	0
74.4	0
74.5	0
74.6	0
74.7	0
74.8	0
74.9	0
75	0
75.1	0
75.2	0
75.3	0
75.4	0
75.5	0
75.6	0
75.7	0
75.8	0
75.9	0
76	0
76.1	0
76.2	0
76.3	0
76.4	0
76.5	0
76.6	0
76.7	0
76.8	0
76.9	0
77	0
77.1	0
77.2	0
77.3	0
77.4	0
77.5	0
77.6	0
77.7	0
77.8	0
77.9	0
78	0
78.1	0
78.2	0
78.3	0
78.4	0
78.5	0
78.6	0
78.7	0
78.8	0
78.9	0
79	0
79.1	0
79.2	0
79.3	0
79.4	0
79.5	0
79.6	0
79.7	0
79.8	0
79.9	0
80	0
80.1	0
80.2	0
80.3	0
80.4	0
80.5	0
80.6	0
80.7	0
80.8	0
80.9	0
81	0
81.1	0
81.2	0
81.3	0
81.4	0
81.5	0
81.6	0
81.7	0
81.8	0
81.9	0
82	0
82.1	0
82.2	0
82.3	0
82.4	0
82.5	0
82.6	0
82.7	0
82.8	0
82.9	0
83	0
83.1	0
83.2	0
83.3	0
83.4	0
83.5	0
83.6	0
83.7	0
83.8	0
83.9	0
84	0
84.1	0
84.2	0
84.3	0
84.4	0
84.5	0
84.6	0
84.7	0
84.8	0
84.9	0
85	0
85.1	0
85.2	0
85.3	0
85.4	0
85.5	0
85.6	0
85.7	0
85.8	0
85.9	0
86	0
86.1	0
86.2	0
86.3	0
86.4	0
86.5	0
86.6	0
86.7	0
86.8	0
86.9	0
87	0
87.1	0
87.2	0
87.3	0
87.4	0
87.5	0
87.6	0
87.7	0
87.8	0
87.9	0
88	0
88.1	0
88.2	0
88.3	0
88.4	0
88.5	0
88.6	0
88.7	0
88.8	0
88.9	0
89	0
89.1	0
89.2	0
89.3	0
89.4	0
89.5	0
89.6	0
89.7	0
89.8	0
89.9	0
90	0
90.1	0
90.2	0
90.3	0
90.4	0
90.5	0
90.6	0
90.7	0
90.8	0
90.9	0
91	0
91.1	0
91.2	0
91.3	0
91.4	0
91.5	0
91.6	0
91.7	0
91.8	0
91.9	0
92	0
92.1	0
92.2	0
92.3	0
92.4	0
92.5	0
92.6	0
92.7	0
92.8	0
92.9	0
93	0
93.1	0
93.2	0
93.3	0
93.4	0
93.5	0
93.6	0
93.7	0
93.8	0
93.9	0
94	0
94.1	0
94.2	0
94.3	0
94.4	0
94.5	0
94.6	0
94.7	0
94.8	0
94.9	0
95	0
95.1	0
95.2	0
95.3	0
95.4	0
95.5	0
95.6	0
95.7	0
95.8	0
95.9	0
96	0
96.1	0
96.2	0
96.3	0
96.4	0
96.5	0
96.6	0
96.7	0
96.8	0
96.9	0
97	0
97.1	0
97.2	0
97.3	0
97.4	0
97.5	0
97.6	0
97.7	0
97.8	0
97.9	0
98	0
98.1	0
98.2	0
98.3	0
98.4	0
98.5	0
98.6	0
98.7	0
98.8	0
98.9	0
99	0
99.1	0
99.2	0
99.3	0
99.4	0
99.5	0
99.6	0
99.7	0
99.8	0
99.9	0
100	0
100.1	0.12
100.2	0.225
100.3	0.29
100.4	0.335
100.5	0.3875
100.6	0.4175
100.7	0.47
100.8	0.4975
100.9	0.52
101	0.55
101.1	0.585
101.2	0.615
101.3	0.6125
101.4	0.63
101.5	0.64
101.6	0.66
101.7	0.69
101.8	0.7025
101.9	0.715
102	0.73
102.1	0.725
102.2	0.725
102.3	0.7325
102.4	0.745
102.5	0.7525
102.6	0.74
102.7	0.745
102.8	0.75
102.9	0.745
103	0.7575
103.1	0.765
103.2	0.7725
103.3	0.775
103.4	0.765
103.5	0.75
103.6	0.7375
103.7	0.7525
103.8	0.76
103.9	0.755
104	0.745
104.1	0.765
104.2	0.77
104.3	0.77
104.4	0.7575
104.5	0.7725
104.6	0.7775
104.7	0.7875
104.8	0.775
104.9	0.765
105	0.765
105.1	0.76
105.2	0.76
105.3	0.765
105.4	0.775
105.5	0.7725
105.6	0.7725
105.7	0.7625
105.8	0.7575
105.9	0.755
106	0.755
106.1	0.77
106.2	0.785
106.3	0.79
106.4	0.7975
106.5	0.7875
106.6	0.7775
106.7	0.79
106.8	0.785
106.9	0.795
107	0.79
107.1	0.785
107.2	0.7775
107.3	0.7725
107.4	0.77
107.5	0.775
107.6	0.78
107.7	0.785
107.8	0.78
107.9	0.7775
108	0.7725
108.1	0.7775
108.2	0.7825
108.3	0.785
108.4	0.7675
108.5	0.775
108.6	0.76
108.7	0.77
108.8	0.7825
108.9	0.7875
109	0.8
109.1	0.8025
109.2	0.8
109.3	0.8025
109.4	0.8
109.5	0.785
109.6	0.7775
109.7	0.7875
109.8	0.7925
109.9	0.805
110	0.8075
110.1	0.82
110.2	0.83
110.3	0.8225
110.4	0.83
110.5	0.8275
110.6	0.815
110.7	0.815
110.8	0.8175
110.9	0.835
111	0.85
111.1	0.8475
111.2	0.835
111.3	0.8475
111.4	0.845
111.5	0.8275
111.6	0.82
111.7	0.81
111.8	0.805
111.9	0.81
112	0.8125
112.1	0.8125
112.2	0.8125
112.3	0.8
112.4	0.8
112.5	0.8
112.6	0.795
112.7	0.8
112.8	0.8
112.9	0.8
113	0.8175
113.1	0.82
113.2	0.82
113.3	0.825
113.4	0.805
113.5	0.805
113.6	0.8175
113.7	0.8175
113.8	0.8175
113.9	0.83
114	0.8225
114.1	0.825
114.2	0.8075
114.3	0.8175
114.4	0.8225
114.5	0.8175
114.6	0.82
114.7	0.8275
114.8	0.8275
114.9	0.84
115	0.835
115.1	0.83
115.2	0.8325
115.3	0.83
115.4	0.84
115.5	0.835
115.6	0.8425
115.7	0.8325
115.8	0.8375
115.9	0.8375
116	0.8325
116.1	0.845
116.2	0.855
116.3	0.85
116.4	0.8425
116.5	0.855
116.6	0.855
116.7	0.855
116.8	0.855
116.9	0.84
117	0.8325
117.1	0.835
117.2	0.835
117.3	0.835
117.4	0.84
117.5	0.8375
117.6	0.8375
117.7	0.8425
117.8	0.8425
117.9	0.84
118	0.84
118.1	0.8475
118.2	0.8475
118.3	0.845
118.4	0.8475
118.5	0.85
118.6	0.8475
118.7	0.8525
118.8	0.86
118.9	0.8625
119	0.87
119.1	0.8625
119.2	0.865
119.3	0.8675
119.4	0.8575
119.5	0.8525
119.6	0.855
119.7	0.8625
119.8	0.8775
119.9	0.87
120	0.88
120.1	0.87
120.2	0.875
120.3	0.8825
120.4	0.8925
120.5	0.88
120.6	0.88
120.7	0.88
120.8	0.8725
120.9	0.865
121	0.865
121.1	0.865
121.2	0.865
121.3	0.865
121.4	0.8675
121.5	0.87
121.6	0.8625
121.7	0.8575
121.8	0.86
121.9	0.8675
122	0.8675
122.1	0.8725
122.2	0.865
122.3	0.865
122.4	0.865
122.5	0.8625
122.6	0.86
122.7	0.86
122.8	0.8625
122.9	0.85
123	0.8475
123.1	0.8575
123.2	0.86
123.3	0.855
123.4	0.8575
123.5	0.86
123.6	0.8525
123.7	0.8625
123.8	0.8675
123.9	0.865
124	0.865
124.1	0.8625
124.2	0.8575
124.3	0.8675
124.4	0.8675
124.5	0.86
124.6	0.86
124.7	0.865
124.8	0.87
124.9	0.8725
125	0.8725
125.1	0.8875
125.2	0.9
125.3	0.9025
125.4	0.895
125.5	0.895
125.6	0.8875
125.7	0.885
125.8	0.8825
125.9	0.8875
126	0.8775
126.1	0.88
126.2	0.885
126.3	0.8825
126.4	0.875
126.5	0.875
126.6	0.8725
126.7	0.87
126.8	0.8725
126.9	0.865
127	0.8725
127.1	0.895
127.2	0.8975
127.3	0.895
127.4	0.895
127.5	0.88
127.6	0.8775
127.7	0.8725
127.8	0.885
127.9	0.8725
128	0.88
128.1	0.875
128.2	0.87
128.3	0.86
128.4	0.8625
128.5	0.8575
128.6	0.855
128.7	0.855
128.8	0.86
128.9	0.8625
129	0.87
129.1	0.8675
129.2	0.8725
129.3	0.875
129.4	0.8725
129.5	0.8825
129.6	0.8875
129.7	0.89
129.8	0.8975
129.9	0.89
130	0.89
130.1	0.8825
130.2	0.8825
130.3	0.89
130.4	0.8925
130.5	0.89
130.6	0.88
130.7	0.88
130.8	0.8875
130.9	0.9025
131	0.895
131.1	0.89
131.2	0.895
131.3	0.9025
131.4	0.9
131.5	0.89
131.6	0.885
131.7	0.8875
131.8	0.8875
131.9	0.895
132	0.8925
132.1	0.8875
132.2	0.895
132.3	0.9
132.4	0.9075
132.5	0.91
132.6	0.91
132.7	0.8975
132.8	0.8875
132.9	0.8825
133	0.885
133.1	0.88
133.2	0.89
133.3	0.9
133.4	0.8975
133.5	0.8925
133.6	0.9025
133.7	0.9
133.8	0.8925
133.9	0.89
134	0.89
134.1	0.8875
134.2	0.8875
134.3	0.8975
134.4	0.905
134.5	0.9025
134.6	0.895
134.7	0.8925
134.8	0.9025
134.9	0.91
135	0.9075
135.1	0.9
135.2	0.89
135.3	0.89
135.4	0.89
135.5	0.89
135.6	0.895
135.7	0.9025
135.8	0.9075
135.9	0.905
136	0.9
136.1	0.8975
136.2	0.905
136.3	0.8975
136.4	0.895
136.5	0.89
136.6	0.895
136.7	0.9
136.8	0.8975
136.9	0.895
137	0.88
137.1	0.87
137.2	0.8675
137.3	0.8675
137.4	0.875
137.5	0.8825
137.6	0.8875
137.7	0.8975
137.8	0.905
137.9	0.9025
138	0.8975
138.1	0.9
138.2	0.9
138.3	0.91
138.4	0.91
138.5	0.9125
138.6	0.9075
138.7	0.895
138.8	0.8975
138.9	0.8925
139	0.9
139.1	0.9125
139.2	0.915
139.3	0.9175
139.4	0.915
139.5	0.9075
139.6	0.905
139.7	0.905
139.8	0.91
139.9	0.9025
140	0.8975
140.1	0.9
140.2	0.9
140.3	0.9
140.4	0.9025
140.5	0.9
140.6	0.9
140.7	0.8975
140.8	0.89
140.9	0.89
141	0.9
141.1	0.9
141.2	0.895
141.3	0.895
141.4	0.89
141.5	0.8925
141.6	0.89
141.7	0.89
141.8	0.8825
141.9	0.88
142	0.8825
142.1	0.8825
142.2	0.8825
142.3	0.8875
142.4	0.89
142.5	0.895
142.6	0.895
142.7	0.9
142.8	0.895
142.9	0.895
143	0.9025
143.1	0.9075
143.2	0.9175
143.3	0.9175
143.4	0.9225
143.5	0.915
143.6	0.915
143.7	0.915
143.8	0.9175
143.9	0.9075
144	0.91
144.1	0.91
144.2	0.9075
144.3	0.91
144.4	0.92
144.5	0.9225
144.6	0.9275
144.7	0.9275
144.8	0.925
144.9	0.925
145	0.9275
145.1	0.93
145.2	0.9125
145.3	0.915
145.4	0.92
145.5	0.9225
145.6	0.9225
145.7	0.905
145.8	0.91
145.9	0.905
146	0.9125
146.1	0.9175
146.2	0.9175
146.3	0.92
146.4	0.91
146.5	0.92
146.6	0.91
146.7	0.9125
146.8	0.915
146.9	0.9075
147	0.9025
147.1	0.895
147.2	0.895
147.3	0.8975
147.4	0.895
147.5	0.9
147.6	0.895
147.7	0.9
147.8	0.9075
147.9	0.9125
148	0.92
148.1	0.92
148.2	0.9225
148.3	0.925
148.4	0.925
148.5	0.9325
148.6	0.935
148.7	0.9325
148.8	0.9375
148.9	0.9375
149	0.935
149.1	0.94
149.2	0.9425
149.3	0.9425
149.4	0.9425
149.5	0.9425
149.6	0.9425
149.7	0.9425
149.8	0.94
149.9	0.935
150	0.9425
150.1	0.9375
150.2	0.925
150.3	0.9275
150.4	0.9275
150.5	0.9225
150.6	0.925
150.7	0.9225
150.8	0.925
150.9	0.9225
151	0.9225
151.1	0.92
151.2	0.915
151.3	0.9125
151.4	0.9175
151.5	0.92
151.6	0.92
151.7	0.92
151.8	0.925
151.9	0.93
152	0.9325
152.1	0.9375
152.2	0.935
152.3	0.925
152.4	0.93
152.5	0.925
152.6	0.93
152.7	0.9275
152.8	0.9275
152.9	0.93
153	0.925
153.1	0.93
153.2	0.925
153.3	0.92
153.4	0.9225
153.5	0.9225
153.6	0.9225
153.7	0.9275
153.8	0.92
153.9	0.9125
154	0.915
154.1	0.92
154.2	0.9225
154.3	0.92
154.4	0.9125
154.5	0.9175
154.6	0.9225
154.7	0.9225
154.8	0.9225
154.9	0.9225
155	0.915
155.1	0.9075
155.2	0.915
155.3	0.9125
155.4	0.9225
155.5	0.9225
155.6	0.9275
155.7	0.925
155.8	0.915
155.9	0.925
156	0.925
156.1	0.925
156.2	0.9225
156.3	0.925
156.4	0.92
156.5	0.915
156.6	0.915
156.7	0.915
156.8	0.9175
156.9	0.92
157	0.92
157.1	0.915
157.2	0.9175
157.3	0.925
157.4	0.925
157.5	0.915
157.6	0.91
157.7	0.9075
157.8	0.91
157.9	0.9075
158	0.9125
158.1	0.905
158.2	0.91
158.3	0.91
158.4	0.9225
158.5	0.925
158.6	0.9275
158.7	0.93
158.8	0.925
158.9	0.9225
159	0.915
159.1	0.9125
159.2	0.915
159.3	0.915
159.4	0.91
159.5	0.91
159.6	0.9125
159.7	0.915
159.8	0.9125
159.9	0.9175
160	0.915
160.1	0.9175
160.2	0.915
160.3	0.91
160.4	0.92
160.5	0.9225
160.6	0.925
160.7	0.925
160.8	0.925
160.9	0.9225
161	0.925
161.1	0.925
161.2	0.9325
161.3	0.94
161.4	0.9375
161.5	0.94
161.6	0.935
161.7	0.9325
161.8	0.9275
161.9	0.9225
162	0.93
162.1	0.935
162.2	0.925
162.3	0.9225
162.4	0.925
162.5	0.935
162.6	0.9375
162.7	0.9375
162.8	0.9325
162.9	0.925
163	0.9225
163.1	0.9225
163.2	0.9225
163.3	0.925
163.4	0.93
163.5	0.9275
163.6	0.9225
163.7	0.92
163.8	0.9225
163.9	0.915
164	0.9125
164.1	0.9175
164.2	0.92
164.3	0.9175
164.4	0.915
164.5	0.9125
164.6	0.9225
164.7	0.925
164.8	0.9175
164.9	0.915
165	0.9225
165.1	0.9175
165.2	0.915
165.3	0.9125
165.4	0.92
165.5	0.92
165.6	0.9225
165.7	0.9175
165.8	0.92
165.9	0.9225
166	0.9225
166.1	0.925
166.2	0.9125
166.3	0.91
166.4	0.9125
166.5	0.915
166.6	0.9225
166.7	0.9175
166.8	0.92
166.9	0.9225
167	0.925
167.1	0.925
167.2	0.9225
167.3	0.93
167.4	0.9325
167.5	0.935
167.6	0.935
167.7	0.93
167.8	0.9275
167.9	0.935
168	0.93
168.1	0.9225
168.2	0.915
168.3	0.915
168.4	0.9225
168.5	0.92
168.6	0.925
168.7	0.93
168.8	0.925
168.9	0.9325
169	0.9325
169.1	0.9375
169.2	0.9375
169.3	0.945
169.4	0.9475
169.5	0.9425
169.6	0.945
169.7	0.9425
169.8	0.9475
169.9	0.9425
170	0.9425
170.1	0.945
170.2	0.94
170.3	0.9425
170.4	0.9425
170.5	0.9525
170.6	0.95
170.7	0.94
170.8	0.9325
170.9	0.9275
171	0.9275
171.1	0.93
171.2	0.93
171.3	0.925
171.4	0.9225
171.5	0.9225
171.6	0.9175
171.7	0.9275
171.8	0.93
171.9	0.93
172	0.9275
172.1	0.9225
172.2	0.9275
172.3	0.9325
172.4	0.9325
172.5	0.935
172.6	0.9325
172.7	0.925
172.8	0.925
172.9	0.925
173	0.93
173.1	0.9325
173.2	0.9275
173.3	0.925
173.4	0.9275
173.5	0.925
173.6	0.92
173.7	0.9175
173.8	0.9175
173.9	0.9175
174	0.915
174.1	0.915
174.2	0.925
174.3	0.92
174.4	0.92
174.5	0.9075
174.6	0.905
174.7	0.92
174.8	0.9275
174.9	0.9275
175	0.92
175.1	0.9125
175.2	0.91
175.3	0.9
175.4	0.89
175.5	0.895
175.6	0.9025
175.7	0.9125
175.8	0.9175
175.9	0.9175
176	0.92
176.1	0.9175
176.2	0.92
176.3	0.9225
176.4	0.915
176.5	0.91
176.6	0.9
176.7	0.905
176.8	0.905
176.9	0.9
177	0.9
177.1	0.905
177.2	0.9025
177.3	0.9025
177.4	0.8925
177.5	0.9025
177.6	0.915
177.7	0.9125
177.8	0.9175
177.9	0.91
178	0.9175
178.1	0.915
178.2	0.92
178.3	0.9175
178.4	0.9175
178.5	0.9225
178.6	0.9175
178.7	0.9175
178.8	0.915
178.9	0.915
179	0.9125
179.1	0.9125
179.2	0.92
179.3	0.93
179.4	0.9325
179.5	0.935
179.6	0.94
179.7	0.935
179.8	0.935
179.9	0.9275
180	0.94
180.1	0.94
180.2	0.935
180.3	0.9425
180.4	0.9475
180.5	0.945
180.6	0.9475
180.7	0.9375
180.8	0.94
180.9	0.9425
181	0.94
181.1	0.93
181.2	0.925
181.3	0.9225
181.4	0.93
181.5	0.93
181.6	0.9325
181.7	0.94
181.8	0.9375
181.9	0.9325
182	0.935
182.1	0.9425
182.2	0.9375
182.3	0.9375
182.4	0.935
182.5	0.9375
182.6	0.9325
182.7	0.9325
182.8	0.93
182.9	0.935
183	0.93
183.1	0.9325
183.2	0.93
183.3	0.935
183.4	0.935
183.5	0.935
183.6	0.9325
183.7	0.9325
183.8	0.9375
183.9	0.9375
184	0.93
184.1	0.9225
184.2	0.9275
184.3	0.93
184.4	0.935
184.5	0.9425
184.6	0.935
184.7	0.9375
184.8	0.9375
184.9	0.9425
185	0.945
185.1	0.95
185.2	0.95
185.3	0.9475
185.4	0.945
185.5	0.9475
185.6	0.94
185.7	0.94
185.8	0.9375
185.9	0.935
186	0.9325
186.1	0.935
186.2	0.9375
186.3	0.9375
186.4	0.9425
186.5	0.945
186.6	0.9475
186.7	0.9475
186.8	0.945
186.9	0.9425
187	0.9475
187.1	0.95
187.2	0.9525
187.3	0.95
187.4	0.955
187.5	0.9575
187.6	0.96
187.7	0.9475
187.8	0.95
187.9	0.95
188	0.9525
188.1	0.9475
188.2	0.94
188.3	0.9475
188.4	0.9525
188.5	0.9575
188.6	0.9525
188.7	0.955
188.8	0.9575
188.9	0.9475
189	0.9425
189.1	0.935
189.2	0.9375
189.3	0.94
189.4	0.9375
189.5	0.9325
189.6	0.935
189.7	0.9425
189.8	0.945
189.9	0.9475
190	0.9375
190.1	0.935
190.2	0.9325
190.3	0.9325
190.4	0.9325
190.5	0.935
190.6	0.93
190.7	0.93
190.8	0.94
190.9	0.9375
191	0.9425
191.1	0.9425
191.2	0.935
191.3	0.93
191.4	0.9325
191.5	0.9325
191.6	0.93
191.7	0.9275
191.8	0.9325
191.9	0.93
192	0.9375
192.1	0.94
192.2	0.9325
192.3	0.935
192.4	0.935
192.5	0.9425
192.6	0.94
192.7	0.945
192.8	0.945
192.9	0.9475
193	0.945
193.1	0.9525
193.2	0.9475
193.3	0.9475
193.4	0.9475
193.5	0.945
193.6	0.945
193.7	0.9375
193.8	0.945
193.9	0.9375
194	0.9425
194.1	0.9475
194.2	0.945
194.3	0.9475
194.4	0.945
194.5	0.9525
194.6	0.9525
194.7	0.95
194.8	0.945
194.9	0.95
195	0.95
195.1	0.945
195.2	0.945
195.3	0.9425
195.4	0.945
195.5	0.9475
195.6	0.9525
195.7	0.95
195.8	0.9475
195.9	0.9475
196	0.9425
196.1	0.935
196.2	0.9375
196.3	0.935
196.4	0.935
196.5	0.935
196.6	0.9375
196.7	0.9325
196.8	0.9325
196.9	0.9275
197	0.935
197.1	0.9375
197.2	0.9325
197.3	0.93
197.4	0.93
197.5	0.93
197.6	0.935
197.7	0.94
197.8	0.945
197.9	0.9425
198	0.9475
198.1	0.955
198.2	0.9575
198.3	0.955
198.4	0.9525
198.5	0.95
198.6	0.9525
198.7	0.95
198.8	0.95
198.9	0.945
199	0.9425
199.1	0.9375
199.2	0.945
199.3	0.95
199.4	0.9525
199.5	0.945
199.6	0.9525
199.7	0.95
199.8	0.945
199.9	0.9425
200	0.9525
[truncated: 14,000 more rows]
