# Supplementary material for: Bayesian inference of kinetic schemes for ion channels by Kalman filtering
Source: eLife journal article supplement (doi:10.7554/elife.62714), 2022-05-04
Supplement: fig4-data7 [file 1_Sim_N_200_Strom_MW_2M.xlsx]

## Sheet: 2 M
0.1	0
0.2	0
0.3	0
0.4	0
0.5	0
0.6	0
0.7	0
0.8	0
0.9	0
1	0
1.1	0
1.2	0
1.3	0
1.4	0
1.5	0
1.6	0
1.7	0
1.8	0
1.9	0
2	0
2.1	0
2.2	0
2.3	0
2.4	0
2.5	0
2.6	0
2.7	0
2.8	0
2.9	0
3	0
3.1	0
3.2	0
3.3	0
3.4	0
3.5	0
3.6	0
3.7	0
3.8	0
3.9	0
4	0
4.1	0
4.2	0
4.3	0
4.4	0
4.5	0
4.6	0
4.7	0
4.8	0
4.9	0
5	0
5.1	0
5.2	0
5.3	0
5.4	0
5.5	0
5.6	0
5.7	0
5.8	0
5.9	0
6	0
6.1	0
6.2	0
6.3	0
6.4	0
6.5	0
6.6	0
6.7	0
6.8	0
6.9	0
7	0
7.1	0
7.2	0
7.3	0
7.4	0
7.5	0
7.6	0
7.7	0
7.8	0
7.9	0
8	0
8.1	0
8.2	0
8.3	0
8.4	0
8.5	0
8.6	0
8.7	0
8.8	0
8.9	0
9	0
9.1	0
9.2	0
9.3	0
9.4	0
9.5	0
9.6	0
9.7	0
9.8	0
9.9	0
10	0
10.1	0
10.2	0
10.3	0
10.4	0
10.5	0
10.6	0
10.7	0
10.8	0
10.9	0
11	0
11.1	0
11.2	0
11.3	0
11.4	0
11.5	0
11.6	0
11.7	0
11.8	0
11.9	0
12	0
12.1	0
12.2	0
12.3	0
12.4	0
12.5	0
12.6	0
12.7	0
12.8	0
12.9	0
13	0
13.1	0
13.2	0
13.3	0
13.4	0
13.5	0
13.6	0
13.7	0
13.8	0
13.9	0
14	0
14.1	0
14.2	0
14.3	0
14.4	0
14.5	0
14.6	0
14.7	0
14.8	0
14.9	0
15	0
15.1	0
15.2	0
15.3	0
15.4	0
15.5	0
15.6	0
15.7	0
15.8	0
15.9	0
16	0
16.1	0
16.2	0
16.3	0
16.4	0
16.5	0
16.6	0
16.7	0
16.8	0
16.9	0
17	0
17.1	0
17.2	0
17.3	0
17.4	0
17.5	0
17.6	0
17.7	0
17.8	0
17.9	0
18	0
18.1	0
18.2	0
18.3	0
18.4	0
18.5	0
18.6	0
18.7	0
18.8	0
18.9	0
19	0
19.1	0
19.2	0
19.3	0
19.4	0
19.5	0
19.6	0
19.7	0
19.8	0
19.9	0
20	0
20.1	0
20.2	0
20.3	0
20.4	0
20.5	0
20.6	0
20.7	0
20.8	0
20.9	0
21	0
21.1	0
21.2	0
21.3	0
21.4	0
21.5	0
21.6	0
21.7	0
21.8	0
21.9	0
22	0
22.1	0
22.2	0
22.3	0
22.4	0
22.5	0
22.6	0
22.7	0
22.8	0
22.9	0
23	0
23.1	0
23.2	0
23.3	0
23.4	0
23.5	0
23.6	0
23.7	0
23.8	0
23.9	0
24	0
24.1	0
24.2	0
24.3	0
24.4	0
24.5	0
24.6	0
24.7	0
24.8	0
24.9	0
25	0
25.1	0
25.2	0
25.3	0
25.4	0
25.5	0
25.6	0
25.7	0
25.8	0
25.9	0
26	0
26.1	0
26.2	0
26.3	0
26.4	0
26.5	0
26.6	0
26.7	0
26.8	0
26.9	0
27	0
27.1	0
27.2	0
27.3	0
27.4	0
27.5	0
27.6	0
27.7	0
27.8	0
27.9	0
28	0
28.1	0
28.2	0
28.3	0
28.4	0
28.5	0
28.6	0
28.7	0
28.8	0
28.9	0
29	0
29.1	0
29.2	0
29.3	0
29.4	0
29.5	0
29.6	0
29.7	0
29.8	0
29.9	0
30	0
30.1	0
30.2	0
30.3	0
30.4	0
30.5	0
30.6	0
30.7	0
30.8	0
30.9	0
31	0
31.1	0
31.2	0
31.3	0
31.4	0
31.5	0
31.6	0
31.7	0
31.8	0
31.9	0
32	0
32.1	0
32.2	0
32.3	0
32.4	0
32.5	0
32.6	0
32.7	0
32.8	0
32.9	0
33	0
33.1	0
33.2	0
33.3	0
33.4	0
33.5	0
33.6	0
33.7	0
33.8	0
33.9	0
34	0
34.1	0
34.2	0
34.3	0
34.4	0
34.5	0
34.6	0
34.7	0
34.8	0
34.9	0
35	0
35.1	0
35.2	0
35.3	0
35.4	0
35.5	0
35.6	0
35.7	0
35.8	0
35.9	0
36	0
36.1	0
36.2	0
36.3	0
36.4	0
36.5	0
36.6	0
36.7	0
36.8	0
36.9	0
37	0
37.1	0
37.2	0
37.3	0
37.4	0
37.5	0
37.6	0
37.7	0
37.8	0
37.9	0
38	0
38.1	0
38.2	0
38.3	0
38.4	0
38.5	0
38.6	0
38.7	0
38.8	0
38.9	0
39	0
39.1	0
39.2	0
39.3	0
39.4	0
39.5	0
39.6	0
39.7	0
39.8	0
39.9	0
40	0
40.1	0
40.2	0
40.3	0
40.4	0
40.5	0
40.6	0
40.7	0
40.8	0
40.9	0
41	0
41.1	0
41.2	0
41.3	0
41.4	0
41.5	0
41.6	0
41.7	0
41.8	0
41.9	0
42	0
42.1	0
42.2	0
42.3	0
42.4	0
42.5	0
42.6	0
42.7	0
42.8	0
42.9	0
43	0
43.1	0
43.2	0
43.3	0
43.4	0
43.5	0
43.6	0
43.7	0
43.8	0
43.9	0
44	0
44.1	0
44.2	0
44.3	0
44.4	0
44.5	0
44.6	0
44.7	0
44.8	0
44.9	0
45	0
45.1	0
45.2	0
45.3	0
45.4	0
45.5	0
45.6	0
45.7	0
45.8	0
45.9	0
46	0
46.1	0
46.2	0
46.3	0
46.4	0
46.5	0
46.6	0
46.7	0
46.8	0
46.9	0
47	0
47.1	0
47.2	0
47.3	0
47.4	0
47.5	0
47.6	0
47.7	0
47.8	0
47.9	0
48	0
48.1	0
48.2	0
48.3	0
48.4	0
48.5	0
48.6	0
48.7	0
48.8	0
48.9	0
49	0
49.1	0
49.2	0
49.3	0
49.4	0
49.5	0
49.6	0
49.7	0
49.8	0
49.9	0
50	0
50.1	0
50.2	0
50.3	0
50.4	0
50.5	0
50.6	0
50.7	0
50.8	0
50.9	0
51	0
51.1	0
51.2	0
51.3	0
51.4	0
51.5	0
51.6	0
51.7	0
51.8	0
51.9	0
52	0
52.1	0
52.2	0
52.3	0
52.4	0
52.5	0
52.6	0
52.7	0
52.8	0
52.9	0
53	0
53.1	0
53.2	0
53.3	0
53.4	0
53.5	0
53.6	0
53.7	0
53.8	0
53.9	0
54	0
54.1	0
54.2	0
54.3	0
54.4	0
54.5	0
54.6	0
54.7	0
54.8	0
54.9	0
55	0
55.1	0
55.2	0
55.3	0
55.4	0
55.5	0
55.6	0
55.7	0
55.8	0
55.9	0
56	0
56.1	0
56.2	0
56.3	0
56.4	0
56.5	0
56.6	0
56.7	0
56.8	0
56.9	0
57	0
57.1	0
57.2	0
57.3	0
57.4	0
57.5	0
57.6	0
57.7	0
57.8	0
57.9	0
58	0
58.1	0
58.2	0
58.3	0
58.4	0
58.5	0
58.6	0
58.7	0
58.8	0
58.9	0
59	0
59.1	0
59.2	0
59.3	0
59.4	0
59.5	0
59.6	0
59.7	0
59.8	0
59.9	0
60	0
60.1	0
60.2	0
60.3	0
60.4	0
60.5	0
60.6	0
60.7	0
60.8	0
60.9	0
61	0
61.1	0
61.2	0
61.3	0
61.4	0
61.5	0
61.6	0
61.7	0
61.8	0
61.9	0
62	0
62.1	0
62.2	0
62.3	0
62.4	0
62.5	0
62.6	0
62.7	0
62.8	0
62.9	0
63	0
63.1	0
63.2	0
63.3	0
63.4	0
63.5	0
63.6	0
63.7	0
63.8	0
63.9	0
64	0
64.1	0
64.2	0
64.3	0
64.4	0
64.5	0
64.6	0
64.7	0
64.8	0
64.9	0
65	0
65.1	0
65.2	0
65.3	0
65.4	0
65.5	0
65.6	0
65.7	0
65.8	0
65.9	0
66	0
66.1	0
66.2	0
66.3	0
66.4	0
66.5	0
66.6	0
66.7	0
66.8	0
66.9	0
67	0
67.1	0
67.2	0
67.3	0
67.4	0
67.5	0
67.6	0
67.7	0
67.8	0
67.9	0
68	0
68.1	0
68.2	0
68.3	0
68.4	0
68.5	0
68.6	0
68.7	0
68.8	0
68.9	0
69	0
69.1	0
69.2	0
69.3	0
69.4	0
69.5	0
69.6	0
69.7	0
69.8	0
69.9	0
70	0
70.1	0
70.2	0
70.3	0
70.4	0
70.5	0
70.6	0
70.7	0
70.8	0
70.9	0
71	0
71.1	0
71.2	0
71.3	0
71.4	0
71.5	0
71.6	0
71.7	0
71.8	0
71.9	0
72	0
72.1	0
72.2	0
72.3	0
72.4	0
72.5	0
72.6	0
72.7	0
72.8	0
72.9	0
73	0
73.1	0
73.2	0
73.3	0
73.4	0
73.5	0
73.6	0
73.7	0
73.8	0
73.9	0
74	0
74.1	0
74.2	0
74.3	0
74.4	0
74.5	0
74.6	0
74.7	0
74.8	0
74.9	0
75	0
75.1	0
75.2	0
75.3	0
75.4	0
75.5	0
75.6	0
75.7	0
75.8	0
75.9	0
76	0
76.1	0
76.2	0
76.3	0
76.4	0
76.5	0
76.6	0
76.7	0
76.8	0
76.9	0
77	0
77.1	0
77.2	0
77.3	0
77.4	0
77.5	0
77.6	0
77.7	0
77.8	0
77.9	0
78	0
78.1	0
78.2	0
78.3	0
78.4	0
78.5	0
78.6	0
78.7	0
78.8	0
78.9	0
79	0
79.1	0
79.2	0
79.3	0
79.4	0
79.5	0
79.6	0
79.7	0
79.8	0
79.9	0
80	0
80.1	0
80.2	0
80.3	0
80.4	0
80.5	0
80.6	0
80.7	0
80.8	0
80.9	0
81	0
81.1	0
81.2	0
81.3	0
81.4	0
81.5	0
81.6	0
81.7	0
81.8	0
81.9	0
82	0
82.1	0
82.2	0
82.3	0
82.4	0
82.5	0
82.6	0
82.7	0
82.8	0
82.9	0
83	0
83.1	0
83.2	0
83.3	0
83.4	0
83.5	0
83.6	0
83.7	0
83.8	0
83.9	0
84	0
84.1	0
84.2	0
84.3	0
84.4	0
84.5	0
84.6	0
84.7	0
84.8	0
84.9	0
85	0
85.1	0
85.2	0
85.3	0
85.4	0
85.5	0
85.6	0
85.7	0
85.8	0
85.9	0
86	0
86.1	0
86.2	0
86.3	0
86.4	0
86.5	0
86.6	0
86.7	0
86.8	0
86.9	0
87	0
87.1	0
87.2	0
87.3	0
87.4	0
87.5	0
87.6	0
87.7	0
87.8	0
87.9	0
88	0
88.1	0
88.2	0
88.3	0
88.4	0
88.5	0
88.6	0
88.7	0
88.8	0
88.9	0
89	0
89.1	0
89.2	0
89.3	0
89.4	0
89.5	0
89.6	0
89.7	0
89.8	0
89.9	0
90	0
90.1	0
90.2	0
90.3	0
90.4	0
90.5	0
90.6	0
90.7	0
90.8	0
90.9	0
91	0
91.1	0
91.2	0
91.3	0
91.4	0
91.5	0
91.6	0
91.7	0
91.8	0
91.9	0
92	0
92.1	0
92.2	0
92.3	0
92.4	0
92.5	0
92.6	0
92.7	0
92.8	0
92.9	0
93	0
93.1	0
93.2	0
93.3	0
93.4	0
93.5	0
93.6	0
93.7	0
93.8	0
93.9	0
94	0
94.1	0
94.2	0
94.3	0
94.4	0
94.5	0
94.6	0
94.7	0
94.8	0
94.9	0
95	0
95.1	0
95.2	0
95.3	0
95.4	0
95.5	0
95.6	0
95.7	0
95.8	0
95.9	0
96	0
96.1	0
96.2	0
96.3	0
96.4	0
96.5	0
96.6	0
96.7	0
96.8	0
96.9	0
97	0
97.1	0
97.2	0
97.3	0
97.4	0
97.5	0
97.6	0
97.7	0
97.8	0
97.9	0
98	0
98.1	0
98.2	0
98.3	0
98.4	0
98.5	0
98.6	0
98.7	0
98.8	0
98.9	0
99	0
99.1	0
99.2	0
99.3	0
99.4	0
99.5	0
99.6	0
99.7	0
99.8	0
99.9	0
100	0
100.1	0
100.2	0
100.3	0
100.4	0
100.5	0
100.6	0
100.7	0
100.8	0
100.9	0.005
101	0.005
101.1	0.01
101.2	0.01
101.3	0.01
101.4	0.01
101.5	0.015
101.6	0.025
101.7	0.03
101.8	0.035
101.9	0.04
102	0.04
102.1	0.04
102.2	0.04
102.3	0.045
102.4	0.055
102.5	0.055
102.6	0.06
102.7	0.06
102.8	0.06
102.9	0.065
103	0.07
103.1	0.085
103.2	0.09
103.3	0.09
103.4	0.09
103.5	0.095
103.6	0.095
103.7	0.095
103.8	0.095
103.9	0.095
104	0.095
104.1	0.095
104.2	0.1
104.3	0.105
104.4	0.105
104.5	0.11
104.6	0.115
104.7	0.115
104.8	0.12
104.9	0.12
105	0.115
105.1	0.115
105.2	0.115
105.3	0.12
105.4	0.12
105.5	0.12
105.6	0.12
105.7	0.12
105.8	0.12
105.9	0.12
106	0.12
106.1	0.12
106.2	0.125
106.3	0.125
106.4	0.13
106.5	0.13
106.6	0.135
106.7	0.145
106.8	0.145
106.9	0.145
107	0.15
107.1	0.15
107.2	0.15
107.3	0.15
107.4	0.15
107.5	0.15
107.6	0.15
107.7	0.155
107.8	0.155
107.9	0.155
108	0.16
108.1	0.16
108.2	0.16
108.3	0.16
108.4	0.16
108.5	0.16
108.6	0.16
108.7	0.165
108.8	0.165
108.9	0.165
109	0.17
109.1	0.17
109.2	0.17
109.3	0.175
109.4	0.175
109.5	0.175
109.6	0.175
109.7	0.18
109.8	0.18
109.9	0.19
110	0.19
110.1	0.19
110.2	0.195
110.3	0.195
110.4	0.2
110.5	0.2
110.6	0.2
110.7	0.2
110.8	0.2
110.9	0.205
111	0.205
111.1	0.205
111.2	0.205
111.3	0.205
111.4	0.21
111.5	0.215
111.6	0.22
111.7	0.225
111.8	0.23
111.9	0.225
112	0.225
112.1	0.23
112.2	0.235
112.3	0.24
112.4	0.24
112.5	0.245
112.6	0.245
112.7	0.245
112.8	0.245
112.9	0.245
113	0.245
113.1	0.245
113.2	0.245
113.3	0.245
113.4	0.25
113.5	0.25
113.6	0.255
113.7	0.26
113.8	0.265
113.9	0.27
114	0.27
114.1	0.27
114.2	0.27
114.3	0.27
114.4	0.27
114.5	0.27
114.6	0.27
114.7	0.27
114.8	0.27
114.9	0.265
115	0.27
115.1	0.28
115.2	0.28
115.3	0.28
115.4	0.28
115.5	0.28
115.6	0.275
115.7	0.27
115.8	0.27
115.9	0.275
116	0.275
116.1	0.28
116.2	0.285
116.3	0.29
116.4	0.29
116.5	0.3
116.6	0.3
116.7	0.3
116.8	0.31
116.9	0.315
117	0.315
117.1	0.315
117.2	0.32
117.3	0.32
117.4	0.32
117.5	0.32
117.6	0.32
117.7	0.325
117.8	0.33
117.9	0.33
118	0.33
118.1	0.335
118.2	0.335
118.3	0.335
118.4	0.335
118.5	0.335
118.6	0.335
118.7	0.34
118.8	0.34
118.9	0.34
119	0.35
119.1	0.36
119.2	0.36
119.3	0.355
119.4	0.355
119.5	0.36
119.6	0.36
119.7	0.36
119.8	0.36
119.9	0.365
120	0.37
120.1	0.37
120.2	0.375
120.3	0.37
120.4	0.37
120.5	0.37
120.6	0.37
120.7	0.37
120.8	0.385
120.9	0.4
121	0.405
121.1	0.415
121.2	0.415
121.3	0.415
121.4	0.425
121.5	0.43
121.6	0.43
121.7	0.43
121.8	0.43
121.9	0.43
122	0.43
122.1	0.425
122.2	0.425
122.3	0.425
122.4	0.425
122.5	0.425
122.6	0.425
122.7	0.43
122.8	0.44
122.9	0.445
123	0.445
123.1	0.445
123.2	0.45
123.3	0.46
123.4	0.46
123.5	0.46
123.6	0.47
123.7	0.47
123.8	0.465
123.9	0.465
124	0.465
124.1	0.47
124.2	0.475
124.3	0.475
124.4	0.475
124.5	0.475
124.6	0.475
124.7	0.475
124.8	0.475
124.9	0.475
125	0.475
125.1	0.48
125.2	0.485
125.3	0.485
125.4	0.48
125.5	0.48
125.6	0.485
125.7	0.485
125.8	0.485
125.9	0.49
126	0.49
126.1	0.49
126.2	0.495
126.3	0.495
126.4	0.495
126.5	0.49
126.6	0.49
126.7	0.495
126.8	0.5
126.9	0.5
127	0.495
127.1	0.495
127.2	0.495
127.3	0.495
127.4	0.5
127.5	0.5
127.6	0.495
127.7	0.5
127.8	0.5
127.9	0.5
128	0.505
128.1	0.505
128.2	0.51
128.3	0.51
128.4	0.51
128.5	0.51
128.6	0.51
128.7	0.515
128.8	0.515
128.9	0.515
129	0.52
129.1	0.52
129.2	0.52
129.3	0.525
129.4	0.525
129.5	0.52
129.6	0.525
129.7	0.525
129.8	0.525
129.9	0.53
130	0.525
130.1	0.525
130.2	0.525
130.3	0.535
130.4	0.535
130.5	0.535
130.6	0.535
130.7	0.545
130.8	0.55
130.9	0.55
131	0.55
131.1	0.55
131.2	0.55
131.3	0.55
131.4	0.55
131.5	0.55
131.6	0.55
131.7	0.555
131.8	0.555
131.9	0.565
132	0.565
132.1	0.565
132.2	0.565
132.3	0.565
132.4	0.565
132.5	0.565
132.6	0.565
132.7	0.565
132.8	0.57
132.9	0.57
133	0.57
133.1	0.57
133.2	0.57
133.3	0.57
133.4	0.57
133.5	0.565
133.6	0.57
133.7	0.575
133.8	0.575
133.9	0.58
134	0.585
134.1	0.585
134.2	0.585
134.3	0.58
134.4	0.58
134.5	0.58
134.6	0.58
134.7	0.58
134.8	0.58
134.9	0.585
135	0.585
135.1	0.585
135.2	0.58
135.3	0.585
135.4	0.585
135.5	0.585
135.6	0.59
135.7	0.59
135.8	0.59
135.9	0.59
136	0.59
136.1	0.59
136.2	0.595
136.3	0.595
136.4	0.595
136.5	0.6
136.6	0.6
136.7	0.6
136.8	0.6
136.9	0.6
137	0.6
137.1	0.6
137.2	0.605
137.3	0.6
137.4	0.6
137.5	0.605
137.6	0.605
137.7	0.605
137.8	0.605
137.9	0.605
138	0.61
138.1	0.61
138.2	0.61
138.3	0.61
138.4	0.615
138.5	0.615
138.6	0.615
138.7	0.615
138.8	0.615
138.9	0.61
139	0.605
139.1	0.605
139.2	0.605
139.3	0.605
139.4	0.605
139.5	0.605
139.6	0.605
139.7	0.6
139.8	0.6
139.9	0.6
140	0.605
140.1	0.605
140.2	0.615
140.3	0.615
140.4	0.615
140.5	0.61
140.6	0.605
140.7	0.6
140.8	0.6
140.9	0.6
141	0.605
141.1	0.605
141.2	0.6
141.3	0.6
141.4	0.6
141.5	0.6
141.6	0.605
141.7	0.605
141.8	0.605
141.9	0.6
142	0.6
142.1	0.6
142.2	0.595
142.3	0.595
142.4	0.6
142.5	0.6
142.6	0.6
142.7	0.595
142.8	0.595
142.9	0.6
143	0.6
143.1	0.6
143.2	0.6
143.3	0.605
143.4	0.61
143.5	0.615
143.6	0.615
143.7	0.625
143.8	0.625
143.9	0.635
144	0.635
144.1	0.63
144.2	0.635
144.3	0.63
144.4	0.63
144.5	0.635
144.6	0.635
144.7	0.64
144.8	0.64
144.9	0.64
145	0.64
145.1	0.64
145.2	0.64
145.3	0.64
145.4	0.64
145.5	0.64
145.6	0.64
145.7	0.64
145.8	0.64
145.9	0.64
146	0.645
146.1	0.65
146.2	0.65
146.3	0.655
146.4	0.655
146.5	0.655
146.6	0.66
146.7	0.665
146.8	0.66
146.9	0.66
147	0.66
147.1	0.66
147.2	0.66
147.3	0.665
147.4	0.665
147.5	0.665
147.6	0.665
147.7	0.665
147.8	0.665
147.9	0.665
148	0.665
148.1	0.665
148.2	0.665
148.3	0.67
148.4	0.67
148.5	0.67
148.6	0.67
148.7	0.67
148.8	0.67
148.9	0.665
149	0.665
149.1	0.665
149.2	0.665
149.3	0.665
149.4	0.665
149.5	0.665
149.6	0.665
149.7	0.665
149.8	0.66
149.9	0.66
150	0.66
150.1	0.66
150.2	0.66
150.3	0.66
150.4	0.66
150.5	0.66
150.6	0.655
150.7	0.655
150.8	0.66
150.9	0.66
151	0.66
151.1	0.66
151.2	0.665
151.3	0.665
151.4	0.665
151.5	0.665
151.6	0.665
151.7	0.66
151.8	0.66
151.9	0.66
152	0.655
152.1	0.66
152.2	0.66
152.3	0.66
152.4	0.66
152.5	0.66
152.6	0.66
152.7	0.66
152.8	0.66
152.9	0.66
153	0.66
153.1	0.665
153.2	0.67
153.3	0.67
153.4	0.67
153.5	0.67
153.6	0.67
153.7	0.67
153.8	0.675
153.9	0.675
154	0.67
154.1	0.675
154.2	0.675
154.3	0.675
154.4	0.675
154.5	0.675
154.6	0.67
154.7	0.67
154.8	0.67
154.9	0.67
155	0.665
155.1	0.665
155.2	0.665
155.3	0.665
155.4	0.665
155.5	0.67
155.6	0.67
155.7	0.67
155.8	0.67
155.9	0.67
156	0.665
156.1	0.665
156.2	0.665
156.3	0.665
156.4	0.665
156.5	0.665
156.6	0.67
156.7	0.675
156.8	0.665
156.9	0.665
157	0.67
157.1	0.67
157.2	0.67
157.3	0.67
157.4	0.665
157.5	0.665
157.6	0.665
157.7	0.67
157.8	0.67
157.9	0.675
158	0.675
158.1	0.675
158.2	0.675
158.3	0.675
158.4	0.675
158.5	0.675
158.6	0.675
158.7	0.675
158.8	0.675
158.9	0.675
159	0.67
159.1	0.67
159.2	0.67
159.3	0.67
159.4	0.67
159.5	0.67
159.6	0.67
159.7	0.665
159.8	0.665
159.9	0.665
160	0.665
160.1	0.66
160.2	0.655
160.3	0.65
160.4	0.65
160.5	0.65
160.6	0.65
160.7	0.645
160.8	0.645
160.9	0.645
161	0.65
161.1	0.65
161.2	0.65
161.3	0.65
161.4	0.65
161.5	0.655
161.6	0.655
161.7	0.655
161.8	0.655
161.9	0.66
162	0.665
162.1	0.665
162.2	0.665
162.3	0.665
162.4	0.665
162.5	0.665
162.6	0.665
162.7	0.665
162.8	0.67
162.9	0.67
163	0.67
163.1	0.67
163.2	0.67
163.3	0.67
163.4	0.67
163.5	0.68
163.6	0.68
163.7	0.685
163.8	0.685
163.9	0.685
164	0.685
164.1	0.685
164.2	0.685
164.3	0.685
164.4	0.685
164.5	0.685
164.6	0.685
164.7	0.685
164.8	0.68
164.9	0.68
165	0.68
165.1	0.68
165.2	0.68
165.3	0.68
165.4	0.68
165.5	0.68
165.6	0.68
165.7	0.68
165.8	0.68
165.9	0.68
166	0.68
166.1	0.68
166.2	0.68
166.3	0.68
166.4	0.68
166.5	0.68
166.6	0.68
166.7	0.68
166.8	0.68
166.9	0.685
167	0.685
167.1	0.685
167.2	0.685
167.3	0.685
167.4	0.685
167.5	0.685
167.6	0.68
167.7	0.675
167.8	0.675
167.9	0.675
168	0.675
168.1	0.675
168.2	0.67
168.3	0.67
168.4	0.675
168.5	0.67
168.6	0.67
168.7	0.67
168.8	0.67
168.9	0.675
169	0.675
169.1	0.68
169.2	0.685
169.3	0.685
169.4	0.68
169.5	0.68
169.6	0.68
169.7	0.68
169.8	0.68
169.9	0.68
170	0.68
170.1	0.68
170.2	0.68
170.3	0.68
170.4	0.68
170.5	0.685
170.6	0.685
170.7	0.685
170.8	0.685
170.9	0.685
171	0.69
171.1	0.69
171.2	0.695
171.3	0.695
171.4	0.695
171.5	0.695
171.6	0.69
171.7	0.69
171.8	0.695
171.9	0.695
172	0.695
172.1	0.695
172.2	0.69
172.3	0.69
172.4	0.69
172.5	0.69
172.6	0.69
172.7	0.695
172.8	0.695
172.9	0.69
173	0.69
173.1	0.685
173.2	0.685
173.3	0.69
173.4	0.69
173.5	0.69
173.6	0.69
173.7	0.69
173.8	0.69
173.9	0.69
174	0.695
174.1	0.69
174.2	0.68
174.3	0.685
174.4	0.68
174.5	0.68
174.6	0.68
174.7	0.68
174.8	0.675
174.9	0.675
175	0.68
175.1	0.685
175.2	0.685
175.3	0.685
175.4	0.685
175.5	0.685
175.6	0.68
175.7	0.685
175.8	0.69
175.9	0.685
176	0.68
176.1	0.68
176.2	0.68
176.3	0.68
176.4	0.675
176.5	0.675
176.6	0.675
176.7	0.675
176.8	0.675
176.9	0.675
177	0.675
177.1	0.68
177.2	0.68
177.3	0.68
177.4	0.69
177.5	0.69
177.6	0.69
177.7	0.695
177.8	0.695
177.9	0.695
178	0.695
178.1	0.695
178.2	0.695
178.3	0.695
178.4	0.695
178.5	0.695
178.6	0.695
178.7	0.695
178.8	0.695
178.9	0.7
179	0.7
179.1	0.7
179.2	0.705
179.3	0.705
179.4	0.705
179.5	0.705
179.6	0.71
179.7	0.71
179.8	0.71
179.9	0.71
180	0.715
180.1	0.715
180.2	0.72
180.3	0.72
180.4	0.725
180.5	0.725
180.6	0.725
180.7	0.725
180.8	0.725
180.9	0.725
181	0.725
181.1	0.725
181.2	0.72
181.3	0.72
181.4	0.72
181.5	0.72
181.6	0.72
181.7	0.72
181.8	0.725
181.9	0.725
182	0.725
182.1	0.725
182.2	0.73
182.3	0.735
182.4	0.735
182.5	0.735
182.6	0.735
182.7	0.735
182.8	0.735
182.9	0.74
183	0.745
183.1	0.745
183.2	0.745
183.3	0.745
183.4	0.745
183.5	0.745
183.6	0.745
183.7	0.745
183.8	0.745
183.9	0.745
184	0.75
184.1	0.745
184.2	0.745
184.3	0.745
184.4	0.745
184.5	0.745
184.6	0.745
184.7	0.745
184.8	0.74
184.9	0.745
185	0.75
185.1	0.75
185.2	0.75
185.3	0.75
185.4	0.75
185.5	0.75
185.6	0.75
185.7	0.755
185.8	0.755
185.9	0.75
186	0.75
186.1	0.75
186.2	0.75
186.3	0.75
186.4	0.75
186.5	0.755
186.6	0.76
186.7	0.76
186.8	0.755
186.9	0.755
187	0.755
187.1	0.755
187.2	0.755
187.3	0.755
187.4	0.75
187.5	0.75
187.6	0.75
187.7	0.75
187.8	0.75
187.9	0.75
188	0.745
188.1	0.745
188.2	0.74
188.3	0.74
188.4	0.74
188.5	0.74
188.6	0.74
188.7	0.74
188.8	0.74
188.9	0.74
189	0.74
189.1	0.745
189.2	0.75
189.3	0.75
189.4	0.75
189.5	0.75
189.6	0.745
189.7	0.745
189.8	0.745
189.9	0.745
190	0.75
190.1	0.75
190.2	0.75
190.3	0.75
190.4	0.75
190.5	0.75
190.6	0.75
190.7	0.75
190.8	0.75
190.9	0.745
191	0.74
191.1	0.74
191.2	0.74
191.3	0.74
191.4	0.74
191.5	0.74
191.6	0.74
191.7	0.74
191.8	0.74
191.9	0.74
192	0.745
192.1	0.745
192.2	0.745
192.3	0.745
192.4	0.745
192.5	0.745
192.6	0.745
192.7	0.745
192.8	0.74
192.9	0.74
193	0.74
193.1	0.74
193.2	0.74
193.3	0.74
193.4	0.74
193.5	0.74
193.6	0.74
193.7	0.74
193.8	0.74
193.9	0.74
194	0.74
194.1	0.745
194.2	0.75
194.3	0.75
194.4	0.75
194.5	0.75
194.6	0.745
194.7	0.74
194.8	0.74
194.9	0.74
195	0.74
195.1	0.74
195.2	0.74
195.3	0.74
195.4	0.74
195.5	0.74
195.6	0.74
195.7	0.74
195.8	0.74
195.9	0.74
196	0.74
196.1	0.74
196.2	0.74
196.3	0.735
196.4	0.735
196.5	0.735
196.6	0.735
196.7	0.735
196.8	0.74
196.9	0.74
197	0.735
197.1	0.735
197.2	0.74
197.3	0.74
197.4	0.745
197.5	0.745
197.6	0.745
197.7	0.74
197.8	0.74
197.9	0.75
198	0.75
198.1	0.75
198.2	0.75
198.3	0.75
198.4	0.75
198.5	0.75
198.6	0.75
198.7	0.75
198.8	0.75
198.9	0.745
199	0.745
199.1	0.745
199.2	0.745
199.3	0.745
199.4	0.74
199.5	0.74
199.6	0.745
199.7	0.75
199.8	0.75
199.9	0.75
200	0.75
[truncated: 14,000 more rows]
