# Supplementary material for: Bayesian inference of kinetic schemes for ion channels by Kalman filtering
Source: eLife journal article supplement (doi:10.7554/elife.62714), 2022-05-04
Supplement: fig4-data7 [file 1_Sim_N_400_Fluor_MW_2M.xlsx]

## Sheet: 2 M
0.1	0
0.2	0
0.3	0
0.4	0
0.5	0
0.6	0
0.7	0
0.8	0
0.9	0
1	0
1.1	0
1.2	0
1.3	0
1.4	0
1.5	0
1.6	0
1.7	0
1.8	0
1.9	0
2	0
2.1	0
2.2	0
2.3	0
2.4	0
2.5	0
2.6	0
2.7	0
2.8	0
2.9	0
3	0
3.1	0
3.2	0
3.3	0
3.4	0
3.5	0
3.6	0
3.7	0
3.8	0
3.9	0
4	0
4.1	0
4.2	0
4.3	0
4.4	0
4.5	0
4.6	0
4.7	0
4.8	0
4.9	0
5	0
5.1	0
5.2	0
5.3	0
5.4	0
5.5	0
5.6	0
5.7	0
5.8	0
5.9	0
6	0
6.1	0
6.2	0
6.3	0
6.4	0
6.5	0
6.6	0
6.7	0
6.8	0
6.9	0
7	0
7.1	0
7.2	0
7.3	0
7.4	0
7.5	0
7.6	0
7.7	0
7.8	0
7.9	0
8	0
8.1	0
8.2	0
8.3	0
8.4	0
8.5	0
8.6	0
8.7	0
8.8	0
8.9	0
9	0
9.1	0
9.2	0
9.3	0
9.4	0
9.5	0
9.6	0
9.7	0
9.8	0
9.9	0
10	0
10.1	0
10.2	0
10.3	0
10.4	0
10.5	0
10.6	0
10.7	0
10.8	0
10.9	0
11	0
11.1	0
11.2	0
11.3	0
11.4	0
11.5	0
11.6	0
11.7	0
11.8	0
11.9	0
12	0
12.1	0
12.2	0
12.3	0
12.4	0
12.5	0
12.6	0
12.7	0
12.8	0
12.9	0
13	0
13.1	0
13.2	0
13.3	0
13.4	0
13.5	0
13.6	0
13.7	0
13.8	0
13.9	0
14	0
14.1	0
14.2	0
14.3	0
14.4	0
14.5	0
14.6	0
14.7	0
14.8	0
14.9	0
15	0
15.1	0
15.2	0
15.3	0
15.4	0
15.5	0
15.6	0
15.7	0
15.8	0
15.9	0
16	0
16.1	0
16.2	0
16.3	0
16.4	0
16.5	0
16.6	0
16.7	0
16.8	0
16.9	0
17	0
17.1	0
17.2	0
17.3	0
17.4	0
17.5	0
17.6	0
17.7	0
17.8	0
17.9	0
18	0
18.1	0
18.2	0
18.3	0
18.4	0
18.5	0
18.6	0
18.7	0
18.8	0
18.9	0
19	0
19.1	0
19.2	0
19.3	0
19.4	0
19.5	0
19.6	0
19.7	0
19.8	0
19.9	0
20	0
20.1	0
20.2	0
20.3	0
20.4	0
20.5	0
20.6	0
20.7	0
20.8	0
20.9	0
21	0
21.1	0
21.2	0
21.3	0
21.4	0
21.5	0
21.6	0
21.7	0
21.8	0
21.9	0
22	0
22.1	0
22.2	0
22.3	0
22.4	0
22.5	0
22.6	0
22.7	0
22.8	0
22.9	0
23	0
23.1	0
23.2	0
23.3	0
23.4	0
23.5	0
23.6	0
23.7	0
23.8	0
23.9	0
24	0
24.1	0
24.2	0
24.3	0
24.4	0
24.5	0
24.6	0
24.7	0
24.8	0
24.9	0
25	0
25.1	0
25.2	0
25.3	0
25.4	0
25.5	0
25.6	0
25.7	0
25.8	0
25.9	0
26	0
26.1	0
26.2	0
26.3	0
26.4	0
26.5	0
26.6	0
26.7	0
26.8	0
26.9	0
27	0
27.1	0
27.2	0
27.3	0
27.4	0
27.5	0
27.6	0
27.7	0
27.8	0
27.9	0
28	0
28.1	0
28.2	0
28.3	0
28.4	0
28.5	0
28.6	0
28.7	0
28.8	0
28.9	0
29	0
29.1	0
29.2	0
29.3	0
29.4	0
29.5	0
29.6	0
29.7	0
29.8	0
29.9	0
30	0
30.1	0
30.2	0
30.3	0
30.4	0
30.5	0
30.6	0
30.7	0
30.8	0
30.9	0
31	0
31.1	0
31.2	0
31.3	0
31.4	0
31.5	0
31.6	0
31.7	0
31.8	0
31.9	0
32	0
32.1	0
32.2	0
32.3	0
32.4	0
32.5	0
32.6	0
32.7	0
32.8	0
32.9	0
33	0
33.1	0
33.2	0
33.3	0
33.4	0
33.5	0
33.6	0
33.7	0
33.8	0
33.9	0
34	0
34.1	0
34.2	0
34.3	0
34.4	0
34.5	0
34.6	0
34.7	0
34.8	0
34.9	0
35	0
35.1	0
35.2	0
35.3	0
35.4	0
35.5	0
35.6	0
35.7	0
35.8	0
35.9	0
36	0
36.1	0
36.2	0
36.3	0
36.4	0
36.5	0
36.6	0
36.7	0
36.8	0
36.9	0
37	0
37.1	0
37.2	0
37.3	0
37.4	0
37.5	0
37.6	0
37.7	0
37.8	0
37.9	0
38	0
38.1	0
38.2	0
38.3	0
38.4	0
38.5	0
38.6	0
38.7	0
38.8	0
38.9	0
39	0
39.1	0
39.2	0
39.3	0
39.4	0
39.5	0
39.6	0
39.7	0
39.8	0
39.9	0
40	0
40.1	0
40.2	0
40.3	0
40.4	0
40.5	0
40.6	0
40.7	0
40.8	0
40.9	0
41	0
41.1	0
41.2	0
41.3	0
41.4	0
41.5	0
41.6	0
41.7	0
41.8	0
41.9	0
42	0
42.1	0
42.2	0
42.3	0
42.4	0
42.5	0
42.6	0
42.7	0
42.8	0
42.9	0
43	0
43.1	0
43.2	0
43.3	0
43.4	0
43.5	0
43.6	0
43.7	0
43.8	0
43.9	0
44	0
44.1	0
44.2	0
44.3	0
44.4	0
44.5	0
44.6	0
44.7	0
44.8	0
44.9	0
45	0
45.1	0
45.2	0
45.3	0
45.4	0
45.5	0
45.6	0
45.7	0
45.8	0
45.9	0
46	0
46.1	0
46.2	0
46.3	0
46.4	0
46.5	0
46.6	0
46.7	0
46.8	0
46.9	0
47	0
47.1	0
47.2	0
47.3	0
47.4	0
47.5	0
47.6	0
47.7	0
47.8	0
47.9	0
48	0
48.1	0
48.2	0
48.3	0
48.4	0
48.5	0
48.6	0
48.7	0
48.8	0
48.9	0
49	0
49.1	0
49.2	0
49.3	0
49.4	0
49.5	0
49.6	0
49.7	0
49.8	0
49.9	0
50	0
50.1	0
50.2	0
50.3	0
50.4	0
50.5	0
50.6	0
50.7	0
50.8	0
50.9	0
51	0
51.1	0
51.2	0
51.3	0
51.4	0
51.5	0
51.6	0
51.7	0
51.8	0
51.9	0
52	0
52.1	0
52.2	0
52.3	0
52.4	0
52.5	0
52.6	0
52.7	0
52.8	0
52.9	0
53	0
53.1	0
53.2	0
53.3	0
53.4	0
53.5	0
53.6	0
53.7	0
53.8	0
53.9	0
54	0
54.1	0
54.2	0
54.3	0
54.4	0
54.5	0
54.6	0
54.7	0
54.8	0
54.9	0
55	0
55.1	0
55.2	0
55.3	0
55.4	0
55.5	0
55.6	0
55.7	0
55.8	0
55.9	0
56	0
56.1	0
56.2	0
56.3	0
56.4	0
56.5	0
56.6	0
56.7	0
56.8	0
56.9	0
57	0
57.1	0
57.2	0
57.3	0
57.4	0
57.5	0
57.6	0
57.7	0
57.8	0
57.9	0
58	0
58.1	0
58.2	0
58.3	0
58.4	0
58.5	0
58.6	0
58.7	0
58.8	0
58.9	0
59	0
59.1	0
59.2	0
59.3	0
59.4	0
59.5	0
59.6	0
59.7	0
59.8	0
59.9	0
60	0
60.1	0
60.2	0
60.3	0
60.4	0
60.5	0
60.6	0
60.7	0
60.8	0
60.9	0
61	0
61.1	0
61.2	0
61.3	0
61.4	0
61.5	0
61.6	0
61.7	0
61.8	0
61.9	0
62	0
62.1	0
62.2	0
62.3	0
62.4	0
62.5	0
62.6	0
62.7	0
62.8	0
62.9	0
63	0
63.1	0
63.2	0
63.3	0
63.4	0
63.5	0
63.6	0
63.7	0
63.8	0
63.9	0
64	0
64.1	0
64.2	0
64.3	0
64.4	0
64.5	0
64.6	0
64.7	0
64.8	0
64.9	0
65	0
65.1	0
65.2	0
65.3	0
65.4	0
65.5	0
65.6	0
65.7	0
65.8	0
65.9	0
66	0
66.1	0
66.2	0
66.3	0
66.4	0
66.5	0
66.6	0
66.7	0
66.8	0
66.9	0
67	0
67.1	0
67.2	0
67.3	0
67.4	0
67.5	0
67.6	0
67.7	0
67.8	0
67.9	0
68	0
68.1	0
68.2	0
68.3	0
68.4	0
68.5	0
68.6	0
68.7	0
68.8	0
68.9	0
69	0
69.1	0
69.2	0
69.3	0
69.4	0
69.5	0
69.6	0
69.7	0
69.8	0
69.9	0
70	0
70.1	0
70.2	0
70.3	0
70.4	0
70.5	0
70.6	0
70.7	0
70.8	0
70.9	0
71	0
71.1	0
71.2	0
71.3	0
71.4	0
71.5	0
71.6	0
71.7	0
71.8	0
71.9	0
72	0
72.1	0
72.2	0
72.3	0
72.4	0
72.5	0
72.6	0
72.7	0
72.8	0
72.9	0
73	0
73.1	0
73.2	0
73.3	0
73.4	0
73.5	0
73.6	0
73.7	0
73.8	0
73.9	0
74	0
74.1	0
74.2	0
74.3	0
74.4	0
74.5	0
74.6	0
74.7	0
74.8	0
74.9	0
75	0
75.1	0
75.2	0
75.3	0
75.4	0
75.5	0
75.6	0
75.7	0
75.8	0
75.9	0
76	0
76.1	0
76.2	0
76.3	0
76.4	0
76.5	0
76.6	0
76.7	0
76.8	0
76.9	0
77	0
77.1	0
77.2	0
77.3	0
77.4	0
77.5	0
77.6	0
77.7	0
77.8	0
77.9	0
78	0
78.1	0
78.2	0
78.3	0
78.4	0
78.5	0
78.6	0
78.7	0
78.8	0
78.9	0
79	0
79.1	0
79.2	0
79.3	0
79.4	0
79.5	0
79.6	0
79.7	0
79.8	0
79.9	0
80	0
80.1	0
80.2	0
80.3	0
80.4	0
80.5	0
80.6	0
80.7	0
80.8	0
80.9	0
81	0
81.1	0
81.2	0
81.3	0
81.4	0
81.5	0
81.6	0
81.7	0
81.8	0
81.9	0
82	0
82.1	0
82.2	0
82.3	0
82.4	0
82.5	0
82.6	0
82.7	0
82.8	0
82.9	0
83	0
83.1	0
83.2	0
83.3	0
83.4	0
83.5	0
83.6	0
83.7	0
83.8	0
83.9	0
84	0
84.1	0
84.2	0
84.3	0
84.4	0
84.5	0
84.6	0
84.7	0
84.8	0
84.9	0
85	0
85.1	0
85.2	0
85.3	0
85.4	0
85.5	0
85.6	0
85.7	0
85.8	0
85.9	0
86	0
86.1	0
86.2	0
86.3	0
86.4	0
86.5	0
86.6	0
86.7	0
86.8	0
86.9	0
87	0
87.1	0
87.2	0
87.3	0
87.4	0
87.5	0
87.6	0
87.7	0
87.8	0
87.9	0
88	0
88.1	0
88.2	0
88.3	0
88.4	0
88.5	0
88.6	0
88.7	0
88.8	0
88.9	0
89	0
89.1	0
89.2	0
89.3	0
89.4	0
89.5	0
89.6	0
89.7	0
89.8	0
89.9	0
90	0
90.1	0
90.2	0
90.3	0
90.4	0
90.5	0
90.6	0
90.7	0
90.8	0
90.9	0
91	0
91.1	0
91.2	0
91.3	0
91.4	0
91.5	0
91.6	0
91.7	0
91.8	0
91.9	0
92	0
92.1	0
92.2	0
92.3	0
92.4	0
92.5	0
92.6	0
92.7	0
92.8	0
92.9	0
93	0
93.1	0
93.2	0
93.3	0
93.4	0
93.5	0
93.6	0
93.7	0
93.8	0
93.9	0
94	0
94.1	0
94.2	0
94.3	0
94.4	0
94.5	0
94.6	0
94.7	0
94.8	0
94.9	0
95	0
95.1	0
95.2	0
95.3	0
95.4	0
95.5	0
95.6	0
95.7	0
95.8	0
95.9	0
96	0
96.1	0
96.2	0
96.3	0
96.4	0
96.5	0
96.6	0
96.7	0
96.8	0
96.9	0
97	0
97.1	0
97.2	0
97.3	0
97.4	0
97.5	0
97.6	0
97.7	0
97.8	0
97.9	0
98	0
98.1	0
98.2	0
98.3	0
98.4	0
98.5	0
98.6	0
98.7	0
98.8	0
98.9	0
99	0
99.1	0
99.2	0
99.3	0
99.4	0
99.5	0
99.6	0
99.7	0
99.8	0
99.9	0
100	0
100.1	0.10125
100.2	0.1675
100.3	0.2475
100.4	0.3075
100.5	0.35375
100.6	0.40875
100.7	0.44375
100.8	0.47375
100.9	0.50875
101	0.5425
101.1	0.56875
101.2	0.59625
101.3	0.61125
101.4	0.615
101.5	0.625
101.6	0.63625
101.7	0.65625
101.8	0.66875
101.9	0.6825
102	0.6875
102.1	0.69375
102.2	0.70125
102.3	0.71375
102.4	0.71375
102.5	0.71625
102.6	0.7175
102.7	0.72375
102.8	0.7175
102.9	0.71875
103	0.72875
103.1	0.72625
103.2	0.74375
103.3	0.7525
103.4	0.75375
103.5	0.74875
103.6	0.75
103.7	0.74875
103.8	0.75
103.9	0.7525
104	0.745
104.1	0.745
104.2	0.73625
104.3	0.74125
104.4	0.7375
104.5	0.74375
104.6	0.7375
104.7	0.74375
104.8	0.7525
104.9	0.755
105	0.765
105.1	0.76875
105.2	0.7675
105.3	0.775
105.4	0.7775
105.5	0.7725
105.6	0.77375
105.7	0.7675
105.8	0.76625
105.9	0.7625
106	0.76625
106.1	0.75625
106.2	0.75375
106.3	0.76
106.4	0.76625
106.5	0.7675
106.6	0.76875
106.7	0.77375
106.8	0.7825
106.9	0.77875
107	0.77625
107.1	0.78125
107.2	0.7775
107.3	0.775
107.4	0.7775
107.5	0.78625
107.6	0.775
107.7	0.77875
107.8	0.77
107.9	0.775
108	0.76875
108.1	0.76125
108.2	0.775
108.3	0.76875
108.4	0.78
108.5	0.77375
108.6	0.7725
108.7	0.7675
108.8	0.7725
108.9	0.78375
109	0.77875
109.1	0.78625
109.2	0.7875
109.3	0.785
109.4	0.7925
109.5	0.7925
109.6	0.79625
109.7	0.79375
109.8	0.79125
109.9	0.79
110	0.78625
110.1	0.795
110.2	0.80125
110.3	0.80125
110.4	0.80375
110.5	0.80625
110.6	0.79875
110.7	0.80875
110.8	0.81375
110.9	0.8225
111	0.81875
111.1	0.80875
111.2	0.81625
111.3	0.82625
111.4	0.82
111.5	0.8175
111.6	0.8175
111.7	0.81625
111.8	0.81875
111.9	0.81875
112	0.815
112.1	0.8125
112.2	0.80875
112.3	0.8225
112.4	0.81625
112.5	0.8075
112.6	0.8125
112.7	0.81125
112.8	0.8175
112.9	0.81125
113	0.8025
113.1	0.80375
113.2	0.81375
113.3	0.81125
113.4	0.81625
113.5	0.81625
113.6	0.81375
113.7	0.81625
113.8	0.80875
113.9	0.80625
114	0.80875
114.1	0.81375
114.2	0.81375
114.3	0.80875
114.4	0.8175
114.5	0.8225
114.6	0.8275
114.7	0.8275
114.8	0.81875
114.9	0.8225
115	0.82375
115.1	0.8225
115.2	0.82375
115.3	0.82875
115.4	0.815
115.5	0.81875
115.6	0.82375
115.7	0.82125
115.8	0.8275
115.9	0.82875
116	0.8275
116.1	0.8325
116.2	0.83375
116.3	0.82625
116.4	0.8275
116.5	0.82625
116.6	0.8325
116.7	0.83
116.8	0.83125
116.9	0.8375
117	0.82625
117.1	0.82125
117.2	0.81375
117.3	0.8225
117.4	0.825
117.5	0.82
117.6	0.83
117.7	0.8325
117.8	0.83625
117.9	0.8375
118	0.8375
118.1	0.84625
118.2	0.845
118.3	0.84
118.4	0.84125
118.5	0.8325
118.6	0.83875
118.7	0.84125
118.8	0.8325
118.9	0.83625
119	0.83
119.1	0.83
119.2	0.82875
119.3	0.8325
119.4	0.83125
119.5	0.8325
119.6	0.825
119.7	0.82625
119.8	0.83625
119.9	0.8325
120	0.82875
120.1	0.835
120.2	0.83875
120.3	0.8375
120.4	0.845
120.5	0.845
120.6	0.8475
120.7	0.85
120.8	0.8475
120.9	0.85125
121	0.84625
121.1	0.84875
121.2	0.84625
121.3	0.84375
121.4	0.84375
121.5	0.84375
121.6	0.8425
121.7	0.8425
121.8	0.84625
121.9	0.8475
122	0.84125
122.1	0.83375
122.2	0.84625
122.3	0.845
122.4	0.84
122.5	0.835
122.6	0.83375
122.7	0.82875
122.8	0.83375
122.9	0.825
123	0.8275
123.1	0.82375
123.2	0.82625
123.3	0.83
123.4	0.83375
123.5	0.83375
123.6	0.83
123.7	0.83625
123.8	0.835
123.9	0.8275
124	0.84
124.1	0.84
124.2	0.83625
124.3	0.8375
124.4	0.84375
124.5	0.85
124.6	0.85625
124.7	0.8575
124.8	0.86625
124.9	0.86375
125	0.86
125.1	0.8575
125.2	0.86375
125.3	0.865
125.4	0.86125
125.5	0.86125
125.6	0.8625
125.7	0.86625
125.8	0.85375
125.9	0.85625
126	0.855
126.1	0.855
126.2	0.86125
126.3	0.86625
126.4	0.86125
126.5	0.86
126.6	0.8625
126.7	0.8675
126.8	0.87
126.9	0.86875
127	0.85625
127.1	0.8575
127.2	0.85375
127.3	0.855
127.4	0.8475
127.5	0.85625
127.6	0.86
127.7	0.84875
127.8	0.85
127.9	0.85375
128	0.84625
128.1	0.845
128.2	0.8425
128.3	0.84
128.4	0.8475
128.5	0.85125
128.6	0.85625
128.7	0.84875
128.8	0.8525
128.9	0.86
129	0.8625
129.1	0.86125
129.2	0.85125
129.3	0.85
129.4	0.85375
129.5	0.855
129.6	0.86
129.7	0.865
129.8	0.86625
129.9	0.865
130	0.86875
130.1	0.86375
130.2	0.86875
130.3	0.8675
130.4	0.865
130.5	0.86875
130.6	0.8775
130.7	0.87625
130.8	0.86875
130.9	0.8725
131	0.86625
131.1	0.87125
131.2	0.8725
131.3	0.87625
131.4	0.87625
131.5	0.8775
131.6	0.87
131.7	0.8725
131.8	0.87375
131.9	0.8775
132	0.87125
132.1	0.87
132.2	0.87125
132.3	0.875
132.4	0.8775
132.5	0.88
132.6	0.875
132.7	0.875
132.8	0.8775
132.9	0.87625
133	0.87375
133.1	0.875
133.2	0.87375
133.3	0.885
133.4	0.885
133.5	0.87875
133.6	0.88375
133.7	0.88625
133.8	0.8825
133.9	0.885
134	0.88875
134.1	0.89375
134.2	0.8825
134.3	0.88125
134.4	0.88
134.5	0.88375
134.6	0.8875
134.7	0.89125
134.8	0.88875
134.9	0.89125
135	0.8925
135.1	0.89125
135.2	0.88375
135.3	0.88375
135.4	0.8875
135.5	0.8825
135.6	0.88
135.7	0.885
135.8	0.88875
135.9	0.8875
136	0.8875
136.1	0.8925
136.2	0.90125
136.3	0.9075
136.4	0.90875
136.5	0.91125
136.6	0.90875
136.7	0.90625
136.8	0.9125
136.9	0.91375
137	0.89875
137.1	0.9
137.2	0.90875
137.3	0.91125
137.4	0.91125
137.5	0.91125
137.6	0.91125
137.7	0.91125
137.8	0.9075
137.9	0.9025
138	0.90375
138.1	0.905
138.2	0.9025
138.3	0.91
138.4	0.9025
138.5	0.90375
138.6	0.905
138.7	0.90375
138.8	0.90625
138.9	0.905
139	0.9025
139.1	0.90375
139.2	0.90625
139.3	0.9075
139.4	0.90375
139.5	0.9025
139.6	0.905
139.7	0.905
139.8	0.905
139.9	0.9025
140	0.89625
140.1	0.90375
140.2	0.9075
140.3	0.9025
140.4	0.9025
140.5	0.90125
140.6	0.9
140.7	0.8975
140.8	0.895
140.9	0.9025
141	0.90375
141.1	0.91
141.2	0.9125
141.3	0.90625
141.4	0.90375
141.5	0.90875
141.6	0.9125
141.7	0.91375
141.8	0.91375
141.9	0.9125
142	0.9125
142.1	0.9125
142.2	0.91
142.3	0.91125
142.4	0.91
142.5	0.915
142.6	0.91125
142.7	0.90375
142.8	0.9075
142.9	0.91125
143	0.915
143.1	0.91125
143.2	0.90375
143.3	0.90375
143.4	0.9
143.5	0.89625
143.6	0.895
143.7	0.89625
143.8	0.89625
143.9	0.895
144	0.89625
144.1	0.9
144.2	0.8975
144.3	0.89125
144.4	0.89125
144.5	0.88625
144.6	0.89
144.7	0.8925
144.8	0.89375
144.9	0.89375
145	0.89625
145.1	0.895
145.2	0.8975
145.3	0.89375
145.4	0.89375
145.5	0.9025
145.6	0.90125
145.7	0.89625
145.8	0.89875
145.9	0.9
146	0.9
146.1	0.8975
146.2	0.89375
146.3	0.89125
146.4	0.89375
146.5	0.9025
146.6	0.90875
146.7	0.90875
146.8	0.9075
146.9	0.9075
147	0.90625
147.1	0.91
147.2	0.90875
147.3	0.89875
147.4	0.89875
147.5	0.89875
147.6	0.905
147.7	0.905
147.8	0.90625
147.9	0.9075
148	0.91125
148.1	0.9075
148.2	0.90375
148.3	0.905
148.4	0.90625
148.5	0.90125
148.6	0.895
148.7	0.8975
148.8	0.895
148.9	0.90375
149	0.90125
149.1	0.89875
149.2	0.895
149.3	0.89625
149.4	0.9
149.5	0.90125
149.6	0.8975
149.7	0.89875
149.8	0.9
149.9	0.89375
150	0.8875
150.1	0.88875
150.2	0.89125
150.3	0.895
150.4	0.9
150.5	0.89125
150.6	0.89
150.7	0.89
150.8	0.8925
150.9	0.89375
151	0.89625
151.1	0.8925
151.2	0.89
151.3	0.89375
151.4	0.89875
151.5	0.9
151.6	0.89625
151.7	0.90125
151.8	0.905
151.9	0.9075
152	0.91
152.1	0.91
152.2	0.9075
152.3	0.91125
152.4	0.91875
152.5	0.915
152.6	0.91625
152.7	0.9075
152.8	0.90875
152.9	0.90625
153	0.90625
153.1	0.90375
153.2	0.9
153.3	0.90125
153.4	0.8975
153.5	0.8975
153.6	0.89125
153.7	0.89625
153.8	0.89375
153.9	0.8925
154	0.9
154.1	0.90125
154.2	0.90875
154.3	0.91
154.4	0.91
154.5	0.915
154.6	0.90875
154.7	0.9075
154.8	0.91
154.9	0.915
155	0.91625
155.1	0.9175
155.2	0.91625
155.3	0.9125
155.4	0.9125
155.5	0.91625
155.6	0.91375
155.7	0.91125
155.8	0.92125
155.9	0.91875
156	0.92
156.1	0.92
156.2	0.91375
156.3	0.91875
156.4	0.92
156.5	0.915
156.6	0.915
156.7	0.915
156.8	0.9125
156.9	0.9125
157	0.91
157.1	0.91625
157.2	0.91625
157.3	0.92125
157.4	0.91875
157.5	0.9175
157.6	0.915
157.7	0.9125
157.8	0.90625
157.9	0.91
158	0.91
158.1	0.905
158.2	0.91
158.3	0.90375
158.4	0.8925
158.5	0.89375
158.6	0.90125
158.7	0.90125
158.8	0.905
158.9	0.90375
159	0.90375
159.1	0.90125
159.2	0.90125
159.3	0.905
159.4	0.90375
159.5	0.9
159.6	0.90625
159.7	0.90625
159.8	0.90625
159.9	0.90875
160	0.91125
160.1	0.91625
160.2	0.92125
160.3	0.925
160.4	0.9275
160.5	0.93125
160.6	0.9275
160.7	0.9275
160.8	0.93
160.9	0.9275
161	0.93125
161.1	0.925
161.2	0.9275
161.3	0.92875
161.4	0.93
161.5	0.92875
161.6	0.92875
161.7	0.9275
161.8	0.92625
161.9	0.92875
162	0.93
162.1	0.92625
162.2	0.92625
162.3	0.92
162.4	0.91625
162.5	0.91125
162.6	0.91625
162.7	0.9175
162.8	0.9175
162.9	0.91625
163	0.92125
163.1	0.915
163.2	0.91125
163.3	0.91
163.4	0.91375
163.5	0.915
163.6	0.9075
163.7	0.90875
163.8	0.91125
163.9	0.91375
164	0.9175
164.1	0.91625
164.2	0.91625
164.3	0.92
164.4	0.92
164.5	0.92125
164.6	0.92
164.7	0.91875
164.8	0.91875
164.9	0.92625
165	0.925
165.1	0.9225
165.2	0.9225
165.3	0.93
165.4	0.92375
165.5	0.91375
165.6	0.91625
165.7	0.91625
165.8	0.9175
165.9	0.92625
166	0.92625
166.1	0.92875
166.2	0.92375
166.3	0.925
166.4	0.92625
166.5	0.92625
166.6	0.92625
166.7	0.9225
166.8	0.92125
166.9	0.92125
167	0.9225
167.1	0.9225
167.2	0.9225
167.3	0.92625
167.4	0.93
167.5	0.93125
167.6	0.93
167.7	0.925
167.8	0.92625
167.9	0.92125
168	0.9175
168.1	0.9175
168.2	0.92
168.3	0.9225
168.4	0.92625
168.5	0.925
168.6	0.92625
168.7	0.92125
168.8	0.9225
168.9	0.92375
169	0.925
169.1	0.92875
169.2	0.9225
169.3	0.925
169.4	0.93
169.5	0.93
169.6	0.9275
169.7	0.92625
169.8	0.92625
169.9	0.9225
170	0.91875
170.1	0.91875
170.2	0.9225
170.3	0.93
170.4	0.9325
170.5	0.93
170.6	0.9225
170.7	0.91625
170.8	0.91
170.9	0.91125
171	0.9075
171.1	0.905
171.2	0.915
171.3	0.91875
171.4	0.92375
171.5	0.92125
171.6	0.9125
171.7	0.91625
171.8	0.9175
171.9	0.9175
172	0.92
172.1	0.9225
172.2	0.92
172.3	0.92125
172.4	0.92125
172.5	0.92
172.6	0.91875
172.7	0.9225
172.8	0.9275
172.9	0.9175
173	0.92
173.1	0.9225
173.2	0.92125
173.3	0.91875
173.4	0.91875
173.5	0.91875
173.6	0.92375
173.7	0.92875
173.8	0.92875
173.9	0.925
174	0.925
174.1	0.92625
174.2	0.9225
174.3	0.92625
174.4	0.925
174.5	0.92625
174.6	0.93
174.7	0.92625
174.8	0.9275
174.9	0.92625
175	0.92625
175.1	0.92375
175.2	0.925
175.3	0.925
175.4	0.92125
175.5	0.92125
175.6	0.925
175.7	0.92375
175.8	0.92625
175.9	0.92625
176	0.92625
176.1	0.9275
176.2	0.92375
176.3	0.925
176.4	0.9325
176.5	0.93375
176.6	0.93375
176.7	0.935
176.8	0.935
176.9	0.93625
177	0.93125
177.1	0.93125
177.2	0.935
177.3	0.93625
177.4	0.935
177.5	0.94375
177.6	0.935
177.7	0.93375
177.8	0.9325
177.9	0.92625
178	0.93
178.1	0.93
178.2	0.935
178.3	0.935
178.4	0.9375
178.5	0.93875
178.6	0.9425
178.7	0.94125
178.8	0.93625
178.9	0.9325
179	0.93375
179.1	0.93125
179.2	0.93125
179.3	0.93
179.4	0.93125
179.5	0.9325
179.6	0.935
179.7	0.93125
179.8	0.93625
179.9	0.93625
180	0.93625
180.1	0.93125
180.2	0.93625
180.3	0.9375
180.4	0.93625
180.5	0.935
180.6	0.9275
180.7	0.935
180.8	0.935
180.9	0.935
181	0.93125
181.1	0.92875
181.2	0.92625
181.3	0.925
181.4	0.92375
181.5	0.9325
181.6	0.93375
181.7	0.93125
181.8	0.9325
181.9	0.92875
182	0.93
182.1	0.9325
182.2	0.9325
182.3	0.935
182.4	0.9375
182.5	0.93375
182.6	0.9375
182.7	0.9375
182.8	0.93625
182.9	0.9325
183	0.92625
183.1	0.92875
183.2	0.92875
183.3	0.92625
183.4	0.92875
183.5	0.92875
183.6	0.92875
183.7	0.9325
183.8	0.92875
183.9	0.92875
184	0.92625
184.1	0.9275
184.2	0.9275
184.3	0.93125
184.4	0.93
184.5	0.92875
184.6	0.92625
184.7	0.92375
184.8	0.92625
184.9	0.92375
185	0.9225
185.1	0.925
185.2	0.925
185.3	0.92625
185.4	0.9275
185.5	0.92875
185.6	0.9325
185.7	0.9275
185.8	0.92375
185.9	0.925
186	0.92875
186.1	0.935
186.2	0.93375
186.3	0.93
186.4	0.93125
186.5	0.92625
186.6	0.93
186.7	0.92375
186.8	0.91875
186.9	0.915
187	0.92125
187.1	0.92375
187.2	0.92375
187.3	0.93
187.4	0.9275
187.5	0.92875
187.6	0.9275
187.7	0.93
187.8	0.93
187.9	0.93625
188	0.94
188.1	0.9425
188.2	0.94625
188.3	0.94375
188.4	0.9375
188.5	0.94
188.6	0.9425
188.7	0.94375
188.8	0.94375
188.9	0.94625
189	0.9475
189.1	0.94125
189.2	0.93875
189.3	0.935
189.4	0.9325
189.5	0.935
189.6	0.93875
189.7	0.94125
189.8	0.93625
189.9	0.93375
190	0.9325
190.1	0.93
190.2	0.93
190.3	0.92125
190.4	0.9225
190.5	0.925
190.6	0.92125
190.7	0.9225
190.8	0.9225
190.9	0.92375
191	0.91875
191.1	0.92
191.2	0.9225
191.3	0.92125
191.4	0.92375
191.5	0.92875
191.6	0.93
191.7	0.93
191.8	0.9325
191.9	0.93125
192	0.9325
192.1	0.92375
192.2	0.9275
192.3	0.93
192.4	0.93375
192.5	0.9275
192.6	0.925
192.7	0.925
192.8	0.92625
192.9	0.92625
193	0.9275
193.1	0.92875
193.2	0.9325
193.3	0.93125
193.4	0.93625
193.5	0.93625
193.6	0.93875
193.7	0.94125
193.8	0.94375
193.9	0.94625
194	0.94625
194.1	0.94
194.2	0.93375
194.3	0.9375
194.4	0.93375
194.5	0.93625
194.6	0.93625
194.7	0.93625
194.8	0.93625
194.9	0.93375
195	0.93375
195.1	0.93
195.2	0.925
195.3	0.93125
195.4	0.92625
195.5	0.92625
195.6	0.92625
195.7	0.925
195.8	0.92125
195.9	0.9225
196	0.92375
196.1	0.92125
196.2	0.9275
196.3	0.925
196.4	0.9225
196.5	0.92375
196.6	0.9225
196.7	0.9225
196.8	0.92125
196.9	0.92
197	0.92625
197.1	0.93
197.2	0.93
197.3	0.9275
197.4	0.92625
197.5	0.9275
197.6	0.93
197.7	0.9325
197.8	0.9225
197.9	0.92375
198	0.92375
198.1	0.92375
198.2	0.9225
198.3	0.92125
198.4	0.925
198.5	0.92875
198.6	0.93375
198.7	0.93625
198.8	0.9375
198.9	0.93875
199	0.93375
199.1	0.93625
199.2	0.93625
199.3	0.935
199.4	0.9425
199.5	0.94125
199.6	0.93875
199.7	0.9375
199.8	0.93625
199.9	0.935
200	0.935
[truncated: 14,000 more rows]
