# Supplementary material for: Bayesian inference of kinetic schemes for ion channels by Kalman filtering
Source: eLife journal article supplement (doi:10.7554/elife.62714), 2022-05-04
Supplement: fig4-data7 [file 1_Sim_N_400_Strom_MW_2M.xlsx]

## Sheet: 2 M
0.1	0
0.2	0
0.3	0
0.4	0
0.5	0
0.6	0
0.7	0
0.8	0
0.9	0
1	0
1.1	0
1.2	0
1.3	0
1.4	0
1.5	0
1.6	0
1.7	0
1.8	0
1.9	0
2	0
2.1	0
2.2	0
2.3	0
2.4	0
2.5	0
2.6	0
2.7	0
2.8	0
2.9	0
3	0
3.1	0
3.2	0
3.3	0
3.4	0
3.5	0
3.6	0
3.7	0
3.8	0
3.9	0
4	0
4.1	0
4.2	0
4.3	0
4.4	0
4.5	0
4.6	0
4.7	0
4.8	0
4.9	0
5	0
5.1	0
5.2	0
5.3	0
5.4	0
5.5	0
5.6	0
5.7	0
5.8	0
5.9	0
6	0
6.1	0
6.2	0
6.3	0
6.4	0
6.5	0
6.6	0
6.7	0
6.8	0
6.9	0
7	0
7.1	0
7.2	0
7.3	0
7.4	0
7.5	0
7.6	0
7.7	0
7.8	0
7.9	0
8	0
8.1	0
8.2	0
8.3	0
8.4	0
8.5	0
8.6	0
8.7	0
8.8	0
8.9	0
9	0
9.1	0
9.2	0
9.3	0
9.4	0
9.5	0
9.6	0
9.7	0
9.8	0
9.9	0
10	0
10.1	0
10.2	0
10.3	0
10.4	0
10.5	0
10.6	0
10.7	0
10.8	0
10.9	0
11	0
11.1	0
11.2	0
11.3	0
11.4	0
11.5	0
11.6	0
11.7	0
11.8	0
11.9	0
12	0
12.1	0
12.2	0
12.3	0
12.4	0
12.5	0
12.6	0
12.7	0
12.8	0
12.9	0
13	0
13.1	0
13.2	0
13.3	0
13.4	0
13.5	0
13.6	0
13.7	0
13.8	0
13.9	0
14	0
14.1	0
14.2	0
14.3	0
14.4	0
14.5	0
14.6	0
14.7	0
14.8	0
14.9	0
15	0
15.1	0
15.2	0
15.3	0
15.4	0
15.5	0
15.6	0
15.7	0
15.8	0
15.9	0
16	0
16.1	0
16.2	0
16.3	0
16.4	0
16.5	0
16.6	0
16.7	0
16.8	0
16.9	0
17	0
17.1	0
17.2	0
17.3	0
17.4	0
17.5	0
17.6	0
17.7	0
17.8	0
17.9	0
18	0
18.1	0
18.2	0
18.3	0
18.4	0
18.5	0
18.6	0
18.7	0
18.8	0
18.9	0
19	0
19.1	0
19.2	0
19.3	0
19.4	0
19.5	0
19.6	0
19.7	0
19.8	0
19.9	0
20	0
20.1	0
20.2	0
20.3	0
20.4	0
20.5	0
20.6	0
20.7	0
20.8	0
20.9	0
21	0
21.1	0
21.2	0
21.3	0
21.4	0
21.5	0
21.6	0
21.7	0
21.8	0
21.9	0
22	0
22.1	0
22.2	0
22.3	0
22.4	0
22.5	0
22.6	0
22.7	0
22.8	0
22.9	0
23	0
23.1	0
23.2	0
23.3	0
23.4	0
23.5	0
23.6	0
23.7	0
23.8	0
23.9	0
24	0
24.1	0
24.2	0
24.3	0
24.4	0
24.5	0
24.6	0
24.7	0
24.8	0
24.9	0
25	0
25.1	0
25.2	0
25.3	0
25.4	0
25.5	0
25.6	0
25.7	0
25.8	0
25.9	0
26	0
26.1	0
26.2	0
26.3	0
26.4	0
26.5	0
26.6	0
26.7	0
26.8	0
26.9	0
27	0
27.1	0
27.2	0
27.3	0
27.4	0
27.5	0
27.6	0
27.7	0
27.8	0
27.9	0
28	0
28.1	0
28.2	0
28.3	0
28.4	0
28.5	0
28.6	0
28.7	0
28.8	0
28.9	0
29	0
29.1	0
29.2	0
29.3	0
29.4	0
29.5	0
29.6	0
29.7	0
29.8	0
29.9	0
30	0
30.1	0
30.2	0
30.3	0
30.4	0
30.5	0
30.6	0
30.7	0
30.8	0
30.9	0
31	0
31.1	0
31.2	0
31.3	0
31.4	0
31.5	0
31.6	0
31.7	0
31.8	0
31.9	0
32	0
32.1	0
32.2	0
32.3	0
32.4	0
32.5	0
32.6	0
32.7	0
32.8	0
32.9	0
33	0
33.1	0
33.2	0
33.3	0
33.4	0
33.5	0
33.6	0
33.7	0
33.8	0
33.9	0
34	0
34.1	0
34.2	0
34.3	0
34.4	0
34.5	0
34.6	0
34.7	0
34.8	0
34.9	0
35	0
35.1	0
35.2	0
35.3	0
35.4	0
35.5	0
35.6	0
35.7	0
35.8	0
35.9	0
36	0
36.1	0
36.2	0
36.3	0
36.4	0
36.5	0
36.6	0
36.7	0
36.8	0
36.9	0
37	0
37.1	0
37.2	0
37.3	0
37.4	0
37.5	0
37.6	0
37.7	0
37.8	0
37.9	0
38	0
38.1	0
38.2	0
38.3	0
38.4	0
38.5	0
38.6	0
38.7	0
38.8	0
38.9	0
39	0
39.1	0
39.2	0
39.3	0
39.4	0
39.5	0
39.6	0
39.7	0
39.8	0
39.9	0
40	0
40.1	0
40.2	0
40.3	0
40.4	0
40.5	0
40.6	0
40.7	0
40.8	0
40.9	0
41	0
41.1	0
41.2	0
41.3	0
41.4	0
41.5	0
41.6	0
41.7	0
41.8	0
41.9	0
42	0
42.1	0
42.2	0
42.3	0
42.4	0
42.5	0
42.6	0
42.7	0
42.8	0
42.9	0
43	0
43.1	0
43.2	0
43.3	0
43.4	0
43.5	0
43.6	0
43.7	0
43.8	0
43.9	0
44	0
44.1	0
44.2	0
44.3	0
44.4	0
44.5	0
44.6	0
44.7	0
44.8	0
44.9	0
45	0
45.1	0
45.2	0
45.3	0
45.4	0
45.5	0
45.6	0
45.7	0
45.8	0
45.9	0
46	0
46.1	0
46.2	0
46.3	0
46.4	0
46.5	0
46.6	0
46.7	0
46.8	0
46.9	0
47	0
47.1	0
47.2	0
47.3	0
47.4	0
47.5	0
47.6	0
47.7	0
47.8	0
47.9	0
48	0
48.1	0
48.2	0
48.3	0
48.4	0
48.5	0
48.6	0
48.7	0
48.8	0
48.9	0
49	0
49.1	0
49.2	0
49.3	0
49.4	0
49.5	0
49.6	0
49.7	0
49.8	0
49.9	0
50	0
50.1	0
50.2	0
50.3	0
50.4	0
50.5	0
50.6	0
50.7	0
50.8	0
50.9	0
51	0
51.1	0
51.2	0
51.3	0
51.4	0
51.5	0
51.6	0
51.7	0
51.8	0
51.9	0
52	0
52.1	0
52.2	0
52.3	0
52.4	0
52.5	0
52.6	0
52.7	0
52.8	0
52.9	0
53	0
53.1	0
53.2	0
53.3	0
53.4	0
53.5	0
53.6	0
53.7	0
53.8	0
53.9	0
54	0
54.1	0
54.2	0
54.3	0
54.4	0
54.5	0
54.6	0
54.7	0
54.8	0
54.9	0
55	0
55.1	0
55.2	0
55.3	0
55.4	0
55.5	0
55.6	0
55.7	0
55.8	0
55.9	0
56	0
56.1	0
56.2	0
56.3	0
56.4	0
56.5	0
56.6	0
56.7	0
56.8	0
56.9	0
57	0
57.1	0
57.2	0
57.3	0
57.4	0
57.5	0
57.6	0
57.7	0
57.8	0
57.9	0
58	0
58.1	0
58.2	0
58.3	0
58.4	0
58.5	0
58.6	0
58.7	0
58.8	0
58.9	0
59	0
59.1	0
59.2	0
59.3	0
59.4	0
59.5	0
59.6	0
59.7	0
59.8	0
59.9	0
60	0
60.1	0
60.2	0
60.3	0
60.4	0
60.5	0
60.6	0
60.7	0
60.8	0
60.9	0
61	0
61.1	0
61.2	0
61.3	0
61.4	0
61.5	0
61.6	0
61.7	0
61.8	0
61.9	0
62	0
62.1	0
62.2	0
62.3	0
62.4	0
62.5	0
62.6	0
62.7	0
62.8	0
62.9	0
63	0
63.1	0
63.2	0
63.3	0
63.4	0
63.5	0
63.6	0
63.7	0
63.8	0
63.9	0
64	0
64.1	0
64.2	0
64.3	0
64.4	0
64.5	0
64.6	0
64.7	0
64.8	0
64.9	0
65	0
65.1	0
65.2	0
65.3	0
65.4	0
65.5	0
65.6	0
65.7	0
65.8	0
65.9	0
66	0
66.1	0
66.2	0
66.3	0
66.4	0
66.5	0
66.6	0
66.7	0
66.8	0
66.9	0
67	0
67.1	0
67.2	0
67.3	0
67.4	0
67.5	0
67.6	0
67.7	0
67.8	0
67.9	0
68	0
68.1	0
68.2	0
68.3	0
68.4	0
68.5	0
68.6	0
68.7	0
68.8	0
68.9	0
69	0
69.1	0
69.2	0
69.3	0
69.4	0
69.5	0
69.6	0
69.7	0
69.8	0
69.9	0
70	0
70.1	0
70.2	0
70.3	0
70.4	0
70.5	0
70.6	0
70.7	0
70.8	0
70.9	0
71	0
71.1	0
71.2	0
71.3	0
71.4	0
71.5	0
71.6	0
71.7	0
71.8	0
71.9	0
72	0
72.1	0
72.2	0
72.3	0
72.4	0
72.5	0
72.6	0
72.7	0
72.8	0
72.9	0
73	0
73.1	0
73.2	0
73.3	0
73.4	0
73.5	0
73.6	0
73.7	0
73.8	0
73.9	0
74	0
74.1	0
74.2	0
74.3	0
74.4	0
74.5	0
74.6	0
74.7	0
74.8	0
74.9	0
75	0
75.1	0
75.2	0
75.3	0
75.4	0
75.5	0
75.6	0
75.7	0
75.8	0
75.9	0
76	0
76.1	0
76.2	0
76.3	0
76.4	0
76.5	0
76.6	0
76.7	0
76.8	0
76.9	0
77	0
77.1	0
77.2	0
77.3	0
77.4	0
77.5	0
77.6	0
77.7	0
77.8	0
77.9	0
78	0
78.1	0
78.2	0
78.3	0
78.4	0
78.5	0
78.6	0
78.7	0
78.8	0
78.9	0
79	0
79.1	0
79.2	0
79.3	0
79.4	0
79.5	0
79.6	0
79.7	0
79.8	0
79.9	0
80	0
80.1	0
80.2	0
80.3	0
80.4	0
80.5	0
80.6	0
80.7	0
80.8	0
80.9	0
81	0
81.1	0
81.2	0
81.3	0
81.4	0
81.5	0
81.6	0
81.7	0
81.8	0
81.9	0
82	0
82.1	0
82.2	0
82.3	0
82.4	0
82.5	0
82.6	0
82.7	0
82.8	0
82.9	0
83	0
83.1	0
83.2	0
83.3	0
83.4	0
83.5	0
83.6	0
83.7	0
83.8	0
83.9	0
84	0
84.1	0
84.2	0
84.3	0
84.4	0
84.5	0
84.6	0
84.7	0
84.8	0
84.9	0
85	0
85.1	0
85.2	0
85.3	0
85.4	0
85.5	0
85.6	0
85.7	0
85.8	0
85.9	0
86	0
86.1	0
86.2	0
86.3	0
86.4	0
86.5	0
86.6	0
86.7	0
86.8	0
86.9	0
87	0
87.1	0
87.2	0
87.3	0
87.4	0
87.5	0
87.6	0
87.7	0
87.8	0
87.9	0
88	0
88.1	0
88.2	0
88.3	0
88.4	0
88.5	0
88.6	0
88.7	0
88.8	0
88.9	0
89	0
89.1	0
89.2	0
89.3	0
89.4	0
89.5	0
89.6	0
89.7	0
89.8	0
89.9	0
90	0
90.1	0
90.2	0
90.3	0
90.4	0
90.5	0
90.6	0
90.7	0
90.8	0
90.9	0
91	0
91.1	0
91.2	0
91.3	0
91.4	0
91.5	0
91.6	0
91.7	0
91.8	0
91.9	0
92	0
92.1	0
92.2	0
92.3	0
92.4	0
92.5	0
92.6	0
92.7	0
92.8	0
92.9	0
93	0
93.1	0
93.2	0
93.3	0
93.4	0
93.5	0
93.6	0
93.7	0
93.8	0
93.9	0
94	0
94.1	0
94.2	0
94.3	0
94.4	0
94.5	0
94.6	0
94.7	0
94.8	0
94.9	0
95	0
95.1	0
95.2	0
95.3	0
95.4	0
95.5	0
95.6	0
95.7	0
95.8	0
95.9	0
96	0
96.1	0
96.2	0
96.3	0
96.4	0
96.5	0
96.6	0
96.7	0
96.8	0
96.9	0
97	0
97.1	0
97.2	0
97.3	0
97.4	0
97.5	0
97.6	0
97.7	0
97.8	0
97.9	0
98	0
98.1	0
98.2	0
98.3	0
98.4	0
98.5	0
98.6	0
98.7	0
98.8	0
98.9	0
99	0
99.1	0
99.2	0
99.3	0
99.4	0
99.5	0
99.6	0
99.7	0
99.8	0
99.9	0
100	0
100.1	0
100.2	0
100.3	0
100.4	0
100.5	0
100.6	0
100.7	0
100.8	0.0025
100.9	0.0025
101	0.0025
101.1	0.0025
101.2	0.0025
101.3	0.005
101.4	0.005
101.5	0.005
101.6	0.0075
101.7	0.01
101.8	0.0175
101.9	0.0175
102	0.0225
102.1	0.0225
102.2	0.0275
102.3	0.0275
102.4	0.0275
102.5	0.03
102.6	0.0325
102.7	0.035
102.8	0.0375
102.9	0.04
103	0.0425
103.1	0.0425
103.2	0.0475
103.3	0.0475
103.4	0.0475
103.5	0.0525
103.6	0.0525
103.7	0.0525
103.8	0.055
103.9	0.055
104	0.0575
104.1	0.06
104.2	0.0675
104.3	0.0675
104.4	0.0725
104.5	0.075
104.6	0.075
104.7	0.0775
104.8	0.08
104.9	0.0825
105	0.0825
105.1	0.0825
105.2	0.0875
105.3	0.09
105.4	0.095
105.5	0.095
105.6	0.0975
105.7	0.1
105.8	0.1
105.9	0.1025
106	0.105
106.1	0.105
106.2	0.105
106.3	0.1075
106.4	0.11
106.5	0.1125
106.6	0.115
106.7	0.115
106.8	0.1175
106.9	0.1225
107	0.125
107.1	0.135
107.2	0.135
107.3	0.1375
107.4	0.1375
107.5	0.14
107.6	0.145
107.7	0.15
107.8	0.15
107.9	0.15
108	0.1525
108.1	0.155
108.2	0.1575
108.3	0.1575
108.4	0.16
108.5	0.16
108.6	0.1625
108.7	0.1675
108.8	0.1675
108.9	0.1675
109	0.1675
109.1	0.1675
109.2	0.1725
109.3	0.175
109.4	0.1775
109.5	0.185
109.6	0.1875
109.7	0.19
109.8	0.195
109.9	0.1975
110	0.1975
110.1	0.1975
110.2	0.2
110.3	0.2
110.4	0.2
110.5	0.2
110.6	0.2
110.7	0.2
110.8	0.2
110.9	0.2025
111	0.2
111.1	0.2
111.2	0.2025
111.3	0.205
111.4	0.2075
111.5	0.2125
111.6	0.2125
111.7	0.215
111.8	0.2225
111.9	0.2225
112	0.2225
112.1	0.22
112.2	0.2225
112.3	0.2275
112.4	0.2275
112.5	0.225
112.6	0.225
112.7	0.225
112.8	0.2225
112.9	0.225
113	0.2275
113.1	0.2325
113.2	0.235
113.3	0.24
113.4	0.24
113.5	0.24
113.6	0.2475
113.7	0.2475
113.8	0.2525
113.9	0.2525
114	0.255
114.1	0.255
114.2	0.255
114.3	0.255
114.4	0.265
114.5	0.2675
114.6	0.2675
114.7	0.2725
114.8	0.2725
114.9	0.28
115	0.2775
115.1	0.28
115.2	0.2825
115.3	0.2825
115.4	0.2825
115.5	0.285
115.6	0.285
115.7	0.2825
115.8	0.285
115.9	0.29
116	0.2925
116.1	0.2925
116.2	0.295
116.3	0.295
116.4	0.295
116.5	0.2975
116.6	0.295
116.7	0.295
116.8	0.2975
116.9	0.3025
117	0.305
117.1	0.305
117.2	0.305
117.3	0.305
117.4	0.3075
117.5	0.31
117.6	0.3125
117.7	0.3125
117.8	0.315
117.9	0.315
118	0.3175
118.1	0.3175
118.2	0.3125
118.3	0.3125
118.4	0.3125
118.5	0.315
118.6	0.3175
118.7	0.3175
118.8	0.3175
118.9	0.315
119	0.32
119.1	0.3225
119.2	0.325
119.3	0.33
119.4	0.3325
119.5	0.3325
119.6	0.33
119.7	0.3325
119.8	0.335
119.9	0.335
120	0.3375
120.1	0.3375
120.2	0.3375
120.3	0.34
120.4	0.3425
120.5	0.345
120.6	0.3475
120.7	0.35
120.8	0.3525
120.9	0.355
121	0.3575
121.1	0.3575
121.2	0.3575
121.3	0.36
121.4	0.3625
121.5	0.365
121.6	0.365
121.7	0.365
121.8	0.365
121.9	0.365
122	0.365
122.1	0.365
122.2	0.365
122.3	0.3675
122.4	0.3625
122.5	0.365
122.6	0.365
122.7	0.365
122.8	0.37
122.9	0.3725
123	0.37
123.1	0.3725
123.2	0.375
123.3	0.375
123.4	0.38
123.5	0.3825
123.6	0.385
123.7	0.3875
123.8	0.3875
123.9	0.39
124	0.3925
124.1	0.3925
124.2	0.3975
124.3	0.3975
124.4	0.3975
124.5	0.4
124.6	0.4025
124.7	0.4075
124.8	0.4075
124.9	0.4075
125	0.4075
125.1	0.4075
125.2	0.41
125.3	0.41
125.4	0.4125
125.5	0.4125
125.6	0.4125
125.7	0.4125
125.8	0.4125
125.9	0.4125
126	0.4125
126.1	0.415
126.2	0.42
126.3	0.42
126.4	0.4225
126.5	0.425
126.6	0.425
126.7	0.4225
126.8	0.4225
126.9	0.42
127	0.4225
127.1	0.4225
127.2	0.425
127.3	0.4275
127.4	0.4275
127.5	0.43
127.6	0.43
127.7	0.435
127.8	0.4375
127.9	0.44
128	0.4375
128.1	0.4375
128.2	0.4375
128.3	0.4425
128.4	0.445
128.5	0.445
128.6	0.4475
128.7	0.4475
128.8	0.4475
128.9	0.45
129	0.45
129.1	0.45
129.2	0.4525
129.3	0.455
129.4	0.46
129.5	0.465
129.6	0.4625
129.7	0.4675
129.8	0.4675
129.9	0.4675
130	0.4725
130.1	0.475
130.2	0.4725
130.3	0.4725
130.4	0.4725
130.5	0.4775
130.6	0.48
130.7	0.48
130.8	0.48
130.9	0.48
131	0.48
131.1	0.4825
131.2	0.485
131.3	0.4875
131.4	0.4925
131.5	0.495
131.6	0.495
131.7	0.495
131.8	0.495
131.9	0.495
132	0.4925
132.1	0.4975
132.2	0.4975
132.3	0.5
132.4	0.5
132.5	0.5025
132.6	0.5025
132.7	0.5025
132.8	0.5
132.9	0.4975
133	0.5
133.1	0.5
133.2	0.505
133.3	0.505
133.4	0.5025
133.5	0.5025
133.6	0.505
133.7	0.5075
133.8	0.505
133.9	0.505
134	0.505
134.1	0.505
134.2	0.5025
134.3	0.5025
134.4	0.505
134.5	0.5075
134.6	0.5075
134.7	0.5075
134.8	0.51
134.9	0.5125
135	0.5175
135.1	0.5175
135.2	0.5175
135.3	0.52
135.4	0.525
135.5	0.525
135.6	0.525
135.7	0.525
135.8	0.525
135.9	0.5275
136	0.5275
136.1	0.525
136.2	0.5275
136.3	0.53
136.4	0.53
136.5	0.54
136.6	0.5425
136.7	0.5425
136.8	0.545
136.9	0.545
137	0.545
137.1	0.545
137.2	0.5475
137.3	0.55
137.4	0.5525
137.5	0.555
137.6	0.5575
137.7	0.555
137.8	0.555
137.9	0.5575
138	0.565
138.1	0.5675
138.2	0.5725
138.3	0.5725
138.4	0.575
138.5	0.575
138.6	0.575
138.7	0.575
138.8	0.5775
138.9	0.575
139	0.575
139.1	0.5775
139.2	0.5775
139.3	0.5775
139.4	0.5775
139.5	0.5775
139.6	0.5775
139.7	0.5775
139.8	0.5775
139.9	0.5775
140	0.58
140.1	0.58
140.2	0.58
140.3	0.5825
140.4	0.5825
140.5	0.5825
140.6	0.5825
140.7	0.5825
140.8	0.585
140.9	0.585
141	0.585
141.1	0.585
141.2	0.5875
141.3	0.5825
141.4	0.58
141.5	0.5775
141.6	0.5775
141.7	0.5775
141.8	0.5775
141.9	0.5775
142	0.58
142.1	0.58
142.2	0.5825
142.3	0.5825
142.4	0.5825
142.5	0.585
142.6	0.585
142.7	0.5825
142.8	0.5825
142.9	0.5775
143	0.58
143.1	0.58
143.2	0.58
143.3	0.5825
143.4	0.5825
143.5	0.5825
143.6	0.5825
143.7	0.5825
143.8	0.5825
143.9	0.5825
144	0.5825
144.1	0.585
144.2	0.59
144.3	0.59
144.4	0.59
144.5	0.59
144.6	0.59
144.7	0.59
144.8	0.5925
144.9	0.5925
145	0.5925
145.1	0.5925
145.2	0.595
145.3	0.5925
145.4	0.5925
145.5	0.5925
145.6	0.59
145.7	0.5925
145.8	0.5975
145.9	0.6
146	0.6025
146.1	0.6025
146.2	0.6
146.3	0.6
146.4	0.6
146.5	0.6
146.6	0.6
146.7	0.6
146.8	0.6
146.9	0.605
147	0.6025
147.1	0.6025
147.2	0.6025
147.3	0.605
147.4	0.6025
147.5	0.6
147.6	0.6
147.7	0.6
147.8	0.6
147.9	0.605
148	0.61
148.1	0.6075
148.2	0.61
148.3	0.6075
148.4	0.6075
148.5	0.61
148.6	0.6075
148.7	0.6075
148.8	0.6075
148.9	0.605
149	0.6025
149.1	0.605
149.2	0.605
149.3	0.6075
149.4	0.605
149.5	0.605
149.6	0.605
149.7	0.6075
149.8	0.6075
149.9	0.6075
150	0.61
150.1	0.61
150.2	0.61
150.3	0.61
150.4	0.61
150.5	0.61
150.6	0.61
150.7	0.61
150.8	0.61
150.9	0.6125
151	0.615
151.1	0.615
151.2	0.6175
151.3	0.62
151.4	0.6175
151.5	0.6175
151.6	0.615
151.7	0.615
151.8	0.615
151.9	0.615
152	0.615
152.1	0.6125
152.2	0.615
152.3	0.615
152.4	0.6175
152.5	0.6175
152.6	0.6175
152.7	0.6175
152.8	0.6175
152.9	0.6175
153	0.62
153.1	0.62
153.2	0.6225
153.3	0.6225
153.4	0.6225
153.5	0.62
153.6	0.62
153.7	0.62
153.8	0.62
153.9	0.62
154	0.6225
154.1	0.625
154.2	0.625
154.3	0.625
154.4	0.63
154.5	0.63
154.6	0.63
154.7	0.6275
154.8	0.6275
154.9	0.6275
155	0.63
155.1	0.6325
155.2	0.6325
155.3	0.635
155.4	0.635
155.5	0.6325
155.6	0.6325
155.7	0.6325
155.8	0.6325
155.9	0.635
156	0.635
156.1	0.64
156.2	0.64
156.3	0.64
156.4	0.64
156.5	0.6425
156.6	0.6425
156.7	0.6425
156.8	0.6425
156.9	0.64
157	0.64
157.1	0.64
157.2	0.64
157.3	0.6375
157.4	0.635
157.5	0.6375
157.6	0.64
157.7	0.64
157.8	0.64
157.9	0.64
158	0.64
158.1	0.64
158.2	0.6425
158.3	0.6425
158.4	0.6425
158.5	0.6425
158.6	0.6425
158.7	0.6425
158.8	0.6425
158.9	0.6425
159	0.645
159.1	0.6475
159.2	0.6525
159.3	0.655
159.4	0.655
159.5	0.655
159.6	0.655
159.7	0.655
159.8	0.655
159.9	0.655
160	0.6525
160.1	0.6525
160.2	0.655
160.3	0.655
160.4	0.655
160.5	0.65
160.6	0.65
160.7	0.6525
160.8	0.6525
160.9	0.655
161	0.6525
161.1	0.6575
161.2	0.655
161.3	0.655
161.4	0.655
161.5	0.66
161.6	0.6625
161.7	0.665
161.8	0.665
161.9	0.665
162	0.665
162.1	0.665
162.2	0.665
162.3	0.6625
162.4	0.6625
162.5	0.6625
162.6	0.6625
162.7	0.66
162.8	0.66
162.9	0.66
163	0.6575
163.1	0.6575
163.2	0.6625
163.3	0.6625
163.4	0.66
163.5	0.66
163.6	0.66
163.7	0.66
163.8	0.6625
163.9	0.6625
164	0.6625
164.1	0.6625
164.2	0.6625
164.3	0.665
164.4	0.665
164.5	0.665
164.6	0.665
164.7	0.665
164.8	0.6675
164.9	0.6675
165	0.665
165.1	0.665
165.2	0.6675
165.3	0.675
165.4	0.675
165.5	0.6775
165.6	0.6775
165.7	0.675
165.8	0.6725
165.9	0.6725
166	0.67
166.1	0.67
166.2	0.67
166.3	0.67
166.4	0.67
166.5	0.67
166.6	0.67
166.7	0.67
166.8	0.67
166.9	0.6725
167	0.6725
167.1	0.6725
167.2	0.675
167.3	0.6775
167.4	0.68
167.5	0.6775
167.6	0.6775
167.7	0.6775
167.8	0.6775
167.9	0.675
168	0.6775
168.1	0.68
168.2	0.68
168.3	0.68
168.4	0.68
168.5	0.68
168.6	0.6775
168.7	0.6775
168.8	0.685
168.9	0.685
169	0.6825
169.1	0.68
169.2	0.68
169.3	0.68
169.4	0.685
169.5	0.6825
169.6	0.6825
169.7	0.685
169.8	0.6875
169.9	0.6875
170	0.685
170.1	0.685
170.2	0.685
170.3	0.685
170.4	0.6825
170.5	0.6825
170.6	0.68
170.7	0.68
170.8	0.68
170.9	0.68
171	0.68
171.1	0.68
171.2	0.6775
171.3	0.675
171.4	0.6725
171.5	0.6725
171.6	0.67
171.7	0.67
171.8	0.665
171.9	0.665
172	0.6625
172.1	0.665
172.2	0.665
172.3	0.665
172.4	0.665
172.5	0.665
172.6	0.6625
172.7	0.6625
172.8	0.6625
172.9	0.6625
173	0.665
173.1	0.6675
173.2	0.6675
173.3	0.6675
173.4	0.6675
173.5	0.665
173.6	0.6675
173.7	0.6675
173.8	0.665
173.9	0.665
174	0.6675
174.1	0.6675
174.2	0.6675
174.3	0.6675
174.4	0.665
174.5	0.6675
174.6	0.67
174.7	0.6725
174.8	0.6725
174.9	0.6725
175	0.6725
175.1	0.6725
175.2	0.675
175.3	0.675
175.4	0.675
175.5	0.675
175.6	0.675
175.7	0.675
175.8	0.675
175.9	0.675
176	0.675
176.1	0.6775
176.2	0.6775
176.3	0.68
176.4	0.6775
176.5	0.68
176.6	0.68
176.7	0.6775
176.8	0.6775
176.9	0.68
177	0.685
177.1	0.6875
177.2	0.6825
177.3	0.6825
177.4	0.68
177.5	0.6825
177.6	0.6825
177.7	0.6825
177.8	0.6825
177.9	0.6825
178	0.685
178.1	0.6875
178.2	0.685
178.3	0.685
178.4	0.6875
178.5	0.6875
178.6	0.6875
178.7	0.6875
178.8	0.685
178.9	0.685
179	0.685
179.1	0.68
179.2	0.6825
179.3	0.6825
179.4	0.6825
179.5	0.6825
179.6	0.6775
179.7	0.6775
179.8	0.6775
179.9	0.6775
180	0.6775
180.1	0.68
180.2	0.68
180.3	0.68
180.4	0.6825
180.5	0.6825
180.6	0.6825
180.7	0.6825
180.8	0.6875
180.9	0.6925
181	0.6925
181.1	0.6925
181.2	0.695
181.3	0.695
181.4	0.69
181.5	0.6925
181.6	0.6925
181.7	0.6975
181.8	0.6975
181.9	0.7
182	0.7025
182.1	0.7025
182.2	0.705
182.3	0.705
182.4	0.705
182.5	0.705
182.6	0.705
182.7	0.705
182.8	0.7075
182.9	0.7075
183	0.71
183.1	0.7125
183.2	0.7125
183.3	0.71
183.4	0.71
183.5	0.71
183.6	0.7075
183.7	0.7075
183.8	0.71
183.9	0.7125
184	0.7125
184.1	0.71
184.2	0.71
184.3	0.7125
184.4	0.7125
184.5	0.7125
184.6	0.71
184.7	0.715
184.8	0.7175
184.9	0.72
185	0.72
185.1	0.7175
185.2	0.7175
185.3	0.72
185.4	0.72
185.5	0.725
185.6	0.7225
185.7	0.715
185.8	0.715
185.9	0.715
186	0.7125
186.1	0.71
186.2	0.71
186.3	0.71
186.4	0.71
186.5	0.7075
186.6	0.7075
186.7	0.71
186.8	0.71
186.9	0.7125
187	0.7125
187.1	0.7125
187.2	0.71
187.3	0.71
187.4	0.71
187.5	0.71
187.6	0.7125
187.7	0.71
187.8	0.71
187.9	0.71
188	0.71
188.1	0.71
188.2	0.71
188.3	0.715
188.4	0.7125
188.5	0.715
188.6	0.715
188.7	0.7175
188.8	0.7175
188.9	0.72
189	0.72
189.1	0.72
189.2	0.7175
189.3	0.7175
189.4	0.7175
189.5	0.7175
189.6	0.715
189.7	0.7175
189.8	0.7175
189.9	0.7175
190	0.715
190.1	0.71
190.2	0.71
190.3	0.705
190.4	0.7075
190.5	0.7075
190.6	0.7075
190.7	0.7075
190.8	0.7075
190.9	0.7075
191	0.7075
191.1	0.7075
191.2	0.7075
191.3	0.705
191.4	0.7075
191.5	0.7075
191.6	0.71
191.7	0.71
191.8	0.7075
191.9	0.7075
192	0.7075
192.1	0.705
192.2	0.71
192.3	0.7125
192.4	0.71
192.5	0.7075
192.6	0.7075
192.7	0.7075
192.8	0.7075
192.9	0.7125
193	0.7125
193.1	0.7125
193.2	0.7125
193.3	0.7125
193.4	0.715
193.5	0.7125
193.6	0.7125
193.7	0.7125
193.8	0.7125
193.9	0.7125
194	0.7125
194.1	0.715
194.2	0.7125
194.3	0.7125
194.4	0.7125
194.5	0.7125
194.6	0.7125
194.7	0.7125
194.8	0.7125
194.9	0.715
195	0.715
195.1	0.715
195.2	0.715
195.3	0.715
195.4	0.715
195.5	0.715
195.6	0.7175
195.7	0.715
195.8	0.7125
195.9	0.7125
196	0.715
196.1	0.715
196.2	0.7175
196.3	0.7175
196.4	0.7175
196.5	0.7175
196.6	0.7175
196.7	0.72
196.8	0.7175
196.9	0.7175
197	0.7175
197.1	0.7175
197.2	0.72
197.3	0.72
197.4	0.72
197.5	0.72
197.6	0.72
197.7	0.72
197.8	0.72
197.9	0.72
198	0.72
198.1	0.72
198.2	0.72
198.3	0.72
198.4	0.7175
198.5	0.715
198.6	0.7125
198.7	0.71
198.8	0.715
198.9	0.7175
199	0.72
199.1	0.72
199.2	0.7175
199.3	0.715
199.4	0.7175
199.5	0.7225
199.6	0.72
199.7	0.7225
199.8	0.7225
199.9	0.7225
200	0.7225
[truncated: 14,000 more rows]
