# Supplementary material for: Bayesian inference of kinetic schemes for ion channels by Kalman filtering
Source: eLife journal article supplement (doi:10.7554/elife.62714), 2022-05-04
Supplement: fig4-data7 [file 1_Sim_N_500_Fluor_MW.xlsx]

## Sheet: Tabelle1
0.1	0
0.2	0
0.3	0
0.4	0
0.5	0
0.6	0
0.7	0
0.8	0
0.9	0
1	0
1.1	0
1.2	0
1.3	0
1.4	0
1.5	0
1.6	0
1.7	0
1.8	0
1.9	0
2	0
2.1	0
2.2	0
2.3	0
2.4	0
2.5	0
2.6	0
2.7	0
2.8	0
2.9	0
3	0
3.1	0
3.2	0
3.3	0
3.4	0
3.5	0
3.6	0
3.7	0
3.8	0
3.9	0
4	0
4.1	0
4.2	0
4.3	0
4.4	0
4.5	0
4.6	0
4.7	0
4.8	0
4.9	0
5	0
5.1	0
5.2	0
5.3	0
5.4	0
5.5	0
5.6	0
5.7	0
5.8	0
5.9	0
6	0
6.1	0
6.2	0
6.3	0
6.4	0
6.5	0
6.6	0
6.7	0
6.8	0
6.9	0
7	0
7.1	0
7.2	0
7.3	0
7.4	0
7.5	0
7.6	0
7.7	0
7.8	0
7.9	0
8	0
8.1	0
8.2	0
8.3	0
8.4	0
8.5	0
8.6	0
8.7	0
8.8	0
8.9	0
9	0
9.1	0
9.2	0
9.3	0
9.4	0
9.5	0
9.6	0
9.7	0
9.8	0
9.9	0
10	0
10.1	0
10.2	0
10.3	0
10.4	0
10.5	0
10.6	0
10.7	0
10.8	0
10.9	0
11	0
11.1	0
11.2	0
11.3	0
11.4	0
11.5	0
11.6	0
11.7	0
11.8	0
11.9	0
12	0
12.1	0
12.2	0
12.3	0
12.4	0
12.5	0
12.6	0
12.7	0
12.8	0
12.9	0
13	0
13.1	0
13.2	0
13.3	0
13.4	0
13.5	0
13.6	0
13.7	0
13.8	0
13.9	0
14	0
14.1	0
14.2	0
14.3	0
14.4	0
14.5	0
14.6	0
14.7	0
14.8	0
14.9	0
15	0
15.1	0
15.2	0
15.3	0
15.4	0
15.5	0
15.6	0
15.7	0
15.8	0
15.9	0
16	0
16.1	0
16.2	0
16.3	0
16.4	0
16.5	0
16.6	0
16.7	0
16.8	0
16.9	0
17	0
17.1	0
17.2	0
17.3	0
17.4	0
17.5	0
17.6	0
17.7	0
17.8	0
17.9	0
18	0
18.1	0
18.2	0
18.3	0
18.4	0
18.5	0
18.6	0
18.7	0
18.8	0
18.9	0
19	0
19.1	0
19.2	0
19.3	0
19.4	0
19.5	0
19.6	0
19.7	0
19.8	0
19.9	0
20	0
20.1	0
20.2	0
20.3	0
20.4	0
20.5	0
20.6	0
20.7	0
20.8	0
20.9	0
21	0
21.1	0
21.2	0
21.3	0
21.4	0
21.5	0
21.6	0
21.7	0
21.8	0
21.9	0
22	0
22.1	0
22.2	0
22.3	0
22.4	0
22.5	0
22.6	0
22.7	0
22.8	0
22.9	0
23	0
23.1	0
23.2	0
23.3	0
23.4	0
23.5	0
23.6	0
23.7	0
23.8	0
23.9	0
24	0
24.1	0
24.2	0
24.3	0
24.4	0
24.5	0
24.6	0
24.7	0
24.8	0
24.9	0
25	0
25.1	0
25.2	0
25.3	0
25.4	0
25.5	0
25.6	0
25.7	0
25.8	0
25.9	0
26	0
26.1	0
26.2	0
26.3	0
26.4	0
26.5	0
26.6	0
26.7	0
26.8	0
26.9	0
27	0
27.1	0
27.2	0
27.3	0
27.4	0
27.5	0
27.6	0
27.7	0
27.8	0
27.9	0
28	0
28.1	0
28.2	0
28.3	0
28.4	0
28.5	0
28.6	0
28.7	0
28.8	0
28.9	0
29	0
29.1	0
29.2	0
29.3	0
29.4	0
29.5	0
29.6	0
29.7	0
29.8	0
29.9	0
30	0
30.1	0
30.2	0
30.3	0
30.4	0
30.5	0
30.6	0
30.7	0
30.8	0
30.9	0
31	0
31.1	0
31.2	0
31.3	0
31.4	0
31.5	0
31.6	0
31.7	0
31.8	0
31.9	0
32	0
32.1	0
32.2	0
32.3	0
32.4	0
32.5	0
32.6	0
32.7	0
32.8	0
32.9	0
33	0
33.1	0
33.2	0
33.3	0
33.4	0
33.5	0
33.6	0
33.7	0
33.8	0
33.9	0
34	0
34.1	0
34.2	0
34.3	0
34.4	0
34.5	0
34.6	0
34.7	0
34.8	0
34.9	0
35	0
35.1	0
35.2	0
35.3	0
35.4	0
35.5	0
35.6	0
35.7	0
35.8	0
35.9	0
36	0
36.1	0
36.2	0
36.3	0
36.4	0
36.5	0
36.6	0
36.7	0
36.8	0
36.9	0
37	0
37.1	0
37.2	0
37.3	0
37.4	0
37.5	0
37.6	0
37.7	0
37.8	0
37.9	0
38	0
38.1	0
38.2	0
38.3	0
38.4	0
38.5	0
38.6	0
38.7	0
38.8	0
38.9	0
39	0
39.1	0
39.2	0
39.3	0
39.4	0
39.5	0
39.6	0
39.7	0
39.8	0
39.9	0
40	0
40.1	0
40.2	0
40.3	0
40.4	0
40.5	0
40.6	0
40.7	0
40.8	0
40.9	0
41	0
41.1	0
41.2	0
41.3	0
41.4	0
41.5	0
41.6	0
41.7	0
41.8	0
41.9	0
42	0
42.1	0
42.2	0
42.3	0
42.4	0
42.5	0
42.6	0
42.7	0
42.8	0
42.9	0
43	0
43.1	0
43.2	0
43.3	0
43.4	0
43.5	0
43.6	0
43.7	0
43.8	0
43.9	0
44	0
44.1	0
44.2	0
44.3	0
44.4	0
44.5	0
44.6	0
44.7	0
44.8	0
44.9	0
45	0
45.1	0
45.2	0
45.3	0
45.4	0
45.5	0
45.6	0
45.7	0
45.8	0
45.9	0
46	0
46.1	0
46.2	0
46.3	0
46.4	0
46.5	0
46.6	0
46.7	0
46.8	0
46.9	0
47	0
47.1	0
47.2	0
47.3	0
47.4	0
47.5	0
47.6	0
47.7	0
47.8	0
47.9	0
48	0
48.1	0
48.2	0
48.3	0
48.4	0
48.5	0
48.6	0
48.7	0
48.8	0
48.9	0
49	0
49.1	0
49.2	0
49.3	0
49.4	0
49.5	0
49.6	0
49.7	0
49.8	0
49.9	0
50	0
50.1	0
50.2	0
50.3	0
50.4	0
50.5	0
50.6	0
50.7	0
50.8	0
50.9	0
51	0
51.1	0
51.2	0
51.3	0
51.4	0
51.5	0
51.6	0
51.7	0
51.8	0
51.9	0
52	0
52.1	0
52.2	0
52.3	0
52.4	0
52.5	0
52.6	0
52.7	0
52.8	0
52.9	0
53	0
53.1	0
53.2	0
53.3	0
53.4	0
53.5	0
53.6	0
53.7	0
53.8	0
53.9	0
54	0
54.1	0
54.2	0
54.3	0
54.4	0
54.5	0
54.6	0
54.7	0
54.8	0
54.9	0
55	0
55.1	0
55.2	0
55.3	0
55.4	0
55.5	0
55.6	0
55.7	0
55.8	0
55.9	0
56	0
56.1	0
56.2	0
56.3	0
56.4	0
56.5	0
56.6	0
56.7	0
56.8	0
56.9	0
57	0
57.1	0
57.2	0
57.3	0
57.4	0
57.5	0
57.6	0
57.7	0
57.8	0
57.9	0
58	0
58.1	0
58.2	0
58.3	0
58.4	0
58.5	0
58.6	0
58.7	0
58.8	0
58.9	0
59	0
59.1	0
59.2	0
59.3	0
59.4	0
59.5	0
59.6	0
59.7	0
59.8	0
59.9	0
60	0
60.1	0
60.2	0
60.3	0
60.4	0
60.5	0
60.6	0
60.7	0
60.8	0
60.9	0
61	0
61.1	0
61.2	0
61.3	0
61.4	0
61.5	0
61.6	0
61.7	0
61.8	0
61.9	0
62	0
62.1	0
62.2	0
62.3	0
62.4	0
62.5	0
62.6	0
62.7	0
62.8	0
62.9	0
63	0
63.1	0
63.2	0
63.3	0
63.4	0
63.5	0
63.6	0
63.7	0
63.8	0
63.9	0
64	0
64.1	0
64.2	0
64.3	0
64.4	0
64.5	0
64.6	0
64.7	0
64.8	0
64.9	0
65	0
65.1	0
65.2	0
65.3	0
65.4	0
65.5	0
65.6	0
65.7	0
65.8	0
65.9	0
66	0
66.1	0
66.2	0
66.3	0
66.4	0
66.5	0
66.6	0
66.7	0
66.8	0
66.9	0
67	0
67.1	0
67.2	0
67.3	0
67.4	0
67.5	0
67.6	0
67.7	0
67.8	0
67.9	0
68	0
68.1	0
68.2	0
68.3	0
68.4	0
68.5	0
68.6	0
68.7	0
68.8	0
68.9	0
69	0
69.1	0
69.2	0
69.3	0
69.4	0
69.5	0
69.6	0
69.7	0
69.8	0
69.9	0
70	0
70.1	0
70.2	0
70.3	0
70.4	0
70.5	0
70.6	0
70.7	0
70.8	0
70.9	0
71	0
71.1	0
71.2	0
71.3	0
71.4	0
71.5	0
71.6	0
71.7	0
71.8	0
71.9	0
72	0
72.1	0
72.2	0
72.3	0
72.4	0
72.5	0
72.6	0
72.7	0
72.8	0
72.9	0
73	0
73.1	0
73.2	0
73.3	0
73.4	0
73.5	0
73.6	0
73.7	0
73.8	0
73.9	0
74	0
74.1	0
74.2	0
74.3	0
74.4	0
74.5	0
74.6	0
74.7	0
74.8	0
74.9	0
75	0
75.1	0
75.2	0
75.3	0
75.4	0
75.5	0
75.6	0
75.7	0
75.8	0
75.9	0
76	0
76.1	0
76.2	0
76.3	0
76.4	0
76.5	0
76.6	0
76.7	0
76.8	0
76.9	0
77	0
77.1	0
77.2	0
77.3	0
77.4	0
77.5	0
77.6	0
77.7	0
77.8	0
77.9	0
78	0
78.1	0
78.2	0
78.3	0
78.4	0
78.5	0
78.6	0
78.7	0
78.8	0
78.9	0
79	0
79.1	0
79.2	0
79.3	0
79.4	0
79.5	0
79.6	0
79.7	0
79.8	0
79.9	0
80	0
80.1	0
80.2	0
80.3	0
80.4	0
80.5	0
80.6	0
80.7	0
80.8	0
80.9	0
81	0
81.1	0
81.2	0
81.3	0
81.4	0
81.5	0
81.6	0
81.7	0
81.8	0
81.9	0
82	0
82.1	0
82.2	0
82.3	0
82.4	0
82.5	0
82.6	0
82.7	0
82.8	0
82.9	0
83	0
83.1	0
83.2	0
83.3	0
83.4	0
83.5	0
83.6	0
83.7	0
83.8	0
83.9	0
84	0
84.1	0
84.2	0
84.3	0
84.4	0
84.5	0
84.6	0
84.7	0
84.8	0
84.9	0
85	0
85.1	0
85.2	0
85.3	0
85.4	0
85.5	0
85.6	0
85.7	0
85.8	0
85.9	0
86	0
86.1	0
86.2	0
86.3	0
86.4	0
86.5	0
86.6	0
86.7	0
86.8	0
86.9	0
87	0
87.1	0
87.2	0
87.3	0
87.4	0
87.5	0
87.6	0
87.7	0
87.8	0
87.9	0
88	0
88.1	0
88.2	0
88.3	0
88.4	0
88.5	0
88.6	0
88.7	0
88.8	0
88.9	0
89	0
89.1	0
89.2	0
89.3	0
89.4	0
89.5	0
89.6	0
89.7	0
89.8	0
89.9	0
90	0
90.1	0
90.2	0
90.3	0
90.4	0
90.5	0
90.6	0
90.7	0
90.8	0
90.9	0
91	0
91.1	0
91.2	0
91.3	0
91.4	0
91.5	0
91.6	0
91.7	0
91.8	0
91.9	0
92	0
92.1	0
92.2	0
92.3	0
92.4	0
92.5	0
92.6	0
92.7	0
92.8	0
92.9	0
93	0
93.1	0
93.2	0
93.3	0
93.4	0
93.5	0
93.6	0
93.7	0
93.8	0
93.9	0
94	0
94.1	0
94.2	0
94.3	0
94.4	0
94.5	0
94.6	0
94.7	0
94.8	0
94.9	0
95	0
95.1	0
95.2	0
95.3	0
95.4	0
95.5	0
95.6	0
95.7	0
95.8	0
95.9	0
96	0
96.1	0
96.2	0
96.3	0
96.4	0
96.5	0
96.6	0
96.7	0
96.8	0
96.9	0
97	0
97.1	0
97.2	0
97.3	0
97.4	0
97.5	0
97.6	0
97.7	0
97.8	0
97.9	0
98	0
98.1	0
98.2	0
98.3	0
98.4	0
98.5	0
98.6	0
98.7	0
98.8	0
98.9	0
99	0
99.1	0
99.2	0
99.3	0
99.4	0
99.5	0
99.6	0
99.7	0
99.8	0
99.9	0
100	0
100.1	0.097
100.2	0.196
100.3	0.276
100.4	0.334
100.5	0.384
100.6	0.434
100.7	0.475
100.8	0.515
100.9	0.542
101	0.551
101.1	0.582
101.2	0.604
101.3	0.616
101.4	0.63
101.5	0.646
101.6	0.665
101.7	0.664
101.8	0.671
101.9	0.683
102	0.692
102.1	0.696
102.2	0.706
102.3	0.716
102.4	0.726
102.5	0.725
102.6	0.731
102.7	0.727
102.8	0.731
102.9	0.733
103	0.741
103.1	0.75
103.2	0.759
103.3	0.758
103.4	0.76
103.5	0.761
103.6	0.758
103.7	0.756
103.8	0.755
103.9	0.761
104	0.763
104.1	0.767
104.2	0.762
104.3	0.754
104.4	0.752
104.5	0.757
104.6	0.751
104.7	0.746
104.8	0.749
104.9	0.755
105	0.75
105.1	0.752
105.2	0.754
105.3	0.764
105.4	0.758
105.5	0.766
105.6	0.764
105.7	0.762
105.8	0.767
105.9	0.768
106	0.768
106.1	0.767
106.2	0.763
106.3	0.77
106.4	0.773
106.5	0.77
106.6	0.768
106.7	0.777
106.8	0.783
106.9	0.788
107	0.786
107.1	0.782
107.2	0.779
107.3	0.774
107.4	0.788
107.5	0.796
107.6	0.792
107.7	0.794
107.8	0.792
107.9	0.795
108	0.784
108.1	0.786
108.2	0.784
108.3	0.787
108.4	0.794
108.5	0.787
108.6	0.788
108.7	0.797
108.8	0.797
108.9	0.791
109	0.779
109.1	0.775
109.2	0.779
109.3	0.782
109.4	0.785
109.5	0.785
109.6	0.779
109.7	0.785
109.8	0.781
109.9	0.785
110	0.785
110.1	0.779
110.2	0.78
110.3	0.781
110.4	0.777
110.5	0.79
110.6	0.796
110.7	0.79
110.8	0.786
110.9	0.786
111	0.784
111.1	0.78
111.2	0.772
111.3	0.78
111.4	0.787
111.5	0.798
111.6	0.804
111.7	0.801
111.8	0.801
111.9	0.802
112	0.808
112.1	0.805
112.2	0.8
112.3	0.796
112.4	0.794
112.5	0.803
112.6	0.808
112.7	0.809
112.8	0.806
112.9	0.81
113	0.809
113.1	0.816
113.2	0.821
113.3	0.822
113.4	0.814
113.5	0.82
113.6	0.827
113.7	0.82
113.8	0.814
113.9	0.802
114	0.804
114.1	0.811
114.2	0.819
114.3	0.815
114.4	0.818
114.5	0.818
114.6	0.821
114.7	0.825
114.8	0.821
114.9	0.826
115	0.827
115.1	0.833
115.2	0.83
115.3	0.828
115.4	0.832
115.5	0.833
115.6	0.835
115.7	0.837
115.8	0.841
115.9	0.838
116	0.832
116.1	0.831
116.2	0.825
116.3	0.829
116.4	0.843
116.5	0.842
116.6	0.838
116.7	0.838
116.8	0.839
116.9	0.832
117	0.826
117.1	0.82
117.2	0.819
117.3	0.826
117.4	0.831
117.5	0.823
117.6	0.822
117.7	0.834
117.8	0.84
117.9	0.838
118	0.836
118.1	0.834
118.2	0.825
118.3	0.827
118.4	0.825
118.5	0.821
118.6	0.82
118.7	0.813
118.8	0.807
118.9	0.809
119	0.817
119.1	0.819
119.2	0.819
119.3	0.823
119.4	0.827
119.5	0.823
119.6	0.82
119.7	0.829
119.8	0.824
119.9	0.828
120	0.829
120.1	0.828
120.2	0.832
120.3	0.83
120.4	0.826
120.5	0.829
120.6	0.834
120.7	0.831
120.8	0.834
120.9	0.832
121	0.828
121.1	0.815
121.2	0.819
121.3	0.822
121.4	0.821
121.5	0.823
121.6	0.83
121.7	0.831
121.8	0.836
121.9	0.832
122	0.834
122.1	0.838
122.2	0.844
122.3	0.848
122.4	0.846
122.5	0.849
122.6	0.851
122.7	0.843
122.8	0.845
122.9	0.847
123	0.842
123.1	0.848
123.2	0.85
123.3	0.844
123.4	0.842
123.5	0.845
123.6	0.849
123.7	0.847
123.8	0.852
123.9	0.849
124	0.843
124.1	0.844
124.2	0.848
124.3	0.848
124.4	0.845
124.5	0.851
124.6	0.855
124.7	0.852
124.8	0.848
124.9	0.849
125	0.854
125.1	0.851
125.2	0.853
125.3	0.857
125.4	0.854
125.5	0.853
125.6	0.853
125.7	0.847
125.8	0.84
125.9	0.844
126	0.842
126.1	0.846
126.2	0.842
126.3	0.846
126.4	0.838
126.5	0.843
126.6	0.845
126.7	0.847
126.8	0.848
126.9	0.851
127	0.851
127.1	0.846
127.2	0.851
127.3	0.853
127.4	0.86
127.5	0.858
127.6	0.856
127.7	0.849
127.8	0.845
127.9	0.85
128	0.846
128.1	0.845
128.2	0.841
128.3	0.845
128.4	0.849
128.5	0.85
128.6	0.858
128.7	0.86
128.8	0.865
128.9	0.869
129	0.87
129.1	0.87
129.2	0.871
129.3	0.863
129.4	0.873
129.5	0.873
129.6	0.875
129.7	0.872
129.8	0.871
129.9	0.871
130	0.872
130.1	0.877
130.2	0.871
130.3	0.868
130.4	0.87
130.5	0.872
130.6	0.879
130.7	0.882
130.8	0.885
130.9	0.882
131	0.886
131.1	0.887
131.2	0.89
131.3	0.885
131.4	0.883
131.5	0.882
131.6	0.876
131.7	0.885
131.8	0.876
131.9	0.874
132	0.87
132.1	0.872
132.2	0.876
132.3	0.876
132.4	0.871
132.5	0.867
132.6	0.871
132.7	0.871
132.8	0.868
132.9	0.867
133	0.869
133.1	0.874
133.2	0.877
133.3	0.872
133.4	0.871
133.5	0.871
133.6	0.869
133.7	0.871
133.8	0.871
133.9	0.867
134	0.865
134.1	0.872
134.2	0.878
134.3	0.876
134.4	0.88
134.5	0.882
134.6	0.887
134.7	0.889
134.8	0.891
134.9	0.886
135	0.881
135.1	0.875
135.2	0.874
135.3	0.878
135.4	0.881
135.5	0.886
135.6	0.889
135.7	0.893
135.8	0.89
135.9	0.887
136	0.881
136.1	0.883
136.2	0.883
136.3	0.885
136.4	0.883
136.5	0.88
136.6	0.876
136.7	0.876
136.8	0.876
136.9	0.874
137	0.869
137.1	0.868
137.2	0.87
137.3	0.863
137.4	0.862
137.5	0.861
137.6	0.865
137.7	0.866
137.8	0.869
137.9	0.872
138	0.873
138.1	0.876
138.2	0.877
138.3	0.886
138.4	0.887
138.5	0.89
138.6	0.888
138.7	0.889
138.8	0.891
138.9	0.886
139	0.881
139.1	0.885
139.2	0.885
139.3	0.888
139.4	0.889
139.5	0.892
139.6	0.895
139.7	0.892
139.8	0.894
139.9	0.894
140	0.898
140.1	0.899
140.2	0.904
140.3	0.907
140.4	0.9
140.5	0.896
140.6	0.902
140.7	0.9
140.8	0.899
140.9	0.898
141	0.891
141.1	0.89
141.2	0.892
141.3	0.891
141.4	0.891
141.5	0.891
141.6	0.887
141.7	0.89
141.8	0.891
141.9	0.888
142	0.89
142.1	0.893
142.2	0.893
142.3	0.893
142.4	0.896
142.5	0.894
142.6	0.886
142.7	0.887
142.8	0.886
142.9	0.882
143	0.878
143.1	0.878
143.2	0.873
143.3	0.88
143.4	0.881
143.5	0.886
143.6	0.884
143.7	0.886
143.8	0.886
143.9	0.883
144	0.884
144.1	0.886
144.2	0.892
144.3	0.893
144.4	0.889
144.5	0.891
144.6	0.89
144.7	0.891
144.8	0.889
144.9	0.888
145	0.887
145.1	0.887
145.2	0.888
145.3	0.891
145.4	0.895
145.5	0.897
145.6	0.898
145.7	0.898
145.8	0.899
145.9	0.9
146	0.895
146.1	0.898
146.2	0.897
146.3	0.895
146.4	0.892
146.5	0.893
146.6	0.899
146.7	0.896
146.8	0.899
146.9	0.899
147	0.899
147.1	0.901
147.2	0.901
147.3	0.903
147.4	0.904
147.5	0.903
147.6	0.902
147.7	0.901
147.8	0.895
147.9	0.888
148	0.885
148.1	0.885
148.2	0.882
148.3	0.885
148.4	0.883
148.5	0.878
148.6	0.874
148.7	0.876
148.8	0.881
148.9	0.886
149	0.88
149.1	0.885
149.2	0.883
149.3	0.88
149.4	0.879
149.5	0.879
149.6	0.883
149.7	0.881
149.8	0.884
149.9	0.882
150	0.881
150.1	0.884
150.2	0.884
150.3	0.883
150.4	0.89
150.5	0.896
150.6	0.9
150.7	0.903
150.8	0.903
150.9	0.904
151	0.907
151.1	0.907
151.2	0.907
151.3	0.907
151.4	0.906
151.5	0.905
151.6	0.902
151.7	0.902
151.8	0.906
151.9	0.908
152	0.906
152.1	0.903
152.2	0.902
152.3	0.904
152.4	0.906
152.5	0.904
152.6	0.902
152.7	0.896
152.8	0.895
152.9	0.899
153	0.902
153.1	0.901
153.2	0.898
153.3	0.896
153.4	0.887
153.5	0.886
153.6	0.888
153.7	0.893
153.8	0.899
153.9	0.899
154	0.898
154.1	0.891
154.2	0.889
154.3	0.896
154.4	0.899
154.5	0.902
154.6	0.9
154.7	0.902
154.8	0.901
154.9	0.896
155	0.896
155.1	0.895
155.2	0.894
155.3	0.898
155.4	0.898
155.5	0.907
155.6	0.9
155.7	0.898
155.8	0.902
155.9	0.903
156	0.899
156.1	0.897
156.2	0.899
156.3	0.907
156.4	0.911
156.5	0.907
156.6	0.913
156.7	0.913
156.8	0.912
156.9	0.905
157	0.903
157.1	0.905
157.2	0.9
157.3	0.894
157.4	0.901
157.5	0.906
157.6	0.901
157.7	0.901
157.8	0.904
157.9	0.905
158	0.903
158.1	0.907
158.2	0.906
158.3	0.905
158.4	0.907
158.5	0.901
158.6	0.903
158.7	0.906
158.8	0.906
158.9	0.906
159	0.91
159.1	0.908
159.2	0.913
159.3	0.912
159.4	0.914
159.5	0.908
159.6	0.913
159.7	0.912
159.8	0.908
159.9	0.901
160	0.9
160.1	0.902
160.2	0.899
160.3	0.905
160.4	0.907
160.5	0.908
160.6	0.906
160.7	0.908
160.8	0.9
160.9	0.9
161	0.897
161.1	0.895
161.2	0.904
161.3	0.906
161.4	0.909
161.5	0.908
161.6	0.909
161.7	0.906
161.8	0.904
161.9	0.908
162	0.911
162.1	0.911
162.2	0.911
162.3	0.907
162.4	0.911
162.5	0.907
162.6	0.911
162.7	0.909
162.8	0.907
162.9	0.909
163	0.905
163.1	0.912
163.2	0.92
163.3	0.924
163.4	0.928
163.5	0.932
163.6	0.925
163.7	0.928
163.8	0.927
163.9	0.925
164	0.929
164.1	0.928
164.2	0.929
164.3	0.926
164.4	0.926
164.5	0.92
164.6	0.92
164.7	0.922
164.8	0.925
164.9	0.927
165	0.93
165.1	0.932
165.2	0.931
165.3	0.935
165.4	0.934
165.5	0.928
165.6	0.927
165.7	0.923
165.8	0.922
165.9	0.914
166	0.916
166.1	0.913
166.2	0.906
166.3	0.902
166.4	0.9
166.5	0.903
166.6	0.9
166.7	0.896
166.8	0.894
166.9	0.895
167	0.895
167.1	0.9
167.2	0.901
167.3	0.902
167.4	0.899
167.5	0.902
167.6	0.905
167.7	0.908
167.8	0.902
167.9	0.904
168	0.903
168.1	0.905
168.2	0.908
168.3	0.909
168.4	0.911
168.5	0.909
168.6	0.905
168.7	0.906
168.8	0.908
168.9	0.911
169	0.91
169.1	0.911
169.2	0.915
169.3	0.914
169.4	0.908
169.5	0.909
169.6	0.912
169.7	0.914
169.8	0.915
169.9	0.913
170	0.915
170.1	0.916
170.2	0.913
170.3	0.909
170.4	0.914
170.5	0.913
170.6	0.91
170.7	0.906
170.8	0.905
170.9	0.91
171	0.914
171.1	0.913
171.2	0.911
171.3	0.913
171.4	0.911
171.5	0.909
171.6	0.91
171.7	0.911
171.8	0.912
171.9	0.908
172	0.909
172.1	0.907
172.2	0.913
172.3	0.909
172.4	0.912
172.5	0.912
172.6	0.91
172.7	0.917
172.8	0.913
172.9	0.917
173	0.92
173.1	0.918
173.2	0.912
173.3	0.912
173.4	0.907
173.5	0.907
173.6	0.908
173.7	0.912
173.8	0.913
173.9	0.915
174	0.91
174.1	0.915
174.2	0.914
174.3	0.92
174.4	0.919
174.5	0.92
174.6	0.919
174.7	0.916
174.8	0.913
174.9	0.91
175	0.915
175.1	0.914
175.2	0.919
175.3	0.919
175.4	0.913
175.5	0.916
175.6	0.92
175.7	0.917
175.8	0.914
175.9	0.918
176	0.916
176.1	0.922
176.2	0.914
176.3	0.913
176.4	0.91
176.5	0.909
176.6	0.914
176.7	0.918
176.8	0.918
176.9	0.922
177	0.917
177.1	0.921
177.2	0.919
177.3	0.923
177.4	0.922
177.5	0.921
177.6	0.926
177.7	0.925
177.8	0.927
177.9	0.926
178	0.925
178.1	0.922
178.2	0.928
178.3	0.927
178.4	0.922
178.5	0.925
178.6	0.927
178.7	0.92
178.8	0.922
178.9	0.92
179	0.918
179.1	0.92
179.2	0.924
179.3	0.928
179.4	0.926
179.5	0.926
179.6	0.927
179.7	0.929
179.8	0.926
179.9	0.922
180	0.926
180.1	0.927
180.2	0.935
180.3	0.933
180.4	0.932
180.5	0.929
180.6	0.926
180.7	0.925
180.8	0.927
180.9	0.93
181	0.926
181.1	0.926
181.2	0.93
181.3	0.934
181.4	0.934
181.5	0.938
181.6	0.934
181.7	0.93
181.8	0.936
181.9	0.934
182	0.934
182.1	0.935
182.2	0.934
182.3	0.928
182.4	0.931
182.5	0.929
182.6	0.934
182.7	0.933
182.8	0.932
182.9	0.93
183	0.922
183.1	0.914
183.2	0.914
183.3	0.911
183.4	0.91
183.5	0.91
183.6	0.909
183.7	0.913
183.8	0.912
183.9	0.915
184	0.917
184.1	0.919
184.2	0.921
184.3	0.922
184.4	0.922
184.5	0.915
184.6	0.915
184.7	0.917
184.8	0.919
184.9	0.923
185	0.921
185.1	0.921
185.2	0.924
185.3	0.928
185.4	0.936
185.5	0.935
185.6	0.935
185.7	0.937
185.8	0.937
185.9	0.934
186	0.931
186.1	0.929
186.2	0.927
186.3	0.927
186.4	0.926
186.5	0.922
186.6	0.921
186.7	0.923
186.8	0.923
186.9	0.925
187	0.923
187.1	0.921
187.2	0.923
187.3	0.928
187.4	0.924
187.5	0.919
187.6	0.917
187.7	0.919
187.8	0.918
187.9	0.919
188	0.921
188.1	0.918
188.2	0.915
188.3	0.919
188.4	0.92
188.5	0.919
188.6	0.914
188.7	0.917
188.8	0.918
188.9	0.918
189	0.919
189.1	0.922
189.2	0.924
189.3	0.926
189.4	0.929
189.5	0.93
189.6	0.929
189.7	0.93
189.8	0.927
189.9	0.924
190	0.92
190.1	0.921
190.2	0.919
190.3	0.927
190.4	0.934
190.5	0.939
190.6	0.939
190.7	0.936
190.8	0.936
190.9	0.935
191	0.934
191.1	0.93
191.2	0.927
191.3	0.925
191.4	0.925
191.5	0.926
191.6	0.924
191.7	0.924
191.8	0.923
191.9	0.924
192	0.919
192.1	0.917
192.2	0.923
192.3	0.924
192.4	0.926
192.5	0.924
192.6	0.924
192.7	0.926
192.8	0.922
192.9	0.916
193	0.919
193.1	0.912
193.2	0.917
193.3	0.919
193.4	0.917
193.5	0.919
193.6	0.922
193.7	0.918
193.8	0.921
193.9	0.922
194	0.926
194.1	0.926
194.2	0.925
194.3	0.922
194.4	0.921
194.5	0.924
194.6	0.921
194.7	0.93
194.8	0.929
194.9	0.931
195	0.933
195.1	0.935
195.2	0.935
195.3	0.931
195.4	0.932
195.5	0.93
195.6	0.929
195.7	0.931
195.8	0.932
195.9	0.933
196	0.928
196.1	0.929
196.2	0.926
196.3	0.923
196.4	0.918
196.5	0.917
196.6	0.922
196.7	0.923
196.8	0.92
196.9	0.917
197	0.917
197.1	0.923
197.2	0.924
197.3	0.92
197.4	0.922
197.5	0.924
197.6	0.926
197.7	0.919
197.8	0.921
197.9	0.916
198	0.922
198.1	0.921
198.2	0.92
198.3	0.921
198.4	0.918
198.5	0.917
198.6	0.918
198.7	0.915
198.8	0.915
198.9	0.92
199	0.922
199.1	0.917
199.2	0.911
199.3	0.912
199.4	0.908
199.5	0.911
199.6	0.919
199.7	0.918
199.8	0.915
199.9	0.918
200	0.92
[truncated: 14,000 more rows]
