# Supplementary material for: Bayesian inference of kinetic schemes for ion channels by Kalman filtering
Source: eLife journal article supplement (doi:10.7554/elife.62714), 2022-05-04
Supplement: fig4-data7 [file 1_Sim_N_500_Strom_MW.xlsx]

## Sheet: Tabelle1
0.1	0
0.2	0
0.3	0
0.4	0
0.5	0
0.6	0
0.7	0
0.8	0
0.9	0
1	0
1.1	0
1.2	0
1.3	0
1.4	0
1.5	0
1.6	0
1.7	0
1.8	0
1.9	0
2	0
2.1	0
2.2	0
2.3	0
2.4	0
2.5	0
2.6	0
2.7	0
2.8	0
2.9	0
3	0
3.1	0
3.2	0
3.3	0
3.4	0
3.5	0
3.6	0
3.7	0
3.8	0
3.9	0
4	0
4.1	0
4.2	0
4.3	0
4.4	0
4.5	0
4.6	0
4.7	0
4.8	0
4.9	0
5	0
5.1	0
5.2	0
5.3	0
5.4	0
5.5	0
5.6	0
5.7	0
5.8	0
5.9	0
6	0
6.1	0
6.2	0
6.3	0
6.4	0
6.5	0
6.6	0
6.7	0
6.8	0
6.9	0
7	0
7.1	0
7.2	0
7.3	0
7.4	0
7.5	0
7.6	0
7.7	0
7.8	0
7.9	0
8	0
8.1	0
8.2	0
8.3	0
8.4	0
8.5	0
8.6	0
8.7	0
8.8	0
8.9	0
9	0
9.1	0
9.2	0
9.3	0
9.4	0
9.5	0
9.6	0
9.7	0
9.8	0
9.9	0
10	0
10.1	0
10.2	0
10.3	0
10.4	0
10.5	0
10.6	0
10.7	0
10.8	0
10.9	0
11	0
11.1	0
11.2	0
11.3	0
11.4	0
11.5	0
11.6	0
11.7	0
11.8	0
11.9	0
12	0
12.1	0
12.2	0
12.3	0
12.4	0
12.5	0
12.6	0
12.7	0
12.8	0
12.9	0
13	0
13.1	0
13.2	0
13.3	0
13.4	0
13.5	0
13.6	0
13.7	0
13.8	0
13.9	0
14	0
14.1	0
14.2	0
14.3	0
14.4	0
14.5	0
14.6	0
14.7	0
14.8	0
14.9	0
15	0
15.1	0
15.2	0
15.3	0
15.4	0
15.5	0
15.6	0
15.7	0
15.8	0
15.9	0
16	0
16.1	0
16.2	0
16.3	0
16.4	0
16.5	0
16.6	0
16.7	0
16.8	0
16.9	0
17	0
17.1	0
17.2	0
17.3	0
17.4	0
17.5	0
17.6	0
17.7	0
17.8	0
17.9	0
18	0
18.1	0
18.2	0
18.3	0
18.4	0
18.5	0
18.6	0
18.7	0
18.8	0
18.9	0
19	0
19.1	0
19.2	0
19.3	0
19.4	0
19.5	0
19.6	0
19.7	0
19.8	0
19.9	0
20	0
20.1	0
20.2	0
20.3	0
20.4	0
20.5	0
20.6	0
20.7	0
20.8	0
20.9	0
21	0
21.1	0
21.2	0
21.3	0
21.4	0
21.5	0
21.6	0
21.7	0
21.8	0
21.9	0
22	0
22.1	0
22.2	0
22.3	0
22.4	0
22.5	0
22.6	0
22.7	0
22.8	0
22.9	0
23	0
23.1	0
23.2	0
23.3	0
23.4	0
23.5	0
23.6	0
23.7	0
23.8	0
23.9	0
24	0
24.1	0
24.2	0
24.3	0
24.4	0
24.5	0
24.6	0
24.7	0
24.8	0
24.9	0
25	0
25.1	0
25.2	0
25.3	0
25.4	0
25.5	0
25.6	0
25.7	0
25.8	0
25.9	0
26	0
26.1	0
26.2	0
26.3	0
26.4	0
26.5	0
26.6	0
26.7	0
26.8	0
26.9	0
27	0
27.1	0
27.2	0
27.3	0
27.4	0
27.5	0
27.6	0
27.7	0
27.8	0
27.9	0
28	0
28.1	0
28.2	0
28.3	0
28.4	0
28.5	0
28.6	0
28.7	0
28.8	0
28.9	0
29	0
29.1	0
29.2	0
29.3	0
29.4	0
29.5	0
29.6	0
29.7	0
29.8	0
29.9	0
30	0
30.1	0
30.2	0
30.3	0
30.4	0
30.5	0
30.6	0
30.7	0
30.8	0
30.9	0
31	0
31.1	0
31.2	0
31.3	0
31.4	0
31.5	0
31.6	0
31.7	0
31.8	0
31.9	0
32	0
32.1	0
32.2	0
32.3	0
32.4	0
32.5	0
32.6	0
32.7	0
32.8	0
32.9	0
33	0
33.1	0
33.2	0
33.3	0
33.4	0
33.5	0
33.6	0
33.7	0
33.8	0
33.9	0
34	0
34.1	0
34.2	0
34.3	0
34.4	0
34.5	0
34.6	0
34.7	0
34.8	0
34.9	0
35	0
35.1	0
35.2	0
35.3	0
35.4	0
35.5	0
35.6	0
35.7	0
35.8	0
35.9	0
36	0
36.1	0
36.2	0
36.3	0
36.4	0
36.5	0
36.6	0
36.7	0
36.8	0
36.9	0
37	0
37.1	0
37.2	0
37.3	0
37.4	0
37.5	0
37.6	0
37.7	0
37.8	0
37.9	0
38	0
38.1	0
38.2	0
38.3	0
38.4	0
38.5	0
38.6	0
38.7	0
38.8	0
38.9	0
39	0
39.1	0
39.2	0
39.3	0
39.4	0
39.5	0
39.6	0
39.7	0
39.8	0
39.9	0
40	0
40.1	0
40.2	0
40.3	0
40.4	0
40.5	0
40.6	0
40.7	0
40.8	0
40.9	0
41	0
41.1	0
41.2	0
41.3	0
41.4	0
41.5	0
41.6	0
41.7	0
41.8	0
41.9	0
42	0
42.1	0
42.2	0
42.3	0
42.4	0
42.5	0
42.6	0
42.7	0
42.8	0
42.9	0
43	0
43.1	0
43.2	0
43.3	0
43.4	0
43.5	0
43.6	0
43.7	0
43.8	0
43.9	0
44	0
44.1	0
44.2	0
44.3	0
44.4	0
44.5	0
44.6	0
44.7	0
44.8	0
44.9	0
45	0
45.1	0
45.2	0
45.3	0
45.4	0
45.5	0
45.6	0
45.7	0
45.8	0
45.9	0
46	0
46.1	0
46.2	0
46.3	0
46.4	0
46.5	0
46.6	0
46.7	0
46.8	0
46.9	0
47	0
47.1	0
47.2	0
47.3	0
47.4	0
47.5	0
47.6	0
47.7	0
47.8	0
47.9	0
48	0
48.1	0
48.2	0
48.3	0
48.4	0
48.5	0
48.6	0
48.7	0
48.8	0
48.9	0
49	0
49.1	0
49.2	0
49.3	0
49.4	0
49.5	0
49.6	0
49.7	0
49.8	0
49.9	0
50	0
50.1	0
50.2	0
50.3	0
50.4	0
50.5	0
50.6	0
50.7	0
50.8	0
50.9	0
51	0
51.1	0
51.2	0
51.3	0
51.4	0
51.5	0
51.6	0
51.7	0
51.8	0
51.9	0
52	0
52.1	0
52.2	0
52.3	0
52.4	0
52.5	0
52.6	0
52.7	0
52.8	0
52.9	0
53	0
53.1	0
53.2	0
53.3	0
53.4	0
53.5	0
53.6	0
53.7	0
53.8	0
53.9	0
54	0
54.1	0
54.2	0
54.3	0
54.4	0
54.5	0
54.6	0
54.7	0
54.8	0
54.9	0
55	0
55.1	0
55.2	0
55.3	0
55.4	0
55.5	0
55.6	0
55.7	0
55.8	0
55.9	0
56	0
56.1	0
56.2	0
56.3	0
56.4	0
56.5	0
56.6	0
56.7	0
56.8	0
56.9	0
57	0
57.1	0
57.2	0
57.3	0
57.4	0
57.5	0
57.6	0
57.7	0
57.8	0
57.9	0
58	0
58.1	0
58.2	0
58.3	0
58.4	0
58.5	0
58.6	0
58.7	0
58.8	0
58.9	0
59	0
59.1	0
59.2	0
59.3	0
59.4	0
59.5	0
59.6	0
59.7	0
59.8	0
59.9	0
60	0
60.1	0
60.2	0
60.3	0
60.4	0
60.5	0
60.6	0
60.7	0
60.8	0
60.9	0
61	0
61.1	0
61.2	0
61.3	0
61.4	0
61.5	0
61.6	0
61.7	0
61.8	0
61.9	0
62	0
62.1	0
62.2	0
62.3	0
62.4	0
62.5	0
62.6	0
62.7	0
62.8	0
62.9	0
63	0
63.1	0
63.2	0
63.3	0
63.4	0
63.5	0
63.6	0
63.7	0
63.8	0
63.9	0
64	0
64.1	0
64.2	0
64.3	0
64.4	0
64.5	0
64.6	0
64.7	0
64.8	0
64.9	0
65	0
65.1	0
65.2	0
65.3	0
65.4	0
65.5	0
65.6	0
65.7	0
65.8	0
65.9	0
66	0
66.1	0
66.2	0
66.3	0
66.4	0
66.5	0
66.6	0
66.7	0
66.8	0
66.9	0
67	0
67.1	0
67.2	0
67.3	0
67.4	0
67.5	0
67.6	0
67.7	0
67.8	0
67.9	0
68	0
68.1	0
68.2	0
68.3	0
68.4	0
68.5	0
68.6	0
68.7	0
68.8	0
68.9	0
69	0
69.1	0
69.2	0
69.3	0
69.4	0
69.5	0
69.6	0
69.7	0
69.8	0
69.9	0
70	0
70.1	0
70.2	0
70.3	0
70.4	0
70.5	0
70.6	0
70.7	0
70.8	0
70.9	0
71	0
71.1	0
71.2	0
71.3	0
71.4	0
71.5	0
71.6	0
71.7	0
71.8	0
71.9	0
72	0
72.1	0
72.2	0
72.3	0
72.4	0
72.5	0
72.6	0
72.7	0
72.8	0
72.9	0
73	0
73.1	0
73.2	0
73.3	0
73.4	0
73.5	0
73.6	0
73.7	0
73.8	0
73.9	0
74	0
74.1	0
74.2	0
74.3	0
74.4	0
74.5	0
74.6	0
74.7	0
74.8	0
74.9	0
75	0
75.1	0
75.2	0
75.3	0
75.4	0
75.5	0
75.6	0
75.7	0
75.8	0
75.9	0
76	0
76.1	0
76.2	0
76.3	0
76.4	0
76.5	0
76.6	0
76.7	0
76.8	0
76.9	0
77	0
77.1	0
77.2	0
77.3	0
77.4	0
77.5	0
77.6	0
77.7	0
77.8	0
77.9	0
78	0
78.1	0
78.2	0
78.3	0
78.4	0
78.5	0
78.6	0
78.7	0
78.8	0
78.9	0
79	0
79.1	0
79.2	0
79.3	0
79.4	0
79.5	0
79.6	0
79.7	0
79.8	0
79.9	0
80	0
80.1	0
80.2	0
80.3	0
80.4	0
80.5	0
80.6	0
80.7	0
80.8	0
80.9	0
81	0
81.1	0
81.2	0
81.3	0
81.4	0
81.5	0
81.6	0
81.7	0
81.8	0
81.9	0
82	0
82.1	0
82.2	0
82.3	0
82.4	0
82.5	0
82.6	0
82.7	0
82.8	0
82.9	0
83	0
83.1	0
83.2	0
83.3	0
83.4	0
83.5	0
83.6	0
83.7	0
83.8	0
83.9	0
84	0
84.1	0
84.2	0
84.3	0
84.4	0
84.5	0
84.6	0
84.7	0
84.8	0
84.9	0
85	0
85.1	0
85.2	0
85.3	0
85.4	0
85.5	0
85.6	0
85.7	0
85.8	0
85.9	0
86	0
86.1	0
86.2	0
86.3	0
86.4	0
86.5	0
86.6	0
86.7	0
86.8	0
86.9	0
87	0
87.1	0
87.2	0
87.3	0
87.4	0
87.5	0
87.6	0
87.7	0
87.8	0
87.9	0
88	0
88.1	0
88.2	0
88.3	0
88.4	0
88.5	0
88.6	0
88.7	0
88.8	0
88.9	0
89	0
89.1	0
89.2	0
89.3	0
89.4	0
89.5	0
89.6	0
89.7	0
89.8	0
89.9	0
90	0
90.1	0
90.2	0
90.3	0
90.4	0
90.5	0
90.6	0
90.7	0
90.8	0
90.9	0
91	0
91.1	0
91.2	0
91.3	0
91.4	0
91.5	0
91.6	0
91.7	0
91.8	0
91.9	0
92	0
92.1	0
92.2	0
92.3	0
92.4	0
92.5	0
92.6	0
92.7	0
92.8	0
92.9	0
93	0
93.1	0
93.2	0
93.3	0
93.4	0
93.5	0
93.6	0
93.7	0
93.8	0
93.9	0
94	0
94.1	0
94.2	0
94.3	0
94.4	0
94.5	0
94.6	0
94.7	0
94.8	0
94.9	0
95	0
95.1	0
95.2	0
95.3	0
95.4	0
95.5	0
95.6	0
95.7	0
95.8	0
95.9	0
96	0
96.1	0
96.2	0
96.3	0
96.4	0
96.5	0
96.6	0
96.7	0
96.8	0
96.9	0
97	0
97.1	0
97.2	0
97.3	0
97.4	0
97.5	0
97.6	0
97.7	0
97.8	0
97.9	0
98	0
98.1	0
98.2	0
98.3	0
98.4	0
98.5	0
98.6	0
98.7	0
98.8	0
98.9	0
99	0
99.1	0
99.2	0
99.3	0
99.4	0
99.5	0
99.6	0
99.7	0
99.8	0
99.9	0
100	0
100.1	0
100.2	0
100.3	0
100.4	0.002
100.5	0.002
100.6	0.002
100.7	0.004
100.8	0.004
100.9	0.004
101	0.004
101.1	0.008
101.2	0.01
101.3	0.01
101.4	0.01
101.5	0.01
101.6	0.014
101.7	0.014
101.8	0.014
101.9	0.016
102	0.016
102.1	0.016
102.2	0.016
102.3	0.016
102.4	0.022
102.5	0.022
102.6	0.024
102.7	0.03
102.8	0.032
102.9	0.036
103	0.04
103.1	0.04
103.2	0.044
103.3	0.046
103.4	0.046
103.5	0.048
103.6	0.048
103.7	0.05
103.8	0.048
103.9	0.048
104	0.05
104.1	0.054
104.2	0.058
104.3	0.06
104.4	0.064
104.5	0.068
104.6	0.07
104.7	0.072
104.8	0.072
104.9	0.072
105	0.072
105.1	0.076
105.2	0.076
105.3	0.076
105.4	0.078
105.5	0.082
105.6	0.086
105.7	0.086
105.8	0.086
105.9	0.088
106	0.09
106.1	0.09
106.2	0.094
106.3	0.098
106.4	0.1
106.5	0.104
106.6	0.104
106.7	0.11
106.8	0.11
106.9	0.11
107	0.11
107.1	0.112
107.2	0.11
107.3	0.114
107.4	0.122
107.5	0.124
107.6	0.128
107.7	0.128
107.8	0.13
107.9	0.134
108	0.134
108.1	0.136
108.2	0.138
108.3	0.138
108.4	0.138
108.5	0.138
108.6	0.138
108.7	0.138
108.8	0.142
108.9	0.144
109	0.146
109.1	0.148
109.2	0.148
109.3	0.148
109.4	0.148
109.5	0.152
109.6	0.156
109.7	0.16
109.8	0.16
109.9	0.166
110	0.168
110.1	0.172
110.2	0.176
110.3	0.174
110.4	0.176
110.5	0.176
110.6	0.178
110.7	0.182
110.8	0.184
110.9	0.186
111	0.188
111.1	0.19
111.2	0.194
111.3	0.2
111.4	0.202
111.5	0.208
111.6	0.208
111.7	0.206
111.8	0.206
111.9	0.206
112	0.21
112.1	0.212
112.2	0.214
112.3	0.218
112.4	0.218
112.5	0.22
112.6	0.22
112.7	0.222
112.8	0.222
112.9	0.222
113	0.226
113.1	0.226
113.2	0.228
113.3	0.228
113.4	0.226
113.5	0.226
113.6	0.228
113.7	0.23
113.8	0.23
113.9	0.23
114	0.23
114.1	0.234
114.2	0.236
114.3	0.24
114.4	0.246
114.5	0.246
114.6	0.248
114.7	0.25
114.8	0.252
114.9	0.254
115	0.254
115.1	0.254
115.2	0.254
115.3	0.256
115.4	0.256
115.5	0.256
115.6	0.256
115.7	0.262
115.8	0.262
115.9	0.264
116	0.264
116.1	0.264
116.2	0.266
116.3	0.27
116.4	0.272
116.5	0.274
116.6	0.276
116.7	0.28
116.8	0.282
116.9	0.282
117	0.282
117.1	0.28
117.2	0.282
117.3	0.282
117.4	0.284
117.5	0.288
117.6	0.288
117.7	0.288
117.8	0.286
117.9	0.286
118	0.292
118.1	0.292
118.2	0.292
118.3	0.292
118.4	0.292
118.5	0.294
118.6	0.294
118.7	0.296
118.8	0.3
118.9	0.3
119	0.304
119.1	0.304
119.2	0.306
119.3	0.308
119.4	0.308
119.5	0.312
119.6	0.312
119.7	0.312
119.8	0.312
119.9	0.316
120	0.316
120.1	0.316
120.2	0.316
120.3	0.316
120.4	0.322
120.5	0.322
120.6	0.322
120.7	0.322
120.8	0.322
120.9	0.322
121	0.326
121.1	0.326
121.2	0.326
121.3	0.328
121.4	0.33
121.5	0.33
121.6	0.33
121.7	0.334
121.8	0.334
121.9	0.334
122	0.336
122.1	0.338
122.2	0.338
122.3	0.344
122.4	0.344
122.5	0.348
122.6	0.346
122.7	0.346
122.8	0.348
122.9	0.348
123	0.346
123.1	0.348
123.2	0.348
123.3	0.348
123.4	0.348
123.5	0.35
123.6	0.35
123.7	0.356
123.8	0.356
123.9	0.356
124	0.356
124.1	0.358
124.2	0.356
124.3	0.356
124.4	0.354
124.5	0.358
124.6	0.36
124.7	0.364
124.8	0.366
124.9	0.366
125	0.366
125.1	0.366
125.2	0.372
125.3	0.374
125.4	0.376
125.5	0.374
125.6	0.374
125.7	0.374
125.8	0.376
125.9	0.376
126	0.376
126.1	0.38
126.2	0.382
126.3	0.382
126.4	0.382
126.5	0.386
126.6	0.386
126.7	0.39
126.8	0.394
126.9	0.396
127	0.398
127.1	0.4
127.2	0.4
127.3	0.4
127.4	0.4
127.5	0.4
127.6	0.402
127.7	0.404
127.8	0.406
127.9	0.414
128	0.414
128.1	0.416
128.2	0.42
128.3	0.42
128.4	0.424
128.5	0.422
128.6	0.422
128.7	0.428
128.8	0.428
128.9	0.428
129	0.428
129.1	0.426
129.2	0.428
129.3	0.43
129.4	0.434
129.5	0.434
129.6	0.436
129.7	0.436
129.8	0.438
129.9	0.44
130	0.44
130.1	0.44
130.2	0.44
130.3	0.446
130.4	0.448
130.5	0.452
130.6	0.454
130.7	0.454
130.8	0.454
130.9	0.458
131	0.462
131.1	0.462
131.2	0.464
131.3	0.464
131.4	0.466
131.5	0.464
131.6	0.466
131.7	0.468
131.8	0.47
131.9	0.472
132	0.472
132.1	0.472
132.2	0.472
132.3	0.472
132.4	0.466
132.5	0.466
132.6	0.466
132.7	0.466
132.8	0.468
132.9	0.466
133	0.464
133.1	0.466
133.2	0.466
133.3	0.466
133.4	0.468
133.5	0.47
133.6	0.47
133.7	0.47
133.8	0.47
133.9	0.472
134	0.474
134.1	0.474
134.2	0.474
134.3	0.474
134.4	0.474
134.5	0.472
134.6	0.474
134.7	0.476
134.8	0.476
134.9	0.476
135	0.482
135.1	0.484
135.2	0.482
135.3	0.482
135.4	0.482
135.5	0.484
135.6	0.486
135.7	0.49
135.8	0.488
135.9	0.49
136	0.492
136.1	0.494
136.2	0.494
136.3	0.494
136.4	0.492
136.5	0.494
136.6	0.498
136.7	0.504
136.8	0.504
136.9	0.504
137	0.508
137.1	0.508
137.2	0.508
137.3	0.51
137.4	0.512
137.5	0.512
137.6	0.512
137.7	0.512
137.8	0.512
137.9	0.512
138	0.512
138.1	0.512
138.2	0.514
138.3	0.514
138.4	0.514
138.5	0.516
138.6	0.518
138.7	0.518
138.8	0.52
138.9	0.52
139	0.518
139.1	0.52
139.2	0.52
139.3	0.52
139.4	0.524
139.5	0.524
139.6	0.524
139.7	0.522
139.8	0.522
139.9	0.524
140	0.522
140.1	0.522
140.2	0.524
140.3	0.522
140.4	0.522
140.5	0.522
140.6	0.524
140.7	0.522
140.8	0.52
140.9	0.522
141	0.524
141.1	0.526
141.2	0.528
141.3	0.53
141.4	0.528
141.5	0.532
141.6	0.532
141.7	0.534
141.8	0.534
141.9	0.532
142	0.532
142.1	0.532
142.2	0.53
142.3	0.528
142.4	0.528
142.5	0.528
142.6	0.528
142.7	0.53
142.8	0.53
142.9	0.536
143	0.54
143.1	0.544
143.2	0.544
143.3	0.544
143.4	0.544
143.5	0.546
143.6	0.546
143.7	0.546
143.8	0.546
143.9	0.546
144	0.544
144.1	0.542
144.2	0.542
144.3	0.542
144.4	0.542
144.5	0.542
144.6	0.542
144.7	0.544
144.8	0.544
144.9	0.544
145	0.546
145.1	0.544
145.2	0.544
145.3	0.546
145.4	0.548
145.5	0.55
145.6	0.554
145.7	0.558
145.8	0.558
145.9	0.558
146	0.558
146.1	0.558
146.2	0.558
146.3	0.562
146.4	0.56
146.5	0.562
146.6	0.564
146.7	0.564
146.8	0.562
146.9	0.564
147	0.564
147.1	0.564
147.2	0.564
147.3	0.57
147.4	0.568
147.5	0.568
147.6	0.566
147.7	0.566
147.8	0.566
147.9	0.566
148	0.568
148.1	0.57
148.2	0.57
148.3	0.57
148.4	0.57
148.5	0.57
148.6	0.57
148.7	0.568
148.8	0.568
148.9	0.568
149	0.568
149.1	0.568
149.2	0.568
149.3	0.566
149.4	0.564
149.5	0.564
149.6	0.564
149.7	0.566
149.8	0.57
149.9	0.572
150	0.572
150.1	0.572
150.2	0.572
150.3	0.572
150.4	0.574
150.5	0.576
150.6	0.576
150.7	0.576
150.8	0.576
150.9	0.576
151	0.578
151.1	0.578
151.2	0.578
151.3	0.582
151.4	0.582
151.5	0.584
151.6	0.584
151.7	0.586
151.8	0.584
151.9	0.584
152	0.584
152.1	0.584
152.2	0.584
152.3	0.584
152.4	0.586
152.5	0.588
152.6	0.588
152.7	0.586
152.8	0.588
152.9	0.588
153	0.588
153.1	0.59
153.2	0.59
153.3	0.592
153.4	0.59
153.5	0.59
153.6	0.59
153.7	0.588
153.8	0.586
153.9	0.59
154	0.59
154.1	0.59
154.2	0.59
154.3	0.592
154.4	0.59
154.5	0.588
154.6	0.588
154.7	0.588
154.8	0.59
154.9	0.594
155	0.594
155.1	0.594
155.2	0.594
155.3	0.592
155.4	0.594
155.5	0.594
155.6	0.598
155.7	0.598
155.8	0.6
155.9	0.598
156	0.598
156.1	0.6
156.2	0.602
156.3	0.602
156.4	0.6
156.5	0.6
156.6	0.604
156.7	0.606
156.8	0.606
156.9	0.608
157	0.608
157.1	0.606
157.2	0.606
157.3	0.608
157.4	0.606
157.5	0.606
157.6	0.606
157.7	0.608
157.8	0.606
157.9	0.606
158	0.612
158.1	0.612
158.2	0.612
158.3	0.614
158.4	0.614
158.5	0.614
158.6	0.612
158.7	0.612
158.8	0.612
158.9	0.614
159	0.616
159.1	0.618
159.2	0.618
159.3	0.618
159.4	0.618
159.5	0.62
159.6	0.624
159.7	0.626
159.8	0.63
159.9	0.63
160	0.628
160.1	0.628
160.2	0.628
160.3	0.63
160.4	0.632
160.5	0.63
160.6	0.63
160.7	0.63
160.8	0.632
160.9	0.63
161	0.63
161.1	0.63
161.2	0.63
161.3	0.63
161.4	0.63
161.5	0.63
161.6	0.628
161.7	0.628
161.8	0.628
161.9	0.626
162	0.626
162.1	0.628
162.2	0.63
162.3	0.63
162.4	0.63
162.5	0.628
162.6	0.626
162.7	0.628
162.8	0.628
162.9	0.63
163	0.632
163.1	0.63
163.2	0.63
163.3	0.63
163.4	0.634
163.5	0.634
163.6	0.634
163.7	0.636
163.8	0.636
163.9	0.636
164	0.636
164.1	0.638
164.2	0.64
164.3	0.638
164.4	0.638
164.5	0.638
164.6	0.64
164.7	0.642
164.8	0.642
164.9	0.642
165	0.642
165.1	0.64
165.2	0.642
165.3	0.646
165.4	0.646
165.5	0.644
165.6	0.642
165.7	0.642
165.8	0.646
165.9	0.648
166	0.648
166.1	0.65
166.2	0.65
166.3	0.65
166.4	0.65
166.5	0.652
166.6	0.652
166.7	0.652
166.8	0.654
166.9	0.652
167	0.65
167.1	0.65
167.2	0.652
167.3	0.652
167.4	0.652
167.5	0.654
167.6	0.654
167.7	0.654
167.8	0.654
167.9	0.652
168	0.652
168.1	0.652
168.2	0.654
168.3	0.652
168.4	0.652
168.5	0.654
168.6	0.654
168.7	0.654
168.8	0.654
168.9	0.654
169	0.656
169.1	0.656
169.2	0.654
169.3	0.654
169.4	0.654
169.5	0.656
169.6	0.652
169.7	0.652
169.8	0.652
169.9	0.65
170	0.65
170.1	0.65
170.2	0.65
170.3	0.65
170.4	0.65
170.5	0.652
170.6	0.654
170.7	0.654
170.8	0.656
170.9	0.656
171	0.656
171.1	0.656
171.2	0.656
171.3	0.656
171.4	0.656
171.5	0.656
171.6	0.656
171.7	0.656
171.8	0.656
171.9	0.66
172	0.66
172.1	0.656
172.2	0.656
172.3	0.658
172.4	0.658
172.5	0.658
172.6	0.658
172.7	0.658
172.8	0.66
172.9	0.658
173	0.658
173.1	0.656
173.2	0.656
173.3	0.658
173.4	0.658
173.5	0.656
173.6	0.656
173.7	0.656
173.8	0.656
173.9	0.654
174	0.654
174.1	0.654
174.2	0.654
174.3	0.652
174.4	0.652
174.5	0.652
174.6	0.652
174.7	0.65
174.8	0.65
174.9	0.654
175	0.652
175.1	0.65
175.2	0.648
175.3	0.648
175.4	0.648
175.5	0.65
175.6	0.65
175.7	0.65
175.8	0.652
175.9	0.65
176	0.65
176.1	0.648
176.2	0.648
176.3	0.648
176.4	0.648
176.5	0.65
176.6	0.65
176.7	0.654
176.8	0.654
176.9	0.654
177	0.656
177.1	0.656
177.2	0.656
177.3	0.658
177.4	0.658
177.5	0.658
177.6	0.656
177.7	0.654
177.8	0.656
177.9	0.656
178	0.656
178.1	0.656
178.2	0.656
178.3	0.658
178.4	0.656
178.5	0.656
178.6	0.656
178.7	0.656
178.8	0.656
178.9	0.656
179	0.66
179.1	0.662
179.2	0.662
179.3	0.662
179.4	0.666
179.5	0.664
179.6	0.664
179.7	0.664
179.8	0.664
179.9	0.664
180	0.666
180.1	0.666
180.2	0.666
180.3	0.666
180.4	0.666
180.5	0.664
180.6	0.666
180.7	0.668
180.8	0.668
180.9	0.666
181	0.666
181.1	0.666
181.2	0.668
181.3	0.666
181.4	0.666
181.5	0.666
181.6	0.666
181.7	0.666
181.8	0.666
181.9	0.666
182	0.668
182.1	0.668
182.2	0.662
182.3	0.662
182.4	0.668
182.5	0.668
182.6	0.668
182.7	0.668
182.8	0.668
182.9	0.668
183	0.67
183.1	0.668
183.2	0.67
183.3	0.67
183.4	0.672
183.5	0.672
183.6	0.674
183.7	0.676
183.8	0.672
183.9	0.674
184	0.672
184.1	0.674
184.2	0.674
184.3	0.672
184.4	0.67
184.5	0.674
184.6	0.676
184.7	0.676
184.8	0.676
184.9	0.676
185	0.676
185.1	0.678
185.2	0.68
185.3	0.686
185.4	0.684
185.5	0.682
185.6	0.682
185.7	0.682
185.8	0.682
185.9	0.682
186	0.684
186.1	0.684
186.2	0.684
186.3	0.682
186.4	0.68
186.5	0.68
186.6	0.68
186.7	0.682
186.8	0.682
186.9	0.682
187	0.682
187.1	0.682
187.2	0.682
187.3	0.682
187.4	0.682
187.5	0.684
187.6	0.684
187.7	0.684
187.8	0.682
187.9	0.682
188	0.684
188.1	0.684
188.2	0.678
188.3	0.68
188.4	0.682
188.5	0.684
188.6	0.684
188.7	0.682
188.8	0.682
188.9	0.682
189	0.682
189.1	0.682
189.2	0.682
189.3	0.68
189.4	0.68
189.5	0.678
189.6	0.678
189.7	0.676
189.8	0.678
189.9	0.678
190	0.678
190.1	0.676
190.2	0.674
190.3	0.674
190.4	0.676
190.5	0.674
190.6	0.674
190.7	0.676
190.8	0.676
190.9	0.676
191	0.676
191.1	0.674
191.2	0.672
191.3	0.672
191.4	0.672
191.5	0.674
191.6	0.674
191.7	0.674
191.8	0.676
191.9	0.676
192	0.678
192.1	0.678
192.2	0.676
192.3	0.676
192.4	0.676
192.5	0.676
192.6	0.676
192.7	0.676
192.8	0.678
192.9	0.68
193	0.682
193.1	0.684
193.2	0.684
193.3	0.684
193.4	0.682
193.5	0.682
193.6	0.682
193.7	0.686
193.8	0.688
193.9	0.686
194	0.686
194.1	0.686
194.2	0.686
194.3	0.686
194.4	0.684
194.5	0.686
194.6	0.686
194.7	0.686
194.8	0.686
194.9	0.688
195	0.684
195.1	0.684
195.2	0.686
195.3	0.686
195.4	0.688
195.5	0.69
195.6	0.69
195.7	0.69
195.8	0.69
195.9	0.69
196	0.69
196.1	0.69
196.2	0.69
196.3	0.69
196.4	0.692
196.5	0.692
196.6	0.69
196.7	0.688
196.8	0.688
196.9	0.686
197	0.686
197.1	0.682
197.2	0.68
197.3	0.68
197.4	0.684
197.5	0.684
197.6	0.686
197.7	0.688
197.8	0.686
197.9	0.688
198	0.69
198.1	0.692
198.2	0.696
198.3	0.696
198.4	0.696
198.5	0.694
198.6	0.694
198.7	0.694
198.8	0.692
198.9	0.692
199	0.694
199.1	0.692
199.2	0.692
199.3	0.694
199.4	0.694
199.5	0.694
199.6	0.694
199.7	0.694
199.8	0.694
199.9	0.694
200	0.694
[truncated: 14,000 more rows]
