# Supplementary material for: Bayesian inference of kinetic schemes for ion channels by Kalman filtering
Source: eLife journal article supplement (doi:10.7554/elife.62714), 2022-05-04
Supplement: fig4-data7 [file 1_Sim_N_800_Fluor_MW_2M.xlsx]

## Sheet: Tabelle1
0.1	0
0.2	0
0.3	0
0.4	0
0.5	0
0.6	0
0.7	0
0.8	0
0.9	0
1	0
1.1	0
1.2	0
1.3	0
1.4	0
1.5	0
1.6	0
1.7	0
1.8	0
1.9	0
2	0
2.1	0
2.2	0
2.3	0
2.4	0
2.5	0
2.6	0
2.7	0
2.8	0
2.9	0
3	0
3.1	0
3.2	0
3.3	0
3.4	0
3.5	0
3.6	0
3.7	0
3.8	0
3.9	0
4	0
4.1	0
4.2	0
4.3	0
4.4	0
4.5	0
4.6	0
4.7	0
4.8	0
4.9	0
5	0
5.1	0
5.2	0
5.3	0
5.4	0
5.5	0
5.6	0
5.7	0
5.8	0
5.9	0
6	0
6.1	0
6.2	0
6.3	0
6.4	0
6.5	0
6.6	0
6.7	0
6.8	0
6.9	0
7	0
7.1	0
7.2	0
7.3	0
7.4	0
7.5	0
7.6	0
7.7	0
7.8	0
7.9	0
8	0
8.1	0
8.2	0
8.3	0
8.4	0
8.5	0
8.6	0
8.7	0
8.8	0
8.9	0
9	0
9.1	0
9.2	0
9.3	0
9.4	0
9.5	0
9.6	0
9.7	0
9.8	0
9.9	0
10	0
10.1	0
10.2	0
10.3	0
10.4	0
10.5	0
10.6	0
10.7	0
10.8	0
10.9	0
11	0
11.1	0
11.2	0
11.3	0
11.4	0
11.5	0
11.6	0
11.7	0
11.8	0
11.9	0
12	0
12.1	0
12.2	0
12.3	0
12.4	0
12.5	0
12.6	0
12.7	0
12.8	0
12.9	0
13	0
13.1	0
13.2	0
13.3	0
13.4	0
13.5	0
13.6	0
13.7	0
13.8	0
13.9	0
14	0
14.1	0
14.2	0
14.3	0
14.4	0
14.5	0
14.6	0
14.7	0
14.8	0
14.9	0
15	0
15.1	0
15.2	0
15.3	0
15.4	0
15.5	0
15.6	0
15.7	0
15.8	0
15.9	0
16	0
16.1	0
16.2	0
16.3	0
16.4	0
16.5	0
16.6	0
16.7	0
16.8	0
16.9	0
17	0
17.1	0
17.2	0
17.3	0
17.4	0
17.5	0
17.6	0
17.7	0
17.8	0
17.9	0
18	0
18.1	0
18.2	0
18.3	0
18.4	0
18.5	0
18.6	0
18.7	0
18.8	0
18.9	0
19	0
19.1	0
19.2	0
19.3	0
19.4	0
19.5	0
19.6	0
19.7	0
19.8	0
19.9	0
20	0
20.1	0
20.2	0
20.3	0
20.4	0
20.5	0
20.6	0
20.7	0
20.8	0
20.9	0
21	0
21.1	0
21.2	0
21.3	0
21.4	0
21.5	0
21.6	0
21.7	0
21.8	0
21.9	0
22	0
22.1	0
22.2	0
22.3	0
22.4	0
22.5	0
22.6	0
22.7	0
22.8	0
22.9	0
23	0
23.1	0
23.2	0
23.3	0
23.4	0
23.5	0
23.6	0
23.7	0
23.8	0
23.9	0
24	0
24.1	0
24.2	0
24.3	0
24.4	0
24.5	0
24.6	0
24.7	0
24.8	0
24.9	0
25	0
25.1	0
25.2	0
25.3	0
25.4	0
25.5	0
25.6	0
25.7	0
25.8	0
25.9	0
26	0
26.1	0
26.2	0
26.3	0
26.4	0
26.5	0
26.6	0
26.7	0
26.8	0
26.9	0
27	0
27.1	0
27.2	0
27.3	0
27.4	0
27.5	0
27.6	0
27.7	0
27.8	0
27.9	0
28	0
28.1	0
28.2	0
28.3	0
28.4	0
28.5	0
28.6	0
28.7	0
28.8	0
28.9	0
29	0
29.1	0
29.2	0
29.3	0
29.4	0
29.5	0
29.6	0
29.7	0
29.8	0
29.9	0
30	0
30.1	0
30.2	0
30.3	0
30.4	0
30.5	0
30.6	0
30.7	0
30.8	0
30.9	0
31	0
31.1	0
31.2	0
31.3	0
31.4	0
31.5	0
31.6	0
31.7	0
31.8	0
31.9	0
32	0
32.1	0
32.2	0
32.3	0
32.4	0
32.5	0
32.6	0
32.7	0
32.8	0
32.9	0
33	0
33.1	0
33.2	0
33.3	0
33.4	0
33.5	0
33.6	0
33.7	0
33.8	0
33.9	0
34	0
34.1	0
34.2	0
34.3	0
34.4	0
34.5	0
34.6	0
34.7	0
34.8	0
34.9	0
35	0
35.1	0
35.2	0
35.3	0
35.4	0
35.5	0
35.6	0
35.7	0
35.8	0
35.9	0
36	0
36.1	0
36.2	0
36.3	0
36.4	0
36.5	0
36.6	0
36.7	0
36.8	0
36.9	0
37	0
37.1	0
37.2	0
37.3	0
37.4	0
37.5	0
37.6	0
37.7	0
37.8	0
37.9	0
38	0
38.1	0
38.2	0
38.3	0
38.4	0
38.5	0
38.6	0
38.7	0
38.8	0
38.9	0
39	0
39.1	0
39.2	0
39.3	0
39.4	0
39.5	0
39.6	0
39.7	0
39.8	0
39.9	0
40	0
40.1	0
40.2	0
40.3	0
40.4	0
40.5	0
40.6	0
40.7	0
40.8	0
40.9	0
41	0
41.1	0
41.2	0
41.3	0
41.4	0
41.5	0
41.6	0
41.7	0
41.8	0
41.9	0
42	0
42.1	0
42.2	0
42.3	0
42.4	0
42.5	0
42.6	0
42.7	0
42.8	0
42.9	0
43	0
43.1	0
43.2	0
43.3	0
43.4	0
43.5	0
43.6	0
43.7	0
43.8	0
43.9	0
44	0
44.1	0
44.2	0
44.3	0
44.4	0
44.5	0
44.6	0
44.7	0
44.8	0
44.9	0
45	0
45.1	0
45.2	0
45.3	0
45.4	0
45.5	0
45.6	0
45.7	0
45.8	0
45.9	0
46	0
46.1	0
46.2	0
46.3	0
46.4	0
46.5	0
46.6	0
46.7	0
46.8	0
46.9	0
47	0
47.1	0
47.2	0
47.3	0
47.4	0
47.5	0
47.6	0
47.7	0
47.8	0
47.9	0
48	0
48.1	0
48.2	0
48.3	0
48.4	0
48.5	0
48.6	0
48.7	0
48.8	0
48.9	0
49	0
49.1	0
49.2	0
49.3	0
49.4	0
49.5	0
49.6	0
49.7	0
49.8	0
49.9	0
50	0
50.1	0
50.2	0
50.3	0
50.4	0
50.5	0
50.6	0
50.7	0
50.8	0
50.9	0
51	0
51.1	0
51.2	0
51.3	0
51.4	0
51.5	0
51.6	0
51.7	0
51.8	0
51.9	0
52	0
52.1	0
52.2	0
52.3	0
52.4	0
52.5	0
52.6	0
52.7	0
52.8	0
52.9	0
53	0
53.1	0
53.2	0
53.3	0
53.4	0
53.5	0
53.6	0
53.7	0
53.8	0
53.9	0
54	0
54.1	0
54.2	0
54.3	0
54.4	0
54.5	0
54.6	0
54.7	0
54.8	0
54.9	0
55	0
55.1	0
55.2	0
55.3	0
55.4	0
55.5	0
55.6	0
55.7	0
55.8	0
55.9	0
56	0
56.1	0
56.2	0
56.3	0
56.4	0
56.5	0
56.6	0
56.7	0
56.8	0
56.9	0
57	0
57.1	0
57.2	0
57.3	0
57.4	0
57.5	0
57.6	0
57.7	0
57.8	0
57.9	0
58	0
58.1	0
58.2	0
58.3	0
58.4	0
58.5	0
58.6	0
58.7	0
58.8	0
58.9	0
59	0
59.1	0
59.2	0
59.3	0
59.4	0
59.5	0
59.6	0
59.7	0
59.8	0
59.9	0
60	0
60.1	0
60.2	0
60.3	0
60.4	0
60.5	0
60.6	0
60.7	0
60.8	0
60.9	0
61	0
61.1	0
61.2	0
61.3	0
61.4	0
61.5	0
61.6	0
61.7	0
61.8	0
61.9	0
62	0
62.1	0
62.2	0
62.3	0
62.4	0
62.5	0
62.6	0
62.7	0
62.8	0
62.9	0
63	0
63.1	0
63.2	0
63.3	0
63.4	0
63.5	0
63.6	0
63.7	0
63.8	0
63.9	0
64	0
64.1	0
64.2	0
64.3	0
64.4	0
64.5	0
64.6	0
64.7	0
64.8	0
64.9	0
65	0
65.1	0
65.2	0
65.3	0
65.4	0
65.5	0
65.6	0
65.7	0
65.8	0
65.9	0
66	0
66.1	0
66.2	0
66.3	0
66.4	0
66.5	0
66.6	0
66.7	0
66.8	0
66.9	0
67	0
67.1	0
67.2	0
67.3	0
67.4	0
67.5	0
67.6	0
67.7	0
67.8	0
67.9	0
68	0
68.1	0
68.2	0
68.3	0
68.4	0
68.5	0
68.6	0
68.7	0
68.8	0
68.9	0
69	0
69.1	0
69.2	0
69.3	0
69.4	0
69.5	0
69.6	0
69.7	0
69.8	0
69.9	0
70	0
70.1	0
70.2	0
70.3	0
70.4	0
70.5	0
70.6	0
70.7	0
70.8	0
70.9	0
71	0
71.1	0
71.2	0
71.3	0
71.4	0
71.5	0
71.6	0
71.7	0
71.8	0
71.9	0
72	0
72.1	0
72.2	0
72.3	0
72.4	0
72.5	0
72.6	0
72.7	0
72.8	0
72.9	0
73	0
73.1	0
73.2	0
73.3	0
73.4	0
73.5	0
73.6	0
73.7	0
73.8	0
73.9	0
74	0
74.1	0
74.2	0
74.3	0
74.4	0
74.5	0
74.6	0
74.7	0
74.8	0
74.9	0
75	0
75.1	0
75.2	0
75.3	0
75.4	0
75.5	0
75.6	0
75.7	0
75.8	0
75.9	0
76	0
76.1	0
76.2	0
76.3	0
76.4	0
76.5	0
76.6	0
76.7	0
76.8	0
76.9	0
77	0
77.1	0
77.2	0
77.3	0
77.4	0
77.5	0
77.6	0
77.7	0
77.8	0
77.9	0
78	0
78.1	0
78.2	0
78.3	0
78.4	0
78.5	0
78.6	0
78.7	0
78.8	0
78.9	0
79	0
79.1	0
79.2	0
79.3	0
79.4	0
79.5	0
79.6	0
79.7	0
79.8	0
79.9	0
80	0
80.1	0
80.2	0
80.3	0
80.4	0
80.5	0
80.6	0
80.7	0
80.8	0
80.9	0
81	0
81.1	0
81.2	0
81.3	0
81.4	0
81.5	0
81.6	0
81.7	0
81.8	0
81.9	0
82	0
82.1	0
82.2	0
82.3	0
82.4	0
82.5	0
82.6	0
82.7	0
82.8	0
82.9	0
83	0
83.1	0
83.2	0
83.3	0
83.4	0
83.5	0
83.6	0
83.7	0
83.8	0
83.9	0
84	0
84.1	0
84.2	0
84.3	0
84.4	0
84.5	0
84.6	0
84.7	0
84.8	0
84.9	0
85	0
85.1	0
85.2	0
85.3	0
85.4	0
85.5	0
85.6	0
85.7	0
85.8	0
85.9	0
86	0
86.1	0
86.2	0
86.3	0
86.4	0
86.5	0
86.6	0
86.7	0
86.8	0
86.9	0
87	0
87.1	0
87.2	0
87.3	0
87.4	0
87.5	0
87.6	0
87.7	0
87.8	0
87.9	0
88	0
88.1	0
88.2	0
88.3	0
88.4	0
88.5	0
88.6	0
88.7	0
88.8	0
88.9	0
89	0
89.1	0
89.2	0
89.3	0
89.4	0
89.5	0
89.6	0
89.7	0
89.8	0
89.9	0
90	0
90.1	0
90.2	0
90.3	0
90.4	0
90.5	0
90.6	0
90.7	0
90.8	0
90.9	0
91	0
91.1	0
91.2	0
91.3	0
91.4	0
91.5	0
91.6	0
91.7	0
91.8	0
91.9	0
92	0
92.1	0
92.2	0
92.3	0
92.4	0
92.5	0
92.6	0
92.7	0
92.8	0
92.9	0
93	0
93.1	0
93.2	0
93.3	0
93.4	0
93.5	0
93.6	0
93.7	0
93.8	0
93.9	0
94	0
94.1	0
94.2	0
94.3	0
94.4	0
94.5	0
94.6	0
94.7	0
94.8	0
94.9	0
95	0
95.1	0
95.2	0
95.3	0
95.4	0
95.5	0
95.6	0
95.7	0
95.8	0
95.9	0
96	0
96.1	0
96.2	0
96.3	0
96.4	0
96.5	0
96.6	0
96.7	0
96.8	0
96.9	0
97	0
97.1	0
97.2	0
97.3	0
97.4	0
97.5	0
97.6	0
97.7	0
97.8	0
97.9	0
98	0
98.1	0
98.2	0
98.3	0
98.4	0
98.5	0
98.6	0
98.7	0
98.8	0
98.9	0
99	0
99.1	0
99.2	0
99.3	0
99.4	0
99.5	0
99.6	0
99.7	0
99.8	0
99.9	0
100	0
100.1	0.10875
100.2	0.19875
100.3	0.27125
100.4	0.34
100.5	0.396875
100.6	0.445
100.7	0.481875
100.8	0.51
100.9	0.54
101	0.57
101.1	0.588125
101.2	0.60375
101.3	0.611875
101.4	0.629375
101.5	0.639375
101.6	0.65375
101.7	0.66625
101.8	0.67375
101.9	0.685625
102	0.69875
102.1	0.703125
102.2	0.713125
102.3	0.714375
102.4	0.72
102.5	0.72375
102.6	0.724375
102.7	0.7275
102.8	0.7375
102.9	0.74375
103	0.74125
103.1	0.749375
103.2	0.749375
103.3	0.75125
103.4	0.754375
103.5	0.76375
103.6	0.769375
103.7	0.763125
103.8	0.775
103.9	0.770625
104	0.77625
104.1	0.774375
104.2	0.775625
104.3	0.774375
104.4	0.77125
104.5	0.770625
104.6	0.76875
104.7	0.76625
104.8	0.765625
104.9	0.76875
105	0.770625
105.1	0.768125
105.2	0.768125
105.3	0.76875
105.4	0.7725
105.5	0.775
105.6	0.774375
105.7	0.778125
105.8	0.774375
105.9	0.76625
106	0.7725
106.1	0.77375
106.2	0.771875
106.3	0.776875
106.4	0.783125
106.5	0.77
106.6	0.765625
106.7	0.771875
106.8	0.77375
106.9	0.785625
107	0.780625
107.1	0.780625
107.2	0.78375
107.3	0.7875
107.4	0.78375
107.5	0.7875
107.6	0.79
107.7	0.78625
107.8	0.785625
107.9	0.7875
108	0.79
108.1	0.786875
108.2	0.79
108.3	0.788125
108.4	0.785625
108.5	0.7925
108.6	0.79
108.7	0.78875
108.8	0.785
108.9	0.7825
109	0.789375
109.1	0.795
109.2	0.79125
109.3	0.79625
109.4	0.798125
109.5	0.801875
109.6	0.79875
109.7	0.79625
109.8	0.798125
109.9	0.79625
110	0.804375
110.1	0.803125
110.2	0.796875
110.3	0.795
110.4	0.798125
110.5	0.799375
110.6	0.79375
110.7	0.79375
110.8	0.78875
110.9	0.784375
111	0.78625
111.1	0.786875
111.2	0.785
111.3	0.785625
111.4	0.786875
111.5	0.793125
111.6	0.79875
111.7	0.7975
111.8	0.79875
111.9	0.799375
112	0.8025
112.1	0.803125
112.2	0.81
112.3	0.811875
112.4	0.809375
112.5	0.80875
112.6	0.81
112.7	0.808125
112.8	0.8025
112.9	0.801875
113	0.79375
113.1	0.7975
113.2	0.794375
113.3	0.8
113.4	0.801875
113.5	0.79875
113.6	0.796875
113.7	0.8
113.8	0.8
113.9	0.801875
114	0.8025
114.1	0.804375
114.2	0.801875
114.3	0.8075
114.4	0.81375
114.5	0.814375
114.6	0.81875
114.7	0.821875
114.8	0.8275
114.9	0.829375
115	0.826875
115.1	0.831875
115.2	0.83125
115.3	0.82375
115.4	0.821875
115.5	0.82
115.6	0.808125
115.7	0.808125
115.8	0.814375
115.9	0.81125
116	0.81625
116.1	0.816875
116.2	0.818125
116.3	0.816875
116.4	0.81875
116.5	0.816875
116.6	0.82
116.7	0.820625
116.8	0.821875
116.9	0.82375
117	0.820625
117.1	0.81875
117.2	0.81875
117.3	0.823125
117.4	0.82375
117.5	0.828125
117.6	0.82875
117.7	0.82625
117.8	0.829375
117.9	0.830625
118	0.833125
118.1	0.83375
118.2	0.83375
118.3	0.8325
118.4	0.830625
118.5	0.834375
118.6	0.835
118.7	0.835
118.8	0.84
118.9	0.838125
119	0.838125
119.1	0.838125
119.2	0.8375
119.3	0.838125
119.4	0.8375
119.5	0.834375
119.6	0.839375
119.7	0.84125
119.8	0.841875
119.9	0.843125
120	0.84375
120.1	0.8475
120.2	0.85125
120.3	0.85
120.4	0.84375
120.5	0.843125
120.6	0.844375
120.7	0.843125
120.8	0.845
120.9	0.8475
121	0.848125
121.1	0.845
121.2	0.845625
121.3	0.841875
121.4	0.8525
121.5	0.85
121.6	0.85
121.7	0.848125
121.8	0.8525
121.9	0.853125
122	0.850625
122.1	0.849375
122.2	0.856875
122.3	0.8625
122.4	0.864375
122.5	0.86
122.6	0.861875
122.7	0.858125
122.8	0.8575
122.9	0.856875
123	0.858125
123.1	0.855625
123.2	0.8575
123.3	0.859375
123.4	0.859375
123.5	0.86
123.6	0.86
123.7	0.855625
123.8	0.850625
123.9	0.85
124	0.85625
124.1	0.860625
124.2	0.860625
124.3	0.864375
124.4	0.864375
124.5	0.865625
124.6	0.8675
124.7	0.866875
124.8	0.865
124.9	0.861875
125	0.861875
125.1	0.860625
125.2	0.860625
125.3	0.860625
125.4	0.863125
125.5	0.865
125.6	0.861875
125.7	0.87
125.8	0.8675
125.9	0.87
126	0.871875
126.1	0.870625
126.2	0.871875
126.3	0.87
126.4	0.86875
126.5	0.868125
126.6	0.874375
126.7	0.871875
126.8	0.8725
126.9	0.87375
127	0.875
127.1	0.87
127.2	0.871875
127.3	0.875625
127.4	0.871875
127.5	0.874375
127.6	0.871875
127.7	0.868125
127.8	0.871875
127.9	0.865625
128	0.87
128.1	0.873125
128.2	0.8775
128.3	0.88
128.4	0.876875
128.5	0.875
128.6	0.8725
128.7	0.870625
128.8	0.875
128.9	0.87625
129	0.873125
129.1	0.871875
129.2	0.87625
129.3	0.873125
129.4	0.8775
129.5	0.880625
129.6	0.880625
129.7	0.8825
129.8	0.8825
129.9	0.88125
130	0.883125
130.1	0.88875
130.2	0.88125
130.3	0.879375
130.4	0.8775
130.5	0.878125
130.6	0.87625
130.7	0.878125
130.8	0.8775
130.9	0.876875
131	0.8775
131.1	0.875625
131.2	0.875625
131.3	0.875
131.4	0.88
131.5	0.883125
131.6	0.88125
131.7	0.8825
131.8	0.885
131.9	0.888125
132	0.88375
132.1	0.88375
132.2	0.883125
132.3	0.884375
132.4	0.886875
132.5	0.885625
132.6	0.88375
132.7	0.876875
132.8	0.87875
132.9	0.874375
133	0.879375
133.1	0.88375
133.2	0.8875
133.3	0.889375
133.4	0.888125
133.5	0.893125
133.6	0.891875
133.7	0.88625
133.8	0.885
133.9	0.88375
134	0.88875
134.1	0.888125
134.2	0.88875
134.3	0.888125
134.4	0.890625
134.5	0.88375
134.6	0.88125
134.7	0.88125
134.8	0.885625
134.9	0.8825
135	0.8825
135.1	0.8825
135.2	0.879375
135.3	0.883125
135.4	0.88125
135.5	0.884375
135.6	0.88375
135.7	0.886875
135.8	0.885625
135.9	0.880625
136	0.8825
136.1	0.886875
136.2	0.8875
136.3	0.88625
136.4	0.884375
136.5	0.885625
136.6	0.8875
136.7	0.890625
136.8	0.89
136.9	0.896875
137	0.89875
137.1	0.8975
137.2	0.89625
137.3	0.898125
137.4	0.896875
137.5	0.8975
137.6	0.896875
137.7	0.899375
137.8	0.9
137.9	0.899375
138	0.903125
138.1	0.904375
138.2	0.90375
138.3	0.905625
138.4	0.905
138.5	0.91125
138.6	0.90875
138.7	0.9025
138.8	0.90625
138.9	0.905625
139	0.9075
139.1	0.9075
139.2	0.90375
139.3	0.89875
139.4	0.90125
139.5	0.9025
139.6	0.903125
139.7	0.899375
139.8	0.90125
139.9	0.900625
140	0.903125
140.1	0.899375
140.2	0.89
140.3	0.88875
140.4	0.890625
140.5	0.8925
140.6	0.894375
140.7	0.8925
140.8	0.894375
140.9	0.88875
141	0.889375
141.1	0.888125
141.2	0.8875
141.3	0.89125
141.4	0.891875
141.5	0.893125
141.6	0.89625
141.7	0.8975
141.8	0.89625
141.9	0.89875
142	0.899375
142.1	0.900625
142.2	0.90125
142.3	0.905625
142.4	0.90125
142.5	0.903125
142.6	0.90125
142.7	0.900625
142.8	0.90125
142.9	0.903125
143	0.90625
143.1	0.9075
143.2	0.90625
143.3	0.9025
143.4	0.895625
143.5	0.895
143.6	0.894375
143.7	0.89
143.8	0.893125
143.9	0.88875
144	0.884375
144.1	0.885
144.2	0.885
144.3	0.889375
144.4	0.89125
144.5	0.89375
144.6	0.891875
144.7	0.89875
144.8	0.894375
144.9	0.896875
145	0.8975
145.1	0.9025
145.2	0.899375
145.3	0.8975
145.4	0.8925
145.5	0.89
145.6	0.89375
145.7	0.895625
145.8	0.8975
145.9	0.900625
146	0.900625
146.1	0.905
146.2	0.90625
146.3	0.905625
146.4	0.904375
146.5	0.9075
146.6	0.90875
146.7	0.909375
146.8	0.90375
146.9	0.9025
147	0.903125
147.1	0.89625
147.2	0.894375
147.3	0.894375
147.4	0.8925
147.5	0.891875
147.6	0.895625
147.7	0.894375
147.8	0.89
147.9	0.8875
148	0.893125
148.1	0.89125
148.2	0.893125
148.3	0.894375
148.4	0.89375
148.5	0.88875
148.6	0.88875
148.7	0.891875
148.8	0.891875
148.9	0.891875
149	0.89125
149.1	0.89625
149.2	0.89375
149.3	0.8925
149.4	0.89
149.5	0.888125
149.6	0.89375
149.7	0.888125
149.8	0.889375
149.9	0.88875
150	0.89125
150.1	0.888125
150.2	0.89375
150.3	0.89625
150.4	0.8975
150.5	0.9
150.6	0.901875
150.7	0.901875
150.8	0.899375
150.9	0.89875
151	0.89875
151.1	0.903125
151.2	0.904375
151.3	0.9025
151.4	0.909375
151.5	0.9075
151.6	0.903125
151.7	0.90375
151.8	0.903125
151.9	0.90125
152	0.90375
152.1	0.905625
152.2	0.908125
152.3	0.90625
152.4	0.905625
152.5	0.906875
152.6	0.905625
152.7	0.908125
152.8	0.910625
152.9	0.914375
153	0.911875
153.1	0.9075
153.2	0.910625
153.3	0.913125
153.4	0.913125
153.5	0.916875
153.6	0.915
153.7	0.915625
153.8	0.913125
153.9	0.909375
154	0.90875
154.1	0.908125
154.2	0.906875
154.3	0.908125
154.4	0.905625
154.5	0.9075
154.6	0.90625
154.7	0.90375
154.8	0.90375
154.9	0.906875
155	0.90375
155.1	0.903125
155.2	0.9025
155.3	0.904375
155.4	0.9
155.5	0.90375
155.6	0.9025
155.7	0.900625
155.8	0.90375
155.9	0.900625
156	0.903125
156.1	0.900625
156.2	0.8975
156.3	0.8975
156.4	0.895625
156.5	0.898125
156.6	0.898125
156.7	0.89875
156.8	0.898125
156.9	0.90125
157	0.899375
157.1	0.89875
157.2	0.899375
157.3	0.904375
157.4	0.9025
157.5	0.903125
157.6	0.90375
157.7	0.90625
157.8	0.903125
157.9	0.904375
158	0.90375
158.1	0.905
158.2	0.9075
158.3	0.90375
158.4	0.901875
158.5	0.9025
158.6	0.9075
158.7	0.908125
158.8	0.90875
158.9	0.910625
159	0.905
159.1	0.90375
159.2	0.90625
159.3	0.9075
159.4	0.9125
159.5	0.913125
159.6	0.910625
159.7	0.911875
159.8	0.91125
159.9	0.910625
160	0.91125
160.1	0.91125
160.2	0.908125
160.3	0.906875
160.4	0.9075
160.5	0.905625
160.6	0.905625
160.7	0.910625
160.8	0.91125
160.9	0.910625
161	0.91125
161.1	0.91
161.2	0.910625
161.3	0.9075
161.4	0.909375
161.5	0.908125
161.6	0.90875
161.7	0.90625
161.8	0.901875
161.9	0.9075
162	0.905625
162.1	0.904375
162.2	0.904375
162.3	0.9075
162.4	0.906875
162.5	0.906875
162.6	0.90625
162.7	0.908125
162.8	0.910625
162.9	0.9075
163	0.9125
163.1	0.908125
163.2	0.909375
163.3	0.90875
163.4	0.913125
163.5	0.90875
163.6	0.911875
163.7	0.91125
163.8	0.90875
163.9	0.908125
164	0.91
164.1	0.90875
164.2	0.91125
164.3	0.9125
164.4	0.915
164.5	0.9175
164.6	0.916875
164.7	0.919375
164.8	0.920625
164.9	0.9225
165	0.92125
165.1	0.921875
165.2	0.92
165.3	0.918125
165.4	0.915625
165.5	0.91875
165.6	0.919375
165.7	0.919375
165.8	0.920625
165.9	0.92125
166	0.920625
166.1	0.918125
166.2	0.919375
166.3	0.91875
166.4	0.916875
166.5	0.916875
166.6	0.915
166.7	0.91625
166.8	0.9125
166.9	0.909375
167	0.911875
167.1	0.915
167.2	0.91625
167.3	0.92
167.4	0.91875
167.5	0.920625
167.6	0.92
167.7	0.92
167.8	0.920625
167.9	0.918125
168	0.92125
168.1	0.91875
168.2	0.914375
168.3	0.915
168.4	0.91625
168.5	0.91625
168.6	0.915625
168.7	0.91625
168.8	0.91625
168.9	0.915625
169	0.915
169.1	0.9175
169.2	0.91625
169.3	0.916875
169.4	0.911875
169.5	0.9125
169.6	0.914375
169.7	0.919375
169.8	0.9175
169.9	0.91875
170	0.92375
170.1	0.92375
170.2	0.925625
170.3	0.929375
170.4	0.92875
170.5	0.929375
170.6	0.928125
170.7	0.9275
170.8	0.928125
170.9	0.925625
171	0.924375
171.1	0.924375
171.2	0.926875
171.3	0.925
171.4	0.9225
171.5	0.91875
171.6	0.92
171.7	0.920625
171.8	0.920625
171.9	0.924375
172	0.924375
172.1	0.925625
172.2	0.92125
172.3	0.919375
172.4	0.92375
172.5	0.919375
172.6	0.91625
172.7	0.91625
172.8	0.915625
172.9	0.915625
173	0.92
173.1	0.918125
173.2	0.91875
173.3	0.919375
173.4	0.920625
173.5	0.920625
173.6	0.9225
173.7	0.925
173.8	0.9275
173.9	0.92375
174	0.925625
174.1	0.92375
174.2	0.92
174.3	0.920625
174.4	0.92
174.5	0.92125
174.6	0.92125
174.7	0.918125
174.8	0.918125
174.9	0.921875
175	0.923125
175.1	0.92375
175.2	0.925
175.3	0.924375
175.4	0.925
175.5	0.926875
175.6	0.924375
175.7	0.9225
175.8	0.925
175.9	0.92375
176	0.91875
176.1	0.921875
176.2	0.921875
176.3	0.91875
176.4	0.915625
176.5	0.915
176.6	0.918125
176.7	0.91875
176.8	0.92
176.9	0.915625
177	0.916875
177.1	0.91375
177.2	0.915
177.3	0.91375
177.4	0.915625
177.5	0.9175
177.6	0.91375
177.7	0.91625
177.8	0.915
177.9	0.9125
178	0.91375
178.1	0.91375
178.2	0.913125
178.3	0.9175
178.4	0.919375
178.5	0.9225
178.6	0.923125
178.7	0.929375
178.8	0.926875
178.9	0.93
179	0.93
179.1	0.928125
179.2	0.930625
179.3	0.92875
179.4	0.9275
179.5	0.92875
179.6	0.931875
179.7	0.928125
179.8	0.930625
179.9	0.92625
180	0.9225
180.1	0.923125
180.2	0.921875
180.3	0.919375
180.4	0.920625
180.5	0.921875
180.6	0.920625
180.7	0.923125
180.8	0.924375
180.9	0.92625
181	0.92625
181.1	0.92375
181.2	0.92875
181.3	0.9275
181.4	0.930625
181.5	0.93375
181.6	0.934375
181.7	0.93125
181.8	0.930625
181.9	0.9325
182	0.9325
182.1	0.93375
182.2	0.933125
182.3	0.933125
182.4	0.93375
182.5	0.9325
182.6	0.929375
182.7	0.92875
182.8	0.931875
182.9	0.931875
183	0.931875
183.1	0.929375
183.2	0.925625
183.3	0.925625
183.4	0.925625
183.5	0.923125
183.6	0.91875
183.7	0.91875
183.8	0.923125
183.9	0.924375
184	0.921875
184.1	0.918125
184.2	0.918125
184.3	0.92125
184.4	0.92125
184.5	0.9225
184.6	0.9225
184.7	0.9225
184.8	0.9225
184.9	0.925
185	0.9275
185.1	0.9275
185.2	0.9275
185.3	0.924375
185.4	0.923125
185.5	0.923125
185.6	0.921875
185.7	0.925
185.8	0.9275
185.9	0.926875
186	0.930625
186.1	0.931875
186.2	0.930625
186.3	0.931875
186.4	0.93
186.5	0.93
186.6	0.93
186.7	0.929375
186.8	0.935625
186.9	0.93125
187	0.928125
187.1	0.925625
187.2	0.925
187.3	0.91875
187.4	0.918125
187.5	0.916875
187.6	0.9125
187.7	0.9125
187.8	0.915625
187.9	0.913125
188	0.91125
188.1	0.915
188.2	0.915625
188.3	0.90875
188.4	0.905625
188.5	0.91375
188.6	0.91125
188.7	0.9075
188.8	0.911875
188.9	0.91125
189	0.91
189.1	0.913125
189.2	0.920625
189.3	0.920625
189.4	0.920625
189.5	0.920625
189.6	0.923125
189.7	0.925625
189.8	0.924375
189.9	0.9225
190	0.93125
190.1	0.9275
190.2	0.928125
190.3	0.925625
190.4	0.928125
190.5	0.930625
190.6	0.930625
190.7	0.928125
190.8	0.928125
190.9	0.92625
191	0.92375
191.1	0.91875
191.2	0.919375
191.3	0.918125
191.4	0.920625
191.5	0.92125
191.6	0.921875
191.7	0.92125
191.8	0.920625
191.9	0.920625
192	0.920625
192.1	0.9175
192.2	0.9175
192.3	0.91625
192.4	0.915
192.5	0.92125
192.6	0.9225
192.7	0.92125
192.8	0.92375
192.9	0.921875
193	0.919375
193.1	0.918125
193.2	0.91875
193.3	0.920625
193.4	0.920625
193.5	0.92125
193.6	0.919375
193.7	0.92
193.8	0.923125
193.9	0.928125
194	0.928125
194.1	0.924375
194.2	0.924375
194.3	0.928125
194.4	0.925625
194.5	0.925
194.6	0.9225
194.7	0.918125
194.8	0.9175
194.9	0.92
195	0.921875
195.1	0.923125
195.2	0.923125
195.3	0.92125
195.4	0.925
195.5	0.926875
195.6	0.924375
195.7	0.925
195.8	0.924375
195.9	0.924375
196	0.924375
196.1	0.9225
196.2	0.928125
196.3	0.9275
196.4	0.929375
196.5	0.93125
196.6	0.925625
196.7	0.926875
196.8	0.92375
196.9	0.926875
197	0.925
197.1	0.92375
197.2	0.92375
197.3	0.925
197.4	0.9275
197.5	0.929375
197.6	0.92875
197.7	0.930625
197.8	0.933125
197.9	0.935
198	0.930625
198.1	0.929375
198.2	0.9325
198.3	0.935
198.4	0.93125
198.5	0.930625
198.6	0.93
198.7	0.93
198.8	0.92875
198.9	0.92875
199	0.926875
199.1	0.9275
199.2	0.923125
199.3	0.925
199.4	0.923125
199.5	0.92125
199.6	0.920625
199.7	0.925
199.8	0.925
199.9	0.928125
200	0.928125
[truncated: 14,000 more rows]
