# Supplementary material for: Bayesian inference of kinetic schemes for ion channels by Kalman filtering
Source: eLife journal article supplement (doi:10.7554/elife.62714), 2022-05-04
Supplement: fig4-data7 [file 1_Sim_N_800_Strom_MW_2M.xlsx]

## Sheet: Tabelle1
0.1	0
0.2	0
0.3	0
0.4	0
0.5	0
0.6	0
0.7	0
0.8	0
0.9	0
1	0
1.1	0
1.2	0
1.3	0
1.4	0
1.5	0
1.6	0
1.7	0
1.8	0
1.9	0
2	0
2.1	0
2.2	0
2.3	0
2.4	0
2.5	0
2.6	0
2.7	0
2.8	0
2.9	0
3	0
3.1	0
3.2	0
3.3	0
3.4	0
3.5	0
3.6	0
3.7	0
3.8	0
3.9	0
4	0
4.1	0
4.2	0
4.3	0
4.4	0
4.5	0
4.6	0
4.7	0
4.8	0
4.9	0
5	0
5.1	0
5.2	0
5.3	0
5.4	0
5.5	0
5.6	0
5.7	0
5.8	0
5.9	0
6	0
6.1	0
6.2	0
6.3	0
6.4	0
6.5	0
6.6	0
6.7	0
6.8	0
6.9	0
7	0
7.1	0
7.2	0
7.3	0
7.4	0
7.5	0
7.6	0
7.7	0
7.8	0
7.9	0
8	0
8.1	0
8.2	0
8.3	0
8.4	0
8.5	0
8.6	0
8.7	0
8.8	0
8.9	0
9	0
9.1	0
9.2	0
9.3	0
9.4	0
9.5	0
9.6	0
9.7	0
9.8	0
9.9	0
10	0
10.1	0
10.2	0
10.3	0
10.4	0
10.5	0
10.6	0
10.7	0
10.8	0
10.9	0
11	0
11.1	0
11.2	0
11.3	0
11.4	0
11.5	0
11.6	0
11.7	0
11.8	0
11.9	0
12	0
12.1	0
12.2	0
12.3	0
12.4	0
12.5	0
12.6	0
12.7	0
12.8	0
12.9	0
13	0
13.1	0
13.2	0
13.3	0
13.4	0
13.5	0
13.6	0
13.7	0
13.8	0
13.9	0
14	0
14.1	0
14.2	0
14.3	0
14.4	0
14.5	0
14.6	0
14.7	0
14.8	0
14.9	0
15	0
15.1	0
15.2	0
15.3	0
15.4	0
15.5	0
15.6	0
15.7	0
15.8	0
15.9	0
16	0
16.1	0
16.2	0
16.3	0
16.4	0
16.5	0
16.6	0
16.7	0
16.8	0
16.9	0
17	0
17.1	0
17.2	0
17.3	0
17.4	0
17.5	0
17.6	0
17.7	0
17.8	0
17.9	0
18	0
18.1	0
18.2	0
18.3	0
18.4	0
18.5	0
18.6	0
18.7	0
18.8	0
18.9	0
19	0
19.1	0
19.2	0
19.3	0
19.4	0
19.5	0
19.6	0
19.7	0
19.8	0
19.9	0
20	0
20.1	0
20.2	0
20.3	0
20.4	0
20.5	0
20.6	0
20.7	0
20.8	0
20.9	0
21	0
21.1	0
21.2	0
21.3	0
21.4	0
21.5	0
21.6	0
21.7	0
21.8	0
21.9	0
22	0
22.1	0
22.2	0
22.3	0
22.4	0
22.5	0
22.6	0
22.7	0
22.8	0
22.9	0
23	0
23.1	0
23.2	0
23.3	0
23.4	0
23.5	0
23.6	0
23.7	0
23.8	0
23.9	0
24	0
24.1	0
24.2	0
24.3	0
24.4	0
24.5	0
24.6	0
24.7	0
24.8	0
24.9	0
25	0
25.1	0
25.2	0
25.3	0
25.4	0
25.5	0
25.6	0
25.7	0
25.8	0
25.9	0
26	0
26.1	0
26.2	0
26.3	0
26.4	0
26.5	0
26.6	0
26.7	0
26.8	0
26.9	0
27	0
27.1	0
27.2	0
27.3	0
27.4	0
27.5	0
27.6	0
27.7	0
27.8	0
27.9	0
28	0
28.1	0
28.2	0
28.3	0
28.4	0
28.5	0
28.6	0
28.7	0
28.8	0
28.9	0
29	0
29.1	0
29.2	0
29.3	0
29.4	0
29.5	0
29.6	0
29.7	0
29.8	0
29.9	0
30	0
30.1	0
30.2	0
30.3	0
30.4	0
30.5	0
30.6	0
30.7	0
30.8	0
30.9	0
31	0
31.1	0
31.2	0
31.3	0
31.4	0
31.5	0
31.6	0
31.7	0
31.8	0
31.9	0
32	0
32.1	0
32.2	0
32.3	0
32.4	0
32.5	0
32.6	0
32.7	0
32.8	0
32.9	0
33	0
33.1	0
33.2	0
33.3	0
33.4	0
33.5	0
33.6	0
33.7	0
33.8	0
33.9	0
34	0
34.1	0
34.2	0
34.3	0
34.4	0
34.5	0
34.6	0
34.7	0
34.8	0
34.9	0
35	0
35.1	0
35.2	0
35.3	0
35.4	0
35.5	0
35.6	0
35.7	0
35.8	0
35.9	0
36	0
36.1	0
36.2	0
36.3	0
36.4	0
36.5	0
36.6	0
36.7	0
36.8	0
36.9	0
37	0
37.1	0
37.2	0
37.3	0
37.4	0
37.5	0
37.6	0
37.7	0
37.8	0
37.9	0
38	0
38.1	0
38.2	0
38.3	0
38.4	0
38.5	0
38.6	0
38.7	0
38.8	0
38.9	0
39	0
39.1	0
39.2	0
39.3	0
39.4	0
39.5	0
39.6	0
39.7	0
39.8	0
39.9	0
40	0
40.1	0
40.2	0
40.3	0
40.4	0
40.5	0
40.6	0
40.7	0
40.8	0
40.9	0
41	0
41.1	0
41.2	0
41.3	0
41.4	0
41.5	0
41.6	0
41.7	0
41.8	0
41.9	0
42	0
42.1	0
42.2	0
42.3	0
42.4	0
42.5	0
42.6	0
42.7	0
42.8	0
42.9	0
43	0
43.1	0
43.2	0
43.3	0
43.4	0
43.5	0
43.6	0
43.7	0
43.8	0
43.9	0
44	0
44.1	0
44.2	0
44.3	0
44.4	0
44.5	0
44.6	0
44.7	0
44.8	0
44.9	0
45	0
45.1	0
45.2	0
45.3	0
45.4	0
45.5	0
45.6	0
45.7	0
45.8	0
45.9	0
46	0
46.1	0
46.2	0
46.3	0
46.4	0
46.5	0
46.6	0
46.7	0
46.8	0
46.9	0
47	0
47.1	0
47.2	0
47.3	0
47.4	0
47.5	0
47.6	0
47.7	0
47.8	0
47.9	0
48	0
48.1	0
48.2	0
48.3	0
48.4	0
48.5	0
48.6	0
48.7	0
48.8	0
48.9	0
49	0
49.1	0
49.2	0
49.3	0
49.4	0
49.5	0
49.6	0
49.7	0
49.8	0
49.9	0
50	0
50.1	0
50.2	0
50.3	0
50.4	0
50.5	0
50.6	0
50.7	0
50.8	0
50.9	0
51	0
51.1	0
51.2	0
51.3	0
51.4	0
51.5	0
51.6	0
51.7	0
51.8	0
51.9	0
52	0
52.1	0
52.2	0
52.3	0
52.4	0
52.5	0
52.6	0
52.7	0
52.8	0
52.9	0
53	0
53.1	0
53.2	0
53.3	0
53.4	0
53.5	0
53.6	0
53.7	0
53.8	0
53.9	0
54	0
54.1	0
54.2	0
54.3	0
54.4	0
54.5	0
54.6	0
54.7	0
54.8	0
54.9	0
55	0
55.1	0
55.2	0
55.3	0
55.4	0
55.5	0
55.6	0
55.7	0
55.8	0
55.9	0
56	0
56.1	0
56.2	0
56.3	0
56.4	0
56.5	0
56.6	0
56.7	0
56.8	0
56.9	0
57	0
57.1	0
57.2	0
57.3	0
57.4	0
57.5	0
57.6	0
57.7	0
57.8	0
57.9	0
58	0
58.1	0
58.2	0
58.3	0
58.4	0
58.5	0
58.6	0
58.7	0
58.8	0
58.9	0
59	0
59.1	0
59.2	0
59.3	0
59.4	0
59.5	0
59.6	0
59.7	0
59.8	0
59.9	0
60	0
60.1	0
60.2	0
60.3	0
60.4	0
60.5	0
60.6	0
60.7	0
60.8	0
60.9	0
61	0
61.1	0
61.2	0
61.3	0
61.4	0
61.5	0
61.6	0
61.7	0
61.8	0
61.9	0
62	0
62.1	0
62.2	0
62.3	0
62.4	0
62.5	0
62.6	0
62.7	0
62.8	0
62.9	0
63	0
63.1	0
63.2	0
63.3	0
63.4	0
63.5	0
63.6	0
63.7	0
63.8	0
63.9	0
64	0
64.1	0
64.2	0
64.3	0
64.4	0
64.5	0
64.6	0
64.7	0
64.8	0
64.9	0
65	0
65.1	0
65.2	0
65.3	0
65.4	0
65.5	0
65.6	0
65.7	0
65.8	0
65.9	0
66	0
66.1	0
66.2	0
66.3	0
66.4	0
66.5	0
66.6	0
66.7	0
66.8	0
66.9	0
67	0
67.1	0
67.2	0
67.3	0
67.4	0
67.5	0
67.6	0
67.7	0
67.8	0
67.9	0
68	0
68.1	0
68.2	0
68.3	0
68.4	0
68.5	0
68.6	0
68.7	0
68.8	0
68.9	0
69	0
69.1	0
69.2	0
69.3	0
69.4	0
69.5	0
69.6	0
69.7	0
69.8	0
69.9	0
70	0
70.1	0
70.2	0
70.3	0
70.4	0
70.5	0
70.6	0
70.7	0
70.8	0
70.9	0
71	0
71.1	0
71.2	0
71.3	0
71.4	0
71.5	0
71.6	0
71.7	0
71.8	0
71.9	0
72	0
72.1	0
72.2	0
72.3	0
72.4	0
72.5	0
72.6	0
72.7	0
72.8	0
72.9	0
73	0
73.1	0
73.2	0
73.3	0
73.4	0
73.5	0
73.6	0
73.7	0
73.8	0
73.9	0
74	0
74.1	0
74.2	0
74.3	0
74.4	0
74.5	0
74.6	0
74.7	0
74.8	0
74.9	0
75	0
75.1	0
75.2	0
75.3	0
75.4	0
75.5	0
75.6	0
75.7	0
75.8	0
75.9	0
76	0
76.1	0
76.2	0
76.3	0
76.4	0
76.5	0
76.6	0
76.7	0
76.8	0
76.9	0
77	0
77.1	0
77.2	0
77.3	0
77.4	0
77.5	0
77.6	0
77.7	0
77.8	0
77.9	0
78	0
78.1	0
78.2	0
78.3	0
78.4	0
78.5	0
78.6	0
78.7	0
78.8	0
78.9	0
79	0
79.1	0
79.2	0
79.3	0
79.4	0
79.5	0
79.6	0
79.7	0
79.8	0
79.9	0
80	0
80.1	0
80.2	0
80.3	0
80.4	0
80.5	0
80.6	0
80.7	0
80.8	0
80.9	0
81	0
81.1	0
81.2	0
81.3	0
81.4	0
81.5	0
81.6	0
81.7	0
81.8	0
81.9	0
82	0
82.1	0
82.2	0
82.3	0
82.4	0
82.5	0
82.6	0
82.7	0
82.8	0
82.9	0
83	0
83.1	0
83.2	0
83.3	0
83.4	0
83.5	0
83.6	0
83.7	0
83.8	0
83.9	0
84	0
84.1	0
84.2	0
84.3	0
84.4	0
84.5	0
84.6	0
84.7	0
84.8	0
84.9	0
85	0
85.1	0
85.2	0
85.3	0
85.4	0
85.5	0
85.6	0
85.7	0
85.8	0
85.9	0
86	0
86.1	0
86.2	0
86.3	0
86.4	0
86.5	0
86.6	0
86.7	0
86.8	0
86.9	0
87	0
87.1	0
87.2	0
87.3	0
87.4	0
87.5	0
87.6	0
87.7	0
87.8	0
87.9	0
88	0
88.1	0
88.2	0
88.3	0
88.4	0
88.5	0
88.6	0
88.7	0
88.8	0
88.9	0
89	0
89.1	0
89.2	0
89.3	0
89.4	0
89.5	0
89.6	0
89.7	0
89.8	0
89.9	0
90	0
90.1	0
90.2	0
90.3	0
90.4	0
90.5	0
90.6	0
90.7	0
90.8	0
90.9	0
91	0
91.1	0
91.2	0
91.3	0
91.4	0
91.5	0
91.6	0
91.7	0
91.8	0
91.9	0
92	0
92.1	0
92.2	0
92.3	0
92.4	0
92.5	0
92.6	0
92.7	0
92.8	0
92.9	0
93	0
93.1	0
93.2	0
93.3	0
93.4	0
93.5	0
93.6	0
93.7	0
93.8	0
93.9	0
94	0
94.1	0
94.2	0
94.3	0
94.4	0
94.5	0
94.6	0
94.7	0
94.8	0
94.9	0
95	0
95.1	0
95.2	0
95.3	0
95.4	0
95.5	0
95.6	0
95.7	0
95.8	0
95.9	0
96	0
96.1	0
96.2	0
96.3	0
96.4	0
96.5	0
96.6	0
96.7	0
96.8	0
96.9	0
97	0
97.1	0
97.2	0
97.3	0
97.4	0
97.5	0
97.6	0
97.7	0
97.8	0
97.9	0
98	0
98.1	0
98.2	0
98.3	0
98.4	0
98.5	0
98.6	0
98.7	0
98.8	0
98.9	0
99	0
99.1	0
99.2	0
99.3	0
99.4	0
99.5	0
99.6	0
99.7	0
99.8	0
99.9	0
100	0
100.1	0
100.2	0
100.3	0
100.4	0
100.5	0
100.6	0
100.7	0.00125
100.8	0.00125
100.9	0.00125
101	0.00375
101.1	0.00625
101.2	0.00625
101.3	0.00625
101.4	0.01
101.5	0.01125
101.6	0.01375
101.7	0.01625
101.8	0.0175
101.9	0.0175
102	0.0175
102.1	0.0225
102.2	0.02375
102.3	0.02625
102.4	0.02875
102.5	0.03
102.6	0.0325
102.7	0.035
102.8	0.03875
102.9	0.04125
103	0.04375
103.1	0.04625
103.2	0.0475
103.3	0.0475
103.4	0.05
103.5	0.0525
103.6	0.05875
103.7	0.06
103.8	0.06375
103.9	0.06625
104	0.06625
104.1	0.06625
104.2	0.06625
104.3	0.06625
104.4	0.07
104.5	0.07125
104.6	0.075
104.7	0.075
104.8	0.07625
104.9	0.08
105	0.08125
105.1	0.08125
105.2	0.08625
105.3	0.08625
105.4	0.08625
105.5	0.09
105.6	0.09125
105.7	0.09125
105.8	0.09375
105.9	0.09875
106	0.10125
106.1	0.1025
106.2	0.10375
106.3	0.10375
106.4	0.105
106.5	0.1075
106.6	0.10875
106.7	0.11125
106.8	0.1125
106.9	0.1125
107	0.11625
107.1	0.11875
107.2	0.12
107.3	0.125
107.4	0.1275
107.5	0.13
107.6	0.1325
107.7	0.1375
107.8	0.13875
107.9	0.14
108	0.13875
108.1	0.14
108.2	0.1425
108.3	0.145
108.4	0.14625
108.5	0.15125
108.6	0.1525
108.7	0.15625
108.8	0.15625
108.9	0.15625
109	0.15875
109.1	0.15875
109.2	0.16
109.3	0.16125
109.4	0.1675
109.5	0.17125
109.6	0.17375
109.7	0.17625
109.8	0.17875
109.9	0.18
110	0.18
110.1	0.18125
110.2	0.18125
110.3	0.1825
110.4	0.185
110.5	0.18875
110.6	0.18875
110.7	0.1925
110.8	0.1925
110.9	0.1925
111	0.1975
111.1	0.2
111.2	0.2025
111.3	0.205
111.4	0.20625
111.5	0.2075
111.6	0.2125
111.7	0.21625
111.8	0.2175
111.9	0.22375
112	0.225
112.1	0.22875
112.2	0.23
112.3	0.23125
112.4	0.235
112.5	0.23625
112.6	0.24
112.7	0.24125
112.8	0.24375
112.9	0.24625
113	0.25125
113.1	0.2525
113.2	0.2525
113.3	0.2525
113.4	0.255
113.5	0.25625
113.6	0.25625
113.7	0.2575
113.8	0.26625
113.9	0.2675
114	0.2675
114.1	0.2675
114.2	0.26875
114.3	0.26875
114.4	0.26875
114.5	0.27
114.6	0.2725
114.7	0.275
114.8	0.27625
114.9	0.2775
115	0.2775
115.1	0.28125
115.2	0.28125
115.3	0.2825
115.4	0.28625
115.5	0.29
115.6	0.29
115.7	0.29
115.8	0.29125
115.9	0.2925
116	0.295
116.1	0.295
116.2	0.29625
116.3	0.2975
116.4	0.3025
116.5	0.3025
116.6	0.305
116.7	0.305
116.8	0.30625
116.9	0.30625
117	0.3075
117.1	0.31125
117.2	0.31125
117.3	0.30875
117.4	0.30875
117.5	0.30875
117.6	0.31125
117.7	0.3125
117.8	0.31625
117.9	0.315
118	0.31875
118.1	0.32
118.2	0.32125
118.3	0.325
118.4	0.3275
118.5	0.32875
118.6	0.335
118.7	0.335
118.8	0.335
118.9	0.33375
119	0.335
119.1	0.33875
119.2	0.3375
119.3	0.34125
119.4	0.34375
119.5	0.34375
119.6	0.345
119.7	0.34875
119.8	0.34875
119.9	0.3525
120	0.355
120.1	0.35875
120.2	0.36125
120.3	0.3625
120.4	0.365
120.5	0.365
120.6	0.3675
120.7	0.3675
120.8	0.36875
120.9	0.37125
121	0.37125
121.1	0.37125
121.2	0.37375
121.3	0.37625
121.4	0.375
121.5	0.37875
121.6	0.37875
121.7	0.38375
121.8	0.38875
121.9	0.39
122	0.39375
122.1	0.395
122.2	0.3975
122.3	0.39875
122.4	0.40125
122.5	0.40375
122.6	0.405
122.7	0.405
122.8	0.4075
122.9	0.40625
123	0.405
123.1	0.40625
123.2	0.4125
123.3	0.415
123.4	0.415
123.5	0.41875
123.6	0.42125
123.7	0.42125
123.8	0.4225
123.9	0.4225
124	0.425
124.1	0.425
124.2	0.4275
124.3	0.43
124.4	0.43
124.5	0.43125
124.6	0.43
124.7	0.43125
124.8	0.4325
124.9	0.43625
125	0.4375
125.1	0.43625
125.2	0.43625
125.3	0.43875
125.4	0.43875
125.5	0.44
125.6	0.44125
125.7	0.4425
125.8	0.44375
125.9	0.44625
126	0.44625
126.1	0.44375
126.2	0.44625
126.3	0.4475
126.4	0.44875
126.5	0.44875
126.6	0.4525
126.7	0.4525
126.8	0.45875
126.9	0.46125
127	0.46125
127.1	0.46375
127.2	0.4625
127.3	0.46375
127.4	0.465
127.5	0.46375
127.6	0.46375
127.7	0.465
127.8	0.46375
127.9	0.465
128	0.46625
128.1	0.47125
128.2	0.4725
128.3	0.4725
128.4	0.47375
128.5	0.47625
128.6	0.475
128.7	0.4725
128.8	0.47375
128.9	0.475
129	0.475
129.1	0.47875
129.2	0.48
129.3	0.48125
129.4	0.48
129.5	0.48
129.6	0.4825
129.7	0.4875
129.8	0.48875
129.9	0.49125
130	0.495
130.1	0.495
130.2	0.495
130.3	0.495
130.4	0.4975
130.5	0.49875
130.6	0.50125
130.7	0.505
130.8	0.50875
130.9	0.51125
131	0.515
131.1	0.515
131.2	0.5125
131.3	0.51375
131.4	0.515
131.5	0.51375
131.6	0.51375
131.7	0.51375
131.8	0.515
131.9	0.51625
132	0.51625
132.1	0.52
132.2	0.52
132.3	0.52125
132.4	0.5225
132.5	0.52375
132.6	0.52375
132.7	0.5225
132.8	0.5225
132.9	0.52375
133	0.525
133.1	0.52625
133.2	0.5275
133.3	0.52875
133.4	0.52875
133.5	0.52875
133.6	0.52875
133.7	0.53
133.8	0.53375
133.9	0.5375
134	0.53625
134.1	0.535
134.2	0.5325
134.3	0.53375
134.4	0.535
134.5	0.53875
134.6	0.54
134.7	0.54
134.8	0.54125
134.9	0.5425
135	0.545
135.1	0.5475
135.2	0.5475
135.3	0.5475
135.4	0.54875
135.5	0.55
135.6	0.55125
135.7	0.5525
135.8	0.55375
135.9	0.55375
136	0.55375
136.1	0.5575
136.2	0.5575
136.3	0.55875
136.4	0.55875
136.5	0.5575
136.6	0.5575
136.7	0.5575
136.8	0.55625
136.9	0.5575
137	0.5575
137.1	0.55625
137.2	0.5575
137.3	0.55875
137.4	0.56
137.5	0.5625
137.6	0.56125
137.7	0.56125
137.8	0.56125
137.9	0.56125
138	0.56125
138.1	0.5625
138.2	0.56125
138.3	0.56125
138.4	0.56375
138.5	0.56625
138.6	0.5675
138.7	0.5625
138.8	0.5625
138.9	0.56
139	0.55875
139.1	0.55875
139.2	0.56
139.3	0.56125
139.4	0.5625
139.5	0.5625
139.6	0.56
139.7	0.56
139.8	0.56125
139.9	0.56125
140	0.56
140.1	0.55875
140.2	0.55875
140.3	0.55875
140.4	0.56
140.5	0.56125
140.6	0.56125
140.7	0.56375
140.8	0.565
140.9	0.5625
141	0.56
141.1	0.56375
141.2	0.56375
141.3	0.565
141.4	0.56625
141.5	0.56625
141.6	0.56625
141.7	0.5675
141.8	0.5675
141.9	0.5675
142	0.57
142.1	0.57125
142.2	0.57125
142.3	0.5725
142.4	0.57375
142.5	0.57375
142.6	0.5725
142.7	0.57125
142.8	0.57
142.9	0.56875
143	0.57
143.1	0.57
143.2	0.57
143.3	0.56875
143.4	0.5675
143.5	0.56875
143.6	0.5675
143.7	0.57
143.8	0.57
143.9	0.56875
144	0.57125
144.1	0.57125
144.2	0.5725
144.3	0.57375
144.4	0.57625
144.5	0.5775
144.6	0.5775
144.7	0.58
144.8	0.58
144.9	0.5825
145	0.5825
145.1	0.58375
145.2	0.5825
145.3	0.5825
145.4	0.585
145.5	0.58625
145.6	0.58625
145.7	0.5875
145.8	0.58875
145.9	0.59125
146	0.59375
146.1	0.59375
146.2	0.5925
146.3	0.59375
146.4	0.59625
146.5	0.5975
146.6	0.59625
146.7	0.59625
146.8	0.595
146.9	0.5975
147	0.595
147.1	0.595
147.2	0.59375
147.3	0.595
147.4	0.595
147.5	0.59375
147.6	0.59625
147.7	0.59625
147.8	0.5975
147.9	0.5975
148	0.5975
148.1	0.5975
148.2	0.595
148.3	0.595
148.4	0.595
148.5	0.59625
148.6	0.5975
148.7	0.59875
148.8	0.6
148.9	0.59875
149	0.6
149.1	0.60125
149.2	0.5975
149.3	0.5975
149.4	0.59375
149.5	0.595
149.6	0.59625
149.7	0.59875
149.8	0.6
149.9	0.59875
150	0.59875
150.1	0.5975
150.2	0.59625
150.3	0.59875
150.4	0.59875
150.5	0.60125
150.6	0.60125
150.7	0.6025
150.8	0.60125
150.9	0.60125
151	0.6025
151.1	0.6025
151.2	0.60375
151.3	0.60375
151.4	0.60125
151.5	0.6
151.6	0.6
151.7	0.6
151.8	0.59875
151.9	0.59875
152	0.59875
152.1	0.59875
152.2	0.6
152.3	0.60125
152.4	0.60125
152.5	0.6
152.6	0.60125
152.7	0.6025
152.8	0.60125
152.9	0.60125
153	0.60375
153.1	0.60375
153.2	0.60375
153.3	0.60625
153.4	0.60875
153.5	0.60875
153.6	0.60875
153.7	0.6075
153.8	0.61
153.9	0.61125
154	0.6125
154.1	0.6125
154.2	0.6125
154.3	0.61125
154.4	0.61
154.5	0.60625
154.6	0.6075
154.7	0.60875
154.8	0.61
154.9	0.61
155	0.61
155.1	0.61125
155.2	0.6125
155.3	0.615
155.4	0.61625
155.5	0.615
155.6	0.61625
155.7	0.61625
155.8	0.61625
155.9	0.61625
156	0.61625
156.1	0.615
156.2	0.61625
156.3	0.615
156.4	0.615
156.5	0.61625
156.6	0.61625
156.7	0.6175
156.8	0.6175
156.9	0.61875
157	0.61875
157.1	0.62125
157.2	0.62
157.3	0.62
157.4	0.62
157.5	0.62125
157.6	0.6225
157.7	0.62375
157.8	0.62625
157.9	0.62625
158	0.6275
158.1	0.6275
158.2	0.6275
158.3	0.63
158.4	0.62875
158.5	0.62875
158.6	0.63
158.7	0.62875
158.8	0.62875
158.9	0.62875
159	0.62875
159.1	0.62875
159.2	0.62875
159.3	0.625
159.4	0.62625
159.5	0.62375
159.6	0.6225
159.7	0.62125
159.8	0.61875
159.9	0.6225
160	0.62125
160.1	0.62125
160.2	0.62125
160.3	0.62375
160.4	0.62125
160.5	0.625
160.6	0.625
160.7	0.62875
160.8	0.62875
160.9	0.62875
161	0.62875
161.1	0.6275
161.2	0.6275
161.3	0.6275
161.4	0.6275
161.5	0.62625
161.6	0.6275
161.7	0.63
161.8	0.63125
161.9	0.63125
162	0.63625
162.1	0.6375
162.2	0.64
162.3	0.64
162.4	0.6425
162.5	0.6425
162.6	0.64125
162.7	0.6425
162.8	0.64375
162.9	0.64375
163	0.645
163.1	0.6475
163.2	0.6475
163.3	0.6475
163.4	0.64625
163.5	0.645
163.6	0.64625
163.7	0.64625
163.8	0.64625
163.9	0.645
164	0.64625
164.1	0.64625
164.2	0.65
164.3	0.65125
164.4	0.65125
164.5	0.65125
164.6	0.65125
164.7	0.65125
164.8	0.64875
164.9	0.65
165	0.65
165.1	0.65
165.2	0.65
165.3	0.65125
165.4	0.65
165.5	0.65
165.6	0.65
165.7	0.64875
165.8	0.64875
165.9	0.64875
166	0.65125
166.1	0.6525
166.2	0.65125
166.3	0.6525
166.4	0.65125
166.5	0.6525
166.6	0.65125
166.7	0.65125
166.8	0.65
166.9	0.65
167	0.65
167.1	0.64875
167.2	0.64875
167.3	0.64875
167.4	0.64875
167.5	0.64875
167.6	0.6475
167.7	0.64625
167.8	0.64875
167.9	0.64875
168	0.64875
168.1	0.64875
168.2	0.6475
168.3	0.64625
168.4	0.64625
168.5	0.64625
168.6	0.64625
168.7	0.6475
168.8	0.64625
168.9	0.64875
169	0.65125
169.1	0.65125
169.2	0.6525
169.3	0.6525
169.4	0.6525
169.5	0.6525
169.6	0.65125
169.7	0.6525
169.8	0.65375
169.9	0.65375
170	0.65375
170.1	0.65125
170.2	0.65125
170.3	0.6525
170.4	0.6525
170.5	0.65375
170.6	0.655
170.7	0.655
170.8	0.65625
170.9	0.65625
171	0.655
171.1	0.65625
171.2	0.6575
171.3	0.65875
171.4	0.66
171.5	0.66
171.6	0.66125
171.7	0.66125
171.8	0.6625
171.9	0.66125
172	0.6625
172.1	0.6625
172.2	0.6625
172.3	0.6625
172.4	0.66125
172.5	0.66125
172.6	0.6625
172.7	0.665
172.8	0.665
172.9	0.665
173	0.6675
173.1	0.66875
173.2	0.66875
173.3	0.6675
173.4	0.66625
173.5	0.66625
173.6	0.665
173.7	0.66625
173.8	0.6675
173.9	0.6675
174	0.66625
174.1	0.665
174.2	0.66875
174.3	0.66875
174.4	0.6675
174.5	0.66875
174.6	0.66875
174.7	0.66875
174.8	0.66875
174.9	0.66875
175	0.66875
175.1	0.67
175.2	0.67125
175.3	0.67375
175.4	0.67375
175.5	0.67375
175.6	0.67375
175.7	0.675
175.8	0.675
175.9	0.675
176	0.6725
176.1	0.675
176.2	0.67875
176.3	0.67875
176.4	0.68
176.5	0.68
176.6	0.68125
176.7	0.68125
176.8	0.67875
176.9	0.68125
177	0.6825
177.1	0.68125
177.2	0.68125
177.3	0.68
177.4	0.68
177.5	0.68
177.6	0.67875
177.7	0.6775
177.8	0.6775
177.9	0.6775
178	0.67625
178.1	0.67625
178.2	0.6725
178.3	0.6725
178.4	0.6725
178.5	0.675
178.6	0.67625
178.7	0.67875
178.8	0.67875
178.9	0.67875
179	0.68
179.1	0.68
179.2	0.6825
179.3	0.6825
179.4	0.68375
179.5	0.68375
179.6	0.6825
179.7	0.6825
179.8	0.68375
179.9	0.68375
180	0.6875
180.1	0.6875
180.2	0.68875
180.3	0.69
180.4	0.69
180.5	0.69125
180.6	0.69125
180.7	0.6925
180.8	0.69375
180.9	0.69375
181	0.69375
181.1	0.695
181.2	0.69375
181.3	0.69375
181.4	0.69625
181.5	0.695
181.6	0.69375
181.7	0.695
181.8	0.695
181.9	0.695
182	0.6925
182.1	0.6925
182.2	0.6925
182.3	0.69375
182.4	0.6925
182.5	0.695
182.6	0.695
182.7	0.69625
182.8	0.69625
182.9	0.69875
183	0.69875
183.1	0.6975
183.2	0.6975
183.3	0.69625
183.4	0.695
183.5	0.69625
183.6	0.6975
183.7	0.695
183.8	0.69375
183.9	0.69375
184	0.69625
184.1	0.6975
184.2	0.69625
184.3	0.69625
184.4	0.69625
184.5	0.695
184.6	0.69375
184.7	0.69375
184.8	0.695
184.9	0.69375
185	0.695
185.1	0.695
185.2	0.69375
185.3	0.69375
185.4	0.6925
185.5	0.6925
185.6	0.6925
185.7	0.69125
185.8	0.68875
185.9	0.68625
186	0.6875
186.1	0.6875
186.2	0.68625
186.3	0.685
186.4	0.68625
186.5	0.68625
186.6	0.68625
186.7	0.68875
186.8	0.6875
186.9	0.69
187	0.69125
187.1	0.69
187.2	0.68875
187.3	0.69
187.4	0.69
187.5	0.68875
187.6	0.69
187.7	0.69125
187.8	0.69125
187.9	0.69125
188	0.69
188.1	0.68875
188.2	0.69
188.3	0.69125
188.4	0.69
188.5	0.6875
188.6	0.6875
188.7	0.6875
188.8	0.68625
188.9	0.68875
189	0.68875
189.1	0.68875
189.2	0.68875
189.3	0.68875
189.4	0.6875
189.5	0.69
189.6	0.69125
189.7	0.69125
189.8	0.69
189.9	0.68875
190	0.68875
190.1	0.6875
190.2	0.6875
190.3	0.6875
190.4	0.68875
190.5	0.68875
190.6	0.68625
190.7	0.68625
190.8	0.685
190.9	0.68375
191	0.68125
191.1	0.68125
191.2	0.68
191.3	0.68
191.4	0.68125
191.5	0.6825
191.6	0.6825
191.7	0.6825
191.8	0.6825
191.9	0.68125
192	0.68125
192.1	0.6825
192.2	0.6825
192.3	0.6825
192.4	0.6825
192.5	0.6825
192.6	0.68
192.7	0.68
192.8	0.67875
192.9	0.67875
193	0.6825
193.1	0.6825
193.2	0.68375
193.3	0.6825
193.4	0.685
193.5	0.6825
193.6	0.68125
193.7	0.68125
193.8	0.68125
193.9	0.68125
194	0.6825
194.1	0.6825
194.2	0.6825
194.3	0.6825
194.4	0.6825
194.5	0.68125
194.6	0.68
194.7	0.68
194.8	0.68
194.9	0.68125
195	0.68125
195.1	0.6825
195.2	0.685
195.3	0.68625
195.4	0.68625
195.5	0.685
195.6	0.68375
195.7	0.6825
195.8	0.68375
195.9	0.6825
196	0.68
196.1	0.68125
196.2	0.68125
196.3	0.6825
196.4	0.6825
196.5	0.6825
196.6	0.6825
196.7	0.68375
196.8	0.68375
196.9	0.68625
197	0.68625
197.1	0.685
197.2	0.68125
197.3	0.68375
197.4	0.68375
197.5	0.68375
197.6	0.68625
197.7	0.68625
197.8	0.68375
197.9	0.68375
198	0.6825
198.1	0.685
198.2	0.68625
198.3	0.69
198.4	0.69
198.5	0.6925
198.6	0.69375
198.7	0.69375
198.8	0.69375
198.9	0.69375
199	0.69375
199.1	0.6975
199.2	0.69875
199.3	0.6975
199.4	0.6975
199.5	0.69875
199.6	0.6975
199.7	0.6975
199.8	0.6975
199.9	0.6975
200	0.69625
[truncated: 14,000 more rows]
