# Supplementary material for: Bayesian inference of kinetic schemes for ion channels by Kalman filtering
Source: eLife journal article supplement (doi:10.7554/elife.62714), 2022-05-04
Supplement: fig4-data7 [file 1_Sim_N_1500_Fluor_MW_2M.xlsx]

## Sheet: Tabelle1
0.1	0
0.2	0
0.3	0
0.4	0
0.5	0
0.6	0
0.7	0
0.8	0
0.9	0
1	0
1.1	0
1.2	0
1.3	0
1.4	0
1.5	0
1.6	0
1.7	0
1.8	0
1.9	0
2	0
2.1	0
2.2	0
2.3	0
2.4	0
2.5	0
2.6	0
2.7	0
2.8	0
2.9	0
3	0
3.1	0
3.2	0
3.3	0
3.4	0
3.5	0
3.6	0
3.7	0
3.8	0
3.9	0
4	0
4.1	0
4.2	0
4.3	0
4.4	0
4.5	0
4.6	0
4.7	0
4.8	0
4.9	0
5	0
5.1	0
5.2	0
5.3	0
5.4	0
5.5	0
5.6	0
5.7	0
5.8	0
5.9	0
6	0
6.1	0
6.2	0
6.3	0
6.4	0
6.5	0
6.6	0
6.7	0
6.8	0
6.9	0
7	0
7.1	0
7.2	0
7.3	0
7.4	0
7.5	0
7.6	0
7.7	0
7.8	0
7.9	0
8	0
8.1	0
8.2	0
8.3	0
8.4	0
8.5	0
8.6	0
8.7	0
8.8	0
8.9	0
9	0
9.1	0
9.2	0
9.3	0
9.4	0
9.5	0
9.6	0
9.7	0
9.8	0
9.9	0
10	0
10.1	0
10.2	0
10.3	0
10.4	0
10.5	0
10.6	0
10.7	0
10.8	0
10.9	0
11	0
11.1	0
11.2	0
11.3	0
11.4	0
11.5	0
11.6	0
11.7	0
11.8	0
11.9	0
12	0
12.1	0
12.2	0
12.3	0
12.4	0
12.5	0
12.6	0
12.7	0
12.8	0
12.9	0
13	0
13.1	0
13.2	0
13.3	0
13.4	0
13.5	0
13.6	0
13.7	0
13.8	0
13.9	0
14	0
14.1	0
14.2	0
14.3	0
14.4	0
14.5	0
14.6	0
14.7	0
14.8	0
14.9	0
15	0
15.1	0
15.2	0
15.3	0
15.4	0
15.5	0
15.6	0
15.7	0
15.8	0
15.9	0
16	0
16.1	0
16.2	0
16.3	0
16.4	0
16.5	0
16.6	0
16.7	0
16.8	0
16.9	0
17	0
17.1	0
17.2	0
17.3	0
17.4	0
17.5	0
17.6	0
17.7	0
17.8	0
17.9	0
18	0
18.1	0
18.2	0
18.3	0
18.4	0
18.5	0
18.6	0
18.7	0
18.8	0
18.9	0
19	0
19.1	0
19.2	0
19.3	0
19.4	0
19.5	0
19.6	0
19.7	0
19.8	0
19.9	0
20	0
20.1	0
20.2	0
20.3	0
20.4	0
20.5	0
20.6	0
20.7	0
20.8	0
20.9	0
21	0
21.1	0
21.2	0
21.3	0
21.4	0
21.5	0
21.6	0
21.7	0
21.8	0
21.9	0
22	0
22.1	0
22.2	0
22.3	0
22.4	0
22.5	0
22.6	0
22.7	0
22.8	0
22.9	0
23	0
23.1	0
23.2	0
23.3	0
23.4	0
23.5	0
23.6	0
23.7	0
23.8	0
23.9	0
24	0
24.1	0
24.2	0
24.3	0
24.4	0
24.5	0
24.6	0
24.7	0
24.8	0
24.9	0
25	0
25.1	0
25.2	0
25.3	0
25.4	0
25.5	0
25.6	0
25.7	0
25.8	0
25.9	0
26	0
26.1	0
26.2	0
26.3	0
26.4	0
26.5	0
26.6	0
26.7	0
26.8	0
26.9	0
27	0
27.1	0
27.2	0
27.3	0
27.4	0
27.5	0
27.6	0
27.7	0
27.8	0
27.9	0
28	0
28.1	0
28.2	0
28.3	0
28.4	0
28.5	0
28.6	0
28.7	0
28.8	0
28.9	0
29	0
29.1	0
29.2	0
29.3	0
29.4	0
29.5	0
29.6	0
29.7	0
29.8	0
29.9	0
30	0
30.1	0
30.2	0
30.3	0
30.4	0
30.5	0
30.6	0
30.7	0
30.8	0
30.9	0
31	0
31.1	0
31.2	0
31.3	0
31.4	0
31.5	0
31.6	0
31.7	0
31.8	0
31.9	0
32	0
32.1	0
32.2	0
32.3	0
32.4	0
32.5	0
32.6	0
32.7	0
32.8	0
32.9	0
33	0
33.1	0
33.2	0
33.3	0
33.4	0
33.5	0
33.6	0
33.7	0
33.8	0
33.9	0
34	0
34.1	0
34.2	0
34.3	0
34.4	0
34.5	0
34.6	0
34.7	0
34.8	0
34.9	0
35	0
35.1	0
35.2	0
35.3	0
35.4	0
35.5	0
35.6	0
35.7	0
35.8	0
35.9	0
36	0
36.1	0
36.2	0
36.3	0
36.4	0
36.5	0
36.6	0
36.7	0
36.8	0
36.9	0
37	0
37.1	0
37.2	0
37.3	0
37.4	0
37.5	0
37.6	0
37.7	0
37.8	0
37.9	0
38	0
38.1	0
38.2	0
38.3	0
38.4	0
38.5	0
38.6	0
38.7	0
38.8	0
38.9	0
39	0
39.1	0
39.2	0
39.3	0
39.4	0
39.5	0
39.6	0
39.7	0
39.8	0
39.9	0
40	0
40.1	0
40.2	0
40.3	0
40.4	0
40.5	0
40.6	0
40.7	0
40.8	0
40.9	0
41	0
41.1	0
41.2	0
41.3	0
41.4	0
41.5	0
41.6	0
41.7	0
41.8	0
41.9	0
42	0
42.1	0
42.2	0
42.3	0
42.4	0
42.5	0
42.6	0
42.7	0
42.8	0
42.9	0
43	0
43.1	0
43.2	0
43.3	0
43.4	0
43.5	0
43.6	0
43.7	0
43.8	0
43.9	0
44	0
44.1	0
44.2	0
44.3	0
44.4	0
44.5	0
44.6	0
44.7	0
44.8	0
44.9	0
45	0
45.1	0
45.2	0
45.3	0
45.4	0
45.5	0
45.6	0
45.7	0
45.8	0
45.9	0
46	0
46.1	0
46.2	0
46.3	0
46.4	0
46.5	0
46.6	0
46.7	0
46.8	0
46.9	0
47	0
47.1	0
47.2	0
47.3	0
47.4	0
47.5	0
47.6	0
47.7	0
47.8	0
47.9	0
48	0
48.1	0
48.2	0
48.3	0
48.4	0
48.5	0
48.6	0
48.7	0
48.8	0
48.9	0
49	0
49.1	0
49.2	0
49.3	0
49.4	0
49.5	0
49.6	0
49.7	0
49.8	0
49.9	0
50	0
50.1	0
50.2	0
50.3	0
50.4	0
50.5	0
50.6	0
50.7	0
50.8	0
50.9	0
51	0
51.1	0
51.2	0
51.3	0
51.4	0
51.5	0
51.6	0
51.7	0
51.8	0
51.9	0
52	0
52.1	0
52.2	0
52.3	0
52.4	0
52.5	0
52.6	0
52.7	0
52.8	0
52.9	0
53	0
53.1	0
53.2	0
53.3	0
53.4	0
53.5	0
53.6	0
53.7	0
53.8	0
53.9	0
54	0
54.1	0
54.2	0
54.3	0
54.4	0
54.5	0
54.6	0
54.7	0
54.8	0
54.9	0
55	0
55.1	0
55.2	0
55.3	0
55.4	0
55.5	0
55.6	0
55.7	0
55.8	0
55.9	0
56	0
56.1	0
56.2	0
56.3	0
56.4	0
56.5	0
56.6	0
56.7	0
56.8	0
56.9	0
57	0
57.1	0
57.2	0
57.3	0
57.4	0
57.5	0
57.6	0
57.7	0
57.8	0
57.9	0
58	0
58.1	0
58.2	0
58.3	0
58.4	0
58.5	0
58.6	0
58.7	0
58.8	0
58.9	0
59	0
59.1	0
59.2	0
59.3	0
59.4	0
59.5	0
59.6	0
59.7	0
59.8	0
59.9	0
60	0
60.1	0
60.2	0
60.3	0
60.4	0
60.5	0
60.6	0
60.7	0
60.8	0
60.9	0
61	0
61.1	0
61.2	0
61.3	0
61.4	0
61.5	0
61.6	0
61.7	0
61.8	0
61.9	0
62	0
62.1	0
62.2	0
62.3	0
62.4	0
62.5	0
62.6	0
62.7	0
62.8	0
62.9	0
63	0
63.1	0
63.2	0
63.3	0
63.4	0
63.5	0
63.6	0
63.7	0
63.8	0
63.9	0
64	0
64.1	0
64.2	0
64.3	0
64.4	0
64.5	0
64.6	0
64.7	0
64.8	0
64.9	0
65	0
65.1	0
65.2	0
65.3	0
65.4	0
65.5	0
65.6	0
65.7	0
65.8	0
65.9	0
66	0
66.1	0
66.2	0
66.3	0
66.4	0
66.5	0
66.6	0
66.7	0
66.8	0
66.9	0
67	0
67.1	0
67.2	0
67.3	0
67.4	0
67.5	0
67.6	0
67.7	0
67.8	0
67.9	0
68	0
68.1	0
68.2	0
68.3	0
68.4	0
68.5	0
68.6	0
68.7	0
68.8	0
68.9	0
69	0
69.1	0
69.2	0
69.3	0
69.4	0
69.5	0
69.6	0
69.7	0
69.8	0
69.9	0
70	0
70.1	0
70.2	0
70.3	0
70.4	0
70.5	0
70.6	0
70.7	0
70.8	0
70.9	0
71	0
71.1	0
71.2	0
71.3	0
71.4	0
71.5	0
71.6	0
71.7	0
71.8	0
71.9	0
72	0
72.1	0
72.2	0
72.3	0
72.4	0
72.5	0
72.6	0
72.7	0
72.8	0
72.9	0
73	0
73.1	0
73.2	0
73.3	0
73.4	0
73.5	0
73.6	0
73.7	0
73.8	0
73.9	0
74	0
74.1	0
74.2	0
74.3	0
74.4	0
74.5	0
74.6	0
74.7	0
74.8	0
74.9	0
75	0
75.1	0
75.2	0
75.3	0
75.4	0
75.5	0
75.6	0
75.7	0
75.8	0
75.9	0
76	0
76.1	0
76.2	0
76.3	0
76.4	0
76.5	0
76.6	0
76.7	0
76.8	0
76.9	0
77	0
77.1	0
77.2	0
77.3	0
77.4	0
77.5	0
77.6	0
77.7	0
77.8	0
77.9	0
78	0
78.1	0
78.2	0
78.3	0
78.4	0
78.5	0
78.6	0
78.7	0
78.8	0
78.9	0
79	0
79.1	0
79.2	0
79.3	0
79.4	0
79.5	0
79.6	0
79.7	0
79.8	0
79.9	0
80	0
80.1	0
80.2	0
80.3	0
80.4	0
80.5	0
80.6	0
80.7	0
80.8	0
80.9	0
81	0
81.1	0
81.2	0
81.3	0
81.4	0
81.5	0
81.6	0
81.7	0
81.8	0
81.9	0
82	0
82.1	0
82.2	0
82.3	0
82.4	0
82.5	0
82.6	0
82.7	0
82.8	0
82.9	0
83	0
83.1	0
83.2	0
83.3	0
83.4	0
83.5	0
83.6	0
83.7	0
83.8	0
83.9	0
84	0
84.1	0
84.2	0
84.3	0
84.4	0
84.5	0
84.6	0
84.7	0
84.8	0
84.9	0
85	0
85.1	0
85.2	0
85.3	0
85.4	0
85.5	0
85.6	0
85.7	0
85.8	0
85.9	0
86	0
86.1	0
86.2	0
86.3	0
86.4	0
86.5	0
86.6	0
86.7	0
86.8	0
86.9	0
87	0
87.1	0
87.2	0
87.3	0
87.4	0
87.5	0
87.6	0
87.7	0
87.8	0
87.9	0
88	0
88.1	0
88.2	0
88.3	0
88.4	0
88.5	0
88.6	0
88.7	0
88.8	0
88.9	0
89	0
89.1	0
89.2	0
89.3	0
89.4	0
89.5	0
89.6	0
89.7	0
89.8	0
89.9	0
90	0
90.1	0
90.2	0
90.3	0
90.4	0
90.5	0
90.6	0
90.7	0
90.8	0
90.9	0
91	0
91.1	0
91.2	0
91.3	0
91.4	0
91.5	0
91.6	0
91.7	0
91.8	0
91.9	0
92	0
92.1	0
92.2	0
92.3	0
92.4	0
92.5	0
92.6	0
92.7	0
92.8	0
92.9	0
93	0
93.1	0
93.2	0
93.3	0
93.4	0
93.5	0
93.6	0
93.7	0
93.8	0
93.9	0
94	0
94.1	0
94.2	0
94.3	0
94.4	0
94.5	0
94.6	0
94.7	0
94.8	0
94.9	0
95	0
95.1	0
95.2	0
95.3	0
95.4	0
95.5	0
95.6	0
95.7	0
95.8	0
95.9	0
96	0
96.1	0
96.2	0
96.3	0
96.4	0
96.5	0
96.6	0
96.7	0
96.8	0
96.9	0
97	0
97.1	0
97.2	0
97.3	0
97.4	0
97.5	0
97.6	0
97.7	0
97.8	0
97.9	0
98	0
98.1	0
98.2	0
98.3	0
98.4	0
98.5	0
98.6	0
98.7	0
98.8	0
98.9	0
99	0
99.1	0
99.2	0
99.3	0
99.4	0
99.5	0
99.6	0
99.7	0
99.8	0
99.9	0
100	0
100.1	0.119667
100.2	0.205333
100.3	0.272
100.4	0.332333
100.5	0.394
100.6	0.432333
100.7	0.474333
100.8	0.515667
100.9	0.543667
101	0.572333
101.1	0.594333
101.2	0.61
101.3	0.628333
101.4	0.643
101.5	0.656333
101.6	0.667333
101.7	0.680667
101.8	0.689333
101.9	0.695333
102	0.703
102.1	0.711667
102.2	0.719
102.3	0.726667
102.4	0.732333
102.5	0.739667
102.6	0.747333
102.7	0.749667
102.8	0.752333
102.9	0.750667
103	0.753333
103.1	0.752
103.2	0.751
103.3	0.755667
103.4	0.76
103.5	0.760333
103.6	0.755
103.7	0.760333
103.8	0.763667
103.9	0.764
104	0.759333
104.1	0.762667
104.2	0.764
104.3	0.763667
104.4	0.759667
104.5	0.764667
104.6	0.764667
104.7	0.764333
104.8	0.769
104.9	0.768
105	0.769667
105.1	0.771667
105.2	0.775333
105.3	0.778
105.4	0.777667
105.5	0.775333
105.6	0.783333
105.7	0.783333
105.8	0.782333
105.9	0.78
106	0.785
106.1	0.784333
106.2	0.782667
106.3	0.784333
106.4	0.784333
106.5	0.781
106.6	0.78
106.7	0.780333
106.8	0.775333
106.9	0.783
107	0.781667
107.1	0.777667
107.2	0.787333
107.3	0.786333
107.4	0.781667
107.5	0.782667
107.6	0.781333
107.7	0.782333
107.8	0.779333
107.9	0.779
108	0.783
108.1	0.784
108.2	0.778
108.3	0.781333
108.4	0.779333
108.5	0.783333
108.6	0.782333
108.7	0.784667
108.8	0.786
108.9	0.784
109	0.781
109.1	0.781667
109.2	0.783
109.3	0.785333
109.4	0.779667
109.5	0.780333
109.6	0.783333
109.7	0.788333
109.8	0.787667
109.9	0.792667
110	0.787333
110.1	0.790333
110.2	0.793
110.3	0.793
110.4	0.785667
110.5	0.785333
110.6	0.782
110.7	0.787
110.8	0.790333
110.9	0.790333
111	0.791
111.1	0.794333
111.2	0.791333
111.3	0.796333
111.4	0.794
111.5	0.792667
111.6	0.795667
111.7	0.798333
111.8	0.797667
111.9	0.798667
112	0.799667
112.1	0.799333
112.2	0.799667
112.3	0.799667
112.4	0.806
112.5	0.802
112.6	0.805
112.7	0.806333
112.8	0.808667
112.9	0.809333
113	0.808333
113.1	0.808333
113.2	0.809333
113.3	0.809333
113.4	0.809667
113.5	0.814
113.6	0.818
113.7	0.818667
113.8	0.82
113.9	0.821333
114	0.824
114.1	0.827333
114.2	0.831667
114.3	0.828
114.4	0.825667
114.5	0.825667
114.6	0.825333
114.7	0.822
114.8	0.822333
114.9	0.822667
115	0.819333
115.1	0.826667
115.2	0.826333
115.3	0.826
115.4	0.827
115.5	0.825667
115.6	0.824333
115.7	0.825667
115.8	0.827333
115.9	0.825333
116	0.823667
116.1	0.818667
116.2	0.821
116.3	0.819333
116.4	0.820667
116.5	0.827
116.6	0.826333
116.7	0.828
116.8	0.828667
116.9	0.828
117	0.825
117.1	0.824333
117.2	0.825
117.3	0.828
117.4	0.827
117.5	0.828
117.6	0.825667
117.7	0.824
117.8	0.826667
117.9	0.823333
118	0.826333
118.1	0.826
118.2	0.825667
118.3	0.827667
118.4	0.827
118.5	0.828
118.6	0.827667
118.7	0.827333
118.8	0.827333
118.9	0.830333
119	0.833
119.1	0.838333
119.2	0.841
119.3	0.847667
119.4	0.845
119.5	0.846333
119.6	0.844
119.7	0.844
119.8	0.845667
119.9	0.848
120	0.847667
120.1	0.85
120.2	0.848
120.3	0.848667
120.4	0.842
120.5	0.840333
120.6	0.845333
120.7	0.845333
120.8	0.847333
120.9	0.846667
121	0.846667
121.1	0.846
121.2	0.845
121.3	0.848333
121.4	0.848
121.5	0.847
121.6	0.847667
121.7	0.850333
121.8	0.851667
121.9	0.852667
122	0.853333
122.1	0.851667
122.2	0.848
122.3	0.846667
122.4	0.847
122.5	0.847667
122.6	0.847
122.7	0.845667
122.8	0.848
122.9	0.849
123	0.848333
123.1	0.850667
123.2	0.851
123.3	0.851333
123.4	0.853
123.5	0.851667
123.6	0.849667
123.7	0.848667
123.8	0.854667
123.9	0.851
124	0.851667
124.1	0.852667
124.2	0.853333
124.3	0.854333
124.4	0.857
124.5	0.856
124.6	0.852667
124.7	0.853333
124.8	0.856333
124.9	0.853
125	0.851667
125.1	0.852667
125.2	0.854667
125.3	0.852333
125.4	0.856333
125.5	0.854667
125.6	0.855667
125.7	0.857
125.8	0.857
125.9	0.856
126	0.860667
126.1	0.861
126.2	0.864667
126.3	0.869667
126.4	0.869
126.5	0.865333
126.6	0.865
126.7	0.862667
126.8	0.862
126.9	0.860667
127	0.864667
127.1	0.867667
127.2	0.866333
127.3	0.867
127.4	0.867667
127.5	0.867
127.6	0.869667
127.7	0.868
127.8	0.869333
127.9	0.866
128	0.867
128.1	0.867
128.2	0.867667
128.3	0.866333
128.4	0.868667
128.5	0.871667
128.6	0.876333
128.7	0.875333
128.8	0.877667
128.9	0.875333
129	0.874
129.1	0.871
129.2	0.871667
129.3	0.870667
129.4	0.869667
129.5	0.869
129.6	0.869
129.7	0.872
129.8	0.869333
129.9	0.871667
130	0.871333
130.1	0.872333
130.2	0.872
130.3	0.874
130.4	0.875333
130.5	0.878
130.6	0.878667
130.7	0.875667
130.8	0.873
130.9	0.87
131	0.871
131.1	0.872333
131.2	0.874667
131.3	0.874333
131.4	0.874
131.5	0.872667
131.6	0.876667
131.7	0.877667
131.8	0.877333
131.9	0.875333
132	0.874
132.1	0.876
132.2	0.879667
132.3	0.881333
132.4	0.883333
132.5	0.88
132.6	0.878667
132.7	0.880333
132.8	0.876667
132.9	0.873667
133	0.876333
133.1	0.874
133.2	0.878333
133.3	0.877
133.4	0.88
133.5	0.878
133.6	0.877333
133.7	0.881667
133.8	0.885
133.9	0.887333
134	0.887333
134.1	0.887667
134.2	0.883667
134.3	0.882667
134.4	0.887
134.5	0.884333
134.6	0.882333
134.7	0.881
134.8	0.881
134.9	0.884
135	0.887
135.1	0.886
135.2	0.885
135.3	0.883667
135.4	0.882
135.5	0.883667
135.6	0.883667
135.7	0.887
135.8	0.888333
135.9	0.888333
136	0.887333
136.1	0.885
136.2	0.881
136.3	0.881
136.4	0.885667
136.5	0.885667
136.6	0.883667
136.7	0.881667
136.8	0.881333
136.9	0.886667
137	0.890667
137.1	0.888
137.2	0.887333
137.3	0.886667
137.4	0.890333
137.5	0.889
137.6	0.89
137.7	0.887667
137.8	0.886667
137.9	0.885667
138	0.884333
138.1	0.885
138.2	0.884667
138.3	0.882667
138.4	0.885667
138.5	0.886333
138.6	0.883333
138.7	0.888
138.8	0.887667
138.9	0.888667
139	0.891667
139.1	0.894
139.2	0.894667
139.3	0.895667
139.4	0.895667
139.5	0.893
139.6	0.893667
139.7	0.894333
139.8	0.895
139.9	0.898
140	0.902333
140.1	0.902333
140.2	0.904
140.3	0.903333
140.4	0.901667
140.5	0.896
140.6	0.900333
140.7	0.897
140.8	0.896667
140.9	0.897333
141	0.898333
141.1	0.899667
141.2	0.899667
141.3	0.897667
141.4	0.898333
141.5	0.896667
141.6	0.897667
141.7	0.901333
141.8	0.897667
141.9	0.895
142	0.899
142.1	0.897333
142.2	0.899667
142.3	0.900667
142.4	0.901333
142.5	0.901667
142.6	0.901667
142.7	0.900667
142.8	0.903667
142.9	0.898667
143	0.902333
143.1	0.903333
143.2	0.902667
143.3	0.902
143.4	0.902
143.5	0.902667
143.6	0.901333
143.7	0.899333
143.8	0.903
143.9	0.903333
144	0.903667
144.1	0.903667
144.2	0.902667
144.3	0.899667
144.4	0.898667
144.5	0.896
144.6	0.896333
144.7	0.895667
144.8	0.895
144.9	0.897
145	0.898
145.1	0.897333
145.2	0.896667
145.3	0.898667
145.4	0.901667
145.5	0.903
145.6	0.903333
145.7	0.902667
145.8	0.902333
145.9	0.904333
146	0.898333
146.1	0.901333
146.2	0.902667
146.3	0.904667
146.4	0.904
146.5	0.903667
146.6	0.905
146.7	0.906
146.8	0.908
146.9	0.910333
147	0.907
147.1	0.905
147.2	0.902333
147.3	0.902
147.4	0.899
147.5	0.899333
147.6	0.899
147.7	0.9
147.8	0.903667
147.9	0.907333
148	0.904667
148.1	0.906
148.2	0.903667
148.3	0.905
148.4	0.902667
148.5	0.898667
148.6	0.901667
148.7	0.903667
148.8	0.902667
148.9	0.904
149	0.904333
149.1	0.905667
149.2	0.906333
149.3	0.905333
149.4	0.905333
149.5	0.905
149.6	0.907333
149.7	0.907
149.8	0.907
149.9	0.909
150	0.907333
150.1	0.909
150.2	0.907333
150.3	0.906
150.4	0.907667
150.5	0.906667
150.6	0.906333
150.7	0.907333
150.8	0.908333
150.9	0.910333
151	0.909667
151.1	0.909333
151.2	0.909333
151.3	0.907
151.4	0.907667
151.5	0.907333
151.6	0.904667
151.7	0.906333
151.8	0.908667
151.9	0.907667
152	0.908667
152.1	0.909
152.2	0.91
152.3	0.910667
152.4	0.912
152.5	0.909
152.6	0.908667
152.7	0.908
152.8	0.907667
152.9	0.904333
153	0.904333
153.1	0.903
153.2	0.903
153.3	0.907
153.4	0.909
153.5	0.907333
153.6	0.906333
153.7	0.907333
153.8	0.906667
153.9	0.904667
154	0.902333
154.1	0.898667
154.2	0.898
154.3	0.897667
154.4	0.901
154.5	0.903333
154.6	0.903
154.7	0.903667
154.8	0.906
154.9	0.905
155	0.905
155.1	0.904
155.2	0.902333
155.3	0.904
155.4	0.906667
155.5	0.906667
155.6	0.906667
155.7	0.907333
155.8	0.905667
155.9	0.904667
156	0.91
156.1	0.909
156.2	0.906667
156.3	0.908667
156.4	0.905667
156.5	0.904
156.6	0.900667
156.7	0.899667
156.8	0.903667
156.9	0.908667
157	0.905667
157.1	0.907333
157.2	0.904667
157.3	0.905667
157.4	0.908333
157.5	0.912
157.6	0.912333
157.7	0.914333
157.8	0.910333
157.9	0.908667
158	0.909333
158.1	0.911333
158.2	0.912333
158.3	0.914
158.4	0.916
158.5	0.918
158.6	0.917333
158.7	0.917333
158.8	0.917667
158.9	0.917333
159	0.915
159.1	0.914667
159.2	0.911667
159.3	0.909667
159.4	0.909
159.5	0.909333
159.6	0.911
159.7	0.913667
159.8	0.911667
159.9	0.911667
160	0.912667
160.1	0.914333
160.2	0.916
160.3	0.918667
160.4	0.918667
160.5	0.921
160.6	0.920333
160.7	0.920333
160.8	0.918
160.9	0.918667
161	0.920667
161.1	0.919333
161.2	0.916333
161.3	0.915667
161.4	0.917667
161.5	0.919667
161.6	0.917333
161.7	0.916333
161.8	0.916
161.9	0.914333
162	0.915667
162.1	0.92
162.2	0.920667
162.3	0.921667
162.4	0.921333
162.5	0.921667
162.6	0.924333
162.7	0.925667
162.8	0.922
162.9	0.920333
163	0.919
163.1	0.921333
163.2	0.923667
163.3	0.925333
163.4	0.924
163.5	0.922667
163.6	0.92
163.7	0.920667
163.8	0.922333
163.9	0.923333
164	0.920667
164.1	0.92
164.2	0.919667
164.3	0.920333
164.4	0.922667
164.5	0.923
164.6	0.921
164.7	0.920333
164.8	0.921333
164.9	0.919333
165	0.919333
165.1	0.919
165.2	0.921
165.3	0.922333
165.4	0.923333
165.5	0.924333
165.6	0.922667
165.7	0.92
165.8	0.919
165.9	0.918667
166	0.919
166.1	0.919333
166.2	0.916
166.3	0.915333
166.4	0.913667
166.5	0.916333
166.6	0.918333
166.7	0.918333
166.8	0.920667
166.9	0.922667
167	0.923667
167.1	0.921
167.2	0.924333
167.3	0.923667
167.4	0.924333
167.5	0.928
167.6	0.928
167.7	0.929667
167.8	0.929333
167.9	0.926667
168	0.925667
168.1	0.925333
168.2	0.925667
168.3	0.924333
168.4	0.922
168.5	0.922333
168.6	0.92
168.7	0.922
168.8	0.919667
168.9	0.917667
169	0.920667
169.1	0.922667
169.2	0.921667
169.3	0.923333
169.4	0.924667
169.5	0.926333
169.6	0.927
169.7	0.925667
169.8	0.927333
169.9	0.925667
170	0.926667
170.1	0.926333
170.2	0.923333
170.3	0.923
170.4	0.922667
170.5	0.921
170.6	0.921333
170.7	0.919333
170.8	0.921
170.9	0.924
171	0.924333
171.1	0.924333
171.2	0.926
171.3	0.929333
171.4	0.929667
171.5	0.926333
171.6	0.923333
171.7	0.921
171.8	0.924333
171.9	0.924
172	0.921
172.1	0.923333
172.2	0.922667
172.3	0.923333
172.4	0.921333
172.5	0.921667
172.6	0.923
172.7	0.924333
172.8	0.925667
172.9	0.922333
173	0.922333
173.1	0.919667
173.2	0.920667
173.3	0.920333
173.4	0.921
173.5	0.923
173.6	0.925667
173.7	0.925667
173.8	0.924333
173.9	0.924
174	0.922667
174.1	0.923667
174.2	0.925667
174.3	0.926
174.4	0.927333
174.5	0.923333
174.6	0.924
174.7	0.925333
174.8	0.925667
174.9	0.925333
175	0.922667
175.1	0.922333
175.2	0.918667
175.3	0.922667
175.4	0.925667
175.5	0.924667
175.6	0.921
175.7	0.92
175.8	0.918333
175.9	0.920667
176	0.923333
176.1	0.924667
176.2	0.926333
176.3	0.925
176.4	0.925667
176.5	0.923333
176.6	0.922
176.7	0.924667
176.8	0.92
176.9	0.921333
177	0.921
177.1	0.924
177.2	0.922667
177.3	0.923
177.4	0.925667
177.5	0.926
177.6	0.928
177.7	0.926333
177.8	0.925667
177.9	0.927333
178	0.926667
178.1	0.927667
178.2	0.930333
178.3	0.931333
178.4	0.933333
178.5	0.930333
178.6	0.932667
178.7	0.932667
178.8	0.931667
178.9	0.930333
179	0.928667
179.1	0.928333
179.2	0.927
179.3	0.925333
179.4	0.924
179.5	0.925667
179.6	0.926
179.7	0.928667
179.8	0.928
179.9	0.930333
180	0.931667
180.1	0.93
180.2	0.928
180.3	0.928
180.4	0.929
180.5	0.928333
180.6	0.928667
180.7	0.928333
180.8	0.928667
180.9	0.927
181	0.924333
181.1	0.926333
181.2	0.928333
181.3	0.928333
181.4	0.925333
181.5	0.928
181.6	0.928667
181.7	0.931333
181.8	0.931
181.9	0.931333
182	0.929333
182.1	0.927333
182.2	0.927333
182.3	0.925667
182.4	0.925667
182.5	0.926333
182.6	0.927
182.7	0.928667
182.8	0.929
182.9	0.931333
183	0.932333
183.1	0.933667
183.2	0.933333
183.3	0.931
183.4	0.932
183.5	0.929
183.6	0.931
183.7	0.93
183.8	0.925333
183.9	0.925
184	0.925
184.1	0.922667
184.2	0.923
184.3	0.921333
184.4	0.922333
184.5	0.923667
184.6	0.924667
184.7	0.925333
184.8	0.926
184.9	0.929
185	0.927333
185.1	0.926667
185.2	0.930667
185.3	0.931333
185.4	0.932667
185.5	0.933667
185.6	0.935333
185.7	0.938
185.8	0.937333
185.9	0.933333
186	0.933667
186.1	0.937
186.2	0.935
186.3	0.936
186.4	0.934333
186.5	0.934333
186.6	0.934
186.7	0.935
186.8	0.933667
186.9	0.932333
187	0.931333
187.1	0.929667
187.2	0.927667
187.3	0.927667
187.4	0.928333
187.5	0.930333
187.6	0.928333
187.7	0.928667
187.8	0.927
187.9	0.927333
188	0.926667
188.1	0.929
188.2	0.929
188.3	0.929333
188.4	0.928667
188.5	0.929
188.6	0.928333
188.7	0.928333
188.8	0.930333
188.9	0.932
189	0.932
189.1	0.933
189.2	0.933667
189.3	0.932333
189.4	0.933
189.5	0.935
189.6	0.935
189.7	0.935333
189.8	0.935333
189.9	0.934667
190	0.935667
190.1	0.933333
190.2	0.93
190.3	0.931
190.4	0.932
190.5	0.935
190.6	0.932667
190.7	0.933333
190.8	0.932
190.9	0.93
191	0.932333
191.1	0.932667
191.2	0.929
191.3	0.931667
191.4	0.929667
191.5	0.930667
191.6	0.927667
191.7	0.928667
191.8	0.928
191.9	0.930667
192	0.929333
192.1	0.933333
192.2	0.932
192.3	0.934667
192.4	0.934333
192.5	0.932
192.6	0.934
192.7	0.934667
192.8	0.933
192.9	0.929333
193	0.928
193.1	0.927667
193.2	0.932
193.3	0.932333
193.4	0.931333
193.5	0.932333
193.6	0.934
193.7	0.935333
193.8	0.934333
193.9	0.934333
194	0.936333
194.1	0.936
194.2	0.933667
194.3	0.930667
194.4	0.929
194.5	0.928
194.6	0.926333
194.7	0.927
194.8	0.924333
194.9	0.926333
195	0.925333
195.1	0.927
195.2	0.927667
195.3	0.932
195.4	0.934667
195.5	0.934
195.6	0.934
195.7	0.931333
195.8	0.934667
195.9	0.934
196	0.934333
196.1	0.933667
196.2	0.932667
196.3	0.931667
196.4	0.932333
196.5	0.930667
196.6	0.929333
196.7	0.927667
196.8	0.927667
196.9	0.928
197	0.928333
197.1	0.93
197.2	0.932333
197.3	0.93
197.4	0.93
197.5	0.926667
197.6	0.928
197.7	0.928333
197.8	0.93
197.9	0.927
198	0.926333
198.1	0.927333
198.2	0.928667
198.3	0.929333
198.4	0.928667
198.5	0.927667
198.6	0.930333
198.7	0.928333
198.8	0.926667
198.9	0.928667
199	0.928667
199.1	0.926667
199.2	0.925333
199.3	0.928333
199.4	0.927333
199.5	0.928667
199.6	0.927333
199.7	0.925667
199.8	0.927667
199.9	0.928
200	0.929333
[truncated: 14,000 more rows]
