# Supplementary material for: Bayesian inference of kinetic schemes for ion channels by Kalman filtering
Source: eLife journal article supplement (doi:10.7554/elife.62714), 2022-05-04
Supplement: fig4-data7 [file 1_Sim_N_1500_Strom_MW_2M.xlsx]

## Sheet: Tabelle1
0.1	0
0.2	0
0.3	0
0.4	0
0.5	0
0.6	0
0.7	0
0.8	0
0.9	0
1	0
1.1	0
1.2	0
1.3	0
1.4	0
1.5	0
1.6	0
1.7	0
1.8	0
1.9	0
2	0
2.1	0
2.2	0
2.3	0
2.4	0
2.5	0
2.6	0
2.7	0
2.8	0
2.9	0
3	0
3.1	0
3.2	0
3.3	0
3.4	0
3.5	0
3.6	0
3.7	0
3.8	0
3.9	0
4	0
4.1	0
4.2	0
4.3	0
4.4	0
4.5	0
4.6	0
4.7	0
4.8	0
4.9	0
5	0
5.1	0
5.2	0
5.3	0
5.4	0
5.5	0
5.6	0
5.7	0
5.8	0
5.9	0
6	0
6.1	0
6.2	0
6.3	0
6.4	0
6.5	0
6.6	0
6.7	0
6.8	0
6.9	0
7	0
7.1	0
7.2	0
7.3	0
7.4	0
7.5	0
7.6	0
7.7	0
7.8	0
7.9	0
8	0
8.1	0
8.2	0
8.3	0
8.4	0
8.5	0
8.6	0
8.7	0
8.8	0
8.9	0
9	0
9.1	0
9.2	0
9.3	0
9.4	0
9.5	0
9.6	0
9.7	0
9.8	0
9.9	0
10	0
10.1	0
10.2	0
10.3	0
10.4	0
10.5	0
10.6	0
10.7	0
10.8	0
10.9	0
11	0
11.1	0
11.2	0
11.3	0
11.4	0
11.5	0
11.6	0
11.7	0
11.8	0
11.9	0
12	0
12.1	0
12.2	0
12.3	0
12.4	0
12.5	0
12.6	0
12.7	0
12.8	0
12.9	0
13	0
13.1	0
13.2	0
13.3	0
13.4	0
13.5	0
13.6	0
13.7	0
13.8	0
13.9	0
14	0
14.1	0
14.2	0
14.3	0
14.4	0
14.5	0
14.6	0
14.7	0
14.8	0
14.9	0
15	0
15.1	0
15.2	0
15.3	0
15.4	0
15.5	0
15.6	0
15.7	0
15.8	0
15.9	0
16	0
16.1	0
16.2	0
16.3	0
16.4	0
16.5	0
16.6	0
16.7	0
16.8	0
16.9	0
17	0
17.1	0
17.2	0
17.3	0
17.4	0
17.5	0
17.6	0
17.7	0
17.8	0
17.9	0
18	0
18.1	0
18.2	0
18.3	0
18.4	0
18.5	0
18.6	0
18.7	0
18.8	0
18.9	0
19	0
19.1	0
19.2	0
19.3	0
19.4	0
19.5	0
19.6	0
19.7	0
19.8	0
19.9	0
20	0
20.1	0
20.2	0
20.3	0
20.4	0
20.5	0
20.6	0
20.7	0
20.8	0
20.9	0
21	0
21.1	0
21.2	0
21.3	0
21.4	0
21.5	0
21.6	0
21.7	0
21.8	0
21.9	0
22	0
22.1	0
22.2	0
22.3	0
22.4	0
22.5	0
22.6	0
22.7	0
22.8	0
22.9	0
23	0
23.1	0
23.2	0
23.3	0
23.4	0
23.5	0
23.6	0
23.7	0
23.8	0
23.9	0
24	0
24.1	0
24.2	0
24.3	0
24.4	0
24.5	0
24.6	0
24.7	0
24.8	0
24.9	0
25	0
25.1	0
25.2	0
25.3	0
25.4	0
25.5	0
25.6	0
25.7	0
25.8	0
25.9	0
26	0
26.1	0
26.2	0
26.3	0
26.4	0
26.5	0
26.6	0
26.7	0
26.8	0
26.9	0
27	0
27.1	0
27.2	0
27.3	0
27.4	0
27.5	0
27.6	0
27.7	0
27.8	0
27.9	0
28	0
28.1	0
28.2	0
28.3	0
28.4	0
28.5	0
28.6	0
28.7	0
28.8	0
28.9	0
29	0
29.1	0
29.2	0
29.3	0
29.4	0
29.5	0
29.6	0
29.7	0
29.8	0
29.9	0
30	0
30.1	0
30.2	0
30.3	0
30.4	0
30.5	0
30.6	0
30.7	0
30.8	0
30.9	0
31	0
31.1	0
31.2	0
31.3	0
31.4	0
31.5	0
31.6	0
31.7	0
31.8	0
31.9	0
32	0
32.1	0
32.2	0
32.3	0
32.4	0
32.5	0
32.6	0
32.7	0
32.8	0
32.9	0
33	0
33.1	0
33.2	0
33.3	0
33.4	0
33.5	0
33.6	0
33.7	0
33.8	0
33.9	0
34	0
34.1	0
34.2	0
34.3	0
34.4	0
34.5	0
34.6	0
34.7	0
34.8	0
34.9	0
35	0
35.1	0
35.2	0
35.3	0
35.4	0
35.5	0
35.6	0
35.7	0
35.8	0
35.9	0
36	0
36.1	0
36.2	0
36.3	0
36.4	0
36.5	0
36.6	0
36.7	0
36.8	0
36.9	0
37	0
37.1	0
37.2	0
37.3	0
37.4	0
37.5	0
37.6	0
37.7	0
37.8	0
37.9	0
38	0
38.1	0
38.2	0
38.3	0
38.4	0
38.5	0
38.6	0
38.7	0
38.8	0
38.9	0
39	0
39.1	0
39.2	0
39.3	0
39.4	0
39.5	0
39.6	0
39.7	0
39.8	0
39.9	0
40	0
40.1	0
40.2	0
40.3	0
40.4	0
40.5	0
40.6	0
40.7	0
40.8	0
40.9	0
41	0
41.1	0
41.2	0
41.3	0
41.4	0
41.5	0
41.6	0
41.7	0
41.8	0
41.9	0
42	0
42.1	0
42.2	0
42.3	0
42.4	0
42.5	0
42.6	0
42.7	0
42.8	0
42.9	0
43	0
43.1	0
43.2	0
43.3	0
43.4	0
43.5	0
43.6	0
43.7	0
43.8	0
43.9	0
44	0
44.1	0
44.2	0
44.3	0
44.4	0
44.5	0
44.6	0
44.7	0
44.8	0
44.9	0
45	0
45.1	0
45.2	0
45.3	0
45.4	0
45.5	0
45.6	0
45.7	0
45.8	0
45.9	0
46	0
46.1	0
46.2	0
46.3	0
46.4	0
46.5	0
46.6	0
46.7	0
46.8	0
46.9	0
47	0
47.1	0
47.2	0
47.3	0
47.4	0
47.5	0
47.6	0
47.7	0
47.8	0
47.9	0
48	0
48.1	0
48.2	0
48.3	0
48.4	0
48.5	0
48.6	0
48.7	0
48.8	0
48.9	0
49	0
49.1	0
49.2	0
49.3	0
49.4	0
49.5	0
49.6	0
49.7	0
49.8	0
49.9	0
50	0
50.1	0
50.2	0
50.3	0
50.4	0
50.5	0
50.6	0
50.7	0
50.8	0
50.9	0
51	0
51.1	0
51.2	0
51.3	0
51.4	0
51.5	0
51.6	0
51.7	0
51.8	0
51.9	0
52	0
52.1	0
52.2	0
52.3	0
52.4	0
52.5	0
52.6	0
52.7	0
52.8	0
52.9	0
53	0
53.1	0
53.2	0
53.3	0
53.4	0
53.5	0
53.6	0
53.7	0
53.8	0
53.9	0
54	0
54.1	0
54.2	0
54.3	0
54.4	0
54.5	0
54.6	0
54.7	0
54.8	0
54.9	0
55	0
55.1	0
55.2	0
55.3	0
55.4	0
55.5	0
55.6	0
55.7	0
55.8	0
55.9	0
56	0
56.1	0
56.2	0
56.3	0
56.4	0
56.5	0
56.6	0
56.7	0
56.8	0
56.9	0
57	0
57.1	0
57.2	0
57.3	0
57.4	0
57.5	0
57.6	0
57.7	0
57.8	0
57.9	0
58	0
58.1	0
58.2	0
58.3	0
58.4	0
58.5	0
58.6	0
58.7	0
58.8	0
58.9	0
59	0
59.1	0
59.2	0
59.3	0
59.4	0
59.5	0
59.6	0
59.7	0
59.8	0
59.9	0
60	0
60.1	0
60.2	0
60.3	0
60.4	0
60.5	0
60.6	0
60.7	0
60.8	0
60.9	0
61	0
61.1	0
61.2	0
61.3	0
61.4	0
61.5	0
61.6	0
61.7	0
61.8	0
61.9	0
62	0
62.1	0
62.2	0
62.3	0
62.4	0
62.5	0
62.6	0
62.7	0
62.8	0
62.9	0
63	0
63.1	0
63.2	0
63.3	0
63.4	0
63.5	0
63.6	0
63.7	0
63.8	0
63.9	0
64	0
64.1	0
64.2	0
64.3	0
64.4	0
64.5	0
64.6	0
64.7	0
64.8	0
64.9	0
65	0
65.1	0
65.2	0
65.3	0
65.4	0
65.5	0
65.6	0
65.7	0
65.8	0
65.9	0
66	0
66.1	0
66.2	0
66.3	0
66.4	0
66.5	0
66.6	0
66.7	0
66.8	0
66.9	0
67	0
67.1	0
67.2	0
67.3	0
67.4	0
67.5	0
67.6	0
67.7	0
67.8	0
67.9	0
68	0
68.1	0
68.2	0
68.3	0
68.4	0
68.5	0
68.6	0
68.7	0
68.8	0
68.9	0
69	0
69.1	0
69.2	0
69.3	0
69.4	0
69.5	0
69.6	0
69.7	0
69.8	0
69.9	0
70	0
70.1	0
70.2	0
70.3	0
70.4	0
70.5	0
70.6	0
70.7	0
70.8	0
70.9	0
71	0
71.1	0
71.2	0
71.3	0
71.4	0
71.5	0
71.6	0
71.7	0
71.8	0
71.9	0
72	0
72.1	0
72.2	0
72.3	0
72.4	0
72.5	0
72.6	0
72.7	0
72.8	0
72.9	0
73	0
73.1	0
73.2	0
73.3	0
73.4	0
73.5	0
73.6	0
73.7	0
73.8	0
73.9	0
74	0
74.1	0
74.2	0
74.3	0
74.4	0
74.5	0
74.6	0
74.7	0
74.8	0
74.9	0
75	0
75.1	0
75.2	0
75.3	0
75.4	0
75.5	0
75.6	0
75.7	0
75.8	0
75.9	0
76	0
76.1	0
76.2	0
76.3	0
76.4	0
76.5	0
76.6	0
76.7	0
76.8	0
76.9	0
77	0
77.1	0
77.2	0
77.3	0
77.4	0
77.5	0
77.6	0
77.7	0
77.8	0
77.9	0
78	0
78.1	0
78.2	0
78.3	0
78.4	0
78.5	0
78.6	0
78.7	0
78.8	0
78.9	0
79	0
79.1	0
79.2	0
79.3	0
79.4	0
79.5	0
79.6	0
79.7	0
79.8	0
79.9	0
80	0
80.1	0
80.2	0
80.3	0
80.4	0
80.5	0
80.6	0
80.7	0
80.8	0
80.9	0
81	0
81.1	0
81.2	0
81.3	0
81.4	0
81.5	0
81.6	0
81.7	0
81.8	0
81.9	0
82	0
82.1	0
82.2	0
82.3	0
82.4	0
82.5	0
82.6	0
82.7	0
82.8	0
82.9	0
83	0
83.1	0
83.2	0
83.3	0
83.4	0
83.5	0
83.6	0
83.7	0
83.8	0
83.9	0
84	0
84.1	0
84.2	0
84.3	0
84.4	0
84.5	0
84.6	0
84.7	0
84.8	0
84.9	0
85	0
85.1	0
85.2	0
85.3	0
85.4	0
85.5	0
85.6	0
85.7	0
85.8	0
85.9	0
86	0
86.1	0
86.2	0
86.3	0
86.4	0
86.5	0
86.6	0
86.7	0
86.8	0
86.9	0
87	0
87.1	0
87.2	0
87.3	0
87.4	0
87.5	0
87.6	0
87.7	0
87.8	0
87.9	0
88	0
88.1	0
88.2	0
88.3	0
88.4	0
88.5	0
88.6	0
88.7	0
88.8	0
88.9	0
89	0
89.1	0
89.2	0
89.3	0
89.4	0
89.5	0
89.6	0
89.7	0
89.8	0
89.9	0
90	0
90.1	0
90.2	0
90.3	0
90.4	0
90.5	0
90.6	0
90.7	0
90.8	0
90.9	0
91	0
91.1	0
91.2	0
91.3	0
91.4	0
91.5	0
91.6	0
91.7	0
91.8	0
91.9	0
92	0
92.1	0
92.2	0
92.3	0
92.4	0
92.5	0
92.6	0
92.7	0
92.8	0
92.9	0
93	0
93.1	0
93.2	0
93.3	0
93.4	0
93.5	0
93.6	0
93.7	0
93.8	0
93.9	0
94	0
94.1	0
94.2	0
94.3	0
94.4	0
94.5	0
94.6	0
94.7	0
94.8	0
94.9	0
95	0
95.1	0
95.2	0
95.3	0
95.4	0
95.5	0
95.6	0
95.7	0
95.8	0
95.9	0
96	0
96.1	0
96.2	0
96.3	0
96.4	0
96.5	0
96.6	0
96.7	0
96.8	0
96.9	0
97	0
97.1	0
97.2	0
97.3	0
97.4	0
97.5	0
97.6	0
97.7	0
97.8	0
97.9	0
98	0
98.1	0
98.2	0
98.3	0
98.4	0
98.5	0
98.6	0
98.7	0
98.8	0
98.9	0
99	0
99.1	0
99.2	0
99.3	0
99.4	0
99.5	0
99.6	0
99.7	0
99.8	0
99.9	0
100	0
100.1	0
100.2	0.000666667
100.3	0.000666667
100.4	0.000666667
100.5	0.000666667
100.6	0.000666667
100.7	0.002
100.8	0.00333333
100.9	0.00666667
101	0.00866667
101.1	0.00933333
101.2	0.0106667
101.3	0.0106667
101.4	0.0126667
101.5	0.0153333
101.6	0.0173333
101.7	0.02
101.8	0.0206667
101.9	0.0246667
102	0.0253333
102.1	0.0266667
102.2	0.0293333
102.3	0.032
102.4	0.034
102.5	0.0353333
102.6	0.036
102.7	0.0373333
102.8	0.0386667
102.9	0.04
103	0.0413333
103.1	0.0426667
103.2	0.046
103.3	0.0493333
103.4	0.0506667
103.5	0.052
103.6	0.054
103.7	0.056
103.8	0.0586667
103.9	0.0586667
104	0.0593333
104.1	0.062
104.2	0.0626667
104.3	0.0626667
104.4	0.0626667
104.5	0.064
104.6	0.0653333
104.7	0.0686667
104.8	0.0693333
104.9	0.0713333
105	0.074
105.1	0.076
105.2	0.078
105.3	0.082
105.4	0.082
105.5	0.082
105.6	0.084
105.7	0.0853333
105.8	0.0873333
105.9	0.0873333
106	0.088
106.1	0.0926667
106.2	0.0946667
106.3	0.0973333
106.4	0.0993333
106.5	0.102
106.6	0.103333
106.7	0.104
106.8	0.107333
106.9	0.110667
107	0.112
107.1	0.115333
107.2	0.119333
107.3	0.122667
107.4	0.126
107.5	0.126667
107.6	0.128667
107.7	0.129333
107.8	0.131333
107.9	0.134
108	0.136
108.1	0.137333
108.2	0.140667
108.3	0.143333
108.4	0.144
108.5	0.145333
108.6	0.146667
108.7	0.149333
108.8	0.150667
108.9	0.152
109	0.152
109.1	0.154667
109.2	0.156
109.3	0.158
109.4	0.16
109.5	0.164667
109.6	0.166667
109.7	0.166
109.8	0.171333
109.9	0.172667
110	0.174
110.1	0.174667
110.2	0.177333
110.3	0.178667
110.4	0.182
110.5	0.184
110.6	0.184
110.7	0.186
110.8	0.186667
110.9	0.190667
111	0.195333
111.1	0.196667
111.2	0.196667
111.3	0.198667
111.4	0.202667
111.5	0.204
111.6	0.207333
111.7	0.208667
111.8	0.210667
111.9	0.213333
112	0.216
112.1	0.223333
112.2	0.224
112.3	0.225333
112.4	0.228667
112.5	0.23
112.6	0.234667
112.7	0.238
112.8	0.239333
112.9	0.24
113	0.241333
113.1	0.244
113.2	0.245333
113.3	0.246667
113.4	0.248667
113.5	0.249333
113.6	0.25
113.7	0.251333
113.8	0.252667
113.9	0.254667
114	0.254667
114.1	0.257333
114.2	0.258667
114.3	0.260667
114.4	0.262
114.5	0.262667
114.6	0.264667
114.7	0.266
114.8	0.267333
114.9	0.268667
115	0.270667
115.1	0.274
115.2	0.276
115.3	0.278667
115.4	0.280667
115.5	0.282
115.6	0.283333
115.7	0.284
115.8	0.285333
115.9	0.286667
116	0.288667
116.1	0.288667
116.2	0.289333
116.3	0.29
116.4	0.292
116.5	0.296
116.6	0.297333
116.7	0.296
116.8	0.297333
116.9	0.297333
117	0.299333
117.1	0.302667
117.2	0.304667
117.3	0.308
117.4	0.31
117.5	0.312
117.6	0.315333
117.7	0.315333
117.8	0.316
117.9	0.317333
118	0.319333
118.1	0.32
118.2	0.32
118.3	0.324
118.4	0.324667
118.5	0.325333
118.6	0.327333
118.7	0.33
118.8	0.331333
118.9	0.334
119	0.334
119.1	0.335333
119.2	0.336
119.3	0.337333
119.4	0.338667
119.5	0.342667
119.6	0.344
119.7	0.344667
119.8	0.348
119.9	0.35
120	0.354
120.1	0.352667
120.2	0.353333
120.3	0.356
120.4	0.361333
120.5	0.363333
120.6	0.365333
120.7	0.366667
120.8	0.367333
120.9	0.367333
121	0.372
121.1	0.375333
121.2	0.377333
121.3	0.38
121.4	0.379333
121.5	0.381333
121.6	0.382667
121.7	0.384
121.8	0.386
121.9	0.385333
122	0.386667
122.1	0.389333
122.2	0.39
122.3	0.392
122.4	0.393333
122.5	0.394
122.6	0.394667
122.7	0.394667
122.8	0.394667
122.9	0.399333
123	0.399333
123.1	0.4
123.2	0.403333
123.3	0.404667
123.4	0.406
123.5	0.409333
123.6	0.41
123.7	0.411333
123.8	0.412
123.9	0.413333
124	0.418
124.1	0.419333
124.2	0.42
124.3	0.420667
124.4	0.420667
124.5	0.422667
124.6	0.423333
124.7	0.426667
124.8	0.428
124.9	0.429333
125	0.43
125.1	0.431333
125.2	0.432667
125.3	0.433333
125.4	0.435333
125.5	0.437333
125.6	0.439333
125.7	0.44
125.8	0.442
125.9	0.443333
126	0.444
126.1	0.448667
126.2	0.449333
126.3	0.449333
126.4	0.452
126.5	0.455333
126.6	0.456667
126.7	0.458
126.8	0.456667
126.9	0.458
127	0.458667
127.1	0.46
127.2	0.461333
127.3	0.460667
127.4	0.465333
127.5	0.466
127.6	0.466667
127.7	0.467333
127.8	0.468
127.9	0.468667
128	0.469333
128.1	0.470667
128.2	0.472
128.3	0.472
128.4	0.472667
128.5	0.473333
128.6	0.476
128.7	0.476667
128.8	0.477333
128.9	0.476667
129	0.478667
129.1	0.48
129.2	0.479333
129.3	0.480667
129.4	0.481333
129.5	0.482
129.6	0.482
129.7	0.482667
129.8	0.485333
129.9	0.486
130	0.486667
130.1	0.486667
130.2	0.489333
130.3	0.49
130.4	0.490667
130.5	0.490667
130.6	0.491333
130.7	0.491333
130.8	0.492667
130.9	0.492667
131	0.494
131.1	0.495333
131.2	0.495333
131.3	0.495333
131.4	0.495333
131.5	0.495333
131.6	0.496
131.7	0.496
131.8	0.497333
131.9	0.496667
132	0.497333
132.1	0.498667
132.2	0.500667
132.3	0.502667
132.4	0.504
132.5	0.502
132.6	0.504
132.7	0.504667
132.8	0.504667
132.9	0.508667
133	0.510667
133.1	0.51
133.2	0.512
133.3	0.512667
133.4	0.513333
133.5	0.512667
133.6	0.514
133.7	0.513333
133.8	0.514
133.9	0.516
134	0.516667
134.1	0.516667
134.2	0.519333
134.3	0.52
134.4	0.520667
134.5	0.520667
134.6	0.520667
134.7	0.522
134.8	0.522667
134.9	0.523333
135	0.523333
135.1	0.523333
135.2	0.524667
135.3	0.526
135.4	0.526
135.5	0.526667
135.6	0.526667
135.7	0.526
135.8	0.524
135.9	0.525333
136	0.528667
136.1	0.53
136.2	0.53
136.3	0.53
136.4	0.531333
136.5	0.531333
136.6	0.531333
136.7	0.534667
136.8	0.536
136.9	0.535333
137	0.535333
137.1	0.536
137.2	0.536667
137.3	0.539333
137.4	0.542
137.5	0.542
137.6	0.543333
137.7	0.543333
137.8	0.543333
137.9	0.546
138	0.546667
138.1	0.547333
138.2	0.548
138.3	0.546667
138.4	0.547333
138.5	0.548
138.6	0.548667
138.7	0.55
138.8	0.550667
138.9	0.551333
139	0.551333
139.1	0.553333
139.2	0.553333
139.3	0.554
139.4	0.555333
139.5	0.559333
139.6	0.559333
139.7	0.560667
139.8	0.559333
139.9	0.559333
140	0.558667
140.1	0.560667
140.2	0.560667
140.3	0.559333
140.4	0.560667
140.5	0.562
140.6	0.562667
140.7	0.562667
140.8	0.564667
140.9	0.563333
141	0.562667
141.1	0.563333
141.2	0.565333
141.3	0.566
141.4	0.566667
141.5	0.568
141.6	0.569333
141.7	0.571333
141.8	0.573333
141.9	0.576
142	0.576
142.1	0.575333
142.2	0.577333
142.3	0.578
142.4	0.578667
142.5	0.579333
142.6	0.580667
142.7	0.582
142.8	0.580667
142.9	0.581333
143	0.581333
143.1	0.584
143.2	0.586
143.3	0.586667
143.4	0.586
143.5	0.588667
143.6	0.590667
143.7	0.591333
143.8	0.591333
143.9	0.591333
144	0.591333
144.1	0.592667
144.2	0.593333
144.3	0.593333
144.4	0.592667
144.5	0.593333
144.6	0.595333
144.7	0.596667
144.8	0.598
144.9	0.598667
145	0.600667
145.1	0.600667
145.2	0.599333
145.3	0.599333
145.4	0.599333
145.5	0.598
145.6	0.6
145.7	0.599333
145.8	0.6
145.9	0.6
146	0.601333
146.1	0.602
146.2	0.604
146.3	0.605333
146.4	0.605333
146.5	0.604667
146.6	0.605333
146.7	0.605333
146.8	0.606667
146.9	0.606667
147	0.606667
147.1	0.604667
147.2	0.605333
147.3	0.605333
147.4	0.606
147.5	0.606
147.6	0.605333
147.7	0.608
147.8	0.608
147.9	0.608667
148	0.609333
148.1	0.61
148.2	0.610667
148.3	0.611333
148.4	0.612
148.5	0.612667
148.6	0.612
148.7	0.613333
148.8	0.614667
148.9	0.615333
149	0.614
149.1	0.615333
149.2	0.614667
149.3	0.614
149.4	0.614667
149.5	0.616667
149.6	0.615333
149.7	0.616667
149.8	0.618667
149.9	0.619333
150	0.62
150.1	0.619333
150.2	0.618
150.3	0.618
150.4	0.617333
150.5	0.618
150.6	0.618667
150.7	0.619333
150.8	0.620667
150.9	0.621333
151	0.621333
151.1	0.621333
151.2	0.620667
151.3	0.62
151.4	0.620667
151.5	0.619333
151.6	0.619333
151.7	0.62
151.8	0.620667
151.9	0.619333
152	0.618667
152.1	0.618667
152.2	0.619333
152.3	0.62
152.4	0.619333
152.5	0.618667
152.6	0.616667
152.7	0.614667
152.8	0.614667
152.9	0.615333
153	0.615333
153.1	0.615333
153.2	0.616
153.3	0.616
153.4	0.616667
153.5	0.617333
153.6	0.617333
153.7	0.617333
153.8	0.617333
153.9	0.618
154	0.618667
154.1	0.621333
154.2	0.620667
154.3	0.621333
154.4	0.622
154.5	0.622667
154.6	0.621333
154.7	0.621333
154.8	0.620667
154.9	0.622
155	0.621333
155.1	0.622
155.2	0.620667
155.3	0.622667
155.4	0.622
155.5	0.622667
155.6	0.622
155.7	0.624667
155.8	0.625333
155.9	0.628
156	0.626
156.1	0.628667
156.2	0.629333
156.3	0.629333
156.4	0.629333
156.5	0.633333
156.6	0.632
156.7	0.630667
156.8	0.63
156.9	0.63
157	0.63
157.1	0.631333
157.2	0.631333
157.3	0.632
157.4	0.632
157.5	0.633333
157.6	0.633333
157.7	0.635333
157.8	0.636
157.9	0.636667
158	0.636
158.1	0.636667
158.2	0.639333
158.3	0.640667
158.4	0.640667
158.5	0.639333
158.6	0.638667
158.7	0.638667
158.8	0.640667
158.9	0.640667
159	0.642
159.1	0.641333
159.2	0.640667
159.3	0.640667
159.4	0.64
159.5	0.640667
159.6	0.64
159.7	0.641333
159.8	0.642
159.9	0.642
160	0.643333
160.1	0.643333
160.2	0.644
160.3	0.644667
160.4	0.644667
160.5	0.646667
160.6	0.648
160.7	0.65
160.8	0.650667
160.9	0.651333
161	0.650667
161.1	0.652667
161.2	0.652667
161.3	0.652667
161.4	0.653333
161.5	0.653333
161.6	0.653333
161.7	0.654
161.8	0.656
161.9	0.654667
162	0.655333
162.1	0.655333
162.2	0.655333
162.3	0.655333
162.4	0.655333
162.5	0.656
162.6	0.653333
162.7	0.654
162.8	0.655333
162.9	0.654667
163	0.654667
163.1	0.654667
163.2	0.656
163.3	0.657333
163.4	0.659333
163.5	0.660667
163.6	0.658667
163.7	0.658667
163.8	0.659333
163.9	0.658667
164	0.659333
164.1	0.660667
164.2	0.660667
164.3	0.659333
164.4	0.658667
164.5	0.659333
164.6	0.661333
164.7	0.663333
164.8	0.663333
164.9	0.664667
165	0.663333
165.1	0.664
165.2	0.664
165.3	0.664667
165.4	0.664667
165.5	0.664667
165.6	0.666
165.7	0.665333
165.8	0.668
165.9	0.668667
166	0.668
166.1	0.669333
166.2	0.668667
166.3	0.671333
166.4	0.671333
166.5	0.672667
166.6	0.673333
166.7	0.674
166.8	0.674
166.9	0.674
167	0.674
167.1	0.674667
167.2	0.675333
167.3	0.676
167.4	0.676667
167.5	0.676667
167.6	0.678
167.7	0.676667
167.8	0.678
167.9	0.679333
168	0.678
168.1	0.679333
168.2	0.679333
168.3	0.679333
168.4	0.678
168.5	0.678
168.6	0.677333
168.7	0.677333
168.8	0.676667
168.9	0.676
169	0.675333
169.1	0.677333
169.2	0.678
169.3	0.676667
169.4	0.677333
169.5	0.677333
169.6	0.676
169.7	0.677333
169.8	0.676667
169.9	0.676
170	0.677333
170.1	0.678667
170.2	0.679333
170.3	0.681333
170.4	0.682667
170.5	0.680667
170.6	0.68
170.7	0.68
170.8	0.678667
170.9	0.679333
171	0.681333
171.1	0.682
171.2	0.682
171.3	0.682
171.4	0.681333
171.5	0.680667
171.6	0.682
171.7	0.681333
171.8	0.682667
171.9	0.682667
172	0.682
172.1	0.681333
172.2	0.682667
172.3	0.683333
172.4	0.683333
172.5	0.683333
172.6	0.682667
172.7	0.683333
172.8	0.685333
172.9	0.686
173	0.686
173.1	0.686667
173.2	0.687333
173.3	0.686667
173.4	0.687333
173.5	0.688667
173.6	0.688667
173.7	0.688667
173.8	0.688667
173.9	0.689333
174	0.689333
174.1	0.69
174.2	0.69
174.3	0.69
174.4	0.69
174.5	0.69
174.6	0.692
174.7	0.692
174.8	0.692
174.9	0.692667
175	0.691333
175.1	0.691333
175.2	0.691333
175.3	0.690667
175.4	0.691333
175.5	0.692
175.6	0.692667
175.7	0.693333
175.8	0.693333
175.9	0.693333
176	0.693333
176.1	0.692667
176.2	0.692667
176.3	0.694
176.4	0.694667
176.5	0.694667
176.6	0.693333
176.7	0.692667
176.8	0.694
176.9	0.696667
177	0.696667
177.1	0.696667
177.2	0.696
177.3	0.694667
177.4	0.694
177.5	0.694667
177.6	0.696
177.7	0.694667
177.8	0.694
177.9	0.695333
178	0.695333
178.1	0.696
178.2	0.695333
178.3	0.696
178.4	0.696
178.5	0.696
178.6	0.694667
178.7	0.694667
178.8	0.694667
178.9	0.696
179	0.697333
179.1	0.697333
179.2	0.696667
179.3	0.697333
179.4	0.697333
179.5	0.697333
179.6	0.7
179.7	0.699333
179.8	0.698667
179.9	0.7
180	0.699333
180.1	0.701333
180.2	0.7
180.3	0.7
180.4	0.701333
180.5	0.701333
180.6	0.701333
180.7	0.702
180.8	0.703333
180.9	0.705333
181	0.706667
181.1	0.707333
181.2	0.706667
181.3	0.706
181.4	0.706667
181.5	0.706
181.6	0.705333
181.7	0.706
181.8	0.704667
181.9	0.705333
182	0.704667
182.1	0.704667
182.2	0.703333
182.3	0.702667
182.4	0.702667
182.5	0.702667
182.6	0.702667
182.7	0.704
182.8	0.704
182.9	0.705333
183	0.706
183.1	0.704667
183.2	0.704667
183.3	0.706667
183.4	0.705333
183.5	0.704667
183.6	0.705333
183.7	0.705333
183.8	0.705333
183.9	0.706667
184	0.707333
184.1	0.707333
184.2	0.706667
184.3	0.708
184.4	0.708
184.5	0.708667
184.6	0.708667
184.7	0.709333
184.8	0.710667
184.9	0.710667
185	0.710667
185.1	0.710667
185.2	0.710667
185.3	0.711333
185.4	0.710667
185.5	0.710667
185.6	0.712
185.7	0.713333
185.8	0.713333
185.9	0.713333
186	0.714
186.1	0.713333
186.2	0.713333
186.3	0.713333
186.4	0.714667
186.5	0.714667
186.6	0.714667
186.7	0.715333
186.8	0.715333
186.9	0.714667
187	0.714
187.1	0.714
187.2	0.713333
187.3	0.715333
187.4	0.715333
187.5	0.713333
187.6	0.712667
187.7	0.712
187.8	0.712667
187.9	0.712667
188	0.712667
188.1	0.715333
188.2	0.716
188.3	0.716
188.4	0.716667
188.5	0.714
188.6	0.716
188.7	0.713333
188.8	0.712667
188.9	0.712
189	0.711333
189.1	0.712
189.2	0.712
189.3	0.713333
189.4	0.715333
189.5	0.715333
189.6	0.714667
189.7	0.713333
189.8	0.712
189.9	0.712667
190	0.714667
190.1	0.714667
190.2	0.714667
190.3	0.714
190.4	0.713333
190.5	0.713333
190.6	0.713333
190.7	0.712
190.8	0.712
190.9	0.712667
191	0.712
191.1	0.712
191.2	0.712667
191.3	0.713333
191.4	0.713333
191.5	0.713333
191.6	0.713333
191.7	0.714667
191.8	0.714667
191.9	0.715333
192	0.716
192.1	0.717333
192.2	0.715333
192.3	0.714
192.4	0.714
192.5	0.713333
192.6	0.714
192.7	0.713333
192.8	0.712667
192.9	0.712
193	0.713333
193.1	0.712
193.2	0.712667
193.3	0.712
193.4	0.711333
193.5	0.714
193.6	0.714
193.7	0.714667
193.8	0.714
193.9	0.714667
194	0.714667
194.1	0.715333
194.2	0.714667
194.3	0.714
194.4	0.712667
194.5	0.712667
194.6	0.714
194.7	0.713333
194.8	0.711333
194.9	0.711333
195	0.71
195.1	0.709333
195.2	0.709333
195.3	0.71
195.4	0.709333
195.5	0.709333
195.6	0.709333
195.7	0.71
195.8	0.709333
195.9	0.709333
196	0.710667
196.1	0.711333
196.2	0.710667
196.3	0.710667
196.4	0.710667
196.5	0.710667
196.6	0.710667
196.7	0.710667
196.8	0.711333
196.9	0.710667
197	0.71
197.1	0.71
197.2	0.710667
197.3	0.71
197.4	0.710667
197.5	0.712667
197.6	0.714
197.7	0.713333
197.8	0.713333
197.9	0.713333
198	0.714667
198.1	0.714667
198.2	0.714
198.3	0.714667
198.4	0.714667
198.5	0.715333
198.6	0.714
198.7	0.714
198.8	0.714
198.9	0.715333
199	0.716667
199.1	0.716667
199.2	0.716667
199.3	0.716667
199.4	0.717333
199.5	0.718
199.6	0.718
199.7	0.718667
199.8	0.718
199.9	0.718667
200	0.718
[truncated: 14,000 more rows]
