# Supplementary material for: Bayesian inference of kinetic schemes for ion channels by Kalman filtering
Source: eLife journal article supplement (doi:10.7554/elife.62714), 2022-05-04
Supplement: fig4-data7 [file 1_Sim_N_2000_Fluor_MW.xlsx]

## Sheet: Tabelle1
0.1	0
0.2	0
0.3	0
0.4	0
0.5	0
0.6	0
0.7	0
0.8	0
0.9	0
1	0
1.1	0
1.2	0
1.3	0
1.4	0
1.5	0
1.6	0
1.7	0
1.8	0
1.9	0
2	0
2.1	0
2.2	0
2.3	0
2.4	0
2.5	0
2.6	0
2.7	0
2.8	0
2.9	0
3	0
3.1	0
3.2	0
3.3	0
3.4	0
3.5	0
3.6	0
3.7	0
3.8	0
3.9	0
4	0
4.1	0
4.2	0
4.3	0
4.4	0
4.5	0
4.6	0
4.7	0
4.8	0
4.9	0
5	0
5.1	0
5.2	0
5.3	0
5.4	0
5.5	0
5.6	0
5.7	0
5.8	0
5.9	0
6	0
6.1	0
6.2	0
6.3	0
6.4	0
6.5	0
6.6	0
6.7	0
6.8	0
6.9	0
7	0
7.1	0
7.2	0
7.3	0
7.4	0
7.5	0
7.6	0
7.7	0
7.8	0
7.9	0
8	0
8.1	0
8.2	0
8.3	0
8.4	0
8.5	0
8.6	0
8.7	0
8.8	0
8.9	0
9	0
9.1	0
9.2	0
9.3	0
9.4	0
9.5	0
9.6	0
9.7	0
9.8	0
9.9	0
10	0
10.1	0
10.2	0
10.3	0
10.4	0
10.5	0
10.6	0
10.7	0
10.8	0
10.9	0
11	0
11.1	0
11.2	0
11.3	0
11.4	0
11.5	0
11.6	0
11.7	0
11.8	0
11.9	0
12	0
12.1	0
12.2	0
12.3	0
12.4	0
12.5	0
12.6	0
12.7	0
12.8	0
12.9	0
13	0
13.1	0
13.2	0
13.3	0
13.4	0
13.5	0
13.6	0
13.7	0
13.8	0
13.9	0
14	0
14.1	0
14.2	0
14.3	0
14.4	0
14.5	0
14.6	0
14.7	0
14.8	0
14.9	0
15	0
15.1	0
15.2	0
15.3	0
15.4	0
15.5	0
15.6	0
15.7	0
15.8	0
15.9	0
16	0
16.1	0
16.2	0
16.3	0
16.4	0
16.5	0
16.6	0
16.7	0
16.8	0
16.9	0
17	0
17.1	0
17.2	0
17.3	0
17.4	0
17.5	0
17.6	0
17.7	0
17.8	0
17.9	0
18	0
18.1	0
18.2	0
18.3	0
18.4	0
18.5	0
18.6	0
18.7	0
18.8	0
18.9	0
19	0
19.1	0
19.2	0
19.3	0
19.4	0
19.5	0
19.6	0
19.7	0
19.8	0
19.9	0
20	0
20.1	0
20.2	0
20.3	0
20.4	0
20.5	0
20.6	0
20.7	0
20.8	0
20.9	0
21	0
21.1	0
21.2	0
21.3	0
21.4	0
21.5	0
21.6	0
21.7	0
21.8	0
21.9	0
22	0
22.1	0
22.2	0
22.3	0
22.4	0
22.5	0
22.6	0
22.7	0
22.8	0
22.9	0
23	0
23.1	0
23.2	0
23.3	0
23.4	0
23.5	0
23.6	0
23.7	0
23.8	0
23.9	0
24	0
24.1	0
24.2	0
24.3	0
24.4	0
24.5	0
24.6	0
24.7	0
24.8	0
24.9	0
25	0
25.1	0
25.2	0
25.3	0
25.4	0
25.5	0
25.6	0
25.7	0
25.8	0
25.9	0
26	0
26.1	0
26.2	0
26.3	0
26.4	0
26.5	0
26.6	0
26.7	0
26.8	0
26.9	0
27	0
27.1	0
27.2	0
27.3	0
27.4	0
27.5	0
27.6	0
27.7	0
27.8	0
27.9	0
28	0
28.1	0
28.2	0
28.3	0
28.4	0
28.5	0
28.6	0
28.7	0
28.8	0
28.9	0
29	0
29.1	0
29.2	0
29.3	0
29.4	0
29.5	0
29.6	0
29.7	0
29.8	0
29.9	0
30	0
30.1	0
30.2	0
30.3	0
30.4	0
30.5	0
30.6	0
30.7	0
30.8	0
30.9	0
31	0
31.1	0
31.2	0
31.3	0
31.4	0
31.5	0
31.6	0
31.7	0
31.8	0
31.9	0
32	0
32.1	0
32.2	0
32.3	0
32.4	0
32.5	0
32.6	0
32.7	0
32.8	0
32.9	0
33	0
33.1	0
33.2	0
33.3	0
33.4	0
33.5	0
33.6	0
33.7	0
33.8	0
33.9	0
34	0
34.1	0
34.2	0
34.3	0
34.4	0
34.5	0
34.6	0
34.7	0
34.8	0
34.9	0
35	0
35.1	0
35.2	0
35.3	0
35.4	0
35.5	0
35.6	0
35.7	0
35.8	0
35.9	0
36	0
36.1	0
36.2	0
36.3	0
36.4	0
36.5	0
36.6	0
36.7	0
36.8	0
36.9	0
37	0
37.1	0
37.2	0
37.3	0
37.4	0
37.5	0
37.6	0
37.7	0
37.8	0
37.9	0
38	0
38.1	0
38.2	0
38.3	0
38.4	0
38.5	0
38.6	0
38.7	0
38.8	0
38.9	0
39	0
39.1	0
39.2	0
39.3	0
39.4	0
39.5	0
39.6	0
39.7	0
39.8	0
39.9	0
40	0
40.1	0
40.2	0
40.3	0
40.4	0
40.5	0
40.6	0
40.7	0
40.8	0
40.9	0
41	0
41.1	0
41.2	0
41.3	0
41.4	0
41.5	0
41.6	0
41.7	0
41.8	0
41.9	0
42	0
42.1	0
42.2	0
42.3	0
42.4	0
42.5	0
42.6	0
42.7	0
42.8	0
42.9	0
43	0
43.1	0
43.2	0
43.3	0
43.4	0
43.5	0
43.6	0
43.7	0
43.8	0
43.9	0
44	0
44.1	0
44.2	0
44.3	0
44.4	0
44.5	0
44.6	0
44.7	0
44.8	0
44.9	0
45	0
45.1	0
45.2	0
45.3	0
45.4	0
45.5	0
45.6	0
45.7	0
45.8	0
45.9	0
46	0
46.1	0
46.2	0
46.3	0
46.4	0
46.5	0
46.6	0
46.7	0
46.8	0
46.9	0
47	0
47.1	0
47.2	0
47.3	0
47.4	0
47.5	0
47.6	0
47.7	0
47.8	0
47.9	0
48	0
48.1	0
48.2	0
48.3	0
48.4	0
48.5	0
48.6	0
48.7	0
48.8	0
48.9	0
49	0
49.1	0
49.2	0
49.3	0
49.4	0
49.5	0
49.6	0
49.7	0
49.8	0
49.9	0
50	0
50.1	0
50.2	0
50.3	0
50.4	0
50.5	0
50.6	0
50.7	0
50.8	0
50.9	0
51	0
51.1	0
51.2	0
51.3	0
51.4	0
51.5	0
51.6	0
51.7	0
51.8	0
51.9	0
52	0
52.1	0
52.2	0
52.3	0
52.4	0
52.5	0
52.6	0
52.7	0
52.8	0
52.9	0
53	0
53.1	0
53.2	0
53.3	0
53.4	0
53.5	0
53.6	0
53.7	0
53.8	0
53.9	0
54	0
54.1	0
54.2	0
54.3	0
54.4	0
54.5	0
54.6	0
54.7	0
54.8	0
54.9	0
55	0
55.1	0
55.2	0
55.3	0
55.4	0
55.5	0
55.6	0
55.7	0
55.8	0
55.9	0
56	0
56.1	0
56.2	0
56.3	0
56.4	0
56.5	0
56.6	0
56.7	0
56.8	0
56.9	0
57	0
57.1	0
57.2	0
57.3	0
57.4	0
57.5	0
57.6	0
57.7	0
57.8	0
57.9	0
58	0
58.1	0
58.2	0
58.3	0
58.4	0
58.5	0
58.6	0
58.7	0
58.8	0
58.9	0
59	0
59.1	0
59.2	0
59.3	0
59.4	0
59.5	0
59.6	0
59.7	0
59.8	0
59.9	0
60	0
60.1	0
60.2	0
60.3	0
60.4	0
60.5	0
60.6	0
60.7	0
60.8	0
60.9	0
61	0
61.1	0
61.2	0
61.3	0
61.4	0
61.5	0
61.6	0
61.7	0
61.8	0
61.9	0
62	0
62.1	0
62.2	0
62.3	0
62.4	0
62.5	0
62.6	0
62.7	0
62.8	0
62.9	0
63	0
63.1	0
63.2	0
63.3	0
63.4	0
63.5	0
63.6	0
63.7	0
63.8	0
63.9	0
64	0
64.1	0
64.2	0
64.3	0
64.4	0
64.5	0
64.6	0
64.7	0
64.8	0
64.9	0
65	0
65.1	0
65.2	0
65.3	0
65.4	0
65.5	0
65.6	0
65.7	0
65.8	0
65.9	0
66	0
66.1	0
66.2	0
66.3	0
66.4	0
66.5	0
66.6	0
66.7	0
66.8	0
66.9	0
67	0
67.1	0
67.2	0
67.3	0
67.4	0
67.5	0
67.6	0
67.7	0
67.8	0
67.9	0
68	0
68.1	0
68.2	0
68.3	0
68.4	0
68.5	0
68.6	0
68.7	0
68.8	0
68.9	0
69	0
69.1	0
69.2	0
69.3	0
69.4	0
69.5	0
69.6	0
69.7	0
69.8	0
69.9	0
70	0
70.1	0
70.2	0
70.3	0
70.4	0
70.5	0
70.6	0
70.7	0
70.8	0
70.9	0
71	0
71.1	0
71.2	0
71.3	0
71.4	0
71.5	0
71.6	0
71.7	0
71.8	0
71.9	0
72	0
72.1	0
72.2	0
72.3	0
72.4	0
72.5	0
72.6	0
72.7	0
72.8	0
72.9	0
73	0
73.1	0
73.2	0
73.3	0
73.4	0
73.5	0
73.6	0
73.7	0
73.8	0
73.9	0
74	0
74.1	0
74.2	0
74.3	0
74.4	0
74.5	0
74.6	0
74.7	0
74.8	0
74.9	0
75	0
75.1	0
75.2	0
75.3	0
75.4	0
75.5	0
75.6	0
75.7	0
75.8	0
75.9	0
76	0
76.1	0
76.2	0
76.3	0
76.4	0
76.5	0
76.6	0
76.7	0
76.8	0
76.9	0
77	0
77.1	0
77.2	0
77.3	0
77.4	0
77.5	0
77.6	0
77.7	0
77.8	0
77.9	0
78	0
78.1	0
78.2	0
78.3	0
78.4	0
78.5	0
78.6	0
78.7	0
78.8	0
78.9	0
79	0
79.1	0
79.2	0
79.3	0
79.4	0
79.5	0
79.6	0
79.7	0
79.8	0
79.9	0
80	0
80.1	0
80.2	0
80.3	0
80.4	0
80.5	0
80.6	0
80.7	0
80.8	0
80.9	0
81	0
81.1	0
81.2	0
81.3	0
81.4	0
81.5	0
81.6	0
81.7	0
81.8	0
81.9	0
82	0
82.1	0
82.2	0
82.3	0
82.4	0
82.5	0
82.6	0
82.7	0
82.8	0
82.9	0
83	0
83.1	0
83.2	0
83.3	0
83.4	0
83.5	0
83.6	0
83.7	0
83.8	0
83.9	0
84	0
84.1	0
84.2	0
84.3	0
84.4	0
84.5	0
84.6	0
84.7	0
84.8	0
84.9	0
85	0
85.1	0
85.2	0
85.3	0
85.4	0
85.5	0
85.6	0
85.7	0
85.8	0
85.9	0
86	0
86.1	0
86.2	0
86.3	0
86.4	0
86.5	0
86.6	0
86.7	0
86.8	0
86.9	0
87	0
87.1	0
87.2	0
87.3	0
87.4	0
87.5	0
87.6	0
87.7	0
87.8	0
87.9	0
88	0
88.1	0
88.2	0
88.3	0
88.4	0
88.5	0
88.6	0
88.7	0
88.8	0
88.9	0
89	0
89.1	0
89.2	0
89.3	0
89.4	0
89.5	0
89.6	0
89.7	0
89.8	0
89.9	0
90	0
90.1	0
90.2	0
90.3	0
90.4	0
90.5	0
90.6	0
90.7	0
90.8	0
90.9	0
91	0
91.1	0
91.2	0
91.3	0
91.4	0
91.5	0
91.6	0
91.7	0
91.8	0
91.9	0
92	0
92.1	0
92.2	0
92.3	0
92.4	0
92.5	0
92.6	0
92.7	0
92.8	0
92.9	0
93	0
93.1	0
93.2	0
93.3	0
93.4	0
93.5	0
93.6	0
93.7	0
93.8	0
93.9	0
94	0
94.1	0
94.2	0
94.3	0
94.4	0
94.5	0
94.6	0
94.7	0
94.8	0
94.9	0
95	0
95.1	0
95.2	0
95.3	0
95.4	0
95.5	0
95.6	0
95.7	0
95.8	0
95.9	0
96	0
96.1	0
96.2	0
96.3	0
96.4	0
96.5	0
96.6	0
96.7	0
96.8	0
96.9	0
97	0
97.1	0
97.2	0
97.3	0
97.4	0
97.5	0
97.6	0
97.7	0
97.8	0
97.9	0
98	0
98.1	0
98.2	0
98.3	0
98.4	0
98.5	0
98.6	0
98.7	0
98.8	0
98.9	0
99	0
99.1	0
99.2	0
99.3	0
99.4	0
99.5	0
99.6	0
99.7	0
99.8	0
99.9	0
100	0
100.1	0.1135
100.2	0.197
100.3	0.2665
100.4	0.33025
100.5	0.3895
100.6	0.43475
100.7	0.475
100.8	0.5075
100.9	0.53475
101	0.5625
101.1	0.58875
101.2	0.61075
101.3	0.62925
101.4	0.6455
101.5	0.65725
101.6	0.6685
101.7	0.679
101.8	0.6895
101.9	0.6995
102	0.707
102.1	0.7175
102.2	0.72025
102.3	0.72375
102.4	0.72575
102.5	0.729
102.6	0.7325
102.7	0.7365
102.8	0.7405
102.9	0.741
103	0.744
103.1	0.7435
103.2	0.74325
103.3	0.7425
103.4	0.74525
103.5	0.7475
103.6	0.75
103.7	0.74875
103.8	0.75225
103.9	0.76125
104	0.76
104.1	0.75925
104.2	0.759
104.3	0.763
104.4	0.76325
104.5	0.766
104.6	0.76425
104.7	0.7645
104.8	0.76825
104.9	0.769
105	0.772
105.1	0.77325
105.2	0.77175
105.3	0.7735
105.4	0.77575
105.5	0.777
105.6	0.77925
105.7	0.7835
105.8	0.783
105.9	0.78225
106	0.78425
106.1	0.78175
106.2	0.7795
106.3	0.7805
106.4	0.77975
106.5	0.78225
106.6	0.781
106.7	0.7825
106.8	0.782
106.9	0.7835
107	0.781
107.1	0.781
107.2	0.78325
107.3	0.78175
107.4	0.78475
107.5	0.782
107.6	0.77875
107.7	0.7845
107.8	0.78525
107.9	0.78725
108	0.79075
108.1	0.7965
108.2	0.79375
108.3	0.794
108.4	0.79275
108.5	0.78875
108.6	0.79075
108.7	0.79125
108.8	0.7925
108.9	0.79025
109	0.79075
109.1	0.79725
109.2	0.79925
109.3	0.7985
109.4	0.798
109.5	0.79825
109.6	0.79475
109.7	0.792
109.8	0.7895
109.9	0.79025
110	0.79275
110.1	0.79425
110.2	0.79475
110.3	0.795
110.4	0.79825
110.5	0.79825
110.6	0.798
110.7	0.80125
110.8	0.80475
110.9	0.80725
111	0.8065
111.1	0.8065
111.2	0.80725
111.3	0.807
111.4	0.8075
111.5	0.80975
111.6	0.8075
111.7	0.80625
111.8	0.80825
111.9	0.8075
112	0.80625
112.1	0.80675
112.2	0.80775
112.3	0.8045
112.4	0.81
112.5	0.809
112.6	0.8125
112.7	0.813
112.8	0.8135
112.9	0.812
113	0.81375
113.1	0.81375
113.2	0.81475
113.3	0.81525
113.4	0.816
113.5	0.817
113.6	0.814
113.7	0.8145
113.8	0.81625
113.9	0.81825
114	0.8165
114.1	0.814
114.2	0.81175
114.3	0.81075
114.4	0.81075
114.5	0.812
114.6	0.80975
114.7	0.81075
114.8	0.811
114.9	0.81075
115	0.81275
115.1	0.81625
115.2	0.8175
115.3	0.8165
115.4	0.81675
115.5	0.81875
115.6	0.82125
115.7	0.81975
115.8	0.824
115.9	0.82625
116	0.8275
116.1	0.825
116.2	0.8275
116.3	0.826
116.4	0.82725
116.5	0.82575
116.6	0.8295
116.7	0.8285
116.8	0.826
116.9	0.823
117	0.82325
117.1	0.82375
117.2	0.82475
117.3	0.8265
117.4	0.82775
117.5	0.83125
117.6	0.829
117.7	0.8295
117.8	0.82875
117.9	0.8315
118	0.82975
118.1	0.82775
118.2	0.82775
118.3	0.82775
118.4	0.82325
118.5	0.82575
118.6	0.833
118.7	0.82875
118.8	0.829
118.9	0.82975
119	0.82725
119.1	0.833
119.2	0.8345
119.3	0.834
119.4	0.8355
119.5	0.83875
119.6	0.8375
119.7	0.83625
119.8	0.838
119.9	0.83775
120	0.83625
120.1	0.8375
120.2	0.83725
120.3	0.83725
120.4	0.8375
120.5	0.8385
120.6	0.839
120.7	0.83875
120.8	0.8415
120.9	0.8395
121	0.8395
121.1	0.8425
121.2	0.84075
121.3	0.837
121.4	0.838
121.5	0.8425
121.6	0.843
121.7	0.84575
121.8	0.8405
121.9	0.843
122	0.8395
122.1	0.8405
122.2	0.842
122.3	0.8415
122.4	0.84375
122.5	0.847
122.6	0.847
122.7	0.84875
122.8	0.8485
122.9	0.84725
123	0.8485
123.1	0.85575
123.2	0.8565
123.3	0.854
123.4	0.85525
123.5	0.85225
123.6	0.8535
123.7	0.8495
123.8	0.85025
123.9	0.853
124	0.8495
124.1	0.85075
124.2	0.84675
124.3	0.84825
124.4	0.844
124.5	0.84275
124.6	0.846
124.7	0.85175
124.8	0.85325
124.9	0.85325
125	0.84975
125.1	0.85325
125.2	0.8495
125.3	0.85275
125.4	0.85625
125.5	0.862
125.6	0.864
125.7	0.86875
125.8	0.8655
125.9	0.865
126	0.86425
126.1	0.8655
126.2	0.86175
126.3	0.86075
126.4	0.86175
126.5	0.8585
126.6	0.8565
126.7	0.854
126.8	0.8525
126.9	0.853
127	0.8555
127.1	0.85325
127.2	0.85825
127.3	0.86025
127.4	0.86
127.5	0.8615
127.6	0.8625
127.7	0.8645
127.8	0.8625
127.9	0.8645
128	0.8655
128.1	0.866
128.2	0.866
128.3	0.86375
128.4	0.86575
128.5	0.86575
128.6	0.8655
128.7	0.86775
128.8	0.867
128.9	0.867
129	0.8665
129.1	0.86975
129.2	0.87125
129.3	0.87525
129.4	0.874
129.5	0.87125
129.6	0.8715
129.7	0.869
129.8	0.87225
129.9	0.87225
130	0.87525
130.1	0.87525
130.2	0.876
130.3	0.8755
130.4	0.87275
130.5	0.87
130.6	0.87025
130.7	0.87125
130.8	0.87225
130.9	0.87375
131	0.8715
131.1	0.86975
131.2	0.87075
131.3	0.87425
131.4	0.8725
131.5	0.8735
131.6	0.87075
131.7	0.8675
131.8	0.8665
131.9	0.86975
132	0.87225
132.1	0.8705
132.2	0.86775
132.3	0.8695
132.4	0.8725
132.5	0.87225
132.6	0.873
132.7	0.87325
132.8	0.8715
132.9	0.8725
133	0.87175
133.1	0.87425
133.2	0.87325
133.3	0.8755
133.4	0.8775
133.5	0.87775
133.6	0.8755
133.7	0.87675
133.8	0.87675
133.9	0.87775
134	0.87225
134.1	0.87675
134.2	0.87575
134.3	0.8775
134.4	0.8735
134.5	0.87625
134.6	0.8805
134.7	0.8795
134.8	0.8815
134.9	0.884
135	0.8845
135.1	0.88575
135.2	0.88575
135.3	0.88675
135.4	0.886
135.5	0.88675
135.6	0.8865
135.7	0.88625
135.8	0.88525
135.9	0.88325
136	0.88425
136.1	0.886
136.2	0.88675
136.3	0.88875
136.4	0.88875
136.5	0.88625
136.6	0.88825
136.7	0.88725
136.8	0.884
136.9	0.88425
137	0.88275
137.1	0.88475
137.2	0.8845
137.3	0.883
137.4	0.88375
137.5	0.883
137.6	0.88425
137.7	0.884
137.8	0.883
137.9	0.8845
138	0.8855
138.1	0.88725
138.2	0.88525
138.3	0.886
138.4	0.8905
138.5	0.8895
138.6	0.88925
138.7	0.88925
138.8	0.88725
138.9	0.88525
139	0.8885
139.1	0.8855
139.2	0.88875
139.3	0.88725
139.4	0.89
139.5	0.8905
139.6	0.89
139.7	0.8915
139.8	0.8925
139.9	0.892
140	0.89175
140.1	0.892
140.2	0.89175
140.3	0.89025
140.4	0.88675
140.5	0.886
140.6	0.8845
140.7	0.8875
140.8	0.88625
140.9	0.886
141	0.8865
141.1	0.8835
141.2	0.88625
141.3	0.8875
141.4	0.88925
141.5	0.89225
141.6	0.88875
141.7	0.8905
141.8	0.8905
141.9	0.89
142	0.89075
142.1	0.8925
142.2	0.894
142.3	0.89325
142.4	0.895
142.5	0.8945
142.6	0.8955
142.7	0.8935
142.8	0.89475
142.9	0.895
143	0.892
143.1	0.89325
143.2	0.8925
143.3	0.8955
143.4	0.896
143.5	0.89525
143.6	0.89525
143.7	0.895
143.8	0.894
143.9	0.89625
144	0.89575
144.1	0.8965
144.2	0.8955
144.3	0.8965
144.4	0.898
144.5	0.8965
144.6	0.8975
144.7	0.89675
144.8	0.8955
144.9	0.89725
145	0.89325
145.1	0.893
145.2	0.894
145.3	0.89325
145.4	0.89375
145.5	0.8935
145.6	0.894
145.7	0.8935
145.8	0.89225
145.9	0.8935
146	0.8935
146.1	0.896
146.2	0.8955
146.3	0.8955
146.4	0.89675
146.5	0.89325
146.6	0.89475
146.7	0.89625
146.8	0.899
146.9	0.9005
147	0.89825
147.1	0.89925
147.2	0.901
147.3	0.901
147.4	0.901
147.5	0.90025
147.6	0.9025
147.7	0.90375
147.8	0.9045
147.9	0.9065
148	0.907
148.1	0.9045
148.2	0.90525
148.3	0.90375
148.4	0.9025
148.5	0.904
148.6	0.9055
148.7	0.90575
148.8	0.907
148.9	0.90825
149	0.908
149.1	0.9065
149.2	0.908
149.3	0.9075
149.4	0.90925
149.5	0.9095
149.6	0.9095
149.7	0.907
149.8	0.90875
149.9	0.91175
150	0.9125
150.1	0.91275
150.2	0.9145
150.3	0.916
150.4	0.91325
150.5	0.915
150.6	0.91275
150.7	0.91
150.8	0.90975
150.9	0.9105
151	0.91175
151.1	0.90925
151.2	0.908
151.3	0.9085
151.4	0.90825
151.5	0.90775
151.6	0.9055
151.7	0.90475
151.8	0.906
151.9	0.90525
152	0.905
152.1	0.9035
152.2	0.90475
152.3	0.9025
152.4	0.9025
152.5	0.903
152.6	0.9045
152.7	0.9015
152.8	0.901
152.9	0.90325
153	0.90625
153.1	0.9075
153.2	0.90875
153.3	0.90875
153.4	0.91025
153.5	0.9095
153.6	0.909
153.7	0.907
153.8	0.907
153.9	0.908
154	0.90825
154.1	0.9075
154.2	0.9095
154.3	0.91
154.4	0.9095
154.5	0.91075
154.6	0.91075
154.7	0.9075
154.8	0.90675
154.9	0.90375
155	0.90625
155.1	0.9075
155.2	0.91
155.3	0.91025
155.4	0.91125
155.5	0.91025
155.6	0.90625
155.7	0.904
155.8	0.9035
155.9	0.9045
156	0.9025
156.1	0.89975
156.2	0.8995
156.3	0.9
156.4	0.9
156.5	0.902
156.6	0.90325
156.7	0.90375
156.8	0.90525
156.9	0.90675
157	0.905
157.1	0.90525
157.2	0.9065
157.3	0.90275
157.4	0.90275
157.5	0.90375
157.6	0.904
157.7	0.90525
157.8	0.90525
157.9	0.90725
158	0.908
158.1	0.907
158.2	0.9025
158.3	0.90475
158.4	0.905
158.5	0.90625
158.6	0.90575
158.7	0.90625
158.8	0.906
158.9	0.9055
159	0.9075
159.1	0.9065
159.2	0.909
159.3	0.9075
159.4	0.9095
159.5	0.91025
159.6	0.914
159.7	0.91525
159.8	0.91525
159.9	0.91375
160	0.91675
160.1	0.917
160.2	0.91675
160.3	0.91725
160.4	0.917
160.5	0.915
160.6	0.916
160.7	0.915
160.8	0.915
160.9	0.91775
161	0.918
161.1	0.91775
161.2	0.9185
161.3	0.916
161.4	0.9165
161.5	0.917
161.6	0.919
161.7	0.91875
161.8	0.9195
161.9	0.9185
162	0.919
162.1	0.919
162.2	0.91825
162.3	0.917
162.4	0.914
162.5	0.911
162.6	0.9125
162.7	0.914
162.8	0.9155
162.9	0.915
163	0.91575
163.1	0.9145
163.2	0.91225
163.3	0.91175
163.4	0.91225
163.5	0.91325
163.6	0.91325
163.7	0.91225
163.8	0.912
163.9	0.91175
164	0.911
164.1	0.91125
164.2	0.9095
164.3	0.9105
164.4	0.91075
164.5	0.9095
164.6	0.9095
164.7	0.9095
164.8	0.9105
164.9	0.905
165	0.90375
165.1	0.90525
165.2	0.909
165.3	0.90875
165.4	0.91
165.5	0.90925
165.6	0.90725
165.7	0.906
165.8	0.9075
165.9	0.908
166	0.909
166.1	0.9105
166.2	0.9085
166.3	0.90825
166.4	0.9075
166.5	0.90775
166.6	0.90825
166.7	0.907
166.8	0.90875
166.9	0.9115
167	0.9095
167.1	0.9085
167.2	0.90975
167.3	0.9115
167.4	0.91475
167.5	0.9125
167.6	0.9105
167.7	0.9105
167.8	0.9125
167.9	0.91225
168	0.912
168.1	0.90975
168.2	0.91175
168.3	0.9125
168.4	0.9135
168.5	0.91325
168.6	0.915
168.7	0.91
168.8	0.911
168.9	0.912
169	0.913
169.1	0.91475
169.2	0.917
169.3	0.9185
169.4	0.92025
169.5	0.91975
169.6	0.91725
169.7	0.91725
169.8	0.91875
169.9	0.91725
170	0.918
170.1	0.91775
170.2	0.919
170.3	0.91825
170.4	0.91675
170.5	0.9155
170.6	0.9145
170.7	0.9135
170.8	0.91475
170.9	0.91625
171	0.91375
171.1	0.912
171.2	0.914
171.3	0.9145
171.4	0.91675
171.5	0.918
171.6	0.91475
171.7	0.9145
171.8	0.9145
171.9	0.9145
172	0.9135
172.1	0.91275
172.2	0.915
172.3	0.91675
172.4	0.91675
172.5	0.9155
172.6	0.91475
172.7	0.91625
172.8	0.917
172.9	0.91675
173	0.91625
173.1	0.9155
173.2	0.9135
173.3	0.91375
173.4	0.9135
173.5	0.911
173.6	0.91375
173.7	0.91225
173.8	0.911
173.9	0.914
174	0.9125
174.1	0.91225
174.2	0.91075
174.3	0.91
174.4	0.90725
174.5	0.91
174.6	0.9135
174.7	0.9135
174.8	0.91225
174.9	0.91275
175	0.9145
175.1	0.9145
175.2	0.915
175.3	0.9145
175.4	0.9145
175.5	0.916
175.6	0.9165
175.7	0.9155
175.8	0.91475
175.9	0.9145
176	0.91125
176.1	0.91175
176.2	0.91075
176.3	0.912
176.4	0.91225
176.5	0.9165
176.6	0.91375
176.7	0.91175
176.8	0.90975
176.9	0.91075
177	0.91175
177.1	0.91325
177.2	0.9115
177.3	0.91025
177.4	0.912
177.5	0.91325
177.6	0.9145
177.7	0.91625
177.8	0.9165
177.9	0.916
178	0.915
178.1	0.9155
178.2	0.91725
178.3	0.9165
178.4	0.919
178.5	0.91775
178.6	0.91725
178.7	0.918
178.8	0.92025
178.9	0.92075
179	0.9185
179.1	0.9195
179.2	0.9185
179.3	0.919
179.4	0.91825
179.5	0.91775
179.6	0.92125
179.7	0.92225
179.8	0.92
179.9	0.9195
180	0.919
180.1	0.9185
180.2	0.91775
180.3	0.91675
180.4	0.91625
180.5	0.91575
180.6	0.91725
180.7	0.9195
180.8	0.921
180.9	0.92175
181	0.9215
181.1	0.9205
181.2	0.92175
181.3	0.91925
181.4	0.91825
181.5	0.92075
181.6	0.9205
181.7	0.92175
181.8	0.91875
181.9	0.9165
182	0.91675
182.1	0.9165
182.2	0.915
182.3	0.914
182.4	0.91475
182.5	0.914
182.6	0.91525
182.7	0.9145
182.8	0.9165
182.9	0.9165
183	0.91575
183.1	0.913
183.2	0.91575
183.3	0.9165
183.4	0.91675
183.5	0.9155
183.6	0.91425
183.7	0.91375
183.8	0.91425
183.9	0.9145
184	0.9155
184.1	0.91775
184.2	0.917
184.3	0.91575
184.4	0.91675
184.5	0.919
184.6	0.92175
184.7	0.9205
184.8	0.92
184.9	0.92175
185	0.921
185.1	0.92075
185.2	0.922
185.3	0.92475
185.4	0.924
185.5	0.9245
185.6	0.92325
185.7	0.92425
185.8	0.9245
185.9	0.925
186	0.92525
186.1	0.92375
186.2	0.9245
186.3	0.928
186.4	0.93125
186.5	0.929
186.6	0.929
186.7	0.92675
186.8	0.92375
186.9	0.9225
187	0.92375
187.1	0.92325
187.2	0.9245
187.3	0.9235
187.4	0.92475
187.5	0.92375
187.6	0.92175
187.7	0.9215
187.8	0.92075
187.9	0.92025
188	0.92175
188.1	0.92125
188.2	0.9255
188.3	0.92475
188.4	0.925
188.5	0.9245
188.6	0.9215
188.7	0.923
188.8	0.92325
188.9	0.92325
189	0.92625
189.1	0.92875
189.2	0.9285
189.3	0.92675
189.4	0.92525
189.5	0.92675
189.6	0.9255
189.7	0.9255
189.8	0.9275
189.9	0.93075
190	0.93175
190.1	0.93175
190.2	0.92975
190.3	0.93075
190.4	0.92775
190.5	0.9265
190.6	0.92925
190.7	0.93125
190.8	0.92775
190.9	0.929
191	0.92725
191.1	0.929
191.2	0.926
191.3	0.9265
191.4	0.927
191.5	0.92975
191.6	0.929
191.7	0.92825
191.8	0.93
191.9	0.92975
192	0.9305
192.1	0.9275
192.2	0.929
192.3	0.93025
192.4	0.92975
192.5	0.9305
192.6	0.931
192.7	0.92975
192.8	0.92675
192.9	0.926
193	0.926
193.1	0.92725
193.2	0.92575
193.3	0.926
193.4	0.92725
193.5	0.92725
193.6	0.928
193.7	0.928
193.8	0.92725
193.9	0.92675
194	0.92525
194.1	0.924
194.2	0.923
194.3	0.92275
194.4	0.923
194.5	0.9225
194.6	0.925
194.7	0.9275
194.8	0.92625
194.9	0.926
195	0.927
195.1	0.92525
195.2	0.92275
195.3	0.926
195.4	0.928
195.5	0.92925
195.6	0.93
195.7	0.929
195.8	0.92825
195.9	0.927
196	0.9275
196.1	0.927
196.2	0.92775
196.3	0.92625
196.4	0.9265
196.5	0.92575
196.6	0.92775
196.7	0.92825
196.8	0.92775
196.9	0.925
197	0.92375
197.1	0.9245
197.2	0.9245
197.3	0.92525
197.4	0.92425
197.5	0.927
197.6	0.9285
197.7	0.9275
197.8	0.9275
197.9	0.92875
198	0.93125
198.1	0.92975
198.2	0.932
198.3	0.93025
198.4	0.9295
198.5	0.9295
198.6	0.93025
198.7	0.93125
198.8	0.93025
198.9	0.93025
199	0.93025
199.1	0.9305
199.2	0.93225
199.3	0.9305
199.4	0.93
199.5	0.92925
199.6	0.929
199.7	0.927
199.8	0.9235
199.9	0.92275
200	0.92375
[truncated: 14,000 more rows]
