# Supplementary material for: Bayesian inference of kinetic schemes for ion channels by Kalman filtering
Source: eLife journal article supplement (doi:10.7554/elife.62714), 2022-05-04
Supplement: fig4-data7 [file 1_Sim_N_2000_Strom_MW.xlsx]

## Sheet: Tabelle1
0.1	0
0.2	0
0.3	0
0.4	0
0.5	0
0.6	0
0.7	0
0.8	0
0.9	0
1	0
1.1	0
1.2	0
1.3	0
1.4	0
1.5	0
1.6	0
1.7	0
1.8	0
1.9	0
2	0
2.1	0
2.2	0
2.3	0
2.4	0
2.5	0
2.6	0
2.7	0
2.8	0
2.9	0
3	0
3.1	0
3.2	0
3.3	0
3.4	0
3.5	0
3.6	0
3.7	0
3.8	0
3.9	0
4	0
4.1	0
4.2	0
4.3	0
4.4	0
4.5	0
4.6	0
4.7	0
4.8	0
4.9	0
5	0
5.1	0
5.2	0
5.3	0
5.4	0
5.5	0
5.6	0
5.7	0
5.8	0
5.9	0
6	0
6.1	0
6.2	0
6.3	0
6.4	0
6.5	0
6.6	0
6.7	0
6.8	0
6.9	0
7	0
7.1	0
7.2	0
7.3	0
7.4	0
7.5	0
7.6	0
7.7	0
7.8	0
7.9	0
8	0
8.1	0
8.2	0
8.3	0
8.4	0
8.5	0
8.6	0
8.7	0
8.8	0
8.9	0
9	0
9.1	0
9.2	0
9.3	0
9.4	0
9.5	0
9.6	0
9.7	0
9.8	0
9.9	0
10	0
10.1	0
10.2	0
10.3	0
10.4	0
10.5	0
10.6	0
10.7	0
10.8	0
10.9	0
11	0
11.1	0
11.2	0
11.3	0
11.4	0
11.5	0
11.6	0
11.7	0
11.8	0
11.9	0
12	0
12.1	0
12.2	0
12.3	0
12.4	0
12.5	0
12.6	0
12.7	0
12.8	0
12.9	0
13	0
13.1	0
13.2	0
13.3	0
13.4	0
13.5	0
13.6	0
13.7	0
13.8	0
13.9	0
14	0
14.1	0
14.2	0
14.3	0
14.4	0
14.5	0
14.6	0
14.7	0
14.8	0
14.9	0
15	0
15.1	0
15.2	0
15.3	0
15.4	0
15.5	0
15.6	0
15.7	0
15.8	0
15.9	0
16	0
16.1	0
16.2	0
16.3	0
16.4	0
16.5	0
16.6	0
16.7	0
16.8	0
16.9	0
17	0
17.1	0
17.2	0
17.3	0
17.4	0
17.5	0
17.6	0
17.7	0
17.8	0
17.9	0
18	0
18.1	0
18.2	0
18.3	0
18.4	0
18.5	0
18.6	0
18.7	0
18.8	0
18.9	0
19	0
19.1	0
19.2	0
19.3	0
19.4	0
19.5	0
19.6	0
19.7	0
19.8	0
19.9	0
20	0
20.1	0
20.2	0
20.3	0
20.4	0
20.5	0
20.6	0
20.7	0
20.8	0
20.9	0
21	0
21.1	0
21.2	0
21.3	0
21.4	0
21.5	0
21.6	0
21.7	0
21.8	0
21.9	0
22	0
22.1	0
22.2	0
22.3	0
22.4	0
22.5	0
22.6	0
22.7	0
22.8	0
22.9	0
23	0
23.1	0
23.2	0
23.3	0
23.4	0
23.5	0
23.6	0
23.7	0
23.8	0
23.9	0
24	0
24.1	0
24.2	0
24.3	0
24.4	0
24.5	0
24.6	0
24.7	0
24.8	0
24.9	0
25	0
25.1	0
25.2	0
25.3	0
25.4	0
25.5	0
25.6	0
25.7	0
25.8	0
25.9	0
26	0
26.1	0
26.2	0
26.3	0
26.4	0
26.5	0
26.6	0
26.7	0
26.8	0
26.9	0
27	0
27.1	0
27.2	0
27.3	0
27.4	0
27.5	0
27.6	0
27.7	0
27.8	0
27.9	0
28	0
28.1	0
28.2	0
28.3	0
28.4	0
28.5	0
28.6	0
28.7	0
28.8	0
28.9	0
29	0
29.1	0
29.2	0
29.3	0
29.4	0
29.5	0
29.6	0
29.7	0
29.8	0
29.9	0
30	0
30.1	0
30.2	0
30.3	0
30.4	0
30.5	0
30.6	0
30.7	0
30.8	0
30.9	0
31	0
31.1	0
31.2	0
31.3	0
31.4	0
31.5	0
31.6	0
31.7	0
31.8	0
31.9	0
32	0
32.1	0
32.2	0
32.3	0
32.4	0
32.5	0
32.6	0
32.7	0
32.8	0
32.9	0
33	0
33.1	0
33.2	0
33.3	0
33.4	0
33.5	0
33.6	0
33.7	0
33.8	0
33.9	0
34	0
34.1	0
34.2	0
34.3	0
34.4	0
34.5	0
34.6	0
34.7	0
34.8	0
34.9	0
35	0
35.1	0
35.2	0
35.3	0
35.4	0
35.5	0
35.6	0
35.7	0
35.8	0
35.9	0
36	0
36.1	0
36.2	0
36.3	0
36.4	0
36.5	0
36.6	0
36.7	0
36.8	0
36.9	0
37	0
37.1	0
37.2	0
37.3	0
37.4	0
37.5	0
37.6	0
37.7	0
37.8	0
37.9	0
38	0
38.1	0
38.2	0
38.3	0
38.4	0
38.5	0
38.6	0
38.7	0
38.8	0
38.9	0
39	0
39.1	0
39.2	0
39.3	0
39.4	0
39.5	0
39.6	0
39.7	0
39.8	0
39.9	0
40	0
40.1	0
40.2	0
40.3	0
40.4	0
40.5	0
40.6	0
40.7	0
40.8	0
40.9	0
41	0
41.1	0
41.2	0
41.3	0
41.4	0
41.5	0
41.6	0
41.7	0
41.8	0
41.9	0
42	0
42.1	0
42.2	0
42.3	0
42.4	0
42.5	0
42.6	0
42.7	0
42.8	0
42.9	0
43	0
43.1	0
43.2	0
43.3	0
43.4	0
43.5	0
43.6	0
43.7	0
43.8	0
43.9	0
44	0
44.1	0
44.2	0
44.3	0
44.4	0
44.5	0
44.6	0
44.7	0
44.8	0
44.9	0
45	0
45.1	0
45.2	0
45.3	0
45.4	0
45.5	0
45.6	0
45.7	0
45.8	0
45.9	0
46	0
46.1	0
46.2	0
46.3	0
46.4	0
46.5	0
46.6	0
46.7	0
46.8	0
46.9	0
47	0
47.1	0
47.2	0
47.3	0
47.4	0
47.5	0
47.6	0
47.7	0
47.8	0
47.9	0
48	0
48.1	0
48.2	0
48.3	0
48.4	0
48.5	0
48.6	0
48.7	0
48.8	0
48.9	0
49	0
49.1	0
49.2	0
49.3	0
49.4	0
49.5	0
49.6	0
49.7	0
49.8	0
49.9	0
50	0
50.1	0
50.2	0
50.3	0
50.4	0
50.5	0
50.6	0
50.7	0
50.8	0
50.9	0
51	0
51.1	0
51.2	0
51.3	0
51.4	0
51.5	0
51.6	0
51.7	0
51.8	0
51.9	0
52	0
52.1	0
52.2	0
52.3	0
52.4	0
52.5	0
52.6	0
52.7	0
52.8	0
52.9	0
53	0
53.1	0
53.2	0
53.3	0
53.4	0
53.5	0
53.6	0
53.7	0
53.8	0
53.9	0
54	0
54.1	0
54.2	0
54.3	0
54.4	0
54.5	0
54.6	0
54.7	0
54.8	0
54.9	0
55	0
55.1	0
55.2	0
55.3	0
55.4	0
55.5	0
55.6	0
55.7	0
55.8	0
55.9	0
56	0
56.1	0
56.2	0
56.3	0
56.4	0
56.5	0
56.6	0
56.7	0
56.8	0
56.9	0
57	0
57.1	0
57.2	0
57.3	0
57.4	0
57.5	0
57.6	0
57.7	0
57.8	0
57.9	0
58	0
58.1	0
58.2	0
58.3	0
58.4	0
58.5	0
58.6	0
58.7	0
58.8	0
58.9	0
59	0
59.1	0
59.2	0
59.3	0
59.4	0
59.5	0
59.6	0
59.7	0
59.8	0
59.9	0
60	0
60.1	0
60.2	0
60.3	0
60.4	0
60.5	0
60.6	0
60.7	0
60.8	0
60.9	0
61	0
61.1	0
61.2	0
61.3	0
61.4	0
61.5	0
61.6	0
61.7	0
61.8	0
61.9	0
62	0
62.1	0
62.2	0
62.3	0
62.4	0
62.5	0
62.6	0
62.7	0
62.8	0
62.9	0
63	0
63.1	0
63.2	0
63.3	0
63.4	0
63.5	0
63.6	0
63.7	0
63.8	0
63.9	0
64	0
64.1	0
64.2	0
64.3	0
64.4	0
64.5	0
64.6	0
64.7	0
64.8	0
64.9	0
65	0
65.1	0
65.2	0
65.3	0
65.4	0
65.5	0
65.6	0
65.7	0
65.8	0
65.9	0
66	0
66.1	0
66.2	0
66.3	0
66.4	0
66.5	0
66.6	0
66.7	0
66.8	0
66.9	0
67	0
67.1	0
67.2	0
67.3	0
67.4	0
67.5	0
67.6	0
67.7	0
67.8	0
67.9	0
68	0
68.1	0
68.2	0
68.3	0
68.4	0
68.5	0
68.6	0
68.7	0
68.8	0
68.9	0
69	0
69.1	0
69.2	0
69.3	0
69.4	0
69.5	0
69.6	0
69.7	0
69.8	0
69.9	0
70	0
70.1	0
70.2	0
70.3	0
70.4	0
70.5	0
70.6	0
70.7	0
70.8	0
70.9	0
71	0
71.1	0
71.2	0
71.3	0
71.4	0
71.5	0
71.6	0
71.7	0
71.8	0
71.9	0
72	0
72.1	0
72.2	0
72.3	0
72.4	0
72.5	0
72.6	0
72.7	0
72.8	0
72.9	0
73	0
73.1	0
73.2	0
73.3	0
73.4	0
73.5	0
73.6	0
73.7	0
73.8	0
73.9	0
74	0
74.1	0
74.2	0
74.3	0
74.4	0
74.5	0
74.6	0
74.7	0
74.8	0
74.9	0
75	0
75.1	0
75.2	0
75.3	0
75.4	0
75.5	0
75.6	0
75.7	0
75.8	0
75.9	0
76	0
76.1	0
76.2	0
76.3	0
76.4	0
76.5	0
76.6	0
76.7	0
76.8	0
76.9	0
77	0
77.1	0
77.2	0
77.3	0
77.4	0
77.5	0
77.6	0
77.7	0
77.8	0
77.9	0
78	0
78.1	0
78.2	0
78.3	0
78.4	0
78.5	0
78.6	0
78.7	0
78.8	0
78.9	0
79	0
79.1	0
79.2	0
79.3	0
79.4	0
79.5	0
79.6	0
79.7	0
79.8	0
79.9	0
80	0
80.1	0
80.2	0
80.3	0
80.4	0
80.5	0
80.6	0
80.7	0
80.8	0
80.9	0
81	0
81.1	0
81.2	0
81.3	0
81.4	0
81.5	0
81.6	0
81.7	0
81.8	0
81.9	0
82	0
82.1	0
82.2	0
82.3	0
82.4	0
82.5	0
82.6	0
82.7	0
82.8	0
82.9	0
83	0
83.1	0
83.2	0
83.3	0
83.4	0
83.5	0
83.6	0
83.7	0
83.8	0
83.9	0
84	0
84.1	0
84.2	0
84.3	0
84.4	0
84.5	0
84.6	0
84.7	0
84.8	0
84.9	0
85	0
85.1	0
85.2	0
85.3	0
85.4	0
85.5	0
85.6	0
85.7	0
85.8	0
85.9	0
86	0
86.1	0
86.2	0
86.3	0
86.4	0
86.5	0
86.6	0
86.7	0
86.8	0
86.9	0
87	0
87.1	0
87.2	0
87.3	0
87.4	0
87.5	0
87.6	0
87.7	0
87.8	0
87.9	0
88	0
88.1	0
88.2	0
88.3	0
88.4	0
88.5	0
88.6	0
88.7	0
88.8	0
88.9	0
89	0
89.1	0
89.2	0
89.3	0
89.4	0
89.5	0
89.6	0
89.7	0
89.8	0
89.9	0
90	0
90.1	0
90.2	0
90.3	0
90.4	0
90.5	0
90.6	0
90.7	0
90.8	0
90.9	0
91	0
91.1	0
91.2	0
91.3	0
91.4	0
91.5	0
91.6	0
91.7	0
91.8	0
91.9	0
92	0
92.1	0
92.2	0
92.3	0
92.4	0
92.5	0
92.6	0
92.7	0
92.8	0
92.9	0
93	0
93.1	0
93.2	0
93.3	0
93.4	0
93.5	0
93.6	0
93.7	0
93.8	0
93.9	0
94	0
94.1	0
94.2	0
94.3	0
94.4	0
94.5	0
94.6	0
94.7	0
94.8	0
94.9	0
95	0
95.1	0
95.2	0
95.3	0
95.4	0
95.5	0
95.6	0
95.7	0
95.8	0
95.9	0
96	0
96.1	0
96.2	0
96.3	0
96.4	0
96.5	0
96.6	0
96.7	0
96.8	0
96.9	0
97	0
97.1	0
97.2	0
97.3	0
97.4	0
97.5	0
97.6	0
97.7	0
97.8	0
97.9	0
98	0
98.1	0
98.2	0
98.3	0
98.4	0
98.5	0
98.6	0
98.7	0
98.8	0
98.9	0
99	0
99.1	0
99.2	0
99.3	0
99.4	0
99.5	0
99.6	0
99.7	0
99.8	0
99.9	0
100	0
100.1	0
100.2	0
100.3	0
100.4	0.001
100.5	0.001
100.6	0.001
100.7	0.001
100.8	0.002
100.9	0.003
101	0.0035
101.1	0.005
101.2	0.007
101.3	0.009
101.4	0.011
101.5	0.0125
101.6	0.0165
101.7	0.017
101.8	0.0185
101.9	0.019
102	0.021
102.1	0.023
102.2	0.0265
102.3	0.0285
102.4	0.031
102.5	0.034
102.6	0.0355
102.7	0.0375
102.8	0.04
102.9	0.04
103	0.0415
103.1	0.0445
103.2	0.046
103.3	0.05
103.4	0.05
103.5	0.0535
103.6	0.0555
103.7	0.059
103.8	0.062
103.9	0.063
104	0.065
104.1	0.0685
104.2	0.0715
104.3	0.075
104.4	0.076
104.5	0.079
104.6	0.0805
104.7	0.083
104.8	0.0865
104.9	0.0875
105	0.0905
105.1	0.0915
105.2	0.0945
105.3	0.097
105.4	0.0985
105.5	0.1
105.6	0.1025
105.7	0.1045
105.8	0.106
105.9	0.1075
106	0.1115
106.1	0.1145
106.2	0.117
106.3	0.1195
106.4	0.1225
106.5	0.126
106.6	0.128
106.7	0.13
106.8	0.133
106.9	0.1345
107	0.136
107.1	0.14
107.2	0.1415
107.3	0.1425
107.4	0.1455
107.5	0.1475
107.6	0.1495
107.7	0.153
107.8	0.1545
107.9	0.1565
108	0.1585
108.1	0.1615
108.2	0.1625
108.3	0.1645
108.4	0.167
108.5	0.1675
108.6	0.1685
108.7	0.17
108.8	0.175
108.9	0.179
109	0.1795
109.1	0.1825
109.2	0.184
109.3	0.185
109.4	0.187
109.5	0.189
109.6	0.1925
109.7	0.1955
109.8	0.196
109.9	0.1995
110	0.201
110.1	0.2015
110.2	0.2045
110.3	0.2065
110.4	0.2085
110.5	0.2085
110.6	0.21
110.7	0.213
110.8	0.216
110.9	0.219
111	0.22
111.1	0.222
111.2	0.223
111.3	0.224
111.4	0.225
111.5	0.227
111.6	0.2285
111.7	0.231
111.8	0.2305
111.9	0.2325
112	0.2355
112.1	0.2355
112.2	0.2375
112.3	0.2395
112.4	0.2425
112.5	0.245
112.6	0.246
112.7	0.246
112.8	0.2455
112.9	0.2455
113	0.2465
113.1	0.247
113.2	0.2475
113.3	0.2485
113.4	0.2495
113.5	0.25
113.6	0.2505
113.7	0.2515
113.8	0.2525
113.9	0.2545
114	0.2575
114.1	0.26
114.2	0.2635
114.3	0.265
114.4	0.2675
114.5	0.269
114.6	0.2705
114.7	0.273
114.8	0.2765
114.9	0.278
115	0.2785
115.1	0.28
115.2	0.2795
115.3	0.281
115.4	0.2815
115.5	0.2825
115.6	0.2835
115.7	0.285
115.8	0.2855
115.9	0.287
116	0.2895
116.1	0.2905
116.2	0.291
116.3	0.2915
116.4	0.2935
116.5	0.295
116.6	0.297
116.7	0.298
116.8	0.299
116.9	0.3005
117	0.3025
117.1	0.303
117.2	0.3045
117.3	0.3055
117.4	0.307
117.5	0.3105
117.6	0.3125
117.7	0.3135
117.8	0.315
117.9	0.3145
118	0.3175
118.1	0.3185
118.2	0.3195
118.3	0.322
118.4	0.324
118.5	0.326
118.6	0.327
118.7	0.329
118.8	0.3305
118.9	0.3315
119	0.333
119.1	0.3335
119.2	0.3315
119.3	0.335
119.4	0.3365
119.5	0.338
119.6	0.339
119.7	0.341
119.8	0.3425
119.9	0.343
120	0.345
120.1	0.3455
120.2	0.3445
120.3	0.3445
120.4	0.3445
120.5	0.346
120.6	0.347
120.7	0.349
120.8	0.3495
120.9	0.35
121	0.351
121.1	0.353
121.2	0.355
121.3	0.358
121.4	0.3585
121.5	0.358
121.6	0.3575
121.7	0.361
121.8	0.362
121.9	0.3635
122	0.365
122.1	0.3655
122.2	0.3675
122.3	0.3685
122.4	0.3695
122.5	0.3695
122.6	0.371
122.7	0.3735
122.8	0.373
122.9	0.3755
123	0.3755
123.1	0.3745
123.2	0.375
123.3	0.3785
123.4	0.38
123.5	0.3825
123.6	0.383
123.7	0.3835
123.8	0.3845
123.9	0.386
124	0.3895
124.1	0.391
124.2	0.393
124.3	0.3945
124.4	0.396
124.5	0.3985
124.6	0.399
124.7	0.4
124.8	0.4025
124.9	0.404
125	0.4055
125.1	0.4065
125.2	0.409
125.3	0.4095
125.4	0.411
125.5	0.412
125.6	0.4125
125.7	0.415
125.8	0.4165
125.9	0.418
126	0.419
126.1	0.419
126.2	0.421
126.3	0.4215
126.4	0.4215
126.5	0.421
126.6	0.4205
126.7	0.423
126.8	0.424
126.9	0.424
127	0.4245
127.1	0.4265
127.2	0.4285
127.3	0.429
127.4	0.4305
127.5	0.4325
127.6	0.432
127.7	0.433
127.8	0.435
127.9	0.439
128	0.44
128.1	0.4415
128.2	0.4445
128.3	0.448
128.4	0.449
128.5	0.4505
128.6	0.4505
128.7	0.4505
128.8	0.451
128.9	0.4525
129	0.453
129.1	0.4555
129.2	0.4555
129.3	0.457
129.4	0.46
129.5	0.4615
129.6	0.4625
129.7	0.4625
129.8	0.462
129.9	0.465
130	0.4655
130.1	0.467
130.2	0.469
130.3	0.47
130.4	0.4705
130.5	0.4705
130.6	0.47
130.7	0.47
130.8	0.471
130.9	0.47
131	0.471
131.1	0.471
131.2	0.4725
131.3	0.474
131.4	0.4755
131.5	0.476
131.6	0.4785
131.7	0.4815
131.8	0.482
131.9	0.4835
132	0.4845
132.1	0.4845
132.2	0.486
132.3	0.4865
132.4	0.4875
132.5	0.4885
132.6	0.4875
132.7	0.488
132.8	0.4885
132.9	0.4895
133	0.4895
133.1	0.488
133.2	0.488
133.3	0.489
133.4	0.489
133.5	0.49
133.6	0.491
133.7	0.4915
133.8	0.4925
133.9	0.493
134	0.4925
134.1	0.494
134.2	0.494
134.3	0.4945
134.4	0.497
134.5	0.4985
134.6	0.5
134.7	0.5005
134.8	0.5005
134.9	0.5025
135	0.5025
135.1	0.503
135.2	0.504
135.3	0.5055
135.4	0.508
135.5	0.5085
135.6	0.51
135.7	0.511
135.8	0.5125
135.9	0.5145
136	0.517
136.1	0.5175
136.2	0.5175
136.3	0.517
136.4	0.519
136.5	0.52
136.6	0.521
136.7	0.5215
136.8	0.5215
136.9	0.521
137	0.521
137.1	0.522
137.2	0.5235
137.3	0.5245
137.4	0.524
137.5	0.5255
137.6	0.5255
137.7	0.527
137.8	0.5285
137.9	0.5305
138	0.5305
138.1	0.534
138.2	0.5345
138.3	0.537
138.4	0.539
138.5	0.5415
138.6	0.5425
138.7	0.543
138.8	0.5445
138.9	0.545
139	0.545
139.1	0.5445
139.2	0.5445
139.3	0.5455
139.4	0.5475
139.5	0.5495
139.6	0.55
139.7	0.55
139.8	0.5495
139.9	0.549
140	0.55
140.1	0.552
140.2	0.5535
140.3	0.555
140.4	0.555
140.5	0.5555
140.6	0.557
140.7	0.5575
140.8	0.559
140.9	0.5605
141	0.5615
141.1	0.562
141.2	0.5635
141.3	0.5635
141.4	0.565
141.5	0.565
141.6	0.5645
141.7	0.5645
141.8	0.5665
141.9	0.5685
142	0.571
142.1	0.572
142.2	0.572
142.3	0.572
142.4	0.574
142.5	0.5745
142.6	0.5745
142.7	0.5745
142.8	0.5755
142.9	0.576
143	0.5775
143.1	0.579
143.2	0.58
143.3	0.579
143.4	0.5805
143.5	0.58
143.6	0.58
143.7	0.5805
143.8	0.5805
143.9	0.5805
144	0.581
144.1	0.582
144.2	0.582
144.3	0.5835
144.4	0.5845
144.5	0.584
144.6	0.584
144.7	0.5855
144.8	0.586
144.9	0.5875
145	0.589
145.1	0.589
145.2	0.5895
145.3	0.59
145.4	0.59
145.5	0.5895
145.6	0.589
145.7	0.589
145.8	0.591
145.9	0.5925
146	0.592
146.1	0.594
146.2	0.5945
146.3	0.5955
146.4	0.596
146.5	0.596
146.6	0.5945
146.7	0.5955
146.8	0.595
146.9	0.5965
147	0.597
147.1	0.5965
147.2	0.5965
147.3	0.597
147.4	0.5975
147.5	0.597
147.6	0.5965
147.7	0.5965
147.8	0.5975
147.9	0.5985
148	0.5995
148.1	0.6005
148.2	0.602
148.3	0.6025
148.4	0.604
148.5	0.6045
148.6	0.604
148.7	0.6035
148.8	0.605
148.9	0.606
149	0.6055
149.1	0.6075
149.2	0.608
149.3	0.609
149.4	0.6095
149.5	0.6095
149.6	0.609
149.7	0.6095
149.8	0.6095
149.9	0.6115
150	0.6115
150.1	0.6125
150.2	0.6135
150.3	0.6145
150.4	0.6145
150.5	0.6145
150.6	0.6145
150.7	0.6135
150.8	0.613
150.9	0.613
151	0.614
151.1	0.6145
151.2	0.616
151.3	0.616
151.4	0.615
151.5	0.614
151.6	0.6155
151.7	0.6155
151.8	0.6165
151.9	0.6165
152	0.616
152.1	0.617
152.2	0.6165
152.3	0.618
152.4	0.618
152.5	0.6195
152.6	0.6205
152.7	0.6225
152.8	0.6225
152.9	0.622
153	0.622
153.1	0.623
153.2	0.6235
153.3	0.6245
153.4	0.6255
153.5	0.626
153.6	0.625
153.7	0.625
153.8	0.6255
153.9	0.625
154	0.626
154.1	0.6275
154.2	0.628
154.3	0.628
154.4	0.6285
154.5	0.629
154.6	0.6285
154.7	0.629
154.8	0.629
154.9	0.6285
155	0.628
155.1	0.628
155.2	0.6285
155.3	0.628
155.4	0.6285
155.5	0.627
155.6	0.6265
155.7	0.626
155.8	0.626
155.9	0.6265
156	0.6255
156.1	0.6265
156.2	0.6275
156.3	0.6285
156.4	0.6275
156.5	0.627
156.6	0.627
156.7	0.627
156.8	0.628
156.9	0.6285
157	0.631
157.1	0.6315
157.2	0.6325
157.3	0.6325
157.4	0.6335
157.5	0.634
157.6	0.634
157.7	0.636
157.8	0.636
157.9	0.6375
158	0.6375
158.1	0.639
158.2	0.64
158.3	0.641
158.4	0.641
158.5	0.642
158.6	0.641
158.7	0.6415
158.8	0.641
158.9	0.641
159	0.6395
159.1	0.64
159.2	0.6385
159.3	0.641
159.4	0.6425
159.5	0.642
159.6	0.6435
159.7	0.645
159.8	0.6455
159.9	0.6465
160	0.648
160.1	0.6475
160.2	0.6485
160.3	0.649
160.4	0.649
160.5	0.65
160.6	0.6505
160.7	0.649
160.8	0.6505
160.9	0.6515
161	0.6525
161.1	0.6525
161.2	0.653
161.3	0.6525
161.4	0.654
161.5	0.655
161.6	0.6545
161.7	0.6535
161.8	0.6525
161.9	0.6525
162	0.6525
162.1	0.651
162.2	0.6525
162.3	0.653
162.4	0.653
162.5	0.6535
162.6	0.6535
162.7	0.653
162.8	0.652
162.9	0.6525
163	0.654
163.1	0.6545
163.2	0.654
163.3	0.654
163.4	0.654
163.5	0.655
163.6	0.6555
163.7	0.6545
163.8	0.655
163.9	0.655
164	0.655
164.1	0.655
164.2	0.655
164.3	0.6545
164.4	0.6535
164.5	0.654
164.6	0.653
164.7	0.653
164.8	0.652
164.9	0.651
165	0.6525
165.1	0.653
165.2	0.6525
165.3	0.652
165.4	0.651
165.5	0.6515
165.6	0.652
165.7	0.6525
165.8	0.652
165.9	0.651
166	0.6515
166.1	0.652
166.2	0.651
166.3	0.651
166.4	0.651
166.5	0.6495
166.6	0.6495
166.7	0.6505
166.8	0.65
166.9	0.6515
167	0.651
167.1	0.651
167.2	0.652
167.3	0.6525
167.4	0.6535
167.5	0.6565
167.6	0.657
167.7	0.656
167.8	0.6575
167.9	0.657
168	0.657
168.1	0.657
168.2	0.6575
168.3	0.6565
168.4	0.656
168.5	0.6555
168.6	0.656
168.7	0.6555
168.8	0.656
168.9	0.6575
169	0.658
169.1	0.659
169.2	0.6585
169.3	0.658
169.4	0.657
169.5	0.6565
169.6	0.6575
169.7	0.658
169.8	0.658
169.9	0.6585
170	0.6575
170.1	0.659
170.2	0.6595
170.3	0.6595
170.4	0.6605
170.5	0.66
170.6	0.6595
170.7	0.6595
170.8	0.659
170.9	0.6585
171	0.6585
171.1	0.658
171.2	0.657
171.3	0.6555
171.4	0.655
171.5	0.653
171.6	0.6525
171.7	0.652
171.8	0.6525
171.9	0.6525
172	0.6525
172.1	0.6525
172.2	0.6535
172.3	0.654
172.4	0.655
172.5	0.6535
172.6	0.6505
172.7	0.65
172.8	0.65
172.9	0.6515
173	0.652
173.1	0.652
173.2	0.652
173.3	0.653
173.4	0.654
173.5	0.6545
173.6	0.6545
173.7	0.658
173.8	0.6575
173.9	0.658
174	0.658
174.1	0.6585
174.2	0.6595
174.3	0.66
174.4	0.658
174.5	0.659
174.6	0.6585
174.7	0.6585
174.8	0.6595
174.9	0.659
175	0.66
175.1	0.66
175.2	0.6615
175.3	0.6625
175.4	0.6635
175.5	0.664
175.6	0.664
175.7	0.665
175.8	0.665
175.9	0.6665
176	0.6665
176.1	0.6675
176.2	0.6675
176.3	0.669
176.4	0.6695
176.5	0.6685
176.6	0.6685
176.7	0.669
176.8	0.6685
176.9	0.6695
177	0.6695
177.1	0.6705
177.2	0.672
177.3	0.6715
177.4	0.6705
177.5	0.67
177.6	0.6705
177.7	0.671
177.8	0.6705
177.9	0.67
178	0.669
178.1	0.6695
178.2	0.669
178.3	0.67
178.4	0.67
178.5	0.6695
178.6	0.6695
178.7	0.669
178.8	0.6715
178.9	0.6715
179	0.672
179.1	0.6715
179.2	0.672
179.3	0.6715
179.4	0.6715
179.5	0.6715
179.6	0.6715
179.7	0.671
179.8	0.6695
179.9	0.6695
180	0.6695
180.1	0.6705
180.2	0.67
180.3	0.672
180.4	0.6735
180.5	0.673
180.6	0.6725
180.7	0.6715
180.8	0.6725
180.9	0.6735
181	0.673
181.1	0.6725
181.2	0.6725
181.3	0.672
181.4	0.6715
181.5	0.673
181.6	0.674
181.7	0.674
181.8	0.672
181.9	0.673
182	0.673
182.1	0.673
182.2	0.673
182.3	0.672
182.4	0.672
182.5	0.6715
182.6	0.671
182.7	0.673
182.8	0.6735
182.9	0.6735
183	0.6735
183.1	0.674
183.2	0.6745
183.3	0.6755
183.4	0.6755
183.5	0.6765
183.6	0.6765
183.7	0.678
183.8	0.679
183.9	0.6795
184	0.6795
184.1	0.679
184.2	0.679
184.3	0.679
184.4	0.6805
184.5	0.6815
184.6	0.681
184.7	0.6815
184.8	0.6805
184.9	0.681
185	0.679
185.1	0.679
185.2	0.6795
185.3	0.681
185.4	0.683
185.5	0.684
185.6	0.686
185.7	0.6855
185.8	0.6865
185.9	0.6865
186	0.6875
186.1	0.6865
186.2	0.687
186.3	0.687
186.4	0.6875
186.5	0.6875
186.6	0.6875
186.7	0.6885
186.8	0.6885
186.9	0.6895
187	0.69
187.1	0.69
187.2	0.6905
187.3	0.6905
187.4	0.6895
187.5	0.6885
187.6	0.689
187.7	0.691
187.8	0.69
187.9	0.6905
188	0.6915
188.1	0.6905
188.2	0.6905
188.3	0.6905
188.4	0.69
188.5	0.689
188.6	0.688
188.7	0.6855
188.8	0.6855
188.9	0.6875
189	0.689
189.1	0.6895
189.2	0.6885
189.3	0.689
189.4	0.6915
189.5	0.692
189.6	0.691
189.7	0.6915
189.8	0.6905
189.9	0.6895
190	0.6885
190.1	0.687
190.2	0.688
190.3	0.6875
190.4	0.6855
190.5	0.6865
190.6	0.686
190.7	0.686
190.8	0.6875
190.9	0.6865
191	0.6885
191.1	0.6895
191.2	0.69
191.3	0.689
191.4	0.6895
191.5	0.689
191.6	0.6895
191.7	0.6895
191.8	0.691
191.9	0.691
192	0.6905
192.1	0.692
192.2	0.692
192.3	0.693
192.4	0.6925
192.5	0.6935
192.6	0.6925
192.7	0.6925
192.8	0.6925
192.9	0.6935
193	0.693
193.1	0.693
193.2	0.693
193.3	0.693
193.4	0.6935
193.5	0.6925
193.6	0.6925
193.7	0.6905
193.8	0.6905
193.9	0.6905
194	0.691
194.1	0.691
194.2	0.6905
194.3	0.6905
194.4	0.689
194.5	0.6885
194.6	0.6875
194.7	0.6875
194.8	0.6885
194.9	0.6885
195	0.69
195.1	0.6905
195.2	0.6915
195.3	0.6925
195.4	0.6915
195.5	0.69
195.6	0.6895
195.7	0.689
195.8	0.69
195.9	0.6905
196	0.6905
196.1	0.69
196.2	0.69
196.3	0.6905
196.4	0.692
196.5	0.6925
196.6	0.6935
196.7	0.6935
196.8	0.693
196.9	0.6935
197	0.6935
197.1	0.6935
197.2	0.6935
197.3	0.693
197.4	0.6935
197.5	0.695
197.6	0.695
197.7	0.6945
197.8	0.6945
197.9	0.695
198	0.696
198.1	0.697
198.2	0.6965
198.3	0.6965
198.4	0.697
198.5	0.6985
198.6	0.698
198.7	0.6985
198.8	0.697
198.9	0.698
199	0.699
199.1	0.6985
199.2	0.698
199.3	0.6975
199.4	0.699
199.5	0.698
199.6	0.697
199.7	0.697
199.8	0.6985
199.9	0.6985
200	0.698
[truncated: 14,000 more rows]
