# Supplementary material for: Bayesian inference of kinetic schemes for ion channels by Kalman filtering
Source: eLife journal article supplement (doi:10.7554/elife.62714), 2022-05-04
Supplement: fig4-data7 [file 1_Sim_N_3000_Fluor_MW_2M.xlsx]

## Sheet: Tabelle1
0.1	0
0.2	0
0.3	0
0.4	0
0.5	0
0.6	0
0.7	0
0.8	0
0.9	0
1	0
1.1	0
1.2	0
1.3	0
1.4	0
1.5	0
1.6	0
1.7	0
1.8	0
1.9	0
2	0
2.1	0
2.2	0
2.3	0
2.4	0
2.5	0
2.6	0
2.7	0
2.8	0
2.9	0
3	0
3.1	0
3.2	0
3.3	0
3.4	0
3.5	0
3.6	0
3.7	0
3.8	0
3.9	0
4	0
4.1	0
4.2	0
4.3	0
4.4	0
4.5	0
4.6	0
4.7	0
4.8	0
4.9	0
5	0
5.1	0
5.2	0
5.3	0
5.4	0
5.5	0
5.6	0
5.7	0
5.8	0
5.9	0
6	0
6.1	0
6.2	0
6.3	0
6.4	0
6.5	0
6.6	0
6.7	0
6.8	0
6.9	0
7	0
7.1	0
7.2	0
7.3	0
7.4	0
7.5	0
7.6	0
7.7	0
7.8	0
7.9	0
8	0
8.1	0
8.2	0
8.3	0
8.4	0
8.5	0
8.6	0
8.7	0
8.8	0
8.9	0
9	0
9.1	0
9.2	0
9.3	0
9.4	0
9.5	0
9.6	0
9.7	0
9.8	0
9.9	0
10	0
10.1	0
10.2	0
10.3	0
10.4	0
10.5	0
10.6	0
10.7	0
10.8	0
10.9	0
11	0
11.1	0
11.2	0
11.3	0
11.4	0
11.5	0
11.6	0
11.7	0
11.8	0
11.9	0
12	0
12.1	0
12.2	0
12.3	0
12.4	0
12.5	0
12.6	0
12.7	0
12.8	0
12.9	0
13	0
13.1	0
13.2	0
13.3	0
13.4	0
13.5	0
13.6	0
13.7	0
13.8	0
13.9	0
14	0
14.1	0
14.2	0
14.3	0
14.4	0
14.5	0
14.6	0
14.7	0
14.8	0
14.9	0
15	0
15.1	0
15.2	0
15.3	0
15.4	0
15.5	0
15.6	0
15.7	0
15.8	0
15.9	0
16	0
16.1	0
16.2	0
16.3	0
16.4	0
16.5	0
16.6	0
16.7	0
16.8	0
16.9	0
17	0
17.1	0
17.2	0
17.3	0
17.4	0
17.5	0
17.6	0
17.7	0
17.8	0
17.9	0
18	0
18.1	0
18.2	0
18.3	0
18.4	0
18.5	0
18.6	0
18.7	0
18.8	0
18.9	0
19	0
19.1	0
19.2	0
19.3	0
19.4	0
19.5	0
19.6	0
19.7	0
19.8	0
19.9	0
20	0
20.1	0
20.2	0
20.3	0
20.4	0
20.5	0
20.6	0
20.7	0
20.8	0
20.9	0
21	0
21.1	0
21.2	0
21.3	0
21.4	0
21.5	0
21.6	0
21.7	0
21.8	0
21.9	0
22	0
22.1	0
22.2	0
22.3	0
22.4	0
22.5	0
22.6	0
22.7	0
22.8	0
22.9	0
23	0
23.1	0
23.2	0
23.3	0
23.4	0
23.5	0
23.6	0
23.7	0
23.8	0
23.9	0
24	0
24.1	0
24.2	0
24.3	0
24.4	0
24.5	0
24.6	0
24.7	0
24.8	0
24.9	0
25	0
25.1	0
25.2	0
25.3	0
25.4	0
25.5	0
25.6	0
25.7	0
25.8	0
25.9	0
26	0
26.1	0
26.2	0
26.3	0
26.4	0
26.5	0
26.6	0
26.7	0
26.8	0
26.9	0
27	0
27.1	0
27.2	0
27.3	0
27.4	0
27.5	0
27.6	0
27.7	0
27.8	0
27.9	0
28	0
28.1	0
28.2	0
28.3	0
28.4	0
28.5	0
28.6	0
28.7	0
28.8	0
28.9	0
29	0
29.1	0
29.2	0
29.3	0
29.4	0
29.5	0
29.6	0
29.7	0
29.8	0
29.9	0
30	0
30.1	0
30.2	0
30.3	0
30.4	0
30.5	0
30.6	0
30.7	0
30.8	0
30.9	0
31	0
31.1	0
31.2	0
31.3	0
31.4	0
31.5	0
31.6	0
31.7	0
31.8	0
31.9	0
32	0
32.1	0
32.2	0
32.3	0
32.4	0
32.5	0
32.6	0
32.7	0
32.8	0
32.9	0
33	0
33.1	0
33.2	0
33.3	0
33.4	0
33.5	0
33.6	0
33.7	0
33.8	0
33.9	0
34	0
34.1	0
34.2	0
34.3	0
34.4	0
34.5	0
34.6	0
34.7	0
34.8	0
34.9	0
35	0
35.1	0
35.2	0
35.3	0
35.4	0
35.5	0
35.6	0
35.7	0
35.8	0
35.9	0
36	0
36.1	0
36.2	0
36.3	0
36.4	0
36.5	0
36.6	0
36.7	0
36.8	0
36.9	0
37	0
37.1	0
37.2	0
37.3	0
37.4	0
37.5	0
37.6	0
37.7	0
37.8	0
37.9	0
38	0
38.1	0
38.2	0
38.3	0
38.4	0
38.5	0
38.6	0
38.7	0
38.8	0
38.9	0
39	0
39.1	0
39.2	0
39.3	0
39.4	0
39.5	0
39.6	0
39.7	0
39.8	0
39.9	0
40	0
40.1	0
40.2	0
40.3	0
40.4	0
40.5	0
40.6	0
40.7	0
40.8	0
40.9	0
41	0
41.1	0
41.2	0
41.3	0
41.4	0
41.5	0
41.6	0
41.7	0
41.8	0
41.9	0
42	0
42.1	0
42.2	0
42.3	0
42.4	0
42.5	0
42.6	0
42.7	0
42.8	0
42.9	0
43	0
43.1	0
43.2	0
43.3	0
43.4	0
43.5	0
43.6	0
43.7	0
43.8	0
43.9	0
44	0
44.1	0
44.2	0
44.3	0
44.4	0
44.5	0
44.6	0
44.7	0
44.8	0
44.9	0
45	0
45.1	0
45.2	0
45.3	0
45.4	0
45.5	0
45.6	0
45.7	0
45.8	0
45.9	0
46	0
46.1	0
46.2	0
46.3	0
46.4	0
46.5	0
46.6	0
46.7	0
46.8	0
46.9	0
47	0
47.1	0
47.2	0
47.3	0
47.4	0
47.5	0
47.6	0
47.7	0
47.8	0
47.9	0
48	0
48.1	0
48.2	0
48.3	0
48.4	0
48.5	0
48.6	0
48.7	0
48.8	0
48.9	0
49	0
49.1	0
49.2	0
49.3	0
49.4	0
49.5	0
49.6	0
49.7	0
49.8	0
49.9	0
50	0
50.1	0
50.2	0
50.3	0
50.4	0
50.5	0
50.6	0
50.7	0
50.8	0
50.9	0
51	0
51.1	0
51.2	0
51.3	0
51.4	0
51.5	0
51.6	0
51.7	0
51.8	0
51.9	0
52	0
52.1	0
52.2	0
52.3	0
52.4	0
52.5	0
52.6	0
52.7	0
52.8	0
52.9	0
53	0
53.1	0
53.2	0
53.3	0
53.4	0
53.5	0
53.6	0
53.7	0
53.8	0
53.9	0
54	0
54.1	0
54.2	0
54.3	0
54.4	0
54.5	0
54.6	0
54.7	0
54.8	0
54.9	0
55	0
55.1	0
55.2	0
55.3	0
55.4	0
55.5	0
55.6	0
55.7	0
55.8	0
55.9	0
56	0
56.1	0
56.2	0
56.3	0
56.4	0
56.5	0
56.6	0
56.7	0
56.8	0
56.9	0
57	0
57.1	0
57.2	0
57.3	0
57.4	0
57.5	0
57.6	0
57.7	0
57.8	0
57.9	0
58	0
58.1	0
58.2	0
58.3	0
58.4	0
58.5	0
58.6	0
58.7	0
58.8	0
58.9	0
59	0
59.1	0
59.2	0
59.3	0
59.4	0
59.5	0
59.6	0
59.7	0
59.8	0
59.9	0
60	0
60.1	0
60.2	0
60.3	0
60.4	0
60.5	0
60.6	0
60.7	0
60.8	0
60.9	0
61	0
61.1	0
61.2	0
61.3	0
61.4	0
61.5	0
61.6	0
61.7	0
61.8	0
61.9	0
62	0
62.1	0
62.2	0
62.3	0
62.4	0
62.5	0
62.6	0
62.7	0
62.8	0
62.9	0
63	0
63.1	0
63.2	0
63.3	0
63.4	0
63.5	0
63.6	0
63.7	0
63.8	0
63.9	0
64	0
64.1	0
64.2	0
64.3	0
64.4	0
64.5	0
64.6	0
64.7	0
64.8	0
64.9	0
65	0
65.1	0
65.2	0
65.3	0
65.4	0
65.5	0
65.6	0
65.7	0
65.8	0
65.9	0
66	0
66.1	0
66.2	0
66.3	0
66.4	0
66.5	0
66.6	0
66.7	0
66.8	0
66.9	0
67	0
67.1	0
67.2	0
67.3	0
67.4	0
67.5	0
67.6	0
67.7	0
67.8	0
67.9	0
68	0
68.1	0
68.2	0
68.3	0
68.4	0
68.5	0
68.6	0
68.7	0
68.8	0
68.9	0
69	0
69.1	0
69.2	0
69.3	0
69.4	0
69.5	0
69.6	0
69.7	0
69.8	0
69.9	0
70	0
70.1	0
70.2	0
70.3	0
70.4	0
70.5	0
70.6	0
70.7	0
70.8	0
70.9	0
71	0
71.1	0
71.2	0
71.3	0
71.4	0
71.5	0
71.6	0
71.7	0
71.8	0
71.9	0
72	0
72.1	0
72.2	0
72.3	0
72.4	0
72.5	0
72.6	0
72.7	0
72.8	0
72.9	0
73	0
73.1	0
73.2	0
73.3	0
73.4	0
73.5	0
73.6	0
73.7	0
73.8	0
73.9	0
74	0
74.1	0
74.2	0
74.3	0
74.4	0
74.5	0
74.6	0
74.7	0
74.8	0
74.9	0
75	0
75.1	0
75.2	0
75.3	0
75.4	0
75.5	0
75.6	0
75.7	0
75.8	0
75.9	0
76	0
76.1	0
76.2	0
76.3	0
76.4	0
76.5	0
76.6	0
76.7	0
76.8	0
76.9	0
77	0
77.1	0
77.2	0
77.3	0
77.4	0
77.5	0
77.6	0
77.7	0
77.8	0
77.9	0
78	0
78.1	0
78.2	0
78.3	0
78.4	0
78.5	0
78.6	0
78.7	0
78.8	0
78.9	0
79	0
79.1	0
79.2	0
79.3	0
79.4	0
79.5	0
79.6	0
79.7	0
79.8	0
79.9	0
80	0
80.1	0
80.2	0
80.3	0
80.4	0
80.5	0
80.6	0
80.7	0
80.8	0
80.9	0
81	0
81.1	0
81.2	0
81.3	0
81.4	0
81.5	0
81.6	0
81.7	0
81.8	0
81.9	0
82	0
82.1	0
82.2	0
82.3	0
82.4	0
82.5	0
82.6	0
82.7	0
82.8	0
82.9	0
83	0
83.1	0
83.2	0
83.3	0
83.4	0
83.5	0
83.6	0
83.7	0
83.8	0
83.9	0
84	0
84.1	0
84.2	0
84.3	0
84.4	0
84.5	0
84.6	0
84.7	0
84.8	0
84.9	0
85	0
85.1	0
85.2	0
85.3	0
85.4	0
85.5	0
85.6	0
85.7	0
85.8	0
85.9	0
86	0
86.1	0
86.2	0
86.3	0
86.4	0
86.5	0
86.6	0
86.7	0
86.8	0
86.9	0
87	0
87.1	0
87.2	0
87.3	0
87.4	0
87.5	0
87.6	0
87.7	0
87.8	0
87.9	0
88	0
88.1	0
88.2	0
88.3	0
88.4	0
88.5	0
88.6	0
88.7	0
88.8	0
88.9	0
89	0
89.1	0
89.2	0
89.3	0
89.4	0
89.5	0
89.6	0
89.7	0
89.8	0
89.9	0
90	0
90.1	0
90.2	0
90.3	0
90.4	0
90.5	0
90.6	0
90.7	0
90.8	0
90.9	0
91	0
91.1	0
91.2	0
91.3	0
91.4	0
91.5	0
91.6	0
91.7	0
91.8	0
91.9	0
92	0
92.1	0
92.2	0
92.3	0
92.4	0
92.5	0
92.6	0
92.7	0
92.8	0
92.9	0
93	0
93.1	0
93.2	0
93.3	0
93.4	0
93.5	0
93.6	0
93.7	0
93.8	0
93.9	0
94	0
94.1	0
94.2	0
94.3	0
94.4	0
94.5	0
94.6	0
94.7	0
94.8	0
94.9	0
95	0
95.1	0
95.2	0
95.3	0
95.4	0
95.5	0
95.6	0
95.7	0
95.8	0
95.9	0
96	0
96.1	0
96.2	0
96.3	0
96.4	0
96.5	0
96.6	0
96.7	0
96.8	0
96.9	0
97	0
97.1	0
97.2	0
97.3	0
97.4	0
97.5	0
97.6	0
97.7	0
97.8	0
97.9	0
98	0
98.1	0
98.2	0
98.3	0
98.4	0
98.5	0
98.6	0
98.7	0
98.8	0
98.9	0
99	0
99.1	0
99.2	0
99.3	0
99.4	0
99.5	0
99.6	0
99.7	0
99.8	0
99.9	0
100	0
100.1	0.113833
100.2	0.205333
100.3	0.277667
100.4	0.335667
100.5	0.389333
100.6	0.433
100.7	0.475167
100.8	0.506667
100.9	0.533333
101	0.559833
101.1	0.585833
101.2	0.605667
101.3	0.6225
101.4	0.637
101.5	0.647333
101.6	0.6545
101.7	0.673167
101.8	0.685667
101.9	0.696167
102	0.702167
102.1	0.705
102.2	0.710833
102.3	0.717667
102.4	0.723333
102.5	0.723667
102.6	0.728333
102.7	0.731333
102.8	0.734667
102.9	0.7375
103	0.738833
103.1	0.742167
103.2	0.746
103.3	0.750833
103.4	0.754333
103.5	0.757167
103.6	0.761833
103.7	0.764333
103.8	0.764667
103.9	0.7655
104	0.767333
104.1	0.769167
104.2	0.771
104.3	0.774
104.4	0.772833
104.5	0.775333
104.6	0.775167
104.7	0.778333
104.8	0.774167
104.9	0.77
105	0.7715
105.1	0.770833
105.2	0.772333
105.3	0.772333
105.4	0.776167
105.5	0.776333
105.6	0.777
105.7	0.775167
105.8	0.774333
105.9	0.772833
106	0.772167
106.1	0.770333
106.2	0.770667
106.3	0.773
106.4	0.773167
106.5	0.774667
106.6	0.776667
106.7	0.778167
106.8	0.780333
106.9	0.781833
107	0.784667
107.1	0.785833
107.2	0.7865
107.3	0.786833
107.4	0.7855
107.5	0.786833
107.6	0.786833
107.7	0.791
107.8	0.790167
107.9	0.789833
108	0.79
108.1	0.789333
108.2	0.788
108.3	0.788833
108.4	0.788
108.5	0.787833
108.6	0.788833
108.7	0.792333
108.8	0.7925
108.9	0.794833
109	0.798333
109.1	0.796167
109.2	0.795
109.3	0.798333
109.4	0.800333
109.5	0.802
109.6	0.802333
109.7	0.804833
109.8	0.806
109.9	0.807
110	0.806667
110.1	0.807
110.2	0.808167
110.3	0.811
110.4	0.811667
110.5	0.813333
110.6	0.815333
110.7	0.815833
110.8	0.816667
110.9	0.8155
111	0.812667
111.1	0.812667
111.2	0.816
111.3	0.817
111.4	0.818667
111.5	0.8165
111.6	0.817167
111.7	0.818167
111.8	0.818167
111.9	0.818167
112	0.820167
112.1	0.819
112.2	0.817833
112.3	0.817333
112.4	0.817667
112.5	0.821167
112.6	0.817
112.7	0.818333
112.8	0.816333
112.9	0.816167
113	0.815667
113.1	0.812833
113.2	0.813167
113.3	0.813833
113.4	0.812833
113.5	0.8135
113.6	0.8145
113.7	0.8125
113.8	0.815833
113.9	0.817333
114	0.818167
114.1	0.8195
114.2	0.822
114.3	0.816833
114.4	0.8155
114.5	0.819667
114.6	0.822667
114.7	0.825167
114.8	0.825833
114.9	0.8245
115	0.8255
115.1	0.827167
115.2	0.825333
115.3	0.825833
115.4	0.826
115.5	0.8265
115.6	0.8295
115.7	0.829167
115.8	0.829
115.9	0.831667
116	0.8305
116.1	0.8315
116.2	0.833167
116.3	0.836167
116.4	0.838
116.5	0.838333
116.6	0.836333
116.7	0.835
116.8	0.836167
116.9	0.835
117	0.833833
117.1	0.834833
117.2	0.836833
117.3	0.840333
117.4	0.839
117.5	0.837667
117.6	0.835833
117.7	0.833167
117.8	0.832
117.9	0.832167
118	0.832667
118.1	0.833667
118.2	0.837167
118.3	0.835833
118.4	0.835
118.5	0.838167
118.6	0.841833
118.7	0.841
118.8	0.839833
118.9	0.839
119	0.839167
119.1	0.838333
119.2	0.837
119.3	0.835833
119.4	0.836333
119.5	0.835667
119.6	0.8355
119.7	0.836833
119.8	0.8395
119.9	0.839167
120	0.84
120.1	0.8405
120.2	0.840667
120.3	0.8425
120.4	0.841333
120.5	0.844167
120.6	0.8435
120.7	0.844333
120.8	0.845167
120.9	0.844333
121	0.844667
121.1	0.847333
121.2	0.8475
121.3	0.847333
121.4	0.845667
121.5	0.845833
121.6	0.844
121.7	0.844833
121.8	0.847833
121.9	0.848833
122	0.849833
122.1	0.850167
122.2	0.851667
122.3	0.854333
122.4	0.851167
122.5	0.852167
122.6	0.852833
122.7	0.8525
122.8	0.8535
122.9	0.855833
123	0.852
123.1	0.851
123.2	0.849333
123.3	0.852667
123.4	0.853667
123.5	0.855167
123.6	0.857
123.7	0.854333
123.8	0.857
123.9	0.8585
124	0.860167
124.1	0.861167
124.2	0.862
124.3	0.862167
124.4	0.860833
124.5	0.862667
124.6	0.864333
124.7	0.8625
124.8	0.8625
124.9	0.8625
125	0.862833
125.1	0.861
125.2	0.861
125.3	0.860667
125.4	0.86
125.5	0.859667
125.6	0.859
125.7	0.858167
125.8	0.859333
125.9	0.861167
126	0.861667
126.1	0.863833
126.2	0.862667
126.3	0.863833
126.4	0.864833
126.5	0.863667
126.6	0.864
126.7	0.865333
126.8	0.8625
126.9	0.864667
127	0.864333
127.1	0.864833
127.2	0.8665
127.3	0.8665
127.4	0.865833
127.5	0.867167
127.6	0.867833
127.7	0.866333
127.8	0.869167
127.9	0.871167
128	0.870333
128.1	0.872333
128.2	0.873
128.3	0.87
128.4	0.87
128.5	0.8675
128.6	0.865333
128.7	0.866667
128.8	0.869
128.9	0.8685
129	0.873167
129.1	0.872
129.2	0.873333
129.3	0.874833
129.4	0.876
129.5	0.875667
129.6	0.877
129.7	0.8785
129.8	0.876833
129.9	0.8735
130	0.8745
130.1	0.874667
130.2	0.877
130.3	0.873167
130.4	0.873167
130.5	0.873
130.6	0.871833
130.7	0.872667
130.8	0.871333
130.9	0.869
131	0.867833
131.1	0.869
131.2	0.868167
131.3	0.868
131.4	0.868667
131.5	0.869
131.6	0.870833
131.7	0.871833
131.8	0.872833
131.9	0.873167
132	0.874
132.1	0.873667
132.2	0.874667
132.3	0.8755
132.4	0.875
132.5	0.875333
132.6	0.875
132.7	0.8765
132.8	0.877167
132.9	0.875833
133	0.878
133.1	0.879167
133.2	0.878667
133.3	0.877833
133.4	0.875
133.5	0.874833
133.6	0.874667
133.7	0.876
133.8	0.875333
133.9	0.873833
134	0.8735
134.1	0.874833
134.2	0.876333
134.3	0.875333
134.4	0.874333
134.5	0.875667
134.6	0.878167
134.7	0.878667
134.8	0.8805
134.9	0.881333
135	0.881667
135.1	0.882167
135.2	0.883167
135.3	0.880833
135.4	0.882
135.5	0.883667
135.6	0.882167
135.7	0.880167
135.8	0.880333
135.9	0.878167
136	0.8775
136.1	0.877333
136.2	0.878333
136.3	0.879333
136.4	0.878167
136.5	0.879167
136.6	0.879167
136.7	0.881333
136.8	0.880667
136.9	0.880667
137	0.881333
137.1	0.881833
137.2	0.883167
137.3	0.8805
137.4	0.880333
137.5	0.879667
137.6	0.881333
137.7	0.882
137.8	0.882167
137.9	0.8815
138	0.882167
138.1	0.882333
138.2	0.8835
138.3	0.8835
138.4	0.8855
138.5	0.887167
138.6	0.89
138.7	0.889833
138.8	0.886667
138.9	0.885667
139	0.886333
139.1	0.887667
139.2	0.885167
139.3	0.885833
139.4	0.887667
139.5	0.886
139.6	0.887
139.7	0.886667
139.8	0.885833
139.9	0.886833
140	0.887667
140.1	0.887667
140.2	0.890333
140.3	0.8915
140.4	0.891833
140.5	0.889167
140.6	0.888667
140.7	0.889167
140.8	0.891167
140.9	0.890833
141	0.891167
141.1	0.889833
141.2	0.890667
141.3	0.891167
141.4	0.891167
141.5	0.887
141.6	0.889333
141.7	0.887
141.8	0.886667
141.9	0.888333
142	0.887167
142.1	0.886333
142.2	0.888333
142.3	0.8855
142.4	0.886167
142.5	0.887
142.6	0.886833
142.7	0.885
142.8	0.885833
142.9	0.8865
143	0.887167
143.1	0.889333
143.2	0.888
143.3	0.888667
143.4	0.889667
143.5	0.888333
143.6	0.889667
143.7	0.8915
143.8	0.8925
143.9	0.894667
144	0.892333
144.1	0.891167
144.2	0.8955
144.3	0.898333
144.4	0.897
144.5	0.898833
144.6	0.898833
144.7	0.899333
144.8	0.896167
144.9	0.898333
145	0.897667
145.1	0.897
145.2	0.898333
145.3	0.899333
145.4	0.898667
145.5	0.900333
145.6	0.900333
145.7	0.9
145.8	0.900667
145.9	0.902833
146	0.902833
146.1	0.902667
146.2	0.901167
146.3	0.901
146.4	0.902
146.5	0.899833
146.6	0.897833
146.7	0.898
146.8	0.897833
146.9	0.896667
147	0.8985
147.1	0.901167
147.2	0.899333
147.3	0.896667
147.4	0.899
147.5	0.899833
147.6	0.900333
147.7	0.900667
147.8	0.902167
147.9	0.902333
148	0.8995
148.1	0.900167
148.2	0.899833
148.3	0.901667
148.4	0.9025
148.5	0.903
148.6	0.9025
148.7	0.905333
148.8	0.905167
148.9	0.904
149	0.905
149.1	0.905167
149.2	0.905333
149.3	0.903
149.4	0.903667
149.5	0.903667
149.6	0.905
149.7	0.9055
149.8	0.9035
149.9	0.903667
150	0.9035
150.1	0.903333
150.2	0.905667
150.3	0.905833
150.4	0.907
150.5	0.908
150.6	0.909667
150.7	0.910333
150.8	0.908833
150.9	0.9075
151	0.908167
151.1	0.909667
151.2	0.907
151.3	0.908333
151.4	0.907667
151.5	0.908833
151.6	0.910333
151.7	0.907333
151.8	0.908667
151.9	0.907
152	0.909333
152.1	0.909
152.2	0.907333
152.3	0.904167
152.4	0.903
152.5	0.900667
152.6	0.904
152.7	0.903
152.8	0.9035
152.9	0.902333
153	0.905667
153.1	0.906667
153.2	0.9095
153.3	0.909167
153.4	0.907667
153.5	0.909
153.6	0.905667
153.7	0.907
153.8	0.91
153.9	0.909333
154	0.9135
154.1	0.912
154.2	0.914
154.3	0.913333
154.4	0.914833
154.5	0.915333
154.6	0.9135
154.7	0.910833
154.8	0.912
154.9	0.909667
155	0.908667
155.1	0.9105
155.2	0.910667
155.3	0.9095
155.4	0.908833
155.5	0.909667
155.6	0.910167
155.7	0.9105
155.8	0.911667
155.9	0.9125
156	0.911833
156.1	0.914
156.2	0.912667
156.3	0.914167
156.4	0.913333
156.5	0.9145
156.6	0.913333
156.7	0.915167
156.8	0.9145
156.9	0.913667
157	0.912
157.1	0.9115
157.2	0.912167
157.3	0.9115
157.4	0.913
157.5	0.913333
157.6	0.9135
157.7	0.913333
157.8	0.911167
157.9	0.909667
158	0.907667
158.1	0.907333
158.2	0.907333
158.3	0.907833
158.4	0.9075
158.5	0.907167
158.6	0.909667
158.7	0.911833
158.8	0.9125
158.9	0.912333
159	0.910667
159.1	0.911167
159.2	0.911833
159.3	0.913833
159.4	0.913
159.5	0.912
159.6	0.912333
159.7	0.911667
159.8	0.911833
159.9	0.912
160	0.9135
160.1	0.912833
160.2	0.9125
160.3	0.911333
160.4	0.909667
160.5	0.911
160.6	0.913333
160.7	0.9125
160.8	0.912167
160.9	0.9125
161	0.915
161.1	0.916
161.2	0.918667
161.3	0.917667
161.4	0.917167
161.5	0.917167
161.6	0.916833
161.7	0.918333
161.8	0.917833
161.9	0.919667
162	0.918833
162.1	0.918
162.2	0.917667
162.3	0.918
162.4	0.916167
162.5	0.9165
162.6	0.9175
162.7	0.9175
162.8	0.914667
162.9	0.913833
163	0.913667
163.1	0.9135
163.2	0.913833
163.3	0.914667
163.4	0.9155
163.5	0.9155
163.6	0.917833
163.7	0.9185
163.8	0.918167
163.9	0.9185
164	0.917667
164.1	0.916167
164.2	0.918333
164.3	0.9195
164.4	0.9185
164.5	0.918
164.6	0.918
164.7	0.9195
164.8	0.919667
164.9	0.919833
165	0.918667
165.1	0.918
165.2	0.919167
165.3	0.918333
165.4	0.9165
165.5	0.917333
165.6	0.917167
165.7	0.9175
165.8	0.9175
165.9	0.916833
166	0.918833
166.1	0.918
166.2	0.9195
166.3	0.918
166.4	0.916333
166.5	0.915667
166.6	0.9165
166.7	0.9155
166.8	0.9175
166.9	0.919667
167	0.919667
167.1	0.920667
167.2	0.920167
167.3	0.918833
167.4	0.921
167.5	0.920167
167.6	0.918333
167.7	0.918
167.8	0.9205
167.9	0.92
168	0.9205
168.1	0.921
168.2	0.919333
168.3	0.919167
168.4	0.9195
168.5	0.920333
168.6	0.922167
168.7	0.9205
168.8	0.918667
168.9	0.919333
169	0.919833
169.1	0.919833
169.2	0.9225
169.3	0.921667
169.4	0.9215
169.5	0.922333
169.6	0.922833
169.7	0.9225
169.8	0.922167
169.9	0.923667
170	0.924333
170.1	0.922333
170.2	0.924
170.3	0.923167
170.4	0.924833
170.5	0.925833
170.6	0.927333
170.7	0.926333
170.8	0.925333
170.9	0.924167
171	0.925667
171.1	0.925
171.2	0.9255
171.3	0.9275
171.4	0.927333
171.5	0.9285
171.6	0.926833
171.7	0.927333
171.8	0.925667
171.9	0.923833
172	0.923667
172.1	0.923833
172.2	0.921333
172.3	0.92
172.4	0.919833
172.5	0.919667
172.6	0.919333
172.7	0.919833
172.8	0.919667
172.9	0.920333
173	0.919667
173.1	0.919167
173.2	0.9195
173.3	0.917833
173.4	0.92
173.5	0.918667
173.6	0.919667
173.7	0.920833
173.8	0.9205
173.9	0.922
174	0.920833
174.1	0.9225
174.2	0.922333
174.3	0.922167
174.4	0.921667
174.5	0.9235
174.6	0.922333
174.7	0.923833
174.8	0.922333
174.9	0.922167
175	0.921333
175.1	0.921833
175.2	0.922
175.3	0.922
175.4	0.9235
175.5	0.922167
175.6	0.925333
175.7	0.926333
175.8	0.923667
175.9	0.9235
176	0.923
176.1	0.925833
176.2	0.925
176.3	0.926333
176.4	0.926
176.5	0.925167
176.6	0.924167
176.7	0.9255
176.8	0.924167
176.9	0.924667
177	0.925167
177.1	0.925167
177.2	0.925167
177.3	0.9235
177.4	0.922667
177.5	0.9225
177.6	0.922167
177.7	0.9225
177.8	0.923
177.9	0.922
178	0.923
178.1	0.925333
178.2	0.925833
178.3	0.925333
178.4	0.925333
178.5	0.924667
178.6	0.925167
178.7	0.926
178.8	0.926
178.9	0.926333
179	0.925667
179.1	0.923333
179.2	0.924
179.3	0.925167
179.4	0.925667
179.5	0.923667
179.6	0.922833
179.7	0.921667
179.8	0.920667
179.9	0.9205
180	0.922333
180.1	0.922333
180.2	0.923833
180.3	0.924833
180.4	0.925167
180.5	0.927167
180.6	0.9295
180.7	0.929167
180.8	0.929167
180.9	0.928333
181	0.93
181.1	0.928167
181.2	0.926333
181.3	0.924
181.4	0.923833
181.5	0.927
181.6	0.927667
181.7	0.928167
181.8	0.925667
181.9	0.928
182	0.927167
182.1	0.926
182.2	0.923167
182.3	0.922333
182.4	0.923667
182.5	0.925333
182.6	0.926333
182.7	0.927333
182.8	0.928167
182.9	0.928167
183	0.927667
183.1	0.9265
183.2	0.9275
183.3	0.926167
183.4	0.927167
183.5	0.927833
183.6	0.9265
183.7	0.928333
183.8	0.928667
183.9	0.929333
184	0.928
184.1	0.9285
184.2	0.927667
184.3	0.928167
184.4	0.927833
184.5	0.9285
184.6	0.9275
184.7	0.929667
184.8	0.929333
184.9	0.930333
185	0.929333
185.1	0.929
185.2	0.93
185.3	0.931167
185.4	0.932167
185.5	0.932333
185.6	0.931333
185.7	0.9305
185.8	0.930833
185.9	0.927833
186	0.929167
186.1	0.929
186.2	0.930333
186.3	0.9305
186.4	0.929833
186.5	0.930333
186.6	0.929333
186.7	0.927333
186.8	0.926
186.9	0.9255
187	0.924667
187.1	0.9265
187.2	0.927333
187.3	0.927
187.4	0.9255
187.5	0.9245
187.6	0.924333
187.7	0.924333
187.8	0.925
187.9	0.925667
188	0.9245
188.1	0.925667
188.2	0.925833
188.3	0.926167
188.4	0.925333
188.5	0.9255
188.6	0.925833
188.7	0.926
188.8	0.9255
188.9	0.925333
189	0.926
189.1	0.925
189.2	0.9235
189.3	0.922
189.4	0.921667
189.5	0.922833
189.6	0.920833
189.7	0.923833
189.8	0.924167
189.9	0.925
190	0.923167
190.1	0.922667
190.2	0.9225
190.3	0.923
190.4	0.923667
190.5	0.9245
190.6	0.9235
190.7	0.9235
190.8	0.924
190.9	0.923333
191	0.9245
191.1	0.924
191.2	0.924833
191.3	0.9245
191.4	0.926667
191.5	0.927833
191.6	0.9275
191.7	0.928
191.8	0.929667
191.9	0.927833
192	0.927
192.1	0.9295
192.2	0.93
192.3	0.928
192.4	0.927
192.5	0.927333
192.6	0.9285
192.7	0.926333
192.8	0.925667
192.9	0.926
193	0.925667
193.1	0.928333
193.2	0.930167
193.3	0.928333
193.4	0.927667
193.5	0.928333
193.6	0.929833
193.7	0.927833
193.8	0.929
193.9	0.928667
194	0.929333
194.1	0.928
194.2	0.9285
194.3	0.9285
194.4	0.928333
194.5	0.926833
194.6	0.928167
194.7	0.928333
194.8	0.930833
194.9	0.930333
195	0.929
195.1	0.928667
195.2	0.929833
195.3	0.929167
195.4	0.928167
195.5	0.926167
195.6	0.926833
195.7	0.9265
195.8	0.926333
195.9	0.927
196	0.927167
196.1	0.927333
196.2	0.928833
196.3	0.9275
196.4	0.924667
196.5	0.926667
196.6	0.926167
196.7	0.9255
196.8	0.926
196.9	0.927
197	0.928833
197.1	0.928833
197.2	0.927667
197.3	0.928667
197.4	0.9275
197.5	0.927667
197.6	0.9285
197.7	0.929
197.8	0.929333
197.9	0.929
198	0.927833
198.1	0.928167
198.2	0.926
198.3	0.925667
198.4	0.924833
198.5	0.925
198.6	0.923
198.7	0.925667
198.8	0.928
198.9	0.9285
199	0.928167
199.1	0.928
199.2	0.928667
199.3	0.929167
199.4	0.929333
199.5	0.93
199.6	0.931
199.7	0.931333
199.8	0.931667
199.9	0.931667
200	0.930667
[truncated: 14,000 more rows]
