# Supplementary material for: Bayesian inference of kinetic schemes for ion channels by Kalman filtering
Source: eLife journal article supplement (doi:10.7554/elife.62714), 2022-05-04
Supplement: fig4-data7 [file 1_Sim_N_3000_Strom_MW_2M.xlsx]

## Sheet: Tabelle1
0.1	0
0.2	0
0.3	0
0.4	0
0.5	0
0.6	0
0.7	0
0.8	0
0.9	0
1	0
1.1	0
1.2	0
1.3	0
1.4	0
1.5	0
1.6	0
1.7	0
1.8	0
1.9	0
2	0
2.1	0
2.2	0
2.3	0
2.4	0
2.5	0
2.6	0
2.7	0
2.8	0
2.9	0
3	0
3.1	0
3.2	0
3.3	0
3.4	0
3.5	0
3.6	0
3.7	0
3.8	0
3.9	0
4	0
4.1	0
4.2	0
4.3	0
4.4	0
4.5	0
4.6	0
4.7	0
4.8	0
4.9	0
5	0
5.1	0
5.2	0
5.3	0
5.4	0
5.5	0
5.6	0
5.7	0
5.8	0
5.9	0
6	0
6.1	0
6.2	0
6.3	0
6.4	0
6.5	0
6.6	0
6.7	0
6.8	0
6.9	0
7	0
7.1	0
7.2	0
7.3	0
7.4	0
7.5	0
7.6	0
7.7	0
7.8	0
7.9	0
8	0
8.1	0
8.2	0
8.3	0
8.4	0
8.5	0
8.6	0
8.7	0
8.8	0
8.9	0
9	0
9.1	0
9.2	0
9.3	0
9.4	0
9.5	0
9.6	0
9.7	0
9.8	0
9.9	0
10	0
10.1	0
10.2	0
10.3	0
10.4	0
10.5	0
10.6	0
10.7	0
10.8	0
10.9	0
11	0
11.1	0
11.2	0
11.3	0
11.4	0
11.5	0
11.6	0
11.7	0
11.8	0
11.9	0
12	0
12.1	0
12.2	0
12.3	0
12.4	0
12.5	0
12.6	0
12.7	0
12.8	0
12.9	0
13	0
13.1	0
13.2	0
13.3	0
13.4	0
13.5	0
13.6	0
13.7	0
13.8	0
13.9	0
14	0
14.1	0
14.2	0
14.3	0
14.4	0
14.5	0
14.6	0
14.7	0
14.8	0
14.9	0
15	0
15.1	0
15.2	0
15.3	0
15.4	0
15.5	0
15.6	0
15.7	0
15.8	0
15.9	0
16	0
16.1	0
16.2	0
16.3	0
16.4	0
16.5	0
16.6	0
16.7	0
16.8	0
16.9	0
17	0
17.1	0
17.2	0
17.3	0
17.4	0
17.5	0
17.6	0
17.7	0
17.8	0
17.9	0
18	0
18.1	0
18.2	0
18.3	0
18.4	0
18.5	0
18.6	0
18.7	0
18.8	0
18.9	0
19	0
19.1	0
19.2	0
19.3	0
19.4	0
19.5	0
19.6	0
19.7	0
19.8	0
19.9	0
20	0
20.1	0
20.2	0
20.3	0
20.4	0
20.5	0
20.6	0
20.7	0
20.8	0
20.9	0
21	0
21.1	0
21.2	0
21.3	0
21.4	0
21.5	0
21.6	0
21.7	0
21.8	0
21.9	0
22	0
22.1	0
22.2	0
22.3	0
22.4	0
22.5	0
22.6	0
22.7	0
22.8	0
22.9	0
23	0
23.1	0
23.2	0
23.3	0
23.4	0
23.5	0
23.6	0
23.7	0
23.8	0
23.9	0
24	0
24.1	0
24.2	0
24.3	0
24.4	0
24.5	0
24.6	0
24.7	0
24.8	0
24.9	0
25	0
25.1	0
25.2	0
25.3	0
25.4	0
25.5	0
25.6	0
25.7	0
25.8	0
25.9	0
26	0
26.1	0
26.2	0
26.3	0
26.4	0
26.5	0
26.6	0
26.7	0
26.8	0
26.9	0
27	0
27.1	0
27.2	0
27.3	0
27.4	0
27.5	0
27.6	0
27.7	0
27.8	0
27.9	0
28	0
28.1	0
28.2	0
28.3	0
28.4	0
28.5	0
28.6	0
28.7	0
28.8	0
28.9	0
29	0
29.1	0
29.2	0
29.3	0
29.4	0
29.5	0
29.6	0
29.7	0
29.8	0
29.9	0
30	0
30.1	0
30.2	0
30.3	0
30.4	0
30.5	0
30.6	0
30.7	0
30.8	0
30.9	0
31	0
31.1	0
31.2	0
31.3	0
31.4	0
31.5	0
31.6	0
31.7	0
31.8	0
31.9	0
32	0
32.1	0
32.2	0
32.3	0
32.4	0
32.5	0
32.6	0
32.7	0
32.8	0
32.9	0
33	0
33.1	0
33.2	0
33.3	0
33.4	0
33.5	0
33.6	0
33.7	0
33.8	0
33.9	0
34	0
34.1	0
34.2	0
34.3	0
34.4	0
34.5	0
34.6	0
34.7	0
34.8	0
34.9	0
35	0
35.1	0
35.2	0
35.3	0
35.4	0
35.5	0
35.6	0
35.7	0
35.8	0
35.9	0
36	0
36.1	0
36.2	0
36.3	0
36.4	0
36.5	0
36.6	0
36.7	0
36.8	0
36.9	0
37	0
37.1	0
37.2	0
37.3	0
37.4	0
37.5	0
37.6	0
37.7	0
37.8	0
37.9	0
38	0
38.1	0
38.2	0
38.3	0
38.4	0
38.5	0
38.6	0
38.7	0
38.8	0
38.9	0
39	0
39.1	0
39.2	0
39.3	0
39.4	0
39.5	0
39.6	0
39.7	0
39.8	0
39.9	0
40	0
40.1	0
40.2	0
40.3	0
40.4	0
40.5	0
40.6	0
40.7	0
40.8	0
40.9	0
41	0
41.1	0
41.2	0
41.3	0
41.4	0
41.5	0
41.6	0
41.7	0
41.8	0
41.9	0
42	0
42.1	0
42.2	0
42.3	0
42.4	0
42.5	0
42.6	0
42.7	0
42.8	0
42.9	0
43	0
43.1	0
43.2	0
43.3	0
43.4	0
43.5	0
43.6	0
43.7	0
43.8	0
43.9	0
44	0
44.1	0
44.2	0
44.3	0
44.4	0
44.5	0
44.6	0
44.7	0
44.8	0
44.9	0
45	0
45.1	0
45.2	0
45.3	0
45.4	0
45.5	0
45.6	0
45.7	0
45.8	0
45.9	0
46	0
46.1	0
46.2	0
46.3	0
46.4	0
46.5	0
46.6	0
46.7	0
46.8	0
46.9	0
47	0
47.1	0
47.2	0
47.3	0
47.4	0
47.5	0
47.6	0
47.7	0
47.8	0
47.9	0
48	0
48.1	0
48.2	0
48.3	0
48.4	0
48.5	0
48.6	0
48.7	0
48.8	0
48.9	0
49	0
49.1	0
49.2	0
49.3	0
49.4	0
49.5	0
49.6	0
49.7	0
49.8	0
49.9	0
50	0
50.1	0
50.2	0
50.3	0
50.4	0
50.5	0
50.6	0
50.7	0
50.8	0
50.9	0
51	0
51.1	0
51.2	0
51.3	0
51.4	0
51.5	0
51.6	0
51.7	0
51.8	0
51.9	0
52	0
52.1	0
52.2	0
52.3	0
52.4	0
52.5	0
52.6	0
52.7	0
52.8	0
52.9	0
53	0
53.1	0
53.2	0
53.3	0
53.4	0
53.5	0
53.6	0
53.7	0
53.8	0
53.9	0
54	0
54.1	0
54.2	0
54.3	0
54.4	0
54.5	0
54.6	0
54.7	0
54.8	0
54.9	0
55	0
55.1	0
55.2	0
55.3	0
55.4	0
55.5	0
55.6	0
55.7	0
55.8	0
55.9	0
56	0
56.1	0
56.2	0
56.3	0
56.4	0
56.5	0
56.6	0
56.7	0
56.8	0
56.9	0
57	0
57.1	0
57.2	0
57.3	0
57.4	0
57.5	0
57.6	0
57.7	0
57.8	0
57.9	0
58	0
58.1	0
58.2	0
58.3	0
58.4	0
58.5	0
58.6	0
58.7	0
58.8	0
58.9	0
59	0
59.1	0
59.2	0
59.3	0
59.4	0
59.5	0
59.6	0
59.7	0
59.8	0
59.9	0
60	0
60.1	0
60.2	0
60.3	0
60.4	0
60.5	0
60.6	0
60.7	0
60.8	0
60.9	0
61	0
61.1	0
61.2	0
61.3	0
61.4	0
61.5	0
61.6	0
61.7	0
61.8	0
61.9	0
62	0
62.1	0
62.2	0
62.3	0
62.4	0
62.5	0
62.6	0
62.7	0
62.8	0
62.9	0
63	0
63.1	0
63.2	0
63.3	0
63.4	0
63.5	0
63.6	0
63.7	0
63.8	0
63.9	0
64	0
64.1	0
64.2	0
64.3	0
64.4	0
64.5	0
64.6	0
64.7	0
64.8	0
64.9	0
65	0
65.1	0
65.2	0
65.3	0
65.4	0
65.5	0
65.6	0
65.7	0
65.8	0
65.9	0
66	0
66.1	0
66.2	0
66.3	0
66.4	0
66.5	0
66.6	0
66.7	0
66.8	0
66.9	0
67	0
67.1	0
67.2	0
67.3	0
67.4	0
67.5	0
67.6	0
67.7	0
67.8	0
67.9	0
68	0
68.1	0
68.2	0
68.3	0
68.4	0
68.5	0
68.6	0
68.7	0
68.8	0
68.9	0
69	0
69.1	0
69.2	0
69.3	0
69.4	0
69.5	0
69.6	0
69.7	0
69.8	0
69.9	0
70	0
70.1	0
70.2	0
70.3	0
70.4	0
70.5	0
70.6	0
70.7	0
70.8	0
70.9	0
71	0
71.1	0
71.2	0
71.3	0
71.4	0
71.5	0
71.6	0
71.7	0
71.8	0
71.9	0
72	0
72.1	0
72.2	0
72.3	0
72.4	0
72.5	0
72.6	0
72.7	0
72.8	0
72.9	0
73	0
73.1	0
73.2	0
73.3	0
73.4	0
73.5	0
73.6	0
73.7	0
73.8	0
73.9	0
74	0
74.1	0
74.2	0
74.3	0
74.4	0
74.5	0
74.6	0
74.7	0
74.8	0
74.9	0
75	0
75.1	0
75.2	0
75.3	0
75.4	0
75.5	0
75.6	0
75.7	0
75.8	0
75.9	0
76	0
76.1	0
76.2	0
76.3	0
76.4	0
76.5	0
76.6	0
76.7	0
76.8	0
76.9	0
77	0
77.1	0
77.2	0
77.3	0
77.4	0
77.5	0
77.6	0
77.7	0
77.8	0
77.9	0
78	0
78.1	0
78.2	0
78.3	0
78.4	0
78.5	0
78.6	0
78.7	0
78.8	0
78.9	0
79	0
79.1	0
79.2	0
79.3	0
79.4	0
79.5	0
79.6	0
79.7	0
79.8	0
79.9	0
80	0
80.1	0
80.2	0
80.3	0
80.4	0
80.5	0
80.6	0
80.7	0
80.8	0
80.9	0
81	0
81.1	0
81.2	0
81.3	0
81.4	0
81.5	0
81.6	0
81.7	0
81.8	0
81.9	0
82	0
82.1	0
82.2	0
82.3	0
82.4	0
82.5	0
82.6	0
82.7	0
82.8	0
82.9	0
83	0
83.1	0
83.2	0
83.3	0
83.4	0
83.5	0
83.6	0
83.7	0
83.8	0
83.9	0
84	0
84.1	0
84.2	0
84.3	0
84.4	0
84.5	0
84.6	0
84.7	0
84.8	0
84.9	0
85	0
85.1	0
85.2	0
85.3	0
85.4	0
85.5	0
85.6	0
85.7	0
85.8	0
85.9	0
86	0
86.1	0
86.2	0
86.3	0
86.4	0
86.5	0
86.6	0
86.7	0
86.8	0
86.9	0
87	0
87.1	0
87.2	0
87.3	0
87.4	0
87.5	0
87.6	0
87.7	0
87.8	0
87.9	0
88	0
88.1	0
88.2	0
88.3	0
88.4	0
88.5	0
88.6	0
88.7	0
88.8	0
88.9	0
89	0
89.1	0
89.2	0
89.3	0
89.4	0
89.5	0
89.6	0
89.7	0
89.8	0
89.9	0
90	0
90.1	0
90.2	0
90.3	0
90.4	0
90.5	0
90.6	0
90.7	0
90.8	0
90.9	0
91	0
91.1	0
91.2	0
91.3	0
91.4	0
91.5	0
91.6	0
91.7	0
91.8	0
91.9	0
92	0
92.1	0
92.2	0
92.3	0
92.4	0
92.5	0
92.6	0
92.7	0
92.8	0
92.9	0
93	0
93.1	0
93.2	0
93.3	0
93.4	0
93.5	0
93.6	0
93.7	0
93.8	0
93.9	0
94	0
94.1	0
94.2	0
94.3	0
94.4	0
94.5	0
94.6	0
94.7	0
94.8	0
94.9	0
95	0
95.1	0
95.2	0
95.3	0
95.4	0
95.5	0
95.6	0
95.7	0
95.8	0
95.9	0
96	0
96.1	0
96.2	0
96.3	0
96.4	0
96.5	0
96.6	0
96.7	0
96.8	0
96.9	0
97	0
97.1	0
97.2	0
97.3	0
97.4	0
97.5	0
97.6	0
97.7	0
97.8	0
97.9	0
98	0
98.1	0
98.2	0
98.3	0
98.4	0
98.5	0
98.6	0
98.7	0
98.8	0
98.9	0
99	0
99.1	0
99.2	0
99.3	0
99.4	0
99.5	0
99.6	0
99.7	0
99.8	0
99.9	0
100	0
100.1	0
100.2	0.000333333
100.3	0.000333333
100.4	0.000666667
100.5	0.001
100.6	0.00133333
100.7	0.00166667
100.8	0.002
100.9	0.00233333
101	0.00333333
101.1	0.00366667
101.2	0.004
101.3	0.005
101.4	0.006
101.5	0.00733333
101.6	0.00966667
101.7	0.0123333
101.8	0.014
101.9	0.015
102	0.0166667
102.1	0.0183333
102.2	0.02
102.3	0.0216667
102.4	0.0233333
102.5	0.0256667
102.6	0.027
102.7	0.031
102.8	0.033
102.9	0.0356667
103	0.0386667
103.1	0.0406667
103.2	0.043
103.3	0.0473333
103.4	0.0503333
103.5	0.0533333
103.6	0.056
103.7	0.057
103.8	0.06
103.9	0.063
104	0.0656667
104.1	0.0673333
104.2	0.071
104.3	0.0716667
104.4	0.0746667
104.5	0.077
104.6	0.0786667
104.7	0.083
104.8	0.0873333
104.9	0.089
105	0.09
105.1	0.0906667
105.2	0.0933333
105.3	0.095
105.4	0.0976667
105.5	0.102333
105.6	0.105333
105.7	0.107667
105.8	0.109
105.9	0.112
106	0.115333
106.1	0.117333
106.2	0.119667
106.3	0.122667
106.4	0.126667
106.5	0.128667
106.6	0.13
106.7	0.132667
106.8	0.135333
106.9	0.137
107	0.138667
107.1	0.14
107.2	0.143667
107.3	0.146333
107.4	0.148
107.5	0.150667
107.6	0.152667
107.7	0.156333
107.8	0.159333
107.9	0.162
108	0.163667
108.1	0.164667
108.2	0.165667
108.3	0.168333
108.4	0.170667
108.5	0.172667
108.6	0.174333
108.7	0.175
108.8	0.175333
108.9	0.177333
109	0.178333
109.1	0.179667
109.2	0.182333
109.3	0.184333
109.4	0.186
109.5	0.187667
109.6	0.189
109.7	0.191667
109.8	0.195333
109.9	0.197333
110	0.198667
110.1	0.200667
110.2	0.202
110.3	0.205667
110.4	0.208333
110.5	0.210333
110.6	0.212333
110.7	0.215
110.8	0.216667
110.9	0.218
111	0.218667
111.1	0.220667
111.2	0.223667
111.3	0.225
111.4	0.226
111.5	0.226667
111.6	0.229
111.7	0.23
111.8	0.231333
111.9	0.233667
112	0.236333
112.1	0.237
112.2	0.237333
112.3	0.237667
112.4	0.238667
112.5	0.241
112.6	0.243667
112.7	0.247333
112.8	0.249667
112.9	0.250667
113	0.252
113.1	0.254667
113.2	0.255667
113.3	0.257
113.4	0.257667
113.5	0.261333
113.6	0.263667
113.7	0.264333
113.8	0.266333
113.9	0.268667
114	0.269333
114.1	0.271333
114.2	0.273333
114.3	0.274667
114.4	0.277
114.5	0.278333
114.6	0.279
114.7	0.28
114.8	0.281
114.9	0.282
115	0.284
115.1	0.285333
115.2	0.287
115.3	0.289
115.4	0.291667
115.5	0.293667
115.6	0.295
115.7	0.296
115.8	0.297
115.9	0.300333
116	0.301667
116.1	0.303
116.2	0.305333
116.3	0.307
116.4	0.309667
116.5	0.311
116.6	0.312667
116.7	0.313333
116.8	0.312667
116.9	0.315667
117	0.318
117.1	0.32
117.2	0.320667
117.3	0.321667
117.4	0.323
117.5	0.325
117.6	0.328667
117.7	0.330667
117.8	0.332667
117.9	0.334667
118	0.335333
118.1	0.336
118.2	0.337333
118.3	0.339333
118.4	0.339667
118.5	0.342667
118.6	0.344
118.7	0.344667
118.8	0.345333
118.9	0.348
119	0.349
119.1	0.348667
119.2	0.35
119.3	0.352667
119.4	0.353333
119.5	0.353333
119.6	0.357
119.7	0.359667
119.8	0.361667
119.9	0.363667
120	0.364667
120.1	0.366333
120.2	0.367333
120.3	0.369
120.4	0.370667
120.5	0.372
120.6	0.373333
120.7	0.376
120.8	0.377667
120.9	0.379
121	0.379667
121.1	0.381333
121.2	0.382333
121.3	0.385333
121.4	0.387
121.5	0.387333
121.6	0.388333
121.7	0.389667
121.8	0.391
121.9	0.394
122	0.394333
122.1	0.393667
122.2	0.393667
122.3	0.394667
122.4	0.396667
122.5	0.397667
122.6	0.398667
122.7	0.399333
122.8	0.4
122.9	0.401
123	0.402
123.1	0.402333
123.2	0.404
123.3	0.405333
123.4	0.406667
123.5	0.405333
123.6	0.405333
123.7	0.406333
123.8	0.406333
123.9	0.408333
124	0.409333
124.1	0.409333
124.2	0.411
124.3	0.412
124.4	0.414
124.5	0.415
124.6	0.415
124.7	0.416
124.8	0.417333
124.9	0.421
125	0.421333
125.1	0.422
125.2	0.424667
125.3	0.425
125.4	0.425667
125.5	0.427
125.6	0.428667
125.7	0.43
125.8	0.431
125.9	0.433667
126	0.434667
126.1	0.436
126.2	0.436333
126.3	0.436333
126.4	0.439
126.5	0.44
126.6	0.44
126.7	0.440667
126.8	0.442333
126.9	0.443
127	0.444
127.1	0.444333
127.2	0.445667
127.3	0.446667
127.4	0.446333
127.5	0.448667
127.6	0.450333
127.7	0.453333
127.8	0.454
127.9	0.455667
128	0.456
128.1	0.456667
128.2	0.457
128.3	0.458
128.4	0.458333
128.5	0.459667
128.6	0.461
128.7	0.463667
128.8	0.465
128.9	0.465
129	0.466
129.1	0.466
129.2	0.468
129.3	0.469
129.4	0.469667
129.5	0.469333
129.6	0.470667
129.7	0.472
129.8	0.472333
129.9	0.472667
130	0.473667
130.1	0.473333
130.2	0.472667
130.3	0.472667
130.4	0.473
130.5	0.474667
130.6	0.474667
130.7	0.474333
130.8	0.476
130.9	0.478
131	0.478333
131.1	0.479
131.2	0.48
131.3	0.482333
131.4	0.483
131.5	0.483667
131.6	0.485333
131.7	0.484333
131.8	0.484
131.9	0.483667
132	0.485
132.1	0.486
132.2	0.488
132.3	0.487
132.4	0.486667
132.5	0.487333
132.6	0.488667
132.7	0.489
132.8	0.489667
132.9	0.491
133	0.492333
133.1	0.492
133.2	0.493
133.3	0.494
133.4	0.495
133.5	0.496
133.6	0.497
133.7	0.498333
133.8	0.500333
133.9	0.500333
134	0.5
134.1	0.501333
134.2	0.501333
134.3	0.503
134.4	0.503333
134.5	0.504
134.6	0.505333
134.7	0.506333
134.8	0.506
134.9	0.507
135	0.507333
135.1	0.508667
135.2	0.509
135.3	0.511667
135.4	0.513333
135.5	0.515
135.6	0.515667
135.7	0.517333
135.8	0.518333
135.9	0.518
136	0.519333
136.1	0.519667
136.2	0.520333
136.3	0.520333
136.4	0.521667
136.5	0.521667
136.6	0.522333
136.7	0.523333
136.8	0.524667
136.9	0.525
137	0.526333
137.1	0.528
137.2	0.529
137.3	0.529
137.4	0.529
137.5	0.53
137.6	0.531
137.7	0.532
137.8	0.532667
137.9	0.533333
138	0.534667
138.1	0.536
138.2	0.537
138.3	0.538333
138.4	0.538333
138.5	0.540333
138.6	0.541667
138.7	0.541333
138.8	0.542
138.9	0.542
139	0.542333
139.1	0.543333
139.2	0.543667
139.3	0.544333
139.4	0.546
139.5	0.547333
139.6	0.548
139.7	0.549
139.8	0.550333
139.9	0.551
140	0.552667
140.1	0.553667
140.2	0.553333
140.3	0.553333
140.4	0.552333
140.5	0.553667
140.6	0.553667
140.7	0.554333
140.8	0.555333
140.9	0.555333
141	0.557333
141.1	0.557333
141.2	0.558333
141.3	0.559
141.4	0.558667
141.5	0.559
141.6	0.559
141.7	0.560333
141.8	0.561333
141.9	0.562667
142	0.561
142.1	0.562667
142.2	0.563333
142.3	0.565
142.4	0.565
142.5	0.565333
142.6	0.565333
142.7	0.565
142.8	0.564667
142.9	0.565333
143	0.566
143.1	0.567
143.2	0.566667
143.3	0.566333
143.4	0.568
143.5	0.567667
143.6	0.568
143.7	0.568333
143.8	0.569667
143.9	0.569667
144	0.571
144.1	0.572333
144.2	0.573
144.3	0.574333
144.4	0.574
144.5	0.573
144.6	0.572
144.7	0.572
144.8	0.573333
144.9	0.574
145	0.574
145.1	0.575
145.2	0.577
145.3	0.577667
145.4	0.578
145.5	0.581
145.6	0.583333
145.7	0.583667
145.8	0.585333
145.9	0.586667
146	0.586333
146.1	0.587333
146.2	0.588333
146.3	0.589667
146.4	0.590333
146.5	0.590667
146.6	0.591333
146.7	0.591
146.8	0.592333
146.9	0.593333
147	0.593333
147.1	0.594667
147.2	0.594
147.3	0.593333
147.4	0.592667
147.5	0.593667
147.6	0.593
147.7	0.593333
147.8	0.594667
147.9	0.596
148	0.597667
148.1	0.599
148.2	0.598667
148.3	0.599667
148.4	0.598333
148.5	0.598667
148.6	0.6
148.7	0.599667
148.8	0.600333
148.9	0.600333
149	0.6
149.1	0.601
149.2	0.601
149.3	0.602
149.4	0.601667
149.5	0.601
149.6	0.601
149.7	0.601667
149.8	0.602333
149.9	0.604
150	0.605
150.1	0.606333
150.2	0.606
150.3	0.606667
150.4	0.606
150.5	0.605667
150.6	0.606
150.7	0.606667
150.8	0.607667
150.9	0.607333
151	0.608
151.1	0.608333
151.2	0.608667
151.3	0.609667
151.4	0.611
151.5	0.610333
151.6	0.611667
151.7	0.611667
151.8	0.612
151.9	0.612667
152	0.613
152.1	0.614333
152.2	0.615333
152.3	0.615667
152.4	0.615667
152.5	0.614333
152.6	0.614333
152.7	0.615333
152.8	0.615
152.9	0.616333
153	0.616667
153.1	0.617
153.2	0.616333
153.3	0.618
153.4	0.618
153.5	0.619333
153.6	0.62
153.7	0.619
153.8	0.62
153.9	0.62
154	0.620667
154.1	0.621
154.2	0.622
154.3	0.622
154.4	0.621667
154.5	0.622
154.6	0.621667
154.7	0.623
154.8	0.622
154.9	0.622333
155	0.622667
155.1	0.623
155.2	0.625
155.3	0.626
155.4	0.627
155.5	0.627667
155.6	0.627333
155.7	0.627333
155.8	0.626667
155.9	0.627667
156	0.628
156.1	0.629
156.2	0.629667
156.3	0.630333
156.4	0.632
156.5	0.632667
156.6	0.632333
156.7	0.633333
156.8	0.633
156.9	0.634667
157	0.635333
157.1	0.635333
157.2	0.636
157.3	0.635667
157.4	0.636667
157.5	0.637
157.6	0.635667
157.7	0.636333
157.8	0.635333
157.9	0.636
158	0.636667
158.1	0.638667
158.2	0.639333
158.3	0.639667
158.4	0.64
158.5	0.640333
158.6	0.640667
158.7	0.642
158.8	0.642
158.9	0.642
159	0.643333
159.1	0.644333
159.2	0.644667
159.3	0.644333
159.4	0.644
159.5	0.645333
159.6	0.645667
159.7	0.647
159.8	0.646333
159.9	0.648333
160	0.648
160.1	0.648333
160.2	0.648333
160.3	0.649
160.4	0.649667
160.5	0.649667
160.6	0.649667
160.7	0.65
160.8	0.650667
160.9	0.651
161	0.652
161.1	0.652333
161.2	0.652333
161.3	0.653
161.4	0.652667
161.5	0.654
161.6	0.655667
161.7	0.655333
161.8	0.656
161.9	0.656
162	0.655667
162.1	0.655333
162.2	0.656
162.3	0.657
162.4	0.658
162.5	0.657333
162.6	0.657333
162.7	0.658333
162.8	0.659
162.9	0.658667
163	0.658333
163.1	0.659333
163.2	0.658333
163.3	0.657667
163.4	0.658333
163.5	0.658333
163.6	0.658333
163.7	0.659
163.8	0.659333
163.9	0.659
164	0.659333
164.1	0.660333
164.2	0.662333
164.3	0.662
164.4	0.663
164.5	0.662
164.6	0.662
164.7	0.662
164.8	0.662
164.9	0.662333
165	0.663
165.1	0.663
165.2	0.663333
165.3	0.662333
165.4	0.662667
165.5	0.662333
165.6	0.661667
165.7	0.661333
165.8	0.662333
165.9	0.663667
166	0.664667
166.1	0.664333
166.2	0.664
166.3	0.664333
166.4	0.665
166.5	0.666
166.6	0.667
166.7	0.668333
166.8	0.668333
166.9	0.669333
167	0.670333
167.1	0.669667
167.2	0.670667
167.3	0.672
167.4	0.671
167.5	0.671
167.6	0.671
167.7	0.672
167.8	0.670667
167.9	0.671333
168	0.672333
168.1	0.673
168.2	0.673333
168.3	0.674
168.4	0.673
168.5	0.673333
168.6	0.673
168.7	0.673
168.8	0.672333
168.9	0.672333
169	0.674
169.1	0.675333
169.2	0.675333
169.3	0.675
169.4	0.675333
169.5	0.675667
169.6	0.676
169.7	0.674667
169.8	0.675667
169.9	0.676333
170	0.676
170.1	0.674667
170.2	0.674333
170.3	0.675667
170.4	0.677
170.5	0.676667
170.6	0.677667
170.7	0.677667
170.8	0.677
170.9	0.677
171	0.676333
171.1	0.676333
171.2	0.676
171.3	0.678
171.4	0.678
171.5	0.677333
171.6	0.677333
171.7	0.677333
171.8	0.678
171.9	0.678333
172	0.678333
172.1	0.676667
172.2	0.677667
172.3	0.678333
172.4	0.679
172.5	0.680333
172.6	0.679333
172.7	0.679333
172.8	0.679667
172.9	0.678667
173	0.678333
173.1	0.677667
173.2	0.677333
173.3	0.678333
173.4	0.679
173.5	0.679667
173.6	0.679333
173.7	0.679667
173.8	0.680333
173.9	0.680333
174	0.680333
174.1	0.681333
174.2	0.681667
174.3	0.680667
174.4	0.680667
174.5	0.681
174.6	0.681667
174.7	0.682667
174.8	0.684
174.9	0.683333
175	0.682667
175.1	0.683
175.2	0.682333
175.3	0.682333
175.4	0.680667
175.5	0.681
175.6	0.680667
175.7	0.680667
175.8	0.681333
175.9	0.681667
176	0.682
176.1	0.682
176.2	0.681333
176.3	0.681667
176.4	0.681667
176.5	0.681333
176.6	0.682333
176.7	0.683333
176.8	0.683
176.9	0.683667
177	0.683333
177.1	0.684333
177.2	0.684
177.3	0.684333
177.4	0.684667
177.5	0.685
177.6	0.685
177.7	0.683667
177.8	0.683
177.9	0.684
178	0.684333
178.1	0.685
178.2	0.683667
178.3	0.684
178.4	0.683333
178.5	0.684
178.6	0.683667
178.7	0.683667
178.8	0.683333
178.9	0.684
179	0.683
179.1	0.682667
179.2	0.683
179.3	0.682667
179.4	0.682667
179.5	0.684
179.6	0.684333
179.7	0.685
179.8	0.685333
179.9	0.685333
180	0.684667
180.1	0.686
180.2	0.685333
180.3	0.684667
180.4	0.684667
180.5	0.684333
180.6	0.684333
180.7	0.685667
180.8	0.687
180.9	0.687667
181	0.687333
181.1	0.687667
181.2	0.688333
181.3	0.688333
181.4	0.688
181.5	0.689
181.6	0.689333
181.7	0.689667
181.8	0.689667
181.9	0.689667
182	0.689667
182.1	0.69
182.2	0.691
182.3	0.691333
182.4	0.693333
182.5	0.692667
182.6	0.692667
182.7	0.693667
182.8	0.693667
182.9	0.693
183	0.693
183.1	0.692
183.2	0.694
183.3	0.694667
183.4	0.695333
183.5	0.695333
183.6	0.696
183.7	0.697333
183.8	0.697333
183.9	0.697
184	0.695333
184.1	0.695
184.2	0.695
184.3	0.695333
184.4	0.695333
184.5	0.695
184.6	0.695333
184.7	0.696
184.8	0.697333
184.9	0.698
185	0.699
185.1	0.699333
185.2	0.699
185.3	0.698333
185.4	0.699667
185.5	0.699
185.6	0.698667
185.7	0.699
185.8	0.698333
185.9	0.698
186	0.697
186.1	0.697333
186.2	0.697333
186.3	0.698
186.4	0.697333
186.5	0.697
186.6	0.695667
186.7	0.697
186.8	0.697667
186.9	0.697667
187	0.697333
187.1	0.696667
187.2	0.695667
187.3	0.696333
187.4	0.695333
187.5	0.695
187.6	0.696333
187.7	0.696333
187.8	0.696333
187.9	0.696667
188	0.696667
188.1	0.697333
188.2	0.697333
188.3	0.697667
188.4	0.698333
188.5	0.698333
188.6	0.698
188.7	0.698333
188.8	0.698
188.9	0.698
189	0.698667
189.1	0.698667
189.2	0.698667
189.3	0.699333
189.4	0.699333
189.5	0.699
189.6	0.699
189.7	0.699333
189.8	0.698333
189.9	0.697667
190	0.697667
190.1	0.698667
190.2	0.698
190.3	0.698
190.4	0.697667
190.5	0.696333
190.6	0.696
190.7	0.696667
190.8	0.696333
190.9	0.697
191	0.697
191.1	0.697667
191.2	0.696667
191.3	0.697
191.4	0.697667
191.5	0.697333
191.6	0.697667
191.7	0.698
191.8	0.698
191.9	0.699667
192	0.699333
192.1	0.699667
192.2	0.699667
192.3	0.700667
192.4	0.700333
192.5	0.700333
192.6	0.701
192.7	0.7
192.8	0.699333
192.9	0.698667
193	0.699667
193.1	0.701
193.2	0.701667
193.3	0.701667
193.4	0.7
193.5	0.699
193.6	0.699
193.7	0.699333
193.8	0.699
193.9	0.699
194	0.698667
194.1	0.698333
194.2	0.698667
194.3	0.7
194.4	0.7
194.5	0.700333
194.6	0.700333
194.7	0.701
194.8	0.701
194.9	0.701333
195	0.702
195.1	0.702
195.2	0.702667
195.3	0.701667
195.4	0.702
195.5	0.702667
195.6	0.702667
195.7	0.703333
195.8	0.703667
195.9	0.703
196	0.702333
196.1	0.702667
196.2	0.702667
196.3	0.702667
196.4	0.703
196.5	0.703667
196.6	0.703
196.7	0.703
196.8	0.704
196.9	0.703
197	0.703333
197.1	0.703667
197.2	0.705
197.3	0.705333
197.4	0.704667
197.5	0.705
197.6	0.705667
197.7	0.706667
197.8	0.706333
197.9	0.705333
198	0.706333
198.1	0.708
198.2	0.707667
198.3	0.707333
198.4	0.708
198.5	0.708333
198.6	0.707667
198.7	0.706667
198.8	0.707333
198.9	0.707
199	0.707667
199.1	0.708
199.2	0.707
199.3	0.706667
199.4	0.707667
199.5	0.706667
199.6	0.707333
199.7	0.707
199.8	0.706667
199.9	0.707333
200	0.707333
[truncated: 14,000 more rows]
