# Supplementary material for: Bayesian inference of kinetic schemes for ion channels by Kalman filtering
Source: eLife journal article supplement (doi:10.7554/elife.62714), 2022-05-04
Supplement: fig4-data7 [file 1_Sim_N_4000_Fluor_MW_2M.xlsx]

## Sheet: Tabelle1
0.1	0
0.2	0
0.3	0
0.4	0
0.5	0
0.6	0
0.7	0
0.8	0
0.9	0
1	0
1.1	0
1.2	0
1.3	0
1.4	0
1.5	0
1.6	0
1.7	0
1.8	0
1.9	0
2	0
2.1	0
2.2	0
2.3	0
2.4	0
2.5	0
2.6	0
2.7	0
2.8	0
2.9	0
3	0
3.1	0
3.2	0
3.3	0
3.4	0
3.5	0
3.6	0
3.7	0
3.8	0
3.9	0
4	0
4.1	0
4.2	0
4.3	0
4.4	0
4.5	0
4.6	0
4.7	0
4.8	0
4.9	0
5	0
5.1	0
5.2	0
5.3	0
5.4	0
5.5	0
5.6	0
5.7	0
5.8	0
5.9	0
6	0
6.1	0
6.2	0
6.3	0
6.4	0
6.5	0
6.6	0
6.7	0
6.8	0
6.9	0
7	0
7.1	0
7.2	0
7.3	0
7.4	0
7.5	0
7.6	0
7.7	0
7.8	0
7.9	0
8	0
8.1	0
8.2	0
8.3	0
8.4	0
8.5	0
8.6	0
8.7	0
8.8	0
8.9	0
9	0
9.1	0
9.2	0
9.3	0
9.4	0
9.5	0
9.6	0
9.7	0
9.8	0
9.9	0
10	0
10.1	0
10.2	0
10.3	0
10.4	0
10.5	0
10.6	0
10.7	0
10.8	0
10.9	0
11	0
11.1	0
11.2	0
11.3	0
11.4	0
11.5	0
11.6	0
11.7	0
11.8	0
11.9	0
12	0
12.1	0
12.2	0
12.3	0
12.4	0
12.5	0
12.6	0
12.7	0
12.8	0
12.9	0
13	0
13.1	0
13.2	0
13.3	0
13.4	0
13.5	0
13.6	0
13.7	0
13.8	0
13.9	0
14	0
14.1	0
14.2	0
14.3	0
14.4	0
14.5	0
14.6	0
14.7	0
14.8	0
14.9	0
15	0
15.1	0
15.2	0
15.3	0
15.4	0
15.5	0
15.6	0
15.7	0
15.8	0
15.9	0
16	0
16.1	0
16.2	0
16.3	0
16.4	0
16.5	0
16.6	0
16.7	0
16.8	0
16.9	0
17	0
17.1	0
17.2	0
17.3	0
17.4	0
17.5	0
17.6	0
17.7	0
17.8	0
17.9	0
18	0
18.1	0
18.2	0
18.3	0
18.4	0
18.5	0
18.6	0
18.7	0
18.8	0
18.9	0
19	0
19.1	0
19.2	0
19.3	0
19.4	0
19.5	0
19.6	0
19.7	0
19.8	0
19.9	0
20	0
20.1	0
20.2	0
20.3	0
20.4	0
20.5	0
20.6	0
20.7	0
20.8	0
20.9	0
21	0
21.1	0
21.2	0
21.3	0
21.4	0
21.5	0
21.6	0
21.7	0
21.8	0
21.9	0
22	0
22.1	0
22.2	0
22.3	0
22.4	0
22.5	0
22.6	0
22.7	0
22.8	0
22.9	0
23	0
23.1	0
23.2	0
23.3	0
23.4	0
23.5	0
23.6	0
23.7	0
23.8	0
23.9	0
24	0
24.1	0
24.2	0
24.3	0
24.4	0
24.5	0
24.6	0
24.7	0
24.8	0
24.9	0
25	0
25.1	0
25.2	0
25.3	0
25.4	0
25.5	0
25.6	0
25.7	0
25.8	0
25.9	0
26	0
26.1	0
26.2	0
26.3	0
26.4	0
26.5	0
26.6	0
26.7	0
26.8	0
26.9	0
27	0
27.1	0
27.2	0
27.3	0
27.4	0
27.5	0
27.6	0
27.7	0
27.8	0
27.9	0
28	0
28.1	0
28.2	0
28.3	0
28.4	0
28.5	0
28.6	0
28.7	0
28.8	0
28.9	0
29	0
29.1	0
29.2	0
29.3	0
29.4	0
29.5	0
29.6	0
29.7	0
29.8	0
29.9	0
30	0
30.1	0
30.2	0
30.3	0
30.4	0
30.5	0
30.6	0
30.7	0
30.8	0
30.9	0
31	0
31.1	0
31.2	0
31.3	0
31.4	0
31.5	0
31.6	0
31.7	0
31.8	0
31.9	0
32	0
32.1	0
32.2	0
32.3	0
32.4	0
32.5	0
32.6	0
32.7	0
32.8	0
32.9	0
33	0
33.1	0
33.2	0
33.3	0
33.4	0
33.5	0
33.6	0
33.7	0
33.8	0
33.9	0
34	0
34.1	0
34.2	0
34.3	0
34.4	0
34.5	0
34.6	0
34.7	0
34.8	0
34.9	0
35	0
35.1	0
35.2	0
35.3	0
35.4	0
35.5	0
35.6	0
35.7	0
35.8	0
35.9	0
36	0
36.1	0
36.2	0
36.3	0
36.4	0
36.5	0
36.6	0
36.7	0
36.8	0
36.9	0
37	0
37.1	0
37.2	0
37.3	0
37.4	0
37.5	0
37.6	0
37.7	0
37.8	0
37.9	0
38	0
38.1	0
38.2	0
38.3	0
38.4	0
38.5	0
38.6	0
38.7	0
38.8	0
38.9	0
39	0
39.1	0
39.2	0
39.3	0
39.4	0
39.5	0
39.6	0
39.7	0
39.8	0
39.9	0
40	0
40.1	0
40.2	0
40.3	0
40.4	0
40.5	0
40.6	0
40.7	0
40.8	0
40.9	0
41	0
41.1	0
41.2	0
41.3	0
41.4	0
41.5	0
41.6	0
41.7	0
41.8	0
41.9	0
42	0
42.1	0
42.2	0
42.3	0
42.4	0
42.5	0
42.6	0
42.7	0
42.8	0
42.9	0
43	0
43.1	0
43.2	0
43.3	0
43.4	0
43.5	0
43.6	0
43.7	0
43.8	0
43.9	0
44	0
44.1	0
44.2	0
44.3	0
44.4	0
44.5	0
44.6	0
44.7	0
44.8	0
44.9	0
45	0
45.1	0
45.2	0
45.3	0
45.4	0
45.5	0
45.6	0
45.7	0
45.8	0
45.9	0
46	0
46.1	0
46.2	0
46.3	0
46.4	0
46.5	0
46.6	0
46.7	0
46.8	0
46.9	0
47	0
47.1	0
47.2	0
47.3	0
47.4	0
47.5	0
47.6	0
47.7	0
47.8	0
47.9	0
48	0
48.1	0
48.2	0
48.3	0
48.4	0
48.5	0
48.6	0
48.7	0
48.8	0
48.9	0
49	0
49.1	0
49.2	0
49.3	0
49.4	0
49.5	0
49.6	0
49.7	0
49.8	0
49.9	0
50	0
50.1	0
50.2	0
50.3	0
50.4	0
50.5	0
50.6	0
50.7	0
50.8	0
50.9	0
51	0
51.1	0
51.2	0
51.3	0
51.4	0
51.5	0
51.6	0
51.7	0
51.8	0
51.9	0
52	0
52.1	0
52.2	0
52.3	0
52.4	0
52.5	0
52.6	0
52.7	0
52.8	0
52.9	0
53	0
53.1	0
53.2	0
53.3	0
53.4	0
53.5	0
53.6	0
53.7	0
53.8	0
53.9	0
54	0
54.1	0
54.2	0
54.3	0
54.4	0
54.5	0
54.6	0
54.7	0
54.8	0
54.9	0
55	0
55.1	0
55.2	0
55.3	0
55.4	0
55.5	0
55.6	0
55.7	0
55.8	0
55.9	0
56	0
56.1	0
56.2	0
56.3	0
56.4	0
56.5	0
56.6	0
56.7	0
56.8	0
56.9	0
57	0
57.1	0
57.2	0
57.3	0
57.4	0
57.5	0
57.6	0
57.7	0
57.8	0
57.9	0
58	0
58.1	0
58.2	0
58.3	0
58.4	0
58.5	0
58.6	0
58.7	0
58.8	0
58.9	0
59	0
59.1	0
59.2	0
59.3	0
59.4	0
59.5	0
59.6	0
59.7	0
59.8	0
59.9	0
60	0
60.1	0
60.2	0
60.3	0
60.4	0
60.5	0
60.6	0
60.7	0
60.8	0
60.9	0
61	0
61.1	0
61.2	0
61.3	0
61.4	0
61.5	0
61.6	0
61.7	0
61.8	0
61.9	0
62	0
62.1	0
62.2	0
62.3	0
62.4	0
62.5	0
62.6	0
62.7	0
62.8	0
62.9	0
63	0
63.1	0
63.2	0
63.3	0
63.4	0
63.5	0
63.6	0
63.7	0
63.8	0
63.9	0
64	0
64.1	0
64.2	0
64.3	0
64.4	0
64.5	0
64.6	0
64.7	0
64.8	0
64.9	0
65	0
65.1	0
65.2	0
65.3	0
65.4	0
65.5	0
65.6	0
65.7	0
65.8	0
65.9	0
66	0
66.1	0
66.2	0
66.3	0
66.4	0
66.5	0
66.6	0
66.7	0
66.8	0
66.9	0
67	0
67.1	0
67.2	0
67.3	0
67.4	0
67.5	0
67.6	0
67.7	0
67.8	0
67.9	0
68	0
68.1	0
68.2	0
68.3	0
68.4	0
68.5	0
68.6	0
68.7	0
68.8	0
68.9	0
69	0
69.1	0
69.2	0
69.3	0
69.4	0
69.5	0
69.6	0
69.7	0
69.8	0
69.9	0
70	0
70.1	0
70.2	0
70.3	0
70.4	0
70.5	0
70.6	0
70.7	0
70.8	0
70.9	0
71	0
71.1	0
71.2	0
71.3	0
71.4	0
71.5	0
71.6	0
71.7	0
71.8	0
71.9	0
72	0
72.1	0
72.2	0
72.3	0
72.4	0
72.5	0
72.6	0
72.7	0
72.8	0
72.9	0
73	0
73.1	0
73.2	0
73.3	0
73.4	0
73.5	0
73.6	0
73.7	0
73.8	0
73.9	0
74	0
74.1	0
74.2	0
74.3	0
74.4	0
74.5	0
74.6	0
74.7	0
74.8	0
74.9	0
75	0
75.1	0
75.2	0
75.3	0
75.4	0
75.5	0
75.6	0
75.7	0
75.8	0
75.9	0
76	0
76.1	0
76.2	0
76.3	0
76.4	0
76.5	0
76.6	0
76.7	0
76.8	0
76.9	0
77	0
77.1	0
77.2	0
77.3	0
77.4	0
77.5	0
77.6	0
77.7	0
77.8	0
77.9	0
78	0
78.1	0
78.2	0
78.3	0
78.4	0
78.5	0
78.6	0
78.7	0
78.8	0
78.9	0
79	0
79.1	0
79.2	0
79.3	0
79.4	0
79.5	0
79.6	0
79.7	0
79.8	0
79.9	0
80	0
80.1	0
80.2	0
80.3	0
80.4	0
80.5	0
80.6	0
80.7	0
80.8	0
80.9	0
81	0
81.1	0
81.2	0
81.3	0
81.4	0
81.5	0
81.6	0
81.7	0
81.8	0
81.9	0
82	0
82.1	0
82.2	0
82.3	0
82.4	0
82.5	0
82.6	0
82.7	0
82.8	0
82.9	0
83	0
83.1	0
83.2	0
83.3	0
83.4	0
83.5	0
83.6	0
83.7	0
83.8	0
83.9	0
84	0
84.1	0
84.2	0
84.3	0
84.4	0
84.5	0
84.6	0
84.7	0
84.8	0
84.9	0
85	0
85.1	0
85.2	0
85.3	0
85.4	0
85.5	0
85.6	0
85.7	0
85.8	0
85.9	0
86	0
86.1	0
86.2	0
86.3	0
86.4	0
86.5	0
86.6	0
86.7	0
86.8	0
86.9	0
87	0
87.1	0
87.2	0
87.3	0
87.4	0
87.5	0
87.6	0
87.7	0
87.8	0
87.9	0
88	0
88.1	0
88.2	0
88.3	0
88.4	0
88.5	0
88.6	0
88.7	0
88.8	0
88.9	0
89	0
89.1	0
89.2	0
89.3	0
89.4	0
89.5	0
89.6	0
89.7	0
89.8	0
89.9	0
90	0
90.1	0
90.2	0
90.3	0
90.4	0
90.5	0
90.6	0
90.7	0
90.8	0
90.9	0
91	0
91.1	0
91.2	0
91.3	0
91.4	0
91.5	0
91.6	0
91.7	0
91.8	0
91.9	0
92	0
92.1	0
92.2	0
92.3	0
92.4	0
92.5	0
92.6	0
92.7	0
92.8	0
92.9	0
93	0
93.1	0
93.2	0
93.3	0
93.4	0
93.5	0
93.6	0
93.7	0
93.8	0
93.9	0
94	0
94.1	0
94.2	0
94.3	0
94.4	0
94.5	0
94.6	0
94.7	0
94.8	0
94.9	0
95	0
95.1	0
95.2	0
95.3	0
95.4	0
95.5	0
95.6	0
95.7	0
95.8	0
95.9	0
96	0
96.1	0
96.2	0
96.3	0
96.4	0
96.5	0
96.6	0
96.7	0
96.8	0
96.9	0
97	0
97.1	0
97.2	0
97.3	0
97.4	0
97.5	0
97.6	0
97.7	0
97.8	0
97.9	0
98	0
98.1	0
98.2	0
98.3	0
98.4	0
98.5	0
98.6	0
98.7	0
98.8	0
98.9	0
99	0
99.1	0
99.2	0
99.3	0
99.4	0
99.5	0
99.6	0
99.7	0
99.8	0
99.9	0
100	0
100.1	0.112
100.2	0.20375
100.3	0.279625
100.4	0.341
100.5	0.393875
100.6	0.443125
100.7	0.48375
100.8	0.52275
100.9	0.554375
101	0.57975
101.1	0.602125
101.2	0.619625
101.3	0.637625
101.4	0.6535
101.5	0.667
101.6	0.67625
101.7	0.687375
101.8	0.6955
101.9	0.703625
102	0.711625
102.1	0.71775
102.2	0.7265
102.3	0.73275
102.4	0.736
102.5	0.739375
102.6	0.742875
102.7	0.746
102.8	0.749125
102.9	0.750625
103	0.751875
103.1	0.75325
103.2	0.753375
103.3	0.756875
103.4	0.75825
103.5	0.75875
103.6	0.763
103.7	0.762625
103.8	0.764625
103.9	0.768125
104	0.764125
104.1	0.765125
104.2	0.765
104.3	0.76775
104.4	0.770375
104.5	0.77225
104.6	0.776
104.7	0.77275
104.8	0.771125
104.9	0.770625
105	0.77375
105.1	0.7765
105.2	0.774625
105.3	0.77575
105.4	0.77975
105.5	0.78075
105.6	0.782
105.7	0.78475
105.8	0.7835
105.9	0.7845
106	0.787
106.1	0.7885
106.2	0.78775
106.3	0.79
106.4	0.79
106.5	0.789375
106.6	0.786625
106.7	0.786875
106.8	0.785375
106.9	0.784625
107	0.78775
107.1	0.789625
107.2	0.78925
107.3	0.7935
107.4	0.791
107.5	0.79225
107.6	0.789
107.7	0.788375
107.8	0.78825
107.9	0.788875
108	0.792625
108.1	0.793
108.2	0.792
108.3	0.79075
108.4	0.791125
108.5	0.790375
108.6	0.789
108.7	0.791
108.8	0.790625
108.9	0.791125
109	0.791
109.1	0.794
109.2	0.797375
109.3	0.797125
109.4	0.795375
109.5	0.79525
109.6	0.795
109.7	0.797
109.8	0.797125
109.9	0.796625
110	0.795875
110.1	0.798625
110.2	0.796625
110.3	0.798
110.4	0.79875
110.5	0.80125
110.6	0.802125
110.7	0.799
110.8	0.799625
110.9	0.799375
111	0.80025
111.1	0.801625
111.2	0.80175
111.3	0.8025
111.4	0.803125
111.5	0.802375
111.6	0.8005
111.7	0.800875
111.8	0.80275
111.9	0.80375
112	0.80225
112.1	0.80325
112.2	0.804625
112.3	0.806125
112.4	0.806
112.5	0.809875
112.6	0.81025
112.7	0.811375
112.8	0.811875
112.9	0.81175
113	0.811375
113.1	0.8145
113.2	0.813875
113.3	0.815875
113.4	0.820875
113.5	0.8205
113.6	0.819375
113.7	0.82175
113.8	0.82
113.9	0.8225
114	0.82225
114.1	0.826375
114.2	0.82625
114.3	0.823375
114.4	0.82175
114.5	0.82125
114.6	0.819375
114.7	0.82025
114.8	0.820125
114.9	0.81875
115	0.8215
115.1	0.82375
115.2	0.822375
115.3	0.822625
115.4	0.8235
115.5	0.82125
115.6	0.819
115.7	0.81975
115.8	0.8205
115.9	0.822
116	0.82325
116.1	0.823375
116.2	0.824125
116.3	0.825375
116.4	0.825625
116.5	0.8245
116.6	0.82325
116.7	0.8235
116.8	0.82575
116.9	0.828875
117	0.82975
117.1	0.830875
117.2	0.831125
117.3	0.8335
117.4	0.833875
117.5	0.837625
117.6	0.835625
117.7	0.8345
117.8	0.83325
117.9	0.83175
118	0.83275
118.1	0.833375
118.2	0.8325
118.3	0.835125
118.4	0.836375
118.5	0.838125
118.6	0.83775
118.7	0.837375
118.8	0.83925
118.9	0.84125
119	0.842125
119.1	0.842125
119.2	0.841625
119.3	0.8425
119.4	0.843875
119.5	0.844375
119.6	0.843625
119.7	0.84
119.8	0.841875
119.9	0.84025
120	0.840625
120.1	0.842375
120.2	0.842125
120.3	0.841375
120.4	0.839875
120.5	0.844
120.6	0.8445
120.7	0.845625
120.8	0.844
120.9	0.84425
121	0.844375
121.1	0.846
121.2	0.8455
121.3	0.845375
121.4	0.846
121.5	0.847375
121.6	0.8475
121.7	0.847875
121.8	0.851625
121.9	0.85025
122	0.849
122.1	0.849625
122.2	0.84975
122.3	0.849125
122.4	0.850375
122.5	0.85075
122.6	0.847375
122.7	0.848125
122.8	0.850375
122.9	0.851625
123	0.8525
123.1	0.855125
123.2	0.855875
123.3	0.857875
123.4	0.857375
123.5	0.857125
123.6	0.854125
123.7	0.855625
123.8	0.856125
123.9	0.859375
124	0.86025
124.1	0.858625
124.2	0.856625
124.3	0.856375
124.4	0.857375
124.5	0.857125
124.6	0.85625
124.7	0.8575
124.8	0.858375
124.9	0.86075
125	0.861875
125.1	0.861125
125.2	0.86175
125.3	0.862
125.4	0.863125
125.5	0.864
125.6	0.8635
125.7	0.864
125.8	0.863375
125.9	0.862375
126	0.861625
126.1	0.864
126.2	0.863625
126.3	0.865125
126.4	0.862875
126.5	0.8615
126.6	0.8605
126.7	0.859
126.8	0.8605
126.9	0.85925
127	0.861875
127.1	0.863875
127.2	0.865125
127.3	0.86425
127.4	0.862625
127.5	0.861875
127.6	0.861625
127.7	0.86125
127.8	0.861875
127.9	0.8615
128	0.8635
128.1	0.862
128.2	0.862375
128.3	0.864625
128.4	0.866
128.5	0.864625
128.6	0.86325
128.7	0.8625
128.8	0.8635
128.9	0.864375
129	0.86475
129.1	0.866875
129.2	0.867
129.3	0.868375
129.4	0.86725
129.5	0.866125
129.6	0.866875
129.7	0.8665
129.8	0.8685
129.9	0.86825
130	0.866625
130.1	0.868375
130.2	0.867
130.3	0.869875
130.4	0.8695
130.5	0.868625
130.6	0.86875
130.7	0.870375
130.8	0.868375
130.9	0.870375
131	0.872375
131.1	0.870375
131.2	0.868375
131.3	0.868125
131.4	0.868125
131.5	0.869375
131.6	0.871625
131.7	0.872625
131.8	0.8735
131.9	0.87275
132	0.87325
132.1	0.875
132.2	0.8755
132.3	0.879
132.4	0.880375
132.5	0.877875
132.6	0.87625
132.7	0.87625
132.8	0.87775
132.9	0.877
133	0.879375
133.1	0.88175
133.2	0.881875
133.3	0.882125
133.4	0.882
133.5	0.882625
133.6	0.882625
133.7	0.882125
133.8	0.881375
133.9	0.880625
134	0.88075
134.1	0.880125
134.2	0.878875
134.3	0.878875
134.4	0.879625
134.5	0.87775
134.6	0.87925
134.7	0.87775
134.8	0.88025
134.9	0.878625
135	0.880125
135.1	0.878375
135.2	0.877125
135.3	0.879
135.4	0.87775
135.5	0.8805
135.6	0.878875
135.7	0.878125
135.8	0.877875
135.9	0.87925
136	0.878875
136.1	0.87775
136.2	0.875625
136.3	0.876125
136.4	0.87775
136.5	0.876875
136.6	0.877625
136.7	0.878875
136.8	0.88075
136.9	0.87975
137	0.881875
137.1	0.881125
137.2	0.883125
137.3	0.8815
137.4	0.88125
137.5	0.883125
137.6	0.880125
137.7	0.883
137.8	0.884375
137.9	0.88225
138	0.8825
138.1	0.882875
138.2	0.883125
138.3	0.881875
138.4	0.883875
138.5	0.884875
138.6	0.883875
138.7	0.883875
138.8	0.883875
138.9	0.885
139	0.8845
139.1	0.88275
139.2	0.881875
139.3	0.88375
139.4	0.883625
139.5	0.8845
139.6	0.883
139.7	0.88225
139.8	0.885125
139.9	0.8825
140	0.883625
140.1	0.88475
140.2	0.886
140.3	0.887
140.4	0.88825
140.5	0.889625
140.6	0.88875
140.7	0.889
140.8	0.888875
140.9	0.888125
141	0.8865
141.1	0.88575
141.2	0.886875
141.3	0.886
141.4	0.88575
141.5	0.886
141.6	0.886875
141.7	0.88575
141.8	0.88775
141.9	0.88725
142	0.8885
142.1	0.888875
142.2	0.891
142.3	0.894125
142.4	0.89325
142.5	0.893125
142.6	0.894625
142.7	0.894
142.8	0.89425
142.9	0.89425
143	0.893875
143.1	0.894375
143.2	0.89375
143.3	0.8935
143.4	0.894875
143.5	0.895375
143.6	0.89325
143.7	0.894125
143.8	0.893625
143.9	0.893625
144	0.892125
144.1	0.89225
144.2	0.892625
144.3	0.894875
144.4	0.895625
144.5	0.893875
144.6	0.894625
144.7	0.894375
144.8	0.895875
144.9	0.896375
145	0.89475
145.1	0.893375
145.2	0.89275
145.3	0.893875
145.4	0.89425
145.5	0.89375
145.6	0.8945
145.7	0.8945
145.8	0.894875
145.9	0.894
146	0.89225
146.1	0.89575
146.2	0.897375
146.3	0.896375
146.4	0.895
146.5	0.894125
146.6	0.89325
146.7	0.89425
146.8	0.8955
146.9	0.896625
147	0.89725
147.1	0.89675
147.2	0.8985
147.3	0.89975
147.4	0.902
147.5	0.902125
147.6	0.901875
147.7	0.900625
147.8	0.901375
147.9	0.89975
148	0.897875
148.1	0.8975
148.2	0.89975
148.3	0.89825
148.4	0.8985
148.5	0.899375
148.6	0.901125
148.7	0.899625
148.8	0.899375
148.9	0.900125
149	0.89925
149.1	0.9015
149.2	0.901875
149.3	0.900125
149.4	0.9
149.5	0.899
149.6	0.898125
149.7	0.8965
149.8	0.896375
149.9	0.897625
150	0.8985
150.1	0.899375
150.2	0.899
150.3	0.90025
150.4	0.900875
150.5	0.90025
150.6	0.900625
150.7	0.90125
150.8	0.901625
150.9	0.902375
151	0.903375
151.1	0.9015
151.2	0.90125
151.3	0.90425
151.4	0.90475
151.5	0.904375
151.6	0.904875
151.7	0.90725
151.8	0.906875
151.9	0.906375
152	0.904875
152.1	0.90425
152.2	0.903875
152.3	0.901625
152.4	0.90275
152.5	0.90625
152.6	0.905375
152.7	0.909
152.8	0.90825
152.9	0.907625
153	0.90475
153.1	0.905625
153.2	0.905125
153.3	0.905
153.4	0.902125
153.5	0.903
153.6	0.904625
153.7	0.90425
153.8	0.903625
153.9	0.903
154	0.902625
154.1	0.90375
154.2	0.905125
154.3	0.905125
154.4	0.90575
154.5	0.907875
154.6	0.90825
154.7	0.908
154.8	0.90825
154.9	0.908
155	0.909875
155.1	0.909125
155.2	0.909625
155.3	0.9085
155.4	0.909125
155.5	0.9095
155.6	0.911375
155.7	0.91
155.8	0.91025
155.9	0.909875
156	0.9095
156.1	0.909375
156.2	0.909375
156.3	0.90775
156.4	0.906
156.5	0.907375
156.6	0.907125
156.7	0.906875
156.8	0.906
156.9	0.906125
157	0.904
157.1	0.904
157.2	0.902
157.3	0.904
157.4	0.906875
157.5	0.90625
157.6	0.9055
157.7	0.906875
157.8	0.909375
157.9	0.91075
158	0.91025
158.1	0.910375
158.2	0.910375
158.3	0.910125
158.4	0.909
158.5	0.908875
158.6	0.907125
158.7	0.908
158.8	0.907375
158.9	0.90825
159	0.909
159.1	0.90875
159.2	0.907125
159.3	0.905875
159.4	0.9065
159.5	0.90725
159.6	0.90825
159.7	0.912
159.8	0.913375
159.9	0.913125
160	0.91475
160.1	0.914125
160.2	0.91575
160.3	0.915
160.4	0.91375
160.5	0.91275
160.6	0.912375
160.7	0.9135
160.8	0.9135
160.9	0.914
161	0.914375
161.1	0.916
161.2	0.9155
161.3	0.913375
161.4	0.913875
161.5	0.91425
161.6	0.914
161.7	0.914875
161.8	0.914125
161.9	0.91475
162	0.914
162.1	0.913
162.2	0.91375
162.3	0.910125
162.4	0.908875
162.5	0.908125
162.6	0.909
162.7	0.90675
162.8	0.907
162.9	0.907
163	0.908
163.1	0.9095
163.2	0.9115
163.3	0.913375
163.4	0.912125
163.5	0.91325
163.6	0.914
163.7	0.915375
163.8	0.9155
163.9	0.916625
164	0.915625
164.1	0.9155
164.2	0.916875
164.3	0.916
164.4	0.913625
164.5	0.912625
164.6	0.9125
164.7	0.91425
164.8	0.912625
164.9	0.914125
165	0.9145
165.1	0.9125
165.2	0.91325
165.3	0.91425
165.4	0.91625
165.5	0.91275
165.6	0.912
165.7	0.910875
165.8	0.912
165.9	0.91225
166	0.913
166.1	0.91275
166.2	0.914
166.3	0.913875
166.4	0.91475
166.5	0.914625
166.6	0.91325
166.7	0.91375
166.8	0.9125
166.9	0.91125
167	0.91125
167.1	0.911875
167.2	0.91425
167.3	0.914
167.4	0.911875
167.5	0.913875
167.6	0.9145
167.7	0.914625
167.8	0.91375
167.9	0.915
168	0.914375
168.1	0.912875
168.2	0.914875
168.3	0.914625
168.4	0.91325
168.5	0.9115
168.6	0.91325
168.7	0.9125
168.8	0.914625
168.9	0.91425
169	0.914375
169.1	0.9145
169.2	0.915375
169.3	0.914625
169.4	0.91475
169.5	0.914875
169.6	0.914375
169.7	0.912875
169.8	0.913125
169.9	0.91325
170	0.91225
170.1	0.9105
170.2	0.911625
170.3	0.911875
170.4	0.914375
170.5	0.913
170.6	0.915
170.7	0.913625
170.8	0.9125
170.9	0.91275
171	0.912625
171.1	0.913
171.2	0.9135
171.3	0.91575
171.4	0.914875
171.5	0.913625
171.6	0.913625
171.7	0.915625
171.8	0.917125
171.9	0.918125
172	0.918375
172.1	0.916625
172.2	0.9175
172.3	0.9165
172.4	0.916
172.5	0.916375
172.6	0.915375
172.7	0.915125
172.8	0.916125
172.9	0.91575
173	0.916875
173.1	0.917
173.2	0.917375
173.3	0.916125
173.4	0.91675
173.5	0.91725
173.6	0.918
173.7	0.917875
173.8	0.9175
173.9	0.9175
174	0.917875
174.1	0.916875
174.2	0.91625
174.3	0.915625
174.4	0.91475
174.5	0.917625
174.6	0.91675
174.7	0.91625
174.8	0.91475
174.9	0.915125
175	0.91575
175.1	0.916625
175.2	0.917875
175.3	0.919
175.4	0.91925
175.5	0.917875
175.6	0.917875
175.7	0.916875
175.8	0.915875
175.9	0.915375
176	0.915125
176.1	0.914625
176.2	0.916
176.3	0.9165
176.4	0.918625
176.5	0.91975
176.6	0.92
176.7	0.920125
176.8	0.919875
176.9	0.919875
177	0.92025
177.1	0.920375
177.2	0.920375
177.3	0.92175
177.4	0.921
177.5	0.920125
177.6	0.920125
177.7	0.920875
177.8	0.92175
177.9	0.92075
178	0.922
178.1	0.919
178.2	0.919625
178.3	0.92
178.4	0.920625
178.5	0.919
178.6	0.918625
178.7	0.918375
178.8	0.919125
178.9	0.919875
179	0.918625
179.1	0.9205
179.2	0.920125
179.3	0.91975
179.4	0.920875
179.5	0.9205
179.6	0.9205
179.7	0.9235
179.8	0.924875
179.9	0.9265
180	0.925125
180.1	0.92525
180.2	0.9255
180.3	0.925
180.4	0.925
180.5	0.9245
180.6	0.92275
180.7	0.923875
180.8	0.924125
180.9	0.922875
181	0.924
181.1	0.92425
181.2	0.92325
181.3	0.92225
181.4	0.92025
181.5	0.922625
181.6	0.9205
181.7	0.92025
181.8	0.9205
181.9	0.92225
182	0.92275
182.1	0.922375
182.2	0.9225
182.3	0.92225
182.4	0.922375
182.5	0.92375
182.6	0.923375
182.7	0.924625
182.8	0.92525
182.9	0.924375
183	0.922625
183.1	0.923625
183.2	0.9245
183.3	0.924875
183.4	0.924875
183.5	0.92475
183.6	0.92525
183.7	0.92325
183.8	0.924
183.9	0.92325
184	0.9245
184.1	0.9225
184.2	0.9225
184.3	0.92325
184.4	0.92325
184.5	0.923875
184.6	0.922875
184.7	0.92425
184.8	0.92575
184.9	0.925875
185	0.92575
185.1	0.92675
185.2	0.92675
185.3	0.926625
185.4	0.926
185.5	0.924875
185.6	0.92325
185.7	0.925375
185.8	0.92525
185.9	0.927125
186	0.92675
186.1	0.92775
186.2	0.92975
186.3	0.929625
186.4	0.92925
186.5	0.927125
186.6	0.927375
186.7	0.927875
186.8	0.927375
186.9	0.92775
187	0.927375
187.1	0.928
187.2	0.927375
187.3	0.92775
187.4	0.927
187.5	0.926375
187.6	0.9265
187.7	0.927625
187.8	0.928375
187.9	0.929875
188	0.9285
188.1	0.927
188.2	0.92725
188.3	0.929125
188.4	0.928875
188.5	0.92675
188.6	0.92725
188.7	0.924
188.8	0.923
188.9	0.92375
189	0.92425
189.1	0.925125
189.2	0.9255
189.3	0.92675
189.4	0.92725
189.5	0.928625
189.6	0.9285
189.7	0.92825
189.8	0.92875
189.9	0.92875
190	0.92825
190.1	0.92625
190.2	0.9245
190.3	0.926
190.4	0.9265
190.5	0.92625
190.6	0.926375
190.7	0.925375
190.8	0.925375
190.9	0.925
191	0.926125
191.1	0.92675
191.2	0.926625
191.3	0.92525
191.4	0.9255
191.5	0.92575
191.6	0.926
191.7	0.928625
191.8	0.928
191.9	0.92825
192	0.928875
192.1	0.93025
192.2	0.929
192.3	0.928375
192.4	0.9285
192.5	0.9285
192.6	0.9285
192.7	0.9285
192.8	0.927125
192.9	0.925
193	0.9245
193.1	0.924
193.2	0.925
193.3	0.924625
193.4	0.92675
193.5	0.9265
193.6	0.924
193.7	0.92575
193.8	0.925875
193.9	0.92525
194	0.925125
194.1	0.92525
194.2	0.926625
194.3	0.926125
194.4	0.925625
194.5	0.926125
194.6	0.926625
194.7	0.92675
194.8	0.925375
194.9	0.923875
195	0.924
195.1	0.9265
195.2	0.926875
195.3	0.926375
195.4	0.926
195.5	0.926625
195.6	0.925625
195.7	0.925625
195.8	0.926
195.9	0.925625
196	0.927375
196.1	0.928
196.2	0.92925
196.3	0.929625
196.4	0.929125
196.5	0.929375
196.6	0.927375
196.7	0.927
196.8	0.926375
196.9	0.927125
197	0.9295
197.1	0.9285
197.2	0.93025
197.3	0.92975
197.4	0.929375
197.5	0.931125
197.6	0.930875
197.7	0.930375
197.8	0.93175
197.9	0.931125
198	0.931
198.1	0.93
198.2	0.92925
198.3	0.9295
198.4	0.93175
198.5	0.93175
198.6	0.931125
198.7	0.93075
198.8	0.929625
198.9	0.92975
199	0.93025
199.1	0.930375
199.2	0.93025
199.3	0.926625
199.4	0.925375
199.5	0.926375
199.6	0.926
199.7	0.926375
199.8	0.927125
199.9	0.927875
200	0.930125
[truncated: 14,000 more rows]
