# Supplementary material for: Bayesian inference of kinetic schemes for ion channels by Kalman filtering
Source: eLife journal article supplement (doi:10.7554/elife.62714), 2022-05-04
Supplement: fig4-data7 [file 1_Sim_N_4000_Strom_MW_2M.xlsx]

## Sheet: Tabelle1
0.1	0
0.2	0
0.3	0
0.4	0
0.5	0
0.6	0
0.7	0
0.8	0
0.9	0
1	0
1.1	0
1.2	0
1.3	0
1.4	0
1.5	0
1.6	0
1.7	0
1.8	0
1.9	0
2	0
2.1	0
2.2	0
2.3	0
2.4	0
2.5	0
2.6	0
2.7	0
2.8	0
2.9	0
3	0
3.1	0
3.2	0
3.3	0
3.4	0
3.5	0
3.6	0
3.7	0
3.8	0
3.9	0
4	0
4.1	0
4.2	0
4.3	0
4.4	0
4.5	0
4.6	0
4.7	0
4.8	0
4.9	0
5	0
5.1	0
5.2	0
5.3	0
5.4	0
5.5	0
5.6	0
5.7	0
5.8	0
5.9	0
6	0
6.1	0
6.2	0
6.3	0
6.4	0
6.5	0
6.6	0
6.7	0
6.8	0
6.9	0
7	0
7.1	0
7.2	0
7.3	0
7.4	0
7.5	0
7.6	0
7.7	0
7.8	0
7.9	0
8	0
8.1	0
8.2	0
8.3	0
8.4	0
8.5	0
8.6	0
8.7	0
8.8	0
8.9	0
9	0
9.1	0
9.2	0
9.3	0
9.4	0
9.5	0
9.6	0
9.7	0
9.8	0
9.9	0
10	0
10.1	0
10.2	0
10.3	0
10.4	0
10.5	0
10.6	0
10.7	0
10.8	0
10.9	0
11	0
11.1	0
11.2	0
11.3	0
11.4	0
11.5	0
11.6	0
11.7	0
11.8	0
11.9	0
12	0
12.1	0
12.2	0
12.3	0
12.4	0
12.5	0
12.6	0
12.7	0
12.8	0
12.9	0
13	0
13.1	0
13.2	0
13.3	0
13.4	0
13.5	0
13.6	0
13.7	0
13.8	0
13.9	0
14	0
14.1	0
14.2	0
14.3	0
14.4	0
14.5	0
14.6	0
14.7	0
14.8	0
14.9	0
15	0
15.1	0
15.2	0
15.3	0
15.4	0
15.5	0
15.6	0
15.7	0
15.8	0
15.9	0
16	0
16.1	0
16.2	0
16.3	0
16.4	0
16.5	0
16.6	0
16.7	0
16.8	0
16.9	0
17	0
17.1	0
17.2	0
17.3	0
17.4	0
17.5	0
17.6	0
17.7	0
17.8	0
17.9	0
18	0
18.1	0
18.2	0
18.3	0
18.4	0
18.5	0
18.6	0
18.7	0
18.8	0
18.9	0
19	0
19.1	0
19.2	0
19.3	0
19.4	0
19.5	0
19.6	0
19.7	0
19.8	0
19.9	0
20	0
20.1	0
20.2	0
20.3	0
20.4	0
20.5	0
20.6	0
20.7	0
20.8	0
20.9	0
21	0
21.1	0
21.2	0
21.3	0
21.4	0
21.5	0
21.6	0
21.7	0
21.8	0
21.9	0
22	0
22.1	0
22.2	0
22.3	0
22.4	0
22.5	0
22.6	0
22.7	0
22.8	0
22.9	0
23	0
23.1	0
23.2	0
23.3	0
23.4	0
23.5	0
23.6	0
23.7	0
23.8	0
23.9	0
24	0
24.1	0
24.2	0
24.3	0
24.4	0
24.5	0
24.6	0
24.7	0
24.8	0
24.9	0
25	0
25.1	0
25.2	0
25.3	0
25.4	0
25.5	0
25.6	0
25.7	0
25.8	0
25.9	0
26	0
26.1	0
26.2	0
26.3	0
26.4	0
26.5	0
26.6	0
26.7	0
26.8	0
26.9	0
27	0
27.1	0
27.2	0
27.3	0
27.4	0
27.5	0
27.6	0
27.7	0
27.8	0
27.9	0
28	0
28.1	0
28.2	0
28.3	0
28.4	0
28.5	0
28.6	0
28.7	0
28.8	0
28.9	0
29	0
29.1	0
29.2	0
29.3	0
29.4	0
29.5	0
29.6	0
29.7	0
29.8	0
29.9	0
30	0
30.1	0
30.2	0
30.3	0
30.4	0
30.5	0
30.6	0
30.7	0
30.8	0
30.9	0
31	0
31.1	0
31.2	0
31.3	0
31.4	0
31.5	0
31.6	0
31.7	0
31.8	0
31.9	0
32	0
32.1	0
32.2	0
32.3	0
32.4	0
32.5	0
32.6	0
32.7	0
32.8	0
32.9	0
33	0
33.1	0
33.2	0
33.3	0
33.4	0
33.5	0
33.6	0
33.7	0
33.8	0
33.9	0
34	0
34.1	0
34.2	0
34.3	0
34.4	0
34.5	0
34.6	0
34.7	0
34.8	0
34.9	0
35	0
35.1	0
35.2	0
35.3	0
35.4	0
35.5	0
35.6	0
35.7	0
35.8	0
35.9	0
36	0
36.1	0
36.2	0
36.3	0
36.4	0
36.5	0
36.6	0
36.7	0
36.8	0
36.9	0
37	0
37.1	0
37.2	0
37.3	0
37.4	0
37.5	0
37.6	0
37.7	0
37.8	0
37.9	0
38	0
38.1	0
38.2	0
38.3	0
38.4	0
38.5	0
38.6	0
38.7	0
38.8	0
38.9	0
39	0
39.1	0
39.2	0
39.3	0
39.4	0
39.5	0
39.6	0
39.7	0
39.8	0
39.9	0
40	0
40.1	0
40.2	0
40.3	0
40.4	0
40.5	0
40.6	0
40.7	0
40.8	0
40.9	0
41	0
41.1	0
41.2	0
41.3	0
41.4	0
41.5	0
41.6	0
41.7	0
41.8	0
41.9	0
42	0
42.1	0
42.2	0
42.3	0
42.4	0
42.5	0
42.6	0
42.7	0
42.8	0
42.9	0
43	0
43.1	0
43.2	0
43.3	0
43.4	0
43.5	0
43.6	0
43.7	0
43.8	0
43.9	0
44	0
44.1	0
44.2	0
44.3	0
44.4	0
44.5	0
44.6	0
44.7	0
44.8	0
44.9	0
45	0
45.1	0
45.2	0
45.3	0
45.4	0
45.5	0
45.6	0
45.7	0
45.8	0
45.9	0
46	0
46.1	0
46.2	0
46.3	0
46.4	0
46.5	0
46.6	0
46.7	0
46.8	0
46.9	0
47	0
47.1	0
47.2	0
47.3	0
47.4	0
47.5	0
47.6	0
47.7	0
47.8	0
47.9	0
48	0
48.1	0
48.2	0
48.3	0
48.4	0
48.5	0
48.6	0
48.7	0
48.8	0
48.9	0
49	0
49.1	0
49.2	0
49.3	0
49.4	0
49.5	0
49.6	0
49.7	0
49.8	0
49.9	0
50	0
50.1	0
50.2	0
50.3	0
50.4	0
50.5	0
50.6	0
50.7	0
50.8	0
50.9	0
51	0
51.1	0
51.2	0
51.3	0
51.4	0
51.5	0
51.6	0
51.7	0
51.8	0
51.9	0
52	0
52.1	0
52.2	0
52.3	0
52.4	0
52.5	0
52.6	0
52.7	0
52.8	0
52.9	0
53	0
53.1	0
53.2	0
53.3	0
53.4	0
53.5	0
53.6	0
53.7	0
53.8	0
53.9	0
54	0
54.1	0
54.2	0
54.3	0
54.4	0
54.5	0
54.6	0
54.7	0
54.8	0
54.9	0
55	0
55.1	0
55.2	0
55.3	0
55.4	0
55.5	0
55.6	0
55.7	0
55.8	0
55.9	0
56	0
56.1	0
56.2	0
56.3	0
56.4	0
56.5	0
56.6	0
56.7	0
56.8	0
56.9	0
57	0
57.1	0
57.2	0
57.3	0
57.4	0
57.5	0
57.6	0
57.7	0
57.8	0
57.9	0
58	0
58.1	0
58.2	0
58.3	0
58.4	0
58.5	0
58.6	0
58.7	0
58.8	0
58.9	0
59	0
59.1	0
59.2	0
59.3	0
59.4	0
59.5	0
59.6	0
59.7	0
59.8	0
59.9	0
60	0
60.1	0
60.2	0
60.3	0
60.4	0
60.5	0
60.6	0
60.7	0
60.8	0
60.9	0
61	0
61.1	0
61.2	0
61.3	0
61.4	0
61.5	0
61.6	0
61.7	0
61.8	0
61.9	0
62	0
62.1	0
62.2	0
62.3	0
62.4	0
62.5	0
62.6	0
62.7	0
62.8	0
62.9	0
63	0
63.1	0
63.2	0
63.3	0
63.4	0
63.5	0
63.6	0
63.7	0
63.8	0
63.9	0
64	0
64.1	0
64.2	0
64.3	0
64.4	0
64.5	0
64.6	0
64.7	0
64.8	0
64.9	0
65	0
65.1	0
65.2	0
65.3	0
65.4	0
65.5	0
65.6	0
65.7	0
65.8	0
65.9	0
66	0
66.1	0
66.2	0
66.3	0
66.4	0
66.5	0
66.6	0
66.7	0
66.8	0
66.9	0
67	0
67.1	0
67.2	0
67.3	0
67.4	0
67.5	0
67.6	0
67.7	0
67.8	0
67.9	0
68	0
68.1	0
68.2	0
68.3	0
68.4	0
68.5	0
68.6	0
68.7	0
68.8	0
68.9	0
69	0
69.1	0
69.2	0
69.3	0
69.4	0
69.5	0
69.6	0
69.7	0
69.8	0
69.9	0
70	0
70.1	0
70.2	0
70.3	0
70.4	0
70.5	0
70.6	0
70.7	0
70.8	0
70.9	0
71	0
71.1	0
71.2	0
71.3	0
71.4	0
71.5	0
71.6	0
71.7	0
71.8	0
71.9	0
72	0
72.1	0
72.2	0
72.3	0
72.4	0
72.5	0
72.6	0
72.7	0
72.8	0
72.9	0
73	0
73.1	0
73.2	0
73.3	0
73.4	0
73.5	0
73.6	0
73.7	0
73.8	0
73.9	0
74	0
74.1	0
74.2	0
74.3	0
74.4	0
74.5	0
74.6	0
74.7	0
74.8	0
74.9	0
75	0
75.1	0
75.2	0
75.3	0
75.4	0
75.5	0
75.6	0
75.7	0
75.8	0
75.9	0
76	0
76.1	0
76.2	0
76.3	0
76.4	0
76.5	0
76.6	0
76.7	0
76.8	0
76.9	0
77	0
77.1	0
77.2	0
77.3	0
77.4	0
77.5	0
77.6	0
77.7	0
77.8	0
77.9	0
78	0
78.1	0
78.2	0
78.3	0
78.4	0
78.5	0
78.6	0
78.7	0
78.8	0
78.9	0
79	0
79.1	0
79.2	0
79.3	0
79.4	0
79.5	0
79.6	0
79.7	0
79.8	0
79.9	0
80	0
80.1	0
80.2	0
80.3	0
80.4	0
80.5	0
80.6	0
80.7	0
80.8	0
80.9	0
81	0
81.1	0
81.2	0
81.3	0
81.4	0
81.5	0
81.6	0
81.7	0
81.8	0
81.9	0
82	0
82.1	0
82.2	0
82.3	0
82.4	0
82.5	0
82.6	0
82.7	0
82.8	0
82.9	0
83	0
83.1	0
83.2	0
83.3	0
83.4	0
83.5	0
83.6	0
83.7	0
83.8	0
83.9	0
84	0
84.1	0
84.2	0
84.3	0
84.4	0
84.5	0
84.6	0
84.7	0
84.8	0
84.9	0
85	0
85.1	0
85.2	0
85.3	0
85.4	0
85.5	0
85.6	0
85.7	0
85.8	0
85.9	0
86	0
86.1	0
86.2	0
86.3	0
86.4	0
86.5	0
86.6	0
86.7	0
86.8	0
86.9	0
87	0
87.1	0
87.2	0
87.3	0
87.4	0
87.5	0
87.6	0
87.7	0
87.8	0
87.9	0
88	0
88.1	0
88.2	0
88.3	0
88.4	0
88.5	0
88.6	0
88.7	0
88.8	0
88.9	0
89	0
89.1	0
89.2	0
89.3	0
89.4	0
89.5	0
89.6	0
89.7	0
89.8	0
89.9	0
90	0
90.1	0
90.2	0
90.3	0
90.4	0
90.5	0
90.6	0
90.7	0
90.8	0
90.9	0
91	0
91.1	0
91.2	0
91.3	0
91.4	0
91.5	0
91.6	0
91.7	0
91.8	0
91.9	0
92	0
92.1	0
92.2	0
92.3	0
92.4	0
92.5	0
92.6	0
92.7	0
92.8	0
92.9	0
93	0
93.1	0
93.2	0
93.3	0
93.4	0
93.5	0
93.6	0
93.7	0
93.8	0
93.9	0
94	0
94.1	0
94.2	0
94.3	0
94.4	0
94.5	0
94.6	0
94.7	0
94.8	0
94.9	0
95	0
95.1	0
95.2	0
95.3	0
95.4	0
95.5	0
95.6	0
95.7	0
95.8	0
95.9	0
96	0
96.1	0
96.2	0
96.3	0
96.4	0
96.5	0
96.6	0
96.7	0
96.8	0
96.9	0
97	0
97.1	0
97.2	0
97.3	0
97.4	0
97.5	0
97.6	0
97.7	0
97.8	0
97.9	0
98	0
98.1	0
98.2	0
98.3	0
98.4	0
98.5	0
98.6	0
98.7	0
98.8	0
98.9	0
99	0
99.1	0
99.2	0
99.3	0
99.4	0
99.5	0
99.6	0
99.7	0
99.8	0
99.9	0
100	0
100.1	0
100.2	0
100.3	0.00025
100.4	0.00075
100.5	0.00175
100.6	0.00275
100.7	0.0035
100.8	0.00425
100.9	0.0055
101	0.00725
101.1	0.00825
101.2	0.00925
101.3	0.0105
101.4	0.0125
101.5	0.01375
101.6	0.01625
101.7	0.0185
101.8	0.0215
101.9	0.023
102	0.0245
102.1	0.0275
102.2	0.0305
102.3	0.0345
102.4	0.037
102.5	0.03975
102.6	0.04175
102.7	0.044
102.8	0.0475
102.9	0.04975
103	0.05125
103.1	0.05325
103.2	0.05525
103.3	0.05675
103.4	0.06
103.5	0.0615
103.6	0.063
103.7	0.06475
103.8	0.0675
103.9	0.0695
104	0.072
104.1	0.075
104.2	0.07675
104.3	0.07825
104.4	0.08075
104.5	0.0825
104.6	0.084
104.7	0.08475
104.8	0.0865
104.9	0.0895
105	0.09375
105.1	0.097
105.2	0.09925
105.3	0.1
105.4	0.101
105.5	0.103
105.6	0.10525
105.7	0.10875
105.8	0.10975
105.9	0.1115
106	0.11375
106.1	0.11525
106.2	0.11725
106.3	0.11925
106.4	0.1205
106.5	0.12225
106.6	0.125
106.7	0.12825
106.8	0.13125
106.9	0.134
107	0.1355
107.1	0.138
107.2	0.141
107.3	0.1435
107.4	0.14575
107.5	0.1475
107.6	0.15075
107.7	0.15325
107.8	0.15575
107.9	0.1565
108	0.1585
108.1	0.15975
108.2	0.16075
108.3	0.162
108.4	0.164
108.5	0.16625
108.6	0.16725
108.7	0.17
108.8	0.173
108.9	0.175
109	0.176
109.1	0.1775
109.2	0.1805
109.3	0.18225
109.4	0.18425
109.5	0.18625
109.6	0.18775
109.7	0.18925
109.8	0.19125
109.9	0.193
110	0.194
110.1	0.196
110.2	0.19775
110.3	0.2
110.4	0.20175
110.5	0.20275
110.6	0.204
110.7	0.20625
110.8	0.2085
110.9	0.211
111	0.21225
111.1	0.213
111.2	0.2145
111.3	0.216
111.4	0.218
111.5	0.22025
111.6	0.22225
111.7	0.22325
111.8	0.22375
111.9	0.22475
112	0.22675
112.1	0.22975
112.2	0.2335
112.3	0.2355
112.4	0.2375
112.5	0.2385
112.6	0.2395
112.7	0.2415
112.8	0.24325
112.9	0.24525
113	0.24675
113.1	0.24875
113.2	0.2505
113.3	0.252
113.4	0.255
113.5	0.25625
113.6	0.25875
113.7	0.26175
113.8	0.26325
113.9	0.26425
114	0.26675
114.1	0.269
114.2	0.27025
114.3	0.27225
114.4	0.2735
114.5	0.275
114.6	0.27675
114.7	0.27825
114.8	0.28
114.9	0.2825
115	0.2855
115.1	0.28525
115.2	0.286
115.3	0.28725
115.4	0.289
115.5	0.29125
115.6	0.29425
115.7	0.295
115.8	0.29625
115.9	0.30025
116	0.30175
116.1	0.30375
116.2	0.304
116.3	0.306
116.4	0.3075
116.5	0.3095
116.6	0.311
116.7	0.31275
116.8	0.31475
116.9	0.31625
117	0.31775
117.1	0.3195
117.2	0.3205
117.3	0.3205
117.4	0.322
117.5	0.32425
117.6	0.326
117.7	0.328
117.8	0.32925
117.9	0.331
118	0.332
118.1	0.333
118.2	0.335
118.3	0.3375
118.4	0.34
118.5	0.34075
118.6	0.3425
118.7	0.344
118.8	0.3465
118.9	0.34775
119	0.3485
119.1	0.35025
119.2	0.35175
119.3	0.3525
119.4	0.35375
119.5	0.35625
119.6	0.35725
119.7	0.35975
119.8	0.35975
119.9	0.362
120	0.36425
120.1	0.36525
120.2	0.366
120.3	0.367
120.4	0.367
120.5	0.3685
120.6	0.36925
120.7	0.3705
120.8	0.37175
120.9	0.37325
121	0.374
121.1	0.37475
121.2	0.3755
121.3	0.37725
121.4	0.37925
121.5	0.38175
121.6	0.38175
121.7	0.383
121.8	0.3845
121.9	0.38525
122	0.3865
122.1	0.3865
122.2	0.38775
122.3	0.38825
122.4	0.3905
122.5	0.3915
122.6	0.3925
122.7	0.39375
122.8	0.39575
122.9	0.39675
123	0.39775
123.1	0.39875
123.2	0.40125
123.3	0.402
123.4	0.404
123.5	0.40675
123.6	0.40775
123.7	0.4075
123.8	0.4085
123.9	0.4095
124	0.40975
124.1	0.4115
124.2	0.413
124.3	0.4135
124.4	0.4145
124.5	0.415
124.6	0.4165
124.7	0.417
124.8	0.41875
124.9	0.41975
125	0.42075
125.1	0.421
125.2	0.4215
125.3	0.4225
125.4	0.42475
125.5	0.42675
125.6	0.4275
125.7	0.42925
125.8	0.43
125.9	0.431
126	0.43175
126.1	0.433
126.2	0.43475
126.3	0.43575
126.4	0.43625
126.5	0.438
126.6	0.43875
126.7	0.43925
126.8	0.4405
126.9	0.44225
127	0.444
127.1	0.445
127.2	0.4455
127.3	0.446
127.4	0.447
127.5	0.44825
127.6	0.44775
127.7	0.449
127.8	0.44975
127.9	0.4515
128	0.45275
128.1	0.45275
128.2	0.454
128.3	0.4555
128.4	0.4555
128.5	0.45675
128.6	0.45825
128.7	0.45875
128.8	0.45925
128.9	0.45875
129	0.45925
129.1	0.46125
129.2	0.4615
129.3	0.46225
129.4	0.46175
129.5	0.46175
129.6	0.462
129.7	0.463
129.8	0.4635
129.9	0.46475
130	0.4655
130.1	0.46525
130.2	0.466
130.3	0.46825
130.4	0.4685
130.5	0.47025
130.6	0.471
130.7	0.47125
130.8	0.47225
130.9	0.47275
131	0.47325
131.1	0.474
131.2	0.4765
131.3	0.4775
131.4	0.4775
131.5	0.47825
131.6	0.479
131.7	0.481
131.8	0.48175
131.9	0.48225
132	0.4835
132.1	0.4845
132.2	0.4865
132.3	0.4875
132.4	0.4885
132.5	0.489
132.6	0.48975
132.7	0.49
132.8	0.49
132.9	0.4895
133	0.4915
133.1	0.49325
133.2	0.4945
133.3	0.49475
133.4	0.4965
133.5	0.49725
133.6	0.4985
133.7	0.4995
133.8	0.5
133.9	0.501
134	0.5015
134.1	0.5015
134.2	0.502
134.3	0.50325
134.4	0.503
134.5	0.503
134.6	0.50325
134.7	0.504
134.8	0.50475
134.9	0.50425
135	0.50525
135.1	0.50575
135.2	0.5075
135.3	0.50875
135.4	0.5085
135.5	0.5085
135.6	0.50975
135.7	0.51075
135.8	0.5115
135.9	0.51225
136	0.51275
136.1	0.5135
136.2	0.51475
136.3	0.51475
136.4	0.5145
136.5	0.5155
136.6	0.5155
136.7	0.51625
136.8	0.5165
136.9	0.51625
137	0.51625
137.1	0.5175
137.2	0.51725
137.3	0.518
137.4	0.518
137.5	0.51875
137.6	0.52
137.7	0.5205
137.8	0.52075
137.9	0.5215
138	0.522
138.1	0.5225
138.2	0.523
138.3	0.523
138.4	0.52525
138.5	0.526
138.6	0.5265
138.7	0.528
138.8	0.5285
138.9	0.52975
139	0.53025
139.1	0.53125
139.2	0.5305
139.3	0.5325
139.4	0.533
139.5	0.53275
139.6	0.534
139.7	0.53525
139.8	0.53525
139.9	0.5345
140	0.535
140.1	0.5355
140.2	0.5375
140.3	0.53725
140.4	0.538
140.5	0.53775
140.6	0.53775
140.7	0.5385
140.8	0.539
140.9	0.5405
141	0.5405
141.1	0.54175
141.2	0.542
141.3	0.544
141.4	0.545
141.5	0.54475
141.6	0.546
141.7	0.54675
141.8	0.5465
141.9	0.5485
142	0.549
142.1	0.55025
142.2	0.5525
142.3	0.55325
142.4	0.555
142.5	0.55475
142.6	0.5575
142.7	0.559
142.8	0.55875
142.9	0.55875
143	0.5585
143.1	0.5595
143.2	0.55975
143.3	0.5605
143.4	0.56225
143.5	0.56225
143.6	0.562
143.7	0.56175
143.8	0.56275
143.9	0.56325
144	0.563
144.1	0.5635
144.2	0.565
144.3	0.5665
144.4	0.56725
144.5	0.56925
144.6	0.57075
144.7	0.57075
144.8	0.56975
144.9	0.57025
145	0.5705
145.1	0.5705
145.2	0.5705
145.3	0.57125
145.4	0.57175
145.5	0.57175
145.6	0.5715
145.7	0.57175
145.8	0.5725
145.9	0.57275
146	0.57275
146.1	0.574
146.2	0.575
146.3	0.5745
146.4	0.577
146.5	0.576
146.6	0.5765
146.7	0.57675
146.8	0.5775
146.9	0.57875
147	0.57875
147.1	0.579
147.2	0.57875
147.3	0.57825
147.4	0.579
147.5	0.5795
147.6	0.58
147.7	0.5805
147.8	0.58
147.9	0.58075
148	0.581
148.1	0.58175
148.2	0.58225
148.3	0.5835
148.4	0.5845
148.5	0.58575
148.6	0.58625
148.7	0.586
148.8	0.58675
148.9	0.58775
149	0.58775
149.1	0.588
149.2	0.58975
149.3	0.59075
149.4	0.5915
149.5	0.59225
149.6	0.59275
149.7	0.59175
149.8	0.593
149.9	0.5935
150	0.594
150.1	0.5955
150.2	0.59575
150.3	0.5955
150.4	0.5955
150.5	0.5965
150.6	0.597
150.7	0.5975
150.8	0.5975
150.9	0.59675
151	0.59825
151.1	0.59775
151.2	0.59725
151.3	0.59825
151.4	0.599
151.5	0.599
151.6	0.59975
151.7	0.60075
151.8	0.60075
151.9	0.601
152	0.60175
152.1	0.60225
152.2	0.602
152.3	0.60175
152.4	0.6025
152.5	0.603
152.6	0.60325
152.7	0.60425
152.8	0.60425
152.9	0.6045
153	0.60675
153.1	0.60825
153.2	0.60725
153.3	0.60725
153.4	0.608
153.5	0.6085
153.6	0.60875
153.7	0.60975
153.8	0.61025
153.9	0.6115
154	0.612
154.1	0.61275
154.2	0.61325
154.3	0.61375
154.4	0.6145
154.5	0.61425
154.6	0.61475
154.7	0.615
154.8	0.61525
154.9	0.615
155	0.616
155.1	0.616
155.2	0.61575
155.3	0.616
155.4	0.61675
155.5	0.6175
155.6	0.6175
155.7	0.6185
155.8	0.61875
155.9	0.61825
156	0.62
156.1	0.62075
156.2	0.62125
156.3	0.621
156.4	0.62175
156.5	0.62175
156.6	0.622
156.7	0.62175
156.8	0.62275
156.9	0.6225
157	0.6235
157.1	0.6245
157.2	0.6255
157.3	0.62575
157.4	0.62625
157.5	0.6255
157.6	0.62525
157.7	0.62625
157.8	0.6265
157.9	0.62675
158	0.6265
158.1	0.6275
158.2	0.628
158.3	0.62875
158.4	0.6295
158.5	0.6295
158.6	0.63
158.7	0.63025
158.8	0.63075
158.9	0.631
159	0.63125
159.1	0.632
159.2	0.6325
159.3	0.6325
159.4	0.632
159.5	0.63175
159.6	0.63075
159.7	0.63075
159.8	0.6315
159.9	0.6315
160	0.632
160.1	0.63175
160.2	0.63275
160.3	0.6335
160.4	0.633
160.5	0.63375
160.6	0.6335
160.7	0.63325
160.8	0.63325
160.9	0.63375
161	0.63325
161.1	0.6345
161.2	0.6335
161.3	0.63425
161.4	0.635
161.5	0.6345
161.6	0.6345
161.7	0.635
161.8	0.63475
161.9	0.635
162	0.63575
162.1	0.63675
162.2	0.6365
162.3	0.6375
162.4	0.6385
162.5	0.6385
162.6	0.63975
162.7	0.64025
162.8	0.64
162.9	0.642
163	0.6425
163.1	0.643
163.2	0.64325
163.3	0.64375
163.4	0.644
163.5	0.64425
163.6	0.6445
163.7	0.64425
163.8	0.64475
163.9	0.64475
164	0.64425
164.1	0.6445
164.2	0.64425
164.3	0.64425
164.4	0.6445
164.5	0.64425
164.6	0.6445
164.7	0.64625
164.8	0.6465
164.9	0.64575
165	0.6455
165.1	0.6455
165.2	0.64525
165.3	0.645
165.4	0.64625
165.5	0.64675
165.6	0.64725
165.7	0.64775
165.8	0.64725
165.9	0.64625
166	0.6465
166.1	0.64675
166.2	0.6485
166.3	0.6495
166.4	0.64975
166.5	0.65025
166.6	0.6495
166.7	0.6495
166.8	0.64925
166.9	0.64925
167	0.6495
167.1	0.65
167.2	0.64975
167.3	0.65075
167.4	0.651
167.5	0.65125
167.6	0.65125
167.7	0.65075
167.8	0.65
167.9	0.6495
168	0.65
168.1	0.6505
168.2	0.65175
168.3	0.652
168.4	0.65325
168.5	0.6545
168.6	0.655
168.7	0.655
168.8	0.6555
168.9	0.656
169	0.6565
169.1	0.6565
169.2	0.6565
169.3	0.65625
169.4	0.656
169.5	0.65625
169.6	0.65625
169.7	0.65625
169.8	0.6565
169.9	0.658
170	0.65775
170.1	0.6565
170.2	0.65625
170.3	0.65525
170.4	0.65575
170.5	0.65725
170.6	0.65775
170.7	0.65875
170.8	0.65875
170.9	0.65975
171	0.65975
171.1	0.66075
171.2	0.6605
171.3	0.65975
171.4	0.66025
171.5	0.66075
171.6	0.661
171.7	0.66025
171.8	0.661
171.9	0.661
172	0.66125
172.1	0.66175
172.2	0.6625
172.3	0.6625
172.4	0.66325
172.5	0.663
172.6	0.66325
172.7	0.6625
172.8	0.66325
172.9	0.66425
173	0.6645
173.1	0.6645
173.2	0.66425
173.3	0.66475
173.4	0.6645
173.5	0.6645
173.6	0.66475
173.7	0.6645
173.8	0.6645
173.9	0.66575
174	0.66575
174.1	0.66625
174.2	0.66625
174.3	0.6665
174.4	0.667
174.5	0.66775
174.6	0.667
174.7	0.66675
174.8	0.66775
174.9	0.667
175	0.66775
175.1	0.668
175.2	0.66825
175.3	0.669
175.4	0.6685
175.5	0.668
175.6	0.66825
175.7	0.66925
175.8	0.67
175.9	0.6715
176	0.6715
176.1	0.67125
176.2	0.672
176.3	0.67275
176.4	0.67325
176.5	0.6735
176.6	0.6735
176.7	0.674
176.8	0.67425
176.9	0.67425
177	0.674
177.1	0.67425
177.2	0.6745
177.3	0.675
177.4	0.67425
177.5	0.6735
177.6	0.674
177.7	0.6745
177.8	0.67475
177.9	0.6745
178	0.676
178.1	0.6765
178.2	0.676
178.3	0.67675
178.4	0.67725
178.5	0.67825
178.6	0.67725
178.7	0.67725
178.8	0.6775
178.9	0.67675
179	0.67625
179.1	0.67675
179.2	0.675
179.3	0.676
179.4	0.676
179.5	0.67625
179.6	0.67675
179.7	0.67675
179.8	0.67775
179.9	0.67875
180	0.67925
180.1	0.67975
180.2	0.67975
180.3	0.68075
180.4	0.683
180.5	0.68325
180.6	0.68275
180.7	0.68325
180.8	0.6835
180.9	0.68375
181	0.684
181.1	0.684
181.2	0.68325
181.3	0.6845
181.4	0.6855
181.5	0.68575
181.6	0.68625
181.7	0.687
181.8	0.687
181.9	0.688
182	0.68925
182.1	0.6895
182.2	0.691
182.3	0.69125
182.4	0.6905
182.5	0.6905
182.6	0.69225
182.7	0.69125
182.8	0.6915
182.9	0.69175
183	0.6925
183.1	0.69275
183.2	0.69375
183.3	0.694
183.4	0.6935
183.5	0.69325
183.6	0.69325
183.7	0.694
183.8	0.69375
183.9	0.695
184	0.69475
184.1	0.6945
184.2	0.69325
184.3	0.6935
184.4	0.69425
184.5	0.69525
184.6	0.69525
184.7	0.6955
184.8	0.69525
184.9	0.695
185	0.695
185.1	0.6955
185.2	0.69575
185.3	0.69425
185.4	0.69475
185.5	0.69525
185.6	0.69575
185.7	0.6965
185.8	0.69675
185.9	0.69725
186	0.6975
186.1	0.69775
186.2	0.6975
186.3	0.698
186.4	0.69775
186.5	0.697
186.6	0.697
186.7	0.697
186.8	0.697
186.9	0.6975
187	0.69825
187.1	0.69875
187.2	0.698
187.3	0.6985
187.4	0.698
187.5	0.698
187.6	0.698
187.7	0.69775
187.8	0.697
187.9	0.6965
188	0.69625
188.1	0.69575
188.2	0.69475
188.3	0.69525
188.4	0.69525
188.5	0.6955
188.6	0.696
188.7	0.69525
188.8	0.69675
188.9	0.697
189	0.6955
189.1	0.69625
189.2	0.6955
189.3	0.69525
189.4	0.69625
189.5	0.695
189.6	0.69475
189.7	0.6945
189.8	0.69475
189.9	0.69525
190	0.6965
190.1	0.6955
190.2	0.696
190.3	0.697
190.4	0.69625
190.5	0.69625
190.6	0.69525
190.7	0.69625
190.8	0.697
190.9	0.697
191	0.6975
191.1	0.6985
191.2	0.6995
191.3	0.69925
191.4	0.6995
191.5	0.69925
191.6	0.69975
191.7	0.69975
191.8	0.701
191.9	0.702
192	0.702
192.1	0.7015
192.2	0.70075
192.3	0.7005
192.4	0.70025
192.5	0.7
192.6	0.70175
192.7	0.702
192.8	0.70125
192.9	0.70075
193	0.70025
193.1	0.7005
193.2	0.70075
193.3	0.7
193.4	0.69925
193.5	0.69925
193.6	0.69775
193.7	0.69725
193.8	0.697
193.9	0.6975
194	0.69825
194.1	0.6975
194.2	0.69675
194.3	0.6975
194.4	0.697
194.5	0.69725
194.6	0.6985
194.7	0.698
194.8	0.69725
194.9	0.698
195	0.69775
195.1	0.698
195.2	0.6975
195.3	0.69725
195.4	0.6975
195.5	0.69775
195.6	0.6975
195.7	0.697
195.8	0.69675
195.9	0.69675
196	0.6975
196.1	0.697
196.2	0.6985
196.3	0.699
196.4	0.6995
196.5	0.70075
196.6	0.70025
196.7	0.69975
196.8	0.69975
196.9	0.69875
197	0.69975
197.1	0.69975
197.2	0.7
197.3	0.699
197.4	0.6995
197.5	0.70025
197.6	0.7
197.7	0.7
197.8	0.70025
197.9	0.70025
198	0.70075
198.1	0.699
198.2	0.6995
198.3	0.7
198.4	0.70025
198.5	0.7005
198.6	0.70075
198.7	0.7005
198.8	0.70075
198.9	0.70075
199	0.7005
199.1	0.70125
199.2	0.70175
199.3	0.70275
199.4	0.70225
199.5	0.70175
199.6	0.702
199.7	0.7025
199.8	0.702
199.9	0.7025
200	0.70275
[truncated: 14,000 more rows]
