# Supplementary material for: Bayesian inference of kinetic schemes for ion channels by Kalman filtering
Source: eLife journal article supplement (doi:10.7554/elife.62714), 2022-05-04
Supplement: fig4-data7 [file 1_Sim_N_5000_Fluor_MW.xlsx]

## Sheet: Tabelle1
0.1	0
0.2	0
0.3	0
0.4	0
0.5	0
0.6	0
0.7	0
0.8	0
0.9	0
1	0
1.1	0
1.2	0
1.3	0
1.4	0
1.5	0
1.6	0
1.7	0
1.8	0
1.9	0
2	0
2.1	0
2.2	0
2.3	0
2.4	0
2.5	0
2.6	0
2.7	0
2.8	0
2.9	0
3	0
3.1	0
3.2	0
3.3	0
3.4	0
3.5	0
3.6	0
3.7	0
3.8	0
3.9	0
4	0
4.1	0
4.2	0
4.3	0
4.4	0
4.5	0
4.6	0
4.7	0
4.8	0
4.9	0
5	0
5.1	0
5.2	0
5.3	0
5.4	0
5.5	0
5.6	0
5.7	0
5.8	0
5.9	0
6	0
6.1	0
6.2	0
6.3	0
6.4	0
6.5	0
6.6	0
6.7	0
6.8	0
6.9	0
7	0
7.1	0
7.2	0
7.3	0
7.4	0
7.5	0
7.6	0
7.7	0
7.8	0
7.9	0
8	0
8.1	0
8.2	0
8.3	0
8.4	0
8.5	0
8.6	0
8.7	0
8.8	0
8.9	0
9	0
9.1	0
9.2	0
9.3	0
9.4	0
9.5	0
9.6	0
9.7	0
9.8	0
9.9	0
10	0
10.1	0
10.2	0
10.3	0
10.4	0
10.5	0
10.6	0
10.7	0
10.8	0
10.9	0
11	0
11.1	0
11.2	0
11.3	0
11.4	0
11.5	0
11.6	0
11.7	0
11.8	0
11.9	0
12	0
12.1	0
12.2	0
12.3	0
12.4	0
12.5	0
12.6	0
12.7	0
12.8	0
12.9	0
13	0
13.1	0
13.2	0
13.3	0
13.4	0
13.5	0
13.6	0
13.7	0
13.8	0
13.9	0
14	0
14.1	0
14.2	0
14.3	0
14.4	0
14.5	0
14.6	0
14.7	0
14.8	0
14.9	0
15	0
15.1	0
15.2	0
15.3	0
15.4	0
15.5	0
15.6	0
15.7	0
15.8	0
15.9	0
16	0
16.1	0
16.2	0
16.3	0
16.4	0
16.5	0
16.6	0
16.7	0
16.8	0
16.9	0
17	0
17.1	0
17.2	0
17.3	0
17.4	0
17.5	0
17.6	0
17.7	0
17.8	0
17.9	0
18	0
18.1	0
18.2	0
18.3	0
18.4	0
18.5	0
18.6	0
18.7	0
18.8	0
18.9	0
19	0
19.1	0
19.2	0
19.3	0
19.4	0
19.5	0
19.6	0
19.7	0
19.8	0
19.9	0
20	0
20.1	0
20.2	0
20.3	0
20.4	0
20.5	0
20.6	0
20.7	0
20.8	0
20.9	0
21	0
21.1	0
21.2	0
21.3	0
21.4	0
21.5	0
21.6	0
21.7	0
21.8	0
21.9	0
22	0
22.1	0
22.2	0
22.3	0
22.4	0
22.5	0
22.6	0
22.7	0
22.8	0
22.9	0
23	0
23.1	0
23.2	0
23.3	0
23.4	0
23.5	0
23.6	0
23.7	0
23.8	0
23.9	0
24	0
24.1	0
24.2	0
24.3	0
24.4	0
24.5	0
24.6	0
24.7	0
24.8	0
24.9	0
25	0
25.1	0
25.2	0
25.3	0
25.4	0
25.5	0
25.6	0
25.7	0
25.8	0
25.9	0
26	0
26.1	0
26.2	0
26.3	0
26.4	0
26.5	0
26.6	0
26.7	0
26.8	0
26.9	0
27	0
27.1	0
27.2	0
27.3	0
27.4	0
27.5	0
27.6	0
27.7	0
27.8	0
27.9	0
28	0
28.1	0
28.2	0
28.3	0
28.4	0
28.5	0
28.6	0
28.7	0
28.8	0
28.9	0
29	0
29.1	0
29.2	0
29.3	0
29.4	0
29.5	0
29.6	0
29.7	0
29.8	0
29.9	0
30	0
30.1	0
30.2	0
30.3	0
30.4	0
30.5	0
30.6	0
30.7	0
30.8	0
30.9	0
31	0
31.1	0
31.2	0
31.3	0
31.4	0
31.5	0
31.6	0
31.7	0
31.8	0
31.9	0
32	0
32.1	0
32.2	0
32.3	0
32.4	0
32.5	0
32.6	0
32.7	0
32.8	0
32.9	0
33	0
33.1	0
33.2	0
33.3	0
33.4	0
33.5	0
33.6	0
33.7	0
33.8	0
33.9	0
34	0
34.1	0
34.2	0
34.3	0
34.4	0
34.5	0
34.6	0
34.7	0
34.8	0
34.9	0
35	0
35.1	0
35.2	0
35.3	0
35.4	0
35.5	0
35.6	0
35.7	0
35.8	0
35.9	0
36	0
36.1	0
36.2	0
36.3	0
36.4	0
36.5	0
36.6	0
36.7	0
36.8	0
36.9	0
37	0
37.1	0
37.2	0
37.3	0
37.4	0
37.5	0
37.6	0
37.7	0
37.8	0
37.9	0
38	0
38.1	0
38.2	0
38.3	0
38.4	0
38.5	0
38.6	0
38.7	0
38.8	0
38.9	0
39	0
39.1	0
39.2	0
39.3	0
39.4	0
39.5	0
39.6	0
39.7	0
39.8	0
39.9	0
40	0
40.1	0
40.2	0
40.3	0
40.4	0
40.5	0
40.6	0
40.7	0
40.8	0
40.9	0
41	0
41.1	0
41.2	0
41.3	0
41.4	0
41.5	0
41.6	0
41.7	0
41.8	0
41.9	0
42	0
42.1	0
42.2	0
42.3	0
42.4	0
42.5	0
42.6	0
42.7	0
42.8	0
42.9	0
43	0
43.1	0
43.2	0
43.3	0
43.4	0
43.5	0
43.6	0
43.7	0
43.8	0
43.9	0
44	0
44.1	0
44.2	0
44.3	0
44.4	0
44.5	0
44.6	0
44.7	0
44.8	0
44.9	0
45	0
45.1	0
45.2	0
45.3	0
45.4	0
45.5	0
45.6	0
45.7	0
45.8	0
45.9	0
46	0
46.1	0
46.2	0
46.3	0
46.4	0
46.5	0
46.6	0
46.7	0
46.8	0
46.9	0
47	0
47.1	0
47.2	0
47.3	0
47.4	0
47.5	0
47.6	0
47.7	0
47.8	0
47.9	0
48	0
48.1	0
48.2	0
48.3	0
48.4	0
48.5	0
48.6	0
48.7	0
48.8	0
48.9	0
49	0
49.1	0
49.2	0
49.3	0
49.4	0
49.5	0
49.6	0
49.7	0
49.8	0
49.9	0
50	0
50.1	0
50.2	0
50.3	0
50.4	0
50.5	0
50.6	0
50.7	0
50.8	0
50.9	0
51	0
51.1	0
51.2	0
51.3	0
51.4	0
51.5	0
51.6	0
51.7	0
51.8	0
51.9	0
52	0
52.1	0
52.2	0
52.3	0
52.4	0
52.5	0
52.6	0
52.7	0
52.8	0
52.9	0
53	0
53.1	0
53.2	0
53.3	0
53.4	0
53.5	0
53.6	0
53.7	0
53.8	0
53.9	0
54	0
54.1	0
54.2	0
54.3	0
54.4	0
54.5	0
54.6	0
54.7	0
54.8	0
54.9	0
55	0
55.1	0
55.2	0
55.3	0
55.4	0
55.5	0
55.6	0
55.7	0
55.8	0
55.9	0
56	0
56.1	0
56.2	0
56.3	0
56.4	0
56.5	0
56.6	0
56.7	0
56.8	0
56.9	0
57	0
57.1	0
57.2	0
57.3	0
57.4	0
57.5	0
57.6	0
57.7	0
57.8	0
57.9	0
58	0
58.1	0
58.2	0
58.3	0
58.4	0
58.5	0
58.6	0
58.7	0
58.8	0
58.9	0
59	0
59.1	0
59.2	0
59.3	0
59.4	0
59.5	0
59.6	0
59.7	0
59.8	0
59.9	0
60	0
60.1	0
60.2	0
60.3	0
60.4	0
60.5	0
60.6	0
60.7	0
60.8	0
60.9	0
61	0
61.1	0
61.2	0
61.3	0
61.4	0
61.5	0
61.6	0
61.7	0
61.8	0
61.9	0
62	0
62.1	0
62.2	0
62.3	0
62.4	0
62.5	0
62.6	0
62.7	0
62.8	0
62.9	0
63	0
63.1	0
63.2	0
63.3	0
63.4	0
63.5	0
63.6	0
63.7	0
63.8	0
63.9	0
64	0
64.1	0
64.2	0
64.3	0
64.4	0
64.5	0
64.6	0
64.7	0
64.8	0
64.9	0
65	0
65.1	0
65.2	0
65.3	0
65.4	0
65.5	0
65.6	0
65.7	0
65.8	0
65.9	0
66	0
66.1	0
66.2	0
66.3	0
66.4	0
66.5	0
66.6	0
66.7	0
66.8	0
66.9	0
67	0
67.1	0
67.2	0
67.3	0
67.4	0
67.5	0
67.6	0
67.7	0
67.8	0
67.9	0
68	0
68.1	0
68.2	0
68.3	0
68.4	0
68.5	0
68.6	0
68.7	0
68.8	0
68.9	0
69	0
69.1	0
69.2	0
69.3	0
69.4	0
69.5	0
69.6	0
69.7	0
69.8	0
69.9	0
70	0
70.1	0
70.2	0
70.3	0
70.4	0
70.5	0
70.6	0
70.7	0
70.8	0
70.9	0
71	0
71.1	0
71.2	0
71.3	0
71.4	0
71.5	0
71.6	0
71.7	0
71.8	0
71.9	0
72	0
72.1	0
72.2	0
72.3	0
72.4	0
72.5	0
72.6	0
72.7	0
72.8	0
72.9	0
73	0
73.1	0
73.2	0
73.3	0
73.4	0
73.5	0
73.6	0
73.7	0
73.8	0
73.9	0
74	0
74.1	0
74.2	0
74.3	0
74.4	0
74.5	0
74.6	0
74.7	0
74.8	0
74.9	0
75	0
75.1	0
75.2	0
75.3	0
75.4	0
75.5	0
75.6	0
75.7	0
75.8	0
75.9	0
76	0
76.1	0
76.2	0
76.3	0
76.4	0
76.5	0
76.6	0
76.7	0
76.8	0
76.9	0
77	0
77.1	0
77.2	0
77.3	0
77.4	0
77.5	0
77.6	0
77.7	0
77.8	0
77.9	0
78	0
78.1	0
78.2	0
78.3	0
78.4	0
78.5	0
78.6	0
78.7	0
78.8	0
78.9	0
79	0
79.1	0
79.2	0
79.3	0
79.4	0
79.5	0
79.6	0
79.7	0
79.8	0
79.9	0
80	0
80.1	0
80.2	0
80.3	0
80.4	0
80.5	0
80.6	0
80.7	0
80.8	0
80.9	0
81	0
81.1	0
81.2	0
81.3	0
81.4	0
81.5	0
81.6	0
81.7	0
81.8	0
81.9	0
82	0
82.1	0
82.2	0
82.3	0
82.4	0
82.5	0
82.6	0
82.7	0
82.8	0
82.9	0
83	0
83.1	0
83.2	0
83.3	0
83.4	0
83.5	0
83.6	0
83.7	0
83.8	0
83.9	0
84	0
84.1	0
84.2	0
84.3	0
84.4	0
84.5	0
84.6	0
84.7	0
84.8	0
84.9	0
85	0
85.1	0
85.2	0
85.3	0
85.4	0
85.5	0
85.6	0
85.7	0
85.8	0
85.9	0
86	0
86.1	0
86.2	0
86.3	0
86.4	0
86.5	0
86.6	0
86.7	0
86.8	0
86.9	0
87	0
87.1	0
87.2	0
87.3	0
87.4	0
87.5	0
87.6	0
87.7	0
87.8	0
87.9	0
88	0
88.1	0
88.2	0
88.3	0
88.4	0
88.5	0
88.6	0
88.7	0
88.8	0
88.9	0
89	0
89.1	0
89.2	0
89.3	0
89.4	0
89.5	0
89.6	0
89.7	0
89.8	0
89.9	0
90	0
90.1	0
90.2	0
90.3	0
90.4	0
90.5	0
90.6	0
90.7	0
90.8	0
90.9	0
91	0
91.1	0
91.2	0
91.3	0
91.4	0
91.5	0
91.6	0
91.7	0
91.8	0
91.9	0
92	0
92.1	0
92.2	0
92.3	0
92.4	0
92.5	0
92.6	0
92.7	0
92.8	0
92.9	0
93	0
93.1	0
93.2	0
93.3	0
93.4	0
93.5	0
93.6	0
93.7	0
93.8	0
93.9	0
94	0
94.1	0
94.2	0
94.3	0
94.4	0
94.5	0
94.6	0
94.7	0
94.8	0
94.9	0
95	0
95.1	0
95.2	0
95.3	0
95.4	0
95.5	0
95.6	0
95.7	0
95.8	0
95.9	0
96	0
96.1	0
96.2	0
96.3	0
96.4	0
96.5	0
96.6	0
96.7	0
96.8	0
96.9	0
97	0
97.1	0
97.2	0
97.3	0
97.4	0
97.5	0
97.6	0
97.7	0
97.8	0
97.9	0
98	0
98.1	0
98.2	0
98.3	0
98.4	0
98.5	0
98.6	0
98.7	0
98.8	0
98.9	0
99	0
99.1	0
99.2	0
99.3	0
99.4	0
99.5	0
99.6	0
99.7	0
99.8	0
99.9	0
100	0
100.1	0.1148
100.2	0.2081
100.3	0.286
100.4	0.3439
100.5	0.3964
100.6	0.4437
100.7	0.4812
100.8	0.5153
100.9	0.5432
101	0.5666
101.1	0.5876
101.2	0.6067
101.3	0.6244
101.4	0.6407
101.5	0.6542
101.6	0.6648
101.7	0.6769
101.8	0.6839
101.9	0.6928
102	0.7002
102.1	0.7046
102.2	0.7112
102.3	0.7132
102.4	0.7212
102.5	0.7236
102.6	0.7245
102.7	0.7278
102.8	0.7321
102.9	0.7353
103	0.7384
103.1	0.7428
103.2	0.7469
103.3	0.7466
103.4	0.7481
103.5	0.751
103.6	0.7543
103.7	0.7555
103.8	0.7561
103.9	0.7586
104	0.7583
104.1	0.759
104.2	0.7606
104.3	0.7626
104.4	0.7627
104.5	0.7615
104.6	0.7622
104.7	0.7638
104.8	0.7649
104.9	0.7656
105	0.7683
105.1	0.7699
105.2	0.771
105.3	0.7715
105.4	0.773
105.5	0.7741
105.6	0.7774
105.7	0.7811
105.8	0.7812
105.9	0.7823
106	0.7832
106.1	0.7813
106.2	0.7836
106.3	0.781
106.4	0.784
106.5	0.7861
106.6	0.7861
106.7	0.7856
106.8	0.7861
106.9	0.7872
107	0.7892
107.1	0.7896
107.2	0.7895
107.3	0.7903
107.4	0.788
107.5	0.7895
107.6	0.7919
107.7	0.7934
107.8	0.7945
107.9	0.793
108	0.796
108.1	0.7967
108.2	0.7957
108.3	0.7955
108.4	0.795
108.5	0.7966
108.6	0.7969
108.7	0.7958
108.8	0.7969
108.9	0.7957
109	0.7953
109.1	0.7965
109.2	0.7991
109.3	0.7973
109.4	0.7992
109.5	0.7998
109.6	0.8013
109.7	0.8001
109.8	0.8016
109.9	0.8044
110	0.8029
110.1	0.801
110.2	0.8015
110.3	0.8022
110.4	0.8034
110.5	0.8054
110.6	0.8056
110.7	0.8071
110.8	0.8051
110.9	0.8062
111	0.8042
111.1	0.8051
111.2	0.8051
111.3	0.8041
111.4	0.8056
111.5	0.809
111.6	0.8071
111.7	0.8045
111.8	0.8047
111.9	0.8019
112	0.806
112.1	0.8088
112.2	0.8098
112.3	0.8096
112.4	0.8073
112.5	0.8083
112.6	0.8106
112.7	0.8142
112.8	0.8148
112.9	0.8145
113	0.8139
113.1	0.8143
113.2	0.814
113.3	0.8132
113.4	0.8155
113.5	0.8193
113.6	0.8197
113.7	0.8232
113.8	0.8203
113.9	0.8219
114	0.8218
114.1	0.8212
114.2	0.821
114.3	0.8207
114.4	0.8212
114.5	0.8211
114.6	0.8231
114.7	0.8228
114.8	0.8236
114.9	0.8222
115	0.8251
115.1	0.8269
115.2	0.8274
115.3	0.8292
115.4	0.8336
115.5	0.8332
115.6	0.8309
115.7	0.8315
115.8	0.8318
115.9	0.8307
116	0.8304
116.1	0.8324
116.2	0.8315
116.3	0.8332
116.4	0.834
116.5	0.8311
116.6	0.8286
116.7	0.8285
116.8	0.8261
116.9	0.8255
117	0.8271
117.1	0.8283
117.2	0.8288
117.3	0.8306
117.4	0.8325
117.5	0.8327
117.6	0.8322
117.7	0.8312
117.8	0.8303
117.9	0.8309
118	0.8321
118.1	0.8322
118.2	0.8342
118.3	0.8346
118.4	0.8375
118.5	0.8377
118.6	0.8361
118.7	0.8388
118.8	0.838
118.9	0.8386
119	0.8405
119.1	0.8402
119.2	0.8384
119.3	0.8384
119.4	0.8407
119.5	0.8411
119.6	0.8425
119.7	0.8432
119.8	0.8432
119.9	0.8428
120	0.8416
120.1	0.8428
120.2	0.8442
120.3	0.843
120.4	0.8425
120.5	0.845
120.6	0.8456
120.7	0.8477
120.8	0.8472
120.9	0.8459
121	0.8437
121.1	0.8479
121.2	0.8464
121.3	0.848
121.4	0.8477
121.5	0.8481
121.6	0.8487
121.7	0.8489
121.8	0.8498
121.9	0.8495
122	0.8483
122.1	0.8475
122.2	0.8472
122.3	0.8492
122.4	0.8487
122.5	0.85
122.6	0.85
122.7	0.8494
122.8	0.8516
122.9	0.85
123	0.8496
123.1	0.85
123.2	0.8505
123.3	0.8497
123.4	0.8491
123.5	0.8522
123.6	0.8519
123.7	0.8522
123.8	0.8535
123.9	0.8529
124	0.8536
124.1	0.8543
124.2	0.8533
124.3	0.8539
124.4	0.8556
124.5	0.8545
124.6	0.8565
124.7	0.8584
124.8	0.8579
124.9	0.8568
125	0.8584
125.1	0.8602
125.2	0.8605
125.3	0.8595
125.4	0.862
125.5	0.8596
125.6	0.8616
125.7	0.8636
125.8	0.8635
125.9	0.8632
126	0.8641
126.1	0.8645
126.2	0.8645
126.3	0.866
126.4	0.8664
126.5	0.8664
126.6	0.8672
126.7	0.8668
126.8	0.8682
126.9	0.8684
127	0.8657
127.1	0.8659
127.2	0.8655
127.3	0.8633
127.4	0.8659
127.5	0.8667
127.6	0.8665
127.7	0.8664
127.8	0.8681
127.9	0.869
128	0.8684
128.1	0.8672
128.2	0.8683
128.3	0.8679
128.4	0.8688
128.5	0.871
128.6	0.8702
128.7	0.8699
128.8	0.8699
128.9	0.8685
129	0.8707
129.1	0.871
129.2	0.8731
129.3	0.8734
129.4	0.8704
129.5	0.871
129.6	0.8717
129.7	0.8719
129.8	0.8727
129.9	0.875
130	0.8739
130.1	0.8738
130.2	0.8736
130.3	0.8731
130.4	0.8749
130.5	0.8758
130.6	0.8757
130.7	0.8772
130.8	0.8768
130.9	0.8758
131	0.8787
131.1	0.8787
131.2	0.8789
131.3	0.8789
131.4	0.8795
131.5	0.8806
131.6	0.8788
131.7	0.8782
131.8	0.8788
131.9	0.8801
132	0.8797
132.1	0.8801
132.2	0.8786
132.3	0.8789
132.4	0.877
132.5	0.8759
132.6	0.8766
132.7	0.8773
132.8	0.8776
132.9	0.8772
133	0.877
133.1	0.8778
133.2	0.8792
133.3	0.8794
133.4	0.8782
133.5	0.8783
133.6	0.879
133.7	0.8799
133.8	0.8808
133.9	0.8796
134	0.88
134.1	0.8806
134.2	0.8805
134.3	0.8809
134.4	0.8812
134.5	0.8803
134.6	0.8821
134.7	0.8824
134.8	0.8827
134.9	0.8815
135	0.8815
135.1	0.8813
135.2	0.8803
135.3	0.8811
135.4	0.8803
135.5	0.8817
135.6	0.8816
135.7	0.8814
135.8	0.8814
135.9	0.8823
136	0.8821
136.1	0.882
136.2	0.8809
136.3	0.8792
136.4	0.8806
136.5	0.8806
136.6	0.8828
136.7	0.8855
136.8	0.8856
136.9	0.8862
137	0.8841
137.1	0.8833
137.2	0.8832
137.3	0.8836
137.4	0.8852
137.5	0.8866
137.6	0.8875
137.7	0.8887
137.8	0.8902
137.9	0.8894
138	0.889
138.1	0.8876
138.2	0.886
138.3	0.886
138.4	0.8867
138.5	0.888
138.6	0.8885
138.7	0.8886
138.8	0.889
138.9	0.8887
139	0.8907
139.1	0.8918
139.2	0.8908
139.3	0.8917
139.4	0.891
139.5	0.8908
139.6	0.8897
139.7	0.8913
139.8	0.8915
139.9	0.8929
140	0.8921
140.1	0.893
140.2	0.8918
140.3	0.8912
140.4	0.8913
140.5	0.89
140.6	0.8908
140.7	0.8918
140.8	0.8904
140.9	0.8904
141	0.887
141.1	0.8863
141.2	0.888
141.3	0.8877
141.4	0.8872
141.5	0.8892
141.6	0.8904
141.7	0.8904
141.8	0.89
141.9	0.8897
142	0.8914
142.1	0.891
142.2	0.8919
142.3	0.8925
142.4	0.892
142.5	0.8934
142.6	0.8918
142.7	0.8915
142.8	0.8911
142.9	0.893
143	0.8926
143.1	0.8934
143.2	0.893
143.3	0.8939
143.4	0.894
143.5	0.8944
143.6	0.8952
143.7	0.8965
143.8	0.8965
143.9	0.8956
144	0.893
144.1	0.8929
144.2	0.8931
144.3	0.8907
144.4	0.8919
144.5	0.8935
144.6	0.8945
144.7	0.8941
144.8	0.8942
144.9	0.8952
145	0.893
145.1	0.8936
145.2	0.8951
145.3	0.8943
145.4	0.8945
145.5	0.8968
145.6	0.8976
145.7	0.8968
145.8	0.8989
145.9	0.8992
146	0.899
146.1	0.8961
146.2	0.8945
146.3	0.8947
146.4	0.894
146.5	0.8946
146.6	0.8966
146.7	0.8956
146.8	0.8967
146.9	0.8969
147	0.8999
147.1	0.9015
147.2	0.9007
147.3	0.901
147.4	0.8993
147.5	0.8983
147.6	0.8976
147.7	0.8986
147.8	0.8986
147.9	0.8988
148	0.9005
148.1	0.9015
148.2	0.9001
148.3	0.901
148.4	0.9029
148.5	0.9023
148.6	0.9021
148.7	0.9028
148.8	0.9039
148.9	0.9036
149	0.9039
149.1	0.9047
149.2	0.9043
149.3	0.9059
149.4	0.9077
149.5	0.9078
149.6	0.9076
149.7	0.9072
149.8	0.9066
149.9	0.9057
150	0.9071
150.1	0.9084
150.2	0.9088
150.3	0.9099
150.4	0.9098
150.5	0.9092
150.6	0.9084
150.7	0.9069
150.8	0.9052
150.9	0.9046
151	0.9058
151.1	0.9065
151.2	0.9084
151.3	0.9099
151.4	0.9107
151.5	0.9098
151.6	0.9092
151.7	0.9093
151.8	0.9106
151.9	0.9112
152	0.9089
152.1	0.909
152.2	0.9085
152.3	0.9086
152.4	0.9097
152.5	0.9116
152.6	0.9099
152.7	0.9111
152.8	0.911
152.9	0.9117
153	0.9107
153.1	0.9107
153.2	0.91
153.3	0.9106
153.4	0.9107
153.5	0.9095
153.6	0.91
153.7	0.9108
153.8	0.9113
153.9	0.911
154	0.9118
154.1	0.9116
154.2	0.9113
154.3	0.9107
154.4	0.9121
154.5	0.9126
154.6	0.9136
154.7	0.9104
154.8	0.9115
154.9	0.9102
155	0.911
155.1	0.9121
155.2	0.9134
155.3	0.9134
155.4	0.9112
155.5	0.9101
155.6	0.9101
155.7	0.9117
155.8	0.9125
155.9	0.9124
156	0.9138
156.1	0.9133
156.2	0.9135
156.3	0.9132
156.4	0.9147
156.5	0.9122
156.6	0.9121
156.7	0.9118
156.8	0.9123
156.9	0.913
157	0.9137
157.1	0.9141
157.2	0.9135
157.3	0.9134
157.4	0.9138
157.5	0.9132
157.6	0.9133
157.7	0.9118
157.8	0.9098
157.9	0.9099
158	0.9103
158.1	0.9119
158.2	0.9124
158.3	0.9126
158.4	0.9127
158.5	0.9143
158.6	0.9126
158.7	0.9111
158.8	0.9104
158.9	0.912
159	0.9135
159.1	0.914
159.2	0.9141
159.3	0.9148
159.4	0.9146
159.5	0.9153
159.6	0.9136
159.7	0.9137
159.8	0.9111
159.9	0.9119
160	0.9112
160.1	0.9107
160.2	0.9122
160.3	0.9118
160.4	0.9116
160.5	0.9121
160.6	0.9121
160.7	0.9126
160.8	0.9125
160.9	0.914
161	0.9148
161.1	0.9147
161.2	0.9153
161.3	0.9162
161.4	0.9155
161.5	0.9133
161.6	0.913
161.7	0.9142
161.8	0.9139
161.9	0.9136
162	0.9139
162.1	0.9141
162.2	0.9139
162.3	0.9142
162.4	0.9158
162.5	0.9149
162.6	0.9146
162.7	0.914
162.8	0.9147
162.9	0.9136
163	0.9132
163.1	0.9145
163.2	0.9139
163.3	0.9127
163.4	0.9139
163.5	0.914
163.6	0.9146
163.7	0.9154
163.8	0.9163
163.9	0.9154
164	0.9164
164.1	0.9151
164.2	0.9142
164.3	0.915
164.4	0.9154
164.5	0.9152
164.6	0.9149
164.7	0.9132
164.8	0.9144
164.9	0.9155
165	0.9163
165.1	0.9155
165.2	0.9165
165.3	0.9174
165.4	0.9168
165.5	0.9184
165.6	0.9203
165.7	0.9194
165.8	0.9191
165.9	0.9195
166	0.9214
166.1	0.92
166.2	0.9185
166.3	0.9185
166.4	0.9162
166.5	0.9158
166.6	0.916
166.7	0.9161
166.8	0.9154
166.9	0.9154
167	0.9186
167.1	0.9204
167.2	0.9226
167.3	0.9218
167.4	0.921
167.5	0.9218
167.6	0.9208
167.7	0.9195
167.8	0.9203
167.9	0.919
168	0.9181
168.1	0.917
168.2	0.9174
168.3	0.9186
168.4	0.918
168.5	0.9169
168.6	0.9183
168.7	0.9185
168.8	0.919
168.9	0.9197
169	0.919
169.1	0.9188
169.2	0.9176
169.3	0.9179
169.4	0.9187
169.5	0.9182
169.6	0.9189
169.7	0.919
169.8	0.9208
169.9	0.9205
170	0.9206
170.1	0.92
170.2	0.9215
170.3	0.9212
170.4	0.9198
170.5	0.9189
170.6	0.9198
170.7	0.9197
170.8	0.9197
170.9	0.9214
171	0.9214
171.1	0.9216
171.2	0.9211
171.3	0.9206
171.4	0.9211
171.5	0.9212
171.6	0.9215
171.7	0.9215
171.8	0.9232
171.9	0.9236
172	0.9227
172.1	0.9229
172.2	0.9216
172.3	0.9219
172.4	0.9225
172.5	0.9221
172.6	0.9214
172.7	0.9208
172.8	0.9212
172.9	0.9208
173	0.922
173.1	0.9222
173.2	0.9214
173.3	0.9208
173.4	0.921
173.5	0.9219
173.6	0.9236
173.7	0.9237
173.8	0.9234
173.9	0.9216
174	0.9217
174.1	0.9225
174.2	0.9233
174.3	0.9224
174.4	0.9243
174.5	0.9235
174.6	0.923
174.7	0.9238
174.8	0.9237
174.9	0.9243
175	0.9234
175.1	0.9232
175.2	0.9229
175.3	0.9238
175.4	0.924
175.5	0.9227
175.6	0.9238
175.7	0.9238
175.8	0.9225
175.9	0.9216
176	0.9222
176.1	0.9211
176.2	0.9212
176.3	0.9229
176.4	0.923
176.5	0.9239
176.6	0.9228
176.7	0.922
176.8	0.9234
176.9	0.924
177	0.9235
177.1	0.9247
177.2	0.9245
177.3	0.9241
177.4	0.9242
177.5	0.9245
177.6	0.9248
177.7	0.923
177.8	0.9227
177.9	0.9225
178	0.921
178.1	0.9206
178.2	0.9208
178.3	0.9217
178.4	0.9228
178.5	0.9208
178.6	0.9219
178.7	0.9227
178.8	0.922
178.9	0.9239
179	0.9247
179.1	0.9239
179.2	0.925
179.3	0.9236
179.4	0.9227
179.5	0.9223
179.6	0.9232
179.7	0.9248
179.8	0.9255
179.9	0.9276
180	0.9288
180.1	0.9271
180.2	0.9258
180.3	0.9257
180.4	0.925
180.5	0.9247
180.6	0.9237
180.7	0.924
180.8	0.9232
180.9	0.9232
181	0.9223
181.1	0.9205
181.2	0.9211
181.3	0.9202
181.4	0.9198
181.5	0.9215
181.6	0.9215
181.7	0.9208
181.8	0.9206
181.9	0.9206
182	0.9208
182.1	0.9205
182.2	0.9206
182.3	0.9212
182.4	0.922
182.5	0.9209
182.6	0.9219
182.7	0.9225
182.8	0.9233
182.9	0.9242
183	0.926
183.1	0.9267
183.2	0.9274
183.3	0.9281
183.4	0.9282
183.5	0.9299
183.6	0.9305
183.7	0.9282
183.8	0.9293
183.9	0.9277
184	0.9276
184.1	0.9269
184.2	0.9251
184.3	0.9245
184.4	0.9249
184.5	0.9258
184.6	0.9253
184.7	0.9256
184.8	0.926
184.9	0.9252
185	0.9249
185.1	0.9253
185.2	0.9255
185.3	0.9272
185.4	0.9266
185.5	0.9269
185.6	0.9278
185.7	0.9284
185.8	0.9293
185.9	0.9293
186	0.9272
186.1	0.9271
186.2	0.9256
186.3	0.9254
186.4	0.9256
186.5	0.9262
186.6	0.9261
186.7	0.9255
186.8	0.9245
186.9	0.924
187	0.9234
187.1	0.9249
187.2	0.925
187.3	0.9242
187.4	0.9252
187.5	0.9232
187.6	0.9239
187.7	0.9259
187.8	0.9276
187.9	0.9265
188	0.9255
188.1	0.9249
188.2	0.924
188.3	0.9252
188.4	0.9266
188.5	0.9268
188.6	0.925
188.7	0.9237
188.8	0.9235
188.9	0.922
189	0.9225
189.1	0.9218
189.2	0.9233
189.3	0.9225
189.4	0.9228
189.5	0.9231
189.6	0.9241
189.7	0.9237
189.8	0.9248
189.9	0.9255
190	0.9265
190.1	0.9266
190.2	0.9256
190.3	0.9279
190.4	0.9297
190.5	0.9288
190.6	0.93
190.7	0.9302
190.8	0.93
190.9	0.9291
191	0.9285
191.1	0.9286
191.2	0.9295
191.3	0.9313
191.4	0.9303
191.5	0.9286
191.6	0.9282
191.7	0.9272
191.8	0.9267
191.9	0.9281
192	0.9287
192.1	0.9286
192.2	0.9268
192.3	0.9285
192.4	0.9298
192.5	0.9291
192.6	0.928
192.7	0.9284
192.8	0.929
192.9	0.929
193	0.9295
193.1	0.9293
193.2	0.9282
193.3	0.928
193.4	0.9282
193.5	0.9277
193.6	0.9281
193.7	0.9292
193.8	0.9291
193.9	0.9261
194	0.9257
194.1	0.9256
194.2	0.9266
194.3	0.9275
194.4	0.9275
194.5	0.9267
194.6	0.9268
194.7	0.9265
194.8	0.9258
194.9	0.9247
195	0.9256
195.1	0.9253
195.2	0.9238
195.3	0.9255
195.4	0.9253
195.5	0.9233
195.6	0.9236
195.7	0.9245
195.8	0.9228
195.9	0.9233
196	0.9253
196.1	0.9251
196.2	0.9236
196.3	0.9252
196.4	0.9264
196.5	0.9259
196.6	0.9265
196.7	0.9258
196.8	0.9259
196.9	0.9271
197	0.9281
197.1	0.9288
197.2	0.9287
197.3	0.9282
197.4	0.9278
197.5	0.927
197.6	0.9263
197.7	0.9262
197.8	0.9271
197.9	0.9264
198	0.9264
198.1	0.9265
198.2	0.9264
198.3	0.927
198.4	0.9267
198.5	0.9261
198.6	0.926
198.7	0.9265
198.8	0.9258
198.9	0.926
199	0.926
199.1	0.9272
199.2	0.9276
199.3	0.9291
199.4	0.928
199.5	0.9288
199.6	0.9288
199.7	0.9295
199.8	0.9294
199.9	0.9298
200	0.9288
[truncated: 14,000 more rows]
