# Supplementary material for: Bayesian inference of kinetic schemes for ion channels by Kalman filtering
Source: eLife journal article supplement (doi:10.7554/elife.62714), 2022-05-04
Supplement: fig4-data7 [file 1_Sim_N_5000_Strom_MW.xlsx]

## Sheet: Tabelle1
0.1	0
0.2	0
0.3	0
0.4	0
0.5	0
0.6	0
0.7	0
0.8	0
0.9	0
1	0
1.1	0
1.2	0
1.3	0
1.4	0
1.5	0
1.6	0
1.7	0
1.8	0
1.9	0
2	0
2.1	0
2.2	0
2.3	0
2.4	0
2.5	0
2.6	0
2.7	0
2.8	0
2.9	0
3	0
3.1	0
3.2	0
3.3	0
3.4	0
3.5	0
3.6	0
3.7	0
3.8	0
3.9	0
4	0
4.1	0
4.2	0
4.3	0
4.4	0
4.5	0
4.6	0
4.7	0
4.8	0
4.9	0
5	0
5.1	0
5.2	0
5.3	0
5.4	0
5.5	0
5.6	0
5.7	0
5.8	0
5.9	0
6	0
6.1	0
6.2	0
6.3	0
6.4	0
6.5	0
6.6	0
6.7	0
6.8	0
6.9	0
7	0
7.1	0
7.2	0
7.3	0
7.4	0
7.5	0
7.6	0
7.7	0
7.8	0
7.9	0
8	0
8.1	0
8.2	0
8.3	0
8.4	0
8.5	0
8.6	0
8.7	0
8.8	0
8.9	0
9	0
9.1	0
9.2	0
9.3	0
9.4	0
9.5	0
9.6	0
9.7	0
9.8	0
9.9	0
10	0
10.1	0
10.2	0
10.3	0
10.4	0
10.5	0
10.6	0
10.7	0
10.8	0
10.9	0
11	0
11.1	0
11.2	0
11.3	0
11.4	0
11.5	0
11.6	0
11.7	0
11.8	0
11.9	0
12	0
12.1	0
12.2	0
12.3	0
12.4	0
12.5	0
12.6	0
12.7	0
12.8	0
12.9	0
13	0
13.1	0
13.2	0
13.3	0
13.4	0
13.5	0
13.6	0
13.7	0
13.8	0
13.9	0
14	0
14.1	0
14.2	0
14.3	0
14.4	0
14.5	0
14.6	0
14.7	0
14.8	0
14.9	0
15	0
15.1	0
15.2	0
15.3	0
15.4	0
15.5	0
15.6	0
15.7	0
15.8	0
15.9	0
16	0
16.1	0
16.2	0
16.3	0
16.4	0
16.5	0
16.6	0
16.7	0
16.8	0
16.9	0
17	0
17.1	0
17.2	0
17.3	0
17.4	0
17.5	0
17.6	0
17.7	0
17.8	0
17.9	0
18	0
18.1	0
18.2	0
18.3	0
18.4	0
18.5	0
18.6	0
18.7	0
18.8	0
18.9	0
19	0
19.1	0
19.2	0
19.3	0
19.4	0
19.5	0
19.6	0
19.7	0
19.8	0
19.9	0
20	0
20.1	0
20.2	0
20.3	0
20.4	0
20.5	0
20.6	0
20.7	0
20.8	0
20.9	0
21	0
21.1	0
21.2	0
21.3	0
21.4	0
21.5	0
21.6	0
21.7	0
21.8	0
21.9	0
22	0
22.1	0
22.2	0
22.3	0
22.4	0
22.5	0
22.6	0
22.7	0
22.8	0
22.9	0
23	0
23.1	0
23.2	0
23.3	0
23.4	0
23.5	0
23.6	0
23.7	0
23.8	0
23.9	0
24	0
24.1	0
24.2	0
24.3	0
24.4	0
24.5	0
24.6	0
24.7	0
24.8	0
24.9	0
25	0
25.1	0
25.2	0
25.3	0
25.4	0
25.5	0
25.6	0
25.7	0
25.8	0
25.9	0
26	0
26.1	0
26.2	0
26.3	0
26.4	0
26.5	0
26.6	0
26.7	0
26.8	0
26.9	0
27	0
27.1	0
27.2	0
27.3	0
27.4	0
27.5	0
27.6	0
27.7	0
27.8	0
27.9	0
28	0
28.1	0
28.2	0
28.3	0
28.4	0
28.5	0
28.6	0
28.7	0
28.8	0
28.9	0
29	0
29.1	0
29.2	0
29.3	0
29.4	0
29.5	0
29.6	0
29.7	0
29.8	0
29.9	0
30	0
30.1	0
30.2	0
30.3	0
30.4	0
30.5	0
30.6	0
30.7	0
30.8	0
30.9	0
31	0
31.1	0
31.2	0
31.3	0
31.4	0
31.5	0
31.6	0
31.7	0
31.8	0
31.9	0
32	0
32.1	0
32.2	0
32.3	0
32.4	0
32.5	0
32.6	0
32.7	0
32.8	0
32.9	0
33	0
33.1	0
33.2	0
33.3	0
33.4	0
33.5	0
33.6	0
33.7	0
33.8	0
33.9	0
34	0
34.1	0
34.2	0
34.3	0
34.4	0
34.5	0
34.6	0
34.7	0
34.8	0
34.9	0
35	0
35.1	0
35.2	0
35.3	0
35.4	0
35.5	0
35.6	0
35.7	0
35.8	0
35.9	0
36	0
36.1	0
36.2	0
36.3	0
36.4	0
36.5	0
36.6	0
36.7	0
36.8	0
36.9	0
37	0
37.1	0
37.2	0
37.3	0
37.4	0
37.5	0
37.6	0
37.7	0
37.8	0
37.9	0
38	0
38.1	0
38.2	0
38.3	0
38.4	0
38.5	0
38.6	0
38.7	0
38.8	0
38.9	0
39	0
39.1	0
39.2	0
39.3	0
39.4	0
39.5	0
39.6	0
39.7	0
39.8	0
39.9	0
40	0
40.1	0
40.2	0
40.3	0
40.4	0
40.5	0
40.6	0
40.7	0
40.8	0
40.9	0
41	0
41.1	0
41.2	0
41.3	0
41.4	0
41.5	0
41.6	0
41.7	0
41.8	0
41.9	0
42	0
42.1	0
42.2	0
42.3	0
42.4	0
42.5	0
42.6	0
42.7	0
42.8	0
42.9	0
43	0
43.1	0
43.2	0
43.3	0
43.4	0
43.5	0
43.6	0
43.7	0
43.8	0
43.9	0
44	0
44.1	0
44.2	0
44.3	0
44.4	0
44.5	0
44.6	0
44.7	0
44.8	0
44.9	0
45	0
45.1	0
45.2	0
45.3	0
45.4	0
45.5	0
45.6	0
45.7	0
45.8	0
45.9	0
46	0
46.1	0
46.2	0
46.3	0
46.4	0
46.5	0
46.6	0
46.7	0
46.8	0
46.9	0
47	0
47.1	0
47.2	0
47.3	0
47.4	0
47.5	0
47.6	0
47.7	0
47.8	0
47.9	0
48	0
48.1	0
48.2	0
48.3	0
48.4	0
48.5	0
48.6	0
48.7	0
48.8	0
48.9	0
49	0
49.1	0
49.2	0
49.3	0
49.4	0
49.5	0
49.6	0
49.7	0
49.8	0
49.9	0
50	0
50.1	0
50.2	0
50.3	0
50.4	0
50.5	0
50.6	0
50.7	0
50.8	0
50.9	0
51	0
51.1	0
51.2	0
51.3	0
51.4	0
51.5	0
51.6	0
51.7	0
51.8	0
51.9	0
52	0
52.1	0
52.2	0
52.3	0
52.4	0
52.5	0
52.6	0
52.7	0
52.8	0
52.9	0
53	0
53.1	0
53.2	0
53.3	0
53.4	0
53.5	0
53.6	0
53.7	0
53.8	0
53.9	0
54	0
54.1	0
54.2	0
54.3	0
54.4	0
54.5	0
54.6	0
54.7	0
54.8	0
54.9	0
55	0
55.1	0
55.2	0
55.3	0
55.4	0
55.5	0
55.6	0
55.7	0
55.8	0
55.9	0
56	0
56.1	0
56.2	0
56.3	0
56.4	0
56.5	0
56.6	0
56.7	0
56.8	0
56.9	0
57	0
57.1	0
57.2	0
57.3	0
57.4	0
57.5	0
57.6	0
57.7	0
57.8	0
57.9	0
58	0
58.1	0
58.2	0
58.3	0
58.4	0
58.5	0
58.6	0
58.7	0
58.8	0
58.9	0
59	0
59.1	0
59.2	0
59.3	0
59.4	0
59.5	0
59.6	0
59.7	0
59.8	0
59.9	0
60	0
60.1	0
60.2	0
60.3	0
60.4	0
60.5	0
60.6	0
60.7	0
60.8	0
60.9	0
61	0
61.1	0
61.2	0
61.3	0
61.4	0
61.5	0
61.6	0
61.7	0
61.8	0
61.9	0
62	0
62.1	0
62.2	0
62.3	0
62.4	0
62.5	0
62.6	0
62.7	0
62.8	0
62.9	0
63	0
63.1	0
63.2	0
63.3	0
63.4	0
63.5	0
63.6	0
63.7	0
63.8	0
63.9	0
64	0
64.1	0
64.2	0
64.3	0
64.4	0
64.5	0
64.6	0
64.7	0
64.8	0
64.9	0
65	0
65.1	0
65.2	0
65.3	0
65.4	0
65.5	0
65.6	0
65.7	0
65.8	0
65.9	0
66	0
66.1	0
66.2	0
66.3	0
66.4	0
66.5	0
66.6	0
66.7	0
66.8	0
66.9	0
67	0
67.1	0
67.2	0
67.3	0
67.4	0
67.5	0
67.6	0
67.7	0
67.8	0
67.9	0
68	0
68.1	0
68.2	0
68.3	0
68.4	0
68.5	0
68.6	0
68.7	0
68.8	0
68.9	0
69	0
69.1	0
69.2	0
69.3	0
69.4	0
69.5	0
69.6	0
69.7	0
69.8	0
69.9	0
70	0
70.1	0
70.2	0
70.3	0
70.4	0
70.5	0
70.6	0
70.7	0
70.8	0
70.9	0
71	0
71.1	0
71.2	0
71.3	0
71.4	0
71.5	0
71.6	0
71.7	0
71.8	0
71.9	0
72	0
72.1	0
72.2	0
72.3	0
72.4	0
72.5	0
72.6	0
72.7	0
72.8	0
72.9	0
73	0
73.1	0
73.2	0
73.3	0
73.4	0
73.5	0
73.6	0
73.7	0
73.8	0
73.9	0
74	0
74.1	0
74.2	0
74.3	0
74.4	0
74.5	0
74.6	0
74.7	0
74.8	0
74.9	0
75	0
75.1	0
75.2	0
75.3	0
75.4	0
75.5	0
75.6	0
75.7	0
75.8	0
75.9	0
76	0
76.1	0
76.2	0
76.3	0
76.4	0
76.5	0
76.6	0
76.7	0
76.8	0
76.9	0
77	0
77.1	0
77.2	0
77.3	0
77.4	0
77.5	0
77.6	0
77.7	0
77.8	0
77.9	0
78	0
78.1	0
78.2	0
78.3	0
78.4	0
78.5	0
78.6	0
78.7	0
78.8	0
78.9	0
79	0
79.1	0
79.2	0
79.3	0
79.4	0
79.5	0
79.6	0
79.7	0
79.8	0
79.9	0
80	0
80.1	0
80.2	0
80.3	0
80.4	0
80.5	0
80.6	0
80.7	0
80.8	0
80.9	0
81	0
81.1	0
81.2	0
81.3	0
81.4	0
81.5	0
81.6	0
81.7	0
81.8	0
81.9	0
82	0
82.1	0
82.2	0
82.3	0
82.4	0
82.5	0
82.6	0
82.7	0
82.8	0
82.9	0
83	0
83.1	0
83.2	0
83.3	0
83.4	0
83.5	0
83.6	0
83.7	0
83.8	0
83.9	0
84	0
84.1	0
84.2	0
84.3	0
84.4	0
84.5	0
84.6	0
84.7	0
84.8	0
84.9	0
85	0
85.1	0
85.2	0
85.3	0
85.4	0
85.5	0
85.6	0
85.7	0
85.8	0
85.9	0
86	0
86.1	0
86.2	0
86.3	0
86.4	0
86.5	0
86.6	0
86.7	0
86.8	0
86.9	0
87	0
87.1	0
87.2	0
87.3	0
87.4	0
87.5	0
87.6	0
87.7	0
87.8	0
87.9	0
88	0
88.1	0
88.2	0
88.3	0
88.4	0
88.5	0
88.6	0
88.7	0
88.8	0
88.9	0
89	0
89.1	0
89.2	0
89.3	0
89.4	0
89.5	0
89.6	0
89.7	0
89.8	0
89.9	0
90	0
90.1	0
90.2	0
90.3	0
90.4	0
90.5	0
90.6	0
90.7	0
90.8	0
90.9	0
91	0
91.1	0
91.2	0
91.3	0
91.4	0
91.5	0
91.6	0
91.7	0
91.8	0
91.9	0
92	0
92.1	0
92.2	0
92.3	0
92.4	0
92.5	0
92.6	0
92.7	0
92.8	0
92.9	0
93	0
93.1	0
93.2	0
93.3	0
93.4	0
93.5	0
93.6	0
93.7	0
93.8	0
93.9	0
94	0
94.1	0
94.2	0
94.3	0
94.4	0
94.5	0
94.6	0
94.7	0
94.8	0
94.9	0
95	0
95.1	0
95.2	0
95.3	0
95.4	0
95.5	0
95.6	0
95.7	0
95.8	0
95.9	0
96	0
96.1	0
96.2	0
96.3	0
96.4	0
96.5	0
96.6	0
96.7	0
96.8	0
96.9	0
97	0
97.1	0
97.2	0
97.3	0
97.4	0
97.5	0
97.6	0
97.7	0
97.8	0
97.9	0
98	0
98.1	0
98.2	0
98.3	0
98.4	0
98.5	0
98.6	0
98.7	0
98.8	0
98.9	0
99	0
99.1	0
99.2	0
99.3	0
99.4	0
99.5	0
99.6	0
99.7	0
99.8	0
99.9	0
100	0
100.1	0
100.2	0.0002
100.3	0.0006
100.4	0.0008
100.5	0.0016
100.6	0.002
100.7	0.0036
100.8	0.005
100.9	0.0066
101	0.0078
101.1	0.0092
101.2	0.01
101.3	0.0122
101.4	0.0134
101.5	0.0152
101.6	0.0178
101.7	0.0192
101.8	0.0214
101.9	0.0232
102	0.025
102.1	0.0262
102.2	0.0282
102.3	0.0302
102.4	0.0336
102.5	0.0352
102.6	0.0378
102.7	0.0392
102.8	0.0404
102.9	0.0426
103	0.0454
103.1	0.047
103.2	0.049
103.3	0.0514
103.4	0.0538
103.5	0.0564
103.6	0.0596
103.7	0.0614
103.8	0.0628
103.9	0.0646
104	0.0672
104.1	0.0698
104.2	0.0718
104.3	0.0738
104.4	0.076
104.5	0.0782
104.6	0.0808
104.7	0.0828
104.8	0.0864
104.9	0.088
105	0.0906
105.1	0.092
105.2	0.094
105.3	0.096
105.4	0.0988
105.5	0.1012
105.6	0.103
105.7	0.105
105.8	0.1096
105.9	0.1116
106	0.1142
106.1	0.1164
106.2	0.118
106.3	0.1202
106.4	0.124
106.5	0.126
106.6	0.1288
106.7	0.1312
106.8	0.133
106.9	0.1338
107	0.1362
107.1	0.1382
107.2	0.1398
107.3	0.1414
107.4	0.1438
107.5	0.1458
107.6	0.1474
107.7	0.1494
107.8	0.151
107.9	0.1538
108	0.157
108.1	0.158
108.2	0.1592
108.3	0.16
108.4	0.1628
108.5	0.1648
108.6	0.1664
108.7	0.1678
108.8	0.1698
108.9	0.172
109	0.1744
109.1	0.177
109.2	0.1788
109.3	0.1804
109.4	0.1816
109.5	0.1842
109.6	0.1866
109.7	0.1894
109.8	0.1918
109.9	0.195
110	0.196
110.1	0.197
110.2	0.1984
110.3	0.2016
110.4	0.2038
110.5	0.2052
110.6	0.2074
110.7	0.2096
110.8	0.2116
110.9	0.2136
111	0.2154
111.1	0.2174
111.2	0.2206
111.3	0.2224
111.4	0.2256
111.5	0.2284
111.6	0.2298
111.7	0.2314
111.8	0.2332
111.9	0.2346
112	0.2364
112.1	0.2384
112.2	0.2402
112.3	0.2418
112.4	0.2434
112.5	0.2456
112.6	0.247
112.7	0.2484
112.8	0.2502
112.9	0.2522
113	0.2544
113.1	0.2556
113.2	0.2568
113.3	0.2586
113.4	0.2608
113.5	0.2624
113.6	0.2656
113.7	0.267
113.8	0.2678
113.9	0.2694
114	0.271
114.1	0.2724
114.2	0.2754
114.3	0.2778
114.4	0.2794
114.5	0.2826
114.6	0.2836
114.7	0.2856
114.8	0.2878
114.9	0.2904
115	0.2922
115.1	0.2934
115.2	0.2954
115.3	0.2962
115.4	0.2988
115.5	0.3008
115.6	0.302
115.7	0.3046
115.8	0.3066
115.9	0.3082
116	0.3084
116.1	0.3104
116.2	0.3124
116.3	0.3146
116.4	0.3158
116.5	0.318
116.6	0.3196
116.7	0.322
116.8	0.3226
116.9	0.3242
117	0.3256
117.1	0.3266
117.2	0.3276
117.3	0.3286
117.4	0.33
117.5	0.3322
117.6	0.3338
117.7	0.3352
117.8	0.337
117.9	0.3386
118	0.3394
118.1	0.3402
118.2	0.3412
118.3	0.3422
118.4	0.3436
118.5	0.3444
118.6	0.3472
118.7	0.348
118.8	0.3484
118.9	0.3508
119	0.3532
119.1	0.3548
119.2	0.356
119.3	0.358
119.4	0.3588
119.5	0.3596
119.6	0.3614
119.7	0.3632
119.8	0.363
119.9	0.3638
120	0.3654
120.1	0.3668
120.2	0.3678
120.3	0.3682
120.4	0.3704
120.5	0.3714
120.6	0.3728
120.7	0.3742
120.8	0.3752
120.9	0.3754
121	0.3768
121.1	0.3784
121.2	0.3792
121.3	0.3806
121.4	0.3812
121.5	0.3822
121.6	0.3824
121.7	0.3846
121.8	0.3874
121.9	0.3882
122	0.3896
122.1	0.3902
122.2	0.3902
122.3	0.391
122.4	0.3926
122.5	0.3938
122.6	0.3948
122.7	0.3964
122.8	0.3974
122.9	0.3982
123	0.399
123.1	0.4004
123.2	0.402
123.3	0.4022
123.4	0.4034
123.5	0.4058
123.6	0.4086
123.7	0.41
123.8	0.4108
123.9	0.413
124	0.415
124.1	0.4168
124.2	0.4174
124.3	0.4192
124.4	0.4208
124.5	0.422
124.6	0.4238
124.7	0.4242
124.8	0.4252
124.9	0.4262
125	0.4272
125.1	0.4284
125.2	0.429
125.3	0.4296
125.4	0.4308
125.5	0.4308
125.6	0.4318
125.7	0.4338
125.8	0.4348
125.9	0.436
126	0.4376
126.1	0.438
126.2	0.439
126.3	0.4392
126.4	0.4402
126.5	0.441
126.6	0.4432
126.7	0.4452
126.8	0.4454
126.9	0.446
127	0.4478
127.1	0.4492
127.2	0.4504
127.3	0.4514
127.4	0.4524
127.5	0.4542
127.6	0.4554
127.7	0.4572
127.8	0.4572
127.9	0.458
128	0.4594
128.1	0.4606
128.2	0.4608
128.3	0.461
128.4	0.4626
128.5	0.4644
128.6	0.4656
128.7	0.467
128.8	0.4674
128.9	0.4698
129	0.4716
129.1	0.4728
129.2	0.473
129.3	0.4742
129.4	0.4756
129.5	0.4758
129.6	0.477
129.7	0.4774
129.8	0.478
129.9	0.4798
130	0.4802
130.1	0.482
130.2	0.4824
130.3	0.4828
130.4	0.4844
130.5	0.486
130.6	0.4876
130.7	0.489
130.8	0.4894
130.9	0.4904
131	0.491
131.1	0.4914
131.2	0.4924
131.3	0.494
131.4	0.4962
131.5	0.497
131.6	0.4978
131.7	0.4984
131.8	0.4992
131.9	0.5002
132	0.4992
132.1	0.499
132.2	0.5006
132.3	0.5008
132.4	0.5012
132.5	0.5026
132.6	0.5028
132.7	0.5026
132.8	0.5036
132.9	0.5052
133	0.5056
133.1	0.5068
133.2	0.5094
133.3	0.509
133.4	0.5096
133.5	0.5096
133.6	0.5108
133.7	0.511
133.8	0.512
133.9	0.5128
134	0.5138
134.1	0.5154
134.2	0.5174
134.3	0.5184
134.4	0.5192
134.5	0.5198
134.6	0.5212
134.7	0.5222
134.8	0.5228
134.9	0.5228
135	0.523
135.1	0.5226
135.2	0.5232
135.3	0.5244
135.4	0.524
135.5	0.5244
135.6	0.5242
135.7	0.5246
135.8	0.5254
135.9	0.526
136	0.5264
136.1	0.5272
136.2	0.529
136.3	0.529
136.4	0.5298
136.5	0.5302
136.6	0.5306
136.7	0.5314
136.8	0.5322
136.9	0.5328
137	0.5338
137.1	0.5348
137.2	0.5352
137.3	0.5354
137.4	0.5356
137.5	0.5362
137.6	0.536
137.7	0.5368
137.8	0.5372
137.9	0.5372
138	0.5384
138.1	0.5384
138.2	0.539
138.3	0.5394
138.4	0.5408
138.5	0.5416
138.6	0.5424
138.7	0.5428
138.8	0.5432
138.9	0.5438
139	0.5452
139.1	0.5462
139.2	0.5476
139.3	0.5488
139.4	0.549
139.5	0.549
139.6	0.5488
139.7	0.55
139.8	0.5504
139.9	0.5506
140	0.5516
140.1	0.553
140.2	0.554
140.3	0.554
140.4	0.5558
140.5	0.5566
140.6	0.557
140.7	0.5572
140.8	0.558
140.9	0.5586
141	0.5594
141.1	0.5594
141.2	0.561
141.3	0.5618
141.4	0.5618
141.5	0.5626
141.6	0.563
141.7	0.5642
141.8	0.5642
141.9	0.565
142	0.5658
142.1	0.5658
142.2	0.5662
142.3	0.5662
142.4	0.567
142.5	0.5668
142.6	0.568
142.7	0.568
142.8	0.5676
142.9	0.5674
143	0.5686
143.1	0.5686
143.2	0.5692
143.3	0.5706
143.4	0.5722
143.5	0.5732
143.6	0.5728
143.7	0.574
143.8	0.5748
143.9	0.5758
144	0.5776
144.1	0.5774
144.2	0.578
144.3	0.5778
144.4	0.5786
144.5	0.5794
144.6	0.5802
144.7	0.5816
144.8	0.582
144.9	0.5812
145	0.5816
145.1	0.5824
145.2	0.5832
145.3	0.5846
145.4	0.5852
145.5	0.5868
145.6	0.587
145.7	0.5874
145.8	0.5876
145.9	0.5886
146	0.589
146.1	0.59
146.2	0.5896
146.3	0.5906
146.4	0.5914
146.5	0.5916
146.6	0.592
146.7	0.5928
146.8	0.5932
146.9	0.5948
147	0.5952
147.1	0.5952
147.2	0.5958
147.3	0.596
147.4	0.5976
147.5	0.5976
147.6	0.5982
147.7	0.5982
147.8	0.5988
147.9	0.5998
148	0.6008
148.1	0.602
148.2	0.6024
148.3	0.6028
148.4	0.6042
148.5	0.6046
148.6	0.6052
148.7	0.6066
148.8	0.6076
148.9	0.6078
149	0.6074
149.1	0.6076
149.2	0.6082
149.3	0.6092
149.4	0.6084
149.5	0.6106
149.6	0.6112
149.7	0.6104
149.8	0.6106
149.9	0.61
150	0.6106
150.1	0.6108
150.2	0.6114
150.3	0.612
150.4	0.612
150.5	0.6124
150.6	0.6132
150.7	0.614
150.8	0.6142
150.9	0.6146
151	0.6148
151.1	0.616
151.2	0.6156
151.3	0.6162
151.4	0.6174
151.5	0.6178
151.6	0.6172
151.7	0.618
151.8	0.618
151.9	0.6186
152	0.6192
152.1	0.619
152.2	0.6194
152.3	0.62
152.4	0.62
152.5	0.6212
152.6	0.621
152.7	0.6218
152.8	0.6226
152.9	0.6232
153	0.6248
153.1	0.6246
153.2	0.626
153.3	0.626
153.4	0.627
153.5	0.6284
153.6	0.6292
153.7	0.63
153.8	0.6312
153.9	0.6316
154	0.6314
154.1	0.6318
154.2	0.6318
154.3	0.6312
154.4	0.631
154.5	0.631
154.6	0.6314
154.7	0.6312
154.8	0.6328
154.9	0.6328
155	0.6328
155.1	0.6324
155.2	0.632
155.3	0.6318
155.4	0.632
155.5	0.6328
155.6	0.6332
155.7	0.633
155.8	0.6342
155.9	0.6336
156	0.634
156.1	0.6352
156.2	0.6356
156.3	0.636
156.4	0.6374
156.5	0.6372
156.6	0.6376
156.7	0.6378
156.8	0.638
156.9	0.6382
157	0.6376
157.1	0.6378
157.2	0.6386
157.3	0.638
157.4	0.6378
157.5	0.6388
157.6	0.6398
157.7	0.6402
157.8	0.6408
157.9	0.6408
158	0.6404
158.1	0.6402
158.2	0.6406
158.3	0.6404
158.4	0.6408
158.5	0.6412
158.6	0.6414
158.7	0.6414
158.8	0.6404
158.9	0.64
159	0.6404
159.1	0.6398
159.2	0.6408
159.3	0.6418
159.4	0.642
159.5	0.6414
159.6	0.6424
159.7	0.6424
159.8	0.6434
159.9	0.6438
160	0.6438
160.1	0.645
160.2	0.646
160.3	0.647
160.4	0.6472
160.5	0.6482
160.6	0.6478
160.7	0.6474
160.8	0.648
160.9	0.6474
161	0.6462
161.1	0.6458
161.2	0.6458
161.3	0.6468
161.4	0.646
161.5	0.6456
161.6	0.6458
161.7	0.6464
161.8	0.647
161.9	0.6474
162	0.6472
162.1	0.6468
162.2	0.6472
162.3	0.6472
162.4	0.6472
162.5	0.6482
162.6	0.6486
162.7	0.6486
162.8	0.6488
162.9	0.6512
163	0.6522
163.1	0.652
163.2	0.6522
163.3	0.6532
163.4	0.6534
163.5	0.6542
163.6	0.6544
163.7	0.655
163.8	0.6548
163.9	0.6546
164	0.654
164.1	0.655
164.2	0.6556
164.3	0.6556
164.4	0.6562
164.5	0.6568
164.6	0.657
164.7	0.6576
164.8	0.6586
164.9	0.6594
165	0.659
165.1	0.6584
165.2	0.658
165.3	0.6582
165.4	0.6582
165.5	0.658
165.6	0.659
165.7	0.6596
165.8	0.66
165.9	0.6604
166	0.6612
166.1	0.662
166.2	0.6634
166.3	0.6634
166.4	0.664
166.5	0.6636
166.6	0.664
166.7	0.6656
166.8	0.6666
166.9	0.6664
167	0.667
167.1	0.6664
167.2	0.667
167.3	0.667
167.4	0.667
167.5	0.667
167.6	0.6668
167.7	0.6662
167.8	0.6674
167.9	0.6668
168	0.6672
168.1	0.6678
168.2	0.6674
168.3	0.6676
168.4	0.6696
168.5	0.6696
168.6	0.671
168.7	0.6716
168.8	0.6718
168.9	0.672
169	0.6718
169.1	0.6722
169.2	0.6716
169.3	0.672
169.4	0.673
169.5	0.6726
169.6	0.6724
169.7	0.6726
169.8	0.673
169.9	0.6734
170	0.6736
170.1	0.6736
170.2	0.6732
170.3	0.674
170.4	0.674
170.5	0.675
170.6	0.6752
170.7	0.6762
170.8	0.6762
170.9	0.6758
171	0.6758
171.1	0.676
171.2	0.6756
171.3	0.6758
171.4	0.6762
171.5	0.6772
171.6	0.6766
171.7	0.6772
171.8	0.6776
171.9	0.676
172	0.6758
172.1	0.6762
172.2	0.6758
172.3	0.676
172.4	0.677
172.5	0.6766
172.6	0.6768
172.7	0.6762
172.8	0.6766
172.9	0.6768
173	0.6766
173.1	0.6772
173.2	0.6772
173.3	0.6776
173.4	0.6772
173.5	0.6778
173.6	0.678
173.7	0.6776
173.8	0.677
173.9	0.678
174	0.6778
174.1	0.678
174.2	0.6776
174.3	0.6774
174.4	0.6772
174.5	0.6768
174.6	0.6764
174.7	0.6766
174.8	0.6776
174.9	0.678
175	0.6782
175.1	0.6788
175.2	0.6794
175.3	0.6792
175.4	0.6786
175.5	0.6792
175.6	0.6798
175.7	0.68
175.8	0.6802
175.9	0.681
176	0.6812
176.1	0.6804
176.2	0.6798
176.3	0.6794
176.4	0.6786
176.5	0.6794
176.6	0.6796
176.7	0.6796
176.8	0.6812
176.9	0.681
177	0.681
177.1	0.681
177.2	0.6816
177.3	0.6816
177.4	0.6816
177.5	0.6814
177.6	0.6814
177.7	0.6818
177.8	0.6828
177.9	0.6828
178	0.6826
178.1	0.682
178.2	0.6824
178.3	0.6826
178.4	0.6826
178.5	0.6828
178.6	0.683
178.7	0.684
178.8	0.6844
178.9	0.684
179	0.6828
179.1	0.6834
179.2	0.684
179.3	0.685
179.4	0.6844
179.5	0.6836
179.6	0.683
179.7	0.683
179.8	0.684
179.9	0.6844
180	0.685
180.1	0.6862
180.2	0.687
180.3	0.6874
180.4	0.687
180.5	0.6866
180.6	0.6872
180.7	0.6882
180.8	0.6888
180.9	0.6896
181	0.6898
181.1	0.6898
181.2	0.6892
181.3	0.6888
181.4	0.6878
181.5	0.6886
181.6	0.6886
181.7	0.6888
181.8	0.6896
181.9	0.6896
182	0.6908
182.1	0.6918
182.2	0.6912
182.3	0.6912
182.4	0.692
182.5	0.692
182.6	0.6916
182.7	0.692
182.8	0.6916
182.9	0.6912
183	0.6912
183.1	0.6918
183.2	0.6916
183.3	0.6918
183.4	0.6918
183.5	0.691
183.6	0.6908
183.7	0.6904
183.8	0.6914
183.9	0.6918
184	0.6918
184.1	0.6924
184.2	0.6926
184.3	0.6918
184.4	0.693
184.5	0.6936
184.6	0.6938
184.7	0.6934
184.8	0.6932
184.9	0.6932
185	0.6936
185.1	0.694
185.2	0.6942
185.3	0.6946
185.4	0.6946
185.5	0.6954
185.6	0.6958
185.7	0.695
185.8	0.695
185.9	0.6946
186	0.6944
186.1	0.6944
186.2	0.695
186.3	0.695
186.4	0.695
186.5	0.6952
186.6	0.6952
186.7	0.696
186.8	0.695
186.9	0.6958
187	0.6962
187.1	0.6968
187.2	0.6978
187.3	0.6974
187.4	0.6978
187.5	0.6982
187.6	0.6982
187.7	0.699
187.8	0.6994
187.9	0.6984
188	0.698
188.1	0.698
188.2	0.6974
188.3	0.6974
188.4	0.6966
188.5	0.6958
188.6	0.6956
188.7	0.6956
188.8	0.6954
188.9	0.6952
189	0.6956
189.1	0.6956
189.2	0.6956
189.3	0.6956
189.4	0.6962
189.5	0.696
189.6	0.6964
189.7	0.6968
189.8	0.6964
189.9	0.6964
190	0.6962
190.1	0.6962
190.2	0.6954
190.3	0.6954
190.4	0.6954
190.5	0.6956
190.6	0.695
190.7	0.6952
190.8	0.6952
190.9	0.6958
191	0.696
191.1	0.696
191.2	0.6956
191.3	0.6968
191.4	0.6968
191.5	0.6962
191.6	0.6952
191.7	0.695
191.8	0.6948
191.9	0.6952
192	0.695
192.1	0.6958
192.2	0.6966
192.3	0.6964
192.4	0.6952
192.5	0.6952
192.6	0.6958
192.7	0.6958
192.8	0.6964
192.9	0.6964
193	0.6954
193.1	0.6962
193.2	0.695
193.3	0.6958
193.4	0.696
193.5	0.6962
193.6	0.6962
193.7	0.696
193.8	0.6958
193.9	0.6942
194	0.6936
194.1	0.693
194.2	0.6934
194.3	0.6932
194.4	0.6934
194.5	0.693
194.6	0.6928
194.7	0.6932
194.8	0.6934
194.9	0.694
195	0.6948
195.1	0.6946
195.2	0.6948
195.3	0.6956
195.4	0.6954
195.5	0.696
195.6	0.6962
195.7	0.6954
195.8	0.6948
195.9	0.6952
196	0.6948
196.1	0.6948
196.2	0.6946
196.3	0.6948
196.4	0.6944
196.5	0.6952
196.6	0.6958
196.7	0.6962
196.8	0.6968
196.9	0.697
197	0.6974
197.1	0.6982
197.2	0.6982
197.3	0.698
197.4	0.698
197.5	0.6986
197.6	0.6988
197.7	0.6994
197.8	0.6988
197.9	0.6994
198	0.6996
198.1	0.6994
198.2	0.6992
198.3	0.6988
198.4	0.6984
198.5	0.6986
198.6	0.699
198.7	0.699
198.8	0.6992
198.9	0.699
199	0.6988
199.1	0.6984
199.2	0.6982
199.3	0.6988
199.4	0.6994
199.5	0.6988
199.6	0.6988
199.7	0.6988
199.8	0.6988
199.9	0.699
200	0.6988
[truncated: 14,000 more rows]
