# Supplementary material for: Bayesian inference of kinetic schemes for ion channels by Kalman filtering
Source: eLife journal article supplement (doi:10.7554/elife.62714), 2022-05-04
Supplement: fig4-data7 [file 1_Sim_N_6000_Fluor_MW_2M.xlsx]

## Sheet: Tabelle1
0.1	0
0.2	0
0.3	0
0.4	0
0.5	0
0.6	0
0.7	0
0.8	0
0.9	0
1	0
1.1	0
1.2	0
1.3	0
1.4	0
1.5	0
1.6	0
1.7	0
1.8	0
1.9	0
2	0
2.1	0
2.2	0
2.3	0
2.4	0
2.5	0
2.6	0
2.7	0
2.8	0
2.9	0
3	0
3.1	0
3.2	0
3.3	0
3.4	0
3.5	0
3.6	0
3.7	0
3.8	0
3.9	0
4	0
4.1	0
4.2	0
4.3	0
4.4	0
4.5	0
4.6	0
4.7	0
4.8	0
4.9	0
5	0
5.1	0
5.2	0
5.3	0
5.4	0
5.5	0
5.6	0
5.7	0
5.8	0
5.9	0
6	0
6.1	0
6.2	0
6.3	0
6.4	0
6.5	0
6.6	0
6.7	0
6.8	0
6.9	0
7	0
7.1	0
7.2	0
7.3	0
7.4	0
7.5	0
7.6	0
7.7	0
7.8	0
7.9	0
8	0
8.1	0
8.2	0
8.3	0
8.4	0
8.5	0
8.6	0
8.7	0
8.8	0
8.9	0
9	0
9.1	0
9.2	0
9.3	0
9.4	0
9.5	0
9.6	0
9.7	0
9.8	0
9.9	0
10	0
10.1	0
10.2	0
10.3	0
10.4	0
10.5	0
10.6	0
10.7	0
10.8	0
10.9	0
11	0
11.1	0
11.2	0
11.3	0
11.4	0
11.5	0
11.6	0
11.7	0
11.8	0
11.9	0
12	0
12.1	0
12.2	0
12.3	0
12.4	0
12.5	0
12.6	0
12.7	0
12.8	0
12.9	0
13	0
13.1	0
13.2	0
13.3	0
13.4	0
13.5	0
13.6	0
13.7	0
13.8	0
13.9	0
14	0
14.1	0
14.2	0
14.3	0
14.4	0
14.5	0
14.6	0
14.7	0
14.8	0
14.9	0
15	0
15.1	0
15.2	0
15.3	0
15.4	0
15.5	0
15.6	0
15.7	0
15.8	0
15.9	0
16	0
16.1	0
16.2	0
16.3	0
16.4	0
16.5	0
16.6	0
16.7	0
16.8	0
16.9	0
17	0
17.1	0
17.2	0
17.3	0
17.4	0
17.5	0
17.6	0
17.7	0
17.8	0
17.9	0
18	0
18.1	0
18.2	0
18.3	0
18.4	0
18.5	0
18.6	0
18.7	0
18.8	0
18.9	0
19	0
19.1	0
19.2	0
19.3	0
19.4	0
19.5	0
19.6	0
19.7	0
19.8	0
19.9	0
20	0
20.1	0
20.2	0
20.3	0
20.4	0
20.5	0
20.6	0
20.7	0
20.8	0
20.9	0
21	0
21.1	0
21.2	0
21.3	0
21.4	0
21.5	0
21.6	0
21.7	0
21.8	0
21.9	0
22	0
22.1	0
22.2	0
22.3	0
22.4	0
22.5	0
22.6	0
22.7	0
22.8	0
22.9	0
23	0
23.1	0
23.2	0
23.3	0
23.4	0
23.5	0
23.6	0
23.7	0
23.8	0
23.9	0
24	0
24.1	0
24.2	0
24.3	0
24.4	0
24.5	0
24.6	0
24.7	0
24.8	0
24.9	0
25	0
25.1	0
25.2	0
25.3	0
25.4	0
25.5	0
25.6	0
25.7	0
25.8	0
25.9	0
26	0
26.1	0
26.2	0
26.3	0
26.4	0
26.5	0
26.6	0
26.7	0
26.8	0
26.9	0
27	0
27.1	0
27.2	0
27.3	0
27.4	0
27.5	0
27.6	0
27.7	0
27.8	0
27.9	0
28	0
28.1	0
28.2	0
28.3	0
28.4	0
28.5	0
28.6	0
28.7	0
28.8	0
28.9	0
29	0
29.1	0
29.2	0
29.3	0
29.4	0
29.5	0
29.6	0
29.7	0
29.8	0
29.9	0
30	0
30.1	0
30.2	0
30.3	0
30.4	0
30.5	0
30.6	0
30.7	0
30.8	0
30.9	0
31	0
31.1	0
31.2	0
31.3	0
31.4	0
31.5	0
31.6	0
31.7	0
31.8	0
31.9	0
32	0
32.1	0
32.2	0
32.3	0
32.4	0
32.5	0
32.6	0
32.7	0
32.8	0
32.9	0
33	0
33.1	0
33.2	0
33.3	0
33.4	0
33.5	0
33.6	0
33.7	0
33.8	0
33.9	0
34	0
34.1	0
34.2	0
34.3	0
34.4	0
34.5	0
34.6	0
34.7	0
34.8	0
34.9	0
35	0
35.1	0
35.2	0
35.3	0
35.4	0
35.5	0
35.6	0
35.7	0
35.8	0
35.9	0
36	0
36.1	0
36.2	0
36.3	0
36.4	0
36.5	0
36.6	0
36.7	0
36.8	0
36.9	0
37	0
37.1	0
37.2	0
37.3	0
37.4	0
37.5	0
37.6	0
37.7	0
37.8	0
37.9	0
38	0
38.1	0
38.2	0
38.3	0
38.4	0
38.5	0
38.6	0
38.7	0
38.8	0
38.9	0
39	0
39.1	0
39.2	0
39.3	0
39.4	0
39.5	0
39.6	0
39.7	0
39.8	0
39.9	0
40	0
40.1	0
40.2	0
40.3	0
40.4	0
40.5	0
40.6	0
40.7	0
40.8	0
40.9	0
41	0
41.1	0
41.2	0
41.3	0
41.4	0
41.5	0
41.6	0
41.7	0
41.8	0
41.9	0
42	0
42.1	0
42.2	0
42.3	0
42.4	0
42.5	0
42.6	0
42.7	0
42.8	0
42.9	0
43	0
43.1	0
43.2	0
43.3	0
43.4	0
43.5	0
43.6	0
43.7	0
43.8	0
43.9	0
44	0
44.1	0
44.2	0
44.3	0
44.4	0
44.5	0
44.6	0
44.7	0
44.8	0
44.9	0
45	0
45.1	0
45.2	0
45.3	0
45.4	0
45.5	0
45.6	0
45.7	0
45.8	0
45.9	0
46	0
46.1	0
46.2	0
46.3	0
46.4	0
46.5	0
46.6	0
46.7	0
46.8	0
46.9	0
47	0
47.1	0
47.2	0
47.3	0
47.4	0
47.5	0
47.6	0
47.7	0
47.8	0
47.9	0
48	0
48.1	0
48.2	0
48.3	0
48.4	0
48.5	0
48.6	0
48.7	0
48.8	0
48.9	0
49	0
49.1	0
49.2	0
49.3	0
49.4	0
49.5	0
49.6	0
49.7	0
49.8	0
49.9	0
50	0
50.1	0
50.2	0
50.3	0
50.4	0
50.5	0
50.6	0
50.7	0
50.8	0
50.9	0
51	0
51.1	0
51.2	0
51.3	0
51.4	0
51.5	0
51.6	0
51.7	0
51.8	0
51.9	0
52	0
52.1	0
52.2	0
52.3	0
52.4	0
52.5	0
52.6	0
52.7	0
52.8	0
52.9	0
53	0
53.1	0
53.2	0
53.3	0
53.4	0
53.5	0
53.6	0
53.7	0
53.8	0
53.9	0
54	0
54.1	0
54.2	0
54.3	0
54.4	0
54.5	0
54.6	0
54.7	0
54.8	0
54.9	0
55	0
55.1	0
55.2	0
55.3	0
55.4	0
55.5	0
55.6	0
55.7	0
55.8	0
55.9	0
56	0
56.1	0
56.2	0
56.3	0
56.4	0
56.5	0
56.6	0
56.7	0
56.8	0
56.9	0
57	0
57.1	0
57.2	0
57.3	0
57.4	0
57.5	0
57.6	0
57.7	0
57.8	0
57.9	0
58	0
58.1	0
58.2	0
58.3	0
58.4	0
58.5	0
58.6	0
58.7	0
58.8	0
58.9	0
59	0
59.1	0
59.2	0
59.3	0
59.4	0
59.5	0
59.6	0
59.7	0
59.8	0
59.9	0
60	0
60.1	0
60.2	0
60.3	0
60.4	0
60.5	0
60.6	0
60.7	0
60.8	0
60.9	0
61	0
61.1	0
61.2	0
61.3	0
61.4	0
61.5	0
61.6	0
61.7	0
61.8	0
61.9	0
62	0
62.1	0
62.2	0
62.3	0
62.4	0
62.5	0
62.6	0
62.7	0
62.8	0
62.9	0
63	0
63.1	0
63.2	0
63.3	0
63.4	0
63.5	0
63.6	0
63.7	0
63.8	0
63.9	0
64	0
64.1	0
64.2	0
64.3	0
64.4	0
64.5	0
64.6	0
64.7	0
64.8	0
64.9	0
65	0
65.1	0
65.2	0
65.3	0
65.4	0
65.5	0
65.6	0
65.7	0
65.8	0
65.9	0
66	0
66.1	0
66.2	0
66.3	0
66.4	0
66.5	0
66.6	0
66.7	0
66.8	0
66.9	0
67	0
67.1	0
67.2	0
67.3	0
67.4	0
67.5	0
67.6	0
67.7	0
67.8	0
67.9	0
68	0
68.1	0
68.2	0
68.3	0
68.4	0
68.5	0
68.6	0
68.7	0
68.8	0
68.9	0
69	0
69.1	0
69.2	0
69.3	0
69.4	0
69.5	0
69.6	0
69.7	0
69.8	0
69.9	0
70	0
70.1	0
70.2	0
70.3	0
70.4	0
70.5	0
70.6	0
70.7	0
70.8	0
70.9	0
71	0
71.1	0
71.2	0
71.3	0
71.4	0
71.5	0
71.6	0
71.7	0
71.8	0
71.9	0
72	0
72.1	0
72.2	0
72.3	0
72.4	0
72.5	0
72.6	0
72.7	0
72.8	0
72.9	0
73	0
73.1	0
73.2	0
73.3	0
73.4	0
73.5	0
73.6	0
73.7	0
73.8	0
73.9	0
74	0
74.1	0
74.2	0
74.3	0
74.4	0
74.5	0
74.6	0
74.7	0
74.8	0
74.9	0
75	0
75.1	0
75.2	0
75.3	0
75.4	0
75.5	0
75.6	0
75.7	0
75.8	0
75.9	0
76	0
76.1	0
76.2	0
76.3	0
76.4	0
76.5	0
76.6	0
76.7	0
76.8	0
76.9	0
77	0
77.1	0
77.2	0
77.3	0
77.4	0
77.5	0
77.6	0
77.7	0
77.8	0
77.9	0
78	0
78.1	0
78.2	0
78.3	0
78.4	0
78.5	0
78.6	0
78.7	0
78.8	0
78.9	0
79	0
79.1	0
79.2	0
79.3	0
79.4	0
79.5	0
79.6	0
79.7	0
79.8	0
79.9	0
80	0
80.1	0
80.2	0
80.3	0
80.4	0
80.5	0
80.6	0
80.7	0
80.8	0
80.9	0
81	0
81.1	0
81.2	0
81.3	0
81.4	0
81.5	0
81.6	0
81.7	0
81.8	0
81.9	0
82	0
82.1	0
82.2	0
82.3	0
82.4	0
82.5	0
82.6	0
82.7	0
82.8	0
82.9	0
83	0
83.1	0
83.2	0
83.3	0
83.4	0
83.5	0
83.6	0
83.7	0
83.8	0
83.9	0
84	0
84.1	0
84.2	0
84.3	0
84.4	0
84.5	0
84.6	0
84.7	0
84.8	0
84.9	0
85	0
85.1	0
85.2	0
85.3	0
85.4	0
85.5	0
85.6	0
85.7	0
85.8	0
85.9	0
86	0
86.1	0
86.2	0
86.3	0
86.4	0
86.5	0
86.6	0
86.7	0
86.8	0
86.9	0
87	0
87.1	0
87.2	0
87.3	0
87.4	0
87.5	0
87.6	0
87.7	0
87.8	0
87.9	0
88	0
88.1	0
88.2	0
88.3	0
88.4	0
88.5	0
88.6	0
88.7	0
88.8	0
88.9	0
89	0
89.1	0
89.2	0
89.3	0
89.4	0
89.5	0
89.6	0
89.7	0
89.8	0
89.9	0
90	0
90.1	0
90.2	0
90.3	0
90.4	0
90.5	0
90.6	0
90.7	0
90.8	0
90.9	0
91	0
91.1	0
91.2	0
91.3	0
91.4	0
91.5	0
91.6	0
91.7	0
91.8	0
91.9	0
92	0
92.1	0
92.2	0
92.3	0
92.4	0
92.5	0
92.6	0
92.7	0
92.8	0
92.9	0
93	0
93.1	0
93.2	0
93.3	0
93.4	0
93.5	0
93.6	0
93.7	0
93.8	0
93.9	0
94	0
94.1	0
94.2	0
94.3	0
94.4	0
94.5	0
94.6	0
94.7	0
94.8	0
94.9	0
95	0
95.1	0
95.2	0
95.3	0
95.4	0
95.5	0
95.6	0
95.7	0
95.8	0
95.9	0
96	0
96.1	0
96.2	0
96.3	0
96.4	0
96.5	0
96.6	0
96.7	0
96.8	0
96.9	0
97	0
97.1	0
97.2	0
97.3	0
97.4	0
97.5	0
97.6	0
97.7	0
97.8	0
97.9	0
98	0
98.1	0
98.2	0
98.3	0
98.4	0
98.5	0
98.6	0
98.7	0
98.8	0
98.9	0
99	0
99.1	0
99.2	0
99.3	0
99.4	0
99.5	0
99.6	0
99.7	0
99.8	0
99.9	0
100	0
100.1	0.104917
100.2	0.199417
100.3	0.271583
100.4	0.337083
100.5	0.390333
100.6	0.43875
100.7	0.4765
100.8	0.510417
100.9	0.540333
101	0.562083
101.1	0.582583
101.2	0.6025
101.3	0.6215
101.4	0.635667
101.5	0.65125
101.6	0.660417
101.7	0.67075
101.8	0.681083
101.9	0.690083
102	0.698917
102.1	0.70525
102.2	0.712167
102.3	0.720417
102.4	0.727083
102.5	0.732333
102.6	0.735917
102.7	0.7385
102.8	0.74325
102.9	0.746417
103	0.748667
103.1	0.748
103.2	0.749167
103.3	0.749333
103.4	0.754167
103.5	0.756333
103.6	0.759417
103.7	0.763583
103.8	0.766333
103.9	0.768083
104	0.769
104.1	0.773167
104.2	0.774833
104.3	0.775167
104.4	0.776917
104.5	0.774
104.6	0.773167
104.7	0.773417
104.8	0.7755
104.9	0.774167
105	0.776833
105.1	0.77825
105.2	0.776083
105.3	0.77475
105.4	0.7725
105.5	0.773583
105.6	0.77175
105.7	0.7725
105.8	0.771417
105.9	0.773583
106	0.774917
106.1	0.77775
106.2	0.780333
106.3	0.781
106.4	0.782167
106.5	0.7815
106.6	0.781
106.7	0.782083
106.8	0.782833
106.9	0.78275
107	0.77975
107.1	0.780333
107.2	0.78475
107.3	0.7855
107.4	0.787417
107.5	0.788417
107.6	0.789667
107.7	0.7915
107.8	0.790417
107.9	0.791333
108	0.790833
108.1	0.791333
108.2	0.792917
108.3	0.792833
108.4	0.795417
108.5	0.796583
108.6	0.796083
108.7	0.79775
108.8	0.8005
108.9	0.800917
109	0.80325
109.1	0.80425
109.2	0.804917
109.3	0.804167
109.4	0.802583
109.5	0.802417
109.6	0.802833
109.7	0.8055
109.8	0.8055
109.9	0.804333
110	0.805167
110.1	0.80475
110.2	0.805583
110.3	0.8085
110.4	0.806833
110.5	0.806833
110.6	0.80625
110.7	0.806917
110.8	0.808167
110.9	0.811333
111	0.811667
111.1	0.810167
111.2	0.8085
111.3	0.808667
111.4	0.810917
111.5	0.810167
111.6	0.810167
111.7	0.810417
111.8	0.813333
111.9	0.815083
112	0.815333
112.1	0.817
112.2	0.816417
112.3	0.816583
112.4	0.8185
112.5	0.816917
112.6	0.815
112.7	0.81475
112.8	0.815333
112.9	0.814083
113	0.813833
113.1	0.814917
113.2	0.81675
113.3	0.816417
113.4	0.818417
113.5	0.819
113.6	0.821
113.7	0.821083
113.8	0.820333
113.9	0.8195
114	0.821167
114.1	0.819583
114.2	0.82125
114.3	0.8215
114.4	0.821333
114.5	0.820083
114.6	0.820583
114.7	0.819833
114.8	0.819417
114.9	0.818167
115	0.819333
115.1	0.821
115.2	0.822667
115.3	0.824083
115.4	0.825083
115.5	0.82475
115.6	0.825583
115.7	0.825167
115.8	0.826083
115.9	0.827833
116	0.828583
116.1	0.828667
116.2	0.827583
116.3	0.827667
116.4	0.826917
116.5	0.827333
116.6	0.829
116.7	0.828833
116.8	0.82875
116.9	0.828667
117	0.829833
117.1	0.831
117.2	0.83325
117.3	0.8335
117.4	0.83275
117.5	0.831167
117.6	0.8315
117.7	0.83175
117.8	0.830917
117.9	0.832417
118	0.83025
118.1	0.830917
118.2	0.832417
118.3	0.832833
118.4	0.834833
118.5	0.836083
118.6	0.83775
118.7	0.837833
118.8	0.839167
118.9	0.840083
119	0.840833
119.1	0.841083
119.2	0.8395
119.3	0.8385
119.4	0.83875
119.5	0.840083
119.6	0.840583
119.7	0.839833
119.8	0.837167
119.9	0.836583
120	0.837833
120.1	0.839167
120.2	0.839417
120.3	0.841083
120.4	0.843333
120.5	0.845333
120.6	0.846417
120.7	0.847083
120.8	0.84825
120.9	0.8475
121	0.84675
121.1	0.84375
121.2	0.843333
121.3	0.843167
121.4	0.845417
121.5	0.848667
121.6	0.84975
121.7	0.8485
121.8	0.8485
121.9	0.848333
122	0.849917
122.1	0.85025
122.2	0.850167
122.3	0.851083
122.4	0.850833
122.5	0.850917
122.6	0.852333
122.7	0.851167
122.8	0.85225
122.9	0.853583
123	0.853917
123.1	0.85575
123.2	0.856167
123.3	0.857333
123.4	0.856417
123.5	0.856583
123.6	0.85625
123.7	0.856167
123.8	0.857417
123.9	0.858833
124	0.8575
124.1	0.857083
124.2	0.857
124.3	0.858333
124.4	0.860917
124.5	0.862167
124.6	0.862417
124.7	0.86075
124.8	0.862833
124.9	0.86325
125	0.86325
125.1	0.863583
125.2	0.863417
125.3	0.861583
125.4	0.861083
125.5	0.85925
125.6	0.860667
125.7	0.862167
125.8	0.864583
125.9	0.86525
126	0.86725
126.1	0.867
126.2	0.86625
126.3	0.866333
126.4	0.865417
126.5	0.865667
126.6	0.864417
126.7	0.865917
126.8	0.866417
126.9	0.866083
127	0.868
127.1	0.866583
127.2	0.866083
127.3	0.867333
127.4	0.865917
127.5	0.864667
127.6	0.864583
127.7	0.864333
127.8	0.864417
127.9	0.865167
128	0.8645
128.1	0.864917
128.2	0.866167
128.3	0.866333
128.4	0.867333
128.5	0.867333
128.6	0.86825
128.7	0.868167
128.8	0.867583
128.9	0.869667
129	0.869417
129.1	0.870667
129.2	0.8705
129.3	0.869583
129.4	0.870333
129.5	0.870333
129.6	0.8705
129.7	0.872
129.8	0.871167
129.9	0.8725
130	0.873
130.1	0.874583
130.2	0.87625
130.3	0.876833
130.4	0.87675
130.5	0.877667
130.6	0.875417
130.7	0.873667
130.8	0.87425
130.9	0.875
131	0.875417
131.1	0.876167
131.2	0.874667
131.3	0.87625
131.4	0.877333
131.5	0.877833
131.6	0.877583
131.7	0.87825
131.8	0.87925
131.9	0.878583
132	0.8785
132.1	0.88025
132.2	0.880333
132.3	0.880417
132.4	0.87975
132.5	0.878667
132.6	0.878333
132.7	0.876917
132.8	0.877917
132.9	0.878333
133	0.878
133.1	0.877833
133.2	0.879
133.3	0.88
133.4	0.8785
133.5	0.88025
133.6	0.879417
133.7	0.880583
133.8	0.8785
133.9	0.877833
134	0.8775
134.1	0.877667
134.2	0.8775
134.3	0.879833
134.4	0.878417
134.5	0.878917
134.6	0.879833
134.7	0.88025
134.8	0.88
134.9	0.880167
135	0.88125
135.1	0.883083
135.2	0.882667
135.3	0.883833
135.4	0.885917
135.5	0.885583
135.6	0.886917
135.7	0.885917
135.8	0.885667
135.9	0.8855
136	0.885583
136.1	0.887083
136.2	0.887417
136.3	0.888583
136.4	0.888417
136.5	0.89025
136.6	0.888917
136.7	0.888333
136.8	0.88725
136.9	0.885833
137	0.886083
137.1	0.888
137.2	0.88825
137.3	0.886417
137.4	0.885083
137.5	0.884167
137.6	0.884917
137.7	0.88675
137.8	0.886083
137.9	0.886583
138	0.88725
138.1	0.8865
138.2	0.888417
138.3	0.888333
138.4	0.888417
138.5	0.889167
138.6	0.889583
138.7	0.89075
138.8	0.891583
138.9	0.890917
139	0.892583
139.1	0.8935
139.2	0.893833
139.3	0.89425
139.4	0.893917
139.5	0.8935
139.6	0.892667
139.7	0.893583
139.8	0.8925
139.9	0.89275
140	0.891667
140.1	0.891
140.2	0.892167
140.3	0.892167
140.4	0.891167
140.5	0.89025
140.6	0.889667
140.7	0.889
140.8	0.88925
140.9	0.889
141	0.888667
141.1	0.890583
141.2	0.89175
141.3	0.891333
141.4	0.8905
141.5	0.889833
141.6	0.8895
141.7	0.8905
141.8	0.891333
141.9	0.892583
142	0.893083
142.1	0.894833
142.2	0.893667
142.3	0.895333
142.4	0.89625
142.5	0.895833
142.6	0.895
142.7	0.895917
142.8	0.89775
142.9	0.897333
143	0.899417
143.1	0.900833
143.2	0.90025
143.3	0.90025
143.4	0.899083
143.5	0.89925
143.6	0.899667
143.7	0.902083
143.8	0.902833
143.9	0.903333
144	0.902667
144.1	0.900667
144.2	0.9015
144.3	0.901667
144.4	0.902667
144.5	0.902167
144.6	0.903667
144.7	0.9025
144.8	0.900583
144.9	0.901083
145	0.9025
145.1	0.900417
145.2	0.90125
145.3	0.901
145.4	0.902167
145.5	0.9025
145.6	0.901667
145.7	0.9015
145.8	0.901333
145.9	0.903083
146	0.903417
146.1	0.903
146.2	0.903583
146.3	0.904667
146.4	0.906
146.5	0.90575
146.6	0.9075
146.7	0.9075
146.8	0.907
146.9	0.90775
147	0.9085
147.1	0.907
147.2	0.90775
147.3	0.906917
147.4	0.906083
147.5	0.90525
147.6	0.904667
147.7	0.904
147.8	0.904667
147.9	0.90675
148	0.906167
148.1	0.90475
148.2	0.904417
148.3	0.90275
148.4	0.902583
148.5	0.903
148.6	0.901417
148.7	0.9
148.8	0.898917
148.9	0.899833
149	0.900333
149.1	0.901917
149.2	0.90225
149.3	0.903583
149.4	0.906083
149.5	0.907
149.6	0.906333
149.7	0.906417
149.8	0.906417
149.9	0.905083
150	0.904583
150.1	0.905417
150.2	0.90675
150.3	0.908833
150.4	0.908167
150.5	0.90725
150.6	0.907083
150.7	0.906833
150.8	0.907333
150.9	0.9075
151	0.906917
151.1	0.907833
151.2	0.908667
151.3	0.909083
151.4	0.9075
151.5	0.9065
151.6	0.906417
151.7	0.906667
151.8	0.906
151.9	0.9055
152	0.903917
152.1	0.903583
152.2	0.904333
152.3	0.90325
152.4	0.90325
152.5	0.903333
152.6	0.901417
152.7	0.90375
152.8	0.903833
152.9	0.904833
153	0.904833
153.1	0.906417
153.2	0.90475
153.3	0.906583
153.4	0.906917
153.5	0.9055
153.6	0.905083
153.7	0.905417
153.8	0.905083
153.9	0.904083
154	0.903083
154.1	0.902167
154.2	0.9025
154.3	0.903083
154.4	0.904167
154.5	0.904667
154.6	0.905583
154.7	0.90525
154.8	0.906833
154.9	0.907083
155	0.907917
155.1	0.909333
155.2	0.909333
155.3	0.910333
155.4	0.910167
155.5	0.9095
155.6	0.909583
155.7	0.909583
155.8	0.9105
155.9	0.910167
156	0.909667
156.1	0.908583
156.2	0.909667
156.3	0.907833
156.4	0.908167
156.5	0.908667
156.6	0.909583
156.7	0.909333
156.8	0.909083
156.9	0.908667
157	0.91
157.1	0.91025
157.2	0.91075
157.3	0.911917
157.4	0.913083
157.5	0.914667
157.6	0.915
157.7	0.914833
157.8	0.916
157.9	0.916333
158	0.914667
158.1	0.912
158.2	0.9135
158.3	0.913333
158.4	0.912083
158.5	0.913667
158.6	0.91375
158.7	0.9145
158.8	0.91425
158.9	0.913333
159	0.913167
159.1	0.913167
159.2	0.913667
159.3	0.914667
159.4	0.915583
159.5	0.917083
159.6	0.917
159.7	0.917417
159.8	0.9165
159.9	0.918083
160	0.9175
160.1	0.9165
160.2	0.915083
160.3	0.915917
160.4	0.914583
160.5	0.91475
160.6	0.915333
160.7	0.916083
160.8	0.914917
160.9	0.91675
161	0.9165
161.1	0.91525
161.2	0.915333
161.3	0.916
161.4	0.916167
161.5	0.914917
161.6	0.915833
161.7	0.916333
161.8	0.916583
161.9	0.915083
162	0.914833
162.1	0.9155
162.2	0.916583
162.3	0.91725
162.4	0.918083
162.5	0.9165
162.6	0.916333
162.7	0.916417
162.8	0.915167
162.9	0.914833
163	0.916167
163.1	0.916083
163.2	0.91775
163.3	0.917167
163.4	0.916917
163.5	0.917833
163.6	0.916417
163.7	0.914917
163.8	0.913917
163.9	0.914167
164	0.915
164.1	0.914833
164.2	0.91575
164.3	0.915833
164.4	0.91575
164.5	0.915667
164.6	0.916167
164.7	0.916833
164.8	0.918333
164.9	0.91875
165	0.919417
165.1	0.918833
165.2	0.919333
165.3	0.919417
165.4	0.919917
165.5	0.921417
165.6	0.921
165.7	0.921083
165.8	0.919333
165.9	0.919
166	0.920583
166.1	0.921167
166.2	0.923167
166.3	0.922917
166.4	0.923333
166.5	0.923917
166.6	0.924667
166.7	0.92525
166.8	0.925667
166.9	0.925083
167	0.924833
167.1	0.924833
167.2	0.924167
167.3	0.923417
167.4	0.923333
167.5	0.92475
167.6	0.924417
167.7	0.9245
167.8	0.92475
167.9	0.924167
168	0.923083
168.1	0.922167
168.2	0.922667
168.3	0.92075
168.4	0.919333
168.5	0.92025
168.6	0.92075
168.7	0.92
168.8	0.92025
168.9	0.921
169	0.920917
169.1	0.921333
169.2	0.92075
169.3	0.920917
169.4	0.92175
169.5	0.921667
169.6	0.921083
169.7	0.921
169.8	0.91975
169.9	0.92125
170	0.920833
170.1	0.91975
170.2	0.920083
170.3	0.92
170.4	0.920917
170.5	0.920833
170.6	0.921
170.7	0.922667
170.8	0.922417
170.9	0.923583
171	0.9225
171.1	0.923083
171.2	0.923167
171.3	0.922167
171.4	0.922667
171.5	0.9225
171.6	0.921583
171.7	0.922917
171.8	0.922083
171.9	0.922667
172	0.922917
172.1	0.923417
172.2	0.922917
172.3	0.9225
172.4	0.924083
172.5	0.924333
172.6	0.924083
172.7	0.924
172.8	0.92325
172.9	0.922417
173	0.922333
173.1	0.923833
173.2	0.924167
173.3	0.922667
173.4	0.922833
173.5	0.923167
173.6	0.92425
173.7	0.923833
173.8	0.923833
173.9	0.925083
174	0.925167
174.1	0.925
174.2	0.924583
174.3	0.925833
174.4	0.925667
174.5	0.924917
174.6	0.92425
174.7	0.925
174.8	0.924917
174.9	0.924583
175	0.924333
175.1	0.923333
175.2	0.925583
175.3	0.925417
175.4	0.92475
175.5	0.924333
175.6	0.924083
175.7	0.92375
175.8	0.925333
175.9	0.924833
176	0.926333
176.1	0.925
176.2	0.925167
176.3	0.9255
176.4	0.925583
176.5	0.92525
176.6	0.9235
176.7	0.924917
176.8	0.9235
176.9	0.923417
177	0.92325
177.1	0.922667
177.2	0.923417
177.3	0.923167
177.4	0.922833
177.5	0.922917
177.6	0.923417
177.7	0.923333
177.8	0.924833
177.9	0.924667
178	0.9255
178.1	0.925833
178.2	0.925
178.3	0.923833
178.4	0.92475
178.5	0.925167
178.6	0.92475
178.7	0.923583
178.8	0.923
178.9	0.922917
179	0.922833
179.1	0.923583
179.2	0.923667
179.3	0.923833
179.4	0.923667
179.5	0.924083
179.6	0.923917
179.7	0.926167
179.8	0.9255
179.9	0.925417
180	0.926333
180.1	0.92725
180.2	0.925833
180.3	0.925167
180.4	0.923333
180.5	0.923833
180.6	0.9235
180.7	0.924417
180.8	0.924
180.9	0.923333
181	0.923917
181.1	0.925417
181.2	0.925167
181.3	0.924667
181.4	0.925333
181.5	0.92575
181.6	0.926
181.7	0.925833
181.8	0.92575
181.9	0.926583
182	0.926333
182.1	0.92575
182.2	0.92575
182.3	0.925083
182.4	0.925833
182.5	0.925583
182.6	0.92525
182.7	0.925667
182.8	0.926333
182.9	0.92725
183	0.927917
183.1	0.927667
183.2	0.9275
183.3	0.92675
183.4	0.926583
183.5	0.92625
183.6	0.927583
183.7	0.924917
183.8	0.925417
183.9	0.925167
184	0.9255
184.1	0.926833
184.2	0.926
184.3	0.925667
184.4	0.926
184.5	0.9255
184.6	0.926583
184.7	0.92625
184.8	0.927083
184.9	0.927667
185	0.928333
185.1	0.9295
185.2	0.930083
185.3	0.92875
185.4	0.928833
185.5	0.928667
185.6	0.928667
185.7	0.928833
185.8	0.928167
185.9	0.927
186	0.926917
186.1	0.928667
186.2	0.927667
186.3	0.92725
186.4	0.927167
186.5	0.927917
186.6	0.92725
186.7	0.927333
186.8	0.9285
186.9	0.928333
187	0.9265
187.1	0.925667
187.2	0.925083
187.3	0.92575
187.4	0.926167
187.5	0.927
187.6	0.927667
187.7	0.928083
187.8	0.92725
187.9	0.9265
188	0.92725
188.1	0.926833
188.2	0.9255
188.3	0.926667
188.4	0.9275
188.5	0.928333
188.6	0.927167
188.7	0.927667
188.8	0.927333
188.9	0.926667
189	0.92675
189.1	0.926583
189.2	0.927167
189.3	0.928
189.4	0.929417
189.5	0.929417
189.6	0.928917
189.7	0.929083
189.8	0.930917
189.9	0.930667
190	0.931667
190.1	0.931833
190.2	0.932167
190.3	0.932833
190.4	0.932417
190.5	0.931917
190.6	0.93125
190.7	0.93175
190.8	0.93025
190.9	0.92975
191	0.930917
191.1	0.93025
191.2	0.930667
191.3	0.929583
191.4	0.92975
191.5	0.930333
191.6	0.930167
191.7	0.93125
191.8	0.93075
191.9	0.930917
192	0.92975
192.1	0.92975
192.2	0.93025
192.3	0.9305
192.4	0.930417
192.5	0.929167
192.6	0.929417
192.7	0.92925
192.8	0.9285
192.9	0.929333
193	0.929083
193.1	0.928917
193.2	0.928167
193.3	0.929083
193.4	0.928917
193.5	0.928833
193.6	0.928333
193.7	0.928917
193.8	0.928417
193.9	0.92825
194	0.927917
194.1	0.92825
194.2	0.928083
194.3	0.927667
194.4	0.929083
194.5	0.929167
194.6	0.92975
194.7	0.92975
194.8	0.929917
194.9	0.928167
195	0.928333
195.1	0.928833
195.2	0.927333
195.3	0.92875
195.4	0.927583
195.5	0.927417
195.6	0.927083
195.7	0.926917
195.8	0.927
195.9	0.928167
196	0.928333
196.1	0.9285
196.2	0.928667
196.3	0.928833
196.4	0.929583
196.5	0.929583
196.6	0.929083
196.7	0.9285
196.8	0.929
196.9	0.927917
197	0.92825
197.1	0.92925
197.2	0.9305
197.3	0.929917
197.4	0.92875
197.5	0.927917
197.6	0.9285
197.7	0.927583
197.8	0.927417
197.9	0.927083
198	0.926583
198.1	0.9255
198.2	0.926167
198.3	0.9275
198.4	0.927917
198.5	0.928333
198.6	0.929167
198.7	0.929833
198.8	0.929333
198.9	0.93
199	0.931833
199.1	0.93175
199.2	0.931333
199.3	0.931833
199.4	0.932583
199.5	0.932667
199.6	0.932
199.7	0.934417
199.8	0.935083
199.9	0.934583
200	0.934917
[truncated: 14,000 more rows]
