# Supplementary material for: Bayesian inference of kinetic schemes for ion channels by Kalman filtering
Source: eLife journal article supplement (doi:10.7554/elife.62714), 2022-05-04
Supplement: fig4-data7 [file 1_Sim_N_6000_Strom_MW_2M.xlsx]

## Sheet: Tabelle1
0.1	0
0.2	0
0.3	0
0.4	0
0.5	0
0.6	0
0.7	0
0.8	0
0.9	0
1	0
1.1	0
1.2	0
1.3	0
1.4	0
1.5	0
1.6	0
1.7	0
1.8	0
1.9	0
2	0
2.1	0
2.2	0
2.3	0
2.4	0
2.5	0
2.6	0
2.7	0
2.8	0
2.9	0
3	0
3.1	0
3.2	0
3.3	0
3.4	0
3.5	0
3.6	0
3.7	0
3.8	0
3.9	0
4	0
4.1	0
4.2	0
4.3	0
4.4	0
4.5	0
4.6	0
4.7	0
4.8	0
4.9	0
5	0
5.1	0
5.2	0
5.3	0
5.4	0
5.5	0
5.6	0
5.7	0
5.8	0
5.9	0
6	0
6.1	0
6.2	0
6.3	0
6.4	0
6.5	0
6.6	0
6.7	0
6.8	0
6.9	0
7	0
7.1	0
7.2	0
7.3	0
7.4	0
7.5	0
7.6	0
7.7	0
7.8	0
7.9	0
8	0
8.1	0
8.2	0
8.3	0
8.4	0
8.5	0
8.6	0
8.7	0
8.8	0
8.9	0
9	0
9.1	0
9.2	0
9.3	0
9.4	0
9.5	0
9.6	0
9.7	0
9.8	0
9.9	0
10	0
10.1	0
10.2	0
10.3	0
10.4	0
10.5	0
10.6	0
10.7	0
10.8	0
10.9	0
11	0
11.1	0
11.2	0
11.3	0
11.4	0
11.5	0
11.6	0
11.7	0
11.8	0
11.9	0
12	0
12.1	0
12.2	0
12.3	0
12.4	0
12.5	0
12.6	0
12.7	0
12.8	0
12.9	0
13	0
13.1	0
13.2	0
13.3	0
13.4	0
13.5	0
13.6	0
13.7	0
13.8	0
13.9	0
14	0
14.1	0
14.2	0
14.3	0
14.4	0
14.5	0
14.6	0
14.7	0
14.8	0
14.9	0
15	0
15.1	0
15.2	0
15.3	0
15.4	0
15.5	0
15.6	0
15.7	0
15.8	0
15.9	0
16	0
16.1	0
16.2	0
16.3	0
16.4	0
16.5	0
16.6	0
16.7	0
16.8	0
16.9	0
17	0
17.1	0
17.2	0
17.3	0
17.4	0
17.5	0
17.6	0
17.7	0
17.8	0
17.9	0
18	0
18.1	0
18.2	0
18.3	0
18.4	0
18.5	0
18.6	0
18.7	0
18.8	0
18.9	0
19	0
19.1	0
19.2	0
19.3	0
19.4	0
19.5	0
19.6	0
19.7	0
19.8	0
19.9	0
20	0
20.1	0
20.2	0
20.3	0
20.4	0
20.5	0
20.6	0
20.7	0
20.8	0
20.9	0
21	0
21.1	0
21.2	0
21.3	0
21.4	0
21.5	0
21.6	0
21.7	0
21.8	0
21.9	0
22	0
22.1	0
22.2	0
22.3	0
22.4	0
22.5	0
22.6	0
22.7	0
22.8	0
22.9	0
23	0
23.1	0
23.2	0
23.3	0
23.4	0
23.5	0
23.6	0
23.7	0
23.8	0
23.9	0
24	0
24.1	0
24.2	0
24.3	0
24.4	0
24.5	0
24.6	0
24.7	0
24.8	0
24.9	0
25	0
25.1	0
25.2	0
25.3	0
25.4	0
25.5	0
25.6	0
25.7	0
25.8	0
25.9	0
26	0
26.1	0
26.2	0
26.3	0
26.4	0
26.5	0
26.6	0
26.7	0
26.8	0
26.9	0
27	0
27.1	0
27.2	0
27.3	0
27.4	0
27.5	0
27.6	0
27.7	0
27.8	0
27.9	0
28	0
28.1	0
28.2	0
28.3	0
28.4	0
28.5	0
28.6	0
28.7	0
28.8	0
28.9	0
29	0
29.1	0
29.2	0
29.3	0
29.4	0
29.5	0
29.6	0
29.7	0
29.8	0
29.9	0
30	0
30.1	0
30.2	0
30.3	0
30.4	0
30.5	0
30.6	0
30.7	0
30.8	0
30.9	0
31	0
31.1	0
31.2	0
31.3	0
31.4	0
31.5	0
31.6	0
31.7	0
31.8	0
31.9	0
32	0
32.1	0
32.2	0
32.3	0
32.4	0
32.5	0
32.6	0
32.7	0
32.8	0
32.9	0
33	0
33.1	0
33.2	0
33.3	0
33.4	0
33.5	0
33.6	0
33.7	0
33.8	0
33.9	0
34	0
34.1	0
34.2	0
34.3	0
34.4	0
34.5	0
34.6	0
34.7	0
34.8	0
34.9	0
35	0
35.1	0
35.2	0
35.3	0
35.4	0
35.5	0
35.6	0
35.7	0
35.8	0
35.9	0
36	0
36.1	0
36.2	0
36.3	0
36.4	0
36.5	0
36.6	0
36.7	0
36.8	0
36.9	0
37	0
37.1	0
37.2	0
37.3	0
37.4	0
37.5	0
37.6	0
37.7	0
37.8	0
37.9	0
38	0
38.1	0
38.2	0
38.3	0
38.4	0
38.5	0
38.6	0
38.7	0
38.8	0
38.9	0
39	0
39.1	0
39.2	0
39.3	0
39.4	0
39.5	0
39.6	0
39.7	0
39.8	0
39.9	0
40	0
40.1	0
40.2	0
40.3	0
40.4	0
40.5	0
40.6	0
40.7	0
40.8	0
40.9	0
41	0
41.1	0
41.2	0
41.3	0
41.4	0
41.5	0
41.6	0
41.7	0
41.8	0
41.9	0
42	0
42.1	0
42.2	0
42.3	0
42.4	0
42.5	0
42.6	0
42.7	0
42.8	0
42.9	0
43	0
43.1	0
43.2	0
43.3	0
43.4	0
43.5	0
43.6	0
43.7	0
43.8	0
43.9	0
44	0
44.1	0
44.2	0
44.3	0
44.4	0
44.5	0
44.6	0
44.7	0
44.8	0
44.9	0
45	0
45.1	0
45.2	0
45.3	0
45.4	0
45.5	0
45.6	0
45.7	0
45.8	0
45.9	0
46	0
46.1	0
46.2	0
46.3	0
46.4	0
46.5	0
46.6	0
46.7	0
46.8	0
46.9	0
47	0
47.1	0
47.2	0
47.3	0
47.4	0
47.5	0
47.6	0
47.7	0
47.8	0
47.9	0
48	0
48.1	0
48.2	0
48.3	0
48.4	0
48.5	0
48.6	0
48.7	0
48.8	0
48.9	0
49	0
49.1	0
49.2	0
49.3	0
49.4	0
49.5	0
49.6	0
49.7	0
49.8	0
49.9	0
50	0
50.1	0
50.2	0
50.3	0
50.4	0
50.5	0
50.6	0
50.7	0
50.8	0
50.9	0
51	0
51.1	0
51.2	0
51.3	0
51.4	0
51.5	0
51.6	0
51.7	0
51.8	0
51.9	0
52	0
52.1	0
52.2	0
52.3	0
52.4	0
52.5	0
52.6	0
52.7	0
52.8	0
52.9	0
53	0
53.1	0
53.2	0
53.3	0
53.4	0
53.5	0
53.6	0
53.7	0
53.8	0
53.9	0
54	0
54.1	0
54.2	0
54.3	0
54.4	0
54.5	0
54.6	0
54.7	0
54.8	0
54.9	0
55	0
55.1	0
55.2	0
55.3	0
55.4	0
55.5	0
55.6	0
55.7	0
55.8	0
55.9	0
56	0
56.1	0
56.2	0
56.3	0
56.4	0
56.5	0
56.6	0
56.7	0
56.8	0
56.9	0
57	0
57.1	0
57.2	0
57.3	0
57.4	0
57.5	0
57.6	0
57.7	0
57.8	0
57.9	0
58	0
58.1	0
58.2	0
58.3	0
58.4	0
58.5	0
58.6	0
58.7	0
58.8	0
58.9	0
59	0
59.1	0
59.2	0
59.3	0
59.4	0
59.5	0
59.6	0
59.7	0
59.8	0
59.9	0
60	0
60.1	0
60.2	0
60.3	0
60.4	0
60.5	0
60.6	0
60.7	0
60.8	0
60.9	0
61	0
61.1	0
61.2	0
61.3	0
61.4	0
61.5	0
61.6	0
61.7	0
61.8	0
61.9	0
62	0
62.1	0
62.2	0
62.3	0
62.4	0
62.5	0
62.6	0
62.7	0
62.8	0
62.9	0
63	0
63.1	0
63.2	0
63.3	0
63.4	0
63.5	0
63.6	0
63.7	0
63.8	0
63.9	0
64	0
64.1	0
64.2	0
64.3	0
64.4	0
64.5	0
64.6	0
64.7	0
64.8	0
64.9	0
65	0
65.1	0
65.2	0
65.3	0
65.4	0
65.5	0
65.6	0
65.7	0
65.8	0
65.9	0
66	0
66.1	0
66.2	0
66.3	0
66.4	0
66.5	0
66.6	0
66.7	0
66.8	0
66.9	0
67	0
67.1	0
67.2	0
67.3	0
67.4	0
67.5	0
67.6	0
67.7	0
67.8	0
67.9	0
68	0
68.1	0
68.2	0
68.3	0
68.4	0
68.5	0
68.6	0
68.7	0
68.8	0
68.9	0
69	0
69.1	0
69.2	0
69.3	0
69.4	0
69.5	0
69.6	0
69.7	0
69.8	0
69.9	0
70	0
70.1	0
70.2	0
70.3	0
70.4	0
70.5	0
70.6	0
70.7	0
70.8	0
70.9	0
71	0
71.1	0
71.2	0
71.3	0
71.4	0
71.5	0
71.6	0
71.7	0
71.8	0
71.9	0
72	0
72.1	0
72.2	0
72.3	0
72.4	0
72.5	0
72.6	0
72.7	0
72.8	0
72.9	0
73	0
73.1	0
73.2	0
73.3	0
73.4	0
73.5	0
73.6	0
73.7	0
73.8	0
73.9	0
74	0
74.1	0
74.2	0
74.3	0
74.4	0
74.5	0
74.6	0
74.7	0
74.8	0
74.9	0
75	0
75.1	0
75.2	0
75.3	0
75.4	0
75.5	0
75.6	0
75.7	0
75.8	0
75.9	0
76	0
76.1	0
76.2	0
76.3	0
76.4	0
76.5	0
76.6	0
76.7	0
76.8	0
76.9	0
77	0
77.1	0
77.2	0
77.3	0
77.4	0
77.5	0
77.6	0
77.7	0
77.8	0
77.9	0
78	0
78.1	0
78.2	0
78.3	0
78.4	0
78.5	0
78.6	0
78.7	0
78.8	0
78.9	0
79	0
79.1	0
79.2	0
79.3	0
79.4	0
79.5	0
79.6	0
79.7	0
79.8	0
79.9	0
80	0
80.1	0
80.2	0
80.3	0
80.4	0
80.5	0
80.6	0
80.7	0
80.8	0
80.9	0
81	0
81.1	0
81.2	0
81.3	0
81.4	0
81.5	0
81.6	0
81.7	0
81.8	0
81.9	0
82	0
82.1	0
82.2	0
82.3	0
82.4	0
82.5	0
82.6	0
82.7	0
82.8	0
82.9	0
83	0
83.1	0
83.2	0
83.3	0
83.4	0
83.5	0
83.6	0
83.7	0
83.8	0
83.9	0
84	0
84.1	0
84.2	0
84.3	0
84.4	0
84.5	0
84.6	0
84.7	0
84.8	0
84.9	0
85	0
85.1	0
85.2	0
85.3	0
85.4	0
85.5	0
85.6	0
85.7	0
85.8	0
85.9	0
86	0
86.1	0
86.2	0
86.3	0
86.4	0
86.5	0
86.6	0
86.7	0
86.8	0
86.9	0
87	0
87.1	0
87.2	0
87.3	0
87.4	0
87.5	0
87.6	0
87.7	0
87.8	0
87.9	0
88	0
88.1	0
88.2	0
88.3	0
88.4	0
88.5	0
88.6	0
88.7	0
88.8	0
88.9	0
89	0
89.1	0
89.2	0
89.3	0
89.4	0
89.5	0
89.6	0
89.7	0
89.8	0
89.9	0
90	0
90.1	0
90.2	0
90.3	0
90.4	0
90.5	0
90.6	0
90.7	0
90.8	0
90.9	0
91	0
91.1	0
91.2	0
91.3	0
91.4	0
91.5	0
91.6	0
91.7	0
91.8	0
91.9	0
92	0
92.1	0
92.2	0
92.3	0
92.4	0
92.5	0
92.6	0
92.7	0
92.8	0
92.9	0
93	0
93.1	0
93.2	0
93.3	0
93.4	0
93.5	0
93.6	0
93.7	0
93.8	0
93.9	0
94	0
94.1	0
94.2	0
94.3	0
94.4	0
94.5	0
94.6	0
94.7	0
94.8	0
94.9	0
95	0
95.1	0
95.2	0
95.3	0
95.4	0
95.5	0
95.6	0
95.7	0
95.8	0
95.9	0
96	0
96.1	0
96.2	0
96.3	0
96.4	0
96.5	0
96.6	0
96.7	0
96.8	0
96.9	0
97	0
97.1	0
97.2	0
97.3	0
97.4	0
97.5	0
97.6	0
97.7	0
97.8	0
97.9	0
98	0
98.1	0
98.2	0
98.3	0
98.4	0
98.5	0
98.6	0
98.7	0
98.8	0
98.9	0
99	0
99.1	0
99.2	0
99.3	0
99.4	0
99.5	0
99.6	0
99.7	0
99.8	0
99.9	0
100	0
100.1	0
100.2	0
100.3	0.000333333
100.4	0.000833333
100.5	0.00133333
100.6	0.00166667
100.7	0.0025
100.8	0.0045
100.9	0.00533333
101	0.006
101.1	0.0065
101.2	0.0075
101.3	0.00866667
101.4	0.0105
101.5	0.0133333
101.6	0.0158333
101.7	0.018
101.8	0.021
101.9	0.0225
102	0.025
102.1	0.0281667
102.2	0.031
102.3	0.0341667
102.4	0.0368333
102.5	0.0395
102.6	0.041
102.7	0.0426667
102.8	0.0453333
102.9	0.0476667
103	0.0508333
103.1	0.0538333
103.2	0.0565
103.3	0.0578333
103.4	0.0593333
103.5	0.0615
103.6	0.0635
103.7	0.0663333
103.8	0.0683333
103.9	0.0715
104	0.0731667
104.1	0.0758333
104.2	0.0781667
104.3	0.0811667
104.4	0.0828333
104.5	0.0841667
104.6	0.0868333
104.7	0.0896667
104.8	0.0918333
104.9	0.0941667
105	0.0955
105.1	0.0975
105.2	0.0998333
105.3	0.103
105.4	0.104667
105.5	0.106667
105.6	0.108833
105.7	0.1115
105.8	0.113167
105.9	0.1155
106	0.116833
106.1	0.1195
106.2	0.121333
106.3	0.123667
106.4	0.126
106.5	0.128667
106.6	0.130667
106.7	0.132667
106.8	0.136
106.9	0.138333
107	0.1405
107.1	0.142
107.2	0.143667
107.3	0.146167
107.4	0.148
107.5	0.150333
107.6	0.152167
107.7	0.154333
107.8	0.158167
107.9	0.161167
108	0.1625
108.1	0.164167
108.2	0.1655
108.3	0.166667
108.4	0.170167
108.5	0.172833
108.6	0.175333
108.7	0.177667
108.8	0.180167
108.9	0.182333
109	0.184
109.1	0.1855
109.2	0.1875
109.3	0.190667
109.4	0.1925
109.5	0.194333
109.6	0.196833
109.7	0.197667
109.8	0.200167
109.9	0.202
110	0.203667
110.1	0.2055
110.2	0.207167
110.3	0.208667
110.4	0.211833
110.5	0.213833
110.6	0.215167
110.7	0.217333
110.8	0.219
110.9	0.221167
111	0.223167
111.1	0.224667
111.2	0.227
111.3	0.229
111.4	0.230333
111.5	0.232
111.6	0.233167
111.7	0.234333
111.8	0.235667
111.9	0.238
112	0.240667
112.1	0.242
112.2	0.2425
112.3	0.2445
112.4	0.245667
112.5	0.247
112.6	0.248
112.7	0.249167
112.8	0.251333
112.9	0.252833
113	0.254167
113.1	0.2565
113.2	0.257
113.3	0.257833
113.4	0.259
113.5	0.260833
113.6	0.261167
113.7	0.261
113.8	0.262
113.9	0.2635
114	0.265667
114.1	0.2675
114.2	0.268167
114.3	0.2695
114.4	0.271333
114.5	0.273
114.6	0.274833
114.7	0.275667
114.8	0.2765
114.9	0.2785
115	0.280833
115.1	0.283
115.2	0.2855
115.3	0.288667
115.4	0.290833
115.5	0.292333
115.6	0.294
115.7	0.296
115.8	0.297667
115.9	0.2995
116	0.300833
116.1	0.303167
116.2	0.305167
116.3	0.3055
116.4	0.306333
116.5	0.308
116.6	0.309667
116.7	0.311167
116.8	0.3125
116.9	0.314667
117	0.3155
117.1	0.317333
117.2	0.319
117.3	0.320167
117.4	0.322167
117.5	0.3235
117.6	0.325333
117.7	0.327333
117.8	0.329
117.9	0.329833
118	0.332
118.1	0.333167
118.2	0.334
118.3	0.3345
118.4	0.336333
118.5	0.338333
118.6	0.3405
118.7	0.340833
118.8	0.343
118.9	0.344333
119	0.346
119.1	0.347833
119.2	0.349333
119.3	0.351833
119.4	0.353
119.5	0.3545
119.6	0.356333
119.7	0.357333
119.8	0.358667
119.9	0.359
120	0.360667
120.1	0.362167
120.2	0.363667
120.3	0.364
120.4	0.364
120.5	0.3655
120.6	0.366833
120.7	0.368333
120.8	0.370667
120.9	0.371167
121	0.373
121.1	0.374333
121.2	0.375833
121.3	0.378167
121.4	0.379167
121.5	0.380333
121.6	0.382
121.7	0.383333
121.8	0.384833
121.9	0.387
122	0.388333
122.1	0.389167
122.2	0.390333
122.3	0.391833
122.4	0.3935
122.5	0.395167
122.6	0.396
122.7	0.396333
122.8	0.3975
122.9	0.399
123	0.401833
123.1	0.402333
123.2	0.4035
123.3	0.405333
123.4	0.405833
123.5	0.407
123.6	0.409333
123.7	0.411167
123.8	0.413167
123.9	0.414833
124	0.416667
124.1	0.417167
124.2	0.4185
124.3	0.419333
124.4	0.420333
124.5	0.4215
124.6	0.421667
124.7	0.422833
124.8	0.424167
124.9	0.425167
125	0.426667
125.1	0.427833
125.2	0.428333
125.3	0.43
125.4	0.4305
125.5	0.432
125.6	0.433333
125.7	0.434333
125.8	0.4355
125.9	0.436833
126	0.4385
126.1	0.440167
126.2	0.440833
126.3	0.442333
126.4	0.443333
126.5	0.4445
126.6	0.445333
126.7	0.445
126.8	0.445667
126.9	0.446333
127	0.447333
127.1	0.448833
127.2	0.450167
127.3	0.450667
127.4	0.451167
127.5	0.451167
127.6	0.452333
127.7	0.454
127.8	0.4545
127.9	0.4555
128	0.457667
128.1	0.459167
128.2	0.459833
128.3	0.460333
128.4	0.461
128.5	0.461667
128.6	0.463333
128.7	0.464167
128.8	0.464
128.9	0.4655
129	0.465667
129.1	0.467333
129.2	0.469667
129.3	0.470667
129.4	0.4715
129.5	0.472833
129.6	0.473
129.7	0.473333
129.8	0.473667
129.9	0.474
130	0.475833
130.1	0.477
130.2	0.478167
130.3	0.478833
130.4	0.479833
130.5	0.481
130.6	0.482
130.7	0.482333
130.8	0.483167
130.9	0.484667
131	0.485
131.1	0.486
131.2	0.487833
131.3	0.488333
131.4	0.488667
131.5	0.4885
131.6	0.49
131.7	0.490667
131.8	0.491
131.9	0.4925
132	0.492833
132.1	0.4935
132.2	0.494333
132.3	0.496333
132.4	0.497833
132.5	0.499
132.6	0.5
132.7	0.501167
132.8	0.501667
132.9	0.501667
133	0.502
133.1	0.5025
133.2	0.502833
133.3	0.503167
133.4	0.5035
133.5	0.505
133.6	0.507
133.7	0.5085
133.8	0.509333
133.9	0.510167
134	0.510667
134.1	0.512333
134.2	0.513667
134.3	0.514
134.4	0.515
134.5	0.515833
134.6	0.516
134.7	0.517
134.8	0.517667
134.9	0.519333
135	0.5205
135.1	0.520667
135.2	0.520667
135.3	0.521
135.4	0.521833
135.5	0.522833
135.6	0.523333
135.7	0.524167
135.8	0.525333
135.9	0.525833
136	0.527167
136.1	0.527667
136.2	0.528667
136.3	0.5285
136.4	0.5295
136.5	0.529833
136.6	0.530167
136.7	0.531167
136.8	0.531167
136.9	0.531833
137	0.5325
137.1	0.532833
137.2	0.533333
137.3	0.533833
137.4	0.534167
137.5	0.535333
137.6	0.535333
137.7	0.5365
137.8	0.536667
137.9	0.538333
138	0.539167
138.1	0.540167
138.2	0.541
138.3	0.5425
138.4	0.5425
138.5	0.543
138.6	0.543667
138.7	0.544667
138.8	0.545667
138.9	0.547333
139	0.548833
139.1	0.549667
139.2	0.5515
139.3	0.552833
139.4	0.5525
139.5	0.553833
139.6	0.5545
139.7	0.555333
139.8	0.555
139.9	0.5555
140	0.557667
140.1	0.557833
140.2	0.558
140.3	0.559
140.4	0.559167
140.5	0.560333
140.6	0.561167
140.7	0.561833
140.8	0.5625
140.9	0.5635
141	0.563667
141.1	0.564167
141.2	0.564167
141.3	0.564833
141.4	0.564833
141.5	0.566667
141.6	0.568333
141.7	0.568667
141.8	0.568667
141.9	0.569667
142	0.569833
142.1	0.571
142.2	0.571667
142.3	0.572167
142.4	0.5735
142.5	0.5735
142.6	0.5745
142.7	0.575833
142.8	0.576833
142.9	0.5785
143	0.579833
143.1	0.579833
143.2	0.580833
143.3	0.5805
143.4	0.580333
143.5	0.5815
143.6	0.581167
143.7	0.581833
143.8	0.5845
143.9	0.585167
144	0.585333
144.1	0.585667
144.2	0.586333
144.3	0.5865
144.4	0.587833
144.5	0.587667
144.6	0.588
144.7	0.588833
144.8	0.5895
144.9	0.589667
145	0.590833
145.1	0.590833
145.2	0.590833
145.3	0.5905
145.4	0.591333
145.5	0.5915
145.6	0.592333
145.7	0.592
145.8	0.592833
145.9	0.592833
146	0.593167
146.1	0.594333
146.2	0.594667
146.3	0.593833
146.4	0.594
146.5	0.5945
146.6	0.595667
146.7	0.595833
146.8	0.596
146.9	0.598
147	0.598833
147.1	0.599333
147.2	0.599333
147.3	0.599167
147.4	0.599833
147.5	0.599833
147.6	0.600167
147.7	0.6005
147.8	0.601167
147.9	0.601167
148	0.600833
148.1	0.601667
148.2	0.602167
148.3	0.602333
148.4	0.6025
148.5	0.603667
148.6	0.6035
148.7	0.6035
148.8	0.6035
148.9	0.603833
149	0.604
149.1	0.6045
149.2	0.604833
149.3	0.606
149.4	0.606167
149.5	0.606333
149.6	0.606333
149.7	0.6075
149.8	0.608667
149.9	0.609333
150	0.610333
150.1	0.611833
150.2	0.611167
150.3	0.611167
150.4	0.611667
150.5	0.612333
150.6	0.6125
150.7	0.612167
150.8	0.612833
150.9	0.613
151	0.6135
151.1	0.6145
151.2	0.614833
151.3	0.615333
151.4	0.615833
151.5	0.616167
151.6	0.617
151.7	0.616667
151.8	0.616833
151.9	0.617
152	0.617333
152.1	0.617
152.2	0.617167
152.3	0.617333
152.4	0.617667
152.5	0.618
152.6	0.618167
152.7	0.617667
152.8	0.617667
152.9	0.618667
153	0.618333
153.1	0.6185
153.2	0.619167
153.3	0.619833
153.4	0.619833
153.5	0.619833
153.6	0.6195
153.7	0.619833
153.8	0.6195
153.9	0.620167
154	0.621333
154.1	0.622167
154.2	0.623167
154.3	0.623667
154.4	0.624333
154.5	0.6245
154.6	0.624667
154.7	0.624333
154.8	0.6255
154.9	0.627333
155	0.627667
155.1	0.628167
155.2	0.627833
155.3	0.628167
155.4	0.629833
155.5	0.6295
155.6	0.63
155.7	0.630333
155.8	0.630833
155.9	0.631
156	0.631333
156.1	0.631333
156.2	0.631333
156.3	0.631333
156.4	0.632
156.5	0.633167
156.6	0.6335
156.7	0.633167
156.8	0.633167
156.9	0.633667
157	0.634333
157.1	0.635333
157.2	0.6345
157.3	0.634667
157.4	0.634833
157.5	0.635333
157.6	0.634833
157.7	0.635667
157.8	0.636833
157.9	0.638167
158	0.6395
158.1	0.640333
158.2	0.640167
158.3	0.6405
158.4	0.6405
158.5	0.64
158.6	0.6405
158.7	0.6405
158.8	0.640167
158.9	0.640333
159	0.641
159.1	0.641167
159.2	0.640667
159.3	0.641167
159.4	0.642
159.5	0.643
159.6	0.643833
159.7	0.645
159.8	0.646
159.9	0.646167
160	0.647167
160.1	0.647333
160.2	0.648333
160.3	0.647667
160.4	0.647833
160.5	0.6485
160.6	0.6485
160.7	0.650167
160.8	0.651
160.9	0.651333
161	0.651667
161.1	0.652167
161.2	0.6525
161.3	0.653
161.4	0.652667
161.5	0.653333
161.6	0.653833
161.7	0.6545
161.8	0.654333
161.9	0.654167
162	0.655167
162.1	0.655333
162.2	0.656167
162.3	0.656833
162.4	0.6585
162.5	0.6585
162.6	0.658833
162.7	0.659
162.8	0.658667
162.9	0.659167
163	0.659
163.1	0.660167
163.2	0.661333
163.3	0.663333
163.4	0.662667
163.5	0.6625
163.6	0.661833
163.7	0.662333
163.8	0.662667
163.9	0.663
164	0.663167
164.1	0.663833
164.2	0.663333
164.3	0.6635
164.4	0.663
164.5	0.662667
164.6	0.663
164.7	0.663833
164.8	0.663333
164.9	0.663167
165	0.662833
165.1	0.663167
165.2	0.664667
165.3	0.665
165.4	0.664833
165.5	0.665333
165.6	0.6655
165.7	0.665667
165.8	0.665833
165.9	0.667
166	0.667167
166.1	0.668167
166.2	0.668833
166.3	0.668833
166.4	0.669
166.5	0.670167
166.6	0.671333
166.7	0.671167
166.8	0.671167
166.9	0.6715
167	0.671833
167.1	0.671167
167.2	0.672
167.3	0.672167
167.4	0.6715
167.5	0.6715
167.6	0.671833
167.7	0.672667
167.8	0.6735
167.9	0.674167
168	0.6745
168.1	0.674833
168.2	0.674333
168.3	0.674833
168.4	0.674667
168.5	0.674667
168.6	0.675167
168.7	0.6755
168.8	0.675
168.9	0.675167
169	0.6755
169.1	0.675667
169.2	0.675333
169.3	0.675333
169.4	0.676167
169.5	0.676667
169.6	0.677
169.7	0.677333
169.8	0.678167
169.9	0.678667
170	0.678667
170.1	0.679167
170.2	0.678333
170.3	0.6785
170.4	0.677833
170.5	0.6775
170.6	0.676833
170.7	0.677333
170.8	0.677
170.9	0.677667
171	0.6775
171.1	0.6775
171.2	0.678167
171.3	0.677833
171.4	0.677833
171.5	0.677667
171.6	0.6785
171.7	0.679
171.8	0.679333
171.9	0.679333
172	0.679167
172.1	0.679
172.2	0.678167
172.3	0.679
172.4	0.678667
172.5	0.678667
172.6	0.678667
172.7	0.6785
172.8	0.679833
172.9	0.680167
173	0.681167
173.1	0.6815
173.2	0.682
173.3	0.6825
173.4	0.682833
173.5	0.683667
173.6	0.684167
173.7	0.6845
173.8	0.684667
173.9	0.685
174	0.685333
174.1	0.6855
174.2	0.685833
174.3	0.686167
174.4	0.686167
174.5	0.6865
174.6	0.686333
174.7	0.685333
174.8	0.686
174.9	0.686333
175	0.686833
175.1	0.686667
175.2	0.686333
175.3	0.6865
175.4	0.686833
175.5	0.687667
175.6	0.688167
175.7	0.688167
175.8	0.687333
175.9	0.687167
176	0.686167
176.1	0.686333
176.2	0.686167
176.3	0.686333
176.4	0.686167
176.5	0.687
176.6	0.686667
176.7	0.687
176.8	0.686
176.9	0.686
177	0.6855
177.1	0.685833
177.2	0.6865
177.3	0.686333
177.4	0.687167
177.5	0.687333
177.6	0.6875
177.7	0.688333
177.8	0.688833
177.9	0.689
178	0.688333
178.1	0.688833
178.2	0.689167
178.3	0.689
178.4	0.689
178.5	0.688833
178.6	0.688
178.7	0.6875
178.8	0.687333
178.9	0.6875
179	0.687667
179.1	0.687167
179.2	0.6875
179.3	0.688333
179.4	0.689333
179.5	0.688833
179.6	0.689333
179.7	0.689667
179.8	0.690833
179.9	0.692
180	0.692167
180.1	0.692167
180.2	0.692
180.3	0.691667
180.4	0.6925
180.5	0.692667
180.6	0.6925
180.7	0.692333
180.8	0.692333
180.9	0.692167
181	0.692333
181.1	0.6915
181.2	0.692
181.3	0.692333
181.4	0.692
181.5	0.6935
181.6	0.694167
181.7	0.695167
181.8	0.695167
181.9	0.695333
182	0.696667
182.1	0.6975
182.2	0.697667
182.3	0.6975
182.4	0.698667
182.5	0.6985
182.6	0.6985
182.7	0.698167
182.8	0.698333
182.9	0.698167
183	0.698333
183.1	0.6995
183.2	0.700167
183.3	0.700167
183.4	0.700167
183.5	0.699667
183.6	0.7
183.7	0.699833
183.8	0.700167
183.9	0.699
184	0.698833
184.1	0.699
184.2	0.698333
184.3	0.6985
184.4	0.698
184.5	0.698833
184.6	0.698833
184.7	0.698667
184.8	0.699167
184.9	0.699167
185	0.698667
185.1	0.698333
185.2	0.698
185.3	0.6985
185.4	0.698833
185.5	0.698167
185.6	0.6985
185.7	0.698333
185.8	0.6985
185.9	0.698333
186	0.698833
186.1	0.698667
186.2	0.699
186.3	0.6995
186.4	0.699167
186.5	0.699
186.6	0.698833
186.7	0.699167
186.8	0.6995
186.9	0.7
187	0.7005
187.1	0.700167
187.2	0.7005
187.3	0.7
187.4	0.699833
187.5	0.699833
187.6	0.700167
187.7	0.700167
187.8	0.700167
187.9	0.699833
188	0.700833
188.1	0.701
188.2	0.7015
188.3	0.701167
188.4	0.701667
188.5	0.701667
188.6	0.702
188.7	0.703
188.8	0.703333
188.9	0.703667
189	0.702667
189.1	0.702667
189.2	0.703
189.3	0.703333
189.4	0.703333
189.5	0.703833
189.6	0.704167
189.7	0.703833
189.8	0.703333
189.9	0.702833
190	0.703833
190.1	0.704167
190.2	0.704
190.3	0.704333
190.4	0.7035
190.5	0.703333
190.6	0.702833
190.7	0.703667
190.8	0.703167
190.9	0.7035
191	0.704167
191.1	0.705
191.2	0.704667
191.3	0.703667
191.4	0.704
191.5	0.7045
191.6	0.704833
191.7	0.705
191.8	0.705
191.9	0.705333
192	0.704833
192.1	0.704833
192.2	0.704833
192.3	0.704833
192.4	0.704833
192.5	0.705167
192.6	0.705
192.7	0.705167
192.8	0.704667
192.9	0.704167
193	0.704167
193.1	0.705
193.2	0.705667
193.3	0.706167
193.4	0.7065
193.5	0.7065
193.6	0.7065
193.7	0.706
193.8	0.706167
193.9	0.706167
194	0.707
194.1	0.707167
194.2	0.707333
194.3	0.707667
194.4	0.708167
194.5	0.708333
194.6	0.7085
194.7	0.707833
194.8	0.707333
194.9	0.708167
195	0.708
195.1	0.708
195.2	0.7075
195.3	0.708
195.4	0.708167
195.5	0.708667
195.6	0.709
195.7	0.7095
195.8	0.709167
195.9	0.709
196	0.7085
196.1	0.708333
196.2	0.708
196.3	0.707833
196.4	0.708333
196.5	0.708667
196.6	0.7095
196.7	0.709833
196.8	0.709667
196.9	0.710167
197	0.71
197.1	0.710667
197.2	0.710333
197.3	0.710167
197.4	0.7105
197.5	0.711
197.6	0.7115
197.7	0.711167
197.8	0.711167
197.9	0.711833
198	0.711333
198.1	0.711667
198.2	0.711
198.3	0.711
198.4	0.7105
198.5	0.710833
198.6	0.711167
198.7	0.7105
198.8	0.710333
198.9	0.710667
199	0.7105
199.1	0.710667
199.2	0.711
199.3	0.711333
199.4	0.711667
199.5	0.711667
199.6	0.711833
199.7	0.712333
199.8	0.713333
199.9	0.714333
200	0.713333
[truncated: 14,000 more rows]
