# Supplementary material for: Bayesian inference of kinetic schemes for ion channels by Kalman filtering
Source: eLife journal article supplement (doi:10.7554/elife.62714), 2022-05-04
Supplement: fig4-data7 [file 1_Sim_N_7000_Fluor_MW_2M.xlsx]

## Sheet: Tabelle1
0.1	0
0.2	0
0.3	0
0.4	0
0.5	0
0.6	0
0.7	0
0.8	0
0.9	0
1	0
1.1	0
1.2	0
1.3	0
1.4	0
1.5	0
1.6	0
1.7	0
1.8	0
1.9	0
2	0
2.1	0
2.2	0
2.3	0
2.4	0
2.5	0
2.6	0
2.7	0
2.8	0
2.9	0
3	0
3.1	0
3.2	0
3.3	0
3.4	0
3.5	0
3.6	0
3.7	0
3.8	0
3.9	0
4	0
4.1	0
4.2	0
4.3	0
4.4	0
4.5	0
4.6	0
4.7	0
4.8	0
4.9	0
5	0
5.1	0
5.2	0
5.3	0
5.4	0
5.5	0
5.6	0
5.7	0
5.8	0
5.9	0
6	0
6.1	0
6.2	0
6.3	0
6.4	0
6.5	0
6.6	0
6.7	0
6.8	0
6.9	0
7	0
7.1	0
7.2	0
7.3	0
7.4	0
7.5	0
7.6	0
7.7	0
7.8	0
7.9	0
8	0
8.1	0
8.2	0
8.3	0
8.4	0
8.5	0
8.6	0
8.7	0
8.8	0
8.9	0
9	0
9.1	0
9.2	0
9.3	0
9.4	0
9.5	0
9.6	0
9.7	0
9.8	0
9.9	0
10	0
10.1	0
10.2	0
10.3	0
10.4	0
10.5	0
10.6	0
10.7	0
10.8	0
10.9	0
11	0
11.1	0
11.2	0
11.3	0
11.4	0
11.5	0
11.6	0
11.7	0
11.8	0
11.9	0
12	0
12.1	0
12.2	0
12.3	0
12.4	0
12.5	0
12.6	0
12.7	0
12.8	0
12.9	0
13	0
13.1	0
13.2	0
13.3	0
13.4	0
13.5	0
13.6	0
13.7	0
13.8	0
13.9	0
14	0
14.1	0
14.2	0
14.3	0
14.4	0
14.5	0
14.6	0
14.7	0
14.8	0
14.9	0
15	0
15.1	0
15.2	0
15.3	0
15.4	0
15.5	0
15.6	0
15.7	0
15.8	0
15.9	0
16	0
16.1	0
16.2	0
16.3	0
16.4	0
16.5	0
16.6	0
16.7	0
16.8	0
16.9	0
17	0
17.1	0
17.2	0
17.3	0
17.4	0
17.5	0
17.6	0
17.7	0
17.8	0
17.9	0
18	0
18.1	0
18.2	0
18.3	0
18.4	0
18.5	0
18.6	0
18.7	0
18.8	0
18.9	0
19	0
19.1	0
19.2	0
19.3	0
19.4	0
19.5	0
19.6	0
19.7	0
19.8	0
19.9	0
20	0
20.1	0
20.2	0
20.3	0
20.4	0
20.5	0
20.6	0
20.7	0
20.8	0
20.9	0
21	0
21.1	0
21.2	0
21.3	0
21.4	0
21.5	0
21.6	0
21.7	0
21.8	0
21.9	0
22	0
22.1	0
22.2	0
22.3	0
22.4	0
22.5	0
22.6	0
22.7	0
22.8	0
22.9	0
23	0
23.1	0
23.2	0
23.3	0
23.4	0
23.5	0
23.6	0
23.7	0
23.8	0
23.9	0
24	0
24.1	0
24.2	0
24.3	0
24.4	0
24.5	0
24.6	0
24.7	0
24.8	0
24.9	0
25	0
25.1	0
25.2	0
25.3	0
25.4	0
25.5	0
25.6	0
25.7	0
25.8	0
25.9	0
26	0
26.1	0
26.2	0
26.3	0
26.4	0
26.5	0
26.6	0
26.7	0
26.8	0
26.9	0
27	0
27.1	0
27.2	0
27.3	0
27.4	0
27.5	0
27.6	0
27.7	0
27.8	0
27.9	0
28	0
28.1	0
28.2	0
28.3	0
28.4	0
28.5	0
28.6	0
28.7	0
28.8	0
28.9	0
29	0
29.1	0
29.2	0
29.3	0
29.4	0
29.5	0
29.6	0
29.7	0
29.8	0
29.9	0
30	0
30.1	0
30.2	0
30.3	0
30.4	0
30.5	0
30.6	0
30.7	0
30.8	0
30.9	0
31	0
31.1	0
31.2	0
31.3	0
31.4	0
31.5	0
31.6	0
31.7	0
31.8	0
31.9	0
32	0
32.1	0
32.2	0
32.3	0
32.4	0
32.5	0
32.6	0
32.7	0
32.8	0
32.9	0
33	0
33.1	0
33.2	0
33.3	0
33.4	0
33.5	0
33.6	0
33.7	0
33.8	0
33.9	0
34	0
34.1	0
34.2	0
34.3	0
34.4	0
34.5	0
34.6	0
34.7	0
34.8	0
34.9	0
35	0
35.1	0
35.2	0
35.3	0
35.4	0
35.5	0
35.6	0
35.7	0
35.8	0
35.9	0
36	0
36.1	0
36.2	0
36.3	0
36.4	0
36.5	0
36.6	0
36.7	0
36.8	0
36.9	0
37	0
37.1	0
37.2	0
37.3	0
37.4	0
37.5	0
37.6	0
37.7	0
37.8	0
37.9	0
38	0
38.1	0
38.2	0
38.3	0
38.4	0
38.5	0
38.6	0
38.7	0
38.8	0
38.9	0
39	0
39.1	0
39.2	0
39.3	0
39.4	0
39.5	0
39.6	0
39.7	0
39.8	0
39.9	0
40	0
40.1	0
40.2	0
40.3	0
40.4	0
40.5	0
40.6	0
40.7	0
40.8	0
40.9	0
41	0
41.1	0
41.2	0
41.3	0
41.4	0
41.5	0
41.6	0
41.7	0
41.8	0
41.9	0
42	0
42.1	0
42.2	0
42.3	0
42.4	0
42.5	0
42.6	0
42.7	0
42.8	0
42.9	0
43	0
43.1	0
43.2	0
43.3	0
43.4	0
43.5	0
43.6	0
43.7	0
43.8	0
43.9	0
44	0
44.1	0
44.2	0
44.3	0
44.4	0
44.5	0
44.6	0
44.7	0
44.8	0
44.9	0
45	0
45.1	0
45.2	0
45.3	0
45.4	0
45.5	0
45.6	0
45.7	0
45.8	0
45.9	0
46	0
46.1	0
46.2	0
46.3	0
46.4	0
46.5	0
46.6	0
46.7	0
46.8	0
46.9	0
47	0
47.1	0
47.2	0
47.3	0
47.4	0
47.5	0
47.6	0
47.7	0
47.8	0
47.9	0
48	0
48.1	0
48.2	0
48.3	0
48.4	0
48.5	0
48.6	0
48.7	0
48.8	0
48.9	0
49	0
49.1	0
49.2	0
49.3	0
49.4	0
49.5	0
49.6	0
49.7	0
49.8	0
49.9	0
50	0
50.1	0
50.2	0
50.3	0
50.4	0
50.5	0
50.6	0
50.7	0
50.8	0
50.9	0
51	0
51.1	0
51.2	0
51.3	0
51.4	0
51.5	0
51.6	0
51.7	0
51.8	0
51.9	0
52	0
52.1	0
52.2	0
52.3	0
52.4	0
52.5	0
52.6	0
52.7	0
52.8	0
52.9	0
53	0
53.1	0
53.2	0
53.3	0
53.4	0
53.5	0
53.6	0
53.7	0
53.8	0
53.9	0
54	0
54.1	0
54.2	0
54.3	0
54.4	0
54.5	0
54.6	0
54.7	0
54.8	0
54.9	0
55	0
55.1	0
55.2	0
55.3	0
55.4	0
55.5	0
55.6	0
55.7	0
55.8	0
55.9	0
56	0
56.1	0
56.2	0
56.3	0
56.4	0
56.5	0
56.6	0
56.7	0
56.8	0
56.9	0
57	0
57.1	0
57.2	0
57.3	0
57.4	0
57.5	0
57.6	0
57.7	0
57.8	0
57.9	0
58	0
58.1	0
58.2	0
58.3	0
58.4	0
58.5	0
58.6	0
58.7	0
58.8	0
58.9	0
59	0
59.1	0
59.2	0
59.3	0
59.4	0
59.5	0
59.6	0
59.7	0
59.8	0
59.9	0
60	0
60.1	0
60.2	0
60.3	0
60.4	0
60.5	0
60.6	0
60.7	0
60.8	0
60.9	0
61	0
61.1	0
61.2	0
61.3	0
61.4	0
61.5	0
61.6	0
61.7	0
61.8	0
61.9	0
62	0
62.1	0
62.2	0
62.3	0
62.4	0
62.5	0
62.6	0
62.7	0
62.8	0
62.9	0
63	0
63.1	0
63.2	0
63.3	0
63.4	0
63.5	0
63.6	0
63.7	0
63.8	0
63.9	0
64	0
64.1	0
64.2	0
64.3	0
64.4	0
64.5	0
64.6	0
64.7	0
64.8	0
64.9	0
65	0
65.1	0
65.2	0
65.3	0
65.4	0
65.5	0
65.6	0
65.7	0
65.8	0
65.9	0
66	0
66.1	0
66.2	0
66.3	0
66.4	0
66.5	0
66.6	0
66.7	0
66.8	0
66.9	0
67	0
67.1	0
67.2	0
67.3	0
67.4	0
67.5	0
67.6	0
67.7	0
67.8	0
67.9	0
68	0
68.1	0
68.2	0
68.3	0
68.4	0
68.5	0
68.6	0
68.7	0
68.8	0
68.9	0
69	0
69.1	0
69.2	0
69.3	0
69.4	0
69.5	0
69.6	0
69.7	0
69.8	0
69.9	0
70	0
70.1	0
70.2	0
70.3	0
70.4	0
70.5	0
70.6	0
70.7	0
70.8	0
70.9	0
71	0
71.1	0
71.2	0
71.3	0
71.4	0
71.5	0
71.6	0
71.7	0
71.8	0
71.9	0
72	0
72.1	0
72.2	0
72.3	0
72.4	0
72.5	0
72.6	0
72.7	0
72.8	0
72.9	0
73	0
73.1	0
73.2	0
73.3	0
73.4	0
73.5	0
73.6	0
73.7	0
73.8	0
73.9	0
74	0
74.1	0
74.2	0
74.3	0
74.4	0
74.5	0
74.6	0
74.7	0
74.8	0
74.9	0
75	0
75.1	0
75.2	0
75.3	0
75.4	0
75.5	0
75.6	0
75.7	0
75.8	0
75.9	0
76	0
76.1	0
76.2	0
76.3	0
76.4	0
76.5	0
76.6	0
76.7	0
76.8	0
76.9	0
77	0
77.1	0
77.2	0
77.3	0
77.4	0
77.5	0
77.6	0
77.7	0
77.8	0
77.9	0
78	0
78.1	0
78.2	0
78.3	0
78.4	0
78.5	0
78.6	0
78.7	0
78.8	0
78.9	0
79	0
79.1	0
79.2	0
79.3	0
79.4	0
79.5	0
79.6	0
79.7	0
79.8	0
79.9	0
80	0
80.1	0
80.2	0
80.3	0
80.4	0
80.5	0
80.6	0
80.7	0
80.8	0
80.9	0
81	0
81.1	0
81.2	0
81.3	0
81.4	0
81.5	0
81.6	0
81.7	0
81.8	0
81.9	0
82	0
82.1	0
82.2	0
82.3	0
82.4	0
82.5	0
82.6	0
82.7	0
82.8	0
82.9	0
83	0
83.1	0
83.2	0
83.3	0
83.4	0
83.5	0
83.6	0
83.7	0
83.8	0
83.9	0
84	0
84.1	0
84.2	0
84.3	0
84.4	0
84.5	0
84.6	0
84.7	0
84.8	0
84.9	0
85	0
85.1	0
85.2	0
85.3	0
85.4	0
85.5	0
85.6	0
85.7	0
85.8	0
85.9	0
86	0
86.1	0
86.2	0
86.3	0
86.4	0
86.5	0
86.6	0
86.7	0
86.8	0
86.9	0
87	0
87.1	0
87.2	0
87.3	0
87.4	0
87.5	0
87.6	0
87.7	0
87.8	0
87.9	0
88	0
88.1	0
88.2	0
88.3	0
88.4	0
88.5	0
88.6	0
88.7	0
88.8	0
88.9	0
89	0
89.1	0
89.2	0
89.3	0
89.4	0
89.5	0
89.6	0
89.7	0
89.8	0
89.9	0
90	0
90.1	0
90.2	0
90.3	0
90.4	0
90.5	0
90.6	0
90.7	0
90.8	0
90.9	0
91	0
91.1	0
91.2	0
91.3	0
91.4	0
91.5	0
91.6	0
91.7	0
91.8	0
91.9	0
92	0
92.1	0
92.2	0
92.3	0
92.4	0
92.5	0
92.6	0
92.7	0
92.8	0
92.9	0
93	0
93.1	0
93.2	0
93.3	0
93.4	0
93.5	0
93.6	0
93.7	0
93.8	0
93.9	0
94	0
94.1	0
94.2	0
94.3	0
94.4	0
94.5	0
94.6	0
94.7	0
94.8	0
94.9	0
95	0
95.1	0
95.2	0
95.3	0
95.4	0
95.5	0
95.6	0
95.7	0
95.8	0
95.9	0
96	0
96.1	0
96.2	0
96.3	0
96.4	0
96.5	0
96.6	0
96.7	0
96.8	0
96.9	0
97	0
97.1	0
97.2	0
97.3	0
97.4	0
97.5	0
97.6	0
97.7	0
97.8	0
97.9	0
98	0
98.1	0
98.2	0
98.3	0
98.4	0
98.5	0
98.6	0
98.7	0
98.8	0
98.9	0
99	0
99.1	0
99.2	0
99.3	0
99.4	0
99.5	0
99.6	0
99.7	0
99.8	0
99.9	0
100	0
100.1	0.112143
100.2	0.203714
100.3	0.280286
100.4	0.343643
100.5	0.397571
100.6	0.441214
100.7	0.485643
100.8	0.518
100.9	0.543786
101	0.567286
101.1	0.587929
101.2	0.607857
101.3	0.624929
101.4	0.635929
101.5	0.648143
101.6	0.6585
101.7	0.671071
101.8	0.681571
101.9	0.693929
102	0.698429
102.1	0.706214
102.2	0.712286
102.3	0.719929
102.4	0.724857
102.5	0.727143
102.6	0.733357
102.7	0.736143
102.8	0.737857
102.9	0.738286
103	0.741071
103.1	0.742643
103.2	0.744
103.3	0.749357
103.4	0.752714
103.5	0.755071
103.6	0.757214
103.7	0.758214
103.8	0.761
103.9	0.760429
104	0.761571
104.1	0.763714
104.2	0.765143
104.3	0.763786
104.4	0.763786
104.5	0.766214
104.6	0.766143
104.7	0.767
104.8	0.768286
104.9	0.770214
105	0.768714
105.1	0.770071
105.2	0.771929
105.3	0.774357
105.4	0.776143
105.5	0.778143
105.6	0.777357
105.7	0.777571
105.8	0.776857
105.9	0.7755
106	0.775143
106.1	0.7755
106.2	0.775071
106.3	0.776286
106.4	0.7765
106.5	0.778071
106.6	0.778643
106.7	0.780643
106.8	0.779429
106.9	0.781714
107	0.782286
107.1	0.7865
107.2	0.789071
107.3	0.789571
107.4	0.789
107.5	0.791357
107.6	0.792143
107.7	0.790929
107.8	0.790286
107.9	0.789643
108	0.788786
108.1	0.788643
108.2	0.789571
108.3	0.790357
108.4	0.7945
108.5	0.794643
108.6	0.793714
108.7	0.795429
108.8	0.794357
108.9	0.795071
109	0.794857
109.1	0.792714
109.2	0.793786
109.3	0.795357
109.4	0.796357
109.5	0.799714
109.6	0.799214
109.7	0.800214
109.8	0.800286
109.9	0.799929
110	0.800286
110.1	0.799071
110.2	0.8005
110.3	0.800786
110.4	0.800643
110.5	0.800071
110.6	0.802786
110.7	0.806143
110.8	0.806643
110.9	0.804
111	0.804
111.1	0.806643
111.2	0.807643
111.3	0.808071
111.4	0.810071
111.5	0.8105
111.6	0.811929
111.7	0.812786
111.8	0.813714
111.9	0.811071
112	0.810571
112.1	0.8115
112.2	0.8125
112.3	0.813786
112.4	0.812571
112.5	0.812786
112.6	0.814857
112.7	0.815714
112.8	0.816786
112.9	0.817357
113	0.816857
113.1	0.816429
113.2	0.816357
113.3	0.816929
113.4	0.816143
113.5	0.816929
113.6	0.819
113.7	0.818429
113.8	0.816929
113.9	0.817
114	0.815929
114.1	0.816071
114.2	0.817357
114.3	0.819214
114.4	0.820929
114.5	0.821429
114.6	0.823286
114.7	0.823214
114.8	0.823929
114.9	0.822929
115	0.822929
115.1	0.823571
115.2	0.824071
115.3	0.823929
115.4	0.823857
115.5	0.825071
115.6	0.824929
115.7	0.826286
115.8	0.8265
115.9	0.827214
116	0.828357
116.1	0.830071
116.2	0.829643
116.3	0.831214
116.4	0.830714
116.5	0.832143
116.6	0.831643
116.7	0.831571
116.8	0.8325
116.9	0.8335
117	0.833214
117.1	0.832857
117.2	0.833643
117.3	0.834286
117.4	0.833857
117.5	0.834
117.6	0.833929
117.7	0.835143
117.8	0.834786
117.9	0.835429
118	0.836214
118.1	0.838
118.2	0.838571
118.3	0.836357
118.4	0.837214
118.5	0.836214
118.6	0.839143
118.7	0.839929
118.8	0.840143
118.9	0.840571
119	0.841
119.1	0.841429
119.2	0.841857
119.3	0.843
119.4	0.845
119.5	0.845643
119.6	0.846
119.7	0.846429
119.8	0.845143
119.9	0.845786
120	0.845357
120.1	0.842857
120.2	0.845143
120.3	0.846143
120.4	0.845857
120.5	0.848857
120.6	0.848857
120.7	0.848357
120.8	0.847714
120.9	0.849214
121	0.85
121.1	0.849643
121.2	0.848714
121.3	0.850643
121.4	0.850143
121.5	0.850143
121.6	0.847786
121.7	0.846357
121.8	0.847214
121.9	0.846071
122	0.846929
122.1	0.847143
122.2	0.847143
122.3	0.846571
122.4	0.845571
122.5	0.8455
122.6	0.848071
122.7	0.847714
122.8	0.847286
122.9	0.844929
123	0.845857
123.1	0.845857
123.2	0.845286
123.3	0.847786
123.4	0.848071
123.5	0.846786
123.6	0.845786
123.7	0.847071
123.8	0.846857
123.9	0.847857
124	0.847357
124.1	0.849571
124.2	0.850714
124.3	0.851857
124.4	0.850714
124.5	0.852
124.6	0.850714
124.7	0.851786
124.8	0.853357
124.9	0.854786
125	0.854429
125.1	0.854286
125.2	0.857929
125.3	0.857143
125.4	0.856857
125.5	0.855929
125.6	0.857643
125.7	0.857786
125.8	0.859071
125.9	0.860571
126	0.8605
126.1	0.861286
126.2	0.862143
126.3	0.863071
126.4	0.861571
126.5	0.862357
126.6	0.861857
126.7	0.860143
126.8	0.860643
126.9	0.860786
127	0.860571
127.1	0.859714
127.2	0.860429
127.3	0.862286
127.4	0.860857
127.5	0.861071
127.6	0.864
127.7	0.864643
127.8	0.8625
127.9	0.8625
128	0.862643
128.1	0.863143
128.2	0.864429
128.3	0.864857
128.4	0.865143
128.5	0.865786
128.6	0.865929
128.7	0.865643
128.8	0.866071
128.9	0.866571
129	0.868429
129.1	0.868857
129.2	0.868214
129.3	0.867643
129.4	0.867929
129.5	0.869143
129.6	0.868714
129.7	0.869714
129.8	0.870286
129.9	0.871214
130	0.870857
130.1	0.872286
130.2	0.869786
130.3	0.869857
130.4	0.868929
130.5	0.869571
130.6	0.869286
130.7	0.868643
130.8	0.870071
130.9	0.87
131	0.869571
131.1	0.870214
131.2	0.869357
131.3	0.870357
131.4	0.870714
131.5	0.871429
131.6	0.872214
131.7	0.8705
131.8	0.870786
131.9	0.871929
132	0.870929
132.1	0.871214
132.2	0.869643
132.3	0.871643
132.4	0.870429
132.5	0.869571
132.6	0.8705
132.7	0.870786
132.8	0.871857
132.9	0.8725
133	0.874429
133.1	0.874643
133.2	0.874714
133.3	0.873429
133.4	0.872143
133.5	0.872857
133.6	0.874143
133.7	0.874571
133.8	0.874357
133.9	0.874857
134	0.875357
134.1	0.877286
134.2	0.875929
134.3	0.877214
134.4	0.876071
134.5	0.875857
134.6	0.876714
134.7	0.877571
134.8	0.879286
134.9	0.879071
135	0.878071
135.1	0.877714
135.2	0.877071
135.3	0.878143
135.4	0.878929
135.5	0.878071
135.6	0.879714
135.7	0.879929
135.8	0.880357
135.9	0.879357
136	0.880571
136.1	0.880857
136.2	0.881429
136.3	0.882071
136.4	0.882143
136.5	0.883643
136.6	0.884143
136.7	0.8845
136.8	0.882571
136.9	0.882357
137	0.881929
137.1	0.879714
137.2	0.880429
137.3	0.880286
137.4	0.879786
137.5	0.880429
137.6	0.880929
137.7	0.8815
137.8	0.881786
137.9	0.882143
138	0.8825
138.1	0.883
138.2	0.883071
138.3	0.883214
138.4	0.882714
138.5	0.883357
138.6	0.885429
138.7	0.885857
138.8	0.885714
138.9	0.885571
139	0.885286
139.1	0.884857
139.2	0.886929
139.3	0.886786
139.4	0.885786
139.5	0.887214
139.6	0.886
139.7	0.886786
139.8	0.888429
139.9	0.889429
140	0.888571
140.1	0.890357
140.2	0.889929
140.3	0.888857
140.4	0.889571
140.5	0.888929
140.6	0.889929
140.7	0.89
140.8	0.889571
140.9	0.888643
141	0.888643
141.1	0.888214
141.2	0.888357
141.3	0.889571
141.4	0.889786
141.5	0.889071
141.6	0.889286
141.7	0.889
141.8	0.889071
141.9	0.888857
142	0.889857
142.1	0.889286
142.2	0.890929
142.3	0.892071
142.4	0.892214
142.5	0.8925
142.6	0.892143
142.7	0.891786
142.8	0.892929
142.9	0.893714
143	0.893571
143.1	0.894
143.2	0.894929
143.3	0.895
143.4	0.894143
143.5	0.893214
143.6	0.893857
143.7	0.894571
143.8	0.896
143.9	0.895
144	0.895
144.1	0.894286
144.2	0.893429
144.3	0.893143
144.4	0.893
144.5	0.894714
144.6	0.894714
144.7	0.894571
144.8	0.896357
144.9	0.896786
145	0.896357
145.1	0.896357
145.2	0.896929
145.3	0.897714
145.4	0.899143
145.5	0.898357
145.6	0.897214
145.7	0.897071
145.8	0.897286
145.9	0.897214
146	0.897071
146.1	0.8975
146.2	0.897071
146.3	0.896571
146.4	0.896929
146.5	0.895571
146.6	0.894214
146.7	0.893
146.8	0.893214
146.9	0.892786
147	0.892857
147.1	0.895357
147.2	0.895143
147.3	0.896357
147.4	0.895643
147.5	0.895571
147.6	0.896071
147.7	0.895643
147.8	0.897929
147.9	0.898286
148	0.897571
148.1	0.8965
148.2	0.896071
148.3	0.896429
148.4	0.8965
148.5	0.897286
148.6	0.897214
148.7	0.896
148.8	0.897071
148.9	0.897143
149	0.897071
149.1	0.896929
149.2	0.897143
149.3	0.897143
149.4	0.8975
149.5	0.8965
149.6	0.898929
149.7	0.899786
149.8	0.898786
149.9	0.900857
150	0.900429
150.1	0.901714
150.2	0.900643
150.3	0.900071
150.4	0.901929
150.5	0.901786
150.6	0.902929
150.7	0.903
150.8	0.903429
150.9	0.903429
151	0.904714
151.1	0.905571
151.2	0.906286
151.3	0.906214
151.4	0.906857
151.5	0.905714
151.6	0.906929
151.7	0.907
151.8	0.907286
151.9	0.908214
152	0.9075
152.1	0.907357
152.2	0.909071
152.3	0.909429
152.4	0.908786
152.5	0.907643
152.6	0.908714
152.7	0.906643
152.8	0.905571
152.9	0.905643
153	0.904786
153.1	0.904857
153.2	0.905286
153.3	0.907429
153.4	0.907643
153.5	0.906286
153.6	0.906357
153.7	0.906
153.8	0.904214
153.9	0.904214
154	0.904857
154.1	0.904214
154.2	0.904286
154.3	0.904857
154.4	0.9075
154.5	0.907143
154.6	0.9075
154.7	0.906571
154.8	0.905
154.9	0.9055
155	0.906214
155.1	0.9065
155.2	0.906929
155.3	0.906786
155.4	0.907071
155.5	0.906429
155.6	0.9075
155.7	0.907786
155.8	0.907
155.9	0.906429
156	0.906643
156.1	0.906143
156.2	0.9055
156.3	0.904429
156.4	0.904714
156.5	0.905571
156.6	0.906571
156.7	0.906857
156.8	0.907857
156.9	0.907214
157	0.906714
157.1	0.907643
157.2	0.907143
157.3	0.905571
157.4	0.905357
157.5	0.907643
157.6	0.906571
157.7	0.906143
157.8	0.905714
157.9	0.907
158	0.9075
158.1	0.9095
158.2	0.909143
158.3	0.909214
158.4	0.909
158.5	0.910143
158.6	0.9115
158.7	0.912857
158.8	0.912143
158.9	0.910714
159	0.909357
159.1	0.909643
159.2	0.908143
159.3	0.9075
159.4	0.907071
159.5	0.908071
159.6	0.907
159.7	0.906786
159.8	0.906
159.9	0.906429
160	0.906286
160.1	0.906143
160.2	0.906
160.3	0.907143
160.4	0.908571
160.5	0.908714
160.6	0.910214
160.7	0.909429
160.8	0.910429
160.9	0.911214
161	0.910571
161.1	0.911929
161.2	0.9125
161.3	0.911714
161.4	0.911714
161.5	0.912
161.6	0.911143
161.7	0.911929
161.8	0.913071
161.9	0.913714
162	0.913071
162.1	0.912071
162.2	0.911143
162.3	0.912429
162.4	0.9125
162.5	0.912929
162.6	0.912714
162.7	0.912286
162.8	0.911286
162.9	0.910857
163	0.910857
163.1	0.911
163.2	0.910214
163.3	0.910071
163.4	0.909714
163.5	0.909857
163.6	0.910643
163.7	0.909786
163.8	0.909214
163.9	0.911143
164	0.912071
164.1	0.912286
164.2	0.913786
164.3	0.915214
164.4	0.916071
164.5	0.916429
164.6	0.9175
164.7	0.916714
164.8	0.917071
164.9	0.917071
165	0.916929
165.1	0.915571
165.2	0.917429
165.3	0.917071
165.4	0.916429
165.5	0.916857
165.6	0.918857
165.7	0.917643
165.8	0.918929
165.9	0.917643
166	0.918571
166.1	0.918143
166.2	0.917357
166.3	0.917143
166.4	0.9175
166.5	0.917286
166.6	0.916714
166.7	0.916214
166.8	0.915429
166.9	0.915929
167	0.914571
167.1	0.913
167.2	0.913357
167.3	0.912857
167.4	0.913357
167.5	0.912429
167.6	0.9135
167.7	0.914143
167.8	0.914214
167.9	0.914429
168	0.915
168.1	0.914714
168.2	0.914643
168.3	0.915786
168.4	0.916286
168.5	0.913357
168.6	0.915
168.7	0.9165
168.8	0.916857
168.9	0.916714
169	0.916571
169.1	0.915286
169.2	0.915214
169.3	0.915143
169.4	0.915286
169.5	0.916
169.6	0.916929
169.7	0.915714
169.8	0.914571
169.9	0.915071
170	0.915643
170.1	0.915071
170.2	0.914
170.3	0.915
170.4	0.916286
170.5	0.917143
170.6	0.916714
170.7	0.917929
170.8	0.918714
170.9	0.918571
171	0.917929
171.1	0.916929
171.2	0.916643
171.3	0.916643
171.4	0.918214
171.5	0.918714
171.6	0.919143
171.7	0.918571
171.8	0.917714
171.9	0.918071
172	0.919643
172.1	0.919929
172.2	0.9185
172.3	0.919357
172.4	0.919429
172.5	0.921214
172.6	0.920857
172.7	0.921214
172.8	0.921214
172.9	0.921714
173	0.922071
173.1	0.922429
173.2	0.921143
173.3	0.919786
173.4	0.919786
173.5	0.920357
173.6	0.921143
173.7	0.922286
173.8	0.922
173.9	0.921143
174	0.921214
174.1	0.921
174.2	0.921429
174.3	0.921429
174.4	0.921786
174.5	0.921357
174.6	0.922071
174.7	0.922071
174.8	0.922357
174.9	0.922714
175	0.921571
175.1	0.921286
175.2	0.922143
175.3	0.921643
175.4	0.922071
175.5	0.921571
175.6	0.919857
175.7	0.919857
175.8	0.919786
175.9	0.921071
176	0.924
176.1	0.923714
176.2	0.924
176.3	0.924143
176.4	0.924286
176.5	0.923429
176.6	0.922643
176.7	0.922857
176.8	0.922357
176.9	0.922357
177	0.921857
177.1	0.922071
177.2	0.9225
177.3	0.921
177.4	0.922
177.5	0.922357
177.6	0.923
177.7	0.923429
177.8	0.923357
177.9	0.923286
178	0.922429
178.1	0.923143
178.2	0.923429
178.3	0.924214
178.4	0.924143
178.5	0.923286
178.6	0.924
178.7	0.922929
178.8	0.922786
178.9	0.922429
179	0.921714
179.1	0.922071
179.2	0.9235
179.3	0.925143
179.4	0.9265
179.5	0.926429
179.6	0.925071
179.7	0.924286
179.8	0.923643
179.9	0.924214
180	0.922929
180.1	0.923286
180.2	0.924071
180.3	0.923929
180.4	0.923429
180.5	0.923929
180.6	0.925286
180.7	0.924214
180.8	0.924071
180.9	0.924643
181	0.922571
181.1	0.923143
181.2	0.923143
181.3	0.923786
181.4	0.923071
181.5	0.922929
181.6	0.922571
181.7	0.922643
181.8	0.922357
181.9	0.921929
182	0.922357
182.1	0.922857
182.2	0.923071
182.3	0.923357
182.4	0.923214
182.5	0.924
182.6	0.923429
182.7	0.922357
182.8	0.923214
182.9	0.922929
183	0.921857
183.1	0.922786
183.2	0.923
183.3	0.924
183.4	0.9245
183.5	0.9255
183.6	0.925357
183.7	0.925786
183.8	0.926071
183.9	0.925286
184	0.925071
184.1	0.925071
184.2	0.926571
184.3	0.926357
184.4	0.926214
184.5	0.926643
184.6	0.926571
184.7	0.925643
184.8	0.924143
184.9	0.923714
185	0.925643
185.1	0.925571
185.2	0.926714
185.3	0.927786
185.4	0.927714
185.5	0.927857
185.6	0.927571
185.7	0.925214
185.8	0.926071
185.9	0.926071
186	0.925714
186.1	0.926071
186.2	0.925286
186.3	0.925786
186.4	0.926143
186.5	0.925357
186.6	0.925857
186.7	0.927
186.8	0.926429
186.9	0.9265
187	0.926786
187.1	0.927429
187.2	0.927786
187.3	0.927714
187.4	0.929
187.5	0.929286
187.6	0.928357
187.7	0.926929
187.8	0.926
187.9	0.925357
188	0.923357
188.1	0.923071
188.2	0.923214
188.3	0.9235
188.4	0.923714
188.5	0.922929
188.6	0.922071
188.7	0.923357
188.8	0.9225
188.9	0.922714
189	0.922357
189.1	0.922214
189.2	0.923429
189.3	0.924
189.4	0.924286
189.5	0.925
189.6	0.925143
189.7	0.926429
189.8	0.924571
189.9	0.924214
190	0.923929
190.1	0.924857
190.2	0.924286
190.3	0.924714
190.4	0.924286
190.5	0.923214
190.6	0.924286
190.7	0.924071
190.8	0.926
190.9	0.925571
191	0.9255
191.1	0.924786
191.2	0.923429
191.3	0.924286
191.4	0.923714
191.5	0.924286
191.6	0.925429
191.7	0.925429
191.8	0.926929
191.9	0.927643
192	0.927786
192.1	0.927
192.2	0.924429
192.3	0.924071
192.4	0.924857
192.5	0.924643
192.6	0.924214
192.7	0.9245
192.8	0.924714
192.9	0.924857
193	0.926143
193.1	0.925071
193.2	0.924929
193.3	0.9255
193.4	0.925571
193.5	0.926714
193.6	0.928429
193.7	0.929
193.8	0.928143
193.9	0.927714
194	0.927643
194.1	0.927714
194.2	0.928
194.3	0.927214
194.4	0.926143
194.5	0.924429
194.6	0.924714
194.7	0.9265
194.8	0.925071
194.9	0.925857
195	0.925929
195.1	0.924714
195.2	0.925714
195.3	0.924929
195.4	0.925857
195.5	0.924857
195.6	0.925
195.7	0.924571
195.8	0.925214
195.9	0.925214
196	0.9255
196.1	0.924786
196.2	0.924
196.3	0.924071
196.4	0.922857
196.5	0.925
196.6	0.924714
196.7	0.923214
196.8	0.922143
196.9	0.922429
197	0.923857
197.1	0.924143
197.2	0.925214
197.3	0.925214
197.4	0.924571
197.5	0.924786
197.6	0.924857
197.7	0.922929
197.8	0.924214
197.9	0.923929
198	0.923857
198.1	0.9245
198.2	0.924
198.3	0.923571
198.4	0.9245
198.5	0.924071
198.6	0.926
198.7	0.925214
198.8	0.925929
198.9	0.9275
199	0.926857
199.1	0.926214
199.2	0.926
199.3	0.925786
199.4	0.9265
199.5	0.927929
199.6	0.926643
199.7	0.927
199.8	0.926071
199.9	0.926143
200	0.925429
[truncated: 14,000 more rows]
