# Supplementary material for: Bayesian inference of kinetic schemes for ion channels by Kalman filtering
Source: eLife journal article supplement (doi:10.7554/elife.62714), 2022-05-04
Supplement: fig4-data7 [file 1_Sim_N_7000_Strom_MW_2M.xlsx]

## Sheet: Tabelle1
0.1	0
0.2	0
0.3	0
0.4	0
0.5	0
0.6	0
0.7	0
0.8	0
0.9	0
1	0
1.1	0
1.2	0
1.3	0
1.4	0
1.5	0
1.6	0
1.7	0
1.8	0
1.9	0
2	0
2.1	0
2.2	0
2.3	0
2.4	0
2.5	0
2.6	0
2.7	0
2.8	0
2.9	0
3	0
3.1	0
3.2	0
3.3	0
3.4	0
3.5	0
3.6	0
3.7	0
3.8	0
3.9	0
4	0
4.1	0
4.2	0
4.3	0
4.4	0
4.5	0
4.6	0
4.7	0
4.8	0
4.9	0
5	0
5.1	0
5.2	0
5.3	0
5.4	0
5.5	0
5.6	0
5.7	0
5.8	0
5.9	0
6	0
6.1	0
6.2	0
6.3	0
6.4	0
6.5	0
6.6	0
6.7	0
6.8	0
6.9	0
7	0
7.1	0
7.2	0
7.3	0
7.4	0
7.5	0
7.6	0
7.7	0
7.8	0
7.9	0
8	0
8.1	0
8.2	0
8.3	0
8.4	0
8.5	0
8.6	0
8.7	0
8.8	0
8.9	0
9	0
9.1	0
9.2	0
9.3	0
9.4	0
9.5	0
9.6	0
9.7	0
9.8	0
9.9	0
10	0
10.1	0
10.2	0
10.3	0
10.4	0
10.5	0
10.6	0
10.7	0
10.8	0
10.9	0
11	0
11.1	0
11.2	0
11.3	0
11.4	0
11.5	0
11.6	0
11.7	0
11.8	0
11.9	0
12	0
12.1	0
12.2	0
12.3	0
12.4	0
12.5	0
12.6	0
12.7	0
12.8	0
12.9	0
13	0
13.1	0
13.2	0
13.3	0
13.4	0
13.5	0
13.6	0
13.7	0
13.8	0
13.9	0
14	0
14.1	0
14.2	0
14.3	0
14.4	0
14.5	0
14.6	0
14.7	0
14.8	0
14.9	0
15	0
15.1	0
15.2	0
15.3	0
15.4	0
15.5	0
15.6	0
15.7	0
15.8	0
15.9	0
16	0
16.1	0
16.2	0
16.3	0
16.4	0
16.5	0
16.6	0
16.7	0
16.8	0
16.9	0
17	0
17.1	0
17.2	0
17.3	0
17.4	0
17.5	0
17.6	0
17.7	0
17.8	0
17.9	0
18	0
18.1	0
18.2	0
18.3	0
18.4	0
18.5	0
18.6	0
18.7	0
18.8	0
18.9	0
19	0
19.1	0
19.2	0
19.3	0
19.4	0
19.5	0
19.6	0
19.7	0
19.8	0
19.9	0
20	0
20.1	0
20.2	0
20.3	0
20.4	0
20.5	0
20.6	0
20.7	0
20.8	0
20.9	0
21	0
21.1	0
21.2	0
21.3	0
21.4	0
21.5	0
21.6	0
21.7	0
21.8	0
21.9	0
22	0
22.1	0
22.2	0
22.3	0
22.4	0
22.5	0
22.6	0
22.7	0
22.8	0
22.9	0
23	0
23.1	0
23.2	0
23.3	0
23.4	0
23.5	0
23.6	0
23.7	0
23.8	0
23.9	0
24	0
24.1	0
24.2	0
24.3	0
24.4	0
24.5	0
24.6	0
24.7	0
24.8	0
24.9	0
25	0
25.1	0
25.2	0
25.3	0
25.4	0
25.5	0
25.6	0
25.7	0
25.8	0
25.9	0
26	0
26.1	0
26.2	0
26.3	0
26.4	0
26.5	0
26.6	0
26.7	0
26.8	0
26.9	0
27	0
27.1	0
27.2	0
27.3	0
27.4	0
27.5	0
27.6	0
27.7	0
27.8	0
27.9	0
28	0
28.1	0
28.2	0
28.3	0
28.4	0
28.5	0
28.6	0
28.7	0
28.8	0
28.9	0
29	0
29.1	0
29.2	0
29.3	0
29.4	0
29.5	0
29.6	0
29.7	0
29.8	0
29.9	0
30	0
30.1	0
30.2	0
30.3	0
30.4	0
30.5	0
30.6	0
30.7	0
30.8	0
30.9	0
31	0
31.1	0
31.2	0
31.3	0
31.4	0
31.5	0
31.6	0
31.7	0
31.8	0
31.9	0
32	0
32.1	0
32.2	0
32.3	0
32.4	0
32.5	0
32.6	0
32.7	0
32.8	0
32.9	0
33	0
33.1	0
33.2	0
33.3	0
33.4	0
33.5	0
33.6	0
33.7	0
33.8	0
33.9	0
34	0
34.1	0
34.2	0
34.3	0
34.4	0
34.5	0
34.6	0
34.7	0
34.8	0
34.9	0
35	0
35.1	0
35.2	0
35.3	0
35.4	0
35.5	0
35.6	0
35.7	0
35.8	0
35.9	0
36	0
36.1	0
36.2	0
36.3	0
36.4	0
36.5	0
36.6	0
36.7	0
36.8	0
36.9	0
37	0
37.1	0
37.2	0
37.3	0
37.4	0
37.5	0
37.6	0
37.7	0
37.8	0
37.9	0
38	0
38.1	0
38.2	0
38.3	0
38.4	0
38.5	0
38.6	0
38.7	0
38.8	0
38.9	0
39	0
39.1	0
39.2	0
39.3	0
39.4	0
39.5	0
39.6	0
39.7	0
39.8	0
39.9	0
40	0
40.1	0
40.2	0
40.3	0
40.4	0
40.5	0
40.6	0
40.7	0
40.8	0
40.9	0
41	0
41.1	0
41.2	0
41.3	0
41.4	0
41.5	0
41.6	0
41.7	0
41.8	0
41.9	0
42	0
42.1	0
42.2	0
42.3	0
42.4	0
42.5	0
42.6	0
42.7	0
42.8	0
42.9	0
43	0
43.1	0
43.2	0
43.3	0
43.4	0
43.5	0
43.6	0
43.7	0
43.8	0
43.9	0
44	0
44.1	0
44.2	0
44.3	0
44.4	0
44.5	0
44.6	0
44.7	0
44.8	0
44.9	0
45	0
45.1	0
45.2	0
45.3	0
45.4	0
45.5	0
45.6	0
45.7	0
45.8	0
45.9	0
46	0
46.1	0
46.2	0
46.3	0
46.4	0
46.5	0
46.6	0
46.7	0
46.8	0
46.9	0
47	0
47.1	0
47.2	0
47.3	0
47.4	0
47.5	0
47.6	0
47.7	0
47.8	0
47.9	0
48	0
48.1	0
48.2	0
48.3	0
48.4	0
48.5	0
48.6	0
48.7	0
48.8	0
48.9	0
49	0
49.1	0
49.2	0
49.3	0
49.4	0
49.5	0
49.6	0
49.7	0
49.8	0
49.9	0
50	0
50.1	0
50.2	0
50.3	0
50.4	0
50.5	0
50.6	0
50.7	0
50.8	0
50.9	0
51	0
51.1	0
51.2	0
51.3	0
51.4	0
51.5	0
51.6	0
51.7	0
51.8	0
51.9	0
52	0
52.1	0
52.2	0
52.3	0
52.4	0
52.5	0
52.6	0
52.7	0
52.8	0
52.9	0
53	0
53.1	0
53.2	0
53.3	0
53.4	0
53.5	0
53.6	0
53.7	0
53.8	0
53.9	0
54	0
54.1	0
54.2	0
54.3	0
54.4	0
54.5	0
54.6	0
54.7	0
54.8	0
54.9	0
55	0
55.1	0
55.2	0
55.3	0
55.4	0
55.5	0
55.6	0
55.7	0
55.8	0
55.9	0
56	0
56.1	0
56.2	0
56.3	0
56.4	0
56.5	0
56.6	0
56.7	0
56.8	0
56.9	0
57	0
57.1	0
57.2	0
57.3	0
57.4	0
57.5	0
57.6	0
57.7	0
57.8	0
57.9	0
58	0
58.1	0
58.2	0
58.3	0
58.4	0
58.5	0
58.6	0
58.7	0
58.8	0
58.9	0
59	0
59.1	0
59.2	0
59.3	0
59.4	0
59.5	0
59.6	0
59.7	0
59.8	0
59.9	0
60	0
60.1	0
60.2	0
60.3	0
60.4	0
60.5	0
60.6	0
60.7	0
60.8	0
60.9	0
61	0
61.1	0
61.2	0
61.3	0
61.4	0
61.5	0
61.6	0
61.7	0
61.8	0
61.9	0
62	0
62.1	0
62.2	0
62.3	0
62.4	0
62.5	0
62.6	0
62.7	0
62.8	0
62.9	0
63	0
63.1	0
63.2	0
63.3	0
63.4	0
63.5	0
63.6	0
63.7	0
63.8	0
63.9	0
64	0
64.1	0
64.2	0
64.3	0
64.4	0
64.5	0
64.6	0
64.7	0
64.8	0
64.9	0
65	0
65.1	0
65.2	0
65.3	0
65.4	0
65.5	0
65.6	0
65.7	0
65.8	0
65.9	0
66	0
66.1	0
66.2	0
66.3	0
66.4	0
66.5	0
66.6	0
66.7	0
66.8	0
66.9	0
67	0
67.1	0
67.2	0
67.3	0
67.4	0
67.5	0
67.6	0
67.7	0
67.8	0
67.9	0
68	0
68.1	0
68.2	0
68.3	0
68.4	0
68.5	0
68.6	0
68.7	0
68.8	0
68.9	0
69	0
69.1	0
69.2	0
69.3	0
69.4	0
69.5	0
69.6	0
69.7	0
69.8	0
69.9	0
70	0
70.1	0
70.2	0
70.3	0
70.4	0
70.5	0
70.6	0
70.7	0
70.8	0
70.9	0
71	0
71.1	0
71.2	0
71.3	0
71.4	0
71.5	0
71.6	0
71.7	0
71.8	0
71.9	0
72	0
72.1	0
72.2	0
72.3	0
72.4	0
72.5	0
72.6	0
72.7	0
72.8	0
72.9	0
73	0
73.1	0
73.2	0
73.3	0
73.4	0
73.5	0
73.6	0
73.7	0
73.8	0
73.9	0
74	0
74.1	0
74.2	0
74.3	0
74.4	0
74.5	0
74.6	0
74.7	0
74.8	0
74.9	0
75	0
75.1	0
75.2	0
75.3	0
75.4	0
75.5	0
75.6	0
75.7	0
75.8	0
75.9	0
76	0
76.1	0
76.2	0
76.3	0
76.4	0
76.5	0
76.6	0
76.7	0
76.8	0
76.9	0
77	0
77.1	0
77.2	0
77.3	0
77.4	0
77.5	0
77.6	0
77.7	0
77.8	0
77.9	0
78	0
78.1	0
78.2	0
78.3	0
78.4	0
78.5	0
78.6	0
78.7	0
78.8	0
78.9	0
79	0
79.1	0
79.2	0
79.3	0
79.4	0
79.5	0
79.6	0
79.7	0
79.8	0
79.9	0
80	0
80.1	0
80.2	0
80.3	0
80.4	0
80.5	0
80.6	0
80.7	0
80.8	0
80.9	0
81	0
81.1	0
81.2	0
81.3	0
81.4	0
81.5	0
81.6	0
81.7	0
81.8	0
81.9	0
82	0
82.1	0
82.2	0
82.3	0
82.4	0
82.5	0
82.6	0
82.7	0
82.8	0
82.9	0
83	0
83.1	0
83.2	0
83.3	0
83.4	0
83.5	0
83.6	0
83.7	0
83.8	0
83.9	0
84	0
84.1	0
84.2	0
84.3	0
84.4	0
84.5	0
84.6	0
84.7	0
84.8	0
84.9	0
85	0
85.1	0
85.2	0
85.3	0
85.4	0
85.5	0
85.6	0
85.7	0
85.8	0
85.9	0
86	0
86.1	0
86.2	0
86.3	0
86.4	0
86.5	0
86.6	0
86.7	0
86.8	0
86.9	0
87	0
87.1	0
87.2	0
87.3	0
87.4	0
87.5	0
87.6	0
87.7	0
87.8	0
87.9	0
88	0
88.1	0
88.2	0
88.3	0
88.4	0
88.5	0
88.6	0
88.7	0
88.8	0
88.9	0
89	0
89.1	0
89.2	0
89.3	0
89.4	0
89.5	0
89.6	0
89.7	0
89.8	0
89.9	0
90	0
90.1	0
90.2	0
90.3	0
90.4	0
90.5	0
90.6	0
90.7	0
90.8	0
90.9	0
91	0
91.1	0
91.2	0
91.3	0
91.4	0
91.5	0
91.6	0
91.7	0
91.8	0
91.9	0
92	0
92.1	0
92.2	0
92.3	0
92.4	0
92.5	0
92.6	0
92.7	0
92.8	0
92.9	0
93	0
93.1	0
93.2	0
93.3	0
93.4	0
93.5	0
93.6	0
93.7	0
93.8	0
93.9	0
94	0
94.1	0
94.2	0
94.3	0
94.4	0
94.5	0
94.6	0
94.7	0
94.8	0
94.9	0
95	0
95.1	0
95.2	0
95.3	0
95.4	0
95.5	0
95.6	0
95.7	0
95.8	0
95.9	0
96	0
96.1	0
96.2	0
96.3	0
96.4	0
96.5	0
96.6	0
96.7	0
96.8	0
96.9	0
97	0
97.1	0
97.2	0
97.3	0
97.4	0
97.5	0
97.6	0
97.7	0
97.8	0
97.9	0
98	0
98.1	0
98.2	0
98.3	0
98.4	0
98.5	0
98.6	0
98.7	0
98.8	0
98.9	0
99	0
99.1	0
99.2	0
99.3	0
99.4	0
99.5	0
99.6	0
99.7	0
99.8	0
99.9	0
100	0
100.1	0
100.2	0
100.3	0.000142857
100.4	0.000571429
100.5	0.00114286
100.6	0.00171429
100.7	0.00271429
100.8	0.00328571
100.9	0.00514286
101	0.00642857
101.1	0.00771429
101.2	0.00828571
101.3	0.0102857
101.4	0.0124286
101.5	0.014
101.6	0.0151429
101.7	0.0165714
101.8	0.0187143
101.9	0.0202857
102	0.0231429
102.1	0.0262857
102.2	0.0282857
102.3	0.0307143
102.4	0.032
102.5	0.0342857
102.6	0.0364286
102.7	0.039
102.8	0.0415714
102.9	0.0445714
103	0.0462857
103.1	0.0482857
103.2	0.0505714
103.3	0.0522857
103.4	0.055
103.5	0.0577143
103.6	0.0597143
103.7	0.0625714
103.8	0.0648571
103.9	0.0662857
104	0.069
104.1	0.0705714
104.2	0.0728571
104.3	0.0751429
104.4	0.0778571
104.5	0.0798571
104.6	0.0817143
104.7	0.0838571
104.8	0.0852857
104.9	0.0878571
105	0.0901429
105.1	0.0922857
105.2	0.0942857
105.3	0.0961429
105.4	0.0985714
105.5	0.0998571
105.6	0.101143
105.7	0.103143
105.8	0.105429
105.9	0.107143
106	0.108857
106.1	0.111429
106.2	0.114429
106.3	0.115286
106.4	0.116714
106.5	0.119429
106.6	0.122143
106.7	0.123714
106.8	0.124857
106.9	0.126429
107	0.128571
107.1	0.130571
107.2	0.132143
107.3	0.133857
107.4	0.136143
107.5	0.139143
107.6	0.141571
107.7	0.143857
107.8	0.146571
107.9	0.148143
108	0.149714
108.1	0.152143
108.2	0.154286
108.3	0.156286
108.4	0.159143
108.5	0.161
108.6	0.162857
108.7	0.164571
108.8	0.165714
108.9	0.168
109	0.170286
109.1	0.172571
109.2	0.175
109.3	0.177429
109.4	0.178286
109.5	0.18
109.6	0.182286
109.7	0.185571
109.8	0.187286
109.9	0.190571
110	0.192429
110.1	0.193429
110.2	0.195143
110.3	0.196857
110.4	0.198286
110.5	0.201286
110.6	0.203286
110.7	0.204571
110.8	0.207286
110.9	0.209714
111	0.212143
111.1	0.213857
111.2	0.215286
111.3	0.216571
111.4	0.217429
111.5	0.219286
111.6	0.220429
111.7	0.222571
111.8	0.223714
111.9	0.225571
112	0.228143
112.1	0.229
112.2	0.23
112.3	0.232286
112.4	0.234429
112.5	0.236286
112.6	0.238714
112.7	0.24
112.8	0.241143
112.9	0.244857
113	0.245714
113.1	0.246714
113.2	0.248714
113.3	0.250286
113.4	0.252
113.5	0.253429
113.6	0.255714
113.7	0.257429
113.8	0.258857
113.9	0.260857
114	0.262
114.1	0.264857
114.2	0.266286
114.3	0.268571
114.4	0.270571
114.5	0.271286
114.6	0.272857
114.7	0.273571
114.8	0.276143
114.9	0.277286
115	0.279857
115.1	0.281714
115.2	0.283286
115.3	0.285
115.4	0.286571
115.5	0.287429
115.6	0.288571
115.7	0.290571
115.8	0.292429
115.9	0.293857
116	0.295571
116.1	0.296571
116.2	0.299143
116.3	0.301286
116.4	0.302286
116.5	0.303714
116.6	0.305286
116.7	0.306286
116.8	0.308571
116.9	0.310857
117	0.312286
117.1	0.314
117.2	0.315286
117.3	0.318143
117.4	0.319571
117.5	0.320857
117.6	0.322
117.7	0.323
117.8	0.324571
117.9	0.325429
118	0.326857
118.1	0.328143
118.2	0.329429
118.3	0.330429
118.4	0.331714
118.5	0.332429
118.6	0.333857
118.7	0.335857
118.8	0.337143
118.9	0.338143
119	0.339286
119.1	0.340429
119.2	0.342
119.3	0.343286
119.4	0.345
119.5	0.346714
119.6	0.347714
119.7	0.348857
119.8	0.351
119.9	0.353143
120	0.354286
120.1	0.355286
120.2	0.356714
120.3	0.358286
120.4	0.359286
120.5	0.360857
120.6	0.361143
120.7	0.361857
120.8	0.363286
120.9	0.365571
121	0.366571
121.1	0.368143
121.2	0.369143
121.3	0.370286
121.4	0.371286
121.5	0.371857
121.6	0.372857
121.7	0.374286
121.8	0.374571
121.9	0.374857
122	0.375429
122.1	0.376143
122.2	0.377429
122.3	0.378714
122.4	0.380714
122.5	0.382
122.6	0.382571
122.7	0.383857
122.8	0.384571
122.9	0.384714
123	0.386286
123.1	0.388
123.2	0.389
123.3	0.390143
123.4	0.392
123.5	0.392286
123.6	0.393429
123.7	0.394571
123.8	0.396143
123.9	0.397143
124	0.398571
124.1	0.400714
124.2	0.401429
124.3	0.402429
124.4	0.403714
124.5	0.404571
124.6	0.404857
124.7	0.406143
124.8	0.407714
124.9	0.409286
125	0.410714
125.1	0.411286
125.2	0.412286
125.3	0.412714
125.4	0.413429
125.5	0.414286
125.6	0.415571
125.7	0.417143
125.8	0.418286
125.9	0.419571
126	0.422286
126.1	0.424
126.2	0.425
126.3	0.426
126.4	0.427571
126.5	0.428571
126.6	0.431
126.7	0.432286
126.8	0.433429
126.9	0.434143
127	0.436
127.1	0.437
127.2	0.438714
127.3	0.44
127.4	0.44
127.5	0.441
127.6	0.441
127.7	0.442286
127.8	0.443571
127.9	0.444143
128	0.444714
128.1	0.445571
128.2	0.446
128.3	0.446857
128.4	0.447429
128.5	0.448143
128.6	0.45
128.7	0.449857
128.8	0.450714
128.9	0.452286
129	0.453571
129.1	0.454143
129.2	0.455714
129.3	0.457143
129.4	0.458714
129.5	0.460857
129.6	0.462714
129.7	0.462857
129.8	0.463571
129.9	0.463714
130	0.464
130.1	0.464857
130.2	0.466429
130.3	0.467571
130.4	0.469571
130.5	0.469857
130.6	0.47
130.7	0.471
130.8	0.471429
130.9	0.472286
131	0.472857
131.1	0.474
131.2	0.475571
131.3	0.476429
131.4	0.476571
131.5	0.477143
131.6	0.477571
131.7	0.478429
131.8	0.479286
131.9	0.48
132	0.481
132.1	0.482429
132.2	0.482571
132.3	0.482857
132.4	0.484143
132.5	0.484714
132.6	0.486286
132.7	0.487714
132.8	0.487714
132.9	0.488857
133	0.489429
133.1	0.490143
133.2	0.490714
133.3	0.491857
133.4	0.492429
133.5	0.494143
133.6	0.495143
133.7	0.496571
133.8	0.497429
133.9	0.497571
134	0.499429
134.1	0.500143
134.2	0.501
134.3	0.500857
134.4	0.501143
134.5	0.502143
134.6	0.502857
134.7	0.504
134.8	0.505571
134.9	0.506
135	0.506857
135.1	0.507286
135.2	0.508429
135.3	0.508857
135.4	0.509571
135.5	0.510286
135.6	0.511
135.7	0.511857
135.8	0.512429
135.9	0.512857
136	0.513429
136.1	0.513571
136.2	0.513286
136.3	0.514286
136.4	0.515429
136.5	0.516286
136.6	0.516857
136.7	0.518286
136.8	0.519571
136.9	0.52
137	0.520429
137.1	0.520571
137.2	0.521714
137.3	0.521857
137.4	0.522714
137.5	0.524
137.6	0.525143
137.7	0.525429
137.8	0.526
137.9	0.527429
138	0.528429
138.1	0.529429
138.2	0.529286
138.3	0.529857
138.4	0.530429
138.5	0.531429
138.6	0.531571
138.7	0.531714
138.8	0.532143
138.9	0.533286
139	0.533857
139.1	0.534714
139.2	0.535571
139.3	0.536
139.4	0.537
139.5	0.538143
139.6	0.539429
139.7	0.539571
139.8	0.54
139.9	0.540143
140	0.540857
140.1	0.541857
140.2	0.542714
140.3	0.543143
140.4	0.543429
140.5	0.543714
140.6	0.544714
140.7	0.545286
140.8	0.546714
140.9	0.547143
141	0.548571
141.1	0.549429
141.2	0.549429
141.3	0.550286
141.4	0.551143
141.5	0.551714
141.6	0.553
141.7	0.553429
141.8	0.554143
141.9	0.554857
142	0.555286
142.1	0.555429
142.2	0.555571
142.3	0.555714
142.4	0.556571
142.5	0.557429
142.6	0.559571
142.7	0.560571
142.8	0.561571
142.9	0.562
143	0.562286
143.1	0.563
143.2	0.563571
143.3	0.564571
143.4	0.565571
143.5	0.566714
143.6	0.567286
143.7	0.567857
143.8	0.568286
143.9	0.568571
144	0.569571
144.1	0.569857
144.2	0.570714
144.3	0.572
144.4	0.572571
144.5	0.572286
144.6	0.572571
144.7	0.573143
144.8	0.573857
144.9	0.574571
145	0.575143
145.1	0.574857
145.2	0.575571
145.3	0.574857
145.4	0.575
145.5	0.575571
145.6	0.576429
145.7	0.576714
145.8	0.577143
145.9	0.577857
146	0.578
146.1	0.578429
146.2	0.579429
146.3	0.579286
146.4	0.580571
146.5	0.581286
146.6	0.582429
146.7	0.582571
146.8	0.583
146.9	0.582857
147	0.583143
147.1	0.584
147.2	0.583571
147.3	0.584286
147.4	0.584286
147.5	0.584571
147.6	0.585429
147.7	0.585857
147.8	0.586143
147.9	0.586143
148	0.587
148.1	0.587143
148.2	0.587714
148.3	0.588
148.4	0.588857
148.5	0.589571
148.6	0.590143
148.7	0.590429
148.8	0.590571
148.9	0.591429
149	0.592571
149.1	0.593571
149.2	0.594
149.3	0.594857
149.4	0.594857
149.5	0.595143
149.6	0.594714
149.7	0.595143
149.8	0.595429
149.9	0.595429
150	0.595714
150.1	0.596714
150.2	0.596714
150.3	0.596857
150.4	0.599
150.5	0.599
150.6	0.600571
150.7	0.600286
150.8	0.600714
150.9	0.601143
151	0.601286
151.1	0.601286
151.2	0.601286
151.3	0.602286
151.4	0.602286
151.5	0.603286
151.6	0.603857
151.7	0.604143
151.8	0.603857
151.9	0.604714
152	0.605143
152.1	0.605857
152.2	0.605714
152.3	0.605714
152.4	0.606143
152.5	0.605857
152.6	0.606143
152.7	0.607571
152.8	0.607714
152.9	0.608143
153	0.609
153.1	0.609714
153.2	0.609571
153.3	0.609
153.4	0.608429
153.5	0.609429
153.6	0.610143
153.7	0.610857
153.8	0.611571
153.9	0.612143
154	0.612286
154.1	0.613714
154.2	0.613714
154.3	0.614714
154.4	0.615143
154.5	0.615571
154.6	0.616
154.7	0.615571
154.8	0.616857
154.9	0.617429
155	0.618286
155.1	0.619286
155.2	0.619571
155.3	0.619571
155.4	0.620429
155.5	0.620143
155.6	0.619714
155.7	0.620429
155.8	0.620286
155.9	0.620714
156	0.621857
156.1	0.621857
156.2	0.622286
156.3	0.622
156.4	0.622
156.5	0.622286
156.6	0.622714
156.7	0.622143
156.8	0.622857
156.9	0.623286
157	0.623
157.1	0.622857
157.2	0.622857
157.3	0.623
157.4	0.623857
157.5	0.624143
157.6	0.625
157.7	0.625143
157.8	0.626
157.9	0.625857
158	0.626571
158.1	0.626571
158.2	0.626
158.3	0.626
158.4	0.626286
158.5	0.626429
158.6	0.627714
158.7	0.627857
158.8	0.627429
158.9	0.628143
159	0.629143
159.1	0.63
159.2	0.631
159.3	0.631143
159.4	0.631286
159.5	0.632857
159.6	0.633714
159.7	0.634
159.8	0.634
159.9	0.635714
160	0.635714
160.1	0.636
160.2	0.636143
160.3	0.636429
160.4	0.637286
160.5	0.637571
160.6	0.638
160.7	0.638286
160.8	0.638857
160.9	0.639571
161	0.639714
161.1	0.640571
161.2	0.640857
161.3	0.641
161.4	0.641429
161.5	0.642286
161.6	0.641857
161.7	0.641714
161.8	0.642143
161.9	0.642429
162	0.642286
162.1	0.643
162.2	0.642857
162.3	0.642
162.4	0.641571
162.5	0.642286
162.6	0.642286
162.7	0.642714
162.8	0.643571
162.9	0.642714
163	0.642714
163.1	0.642571
163.2	0.643571
163.3	0.643714
163.4	0.643143
163.5	0.643857
163.6	0.643429
163.7	0.643714
163.8	0.644
163.9	0.644429
164	0.644429
164.1	0.644714
164.2	0.644571
164.3	0.645143
164.4	0.645571
164.5	0.645286
164.6	0.646143
164.7	0.646571
164.8	0.647
164.9	0.646857
165	0.647714
165.1	0.648857
165.2	0.648857
165.3	0.649571
165.4	0.649571
165.5	0.650571
165.6	0.652
165.7	0.651857
165.8	0.652286
165.9	0.652286
166	0.652714
166.1	0.652571
166.2	0.653143
166.3	0.653286
166.4	0.653857
166.5	0.654
166.6	0.654571
166.7	0.654857
166.8	0.655286
166.9	0.655
167	0.654857
167.1	0.655286
167.2	0.656429
167.3	0.656857
167.4	0.656286
167.5	0.656286
167.6	0.657143
167.7	0.657429
167.8	0.656857
167.9	0.657571
168	0.658571
168.1	0.659429
168.2	0.659286
168.3	0.658857
168.4	0.658143
168.5	0.658571
168.6	0.659143
168.7	0.659429
168.8	0.660286
168.9	0.660143
169	0.661143
169.1	0.661571
169.2	0.661286
169.3	0.661429
169.4	0.661429
169.5	0.661571
169.6	0.662429
169.7	0.663
169.8	0.663286
169.9	0.664143
170	0.664714
170.1	0.665143
170.2	0.665143
170.3	0.665429
170.4	0.665429
170.5	0.666143
170.6	0.666714
170.7	0.667714
170.8	0.668143
170.9	0.668143
171	0.668143
171.1	0.668143
171.2	0.667714
171.3	0.668714
171.4	0.668857
171.5	0.669
171.6	0.669
171.7	0.668857
171.8	0.669
171.9	0.669286
172	0.669857
172.1	0.669714
172.2	0.669571
172.3	0.670571
172.4	0.671
172.5	0.670857
172.6	0.671714
172.7	0.672143
172.8	0.673429
172.9	0.673857
173	0.673714
173.1	0.674
173.2	0.674
173.3	0.674429
173.4	0.674429
173.5	0.674714
173.6	0.673857
173.7	0.673857
173.8	0.674143
173.9	0.674286
174	0.673714
174.1	0.673857
174.2	0.674143
174.3	0.674286
174.4	0.673429
174.5	0.673143
174.6	0.673143
174.7	0.673286
174.8	0.673429
174.9	0.674286
175	0.674429
175.1	0.673857
175.2	0.674286
175.3	0.675143
175.4	0.675
175.5	0.675429
175.6	0.676143
175.7	0.676143
175.8	0.676571
175.9	0.677143
176	0.677429
176.1	0.678143
176.2	0.679286
176.3	0.680286
176.4	0.679286
176.5	0.679286
176.6	0.679429
176.7	0.679
176.8	0.678571
176.9	0.678571
177	0.678714
177.1	0.678286
177.2	0.678286
177.3	0.677857
177.4	0.677714
177.5	0.678
177.6	0.678
177.7	0.677857
177.8	0.677429
177.9	0.676857
178	0.676857
178.1	0.676857
178.2	0.676714
178.3	0.677286
178.4	0.677571
178.5	0.678143
178.6	0.678
178.7	0.678571
178.8	0.677857
178.9	0.678857
179	0.678429
179.1	0.678429
179.2	0.678571
179.3	0.679
179.4	0.678429
179.5	0.679143
179.6	0.679286
179.7	0.679714
179.8	0.680143
179.9	0.679714
180	0.679857
180.1	0.679143
180.2	0.679143
180.3	0.679571
180.4	0.680143
180.5	0.680286
180.6	0.681857
180.7	0.682286
180.8	0.683571
180.9	0.683429
181	0.683429
181.1	0.683286
181.2	0.683857
181.3	0.684286
181.4	0.684571
181.5	0.684143
181.6	0.684714
181.7	0.684143
181.8	0.684286
181.9	0.685286
182	0.685571
182.1	0.685857
182.2	0.686
182.3	0.686857
182.4	0.686857
182.5	0.687286
182.6	0.687286
182.7	0.688143
182.8	0.688571
182.9	0.688429
183	0.688571
183.1	0.689
183.2	0.688714
183.3	0.688571
183.4	0.687857
183.5	0.688
183.6	0.688571
183.7	0.689
183.8	0.688429
183.9	0.689143
184	0.689
184.1	0.689429
184.2	0.689143
184.3	0.689286
184.4	0.689857
184.5	0.690571
184.6	0.690571
184.7	0.690714
184.8	0.69
184.9	0.690714
185	0.690571
185.1	0.691429
185.2	0.690857
185.3	0.689714
185.4	0.689571
185.5	0.689714
185.6	0.690286
185.7	0.690714
185.8	0.692143
185.9	0.691857
186	0.692143
186.1	0.692
186.2	0.692143
186.3	0.692143
186.4	0.692143
186.5	0.692143
186.6	0.692143
186.7	0.691429
186.8	0.691
186.9	0.690857
187	0.690571
187.1	0.69
187.2	0.689429
187.3	0.689714
187.4	0.690429
187.5	0.690429
187.6	0.690857
187.7	0.691
187.8	0.689714
187.9	0.689857
188	0.69
188.1	0.689857
188.2	0.690857
188.3	0.69
188.4	0.690571
188.5	0.690429
188.6	0.690857
188.7	0.691
188.8	0.691714
188.9	0.692286
189	0.691571
189.1	0.692
189.2	0.691857
189.3	0.691286
189.4	0.690571
189.5	0.691714
189.6	0.692143
189.7	0.692429
189.8	0.693143
189.9	0.693571
190	0.694
190.1	0.694429
190.2	0.694429
190.3	0.695286
190.4	0.694571
190.5	0.694571
190.6	0.695429
190.7	0.695143
190.8	0.695
190.9	0.694571
191	0.694286
191.1	0.693857
191.2	0.693857
191.3	0.694
191.4	0.694571
191.5	0.694429
191.6	0.694286
191.7	0.694286
191.8	0.694571
191.9	0.695
192	0.694714
192.1	0.695286
192.2	0.694571
192.3	0.694286
192.4	0.694429
192.5	0.693143
192.6	0.693571
192.7	0.694857
192.8	0.695571
192.9	0.695571
193	0.695143
193.1	0.694857
193.2	0.695286
193.3	0.695286
193.4	0.695571
193.5	0.695286
193.6	0.694857
193.7	0.694857
193.8	0.695
193.9	0.696
194	0.696429
194.1	0.696571
194.2	0.696429
194.3	0.696857
194.4	0.697143
194.5	0.696857
194.6	0.697
194.7	0.697143
194.8	0.696429
194.9	0.697571
195	0.697429
195.1	0.697571
195.2	0.697
195.3	0.696429
195.4	0.695857
195.5	0.696
195.6	0.695571
195.7	0.695714
195.8	0.695143
195.9	0.695286
196	0.695429
196.1	0.695714
196.2	0.695429
196.3	0.695714
196.4	0.696429
196.5	0.696429
196.6	0.696571
196.7	0.697143
196.8	0.697286
196.9	0.696857
197	0.697286
197.1	0.697
197.2	0.696571
197.3	0.695857
197.4	0.696
197.5	0.696
197.6	0.696143
197.7	0.696714
197.8	0.696
197.9	0.696286
198	0.696143
198.1	0.695857
198.2	0.696
198.3	0.696143
198.4	0.697286
198.5	0.697429
198.6	0.697
198.7	0.696429
198.8	0.696857
198.9	0.696429
199	0.696714
199.1	0.697714
199.2	0.697286
199.3	0.697429
199.4	0.698571
199.5	0.697857
199.6	0.698143
199.7	0.697714
199.8	0.697857
199.9	0.698857
200	0.698857
[truncated: 14,000 more rows]
