# Supplementary material for: Bayesian inference of kinetic schemes for ion channels by Kalman filtering
Source: eLife journal article supplement (doi:10.7554/elife.62714), 2022-05-04
Supplement: fig4-data7 [file 1_Sim_N_10000_Fluor_MW.xlsx]

## Sheet: Tabelle1
0.1	0
0.2	0
0.3	0
0.4	0
0.5	0
0.6	0
0.7	0
0.8	0
0.9	0
1	0
1.1	0
1.2	0
1.3	0
1.4	0
1.5	0
1.6	0
1.7	0
1.8	0
1.9	0
2	0
2.1	0
2.2	0
2.3	0
2.4	0
2.5	0
2.6	0
2.7	0
2.8	0
2.9	0
3	0
3.1	0
3.2	0
3.3	0
3.4	0
3.5	0
3.6	0
3.7	0
3.8	0
3.9	0
4	0
4.1	0
4.2	0
4.3	0
4.4	0
4.5	0
4.6	0
4.7	0
4.8	0
4.9	0
5	0
5.1	0
5.2	0
5.3	0
5.4	0
5.5	0
5.6	0
5.7	0
5.8	0
5.9	0
6	0
6.1	0
6.2	0
6.3	0
6.4	0
6.5	0
6.6	0
6.7	0
6.8	0
6.9	0
7	0
7.1	0
7.2	0
7.3	0
7.4	0
7.5	0
7.6	0
7.7	0
7.8	0
7.9	0
8	0
8.1	0
8.2	0
8.3	0
8.4	0
8.5	0
8.6	0
8.7	0
8.8	0
8.9	0
9	0
9.1	0
9.2	0
9.3	0
9.4	0
9.5	0
9.6	0
9.7	0
9.8	0
9.9	0
10	0
10.1	0
10.2	0
10.3	0
10.4	0
10.5	0
10.6	0
10.7	0
10.8	0
10.9	0
11	0
11.1	0
11.2	0
11.3	0
11.4	0
11.5	0
11.6	0
11.7	0
11.8	0
11.9	0
12	0
12.1	0
12.2	0
12.3	0
12.4	0
12.5	0
12.6	0
12.7	0
12.8	0
12.9	0
13	0
13.1	0
13.2	0
13.3	0
13.4	0
13.5	0
13.6	0
13.7	0
13.8	0
13.9	0
14	0
14.1	0
14.2	0
14.3	0
14.4	0
14.5	0
14.6	0
14.7	0
14.8	0
14.9	0
15	0
15.1	0
15.2	0
15.3	0
15.4	0
15.5	0
15.6	0
15.7	0
15.8	0
15.9	0
16	0
16.1	0
16.2	0
16.3	0
16.4	0
16.5	0
16.6	0
16.7	0
16.8	0
16.9	0
17	0
17.1	0
17.2	0
17.3	0
17.4	0
17.5	0
17.6	0
17.7	0
17.8	0
17.9	0
18	0
18.1	0
18.2	0
18.3	0
18.4	0
18.5	0
18.6	0
18.7	0
18.8	0
18.9	0
19	0
19.1	0
19.2	0
19.3	0
19.4	0
19.5	0
19.6	0
19.7	0
19.8	0
19.9	0
20	0
20.1	0
20.2	0
20.3	0
20.4	0
20.5	0
20.6	0
20.7	0
20.8	0
20.9	0
21	0
21.1	0
21.2	0
21.3	0
21.4	0
21.5	0
21.6	0
21.7	0
21.8	0
21.9	0
22	0
22.1	0
22.2	0
22.3	0
22.4	0
22.5	0
22.6	0
22.7	0
22.8	0
22.9	0
23	0
23.1	0
23.2	0
23.3	0
23.4	0
23.5	0
23.6	0
23.7	0
23.8	0
23.9	0
24	0
24.1	0
24.2	0
24.3	0
24.4	0
24.5	0
24.6	0
24.7	0
24.8	0
24.9	0
25	0
25.1	0
25.2	0
25.3	0
25.4	0
25.5	0
25.6	0
25.7	0
25.8	0
25.9	0
26	0
26.1	0
26.2	0
26.3	0
26.4	0
26.5	0
26.6	0
26.7	0
26.8	0
26.9	0
27	0
27.1	0
27.2	0
27.3	0
27.4	0
27.5	0
27.6	0
27.7	0
27.8	0
27.9	0
28	0
28.1	0
28.2	0
28.3	0
28.4	0
28.5	0
28.6	0
28.7	0
28.8	0
28.9	0
29	0
29.1	0
29.2	0
29.3	0
29.4	0
29.5	0
29.6	0
29.7	0
29.8	0
29.9	0
30	0
30.1	0
30.2	0
30.3	0
30.4	0
30.5	0
30.6	0
30.7	0
30.8	0
30.9	0
31	0
31.1	0
31.2	0
31.3	0
31.4	0
31.5	0
31.6	0
31.7	0
31.8	0
31.9	0
32	0
32.1	0
32.2	0
32.3	0
32.4	0
32.5	0
32.6	0
32.7	0
32.8	0
32.9	0
33	0
33.1	0
33.2	0
33.3	0
33.4	0
33.5	0
33.6	0
33.7	0
33.8	0
33.9	0
34	0
34.1	0
34.2	0
34.3	0
34.4	0
34.5	0
34.6	0
34.7	0
34.8	0
34.9	0
35	0
35.1	0
35.2	0
35.3	0
35.4	0
35.5	0
35.6	0
35.7	0
35.8	0
35.9	0
36	0
36.1	0
36.2	0
36.3	0
36.4	0
36.5	0
36.6	0
36.7	0
36.8	0
36.9	0
37	0
37.1	0
37.2	0
37.3	0
37.4	0
37.5	0
37.6	0
37.7	0
37.8	0
37.9	0
38	0
38.1	0
38.2	0
38.3	0
38.4	0
38.5	0
38.6	0
38.7	0
38.8	0
38.9	0
39	0
39.1	0
39.2	0
39.3	0
39.4	0
39.5	0
39.6	0
39.7	0
39.8	0
39.9	0
40	0
40.1	0
40.2	0
40.3	0
40.4	0
40.5	0
40.6	0
40.7	0
40.8	0
40.9	0
41	0
41.1	0
41.2	0
41.3	0
41.4	0
41.5	0
41.6	0
41.7	0
41.8	0
41.9	0
42	0
42.1	0
42.2	0
42.3	0
42.4	0
42.5	0
42.6	0
42.7	0
42.8	0
42.9	0
43	0
43.1	0
43.2	0
43.3	0
43.4	0
43.5	0
43.6	0
43.7	0
43.8	0
43.9	0
44	0
44.1	0
44.2	0
44.3	0
44.4	0
44.5	0
44.6	0
44.7	0
44.8	0
44.9	0
45	0
45.1	0
45.2	0
45.3	0
45.4	0
45.5	0
45.6	0
45.7	0
45.8	0
45.9	0
46	0
46.1	0
46.2	0
46.3	0
46.4	0
46.5	0
46.6	0
46.7	0
46.8	0
46.9	0
47	0
47.1	0
47.2	0
47.3	0
47.4	0
47.5	0
47.6	0
47.7	0
47.8	0
47.9	0
48	0
48.1	0
48.2	0
48.3	0
48.4	0
48.5	0
48.6	0
48.7	0
48.8	0
48.9	0
49	0
49.1	0
49.2	0
49.3	0
49.4	0
49.5	0
49.6	0
49.7	0
49.8	0
49.9	0
50	0
50.1	0
50.2	0
50.3	0
50.4	0
50.5	0
50.6	0
50.7	0
50.8	0
50.9	0
51	0
51.1	0
51.2	0
51.3	0
51.4	0
51.5	0
51.6	0
51.7	0
51.8	0
51.9	0
52	0
52.1	0
52.2	0
52.3	0
52.4	0
52.5	0
52.6	0
52.7	0
52.8	0
52.9	0
53	0
53.1	0
53.2	0
53.3	0
53.4	0
53.5	0
53.6	0
53.7	0
53.8	0
53.9	0
54	0
54.1	0
54.2	0
54.3	0
54.4	0
54.5	0
54.6	0
54.7	0
54.8	0
54.9	0
55	0
55.1	0
55.2	0
55.3	0
55.4	0
55.5	0
55.6	0
55.7	0
55.8	0
55.9	0
56	0
56.1	0
56.2	0
56.3	0
56.4	0
56.5	0
56.6	0
56.7	0
56.8	0
56.9	0
57	0
57.1	0
57.2	0
57.3	0
57.4	0
57.5	0
57.6	0
57.7	0
57.8	0
57.9	0
58	0
58.1	0
58.2	0
58.3	0
58.4	0
58.5	0
58.6	0
58.7	0
58.8	0
58.9	0
59	0
59.1	0
59.2	0
59.3	0
59.4	0
59.5	0
59.6	0
59.7	0
59.8	0
59.9	0
60	0
60.1	0
60.2	0
60.3	0
60.4	0
60.5	0
60.6	0
60.7	0
60.8	0
60.9	0
61	0
61.1	0
61.2	0
61.3	0
61.4	0
61.5	0
61.6	0
61.7	0
61.8	0
61.9	0
62	0
62.1	0
62.2	0
62.3	0
62.4	0
62.5	0
62.6	0
62.7	0
62.8	0
62.9	0
63	0
63.1	0
63.2	0
63.3	0
63.4	0
63.5	0
63.6	0
63.7	0
63.8	0
63.9	0
64	0
64.1	0
64.2	0
64.3	0
64.4	0
64.5	0
64.6	0
64.7	0
64.8	0
64.9	0
65	0
65.1	0
65.2	0
65.3	0
65.4	0
65.5	0
65.6	0
65.7	0
65.8	0
65.9	0
66	0
66.1	0
66.2	0
66.3	0
66.4	0
66.5	0
66.6	0
66.7	0
66.8	0
66.9	0
67	0
67.1	0
67.2	0
67.3	0
67.4	0
67.5	0
67.6	0
67.7	0
67.8	0
67.9	0
68	0
68.1	0
68.2	0
68.3	0
68.4	0
68.5	0
68.6	0
68.7	0
68.8	0
68.9	0
69	0
69.1	0
69.2	0
69.3	0
69.4	0
69.5	0
69.6	0
69.7	0
69.8	0
69.9	0
70	0
70.1	0
70.2	0
70.3	0
70.4	0
70.5	0
70.6	0
70.7	0
70.8	0
70.9	0
71	0
71.1	0
71.2	0
71.3	0
71.4	0
71.5	0
71.6	0
71.7	0
71.8	0
71.9	0
72	0
72.1	0
72.2	0
72.3	0
72.4	0
72.5	0
72.6	0
72.7	0
72.8	0
72.9	0
73	0
73.1	0
73.2	0
73.3	0
73.4	0
73.5	0
73.6	0
73.7	0
73.8	0
73.9	0
74	0
74.1	0
74.2	0
74.3	0
74.4	0
74.5	0
74.6	0
74.7	0
74.8	0
74.9	0
75	0
75.1	0
75.2	0
75.3	0
75.4	0
75.5	0
75.6	0
75.7	0
75.8	0
75.9	0
76	0
76.1	0
76.2	0
76.3	0
76.4	0
76.5	0
76.6	0
76.7	0
76.8	0
76.9	0
77	0
77.1	0
77.2	0
77.3	0
77.4	0
77.5	0
77.6	0
77.7	0
77.8	0
77.9	0
78	0
78.1	0
78.2	0
78.3	0
78.4	0
78.5	0
78.6	0
78.7	0
78.8	0
78.9	0
79	0
79.1	0
79.2	0
79.3	0
79.4	0
79.5	0
79.6	0
79.7	0
79.8	0
79.9	0
80	0
80.1	0
80.2	0
80.3	0
80.4	0
80.5	0
80.6	0
80.7	0
80.8	0
80.9	0
81	0
81.1	0
81.2	0
81.3	0
81.4	0
81.5	0
81.6	0
81.7	0
81.8	0
81.9	0
82	0
82.1	0
82.2	0
82.3	0
82.4	0
82.5	0
82.6	0
82.7	0
82.8	0
82.9	0
83	0
83.1	0
83.2	0
83.3	0
83.4	0
83.5	0
83.6	0
83.7	0
83.8	0
83.9	0
84	0
84.1	0
84.2	0
84.3	0
84.4	0
84.5	0
84.6	0
84.7	0
84.8	0
84.9	0
85	0
85.1	0
85.2	0
85.3	0
85.4	0
85.5	0
85.6	0
85.7	0
85.8	0
85.9	0
86	0
86.1	0
86.2	0
86.3	0
86.4	0
86.5	0
86.6	0
86.7	0
86.8	0
86.9	0
87	0
87.1	0
87.2	0
87.3	0
87.4	0
87.5	0
87.6	0
87.7	0
87.8	0
87.9	0
88	0
88.1	0
88.2	0
88.3	0
88.4	0
88.5	0
88.6	0
88.7	0
88.8	0
88.9	0
89	0
89.1	0
89.2	0
89.3	0
89.4	0
89.5	0
89.6	0
89.7	0
89.8	0
89.9	0
90	0
90.1	0
90.2	0
90.3	0
90.4	0
90.5	0
90.6	0
90.7	0
90.8	0
90.9	0
91	0
91.1	0
91.2	0
91.3	0
91.4	0
91.5	0
91.6	0
91.7	0
91.8	0
91.9	0
92	0
92.1	0
92.2	0
92.3	0
92.4	0
92.5	0
92.6	0
92.7	0
92.8	0
92.9	0
93	0
93.1	0
93.2	0
93.3	0
93.4	0
93.5	0
93.6	0
93.7	0
93.8	0
93.9	0
94	0
94.1	0
94.2	0
94.3	0
94.4	0
94.5	0
94.6	0
94.7	0
94.8	0
94.9	0
95	0
95.1	0
95.2	0
95.3	0
95.4	0
95.5	0
95.6	0
95.7	0
95.8	0
95.9	0
96	0
96.1	0
96.2	0
96.3	0
96.4	0
96.5	0
96.6	0
96.7	0
96.8	0
96.9	0
97	0
97.1	0
97.2	0
97.3	0
97.4	0
97.5	0
97.6	0
97.7	0
97.8	0
97.9	0
98	0
98.1	0
98.2	0
98.3	0
98.4	0
98.5	0
98.6	0
98.7	0
98.8	0
98.9	0
99	0
99.1	0
99.2	0
99.3	0
99.4	0
99.5	0
99.6	0
99.7	0
99.8	0
99.9	0
100	0
100.1	0.1105
100.2	0.19835
100.3	0.27365
100.4	0.3348
100.5	0.38925
100.6	0.43825
100.7	0.478
100.8	0.511
100.9	0.5408
101	0.56625
101.1	0.58705
101.2	0.60615
101.3	0.6237
101.4	0.6396
101.5	0.65225
101.6	0.6655
101.7	0.67575
101.8	0.68505
101.9	0.69255
102	0.7007
102.1	0.7075
102.2	0.71285
102.3	0.718
102.4	0.72445
102.5	0.7293
102.6	0.73455
102.7	0.7374
102.8	0.74
102.9	0.74195
103	0.74625
103.1	0.7501
103.2	0.75275
103.3	0.75425
103.4	0.7561
103.5	0.7594
103.6	0.7622
103.7	0.7627
103.8	0.7629
103.9	0.76635
104	0.76605
104.1	0.76555
104.2	0.7647
104.3	0.7657
104.4	0.7651
104.5	0.7692
104.6	0.7703
104.7	0.7735
104.8	0.7735
104.9	0.7738
105	0.7744
105.1	0.7745
105.2	0.77525
105.3	0.77405
105.4	0.7745
105.5	0.77525
105.6	0.77545
105.7	0.77675
105.8	0.77665
105.9	0.77695
106	0.77805
106.1	0.77905
106.2	0.7802
106.3	0.78075
106.4	0.77945
106.5	0.78115
106.6	0.7808
106.7	0.7852
106.8	0.7859
106.9	0.78665
107	0.78485
107.1	0.78475
107.2	0.7844
107.3	0.785
107.4	0.78515
107.5	0.78485
107.6	0.78495
107.7	0.78495
107.8	0.78485
107.9	0.78435
108	0.7836
108.1	0.78565
108.2	0.78695
108.3	0.78715
108.4	0.7899
108.5	0.7885
108.6	0.79055
108.7	0.7926
108.8	0.7938
108.9	0.7942
109	0.7953
109.1	0.79545
109.2	0.797
109.3	0.79725
109.4	0.7984
109.5	0.79985
109.6	0.79875
109.7	0.7975
109.8	0.7969
109.9	0.7982
110	0.7971
110.1	0.7968
110.2	0.7977
110.3	0.79775
110.4	0.7979
110.5	0.79925
110.6	0.79765
110.7	0.79985
110.8	0.80165
110.9	0.80285
111	0.8037
111.1	0.80355
111.2	0.8053
111.3	0.8053
111.4	0.8061
111.5	0.8079
111.6	0.80915
111.7	0.80895
111.8	0.8094
111.9	0.81045
112	0.8097
112.1	0.8101
112.2	0.8113
112.3	0.8117
112.4	0.8129
112.5	0.81345
112.6	0.8147
112.7	0.81475
112.8	0.8141
112.9	0.8127
113	0.81345
113.1	0.8129
113.2	0.81525
113.3	0.8164
113.4	0.81745
113.5	0.8182
113.6	0.81835
113.7	0.81795
113.8	0.81645
113.9	0.81535
114	0.81465
114.1	0.81735
114.2	0.8177
114.3	0.8197
114.4	0.8207
114.5	0.82215
114.6	0.8224
114.7	0.82275
114.8	0.82185
114.9	0.8211
115	0.82285
115.1	0.8232
115.2	0.8241
115.3	0.82545
115.4	0.8254
115.5	0.8249
115.6	0.8256
115.7	0.82455
115.8	0.8262
115.9	0.82595
116	0.82665
116.1	0.82775
116.2	0.82785
116.3	0.82685
116.4	0.8264
116.5	0.82815
116.6	0.82995
116.7	0.83055
116.8	0.82995
116.9	0.83005
117	0.82905
117.1	0.8304
117.2	0.83025
117.3	0.83135
117.4	0.8315
117.5	0.83275
117.6	0.8324
117.7	0.8324
117.8	0.83285
117.9	0.83445
118	0.83355
118.1	0.8326
118.2	0.8335
118.3	0.8339
118.4	0.83475
118.5	0.83585
118.6	0.83605
118.7	0.83555
118.8	0.8351
118.9	0.8343
119	0.83475
119.1	0.8364
119.2	0.8377
119.3	0.83895
119.4	0.8366
119.5	0.837
119.6	0.8374
119.7	0.8387
119.8	0.8398
119.9	0.83985
120	0.83965
120.1	0.83995
120.2	0.8395
120.3	0.8385
120.4	0.839
120.5	0.84185
120.6	0.8417
120.7	0.8419
120.8	0.844
120.9	0.8442
121	0.84495
121.1	0.84545
121.2	0.84575
121.3	0.84535
121.4	0.8476
121.5	0.8479
121.6	0.8487
121.7	0.8488
121.8	0.84805
121.9	0.8489
122	0.84705
122.1	0.8448
122.2	0.84605
122.3	0.847
122.4	0.84785
122.5	0.849
122.6	0.84865
122.7	0.848
122.8	0.8499
122.9	0.8498
123	0.8521
123.1	0.8522
123.2	0.8532
123.3	0.85335
123.4	0.854
123.5	0.8534
123.6	0.8535
123.7	0.85365
123.8	0.8525
123.9	0.85365
124	0.85425
124.1	0.85415
124.2	0.85275
124.3	0.85425
124.4	0.8539
124.5	0.85475
124.6	0.8558
124.7	0.85555
124.8	0.8575
124.9	0.85685
125	0.8565
125.1	0.85675
125.2	0.85645
125.3	0.85645
125.4	0.85835
125.5	0.86
125.6	0.86135
125.7	0.86145
125.8	0.86125
125.9	0.8619
126	0.86005
126.1	0.86065
126.2	0.8608
126.3	0.86075
126.4	0.8609
126.5	0.86075
126.6	0.86135
126.7	0.86135
126.8	0.86095
126.9	0.8615
127	0.86065
127.1	0.86075
127.2	0.86135
127.3	0.86165
127.4	0.8623
127.5	0.8635
127.6	0.86185
127.7	0.86215
127.8	0.86015
127.9	0.86155
128	0.86025
128.1	0.862
128.2	0.86105
128.3	0.8617
128.4	0.86195
128.5	0.86225
128.6	0.86355
128.7	0.86405
128.8	0.86355
128.9	0.8642
129	0.86565
129.1	0.86555
129.2	0.86755
129.3	0.8666
129.4	0.8658
129.5	0.8662
129.6	0.86845
129.7	0.86945
129.8	0.87015
129.9	0.8709
130	0.8705
130.1	0.87015
130.2	0.86965
130.3	0.87075
130.4	0.8704
130.5	0.87045
130.6	0.87225
130.7	0.8713
130.8	0.871
130.9	0.87225
131	0.87145
131.1	0.8709
131.2	0.87075
131.3	0.8729
131.4	0.872
131.5	0.87205
131.6	0.87085
131.7	0.871
131.8	0.87335
131.9	0.87425
132	0.8745
132.1	0.87405
132.2	0.8745
132.3	0.87355
132.4	0.8723
132.5	0.87445
132.6	0.87475
132.7	0.87395
132.8	0.87505
132.9	0.87375
133	0.87475
133.1	0.8746
133.2	0.87445
133.3	0.8758
133.4	0.87525
133.5	0.87535
133.6	0.87705
133.7	0.87865
133.8	0.8783
133.9	0.87925
134	0.87775
134.1	0.87795
134.2	0.87845
134.3	0.87865
134.4	0.87785
134.5	0.8787
134.6	0.8792
134.7	0.87865
134.8	0.87975
134.9	0.881
135	0.88095
135.1	0.8807
135.2	0.87965
135.3	0.88015
135.4	0.8818
135.5	0.88335
135.6	0.88365
135.7	0.88365
135.8	0.8832
135.9	0.8835
136	0.8832
136.1	0.8833
136.2	0.88355
136.3	0.8849
136.4	0.8849
136.5	0.8835
136.6	0.8834
136.7	0.88355
136.8	0.88445
136.9	0.88395
137	0.8837
137.1	0.8845
137.2	0.88475
137.3	0.886
137.4	0.88625
137.5	0.8862
137.6	0.8852
137.7	0.887
137.8	0.88695
137.9	0.88775
138	0.88765
138.1	0.88805
138.2	0.8874
138.3	0.88845
138.4	0.88885
138.5	0.88855
138.6	0.88815
138.7	0.8872
138.8	0.8878
138.9	0.8862
139	0.887
139.1	0.8869
139.2	0.88755
139.3	0.88745
139.4	0.88875
139.5	0.88875
139.6	0.88915
139.7	0.88895
139.8	0.89035
139.9	0.8906
140	0.8907
140.1	0.8906
140.2	0.89035
140.3	0.88965
140.4	0.88915
140.5	0.8878
140.6	0.88735
140.7	0.8884
140.8	0.88695
140.9	0.8871
141	0.88845
141.1	0.88945
141.2	0.89075
141.3	0.88975
141.4	0.8907
141.5	0.8901
141.6	0.89055
141.7	0.89165
141.8	0.8924
141.9	0.89145
142	0.89155
142.1	0.8939
142.2	0.8936
142.3	0.89345
142.4	0.8939
142.5	0.89355
142.6	0.8942
142.7	0.89365
142.8	0.8935
142.9	0.89515
143	0.8951
143.1	0.89645
143.2	0.89615
143.3	0.8952
143.4	0.89575
143.5	0.8965
143.6	0.89675
143.7	0.8972
143.8	0.8982
143.9	0.8973
144	0.897
144.1	0.8958
144.2	0.8957
144.3	0.89625
144.4	0.89555
144.5	0.8957
144.6	0.89575
144.7	0.89605
144.8	0.89635
144.9	0.89745
145	0.89685
145.1	0.8955
145.2	0.89625
145.3	0.896
145.4	0.8951
145.5	0.89555
145.6	0.8966
145.7	0.8973
145.8	0.8992
145.9	0.8995
146	0.8994
146.1	0.8998
146.2	0.89875
146.3	0.8989
146.4	0.89835
146.5	0.8983
146.6	0.89935
146.7	0.9005
146.8	0.9009
146.9	0.90005
147	0.89865
147.1	0.89955
147.2	0.89985
147.3	0.8999
147.4	0.9011
147.5	0.9011
147.6	0.9018
147.7	0.9015
147.8	0.90195
147.9	0.90145
148	0.90155
148.1	0.90075
148.2	0.90005
148.3	0.9012
148.4	0.90045
148.5	0.9002
148.6	0.9
148.7	0.9012
148.8	0.9009
148.9	0.9018
149	0.903
149.1	0.90385
149.2	0.90375
149.3	0.90355
149.4	0.9044
149.5	0.9039
149.6	0.90365
149.7	0.9023
149.8	0.90275
149.9	0.9034
150	0.90335
150.1	0.903
150.2	0.9031
150.3	0.90255
150.4	0.9033
150.5	0.90305
150.6	0.90265
150.7	0.9022
150.8	0.9039
150.9	0.9037
151	0.9041
151.1	0.9036
151.2	0.9033
151.3	0.9028
151.4	0.9019
151.5	0.9016
151.6	0.90195
151.7	0.90395
151.8	0.9032
151.9	0.9027
152	0.90265
152.1	0.902
152.2	0.90225
152.3	0.9031
152.4	0.90275
152.5	0.90435
152.6	0.9037
152.7	0.90235
152.8	0.90275
152.9	0.9038
153	0.90465
153.1	0.9049
153.2	0.90455
153.3	0.9057
153.4	0.90565
153.5	0.9058
153.6	0.9061
153.7	0.90635
153.8	0.90635
153.9	0.90755
154	0.9079
154.1	0.9079
154.2	0.90745
154.3	0.9077
154.4	0.90805
154.5	0.9093
154.6	0.90905
154.7	0.9092
154.8	0.90835
154.9	0.90785
155	0.90885
155.1	0.90795
155.2	0.9078
155.3	0.9072
155.4	0.908
155.5	0.90925
155.6	0.91035
155.7	0.91115
155.8	0.9103
155.9	0.9101
156	0.9099
156.1	0.9103
156.2	0.9099
156.3	0.9101
156.4	0.90935
156.5	0.90905
156.6	0.9098
156.7	0.9099
156.8	0.9095
156.9	0.9103
157	0.90965
157.1	0.90875
157.2	0.9085
157.3	0.90805
157.4	0.90795
157.5	0.9076
157.6	0.90905
157.7	0.91015
157.8	0.90995
157.9	0.91035
158	0.9107
158.1	0.9102
158.2	0.9103
158.3	0.9104
158.4	0.9102
158.5	0.91085
158.6	0.9112
158.7	0.91255
158.8	0.91255
158.9	0.91175
159	0.9122
159.1	0.911
159.2	0.9108
159.3	0.9113
159.4	0.9112
159.5	0.9091
159.6	0.90915
159.7	0.9102
159.8	0.9104
159.9	0.91065
160	0.9107
160.1	0.91225
160.2	0.912
160.3	0.9117
160.4	0.91135
160.5	0.9112
160.6	0.9111
160.7	0.91085
160.8	0.91225
160.9	0.91135
161	0.9124
161.1	0.91195
161.2	0.9119
161.3	0.912
161.4	0.91265
161.5	0.9122
161.6	0.91355
161.7	0.9136
161.8	0.9136
161.9	0.91505
162	0.91535
162.1	0.91415
162.2	0.9133
162.3	0.913
162.4	0.9133
162.5	0.9114
162.6	0.9129
162.7	0.9129
162.8	0.91275
162.9	0.91255
163	0.91325
163.1	0.91265
163.2	0.9119
163.3	0.91175
163.4	0.91185
163.5	0.91145
163.6	0.911
163.7	0.91105
163.8	0.91115
163.9	0.9118
164	0.9121
164.1	0.91225
164.2	0.9123
164.3	0.9123
164.4	0.9132
164.5	0.913
164.6	0.9134
164.7	0.913
164.8	0.91315
164.9	0.9125
165	0.91305
165.1	0.9142
165.2	0.9146
165.3	0.9147
165.4	0.91495
165.5	0.91415
165.6	0.9151
165.7	0.9147
165.8	0.9151
165.9	0.9158
166	0.91575
166.1	0.91565
166.2	0.91545
166.3	0.9152
166.4	0.91565
166.5	0.91685
166.6	0.91735
166.7	0.91655
166.8	0.91615
166.9	0.91585
167	0.9171
167.1	0.9168
167.2	0.91645
167.3	0.9166
167.4	0.9164
167.5	0.91725
167.6	0.9168
167.7	0.91665
167.8	0.9173
167.9	0.9172
168	0.91725
168.1	0.9181
168.2	0.919
168.3	0.9189
168.4	0.9194
168.5	0.9196
168.6	0.9196
168.7	0.91845
168.8	0.91825
168.9	0.9195
169	0.91915
169.1	0.918
169.2	0.9188
169.3	0.9186
169.4	0.91995
169.5	0.9196
169.6	0.919
169.7	0.91765
169.8	0.9172
169.9	0.91635
170	0.9169
170.1	0.9169
170.2	0.91745
170.3	0.91765
170.4	0.9188
170.5	0.91805
170.6	0.9177
170.7	0.91605
170.8	0.91655
170.9	0.91775
171	0.91765
171.1	0.9174
171.2	0.91845
171.3	0.91935
171.4	0.9198
171.5	0.9209
171.6	0.9191
171.7	0.919
171.8	0.9193
171.9	0.9202
172	0.9197
172.1	0.9201
172.2	0.9198
172.3	0.9203
172.4	0.92005
172.5	0.9196
172.6	0.91875
172.7	0.91935
172.8	0.92055
172.9	0.9202
173	0.92055
173.1	0.92135
173.2	0.9203
173.3	0.9199
173.4	0.91905
173.5	0.919
173.6	0.92115
173.7	0.92125
173.8	0.92045
173.9	0.92095
174	0.9202
174.1	0.9209
174.2	0.9212
174.3	0.92115
174.4	0.92065
174.5	0.92205
174.6	0.9224
174.7	0.923
174.8	0.92265
174.9	0.92355
175	0.92415
175.1	0.9233
175.2	0.9236
175.3	0.9235
175.4	0.92215
175.5	0.9228
175.6	0.9242
175.7	0.9229
175.8	0.923
175.9	0.923
176	0.9217
176.1	0.92155
176.2	0.9209
176.3	0.92225
176.4	0.92225
176.5	0.92365
176.6	0.92375
176.7	0.9241
176.8	0.92345
176.9	0.9233
177	0.92325
177.1	0.92215
177.2	0.9222
177.3	0.9225
177.4	0.92205
177.5	0.92265
177.6	0.92245
177.7	0.92285
177.8	0.9226
177.9	0.92135
178	0.92155
178.1	0.92175
178.2	0.9218
178.3	0.9223
178.4	0.92265
178.5	0.92285
178.6	0.92315
178.7	0.9241
178.8	0.92315
178.9	0.92255
179	0.92365
179.1	0.92185
179.2	0.92145
179.3	0.92165
179.4	0.92065
179.5	0.92025
179.6	0.9213
179.7	0.9216
179.8	0.9225
179.9	0.92435
180	0.92445
180.1	0.92375
180.2	0.92385
180.3	0.92365
180.4	0.9237
180.5	0.92445
180.6	0.92515
180.7	0.92425
180.8	0.9242
180.9	0.9244
181	0.9236
181.1	0.9245
181.2	0.9255
181.3	0.92505
181.4	0.9238
181.5	0.9239
181.6	0.9246
181.7	0.925
181.8	0.92495
181.9	0.925
182	0.92555
182.1	0.92575
182.2	0.9252
182.3	0.9251
182.4	0.92445
182.5	0.92355
182.6	0.92465
182.7	0.92405
182.8	0.92385
182.9	0.92345
183	0.9236
183.1	0.92355
183.2	0.925
183.3	0.9248
183.4	0.92525
183.5	0.9251
183.6	0.9252
183.7	0.92595
183.8	0.92455
183.9	0.9245
184	0.92545
184.1	0.9268
184.2	0.9257
184.3	0.9265
184.4	0.9273
184.5	0.92665
184.6	0.9253
184.7	0.925
184.8	0.9246
184.9	0.92475
185	0.9241
185.1	0.92485
185.2	0.92425
185.3	0.9239
185.4	0.9234
185.5	0.9249
185.6	0.9256
185.7	0.9255
185.8	0.92605
185.9	0.92645
186	0.9262
186.1	0.9255
186.2	0.92545
186.3	0.9263
186.4	0.9268
186.5	0.92625
186.6	0.92685
186.7	0.9264
186.8	0.9272
186.9	0.92645
187	0.92645
187.1	0.92645
187.2	0.92705
187.3	0.9271
187.4	0.92725
187.5	0.9272
187.6	0.9266
187.7	0.92735
187.8	0.92845
187.9	0.9281
188	0.9281
188.1	0.92825
188.2	0.9285
188.3	0.9285
188.4	0.9272
188.5	0.92765
188.6	0.92825
188.7	0.92845
188.8	0.92975
188.9	0.9305
189	0.9308
189.1	0.93
189.2	0.92995
189.3	0.9296
189.4	0.9282
189.5	0.9291
189.6	0.9295
189.7	0.93005
189.8	0.92915
189.9	0.9291
190	0.929
190.1	0.92845
190.2	0.9284
190.3	0.9286
190.4	0.9277
190.5	0.92865
190.6	0.9282
190.7	0.9284
190.8	0.92755
190.9	0.9272
191	0.9264
191.1	0.92675
191.2	0.92685
191.3	0.9265
191.4	0.9279
191.5	0.928
191.6	0.9281
191.7	0.9285
191.8	0.9298
191.9	0.9299
192	0.93095
192.1	0.9301
192.2	0.931
192.3	0.9308
192.4	0.93155
192.5	0.92975
192.6	0.9297
192.7	0.92875
192.8	0.9292
192.9	0.9294
193	0.9306
193.1	0.9316
193.2	0.9311
193.3	0.9309
193.4	0.93195
193.5	0.93125
193.6	0.9308
193.7	0.93155
193.8	0.932
193.9	0.9319
194	0.931
194.1	0.9311
194.2	0.93145
194.3	0.932
194.4	0.9312
194.5	0.9313
194.6	0.93135
194.7	0.9309
194.8	0.9308
194.9	0.9309
195	0.93135
195.1	0.9323
195.2	0.9315
195.3	0.93095
195.4	0.9305
195.5	0.9301
195.6	0.9305
195.7	0.9309
195.8	0.9301
195.9	0.92945
196	0.92965
196.1	0.9307
196.2	0.9309
196.3	0.93025
196.4	0.93025
196.5	0.92955
196.6	0.9287
196.7	0.9295
196.8	0.9298
196.9	0.93
197	0.9293
197.1	0.9295
197.2	0.92975
197.3	0.9295
197.4	0.92975
197.5	0.92935
197.6	0.92945
197.7	0.92995
197.8	0.9289
197.9	0.9299
198	0.93095
198.1	0.9315
198.2	0.93065
198.3	0.9308
198.4	0.93025
198.5	0.93155
198.6	0.9313
198.7	0.93195
198.8	0.93215
198.9	0.9321
199	0.9323
199.1	0.9325
199.2	0.9319
199.3	0.9315
199.4	0.93085
199.5	0.9311
199.6	0.9311
199.7	0.93145
199.8	0.9302
199.9	0.93
200	0.92935
[truncated: 14,000 more rows]
