# Supplementary material for: Bayesian inference of kinetic schemes for ion channels by Kalman filtering
Source: eLife journal article supplement (doi:10.7554/elife.62714), 2022-05-04
Supplement: fig4-data7 [file 1_Sim_N_10000_Strom_MW.xlsx]

## Sheet: Tabelle1
0.1	0
0.2	0
0.3	0
0.4	0
0.5	0
0.6	0
0.7	0
0.8	0
0.9	0
1	0
1.1	0
1.2	0
1.3	0
1.4	0
1.5	0
1.6	0
1.7	0
1.8	0
1.9	0
2	0
2.1	0
2.2	0
2.3	0
2.4	0
2.5	0
2.6	0
2.7	0
2.8	0
2.9	0
3	0
3.1	0
3.2	0
3.3	0
3.4	0
3.5	0
3.6	0
3.7	0
3.8	0
3.9	0
4	0
4.1	0
4.2	0
4.3	0
4.4	0
4.5	0
4.6	0
4.7	0
4.8	0
4.9	0
5	0
5.1	0
5.2	0
5.3	0
5.4	0
5.5	0
5.6	0
5.7	0
5.8	0
5.9	0
6	0
6.1	0
6.2	0
6.3	0
6.4	0
6.5	0
6.6	0
6.7	0
6.8	0
6.9	0
7	0
7.1	0
7.2	0
7.3	0
7.4	0
7.5	0
7.6	0
7.7	0
7.8	0
7.9	0
8	0
8.1	0
8.2	0
8.3	0
8.4	0
8.5	0
8.6	0
8.7	0
8.8	0
8.9	0
9	0
9.1	0
9.2	0
9.3	0
9.4	0
9.5	0
9.6	0
9.7	0
9.8	0
9.9	0
10	0
10.1	0
10.2	0
10.3	0
10.4	0
10.5	0
10.6	0
10.7	0
10.8	0
10.9	0
11	0
11.1	0
11.2	0
11.3	0
11.4	0
11.5	0
11.6	0
11.7	0
11.8	0
11.9	0
12	0
12.1	0
12.2	0
12.3	0
12.4	0
12.5	0
12.6	0
12.7	0
12.8	0
12.9	0
13	0
13.1	0
13.2	0
13.3	0
13.4	0
13.5	0
13.6	0
13.7	0
13.8	0
13.9	0
14	0
14.1	0
14.2	0
14.3	0
14.4	0
14.5	0
14.6	0
14.7	0
14.8	0
14.9	0
15	0
15.1	0
15.2	0
15.3	0
15.4	0
15.5	0
15.6	0
15.7	0
15.8	0
15.9	0
16	0
16.1	0
16.2	0
16.3	0
16.4	0
16.5	0
16.6	0
16.7	0
16.8	0
16.9	0
17	0
17.1	0
17.2	0
17.3	0
17.4	0
17.5	0
17.6	0
17.7	0
17.8	0
17.9	0
18	0
18.1	0
18.2	0
18.3	0
18.4	0
18.5	0
18.6	0
18.7	0
18.8	0
18.9	0
19	0
19.1	0
19.2	0
19.3	0
19.4	0
19.5	0
19.6	0
19.7	0
19.8	0
19.9	0
20	0
20.1	0
20.2	0
20.3	0
20.4	0
20.5	0
20.6	0
20.7	0
20.8	0
20.9	0
21	0
21.1	0
21.2	0
21.3	0
21.4	0
21.5	0
21.6	0
21.7	0
21.8	0
21.9	0
22	0
22.1	0
22.2	0
22.3	0
22.4	0
22.5	0
22.6	0
22.7	0
22.8	0
22.9	0
23	0
23.1	0
23.2	0
23.3	0
23.4	0
23.5	0
23.6	0
23.7	0
23.8	0
23.9	0
24	0
24.1	0
24.2	0
24.3	0
24.4	0
24.5	0
24.6	0
24.7	0
24.8	0
24.9	0
25	0
25.1	0
25.2	0
25.3	0
25.4	0
25.5	0
25.6	0
25.7	0
25.8	0
25.9	0
26	0
26.1	0
26.2	0
26.3	0
26.4	0
26.5	0
26.6	0
26.7	0
26.8	0
26.9	0
27	0
27.1	0
27.2	0
27.3	0
27.4	0
27.5	0
27.6	0
27.7	0
27.8	0
27.9	0
28	0
28.1	0
28.2	0
28.3	0
28.4	0
28.5	0
28.6	0
28.7	0
28.8	0
28.9	0
29	0
29.1	0
29.2	0
29.3	0
29.4	0
29.5	0
29.6	0
29.7	0
29.8	0
29.9	0
30	0
30.1	0
30.2	0
30.3	0
30.4	0
30.5	0
30.6	0
30.7	0
30.8	0
30.9	0
31	0
31.1	0
31.2	0
31.3	0
31.4	0
31.5	0
31.6	0
31.7	0
31.8	0
31.9	0
32	0
32.1	0
32.2	0
32.3	0
32.4	0
32.5	0
32.6	0
32.7	0
32.8	0
32.9	0
33	0
33.1	0
33.2	0
33.3	0
33.4	0
33.5	0
33.6	0
33.7	0
33.8	0
33.9	0
34	0
34.1	0
34.2	0
34.3	0
34.4	0
34.5	0
34.6	0
34.7	0
34.8	0
34.9	0
35	0
35.1	0
35.2	0
35.3	0
35.4	0
35.5	0
35.6	0
35.7	0
35.8	0
35.9	0
36	0
36.1	0
36.2	0
36.3	0
36.4	0
36.5	0
36.6	0
36.7	0
36.8	0
36.9	0
37	0
37.1	0
37.2	0
37.3	0
37.4	0
37.5	0
37.6	0
37.7	0
37.8	0
37.9	0
38	0
38.1	0
38.2	0
38.3	0
38.4	0
38.5	0
38.6	0
38.7	0
38.8	0
38.9	0
39	0
39.1	0
39.2	0
39.3	0
39.4	0
39.5	0
39.6	0
39.7	0
39.8	0
39.9	0
40	0
40.1	0
40.2	0
40.3	0
40.4	0
40.5	0
40.6	0
40.7	0
40.8	0
40.9	0
41	0
41.1	0
41.2	0
41.3	0
41.4	0
41.5	0
41.6	0
41.7	0
41.8	0
41.9	0
42	0
42.1	0
42.2	0
42.3	0
42.4	0
42.5	0
42.6	0
42.7	0
42.8	0
42.9	0
43	0
43.1	0
43.2	0
43.3	0
43.4	0
43.5	0
43.6	0
43.7	0
43.8	0
43.9	0
44	0
44.1	0
44.2	0
44.3	0
44.4	0
44.5	0
44.6	0
44.7	0
44.8	0
44.9	0
45	0
45.1	0
45.2	0
45.3	0
45.4	0
45.5	0
45.6	0
45.7	0
45.8	0
45.9	0
46	0
46.1	0
46.2	0
46.3	0
46.4	0
46.5	0
46.6	0
46.7	0
46.8	0
46.9	0
47	0
47.1	0
47.2	0
47.3	0
47.4	0
47.5	0
47.6	0
47.7	0
47.8	0
47.9	0
48	0
48.1	0
48.2	0
48.3	0
48.4	0
48.5	0
48.6	0
48.7	0
48.8	0
48.9	0
49	0
49.1	0
49.2	0
49.3	0
49.4	0
49.5	0
49.6	0
49.7	0
49.8	0
49.9	0
50	0
50.1	0
50.2	0
50.3	0
50.4	0
50.5	0
50.6	0
50.7	0
50.8	0
50.9	0
51	0
51.1	0
51.2	0
51.3	0
51.4	0
51.5	0
51.6	0
51.7	0
51.8	0
51.9	0
52	0
52.1	0
52.2	0
52.3	0
52.4	0
52.5	0
52.6	0
52.7	0
52.8	0
52.9	0
53	0
53.1	0
53.2	0
53.3	0
53.4	0
53.5	0
53.6	0
53.7	0
53.8	0
53.9	0
54	0
54.1	0
54.2	0
54.3	0
54.4	0
54.5	0
54.6	0
54.7	0
54.8	0
54.9	0
55	0
55.1	0
55.2	0
55.3	0
55.4	0
55.5	0
55.6	0
55.7	0
55.8	0
55.9	0
56	0
56.1	0
56.2	0
56.3	0
56.4	0
56.5	0
56.6	0
56.7	0
56.8	0
56.9	0
57	0
57.1	0
57.2	0
57.3	0
57.4	0
57.5	0
57.6	0
57.7	0
57.8	0
57.9	0
58	0
58.1	0
58.2	0
58.3	0
58.4	0
58.5	0
58.6	0
58.7	0
58.8	0
58.9	0
59	0
59.1	0
59.2	0
59.3	0
59.4	0
59.5	0
59.6	0
59.7	0
59.8	0
59.9	0
60	0
60.1	0
60.2	0
60.3	0
60.4	0
60.5	0
60.6	0
60.7	0
60.8	0
60.9	0
61	0
61.1	0
61.2	0
61.3	0
61.4	0
61.5	0
61.6	0
61.7	0
61.8	0
61.9	0
62	0
62.1	0
62.2	0
62.3	0
62.4	0
62.5	0
62.6	0
62.7	0
62.8	0
62.9	0
63	0
63.1	0
63.2	0
63.3	0
63.4	0
63.5	0
63.6	0
63.7	0
63.8	0
63.9	0
64	0
64.1	0
64.2	0
64.3	0
64.4	0
64.5	0
64.6	0
64.7	0
64.8	0
64.9	0
65	0
65.1	0
65.2	0
65.3	0
65.4	0
65.5	0
65.6	0
65.7	0
65.8	0
65.9	0
66	0
66.1	0
66.2	0
66.3	0
66.4	0
66.5	0
66.6	0
66.7	0
66.8	0
66.9	0
67	0
67.1	0
67.2	0
67.3	0
67.4	0
67.5	0
67.6	0
67.7	0
67.8	0
67.9	0
68	0
68.1	0
68.2	0
68.3	0
68.4	0
68.5	0
68.6	0
68.7	0
68.8	0
68.9	0
69	0
69.1	0
69.2	0
69.3	0
69.4	0
69.5	0
69.6	0
69.7	0
69.8	0
69.9	0
70	0
70.1	0
70.2	0
70.3	0
70.4	0
70.5	0
70.6	0
70.7	0
70.8	0
70.9	0
71	0
71.1	0
71.2	0
71.3	0
71.4	0
71.5	0
71.6	0
71.7	0
71.8	0
71.9	0
72	0
72.1	0
72.2	0
72.3	0
72.4	0
72.5	0
72.6	0
72.7	0
72.8	0
72.9	0
73	0
73.1	0
73.2	0
73.3	0
73.4	0
73.5	0
73.6	0
73.7	0
73.8	0
73.9	0
74	0
74.1	0
74.2	0
74.3	0
74.4	0
74.5	0
74.6	0
74.7	0
74.8	0
74.9	0
75	0
75.1	0
75.2	0
75.3	0
75.4	0
75.5	0
75.6	0
75.7	0
75.8	0
75.9	0
76	0
76.1	0
76.2	0
76.3	0
76.4	0
76.5	0
76.6	0
76.7	0
76.8	0
76.9	0
77	0
77.1	0
77.2	0
77.3	0
77.4	0
77.5	0
77.6	0
77.7	0
77.8	0
77.9	0
78	0
78.1	0
78.2	0
78.3	0
78.4	0
78.5	0
78.6	0
78.7	0
78.8	0
78.9	0
79	0
79.1	0
79.2	0
79.3	0
79.4	0
79.5	0
79.6	0
79.7	0
79.8	0
79.9	0
80	0
80.1	0
80.2	0
80.3	0
80.4	0
80.5	0
80.6	0
80.7	0
80.8	0
80.9	0
81	0
81.1	0
81.2	0
81.3	0
81.4	0
81.5	0
81.6	0
81.7	0
81.8	0
81.9	0
82	0
82.1	0
82.2	0
82.3	0
82.4	0
82.5	0
82.6	0
82.7	0
82.8	0
82.9	0
83	0
83.1	0
83.2	0
83.3	0
83.4	0
83.5	0
83.6	0
83.7	0
83.8	0
83.9	0
84	0
84.1	0
84.2	0
84.3	0
84.4	0
84.5	0
84.6	0
84.7	0
84.8	0
84.9	0
85	0
85.1	0
85.2	0
85.3	0
85.4	0
85.5	0
85.6	0
85.7	0
85.8	0
85.9	0
86	0
86.1	0
86.2	0
86.3	0
86.4	0
86.5	0
86.6	0
86.7	0
86.8	0
86.9	0
87	0
87.1	0
87.2	0
87.3	0
87.4	0
87.5	0
87.6	0
87.7	0
87.8	0
87.9	0
88	0
88.1	0
88.2	0
88.3	0
88.4	0
88.5	0
88.6	0
88.7	0
88.8	0
88.9	0
89	0
89.1	0
89.2	0
89.3	0
89.4	0
89.5	0
89.6	0
89.7	0
89.8	0
89.9	0
90	0
90.1	0
90.2	0
90.3	0
90.4	0
90.5	0
90.6	0
90.7	0
90.8	0
90.9	0
91	0
91.1	0
91.2	0
91.3	0
91.4	0
91.5	0
91.6	0
91.7	0
91.8	0
91.9	0
92	0
92.1	0
92.2	0
92.3	0
92.4	0
92.5	0
92.6	0
92.7	0
92.8	0
92.9	0
93	0
93.1	0
93.2	0
93.3	0
93.4	0
93.5	0
93.6	0
93.7	0
93.8	0
93.9	0
94	0
94.1	0
94.2	0
94.3	0
94.4	0
94.5	0
94.6	0
94.7	0
94.8	0
94.9	0
95	0
95.1	0
95.2	0
95.3	0
95.4	0
95.5	0
95.6	0
95.7	0
95.8	0
95.9	0
96	0
96.1	0
96.2	0
96.3	0
96.4	0
96.5	0
96.6	0
96.7	0
96.8	0
96.9	0
97	0
97.1	0
97.2	0
97.3	0
97.4	0
97.5	0
97.6	0
97.7	0
97.8	0
97.9	0
98	0
98.1	0
98.2	0
98.3	0
98.4	0
98.5	0
98.6	0
98.7	0
98.8	0
98.9	0
99	0
99.1	0
99.2	0
99.3	0
99.4	0
99.5	0
99.6	0
99.7	0
99.8	0
99.9	0
100	0
100.1	0.0001
100.2	0.0001
100.3	0.0001
100.4	0.0003
100.5	0.0008
100.6	0.0013
100.7	0.002
100.8	0.0027
100.9	0.0041
101	0.0045
101.1	0.0056
101.2	0.0064
101.3	0.0081
101.4	0.0099
101.5	0.0116
101.6	0.0141
101.7	0.016
101.8	0.0184
101.9	0.0203
102	0.0223
102.1	0.0244
102.2	0.0268
102.3	0.0288
102.4	0.0311
102.5	0.033
102.6	0.0359
102.7	0.039
102.8	0.0418
102.9	0.0437
103	0.0455
103.1	0.0479
103.2	0.05
103.3	0.0528
103.4	0.0547
103.5	0.0577
103.6	0.0602
103.7	0.0622
103.8	0.0646
103.9	0.0668
104	0.0685
104.1	0.0707
104.2	0.0733
104.3	0.0753
104.4	0.0785
104.5	0.0802
104.6	0.0829
104.7	0.0848
104.8	0.0875
104.9	0.09
105	0.0921
105.1	0.0937
105.2	0.0967
105.3	0.0982
105.4	0.1006
105.5	0.103
105.6	0.1051
105.7	0.1068
105.8	0.1089
105.9	0.1103
106	0.1126
106.1	0.1144
106.2	0.1165
106.3	0.1188
106.4	0.1211
106.5	0.1226
106.6	0.1247
106.7	0.1265
106.8	0.1288
106.9	0.1303
107	0.1335
107.1	0.1367
107.2	0.1389
107.3	0.1405
107.4	0.1427
107.5	0.1445
107.6	0.1471
107.7	0.1488
107.8	0.1506
107.9	0.1524
108	0.1551
108.1	0.157
108.2	0.1586
108.3	0.1602
108.4	0.1626
108.5	0.164
108.6	0.1657
108.7	0.1686
108.8	0.1715
108.9	0.1735
109	0.1759
109.1	0.1775
109.2	0.1791
109.3	0.1806
109.4	0.1825
109.5	0.1844
109.6	0.1869
109.7	0.1893
109.8	0.1916
109.9	0.1944
110	0.1958
110.1	0.1973
110.2	0.1985
110.3	0.2009
110.4	0.2023
110.5	0.2033
110.6	0.2052
110.7	0.2069
110.8	0.2091
110.9	0.2116
111	0.2126
111.1	0.2148
111.2	0.2161
111.3	0.2174
111.4	0.2188
111.5	0.2212
111.6	0.2236
111.7	0.2257
111.8	0.2279
111.9	0.2299
112	0.2318
112.1	0.2332
112.2	0.2348
112.3	0.2369
112.4	0.2385
112.5	0.2402
112.6	0.2415
112.7	0.2431
112.8	0.2446
112.9	0.2458
113	0.2473
113.1	0.2492
113.2	0.2513
113.3	0.2526
113.4	0.2537
113.5	0.256
113.6	0.2582
113.7	0.2599
113.8	0.2608
113.9	0.262
114	0.2642
114.1	0.2662
114.2	0.2692
114.3	0.2712
114.4	0.2733
114.5	0.2751
114.6	0.277
114.7	0.2788
114.8	0.2802
114.9	0.2825
115	0.2837
115.1	0.2861
115.2	0.2867
115.3	0.2883
115.4	0.2894
115.5	0.2913
115.6	0.292
115.7	0.2941
115.8	0.2955
115.9	0.2969
116	0.2987
116.1	0.3003
116.2	0.3017
116.3	0.3034
116.4	0.3051
116.5	0.3057
116.6	0.3069
116.7	0.3083
116.8	0.3104
116.9	0.3129
117	0.3151
117.1	0.3165
117.2	0.3169
117.3	0.3181
117.4	0.3198
117.5	0.3213
117.6	0.3232
117.7	0.3244
117.8	0.3255
117.9	0.3262
118	0.3288
118.1	0.3303
118.2	0.3311
118.3	0.3333
118.4	0.3343
118.5	0.3356
118.6	0.3372
118.7	0.3395
118.8	0.3401
118.9	0.3404
119	0.3428
119.1	0.3452
119.2	0.3467
119.3	0.3478
119.4	0.3487
119.5	0.3496
119.6	0.3507
119.7	0.3526
119.8	0.3541
119.9	0.3558
120	0.3574
120.1	0.3585
120.2	0.3598
120.3	0.3608
120.4	0.362
120.5	0.3632
120.6	0.3645
120.7	0.3658
120.8	0.3673
120.9	0.3688
121	0.3702
121.1	0.3716
121.2	0.3731
121.3	0.3742
121.4	0.3764
121.5	0.3777
121.6	0.3792
121.7	0.3807
121.8	0.3821
121.9	0.3832
122	0.3843
122.1	0.3853
122.2	0.3863
122.3	0.3875
122.4	0.3886
122.5	0.3906
122.6	0.3907
122.7	0.3924
122.8	0.3937
122.9	0.3951
123	0.396
123.1	0.3967
123.2	0.3979
123.3	0.3982
123.4	0.3994
123.5	0.4006
123.6	0.4016
123.7	0.4029
123.8	0.4037
123.9	0.4047
124	0.4061
124.1	0.4077
124.2	0.4092
124.3	0.4102
124.4	0.4104
124.5	0.4124
124.6	0.4134
124.7	0.4152
124.8	0.4169
124.9	0.4187
125	0.4201
125.1	0.4217
125.2	0.4231
125.3	0.4242
125.4	0.4249
125.5	0.4257
125.6	0.4265
125.7	0.4275
125.8	0.4286
125.9	0.4297
126	0.4306
126.1	0.4321
126.2	0.4339
126.3	0.4352
126.4	0.4361
126.5	0.4367
126.6	0.438
126.7	0.4388
126.8	0.439
126.9	0.4393
127	0.4401
127.1	0.4411
127.2	0.4425
127.3	0.4431
127.4	0.4445
127.5	0.4456
127.6	0.4467
127.7	0.4472
127.8	0.4488
127.9	0.4502
128	0.4511
128.1	0.4517
128.2	0.453
128.3	0.4542
128.4	0.4546
128.5	0.4556
128.6	0.4562
128.7	0.4565
128.8	0.4568
128.9	0.4575
129	0.4579
129.1	0.4588
129.2	0.4593
129.3	0.4601
129.4	0.461
129.5	0.462
129.6	0.4626
129.7	0.4639
129.8	0.4644
129.9	0.4648
130	0.4657
130.1	0.4669
130.2	0.4688
130.3	0.4697
130.4	0.4703
130.5	0.4711
130.6	0.4713
130.7	0.4721
130.8	0.4725
130.9	0.4727
131	0.4732
131.1	0.4741
131.2	0.4748
131.3	0.4757
131.4	0.4772
131.5	0.4786
131.6	0.4791
131.7	0.4809
131.8	0.4824
131.9	0.4837
132	0.4843
132.1	0.4856
132.2	0.4859
132.3	0.4873
132.4	0.4884
132.5	0.4888
132.6	0.4898
132.7	0.4907
132.8	0.4913
132.9	0.4926
133	0.4928
133.1	0.4934
133.2	0.4947
133.3	0.4951
133.4	0.4957
133.5	0.4961
133.6	0.4972
133.7	0.4983
133.8	0.4991
133.9	0.4998
134	0.501
134.1	0.5021
134.2	0.5031
134.3	0.5046
134.4	0.5055
134.5	0.5067
134.6	0.5073
134.7	0.5079
134.8	0.5081
134.9	0.5085
135	0.5092
135.1	0.5101
135.2	0.5113
135.3	0.5124
135.4	0.5136
135.5	0.5143
135.6	0.5144
135.7	0.5153
135.8	0.5167
135.9	0.5174
136	0.5187
136.1	0.5188
136.2	0.5196
136.3	0.52
136.4	0.52
136.5	0.5213
136.6	0.5219
136.7	0.5225
136.8	0.5242
136.9	0.5251
137	0.5263
137.1	0.527
137.2	0.5275
137.3	0.5281
137.4	0.5288
137.5	0.5298
137.6	0.5309
137.7	0.532
137.8	0.5331
137.9	0.5337
138	0.5348
138.1	0.5356
138.2	0.536
138.3	0.537
138.4	0.5375
138.5	0.5381
138.6	0.5391
138.7	0.54
138.8	0.54
138.9	0.5407
139	0.5412
139.1	0.5419
139.2	0.5426
139.3	0.5431
139.4	0.5434
139.5	0.5442
139.6	0.5451
139.7	0.5458
139.8	0.5467
139.9	0.5472
140	0.5481
140.1	0.5496
140.2	0.5506
140.3	0.551
140.4	0.5519
140.5	0.5521
140.6	0.553
140.7	0.5536
140.8	0.5543
140.9	0.5553
141	0.5564
141.1	0.5571
141.2	0.5586
141.3	0.5579
141.4	0.5583
141.5	0.5585
141.6	0.5592
141.7	0.5604
141.8	0.5605
141.9	0.5612
142	0.5623
142.1	0.5633
142.2	0.5644
142.3	0.5655
142.4	0.5662
142.5	0.5664
142.6	0.567
142.7	0.5673
142.8	0.5681
142.9	0.5675
143	0.5681
143.1	0.5688
143.2	0.569
143.3	0.5701
143.4	0.5706
143.5	0.5714
143.6	0.5722
143.7	0.573
143.8	0.5728
143.9	0.5732
144	0.5732
144.1	0.5742
144.2	0.5751
144.3	0.5757
144.4	0.576
144.5	0.576
144.6	0.5766
144.7	0.577
144.8	0.5773
144.9	0.5782
145	0.5785
145.1	0.5785
145.2	0.5793
145.3	0.5795
145.4	0.5801
145.5	0.5799
145.6	0.5797
145.7	0.5802
145.8	0.5809
145.9	0.5813
146	0.5821
146.1	0.5834
146.2	0.5833
146.3	0.5842
146.4	0.5847
146.5	0.5848
146.6	0.5849
146.7	0.5858
146.8	0.587
146.9	0.5881
147	0.5886
147.1	0.5894
147.2	0.5897
147.3	0.5905
147.4	0.5905
147.5	0.5902
147.6	0.5906
147.7	0.5915
147.8	0.592
147.9	0.5927
148	0.5934
148.1	0.5937
148.2	0.5943
148.3	0.5948
148.4	0.5953
148.5	0.5956
148.6	0.5957
148.7	0.5961
148.8	0.5963
148.9	0.5963
149	0.5968
149.1	0.5979
149.2	0.5985
149.3	0.5986
149.4	0.5986
149.5	0.5982
149.6	0.5989
149.7	0.5996
149.8	0.5997
149.9	0.5997
150	0.6002
150.1	0.6003
150.2	0.601
150.3	0.6017
150.4	0.6027
150.5	0.603
150.6	0.604
150.7	0.6042
150.8	0.605
150.9	0.6062
151	0.6067
151.1	0.6072
151.2	0.6081
151.3	0.6083
151.4	0.6083
151.5	0.609
151.6	0.609
151.7	0.6095
151.8	0.6096
151.9	0.6103
152	0.6105
152.1	0.6112
152.2	0.6117
152.3	0.6123
152.4	0.6134
152.5	0.6134
152.6	0.6143
152.7	0.615
152.8	0.6153
152.9	0.6154
153	0.616
153.1	0.616
153.2	0.6163
153.3	0.6165
153.4	0.6167
153.5	0.617
153.6	0.6175
153.7	0.6179
153.8	0.618
153.9	0.6185
154	0.6189
154.1	0.6189
154.2	0.6191
154.3	0.6192
154.4	0.6193
154.5	0.6196
154.6	0.6195
154.7	0.6194
154.8	0.6199
154.9	0.6199
155	0.62
155.1	0.6207
155.2	0.6211
155.3	0.6206
155.4	0.6216
155.5	0.6216
155.6	0.6215
155.7	0.6219
155.8	0.6221
155.9	0.6224
156	0.6233
156.1	0.624
156.2	0.6236
156.3	0.6249
156.4	0.6252
156.5	0.6255
156.6	0.625
156.7	0.6255
156.8	0.6255
156.9	0.6261
157	0.6265
157.1	0.6269
157.2	0.6267
157.3	0.6272
157.4	0.6276
157.5	0.6281
157.6	0.6284
157.7	0.6291
157.8	0.629
157.9	0.6297
158	0.6301
158.1	0.6303
158.2	0.6311
158.3	0.6312
158.4	0.6314
158.5	0.6315
158.6	0.6316
158.7	0.6324
158.8	0.6325
158.9	0.6333
159	0.634
159.1	0.6347
159.2	0.6354
159.3	0.6358
159.4	0.6367
159.5	0.6369
159.6	0.6376
159.7	0.6382
159.8	0.6385
159.9	0.6387
160	0.6388
160.1	0.6384
160.2	0.6383
160.3	0.6391
160.4	0.6395
160.5	0.6392
160.6	0.6389
160.7	0.6399
160.8	0.6396
160.9	0.641
161	0.6415
161.1	0.6425
161.2	0.6429
161.3	0.6439
161.4	0.6441
161.5	0.6438
161.6	0.6446
161.7	0.6444
161.8	0.6453
161.9	0.6455
162	0.6463
162.1	0.6467
162.2	0.6478
162.3	0.6482
162.4	0.6485
162.5	0.6486
162.6	0.6485
162.7	0.6488
162.8	0.6491
162.9	0.6485
163	0.6491
163.1	0.6486
163.2	0.6489
163.3	0.6496
163.4	0.6496
163.5	0.6504
163.6	0.6504
163.7	0.6507
163.8	0.6508
163.9	0.6515
164	0.6513
164.1	0.6514
164.2	0.6519
164.3	0.6519
164.4	0.6515
164.5	0.6508
164.6	0.6511
164.7	0.6514
164.8	0.6515
164.9	0.6517
165	0.6525
165.1	0.6526
165.2	0.6531
165.3	0.6527
165.4	0.6531
165.5	0.6534
165.6	0.6533
165.7	0.6536
165.8	0.6541
165.9	0.6543
166	0.6548
166.1	0.6554
166.2	0.6564
166.3	0.6574
166.4	0.6573
166.5	0.6577
166.6	0.6581
166.7	0.6588
166.8	0.6594
166.9	0.6599
167	0.6599
167.1	0.6601
167.2	0.661
167.3	0.6615
167.4	0.6618
167.5	0.6629
167.6	0.6633
167.7	0.6629
167.8	0.6635
167.9	0.6634
168	0.6635
168.1	0.6632
168.2	0.6638
168.3	0.664
168.4	0.6642
168.5	0.6644
168.6	0.6648
168.7	0.6649
168.8	0.6655
168.9	0.6658
169	0.6661
169.1	0.6661
169.2	0.6658
169.3	0.6657
169.4	0.6657
169.5	0.6653
169.6	0.6659
169.7	0.6663
169.8	0.667
169.9	0.6678
170	0.6678
170.1	0.6682
170.2	0.6686
170.3	0.6683
170.4	0.6685
170.5	0.6691
170.6	0.6693
170.7	0.6695
170.8	0.6697
170.9	0.6696
171	0.6702
171.1	0.6706
171.2	0.6715
171.3	0.6707
171.4	0.6698
171.5	0.6705
171.6	0.6698
171.7	0.6697
171.8	0.67
171.9	0.67
172	0.6697
172.1	0.6703
172.2	0.6705
172.3	0.6706
172.4	0.6708
172.5	0.6706
172.6	0.6706
172.7	0.6701
172.8	0.6702
172.9	0.6706
173	0.6715
173.1	0.6717
173.2	0.6717
173.3	0.6721
173.4	0.673
173.5	0.6725
173.6	0.6726
173.7	0.6723
173.8	0.6726
173.9	0.6726
174	0.6731
174.1	0.6727
174.2	0.6734
174.3	0.6735
174.4	0.6728
174.5	0.673
174.6	0.6732
174.7	0.6731
174.8	0.6731
174.9	0.6733
175	0.6738
175.1	0.6741
175.2	0.6749
175.3	0.6751
175.4	0.6752
175.5	0.6753
175.6	0.6746
175.7	0.6754
175.8	0.6753
175.9	0.6751
176	0.6749
176.1	0.6751
176.2	0.6754
176.3	0.676
176.4	0.6772
176.5	0.6774
176.6	0.6777
176.7	0.6775
176.8	0.6778
176.9	0.6783
177	0.6786
177.1	0.6792
177.2	0.6797
177.3	0.68
177.4	0.6795
177.5	0.6795
177.6	0.6797
177.7	0.6799
177.8	0.6804
177.9	0.6803
178	0.6802
178.1	0.681
178.2	0.6807
178.3	0.6813
178.4	0.6819
178.5	0.6821
178.6	0.6819
178.7	0.6821
178.8	0.6823
178.9	0.6823
179	0.6828
179.1	0.6831
179.2	0.6833
179.3	0.6835
179.4	0.6839
179.5	0.6845
179.6	0.6842
179.7	0.6844
179.8	0.685
179.9	0.6847
180	0.6852
180.1	0.6854
180.2	0.686
180.3	0.6868
180.4	0.6873
180.5	0.6868
180.6	0.6869
180.7	0.6871
180.8	0.6872
180.9	0.6873
181	0.6873
181.1	0.6873
181.2	0.6871
181.3	0.6868
181.4	0.6869
181.5	0.6865
181.6	0.687
181.7	0.6879
181.8	0.6876
181.9	0.6879
182	0.6885
182.1	0.6887
182.2	0.6893
182.3	0.689
182.4	0.6892
182.5	0.6899
182.6	0.69
182.7	0.6897
182.8	0.6899
182.9	0.6904
183	0.6909
183.1	0.6916
183.2	0.6914
183.3	0.6915
183.4	0.6922
183.5	0.6926
183.6	0.6928
183.7	0.6931
183.8	0.6931
183.9	0.6935
184	0.6939
184.1	0.6936
184.2	0.6934
184.3	0.6943
184.4	0.6945
184.5	0.694
184.6	0.6939
184.7	0.6946
184.8	0.695
184.9	0.6953
185	0.6951
185.1	0.6949
185.2	0.6953
185.3	0.6959
185.4	0.6957
185.5	0.6959
185.6	0.6953
185.7	0.6957
185.8	0.6962
185.9	0.6963
186	0.6965
186.1	0.696
186.2	0.6965
186.3	0.698
186.4	0.6984
186.5	0.6985
186.6	0.6987
186.7	0.6988
186.8	0.6988
186.9	0.6987
187	0.6988
187.1	0.6994
187.2	0.6987
187.3	0.6976
187.4	0.6976
187.5	0.6977
187.6	0.6986
187.7	0.699
187.8	0.6993
187.9	0.6994
188	0.6993
188.1	0.6993
188.2	0.6996
188.3	0.7002
188.4	0.6991
188.5	0.6991
188.6	0.6993
188.7	0.6995
188.8	0.7
188.9	0.7006
189	0.7002
189.1	0.7012
189.2	0.7012
189.3	0.7016
189.4	0.7016
189.5	0.7022
189.6	0.7023
189.7	0.7031
189.8	0.7026
189.9	0.7032
190	0.7035
190.1	0.703
190.2	0.7033
190.3	0.7029
190.4	0.7025
190.5	0.7028
190.6	0.7027
190.7	0.7026
190.8	0.7029
190.9	0.7026
191	0.7031
191.1	0.7034
191.2	0.7037
191.3	0.7039
191.4	0.7042
191.5	0.704
191.6	0.704
191.7	0.7038
191.8	0.7047
191.9	0.7052
192	0.7058
192.1	0.706
192.2	0.7064
192.3	0.7075
192.4	0.7073
192.5	0.7075
192.6	0.7081
192.7	0.7081
192.8	0.7081
192.9	0.709
193	0.7092
193.1	0.7088
193.2	0.7087
193.3	0.7093
193.4	0.7093
193.5	0.7089
193.6	0.7088
193.7	0.7085
193.8	0.708
193.9	0.7079
194	0.7076
194.1	0.7082
194.2	0.7083
194.3	0.7079
194.4	0.7078
194.5	0.7078
194.6	0.7074
194.7	0.7074
194.8	0.708
194.9	0.7083
195	0.7079
195.1	0.7081
195.2	0.7082
195.3	0.7076
195.4	0.7075
195.5	0.7088
195.6	0.7093
195.7	0.7092
195.8	0.7089
195.9	0.7088
196	0.7089
196.1	0.7082
196.2	0.7088
196.3	0.709
196.4	0.7091
196.5	0.7087
196.6	0.7092
196.7	0.7095
196.8	0.7092
196.9	0.7093
197	0.7092
197.1	0.7094
197.2	0.7097
197.3	0.7097
197.4	0.71
197.5	0.7101
197.6	0.71
197.7	0.7104
197.8	0.7108
197.9	0.7114
198	0.7116
198.1	0.7125
198.2	0.7122
198.3	0.7124
198.4	0.7127
198.5	0.7134
198.6	0.7137
198.7	0.7132
198.8	0.7133
198.9	0.7133
199	0.7136
199.1	0.7132
199.2	0.713
199.3	0.7119
199.4	0.7124
199.5	0.7124
199.6	0.7131
199.7	0.7131
199.8	0.7124
199.9	0.7126
200	0.7128
[truncated: 14,000 more rows]
