# Supplementary material for: Bayesian inference of kinetic schemes for ion channels by Kalman filtering
Source: eLife journal article supplement (doi:10.7554/elife.62714), 2022-05-04
Supplement: fig4-data7 [file 1_Sim_N_20000_Fluor_MW_2M.xlsx]

## Sheet: Tabelle1
0.1	0
0.2	0
0.3	0
0.4	0
0.5	0
0.6	0
0.7	0
0.8	0
0.9	0
1	0
1.1	0
1.2	0
1.3	0
1.4	0
1.5	0
1.6	0
1.7	0
1.8	0
1.9	0
2	0
2.1	0
2.2	0
2.3	0
2.4	0
2.5	0
2.6	0
2.7	0
2.8	0
2.9	0
3	0
3.1	0
3.2	0
3.3	0
3.4	0
3.5	0
3.6	0
3.7	0
3.8	0
3.9	0
4	0
4.1	0
4.2	0
4.3	0
4.4	0
4.5	0
4.6	0
4.7	0
4.8	0
4.9	0
5	0
5.1	0
5.2	0
5.3	0
5.4	0
5.5	0
5.6	0
5.7	0
5.8	0
5.9	0
6	0
6.1	0
6.2	0
6.3	0
6.4	0
6.5	0
6.6	0
6.7	0
6.8	0
6.9	0
7	0
7.1	0
7.2	0
7.3	0
7.4	0
7.5	0
7.6	0
7.7	0
7.8	0
7.9	0
8	0
8.1	0
8.2	0
8.3	0
8.4	0
8.5	0
8.6	0
8.7	0
8.8	0
8.9	0
9	0
9.1	0
9.2	0
9.3	0
9.4	0
9.5	0
9.6	0
9.7	0
9.8	0
9.9	0
10	0
10.1	0
10.2	0
10.3	0
10.4	0
10.5	0
10.6	0
10.7	0
10.8	0
10.9	0
11	0
11.1	0
11.2	0
11.3	0
11.4	0
11.5	0
11.6	0
11.7	0
11.8	0
11.9	0
12	0
12.1	0
12.2	0
12.3	0
12.4	0
12.5	0
12.6	0
12.7	0
12.8	0
12.9	0
13	0
13.1	0
13.2	0
13.3	0
13.4	0
13.5	0
13.6	0
13.7	0
13.8	0
13.9	0
14	0
14.1	0
14.2	0
14.3	0
14.4	0
14.5	0
14.6	0
14.7	0
14.8	0
14.9	0
15	0
15.1	0
15.2	0
15.3	0
15.4	0
15.5	0
15.6	0
15.7	0
15.8	0
15.9	0
16	0
16.1	0
16.2	0
16.3	0
16.4	0
16.5	0
16.6	0
16.7	0
16.8	0
16.9	0
17	0
17.1	0
17.2	0
17.3	0
17.4	0
17.5	0
17.6	0
17.7	0
17.8	0
17.9	0
18	0
18.1	0
18.2	0
18.3	0
18.4	0
18.5	0
18.6	0
18.7	0
18.8	0
18.9	0
19	0
19.1	0
19.2	0
19.3	0
19.4	0
19.5	0
19.6	0
19.7	0
19.8	0
19.9	0
20	0
20.1	0
20.2	0
20.3	0
20.4	0
20.5	0
20.6	0
20.7	0
20.8	0
20.9	0
21	0
21.1	0
21.2	0
21.3	0
21.4	0
21.5	0
21.6	0
21.7	0
21.8	0
21.9	0
22	0
22.1	0
22.2	0
22.3	0
22.4	0
22.5	0
22.6	0
22.7	0
22.8	0
22.9	0
23	0
23.1	0
23.2	0
23.3	0
23.4	0
23.5	0
23.6	0
23.7	0
23.8	0
23.9	0
24	0
24.1	0
24.2	0
24.3	0
24.4	0
24.5	0
24.6	0
24.7	0
24.8	0
24.9	0
25	0
25.1	0
25.2	0
25.3	0
25.4	0
25.5	0
25.6	0
25.7	0
25.8	0
25.9	0
26	0
26.1	0
26.2	0
26.3	0
26.4	0
26.5	0
26.6	0
26.7	0
26.8	0
26.9	0
27	0
27.1	0
27.2	0
27.3	0
27.4	0
27.5	0
27.6	0
27.7	0
27.8	0
27.9	0
28	0
28.1	0
28.2	0
28.3	0
28.4	0
28.5	0
28.6	0
28.7	0
28.8	0
28.9	0
29	0
29.1	0
29.2	0
29.3	0
29.4	0
29.5	0
29.6	0
29.7	0
29.8	0
29.9	0
30	0
30.1	0
30.2	0
30.3	0
30.4	0
30.5	0
30.6	0
30.7	0
30.8	0
30.9	0
31	0
31.1	0
31.2	0
31.3	0
31.4	0
31.5	0
31.6	0
31.7	0
31.8	0
31.9	0
32	0
32.1	0
32.2	0
32.3	0
32.4	0
32.5	0
32.6	0
32.7	0
32.8	0
32.9	0
33	0
33.1	0
33.2	0
33.3	0
33.4	0
33.5	0
33.6	0
33.7	0
33.8	0
33.9	0
34	0
34.1	0
34.2	0
34.3	0
34.4	0
34.5	0
34.6	0
34.7	0
34.8	0
34.9	0
35	0
35.1	0
35.2	0
35.3	0
35.4	0
35.5	0
35.6	0
35.7	0
35.8	0
35.9	0
36	0
36.1	0
36.2	0
36.3	0
36.4	0
36.5	0
36.6	0
36.7	0
36.8	0
36.9	0
37	0
37.1	0
37.2	0
37.3	0
37.4	0
37.5	0
37.6	0
37.7	0
37.8	0
37.9	0
38	0
38.1	0
38.2	0
38.3	0
38.4	0
38.5	0
38.6	0
38.7	0
38.8	0
38.9	0
39	0
39.1	0
39.2	0
39.3	0
39.4	0
39.5	0
39.6	0
39.7	0
39.8	0
39.9	0
40	0
40.1	0
40.2	0
40.3	0
40.4	0
40.5	0
40.6	0
40.7	0
40.8	0
40.9	0
41	0
41.1	0
41.2	0
41.3	0
41.4	0
41.5	0
41.6	0
41.7	0
41.8	0
41.9	0
42	0
42.1	0
42.2	0
42.3	0
42.4	0
42.5	0
42.6	0
42.7	0
42.8	0
42.9	0
43	0
43.1	0
43.2	0
43.3	0
43.4	0
43.5	0
43.6	0
43.7	0
43.8	0
43.9	0
44	0
44.1	0
44.2	0
44.3	0
44.4	0
44.5	0
44.6	0
44.7	0
44.8	0
44.9	0
45	0
45.1	0
45.2	0
45.3	0
45.4	0
45.5	0
45.6	0
45.7	0
45.8	0
45.9	0
46	0
46.1	0
46.2	0
46.3	0
46.4	0
46.5	0
46.6	0
46.7	0
46.8	0
46.9	0
47	0
47.1	0
47.2	0
47.3	0
47.4	0
47.5	0
47.6	0
47.7	0
47.8	0
47.9	0
48	0
48.1	0
48.2	0
48.3	0
48.4	0
48.5	0
48.6	0
48.7	0
48.8	0
48.9	0
49	0
49.1	0
49.2	0
49.3	0
49.4	0
49.5	0
49.6	0
49.7	0
49.8	0
49.9	0
50	0
50.1	0
50.2	0
50.3	0
50.4	0
50.5	0
50.6	0
50.7	0
50.8	0
50.9	0
51	0
51.1	0
51.2	0
51.3	0
51.4	0
51.5	0
51.6	0
51.7	0
51.8	0
51.9	0
52	0
52.1	0
52.2	0
52.3	0
52.4	0
52.5	0
52.6	0
52.7	0
52.8	0
52.9	0
53	0
53.1	0
53.2	0
53.3	0
53.4	0
53.5	0
53.6	0
53.7	0
53.8	0
53.9	0
54	0
54.1	0
54.2	0
54.3	0
54.4	0
54.5	0
54.6	0
54.7	0
54.8	0
54.9	0
55	0
55.1	0
55.2	0
55.3	0
55.4	0
55.5	0
55.6	0
55.7	0
55.8	0
55.9	0
56	0
56.1	0
56.2	0
56.3	0
56.4	0
56.5	0
56.6	0
56.7	0
56.8	0
56.9	0
57	0
57.1	0
57.2	0
57.3	0
57.4	0
57.5	0
57.6	0
57.7	0
57.8	0
57.9	0
58	0
58.1	0
58.2	0
58.3	0
58.4	0
58.5	0
58.6	0
58.7	0
58.8	0
58.9	0
59	0
59.1	0
59.2	0
59.3	0
59.4	0
59.5	0
59.6	0
59.7	0
59.8	0
59.9	0
60	0
60.1	0
60.2	0
60.3	0
60.4	0
60.5	0
60.6	0
60.7	0
60.8	0
60.9	0
61	0
61.1	0
61.2	0
61.3	0
61.4	0
61.5	0
61.6	0
61.7	0
61.8	0
61.9	0
62	0
62.1	0
62.2	0
62.3	0
62.4	0
62.5	0
62.6	0
62.7	0
62.8	0
62.9	0
63	0
63.1	0
63.2	0
63.3	0
63.4	0
63.5	0
63.6	0
63.7	0
63.8	0
63.9	0
64	0
64.1	0
64.2	0
64.3	0
64.4	0
64.5	0
64.6	0
64.7	0
64.8	0
64.9	0
65	0
65.1	0
65.2	0
65.3	0
65.4	0
65.5	0
65.6	0
65.7	0
65.8	0
65.9	0
66	0
66.1	0
66.2	0
66.3	0
66.4	0
66.5	0
66.6	0
66.7	0
66.8	0
66.9	0
67	0
67.1	0
67.2	0
67.3	0
67.4	0
67.5	0
67.6	0
67.7	0
67.8	0
67.9	0
68	0
68.1	0
68.2	0
68.3	0
68.4	0
68.5	0
68.6	0
68.7	0
68.8	0
68.9	0
69	0
69.1	0
69.2	0
69.3	0
69.4	0
69.5	0
69.6	0
69.7	0
69.8	0
69.9	0
70	0
70.1	0
70.2	0
70.3	0
70.4	0
70.5	0
70.6	0
70.7	0
70.8	0
70.9	0
71	0
71.1	0
71.2	0
71.3	0
71.4	0
71.5	0
71.6	0
71.7	0
71.8	0
71.9	0
72	0
72.1	0
72.2	0
72.3	0
72.4	0
72.5	0
72.6	0
72.7	0
72.8	0
72.9	0
73	0
73.1	0
73.2	0
73.3	0
73.4	0
73.5	0
73.6	0
73.7	0
73.8	0
73.9	0
74	0
74.1	0
74.2	0
74.3	0
74.4	0
74.5	0
74.6	0
74.7	0
74.8	0
74.9	0
75	0
75.1	0
75.2	0
75.3	0
75.4	0
75.5	0
75.6	0
75.7	0
75.8	0
75.9	0
76	0
76.1	0
76.2	0
76.3	0
76.4	0
76.5	0
76.6	0
76.7	0
76.8	0
76.9	0
77	0
77.1	0
77.2	0
77.3	0
77.4	0
77.5	0
77.6	0
77.7	0
77.8	0
77.9	0
78	0
78.1	0
78.2	0
78.3	0
78.4	0
78.5	0
78.6	0
78.7	0
78.8	0
78.9	0
79	0
79.1	0
79.2	0
79.3	0
79.4	0
79.5	0
79.6	0
79.7	0
79.8	0
79.9	0
80	0
80.1	0
80.2	0
80.3	0
80.4	0
80.5	0
80.6	0
80.7	0
80.8	0
80.9	0
81	0
81.1	0
81.2	0
81.3	0
81.4	0
81.5	0
81.6	0
81.7	0
81.8	0
81.9	0
82	0
82.1	0
82.2	0
82.3	0
82.4	0
82.5	0
82.6	0
82.7	0
82.8	0
82.9	0
83	0
83.1	0
83.2	0
83.3	0
83.4	0
83.5	0
83.6	0
83.7	0
83.8	0
83.9	0
84	0
84.1	0
84.2	0
84.3	0
84.4	0
84.5	0
84.6	0
84.7	0
84.8	0
84.9	0
85	0
85.1	0
85.2	0
85.3	0
85.4	0
85.5	0
85.6	0
85.7	0
85.8	0
85.9	0
86	0
86.1	0
86.2	0
86.3	0
86.4	0
86.5	0
86.6	0
86.7	0
86.8	0
86.9	0
87	0
87.1	0
87.2	0
87.3	0
87.4	0
87.5	0
87.6	0
87.7	0
87.8	0
87.9	0
88	0
88.1	0
88.2	0
88.3	0
88.4	0
88.5	0
88.6	0
88.7	0
88.8	0
88.9	0
89	0
89.1	0
89.2	0
89.3	0
89.4	0
89.5	0
89.6	0
89.7	0
89.8	0
89.9	0
90	0
90.1	0
90.2	0
90.3	0
90.4	0
90.5	0
90.6	0
90.7	0
90.8	0
90.9	0
91	0
91.1	0
91.2	0
91.3	0
91.4	0
91.5	0
91.6	0
91.7	0
91.8	0
91.9	0
92	0
92.1	0
92.2	0
92.3	0
92.4	0
92.5	0
92.6	0
92.7	0
92.8	0
92.9	0
93	0
93.1	0
93.2	0
93.3	0
93.4	0
93.5	0
93.6	0
93.7	0
93.8	0
93.9	0
94	0
94.1	0
94.2	0
94.3	0
94.4	0
94.5	0
94.6	0
94.7	0
94.8	0
94.9	0
95	0
95.1	0
95.2	0
95.3	0
95.4	0
95.5	0
95.6	0
95.7	0
95.8	0
95.9	0
96	0
96.1	0
96.2	0
96.3	0
96.4	0
96.5	0
96.6	0
96.7	0
96.8	0
96.9	0
97	0
97.1	0
97.2	0
97.3	0
97.4	0
97.5	0
97.6	0
97.7	0
97.8	0
97.9	0
98	0
98.1	0
98.2	0
98.3	0
98.4	0
98.5	0
98.6	0
98.7	0
98.8	0
98.9	0
99	0
99.1	0
99.2	0
99.3	0
99.4	0
99.5	0
99.6	0
99.7	0
99.8	0
99.9	0
100	0
100.1	0.111025
100.2	0.201475
100.3	0.27905
100.4	0.343825
100.5	0.397325
100.6	0.440225
100.7	0.480525
100.8	0.514325
100.9	0.542025
101	0.565475
101.1	0.58855
101.2	0.60705
101.3	0.62375
101.4	0.639
101.5	0.653025
101.6	0.66445
101.7	0.675425
101.8	0.68425
101.9	0.69235
102	0.6987
102.1	0.70505
102.2	0.71015
102.3	0.714825
102.4	0.719275
102.5	0.72445
102.6	0.7291
102.7	0.732925
102.8	0.737125
102.9	0.741625
103	0.7441
103.1	0.74595
103.2	0.748425
103.3	0.75145
103.4	0.7535
103.5	0.7557
103.6	0.758475
103.7	0.7607
103.8	0.762125
103.9	0.763975
104	0.766125
104.1	0.7665
104.2	0.767225
104.3	0.768525
104.4	0.770875
104.5	0.771175
104.6	0.773075
104.7	0.773575
104.8	0.773475
104.9	0.774275
105	0.774
105.1	0.774025
105.2	0.773725
105.3	0.774225
105.4	0.77565
105.5	0.7753
105.6	0.7764
105.7	0.777175
105.8	0.7774
105.9	0.77785
106	0.779075
106.1	0.779075
106.2	0.780275
106.3	0.78115
106.4	0.780625
106.5	0.782525
106.6	0.78215
106.7	0.7835
106.8	0.7837
106.9	0.78495
107	0.78475
107.1	0.786375
107.2	0.787775
107.3	0.788175
107.4	0.7884
107.5	0.78905
107.6	0.788075
107.7	0.78775
107.8	0.788925
107.9	0.790225
108	0.789675
108.1	0.790325
108.2	0.790625
108.3	0.7914
108.4	0.791225
108.5	0.792375
108.6	0.793625
108.7	0.79415
108.8	0.79535
108.9	0.7966
109	0.797525
109.1	0.797575
109.2	0.79785
109.3	0.79825
109.4	0.798875
109.5	0.797225
109.6	0.79765
109.7	0.79865
109.8	0.79925
109.9	0.8007
110	0.8013
110.1	0.801525
110.2	0.8021
110.3	0.80225
110.4	0.8027
110.5	0.803525
110.6	0.8042
110.7	0.8032
110.8	0.803425
110.9	0.803925
111	0.804325
111.1	0.8054
111.2	0.806675
111.3	0.806225
111.4	0.806625
111.5	0.8066
111.6	0.80665
111.7	0.8088
111.8	0.8079
111.9	0.808775
112	0.80925
112.1	0.8089
112.2	0.80845
112.3	0.8085
112.4	0.80915
112.5	0.809575
112.6	0.808875
112.7	0.80965
112.8	0.808625
112.9	0.80985
113	0.8115
113.1	0.8133
113.2	0.813375
113.3	0.81205
113.4	0.8124
113.5	0.8123
113.6	0.813575
113.7	0.81335
113.8	0.814875
113.9	0.81565
114	0.8163
114.1	0.81815
114.2	0.82
114.3	0.821375
114.4	0.82215
114.5	0.822
114.6	0.82115
114.7	0.820625
114.8	0.82025
114.9	0.82075
115	0.82035
115.1	0.821525
115.2	0.821575
115.3	0.822025
115.4	0.822275
115.5	0.8218
115.6	0.8213
115.7	0.821575
115.8	0.822525
115.9	0.824575
116	0.8254
116.1	0.824325
116.2	0.82545
116.3	0.8257
116.4	0.825775
116.5	0.82605
116.6	0.8267
116.7	0.82805
116.8	0.82775
116.9	0.8268
117	0.82835
117.1	0.828225
117.2	0.828475
117.3	0.82995
117.4	0.831625
117.5	0.83265
117.6	0.8333
117.7	0.835
117.8	0.83585
117.9	0.836
118	0.83605
118.1	0.8351
118.2	0.8363
118.3	0.836575
118.4	0.8367
118.5	0.837075
118.6	0.83725
118.7	0.837
118.8	0.8366
118.9	0.83655
119	0.837425
119.1	0.837525
119.2	0.83865
119.3	0.839075
119.4	0.83895
119.5	0.839175
119.6	0.840325
119.7	0.8393
119.8	0.8399
119.9	0.841425
120	0.84195
120.1	0.841775
120.2	0.84195
120.3	0.842825
120.4	0.843475
120.5	0.84275
120.6	0.8429
120.7	0.84345
120.8	0.8436
120.9	0.84375
121	0.844925
121.1	0.84525
121.2	0.8454
121.3	0.845025
121.4	0.845325
121.5	0.845825
121.6	0.846825
121.7	0.847125
121.8	0.847525
121.9	0.846975
122	0.84725
122.1	0.846375
122.2	0.846925
122.3	0.8467
122.4	0.847525
122.5	0.847275
122.6	0.847225
122.7	0.84745
122.8	0.848375
122.9	0.84845
123	0.849475
123.1	0.8497
123.2	0.849675
123.3	0.85035
123.4	0.8507
123.5	0.851725
123.6	0.851925
123.7	0.85165
123.8	0.8522
123.9	0.85305
124	0.8532
124.1	0.853075
124.2	0.8553
124.3	0.8559
124.4	0.857825
124.5	0.8572
124.6	0.856275
124.7	0.8565
124.8	0.856925
124.9	0.856125
125	0.85745
125.1	0.856775
125.2	0.857225
125.3	0.857375
125.4	0.85755
125.5	0.85695
125.6	0.8569
125.7	0.85765
125.8	0.857625
125.9	0.85715
126	0.857025
126.1	0.85615
126.2	0.8563
126.3	0.85685
126.4	0.85815
126.5	0.85735
126.6	0.8584
126.7	0.8579
126.8	0.858925
126.9	0.858725
127	0.859025
127.1	0.859925
127.2	0.8608
127.3	0.86075
127.4	0.86045
127.5	0.860675
127.6	0.8616
127.7	0.86335
127.8	0.8634
127.9	0.86275
128	0.86205
128.1	0.863
128.2	0.863425
128.3	0.863375
128.4	0.86355
128.5	0.864525
128.6	0.864675
128.7	0.864375
128.8	0.864825
128.9	0.86605
129	0.8671
129.1	0.866975
129.2	0.867625
129.3	0.86935
129.4	0.86885
129.5	0.8695
129.6	0.869725
129.7	0.86985
129.8	0.869625
129.9	0.868375
130	0.86925
130.1	0.86915
130.2	0.86825
130.3	0.86835
130.4	0.86795
130.5	0.868475
130.6	0.868975
130.7	0.8707
130.8	0.8706
130.9	0.870575
131	0.8716
131.1	0.871875
131.2	0.871825
131.3	0.87155
131.4	0.871725
131.5	0.8714
131.6	0.87225
131.7	0.872725
131.8	0.8732
131.9	0.873775
132	0.8731
132.1	0.8731
132.2	0.873675
132.3	0.874
132.4	0.87415
132.5	0.874125
132.6	0.874375
132.7	0.874375
132.8	0.874575
132.9	0.8747
133	0.874725
133.1	0.87505
133.2	0.8754
133.3	0.875525
133.4	0.87445
133.5	0.873975
133.6	0.87445
133.7	0.875125
133.8	0.87565
133.9	0.87665
134	0.87795
134.1	0.878175
134.2	0.878425
134.3	0.87785
134.4	0.877075
134.5	0.876825
134.6	0.877325
134.7	0.876775
134.8	0.876675
134.9	0.87705
135	0.87755
135.1	0.876725
135.2	0.8763
135.3	0.8767
135.4	0.8769
135.5	0.876325
135.6	0.876775
135.7	0.878375
135.8	0.878475
135.9	0.8788
136	0.87955
136.1	0.880425
136.2	0.881125
136.3	0.8806
136.4	0.880625
136.5	0.88045
136.6	0.8813
136.7	0.88115
136.8	0.88175
136.9	0.881925
137	0.881225
137.1	0.8814
137.2	0.882025
137.3	0.881475
137.4	0.881625
137.5	0.881775
137.6	0.882325
137.7	0.882575
137.8	0.882525
137.9	0.8819
138	0.881875
138.1	0.8823
138.2	0.8829
138.3	0.882825
138.4	0.8833
138.5	0.8828
138.6	0.8833
138.7	0.884125
138.8	0.883975
138.9	0.884375
139	0.885425
139.1	0.886625
139.2	0.885875
139.3	0.88565
139.4	0.885375
139.5	0.885475
139.6	0.885925
139.7	0.88705
139.8	0.887575
139.9	0.887125
140	0.886825
140.1	0.888025
140.2	0.8883
140.3	0.888025
140.4	0.8886
140.5	0.8896
140.6	0.8896
140.7	0.890025
140.8	0.890525
140.9	0.890475
141	0.891225
141.1	0.891175
141.2	0.8903
141.3	0.889575
141.4	0.89075
141.5	0.8912
141.6	0.890925
141.7	0.892075
141.8	0.89245
141.9	0.893025
142	0.892875
142.1	0.893325
142.2	0.892925
142.3	0.893025
142.4	0.893525
142.5	0.892425
142.6	0.893375
142.7	0.8934
142.8	0.893275
142.9	0.89205
143	0.892325
143.1	0.8934
143.2	0.894
143.3	0.893725
143.4	0.892425
143.5	0.89235
143.6	0.89215
143.7	0.8932
143.8	0.893575
143.9	0.8949
144	0.895725
144.1	0.895625
144.2	0.895825
144.3	0.8955
144.4	0.8955
144.5	0.89545
144.6	0.895725
144.7	0.896175
144.8	0.895
144.9	0.896725
145	0.897
145.1	0.897125
145.2	0.897325
145.3	0.89725
145.4	0.89755
145.5	0.897825
145.6	0.89775
145.7	0.8986
145.8	0.899075
145.9	0.899
146	0.897875
146.1	0.8981
146.2	0.89815
146.3	0.89765
146.4	0.89725
146.5	0.897575
146.6	0.898475
146.7	0.8979
146.8	0.89835
146.9	0.898225
147	0.89805
147.1	0.8983
147.2	0.899
147.3	0.899375
147.4	0.89875
147.5	0.899225
147.6	0.899325
147.7	0.898975
147.8	0.898775
147.9	0.899225
148	0.89905
148.1	0.898275
148.2	0.8975
148.3	0.898925
148.4	0.898525
148.5	0.898725
148.6	0.89925
148.7	0.899675
148.8	0.900125
148.9	0.9
149	0.899975
149.1	0.90005
149.2	0.901
149.3	0.900675
149.4	0.901225
149.5	0.901575
149.6	0.901425
149.7	0.901475
149.8	0.900675
149.9	0.9009
150	0.901575
150.1	0.901725
150.2	0.902025
150.3	0.9025
150.4	0.903125
150.5	0.903775
150.6	0.904025
150.7	0.904475
150.8	0.904425
150.9	0.9042
151	0.904375
151.1	0.903975
151.2	0.9041
151.3	0.903675
151.4	0.904075
151.5	0.90455
151.6	0.904225
151.7	0.904025
151.8	0.90435
151.9	0.90485
152	0.904875
152.1	0.9052
152.2	0.904975
152.3	0.90385
152.4	0.90425
152.5	0.9045
152.6	0.90385
152.7	0.90355
152.8	0.9047
152.9	0.905175
153	0.90555
153.1	0.906525
153.2	0.906575
153.3	0.9058
153.4	0.9058
153.5	0.905225
153.6	0.90595
153.7	0.906025
153.8	0.906725
153.9	0.90625
154	0.907125
154.1	0.907425
154.2	0.907425
154.3	0.907825
154.4	0.90765
154.5	0.907575
154.6	0.90765
154.7	0.907125
154.8	0.907375
154.9	0.9069
155	0.90675
155.1	0.9065
155.2	0.907025
155.3	0.907825
155.4	0.907625
155.5	0.9069
155.6	0.907325
155.7	0.9075
155.8	0.906475
155.9	0.906825
156	0.907325
156.1	0.90755
156.2	0.907225
156.3	0.907775
156.4	0.908475
156.5	0.90925
156.6	0.90935
156.7	0.90885
156.8	0.90905
156.9	0.909875
157	0.9101
157.1	0.91025
157.2	0.9106
157.3	0.9111
157.4	0.910725
157.5	0.910975
157.6	0.910825
157.7	0.910375
157.8	0.9105
157.9	0.910475
158	0.910225
158.1	0.9108
158.2	0.911375
158.3	0.91135
158.4	0.911525
158.5	0.910625
158.6	0.910325
158.7	0.90965
158.8	0.909775
158.9	0.910325
159	0.9102
159.1	0.9108
159.2	0.910575
159.3	0.91065
159.4	0.9106
159.5	0.910975
159.6	0.9111
159.7	0.911275
159.8	0.91185
159.9	0.91285
160	0.9131
160.1	0.912325
160.2	0.912
160.3	0.91085
160.4	0.9111
160.5	0.9121
160.6	0.911875
160.7	0.91195
160.8	0.91225
160.9	0.911825
161	0.9125
161.1	0.9123
161.2	0.91205
161.3	0.91155
161.4	0.911275
161.5	0.9116
161.6	0.91115
161.7	0.911575
161.8	0.911975
161.9	0.912475
162	0.912875
162.1	0.91315
162.2	0.9138
162.3	0.91345
162.4	0.912625
162.5	0.913075
162.6	0.912975
162.7	0.913325
162.8	0.9132
162.9	0.9127
163	0.9132
163.1	0.91375
163.2	0.914175
163.3	0.91325
163.4	0.914575
163.5	0.9149
163.6	0.9153
163.7	0.9155
163.8	0.914325
163.9	0.913775
164	0.91315
164.1	0.913225
164.2	0.9137
164.3	0.914125
164.4	0.914
164.5	0.91375
164.6	0.9145
164.7	0.91385
164.8	0.913725
164.9	0.91265
165	0.913025
165.1	0.913425
165.2	0.912875
165.3	0.9132
165.4	0.912475
165.5	0.91265
165.6	0.912475
165.7	0.9121
165.8	0.912075
165.9	0.912125
166	0.912425
166.1	0.912475
166.2	0.91245
166.3	0.912925
166.4	0.91335
166.5	0.913225
166.6	0.9126
166.7	0.912475
166.8	0.91265
166.9	0.91285
167	0.9139
167.1	0.9137
167.2	0.914475
167.3	0.9154
167.4	0.91525
167.5	0.9156
167.6	0.9158
167.7	0.915225
167.8	0.9157
167.9	0.91595
168	0.916175
168.1	0.91615
168.2	0.916975
168.3	0.916025
168.4	0.91575
168.5	0.9154
168.6	0.915925
168.7	0.9156
168.8	0.916525
168.9	0.916425
169	0.916275
169.1	0.91655
169.2	0.916175
169.3	0.9171
169.4	0.917375
169.5	0.916375
169.6	0.916475
169.7	0.916075
169.8	0.9164
169.9	0.9167
170	0.917275
170.1	0.91785
170.2	0.917725
170.3	0.91735
170.4	0.91755
170.5	0.917475
170.6	0.9177
170.7	0.918225
170.8	0.9182
170.9	0.917925
171	0.9182
171.1	0.918175
171.2	0.91845
171.3	0.918175
171.4	0.9188
171.5	0.917425
171.6	0.9176
171.7	0.91745
171.8	0.917625
171.9	0.917675
172	0.917725
172.1	0.918025
172.2	0.9181
172.3	0.9182
172.4	0.91905
172.5	0.919675
172.6	0.919225
172.7	0.919725
172.8	0.9198
172.9	0.919875
173	0.9201
173.1	0.9194
173.2	0.919275
173.3	0.9196
173.4	0.919225
173.5	0.918625
173.6	0.918625
173.7	0.918275
173.8	0.918675
173.9	0.919525
174	0.920075
174.1	0.919675
174.2	0.919825
174.3	0.9191
174.4	0.91905
174.5	0.91955
174.6	0.9206
174.7	0.920475
174.8	0.919725
174.9	0.91985
175	0.920125
175.1	0.9198
175.2	0.91955
175.3	0.920025
175.4	0.9203
175.5	0.9199
175.6	0.92005
175.7	0.9201
175.8	0.920875
175.9	0.921025
176	0.920525
176.1	0.920925
176.2	0.92095
176.3	0.9209
176.4	0.921275
176.5	0.921175
176.6	0.921425
176.7	0.921375
176.8	0.921975
176.9	0.92235
177	0.922825
177.1	0.9232
177.2	0.92295
177.3	0.9216
177.4	0.92185
177.5	0.921875
177.6	0.9217
177.7	0.922075
177.8	0.9211
177.9	0.922425
178	0.922975
178.1	0.922275
178.2	0.922275
178.3	0.92235
178.4	0.9222
178.5	0.9215
178.6	0.92145
178.7	0.921625
178.8	0.92185
178.9	0.92295
179	0.92255
179.1	0.92185
179.2	0.921975
179.3	0.922675
179.4	0.923
179.5	0.9225
179.6	0.92275
179.7	0.922325
179.8	0.922025
179.9	0.921175
180	0.921375
180.1	0.9214
180.2	0.922275
180.3	0.921875
180.4	0.921675
180.5	0.922225
180.6	0.923025
180.7	0.923525
180.8	0.923025
180.9	0.923775
181	0.923325
181.1	0.923025
181.2	0.92265
181.3	0.922825
181.4	0.9237
181.5	0.923425
181.6	0.9232
181.7	0.923275
181.8	0.923125
181.9	0.922975
182	0.922425
182.1	0.92215
182.2	0.922375
182.3	0.9233
182.4	0.923425
182.5	0.923075
182.6	0.922625
182.7	0.922725
182.8	0.923575
182.9	0.92365
183	0.9237
183.1	0.923575
183.2	0.923575
183.3	0.9229
183.4	0.92285
183.5	0.923
183.6	0.9224
183.7	0.9228
183.8	0.923025
183.9	0.922975
184	0.92235
184.1	0.923625
184.2	0.9232
184.3	0.9237
184.4	0.923575
184.5	0.924225
184.6	0.9238
184.7	0.923575
184.8	0.923875
184.9	0.9244
185	0.924425
185.1	0.92505
185.2	0.925775
185.3	0.924925
185.4	0.9253
185.5	0.925725
185.6	0.925775
185.7	0.925325
185.8	0.9257
185.9	0.9249
186	0.924625
186.1	0.92415
186.2	0.924425
186.3	0.92485
186.4	0.924025
186.5	0.92365
186.6	0.924025
186.7	0.92475
186.8	0.925275
186.9	0.925925
187	0.925375
187.1	0.9253
187.2	0.925875
187.3	0.925675
187.4	0.925675
187.5	0.926275
187.6	0.926575
187.7	0.92695
187.8	0.926775
187.9	0.926925
188	0.9263
188.1	0.925725
188.2	0.9262
188.3	0.9269
188.4	0.927175
188.5	0.927175
188.6	0.927125
188.7	0.926375
188.8	0.92665
188.9	0.927225
189	0.9263
189.1	0.926025
189.2	0.9258
189.3	0.9258
189.4	0.92645
189.5	0.92585
189.6	0.92605
189.7	0.92615
189.8	0.9262
189.9	0.926125
190	0.926175
190.1	0.9265
190.2	0.9266
190.3	0.92675
190.4	0.92615
190.5	0.92595
190.6	0.926325
190.7	0.926225
190.8	0.926225
190.9	0.92665
191	0.926325
191.1	0.926525
191.2	0.927025
191.3	0.92715
191.4	0.926675
191.5	0.926675
191.6	0.926475
191.7	0.926825
191.8	0.92625
191.9	0.926725
192	0.927225
192.1	0.92655
192.2	0.926225
192.3	0.92605
192.4	0.926475
192.5	0.92695
192.6	0.92825
192.7	0.92815
192.8	0.926775
192.9	0.926975
193	0.927
193.1	0.92665
193.2	0.92715
193.3	0.926975
193.4	0.927325
193.5	0.926775
193.6	0.926775
193.7	0.926775
193.8	0.9268
193.9	0.926425
194	0.926525
194.1	0.926725
194.2	0.926925
194.3	0.926525
194.4	0.926875
194.5	0.926925
194.6	0.926675
194.7	0.92715
194.8	0.926675
194.9	0.926325
195	0.92655
195.1	0.9261
195.2	0.92685
195.3	0.92635
195.4	0.925575
195.5	0.925725
195.6	0.9255
195.7	0.925925
195.8	0.925725
195.9	0.925275
196	0.925
196.1	0.925775
196.2	0.925775
196.3	0.9259
196.4	0.926475
196.5	0.926375
196.6	0.925375
196.7	0.9253
196.8	0.92545
196.9	0.925775
197	0.92625
197.1	0.926425
197.2	0.926525
197.3	0.926225
197.4	0.926875
197.5	0.9265
197.6	0.9271
197.7	0.9275
197.8	0.927525
197.9	0.926075
198	0.926725
198.1	0.9271
198.2	0.927875
198.3	0.928125
198.4	0.92795
198.5	0.928325
198.6	0.9289
198.7	0.928525
198.8	0.9279
198.9	0.9281
199	0.927175
199.1	0.9275
199.2	0.9276
199.3	0.927525
199.4	0.928325
199.5	0.928
199.6	0.927975
199.7	0.928475
199.8	0.928425
199.9	0.9285
200	0.9285
[truncated: 14,000 more rows]
