# Supplementary material for: Bayesian inference of kinetic schemes for ion channels by Kalman filtering
Source: eLife journal article supplement (doi:10.7554/elife.62714), 2022-05-04
Supplement: fig4-data7 [file 1_Sim_N_20000_Strom_MW_2M.xlsx]

## Sheet: Tabelle1
0.1	0
0.2	0
0.3	0
0.4	0
0.5	0
0.6	0
0.7	0
0.8	0
0.9	0
1	0
1.1	0
1.2	0
1.3	0
1.4	0
1.5	0
1.6	0
1.7	0
1.8	0
1.9	0
2	0
2.1	0
2.2	0
2.3	0
2.4	0
2.5	0
2.6	0
2.7	0
2.8	0
2.9	0
3	0
3.1	0
3.2	0
3.3	0
3.4	0
3.5	0
3.6	0
3.7	0
3.8	0
3.9	0
4	0
4.1	0
4.2	0
4.3	0
4.4	0
4.5	0
4.6	0
4.7	0
4.8	0
4.9	0
5	0
5.1	0
5.2	0
5.3	0
5.4	0
5.5	0
5.6	0
5.7	0
5.8	0
5.9	0
6	0
6.1	0
6.2	0
6.3	0
6.4	0
6.5	0
6.6	0
6.7	0
6.8	0
6.9	0
7	0
7.1	0
7.2	0
7.3	0
7.4	0
7.5	0
7.6	0
7.7	0
7.8	0
7.9	0
8	0
8.1	0
8.2	0
8.3	0
8.4	0
8.5	0
8.6	0
8.7	0
8.8	0
8.9	0
9	0
9.1	0
9.2	0
9.3	0
9.4	0
9.5	0
9.6	0
9.7	0
9.8	0
9.9	0
10	0
10.1	0
10.2	0
10.3	0
10.4	0
10.5	0
10.6	0
10.7	0
10.8	0
10.9	0
11	0
11.1	0
11.2	0
11.3	0
11.4	0
11.5	0
11.6	0
11.7	0
11.8	0
11.9	0
12	0
12.1	0
12.2	0
12.3	0
12.4	0
12.5	0
12.6	0
12.7	0
12.8	0
12.9	0
13	0
13.1	0
13.2	0
13.3	0
13.4	0
13.5	0
13.6	0
13.7	0
13.8	0
13.9	0
14	0
14.1	0
14.2	0
14.3	0
14.4	0
14.5	0
14.6	0
14.7	0
14.8	0
14.9	0
15	0
15.1	0
15.2	0
15.3	0
15.4	0
15.5	0
15.6	0
15.7	0
15.8	0
15.9	0
16	0
16.1	0
16.2	0
16.3	0
16.4	0
16.5	0
16.6	0
16.7	0
16.8	0
16.9	0
17	0
17.1	0
17.2	0
17.3	0
17.4	0
17.5	0
17.6	0
17.7	0
17.8	0
17.9	0
18	0
18.1	0
18.2	0
18.3	0
18.4	0
18.5	0
18.6	0
18.7	0
18.8	0
18.9	0
19	0
19.1	0
19.2	0
19.3	0
19.4	0
19.5	0
19.6	0
19.7	0
19.8	0
19.9	0
20	0
20.1	0
20.2	0
20.3	0
20.4	0
20.5	0
20.6	0
20.7	0
20.8	0
20.9	0
21	0
21.1	0
21.2	0
21.3	0
21.4	0
21.5	0
21.6	0
21.7	0
21.8	0
21.9	0
22	0
22.1	0
22.2	0
22.3	0
22.4	0
22.5	0
22.6	0
22.7	0
22.8	0
22.9	0
23	0
23.1	0
23.2	0
23.3	0
23.4	0
23.5	0
23.6	0
23.7	0
23.8	0
23.9	0
24	0
24.1	0
24.2	0
24.3	0
24.4	0
24.5	0
24.6	0
24.7	0
24.8	0
24.9	0
25	0
25.1	0
25.2	0
25.3	0
25.4	0
25.5	0
25.6	0
25.7	0
25.8	0
25.9	0
26	0
26.1	0
26.2	0
26.3	0
26.4	0
26.5	0
26.6	0
26.7	0
26.8	0
26.9	0
27	0
27.1	0
27.2	0
27.3	0
27.4	0
27.5	0
27.6	0
27.7	0
27.8	0
27.9	0
28	0
28.1	0
28.2	0
28.3	0
28.4	0
28.5	0
28.6	0
28.7	0
28.8	0
28.9	0
29	0
29.1	0
29.2	0
29.3	0
29.4	0
29.5	0
29.6	0
29.7	0
29.8	0
29.9	0
30	0
30.1	0
30.2	0
30.3	0
30.4	0
30.5	0
30.6	0
30.7	0
30.8	0
30.9	0
31	0
31.1	0
31.2	0
31.3	0
31.4	0
31.5	0
31.6	0
31.7	0
31.8	0
31.9	0
32	0
32.1	0
32.2	0
32.3	0
32.4	0
32.5	0
32.6	0
32.7	0
32.8	0
32.9	0
33	0
33.1	0
33.2	0
33.3	0
33.4	0
33.5	0
33.6	0
33.7	0
33.8	0
33.9	0
34	0
34.1	0
34.2	0
34.3	0
34.4	0
34.5	0
34.6	0
34.7	0
34.8	0
34.9	0
35	0
35.1	0
35.2	0
35.3	0
35.4	0
35.5	0
35.6	0
35.7	0
35.8	0
35.9	0
36	0
36.1	0
36.2	0
36.3	0
36.4	0
36.5	0
36.6	0
36.7	0
36.8	0
36.9	0
37	0
37.1	0
37.2	0
37.3	0
37.4	0
37.5	0
37.6	0
37.7	0
37.8	0
37.9	0
38	0
38.1	0
38.2	0
38.3	0
38.4	0
38.5	0
38.6	0
38.7	0
38.8	0
38.9	0
39	0
39.1	0
39.2	0
39.3	0
39.4	0
39.5	0
39.6	0
39.7	0
39.8	0
39.9	0
40	0
40.1	0
40.2	0
40.3	0
40.4	0
40.5	0
40.6	0
40.7	0
40.8	0
40.9	0
41	0
41.1	0
41.2	0
41.3	0
41.4	0
41.5	0
41.6	0
41.7	0
41.8	0
41.9	0
42	0
42.1	0
42.2	0
42.3	0
42.4	0
42.5	0
42.6	0
42.7	0
42.8	0
42.9	0
43	0
43.1	0
43.2	0
43.3	0
43.4	0
43.5	0
43.6	0
43.7	0
43.8	0
43.9	0
44	0
44.1	0
44.2	0
44.3	0
44.4	0
44.5	0
44.6	0
44.7	0
44.8	0
44.9	0
45	0
45.1	0
45.2	0
45.3	0
45.4	0
45.5	0
45.6	0
45.7	0
45.8	0
45.9	0
46	0
46.1	0
46.2	0
46.3	0
46.4	0
46.5	0
46.6	0
46.7	0
46.8	0
46.9	0
47	0
47.1	0
47.2	0
47.3	0
47.4	0
47.5	0
47.6	0
47.7	0
47.8	0
47.9	0
48	0
48.1	0
48.2	0
48.3	0
48.4	0
48.5	0
48.6	0
48.7	0
48.8	0
48.9	0
49	0
49.1	0
49.2	0
49.3	0
49.4	0
49.5	0
49.6	0
49.7	0
49.8	0
49.9	0
50	0
50.1	0
50.2	0
50.3	0
50.4	0
50.5	0
50.6	0
50.7	0
50.8	0
50.9	0
51	0
51.1	0
51.2	0
51.3	0
51.4	0
51.5	0
51.6	0
51.7	0
51.8	0
51.9	0
52	0
52.1	0
52.2	0
52.3	0
52.4	0
52.5	0
52.6	0
52.7	0
52.8	0
52.9	0
53	0
53.1	0
53.2	0
53.3	0
53.4	0
53.5	0
53.6	0
53.7	0
53.8	0
53.9	0
54	0
54.1	0
54.2	0
54.3	0
54.4	0
54.5	0
54.6	0
54.7	0
54.8	0
54.9	0
55	0
55.1	0
55.2	0
55.3	0
55.4	0
55.5	0
55.6	0
55.7	0
55.8	0
55.9	0
56	0
56.1	0
56.2	0
56.3	0
56.4	0
56.5	0
56.6	0
56.7	0
56.8	0
56.9	0
57	0
57.1	0
57.2	0
57.3	0
57.4	0
57.5	0
57.6	0
57.7	0
57.8	0
57.9	0
58	0
58.1	0
58.2	0
58.3	0
58.4	0
58.5	0
58.6	0
58.7	0
58.8	0
58.9	0
59	0
59.1	0
59.2	0
59.3	0
59.4	0
59.5	0
59.6	0
59.7	0
59.8	0
59.9	0
60	0
60.1	0
60.2	0
60.3	0
60.4	0
60.5	0
60.6	0
60.7	0
60.8	0
60.9	0
61	0
61.1	0
61.2	0
61.3	0
61.4	0
61.5	0
61.6	0
61.7	0
61.8	0
61.9	0
62	0
62.1	0
62.2	0
62.3	0
62.4	0
62.5	0
62.6	0
62.7	0
62.8	0
62.9	0
63	0
63.1	0
63.2	0
63.3	0
63.4	0
63.5	0
63.6	0
63.7	0
63.8	0
63.9	0
64	0
64.1	0
64.2	0
64.3	0
64.4	0
64.5	0
64.6	0
64.7	0
64.8	0
64.9	0
65	0
65.1	0
65.2	0
65.3	0
65.4	0
65.5	0
65.6	0
65.7	0
65.8	0
65.9	0
66	0
66.1	0
66.2	0
66.3	0
66.4	0
66.5	0
66.6	0
66.7	0
66.8	0
66.9	0
67	0
67.1	0
67.2	0
67.3	0
67.4	0
67.5	0
67.6	0
67.7	0
67.8	0
67.9	0
68	0
68.1	0
68.2	0
68.3	0
68.4	0
68.5	0
68.6	0
68.7	0
68.8	0
68.9	0
69	0
69.1	0
69.2	0
69.3	0
69.4	0
69.5	0
69.6	0
69.7	0
69.8	0
69.9	0
70	0
70.1	0
70.2	0
70.3	0
70.4	0
70.5	0
70.6	0
70.7	0
70.8	0
70.9	0
71	0
71.1	0
71.2	0
71.3	0
71.4	0
71.5	0
71.6	0
71.7	0
71.8	0
71.9	0
72	0
72.1	0
72.2	0
72.3	0
72.4	0
72.5	0
72.6	0
72.7	0
72.8	0
72.9	0
73	0
73.1	0
73.2	0
73.3	0
73.4	0
73.5	0
73.6	0
73.7	0
73.8	0
73.9	0
74	0
74.1	0
74.2	0
74.3	0
74.4	0
74.5	0
74.6	0
74.7	0
74.8	0
74.9	0
75	0
75.1	0
75.2	0
75.3	0
75.4	0
75.5	0
75.6	0
75.7	0
75.8	0
75.9	0
76	0
76.1	0
76.2	0
76.3	0
76.4	0
76.5	0
76.6	0
76.7	0
76.8	0
76.9	0
77	0
77.1	0
77.2	0
77.3	0
77.4	0
77.5	0
77.6	0
77.7	0
77.8	0
77.9	0
78	0
78.1	0
78.2	0
78.3	0
78.4	0
78.5	0
78.6	0
78.7	0
78.8	0
78.9	0
79	0
79.1	0
79.2	0
79.3	0
79.4	0
79.5	0
79.6	0
79.7	0
79.8	0
79.9	0
80	0
80.1	0
80.2	0
80.3	0
80.4	0
80.5	0
80.6	0
80.7	0
80.8	0
80.9	0
81	0
81.1	0
81.2	0
81.3	0
81.4	0
81.5	0
81.6	0
81.7	0
81.8	0
81.9	0
82	0
82.1	0
82.2	0
82.3	0
82.4	0
82.5	0
82.6	0
82.7	0
82.8	0
82.9	0
83	0
83.1	0
83.2	0
83.3	0
83.4	0
83.5	0
83.6	0
83.7	0
83.8	0
83.9	0
84	0
84.1	0
84.2	0
84.3	0
84.4	0
84.5	0
84.6	0
84.7	0
84.8	0
84.9	0
85	0
85.1	0
85.2	0
85.3	0
85.4	0
85.5	0
85.6	0
85.7	0
85.8	0
85.9	0
86	0
86.1	0
86.2	0
86.3	0
86.4	0
86.5	0
86.6	0
86.7	0
86.8	0
86.9	0
87	0
87.1	0
87.2	0
87.3	0
87.4	0
87.5	0
87.6	0
87.7	0
87.8	0
87.9	0
88	0
88.1	0
88.2	0
88.3	0
88.4	0
88.5	0
88.6	0
88.7	0
88.8	0
88.9	0
89	0
89.1	0
89.2	0
89.3	0
89.4	0
89.5	0
89.6	0
89.7	0
89.8	0
89.9	0
90	0
90.1	0
90.2	0
90.3	0
90.4	0
90.5	0
90.6	0
90.7	0
90.8	0
90.9	0
91	0
91.1	0
91.2	0
91.3	0
91.4	0
91.5	0
91.6	0
91.7	0
91.8	0
91.9	0
92	0
92.1	0
92.2	0
92.3	0
92.4	0
92.5	0
92.6	0
92.7	0
92.8	0
92.9	0
93	0
93.1	0
93.2	0
93.3	0
93.4	0
93.5	0
93.6	0
93.7	0
93.8	0
93.9	0
94	0
94.1	0
94.2	0
94.3	0
94.4	0
94.5	0
94.6	0
94.7	0
94.8	0
94.9	0
95	0
95.1	0
95.2	0
95.3	0
95.4	0
95.5	0
95.6	0
95.7	0
95.8	0
95.9	0
96	0
96.1	0
96.2	0
96.3	0
96.4	0
96.5	0
96.6	0
96.7	0
96.8	0
96.9	0
97	0
97.1	0
97.2	0
97.3	0
97.4	0
97.5	0
97.6	0
97.7	0
97.8	0
97.9	0
98	0
98.1	0
98.2	0
98.3	0
98.4	0
98.5	0
98.6	0
98.7	0
98.8	0
98.9	0
99	0
99.1	0
99.2	0
99.3	0
99.4	0
99.5	0
99.6	0
99.7	0
99.8	0
99.9	0
100	0
100.1	0
100.2	5e-05
100.3	0.0001
100.4	0.0004
100.5	0.00085
100.6	0.0015
100.7	0.00205
100.8	0.00295
100.9	0.00375
101	0.0047
101.1	0.0055
101.2	0.0065
101.3	0.00785
101.4	0.0095
101.5	0.01095
101.6	0.0128
101.7	0.0151
101.8	0.0166
101.9	0.01865
102	0.0208
102.1	0.0231
102.2	0.0252
102.3	0.02705
102.4	0.0289
102.5	0.031
102.6	0.0333
102.7	0.03525
102.8	0.038
102.9	0.0402
103	0.0423
103.1	0.04415
103.2	0.04665
103.3	0.04945
103.4	0.05155
103.5	0.0538
103.6	0.05595
103.7	0.05775
103.8	0.0607
103.9	0.06285
104	0.0653
104.1	0.06755
104.2	0.06975
104.3	0.07235
104.4	0.0744
104.5	0.07665
104.6	0.07945
104.7	0.08165
104.8	0.0842
104.9	0.0868
105	0.089
105.1	0.0916
105.2	0.0943
105.3	0.09655
105.4	0.09835
105.5	0.1004
105.6	0.10325
105.7	0.10505
105.8	0.10745
105.9	0.1101
106	0.11205
106.1	0.1142
106.2	0.1164
106.3	0.11865
106.4	0.1214
106.5	0.1235
106.6	0.12575
106.7	0.1279
106.8	0.13015
106.9	0.1324
107	0.13445
107.1	0.1369
107.2	0.1388
107.3	0.14045
107.4	0.1422
107.5	0.1436
107.6	0.14545
107.7	0.14735
107.8	0.1497
107.9	0.152
108	0.1534
108.1	0.15515
108.2	0.15755
108.3	0.15985
108.4	0.1614
108.5	0.1634
108.6	0.16535
108.7	0.16705
108.8	0.16955
108.9	0.17145
109	0.1732
109.1	0.17485
109.2	0.1765
109.3	0.1781
109.4	0.1799
109.5	0.1824
109.6	0.18395
109.7	0.18555
109.8	0.18725
109.9	0.18875
110	0.1913
110.1	0.19315
110.2	0.195
110.3	0.19725
110.4	0.199
110.5	0.20045
110.6	0.20235
110.7	0.20365
110.8	0.20545
110.9	0.2074
111	0.20935
111.1	0.21115
111.2	0.213
111.3	0.2143
111.4	0.2163
111.5	0.21785
111.6	0.2201
111.7	0.22205
111.8	0.22455
111.9	0.22635
112	0.2279
112.1	0.2303
112.2	0.23205
112.3	0.23335
112.4	0.2353
112.5	0.2376
112.6	0.2392
112.7	0.24045
112.8	0.2418
112.9	0.24355
113	0.24535
113.1	0.24695
113.2	0.2487
113.3	0.2508
113.4	0.25295
113.5	0.2543
113.6	0.256
113.7	0.2571
113.8	0.25865
113.9	0.2603
114	0.2619
114.1	0.2634
114.2	0.265
114.3	0.26685
114.4	0.2682
114.5	0.2701
114.6	0.27145
114.7	0.2726
114.8	0.27345
114.9	0.2748
115	0.27695
115.1	0.27865
115.2	0.28015
115.3	0.2813
115.4	0.2831
115.5	0.2845
115.6	0.28635
115.7	0.28755
115.8	0.28925
115.9	0.29045
116	0.2921
116.1	0.2945
116.2	0.29615
116.3	0.29755
116.4	0.29905
116.5	0.30045
116.6	0.3016
116.7	0.30315
116.8	0.30465
116.9	0.30615
117	0.30795
117.1	0.30945
117.2	0.31135
117.3	0.3128
117.4	0.31435
117.5	0.3155
117.6	0.3169
117.7	0.31855
117.8	0.31975
117.9	0.32115
118	0.3226
118.1	0.32355
118.2	0.3258
118.3	0.3275
118.4	0.3293
118.5	0.33055
118.6	0.33205
118.7	0.3334
118.8	0.3346
118.9	0.33555
119	0.3368
119.1	0.3384
119.2	0.3398
119.3	0.3409
119.4	0.34215
119.5	0.3435
119.6	0.3447
119.7	0.3461
119.8	0.3473
119.9	0.3485
120	0.3502
120.1	0.3517
120.2	0.3531
120.3	0.35395
120.4	0.35565
120.5	0.3571
120.6	0.35855
120.7	0.36
120.8	0.36165
120.9	0.36285
121	0.36445
121.1	0.36525
121.2	0.3666
121.3	0.3679
121.4	0.3695
121.5	0.37095
121.6	0.37235
121.7	0.37335
121.8	0.3748
121.9	0.3763
122	0.37755
122.1	0.37865
122.2	0.38035
122.3	0.38155
122.4	0.38245
122.5	0.3833
122.6	0.38435
122.7	0.38515
122.8	0.3857
122.9	0.38685
123	0.38815
123.1	0.3894
123.2	0.39
123.3	0.39125
123.4	0.3927
123.5	0.3942
123.6	0.3954
123.7	0.39675
123.8	0.3979
123.9	0.39895
124	0.4003
124.1	0.40185
124.2	0.40285
124.3	0.40405
124.4	0.4047
124.5	0.40605
124.6	0.4075
124.7	0.40885
124.8	0.4095
124.9	0.41085
125	0.4118
125.1	0.4133
125.2	0.41475
125.3	0.41615
125.4	0.4172
125.5	0.4181
125.6	0.41935
125.7	0.4204
125.8	0.42175
125.9	0.4226
126	0.42415
126.1	0.42535
126.2	0.42635
126.3	0.42745
126.4	0.4284
126.5	0.42955
126.6	0.4303
126.7	0.43135
126.8	0.4328
126.9	0.43365
127	0.43445
127.1	0.43575
127.2	0.43645
127.3	0.43755
127.4	0.43875
127.5	0.43965
127.6	0.44085
127.7	0.44165
127.8	0.44205
127.9	0.44305
128	0.44395
128.1	0.4451
128.2	0.44615
128.3	0.4471
128.4	0.4483
128.5	0.4491
128.6	0.45035
128.7	0.4515
128.8	0.45245
128.9	0.45325
129	0.45415
129.1	0.4552
129.2	0.45665
129.3	0.45725
129.4	0.4584
129.5	0.4595
129.6	0.46055
129.7	0.4615
129.8	0.4627
129.9	0.46375
130	0.46455
130.1	0.4659
130.2	0.467
130.3	0.46725
130.4	0.46855
130.5	0.4696
130.6	0.4706
130.7	0.4713
130.8	0.47225
130.9	0.47315
131	0.474
131.1	0.47445
131.2	0.4756
131.3	0.47655
131.4	0.47745
131.5	0.4785
131.6	0.47925
131.7	0.48005
131.8	0.4809
131.9	0.48165
132	0.4828
132.1	0.48345
132.2	0.4851
132.3	0.486
132.4	0.4865
132.5	0.48765
132.6	0.48805
132.7	0.4887
132.8	0.489
132.9	0.48965
133	0.49
133.1	0.4905
133.2	0.49135
133.3	0.49225
133.4	0.49275
133.5	0.49335
133.6	0.49395
133.7	0.49515
133.8	0.49635
133.9	0.4971
134	0.4983
134.1	0.4992
134.2	0.5002
134.3	0.50115
134.4	0.50225
134.5	0.503
134.6	0.50365
134.7	0.5046
134.8	0.50495
134.9	0.50565
135	0.50705
135.1	0.5078
135.2	0.508
135.3	0.5084
135.4	0.50895
135.5	0.51
135.6	0.5108
135.7	0.5118
135.8	0.51225
135.9	0.51305
136	0.5134
136.1	0.51395
136.2	0.51435
136.3	0.51525
136.4	0.51595
136.5	0.51635
136.6	0.51685
136.7	0.5173
136.8	0.51835
136.9	0.51965
137	0.52085
137.1	0.52145
137.2	0.52185
137.3	0.52245
137.4	0.5229
137.5	0.5239
137.6	0.5246
137.7	0.52575
137.8	0.52645
137.9	0.5274
138	0.5276
138.1	0.52805
138.2	0.5283
138.3	0.5294
138.4	0.53055
138.5	0.53155
138.6	0.5323
138.7	0.53265
138.8	0.53305
138.9	0.534
139	0.5347
139.1	0.53545
139.2	0.5364
139.3	0.53685
139.4	0.5376
139.5	0.5388
139.6	0.5397
139.7	0.5408
139.8	0.54135
139.9	0.5423
140	0.54335
140.1	0.54415
140.2	0.545
140.3	0.54555
140.4	0.54605
140.5	0.5475
140.6	0.5481
140.7	0.54885
140.8	0.54965
140.9	0.55025
141	0.55085
141.1	0.55085
141.2	0.5516
141.3	0.55215
141.4	0.5526
141.5	0.5536
141.6	0.55435
141.7	0.55465
141.8	0.55535
141.9	0.5566
142	0.55695
142.1	0.5579
142.2	0.55835
142.3	0.55875
142.4	0.5589
142.5	0.5597
142.6	0.5598
142.7	0.56035
142.8	0.56075
142.9	0.5609
143	0.56215
143.1	0.5625
143.2	0.56285
143.3	0.56325
143.4	0.5637
143.5	0.5643
143.6	0.56485
143.7	0.56595
143.8	0.5665
143.9	0.56715
144	0.5678
144.1	0.56855
144.2	0.5691
144.3	0.5694
144.4	0.5697
144.5	0.5703
144.6	0.57095
144.7	0.57145
144.8	0.5723
144.9	0.5724
145	0.5727
145.1	0.5729
145.2	0.5736
145.3	0.57425
145.4	0.5749
145.5	0.5754
145.6	0.5758
145.7	0.57655
145.8	0.57745
145.9	0.57825
146	0.5787
146.1	0.5792
146.2	0.5798
146.3	0.58075
146.4	0.58155
146.5	0.58185
146.6	0.5822
146.7	0.5823
146.8	0.58315
146.9	0.58405
147	0.58445
147.1	0.58505
147.2	0.58585
147.3	0.58655
147.4	0.58695
147.5	0.5875
147.6	0.5881
147.7	0.58865
147.8	0.589
147.9	0.589
148	0.58975
148.1	0.5904
148.2	0.59055
148.3	0.59095
148.4	0.59115
148.5	0.592
148.6	0.59265
148.7	0.5927
148.8	0.59295
148.9	0.5933
149	0.59335
149.1	0.59375
149.2	0.59355
149.3	0.59395
149.4	0.5944
149.5	0.5951
149.6	0.59585
149.7	0.59655
149.8	0.5972
149.9	0.59795
150	0.5982
150.1	0.5986
150.2	0.59985
150.3	0.60025
150.4	0.6007
150.5	0.601
150.6	0.60145
150.7	0.60195
150.8	0.60265
150.9	0.6033
151	0.6042
151.1	0.6048
151.2	0.60495
151.3	0.6058
151.4	0.6062
151.5	0.60625
151.6	0.60725
151.7	0.60725
151.8	0.60755
151.9	0.60825
152	0.6088
152.1	0.60985
152.2	0.6108
152.3	0.6115
152.4	0.6121
152.5	0.6119
152.6	0.6121
152.7	0.6124
152.8	0.6128
152.9	0.61315
153	0.61375
153.1	0.61375
153.2	0.6139
153.3	0.61415
153.4	0.61455
153.5	0.6151
153.6	0.61545
153.7	0.6159
153.8	0.6162
153.9	0.61615
154	0.6163
154.1	0.61695
154.2	0.6173
154.3	0.61765
154.4	0.61755
154.5	0.61805
154.6	0.61855
154.7	0.61885
154.8	0.6195
154.9	0.6199
155	0.62005
155.1	0.62055
155.2	0.62095
155.3	0.6212
155.4	0.62195
155.5	0.62245
155.6	0.62305
155.7	0.6228
155.8	0.6229
155.9	0.6234
156	0.62375
156.1	0.62445
156.2	0.62515
156.3	0.6257
156.4	0.62625
156.5	0.6268
156.6	0.62695
156.7	0.62715
156.8	0.62735
156.9	0.6273
157	0.6279
157.1	0.6282
157.2	0.6284
157.3	0.62865
157.4	0.62885
157.5	0.6287
157.6	0.6289
157.7	0.62935
157.8	0.62955
157.9	0.63025
158	0.63015
158.1	0.63015
158.2	0.6305
158.3	0.6306
158.4	0.6303
158.5	0.63035
158.6	0.6304
158.7	0.63055
158.8	0.63085
158.9	0.63095
159	0.6314
159.1	0.6323
159.2	0.63265
159.3	0.6331
159.4	0.633
159.5	0.6334
159.6	0.63365
159.7	0.63415
159.8	0.63455
159.9	0.6351
160	0.6358
160.1	0.6356
160.2	0.63585
160.3	0.6361
160.4	0.63635
160.5	0.63665
160.6	0.63655
160.7	0.63675
160.8	0.63715
160.9	0.6381
161	0.63895
161.1	0.639
161.2	0.6395
161.3	0.63975
161.4	0.6402
161.5	0.6402
161.6	0.64
161.7	0.63995
161.8	0.64035
161.9	0.6402
162	0.64095
162.1	0.64165
162.2	0.6425
162.3	0.64275
162.4	0.6432
162.5	0.64335
162.6	0.6436
162.7	0.6443
162.8	0.64455
162.9	0.64475
163	0.64535
163.1	0.6454
163.2	0.64605
163.3	0.6464
163.4	0.6462
163.5	0.6462
163.6	0.646
163.7	0.64615
163.8	0.64645
163.9	0.64695
164	0.64675
164.1	0.6471
164.2	0.647
164.3	0.64705
164.4	0.6477
164.5	0.64805
164.6	0.64825
164.7	0.6485
164.8	0.64905
164.9	0.64945
165	0.64995
165.1	0.65
165.2	0.65065
165.3	0.6509
165.4	0.65145
165.5	0.6517
165.6	0.65185
165.7	0.6522
165.8	0.6526
165.9	0.6526
166	0.65225
166.1	0.65275
166.2	0.6531
166.3	0.65365
166.4	0.65375
166.5	0.6537
166.6	0.6541
166.7	0.6544
166.8	0.6544
166.9	0.65475
167	0.65505
167.1	0.65545
167.2	0.6554
167.3	0.656
167.4	0.6558
167.5	0.6566
167.6	0.6568
167.7	0.6573
167.8	0.6573
167.9	0.6577
168	0.6578
168.1	0.65765
168.2	0.65775
168.3	0.65825
168.4	0.65855
168.5	0.65835
168.6	0.6582
168.7	0.65855
168.8	0.6585
168.9	0.659
169	0.65915
169.1	0.659
169.2	0.6595
169.3	0.65985
169.4	0.65965
169.5	0.65995
169.6	0.6599
169.7	0.66045
169.8	0.6611
169.9	0.6607
170	0.6607
170.1	0.6609
170.2	0.6612
170.3	0.66115
170.4	0.66165
170.5	0.662
170.6	0.6625
170.7	0.66315
170.8	0.6635
170.9	0.6633
171	0.66395
171.1	0.6642
171.2	0.6644
171.3	0.66465
171.4	0.66525
171.5	0.6656
171.6	0.66595
171.7	0.66595
171.8	0.666
171.9	0.6667
172	0.667
172.1	0.6675
172.2	0.6678
172.3	0.66795
172.4	0.6678
172.5	0.6682
172.6	0.6683
172.7	0.66865
172.8	0.66885
172.9	0.6691
173	0.66995
173.1	0.66945
173.2	0.66985
173.3	0.6696
173.4	0.6699
173.5	0.6702
173.6	0.67055
173.7	0.67065
173.8	0.6704
173.9	0.67085
174	0.671
174.1	0.67115
174.2	0.6714
174.3	0.67155
174.4	0.67215
174.5	0.67255
174.6	0.67285
174.7	0.6729
174.8	0.67285
174.9	0.67245
175	0.67265
175.1	0.67275
175.2	0.6732
175.3	0.67315
175.4	0.67335
175.5	0.67405
175.6	0.67405
175.7	0.6741
175.8	0.6744
175.9	0.67445
176	0.6752
176.1	0.67555
176.2	0.67545
176.3	0.67545
176.4	0.67605
176.5	0.67595
176.6	0.6756
176.7	0.67575
176.8	0.67575
176.9	0.67565
177	0.6759
177.1	0.6758
177.2	0.67655
177.3	0.67645
177.4	0.67655
177.5	0.6769
177.6	0.67715
177.7	0.6766
177.8	0.6764
177.9	0.6766
178	0.67645
178.1	0.6764
178.2	0.6767
178.3	0.67665
178.4	0.6772
178.5	0.6774
178.6	0.6777
178.7	0.6779
178.8	0.6777
178.9	0.6781
179	0.67795
179.1	0.67825
179.2	0.67855
179.3	0.6789
179.4	0.6793
179.5	0.67935
179.6	0.67975
179.7	0.68
179.8	0.6804
179.9	0.6808
180	0.68075
180.1	0.68105
180.2	0.68135
180.3	0.6816
180.4	0.6822
180.5	0.68205
180.6	0.68225
180.7	0.6822
180.8	0.6823
180.9	0.68245
181	0.68295
181.1	0.6829
181.2	0.68275
181.3	0.6828
181.4	0.68295
181.5	0.68305
181.6	0.68355
181.7	0.68375
181.8	0.68395
181.9	0.68415
182	0.6837
182.1	0.684
182.2	0.684
182.3	0.6844
182.4	0.68455
182.5	0.685
182.6	0.68535
182.7	0.6853
182.8	0.68555
182.9	0.6853
183	0.68605
183.1	0.686
183.2	0.68635
183.3	0.6865
183.4	0.6866
183.5	0.6869
183.6	0.687
183.7	0.6876
183.8	0.68765
183.9	0.6887
184	0.68845
184.1	0.68875
184.2	0.6889
184.3	0.6893
184.4	0.6895
184.5	0.68985
184.6	0.6902
184.7	0.69025
184.8	0.6902
184.9	0.69035
185	0.6902
185.1	0.69005
185.2	0.6899
185.3	0.6897
185.4	0.6896
185.5	0.6899
185.6	0.6901
185.7	0.6901
185.8	0.69005
185.9	0.69035
186	0.6907
186.1	0.6908
186.2	0.69095
186.3	0.6911
186.4	0.69095
186.5	0.69065
186.6	0.691
186.7	0.69095
186.8	0.6903
186.9	0.69015
187	0.69005
187.1	0.68995
187.2	0.69
187.3	0.68995
187.4	0.6905
187.5	0.69025
187.6	0.6901
187.7	0.6902
187.8	0.6905
187.9	0.6904
188	0.6904
188.1	0.69055
188.2	0.6905
188.3	0.69085
188.4	0.69095
188.5	0.6914
188.6	0.6914
188.7	0.6915
188.8	0.6918
188.9	0.6923
189	0.6923
189.1	0.6924
189.2	0.6927
189.3	0.69295
189.4	0.69305
189.5	0.69335
189.6	0.69335
189.7	0.69345
189.8	0.69375
189.9	0.69395
190	0.69415
190.1	0.69415
190.2	0.6945
190.3	0.6942
190.4	0.69435
190.5	0.6947
190.6	0.6947
190.7	0.69485
190.8	0.69475
190.9	0.6952
191	0.6954
191.1	0.69565
191.2	0.69585
191.3	0.6965
191.4	0.69665
191.5	0.69635
191.6	0.69675
191.7	0.69685
191.8	0.6972
191.9	0.6972
192	0.6974
192.1	0.69715
192.2	0.69715
192.3	0.69745
192.4	0.69805
192.5	0.69765
192.6	0.69755
192.7	0.69755
192.8	0.69705
192.9	0.69725
193	0.69725
193.1	0.6973
193.2	0.6972
193.3	0.6968
193.4	0.69715
193.5	0.6969
193.6	0.69745
193.7	0.69745
193.8	0.69735
193.9	0.69725
194	0.6971
194.1	0.69745
194.2	0.6976
194.3	0.69745
194.4	0.69725
194.5	0.69695
194.6	0.6969
194.7	0.6964
194.8	0.69585
194.9	0.69595
195	0.6959
195.1	0.69605
195.2	0.6962
195.3	0.69595
195.4	0.6963
195.5	0.69615
195.6	0.69605
195.7	0.6962
195.8	0.69635
195.9	0.6965
196	0.69685
196.1	0.6969
196.2	0.6974
196.3	0.69755
196.4	0.69755
196.5	0.69795
196.6	0.698
196.7	0.6985
196.8	0.6983
196.9	0.6984
197	0.69905
197.1	0.69865
197.2	0.69855
197.3	0.69865
197.4	0.69875
197.5	0.6989
197.6	0.6991
197.7	0.69925
197.8	0.6992
197.9	0.69955
198	0.7001
198.1	0.70025
198.2	0.70065
198.3	0.70125
198.4	0.7009
198.5	0.7014
198.6	0.70135
198.7	0.70175
198.8	0.7021
198.9	0.7018
199	0.7018
199.1	0.7018
199.2	0.7022
199.3	0.70215
199.4	0.7024
199.5	0.7022
199.6	0.7024
199.7	0.70275
199.8	0.70295
199.9	0.70335
200	0.7033
[truncated: 14,000 more rows]
