# Supplementary material for: Bayesian inference of kinetic schemes for ion channels by Kalman filtering
Source: eLife journal article supplement (doi:10.7554/elife.62714), 2022-05-04
Supplement: fig4-data7 [file 1_Sim_N_50000_Fluor_MW_2M.xlsx]

## Sheet: 2 M
0.1	0
0.2	0
0.3	0
0.4	0
0.5	0
0.6	0
0.7	0
0.8	0
0.9	0
1	0
1.1	0
1.2	0
1.3	0
1.4	0
1.5	0
1.6	0
1.7	0
1.8	0
1.9	0
2	0
2.1	0
2.2	0
2.3	0
2.4	0
2.5	0
2.6	0
2.7	0
2.8	0
2.9	0
3	0
3.1	0
3.2	0
3.3	0
3.4	0
3.5	0
3.6	0
3.7	0
3.8	0
3.9	0
4	0
4.1	0
4.2	0
4.3	0
4.4	0
4.5	0
4.6	0
4.7	0
4.8	0
4.9	0
5	0
5.1	0
5.2	0
5.3	0
5.4	0
5.5	0
5.6	0
5.7	0
5.8	0
5.9	0
6	0
6.1	0
6.2	0
6.3	0
6.4	0
6.5	0
6.6	0
6.7	0
6.8	0
6.9	0
7	0
7.1	0
7.2	0
7.3	0
7.4	0
7.5	0
7.6	0
7.7	0
7.8	0
7.9	0
8	0
8.1	0
8.2	0
8.3	0
8.4	0
8.5	0
8.6	0
8.7	0
8.8	0
8.9	0
9	0
9.1	0
9.2	0
9.3	0
9.4	0
9.5	0
9.6	0
9.7	0
9.8	0
9.9	0
10	0
10.1	0
10.2	0
10.3	0
10.4	0
10.5	0
10.6	0
10.7	0
10.8	0
10.9	0
11	0
11.1	0
11.2	0
11.3	0
11.4	0
11.5	0
11.6	0
11.7	0
11.8	0
11.9	0
12	0
12.1	0
12.2	0
12.3	0
12.4	0
12.5	0
12.6	0
12.7	0
12.8	0
12.9	0
13	0
13.1	0
13.2	0
13.3	0
13.4	0
13.5	0
13.6	0
13.7	0
13.8	0
13.9	0
14	0
14.1	0
14.2	0
14.3	0
14.4	0
14.5	0
14.6	0
14.7	0
14.8	0
14.9	0
15	0
15.1	0
15.2	0
15.3	0
15.4	0
15.5	0
15.6	0
15.7	0
15.8	0
15.9	0
16	0
16.1	0
16.2	0
16.3	0
16.4	0
16.5	0
16.6	0
16.7	0
16.8	0
16.9	0
17	0
17.1	0
17.2	0
17.3	0
17.4	0
17.5	0
17.6	0
17.7	0
17.8	0
17.9	0
18	0
18.1	0
18.2	0
18.3	0
18.4	0
18.5	0
18.6	0
18.7	0
18.8	0
18.9	0
19	0
19.1	0
19.2	0
19.3	0
19.4	0
19.5	0
19.6	0
19.7	0
19.8	0
19.9	0
20	0
20.1	0
20.2	0
20.3	0
20.4	0
20.5	0
20.6	0
20.7	0
20.8	0
20.9	0
21	0
21.1	0
21.2	0
21.3	0
21.4	0
21.5	0
21.6	0
21.7	0
21.8	0
21.9	0
22	0
22.1	0
22.2	0
22.3	0
22.4	0
22.5	0
22.6	0
22.7	0
22.8	0
22.9	0
23	0
23.1	0
23.2	0
23.3	0
23.4	0
23.5	0
23.6	0
23.7	0
23.8	0
23.9	0
24	0
24.1	0
24.2	0
24.3	0
24.4	0
24.5	0
24.6	0
24.7	0
24.8	0
24.9	0
25	0
25.1	0
25.2	0
25.3	0
25.4	0
25.5	0
25.6	0
25.7	0
25.8	0
25.9	0
26	0
26.1	0
26.2	0
26.3	0
26.4	0
26.5	0
26.6	0
26.7	0
26.8	0
26.9	0
27	0
27.1	0
27.2	0
27.3	0
27.4	0
27.5	0
27.6	0
27.7	0
27.8	0
27.9	0
28	0
28.1	0
28.2	0
28.3	0
28.4	0
28.5	0
28.6	0
28.7	0
28.8	0
28.9	0
29	0
29.1	0
29.2	0
29.3	0
29.4	0
29.5	0
29.6	0
29.7	0
29.8	0
29.9	0
30	0
30.1	0
30.2	0
30.3	0
30.4	0
30.5	0
30.6	0
30.7	0
30.8	0
30.9	0
31	0
31.1	0
31.2	0
31.3	0
31.4	0
31.5	0
31.6	0
31.7	0
31.8	0
31.9	0
32	0
32.1	0
32.2	0
32.3	0
32.4	0
32.5	0
32.6	0
32.7	0
32.8	0
32.9	0
33	0
33.1	0
33.2	0
33.3	0
33.4	0
33.5	0
33.6	0
33.7	0
33.8	0
33.9	0
34	0
34.1	0
34.2	0
34.3	0
34.4	0
34.5	0
34.6	0
34.7	0
34.8	0
34.9	0
35	0
35.1	0
35.2	0
35.3	0
35.4	0
35.5	0
35.6	0
35.7	0
35.8	0
35.9	0
36	0
36.1	0
36.2	0
36.3	0
36.4	0
36.5	0
36.6	0
36.7	0
36.8	0
36.9	0
37	0
37.1	0
37.2	0
37.3	0
37.4	0
37.5	0
37.6	0
37.7	0
37.8	0
37.9	0
38	0
38.1	0
38.2	0
38.3	0
38.4	0
38.5	0
38.6	0
38.7	0
38.8	0
38.9	0
39	0
39.1	0
39.2	0
39.3	0
39.4	0
39.5	0
39.6	0
39.7	0
39.8	0
39.9	0
40	0
40.1	0
40.2	0
40.3	0
40.4	0
40.5	0
40.6	0
40.7	0
40.8	0
40.9	0
41	0
41.1	0
41.2	0
41.3	0
41.4	0
41.5	0
41.6	0
41.7	0
41.8	0
41.9	0
42	0
42.1	0
42.2	0
42.3	0
42.4	0
42.5	0
42.6	0
42.7	0
42.8	0
42.9	0
43	0
43.1	0
43.2	0
43.3	0
43.4	0
43.5	0
43.6	0
43.7	0
43.8	0
43.9	0
44	0
44.1	0
44.2	0
44.3	0
44.4	0
44.5	0
44.6	0
44.7	0
44.8	0
44.9	0
45	0
45.1	0
45.2	0
45.3	0
45.4	0
45.5	0
45.6	0
45.7	0
45.8	0
45.9	0
46	0
46.1	0
46.2	0
46.3	0
46.4	0
46.5	0
46.6	0
46.7	0
46.8	0
46.9	0
47	0
47.1	0
47.2	0
47.3	0
47.4	0
47.5	0
47.6	0
47.7	0
47.8	0
47.9	0
48	0
48.1	0
48.2	0
48.3	0
48.4	0
48.5	0
48.6	0
48.7	0
48.8	0
48.9	0
49	0
49.1	0
49.2	0
49.3	0
49.4	0
49.5	0
49.6	0
49.7	0
49.8	0
49.9	0
50	0
50.1	0
50.2	0
50.3	0
50.4	0
50.5	0
50.6	0
50.7	0
50.8	0
50.9	0
51	0
51.1	0
51.2	0
51.3	0
51.4	0
51.5	0
51.6	0
51.7	0
51.8	0
51.9	0
52	0
52.1	0
52.2	0
52.3	0
52.4	0
52.5	0
52.6	0
52.7	0
52.8	0
52.9	0
53	0
53.1	0
53.2	0
53.3	0
53.4	0
53.5	0
53.6	0
53.7	0
53.8	0
53.9	0
54	0
54.1	0
54.2	0
54.3	0
54.4	0
54.5	0
54.6	0
54.7	0
54.8	0
54.9	0
55	0
55.1	0
55.2	0
55.3	0
55.4	0
55.5	0
55.6	0
55.7	0
55.8	0
55.9	0
56	0
56.1	0
56.2	0
56.3	0
56.4	0
56.5	0
56.6	0
56.7	0
56.8	0
56.9	0
57	0
57.1	0
57.2	0
57.3	0
57.4	0
57.5	0
57.6	0
57.7	0
57.8	0
57.9	0
58	0
58.1	0
58.2	0
58.3	0
58.4	0
58.5	0
58.6	0
58.7	0
58.8	0
58.9	0
59	0
59.1	0
59.2	0
59.3	0
59.4	0
59.5	0
59.6	0
59.7	0
59.8	0
59.9	0
60	0
60.1	0
60.2	0
60.3	0
60.4	0
60.5	0
60.6	0
60.7	0
60.8	0
60.9	0
61	0
61.1	0
61.2	0
61.3	0
61.4	0
61.5	0
61.6	0
61.7	0
61.8	0
61.9	0
62	0
62.1	0
62.2	0
62.3	0
62.4	0
62.5	0
62.6	0
62.7	0
62.8	0
62.9	0
63	0
63.1	0
63.2	0
63.3	0
63.4	0
63.5	0
63.6	0
63.7	0
63.8	0
63.9	0
64	0
64.1	0
64.2	0
64.3	0
64.4	0
64.5	0
64.6	0
64.7	0
64.8	0
64.9	0
65	0
65.1	0
65.2	0
65.3	0
65.4	0
65.5	0
65.6	0
65.7	0
65.8	0
65.9	0
66	0
66.1	0
66.2	0
66.3	0
66.4	0
66.5	0
66.6	0
66.7	0
66.8	0
66.9	0
67	0
67.1	0
67.2	0
67.3	0
67.4	0
67.5	0
67.6	0
67.7	0
67.8	0
67.9	0
68	0
68.1	0
68.2	0
68.3	0
68.4	0
68.5	0
68.6	0
68.7	0
68.8	0
68.9	0
69	0
69.1	0
69.2	0
69.3	0
69.4	0
69.5	0
69.6	0
69.7	0
69.8	0
69.9	0
70	0
70.1	0
70.2	0
70.3	0
70.4	0
70.5	0
70.6	0
70.7	0
70.8	0
70.9	0
71	0
71.1	0
71.2	0
71.3	0
71.4	0
71.5	0
71.6	0
71.7	0
71.8	0
71.9	0
72	0
72.1	0
72.2	0
72.3	0
72.4	0
72.5	0
72.6	0
72.7	0
72.8	0
72.9	0
73	0
73.1	0
73.2	0
73.3	0
73.4	0
73.5	0
73.6	0
73.7	0
73.8	0
73.9	0
74	0
74.1	0
74.2	0
74.3	0
74.4	0
74.5	0
74.6	0
74.7	0
74.8	0
74.9	0
75	0
75.1	0
75.2	0
75.3	0
75.4	0
75.5	0
75.6	0
75.7	0
75.8	0
75.9	0
76	0
76.1	0
76.2	0
76.3	0
76.4	0
76.5	0
76.6	0
76.7	0
76.8	0
76.9	0
77	0
77.1	0
77.2	0
77.3	0
77.4	0
77.5	0
77.6	0
77.7	0
77.8	0
77.9	0
78	0
78.1	0
78.2	0
78.3	0
78.4	0
78.5	0
78.6	0
78.7	0
78.8	0
78.9	0
79	0
79.1	0
79.2	0
79.3	0
79.4	0
79.5	0
79.6	0
79.7	0
79.8	0
79.9	0
80	0
80.1	0
80.2	0
80.3	0
80.4	0
80.5	0
80.6	0
80.7	0
80.8	0
80.9	0
81	0
81.1	0
81.2	0
81.3	0
81.4	0
81.5	0
81.6	0
81.7	0
81.8	0
81.9	0
82	0
82.1	0
82.2	0
82.3	0
82.4	0
82.5	0
82.6	0
82.7	0
82.8	0
82.9	0
83	0
83.1	0
83.2	0
83.3	0
83.4	0
83.5	0
83.6	0
83.7	0
83.8	0
83.9	0
84	0
84.1	0
84.2	0
84.3	0
84.4	0
84.5	0
84.6	0
84.7	0
84.8	0
84.9	0
85	0
85.1	0
85.2	0
85.3	0
85.4	0
85.5	0
85.6	0
85.7	0
85.8	0
85.9	0
86	0
86.1	0
86.2	0
86.3	0
86.4	0
86.5	0
86.6	0
86.7	0
86.8	0
86.9	0
87	0
87.1	0
87.2	0
87.3	0
87.4	0
87.5	0
87.6	0
87.7	0
87.8	0
87.9	0
88	0
88.1	0
88.2	0
88.3	0
88.4	0
88.5	0
88.6	0
88.7	0
88.8	0
88.9	0
89	0
89.1	0
89.2	0
89.3	0
89.4	0
89.5	0
89.6	0
89.7	0
89.8	0
89.9	0
90	0
90.1	0
90.2	0
90.3	0
90.4	0
90.5	0
90.6	0
90.7	0
90.8	0
90.9	0
91	0
91.1	0
91.2	0
91.3	0
91.4	0
91.5	0
91.6	0
91.7	0
91.8	0
91.9	0
92	0
92.1	0
92.2	0
92.3	0
92.4	0
92.5	0
92.6	0
92.7	0
92.8	0
92.9	0
93	0
93.1	0
93.2	0
93.3	0
93.4	0
93.5	0
93.6	0
93.7	0
93.8	0
93.9	0
94	0
94.1	0
94.2	0
94.3	0
94.4	0
94.5	0
94.6	0
94.7	0
94.8	0
94.9	0
95	0
95.1	0
95.2	0
95.3	0
95.4	0
95.5	0
95.6	0
95.7	0
95.8	0
95.9	0
96	0
96.1	0
96.2	0
96.3	0
96.4	0
96.5	0
96.6	0
96.7	0
96.8	0
96.9	0
97	0
97.1	0
97.2	0
97.3	0
97.4	0
97.5	0
97.6	0
97.7	0
97.8	0
97.9	0
98	0
98.1	0
98.2	0
98.3	0
98.4	0
98.5	0
98.6	0
98.7	0
98.8	0
98.9	0
99	0
99.1	0
99.2	0
99.3	0
99.4	0
99.5	0
99.6	0
99.7	0
99.8	0
99.9	0
100	0
100.1	0.10954
100.2	0.20002
100.3	0.27612
100.4	0.34069
100.5	0.39578
100.6	0.44065
100.7	0.47936
100.8	0.51233
100.9	0.54252
101	0.56794
101.1	0.59035
101.2	0.60962
101.3	0.62712
101.4	0.64194
101.5	0.65431
101.6	0.66646
101.7	0.67706
101.8	0.68602
101.9	0.69422
102	0.70164
102.1	0.70789
102.2	0.71348
102.3	0.71851
102.4	0.72419
102.5	0.72819
102.6	0.73121
102.7	0.73446
102.8	0.73802
102.9	0.74085
103	0.74264
103.1	0.74526
103.2	0.74753
103.3	0.74947
103.4	0.75137
103.5	0.75322
103.6	0.75472
103.7	0.75641
103.8	0.75881
103.9	0.76024
104	0.76105
104.1	0.76241
104.2	0.76383
104.3	0.76485
104.4	0.76611
104.5	0.76697
104.6	0.76833
104.7	0.76892
104.8	0.77057
104.9	0.77084
105	0.77249
105.1	0.7746
105.2	0.77634
105.3	0.77645
105.4	0.77662
105.5	0.77622
105.6	0.77737
105.7	0.778
105.8	0.77837
105.9	0.77923
106	0.78049
106.1	0.78136
106.2	0.78235
106.3	0.78366
106.4	0.78379
106.5	0.78399
106.6	0.78434
106.7	0.78449
106.8	0.78506
106.9	0.78467
107	0.78471
107.1	0.7855
107.2	0.78601
107.3	0.78632
107.4	0.78717
107.5	0.78772
107.6	0.78858
107.7	0.78893
107.8	0.7895
107.9	0.78998
108	0.79078
108.1	0.79082
108.2	0.79184
108.3	0.79204
108.4	0.79247
108.5	0.79275
108.6	0.79365
108.7	0.79408
108.8	0.79509
108.9	0.79477
109	0.79562
109.1	0.79743
109.2	0.79766
109.3	0.79689
109.4	0.79842
109.5	0.79926
109.6	0.79933
109.7	0.7999
109.8	0.80089
109.9	0.80134
110	0.8021
110.1	0.80349
110.2	0.804
110.3	0.80396
110.4	0.80454
110.5	0.80457
110.6	0.80469
110.7	0.80532
110.8	0.80587
110.9	0.80653
111	0.80607
111.1	0.80544
111.2	0.80597
111.3	0.80617
111.4	0.80591
111.5	0.80691
111.6	0.80682
111.7	0.80781
111.8	0.8082
111.9	0.8092
112	0.81021
112.1	0.8112
112.2	0.81133
112.3	0.8119
112.4	0.81172
112.5	0.8117
112.6	0.81289
112.7	0.81281
112.8	0.8137
112.9	0.81493
113	0.81431
113.1	0.81551
113.2	0.81524
113.3	0.81643
113.4	0.81668
113.5	0.81726
113.6	0.81767
113.7	0.81754
113.8	0.81744
113.9	0.81716
114	0.81768
114.1	0.81815
114.2	0.81861
114.3	0.81951
114.4	0.8208
114.5	0.82183
114.6	0.82235
114.7	0.82293
114.8	0.82303
114.9	0.82428
115	0.8243
115.1	0.82424
115.2	0.82414
115.3	0.82378
115.4	0.82397
115.5	0.82415
115.6	0.82438
115.7	0.8256
115.8	0.82583
115.9	0.82628
116	0.82643
116.1	0.82757
116.2	0.8277
116.3	0.82826
116.4	0.82805
116.5	0.82738
116.6	0.8281
116.7	0.82865
116.8	0.82858
116.9	0.8286
117	0.82861
117.1	0.82854
117.2	0.82894
117.3	0.82918
117.4	0.82907
117.5	0.82933
117.6	0.83055
117.7	0.83096
117.8	0.83145
117.9	0.83307
118	0.83386
118.1	0.83482
118.2	0.83537
118.3	0.83523
118.4	0.83484
118.5	0.83549
118.6	0.83665
118.7	0.83631
118.8	0.83641
118.9	0.83701
119	0.83763
119.1	0.83722
119.2	0.83827
119.3	0.83802
119.4	0.83814
119.5	0.83822
119.6	0.8379
119.7	0.83921
119.8	0.84006
119.9	0.84002
120	0.83961
120.1	0.83979
120.2	0.84065
120.3	0.84122
120.4	0.84139
120.5	0.8414
120.6	0.84204
120.7	0.84242
120.8	0.84305
120.9	0.84317
121	0.84388
121.1	0.84373
121.2	0.84395
121.3	0.84379
121.4	0.84352
121.5	0.84391
121.6	0.84416
121.7	0.84468
121.8	0.84583
121.9	0.84589
122	0.84608
122.1	0.84678
122.2	0.84728
122.3	0.8483
122.4	0.84869
122.5	0.84899
122.6	0.84997
122.7	0.84982
122.8	0.84971
122.9	0.85003
123	0.85022
123.1	0.85007
123.2	0.85095
123.3	0.85139
123.4	0.85152
123.5	0.85178
123.6	0.85176
123.7	0.8517
123.8	0.85362
123.9	0.85336
124	0.85426
124.1	0.85458
124.2	0.85438
124.3	0.85502
124.4	0.85523
124.5	0.85533
124.6	0.85557
124.7	0.85546
124.8	0.85534
124.9	0.8552
125	0.85558
125.1	0.856
125.2	0.85594
125.3	0.85612
125.4	0.85602
125.5	0.85624
125.6	0.85632
125.7	0.85581
125.8	0.85625
125.9	0.8566
126	0.85649
126.1	0.85651
126.2	0.85683
126.3	0.85711
126.4	0.85772
126.5	0.8582
126.6	0.859
126.7	0.85948
126.8	0.86012
126.9	0.86173
127	0.86234
127.1	0.86228
127.2	0.86333
127.3	0.8635
127.4	0.86342
127.5	0.86388
127.6	0.86355
127.7	0.86397
127.8	0.86417
127.9	0.8646
128	0.86389
128.1	0.86411
128.2	0.86408
128.3	0.86485
128.4	0.86426
128.5	0.864
128.6	0.86459
128.7	0.86427
128.8	0.86421
128.9	0.86497
129	0.86523
129.1	0.86528
129.2	0.86625
129.3	0.86598
129.4	0.86658
129.5	0.86697
129.6	0.86769
129.7	0.86748
129.8	0.86744
129.9	0.86733
130	0.86737
130.1	0.86813
130.2	0.86855
130.3	0.86897
130.4	0.86924
130.5	0.86953
130.6	0.87043
130.7	0.87073
130.8	0.87056
130.9	0.87052
131	0.87081
131.1	0.87138
131.2	0.87154
131.3	0.87201
131.4	0.87246
131.5	0.8729
131.6	0.87312
131.7	0.87369
131.8	0.8736
131.9	0.87365
132	0.8735
132.1	0.874
132.2	0.87473
132.3	0.87457
132.4	0.87416
132.5	0.87414
132.6	0.87441
132.7	0.87449
132.8	0.87501
132.9	0.87544
133	0.87574
133.1	0.87574
133.2	0.87571
133.3	0.87619
133.4	0.87674
133.5	0.87659
133.6	0.87642
133.7	0.87649
133.8	0.87687
133.9	0.87703
134	0.8779
134.1	0.87853
134.2	0.87936
134.3	0.8802
134.4	0.88063
134.5	0.88076
134.6	0.8817
134.7	0.88154
134.8	0.88105
134.9	0.8814
135	0.88146
135.1	0.88136
135.2	0.88161
135.3	0.8823
135.4	0.88252
135.5	0.88226
135.6	0.88268
135.7	0.88216
135.8	0.88178
135.9	0.88154
136	0.88173
136.1	0.88252
136.2	0.88338
136.3	0.88378
136.4	0.88399
136.5	0.88415
136.6	0.88451
136.7	0.88521
136.8	0.88425
136.9	0.88441
137	0.88433
137.1	0.88448
137.2	0.88405
137.3	0.88463
137.4	0.88483
137.5	0.88542
137.6	0.88546
137.7	0.88593
137.8	0.88579
137.9	0.88613
138	0.88598
138.1	0.88656
138.2	0.88699
138.3	0.88677
138.4	0.88718
138.5	0.88661
138.6	0.8863
138.7	0.88627
138.8	0.88645
138.9	0.88633
139	0.88665
139.1	0.88702
139.2	0.88678
139.3	0.88634
139.4	0.88643
139.5	0.8867
139.6	0.88677
139.7	0.88725
139.8	0.88718
139.9	0.88749
140	0.88838
140.1	0.88825
140.2	0.88867
140.3	0.88866
140.4	0.88921
140.5	0.88946
140.6	0.88986
140.7	0.8898
140.8	0.88984
140.9	0.88976
141	0.88986
141.1	0.88987
141.2	0.89053
141.3	0.8901
141.4	0.89046
141.5	0.89104
141.6	0.8905
141.7	0.89079
141.8	0.89083
141.9	0.89129
142	0.89076
142.1	0.89078
142.2	0.89102
142.3	0.8914
142.4	0.89115
142.5	0.89167
142.6	0.89171
142.7	0.89184
142.8	0.89188
142.9	0.89199
143	0.89192
143.1	0.89225
143.2	0.8926
143.3	0.89271
143.4	0.89259
143.5	0.89254
143.6	0.89295
143.7	0.89271
143.8	0.89311
143.9	0.89313
144	0.89416
144.1	0.89406
144.2	0.89413
144.3	0.89444
144.4	0.89437
144.5	0.89416
144.6	0.89441
144.7	0.8949
144.8	0.89522
144.9	0.8958
145	0.89637
145.1	0.89655
145.2	0.89641
145.3	0.89672
145.4	0.89709
145.5	0.89706
145.6	0.89683
145.7	0.89706
145.8	0.8974
145.9	0.8969
146	0.89711
146.1	0.89765
146.2	0.89732
146.3	0.89813
146.4	0.89811
146.5	0.89768
146.6	0.89799
146.7	0.89828
146.8	0.89837
146.9	0.89826
147	0.89877
147.1	0.89852
147.2	0.89833
147.3	0.89846
147.4	0.89853
147.5	0.89818
147.6	0.89824
147.7	0.89791
147.8	0.89833
147.9	0.89903
148	0.89901
148.1	0.89876
148.2	0.89916
148.3	0.89914
148.4	0.89921
148.5	0.8994
148.6	0.89902
148.7	0.89943
148.8	0.89975
148.9	0.90015
149	0.90055
149.1	0.90087
149.2	0.90126
149.3	0.90151
149.4	0.90174
149.5	0.90151
149.6	0.90176
149.7	0.902
149.8	0.90239
149.9	0.90251
150	0.90225
150.1	0.9024
150.2	0.90254
150.3	0.9029
150.4	0.90267
150.5	0.90275
150.6	0.90314
150.7	0.90357
150.8	0.90348
150.9	0.90454
151	0.90481
151.1	0.90425
151.2	0.90393
151.3	0.90414
151.4	0.90397
151.5	0.90366
151.6	0.90374
151.7	0.90377
151.8	0.90375
151.9	0.90379
152	0.90388
152.1	0.90391
152.2	0.90416
152.3	0.90427
152.4	0.90448
152.5	0.9044
152.6	0.90447
152.7	0.90454
152.8	0.90428
152.9	0.90483
153	0.90561
153.1	0.9059
153.2	0.90548
153.3	0.90516
153.4	0.90568
153.5	0.90577
153.6	0.90615
153.7	0.90623
153.8	0.9063
153.9	0.90685
154	0.90675
154.1	0.90682
154.2	0.90661
154.3	0.90667
154.4	0.90715
154.5	0.90729
154.6	0.90752
154.7	0.90759
154.8	0.90733
154.9	0.9066
155	0.90689
155.1	0.90708
155.2	0.90739
155.3	0.90754
155.4	0.90758
155.5	0.9075
155.6	0.90737
155.7	0.90708
155.8	0.90724
155.9	0.90679
156	0.90741
156.1	0.90737
156.2	0.90778
156.3	0.90825
156.4	0.90849
156.5	0.90879
156.6	0.90901
156.7	0.90896
156.8	0.9094
156.9	0.90938
157	0.90944
157.1	0.90966
157.2	0.90987
157.3	0.9097
157.4	0.90929
157.5	0.90916
157.6	0.9092
157.7	0.90948
157.8	0.90939
157.9	0.90922
158	0.90998
158.1	0.90959
158.2	0.91005
158.3	0.90995
158.4	0.90978
158.5	0.91053
158.6	0.91048
158.7	0.91038
158.8	0.90999
158.9	0.91057
159	0.91019
159.1	0.91108
159.2	0.91153
159.3	0.91108
159.4	0.91124
159.5	0.91132
159.6	0.91141
159.7	0.91147
159.8	0.91162
159.9	0.9122
160	0.91244
160.1	0.91248
160.2	0.91253
160.3	0.91271
160.4	0.91265
160.5	0.91273
160.6	0.91311
160.7	0.91291
160.8	0.91289
160.9	0.91324
161	0.91339
161.1	0.91341
161.2	0.91339
161.3	0.91293
161.4	0.91362
161.5	0.91367
161.6	0.91386
161.7	0.91336
161.8	0.91306
161.9	0.91304
162	0.91386
162.1	0.91384
162.2	0.91408
162.3	0.91451
162.4	0.91471
162.5	0.91447
162.6	0.91443
162.7	0.91445
162.8	0.91437
162.9	0.91455
163	0.91443
163.1	0.91492
163.2	0.9144
163.3	0.9142
163.4	0.91451
163.5	0.91453
163.6	0.91441
163.7	0.91394
163.8	0.91416
163.9	0.91452
164	0.91449
164.1	0.91494
164.2	0.91526
164.3	0.91435
164.4	0.91439
164.5	0.91425
164.6	0.9149
164.7	0.91467
164.8	0.91515
164.9	0.91463
165	0.91443
165.1	0.91448
165.2	0.91477
165.3	0.91472
165.4	0.91451
165.5	0.91468
165.6	0.91498
165.7	0.91568
165.8	0.91549
165.9	0.91596
166	0.91609
166.1	0.91639
166.2	0.91678
166.3	0.91687
166.4	0.91697
166.5	0.91694
166.6	0.91698
166.7	0.91657
166.8	0.91721
166.9	0.91761
167	0.91758
167.1	0.91761
167.2	0.91799
167.3	0.91779
167.4	0.91799
167.5	0.91807
167.6	0.91791
167.7	0.91803
167.8	0.91841
167.9	0.91839
168	0.91859
168.1	0.91902
168.2	0.91916
168.3	0.91923
168.4	0.91945
168.5	0.91908
168.6	0.9194
168.7	0.91928
168.8	0.91875
168.9	0.91874
169	0.91916
169.1	0.91926
169.2	0.91932
169.3	0.91928
169.4	0.91926
169.5	0.92012
169.6	0.9201
169.7	0.92028
169.8	0.92056
169.9	0.92036
170	0.92036
170.1	0.91976
170.2	0.92011
170.3	0.91982
170.4	0.91967
170.5	0.91922
170.6	0.91927
170.7	0.91882
170.8	0.91951
170.9	0.91974
171	0.91986
171.1	0.91998
171.2	0.91992
171.3	0.91998
171.4	0.91994
171.5	0.92021
171.6	0.92028
171.7	0.92013
171.8	0.92015
171.9	0.92015
172	0.92025
172.1	0.92014
172.2	0.92026
172.3	0.91998
172.4	0.92033
172.5	0.91999
172.6	0.9201
172.7	0.91987
172.8	0.91994
172.9	0.92003
173	0.91972
173.1	0.92028
173.2	0.92029
173.3	0.92028
173.4	0.92018
173.5	0.92043
173.6	0.92053
173.7	0.92084
173.8	0.92109
173.9	0.92154
174	0.92157
174.1	0.92173
174.2	0.92178
174.3	0.92161
174.4	0.92146
174.5	0.92095
174.6	0.92106
174.7	0.92133
174.8	0.92135
174.9	0.92138
175	0.92148
175.1	0.92147
175.2	0.92104
175.3	0.921
175.4	0.92098
175.5	0.92155
175.6	0.92177
175.7	0.922
175.8	0.92187
175.9	0.92195
176	0.92114
176.1	0.92123
176.2	0.92148
176.3	0.92189
176.4	0.92183
176.5	0.92167
176.6	0.92155
176.7	0.92145
176.8	0.92159
176.9	0.92192
177	0.92164
177.1	0.92189
177.2	0.92162
177.3	0.92146
177.4	0.9215
177.5	0.92108
177.6	0.92133
177.7	0.92163
177.8	0.9212
177.9	0.92148
178	0.92198
178.1	0.92216
178.2	0.92217
178.3	0.92258
178.4	0.92252
178.5	0.92269
178.6	0.92269
178.7	0.92279
178.8	0.92292
178.9	0.92324
179	0.92347
179.1	0.92326
179.2	0.92341
179.3	0.92292
179.4	0.92235
179.5	0.9224
179.6	0.92232
179.7	0.92218
179.8	0.922
179.9	0.92199
180	0.92175
180.1	0.9218
180.2	0.92151
180.3	0.92191
180.4	0.92219
180.5	0.92182
180.6	0.92172
180.7	0.92169
180.8	0.92147
180.9	0.92193
181	0.9219
181.1	0.92228
181.2	0.92249
181.3	0.92304
181.4	0.92287
181.5	0.92342
181.6	0.92367
181.7	0.92426
181.8	0.92384
181.9	0.92364
182	0.92373
182.1	0.92364
182.2	0.92374
182.3	0.92388
182.4	0.92402
182.5	0.92413
182.6	0.92416
182.7	0.92404
182.8	0.92395
182.9	0.9243
183	0.92447
183.1	0.92501
183.2	0.92507
183.3	0.92516
183.4	0.92557
183.5	0.92541
183.6	0.92505
183.7	0.92549
183.8	0.92525
183.9	0.92511
184	0.9253
184.1	0.92537
184.2	0.92521
184.3	0.9246
184.4	0.92431
184.5	0.92403
184.6	0.92409
184.7	0.92407
184.8	0.92449
184.9	0.92488
185	0.9249
185.1	0.92486
185.2	0.92496
185.3	0.92514
185.4	0.9252
185.5	0.92564
185.6	0.92586
185.7	0.92597
185.8	0.92628
185.9	0.92591
186	0.92616
186.1	0.9263
186.2	0.92642
186.3	0.92587
186.4	0.92554
186.5	0.92547
186.6	0.92547
186.7	0.92572
186.8	0.92593
186.9	0.9258
187	0.92586
187.1	0.92568
187.2	0.92595
187.3	0.92568
187.4	0.92574
187.5	0.92554
187.6	0.92581
187.7	0.92583
187.8	0.92591
187.9	0.92564
188	0.92558
188.1	0.9251
188.2	0.92537
188.3	0.92555
188.4	0.92577
188.5	0.92603
188.6	0.92589
188.7	0.92597
188.8	0.92648
188.9	0.92717
189	0.92745
189.1	0.92777
189.2	0.92704
189.3	0.9271
189.4	0.92689
189.5	0.92729
189.6	0.92736
189.7	0.92768
189.8	0.92744
189.9	0.92715
190	0.927
190.1	0.9266
190.2	0.92648
190.3	0.92668
190.4	0.92632
190.5	0.92622
190.6	0.92654
190.7	0.92619
190.8	0.9262
190.9	0.92632
191	0.92665
191.1	0.92688
191.2	0.92713
191.3	0.92782
191.4	0.92763
191.5	0.92745
191.6	0.92729
191.7	0.92722
191.8	0.92759
191.9	0.92773
192	0.92807
192.1	0.92852
192.2	0.92826
192.3	0.92786
192.4	0.92794
192.5	0.92802
192.6	0.92808
192.7	0.92862
192.8	0.92878
192.9	0.92872
193	0.9283
193.1	0.92787
193.2	0.92815
193.3	0.92833
193.4	0.92876
193.5	0.9285
193.6	0.92862
193.7	0.92855
193.8	0.92843
193.9	0.92783
194	0.92776
194.1	0.92749
194.2	0.92788
194.3	0.92771
194.4	0.92789
194.5	0.92787
194.6	0.92767
194.7	0.92791
194.8	0.92791
194.9	0.92773
195	0.92782
195.1	0.92758
195.2	0.92789
195.3	0.92797
195.4	0.92773
195.5	0.9276
195.6	0.9274
195.7	0.92706
195.8	0.92685
195.9	0.92709
196	0.92724
196.1	0.92784
196.2	0.92772
196.3	0.9279
196.4	0.92823
196.5	0.9282
196.6	0.92833
196.7	0.9286
196.8	0.92873
196.9	0.92896
197	0.92914
197.1	0.92927
197.2	0.92961
197.3	0.92956
197.4	0.9293
197.5	0.92891
197.6	0.92903
197.7	0.9288
197.8	0.92899
197.9	0.9287
198	0.92849
198.1	0.92859
198.2	0.92868
198.3	0.92878
198.4	0.92865
198.5	0.92856
198.6	0.92846
198.7	0.9282
198.8	0.92822
198.9	0.9278
199	0.92797
199.1	0.92817
199.2	0.92829
199.3	0.92888
199.4	0.92907
199.5	0.92963
199.6	0.92972
199.7	0.92975
199.8	0.92967
199.9	0.92989
200	0.92988
[truncated: 14,000 more rows]
