# Supplementary material for: Bayesian inference of kinetic schemes for ion channels by Kalman filtering
Source: eLife journal article supplement (doi:10.7554/elife.62714), 2022-05-04
Supplement: fig4-data7 [file 1_Sim_N_50000_Strom_MW_2M.xlsx]

## Sheet: 2 M
0.1	0
0.2	0
0.3	0
0.4	0
0.5	0
0.6	0
0.7	0
0.8	0
0.9	0
1	0
1.1	0
1.2	0
1.3	0
1.4	0
1.5	0
1.6	0
1.7	0
1.8	0
1.9	0
2	0
2.1	0
2.2	0
2.3	0
2.4	0
2.5	0
2.6	0
2.7	0
2.8	0
2.9	0
3	0
3.1	0
3.2	0
3.3	0
3.4	0
3.5	0
3.6	0
3.7	0
3.8	0
3.9	0
4	0
4.1	0
4.2	0
4.3	0
4.4	0
4.5	0
4.6	0
4.7	0
4.8	0
4.9	0
5	0
5.1	0
5.2	0
5.3	0
5.4	0
5.5	0
5.6	0
5.7	0
5.8	0
5.9	0
6	0
6.1	0
6.2	0
6.3	0
6.4	0
6.5	0
6.6	0
6.7	0
6.8	0
6.9	0
7	0
7.1	0
7.2	0
7.3	0
7.4	0
7.5	0
7.6	0
7.7	0
7.8	0
7.9	0
8	0
8.1	0
8.2	0
8.3	0
8.4	0
8.5	0
8.6	0
8.7	0
8.8	0
8.9	0
9	0
9.1	0
9.2	0
9.3	0
9.4	0
9.5	0
9.6	0
9.7	0
9.8	0
9.9	0
10	0
10.1	0
10.2	0
10.3	0
10.4	0
10.5	0
10.6	0
10.7	0
10.8	0
10.9	0
11	0
11.1	0
11.2	0
11.3	0
11.4	0
11.5	0
11.6	0
11.7	0
11.8	0
11.9	0
12	0
12.1	0
12.2	0
12.3	0
12.4	0
12.5	0
12.6	0
12.7	0
12.8	0
12.9	0
13	0
13.1	0
13.2	0
13.3	0
13.4	0
13.5	0
13.6	0
13.7	0
13.8	0
13.9	0
14	0
14.1	0
14.2	0
14.3	0
14.4	0
14.5	0
14.6	0
14.7	0
14.8	0
14.9	0
15	0
15.1	0
15.2	0
15.3	0
15.4	0
15.5	0
15.6	0
15.7	0
15.8	0
15.9	0
16	0
16.1	0
16.2	0
16.3	0
16.4	0
16.5	0
16.6	0
16.7	0
16.8	0
16.9	0
17	0
17.1	0
17.2	0
17.3	0
17.4	0
17.5	0
17.6	0
17.7	0
17.8	0
17.9	0
18	0
18.1	0
18.2	0
18.3	0
18.4	0
18.5	0
18.6	0
18.7	0
18.8	0
18.9	0
19	0
19.1	0
19.2	0
19.3	0
19.4	0
19.5	0
19.6	0
19.7	0
19.8	0
19.9	0
20	0
20.1	0
20.2	0
20.3	0
20.4	0
20.5	0
20.6	0
20.7	0
20.8	0
20.9	0
21	0
21.1	0
21.2	0
21.3	0
21.4	0
21.5	0
21.6	0
21.7	0
21.8	0
21.9	0
22	0
22.1	0
22.2	0
22.3	0
22.4	0
22.5	0
22.6	0
22.7	0
22.8	0
22.9	0
23	0
23.1	0
23.2	0
23.3	0
23.4	0
23.5	0
23.6	0
23.7	0
23.8	0
23.9	0
24	0
24.1	0
24.2	0
24.3	0
24.4	0
24.5	0
24.6	0
24.7	0
24.8	0
24.9	0
25	0
25.1	0
25.2	0
25.3	0
25.4	0
25.5	0
25.6	0
25.7	0
25.8	0
25.9	0
26	0
26.1	0
26.2	0
26.3	0
26.4	0
26.5	0
26.6	0
26.7	0
26.8	0
26.9	0
27	0
27.1	0
27.2	0
27.3	0
27.4	0
27.5	0
27.6	0
27.7	0
27.8	0
27.9	0
28	0
28.1	0
28.2	0
28.3	0
28.4	0
28.5	0
28.6	0
28.7	0
28.8	0
28.9	0
29	0
29.1	0
29.2	0
29.3	0
29.4	0
29.5	0
29.6	0
29.7	0
29.8	0
29.9	0
30	0
30.1	0
30.2	0
30.3	0
30.4	0
30.5	0
30.6	0
30.7	0
30.8	0
30.9	0
31	0
31.1	0
31.2	0
31.3	0
31.4	0
31.5	0
31.6	0
31.7	0
31.8	0
31.9	0
32	0
32.1	0
32.2	0
32.3	0
32.4	0
32.5	0
32.6	0
32.7	0
32.8	0
32.9	0
33	0
33.1	0
33.2	0
33.3	0
33.4	0
33.5	0
33.6	0
33.7	0
33.8	0
33.9	0
34	0
34.1	0
34.2	0
34.3	0
34.4	0
34.5	0
34.6	0
34.7	0
34.8	0
34.9	0
35	0
35.1	0
35.2	0
35.3	0
35.4	0
35.5	0
35.6	0
35.7	0
35.8	0
35.9	0
36	0
36.1	0
36.2	0
36.3	0
36.4	0
36.5	0
36.6	0
36.7	0
36.8	0
36.9	0
37	0
37.1	0
37.2	0
37.3	0
37.4	0
37.5	0
37.6	0
37.7	0
37.8	0
37.9	0
38	0
38.1	0
38.2	0
38.3	0
38.4	0
38.5	0
38.6	0
38.7	0
38.8	0
38.9	0
39	0
39.1	0
39.2	0
39.3	0
39.4	0
39.5	0
39.6	0
39.7	0
39.8	0
39.9	0
40	0
40.1	0
40.2	0
40.3	0
40.4	0
40.5	0
40.6	0
40.7	0
40.8	0
40.9	0
41	0
41.1	0
41.2	0
41.3	0
41.4	0
41.5	0
41.6	0
41.7	0
41.8	0
41.9	0
42	0
42.1	0
42.2	0
42.3	0
42.4	0
42.5	0
42.6	0
42.7	0
42.8	0
42.9	0
43	0
43.1	0
43.2	0
43.3	0
43.4	0
43.5	0
43.6	0
43.7	0
43.8	0
43.9	0
44	0
44.1	0
44.2	0
44.3	0
44.4	0
44.5	0
44.6	0
44.7	0
44.8	0
44.9	0
45	0
45.1	0
45.2	0
45.3	0
45.4	0
45.5	0
45.6	0
45.7	0
45.8	0
45.9	0
46	0
46.1	0
46.2	0
46.3	0
46.4	0
46.5	0
46.6	0
46.7	0
46.8	0
46.9	0
47	0
47.1	0
47.2	0
47.3	0
47.4	0
47.5	0
47.6	0
47.7	0
47.8	0
47.9	0
48	0
48.1	0
48.2	0
48.3	0
48.4	0
48.5	0
48.6	0
48.7	0
48.8	0
48.9	0
49	0
49.1	0
49.2	0
49.3	0
49.4	0
49.5	0
49.6	0
49.7	0
49.8	0
49.9	0
50	0
50.1	0
50.2	0
50.3	0
50.4	0
50.5	0
50.6	0
50.7	0
50.8	0
50.9	0
51	0
51.1	0
51.2	0
51.3	0
51.4	0
51.5	0
51.6	0
51.7	0
51.8	0
51.9	0
52	0
52.1	0
52.2	0
52.3	0
52.4	0
52.5	0
52.6	0
52.7	0
52.8	0
52.9	0
53	0
53.1	0
53.2	0
53.3	0
53.4	0
53.5	0
53.6	0
53.7	0
53.8	0
53.9	0
54	0
54.1	0
54.2	0
54.3	0
54.4	0
54.5	0
54.6	0
54.7	0
54.8	0
54.9	0
55	0
55.1	0
55.2	0
55.3	0
55.4	0
55.5	0
55.6	0
55.7	0
55.8	0
55.9	0
56	0
56.1	0
56.2	0
56.3	0
56.4	0
56.5	0
56.6	0
56.7	0
56.8	0
56.9	0
57	0
57.1	0
57.2	0
57.3	0
57.4	0
57.5	0
57.6	0
57.7	0
57.8	0
57.9	0
58	0
58.1	0
58.2	0
58.3	0
58.4	0
58.5	0
58.6	0
58.7	0
58.8	0
58.9	0
59	0
59.1	0
59.2	0
59.3	0
59.4	0
59.5	0
59.6	0
59.7	0
59.8	0
59.9	0
60	0
60.1	0
60.2	0
60.3	0
60.4	0
60.5	0
60.6	0
60.7	0
60.8	0
60.9	0
61	0
61.1	0
61.2	0
61.3	0
61.4	0
61.5	0
61.6	0
61.7	0
61.8	0
61.9	0
62	0
62.1	0
62.2	0
62.3	0
62.4	0
62.5	0
62.6	0
62.7	0
62.8	0
62.9	0
63	0
63.1	0
63.2	0
63.3	0
63.4	0
63.5	0
63.6	0
63.7	0
63.8	0
63.9	0
64	0
64.1	0
64.2	0
64.3	0
64.4	0
64.5	0
64.6	0
64.7	0
64.8	0
64.9	0
65	0
65.1	0
65.2	0
65.3	0
65.4	0
65.5	0
65.6	0
65.7	0
65.8	0
65.9	0
66	0
66.1	0
66.2	0
66.3	0
66.4	0
66.5	0
66.6	0
66.7	0
66.8	0
66.9	0
67	0
67.1	0
67.2	0
67.3	0
67.4	0
67.5	0
67.6	0
67.7	0
67.8	0
67.9	0
68	0
68.1	0
68.2	0
68.3	0
68.4	0
68.5	0
68.6	0
68.7	0
68.8	0
68.9	0
69	0
69.1	0
69.2	0
69.3	0
69.4	0
69.5	0
69.6	0
69.7	0
69.8	0
69.9	0
70	0
70.1	0
70.2	0
70.3	0
70.4	0
70.5	0
70.6	0
70.7	0
70.8	0
70.9	0
71	0
71.1	0
71.2	0
71.3	0
71.4	0
71.5	0
71.6	0
71.7	0
71.8	0
71.9	0
72	0
72.1	0
72.2	0
72.3	0
72.4	0
72.5	0
72.6	0
72.7	0
72.8	0
72.9	0
73	0
73.1	0
73.2	0
73.3	0
73.4	0
73.5	0
73.6	0
73.7	0
73.8	0
73.9	0
74	0
74.1	0
74.2	0
74.3	0
74.4	0
74.5	0
74.6	0
74.7	0
74.8	0
74.9	0
75	0
75.1	0
75.2	0
75.3	0
75.4	0
75.5	0
75.6	0
75.7	0
75.8	0
75.9	0
76	0
76.1	0
76.2	0
76.3	0
76.4	0
76.5	0
76.6	0
76.7	0
76.8	0
76.9	0
77	0
77.1	0
77.2	0
77.3	0
77.4	0
77.5	0
77.6	0
77.7	0
77.8	0
77.9	0
78	0
78.1	0
78.2	0
78.3	0
78.4	0
78.5	0
78.6	0
78.7	0
78.8	0
78.9	0
79	0
79.1	0
79.2	0
79.3	0
79.4	0
79.5	0
79.6	0
79.7	0
79.8	0
79.9	0
80	0
80.1	0
80.2	0
80.3	0
80.4	0
80.5	0
80.6	0
80.7	0
80.8	0
80.9	0
81	0
81.1	0
81.2	0
81.3	0
81.4	0
81.5	0
81.6	0
81.7	0
81.8	0
81.9	0
82	0
82.1	0
82.2	0
82.3	0
82.4	0
82.5	0
82.6	0
82.7	0
82.8	0
82.9	0
83	0
83.1	0
83.2	0
83.3	0
83.4	0
83.5	0
83.6	0
83.7	0
83.8	0
83.9	0
84	0
84.1	0
84.2	0
84.3	0
84.4	0
84.5	0
84.6	0
84.7	0
84.8	0
84.9	0
85	0
85.1	0
85.2	0
85.3	0
85.4	0
85.5	0
85.6	0
85.7	0
85.8	0
85.9	0
86	0
86.1	0
86.2	0
86.3	0
86.4	0
86.5	0
86.6	0
86.7	0
86.8	0
86.9	0
87	0
87.1	0
87.2	0
87.3	0
87.4	0
87.5	0
87.6	0
87.7	0
87.8	0
87.9	0
88	0
88.1	0
88.2	0
88.3	0
88.4	0
88.5	0
88.6	0
88.7	0
88.8	0
88.9	0
89	0
89.1	0
89.2	0
89.3	0
89.4	0
89.5	0
89.6	0
89.7	0
89.8	0
89.9	0
90	0
90.1	0
90.2	0
90.3	0
90.4	0
90.5	0
90.6	0
90.7	0
90.8	0
90.9	0
91	0
91.1	0
91.2	0
91.3	0
91.4	0
91.5	0
91.6	0
91.7	0
91.8	0
91.9	0
92	0
92.1	0
92.2	0
92.3	0
92.4	0
92.5	0
92.6	0
92.7	0
92.8	0
92.9	0
93	0
93.1	0
93.2	0
93.3	0
93.4	0
93.5	0
93.6	0
93.7	0
93.8	0
93.9	0
94	0
94.1	0
94.2	0
94.3	0
94.4	0
94.5	0
94.6	0
94.7	0
94.8	0
94.9	0
95	0
95.1	0
95.2	0
95.3	0
95.4	0
95.5	0
95.6	0
95.7	0
95.8	0
95.9	0
96	0
96.1	0
96.2	0
96.3	0
96.4	0
96.5	0
96.6	0
96.7	0
96.8	0
96.9	0
97	0
97.1	0
97.2	0
97.3	0
97.4	0
97.5	0
97.6	0
97.7	0
97.8	0
97.9	0
98	0
98.1	0
98.2	0
98.3	0
98.4	0
98.5	0
98.6	0
98.7	0
98.8	0
98.9	0
99	0
99.1	0
99.2	0
99.3	0
99.4	0
99.5	0
99.6	0
99.7	0
99.8	0
99.9	0
100	0
100.1	0
100.2	4e-05
100.3	0.00022
100.4	0.0007
100.5	0.00102
100.6	0.00154
100.7	0.00204
100.8	0.00296
100.9	0.0037
101	0.00498
101.1	0.00614
101.2	0.00772
101.3	0.00944
101.4	0.01102
101.5	0.0128
101.6	0.01444
101.7	0.0165
101.8	0.01824
101.9	0.0203
102	0.02252
102.1	0.02446
102.2	0.0261
102.3	0.02828
102.4	0.03066
102.5	0.03298
102.6	0.03498
102.7	0.037
102.8	0.03958
102.9	0.04232
103	0.04442
103.1	0.04708
103.2	0.04902
103.3	0.05124
103.4	0.0534
103.5	0.05586
103.6	0.05784
103.7	0.05966
103.8	0.06186
103.9	0.06398
104	0.06646
104.1	0.06886
104.2	0.07092
104.3	0.07354
104.4	0.07578
104.5	0.07812
104.6	0.08022
104.7	0.0826
104.8	0.08494
104.9	0.08748
105	0.08966
105.1	0.09172
105.2	0.0939
105.3	0.09576
105.4	0.09816
105.5	0.10038
105.6	0.1031
105.7	0.1051
105.8	0.10716
105.9	0.10912
106	0.11104
106.1	0.11334
106.2	0.11554
106.3	0.1177
106.4	0.11966
106.5	0.12188
106.6	0.1239
106.7	0.12604
106.8	0.12852
106.9	0.13058
107	0.13266
107.1	0.13444
107.2	0.1367
107.3	0.13872
107.4	0.1408
107.5	0.14294
107.6	0.14548
107.7	0.14772
107.8	0.1499
107.9	0.1521
108	0.1542
108.1	0.15626
108.2	0.15882
108.3	0.16092
108.4	0.16284
108.5	0.16458
108.6	0.16634
108.7	0.16812
108.8	0.17014
108.9	0.17204
109	0.17388
109.1	0.17608
109.2	0.1778
109.3	0.17976
109.4	0.1815
109.5	0.18336
109.6	0.18494
109.7	0.18704
109.8	0.18908
109.9	0.19116
110	0.1928
110.1	0.1945
110.2	0.19654
110.3	0.19792
110.4	0.19978
110.5	0.20138
110.6	0.20324
110.7	0.20534
110.8	0.20708
110.9	0.20888
111	0.21066
111.1	0.21224
111.2	0.21402
111.3	0.21594
111.4	0.21794
111.5	0.2195
111.6	0.2214
111.7	0.22322
111.8	0.22486
111.9	0.22624
112	0.228
112.1	0.2294
112.2	0.2315
112.3	0.23324
112.4	0.23562
112.5	0.23746
112.6	0.23942
112.7	0.24108
112.8	0.24274
112.9	0.24458
113	0.2465
113.1	0.24818
113.2	0.2499
113.3	0.25128
113.4	0.25302
113.5	0.25444
113.6	0.2563
113.7	0.25792
113.8	0.2597
113.9	0.2614
114	0.2633
114.1	0.26524
114.2	0.26702
114.3	0.26844
114.4	0.27028
114.5	0.2722
114.6	0.27384
114.7	0.27558
114.8	0.27716
114.9	0.2784
115	0.28004
115.1	0.28178
115.2	0.28334
115.3	0.28488
115.4	0.2862
115.5	0.28808
115.6	0.28972
115.7	0.29118
115.8	0.29246
115.9	0.2941
116	0.29564
116.1	0.29736
116.2	0.29898
116.3	0.3004
116.4	0.30202
116.5	0.30354
116.6	0.30484
116.7	0.30672
116.8	0.30836
116.9	0.3096
117	0.311
117.1	0.31278
117.2	0.31418
117.3	0.31578
117.4	0.31708
117.5	0.31848
117.6	0.31976
117.7	0.3212
117.8	0.32238
117.9	0.3243
118	0.3256
118.1	0.32718
118.2	0.32874
118.3	0.33002
118.4	0.33174
118.5	0.3329
118.6	0.3341
118.7	0.33536
118.8	0.3366
118.9	0.33784
119	0.33918
119.1	0.34056
119.2	0.34196
119.3	0.34332
119.4	0.34454
119.5	0.3461
119.6	0.34744
119.7	0.3492
119.8	0.35072
119.9	0.35198
120	0.35306
120.1	0.35436
120.2	0.35554
120.3	0.35682
120.4	0.35832
120.5	0.3595
120.6	0.36074
120.7	0.36196
120.8	0.36338
120.9	0.3645
121	0.36592
121.1	0.36702
121.2	0.36814
121.3	0.36948
121.4	0.37092
121.5	0.37198
121.6	0.37298
121.7	0.37434
121.8	0.37566
121.9	0.37728
122	0.37878
122.1	0.37986
122.2	0.38142
122.3	0.38268
122.4	0.38404
122.5	0.38538
122.6	0.3867
122.7	0.38784
122.8	0.38894
122.9	0.39038
123	0.3916
123.1	0.39324
123.2	0.39444
123.3	0.3958
123.4	0.39716
123.5	0.3982
123.6	0.39942
123.7	0.40036
123.8	0.40132
123.9	0.4027
124	0.40364
124.1	0.4045
124.2	0.40556
124.3	0.40676
124.4	0.4078
124.5	0.40894
124.6	0.41006
124.7	0.41122
124.8	0.4125
124.9	0.41384
125	0.41486
125.1	0.41608
125.2	0.41746
125.3	0.41844
125.4	0.4196
125.5	0.42116
125.6	0.42212
125.7	0.42316
125.8	0.42448
125.9	0.42544
126	0.42642
126.1	0.42724
126.2	0.42804
126.3	0.42886
126.4	0.42956
126.5	0.43102
126.6	0.43212
126.7	0.43322
126.8	0.43396
126.9	0.43482
127	0.43578
127.1	0.43648
127.2	0.43776
127.3	0.4389
127.4	0.43998
127.5	0.44114
127.6	0.442
127.7	0.44328
127.8	0.44394
127.9	0.44464
128	0.44562
128.1	0.44688
128.2	0.44774
128.3	0.4487
128.4	0.44988
128.5	0.45072
128.6	0.45182
128.7	0.45314
128.8	0.45426
128.9	0.4553
129	0.4565
129.1	0.45714
129.2	0.4584
129.3	0.45944
129.4	0.46044
129.5	0.46148
129.6	0.46248
129.7	0.46362
129.8	0.46414
129.9	0.46496
130	0.46592
130.1	0.46666
130.2	0.4677
130.3	0.46854
130.4	0.46952
130.5	0.47044
130.6	0.47126
130.7	0.47202
130.8	0.47292
130.9	0.47378
131	0.47496
131.1	0.47602
131.2	0.47714
131.3	0.47816
131.4	0.47938
131.5	0.48012
131.6	0.48098
131.7	0.48192
131.8	0.48294
131.9	0.48362
132	0.48448
132.1	0.4858
132.2	0.4866
132.3	0.48742
132.4	0.48856
132.5	0.4894
132.6	0.48996
132.7	0.49086
132.8	0.49162
132.9	0.49228
133	0.4934
133.1	0.4941
133.2	0.49466
133.3	0.49542
133.4	0.49618
133.5	0.49724
133.6	0.49826
133.7	0.499
133.8	0.4998
133.9	0.50088
134	0.50162
134.1	0.50246
134.2	0.50312
134.3	0.50384
134.4	0.50448
134.5	0.50554
134.6	0.50658
134.7	0.50752
134.8	0.50822
134.9	0.50926
135	0.51008
135.1	0.5106
135.2	0.51098
135.3	0.51184
135.4	0.51262
135.5	0.51342
135.6	0.5143
135.7	0.5152
135.8	0.51586
135.9	0.51654
136	0.51718
136.1	0.5177
136.2	0.51854
136.3	0.51946
136.4	0.52018
136.5	0.52108
136.6	0.52188
136.7	0.52302
136.8	0.5236
136.9	0.52446
137	0.52532
137.1	0.52624
137.2	0.52676
137.3	0.52752
137.4	0.52836
137.5	0.52932
137.6	0.52978
137.7	0.53058
137.8	0.53116
137.9	0.53208
138	0.53282
138.1	0.53334
138.2	0.53398
138.3	0.53474
138.4	0.53532
138.5	0.53568
138.6	0.53662
138.7	0.53712
138.8	0.5375
138.9	0.538
139	0.53874
139.1	0.5395
139.2	0.5405
139.3	0.54112
139.4	0.5419
139.5	0.54248
139.6	0.54272
139.7	0.5436
139.8	0.54426
139.9	0.54488
140	0.5456
140.1	0.5462
140.2	0.54706
140.3	0.54774
140.4	0.54806
140.5	0.5486
140.6	0.54896
140.7	0.54944
140.8	0.55012
140.9	0.55076
141	0.55132
141.1	0.55208
141.2	0.55288
141.3	0.55336
141.4	0.55414
141.5	0.55484
141.6	0.55562
141.7	0.55624
141.8	0.55672
141.9	0.55762
142	0.55836
142.1	0.55884
142.2	0.55942
142.3	0.56032
142.4	0.56094
142.5	0.56144
142.6	0.56186
142.7	0.56252
142.8	0.5634
142.9	0.56388
143	0.56456
143.1	0.56484
143.2	0.5656
143.3	0.56612
143.4	0.56658
143.5	0.56718
143.6	0.5679
143.7	0.5682
143.8	0.56836
143.9	0.56884
144	0.5695
144.1	0.56998
144.2	0.57084
144.3	0.5717
144.4	0.57238
144.5	0.57294
144.6	0.5735
144.7	0.57398
144.8	0.57448
144.9	0.5757
145	0.5761
145.1	0.5765
145.2	0.577
145.3	0.57748
145.4	0.57784
145.5	0.57832
145.6	0.57848
145.7	0.5791
145.8	0.57928
145.9	0.5797
146	0.58032
146.1	0.5809
146.2	0.58124
146.3	0.58218
146.4	0.58256
146.5	0.58314
146.6	0.58344
146.7	0.58416
146.8	0.58476
146.9	0.585
147	0.58542
147.1	0.5858
147.2	0.5861
147.3	0.5866
147.4	0.5872
147.5	0.58796
147.6	0.58806
147.7	0.58828
147.8	0.58856
147.9	0.58898
148	0.58922
148.1	0.58948
148.2	0.58994
148.3	0.58994
148.4	0.59024
148.5	0.59068
148.6	0.59136
148.7	0.59166
148.8	0.59206
148.9	0.59248
149	0.59326
149.1	0.5934
149.2	0.59374
149.3	0.59404
149.4	0.59444
149.5	0.59486
149.6	0.5955
149.7	0.5958
149.8	0.59628
149.9	0.59712
150	0.59724
150.1	0.59772
150.2	0.59818
150.3	0.59872
150.4	0.59992
150.5	0.60028
150.6	0.6005
150.7	0.601
150.8	0.60158
150.9	0.60204
151	0.60224
151.1	0.60282
151.2	0.60322
151.3	0.6038
151.4	0.6047
151.5	0.60526
151.6	0.6053
151.7	0.60612
151.8	0.60648
151.9	0.607
152	0.6075
152.1	0.60798
152.2	0.60856
152.3	0.60902
152.4	0.60974
152.5	0.60988
152.6	0.6103
152.7	0.61082
152.8	0.61128
152.9	0.6116
153	0.61214
153.1	0.61238
153.2	0.61292
153.3	0.61366
153.4	0.61414
153.5	0.6144
153.6	0.61476
153.7	0.61518
153.8	0.61568
153.9	0.61582
154	0.6164
154.1	0.61678
154.2	0.61676
154.3	0.61698
154.4	0.61746
154.5	0.61784
154.6	0.61806
154.7	0.61848
154.8	0.61888
154.9	0.61938
155	0.61996
155.1	0.62018
155.2	0.62054
155.3	0.62112
155.4	0.62162
155.5	0.62212
155.6	0.62268
155.7	0.62356
155.8	0.6235
155.9	0.62394
156	0.62438
156.1	0.62462
156.2	0.62514
156.3	0.62552
156.4	0.62594
156.5	0.62622
156.6	0.6265
156.7	0.62676
156.8	0.6273
156.9	0.62782
157	0.62806
157.1	0.62842
157.2	0.62868
157.3	0.62912
157.4	0.62958
157.5	0.63022
157.6	0.6309
157.7	0.63122
157.8	0.63162
157.9	0.63218
158	0.63266
158.1	0.63268
158.2	0.6331
158.3	0.63372
158.4	0.63422
158.5	0.63446
158.6	0.63476
158.7	0.63522
158.8	0.63568
158.9	0.63626
159	0.63682
159.1	0.6374
159.2	0.63776
159.3	0.63808
159.4	0.63868
159.5	0.63924
159.6	0.63944
159.7	0.6398
159.8	0.63982
159.9	0.64026
160	0.6406
160.1	0.64084
160.2	0.64106
160.3	0.64124
160.4	0.64154
160.5	0.64196
160.6	0.6422
160.7	0.64254
160.8	0.64308
160.9	0.64324
161	0.64342
161.1	0.64362
161.2	0.64398
161.3	0.64436
161.4	0.64462
161.5	0.64476
161.6	0.64496
161.7	0.64534
161.8	0.64566
161.9	0.64578
162	0.64616
162.1	0.6463
162.2	0.64624
162.3	0.64648
162.4	0.64716
162.5	0.64728
162.6	0.64764
162.7	0.64828
162.8	0.64836
162.9	0.64854
163	0.64888
163.1	0.64918
163.2	0.64954
163.3	0.64998
163.4	0.65022
163.5	0.65018
163.6	0.65054
163.7	0.65062
163.8	0.65148
163.9	0.65168
164	0.6519
164.1	0.65208
164.2	0.65272
164.3	0.6527
164.4	0.65302
164.5	0.65326
164.6	0.65334
164.7	0.6535
164.8	0.654
164.9	0.65408
165	0.6544
165.1	0.6547
165.2	0.65468
165.3	0.65492
165.4	0.65526
165.5	0.65552
165.6	0.65568
165.7	0.65624
165.8	0.65664
165.9	0.65698
166	0.65716
166.1	0.65714
166.2	0.6572
166.3	0.65748
166.4	0.65792
166.5	0.65836
166.6	0.65882
166.7	0.65918
166.8	0.65952
166.9	0.65964
167	0.65988
167.1	0.66026
167.2	0.66088
167.3	0.66082
167.4	0.66092
167.5	0.66104
167.6	0.66146
167.7	0.6616
167.8	0.6622
167.9	0.66222
168	0.6622
168.1	0.66238
168.2	0.66296
168.3	0.66334
168.4	0.66372
168.5	0.66398
168.6	0.66442
168.7	0.6646
168.8	0.66464
168.9	0.6651
169	0.6652
169.1	0.66548
169.2	0.66558
169.3	0.66572
169.4	0.6658
169.5	0.66594
169.6	0.66604
169.7	0.66622
169.8	0.66652
169.9	0.66628
170	0.6663
170.1	0.66666
170.2	0.6671
170.3	0.66728
170.4	0.66728
170.5	0.66744
170.6	0.66734
170.7	0.668
170.8	0.66804
170.9	0.66818
171	0.66842
171.1	0.6685
171.2	0.6686
171.3	0.66876
171.4	0.66892
171.5	0.66888
171.6	0.66906
171.7	0.6693
171.8	0.66942
171.9	0.67008
172	0.67
172.1	0.67054
172.2	0.67068
172.3	0.67128
172.4	0.67138
172.5	0.67142
172.6	0.67168
172.7	0.67194
172.8	0.67182
172.9	0.6723
173	0.67248
173.1	0.67278
173.2	0.67308
173.3	0.67274
173.4	0.67302
173.5	0.67316
173.6	0.6733
173.7	0.67366
173.8	0.67376
173.9	0.67422
174	0.67438
174.1	0.6746
174.2	0.67494
174.3	0.67532
174.4	0.67554
174.5	0.676
174.6	0.67642
174.7	0.67614
174.8	0.67636
174.9	0.67634
175	0.67654
175.1	0.67656
175.2	0.67674
175.3	0.67682
175.4	0.67696
175.5	0.67694
175.6	0.67726
175.7	0.67748
175.8	0.6774
175.9	0.67758
176	0.6776
176.1	0.6775
176.2	0.6774
176.3	0.67796
176.4	0.6782
176.5	0.67844
176.6	0.67836
176.7	0.67832
176.8	0.67846
176.9	0.6788
177	0.67888
177.1	0.67906
177.2	0.67902
177.3	0.67908
177.4	0.67948
177.5	0.68004
177.6	0.68006
177.7	0.68006
177.8	0.68026
177.9	0.6804
178	0.68042
178.1	0.6807
178.2	0.68032
178.3	0.68084
178.4	0.68078
178.5	0.6807
178.6	0.6807
178.7	0.68074
178.8	0.68124
178.9	0.68138
179	0.68158
179.1	0.6819
179.2	0.6823
179.3	0.68264
179.4	0.683
179.5	0.68326
179.6	0.6836
179.7	0.68402
179.8	0.68424
179.9	0.68456
180	0.68472
180.1	0.68478
180.2	0.68504
180.3	0.68518
180.4	0.68536
180.5	0.68556
180.6	0.68556
180.7	0.6857
180.8	0.68572
180.9	0.68566
181	0.6858
181.1	0.6857
181.2	0.68564
181.3	0.68566
181.4	0.6859
181.5	0.6861
181.6	0.68636
181.7	0.68656
181.8	0.68678
181.9	0.68674
182	0.68704
182.1	0.68718
182.2	0.68714
182.3	0.68712
182.4	0.68748
182.5	0.68778
182.6	0.68804
182.7	0.68802
182.8	0.68828
182.9	0.68852
183	0.6885
183.1	0.68886
183.2	0.68916
183.3	0.6891
183.4	0.6893
183.5	0.68946
183.6	0.68972
183.7	0.68966
183.8	0.68984
183.9	0.68986
184	0.69002
184.1	0.69006
184.2	0.69038
184.3	0.69042
184.4	0.69038
184.5	0.69036
184.6	0.69088
184.7	0.69096
184.8	0.69104
184.9	0.69134
185	0.69146
185.1	0.69192
185.2	0.69236
185.3	0.69242
185.4	0.69248
185.5	0.6926
185.6	0.69298
185.7	0.69292
185.8	0.693
185.9	0.69306
186	0.69334
186.1	0.6937
186.2	0.694
186.3	0.69408
186.4	0.69434
186.5	0.6943
186.6	0.69422
186.7	0.6944
186.8	0.69462
186.9	0.6947
187	0.69468
187.1	0.69484
187.2	0.6949
187.3	0.69516
187.4	0.69498
187.5	0.69528
187.6	0.69532
187.7	0.69558
187.8	0.69574
187.9	0.69604
188	0.69624
188.1	0.69622
188.2	0.6963
188.3	0.69648
188.4	0.69652
188.5	0.69692
188.6	0.69714
188.7	0.697
188.8	0.69698
188.9	0.69728
189	0.69748
189.1	0.69752
189.2	0.69778
189.3	0.69814
189.4	0.6982
189.5	0.69838
189.6	0.69868
189.7	0.69866
189.8	0.69856
189.9	0.69878
190	0.69882
190.1	0.69908
190.2	0.69942
190.3	0.69944
190.4	0.69962
190.5	0.6996
190.6	0.69952
190.7	0.69988
190.8	0.70012
190.9	0.7002
191	0.70074
191.1	0.70082
191.2	0.70076
191.3	0.7009
191.4	0.70094
191.5	0.70084
191.6	0.70096
191.7	0.7012
191.8	0.70124
191.9	0.70136
192	0.70162
192.1	0.70192
192.2	0.70218
192.3	0.7021
192.4	0.70224
192.5	0.7025
192.6	0.7023
192.7	0.70246
192.8	0.70292
192.9	0.70302
193	0.70326
193.1	0.70346
193.2	0.70344
193.3	0.70374
193.4	0.70384
193.5	0.70428
193.6	0.70466
193.7	0.70472
193.8	0.70474
193.9	0.70472
194	0.70498
194.1	0.70494
194.2	0.70498
194.3	0.70516
194.4	0.70516
194.5	0.70502
194.6	0.7053
194.7	0.70546
194.8	0.70564
194.9	0.70594
195	0.70594
195.1	0.70588
195.2	0.70602
195.3	0.7062
195.4	0.70614
195.5	0.7065
195.6	0.70648
195.7	0.7067
195.8	0.70682
195.9	0.707
196	0.7072
196.1	0.7072
196.2	0.70736
196.3	0.7075
196.4	0.70766
196.5	0.70802
196.6	0.70812
196.7	0.70806
196.8	0.70808
196.9	0.7081
197	0.70814
197.1	0.70834
197.2	0.70844
197.3	0.70838
197.4	0.7085
197.5	0.70848
197.6	0.7083
197.7	0.70804
197.8	0.70812
197.9	0.70846
198	0.70872
198.1	0.70888
198.2	0.70888
198.3	0.70904
198.4	0.70912
198.5	0.70894
198.6	0.7086
198.7	0.70842
198.8	0.70832
198.9	0.70854
199	0.70878
199.1	0.70898
199.2	0.70886
199.3	0.7087
199.4	0.70854
199.5	0.70858
199.6	0.70876
199.7	0.70854
199.8	0.70844
199.9	0.70852
200	0.70858
[truncated: 14,000 more rows]
