# Supplementary material for: Bayesian inference of kinetic schemes for ion channels by Kalman filtering
Source: eLife journal article supplement (doi:10.7554/elife.62714), 2022-05-04
Supplement: fig4-data8 [file 1_Sim_N_80_Fluor_MW.xlsx]

## Sheet: 0.25 M
0.1	0
0.2	0
0.3	0
0.4	0
0.5	0
0.6	0
0.7	0
0.8	0
0.9	0
1	0
1.1	0
1.2	0
1.3	0
1.4	0
1.5	0
1.6	0
1.7	0
1.8	0
1.9	0
2	0
2.1	0
2.2	0
2.3	0
2.4	0
2.5	0
2.6	0
2.7	0
2.8	0
2.9	0
3	0
3.1	0
3.2	0
3.3	0
3.4	0
3.5	0
3.6	0
3.7	0
3.8	0
3.9	0
4	0
4.1	0
4.2	0
4.3	0
4.4	0
4.5	0
4.6	0
4.7	0
4.8	0
4.9	0
5	0
5.1	0
5.2	0
5.3	0
5.4	0
5.5	0
5.6	0
5.7	0
5.8	0
5.9	0
6	0
6.1	0
6.2	0
6.3	0
6.4	0
6.5	0
6.6	0
6.7	0
6.8	0
6.9	0
7	0
7.1	0
7.2	0
7.3	0
7.4	0
7.5	0
7.6	0
7.7	0
7.8	0
7.9	0
8	0
8.1	0
8.2	0
8.3	0
8.4	0
8.5	0
8.6	0
8.7	0
8.8	0
8.9	0
9	0
9.1	0
9.2	0
9.3	0
9.4	0
9.5	0
9.6	0
9.7	0
9.8	0
9.9	0
10	0
10.1	0
10.2	0
10.3	0
10.4	0
10.5	0
10.6	0
10.7	0
10.8	0
10.9	0
11	0
11.1	0
11.2	0
11.3	0
11.4	0
11.5	0
11.6	0
11.7	0
11.8	0
11.9	0
12	0
12.1	0
12.2	0
12.3	0
12.4	0
12.5	0
12.6	0
12.7	0
12.8	0
12.9	0
13	0
13.1	0
13.2	0
13.3	0
13.4	0
13.5	0
13.6	0
13.7	0
13.8	0
13.9	0
14	0
14.1	0
14.2	0
14.3	0
14.4	0
14.5	0
14.6	0
14.7	0
14.8	0
14.9	0
15	0
15.1	0
15.2	0
15.3	0
15.4	0
15.5	0
15.6	0
15.7	0
15.8	0
15.9	0
16	0
16.1	0
16.2	0
16.3	0
16.4	0
16.5	0
16.6	0
16.7	0
16.8	0
16.9	0
17	0
17.1	0
17.2	0
17.3	0
17.4	0
17.5	0
17.6	0
17.7	0
17.8	0
17.9	0
18	0
18.1	0
18.2	0
18.3	0
18.4	0
18.5	0
18.6	0
18.7	0
18.8	0
18.9	0
19	0
19.1	0
19.2	0
19.3	0
19.4	0
19.5	0
19.6	0
19.7	0
19.8	0
19.9	0
20	0
20.1	0
20.2	0
20.3	0
20.4	0
20.5	0
20.6	0
20.7	0
20.8	0
20.9	0
21	0
21.1	0
21.2	0
21.3	0
21.4	0
21.5	0
21.6	0
21.7	0
21.8	0
21.9	0
22	0
22.1	0
22.2	0
22.3	0
22.4	0
22.5	0
22.6	0
22.7	0
22.8	0
22.9	0
23	0
23.1	0
23.2	0
23.3	0
23.4	0
23.5	0
23.6	0
23.7	0
23.8	0
23.9	0
24	0
24.1	0
24.2	0
24.3	0
24.4	0
24.5	0
24.6	0
24.7	0
24.8	0
24.9	0
25	0
25.1	0
25.2	0
25.3	0
25.4	0
25.5	0
25.6	0
25.7	0
25.8	0
25.9	0
26	0
26.1	0
26.2	0
26.3	0
26.4	0
26.5	0
26.6	0
26.7	0
26.8	0
26.9	0
27	0
27.1	0
27.2	0
27.3	0
27.4	0
27.5	0
27.6	0
27.7	0
27.8	0
27.9	0
28	0
28.1	0
28.2	0
28.3	0
28.4	0
28.5	0
28.6	0
28.7	0
28.8	0
28.9	0
29	0
29.1	0
29.2	0
29.3	0
29.4	0
29.5	0
29.6	0
29.7	0
29.8	0
29.9	0
30	0
30.1	0
30.2	0
30.3	0
30.4	0
30.5	0
30.6	0
30.7	0
30.8	0
30.9	0
31	0
31.1	0
31.2	0
31.3	0
31.4	0
31.5	0
31.6	0
31.7	0
31.8	0
31.9	0
32	0
32.1	0
32.2	0
32.3	0
32.4	0
32.5	0
32.6	0
32.7	0
32.8	0
32.9	0
33	0
33.1	0
33.2	0
33.3	0
33.4	0
33.5	0
33.6	0
33.7	0
33.8	0
33.9	0
34	0
34.1	0
34.2	0
34.3	0
34.4	0
34.5	0
34.6	0
34.7	0
34.8	0
34.9	0
35	0
35.1	0
35.2	0
35.3	0
35.4	0
35.5	0
35.6	0
35.7	0
35.8	0
35.9	0
36	0
36.1	0
36.2	0
36.3	0
36.4	0
36.5	0
36.6	0
36.7	0
36.8	0
36.9	0
37	0
37.1	0
37.2	0
37.3	0
37.4	0
37.5	0
37.6	0
37.7	0
37.8	0
37.9	0
38	0
38.1	0
38.2	0
38.3	0
38.4	0
38.5	0
38.6	0
38.7	0
38.8	0
38.9	0
39	0
39.1	0
39.2	0
39.3	0
39.4	0
39.5	0
39.6	0
39.7	0
39.8	0
39.9	0
40	0
40.1	0
40.2	0
40.3	0
40.4	0
40.5	0
40.6	0
40.7	0
40.8	0
40.9	0
41	0
41.1	0
41.2	0
41.3	0
41.4	0
41.5	0
41.6	0
41.7	0
41.8	0
41.9	0
42	0
42.1	0
42.2	0
42.3	0
42.4	0
42.5	0
42.6	0
42.7	0
42.8	0
42.9	0
43	0
43.1	0
43.2	0
43.3	0
43.4	0
43.5	0
43.6	0
43.7	0
43.8	0
43.9	0
44	0
44.1	0
44.2	0
44.3	0
44.4	0
44.5	0
44.6	0
44.7	0
44.8	0
44.9	0
45	0
45.1	0
45.2	0
45.3	0
45.4	0
45.5	0
45.6	0
45.7	0
45.8	0
45.9	0
46	0
46.1	0
46.2	0
46.3	0
46.4	0
46.5	0
46.6	0
46.7	0
46.8	0
46.9	0
47	0
47.1	0
47.2	0
47.3	0
47.4	0
47.5	0
47.6	0
47.7	0
47.8	0
47.9	0
48	0
48.1	0
48.2	0
48.3	0
48.4	0
48.5	0
48.6	0
48.7	0
48.8	0
48.9	0
49	0
49.1	0
49.2	0
49.3	0
49.4	0
49.5	0
49.6	0
49.7	0
49.8	0
49.9	0
50	0
50.1	0
50.2	0
50.3	0
50.4	0
50.5	0
50.6	0
50.7	0
50.8	0
50.9	0
51	0
51.1	0
51.2	0
51.3	0
51.4	0
51.5	0
51.6	0
51.7	0
51.8	0
51.9	0
52	0
52.1	0
52.2	0
52.3	0
52.4	0
52.5	0
52.6	0
52.7	0
52.8	0
52.9	0
53	0
53.1	0
53.2	0
53.3	0
53.4	0
53.5	0
53.6	0
53.7	0
53.8	0
53.9	0
54	0
54.1	0
54.2	0
54.3	0
54.4	0
54.5	0
54.6	0
54.7	0
54.8	0
54.9	0
55	0
55.1	0
55.2	0
55.3	0
55.4	0
55.5	0
55.6	0
55.7	0
55.8	0
55.9	0
56	0
56.1	0
56.2	0
56.3	0
56.4	0
56.5	0
56.6	0
56.7	0
56.8	0
56.9	0
57	0
57.1	0
57.2	0
57.3	0
57.4	0
57.5	0
57.6	0
57.7	0
57.8	0
57.9	0
58	0
58.1	0
58.2	0
58.3	0
58.4	0
58.5	0
58.6	0
58.7	0
58.8	0
58.9	0
59	0
59.1	0
59.2	0
59.3	0
59.4	0
59.5	0
59.6	0
59.7	0
59.8	0
59.9	0
60	0
60.1	0
60.2	0
60.3	0
60.4	0
60.5	0
60.6	0
60.7	0
60.8	0
60.9	0
61	0
61.1	0
61.2	0
61.3	0
61.4	0
61.5	0
61.6	0
61.7	0
61.8	0
61.9	0
62	0
62.1	0
62.2	0
62.3	0
62.4	0
62.5	0
62.6	0
62.7	0
62.8	0
62.9	0
63	0
63.1	0
63.2	0
63.3	0
63.4	0
63.5	0
63.6	0
63.7	0
63.8	0
63.9	0
64	0
64.1	0
64.2	0
64.3	0
64.4	0
64.5	0
64.6	0
64.7	0
64.8	0
64.9	0
65	0
65.1	0
65.2	0
65.3	0
65.4	0
65.5	0
65.6	0
65.7	0
65.8	0
65.9	0
66	0
66.1	0
66.2	0
66.3	0
66.4	0
66.5	0
66.6	0
66.7	0
66.8	0
66.9	0
67	0
67.1	0
67.2	0
67.3	0
67.4	0
67.5	0
67.6	0
67.7	0
67.8	0
67.9	0
68	0
68.1	0
68.2	0
68.3	0
68.4	0
68.5	0
68.6	0
68.7	0
68.8	0
68.9	0
69	0
69.1	0
69.2	0
69.3	0
69.4	0
69.5	0
69.6	0
69.7	0
69.8	0
69.9	0
70	0
70.1	0
70.2	0
70.3	0
70.4	0
70.5	0
70.6	0
70.7	0
70.8	0
70.9	0
71	0
71.1	0
71.2	0
71.3	0
71.4	0
71.5	0
71.6	0
71.7	0
71.8	0
71.9	0
72	0
72.1	0
72.2	0
72.3	0
72.4	0
72.5	0
72.6	0
72.7	0
72.8	0
72.9	0
73	0
73.1	0
73.2	0
73.3	0
73.4	0
73.5	0
73.6	0
73.7	0
73.8	0
73.9	0
74	0
74.1	0
74.2	0
74.3	0
74.4	0
74.5	0
74.6	0
74.7	0
74.8	0
74.9	0
75	0
75.1	0
75.2	0
75.3	0
75.4	0
75.5	0
75.6	0
75.7	0
75.8	0
75.9	0
76	0
76.1	0
76.2	0
76.3	0
76.4	0
76.5	0
76.6	0
76.7	0
76.8	0
76.9	0
77	0
77.1	0
77.2	0
77.3	0
77.4	0
77.5	0
77.6	0
77.7	0
77.8	0
77.9	0
78	0
78.1	0
78.2	0
78.3	0
78.4	0
78.5	0
78.6	0
78.7	0
78.8	0
78.9	0
79	0
79.1	0
79.2	0
79.3	0
79.4	0
79.5	0
79.6	0
79.7	0
79.8	0
79.9	0
80	0
80.1	0
80.2	0
80.3	0
80.4	0
80.5	0
80.6	0
80.7	0
80.8	0
80.9	0
81	0
81.1	0
81.2	0
81.3	0
81.4	0
81.5	0
81.6	0
81.7	0
81.8	0
81.9	0
82	0
82.1	0
82.2	0
82.3	0
82.4	0
82.5	0
82.6	0
82.7	0
82.8	0
82.9	0
83	0
83.1	0
83.2	0
83.3	0
83.4	0
83.5	0
83.6	0
83.7	0
83.8	0
83.9	0
84	0
84.1	0
84.2	0
84.3	0
84.4	0
84.5	0
84.6	0
84.7	0
84.8	0
84.9	0
85	0
85.1	0
85.2	0
85.3	0
85.4	0
85.5	0
85.6	0
85.7	0
85.8	0
85.9	0
86	0
86.1	0
86.2	0
86.3	0
86.4	0
86.5	0
86.6	0
86.7	0
86.8	0
86.9	0
87	0
87.1	0
87.2	0
87.3	0
87.4	0
87.5	0
87.6	0
87.7	0
87.8	0
87.9	0
88	0
88.1	0
88.2	0
88.3	0
88.4	0
88.5	0
88.6	0
88.7	0
88.8	0
88.9	0
89	0
89.1	0
89.2	0
89.3	0
89.4	0
89.5	0
89.6	0
89.7	0
89.8	0
89.9	0
90	0
90.1	0
90.2	0
90.3	0
90.4	0
90.5	0
90.6	0
90.7	0
90.8	0
90.9	0
91	0
91.1	0
91.2	0
91.3	0
91.4	0
91.5	0
91.6	0
91.7	0
91.8	0
91.9	0
92	0
92.1	0
92.2	0
92.3	0
92.4	0
92.5	0
92.6	0
92.7	0
92.8	0
92.9	0
93	0
93.1	0
93.2	0
93.3	0
93.4	0
93.5	0
93.6	0
93.7	0
93.8	0
93.9	0
94	0
94.1	0
94.2	0
94.3	0
94.4	0
94.5	0
94.6	0
94.7	0
94.8	0
94.9	0
95	0
95.1	0
95.2	0
95.3	0
95.4	0
95.5	0
95.6	0
95.7	0
95.8	0
95.9	0
96	0
96.1	0
96.2	0
96.3	0
96.4	0
96.5	0
96.6	0
96.7	0
96.8	0
96.9	0
97	0
97.1	0
97.2	0
97.3	0
97.4	0
97.5	0
97.6	0
97.7	0
97.8	0
97.9	0
98	0
98.1	0
98.2	0
98.3	0
98.4	0
98.5	0
98.6	0
98.7	0
98.8	0
98.9	0
99	0
99.1	0
99.2	0
99.3	0
99.4	0
99.5	0
99.6	0
99.7	0
99.8	0
99.9	0
100	0
100.1	0.0125
100.2	0.04375
100.3	0.04375
100.4	0.0625
100.5	0.0875
100.6	0.1
100.7	0.125
100.8	0.15
100.9	0.1625
101	0.1875
101.1	0.175
101.2	0.175
101.3	0.18125
101.4	0.2
101.5	0.21875
101.6	0.21875
101.7	0.21875
101.8	0.21875
101.9	0.2125
102	0.2125
102.1	0.2125
102.2	0.2125
102.3	0.2125
102.4	0.23125
102.5	0.225
102.6	0.2375
102.7	0.25
102.8	0.25625
102.9	0.26875
103	0.28125
103.1	0.28125
103.2	0.2875
103.3	0.3
103.4	0.30625
103.5	0.3125
103.6	0.3375
103.7	0.3375
103.8	0.34375
103.9	0.35
104	0.35625
104.1	0.35
104.2	0.35
104.3	0.34375
104.4	0.34375
104.5	0.3625
104.6	0.375
104.7	0.38125
104.8	0.3875
104.9	0.3875
105	0.3875
105.1	0.39375
105.2	0.38125
105.3	0.39375
105.4	0.4
105.5	0.4
105.6	0.40625
105.7	0.4125
105.8	0.425
105.9	0.4375
106	0.43125
106.1	0.4375
106.2	0.45
106.3	0.45
106.4	0.44375
106.5	0.4375
106.6	0.425
106.7	0.425
106.8	0.425
106.9	0.4
107	0.4
107.1	0.38125
107.2	0.375
107.3	0.3875
107.4	0.38125
107.5	0.3875
107.6	0.3875
107.7	0.39375
107.8	0.4
107.9	0.40625
108	0.425
108.1	0.4375
108.2	0.44375
108.3	0.44375
108.4	0.45625
108.5	0.45625
108.6	0.45
108.7	0.4625
108.8	0.45625
108.9	0.45625
109	0.45625
109.1	0.45
109.2	0.43125
109.3	0.4375
109.4	0.4375
109.5	0.44375
109.6	0.45
109.7	0.45625
109.8	0.4625
109.9	0.46875
110	0.475
110.1	0.48125
110.2	0.4875
110.3	0.48125
110.4	0.475
110.5	0.48125
110.6	0.48125
110.7	0.48125
110.8	0.475
110.9	0.48125
111	0.4875
111.1	0.4875
111.2	0.4875
111.3	0.48125
111.4	0.48125
111.5	0.475
111.6	0.475
111.7	0.4875
111.8	0.49375
111.9	0.5
112	0.5
112.1	0.50625
112.2	0.50625
112.3	0.50625
112.4	0.50625
112.5	0.49375
112.6	0.4875
112.7	0.48125
112.8	0.4875
112.9	0.4875
113	0.51875
113.1	0.55
113.2	0.5375
113.3	0.53125
113.4	0.5375
113.5	0.525
113.6	0.525
113.7	0.50625
113.8	0.50625
113.9	0.5
114	0.49375
114.1	0.49375
114.2	0.50625
114.3	0.50625
114.4	0.5125
114.5	0.50625
114.6	0.5
114.7	0.5125
114.8	0.51875
114.9	0.50625
115	0.5
115.1	0.5
115.2	0.50625
115.3	0.5
115.4	0.50625
115.5	0.4875
115.6	0.4875
115.7	0.49375
115.8	0.49375
115.9	0.4875
116	0.50625
116.1	0.5
116.2	0.5
116.3	0.49375
116.4	0.5
116.5	0.50625
116.6	0.50625
116.7	0.5125
116.8	0.50625
116.9	0.5125
117	0.5125
117.1	0.5125
117.2	0.50625
117.3	0.5
117.4	0.5
117.5	0.49375
117.6	0.4875
117.7	0.49375
117.8	0.5
117.9	0.5
118	0.49375
118.1	0.4875
118.2	0.49375
118.3	0.50625
118.4	0.50625
118.5	0.50625
118.6	0.5
118.7	0.50625
118.8	0.5
118.9	0.50625
119	0.5125
119.1	0.5125
119.2	0.5
119.3	0.49375
119.4	0.5
119.5	0.4875
119.6	0.49375
119.7	0.49375
119.8	0.4875
119.9	0.49375
120	0.50625
120.1	0.50625
120.2	0.5125
120.3	0.5125
120.4	0.50625
120.5	0.49375
120.6	0.5
120.7	0.49375
120.8	0.4875
120.9	0.49375
121	0.4875
121.1	0.5125
121.2	0.5125
121.3	0.50625
121.4	0.50625
121.5	0.5
121.6	0.50625
121.7	0.5125
121.8	0.5
121.9	0.5
122	0.4875
122.1	0.49375
122.2	0.4875
122.3	0.48125
122.4	0.475
122.5	0.475
122.6	0.48125
122.7	0.4875
122.8	0.50625
122.9	0.49375
123	0.4875
123.1	0.49375
123.2	0.4875
123.3	0.4875
123.4	0.48125
123.5	0.49375
123.6	0.5
123.7	0.49375
123.8	0.49375
123.9	0.50625
124	0.5125
124.1	0.5125
124.2	0.5125
124.3	0.5125
124.4	0.51875
124.5	0.51875
124.6	0.5125
124.7	0.5
124.8	0.51875
124.9	0.51875
125	0.51875
125.1	0.51875
125.2	0.51875
125.3	0.525
125.4	0.5
125.5	0.49375
125.6	0.5
125.7	0.4875
125.8	0.475
125.9	0.46875
126	0.46875
126.1	0.46875
126.2	0.4625
126.3	0.46875
126.4	0.475
126.5	0.475
126.6	0.48125
126.7	0.4875
126.8	0.4875
126.9	0.4875
127	0.4875
127.1	0.4875
127.2	0.49375
127.3	0.50625
127.4	0.4875
127.5	0.4875
127.6	0.4875
127.7	0.4875
127.8	0.5
127.9	0.5
128	0.4875
128.1	0.4875
128.2	0.49375
128.3	0.5
128.4	0.5125
128.5	0.51875
128.6	0.525
128.7	0.5375
128.8	0.5375
128.9	0.5375
129	0.5375
129.1	0.525
129.2	0.53125
129.3	0.53125
129.4	0.53125
129.5	0.54375
129.6	0.54375
129.7	0.54375
129.8	0.54375
129.9	0.54375
130	0.54375
130.1	0.5375
130.2	0.5375
130.3	0.53125
130.4	0.5375
130.5	0.51875
130.6	0.5125
130.7	0.525
130.8	0.51875
130.9	0.51875
131	0.525
131.1	0.5125
131.2	0.50625
131.3	0.5
131.4	0.4875
131.5	0.49375
131.6	0.50625
131.7	0.5
131.8	0.51875
131.9	0.51875
132	0.51875
132.1	0.5125
132.2	0.53125
132.3	0.54375
132.4	0.55
132.5	0.55625
132.6	0.55
132.7	0.55
132.8	0.55625
132.9	0.55
133	0.55625
133.1	0.5625
133.2	0.55
133.3	0.53125
133.4	0.53125
133.5	0.525
133.6	0.525
133.7	0.53125
133.8	0.53125
133.9	0.525
134	0.53125
134.1	0.5375
134.2	0.53125
134.3	0.53125
134.4	0.53125
134.5	0.51875
134.6	0.51875
134.7	0.525
134.8	0.5375
134.9	0.5375
135	0.525
135.1	0.525
135.2	0.525
135.3	0.525
135.4	0.525
135.5	0.525
135.6	0.525
135.7	0.525
135.8	0.525
135.9	0.53125
136	0.5375
136.1	0.55
136.2	0.54375
136.3	0.55
136.4	0.53125
136.5	0.53125
136.6	0.53125
136.7	0.53125
136.8	0.525
136.9	0.53125
137	0.53125
137.1	0.525
137.2	0.51875
137.3	0.51875
137.4	0.53125
137.5	0.53125
137.6	0.53125
137.7	0.51875
137.8	0.51875
137.9	0.51875
138	0.51875
138.1	0.51875
138.2	0.51875
138.3	0.51875
138.4	0.525
138.5	0.525
138.6	0.51875
138.7	0.51875
138.8	0.5125
138.9	0.5125
139	0.5125
139.1	0.5125
139.2	0.51875
139.3	0.51875
139.4	0.53125
139.5	0.5375
139.6	0.5375
139.7	0.53125
139.8	0.5375
139.9	0.55
140	0.55
140.1	0.5375
140.2	0.53125
140.3	0.53125
140.4	0.5375
140.5	0.51875
140.6	0.525
140.7	0.53125
140.8	0.525
140.9	0.525
141	0.53125
141.1	0.525
141.2	0.51875
141.3	0.525
141.4	0.525
141.5	0.53125
141.6	0.53125
141.7	0.53125
141.8	0.53125
141.9	0.51875
142	0.51875
142.1	0.525
142.2	0.53125
142.3	0.5375
142.4	0.53125
142.5	0.525
142.6	0.53125
142.7	0.51875
142.8	0.51875
142.9	0.525
143	0.53125
143.1	0.5375
143.2	0.53125
143.3	0.53125
143.4	0.53125
143.5	0.525
143.6	0.53125
143.7	0.54375
143.8	0.55
143.9	0.54375
144	0.5375
144.1	0.54375
144.2	0.54375
144.3	0.54375
144.4	0.55
144.5	0.54375
144.6	0.54375
144.7	0.55
144.8	0.55625
144.9	0.56875
145	0.56875
145.1	0.56875
145.2	0.56875
145.3	0.56875
145.4	0.5625
145.5	0.5625
145.6	0.5625
145.7	0.575
145.8	0.56875
145.9	0.5625
146	0.56875
146.1	0.56875
146.2	0.575
146.3	0.58125
146.4	0.5625
146.5	0.55625
146.6	0.55
146.7	0.54375
146.8	0.54375
146.9	0.55
147	0.55625
147.1	0.55625
147.2	0.55625
147.3	0.5625
147.4	0.55
147.5	0.54375
147.6	0.54375
147.7	0.5375
147.8	0.53125
147.9	0.5125
148	0.525
148.1	0.5375
148.2	0.5375
148.3	0.5375
148.4	0.53125
148.5	0.53125
148.6	0.53125
148.7	0.5375
148.8	0.53125
148.9	0.5375
149	0.53125
149.1	0.5375
149.2	0.54375
149.3	0.54375
149.4	0.54375
149.5	0.55
149.6	0.55625
149.7	0.55
149.8	0.54375
149.9	0.5375
150	0.55
150.1	0.55
150.2	0.55
150.3	0.55625
150.4	0.55625
150.5	0.55625
150.6	0.55
150.7	0.55
150.8	0.55625
150.9	0.55625
151	0.55
151.1	0.55
151.2	0.55
151.3	0.55625
151.4	0.55625
151.5	0.5625
151.6	0.55625
151.7	0.55
151.8	0.54375
151.9	0.5375
152	0.55
152.1	0.54375
152.2	0.53125
152.3	0.53125
152.4	0.51875
152.5	0.51875
152.6	0.525
152.7	0.53125
152.8	0.54375
152.9	0.54375
153	0.55
153.1	0.55
153.2	0.55
153.3	0.5375
153.4	0.55
153.5	0.55625
153.6	0.55625
153.7	0.55625
153.8	0.55
153.9	0.54375
154	0.55
154.1	0.55
154.2	0.55
154.3	0.5625
154.4	0.5625
154.5	0.575
154.6	0.575
154.7	0.575
154.8	0.5625
154.9	0.55625
155	0.55
155.1	0.55
155.2	0.55625
155.3	0.56875
155.4	0.56875
155.5	0.575
155.6	0.5625
155.7	0.55625
155.8	0.55625
155.9	0.5625
156	0.5625
156.1	0.5625
156.2	0.55625
156.3	0.55625
156.4	0.5625
156.5	0.5625
156.6	0.5625
156.7	0.575
156.8	0.58125
156.9	0.575
157	0.575
157.1	0.58125
157.2	0.575
157.3	0.56875
157.4	0.5625
157.5	0.5625
157.6	0.55625
157.7	0.56875
157.8	0.5625
157.9	0.56875
158	0.56875
158.1	0.56875
158.2	0.5625
158.3	0.55
158.4	0.5375
158.5	0.5375
158.6	0.53125
158.7	0.53125
158.8	0.53125
158.9	0.525
159	0.525
159.1	0.51875
159.2	0.51875
159.3	0.53125
159.4	0.5375
159.5	0.54375
159.6	0.54375
159.7	0.54375
159.8	0.5375
159.9	0.5375
160	0.53125
160.1	0.5375
160.2	0.54375
160.3	0.55
160.4	0.55
160.5	0.55
160.6	0.5625
160.7	0.55
160.8	0.5625
160.9	0.56875
161	0.56875
161.1	0.56875
161.2	0.5625
161.3	0.55
161.4	0.54375
161.5	0.54375
161.6	0.54375
161.7	0.54375
161.8	0.53125
161.9	0.5375
162	0.5375
162.1	0.5375
162.2	0.5375
162.3	0.5375
162.4	0.5375
162.5	0.53125
162.6	0.525
162.7	0.525
162.8	0.525
162.9	0.525
163	0.51875
163.1	0.5375
163.2	0.53125
163.3	0.51875
163.4	0.51875
163.5	0.5125
163.6	0.5125
163.7	0.5125
163.8	0.49375
163.9	0.49375
164	0.5125
164.1	0.5
164.2	0.5
164.3	0.49375
164.4	0.5
164.5	0.5
164.6	0.49375
164.7	0.5
164.8	0.49375
164.9	0.4875
165	0.49375
165.1	0.4875
165.2	0.5
165.3	0.50625
165.4	0.50625
165.5	0.5125
165.6	0.525
165.7	0.525
165.8	0.525
165.9	0.53125
166	0.53125
166.1	0.525
166.2	0.525
166.3	0.525
166.4	0.525
166.5	0.53125
166.6	0.53125
166.7	0.55
166.8	0.55
166.9	0.56875
167	0.58125
167.1	0.5875
167.2	0.58125
167.3	0.5875
167.4	0.59375
167.5	0.59375
167.6	0.6125
167.7	0.60625
167.8	0.60625
167.9	0.60625
168	0.6125
168.1	0.60625
168.2	0.59375
168.3	0.59375
168.4	0.5875
168.5	0.575
168.6	0.575
168.7	0.575
168.8	0.58125
168.9	0.58125
169	0.58125
169.1	0.575
169.2	0.575
169.3	0.575
169.4	0.56875
169.5	0.56875
169.6	0.575
169.7	0.575
169.8	0.575
169.9	0.6
170	0.60625
170.1	0.60625
170.2	0.6125
170.3	0.61875
170.4	0.6125
170.5	0.6125
170.6	0.61875
170.7	0.61875
170.8	0.60625
170.9	0.59375
171	0.59375
171.1	0.59375
171.2	0.5875
171.3	0.59375
171.4	0.59375
171.5	0.59375
171.6	0.5875
171.7	0.5875
171.8	0.59375
171.9	0.59375
172	0.59375
172.1	0.59375
172.2	0.58125
172.3	0.58125
172.4	0.575
172.5	0.5875
172.6	0.59375
172.7	0.5875
172.8	0.575
172.9	0.56875
173	0.55625
173.1	0.55
173.2	0.55625
173.3	0.55
173.4	0.54375
173.5	0.55625
173.6	0.54375
173.7	0.55625
173.8	0.5625
173.9	0.5625
174	0.56875
174.1	0.55625
174.2	0.55
174.3	0.55
174.4	0.55625
174.5	0.5625
174.6	0.5625
174.7	0.575
174.8	0.575
174.9	0.575
175	0.58125
175.1	0.5875
175.2	0.5875
175.3	0.5875
175.4	0.59375
175.5	0.59375
175.6	0.59375
175.7	0.6125
175.8	0.6
175.9	0.6
176	0.6
176.1	0.5875
176.2	0.56875
176.3	0.5625
176.4	0.5625
176.5	0.55625
176.6	0.55
176.7	0.55
176.8	0.55625
176.9	0.55625
177	0.5625
177.1	0.5625
177.2	0.56875
177.3	0.56875
177.4	0.575
177.5	0.575
177.6	0.56875
177.7	0.55625
177.8	0.55625
177.9	0.55625
178	0.55625
178.1	0.55
178.2	0.5625
178.3	0.5625
178.4	0.5625
178.5	0.575
178.6	0.56875
178.7	0.56875
178.8	0.56875
178.9	0.56875
179	0.56875
179.1	0.575
179.2	0.58125
179.3	0.5875
179.4	0.6
179.5	0.60625
179.6	0.60625
179.7	0.60625
179.8	0.60625
179.9	0.6
180	0.6
180.1	0.6
180.2	0.60625
180.3	0.6125
180.4	0.60625
180.5	0.6125
180.6	0.58125
180.7	0.575
180.8	0.56875
180.9	0.575
181	0.58125
181.1	0.575
181.2	0.56875
181.3	0.575
181.4	0.56875
181.5	0.56875
181.6	0.5625
181.7	0.5625
181.8	0.55
181.9	0.55625
182	0.55625
182.1	0.55625
182.2	0.55
182.3	0.55625
182.4	0.55
182.5	0.55
182.6	0.55
182.7	0.575
182.8	0.58125
182.9	0.5875
183	0.5875
183.1	0.5875
183.2	0.58125
183.3	0.59375
183.4	0.59375
183.5	0.59375
183.6	0.59375
183.7	0.59375
183.8	0.59375
183.9	0.58125
184	0.575
184.1	0.5875
184.2	0.59375
184.3	0.59375
184.4	0.60625
184.5	0.60625
184.6	0.60625
184.7	0.59375
184.8	0.5875
184.9	0.5875
185	0.5875
185.1	0.5875
185.2	0.59375
185.3	0.6
185.4	0.6
185.5	0.59375
185.6	0.6
185.7	0.60625
185.8	0.60625
185.9	0.60625
186	0.60625
186.1	0.6
186.2	0.60625
186.3	0.60625
186.4	0.60625
186.5	0.60625
186.6	0.6125
186.7	0.6125
186.8	0.625
186.9	0.625
187	0.625
187.1	0.63125
187.2	0.625
187.3	0.63125
187.4	0.63125
187.5	0.625
187.6	0.625
187.7	0.625
187.8	0.63125
187.9	0.625
188	0.6375
188.1	0.64375
188.2	0.64375
188.3	0.6375
188.4	0.63125
188.5	0.63125
188.6	0.63125
188.7	0.63125
188.8	0.61875
188.9	0.625
189	0.63125
189.1	0.61875
189.2	0.6125
189.3	0.6125
189.4	0.5875
189.5	0.5875
189.6	0.5875
189.7	0.59375
189.8	0.6
189.9	0.59375
190	0.59375
190.1	0.6
190.2	0.6
190.3	0.6
190.4	0.59375
190.5	0.59375
190.6	0.6
190.7	0.6
190.8	0.6125
190.9	0.6125
191	0.63125
191.1	0.63125
191.2	0.63125
191.3	0.63125
191.4	0.625
191.5	0.625
191.6	0.625
191.7	0.61875
191.8	0.6125
191.9	0.6125
192	0.61875
192.1	0.6
192.2	0.60625
192.3	0.60625
192.4	0.60625
192.5	0.60625
192.6	0.58125
192.7	0.58125
192.8	0.58125
192.9	0.58125
193	0.5875
193.1	0.58125
193.2	0.5875
193.3	0.59375
193.4	0.59375
193.5	0.59375
193.6	0.59375
193.7	0.5875
193.8	0.5875
193.9	0.575
194	0.575
194.1	0.58125
194.2	0.58125
194.3	0.5875
194.4	0.5875
194.5	0.5875
194.6	0.6
194.7	0.5875
194.8	0.6
194.9	0.60625
195	0.6125
195.1	0.625
195.2	0.625
195.3	0.61875
195.4	0.61875
195.5	0.61875
195.6	0.60625
195.7	0.60625
195.8	0.61875
195.9	0.6125
196	0.61875
196.1	0.625
196.2	0.61875
196.3	0.61875
196.4	0.6125
196.5	0.60625
196.6	0.6125
196.7	0.6125
196.8	0.6125
196.9	0.6125
197	0.6125
197.1	0.6125
197.2	0.61875
197.3	0.61875
197.4	0.61875
197.5	0.61875
197.6	0.6125
197.7	0.6125
197.8	0.6125
197.9	0.6125
198	0.60625
198.1	0.60625
198.2	0.6
198.3	0.5875
198.4	0.5875
198.5	0.5875
198.6	0.5875
198.7	0.5875
198.8	0.5875
198.9	0.5875
199	0.58125
199.1	0.575
199.2	0.58125
199.3	0.59375
199.4	0.6
199.5	0.6
199.6	0.6
199.7	0.59375
199.8	0.6
199.9	0.6
200	0.60625
[truncated: 14,000 more rows]
