# Supplementary material for: Bayesian inference of kinetic schemes for ion channels by Kalman filtering
Source: eLife journal article supplement (doi:10.7554/elife.62714), 2022-05-04
Supplement: fig4-data8 [file 1_Sim_N_80_Strom_MW.xlsx]

## Sheet: 0.25 M
0.1	0
0.2	0
0.3	0
0.4	0
0.5	0
0.6	0
0.7	0
0.8	0
0.9	0
1	0
1.1	0
1.2	0
1.3	0
1.4	0
1.5	0
1.6	0
1.7	0
1.8	0
1.9	0
2	0
2.1	0
2.2	0
2.3	0
2.4	0
2.5	0
2.6	0
2.7	0
2.8	0
2.9	0
3	0
3.1	0
3.2	0
3.3	0
3.4	0
3.5	0
3.6	0
3.7	0
3.8	0
3.9	0
4	0
4.1	0
4.2	0
4.3	0
4.4	0
4.5	0
4.6	0
4.7	0
4.8	0
4.9	0
5	0
5.1	0
5.2	0
5.3	0
5.4	0
5.5	0
5.6	0
5.7	0
5.8	0
5.9	0
6	0
6.1	0
6.2	0
6.3	0
6.4	0
6.5	0
6.6	0
6.7	0
6.8	0
6.9	0
7	0
7.1	0
7.2	0
7.3	0
7.4	0
7.5	0
7.6	0
7.7	0
7.8	0
7.9	0
8	0
8.1	0
8.2	0
8.3	0
8.4	0
8.5	0
8.6	0
8.7	0
8.8	0
8.9	0
9	0
9.1	0
9.2	0
9.3	0
9.4	0
9.5	0
9.6	0
9.7	0
9.8	0
9.9	0
10	0
10.1	0
10.2	0
10.3	0
10.4	0
10.5	0
10.6	0
10.7	0
10.8	0
10.9	0
11	0
11.1	0
11.2	0
11.3	0
11.4	0
11.5	0
11.6	0
11.7	0
11.8	0
11.9	0
12	0
12.1	0
12.2	0
12.3	0
12.4	0
12.5	0
12.6	0
12.7	0
12.8	0
12.9	0
13	0
13.1	0
13.2	0
13.3	0
13.4	0
13.5	0
13.6	0
13.7	0
13.8	0
13.9	0
14	0
14.1	0
14.2	0
14.3	0
14.4	0
14.5	0
14.6	0
14.7	0
14.8	0
14.9	0
15	0
15.1	0
15.2	0
15.3	0
15.4	0
15.5	0
15.6	0
15.7	0
15.8	0
15.9	0
16	0
16.1	0
16.2	0
16.3	0
16.4	0
16.5	0
16.6	0
16.7	0
16.8	0
16.9	0
17	0
17.1	0
17.2	0
17.3	0
17.4	0
17.5	0
17.6	0
17.7	0
17.8	0
17.9	0
18	0
18.1	0
18.2	0
18.3	0
18.4	0
18.5	0
18.6	0
18.7	0
18.8	0
18.9	0
19	0
19.1	0
19.2	0
19.3	0
19.4	0
19.5	0
19.6	0
19.7	0
19.8	0
19.9	0
20	0
20.1	0
20.2	0
20.3	0
20.4	0
20.5	0
20.6	0
20.7	0
20.8	0
20.9	0
21	0
21.1	0
21.2	0
21.3	0
21.4	0
21.5	0
21.6	0
21.7	0
21.8	0
21.9	0
22	0
22.1	0
22.2	0
22.3	0
22.4	0
22.5	0
22.6	0
22.7	0
22.8	0
22.9	0
23	0
23.1	0
23.2	0
23.3	0
23.4	0
23.5	0
23.6	0
23.7	0
23.8	0
23.9	0
24	0
24.1	0
24.2	0
24.3	0
24.4	0
24.5	0
24.6	0
24.7	0
24.8	0
24.9	0
25	0
25.1	0
25.2	0
25.3	0
25.4	0
25.5	0
25.6	0
25.7	0
25.8	0
25.9	0
26	0
26.1	0
26.2	0
26.3	0
26.4	0
26.5	0
26.6	0
26.7	0
26.8	0
26.9	0
27	0
27.1	0
27.2	0
27.3	0
27.4	0
27.5	0
27.6	0
27.7	0
27.8	0
27.9	0
28	0
28.1	0
28.2	0
28.3	0
28.4	0
28.5	0
28.6	0
28.7	0
28.8	0
28.9	0
29	0
29.1	0
29.2	0
29.3	0
29.4	0
29.5	0
29.6	0
29.7	0
29.8	0
29.9	0
30	0
30.1	0
30.2	0
30.3	0
30.4	0
30.5	0
30.6	0
30.7	0
30.8	0
30.9	0
31	0
31.1	0
31.2	0
31.3	0
31.4	0
31.5	0
31.6	0
31.7	0
31.8	0
31.9	0
32	0
32.1	0
32.2	0
32.3	0
32.4	0
32.5	0
32.6	0
32.7	0
32.8	0
32.9	0
33	0
33.1	0
33.2	0
33.3	0
33.4	0
33.5	0
33.6	0
33.7	0
33.8	0
33.9	0
34	0
34.1	0
34.2	0
34.3	0
34.4	0
34.5	0
34.6	0
34.7	0
34.8	0
34.9	0
35	0
35.1	0
35.2	0
35.3	0
35.4	0
35.5	0
35.6	0
35.7	0
35.8	0
35.9	0
36	0
36.1	0
36.2	0
36.3	0
36.4	0
36.5	0
36.6	0
36.7	0
36.8	0
36.9	0
37	0
37.1	0
37.2	0
37.3	0
37.4	0
37.5	0
37.6	0
37.7	0
37.8	0
37.9	0
38	0
38.1	0
38.2	0
38.3	0
38.4	0
38.5	0
38.6	0
38.7	0
38.8	0
38.9	0
39	0
39.1	0
39.2	0
39.3	0
39.4	0
39.5	0
39.6	0
39.7	0
39.8	0
39.9	0
40	0
40.1	0
40.2	0
40.3	0
40.4	0
40.5	0
40.6	0
40.7	0
40.8	0
40.9	0
41	0
41.1	0
41.2	0
41.3	0
41.4	0
41.5	0
41.6	0
41.7	0
41.8	0
41.9	0
42	0
42.1	0
42.2	0
42.3	0
42.4	0
42.5	0
42.6	0
42.7	0
42.8	0
42.9	0
43	0
43.1	0
43.2	0
43.3	0
43.4	0
43.5	0
43.6	0
43.7	0
43.8	0
43.9	0
44	0
44.1	0
44.2	0
44.3	0
44.4	0
44.5	0
44.6	0
44.7	0
44.8	0
44.9	0
45	0
45.1	0
45.2	0
45.3	0
45.4	0
45.5	0
45.6	0
45.7	0
45.8	0
45.9	0
46	0
46.1	0
46.2	0
46.3	0
46.4	0
46.5	0
46.6	0
46.7	0
46.8	0
46.9	0
47	0
47.1	0
47.2	0
47.3	0
47.4	0
47.5	0
47.6	0
47.7	0
47.8	0
47.9	0
48	0
48.1	0
48.2	0
48.3	0
48.4	0
48.5	0
48.6	0
48.7	0
48.8	0
48.9	0
49	0
49.1	0
49.2	0
49.3	0
49.4	0
49.5	0
49.6	0
49.7	0
49.8	0
49.9	0
50	0
50.1	0
50.2	0
50.3	0
50.4	0
50.5	0
50.6	0
50.7	0
50.8	0
50.9	0
51	0
51.1	0
51.2	0
51.3	0
51.4	0
51.5	0
51.6	0
51.7	0
51.8	0
51.9	0
52	0
52.1	0
52.2	0
52.3	0
52.4	0
52.5	0
52.6	0
52.7	0
52.8	0
52.9	0
53	0
53.1	0
53.2	0
53.3	0
53.4	0
53.5	0
53.6	0
53.7	0
53.8	0
53.9	0
54	0
54.1	0
54.2	0
54.3	0
54.4	0
54.5	0
54.6	0
54.7	0
54.8	0
54.9	0
55	0
55.1	0
55.2	0
55.3	0
55.4	0
55.5	0
55.6	0
55.7	0
55.8	0
55.9	0
56	0
56.1	0
56.2	0
56.3	0
56.4	0
56.5	0
56.6	0
56.7	0
56.8	0
56.9	0
57	0
57.1	0
57.2	0
57.3	0
57.4	0
57.5	0
57.6	0
57.7	0
57.8	0
57.9	0
58	0
58.1	0
58.2	0
58.3	0
58.4	0
58.5	0
58.6	0
58.7	0
58.8	0
58.9	0
59	0
59.1	0
59.2	0
59.3	0
59.4	0
59.5	0
59.6	0
59.7	0
59.8	0
59.9	0
60	0
60.1	0
60.2	0
60.3	0
60.4	0
60.5	0
60.6	0
60.7	0
60.8	0
60.9	0
61	0
61.1	0
61.2	0
61.3	0
61.4	0
61.5	0
61.6	0
61.7	0
61.8	0
61.9	0
62	0
62.1	0
62.2	0
62.3	0
62.4	0
62.5	0
62.6	0
62.7	0
62.8	0
62.9	0
63	0
63.1	0
63.2	0
63.3	0
63.4	0
63.5	0
63.6	0
63.7	0
63.8	0
63.9	0
64	0
64.1	0
64.2	0
64.3	0
64.4	0
64.5	0
64.6	0
64.7	0
64.8	0
64.9	0
65	0
65.1	0
65.2	0
65.3	0
65.4	0
65.5	0
65.6	0
65.7	0
65.8	0
65.9	0
66	0
66.1	0
66.2	0
66.3	0
66.4	0
66.5	0
66.6	0
66.7	0
66.8	0
66.9	0
67	0
67.1	0
67.2	0
67.3	0
67.4	0
67.5	0
67.6	0
67.7	0
67.8	0
67.9	0
68	0
68.1	0
68.2	0
68.3	0
68.4	0
68.5	0
68.6	0
68.7	0
68.8	0
68.9	0
69	0
69.1	0
69.2	0
69.3	0
69.4	0
69.5	0
69.6	0
69.7	0
69.8	0
69.9	0
70	0
70.1	0
70.2	0
70.3	0
70.4	0
70.5	0
70.6	0
70.7	0
70.8	0
70.9	0
71	0
71.1	0
71.2	0
71.3	0
71.4	0
71.5	0
71.6	0
71.7	0
71.8	0
71.9	0
72	0
72.1	0
72.2	0
72.3	0
72.4	0
72.5	0
72.6	0
72.7	0
72.8	0
72.9	0
73	0
73.1	0
73.2	0
73.3	0
73.4	0
73.5	0
73.6	0
73.7	0
73.8	0
73.9	0
74	0
74.1	0
74.2	0
74.3	0
74.4	0
74.5	0
74.6	0
74.7	0
74.8	0
74.9	0
75	0
75.1	0
75.2	0
75.3	0
75.4	0
75.5	0
75.6	0
75.7	0
75.8	0
75.9	0
76	0
76.1	0
76.2	0
76.3	0
76.4	0
76.5	0
76.6	0
76.7	0
76.8	0
76.9	0
77	0
77.1	0
77.2	0
77.3	0
77.4	0
77.5	0
77.6	0
77.7	0
77.8	0
77.9	0
78	0
78.1	0
78.2	0
78.3	0
78.4	0
78.5	0
78.6	0
78.7	0
78.8	0
78.9	0
79	0
79.1	0
79.2	0
79.3	0
79.4	0
79.5	0
79.6	0
79.7	0
79.8	0
79.9	0
80	0
80.1	0
80.2	0
80.3	0
80.4	0
80.5	0
80.6	0
80.7	0
80.8	0
80.9	0
81	0
81.1	0
81.2	0
81.3	0
81.4	0
81.5	0
81.6	0
81.7	0
81.8	0
81.9	0
82	0
82.1	0
82.2	0
82.3	0
82.4	0
82.5	0
82.6	0
82.7	0
82.8	0
82.9	0
83	0
83.1	0
83.2	0
83.3	0
83.4	0
83.5	0
83.6	0
83.7	0
83.8	0
83.9	0
84	0
84.1	0
84.2	0
84.3	0
84.4	0
84.5	0
84.6	0
84.7	0
84.8	0
84.9	0
85	0
85.1	0
85.2	0
85.3	0
85.4	0
85.5	0
85.6	0
85.7	0
85.8	0
85.9	0
86	0
86.1	0
86.2	0
86.3	0
86.4	0
86.5	0
86.6	0
86.7	0
86.8	0
86.9	0
87	0
87.1	0
87.2	0
87.3	0
87.4	0
87.5	0
87.6	0
87.7	0
87.8	0
87.9	0
88	0
88.1	0
88.2	0
88.3	0
88.4	0
88.5	0
88.6	0
88.7	0
88.8	0
88.9	0
89	0
89.1	0
89.2	0
89.3	0
89.4	0
89.5	0
89.6	0
89.7	0
89.8	0
89.9	0
90	0
90.1	0
90.2	0
90.3	0
90.4	0
90.5	0
90.6	0
90.7	0
90.8	0
90.9	0
91	0
91.1	0
91.2	0
91.3	0
91.4	0
91.5	0
91.6	0
91.7	0
91.8	0
91.9	0
92	0
92.1	0
92.2	0
92.3	0
92.4	0
92.5	0
92.6	0
92.7	0
92.8	0
92.9	0
93	0
93.1	0
93.2	0
93.3	0
93.4	0
93.5	0
93.6	0
93.7	0
93.8	0
93.9	0
94	0
94.1	0
94.2	0
94.3	0
94.4	0
94.5	0
94.6	0
94.7	0
94.8	0
94.9	0
95	0
95.1	0
95.2	0
95.3	0
95.4	0
95.5	0
95.6	0
95.7	0
95.8	0
95.9	0
96	0
96.1	0
96.2	0
96.3	0
96.4	0
96.5	0
96.6	0
96.7	0
96.8	0
96.9	0
97	0
97.1	0
97.2	0
97.3	0
97.4	0
97.5	0
97.6	0
97.7	0
97.8	0
97.9	0
98	0
98.1	0
98.2	0
98.3	0
98.4	0
98.5	0
98.6	0
98.7	0
98.8	0
98.9	0
99	0
99.1	0
99.2	0
99.3	0
99.4	0
99.5	0
99.6	0
99.7	0
99.8	0
99.9	0
100	0
100.1	0
100.2	0
100.3	0
100.4	0
100.5	0
100.6	0
100.7	0
100.8	0
100.9	0
101	0
101.1	0
101.2	0
101.3	0
101.4	0
101.5	0
101.6	0
101.7	0
101.8	0
101.9	0
102	0
102.1	0
102.2	0
102.3	0
102.4	0
102.5	0
102.6	0
102.7	0
102.8	0
102.9	0
103	0
103.1	0
103.2	0
103.3	0
103.4	0
103.5	0
103.6	0
103.7	0
103.8	0
103.9	0
104	0
104.1	0
104.2	0
104.3	0
104.4	0
104.5	0
104.6	0
104.7	0
104.8	0
104.9	0
105	0
105.1	0
105.2	0
105.3	0
105.4	0
105.5	0
105.6	0
105.7	0
105.8	0
105.9	0
106	0
106.1	0
106.2	0
106.3	0
106.4	0
106.5	0
106.6	0
106.7	0
106.8	0.0125
106.9	0.0125
107	0.0125
107.1	0.0125
107.2	0.0125
107.3	0.0125
107.4	0.025
107.5	0.025
107.6	0.025
107.7	0.025
107.8	0.025
107.9	0.0375
108	0.0375
108.1	0.0375
108.2	0.0375
108.3	0.0375
108.4	0.0375
108.5	0.0375
108.6	0.0375
108.7	0.05
108.8	0.05
108.9	0.05
109	0.05
109.1	0.05
109.2	0.05
109.3	0.05
109.4	0.05
109.5	0.05
109.6	0.05
109.7	0.05
109.8	0.05
109.9	0.05
110	0.05
110.1	0.0625
110.2	0.0625
110.3	0.0625
110.4	0.0625
110.5	0.0625
110.6	0.075
110.7	0.075
110.8	0.075
110.9	0.075
111	0.075
111.1	0.075
111.2	0.075
111.3	0.0875
111.4	0.0875
111.5	0.0875
111.6	0.0875
111.7	0.0875
111.8	0.0875
111.9	0.1
112	0.1
112.1	0.1
112.2	0.1
112.3	0.1
112.4	0.1
112.5	0.1
112.6	0.1
112.7	0.1
112.8	0.1
112.9	0.1
113	0.1
113.1	0.1
113.2	0.1
113.3	0.1
113.4	0.1
113.5	0.1
113.6	0.1
113.7	0.1
113.8	0.1
113.9	0.1
114	0.1125
114.1	0.1125
114.2	0.1125
114.3	0.1125
114.4	0.1125
114.5	0.1125
114.6	0.1125
114.7	0.1125
114.8	0.1125
114.9	0.1125
115	0.1125
115.1	0.1125
115.2	0.1125
115.3	0.1125
115.4	0.1125
115.5	0.1125
115.6	0.125
115.7	0.125
115.8	0.125
115.9	0.125
116	0.125
116.1	0.125
116.2	0.125
116.3	0.125
116.4	0.125
116.5	0.125
116.6	0.125
116.7	0.125
116.8	0.125
116.9	0.125
117	0.125
117.1	0.125
117.2	0.125
117.3	0.125
117.4	0.125
117.5	0.125
117.6	0.125
117.7	0.125
117.8	0.125
117.9	0.125
118	0.125
118.1	0.125
118.2	0.125
118.3	0.125
118.4	0.125
118.5	0.125
118.6	0.125
118.7	0.125
118.8	0.125
118.9	0.125
119	0.125
119.1	0.125
119.2	0.125
119.3	0.125
119.4	0.125
119.5	0.125
119.6	0.125
119.7	0.125
119.8	0.125
119.9	0.125
120	0.125
120.1	0.125
120.2	0.125
120.3	0.125
120.4	0.125
120.5	0.125
120.6	0.125
120.7	0.125
120.8	0.1375
120.9	0.1375
121	0.1375
121.1	0.1375
121.2	0.1375
121.3	0.1375
121.4	0.1375
121.5	0.1375
121.6	0.1375
121.7	0.1375
121.8	0.1375
121.9	0.1375
122	0.1375
122.1	0.1375
122.2	0.1375
122.3	0.1375
122.4	0.1375
122.5	0.1375
122.6	0.1375
122.7	0.1375
122.8	0.1375
122.9	0.1375
123	0.1375
123.1	0.1375
123.2	0.1375
123.3	0.1375
123.4	0.1375
123.5	0.1375
123.6	0.1375
123.7	0.1375
123.8	0.1375
123.9	0.1375
124	0.1375
124.1	0.1375
124.2	0.1375
124.3	0.1375
124.4	0.1375
124.5	0.1375
124.6	0.1375
124.7	0.1375
124.8	0.1375
124.9	0.1375
125	0.1375
125.1	0.1375
125.2	0.1375
125.3	0.1375
125.4	0.1375
125.5	0.1375
125.6	0.1375
125.7	0.1375
125.8	0.1375
125.9	0.1375
126	0.1375
126.1	0.1375
126.2	0.1375
126.3	0.1375
126.4	0.1375
126.5	0.1375
126.6	0.1375
126.7	0.1375
126.8	0.1375
126.9	0.1375
127	0.1375
127.1	0.1375
127.2	0.1375
127.3	0.1375
127.4	0.1375
127.5	0.1375
127.6	0.1375
127.7	0.1375
127.8	0.1375
127.9	0.1375
128	0.1375
128.1	0.1375
128.2	0.15
128.3	0.15
128.4	0.15
128.5	0.15
128.6	0.15
128.7	0.15
128.8	0.15
128.9	0.15
129	0.15
129.1	0.15
129.2	0.15
129.3	0.15
129.4	0.15
129.5	0.15
129.6	0.15
129.7	0.15
129.8	0.15
129.9	0.15
130	0.1625
130.1	0.1625
130.2	0.1625
130.3	0.1625
130.4	0.1625
130.5	0.1625
130.6	0.1625
130.7	0.1625
130.8	0.1625
130.9	0.1625
131	0.1625
131.1	0.1625
131.2	0.1625
131.3	0.1625
131.4	0.1625
131.5	0.1625
131.6	0.1625
131.7	0.1625
131.8	0.1625
131.9	0.1625
132	0.1625
132.1	0.1625
132.2	0.1625
132.3	0.1625
132.4	0.1625
132.5	0.1625
132.6	0.1625
132.7	0.1625
132.8	0.1625
132.9	0.1625
133	0.1625
133.1	0.1625
133.2	0.1625
133.3	0.1625
133.4	0.1625
133.5	0.1625
133.6	0.1625
133.7	0.1625
133.8	0.175
133.9	0.175
134	0.175
134.1	0.175
134.2	0.175
134.3	0.175
134.4	0.175
134.5	0.175
134.6	0.175
134.7	0.175
134.8	0.1625
134.9	0.1625
135	0.1625
135.1	0.1625
135.2	0.1625
135.3	0.1625
135.4	0.1625
135.5	0.1625
135.6	0.1625
135.7	0.1625
135.8	0.1625
135.9	0.1625
136	0.1625
136.1	0.1625
136.2	0.1625
136.3	0.1625
136.4	0.1625
136.5	0.1625
136.6	0.1625
136.7	0.1625
136.8	0.1625
136.9	0.1625
137	0.1625
137.1	0.1625
137.2	0.1625
137.3	0.1625
137.4	0.1625
137.5	0.1625
137.6	0.1625
137.7	0.1625
137.8	0.1625
137.9	0.1625
138	0.1625
138.1	0.1625
138.2	0.1625
138.3	0.1625
138.4	0.1625
138.5	0.1625
138.6	0.1625
138.7	0.1625
138.8	0.1625
138.9	0.1625
139	0.1625
139.1	0.1625
139.2	0.1625
139.3	0.1625
139.4	0.1625
139.5	0.15
139.6	0.15
139.7	0.15
139.8	0.15
139.9	0.15
140	0.15
140.1	0.15
140.2	0.15
140.3	0.15
140.4	0.15
140.5	0.15
140.6	0.15
140.7	0.15
140.8	0.15
140.9	0.15
141	0.15
141.1	0.15
141.2	0.15
141.3	0.15
141.4	0.1625
141.5	0.1625
141.6	0.1625
141.7	0.1625
141.8	0.1625
141.9	0.1625
142	0.1625
142.1	0.1625
142.2	0.1625
142.3	0.1625
142.4	0.1625
142.5	0.1625
142.6	0.1625
142.7	0.1625
142.8	0.1625
142.9	0.1625
143	0.1625
143.1	0.1625
143.2	0.1625
143.3	0.1625
143.4	0.1625
143.5	0.1625
143.6	0.1625
143.7	0.1625
143.8	0.1625
143.9	0.1625
144	0.1625
144.1	0.1625
144.2	0.1625
144.3	0.1625
144.4	0.175
144.5	0.175
144.6	0.1625
144.7	0.1625
144.8	0.1625
144.9	0.1625
145	0.1625
145.1	0.1625
145.2	0.1625
145.3	0.1625
145.4	0.1625
145.5	0.1625
145.6	0.1625
145.7	0.1625
145.8	0.1625
145.9	0.1625
146	0.1625
146.1	0.15
146.2	0.15
146.3	0.15
146.4	0.15
146.5	0.15
146.6	0.15
146.7	0.15
146.8	0.15
146.9	0.15
147	0.15
147.1	0.15
147.2	0.15
147.3	0.15
147.4	0.15
147.5	0.15
147.6	0.15
147.7	0.15
147.8	0.15
147.9	0.15
148	0.1625
148.1	0.1625
148.2	0.1625
148.3	0.175
148.4	0.175
148.5	0.175
148.6	0.175
148.7	0.175
148.8	0.175
148.9	0.175
149	0.175
149.1	0.175
149.2	0.175
149.3	0.175
149.4	0.175
149.5	0.175
149.6	0.175
149.7	0.175
149.8	0.175
149.9	0.175
150	0.1875
150.1	0.1875
150.2	0.1875
150.3	0.1875
150.4	0.1875
150.5	0.1875
150.6	0.1875
150.7	0.1875
150.8	0.1875
150.9	0.1875
151	0.1875
151.1	0.1875
151.2	0.1875
151.3	0.1875
151.4	0.1875
151.5	0.1875
151.6	0.1875
151.7	0.1875
151.8	0.1875
151.9	0.1875
152	0.1875
152.1	0.1875
152.2	0.1875
152.3	0.1875
152.4	0.1875
152.5	0.1875
152.6	0.1875
152.7	0.1875
152.8	0.1875
152.9	0.1875
153	0.1875
153.1	0.1875
153.2	0.1875
153.3	0.1875
153.4	0.1875
153.5	0.1875
153.6	0.1875
153.7	0.1875
153.8	0.1875
153.9	0.1875
154	0.1875
154.1	0.1875
154.2	0.1875
154.3	0.1875
154.4	0.1875
154.5	0.1875
154.6	0.1875
154.7	0.1875
154.8	0.1875
154.9	0.1875
155	0.1875
155.1	0.1875
155.2	0.1875
155.3	0.1875
155.4	0.1875
155.5	0.1875
155.6	0.1875
155.7	0.1875
155.8	0.1875
155.9	0.1875
156	0.1875
156.1	0.1875
156.2	0.175
156.3	0.175
156.4	0.175
156.5	0.175
156.6	0.175
156.7	0.175
156.8	0.175
156.9	0.1875
157	0.1875
157.1	0.1875
157.2	0.1875
157.3	0.1875
157.4	0.1875
157.5	0.1875
157.6	0.1875
157.7	0.1875
157.8	0.1875
157.9	0.1875
158	0.1875
158.1	0.1875
158.2	0.1875
158.3	0.1875
158.4	0.1875
158.5	0.1875
158.6	0.1875
158.7	0.1875
158.8	0.1875
158.9	0.1875
159	0.1875
159.1	0.1875
159.2	0.1875
159.3	0.1875
159.4	0.1875
159.5	0.1875
159.6	0.1875
159.7	0.1875
159.8	0.1875
159.9	0.1875
160	0.1875
160.1	0.1875
160.2	0.1875
160.3	0.1875
160.4	0.1875
160.5	0.1875
160.6	0.1875
160.7	0.1875
160.8	0.1875
160.9	0.1875
161	0.1875
161.1	0.1875
161.2	0.1875
161.3	0.1875
161.4	0.1875
161.5	0.1875
161.6	0.1875
161.7	0.175
161.8	0.175
161.9	0.175
162	0.175
162.1	0.175
162.2	0.175
162.3	0.175
162.4	0.175
162.5	0.1875
162.6	0.1875
162.7	0.1875
162.8	0.1875
162.9	0.1875
163	0.1875
163.1	0.1875
163.2	0.1875
163.3	0.1875
163.4	0.1875
163.5	0.1875
163.6	0.1875
163.7	0.1875
163.8	0.1875
163.9	0.1875
164	0.1875
164.1	0.1875
164.2	0.1875
164.3	0.1875
164.4	0.1875
164.5	0.1875
164.6	0.1875
164.7	0.1875
164.8	0.1875
164.9	0.2
165	0.2
165.1	0.2
165.2	0.2
165.3	0.2
165.4	0.2
165.5	0.2
165.6	0.2
165.7	0.2
165.8	0.2
165.9	0.2
166	0.2
166.1	0.2
166.2	0.2
166.3	0.2
166.4	0.2
166.5	0.2
166.6	0.2
166.7	0.2
166.8	0.2
166.9	0.2
167	0.2
167.1	0.2
167.2	0.2
167.3	0.2
167.4	0.2
167.5	0.2
167.6	0.2
167.7	0.2
167.8	0.2
167.9	0.2
168	0.2
168.1	0.2
168.2	0.2
168.3	0.2
168.4	0.2
168.5	0.2125
168.6	0.2125
168.7	0.2125
168.8	0.2125
168.9	0.2125
169	0.2125
169.1	0.2125
169.2	0.2125
169.3	0.2125
169.4	0.225
169.5	0.225
169.6	0.225
169.7	0.2375
169.8	0.2375
169.9	0.2375
170	0.2375
170.1	0.2375
170.2	0.2375
170.3	0.2375
170.4	0.2375
170.5	0.2375
170.6	0.2375
170.7	0.2375
170.8	0.2375
170.9	0.2375
171	0.2375
171.1	0.2375
171.2	0.2375
171.3	0.2375
171.4	0.2375
171.5	0.2375
171.6	0.2375
171.7	0.25
171.8	0.25
171.9	0.25
172	0.25
172.1	0.25
172.2	0.25
172.3	0.25
172.4	0.25
172.5	0.25
172.6	0.25
172.7	0.25
172.8	0.25
172.9	0.25
173	0.25
173.1	0.25
173.2	0.25
173.3	0.25
173.4	0.25
173.5	0.25
173.6	0.25
173.7	0.25
173.8	0.25
173.9	0.25
174	0.25
174.1	0.25
174.2	0.25
174.3	0.25
174.4	0.25
174.5	0.25
174.6	0.25
174.7	0.25
174.8	0.25
174.9	0.25
175	0.25
175.1	0.25
175.2	0.25
175.3	0.25
175.4	0.25
175.5	0.25
175.6	0.25
175.7	0.25
175.8	0.25
175.9	0.2625
176	0.2625
176.1	0.25
176.2	0.25
176.3	0.25
176.4	0.25
176.5	0.25
176.6	0.25
176.7	0.25
176.8	0.25
176.9	0.25
177	0.25
177.1	0.25
177.2	0.2625
177.3	0.2625
177.4	0.2625
177.5	0.2625
177.6	0.2625
177.7	0.2625
177.8	0.2625
177.9	0.2625
178	0.2625
178.1	0.2625
178.2	0.2625
178.3	0.275
178.4	0.275
178.5	0.275
178.6	0.275
178.7	0.275
178.8	0.275
178.9	0.275
179	0.275
179.1	0.275
179.2	0.275
179.3	0.275
179.4	0.275
179.5	0.275
179.6	0.275
179.7	0.275
179.8	0.275
179.9	0.275
180	0.275
180.1	0.275
180.2	0.275
180.3	0.275
180.4	0.275
180.5	0.275
180.6	0.275
180.7	0.275
180.8	0.275
180.9	0.275
181	0.275
181.1	0.275
181.2	0.275
181.3	0.275
181.4	0.2875
181.5	0.2875
181.6	0.2875
181.7	0.2875
181.8	0.2875
181.9	0.2875
182	0.2875
182.1	0.2875
182.2	0.2875
182.3	0.2875
182.4	0.2875
182.5	0.2875
182.6	0.2875
182.7	0.2875
182.8	0.2875
182.9	0.2875
183	0.2875
183.1	0.3
183.2	0.3
183.3	0.3
183.4	0.3
183.5	0.3
183.6	0.2875
183.7	0.3
183.8	0.3
183.9	0.3
184	0.3
184.1	0.3
184.2	0.2875
184.3	0.2875
184.4	0.2875
184.5	0.2875
184.6	0.2875
184.7	0.3
184.8	0.3
184.9	0.3
185	0.3
185.1	0.3
185.2	0.3
185.3	0.3
185.4	0.3
185.5	0.3
185.6	0.3
185.7	0.3
185.8	0.3
185.9	0.3
186	0.3
186.1	0.3
186.2	0.3
186.3	0.3
186.4	0.3
186.5	0.3
186.6	0.3
186.7	0.3
186.8	0.3
186.9	0.3
187	0.3
187.1	0.3
187.2	0.3
187.3	0.3
187.4	0.3
187.5	0.3
187.6	0.3
187.7	0.3
187.8	0.3
187.9	0.3
188	0.3125
188.1	0.325
188.2	0.325
188.3	0.325
188.4	0.325
188.5	0.325
188.6	0.325
188.7	0.325
188.8	0.325
188.9	0.325
189	0.325
189.1	0.325
189.2	0.325
189.3	0.325
189.4	0.325
189.5	0.325
189.6	0.325
189.7	0.325
189.8	0.325
189.9	0.325
190	0.325
190.1	0.325
190.2	0.325
190.3	0.325
190.4	0.325
190.5	0.325
190.6	0.325
190.7	0.325
190.8	0.325
190.9	0.325
191	0.325
191.1	0.325
191.2	0.325
191.3	0.325
191.4	0.325
191.5	0.325
191.6	0.325
191.7	0.325
191.8	0.325
191.9	0.325
192	0.325
192.1	0.325
192.2	0.325
192.3	0.325
192.4	0.3125
192.5	0.3125
192.6	0.3125
192.7	0.3125
192.8	0.3125
192.9	0.3125
193	0.3125
193.1	0.3125
193.2	0.3125
193.3	0.3125
193.4	0.3125
193.5	0.3125
193.6	0.3
193.7	0.3
193.8	0.3
193.9	0.3
194	0.3
194.1	0.3
194.2	0.3
194.3	0.3
194.4	0.3
194.5	0.3
194.6	0.3
194.7	0.3
194.8	0.3
194.9	0.3
195	0.3125
195.1	0.3125
195.2	0.3125
195.3	0.325
195.4	0.325
195.5	0.325
195.6	0.325
195.7	0.325
195.8	0.325
195.9	0.325
196	0.325
196.1	0.325
196.2	0.325
196.3	0.325
196.4	0.325
196.5	0.325
196.6	0.325
196.7	0.325
196.8	0.325
196.9	0.325
197	0.3375
197.1	0.3375
197.2	0.3375
197.3	0.3375
197.4	0.3375
197.5	0.3375
197.6	0.3375
197.7	0.3375
197.8	0.3375
197.9	0.3375
198	0.3375
198.1	0.3375
198.2	0.3375
198.3	0.3375
198.4	0.3375
198.5	0.3375
198.6	0.3375
198.7	0.3375
198.8	0.3375
198.9	0.3375
199	0.3375
199.1	0.3375
199.2	0.3375
199.3	0.3375
199.4	0.35
199.5	0.35
199.6	0.3375
199.7	0.3375
199.8	0.3375
199.9	0.3375
200	0.3375
[truncated: 14,000 more rows]
