# Supplementary material for: Bayesian inference of kinetic schemes for ion channels by Kalman filtering
Source: eLife journal article supplement (doi:10.7554/elife.62714), 2022-05-04
Supplement: fig4-data8 [file 1_Sim_N_100_Fluor_MW.xlsx]

## Sheet: Tabelle1
0.1	0
0.2	0
0.3	0
0.4	0
0.5	0
0.6	0
0.7	0
0.8	0
0.9	0
1	0
1.1	0
1.2	0
1.3	0
1.4	0
1.5	0
1.6	0
1.7	0
1.8	0
1.9	0
2	0
2.1	0
2.2	0
2.3	0
2.4	0
2.5	0
2.6	0
2.7	0
2.8	0
2.9	0
3	0
3.1	0
3.2	0
3.3	0
3.4	0
3.5	0
3.6	0
3.7	0
3.8	0
3.9	0
4	0
4.1	0
4.2	0
4.3	0
4.4	0
4.5	0
4.6	0
4.7	0
4.8	0
4.9	0
5	0
5.1	0
5.2	0
5.3	0
5.4	0
5.5	0
5.6	0
5.7	0
5.8	0
5.9	0
6	0
6.1	0
6.2	0
6.3	0
6.4	0
6.5	0
6.6	0
6.7	0
6.8	0
6.9	0
7	0
7.1	0
7.2	0
7.3	0
7.4	0
7.5	0
7.6	0
7.7	0
7.8	0
7.9	0
8	0
8.1	0
8.2	0
8.3	0
8.4	0
8.5	0
8.6	0
8.7	0
8.8	0
8.9	0
9	0
9.1	0
9.2	0
9.3	0
9.4	0
9.5	0
9.6	0
9.7	0
9.8	0
9.9	0
10	0
10.1	0
10.2	0
10.3	0
10.4	0
10.5	0
10.6	0
10.7	0
10.8	0
10.9	0
11	0
11.1	0
11.2	0
11.3	0
11.4	0
11.5	0
11.6	0
11.7	0
11.8	0
11.9	0
12	0
12.1	0
12.2	0
12.3	0
12.4	0
12.5	0
12.6	0
12.7	0
12.8	0
12.9	0
13	0
13.1	0
13.2	0
13.3	0
13.4	0
13.5	0
13.6	0
13.7	0
13.8	0
13.9	0
14	0
14.1	0
14.2	0
14.3	0
14.4	0
14.5	0
14.6	0
14.7	0
14.8	0
14.9	0
15	0
15.1	0
15.2	0
15.3	0
15.4	0
15.5	0
15.6	0
15.7	0
15.8	0
15.9	0
16	0
16.1	0
16.2	0
16.3	0
16.4	0
16.5	0
16.6	0
16.7	0
16.8	0
16.9	0
17	0
17.1	0
17.2	0
17.3	0
17.4	0
17.5	0
17.6	0
17.7	0
17.8	0
17.9	0
18	0
18.1	0
18.2	0
18.3	0
18.4	0
18.5	0
18.6	0
18.7	0
18.8	0
18.9	0
19	0
19.1	0
19.2	0
19.3	0
19.4	0
19.5	0
19.6	0
19.7	0
19.8	0
19.9	0
20	0
20.1	0
20.2	0
20.3	0
20.4	0
20.5	0
20.6	0
20.7	0
20.8	0
20.9	0
21	0
21.1	0
21.2	0
21.3	0
21.4	0
21.5	0
21.6	0
21.7	0
21.8	0
21.9	0
22	0
22.1	0
22.2	0
22.3	0
22.4	0
22.5	0
22.6	0
22.7	0
22.8	0
22.9	0
23	0
23.1	0
23.2	0
23.3	0
23.4	0
23.5	0
23.6	0
23.7	0
23.8	0
23.9	0
24	0
24.1	0
24.2	0
24.3	0
24.4	0
24.5	0
24.6	0
24.7	0
24.8	0
24.9	0
25	0
25.1	0
25.2	0
25.3	0
25.4	0
25.5	0
25.6	0
25.7	0
25.8	0
25.9	0
26	0
26.1	0
26.2	0
26.3	0
26.4	0
26.5	0
26.6	0
26.7	0
26.8	0
26.9	0
27	0
27.1	0
27.2	0
27.3	0
27.4	0
27.5	0
27.6	0
27.7	0
27.8	0
27.9	0
28	0
28.1	0
28.2	0
28.3	0
28.4	0
28.5	0
28.6	0
28.7	0
28.8	0
28.9	0
29	0
29.1	0
29.2	0
29.3	0
29.4	0
29.5	0
29.6	0
29.7	0
29.8	0
29.9	0
30	0
30.1	0
30.2	0
30.3	0
30.4	0
30.5	0
30.6	0
30.7	0
30.8	0
30.9	0
31	0
31.1	0
31.2	0
31.3	0
31.4	0
31.5	0
31.6	0
31.7	0
31.8	0
31.9	0
32	0
32.1	0
32.2	0
32.3	0
32.4	0
32.5	0
32.6	0
32.7	0
32.8	0
32.9	0
33	0
33.1	0
33.2	0
33.3	0
33.4	0
33.5	0
33.6	0
33.7	0
33.8	0
33.9	0
34	0
34.1	0
34.2	0
34.3	0
34.4	0
34.5	0
34.6	0
34.7	0
34.8	0
34.9	0
35	0
35.1	0
35.2	0
35.3	0
35.4	0
35.5	0
35.6	0
35.7	0
35.8	0
35.9	0
36	0
36.1	0
36.2	0
36.3	0
36.4	0
36.5	0
36.6	0
36.7	0
36.8	0
36.9	0
37	0
37.1	0
37.2	0
37.3	0
37.4	0
37.5	0
37.6	0
37.7	0
37.8	0
37.9	0
38	0
38.1	0
38.2	0
38.3	0
38.4	0
38.5	0
38.6	0
38.7	0
38.8	0
38.9	0
39	0
39.1	0
39.2	0
39.3	0
39.4	0
39.5	0
39.6	0
39.7	0
39.8	0
39.9	0
40	0
40.1	0
40.2	0
40.3	0
40.4	0
40.5	0
40.6	0
40.7	0
40.8	0
40.9	0
41	0
41.1	0
41.2	0
41.3	0
41.4	0
41.5	0
41.6	0
41.7	0
41.8	0
41.9	0
42	0
42.1	0
42.2	0
42.3	0
42.4	0
42.5	0
42.6	0
42.7	0
42.8	0
42.9	0
43	0
43.1	0
43.2	0
43.3	0
43.4	0
43.5	0
43.6	0
43.7	0
43.8	0
43.9	0
44	0
44.1	0
44.2	0
44.3	0
44.4	0
44.5	0
44.6	0
44.7	0
44.8	0
44.9	0
45	0
45.1	0
45.2	0
45.3	0
45.4	0
45.5	0
45.6	0
45.7	0
45.8	0
45.9	0
46	0
46.1	0
46.2	0
46.3	0
46.4	0
46.5	0
46.6	0
46.7	0
46.8	0
46.9	0
47	0
47.1	0
47.2	0
47.3	0
47.4	0
47.5	0
47.6	0
47.7	0
47.8	0
47.9	0
48	0
48.1	0
48.2	0
48.3	0
48.4	0
48.5	0
48.6	0
48.7	0
48.8	0
48.9	0
49	0
49.1	0
49.2	0
49.3	0
49.4	0
49.5	0
49.6	0
49.7	0
49.8	0
49.9	0
50	0
50.1	0
50.2	0
50.3	0
50.4	0
50.5	0
50.6	0
50.7	0
50.8	0
50.9	0
51	0
51.1	0
51.2	0
51.3	0
51.4	0
51.5	0
51.6	0
51.7	0
51.8	0
51.9	0
52	0
52.1	0
52.2	0
52.3	0
52.4	0
52.5	0
52.6	0
52.7	0
52.8	0
52.9	0
53	0
53.1	0
53.2	0
53.3	0
53.4	0
53.5	0
53.6	0
53.7	0
53.8	0
53.9	0
54	0
54.1	0
54.2	0
54.3	0
54.4	0
54.5	0
54.6	0
54.7	0
54.8	0
54.9	0
55	0
55.1	0
55.2	0
55.3	0
55.4	0
55.5	0
55.6	0
55.7	0
55.8	0
55.9	0
56	0
56.1	0
56.2	0
56.3	0
56.4	0
56.5	0
56.6	0
56.7	0
56.8	0
56.9	0
57	0
57.1	0
57.2	0
57.3	0
57.4	0
57.5	0
57.6	0
57.7	0
57.8	0
57.9	0
58	0
58.1	0
58.2	0
58.3	0
58.4	0
58.5	0
58.6	0
58.7	0
58.8	0
58.9	0
59	0
59.1	0
59.2	0
59.3	0
59.4	0
59.5	0
59.6	0
59.7	0
59.8	0
59.9	0
60	0
60.1	0
60.2	0
60.3	0
60.4	0
60.5	0
60.6	0
60.7	0
60.8	0
60.9	0
61	0
61.1	0
61.2	0
61.3	0
61.4	0
61.5	0
61.6	0
61.7	0
61.8	0
61.9	0
62	0
62.1	0
62.2	0
62.3	0
62.4	0
62.5	0
62.6	0
62.7	0
62.8	0
62.9	0
63	0
63.1	0
63.2	0
63.3	0
63.4	0
63.5	0
63.6	0
63.7	0
63.8	0
63.9	0
64	0
64.1	0
64.2	0
64.3	0
64.4	0
64.5	0
64.6	0
64.7	0
64.8	0
64.9	0
65	0
65.1	0
65.2	0
65.3	0
65.4	0
65.5	0
65.6	0
65.7	0
65.8	0
65.9	0
66	0
66.1	0
66.2	0
66.3	0
66.4	0
66.5	0
66.6	0
66.7	0
66.8	0
66.9	0
67	0
67.1	0
67.2	0
67.3	0
67.4	0
67.5	0
67.6	0
67.7	0
67.8	0
67.9	0
68	0
68.1	0
68.2	0
68.3	0
68.4	0
68.5	0
68.6	0
68.7	0
68.8	0
68.9	0
69	0
69.1	0
69.2	0
69.3	0
69.4	0
69.5	0
69.6	0
69.7	0
69.8	0
69.9	0
70	0
70.1	0
70.2	0
70.3	0
70.4	0
70.5	0
70.6	0
70.7	0
70.8	0
70.9	0
71	0
71.1	0
71.2	0
71.3	0
71.4	0
71.5	0
71.6	0
71.7	0
71.8	0
71.9	0
72	0
72.1	0
72.2	0
72.3	0
72.4	0
72.5	0
72.6	0
72.7	0
72.8	0
72.9	0
73	0
73.1	0
73.2	0
73.3	0
73.4	0
73.5	0
73.6	0
73.7	0
73.8	0
73.9	0
74	0
74.1	0
74.2	0
74.3	0
74.4	0
74.5	0
74.6	0
74.7	0
74.8	0
74.9	0
75	0
75.1	0
75.2	0
75.3	0
75.4	0
75.5	0
75.6	0
75.7	0
75.8	0
75.9	0
76	0
76.1	0
76.2	0
76.3	0
76.4	0
76.5	0
76.6	0
76.7	0
76.8	0
76.9	0
77	0
77.1	0
77.2	0
77.3	0
77.4	0
77.5	0
77.6	0
77.7	0
77.8	0
77.9	0
78	0
78.1	0
78.2	0
78.3	0
78.4	0
78.5	0
78.6	0
78.7	0
78.8	0
78.9	0
79	0
79.1	0
79.2	0
79.3	0
79.4	0
79.5	0
79.6	0
79.7	0
79.8	0
79.9	0
80	0
80.1	0
80.2	0
80.3	0
80.4	0
80.5	0
80.6	0
80.7	0
80.8	0
80.9	0
81	0
81.1	0
81.2	0
81.3	0
81.4	0
81.5	0
81.6	0
81.7	0
81.8	0
81.9	0
82	0
82.1	0
82.2	0
82.3	0
82.4	0
82.5	0
82.6	0
82.7	0
82.8	0
82.9	0
83	0
83.1	0
83.2	0
83.3	0
83.4	0
83.5	0
83.6	0
83.7	0
83.8	0
83.9	0
84	0
84.1	0
84.2	0
84.3	0
84.4	0
84.5	0
84.6	0
84.7	0
84.8	0
84.9	0
85	0
85.1	0
85.2	0
85.3	0
85.4	0
85.5	0
85.6	0
85.7	0
85.8	0
85.9	0
86	0
86.1	0
86.2	0
86.3	0
86.4	0
86.5	0
86.6	0
86.7	0
86.8	0
86.9	0
87	0
87.1	0
87.2	0
87.3	0
87.4	0
87.5	0
87.6	0
87.7	0
87.8	0
87.9	0
88	0
88.1	0
88.2	0
88.3	0
88.4	0
88.5	0
88.6	0
88.7	0
88.8	0
88.9	0
89	0
89.1	0
89.2	0
89.3	0
89.4	0
89.5	0
89.6	0
89.7	0
89.8	0
89.9	0
90	0
90.1	0
90.2	0
90.3	0
90.4	0
90.5	0
90.6	0
90.7	0
90.8	0
90.9	0
91	0
91.1	0
91.2	0
91.3	0
91.4	0
91.5	0
91.6	0
91.7	0
91.8	0
91.9	0
92	0
92.1	0
92.2	0
92.3	0
92.4	0
92.5	0
92.6	0
92.7	0
92.8	0
92.9	0
93	0
93.1	0
93.2	0
93.3	0
93.4	0
93.5	0
93.6	0
93.7	0
93.8	0
93.9	0
94	0
94.1	0
94.2	0
94.3	0
94.4	0
94.5	0
94.6	0
94.7	0
94.8	0
94.9	0
95	0
95.1	0
95.2	0
95.3	0
95.4	0
95.5	0
95.6	0
95.7	0
95.8	0
95.9	0
96	0
96.1	0
96.2	0
96.3	0
96.4	0
96.5	0
96.6	0
96.7	0
96.8	0
96.9	0
97	0
97.1	0
97.2	0
97.3	0
97.4	0
97.5	0
97.6	0
97.7	0
97.8	0
97.9	0
98	0
98.1	0
98.2	0
98.3	0
98.4	0
98.5	0
98.6	0
98.7	0
98.8	0
98.9	0
99	0
99.1	0
99.2	0
99.3	0
99.4	0
99.5	0
99.6	0
99.7	0
99.8	0
99.9	0
100	0
100.1	0.025
100.2	0.04
100.3	0.075
100.4	0.08
100.5	0.09
100.6	0.105
100.7	0.115
100.8	0.125
100.9	0.14
101	0.16
101.1	0.175
101.2	0.21
101.3	0.22
101.4	0.225
101.5	0.225
101.6	0.235
101.7	0.235
101.8	0.245
101.9	0.26
102	0.27
102.1	0.25
102.2	0.275
102.3	0.285
102.4	0.29
102.5	0.29
102.6	0.29
102.7	0.295
102.8	0.3
102.9	0.295
103	0.285
103.1	0.305
103.2	0.295
103.3	0.285
103.4	0.3
103.5	0.31
103.6	0.31
103.7	0.315
103.8	0.32
103.9	0.33
104	0.325
104.1	0.34
104.2	0.34
104.3	0.345
104.4	0.35
104.5	0.35
104.6	0.345
104.7	0.345
104.8	0.36
104.9	0.36
105	0.36
105.1	0.36
105.2	0.365
105.3	0.365
105.4	0.375
105.5	0.365
105.6	0.36
105.7	0.355
105.8	0.365
105.9	0.38
106	0.38
106.1	0.385
106.2	0.39
106.3	0.405
106.4	0.405
106.5	0.405
106.6	0.415
106.7	0.42
106.8	0.415
106.9	0.395
107	0.385
107.1	0.385
107.2	0.385
107.3	0.39
107.4	0.395
107.5	0.4
107.6	0.405
107.7	0.415
107.8	0.42
107.9	0.425
108	0.42
108.1	0.43
108.2	0.43
108.3	0.425
108.4	0.43
108.5	0.435
108.6	0.435
108.7	0.435
108.8	0.445
108.9	0.43
109	0.43
109.1	0.425
109.2	0.425
109.3	0.415
109.4	0.41
109.5	0.415
109.6	0.41
109.7	0.415
109.8	0.425
109.9	0.43
110	0.44
110.1	0.435
110.2	0.42
110.3	0.42
110.4	0.425
110.5	0.405
110.6	0.405
110.7	0.415
110.8	0.42
110.9	0.425
111	0.42
111.1	0.415
111.2	0.415
111.3	0.415
111.4	0.415
111.5	0.415
111.6	0.415
111.7	0.425
111.8	0.425
111.9	0.42
112	0.42
112.1	0.41
112.2	0.415
112.3	0.43
112.4	0.435
112.5	0.435
112.6	0.43
112.7	0.43
112.8	0.435
112.9	0.43
113	0.405
113.1	0.395
113.2	0.395
113.3	0.405
113.4	0.395
113.5	0.385
113.6	0.39
113.7	0.395
113.8	0.405
113.9	0.41
114	0.405
114.1	0.4
114.2	0.41
114.3	0.41
114.4	0.41
114.5	0.41
114.6	0.405
114.7	0.425
114.8	0.425
114.9	0.42
115	0.42
115.1	0.41
115.2	0.41
115.3	0.41
115.4	0.425
115.5	0.43
115.6	0.43
115.7	0.42
115.8	0.43
115.9	0.43
116	0.425
116.1	0.43
116.2	0.43
116.3	0.435
116.4	0.445
116.5	0.445
116.6	0.44
116.7	0.45
116.8	0.45
116.9	0.45
117	0.45
117.1	0.45
117.2	0.46
117.3	0.46
117.4	0.45
117.5	0.45
117.6	0.445
117.7	0.455
117.8	0.46
117.9	0.46
118	0.46
118.1	0.47
118.2	0.48
118.3	0.47
118.4	0.48
118.5	0.485
118.6	0.49
118.7	0.48
118.8	0.48
118.9	0.485
119	0.49
119.1	0.485
119.2	0.48
119.3	0.48
119.4	0.47
119.5	0.46
119.6	0.46
119.7	0.45
119.8	0.45
119.9	0.45
120	0.45
120.1	0.455
120.2	0.46
120.3	0.45
120.4	0.45
120.5	0.455
120.6	0.47
120.7	0.47
120.8	0.48
120.9	0.475
121	0.47
121.1	0.475
121.2	0.47
121.3	0.475
121.4	0.465
121.5	0.455
121.6	0.46
121.7	0.445
121.8	0.45
121.9	0.45
122	0.44
122.1	0.445
122.2	0.46
122.3	0.45
122.4	0.44
122.5	0.445
122.6	0.45
122.7	0.45
122.8	0.455
122.9	0.465
123	0.46
123.1	0.46
123.2	0.465
123.3	0.455
123.4	0.455
123.5	0.445
123.6	0.455
123.7	0.45
123.8	0.455
123.9	0.445
124	0.44
124.1	0.44
124.2	0.44
124.3	0.45
124.4	0.45
124.5	0.45
124.6	0.465
124.7	0.465
124.8	0.46
124.9	0.465
125	0.475
125.1	0.47
125.2	0.47
125.3	0.455
125.4	0.46
125.5	0.46
125.6	0.455
125.7	0.45
125.8	0.45
125.9	0.45
126	0.45
126.1	0.465
126.2	0.47
126.3	0.465
126.4	0.465
126.5	0.465
126.6	0.46
126.7	0.45
126.8	0.45
126.9	0.46
127	0.46
127.1	0.46
127.2	0.47
127.3	0.47
127.4	0.465
127.5	0.465
127.6	0.485
127.7	0.485
127.8	0.49
127.9	0.505
128	0.51
128.1	0.51
128.2	0.495
128.3	0.5
128.4	0.495
128.5	0.5
128.6	0.49
128.7	0.475
128.8	0.47
128.9	0.475
129	0.485
129.1	0.48
129.2	0.48
129.3	0.48
129.4	0.48
129.5	0.465
129.6	0.47
129.7	0.465
129.8	0.465
129.9	0.47
130	0.48
130.1	0.48
130.2	0.495
130.3	0.49
130.4	0.48
130.5	0.465
130.6	0.465
130.7	0.475
130.8	0.475
130.9	0.48
131	0.475
131.1	0.485
131.2	0.475
131.3	0.48
131.4	0.48
131.5	0.485
131.6	0.485
131.7	0.5
131.8	0.5
131.9	0.5
132	0.5
132.1	0.495
132.2	0.49
132.3	0.49
132.4	0.495
132.5	0.49
132.6	0.5
132.7	0.51
132.8	0.515
132.9	0.51
133	0.515
133.1	0.5
133.2	0.48
133.3	0.485
133.4	0.495
133.5	0.495
133.6	0.495
133.7	0.505
133.8	0.51
133.9	0.515
134	0.53
134.1	0.525
134.2	0.505
134.3	0.5
134.4	0.505
134.5	0.505
134.6	0.52
134.7	0.525
134.8	0.505
134.9	0.505
135	0.5
135.1	0.505
135.2	0.51
135.3	0.505
135.4	0.495
135.5	0.49
135.6	0.49
135.7	0.49
135.8	0.485
135.9	0.475
136	0.48
136.1	0.48
136.2	0.485
136.3	0.48
136.4	0.48
136.5	0.485
136.6	0.495
136.7	0.495
136.8	0.485
136.9	0.49
137	0.475
137.1	0.475
137.2	0.475
137.3	0.47
137.4	0.47
137.5	0.475
137.6	0.47
137.7	0.48
137.8	0.485
137.9	0.49
138	0.485
138.1	0.485
138.2	0.485
138.3	0.5
138.4	0.5
138.5	0.5
138.6	0.5
138.7	0.495
138.8	0.485
138.9	0.48
139	0.475
139.1	0.465
139.2	0.46
139.3	0.48
139.4	0.475
139.5	0.475
139.6	0.48
139.7	0.485
139.8	0.48
139.9	0.485
140	0.48
140.1	0.48
140.2	0.495
140.3	0.495
140.4	0.5
140.5	0.5
140.6	0.49
140.7	0.48
140.8	0.485
140.9	0.485
141	0.495
141.1	0.505
141.2	0.5
141.3	0.5
141.4	0.505
141.5	0.5
141.6	0.505
141.7	0.505
141.8	0.505
141.9	0.51
142	0.505
142.1	0.5
142.2	0.5
142.3	0.495
142.4	0.5
142.5	0.5
142.6	0.5
142.7	0.5
142.8	0.51
142.9	0.515
143	0.52
143.1	0.52
143.2	0.52
143.3	0.52
143.4	0.52
143.5	0.525
143.6	0.535
143.7	0.53
143.8	0.53
143.9	0.54
144	0.54
144.1	0.535
144.2	0.535
144.3	0.535
144.4	0.535
144.5	0.535
144.6	0.54
144.7	0.545
144.8	0.54
144.9	0.54
145	0.54
145.1	0.535
145.2	0.54
145.3	0.545
145.4	0.545
145.5	0.545
145.6	0.545
145.7	0.55
145.8	0.55
145.9	0.55
146	0.555
146.1	0.545
146.2	0.54
146.3	0.545
146.4	0.555
146.5	0.555
146.6	0.555
146.7	0.56
146.8	0.55
146.9	0.555
147	0.56
147.1	0.56
147.2	0.55
147.3	0.545
147.4	0.545
147.5	0.54
147.6	0.53
147.7	0.54
147.8	0.535
147.9	0.535
148	0.54
148.1	0.54
148.2	0.545
148.3	0.555
148.4	0.55
148.5	0.55
148.6	0.545
148.7	0.53
148.8	0.54
148.9	0.545
149	0.54
149.1	0.54
149.2	0.535
149.3	0.545
149.4	0.54
149.5	0.55
149.6	0.545
149.7	0.54
149.8	0.545
149.9	0.54
150	0.555
150.1	0.56
150.2	0.555
150.3	0.57
150.4	0.575
150.5	0.57
150.6	0.57
150.7	0.575
150.8	0.575
150.9	0.575
151	0.575
151.1	0.565
151.2	0.56
151.3	0.565
151.4	0.57
151.5	0.575
151.6	0.58
151.7	0.585
151.8	0.585
151.9	0.58
152	0.585
152.1	0.585
152.2	0.58
152.3	0.565
152.4	0.57
152.5	0.575
152.6	0.58
152.7	0.58
152.8	0.58
152.9	0.585
153	0.575
153.1	0.57
153.2	0.575
153.3	0.57
153.4	0.57
153.5	0.575
153.6	0.585
153.7	0.59
153.8	0.585
153.9	0.58
154	0.58
154.1	0.59
154.2	0.59
154.3	0.585
154.4	0.585
154.5	0.585
154.6	0.59
154.7	0.57
154.8	0.575
154.9	0.58
155	0.575
155.1	0.575
155.2	0.575
155.3	0.575
155.4	0.56
155.5	0.565
155.6	0.57
155.7	0.565
155.8	0.57
155.9	0.575
156	0.575
156.1	0.565
156.2	0.56
156.3	0.555
156.4	0.55
156.5	0.55
156.6	0.555
156.7	0.56
156.8	0.565
156.9	0.555
157	0.56
157.1	0.57
157.2	0.565
157.3	0.57
157.4	0.56
157.5	0.565
157.6	0.56
157.7	0.57
157.8	0.56
157.9	0.56
158	0.56
158.1	0.56
158.2	0.56
158.3	0.545
158.4	0.555
158.5	0.565
158.6	0.57
158.7	0.565
158.8	0.57
158.9	0.565
159	0.57
159.1	0.565
159.2	0.555
159.3	0.55
159.4	0.55
159.5	0.55
159.6	0.54
159.7	0.545
159.8	0.54
159.9	0.54
160	0.555
160.1	0.56
160.2	0.56
160.3	0.565
160.4	0.555
160.5	0.56
160.6	0.56
160.7	0.56
160.8	0.555
160.9	0.555
161	0.565
161.1	0.565
161.2	0.565
161.3	0.565
161.4	0.575
161.5	0.57
161.6	0.58
161.7	0.565
161.8	0.555
161.9	0.555
162	0.545
162.1	0.545
162.2	0.53
162.3	0.53
162.4	0.52
162.5	0.525
162.6	0.525
162.7	0.51
162.8	0.525
162.9	0.525
163	0.515
163.1	0.515
163.2	0.515
163.3	0.525
163.4	0.53
163.5	0.53
163.6	0.53
163.7	0.545
163.8	0.55
163.9	0.55
164	0.575
164.1	0.575
164.2	0.575
164.3	0.57
164.4	0.575
164.5	0.545
164.6	0.54
164.7	0.55
164.8	0.555
164.9	0.545
165	0.55
165.1	0.555
165.2	0.54
165.3	0.545
165.4	0.545
165.5	0.555
165.6	0.545
165.7	0.54
165.8	0.53
165.9	0.535
166	0.54
166.1	0.54
166.2	0.525
166.3	0.53
166.4	0.535
166.5	0.535
166.6	0.545
166.7	0.54
166.8	0.54
166.9	0.53
167	0.54
167.1	0.54
167.2	0.54
167.3	0.54
167.4	0.525
167.5	0.53
167.6	0.52
167.7	0.53
167.8	0.53
167.9	0.53
168	0.55
168.1	0.55
168.2	0.555
168.3	0.55
168.4	0.555
168.5	0.56
168.6	0.55
168.7	0.565
168.8	0.565
168.9	0.56
169	0.56
169.1	0.56
169.2	0.56
169.3	0.57
169.4	0.565
169.5	0.565
169.6	0.565
169.7	0.565
169.8	0.555
169.9	0.56
170	0.535
170.1	0.54
170.2	0.545
170.3	0.555
170.4	0.55
170.5	0.55
170.6	0.55
170.7	0.55
170.8	0.54
170.9	0.535
171	0.54
171.1	0.535
171.2	0.535
171.3	0.54
171.4	0.535
171.5	0.535
171.6	0.545
171.7	0.545
171.8	0.545
171.9	0.545
172	0.55
172.1	0.55
172.2	0.56
172.3	0.57
172.4	0.58
172.5	0.565
172.6	0.565
172.7	0.555
172.8	0.555
172.9	0.555
173	0.555
173.1	0.545
173.2	0.545
173.3	0.55
173.4	0.55
173.5	0.555
173.6	0.545
173.7	0.555
173.8	0.555
173.9	0.55
174	0.555
174.1	0.57
174.2	0.555
174.3	0.555
174.4	0.56
174.5	0.56
174.6	0.57
174.7	0.565
174.8	0.565
174.9	0.57
175	0.58
175.1	0.585
175.2	0.585
175.3	0.585
175.4	0.585
175.5	0.585
175.6	0.59
175.7	0.595
175.8	0.59
175.9	0.585
176	0.585
176.1	0.59
176.2	0.6
176.3	0.6
176.4	0.595
176.5	0.59
176.6	0.59
176.7	0.595
176.8	0.595
176.9	0.6
177	0.6
177.1	0.6
177.2	0.605
177.3	0.61
177.4	0.605
177.5	0.615
177.6	0.61
177.7	0.615
177.8	0.615
177.9	0.62
178	0.61
178.1	0.615
178.2	0.63
178.3	0.625
178.4	0.62
178.5	0.61
178.6	0.61
178.7	0.605
178.8	0.595
178.9	0.585
179	0.585
179.1	0.59
179.2	0.595
179.3	0.585
179.4	0.58
179.5	0.575
179.6	0.575
179.7	0.58
179.8	0.585
179.9	0.575
180	0.57
180.1	0.56
180.2	0.555
180.3	0.55
180.4	0.55
180.5	0.545
180.6	0.55
180.7	0.565
180.8	0.57
180.9	0.55
181	0.54
181.1	0.55
181.2	0.545
181.3	0.54
181.4	0.54
181.5	0.535
181.6	0.535
181.7	0.535
181.8	0.535
181.9	0.51
182	0.53
182.1	0.53
182.2	0.525
182.3	0.515
182.4	0.51
182.5	0.495
182.6	0.49
182.7	0.49
182.8	0.495
182.9	0.49
183	0.49
183.1	0.5
183.2	0.5
183.3	0.505
183.4	0.515
183.5	0.515
183.6	0.505
183.7	0.505
183.8	0.5
183.9	0.5
184	0.5
184.1	0.505
184.2	0.505
184.3	0.505
184.4	0.525
184.5	0.515
184.6	0.505
184.7	0.52
184.8	0.53
184.9	0.525
185	0.525
185.1	0.525
185.2	0.525
185.3	0.525
185.4	0.52
185.5	0.51
185.6	0.515
185.7	0.51
185.8	0.51
185.9	0.52
186	0.53
186.1	0.52
186.2	0.53
186.3	0.54
186.4	0.545
186.5	0.545
186.6	0.545
186.7	0.55
186.8	0.55
186.9	0.555
187	0.57
187.1	0.585
187.2	0.58
187.3	0.59
187.4	0.575
187.5	0.585
187.6	0.58
187.7	0.58
187.8	0.58
187.9	0.57
188	0.565
188.1	0.56
188.2	0.56
188.3	0.555
188.4	0.555
188.5	0.555
188.6	0.555
188.7	0.565
188.8	0.56
188.9	0.555
189	0.555
189.1	0.57
189.2	0.57
189.3	0.57
189.4	0.57
189.5	0.58
189.6	0.57
189.7	0.57
189.8	0.57
189.9	0.585
190	0.58
190.1	0.58
190.2	0.595
190.3	0.61
190.4	0.61
190.5	0.615
190.6	0.61
190.7	0.605
190.8	0.6
190.9	0.595
191	0.59
191.1	0.58
191.2	0.57
191.3	0.565
191.4	0.565
191.5	0.565
191.6	0.565
191.7	0.57
191.8	0.57
191.9	0.57
192	0.57
192.1	0.575
192.2	0.585
192.3	0.575
192.4	0.58
192.5	0.575
192.6	0.585
192.7	0.59
192.8	0.58
192.9	0.585
193	0.58
193.1	0.58
193.2	0.57
193.3	0.57
193.4	0.575
193.5	0.575
193.6	0.575
193.7	0.585
193.8	0.58
193.9	0.575
194	0.575
194.1	0.575
194.2	0.57
194.3	0.57
194.4	0.575
194.5	0.58
194.6	0.585
194.7	0.585
194.8	0.585
194.9	0.575
195	0.58
195.1	0.585
195.2	0.585
195.3	0.58
195.4	0.575
195.5	0.575
195.6	0.58
195.7	0.58
195.8	0.585
195.9	0.585
196	0.575
196.1	0.58
196.2	0.575
196.3	0.575
196.4	0.58
196.5	0.58
196.6	0.585
196.7	0.575
196.8	0.56
196.9	0.565
197	0.565
197.1	0.565
197.2	0.57
197.3	0.57
197.4	0.56
197.5	0.555
197.6	0.555
197.7	0.565
197.8	0.57
197.9	0.565
198	0.565
198.1	0.565
198.2	0.57
198.3	0.565
198.4	0.56
198.5	0.56
198.6	0.565
198.7	0.565
198.8	0.575
198.9	0.575
199	0.58
199.1	0.585
199.2	0.58
199.3	0.575
199.4	0.57
199.5	0.55
199.6	0.555
199.7	0.57
199.8	0.57
199.9	0.565
200	0.56
[truncated: 14,000 more rows]
