# Supplementary material for: Bayesian inference of kinetic schemes for ion channels by Kalman filtering
Source: eLife journal article supplement (doi:10.7554/elife.62714), 2022-05-04
Supplement: fig4-data8 [file 1_Sim_N_100_theor_Fluor_Werte.xlsx]

## Sheet: Tabelle1
0.1	0
0.2	0
0.3	0
0.4	0
0.5	0
0.6	0
0.7	0
0.8	0
0.9	0
1	0
1.1	0
1.2	0
1.3	0
1.4	0
1.5	0
1.6	0
1.7	0
1.8	0
1.9	0
2	0
2.1	0
2.2	0
2.3	0
2.4	0
2.5	0
2.6	0
2.7	0
2.8	0
2.9	0
3	0
3.1	0
3.2	0
3.3	0
3.4	0
3.5	0
3.6	0
3.7	0
3.8	0
3.9	0
4	0
4.1	0
4.2	0
4.3	0
4.4	0
4.5	0
4.6	0
4.7	0
4.8	0
4.9	0
5	0
5.1	0
5.2	0
5.3	0
5.4	0
5.5	0
5.6	0
5.7	0
5.8	0
5.9	0
6	0
6.1	0
6.2	0
6.3	0
6.4	0
6.5	0
6.6	0
6.7	0
6.8	0
6.9	0
7	0
7.1	0
7.2	0
7.3	0
7.4	0
7.5	0
7.6	0
7.7	0
7.8	0
7.9	0
8	0
8.1	0
8.2	0
8.3	0
8.4	0
8.5	0
8.6	0
8.7	0
8.8	0
8.9	0
9	0
9.1	0
9.2	0
9.3	0
9.4	0
9.5	0
9.6	0
9.7	0
9.8	0
9.9	0
10	0
10.1	0
10.2	0
10.3	0
10.4	0
10.5	0
10.6	0
10.7	0
10.8	0
10.9	0
11	0
11.1	0
11.2	0
11.3	0
11.4	0
11.5	0
11.6	0
11.7	0
11.8	0
11.9	0
12	0
12.1	0
12.2	0
12.3	0
12.4	0
12.5	0
12.6	0
12.7	0
12.8	0
12.9	0
13	0
13.1	0
13.2	0
13.3	0
13.4	0
13.5	0
13.6	0
13.7	0
13.8	0
13.9	0
14	0
14.1	0
14.2	0
14.3	0
14.4	0
14.5	0
14.6	0
14.7	0
14.8	0
14.9	0
15	0
15.1	0
15.2	0
15.3	0
15.4	0
15.5	0
15.6	0
15.7	0
15.8	0
15.9	0
16	0
16.1	0
16.2	0
16.3	0
16.4	0
16.5	0
16.6	0
16.7	0
16.8	0
16.9	0
17	0
17.1	0
17.2	0
17.3	0
17.4	0
17.5	0
17.6	0
17.7	0
17.8	0
17.9	0
18	0
18.1	0
18.2	0
18.3	0
18.4	0
18.5	0
18.6	0
18.7	0
18.8	0
18.9	0
19	0
19.1	0
19.2	0
19.3	0
19.4	0
19.5	0
19.6	0
19.7	0
19.8	0
19.9	0
20	0
20.1	0
20.2	0
20.3	0
20.4	0
20.5	0
20.6	0
20.7	0
20.8	0
20.9	0
21	0
21.1	0
21.2	0
21.3	0
21.4	0
21.5	0
21.6	0
21.7	0
21.8	0
21.9	0
22	0
22.1	0
22.2	0
22.3	0
22.4	0
22.5	0
22.6	0
22.7	0
22.8	0
22.9	0
23	0
23.1	0
23.2	0
23.3	0
23.4	0
23.5	0
23.6	0
23.7	0
23.8	0
23.9	0
24	0
24.1	0
24.2	0
24.3	0
24.4	0
24.5	0
24.6	0
24.7	0
24.8	0
24.9	0
25	0
25.1	0
25.2	0
25.3	0
25.4	0
25.5	0
25.6	0
25.7	0
25.8	0
25.9	0
26	0
26.1	0
26.2	0
26.3	0
26.4	0
26.5	0
26.6	0
26.7	0
26.8	0
26.9	0
27	0
27.1	0
27.2	0
27.3	0
27.4	0
27.5	0
27.6	0
27.7	0
27.8	0
27.9	0
28	0
28.1	0
28.2	0
28.3	0
28.4	0
28.5	0
28.6	0
28.7	0
28.8	0
28.9	0
29	0
29.1	0
29.2	0
29.3	0
29.4	0
29.5	0
29.6	0
29.7	0
29.8	0
29.9	0
30	0
30.1	0
30.2	0
30.3	0
30.4	0
30.5	0
30.6	0
30.7	0
30.8	0
30.9	0
31	0
31.1	0
31.2	0
31.3	0
31.4	0
31.5	0
31.6	0
31.7	0
31.8	0
31.9	0
32	0
32.1	0
32.2	0
32.3	0
32.4	0
32.5	0
32.6	0
32.7	0
32.8	0
32.9	0
33	0
33.1	0
33.2	0
33.3	0
33.4	0
33.5	0
33.6	0
33.7	0
33.8	0
33.9	0
34	0
34.1	0
34.2	0
34.3	0
34.4	0
34.5	0
34.6	0
34.7	0
34.8	0
34.9	0
35	0
35.1	0
35.2	0
35.3	0
35.4	0
35.5	0
35.6	0
35.7	0
35.8	0
35.9	0
36	0
36.1	0
36.2	0
36.3	0
36.4	0
36.5	0
36.6	0
36.7	0
36.8	0
36.9	0
37	0
37.1	0
37.2	0
37.3	0
37.4	0
37.5	0
37.6	0
37.7	0
37.8	0
37.9	0
38	0
38.1	0
38.2	0
38.3	0
38.4	0
38.5	0
38.6	0
38.7	0
38.8	0
38.9	0
39	0
39.1	0
39.2	0
39.3	0
39.4	0
39.5	0
39.6	0
39.7	0
39.8	0
39.9	0
40	0
40.1	0
40.2	0
40.3	0
40.4	0
40.5	0
40.6	0
40.7	0
40.8	0
40.9	0
41	0
41.1	0
41.2	0
41.3	0
41.4	0
41.5	0
41.6	0
41.7	0
41.8	0
41.9	0
42	0
42.1	0
42.2	0
42.3	0
42.4	0
42.5	0
42.6	0
42.7	0
42.8	0
42.9	0
43	0
43.1	0
43.2	0
43.3	0
43.4	0
43.5	0
43.6	0
43.7	0
43.8	0
43.9	0
44	0
44.1	0
44.2	0
44.3	0
44.4	0
44.5	0
44.6	0
44.7	0
44.8	0
44.9	0
45	0
45.1	0
45.2	0
45.3	0
45.4	0
45.5	0
45.6	0
45.7	0
45.8	0
45.9	0
46	0
46.1	0
46.2	0
46.3	0
46.4	0
46.5	0
46.6	0
46.7	0
46.8	0
46.9	0
47	0
47.1	0
47.2	0
47.3	0
47.4	0
47.5	0
47.6	0
47.7	0
47.8	0
47.9	0
48	0
48.1	0
48.2	0
48.3	0
48.4	0
48.5	0
48.6	0
48.7	0
48.8	0
48.9	0
49	0
49.1	0
49.2	0
49.3	0
49.4	0
49.5	0
49.6	0
49.7	0
49.8	0
49.9	0
50	0
50.1	0
50.2	0
50.3	0
50.4	0
50.5	0
50.6	0
50.7	0
50.8	0
50.9	0
51	0
51.1	0
51.2	0
51.3	0
51.4	0
51.5	0
51.6	0
51.7	0
51.8	0
51.9	0
52	0
52.1	0
52.2	0
52.3	0
52.4	0
52.5	0
52.6	0
52.7	0
52.8	0
52.9	0
53	0
53.1	0
53.2	0
53.3	0
53.4	0
53.5	0
53.6	0
53.7	0
53.8	0
53.9	0
54	0
54.1	0
54.2	0
54.3	0
54.4	0
54.5	0
54.6	0
54.7	0
54.8	0
54.9	0
55	0
55.1	0
55.2	0
55.3	0
55.4	0
55.5	0
55.6	0
55.7	0
55.8	0
55.9	0
56	0
56.1	0
56.2	0
56.3	0
56.4	0
56.5	0
56.6	0
56.7	0
56.8	0
56.9	0
57	0
57.1	0
57.2	0
57.3	0
57.4	0
57.5	0
57.6	0
57.7	0
57.8	0
57.9	0
58	0
58.1	0
58.2	0
58.3	0
58.4	0
58.5	0
58.6	0
58.7	0
58.8	0
58.9	0
59	0
59.1	0
59.2	0
59.3	0
59.4	0
59.5	0
59.6	0
59.7	0
59.8	0
59.9	0
60	0
60.1	0
60.2	0
60.3	0
60.4	0
60.5	0
60.6	0
60.7	0
60.8	0
60.9	0
61	0
61.1	0
61.2	0
61.3	0
61.4	0
61.5	0
61.6	0
61.7	0
61.8	0
61.9	0
62	0
62.1	0
62.2	0
62.3	0
62.4	0
62.5	0
62.6	0
62.7	0
62.8	0
62.9	0
63	0
63.1	0
63.2	0
63.3	0
63.4	0
63.5	0
63.6	0
63.7	0
63.8	0
63.9	0
64	0
64.1	0
64.2	0
64.3	0
64.4	0
64.5	0
64.6	0
64.7	0
64.8	0
64.9	0
65	0
65.1	0
65.2	0
65.3	0
65.4	0
65.5	0
65.6	0
65.7	0
65.8	0
65.9	0
66	0
66.1	0
66.2	0
66.3	0
66.4	0
66.5	0
66.6	0
66.7	0
66.8	0
66.9	0
67	0
67.1	0
67.2	0
67.3	0
67.4	0
67.5	0
67.6	0
67.7	0
67.8	0
67.9	0
68	0
68.1	0
68.2	0
68.3	0
68.4	0
68.5	0
68.6	0
68.7	0
68.8	0
68.9	0
69	0
69.1	0
69.2	0
69.3	0
69.4	0
69.5	0
69.6	0
69.7	0
69.8	0
69.9	0
70	0
70.1	0
70.2	0
70.3	0
70.4	0
70.5	0
70.6	0
70.7	0
70.8	0
70.9	0
71	0
71.1	0
71.2	0
71.3	0
71.4	0
71.5	0
71.6	0
71.7	0
71.8	0
71.9	0
72	0
72.1	0
72.2	0
72.3	0
72.4	0
72.5	0
72.6	0
72.7	0
72.8	0
72.9	0
73	0
73.1	0
73.2	0
73.3	0
73.4	0
73.5	0
73.6	0
73.7	0
73.8	0
73.9	0
74	0
74.1	0
74.2	0
74.3	0
74.4	0
74.5	0
74.6	0
74.7	0
74.8	0
74.9	0
75	0
75.1	0
75.2	0
75.3	0
75.4	0
75.5	0
75.6	0
75.7	0
75.8	0
75.9	0
76	0
76.1	0
76.2	0
76.3	0
76.4	0
76.5	0
76.6	0
76.7	0
76.8	0
76.9	0
77	0
77.1	0
77.2	0
77.3	0
77.4	0
77.5	0
77.6	0
77.7	0
77.8	0
77.9	0
78	0
78.1	0
78.2	0
78.3	0
78.4	0
78.5	0
78.6	0
78.7	0
78.8	0
78.9	0
79	0
79.1	0
79.2	0
79.3	0
79.4	0
79.5	0
79.6	0
79.7	0
79.8	0
79.9	0
80	0
80.1	0
80.2	0
80.3	0
80.4	0
80.5	0
80.6	0
80.7	0
80.8	0
80.9	0
81	0
81.1	0
81.2	0
81.3	0
81.4	0
81.5	0
81.6	0
81.7	0
81.8	0
81.9	0
82	0
82.1	0
82.2	0
82.3	0
82.4	0
82.5	0
82.6	0
82.7	0
82.8	0
82.9	0
83	0
83.1	0
83.2	0
83.3	0
83.4	0
83.5	0
83.6	0
83.7	0
83.8	0
83.9	0
84	0
84.1	0
84.2	0
84.3	0
84.4	0
84.5	0
84.6	0
84.7	0
84.8	0
84.9	0
85	0
85.1	0
85.2	0
85.3	0
85.4	0
85.5	0
85.6	0
85.7	0
85.8	0
85.9	0
86	0
86.1	0
86.2	0
86.3	0
86.4	0
86.5	0
86.6	0
86.7	0
86.8	0
86.9	0
87	0
87.1	0
87.2	0
87.3	0
87.4	0
87.5	0
87.6	0
87.7	0
87.8	0
87.9	0
88	0
88.1	0
88.2	0
88.3	0
88.4	0
88.5	0
88.6	0
88.7	0
88.8	0
88.9	0
89	0
89.1	0
89.2	0
89.3	0
89.4	0
89.5	0
89.6	0
89.7	0
89.8	0
89.9	0
90	0
90.1	0
90.2	0
90.3	0
90.4	0
90.5	0
90.6	0
90.7	0
90.8	0
90.9	0
91	0
91.1	0
91.2	0
91.3	0
91.4	0
91.5	0
91.6	0
91.7	0
91.8	0
91.9	0
92	0
92.1	0
92.2	0
92.3	0
92.4	0
92.5	0
92.6	0
92.7	0
92.8	0
92.9	0
93	0
93.1	0
93.2	0
93.3	0
93.4	0
93.5	0
93.6	0
93.7	0
93.8	0
93.9	0
94	0
94.1	0
94.2	0
94.3	0
94.4	0
94.5	0
94.6	0
94.7	0
94.8	0
94.9	0
95	0
95.1	0
95.2	0
95.3	0
95.4	0
95.5	0
95.6	0
95.7	0
95.8	0
95.9	0
96	0
96.1	0
96.2	0
96.3	0
96.4	0
96.5	0
96.6	0
96.7	0
96.8	0
96.9	0
97	0
97.1	0
97.2	0
97.3	0
97.4	0
97.5	0
97.6	0
97.7	0
97.8	0
97.9	0
98	0
98.1	0
98.2	0
98.3	0
98.4	0
98.5	0
98.6	0
98.7	0
98.8	0
98.9	0
99	0
99.1	0
99.2	0
99.3	0
99.4	0
99.5	0
99.6	0
99.7	0
99.8	0
99.9	0
100	0
100.1	0.0147586
100.2	0.0290437
100.3	0.042869
100.4	0.0562481
100.5	0.0691941
100.6	0.0817198
100.7	0.093838
100.8	0.105561
100.9	0.116901
101	0.127869
101.1	0.138477
101.2	0.148736
101.3	0.158658
101.4	0.168252
101.5	0.177529
101.6	0.186499
101.7	0.195172
101.8	0.203557
101.9	0.211664
102	0.219502
102.1	0.227079
102.2	0.234404
102.3	0.241484
102.4	0.248329
102.5	0.254946
102.6	0.261342
102.7	0.267525
102.8	0.273501
102.9	0.279279
103	0.284863
103.1	0.290262
103.2	0.29548
103.3	0.300525
103.4	0.305401
103.5	0.310116
103.6	0.314673
103.7	0.319079
103.8	0.323339
103.9	0.327457
104	0.331439
104.1	0.33529
104.2	0.339013
104.3	0.342613
104.4	0.346094
104.5	0.349461
104.6	0.352718
104.7	0.355867
104.8	0.358914
104.9	0.361861
105	0.364712
105.1	0.367471
105.2	0.37014
105.3	0.372722
105.4	0.375222
105.5	0.377641
105.6	0.379983
105.7	0.38225
105.8	0.384444
105.9	0.386569
106	0.388627
106.1	0.39062
106.2	0.39255
106.3	0.39442
106.4	0.396232
106.5	0.397987
106.6	0.399689
106.7	0.401338
106.8	0.402937
106.9	0.404487
107	0.40599
107.1	0.407448
107.2	0.408862
107.3	0.410234
107.4	0.411566
107.5	0.412858
107.6	0.414113
107.7	0.415331
107.8	0.416515
107.9	0.417664
108	0.41878
108.1	0.419865
108.2	0.42092
108.3	0.421945
108.4	0.422942
108.5	0.423912
108.6	0.424856
108.7	0.425774
108.8	0.426667
108.9	0.427538
109	0.428385
109.1	0.42921
109.2	0.430015
109.3	0.430798
109.4	0.431563
109.5	0.432308
109.6	0.433035
109.7	0.433744
109.8	0.434436
109.9	0.435112
110	0.435772
110.1	0.436416
110.2	0.437046
110.3	0.437662
110.4	0.438264
110.5	0.438853
110.6	0.439429
110.7	0.439992
110.8	0.440544
110.9	0.441085
111	0.441614
111.1	0.442133
111.2	0.442641
111.3	0.443139
111.4	0.443628
111.5	0.444108
111.6	0.444579
111.7	0.445041
111.8	0.445495
111.9	0.44594
112	0.446379
112.1	0.446809
112.2	0.447233
112.3	0.447649
112.4	0.448059
112.5	0.448462
112.6	0.448859
112.7	0.44925
112.8	0.449636
112.9	0.450015
113	0.450389
113.1	0.450758
113.2	0.451122
113.3	0.451481
113.4	0.451835
113.5	0.452185
113.6	0.45253
113.7	0.452871
113.8	0.453208
113.9	0.453541
114	0.45387
114.1	0.454195
114.2	0.454517
114.3	0.454835
114.4	0.45515
114.5	0.455462
114.6	0.45577
114.7	0.456076
114.8	0.456378
114.9	0.456678
115	0.456975
115.1	0.457269
115.2	0.457561
115.3	0.45785
115.4	0.458137
115.5	0.458422
115.6	0.458704
115.7	0.458984
115.8	0.459262
115.9	0.459538
116	0.459812
116.1	0.460084
116.2	0.460354
116.3	0.460622
116.4	0.460889
116.5	0.461154
116.6	0.461417
116.7	0.461678
116.8	0.461938
116.9	0.462197
117	0.462454
117.1	0.46271
117.2	0.462964
117.3	0.463217
117.4	0.463468
117.5	0.463719
117.6	0.463968
117.7	0.464216
117.8	0.464463
117.9	0.464708
118	0.464953
118.1	0.465196
118.2	0.465438
118.3	0.46568
118.4	0.46592
118.5	0.46616
118.6	0.466398
118.7	0.466636
118.8	0.466872
118.9	0.467108
119	0.467343
119.1	0.467577
119.2	0.467811
119.3	0.468043
119.4	0.468275
119.5	0.468506
119.6	0.468736
119.7	0.468965
119.8	0.469194
119.9	0.469422
120	0.46965
120.1	0.469877
120.2	0.470103
120.3	0.470328
120.4	0.470553
120.5	0.470777
120.6	0.471001
120.7	0.471224
120.8	0.471447
120.9	0.471668
121	0.47189
121.1	0.472111
121.2	0.472331
121.3	0.472551
121.4	0.47277
121.5	0.472989
121.6	0.473207
121.7	0.473425
121.8	0.473642
121.9	0.473859
122	0.474075
122.1	0.474291
122.2	0.474506
122.3	0.474721
122.4	0.474936
122.5	0.47515
122.6	0.475363
122.7	0.475576
122.8	0.475789
122.9	0.476001
123	0.476213
123.1	0.476425
123.2	0.476636
123.3	0.476847
123.4	0.477057
123.5	0.477267
123.6	0.477477
123.7	0.477686
123.8	0.477895
123.9	0.478103
124	0.478311
124.1	0.478519
124.2	0.478726
124.3	0.478933
124.4	0.47914
124.5	0.479346
124.6	0.479552
124.7	0.479757
124.8	0.479962
124.9	0.480167
125	0.480372
125.1	0.480576
125.2	0.48078
125.3	0.480983
125.4	0.481187
125.5	0.481389
125.6	0.481592
125.7	0.481794
125.8	0.481996
125.9	0.482198
126	0.482399
126.1	0.4826
126.2	0.482801
126.3	0.483001
126.4	0.483201
126.5	0.483401
126.6	0.4836
126.7	0.483799
126.8	0.483998
126.9	0.484196
127	0.484394
127.1	0.484592
127.2	0.48479
127.3	0.484987
127.4	0.485184
127.5	0.485381
127.6	0.485577
127.7	0.485773
127.8	0.485969
127.9	0.486165
128	0.48636
128.1	0.486555
128.2	0.48675
128.3	0.486944
128.4	0.487138
128.5	0.487332
128.6	0.487525
128.7	0.487719
128.8	0.487911
128.9	0.488104
129	0.488297
129.1	0.488489
129.2	0.488681
129.3	0.488872
129.4	0.489063
129.5	0.489254
129.6	0.489445
129.7	0.489636
129.8	0.489826
129.9	0.490016
130	0.490205
130.1	0.490395
130.2	0.490584
130.3	0.490773
130.4	0.490961
130.5	0.49115
130.6	0.491338
130.7	0.491525
130.8	0.491713
130.9	0.4919
131	0.492087
131.1	0.492274
131.2	0.49246
131.3	0.492646
131.4	0.492832
131.5	0.493018
131.6	0.493203
131.7	0.493389
131.8	0.493573
131.9	0.493758
132	0.493942
132.1	0.494126
132.2	0.49431
132.3	0.494494
132.4	0.494677
132.5	0.49486
132.6	0.495043
132.7	0.495226
132.8	0.495408
132.9	0.49559
133	0.495772
133.1	0.495953
133.2	0.496134
133.3	0.496316
133.4	0.496496
133.5	0.496677
133.6	0.496857
133.7	0.497037
133.8	0.497217
133.9	0.497396
134	0.497576
134.1	0.497755
134.2	0.497933
134.3	0.498112
134.4	0.49829
134.5	0.498468
134.6	0.498646
134.7	0.498823
134.8	0.499001
134.9	0.499178
135	0.499354
135.1	0.499531
135.2	0.499707
135.3	0.499883
135.4	0.500059
135.5	0.500235
135.6	0.50041
135.7	0.500585
135.8	0.50076
135.9	0.500934
136	0.501109
136.1	0.501283
136.2	0.501457
136.3	0.50163
136.4	0.501804
136.5	0.501977
136.6	0.50215
136.7	0.502322
136.8	0.502495
136.9	0.502667
137	0.502839
137.1	0.503011
137.2	0.503182
137.3	0.503353
137.4	0.503524
137.5	0.503695
137.6	0.503865
137.7	0.504036
137.8	0.504206
137.9	0.504376
138	0.504545
138.1	0.504714
138.2	0.504883
138.3	0.505052
138.4	0.505221
138.5	0.505389
138.6	0.505557
138.7	0.505725
138.8	0.505893
138.9	0.506061
139	0.506228
139.1	0.506395
139.2	0.506562
139.3	0.506728
139.4	0.506894
139.5	0.50706
139.6	0.507226
139.7	0.507392
139.8	0.507557
139.9	0.507722
140	0.507887
140.1	0.508052
140.2	0.508216
140.3	0.508381
140.4	0.508545
140.5	0.508708
140.6	0.508872
140.7	0.509035
140.8	0.509198
140.9	0.509361
141	0.509524
141.1	0.509686
141.2	0.509849
141.3	0.510011
141.4	0.510172
141.5	0.510334
141.6	0.510495
141.7	0.510656
141.8	0.510817
141.9	0.510978
142	0.511138
142.1	0.511298
142.2	0.511458
142.3	0.511618
142.4	0.511778
142.5	0.511937
142.6	0.512096
142.7	0.512255
142.8	0.512413
142.9	0.512572
143	0.51273
143.1	0.512888
143.2	0.513046
143.3	0.513203
143.4	0.513361
143.5	0.513518
143.6	0.513675
143.7	0.513831
143.8	0.513988
143.9	0.514144
144	0.5143
144.1	0.514456
144.2	0.514612
144.3	0.514767
144.4	0.514922
144.5	0.515077
144.6	0.515232
144.7	0.515386
144.8	0.515541
144.9	0.515695
145	0.515849
145.1	0.516002
145.2	0.516156
145.3	0.516309
145.4	0.516462
145.5	0.516615
145.6	0.516767
145.7	0.51692
145.8	0.517072
145.9	0.517224
146	0.517376
146.1	0.517527
146.2	0.517679
146.3	0.51783
146.4	0.517981
146.5	0.518131
146.6	0.518282
146.7	0.518432
146.8	0.518582
146.9	0.518732
147	0.518882
147.1	0.519031
147.2	0.519181
147.3	0.51933
147.4	0.519478
147.5	0.519627
147.6	0.519775
147.7	0.519924
147.8	0.520072
147.9	0.52022
148	0.520367
148.1	0.520515
148.2	0.520662
148.3	0.520809
148.4	0.520956
148.5	0.521102
148.6	0.521249
148.7	0.521395
148.8	0.521541
148.9	0.521687
149	0.521832
149.1	0.521978
149.2	0.522123
149.3	0.522268
149.4	0.522412
149.5	0.522557
149.6	0.522701
149.7	0.522846
149.8	0.52299
149.9	0.523133
150	0.523277
150.1	0.52342
150.2	0.523564
150.3	0.523707
150.4	0.523849
150.5	0.523992
150.6	0.524134
150.7	0.524277
150.8	0.524419
150.9	0.52456
151	0.524702
151.1	0.524843
151.2	0.524985
151.3	0.525126
151.4	0.525266
151.5	0.525407
151.6	0.525547
151.7	0.525688
151.8	0.525828
151.9	0.525968
152	0.526107
152.1	0.526247
152.2	0.526386
152.3	0.526525
152.4	0.526664
152.5	0.526803
152.6	0.526941
152.7	0.527079
152.8	0.527218
152.9	0.527356
153	0.527493
153.1	0.527631
153.2	0.527768
153.3	0.527905
153.4	0.528042
153.5	0.528179
153.6	0.528316
153.7	0.528452
153.8	0.528588
153.9	0.528724
154	0.52886
154.1	0.528996
154.2	0.529131
154.3	0.529267
154.4	0.529402
154.5	0.529537
154.6	0.529671
154.7	0.529806
154.8	0.52994
154.9	0.530074
155	0.530208
155.1	0.530342
155.2	0.530476
155.3	0.530609
155.4	0.530742
155.5	0.530875
155.6	0.531008
155.7	0.531141
155.8	0.531273
155.9	0.531406
156	0.531538
156.1	0.53167
156.2	0.531802
156.3	0.531933
156.4	0.532065
156.5	0.532196
156.6	0.532327
156.7	0.532458
156.8	0.532588
156.9	0.532719
157	0.532849
157.1	0.532979
157.2	0.533109
157.3	0.533239
157.4	0.533369
157.5	0.533498
157.6	0.533627
157.7	0.533756
157.8	0.533885
157.9	0.534014
158	0.534142
158.1	0.534271
158.2	0.534399
158.3	0.534527
158.4	0.534655
158.5	0.534782
158.6	0.53491
158.7	0.535037
158.8	0.535164
158.9	0.535291
159	0.535418
159.1	0.535545
159.2	0.535671
159.3	0.535797
159.4	0.535923
159.5	0.536049
159.6	0.536175
159.7	0.5363
159.8	0.536426
159.9	0.536551
160	0.536676
160.1	0.536801
160.2	0.536925
160.3	0.53705
160.4	0.537174
160.5	0.537298
160.6	0.537422
160.7	0.537546
160.8	0.53767
160.9	0.537793
161	0.537917
161.1	0.53804
161.2	0.538163
161.3	0.538285
161.4	0.538408
161.5	0.53853
161.6	0.538653
161.7	0.538775
161.8	0.538897
161.9	0.539018
162	0.53914
162.1	0.539262
162.2	0.539383
162.3	0.539504
162.4	0.539625
162.5	0.539746
162.6	0.539866
162.7	0.539987
162.8	0.540107
162.9	0.540227
163	0.540347
163.1	0.540467
163.2	0.540586
163.3	0.540706
163.4	0.540825
163.5	0.540944
163.6	0.541063
163.7	0.541182
163.8	0.5413
163.9	0.541419
164	0.541537
164.1	0.541655
164.2	0.541773
164.3	0.541891
164.4	0.542008
164.5	0.542126
164.6	0.542243
164.7	0.54236
164.8	0.542477
164.9	0.542594
165	0.542711
165.1	0.542827
165.2	0.542944
165.3	0.54306
165.4	0.543176
165.5	0.543292
165.6	0.543407
165.7	0.543523
165.8	0.543638
165.9	0.543753
166	0.543868
166.1	0.543983
166.2	0.544098
166.3	0.544212
166.4	0.544327
166.5	0.544441
166.6	0.544555
166.7	0.544669
166.8	0.544783
166.9	0.544897
167	0.54501
167.1	0.545123
167.2	0.545236
167.3	0.545349
167.4	0.545462
167.5	0.545575
167.6	0.545687
167.7	0.5458
167.8	0.545912
167.9	0.546024
168	0.546136
168.1	0.546248
168.2	0.546359
168.3	0.546471
168.4	0.546582
168.5	0.546693
168.6	0.546804
168.7	0.546915
168.8	0.547026
168.9	0.547136
169	0.547247
169.1	0.547357
169.2	0.547467
169.3	0.547577
169.4	0.547686
169.5	0.547796
169.6	0.547905
169.7	0.548015
169.8	0.548124
169.9	0.548233
170	0.548342
170.1	0.54845
170.2	0.548559
170.3	0.548667
170.4	0.548776
170.5	0.548884
170.6	0.548992
170.7	0.549099
170.8	0.549207
170.9	0.549315
171	0.549422
171.1	0.549529
171.2	0.549636
171.3	0.549743
171.4	0.54985
171.5	0.549956
171.6	0.550063
171.7	0.550169
171.8	0.550275
171.9	0.550381
172	0.550487
172.1	0.550593
172.2	0.550698
172.3	0.550804
172.4	0.550909
172.5	0.551014
172.6	0.551119
172.7	0.551224
172.8	0.551329
172.9	0.551433
173	0.551538
173.1	0.551642
173.2	0.551746
173.3	0.55185
173.4	0.551954
173.5	0.552058
173.6	0.552161
173.7	0.552265
173.8	0.552368
173.9	0.552471
174	0.552574
174.1	0.552677
174.2	0.55278
174.3	0.552882
174.4	0.552984
174.5	0.553087
174.6	0.553189
174.7	0.553291
174.8	0.553393
174.9	0.553494
175	0.553596
175.1	0.553697
175.2	0.553799
175.3	0.5539
175.4	0.554001
175.5	0.554102
175.6	0.554202
175.7	0.554303
175.8	0.554403
175.9	0.554504
176	0.554604
176.1	0.554704
176.2	0.554804
176.3	0.554903
176.4	0.555003
176.5	0.555103
176.6	0.555202
176.7	0.555301
176.8	0.5554
176.9	0.555499
177	0.555598
177.1	0.555696
177.2	0.555795
177.3	0.555893
177.4	0.555992
177.5	0.55609
177.6	0.556188
177.7	0.556286
177.8	0.556383
177.9	0.556481
178	0.556578
178.1	0.556675
178.2	0.556773
178.3	0.55687
178.4	0.556967
178.5	0.557063
178.6	0.55716
178.7	0.557256
178.8	0.557353
178.9	0.557449
179	0.557545
179.1	0.557641
179.2	0.557737
179.3	0.557832
179.4	0.557928
179.5	0.558023
179.6	0.558119
179.7	0.558214
179.8	0.558309
179.9	0.558404
180	0.558499
180.1	0.558593
180.2	0.558688
180.3	0.558782
180.4	0.558876
180.5	0.55897
180.6	0.559064
180.7	0.559158
180.8	0.559252
180.9	0.559346
181	0.559439
181.1	0.559532
181.2	0.559626
181.3	0.559719
181.4	0.559812
181.5	0.559904
181.6	0.559997
181.7	0.56009
181.8	0.560182
181.9	0.560274
182	0.560367
182.1	0.560459
182.2	0.56055
182.3	0.560642
182.4	0.560734
182.5	0.560825
182.6	0.560917
182.7	0.561008
182.8	0.561099
182.9	0.56119
183	0.561281
183.1	0.561372
183.2	0.561463
183.3	0.561553
183.4	0.561644
183.5	0.561734
183.6	0.561824
183.7	0.561914
183.8	0.562004
183.9	0.562094
184	0.562183
184.1	0.562273
184.2	0.562362
184.3	0.562452
184.4	0.562541
184.5	0.56263
184.6	0.562719
184.7	0.562808
184.8	0.562896
184.9	0.562985
185	0.563073
185.1	0.563161
185.2	0.56325
185.3	0.563338
185.4	0.563426
185.5	0.563513
185.6	0.563601
185.7	0.563689
185.8	0.563776
185.9	0.563864
186	0.563951
186.1	0.564038
186.2	0.564125
186.3	0.564212
186.4	0.564298
186.5	0.564385
186.6	0.564471
186.7	0.564558
186.8	0.564644
186.9	0.56473
187	0.564816
187.1	0.564902
187.2	0.564988
187.3	0.565073
187.4	0.565159
187.5	0.565244
187.6	0.56533
187.7	0.565415
187.8	0.5655
187.9	0.565585
188	0.56567
188.1	0.565754
188.2	0.565839
188.3	0.565923
188.4	0.566008
188.5	0.566092
188.6	0.566176
188.7	0.56626
188.8	0.566344
188.9	0.566428
189	0.566511
189.1	0.566595
189.2	0.566678
189.3	0.566762
189.4	0.566845
189.5	0.566928
189.6	0.567011
189.7	0.567094
189.8	0.567177
189.9	0.567259
190	0.567342
190.1	0.567424
190.2	0.567506
190.3	0.567589
190.4	0.567671
190.5	0.567753
190.6	0.567834
190.7	0.567916
190.8	0.567998
190.9	0.568079
191	0.56816
191.1	0.568242
191.2	0.568323
191.3	0.568404
191.4	0.568485
191.5	0.568566
191.6	0.568646
191.7	0.568727
191.8	0.568807
191.9	0.568888
192	0.568968
192.1	0.569048
192.2	0.569128
192.3	0.569208
192.4	0.569288
192.5	0.569368
192.6	0.569447
192.7	0.569527
192.8	0.569606
192.9	0.569685
193	0.569764
193.1	0.569843
193.2	0.569922
193.3	0.570001
193.4	0.57008
193.5	0.570159
193.6	0.570237
193.7	0.570315
193.8	0.570394
193.9	0.570472
194	0.57055
194.1	0.570628
194.2	0.570706
194.3	0.570783
194.4	0.570861
194.5	0.570939
194.6	0.571016
194.7	0.571093
194.8	0.571171
194.9	0.571248
195	0.571325
195.1	0.571401
195.2	0.571478
195.3	0.571555
195.4	0.571631
195.5	0.571708
195.6	0.571784
195.7	0.571861
195.8	0.571937
195.9	0.572013
196	0.572089
196.1	0.572164
196.2	0.57224
196.3	0.572316
196.4	0.572391
196.5	0.572467
196.6	0.572542
196.7	0.572617
196.8	0.572692
196.9	0.572767
197	0.572842
197.1	0.572917
197.2	0.572992
197.3	0.573066
197.4	0.573141
197.5	0.573215
197.6	0.573289
197.7	0.573363
197.8	0.573437
197.9	0.573511
198	0.573585
198.1	0.573659
198.2	0.573733
198.3	0.573806
198.4	0.57388
198.5	0.573953
198.6	0.574026
198.7	0.574099
198.8	0.574172
198.9	0.574245
199	0.574318
199.1	0.574391
199.2	0.574464
199.3	0.574536
199.4	0.574608
199.5	0.574681
199.6	0.574753
199.7	0.574825
199.8	0.574897
199.9	0.574969
200	0.575041
[truncated: 14,000 more rows]
