# Supplementary material for: Bayesian inference of kinetic schemes for ion channels by Kalman filtering
Source: eLife journal article supplement (doi:10.7554/elife.62714), 2022-05-04
Supplement: fig4-data8 [file 1_Sim_N_200_Fluor_MW.xlsx]

## Sheet: 0.25 M
0.1	0
0.2	0
0.3	0
0.4	0
0.5	0
0.6	0
0.7	0
0.8	0
0.9	0
1	0
1.1	0
1.2	0
1.3	0
1.4	0
1.5	0
1.6	0
1.7	0
1.8	0
1.9	0
2	0
2.1	0
2.2	0
2.3	0
2.4	0
2.5	0
2.6	0
2.7	0
2.8	0
2.9	0
3	0
3.1	0
3.2	0
3.3	0
3.4	0
3.5	0
3.6	0
3.7	0
3.8	0
3.9	0
4	0
4.1	0
4.2	0
4.3	0
4.4	0
4.5	0
4.6	0
4.7	0
4.8	0
4.9	0
5	0
5.1	0
5.2	0
5.3	0
5.4	0
5.5	0
5.6	0
5.7	0
5.8	0
5.9	0
6	0
6.1	0
6.2	0
6.3	0
6.4	0
6.5	0
6.6	0
6.7	0
6.8	0
6.9	0
7	0
7.1	0
7.2	0
7.3	0
7.4	0
7.5	0
7.6	0
7.7	0
7.8	0
7.9	0
8	0
8.1	0
8.2	0
8.3	0
8.4	0
8.5	0
8.6	0
8.7	0
8.8	0
8.9	0
9	0
9.1	0
9.2	0
9.3	0
9.4	0
9.5	0
9.6	0
9.7	0
9.8	0
9.9	0
10	0
10.1	0
10.2	0
10.3	0
10.4	0
10.5	0
10.6	0
10.7	0
10.8	0
10.9	0
11	0
11.1	0
11.2	0
11.3	0
11.4	0
11.5	0
11.6	0
11.7	0
11.8	0
11.9	0
12	0
12.1	0
12.2	0
12.3	0
12.4	0
12.5	0
12.6	0
12.7	0
12.8	0
12.9	0
13	0
13.1	0
13.2	0
13.3	0
13.4	0
13.5	0
13.6	0
13.7	0
13.8	0
13.9	0
14	0
14.1	0
14.2	0
14.3	0
14.4	0
14.5	0
14.6	0
14.7	0
14.8	0
14.9	0
15	0
15.1	0
15.2	0
15.3	0
15.4	0
15.5	0
15.6	0
15.7	0
15.8	0
15.9	0
16	0
16.1	0
16.2	0
16.3	0
16.4	0
16.5	0
16.6	0
16.7	0
16.8	0
16.9	0
17	0
17.1	0
17.2	0
17.3	0
17.4	0
17.5	0
17.6	0
17.7	0
17.8	0
17.9	0
18	0
18.1	0
18.2	0
18.3	0
18.4	0
18.5	0
18.6	0
18.7	0
18.8	0
18.9	0
19	0
19.1	0
19.2	0
19.3	0
19.4	0
19.5	0
19.6	0
19.7	0
19.8	0
19.9	0
20	0
20.1	0
20.2	0
20.3	0
20.4	0
20.5	0
20.6	0
20.7	0
20.8	0
20.9	0
21	0
21.1	0
21.2	0
21.3	0
21.4	0
21.5	0
21.6	0
21.7	0
21.8	0
21.9	0
22	0
22.1	0
22.2	0
22.3	0
22.4	0
22.5	0
22.6	0
22.7	0
22.8	0
22.9	0
23	0
23.1	0
23.2	0
23.3	0
23.4	0
23.5	0
23.6	0
23.7	0
23.8	0
23.9	0
24	0
24.1	0
24.2	0
24.3	0
24.4	0
24.5	0
24.6	0
24.7	0
24.8	0
24.9	0
25	0
25.1	0
25.2	0
25.3	0
25.4	0
25.5	0
25.6	0
25.7	0
25.8	0
25.9	0
26	0
26.1	0
26.2	0
26.3	0
26.4	0
26.5	0
26.6	0
26.7	0
26.8	0
26.9	0
27	0
27.1	0
27.2	0
27.3	0
27.4	0
27.5	0
27.6	0
27.7	0
27.8	0
27.9	0
28	0
28.1	0
28.2	0
28.3	0
28.4	0
28.5	0
28.6	0
28.7	0
28.8	0
28.9	0
29	0
29.1	0
29.2	0
29.3	0
29.4	0
29.5	0
29.6	0
29.7	0
29.8	0
29.9	0
30	0
30.1	0
30.2	0
30.3	0
30.4	0
30.5	0
30.6	0
30.7	0
30.8	0
30.9	0
31	0
31.1	0
31.2	0
31.3	0
31.4	0
31.5	0
31.6	0
31.7	0
31.8	0
31.9	0
32	0
32.1	0
32.2	0
32.3	0
32.4	0
32.5	0
32.6	0
32.7	0
32.8	0
32.9	0
33	0
33.1	0
33.2	0
33.3	0
33.4	0
33.5	0
33.6	0
33.7	0
33.8	0
33.9	0
34	0
34.1	0
34.2	0
34.3	0
34.4	0
34.5	0
34.6	0
34.7	0
34.8	0
34.9	0
35	0
35.1	0
35.2	0
35.3	0
35.4	0
35.5	0
35.6	0
35.7	0
35.8	0
35.9	0
36	0
36.1	0
36.2	0
36.3	0
36.4	0
36.5	0
36.6	0
36.7	0
36.8	0
36.9	0
37	0
37.1	0
37.2	0
37.3	0
37.4	0
37.5	0
37.6	0
37.7	0
37.8	0
37.9	0
38	0
38.1	0
38.2	0
38.3	0
38.4	0
38.5	0
38.6	0
38.7	0
38.8	0
38.9	0
39	0
39.1	0
39.2	0
39.3	0
39.4	0
39.5	0
39.6	0
39.7	0
39.8	0
39.9	0
40	0
40.1	0
40.2	0
40.3	0
40.4	0
40.5	0
40.6	0
40.7	0
40.8	0
40.9	0
41	0
41.1	0
41.2	0
41.3	0
41.4	0
41.5	0
41.6	0
41.7	0
41.8	0
41.9	0
42	0
42.1	0
42.2	0
42.3	0
42.4	0
42.5	0
42.6	0
42.7	0
42.8	0
42.9	0
43	0
43.1	0
43.2	0
43.3	0
43.4	0
43.5	0
43.6	0
43.7	0
43.8	0
43.9	0
44	0
44.1	0
44.2	0
44.3	0
44.4	0
44.5	0
44.6	0
44.7	0
44.8	0
44.9	0
45	0
45.1	0
45.2	0
45.3	0
45.4	0
45.5	0
45.6	0
45.7	0
45.8	0
45.9	0
46	0
46.1	0
46.2	0
46.3	0
46.4	0
46.5	0
46.6	0
46.7	0
46.8	0
46.9	0
47	0
47.1	0
47.2	0
47.3	0
47.4	0
47.5	0
47.6	0
47.7	0
47.8	0
47.9	0
48	0
48.1	0
48.2	0
48.3	0
48.4	0
48.5	0
48.6	0
48.7	0
48.8	0
48.9	0
49	0
49.1	0
49.2	0
49.3	0
49.4	0
49.5	0
49.6	0
49.7	0
49.8	0
49.9	0
50	0
50.1	0
50.2	0
50.3	0
50.4	0
50.5	0
50.6	0
50.7	0
50.8	0
50.9	0
51	0
51.1	0
51.2	0
51.3	0
51.4	0
51.5	0
51.6	0
51.7	0
51.8	0
51.9	0
52	0
52.1	0
52.2	0
52.3	0
52.4	0
52.5	0
52.6	0
52.7	0
52.8	0
52.9	0
53	0
53.1	0
53.2	0
53.3	0
53.4	0
53.5	0
53.6	0
53.7	0
53.8	0
53.9	0
54	0
54.1	0
54.2	0
54.3	0
54.4	0
54.5	0
54.6	0
54.7	0
54.8	0
54.9	0
55	0
55.1	0
55.2	0
55.3	0
55.4	0
55.5	0
55.6	0
55.7	0
55.8	0
55.9	0
56	0
56.1	0
56.2	0
56.3	0
56.4	0
56.5	0
56.6	0
56.7	0
56.8	0
56.9	0
57	0
57.1	0
57.2	0
57.3	0
57.4	0
57.5	0
57.6	0
57.7	0
57.8	0
57.9	0
58	0
58.1	0
58.2	0
58.3	0
58.4	0
58.5	0
58.6	0
58.7	0
58.8	0
58.9	0
59	0
59.1	0
59.2	0
59.3	0
59.4	0
59.5	0
59.6	0
59.7	0
59.8	0
59.9	0
60	0
60.1	0
60.2	0
60.3	0
60.4	0
60.5	0
60.6	0
60.7	0
60.8	0
60.9	0
61	0
61.1	0
61.2	0
61.3	0
61.4	0
61.5	0
61.6	0
61.7	0
61.8	0
61.9	0
62	0
62.1	0
62.2	0
62.3	0
62.4	0
62.5	0
62.6	0
62.7	0
62.8	0
62.9	0
63	0
63.1	0
63.2	0
63.3	0
63.4	0
63.5	0
63.6	0
63.7	0
63.8	0
63.9	0
64	0
64.1	0
64.2	0
64.3	0
64.4	0
64.5	0
64.6	0
64.7	0
64.8	0
64.9	0
65	0
65.1	0
65.2	0
65.3	0
65.4	0
65.5	0
65.6	0
65.7	0
65.8	0
65.9	0
66	0
66.1	0
66.2	0
66.3	0
66.4	0
66.5	0
66.6	0
66.7	0
66.8	0
66.9	0
67	0
67.1	0
67.2	0
67.3	0
67.4	0
67.5	0
67.6	0
67.7	0
67.8	0
67.9	0
68	0
68.1	0
68.2	0
68.3	0
68.4	0
68.5	0
68.6	0
68.7	0
68.8	0
68.9	0
69	0
69.1	0
69.2	0
69.3	0
69.4	0
69.5	0
69.6	0
69.7	0
69.8	0
69.9	0
70	0
70.1	0
70.2	0
70.3	0
70.4	0
70.5	0
70.6	0
70.7	0
70.8	0
70.9	0
71	0
71.1	0
71.2	0
71.3	0
71.4	0
71.5	0
71.6	0
71.7	0
71.8	0
71.9	0
72	0
72.1	0
72.2	0
72.3	0
72.4	0
72.5	0
72.6	0
72.7	0
72.8	0
72.9	0
73	0
73.1	0
73.2	0
73.3	0
73.4	0
73.5	0
73.6	0
73.7	0
73.8	0
73.9	0
74	0
74.1	0
74.2	0
74.3	0
74.4	0
74.5	0
74.6	0
74.7	0
74.8	0
74.9	0
75	0
75.1	0
75.2	0
75.3	0
75.4	0
75.5	0
75.6	0
75.7	0
75.8	0
75.9	0
76	0
76.1	0
76.2	0
76.3	0
76.4	0
76.5	0
76.6	0
76.7	0
76.8	0
76.9	0
77	0
77.1	0
77.2	0
77.3	0
77.4	0
77.5	0
77.6	0
77.7	0
77.8	0
77.9	0
78	0
78.1	0
78.2	0
78.3	0
78.4	0
78.5	0
78.6	0
78.7	0
78.8	0
78.9	0
79	0
79.1	0
79.2	0
79.3	0
79.4	0
79.5	0
79.6	0
79.7	0
79.8	0
79.9	0
80	0
80.1	0
80.2	0
80.3	0
80.4	0
80.5	0
80.6	0
80.7	0
80.8	0
80.9	0
81	0
81.1	0
81.2	0
81.3	0
81.4	0
81.5	0
81.6	0
81.7	0
81.8	0
81.9	0
82	0
82.1	0
82.2	0
82.3	0
82.4	0
82.5	0
82.6	0
82.7	0
82.8	0
82.9	0
83	0
83.1	0
83.2	0
83.3	0
83.4	0
83.5	0
83.6	0
83.7	0
83.8	0
83.9	0
84	0
84.1	0
84.2	0
84.3	0
84.4	0
84.5	0
84.6	0
84.7	0
84.8	0
84.9	0
85	0
85.1	0
85.2	0
85.3	0
85.4	0
85.5	0
85.6	0
85.7	0
85.8	0
85.9	0
86	0
86.1	0
86.2	0
86.3	0
86.4	0
86.5	0
86.6	0
86.7	0
86.8	0
86.9	0
87	0
87.1	0
87.2	0
87.3	0
87.4	0
87.5	0
87.6	0
87.7	0
87.8	0
87.9	0
88	0
88.1	0
88.2	0
88.3	0
88.4	0
88.5	0
88.6	0
88.7	0
88.8	0
88.9	0
89	0
89.1	0
89.2	0
89.3	0
89.4	0
89.5	0
89.6	0
89.7	0
89.8	0
89.9	0
90	0
90.1	0
90.2	0
90.3	0
90.4	0
90.5	0
90.6	0
90.7	0
90.8	0
90.9	0
91	0
91.1	0
91.2	0
91.3	0
91.4	0
91.5	0
91.6	0
91.7	0
91.8	0
91.9	0
92	0
92.1	0
92.2	0
92.3	0
92.4	0
92.5	0
92.6	0
92.7	0
92.8	0
92.9	0
93	0
93.1	0
93.2	0
93.3	0
93.4	0
93.5	0
93.6	0
93.7	0
93.8	0
93.9	0
94	0
94.1	0
94.2	0
94.3	0
94.4	0
94.5	0
94.6	0
94.7	0
94.8	0
94.9	0
95	0
95.1	0
95.2	0
95.3	0
95.4	0
95.5	0
95.6	0
95.7	0
95.8	0
95.9	0
96	0
96.1	0
96.2	0
96.3	0
96.4	0
96.5	0
96.6	0
96.7	0
96.8	0
96.9	0
97	0
97.1	0
97.2	0
97.3	0
97.4	0
97.5	0
97.6	0
97.7	0
97.8	0
97.9	0
98	0
98.1	0
98.2	0
98.3	0
98.4	0
98.5	0
98.6	0
98.7	0
98.8	0
98.9	0
99	0
99.1	0
99.2	0
99.3	0
99.4	0
99.5	0
99.6	0
99.7	0
99.8	0
99.9	0
100	0
100.1	0.0125
100.2	0.0225
100.3	0.0375
100.4	0.0525
100.5	0.0575
100.6	0.0675
100.7	0.0825
100.8	0.0875
100.9	0.0925
101	0.1
101.1	0.1125
101.2	0.12
101.3	0.1275
101.4	0.1375
101.5	0.145
101.6	0.155
101.7	0.1675
101.8	0.17
101.9	0.1825
102	0.1975
102.1	0.2
102.2	0.2175
102.3	0.2175
102.4	0.23
102.5	0.2375
102.6	0.2425
102.7	0.235
102.8	0.24
102.9	0.2475
103	0.2475
103.1	0.2525
103.2	0.26
103.3	0.265
103.4	0.275
103.5	0.2875
103.6	0.2925
103.7	0.2975
103.8	0.305
103.9	0.3175
104	0.32
104.1	0.325
104.2	0.3375
104.3	0.345
104.4	0.35
104.5	0.365
104.6	0.365
104.7	0.3625
104.8	0.36
104.9	0.365
105	0.36
105.1	0.3625
105.2	0.37
105.3	0.3775
105.4	0.375
105.5	0.37
105.6	0.3675
105.7	0.37
105.8	0.3775
105.9	0.37
106	0.3775
106.1	0.3825
106.2	0.38
106.3	0.3825
106.4	0.3775
106.5	0.3825
106.6	0.39
106.7	0.385
106.8	0.3925
106.9	0.39
107	0.3875
107.1	0.3875
107.2	0.3925
107.3	0.4125
107.4	0.4175
107.5	0.4175
107.6	0.4175
107.7	0.43
107.8	0.43
107.9	0.4275
108	0.43
108.1	0.43
108.2	0.4275
108.3	0.435
108.4	0.43
108.5	0.4275
108.6	0.425
108.7	0.4325
108.8	0.43
108.9	0.43
109	0.435
109.1	0.4425
109.2	0.44
109.3	0.44
109.4	0.4375
109.5	0.435
109.6	0.43
109.7	0.43
109.8	0.43
109.9	0.4275
110	0.4225
110.1	0.42
110.2	0.43
110.3	0.425
110.4	0.425
110.5	0.4275
110.6	0.4325
110.7	0.4325
110.8	0.435
110.9	0.4325
111	0.4375
111.1	0.4275
111.2	0.42
111.3	0.42
111.4	0.42
111.5	0.4225
111.6	0.435
111.7	0.4375
111.8	0.445
111.9	0.4425
112	0.4425
112.1	0.445
112.2	0.4425
112.3	0.4475
112.4	0.45
112.5	0.4525
112.6	0.45
112.7	0.45
112.8	0.455
112.9	0.4525
113	0.4525
113.1	0.4575
113.2	0.465
113.3	0.47
113.4	0.4725
113.5	0.4675
113.6	0.4725
113.7	0.48
113.8	0.4825
113.9	0.4825
114	0.4925
114.1	0.4925
114.2	0.49
114.3	0.4925
114.4	0.4925
114.5	0.4975
114.6	0.49
114.7	0.49
114.8	0.4975
114.9	0.505
115	0.495
115.1	0.4975
115.2	0.49
115.3	0.49
115.4	0.495
115.5	0.4975
115.6	0.4975
115.7	0.505
115.8	0.5025
115.9	0.505
116	0.4975
116.1	0.4925
116.2	0.4975
116.3	0.4925
116.4	0.4875
116.5	0.4875
116.6	0.495
116.7	0.495
116.8	0.5025
116.9	0.5
117	0.495
117.1	0.5
117.2	0.5025
117.3	0.4975
117.4	0.49
117.5	0.4875
117.6	0.4875
117.7	0.4925
117.8	0.4925
117.9	0.49
118	0.4975
118.1	0.49
118.2	0.4925
118.3	0.4975
118.4	0.5
118.5	0.505
118.6	0.5025
118.7	0.505
118.8	0.5
118.9	0.5
119	0.5
119.1	0.495
119.2	0.4925
119.3	0.4875
119.4	0.485
119.5	0.48
119.6	0.48
119.7	0.475
119.8	0.4675
119.9	0.465
120	0.4675
120.1	0.465
120.2	0.465
120.3	0.46
120.4	0.4575
120.5	0.4525
120.6	0.46
120.7	0.4625
120.8	0.4625
120.9	0.4525
121	0.4625
121.1	0.46
121.2	0.4575
121.3	0.4575
121.4	0.455
121.5	0.46
121.6	0.4625
121.7	0.4575
121.8	0.455
121.9	0.455
122	0.45
122.1	0.4475
122.2	0.455
122.3	0.4575
122.4	0.465
122.5	0.465
122.6	0.4625
122.7	0.47
122.8	0.475
122.9	0.485
123	0.4925
123.1	0.5
123.2	0.4975
123.3	0.4975
123.4	0.5025
123.5	0.5075
123.6	0.5025
123.7	0.505
123.8	0.5025
123.9	0.505
124	0.51
124.1	0.5125
124.2	0.5125
124.3	0.52
124.4	0.5225
124.5	0.52
124.6	0.52
124.7	0.5175
124.8	0.52
124.9	0.5175
125	0.5175
125.1	0.5125
125.2	0.5175
125.3	0.535
125.4	0.54
125.5	0.5425
125.6	0.5375
125.7	0.5275
125.8	0.53
125.9	0.53
126	0.5375
126.1	0.525
126.2	0.5175
126.3	0.515
126.4	0.515
126.5	0.5125
126.6	0.5075
126.7	0.505
126.8	0.5025
126.9	0.495
127	0.5075
127.1	0.51
127.2	0.5125
127.3	0.5
127.4	0.4975
127.5	0.4975
127.6	0.495
127.7	0.505
127.8	0.5075
127.9	0.5075
128	0.505
128.1	0.5075
128.2	0.4975
128.3	0.5
128.4	0.5075
128.5	0.5125
128.6	0.5125
128.7	0.51
128.8	0.5125
128.9	0.5125
129	0.515
129.1	0.515
129.2	0.51
129.3	0.5025
129.4	0.5025
129.5	0.5
129.6	0.5
129.7	0.505
129.8	0.5025
129.9	0.5025
130	0.49
130.1	0.4975
130.2	0.5
130.3	0.5
130.4	0.4975
130.5	0.495
130.6	0.5
130.7	0.505
130.8	0.5025
130.9	0.5025
131	0.5
131.1	0.4975
131.2	0.5
131.3	0.4825
131.4	0.48
131.5	0.4825
131.6	0.485
131.7	0.485
131.8	0.4825
131.9	0.4825
132	0.48
132.1	0.485
132.2	0.49
132.3	0.495
132.4	0.495
132.5	0.4825
132.6	0.485
132.7	0.485
132.8	0.485
132.9	0.485
133	0.4825
133.1	0.4725
133.2	0.4825
133.3	0.475
133.4	0.47
133.5	0.47
133.6	0.4675
133.7	0.47
133.8	0.47
133.9	0.465
134	0.465
134.1	0.47
134.2	0.4725
134.3	0.47
134.4	0.4675
134.5	0.4675
134.6	0.46
134.7	0.47
134.8	0.475
134.9	0.4825
135	0.485
135.1	0.4875
135.2	0.495
135.3	0.4925
135.4	0.5
135.5	0.5025
135.6	0.505
135.7	0.51
135.8	0.5075
135.9	0.5125
136	0.5075
136.1	0.5075
136.2	0.5075
136.3	0.51
136.4	0.5025
136.5	0.5
136.6	0.505
136.7	0.505
136.8	0.505
136.9	0.5
137	0.49
137.1	0.4925
137.2	0.495
137.3	0.5
137.4	0.5025
137.5	0.5025
137.6	0.51
137.7	0.5075
137.8	0.5125
137.9	0.515
138	0.5175
138.1	0.52
138.2	0.525
138.3	0.5275
138.4	0.5275
138.5	0.53
138.6	0.5225
138.7	0.5275
138.8	0.53
138.9	0.525
139	0.5175
139.1	0.51
139.2	0.5175
139.3	0.5175
139.4	0.5175
139.5	0.51
139.6	0.5125
139.7	0.51
139.8	0.51
139.9	0.515
140	0.52
140.1	0.515
140.2	0.5025
140.3	0.505
140.4	0.505
140.5	0.505
140.6	0.505
140.7	0.51
140.8	0.515
140.9	0.5125
141	0.51
141.1	0.51
141.2	0.51
141.3	0.5025
141.4	0.495
141.5	0.495
141.6	0.5
141.7	0.4975
141.8	0.5
141.9	0.49
142	0.495
142.1	0.49
142.2	0.49
142.3	0.48
142.4	0.4875
142.5	0.49
142.6	0.4875
142.7	0.4875
142.8	0.48
142.9	0.4825
143	0.4825
143.1	0.4825
143.2	0.48
143.3	0.4825
143.4	0.4825
143.5	0.4875
143.6	0.5
143.7	0.5075
143.8	0.5125
143.9	0.51
144	0.51
144.1	0.5075
144.2	0.51
144.3	0.5175
144.4	0.5125
144.5	0.5175
144.6	0.5175
144.7	0.515
144.8	0.5075
144.9	0.51
145	0.505
145.1	0.5025
145.2	0.5025
145.3	0.505
145.4	0.5075
145.5	0.51
145.6	0.515
145.7	0.5175
145.8	0.5125
145.9	0.52
146	0.515
146.1	0.515
146.2	0.5125
146.3	0.5175
146.4	0.5225
146.5	0.525
146.6	0.5225
146.7	0.5225
146.8	0.52
146.9	0.5225
147	0.525
147.1	0.53
147.2	0.5275
147.3	0.5275
147.4	0.5225
147.5	0.52
147.6	0.5275
147.7	0.525
147.8	0.52
147.9	0.5225
148	0.52
148.1	0.51
148.2	0.51
148.3	0.515
148.4	0.5125
148.5	0.515
148.6	0.515
148.7	0.5225
148.8	0.515
148.9	0.515
149	0.5125
149.1	0.5075
149.2	0.51
149.3	0.5075
149.4	0.505
149.5	0.51
149.6	0.5125
149.7	0.5175
149.8	0.5275
149.9	0.5325
150	0.5325
150.1	0.525
150.2	0.5325
150.3	0.53
150.4	0.5275
150.5	0.53
150.6	0.5325
150.7	0.53
150.8	0.53
150.9	0.525
151	0.525
151.1	0.525
151.2	0.52
151.3	0.52
151.4	0.515
151.5	0.52
151.6	0.5225
151.7	0.5275
151.8	0.525
151.9	0.525
152	0.535
152.1	0.53
152.2	0.54
152.3	0.54
152.4	0.55
152.5	0.545
152.6	0.54
152.7	0.545
152.8	0.5475
152.9	0.55
153	0.5475
153.1	0.545
153.2	0.545
153.3	0.545
153.4	0.5425
153.5	0.54
153.6	0.5375
153.7	0.5325
153.8	0.535
153.9	0.535
154	0.5375
154.1	0.5325
154.2	0.54
154.3	0.5425
154.4	0.5425
154.5	0.5425
154.6	0.5425
154.7	0.5375
154.8	0.53
154.9	0.535
155	0.5375
155.1	0.54
155.2	0.53
155.3	0.5325
155.4	0.5325
155.5	0.5375
155.6	0.5425
155.7	0.535
155.8	0.54
155.9	0.535
156	0.5325
156.1	0.5375
156.2	0.5325
156.3	0.53
156.4	0.5325
156.5	0.5375
156.6	0.5325
156.7	0.5325
156.8	0.5325
156.9	0.5325
157	0.5325
157.1	0.5275
157.2	0.535
157.3	0.53
157.4	0.53
157.5	0.5325
157.6	0.5325
157.7	0.5425
157.8	0.54
157.9	0.54
158	0.5375
158.1	0.54
158.2	0.5375
158.3	0.5325
158.4	0.5425
158.5	0.5425
158.6	0.54
158.7	0.545
158.8	0.55
158.9	0.535
159	0.5325
159.1	0.5325
159.2	0.5275
159.3	0.525
159.4	0.525
159.5	0.525
159.6	0.5325
159.7	0.5325
159.8	0.5325
159.9	0.535
160	0.5325
160.1	0.54
160.2	0.5375
160.3	0.53
160.4	0.535
160.5	0.5375
160.6	0.5425
160.7	0.55
160.8	0.545
160.9	0.54
161	0.54
161.1	0.54
161.2	0.5375
161.3	0.53
161.4	0.5275
161.5	0.52
161.6	0.52
161.7	0.5175
161.8	0.51
161.9	0.5075
162	0.505
162.1	0.5125
162.2	0.515
162.3	0.5225
162.4	0.53
162.5	0.525
162.6	0.5275
162.7	0.525
162.8	0.525
162.9	0.5225
163	0.5275
163.1	0.53
163.2	0.525
163.3	0.525
163.4	0.5325
163.5	0.5275
163.6	0.525
163.7	0.53
163.8	0.53
163.9	0.535
164	0.5275
164.1	0.5225
164.2	0.5275
164.3	0.5325
164.4	0.535
164.5	0.5375
164.6	0.535
164.7	0.5375
164.8	0.53
164.9	0.53
165	0.5325
165.1	0.5425
165.2	0.5425
165.3	0.5425
165.4	0.545
165.5	0.5425
165.6	0.5325
165.7	0.53
165.8	0.53
165.9	0.535
166	0.5325
166.1	0.515
166.2	0.5225
166.3	0.52
166.4	0.5225
166.5	0.53
166.6	0.5325
166.7	0.53
166.8	0.5275
166.9	0.5275
167	0.525
167.1	0.5275
167.2	0.5225
167.3	0.525
167.4	0.5325
167.5	0.5325
167.6	0.5375
167.7	0.5375
167.8	0.535
167.9	0.5425
168	0.535
168.1	0.5425
168.2	0.55
168.3	0.555
168.4	0.5575
168.5	0.56
168.6	0.5575
168.7	0.55
168.8	0.555
168.9	0.55
169	0.5525
169.1	0.555
169.2	0.5475
169.3	0.545
169.4	0.545
169.5	0.545
169.6	0.545
169.7	0.5475
169.8	0.5475
169.9	0.5425
170	0.545
170.1	0.545
170.2	0.54
170.3	0.545
170.4	0.545
170.5	0.5425
170.6	0.5475
170.7	0.5525
170.8	0.565
170.9	0.5575
171	0.555
171.1	0.56
171.2	0.5475
171.3	0.5575
171.4	0.555
171.5	0.56
171.6	0.5625
171.7	0.5675
171.8	0.56
171.9	0.5575
172	0.555
172.1	0.55
172.2	0.5525
172.3	0.5525
172.4	0.5575
172.5	0.5625
172.6	0.565
172.7	0.56
172.8	0.56
172.9	0.5625
173	0.555
173.1	0.5525
173.2	0.555
173.3	0.545
173.4	0.5475
173.5	0.545
173.6	0.5525
173.7	0.5625
173.8	0.565
173.9	0.565
174	0.575
174.1	0.575
174.2	0.57
174.3	0.5625
174.4	0.555
174.5	0.545
174.6	0.5475
174.7	0.545
174.8	0.5425
174.9	0.5425
175	0.5425
175.1	0.5375
175.2	0.5425
175.3	0.54
175.4	0.5325
175.5	0.5325
175.6	0.54
175.7	0.545
175.8	0.5575
175.9	0.555
176	0.5525
176.1	0.555
176.2	0.5525
176.3	0.5475
176.4	0.55
176.5	0.5475
176.6	0.5475
176.7	0.55
176.8	0.5425
176.9	0.54
177	0.55
177.1	0.545
177.2	0.5475
177.3	0.5425
177.4	0.54
177.5	0.5375
177.6	0.5425
177.7	0.5425
177.8	0.5375
177.9	0.5375
178	0.5375
178.1	0.5325
178.2	0.5325
178.3	0.5325
178.4	0.535
178.5	0.535
178.6	0.5375
178.7	0.53
178.8	0.535
178.9	0.535
179	0.535
179.1	0.5275
179.2	0.52
179.3	0.5225
179.4	0.5275
179.5	0.525
179.6	0.5275
179.7	0.525
179.8	0.5275
179.9	0.5275
180	0.5325
180.1	0.535
180.2	0.535
180.3	0.5375
180.4	0.535
180.5	0.535
180.6	0.53
180.7	0.535
180.8	0.5325
180.9	0.53
181	0.535
181.1	0.5375
181.2	0.5325
181.3	0.5375
181.4	0.5375
181.5	0.5325
181.6	0.535
181.7	0.5275
181.8	0.5275
181.9	0.5275
182	0.5275
182.1	0.5225
182.2	0.5225
182.3	0.5225
182.4	0.5175
182.5	0.5175
182.6	0.515
182.7	0.5125
182.8	0.5125
182.9	0.5125
183	0.5125
183.1	0.51
183.2	0.52
183.3	0.5275
183.4	0.525
183.5	0.525
183.6	0.52
183.7	0.525
183.8	0.5225
183.9	0.5225
184	0.5175
184.1	0.5325
184.2	0.54
184.3	0.5375
184.4	0.545
184.5	0.545
184.6	0.5525
184.7	0.55
184.8	0.5475
184.9	0.5475
185	0.55
185.1	0.555
185.2	0.55
185.3	0.5475
185.4	0.5325
185.5	0.53
185.6	0.53
185.7	0.52
185.8	0.53
185.9	0.5375
186	0.54
186.1	0.5375
186.2	0.535
186.3	0.55
186.4	0.545
186.5	0.5425
186.6	0.545
186.7	0.54
186.8	0.535
186.9	0.5275
187	0.53
187.1	0.5225
187.2	0.5225
187.3	0.5275
187.4	0.5325
187.5	0.5375
187.6	0.5475
187.7	0.55
187.8	0.5575
187.9	0.5575
188	0.5625
188.1	0.5625
188.2	0.5675
188.3	0.5675
188.4	0.58
188.5	0.58
188.6	0.58
188.7	0.5825
188.8	0.5775
188.9	0.57
189	0.5675
189.1	0.5675
189.2	0.57
189.3	0.5675
189.4	0.5625
189.5	0.56
189.6	0.5575
189.7	0.5575
189.8	0.5525
189.9	0.5525
190	0.5525
190.1	0.5575
190.2	0.555
190.3	0.5575
190.4	0.5625
190.5	0.5625
190.6	0.57
190.7	0.5625
190.8	0.56
190.9	0.5625
191	0.5575
191.1	0.555
191.2	0.555
191.3	0.555
191.4	0.5475
191.5	0.5475
191.6	0.54
191.7	0.54
191.8	0.55
191.9	0.5525
192	0.5525
192.1	0.5475
192.2	0.545
192.3	0.5425
192.4	0.55
192.5	0.55
192.6	0.5475
192.7	0.5475
192.8	0.545
192.9	0.545
193	0.5475
193.1	0.5475
193.2	0.545
193.3	0.55
193.4	0.545
193.5	0.56
193.6	0.5675
193.7	0.565
193.8	0.5575
193.9	0.555
194	0.5575
194.1	0.545
194.2	0.545
194.3	0.55
194.4	0.5475
194.5	0.5475
194.6	0.5525
194.7	0.5525
194.8	0.5575
194.9	0.5575
195	0.5525
195.1	0.555
195.2	0.555
195.3	0.5475
195.4	0.5525
195.5	0.5625
195.6	0.5675
195.7	0.5575
195.8	0.555
195.9	0.5525
196	0.555
196.1	0.5625
196.2	0.56
196.3	0.56
196.4	0.5575
196.5	0.555
196.6	0.5575
196.7	0.5675
196.8	0.57
196.9	0.5675
197	0.585
197.1	0.5825
197.2	0.5825
197.3	0.585
197.4	0.5875
197.5	0.585
197.6	0.5725
197.7	0.5725
197.8	0.57
197.9	0.57
198	0.575
198.1	0.575
198.2	0.57
198.3	0.57
198.4	0.57
198.5	0.56
198.6	0.56
198.7	0.5675
198.8	0.575
198.9	0.575
199	0.5825
199.1	0.585
199.2	0.5875
199.3	0.5875
199.4	0.5875
199.5	0.585
199.6	0.585
199.7	0.5775
199.8	0.575
199.9	0.57
200	0.5675
[truncated: 14,000 more rows]
