# Supplementary material for: Bayesian inference of kinetic schemes for ion channels by Kalman filtering
Source: eLife journal article supplement (doi:10.7554/elife.62714), 2022-05-04
Supplement: fig4-data8 [file 1_Sim_N_200_Strom_MW.xlsx]

## Sheet: 0.25 M
0.1	0
0.2	0
0.3	0
0.4	0
0.5	0
0.6	0
0.7	0
0.8	0
0.9	0
1	0
1.1	0
1.2	0
1.3	0
1.4	0
1.5	0
1.6	0
1.7	0
1.8	0
1.9	0
2	0
2.1	0
2.2	0
2.3	0
2.4	0
2.5	0
2.6	0
2.7	0
2.8	0
2.9	0
3	0
3.1	0
3.2	0
3.3	0
3.4	0
3.5	0
3.6	0
3.7	0
3.8	0
3.9	0
4	0
4.1	0
4.2	0
4.3	0
4.4	0
4.5	0
4.6	0
4.7	0
4.8	0
4.9	0
5	0
5.1	0
5.2	0
5.3	0
5.4	0
5.5	0
5.6	0
5.7	0
5.8	0
5.9	0
6	0
6.1	0
6.2	0
6.3	0
6.4	0
6.5	0
6.6	0
6.7	0
6.8	0
6.9	0
7	0
7.1	0
7.2	0
7.3	0
7.4	0
7.5	0
7.6	0
7.7	0
7.8	0
7.9	0
8	0
8.1	0
8.2	0
8.3	0
8.4	0
8.5	0
8.6	0
8.7	0
8.8	0
8.9	0
9	0
9.1	0
9.2	0
9.3	0
9.4	0
9.5	0
9.6	0
9.7	0
9.8	0
9.9	0
10	0
10.1	0
10.2	0
10.3	0
10.4	0
10.5	0
10.6	0
10.7	0
10.8	0
10.9	0
11	0
11.1	0
11.2	0
11.3	0
11.4	0
11.5	0
11.6	0
11.7	0
11.8	0
11.9	0
12	0
12.1	0
12.2	0
12.3	0
12.4	0
12.5	0
12.6	0
12.7	0
12.8	0
12.9	0
13	0
13.1	0
13.2	0
13.3	0
13.4	0
13.5	0
13.6	0
13.7	0
13.8	0
13.9	0
14	0
14.1	0
14.2	0
14.3	0
14.4	0
14.5	0
14.6	0
14.7	0
14.8	0
14.9	0
15	0
15.1	0
15.2	0
15.3	0
15.4	0
15.5	0
15.6	0
15.7	0
15.8	0
15.9	0
16	0
16.1	0
16.2	0
16.3	0
16.4	0
16.5	0
16.6	0
16.7	0
16.8	0
16.9	0
17	0
17.1	0
17.2	0
17.3	0
17.4	0
17.5	0
17.6	0
17.7	0
17.8	0
17.9	0
18	0
18.1	0
18.2	0
18.3	0
18.4	0
18.5	0
18.6	0
18.7	0
18.8	0
18.9	0
19	0
19.1	0
19.2	0
19.3	0
19.4	0
19.5	0
19.6	0
19.7	0
19.8	0
19.9	0
20	0
20.1	0
20.2	0
20.3	0
20.4	0
20.5	0
20.6	0
20.7	0
20.8	0
20.9	0
21	0
21.1	0
21.2	0
21.3	0
21.4	0
21.5	0
21.6	0
21.7	0
21.8	0
21.9	0
22	0
22.1	0
22.2	0
22.3	0
22.4	0
22.5	0
22.6	0
22.7	0
22.8	0
22.9	0
23	0
23.1	0
23.2	0
23.3	0
23.4	0
23.5	0
23.6	0
23.7	0
23.8	0
23.9	0
24	0
24.1	0
24.2	0
24.3	0
24.4	0
24.5	0
24.6	0
24.7	0
24.8	0
24.9	0
25	0
25.1	0
25.2	0
25.3	0
25.4	0
25.5	0
25.6	0
25.7	0
25.8	0
25.9	0
26	0
26.1	0
26.2	0
26.3	0
26.4	0
26.5	0
26.6	0
26.7	0
26.8	0
26.9	0
27	0
27.1	0
27.2	0
27.3	0
27.4	0
27.5	0
27.6	0
27.7	0
27.8	0
27.9	0
28	0
28.1	0
28.2	0
28.3	0
28.4	0
28.5	0
28.6	0
28.7	0
28.8	0
28.9	0
29	0
29.1	0
29.2	0
29.3	0
29.4	0
29.5	0
29.6	0
29.7	0
29.8	0
29.9	0
30	0
30.1	0
30.2	0
30.3	0
30.4	0
30.5	0
30.6	0
30.7	0
30.8	0
30.9	0
31	0
31.1	0
31.2	0
31.3	0
31.4	0
31.5	0
31.6	0
31.7	0
31.8	0
31.9	0
32	0
32.1	0
32.2	0
32.3	0
32.4	0
32.5	0
32.6	0
32.7	0
32.8	0
32.9	0
33	0
33.1	0
33.2	0
33.3	0
33.4	0
33.5	0
33.6	0
33.7	0
33.8	0
33.9	0
34	0
34.1	0
34.2	0
34.3	0
34.4	0
34.5	0
34.6	0
34.7	0
34.8	0
34.9	0
35	0
35.1	0
35.2	0
35.3	0
35.4	0
35.5	0
35.6	0
35.7	0
35.8	0
35.9	0
36	0
36.1	0
36.2	0
36.3	0
36.4	0
36.5	0
36.6	0
36.7	0
36.8	0
36.9	0
37	0
37.1	0
37.2	0
37.3	0
37.4	0
37.5	0
37.6	0
37.7	0
37.8	0
37.9	0
38	0
38.1	0
38.2	0
38.3	0
38.4	0
38.5	0
38.6	0
38.7	0
38.8	0
38.9	0
39	0
39.1	0
39.2	0
39.3	0
39.4	0
39.5	0
39.6	0
39.7	0
39.8	0
39.9	0
40	0
40.1	0
40.2	0
40.3	0
40.4	0
40.5	0
40.6	0
40.7	0
40.8	0
40.9	0
41	0
41.1	0
41.2	0
41.3	0
41.4	0
41.5	0
41.6	0
41.7	0
41.8	0
41.9	0
42	0
42.1	0
42.2	0
42.3	0
42.4	0
42.5	0
42.6	0
42.7	0
42.8	0
42.9	0
43	0
43.1	0
43.2	0
43.3	0
43.4	0
43.5	0
43.6	0
43.7	0
43.8	0
43.9	0
44	0
44.1	0
44.2	0
44.3	0
44.4	0
44.5	0
44.6	0
44.7	0
44.8	0
44.9	0
45	0
45.1	0
45.2	0
45.3	0
45.4	0
45.5	0
45.6	0
45.7	0
45.8	0
45.9	0
46	0
46.1	0
46.2	0
46.3	0
46.4	0
46.5	0
46.6	0
46.7	0
46.8	0
46.9	0
47	0
47.1	0
47.2	0
47.3	0
47.4	0
47.5	0
47.6	0
47.7	0
47.8	0
47.9	0
48	0
48.1	0
48.2	0
48.3	0
48.4	0
48.5	0
48.6	0
48.7	0
48.8	0
48.9	0
49	0
49.1	0
49.2	0
49.3	0
49.4	0
49.5	0
49.6	0
49.7	0
49.8	0
49.9	0
50	0
50.1	0
50.2	0
50.3	0
50.4	0
50.5	0
50.6	0
50.7	0
50.8	0
50.9	0
51	0
51.1	0
51.2	0
51.3	0
51.4	0
51.5	0
51.6	0
51.7	0
51.8	0
51.9	0
52	0
52.1	0
52.2	0
52.3	0
52.4	0
52.5	0
52.6	0
52.7	0
52.8	0
52.9	0
53	0
53.1	0
53.2	0
53.3	0
53.4	0
53.5	0
53.6	0
53.7	0
53.8	0
53.9	0
54	0
54.1	0
54.2	0
54.3	0
54.4	0
54.5	0
54.6	0
54.7	0
54.8	0
54.9	0
55	0
55.1	0
55.2	0
55.3	0
55.4	0
55.5	0
55.6	0
55.7	0
55.8	0
55.9	0
56	0
56.1	0
56.2	0
56.3	0
56.4	0
56.5	0
56.6	0
56.7	0
56.8	0
56.9	0
57	0
57.1	0
57.2	0
57.3	0
57.4	0
57.5	0
57.6	0
57.7	0
57.8	0
57.9	0
58	0
58.1	0
58.2	0
58.3	0
58.4	0
58.5	0
58.6	0
58.7	0
58.8	0
58.9	0
59	0
59.1	0
59.2	0
59.3	0
59.4	0
59.5	0
59.6	0
59.7	0
59.8	0
59.9	0
60	0
60.1	0
60.2	0
60.3	0
60.4	0
60.5	0
60.6	0
60.7	0
60.8	0
60.9	0
61	0
61.1	0
61.2	0
61.3	0
61.4	0
61.5	0
61.6	0
61.7	0
61.8	0
61.9	0
62	0
62.1	0
62.2	0
62.3	0
62.4	0
62.5	0
62.6	0
62.7	0
62.8	0
62.9	0
63	0
63.1	0
63.2	0
63.3	0
63.4	0
63.5	0
63.6	0
63.7	0
63.8	0
63.9	0
64	0
64.1	0
64.2	0
64.3	0
64.4	0
64.5	0
64.6	0
64.7	0
64.8	0
64.9	0
65	0
65.1	0
65.2	0
65.3	0
65.4	0
65.5	0
65.6	0
65.7	0
65.8	0
65.9	0
66	0
66.1	0
66.2	0
66.3	0
66.4	0
66.5	0
66.6	0
66.7	0
66.8	0
66.9	0
67	0
67.1	0
67.2	0
67.3	0
67.4	0
67.5	0
67.6	0
67.7	0
67.8	0
67.9	0
68	0
68.1	0
68.2	0
68.3	0
68.4	0
68.5	0
68.6	0
68.7	0
68.8	0
68.9	0
69	0
69.1	0
69.2	0
69.3	0
69.4	0
69.5	0
69.6	0
69.7	0
69.8	0
69.9	0
70	0
70.1	0
70.2	0
70.3	0
70.4	0
70.5	0
70.6	0
70.7	0
70.8	0
70.9	0
71	0
71.1	0
71.2	0
71.3	0
71.4	0
71.5	0
71.6	0
71.7	0
71.8	0
71.9	0
72	0
72.1	0
72.2	0
72.3	0
72.4	0
72.5	0
72.6	0
72.7	0
72.8	0
72.9	0
73	0
73.1	0
73.2	0
73.3	0
73.4	0
73.5	0
73.6	0
73.7	0
73.8	0
73.9	0
74	0
74.1	0
74.2	0
74.3	0
74.4	0
74.5	0
74.6	0
74.7	0
74.8	0
74.9	0
75	0
75.1	0
75.2	0
75.3	0
75.4	0
75.5	0
75.6	0
75.7	0
75.8	0
75.9	0
76	0
76.1	0
76.2	0
76.3	0
76.4	0
76.5	0
76.6	0
76.7	0
76.8	0
76.9	0
77	0
77.1	0
77.2	0
77.3	0
77.4	0
77.5	0
77.6	0
77.7	0
77.8	0
77.9	0
78	0
78.1	0
78.2	0
78.3	0
78.4	0
78.5	0
78.6	0
78.7	0
78.8	0
78.9	0
79	0
79.1	0
79.2	0
79.3	0
79.4	0
79.5	0
79.6	0
79.7	0
79.8	0
79.9	0
80	0
80.1	0
80.2	0
80.3	0
80.4	0
80.5	0
80.6	0
80.7	0
80.8	0
80.9	0
81	0
81.1	0
81.2	0
81.3	0
81.4	0
81.5	0
81.6	0
81.7	0
81.8	0
81.9	0
82	0
82.1	0
82.2	0
82.3	0
82.4	0
82.5	0
82.6	0
82.7	0
82.8	0
82.9	0
83	0
83.1	0
83.2	0
83.3	0
83.4	0
83.5	0
83.6	0
83.7	0
83.8	0
83.9	0
84	0
84.1	0
84.2	0
84.3	0
84.4	0
84.5	0
84.6	0
84.7	0
84.8	0
84.9	0
85	0
85.1	0
85.2	0
85.3	0
85.4	0
85.5	0
85.6	0
85.7	0
85.8	0
85.9	0
86	0
86.1	0
86.2	0
86.3	0
86.4	0
86.5	0
86.6	0
86.7	0
86.8	0
86.9	0
87	0
87.1	0
87.2	0
87.3	0
87.4	0
87.5	0
87.6	0
87.7	0
87.8	0
87.9	0
88	0
88.1	0
88.2	0
88.3	0
88.4	0
88.5	0
88.6	0
88.7	0
88.8	0
88.9	0
89	0
89.1	0
89.2	0
89.3	0
89.4	0
89.5	0
89.6	0
89.7	0
89.8	0
89.9	0
90	0
90.1	0
90.2	0
90.3	0
90.4	0
90.5	0
90.6	0
90.7	0
90.8	0
90.9	0
91	0
91.1	0
91.2	0
91.3	0
91.4	0
91.5	0
91.6	0
91.7	0
91.8	0
91.9	0
92	0
92.1	0
92.2	0
92.3	0
92.4	0
92.5	0
92.6	0
92.7	0
92.8	0
92.9	0
93	0
93.1	0
93.2	0
93.3	0
93.4	0
93.5	0
93.6	0
93.7	0
93.8	0
93.9	0
94	0
94.1	0
94.2	0
94.3	0
94.4	0
94.5	0
94.6	0
94.7	0
94.8	0
94.9	0
95	0
95.1	0
95.2	0
95.3	0
95.4	0
95.5	0
95.6	0
95.7	0
95.8	0
95.9	0
96	0
96.1	0
96.2	0
96.3	0
96.4	0
96.5	0
96.6	0
96.7	0
96.8	0
96.9	0
97	0
97.1	0
97.2	0
97.3	0
97.4	0
97.5	0
97.6	0
97.7	0
97.8	0
97.9	0
98	0
98.1	0
98.2	0
98.3	0
98.4	0
98.5	0
98.6	0
98.7	0
98.8	0
98.9	0
99	0
99.1	0
99.2	0
99.3	0
99.4	0
99.5	0
99.6	0
99.7	0
99.8	0
99.9	0
100	0
100.1	0
100.2	0
100.3	0
100.4	0
100.5	0
100.6	0
100.7	0
100.8	0
100.9	0
101	0
101.1	0
101.2	0
101.3	0
101.4	0
101.5	0
101.6	0
101.7	0
101.8	0
101.9	0.005
102	0.005
102.1	0.005
102.2	0.005
102.3	0.005
102.4	0.01
102.5	0.01
102.6	0.01
102.7	0.01
102.8	0.01
102.9	0.01
103	0.01
103.1	0.01
103.2	0.01
103.3	0.01
103.4	0.01
103.5	0.01
103.6	0.015
103.7	0.015
103.8	0.015
103.9	0.015
104	0.015
104.1	0.015
104.2	0.015
104.3	0.015
104.4	0.015
104.5	0.015
104.6	0.015
104.7	0.015
104.8	0.015
104.9	0.015
105	0.015
105.1	0.015
105.2	0.015
105.3	0.015
105.4	0.015
105.5	0.015
105.6	0.015
105.7	0.015
105.8	0.015
105.9	0.015
106	0.015
106.1	0.015
106.2	0.015
106.3	0.015
106.4	0.015
106.5	0.015
106.6	0.015
106.7	0.015
106.8	0.015
106.9	0.015
107	0.015
107.1	0.015
107.2	0.015
107.3	0.015
107.4	0.015
107.5	0.015
107.6	0.015
107.7	0.015
107.8	0.015
107.9	0.02
108	0.02
108.1	0.02
108.2	0.02
108.3	0.02
108.4	0.025
108.5	0.025
108.6	0.025
108.7	0.025
108.8	0.025
108.9	0.025
109	0.025
109.1	0.025
109.2	0.025
109.3	0.025
109.4	0.025
109.5	0.025
109.6	0.025
109.7	0.025
109.8	0.025
109.9	0.025
110	0.025
110.1	0.025
110.2	0.025
110.3	0.025
110.4	0.025
110.5	0.03
110.6	0.03
110.7	0.03
110.8	0.03
110.9	0.03
111	0.03
111.1	0.03
111.2	0.035
111.3	0.035
111.4	0.035
111.5	0.035
111.6	0.035
111.7	0.035
111.8	0.035
111.9	0.035
112	0.035
112.1	0.035
112.2	0.035
112.3	0.035
112.4	0.035
112.5	0.035
112.6	0.035
112.7	0.035
112.8	0.035
112.9	0.035
113	0.035
113.1	0.035
113.2	0.035
113.3	0.035
113.4	0.035
113.5	0.04
113.6	0.04
113.7	0.04
113.8	0.04
113.9	0.04
114	0.04
114.1	0.04
114.2	0.04
114.3	0.04
114.4	0.045
114.5	0.045
114.6	0.05
114.7	0.05
114.8	0.05
114.9	0.05
115	0.05
115.1	0.05
115.2	0.05
115.3	0.05
115.4	0.05
115.5	0.05
115.6	0.05
115.7	0.05
115.8	0.05
115.9	0.055
116	0.055
116.1	0.055
116.2	0.06
116.3	0.06
116.4	0.06
116.5	0.06
116.6	0.06
116.7	0.06
116.8	0.06
116.9	0.06
117	0.06
117.1	0.06
117.2	0.06
117.3	0.06
117.4	0.06
117.5	0.065
117.6	0.065
117.7	0.065
117.8	0.065
117.9	0.065
118	0.065
118.1	0.065
118.2	0.065
118.3	0.065
118.4	0.065
118.5	0.065
118.6	0.065
118.7	0.065
118.8	0.065
118.9	0.065
119	0.065
119.1	0.065
119.2	0.065
119.3	0.07
119.4	0.07
119.5	0.07
119.6	0.07
119.7	0.07
119.8	0.07
119.9	0.07
120	0.07
120.1	0.07
120.2	0.07
120.3	0.07
120.4	0.07
120.5	0.07
120.6	0.07
120.7	0.07
120.8	0.07
120.9	0.07
121	0.07
121.1	0.07
121.2	0.07
121.3	0.07
121.4	0.07
121.5	0.07
121.6	0.07
121.7	0.07
121.8	0.07
121.9	0.07
122	0.07
122.1	0.07
122.2	0.07
122.3	0.07
122.4	0.075
122.5	0.075
122.6	0.075
122.7	0.08
122.8	0.08
122.9	0.08
123	0.08
123.1	0.08
123.2	0.085
123.3	0.09
123.4	0.09
123.5	0.09
123.6	0.09
123.7	0.09
123.8	0.09
123.9	0.09
124	0.09
124.1	0.09
124.2	0.09
124.3	0.09
124.4	0.085
124.5	0.085
124.6	0.09
124.7	0.09
124.8	0.09
124.9	0.09
125	0.09
125.1	0.09
125.2	0.09
125.3	0.085
125.4	0.085
125.5	0.085
125.6	0.085
125.7	0.085
125.8	0.085
125.9	0.085
126	0.085
126.1	0.085
126.2	0.085
126.3	0.085
126.4	0.085
126.5	0.085
126.6	0.085
126.7	0.085
126.8	0.09
126.9	0.09
127	0.09
127.1	0.09
127.2	0.09
127.3	0.095
127.4	0.1
127.5	0.1
127.6	0.1
127.7	0.1
127.8	0.1
127.9	0.1
128	0.1
128.1	0.1
128.2	0.1
128.3	0.1
128.4	0.1
128.5	0.1
128.6	0.1
128.7	0.1
128.8	0.1
128.9	0.105
129	0.105
129.1	0.105
129.2	0.105
129.3	0.105
129.4	0.105
129.5	0.115
129.6	0.115
129.7	0.115
129.8	0.115
129.9	0.115
130	0.115
130.1	0.115
130.2	0.115
130.3	0.115
130.4	0.115
130.5	0.115
130.6	0.115
130.7	0.115
130.8	0.115
130.9	0.115
131	0.115
131.1	0.115
131.2	0.115
131.3	0.115
131.4	0.115
131.5	0.12
131.6	0.12
131.7	0.12
131.8	0.12
131.9	0.12
132	0.12
132.1	0.12
132.2	0.12
132.3	0.125
132.4	0.125
132.5	0.125
132.6	0.125
132.7	0.125
132.8	0.125
132.9	0.125
133	0.125
133.1	0.125
133.2	0.125
133.3	0.125
133.4	0.125
133.5	0.125
133.6	0.125
133.7	0.125
133.8	0.125
133.9	0.13
134	0.13
134.1	0.13
134.2	0.13
134.3	0.13
134.4	0.13
134.5	0.13
134.6	0.13
134.7	0.13
134.8	0.13
134.9	0.13
135	0.13
135.1	0.13
135.2	0.13
135.3	0.13
135.4	0.13
135.5	0.13
135.6	0.13
135.7	0.13
135.8	0.13
135.9	0.13
136	0.13
136.1	0.13
136.2	0.13
136.3	0.13
136.4	0.13
136.5	0.13
136.6	0.13
136.7	0.135
136.8	0.135
136.9	0.135
137	0.135
137.1	0.135
137.2	0.135
137.3	0.135
137.4	0.135
137.5	0.135
137.6	0.135
137.7	0.135
137.8	0.135
137.9	0.135
138	0.135
138.1	0.135
138.2	0.135
138.3	0.135
138.4	0.135
138.5	0.135
138.6	0.135
138.7	0.135
138.8	0.135
138.9	0.135
139	0.135
139.1	0.135
139.2	0.135
139.3	0.13
139.4	0.13
139.5	0.13
139.6	0.13
139.7	0.13
139.8	0.13
139.9	0.13
140	0.13
140.1	0.13
140.2	0.135
140.3	0.135
140.4	0.135
140.5	0.135
140.6	0.135
140.7	0.135
140.8	0.135
140.9	0.135
141	0.135
141.1	0.135
141.2	0.135
141.3	0.135
141.4	0.135
141.5	0.135
141.6	0.135
141.7	0.135
141.8	0.135
141.9	0.135
142	0.135
142.1	0.135
142.2	0.135
142.3	0.135
142.4	0.14
142.5	0.14
142.6	0.14
142.7	0.14
142.8	0.14
142.9	0.14
143	0.14
143.1	0.14
143.2	0.14
143.3	0.14
143.4	0.14
143.5	0.14
143.6	0.14
143.7	0.14
143.8	0.14
143.9	0.14
144	0.14
144.1	0.14
144.2	0.14
144.3	0.14
144.4	0.14
144.5	0.14
144.6	0.145
144.7	0.15
144.8	0.15
144.9	0.15
145	0.15
145.1	0.15
145.2	0.15
145.3	0.15
145.4	0.15
145.5	0.15
145.6	0.15
145.7	0.15
145.8	0.15
145.9	0.15
146	0.15
146.1	0.15
146.2	0.15
146.3	0.15
146.4	0.15
146.5	0.145
146.6	0.145
146.7	0.145
146.8	0.145
146.9	0.145
147	0.145
147.1	0.145
147.2	0.145
147.3	0.145
147.4	0.145
147.5	0.145
147.6	0.145
147.7	0.145
147.8	0.145
147.9	0.15
148	0.155
148.1	0.155
148.2	0.155
148.3	0.155
148.4	0.155
148.5	0.155
148.6	0.155
148.7	0.155
148.8	0.155
148.9	0.155
149	0.155
149.1	0.155
149.2	0.155
149.3	0.155
149.4	0.155
149.5	0.155
149.6	0.155
149.7	0.155
149.8	0.155
149.9	0.155
150	0.155
150.1	0.155
150.2	0.155
150.3	0.155
150.4	0.155
150.5	0.155
150.6	0.155
150.7	0.155
150.8	0.155
150.9	0.16
151	0.16
151.1	0.16
151.2	0.16
151.3	0.16
151.4	0.16
151.5	0.16
151.6	0.16
151.7	0.165
151.8	0.165
151.9	0.165
152	0.165
152.1	0.165
152.2	0.165
152.3	0.165
152.4	0.165
152.5	0.165
152.6	0.165
152.7	0.165
152.8	0.165
152.9	0.16
153	0.16
153.1	0.16
153.2	0.16
153.3	0.16
153.4	0.16
153.5	0.16
153.6	0.16
153.7	0.16
153.8	0.16
153.9	0.16
154	0.16
154.1	0.16
154.2	0.16
154.3	0.16
154.4	0.16
154.5	0.16
154.6	0.165
154.7	0.165
154.8	0.165
154.9	0.165
155	0.165
155.1	0.165
155.2	0.165
155.3	0.165
155.4	0.165
155.5	0.165
155.6	0.165
155.7	0.165
155.8	0.165
155.9	0.165
156	0.165
156.1	0.165
156.2	0.165
156.3	0.165
156.4	0.165
156.5	0.165
156.6	0.165
156.7	0.165
156.8	0.165
156.9	0.175
157	0.175
157.1	0.175
157.2	0.175
157.3	0.175
157.4	0.175
157.5	0.175
157.6	0.175
157.7	0.175
157.8	0.175
157.9	0.175
158	0.175
158.1	0.175
158.2	0.175
158.3	0.175
158.4	0.175
158.5	0.175
158.6	0.175
158.7	0.175
158.8	0.175
158.9	0.175
159	0.175
159.1	0.175
159.2	0.175
159.3	0.175
159.4	0.175
159.5	0.175
159.6	0.175
159.7	0.175
159.8	0.175
159.9	0.175
160	0.17
160.1	0.17
160.2	0.17
160.3	0.17
160.4	0.17
160.5	0.17
160.6	0.17
160.7	0.17
160.8	0.17
160.9	0.175
161	0.175
161.1	0.175
161.2	0.18
161.3	0.18
161.4	0.18
161.5	0.18
161.6	0.18
161.7	0.18
161.8	0.18
161.9	0.18
162	0.18
162.1	0.18
162.2	0.18
162.3	0.18
162.4	0.18
162.5	0.18
162.6	0.18
162.7	0.18
162.8	0.18
162.9	0.18
163	0.18
163.1	0.18
163.2	0.18
163.3	0.18
163.4	0.18
163.5	0.18
163.6	0.18
163.7	0.18
163.8	0.18
163.9	0.18
164	0.18
164.1	0.18
164.2	0.18
164.3	0.18
164.4	0.175
164.5	0.175
164.6	0.175
164.7	0.18
164.8	0.18
164.9	0.18
165	0.18
165.1	0.18
165.2	0.18
165.3	0.18
165.4	0.18
165.5	0.18
165.6	0.18
165.7	0.185
165.8	0.18
165.9	0.18
166	0.18
166.1	0.18
166.2	0.175
166.3	0.175
166.4	0.175
166.5	0.175
166.6	0.175
166.7	0.175
166.8	0.175
166.9	0.175
167	0.175
167.1	0.175
167.2	0.175
167.3	0.175
167.4	0.175
167.5	0.175
167.6	0.17
167.7	0.17
167.8	0.17
167.9	0.175
168	0.175
168.1	0.175
168.2	0.18
168.3	0.18
168.4	0.18
168.5	0.18
168.6	0.18
168.7	0.18
168.8	0.18
168.9	0.18
169	0.18
169.1	0.18
169.2	0.18
169.3	0.175
169.4	0.175
169.5	0.175
169.6	0.175
169.7	0.175
169.8	0.175
169.9	0.175
170	0.175
170.1	0.175
170.2	0.17
170.3	0.17
170.4	0.175
170.5	0.175
170.6	0.175
170.7	0.175
170.8	0.175
170.9	0.175
171	0.175
171.1	0.175
171.2	0.175
171.3	0.175
171.4	0.175
171.5	0.175
171.6	0.175
171.7	0.175
171.8	0.175
171.9	0.175
172	0.175
172.1	0.175
172.2	0.175
172.3	0.175
172.4	0.175
172.5	0.175
172.6	0.175
172.7	0.175
172.8	0.175
172.9	0.18
173	0.18
173.1	0.18
173.2	0.18
173.3	0.18
173.4	0.18
173.5	0.18
173.6	0.18
173.7	0.18
173.8	0.18
173.9	0.18
174	0.18
174.1	0.18
174.2	0.18
174.3	0.18
174.4	0.18
174.5	0.18
174.6	0.18
174.7	0.18
174.8	0.18
174.9	0.18
175	0.18
175.1	0.18
175.2	0.18
175.3	0.18
175.4	0.18
175.5	0.18
175.6	0.18
175.7	0.175
175.8	0.17
175.9	0.17
176	0.17
176.1	0.17
176.2	0.17
176.3	0.17
176.4	0.17
176.5	0.17
176.6	0.175
176.7	0.175
176.8	0.175
176.9	0.17
177	0.17
177.1	0.17
177.2	0.17
177.3	0.175
177.4	0.175
177.5	0.175
177.6	0.175
177.7	0.175
177.8	0.175
177.9	0.17
178	0.17
178.1	0.17
178.2	0.17
178.3	0.17
178.4	0.17
178.5	0.175
178.6	0.175
178.7	0.175
178.8	0.175
178.9	0.175
179	0.175
179.1	0.175
179.2	0.175
179.3	0.175
179.4	0.175
179.5	0.175
179.6	0.175
179.7	0.175
179.8	0.17
179.9	0.17
180	0.17
180.1	0.165
180.2	0.165
180.3	0.165
180.4	0.165
180.5	0.165
180.6	0.165
180.7	0.165
180.8	0.165
180.9	0.165
181	0.165
181.1	0.165
181.2	0.165
181.3	0.165
181.4	0.165
181.5	0.165
181.6	0.17
181.7	0.17
181.8	0.165
181.9	0.165
182	0.165
182.1	0.165
182.2	0.165
182.3	0.165
182.4	0.165
182.5	0.165
182.6	0.165
182.7	0.165
182.8	0.165
182.9	0.165
183	0.165
183.1	0.165
183.2	0.165
183.3	0.165
183.4	0.165
183.5	0.165
183.6	0.165
183.7	0.165
183.8	0.165
183.9	0.165
184	0.165
184.1	0.165
184.2	0.165
184.3	0.165
184.4	0.165
184.5	0.165
184.6	0.165
184.7	0.165
184.8	0.165
184.9	0.165
185	0.165
185.1	0.165
185.2	0.165
185.3	0.165
185.4	0.165
185.5	0.165
185.6	0.165
185.7	0.165
185.8	0.165
185.9	0.165
186	0.165
186.1	0.165
186.2	0.165
186.3	0.165
186.4	0.165
186.5	0.17
186.6	0.17
186.7	0.17
186.8	0.175
186.9	0.175
187	0.175
187.1	0.175
187.2	0.175
187.3	0.175
187.4	0.175
187.5	0.175
187.6	0.175
187.7	0.175
187.8	0.175
187.9	0.175
188	0.175
188.1	0.175
188.2	0.175
188.3	0.175
188.4	0.175
188.5	0.175
188.6	0.175
188.7	0.175
188.8	0.17
188.9	0.17
189	0.17
189.1	0.17
189.2	0.17
189.3	0.17
189.4	0.17
189.5	0.17
189.6	0.17
189.7	0.17
189.8	0.17
189.9	0.17
190	0.17
190.1	0.17
190.2	0.17
190.3	0.17
190.4	0.17
190.5	0.17
190.6	0.17
190.7	0.175
190.8	0.18
190.9	0.175
191	0.175
191.1	0.175
191.2	0.175
191.3	0.175
191.4	0.175
191.5	0.175
191.6	0.175
191.7	0.175
191.8	0.175
191.9	0.175
192	0.175
192.1	0.175
192.2	0.175
192.3	0.18
192.4	0.18
192.5	0.18
192.6	0.18
192.7	0.18
192.8	0.18
192.9	0.19
193	0.19
193.1	0.19
193.2	0.19
193.3	0.19
193.4	0.19
193.5	0.19
193.6	0.185
193.7	0.185
193.8	0.185
193.9	0.185
194	0.185
194.1	0.185
194.2	0.185
194.3	0.185
194.4	0.185
194.5	0.185
194.6	0.185
194.7	0.185
194.8	0.185
194.9	0.185
195	0.19
195.1	0.19
195.2	0.195
195.3	0.195
195.4	0.195
195.5	0.195
195.6	0.195
195.7	0.195
195.8	0.195
195.9	0.195
196	0.195
196.1	0.195
196.2	0.195
196.3	0.195
196.4	0.195
196.5	0.195
196.6	0.195
196.7	0.195
196.8	0.195
196.9	0.2
197	0.2
197.1	0.205
197.2	0.205
197.3	0.205
197.4	0.205
197.5	0.205
197.6	0.205
197.7	0.205
197.8	0.2
197.9	0.205
198	0.205
198.1	0.205
198.2	0.205
198.3	0.205
198.4	0.205
198.5	0.205
198.6	0.205
198.7	0.205
198.8	0.205
198.9	0.205
199	0.205
199.1	0.205
199.2	0.205
199.3	0.205
199.4	0.205
199.5	0.205
199.6	0.205
199.7	0.205
199.8	0.205
199.9	0.205
200	0.205
[truncated: 14,000 more rows]
