# Supplementary material for: Bayesian inference of kinetic schemes for ion channels by Kalman filtering
Source: eLife journal article supplement (doi:10.7554/elife.62714), 2022-05-04
Supplement: fig4-data8 [file 1_Sim_N_400_Fluor_MW.xlsx]

## Sheet: 0.25 M
0.1	0
0.2	0
0.3	0
0.4	0
0.5	0
0.6	0
0.7	0
0.8	0
0.9	0
1	0
1.1	0
1.2	0
1.3	0
1.4	0
1.5	0
1.6	0
1.7	0
1.8	0
1.9	0
2	0
2.1	0
2.2	0
2.3	0
2.4	0
2.5	0
2.6	0
2.7	0
2.8	0
2.9	0
3	0
3.1	0
3.2	0
3.3	0
3.4	0
3.5	0
3.6	0
3.7	0
3.8	0
3.9	0
4	0
4.1	0
4.2	0
4.3	0
4.4	0
4.5	0
4.6	0
4.7	0
4.8	0
4.9	0
5	0
5.1	0
5.2	0
5.3	0
5.4	0
5.5	0
5.6	0
5.7	0
5.8	0
5.9	0
6	0
6.1	0
6.2	0
6.3	0
6.4	0
6.5	0
6.6	0
6.7	0
6.8	0
6.9	0
7	0
7.1	0
7.2	0
7.3	0
7.4	0
7.5	0
7.6	0
7.7	0
7.8	0
7.9	0
8	0
8.1	0
8.2	0
8.3	0
8.4	0
8.5	0
8.6	0
8.7	0
8.8	0
8.9	0
9	0
9.1	0
9.2	0
9.3	0
9.4	0
9.5	0
9.6	0
9.7	0
9.8	0
9.9	0
10	0
10.1	0
10.2	0
10.3	0
10.4	0
10.5	0
10.6	0
10.7	0
10.8	0
10.9	0
11	0
11.1	0
11.2	0
11.3	0
11.4	0
11.5	0
11.6	0
11.7	0
11.8	0
11.9	0
12	0
12.1	0
12.2	0
12.3	0
12.4	0
12.5	0
12.6	0
12.7	0
12.8	0
12.9	0
13	0
13.1	0
13.2	0
13.3	0
13.4	0
13.5	0
13.6	0
13.7	0
13.8	0
13.9	0
14	0
14.1	0
14.2	0
14.3	0
14.4	0
14.5	0
14.6	0
14.7	0
14.8	0
14.9	0
15	0
15.1	0
15.2	0
15.3	0
15.4	0
15.5	0
15.6	0
15.7	0
15.8	0
15.9	0
16	0
16.1	0
16.2	0
16.3	0
16.4	0
16.5	0
16.6	0
16.7	0
16.8	0
16.9	0
17	0
17.1	0
17.2	0
17.3	0
17.4	0
17.5	0
17.6	0
17.7	0
17.8	0
17.9	0
18	0
18.1	0
18.2	0
18.3	0
18.4	0
18.5	0
18.6	0
18.7	0
18.8	0
18.9	0
19	0
19.1	0
19.2	0
19.3	0
19.4	0
19.5	0
19.6	0
19.7	0
19.8	0
19.9	0
20	0
20.1	0
20.2	0
20.3	0
20.4	0
20.5	0
20.6	0
20.7	0
20.8	0
20.9	0
21	0
21.1	0
21.2	0
21.3	0
21.4	0
21.5	0
21.6	0
21.7	0
21.8	0
21.9	0
22	0
22.1	0
22.2	0
22.3	0
22.4	0
22.5	0
22.6	0
22.7	0
22.8	0
22.9	0
23	0
23.1	0
23.2	0
23.3	0
23.4	0
23.5	0
23.6	0
23.7	0
23.8	0
23.9	0
24	0
24.1	0
24.2	0
24.3	0
24.4	0
24.5	0
24.6	0
24.7	0
24.8	0
24.9	0
25	0
25.1	0
25.2	0
25.3	0
25.4	0
25.5	0
25.6	0
25.7	0
25.8	0
25.9	0
26	0
26.1	0
26.2	0
26.3	0
26.4	0
26.5	0
26.6	0
26.7	0
26.8	0
26.9	0
27	0
27.1	0
27.2	0
27.3	0
27.4	0
27.5	0
27.6	0
27.7	0
27.8	0
27.9	0
28	0
28.1	0
28.2	0
28.3	0
28.4	0
28.5	0
28.6	0
28.7	0
28.8	0
28.9	0
29	0
29.1	0
29.2	0
29.3	0
29.4	0
29.5	0
29.6	0
29.7	0
29.8	0
29.9	0
30	0
30.1	0
30.2	0
30.3	0
30.4	0
30.5	0
30.6	0
30.7	0
30.8	0
30.9	0
31	0
31.1	0
31.2	0
31.3	0
31.4	0
31.5	0
31.6	0
31.7	0
31.8	0
31.9	0
32	0
32.1	0
32.2	0
32.3	0
32.4	0
32.5	0
32.6	0
32.7	0
32.8	0
32.9	0
33	0
33.1	0
33.2	0
33.3	0
33.4	0
33.5	0
33.6	0
33.7	0
33.8	0
33.9	0
34	0
34.1	0
34.2	0
34.3	0
34.4	0
34.5	0
34.6	0
34.7	0
34.8	0
34.9	0
35	0
35.1	0
35.2	0
35.3	0
35.4	0
35.5	0
35.6	0
35.7	0
35.8	0
35.9	0
36	0
36.1	0
36.2	0
36.3	0
36.4	0
36.5	0
36.6	0
36.7	0
36.8	0
36.9	0
37	0
37.1	0
37.2	0
37.3	0
37.4	0
37.5	0
37.6	0
37.7	0
37.8	0
37.9	0
38	0
38.1	0
38.2	0
38.3	0
38.4	0
38.5	0
38.6	0
38.7	0
38.8	0
38.9	0
39	0
39.1	0
39.2	0
39.3	0
39.4	0
39.5	0
39.6	0
39.7	0
39.8	0
39.9	0
40	0
40.1	0
40.2	0
40.3	0
40.4	0
40.5	0
40.6	0
40.7	0
40.8	0
40.9	0
41	0
41.1	0
41.2	0
41.3	0
41.4	0
41.5	0
41.6	0
41.7	0
41.8	0
41.9	0
42	0
42.1	0
42.2	0
42.3	0
42.4	0
42.5	0
42.6	0
42.7	0
42.8	0
42.9	0
43	0
43.1	0
43.2	0
43.3	0
43.4	0
43.5	0
43.6	0
43.7	0
43.8	0
43.9	0
44	0
44.1	0
44.2	0
44.3	0
44.4	0
44.5	0
44.6	0
44.7	0
44.8	0
44.9	0
45	0
45.1	0
45.2	0
45.3	0
45.4	0
45.5	0
45.6	0
45.7	0
45.8	0
45.9	0
46	0
46.1	0
46.2	0
46.3	0
46.4	0
46.5	0
46.6	0
46.7	0
46.8	0
46.9	0
47	0
47.1	0
47.2	0
47.3	0
47.4	0
47.5	0
47.6	0
47.7	0
47.8	0
47.9	0
48	0
48.1	0
48.2	0
48.3	0
48.4	0
48.5	0
48.6	0
48.7	0
48.8	0
48.9	0
49	0
49.1	0
49.2	0
49.3	0
49.4	0
49.5	0
49.6	0
49.7	0
49.8	0
49.9	0
50	0
50.1	0
50.2	0
50.3	0
50.4	0
50.5	0
50.6	0
50.7	0
50.8	0
50.9	0
51	0
51.1	0
51.2	0
51.3	0
51.4	0
51.5	0
51.6	0
51.7	0
51.8	0
51.9	0
52	0
52.1	0
52.2	0
52.3	0
52.4	0
52.5	0
52.6	0
52.7	0
52.8	0
52.9	0
53	0
53.1	0
53.2	0
53.3	0
53.4	0
53.5	0
53.6	0
53.7	0
53.8	0
53.9	0
54	0
54.1	0
54.2	0
54.3	0
54.4	0
54.5	0
54.6	0
54.7	0
54.8	0
54.9	0
55	0
55.1	0
55.2	0
55.3	0
55.4	0
55.5	0
55.6	0
55.7	0
55.8	0
55.9	0
56	0
56.1	0
56.2	0
56.3	0
56.4	0
56.5	0
56.6	0
56.7	0
56.8	0
56.9	0
57	0
57.1	0
57.2	0
57.3	0
57.4	0
57.5	0
57.6	0
57.7	0
57.8	0
57.9	0
58	0
58.1	0
58.2	0
58.3	0
58.4	0
58.5	0
58.6	0
58.7	0
58.8	0
58.9	0
59	0
59.1	0
59.2	0
59.3	0
59.4	0
59.5	0
59.6	0
59.7	0
59.8	0
59.9	0
60	0
60.1	0
60.2	0
60.3	0
60.4	0
60.5	0
60.6	0
60.7	0
60.8	0
60.9	0
61	0
61.1	0
61.2	0
61.3	0
61.4	0
61.5	0
61.6	0
61.7	0
61.8	0
61.9	0
62	0
62.1	0
62.2	0
62.3	0
62.4	0
62.5	0
62.6	0
62.7	0
62.8	0
62.9	0
63	0
63.1	0
63.2	0
63.3	0
63.4	0
63.5	0
63.6	0
63.7	0
63.8	0
63.9	0
64	0
64.1	0
64.2	0
64.3	0
64.4	0
64.5	0
64.6	0
64.7	0
64.8	0
64.9	0
65	0
65.1	0
65.2	0
65.3	0
65.4	0
65.5	0
65.6	0
65.7	0
65.8	0
65.9	0
66	0
66.1	0
66.2	0
66.3	0
66.4	0
66.5	0
66.6	0
66.7	0
66.8	0
66.9	0
67	0
67.1	0
67.2	0
67.3	0
67.4	0
67.5	0
67.6	0
67.7	0
67.8	0
67.9	0
68	0
68.1	0
68.2	0
68.3	0
68.4	0
68.5	0
68.6	0
68.7	0
68.8	0
68.9	0
69	0
69.1	0
69.2	0
69.3	0
69.4	0
69.5	0
69.6	0
69.7	0
69.8	0
69.9	0
70	0
70.1	0
70.2	0
70.3	0
70.4	0
70.5	0
70.6	0
70.7	0
70.8	0
70.9	0
71	0
71.1	0
71.2	0
71.3	0
71.4	0
71.5	0
71.6	0
71.7	0
71.8	0
71.9	0
72	0
72.1	0
72.2	0
72.3	0
72.4	0
72.5	0
72.6	0
72.7	0
72.8	0
72.9	0
73	0
73.1	0
73.2	0
73.3	0
73.4	0
73.5	0
73.6	0
73.7	0
73.8	0
73.9	0
74	0
74.1	0
74.2	0
74.3	0
74.4	0
74.5	0
74.6	0
74.7	0
74.8	0
74.9	0
75	0
75.1	0
75.2	0
75.3	0
75.4	0
75.5	0
75.6	0
75.7	0
75.8	0
75.9	0
76	0
76.1	0
76.2	0
76.3	0
76.4	0
76.5	0
76.6	0
76.7	0
76.8	0
76.9	0
77	0
77.1	0
77.2	0
77.3	0
77.4	0
77.5	0
77.6	0
77.7	0
77.8	0
77.9	0
78	0
78.1	0
78.2	0
78.3	0
78.4	0
78.5	0
78.6	0
78.7	0
78.8	0
78.9	0
79	0
79.1	0
79.2	0
79.3	0
79.4	0
79.5	0
79.6	0
79.7	0
79.8	0
79.9	0
80	0
80.1	0
80.2	0
80.3	0
80.4	0
80.5	0
80.6	0
80.7	0
80.8	0
80.9	0
81	0
81.1	0
81.2	0
81.3	0
81.4	0
81.5	0
81.6	0
81.7	0
81.8	0
81.9	0
82	0
82.1	0
82.2	0
82.3	0
82.4	0
82.5	0
82.6	0
82.7	0
82.8	0
82.9	0
83	0
83.1	0
83.2	0
83.3	0
83.4	0
83.5	0
83.6	0
83.7	0
83.8	0
83.9	0
84	0
84.1	0
84.2	0
84.3	0
84.4	0
84.5	0
84.6	0
84.7	0
84.8	0
84.9	0
85	0
85.1	0
85.2	0
85.3	0
85.4	0
85.5	0
85.6	0
85.7	0
85.8	0
85.9	0
86	0
86.1	0
86.2	0
86.3	0
86.4	0
86.5	0
86.6	0
86.7	0
86.8	0
86.9	0
87	0
87.1	0
87.2	0
87.3	0
87.4	0
87.5	0
87.6	0
87.7	0
87.8	0
87.9	0
88	0
88.1	0
88.2	0
88.3	0
88.4	0
88.5	0
88.6	0
88.7	0
88.8	0
88.9	0
89	0
89.1	0
89.2	0
89.3	0
89.4	0
89.5	0
89.6	0
89.7	0
89.8	0
89.9	0
90	0
90.1	0
90.2	0
90.3	0
90.4	0
90.5	0
90.6	0
90.7	0
90.8	0
90.9	0
91	0
91.1	0
91.2	0
91.3	0
91.4	0
91.5	0
91.6	0
91.7	0
91.8	0
91.9	0
92	0
92.1	0
92.2	0
92.3	0
92.4	0
92.5	0
92.6	0
92.7	0
92.8	0
92.9	0
93	0
93.1	0
93.2	0
93.3	0
93.4	0
93.5	0
93.6	0
93.7	0
93.8	0
93.9	0
94	0
94.1	0
94.2	0
94.3	0
94.4	0
94.5	0
94.6	0
94.7	0
94.8	0
94.9	0
95	0
95.1	0
95.2	0
95.3	0
95.4	0
95.5	0
95.6	0
95.7	0
95.8	0
95.9	0
96	0
96.1	0
96.2	0
96.3	0
96.4	0
96.5	0
96.6	0
96.7	0
96.8	0
96.9	0
97	0
97.1	0
97.2	0
97.3	0
97.4	0
97.5	0
97.6	0
97.7	0
97.8	0
97.9	0
98	0
98.1	0
98.2	0
98.3	0
98.4	0
98.5	0
98.6	0
98.7	0
98.8	0
98.9	0
99	0
99.1	0
99.2	0
99.3	0
99.4	0
99.5	0
99.6	0
99.7	0
99.8	0
99.9	0
100	0
100.1	0.015
100.2	0.03
100.3	0.04
100.4	0.05
100.5	0.06125
100.6	0.08125
100.7	0.09
100.8	0.10625
100.9	0.12
101	0.1325
101.1	0.13875
101.2	0.1525
101.3	0.15625
101.4	0.15875
101.5	0.17125
101.6	0.17875
101.7	0.1875
101.8	0.19125
101.9	0.20625
102	0.21125
102.1	0.22375
102.2	0.22625
102.3	0.23875
102.4	0.24375
102.5	0.25375
102.6	0.26
102.7	0.26625
102.8	0.275
102.9	0.285
103	0.29
103.1	0.29125
103.2	0.31
103.3	0.31875
103.4	0.32875
103.5	0.33375
103.6	0.34125
103.7	0.345
103.8	0.3525
103.9	0.36
104	0.36375
104.1	0.37125
104.2	0.37125
104.3	0.37375
104.4	0.36375
104.5	0.37125
104.6	0.37125
104.7	0.38
104.8	0.38
104.9	0.3825
105	0.38625
105.1	0.39375
105.2	0.3975
105.3	0.40375
105.4	0.4075
105.5	0.4075
105.6	0.4075
105.7	0.4075
105.8	0.40875
105.9	0.405
106	0.41375
106.1	0.4175
106.2	0.42125
106.3	0.42625
106.4	0.4325
106.5	0.44
106.6	0.44
106.7	0.44125
106.8	0.44375
106.9	0.43625
107	0.4375
107.1	0.43
107.2	0.4275
107.3	0.42875
107.4	0.4325
107.5	0.43
107.6	0.42875
107.7	0.43125
107.8	0.4325
107.9	0.43125
108	0.43625
108.1	0.43625
108.2	0.43375
108.3	0.43125
108.4	0.4375
108.5	0.44125
108.6	0.44875
108.7	0.44375
108.8	0.4425
108.9	0.43875
109	0.4425
109.1	0.44625
109.2	0.44375
109.3	0.4425
109.4	0.44
109.5	0.44
109.6	0.445
109.7	0.45
109.8	0.45125
109.9	0.45
110	0.4475
110.1	0.4475
110.2	0.45
110.3	0.445
110.4	0.45
110.5	0.44875
110.6	0.44875
110.7	0.4475
110.8	0.4475
110.9	0.46
111	0.46875
111.1	0.46875
111.2	0.4725
111.3	0.47125
111.4	0.46625
111.5	0.4675
111.6	0.465
111.7	0.46625
111.8	0.46625
111.9	0.47125
112	0.46875
112.1	0.475
112.2	0.47625
112.3	0.48
112.4	0.47875
112.5	0.47625
112.6	0.47625
112.7	0.4825
112.8	0.4775
112.9	0.485
113	0.47875
113.1	0.4825
113.2	0.485
113.3	0.4875
113.4	0.49125
113.5	0.4825
113.6	0.48125
113.7	0.47625
113.8	0.47125
113.9	0.47
114	0.47
114.1	0.47375
114.2	0.47875
114.3	0.4725
114.4	0.4725
114.5	0.46875
114.6	0.47375
114.7	0.48375
114.8	0.48125
114.9	0.4825
115	0.48125
115.1	0.48625
115.2	0.48375
115.3	0.4875
115.4	0.49375
115.5	0.49125
115.6	0.49125
115.7	0.48625
115.8	0.48625
115.9	0.4875
116	0.4825
116.1	0.48
116.2	0.48125
116.3	0.4825
116.4	0.48375
116.5	0.4775
116.6	0.4775
116.7	0.48125
116.8	0.48375
116.9	0.47875
117	0.48125
117.1	0.48375
117.2	0.47875
117.3	0.4825
117.4	0.485
117.5	0.48625
117.6	0.48625
117.7	0.4825
117.8	0.4825
117.9	0.47875
118	0.485
118.1	0.4825
118.2	0.4825
118.3	0.4825
118.4	0.47625
118.5	0.48125
118.6	0.48375
118.7	0.48625
118.8	0.48625
118.9	0.48125
119	0.4825
119.1	0.48125
119.2	0.47125
119.3	0.47875
119.4	0.4775
119.5	0.48875
119.6	0.48875
119.7	0.48375
119.8	0.485
119.9	0.48375
120	0.48625
120.1	0.48625
120.2	0.4875
120.3	0.485
120.4	0.48
120.5	0.485
120.6	0.4875
120.7	0.49
120.8	0.4875
120.9	0.4875
121	0.49125
121.1	0.4875
121.2	0.485
121.3	0.48375
121.4	0.48125
121.5	0.4725
121.6	0.475
121.7	0.47
121.8	0.47125
121.9	0.475
122	0.46875
122.1	0.46875
122.2	0.4725
122.3	0.47375
122.4	0.4775
122.5	0.47375
122.6	0.48125
122.7	0.485
122.8	0.485
122.9	0.4825
123	0.48375
123.1	0.48375
123.2	0.4825
123.3	0.48
123.4	0.47375
123.5	0.47625
123.6	0.47875
123.7	0.47375
123.8	0.47375
123.9	0.4725
124	0.47125
124.1	0.47125
124.2	0.47
124.3	0.46875
124.4	0.46625
124.5	0.465
124.6	0.46625
124.7	0.46875
124.8	0.46875
124.9	0.46875
125	0.47375
125.1	0.47625
125.2	0.47875
125.3	0.47875
125.4	0.47875
125.5	0.48125
125.6	0.485
125.7	0.48625
125.8	0.4875
125.9	0.4925
126	0.4925
126.1	0.4925
126.2	0.4875
126.3	0.49
126.4	0.48875
126.5	0.49125
126.6	0.495
126.7	0.49125
126.8	0.49375
126.9	0.49625
127	0.4925
127.1	0.48875
127.2	0.4875
127.3	0.49
127.4	0.4875
127.5	0.495
127.6	0.495
127.7	0.49875
127.8	0.5025
127.9	0.5025
128	0.4975
128.1	0.4975
128.2	0.495
128.3	0.49625
128.4	0.49875
128.5	0.5
128.6	0.49875
128.7	0.5025
128.8	0.5025
128.9	0.5075
129	0.5025
129.1	0.51125
129.2	0.50625
129.3	0.505
129.4	0.505
129.5	0.50125
129.6	0.5
129.7	0.5025
129.8	0.49875
129.9	0.49375
130	0.49375
130.1	0.49625
130.2	0.4975
130.3	0.5025
130.4	0.49875
130.5	0.50375
130.6	0.50875
130.7	0.50625
130.8	0.5025
130.9	0.5025
131	0.50125
131.1	0.5025
131.2	0.5025
131.3	0.50125
131.4	0.5025
131.5	0.4975
131.6	0.49625
131.7	0.4975
131.8	0.50375
131.9	0.505
132	0.505
132.1	0.50625
132.2	0.50875
132.3	0.505
132.4	0.50875
132.5	0.50875
132.6	0.50375
132.7	0.5025
132.8	0.50625
132.9	0.5025
133	0.505
133.1	0.51
133.2	0.51125
133.3	0.50875
133.4	0.51125
133.5	0.5075
133.6	0.50625
133.7	0.50625
133.8	0.51125
133.9	0.50875
134	0.50625
134.1	0.50375
134.2	0.50125
134.3	0.5
134.4	0.50375
134.5	0.5
134.6	0.505
134.7	0.505
134.8	0.51125
134.9	0.515
135	0.51
135.1	0.5175
135.2	0.51625
135.3	0.51625
135.4	0.515
135.5	0.5225
135.6	0.52375
135.7	0.52125
135.8	0.52375
135.9	0.525
136	0.5275
136.1	0.53
136.2	0.53
136.3	0.5275
136.4	0.525
136.5	0.51875
136.6	0.52125
136.7	0.52375
136.8	0.515
136.9	0.51
137	0.51125
137.1	0.51125
137.2	0.51125
137.3	0.5075
137.4	0.50625
137.5	0.5075
137.6	0.50375
137.7	0.5
137.8	0.505
137.9	0.50625
138	0.505
138.1	0.5075
138.2	0.505
138.3	0.50625
138.4	0.51
138.5	0.51125
138.6	0.51125
138.7	0.51
138.8	0.50625
138.9	0.51125
139	0.51625
139.1	0.52
139.2	0.52
139.3	0.52
139.4	0.51625
139.5	0.51125
139.6	0.515
139.7	0.515
139.8	0.51125
139.9	0.51125
140	0.51375
140.1	0.51
140.2	0.5075
140.3	0.51
140.4	0.50875
140.5	0.50625
140.6	0.5025
140.7	0.5
140.8	0.4975
140.9	0.495
141	0.49375
141.1	0.495
141.2	0.4875
141.3	0.49
141.4	0.495
141.5	0.5
141.6	0.5025
141.7	0.50125
141.8	0.49875
141.9	0.49875
142	0.5
142.1	0.49875
142.2	0.495
142.3	0.49875
142.4	0.4975
142.5	0.5
142.6	0.50125
142.7	0.50125
142.8	0.5025
142.9	0.49625
143	0.495
143.1	0.4975
143.2	0.50125
143.3	0.49625
143.4	0.4975
143.5	0.49625
143.6	0.49625
143.7	0.49375
143.8	0.50125
143.9	0.50125
144	0.51125
144.1	0.51625
144.2	0.51625
144.3	0.515
144.4	0.51375
144.5	0.5125
144.6	0.51375
144.7	0.51375
144.8	0.5125
144.9	0.51375
145	0.515
145.1	0.5175
145.2	0.52125
145.3	0.51875
145.4	0.5175
145.5	0.5125
145.6	0.505
145.7	0.50375
145.8	0.505
145.9	0.51375
146	0.51375
146.1	0.5175
146.2	0.52
146.3	0.51875
146.4	0.51875
146.5	0.51375
146.6	0.50875
146.7	0.5075
146.8	0.505
146.9	0.505
147	0.51
147.1	0.5075
147.2	0.51625
147.3	0.5225
147.4	0.52375
147.5	0.52375
147.6	0.52625
147.7	0.52875
147.8	0.52375
147.9	0.5225
148	0.5225
148.1	0.52375
148.2	0.52625
148.3	0.5225
148.4	0.52125
148.5	0.52375
148.6	0.525
148.7	0.52375
148.8	0.52875
148.9	0.5325
149	0.5325
149.1	0.53125
149.2	0.5275
149.3	0.53125
149.4	0.53125
149.5	0.53625
149.6	0.53375
149.7	0.53375
149.8	0.5375
149.9	0.54375
150	0.54125
150.1	0.54
150.2	0.54375
150.3	0.54625
150.4	0.53875
150.5	0.5375
150.6	0.53875
150.7	0.53375
150.8	0.535
150.9	0.53875
151	0.53625
151.1	0.535
151.2	0.535
151.3	0.53875
151.4	0.54125
151.5	0.53875
151.6	0.54
151.7	0.54625
151.8	0.545
151.9	0.5375
152	0.53875
152.1	0.5375
152.2	0.54
152.3	0.54
152.4	0.54375
152.5	0.5475
152.6	0.54875
152.7	0.55125
152.8	0.55
152.9	0.55
153	0.5525
153.1	0.55625
153.2	0.55375
153.3	0.55125
153.4	0.54625
153.5	0.54875
153.6	0.54625
153.7	0.545
153.8	0.53875
153.9	0.54
154	0.53625
154.1	0.53625
154.2	0.53375
154.3	0.53375
154.4	0.54125
154.5	0.54
154.6	0.53625
154.7	0.53125
154.8	0.53
154.9	0.52875
155	0.53125
155.1	0.5325
155.2	0.53125
155.3	0.53875
155.4	0.54
155.5	0.53375
155.6	0.53125
155.7	0.5275
155.8	0.53375
155.9	0.53
156	0.52875
156.1	0.52875
156.2	0.52875
156.3	0.5275
156.4	0.52875
156.5	0.52875
156.6	0.5275
156.7	0.53125
156.8	0.5325
156.9	0.5375
157	0.5375
157.1	0.54125
157.2	0.5375
157.3	0.5375
157.4	0.53875
157.5	0.5425
157.6	0.54
157.7	0.5475
157.8	0.54875
157.9	0.5475
158	0.5575
158.1	0.5575
158.2	0.55625
158.3	0.5525
158.4	0.55
158.5	0.54875
158.6	0.5425
158.7	0.54
158.8	0.54
158.9	0.54125
159	0.5425
159.1	0.5425
159.2	0.54
159.3	0.53875
159.4	0.53875
159.5	0.54125
159.6	0.545
159.7	0.54375
159.8	0.55
159.9	0.55
160	0.5475
160.1	0.55
160.2	0.5475
160.3	0.545
160.4	0.54375
160.5	0.545
160.6	0.54625
160.7	0.54875
160.8	0.5525
160.9	0.5525
161	0.5525
161.1	0.55875
161.2	0.55875
161.3	0.55625
161.4	0.55625
161.5	0.54625
161.6	0.5475
161.7	0.54625
161.8	0.5475
161.9	0.54625
162	0.5475
162.1	0.54375
162.2	0.545
162.3	0.54375
162.4	0.54625
162.5	0.5475
162.6	0.5475
162.7	0.54375
162.8	0.54375
162.9	0.5425
163	0.54625
163.1	0.55125
163.2	0.54875
163.3	0.5525
163.4	0.55375
163.5	0.55375
163.6	0.555
163.7	0.5575
163.8	0.55625
163.9	0.55125
164	0.5525
164.1	0.55625
164.2	0.5575
164.3	0.5525
164.4	0.5475
164.5	0.54625
164.6	0.54625
164.7	0.5475
164.8	0.55
164.9	0.54875
165	0.5475
165.1	0.55
165.2	0.54625
165.3	0.5425
165.4	0.54
165.5	0.54
165.6	0.545
165.7	0.54625
165.8	0.54
165.9	0.54375
166	0.5425
166.1	0.54375
166.2	0.545
166.3	0.545
166.4	0.5425
166.5	0.54125
166.6	0.53625
166.7	0.53375
166.8	0.53875
166.9	0.53875
167	0.535
167.1	0.5375
167.2	0.5375
167.3	0.53375
167.4	0.5375
167.5	0.535
167.6	0.5375
167.7	0.53375
167.8	0.53125
167.9	0.53125
168	0.53375
168.1	0.53125
168.2	0.5275
168.3	0.53
168.4	0.53125
168.5	0.52875
168.6	0.5325
168.7	0.53125
168.8	0.535
168.9	0.54125
169	0.5475
169.1	0.55
169.2	0.55
169.3	0.55
169.4	0.54875
169.5	0.55
169.6	0.55125
169.7	0.555
169.8	0.555
169.9	0.55
170	0.55125
170.1	0.5525
170.2	0.555
170.3	0.555
170.4	0.5525
170.5	0.5525
170.6	0.55625
170.7	0.5575
170.8	0.55125
170.9	0.54875
171	0.54375
171.1	0.545
171.2	0.55
171.3	0.54375
171.4	0.54375
171.5	0.54375
171.6	0.5475
171.7	0.55
171.8	0.555
171.9	0.5525
172	0.55375
172.1	0.55
172.2	0.54875
172.3	0.55
172.4	0.5425
172.5	0.5425
172.6	0.54375
172.7	0.54625
172.8	0.5475
172.9	0.54125
173	0.5425
173.1	0.54375
173.2	0.54375
173.3	0.545
173.4	0.54375
173.5	0.54375
173.6	0.53625
173.7	0.535
173.8	0.53875
173.9	0.54
174	0.53875
174.1	0.5425
174.2	0.54375
174.3	0.54125
174.4	0.53875
174.5	0.54
174.6	0.53375
174.7	0.53625
174.8	0.53625
174.9	0.5375
175	0.53625
175.1	0.53
175.2	0.53
175.3	0.5275
175.4	0.5275
175.5	0.5275
175.6	0.53
175.7	0.53
175.8	0.53125
175.9	0.53625
176	0.5375
176.1	0.54
176.2	0.5375
176.3	0.5425
176.4	0.545
176.5	0.54625
176.6	0.54875
176.7	0.54875
176.8	0.5475
176.9	0.54625
177	0.5425
177.1	0.54125
177.2	0.54125
177.3	0.54
177.4	0.54125
177.5	0.54
177.6	0.535
177.7	0.53625
177.8	0.53375
177.9	0.53375
178	0.5325
178.1	0.53625
178.2	0.53625
178.3	0.5375
178.4	0.5425
178.5	0.54625
178.6	0.54375
178.7	0.54375
178.8	0.55
178.9	0.55
179	0.55625
179.1	0.5575
179.2	0.5575
179.3	0.55875
179.4	0.56
179.5	0.5575
179.6	0.555
179.7	0.5575
179.8	0.5575
179.9	0.55875
180	0.55875
180.1	0.55875
180.2	0.5575
180.3	0.55125
180.4	0.55375
180.5	0.5525
180.6	0.54875
180.7	0.545
180.8	0.54625
180.9	0.545
181	0.54375
181.1	0.5475
181.2	0.54875
181.3	0.5425
181.4	0.54
181.5	0.54
181.6	0.53875
181.7	0.5375
181.8	0.545
181.9	0.54
182	0.5475
182.1	0.54875
182.2	0.54875
182.3	0.5525
182.4	0.55125
182.5	0.5575
182.6	0.56
182.7	0.56
182.8	0.5625
182.9	0.5575
183	0.55875
183.1	0.55625
183.2	0.555
183.3	0.5525
183.4	0.55125
183.5	0.55375
183.6	0.54875
183.7	0.55
183.8	0.55125
183.9	0.55625
184	0.55625
184.1	0.5575
184.2	0.55875
184.3	0.56375
184.4	0.56375
184.5	0.5675
184.6	0.575
184.7	0.57375
184.8	0.5775
184.9	0.57375
185	0.5725
185.1	0.57375
185.2	0.5775
185.3	0.575
185.4	0.5675
185.5	0.56625
185.6	0.56375
185.7	0.56
185.8	0.555
185.9	0.555
186	0.5525
186.1	0.5525
186.2	0.55875
186.3	0.55875
186.4	0.55125
186.5	0.5525
186.6	0.555
186.7	0.5525
186.8	0.54875
186.9	0.54875
187	0.54875
187.1	0.5475
187.2	0.54875
187.3	0.54875
187.4	0.54875
187.5	0.5475
187.6	0.55125
187.7	0.55125
187.8	0.55125
187.9	0.555
188	0.55875
188.1	0.56125
188.2	0.5625
188.3	0.56125
188.4	0.56
188.5	0.56
188.6	0.5575
188.7	0.5575
188.8	0.56
188.9	0.55375
189	0.56375
189.1	0.56625
189.2	0.56375
189.3	0.56625
189.4	0.565
189.5	0.56375
189.6	0.56125
189.7	0.5625
189.8	0.565
189.9	0.56125
190	0.55875
190.1	0.555
190.2	0.54875
190.3	0.545
190.4	0.54125
190.5	0.545
190.6	0.5475
190.7	0.5475
190.8	0.545
190.9	0.54625
191	0.54875
191.1	0.55625
191.2	0.5525
191.3	0.54875
191.4	0.5425
191.5	0.54875
191.6	0.55125
191.7	0.55
191.8	0.55625
191.9	0.56
192	0.5625
192.1	0.56
192.2	0.5625
192.3	0.56125
192.4	0.56125
192.5	0.565
192.6	0.56875
192.7	0.5725
192.8	0.57
192.9	0.57125
193	0.56625
193.1	0.56875
193.2	0.57
193.3	0.57625
193.4	0.57625
193.5	0.57
193.6	0.57
193.7	0.57
193.8	0.57375
193.9	0.57125
194	0.57375
194.1	0.575
194.2	0.57875
194.3	0.58125
194.4	0.58375
194.5	0.58125
194.6	0.57875
194.7	0.5775
194.8	0.585
194.9	0.5825
195	0.58
195.1	0.5775
195.2	0.57375
195.3	0.57875
195.4	0.5775
195.5	0.575
195.6	0.57125
195.7	0.5725
195.8	0.56875
195.9	0.56875
196	0.565
196.1	0.56625
196.2	0.56375
196.3	0.56875
196.4	0.565
196.5	0.56125
196.6	0.5625
196.7	0.56
196.8	0.55875
196.9	0.5575
197	0.55375
197.1	0.555
197.2	0.55625
197.3	0.5525
197.4	0.5575
197.5	0.56125
197.6	0.56125
197.7	0.5575
197.8	0.5575
197.9	0.56125
198	0.565
198.1	0.56625
198.2	0.56375
198.3	0.5625
198.4	0.56
198.5	0.5625
198.6	0.56625
198.7	0.5675
198.8	0.5675
198.9	0.575
199	0.57875
199.1	0.5725
199.2	0.57375
199.3	0.57375
199.4	0.58
199.5	0.57875
199.6	0.5775
199.7	0.57375
199.8	0.5725
199.9	0.57375
200	0.56875
[truncated: 14,000 more rows]
