# Supplementary material for: Bayesian inference of kinetic schemes for ion channels by Kalman filtering
Source: eLife journal article supplement (doi:10.7554/elife.62714), 2022-05-04
Supplement: fig4-data8 [file 1_Sim_N_400_Strom_MW.xlsx]

## Sheet: 0.25 M
0.1	0
0.2	0
0.3	0
0.4	0
0.5	0
0.6	0
0.7	0
0.8	0
0.9	0
1	0
1.1	0
1.2	0
1.3	0
1.4	0
1.5	0
1.6	0
1.7	0
1.8	0
1.9	0
2	0
2.1	0
2.2	0
2.3	0
2.4	0
2.5	0
2.6	0
2.7	0
2.8	0
2.9	0
3	0
3.1	0
3.2	0
3.3	0
3.4	0
3.5	0
3.6	0
3.7	0
3.8	0
3.9	0
4	0
4.1	0
4.2	0
4.3	0
4.4	0
4.5	0
4.6	0
4.7	0
4.8	0
4.9	0
5	0
5.1	0
5.2	0
5.3	0
5.4	0
5.5	0
5.6	0
5.7	0
5.8	0
5.9	0
6	0
6.1	0
6.2	0
6.3	0
6.4	0
6.5	0
6.6	0
6.7	0
6.8	0
6.9	0
7	0
7.1	0
7.2	0
7.3	0
7.4	0
7.5	0
7.6	0
7.7	0
7.8	0
7.9	0
8	0
8.1	0
8.2	0
8.3	0
8.4	0
8.5	0
8.6	0
8.7	0
8.8	0
8.9	0
9	0
9.1	0
9.2	0
9.3	0
9.4	0
9.5	0
9.6	0
9.7	0
9.8	0
9.9	0
10	0
10.1	0
10.2	0
10.3	0
10.4	0
10.5	0
10.6	0
10.7	0
10.8	0
10.9	0
11	0
11.1	0
11.2	0
11.3	0
11.4	0
11.5	0
11.6	0
11.7	0
11.8	0
11.9	0
12	0
12.1	0
12.2	0
12.3	0
12.4	0
12.5	0
12.6	0
12.7	0
12.8	0
12.9	0
13	0
13.1	0
13.2	0
13.3	0
13.4	0
13.5	0
13.6	0
13.7	0
13.8	0
13.9	0
14	0
14.1	0
14.2	0
14.3	0
14.4	0
14.5	0
14.6	0
14.7	0
14.8	0
14.9	0
15	0
15.1	0
15.2	0
15.3	0
15.4	0
15.5	0
15.6	0
15.7	0
15.8	0
15.9	0
16	0
16.1	0
16.2	0
16.3	0
16.4	0
16.5	0
16.6	0
16.7	0
16.8	0
16.9	0
17	0
17.1	0
17.2	0
17.3	0
17.4	0
17.5	0
17.6	0
17.7	0
17.8	0
17.9	0
18	0
18.1	0
18.2	0
18.3	0
18.4	0
18.5	0
18.6	0
18.7	0
18.8	0
18.9	0
19	0
19.1	0
19.2	0
19.3	0
19.4	0
19.5	0
19.6	0
19.7	0
19.8	0
19.9	0
20	0
20.1	0
20.2	0
20.3	0
20.4	0
20.5	0
20.6	0
20.7	0
20.8	0
20.9	0
21	0
21.1	0
21.2	0
21.3	0
21.4	0
21.5	0
21.6	0
21.7	0
21.8	0
21.9	0
22	0
22.1	0
22.2	0
22.3	0
22.4	0
22.5	0
22.6	0
22.7	0
22.8	0
22.9	0
23	0
23.1	0
23.2	0
23.3	0
23.4	0
23.5	0
23.6	0
23.7	0
23.8	0
23.9	0
24	0
24.1	0
24.2	0
24.3	0
24.4	0
24.5	0
24.6	0
24.7	0
24.8	0
24.9	0
25	0
25.1	0
25.2	0
25.3	0
25.4	0
25.5	0
25.6	0
25.7	0
25.8	0
25.9	0
26	0
26.1	0
26.2	0
26.3	0
26.4	0
26.5	0
26.6	0
26.7	0
26.8	0
26.9	0
27	0
27.1	0
27.2	0
27.3	0
27.4	0
27.5	0
27.6	0
27.7	0
27.8	0
27.9	0
28	0
28.1	0
28.2	0
28.3	0
28.4	0
28.5	0
28.6	0
28.7	0
28.8	0
28.9	0
29	0
29.1	0
29.2	0
29.3	0
29.4	0
29.5	0
29.6	0
29.7	0
29.8	0
29.9	0
30	0
30.1	0
30.2	0
30.3	0
30.4	0
30.5	0
30.6	0
30.7	0
30.8	0
30.9	0
31	0
31.1	0
31.2	0
31.3	0
31.4	0
31.5	0
31.6	0
31.7	0
31.8	0
31.9	0
32	0
32.1	0
32.2	0
32.3	0
32.4	0
32.5	0
32.6	0
32.7	0
32.8	0
32.9	0
33	0
33.1	0
33.2	0
33.3	0
33.4	0
33.5	0
33.6	0
33.7	0
33.8	0
33.9	0
34	0
34.1	0
34.2	0
34.3	0
34.4	0
34.5	0
34.6	0
34.7	0
34.8	0
34.9	0
35	0
35.1	0
35.2	0
35.3	0
35.4	0
35.5	0
35.6	0
35.7	0
35.8	0
35.9	0
36	0
36.1	0
36.2	0
36.3	0
36.4	0
36.5	0
36.6	0
36.7	0
36.8	0
36.9	0
37	0
37.1	0
37.2	0
37.3	0
37.4	0
37.5	0
37.6	0
37.7	0
37.8	0
37.9	0
38	0
38.1	0
38.2	0
38.3	0
38.4	0
38.5	0
38.6	0
38.7	0
38.8	0
38.9	0
39	0
39.1	0
39.2	0
39.3	0
39.4	0
39.5	0
39.6	0
39.7	0
39.8	0
39.9	0
40	0
40.1	0
40.2	0
40.3	0
40.4	0
40.5	0
40.6	0
40.7	0
40.8	0
40.9	0
41	0
41.1	0
41.2	0
41.3	0
41.4	0
41.5	0
41.6	0
41.7	0
41.8	0
41.9	0
42	0
42.1	0
42.2	0
42.3	0
42.4	0
42.5	0
42.6	0
42.7	0
42.8	0
42.9	0
43	0
43.1	0
43.2	0
43.3	0
43.4	0
43.5	0
43.6	0
43.7	0
43.8	0
43.9	0
44	0
44.1	0
44.2	0
44.3	0
44.4	0
44.5	0
44.6	0
44.7	0
44.8	0
44.9	0
45	0
45.1	0
45.2	0
45.3	0
45.4	0
45.5	0
45.6	0
45.7	0
45.8	0
45.9	0
46	0
46.1	0
46.2	0
46.3	0
46.4	0
46.5	0
46.6	0
46.7	0
46.8	0
46.9	0
47	0
47.1	0
47.2	0
47.3	0
47.4	0
47.5	0
47.6	0
47.7	0
47.8	0
47.9	0
48	0
48.1	0
48.2	0
48.3	0
48.4	0
48.5	0
48.6	0
48.7	0
48.8	0
48.9	0
49	0
49.1	0
49.2	0
49.3	0
49.4	0
49.5	0
49.6	0
49.7	0
49.8	0
49.9	0
50	0
50.1	0
50.2	0
50.3	0
50.4	0
50.5	0
50.6	0
50.7	0
50.8	0
50.9	0
51	0
51.1	0
51.2	0
51.3	0
51.4	0
51.5	0
51.6	0
51.7	0
51.8	0
51.9	0
52	0
52.1	0
52.2	0
52.3	0
52.4	0
52.5	0
52.6	0
52.7	0
52.8	0
52.9	0
53	0
53.1	0
53.2	0
53.3	0
53.4	0
53.5	0
53.6	0
53.7	0
53.8	0
53.9	0
54	0
54.1	0
54.2	0
54.3	0
54.4	0
54.5	0
54.6	0
54.7	0
54.8	0
54.9	0
55	0
55.1	0
55.2	0
55.3	0
55.4	0
55.5	0
55.6	0
55.7	0
55.8	0
55.9	0
56	0
56.1	0
56.2	0
56.3	0
56.4	0
56.5	0
56.6	0
56.7	0
56.8	0
56.9	0
57	0
57.1	0
57.2	0
57.3	0
57.4	0
57.5	0
57.6	0
57.7	0
57.8	0
57.9	0
58	0
58.1	0
58.2	0
58.3	0
58.4	0
58.5	0
58.6	0
58.7	0
58.8	0
58.9	0
59	0
59.1	0
59.2	0
59.3	0
59.4	0
59.5	0
59.6	0
59.7	0
59.8	0
59.9	0
60	0
60.1	0
60.2	0
60.3	0
60.4	0
60.5	0
60.6	0
60.7	0
60.8	0
60.9	0
61	0
61.1	0
61.2	0
61.3	0
61.4	0
61.5	0
61.6	0
61.7	0
61.8	0
61.9	0
62	0
62.1	0
62.2	0
62.3	0
62.4	0
62.5	0
62.6	0
62.7	0
62.8	0
62.9	0
63	0
63.1	0
63.2	0
63.3	0
63.4	0
63.5	0
63.6	0
63.7	0
63.8	0
63.9	0
64	0
64.1	0
64.2	0
64.3	0
64.4	0
64.5	0
64.6	0
64.7	0
64.8	0
64.9	0
65	0
65.1	0
65.2	0
65.3	0
65.4	0
65.5	0
65.6	0
65.7	0
65.8	0
65.9	0
66	0
66.1	0
66.2	0
66.3	0
66.4	0
66.5	0
66.6	0
66.7	0
66.8	0
66.9	0
67	0
67.1	0
67.2	0
67.3	0
67.4	0
67.5	0
67.6	0
67.7	0
67.8	0
67.9	0
68	0
68.1	0
68.2	0
68.3	0
68.4	0
68.5	0
68.6	0
68.7	0
68.8	0
68.9	0
69	0
69.1	0
69.2	0
69.3	0
69.4	0
69.5	0
69.6	0
69.7	0
69.8	0
69.9	0
70	0
70.1	0
70.2	0
70.3	0
70.4	0
70.5	0
70.6	0
70.7	0
70.8	0
70.9	0
71	0
71.1	0
71.2	0
71.3	0
71.4	0
71.5	0
71.6	0
71.7	0
71.8	0
71.9	0
72	0
72.1	0
72.2	0
72.3	0
72.4	0
72.5	0
72.6	0
72.7	0
72.8	0
72.9	0
73	0
73.1	0
73.2	0
73.3	0
73.4	0
73.5	0
73.6	0
73.7	0
73.8	0
73.9	0
74	0
74.1	0
74.2	0
74.3	0
74.4	0
74.5	0
74.6	0
74.7	0
74.8	0
74.9	0
75	0
75.1	0
75.2	0
75.3	0
75.4	0
75.5	0
75.6	0
75.7	0
75.8	0
75.9	0
76	0
76.1	0
76.2	0
76.3	0
76.4	0
76.5	0
76.6	0
76.7	0
76.8	0
76.9	0
77	0
77.1	0
77.2	0
77.3	0
77.4	0
77.5	0
77.6	0
77.7	0
77.8	0
77.9	0
78	0
78.1	0
78.2	0
78.3	0
78.4	0
78.5	0
78.6	0
78.7	0
78.8	0
78.9	0
79	0
79.1	0
79.2	0
79.3	0
79.4	0
79.5	0
79.6	0
79.7	0
79.8	0
79.9	0
80	0
80.1	0
80.2	0
80.3	0
80.4	0
80.5	0
80.6	0
80.7	0
80.8	0
80.9	0
81	0
81.1	0
81.2	0
81.3	0
81.4	0
81.5	0
81.6	0
81.7	0
81.8	0
81.9	0
82	0
82.1	0
82.2	0
82.3	0
82.4	0
82.5	0
82.6	0
82.7	0
82.8	0
82.9	0
83	0
83.1	0
83.2	0
83.3	0
83.4	0
83.5	0
83.6	0
83.7	0
83.8	0
83.9	0
84	0
84.1	0
84.2	0
84.3	0
84.4	0
84.5	0
84.6	0
84.7	0
84.8	0
84.9	0
85	0
85.1	0
85.2	0
85.3	0
85.4	0
85.5	0
85.6	0
85.7	0
85.8	0
85.9	0
86	0
86.1	0
86.2	0
86.3	0
86.4	0
86.5	0
86.6	0
86.7	0
86.8	0
86.9	0
87	0
87.1	0
87.2	0
87.3	0
87.4	0
87.5	0
87.6	0
87.7	0
87.8	0
87.9	0
88	0
88.1	0
88.2	0
88.3	0
88.4	0
88.5	0
88.6	0
88.7	0
88.8	0
88.9	0
89	0
89.1	0
89.2	0
89.3	0
89.4	0
89.5	0
89.6	0
89.7	0
89.8	0
89.9	0
90	0
90.1	0
90.2	0
90.3	0
90.4	0
90.5	0
90.6	0
90.7	0
90.8	0
90.9	0
91	0
91.1	0
91.2	0
91.3	0
91.4	0
91.5	0
91.6	0
91.7	0
91.8	0
91.9	0
92	0
92.1	0
92.2	0
92.3	0
92.4	0
92.5	0
92.6	0
92.7	0
92.8	0
92.9	0
93	0
93.1	0
93.2	0
93.3	0
93.4	0
93.5	0
93.6	0
93.7	0
93.8	0
93.9	0
94	0
94.1	0
94.2	0
94.3	0
94.4	0
94.5	0
94.6	0
94.7	0
94.8	0
94.9	0
95	0
95.1	0
95.2	0
95.3	0
95.4	0
95.5	0
95.6	0
95.7	0
95.8	0
95.9	0
96	0
96.1	0
96.2	0
96.3	0
96.4	0
96.5	0
96.6	0
96.7	0
96.8	0
96.9	0
97	0
97.1	0
97.2	0
97.3	0
97.4	0
97.5	0
97.6	0
97.7	0
97.8	0
97.9	0
98	0
98.1	0
98.2	0
98.3	0
98.4	0
98.5	0
98.6	0
98.7	0
98.8	0
98.9	0
99	0
99.1	0
99.2	0
99.3	0
99.4	0
99.5	0
99.6	0
99.7	0
99.8	0
99.9	0
100	0
100.1	0
100.2	0
100.3	0
100.4	0
100.5	0
100.6	0
100.7	0
100.8	0
100.9	0
101	0
101.1	0
101.2	0
101.3	0
101.4	0
101.5	0
101.6	0
101.7	0
101.8	0
101.9	0
102	0
102.1	0
102.2	0
102.3	0
102.4	0
102.5	0
102.6	0
102.7	0
102.8	0
102.9	0
103	0
103.1	0
103.2	0
103.3	0
103.4	0
103.5	0
103.6	0
103.7	0
103.8	0
103.9	0
104	0.0025
104.1	0.0025
104.2	0.0025
104.3	0.0025
104.4	0.0025
104.5	0.005
104.6	0.005
104.7	0.01
104.8	0.01
104.9	0.01
105	0.01
105.1	0.0125
105.2	0.0125
105.3	0.0125
105.4	0.0125
105.5	0.015
105.6	0.0175
105.7	0.0175
105.8	0.0175
105.9	0.02
106	0.02
106.1	0.02
106.2	0.02
106.3	0.02
106.4	0.02
106.5	0.02
106.6	0.02
106.7	0.02
106.8	0.02
106.9	0.02
107	0.02
107.1	0.02
107.2	0.0225
107.3	0.0225
107.4	0.0225
107.5	0.0225
107.6	0.0225
107.7	0.0225
107.8	0.0225
107.9	0.0225
108	0.0225
108.1	0.0225
108.2	0.025
108.3	0.03
108.4	0.03
108.5	0.03
108.6	0.03
108.7	0.03
108.8	0.03
108.9	0.03
109	0.0325
109.1	0.0325
109.2	0.0325
109.3	0.0325
109.4	0.0325
109.5	0.0325
109.6	0.0325
109.7	0.0325
109.8	0.0325
109.9	0.0325
110	0.0325
110.1	0.0325
110.2	0.0325
110.3	0.0325
110.4	0.0325
110.5	0.035
110.6	0.035
110.7	0.035
110.8	0.0375
110.9	0.0375
111	0.0375
111.1	0.0375
111.2	0.0375
111.3	0.0375
111.4	0.0375
111.5	0.0375
111.6	0.035
111.7	0.0375
111.8	0.0375
111.9	0.0375
112	0.0375
112.1	0.0375
112.2	0.04
112.3	0.04
112.4	0.04
112.5	0.0425
112.6	0.0475
112.7	0.0475
112.8	0.0475
112.9	0.0475
113	0.0475
113.1	0.05
113.2	0.05
113.3	0.0525
113.4	0.0525
113.5	0.055
113.6	0.055
113.7	0.055
113.8	0.055
113.9	0.055
114	0.055
114.1	0.0525
114.2	0.0525
114.3	0.0525
114.4	0.055
114.5	0.055
114.6	0.055
114.7	0.055
114.8	0.0575
114.9	0.06
115	0.06
115.1	0.0625
115.2	0.0625
115.3	0.0625
115.4	0.0625
115.5	0.0625
115.6	0.0625
115.7	0.0625
115.8	0.0625
115.9	0.0625
116	0.0625
116.1	0.0625
116.2	0.0625
116.3	0.0625
116.4	0.0625
116.5	0.0625
116.6	0.0625
116.7	0.0625
116.8	0.065
116.9	0.065
117	0.065
117.1	0.065
117.2	0.065
117.3	0.0675
117.4	0.0675
117.5	0.0675
117.6	0.0675
117.7	0.07
117.8	0.0725
117.9	0.075
118	0.075
118.1	0.075
118.2	0.075
118.3	0.075
118.4	0.0775
118.5	0.0775
118.6	0.0775
118.7	0.0775
118.8	0.0775
118.9	0.0775
119	0.0775
119.1	0.0775
119.2	0.0775
119.3	0.0775
119.4	0.0775
119.5	0.0775
119.6	0.0775
119.7	0.08
119.8	0.08
119.9	0.08
120	0.08
120.1	0.0825
120.2	0.0825
120.3	0.0825
120.4	0.0825
120.5	0.0825
120.6	0.0825
120.7	0.0825
120.8	0.0825
120.9	0.0825
121	0.085
121.1	0.085
121.2	0.085
121.3	0.085
121.4	0.085
121.5	0.085
121.6	0.085
121.7	0.085
121.8	0.0875
121.9	0.0875
122	0.0875
122.1	0.085
122.2	0.0875
122.3	0.0875
122.4	0.0875
122.5	0.095
122.6	0.095
122.7	0.0975
122.8	0.0975
122.9	0.0975
123	0.0975
123.1	0.0975
123.2	0.0975
123.3	0.0975
123.4	0.0975
123.5	0.0975
123.6	0.0975
123.7	0.0975
123.8	0.0975
123.9	0.1
124	0.0975
124.1	0.0975
124.2	0.0975
124.3	0.0975
124.4	0.0975
124.5	0.0975
124.6	0.0975
124.7	0.0975
124.8	0.0975
124.9	0.0975
125	0.0975
125.1	0.0925
125.2	0.095
125.3	0.095
125.4	0.095
125.5	0.095
125.6	0.095
125.7	0.1
125.8	0.1025
125.9	0.1025
126	0.1025
126.1	0.1025
126.2	0.1025
126.3	0.1025
126.4	0.1025
126.5	0.1025
126.6	0.1025
126.7	0.1025
126.8	0.1
126.9	0.1
127	0.1
127.1	0.1
127.2	0.1
127.3	0.1
127.4	0.1
127.5	0.1
127.6	0.1
127.7	0.1
127.8	0.1
127.9	0.1
128	0.1
128.1	0.1
128.2	0.1
128.3	0.1
128.4	0.1
128.5	0.1
128.6	0.1
128.7	0.1
128.8	0.0975
128.9	0.0975
129	0.0975
129.1	0.0975
129.2	0.0975
129.3	0.0975
129.4	0.1
129.5	0.0975
129.6	0.0975
129.7	0.0975
129.8	0.0975
129.9	0.0975
130	0.0975
130.1	0.0975
130.2	0.0975
130.3	0.0975
130.4	0.0975
130.5	0.1
130.6	0.1025
130.7	0.1025
130.8	0.1025
130.9	0.1025
131	0.1025
131.1	0.11
131.2	0.11
131.3	0.11
131.4	0.1075
131.5	0.1075
131.6	0.11
131.7	0.11
131.8	0.11
131.9	0.115
132	0.1125
132.1	0.1125
132.2	0.1125
132.3	0.1125
132.4	0.1125
132.5	0.1125
132.6	0.1125
132.7	0.1125
132.8	0.1125
132.9	0.1125
133	0.1125
133.1	0.11
133.2	0.11
133.3	0.1125
133.4	0.1125
133.5	0.1125
133.6	0.1125
133.7	0.1125
133.8	0.1125
133.9	0.1125
134	0.1125
134.1	0.11
134.2	0.11
134.3	0.11
134.4	0.11
134.5	0.1125
134.6	0.1125
134.7	0.1125
134.8	0.1125
134.9	0.1125
135	0.1125
135.1	0.115
135.2	0.115
135.3	0.115
135.4	0.115
135.5	0.115
135.6	0.115
135.7	0.115
135.8	0.115
135.9	0.115
136	0.1175
136.1	0.1175
136.2	0.12
136.3	0.12
136.4	0.12
136.5	0.12
136.6	0.12
136.7	0.12
136.8	0.12
136.9	0.12
137	0.12
137.1	0.12
137.2	0.12
137.3	0.12
137.4	0.12
137.5	0.12
137.6	0.12
137.7	0.1225
137.8	0.1225
137.9	0.12
138	0.12
138.1	0.125
138.2	0.125
138.3	0.125
138.4	0.125
138.5	0.125
138.6	0.1275
138.7	0.1275
138.8	0.1275
138.9	0.1275
139	0.1275
139.1	0.13
139.2	0.1325
139.3	0.13
139.4	0.13
139.5	0.13
139.6	0.13
139.7	0.13
139.8	0.13
139.9	0.1275
140	0.1275
140.1	0.1275
140.2	0.1275
140.3	0.1275
140.4	0.1275
140.5	0.1275
140.6	0.1275
140.7	0.1275
140.8	0.1275
140.9	0.1275
141	0.1275
141.1	0.13
141.2	0.13
141.3	0.13
141.4	0.13
141.5	0.13
141.6	0.1375
141.7	0.1375
141.8	0.1375
141.9	0.1375
142	0.1375
142.1	0.1375
142.2	0.135
142.3	0.1375
142.4	0.1375
142.5	0.1375
142.6	0.14
142.7	0.1375
142.8	0.1375
142.9	0.1375
143	0.1375
143.1	0.1375
143.2	0.1375
143.3	0.1375
143.4	0.1375
143.5	0.1375
143.6	0.1375
143.7	0.1375
143.8	0.1375
143.9	0.1375
144	0.1375
144.1	0.1375
144.2	0.1375
144.3	0.1375
144.4	0.14
144.5	0.14
144.6	0.14
144.7	0.14
144.8	0.14
144.9	0.14
145	0.14
145.1	0.14
145.2	0.14
145.3	0.14
145.4	0.1425
145.5	0.1425
145.6	0.1425
145.7	0.1425
145.8	0.1425
145.9	0.1425
146	0.1425
146.1	0.1425
146.2	0.1425
146.3	0.1425
146.4	0.1425
146.5	0.145
146.6	0.145
146.7	0.1475
146.8	0.1475
146.9	0.1475
147	0.1475
147.1	0.15
147.2	0.15
147.3	0.15
147.4	0.155
147.5	0.1575
147.6	0.1575
147.7	0.16
147.8	0.16
147.9	0.16
148	0.16
148.1	0.16
148.2	0.1625
148.3	0.1625
148.4	0.1625
148.5	0.1625
148.6	0.165
148.7	0.165
148.8	0.1625
148.9	0.1625
149	0.1625
149.1	0.1625
149.2	0.1625
149.3	0.1625
149.4	0.1625
149.5	0.1625
149.6	0.1625
149.7	0.1625
149.8	0.1625
149.9	0.1625
150	0.1625
150.1	0.1625
150.2	0.1625
150.3	0.1625
150.4	0.1625
150.5	0.1625
150.6	0.1625
150.7	0.1625
150.8	0.1625
150.9	0.1625
151	0.1625
151.1	0.1625
151.2	0.165
151.3	0.165
151.4	0.1675
151.5	0.1675
151.6	0.1675
151.7	0.1675
151.8	0.1675
151.9	0.165
152	0.165
152.1	0.1625
152.2	0.1625
152.3	0.1625
152.4	0.165
152.5	0.165
152.6	0.165
152.7	0.165
152.8	0.165
152.9	0.165
153	0.165
153.1	0.165
153.2	0.165
153.3	0.165
153.4	0.165
153.5	0.165
153.6	0.165
153.7	0.165
153.8	0.1625
153.9	0.1625
154	0.16
154.1	0.16
154.2	0.1625
154.3	0.1625
154.4	0.1625
154.5	0.1625
154.6	0.1625
154.7	0.1625
154.8	0.1625
154.9	0.1625
155	0.1625
155.1	0.165
155.2	0.165
155.3	0.165
155.4	0.165
155.5	0.165
155.6	0.1675
155.7	0.1675
155.8	0.1675
155.9	0.17
156	0.17
156.1	0.17
156.2	0.17
156.3	0.17
156.4	0.17
156.5	0.17
156.6	0.17
156.7	0.17
156.8	0.17
156.9	0.17
157	0.1725
157.1	0.1725
157.2	0.1725
157.3	0.1725
157.4	0.1725
157.5	0.1725
157.6	0.17
157.7	0.17
157.8	0.17
157.9	0.17
158	0.17
158.1	0.17
158.2	0.17
158.3	0.1725
158.4	0.1725
158.5	0.1725
158.6	0.1725
158.7	0.175
158.8	0.175
158.9	0.175
159	0.175
159.1	0.175
159.2	0.175
159.3	0.175
159.4	0.175
159.5	0.175
159.6	0.175
159.7	0.175
159.8	0.175
159.9	0.175
160	0.175
160.1	0.175
160.2	0.175
160.3	0.175
160.4	0.175
160.5	0.1775
160.6	0.1775
160.7	0.18
160.8	0.1775
160.9	0.1775
161	0.1775
161.1	0.18
161.2	0.1775
161.3	0.1775
161.4	0.1775
161.5	0.18
161.6	0.18
161.7	0.18
161.8	0.18
161.9	0.1775
162	0.1775
162.1	0.1775
162.2	0.1775
162.3	0.1775
162.4	0.1775
162.5	0.1775
162.6	0.1775
162.7	0.1775
162.8	0.1775
162.9	0.1775
163	0.1775
163.1	0.1775
163.2	0.18
163.3	0.18
163.4	0.18
163.5	0.1825
163.6	0.1825
163.7	0.185
163.8	0.185
163.9	0.185
164	0.185
164.1	0.185
164.2	0.185
164.3	0.1875
164.4	0.1875
164.5	0.1875
164.6	0.1875
164.7	0.19
164.8	0.19
164.9	0.19
165	0.19
165.1	0.19
165.2	0.19
165.3	0.19
165.4	0.19
165.5	0.1875
165.6	0.19
165.7	0.19
165.8	0.19
165.9	0.19
166	0.19
166.1	0.19
166.2	0.19
166.3	0.19
166.4	0.19
166.5	0.19
166.6	0.19
166.7	0.19
166.8	0.19
166.9	0.19
167	0.19
167.1	0.19
167.2	0.19
167.3	0.19
167.4	0.19
167.5	0.19
167.6	0.19
167.7	0.19
167.8	0.19
167.9	0.19
168	0.19
168.1	0.19
168.2	0.19
168.3	0.19
168.4	0.19
168.5	0.19
168.6	0.19
168.7	0.19
168.8	0.1925
168.9	0.1925
169	0.1925
169.1	0.1925
169.2	0.19
169.3	0.19
169.4	0.19
169.5	0.19
169.6	0.19
169.7	0.19
169.8	0.19
169.9	0.19
170	0.19
170.1	0.19
170.2	0.1875
170.3	0.1875
170.4	0.19
170.5	0.19
170.6	0.19
170.7	0.1875
170.8	0.1875
170.9	0.19
171	0.19
171.1	0.1875
171.2	0.1875
171.3	0.1875
171.4	0.1875
171.5	0.1875
171.6	0.19
171.7	0.19
171.8	0.19
171.9	0.19
172	0.19
172.1	0.19
172.2	0.19
172.3	0.19
172.4	0.19
172.5	0.1925
172.6	0.1925
172.7	0.1925
172.8	0.1925
172.9	0.195
173	0.195
173.1	0.195
173.2	0.195
173.3	0.195
173.4	0.195
173.5	0.1975
173.6	0.1975
173.7	0.1975
173.8	0.1975
173.9	0.1975
174	0.195
174.1	0.195
174.2	0.195
174.3	0.195
174.4	0.195
174.5	0.195
174.6	0.195
174.7	0.195
174.8	0.195
174.9	0.195
175	0.195
175.1	0.195
175.2	0.195
175.3	0.2
175.4	0.2
175.5	0.2
175.6	0.1975
175.7	0.1975
175.8	0.195
175.9	0.195
176	0.195
176.1	0.1925
176.2	0.1925
176.3	0.195
176.4	0.195
176.5	0.1975
176.6	0.1975
176.7	0.1975
176.8	0.1975
176.9	0.1975
177	0.1975
177.1	0.1975
177.2	0.1975
177.3	0.2
177.4	0.2
177.5	0.2
177.6	0.2
177.7	0.2
177.8	0.2
177.9	0.2
178	0.2
178.1	0.2025
178.2	0.2025
178.3	0.2025
178.4	0.205
178.5	0.205
178.6	0.205
178.7	0.205
178.8	0.205
178.9	0.205
179	0.205
179.1	0.205
179.2	0.205
179.3	0.205
179.4	0.21
179.5	0.21
179.6	0.21
179.7	0.21
179.8	0.21
179.9	0.21
180	0.21
180.1	0.21
180.2	0.21
180.3	0.21
180.4	0.21
180.5	0.21
180.6	0.21
180.7	0.21
180.8	0.2125
180.9	0.2125
181	0.215
181.1	0.215
181.2	0.2125
181.3	0.2125
181.4	0.2125
181.5	0.2125
181.6	0.2125
181.7	0.2125
181.8	0.2125
181.9	0.2125
182	0.2175
182.1	0.2175
182.2	0.215
182.3	0.2175
182.4	0.2175
182.5	0.2175
182.6	0.2175
182.7	0.2175
182.8	0.2175
182.9	0.2175
183	0.2175
183.1	0.2175
183.2	0.2175
183.3	0.2175
183.4	0.2175
183.5	0.2175
183.6	0.2175
183.7	0.2175
183.8	0.22
183.9	0.22
184	0.22
184.1	0.22
184.2	0.22
184.3	0.22
184.4	0.22
184.5	0.22
184.6	0.22
184.7	0.22
184.8	0.22
184.9	0.22
185	0.22
185.1	0.22
185.2	0.225
185.3	0.2225
185.4	0.2225
185.5	0.2225
185.6	0.2225
185.7	0.2225
185.8	0.22
185.9	0.22
186	0.22
186.1	0.22
186.2	0.22
186.3	0.22
186.4	0.22
186.5	0.2175
186.6	0.22
186.7	0.22
186.8	0.22
186.9	0.22
187	0.2225
187.1	0.2225
187.2	0.2225
187.3	0.2225
187.4	0.2225
187.5	0.2225
187.6	0.2225
187.7	0.22
187.8	0.22
187.9	0.22
188	0.22
188.1	0.22
188.2	0.22
188.3	0.225
188.4	0.225
188.5	0.225
188.6	0.2275
188.7	0.23
188.8	0.23
188.9	0.2275
189	0.2275
189.1	0.2275
189.2	0.2275
189.3	0.2275
189.4	0.2275
189.5	0.2275
189.6	0.23
189.7	0.23
189.8	0.23
189.9	0.2325
190	0.235
190.1	0.235
190.2	0.2325
190.3	0.2325
190.4	0.235
190.5	0.235
190.6	0.235
190.7	0.235
190.8	0.235
190.9	0.235
191	0.235
191.1	0.235
191.2	0.2375
191.3	0.24
191.4	0.24
191.5	0.24
191.6	0.24
191.7	0.24
191.8	0.24
191.9	0.2425
192	0.2425
192.1	0.2425
192.2	0.2425
192.3	0.2425
192.4	0.245
192.5	0.2425
192.6	0.2425
192.7	0.2425
192.8	0.2425
192.9	0.2425
193	0.2425
193.1	0.2425
193.2	0.24
193.3	0.24
193.4	0.2425
193.5	0.2425
193.6	0.2425
193.7	0.245
193.8	0.2425
193.9	0.2425
194	0.2425
194.1	0.2425
194.2	0.2475
194.3	0.245
194.4	0.245
194.5	0.245
194.6	0.245
194.7	0.2425
194.8	0.2425
194.9	0.2425
195	0.2425
195.1	0.2425
195.2	0.2425
195.3	0.2425
195.4	0.2425
195.5	0.245
195.6	0.245
195.7	0.245
195.8	0.245
195.9	0.245
196	0.245
196.1	0.245
196.2	0.245
196.3	0.245
196.4	0.245
196.5	0.2475
196.6	0.2475
196.7	0.2475
196.8	0.2475
196.9	0.2475
197	0.2475
197.1	0.2475
197.2	0.2475
197.3	0.2475
197.4	0.245
197.5	0.245
197.6	0.245
197.7	0.245
197.8	0.2425
197.9	0.2425
198	0.2425
198.1	0.2425
198.2	0.2425
198.3	0.2425
198.4	0.2425
198.5	0.2425
198.6	0.2425
198.7	0.2425
198.8	0.2425
198.9	0.2425
199	0.2425
199.1	0.2425
199.2	0.2425
199.3	0.2425
199.4	0.24
199.5	0.24
199.6	0.24
199.7	0.24
199.8	0.2375
199.9	0.2375
200	0.235
[truncated: 14,000 more rows]
