# Supplementary material for: Bayesian inference of kinetic schemes for ion channels by Kalman filtering
Source: eLife journal article supplement (doi:10.7554/elife.62714), 2022-05-04
Supplement: fig4-data8 [file 1_Sim_N_500_Fluor_MW.xlsx]

## Sheet: Tabelle1
0.1	0
0.2	0
0.3	0
0.4	0
0.5	0
0.6	0
0.7	0
0.8	0
0.9	0
1	0
1.1	0
1.2	0
1.3	0
1.4	0
1.5	0
1.6	0
1.7	0
1.8	0
1.9	0
2	0
2.1	0
2.2	0
2.3	0
2.4	0
2.5	0
2.6	0
2.7	0
2.8	0
2.9	0
3	0
3.1	0
3.2	0
3.3	0
3.4	0
3.5	0
3.6	0
3.7	0
3.8	0
3.9	0
4	0
4.1	0
4.2	0
4.3	0
4.4	0
4.5	0
4.6	0
4.7	0
4.8	0
4.9	0
5	0
5.1	0
5.2	0
5.3	0
5.4	0
5.5	0
5.6	0
5.7	0
5.8	0
5.9	0
6	0
6.1	0
6.2	0
6.3	0
6.4	0
6.5	0
6.6	0
6.7	0
6.8	0
6.9	0
7	0
7.1	0
7.2	0
7.3	0
7.4	0
7.5	0
7.6	0
7.7	0
7.8	0
7.9	0
8	0
8.1	0
8.2	0
8.3	0
8.4	0
8.5	0
8.6	0
8.7	0
8.8	0
8.9	0
9	0
9.1	0
9.2	0
9.3	0
9.4	0
9.5	0
9.6	0
9.7	0
9.8	0
9.9	0
10	0
10.1	0
10.2	0
10.3	0
10.4	0
10.5	0
10.6	0
10.7	0
10.8	0
10.9	0
11	0
11.1	0
11.2	0
11.3	0
11.4	0
11.5	0
11.6	0
11.7	0
11.8	0
11.9	0
12	0
12.1	0
12.2	0
12.3	0
12.4	0
12.5	0
12.6	0
12.7	0
12.8	0
12.9	0
13	0
13.1	0
13.2	0
13.3	0
13.4	0
13.5	0
13.6	0
13.7	0
13.8	0
13.9	0
14	0
14.1	0
14.2	0
14.3	0
14.4	0
14.5	0
14.6	0
14.7	0
14.8	0
14.9	0
15	0
15.1	0
15.2	0
15.3	0
15.4	0
15.5	0
15.6	0
15.7	0
15.8	0
15.9	0
16	0
16.1	0
16.2	0
16.3	0
16.4	0
16.5	0
16.6	0
16.7	0
16.8	0
16.9	0
17	0
17.1	0
17.2	0
17.3	0
17.4	0
17.5	0
17.6	0
17.7	0
17.8	0
17.9	0
18	0
18.1	0
18.2	0
18.3	0
18.4	0
18.5	0
18.6	0
18.7	0
18.8	0
18.9	0
19	0
19.1	0
19.2	0
19.3	0
19.4	0
19.5	0
19.6	0
19.7	0
19.8	0
19.9	0
20	0
20.1	0
20.2	0
20.3	0
20.4	0
20.5	0
20.6	0
20.7	0
20.8	0
20.9	0
21	0
21.1	0
21.2	0
21.3	0
21.4	0
21.5	0
21.6	0
21.7	0
21.8	0
21.9	0
22	0
22.1	0
22.2	0
22.3	0
22.4	0
22.5	0
22.6	0
22.7	0
22.8	0
22.9	0
23	0
23.1	0
23.2	0
23.3	0
23.4	0
23.5	0
23.6	0
23.7	0
23.8	0
23.9	0
24	0
24.1	0
24.2	0
24.3	0
24.4	0
24.5	0
24.6	0
24.7	0
24.8	0
24.9	0
25	0
25.1	0
25.2	0
25.3	0
25.4	0
25.5	0
25.6	0
25.7	0
25.8	0
25.9	0
26	0
26.1	0
26.2	0
26.3	0
26.4	0
26.5	0
26.6	0
26.7	0
26.8	0
26.9	0
27	0
27.1	0
27.2	0
27.3	0
27.4	0
27.5	0
27.6	0
27.7	0
27.8	0
27.9	0
28	0
28.1	0
28.2	0
28.3	0
28.4	0
28.5	0
28.6	0
28.7	0
28.8	0
28.9	0
29	0
29.1	0
29.2	0
29.3	0
29.4	0
29.5	0
29.6	0
29.7	0
29.8	0
29.9	0
30	0
30.1	0
30.2	0
30.3	0
30.4	0
30.5	0
30.6	0
30.7	0
30.8	0
30.9	0
31	0
31.1	0
31.2	0
31.3	0
31.4	0
31.5	0
31.6	0
31.7	0
31.8	0
31.9	0
32	0
32.1	0
32.2	0
32.3	0
32.4	0
32.5	0
32.6	0
32.7	0
32.8	0
32.9	0
33	0
33.1	0
33.2	0
33.3	0
33.4	0
33.5	0
33.6	0
33.7	0
33.8	0
33.9	0
34	0
34.1	0
34.2	0
34.3	0
34.4	0
34.5	0
34.6	0
34.7	0
34.8	0
34.9	0
35	0
35.1	0
35.2	0
35.3	0
35.4	0
35.5	0
35.6	0
35.7	0
35.8	0
35.9	0
36	0
36.1	0
36.2	0
36.3	0
36.4	0
36.5	0
36.6	0
36.7	0
36.8	0
36.9	0
37	0
37.1	0
37.2	0
37.3	0
37.4	0
37.5	0
37.6	0
37.7	0
37.8	0
37.9	0
38	0
38.1	0
38.2	0
38.3	0
38.4	0
38.5	0
38.6	0
38.7	0
38.8	0
38.9	0
39	0
39.1	0
39.2	0
39.3	0
39.4	0
39.5	0
39.6	0
39.7	0
39.8	0
39.9	0
40	0
40.1	0
40.2	0
40.3	0
40.4	0
40.5	0
40.6	0
40.7	0
40.8	0
40.9	0
41	0
41.1	0
41.2	0
41.3	0
41.4	0
41.5	0
41.6	0
41.7	0
41.8	0
41.9	0
42	0
42.1	0
42.2	0
42.3	0
42.4	0
42.5	0
42.6	0
42.7	0
42.8	0
42.9	0
43	0
43.1	0
43.2	0
43.3	0
43.4	0
43.5	0
43.6	0
43.7	0
43.8	0
43.9	0
44	0
44.1	0
44.2	0
44.3	0
44.4	0
44.5	0
44.6	0
44.7	0
44.8	0
44.9	0
45	0
45.1	0
45.2	0
45.3	0
45.4	0
45.5	0
45.6	0
45.7	0
45.8	0
45.9	0
46	0
46.1	0
46.2	0
46.3	0
46.4	0
46.5	0
46.6	0
46.7	0
46.8	0
46.9	0
47	0
47.1	0
47.2	0
47.3	0
47.4	0
47.5	0
47.6	0
47.7	0
47.8	0
47.9	0
48	0
48.1	0
48.2	0
48.3	0
48.4	0
48.5	0
48.6	0
48.7	0
48.8	0
48.9	0
49	0
49.1	0
49.2	0
49.3	0
49.4	0
49.5	0
49.6	0
49.7	0
49.8	0
49.9	0
50	0
50.1	0
50.2	0
50.3	0
50.4	0
50.5	0
50.6	0
50.7	0
50.8	0
50.9	0
51	0
51.1	0
51.2	0
51.3	0
51.4	0
51.5	0
51.6	0
51.7	0
51.8	0
51.9	0
52	0
52.1	0
52.2	0
52.3	0
52.4	0
52.5	0
52.6	0
52.7	0
52.8	0
52.9	0
53	0
53.1	0
53.2	0
53.3	0
53.4	0
53.5	0
53.6	0
53.7	0
53.8	0
53.9	0
54	0
54.1	0
54.2	0
54.3	0
54.4	0
54.5	0
54.6	0
54.7	0
54.8	0
54.9	0
55	0
55.1	0
55.2	0
55.3	0
55.4	0
55.5	0
55.6	0
55.7	0
55.8	0
55.9	0
56	0
56.1	0
56.2	0
56.3	0
56.4	0
56.5	0
56.6	0
56.7	0
56.8	0
56.9	0
57	0
57.1	0
57.2	0
57.3	0
57.4	0
57.5	0
57.6	0
57.7	0
57.8	0
57.9	0
58	0
58.1	0
58.2	0
58.3	0
58.4	0
58.5	0
58.6	0
58.7	0
58.8	0
58.9	0
59	0
59.1	0
59.2	0
59.3	0
59.4	0
59.5	0
59.6	0
59.7	0
59.8	0
59.9	0
60	0
60.1	0
60.2	0
60.3	0
60.4	0
60.5	0
60.6	0
60.7	0
60.8	0
60.9	0
61	0
61.1	0
61.2	0
61.3	0
61.4	0
61.5	0
61.6	0
61.7	0
61.8	0
61.9	0
62	0
62.1	0
62.2	0
62.3	0
62.4	0
62.5	0
62.6	0
62.7	0
62.8	0
62.9	0
63	0
63.1	0
63.2	0
63.3	0
63.4	0
63.5	0
63.6	0
63.7	0
63.8	0
63.9	0
64	0
64.1	0
64.2	0
64.3	0
64.4	0
64.5	0
64.6	0
64.7	0
64.8	0
64.9	0
65	0
65.1	0
65.2	0
65.3	0
65.4	0
65.5	0
65.6	0
65.7	0
65.8	0
65.9	0
66	0
66.1	0
66.2	0
66.3	0
66.4	0
66.5	0
66.6	0
66.7	0
66.8	0
66.9	0
67	0
67.1	0
67.2	0
67.3	0
67.4	0
67.5	0
67.6	0
67.7	0
67.8	0
67.9	0
68	0
68.1	0
68.2	0
68.3	0
68.4	0
68.5	0
68.6	0
68.7	0
68.8	0
68.9	0
69	0
69.1	0
69.2	0
69.3	0
69.4	0
69.5	0
69.6	0
69.7	0
69.8	0
69.9	0
70	0
70.1	0
70.2	0
70.3	0
70.4	0
70.5	0
70.6	0
70.7	0
70.8	0
70.9	0
71	0
71.1	0
71.2	0
71.3	0
71.4	0
71.5	0
71.6	0
71.7	0
71.8	0
71.9	0
72	0
72.1	0
72.2	0
72.3	0
72.4	0
72.5	0
72.6	0
72.7	0
72.8	0
72.9	0
73	0
73.1	0
73.2	0
73.3	0
73.4	0
73.5	0
73.6	0
73.7	0
73.8	0
73.9	0
74	0
74.1	0
74.2	0
74.3	0
74.4	0
74.5	0
74.6	0
74.7	0
74.8	0
74.9	0
75	0
75.1	0
75.2	0
75.3	0
75.4	0
75.5	0
75.6	0
75.7	0
75.8	0
75.9	0
76	0
76.1	0
76.2	0
76.3	0
76.4	0
76.5	0
76.6	0
76.7	0
76.8	0
76.9	0
77	0
77.1	0
77.2	0
77.3	0
77.4	0
77.5	0
77.6	0
77.7	0
77.8	0
77.9	0
78	0
78.1	0
78.2	0
78.3	0
78.4	0
78.5	0
78.6	0
78.7	0
78.8	0
78.9	0
79	0
79.1	0
79.2	0
79.3	0
79.4	0
79.5	0
79.6	0
79.7	0
79.8	0
79.9	0
80	0
80.1	0
80.2	0
80.3	0
80.4	0
80.5	0
80.6	0
80.7	0
80.8	0
80.9	0
81	0
81.1	0
81.2	0
81.3	0
81.4	0
81.5	0
81.6	0
81.7	0
81.8	0
81.9	0
82	0
82.1	0
82.2	0
82.3	0
82.4	0
82.5	0
82.6	0
82.7	0
82.8	0
82.9	0
83	0
83.1	0
83.2	0
83.3	0
83.4	0
83.5	0
83.6	0
83.7	0
83.8	0
83.9	0
84	0
84.1	0
84.2	0
84.3	0
84.4	0
84.5	0
84.6	0
84.7	0
84.8	0
84.9	0
85	0
85.1	0
85.2	0
85.3	0
85.4	0
85.5	0
85.6	0
85.7	0
85.8	0
85.9	0
86	0
86.1	0
86.2	0
86.3	0
86.4	0
86.5	0
86.6	0
86.7	0
86.8	0
86.9	0
87	0
87.1	0
87.2	0
87.3	0
87.4	0
87.5	0
87.6	0
87.7	0
87.8	0
87.9	0
88	0
88.1	0
88.2	0
88.3	0
88.4	0
88.5	0
88.6	0
88.7	0
88.8	0
88.9	0
89	0
89.1	0
89.2	0
89.3	0
89.4	0
89.5	0
89.6	0
89.7	0
89.8	0
89.9	0
90	0
90.1	0
90.2	0
90.3	0
90.4	0
90.5	0
90.6	0
90.7	0
90.8	0
90.9	0
91	0
91.1	0
91.2	0
91.3	0
91.4	0
91.5	0
91.6	0
91.7	0
91.8	0
91.9	0
92	0
92.1	0
92.2	0
92.3	0
92.4	0
92.5	0
92.6	0
92.7	0
92.8	0
92.9	0
93	0
93.1	0
93.2	0
93.3	0
93.4	0
93.5	0
93.6	0
93.7	0
93.8	0
93.9	0
94	0
94.1	0
94.2	0
94.3	0
94.4	0
94.5	0
94.6	0
94.7	0
94.8	0
94.9	0
95	0
95.1	0
95.2	0
95.3	0
95.4	0
95.5	0
95.6	0
95.7	0
95.8	0
95.9	0
96	0
96.1	0
96.2	0
96.3	0
96.4	0
96.5	0
96.6	0
96.7	0
96.8	0
96.9	0
97	0
97.1	0
97.2	0
97.3	0
97.4	0
97.5	0
97.6	0
97.7	0
97.8	0
97.9	0
98	0
98.1	0
98.2	0
98.3	0
98.4	0
98.5	0
98.6	0
98.7	0
98.8	0
98.9	0
99	0
99.1	0
99.2	0
99.3	0
99.4	0
99.5	0
99.6	0
99.7	0
99.8	0
99.9	0
100	0
100.1	0.017
100.2	0.031
100.3	0.043
100.4	0.056
100.5	0.072
100.6	0.087
100.7	0.104
100.8	0.115
100.9	0.127
101	0.137
101.1	0.146
101.2	0.153
101.3	0.163
101.4	0.171
101.5	0.182
101.6	0.194
101.7	0.2
101.8	0.208
101.9	0.219
102	0.224
102.1	0.23
102.2	0.235
102.3	0.24
102.4	0.242
102.5	0.248
102.6	0.254
102.7	0.262
102.8	0.268
102.9	0.274
103	0.274
103.1	0.276
103.2	0.288
103.3	0.294
103.4	0.298
103.5	0.307
103.6	0.309
103.7	0.314
103.8	0.315
103.9	0.315
104	0.32
104.1	0.326
104.2	0.333
104.3	0.339
104.4	0.34
104.5	0.339
104.6	0.345
104.7	0.343
104.8	0.345
104.9	0.351
105	0.357
105.1	0.367
105.2	0.367
105.3	0.37
105.4	0.368
105.5	0.365
105.6	0.367
105.7	0.37
105.8	0.378
105.9	0.378
106	0.377
106.1	0.38
106.2	0.384
106.3	0.381
106.4	0.394
106.5	0.394
106.6	0.393
106.7	0.391
106.8	0.393
106.9	0.401
107	0.404
107.1	0.405
107.2	0.406
107.3	0.41
107.4	0.416
107.5	0.421
107.6	0.418
107.7	0.414
107.8	0.415
107.9	0.418
108	0.418
108.1	0.417
108.2	0.421
108.3	0.417
108.4	0.421
108.5	0.419
108.6	0.417
108.7	0.42
108.8	0.419
108.9	0.42
109	0.428
109.1	0.426
109.2	0.428
109.3	0.427
109.4	0.426
109.5	0.431
109.6	0.434
109.7	0.435
109.8	0.438
109.9	0.428
110	0.43
110.1	0.432
110.2	0.429
110.3	0.423
110.4	0.425
110.5	0.423
110.6	0.425
110.7	0.429
110.8	0.429
110.9	0.429
111	0.432
111.1	0.43
111.2	0.429
111.3	0.43
111.4	0.429
111.5	0.424
111.6	0.419
111.7	0.419
111.8	0.419
111.9	0.421
112	0.417
112.1	0.419
112.2	0.421
112.3	0.414
112.4	0.418
112.5	0.418
112.6	0.418
112.7	0.414
112.8	0.416
112.9	0.426
113	0.426
113.1	0.428
113.2	0.429
113.3	0.433
113.4	0.434
113.5	0.437
113.6	0.44
113.7	0.44
113.8	0.442
113.9	0.442
114	0.441
114.1	0.447
114.2	0.448
114.3	0.448
114.4	0.444
114.5	0.441
114.6	0.44
114.7	0.442
114.8	0.439
114.9	0.442
115	0.442
115.1	0.442
115.2	0.442
115.3	0.44
115.4	0.438
115.5	0.437
115.6	0.439
115.7	0.446
115.8	0.444
115.9	0.444
116	0.448
116.1	0.446
116.2	0.448
116.3	0.45
116.4	0.45
116.5	0.453
116.6	0.453
116.7	0.452
116.8	0.453
116.9	0.454
117	0.453
117.1	0.454
117.2	0.446
117.3	0.447
117.4	0.451
117.5	0.453
117.6	0.456
117.7	0.453
117.8	0.452
117.9	0.453
118	0.458
118.1	0.458
118.2	0.459
118.3	0.462
118.4	0.465
118.5	0.465
118.6	0.467
118.7	0.466
118.8	0.468
118.9	0.468
119	0.469
119.1	0.466
119.2	0.464
119.3	0.46
119.4	0.457
119.5	0.454
119.6	0.456
119.7	0.455
119.8	0.459
119.9	0.461
120	0.466
120.1	0.466
120.2	0.466
120.3	0.469
120.4	0.475
120.5	0.477
120.6	0.476
120.7	0.478
120.8	0.479
120.9	0.48
121	0.475
121.1	0.473
121.2	0.468
121.3	0.467
121.4	0.471
121.5	0.477
121.6	0.478
121.7	0.481
121.8	0.483
121.9	0.487
122	0.484
122.1	0.484
122.2	0.484
122.3	0.486
122.4	0.482
122.5	0.485
122.6	0.484
122.7	0.48
122.8	0.482
122.9	0.484
123	0.489
123.1	0.487
123.2	0.488
123.3	0.49
123.4	0.489
123.5	0.493
123.6	0.491
123.7	0.484
123.8	0.487
123.9	0.49
124	0.495
124.1	0.493
124.2	0.494
124.3	0.489
124.4	0.494
124.5	0.496
124.6	0.495
124.7	0.491
124.8	0.488
124.9	0.493
125	0.493
125.1	0.492
125.2	0.488
125.3	0.493
125.4	0.495
125.5	0.498
125.6	0.49
125.7	0.497
125.8	0.495
125.9	0.494
126	0.493
126.1	0.493
126.2	0.49
126.3	0.497
126.4	0.49
126.5	0.493
126.6	0.496
126.7	0.497
126.8	0.496
126.9	0.49
127	0.484
127.1	0.489
127.2	0.484
127.3	0.487
127.4	0.487
127.5	0.492
127.6	0.492
127.7	0.493
127.8	0.493
127.9	0.494
128	0.488
128.1	0.487
128.2	0.488
128.3	0.483
128.4	0.484
128.5	0.489
128.6	0.489
128.7	0.485
128.8	0.477
128.9	0.482
129	0.482
129.1	0.481
129.2	0.48
129.3	0.481
129.4	0.481
129.5	0.488
129.6	0.49
129.7	0.492
129.8	0.495
129.9	0.494
130	0.492
130.1	0.49
130.2	0.491
130.3	0.486
130.4	0.491
130.5	0.491
130.6	0.49
130.7	0.491
130.8	0.491
130.9	0.487
131	0.486
131.1	0.489
131.2	0.49
131.3	0.489
131.4	0.489
131.5	0.492
131.6	0.492
131.7	0.494
131.8	0.493
131.9	0.495
132	0.493
132.1	0.494
132.2	0.493
132.3	0.495
132.4	0.492
132.5	0.491
132.6	0.488
132.7	0.494
132.8	0.488
132.9	0.487
133	0.487
133.1	0.492
133.2	0.492
133.3	0.492
133.4	0.487
133.5	0.484
133.6	0.487
133.7	0.497
133.8	0.496
133.9	0.493
134	0.497
134.1	0.5
134.2	0.504
134.3	0.506
134.4	0.504
134.5	0.504
134.6	0.501
134.7	0.504
134.8	0.503
134.9	0.505
135	0.504
135.1	0.502
135.2	0.5
135.3	0.504
135.4	0.507
135.5	0.507
135.6	0.508
135.7	0.507
135.8	0.507
135.9	0.508
136	0.502
136.1	0.5
136.2	0.499
136.3	0.498
136.4	0.494
136.5	0.499
136.6	0.501
136.7	0.497
136.8	0.494
136.9	0.496
137	0.496
137.1	0.493
137.2	0.492
137.3	0.492
137.4	0.491
137.5	0.49
137.6	0.495
137.7	0.492
137.8	0.491
137.9	0.498
138	0.502
138.1	0.501
138.2	0.503
138.3	0.509
138.4	0.511
138.5	0.516
138.6	0.514
138.7	0.517
138.8	0.519
138.9	0.518
139	0.512
139.1	0.513
139.2	0.515
139.3	0.517
139.4	0.52
139.5	0.519
139.6	0.528
139.7	0.527
139.8	0.528
139.9	0.53
140	0.527
140.1	0.526
140.2	0.529
140.3	0.532
140.4	0.533
140.5	0.533
140.6	0.534
140.7	0.536
140.8	0.535
140.9	0.533
141	0.528
141.1	0.528
141.2	0.525
141.3	0.527
141.4	0.531
141.5	0.528
141.6	0.525
141.7	0.523
141.8	0.52
141.9	0.521
142	0.522
142.1	0.514
142.2	0.513
142.3	0.519
142.4	0.518
142.5	0.519
142.6	0.519
142.7	0.518
142.8	0.519
142.9	0.519
143	0.523
143.1	0.521
143.2	0.522
143.3	0.518
143.4	0.521
143.5	0.526
143.6	0.522
143.7	0.525
143.8	0.528
143.9	0.53
144	0.526
144.1	0.526
144.2	0.521
144.3	0.524
144.4	0.525
144.5	0.523
144.6	0.521
144.7	0.521
144.8	0.523
144.9	0.525
145	0.519
145.1	0.514
145.2	0.514
145.3	0.516
145.4	0.514
145.5	0.516
145.6	0.517
145.7	0.516
145.8	0.517
145.9	0.521
146	0.522
146.1	0.518
146.2	0.52
146.3	0.519
146.4	0.521
146.5	0.513
146.6	0.517
146.7	0.512
146.8	0.514
146.9	0.52
147	0.52
147.1	0.524
147.2	0.524
147.3	0.526
147.4	0.523
147.5	0.523
147.6	0.523
147.7	0.521
147.8	0.519
147.9	0.523
148	0.522
148.1	0.526
148.2	0.525
148.3	0.529
148.4	0.531
148.5	0.53
148.6	0.53
148.7	0.53
148.8	0.53
148.9	0.533
149	0.534
149.1	0.537
149.2	0.536
149.3	0.532
149.4	0.542
149.5	0.546
149.6	0.544
149.7	0.546
149.8	0.542
149.9	0.539
150	0.537
150.1	0.537
150.2	0.539
150.3	0.542
150.4	0.547
150.5	0.546
150.6	0.548
150.7	0.549
150.8	0.546
150.9	0.549
151	0.549
151.1	0.548
151.2	0.548
151.3	0.554
151.4	0.558
151.5	0.56
151.6	0.551
151.7	0.548
151.8	0.553
151.9	0.553
152	0.557
152.1	0.552
152.2	0.554
152.3	0.551
152.4	0.552
152.5	0.55
152.6	0.543
152.7	0.542
152.8	0.54
152.9	0.542
153	0.54
153.1	0.54
153.2	0.534
153.3	0.538
153.4	0.539
153.5	0.536
153.6	0.534
153.7	0.534
153.8	0.528
153.9	0.526
154	0.53
154.1	0.532
154.2	0.533
154.3	0.541
154.4	0.54
154.5	0.54
154.6	0.542
154.7	0.541
154.8	0.545
154.9	0.543
155	0.547
155.1	0.548
155.2	0.548
155.3	0.545
155.4	0.536
155.5	0.532
155.6	0.539
155.7	0.537
155.8	0.532
155.9	0.533
156	0.538
156.1	0.542
156.2	0.538
156.3	0.542
156.4	0.538
156.5	0.539
156.6	0.54
156.7	0.538
156.8	0.535
156.9	0.536
157	0.535
157.1	0.531
157.2	0.529
157.3	0.527
157.4	0.53
157.5	0.529
157.6	0.532
157.7	0.534
157.8	0.533
157.9	0.535
158	0.532
158.1	0.53
158.2	0.53
158.3	0.533
158.4	0.535
158.5	0.535
158.6	0.533
158.7	0.532
158.8	0.532
158.9	0.533
159	0.531
159.1	0.533
159.2	0.537
159.3	0.538
159.4	0.539
159.5	0.543
159.6	0.539
159.7	0.54
159.8	0.543
159.9	0.546
160	0.543
160.1	0.539
160.2	0.542
160.3	0.544
160.4	0.544
160.5	0.543
160.6	0.546
160.7	0.542
160.8	0.541
160.9	0.54
161	0.546
161.1	0.549
161.2	0.55
161.3	0.555
161.4	0.555
161.5	0.56
161.6	0.566
161.7	0.563
161.8	0.568
161.9	0.564
162	0.566
162.1	0.563
162.2	0.562
162.3	0.561
162.4	0.558
162.5	0.557
162.6	0.563
162.7	0.562
162.8	0.563
162.9	0.565
163	0.567
163.1	0.563
163.2	0.56
163.3	0.565
163.4	0.564
163.5	0.562
163.6	0.564
163.7	0.566
163.8	0.568
163.9	0.567
164	0.565
164.1	0.562
164.2	0.564
164.3	0.563
164.4	0.564
164.5	0.562
164.6	0.562
164.7	0.558
164.8	0.558
164.9	0.557
165	0.556
165.1	0.56
165.2	0.561
165.3	0.558
165.4	0.555
165.5	0.552
165.6	0.552
165.7	0.557
165.8	0.559
165.9	0.559
166	0.559
166.1	0.561
166.2	0.558
166.3	0.56
166.4	0.556
166.5	0.552
166.6	0.55
166.7	0.549
166.8	0.552
166.9	0.554
167	0.553
167.1	0.558
167.2	0.557
167.3	0.559
167.4	0.563
167.5	0.561
167.6	0.558
167.7	0.558
167.8	0.557
167.9	0.557
168	0.565
168.1	0.565
168.2	0.565
168.3	0.565
168.4	0.567
168.5	0.57
168.6	0.567
168.7	0.569
168.8	0.567
168.9	0.564
169	0.564
169.1	0.567
169.2	0.564
169.3	0.563
169.4	0.569
169.5	0.568
169.6	0.567
169.7	0.568
169.8	0.561
169.9	0.562
170	0.564
170.1	0.567
170.2	0.568
170.3	0.567
170.4	0.568
170.5	0.567
170.6	0.568
170.7	0.568
170.8	0.567
170.9	0.567
171	0.569
171.1	0.569
171.2	0.571
171.3	0.573
171.4	0.574
171.5	0.573
171.6	0.573
171.7	0.569
171.8	0.571
171.9	0.568
172	0.568
172.1	0.567
172.2	0.561
172.3	0.56
172.4	0.558
172.5	0.565
172.6	0.568
172.7	0.571
172.8	0.569
172.9	0.571
173	0.567
173.1	0.568
173.2	0.566
173.3	0.566
173.4	0.567
173.5	0.565
173.6	0.564
173.7	0.568
173.8	0.566
173.9	0.561
174	0.561
174.1	0.559
174.2	0.56
174.3	0.562
174.4	0.562
174.5	0.563
174.6	0.561
174.7	0.555
174.8	0.558
174.9	0.561
175	0.556
175.1	0.556
175.2	0.564
175.3	0.568
175.4	0.571
175.5	0.568
175.6	0.57
175.7	0.573
175.8	0.573
175.9	0.568
176	0.571
176.1	0.573
176.2	0.568
176.3	0.565
176.4	0.568
176.5	0.568
176.6	0.568
176.7	0.57
176.8	0.568
176.9	0.561
177	0.56
177.1	0.562
177.2	0.557
177.3	0.56
177.4	0.567
177.5	0.566
177.6	0.56
177.7	0.558
177.8	0.561
177.9	0.565
178	0.567
178.1	0.569
178.2	0.567
178.3	0.565
178.4	0.566
178.5	0.567
178.6	0.569
178.7	0.571
178.8	0.569
178.9	0.566
179	0.563
179.1	0.558
179.2	0.56
179.3	0.56
179.4	0.558
179.5	0.558
179.6	0.556
179.7	0.556
179.8	0.56
179.9	0.562
180	0.563
180.1	0.566
180.2	0.565
180.3	0.568
180.4	0.568
180.5	0.567
180.6	0.571
180.7	0.573
180.8	0.571
180.9	0.572
181	0.569
181.1	0.57
181.2	0.565
181.3	0.565
181.4	0.565
181.5	0.567
181.6	0.56
181.7	0.56
181.8	0.564
181.9	0.565
182	0.564
182.1	0.565
182.2	0.567
182.3	0.57
182.4	0.567
182.5	0.57
182.6	0.575
182.7	0.577
182.8	0.574
182.9	0.575
183	0.579
183.1	0.579
183.2	0.583
183.3	0.589
183.4	0.589
183.5	0.591
183.6	0.593
183.7	0.597
183.8	0.595
183.9	0.594
184	0.602
184.1	0.599
184.2	0.599
184.3	0.596
184.4	0.598
184.5	0.592
184.6	0.591
184.7	0.587
184.8	0.585
184.9	0.583
185	0.584
185.1	0.584
185.2	0.583
185.3	0.583
185.4	0.576
185.5	0.574
185.6	0.571
185.7	0.572
185.8	0.571
185.9	0.57
186	0.572
186.1	0.572
186.2	0.57
186.3	0.566
186.4	0.565
186.5	0.563
186.6	0.56
186.7	0.564
186.8	0.565
186.9	0.561
187	0.559
187.1	0.563
187.2	0.567
187.3	0.571
187.4	0.569
187.5	0.57
187.6	0.569
187.7	0.567
187.8	0.566
187.9	0.565
188	0.564
188.1	0.565
188.2	0.569
188.3	0.566
188.4	0.56
188.5	0.567
188.6	0.566
188.7	0.564
188.8	0.564
188.9	0.566
189	0.564
189.1	0.562
189.2	0.561
189.3	0.562
189.4	0.563
189.5	0.567
189.6	0.568
189.7	0.565
189.8	0.565
189.9	0.566
190	0.568
190.1	0.569
190.2	0.568
190.3	0.57
190.4	0.569
190.5	0.57
190.6	0.569
190.7	0.568
190.8	0.572
190.9	0.567
191	0.571
191.1	0.574
191.2	0.571
191.3	0.572
191.4	0.571
191.5	0.571
191.6	0.571
191.7	0.569
191.8	0.563
191.9	0.565
192	0.568
192.1	0.568
192.2	0.569
192.3	0.573
192.4	0.573
192.5	0.577
192.6	0.572
192.7	0.575
192.8	0.571
192.9	0.571
193	0.572
193.1	0.577
193.2	0.575
193.3	0.575
193.4	0.578
193.5	0.581
193.6	0.579
193.7	0.575
193.8	0.573
193.9	0.574
194	0.572
194.1	0.571
194.2	0.573
194.3	0.578
194.4	0.575
194.5	0.573
194.6	0.574
194.7	0.574
194.8	0.573
194.9	0.572
195	0.576
195.1	0.58
195.2	0.586
195.3	0.579
195.4	0.58
195.5	0.584
195.6	0.577
195.7	0.578
195.8	0.583
195.9	0.585
196	0.586
196.1	0.586
196.2	0.583
196.3	0.583
196.4	0.583
196.5	0.583
196.6	0.583
196.7	0.579
196.8	0.577
196.9	0.576
197	0.574
197.1	0.572
197.2	0.577
197.3	0.573
197.4	0.573
197.5	0.57
197.6	0.57
197.7	0.567
197.8	0.571
197.9	0.57
198	0.575
198.1	0.58
198.2	0.583
198.3	0.583
198.4	0.591
198.5	0.592
198.6	0.593
198.7	0.595
198.8	0.595
198.9	0.59
199	0.591
199.1	0.586
199.2	0.585
199.3	0.594
199.4	0.594
199.5	0.59
199.6	0.592
199.7	0.589
199.8	0.592
199.9	0.588
200	0.586
[truncated: 14,000 more rows]
