# Supplementary material for: Bayesian inference of kinetic schemes for ion channels by Kalman filtering
Source: eLife journal article supplement (doi:10.7554/elife.62714), 2022-05-04
Supplement: fig4-data8 [file 1_Sim_N_500_Strom_MW.xlsx]

## Sheet: Tabelle1
0.1	0
0.2	0
0.3	0
0.4	0
0.5	0
0.6	0
0.7	0
0.8	0
0.9	0
1	0
1.1	0
1.2	0
1.3	0
1.4	0
1.5	0
1.6	0
1.7	0
1.8	0
1.9	0
2	0
2.1	0
2.2	0
2.3	0
2.4	0
2.5	0
2.6	0
2.7	0
2.8	0
2.9	0
3	0
3.1	0
3.2	0
3.3	0
3.4	0
3.5	0
3.6	0
3.7	0
3.8	0
3.9	0
4	0
4.1	0
4.2	0
4.3	0
4.4	0
4.5	0
4.6	0
4.7	0
4.8	0
4.9	0
5	0
5.1	0
5.2	0
5.3	0
5.4	0
5.5	0
5.6	0
5.7	0
5.8	0
5.9	0
6	0
6.1	0
6.2	0
6.3	0
6.4	0
6.5	0
6.6	0
6.7	0
6.8	0
6.9	0
7	0
7.1	0
7.2	0
7.3	0
7.4	0
7.5	0
7.6	0
7.7	0
7.8	0
7.9	0
8	0
8.1	0
8.2	0
8.3	0
8.4	0
8.5	0
8.6	0
8.7	0
8.8	0
8.9	0
9	0
9.1	0
9.2	0
9.3	0
9.4	0
9.5	0
9.6	0
9.7	0
9.8	0
9.9	0
10	0
10.1	0
10.2	0
10.3	0
10.4	0
10.5	0
10.6	0
10.7	0
10.8	0
10.9	0
11	0
11.1	0
11.2	0
11.3	0
11.4	0
11.5	0
11.6	0
11.7	0
11.8	0
11.9	0
12	0
12.1	0
12.2	0
12.3	0
12.4	0
12.5	0
12.6	0
12.7	0
12.8	0
12.9	0
13	0
13.1	0
13.2	0
13.3	0
13.4	0
13.5	0
13.6	0
13.7	0
13.8	0
13.9	0
14	0
14.1	0
14.2	0
14.3	0
14.4	0
14.5	0
14.6	0
14.7	0
14.8	0
14.9	0
15	0
15.1	0
15.2	0
15.3	0
15.4	0
15.5	0
15.6	0
15.7	0
15.8	0
15.9	0
16	0
16.1	0
16.2	0
16.3	0
16.4	0
16.5	0
16.6	0
16.7	0
16.8	0
16.9	0
17	0
17.1	0
17.2	0
17.3	0
17.4	0
17.5	0
17.6	0
17.7	0
17.8	0
17.9	0
18	0
18.1	0
18.2	0
18.3	0
18.4	0
18.5	0
18.6	0
18.7	0
18.8	0
18.9	0
19	0
19.1	0
19.2	0
19.3	0
19.4	0
19.5	0
19.6	0
19.7	0
19.8	0
19.9	0
20	0
20.1	0
20.2	0
20.3	0
20.4	0
20.5	0
20.6	0
20.7	0
20.8	0
20.9	0
21	0
21.1	0
21.2	0
21.3	0
21.4	0
21.5	0
21.6	0
21.7	0
21.8	0
21.9	0
22	0
22.1	0
22.2	0
22.3	0
22.4	0
22.5	0
22.6	0
22.7	0
22.8	0
22.9	0
23	0
23.1	0
23.2	0
23.3	0
23.4	0
23.5	0
23.6	0
23.7	0
23.8	0
23.9	0
24	0
24.1	0
24.2	0
24.3	0
24.4	0
24.5	0
24.6	0
24.7	0
24.8	0
24.9	0
25	0
25.1	0
25.2	0
25.3	0
25.4	0
25.5	0
25.6	0
25.7	0
25.8	0
25.9	0
26	0
26.1	0
26.2	0
26.3	0
26.4	0
26.5	0
26.6	0
26.7	0
26.8	0
26.9	0
27	0
27.1	0
27.2	0
27.3	0
27.4	0
27.5	0
27.6	0
27.7	0
27.8	0
27.9	0
28	0
28.1	0
28.2	0
28.3	0
28.4	0
28.5	0
28.6	0
28.7	0
28.8	0
28.9	0
29	0
29.1	0
29.2	0
29.3	0
29.4	0
29.5	0
29.6	0
29.7	0
29.8	0
29.9	0
30	0
30.1	0
30.2	0
30.3	0
30.4	0
30.5	0
30.6	0
30.7	0
30.8	0
30.9	0
31	0
31.1	0
31.2	0
31.3	0
31.4	0
31.5	0
31.6	0
31.7	0
31.8	0
31.9	0
32	0
32.1	0
32.2	0
32.3	0
32.4	0
32.5	0
32.6	0
32.7	0
32.8	0
32.9	0
33	0
33.1	0
33.2	0
33.3	0
33.4	0
33.5	0
33.6	0
33.7	0
33.8	0
33.9	0
34	0
34.1	0
34.2	0
34.3	0
34.4	0
34.5	0
34.6	0
34.7	0
34.8	0
34.9	0
35	0
35.1	0
35.2	0
35.3	0
35.4	0
35.5	0
35.6	0
35.7	0
35.8	0
35.9	0
36	0
36.1	0
36.2	0
36.3	0
36.4	0
36.5	0
36.6	0
36.7	0
36.8	0
36.9	0
37	0
37.1	0
37.2	0
37.3	0
37.4	0
37.5	0
37.6	0
37.7	0
37.8	0
37.9	0
38	0
38.1	0
38.2	0
38.3	0
38.4	0
38.5	0
38.6	0
38.7	0
38.8	0
38.9	0
39	0
39.1	0
39.2	0
39.3	0
39.4	0
39.5	0
39.6	0
39.7	0
39.8	0
39.9	0
40	0
40.1	0
40.2	0
40.3	0
40.4	0
40.5	0
40.6	0
40.7	0
40.8	0
40.9	0
41	0
41.1	0
41.2	0
41.3	0
41.4	0
41.5	0
41.6	0
41.7	0
41.8	0
41.9	0
42	0
42.1	0
42.2	0
42.3	0
42.4	0
42.5	0
42.6	0
42.7	0
42.8	0
42.9	0
43	0
43.1	0
43.2	0
43.3	0
43.4	0
43.5	0
43.6	0
43.7	0
43.8	0
43.9	0
44	0
44.1	0
44.2	0
44.3	0
44.4	0
44.5	0
44.6	0
44.7	0
44.8	0
44.9	0
45	0
45.1	0
45.2	0
45.3	0
45.4	0
45.5	0
45.6	0
45.7	0
45.8	0
45.9	0
46	0
46.1	0
46.2	0
46.3	0
46.4	0
46.5	0
46.6	0
46.7	0
46.8	0
46.9	0
47	0
47.1	0
47.2	0
47.3	0
47.4	0
47.5	0
47.6	0
47.7	0
47.8	0
47.9	0
48	0
48.1	0
48.2	0
48.3	0
48.4	0
48.5	0
48.6	0
48.7	0
48.8	0
48.9	0
49	0
49.1	0
49.2	0
49.3	0
49.4	0
49.5	0
49.6	0
49.7	0
49.8	0
49.9	0
50	0
50.1	0
50.2	0
50.3	0
50.4	0
50.5	0
50.6	0
50.7	0
50.8	0
50.9	0
51	0
51.1	0
51.2	0
51.3	0
51.4	0
51.5	0
51.6	0
51.7	0
51.8	0
51.9	0
52	0
52.1	0
52.2	0
52.3	0
52.4	0
52.5	0
52.6	0
52.7	0
52.8	0
52.9	0
53	0
53.1	0
53.2	0
53.3	0
53.4	0
53.5	0
53.6	0
53.7	0
53.8	0
53.9	0
54	0
54.1	0
54.2	0
54.3	0
54.4	0
54.5	0
54.6	0
54.7	0
54.8	0
54.9	0
55	0
55.1	0
55.2	0
55.3	0
55.4	0
55.5	0
55.6	0
55.7	0
55.8	0
55.9	0
56	0
56.1	0
56.2	0
56.3	0
56.4	0
56.5	0
56.6	0
56.7	0
56.8	0
56.9	0
57	0
57.1	0
57.2	0
57.3	0
57.4	0
57.5	0
57.6	0
57.7	0
57.8	0
57.9	0
58	0
58.1	0
58.2	0
58.3	0
58.4	0
58.5	0
58.6	0
58.7	0
58.8	0
58.9	0
59	0
59.1	0
59.2	0
59.3	0
59.4	0
59.5	0
59.6	0
59.7	0
59.8	0
59.9	0
60	0
60.1	0
60.2	0
60.3	0
60.4	0
60.5	0
60.6	0
60.7	0
60.8	0
60.9	0
61	0
61.1	0
61.2	0
61.3	0
61.4	0
61.5	0
61.6	0
61.7	0
61.8	0
61.9	0
62	0
62.1	0
62.2	0
62.3	0
62.4	0
62.5	0
62.6	0
62.7	0
62.8	0
62.9	0
63	0
63.1	0
63.2	0
63.3	0
63.4	0
63.5	0
63.6	0
63.7	0
63.8	0
63.9	0
64	0
64.1	0
64.2	0
64.3	0
64.4	0
64.5	0
64.6	0
64.7	0
64.8	0
64.9	0
65	0
65.1	0
65.2	0
65.3	0
65.4	0
65.5	0
65.6	0
65.7	0
65.8	0
65.9	0
66	0
66.1	0
66.2	0
66.3	0
66.4	0
66.5	0
66.6	0
66.7	0
66.8	0
66.9	0
67	0
67.1	0
67.2	0
67.3	0
67.4	0
67.5	0
67.6	0
67.7	0
67.8	0
67.9	0
68	0
68.1	0
68.2	0
68.3	0
68.4	0
68.5	0
68.6	0
68.7	0
68.8	0
68.9	0
69	0
69.1	0
69.2	0
69.3	0
69.4	0
69.5	0
69.6	0
69.7	0
69.8	0
69.9	0
70	0
70.1	0
70.2	0
70.3	0
70.4	0
70.5	0
70.6	0
70.7	0
70.8	0
70.9	0
71	0
71.1	0
71.2	0
71.3	0
71.4	0
71.5	0
71.6	0
71.7	0
71.8	0
71.9	0
72	0
72.1	0
72.2	0
72.3	0
72.4	0
72.5	0
72.6	0
72.7	0
72.8	0
72.9	0
73	0
73.1	0
73.2	0
73.3	0
73.4	0
73.5	0
73.6	0
73.7	0
73.8	0
73.9	0
74	0
74.1	0
74.2	0
74.3	0
74.4	0
74.5	0
74.6	0
74.7	0
74.8	0
74.9	0
75	0
75.1	0
75.2	0
75.3	0
75.4	0
75.5	0
75.6	0
75.7	0
75.8	0
75.9	0
76	0
76.1	0
76.2	0
76.3	0
76.4	0
76.5	0
76.6	0
76.7	0
76.8	0
76.9	0
77	0
77.1	0
77.2	0
77.3	0
77.4	0
77.5	0
77.6	0
77.7	0
77.8	0
77.9	0
78	0
78.1	0
78.2	0
78.3	0
78.4	0
78.5	0
78.6	0
78.7	0
78.8	0
78.9	0
79	0
79.1	0
79.2	0
79.3	0
79.4	0
79.5	0
79.6	0
79.7	0
79.8	0
79.9	0
80	0
80.1	0
80.2	0
80.3	0
80.4	0
80.5	0
80.6	0
80.7	0
80.8	0
80.9	0
81	0
81.1	0
81.2	0
81.3	0
81.4	0
81.5	0
81.6	0
81.7	0
81.8	0
81.9	0
82	0
82.1	0
82.2	0
82.3	0
82.4	0
82.5	0
82.6	0
82.7	0
82.8	0
82.9	0
83	0
83.1	0
83.2	0
83.3	0
83.4	0
83.5	0
83.6	0
83.7	0
83.8	0
83.9	0
84	0
84.1	0
84.2	0
84.3	0
84.4	0
84.5	0
84.6	0
84.7	0
84.8	0
84.9	0
85	0
85.1	0
85.2	0
85.3	0
85.4	0
85.5	0
85.6	0
85.7	0
85.8	0
85.9	0
86	0
86.1	0
86.2	0
86.3	0
86.4	0
86.5	0
86.6	0
86.7	0
86.8	0
86.9	0
87	0
87.1	0
87.2	0
87.3	0
87.4	0
87.5	0
87.6	0
87.7	0
87.8	0
87.9	0
88	0
88.1	0
88.2	0
88.3	0
88.4	0
88.5	0
88.6	0
88.7	0
88.8	0
88.9	0
89	0
89.1	0
89.2	0
89.3	0
89.4	0
89.5	0
89.6	0
89.7	0
89.8	0
89.9	0
90	0
90.1	0
90.2	0
90.3	0
90.4	0
90.5	0
90.6	0
90.7	0
90.8	0
90.9	0
91	0
91.1	0
91.2	0
91.3	0
91.4	0
91.5	0
91.6	0
91.7	0
91.8	0
91.9	0
92	0
92.1	0
92.2	0
92.3	0
92.4	0
92.5	0
92.6	0
92.7	0
92.8	0
92.9	0
93	0
93.1	0
93.2	0
93.3	0
93.4	0
93.5	0
93.6	0
93.7	0
93.8	0
93.9	0
94	0
94.1	0
94.2	0
94.3	0
94.4	0
94.5	0
94.6	0
94.7	0
94.8	0
94.9	0
95	0
95.1	0
95.2	0
95.3	0
95.4	0
95.5	0
95.6	0
95.7	0
95.8	0
95.9	0
96	0
96.1	0
96.2	0
96.3	0
96.4	0
96.5	0
96.6	0
96.7	0
96.8	0
96.9	0
97	0
97.1	0
97.2	0
97.3	0
97.4	0
97.5	0
97.6	0
97.7	0
97.8	0
97.9	0
98	0
98.1	0
98.2	0
98.3	0
98.4	0
98.5	0
98.6	0
98.7	0
98.8	0
98.9	0
99	0
99.1	0
99.2	0
99.3	0
99.4	0
99.5	0
99.6	0
99.7	0
99.8	0
99.9	0
100	0
100.1	0
100.2	0
100.3	0
100.4	0
100.5	0
100.6	0
100.7	0
100.8	0
100.9	0
101	0
101.1	0
101.2	0
101.3	0
101.4	0
101.5	0
101.6	0
101.7	0
101.8	0
101.9	0
102	0
102.1	0
102.2	0
102.3	0
102.4	0.002
102.5	0.002
102.6	0.002
102.7	0.002
102.8	0.002
102.9	0.002
103	0.002
103.1	0.002
103.2	0.002
103.3	0.002
103.4	0.002
103.5	0.002
103.6	0.002
103.7	0.002
103.8	0.002
103.9	0.002
104	0.002
104.1	0.002
104.2	0.002
104.3	0.002
104.4	0.002
104.5	0.002
104.6	0.002
104.7	0.002
104.8	0.002
104.9	0.002
105	0.002
105.1	0.002
105.2	0.002
105.3	0.002
105.4	0.002
105.5	0.002
105.6	0.002
105.7	0.002
105.8	0.002
105.9	0.002
106	0.002
106.1	0.002
106.2	0.002
106.3	0.002
106.4	0.002
106.5	0.002
106.6	0.002
106.7	0.004
106.8	0.004
106.9	0.004
107	0.006
107.1	0.006
107.2	0.006
107.3	0.01
107.4	0.01
107.5	0.01
107.6	0.01
107.7	0.01
107.8	0.01
107.9	0.01
108	0.012
108.1	0.014
108.2	0.014
108.3	0.014
108.4	0.014
108.5	0.014
108.6	0.014
108.7	0.014
108.8	0.014
108.9	0.014
109	0.016
109.1	0.018
109.2	0.018
109.3	0.02
109.4	0.022
109.5	0.022
109.6	0.024
109.7	0.024
109.8	0.024
109.9	0.024
110	0.024
110.1	0.024
110.2	0.024
110.3	0.024
110.4	0.026
110.5	0.026
110.6	0.026
110.7	0.026
110.8	0.026
110.9	0.028
111	0.028
111.1	0.028
111.2	0.028
111.3	0.028
111.4	0.028
111.5	0.028
111.6	0.028
111.7	0.028
111.8	0.028
111.9	0.028
112	0.028
112.1	0.028
112.2	0.028
112.3	0.028
112.4	0.028
112.5	0.028
112.6	0.028
112.7	0.028
112.8	0.028
112.9	0.028
113	0.028
113.1	0.028
113.2	0.028
113.3	0.028
113.4	0.028
113.5	0.028
113.6	0.028
113.7	0.028
113.8	0.028
113.9	0.028
114	0.028
114.1	0.028
114.2	0.028
114.3	0.028
114.4	0.028
114.5	0.028
114.6	0.028
114.7	0.028
114.8	0.028
114.9	0.03
115	0.03
115.1	0.03
115.2	0.03
115.3	0.032
115.4	0.032
115.5	0.032
115.6	0.032
115.7	0.036
115.8	0.036
115.9	0.036
116	0.036
116.1	0.036
116.2	0.036
116.3	0.038
116.4	0.038
116.5	0.038
116.6	0.038
116.7	0.038
116.8	0.042
116.9	0.042
117	0.044
117.1	0.044
117.2	0.046
117.3	0.046
117.4	0.046
117.5	0.046
117.6	0.046
117.7	0.048
117.8	0.048
117.9	0.05
118	0.05
118.1	0.05
118.2	0.05
118.3	0.05
118.4	0.052
118.5	0.052
118.6	0.052
118.7	0.052
118.8	0.052
118.9	0.052
119	0.052
119.1	0.052
119.2	0.052
119.3	0.052
119.4	0.052
119.5	0.052
119.6	0.052
119.7	0.052
119.8	0.054
119.9	0.056
120	0.056
120.1	0.06
120.2	0.062
120.3	0.062
120.4	0.064
120.5	0.064
120.6	0.064
120.7	0.064
120.8	0.068
120.9	0.068
121	0.068
121.1	0.068
121.2	0.07
121.3	0.07
121.4	0.068
121.5	0.068
121.6	0.07
121.7	0.07
121.8	0.07
121.9	0.07
122	0.068
122.1	0.068
122.2	0.068
122.3	0.068
122.4	0.07
122.5	0.072
122.6	0.072
122.7	0.072
122.8	0.072
122.9	0.072
123	0.072
123.1	0.072
123.2	0.072
123.3	0.074
123.4	0.074
123.5	0.074
123.6	0.074
123.7	0.074
123.8	0.074
123.9	0.076
124	0.076
124.1	0.076
124.2	0.076
124.3	0.074
124.4	0.074
124.5	0.074
124.6	0.074
124.7	0.074
124.8	0.074
124.9	0.074
125	0.074
125.1	0.074
125.2	0.074
125.3	0.074
125.4	0.074
125.5	0.074
125.6	0.074
125.7	0.074
125.8	0.074
125.9	0.074
126	0.074
126.1	0.074
126.2	0.074
126.3	0.074
126.4	0.078
126.5	0.078
126.6	0.076
126.7	0.076
126.8	0.076
126.9	0.078
127	0.078
127.1	0.08
127.2	0.08
127.3	0.08
127.4	0.08
127.5	0.08
127.6	0.082
127.7	0.082
127.8	0.082
127.9	0.082
128	0.082
128.1	0.082
128.2	0.082
128.3	0.082
128.4	0.082
128.5	0.082
128.6	0.082
128.7	0.082
128.8	0.082
128.9	0.082
129	0.082
129.1	0.082
129.2	0.08
129.3	0.08
129.4	0.08
129.5	0.08
129.6	0.082
129.7	0.082
129.8	0.082
129.9	0.086
130	0.086
130.1	0.086
130.2	0.088
130.3	0.088
130.4	0.088
130.5	0.088
130.6	0.088
130.7	0.09
130.8	0.094
130.9	0.094
131	0.094
131.1	0.092
131.2	0.096
131.3	0.096
131.4	0.096
131.5	0.096
131.6	0.098
131.7	0.1
131.8	0.102
131.9	0.102
132	0.104
132.1	0.104
132.2	0.104
132.3	0.104
132.4	0.106
132.5	0.108
132.6	0.108
132.7	0.108
132.8	0.108
132.9	0.108
133	0.108
133.1	0.108
133.2	0.108
133.3	0.108
133.4	0.108
133.5	0.108
133.6	0.108
133.7	0.108
133.8	0.108
133.9	0.108
134	0.108
134.1	0.108
134.2	0.108
134.3	0.108
134.4	0.11
134.5	0.11
134.6	0.11
134.7	0.11
134.8	0.11
134.9	0.112
135	0.112
135.1	0.112
135.2	0.112
135.3	0.112
135.4	0.112
135.5	0.112
135.6	0.112
135.7	0.114
135.8	0.116
135.9	0.116
136	0.118
136.1	0.118
136.2	0.118
136.3	0.118
136.4	0.118
136.5	0.118
136.6	0.12
136.7	0.12
136.8	0.12
136.9	0.12
137	0.12
137.1	0.12
137.2	0.12
137.3	0.12
137.4	0.12
137.5	0.12
137.6	0.12
137.7	0.122
137.8	0.124
137.9	0.126
138	0.128
138.1	0.13
138.2	0.128
138.3	0.128
138.4	0.128
138.5	0.128
138.6	0.128
138.7	0.13
138.8	0.13
138.9	0.13
139	0.128
139.1	0.13
139.2	0.13
139.3	0.132
139.4	0.132
139.5	0.134
139.6	0.134
139.7	0.136
139.8	0.136
139.9	0.136
140	0.138
140.1	0.138
140.2	0.138
140.3	0.138
140.4	0.138
140.5	0.138
140.6	0.138
140.7	0.138
140.8	0.14
140.9	0.14
141	0.14
141.1	0.146
141.2	0.146
141.3	0.146
141.4	0.146
141.5	0.146
141.6	0.148
141.7	0.148
141.8	0.152
141.9	0.15
142	0.15
142.1	0.15
142.2	0.15
142.3	0.15
142.4	0.15
142.5	0.152
142.6	0.152
142.7	0.152
142.8	0.152
142.9	0.152
143	0.152
143.1	0.154
143.2	0.154
143.3	0.154
143.4	0.154
143.5	0.154
143.6	0.154
143.7	0.156
143.8	0.156
143.9	0.156
144	0.156
144.1	0.156
144.2	0.156
144.3	0.156
144.4	0.16
144.5	0.16
144.6	0.162
144.7	0.162
144.8	0.162
144.9	0.162
145	0.162
145.1	0.162
145.2	0.162
145.3	0.162
145.4	0.162
145.5	0.166
145.6	0.166
145.7	0.166
145.8	0.166
145.9	0.166
146	0.166
146.1	0.166
146.2	0.166
146.3	0.166
146.4	0.166
146.5	0.166
146.6	0.166
146.7	0.168
146.8	0.168
146.9	0.168
147	0.168
147.1	0.166
147.2	0.168
147.3	0.17
147.4	0.174
147.5	0.174
147.6	0.174
147.7	0.178
147.8	0.178
147.9	0.176
148	0.176
148.1	0.176
148.2	0.176
148.3	0.176
148.4	0.176
148.5	0.176
148.6	0.176
148.7	0.176
148.8	0.176
148.9	0.176
149	0.178
149.1	0.178
149.2	0.182
149.3	0.182
149.4	0.182
149.5	0.182
149.6	0.182
149.7	0.182
149.8	0.182
149.9	0.182
150	0.182
150.1	0.182
150.2	0.182
150.3	0.182
150.4	0.184
150.5	0.184
150.6	0.184
150.7	0.184
150.8	0.184
150.9	0.184
151	0.186
151.1	0.186
151.2	0.186
151.3	0.186
151.4	0.186
151.5	0.186
151.6	0.186
151.7	0.186
151.8	0.186
151.9	0.19
152	0.19
152.1	0.19
152.2	0.188
152.3	0.188
152.4	0.188
152.5	0.188
152.6	0.188
152.7	0.188
152.8	0.188
152.9	0.188
153	0.19
153.1	0.19
153.2	0.19
153.3	0.19
153.4	0.19
153.5	0.19
153.6	0.19
153.7	0.19
153.8	0.19
153.9	0.192
154	0.192
154.1	0.192
154.2	0.192
154.3	0.192
154.4	0.192
154.5	0.192
154.6	0.192
154.7	0.192
154.8	0.192
154.9	0.192
155	0.192
155.1	0.192
155.2	0.192
155.3	0.194
155.4	0.194
155.5	0.196
155.6	0.196
155.7	0.198
155.8	0.196
155.9	0.196
156	0.196
156.1	0.196
156.2	0.196
156.3	0.196
156.4	0.196
156.5	0.194
156.6	0.194
156.7	0.194
156.8	0.194
156.9	0.194
157	0.194
157.1	0.194
157.2	0.194
157.3	0.194
157.4	0.194
157.5	0.194
157.6	0.194
157.7	0.194
157.8	0.194
157.9	0.196
158	0.196
158.1	0.196
158.2	0.196
158.3	0.196
158.4	0.196
158.5	0.196
158.6	0.196
158.7	0.196
158.8	0.196
158.9	0.196
159	0.198
159.1	0.2
159.2	0.2
159.3	0.2
159.4	0.2
159.5	0.2
159.6	0.202
159.7	0.202
159.8	0.202
159.9	0.202
160	0.202
160.1	0.204
160.2	0.204
160.3	0.204
160.4	0.204
160.5	0.204
160.6	0.204
160.7	0.204
160.8	0.204
160.9	0.204
161	0.204
161.1	0.204
161.2	0.202
161.3	0.202
161.4	0.202
161.5	0.202
161.6	0.202
161.7	0.2
161.8	0.198
161.9	0.198
162	0.198
162.1	0.198
162.2	0.198
162.3	0.2
162.4	0.2
162.5	0.202
162.6	0.202
162.7	0.202
162.8	0.202
162.9	0.202
163	0.202
163.1	0.202
163.2	0.2
163.3	0.202
163.4	0.204
163.5	0.204
163.6	0.206
163.7	0.206
163.8	0.204
163.9	0.204
164	0.204
164.1	0.206
164.2	0.206
164.3	0.206
164.4	0.204
164.5	0.206
164.6	0.206
164.7	0.206
164.8	0.206
164.9	0.206
165	0.206
165.1	0.206
165.2	0.206
165.3	0.206
165.4	0.208
165.5	0.208
165.6	0.21
165.7	0.21
165.8	0.21
165.9	0.21
166	0.21
166.1	0.208
166.2	0.208
166.3	0.212
166.4	0.212
166.5	0.216
166.6	0.216
166.7	0.216
166.8	0.214
166.9	0.214
167	0.214
167.1	0.214
167.2	0.214
167.3	0.214
167.4	0.214
167.5	0.216
167.6	0.216
167.7	0.216
167.8	0.216
167.9	0.218
168	0.216
168.1	0.216
168.2	0.218
168.3	0.218
168.4	0.218
168.5	0.218
168.6	0.216
168.7	0.216
168.8	0.216
168.9	0.218
169	0.218
169.1	0.216
169.2	0.214
169.3	0.214
169.4	0.214
169.5	0.216
169.6	0.218
169.7	0.218
169.8	0.224
169.9	0.224
170	0.224
170.1	0.224
170.2	0.224
170.3	0.224
170.4	0.224
170.5	0.224
170.6	0.224
170.7	0.224
170.8	0.224
170.9	0.224
171	0.224
171.1	0.226
171.2	0.226
171.3	0.226
171.4	0.224
171.5	0.224
171.6	0.224
171.7	0.224
171.8	0.222
171.9	0.222
172	0.224
172.1	0.224
172.2	0.224
172.3	0.224
172.4	0.224
172.5	0.224
172.6	0.224
172.7	0.226
172.8	0.226
172.9	0.226
173	0.228
173.1	0.228
173.2	0.228
173.3	0.226
173.4	0.226
173.5	0.23
173.6	0.23
173.7	0.23
173.8	0.228
173.9	0.228
174	0.228
174.1	0.228
174.2	0.228
174.3	0.228
174.4	0.228
174.5	0.228
174.6	0.228
174.7	0.228
174.8	0.226
174.9	0.226
175	0.226
175.1	0.226
175.2	0.224
175.3	0.224
175.4	0.226
175.5	0.226
175.6	0.224
175.7	0.224
175.8	0.224
175.9	0.224
176	0.226
176.1	0.226
176.2	0.226
176.3	0.226
176.4	0.226
176.5	0.226
176.6	0.226
176.7	0.226
176.8	0.226
176.9	0.226
177	0.226
177.1	0.226
177.2	0.226
177.3	0.226
177.4	0.226
177.5	0.226
177.6	0.226
177.7	0.226
177.8	0.228
177.9	0.228
178	0.228
178.1	0.228
178.2	0.228
178.3	0.228
178.4	0.228
178.5	0.23
178.6	0.23
178.7	0.232
178.8	0.232
178.9	0.234
179	0.236
179.1	0.236
179.2	0.236
179.3	0.24
179.4	0.244
179.5	0.244
179.6	0.246
179.7	0.246
179.8	0.244
179.9	0.244
180	0.244
180.1	0.244
180.2	0.244
180.3	0.244
180.4	0.244
180.5	0.242
180.6	0.242
180.7	0.242
180.8	0.24
180.9	0.238
181	0.238
181.1	0.238
181.2	0.238
181.3	0.24
181.4	0.24
181.5	0.24
181.6	0.24
181.7	0.24
181.8	0.242
181.9	0.242
182	0.242
182.1	0.242
182.2	0.242
182.3	0.242
182.4	0.242
182.5	0.242
182.6	0.242
182.7	0.242
182.8	0.244
182.9	0.244
183	0.246
183.1	0.246
183.2	0.246
183.3	0.244
183.4	0.244
183.5	0.244
183.6	0.244
183.7	0.244
183.8	0.244
183.9	0.244
184	0.244
184.1	0.244
184.2	0.244
184.3	0.244
184.4	0.244
184.5	0.242
184.6	0.242
184.7	0.242
184.8	0.244
184.9	0.244
185	0.244
185.1	0.244
185.2	0.244
185.3	0.244
185.4	0.244
185.5	0.242
185.6	0.242
185.7	0.242
185.8	0.244
185.9	0.244
186	0.244
186.1	0.244
186.2	0.244
186.3	0.246
186.4	0.246
186.5	0.246
186.6	0.246
186.7	0.246
186.8	0.246
186.9	0.246
187	0.246
187.1	0.244
187.2	0.244
187.3	0.242
187.4	0.242
187.5	0.242
187.6	0.24
187.7	0.242
187.8	0.242
187.9	0.242
188	0.242
188.1	0.242
188.2	0.242
188.3	0.242
188.4	0.242
188.5	0.242
188.6	0.242
188.7	0.244
188.8	0.242
188.9	0.242
189	0.242
189.1	0.242
189.2	0.242
189.3	0.242
189.4	0.242
189.5	0.242
189.6	0.242
189.7	0.24
189.8	0.24
189.9	0.238
190	0.238
190.1	0.238
190.2	0.238
190.3	0.238
190.4	0.238
190.5	0.238
190.6	0.24
190.7	0.242
190.8	0.24
190.9	0.24
191	0.24
191.1	0.24
191.2	0.238
191.3	0.238
191.4	0.238
191.5	0.238
191.6	0.238
191.7	0.236
191.8	0.234
191.9	0.236
192	0.236
192.1	0.236
192.2	0.232
192.3	0.234
192.4	0.234
192.5	0.234
192.6	0.234
192.7	0.238
192.8	0.238
192.9	0.238
193	0.236
193.1	0.236
193.2	0.238
193.3	0.236
193.4	0.236
193.5	0.236
193.6	0.234
193.7	0.234
193.8	0.232
193.9	0.232
194	0.232
194.1	0.232
194.2	0.234
194.3	0.234
194.4	0.234
194.5	0.234
194.6	0.234
194.7	0.234
194.8	0.234
194.9	0.234
195	0.234
195.1	0.234
195.2	0.24
195.3	0.24
195.4	0.24
195.5	0.24
195.6	0.24
195.7	0.24
195.8	0.24
195.9	0.24
196	0.24
196.1	0.24
196.2	0.24
196.3	0.242
196.4	0.24
196.5	0.24
196.6	0.24
196.7	0.24
196.8	0.242
196.9	0.242
197	0.242
197.1	0.242
197.2	0.242
197.3	0.24
197.4	0.24
197.5	0.24
197.6	0.238
197.7	0.236
197.8	0.236
197.9	0.236
198	0.236
198.1	0.236
198.2	0.234
198.3	0.236
198.4	0.236
198.5	0.236
198.6	0.236
198.7	0.24
198.8	0.24
198.9	0.238
199	0.24
199.1	0.24
199.2	0.24
199.3	0.242
199.4	0.242
199.5	0.242
199.6	0.246
199.7	0.248
199.8	0.248
199.9	0.248
200	0.248
[truncated: 14,000 more rows]
