# Supplementary material for: Bayesian inference of kinetic schemes for ion channels by Kalman filtering
Source: eLife journal article supplement (doi:10.7554/elife.62714), 2022-05-04
Supplement: fig4-data8 [file 1_Sim_N_800_Fluor_MW.xlsx]

## Sheet: Tabelle1
0.1	0
0.2	0
0.3	0
0.4	0
0.5	0
0.6	0
0.7	0
0.8	0
0.9	0
1	0
1.1	0
1.2	0
1.3	0
1.4	0
1.5	0
1.6	0
1.7	0
1.8	0
1.9	0
2	0
2.1	0
2.2	0
2.3	0
2.4	0
2.5	0
2.6	0
2.7	0
2.8	0
2.9	0
3	0
3.1	0
3.2	0
3.3	0
3.4	0
3.5	0
3.6	0
3.7	0
3.8	0
3.9	0
4	0
4.1	0
4.2	0
4.3	0
4.4	0
4.5	0
4.6	0
4.7	0
4.8	0
4.9	0
5	0
5.1	0
5.2	0
5.3	0
5.4	0
5.5	0
5.6	0
5.7	0
5.8	0
5.9	0
6	0
6.1	0
6.2	0
6.3	0
6.4	0
6.5	0
6.6	0
6.7	0
6.8	0
6.9	0
7	0
7.1	0
7.2	0
7.3	0
7.4	0
7.5	0
7.6	0
7.7	0
7.8	0
7.9	0
8	0
8.1	0
8.2	0
8.3	0
8.4	0
8.5	0
8.6	0
8.7	0
8.8	0
8.9	0
9	0
9.1	0
9.2	0
9.3	0
9.4	0
9.5	0
9.6	0
9.7	0
9.8	0
9.9	0
10	0
10.1	0
10.2	0
10.3	0
10.4	0
10.5	0
10.6	0
10.7	0
10.8	0
10.9	0
11	0
11.1	0
11.2	0
11.3	0
11.4	0
11.5	0
11.6	0
11.7	0
11.8	0
11.9	0
12	0
12.1	0
12.2	0
12.3	0
12.4	0
12.5	0
12.6	0
12.7	0
12.8	0
12.9	0
13	0
13.1	0
13.2	0
13.3	0
13.4	0
13.5	0
13.6	0
13.7	0
13.8	0
13.9	0
14	0
14.1	0
14.2	0
14.3	0
14.4	0
14.5	0
14.6	0
14.7	0
14.8	0
14.9	0
15	0
15.1	0
15.2	0
15.3	0
15.4	0
15.5	0
15.6	0
15.7	0
15.8	0
15.9	0
16	0
16.1	0
16.2	0
16.3	0
16.4	0
16.5	0
16.6	0
16.7	0
16.8	0
16.9	0
17	0
17.1	0
17.2	0
17.3	0
17.4	0
17.5	0
17.6	0
17.7	0
17.8	0
17.9	0
18	0
18.1	0
18.2	0
18.3	0
18.4	0
18.5	0
18.6	0
18.7	0
18.8	0
18.9	0
19	0
19.1	0
19.2	0
19.3	0
19.4	0
19.5	0
19.6	0
19.7	0
19.8	0
19.9	0
20	0
20.1	0
20.2	0
20.3	0
20.4	0
20.5	0
20.6	0
20.7	0
20.8	0
20.9	0
21	0
21.1	0
21.2	0
21.3	0
21.4	0
21.5	0
21.6	0
21.7	0
21.8	0
21.9	0
22	0
22.1	0
22.2	0
22.3	0
22.4	0
22.5	0
22.6	0
22.7	0
22.8	0
22.9	0
23	0
23.1	0
23.2	0
23.3	0
23.4	0
23.5	0
23.6	0
23.7	0
23.8	0
23.9	0
24	0
24.1	0
24.2	0
24.3	0
24.4	0
24.5	0
24.6	0
24.7	0
24.8	0
24.9	0
25	0
25.1	0
25.2	0
25.3	0
25.4	0
25.5	0
25.6	0
25.7	0
25.8	0
25.9	0
26	0
26.1	0
26.2	0
26.3	0
26.4	0
26.5	0
26.6	0
26.7	0
26.8	0
26.9	0
27	0
27.1	0
27.2	0
27.3	0
27.4	0
27.5	0
27.6	0
27.7	0
27.8	0
27.9	0
28	0
28.1	0
28.2	0
28.3	0
28.4	0
28.5	0
28.6	0
28.7	0
28.8	0
28.9	0
29	0
29.1	0
29.2	0
29.3	0
29.4	0
29.5	0
29.6	0
29.7	0
29.8	0
29.9	0
30	0
30.1	0
30.2	0
30.3	0
30.4	0
30.5	0
30.6	0
30.7	0
30.8	0
30.9	0
31	0
31.1	0
31.2	0
31.3	0
31.4	0
31.5	0
31.6	0
31.7	0
31.8	0
31.9	0
32	0
32.1	0
32.2	0
32.3	0
32.4	0
32.5	0
32.6	0
32.7	0
32.8	0
32.9	0
33	0
33.1	0
33.2	0
33.3	0
33.4	0
33.5	0
33.6	0
33.7	0
33.8	0
33.9	0
34	0
34.1	0
34.2	0
34.3	0
34.4	0
34.5	0
34.6	0
34.7	0
34.8	0
34.9	0
35	0
35.1	0
35.2	0
35.3	0
35.4	0
35.5	0
35.6	0
35.7	0
35.8	0
35.9	0
36	0
36.1	0
36.2	0
36.3	0
36.4	0
36.5	0
36.6	0
36.7	0
36.8	0
36.9	0
37	0
37.1	0
37.2	0
37.3	0
37.4	0
37.5	0
37.6	0
37.7	0
37.8	0
37.9	0
38	0
38.1	0
38.2	0
38.3	0
38.4	0
38.5	0
38.6	0
38.7	0
38.8	0
38.9	0
39	0
39.1	0
39.2	0
39.3	0
39.4	0
39.5	0
39.6	0
39.7	0
39.8	0
39.9	0
40	0
40.1	0
40.2	0
40.3	0
40.4	0
40.5	0
40.6	0
40.7	0
40.8	0
40.9	0
41	0
41.1	0
41.2	0
41.3	0
41.4	0
41.5	0
41.6	0
41.7	0
41.8	0
41.9	0
42	0
42.1	0
42.2	0
42.3	0
42.4	0
42.5	0
42.6	0
42.7	0
42.8	0
42.9	0
43	0
43.1	0
43.2	0
43.3	0
43.4	0
43.5	0
43.6	0
43.7	0
43.8	0
43.9	0
44	0
44.1	0
44.2	0
44.3	0
44.4	0
44.5	0
44.6	0
44.7	0
44.8	0
44.9	0
45	0
45.1	0
45.2	0
45.3	0
45.4	0
45.5	0
45.6	0
45.7	0
45.8	0
45.9	0
46	0
46.1	0
46.2	0
46.3	0
46.4	0
46.5	0
46.6	0
46.7	0
46.8	0
46.9	0
47	0
47.1	0
47.2	0
47.3	0
47.4	0
47.5	0
47.6	0
47.7	0
47.8	0
47.9	0
48	0
48.1	0
48.2	0
48.3	0
48.4	0
48.5	0
48.6	0
48.7	0
48.8	0
48.9	0
49	0
49.1	0
49.2	0
49.3	0
49.4	0
49.5	0
49.6	0
49.7	0
49.8	0
49.9	0
50	0
50.1	0
50.2	0
50.3	0
50.4	0
50.5	0
50.6	0
50.7	0
50.8	0
50.9	0
51	0
51.1	0
51.2	0
51.3	0
51.4	0
51.5	0
51.6	0
51.7	0
51.8	0
51.9	0
52	0
52.1	0
52.2	0
52.3	0
52.4	0
52.5	0
52.6	0
52.7	0
52.8	0
52.9	0
53	0
53.1	0
53.2	0
53.3	0
53.4	0
53.5	0
53.6	0
53.7	0
53.8	0
53.9	0
54	0
54.1	0
54.2	0
54.3	0
54.4	0
54.5	0
54.6	0
54.7	0
54.8	0
54.9	0
55	0
55.1	0
55.2	0
55.3	0
55.4	0
55.5	0
55.6	0
55.7	0
55.8	0
55.9	0
56	0
56.1	0
56.2	0
56.3	0
56.4	0
56.5	0
56.6	0
56.7	0
56.8	0
56.9	0
57	0
57.1	0
57.2	0
57.3	0
57.4	0
57.5	0
57.6	0
57.7	0
57.8	0
57.9	0
58	0
58.1	0
58.2	0
58.3	0
58.4	0
58.5	0
58.6	0
58.7	0
58.8	0
58.9	0
59	0
59.1	0
59.2	0
59.3	0
59.4	0
59.5	0
59.6	0
59.7	0
59.8	0
59.9	0
60	0
60.1	0
60.2	0
60.3	0
60.4	0
60.5	0
60.6	0
60.7	0
60.8	0
60.9	0
61	0
61.1	0
61.2	0
61.3	0
61.4	0
61.5	0
61.6	0
61.7	0
61.8	0
61.9	0
62	0
62.1	0
62.2	0
62.3	0
62.4	0
62.5	0
62.6	0
62.7	0
62.8	0
62.9	0
63	0
63.1	0
63.2	0
63.3	0
63.4	0
63.5	0
63.6	0
63.7	0
63.8	0
63.9	0
64	0
64.1	0
64.2	0
64.3	0
64.4	0
64.5	0
64.6	0
64.7	0
64.8	0
64.9	0
65	0
65.1	0
65.2	0
65.3	0
65.4	0
65.5	0
65.6	0
65.7	0
65.8	0
65.9	0
66	0
66.1	0
66.2	0
66.3	0
66.4	0
66.5	0
66.6	0
66.7	0
66.8	0
66.9	0
67	0
67.1	0
67.2	0
67.3	0
67.4	0
67.5	0
67.6	0
67.7	0
67.8	0
67.9	0
68	0
68.1	0
68.2	0
68.3	0
68.4	0
68.5	0
68.6	0
68.7	0
68.8	0
68.9	0
69	0
69.1	0
69.2	0
69.3	0
69.4	0
69.5	0
69.6	0
69.7	0
69.8	0
69.9	0
70	0
70.1	0
70.2	0
70.3	0
70.4	0
70.5	0
70.6	0
70.7	0
70.8	0
70.9	0
71	0
71.1	0
71.2	0
71.3	0
71.4	0
71.5	0
71.6	0
71.7	0
71.8	0
71.9	0
72	0
72.1	0
72.2	0
72.3	0
72.4	0
72.5	0
72.6	0
72.7	0
72.8	0
72.9	0
73	0
73.1	0
73.2	0
73.3	0
73.4	0
73.5	0
73.6	0
73.7	0
73.8	0
73.9	0
74	0
74.1	0
74.2	0
74.3	0
74.4	0
74.5	0
74.6	0
74.7	0
74.8	0
74.9	0
75	0
75.1	0
75.2	0
75.3	0
75.4	0
75.5	0
75.6	0
75.7	0
75.8	0
75.9	0
76	0
76.1	0
76.2	0
76.3	0
76.4	0
76.5	0
76.6	0
76.7	0
76.8	0
76.9	0
77	0
77.1	0
77.2	0
77.3	0
77.4	0
77.5	0
77.6	0
77.7	0
77.8	0
77.9	0
78	0
78.1	0
78.2	0
78.3	0
78.4	0
78.5	0
78.6	0
78.7	0
78.8	0
78.9	0
79	0
79.1	0
79.2	0
79.3	0
79.4	0
79.5	0
79.6	0
79.7	0
79.8	0
79.9	0
80	0
80.1	0
80.2	0
80.3	0
80.4	0
80.5	0
80.6	0
80.7	0
80.8	0
80.9	0
81	0
81.1	0
81.2	0
81.3	0
81.4	0
81.5	0
81.6	0
81.7	0
81.8	0
81.9	0
82	0
82.1	0
82.2	0
82.3	0
82.4	0
82.5	0
82.6	0
82.7	0
82.8	0
82.9	0
83	0
83.1	0
83.2	0
83.3	0
83.4	0
83.5	0
83.6	0
83.7	0
83.8	0
83.9	0
84	0
84.1	0
84.2	0
84.3	0
84.4	0
84.5	0
84.6	0
84.7	0
84.8	0
84.9	0
85	0
85.1	0
85.2	0
85.3	0
85.4	0
85.5	0
85.6	0
85.7	0
85.8	0
85.9	0
86	0
86.1	0
86.2	0
86.3	0
86.4	0
86.5	0
86.6	0
86.7	0
86.8	0
86.9	0
87	0
87.1	0
87.2	0
87.3	0
87.4	0
87.5	0
87.6	0
87.7	0
87.8	0
87.9	0
88	0
88.1	0
88.2	0
88.3	0
88.4	0
88.5	0
88.6	0
88.7	0
88.8	0
88.9	0
89	0
89.1	0
89.2	0
89.3	0
89.4	0
89.5	0
89.6	0
89.7	0
89.8	0
89.9	0
90	0
90.1	0
90.2	0
90.3	0
90.4	0
90.5	0
90.6	0
90.7	0
90.8	0
90.9	0
91	0
91.1	0
91.2	0
91.3	0
91.4	0
91.5	0
91.6	0
91.7	0
91.8	0
91.9	0
92	0
92.1	0
92.2	0
92.3	0
92.4	0
92.5	0
92.6	0
92.7	0
92.8	0
92.9	0
93	0
93.1	0
93.2	0
93.3	0
93.4	0
93.5	0
93.6	0
93.7	0
93.8	0
93.9	0
94	0
94.1	0
94.2	0
94.3	0
94.4	0
94.5	0
94.6	0
94.7	0
94.8	0
94.9	0
95	0
95.1	0
95.2	0
95.3	0
95.4	0
95.5	0
95.6	0
95.7	0
95.8	0
95.9	0
96	0
96.1	0
96.2	0
96.3	0
96.4	0
96.5	0
96.6	0
96.7	0
96.8	0
96.9	0
97	0
97.1	0
97.2	0
97.3	0
97.4	0
97.5	0
97.6	0
97.7	0
97.8	0
97.9	0
98	0
98.1	0
98.2	0
98.3	0
98.4	0
98.5	0
98.6	0
98.7	0
98.8	0
98.9	0
99	0
99.1	0
99.2	0
99.3	0
99.4	0
99.5	0
99.6	0
99.7	0
99.8	0
99.9	0
100	0
100.1	0.0175
100.2	0.031875
100.3	0.049375
100.4	0.06375
100.5	0.074375
100.6	0.0875
100.7	0.09625
100.8	0.10875
100.9	0.11875
101	0.1275
101.1	0.14
101.2	0.149375
101.3	0.159375
101.4	0.168125
101.5	0.175625
101.6	0.18375
101.7	0.189375
101.8	0.1975
101.9	0.205625
102	0.215625
102.1	0.225
102.2	0.230625
102.3	0.234375
102.4	0.244375
102.5	0.2525
102.6	0.26
102.7	0.265625
102.8	0.269375
102.9	0.269375
103	0.275
103.1	0.279375
103.2	0.281875
103.3	0.29125
103.4	0.29625
103.5	0.303125
103.6	0.305625
103.7	0.308125
103.8	0.316875
103.9	0.323125
104	0.32875
104.1	0.334375
104.2	0.336875
104.3	0.338125
104.4	0.339375
104.5	0.3475
104.6	0.355
104.7	0.351875
104.8	0.356875
104.9	0.359375
105	0.3575
105.1	0.360625
105.2	0.3625
105.3	0.3675
105.4	0.375625
105.5	0.376875
105.6	0.378125
105.7	0.385
105.8	0.385
105.9	0.394375
106	0.39375
106.1	0.394375
106.2	0.39625
106.3	0.39625
106.4	0.3925
106.5	0.39625
106.6	0.4
106.7	0.4
106.8	0.4
106.9	0.405
107	0.4125
107.1	0.4175
107.2	0.419375
107.3	0.419375
107.4	0.420625
107.5	0.425
107.6	0.42375
107.7	0.424375
107.8	0.425625
107.9	0.425625
108	0.42625
108.1	0.425625
108.2	0.42875
108.3	0.425
108.4	0.4275
108.5	0.425
108.6	0.430625
108.7	0.4325
108.8	0.435625
108.9	0.435
109	0.4325
109.1	0.43
109.2	0.433125
109.3	0.434375
109.4	0.43375
109.5	0.43375
109.6	0.433125
109.7	0.433125
109.8	0.438125
109.9	0.440625
110	0.44125
110.1	0.44
110.2	0.440625
110.3	0.4425
110.4	0.4375
110.5	0.436875
110.6	0.44
110.7	0.44125
110.8	0.43875
110.9	0.438125
111	0.445625
111.1	0.4475
111.2	0.4425
111.3	0.444375
111.4	0.44625
111.5	0.444375
111.6	0.44625
111.7	0.45
111.8	0.45
111.9	0.44875
112	0.449375
112.1	0.449375
112.2	0.445625
112.3	0.441875
112.4	0.445
112.5	0.44625
112.6	0.44625
112.7	0.445
112.8	0.44625
112.9	0.443125
113	0.449375
113.1	0.448125
113.2	0.446875
113.3	0.446875
113.4	0.4475
113.5	0.4475
113.6	0.45
113.7	0.4525
113.8	0.456875
113.9	0.46
114	0.459375
114.1	0.464375
114.2	0.465625
114.3	0.46
114.4	0.46
114.5	0.45875
114.6	0.46
114.7	0.4575
114.8	0.45625
114.9	0.455
115	0.455625
115.1	0.46125
115.2	0.46125
115.3	0.4625
115.4	0.46125
115.5	0.461875
115.6	0.463125
115.7	0.4625
115.8	0.46
115.9	0.460625
116	0.463125
116.1	0.460625
116.2	0.458125
116.3	0.456875
116.4	0.450625
116.5	0.45
116.6	0.45
116.7	0.455
116.8	0.4575
116.9	0.455625
117	0.4575
117.1	0.461875
117.2	0.4625
117.3	0.4675
117.4	0.4625
117.5	0.460625
117.6	0.461875
117.7	0.460625
117.8	0.46375
117.9	0.458125
118	0.455
118.1	0.454375
118.2	0.454375
118.3	0.460625
118.4	0.46375
118.5	0.464375
118.6	0.4625
118.7	0.464375
118.8	0.459375
118.9	0.45875
119	0.4575
119.1	0.455
119.2	0.45375
119.3	0.450625
119.4	0.44875
119.5	0.448125
119.6	0.44875
119.7	0.44875
119.8	0.448125
119.9	0.450625
120	0.453125
120.1	0.455625
120.2	0.453125
120.3	0.45375
120.4	0.456875
120.5	0.45875
120.6	0.466875
120.7	0.47
120.8	0.470625
120.9	0.470625
121	0.470625
121.1	0.470625
121.2	0.470625
121.3	0.470625
121.4	0.473125
121.5	0.470625
121.6	0.470625
121.7	0.471875
121.8	0.473125
121.9	0.475625
122	0.47375
122.1	0.47875
122.2	0.478125
122.3	0.476875
122.4	0.476875
122.5	0.47625
122.6	0.479375
122.7	0.47875
122.8	0.4825
122.9	0.48
123	0.47875
123.1	0.48
123.2	0.4775
123.3	0.47625
123.4	0.474375
123.5	0.471875
123.6	0.473125
123.7	0.47
123.8	0.470625
123.9	0.471875
124	0.470625
124.1	0.47375
124.2	0.474375
124.3	0.475
124.4	0.48
124.5	0.483125
124.6	0.48625
124.7	0.48625
124.8	0.485
124.9	0.483125
125	0.485625
125.1	0.488125
125.2	0.490625
125.3	0.4875
125.4	0.48875
125.5	0.484375
125.6	0.48125
125.7	0.480625
125.8	0.4775
125.9	0.479375
126	0.48
126.1	0.48
126.2	0.473125
126.3	0.475
126.4	0.481875
126.5	0.48125
126.6	0.484375
126.7	0.488125
126.8	0.486875
126.9	0.484375
127	0.4825
127.1	0.4775
127.2	0.478125
127.3	0.4825
127.4	0.481875
127.5	0.48
127.6	0.4825
127.7	0.481875
127.8	0.4775
127.9	0.4775
128	0.480625
128.1	0.48375
128.2	0.485625
128.3	0.483125
128.4	0.480625
128.5	0.480625
128.6	0.4825
128.7	0.4825
128.8	0.486875
128.9	0.490625
129	0.4925
129.1	0.491875
129.2	0.49
129.3	0.485
129.4	0.485625
129.5	0.485625
129.6	0.485
129.7	0.488125
129.8	0.49125
129.9	0.490625
130	0.49
130.1	0.4925
130.2	0.495
130.3	0.499375
130.4	0.500625
130.5	0.5025
130.6	0.5025
130.7	0.499375
130.8	0.4975
130.9	0.500625
131	0.50375
131.1	0.5025
131.2	0.500625
131.3	0.49625
131.4	0.49625
131.5	0.495
131.6	0.49875
131.7	0.495625
131.8	0.494375
131.9	0.48875
132	0.490625
132.1	0.4925
132.2	0.495625
132.3	0.498125
132.4	0.50125
132.5	0.50375
132.6	0.504375
132.7	0.505
132.8	0.508125
132.9	0.509375
133	0.508125
133.1	0.511875
133.2	0.51
133.3	0.510625
133.4	0.513125
133.5	0.515625
133.6	0.5175
133.7	0.523125
133.8	0.525625
133.9	0.52375
134	0.52625
134.1	0.52375
134.2	0.525
134.3	0.5225
134.4	0.519375
134.5	0.52
134.6	0.520625
134.7	0.525625
134.8	0.52375
134.9	0.524375
135	0.525
135.1	0.528125
135.2	0.53125
135.3	0.53125
135.4	0.53
135.5	0.529375
135.6	0.53
135.7	0.52875
135.8	0.524375
135.9	0.519375
136	0.523125
136.1	0.52625
136.2	0.524375
136.3	0.524375
136.4	0.52375
136.5	0.518125
136.6	0.51875
136.7	0.51875
136.8	0.51375
136.9	0.51125
137	0.5125
137.1	0.511875
137.2	0.51375
137.3	0.514375
137.4	0.513125
137.5	0.514375
137.6	0.5125
137.7	0.5125
137.8	0.513125
137.9	0.51
138	0.508125
138.1	0.505
138.2	0.509375
138.3	0.50625
138.4	0.50625
138.5	0.505
138.6	0.504375
138.7	0.50625
138.8	0.510625
138.9	0.51625
139	0.51875
139.1	0.516875
139.2	0.51875
139.3	0.519375
139.4	0.516875
139.5	0.5175
139.6	0.52
139.7	0.52125
139.8	0.52
139.9	0.516875
140	0.518125
140.1	0.51875
140.2	0.515625
140.3	0.5175
140.4	0.51625
140.5	0.51875
140.6	0.518125
140.7	0.5175
140.8	0.524375
140.9	0.52375
141	0.523125
141.1	0.52125
141.2	0.52375
141.3	0.528125
141.4	0.52875
141.5	0.52875
141.6	0.529375
141.7	0.531875
141.8	0.529375
141.9	0.53
142	0.525
142.1	0.523125
142.2	0.52625
142.3	0.525625
142.4	0.52375
142.5	0.52125
142.6	0.521875
142.7	0.524375
142.8	0.52125
142.9	0.524375
143	0.526875
143.1	0.526875
143.2	0.52625
143.3	0.5275
143.4	0.528125
143.5	0.525
143.6	0.52125
143.7	0.520625
143.8	0.519375
143.9	0.518125
144	0.519375
144.1	0.518125
144.2	0.520625
144.3	0.520625
144.4	0.520625
144.5	0.52
144.6	0.5175
144.7	0.5175
144.8	0.519375
144.9	0.520625
145	0.519375
145.1	0.52
145.2	0.519375
145.3	0.520625
145.4	0.520625
145.5	0.52125
145.6	0.52
145.7	0.518125
145.8	0.518125
145.9	0.5125
146	0.510625
146.1	0.51125
146.2	0.514375
146.3	0.514375
146.4	0.515
146.5	0.515625
146.6	0.5175
146.7	0.52
146.8	0.521875
146.9	0.520625
147	0.52375
147.1	0.52375
147.2	0.52125
147.3	0.524375
147.4	0.52375
147.5	0.521875
147.6	0.525
147.7	0.521875
147.8	0.523125
147.9	0.5225
148	0.51375
148.1	0.510625
148.2	0.5125
148.3	0.513125
148.4	0.515625
148.5	0.520625
148.6	0.520625
148.7	0.520625
148.8	0.52
148.9	0.521875
149	0.52125
149.1	0.523125
149.2	0.530625
149.3	0.526875
149.4	0.52875
149.5	0.53125
149.6	0.531875
149.7	0.534375
149.8	0.535625
149.9	0.535625
150	0.533125
150.1	0.533125
150.2	0.53
150.3	0.526875
150.4	0.523125
150.5	0.52375
150.6	0.525625
150.7	0.526875
150.8	0.5275
150.9	0.526875
151	0.533125
151.1	0.533125
151.2	0.5325
151.3	0.534375
151.4	0.535
151.5	0.531875
151.6	0.535
151.7	0.53125
151.8	0.53375
151.9	0.539375
152	0.5375
152.1	0.535
152.2	0.5375
152.3	0.5425
152.4	0.54625
152.5	0.546875
152.6	0.546875
152.7	0.546875
152.8	0.544375
152.9	0.546875
153	0.5375
153.1	0.540625
153.2	0.541875
153.3	0.540625
153.4	0.54
153.5	0.540625
153.6	0.539375
153.7	0.53875
153.8	0.535625
153.9	0.53625
154	0.535
154.1	0.530625
154.2	0.530625
154.3	0.52875
154.4	0.528125
154.5	0.533125
154.6	0.53625
154.7	0.5325
154.8	0.533125
154.9	0.534375
155	0.5375
155.1	0.5375
155.2	0.538125
155.3	0.538125
155.4	0.543125
155.5	0.54375
155.6	0.5375
155.7	0.538125
155.8	0.538125
155.9	0.538125
156	0.5425
156.1	0.5425
156.2	0.53875
156.3	0.539375
156.4	0.5375
156.5	0.536875
156.6	0.5375
156.7	0.538125
156.8	0.536875
156.9	0.538125
157	0.5375
157.1	0.540625
157.2	0.540625
157.3	0.5375
157.4	0.5375
157.5	0.5375
157.6	0.53875
157.7	0.53875
157.8	0.534375
157.9	0.5325
158	0.530625
158.1	0.53125
158.2	0.5275
158.3	0.5275
158.4	0.52375
158.5	0.520625
158.6	0.52
158.7	0.523125
158.8	0.523125
158.9	0.525
159	0.525
159.1	0.524375
159.2	0.52875
159.3	0.52875
159.4	0.531875
159.5	0.533125
159.6	0.531875
159.7	0.5325
159.8	0.533125
159.9	0.54
160	0.539375
160.1	0.543125
160.2	0.544375
160.3	0.541875
160.4	0.544375
160.5	0.544375
160.6	0.539375
160.7	0.535625
160.8	0.536875
160.9	0.536875
161	0.535
161.1	0.536875
161.2	0.5375
161.3	0.540625
161.4	0.540625
161.5	0.53625
161.6	0.536875
161.7	0.539375
161.8	0.536875
161.9	0.536875
162	0.534375
162.1	0.535
162.2	0.536875
162.3	0.535
162.4	0.534375
162.5	0.5375
162.6	0.534375
162.7	0.539375
162.8	0.538125
162.9	0.536875
163	0.539375
163.1	0.540625
163.2	0.545
163.3	0.545625
163.4	0.544375
163.5	0.538125
163.6	0.539375
163.7	0.54
163.8	0.540625
163.9	0.5425
164	0.54
164.1	0.546875
164.2	0.550625
164.3	0.553125
164.4	0.5525
164.5	0.55
164.6	0.553125
164.7	0.55375
164.8	0.553125
164.9	0.55375
165	0.5525
165.1	0.549375
165.2	0.549375
165.3	0.5525
165.4	0.554375
165.5	0.551875
165.6	0.5525
165.7	0.549375
165.8	0.549375
165.9	0.549375
166	0.545625
166.1	0.548125
166.2	0.54625
166.3	0.548125
166.4	0.55
166.5	0.549375
166.6	0.546875
166.7	0.54875
166.8	0.546875
166.9	0.544375
167	0.546875
167.1	0.54375
167.2	0.5375
167.3	0.54125
167.4	0.54
167.5	0.54125
167.6	0.54375
167.7	0.546875
167.8	0.549375
167.9	0.550625
168	0.55
168.1	0.550625
168.2	0.548125
168.3	0.549375
168.4	0.550625
168.5	0.54875
168.6	0.550625
168.7	0.5525
168.8	0.5525
168.9	0.553125
169	0.55625
169.1	0.5575
169.2	0.559375
169.3	0.55875
169.4	0.559375
169.5	0.55375
169.6	0.55
169.7	0.551875
169.8	0.553125
169.9	0.5525
170	0.55625
170.1	0.55875
170.2	0.56125
170.3	0.560625
170.4	0.55875
170.5	0.5625
170.6	0.558125
170.7	0.56
170.8	0.56
170.9	0.56
171	0.556875
171.1	0.555
171.2	0.558125
171.3	0.556875
171.4	0.558125
171.5	0.555
171.6	0.555
171.7	0.551875
171.8	0.553125
171.9	0.55
172	0.548125
172.1	0.545625
172.2	0.544375
172.3	0.543125
172.4	0.54375
172.5	0.54375
172.6	0.544375
172.7	0.54625
172.8	0.54875
172.9	0.546875
173	0.54625
173.1	0.543125
173.2	0.546875
173.3	0.545
173.4	0.54875
173.5	0.543125
173.6	0.54375
173.7	0.546875
173.8	0.543125
173.9	0.541875
174	0.5425
174.1	0.545
174.2	0.545625
174.3	0.544375
174.4	0.548125
174.5	0.55
174.6	0.548125
174.7	0.5475
174.8	0.549375
174.9	0.55
175	0.548125
175.1	0.54875
175.2	0.546875
175.3	0.546875
175.4	0.546875
175.5	0.54875
175.6	0.546875
175.7	0.548125
175.8	0.55125
175.9	0.548125
176	0.54875
176.1	0.55125
176.2	0.553125
176.3	0.554375
176.4	0.55125
176.5	0.551875
176.6	0.548125
176.7	0.5475
176.8	0.551875
176.9	0.550625
177	0.550625
177.1	0.54625
177.2	0.548125
177.3	0.551875
177.4	0.5525
177.5	0.549375
177.6	0.5475
177.7	0.55
177.8	0.554375
177.9	0.553125
178	0.551875
178.1	0.55375
178.2	0.554375
178.3	0.554375
178.4	0.555
178.5	0.553125
178.6	0.5575
178.7	0.556875
178.8	0.555625
178.9	0.56
179	0.558125
179.1	0.555
179.2	0.5575
179.3	0.556875
179.4	0.55875
179.5	0.56125
179.6	0.559375
179.7	0.560625
179.8	0.56
179.9	0.560625
180	0.56
180.1	0.561875
180.2	0.55625
180.3	0.55625
180.4	0.559375
180.5	0.556875
180.6	0.55875
180.7	0.5525
180.8	0.551875
180.9	0.5525
181	0.5525
181.1	0.5475
181.2	0.5475
181.3	0.55
181.4	0.54875
181.5	0.544375
181.6	0.544375
181.7	0.54875
181.8	0.55
181.9	0.54875
182	0.553125
182.1	0.550625
182.2	0.5475
182.3	0.5475
182.4	0.548125
182.5	0.544375
182.6	0.54625
182.7	0.550625
182.8	0.554375
182.9	0.558125
183	0.55625
183.1	0.55375
183.2	0.554375
183.3	0.555
183.4	0.55625
183.5	0.5575
183.6	0.55875
183.7	0.558125
183.8	0.55625
183.9	0.55625
184	0.5575
184.1	0.559375
184.2	0.561875
184.3	0.565625
184.4	0.568125
184.5	0.57375
184.6	0.57125
184.7	0.56875
184.8	0.565625
184.9	0.565625
185	0.56375
185.1	0.563125
185.2	0.563125
185.3	0.560625
185.4	0.56
185.5	0.55875
185.6	0.55875
185.7	0.555625
185.8	0.553125
185.9	0.55125
186	0.555625
186.1	0.556875
186.2	0.560625
186.3	0.55875
186.4	0.55875
186.5	0.5575
186.6	0.554375
186.7	0.55875
186.8	0.559375
186.9	0.5625
187	0.566875
187.1	0.566875
187.2	0.56875
187.3	0.564375
187.4	0.564375
187.5	0.56625
187.6	0.56375
187.7	0.563125
187.8	0.561875
187.9	0.5575
188	0.55875
188.1	0.561875
188.2	0.560625
188.3	0.5625
188.4	0.559375
188.5	0.56
188.6	0.558125
188.7	0.558125
188.8	0.559375
188.9	0.560625
189	0.559375
189.1	0.561875
189.2	0.56125
189.3	0.56125
189.4	0.5625
189.5	0.561875
189.6	0.56
189.7	0.55875
189.8	0.555625
189.9	0.555625
190	0.555
190.1	0.5575
190.2	0.55875
190.3	0.555625
190.4	0.56
190.5	0.559375
190.6	0.560625
190.7	0.5625
190.8	0.56375
190.9	0.558125
191	0.561875
191.1	0.563125
191.2	0.564375
191.3	0.564375
191.4	0.565
191.5	0.564375
191.6	0.57
191.7	0.57125
191.8	0.57125
191.9	0.568125
192	0.569375
192.1	0.573125
192.2	0.575625
192.3	0.575
192.4	0.57125
192.5	0.571875
192.6	0.570625
192.7	0.56625
192.8	0.568125
192.9	0.568125
193	0.56625
193.1	0.564375
193.2	0.561875
193.3	0.565625
193.4	0.563125
193.5	0.56125
193.6	0.559375
193.7	0.56
193.8	0.56
193.9	0.566875
194	0.56375
194.1	0.565625
194.2	0.568125
194.3	0.569375
194.4	0.57375
194.5	0.57375
194.6	0.57125
194.7	0.57125
194.8	0.575625
194.9	0.576875
195	0.57875
195.1	0.580625
195.2	0.576875
195.3	0.579375
195.4	0.57875
195.5	0.576875
195.6	0.580625
195.7	0.5825
195.8	0.5825
195.9	0.579375
196	0.583125
196.1	0.579375
196.2	0.580625
196.3	0.583125
196.4	0.579375
196.5	0.580625
196.6	0.581875
196.7	0.579375
196.8	0.580625
196.9	0.581875
197	0.584375
197.1	0.585
197.2	0.583125
197.3	0.58125
197.4	0.58375
197.5	0.58375
197.6	0.58
197.7	0.58125
197.8	0.5775
197.9	0.57875
198	0.579375
198.1	0.58
198.2	0.57875
198.3	0.576875
198.4	0.576875
198.5	0.583125
198.6	0.579375
198.7	0.578125
198.8	0.57875
198.9	0.580625
199	0.579375
199.1	0.580625
199.2	0.584375
199.3	0.58375
199.4	0.585625
199.5	0.585
199.6	0.580625
199.7	0.580625
199.8	0.585
199.9	0.58375
200	0.583125
[truncated: 14,000 more rows]
