# Supplementary material for: Bayesian inference of kinetic schemes for ion channels by Kalman filtering
Source: eLife journal article supplement (doi:10.7554/elife.62714), 2022-05-04
Supplement: fig4-data8 [file 1_Sim_N_800_Strom_MW.xlsx]

## Sheet: Tabelle1
0.1	0
0.2	0
0.3	0
0.4	0
0.5	0
0.6	0
0.7	0
0.8	0
0.9	0
1	0
1.1	0
1.2	0
1.3	0
1.4	0
1.5	0
1.6	0
1.7	0
1.8	0
1.9	0
2	0
2.1	0
2.2	0
2.3	0
2.4	0
2.5	0
2.6	0
2.7	0
2.8	0
2.9	0
3	0
3.1	0
3.2	0
3.3	0
3.4	0
3.5	0
3.6	0
3.7	0
3.8	0
3.9	0
4	0
4.1	0
4.2	0
4.3	0
4.4	0
4.5	0
4.6	0
4.7	0
4.8	0
4.9	0
5	0
5.1	0
5.2	0
5.3	0
5.4	0
5.5	0
5.6	0
5.7	0
5.8	0
5.9	0
6	0
6.1	0
6.2	0
6.3	0
6.4	0
6.5	0
6.6	0
6.7	0
6.8	0
6.9	0
7	0
7.1	0
7.2	0
7.3	0
7.4	0
7.5	0
7.6	0
7.7	0
7.8	0
7.9	0
8	0
8.1	0
8.2	0
8.3	0
8.4	0
8.5	0
8.6	0
8.7	0
8.8	0
8.9	0
9	0
9.1	0
9.2	0
9.3	0
9.4	0
9.5	0
9.6	0
9.7	0
9.8	0
9.9	0
10	0
10.1	0
10.2	0
10.3	0
10.4	0
10.5	0
10.6	0
10.7	0
10.8	0
10.9	0
11	0
11.1	0
11.2	0
11.3	0
11.4	0
11.5	0
11.6	0
11.7	0
11.8	0
11.9	0
12	0
12.1	0
12.2	0
12.3	0
12.4	0
12.5	0
12.6	0
12.7	0
12.8	0
12.9	0
13	0
13.1	0
13.2	0
13.3	0
13.4	0
13.5	0
13.6	0
13.7	0
13.8	0
13.9	0
14	0
14.1	0
14.2	0
14.3	0
14.4	0
14.5	0
14.6	0
14.7	0
14.8	0
14.9	0
15	0
15.1	0
15.2	0
15.3	0
15.4	0
15.5	0
15.6	0
15.7	0
15.8	0
15.9	0
16	0
16.1	0
16.2	0
16.3	0
16.4	0
16.5	0
16.6	0
16.7	0
16.8	0
16.9	0
17	0
17.1	0
17.2	0
17.3	0
17.4	0
17.5	0
17.6	0
17.7	0
17.8	0
17.9	0
18	0
18.1	0
18.2	0
18.3	0
18.4	0
18.5	0
18.6	0
18.7	0
18.8	0
18.9	0
19	0
19.1	0
19.2	0
19.3	0
19.4	0
19.5	0
19.6	0
19.7	0
19.8	0
19.9	0
20	0
20.1	0
20.2	0
20.3	0
20.4	0
20.5	0
20.6	0
20.7	0
20.8	0
20.9	0
21	0
21.1	0
21.2	0
21.3	0
21.4	0
21.5	0
21.6	0
21.7	0
21.8	0
21.9	0
22	0
22.1	0
22.2	0
22.3	0
22.4	0
22.5	0
22.6	0
22.7	0
22.8	0
22.9	0
23	0
23.1	0
23.2	0
23.3	0
23.4	0
23.5	0
23.6	0
23.7	0
23.8	0
23.9	0
24	0
24.1	0
24.2	0
24.3	0
24.4	0
24.5	0
24.6	0
24.7	0
24.8	0
24.9	0
25	0
25.1	0
25.2	0
25.3	0
25.4	0
25.5	0
25.6	0
25.7	0
25.8	0
25.9	0
26	0
26.1	0
26.2	0
26.3	0
26.4	0
26.5	0
26.6	0
26.7	0
26.8	0
26.9	0
27	0
27.1	0
27.2	0
27.3	0
27.4	0
27.5	0
27.6	0
27.7	0
27.8	0
27.9	0
28	0
28.1	0
28.2	0
28.3	0
28.4	0
28.5	0
28.6	0
28.7	0
28.8	0
28.9	0
29	0
29.1	0
29.2	0
29.3	0
29.4	0
29.5	0
29.6	0
29.7	0
29.8	0
29.9	0
30	0
30.1	0
30.2	0
30.3	0
30.4	0
30.5	0
30.6	0
30.7	0
30.8	0
30.9	0
31	0
31.1	0
31.2	0
31.3	0
31.4	0
31.5	0
31.6	0
31.7	0
31.8	0
31.9	0
32	0
32.1	0
32.2	0
32.3	0
32.4	0
32.5	0
32.6	0
32.7	0
32.8	0
32.9	0
33	0
33.1	0
33.2	0
33.3	0
33.4	0
33.5	0
33.6	0
33.7	0
33.8	0
33.9	0
34	0
34.1	0
34.2	0
34.3	0
34.4	0
34.5	0
34.6	0
34.7	0
34.8	0
34.9	0
35	0
35.1	0
35.2	0
35.3	0
35.4	0
35.5	0
35.6	0
35.7	0
35.8	0
35.9	0
36	0
36.1	0
36.2	0
36.3	0
36.4	0
36.5	0
36.6	0
36.7	0
36.8	0
36.9	0
37	0
37.1	0
37.2	0
37.3	0
37.4	0
37.5	0
37.6	0
37.7	0
37.8	0
37.9	0
38	0
38.1	0
38.2	0
38.3	0
38.4	0
38.5	0
38.6	0
38.7	0
38.8	0
38.9	0
39	0
39.1	0
39.2	0
39.3	0
39.4	0
39.5	0
39.6	0
39.7	0
39.8	0
39.9	0
40	0
40.1	0
40.2	0
40.3	0
40.4	0
40.5	0
40.6	0
40.7	0
40.8	0
40.9	0
41	0
41.1	0
41.2	0
41.3	0
41.4	0
41.5	0
41.6	0
41.7	0
41.8	0
41.9	0
42	0
42.1	0
42.2	0
42.3	0
42.4	0
42.5	0
42.6	0
42.7	0
42.8	0
42.9	0
43	0
43.1	0
43.2	0
43.3	0
43.4	0
43.5	0
43.6	0
43.7	0
43.8	0
43.9	0
44	0
44.1	0
44.2	0
44.3	0
44.4	0
44.5	0
44.6	0
44.7	0
44.8	0
44.9	0
45	0
45.1	0
45.2	0
45.3	0
45.4	0
45.5	0
45.6	0
45.7	0
45.8	0
45.9	0
46	0
46.1	0
46.2	0
46.3	0
46.4	0
46.5	0
46.6	0
46.7	0
46.8	0
46.9	0
47	0
47.1	0
47.2	0
47.3	0
47.4	0
47.5	0
47.6	0
47.7	0
47.8	0
47.9	0
48	0
48.1	0
48.2	0
48.3	0
48.4	0
48.5	0
48.6	0
48.7	0
48.8	0
48.9	0
49	0
49.1	0
49.2	0
49.3	0
49.4	0
49.5	0
49.6	0
49.7	0
49.8	0
49.9	0
50	0
50.1	0
50.2	0
50.3	0
50.4	0
50.5	0
50.6	0
50.7	0
50.8	0
50.9	0
51	0
51.1	0
51.2	0
51.3	0
51.4	0
51.5	0
51.6	0
51.7	0
51.8	0
51.9	0
52	0
52.1	0
52.2	0
52.3	0
52.4	0
52.5	0
52.6	0
52.7	0
52.8	0
52.9	0
53	0
53.1	0
53.2	0
53.3	0
53.4	0
53.5	0
53.6	0
53.7	0
53.8	0
53.9	0
54	0
54.1	0
54.2	0
54.3	0
54.4	0
54.5	0
54.6	0
54.7	0
54.8	0
54.9	0
55	0
55.1	0
55.2	0
55.3	0
55.4	0
55.5	0
55.6	0
55.7	0
55.8	0
55.9	0
56	0
56.1	0
56.2	0
56.3	0
56.4	0
56.5	0
56.6	0
56.7	0
56.8	0
56.9	0
57	0
57.1	0
57.2	0
57.3	0
57.4	0
57.5	0
57.6	0
57.7	0
57.8	0
57.9	0
58	0
58.1	0
58.2	0
58.3	0
58.4	0
58.5	0
58.6	0
58.7	0
58.8	0
58.9	0
59	0
59.1	0
59.2	0
59.3	0
59.4	0
59.5	0
59.6	0
59.7	0
59.8	0
59.9	0
60	0
60.1	0
60.2	0
60.3	0
60.4	0
60.5	0
60.6	0
60.7	0
60.8	0
60.9	0
61	0
61.1	0
61.2	0
61.3	0
61.4	0
61.5	0
61.6	0
61.7	0
61.8	0
61.9	0
62	0
62.1	0
62.2	0
62.3	0
62.4	0
62.5	0
62.6	0
62.7	0
62.8	0
62.9	0
63	0
63.1	0
63.2	0
63.3	0
63.4	0
63.5	0
63.6	0
63.7	0
63.8	0
63.9	0
64	0
64.1	0
64.2	0
64.3	0
64.4	0
64.5	0
64.6	0
64.7	0
64.8	0
64.9	0
65	0
65.1	0
65.2	0
65.3	0
65.4	0
65.5	0
65.6	0
65.7	0
65.8	0
65.9	0
66	0
66.1	0
66.2	0
66.3	0
66.4	0
66.5	0
66.6	0
66.7	0
66.8	0
66.9	0
67	0
67.1	0
67.2	0
67.3	0
67.4	0
67.5	0
67.6	0
67.7	0
67.8	0
67.9	0
68	0
68.1	0
68.2	0
68.3	0
68.4	0
68.5	0
68.6	0
68.7	0
68.8	0
68.9	0
69	0
69.1	0
69.2	0
69.3	0
69.4	0
69.5	0
69.6	0
69.7	0
69.8	0
69.9	0
70	0
70.1	0
70.2	0
70.3	0
70.4	0
70.5	0
70.6	0
70.7	0
70.8	0
70.9	0
71	0
71.1	0
71.2	0
71.3	0
71.4	0
71.5	0
71.6	0
71.7	0
71.8	0
71.9	0
72	0
72.1	0
72.2	0
72.3	0
72.4	0
72.5	0
72.6	0
72.7	0
72.8	0
72.9	0
73	0
73.1	0
73.2	0
73.3	0
73.4	0
73.5	0
73.6	0
73.7	0
73.8	0
73.9	0
74	0
74.1	0
74.2	0
74.3	0
74.4	0
74.5	0
74.6	0
74.7	0
74.8	0
74.9	0
75	0
75.1	0
75.2	0
75.3	0
75.4	0
75.5	0
75.6	0
75.7	0
75.8	0
75.9	0
76	0
76.1	0
76.2	0
76.3	0
76.4	0
76.5	0
76.6	0
76.7	0
76.8	0
76.9	0
77	0
77.1	0
77.2	0
77.3	0
77.4	0
77.5	0
77.6	0
77.7	0
77.8	0
77.9	0
78	0
78.1	0
78.2	0
78.3	0
78.4	0
78.5	0
78.6	0
78.7	0
78.8	0
78.9	0
79	0
79.1	0
79.2	0
79.3	0
79.4	0
79.5	0
79.6	0
79.7	0
79.8	0
79.9	0
80	0
80.1	0
80.2	0
80.3	0
80.4	0
80.5	0
80.6	0
80.7	0
80.8	0
80.9	0
81	0
81.1	0
81.2	0
81.3	0
81.4	0
81.5	0
81.6	0
81.7	0
81.8	0
81.9	0
82	0
82.1	0
82.2	0
82.3	0
82.4	0
82.5	0
82.6	0
82.7	0
82.8	0
82.9	0
83	0
83.1	0
83.2	0
83.3	0
83.4	0
83.5	0
83.6	0
83.7	0
83.8	0
83.9	0
84	0
84.1	0
84.2	0
84.3	0
84.4	0
84.5	0
84.6	0
84.7	0
84.8	0
84.9	0
85	0
85.1	0
85.2	0
85.3	0
85.4	0
85.5	0
85.6	0
85.7	0
85.8	0
85.9	0
86	0
86.1	0
86.2	0
86.3	0
86.4	0
86.5	0
86.6	0
86.7	0
86.8	0
86.9	0
87	0
87.1	0
87.2	0
87.3	0
87.4	0
87.5	0
87.6	0
87.7	0
87.8	0
87.9	0
88	0
88.1	0
88.2	0
88.3	0
88.4	0
88.5	0
88.6	0
88.7	0
88.8	0
88.9	0
89	0
89.1	0
89.2	0
89.3	0
89.4	0
89.5	0
89.6	0
89.7	0
89.8	0
89.9	0
90	0
90.1	0
90.2	0
90.3	0
90.4	0
90.5	0
90.6	0
90.7	0
90.8	0
90.9	0
91	0
91.1	0
91.2	0
91.3	0
91.4	0
91.5	0
91.6	0
91.7	0
91.8	0
91.9	0
92	0
92.1	0
92.2	0
92.3	0
92.4	0
92.5	0
92.6	0
92.7	0
92.8	0
92.9	0
93	0
93.1	0
93.2	0
93.3	0
93.4	0
93.5	0
93.6	0
93.7	0
93.8	0
93.9	0
94	0
94.1	0
94.2	0
94.3	0
94.4	0
94.5	0
94.6	0
94.7	0
94.8	0
94.9	0
95	0
95.1	0
95.2	0
95.3	0
95.4	0
95.5	0
95.6	0
95.7	0
95.8	0
95.9	0
96	0
96.1	0
96.2	0
96.3	0
96.4	0
96.5	0
96.6	0
96.7	0
96.8	0
96.9	0
97	0
97.1	0
97.2	0
97.3	0
97.4	0
97.5	0
97.6	0
97.7	0
97.8	0
97.9	0
98	0
98.1	0
98.2	0
98.3	0
98.4	0
98.5	0
98.6	0
98.7	0
98.8	0
98.9	0
99	0
99.1	0
99.2	0
99.3	0
99.4	0
99.5	0
99.6	0
99.7	0
99.8	0
99.9	0
100	0
100.1	0
100.2	0
100.3	0
100.4	0
100.5	0
100.6	0
100.7	0
100.8	0
100.9	0
101	0
101.1	0
101.2	0
101.3	0
101.4	0
101.5	0
101.6	0
101.7	0
101.8	0
101.9	0
102	0
102.1	0
102.2	0
102.3	0
102.4	0
102.5	0
102.6	0
102.7	0.00125
102.8	0.00125
102.9	0.00125
103	0.00125
103.1	0.00125
103.2	0.00125
103.3	0.00125
103.4	0.00125
103.5	0.00125
103.6	0.0025
103.7	0.0025
103.8	0.0025
103.9	0.0025
104	0.00375
104.1	0.00375
104.2	0.00375
104.3	0.00375
104.4	0.00375
104.5	0.00375
104.6	0.00375
104.7	0.00625
104.8	0.0075
104.9	0.0075
105	0.01
105.1	0.01
105.2	0.0125
105.3	0.01375
105.4	0.01375
105.5	0.01375
105.6	0.01375
105.7	0.015
105.8	0.015
105.9	0.015
106	0.01625
106.1	0.0175
106.2	0.0175
106.3	0.0175
106.4	0.0175
106.5	0.0175
106.6	0.0175
106.7	0.01875
106.8	0.02
106.9	0.02
107	0.02
107.1	0.02
107.2	0.02
107.3	0.0225
107.4	0.02125
107.5	0.02125
107.6	0.02125
107.7	0.0225
107.8	0.0225
107.9	0.0225
108	0.0225
108.1	0.02375
108.2	0.02375
108.3	0.02375
108.4	0.025
108.5	0.025
108.6	0.025
108.7	0.025
108.8	0.02625
108.9	0.0275
109	0.0275
109.1	0.02875
109.2	0.03
109.3	0.03
109.4	0.03
109.5	0.03
109.6	0.03125
109.7	0.0325
109.8	0.03375
109.9	0.03375
110	0.03375
110.1	0.03375
110.2	0.03375
110.3	0.035
110.4	0.035
110.5	0.035
110.6	0.03625
110.7	0.03625
110.8	0.03625
110.9	0.03625
111	0.0375
111.1	0.0375
111.2	0.0375
111.3	0.0375
111.4	0.03875
111.5	0.03875
111.6	0.04
111.7	0.04
111.8	0.04
111.9	0.04
112	0.04
112.1	0.04125
112.2	0.0425
112.3	0.0425
112.4	0.0425
112.5	0.04375
112.6	0.04375
112.7	0.045
112.8	0.045
112.9	0.045
113	0.045
113.1	0.045
113.2	0.0475
113.3	0.05
113.4	0.05
113.5	0.05
113.6	0.05
113.7	0.05
113.8	0.05125
113.9	0.0525
114	0.0525
114.1	0.0525
114.2	0.0525
114.3	0.05125
114.4	0.05125
114.5	0.05125
114.6	0.05125
114.7	0.05125
114.8	0.05125
114.9	0.05
115	0.05125
115.1	0.05125
115.2	0.05125
115.3	0.05125
115.4	0.05125
115.5	0.0525
115.6	0.055
115.7	0.055
115.8	0.05625
115.9	0.0575
116	0.0575
116.1	0.0575
116.2	0.0575
116.3	0.0575
116.4	0.0575
116.5	0.0575
116.6	0.0575
116.7	0.0575
116.8	0.0575
116.9	0.0575
117	0.0575
117.1	0.0575
117.2	0.0575
117.3	0.0575
117.4	0.0575
117.5	0.05875
117.6	0.05875
117.7	0.06
117.8	0.06
117.9	0.0625
118	0.06125
118.1	0.06125
118.2	0.06125
118.3	0.06125
118.4	0.06125
118.5	0.0625
118.6	0.0625
118.7	0.0625
118.8	0.0625
118.9	0.0625
119	0.06375
119.1	0.065
119.2	0.065
119.3	0.06625
119.4	0.06625
119.5	0.06625
119.6	0.06625
119.7	0.06625
119.8	0.06625
119.9	0.06625
120	0.06625
120.1	0.0675
120.2	0.0675
120.3	0.0675
120.4	0.06875
120.5	0.06875
120.6	0.07
120.7	0.07125
120.8	0.07125
120.9	0.0725
121	0.07375
121.1	0.07375
121.2	0.07375
121.3	0.07375
121.4	0.07625
121.5	0.0775
121.6	0.0775
121.7	0.07875
121.8	0.07875
121.9	0.07875
122	0.07875
122.1	0.07875
122.2	0.07875
122.3	0.07875
122.4	0.07875
122.5	0.07875
122.6	0.07875
122.7	0.07875
122.8	0.08
122.9	0.08
123	0.08125
123.1	0.08375
123.2	0.08375
123.3	0.085
123.4	0.08625
123.5	0.08625
123.6	0.08625
123.7	0.08625
123.8	0.0875
123.9	0.08875
124	0.08875
124.1	0.08875
124.2	0.08875
124.3	0.09
124.4	0.09
124.5	0.09
124.6	0.09
124.7	0.09
124.8	0.08875
124.9	0.08875
125	0.09
125.1	0.09
125.2	0.08875
125.3	0.09
125.4	0.09
125.5	0.09
125.6	0.08875
125.7	0.09125
125.8	0.09125
125.9	0.0925
126	0.0925
126.1	0.09375
126.2	0.09375
126.3	0.09375
126.4	0.095
126.5	0.09625
126.6	0.09625
126.7	0.09625
126.8	0.0975
126.9	0.0975
127	0.0975
127.1	0.09625
127.2	0.09625
127.3	0.0975
127.4	0.0975
127.5	0.0975
127.6	0.0975
127.7	0.09875
127.8	0.1
127.9	0.10125
128	0.10125
128.1	0.1025
128.2	0.10375
128.3	0.10375
128.4	0.10375
128.5	0.10375
128.6	0.10375
128.7	0.10375
128.8	0.10375
128.9	0.10375
129	0.10375
129.1	0.10375
129.2	0.10375
129.3	0.10375
129.4	0.10375
129.5	0.10375
129.6	0.10375
129.7	0.10375
129.8	0.10375
129.9	0.10625
130	0.1075
130.1	0.10875
130.2	0.11
130.3	0.11125
130.4	0.11125
130.5	0.1125
130.6	0.1125
130.7	0.11125
130.8	0.11125
130.9	0.11125
131	0.11125
131.1	0.11125
131.2	0.11125
131.3	0.1125
131.4	0.11125
131.5	0.1125
131.6	0.11375
131.7	0.11375
131.8	0.115
131.9	0.115
132	0.115
132.1	0.115
132.2	0.11625
132.3	0.11625
132.4	0.11625
132.5	0.11625
132.6	0.11625
132.7	0.11625
132.8	0.11625
132.9	0.1175
133	0.1175
133.1	0.11625
133.2	0.1175
133.3	0.1175
133.4	0.11625
133.5	0.1175
133.6	0.12
133.7	0.12125
133.8	0.12125
133.9	0.12125
134	0.12125
134.1	0.1225
134.2	0.1225
134.3	0.1225
134.4	0.1225
134.5	0.12375
134.6	0.125
134.7	0.125
134.8	0.12625
134.9	0.1275
135	0.1275
135.1	0.1275
135.2	0.1275
135.3	0.13
135.4	0.13
135.5	0.13
135.6	0.13125
135.7	0.1325
135.8	0.1325
135.9	0.1325
136	0.1325
136.1	0.1325
136.2	0.1325
136.3	0.1325
136.4	0.1325
136.5	0.1325
136.6	0.13375
136.7	0.135
136.8	0.135
136.9	0.135
137	0.135
137.1	0.135
137.2	0.135
137.3	0.13625
137.4	0.13625
137.5	0.13625
137.6	0.13625
137.7	0.135
137.8	0.135
137.9	0.135
138	0.135
138.1	0.13625
138.2	0.13625
138.3	0.13625
138.4	0.13625
138.5	0.13625
138.6	0.13625
138.7	0.135
138.8	0.135
138.9	0.1375
139	0.1375
139.1	0.1375
139.2	0.13625
139.3	0.13625
139.4	0.13625
139.5	0.13625
139.6	0.1375
139.7	0.1375
139.8	0.1375
139.9	0.1375
140	0.1375
140.1	0.1375
140.2	0.1375
140.3	0.13875
140.4	0.13875
140.5	0.13875
140.6	0.14125
140.7	0.14125
140.8	0.14125
140.9	0.14125
141	0.1425
141.1	0.14125
141.2	0.14125
141.3	0.1425
141.4	0.1425
141.5	0.1425
141.6	0.1425
141.7	0.1425
141.8	0.1425
141.9	0.1425
142	0.1425
142.1	0.14375
142.2	0.14375
142.3	0.14375
142.4	0.14375
142.5	0.14375
142.6	0.14375
142.7	0.14375
142.8	0.14375
142.9	0.14375
143	0.14375
143.1	0.14375
143.2	0.14375
143.3	0.14375
143.4	0.14375
143.5	0.14375
143.6	0.14375
143.7	0.14125
143.8	0.1425
143.9	0.14375
144	0.1425
144.1	0.1425
144.2	0.14375
144.3	0.145
144.4	0.145
144.5	0.14625
144.6	0.145
144.7	0.1475
144.8	0.1475
144.9	0.14875
145	0.14875
145.1	0.14875
145.2	0.1475
145.3	0.1475
145.4	0.14875
145.5	0.14875
145.6	0.15
145.7	0.15
145.8	0.15
145.9	0.15
146	0.15
146.1	0.15
146.2	0.15
146.3	0.14875
146.4	0.14875
146.5	0.14875
146.6	0.14875
146.7	0.15
146.8	0.15
146.9	0.15125
147	0.15375
147.1	0.155
147.2	0.15375
147.3	0.15375
147.4	0.15375
147.5	0.155
147.6	0.155
147.7	0.155
147.8	0.155
147.9	0.155
148	0.155
148.1	0.15625
148.2	0.15625
148.3	0.15625
148.4	0.15625
148.5	0.15625
148.6	0.1575
148.7	0.1575
148.8	0.15875
148.9	0.15875
149	0.15875
149.1	0.16
149.2	0.16125
149.3	0.1625
149.4	0.1625
149.5	0.1625
149.6	0.165
149.7	0.16625
149.8	0.16625
149.9	0.165
150	0.165
150.1	0.165
150.2	0.165
150.3	0.165
150.4	0.165
150.5	0.165
150.6	0.16375
150.7	0.16375
150.8	0.16375
150.9	0.16375
151	0.16375
151.1	0.16625
151.2	0.1675
151.3	0.1675
151.4	0.1675
151.5	0.1675
151.6	0.1675
151.7	0.1675
151.8	0.1675
151.9	0.1675
152	0.1675
152.1	0.1675
152.2	0.1675
152.3	0.1675
152.4	0.1675
152.5	0.16875
152.6	0.16875
152.7	0.16875
152.8	0.16875
152.9	0.16875
153	0.16875
153.1	0.17
153.2	0.17
153.3	0.17
153.4	0.17
153.5	0.17125
153.6	0.1725
153.7	0.17375
153.8	0.17375
153.9	0.175
154	0.175
154.1	0.175
154.2	0.175
154.3	0.175
154.4	0.175
154.5	0.17625
154.6	0.17625
154.7	0.1775
154.8	0.1775
154.9	0.18
155	0.18
155.1	0.18
155.2	0.18125
155.3	0.1825
155.4	0.1825
155.5	0.1825
155.6	0.1825
155.7	0.1825
155.8	0.18125
155.9	0.18125
156	0.18125
156.1	0.18125
156.2	0.18125
156.3	0.18125
156.4	0.18125
156.5	0.18125
156.6	0.18125
156.7	0.1825
156.8	0.1825
156.9	0.18125
157	0.18125
157.1	0.1825
157.2	0.18375
157.3	0.18375
157.4	0.185
157.5	0.185
157.6	0.18375
157.7	0.18625
157.8	0.18625
157.9	0.18375
158	0.18375
158.1	0.1825
158.2	0.1825
158.3	0.1825
158.4	0.1825
158.5	0.1825
158.6	0.1825
158.7	0.18375
158.8	0.18375
158.9	0.18375
159	0.18375
159.1	0.18375
159.2	0.18375
159.3	0.18375
159.4	0.1825
159.5	0.1825
159.6	0.1825
159.7	0.1825
159.8	0.1825
159.9	0.18125
160	0.18375
160.1	0.1825
160.2	0.1825
160.3	0.1825
160.4	0.18375
160.5	0.18375
160.6	0.185
160.7	0.185
160.8	0.185
160.9	0.185
161	0.185
161.1	0.185
161.2	0.185
161.3	0.18625
161.4	0.18625
161.5	0.18625
161.6	0.18625
161.7	0.1875
161.8	0.18875
161.9	0.18875
162	0.19
162.1	0.19
162.2	0.19
162.3	0.19
162.4	0.19375
162.5	0.19375
162.6	0.195
162.7	0.195
162.8	0.195
162.9	0.195
163	0.195
163.1	0.19625
163.2	0.19625
163.3	0.1975
163.4	0.1975
163.5	0.1975
163.6	0.1975
163.7	0.1975
163.8	0.1975
163.9	0.19625
164	0.195
164.1	0.19625
164.2	0.19625
164.3	0.19625
164.4	0.1975
164.5	0.1975
164.6	0.19875
164.7	0.19875
164.8	0.19875
164.9	0.19875
165	0.19875
165.1	0.2
165.2	0.2
165.3	0.2
165.4	0.20125
165.5	0.20125
165.6	0.20125
165.7	0.20125
165.8	0.19875
165.9	0.19875
166	0.19875
166.1	0.19875
166.2	0.19875
166.3	0.19875
166.4	0.2
166.5	0.2
166.6	0.2
166.7	0.2
166.8	0.2
166.9	0.19875
167	0.19875
167.1	0.19875
167.2	0.19875
167.3	0.19875
167.4	0.19875
167.5	0.19875
167.6	0.2
167.7	0.2
167.8	0.19875
167.9	0.19875
168	0.19875
168.1	0.19875
168.2	0.19875
168.3	0.20125
168.4	0.2
168.5	0.2
168.6	0.20125
168.7	0.2025
168.8	0.20625
168.9	0.205
169	0.20625
169.1	0.205
169.2	0.20375
169.3	0.20375
169.4	0.20375
169.5	0.20375
169.6	0.205
169.7	0.20375
169.8	0.20375
169.9	0.20375
170	0.20375
170.1	0.2025
170.2	0.20375
170.3	0.205
170.4	0.205
170.5	0.205
170.6	0.2075
170.7	0.2075
170.8	0.2075
170.9	0.2075
171	0.2075
171.1	0.2075
171.2	0.2075
171.3	0.2075
171.4	0.2075
171.5	0.2075
171.6	0.21
171.7	0.21
171.8	0.21125
171.9	0.21125
172	0.2125
172.1	0.21375
172.2	0.21375
172.3	0.215
172.4	0.215
172.5	0.215
172.6	0.215
172.7	0.215
172.8	0.215
172.9	0.215
173	0.21625
173.1	0.21625
173.2	0.2175
173.3	0.21875
173.4	0.21875
173.5	0.21875
173.6	0.21875
173.7	0.21875
173.8	0.21875
173.9	0.21875
174	0.21875
174.1	0.21875
174.2	0.22
174.3	0.22
174.4	0.22
174.5	0.22
174.6	0.2225
174.7	0.22125
174.8	0.22125
174.9	0.22125
175	0.22125
175.1	0.22125
175.2	0.21875
175.3	0.21875
175.4	0.21875
175.5	0.22
175.6	0.21875
175.7	0.21875
175.8	0.21875
175.9	0.21875
176	0.2175
176.1	0.2175
176.2	0.2175
176.3	0.2175
176.4	0.2175
176.5	0.2175
176.6	0.21625
176.7	0.21625
176.8	0.215
176.9	0.21375
177	0.21375
177.1	0.215
177.2	0.21625
177.3	0.2175
177.4	0.21875
177.5	0.22125
177.6	0.2225
177.7	0.2225
177.8	0.2225
177.9	0.2225
178	0.2225
178.1	0.2225
178.2	0.22375
178.3	0.22375
178.4	0.22375
178.5	0.22375
178.6	0.22375
178.7	0.22375
178.8	0.22375
178.9	0.22375
179	0.22375
179.1	0.22375
179.2	0.22375
179.3	0.22375
179.4	0.22375
179.5	0.22375
179.6	0.22375
179.7	0.2225
179.8	0.2225
179.9	0.2225
180	0.2225
180.1	0.22125
180.2	0.22125
180.3	0.2225
180.4	0.2225
180.5	0.2225
180.6	0.22375
180.7	0.22375
180.8	0.22375
180.9	0.22375
181	0.22375
181.1	0.2225
181.2	0.2225
181.3	0.2225
181.4	0.22125
181.5	0.2225
181.6	0.2225
181.7	0.2225
181.8	0.22125
181.9	0.22125
182	0.2225
182.1	0.2225
182.2	0.2225
182.3	0.22375
182.4	0.22375
182.5	0.22375
182.6	0.22375
182.7	0.22375
182.8	0.22375
182.9	0.22375
183	0.22375
183.1	0.225
183.2	0.22625
183.3	0.22625
183.4	0.2275
183.5	0.22875
183.6	0.23
183.7	0.23
183.8	0.23
183.9	0.23
184	0.2325
184.1	0.23375
184.2	0.23125
184.3	0.2325
184.4	0.2325
184.5	0.23375
184.6	0.2325
184.7	0.2325
184.8	0.23125
184.9	0.23125
185	0.2325
185.1	0.23375
185.2	0.23375
185.3	0.23375
185.4	0.23375
185.5	0.23375
185.6	0.235
185.7	0.235
185.8	0.23375
185.9	0.23375
186	0.23375
186.1	0.23375
186.2	0.235
186.3	0.235
186.4	0.235
186.5	0.235
186.6	0.235
186.7	0.23375
186.8	0.2325
186.9	0.2325
187	0.23125
187.1	0.23125
187.2	0.23125
187.3	0.23125
187.4	0.23
187.5	0.22875
187.6	0.22875
187.7	0.22875
187.8	0.22875
187.9	0.22875
188	0.22875
188.1	0.22875
188.2	0.2275
188.3	0.2275
188.4	0.2275
188.5	0.2275
188.6	0.2275
188.7	0.2275
188.8	0.2275
188.9	0.22875
189	0.23
189.1	0.23
189.2	0.23
189.3	0.22875
189.4	0.23
189.5	0.2325
189.6	0.2325
189.7	0.23375
189.8	0.23375
189.9	0.23375
190	0.23375
190.1	0.23375
190.2	0.23625
190.3	0.23625
190.4	0.23625
190.5	0.23625
190.6	0.23625
190.7	0.23625
190.8	0.23625
190.9	0.2375
191	0.2375
191.1	0.2375
191.2	0.2375
191.3	0.2375
191.4	0.2375
191.5	0.2375
191.6	0.235
191.7	0.23375
191.8	0.2325
191.9	0.2325
192	0.2325
192.1	0.2325
192.2	0.2325
192.3	0.2325
192.4	0.235
192.5	0.23375
192.6	0.23375
192.7	0.2325
192.8	0.23375
192.9	0.23375
193	0.23375
193.1	0.23375
193.2	0.2325
193.3	0.2325
193.4	0.2325
193.5	0.2325
193.6	0.2325
193.7	0.2325
193.8	0.2325
193.9	0.2325
194	0.2325
194.1	0.2325
194.2	0.2325
194.3	0.2325
194.4	0.2325
194.5	0.23375
194.6	0.23625
194.7	0.2375
194.8	0.2375
194.9	0.23625
195	0.23625
195.1	0.2375
195.2	0.2375
195.3	0.23875
195.4	0.24
195.5	0.24
195.6	0.2425
195.7	0.24125
195.8	0.24125
195.9	0.24125
196	0.24375
196.1	0.245
196.2	0.24625
196.3	0.245
196.4	0.24625
196.5	0.245
196.6	0.245
196.7	0.245
196.8	0.245
196.9	0.245
197	0.245
197.1	0.24625
197.2	0.2475
197.3	0.2475
197.4	0.2475
197.5	0.2475
197.6	0.2475
197.7	0.2475
197.8	0.2475
197.9	0.25
198	0.25
198.1	0.2525
198.2	0.25125
198.3	0.25
198.4	0.25
198.5	0.25
198.6	0.25
198.7	0.25
198.8	0.25
198.9	0.25
199	0.25
199.1	0.25
199.2	0.25
199.3	0.25
199.4	0.25
199.5	0.25
199.6	0.25
199.7	0.24875
199.8	0.25125
199.9	0.2525
200	0.25
[truncated: 14,000 more rows]
