# Supplementary material for: Bayesian inference of kinetic schemes for ion channels by Kalman filtering
Source: eLife journal article supplement (doi:10.7554/elife.62714), 2022-05-04
Supplement: fig4-data8 [file 1_Sim_N_1500_Fluor_MW.xlsx]

## Sheet: Tabelle1
0.1	0
0.2	0
0.3	0
0.4	0
0.5	0
0.6	0
0.7	0
0.8	0
0.9	0
1	0
1.1	0
1.2	0
1.3	0
1.4	0
1.5	0
1.6	0
1.7	0
1.8	0
1.9	0
2	0
2.1	0
2.2	0
2.3	0
2.4	0
2.5	0
2.6	0
2.7	0
2.8	0
2.9	0
3	0
3.1	0
3.2	0
3.3	0
3.4	0
3.5	0
3.6	0
3.7	0
3.8	0
3.9	0
4	0
4.1	0
4.2	0
4.3	0
4.4	0
4.5	0
4.6	0
4.7	0
4.8	0
4.9	0
5	0
5.1	0
5.2	0
5.3	0
5.4	0
5.5	0
5.6	0
5.7	0
5.8	0
5.9	0
6	0
6.1	0
6.2	0
6.3	0
6.4	0
6.5	0
6.6	0
6.7	0
6.8	0
6.9	0
7	0
7.1	0
7.2	0
7.3	0
7.4	0
7.5	0
7.6	0
7.7	0
7.8	0
7.9	0
8	0
8.1	0
8.2	0
8.3	0
8.4	0
8.5	0
8.6	0
8.7	0
8.8	0
8.9	0
9	0
9.1	0
9.2	0
9.3	0
9.4	0
9.5	0
9.6	0
9.7	0
9.8	0
9.9	0
10	0
10.1	0
10.2	0
10.3	0
10.4	0
10.5	0
10.6	0
10.7	0
10.8	0
10.9	0
11	0
11.1	0
11.2	0
11.3	0
11.4	0
11.5	0
11.6	0
11.7	0
11.8	0
11.9	0
12	0
12.1	0
12.2	0
12.3	0
12.4	0
12.5	0
12.6	0
12.7	0
12.8	0
12.9	0
13	0
13.1	0
13.2	0
13.3	0
13.4	0
13.5	0
13.6	0
13.7	0
13.8	0
13.9	0
14	0
14.1	0
14.2	0
14.3	0
14.4	0
14.5	0
14.6	0
14.7	0
14.8	0
14.9	0
15	0
15.1	0
15.2	0
15.3	0
15.4	0
15.5	0
15.6	0
15.7	0
15.8	0
15.9	0
16	0
16.1	0
16.2	0
16.3	0
16.4	0
16.5	0
16.6	0
16.7	0
16.8	0
16.9	0
17	0
17.1	0
17.2	0
17.3	0
17.4	0
17.5	0
17.6	0
17.7	0
17.8	0
17.9	0
18	0
18.1	0
18.2	0
18.3	0
18.4	0
18.5	0
18.6	0
18.7	0
18.8	0
18.9	0
19	0
19.1	0
19.2	0
19.3	0
19.4	0
19.5	0
19.6	0
19.7	0
19.8	0
19.9	0
20	0
20.1	0
20.2	0
20.3	0
20.4	0
20.5	0
20.6	0
20.7	0
20.8	0
20.9	0
21	0
21.1	0
21.2	0
21.3	0
21.4	0
21.5	0
21.6	0
21.7	0
21.8	0
21.9	0
22	0
22.1	0
22.2	0
22.3	0
22.4	0
22.5	0
22.6	0
22.7	0
22.8	0
22.9	0
23	0
23.1	0
23.2	0
23.3	0
23.4	0
23.5	0
23.6	0
23.7	0
23.8	0
23.9	0
24	0
24.1	0
24.2	0
24.3	0
24.4	0
24.5	0
24.6	0
24.7	0
24.8	0
24.9	0
25	0
25.1	0
25.2	0
25.3	0
25.4	0
25.5	0
25.6	0
25.7	0
25.8	0
25.9	0
26	0
26.1	0
26.2	0
26.3	0
26.4	0
26.5	0
26.6	0
26.7	0
26.8	0
26.9	0
27	0
27.1	0
27.2	0
27.3	0
27.4	0
27.5	0
27.6	0
27.7	0
27.8	0
27.9	0
28	0
28.1	0
28.2	0
28.3	0
28.4	0
28.5	0
28.6	0
28.7	0
28.8	0
28.9	0
29	0
29.1	0
29.2	0
29.3	0
29.4	0
29.5	0
29.6	0
29.7	0
29.8	0
29.9	0
30	0
30.1	0
30.2	0
30.3	0
30.4	0
30.5	0
30.6	0
30.7	0
30.8	0
30.9	0
31	0
31.1	0
31.2	0
31.3	0
31.4	0
31.5	0
31.6	0
31.7	0
31.8	0
31.9	0
32	0
32.1	0
32.2	0
32.3	0
32.4	0
32.5	0
32.6	0
32.7	0
32.8	0
32.9	0
33	0
33.1	0
33.2	0
33.3	0
33.4	0
33.5	0
33.6	0
33.7	0
33.8	0
33.9	0
34	0
34.1	0
34.2	0
34.3	0
34.4	0
34.5	0
34.6	0
34.7	0
34.8	0
34.9	0
35	0
35.1	0
35.2	0
35.3	0
35.4	0
35.5	0
35.6	0
35.7	0
35.8	0
35.9	0
36	0
36.1	0
36.2	0
36.3	0
36.4	0
36.5	0
36.6	0
36.7	0
36.8	0
36.9	0
37	0
37.1	0
37.2	0
37.3	0
37.4	0
37.5	0
37.6	0
37.7	0
37.8	0
37.9	0
38	0
38.1	0
38.2	0
38.3	0
38.4	0
38.5	0
38.6	0
38.7	0
38.8	0
38.9	0
39	0
39.1	0
39.2	0
39.3	0
39.4	0
39.5	0
39.6	0
39.7	0
39.8	0
39.9	0
40	0
40.1	0
40.2	0
40.3	0
40.4	0
40.5	0
40.6	0
40.7	0
40.8	0
40.9	0
41	0
41.1	0
41.2	0
41.3	0
41.4	0
41.5	0
41.6	0
41.7	0
41.8	0
41.9	0
42	0
42.1	0
42.2	0
42.3	0
42.4	0
42.5	0
42.6	0
42.7	0
42.8	0
42.9	0
43	0
43.1	0
43.2	0
43.3	0
43.4	0
43.5	0
43.6	0
43.7	0
43.8	0
43.9	0
44	0
44.1	0
44.2	0
44.3	0
44.4	0
44.5	0
44.6	0
44.7	0
44.8	0
44.9	0
45	0
45.1	0
45.2	0
45.3	0
45.4	0
45.5	0
45.6	0
45.7	0
45.8	0
45.9	0
46	0
46.1	0
46.2	0
46.3	0
46.4	0
46.5	0
46.6	0
46.7	0
46.8	0
46.9	0
47	0
47.1	0
47.2	0
47.3	0
47.4	0
47.5	0
47.6	0
47.7	0
47.8	0
47.9	0
48	0
48.1	0
48.2	0
48.3	0
48.4	0
48.5	0
48.6	0
48.7	0
48.8	0
48.9	0
49	0
49.1	0
49.2	0
49.3	0
49.4	0
49.5	0
49.6	0
49.7	0
49.8	0
49.9	0
50	0
50.1	0
50.2	0
50.3	0
50.4	0
50.5	0
50.6	0
50.7	0
50.8	0
50.9	0
51	0
51.1	0
51.2	0
51.3	0
51.4	0
51.5	0
51.6	0
51.7	0
51.8	0
51.9	0
52	0
52.1	0
52.2	0
52.3	0
52.4	0
52.5	0
52.6	0
52.7	0
52.8	0
52.9	0
53	0
53.1	0
53.2	0
53.3	0
53.4	0
53.5	0
53.6	0
53.7	0
53.8	0
53.9	0
54	0
54.1	0
54.2	0
54.3	0
54.4	0
54.5	0
54.6	0
54.7	0
54.8	0
54.9	0
55	0
55.1	0
55.2	0
55.3	0
55.4	0
55.5	0
55.6	0
55.7	0
55.8	0
55.9	0
56	0
56.1	0
56.2	0
56.3	0
56.4	0
56.5	0
56.6	0
56.7	0
56.8	0
56.9	0
57	0
57.1	0
57.2	0
57.3	0
57.4	0
57.5	0
57.6	0
57.7	0
57.8	0
57.9	0
58	0
58.1	0
58.2	0
58.3	0
58.4	0
58.5	0
58.6	0
58.7	0
58.8	0
58.9	0
59	0
59.1	0
59.2	0
59.3	0
59.4	0
59.5	0
59.6	0
59.7	0
59.8	0
59.9	0
60	0
60.1	0
60.2	0
60.3	0
60.4	0
60.5	0
60.6	0
60.7	0
60.8	0
60.9	0
61	0
61.1	0
61.2	0
61.3	0
61.4	0
61.5	0
61.6	0
61.7	0
61.8	0
61.9	0
62	0
62.1	0
62.2	0
62.3	0
62.4	0
62.5	0
62.6	0
62.7	0
62.8	0
62.9	0
63	0
63.1	0
63.2	0
63.3	0
63.4	0
63.5	0
63.6	0
63.7	0
63.8	0
63.9	0
64	0
64.1	0
64.2	0
64.3	0
64.4	0
64.5	0
64.6	0
64.7	0
64.8	0
64.9	0
65	0
65.1	0
65.2	0
65.3	0
65.4	0
65.5	0
65.6	0
65.7	0
65.8	0
65.9	0
66	0
66.1	0
66.2	0
66.3	0
66.4	0
66.5	0
66.6	0
66.7	0
66.8	0
66.9	0
67	0
67.1	0
67.2	0
67.3	0
67.4	0
67.5	0
67.6	0
67.7	0
67.8	0
67.9	0
68	0
68.1	0
68.2	0
68.3	0
68.4	0
68.5	0
68.6	0
68.7	0
68.8	0
68.9	0
69	0
69.1	0
69.2	0
69.3	0
69.4	0
69.5	0
69.6	0
69.7	0
69.8	0
69.9	0
70	0
70.1	0
70.2	0
70.3	0
70.4	0
70.5	0
70.6	0
70.7	0
70.8	0
70.9	0
71	0
71.1	0
71.2	0
71.3	0
71.4	0
71.5	0
71.6	0
71.7	0
71.8	0
71.9	0
72	0
72.1	0
72.2	0
72.3	0
72.4	0
72.5	0
72.6	0
72.7	0
72.8	0
72.9	0
73	0
73.1	0
73.2	0
73.3	0
73.4	0
73.5	0
73.6	0
73.7	0
73.8	0
73.9	0
74	0
74.1	0
74.2	0
74.3	0
74.4	0
74.5	0
74.6	0
74.7	0
74.8	0
74.9	0
75	0
75.1	0
75.2	0
75.3	0
75.4	0
75.5	0
75.6	0
75.7	0
75.8	0
75.9	0
76	0
76.1	0
76.2	0
76.3	0
76.4	0
76.5	0
76.6	0
76.7	0
76.8	0
76.9	0
77	0
77.1	0
77.2	0
77.3	0
77.4	0
77.5	0
77.6	0
77.7	0
77.8	0
77.9	0
78	0
78.1	0
78.2	0
78.3	0
78.4	0
78.5	0
78.6	0
78.7	0
78.8	0
78.9	0
79	0
79.1	0
79.2	0
79.3	0
79.4	0
79.5	0
79.6	0
79.7	0
79.8	0
79.9	0
80	0
80.1	0
80.2	0
80.3	0
80.4	0
80.5	0
80.6	0
80.7	0
80.8	0
80.9	0
81	0
81.1	0
81.2	0
81.3	0
81.4	0
81.5	0
81.6	0
81.7	0
81.8	0
81.9	0
82	0
82.1	0
82.2	0
82.3	0
82.4	0
82.5	0
82.6	0
82.7	0
82.8	0
82.9	0
83	0
83.1	0
83.2	0
83.3	0
83.4	0
83.5	0
83.6	0
83.7	0
83.8	0
83.9	0
84	0
84.1	0
84.2	0
84.3	0
84.4	0
84.5	0
84.6	0
84.7	0
84.8	0
84.9	0
85	0
85.1	0
85.2	0
85.3	0
85.4	0
85.5	0
85.6	0
85.7	0
85.8	0
85.9	0
86	0
86.1	0
86.2	0
86.3	0
86.4	0
86.5	0
86.6	0
86.7	0
86.8	0
86.9	0
87	0
87.1	0
87.2	0
87.3	0
87.4	0
87.5	0
87.6	0
87.7	0
87.8	0
87.9	0
88	0
88.1	0
88.2	0
88.3	0
88.4	0
88.5	0
88.6	0
88.7	0
88.8	0
88.9	0
89	0
89.1	0
89.2	0
89.3	0
89.4	0
89.5	0
89.6	0
89.7	0
89.8	0
89.9	0
90	0
90.1	0
90.2	0
90.3	0
90.4	0
90.5	0
90.6	0
90.7	0
90.8	0
90.9	0
91	0
91.1	0
91.2	0
91.3	0
91.4	0
91.5	0
91.6	0
91.7	0
91.8	0
91.9	0
92	0
92.1	0
92.2	0
92.3	0
92.4	0
92.5	0
92.6	0
92.7	0
92.8	0
92.9	0
93	0
93.1	0
93.2	0
93.3	0
93.4	0
93.5	0
93.6	0
93.7	0
93.8	0
93.9	0
94	0
94.1	0
94.2	0
94.3	0
94.4	0
94.5	0
94.6	0
94.7	0
94.8	0
94.9	0
95	0
95.1	0
95.2	0
95.3	0
95.4	0
95.5	0
95.6	0
95.7	0
95.8	0
95.9	0
96	0
96.1	0
96.2	0
96.3	0
96.4	0
96.5	0
96.6	0
96.7	0
96.8	0
96.9	0
97	0
97.1	0
97.2	0
97.3	0
97.4	0
97.5	0
97.6	0
97.7	0
97.8	0
97.9	0
98	0
98.1	0
98.2	0
98.3	0
98.4	0
98.5	0
98.6	0
98.7	0
98.8	0
98.9	0
99	0
99.1	0
99.2	0
99.3	0
99.4	0
99.5	0
99.6	0
99.7	0
99.8	0
99.9	0
100	0
100.1	0.0166667
100.2	0.0316667
100.3	0.0446667
100.4	0.056
100.5	0.0673333
100.6	0.0776667
100.7	0.0893333
100.8	0.103
100.9	0.117
101	0.126667
101.1	0.134333
101.2	0.143667
101.3	0.153
101.4	0.162667
101.5	0.179
101.6	0.187667
101.7	0.195333
101.8	0.205333
101.9	0.211333
102	0.222667
102.1	0.232333
102.2	0.24
102.3	0.245
102.4	0.251333
102.5	0.254333
102.6	0.261667
102.7	0.266667
102.8	0.270667
102.9	0.276667
103	0.278667
103.1	0.281667
103.2	0.287333
103.3	0.297
103.4	0.305333
103.5	0.306667
103.6	0.311333
103.7	0.317667
103.8	0.322667
103.9	0.326667
104	0.330667
104.1	0.335667
104.2	0.339667
104.3	0.343667
104.4	0.347333
104.5	0.349667
104.6	0.353667
104.7	0.354667
104.8	0.355667
104.9	0.36
105	0.364667
105.1	0.371
105.2	0.372667
105.3	0.374333
105.4	0.376667
105.5	0.378667
105.6	0.381333
105.7	0.385333
105.8	0.390667
105.9	0.394667
106	0.395667
106.1	0.398333
106.2	0.398
106.3	0.401
106.4	0.406
106.5	0.406667
106.6	0.407333
106.7	0.411
106.8	0.411667
106.9	0.408667
107	0.410333
107.1	0.412667
107.2	0.413
107.3	0.417667
107.4	0.417
107.5	0.418333
107.6	0.418333
107.7	0.417667
107.8	0.418667
107.9	0.421333
108	0.42
108.1	0.419
108.2	0.418667
108.3	0.421333
108.4	0.422
108.5	0.420667
108.6	0.422667
108.7	0.424
108.8	0.424667
108.9	0.423333
109	0.421
109.1	0.418
109.2	0.419333
109.3	0.421333
109.4	0.427333
109.5	0.427667
109.6	0.428
109.7	0.429667
109.8	0.429667
109.9	0.43
110	0.43
110.1	0.429
110.2	0.428333
110.3	0.428667
110.4	0.426333
110.5	0.428667
110.6	0.429667
110.7	0.426
110.8	0.428
110.9	0.431333
111	0.431333
111.1	0.432
111.2	0.433
111.3	0.432333
111.4	0.433333
111.5	0.434333
111.6	0.434
111.7	0.435
111.8	0.435667
111.9	0.434
112	0.434
112.1	0.430333
112.2	0.435333
112.3	0.436667
112.4	0.435333
112.5	0.436667
112.6	0.437
112.7	0.441667
112.8	0.439
112.9	0.440667
113	0.441667
113.1	0.441667
113.2	0.443
113.3	0.439333
113.4	0.440667
113.5	0.439333
113.6	0.442
113.7	0.440667
113.8	0.441333
113.9	0.442333
114	0.444667
114.1	0.445667
114.2	0.446333
114.3	0.445667
114.4	0.445
114.5	0.445333
114.6	0.449333
114.7	0.450333
114.8	0.450333
114.9	0.451
115	0.453667
115.1	0.454667
115.2	0.451333
115.3	0.447
115.4	0.446
115.5	0.444
115.6	0.443667
115.7	0.440667
115.8	0.444333
115.9	0.445
116	0.442667
116.1	0.448
116.2	0.450333
116.3	0.448667
116.4	0.451333
116.5	0.451333
116.6	0.450333
116.7	0.452667
116.8	0.453333
116.9	0.454667
117	0.454333
117.1	0.452667
117.2	0.455333
117.3	0.454333
117.4	0.457
117.5	0.457333
117.6	0.457
117.7	0.458
117.8	0.456333
117.9	0.459333
118	0.460333
118.1	0.458333
118.2	0.457
118.3	0.456333
118.4	0.457667
118.5	0.458667
118.6	0.460667
118.7	0.459667
118.8	0.458
118.9	0.456667
119	0.457
119.1	0.454
119.2	0.456667
119.3	0.459333
119.4	0.457
119.5	0.457333
119.6	0.453667
119.7	0.453333
119.8	0.455333
119.9	0.455333
120	0.451
120.1	0.449667
120.2	0.451333
120.3	0.452667
120.4	0.453333
120.5	0.456667
120.6	0.453333
120.7	0.455333
120.8	0.455667
120.9	0.457333
121	0.457333
121.1	0.459333
121.2	0.459
121.3	0.460333
121.4	0.462333
121.5	0.464
121.6	0.463
121.7	0.464
121.8	0.463333
121.9	0.464667
122	0.466333
122.1	0.465667
122.2	0.467
122.3	0.466333
122.4	0.471333
122.5	0.473667
122.6	0.473333
122.7	0.469333
122.8	0.472333
122.9	0.467333
123	0.467333
123.1	0.467
123.2	0.466333
123.3	0.466667
123.4	0.467667
123.5	0.467
123.6	0.470667
123.7	0.474
123.8	0.476667
123.9	0.478
124	0.475667
124.1	0.476333
124.2	0.476333
124.3	0.476
124.4	0.477667
124.5	0.478
124.6	0.478667
124.7	0.479333
124.8	0.483333
124.9	0.480333
125	0.484333
125.1	0.487
125.2	0.487333
125.3	0.483
125.4	0.48
125.5	0.480667
125.6	0.481333
125.7	0.481
125.8	0.482333
125.9	0.482667
126	0.483
126.1	0.484333
126.2	0.484333
126.3	0.482667
126.4	0.477333
126.5	0.478667
126.6	0.482333
126.7	0.486333
126.8	0.484667
126.9	0.481667
127	0.484333
127.1	0.488
127.2	0.485333
127.3	0.485667
127.4	0.486
127.5	0.484
127.6	0.484333
127.7	0.486667
127.8	0.484667
127.9	0.484333
128	0.483667
128.1	0.484
128.2	0.486333
128.3	0.482333
128.4	0.483333
128.5	0.485
128.6	0.485667
128.7	0.488
128.8	0.488
128.9	0.484333
129	0.487333
129.1	0.486667
129.2	0.489667
129.3	0.488667
129.4	0.486
129.5	0.486667
129.6	0.485333
129.7	0.484667
129.8	0.485667
129.9	0.484667
130	0.483333
130.1	0.485333
130.2	0.483333
130.3	0.486667
130.4	0.488333
130.5	0.487667
130.6	0.487333
130.7	0.489667
130.8	0.491333
130.9	0.494
131	0.494667
131.1	0.495333
131.2	0.498
131.3	0.493333
131.4	0.491
131.5	0.494
131.6	0.496333
131.7	0.494333
131.8	0.492667
131.9	0.494
132	0.495
132.1	0.496333
132.2	0.495
132.3	0.492667
132.4	0.492333
132.5	0.493
132.6	0.492
132.7	0.491333
132.8	0.49
132.9	0.492667
133	0.493667
133.1	0.491333
133.2	0.489667
133.3	0.490333
133.4	0.489333
133.5	0.492667
133.6	0.493
133.7	0.493
133.8	0.491667
133.9	0.490333
134	0.488667
134.1	0.487667
134.2	0.490667
134.3	0.490667
134.4	0.492667
134.5	0.494333
134.6	0.497
134.7	0.497333
134.8	0.495333
134.9	0.495
135	0.497
135.1	0.494667
135.2	0.497
135.3	0.497333
135.4	0.500667
135.5	0.502
135.6	0.499
135.7	0.499333
135.8	0.499
135.9	0.501333
136	0.502
136.1	0.501667
136.2	0.501667
136.3	0.503333
136.4	0.503333
136.5	0.501
136.6	0.499667
136.7	0.498667
136.8	0.497
136.9	0.496
137	0.498667
137.1	0.495
137.2	0.496667
137.3	0.492667
137.4	0.494667
137.5	0.492667
137.6	0.493333
137.7	0.494667
137.8	0.495
137.9	0.494333
138	0.492333
138.1	0.498
138.2	0.5
138.3	0.500333
138.4	0.500333
138.5	0.498667
138.6	0.499333
138.7	0.500333
138.8	0.498333
138.9	0.497
139	0.499
139.1	0.5
139.2	0.497667
139.3	0.498333
139.4	0.496667
139.5	0.495667
139.6	0.494667
139.7	0.494667
139.8	0.498
139.9	0.500333
140	0.503667
140.1	0.504333
140.2	0.503667
140.3	0.504333
140.4	0.504667
140.5	0.504667
140.6	0.503333
140.7	0.504
140.8	0.503
140.9	0.500667
141	0.501
141.1	0.501333
141.2	0.500667
141.3	0.501
141.4	0.502333
141.5	0.501333
141.6	0.501
141.7	0.503
141.8	0.502667
141.9	0.504667
142	0.503
142.1	0.505333
142.2	0.506
142.3	0.505667
142.4	0.502333
142.5	0.503
142.6	0.505333
142.7	0.505333
142.8	0.506667
142.9	0.505333
143	0.505333
143.1	0.506667
143.2	0.504667
143.3	0.505
143.4	0.507
143.5	0.508333
143.6	0.51
143.7	0.511
143.8	0.514333
143.9	0.516333
144	0.512333
144.1	0.510667
144.2	0.513333
144.3	0.514333
144.4	0.514667
144.5	0.514667
144.6	0.514667
144.7	0.515333
144.8	0.514667
144.9	0.513667
145	0.512
145.1	0.512333
145.2	0.514333
145.3	0.513667
145.4	0.512333
145.5	0.511667
145.6	0.510667
145.7	0.510667
145.8	0.509
145.9	0.51
146	0.511667
146.1	0.509333
146.2	0.507333
146.3	0.507333
146.4	0.51
146.5	0.512
146.6	0.512333
146.7	0.513333
146.8	0.512667
146.9	0.511333
147	0.512
147.1	0.509667
147.2	0.509
147.3	0.508667
147.4	0.510667
147.5	0.510667
147.6	0.511667
147.7	0.513
147.8	0.512667
147.9	0.515333
148	0.516667
148.1	0.517
148.2	0.521
148.3	0.518333
148.4	0.518667
148.5	0.519333
148.6	0.517667
148.7	0.519667
148.8	0.518333
148.9	0.52
149	0.519667
149.1	0.517
149.2	0.519333
149.3	0.517
149.4	0.52
149.5	0.519333
149.6	0.518333
149.7	0.518333
149.8	0.519333
149.9	0.520667
150	0.522667
150.1	0.525333
150.2	0.522
150.3	0.522333
150.4	0.52
150.5	0.518667
150.6	0.517333
150.7	0.515
150.8	0.517667
150.9	0.516667
151	0.516
151.1	0.518667
151.2	0.52
151.3	0.522333
151.4	0.523667
151.5	0.521333
151.6	0.521333
151.7	0.524667
151.8	0.524333
151.9	0.525
152	0.520667
152.1	0.522333
152.2	0.524333
152.3	0.523
152.4	0.523667
152.5	0.521333
152.6	0.523333
152.7	0.523
152.8	0.519667
152.9	0.521667
153	0.521
153.1	0.519667
153.2	0.521
153.3	0.522
153.4	0.520333
153.5	0.522333
153.6	0.520667
153.7	0.517333
153.8	0.517667
153.9	0.518667
154	0.519667
154.1	0.518667
154.2	0.518667
154.3	0.517
154.4	0.515333
154.5	0.517333
154.6	0.516
154.7	0.514667
154.8	0.516
154.9	0.515333
155	0.515667
155.1	0.515333
155.2	0.514333
155.3	0.515667
155.4	0.516667
155.5	0.516667
155.6	0.515667
155.7	0.513667
155.8	0.513667
155.9	0.517333
156	0.516333
156.1	0.516333
156.2	0.519
156.3	0.519667
156.4	0.523333
156.5	0.522
156.6	0.522
156.7	0.521333
156.8	0.523667
156.9	0.522
157	0.522
157.1	0.522
157.2	0.520667
157.3	0.519333
157.4	0.517667
157.5	0.517667
157.6	0.517
157.7	0.522
157.8	0.524333
157.9	0.523333
158	0.524333
158.1	0.527333
158.2	0.529
158.3	0.527667
158.4	0.528667
158.5	0.528
158.6	0.530667
158.7	0.533
158.8	0.530333
158.9	0.531667
159	0.533667
159.1	0.533333
159.2	0.533
159.3	0.532
159.4	0.532667
159.5	0.531667
159.6	0.531
159.7	0.531667
159.8	0.531667
159.9	0.533667
160	0.534667
160.1	0.533667
160.2	0.531333
160.3	0.528667
160.4	0.525667
160.5	0.527
160.6	0.527667
160.7	0.529333
160.8	0.528667
160.9	0.529333
161	0.529667
161.1	0.528667
161.2	0.531667
161.3	0.532333
161.4	0.535667
161.5	0.534667
161.6	0.535
161.7	0.536333
161.8	0.535333
161.9	0.534667
162	0.537
162.1	0.538
162.2	0.538667
162.3	0.541
162.4	0.540667
162.5	0.539333
162.6	0.542
162.7	0.541333
162.8	0.539667
162.9	0.539667
163	0.541
163.1	0.539667
163.2	0.537333
163.3	0.538
163.4	0.537
163.5	0.536
163.6	0.535333
163.7	0.534667
163.8	0.535
163.9	0.535667
164	0.534667
164.1	0.538333
164.2	0.538
164.3	0.539667
164.4	0.540667
164.5	0.541333
164.6	0.540333
164.7	0.542667
164.8	0.542333
164.9	0.545
165	0.546
165.1	0.548
165.2	0.550333
165.3	0.550333
165.4	0.551333
165.5	0.550333
165.6	0.547667
165.7	0.544667
165.8	0.545667
165.9	0.543333
166	0.541
166.1	0.538667
166.2	0.536
166.3	0.534667
166.4	0.531667
166.5	0.532
166.6	0.530667
166.7	0.530667
166.8	0.529333
166.9	0.531
167	0.531333
167.1	0.531667
167.2	0.532667
167.3	0.532
167.4	0.532
167.5	0.534667
167.6	0.538
167.7	0.537
167.8	0.535333
167.9	0.540667
168	0.542
168.1	0.542667
168.2	0.545333
168.3	0.546
168.4	0.546
168.5	0.545
168.6	0.547
168.7	0.548333
168.8	0.546667
168.9	0.546
169	0.544
169.1	0.545667
169.2	0.546667
169.3	0.548
169.4	0.548
169.5	0.548667
169.6	0.547333
169.7	0.549
169.8	0.548333
169.9	0.548
170	0.548667
170.1	0.550667
170.2	0.552333
170.3	0.550667
170.4	0.549333
170.5	0.551333
170.6	0.550333
170.7	0.549
170.8	0.549333
170.9	0.549667
171	0.548333
171.1	0.549667
171.2	0.548667
171.3	0.549667
171.4	0.545667
171.5	0.546
171.6	0.545
171.7	0.548
171.8	0.549333
171.9	0.55
172	0.552
172.1	0.555
172.2	0.555667
172.3	0.555333
172.4	0.554
172.5	0.554667
172.6	0.555667
172.7	0.558
172.8	0.557333
172.9	0.558
173	0.558333
173.1	0.562333
173.2	0.562333
173.3	0.561
173.4	0.558
173.5	0.556667
173.6	0.557333
173.7	0.556667
173.8	0.558667
173.9	0.560667
174	0.560667
174.1	0.558333
174.2	0.556333
174.3	0.557
174.4	0.556667
174.5	0.557333
174.6	0.557
174.7	0.558667
174.8	0.559
174.9	0.56
175	0.556667
175.1	0.554333
175.2	0.556667
175.3	0.555333
175.4	0.553333
175.5	0.553
175.6	0.555333
175.7	0.556
175.8	0.558
175.9	0.560667
176	0.561
176.1	0.561667
176.2	0.563
176.3	0.562667
176.4	0.561
176.5	0.559
176.6	0.557
176.7	0.556667
176.8	0.554667
176.9	0.554667
177	0.551333
177.1	0.549333
177.2	0.550333
177.3	0.548667
177.4	0.547667
177.5	0.547667
177.6	0.545667
177.7	0.546333
177.8	0.547667
177.9	0.550667
178	0.551667
178.1	0.551333
178.2	0.551333
178.3	0.552667
178.4	0.554333
178.5	0.556
178.6	0.556333
178.7	0.553333
178.8	0.556
178.9	0.556
179	0.558
179.1	0.556667
179.2	0.554
179.3	0.553
179.4	0.552333
179.5	0.552333
179.6	0.555
179.7	0.555333
179.8	0.556
179.9	0.558667
180	0.561333
180.1	0.558667
180.2	0.559333
180.3	0.560333
180.4	0.562
180.5	0.56
180.6	0.562667
180.7	0.563333
180.8	0.564667
180.9	0.566
181	0.564
181.1	0.564667
181.2	0.56
181.3	0.559333
181.4	0.555667
181.5	0.556333
181.6	0.555667
181.7	0.555667
181.8	0.553
181.9	0.556333
182	0.553667
182.1	0.553667
182.2	0.552
182.3	0.553667
182.4	0.556
182.5	0.557333
182.6	0.557
182.7	0.556667
182.8	0.555667
182.9	0.556333
183	0.557
183.1	0.556
183.2	0.559333
183.3	0.558
183.4	0.562333
183.5	0.563
183.6	0.561
183.7	0.560333
183.8	0.561667
183.9	0.562667
184	0.560333
184.1	0.559667
184.2	0.563
184.3	0.562333
184.4	0.560333
184.5	0.559667
184.6	0.559333
184.7	0.557333
184.8	0.555333
184.9	0.552333
185	0.555333
185.1	0.557
185.2	0.556333
185.3	0.553667
185.4	0.554667
185.5	0.555333
185.6	0.554667
185.7	0.553
185.8	0.555667
185.9	0.559
186	0.558667
186.1	0.558333
186.2	0.558
186.3	0.553333
186.4	0.554667
186.5	0.555667
186.6	0.555333
186.7	0.557333
186.8	0.557667
186.9	0.557333
187	0.557
187.1	0.557333
187.2	0.558667
187.3	0.558
187.4	0.56
187.5	0.562667
187.6	0.564
187.7	0.563
187.8	0.563667
187.9	0.563333
188	0.565
188.1	0.564667
188.2	0.563
188.3	0.564333
188.4	0.565667
188.5	0.567
188.6	0.566
188.7	0.564667
188.8	0.566
188.9	0.567
189	0.564333
189.1	0.562333
189.2	0.565667
189.3	0.564667
189.4	0.565333
189.5	0.563333
189.6	0.568333
189.7	0.568667
189.8	0.565
189.9	0.566
190	0.566333
190.1	0.566667
190.2	0.567667
190.3	0.565
190.4	0.564333
190.5	0.563333
190.6	0.565
190.7	0.565333
190.8	0.564
190.9	0.565
191	0.567
191.1	0.567667
191.2	0.566667
191.3	0.565333
191.4	0.566667
191.5	0.562
191.6	0.561667
191.7	0.563
191.8	0.560667
191.9	0.563333
192	0.565
192.1	0.565
192.2	0.564
192.3	0.564
192.4	0.562667
192.5	0.560333
192.6	0.561667
192.7	0.562
192.8	0.564333
192.9	0.566667
193	0.567667
193.1	0.568
193.2	0.568
193.3	0.570667
193.4	0.573333
193.5	0.573667
193.6	0.574
193.7	0.574333
193.8	0.572667
193.9	0.572333
194	0.571667
194.1	0.571
194.2	0.570333
194.3	0.568667
194.4	0.563667
194.5	0.564
194.6	0.568333
194.7	0.569
194.8	0.567667
194.9	0.564667
195	0.566
195.1	0.567333
195.2	0.569333
195.3	0.569667
195.4	0.571333
195.5	0.572
195.6	0.573333
195.7	0.574
195.8	0.573333
195.9	0.575333
196	0.574333
196.1	0.575333
196.2	0.574
196.3	0.574
196.4	0.573333
196.5	0.574333
196.6	0.575667
196.7	0.577333
196.8	0.576333
196.9	0.574333
197	0.573667
197.1	0.572333
197.2	0.570333
197.3	0.572333
197.4	0.573667
197.5	0.573667
197.6	0.572667
197.7	0.573
197.8	0.572667
197.9	0.574
198	0.574333
198.1	0.574667
198.2	0.573333
198.3	0.572
198.4	0.570333
198.5	0.570667
198.6	0.571667
198.7	0.572333
198.8	0.574
198.9	0.574
199	0.572333
199.1	0.572333
199.2	0.575
199.3	0.578333
199.4	0.578667
199.5	0.579333
199.6	0.577
199.7	0.576333
199.8	0.576667
199.9	0.577
200	0.575667
[truncated: 14,000 more rows]
