# Supplementary material for: Bayesian inference of kinetic schemes for ion channels by Kalman filtering
Source: eLife journal article supplement (doi:10.7554/elife.62714), 2022-05-04
Supplement: fig4-data8 [file 1_Sim_N_1500_Strom_MW.xlsx]

## Sheet: Tabelle1
0.1	0
0.2	0
0.3	0
0.4	0
0.5	0
0.6	0
0.7	0
0.8	0
0.9	0
1	0
1.1	0
1.2	0
1.3	0
1.4	0
1.5	0
1.6	0
1.7	0
1.8	0
1.9	0
2	0
2.1	0
2.2	0
2.3	0
2.4	0
2.5	0
2.6	0
2.7	0
2.8	0
2.9	0
3	0
3.1	0
3.2	0
3.3	0
3.4	0
3.5	0
3.6	0
3.7	0
3.8	0
3.9	0
4	0
4.1	0
4.2	0
4.3	0
4.4	0
4.5	0
4.6	0
4.7	0
4.8	0
4.9	0
5	0
5.1	0
5.2	0
5.3	0
5.4	0
5.5	0
5.6	0
5.7	0
5.8	0
5.9	0
6	0
6.1	0
6.2	0
6.3	0
6.4	0
6.5	0
6.6	0
6.7	0
6.8	0
6.9	0
7	0
7.1	0
7.2	0
7.3	0
7.4	0
7.5	0
7.6	0
7.7	0
7.8	0
7.9	0
8	0
8.1	0
8.2	0
8.3	0
8.4	0
8.5	0
8.6	0
8.7	0
8.8	0
8.9	0
9	0
9.1	0
9.2	0
9.3	0
9.4	0
9.5	0
9.6	0
9.7	0
9.8	0
9.9	0
10	0
10.1	0
10.2	0
10.3	0
10.4	0
10.5	0
10.6	0
10.7	0
10.8	0
10.9	0
11	0
11.1	0
11.2	0
11.3	0
11.4	0
11.5	0
11.6	0
11.7	0
11.8	0
11.9	0
12	0
12.1	0
12.2	0
12.3	0
12.4	0
12.5	0
12.6	0
12.7	0
12.8	0
12.9	0
13	0
13.1	0
13.2	0
13.3	0
13.4	0
13.5	0
13.6	0
13.7	0
13.8	0
13.9	0
14	0
14.1	0
14.2	0
14.3	0
14.4	0
14.5	0
14.6	0
14.7	0
14.8	0
14.9	0
15	0
15.1	0
15.2	0
15.3	0
15.4	0
15.5	0
15.6	0
15.7	0
15.8	0
15.9	0
16	0
16.1	0
16.2	0
16.3	0
16.4	0
16.5	0
16.6	0
16.7	0
16.8	0
16.9	0
17	0
17.1	0
17.2	0
17.3	0
17.4	0
17.5	0
17.6	0
17.7	0
17.8	0
17.9	0
18	0
18.1	0
18.2	0
18.3	0
18.4	0
18.5	0
18.6	0
18.7	0
18.8	0
18.9	0
19	0
19.1	0
19.2	0
19.3	0
19.4	0
19.5	0
19.6	0
19.7	0
19.8	0
19.9	0
20	0
20.1	0
20.2	0
20.3	0
20.4	0
20.5	0
20.6	0
20.7	0
20.8	0
20.9	0
21	0
21.1	0
21.2	0
21.3	0
21.4	0
21.5	0
21.6	0
21.7	0
21.8	0
21.9	0
22	0
22.1	0
22.2	0
22.3	0
22.4	0
22.5	0
22.6	0
22.7	0
22.8	0
22.9	0
23	0
23.1	0
23.2	0
23.3	0
23.4	0
23.5	0
23.6	0
23.7	0
23.8	0
23.9	0
24	0
24.1	0
24.2	0
24.3	0
24.4	0
24.5	0
24.6	0
24.7	0
24.8	0
24.9	0
25	0
25.1	0
25.2	0
25.3	0
25.4	0
25.5	0
25.6	0
25.7	0
25.8	0
25.9	0
26	0
26.1	0
26.2	0
26.3	0
26.4	0
26.5	0
26.6	0
26.7	0
26.8	0
26.9	0
27	0
27.1	0
27.2	0
27.3	0
27.4	0
27.5	0
27.6	0
27.7	0
27.8	0
27.9	0
28	0
28.1	0
28.2	0
28.3	0
28.4	0
28.5	0
28.6	0
28.7	0
28.8	0
28.9	0
29	0
29.1	0
29.2	0
29.3	0
29.4	0
29.5	0
29.6	0
29.7	0
29.8	0
29.9	0
30	0
30.1	0
30.2	0
30.3	0
30.4	0
30.5	0
30.6	0
30.7	0
30.8	0
30.9	0
31	0
31.1	0
31.2	0
31.3	0
31.4	0
31.5	0
31.6	0
31.7	0
31.8	0
31.9	0
32	0
32.1	0
32.2	0
32.3	0
32.4	0
32.5	0
32.6	0
32.7	0
32.8	0
32.9	0
33	0
33.1	0
33.2	0
33.3	0
33.4	0
33.5	0
33.6	0
33.7	0
33.8	0
33.9	0
34	0
34.1	0
34.2	0
34.3	0
34.4	0
34.5	0
34.6	0
34.7	0
34.8	0
34.9	0
35	0
35.1	0
35.2	0
35.3	0
35.4	0
35.5	0
35.6	0
35.7	0
35.8	0
35.9	0
36	0
36.1	0
36.2	0
36.3	0
36.4	0
36.5	0
36.6	0
36.7	0
36.8	0
36.9	0
37	0
37.1	0
37.2	0
37.3	0
37.4	0
37.5	0
37.6	0
37.7	0
37.8	0
37.9	0
38	0
38.1	0
38.2	0
38.3	0
38.4	0
38.5	0
38.6	0
38.7	0
38.8	0
38.9	0
39	0
39.1	0
39.2	0
39.3	0
39.4	0
39.5	0
39.6	0
39.7	0
39.8	0
39.9	0
40	0
40.1	0
40.2	0
40.3	0
40.4	0
40.5	0
40.6	0
40.7	0
40.8	0
40.9	0
41	0
41.1	0
41.2	0
41.3	0
41.4	0
41.5	0
41.6	0
41.7	0
41.8	0
41.9	0
42	0
42.1	0
42.2	0
42.3	0
42.4	0
42.5	0
42.6	0
42.7	0
42.8	0
42.9	0
43	0
43.1	0
43.2	0
43.3	0
43.4	0
43.5	0
43.6	0
43.7	0
43.8	0
43.9	0
44	0
44.1	0
44.2	0
44.3	0
44.4	0
44.5	0
44.6	0
44.7	0
44.8	0
44.9	0
45	0
45.1	0
45.2	0
45.3	0
45.4	0
45.5	0
45.6	0
45.7	0
45.8	0
45.9	0
46	0
46.1	0
46.2	0
46.3	0
46.4	0
46.5	0
46.6	0
46.7	0
46.8	0
46.9	0
47	0
47.1	0
47.2	0
47.3	0
47.4	0
47.5	0
47.6	0
47.7	0
47.8	0
47.9	0
48	0
48.1	0
48.2	0
48.3	0
48.4	0
48.5	0
48.6	0
48.7	0
48.8	0
48.9	0
49	0
49.1	0
49.2	0
49.3	0
49.4	0
49.5	0
49.6	0
49.7	0
49.8	0
49.9	0
50	0
50.1	0
50.2	0
50.3	0
50.4	0
50.5	0
50.6	0
50.7	0
50.8	0
50.9	0
51	0
51.1	0
51.2	0
51.3	0
51.4	0
51.5	0
51.6	0
51.7	0
51.8	0
51.9	0
52	0
52.1	0
52.2	0
52.3	0
52.4	0
52.5	0
52.6	0
52.7	0
52.8	0
52.9	0
53	0
53.1	0
53.2	0
53.3	0
53.4	0
53.5	0
53.6	0
53.7	0
53.8	0
53.9	0
54	0
54.1	0
54.2	0
54.3	0
54.4	0
54.5	0
54.6	0
54.7	0
54.8	0
54.9	0
55	0
55.1	0
55.2	0
55.3	0
55.4	0
55.5	0
55.6	0
55.7	0
55.8	0
55.9	0
56	0
56.1	0
56.2	0
56.3	0
56.4	0
56.5	0
56.6	0
56.7	0
56.8	0
56.9	0
57	0
57.1	0
57.2	0
57.3	0
57.4	0
57.5	0
57.6	0
57.7	0
57.8	0
57.9	0
58	0
58.1	0
58.2	0
58.3	0
58.4	0
58.5	0
58.6	0
58.7	0
58.8	0
58.9	0
59	0
59.1	0
59.2	0
59.3	0
59.4	0
59.5	0
59.6	0
59.7	0
59.8	0
59.9	0
60	0
60.1	0
60.2	0
60.3	0
60.4	0
60.5	0
60.6	0
60.7	0
60.8	0
60.9	0
61	0
61.1	0
61.2	0
61.3	0
61.4	0
61.5	0
61.6	0
61.7	0
61.8	0
61.9	0
62	0
62.1	0
62.2	0
62.3	0
62.4	0
62.5	0
62.6	0
62.7	0
62.8	0
62.9	0
63	0
63.1	0
63.2	0
63.3	0
63.4	0
63.5	0
63.6	0
63.7	0
63.8	0
63.9	0
64	0
64.1	0
64.2	0
64.3	0
64.4	0
64.5	0
64.6	0
64.7	0
64.8	0
64.9	0
65	0
65.1	0
65.2	0
65.3	0
65.4	0
65.5	0
65.6	0
65.7	0
65.8	0
65.9	0
66	0
66.1	0
66.2	0
66.3	0
66.4	0
66.5	0
66.6	0
66.7	0
66.8	0
66.9	0
67	0
67.1	0
67.2	0
67.3	0
67.4	0
67.5	0
67.6	0
67.7	0
67.8	0
67.9	0
68	0
68.1	0
68.2	0
68.3	0
68.4	0
68.5	0
68.6	0
68.7	0
68.8	0
68.9	0
69	0
69.1	0
69.2	0
69.3	0
69.4	0
69.5	0
69.6	0
69.7	0
69.8	0
69.9	0
70	0
70.1	0
70.2	0
70.3	0
70.4	0
70.5	0
70.6	0
70.7	0
70.8	0
70.9	0
71	0
71.1	0
71.2	0
71.3	0
71.4	0
71.5	0
71.6	0
71.7	0
71.8	0
71.9	0
72	0
72.1	0
72.2	0
72.3	0
72.4	0
72.5	0
72.6	0
72.7	0
72.8	0
72.9	0
73	0
73.1	0
73.2	0
73.3	0
73.4	0
73.5	0
73.6	0
73.7	0
73.8	0
73.9	0
74	0
74.1	0
74.2	0
74.3	0
74.4	0
74.5	0
74.6	0
74.7	0
74.8	0
74.9	0
75	0
75.1	0
75.2	0
75.3	0
75.4	0
75.5	0
75.6	0
75.7	0
75.8	0
75.9	0
76	0
76.1	0
76.2	0
76.3	0
76.4	0
76.5	0
76.6	0
76.7	0
76.8	0
76.9	0
77	0
77.1	0
77.2	0
77.3	0
77.4	0
77.5	0
77.6	0
77.7	0
77.8	0
77.9	0
78	0
78.1	0
78.2	0
78.3	0
78.4	0
78.5	0
78.6	0
78.7	0
78.8	0
78.9	0
79	0
79.1	0
79.2	0
79.3	0
79.4	0
79.5	0
79.6	0
79.7	0
79.8	0
79.9	0
80	0
80.1	0
80.2	0
80.3	0
80.4	0
80.5	0
80.6	0
80.7	0
80.8	0
80.9	0
81	0
81.1	0
81.2	0
81.3	0
81.4	0
81.5	0
81.6	0
81.7	0
81.8	0
81.9	0
82	0
82.1	0
82.2	0
82.3	0
82.4	0
82.5	0
82.6	0
82.7	0
82.8	0
82.9	0
83	0
83.1	0
83.2	0
83.3	0
83.4	0
83.5	0
83.6	0
83.7	0
83.8	0
83.9	0
84	0
84.1	0
84.2	0
84.3	0
84.4	0
84.5	0
84.6	0
84.7	0
84.8	0
84.9	0
85	0
85.1	0
85.2	0
85.3	0
85.4	0
85.5	0
85.6	0
85.7	0
85.8	0
85.9	0
86	0
86.1	0
86.2	0
86.3	0
86.4	0
86.5	0
86.6	0
86.7	0
86.8	0
86.9	0
87	0
87.1	0
87.2	0
87.3	0
87.4	0
87.5	0
87.6	0
87.7	0
87.8	0
87.9	0
88	0
88.1	0
88.2	0
88.3	0
88.4	0
88.5	0
88.6	0
88.7	0
88.8	0
88.9	0
89	0
89.1	0
89.2	0
89.3	0
89.4	0
89.5	0
89.6	0
89.7	0
89.8	0
89.9	0
90	0
90.1	0
90.2	0
90.3	0
90.4	0
90.5	0
90.6	0
90.7	0
90.8	0
90.9	0
91	0
91.1	0
91.2	0
91.3	0
91.4	0
91.5	0
91.6	0
91.7	0
91.8	0
91.9	0
92	0
92.1	0
92.2	0
92.3	0
92.4	0
92.5	0
92.6	0
92.7	0
92.8	0
92.9	0
93	0
93.1	0
93.2	0
93.3	0
93.4	0
93.5	0
93.6	0
93.7	0
93.8	0
93.9	0
94	0
94.1	0
94.2	0
94.3	0
94.4	0
94.5	0
94.6	0
94.7	0
94.8	0
94.9	0
95	0
95.1	0
95.2	0
95.3	0
95.4	0
95.5	0
95.6	0
95.7	0
95.8	0
95.9	0
96	0
96.1	0
96.2	0
96.3	0
96.4	0
96.5	0
96.6	0
96.7	0
96.8	0
96.9	0
97	0
97.1	0
97.2	0
97.3	0
97.4	0
97.5	0
97.6	0
97.7	0
97.8	0
97.9	0
98	0
98.1	0
98.2	0
98.3	0
98.4	0
98.5	0
98.6	0
98.7	0
98.8	0
98.9	0
99	0
99.1	0
99.2	0
99.3	0
99.4	0
99.5	0
99.6	0
99.7	0
99.8	0
99.9	0
100	0
100.1	0
100.2	0
100.3	0
100.4	0
100.5	0
100.6	0
100.7	0
100.8	0
100.9	0
101	0
101.1	0
101.2	0.000666667
101.3	0.000666667
101.4	0.000666667
101.5	0.000666667
101.6	0.000666667
101.7	0.000666667
101.8	0.000666667
101.9	0.000666667
102	0.000666667
102.1	0.000666667
102.2	0.00133333
102.3	0.00133333
102.4	0.002
102.5	0.00266667
102.6	0.00333333
102.7	0.00333333
102.8	0.00333333
102.9	0.00333333
103	0.00333333
103.1	0.00466667
103.2	0.00533333
103.3	0.006
103.4	0.006
103.5	0.00666667
103.6	0.00666667
103.7	0.00666667
103.8	0.00666667
103.9	0.00733333
104	0.008
104.1	0.008
104.2	0.008
104.3	0.008
104.4	0.00866667
104.5	0.00866667
104.6	0.00933333
104.7	0.00933333
104.8	0.00933333
104.9	0.00933333
105	0.00933333
105.1	0.00933333
105.2	0.00933333
105.3	0.00933333
105.4	0.00933333
105.5	0.00933333
105.6	0.00933333
105.7	0.00933333
105.8	0.00933333
105.9	0.00933333
106	0.01
106.1	0.0106667
106.2	0.0113333
106.3	0.0113333
106.4	0.012
106.5	0.0133333
106.6	0.0133333
106.7	0.0133333
106.8	0.0133333
106.9	0.014
107	0.014
107.1	0.0146667
107.2	0.0153333
107.3	0.0153333
107.4	0.0153333
107.5	0.0153333
107.6	0.0153333
107.7	0.0153333
107.8	0.0153333
107.9	0.0153333
108	0.016
108.1	0.016
108.2	0.0173333
108.3	0.018
108.4	0.018
108.5	0.018
108.6	0.0186667
108.7	0.0186667
108.8	0.0213333
108.9	0.0226667
109	0.0226667
109.1	0.0233333
109.2	0.024
109.3	0.0246667
109.4	0.0253333
109.5	0.0266667
109.6	0.0273333
109.7	0.0273333
109.8	0.0273333
109.9	0.0273333
110	0.0286667
110.1	0.0293333
110.2	0.0306667
110.3	0.0313333
110.4	0.0313333
110.5	0.0313333
110.6	0.0313333
110.7	0.032
110.8	0.032
110.9	0.0326667
111	0.0326667
111.1	0.0326667
111.2	0.0333333
111.3	0.034
111.4	0.034
111.5	0.0346667
111.6	0.0353333
111.7	0.036
111.8	0.036
111.9	0.036
112	0.036
112.1	0.036
112.2	0.036
112.3	0.0366667
112.4	0.0366667
112.5	0.0373333
112.6	0.038
112.7	0.038
112.8	0.038
112.9	0.0386667
113	0.0393333
113.1	0.04
113.2	0.0413333
113.3	0.042
113.4	0.042
113.5	0.0426667
113.6	0.044
113.7	0.0446667
113.8	0.0453333
113.9	0.0446667
114	0.0453333
114.1	0.046
114.2	0.0466667
114.3	0.048
114.4	0.0493333
114.5	0.05
114.6	0.052
114.7	0.052
114.8	0.052
114.9	0.0533333
115	0.054
115.1	0.054
115.2	0.054
115.3	0.054
115.4	0.056
115.5	0.0553333
115.6	0.056
115.7	0.056
115.8	0.056
115.9	0.0566667
116	0.0566667
116.1	0.0566667
116.2	0.0566667
116.3	0.058
116.4	0.0586667
116.5	0.0586667
116.6	0.0586667
116.7	0.058
116.8	0.058
116.9	0.058
117	0.0586667
117.1	0.0593333
117.2	0.0593333
117.3	0.0593333
117.4	0.0593333
117.5	0.06
117.6	0.0606667
117.7	0.0613333
117.8	0.062
117.9	0.062
118	0.062
118.1	0.0633333
118.2	0.064
118.3	0.064
118.4	0.0646667
118.5	0.0653333
118.6	0.0653333
118.7	0.0653333
118.8	0.0653333
118.9	0.066
119	0.066
119.1	0.066
119.2	0.0666667
119.3	0.066
119.4	0.066
119.5	0.066
119.6	0.066
119.7	0.0666667
119.8	0.0666667
119.9	0.0673333
120	0.0673333
120.1	0.0666667
120.2	0.0666667
120.3	0.0666667
120.4	0.0673333
120.5	0.0673333
120.6	0.068
120.7	0.068
120.8	0.068
120.9	0.0686667
121	0.0686667
121.1	0.0686667
121.2	0.0686667
121.3	0.0693333
121.4	0.07
121.5	0.07
121.6	0.0713333
121.7	0.0713333
121.8	0.0713333
121.9	0.0713333
122	0.072
122.1	0.072
122.2	0.072
122.3	0.0726667
122.4	0.0733333
122.5	0.074
122.6	0.0753333
122.7	0.0753333
122.8	0.0746667
122.9	0.0753333
123	0.0753333
123.1	0.076
123.2	0.076
123.3	0.076
123.4	0.0766667
123.5	0.0766667
123.6	0.0766667
123.7	0.0773333
123.8	0.0773333
123.9	0.078
124	0.078
124.1	0.0786667
124.2	0.08
124.3	0.08
124.4	0.08
124.5	0.0813333
124.6	0.0813333
124.7	0.0813333
124.8	0.0806667
124.9	0.0813333
125	0.0813333
125.1	0.0813333
125.2	0.0813333
125.3	0.082
125.4	0.0826667
125.5	0.0833333
125.6	0.0846667
125.7	0.086
125.8	0.086
125.9	0.0866667
126	0.0873333
126.1	0.0873333
126.2	0.0873333
126.3	0.0873333
126.4	0.0873333
126.5	0.0873333
126.6	0.0873333
126.7	0.088
126.8	0.088
126.9	0.0886667
127	0.0893333
127.1	0.0906667
127.2	0.0913333
127.3	0.092
127.4	0.0926667
127.5	0.0926667
127.6	0.0926667
127.7	0.094
127.8	0.0946667
127.9	0.0946667
128	0.0946667
128.1	0.0946667
128.2	0.0946667
128.3	0.0946667
128.4	0.0953333
128.5	0.0953333
128.6	0.0953333
128.7	0.096
128.8	0.096
128.9	0.0966667
129	0.0966667
129.1	0.0966667
129.2	0.0986667
129.3	0.0986667
129.4	0.0986667
129.5	0.0986667
129.6	0.0993333
129.7	0.0993333
129.8	0.0993333
129.9	0.098
130	0.098
130.1	0.098
130.2	0.098
130.3	0.0993333
130.4	0.0993333
130.5	0.0993333
130.6	0.1
130.7	0.100667
130.8	0.100667
130.9	0.100667
131	0.100667
131.1	0.100667
131.2	0.100667
131.3	0.101333
131.4	0.102
131.5	0.102667
131.6	0.103333
131.7	0.103333
131.8	0.104
131.9	0.105333
132	0.105333
132.1	0.105333
132.2	0.106
132.3	0.106
132.4	0.106
132.5	0.106
132.6	0.106667
132.7	0.106667
132.8	0.106
132.9	0.106667
133	0.106667
133.1	0.108667
133.2	0.11
133.3	0.110667
133.4	0.111333
133.5	0.111333
133.6	0.112
133.7	0.111333
133.8	0.111333
133.9	0.111333
134	0.111333
134.1	0.111333
134.2	0.110667
134.3	0.110667
134.4	0.110667
134.5	0.111333
134.6	0.11
134.7	0.11
134.8	0.110667
134.9	0.110667
135	0.111333
135.1	0.111333
135.2	0.111333
135.3	0.112
135.4	0.113333
135.5	0.114
135.6	0.114
135.7	0.114667
135.8	0.115333
135.9	0.115333
136	0.116
136.1	0.115333
136.2	0.115333
136.3	0.115333
136.4	0.115333
136.5	0.115333
136.6	0.115333
136.7	0.115333
136.8	0.116
136.9	0.115333
137	0.115333
137.1	0.115333
137.2	0.116
137.3	0.116667
137.4	0.116667
137.5	0.116
137.6	0.116
137.7	0.116
137.8	0.116667
137.9	0.116667
138	0.116667
138.1	0.116667
138.2	0.118
138.3	0.118
138.4	0.118
138.5	0.118
138.6	0.118
138.7	0.119333
138.8	0.12
138.9	0.12
139	0.120667
139.1	0.121333
139.2	0.121333
139.3	0.121333
139.4	0.122
139.5	0.122
139.6	0.122
139.7	0.122
139.8	0.122
139.9	0.122667
140	0.123333
140.1	0.123333
140.2	0.123333
140.3	0.123333
140.4	0.124667
140.5	0.124667
140.6	0.125333
140.7	0.126
140.8	0.126667
140.9	0.126667
141	0.126667
141.1	0.125333
141.2	0.124667
141.3	0.126
141.4	0.126
141.5	0.126
141.6	0.126667
141.7	0.128667
141.8	0.13
141.9	0.130667
142	0.131333
142.1	0.130667
142.2	0.130667
142.3	0.130667
142.4	0.130667
142.5	0.130667
142.6	0.131333
142.7	0.131333
142.8	0.132
142.9	0.132667
143	0.135333
143.1	0.135333
143.2	0.135333
143.3	0.135333
143.4	0.136
143.5	0.136
143.6	0.136667
143.7	0.136
143.8	0.136667
143.9	0.136667
144	0.136667
144.1	0.136667
144.2	0.137333
144.3	0.137333
144.4	0.137333
144.5	0.137333
144.6	0.136667
144.7	0.136
144.8	0.136
144.9	0.136
145	0.136
145.1	0.136667
145.2	0.136667
145.3	0.136667
145.4	0.138
145.5	0.138667
145.6	0.139333
145.7	0.140667
145.8	0.141333
145.9	0.142667
146	0.142667
146.1	0.142667
146.2	0.142667
146.3	0.143333
146.4	0.144667
146.5	0.145333
146.6	0.145333
146.7	0.145333
146.8	0.146
146.9	0.146
147	0.146667
147.1	0.146667
147.2	0.146
147.3	0.146
147.4	0.147333
147.5	0.147333
147.6	0.148
147.7	0.147333
147.8	0.148
147.9	0.148
148	0.148
148.1	0.148
148.2	0.149333
148.3	0.15
148.4	0.150667
148.5	0.150667
148.6	0.150667
148.7	0.150667
148.8	0.150667
148.9	0.150667
149	0.151333
149.1	0.152
149.2	0.152
149.3	0.152
149.4	0.152667
149.5	0.152667
149.6	0.152667
149.7	0.152667
149.8	0.153333
149.9	0.153333
150	0.153333
150.1	0.153333
150.2	0.153333
150.3	0.152
150.4	0.151333
150.5	0.152
150.6	0.152
150.7	0.152667
150.8	0.154
150.9	0.154
151	0.154
151.1	0.154
151.2	0.154667
151.3	0.154667
151.4	0.154667
151.5	0.155333
151.6	0.156
151.7	0.156
151.8	0.156
151.9	0.156
152	0.156667
152.1	0.156667
152.2	0.157333
152.3	0.156
152.4	0.157333
152.5	0.158
152.6	0.158
152.7	0.158
152.8	0.157333
152.9	0.157333
153	0.157333
153.1	0.157333
153.2	0.158
153.3	0.158667
153.4	0.158667
153.5	0.159333
153.6	0.158667
153.7	0.158
153.8	0.156667
153.9	0.156667
154	0.157333
154.1	0.156667
154.2	0.156667
154.3	0.156
154.4	0.156
154.5	0.156
154.6	0.156667
154.7	0.158667
154.8	0.159333
154.9	0.159333
155	0.159333
155.1	0.16
155.2	0.16
155.3	0.160667
155.4	0.16
155.5	0.161333
155.6	0.161333
155.7	0.162
155.8	0.162667
155.9	0.161333
156	0.160667
156.1	0.160667
156.2	0.161333
156.3	0.162
156.4	0.162
156.5	0.163333
156.6	0.164667
156.7	0.164667
156.8	0.164667
156.9	0.164667
157	0.164667
157.1	0.164667
157.2	0.164
157.3	0.165333
157.4	0.166
157.5	0.166
157.6	0.166
157.7	0.166667
157.8	0.167333
157.9	0.167333
158	0.167333
158.1	0.168
158.2	0.168
158.3	0.168667
158.4	0.168
158.5	0.168667
158.6	0.17
158.7	0.170667
158.8	0.171333
158.9	0.171333
159	0.173333
159.1	0.174
159.2	0.174
159.3	0.176
159.4	0.176
159.5	0.176
159.6	0.176
159.7	0.179333
159.8	0.179333
159.9	0.179333
160	0.18
160.1	0.18
160.2	0.18
160.3	0.179333
160.4	0.179333
160.5	0.179333
160.6	0.18
160.7	0.18
160.8	0.18
160.9	0.179333
161	0.179333
161.1	0.179333
161.2	0.180667
161.3	0.182
161.4	0.181333
161.5	0.181333
161.6	0.181333
161.7	0.182
161.8	0.182667
161.9	0.182667
162	0.182667
162.1	0.182667
162.2	0.184
162.3	0.183333
162.4	0.184667
162.5	0.184667
162.6	0.184667
162.7	0.184667
162.8	0.184667
162.9	0.184667
163	0.184667
163.1	0.184667
163.2	0.185333
163.3	0.185333
163.4	0.185333
163.5	0.186667
163.6	0.186667
163.7	0.186667
163.8	0.186667
163.9	0.186667
164	0.186
164.1	0.186
164.2	0.185333
164.3	0.185333
164.4	0.184667
164.5	0.184667
164.6	0.184667
164.7	0.185333
164.8	0.185333
164.9	0.185333
165	0.185333
165.1	0.185333
165.2	0.186
165.3	0.186
165.4	0.186
165.5	0.188
165.6	0.188
165.7	0.188667
165.8	0.188667
165.9	0.189333
166	0.189333
166.1	0.19
166.2	0.190667
166.3	0.191333
166.4	0.191333
166.5	0.190667
166.6	0.192667
166.7	0.192
166.8	0.193333
166.9	0.191333
167	0.192
167.1	0.192
167.2	0.192
167.3	0.192
167.4	0.192
167.5	0.192
167.6	0.192
167.7	0.192
167.8	0.192667
167.9	0.193333
168	0.194667
168.1	0.195333
168.2	0.196667
168.3	0.196
168.4	0.195333
168.5	0.196
168.6	0.196667
168.7	0.197333
168.8	0.196667
168.9	0.197333
169	0.196667
169.1	0.196667
169.2	0.196667
169.3	0.197333
169.4	0.197333
169.5	0.196667
169.6	0.196667
169.7	0.198
169.8	0.198
169.9	0.198667
170	0.198667
170.1	0.198667
170.2	0.199333
170.3	0.199333
170.4	0.199333
170.5	0.2
170.6	0.2
170.7	0.200667
170.8	0.200667
170.9	0.2
171	0.200667
171.1	0.201333
171.2	0.202667
171.3	0.202667
171.4	0.202
171.5	0.202
171.6	0.202667
171.7	0.202667
171.8	0.203333
171.9	0.203333
172	0.204667
172.1	0.204667
172.2	0.204667
172.3	0.204667
172.4	0.204
172.5	0.204667
172.6	0.206667
172.7	0.206667
172.8	0.206667
172.9	0.206
173	0.205333
173.1	0.205333
173.2	0.206
173.3	0.205333
173.4	0.205333
173.5	0.204667
173.6	0.204667
173.7	0.205333
173.8	0.206
173.9	0.205333
174	0.205333
174.1	0.204667
174.2	0.204667
174.3	0.205333
174.4	0.206
174.5	0.205333
174.6	0.206
174.7	0.206667
174.8	0.207333
174.9	0.207333
175	0.208667
175.1	0.209333
175.2	0.21
175.3	0.21
175.4	0.21
175.5	0.210667
175.6	0.211333
175.7	0.212
175.8	0.212
175.9	0.212667
176	0.212
176.1	0.212
176.2	0.212
176.3	0.212
176.4	0.210667
176.5	0.212
176.6	0.212
176.7	0.211333
176.8	0.212
176.9	0.212
177	0.212667
177.1	0.212667
177.2	0.213333
177.3	0.213333
177.4	0.213333
177.5	0.213333
177.6	0.213333
177.7	0.213333
177.8	0.213333
177.9	0.212667
178	0.214
178.1	0.214
178.2	0.214667
178.3	0.214667
178.4	0.214667
178.5	0.214667
178.6	0.214667
178.7	0.214
178.8	0.213333
178.9	0.213333
179	0.213333
179.1	0.214
179.2	0.214667
179.3	0.214667
179.4	0.215333
179.5	0.215333
179.6	0.215333
179.7	0.216
179.8	0.216
179.9	0.216
180	0.216
180.1	0.216
180.2	0.214667
180.3	0.216667
180.4	0.216667
180.5	0.216667
180.6	0.216
180.7	0.218
180.8	0.218667
180.9	0.218667
181	0.219333
181.1	0.219333
181.2	0.219333
181.3	0.22
181.4	0.22
181.5	0.221333
181.6	0.221333
181.7	0.220667
181.8	0.220667
181.9	0.220667
182	0.221333
182.1	0.221333
182.2	0.221333
182.3	0.221333
182.4	0.223333
182.5	0.223333
182.6	0.223333
182.7	0.223333
182.8	0.224667
182.9	0.224667
183	0.224
183.1	0.224667
183.2	0.226
183.3	0.226
183.4	0.226667
183.5	0.226667
183.6	0.226
183.7	0.226667
183.8	0.228
183.9	0.228667
184	0.228667
184.1	0.229333
184.2	0.230667
184.3	0.230667
184.4	0.230667
184.5	0.230667
184.6	0.231333
184.7	0.230667
184.8	0.229333
184.9	0.229333
185	0.228667
185.1	0.228667
185.2	0.228667
185.3	0.228667
185.4	0.228667
185.5	0.228667
185.6	0.226667
185.7	0.227333
185.8	0.227333
185.9	0.226667
186	0.227333
186.1	0.228
186.2	0.227333
186.3	0.227333
186.4	0.227333
186.5	0.228
186.6	0.228
186.7	0.228
186.8	0.227333
186.9	0.228
187	0.228667
187.1	0.228667
187.2	0.229333
187.3	0.229333
187.4	0.23
187.5	0.23
187.6	0.23
187.7	0.23
187.8	0.230667
187.9	0.231333
188	0.232
188.1	0.232
188.2	0.232
188.3	0.232
188.4	0.232667
188.5	0.232667
188.6	0.232667
188.7	0.233333
188.8	0.233333
188.9	0.234
189	0.234
189.1	0.233333
189.2	0.233333
189.3	0.232667
189.4	0.232667
189.5	0.233333
189.6	0.234
189.7	0.233333
189.8	0.233333
189.9	0.234667
190	0.235333
190.1	0.235333
190.2	0.235333
190.3	0.236
190.4	0.236
190.5	0.236
190.6	0.236667
190.7	0.236667
190.8	0.236667
190.9	0.236
191	0.236
191.1	0.236
191.2	0.236667
191.3	0.236
191.4	0.236667
191.5	0.236667
191.6	0.237333
191.7	0.238
191.8	0.238
191.9	0.238667
192	0.238
192.1	0.238
192.2	0.238667
192.3	0.238667
192.4	0.238
192.5	0.238667
192.6	0.238667
192.7	0.238
192.8	0.238667
192.9	0.24
193	0.239333
193.1	0.24
193.2	0.240667
193.3	0.242667
193.4	0.243333
193.5	0.244
193.6	0.244
193.7	0.244667
193.8	0.244
193.9	0.244
194	0.244
194.1	0.244
194.2	0.244
194.3	0.244
194.4	0.244667
194.5	0.244667
194.6	0.244667
194.7	0.245333
194.8	0.246667
194.9	0.247333
195	0.247333
195.1	0.246667
195.2	0.246
195.3	0.246
195.4	0.246667
195.5	0.246667
195.6	0.246667
195.7	0.247333
195.8	0.248
195.9	0.248667
196	0.248667
196.1	0.249333
196.2	0.25
196.3	0.250667
196.4	0.250667
196.5	0.250667
196.6	0.251333
196.7	0.251333
196.8	0.251333
196.9	0.25
197	0.250667
197.1	0.25
197.2	0.249333
197.3	0.249333
197.4	0.25
197.5	0.25
197.6	0.25
197.7	0.250667
197.8	0.250667
197.9	0.250667
198	0.250667
198.1	0.252
198.2	0.252
198.3	0.252
198.4	0.250667
198.5	0.251333
198.6	0.252
198.7	0.252
198.8	0.252
198.9	0.252
199	0.252
199.1	0.253333
199.2	0.253333
199.3	0.253333
199.4	0.252
199.5	0.252
199.6	0.252
199.7	0.252
199.8	0.252
199.9	0.252667
200	0.252667
[truncated: 14,000 more rows]
