# Supplementary material for: Bayesian inference of kinetic schemes for ion channels by Kalman filtering
Source: eLife journal article supplement (doi:10.7554/elife.62714), 2022-05-04
Supplement: fig4-data8 [file 1_Sim_N_2000_Fluor_MW.xlsx]

## Sheet: Tabelle1
0.1	0
0.2	0
0.3	0
0.4	0
0.5	0
0.6	0
0.7	0
0.8	0
0.9	0
1	0
1.1	0
1.2	0
1.3	0
1.4	0
1.5	0
1.6	0
1.7	0
1.8	0
1.9	0
2	0
2.1	0
2.2	0
2.3	0
2.4	0
2.5	0
2.6	0
2.7	0
2.8	0
2.9	0
3	0
3.1	0
3.2	0
3.3	0
3.4	0
3.5	0
3.6	0
3.7	0
3.8	0
3.9	0
4	0
4.1	0
4.2	0
4.3	0
4.4	0
4.5	0
4.6	0
4.7	0
4.8	0
4.9	0
5	0
5.1	0
5.2	0
5.3	0
5.4	0
5.5	0
5.6	0
5.7	0
5.8	0
5.9	0
6	0
6.1	0
6.2	0
6.3	0
6.4	0
6.5	0
6.6	0
6.7	0
6.8	0
6.9	0
7	0
7.1	0
7.2	0
7.3	0
7.4	0
7.5	0
7.6	0
7.7	0
7.8	0
7.9	0
8	0
8.1	0
8.2	0
8.3	0
8.4	0
8.5	0
8.6	0
8.7	0
8.8	0
8.9	0
9	0
9.1	0
9.2	0
9.3	0
9.4	0
9.5	0
9.6	0
9.7	0
9.8	0
9.9	0
10	0
10.1	0
10.2	0
10.3	0
10.4	0
10.5	0
10.6	0
10.7	0
10.8	0
10.9	0
11	0
11.1	0
11.2	0
11.3	0
11.4	0
11.5	0
11.6	0
11.7	0
11.8	0
11.9	0
12	0
12.1	0
12.2	0
12.3	0
12.4	0
12.5	0
12.6	0
12.7	0
12.8	0
12.9	0
13	0
13.1	0
13.2	0
13.3	0
13.4	0
13.5	0
13.6	0
13.7	0
13.8	0
13.9	0
14	0
14.1	0
14.2	0
14.3	0
14.4	0
14.5	0
14.6	0
14.7	0
14.8	0
14.9	0
15	0
15.1	0
15.2	0
15.3	0
15.4	0
15.5	0
15.6	0
15.7	0
15.8	0
15.9	0
16	0
16.1	0
16.2	0
16.3	0
16.4	0
16.5	0
16.6	0
16.7	0
16.8	0
16.9	0
17	0
17.1	0
17.2	0
17.3	0
17.4	0
17.5	0
17.6	0
17.7	0
17.8	0
17.9	0
18	0
18.1	0
18.2	0
18.3	0
18.4	0
18.5	0
18.6	0
18.7	0
18.8	0
18.9	0
19	0
19.1	0
19.2	0
19.3	0
19.4	0
19.5	0
19.6	0
19.7	0
19.8	0
19.9	0
20	0
20.1	0
20.2	0
20.3	0
20.4	0
20.5	0
20.6	0
20.7	0
20.8	0
20.9	0
21	0
21.1	0
21.2	0
21.3	0
21.4	0
21.5	0
21.6	0
21.7	0
21.8	0
21.9	0
22	0
22.1	0
22.2	0
22.3	0
22.4	0
22.5	0
22.6	0
22.7	0
22.8	0
22.9	0
23	0
23.1	0
23.2	0
23.3	0
23.4	0
23.5	0
23.6	0
23.7	0
23.8	0
23.9	0
24	0
24.1	0
24.2	0
24.3	0
24.4	0
24.5	0
24.6	0
24.7	0
24.8	0
24.9	0
25	0
25.1	0
25.2	0
25.3	0
25.4	0
25.5	0
25.6	0
25.7	0
25.8	0
25.9	0
26	0
26.1	0
26.2	0
26.3	0
26.4	0
26.5	0
26.6	0
26.7	0
26.8	0
26.9	0
27	0
27.1	0
27.2	0
27.3	0
27.4	0
27.5	0
27.6	0
27.7	0
27.8	0
27.9	0
28	0
28.1	0
28.2	0
28.3	0
28.4	0
28.5	0
28.6	0
28.7	0
28.8	0
28.9	0
29	0
29.1	0
29.2	0
29.3	0
29.4	0
29.5	0
29.6	0
29.7	0
29.8	0
29.9	0
30	0
30.1	0
30.2	0
30.3	0
30.4	0
30.5	0
30.6	0
30.7	0
30.8	0
30.9	0
31	0
31.1	0
31.2	0
31.3	0
31.4	0
31.5	0
31.6	0
31.7	0
31.8	0
31.9	0
32	0
32.1	0
32.2	0
32.3	0
32.4	0
32.5	0
32.6	0
32.7	0
32.8	0
32.9	0
33	0
33.1	0
33.2	0
33.3	0
33.4	0
33.5	0
33.6	0
33.7	0
33.8	0
33.9	0
34	0
34.1	0
34.2	0
34.3	0
34.4	0
34.5	0
34.6	0
34.7	0
34.8	0
34.9	0
35	0
35.1	0
35.2	0
35.3	0
35.4	0
35.5	0
35.6	0
35.7	0
35.8	0
35.9	0
36	0
36.1	0
36.2	0
36.3	0
36.4	0
36.5	0
36.6	0
36.7	0
36.8	0
36.9	0
37	0
37.1	0
37.2	0
37.3	0
37.4	0
37.5	0
37.6	0
37.7	0
37.8	0
37.9	0
38	0
38.1	0
38.2	0
38.3	0
38.4	0
38.5	0
38.6	0
38.7	0
38.8	0
38.9	0
39	0
39.1	0
39.2	0
39.3	0
39.4	0
39.5	0
39.6	0
39.7	0
39.8	0
39.9	0
40	0
40.1	0
40.2	0
40.3	0
40.4	0
40.5	0
40.6	0
40.7	0
40.8	0
40.9	0
41	0
41.1	0
41.2	0
41.3	0
41.4	0
41.5	0
41.6	0
41.7	0
41.8	0
41.9	0
42	0
42.1	0
42.2	0
42.3	0
42.4	0
42.5	0
42.6	0
42.7	0
42.8	0
42.9	0
43	0
43.1	0
43.2	0
43.3	0
43.4	0
43.5	0
43.6	0
43.7	0
43.8	0
43.9	0
44	0
44.1	0
44.2	0
44.3	0
44.4	0
44.5	0
44.6	0
44.7	0
44.8	0
44.9	0
45	0
45.1	0
45.2	0
45.3	0
45.4	0
45.5	0
45.6	0
45.7	0
45.8	0
45.9	0
46	0
46.1	0
46.2	0
46.3	0
46.4	0
46.5	0
46.6	0
46.7	0
46.8	0
46.9	0
47	0
47.1	0
47.2	0
47.3	0
47.4	0
47.5	0
47.6	0
47.7	0
47.8	0
47.9	0
48	0
48.1	0
48.2	0
48.3	0
48.4	0
48.5	0
48.6	0
48.7	0
48.8	0
48.9	0
49	0
49.1	0
49.2	0
49.3	0
49.4	0
49.5	0
49.6	0
49.7	0
49.8	0
49.9	0
50	0
50.1	0
50.2	0
50.3	0
50.4	0
50.5	0
50.6	0
50.7	0
50.8	0
50.9	0
51	0
51.1	0
51.2	0
51.3	0
51.4	0
51.5	0
51.6	0
51.7	0
51.8	0
51.9	0
52	0
52.1	0
52.2	0
52.3	0
52.4	0
52.5	0
52.6	0
52.7	0
52.8	0
52.9	0
53	0
53.1	0
53.2	0
53.3	0
53.4	0
53.5	0
53.6	0
53.7	0
53.8	0
53.9	0
54	0
54.1	0
54.2	0
54.3	0
54.4	0
54.5	0
54.6	0
54.7	0
54.8	0
54.9	0
55	0
55.1	0
55.2	0
55.3	0
55.4	0
55.5	0
55.6	0
55.7	0
55.8	0
55.9	0
56	0
56.1	0
56.2	0
56.3	0
56.4	0
56.5	0
56.6	0
56.7	0
56.8	0
56.9	0
57	0
57.1	0
57.2	0
57.3	0
57.4	0
57.5	0
57.6	0
57.7	0
57.8	0
57.9	0
58	0
58.1	0
58.2	0
58.3	0
58.4	0
58.5	0
58.6	0
58.7	0
58.8	0
58.9	0
59	0
59.1	0
59.2	0
59.3	0
59.4	0
59.5	0
59.6	0
59.7	0
59.8	0
59.9	0
60	0
60.1	0
60.2	0
60.3	0
60.4	0
60.5	0
60.6	0
60.7	0
60.8	0
60.9	0
61	0
61.1	0
61.2	0
61.3	0
61.4	0
61.5	0
61.6	0
61.7	0
61.8	0
61.9	0
62	0
62.1	0
62.2	0
62.3	0
62.4	0
62.5	0
62.6	0
62.7	0
62.8	0
62.9	0
63	0
63.1	0
63.2	0
63.3	0
63.4	0
63.5	0
63.6	0
63.7	0
63.8	0
63.9	0
64	0
64.1	0
64.2	0
64.3	0
64.4	0
64.5	0
64.6	0
64.7	0
64.8	0
64.9	0
65	0
65.1	0
65.2	0
65.3	0
65.4	0
65.5	0
65.6	0
65.7	0
65.8	0
65.9	0
66	0
66.1	0
66.2	0
66.3	0
66.4	0
66.5	0
66.6	0
66.7	0
66.8	0
66.9	0
67	0
67.1	0
67.2	0
67.3	0
67.4	0
67.5	0
67.6	0
67.7	0
67.8	0
67.9	0
68	0
68.1	0
68.2	0
68.3	0
68.4	0
68.5	0
68.6	0
68.7	0
68.8	0
68.9	0
69	0
69.1	0
69.2	0
69.3	0
69.4	0
69.5	0
69.6	0
69.7	0
69.8	0
69.9	0
70	0
70.1	0
70.2	0
70.3	0
70.4	0
70.5	0
70.6	0
70.7	0
70.8	0
70.9	0
71	0
71.1	0
71.2	0
71.3	0
71.4	0
71.5	0
71.6	0
71.7	0
71.8	0
71.9	0
72	0
72.1	0
72.2	0
72.3	0
72.4	0
72.5	0
72.6	0
72.7	0
72.8	0
72.9	0
73	0
73.1	0
73.2	0
73.3	0
73.4	0
73.5	0
73.6	0
73.7	0
73.8	0
73.9	0
74	0
74.1	0
74.2	0
74.3	0
74.4	0
74.5	0
74.6	0
74.7	0
74.8	0
74.9	0
75	0
75.1	0
75.2	0
75.3	0
75.4	0
75.5	0
75.6	0
75.7	0
75.8	0
75.9	0
76	0
76.1	0
76.2	0
76.3	0
76.4	0
76.5	0
76.6	0
76.7	0
76.8	0
76.9	0
77	0
77.1	0
77.2	0
77.3	0
77.4	0
77.5	0
77.6	0
77.7	0
77.8	0
77.9	0
78	0
78.1	0
78.2	0
78.3	0
78.4	0
78.5	0
78.6	0
78.7	0
78.8	0
78.9	0
79	0
79.1	0
79.2	0
79.3	0
79.4	0
79.5	0
79.6	0
79.7	0
79.8	0
79.9	0
80	0
80.1	0
80.2	0
80.3	0
80.4	0
80.5	0
80.6	0
80.7	0
80.8	0
80.9	0
81	0
81.1	0
81.2	0
81.3	0
81.4	0
81.5	0
81.6	0
81.7	0
81.8	0
81.9	0
82	0
82.1	0
82.2	0
82.3	0
82.4	0
82.5	0
82.6	0
82.7	0
82.8	0
82.9	0
83	0
83.1	0
83.2	0
83.3	0
83.4	0
83.5	0
83.6	0
83.7	0
83.8	0
83.9	0
84	0
84.1	0
84.2	0
84.3	0
84.4	0
84.5	0
84.6	0
84.7	0
84.8	0
84.9	0
85	0
85.1	0
85.2	0
85.3	0
85.4	0
85.5	0
85.6	0
85.7	0
85.8	0
85.9	0
86	0
86.1	0
86.2	0
86.3	0
86.4	0
86.5	0
86.6	0
86.7	0
86.8	0
86.9	0
87	0
87.1	0
87.2	0
87.3	0
87.4	0
87.5	0
87.6	0
87.7	0
87.8	0
87.9	0
88	0
88.1	0
88.2	0
88.3	0
88.4	0
88.5	0
88.6	0
88.7	0
88.8	0
88.9	0
89	0
89.1	0
89.2	0
89.3	0
89.4	0
89.5	0
89.6	0
89.7	0
89.8	0
89.9	0
90	0
90.1	0
90.2	0
90.3	0
90.4	0
90.5	0
90.6	0
90.7	0
90.8	0
90.9	0
91	0
91.1	0
91.2	0
91.3	0
91.4	0
91.5	0
91.6	0
91.7	0
91.8	0
91.9	0
92	0
92.1	0
92.2	0
92.3	0
92.4	0
92.5	0
92.6	0
92.7	0
92.8	0
92.9	0
93	0
93.1	0
93.2	0
93.3	0
93.4	0
93.5	0
93.6	0
93.7	0
93.8	0
93.9	0
94	0
94.1	0
94.2	0
94.3	0
94.4	0
94.5	0
94.6	0
94.7	0
94.8	0
94.9	0
95	0
95.1	0
95.2	0
95.3	0
95.4	0
95.5	0
95.6	0
95.7	0
95.8	0
95.9	0
96	0
96.1	0
96.2	0
96.3	0
96.4	0
96.5	0
96.6	0
96.7	0
96.8	0
96.9	0
97	0
97.1	0
97.2	0
97.3	0
97.4	0
97.5	0
97.6	0
97.7	0
97.8	0
97.9	0
98	0
98.1	0
98.2	0
98.3	0
98.4	0
98.5	0
98.6	0
98.7	0
98.8	0
98.9	0
99	0
99.1	0
99.2	0
99.3	0
99.4	0
99.5	0
99.6	0
99.7	0
99.8	0
99.9	0
100	0
100.1	0.0155
100.2	0.0275
100.3	0.04425
100.4	0.05975
100.5	0.073
100.6	0.08575
100.7	0.0955
100.8	0.106
100.9	0.11725
101	0.12875
101.1	0.1405
101.2	0.1485
101.3	0.16075
101.4	0.17175
101.5	0.17975
101.6	0.1865
101.7	0.195
101.8	0.2025
101.9	0.21025
102	0.21875
102.1	0.227
102.2	0.234
102.3	0.241
102.4	0.24875
102.5	0.25725
102.6	0.26575
102.7	0.274
102.8	0.27775
102.9	0.2845
103	0.29
103.1	0.294
103.2	0.2995
103.3	0.30825
103.4	0.3105
103.5	0.313
103.6	0.32
103.7	0.324
103.8	0.328
103.9	0.33225
104	0.334
104.1	0.3385
104.2	0.34275
104.3	0.34725
104.4	0.3505
104.5	0.356
104.6	0.3585
104.7	0.36275
104.8	0.36675
104.9	0.36925
105	0.37325
105.1	0.375
105.2	0.3775
105.3	0.37825
105.4	0.38175
105.5	0.38275
105.6	0.3835
105.7	0.385
105.8	0.38875
105.9	0.38875
106	0.388
106.1	0.39
106.2	0.3895
106.3	0.391
106.4	0.3935
106.5	0.39475
106.6	0.3965
106.7	0.398
106.8	0.40025
106.9	0.4015
107	0.40275
107.1	0.40325
107.2	0.404
107.3	0.409
107.4	0.40675
107.5	0.4085
107.6	0.4125
107.7	0.41325
107.8	0.41275
107.9	0.41225
108	0.417
108.1	0.4195
108.2	0.425
108.3	0.4265
108.4	0.43125
108.5	0.43425
108.6	0.43475
108.7	0.437
108.8	0.43975
108.9	0.43925
109	0.44075
109.1	0.442
109.2	0.44325
109.3	0.44225
109.4	0.4415
109.5	0.43975
109.6	0.44
109.7	0.44325
109.8	0.44075
109.9	0.44425
110	0.44475
110.1	0.44625
110.2	0.4495
110.3	0.45175
110.4	0.4525
110.5	0.452
110.6	0.45225
110.7	0.45
110.8	0.45025
110.9	0.45225
111	0.45375
111.1	0.45775
111.2	0.45775
111.3	0.45575
111.4	0.45825
111.5	0.459
111.6	0.46
111.7	0.45925
111.8	0.458
111.9	0.458
112	0.458
112.1	0.45775
112.2	0.4545
112.3	0.45675
112.4	0.4545
112.5	0.4545
112.6	0.454
112.7	0.452
112.8	0.45175
112.9	0.4495
113	0.4495
113.1	0.45225
113.2	0.44825
113.3	0.4475
113.4	0.4485
113.5	0.452
113.6	0.45275
113.7	0.45425
113.8	0.4555
113.9	0.45825
114	0.45875
114.1	0.4565
114.2	0.4585
114.3	0.458
114.4	0.45575
114.5	0.454
114.6	0.455
114.7	0.45675
114.8	0.45825
114.9	0.4595
115	0.4585
115.1	0.4625
115.2	0.466
115.3	0.46475
115.4	0.467
115.5	0.46725
115.6	0.469
115.7	0.46775
115.8	0.4695
115.9	0.4675
116	0.468
116.1	0.46775
116.2	0.467
116.3	0.46725
116.4	0.46775
116.5	0.46625
116.6	0.4675
116.7	0.46725
116.8	0.466
116.9	0.467
117	0.46775
117.1	0.46725
117.2	0.4665
117.3	0.4655
117.4	0.46575
117.5	0.46475
117.6	0.4665
117.7	0.46825
117.8	0.4675
117.9	0.467
118	0.4665
118.1	0.4665
118.2	0.46575
118.3	0.4645
118.4	0.46425
118.5	0.466
118.6	0.46925
118.7	0.46875
118.8	0.46825
118.9	0.46775
119	0.46675
119.1	0.46725
119.2	0.46825
119.3	0.46875
119.4	0.4685
119.5	0.46725
119.6	0.46825
119.7	0.46975
119.8	0.46825
119.9	0.4695
120	0.47
120.1	0.472
120.2	0.47325
120.3	0.4745
120.4	0.4755
120.5	0.4775
120.6	0.479
120.7	0.47575
120.8	0.47675
120.9	0.4775
121	0.479
121.1	0.481
121.2	0.48
121.3	0.4795
121.4	0.4805
121.5	0.48025
121.6	0.483
121.7	0.48275
121.8	0.482
121.9	0.4835
122	0.4845
122.1	0.4845
122.2	0.4845
122.3	0.48225
122.4	0.48275
122.5	0.48275
122.6	0.48425
122.7	0.4825
122.8	0.48175
122.9	0.48075
123	0.48175
123.1	0.4805
123.2	0.48025
123.3	0.48175
123.4	0.48175
123.5	0.485
123.6	0.48375
123.7	0.482
123.8	0.48
123.9	0.48075
124	0.48075
124.1	0.48175
124.2	0.4825
124.3	0.47975
124.4	0.48275
124.5	0.4805
124.6	0.48275
124.7	0.48425
124.8	0.48375
124.9	0.48425
125	0.4855
125.1	0.4875
125.2	0.4865
125.3	0.48725
125.4	0.489
125.5	0.4905
125.6	0.489
125.7	0.4875
125.8	0.48725
125.9	0.48425
126	0.484
126.1	0.4845
126.2	0.4825
126.3	0.4855
126.4	0.485
126.5	0.487
126.6	0.486
126.7	0.48725
126.8	0.48725
126.9	0.4885
127	0.4905
127.1	0.493
127.2	0.4915
127.3	0.49225
127.4	0.4925
127.5	0.493
127.6	0.49275
127.7	0.4925
127.8	0.49125
127.9	0.492
128	0.49125
128.1	0.49225
128.2	0.4935
128.3	0.4945
128.4	0.494
128.5	0.49225
128.6	0.49275
128.7	0.491
128.8	0.491
128.9	0.49125
129	0.4925
129.1	0.49425
129.2	0.49525
129.3	0.49375
129.4	0.49475
129.5	0.497
129.6	0.49675
129.7	0.4955
129.8	0.495
129.9	0.494
130	0.497
130.1	0.4985
130.2	0.49675
130.3	0.4945
130.4	0.493
130.5	0.49325
130.6	0.49175
130.7	0.493
130.8	0.49275
130.9	0.49375
131	0.4935
131.1	0.494
131.2	0.49725
131.3	0.4985
131.4	0.499
131.5	0.5035
131.6	0.5055
131.7	0.50525
131.8	0.50725
131.9	0.50975
132	0.507
132.1	0.50925
132.2	0.51125
132.3	0.514
132.4	0.514
132.5	0.513
132.6	0.51275
132.7	0.51375
132.8	0.51625
132.9	0.518
133	0.5175
133.1	0.51675
133.2	0.51725
133.3	0.5175
133.4	0.5165
133.5	0.51675
133.6	0.5175
133.7	0.51825
133.8	0.518
133.9	0.517
134	0.51425
134.1	0.515
134.2	0.51525
134.3	0.51625
134.4	0.517
134.5	0.5175
134.6	0.518
134.7	0.5195
134.8	0.517
134.9	0.5165
135	0.5175
135.1	0.51625
135.2	0.51575
135.3	0.516
135.4	0.51375
135.5	0.5145
135.6	0.5135
135.7	0.512
135.8	0.51125
135.9	0.50925
136	0.50625
136.1	0.5055
136.2	0.50525
136.3	0.505
136.4	0.50425
136.5	0.507
136.6	0.50775
136.7	0.50875
136.8	0.508
136.9	0.5075
137	0.505
137.1	0.503
137.2	0.50525
137.3	0.5055
137.4	0.5065
137.5	0.50275
137.6	0.505
137.7	0.503
137.8	0.504
137.9	0.50425
138	0.50625
138.1	0.5065
138.2	0.50425
138.3	0.5025
138.4	0.50275
138.5	0.5005
138.6	0.502
138.7	0.503
138.8	0.50375
138.9	0.505
139	0.50625
139.1	0.50675
139.2	0.507
139.3	0.5095
139.4	0.508
139.5	0.51025
139.6	0.50875
139.7	0.5095
139.8	0.50775
139.9	0.5085
140	0.5095
140.1	0.51
140.2	0.5115
140.3	0.51
140.4	0.5075
140.5	0.5065
140.6	0.509
140.7	0.50825
140.8	0.508
140.9	0.508
141	0.50925
141.1	0.5095
141.2	0.51075
141.3	0.513
141.4	0.513
141.5	0.514
141.6	0.51325
141.7	0.51525
141.8	0.51625
141.9	0.51675
142	0.5165
142.1	0.51825
142.2	0.51375
142.3	0.518
142.4	0.5165
142.5	0.51575
142.6	0.51525
142.7	0.51575
142.8	0.5155
142.9	0.516
143	0.51675
143.1	0.5175
143.2	0.51725
143.3	0.51625
143.4	0.51825
143.5	0.51875
143.6	0.52025
143.7	0.5215
143.8	0.5175
143.9	0.513
144	0.51075
144.1	0.5125
144.2	0.512
144.3	0.512
144.4	0.51175
144.5	0.5105
144.6	0.511
144.7	0.513
144.8	0.51175
144.9	0.51375
145	0.51575
145.1	0.51625
145.2	0.51675
145.3	0.51825
145.4	0.5195
145.5	0.52
145.6	0.519
145.7	0.51825
145.8	0.5165
145.9	0.51425
146	0.5135
146.1	0.51375
146.2	0.51425
146.3	0.5145
146.4	0.51275
146.5	0.5145
146.6	0.5155
146.7	0.514
146.8	0.51325
146.9	0.51275
147	0.51225
147.1	0.51075
147.2	0.51325
147.3	0.51375
147.4	0.51375
147.5	0.51375
147.6	0.51
147.7	0.5105
147.8	0.50925
147.9	0.51125
148	0.5125
148.1	0.5145
148.2	0.512
148.3	0.5135
148.4	0.51525
148.5	0.51375
148.6	0.5165
148.7	0.51725
148.8	0.51825
148.9	0.52075
149	0.52225
149.1	0.522
149.2	0.5195
149.3	0.52025
149.4	0.5195
149.5	0.52075
149.6	0.52125
149.7	0.521
149.8	0.52125
149.9	0.52
150	0.5185
150.1	0.51775
150.2	0.51725
150.3	0.5185
150.4	0.51625
150.5	0.519
150.6	0.52125
150.7	0.524
150.8	0.52125
150.9	0.51925
151	0.5195
151.1	0.52
151.2	0.52025
151.3	0.52075
151.4	0.52075
151.5	0.5195
151.6	0.521
151.7	0.52325
151.8	0.524
151.9	0.52175
152	0.5235
152.1	0.52525
152.2	0.52625
152.3	0.52575
152.4	0.52575
152.5	0.5245
152.6	0.52525
152.7	0.5255
152.8	0.5255
152.9	0.528
153	0.529
153.1	0.528
153.2	0.52925
153.3	0.52925
153.4	0.528
153.5	0.53
153.6	0.53175
153.7	0.532
153.8	0.531
153.9	0.52775
154	0.52775
154.1	0.5295
154.2	0.53075
154.3	0.528
154.4	0.528
154.5	0.52575
154.6	0.52525
154.7	0.527
154.8	0.527
154.9	0.527
155	0.5275
155.1	0.52575
155.2	0.527
155.3	0.52725
155.4	0.52975
155.5	0.52775
155.6	0.53125
155.7	0.531
155.8	0.5295
155.9	0.53025
156	0.52925
156.1	0.53175
156.2	0.53175
156.3	0.5335
156.4	0.534
156.5	0.5325
156.6	0.533
156.7	0.53475
156.8	0.534
156.9	0.53425
157	0.5345
157.1	0.53475
157.2	0.53325
157.3	0.53325
157.4	0.533
157.5	0.53375
157.6	0.536
157.7	0.5325
157.8	0.53025
157.9	0.5325
158	0.53375
158.1	0.53475
158.2	0.5335
158.3	0.53475
158.4	0.53525
158.5	0.5345
158.6	0.53425
158.7	0.53525
158.8	0.53875
158.9	0.537
159	0.53875
159.1	0.538
159.2	0.53875
159.3	0.5375
159.4	0.54075
159.5	0.53875
159.6	0.5385
159.7	0.53975
159.8	0.54225
159.9	0.5405
160	0.54175
160.1	0.5395
160.2	0.53975
160.3	0.539
160.4	0.53675
160.5	0.53825
160.6	0.53925
160.7	0.54
160.8	0.54025
160.9	0.5415
161	0.542
161.1	0.54175
161.2	0.53975
161.3	0.54025
161.4	0.5425
161.5	0.54225
161.6	0.546
161.7	0.54625
161.8	0.5445
161.9	0.54425
162	0.5435
162.1	0.54425
162.2	0.54375
162.3	0.5435
162.4	0.54375
162.5	0.546
162.6	0.5455
162.7	0.545
162.8	0.5445
162.9	0.54375
163	0.5445
163.1	0.5415
163.2	0.54075
163.3	0.54275
163.4	0.54575
163.5	0.5445
163.6	0.54275
163.7	0.5435
163.8	0.54575
163.9	0.54725
164	0.5475
164.1	0.54675
164.2	0.5445
164.3	0.546
164.4	0.54825
164.5	0.549
164.6	0.54975
164.7	0.55075
164.8	0.551
164.9	0.5485
165	0.548
165.1	0.5485
165.2	0.54875
165.3	0.55
165.4	0.54775
165.5	0.5495
165.6	0.5485
165.7	0.54875
165.8	0.54925
165.9	0.55025
166	0.5515
166.1	0.553
166.2	0.551
166.3	0.54975
166.4	0.5515
166.5	0.548
166.6	0.5465
166.7	0.54625
166.8	0.546
166.9	0.54475
167	0.5465
167.1	0.549
167.2	0.5505
167.3	0.5515
167.4	0.55375
167.5	0.5525
167.6	0.54975
167.7	0.54975
167.8	0.54875
167.9	0.5495
168	0.552
168.1	0.55275
168.2	0.554
168.3	0.5525
168.4	0.5525
168.5	0.55
168.6	0.5505
168.7	0.55275
168.8	0.55575
168.9	0.5555
169	0.55325
169.1	0.554
169.2	0.552
169.3	0.5505
169.4	0.55025
169.5	0.54725
169.6	0.544
169.7	0.545
169.8	0.54575
169.9	0.54925
170	0.551
170.1	0.5505
170.2	0.5485
170.3	0.54975
170.4	0.55225
170.5	0.55375
170.6	0.55325
170.7	0.5525
170.8	0.55075
170.9	0.54875
171	0.54925
171.1	0.5495
171.2	0.5485
171.3	0.5475
171.4	0.54675
171.5	0.547
171.6	0.548
171.7	0.54925
171.8	0.54925
171.9	0.55025
172	0.551
172.1	0.54875
172.2	0.54825
172.3	0.548
172.4	0.545
172.5	0.54575
172.6	0.5435
172.7	0.54375
172.8	0.54375
172.9	0.54325
173	0.5425
173.1	0.54525
173.2	0.5435
173.3	0.54325
173.4	0.54375
173.5	0.54425
173.6	0.546
173.7	0.54425
173.8	0.54425
173.9	0.54575
174	0.54975
174.1	0.55375
174.2	0.556
174.3	0.5585
174.4	0.55925
174.5	0.55875
174.6	0.55975
174.7	0.56175
174.8	0.56075
174.9	0.55825
175	0.55825
175.1	0.55475
175.2	0.55525
175.3	0.55375
175.4	0.55425
175.5	0.55425
175.6	0.55425
175.7	0.55225
175.8	0.55125
175.9	0.55225
176	0.55475
176.1	0.55475
176.2	0.5545
176.3	0.5555
176.4	0.55575
176.5	0.55375
176.6	0.55475
176.7	0.554
176.8	0.55475
176.9	0.5575
177	0.558
177.1	0.55825
177.2	0.558
177.3	0.5585
177.4	0.5585
177.5	0.55975
177.6	0.55975
177.7	0.56025
177.8	0.55825
177.9	0.55725
178	0.5575
178.1	0.557
178.2	0.558
178.3	0.55775
178.4	0.56
178.5	0.56175
178.6	0.56025
178.7	0.5605
178.8	0.561
178.9	0.563
179	0.56325
179.1	0.56525
179.2	0.566
179.3	0.56575
179.4	0.56625
179.5	0.564
179.6	0.565
179.7	0.56275
179.8	0.56225
179.9	0.562
180	0.56175
180.1	0.562
180.2	0.5595
180.3	0.55975
180.4	0.5575
180.5	0.558
180.6	0.559
180.7	0.5575
180.8	0.557
180.9	0.55675
181	0.555
181.1	0.557
181.2	0.555
181.3	0.55725
181.4	0.559
181.5	0.5575
181.6	0.55775
181.7	0.5555
181.8	0.55625
181.9	0.557
182	0.55975
182.1	0.5585
182.2	0.55975
182.3	0.559
182.4	0.55925
182.5	0.5605
182.6	0.564
182.7	0.56225
182.8	0.565
182.9	0.5655
183	0.5665
183.1	0.56525
183.2	0.56375
183.3	0.5635
183.4	0.56175
183.5	0.561
183.6	0.55975
183.7	0.5595
183.8	0.5585
183.9	0.55675
184	0.559
184.1	0.56
184.2	0.55725
184.3	0.5595
184.4	0.5625
184.5	0.564
184.6	0.5615
184.7	0.56275
184.8	0.56
184.9	0.56075
185	0.55925
185.1	0.558
185.2	0.55675
185.3	0.55775
185.4	0.558
185.5	0.5585
185.6	0.5605
185.7	0.56175
185.8	0.56275
185.9	0.56325
186	0.563
186.1	0.56275
186.2	0.5655
186.3	0.5645
186.4	0.56225
186.5	0.5605
186.6	0.5615
186.7	0.5595
186.8	0.55775
186.9	0.55825
187	0.55675
187.1	0.553
187.2	0.55325
187.3	0.554
187.4	0.55275
187.5	0.55525
187.6	0.55575
187.7	0.55325
187.8	0.5535
187.9	0.55375
188	0.5545
188.1	0.55875
188.2	0.561
188.3	0.56125
188.4	0.56225
188.5	0.56225
188.6	0.5625
188.7	0.56425
188.8	0.566
188.9	0.56475
189	0.564
189.1	0.563
189.2	0.563
189.3	0.56425
189.4	0.56375
189.5	0.56575
189.6	0.564
189.7	0.563
189.8	0.56275
189.9	0.5625
190	0.56175
190.1	0.563
190.2	0.564
190.3	0.56325
190.4	0.56375
190.5	0.56225
190.6	0.5635
190.7	0.56175
190.8	0.563
190.9	0.563
191	0.5605
191.1	0.56125
191.2	0.5595
191.3	0.56225
191.4	0.563
191.5	0.56
191.6	0.55925
191.7	0.55875
191.8	0.55825
191.9	0.5585
192	0.56
192.1	0.5605
192.2	0.55725
192.3	0.55775
192.4	0.5585
192.5	0.55825
192.6	0.55825
192.7	0.55825
192.8	0.5585
192.9	0.5565
193	0.55625
193.1	0.55725
193.2	0.559
193.3	0.55775
193.4	0.55775
193.5	0.55775
193.6	0.55575
193.7	0.55775
193.8	0.5565
193.9	0.558
194	0.5575
194.1	0.559
194.2	0.559
194.3	0.55975
194.4	0.5605
194.5	0.5615
194.6	0.5635
194.7	0.56325
194.8	0.56475
194.9	0.56525
195	0.56425
195.1	0.565
195.2	0.56825
195.3	0.565
195.4	0.5655
195.5	0.56225
195.6	0.56275
195.7	0.564
195.8	0.5645
195.9	0.56375
196	0.5655
196.1	0.56525
196.2	0.56675
196.3	0.565
196.4	0.56475
196.5	0.56775
196.6	0.5665
196.7	0.56825
196.8	0.569
196.9	0.56725
197	0.564
197.1	0.56575
197.2	0.56675
197.3	0.56775
197.4	0.56675
197.5	0.5675
197.6	0.56975
197.7	0.568
197.8	0.56825
197.9	0.56725
198	0.56525
198.1	0.565
198.2	0.5645
198.3	0.5635
198.4	0.563
198.5	0.5645
198.6	0.56275
198.7	0.56225
198.8	0.564
198.9	0.56475
199	0.56525
199.1	0.56475
199.2	0.56725
199.3	0.564
199.4	0.564
199.5	0.564
199.6	0.5655
199.7	0.56775
199.8	0.57125
199.9	0.57075
200	0.57225
[truncated: 14,000 more rows]
