# Supplementary material for: Bayesian inference of kinetic schemes for ion channels by Kalman filtering
Source: eLife journal article supplement (doi:10.7554/elife.62714), 2022-05-04
Supplement: fig4-data8 [file 1_Sim_N_2000_Strom_MW.xlsx]

## Sheet: Tabelle1
0.1	0
0.2	0
0.3	0
0.4	0
0.5	0
0.6	0
0.7	0
0.8	0
0.9	0
1	0
1.1	0
1.2	0
1.3	0
1.4	0
1.5	0
1.6	0
1.7	0
1.8	0
1.9	0
2	0
2.1	0
2.2	0
2.3	0
2.4	0
2.5	0
2.6	0
2.7	0
2.8	0
2.9	0
3	0
3.1	0
3.2	0
3.3	0
3.4	0
3.5	0
3.6	0
3.7	0
3.8	0
3.9	0
4	0
4.1	0
4.2	0
4.3	0
4.4	0
4.5	0
4.6	0
4.7	0
4.8	0
4.9	0
5	0
5.1	0
5.2	0
5.3	0
5.4	0
5.5	0
5.6	0
5.7	0
5.8	0
5.9	0
6	0
6.1	0
6.2	0
6.3	0
6.4	0
6.5	0
6.6	0
6.7	0
6.8	0
6.9	0
7	0
7.1	0
7.2	0
7.3	0
7.4	0
7.5	0
7.6	0
7.7	0
7.8	0
7.9	0
8	0
8.1	0
8.2	0
8.3	0
8.4	0
8.5	0
8.6	0
8.7	0
8.8	0
8.9	0
9	0
9.1	0
9.2	0
9.3	0
9.4	0
9.5	0
9.6	0
9.7	0
9.8	0
9.9	0
10	0
10.1	0
10.2	0
10.3	0
10.4	0
10.5	0
10.6	0
10.7	0
10.8	0
10.9	0
11	0
11.1	0
11.2	0
11.3	0
11.4	0
11.5	0
11.6	0
11.7	0
11.8	0
11.9	0
12	0
12.1	0
12.2	0
12.3	0
12.4	0
12.5	0
12.6	0
12.7	0
12.8	0
12.9	0
13	0
13.1	0
13.2	0
13.3	0
13.4	0
13.5	0
13.6	0
13.7	0
13.8	0
13.9	0
14	0
14.1	0
14.2	0
14.3	0
14.4	0
14.5	0
14.6	0
14.7	0
14.8	0
14.9	0
15	0
15.1	0
15.2	0
15.3	0
15.4	0
15.5	0
15.6	0
15.7	0
15.8	0
15.9	0
16	0
16.1	0
16.2	0
16.3	0
16.4	0
16.5	0
16.6	0
16.7	0
16.8	0
16.9	0
17	0
17.1	0
17.2	0
17.3	0
17.4	0
17.5	0
17.6	0
17.7	0
17.8	0
17.9	0
18	0
18.1	0
18.2	0
18.3	0
18.4	0
18.5	0
18.6	0
18.7	0
18.8	0
18.9	0
19	0
19.1	0
19.2	0
19.3	0
19.4	0
19.5	0
19.6	0
19.7	0
19.8	0
19.9	0
20	0
20.1	0
20.2	0
20.3	0
20.4	0
20.5	0
20.6	0
20.7	0
20.8	0
20.9	0
21	0
21.1	0
21.2	0
21.3	0
21.4	0
21.5	0
21.6	0
21.7	0
21.8	0
21.9	0
22	0
22.1	0
22.2	0
22.3	0
22.4	0
22.5	0
22.6	0
22.7	0
22.8	0
22.9	0
23	0
23.1	0
23.2	0
23.3	0
23.4	0
23.5	0
23.6	0
23.7	0
23.8	0
23.9	0
24	0
24.1	0
24.2	0
24.3	0
24.4	0
24.5	0
24.6	0
24.7	0
24.8	0
24.9	0
25	0
25.1	0
25.2	0
25.3	0
25.4	0
25.5	0
25.6	0
25.7	0
25.8	0
25.9	0
26	0
26.1	0
26.2	0
26.3	0
26.4	0
26.5	0
26.6	0
26.7	0
26.8	0
26.9	0
27	0
27.1	0
27.2	0
27.3	0
27.4	0
27.5	0
27.6	0
27.7	0
27.8	0
27.9	0
28	0
28.1	0
28.2	0
28.3	0
28.4	0
28.5	0
28.6	0
28.7	0
28.8	0
28.9	0
29	0
29.1	0
29.2	0
29.3	0
29.4	0
29.5	0
29.6	0
29.7	0
29.8	0
29.9	0
30	0
30.1	0
30.2	0
30.3	0
30.4	0
30.5	0
30.6	0
30.7	0
30.8	0
30.9	0
31	0
31.1	0
31.2	0
31.3	0
31.4	0
31.5	0
31.6	0
31.7	0
31.8	0
31.9	0
32	0
32.1	0
32.2	0
32.3	0
32.4	0
32.5	0
32.6	0
32.7	0
32.8	0
32.9	0
33	0
33.1	0
33.2	0
33.3	0
33.4	0
33.5	0
33.6	0
33.7	0
33.8	0
33.9	0
34	0
34.1	0
34.2	0
34.3	0
34.4	0
34.5	0
34.6	0
34.7	0
34.8	0
34.9	0
35	0
35.1	0
35.2	0
35.3	0
35.4	0
35.5	0
35.6	0
35.7	0
35.8	0
35.9	0
36	0
36.1	0
36.2	0
36.3	0
36.4	0
36.5	0
36.6	0
36.7	0
36.8	0
36.9	0
37	0
37.1	0
37.2	0
37.3	0
37.4	0
37.5	0
37.6	0
37.7	0
37.8	0
37.9	0
38	0
38.1	0
38.2	0
38.3	0
38.4	0
38.5	0
38.6	0
38.7	0
38.8	0
38.9	0
39	0
39.1	0
39.2	0
39.3	0
39.4	0
39.5	0
39.6	0
39.7	0
39.8	0
39.9	0
40	0
40.1	0
40.2	0
40.3	0
40.4	0
40.5	0
40.6	0
40.7	0
40.8	0
40.9	0
41	0
41.1	0
41.2	0
41.3	0
41.4	0
41.5	0
41.6	0
41.7	0
41.8	0
41.9	0
42	0
42.1	0
42.2	0
42.3	0
42.4	0
42.5	0
42.6	0
42.7	0
42.8	0
42.9	0
43	0
43.1	0
43.2	0
43.3	0
43.4	0
43.5	0
43.6	0
43.7	0
43.8	0
43.9	0
44	0
44.1	0
44.2	0
44.3	0
44.4	0
44.5	0
44.6	0
44.7	0
44.8	0
44.9	0
45	0
45.1	0
45.2	0
45.3	0
45.4	0
45.5	0
45.6	0
45.7	0
45.8	0
45.9	0
46	0
46.1	0
46.2	0
46.3	0
46.4	0
46.5	0
46.6	0
46.7	0
46.8	0
46.9	0
47	0
47.1	0
47.2	0
47.3	0
47.4	0
47.5	0
47.6	0
47.7	0
47.8	0
47.9	0
48	0
48.1	0
48.2	0
48.3	0
48.4	0
48.5	0
48.6	0
48.7	0
48.8	0
48.9	0
49	0
49.1	0
49.2	0
49.3	0
49.4	0
49.5	0
49.6	0
49.7	0
49.8	0
49.9	0
50	0
50.1	0
50.2	0
50.3	0
50.4	0
50.5	0
50.6	0
50.7	0
50.8	0
50.9	0
51	0
51.1	0
51.2	0
51.3	0
51.4	0
51.5	0
51.6	0
51.7	0
51.8	0
51.9	0
52	0
52.1	0
52.2	0
52.3	0
52.4	0
52.5	0
52.6	0
52.7	0
52.8	0
52.9	0
53	0
53.1	0
53.2	0
53.3	0
53.4	0
53.5	0
53.6	0
53.7	0
53.8	0
53.9	0
54	0
54.1	0
54.2	0
54.3	0
54.4	0
54.5	0
54.6	0
54.7	0
54.8	0
54.9	0
55	0
55.1	0
55.2	0
55.3	0
55.4	0
55.5	0
55.6	0
55.7	0
55.8	0
55.9	0
56	0
56.1	0
56.2	0
56.3	0
56.4	0
56.5	0
56.6	0
56.7	0
56.8	0
56.9	0
57	0
57.1	0
57.2	0
57.3	0
57.4	0
57.5	0
57.6	0
57.7	0
57.8	0
57.9	0
58	0
58.1	0
58.2	0
58.3	0
58.4	0
58.5	0
58.6	0
58.7	0
58.8	0
58.9	0
59	0
59.1	0
59.2	0
59.3	0
59.4	0
59.5	0
59.6	0
59.7	0
59.8	0
59.9	0
60	0
60.1	0
60.2	0
60.3	0
60.4	0
60.5	0
60.6	0
60.7	0
60.8	0
60.9	0
61	0
61.1	0
61.2	0
61.3	0
61.4	0
61.5	0
61.6	0
61.7	0
61.8	0
61.9	0
62	0
62.1	0
62.2	0
62.3	0
62.4	0
62.5	0
62.6	0
62.7	0
62.8	0
62.9	0
63	0
63.1	0
63.2	0
63.3	0
63.4	0
63.5	0
63.6	0
63.7	0
63.8	0
63.9	0
64	0
64.1	0
64.2	0
64.3	0
64.4	0
64.5	0
64.6	0
64.7	0
64.8	0
64.9	0
65	0
65.1	0
65.2	0
65.3	0
65.4	0
65.5	0
65.6	0
65.7	0
65.8	0
65.9	0
66	0
66.1	0
66.2	0
66.3	0
66.4	0
66.5	0
66.6	0
66.7	0
66.8	0
66.9	0
67	0
67.1	0
67.2	0
67.3	0
67.4	0
67.5	0
67.6	0
67.7	0
67.8	0
67.9	0
68	0
68.1	0
68.2	0
68.3	0
68.4	0
68.5	0
68.6	0
68.7	0
68.8	0
68.9	0
69	0
69.1	0
69.2	0
69.3	0
69.4	0
69.5	0
69.6	0
69.7	0
69.8	0
69.9	0
70	0
70.1	0
70.2	0
70.3	0
70.4	0
70.5	0
70.6	0
70.7	0
70.8	0
70.9	0
71	0
71.1	0
71.2	0
71.3	0
71.4	0
71.5	0
71.6	0
71.7	0
71.8	0
71.9	0
72	0
72.1	0
72.2	0
72.3	0
72.4	0
72.5	0
72.6	0
72.7	0
72.8	0
72.9	0
73	0
73.1	0
73.2	0
73.3	0
73.4	0
73.5	0
73.6	0
73.7	0
73.8	0
73.9	0
74	0
74.1	0
74.2	0
74.3	0
74.4	0
74.5	0
74.6	0
74.7	0
74.8	0
74.9	0
75	0
75.1	0
75.2	0
75.3	0
75.4	0
75.5	0
75.6	0
75.7	0
75.8	0
75.9	0
76	0
76.1	0
76.2	0
76.3	0
76.4	0
76.5	0
76.6	0
76.7	0
76.8	0
76.9	0
77	0
77.1	0
77.2	0
77.3	0
77.4	0
77.5	0
77.6	0
77.7	0
77.8	0
77.9	0
78	0
78.1	0
78.2	0
78.3	0
78.4	0
78.5	0
78.6	0
78.7	0
78.8	0
78.9	0
79	0
79.1	0
79.2	0
79.3	0
79.4	0
79.5	0
79.6	0
79.7	0
79.8	0
79.9	0
80	0
80.1	0
80.2	0
80.3	0
80.4	0
80.5	0
80.6	0
80.7	0
80.8	0
80.9	0
81	0
81.1	0
81.2	0
81.3	0
81.4	0
81.5	0
81.6	0
81.7	0
81.8	0
81.9	0
82	0
82.1	0
82.2	0
82.3	0
82.4	0
82.5	0
82.6	0
82.7	0
82.8	0
82.9	0
83	0
83.1	0
83.2	0
83.3	0
83.4	0
83.5	0
83.6	0
83.7	0
83.8	0
83.9	0
84	0
84.1	0
84.2	0
84.3	0
84.4	0
84.5	0
84.6	0
84.7	0
84.8	0
84.9	0
85	0
85.1	0
85.2	0
85.3	0
85.4	0
85.5	0
85.6	0
85.7	0
85.8	0
85.9	0
86	0
86.1	0
86.2	0
86.3	0
86.4	0
86.5	0
86.6	0
86.7	0
86.8	0
86.9	0
87	0
87.1	0
87.2	0
87.3	0
87.4	0
87.5	0
87.6	0
87.7	0
87.8	0
87.9	0
88	0
88.1	0
88.2	0
88.3	0
88.4	0
88.5	0
88.6	0
88.7	0
88.8	0
88.9	0
89	0
89.1	0
89.2	0
89.3	0
89.4	0
89.5	0
89.6	0
89.7	0
89.8	0
89.9	0
90	0
90.1	0
90.2	0
90.3	0
90.4	0
90.5	0
90.6	0
90.7	0
90.8	0
90.9	0
91	0
91.1	0
91.2	0
91.3	0
91.4	0
91.5	0
91.6	0
91.7	0
91.8	0
91.9	0
92	0
92.1	0
92.2	0
92.3	0
92.4	0
92.5	0
92.6	0
92.7	0
92.8	0
92.9	0
93	0
93.1	0
93.2	0
93.3	0
93.4	0
93.5	0
93.6	0
93.7	0
93.8	0
93.9	0
94	0
94.1	0
94.2	0
94.3	0
94.4	0
94.5	0
94.6	0
94.7	0
94.8	0
94.9	0
95	0
95.1	0
95.2	0
95.3	0
95.4	0
95.5	0
95.6	0
95.7	0
95.8	0
95.9	0
96	0
96.1	0
96.2	0
96.3	0
96.4	0
96.5	0
96.6	0
96.7	0
96.8	0
96.9	0
97	0
97.1	0
97.2	0
97.3	0
97.4	0
97.5	0
97.6	0
97.7	0
97.8	0
97.9	0
98	0
98.1	0
98.2	0
98.3	0
98.4	0
98.5	0
98.6	0
98.7	0
98.8	0
98.9	0
99	0
99.1	0
99.2	0
99.3	0
99.4	0
99.5	0
99.6	0
99.7	0
99.8	0
99.9	0
100	0
100.1	0
100.2	0
100.3	0
100.4	0
100.5	0
100.6	0
100.7	0
100.8	0
100.9	0
101	0
101.1	0
101.2	0
101.3	0
101.4	0
101.5	0
101.6	0
101.7	0
101.8	0
101.9	0
102	0
102.1	0
102.2	0
102.3	0.0005
102.4	0.0005
102.5	0.001
102.6	0.001
102.7	0.001
102.8	0.001
102.9	0.001
103	0.001
103.1	0.0015
103.2	0.0015
103.3	0.0015
103.4	0.0015
103.5	0.0015
103.6	0.002
103.7	0.003
103.8	0.003
103.9	0.003
104	0.0035
104.1	0.0035
104.2	0.0035
104.3	0.0035
104.4	0.0035
104.5	0.0035
104.6	0.0035
104.7	0.0035
104.8	0.0035
104.9	0.0035
105	0.0045
105.1	0.005
105.2	0.006
105.3	0.0065
105.4	0.0065
105.5	0.0075
105.6	0.0075
105.7	0.0085
105.8	0.0085
105.9	0.009
106	0.0105
106.1	0.0105
106.2	0.011
106.3	0.0115
106.4	0.012
106.5	0.0125
106.6	0.0125
106.7	0.0135
106.8	0.0135
106.9	0.014
107	0.014
107.1	0.014
107.2	0.0145
107.3	0.0145
107.4	0.0155
107.5	0.016
107.6	0.0165
107.7	0.0175
107.8	0.018
107.9	0.019
108	0.019
108.1	0.02
108.2	0.0215
108.3	0.023
108.4	0.023
108.5	0.0235
108.6	0.0235
108.7	0.0245
108.8	0.0255
108.9	0.0265
109	0.0265
109.1	0.0265
109.2	0.0265
109.3	0.0265
109.4	0.0275
109.5	0.0275
109.6	0.0285
109.7	0.029
109.8	0.03
109.9	0.0305
110	0.0305
110.1	0.0315
110.2	0.0315
110.3	0.032
110.4	0.0325
110.5	0.0335
110.6	0.0345
110.7	0.0345
110.8	0.0355
110.9	0.0365
111	0.0375
111.1	0.0385
111.2	0.0385
111.3	0.04
111.4	0.04
111.5	0.0405
111.6	0.0405
111.7	0.0405
111.8	0.0405
111.9	0.041
112	0.041
112.1	0.041
112.2	0.0425
112.3	0.043
112.4	0.043
112.5	0.0425
112.6	0.0425
112.7	0.043
112.8	0.043
112.9	0.044
113	0.0445
113.1	0.045
113.2	0.0455
113.3	0.045
113.4	0.045
113.5	0.0455
113.6	0.0465
113.7	0.048
113.8	0.0485
113.9	0.05
114	0.051
114.1	0.0515
114.2	0.0525
114.3	0.053
114.4	0.0525
114.5	0.0525
114.6	0.054
114.7	0.054
114.8	0.054
114.9	0.054
115	0.054
115.1	0.054
115.2	0.054
115.3	0.0545
115.4	0.0545
115.5	0.055
115.6	0.055
115.7	0.0555
115.8	0.056
115.9	0.0565
116	0.057
116.1	0.0575
116.2	0.058
116.3	0.058
116.4	0.058
116.5	0.058
116.6	0.058
116.7	0.0585
116.8	0.059
116.9	0.0595
117	0.061
117.1	0.061
117.2	0.062
117.3	0.0625
117.4	0.064
117.5	0.064
117.6	0.0655
117.7	0.0655
117.8	0.066
117.9	0.066
118	0.0665
118.1	0.067
118.2	0.068
118.3	0.068
118.4	0.0695
118.5	0.07
118.6	0.07
118.7	0.07
118.8	0.07
118.9	0.07
119	0.0705
119.1	0.0715
119.2	0.071
119.3	0.071
119.4	0.071
119.5	0.071
119.6	0.072
119.7	0.0725
119.8	0.0725
119.9	0.073
120	0.073
120.1	0.0745
120.2	0.0745
120.3	0.075
120.4	0.0755
120.5	0.075
120.6	0.0755
120.7	0.076
120.8	0.0765
120.9	0.077
121	0.077
121.1	0.078
121.2	0.079
121.3	0.0795
121.4	0.081
121.5	0.081
121.6	0.081
121.7	0.081
121.8	0.081
121.9	0.0815
122	0.0825
122.1	0.0825
122.2	0.0825
122.3	0.082
122.4	0.082
122.5	0.0825
122.6	0.0825
122.7	0.082
122.8	0.082
122.9	0.082
123	0.0825
123.1	0.0825
123.2	0.0835
123.3	0.084
123.4	0.0845
123.5	0.0845
123.6	0.0845
123.7	0.0845
123.8	0.084
123.9	0.084
124	0.0865
124.1	0.0865
124.2	0.0865
124.3	0.087
124.4	0.088
124.5	0.0885
124.6	0.089
124.7	0.0895
124.8	0.09
124.9	0.0895
125	0.09
125.1	0.091
125.2	0.091
125.3	0.091
125.4	0.0915
125.5	0.0925
125.6	0.0935
125.7	0.0945
125.8	0.095
125.9	0.0965
126	0.097
126.1	0.0975
126.2	0.098
126.3	0.0985
126.4	0.0985
126.5	0.0985
126.6	0.099
126.7	0.099
126.8	0.0995
126.9	0.1005
127	0.101
127.1	0.101
127.2	0.101
127.3	0.1025
127.4	0.1025
127.5	0.102
127.6	0.1025
127.7	0.1025
127.8	0.1035
127.9	0.1035
128	0.1045
128.1	0.105
128.2	0.105
128.3	0.1045
128.4	0.1045
128.5	0.1045
128.6	0.105
128.7	0.106
128.8	0.106
128.9	0.1055
129	0.1055
129.1	0.106
129.2	0.106
129.3	0.1065
129.4	0.1075
129.5	0.109
129.6	0.1095
129.7	0.111
129.8	0.111
129.9	0.1115
130	0.1115
130.1	0.1125
130.2	0.1115
130.3	0.1115
130.4	0.112
130.5	0.113
130.6	0.113
130.7	0.113
130.8	0.1135
130.9	0.113
131	0.114
131.1	0.114
131.2	0.114
131.3	0.114
131.4	0.115
131.5	0.115
131.6	0.115
131.7	0.116
131.8	0.1165
131.9	0.117
132	0.1165
132.1	0.1165
132.2	0.117
132.3	0.117
132.4	0.118
132.5	0.1185
132.6	0.1185
132.7	0.119
132.8	0.119
132.9	0.119
133	0.1205
133.1	0.121
133.2	0.1205
133.3	0.1225
133.4	0.122
133.5	0.122
133.6	0.123
133.7	0.124
133.8	0.124
133.9	0.124
134	0.124
134.1	0.125
134.2	0.126
134.3	0.126
134.4	0.1255
134.5	0.126
134.6	0.127
134.7	0.128
134.8	0.1285
134.9	0.129
135	0.129
135.1	0.1305
135.2	0.1305
135.3	0.13
135.4	0.1305
135.5	0.131
135.6	0.1315
135.7	0.132
135.8	0.132
135.9	0.132
136	0.132
136.1	0.1325
136.2	0.133
136.3	0.133
136.4	0.133
136.5	0.1335
136.6	0.134
136.7	0.1345
136.8	0.1335
136.9	0.134
137	0.135
137.1	0.1355
137.2	0.1355
137.3	0.1355
137.4	0.1355
137.5	0.1365
137.6	0.136
137.7	0.1365
137.8	0.1365
137.9	0.137
138	0.136
138.1	0.136
138.2	0.137
138.3	0.137
138.4	0.1375
138.5	0.137
138.6	0.1375
138.7	0.1375
138.8	0.1375
138.9	0.1375
139	0.1375
139.1	0.1375
139.2	0.1375
139.3	0.1375
139.4	0.138
139.5	0.1385
139.6	0.139
139.7	0.1395
139.8	0.1395
139.9	0.1395
140	0.139
140.1	0.1395
140.2	0.14
140.3	0.1405
140.4	0.1415
140.5	0.1415
140.6	0.1415
140.7	0.1415
140.8	0.142
140.9	0.142
141	0.142
141.1	0.143
141.2	0.143
141.3	0.143
141.4	0.143
141.5	0.143
141.6	0.143
141.7	0.143
141.8	0.144
141.9	0.1445
142	0.144
142.1	0.144
142.2	0.144
142.3	0.144
142.4	0.1435
142.5	0.144
142.6	0.1445
142.7	0.145
142.8	0.1445
142.9	0.145
143	0.145
143.1	0.145
143.2	0.1455
143.3	0.145
143.4	0.145
143.5	0.1455
143.6	0.1455
143.7	0.1455
143.8	0.1455
143.9	0.1465
144	0.1465
144.1	0.1465
144.2	0.147
144.3	0.1475
144.4	0.1485
144.5	0.1485
144.6	0.148
144.7	0.149
144.8	0.1485
144.9	0.1485
145	0.149
145.1	0.1495
145.2	0.1495
145.3	0.149
145.4	0.149
145.5	0.1495
145.6	0.149
145.7	0.15
145.8	0.15
145.9	0.15
146	0.1495
146.1	0.149
146.2	0.1495
146.3	0.1495
146.4	0.15
146.5	0.15
146.6	0.1505
146.7	0.151
146.8	0.151
146.9	0.1515
147	0.1515
147.1	0.152
147.2	0.1525
147.3	0.1535
147.4	0.154
147.5	0.1545
147.6	0.1545
147.7	0.154
147.8	0.154
147.9	0.1535
148	0.154
148.1	0.154
148.2	0.154
148.3	0.1535
148.4	0.154
148.5	0.1545
148.6	0.155
148.7	0.155
148.8	0.156
148.9	0.1565
149	0.157
149.1	0.1575
149.2	0.159
149.3	0.1595
149.4	0.1605
149.5	0.16
149.6	0.1605
149.7	0.16
149.8	0.161
149.9	0.1615
150	0.162
150.1	0.1615
150.2	0.162
150.3	0.1625
150.4	0.1625
150.5	0.1625
150.6	0.163
150.7	0.163
150.8	0.163
150.9	0.1645
151	0.1645
151.1	0.165
151.2	0.166
151.3	0.166
151.4	0.167
151.5	0.1675
151.6	0.168
151.7	0.168
151.8	0.168
151.9	0.1675
152	0.1675
152.1	0.168
152.2	0.168
152.3	0.1685
152.4	0.169
152.5	0.1685
152.6	0.1685
152.7	0.1695
152.8	0.1695
152.9	0.1695
153	0.17
153.1	0.1695
153.2	0.169
153.3	0.1695
153.4	0.1695
153.5	0.1705
153.6	0.171
153.7	0.171
153.8	0.1715
153.9	0.1705
154	0.171
154.1	0.171
154.2	0.171
154.3	0.171
154.4	0.171
154.5	0.172
154.6	0.173
154.7	0.173
154.8	0.1735
154.9	0.1735
155	0.174
155.1	0.1745
155.2	0.1745
155.3	0.174
155.4	0.174
155.5	0.174
155.6	0.175
155.7	0.175
155.8	0.175
155.9	0.1755
156	0.176
156.1	0.1765
156.2	0.176
156.3	0.175
156.4	0.175
156.5	0.1745
156.6	0.175
156.7	0.1755
156.8	0.1765
156.9	0.1765
157	0.177
157.1	0.1775
157.2	0.1775
157.3	0.1775
157.4	0.1775
157.5	0.177
157.6	0.177
157.7	0.1775
157.8	0.1775
157.9	0.177
158	0.177
158.1	0.177
158.2	0.177
158.3	0.1775
158.4	0.177
158.5	0.1775
158.6	0.1775
158.7	0.178
158.8	0.1785
158.9	0.179
159	0.18
159.1	0.181
159.2	0.181
159.3	0.181
159.4	0.1815
159.5	0.1815
159.6	0.181
159.7	0.1795
159.8	0.1795
159.9	0.179
160	0.1795
160.1	0.1795
160.2	0.1815
160.3	0.1815
160.4	0.1815
160.5	0.1805
160.6	0.181
160.7	0.1815
160.8	0.181
160.9	0.181
161	0.1805
161.1	0.18
161.2	0.181
161.3	0.181
161.4	0.181
161.5	0.182
161.6	0.1825
161.7	0.182
161.8	0.183
161.9	0.1835
162	0.1845
162.1	0.1835
162.2	0.1835
162.3	0.1835
162.4	0.185
162.5	0.1865
162.6	0.1865
162.7	0.1865
162.8	0.187
162.9	0.187
163	0.187
163.1	0.1865
163.2	0.1865
163.3	0.1885
163.4	0.188
163.5	0.1885
163.6	0.188
163.7	0.188
163.8	0.188
163.9	0.1875
164	0.1885
164.1	0.1885
164.2	0.189
164.3	0.1895
164.4	0.1895
164.5	0.189
164.6	0.19
164.7	0.191
164.8	0.192
164.9	0.1925
165	0.1935
165.1	0.1935
165.2	0.193
165.3	0.1935
165.4	0.195
165.5	0.196
165.6	0.196
165.7	0.196
165.8	0.196
165.9	0.195
166	0.195
166.1	0.195
166.2	0.195
166.3	0.1945
166.4	0.1945
166.5	0.1945
166.6	0.195
166.7	0.195
166.8	0.1955
166.9	0.196
167	0.196
167.1	0.197
167.2	0.1975
167.3	0.1975
167.4	0.199
167.5	0.199
167.6	0.1985
167.7	0.198
167.8	0.1975
167.9	0.1975
168	0.1975
168.1	0.1975
168.2	0.1975
168.3	0.1975
168.4	0.1985
168.5	0.1995
168.6	0.2
168.7	0.2015
168.8	0.2015
168.9	0.202
169	0.202
169.1	0.203
169.2	0.203
169.3	0.203
169.4	0.204
169.5	0.2045
169.6	0.205
169.7	0.205
169.8	0.2045
169.9	0.205
170	0.2055
170.1	0.205
170.2	0.205
170.3	0.205
170.4	0.205
170.5	0.2055
170.6	0.2055
170.7	0.206
170.8	0.2065
170.9	0.206
171	0.206
171.1	0.205
171.2	0.2045
171.3	0.204
171.4	0.204
171.5	0.204
171.6	0.2045
171.7	0.2045
171.8	0.2045
171.9	0.205
172	0.205
172.1	0.205
172.2	0.2045
172.3	0.2045
172.4	0.2045
172.5	0.2055
172.6	0.2055
172.7	0.2055
172.8	0.207
172.9	0.208
173	0.209
173.1	0.2095
173.2	0.21
173.3	0.2105
173.4	0.2105
173.5	0.211
173.6	0.212
173.7	0.212
173.8	0.2125
173.9	0.213
174	0.2135
174.1	0.213
174.2	0.213
174.3	0.2125
174.4	0.2125
174.5	0.2135
174.6	0.2135
174.7	0.2135
174.8	0.213
174.9	0.213
175	0.214
175.1	0.2135
175.2	0.213
175.3	0.213
175.4	0.213
175.5	0.213
175.6	0.2125
175.7	0.2125
175.8	0.213
175.9	0.2125
176	0.2125
176.1	0.212
176.2	0.2115
176.3	0.2115
176.4	0.2115
176.5	0.211
176.6	0.211
176.7	0.211
176.8	0.211
176.9	0.2115
177	0.213
177.1	0.2135
177.2	0.2145
177.3	0.2145
177.4	0.215
177.5	0.215
177.6	0.215
177.7	0.215
177.8	0.2155
177.9	0.2155
178	0.215
178.1	0.2145
178.2	0.2145
178.3	0.216
178.4	0.216
178.5	0.2155
178.6	0.215
178.7	0.2165
178.8	0.217
178.9	0.217
179	0.217
179.1	0.217
179.2	0.2175
179.3	0.2175
179.4	0.2175
179.5	0.218
179.6	0.2175
179.7	0.217
179.8	0.217
179.9	0.217
180	0.217
180.1	0.2175
180.2	0.2175
180.3	0.2175
180.4	0.218
180.5	0.218
180.6	0.218
180.7	0.2175
180.8	0.2175
180.9	0.2175
181	0.2175
181.1	0.2175
181.2	0.2165
181.3	0.2175
181.4	0.217
181.5	0.217
181.6	0.217
181.7	0.2165
181.8	0.2165
181.9	0.216
182	0.2165
182.1	0.216
182.2	0.2165
182.3	0.2165
182.4	0.2175
182.5	0.2175
182.6	0.217
182.7	0.218
182.8	0.218
182.9	0.218
183	0.2185
183.1	0.2195
183.2	0.22
183.3	0.22
183.4	0.2195
183.5	0.22
183.6	0.22
183.7	0.2205
183.8	0.2205
183.9	0.221
184	0.222
184.1	0.2215
184.2	0.2215
184.3	0.222
184.4	0.222
184.5	0.2225
184.6	0.2225
184.7	0.2225
184.8	0.2225
184.9	0.222
185	0.2225
185.1	0.224
185.2	0.2245
185.3	0.2245
185.4	0.224
185.5	0.2245
185.6	0.2245
185.7	0.2245
185.8	0.2245
185.9	0.225
186	0.2245
186.1	0.225
186.2	0.225
186.3	0.225
186.4	0.226
186.5	0.2265
186.6	0.2265
186.7	0.2265
186.8	0.226
186.9	0.2255
187	0.2255
187.1	0.226
187.2	0.226
187.3	0.2265
187.4	0.2255
187.5	0.2265
187.6	0.227
187.7	0.2255
187.8	0.226
187.9	0.2265
188	0.2265
188.1	0.228
188.2	0.2275
188.3	0.2275
188.4	0.228
188.5	0.2275
188.6	0.2275
188.7	0.228
188.8	0.2295
188.9	0.229
189	0.2285
189.1	0.229
189.2	0.229
189.3	0.229
189.4	0.229
189.5	0.229
189.6	0.228
189.7	0.2275
189.8	0.2275
189.9	0.2275
190	0.2265
190.1	0.2275
190.2	0.2275
190.3	0.228
190.4	0.228
190.5	0.2285
190.6	0.229
190.7	0.228
190.8	0.229
190.9	0.229
191	0.229
191.1	0.229
191.2	0.228
191.3	0.2285
191.4	0.2285
191.5	0.228
191.6	0.2285
191.7	0.2295
191.8	0.2295
191.9	0.229
192	0.2305
192.1	0.23
192.2	0.2295
192.3	0.23
192.4	0.23
192.5	0.23
192.6	0.2305
192.7	0.2305
192.8	0.23
192.9	0.23
193	0.2305
193.1	0.2305
193.2	0.2295
193.3	0.2305
193.4	0.2305
193.5	0.2305
193.6	0.2295
193.7	0.229
193.8	0.2285
193.9	0.228
194	0.229
194.1	0.23
194.2	0.231
194.3	0.2315
194.4	0.231
194.5	0.231
194.6	0.231
194.7	0.2305
194.8	0.2305
194.9	0.231
195	0.231
195.1	0.231
195.2	0.2315
195.3	0.231
195.4	0.23
195.5	0.229
195.6	0.2285
195.7	0.229
195.8	0.229
195.9	0.2295
196	0.23
196.1	0.2315
196.2	0.2315
196.3	0.2315
196.4	0.233
196.5	0.2335
196.6	0.234
196.7	0.2335
196.8	0.2335
196.9	0.2335
197	0.2335
197.1	0.234
197.2	0.235
197.3	0.2345
197.4	0.2345
197.5	0.235
197.6	0.235
197.7	0.235
197.8	0.235
197.9	0.235
198	0.235
198.1	0.2345
198.2	0.234
198.3	0.2345
198.4	0.2355
198.5	0.235
198.6	0.235
198.7	0.2355
198.8	0.2355
198.9	0.2355
199	0.235
199.1	0.2355
199.2	0.236
199.3	0.236
199.4	0.2365
199.5	0.236
199.6	0.235
199.7	0.2365
199.8	0.2365
199.9	0.2365
200	0.237
[truncated: 14,000 more rows]
