# Supplementary material for: Bayesian inference of kinetic schemes for ion channels by Kalman filtering
Source: eLife journal article supplement (doi:10.7554/elife.62714), 2022-05-04
Supplement: fig4-data8 [file 1_Sim_N_2000_theor_Strom_Werte.xlsx]

## Sheet: Tabelle1
0.1	0
0.2	0
0.3	0
0.4	0
0.5	0
0.6	0
0.7	0
0.8	0
0.9	0
1	0
1.1	0
1.2	0
1.3	0
1.4	0
1.5	0
1.6	0
1.7	0
1.8	0
1.9	0
2	0
2.1	0
2.2	0
2.3	0
2.4	0
2.5	0
2.6	0
2.7	0
2.8	0
2.9	0
3	0
3.1	0
3.2	0
3.3	0
3.4	0
3.5	0
3.6	0
3.7	0
3.8	0
3.9	0
4	0
4.1	0
4.2	0
4.3	0
4.4	0
4.5	0
4.6	0
4.7	0
4.8	0
4.9	0
5	0
5.1	0
5.2	0
5.3	0
5.4	0
5.5	0
5.6	0
5.7	0
5.8	0
5.9	0
6	0
6.1	0
6.2	0
6.3	0
6.4	0
6.5	0
6.6	0
6.7	0
6.8	0
6.9	0
7	0
7.1	0
7.2	0
7.3	0
7.4	0
7.5	0
7.6	0
7.7	0
7.8	0
7.9	0
8	0
8.1	0
8.2	0
8.3	0
8.4	0
8.5	0
8.6	0
8.7	0
8.8	0
8.9	0
9	0
9.1	0
9.2	0
9.3	0
9.4	0
9.5	0
9.6	0
9.7	0
9.8	0
9.9	0
10	0
10.1	0
10.2	0
10.3	0
10.4	0
10.5	0
10.6	0
10.7	0
10.8	0
10.9	0
11	0
11.1	0
11.2	0
11.3	0
11.4	0
11.5	0
11.6	0
11.7	0
11.8	0
11.9	0
12	0
12.1	0
12.2	0
12.3	0
12.4	0
12.5	0
12.6	0
12.7	0
12.8	0
12.9	0
13	0
13.1	0
13.2	0
13.3	0
13.4	0
13.5	0
13.6	0
13.7	0
13.8	0
13.9	0
14	0
14.1	0
14.2	0
14.3	0
14.4	0
14.5	0
14.6	0
14.7	0
14.8	0
14.9	0
15	0
15.1	0
15.2	0
15.3	0
15.4	0
15.5	0
15.6	0
15.7	0
15.8	0
15.9	0
16	0
16.1	0
16.2	0
16.3	0
16.4	0
16.5	0
16.6	0
16.7	0
16.8	0
16.9	0
17	0
17.1	0
17.2	0
17.3	0
17.4	0
17.5	0
17.6	0
17.7	0
17.8	0
17.9	0
18	0
18.1	0
18.2	0
18.3	0
18.4	0
18.5	0
18.6	0
18.7	0
18.8	0
18.9	0
19	0
19.1	0
19.2	0
19.3	0
19.4	0
19.5	0
19.6	0
19.7	0
19.8	0
19.9	0
20	0
20.1	0
20.2	0
20.3	0
20.4	0
20.5	0
20.6	0
20.7	0
20.8	0
20.9	0
21	0
21.1	0
21.2	0
21.3	0
21.4	0
21.5	0
21.6	0
21.7	0
21.8	0
21.9	0
22	0
22.1	0
22.2	0
22.3	0
22.4	0
22.5	0
22.6	0
22.7	0
22.8	0
22.9	0
23	0
23.1	0
23.2	0
23.3	0
23.4	0
23.5	0
23.6	0
23.7	0
23.8	0
23.9	0
24	0
24.1	0
24.2	0
24.3	0
24.4	0
24.5	0
24.6	0
24.7	0
24.8	0
24.9	0
25	0
25.1	0
25.2	0
25.3	0
25.4	0
25.5	0
25.6	0
25.7	0
25.8	0
25.9	0
26	0
26.1	0
26.2	0
26.3	0
26.4	0
26.5	0
26.6	0
26.7	0
26.8	0
26.9	0
27	0
27.1	0
27.2	0
27.3	0
27.4	0
27.5	0
27.6	0
27.7	0
27.8	0
27.9	0
28	0
28.1	0
28.2	0
28.3	0
28.4	0
28.5	0
28.6	0
28.7	0
28.8	0
28.9	0
29	0
29.1	0
29.2	0
29.3	0
29.4	0
29.5	0
29.6	0
29.7	0
29.8	0
29.9	0
30	0
30.1	0
30.2	0
30.3	0
30.4	0
30.5	0
30.6	0
30.7	0
30.8	0
30.9	0
31	0
31.1	0
31.2	0
31.3	0
31.4	0
31.5	0
31.6	0
31.7	0
31.8	0
31.9	0
32	0
32.1	0
32.2	0
32.3	0
32.4	0
32.5	0
32.6	0
32.7	0
32.8	0
32.9	0
33	0
33.1	0
33.2	0
33.3	0
33.4	0
33.5	0
33.6	0
33.7	0
33.8	0
33.9	0
34	0
34.1	0
34.2	0
34.3	0
34.4	0
34.5	0
34.6	0
34.7	0
34.8	0
34.9	0
35	0
35.1	0
35.2	0
35.3	0
35.4	0
35.5	0
35.6	0
35.7	0
35.8	0
35.9	0
36	0
36.1	0
36.2	0
36.3	0
36.4	0
36.5	0
36.6	0
36.7	0
36.8	0
36.9	0
37	0
37.1	0
37.2	0
37.3	0
37.4	0
37.5	0
37.6	0
37.7	0
37.8	0
37.9	0
38	0
38.1	0
38.2	0
38.3	0
38.4	0
38.5	0
38.6	0
38.7	0
38.8	0
38.9	0
39	0
39.1	0
39.2	0
39.3	0
39.4	0
39.5	0
39.6	0
39.7	0
39.8	0
39.9	0
40	0
40.1	0
40.2	0
40.3	0
40.4	0
40.5	0
40.6	0
40.7	0
40.8	0
40.9	0
41	0
41.1	0
41.2	0
41.3	0
41.4	0
41.5	0
41.6	0
41.7	0
41.8	0
41.9	0
42	0
42.1	0
42.2	0
42.3	0
42.4	0
42.5	0
42.6	0
42.7	0
42.8	0
42.9	0
43	0
43.1	0
43.2	0
43.3	0
43.4	0
43.5	0
43.6	0
43.7	0
43.8	0
43.9	0
44	0
44.1	0
44.2	0
44.3	0
44.4	0
44.5	0
44.6	0
44.7	0
44.8	0
44.9	0
45	0
45.1	0
45.2	0
45.3	0
45.4	0
45.5	0
45.6	0
45.7	0
45.8	0
45.9	0
46	0
46.1	0
46.2	0
46.3	0
46.4	0
46.5	0
46.6	0
46.7	0
46.8	0
46.9	0
47	0
47.1	0
47.2	0
47.3	0
47.4	0
47.5	0
47.6	0
47.7	0
47.8	0
47.9	0
48	0
48.1	0
48.2	0
48.3	0
48.4	0
48.5	0
48.6	0
48.7	0
48.8	0
48.9	0
49	0
49.1	0
49.2	0
49.3	0
49.4	0
49.5	0
49.6	0
49.7	0
49.8	0
49.9	0
50	0
50.1	0
50.2	0
50.3	0
50.4	0
50.5	0
50.6	0
50.7	0
50.8	0
50.9	0
51	0
51.1	0
51.2	0
51.3	0
51.4	0
51.5	0
51.6	0
51.7	0
51.8	0
51.9	0
52	0
52.1	0
52.2	0
52.3	0
52.4	0
52.5	0
52.6	0
52.7	0
52.8	0
52.9	0
53	0
53.1	0
53.2	0
53.3	0
53.4	0
53.5	0
53.6	0
53.7	0
53.8	0
53.9	0
54	0
54.1	0
54.2	0
54.3	0
54.4	0
54.5	0
54.6	0
54.7	0
54.8	0
54.9	0
55	0
55.1	0
55.2	0
55.3	0
55.4	0
55.5	0
55.6	0
55.7	0
55.8	0
55.9	0
56	0
56.1	0
56.2	0
56.3	0
56.4	0
56.5	0
56.6	0
56.7	0
56.8	0
56.9	0
57	0
57.1	0
57.2	0
57.3	0
57.4	0
57.5	0
57.6	0
57.7	0
57.8	0
57.9	0
58	0
58.1	0
58.2	0
58.3	0
58.4	0
58.5	0
58.6	0
58.7	0
58.8	0
58.9	0
59	0
59.1	0
59.2	0
59.3	0
59.4	0
59.5	0
59.6	0
59.7	0
59.8	0
59.9	0
60	0
60.1	0
60.2	0
60.3	0
60.4	0
60.5	0
60.6	0
60.7	0
60.8	0
60.9	0
61	0
61.1	0
61.2	0
61.3	0
61.4	0
61.5	0
61.6	0
61.7	0
61.8	0
61.9	0
62	0
62.1	0
62.2	0
62.3	0
62.4	0
62.5	0
62.6	0
62.7	0
62.8	0
62.9	0
63	0
63.1	0
63.2	0
63.3	0
63.4	0
63.5	0
63.6	0
63.7	0
63.8	0
63.9	0
64	0
64.1	0
64.2	0
64.3	0
64.4	0
64.5	0
64.6	0
64.7	0
64.8	0
64.9	0
65	0
65.1	0
65.2	0
65.3	0
65.4	0
65.5	0
65.6	0
65.7	0
65.8	0
65.9	0
66	0
66.1	0
66.2	0
66.3	0
66.4	0
66.5	0
66.6	0
66.7	0
66.8	0
66.9	0
67	0
67.1	0
67.2	0
67.3	0
67.4	0
67.5	0
67.6	0
67.7	0
67.8	0
67.9	0
68	0
68.1	0
68.2	0
68.3	0
68.4	0
68.5	0
68.6	0
68.7	0
68.8	0
68.9	0
69	0
69.1	0
69.2	0
69.3	0
69.4	0
69.5	0
69.6	0
69.7	0
69.8	0
69.9	0
70	0
70.1	0
70.2	0
70.3	0
70.4	0
70.5	0
70.6	0
70.7	0
70.8	0
70.9	0
71	0
71.1	0
71.2	0
71.3	0
71.4	0
71.5	0
71.6	0
71.7	0
71.8	0
71.9	0
72	0
72.1	0
72.2	0
72.3	0
72.4	0
72.5	0
72.6	0
72.7	0
72.8	0
72.9	0
73	0
73.1	0
73.2	0
73.3	0
73.4	0
73.5	0
73.6	0
73.7	0
73.8	0
73.9	0
74	0
74.1	0
74.2	0
74.3	0
74.4	0
74.5	0
74.6	0
74.7	0
74.8	0
74.9	0
75	0
75.1	0
75.2	0
75.3	0
75.4	0
75.5	0
75.6	0
75.7	0
75.8	0
75.9	0
76	0
76.1	0
76.2	0
76.3	0
76.4	0
76.5	0
76.6	0
76.7	0
76.8	0
76.9	0
77	0
77.1	0
77.2	0
77.3	0
77.4	0
77.5	0
77.6	0
77.7	0
77.8	0
77.9	0
78	0
78.1	0
78.2	0
78.3	0
78.4	0
78.5	0
78.6	0
78.7	0
78.8	0
78.9	0
79	0
79.1	0
79.2	0
79.3	0
79.4	0
79.5	0
79.6	0
79.7	0
79.8	0
79.9	0
80	0
80.1	0
80.2	0
80.3	0
80.4	0
80.5	0
80.6	0
80.7	0
80.8	0
80.9	0
81	0
81.1	0
81.2	0
81.3	0
81.4	0
81.5	0
81.6	0
81.7	0
81.8	0
81.9	0
82	0
82.1	0
82.2	0
82.3	0
82.4	0
82.5	0
82.6	0
82.7	0
82.8	0
82.9	0
83	0
83.1	0
83.2	0
83.3	0
83.4	0
83.5	0
83.6	0
83.7	0
83.8	0
83.9	0
84	0
84.1	0
84.2	0
84.3	0
84.4	0
84.5	0
84.6	0
84.7	0
84.8	0
84.9	0
85	0
85.1	0
85.2	0
85.3	0
85.4	0
85.5	0
85.6	0
85.7	0
85.8	0
85.9	0
86	0
86.1	0
86.2	0
86.3	0
86.4	0
86.5	0
86.6	0
86.7	0
86.8	0
86.9	0
87	0
87.1	0
87.2	0
87.3	0
87.4	0
87.5	0
87.6	0
87.7	0
87.8	0
87.9	0
88	0
88.1	0
88.2	0
88.3	0
88.4	0
88.5	0
88.6	0
88.7	0
88.8	0
88.9	0
89	0
89.1	0
89.2	0
89.3	0
89.4	0
89.5	0
89.6	0
89.7	0
89.8	0
89.9	0
90	0
90.1	0
90.2	0
90.3	0
90.4	0
90.5	0
90.6	0
90.7	0
90.8	0
90.9	0
91	0
91.1	0
91.2	0
91.3	0
91.4	0
91.5	0
91.6	0
91.7	0
91.8	0
91.9	0
92	0
92.1	0
92.2	0
92.3	0
92.4	0
92.5	0
92.6	0
92.7	0
92.8	0
92.9	0
93	0
93.1	0
93.2	0
93.3	0
93.4	0
93.5	0
93.6	0
93.7	0
93.8	0
93.9	0
94	0
94.1	0
94.2	0
94.3	0
94.4	0
94.5	0
94.6	0
94.7	0
94.8	0
94.9	0
95	0
95.1	0
95.2	0
95.3	0
95.4	0
95.5	0
95.6	0
95.7	0
95.8	0
95.9	0
96	0
96.1	0
96.2	0
96.3	0
96.4	0
96.5	0
96.6	0
96.7	0
96.8	0
96.9	0
97	0
97.1	0
97.2	0
97.3	0
97.4	0
97.5	0
97.6	0
97.7	0
97.8	0
97.9	0
98	0
98.1	0
98.2	0
98.3	0
98.4	0
98.5	0
98.6	0
98.7	0
98.8	0
98.9	0
99	0
99.1	0
99.2	0
99.3	0
99.4	0
99.5	0
99.6	0
99.7	0
99.8	0
99.9	0
100	0
100.1	1.82724e-07
100.2	1.42476e-06
100.3	4.68745e-06
100.4	1.08327e-05
100.5	2.06306e-05
100.6	3.47666e-05
100.7	5.38483e-05
100.8	7.84114e-05
100.9	0.000108925
101	0.000145799
101.1	0.000189386
101.2	0.000239988
101.3	0.00029786
101.4	0.000363214
101.5	0.000436223
101.6	0.000517024
101.7	0.000605721
101.8	0.00070239
101.9	0.000807077
102	0.000919806
102.1	0.00104058
102.2	0.00116937
102.3	0.00130616
102.4	0.00145087
102.5	0.00160345
102.6	0.00176382
102.7	0.00193188
102.8	0.00210753
102.9	0.00229065
103	0.00248114
103.1	0.00267886
103.2	0.00288369
103.3	0.00309548
103.4	0.00331409
103.5	0.00353939
103.6	0.00377121
103.7	0.00400943
103.8	0.00425387
103.9	0.0045044
104	0.00476086
104.1	0.00502309
104.2	0.00529094
104.3	0.00556427
104.4	0.00584292
104.5	0.00612674
104.6	0.00641557
104.7	0.00670929
104.8	0.00700773
104.9	0.00731075
105	0.00761821
105.1	0.00792998
105.2	0.00824592
105.3	0.00856588
105.4	0.00888974
105.5	0.00921737
105.6	0.00954864
105.7	0.00988343
105.8	0.0102216
105.9	0.0105631
106	0.0109077
106.1	0.0112553
106.2	0.0116059
106.3	0.0119593
106.4	0.0123154
106.5	0.0126742
106.6	0.0130354
106.7	0.0133991
106.8	0.0137651
106.9	0.0141333
107	0.0145037
107.1	0.0148761
107.2	0.0152505
107.3	0.0156267
107.4	0.0160048
107.5	0.0163846
107.6	0.016766
107.7	0.017149
107.8	0.0175335
107.9	0.0179194
108	0.0183067
108.1	0.0186953
108.2	0.0190851
108.3	0.0194762
108.4	0.0198683
108.5	0.0202615
108.6	0.0206557
108.7	0.0210508
108.8	0.0214469
108.9	0.0218438
109	0.0222414
109.1	0.0226399
109.2	0.023039
109.3	0.0234388
109.4	0.0238393
109.5	0.0242403
109.6	0.0246418
109.7	0.0250439
109.8	0.0254464
109.9	0.0258493
110	0.0262526
110.1	0.0266563
110.2	0.0270603
110.3	0.0274646
110.4	0.0278692
110.5	0.028274
110.6	0.028679
110.7	0.0290842
110.8	0.0294896
110.9	0.029895
111	0.0303006
111.1	0.0307063
111.2	0.031112
111.3	0.0315177
111.4	0.0319235
111.5	0.0323293
111.6	0.032735
111.7	0.0331407
111.8	0.0335463
111.9	0.0339518
112	0.0343573
112.1	0.0347626
112.2	0.0351678
112.3	0.0355729
112.4	0.0359778
112.5	0.0363825
112.6	0.036787
112.7	0.0371914
112.8	0.0375955
112.9	0.0379994
113	0.038403
113.1	0.0388064
113.2	0.0392096
113.3	0.0396125
113.4	0.0400151
113.5	0.0404174
113.6	0.0408194
113.7	0.0412211
113.8	0.0416225
113.9	0.0420236
114	0.0424243
114.1	0.0428247
114.2	0.0432247
114.3	0.0436244
114.4	0.0440238
114.5	0.0444227
114.6	0.0448213
114.7	0.0452196
114.8	0.0456174
114.9	0.0460148
115	0.0464119
115.1	0.0468085
115.2	0.0472048
115.3	0.0476006
115.4	0.047996
115.5	0.048391
115.6	0.0487856
115.7	0.0491797
115.8	0.0495734
115.9	0.0499667
116	0.0503596
116.1	0.050752
116.2	0.0511439
116.3	0.0515354
116.4	0.0519265
116.5	0.0523171
116.6	0.0527073
116.7	0.053097
116.8	0.0534862
116.9	0.053875
117	0.0542633
117.1	0.0546511
117.2	0.0550385
117.3	0.0554254
117.4	0.0558118
117.5	0.0561978
117.6	0.0565833
117.7	0.0569683
117.8	0.0573528
117.9	0.0577369
118	0.0581205
118.1	0.0585035
118.2	0.0588862
118.3	0.0592683
118.4	0.0596499
118.5	0.0600311
118.6	0.0604117
118.7	0.0607919
118.8	0.0611716
118.9	0.0615508
119	0.0619295
119.1	0.0623077
119.2	0.0626855
119.3	0.0630627
119.4	0.0634394
119.5	0.0638157
119.6	0.0641914
119.7	0.0645667
119.8	0.0649415
119.9	0.0653158
120	0.0656896
120.1	0.0660628
120.2	0.0664356
120.3	0.0668079
120.4	0.0671798
120.5	0.0675511
120.6	0.0679219
120.7	0.0682922
120.8	0.068662
120.9	0.0690314
121	0.0694002
121.1	0.0697686
121.2	0.0701364
121.3	0.0705038
121.4	0.0708706
121.5	0.071237
121.6	0.0716029
121.7	0.0719683
121.8	0.0723332
121.9	0.0726976
122	0.0730615
122.1	0.0734249
122.2	0.0737878
122.3	0.0741502
122.4	0.0745121
122.5	0.0748736
122.6	0.0752345
122.7	0.075595
122.8	0.075955
122.9	0.0763145
123	0.0766734
123.1	0.0770319
123.2	0.07739
123.3	0.0777475
123.4	0.0781045
123.5	0.0784611
123.6	0.0788171
123.7	0.0791727
123.8	0.0795278
123.9	0.0798824
124	0.0802365
124.1	0.0805901
124.2	0.0809433
124.3	0.081296
124.4	0.0816481
124.5	0.0819998
124.6	0.0823511
124.7	0.0827018
124.8	0.083052
124.9	0.0834018
125	0.0837511
125.1	0.0840999
125.2	0.0844482
125.3	0.0847961
125.4	0.0851435
125.5	0.0854904
125.6	0.0858368
125.7	0.0861827
125.8	0.0865282
125.9	0.0868732
126	0.0872177
126.1	0.0875617
126.2	0.0879053
126.3	0.0882484
126.4	0.088591
126.5	0.0889332
126.6	0.0892749
126.7	0.0896161
126.8	0.0899568
126.9	0.0902971
127	0.0906369
127.1	0.0909762
127.2	0.0913151
127.3	0.0916535
127.4	0.0919914
127.5	0.0923288
127.6	0.0926658
127.7	0.0930024
127.8	0.0933384
127.9	0.093674
128	0.0940092
128.1	0.0943439
128.2	0.0946781
128.3	0.0950118
128.4	0.0953451
128.5	0.0956779
128.6	0.0960103
128.7	0.0963422
128.8	0.0966737
128.9	0.0970047
129	0.0973352
129.1	0.0976653
129.2	0.0979949
129.3	0.0983241
129.4	0.0986528
129.5	0.0989811
129.6	0.0993089
129.7	0.0996362
129.8	0.0999631
129.9	0.10029
130	0.100616
130.1	0.100941
130.2	0.101266
130.3	0.101591
130.4	0.101915
130.5	0.102239
130.6	0.102562
130.7	0.102885
130.8	0.103207
130.9	0.103529
131	0.103851
131.1	0.104172
131.2	0.104493
131.3	0.104813
131.4	0.105133
131.5	0.105452
131.6	0.105771
131.7	0.106089
131.8	0.106407
131.9	0.106725
132	0.107042
132.1	0.107358
132.2	0.107675
132.3	0.10799
132.4	0.108306
132.5	0.108621
132.6	0.108935
132.7	0.109249
132.8	0.109563
132.9	0.109876
133	0.110189
133.1	0.110501
133.2	0.110813
133.3	0.111124
133.4	0.111435
133.5	0.111746
133.6	0.112056
133.7	0.112366
133.8	0.112675
133.9	0.112984
134	0.113292
134.1	0.1136
134.2	0.113908
134.3	0.114215
134.4	0.114522
134.5	0.114828
134.6	0.115134
134.7	0.11544
134.8	0.115745
134.9	0.116049
135	0.116353
135.1	0.116657
135.2	0.116961
135.3	0.117263
135.4	0.117566
135.5	0.117868
135.6	0.11817
135.7	0.118471
135.8	0.118772
135.9	0.119072
136	0.119372
136.1	0.119672
136.2	0.119971
136.3	0.12027
136.4	0.120568
136.5	0.120866
136.6	0.121164
136.7	0.121461
136.8	0.121758
136.9	0.122054
137	0.12235
137.1	0.122645
137.2	0.12294
137.3	0.123235
137.4	0.123529
137.5	0.123823
137.6	0.124116
137.7	0.124409
137.8	0.124702
137.9	0.124994
138	0.125286
138.1	0.125578
138.2	0.125869
138.3	0.126159
138.4	0.126449
138.5	0.126739
138.6	0.127029
138.7	0.127318
138.8	0.127606
138.9	0.127894
139	0.128182
139.1	0.12847
139.2	0.128757
139.3	0.129043
139.4	0.129329
139.5	0.129615
139.6	0.129901
139.7	0.130186
139.8	0.13047
139.9	0.130755
140	0.131038
140.1	0.131322
140.2	0.131605
140.3	0.131888
140.4	0.13217
140.5	0.132452
140.6	0.132733
140.7	0.133014
140.8	0.133295
140.9	0.133575
141	0.133855
141.1	0.134135
141.2	0.134414
141.3	0.134693
141.4	0.134971
141.5	0.135249
141.6	0.135527
141.7	0.135804
141.8	0.136081
141.9	0.136357
142	0.136634
142.1	0.136909
142.2	0.137185
142.3	0.13746
142.4	0.137734
142.5	0.138008
142.6	0.138282
142.7	0.138556
142.8	0.138829
142.9	0.139101
143	0.139374
143.1	0.139645
143.2	0.139917
143.3	0.140188
143.4	0.140459
143.5	0.140729
143.6	0.140999
143.7	0.141269
143.8	0.141538
143.9	0.141807
144	0.142076
144.1	0.142344
144.2	0.142612
144.3	0.142879
144.4	0.143146
144.5	0.143413
144.6	0.143679
144.7	0.143945
144.8	0.144211
144.9	0.144476
145	0.144741
145.1	0.145005
145.2	0.14527
145.3	0.145533
145.4	0.145797
145.5	0.14606
145.6	0.146322
145.7	0.146585
145.8	0.146847
145.9	0.147108
146	0.147369
146.1	0.14763
146.2	0.147891
146.3	0.148151
146.4	0.148411
146.5	0.14867
146.6	0.148929
146.7	0.149188
146.8	0.149446
146.9	0.149704
147	0.149962
147.1	0.150219
147.2	0.150476
147.3	0.150732
147.4	0.150989
147.5	0.151244
147.6	0.1515
147.7	0.151755
147.8	0.15201
147.9	0.152264
148	0.152518
148.1	0.152772
148.2	0.153025
148.3	0.153278
148.4	0.153531
148.5	0.153783
148.6	0.154035
148.7	0.154287
148.8	0.154538
148.9	0.154789
149	0.15504
149.1	0.15529
149.2	0.15554
149.3	0.155789
149.4	0.156039
149.5	0.156287
149.6	0.156536
149.7	0.156784
149.8	0.157032
149.9	0.157279
150	0.157527
150.1	0.157773
150.2	0.15802
150.3	0.158266
150.4	0.158512
150.5	0.158757
150.6	0.159002
150.7	0.159247
150.8	0.159491
150.9	0.159735
151	0.159979
151.1	0.160222
151.2	0.160466
151.3	0.160708
151.4	0.160951
151.5	0.161193
151.6	0.161434
151.7	0.161676
151.8	0.161917
151.9	0.162158
152	0.162398
152.1	0.162638
152.2	0.162878
152.3	0.163117
152.4	0.163356
152.5	0.163595
152.6	0.163833
152.7	0.164071
152.8	0.164309
152.9	0.164546
153	0.164783
153.1	0.16502
153.2	0.165257
153.3	0.165493
153.4	0.165728
153.5	0.165964
153.6	0.166199
153.7	0.166434
153.8	0.166668
153.9	0.166902
154	0.167136
154.1	0.16737
154.2	0.167603
154.3	0.167836
154.4	0.168068
154.5	0.1683
154.6	0.168532
154.7	0.168764
154.8	0.168995
154.9	0.169226
155	0.169457
155.1	0.169687
155.2	0.169917
155.3	0.170146
155.4	0.170376
155.5	0.170605
155.6	0.170833
155.7	0.171062
155.8	0.17129
155.9	0.171518
156	0.171745
156.1	0.171972
156.2	0.172199
156.3	0.172425
156.4	0.172652
156.5	0.172877
156.6	0.173103
156.7	0.173328
156.8	0.173553
156.9	0.173778
157	0.174002
157.1	0.174226
157.2	0.17445
157.3	0.174673
157.4	0.174896
157.5	0.175119
157.6	0.175341
157.7	0.175563
157.8	0.175785
157.9	0.176007
158	0.176228
158.1	0.176449
158.2	0.176669
158.3	0.17689
158.4	0.17711
158.5	0.177329
158.6	0.177549
158.7	0.177768
158.8	0.177987
158.9	0.178205
159	0.178423
159.1	0.178641
159.2	0.178859
159.3	0.179076
159.4	0.179293
159.5	0.17951
159.6	0.179726
159.7	0.179942
159.8	0.180158
159.9	0.180373
160	0.180588
160.1	0.180803
160.2	0.181018
160.3	0.181232
160.4	0.181446
160.5	0.18166
160.6	0.181873
160.7	0.182086
160.8	0.182299
160.9	0.182512
161	0.182724
161.1	0.182936
161.2	0.183147
161.3	0.183359
161.4	0.18357
161.5	0.18378
161.6	0.183991
161.7	0.184201
161.8	0.184411
161.9	0.18462
162	0.18483
162.1	0.185039
162.2	0.185247
162.3	0.185456
162.4	0.185664
162.5	0.185872
162.6	0.186079
162.7	0.186287
162.8	0.186494
162.9	0.1867
163	0.186907
163.1	0.187113
163.2	0.187319
163.3	0.187524
163.4	0.18773
163.5	0.187934
163.6	0.188139
163.7	0.188344
163.8	0.188548
163.9	0.188752
164	0.188955
164.1	0.189158
164.2	0.189361
164.3	0.189564
164.4	0.189767
164.5	0.189969
164.6	0.190171
164.7	0.190372
164.8	0.190574
164.9	0.190775
165	0.190975
165.1	0.191176
165.2	0.191376
165.3	0.191576
165.4	0.191776
165.5	0.191975
165.6	0.192174
165.7	0.192373
165.8	0.192572
165.9	0.19277
166	0.192968
166.1	0.193166
166.2	0.193363
166.3	0.19356
166.4	0.193757
166.5	0.193954
166.6	0.19415
166.7	0.194346
166.8	0.194542
166.9	0.194738
167	0.194933
167.1	0.195128
167.2	0.195323
167.3	0.195517
167.4	0.195711
167.5	0.195905
167.6	0.196099
167.7	0.196292
167.8	0.196485
167.9	0.196678
168	0.196871
168.1	0.197063
168.2	0.197255
168.3	0.197447
168.4	0.197639
168.5	0.19783
168.6	0.198021
168.7	0.198212
168.8	0.198402
168.9	0.198592
169	0.198782
169.1	0.198972
169.2	0.199161
169.3	0.199351
169.4	0.199539
169.5	0.199728
169.6	0.199916
169.7	0.200105
169.8	0.200292
169.9	0.20048
170	0.200667
170.1	0.200854
170.2	0.201041
170.3	0.201228
170.4	0.201414
170.5	0.2016
170.6	0.201786
170.7	0.201971
170.8	0.202157
170.9	0.202342
171	0.202526
171.1	0.202711
171.2	0.202895
171.3	0.203079
171.4	0.203263
171.5	0.203446
171.6	0.20363
171.7	0.203813
171.8	0.203995
171.9	0.204178
172	0.20436
172.1	0.204542
172.2	0.204724
172.3	0.204905
172.4	0.205086
172.5	0.205267
172.6	0.205448
172.7	0.205629
172.8	0.205809
172.9	0.205989
173	0.206168
173.1	0.206348
173.2	0.206527
173.3	0.206706
173.4	0.206885
173.5	0.207063
173.6	0.207241
173.7	0.207419
173.8	0.207597
173.9	0.207775
174	0.207952
174.1	0.208129
174.2	0.208306
174.3	0.208482
174.4	0.208658
174.5	0.208834
174.6	0.20901
174.7	0.209186
174.8	0.209361
174.9	0.209536
175	0.209711
175.1	0.209885
175.2	0.21006
175.3	0.210234
175.4	0.210408
175.5	0.210581
175.6	0.210755
175.7	0.210928
175.8	0.2111
175.9	0.211273
176	0.211446
176.1	0.211618
176.2	0.21179
176.3	0.211961
176.4	0.212133
176.5	0.212304
176.6	0.212475
176.7	0.212646
176.8	0.212816
176.9	0.212986
177	0.213156
177.1	0.213326
177.2	0.213496
177.3	0.213665
177.4	0.213834
177.5	0.214003
177.6	0.214172
177.7	0.21434
177.8	0.214508
177.9	0.214676
178	0.214844
178.1	0.215011
178.2	0.215178
178.3	0.215345
178.4	0.215512
178.5	0.215679
178.6	0.215845
178.7	0.216011
178.8	0.216177
178.9	0.216342
179	0.216508
179.1	0.216673
179.2	0.216838
179.3	0.217003
179.4	0.217167
179.5	0.217331
179.6	0.217495
179.7	0.217659
179.8	0.217823
179.9	0.217986
180	0.218149
180.1	0.218312
180.2	0.218475
180.3	0.218637
180.4	0.218799
180.5	0.218961
180.6	0.219123
180.7	0.219285
180.8	0.219446
180.9	0.219607
181	0.219768
181.1	0.219928
181.2	0.220089
181.3	0.220249
181.4	0.220409
181.5	0.220569
181.6	0.220728
181.7	0.220888
181.8	0.221047
181.9	0.221206
182	0.221364
182.1	0.221523
182.2	0.221681
182.3	0.221839
182.4	0.221997
182.5	0.222154
182.6	0.222311
182.7	0.222469
182.8	0.222625
182.9	0.222782
183	0.222939
183.1	0.223095
183.2	0.223251
183.3	0.223407
183.4	0.223562
183.5	0.223718
183.6	0.223873
183.7	0.224028
183.8	0.224183
183.9	0.224337
184	0.224491
184.1	0.224645
184.2	0.224799
184.3	0.224953
184.4	0.225107
184.5	0.22526
184.6	0.225413
184.7	0.225566
184.8	0.225718
184.9	0.225871
185	0.226023
185.1	0.226175
185.2	0.226327
185.3	0.226478
185.4	0.226629
185.5	0.226781
185.6	0.226932
185.7	0.227082
185.8	0.227233
185.9	0.227383
186	0.227533
186.1	0.227683
186.2	0.227833
186.3	0.227982
186.4	0.228131
186.5	0.228281
186.6	0.228429
186.7	0.228578
186.8	0.228726
186.9	0.228875
187	0.229023
187.1	0.229171
187.2	0.229318
187.3	0.229466
187.4	0.229613
187.5	0.22976
187.6	0.229907
187.7	0.230053
187.8	0.2302
187.9	0.230346
188	0.230492
188.1	0.230638
188.2	0.230783
188.3	0.230929
188.4	0.231074
188.5	0.231219
188.6	0.231364
188.7	0.231508
188.8	0.231653
188.9	0.231797
189	0.231941
189.1	0.232084
189.2	0.232228
189.3	0.232371
189.4	0.232515
189.5	0.232658
189.6	0.2328
189.7	0.232943
189.8	0.233085
189.9	0.233228
190	0.23337
190.1	0.233511
190.2	0.233653
190.3	0.233794
190.4	0.233936
190.5	0.234077
190.6	0.234218
190.7	0.234358
190.8	0.234499
190.9	0.234639
191	0.234779
191.1	0.234919
191.2	0.235058
191.3	0.235198
191.4	0.235337
191.5	0.235476
191.6	0.235615
191.7	0.235754
191.8	0.235892
191.9	0.236031
192	0.236169
192.1	0.236307
192.2	0.236445
192.3	0.236582
192.4	0.236719
192.5	0.236857
192.6	0.236994
192.7	0.23713
192.8	0.237267
192.9	0.237403
193	0.23754
193.1	0.237676
193.2	0.237812
193.3	0.237947
193.4	0.238083
193.5	0.238218
193.6	0.238353
193.7	0.238488
193.8	0.238623
193.9	0.238757
194	0.238892
194.1	0.239026
194.2	0.23916
194.3	0.239294
194.4	0.239427
194.5	0.239561
194.6	0.239694
194.7	0.239827
194.8	0.23996
194.9	0.240092
195	0.240225
195.1	0.240357
195.2	0.240489
195.3	0.240621
195.4	0.240753
195.5	0.240885
195.6	0.241016
195.7	0.241147
195.8	0.241278
195.9	0.241409
196	0.24154
196.1	0.24167
196.2	0.241801
196.3	0.241931
196.4	0.242061
196.5	0.242191
196.6	0.24232
196.7	0.24245
196.8	0.242579
196.9	0.242708
197	0.242837
197.1	0.242966
197.2	0.243094
197.3	0.243222
197.4	0.243351
197.5	0.243479
197.6	0.243606
197.7	0.243734
197.8	0.243861
197.9	0.243989
198	0.244116
198.1	0.244243
198.2	0.24437
198.3	0.244496
198.4	0.244623
198.5	0.244749
198.6	0.244875
198.7	0.245001
198.8	0.245126
198.9	0.245252
199	0.245377
199.1	0.245503
199.2	0.245628
199.3	0.245752
199.4	0.245877
199.5	0.246002
199.6	0.246126
199.7	0.24625
199.8	0.246374
199.9	0.246498
200	0.246621
[truncated: 14,000 more rows]
