# Supplementary material for: Bayesian inference of kinetic schemes for ion channels by Kalman filtering
Source: eLife journal article supplement (doi:10.7554/elife.62714), 2022-05-04
Supplement: fig4-data8 [file 1_Sim_N_3000_Fluor_MW.xlsx]

## Sheet: Tabelle1
0.1	0
0.2	0
0.3	0
0.4	0
0.5	0
0.6	0
0.7	0
0.8	0
0.9	0
1	0
1.1	0
1.2	0
1.3	0
1.4	0
1.5	0
1.6	0
1.7	0
1.8	0
1.9	0
2	0
2.1	0
2.2	0
2.3	0
2.4	0
2.5	0
2.6	0
2.7	0
2.8	0
2.9	0
3	0
3.1	0
3.2	0
3.3	0
3.4	0
3.5	0
3.6	0
3.7	0
3.8	0
3.9	0
4	0
4.1	0
4.2	0
4.3	0
4.4	0
4.5	0
4.6	0
4.7	0
4.8	0
4.9	0
5	0
5.1	0
5.2	0
5.3	0
5.4	0
5.5	0
5.6	0
5.7	0
5.8	0
5.9	0
6	0
6.1	0
6.2	0
6.3	0
6.4	0
6.5	0
6.6	0
6.7	0
6.8	0
6.9	0
7	0
7.1	0
7.2	0
7.3	0
7.4	0
7.5	0
7.6	0
7.7	0
7.8	0
7.9	0
8	0
8.1	0
8.2	0
8.3	0
8.4	0
8.5	0
8.6	0
8.7	0
8.8	0
8.9	0
9	0
9.1	0
9.2	0
9.3	0
9.4	0
9.5	0
9.6	0
9.7	0
9.8	0
9.9	0
10	0
10.1	0
10.2	0
10.3	0
10.4	0
10.5	0
10.6	0
10.7	0
10.8	0
10.9	0
11	0
11.1	0
11.2	0
11.3	0
11.4	0
11.5	0
11.6	0
11.7	0
11.8	0
11.9	0
12	0
12.1	0
12.2	0
12.3	0
12.4	0
12.5	0
12.6	0
12.7	0
12.8	0
12.9	0
13	0
13.1	0
13.2	0
13.3	0
13.4	0
13.5	0
13.6	0
13.7	0
13.8	0
13.9	0
14	0
14.1	0
14.2	0
14.3	0
14.4	0
14.5	0
14.6	0
14.7	0
14.8	0
14.9	0
15	0
15.1	0
15.2	0
15.3	0
15.4	0
15.5	0
15.6	0
15.7	0
15.8	0
15.9	0
16	0
16.1	0
16.2	0
16.3	0
16.4	0
16.5	0
16.6	0
16.7	0
16.8	0
16.9	0
17	0
17.1	0
17.2	0
17.3	0
17.4	0
17.5	0
17.6	0
17.7	0
17.8	0
17.9	0
18	0
18.1	0
18.2	0
18.3	0
18.4	0
18.5	0
18.6	0
18.7	0
18.8	0
18.9	0
19	0
19.1	0
19.2	0
19.3	0
19.4	0
19.5	0
19.6	0
19.7	0
19.8	0
19.9	0
20	0
20.1	0
20.2	0
20.3	0
20.4	0
20.5	0
20.6	0
20.7	0
20.8	0
20.9	0
21	0
21.1	0
21.2	0
21.3	0
21.4	0
21.5	0
21.6	0
21.7	0
21.8	0
21.9	0
22	0
22.1	0
22.2	0
22.3	0
22.4	0
22.5	0
22.6	0
22.7	0
22.8	0
22.9	0
23	0
23.1	0
23.2	0
23.3	0
23.4	0
23.5	0
23.6	0
23.7	0
23.8	0
23.9	0
24	0
24.1	0
24.2	0
24.3	0
24.4	0
24.5	0
24.6	0
24.7	0
24.8	0
24.9	0
25	0
25.1	0
25.2	0
25.3	0
25.4	0
25.5	0
25.6	0
25.7	0
25.8	0
25.9	0
26	0
26.1	0
26.2	0
26.3	0
26.4	0
26.5	0
26.6	0
26.7	0
26.8	0
26.9	0
27	0
27.1	0
27.2	0
27.3	0
27.4	0
27.5	0
27.6	0
27.7	0
27.8	0
27.9	0
28	0
28.1	0
28.2	0
28.3	0
28.4	0
28.5	0
28.6	0
28.7	0
28.8	0
28.9	0
29	0
29.1	0
29.2	0
29.3	0
29.4	0
29.5	0
29.6	0
29.7	0
29.8	0
29.9	0
30	0
30.1	0
30.2	0
30.3	0
30.4	0
30.5	0
30.6	0
30.7	0
30.8	0
30.9	0
31	0
31.1	0
31.2	0
31.3	0
31.4	0
31.5	0
31.6	0
31.7	0
31.8	0
31.9	0
32	0
32.1	0
32.2	0
32.3	0
32.4	0
32.5	0
32.6	0
32.7	0
32.8	0
32.9	0
33	0
33.1	0
33.2	0
33.3	0
33.4	0
33.5	0
33.6	0
33.7	0
33.8	0
33.9	0
34	0
34.1	0
34.2	0
34.3	0
34.4	0
34.5	0
34.6	0
34.7	0
34.8	0
34.9	0
35	0
35.1	0
35.2	0
35.3	0
35.4	0
35.5	0
35.6	0
35.7	0
35.8	0
35.9	0
36	0
36.1	0
36.2	0
36.3	0
36.4	0
36.5	0
36.6	0
36.7	0
36.8	0
36.9	0
37	0
37.1	0
37.2	0
37.3	0
37.4	0
37.5	0
37.6	0
37.7	0
37.8	0
37.9	0
38	0
38.1	0
38.2	0
38.3	0
38.4	0
38.5	0
38.6	0
38.7	0
38.8	0
38.9	0
39	0
39.1	0
39.2	0
39.3	0
39.4	0
39.5	0
39.6	0
39.7	0
39.8	0
39.9	0
40	0
40.1	0
40.2	0
40.3	0
40.4	0
40.5	0
40.6	0
40.7	0
40.8	0
40.9	0
41	0
41.1	0
41.2	0
41.3	0
41.4	0
41.5	0
41.6	0
41.7	0
41.8	0
41.9	0
42	0
42.1	0
42.2	0
42.3	0
42.4	0
42.5	0
42.6	0
42.7	0
42.8	0
42.9	0
43	0
43.1	0
43.2	0
43.3	0
43.4	0
43.5	0
43.6	0
43.7	0
43.8	0
43.9	0
44	0
44.1	0
44.2	0
44.3	0
44.4	0
44.5	0
44.6	0
44.7	0
44.8	0
44.9	0
45	0
45.1	0
45.2	0
45.3	0
45.4	0
45.5	0
45.6	0
45.7	0
45.8	0
45.9	0
46	0
46.1	0
46.2	0
46.3	0
46.4	0
46.5	0
46.6	0
46.7	0
46.8	0
46.9	0
47	0
47.1	0
47.2	0
47.3	0
47.4	0
47.5	0
47.6	0
47.7	0
47.8	0
47.9	0
48	0
48.1	0
48.2	0
48.3	0
48.4	0
48.5	0
48.6	0
48.7	0
48.8	0
48.9	0
49	0
49.1	0
49.2	0
49.3	0
49.4	0
49.5	0
49.6	0
49.7	0
49.8	0
49.9	0
50	0
50.1	0
50.2	0
50.3	0
50.4	0
50.5	0
50.6	0
50.7	0
50.8	0
50.9	0
51	0
51.1	0
51.2	0
51.3	0
51.4	0
51.5	0
51.6	0
51.7	0
51.8	0
51.9	0
52	0
52.1	0
52.2	0
52.3	0
52.4	0
52.5	0
52.6	0
52.7	0
52.8	0
52.9	0
53	0
53.1	0
53.2	0
53.3	0
53.4	0
53.5	0
53.6	0
53.7	0
53.8	0
53.9	0
54	0
54.1	0
54.2	0
54.3	0
54.4	0
54.5	0
54.6	0
54.7	0
54.8	0
54.9	0
55	0
55.1	0
55.2	0
55.3	0
55.4	0
55.5	0
55.6	0
55.7	0
55.8	0
55.9	0
56	0
56.1	0
56.2	0
56.3	0
56.4	0
56.5	0
56.6	0
56.7	0
56.8	0
56.9	0
57	0
57.1	0
57.2	0
57.3	0
57.4	0
57.5	0
57.6	0
57.7	0
57.8	0
57.9	0
58	0
58.1	0
58.2	0
58.3	0
58.4	0
58.5	0
58.6	0
58.7	0
58.8	0
58.9	0
59	0
59.1	0
59.2	0
59.3	0
59.4	0
59.5	0
59.6	0
59.7	0
59.8	0
59.9	0
60	0
60.1	0
60.2	0
60.3	0
60.4	0
60.5	0
60.6	0
60.7	0
60.8	0
60.9	0
61	0
61.1	0
61.2	0
61.3	0
61.4	0
61.5	0
61.6	0
61.7	0
61.8	0
61.9	0
62	0
62.1	0
62.2	0
62.3	0
62.4	0
62.5	0
62.6	0
62.7	0
62.8	0
62.9	0
63	0
63.1	0
63.2	0
63.3	0
63.4	0
63.5	0
63.6	0
63.7	0
63.8	0
63.9	0
64	0
64.1	0
64.2	0
64.3	0
64.4	0
64.5	0
64.6	0
64.7	0
64.8	0
64.9	0
65	0
65.1	0
65.2	0
65.3	0
65.4	0
65.5	0
65.6	0
65.7	0
65.8	0
65.9	0
66	0
66.1	0
66.2	0
66.3	0
66.4	0
66.5	0
66.6	0
66.7	0
66.8	0
66.9	0
67	0
67.1	0
67.2	0
67.3	0
67.4	0
67.5	0
67.6	0
67.7	0
67.8	0
67.9	0
68	0
68.1	0
68.2	0
68.3	0
68.4	0
68.5	0
68.6	0
68.7	0
68.8	0
68.9	0
69	0
69.1	0
69.2	0
69.3	0
69.4	0
69.5	0
69.6	0
69.7	0
69.8	0
69.9	0
70	0
70.1	0
70.2	0
70.3	0
70.4	0
70.5	0
70.6	0
70.7	0
70.8	0
70.9	0
71	0
71.1	0
71.2	0
71.3	0
71.4	0
71.5	0
71.6	0
71.7	0
71.8	0
71.9	0
72	0
72.1	0
72.2	0
72.3	0
72.4	0
72.5	0
72.6	0
72.7	0
72.8	0
72.9	0
73	0
73.1	0
73.2	0
73.3	0
73.4	0
73.5	0
73.6	0
73.7	0
73.8	0
73.9	0
74	0
74.1	0
74.2	0
74.3	0
74.4	0
74.5	0
74.6	0
74.7	0
74.8	0
74.9	0
75	0
75.1	0
75.2	0
75.3	0
75.4	0
75.5	0
75.6	0
75.7	0
75.8	0
75.9	0
76	0
76.1	0
76.2	0
76.3	0
76.4	0
76.5	0
76.6	0
76.7	0
76.8	0
76.9	0
77	0
77.1	0
77.2	0
77.3	0
77.4	0
77.5	0
77.6	0
77.7	0
77.8	0
77.9	0
78	0
78.1	0
78.2	0
78.3	0
78.4	0
78.5	0
78.6	0
78.7	0
78.8	0
78.9	0
79	0
79.1	0
79.2	0
79.3	0
79.4	0
79.5	0
79.6	0
79.7	0
79.8	0
79.9	0
80	0
80.1	0
80.2	0
80.3	0
80.4	0
80.5	0
80.6	0
80.7	0
80.8	0
80.9	0
81	0
81.1	0
81.2	0
81.3	0
81.4	0
81.5	0
81.6	0
81.7	0
81.8	0
81.9	0
82	0
82.1	0
82.2	0
82.3	0
82.4	0
82.5	0
82.6	0
82.7	0
82.8	0
82.9	0
83	0
83.1	0
83.2	0
83.3	0
83.4	0
83.5	0
83.6	0
83.7	0
83.8	0
83.9	0
84	0
84.1	0
84.2	0
84.3	0
84.4	0
84.5	0
84.6	0
84.7	0
84.8	0
84.9	0
85	0
85.1	0
85.2	0
85.3	0
85.4	0
85.5	0
85.6	0
85.7	0
85.8	0
85.9	0
86	0
86.1	0
86.2	0
86.3	0
86.4	0
86.5	0
86.6	0
86.7	0
86.8	0
86.9	0
87	0
87.1	0
87.2	0
87.3	0
87.4	0
87.5	0
87.6	0
87.7	0
87.8	0
87.9	0
88	0
88.1	0
88.2	0
88.3	0
88.4	0
88.5	0
88.6	0
88.7	0
88.8	0
88.9	0
89	0
89.1	0
89.2	0
89.3	0
89.4	0
89.5	0
89.6	0
89.7	0
89.8	0
89.9	0
90	0
90.1	0
90.2	0
90.3	0
90.4	0
90.5	0
90.6	0
90.7	0
90.8	0
90.9	0
91	0
91.1	0
91.2	0
91.3	0
91.4	0
91.5	0
91.6	0
91.7	0
91.8	0
91.9	0
92	0
92.1	0
92.2	0
92.3	0
92.4	0
92.5	0
92.6	0
92.7	0
92.8	0
92.9	0
93	0
93.1	0
93.2	0
93.3	0
93.4	0
93.5	0
93.6	0
93.7	0
93.8	0
93.9	0
94	0
94.1	0
94.2	0
94.3	0
94.4	0
94.5	0
94.6	0
94.7	0
94.8	0
94.9	0
95	0
95.1	0
95.2	0
95.3	0
95.4	0
95.5	0
95.6	0
95.7	0
95.8	0
95.9	0
96	0
96.1	0
96.2	0
96.3	0
96.4	0
96.5	0
96.6	0
96.7	0
96.8	0
96.9	0
97	0
97.1	0
97.2	0
97.3	0
97.4	0
97.5	0
97.6	0
97.7	0
97.8	0
97.9	0
98	0
98.1	0
98.2	0
98.3	0
98.4	0
98.5	0
98.6	0
98.7	0
98.8	0
98.9	0
99	0
99.1	0
99.2	0
99.3	0
99.4	0
99.5	0
99.6	0
99.7	0
99.8	0
99.9	0
100	0
100.1	0.0146667
100.2	0.0308333
100.3	0.0461667
100.4	0.0596667
100.5	0.073
100.6	0.0846667
100.7	0.0961667
100.8	0.106833
100.9	0.118667
101	0.13
101.1	0.14
101.2	0.152667
101.3	0.16
101.4	0.169667
101.5	0.178667
101.6	0.188167
101.7	0.196
101.8	0.203833
101.9	0.2105
102	0.218
102.1	0.2255
102.2	0.232667
102.3	0.236167
102.4	0.243167
102.5	0.251167
102.6	0.258667
102.7	0.265
102.8	0.269833
102.9	0.276833
103	0.282
103.1	0.286167
103.2	0.293167
103.3	0.298333
103.4	0.301667
103.5	0.304833
103.6	0.3075
103.7	0.311667
103.8	0.317333
103.9	0.321167
104	0.324667
104.1	0.328
104.2	0.332833
104.3	0.337167
104.4	0.34
104.5	0.343167
104.6	0.346667
104.7	0.349333
104.8	0.35
104.9	0.353167
105	0.356
105.1	0.356667
105.2	0.3585
105.3	0.362333
105.4	0.368167
105.5	0.371667
105.6	0.375
105.7	0.378167
105.8	0.381667
105.9	0.388
106	0.3895
106.1	0.3925
106.2	0.3925
106.3	0.395833
106.4	0.396333
106.5	0.398
106.6	0.399167
106.7	0.401333
106.8	0.404667
106.9	0.407167
107	0.408167
107.1	0.409833
107.2	0.4125
107.3	0.414833
107.4	0.414667
107.5	0.415167
107.6	0.417833
107.7	0.417333
107.8	0.421
107.9	0.421
108	0.420667
108.1	0.422833
108.2	0.425167
108.3	0.427333
108.4	0.427667
108.5	0.429833
108.6	0.4295
108.7	0.431
108.8	0.429833
108.9	0.43
109	0.431
109.1	0.432
109.2	0.4355
109.3	0.4345
109.4	0.433333
109.5	0.4335
109.6	0.433
109.7	0.433
109.8	0.433667
109.9	0.434333
110	0.436
110.1	0.437167
110.2	0.439667
110.3	0.439333
110.4	0.4395
110.5	0.439333
110.6	0.436667
110.7	0.436667
110.8	0.437167
110.9	0.437833
111	0.440333
111.1	0.440167
111.2	0.440667
111.3	0.4415
111.4	0.442
111.5	0.443167
111.6	0.445
111.7	0.447167
111.8	0.446833
111.9	0.4475
112	0.446333
112.1	0.449
112.2	0.452
112.3	0.454333
112.4	0.453
112.5	0.454167
112.6	0.453667
112.7	0.453
112.8	0.453667
112.9	0.4535
113	0.454
113.1	0.454
113.2	0.4535
113.3	0.453167
113.4	0.451333
113.5	0.452833
113.6	0.454
113.7	0.453167
113.8	0.451333
113.9	0.451667
114	0.451333
114.1	0.451833
114.2	0.452833
114.3	0.4535
114.4	0.455833
114.5	0.456
114.6	0.456667
114.7	0.457667
114.8	0.457833
114.9	0.457333
115	0.459
115.1	0.458667
115.2	0.458833
115.3	0.4595
115.4	0.461
115.5	0.462167
115.6	0.463
115.7	0.464333
115.8	0.4645
115.9	0.465833
116	0.4685
116.1	0.470333
116.2	0.469833
116.3	0.468167
116.4	0.468833
116.5	0.469
116.6	0.469
116.7	0.469667
116.8	0.467833
116.9	0.466833
117	0.4675
117.1	0.466833
117.2	0.4685
117.3	0.470667
117.4	0.470333
117.5	0.470833
117.6	0.470833
117.7	0.472333
117.8	0.472833
117.9	0.4715
118	0.471167
118.1	0.473167
118.2	0.473833
118.3	0.472333
118.4	0.471833
118.5	0.469833
118.6	0.472167
118.7	0.4725
118.8	0.470833
118.9	0.474167
119	0.476667
119.1	0.4755
119.2	0.475
119.3	0.476167
119.4	0.4755
119.5	0.475
119.6	0.473667
119.7	0.473167
119.8	0.473333
119.9	0.474167
120	0.474167
120.1	0.473167
120.2	0.471667
120.3	0.471667
120.4	0.4715
120.5	0.473333
120.6	0.473167
120.7	0.473333
120.8	0.475167
120.9	0.473833
121	0.473667
121.1	0.473833
121.2	0.475167
121.3	0.473167
121.4	0.472667
121.5	0.472333
121.6	0.4715
121.7	0.4705
121.8	0.471833
121.9	0.472833
122	0.471333
122.1	0.471833
122.2	0.472667
122.3	0.470333
122.4	0.4695
122.5	0.471
122.6	0.4735
122.7	0.4775
122.8	0.478
122.9	0.479
123	0.480667
123.1	0.4825
123.2	0.480667
123.3	0.483167
123.4	0.482833
123.5	0.484833
123.6	0.486167
123.7	0.486167
123.8	0.4885
123.9	0.489167
124	0.487833
124.1	0.485667
124.2	0.484
124.3	0.484833
124.4	0.4845
124.5	0.4835
124.6	0.4855
124.7	0.485667
124.8	0.487
124.9	0.483667
125	0.483833
125.1	0.4845
125.2	0.485833
125.3	0.486167
125.4	0.486667
125.5	0.483833
125.6	0.485833
125.7	0.485333
125.8	0.484833
125.9	0.487333
126	0.486
126.1	0.484
126.2	0.484333
126.3	0.485667
126.4	0.486667
126.5	0.488167
126.6	0.487833
126.7	0.4885
126.8	0.4865
126.9	0.487333
127	0.487167
127.1	0.486833
127.2	0.487
127.3	0.488167
127.4	0.489833
127.5	0.489667
127.6	0.489833
127.7	0.488167
127.8	0.488
127.9	0.4895
128	0.4905
128.1	0.490833
128.2	0.492
128.3	0.491167
128.4	0.489333
128.5	0.488167
128.6	0.489333
128.7	0.4895
128.8	0.4885
128.9	0.489833
129	0.489333
129.1	0.490667
129.2	0.489833
129.3	0.487667
129.4	0.488833
129.5	0.4885
129.6	0.489
129.7	0.4875
129.8	0.486833
129.9	0.486667
130	0.488333
130.1	0.486
130.2	0.485667
130.3	0.484
130.4	0.484833
130.5	0.485167
130.6	0.485833
130.7	0.485167
130.8	0.488333
130.9	0.486833
131	0.486667
131.1	0.485333
131.2	0.485667
131.3	0.486333
131.4	0.487333
131.5	0.486167
131.6	0.488833
131.7	0.491
131.8	0.492333
131.9	0.492333
132	0.4905
132.1	0.491333
132.2	0.491333
132.3	0.492167
132.4	0.4915
132.5	0.492833
132.6	0.492833
132.7	0.493333
132.8	0.491167
132.9	0.492
133	0.492667
133.1	0.492833
133.2	0.493167
133.3	0.494667
133.4	0.495667
133.5	0.496167
133.6	0.4965
133.7	0.496167
133.8	0.495833
133.9	0.496667
134	0.496667
134.1	0.497
134.2	0.496167
134.3	0.496667
134.4	0.496667
134.5	0.4975
134.6	0.4965
134.7	0.4985
134.8	0.501167
134.9	0.499833
135	0.499667
135.1	0.500167
135.2	0.500333
135.3	0.499833
135.4	0.499667
135.5	0.498167
135.6	0.498167
135.7	0.498333
135.8	0.496333
135.9	0.497667
136	0.497333
136.1	0.4985
136.2	0.4995
136.3	0.502167
136.4	0.500833
136.5	0.500167
136.6	0.502
136.7	0.502167
136.8	0.501833
136.9	0.501333
137	0.501833
137.1	0.504333
137.2	0.5045
137.3	0.505
137.4	0.506667
137.5	0.506
137.6	0.507833
137.7	0.508833
137.8	0.510833
137.9	0.510667
138	0.508667
138.1	0.507667
138.2	0.506333
138.3	0.507
138.4	0.505
138.5	0.5045
138.6	0.504333
138.7	0.508833
138.8	0.509167
138.9	0.507333
139	0.508
139.1	0.509
139.2	0.509333
139.3	0.5065
139.4	0.506
139.5	0.5065
139.6	0.505667
139.7	0.507167
139.8	0.5085
139.9	0.506167
140	0.506
140.1	0.504833
140.2	0.504167
140.3	0.507333
140.4	0.507167
140.5	0.507667
140.6	0.506833
140.7	0.508167
140.8	0.508167
140.9	0.506667
141	0.504333
141.1	0.5045
141.2	0.502833
141.3	0.502833
141.4	0.502833
141.5	0.504
141.6	0.505
141.7	0.504667
141.8	0.502167
141.9	0.504667
142	0.504333
142.1	0.504167
142.2	0.503167
142.3	0.5065
142.4	0.506333
142.5	0.5045
142.6	0.5065
142.7	0.508167
142.8	0.5095
142.9	0.508167
143	0.511
143.1	0.5085
143.2	0.508667
143.3	0.509833
143.4	0.5115
143.5	0.512333
143.6	0.51
143.7	0.511667
143.8	0.5115
143.9	0.512667
144	0.514833
144.1	0.515667
144.2	0.513167
144.3	0.513833
144.4	0.515167
144.5	0.5135
144.6	0.514
144.7	0.516
144.8	0.5155
144.9	0.515833
145	0.516167
145.1	0.514667
145.2	0.5165
145.3	0.516667
145.4	0.519667
145.5	0.520667
145.6	0.518
145.7	0.518667
145.8	0.516667
145.9	0.516667
146	0.5165
146.1	0.5125
146.2	0.512167
146.3	0.511167
146.4	0.509833
146.5	0.510333
146.6	0.510667
146.7	0.510667
146.8	0.508
146.9	0.507667
147	0.508667
147.1	0.508333
147.2	0.507833
147.3	0.509333
147.4	0.507833
147.5	0.508333
147.6	0.507833
147.7	0.5075
147.8	0.507167
147.9	0.509333
148	0.508667
148.1	0.509833
148.2	0.511167
148.3	0.511333
148.4	0.5095
148.5	0.510333
148.6	0.5095
148.7	0.509833
148.8	0.509167
148.9	0.510333
149	0.512167
149.1	0.5135
149.2	0.514167
149.3	0.512833
149.4	0.513833
149.5	0.515667
149.6	0.515667
149.7	0.516
149.8	0.5165
149.9	0.518167
150	0.517
150.1	0.5165
150.2	0.516667
150.3	0.515667
150.4	0.514167
150.5	0.514833
150.6	0.513667
150.7	0.515167
150.8	0.5145
150.9	0.5125
151	0.514167
151.1	0.515167
151.2	0.515833
151.3	0.517167
151.4	0.517
151.5	0.518333
151.6	0.517167
151.7	0.5165
151.8	0.515
151.9	0.5135
152	0.5125
152.1	0.513667
152.2	0.515167
152.3	0.5165
152.4	0.52
152.5	0.5205
152.6	0.520833
152.7	0.5205
152.8	0.5205
152.9	0.520667
153	0.522833
153.1	0.522333
153.2	0.5215
153.3	0.522167
153.4	0.522167
153.5	0.522
153.6	0.524167
153.7	0.524333
153.8	0.524
153.9	0.524167
154	0.524167
154.1	0.525
154.2	0.525167
154.3	0.525167
154.4	0.5265
154.5	0.526333
154.6	0.527333
154.7	0.529167
154.8	0.528667
154.9	0.527167
155	0.527667
155.1	0.527667
155.2	0.526667
155.3	0.529
155.4	0.5285
155.5	0.5275
155.6	0.528333
155.7	0.529333
155.8	0.530167
155.9	0.529833
156	0.53
156.1	0.531
156.2	0.532833
156.3	0.5315
156.4	0.530167
156.5	0.5325
156.6	0.531333
156.7	0.5315
156.8	0.530167
156.9	0.530333
157	0.531
157.1	0.529167
157.2	0.5275
157.3	0.526333
157.4	0.525833
157.5	0.524167
157.6	0.524
157.7	0.523333
157.8	0.525
157.9	0.526167
158	0.526333
158.1	0.5265
158.2	0.527167
158.3	0.526833
158.4	0.528
158.5	0.529
158.6	0.5295
158.7	0.5285
158.8	0.5275
158.9	0.528333
159	0.528833
159.1	0.530833
159.2	0.531833
159.3	0.532
159.4	0.533833
159.5	0.534167
159.6	0.5365
159.7	0.536833
159.8	0.537
159.9	0.538167
160	0.538167
160.1	0.538833
160.2	0.5395
160.3	0.537667
160.4	0.539
160.5	0.541667
160.6	0.542833
160.7	0.541667
160.8	0.539833
160.9	0.539667
161	0.539167
161.1	0.541333
161.2	0.543167
161.3	0.543833
161.4	0.545
161.5	0.542833
161.6	0.5415
161.7	0.539833
161.8	0.539833
161.9	0.539167
162	0.538833
162.1	0.539833
162.2	0.540333
162.3	0.540167
162.4	0.5405
162.5	0.5395
162.6	0.542667
162.7	0.544833
162.8	0.546833
162.9	0.543167
163	0.542
163.1	0.541833
163.2	0.539667
163.3	0.5405
163.4	0.5405
163.5	0.540833
163.6	0.540833
163.7	0.542167
163.8	0.542833
163.9	0.5435
164	0.544333
164.1	0.544167
164.2	0.541333
164.3	0.54
164.4	0.538667
164.5	0.5375
164.6	0.537167
164.7	0.537167
164.8	0.5365
164.9	0.5345
165	0.535333
165.1	0.537
165.2	0.535333
165.3	0.537667
165.4	0.536833
165.5	0.537333
165.6	0.538333
165.7	0.537833
165.8	0.540333
165.9	0.539333
166	0.540667
166.1	0.541
166.2	0.543
166.3	0.543167
166.4	0.543167
166.5	0.544333
166.6	0.5435
166.7	0.542167
166.8	0.540833
166.9	0.5415
167	0.542
167.1	0.542667
167.2	0.543833
167.3	0.543667
167.4	0.544167
167.5	0.545
167.6	0.545833
167.7	0.545667
167.8	0.546833
167.9	0.546833
168	0.5475
168.1	0.549167
168.2	0.551167
168.3	0.552
168.4	0.551667
168.5	0.554167
168.6	0.555333
168.7	0.554833
168.8	0.553167
168.9	0.554167
169	0.554667
169.1	0.554667
169.2	0.554167
169.3	0.555333
169.4	0.557333
169.5	0.557
169.6	0.555333
169.7	0.554333
169.8	0.556333
169.9	0.555833
170	0.554
170.1	0.555
170.2	0.552833
170.3	0.552
170.4	0.551333
170.5	0.551833
170.6	0.552
170.7	0.5525
170.8	0.549
170.9	0.551333
171	0.549667
171.1	0.5505
171.2	0.549833
171.3	0.551667
171.4	0.551167
171.5	0.551333
171.6	0.551667
171.7	0.552333
171.8	0.5505
171.9	0.546833
172	0.547
172.1	0.547333
172.2	0.5465
172.3	0.546333
172.4	0.546667
172.5	0.547333
172.6	0.5475
172.7	0.547
172.8	0.548167
172.9	0.548333
173	0.549667
173.1	0.551333
173.2	0.5525
173.3	0.551333
173.4	0.552
173.5	0.554167
173.6	0.552167
173.7	0.550333
173.8	0.5505
173.9	0.549667
174	0.549667
174.1	0.55
174.2	0.549833
174.3	0.552333
174.4	0.552667
174.5	0.550667
174.6	0.55
174.7	0.549167
174.8	0.546667
174.9	0.545833
175	0.545
175.1	0.5455
175.2	0.548
175.3	0.549
175.4	0.549167
175.5	0.547833
175.6	0.548833
175.7	0.55
175.8	0.5515
175.9	0.553833
176	0.555333
176.1	0.553833
176.2	0.554
176.3	0.5545
176.4	0.555
176.5	0.554833
176.6	0.555667
176.7	0.5525
176.8	0.552
176.9	0.553333
177	0.554333
177.1	0.554667
177.2	0.555833
177.3	0.556833
177.4	0.554333
177.5	0.554
177.6	0.554333
177.7	0.555167
177.8	0.555667
177.9	0.556167
178	0.553667
178.1	0.5535
178.2	0.551833
178.3	0.555333
178.4	0.554833
178.5	0.554833
178.6	0.554333
178.7	0.554
178.8	0.554167
178.9	0.5545
179	0.553667
179.1	0.553833
179.2	0.5565
179.3	0.558
179.4	0.5585
179.5	0.5575
179.6	0.558
179.7	0.557167
179.8	0.558333
179.9	0.56
180	0.562
180.1	0.562
180.2	0.564
180.3	0.5625
180.4	0.560333
180.5	0.560167
180.6	0.5595
180.7	0.558
180.8	0.558
180.9	0.557167
181	0.558
181.1	0.5585
181.2	0.558
181.3	0.561167
181.4	0.559333
181.5	0.560167
181.6	0.562
181.7	0.564167
181.8	0.5635
181.9	0.562167
182	0.5615
182.1	0.560667
182.2	0.5605
182.3	0.56
182.4	0.559667
182.5	0.558
182.6	0.5555
182.7	0.552833
182.8	0.553833
182.9	0.554833
183	0.5545
183.1	0.555
183.2	0.5545
183.3	0.555833
183.4	0.556333
183.5	0.555833
183.6	0.557
183.7	0.557
183.8	0.555833
183.9	0.556167
184	0.555333
184.1	0.5555
184.2	0.554167
184.3	0.554667
184.4	0.554167
184.5	0.556167
184.6	0.555833
184.7	0.556
184.8	0.555833
184.9	0.554833
185	0.5565
185.1	0.554
185.2	0.5555
185.3	0.554333
185.4	0.553167
185.5	0.55
185.6	0.5495
185.7	0.551
185.8	0.5505
185.9	0.552667
186	0.5525
186.1	0.554333
186.2	0.553667
186.3	0.553833
186.4	0.555
186.5	0.556
186.6	0.556333
186.7	0.557333
186.8	0.555167
186.9	0.5565
187	0.557167
187.1	0.558667
187.2	0.560333
187.3	0.5615
187.4	0.559667
187.5	0.5615
187.6	0.561833
187.7	0.561
187.8	0.56
187.9	0.5635
188	0.564667
188.1	0.5635
188.2	0.565667
188.3	0.565167
188.4	0.564333
188.5	0.564833
188.6	0.564833
188.7	0.566167
188.8	0.565333
188.9	0.564
189	0.564667
189.1	0.567
189.2	0.564333
189.3	0.565167
189.4	0.5625
189.5	0.563
189.6	0.5635
189.7	0.565333
189.8	0.566667
189.9	0.567333
190	0.566333
190.1	0.565833
190.2	0.566
190.3	0.568833
190.4	0.57
190.5	0.569167
190.6	0.5695
190.7	0.5695
190.8	0.570667
190.9	0.570833
191	0.572
191.1	0.571667
191.2	0.572667
191.3	0.573333
191.4	0.571167
191.5	0.5705
191.6	0.569833
191.7	0.5735
191.8	0.575
191.9	0.576833
192	0.577
192.1	0.577
192.2	0.575667
192.3	0.574167
192.4	0.573167
192.5	0.574333
192.6	0.575
192.7	0.575667
192.8	0.576667
192.9	0.575333
193	0.5735
193.1	0.5725
193.2	0.572
193.3	0.5735
193.4	0.572333
193.5	0.572667
193.6	0.573
193.7	0.573833
193.8	0.574667
193.9	0.575167
194	0.576833
194.1	0.575833
194.2	0.575833
194.3	0.577333
194.4	0.578333
194.5	0.577333
194.6	0.575333
194.7	0.575667
194.8	0.574333
194.9	0.573833
195	0.573667
195.1	0.573667
195.2	0.571
195.3	0.571167
195.4	0.573667
195.5	0.5745
195.6	0.574167
195.7	0.573167
195.8	0.573667
195.9	0.5725
196	0.573333
196.1	0.572333
196.2	0.571333
196.3	0.571667
196.4	0.5715
196.5	0.573167
196.6	0.5735
196.7	0.575333
196.8	0.576
196.9	0.577
197	0.575667
197.1	0.572167
197.2	0.573833
197.3	0.575333
197.4	0.574167
197.5	0.575667
197.6	0.577167
197.7	0.579333
197.8	0.579167
197.9	0.578167
198	0.5805
198.1	0.578667
198.2	0.58
198.3	0.582
198.4	0.5835
198.5	0.582833
198.6	0.584333
198.7	0.580667
198.8	0.581167
198.9	0.582167
199	0.583
199.1	0.582667
199.2	0.580333
199.3	0.579167
199.4	0.5805
199.5	0.5805
199.6	0.580667
199.7	0.582333
199.8	0.582167
199.9	0.58
200	0.578833
[truncated: 14,000 more rows]
