# Supplementary material for: Bayesian inference of kinetic schemes for ion channels by Kalman filtering
Source: eLife journal article supplement (doi:10.7554/elife.62714), 2022-05-04
Supplement: fig4-data8 [file 1_Sim_N_3000_Strom_MW.xlsx]

## Sheet: Tabelle1
0.1	0
0.2	0
0.3	0
0.4	0
0.5	0
0.6	0
0.7	0
0.8	0
0.9	0
1	0
1.1	0
1.2	0
1.3	0
1.4	0
1.5	0
1.6	0
1.7	0
1.8	0
1.9	0
2	0
2.1	0
2.2	0
2.3	0
2.4	0
2.5	0
2.6	0
2.7	0
2.8	0
2.9	0
3	0
3.1	0
3.2	0
3.3	0
3.4	0
3.5	0
3.6	0
3.7	0
3.8	0
3.9	0
4	0
4.1	0
4.2	0
4.3	0
4.4	0
4.5	0
4.6	0
4.7	0
4.8	0
4.9	0
5	0
5.1	0
5.2	0
5.3	0
5.4	0
5.5	0
5.6	0
5.7	0
5.8	0
5.9	0
6	0
6.1	0
6.2	0
6.3	0
6.4	0
6.5	0
6.6	0
6.7	0
6.8	0
6.9	0
7	0
7.1	0
7.2	0
7.3	0
7.4	0
7.5	0
7.6	0
7.7	0
7.8	0
7.9	0
8	0
8.1	0
8.2	0
8.3	0
8.4	0
8.5	0
8.6	0
8.7	0
8.8	0
8.9	0
9	0
9.1	0
9.2	0
9.3	0
9.4	0
9.5	0
9.6	0
9.7	0
9.8	0
9.9	0
10	0
10.1	0
10.2	0
10.3	0
10.4	0
10.5	0
10.6	0
10.7	0
10.8	0
10.9	0
11	0
11.1	0
11.2	0
11.3	0
11.4	0
11.5	0
11.6	0
11.7	0
11.8	0
11.9	0
12	0
12.1	0
12.2	0
12.3	0
12.4	0
12.5	0
12.6	0
12.7	0
12.8	0
12.9	0
13	0
13.1	0
13.2	0
13.3	0
13.4	0
13.5	0
13.6	0
13.7	0
13.8	0
13.9	0
14	0
14.1	0
14.2	0
14.3	0
14.4	0
14.5	0
14.6	0
14.7	0
14.8	0
14.9	0
15	0
15.1	0
15.2	0
15.3	0
15.4	0
15.5	0
15.6	0
15.7	0
15.8	0
15.9	0
16	0
16.1	0
16.2	0
16.3	0
16.4	0
16.5	0
16.6	0
16.7	0
16.8	0
16.9	0
17	0
17.1	0
17.2	0
17.3	0
17.4	0
17.5	0
17.6	0
17.7	0
17.8	0
17.9	0
18	0
18.1	0
18.2	0
18.3	0
18.4	0
18.5	0
18.6	0
18.7	0
18.8	0
18.9	0
19	0
19.1	0
19.2	0
19.3	0
19.4	0
19.5	0
19.6	0
19.7	0
19.8	0
19.9	0
20	0
20.1	0
20.2	0
20.3	0
20.4	0
20.5	0
20.6	0
20.7	0
20.8	0
20.9	0
21	0
21.1	0
21.2	0
21.3	0
21.4	0
21.5	0
21.6	0
21.7	0
21.8	0
21.9	0
22	0
22.1	0
22.2	0
22.3	0
22.4	0
22.5	0
22.6	0
22.7	0
22.8	0
22.9	0
23	0
23.1	0
23.2	0
23.3	0
23.4	0
23.5	0
23.6	0
23.7	0
23.8	0
23.9	0
24	0
24.1	0
24.2	0
24.3	0
24.4	0
24.5	0
24.6	0
24.7	0
24.8	0
24.9	0
25	0
25.1	0
25.2	0
25.3	0
25.4	0
25.5	0
25.6	0
25.7	0
25.8	0
25.9	0
26	0
26.1	0
26.2	0
26.3	0
26.4	0
26.5	0
26.6	0
26.7	0
26.8	0
26.9	0
27	0
27.1	0
27.2	0
27.3	0
27.4	0
27.5	0
27.6	0
27.7	0
27.8	0
27.9	0
28	0
28.1	0
28.2	0
28.3	0
28.4	0
28.5	0
28.6	0
28.7	0
28.8	0
28.9	0
29	0
29.1	0
29.2	0
29.3	0
29.4	0
29.5	0
29.6	0
29.7	0
29.8	0
29.9	0
30	0
30.1	0
30.2	0
30.3	0
30.4	0
30.5	0
30.6	0
30.7	0
30.8	0
30.9	0
31	0
31.1	0
31.2	0
31.3	0
31.4	0
31.5	0
31.6	0
31.7	0
31.8	0
31.9	0
32	0
32.1	0
32.2	0
32.3	0
32.4	0
32.5	0
32.6	0
32.7	0
32.8	0
32.9	0
33	0
33.1	0
33.2	0
33.3	0
33.4	0
33.5	0
33.6	0
33.7	0
33.8	0
33.9	0
34	0
34.1	0
34.2	0
34.3	0
34.4	0
34.5	0
34.6	0
34.7	0
34.8	0
34.9	0
35	0
35.1	0
35.2	0
35.3	0
35.4	0
35.5	0
35.6	0
35.7	0
35.8	0
35.9	0
36	0
36.1	0
36.2	0
36.3	0
36.4	0
36.5	0
36.6	0
36.7	0
36.8	0
36.9	0
37	0
37.1	0
37.2	0
37.3	0
37.4	0
37.5	0
37.6	0
37.7	0
37.8	0
37.9	0
38	0
38.1	0
38.2	0
38.3	0
38.4	0
38.5	0
38.6	0
38.7	0
38.8	0
38.9	0
39	0
39.1	0
39.2	0
39.3	0
39.4	0
39.5	0
39.6	0
39.7	0
39.8	0
39.9	0
40	0
40.1	0
40.2	0
40.3	0
40.4	0
40.5	0
40.6	0
40.7	0
40.8	0
40.9	0
41	0
41.1	0
41.2	0
41.3	0
41.4	0
41.5	0
41.6	0
41.7	0
41.8	0
41.9	0
42	0
42.1	0
42.2	0
42.3	0
42.4	0
42.5	0
42.6	0
42.7	0
42.8	0
42.9	0
43	0
43.1	0
43.2	0
43.3	0
43.4	0
43.5	0
43.6	0
43.7	0
43.8	0
43.9	0
44	0
44.1	0
44.2	0
44.3	0
44.4	0
44.5	0
44.6	0
44.7	0
44.8	0
44.9	0
45	0
45.1	0
45.2	0
45.3	0
45.4	0
45.5	0
45.6	0
45.7	0
45.8	0
45.9	0
46	0
46.1	0
46.2	0
46.3	0
46.4	0
46.5	0
46.6	0
46.7	0
46.8	0
46.9	0
47	0
47.1	0
47.2	0
47.3	0
47.4	0
47.5	0
47.6	0
47.7	0
47.8	0
47.9	0
48	0
48.1	0
48.2	0
48.3	0
48.4	0
48.5	0
48.6	0
48.7	0
48.8	0
48.9	0
49	0
49.1	0
49.2	0
49.3	0
49.4	0
49.5	0
49.6	0
49.7	0
49.8	0
49.9	0
50	0
50.1	0
50.2	0
50.3	0
50.4	0
50.5	0
50.6	0
50.7	0
50.8	0
50.9	0
51	0
51.1	0
51.2	0
51.3	0
51.4	0
51.5	0
51.6	0
51.7	0
51.8	0
51.9	0
52	0
52.1	0
52.2	0
52.3	0
52.4	0
52.5	0
52.6	0
52.7	0
52.8	0
52.9	0
53	0
53.1	0
53.2	0
53.3	0
53.4	0
53.5	0
53.6	0
53.7	0
53.8	0
53.9	0
54	0
54.1	0
54.2	0
54.3	0
54.4	0
54.5	0
54.6	0
54.7	0
54.8	0
54.9	0
55	0
55.1	0
55.2	0
55.3	0
55.4	0
55.5	0
55.6	0
55.7	0
55.8	0
55.9	0
56	0
56.1	0
56.2	0
56.3	0
56.4	0
56.5	0
56.6	0
56.7	0
56.8	0
56.9	0
57	0
57.1	0
57.2	0
57.3	0
57.4	0
57.5	0
57.6	0
57.7	0
57.8	0
57.9	0
58	0
58.1	0
58.2	0
58.3	0
58.4	0
58.5	0
58.6	0
58.7	0
58.8	0
58.9	0
59	0
59.1	0
59.2	0
59.3	0
59.4	0
59.5	0
59.6	0
59.7	0
59.8	0
59.9	0
60	0
60.1	0
60.2	0
60.3	0
60.4	0
60.5	0
60.6	0
60.7	0
60.8	0
60.9	0
61	0
61.1	0
61.2	0
61.3	0
61.4	0
61.5	0
61.6	0
61.7	0
61.8	0
61.9	0
62	0
62.1	0
62.2	0
62.3	0
62.4	0
62.5	0
62.6	0
62.7	0
62.8	0
62.9	0
63	0
63.1	0
63.2	0
63.3	0
63.4	0
63.5	0
63.6	0
63.7	0
63.8	0
63.9	0
64	0
64.1	0
64.2	0
64.3	0
64.4	0
64.5	0
64.6	0
64.7	0
64.8	0
64.9	0
65	0
65.1	0
65.2	0
65.3	0
65.4	0
65.5	0
65.6	0
65.7	0
65.8	0
65.9	0
66	0
66.1	0
66.2	0
66.3	0
66.4	0
66.5	0
66.6	0
66.7	0
66.8	0
66.9	0
67	0
67.1	0
67.2	0
67.3	0
67.4	0
67.5	0
67.6	0
67.7	0
67.8	0
67.9	0
68	0
68.1	0
68.2	0
68.3	0
68.4	0
68.5	0
68.6	0
68.7	0
68.8	0
68.9	0
69	0
69.1	0
69.2	0
69.3	0
69.4	0
69.5	0
69.6	0
69.7	0
69.8	0
69.9	0
70	0
70.1	0
70.2	0
70.3	0
70.4	0
70.5	0
70.6	0
70.7	0
70.8	0
70.9	0
71	0
71.1	0
71.2	0
71.3	0
71.4	0
71.5	0
71.6	0
71.7	0
71.8	0
71.9	0
72	0
72.1	0
72.2	0
72.3	0
72.4	0
72.5	0
72.6	0
72.7	0
72.8	0
72.9	0
73	0
73.1	0
73.2	0
73.3	0
73.4	0
73.5	0
73.6	0
73.7	0
73.8	0
73.9	0
74	0
74.1	0
74.2	0
74.3	0
74.4	0
74.5	0
74.6	0
74.7	0
74.8	0
74.9	0
75	0
75.1	0
75.2	0
75.3	0
75.4	0
75.5	0
75.6	0
75.7	0
75.8	0
75.9	0
76	0
76.1	0
76.2	0
76.3	0
76.4	0
76.5	0
76.6	0
76.7	0
76.8	0
76.9	0
77	0
77.1	0
77.2	0
77.3	0
77.4	0
77.5	0
77.6	0
77.7	0
77.8	0
77.9	0
78	0
78.1	0
78.2	0
78.3	0
78.4	0
78.5	0
78.6	0
78.7	0
78.8	0
78.9	0
79	0
79.1	0
79.2	0
79.3	0
79.4	0
79.5	0
79.6	0
79.7	0
79.8	0
79.9	0
80	0
80.1	0
80.2	0
80.3	0
80.4	0
80.5	0
80.6	0
80.7	0
80.8	0
80.9	0
81	0
81.1	0
81.2	0
81.3	0
81.4	0
81.5	0
81.6	0
81.7	0
81.8	0
81.9	0
82	0
82.1	0
82.2	0
82.3	0
82.4	0
82.5	0
82.6	0
82.7	0
82.8	0
82.9	0
83	0
83.1	0
83.2	0
83.3	0
83.4	0
83.5	0
83.6	0
83.7	0
83.8	0
83.9	0
84	0
84.1	0
84.2	0
84.3	0
84.4	0
84.5	0
84.6	0
84.7	0
84.8	0
84.9	0
85	0
85.1	0
85.2	0
85.3	0
85.4	0
85.5	0
85.6	0
85.7	0
85.8	0
85.9	0
86	0
86.1	0
86.2	0
86.3	0
86.4	0
86.5	0
86.6	0
86.7	0
86.8	0
86.9	0
87	0
87.1	0
87.2	0
87.3	0
87.4	0
87.5	0
87.6	0
87.7	0
87.8	0
87.9	0
88	0
88.1	0
88.2	0
88.3	0
88.4	0
88.5	0
88.6	0
88.7	0
88.8	0
88.9	0
89	0
89.1	0
89.2	0
89.3	0
89.4	0
89.5	0
89.6	0
89.7	0
89.8	0
89.9	0
90	0
90.1	0
90.2	0
90.3	0
90.4	0
90.5	0
90.6	0
90.7	0
90.8	0
90.9	0
91	0
91.1	0
91.2	0
91.3	0
91.4	0
91.5	0
91.6	0
91.7	0
91.8	0
91.9	0
92	0
92.1	0
92.2	0
92.3	0
92.4	0
92.5	0
92.6	0
92.7	0
92.8	0
92.9	0
93	0
93.1	0
93.2	0
93.3	0
93.4	0
93.5	0
93.6	0
93.7	0
93.8	0
93.9	0
94	0
94.1	0
94.2	0
94.3	0
94.4	0
94.5	0
94.6	0
94.7	0
94.8	0
94.9	0
95	0
95.1	0
95.2	0
95.3	0
95.4	0
95.5	0
95.6	0
95.7	0
95.8	0
95.9	0
96	0
96.1	0
96.2	0
96.3	0
96.4	0
96.5	0
96.6	0
96.7	0
96.8	0
96.9	0
97	0
97.1	0
97.2	0
97.3	0
97.4	0
97.5	0
97.6	0
97.7	0
97.8	0
97.9	0
98	0
98.1	0
98.2	0
98.3	0
98.4	0
98.5	0
98.6	0
98.7	0
98.8	0
98.9	0
99	0
99.1	0
99.2	0
99.3	0
99.4	0
99.5	0
99.6	0
99.7	0
99.8	0
99.9	0
100	0
100.1	0
100.2	0
100.3	0
100.4	0
100.5	0
100.6	0
100.7	0
100.8	0
100.9	0
101	0
101.1	0
101.2	0
101.3	0
101.4	0
101.5	0
101.6	0
101.7	0.000666667
101.8	0.000666667
101.9	0.000666667
102	0.001
102.1	0.001
102.2	0.001
102.3	0.001
102.4	0.001
102.5	0.001
102.6	0.00166667
102.7	0.00166667
102.8	0.00166667
102.9	0.00166667
103	0.00166667
103.1	0.002
103.2	0.00233333
103.3	0.00266667
103.4	0.003
103.5	0.004
103.6	0.004
103.7	0.00466667
103.8	0.005
103.9	0.00566667
104	0.006
104.1	0.00633333
104.2	0.00666667
104.3	0.00666667
104.4	0.007
104.5	0.00733333
104.6	0.00733333
104.7	0.00733333
104.8	0.00733333
104.9	0.008
105	0.008
105.1	0.00866667
105.2	0.00866667
105.3	0.00833333
105.4	0.00833333
105.5	0.00866667
105.6	0.00866667
105.7	0.00866667
105.8	0.00866667
105.9	0.009
106	0.0103333
106.1	0.0106667
106.2	0.0106667
106.3	0.011
106.4	0.011
106.5	0.0123333
106.6	0.0123333
106.7	0.0123333
106.8	0.0126667
106.9	0.0126667
107	0.0126667
107.1	0.013
107.2	0.013
107.3	0.015
107.4	0.015
107.5	0.016
107.6	0.0166667
107.7	0.017
107.8	0.017
107.9	0.017
108	0.0173333
108.1	0.0173333
108.2	0.0176667
108.3	0.0176667
108.4	0.0183333
108.5	0.0193333
108.6	0.0196667
108.7	0.0203333
108.8	0.0206667
108.9	0.021
109	0.021
109.1	0.0216667
109.2	0.0216667
109.3	0.0226667
109.4	0.0226667
109.5	0.024
109.6	0.0243333
109.7	0.0246667
109.8	0.025
109.9	0.0256667
110	0.0263333
110.1	0.0263333
110.2	0.0263333
110.3	0.027
110.4	0.027
110.5	0.0276667
110.6	0.0276667
110.7	0.0276667
110.8	0.028
110.9	0.0286667
111	0.029
111.1	0.0296667
111.2	0.03
111.3	0.031
111.4	0.0313333
111.5	0.0316667
111.6	0.0313333
111.7	0.032
111.8	0.0323333
111.9	0.0323333
112	0.0326667
112.1	0.0333333
112.2	0.0343333
112.3	0.0343333
112.4	0.0346667
112.5	0.0356667
112.6	0.036
112.7	0.0366667
112.8	0.0366667
112.9	0.0373333
113	0.0376667
113.1	0.0383333
113.2	0.0386667
113.3	0.039
113.4	0.0393333
113.5	0.0403333
113.6	0.041
113.7	0.0413333
113.8	0.0416667
113.9	0.042
114	0.0426667
114.1	0.0423333
114.2	0.043
114.3	0.0436667
114.4	0.0446667
114.5	0.0456667
114.6	0.046
114.7	0.0463333
114.8	0.0463333
114.9	0.0463333
115	0.0466667
115.1	0.0476667
115.2	0.048
115.3	0.0493333
115.4	0.05
115.5	0.0503333
115.6	0.0506667
115.7	0.0506667
115.8	0.0516667
115.9	0.0523333
116	0.053
116.1	0.0536667
116.2	0.054
116.3	0.054
116.4	0.0543333
116.5	0.055
116.6	0.055
116.7	0.0553333
116.8	0.0553333
116.9	0.0556667
117	0.056
117.1	0.056
117.2	0.0556667
117.3	0.0563333
117.4	0.0566667
117.5	0.0576667
117.6	0.0583333
117.7	0.059
117.8	0.06
117.9	0.0596667
118	0.06
118.1	0.061
118.2	0.0616667
118.3	0.062
118.4	0.0623333
118.5	0.063
118.6	0.063
118.7	0.0633333
118.8	0.0643333
118.9	0.065
119	0.0656667
119.1	0.0656667
119.2	0.066
119.3	0.0663333
119.4	0.0666667
119.5	0.0683333
119.6	0.0683333
119.7	0.069
119.8	0.0696667
119.9	0.0703333
120	0.0706667
120.1	0.071
120.2	0.071
120.3	0.072
120.4	0.0723333
120.5	0.0726667
120.6	0.0726667
120.7	0.0723333
120.8	0.0726667
120.9	0.074
121	0.0736667
121.1	0.074
121.2	0.0746667
121.3	0.0746667
121.4	0.0756667
121.5	0.076
121.6	0.076
121.7	0.077
121.8	0.0773333
121.9	0.0776667
122	0.078
122.1	0.0783333
122.2	0.079
122.3	0.0793333
122.4	0.0796667
122.5	0.08
122.6	0.0803333
122.7	0.081
122.8	0.081
122.9	0.0816667
123	0.0826667
123.1	0.0823333
123.2	0.0823333
123.3	0.0833333
123.4	0.0836667
123.5	0.084
123.6	0.0843333
123.7	0.0846667
123.8	0.085
123.9	0.085
124	0.0846667
124.1	0.0846667
124.2	0.0846667
124.3	0.0846667
124.4	0.0856667
124.5	0.0856667
124.6	0.0863333
124.7	0.086
124.8	0.0863333
124.9	0.0866667
125	0.0873333
125.1	0.0876667
125.2	0.088
125.3	0.0886667
125.4	0.0893333
125.5	0.0893333
125.6	0.0896667
125.7	0.0896667
125.8	0.0896667
125.9	0.09
126	0.0903333
126.1	0.0913333
126.2	0.0916667
126.3	0.0926667
126.4	0.0926667
126.5	0.093
126.6	0.0936667
126.7	0.0943333
126.8	0.0946667
126.9	0.0943333
127	0.0946667
127.1	0.0946667
127.2	0.0946667
127.3	0.095
127.4	0.096
127.5	0.096
127.6	0.0966667
127.7	0.0966667
127.8	0.0966667
127.9	0.097
128	0.0973333
128.1	0.098
128.2	0.098
128.3	0.0983333
128.4	0.0986667
128.5	0.0986667
128.6	0.1
128.7	0.1
128.8	0.100667
128.9	0.101333
129	0.101333
129.1	0.101667
129.2	0.101333
129.3	0.101333
129.4	0.101
129.5	0.101333
129.6	0.102
129.7	0.102
129.8	0.102667
129.9	0.102333
130	0.101667
130.1	0.101667
130.2	0.101667
130.3	0.102
130.4	0.102333
130.5	0.103
130.6	0.103333
130.7	0.103667
130.8	0.104333
130.9	0.104667
131	0.104667
131.1	0.105333
131.2	0.105
131.3	0.105
131.4	0.105667
131.5	0.106667
131.6	0.106667
131.7	0.107
131.8	0.107667
131.9	0.109333
132	0.11
132.1	0.109667
132.2	0.109667
132.3	0.11
132.4	0.110333
132.5	0.110667
132.6	0.110667
132.7	0.111333
132.8	0.111333
132.9	0.111
133	0.110667
133.1	0.110667
133.2	0.111667
133.3	0.111333
133.4	0.111333
133.5	0.111667
133.6	0.111
133.7	0.111667
133.8	0.111667
133.9	0.112
134	0.112333
134.1	0.112333
134.2	0.113
134.3	0.113333
134.4	0.114333
134.5	0.114
134.6	0.114
134.7	0.114667
134.8	0.114667
134.9	0.114667
135	0.115
135.1	0.115667
135.2	0.115667
135.3	0.117
135.4	0.118
135.5	0.117667
135.6	0.118
135.7	0.118333
135.8	0.118333
135.9	0.119
136	0.119
136.1	0.119333
136.2	0.119667
136.3	0.119333
136.4	0.12
136.5	0.12
136.6	0.120333
136.7	0.120333
136.8	0.120333
136.9	0.120667
137	0.121
137.1	0.121333
137.2	0.122
137.3	0.122
137.4	0.122667
137.5	0.122333
137.6	0.123667
137.7	0.123333
137.8	0.124
137.9	0.124667
138	0.125
138.1	0.125333
138.2	0.125333
138.3	0.124667
138.4	0.125
138.5	0.125333
138.6	0.126
138.7	0.126333
138.8	0.126667
138.9	0.126667
139	0.127333
139.1	0.128333
139.2	0.129
139.3	0.129667
139.4	0.129667
139.5	0.13
139.6	0.131667
139.7	0.131667
139.8	0.131667
139.9	0.133
140	0.133333
140.1	0.134
140.2	0.134667
140.3	0.134667
140.4	0.134667
140.5	0.135333
140.6	0.135667
140.7	0.135667
140.8	0.136333
140.9	0.136667
141	0.137333
141.1	0.137667
141.2	0.137667
141.3	0.137667
141.4	0.138333
141.5	0.139
141.6	0.139333
141.7	0.139667
141.8	0.139333
141.9	0.139333
142	0.139667
142.1	0.139333
142.2	0.139667
142.3	0.140333
142.4	0.140333
142.5	0.141
142.6	0.140333
142.7	0.140667
142.8	0.140333
142.9	0.140667
143	0.140667
143.1	0.140667
143.2	0.142
143.3	0.142
143.4	0.142
143.5	0.142667
143.6	0.142667
143.7	0.142667
143.8	0.143
143.9	0.143
144	0.143333
144.1	0.144
144.2	0.144667
144.3	0.145
144.4	0.145667
144.5	0.146
144.6	0.146
144.7	0.146
144.8	0.146333
144.9	0.146333
145	0.146333
145.1	0.146333
145.2	0.146667
145.3	0.147
145.4	0.147333
145.5	0.148
145.6	0.149
145.7	0.149
145.8	0.149333
145.9	0.149333
146	0.149667
146.1	0.15
146.2	0.15
146.3	0.150667
146.4	0.151
146.5	0.151333
146.6	0.150667
146.7	0.150667
146.8	0.151
146.9	0.152333
147	0.152667
147.1	0.152667
147.2	0.152333
147.3	0.152333
147.4	0.152333
147.5	0.152667
147.6	0.152333
147.7	0.152
147.8	0.152
147.9	0.152667
148	0.152333
148.1	0.152667
148.2	0.153
148.3	0.153
148.4	0.152667
148.5	0.152667
148.6	0.152667
148.7	0.153
148.8	0.153
148.9	0.152333
149	0.152667
149.1	0.152667
149.2	0.152333
149.3	0.152
149.4	0.152
149.5	0.153
149.6	0.153333
149.7	0.154333
149.8	0.154667
149.9	0.154
150	0.154
150.1	0.155
150.2	0.156
150.3	0.156
150.4	0.156
150.5	0.156333
150.6	0.156667
150.7	0.156667
150.8	0.157333
150.9	0.157667
151	0.158
151.1	0.157333
151.2	0.157667
151.3	0.158
151.4	0.158333
151.5	0.158
151.6	0.158333
151.7	0.159333
151.8	0.16
151.9	0.160333
152	0.160333
152.1	0.161
152.2	0.160333
152.3	0.160333
152.4	0.160333
152.5	0.160667
152.6	0.161
152.7	0.161333
152.8	0.161667
152.9	0.162333
153	0.162667
153.1	0.162667
153.2	0.163333
153.3	0.164
153.4	0.164333
153.5	0.164
153.6	0.164333
153.7	0.164667
153.8	0.164667
153.9	0.164667
154	0.164667
154.1	0.164333
154.2	0.163667
154.3	0.164
154.4	0.164
154.5	0.164
154.6	0.164
154.7	0.164333
154.8	0.164667
154.9	0.165
155	0.165
155.1	0.165
155.2	0.166333
155.3	0.167
155.4	0.166667
155.5	0.167
155.6	0.167333
155.7	0.167
155.8	0.166667
155.9	0.167333
156	0.167667
156.1	0.168333
156.2	0.168
156.3	0.168333
156.4	0.168333
156.5	0.168333
156.6	0.168
156.7	0.168
156.8	0.168667
156.9	0.169333
157	0.169667
157.1	0.170667
157.2	0.171667
157.3	0.171333
157.4	0.171667
157.5	0.171667
157.6	0.172667
157.7	0.174
157.8	0.174333
157.9	0.174667
158	0.174
158.1	0.174333
158.2	0.174333
158.3	0.175
158.4	0.175333
158.5	0.175333
158.6	0.175333
158.7	0.176333
158.8	0.177
158.9	0.177
159	0.177
159.1	0.177333
159.2	0.177667
159.3	0.177667
159.4	0.178
159.5	0.177667
159.6	0.178
159.7	0.178667
159.8	0.179333
159.9	0.179667
160	0.18
160.1	0.18
160.2	0.180667
160.3	0.181
160.4	0.181
160.5	0.181
160.6	0.182
160.7	0.182333
160.8	0.182333
160.9	0.182667
161	0.183
161.1	0.183
161.2	0.183333
161.3	0.183333
161.4	0.183
161.5	0.183
161.6	0.183667
161.7	0.183333
161.8	0.183333
161.9	0.183333
162	0.183667
162.1	0.184333
162.2	0.184333
162.3	0.184333
162.4	0.184333
162.5	0.184333
162.6	0.184333
162.7	0.184333
162.8	0.183667
162.9	0.184
163	0.184333
163.1	0.184667
163.2	0.185333
163.3	0.185333
163.4	0.185
163.5	0.184667
163.6	0.184
163.7	0.184333
163.8	0.184333
163.9	0.185
164	0.185333
164.1	0.185667
164.2	0.185333
164.3	0.186333
164.4	0.186333
164.5	0.186667
164.6	0.187
164.7	0.187667
164.8	0.189
164.9	0.188333
165	0.187667
165.1	0.187667
165.2	0.188
165.3	0.188667
165.4	0.189333
165.5	0.19
165.6	0.19
165.7	0.189667
165.8	0.19
165.9	0.19
166	0.19
166.1	0.190667
166.2	0.191333
166.3	0.191333
166.4	0.191667
166.5	0.191667
166.6	0.192
166.7	0.192
166.8	0.193333
166.9	0.193667
167	0.193333
167.1	0.193667
167.2	0.194
167.3	0.195
167.4	0.195
167.5	0.194667
167.6	0.194667
167.7	0.195
167.8	0.195333
167.9	0.196667
168	0.196333
168.1	0.196333
168.2	0.196667
168.3	0.197
168.4	0.197
168.5	0.196333
168.6	0.196667
168.7	0.196667
168.8	0.197
168.9	0.197333
169	0.197333
169.1	0.197333
169.2	0.197667
169.3	0.198
169.4	0.199
169.5	0.199667
169.6	0.199667
169.7	0.199333
169.8	0.199
169.9	0.199333
170	0.199667
170.1	0.2
170.2	0.200333
170.3	0.200667
170.4	0.201
170.5	0.201
170.6	0.201
170.7	0.201
170.8	0.200667
170.9	0.2
171	0.199667
171.1	0.200333
171.2	0.200333
171.3	0.200667
171.4	0.200333
171.5	0.199667
171.6	0.199333
171.7	0.199333
171.8	0.199667
171.9	0.200333
172	0.200667
172.1	0.201
172.2	0.201
172.3	0.201667
172.4	0.202
172.5	0.202
172.6	0.202333
172.7	0.202667
172.8	0.203
172.9	0.202667
173	0.203
173.1	0.204333
173.2	0.204
173.3	0.204667
173.4	0.205667
173.5	0.206
173.6	0.205667
173.7	0.205
173.8	0.205
173.9	0.205
174	0.205333
174.1	0.205667
174.2	0.205667
174.3	0.205667
174.4	0.206
174.5	0.206667
174.6	0.207333
174.7	0.207333
174.8	0.207
174.9	0.207333
175	0.207
175.1	0.207
175.2	0.207667
175.3	0.207
175.4	0.208
175.5	0.208333
175.6	0.208333
175.7	0.208667
175.8	0.208333
175.9	0.208333
176	0.208
176.1	0.208
176.2	0.208333
176.3	0.209
176.4	0.208667
176.5	0.209
176.6	0.21
176.7	0.209667
176.8	0.21
176.9	0.209667
177	0.21
177.1	0.210333
177.2	0.211
177.3	0.211667
177.4	0.211
177.5	0.211
177.6	0.211
177.7	0.211667
177.8	0.212333
177.9	0.211667
178	0.211
178.1	0.211
178.2	0.211333
178.3	0.211333
178.4	0.211667
178.5	0.211667
178.6	0.212
178.7	0.212333
178.8	0.212667
178.9	0.212667
179	0.212333
179.1	0.212333
179.2	0.212333
179.3	0.211333
179.4	0.212
179.5	0.212667
179.6	0.213333
179.7	0.214333
179.8	0.214667
179.9	0.215
180	0.214667
180.1	0.215
180.2	0.215
180.3	0.214333
180.4	0.214333
180.5	0.214667
180.6	0.214667
180.7	0.215
180.8	0.215333
180.9	0.218
181	0.218333
181.1	0.218
181.2	0.218667
181.3	0.218333
181.4	0.218
181.5	0.218
181.6	0.218
181.7	0.217667
181.8	0.217333
181.9	0.216667
182	0.216667
182.1	0.216667
182.2	0.216667
182.3	0.217333
182.4	0.217667
182.5	0.218
182.6	0.218
182.7	0.217333
182.8	0.217667
182.9	0.217667
183	0.217333
183.1	0.218
183.2	0.218
183.3	0.217667
183.4	0.217667
183.5	0.217333
183.6	0.217333
183.7	0.217333
183.8	0.217667
183.9	0.218667
184	0.218667
184.1	0.218667
184.2	0.219667
184.3	0.220667
184.4	0.220667
184.5	0.221333
184.6	0.221667
184.7	0.222667
184.8	0.222667
184.9	0.222667
185	0.222667
185.1	0.223
185.2	0.223
185.3	0.223333
185.4	0.223333
185.5	0.223
185.6	0.223
185.7	0.223
185.8	0.223667
185.9	0.224667
186	0.225333
186.1	0.225667
186.2	0.225333
186.3	0.225667
186.4	0.225
186.5	0.224667
186.6	0.225
186.7	0.225333
186.8	0.225667
186.9	0.225667
187	0.227
187.1	0.227333
187.2	0.228
187.3	0.228
187.4	0.228
187.5	0.228333
187.6	0.228333
187.7	0.229
187.8	0.229333
187.9	0.229667
188	0.230333
188.1	0.231667
188.2	0.231333
188.3	0.232
188.4	0.233333
188.5	0.233
188.6	0.233
188.7	0.233667
188.8	0.234
188.9	0.233667
189	0.233333
189.1	0.233333
189.2	0.233333
189.3	0.234333
189.4	0.234333
189.5	0.235
189.6	0.236
189.7	0.235333
189.8	0.235667
189.9	0.236333
190	0.236667
190.1	0.237333
190.2	0.238
190.3	0.238
190.4	0.238
190.5	0.237667
190.6	0.238
190.7	0.238333
190.8	0.238
190.9	0.238333
191	0.238
191.1	0.237667
191.2	0.238333
191.3	0.238333
191.4	0.238333
191.5	0.240667
191.6	0.240667
191.7	0.240333
191.8	0.240667
191.9	0.240333
192	0.241
192.1	0.241333
192.2	0.241333
192.3	0.241
192.4	0.24
192.5	0.24
192.6	0.24
192.7	0.24
192.8	0.240667
192.9	0.240333
193	0.241
193.1	0.240333
193.2	0.240333
193.3	0.24
193.4	0.24
193.5	0.240333
193.6	0.240333
193.7	0.24
193.8	0.239667
193.9	0.239667
194	0.239333
194.1	0.24
194.2	0.240333
194.3	0.240333
194.4	0.240667
194.5	0.241333
194.6	0.241333
194.7	0.241333
194.8	0.242667
194.9	0.242667
195	0.242
195.1	0.242
195.2	0.241333
195.3	0.242333
195.4	0.242667
195.5	0.243
195.6	0.242667
195.7	0.243
195.8	0.243667
195.9	0.244
196	0.244
196.1	0.244667
196.2	0.246333
196.3	0.247333
196.4	0.247333
196.5	0.247667
196.6	0.248
196.7	0.248667
196.8	0.248667
196.9	0.248667
197	0.248667
197.1	0.248333
197.2	0.248333
197.3	0.248667
197.4	0.249
197.5	0.248667
197.6	0.248
197.7	0.248333
197.8	0.248333
197.9	0.248
198	0.247667
198.1	0.247333
198.2	0.247333
198.3	0.247333
198.4	0.247333
198.5	0.247667
198.6	0.248333
198.7	0.249333
198.8	0.249333
198.9	0.25
199	0.250667
199.1	0.250667
199.2	0.251
199.3	0.251
199.4	0.251333
199.5	0.251333
199.6	0.251333
199.7	0.252
199.8	0.252
199.9	0.252333
200	0.253
[truncated: 14,000 more rows]
