# Supplementary material for: Bayesian inference of kinetic schemes for ion channels by Kalman filtering
Source: eLife journal article supplement (doi:10.7554/elife.62714), 2022-05-04
Supplement: fig4-data8 [file 1_Sim_N_4000_Fluor_MW.xlsx]

## Sheet: Tabelle1
0.1	0
0.2	0
0.3	0
0.4	0
0.5	0
0.6	0
0.7	0
0.8	0
0.9	0
1	0
1.1	0
1.2	0
1.3	0
1.4	0
1.5	0
1.6	0
1.7	0
1.8	0
1.9	0
2	0
2.1	0
2.2	0
2.3	0
2.4	0
2.5	0
2.6	0
2.7	0
2.8	0
2.9	0
3	0
3.1	0
3.2	0
3.3	0
3.4	0
3.5	0
3.6	0
3.7	0
3.8	0
3.9	0
4	0
4.1	0
4.2	0
4.3	0
4.4	0
4.5	0
4.6	0
4.7	0
4.8	0
4.9	0
5	0
5.1	0
5.2	0
5.3	0
5.4	0
5.5	0
5.6	0
5.7	0
5.8	0
5.9	0
6	0
6.1	0
6.2	0
6.3	0
6.4	0
6.5	0
6.6	0
6.7	0
6.8	0
6.9	0
7	0
7.1	0
7.2	0
7.3	0
7.4	0
7.5	0
7.6	0
7.7	0
7.8	0
7.9	0
8	0
8.1	0
8.2	0
8.3	0
8.4	0
8.5	0
8.6	0
8.7	0
8.8	0
8.9	0
9	0
9.1	0
9.2	0
9.3	0
9.4	0
9.5	0
9.6	0
9.7	0
9.8	0
9.9	0
10	0
10.1	0
10.2	0
10.3	0
10.4	0
10.5	0
10.6	0
10.7	0
10.8	0
10.9	0
11	0
11.1	0
11.2	0
11.3	0
11.4	0
11.5	0
11.6	0
11.7	0
11.8	0
11.9	0
12	0
12.1	0
12.2	0
12.3	0
12.4	0
12.5	0
12.6	0
12.7	0
12.8	0
12.9	0
13	0
13.1	0
13.2	0
13.3	0
13.4	0
13.5	0
13.6	0
13.7	0
13.8	0
13.9	0
14	0
14.1	0
14.2	0
14.3	0
14.4	0
14.5	0
14.6	0
14.7	0
14.8	0
14.9	0
15	0
15.1	0
15.2	0
15.3	0
15.4	0
15.5	0
15.6	0
15.7	0
15.8	0
15.9	0
16	0
16.1	0
16.2	0
16.3	0
16.4	0
16.5	0
16.6	0
16.7	0
16.8	0
16.9	0
17	0
17.1	0
17.2	0
17.3	0
17.4	0
17.5	0
17.6	0
17.7	0
17.8	0
17.9	0
18	0
18.1	0
18.2	0
18.3	0
18.4	0
18.5	0
18.6	0
18.7	0
18.8	0
18.9	0
19	0
19.1	0
19.2	0
19.3	0
19.4	0
19.5	0
19.6	0
19.7	0
19.8	0
19.9	0
20	0
20.1	0
20.2	0
20.3	0
20.4	0
20.5	0
20.6	0
20.7	0
20.8	0
20.9	0
21	0
21.1	0
21.2	0
21.3	0
21.4	0
21.5	0
21.6	0
21.7	0
21.8	0
21.9	0
22	0
22.1	0
22.2	0
22.3	0
22.4	0
22.5	0
22.6	0
22.7	0
22.8	0
22.9	0
23	0
23.1	0
23.2	0
23.3	0
23.4	0
23.5	0
23.6	0
23.7	0
23.8	0
23.9	0
24	0
24.1	0
24.2	0
24.3	0
24.4	0
24.5	0
24.6	0
24.7	0
24.8	0
24.9	0
25	0
25.1	0
25.2	0
25.3	0
25.4	0
25.5	0
25.6	0
25.7	0
25.8	0
25.9	0
26	0
26.1	0
26.2	0
26.3	0
26.4	0
26.5	0
26.6	0
26.7	0
26.8	0
26.9	0
27	0
27.1	0
27.2	0
27.3	0
27.4	0
27.5	0
27.6	0
27.7	0
27.8	0
27.9	0
28	0
28.1	0
28.2	0
28.3	0
28.4	0
28.5	0
28.6	0
28.7	0
28.8	0
28.9	0
29	0
29.1	0
29.2	0
29.3	0
29.4	0
29.5	0
29.6	0
29.7	0
29.8	0
29.9	0
30	0
30.1	0
30.2	0
30.3	0
30.4	0
30.5	0
30.6	0
30.7	0
30.8	0
30.9	0
31	0
31.1	0
31.2	0
31.3	0
31.4	0
31.5	0
31.6	0
31.7	0
31.8	0
31.9	0
32	0
32.1	0
32.2	0
32.3	0
32.4	0
32.5	0
32.6	0
32.7	0
32.8	0
32.9	0
33	0
33.1	0
33.2	0
33.3	0
33.4	0
33.5	0
33.6	0
33.7	0
33.8	0
33.9	0
34	0
34.1	0
34.2	0
34.3	0
34.4	0
34.5	0
34.6	0
34.7	0
34.8	0
34.9	0
35	0
35.1	0
35.2	0
35.3	0
35.4	0
35.5	0
35.6	0
35.7	0
35.8	0
35.9	0
36	0
36.1	0
36.2	0
36.3	0
36.4	0
36.5	0
36.6	0
36.7	0
36.8	0
36.9	0
37	0
37.1	0
37.2	0
37.3	0
37.4	0
37.5	0
37.6	0
37.7	0
37.8	0
37.9	0
38	0
38.1	0
38.2	0
38.3	0
38.4	0
38.5	0
38.6	0
38.7	0
38.8	0
38.9	0
39	0
39.1	0
39.2	0
39.3	0
39.4	0
39.5	0
39.6	0
39.7	0
39.8	0
39.9	0
40	0
40.1	0
40.2	0
40.3	0
40.4	0
40.5	0
40.6	0
40.7	0
40.8	0
40.9	0
41	0
41.1	0
41.2	0
41.3	0
41.4	0
41.5	0
41.6	0
41.7	0
41.8	0
41.9	0
42	0
42.1	0
42.2	0
42.3	0
42.4	0
42.5	0
42.6	0
42.7	0
42.8	0
42.9	0
43	0
43.1	0
43.2	0
43.3	0
43.4	0
43.5	0
43.6	0
43.7	0
43.8	0
43.9	0
44	0
44.1	0
44.2	0
44.3	0
44.4	0
44.5	0
44.6	0
44.7	0
44.8	0
44.9	0
45	0
45.1	0
45.2	0
45.3	0
45.4	0
45.5	0
45.6	0
45.7	0
45.8	0
45.9	0
46	0
46.1	0
46.2	0
46.3	0
46.4	0
46.5	0
46.6	0
46.7	0
46.8	0
46.9	0
47	0
47.1	0
47.2	0
47.3	0
47.4	0
47.5	0
47.6	0
47.7	0
47.8	0
47.9	0
48	0
48.1	0
48.2	0
48.3	0
48.4	0
48.5	0
48.6	0
48.7	0
48.8	0
48.9	0
49	0
49.1	0
49.2	0
49.3	0
49.4	0
49.5	0
49.6	0
49.7	0
49.8	0
49.9	0
50	0
50.1	0
50.2	0
50.3	0
50.4	0
50.5	0
50.6	0
50.7	0
50.8	0
50.9	0
51	0
51.1	0
51.2	0
51.3	0
51.4	0
51.5	0
51.6	0
51.7	0
51.8	0
51.9	0
52	0
52.1	0
52.2	0
52.3	0
52.4	0
52.5	0
52.6	0
52.7	0
52.8	0
52.9	0
53	0
53.1	0
53.2	0
53.3	0
53.4	0
53.5	0
53.6	0
53.7	0
53.8	0
53.9	0
54	0
54.1	0
54.2	0
54.3	0
54.4	0
54.5	0
54.6	0
54.7	0
54.8	0
54.9	0
55	0
55.1	0
55.2	0
55.3	0
55.4	0
55.5	0
55.6	0
55.7	0
55.8	0
55.9	0
56	0
56.1	0
56.2	0
56.3	0
56.4	0
56.5	0
56.6	0
56.7	0
56.8	0
56.9	0
57	0
57.1	0
57.2	0
57.3	0
57.4	0
57.5	0
57.6	0
57.7	0
57.8	0
57.9	0
58	0
58.1	0
58.2	0
58.3	0
58.4	0
58.5	0
58.6	0
58.7	0
58.8	0
58.9	0
59	0
59.1	0
59.2	0
59.3	0
59.4	0
59.5	0
59.6	0
59.7	0
59.8	0
59.9	0
60	0
60.1	0
60.2	0
60.3	0
60.4	0
60.5	0
60.6	0
60.7	0
60.8	0
60.9	0
61	0
61.1	0
61.2	0
61.3	0
61.4	0
61.5	0
61.6	0
61.7	0
61.8	0
61.9	0
62	0
62.1	0
62.2	0
62.3	0
62.4	0
62.5	0
62.6	0
62.7	0
62.8	0
62.9	0
63	0
63.1	0
63.2	0
63.3	0
63.4	0
63.5	0
63.6	0
63.7	0
63.8	0
63.9	0
64	0
64.1	0
64.2	0
64.3	0
64.4	0
64.5	0
64.6	0
64.7	0
64.8	0
64.9	0
65	0
65.1	0
65.2	0
65.3	0
65.4	0
65.5	0
65.6	0
65.7	0
65.8	0
65.9	0
66	0
66.1	0
66.2	0
66.3	0
66.4	0
66.5	0
66.6	0
66.7	0
66.8	0
66.9	0
67	0
67.1	0
67.2	0
67.3	0
67.4	0
67.5	0
67.6	0
67.7	0
67.8	0
67.9	0
68	0
68.1	0
68.2	0
68.3	0
68.4	0
68.5	0
68.6	0
68.7	0
68.8	0
68.9	0
69	0
69.1	0
69.2	0
69.3	0
69.4	0
69.5	0
69.6	0
69.7	0
69.8	0
69.9	0
70	0
70.1	0
70.2	0
70.3	0
70.4	0
70.5	0
70.6	0
70.7	0
70.8	0
70.9	0
71	0
71.1	0
71.2	0
71.3	0
71.4	0
71.5	0
71.6	0
71.7	0
71.8	0
71.9	0
72	0
72.1	0
72.2	0
72.3	0
72.4	0
72.5	0
72.6	0
72.7	0
72.8	0
72.9	0
73	0
73.1	0
73.2	0
73.3	0
73.4	0
73.5	0
73.6	0
73.7	0
73.8	0
73.9	0
74	0
74.1	0
74.2	0
74.3	0
74.4	0
74.5	0
74.6	0
74.7	0
74.8	0
74.9	0
75	0
75.1	0
75.2	0
75.3	0
75.4	0
75.5	0
75.6	0
75.7	0
75.8	0
75.9	0
76	0
76.1	0
76.2	0
76.3	0
76.4	0
76.5	0
76.6	0
76.7	0
76.8	0
76.9	0
77	0
77.1	0
77.2	0
77.3	0
77.4	0
77.5	0
77.6	0
77.7	0
77.8	0
77.9	0
78	0
78.1	0
78.2	0
78.3	0
78.4	0
78.5	0
78.6	0
78.7	0
78.8	0
78.9	0
79	0
79.1	0
79.2	0
79.3	0
79.4	0
79.5	0
79.6	0
79.7	0
79.8	0
79.9	0
80	0
80.1	0
80.2	0
80.3	0
80.4	0
80.5	0
80.6	0
80.7	0
80.8	0
80.9	0
81	0
81.1	0
81.2	0
81.3	0
81.4	0
81.5	0
81.6	0
81.7	0
81.8	0
81.9	0
82	0
82.1	0
82.2	0
82.3	0
82.4	0
82.5	0
82.6	0
82.7	0
82.8	0
82.9	0
83	0
83.1	0
83.2	0
83.3	0
83.4	0
83.5	0
83.6	0
83.7	0
83.8	0
83.9	0
84	0
84.1	0
84.2	0
84.3	0
84.4	0
84.5	0
84.6	0
84.7	0
84.8	0
84.9	0
85	0
85.1	0
85.2	0
85.3	0
85.4	0
85.5	0
85.6	0
85.7	0
85.8	0
85.9	0
86	0
86.1	0
86.2	0
86.3	0
86.4	0
86.5	0
86.6	0
86.7	0
86.8	0
86.9	0
87	0
87.1	0
87.2	0
87.3	0
87.4	0
87.5	0
87.6	0
87.7	0
87.8	0
87.9	0
88	0
88.1	0
88.2	0
88.3	0
88.4	0
88.5	0
88.6	0
88.7	0
88.8	0
88.9	0
89	0
89.1	0
89.2	0
89.3	0
89.4	0
89.5	0
89.6	0
89.7	0
89.8	0
89.9	0
90	0
90.1	0
90.2	0
90.3	0
90.4	0
90.5	0
90.6	0
90.7	0
90.8	0
90.9	0
91	0
91.1	0
91.2	0
91.3	0
91.4	0
91.5	0
91.6	0
91.7	0
91.8	0
91.9	0
92	0
92.1	0
92.2	0
92.3	0
92.4	0
92.5	0
92.6	0
92.7	0
92.8	0
92.9	0
93	0
93.1	0
93.2	0
93.3	0
93.4	0
93.5	0
93.6	0
93.7	0
93.8	0
93.9	0
94	0
94.1	0
94.2	0
94.3	0
94.4	0
94.5	0
94.6	0
94.7	0
94.8	0
94.9	0
95	0
95.1	0
95.2	0
95.3	0
95.4	0
95.5	0
95.6	0
95.7	0
95.8	0
95.9	0
96	0
96.1	0
96.2	0
96.3	0
96.4	0
96.5	0
96.6	0
96.7	0
96.8	0
96.9	0
97	0
97.1	0
97.2	0
97.3	0
97.4	0
97.5	0
97.6	0
97.7	0
97.8	0
97.9	0
98	0
98.1	0
98.2	0
98.3	0
98.4	0
98.5	0
98.6	0
98.7	0
98.8	0
98.9	0
99	0
99.1	0
99.2	0
99.3	0
99.4	0
99.5	0
99.6	0
99.7	0
99.8	0
99.9	0
100	0
100.1	0.014375
100.2	0.027625
100.3	0.04025
100.4	0.055625
100.5	0.067625
100.6	0.081625
100.7	0.092125
100.8	0.1025
100.9	0.11325
101	0.1255
101.1	0.136125
101.2	0.14575
101.3	0.1555
101.4	0.166
101.5	0.174625
101.6	0.184
101.7	0.19275
101.8	0.202125
101.9	0.209125
102	0.21775
102.1	0.225375
102.2	0.2325
102.3	0.240375
102.4	0.248125
102.5	0.2545
102.6	0.26025
102.7	0.26525
102.8	0.27475
102.9	0.281125
103	0.287
103.1	0.29025
103.2	0.295375
103.3	0.30075
103.4	0.305375
103.5	0.3095
103.6	0.315125
103.7	0.31975
103.8	0.32125
103.9	0.326375
104	0.33025
104.1	0.3335
104.2	0.335625
104.3	0.339375
104.4	0.343
104.5	0.345375
104.6	0.349125
104.7	0.350875
104.8	0.351375
104.9	0.35625
105	0.35925
105.1	0.3615
105.2	0.365375
105.3	0.36925
105.4	0.372375
105.5	0.3745
105.6	0.377
105.7	0.379125
105.8	0.3835
105.9	0.385375
106	0.38825
106.1	0.390375
106.2	0.390875
106.3	0.3925
106.4	0.394
106.5	0.3945
106.6	0.395375
106.7	0.397125
106.8	0.398
106.9	0.399375
107	0.400625
107.1	0.40325
107.2	0.40575
107.3	0.40575
107.4	0.408625
107.5	0.41075
107.6	0.414
107.7	0.416875
107.8	0.415125
107.9	0.415
108	0.41725
108.1	0.418375
108.2	0.41975
108.3	0.420125
108.4	0.42225
108.5	0.42275
108.6	0.424375
108.7	0.42575
108.8	0.42575
108.9	0.429375
109	0.428
109.1	0.427125
109.2	0.4275
109.3	0.426625
109.4	0.426625
109.5	0.428125
109.6	0.429875
109.7	0.43175
109.8	0.431
109.9	0.4325
110	0.43375
110.1	0.43475
110.2	0.435625
110.3	0.4355
110.4	0.43725
110.5	0.4375
110.6	0.43825
110.7	0.439
110.8	0.442125
110.9	0.44325
111	0.444375
111.1	0.44525
111.2	0.445
111.3	0.444125
111.4	0.44525
111.5	0.445375
111.6	0.446625
111.7	0.44825
111.8	0.44775
111.9	0.451
112	0.4495
112.1	0.449
112.2	0.4485
112.3	0.4505
112.4	0.45075
112.5	0.451125
112.6	0.4505
112.7	0.452
112.8	0.453
112.9	0.4535
113	0.452125
113.1	0.4535
113.2	0.450625
113.3	0.453375
113.4	0.45275
113.5	0.4525
113.6	0.45225
113.7	0.4515
113.8	0.4505
113.9	0.451875
114	0.45125
114.1	0.451
114.2	0.45125
114.3	0.451
114.4	0.451125
114.5	0.45125
114.6	0.453125
114.7	0.455125
114.8	0.45475
114.9	0.454375
115	0.454
115.1	0.456875
115.2	0.458
115.3	0.4565
115.4	0.45675
115.5	0.457375
115.6	0.45825
115.7	0.45925
115.8	0.460125
115.9	0.461125
116	0.461125
116.1	0.463125
116.2	0.464
116.3	0.464125
116.4	0.46525
116.5	0.46575
116.6	0.4675
116.7	0.46625
116.8	0.46575
116.9	0.46625
117	0.4665
117.1	0.46825
117.2	0.467625
117.3	0.46825
117.4	0.46775
117.5	0.467
117.6	0.46575
117.7	0.466
117.8	0.464375
117.9	0.462125
118	0.462
118.1	0.461875
118.2	0.459375
118.3	0.45925
118.4	0.46175
118.5	0.460375
118.6	0.46075
118.7	0.46025
118.8	0.4595
118.9	0.460625
119	0.460875
119.1	0.462875
119.2	0.464875
119.3	0.46325
119.4	0.461625
119.5	0.462625
119.6	0.461
119.7	0.46075
119.8	0.460875
119.9	0.460875
120	0.46325
120.1	0.463125
120.2	0.466625
120.3	0.467125
120.4	0.467625
120.5	0.466125
120.6	0.463875
120.7	0.46425
120.8	0.46425
120.9	0.466125
121	0.4655
121.1	0.465
121.2	0.467125
121.3	0.4695
121.4	0.468625
121.5	0.469625
121.6	0.472375
121.7	0.47475
121.8	0.475
121.9	0.474625
122	0.47475
122.1	0.4755
122.2	0.47525
122.3	0.474125
122.4	0.474625
122.5	0.475
122.6	0.47625
122.7	0.476875
122.8	0.4775
122.9	0.477125
123	0.47625
123.1	0.47675
123.2	0.477375
123.3	0.476875
123.4	0.476375
123.5	0.477125
123.6	0.477375
123.7	0.4755
123.8	0.477625
123.9	0.477125
124	0.478375
124.1	0.4795
124.2	0.480375
124.3	0.480625
124.4	0.482125
124.5	0.481375
124.6	0.481125
124.7	0.479625
124.8	0.479125
124.9	0.47825
125	0.47675
125.1	0.477375
125.2	0.477875
125.3	0.47775
125.4	0.48
125.5	0.479625
125.6	0.47975
125.7	0.47975
125.8	0.480125
125.9	0.48175
126	0.48275
126.1	0.484375
126.2	0.48475
126.3	0.485625
126.4	0.483625
126.5	0.48375
126.6	0.484625
126.7	0.48575
126.8	0.485875
126.9	0.48775
127	0.490125
127.1	0.49025
127.2	0.48975
127.3	0.48975
127.4	0.48975
127.5	0.49075
127.6	0.490625
127.7	0.49075
127.8	0.48975
127.9	0.4885
128	0.487875
128.1	0.487375
128.2	0.48775
128.3	0.48975
128.4	0.490375
128.5	0.49175
128.6	0.490875
128.7	0.49225
128.8	0.492875
128.9	0.493
129	0.493875
129.1	0.495375
129.2	0.496875
129.3	0.497625
129.4	0.497375
129.5	0.49725
129.6	0.497375
129.7	0.498875
129.8	0.499
129.9	0.49975
130	0.49975
130.1	0.499375
130.2	0.5
130.3	0.50125
130.4	0.5
130.5	0.5015
130.6	0.50275
130.7	0.502125
130.8	0.502625
130.9	0.502875
131	0.502
131.1	0.5025
131.2	0.502875
131.3	0.504125
131.4	0.50425
131.5	0.503125
131.6	0.502
131.7	0.501
131.8	0.500375
131.9	0.49975
132	0.49975
132.1	0.4975
132.2	0.499125
132.3	0.5
132.4	0.4995
132.5	0.4985
132.6	0.499375
132.7	0.499125
132.8	0.498375
132.9	0.499
133	0.49775
133.1	0.496875
133.2	0.4965
133.3	0.4955
133.4	0.496
133.5	0.4955
133.6	0.496
133.7	0.496375
133.8	0.4975
133.9	0.4985
134	0.498625
134.1	0.498875
134.2	0.499125
134.3	0.498
134.4	0.5
134.5	0.500875
134.6	0.50275
134.7	0.50375
134.8	0.50475
134.9	0.5035
135	0.50525
135.1	0.504375
135.2	0.50525
135.3	0.505375
135.4	0.50625
135.5	0.505625
135.6	0.5075
135.7	0.5045
135.8	0.504375
135.9	0.50475
136	0.505875
136.1	0.506125
136.2	0.505625
136.3	0.50475
136.4	0.50475
136.5	0.505
136.6	0.50475
136.7	0.5055
136.8	0.50425
136.9	0.502625
137	0.50225
137.1	0.503875
137.2	0.503
137.3	0.502625
137.4	0.503
137.5	0.503125
137.6	0.5035
137.7	0.50275
137.8	0.502125
137.9	0.502375
138	0.502875
138.1	0.50375
138.2	0.506125
138.3	0.508
138.4	0.5075
138.5	0.50725
138.6	0.509
138.7	0.509625
138.8	0.51175
138.9	0.514
139	0.51425
139.1	0.514875
139.2	0.514875
139.3	0.515375
139.4	0.5145
139.5	0.51475
139.6	0.514125
139.7	0.51525
139.8	0.516125
139.9	0.516375
140	0.515
140.1	0.514625
140.2	0.5135
140.3	0.515125
140.4	0.514875
140.5	0.51525
140.6	0.517
140.7	0.51925
140.8	0.52125
140.9	0.52075
141	0.52075
141.1	0.52075
141.2	0.52025
141.3	0.521125
141.4	0.521375
141.5	0.52
141.6	0.52
141.7	0.520125
141.8	0.52
141.9	0.5205
142	0.51925
142.1	0.518375
142.2	0.52
142.3	0.52
142.4	0.517875
142.5	0.517125
142.6	0.51575
142.7	0.51875
142.8	0.5185
142.9	0.5185
143	0.517625
143.1	0.51725
143.2	0.518
143.3	0.51825
143.4	0.5185
143.5	0.51925
143.6	0.5185
143.7	0.51775
143.8	0.521125
143.9	0.519875
144	0.52025
144.1	0.519875
144.2	0.519875
144.3	0.519375
144.4	0.519875
144.5	0.520125
144.6	0.521875
144.7	0.52375
144.8	0.524
144.9	0.522875
145	0.5245
145.1	0.526125
145.2	0.525625
145.3	0.5265
145.4	0.52825
145.5	0.5265
145.6	0.525
145.7	0.5245
145.8	0.52375
145.9	0.522375
146	0.5245
146.1	0.5245
146.2	0.525875
146.3	0.5255
146.4	0.52625
146.5	0.526125
146.6	0.526375
146.7	0.526125
146.8	0.52675
146.9	0.52725
147	0.525625
147.1	0.525125
147.2	0.52475
147.3	0.52425
147.4	0.5265
147.5	0.526375
147.6	0.527125
147.7	0.524875
147.8	0.524375
147.9	0.524375
148	0.522125
148.1	0.521375
148.2	0.52175
148.3	0.522875
148.4	0.523125
148.5	0.523625
148.6	0.5245
148.7	0.52475
148.8	0.524375
148.9	0.525375
149	0.52525
149.1	0.525375
149.2	0.52475
149.3	0.52425
149.4	0.524625
149.5	0.524875
149.6	0.523625
149.7	0.52475
149.8	0.52525
149.9	0.523875
150	0.525375
150.1	0.526
150.2	0.524625
150.3	0.5255
150.4	0.52525
150.5	0.525
150.6	0.525
150.7	0.525375
150.8	0.525875
150.9	0.525375
151	0.525375
151.1	0.52675
151.2	0.524625
151.3	0.525
151.4	0.524875
151.5	0.525375
151.6	0.52525
151.7	0.5265
151.8	0.528625
151.9	0.52875
152	0.527875
152.1	0.528875
152.2	0.528375
152.3	0.528875
152.4	0.528375
152.5	0.527875
152.6	0.527625
152.7	0.526875
152.8	0.527
152.9	0.527875
153	0.529375
153.1	0.528125
153.2	0.52825
153.3	0.52775
153.4	0.527625
153.5	0.528
153.6	0.529125
153.7	0.529875
153.8	0.532375
153.9	0.532625
154	0.533625
154.1	0.532875
154.2	0.535125
154.3	0.53375
154.4	0.533
154.5	0.5325
154.6	0.534
154.7	0.53225
154.8	0.533
154.9	0.533625
155	0.53325
155.1	0.5335
155.2	0.535
155.3	0.535375
155.4	0.53625
155.5	0.535125
155.6	0.535625
155.7	0.53525
155.8	0.53625
155.9	0.53775
156	0.53875
156.1	0.53825
156.2	0.537875
156.3	0.537
156.4	0.53625
156.5	0.534875
156.6	0.5355
156.7	0.536625
156.8	0.536125
156.9	0.5345
157	0.536125
157.1	0.534375
157.2	0.534875
157.3	0.534
157.4	0.535625
157.5	0.538
157.6	0.536625
157.7	0.535875
157.8	0.53625
157.9	0.535125
158	0.534625
158.1	0.53425
158.2	0.5345
158.3	0.534875
158.4	0.536875
158.5	0.53675
158.6	0.538125
158.7	0.538625
158.8	0.537875
158.9	0.537625
159	0.540375
159.1	0.540625
159.2	0.542375
159.3	0.54275
159.4	0.542
159.5	0.54325
159.6	0.542125
159.7	0.543125
159.8	0.541375
159.9	0.541875
160	0.541875
160.1	0.544
160.2	0.5455
160.3	0.545
160.4	0.544125
160.5	0.542875
160.6	0.54125
160.7	0.539
160.8	0.53875
160.9	0.53825
161	0.53775
161.1	0.53875
161.2	0.538
161.3	0.537875
161.4	0.538375
161.5	0.538625
161.6	0.5385
161.7	0.538125
161.8	0.53625
161.9	0.536625
162	0.53775
162.1	0.53925
162.2	0.539
162.3	0.539375
162.4	0.539125
162.5	0.53875
162.6	0.537625
162.7	0.537125
162.8	0.537375
162.9	0.53875
163	0.537
163.1	0.538875
163.2	0.541625
163.3	0.540625
163.4	0.540875
163.5	0.5415
163.6	0.54125
163.7	0.540875
163.8	0.541125
163.9	0.54175
164	0.5415
164.1	0.539625
164.2	0.5385
164.3	0.53825
164.4	0.538
164.5	0.53725
164.6	0.536
164.7	0.537125
164.8	0.537375
164.9	0.539125
165	0.540125
165.1	0.54275
165.2	0.541
165.3	0.542375
165.4	0.542
165.5	0.5425
165.6	0.544375
165.7	0.543375
165.8	0.54375
165.9	0.54475
166	0.546
166.1	0.54625
166.2	0.547125
166.3	0.545
166.4	0.546125
166.5	0.5455
166.6	0.546875
166.7	0.54825
166.8	0.548875
166.9	0.550875
167	0.54775
167.1	0.548125
167.2	0.54925
167.3	0.548625
167.4	0.54725
167.5	0.547
167.6	0.549
167.7	0.550625
167.8	0.55075
167.9	0.551125
168	0.552125
168.1	0.5515
168.2	0.552625
168.3	0.551125
168.4	0.549875
168.5	0.551
168.6	0.551875
168.7	0.553625
168.8	0.554125
168.9	0.553125
169	0.552
169.1	0.550375
169.2	0.54975
169.3	0.54875
169.4	0.548375
169.5	0.548375
169.6	0.549625
169.7	0.5485
169.8	0.548875
169.9	0.5495
170	0.54975
170.1	0.55
170.2	0.549625
170.3	0.548875
170.4	0.548875
170.5	0.548875
170.6	0.54975
170.7	0.550875
170.8	0.552
170.9	0.553125
171	0.552625
171.1	0.5545
171.2	0.5545
171.3	0.553625
171.4	0.5535
171.5	0.55425
171.6	0.553625
171.7	0.5525
171.8	0.552625
171.9	0.552625
172	0.551625
172.1	0.549375
172.2	0.549125
172.3	0.54925
172.4	0.550125
172.5	0.550875
172.6	0.550125
172.7	0.54925
172.8	0.551125
172.9	0.552625
173	0.554625
173.1	0.5565
173.2	0.558125
173.3	0.557375
173.4	0.557375
173.5	0.55725
173.6	0.557375
173.7	0.5585
173.8	0.557875
173.9	0.558125
174	0.560625
174.1	0.56025
174.2	0.559875
174.3	0.559375
174.4	0.557625
174.5	0.558
174.6	0.55825
174.7	0.55925
174.8	0.557125
174.9	0.554875
175	0.556625
175.1	0.5565
175.2	0.558375
175.3	0.559
175.4	0.5605
175.5	0.558875
175.6	0.558
175.7	0.559625
175.8	0.562125
175.9	0.562375
176	0.56425
176.1	0.56425
176.2	0.5655
176.3	0.564875
176.4	0.5635
176.5	0.563625
176.6	0.5635
176.7	0.564125
176.8	0.564
176.9	0.564625
177	0.564
177.1	0.56575
177.2	0.56575
177.3	0.564
177.4	0.563125
177.5	0.56425
177.6	0.565125
177.7	0.56525
177.8	0.564375
177.9	0.56325
178	0.563
178.1	0.562875
178.2	0.565125
178.3	0.56375
178.4	0.563875
178.5	0.564
178.6	0.564125
178.7	0.563
178.8	0.562125
178.9	0.56225
179	0.562875
179.1	0.564125
179.2	0.56275
179.3	0.564
179.4	0.564
179.5	0.56375
179.6	0.563375
179.7	0.563125
179.8	0.564
179.9	0.565625
180	0.5645
180.1	0.563625
180.2	0.561375
180.3	0.561875
180.4	0.56125
180.5	0.55975
180.6	0.557875
180.7	0.557625
180.8	0.55825
180.9	0.558875
181	0.559625
181.1	0.56125
181.2	0.562
181.3	0.564125
181.4	0.563625
181.5	0.563875
181.6	0.56475
181.7	0.5665
181.8	0.5645
181.9	0.564875
182	0.56625
182.1	0.566875
182.2	0.567875
182.3	0.56825
182.4	0.568
182.5	0.567875
182.6	0.566125
182.7	0.566125
182.8	0.567
182.9	0.566875
183	0.5665
183.1	0.5655
183.2	0.563875
183.3	0.56475
183.4	0.564875
183.5	0.565
183.6	0.565625
183.7	0.566125
183.8	0.56775
183.9	0.56875
184	0.569125
184.1	0.569
184.2	0.569625
184.3	0.568875
184.4	0.57025
184.5	0.5705
184.6	0.571375
184.7	0.5725
184.8	0.572
184.9	0.571875
185	0.57275
185.1	0.572125
185.2	0.5725
185.3	0.570375
185.4	0.569125
185.5	0.5685
185.6	0.5685
185.7	0.569625
185.8	0.5705
185.9	0.571
186	0.571625
186.1	0.574
186.2	0.575375
186.3	0.575
186.4	0.577125
186.5	0.57775
186.6	0.577125
186.7	0.57875
186.8	0.578375
186.9	0.577125
187	0.57675
187.1	0.577625
187.2	0.5775
187.3	0.577
187.4	0.57875
187.5	0.579125
187.6	0.578125
187.7	0.5765
187.8	0.575375
187.9	0.574875
188	0.573625
188.1	0.572625
188.2	0.573125
188.3	0.573625
188.4	0.574125
188.5	0.573875
188.6	0.5745
188.7	0.57425
188.8	0.57325
188.9	0.575375
189	0.574125
189.1	0.57325
189.2	0.572
189.3	0.572875
189.4	0.57375
189.5	0.572
189.6	0.572625
189.7	0.572625
189.8	0.573125
189.9	0.57125
190	0.57175
190.1	0.57175
190.2	0.574
190.3	0.574125
190.4	0.57475
190.5	0.575375
190.6	0.57525
190.7	0.574625
190.8	0.573
190.9	0.57425
191	0.573125
191.1	0.57375
191.2	0.572625
191.3	0.57275
191.4	0.571375
191.5	0.571625
191.6	0.57125
191.7	0.5725
191.8	0.57125
191.9	0.571125
192	0.571375
192.1	0.571
192.2	0.568625
192.3	0.569625
192.4	0.569
192.5	0.569875
192.6	0.571
192.7	0.569375
192.8	0.569
192.9	0.56825
193	0.568625
193.1	0.57025
193.2	0.569375
193.3	0.56875
193.4	0.569
193.5	0.568375
193.6	0.568
193.7	0.56825
193.8	0.568375
193.9	0.568375
194	0.56875
194.1	0.568375
194.2	0.566
194.3	0.564875
194.4	0.56675
194.5	0.567625
194.6	0.567625
194.7	0.568875
194.8	0.569
194.9	0.57
195	0.569
195.1	0.5695
195.2	0.570625
195.3	0.570625
195.4	0.57125
195.5	0.57225
195.6	0.573
195.7	0.573
195.8	0.57275
195.9	0.57325
196	0.570875
196.1	0.569625
196.2	0.570875
196.3	0.569625
196.4	0.56975
196.5	0.571375
196.6	0.572375
196.7	0.572875
196.8	0.572875
196.9	0.573375
197	0.57375
197.1	0.572
197.2	0.571125
197.3	0.5715
197.4	0.57125
197.5	0.571
197.6	0.573125
197.7	0.573
197.8	0.5735
197.9	0.573
198	0.574875
198.1	0.576625
198.2	0.578875
198.3	0.58025
198.4	0.579875
198.5	0.579125
198.6	0.5805
198.7	0.5795
198.8	0.579125
198.9	0.57825
199	0.578125
199.1	0.57725
199.2	0.57775
199.3	0.578125
199.4	0.577125
199.5	0.577
199.6	0.578125
199.7	0.577625
199.8	0.575375
199.9	0.57475
200	0.576125
[truncated: 14,000 more rows]
