# Supplementary material for: Bayesian inference of kinetic schemes for ion channels by Kalman filtering
Source: eLife journal article supplement (doi:10.7554/elife.62714), 2022-05-04
Supplement: fig4-data8 [file 1_Sim_N_4000_Strom_MW.xlsx]

## Sheet: Tabelle1
0.1	0
0.2	0
0.3	0
0.4	0
0.5	0
0.6	0
0.7	0
0.8	0
0.9	0
1	0
1.1	0
1.2	0
1.3	0
1.4	0
1.5	0
1.6	0
1.7	0
1.8	0
1.9	0
2	0
2.1	0
2.2	0
2.3	0
2.4	0
2.5	0
2.6	0
2.7	0
2.8	0
2.9	0
3	0
3.1	0
3.2	0
3.3	0
3.4	0
3.5	0
3.6	0
3.7	0
3.8	0
3.9	0
4	0
4.1	0
4.2	0
4.3	0
4.4	0
4.5	0
4.6	0
4.7	0
4.8	0
4.9	0
5	0
5.1	0
5.2	0
5.3	0
5.4	0
5.5	0
5.6	0
5.7	0
5.8	0
5.9	0
6	0
6.1	0
6.2	0
6.3	0
6.4	0
6.5	0
6.6	0
6.7	0
6.8	0
6.9	0
7	0
7.1	0
7.2	0
7.3	0
7.4	0
7.5	0
7.6	0
7.7	0
7.8	0
7.9	0
8	0
8.1	0
8.2	0
8.3	0
8.4	0
8.5	0
8.6	0
8.7	0
8.8	0
8.9	0
9	0
9.1	0
9.2	0
9.3	0
9.4	0
9.5	0
9.6	0
9.7	0
9.8	0
9.9	0
10	0
10.1	0
10.2	0
10.3	0
10.4	0
10.5	0
10.6	0
10.7	0
10.8	0
10.9	0
11	0
11.1	0
11.2	0
11.3	0
11.4	0
11.5	0
11.6	0
11.7	0
11.8	0
11.9	0
12	0
12.1	0
12.2	0
12.3	0
12.4	0
12.5	0
12.6	0
12.7	0
12.8	0
12.9	0
13	0
13.1	0
13.2	0
13.3	0
13.4	0
13.5	0
13.6	0
13.7	0
13.8	0
13.9	0
14	0
14.1	0
14.2	0
14.3	0
14.4	0
14.5	0
14.6	0
14.7	0
14.8	0
14.9	0
15	0
15.1	0
15.2	0
15.3	0
15.4	0
15.5	0
15.6	0
15.7	0
15.8	0
15.9	0
16	0
16.1	0
16.2	0
16.3	0
16.4	0
16.5	0
16.6	0
16.7	0
16.8	0
16.9	0
17	0
17.1	0
17.2	0
17.3	0
17.4	0
17.5	0
17.6	0
17.7	0
17.8	0
17.9	0
18	0
18.1	0
18.2	0
18.3	0
18.4	0
18.5	0
18.6	0
18.7	0
18.8	0
18.9	0
19	0
19.1	0
19.2	0
19.3	0
19.4	0
19.5	0
19.6	0
19.7	0
19.8	0
19.9	0
20	0
20.1	0
20.2	0
20.3	0
20.4	0
20.5	0
20.6	0
20.7	0
20.8	0
20.9	0
21	0
21.1	0
21.2	0
21.3	0
21.4	0
21.5	0
21.6	0
21.7	0
21.8	0
21.9	0
22	0
22.1	0
22.2	0
22.3	0
22.4	0
22.5	0
22.6	0
22.7	0
22.8	0
22.9	0
23	0
23.1	0
23.2	0
23.3	0
23.4	0
23.5	0
23.6	0
23.7	0
23.8	0
23.9	0
24	0
24.1	0
24.2	0
24.3	0
24.4	0
24.5	0
24.6	0
24.7	0
24.8	0
24.9	0
25	0
25.1	0
25.2	0
25.3	0
25.4	0
25.5	0
25.6	0
25.7	0
25.8	0
25.9	0
26	0
26.1	0
26.2	0
26.3	0
26.4	0
26.5	0
26.6	0
26.7	0
26.8	0
26.9	0
27	0
27.1	0
27.2	0
27.3	0
27.4	0
27.5	0
27.6	0
27.7	0
27.8	0
27.9	0
28	0
28.1	0
28.2	0
28.3	0
28.4	0
28.5	0
28.6	0
28.7	0
28.8	0
28.9	0
29	0
29.1	0
29.2	0
29.3	0
29.4	0
29.5	0
29.6	0
29.7	0
29.8	0
29.9	0
30	0
30.1	0
30.2	0
30.3	0
30.4	0
30.5	0
30.6	0
30.7	0
30.8	0
30.9	0
31	0
31.1	0
31.2	0
31.3	0
31.4	0
31.5	0
31.6	0
31.7	0
31.8	0
31.9	0
32	0
32.1	0
32.2	0
32.3	0
32.4	0
32.5	0
32.6	0
32.7	0
32.8	0
32.9	0
33	0
33.1	0
33.2	0
33.3	0
33.4	0
33.5	0
33.6	0
33.7	0
33.8	0
33.9	0
34	0
34.1	0
34.2	0
34.3	0
34.4	0
34.5	0
34.6	0
34.7	0
34.8	0
34.9	0
35	0
35.1	0
35.2	0
35.3	0
35.4	0
35.5	0
35.6	0
35.7	0
35.8	0
35.9	0
36	0
36.1	0
36.2	0
36.3	0
36.4	0
36.5	0
36.6	0
36.7	0
36.8	0
36.9	0
37	0
37.1	0
37.2	0
37.3	0
37.4	0
37.5	0
37.6	0
37.7	0
37.8	0
37.9	0
38	0
38.1	0
38.2	0
38.3	0
38.4	0
38.5	0
38.6	0
38.7	0
38.8	0
38.9	0
39	0
39.1	0
39.2	0
39.3	0
39.4	0
39.5	0
39.6	0
39.7	0
39.8	0
39.9	0
40	0
40.1	0
40.2	0
40.3	0
40.4	0
40.5	0
40.6	0
40.7	0
40.8	0
40.9	0
41	0
41.1	0
41.2	0
41.3	0
41.4	0
41.5	0
41.6	0
41.7	0
41.8	0
41.9	0
42	0
42.1	0
42.2	0
42.3	0
42.4	0
42.5	0
42.6	0
42.7	0
42.8	0
42.9	0
43	0
43.1	0
43.2	0
43.3	0
43.4	0
43.5	0
43.6	0
43.7	0
43.8	0
43.9	0
44	0
44.1	0
44.2	0
44.3	0
44.4	0
44.5	0
44.6	0
44.7	0
44.8	0
44.9	0
45	0
45.1	0
45.2	0
45.3	0
45.4	0
45.5	0
45.6	0
45.7	0
45.8	0
45.9	0
46	0
46.1	0
46.2	0
46.3	0
46.4	0
46.5	0
46.6	0
46.7	0
46.8	0
46.9	0
47	0
47.1	0
47.2	0
47.3	0
47.4	0
47.5	0
47.6	0
47.7	0
47.8	0
47.9	0
48	0
48.1	0
48.2	0
48.3	0
48.4	0
48.5	0
48.6	0
48.7	0
48.8	0
48.9	0
49	0
49.1	0
49.2	0
49.3	0
49.4	0
49.5	0
49.6	0
49.7	0
49.8	0
49.9	0
50	0
50.1	0
50.2	0
50.3	0
50.4	0
50.5	0
50.6	0
50.7	0
50.8	0
50.9	0
51	0
51.1	0
51.2	0
51.3	0
51.4	0
51.5	0
51.6	0
51.7	0
51.8	0
51.9	0
52	0
52.1	0
52.2	0
52.3	0
52.4	0
52.5	0
52.6	0
52.7	0
52.8	0
52.9	0
53	0
53.1	0
53.2	0
53.3	0
53.4	0
53.5	0
53.6	0
53.7	0
53.8	0
53.9	0
54	0
54.1	0
54.2	0
54.3	0
54.4	0
54.5	0
54.6	0
54.7	0
54.8	0
54.9	0
55	0
55.1	0
55.2	0
55.3	0
55.4	0
55.5	0
55.6	0
55.7	0
55.8	0
55.9	0
56	0
56.1	0
56.2	0
56.3	0
56.4	0
56.5	0
56.6	0
56.7	0
56.8	0
56.9	0
57	0
57.1	0
57.2	0
57.3	0
57.4	0
57.5	0
57.6	0
57.7	0
57.8	0
57.9	0
58	0
58.1	0
58.2	0
58.3	0
58.4	0
58.5	0
58.6	0
58.7	0
58.8	0
58.9	0
59	0
59.1	0
59.2	0
59.3	0
59.4	0
59.5	0
59.6	0
59.7	0
59.8	0
59.9	0
60	0
60.1	0
60.2	0
60.3	0
60.4	0
60.5	0
60.6	0
60.7	0
60.8	0
60.9	0
61	0
61.1	0
61.2	0
61.3	0
61.4	0
61.5	0
61.6	0
61.7	0
61.8	0
61.9	0
62	0
62.1	0
62.2	0
62.3	0
62.4	0
62.5	0
62.6	0
62.7	0
62.8	0
62.9	0
63	0
63.1	0
63.2	0
63.3	0
63.4	0
63.5	0
63.6	0
63.7	0
63.8	0
63.9	0
64	0
64.1	0
64.2	0
64.3	0
64.4	0
64.5	0
64.6	0
64.7	0
64.8	0
64.9	0
65	0
65.1	0
65.2	0
65.3	0
65.4	0
65.5	0
65.6	0
65.7	0
65.8	0
65.9	0
66	0
66.1	0
66.2	0
66.3	0
66.4	0
66.5	0
66.6	0
66.7	0
66.8	0
66.9	0
67	0
67.1	0
67.2	0
67.3	0
67.4	0
67.5	0
67.6	0
67.7	0
67.8	0
67.9	0
68	0
68.1	0
68.2	0
68.3	0
68.4	0
68.5	0
68.6	0
68.7	0
68.8	0
68.9	0
69	0
69.1	0
69.2	0
69.3	0
69.4	0
69.5	0
69.6	0
69.7	0
69.8	0
69.9	0
70	0
70.1	0
70.2	0
70.3	0
70.4	0
70.5	0
70.6	0
70.7	0
70.8	0
70.9	0
71	0
71.1	0
71.2	0
71.3	0
71.4	0
71.5	0
71.6	0
71.7	0
71.8	0
71.9	0
72	0
72.1	0
72.2	0
72.3	0
72.4	0
72.5	0
72.6	0
72.7	0
72.8	0
72.9	0
73	0
73.1	0
73.2	0
73.3	0
73.4	0
73.5	0
73.6	0
73.7	0
73.8	0
73.9	0
74	0
74.1	0
74.2	0
74.3	0
74.4	0
74.5	0
74.6	0
74.7	0
74.8	0
74.9	0
75	0
75.1	0
75.2	0
75.3	0
75.4	0
75.5	0
75.6	0
75.7	0
75.8	0
75.9	0
76	0
76.1	0
76.2	0
76.3	0
76.4	0
76.5	0
76.6	0
76.7	0
76.8	0
76.9	0
77	0
77.1	0
77.2	0
77.3	0
77.4	0
77.5	0
77.6	0
77.7	0
77.8	0
77.9	0
78	0
78.1	0
78.2	0
78.3	0
78.4	0
78.5	0
78.6	0
78.7	0
78.8	0
78.9	0
79	0
79.1	0
79.2	0
79.3	0
79.4	0
79.5	0
79.6	0
79.7	0
79.8	0
79.9	0
80	0
80.1	0
80.2	0
80.3	0
80.4	0
80.5	0
80.6	0
80.7	0
80.8	0
80.9	0
81	0
81.1	0
81.2	0
81.3	0
81.4	0
81.5	0
81.6	0
81.7	0
81.8	0
81.9	0
82	0
82.1	0
82.2	0
82.3	0
82.4	0
82.5	0
82.6	0
82.7	0
82.8	0
82.9	0
83	0
83.1	0
83.2	0
83.3	0
83.4	0
83.5	0
83.6	0
83.7	0
83.8	0
83.9	0
84	0
84.1	0
84.2	0
84.3	0
84.4	0
84.5	0
84.6	0
84.7	0
84.8	0
84.9	0
85	0
85.1	0
85.2	0
85.3	0
85.4	0
85.5	0
85.6	0
85.7	0
85.8	0
85.9	0
86	0
86.1	0
86.2	0
86.3	0
86.4	0
86.5	0
86.6	0
86.7	0
86.8	0
86.9	0
87	0
87.1	0
87.2	0
87.3	0
87.4	0
87.5	0
87.6	0
87.7	0
87.8	0
87.9	0
88	0
88.1	0
88.2	0
88.3	0
88.4	0
88.5	0
88.6	0
88.7	0
88.8	0
88.9	0
89	0
89.1	0
89.2	0
89.3	0
89.4	0
89.5	0
89.6	0
89.7	0
89.8	0
89.9	0
90	0
90.1	0
90.2	0
90.3	0
90.4	0
90.5	0
90.6	0
90.7	0
90.8	0
90.9	0
91	0
91.1	0
91.2	0
91.3	0
91.4	0
91.5	0
91.6	0
91.7	0
91.8	0
91.9	0
92	0
92.1	0
92.2	0
92.3	0
92.4	0
92.5	0
92.6	0
92.7	0
92.8	0
92.9	0
93	0
93.1	0
93.2	0
93.3	0
93.4	0
93.5	0
93.6	0
93.7	0
93.8	0
93.9	0
94	0
94.1	0
94.2	0
94.3	0
94.4	0
94.5	0
94.6	0
94.7	0
94.8	0
94.9	0
95	0
95.1	0
95.2	0
95.3	0
95.4	0
95.5	0
95.6	0
95.7	0
95.8	0
95.9	0
96	0
96.1	0
96.2	0
96.3	0
96.4	0
96.5	0
96.6	0
96.7	0
96.8	0
96.9	0
97	0
97.1	0
97.2	0
97.3	0
97.4	0
97.5	0
97.6	0
97.7	0
97.8	0
97.9	0
98	0
98.1	0
98.2	0
98.3	0
98.4	0
98.5	0
98.6	0
98.7	0
98.8	0
98.9	0
99	0
99.1	0
99.2	0
99.3	0
99.4	0
99.5	0
99.6	0
99.7	0
99.8	0
99.9	0
100	0
100.1	0
100.2	0
100.3	0
100.4	0
100.5	0
100.6	0
100.7	0
100.8	0
100.9	0.00025
101	0.00025
101.1	0.00025
101.2	0.0005
101.3	0.00075
101.4	0.00075
101.5	0.00075
101.6	0.001
101.7	0.0015
101.8	0.0015
101.9	0.00175
102	0.00175
102.1	0.002
102.2	0.002
102.3	0.002
102.4	0.002
102.5	0.002
102.6	0.002
102.7	0.00225
102.8	0.00225
102.9	0.0025
103	0.00275
103.1	0.00275
103.2	0.003
103.3	0.003
103.4	0.003
103.5	0.00325
103.6	0.00325
103.7	0.00325
103.8	0.004
103.9	0.0045
104	0.00475
104.1	0.00575
104.2	0.00625
104.3	0.0065
104.4	0.0065
104.5	0.00675
104.6	0.00675
104.7	0.00725
104.8	0.0075
104.9	0.0075
105	0.0075
105.1	0.008
105.2	0.00875
105.3	0.00875
105.4	0.00925
105.5	0.0095
105.6	0.0095
105.7	0.01
105.8	0.01025
105.9	0.0105
106	0.01075
106.1	0.01125
106.2	0.011
106.3	0.01125
106.4	0.01125
106.5	0.01225
106.6	0.01225
106.7	0.012
106.8	0.0125
106.9	0.01275
107	0.013
107.1	0.0135
107.2	0.014
107.3	0.01475
107.4	0.01475
107.5	0.0155
107.6	0.01575
107.7	0.016
107.8	0.0165
107.9	0.0165
108	0.017
108.1	0.0175
108.2	0.01775
108.3	0.018
108.4	0.01925
108.5	0.02025
108.6	0.021
108.7	0.02125
108.8	0.0215
108.9	0.02175
109	0.022
109.1	0.02225
109.2	0.02225
109.3	0.02325
109.4	0.02325
109.5	0.0245
109.6	0.02475
109.7	0.0255
109.8	0.026
109.9	0.027
110	0.0275
110.1	0.0275
110.2	0.028
110.3	0.028
110.4	0.02875
110.5	0.029
110.6	0.0295
110.7	0.03
110.8	0.0305
110.9	0.0305
111	0.031
111.1	0.03175
111.2	0.032
111.3	0.03275
111.4	0.0335
111.5	0.03375
111.6	0.03425
111.7	0.03525
111.8	0.03625
111.9	0.036
112	0.0365
112.1	0.0365
112.2	0.03725
112.3	0.0375
112.4	0.0375
112.5	0.03825
112.6	0.039
112.7	0.03925
112.8	0.0405
112.9	0.041
113	0.04225
113.1	0.04225
113.2	0.043
113.3	0.044
113.4	0.044
113.5	0.04425
113.6	0.04475
113.7	0.045
113.8	0.0455
113.9	0.0455
114	0.0465
114.1	0.047
114.2	0.04725
114.3	0.048
114.4	0.04825
114.5	0.0485
114.6	0.04875
114.7	0.0495
114.8	0.04925
114.9	0.04925
115	0.0495
115.1	0.04975
115.2	0.05
115.3	0.05025
115.4	0.0505
115.5	0.0505
115.6	0.05125
115.7	0.05175
115.8	0.052
115.9	0.05225
116	0.05275
116.1	0.0535
116.2	0.05425
116.3	0.0545
116.4	0.055
116.5	0.055
116.6	0.05575
116.7	0.056
116.8	0.05625
116.9	0.05675
117	0.05675
117.1	0.057
117.2	0.057
117.3	0.05725
117.4	0.0575
117.5	0.0575
117.6	0.05825
117.7	0.0585
117.8	0.059
117.9	0.0595
118	0.06
118.1	0.06025
118.2	0.06075
118.3	0.0615
118.4	0.06225
118.5	0.062
118.6	0.06175
118.7	0.0625
118.8	0.06325
118.9	0.06375
119	0.06475
119.1	0.0655
119.2	0.06575
119.3	0.06675
119.4	0.06725
119.5	0.068
119.6	0.06825
119.7	0.06775
119.8	0.06775
119.9	0.06775
120	0.0685
120.1	0.069
120.2	0.06975
120.3	0.07
120.4	0.07025
120.5	0.071
120.6	0.0715
120.7	0.0715
120.8	0.07175
120.9	0.07175
121	0.072
121.1	0.072
121.2	0.07175
121.3	0.072
121.4	0.07225
121.5	0.07225
121.6	0.07325
121.7	0.07375
121.8	0.0745
121.9	0.07525
122	0.0755
122.1	0.07575
122.2	0.07625
122.3	0.076
122.4	0.07675
122.5	0.07675
122.6	0.077
122.7	0.077
122.8	0.077
122.9	0.077
123	0.0775
123.1	0.07725
123.2	0.0775
123.3	0.07825
123.4	0.0785
123.5	0.07875
123.6	0.07925
123.7	0.07925
123.8	0.07925
123.9	0.07925
124	0.0805
124.1	0.08075
124.2	0.08225
124.3	0.08225
124.4	0.08275
124.5	0.0825
124.6	0.0825
124.7	0.08325
124.8	0.0835
124.9	0.08325
125	0.08375
125.1	0.084
125.2	0.0845
125.3	0.086
125.4	0.0865
125.5	0.0865
125.6	0.087
125.7	0.0875
125.8	0.08825
125.9	0.08875
126	0.0895
126.1	0.0905
126.2	0.09075
126.3	0.09175
126.4	0.093
126.5	0.0935
126.6	0.0935
126.7	0.09475
126.8	0.09525
126.9	0.09525
127	0.09525
127.1	0.09575
127.2	0.097
127.3	0.098
127.4	0.098
127.5	0.0985
127.6	0.09925
127.7	0.09975
127.8	0.0995
127.9	0.09975
128	0.09975
128.1	0.09975
128.2	0.0995
128.3	0.09925
128.4	0.0995
128.5	0.1
128.6	0.1005
128.7	0.1015
128.8	0.10125
128.9	0.10225
129	0.1025
129.1	0.103
129.2	0.1035
129.3	0.1035
129.4	0.104
129.5	0.105
129.6	0.10575
129.7	0.10625
129.8	0.1065
129.9	0.1065
130	0.1065
130.1	0.10675
130.2	0.10675
130.3	0.1075
130.4	0.10825
130.5	0.109
130.6	0.11
130.7	0.11
130.8	0.1105
130.9	0.11125
131	0.1115
131.1	0.11175
131.2	0.11175
131.3	0.112
131.4	0.1125
131.5	0.113
131.6	0.1135
131.7	0.11425
131.8	0.115
131.9	0.11525
132	0.1155
132.1	0.1165
132.2	0.11675
132.3	0.117
132.4	0.11825
132.5	0.11825
132.6	0.11925
132.7	0.1195
132.8	0.1195
132.9	0.1195
133	0.12
133.1	0.1205
133.2	0.12125
133.3	0.12125
133.4	0.12175
133.5	0.122
133.6	0.12275
133.7	0.1225
133.8	0.1225
133.9	0.123
134	0.1235
134.1	0.1245
134.2	0.12525
134.3	0.126
134.4	0.12625
134.5	0.126
134.6	0.12675
134.7	0.127
134.8	0.12725
134.9	0.12725
135	0.12775
135.1	0.12725
135.2	0.1275
135.3	0.128
135.4	0.12825
135.5	0.128
135.6	0.1295
135.7	0.1295
135.8	0.12925
135.9	0.1295
136	0.12975
136.1	0.1295
136.2	0.1295
136.3	0.12975
136.4	0.13025
136.5	0.131
136.6	0.132
136.7	0.13225
136.8	0.13225
136.9	0.13275
137	0.13325
137.1	0.1335
137.2	0.1335
137.3	0.13375
137.4	0.134
137.5	0.13425
137.6	0.1355
137.7	0.13575
137.8	0.136
137.9	0.13625
138	0.13675
138.1	0.13775
138.2	0.1385
138.3	0.13875
138.4	0.1395
138.5	0.1395
138.6	0.13975
138.7	0.1405
138.8	0.14075
138.9	0.14125
139	0.14175
139.1	0.141
139.2	0.1415
139.3	0.1415
139.4	0.14175
139.5	0.142
139.6	0.1425
139.7	0.14275
139.8	0.1425
139.9	0.1425
140	0.14275
140.1	0.143
140.2	0.1435
140.3	0.1435
140.4	0.14375
140.5	0.1435
140.6	0.14375
140.7	0.14375
140.8	0.14475
140.9	0.1455
141	0.14575
141.1	0.14625
141.2	0.14625
141.3	0.147
141.4	0.147
141.5	0.14675
141.6	0.14725
141.7	0.14725
141.8	0.1465
141.9	0.1475
142	0.14775
142.1	0.14825
142.2	0.1485
142.3	0.14875
142.4	0.14925
142.5	0.14975
142.6	0.14975
142.7	0.14925
142.8	0.1495
142.9	0.14975
143	0.15
143.1	0.15025
143.2	0.15025
143.3	0.15
143.4	0.15025
143.5	0.15025
143.6	0.14975
143.7	0.14975
143.8	0.15
143.9	0.14975
144	0.15
144.1	0.15025
144.2	0.15075
144.3	0.151
144.4	0.15125
144.5	0.151
144.6	0.15125
144.7	0.1515
144.8	0.15225
144.9	0.15225
145	0.1525
145.1	0.15275
145.2	0.1525
145.3	0.15275
145.4	0.15325
145.5	0.15375
145.6	0.15425
145.7	0.1545
145.8	0.1545
145.9	0.15475
146	0.15425
146.1	0.1545
146.2	0.15575
146.3	0.1555
146.4	0.155
146.5	0.1555
146.6	0.15575
146.7	0.156
146.8	0.15575
146.9	0.15575
147	0.156
147.1	0.15575
147.2	0.15625
147.3	0.1565
147.4	0.157
147.5	0.15675
147.6	0.15675
147.7	0.15725
147.8	0.1575
147.9	0.1575
148	0.15725
148.1	0.1575
148.2	0.15725
148.3	0.15775
148.4	0.15825
148.5	0.159
148.6	0.159
148.7	0.15875
148.8	0.159
148.9	0.159
149	0.15925
149.1	0.15975
149.2	0.1595
149.3	0.15925
149.4	0.1595
149.5	0.1595
149.6	0.15975
149.7	0.16
149.8	0.16075
149.9	0.16125
150	0.1615
150.1	0.16125
150.2	0.161
150.3	0.1615
150.4	0.16225
150.5	0.16175
150.6	0.16175
150.7	0.16175
150.8	0.16175
150.9	0.16175
151	0.16175
151.1	0.16225
151.2	0.1625
151.3	0.163
151.4	0.1635
151.5	0.1635
151.6	0.16425
151.7	0.1645
151.8	0.16475
151.9	0.165
152	0.16625
152.1	0.16625
152.2	0.1665
152.3	0.1665
152.4	0.16625
152.5	0.16625
152.6	0.16725
152.7	0.16775
152.8	0.168
152.9	0.1685
153	0.16875
153.1	0.16875
153.2	0.16825
153.3	0.1685
153.4	0.169
153.5	0.16875
153.6	0.16875
153.7	0.1695
153.8	0.1705
153.9	0.17025
154	0.171
154.1	0.172
154.2	0.172
154.3	0.1725
154.4	0.17225
154.5	0.17225
154.6	0.17225
154.7	0.17225
154.8	0.1725
154.9	0.17275
155	0.17225
155.1	0.1725
155.2	0.1725
155.3	0.173
155.4	0.1735
155.5	0.174
155.6	0.175
155.7	0.17575
155.8	0.176
155.9	0.17625
156	0.17675
156.1	0.17625
156.2	0.17625
156.3	0.176
156.4	0.17675
156.5	0.1765
156.6	0.1765
156.7	0.1765
156.8	0.17625
156.9	0.177
157	0.17725
157.1	0.17775
157.2	0.178
157.3	0.178
157.4	0.178
157.5	0.17875
157.6	0.179
157.7	0.17875
157.8	0.17925
157.9	0.17975
158	0.18025
158.1	0.18075
158.2	0.1805
158.3	0.18075
158.4	0.18125
158.5	0.181
158.6	0.18175
158.7	0.182
158.8	0.1825
158.9	0.1825
159	0.183
159.1	0.18325
159.2	0.1835
159.3	0.184
159.4	0.18475
159.5	0.1855
159.6	0.18525
159.7	0.186
159.8	0.1855
159.9	0.18575
160	0.18625
160.1	0.1865
160.2	0.18725
160.3	0.18725
160.4	0.1875
160.5	0.18725
160.6	0.18725
160.7	0.188
160.8	0.18825
160.9	0.1885
161	0.18875
161.1	0.1885
161.2	0.189
161.3	0.1885
161.4	0.18875
161.5	0.189
161.6	0.18925
161.7	0.18925
161.8	0.189
161.9	0.18925
162	0.18925
162.1	0.19
162.2	0.19
162.3	0.19025
162.4	0.19025
162.5	0.1905
162.6	0.19025
162.7	0.19025
162.8	0.19075
162.9	0.19075
163	0.19175
163.1	0.19175
163.2	0.19125
163.3	0.19225
163.4	0.1925
163.5	0.193
163.6	0.193
163.7	0.19225
163.8	0.19275
163.9	0.19275
164	0.19275
164.1	0.19275
164.2	0.193
164.3	0.19325
164.4	0.19375
164.5	0.19425
164.6	0.195
164.7	0.19525
164.8	0.19525
164.9	0.1955
165	0.196
165.1	0.19575
165.2	0.19625
165.3	0.19575
165.4	0.197
165.5	0.19775
165.6	0.19825
165.7	0.19925
165.8	0.199
165.9	0.19875
166	0.19875
166.1	0.199
166.2	0.19875
166.3	0.19925
166.4	0.1995
166.5	0.19975
166.6	0.201
166.7	0.2015
166.8	0.2025
166.9	0.20225
167	0.2025
167.1	0.2025
167.2	0.20225
167.3	0.20225
167.4	0.2025
167.5	0.2025
167.6	0.20275
167.7	0.20325
167.8	0.20375
167.9	0.20375
168	0.20475
168.1	0.205
168.2	0.205
168.3	0.2045
168.4	0.20475
168.5	0.20525
168.6	0.205
168.7	0.20525
168.8	0.2055
168.9	0.20575
169	0.20625
169.1	0.207
169.2	0.2065
169.3	0.20675
169.4	0.208
169.5	0.20775
169.6	0.208
169.7	0.208
169.8	0.208
169.9	0.20825
170	0.208
170.1	0.20825
170.2	0.2085
170.3	0.2085
170.4	0.2085
170.5	0.2085
170.6	0.20825
170.7	0.2085
170.8	0.20875
170.9	0.20925
171	0.209
171.1	0.2085
171.2	0.2085
171.3	0.2085
171.4	0.20875
171.5	0.20925
171.6	0.2095
171.7	0.20975
171.8	0.2095
171.9	0.21
172	0.21075
172.1	0.21125
172.2	0.21175
172.3	0.212
172.4	0.21175
172.5	0.2115
172.6	0.2115
172.7	0.212
172.8	0.21175
172.9	0.2115
173	0.21225
173.1	0.21275
173.2	0.213
173.3	0.21375
173.4	0.214
173.5	0.21425
173.6	0.21375
173.7	0.214
173.8	0.21375
173.9	0.2135
174	0.21325
174.1	0.21375
174.2	0.214
174.3	0.21425
174.4	0.21575
174.5	0.21625
174.6	0.2165
174.7	0.21725
174.8	0.2175
174.9	0.218
175	0.218
175.1	0.21825
175.2	0.21875
175.3	0.2185
175.4	0.21925
175.5	0.21975
175.6	0.21975
175.7	0.2195
175.8	0.2195
175.9	0.21925
176	0.219
176.1	0.2195
176.2	0.21975
176.3	0.22
176.4	0.22075
176.5	0.22125
176.6	0.221
176.7	0.22125
176.8	0.222
176.9	0.22275
177	0.22275
177.1	0.22325
177.2	0.2235
177.3	0.22325
177.4	0.2235
177.5	0.22375
177.6	0.224
177.7	0.224
177.8	0.22475
177.9	0.22425
178	0.224
178.1	0.22425
178.2	0.2245
178.3	0.22475
178.4	0.22525
178.5	0.22525
178.6	0.22625
178.7	0.227
178.8	0.22725
178.9	0.2285
179	0.22825
179.1	0.228
179.2	0.22725
179.3	0.22725
179.4	0.227
179.5	0.22775
179.6	0.2275
179.7	0.22675
179.8	0.227
179.9	0.22725
180	0.22775
180.1	0.22775
180.2	0.22775
180.3	0.2275
180.4	0.22825
180.5	0.228
180.6	0.228
180.7	0.22775
180.8	0.22775
180.9	0.22725
181	0.227
181.1	0.227
181.2	0.227
181.3	0.22725
181.4	0.22725
181.5	0.227
181.6	0.22725
181.7	0.227
181.8	0.227
181.9	0.22675
182	0.22675
182.1	0.226
182.2	0.22575
182.3	0.226
182.4	0.2265
182.5	0.22675
182.6	0.22675
182.7	0.2265
182.8	0.2265
182.9	0.227
183	0.22725
183.1	0.22725
183.2	0.22775
183.3	0.2285
183.4	0.2285
183.5	0.2285
183.6	0.229
183.7	0.229
183.8	0.22875
183.9	0.229
184	0.2285
184.1	0.22775
184.2	0.22775
184.3	0.22775
184.4	0.2285
184.5	0.22875
184.6	0.229
184.7	0.22875
184.8	0.22875
184.9	0.2295
185	0.2295
185.1	0.22975
185.2	0.23025
185.3	0.2305
185.4	0.23075
185.5	0.231
185.6	0.23175
185.7	0.2315
185.8	0.2315
185.9	0.23275
186	0.23275
186.1	0.233
186.2	0.233
186.3	0.23325
186.4	0.234
186.5	0.23475
186.6	0.2345
186.7	0.23475
186.8	0.2355
186.9	0.2355
187	0.235
187.1	0.235
187.2	0.2355
187.3	0.2355
187.4	0.2355
187.5	0.2355
187.6	0.23525
187.7	0.23525
187.8	0.236
187.9	0.236
188	0.236
188.1	0.236
188.2	0.23675
188.3	0.2365
188.4	0.237
188.5	0.237
188.6	0.2375
188.7	0.237
188.8	0.2375
188.9	0.2375
189	0.23775
189.1	0.23775
189.2	0.238
189.3	0.23825
189.4	0.23925
189.5	0.23975
189.6	0.23975
189.7	0.24
189.8	0.2405
189.9	0.2405
190	0.24125
190.1	0.2415
190.2	0.24175
190.3	0.241
190.4	0.2405
190.5	0.2405
190.6	0.2395
190.7	0.2395
190.8	0.23975
190.9	0.24025
191	0.24025
191.1	0.24075
191.2	0.241
191.3	0.24075
191.4	0.2415
191.5	0.24175
191.6	0.24175
191.7	0.2415
191.8	0.24125
191.9	0.24175
192	0.242
192.1	0.24225
192.2	0.242
192.3	0.24125
192.4	0.2415
192.5	0.2415
192.6	0.2415
192.7	0.2415
192.8	0.24225
192.9	0.242
193	0.24225
193.1	0.24225
193.2	0.24225
193.3	0.24175
193.4	0.24175
193.5	0.24125
193.6	0.2415
193.7	0.24175
193.8	0.242
193.9	0.24225
194	0.24225
194.1	0.242
194.2	0.242
194.3	0.242
194.4	0.24175
194.5	0.241
194.6	0.241
194.7	0.24125
194.8	0.2415
194.9	0.2415
195	0.24125
195.1	0.24125
195.2	0.24075
195.3	0.2405
195.4	0.24075
195.5	0.24125
195.6	0.24075
195.7	0.24075
195.8	0.241
195.9	0.24125
196	0.2415
196.1	0.242
196.2	0.24175
196.3	0.242
196.4	0.2425
196.5	0.2425
196.6	0.2425
196.7	0.2425
196.8	0.242
196.9	0.242
197	0.242
197.1	0.24225
197.2	0.242
197.3	0.242
197.4	0.242
197.5	0.24275
197.6	0.24325
197.7	0.243
197.8	0.24325
197.9	0.24375
198	0.24375
198.1	0.24375
198.2	0.2435
198.3	0.24375
198.4	0.24375
198.5	0.2435
198.6	0.24375
198.7	0.24425
198.8	0.245
198.9	0.245
199	0.244
199.1	0.244
199.2	0.244
199.3	0.24525
199.4	0.24525
199.5	0.24525
199.6	0.24575
199.7	0.24575
199.8	0.2455
199.9	0.2455
200	0.24525
[truncated: 14,000 more rows]
