# Supplementary material for: Bayesian inference of kinetic schemes for ion channels by Kalman filtering
Source: eLife journal article supplement (doi:10.7554/elife.62714), 2022-05-04
Supplement: fig4-data8 [file 1_Sim_N_5000_Fluor_MW.xlsx]

## Sheet: Tabelle1
0.1	0
0.2	0
0.3	0
0.4	0
0.5	0
0.6	0
0.7	0
0.8	0
0.9	0
1	0
1.1	0
1.2	0
1.3	0
1.4	0
1.5	0
1.6	0
1.7	0
1.8	0
1.9	0
2	0
2.1	0
2.2	0
2.3	0
2.4	0
2.5	0
2.6	0
2.7	0
2.8	0
2.9	0
3	0
3.1	0
3.2	0
3.3	0
3.4	0
3.5	0
3.6	0
3.7	0
3.8	0
3.9	0
4	0
4.1	0
4.2	0
4.3	0
4.4	0
4.5	0
4.6	0
4.7	0
4.8	0
4.9	0
5	0
5.1	0
5.2	0
5.3	0
5.4	0
5.5	0
5.6	0
5.7	0
5.8	0
5.9	0
6	0
6.1	0
6.2	0
6.3	0
6.4	0
6.5	0
6.6	0
6.7	0
6.8	0
6.9	0
7	0
7.1	0
7.2	0
7.3	0
7.4	0
7.5	0
7.6	0
7.7	0
7.8	0
7.9	0
8	0
8.1	0
8.2	0
8.3	0
8.4	0
8.5	0
8.6	0
8.7	0
8.8	0
8.9	0
9	0
9.1	0
9.2	0
9.3	0
9.4	0
9.5	0
9.6	0
9.7	0
9.8	0
9.9	0
10	0
10.1	0
10.2	0
10.3	0
10.4	0
10.5	0
10.6	0
10.7	0
10.8	0
10.9	0
11	0
11.1	0
11.2	0
11.3	0
11.4	0
11.5	0
11.6	0
11.7	0
11.8	0
11.9	0
12	0
12.1	0
12.2	0
12.3	0
12.4	0
12.5	0
12.6	0
12.7	0
12.8	0
12.9	0
13	0
13.1	0
13.2	0
13.3	0
13.4	0
13.5	0
13.6	0
13.7	0
13.8	0
13.9	0
14	0
14.1	0
14.2	0
14.3	0
14.4	0
14.5	0
14.6	0
14.7	0
14.8	0
14.9	0
15	0
15.1	0
15.2	0
15.3	0
15.4	0
15.5	0
15.6	0
15.7	0
15.8	0
15.9	0
16	0
16.1	0
16.2	0
16.3	0
16.4	0
16.5	0
16.6	0
16.7	0
16.8	0
16.9	0
17	0
17.1	0
17.2	0
17.3	0
17.4	0
17.5	0
17.6	0
17.7	0
17.8	0
17.9	0
18	0
18.1	0
18.2	0
18.3	0
18.4	0
18.5	0
18.6	0
18.7	0
18.8	0
18.9	0
19	0
19.1	0
19.2	0
19.3	0
19.4	0
19.5	0
19.6	0
19.7	0
19.8	0
19.9	0
20	0
20.1	0
20.2	0
20.3	0
20.4	0
20.5	0
20.6	0
20.7	0
20.8	0
20.9	0
21	0
21.1	0
21.2	0
21.3	0
21.4	0
21.5	0
21.6	0
21.7	0
21.8	0
21.9	0
22	0
22.1	0
22.2	0
22.3	0
22.4	0
22.5	0
22.6	0
22.7	0
22.8	0
22.9	0
23	0
23.1	0
23.2	0
23.3	0
23.4	0
23.5	0
23.6	0
23.7	0
23.8	0
23.9	0
24	0
24.1	0
24.2	0
24.3	0
24.4	0
24.5	0
24.6	0
24.7	0
24.8	0
24.9	0
25	0
25.1	0
25.2	0
25.3	0
25.4	0
25.5	0
25.6	0
25.7	0
25.8	0
25.9	0
26	0
26.1	0
26.2	0
26.3	0
26.4	0
26.5	0
26.6	0
26.7	0
26.8	0
26.9	0
27	0
27.1	0
27.2	0
27.3	0
27.4	0
27.5	0
27.6	0
27.7	0
27.8	0
27.9	0
28	0
28.1	0
28.2	0
28.3	0
28.4	0
28.5	0
28.6	0
28.7	0
28.8	0
28.9	0
29	0
29.1	0
29.2	0
29.3	0
29.4	0
29.5	0
29.6	0
29.7	0
29.8	0
29.9	0
30	0
30.1	0
30.2	0
30.3	0
30.4	0
30.5	0
30.6	0
30.7	0
30.8	0
30.9	0
31	0
31.1	0
31.2	0
31.3	0
31.4	0
31.5	0
31.6	0
31.7	0
31.8	0
31.9	0
32	0
32.1	0
32.2	0
32.3	0
32.4	0
32.5	0
32.6	0
32.7	0
32.8	0
32.9	0
33	0
33.1	0
33.2	0
33.3	0
33.4	0
33.5	0
33.6	0
33.7	0
33.8	0
33.9	0
34	0
34.1	0
34.2	0
34.3	0
34.4	0
34.5	0
34.6	0
34.7	0
34.8	0
34.9	0
35	0
35.1	0
35.2	0
35.3	0
35.4	0
35.5	0
35.6	0
35.7	0
35.8	0
35.9	0
36	0
36.1	0
36.2	0
36.3	0
36.4	0
36.5	0
36.6	0
36.7	0
36.8	0
36.9	0
37	0
37.1	0
37.2	0
37.3	0
37.4	0
37.5	0
37.6	0
37.7	0
37.8	0
37.9	0
38	0
38.1	0
38.2	0
38.3	0
38.4	0
38.5	0
38.6	0
38.7	0
38.8	0
38.9	0
39	0
39.1	0
39.2	0
39.3	0
39.4	0
39.5	0
39.6	0
39.7	0
39.8	0
39.9	0
40	0
40.1	0
40.2	0
40.3	0
40.4	0
40.5	0
40.6	0
40.7	0
40.8	0
40.9	0
41	0
41.1	0
41.2	0
41.3	0
41.4	0
41.5	0
41.6	0
41.7	0
41.8	0
41.9	0
42	0
42.1	0
42.2	0
42.3	0
42.4	0
42.5	0
42.6	0
42.7	0
42.8	0
42.9	0
43	0
43.1	0
43.2	0
43.3	0
43.4	0
43.5	0
43.6	0
43.7	0
43.8	0
43.9	0
44	0
44.1	0
44.2	0
44.3	0
44.4	0
44.5	0
44.6	0
44.7	0
44.8	0
44.9	0
45	0
45.1	0
45.2	0
45.3	0
45.4	0
45.5	0
45.6	0
45.7	0
45.8	0
45.9	0
46	0
46.1	0
46.2	0
46.3	0
46.4	0
46.5	0
46.6	0
46.7	0
46.8	0
46.9	0
47	0
47.1	0
47.2	0
47.3	0
47.4	0
47.5	0
47.6	0
47.7	0
47.8	0
47.9	0
48	0
48.1	0
48.2	0
48.3	0
48.4	0
48.5	0
48.6	0
48.7	0
48.8	0
48.9	0
49	0
49.1	0
49.2	0
49.3	0
49.4	0
49.5	0
49.6	0
49.7	0
49.8	0
49.9	0
50	0
50.1	0
50.2	0
50.3	0
50.4	0
50.5	0
50.6	0
50.7	0
50.8	0
50.9	0
51	0
51.1	0
51.2	0
51.3	0
51.4	0
51.5	0
51.6	0
51.7	0
51.8	0
51.9	0
52	0
52.1	0
52.2	0
52.3	0
52.4	0
52.5	0
52.6	0
52.7	0
52.8	0
52.9	0
53	0
53.1	0
53.2	0
53.3	0
53.4	0
53.5	0
53.6	0
53.7	0
53.8	0
53.9	0
54	0
54.1	0
54.2	0
54.3	0
54.4	0
54.5	0
54.6	0
54.7	0
54.8	0
54.9	0
55	0
55.1	0
55.2	0
55.3	0
55.4	0
55.5	0
55.6	0
55.7	0
55.8	0
55.9	0
56	0
56.1	0
56.2	0
56.3	0
56.4	0
56.5	0
56.6	0
56.7	0
56.8	0
56.9	0
57	0
57.1	0
57.2	0
57.3	0
57.4	0
57.5	0
57.6	0
57.7	0
57.8	0
57.9	0
58	0
58.1	0
58.2	0
58.3	0
58.4	0
58.5	0
58.6	0
58.7	0
58.8	0
58.9	0
59	0
59.1	0
59.2	0
59.3	0
59.4	0
59.5	0
59.6	0
59.7	0
59.8	0
59.9	0
60	0
60.1	0
60.2	0
60.3	0
60.4	0
60.5	0
60.6	0
60.7	0
60.8	0
60.9	0
61	0
61.1	0
61.2	0
61.3	0
61.4	0
61.5	0
61.6	0
61.7	0
61.8	0
61.9	0
62	0
62.1	0
62.2	0
62.3	0
62.4	0
62.5	0
62.6	0
62.7	0
62.8	0
62.9	0
63	0
63.1	0
63.2	0
63.3	0
63.4	0
63.5	0
63.6	0
63.7	0
63.8	0
63.9	0
64	0
64.1	0
64.2	0
64.3	0
64.4	0
64.5	0
64.6	0
64.7	0
64.8	0
64.9	0
65	0
65.1	0
65.2	0
65.3	0
65.4	0
65.5	0
65.6	0
65.7	0
65.8	0
65.9	0
66	0
66.1	0
66.2	0
66.3	0
66.4	0
66.5	0
66.6	0
66.7	0
66.8	0
66.9	0
67	0
67.1	0
67.2	0
67.3	0
67.4	0
67.5	0
67.6	0
67.7	0
67.8	0
67.9	0
68	0
68.1	0
68.2	0
68.3	0
68.4	0
68.5	0
68.6	0
68.7	0
68.8	0
68.9	0
69	0
69.1	0
69.2	0
69.3	0
69.4	0
69.5	0
69.6	0
69.7	0
69.8	0
69.9	0
70	0
70.1	0
70.2	0
70.3	0
70.4	0
70.5	0
70.6	0
70.7	0
70.8	0
70.9	0
71	0
71.1	0
71.2	0
71.3	0
71.4	0
71.5	0
71.6	0
71.7	0
71.8	0
71.9	0
72	0
72.1	0
72.2	0
72.3	0
72.4	0
72.5	0
72.6	0
72.7	0
72.8	0
72.9	0
73	0
73.1	0
73.2	0
73.3	0
73.4	0
73.5	0
73.6	0
73.7	0
73.8	0
73.9	0
74	0
74.1	0
74.2	0
74.3	0
74.4	0
74.5	0
74.6	0
74.7	0
74.8	0
74.9	0
75	0
75.1	0
75.2	0
75.3	0
75.4	0
75.5	0
75.6	0
75.7	0
75.8	0
75.9	0
76	0
76.1	0
76.2	0
76.3	0
76.4	0
76.5	0
76.6	0
76.7	0
76.8	0
76.9	0
77	0
77.1	0
77.2	0
77.3	0
77.4	0
77.5	0
77.6	0
77.7	0
77.8	0
77.9	0
78	0
78.1	0
78.2	0
78.3	0
78.4	0
78.5	0
78.6	0
78.7	0
78.8	0
78.9	0
79	0
79.1	0
79.2	0
79.3	0
79.4	0
79.5	0
79.6	0
79.7	0
79.8	0
79.9	0
80	0
80.1	0
80.2	0
80.3	0
80.4	0
80.5	0
80.6	0
80.7	0
80.8	0
80.9	0
81	0
81.1	0
81.2	0
81.3	0
81.4	0
81.5	0
81.6	0
81.7	0
81.8	0
81.9	0
82	0
82.1	0
82.2	0
82.3	0
82.4	0
82.5	0
82.6	0
82.7	0
82.8	0
82.9	0
83	0
83.1	0
83.2	0
83.3	0
83.4	0
83.5	0
83.6	0
83.7	0
83.8	0
83.9	0
84	0
84.1	0
84.2	0
84.3	0
84.4	0
84.5	0
84.6	0
84.7	0
84.8	0
84.9	0
85	0
85.1	0
85.2	0
85.3	0
85.4	0
85.5	0
85.6	0
85.7	0
85.8	0
85.9	0
86	0
86.1	0
86.2	0
86.3	0
86.4	0
86.5	0
86.6	0
86.7	0
86.8	0
86.9	0
87	0
87.1	0
87.2	0
87.3	0
87.4	0
87.5	0
87.6	0
87.7	0
87.8	0
87.9	0
88	0
88.1	0
88.2	0
88.3	0
88.4	0
88.5	0
88.6	0
88.7	0
88.8	0
88.9	0
89	0
89.1	0
89.2	0
89.3	0
89.4	0
89.5	0
89.6	0
89.7	0
89.8	0
89.9	0
90	0
90.1	0
90.2	0
90.3	0
90.4	0
90.5	0
90.6	0
90.7	0
90.8	0
90.9	0
91	0
91.1	0
91.2	0
91.3	0
91.4	0
91.5	0
91.6	0
91.7	0
91.8	0
91.9	0
92	0
92.1	0
92.2	0
92.3	0
92.4	0
92.5	0
92.6	0
92.7	0
92.8	0
92.9	0
93	0
93.1	0
93.2	0
93.3	0
93.4	0
93.5	0
93.6	0
93.7	0
93.8	0
93.9	0
94	0
94.1	0
94.2	0
94.3	0
94.4	0
94.5	0
94.6	0
94.7	0
94.8	0
94.9	0
95	0
95.1	0
95.2	0
95.3	0
95.4	0
95.5	0
95.6	0
95.7	0
95.8	0
95.9	0
96	0
96.1	0
96.2	0
96.3	0
96.4	0
96.5	0
96.6	0
96.7	0
96.8	0
96.9	0
97	0
97.1	0
97.2	0
97.3	0
97.4	0
97.5	0
97.6	0
97.7	0
97.8	0
97.9	0
98	0
98.1	0
98.2	0
98.3	0
98.4	0
98.5	0
98.6	0
98.7	0
98.8	0
98.9	0
99	0
99.1	0
99.2	0
99.3	0
99.4	0
99.5	0
99.6	0
99.7	0
99.8	0
99.9	0
100	0
100.1	0.0133
100.2	0.0275
100.3	0.0417
100.4	0.0544
100.5	0.0651
100.6	0.0783
100.7	0.0918
100.8	0.1029
100.9	0.1142
101	0.127
101.1	0.1386
101.2	0.1482
101.3	0.1596
101.4	0.1721
101.5	0.1812
101.6	0.1904
101.7	0.1993
101.8	0.2093
101.9	0.2173
102	0.2251
102.1	0.2326
102.2	0.2402
102.3	0.2463
102.4	0.2552
102.5	0.2615
102.6	0.2663
102.7	0.2697
102.8	0.2735
102.9	0.2826
103	0.2881
103.1	0.2937
103.2	0.2999
103.3	0.3035
103.4	0.3085
103.5	0.3142
103.6	0.3178
103.7	0.3211
103.8	0.3253
103.9	0.3306
104	0.3359
104.1	0.3386
104.2	0.3441
104.3	0.3486
104.4	0.3543
104.5	0.3564
104.6	0.3583
104.7	0.3616
104.8	0.3626
104.9	0.3661
105	0.3706
105.1	0.3745
105.2	0.3765
105.3	0.3782
105.4	0.3797
105.5	0.3843
105.6	0.386
105.7	0.3883
105.8	0.3914
105.9	0.3945
106	0.3959
106.1	0.3982
106.2	0.3998
106.3	0.4001
106.4	0.4011
106.5	0.4017
106.6	0.4056
106.7	0.4072
106.8	0.4089
106.9	0.4106
107	0.4107
107.1	0.4113
107.2	0.4132
107.3	0.413
107.4	0.4138
107.5	0.4158
107.6	0.4147
107.7	0.4139
107.8	0.4168
107.9	0.4182
108	0.4214
108.1	0.4233
108.2	0.4241
108.3	0.4255
108.4	0.4269
108.5	0.4261
108.6	0.426
108.7	0.4273
108.8	0.4287
108.9	0.4311
109	0.4316
109.1	0.433
109.2	0.4342
109.3	0.4337
109.4	0.4354
109.5	0.4366
109.6	0.4364
109.7	0.4378
109.8	0.4392
109.9	0.4389
110	0.4385
110.1	0.4401
110.2	0.4416
110.3	0.4409
110.4	0.4422
110.5	0.4441
110.6	0.444
110.7	0.4431
110.8	0.4429
110.9	0.443
111	0.4419
111.1	0.4403
111.2	0.4405
111.3	0.4416
111.4	0.4439
111.5	0.4443
111.6	0.4451
111.7	0.4463
111.8	0.447
111.9	0.4467
112	0.4478
112.1	0.4492
112.2	0.4476
112.3	0.4486
112.4	0.4502
112.5	0.4512
112.6	0.4502
112.7	0.4504
112.8	0.4513
112.9	0.4517
113	0.4555
113.1	0.4559
113.2	0.4569
113.3	0.4576
113.4	0.4593
113.5	0.461
113.6	0.4607
113.7	0.4627
113.8	0.4632
113.9	0.4644
114	0.4628
114.1	0.463
114.2	0.4637
114.3	0.463
114.4	0.465
114.5	0.464
114.6	0.4664
114.7	0.4645
114.8	0.4643
114.9	0.4644
115	0.4644
115.1	0.4648
115.2	0.4634
115.3	0.4643
115.4	0.464
115.5	0.4635
115.6	0.4631
115.7	0.4629
115.8	0.4621
115.9	0.4614
116	0.4636
116.1	0.4638
116.2	0.4635
116.3	0.463
116.4	0.4642
116.5	0.4637
116.6	0.4636
116.7	0.4655
116.8	0.4658
116.9	0.4655
117	0.4655
117.1	0.4664
117.2	0.467
117.3	0.4662
117.4	0.4665
117.5	0.4682
117.6	0.4693
117.7	0.4703
117.8	0.4703
117.9	0.4706
118	0.4714
118.1	0.4717
118.2	0.4717
118.3	0.4706
118.4	0.4704
118.5	0.4713
118.6	0.4721
118.7	0.4733
118.8	0.4705
118.9	0.4712
119	0.4712
119.1	0.4721
119.2	0.4747
119.3	0.4761
119.4	0.4761
119.5	0.4757
119.6	0.4779
119.7	0.479
119.8	0.4768
119.9	0.4792
120	0.478
120.1	0.4786
120.2	0.4799
120.3	0.4801
120.4	0.4809
120.5	0.4816
120.6	0.4815
120.7	0.482
120.8	0.4832
120.9	0.4818
121	0.4824
121.1	0.4809
121.2	0.4812
121.3	0.4822
121.4	0.4827
121.5	0.4841
121.6	0.4829
121.7	0.4815
121.8	0.4811
121.9	0.4811
122	0.4807
122.1	0.4803
122.2	0.4815
122.3	0.4792
122.4	0.4797
122.5	0.4795
122.6	0.4795
122.7	0.4801
122.8	0.4822
122.9	0.4821
123	0.4832
123.1	0.4834
123.2	0.4848
123.3	0.4854
123.4	0.4832
123.5	0.4836
123.6	0.4832
123.7	0.483
123.8	0.4851
123.9	0.4856
124	0.4852
124.1	0.4839
124.2	0.4829
124.3	0.4846
124.4	0.4867
124.5	0.4874
124.6	0.4879
124.7	0.4874
124.8	0.4877
124.9	0.4891
125	0.4885
125.1	0.4884
125.2	0.4896
125.3	0.4893
125.4	0.4884
125.5	0.4885
125.6	0.4885
125.7	0.4895
125.8	0.4896
125.9	0.4917
126	0.4934
126.1	0.4915
126.2	0.4912
126.3	0.4908
126.4	0.4915
126.5	0.4915
126.6	0.4913
126.7	0.4926
126.8	0.4926
126.9	0.4915
127	0.4915
127.1	0.4913
127.2	0.4918
127.3	0.4931
127.4	0.4954
127.5	0.4941
127.6	0.495
127.7	0.4943
127.8	0.4953
127.9	0.4955
128	0.494
128.1	0.495
128.2	0.4945
128.3	0.4954
128.4	0.4956
128.5	0.4952
128.6	0.4961
128.7	0.497
128.8	0.4963
128.9	0.4974
129	0.4985
129.1	0.4981
129.2	0.4981
129.3	0.4972
129.4	0.4977
129.5	0.4978
129.6	0.4973
129.7	0.4979
129.8	0.4988
129.9	0.4988
130	0.4986
130.1	0.4975
130.2	0.4963
130.3	0.4967
130.4	0.4978
130.5	0.4977
130.6	0.4987
130.7	0.4991
130.8	0.4984
130.9	0.4983
131	0.4976
131.1	0.4994
131.2	0.5016
131.3	0.5018
131.4	0.5022
131.5	0.5021
131.6	0.5029
131.7	0.5027
131.8	0.5024
131.9	0.5027
132	0.5043
132.1	0.5051
132.2	0.5041
132.3	0.5052
132.4	0.5044
132.5	0.5033
132.6	0.5038
132.7	0.5038
132.8	0.5044
132.9	0.5031
133	0.5036
133.1	0.5043
133.2	0.5045
133.3	0.5042
133.4	0.5041
133.5	0.5039
133.6	0.504
133.7	0.5025
133.8	0.5018
133.9	0.5025
134	0.5032
134.1	0.5033
134.2	0.5038
134.3	0.503
134.4	0.5029
134.5	0.505
134.6	0.5059
134.7	0.5055
134.8	0.5053
134.9	0.5052
135	0.5073
135.1	0.5081
135.2	0.5082
135.3	0.5089
135.4	0.5087
135.5	0.5069
135.6	0.5061
135.7	0.5059
135.8	0.5059
135.9	0.5062
136	0.505
136.1	0.5052
136.2	0.5058
136.3	0.5061
136.4	0.5044
136.5	0.5042
136.6	0.5034
136.7	0.5046
136.8	0.5046
136.9	0.5039
137	0.5036
137.1	0.5038
137.2	0.5033
137.3	0.5039
137.4	0.503
137.5	0.5035
137.6	0.5029
137.7	0.5033
137.8	0.5025
137.9	0.5033
138	0.5038
138.1	0.5036
138.2	0.504
138.3	0.5048
138.4	0.5045
138.5	0.5043
138.6	0.5048
138.7	0.5045
138.8	0.5043
138.9	0.5048
139	0.505
139.1	0.504
139.2	0.504
139.3	0.5031
139.4	0.5034
139.5	0.5044
139.6	0.5039
139.7	0.5048
139.8	0.5067
139.9	0.5066
140	0.5062
140.1	0.5089
140.2	0.5072
140.3	0.5087
140.4	0.5084
140.5	0.5091
140.6	0.5092
140.7	0.5099
140.8	0.5105
140.9	0.5101
141	0.5099
141.1	0.5102
141.2	0.5109
141.3	0.5105
141.4	0.5104
141.5	0.5096
141.6	0.5086
141.7	0.5095
141.8	0.5089
141.9	0.5098
142	0.5094
142.1	0.5089
142.2	0.5083
142.3	0.5089
142.4	0.5076
142.5	0.5077
142.6	0.5088
142.7	0.5098
142.8	0.5079
142.9	0.5085
143	0.509
143.1	0.5091
143.2	0.5103
143.3	0.5115
143.4	0.5119
143.5	0.5126
143.6	0.5131
143.7	0.5139
143.8	0.5144
143.9	0.5153
144	0.515
144.1	0.5184
144.2	0.5197
144.3	0.5211
144.4	0.5206
144.5	0.5199
144.6	0.52
144.7	0.5208
144.8	0.5206
144.9	0.5213
145	0.5211
145.1	0.5217
145.2	0.5214
145.3	0.521
145.4	0.5201
145.5	0.5215
145.6	0.5193
145.7	0.5179
145.8	0.5176
145.9	0.5175
146	0.5179
146.1	0.5199
146.2	0.518
146.3	0.5171
146.4	0.5165
146.5	0.5172
146.6	0.5168
146.7	0.5171
146.8	0.5163
146.9	0.5165
147	0.5171
147.1	0.517
147.2	0.5177
147.3	0.518
147.4	0.5177
147.5	0.5183
147.6	0.5181
147.7	0.5177
147.8	0.5178
147.9	0.5184
148	0.5198
148.1	0.5209
148.2	0.5217
148.3	0.5213
148.4	0.5204
148.5	0.5201
148.6	0.5215
148.7	0.521
148.8	0.5237
148.9	0.5232
149	0.5231
149.1	0.5217
149.2	0.5212
149.3	0.5209
149.4	0.5208
149.5	0.5219
149.6	0.5225
149.7	0.5227
149.8	0.5234
149.9	0.5248
150	0.5254
150.1	0.5257
150.2	0.5252
150.3	0.525
150.4	0.5258
150.5	0.5254
150.6	0.5246
150.7	0.5246
150.8	0.5254
150.9	0.5241
151	0.5246
151.1	0.5282
151.2	0.5283
151.3	0.529
151.4	0.5292
151.5	0.5288
151.6	0.5292
151.7	0.5282
151.8	0.5267
151.9	0.527
152	0.527
152.1	0.5272
152.2	0.5285
152.3	0.5284
152.4	0.5312
152.5	0.5319
152.6	0.531
152.7	0.5324
152.8	0.533
152.9	0.5329
153	0.5326
153.1	0.5325
153.2	0.5318
153.3	0.5318
153.4	0.532
153.5	0.5324
153.6	0.5322
153.7	0.5338
153.8	0.5338
153.9	0.533
154	0.5336
154.1	0.5339
154.2	0.5342
154.3	0.5327
154.4	0.5316
154.5	0.5311
154.6	0.5299
154.7	0.5275
154.8	0.528
154.9	0.5262
155	0.5251
155.1	0.5273
155.2	0.5276
155.3	0.5293
155.4	0.5297
155.5	0.5294
155.6	0.5302
155.7	0.5301
155.8	0.5314
155.9	0.5319
156	0.5318
156.1	0.5332
156.2	0.5319
156.3	0.5313
156.4	0.5318
156.5	0.5319
156.6	0.5304
156.7	0.5319
156.8	0.5331
156.9	0.5329
157	0.5355
157.1	0.5352
157.2	0.5364
157.3	0.5352
157.4	0.5363
157.5	0.5365
157.6	0.5351
157.7	0.5376
157.8	0.5375
157.9	0.5368
158	0.5355
158.1	0.5344
158.2	0.5337
158.3	0.5319
158.4	0.534
158.5	0.534
158.6	0.5325
158.7	0.5317
158.8	0.5315
158.9	0.53
159	0.5308
159.1	0.5305
159.2	0.5322
159.3	0.532
159.4	0.5309
159.5	0.5301
159.6	0.5312
159.7	0.5315
159.8	0.5314
159.9	0.5305
160	0.53
160.1	0.5302
160.2	0.5299
160.3	0.5309
160.4	0.5305
160.5	0.5312
160.6	0.5316
160.7	0.5314
160.8	0.5318
160.9	0.5325
161	0.5328
161.1	0.5322
161.2	0.5336
161.3	0.534
161.4	0.5333
161.5	0.5345
161.6	0.5341
161.7	0.5345
161.8	0.5355
161.9	0.535
162	0.5344
162.1	0.5345
162.2	0.536
162.3	0.5364
162.4	0.5369
162.5	0.5384
162.6	0.5384
162.7	0.5376
162.8	0.5372
162.9	0.5376
163	0.5385
163.1	0.54
163.2	0.5402
163.3	0.5411
163.4	0.5417
163.5	0.5422
163.6	0.5411
163.7	0.5399
163.8	0.5388
163.9	0.5397
164	0.5394
164.1	0.5401
164.2	0.5412
164.3	0.5427
164.4	0.5435
164.5	0.5427
164.6	0.5447
164.7	0.5456
164.8	0.5449
164.9	0.5463
165	0.547
165.1	0.547
165.2	0.5468
165.3	0.546
165.4	0.5455
165.5	0.5454
165.6	0.5451
165.7	0.5459
165.8	0.5445
165.9	0.5446
166	0.5441
166.1	0.5434
166.2	0.5438
166.3	0.5446
166.4	0.5439
166.5	0.5439
166.6	0.5457
166.7	0.546
166.8	0.5465
166.9	0.547
167	0.5475
167.1	0.5482
167.2	0.5477
167.3	0.5483
167.4	0.5472
167.5	0.5475
167.6	0.5459
167.7	0.5468
167.8	0.5455
167.9	0.5454
168	0.5441
168.1	0.5446
168.2	0.5447
168.3	0.544
168.4	0.5448
168.5	0.5435
168.6	0.5431
168.7	0.5448
168.8	0.5441
168.9	0.5449
169	0.5436
169.1	0.5442
169.2	0.5442
169.3	0.5432
169.4	0.5442
169.5	0.5448
169.6	0.5442
169.7	0.5434
169.8	0.5425
169.9	0.5421
170	0.5404
170.1	0.5421
170.2	0.5424
170.3	0.542
170.4	0.5412
170.5	0.5423
170.6	0.5422
170.7	0.5433
170.8	0.5437
170.9	0.5441
171	0.545
171.1	0.546
171.2	0.5463
171.3	0.5466
171.4	0.5482
171.5	0.5485
171.6	0.5476
171.7	0.5471
171.8	0.548
171.9	0.5495
172	0.5504
172.1	0.5495
172.2	0.5497
172.3	0.5499
172.4	0.5498
172.5	0.5492
172.6	0.5493
172.7	0.5499
172.8	0.5508
172.9	0.5511
173	0.5491
173.1	0.5509
173.2	0.5512
173.3	0.5501
173.4	0.5513
173.5	0.5526
173.6	0.5532
173.7	0.5535
173.8	0.5541
173.9	0.5541
174	0.5531
174.1	0.5496
174.2	0.55
174.3	0.5492
174.4	0.5509
174.5	0.5508
174.6	0.5508
174.7	0.5508
174.8	0.5516
174.9	0.5507
175	0.5485
175.1	0.5483
175.2	0.5491
175.3	0.5498
175.4	0.5488
175.5	0.5502
175.6	0.5506
175.7	0.5509
175.8	0.5519
175.9	0.5538
176	0.5533
176.1	0.5531
176.2	0.5522
176.3	0.5529
176.4	0.5532
176.5	0.5554
176.6	0.5545
176.7	0.5567
176.8	0.5579
176.9	0.5584
177	0.558
177.1	0.5579
177.2	0.5589
177.3	0.5585
177.4	0.559
177.5	0.5588
177.6	0.5581
177.7	0.5574
177.8	0.5562
177.9	0.5551
178	0.5556
178.1	0.5553
178.2	0.5567
178.3	0.5571
178.4	0.5562
178.5	0.5559
178.6	0.5555
178.7	0.5553
178.8	0.5561
178.9	0.556
179	0.5564
179.1	0.5576
179.2	0.5585
179.3	0.5596
179.4	0.5614
179.5	0.5625
179.6	0.5625
179.7	0.5618
179.8	0.5627
179.9	0.5635
180	0.5631
180.1	0.5637
180.2	0.5641
180.3	0.564
180.4	0.5645
180.5	0.5642
180.6	0.5637
180.7	0.5641
180.8	0.5639
180.9	0.5643
181	0.563
181.1	0.5618
181.2	0.5632
181.3	0.5632
181.4	0.5629
181.5	0.5625
181.6	0.5623
181.7	0.5622
181.8	0.5613
181.9	0.5613
182	0.5632
182.1	0.5637
182.2	0.5622
182.3	0.5625
182.4	0.5623
182.5	0.5616
182.6	0.561
182.7	0.5606
182.8	0.5613
182.9	0.5618
183	0.5621
183.1	0.5621
183.2	0.5616
183.3	0.5614
183.4	0.5615
183.5	0.5589
183.6	0.5577
183.7	0.5572
183.8	0.5577
183.9	0.5577
184	0.5593
184.1	0.5592
184.2	0.5604
184.3	0.5626
184.4	0.5641
184.5	0.5618
184.6	0.5608
184.7	0.5623
184.8	0.56
184.9	0.561
185	0.5605
185.1	0.5603
185.2	0.5588
185.3	0.5597
185.4	0.5597
185.5	0.5583
185.6	0.5591
185.7	0.5595
185.8	0.5592
185.9	0.5588
186	0.5597
186.1	0.5593
186.2	0.5596
186.3	0.5606
186.4	0.5601
186.5	0.5608
186.6	0.5612
186.7	0.5587
186.8	0.5582
186.9	0.5588
187	0.5614
187.1	0.5607
187.2	0.5607
187.3	0.5616
187.4	0.5625
187.5	0.5643
187.6	0.5635
187.7	0.5631
187.8	0.5632
187.9	0.5627
188	0.5613
188.1	0.561
188.2	0.5615
188.3	0.5627
188.4	0.5621
188.5	0.5639
188.6	0.5656
188.7	0.5674
188.8	0.5667
188.9	0.567
189	0.5657
189.1	0.5651
189.2	0.5654
189.3	0.5661
189.4	0.5656
189.5	0.5648
189.6	0.5648
189.7	0.5629
189.8	0.5645
189.9	0.5648
190	0.5653
190.1	0.5662
190.2	0.5654
190.3	0.5638
190.4	0.5639
190.5	0.5646
190.6	0.5659
190.7	0.5657
190.8	0.5673
190.9	0.5656
191	0.5659
191.1	0.5656
191.2	0.5653
191.3	0.5669
191.4	0.5667
191.5	0.5657
191.6	0.5668
191.7	0.5669
191.8	0.566
191.9	0.5652
192	0.5657
192.1	0.565
192.2	0.5651
192.3	0.5659
192.4	0.5659
192.5	0.567
192.6	0.5673
192.7	0.568
192.8	0.5678
192.9	0.5672
193	0.5675
193.1	0.5678
193.2	0.5693
193.3	0.5696
193.4	0.5692
193.5	0.5682
193.6	0.5685
193.7	0.5682
193.8	0.5693
193.9	0.5686
194	0.5688
194.1	0.5695
194.2	0.5705
194.3	0.5695
194.4	0.5707
194.5	0.5701
194.6	0.5703
194.7	0.571
194.8	0.5717
194.9	0.5727
195	0.5728
195.1	0.573
195.2	0.573
195.3	0.5716
195.4	0.5716
195.5	0.5714
195.6	0.5709
195.7	0.5694
195.8	0.568
195.9	0.5688
196	0.5691
196.1	0.5711
196.2	0.5707
196.3	0.5705
196.4	0.5697
196.5	0.5702
196.6	0.57
196.7	0.5707
196.8	0.5713
196.9	0.5721
197	0.5722
197.1	0.5742
197.2	0.5728
197.3	0.5738
197.4	0.5736
197.5	0.5736
197.6	0.5736
197.7	0.5733
197.8	0.5731
197.9	0.572
198	0.5728
198.1	0.5718
198.2	0.5713
198.3	0.5709
198.4	0.5707
198.5	0.5706
198.6	0.5686
198.7	0.5698
198.8	0.5707
198.9	0.5713
199	0.573
199.1	0.5725
199.2	0.5731
199.3	0.5734
199.4	0.5737
199.5	0.5732
199.6	0.574
199.7	0.5739
199.8	0.5733
199.9	0.5733
200	0.5717
[truncated: 14,000 more rows]
