# Supplementary material for: Bayesian inference of kinetic schemes for ion channels by Kalman filtering
Source: eLife journal article supplement (doi:10.7554/elife.62714), 2022-05-04
Supplement: fig4-data8 [file 1_Sim_N_5000_Strom_MW.xlsx]

## Sheet: Tabelle1
0.1	0
0.2	0
0.3	0
0.4	0
0.5	0
0.6	0
0.7	0
0.8	0
0.9	0
1	0
1.1	0
1.2	0
1.3	0
1.4	0
1.5	0
1.6	0
1.7	0
1.8	0
1.9	0
2	0
2.1	0
2.2	0
2.3	0
2.4	0
2.5	0
2.6	0
2.7	0
2.8	0
2.9	0
3	0
3.1	0
3.2	0
3.3	0
3.4	0
3.5	0
3.6	0
3.7	0
3.8	0
3.9	0
4	0
4.1	0
4.2	0
4.3	0
4.4	0
4.5	0
4.6	0
4.7	0
4.8	0
4.9	0
5	0
5.1	0
5.2	0
5.3	0
5.4	0
5.5	0
5.6	0
5.7	0
5.8	0
5.9	0
6	0
6.1	0
6.2	0
6.3	0
6.4	0
6.5	0
6.6	0
6.7	0
6.8	0
6.9	0
7	0
7.1	0
7.2	0
7.3	0
7.4	0
7.5	0
7.6	0
7.7	0
7.8	0
7.9	0
8	0
8.1	0
8.2	0
8.3	0
8.4	0
8.5	0
8.6	0
8.7	0
8.8	0
8.9	0
9	0
9.1	0
9.2	0
9.3	0
9.4	0
9.5	0
9.6	0
9.7	0
9.8	0
9.9	0
10	0
10.1	0
10.2	0
10.3	0
10.4	0
10.5	0
10.6	0
10.7	0
10.8	0
10.9	0
11	0
11.1	0
11.2	0
11.3	0
11.4	0
11.5	0
11.6	0
11.7	0
11.8	0
11.9	0
12	0
12.1	0
12.2	0
12.3	0
12.4	0
12.5	0
12.6	0
12.7	0
12.8	0
12.9	0
13	0
13.1	0
13.2	0
13.3	0
13.4	0
13.5	0
13.6	0
13.7	0
13.8	0
13.9	0
14	0
14.1	0
14.2	0
14.3	0
14.4	0
14.5	0
14.6	0
14.7	0
14.8	0
14.9	0
15	0
15.1	0
15.2	0
15.3	0
15.4	0
15.5	0
15.6	0
15.7	0
15.8	0
15.9	0
16	0
16.1	0
16.2	0
16.3	0
16.4	0
16.5	0
16.6	0
16.7	0
16.8	0
16.9	0
17	0
17.1	0
17.2	0
17.3	0
17.4	0
17.5	0
17.6	0
17.7	0
17.8	0
17.9	0
18	0
18.1	0
18.2	0
18.3	0
18.4	0
18.5	0
18.6	0
18.7	0
18.8	0
18.9	0
19	0
19.1	0
19.2	0
19.3	0
19.4	0
19.5	0
19.6	0
19.7	0
19.8	0
19.9	0
20	0
20.1	0
20.2	0
20.3	0
20.4	0
20.5	0
20.6	0
20.7	0
20.8	0
20.9	0
21	0
21.1	0
21.2	0
21.3	0
21.4	0
21.5	0
21.6	0
21.7	0
21.8	0
21.9	0
22	0
22.1	0
22.2	0
22.3	0
22.4	0
22.5	0
22.6	0
22.7	0
22.8	0
22.9	0
23	0
23.1	0
23.2	0
23.3	0
23.4	0
23.5	0
23.6	0
23.7	0
23.8	0
23.9	0
24	0
24.1	0
24.2	0
24.3	0
24.4	0
24.5	0
24.6	0
24.7	0
24.8	0
24.9	0
25	0
25.1	0
25.2	0
25.3	0
25.4	0
25.5	0
25.6	0
25.7	0
25.8	0
25.9	0
26	0
26.1	0
26.2	0
26.3	0
26.4	0
26.5	0
26.6	0
26.7	0
26.8	0
26.9	0
27	0
27.1	0
27.2	0
27.3	0
27.4	0
27.5	0
27.6	0
27.7	0
27.8	0
27.9	0
28	0
28.1	0
28.2	0
28.3	0
28.4	0
28.5	0
28.6	0
28.7	0
28.8	0
28.9	0
29	0
29.1	0
29.2	0
29.3	0
29.4	0
29.5	0
29.6	0
29.7	0
29.8	0
29.9	0
30	0
30.1	0
30.2	0
30.3	0
30.4	0
30.5	0
30.6	0
30.7	0
30.8	0
30.9	0
31	0
31.1	0
31.2	0
31.3	0
31.4	0
31.5	0
31.6	0
31.7	0
31.8	0
31.9	0
32	0
32.1	0
32.2	0
32.3	0
32.4	0
32.5	0
32.6	0
32.7	0
32.8	0
32.9	0
33	0
33.1	0
33.2	0
33.3	0
33.4	0
33.5	0
33.6	0
33.7	0
33.8	0
33.9	0
34	0
34.1	0
34.2	0
34.3	0
34.4	0
34.5	0
34.6	0
34.7	0
34.8	0
34.9	0
35	0
35.1	0
35.2	0
35.3	0
35.4	0
35.5	0
35.6	0
35.7	0
35.8	0
35.9	0
36	0
36.1	0
36.2	0
36.3	0
36.4	0
36.5	0
36.6	0
36.7	0
36.8	0
36.9	0
37	0
37.1	0
37.2	0
37.3	0
37.4	0
37.5	0
37.6	0
37.7	0
37.8	0
37.9	0
38	0
38.1	0
38.2	0
38.3	0
38.4	0
38.5	0
38.6	0
38.7	0
38.8	0
38.9	0
39	0
39.1	0
39.2	0
39.3	0
39.4	0
39.5	0
39.6	0
39.7	0
39.8	0
39.9	0
40	0
40.1	0
40.2	0
40.3	0
40.4	0
40.5	0
40.6	0
40.7	0
40.8	0
40.9	0
41	0
41.1	0
41.2	0
41.3	0
41.4	0
41.5	0
41.6	0
41.7	0
41.8	0
41.9	0
42	0
42.1	0
42.2	0
42.3	0
42.4	0
42.5	0
42.6	0
42.7	0
42.8	0
42.9	0
43	0
43.1	0
43.2	0
43.3	0
43.4	0
43.5	0
43.6	0
43.7	0
43.8	0
43.9	0
44	0
44.1	0
44.2	0
44.3	0
44.4	0
44.5	0
44.6	0
44.7	0
44.8	0
44.9	0
45	0
45.1	0
45.2	0
45.3	0
45.4	0
45.5	0
45.6	0
45.7	0
45.8	0
45.9	0
46	0
46.1	0
46.2	0
46.3	0
46.4	0
46.5	0
46.6	0
46.7	0
46.8	0
46.9	0
47	0
47.1	0
47.2	0
47.3	0
47.4	0
47.5	0
47.6	0
47.7	0
47.8	0
47.9	0
48	0
48.1	0
48.2	0
48.3	0
48.4	0
48.5	0
48.6	0
48.7	0
48.8	0
48.9	0
49	0
49.1	0
49.2	0
49.3	0
49.4	0
49.5	0
49.6	0
49.7	0
49.8	0
49.9	0
50	0
50.1	0
50.2	0
50.3	0
50.4	0
50.5	0
50.6	0
50.7	0
50.8	0
50.9	0
51	0
51.1	0
51.2	0
51.3	0
51.4	0
51.5	0
51.6	0
51.7	0
51.8	0
51.9	0
52	0
52.1	0
52.2	0
52.3	0
52.4	0
52.5	0
52.6	0
52.7	0
52.8	0
52.9	0
53	0
53.1	0
53.2	0
53.3	0
53.4	0
53.5	0
53.6	0
53.7	0
53.8	0
53.9	0
54	0
54.1	0
54.2	0
54.3	0
54.4	0
54.5	0
54.6	0
54.7	0
54.8	0
54.9	0
55	0
55.1	0
55.2	0
55.3	0
55.4	0
55.5	0
55.6	0
55.7	0
55.8	0
55.9	0
56	0
56.1	0
56.2	0
56.3	0
56.4	0
56.5	0
56.6	0
56.7	0
56.8	0
56.9	0
57	0
57.1	0
57.2	0
57.3	0
57.4	0
57.5	0
57.6	0
57.7	0
57.8	0
57.9	0
58	0
58.1	0
58.2	0
58.3	0
58.4	0
58.5	0
58.6	0
58.7	0
58.8	0
58.9	0
59	0
59.1	0
59.2	0
59.3	0
59.4	0
59.5	0
59.6	0
59.7	0
59.8	0
59.9	0
60	0
60.1	0
60.2	0
60.3	0
60.4	0
60.5	0
60.6	0
60.7	0
60.8	0
60.9	0
61	0
61.1	0
61.2	0
61.3	0
61.4	0
61.5	0
61.6	0
61.7	0
61.8	0
61.9	0
62	0
62.1	0
62.2	0
62.3	0
62.4	0
62.5	0
62.6	0
62.7	0
62.8	0
62.9	0
63	0
63.1	0
63.2	0
63.3	0
63.4	0
63.5	0
63.6	0
63.7	0
63.8	0
63.9	0
64	0
64.1	0
64.2	0
64.3	0
64.4	0
64.5	0
64.6	0
64.7	0
64.8	0
64.9	0
65	0
65.1	0
65.2	0
65.3	0
65.4	0
65.5	0
65.6	0
65.7	0
65.8	0
65.9	0
66	0
66.1	0
66.2	0
66.3	0
66.4	0
66.5	0
66.6	0
66.7	0
66.8	0
66.9	0
67	0
67.1	0
67.2	0
67.3	0
67.4	0
67.5	0
67.6	0
67.7	0
67.8	0
67.9	0
68	0
68.1	0
68.2	0
68.3	0
68.4	0
68.5	0
68.6	0
68.7	0
68.8	0
68.9	0
69	0
69.1	0
69.2	0
69.3	0
69.4	0
69.5	0
69.6	0
69.7	0
69.8	0
69.9	0
70	0
70.1	0
70.2	0
70.3	0
70.4	0
70.5	0
70.6	0
70.7	0
70.8	0
70.9	0
71	0
71.1	0
71.2	0
71.3	0
71.4	0
71.5	0
71.6	0
71.7	0
71.8	0
71.9	0
72	0
72.1	0
72.2	0
72.3	0
72.4	0
72.5	0
72.6	0
72.7	0
72.8	0
72.9	0
73	0
73.1	0
73.2	0
73.3	0
73.4	0
73.5	0
73.6	0
73.7	0
73.8	0
73.9	0
74	0
74.1	0
74.2	0
74.3	0
74.4	0
74.5	0
74.6	0
74.7	0
74.8	0
74.9	0
75	0
75.1	0
75.2	0
75.3	0
75.4	0
75.5	0
75.6	0
75.7	0
75.8	0
75.9	0
76	0
76.1	0
76.2	0
76.3	0
76.4	0
76.5	0
76.6	0
76.7	0
76.8	0
76.9	0
77	0
77.1	0
77.2	0
77.3	0
77.4	0
77.5	0
77.6	0
77.7	0
77.8	0
77.9	0
78	0
78.1	0
78.2	0
78.3	0
78.4	0
78.5	0
78.6	0
78.7	0
78.8	0
78.9	0
79	0
79.1	0
79.2	0
79.3	0
79.4	0
79.5	0
79.6	0
79.7	0
79.8	0
79.9	0
80	0
80.1	0
80.2	0
80.3	0
80.4	0
80.5	0
80.6	0
80.7	0
80.8	0
80.9	0
81	0
81.1	0
81.2	0
81.3	0
81.4	0
81.5	0
81.6	0
81.7	0
81.8	0
81.9	0
82	0
82.1	0
82.2	0
82.3	0
82.4	0
82.5	0
82.6	0
82.7	0
82.8	0
82.9	0
83	0
83.1	0
83.2	0
83.3	0
83.4	0
83.5	0
83.6	0
83.7	0
83.8	0
83.9	0
84	0
84.1	0
84.2	0
84.3	0
84.4	0
84.5	0
84.6	0
84.7	0
84.8	0
84.9	0
85	0
85.1	0
85.2	0
85.3	0
85.4	0
85.5	0
85.6	0
85.7	0
85.8	0
85.9	0
86	0
86.1	0
86.2	0
86.3	0
86.4	0
86.5	0
86.6	0
86.7	0
86.8	0
86.9	0
87	0
87.1	0
87.2	0
87.3	0
87.4	0
87.5	0
87.6	0
87.7	0
87.8	0
87.9	0
88	0
88.1	0
88.2	0
88.3	0
88.4	0
88.5	0
88.6	0
88.7	0
88.8	0
88.9	0
89	0
89.1	0
89.2	0
89.3	0
89.4	0
89.5	0
89.6	0
89.7	0
89.8	0
89.9	0
90	0
90.1	0
90.2	0
90.3	0
90.4	0
90.5	0
90.6	0
90.7	0
90.8	0
90.9	0
91	0
91.1	0
91.2	0
91.3	0
91.4	0
91.5	0
91.6	0
91.7	0
91.8	0
91.9	0
92	0
92.1	0
92.2	0
92.3	0
92.4	0
92.5	0
92.6	0
92.7	0
92.8	0
92.9	0
93	0
93.1	0
93.2	0
93.3	0
93.4	0
93.5	0
93.6	0
93.7	0
93.8	0
93.9	0
94	0
94.1	0
94.2	0
94.3	0
94.4	0
94.5	0
94.6	0
94.7	0
94.8	0
94.9	0
95	0
95.1	0
95.2	0
95.3	0
95.4	0
95.5	0
95.6	0
95.7	0
95.8	0
95.9	0
96	0
96.1	0
96.2	0
96.3	0
96.4	0
96.5	0
96.6	0
96.7	0
96.8	0
96.9	0
97	0
97.1	0
97.2	0
97.3	0
97.4	0
97.5	0
97.6	0
97.7	0
97.8	0
97.9	0
98	0
98.1	0
98.2	0
98.3	0
98.4	0
98.5	0
98.6	0
98.7	0
98.8	0
98.9	0
99	0
99.1	0
99.2	0
99.3	0
99.4	0
99.5	0
99.6	0
99.7	0
99.8	0
99.9	0
100	0
100.1	0
100.2	0
100.3	0
100.4	0
100.5	0
100.6	0.0002
100.7	0.0002
100.8	0.0002
100.9	0.0002
101	0.0002
101.1	0.0002
101.2	0.0002
101.3	0.0002
101.4	0.0004
101.5	0.0004
101.6	0.0004
101.7	0.001
101.8	0.001
101.9	0.001
102	0.001
102.1	0.0012
102.2	0.0012
102.3	0.0014
102.4	0.0016
102.5	0.002
102.6	0.002
102.7	0.002
102.8	0.0022
102.9	0.0022
103	0.0022
103.1	0.0022
103.2	0.0026
103.3	0.0026
103.4	0.0026
103.5	0.003
103.6	0.0032
103.7	0.0034
103.8	0.0034
103.9	0.0036
104	0.0038
104.1	0.0044
104.2	0.0044
104.3	0.0046
104.4	0.0048
104.5	0.0052
104.6	0.0054
104.7	0.0054
104.8	0.0056
104.9	0.0062
105	0.007
105.1	0.0074
105.2	0.0084
105.3	0.0086
105.4	0.0092
105.5	0.0098
105.6	0.0098
105.7	0.0102
105.8	0.0106
105.9	0.0106
106	0.011
106.1	0.011
106.2	0.0116
106.3	0.0116
106.4	0.0122
106.5	0.013
106.6	0.0132
106.7	0.0136
106.8	0.0136
106.9	0.0138
107	0.014
107.1	0.0146
107.2	0.0154
107.3	0.0162
107.4	0.0164
107.5	0.017
107.6	0.0172
107.7	0.0176
107.8	0.0178
107.9	0.018
108	0.0186
108.1	0.0188
108.2	0.0192
108.3	0.0194
108.4	0.0196
108.5	0.0204
108.6	0.0212
108.7	0.0214
108.8	0.0216
108.9	0.0218
109	0.0222
109.1	0.0224
109.2	0.0226
109.3	0.0236
109.4	0.0236
109.5	0.0242
109.6	0.025
109.7	0.0256
109.8	0.0262
109.9	0.0262
110	0.0268
110.1	0.0272
110.2	0.0274
110.3	0.0284
110.4	0.029
110.5	0.0292
110.6	0.0298
110.7	0.0302
110.8	0.0302
110.9	0.0304
111	0.0308
111.1	0.031
111.2	0.0314
111.3	0.0318
111.4	0.0324
111.5	0.0332
111.6	0.0338
111.7	0.0338
111.8	0.0338
111.9	0.0346
112	0.0352
112.1	0.0364
112.2	0.0366
112.3	0.0368
112.4	0.0372
112.5	0.0372
112.6	0.0374
112.7	0.038
112.8	0.0382
112.9	0.0386
113	0.039
113.1	0.0392
113.2	0.0396
113.3	0.04
113.4	0.04
113.5	0.0406
113.6	0.0412
113.7	0.0414
113.8	0.0416
113.9	0.0424
114	0.043
114.1	0.0436
114.2	0.0442
114.3	0.0446
114.4	0.045
114.5	0.0456
114.6	0.0458
114.7	0.0458
114.8	0.0462
114.9	0.0466
115	0.0472
115.1	0.0478
115.2	0.0482
115.3	0.049
115.4	0.0494
115.5	0.0498
115.6	0.05
115.7	0.0504
115.8	0.0506
115.9	0.0506
116	0.0504
116.1	0.0508
116.2	0.0508
116.3	0.0512
116.4	0.0518
116.5	0.0522
116.6	0.0528
116.7	0.0526
116.8	0.053
116.9	0.054
117	0.0552
117.1	0.0556
117.2	0.0554
117.3	0.0558
117.4	0.0568
117.5	0.0572
117.6	0.057
117.7	0.0572
117.8	0.0572
117.9	0.0572
118	0.0578
118.1	0.0584
118.2	0.0592
118.3	0.0596
118.4	0.06
118.5	0.0604
118.6	0.0608
118.7	0.0612
118.8	0.0622
118.9	0.063
119	0.0634
119.1	0.0642
119.2	0.0646
119.3	0.065
119.4	0.0652
119.5	0.0658
119.6	0.0662
119.7	0.0662
119.8	0.067
119.9	0.068
120	0.0684
120.1	0.0686
120.2	0.069
120.3	0.0692
120.4	0.07
120.5	0.0704
120.6	0.0712
120.7	0.0716
120.8	0.0718
120.9	0.072
121	0.0726
121.1	0.073
121.2	0.0734
121.3	0.0752
121.4	0.0758
121.5	0.0766
121.6	0.0768
121.7	0.0776
121.8	0.0778
121.9	0.0786
122	0.0792
122.1	0.08
122.2	0.0806
122.3	0.0812
122.4	0.0814
122.5	0.0818
122.6	0.082
122.7	0.082
122.8	0.0828
122.9	0.0826
123	0.0828
123.1	0.0832
123.2	0.0834
123.3	0.0836
123.4	0.0836
123.5	0.084
123.6	0.0844
123.7	0.085
123.8	0.0856
123.9	0.0852
124	0.0856
124.1	0.0856
124.2	0.086
124.3	0.0864
124.4	0.0868
124.5	0.087
124.6	0.0876
124.7	0.0884
124.8	0.0888
124.9	0.0898
125	0.091
125.1	0.0918
125.2	0.092
125.3	0.0924
125.4	0.0928
125.5	0.093
125.6	0.093
125.7	0.0934
125.8	0.0936
125.9	0.094
126	0.095
126.1	0.0956
126.2	0.0958
126.3	0.0966
126.4	0.097
126.5	0.0974
126.6	0.098
126.7	0.0984
126.8	0.099
126.9	0.0992
127	0.0996
127.1	0.1
127.2	0.0998
127.3	0.0998
127.4	0.1
127.5	0.1002
127.6	0.101
127.7	0.101
127.8	0.1014
127.9	0.102
128	0.1028
128.1	0.1028
128.2	0.103
128.3	0.1032
128.4	0.1036
128.5	0.1036
128.6	0.1048
128.7	0.1048
128.8	0.1054
128.9	0.1054
129	0.1056
129.1	0.106
129.2	0.1068
129.3	0.1078
129.4	0.1086
129.5	0.1088
129.6	0.1092
129.7	0.1092
129.8	0.1092
129.9	0.1096
130	0.1098
130.1	0.111
130.2	0.1112
130.3	0.1118
130.4	0.1122
130.5	0.1122
130.6	0.1122
130.7	0.1124
130.8	0.1126
130.9	0.1132
131	0.113
131.1	0.1132
131.2	0.1138
131.3	0.1148
131.4	0.1148
131.5	0.1152
131.6	0.1158
131.7	0.1158
131.8	0.116
131.9	0.1164
132	0.1172
132.1	0.117
132.2	0.1172
132.3	0.1174
132.4	0.1176
132.5	0.1182
132.6	0.1192
132.7	0.1194
132.8	0.1196
132.9	0.12
133	0.1204
133.1	0.1206
133.2	0.121
133.3	0.121
133.4	0.1216
133.5	0.1222
133.6	0.1218
133.7	0.1224
133.8	0.123
133.9	0.1228
134	0.123
134.1	0.1234
134.2	0.1234
134.3	0.1238
134.4	0.124
134.5	0.124
134.6	0.1246
134.7	0.1248
134.8	0.125
134.9	0.125
135	0.125
135.1	0.1248
135.2	0.1248
135.3	0.125
135.4	0.1248
135.5	0.125
135.6	0.1252
135.7	0.126
135.8	0.1258
135.9	0.126
136	0.1262
136.1	0.1264
136.2	0.1268
136.3	0.127
136.4	0.127
136.5	0.1276
136.6	0.1278
136.7	0.1284
136.8	0.129
136.9	0.129
137	0.1292
137.1	0.129
137.2	0.1298
137.3	0.1302
137.4	0.1308
137.5	0.1304
137.6	0.1308
137.7	0.1308
137.8	0.1308
137.9	0.1312
138	0.1318
138.1	0.132
138.2	0.132
138.3	0.132
138.4	0.1322
138.5	0.1322
138.6	0.1326
138.7	0.1326
138.8	0.1328
138.9	0.1336
139	0.1338
139.1	0.1342
139.2	0.1342
139.3	0.1346
139.4	0.1344
139.5	0.1344
139.6	0.1344
139.7	0.135
139.8	0.1354
139.9	0.1354
140	0.135
140.1	0.1348
140.2	0.1352
140.3	0.1354
140.4	0.1358
140.5	0.136
140.6	0.1366
140.7	0.1374
140.8	0.1376
140.9	0.1384
141	0.1382
141.1	0.1384
141.2	0.1388
141.3	0.139
141.4	0.139
141.5	0.139
141.6	0.1396
141.7	0.1408
141.8	0.1408
141.9	0.1408
142	0.1408
142.1	0.1406
142.2	0.141
142.3	0.1408
142.4	0.1408
142.5	0.141
142.6	0.1408
142.7	0.1414
142.8	0.1416
142.9	0.1418
143	0.142
143.1	0.1426
143.2	0.1428
143.3	0.143
143.4	0.1434
143.5	0.1432
143.6	0.1438
143.7	0.144
143.8	0.1442
143.9	0.145
144	0.1454
144.1	0.146
144.2	0.1466
144.3	0.147
144.4	0.147
144.5	0.1474
144.6	0.1472
144.7	0.1474
144.8	0.1474
144.9	0.1482
145	0.1482
145.1	0.1486
145.2	0.1492
145.3	0.1496
145.4	0.1496
145.5	0.1498
145.6	0.15
145.7	0.1502
145.8	0.1504
145.9	0.1506
146	0.151
146.1	0.1512
146.2	0.1514
146.3	0.1516
146.4	0.1524
146.5	0.153
146.6	0.1532
146.7	0.1534
146.8	0.1538
146.9	0.1544
147	0.1544
147.1	0.1546
147.2	0.1544
147.3	0.1534
147.4	0.1538
147.5	0.1538
147.6	0.1546
147.7	0.154
147.8	0.1542
147.9	0.1548
148	0.1552
148.1	0.155
148.2	0.1554
148.3	0.1566
148.4	0.1566
148.5	0.1566
148.6	0.1574
148.7	0.1578
148.8	0.1576
148.9	0.158
149	0.1582
149.1	0.1584
149.2	0.1586
149.3	0.159
149.4	0.159
149.5	0.1586
149.6	0.1588
149.7	0.159
149.8	0.1592
149.9	0.1594
150	0.1594
150.1	0.1596
150.2	0.1598
150.3	0.1602
150.4	0.1602
150.5	0.1608
150.6	0.161
150.7	0.161
150.8	0.1618
150.9	0.162
151	0.1622
151.1	0.1632
151.2	0.1638
151.3	0.1642
151.4	0.1642
151.5	0.1646
151.6	0.165
151.7	0.1654
151.8	0.1656
151.9	0.1662
152	0.166
152.1	0.1664
152.2	0.1666
152.3	0.1668
152.4	0.1666
152.5	0.1662
152.6	0.1668
152.7	0.1672
152.8	0.168
152.9	0.1682
153	0.1682
153.1	0.168
153.2	0.1686
153.3	0.1688
153.4	0.1686
153.5	0.1682
153.6	0.1682
153.7	0.1686
153.8	0.1684
153.9	0.1686
154	0.169
154.1	0.169
154.2	0.1692
154.3	0.1696
154.4	0.1698
154.5	0.1698
154.6	0.1698
154.7	0.1702
154.8	0.1706
154.9	0.1708
155	0.171
155.1	0.171
155.2	0.1716
155.3	0.1716
155.4	0.1722
155.5	0.173
155.6	0.1734
155.7	0.1736
155.8	0.1738
155.9	0.174
156	0.174
156.1	0.1738
156.2	0.1738
156.3	0.1738
156.4	0.174
156.5	0.1744
156.6	0.1744
156.7	0.174
156.8	0.1746
156.9	0.1742
157	0.1746
157.1	0.1746
157.2	0.1748
157.3	0.1748
157.4	0.1752
157.5	0.1752
157.6	0.1752
157.7	0.175
157.8	0.1756
157.9	0.1758
158	0.1762
158.1	0.1766
158.2	0.1772
158.3	0.178
158.4	0.1786
158.5	0.1786
158.6	0.179
158.7	0.179
158.8	0.1792
158.9	0.1794
159	0.1792
159.1	0.1794
159.2	0.179
159.3	0.1792
159.4	0.1788
159.5	0.1788
159.6	0.179
159.7	0.179
159.8	0.179
159.9	0.1792
160	0.1792
160.1	0.1796
160.2	0.1796
160.3	0.18
160.4	0.1802
160.5	0.1804
160.6	0.181
160.7	0.181
160.8	0.181
160.9	0.1816
161	0.1818
161.1	0.1816
161.2	0.1816
161.3	0.182
161.4	0.1822
161.5	0.1826
161.6	0.1826
161.7	0.1834
161.8	0.183
161.9	0.1834
162	0.1834
162.1	0.1838
162.2	0.184
162.3	0.1846
162.4	0.185
162.5	0.1854
162.6	0.1856
162.7	0.186
162.8	0.1864
162.9	0.1862
163	0.186
163.1	0.186
163.2	0.1862
163.3	0.1858
163.4	0.1864
163.5	0.187
163.6	0.1872
163.7	0.1876
163.8	0.1878
163.9	0.188
164	0.1886
164.1	0.1888
164.2	0.1892
164.3	0.1886
164.4	0.1888
164.5	0.1892
164.6	0.19
164.7	0.19
164.8	0.1896
164.9	0.1902
165	0.1904
165.1	0.1906
165.2	0.1912
165.3	0.191
165.4	0.1914
165.5	0.192
165.6	0.1918
165.7	0.192
165.8	0.1922
165.9	0.1926
166	0.1932
166.1	0.1934
166.2	0.194
166.3	0.1938
166.4	0.1938
166.5	0.1938
166.6	0.1942
166.7	0.1942
166.8	0.1946
166.9	0.1946
167	0.1944
167.1	0.1942
167.2	0.1942
167.3	0.195
167.4	0.195
167.5	0.1946
167.6	0.1948
167.7	0.1948
167.8	0.1954
167.9	0.196
168	0.1964
168.1	0.1964
168.2	0.1964
168.3	0.1964
168.4	0.1964
168.5	0.1964
168.6	0.1964
168.7	0.1964
168.8	0.196
168.9	0.1964
169	0.1966
169.1	0.1964
169.2	0.1964
169.3	0.198
169.4	0.1976
169.5	0.1976
169.6	0.1974
169.7	0.1978
169.8	0.1982
169.9	0.1986
170	0.199
170.1	0.1998
170.2	0.2
170.3	0.1994
170.4	0.2002
170.5	0.2002
170.6	0.2
170.7	0.2002
170.8	0.2002
170.9	0.1998
171	0.1994
171.1	0.1998
171.2	0.1998
171.3	0.1998
171.4	0.1994
171.5	0.1996
171.6	0.2
171.7	0.2006
171.8	0.2006
171.9	0.2006
172	0.2004
172.1	0.201
172.2	0.2006
172.3	0.2008
172.4	0.2008
172.5	0.2018
172.6	0.202
172.7	0.2024
172.8	0.2024
172.9	0.2024
173	0.2028
173.1	0.2028
173.2	0.2034
173.3	0.2032
173.4	0.2034
173.5	0.2034
173.6	0.2034
173.7	0.204
173.8	0.2046
173.9	0.2048
174	0.2052
174.1	0.2054
174.2	0.2052
174.3	0.2056
174.4	0.2062
174.5	0.2064
174.6	0.206
174.7	0.206
174.8	0.2064
174.9	0.2064
175	0.2068
175.1	0.2074
175.2	0.2074
175.3	0.2078
175.4	0.2084
175.5	0.2088
175.6	0.2086
175.7	0.209
175.8	0.209
175.9	0.2088
176	0.2088
176.1	0.2082
176.2	0.209
176.3	0.2092
176.4	0.2088
176.5	0.2086
176.6	0.2086
176.7	0.2084
176.8	0.2088
176.9	0.209
177	0.2092
177.1	0.2096
177.2	0.21
177.3	0.2104
177.4	0.211
177.5	0.2104
177.6	0.2108
177.7	0.2116
177.8	0.2122
177.9	0.2128
178	0.2128
178.1	0.2126
178.2	0.2124
178.3	0.2124
178.4	0.2128
178.5	0.2128
178.6	0.2132
178.7	0.2134
178.8	0.2138
178.9	0.2142
179	0.2148
179.1	0.2148
179.2	0.2154
179.3	0.2158
179.4	0.216
179.5	0.2156
179.6	0.216
179.7	0.2164
179.8	0.2156
179.9	0.216
180	0.2164
180.1	0.2168
180.2	0.217
180.3	0.2172
180.4	0.2172
180.5	0.2172
180.6	0.217
180.7	0.2172
180.8	0.2168
180.9	0.2172
181	0.2174
181.1	0.218
181.2	0.2192
181.3	0.219
181.4	0.2194
181.5	0.2202
181.6	0.2204
181.7	0.2204
181.8	0.2206
181.9	0.2218
182	0.2218
182.1	0.2218
182.2	0.2218
182.3	0.222
182.4	0.2216
182.5	0.222
182.6	0.2222
182.7	0.2218
182.8	0.2218
182.9	0.222
183	0.2218
183.1	0.2224
183.2	0.2222
183.3	0.222
183.4	0.222
183.5	0.2222
183.6	0.2228
183.7	0.2226
183.8	0.2228
183.9	0.2232
184	0.2232
184.1	0.2226
184.2	0.2226
184.3	0.2226
184.4	0.2226
184.5	0.2222
184.6	0.2224
184.7	0.222
184.8	0.2224
184.9	0.2226
185	0.2224
185.1	0.223
185.2	0.2228
185.3	0.2228
185.4	0.223
185.5	0.223
185.6	0.2238
185.7	0.2236
185.8	0.2234
185.9	0.2234
186	0.2228
186.1	0.2226
186.2	0.223
186.3	0.2232
186.4	0.223
186.5	0.2234
186.6	0.2236
186.7	0.2236
186.8	0.2236
186.9	0.2238
187	0.2236
187.1	0.2238
187.2	0.224
187.3	0.2248
187.4	0.225
187.5	0.2248
187.6	0.225
187.7	0.2246
187.8	0.2242
187.9	0.224
188	0.2242
188.1	0.2244
188.2	0.224
188.3	0.2242
188.4	0.2252
188.5	0.226
188.6	0.2266
188.7	0.227
188.8	0.2274
188.9	0.2278
189	0.228
189.1	0.2284
189.2	0.2282
189.3	0.2282
189.4	0.2286
189.5	0.2284
189.6	0.2282
189.7	0.229
189.8	0.2294
189.9	0.23
190	0.2304
190.1	0.231
190.2	0.2314
190.3	0.2316
190.4	0.2316
190.5	0.2318
190.6	0.2324
190.7	0.2326
190.8	0.2326
190.9	0.2328
191	0.2326
191.1	0.233
191.2	0.2328
191.3	0.2328
191.4	0.2326
191.5	0.2326
191.6	0.2332
191.7	0.2334
191.8	0.2336
191.9	0.2334
192	0.233
192.1	0.2328
192.2	0.2326
192.3	0.2326
192.4	0.2332
192.5	0.2336
192.6	0.2344
192.7	0.2344
192.8	0.2352
192.9	0.2352
193	0.2346
193.1	0.2344
193.2	0.2346
193.3	0.235
193.4	0.235
193.5	0.2352
193.6	0.2356
193.7	0.2362
193.8	0.2362
193.9	0.2358
194	0.2362
194.1	0.2368
194.2	0.237
194.3	0.2374
194.4	0.2374
194.5	0.2382
194.6	0.238
194.7	0.238
194.8	0.238
194.9	0.2374
195	0.2376
195.1	0.2376
195.2	0.2386
195.3	0.2384
195.4	0.2378
195.5	0.2384
195.6	0.239
195.7	0.2392
195.8	0.2394
195.9	0.2394
196	0.2396
196.1	0.24
196.2	0.24
196.3	0.24
196.4	0.2398
196.5	0.2404
196.6	0.2406
196.7	0.2406
196.8	0.2408
196.9	0.241
197	0.2412
197.1	0.2414
197.2	0.2422
197.3	0.2422
197.4	0.2422
197.5	0.2428
197.6	0.243
197.7	0.2428
197.8	0.2424
197.9	0.2426
198	0.243
198.1	0.2436
198.2	0.2432
198.3	0.2428
198.4	0.243
198.5	0.2426
198.6	0.2428
198.7	0.2428
198.8	0.2424
198.9	0.2422
199	0.242
199.1	0.2418
199.2	0.2418
199.3	0.2424
199.4	0.2424
199.5	0.2422
199.6	0.242
199.7	0.2416
199.8	0.2416
199.9	0.242
200	0.2428
[truncated: 14,000 more rows]
