# Supplementary material for: Bayesian inference of kinetic schemes for ion channels by Kalman filtering
Source: eLife journal article supplement (doi:10.7554/elife.62714), 2022-05-04
Supplement: fig4-data8 [file 1_Sim_N_6000_Fluor_MW.xlsx]

## Sheet: Tabelle1
0.1	0
0.2	0
0.3	0
0.4	0
0.5	0
0.6	0
0.7	0
0.8	0
0.9	0
1	0
1.1	0
1.2	0
1.3	0
1.4	0
1.5	0
1.6	0
1.7	0
1.8	0
1.9	0
2	0
2.1	0
2.2	0
2.3	0
2.4	0
2.5	0
2.6	0
2.7	0
2.8	0
2.9	0
3	0
3.1	0
3.2	0
3.3	0
3.4	0
3.5	0
3.6	0
3.7	0
3.8	0
3.9	0
4	0
4.1	0
4.2	0
4.3	0
4.4	0
4.5	0
4.6	0
4.7	0
4.8	0
4.9	0
5	0
5.1	0
5.2	0
5.3	0
5.4	0
5.5	0
5.6	0
5.7	0
5.8	0
5.9	0
6	0
6.1	0
6.2	0
6.3	0
6.4	0
6.5	0
6.6	0
6.7	0
6.8	0
6.9	0
7	0
7.1	0
7.2	0
7.3	0
7.4	0
7.5	0
7.6	0
7.7	0
7.8	0
7.9	0
8	0
8.1	0
8.2	0
8.3	0
8.4	0
8.5	0
8.6	0
8.7	0
8.8	0
8.9	0
9	0
9.1	0
9.2	0
9.3	0
9.4	0
9.5	0
9.6	0
9.7	0
9.8	0
9.9	0
10	0
10.1	0
10.2	0
10.3	0
10.4	0
10.5	0
10.6	0
10.7	0
10.8	0
10.9	0
11	0
11.1	0
11.2	0
11.3	0
11.4	0
11.5	0
11.6	0
11.7	0
11.8	0
11.9	0
12	0
12.1	0
12.2	0
12.3	0
12.4	0
12.5	0
12.6	0
12.7	0
12.8	0
12.9	0
13	0
13.1	0
13.2	0
13.3	0
13.4	0
13.5	0
13.6	0
13.7	0
13.8	0
13.9	0
14	0
14.1	0
14.2	0
14.3	0
14.4	0
14.5	0
14.6	0
14.7	0
14.8	0
14.9	0
15	0
15.1	0
15.2	0
15.3	0
15.4	0
15.5	0
15.6	0
15.7	0
15.8	0
15.9	0
16	0
16.1	0
16.2	0
16.3	0
16.4	0
16.5	0
16.6	0
16.7	0
16.8	0
16.9	0
17	0
17.1	0
17.2	0
17.3	0
17.4	0
17.5	0
17.6	0
17.7	0
17.8	0
17.9	0
18	0
18.1	0
18.2	0
18.3	0
18.4	0
18.5	0
18.6	0
18.7	0
18.8	0
18.9	0
19	0
19.1	0
19.2	0
19.3	0
19.4	0
19.5	0
19.6	0
19.7	0
19.8	0
19.9	0
20	0
20.1	0
20.2	0
20.3	0
20.4	0
20.5	0
20.6	0
20.7	0
20.8	0
20.9	0
21	0
21.1	0
21.2	0
21.3	0
21.4	0
21.5	0
21.6	0
21.7	0
21.8	0
21.9	0
22	0
22.1	0
22.2	0
22.3	0
22.4	0
22.5	0
22.6	0
22.7	0
22.8	0
22.9	0
23	0
23.1	0
23.2	0
23.3	0
23.4	0
23.5	0
23.6	0
23.7	0
23.8	0
23.9	0
24	0
24.1	0
24.2	0
24.3	0
24.4	0
24.5	0
24.6	0
24.7	0
24.8	0
24.9	0
25	0
25.1	0
25.2	0
25.3	0
25.4	0
25.5	0
25.6	0
25.7	0
25.8	0
25.9	0
26	0
26.1	0
26.2	0
26.3	0
26.4	0
26.5	0
26.6	0
26.7	0
26.8	0
26.9	0
27	0
27.1	0
27.2	0
27.3	0
27.4	0
27.5	0
27.6	0
27.7	0
27.8	0
27.9	0
28	0
28.1	0
28.2	0
28.3	0
28.4	0
28.5	0
28.6	0
28.7	0
28.8	0
28.9	0
29	0
29.1	0
29.2	0
29.3	0
29.4	0
29.5	0
29.6	0
29.7	0
29.8	0
29.9	0
30	0
30.1	0
30.2	0
30.3	0
30.4	0
30.5	0
30.6	0
30.7	0
30.8	0
30.9	0
31	0
31.1	0
31.2	0
31.3	0
31.4	0
31.5	0
31.6	0
31.7	0
31.8	0
31.9	0
32	0
32.1	0
32.2	0
32.3	0
32.4	0
32.5	0
32.6	0
32.7	0
32.8	0
32.9	0
33	0
33.1	0
33.2	0
33.3	0
33.4	0
33.5	0
33.6	0
33.7	0
33.8	0
33.9	0
34	0
34.1	0
34.2	0
34.3	0
34.4	0
34.5	0
34.6	0
34.7	0
34.8	0
34.9	0
35	0
35.1	0
35.2	0
35.3	0
35.4	0
35.5	0
35.6	0
35.7	0
35.8	0
35.9	0
36	0
36.1	0
36.2	0
36.3	0
36.4	0
36.5	0
36.6	0
36.7	0
36.8	0
36.9	0
37	0
37.1	0
37.2	0
37.3	0
37.4	0
37.5	0
37.6	0
37.7	0
37.8	0
37.9	0
38	0
38.1	0
38.2	0
38.3	0
38.4	0
38.5	0
38.6	0
38.7	0
38.8	0
38.9	0
39	0
39.1	0
39.2	0
39.3	0
39.4	0
39.5	0
39.6	0
39.7	0
39.8	0
39.9	0
40	0
40.1	0
40.2	0
40.3	0
40.4	0
40.5	0
40.6	0
40.7	0
40.8	0
40.9	0
41	0
41.1	0
41.2	0
41.3	0
41.4	0
41.5	0
41.6	0
41.7	0
41.8	0
41.9	0
42	0
42.1	0
42.2	0
42.3	0
42.4	0
42.5	0
42.6	0
42.7	0
42.8	0
42.9	0
43	0
43.1	0
43.2	0
43.3	0
43.4	0
43.5	0
43.6	0
43.7	0
43.8	0
43.9	0
44	0
44.1	0
44.2	0
44.3	0
44.4	0
44.5	0
44.6	0
44.7	0
44.8	0
44.9	0
45	0
45.1	0
45.2	0
45.3	0
45.4	0
45.5	0
45.6	0
45.7	0
45.8	0
45.9	0
46	0
46.1	0
46.2	0
46.3	0
46.4	0
46.5	0
46.6	0
46.7	0
46.8	0
46.9	0
47	0
47.1	0
47.2	0
47.3	0
47.4	0
47.5	0
47.6	0
47.7	0
47.8	0
47.9	0
48	0
48.1	0
48.2	0
48.3	0
48.4	0
48.5	0
48.6	0
48.7	0
48.8	0
48.9	0
49	0
49.1	0
49.2	0
49.3	0
49.4	0
49.5	0
49.6	0
49.7	0
49.8	0
49.9	0
50	0
50.1	0
50.2	0
50.3	0
50.4	0
50.5	0
50.6	0
50.7	0
50.8	0
50.9	0
51	0
51.1	0
51.2	0
51.3	0
51.4	0
51.5	0
51.6	0
51.7	0
51.8	0
51.9	0
52	0
52.1	0
52.2	0
52.3	0
52.4	0
52.5	0
52.6	0
52.7	0
52.8	0
52.9	0
53	0
53.1	0
53.2	0
53.3	0
53.4	0
53.5	0
53.6	0
53.7	0
53.8	0
53.9	0
54	0
54.1	0
54.2	0
54.3	0
54.4	0
54.5	0
54.6	0
54.7	0
54.8	0
54.9	0
55	0
55.1	0
55.2	0
55.3	0
55.4	0
55.5	0
55.6	0
55.7	0
55.8	0
55.9	0
56	0
56.1	0
56.2	0
56.3	0
56.4	0
56.5	0
56.6	0
56.7	0
56.8	0
56.9	0
57	0
57.1	0
57.2	0
57.3	0
57.4	0
57.5	0
57.6	0
57.7	0
57.8	0
57.9	0
58	0
58.1	0
58.2	0
58.3	0
58.4	0
58.5	0
58.6	0
58.7	0
58.8	0
58.9	0
59	0
59.1	0
59.2	0
59.3	0
59.4	0
59.5	0
59.6	0
59.7	0
59.8	0
59.9	0
60	0
60.1	0
60.2	0
60.3	0
60.4	0
60.5	0
60.6	0
60.7	0
60.8	0
60.9	0
61	0
61.1	0
61.2	0
61.3	0
61.4	0
61.5	0
61.6	0
61.7	0
61.8	0
61.9	0
62	0
62.1	0
62.2	0
62.3	0
62.4	0
62.5	0
62.6	0
62.7	0
62.8	0
62.9	0
63	0
63.1	0
63.2	0
63.3	0
63.4	0
63.5	0
63.6	0
63.7	0
63.8	0
63.9	0
64	0
64.1	0
64.2	0
64.3	0
64.4	0
64.5	0
64.6	0
64.7	0
64.8	0
64.9	0
65	0
65.1	0
65.2	0
65.3	0
65.4	0
65.5	0
65.6	0
65.7	0
65.8	0
65.9	0
66	0
66.1	0
66.2	0
66.3	0
66.4	0
66.5	0
66.6	0
66.7	0
66.8	0
66.9	0
67	0
67.1	0
67.2	0
67.3	0
67.4	0
67.5	0
67.6	0
67.7	0
67.8	0
67.9	0
68	0
68.1	0
68.2	0
68.3	0
68.4	0
68.5	0
68.6	0
68.7	0
68.8	0
68.9	0
69	0
69.1	0
69.2	0
69.3	0
69.4	0
69.5	0
69.6	0
69.7	0
69.8	0
69.9	0
70	0
70.1	0
70.2	0
70.3	0
70.4	0
70.5	0
70.6	0
70.7	0
70.8	0
70.9	0
71	0
71.1	0
71.2	0
71.3	0
71.4	0
71.5	0
71.6	0
71.7	0
71.8	0
71.9	0
72	0
72.1	0
72.2	0
72.3	0
72.4	0
72.5	0
72.6	0
72.7	0
72.8	0
72.9	0
73	0
73.1	0
73.2	0
73.3	0
73.4	0
73.5	0
73.6	0
73.7	0
73.8	0
73.9	0
74	0
74.1	0
74.2	0
74.3	0
74.4	0
74.5	0
74.6	0
74.7	0
74.8	0
74.9	0
75	0
75.1	0
75.2	0
75.3	0
75.4	0
75.5	0
75.6	0
75.7	0
75.8	0
75.9	0
76	0
76.1	0
76.2	0
76.3	0
76.4	0
76.5	0
76.6	0
76.7	0
76.8	0
76.9	0
77	0
77.1	0
77.2	0
77.3	0
77.4	0
77.5	0
77.6	0
77.7	0
77.8	0
77.9	0
78	0
78.1	0
78.2	0
78.3	0
78.4	0
78.5	0
78.6	0
78.7	0
78.8	0
78.9	0
79	0
79.1	0
79.2	0
79.3	0
79.4	0
79.5	0
79.6	0
79.7	0
79.8	0
79.9	0
80	0
80.1	0
80.2	0
80.3	0
80.4	0
80.5	0
80.6	0
80.7	0
80.8	0
80.9	0
81	0
81.1	0
81.2	0
81.3	0
81.4	0
81.5	0
81.6	0
81.7	0
81.8	0
81.9	0
82	0
82.1	0
82.2	0
82.3	0
82.4	0
82.5	0
82.6	0
82.7	0
82.8	0
82.9	0
83	0
83.1	0
83.2	0
83.3	0
83.4	0
83.5	0
83.6	0
83.7	0
83.8	0
83.9	0
84	0
84.1	0
84.2	0
84.3	0
84.4	0
84.5	0
84.6	0
84.7	0
84.8	0
84.9	0
85	0
85.1	0
85.2	0
85.3	0
85.4	0
85.5	0
85.6	0
85.7	0
85.8	0
85.9	0
86	0
86.1	0
86.2	0
86.3	0
86.4	0
86.5	0
86.6	0
86.7	0
86.8	0
86.9	0
87	0
87.1	0
87.2	0
87.3	0
87.4	0
87.5	0
87.6	0
87.7	0
87.8	0
87.9	0
88	0
88.1	0
88.2	0
88.3	0
88.4	0
88.5	0
88.6	0
88.7	0
88.8	0
88.9	0
89	0
89.1	0
89.2	0
89.3	0
89.4	0
89.5	0
89.6	0
89.7	0
89.8	0
89.9	0
90	0
90.1	0
90.2	0
90.3	0
90.4	0
90.5	0
90.6	0
90.7	0
90.8	0
90.9	0
91	0
91.1	0
91.2	0
91.3	0
91.4	0
91.5	0
91.6	0
91.7	0
91.8	0
91.9	0
92	0
92.1	0
92.2	0
92.3	0
92.4	0
92.5	0
92.6	0
92.7	0
92.8	0
92.9	0
93	0
93.1	0
93.2	0
93.3	0
93.4	0
93.5	0
93.6	0
93.7	0
93.8	0
93.9	0
94	0
94.1	0
94.2	0
94.3	0
94.4	0
94.5	0
94.6	0
94.7	0
94.8	0
94.9	0
95	0
95.1	0
95.2	0
95.3	0
95.4	0
95.5	0
95.6	0
95.7	0
95.8	0
95.9	0
96	0
96.1	0
96.2	0
96.3	0
96.4	0
96.5	0
96.6	0
96.7	0
96.8	0
96.9	0
97	0
97.1	0
97.2	0
97.3	0
97.4	0
97.5	0
97.6	0
97.7	0
97.8	0
97.9	0
98	0
98.1	0
98.2	0
98.3	0
98.4	0
98.5	0
98.6	0
98.7	0
98.8	0
98.9	0
99	0
99.1	0
99.2	0
99.3	0
99.4	0
99.5	0
99.6	0
99.7	0
99.8	0
99.9	0
100	0
100.1	0.01625
100.2	0.03075
100.3	0.0449167
100.4	0.0583333
100.5	0.07225
100.6	0.0865
100.7	0.0979167
100.8	0.109167
100.9	0.12025
101	0.129417
101.1	0.139917
101.2	0.151167
101.3	0.1615
101.4	0.172667
101.5	0.179917
101.6	0.18775
101.7	0.196667
101.8	0.20675
101.9	0.213917
102	0.223417
102.1	0.232
102.2	0.239083
102.3	0.244833
102.4	0.251917
102.5	0.258917
102.6	0.265
102.7	0.272333
102.8	0.27575
102.9	0.28175
103	0.287417
103.1	0.294083
103.2	0.300333
103.3	0.3055
103.4	0.311083
103.5	0.313667
103.6	0.318083
103.7	0.321667
103.8	0.324833
103.9	0.329083
104	0.33325
104.1	0.3355
104.2	0.337667
104.3	0.3415
104.4	0.344333
104.5	0.3485
104.6	0.353083
104.7	0.357
104.8	0.361833
104.9	0.36575
105	0.368083
105.1	0.370083
105.2	0.373083
105.3	0.374583
105.4	0.37825
105.5	0.383
105.6	0.384167
105.7	0.385333
105.8	0.38775
105.9	0.388583
106	0.391833
106.1	0.3945
106.2	0.395583
106.3	0.39575
106.4	0.397833
106.5	0.400833
106.6	0.403417
106.7	0.404583
106.8	0.4035
106.9	0.405917
107	0.40625
107.1	0.409583
107.2	0.4115
107.3	0.412083
107.4	0.414
107.5	0.415
107.6	0.415583
107.7	0.417083
107.8	0.419
107.9	0.42025
108	0.421417
108.1	0.42075
108.2	0.421917
108.3	0.422167
108.4	0.423917
108.5	0.424833
108.6	0.425667
108.7	0.424333
108.8	0.42425
108.9	0.425
109	0.425167
109.1	0.426333
109.2	0.427083
109.3	0.428083
109.4	0.429333
109.5	0.4305
109.6	0.433167
109.7	0.434083
109.8	0.433583
109.9	0.435
110	0.43575
110.1	0.435917
110.2	0.435917
110.3	0.43575
110.4	0.43675
110.5	0.4375
110.6	0.437
110.7	0.437
110.8	0.43775
110.9	0.4365
111	0.43725
111.1	0.438417
111.2	0.437917
111.3	0.439917
111.4	0.438917
111.5	0.438667
111.6	0.439667
111.7	0.440833
111.8	0.440583
111.9	0.440583
112	0.44075
112.1	0.441167
112.2	0.440917
112.3	0.440917
112.4	0.440917
112.5	0.442167
112.6	0.441917
112.7	0.442667
112.8	0.442917
112.9	0.442417
113	0.44375
113.1	0.4435
113.2	0.44425
113.3	0.445333
113.4	0.44475
113.5	0.4455
113.6	0.446333
113.7	0.445833
113.8	0.446667
113.9	0.4465
114	0.446333
114.1	0.44725
114.2	0.44775
114.3	0.449083
114.4	0.45125
114.5	0.450917
114.6	0.45175
114.7	0.4535
114.8	0.45425
114.9	0.454583
115	0.456167
115.1	0.456667
115.2	0.456083
115.3	0.455667
115.4	0.456417
115.5	0.456083
115.6	0.459083
115.7	0.459333
115.8	0.45975
115.9	0.459
116	0.459
116.1	0.458667
116.2	0.457917
116.3	0.459167
116.4	0.46025
116.5	0.461083
116.6	0.461167
116.7	0.462417
116.8	0.4625
116.9	0.46475
117	0.466083
117.1	0.466083
117.2	0.46625
117.3	0.466333
117.4	0.465833
117.5	0.466
117.6	0.4665
117.7	0.466
117.8	0.466
117.9	0.466
118	0.466917
118.1	0.465333
118.2	0.465167
118.3	0.465417
118.4	0.465583
118.5	0.46575
118.6	0.466083
118.7	0.467
118.8	0.467917
118.9	0.468417
119	0.468833
119.1	0.469
119.2	0.470083
119.3	0.471667
119.4	0.471083
119.5	0.471083
119.6	0.470833
119.7	0.469583
119.8	0.46975
119.9	0.469083
120	0.4685
120.1	0.469667
120.2	0.47
120.3	0.47025
120.4	0.470917
120.5	0.46925
120.6	0.470583
120.7	0.46975
120.8	0.469083
120.9	0.469583
121	0.470417
121.1	0.4705
121.2	0.472083
121.3	0.472333
121.4	0.47175
121.5	0.474083
121.6	0.474417
121.7	0.474667
121.8	0.474333
121.9	0.474583
122	0.475083
122.1	0.4755
122.2	0.475833
122.3	0.477
122.4	0.4755
122.5	0.476917
122.6	0.47575
122.7	0.477
122.8	0.475583
122.9	0.476
123	0.478
123.1	0.478083
123.2	0.476667
123.3	0.476833
123.4	0.476583
123.5	0.476667
123.6	0.476417
123.7	0.476
123.8	0.475917
123.9	0.476333
124	0.477167
124.1	0.476667
124.2	0.475833
124.3	0.475833
124.4	0.476583
124.5	0.477917
124.6	0.477833
124.7	0.4775
124.8	0.478667
124.9	0.479583
125	0.479417
125.1	0.482167
125.2	0.482
125.3	0.48175
125.4	0.483917
125.5	0.484083
125.6	0.484833
125.7	0.487083
125.8	0.488167
125.9	0.488417
126	0.489833
126.1	0.488
126.2	0.489
126.3	0.48875
126.4	0.4895
126.5	0.488583
126.6	0.48825
126.7	0.4875
126.8	0.487167
126.9	0.48725
127	0.486583
127.1	0.487083
127.2	0.487167
127.3	0.487917
127.4	0.489167
127.5	0.48725
127.6	0.487417
127.7	0.4855
127.8	0.486333
127.9	0.487
128	0.486417
128.1	0.486917
128.2	0.48575
128.3	0.485667
128.4	0.486
128.5	0.48575
128.6	0.48475
128.7	0.48675
128.8	0.486583
128.9	0.486417
129	0.487
129.1	0.486583
129.2	0.486417
129.3	0.4855
129.4	0.485667
129.5	0.485833
129.6	0.485333
129.7	0.485833
129.8	0.484167
129.9	0.484583
130	0.485167
130.1	0.48475
130.2	0.48425
130.3	0.4855
130.4	0.486333
130.5	0.485917
130.6	0.485833
130.7	0.486333
130.8	0.487167
130.9	0.488667
131	0.48825
131.1	0.488917
131.2	0.488833
131.3	0.48775
131.4	0.488333
131.5	0.49025
131.6	0.490083
131.7	0.489167
131.8	0.489667
131.9	0.490667
132	0.489583
132.1	0.489417
132.2	0.489333
132.3	0.489917
132.4	0.490167
132.5	0.489417
132.6	0.4915
132.7	0.49075
132.8	0.49175
132.9	0.493167
133	0.493667
133.1	0.49575
133.2	0.495
133.3	0.49625
133.4	0.496083
133.5	0.495833
133.6	0.494833
133.7	0.49375
133.8	0.49325
133.9	0.494917
134	0.495833
134.1	0.497583
134.2	0.49825
134.3	0.49675
134.4	0.496833
134.5	0.496583
134.6	0.497583
134.7	0.496083
134.8	0.49675
134.9	0.496083
135	0.495917
135.1	0.495833
135.2	0.497
135.3	0.49675
135.4	0.496417
135.5	0.497333
135.6	0.498333
135.7	0.497667
135.8	0.496833
135.9	0.496083
136	0.495333
136.1	0.4955
136.2	0.496667
136.3	0.497833
136.4	0.498833
136.5	0.499417
136.6	0.499833
136.7	0.500667
136.8	0.5005
136.9	0.501167
137	0.5015
137.1	0.50075
137.2	0.499417
137.3	0.499083
137.4	0.49925
137.5	0.49875
137.6	0.498833
137.7	0.501083
137.8	0.501833
137.9	0.501917
138	0.502083
138.1	0.501417
138.2	0.503167
138.3	0.503667
138.4	0.503833
138.5	0.503917
138.6	0.5045
138.7	0.5055
138.8	0.5045
138.9	0.505583
139	0.505083
139.1	0.505917
139.2	0.506583
139.3	0.506583
139.4	0.506667
139.5	0.507
139.6	0.506833
139.7	0.506667
139.8	0.506083
139.9	0.508167
140	0.509
140.1	0.508667
140.2	0.508
140.3	0.508417
140.4	0.50725
140.5	0.506833
140.6	0.506917
140.7	0.507417
140.8	0.50825
140.9	0.508667
141	0.509333
141.1	0.51
141.2	0.510667
141.3	0.51025
141.4	0.510667
141.5	0.511
141.6	0.510083
141.7	0.510667
141.8	0.510917
141.9	0.51275
142	0.513917
142.1	0.515083
142.2	0.515667
142.3	0.517
142.4	0.516333
142.5	0.516833
142.6	0.51825
142.7	0.519
142.8	0.518417
142.9	0.51775
143	0.5185
143.1	0.517583
143.2	0.518417
143.3	0.518917
143.4	0.518667
143.5	0.519
143.6	0.518417
143.7	0.518833
143.8	0.518667
143.9	0.518
144	0.518167
144.1	0.516833
144.2	0.517167
144.3	0.51675
144.4	0.518083
144.5	0.519167
144.6	0.5185
144.7	0.520417
144.8	0.520667
144.9	0.519583
145	0.519167
145.1	0.518917
145.2	0.518667
145.3	0.518083
145.4	0.519167
145.5	0.519083
145.6	0.52025
145.7	0.52075
145.8	0.521667
145.9	0.52225
146	0.522917
146.1	0.523083
146.2	0.523333
146.3	0.52425
146.4	0.524833
146.5	0.52625
146.6	0.5245
146.7	0.525583
146.8	0.525167
146.9	0.524667
147	0.524417
147.1	0.524583
147.2	0.524167
147.3	0.524083
147.4	0.523333
147.5	0.524167
147.6	0.523417
147.7	0.524583
147.8	0.524333
147.9	0.522583
148	0.5235
148.1	0.522583
148.2	0.523667
148.3	0.523167
148.4	0.5215
148.5	0.520833
148.6	0.52225
148.7	0.523
148.8	0.522583
148.9	0.523417
149	0.524417
149.1	0.525667
149.2	0.52625
149.3	0.526833
149.4	0.527917
149.5	0.527083
149.6	0.528083
149.7	0.527333
149.8	0.525667
149.9	0.526167
150	0.52725
150.1	0.527417
150.2	0.52775
150.3	0.527
150.4	0.52625
150.5	0.526167
150.6	0.525917
150.7	0.526167
150.8	0.525417
150.9	0.525583
151	0.525083
151.1	0.525333
151.2	0.525417
151.3	0.525167
151.4	0.526417
151.5	0.525333
151.6	0.526917
151.7	0.527917
151.8	0.5275
151.9	0.527417
152	0.526667
152.1	0.526917
152.2	0.526667
152.3	0.52675
152.4	0.524917
152.5	0.525083
152.6	0.524167
152.7	0.523083
152.8	0.5235
152.9	0.524833
153	0.524917
153.1	0.526333
153.2	0.526833
153.3	0.52625
153.4	0.52525
153.5	0.5275
153.6	0.528083
153.7	0.527917
153.8	0.5275
153.9	0.526917
154	0.527583
154.1	0.529083
154.2	0.529417
154.3	0.52775
154.4	0.528167
154.5	0.52875
154.6	0.530083
154.7	0.53075
154.8	0.531417
154.9	0.531417
155	0.53125
155.1	0.531417
155.2	0.53275
155.3	0.53425
155.4	0.5335
155.5	0.5325
155.6	0.53225
155.7	0.532917
155.8	0.532167
155.9	0.530917
156	0.534
156.1	0.53325
156.2	0.532
156.3	0.532333
156.4	0.532833
156.5	0.53175
156.6	0.531333
156.7	0.531083
156.8	0.53325
156.9	0.5335
157	0.531333
157.1	0.532167
157.2	0.532417
157.3	0.53425
157.4	0.535667
157.5	0.535667
157.6	0.535167
157.7	0.535333
157.8	0.53525
157.9	0.533917
158	0.53425
158.1	0.533667
158.2	0.534917
158.3	0.533833
158.4	0.535417
158.5	0.536417
158.6	0.537667
158.7	0.538833
158.8	0.540417
158.9	0.540833
159	0.54125
159.1	0.5405
159.2	0.540583
159.3	0.5385
159.4	0.538667
159.5	0.537833
159.6	0.538167
159.7	0.539167
159.8	0.536833
159.9	0.53775
160	0.537
160.1	0.535583
160.2	0.536417
160.3	0.53575
160.4	0.536083
160.5	0.536167
160.6	0.5365
160.7	0.537167
160.8	0.536083
160.9	0.536417
161	0.534417
161.1	0.533583
161.2	0.534
161.3	0.533917
161.4	0.53475
161.5	0.535417
161.6	0.53575
161.7	0.536417
161.8	0.537917
161.9	0.53875
162	0.541083
162.1	0.541
162.2	0.542
162.3	0.54125
162.4	0.540833
162.5	0.54
162.6	0.541083
162.7	0.541167
162.8	0.543
162.9	0.542667
163	0.542583
163.1	0.542333
163.2	0.541083
163.3	0.540167
163.4	0.5405
163.5	0.539667
163.6	0.540417
163.7	0.542833
163.8	0.543333
163.9	0.54275
164	0.542917
164.1	0.542
164.2	0.541333
164.3	0.543
164.4	0.54375
164.5	0.544583
164.6	0.544083
164.7	0.545667
164.8	0.544167
164.9	0.545333
165	0.544917
165.1	0.544833
165.2	0.544833
165.3	0.547167
165.4	0.547167
165.5	0.547083
165.6	0.547833
165.7	0.547833
165.8	0.548667
165.9	0.547
166	0.5475
166.1	0.546833
166.2	0.547833
166.3	0.54825
166.4	0.548417
166.5	0.548583
166.6	0.548917
166.7	0.54825
166.8	0.549667
166.9	0.550417
167	0.550417
167.1	0.5515
167.2	0.552
167.3	0.551833
167.4	0.5525
167.5	0.553333
167.6	0.55375
167.7	0.554667
167.8	0.555583
167.9	0.554583
168	0.554583
168.1	0.553917
168.2	0.55225
168.3	0.552333
168.4	0.552917
168.5	0.55225
168.6	0.554
168.7	0.552417
168.8	0.551417
168.9	0.5515
169	0.551917
169.1	0.552667
169.2	0.554583
169.3	0.554417
169.4	0.553583
169.5	0.553167
169.6	0.553
169.7	0.553417
169.8	0.554417
169.9	0.554583
170	0.553667
170.1	0.5535
170.2	0.553917
170.3	0.555
170.4	0.55475
170.5	0.5535
170.6	0.552667
170.7	0.553333
170.8	0.554333
170.9	0.554333
171	0.553667
171.1	0.554
171.2	0.55325
171.3	0.553417
171.4	0.554417
171.5	0.554
171.6	0.55375
171.7	0.55375
171.8	0.553417
171.9	0.555583
172	0.558
172.1	0.557833
172.2	0.557833
172.3	0.557417
172.4	0.556
172.5	0.555667
172.6	0.555083
172.7	0.554833
172.8	0.553167
172.9	0.553417
173	0.553417
173.1	0.553
173.2	0.555333
173.3	0.554333
173.4	0.5555
173.5	0.55675
173.6	0.55575
173.7	0.555333
173.8	0.555833
173.9	0.556167
174	0.556583
174.1	0.555833
174.2	0.555333
174.3	0.55375
174.4	0.555583
174.5	0.555333
174.6	0.555333
174.7	0.555417
174.8	0.555917
174.9	0.555417
175	0.556583
175.1	0.557333
175.2	0.558417
175.3	0.559333
175.4	0.55875
175.5	0.559667
175.6	0.559083
175.7	0.55825
175.8	0.558167
175.9	0.5595
176	0.559917
176.1	0.558667
176.2	0.557333
176.3	0.556333
176.4	0.556417
176.5	0.55575
176.6	0.555583
176.7	0.556
176.8	0.55675
176.9	0.557083
177	0.556917
177.1	0.556417
177.2	0.556417
177.3	0.557667
177.4	0.557917
177.5	0.558583
177.6	0.558
177.7	0.557
177.8	0.556167
177.9	0.556
178	0.555083
178.1	0.554917
178.2	0.554
178.3	0.554917
178.4	0.555833
178.5	0.55675
178.6	0.556417
178.7	0.556917
178.8	0.55625
178.9	0.557583
179	0.55775
179.1	0.558667
179.2	0.558333
179.3	0.5575
179.4	0.558167
179.5	0.55875
179.6	0.55875
179.7	0.559167
179.8	0.55925
179.9	0.5585
180	0.558167
180.1	0.55925
180.2	0.560333
180.3	0.559667
180.4	0.560083
180.5	0.5595
180.6	0.559833
180.7	0.558167
180.8	0.5585
180.9	0.559417
181	0.559083
181.1	0.558167
181.2	0.555917
181.3	0.55675
181.4	0.556333
181.5	0.555583
181.6	0.555667
181.7	0.5565
181.8	0.558333
181.9	0.558417
182	0.558583
182.1	0.558583
182.2	0.558083
182.3	0.557583
182.4	0.5565
182.5	0.556583
182.6	0.557083
182.7	0.557833
182.8	0.559083
182.9	0.559917
183	0.560917
183.1	0.561167
183.2	0.561167
183.3	0.5625
183.4	0.5625
183.5	0.562917
183.6	0.563
183.7	0.563167
183.8	0.56475
183.9	0.564333
184	0.564083
184.1	0.5645
184.2	0.564667
184.3	0.564333
184.4	0.564
184.5	0.56375
184.6	0.563083
184.7	0.56425
184.8	0.564667
184.9	0.564917
185	0.56625
185.1	0.565917
185.2	0.564417
185.3	0.562833
185.4	0.562167
185.5	0.5615
185.6	0.563
185.7	0.564417
185.8	0.562917
185.9	0.564083
186	0.56525
186.1	0.5645
186.2	0.564333
186.3	0.565583
186.4	0.565417
186.5	0.566
186.6	0.566
186.7	0.567667
186.8	0.567667
186.9	0.5675
187	0.5675
187.1	0.567333
187.2	0.568333
187.3	0.569417
187.4	0.5685
187.5	0.5695
187.6	0.568833
187.7	0.56875
187.8	0.568583
187.9	0.567833
188	0.568333
188.1	0.569167
188.2	0.569833
188.3	0.570167
188.4	0.568083
188.5	0.569417
188.6	0.569583
188.7	0.568917
188.8	0.57025
188.9	0.57075
189	0.570333
189.1	0.570333
189.2	0.571167
189.3	0.572
189.4	0.572167
189.5	0.5715
189.6	0.572917
189.7	0.572667
189.8	0.572333
189.9	0.572833
190	0.57275
190.1	0.572833
190.2	0.572333
190.3	0.573833
190.4	0.573917
190.5	0.574167
190.6	0.574417
190.7	0.57375
190.8	0.573833
190.9	0.575667
191	0.576333
191.1	0.576917
191.2	0.577
191.3	0.576
191.4	0.576833
191.5	0.576917
191.6	0.577417
191.7	0.578083
191.8	0.577333
191.9	0.577583
192	0.575917
192.1	0.575
192.2	0.575667
192.3	0.576167
192.4	0.5755
192.5	0.575
192.6	0.575583
192.7	0.57675
192.8	0.575083
192.9	0.575
193	0.574
193.1	0.575
193.2	0.575667
193.3	0.576667
193.4	0.575833
193.5	0.576917
193.6	0.576333
193.7	0.576
193.8	0.577083
193.9	0.576333
194	0.576
194.1	0.576333
194.2	0.575167
194.3	0.57475
194.4	0.5745
194.5	0.575417
194.6	0.57525
194.7	0.574
194.8	0.572417
194.9	0.571917
195	0.57275
195.1	0.572583
195.2	0.5735
195.3	0.572333
195.4	0.575083
195.5	0.574917
195.6	0.574917
195.7	0.574083
195.8	0.573167
195.9	0.571667
196	0.570667
196.1	0.570333
196.2	0.5715
196.3	0.572167
196.4	0.57275
196.5	0.57275
196.6	0.57275
196.7	0.572333
196.8	0.573417
196.9	0.573917
197	0.5745
197.1	0.575917
197.2	0.575167
197.3	0.575083
197.4	0.574667
197.5	0.574667
197.6	0.57475
197.7	0.573167
197.8	0.573417
197.9	0.574417
198	0.573917
198.1	0.574667
198.2	0.573667
198.3	0.5725
198.4	0.571917
198.5	0.57325
198.6	0.574
198.7	0.575083
198.8	0.576
198.9	0.575417
199	0.575667
199.1	0.575333
199.2	0.57475
199.3	0.576833
199.4	0.5765
199.5	0.577583
199.6	0.577167
199.7	0.57825
199.8	0.576833
199.9	0.576833
200	0.57725
[truncated: 14,000 more rows]
