# Supplementary material for: Bayesian inference of kinetic schemes for ion channels by Kalman filtering
Source: eLife journal article supplement (doi:10.7554/elife.62714), 2022-05-04
Supplement: fig4-data8 [file 1_Sim_N_6000_Strom_MW.xlsx]

## Sheet: Tabelle1
0.1	0
0.2	0
0.3	0
0.4	0
0.5	0
0.6	0
0.7	0
0.8	0
0.9	0
1	0
1.1	0
1.2	0
1.3	0
1.4	0
1.5	0
1.6	0
1.7	0
1.8	0
1.9	0
2	0
2.1	0
2.2	0
2.3	0
2.4	0
2.5	0
2.6	0
2.7	0
2.8	0
2.9	0
3	0
3.1	0
3.2	0
3.3	0
3.4	0
3.5	0
3.6	0
3.7	0
3.8	0
3.9	0
4	0
4.1	0
4.2	0
4.3	0
4.4	0
4.5	0
4.6	0
4.7	0
4.8	0
4.9	0
5	0
5.1	0
5.2	0
5.3	0
5.4	0
5.5	0
5.6	0
5.7	0
5.8	0
5.9	0
6	0
6.1	0
6.2	0
6.3	0
6.4	0
6.5	0
6.6	0
6.7	0
6.8	0
6.9	0
7	0
7.1	0
7.2	0
7.3	0
7.4	0
7.5	0
7.6	0
7.7	0
7.8	0
7.9	0
8	0
8.1	0
8.2	0
8.3	0
8.4	0
8.5	0
8.6	0
8.7	0
8.8	0
8.9	0
9	0
9.1	0
9.2	0
9.3	0
9.4	0
9.5	0
9.6	0
9.7	0
9.8	0
9.9	0
10	0
10.1	0
10.2	0
10.3	0
10.4	0
10.5	0
10.6	0
10.7	0
10.8	0
10.9	0
11	0
11.1	0
11.2	0
11.3	0
11.4	0
11.5	0
11.6	0
11.7	0
11.8	0
11.9	0
12	0
12.1	0
12.2	0
12.3	0
12.4	0
12.5	0
12.6	0
12.7	0
12.8	0
12.9	0
13	0
13.1	0
13.2	0
13.3	0
13.4	0
13.5	0
13.6	0
13.7	0
13.8	0
13.9	0
14	0
14.1	0
14.2	0
14.3	0
14.4	0
14.5	0
14.6	0
14.7	0
14.8	0
14.9	0
15	0
15.1	0
15.2	0
15.3	0
15.4	0
15.5	0
15.6	0
15.7	0
15.8	0
15.9	0
16	0
16.1	0
16.2	0
16.3	0
16.4	0
16.5	0
16.6	0
16.7	0
16.8	0
16.9	0
17	0
17.1	0
17.2	0
17.3	0
17.4	0
17.5	0
17.6	0
17.7	0
17.8	0
17.9	0
18	0
18.1	0
18.2	0
18.3	0
18.4	0
18.5	0
18.6	0
18.7	0
18.8	0
18.9	0
19	0
19.1	0
19.2	0
19.3	0
19.4	0
19.5	0
19.6	0
19.7	0
19.8	0
19.9	0
20	0
20.1	0
20.2	0
20.3	0
20.4	0
20.5	0
20.6	0
20.7	0
20.8	0
20.9	0
21	0
21.1	0
21.2	0
21.3	0
21.4	0
21.5	0
21.6	0
21.7	0
21.8	0
21.9	0
22	0
22.1	0
22.2	0
22.3	0
22.4	0
22.5	0
22.6	0
22.7	0
22.8	0
22.9	0
23	0
23.1	0
23.2	0
23.3	0
23.4	0
23.5	0
23.6	0
23.7	0
23.8	0
23.9	0
24	0
24.1	0
24.2	0
24.3	0
24.4	0
24.5	0
24.6	0
24.7	0
24.8	0
24.9	0
25	0
25.1	0
25.2	0
25.3	0
25.4	0
25.5	0
25.6	0
25.7	0
25.8	0
25.9	0
26	0
26.1	0
26.2	0
26.3	0
26.4	0
26.5	0
26.6	0
26.7	0
26.8	0
26.9	0
27	0
27.1	0
27.2	0
27.3	0
27.4	0
27.5	0
27.6	0
27.7	0
27.8	0
27.9	0
28	0
28.1	0
28.2	0
28.3	0
28.4	0
28.5	0
28.6	0
28.7	0
28.8	0
28.9	0
29	0
29.1	0
29.2	0
29.3	0
29.4	0
29.5	0
29.6	0
29.7	0
29.8	0
29.9	0
30	0
30.1	0
30.2	0
30.3	0
30.4	0
30.5	0
30.6	0
30.7	0
30.8	0
30.9	0
31	0
31.1	0
31.2	0
31.3	0
31.4	0
31.5	0
31.6	0
31.7	0
31.8	0
31.9	0
32	0
32.1	0
32.2	0
32.3	0
32.4	0
32.5	0
32.6	0
32.7	0
32.8	0
32.9	0
33	0
33.1	0
33.2	0
33.3	0
33.4	0
33.5	0
33.6	0
33.7	0
33.8	0
33.9	0
34	0
34.1	0
34.2	0
34.3	0
34.4	0
34.5	0
34.6	0
34.7	0
34.8	0
34.9	0
35	0
35.1	0
35.2	0
35.3	0
35.4	0
35.5	0
35.6	0
35.7	0
35.8	0
35.9	0
36	0
36.1	0
36.2	0
36.3	0
36.4	0
36.5	0
36.6	0
36.7	0
36.8	0
36.9	0
37	0
37.1	0
37.2	0
37.3	0
37.4	0
37.5	0
37.6	0
37.7	0
37.8	0
37.9	0
38	0
38.1	0
38.2	0
38.3	0
38.4	0
38.5	0
38.6	0
38.7	0
38.8	0
38.9	0
39	0
39.1	0
39.2	0
39.3	0
39.4	0
39.5	0
39.6	0
39.7	0
39.8	0
39.9	0
40	0
40.1	0
40.2	0
40.3	0
40.4	0
40.5	0
40.6	0
40.7	0
40.8	0
40.9	0
41	0
41.1	0
41.2	0
41.3	0
41.4	0
41.5	0
41.6	0
41.7	0
41.8	0
41.9	0
42	0
42.1	0
42.2	0
42.3	0
42.4	0
42.5	0
42.6	0
42.7	0
42.8	0
42.9	0
43	0
43.1	0
43.2	0
43.3	0
43.4	0
43.5	0
43.6	0
43.7	0
43.8	0
43.9	0
44	0
44.1	0
44.2	0
44.3	0
44.4	0
44.5	0
44.6	0
44.7	0
44.8	0
44.9	0
45	0
45.1	0
45.2	0
45.3	0
45.4	0
45.5	0
45.6	0
45.7	0
45.8	0
45.9	0
46	0
46.1	0
46.2	0
46.3	0
46.4	0
46.5	0
46.6	0
46.7	0
46.8	0
46.9	0
47	0
47.1	0
47.2	0
47.3	0
47.4	0
47.5	0
47.6	0
47.7	0
47.8	0
47.9	0
48	0
48.1	0
48.2	0
48.3	0
48.4	0
48.5	0
48.6	0
48.7	0
48.8	0
48.9	0
49	0
49.1	0
49.2	0
49.3	0
49.4	0
49.5	0
49.6	0
49.7	0
49.8	0
49.9	0
50	0
50.1	0
50.2	0
50.3	0
50.4	0
50.5	0
50.6	0
50.7	0
50.8	0
50.9	0
51	0
51.1	0
51.2	0
51.3	0
51.4	0
51.5	0
51.6	0
51.7	0
51.8	0
51.9	0
52	0
52.1	0
52.2	0
52.3	0
52.4	0
52.5	0
52.6	0
52.7	0
52.8	0
52.9	0
53	0
53.1	0
53.2	0
53.3	0
53.4	0
53.5	0
53.6	0
53.7	0
53.8	0
53.9	0
54	0
54.1	0
54.2	0
54.3	0
54.4	0
54.5	0
54.6	0
54.7	0
54.8	0
54.9	0
55	0
55.1	0
55.2	0
55.3	0
55.4	0
55.5	0
55.6	0
55.7	0
55.8	0
55.9	0
56	0
56.1	0
56.2	0
56.3	0
56.4	0
56.5	0
56.6	0
56.7	0
56.8	0
56.9	0
57	0
57.1	0
57.2	0
57.3	0
57.4	0
57.5	0
57.6	0
57.7	0
57.8	0
57.9	0
58	0
58.1	0
58.2	0
58.3	0
58.4	0
58.5	0
58.6	0
58.7	0
58.8	0
58.9	0
59	0
59.1	0
59.2	0
59.3	0
59.4	0
59.5	0
59.6	0
59.7	0
59.8	0
59.9	0
60	0
60.1	0
60.2	0
60.3	0
60.4	0
60.5	0
60.6	0
60.7	0
60.8	0
60.9	0
61	0
61.1	0
61.2	0
61.3	0
61.4	0
61.5	0
61.6	0
61.7	0
61.8	0
61.9	0
62	0
62.1	0
62.2	0
62.3	0
62.4	0
62.5	0
62.6	0
62.7	0
62.8	0
62.9	0
63	0
63.1	0
63.2	0
63.3	0
63.4	0
63.5	0
63.6	0
63.7	0
63.8	0
63.9	0
64	0
64.1	0
64.2	0
64.3	0
64.4	0
64.5	0
64.6	0
64.7	0
64.8	0
64.9	0
65	0
65.1	0
65.2	0
65.3	0
65.4	0
65.5	0
65.6	0
65.7	0
65.8	0
65.9	0
66	0
66.1	0
66.2	0
66.3	0
66.4	0
66.5	0
66.6	0
66.7	0
66.8	0
66.9	0
67	0
67.1	0
67.2	0
67.3	0
67.4	0
67.5	0
67.6	0
67.7	0
67.8	0
67.9	0
68	0
68.1	0
68.2	0
68.3	0
68.4	0
68.5	0
68.6	0
68.7	0
68.8	0
68.9	0
69	0
69.1	0
69.2	0
69.3	0
69.4	0
69.5	0
69.6	0
69.7	0
69.8	0
69.9	0
70	0
70.1	0
70.2	0
70.3	0
70.4	0
70.5	0
70.6	0
70.7	0
70.8	0
70.9	0
71	0
71.1	0
71.2	0
71.3	0
71.4	0
71.5	0
71.6	0
71.7	0
71.8	0
71.9	0
72	0
72.1	0
72.2	0
72.3	0
72.4	0
72.5	0
72.6	0
72.7	0
72.8	0
72.9	0
73	0
73.1	0
73.2	0
73.3	0
73.4	0
73.5	0
73.6	0
73.7	0
73.8	0
73.9	0
74	0
74.1	0
74.2	0
74.3	0
74.4	0
74.5	0
74.6	0
74.7	0
74.8	0
74.9	0
75	0
75.1	0
75.2	0
75.3	0
75.4	0
75.5	0
75.6	0
75.7	0
75.8	0
75.9	0
76	0
76.1	0
76.2	0
76.3	0
76.4	0
76.5	0
76.6	0
76.7	0
76.8	0
76.9	0
77	0
77.1	0
77.2	0
77.3	0
77.4	0
77.5	0
77.6	0
77.7	0
77.8	0
77.9	0
78	0
78.1	0
78.2	0
78.3	0
78.4	0
78.5	0
78.6	0
78.7	0
78.8	0
78.9	0
79	0
79.1	0
79.2	0
79.3	0
79.4	0
79.5	0
79.6	0
79.7	0
79.8	0
79.9	0
80	0
80.1	0
80.2	0
80.3	0
80.4	0
80.5	0
80.6	0
80.7	0
80.8	0
80.9	0
81	0
81.1	0
81.2	0
81.3	0
81.4	0
81.5	0
81.6	0
81.7	0
81.8	0
81.9	0
82	0
82.1	0
82.2	0
82.3	0
82.4	0
82.5	0
82.6	0
82.7	0
82.8	0
82.9	0
83	0
83.1	0
83.2	0
83.3	0
83.4	0
83.5	0
83.6	0
83.7	0
83.8	0
83.9	0
84	0
84.1	0
84.2	0
84.3	0
84.4	0
84.5	0
84.6	0
84.7	0
84.8	0
84.9	0
85	0
85.1	0
85.2	0
85.3	0
85.4	0
85.5	0
85.6	0
85.7	0
85.8	0
85.9	0
86	0
86.1	0
86.2	0
86.3	0
86.4	0
86.5	0
86.6	0
86.7	0
86.8	0
86.9	0
87	0
87.1	0
87.2	0
87.3	0
87.4	0
87.5	0
87.6	0
87.7	0
87.8	0
87.9	0
88	0
88.1	0
88.2	0
88.3	0
88.4	0
88.5	0
88.6	0
88.7	0
88.8	0
88.9	0
89	0
89.1	0
89.2	0
89.3	0
89.4	0
89.5	0
89.6	0
89.7	0
89.8	0
89.9	0
90	0
90.1	0
90.2	0
90.3	0
90.4	0
90.5	0
90.6	0
90.7	0
90.8	0
90.9	0
91	0
91.1	0
91.2	0
91.3	0
91.4	0
91.5	0
91.6	0
91.7	0
91.8	0
91.9	0
92	0
92.1	0
92.2	0
92.3	0
92.4	0
92.5	0
92.6	0
92.7	0
92.8	0
92.9	0
93	0
93.1	0
93.2	0
93.3	0
93.4	0
93.5	0
93.6	0
93.7	0
93.8	0
93.9	0
94	0
94.1	0
94.2	0
94.3	0
94.4	0
94.5	0
94.6	0
94.7	0
94.8	0
94.9	0
95	0
95.1	0
95.2	0
95.3	0
95.4	0
95.5	0
95.6	0
95.7	0
95.8	0
95.9	0
96	0
96.1	0
96.2	0
96.3	0
96.4	0
96.5	0
96.6	0
96.7	0
96.8	0
96.9	0
97	0
97.1	0
97.2	0
97.3	0
97.4	0
97.5	0
97.6	0
97.7	0
97.8	0
97.9	0
98	0
98.1	0
98.2	0
98.3	0
98.4	0
98.5	0
98.6	0
98.7	0
98.8	0
98.9	0
99	0
99.1	0
99.2	0
99.3	0
99.4	0
99.5	0
99.6	0
99.7	0
99.8	0
99.9	0
100	0
100.1	0
100.2	0
100.3	0
100.4	0.000166667
100.5	0.000166667
100.6	0.000166667
100.7	0.000166667
100.8	0.000166667
100.9	0.000166667
101	0.000166667
101.1	0.000166667
101.2	0.000166667
101.3	0.000333333
101.4	0.000333333
101.5	0.000333333
101.6	0.000333333
101.7	0.0005
101.8	0.0005
101.9	0.0005
102	0.0005
102.1	0.001
102.2	0.0015
102.3	0.00183333
102.4	0.00183333
102.5	0.002
102.6	0.002
102.7	0.002
102.8	0.002
102.9	0.00216667
103	0.00216667
103.1	0.00216667
103.2	0.00233333
103.3	0.00266667
103.4	0.003
103.5	0.00316667
103.6	0.00333333
103.7	0.00333333
103.8	0.00333333
103.9	0.0035
104	0.00366667
104.1	0.004
104.2	0.0045
104.3	0.00466667
104.4	0.005
104.5	0.00516667
104.6	0.0055
104.7	0.0055
104.8	0.00583333
104.9	0.00583333
105	0.006
105.1	0.006
105.2	0.00616667
105.3	0.007
105.4	0.00733333
105.5	0.0075
105.6	0.00766667
105.7	0.008
105.8	0.00883333
105.9	0.00933333
106	0.00983333
106.1	0.0105
106.2	0.0108333
106.3	0.011
106.4	0.0113333
106.5	0.0113333
106.6	0.012
106.7	0.0123333
106.8	0.0123333
106.9	0.0133333
107	0.014
107.1	0.0141667
107.2	0.0151667
107.3	0.0153333
107.4	0.0155
107.5	0.0153333
107.6	0.0156667
107.7	0.016
107.8	0.016
107.9	0.0163333
108	0.017
108.1	0.017
108.2	0.0176667
108.3	0.018
108.4	0.0186667
108.5	0.0193333
108.6	0.0196667
108.7	0.0205
108.8	0.021
108.9	0.0216667
109	0.0221667
109.1	0.0223333
109.2	0.0226667
109.3	0.023
109.4	0.0235
109.5	0.024
109.6	0.0246667
109.7	0.0251667
109.8	0.0255
109.9	0.0256667
110	0.026
110.1	0.0265
110.2	0.0273333
110.3	0.0276667
110.4	0.0281667
110.5	0.0286667
110.6	0.0293333
110.7	0.0295
110.8	0.0295
110.9	0.0296667
111	0.0301667
111.1	0.0305
111.2	0.0305
111.3	0.031
111.4	0.0315
111.5	0.0318333
111.6	0.0321667
111.7	0.0321667
111.8	0.0326667
111.9	0.033
112	0.0335
112.1	0.0336667
112.2	0.0338333
112.3	0.0338333
112.4	0.0338333
112.5	0.034
112.6	0.0338333
112.7	0.034
112.8	0.0345
112.9	0.0351667
113	0.036
113.1	0.0363333
113.2	0.0365
113.3	0.0368333
113.4	0.0376667
113.5	0.0385
113.6	0.0386667
113.7	0.0393333
113.8	0.0401667
113.9	0.04
114	0.0406667
114.1	0.0411667
114.2	0.0418333
114.3	0.0425
114.4	0.0435
114.5	0.0443333
114.6	0.0448333
114.7	0.0448333
114.8	0.0453333
114.9	0.0455
115	0.0461667
115.1	0.0463333
115.2	0.0466667
115.3	0.0471667
115.4	0.0476667
115.5	0.048
115.6	0.0481667
115.7	0.0491667
115.8	0.05
115.9	0.0496667
116	0.0496667
116.1	0.0496667
116.2	0.0501667
116.3	0.0511667
116.4	0.0511667
116.5	0.0516667
116.6	0.0521667
116.7	0.0528333
116.8	0.053
116.9	0.053
117	0.054
117.1	0.0543333
117.2	0.0551667
117.3	0.0556667
117.4	0.0563333
117.5	0.057
117.6	0.0571667
117.7	0.0576667
117.8	0.0581667
117.9	0.0586667
118	0.0595
118.1	0.0598333
118.2	0.0601667
118.3	0.0601667
118.4	0.0603333
118.5	0.061
118.6	0.0606667
118.7	0.0608333
118.8	0.061
118.9	0.0615
119	0.0625
119.1	0.0625
119.2	0.0625
119.3	0.0626667
119.4	0.063
119.5	0.0635
119.6	0.0641667
119.7	0.0645
119.8	0.0646667
119.9	0.0651667
120	0.065
120.1	0.0653333
120.2	0.0655
120.3	0.066
120.4	0.0668333
120.5	0.0668333
120.6	0.0675
120.7	0.068
120.8	0.0683333
120.9	0.0693333
121	0.0695
121.1	0.0696667
121.2	0.07
121.3	0.0705
121.4	0.0708333
121.5	0.0708333
121.6	0.0713333
121.7	0.0718333
121.8	0.0721667
121.9	0.0726667
122	0.0726667
122.1	0.0728333
122.2	0.0736667
122.3	0.0738333
122.4	0.074
122.5	0.0743333
122.6	0.0748333
122.7	0.075
122.8	0.0753333
122.9	0.076
123	0.0765
123.1	0.0768333
123.2	0.0773333
123.3	0.0783333
123.4	0.0786667
123.5	0.0788333
123.6	0.0791667
123.7	0.0791667
123.8	0.0793333
123.9	0.0796667
124	0.0798333
124.1	0.0801667
124.2	0.081
124.3	0.0813333
124.4	0.0813333
124.5	0.0813333
124.6	0.0813333
124.7	0.0815
124.8	0.0816667
124.9	0.082
125	0.0825
125.1	0.0828333
125.2	0.0831667
125.3	0.0831667
125.4	0.0836667
125.5	0.0838333
125.6	0.0845
125.7	0.0846667
125.8	0.0848333
125.9	0.085
126	0.085
126.1	0.0851667
126.2	0.0858333
126.3	0.0861667
126.4	0.0868333
126.5	0.088
126.6	0.0883333
126.7	0.0883333
126.8	0.0888333
126.9	0.0888333
127	0.0898333
127.1	0.0903333
127.2	0.0905
127.3	0.0906667
127.4	0.0915
127.5	0.0921667
127.6	0.0923333
127.7	0.0925
127.8	0.093
127.9	0.0938333
128	0.094
128.1	0.0943333
128.2	0.0945
128.3	0.0946667
128.4	0.0948333
128.5	0.0951667
128.6	0.0956667
128.7	0.0965
128.8	0.0968333
128.9	0.0968333
129	0.097
129.1	0.0971667
129.2	0.0975
129.3	0.0976667
129.4	0.0976667
129.5	0.098
129.6	0.0981667
129.7	0.0985
129.8	0.0991667
129.9	0.0993333
130	0.0995
130.1	0.0998333
130.2	0.100333
130.3	0.1005
130.4	0.100333
130.5	0.100833
130.6	0.1015
130.7	0.102
130.8	0.102333
130.9	0.102833
131	0.102833
131.1	0.103667
131.2	0.104
131.3	0.104167
131.4	0.104833
131.5	0.104833
131.6	0.105167
131.7	0.105667
131.8	0.106333
131.9	0.106833
132	0.107333
132.1	0.1075
132.2	0.107667
132.3	0.108333
132.4	0.108833
132.5	0.108833
132.6	0.109333
132.7	0.109667
132.8	0.1095
132.9	0.1105
133	0.110833
133.1	0.111333
133.2	0.1115
133.3	0.111667
133.4	0.112167
133.5	0.112667
133.6	0.113
133.7	0.112833
133.8	0.112833
133.9	0.113
134	0.113667
134.1	0.113833
134.2	0.114167
134.3	0.114
134.4	0.114167
134.5	0.114833
134.6	0.115167
134.7	0.115333
134.8	0.115667
134.9	0.116
135	0.116667
135.1	0.117
135.2	0.117167
135.3	0.117667
135.4	0.117833
135.5	0.1175
135.6	0.117667
135.7	0.117833
135.8	0.118
135.9	0.118333
136	0.1185
136.1	0.118833
136.2	0.119167
136.3	0.1195
136.4	0.12
136.5	0.120167
136.6	0.119833
136.7	0.120833
136.8	0.1205
136.9	0.120833
137	0.121167
137.1	0.121
137.2	0.122
137.3	0.122333
137.4	0.123333
137.5	0.123667
137.6	0.124167
137.7	0.124667
137.8	0.124667
137.9	0.124833
138	0.125833
138.1	0.125833
138.2	0.126
138.3	0.126333
138.4	0.1265
138.5	0.127333
138.6	0.127333
138.7	0.127833
138.8	0.127667
138.9	0.128
139	0.128333
139.1	0.128667
139.2	0.128667
139.3	0.128833
139.4	0.128833
139.5	0.129167
139.6	0.1295
139.7	0.129667
139.8	0.13
139.9	0.130333
140	0.130333
140.1	0.130833
140.2	0.131
140.3	0.131833
140.4	0.131833
140.5	0.132667
140.6	0.1325
140.7	0.132667
140.8	0.133
140.9	0.132833
141	0.133167
141.1	0.133167
141.2	0.133333
141.3	0.133833
141.4	0.1345
141.5	0.134833
141.6	0.135833
141.7	0.136167
141.8	0.136333
141.9	0.136833
142	0.137
142.1	0.1375
142.2	0.137833
142.3	0.138
142.4	0.138167
142.5	0.138333
142.6	0.138333
142.7	0.1385
142.8	0.139167
142.9	0.139833
143	0.140333
143.1	0.140667
143.2	0.140833
143.3	0.141167
143.4	0.141667
143.5	0.141833
143.6	0.1425
143.7	0.143333
143.8	0.144
143.9	0.143667
144	0.143833
144.1	0.143833
144.2	0.144
144.3	0.144667
144.4	0.145167
144.5	0.145167
144.6	0.145333
144.7	0.1455
144.8	0.145333
144.9	0.145833
145	0.146167
145.1	0.1465
145.2	0.1465
145.3	0.146667
145.4	0.146333
145.5	0.1465
145.6	0.147167
145.7	0.147667
145.8	0.147667
145.9	0.148167
146	0.148333
146.1	0.148667
146.2	0.148667
146.3	0.148833
146.4	0.1495
146.5	0.15
146.6	0.150333
146.7	0.150667
146.8	0.150667
146.9	0.1505
147	0.150333
147.1	0.1505
147.2	0.150667
147.3	0.151167
147.4	0.1515
147.5	0.151833
147.6	0.152
147.7	0.152167
147.8	0.152167
147.9	0.153167
148	0.153333
148.1	0.153167
148.2	0.153333
148.3	0.153667
148.4	0.154333
148.5	0.154667
148.6	0.155333
148.7	0.156
148.8	0.156667
148.9	0.1575
149	0.157333
149.1	0.1575
149.2	0.157667
149.3	0.157833
149.4	0.158333
149.5	0.1585
149.6	0.158333
149.7	0.157833
149.8	0.157833
149.9	0.1575
150	0.157667
150.1	0.157833
150.2	0.158333
150.3	0.159
150.4	0.159333
150.5	0.16
150.6	0.160833
150.7	0.1605
150.8	0.160833
150.9	0.160833
151	0.160833
151.1	0.161167
151.2	0.161333
151.3	0.1615
151.4	0.162167
151.5	0.1625
151.6	0.162667
151.7	0.163
151.8	0.163333
151.9	0.164
152	0.164167
152.1	0.1645
152.2	0.1645
152.3	0.164667
152.4	0.164
152.5	0.164167
152.6	0.164333
152.7	0.164833
152.8	0.165167
152.9	0.165667
153	0.166
153.1	0.166333
153.2	0.166333
153.3	0.167
153.4	0.1675
153.5	0.1675
153.6	0.168167
153.7	0.168333
153.8	0.168333
153.9	0.168667
154	0.169333
154.1	0.170167
154.2	0.170333
154.3	0.170667
154.4	0.170333
154.5	0.170333
154.6	0.1705
154.7	0.170667
154.8	0.171
154.9	0.171667
155	0.171333
155.1	0.171333
155.2	0.1715
155.3	0.172167
155.4	0.173667
155.5	0.173833
155.6	0.1735
155.7	0.173833
155.8	0.174
155.9	0.174
156	0.173833
156.1	0.173833
156.2	0.1745
156.3	0.175
156.4	0.174833
156.5	0.174667
156.6	0.174833
156.7	0.175
156.8	0.175167
156.9	0.175
157	0.175167
157.1	0.175667
157.2	0.176333
157.3	0.176333
157.4	0.177167
157.5	0.1775
157.6	0.178167
157.7	0.1785
157.8	0.179167
157.9	0.179167
158	0.179167
158.1	0.179333
158.2	0.180167
158.3	0.18
158.4	0.18
158.5	0.180333
158.6	0.180167
158.7	0.180333
158.8	0.180667
158.9	0.180833
159	0.181333
159.1	0.1815
159.2	0.181667
159.3	0.181667
159.4	0.182167
159.5	0.182333
159.6	0.182667
159.7	0.182833
159.8	0.1825
159.9	0.182667
160	0.182833
160.1	0.183
160.2	0.182833
160.3	0.183333
160.4	0.1845
160.5	0.184333
160.6	0.184667
160.7	0.185167
160.8	0.1855
160.9	0.185833
161	0.186167
161.1	0.187333
161.2	0.187333
161.3	0.187167
161.4	0.187333
161.5	0.187667
161.6	0.188
161.7	0.1875
161.8	0.187833
161.9	0.188167
162	0.188667
162.1	0.189
162.2	0.188833
162.3	0.189333
162.4	0.1895
162.5	0.19
162.6	0.190167
162.7	0.190833
162.8	0.190667
162.9	0.190833
163	0.191167
163.1	0.191333
163.2	0.191333
163.3	0.191333
163.4	0.1915
163.5	0.1925
163.6	0.193
163.7	0.192833
163.8	0.192833
163.9	0.1925
164	0.192167
164.1	0.192333
164.2	0.192667
164.3	0.193333
164.4	0.193667
164.5	0.193667
164.6	0.1945
164.7	0.194667
164.8	0.1945
164.9	0.194833
165	0.195167
165.1	0.195167
165.2	0.195667
165.3	0.196
165.4	0.1965
165.5	0.197167
165.6	0.197333
165.7	0.197833
165.8	0.197833
165.9	0.198333
166	0.198667
166.1	0.198667
166.2	0.1995
166.3	0.1995
166.4	0.199333
166.5	0.199833
166.6	0.200167
166.7	0.200333
166.8	0.200667
166.9	0.201167
167	0.201333
167.1	0.2015
167.2	0.202167
167.3	0.202167
167.4	0.202333
167.5	0.202167
167.6	0.2025
167.7	0.2025
167.8	0.202833
167.9	0.202667
168	0.202667
168.1	0.202667
168.2	0.202333
168.3	0.202667
168.4	0.203
168.5	0.203167
168.6	0.203333
168.7	0.203833
168.8	0.204667
168.9	0.204833
169	0.205167
169.1	0.205
169.2	0.204833
169.3	0.205167
169.4	0.205667
169.5	0.205833
169.6	0.206
169.7	0.206
169.8	0.206
169.9	0.206167
170	0.2065
170.1	0.206667
170.2	0.2065
170.3	0.206667
170.4	0.206833
170.5	0.207
170.6	0.207
170.7	0.207167
170.8	0.207
170.9	0.2075
171	0.207667
171.1	0.207333
171.2	0.207667
171.3	0.2075
171.4	0.2085
171.5	0.209
171.6	0.2095
171.7	0.209667
171.8	0.209833
171.9	0.21
172	0.210167
172.1	0.209833
172.2	0.209833
172.3	0.210167
172.4	0.210333
172.5	0.211
172.6	0.210667
172.7	0.210833
172.8	0.211
172.9	0.210833
173	0.2105
173.1	0.210333
173.2	0.210333
173.3	0.210667
173.4	0.210833
173.5	0.211
173.6	0.211333
173.7	0.211333
173.8	0.211667
173.9	0.211833
174	0.212167
174.1	0.212167
174.2	0.211667
174.3	0.211833
174.4	0.211667
174.5	0.211833
174.6	0.211833
174.7	0.212333
174.8	0.212667
174.9	0.212667
175	0.214167
175.1	0.214667
175.2	0.214667
175.3	0.215333
175.4	0.215667
175.5	0.215667
175.6	0.215833
175.7	0.216333
175.8	0.216833
175.9	0.217
176	0.217167
176.1	0.217167
176.2	0.217667
176.3	0.218333
176.4	0.219167
176.5	0.2195
176.6	0.219333
176.7	0.2195
176.8	0.220333
176.9	0.220833
177	0.220833
177.1	0.221167
177.2	0.221833
177.3	0.221667
177.4	0.2215
177.5	0.2215
177.6	0.221333
177.7	0.2215
177.8	0.220833
177.9	0.220833
178	0.221333
178.1	0.221833
178.2	0.222167
178.3	0.221667
178.4	0.220833
178.5	0.221167
178.6	0.221333
178.7	0.221167
178.8	0.221333
178.9	0.2215
179	0.221667
179.1	0.222
179.2	0.2215
179.3	0.220833
179.4	0.220667
179.5	0.220833
179.6	0.220833
179.7	0.221
179.8	0.221
179.9	0.221167
180	0.221
180.1	0.220833
180.2	0.220667
180.3	0.220667
180.4	0.220667
180.5	0.220667
180.6	0.220167
180.7	0.2205
180.8	0.220833
180.9	0.220833
181	0.221
181.1	0.221333
181.2	0.221833
181.3	0.222
181.4	0.222
181.5	0.222667
181.6	0.222333
181.7	0.222333
181.8	0.2225
181.9	0.222833
182	0.222667
182.1	0.222333
182.2	0.222667
182.3	0.222833
182.4	0.224
182.5	0.2245
182.6	0.224667
182.7	0.224833
182.8	0.224833
182.9	0.225
183	0.225333
183.1	0.225333
183.2	0.225333
183.3	0.2255
183.4	0.2255
183.5	0.2255
183.6	0.226167
183.7	0.226667
183.8	0.227333
183.9	0.227667
184	0.227833
184.1	0.228
184.2	0.228167
184.3	0.228333
184.4	0.228167
184.5	0.228
184.6	0.228
184.7	0.228167
184.8	0.228
184.9	0.228167
185	0.228
185.1	0.229167
185.2	0.229167
185.3	0.229167
185.4	0.229333
185.5	0.229167
185.6	0.229333
185.7	0.229167
185.8	0.229667
185.9	0.229667
186	0.229833
186.1	0.229833
186.2	0.229667
186.3	0.2295
186.4	0.229333
186.5	0.229667
186.6	0.229667
186.7	0.23
186.8	0.2305
186.9	0.230833
187	0.230833
187.1	0.231
187.2	0.231
187.3	0.230833
187.4	0.231333
187.5	0.231833
187.6	0.232
187.7	0.2325
187.8	0.232667
187.9	0.233167
188	0.2335
188.1	0.233667
188.2	0.234167
188.3	0.234
188.4	0.234
188.5	0.2345
188.6	0.234667
188.7	0.234667
188.8	0.2345
188.9	0.234667
189	0.234667
189.1	0.235167
189.2	0.2355
189.3	0.235833
189.4	0.235667
189.5	0.235667
189.6	0.236
189.7	0.236167
189.8	0.236
189.9	0.236167
190	0.2365
190.1	0.236333
190.2	0.235833
190.3	0.2365
190.4	0.2365
190.5	0.236667
190.6	0.2365
190.7	0.2365
190.8	0.236833
190.9	0.236833
191	0.237167
191.1	0.237333
191.2	0.237667
191.3	0.2375
191.4	0.237333
191.5	0.237167
191.6	0.238167
191.7	0.238
191.8	0.238167
191.9	0.2385
192	0.238667
192.1	0.2385
192.2	0.2385
192.3	0.239
192.4	0.239333
192.5	0.239333
192.6	0.239667
192.7	0.239667
192.8	0.240167
192.9	0.241167
193	0.241167
193.1	0.241
193.2	0.240833
193.3	0.241
193.4	0.240833
193.5	0.240667
193.6	0.240667
193.7	0.241167
193.8	0.242167
193.9	0.2425
194	0.243
194.1	0.242667
194.2	0.2425
194.3	0.2425
194.4	0.242333
194.5	0.242833
194.6	0.243333
194.7	0.243167
194.8	0.243
194.9	0.243167
195	0.242667
195.1	0.243
195.2	0.243
195.3	0.242667
195.4	0.242333
195.5	0.241333
195.6	0.241333
195.7	0.241167
195.8	0.2415
195.9	0.2415
196	0.241833
196.1	0.241833
196.2	0.2415
196.3	0.241
196.4	0.241333
196.5	0.241667
196.6	0.242
196.7	0.242167
196.8	0.242833
196.9	0.242833
197	0.243333
197.1	0.243667
197.2	0.243833
197.3	0.244
197.4	0.244167
197.5	0.244333
197.6	0.244833
197.7	0.244667
197.8	0.244667
197.9	0.244333
198	0.244333
198.1	0.2445
198.2	0.2445
198.3	0.244333
198.4	0.244333
198.5	0.2445
198.6	0.244333
198.7	0.244333
198.8	0.244833
198.9	0.2455
199	0.246167
199.1	0.246333
199.2	0.246667
199.3	0.246333
199.4	0.2465
199.5	0.2465
199.6	0.2465
199.7	0.246
199.8	0.2465
199.9	0.246333
200	0.246167
[truncated: 14,000 more rows]
