# Supplementary material for: Bayesian inference of kinetic schemes for ion channels by Kalman filtering
Source: eLife journal article supplement (doi:10.7554/elife.62714), 2022-05-04
Supplement: fig4-data8 [file 1_Sim_N_7000_Fluor_MW.xlsx]

## Sheet: Tabelle1
0.1	0
0.2	0
0.3	0
0.4	0
0.5	0
0.6	0
0.7	0
0.8	0
0.9	0
1	0
1.1	0
1.2	0
1.3	0
1.4	0
1.5	0
1.6	0
1.7	0
1.8	0
1.9	0
2	0
2.1	0
2.2	0
2.3	0
2.4	0
2.5	0
2.6	0
2.7	0
2.8	0
2.9	0
3	0
3.1	0
3.2	0
3.3	0
3.4	0
3.5	0
3.6	0
3.7	0
3.8	0
3.9	0
4	0
4.1	0
4.2	0
4.3	0
4.4	0
4.5	0
4.6	0
4.7	0
4.8	0
4.9	0
5	0
5.1	0
5.2	0
5.3	0
5.4	0
5.5	0
5.6	0
5.7	0
5.8	0
5.9	0
6	0
6.1	0
6.2	0
6.3	0
6.4	0
6.5	0
6.6	0
6.7	0
6.8	0
6.9	0
7	0
7.1	0
7.2	0
7.3	0
7.4	0
7.5	0
7.6	0
7.7	0
7.8	0
7.9	0
8	0
8.1	0
8.2	0
8.3	0
8.4	0
8.5	0
8.6	0
8.7	0
8.8	0
8.9	0
9	0
9.1	0
9.2	0
9.3	0
9.4	0
9.5	0
9.6	0
9.7	0
9.8	0
9.9	0
10	0
10.1	0
10.2	0
10.3	0
10.4	0
10.5	0
10.6	0
10.7	0
10.8	0
10.9	0
11	0
11.1	0
11.2	0
11.3	0
11.4	0
11.5	0
11.6	0
11.7	0
11.8	0
11.9	0
12	0
12.1	0
12.2	0
12.3	0
12.4	0
12.5	0
12.6	0
12.7	0
12.8	0
12.9	0
13	0
13.1	0
13.2	0
13.3	0
13.4	0
13.5	0
13.6	0
13.7	0
13.8	0
13.9	0
14	0
14.1	0
14.2	0
14.3	0
14.4	0
14.5	0
14.6	0
14.7	0
14.8	0
14.9	0
15	0
15.1	0
15.2	0
15.3	0
15.4	0
15.5	0
15.6	0
15.7	0
15.8	0
15.9	0
16	0
16.1	0
16.2	0
16.3	0
16.4	0
16.5	0
16.6	0
16.7	0
16.8	0
16.9	0
17	0
17.1	0
17.2	0
17.3	0
17.4	0
17.5	0
17.6	0
17.7	0
17.8	0
17.9	0
18	0
18.1	0
18.2	0
18.3	0
18.4	0
18.5	0
18.6	0
18.7	0
18.8	0
18.9	0
19	0
19.1	0
19.2	0
19.3	0
19.4	0
19.5	0
19.6	0
19.7	0
19.8	0
19.9	0
20	0
20.1	0
20.2	0
20.3	0
20.4	0
20.5	0
20.6	0
20.7	0
20.8	0
20.9	0
21	0
21.1	0
21.2	0
21.3	0
21.4	0
21.5	0
21.6	0
21.7	0
21.8	0
21.9	0
22	0
22.1	0
22.2	0
22.3	0
22.4	0
22.5	0
22.6	0
22.7	0
22.8	0
22.9	0
23	0
23.1	0
23.2	0
23.3	0
23.4	0
23.5	0
23.6	0
23.7	0
23.8	0
23.9	0
24	0
24.1	0
24.2	0
24.3	0
24.4	0
24.5	0
24.6	0
24.7	0
24.8	0
24.9	0
25	0
25.1	0
25.2	0
25.3	0
25.4	0
25.5	0
25.6	0
25.7	0
25.8	0
25.9	0
26	0
26.1	0
26.2	0
26.3	0
26.4	0
26.5	0
26.6	0
26.7	0
26.8	0
26.9	0
27	0
27.1	0
27.2	0
27.3	0
27.4	0
27.5	0
27.6	0
27.7	0
27.8	0
27.9	0
28	0
28.1	0
28.2	0
28.3	0
28.4	0
28.5	0
28.6	0
28.7	0
28.8	0
28.9	0
29	0
29.1	0
29.2	0
29.3	0
29.4	0
29.5	0
29.6	0
29.7	0
29.8	0
29.9	0
30	0
30.1	0
30.2	0
30.3	0
30.4	0
30.5	0
30.6	0
30.7	0
30.8	0
30.9	0
31	0
31.1	0
31.2	0
31.3	0
31.4	0
31.5	0
31.6	0
31.7	0
31.8	0
31.9	0
32	0
32.1	0
32.2	0
32.3	0
32.4	0
32.5	0
32.6	0
32.7	0
32.8	0
32.9	0
33	0
33.1	0
33.2	0
33.3	0
33.4	0
33.5	0
33.6	0
33.7	0
33.8	0
33.9	0
34	0
34.1	0
34.2	0
34.3	0
34.4	0
34.5	0
34.6	0
34.7	0
34.8	0
34.9	0
35	0
35.1	0
35.2	0
35.3	0
35.4	0
35.5	0
35.6	0
35.7	0
35.8	0
35.9	0
36	0
36.1	0
36.2	0
36.3	0
36.4	0
36.5	0
36.6	0
36.7	0
36.8	0
36.9	0
37	0
37.1	0
37.2	0
37.3	0
37.4	0
37.5	0
37.6	0
37.7	0
37.8	0
37.9	0
38	0
38.1	0
38.2	0
38.3	0
38.4	0
38.5	0
38.6	0
38.7	0
38.8	0
38.9	0
39	0
39.1	0
39.2	0
39.3	0
39.4	0
39.5	0
39.6	0
39.7	0
39.8	0
39.9	0
40	0
40.1	0
40.2	0
40.3	0
40.4	0
40.5	0
40.6	0
40.7	0
40.8	0
40.9	0
41	0
41.1	0
41.2	0
41.3	0
41.4	0
41.5	0
41.6	0
41.7	0
41.8	0
41.9	0
42	0
42.1	0
42.2	0
42.3	0
42.4	0
42.5	0
42.6	0
42.7	0
42.8	0
42.9	0
43	0
43.1	0
43.2	0
43.3	0
43.4	0
43.5	0
43.6	0
43.7	0
43.8	0
43.9	0
44	0
44.1	0
44.2	0
44.3	0
44.4	0
44.5	0
44.6	0
44.7	0
44.8	0
44.9	0
45	0
45.1	0
45.2	0
45.3	0
45.4	0
45.5	0
45.6	0
45.7	0
45.8	0
45.9	0
46	0
46.1	0
46.2	0
46.3	0
46.4	0
46.5	0
46.6	0
46.7	0
46.8	0
46.9	0
47	0
47.1	0
47.2	0
47.3	0
47.4	0
47.5	0
47.6	0
47.7	0
47.8	0
47.9	0
48	0
48.1	0
48.2	0
48.3	0
48.4	0
48.5	0
48.6	0
48.7	0
48.8	0
48.9	0
49	0
49.1	0
49.2	0
49.3	0
49.4	0
49.5	0
49.6	0
49.7	0
49.8	0
49.9	0
50	0
50.1	0
50.2	0
50.3	0
50.4	0
50.5	0
50.6	0
50.7	0
50.8	0
50.9	0
51	0
51.1	0
51.2	0
51.3	0
51.4	0
51.5	0
51.6	0
51.7	0
51.8	0
51.9	0
52	0
52.1	0
52.2	0
52.3	0
52.4	0
52.5	0
52.6	0
52.7	0
52.8	0
52.9	0
53	0
53.1	0
53.2	0
53.3	0
53.4	0
53.5	0
53.6	0
53.7	0
53.8	0
53.9	0
54	0
54.1	0
54.2	0
54.3	0
54.4	0
54.5	0
54.6	0
54.7	0
54.8	0
54.9	0
55	0
55.1	0
55.2	0
55.3	0
55.4	0
55.5	0
55.6	0
55.7	0
55.8	0
55.9	0
56	0
56.1	0
56.2	0
56.3	0
56.4	0
56.5	0
56.6	0
56.7	0
56.8	0
56.9	0
57	0
57.1	0
57.2	0
57.3	0
57.4	0
57.5	0
57.6	0
57.7	0
57.8	0
57.9	0
58	0
58.1	0
58.2	0
58.3	0
58.4	0
58.5	0
58.6	0
58.7	0
58.8	0
58.9	0
59	0
59.1	0
59.2	0
59.3	0
59.4	0
59.5	0
59.6	0
59.7	0
59.8	0
59.9	0
60	0
60.1	0
60.2	0
60.3	0
60.4	0
60.5	0
60.6	0
60.7	0
60.8	0
60.9	0
61	0
61.1	0
61.2	0
61.3	0
61.4	0
61.5	0
61.6	0
61.7	0
61.8	0
61.9	0
62	0
62.1	0
62.2	0
62.3	0
62.4	0
62.5	0
62.6	0
62.7	0
62.8	0
62.9	0
63	0
63.1	0
63.2	0
63.3	0
63.4	0
63.5	0
63.6	0
63.7	0
63.8	0
63.9	0
64	0
64.1	0
64.2	0
64.3	0
64.4	0
64.5	0
64.6	0
64.7	0
64.8	0
64.9	0
65	0
65.1	0
65.2	0
65.3	0
65.4	0
65.5	0
65.6	0
65.7	0
65.8	0
65.9	0
66	0
66.1	0
66.2	0
66.3	0
66.4	0
66.5	0
66.6	0
66.7	0
66.8	0
66.9	0
67	0
67.1	0
67.2	0
67.3	0
67.4	0
67.5	0
67.6	0
67.7	0
67.8	0
67.9	0
68	0
68.1	0
68.2	0
68.3	0
68.4	0
68.5	0
68.6	0
68.7	0
68.8	0
68.9	0
69	0
69.1	0
69.2	0
69.3	0
69.4	0
69.5	0
69.6	0
69.7	0
69.8	0
69.9	0
70	0
70.1	0
70.2	0
70.3	0
70.4	0
70.5	0
70.6	0
70.7	0
70.8	0
70.9	0
71	0
71.1	0
71.2	0
71.3	0
71.4	0
71.5	0
71.6	0
71.7	0
71.8	0
71.9	0
72	0
72.1	0
72.2	0
72.3	0
72.4	0
72.5	0
72.6	0
72.7	0
72.8	0
72.9	0
73	0
73.1	0
73.2	0
73.3	0
73.4	0
73.5	0
73.6	0
73.7	0
73.8	0
73.9	0
74	0
74.1	0
74.2	0
74.3	0
74.4	0
74.5	0
74.6	0
74.7	0
74.8	0
74.9	0
75	0
75.1	0
75.2	0
75.3	0
75.4	0
75.5	0
75.6	0
75.7	0
75.8	0
75.9	0
76	0
76.1	0
76.2	0
76.3	0
76.4	0
76.5	0
76.6	0
76.7	0
76.8	0
76.9	0
77	0
77.1	0
77.2	0
77.3	0
77.4	0
77.5	0
77.6	0
77.7	0
77.8	0
77.9	0
78	0
78.1	0
78.2	0
78.3	0
78.4	0
78.5	0
78.6	0
78.7	0
78.8	0
78.9	0
79	0
79.1	0
79.2	0
79.3	0
79.4	0
79.5	0
79.6	0
79.7	0
79.8	0
79.9	0
80	0
80.1	0
80.2	0
80.3	0
80.4	0
80.5	0
80.6	0
80.7	0
80.8	0
80.9	0
81	0
81.1	0
81.2	0
81.3	0
81.4	0
81.5	0
81.6	0
81.7	0
81.8	0
81.9	0
82	0
82.1	0
82.2	0
82.3	0
82.4	0
82.5	0
82.6	0
82.7	0
82.8	0
82.9	0
83	0
83.1	0
83.2	0
83.3	0
83.4	0
83.5	0
83.6	0
83.7	0
83.8	0
83.9	0
84	0
84.1	0
84.2	0
84.3	0
84.4	0
84.5	0
84.6	0
84.7	0
84.8	0
84.9	0
85	0
85.1	0
85.2	0
85.3	0
85.4	0
85.5	0
85.6	0
85.7	0
85.8	0
85.9	0
86	0
86.1	0
86.2	0
86.3	0
86.4	0
86.5	0
86.6	0
86.7	0
86.8	0
86.9	0
87	0
87.1	0
87.2	0
87.3	0
87.4	0
87.5	0
87.6	0
87.7	0
87.8	0
87.9	0
88	0
88.1	0
88.2	0
88.3	0
88.4	0
88.5	0
88.6	0
88.7	0
88.8	0
88.9	0
89	0
89.1	0
89.2	0
89.3	0
89.4	0
89.5	0
89.6	0
89.7	0
89.8	0
89.9	0
90	0
90.1	0
90.2	0
90.3	0
90.4	0
90.5	0
90.6	0
90.7	0
90.8	0
90.9	0
91	0
91.1	0
91.2	0
91.3	0
91.4	0
91.5	0
91.6	0
91.7	0
91.8	0
91.9	0
92	0
92.1	0
92.2	0
92.3	0
92.4	0
92.5	0
92.6	0
92.7	0
92.8	0
92.9	0
93	0
93.1	0
93.2	0
93.3	0
93.4	0
93.5	0
93.6	0
93.7	0
93.8	0
93.9	0
94	0
94.1	0
94.2	0
94.3	0
94.4	0
94.5	0
94.6	0
94.7	0
94.8	0
94.9	0
95	0
95.1	0
95.2	0
95.3	0
95.4	0
95.5	0
95.6	0
95.7	0
95.8	0
95.9	0
96	0
96.1	0
96.2	0
96.3	0
96.4	0
96.5	0
96.6	0
96.7	0
96.8	0
96.9	0
97	0
97.1	0
97.2	0
97.3	0
97.4	0
97.5	0
97.6	0
97.7	0
97.8	0
97.9	0
98	0
98.1	0
98.2	0
98.3	0
98.4	0
98.5	0
98.6	0
98.7	0
98.8	0
98.9	0
99	0
99.1	0
99.2	0
99.3	0
99.4	0
99.5	0
99.6	0
99.7	0
99.8	0
99.9	0
100	0
100.1	0.0145714
100.2	0.0293571
100.3	0.0428571
100.4	0.0567143
100.5	0.0695714
100.6	0.0810714
100.7	0.0926429
100.8	0.104357
100.9	0.115
101	0.128643
101.1	0.138643
101.2	0.147429
101.3	0.158571
101.4	0.168429
101.5	0.178
101.6	0.187143
101.7	0.197
101.8	0.206429
101.9	0.213786
102	0.220786
102.1	0.228071
102.2	0.235357
102.3	0.242214
102.4	0.248286
102.5	0.255143
102.6	0.261143
102.7	0.267286
102.8	0.274429
102.9	0.279571
103	0.285214
103.1	0.288929
103.2	0.293286
103.3	0.298
103.4	0.302214
103.5	0.309071
103.6	0.314857
103.7	0.319929
103.8	0.324429
103.9	0.328857
104	0.333643
104.1	0.337357
104.2	0.341
104.3	0.345643
104.4	0.348214
104.5	0.351857
104.6	0.353214
104.7	0.356571
104.8	0.359857
104.9	0.363786
105	0.365071
105.1	0.3665
105.2	0.367929
105.3	0.371571
105.4	0.374
105.5	0.375571
105.6	0.377786
105.7	0.379429
105.8	0.383714
105.9	0.386643
106	0.3885
106.1	0.390643
106.2	0.392429
106.3	0.393214
106.4	0.393929
106.5	0.3965
106.6	0.398357
106.7	0.398643
106.8	0.400571
106.9	0.402071
107	0.405143
107.1	0.4055
107.2	0.405786
107.3	0.408714
107.4	0.4105
107.5	0.411643
107.6	0.412071
107.7	0.413643
107.8	0.415643
107.9	0.417286
108	0.419929
108.1	0.419714
108.2	0.419714
108.3	0.419071
108.4	0.4205
108.5	0.421714
108.6	0.423786
108.7	0.425571
108.8	0.425143
108.9	0.424929
109	0.424429
109.1	0.425857
109.2	0.426357
109.3	0.428
109.4	0.428571
109.5	0.429429
109.6	0.431357
109.7	0.430286
109.8	0.430786
109.9	0.431786
110	0.432286
110.1	0.433214
110.2	0.433857
110.3	0.433286
110.4	0.432857
110.5	0.433857
110.6	0.434286
110.7	0.434571
110.8	0.434714
110.9	0.433929
111	0.436714
111.1	0.436714
111.2	0.438643
111.3	0.439071
111.4	0.438143
111.5	0.438786
111.6	0.4405
111.7	0.440786
111.8	0.441714
111.9	0.442071
112	0.443214
112.1	0.444286
112.2	0.445714
112.3	0.444857
112.4	0.445786
112.5	0.4465
112.6	0.445714
112.7	0.445714
112.8	0.444571
112.9	0.445214
113	0.447786
113.1	0.448071
113.2	0.449643
113.3	0.449214
113.4	0.450143
113.5	0.450714
113.6	0.452286
113.7	0.452786
113.8	0.451786
113.9	0.452786
114	0.452714
114.1	0.453071
114.2	0.453857
114.3	0.453286
114.4	0.452929
114.5	0.453286
114.6	0.455429
114.7	0.456143
114.8	0.457071
114.9	0.458
115	0.457786
115.1	0.456929
115.2	0.458286
115.3	0.458929
115.4	0.459
115.5	0.458357
115.6	0.458071
115.7	0.458071
115.8	0.461071
115.9	0.460214
116	0.4605
116.1	0.459643
116.2	0.461071
116.3	0.461429
116.4	0.4605
116.5	0.4605
116.6	0.461571
116.7	0.462214
116.8	0.461786
116.9	0.461286
117	0.460214
117.1	0.461786
117.2	0.462857
117.3	0.461929
117.4	0.462214
117.5	0.462143
117.6	0.462286
117.7	0.464
117.8	0.464286
117.9	0.464929
118	0.464929
118.1	0.463786
118.2	0.463714
118.3	0.463714
118.4	0.462143
118.5	0.462429
118.6	0.462429
118.7	0.463143
118.8	0.462
118.9	0.463357
119	0.463214
119.1	0.464286
119.2	0.464571
119.3	0.464071
119.4	0.464357
119.5	0.466214
119.6	0.467714
119.7	0.468
119.8	0.468
119.9	0.467286
120	0.467643
120.1	0.468429
120.2	0.467714
120.3	0.467357
120.4	0.467071
120.5	0.466929
120.6	0.468
120.7	0.468286
120.8	0.470429
120.9	0.471571
121	0.473286
121.1	0.474643
121.2	0.474929
121.3	0.475643
121.4	0.476786
121.5	0.476857
121.6	0.476714
121.7	0.475786
121.8	0.476
121.9	0.475286
122	0.475143
122.1	0.474286
122.2	0.474643
122.3	0.475
122.4	0.475143
122.5	0.475857
122.6	0.476286
122.7	0.476071
122.8	0.475643
122.9	0.475
123	0.475214
123.1	0.473786
123.2	0.473857
123.3	0.474786
123.4	0.475071
123.5	0.474857
123.6	0.475643
123.7	0.478214
123.8	0.480143
123.9	0.479286
124	0.479714
124.1	0.480214
124.2	0.479357
124.3	0.479357
124.4	0.479857
124.5	0.480357
124.6	0.482143
124.7	0.482429
124.8	0.482571
124.9	0.484286
125	0.484571
125.1	0.485643
125.2	0.487143
125.3	0.4885
125.4	0.488571
125.5	0.486929
125.6	0.487714
125.7	0.486714
125.8	0.486071
125.9	0.487643
126	0.488571
126.1	0.489
126.2	0.488643
126.3	0.486643
126.4	0.487214
126.5	0.486643
126.6	0.487643
126.7	0.4885
126.8	0.489
126.9	0.488571
127	0.487857
127.1	0.488071
127.2	0.486786
127.3	0.485714
127.4	0.484857
127.5	0.486143
127.6	0.485429
127.7	0.487143
127.8	0.486571
127.9	0.487
128	0.487
128.1	0.487643
128.2	0.488571
128.3	0.488071
128.4	0.488
128.5	0.488286
128.6	0.488214
128.7	0.489714
128.8	0.488357
128.9	0.488786
129	0.488
129.1	0.489
129.2	0.488786
129.3	0.488714
129.4	0.489143
129.5	0.489214
129.6	0.488357
129.7	0.487857
129.8	0.485857
129.9	0.485714
130	0.485571
130.1	0.485786
130.2	0.486429
130.3	0.486071
130.4	0.486857
130.5	0.486571
130.6	0.486357
130.7	0.486429
130.8	0.484786
130.9	0.486357
131	0.486857
131.1	0.488071
131.2	0.488071
131.3	0.489643
131.4	0.490286
131.5	0.490571
131.6	0.489643
131.7	0.489786
131.8	0.490857
131.9	0.491643
132	0.492214
132.1	0.491929
132.2	0.490429
132.3	0.490429
132.4	0.491429
132.5	0.492786
132.6	0.493143
132.7	0.4945
132.8	0.4945
132.9	0.495714
133	0.496714
133.1	0.497857
133.2	0.498143
133.3	0.499643
133.4	0.499571
133.5	0.501286
133.6	0.500857
133.7	0.4995
133.8	0.498071
133.9	0.498571
134	0.500071
134.1	0.500071
134.2	0.501071
134.3	0.502214
134.4	0.502
134.5	0.5015
134.6	0.500929
134.7	0.503143
134.8	0.504429
134.9	0.505071
135	0.504857
135.1	0.505214
135.2	0.505857
135.3	0.5055
135.4	0.504357
135.5	0.502929
135.6	0.504143
135.7	0.504643
135.8	0.503714
135.9	0.504643
136	0.505929
136.1	0.506929
136.2	0.505786
136.3	0.506857
136.4	0.507357
136.5	0.507571
136.6	0.507929
136.7	0.506643
136.8	0.508143
136.9	0.5075
137	0.5075
137.1	0.5075
137.2	0.506929
137.3	0.507357
137.4	0.507929
137.5	0.508214
137.6	0.506571
137.7	0.506143
137.8	0.505357
137.9	0.505857
138	0.505
138.1	0.505286
138.2	0.5055
138.3	0.504429
138.4	0.504643
138.5	0.504786
138.6	0.505786
138.7	0.506143
138.8	0.505357
138.9	0.505857
139	0.506
139.1	0.507071
139.2	0.506071
139.3	0.507786
139.4	0.508
139.5	0.507786
139.6	0.508714
139.7	0.509214
139.8	0.509857
139.9	0.509214
140	0.509643
140.1	0.508643
140.2	0.509143
140.3	0.509
140.4	0.509429
140.5	0.509571
140.6	0.509714
140.7	0.510571
140.8	0.509357
140.9	0.509357
141	0.509929
141.1	0.510143
141.2	0.509357
141.3	0.510071
141.4	0.509286
141.5	0.508929
141.6	0.510643
141.7	0.509429
141.8	0.508714
141.9	0.507643
142	0.5085
142.1	0.508929
142.2	0.5085
142.3	0.509929
142.4	0.510857
142.5	0.511286
142.6	0.511071
142.7	0.512214
142.8	0.514429
142.9	0.514714
143	0.515714
143.1	0.517286
143.2	0.517286
143.3	0.5165
143.4	0.517
143.5	0.516714
143.6	0.517071
143.7	0.515714
143.8	0.517786
143.9	0.517214
144	0.517357
144.1	0.5185
144.2	0.518286
144.3	0.519357
144.4	0.520286
144.5	0.520357
144.6	0.520357
144.7	0.5195
144.8	0.519929
144.9	0.520071
145	0.519286
145.1	0.518929
145.2	0.519071
145.3	0.519286
145.4	0.519571
145.5	0.519643
145.6	0.519929
145.7	0.519214
145.8	0.519429
145.9	0.520786
146	0.520429
146.1	0.520357
146.2	0.522929
146.3	0.523143
146.4	0.523286
146.5	0.522214
146.6	0.5215
146.7	0.522286
146.8	0.522357
146.9	0.522286
147	0.522786
147.1	0.525357
147.2	0.525214
147.3	0.524357
147.4	0.526
147.5	0.525143
147.6	0.525643
147.7	0.525429
147.8	0.525071
147.9	0.525714
148	0.525357
148.1	0.526357
148.2	0.526714
148.3	0.526929
148.4	0.526571
148.5	0.5255
148.6	0.526
148.7	0.525643
148.8	0.525571
148.9	0.526357
149	0.525857
149.1	0.525429
149.2	0.525143
149.3	0.525143
149.4	0.523714
149.5	0.523429
149.6	0.523857
149.7	0.523643
149.8	0.524429
149.9	0.526286
150	0.526429
150.1	0.526929
150.2	0.527714
150.3	0.527643
150.4	0.527571
150.5	0.5265
150.6	0.526429
150.7	0.5265
150.8	0.526071
150.9	0.526929
151	0.528
151.1	0.529143
151.2	0.528429
151.3	0.527643
151.4	0.527071
151.5	0.527286
151.6	0.528
151.7	0.527286
151.8	0.528143
151.9	0.528214
152	0.528929
152.1	0.5275
152.2	0.5265
152.3	0.526286
152.4	0.526357
152.5	0.526214
152.6	0.527571
152.7	0.527929
152.8	0.526714
152.9	0.527143
153	0.526143
153.1	0.525357
153.2	0.525714
153.3	0.524786
153.4	0.524357
153.5	0.525143
153.6	0.524786
153.7	0.524786
153.8	0.524071
153.9	0.524429
154	0.525786
154.1	0.526357
154.2	0.528143
154.3	0.528
154.4	0.5275
154.5	0.529143
154.6	0.529
154.7	0.527357
154.8	0.527714
154.9	0.526786
155	0.527786
155.1	0.5275
155.2	0.528357
155.3	0.5285
155.4	0.53
155.5	0.529929
155.6	0.530357
155.7	0.529643
155.8	0.530143
155.9	0.530714
156	0.532643
156.1	0.535857
156.2	0.534786
156.3	0.535214
156.4	0.534429
156.5	0.535357
156.6	0.534429
156.7	0.534214
156.8	0.533786
156.9	0.534
157	0.534357
157.1	0.534786
157.2	0.534429
157.3	0.533857
157.4	0.534357
157.5	0.536286
157.6	0.535786
157.7	0.536143
157.8	0.534929
157.9	0.534357
158	0.534429
158.1	0.534643
158.2	0.534643
158.3	0.534571
158.4	0.534357
158.5	0.533786
158.6	0.535143
158.7	0.536071
158.8	0.536286
158.9	0.535786
159	0.535714
159.1	0.535643
159.2	0.535857
159.3	0.537
159.4	0.538857
159.5	0.540643
159.6	0.540143
159.7	0.541571
159.8	0.540357
159.9	0.540429
160	0.540643
160.1	0.539071
160.2	0.538857
160.3	0.539929
160.4	0.5385
160.5	0.54
160.6	0.539571
160.7	0.538
160.8	0.538071
160.9	0.538429
161	0.538286
161.1	0.538357
161.2	0.538714
161.3	0.538786
161.4	0.540214
161.5	0.540286
161.6	0.539571
161.7	0.540429
161.8	0.541429
161.9	0.542
162	0.542643
162.1	0.542857
162.2	0.542429
162.3	0.541357
162.4	0.541714
162.5	0.542429
162.6	0.541357
162.7	0.540429
162.8	0.540571
162.9	0.540929
163	0.541571
163.1	0.541929
163.2	0.541
163.3	0.543357
163.4	0.543429
163.5	0.543786
163.6	0.545571
163.7	0.546
163.8	0.544786
163.9	0.545143
164	0.545571
164.1	0.547214
164.2	0.546071
164.3	0.544786
164.4	0.545
164.5	0.544929
164.6	0.544714
164.7	0.545286
164.8	0.543857
164.9	0.544429
165	0.544786
165.1	0.543643
165.2	0.543786
165.3	0.5435
165.4	0.543857
165.5	0.542643
165.6	0.542571
165.7	0.541714
165.8	0.542214
165.9	0.542429
166	0.542643
166.1	0.5435
166.2	0.544143
166.3	0.5455
166.4	0.545643
166.5	0.546571
166.6	0.546714
166.7	0.546214
166.8	0.545714
166.9	0.545643
167	0.544929
167.1	0.544929
167.2	0.545214
167.3	0.545357
167.4	0.545357
167.5	0.544786
167.6	0.545286
167.7	0.546643
167.8	0.546143
167.9	0.546714
168	0.546357
168.1	0.545714
168.2	0.545786
168.3	0.545786
168.4	0.544143
168.5	0.543571
168.6	0.5445
168.7	0.544429
168.8	0.544929
168.9	0.545214
169	0.546214
169.1	0.546571
169.2	0.546643
169.3	0.546857
169.4	0.547571
169.5	0.547786
169.6	0.547786
169.7	0.548357
169.8	0.548571
169.9	0.549214
170	0.5495
170.1	0.550929
170.2	0.552143
170.3	0.551643
170.4	0.551857
170.5	0.551571
170.6	0.550857
170.7	0.5505
170.8	0.550286
170.9	0.551286
171	0.552286
171.1	0.552
171.2	0.551214
171.3	0.551214
171.4	0.551786
171.5	0.552643
171.6	0.552214
171.7	0.552357
171.8	0.552714
171.9	0.553214
172	0.553429
172.1	0.554214
172.2	0.553071
172.3	0.552929
172.4	0.5545
172.5	0.555
172.6	0.554786
172.7	0.553786
172.8	0.553571
172.9	0.553929
173	0.553786
173.1	0.554357
173.2	0.554786
173.3	0.5555
173.4	0.554571
173.5	0.555929
173.6	0.555786
173.7	0.556143
173.8	0.556214
173.9	0.554286
174	0.555071
174.1	0.556214
174.2	0.5555
174.3	0.555071
174.4	0.555857
174.5	0.557643
174.6	0.557
174.7	0.557286
174.8	0.557571
174.9	0.557929
175	0.557571
175.1	0.558143
175.2	0.557786
175.3	0.558429
175.4	0.557857
175.5	0.558214
175.6	0.559071
175.7	0.5605
175.8	0.561071
175.9	0.559786
176	0.561714
176.1	0.560929
176.2	0.561071
176.3	0.561214
176.4	0.560643
176.5	0.561071
176.6	0.561143
176.7	0.560714
176.8	0.562714
176.9	0.561714
177	0.561429
177.1	0.5625
177.2	0.561429
177.3	0.563286
177.4	0.562
177.5	0.562286
177.6	0.560857
177.7	0.560214
177.8	0.561143
177.9	0.561714
178	0.562786
178.1	0.564643
178.2	0.564857
178.3	0.564714
178.4	0.564857
178.5	0.564286
178.6	0.5655
178.7	0.565929
178.8	0.5655
178.9	0.565071
179	0.565786
179.1	0.565214
179.2	0.5655
179.3	0.565143
179.4	0.564357
179.5	0.564643
179.6	0.564643
179.7	0.565357
179.8	0.566571
179.9	0.566857
180	0.566357
180.1	0.567357
180.2	0.566786
180.3	0.569
180.4	0.568357
180.5	0.568071
180.6	0.568786
180.7	0.567714
180.8	0.568357
180.9	0.567857
181	0.567643
181.1	0.568214
181.2	0.568429
181.3	0.5685
181.4	0.567929
181.5	0.566357
181.6	0.565929
181.7	0.566786
181.8	0.567286
181.9	0.567357
182	0.567429
182.1	0.566857
182.2	0.566143
182.3	0.568214
182.4	0.568357
182.5	0.567429
182.6	0.567429
182.7	0.566214
182.8	0.565929
182.9	0.567214
183	0.566643
183.1	0.566643
183.2	0.566929
183.3	0.566929
183.4	0.567143
183.5	0.5665
183.6	0.566286
183.7	0.566286
183.8	0.566143
183.9	0.566857
184	0.566
184.1	0.564071
184.2	0.565357
184.3	0.565214
184.4	0.564929
184.5	0.564857
184.6	0.566357
184.7	0.565
184.8	0.565286
184.9	0.566357
185	0.566786
185.1	0.566786
185.2	0.5665
185.3	0.565857
185.4	0.566071
185.5	0.566071
185.6	0.567
185.7	0.566571
185.8	0.566357
185.9	0.567143
186	0.567143
186.1	0.567857
186.2	0.567643
186.3	0.568143
186.4	0.568286
186.5	0.569286
186.6	0.569143
186.7	0.568929
186.8	0.5685
186.9	0.568929
187	0.569214
187.1	0.570214
187.2	0.570429
187.3	0.570214
187.4	0.569643
187.5	0.569571
187.6	0.57
187.7	0.569857
187.8	0.570071
187.9	0.569714
188	0.569429
188.1	0.570429
188.2	0.569929
188.3	0.570143
188.4	0.571
188.5	0.571286
188.6	0.570357
188.7	0.571643
188.8	0.571143
188.9	0.572
189	0.572857
189.1	0.572071
189.2	0.571429
189.3	0.572357
189.4	0.5725
189.5	0.572214
189.6	0.572
189.7	0.572643
189.8	0.571429
189.9	0.571929
190	0.5725
190.1	0.572357
190.2	0.573357
190.3	0.573357
190.4	0.572857
190.5	0.572071
190.6	0.5705
190.7	0.571643
190.8	0.571643
190.9	0.570714
191	0.571071
191.1	0.570857
191.2	0.571143
191.3	0.570643
191.4	0.5715
191.5	0.571143
191.6	0.570857
191.7	0.573071
191.8	0.575071
191.9	0.575714
192	0.5745
192.1	0.574429
192.2	0.5745
192.3	0.573643
192.4	0.574
192.5	0.574214
192.6	0.573714
192.7	0.574286
192.8	0.573643
192.9	0.572286
193	0.572643
193.1	0.5725
193.2	0.572786
193.3	0.573786
193.4	0.574071
193.5	0.573786
193.6	0.573929
193.7	0.574786
193.8	0.576214
193.9	0.577143
194	0.576
194.1	0.575571
194.2	0.576857
194.3	0.576357
194.4	0.576071
194.5	0.577286
194.6	0.577286
194.7	0.5785
194.8	0.579429
194.9	0.579857
195	0.578643
195.1	0.579357
195.2	0.581
195.3	0.580786
195.4	0.582429
195.5	0.581929
195.6	0.580857
195.7	0.579857
195.8	0.579857
195.9	0.579857
196	0.580143
196.1	0.580214
196.2	0.579714
196.3	0.580214
196.4	0.580143
196.5	0.579357
196.6	0.578643
196.7	0.578286
196.8	0.577571
196.9	0.577357
197	0.578071
197.1	0.578857
197.2	0.579429
197.3	0.578714
197.4	0.578214
197.5	0.578286
197.6	0.578143
197.7	0.576571
197.8	0.577214
197.9	0.577286
198	0.5765
198.1	0.576429
198.2	0.575786
198.3	0.576071
198.4	0.576357
198.5	0.576714
198.6	0.576357
198.7	0.575
198.8	0.575857
198.9	0.577357
199	0.577786
199.1	0.578857
199.2	0.578571
199.3	0.579143
199.4	0.580143
199.5	0.581
199.6	0.5795
199.7	0.580357
199.8	0.581
199.9	0.581
200	0.581643
[truncated: 14,000 more rows]
