# Supplementary material for: Bayesian inference of kinetic schemes for ion channels by Kalman filtering
Source: eLife journal article supplement (doi:10.7554/elife.62714), 2022-05-04
Supplement: fig4-data8 [file 1_Sim_N_7000_Strom_MW.xlsx]

## Sheet: Tabelle1
0.1	0
0.2	0
0.3	0
0.4	0
0.5	0
0.6	0
0.7	0
0.8	0
0.9	0
1	0
1.1	0
1.2	0
1.3	0
1.4	0
1.5	0
1.6	0
1.7	0
1.8	0
1.9	0
2	0
2.1	0
2.2	0
2.3	0
2.4	0
2.5	0
2.6	0
2.7	0
2.8	0
2.9	0
3	0
3.1	0
3.2	0
3.3	0
3.4	0
3.5	0
3.6	0
3.7	0
3.8	0
3.9	0
4	0
4.1	0
4.2	0
4.3	0
4.4	0
4.5	0
4.6	0
4.7	0
4.8	0
4.9	0
5	0
5.1	0
5.2	0
5.3	0
5.4	0
5.5	0
5.6	0
5.7	0
5.8	0
5.9	0
6	0
6.1	0
6.2	0
6.3	0
6.4	0
6.5	0
6.6	0
6.7	0
6.8	0
6.9	0
7	0
7.1	0
7.2	0
7.3	0
7.4	0
7.5	0
7.6	0
7.7	0
7.8	0
7.9	0
8	0
8.1	0
8.2	0
8.3	0
8.4	0
8.5	0
8.6	0
8.7	0
8.8	0
8.9	0
9	0
9.1	0
9.2	0
9.3	0
9.4	0
9.5	0
9.6	0
9.7	0
9.8	0
9.9	0
10	0
10.1	0
10.2	0
10.3	0
10.4	0
10.5	0
10.6	0
10.7	0
10.8	0
10.9	0
11	0
11.1	0
11.2	0
11.3	0
11.4	0
11.5	0
11.6	0
11.7	0
11.8	0
11.9	0
12	0
12.1	0
12.2	0
12.3	0
12.4	0
12.5	0
12.6	0
12.7	0
12.8	0
12.9	0
13	0
13.1	0
13.2	0
13.3	0
13.4	0
13.5	0
13.6	0
13.7	0
13.8	0
13.9	0
14	0
14.1	0
14.2	0
14.3	0
14.4	0
14.5	0
14.6	0
14.7	0
14.8	0
14.9	0
15	0
15.1	0
15.2	0
15.3	0
15.4	0
15.5	0
15.6	0
15.7	0
15.8	0
15.9	0
16	0
16.1	0
16.2	0
16.3	0
16.4	0
16.5	0
16.6	0
16.7	0
16.8	0
16.9	0
17	0
17.1	0
17.2	0
17.3	0
17.4	0
17.5	0
17.6	0
17.7	0
17.8	0
17.9	0
18	0
18.1	0
18.2	0
18.3	0
18.4	0
18.5	0
18.6	0
18.7	0
18.8	0
18.9	0
19	0
19.1	0
19.2	0
19.3	0
19.4	0
19.5	0
19.6	0
19.7	0
19.8	0
19.9	0
20	0
20.1	0
20.2	0
20.3	0
20.4	0
20.5	0
20.6	0
20.7	0
20.8	0
20.9	0
21	0
21.1	0
21.2	0
21.3	0
21.4	0
21.5	0
21.6	0
21.7	0
21.8	0
21.9	0
22	0
22.1	0
22.2	0
22.3	0
22.4	0
22.5	0
22.6	0
22.7	0
22.8	0
22.9	0
23	0
23.1	0
23.2	0
23.3	0
23.4	0
23.5	0
23.6	0
23.7	0
23.8	0
23.9	0
24	0
24.1	0
24.2	0
24.3	0
24.4	0
24.5	0
24.6	0
24.7	0
24.8	0
24.9	0
25	0
25.1	0
25.2	0
25.3	0
25.4	0
25.5	0
25.6	0
25.7	0
25.8	0
25.9	0
26	0
26.1	0
26.2	0
26.3	0
26.4	0
26.5	0
26.6	0
26.7	0
26.8	0
26.9	0
27	0
27.1	0
27.2	0
27.3	0
27.4	0
27.5	0
27.6	0
27.7	0
27.8	0
27.9	0
28	0
28.1	0
28.2	0
28.3	0
28.4	0
28.5	0
28.6	0
28.7	0
28.8	0
28.9	0
29	0
29.1	0
29.2	0
29.3	0
29.4	0
29.5	0
29.6	0
29.7	0
29.8	0
29.9	0
30	0
30.1	0
30.2	0
30.3	0
30.4	0
30.5	0
30.6	0
30.7	0
30.8	0
30.9	0
31	0
31.1	0
31.2	0
31.3	0
31.4	0
31.5	0
31.6	0
31.7	0
31.8	0
31.9	0
32	0
32.1	0
32.2	0
32.3	0
32.4	0
32.5	0
32.6	0
32.7	0
32.8	0
32.9	0
33	0
33.1	0
33.2	0
33.3	0
33.4	0
33.5	0
33.6	0
33.7	0
33.8	0
33.9	0
34	0
34.1	0
34.2	0
34.3	0
34.4	0
34.5	0
34.6	0
34.7	0
34.8	0
34.9	0
35	0
35.1	0
35.2	0
35.3	0
35.4	0
35.5	0
35.6	0
35.7	0
35.8	0
35.9	0
36	0
36.1	0
36.2	0
36.3	0
36.4	0
36.5	0
36.6	0
36.7	0
36.8	0
36.9	0
37	0
37.1	0
37.2	0
37.3	0
37.4	0
37.5	0
37.6	0
37.7	0
37.8	0
37.9	0
38	0
38.1	0
38.2	0
38.3	0
38.4	0
38.5	0
38.6	0
38.7	0
38.8	0
38.9	0
39	0
39.1	0
39.2	0
39.3	0
39.4	0
39.5	0
39.6	0
39.7	0
39.8	0
39.9	0
40	0
40.1	0
40.2	0
40.3	0
40.4	0
40.5	0
40.6	0
40.7	0
40.8	0
40.9	0
41	0
41.1	0
41.2	0
41.3	0
41.4	0
41.5	0
41.6	0
41.7	0
41.8	0
41.9	0
42	0
42.1	0
42.2	0
42.3	0
42.4	0
42.5	0
42.6	0
42.7	0
42.8	0
42.9	0
43	0
43.1	0
43.2	0
43.3	0
43.4	0
43.5	0
43.6	0
43.7	0
43.8	0
43.9	0
44	0
44.1	0
44.2	0
44.3	0
44.4	0
44.5	0
44.6	0
44.7	0
44.8	0
44.9	0
45	0
45.1	0
45.2	0
45.3	0
45.4	0
45.5	0
45.6	0
45.7	0
45.8	0
45.9	0
46	0
46.1	0
46.2	0
46.3	0
46.4	0
46.5	0
46.6	0
46.7	0
46.8	0
46.9	0
47	0
47.1	0
47.2	0
47.3	0
47.4	0
47.5	0
47.6	0
47.7	0
47.8	0
47.9	0
48	0
48.1	0
48.2	0
48.3	0
48.4	0
48.5	0
48.6	0
48.7	0
48.8	0
48.9	0
49	0
49.1	0
49.2	0
49.3	0
49.4	0
49.5	0
49.6	0
49.7	0
49.8	0
49.9	0
50	0
50.1	0
50.2	0
50.3	0
50.4	0
50.5	0
50.6	0
50.7	0
50.8	0
50.9	0
51	0
51.1	0
51.2	0
51.3	0
51.4	0
51.5	0
51.6	0
51.7	0
51.8	0
51.9	0
52	0
52.1	0
52.2	0
52.3	0
52.4	0
52.5	0
52.6	0
52.7	0
52.8	0
52.9	0
53	0
53.1	0
53.2	0
53.3	0
53.4	0
53.5	0
53.6	0
53.7	0
53.8	0
53.9	0
54	0
54.1	0
54.2	0
54.3	0
54.4	0
54.5	0
54.6	0
54.7	0
54.8	0
54.9	0
55	0
55.1	0
55.2	0
55.3	0
55.4	0
55.5	0
55.6	0
55.7	0
55.8	0
55.9	0
56	0
56.1	0
56.2	0
56.3	0
56.4	0
56.5	0
56.6	0
56.7	0
56.8	0
56.9	0
57	0
57.1	0
57.2	0
57.3	0
57.4	0
57.5	0
57.6	0
57.7	0
57.8	0
57.9	0
58	0
58.1	0
58.2	0
58.3	0
58.4	0
58.5	0
58.6	0
58.7	0
58.8	0
58.9	0
59	0
59.1	0
59.2	0
59.3	0
59.4	0
59.5	0
59.6	0
59.7	0
59.8	0
59.9	0
60	0
60.1	0
60.2	0
60.3	0
60.4	0
60.5	0
60.6	0
60.7	0
60.8	0
60.9	0
61	0
61.1	0
61.2	0
61.3	0
61.4	0
61.5	0
61.6	0
61.7	0
61.8	0
61.9	0
62	0
62.1	0
62.2	0
62.3	0
62.4	0
62.5	0
62.6	0
62.7	0
62.8	0
62.9	0
63	0
63.1	0
63.2	0
63.3	0
63.4	0
63.5	0
63.6	0
63.7	0
63.8	0
63.9	0
64	0
64.1	0
64.2	0
64.3	0
64.4	0
64.5	0
64.6	0
64.7	0
64.8	0
64.9	0
65	0
65.1	0
65.2	0
65.3	0
65.4	0
65.5	0
65.6	0
65.7	0
65.8	0
65.9	0
66	0
66.1	0
66.2	0
66.3	0
66.4	0
66.5	0
66.6	0
66.7	0
66.8	0
66.9	0
67	0
67.1	0
67.2	0
67.3	0
67.4	0
67.5	0
67.6	0
67.7	0
67.8	0
67.9	0
68	0
68.1	0
68.2	0
68.3	0
68.4	0
68.5	0
68.6	0
68.7	0
68.8	0
68.9	0
69	0
69.1	0
69.2	0
69.3	0
69.4	0
69.5	0
69.6	0
69.7	0
69.8	0
69.9	0
70	0
70.1	0
70.2	0
70.3	0
70.4	0
70.5	0
70.6	0
70.7	0
70.8	0
70.9	0
71	0
71.1	0
71.2	0
71.3	0
71.4	0
71.5	0
71.6	0
71.7	0
71.8	0
71.9	0
72	0
72.1	0
72.2	0
72.3	0
72.4	0
72.5	0
72.6	0
72.7	0
72.8	0
72.9	0
73	0
73.1	0
73.2	0
73.3	0
73.4	0
73.5	0
73.6	0
73.7	0
73.8	0
73.9	0
74	0
74.1	0
74.2	0
74.3	0
74.4	0
74.5	0
74.6	0
74.7	0
74.8	0
74.9	0
75	0
75.1	0
75.2	0
75.3	0
75.4	0
75.5	0
75.6	0
75.7	0
75.8	0
75.9	0
76	0
76.1	0
76.2	0
76.3	0
76.4	0
76.5	0
76.6	0
76.7	0
76.8	0
76.9	0
77	0
77.1	0
77.2	0
77.3	0
77.4	0
77.5	0
77.6	0
77.7	0
77.8	0
77.9	0
78	0
78.1	0
78.2	0
78.3	0
78.4	0
78.5	0
78.6	0
78.7	0
78.8	0
78.9	0
79	0
79.1	0
79.2	0
79.3	0
79.4	0
79.5	0
79.6	0
79.7	0
79.8	0
79.9	0
80	0
80.1	0
80.2	0
80.3	0
80.4	0
80.5	0
80.6	0
80.7	0
80.8	0
80.9	0
81	0
81.1	0
81.2	0
81.3	0
81.4	0
81.5	0
81.6	0
81.7	0
81.8	0
81.9	0
82	0
82.1	0
82.2	0
82.3	0
82.4	0
82.5	0
82.6	0
82.7	0
82.8	0
82.9	0
83	0
83.1	0
83.2	0
83.3	0
83.4	0
83.5	0
83.6	0
83.7	0
83.8	0
83.9	0
84	0
84.1	0
84.2	0
84.3	0
84.4	0
84.5	0
84.6	0
84.7	0
84.8	0
84.9	0
85	0
85.1	0
85.2	0
85.3	0
85.4	0
85.5	0
85.6	0
85.7	0
85.8	0
85.9	0
86	0
86.1	0
86.2	0
86.3	0
86.4	0
86.5	0
86.6	0
86.7	0
86.8	0
86.9	0
87	0
87.1	0
87.2	0
87.3	0
87.4	0
87.5	0
87.6	0
87.7	0
87.8	0
87.9	0
88	0
88.1	0
88.2	0
88.3	0
88.4	0
88.5	0
88.6	0
88.7	0
88.8	0
88.9	0
89	0
89.1	0
89.2	0
89.3	0
89.4	0
89.5	0
89.6	0
89.7	0
89.8	0
89.9	0
90	0
90.1	0
90.2	0
90.3	0
90.4	0
90.5	0
90.6	0
90.7	0
90.8	0
90.9	0
91	0
91.1	0
91.2	0
91.3	0
91.4	0
91.5	0
91.6	0
91.7	0
91.8	0
91.9	0
92	0
92.1	0
92.2	0
92.3	0
92.4	0
92.5	0
92.6	0
92.7	0
92.8	0
92.9	0
93	0
93.1	0
93.2	0
93.3	0
93.4	0
93.5	0
93.6	0
93.7	0
93.8	0
93.9	0
94	0
94.1	0
94.2	0
94.3	0
94.4	0
94.5	0
94.6	0
94.7	0
94.8	0
94.9	0
95	0
95.1	0
95.2	0
95.3	0
95.4	0
95.5	0
95.6	0
95.7	0
95.8	0
95.9	0
96	0
96.1	0
96.2	0
96.3	0
96.4	0
96.5	0
96.6	0
96.7	0
96.8	0
96.9	0
97	0
97.1	0
97.2	0
97.3	0
97.4	0
97.5	0
97.6	0
97.7	0
97.8	0
97.9	0
98	0
98.1	0
98.2	0
98.3	0
98.4	0
98.5	0
98.6	0
98.7	0
98.8	0
98.9	0
99	0
99.1	0
99.2	0
99.3	0
99.4	0
99.5	0
99.6	0
99.7	0
99.8	0
99.9	0
100	0
100.1	0
100.2	0
100.3	0
100.4	0
100.5	0
100.6	0
100.7	0
100.8	0
100.9	0
101	0
101.1	0
101.2	0
101.3	0
101.4	0
101.5	0
101.6	0
101.7	0
101.8	0.000142857
101.9	0.000285714
102	0.000285714
102.1	0.000714286
102.2	0.000857143
102.3	0.000857143
102.4	0.00142857
102.5	0.00157143
102.6	0.00157143
102.7	0.00171429
102.8	0.00185714
102.9	0.002
103	0.002
103.1	0.00214286
103.2	0.00228571
103.3	0.00257143
103.4	0.00271429
103.5	0.00314286
103.6	0.00342857
103.7	0.00371429
103.8	0.00414286
103.9	0.00428571
104	0.00485714
104.1	0.00485714
104.2	0.00514286
104.3	0.00557143
104.4	0.00571429
104.5	0.00571429
104.6	0.00571429
104.7	0.00628571
104.8	0.00671429
104.9	0.00685714
105	0.00685714
105.1	0.007
105.2	0.00714286
105.3	0.00742857
105.4	0.00757143
105.5	0.00785714
105.6	0.00842857
105.7	0.00914286
105.8	0.00914286
105.9	0.00971429
106	0.0102857
106.1	0.0105714
106.2	0.0105714
106.3	0.0108571
106.4	0.0108571
106.5	0.0111429
106.6	0.0112857
106.7	0.0117143
106.8	0.0121429
106.9	0.0124286
107	0.0127143
107.1	0.013
107.2	0.0134286
107.3	0.0142857
107.4	0.0148571
107.5	0.0152857
107.6	0.016
107.7	0.0165714
107.8	0.0172857
107.9	0.0178571
108	0.018
108.1	0.0184286
108.2	0.0195714
108.3	0.0197143
108.4	0.0204286
108.5	0.0208571
108.6	0.0214286
108.7	0.0218571
108.8	0.022
108.9	0.0222857
109	0.0231429
109.1	0.0232857
109.2	0.0238571
109.3	0.0241429
109.4	0.025
109.5	0.0257143
109.6	0.0255714
109.7	0.026
109.8	0.0262857
109.9	0.0267143
110	0.0275714
110.1	0.0284286
110.2	0.0284286
110.3	0.0285714
110.4	0.0292857
110.5	0.03
110.6	0.0308571
110.7	0.0312857
110.8	0.0317143
110.9	0.0321429
111	0.0324286
111.1	0.0331429
111.2	0.0331429
111.3	0.0331429
111.4	0.0331429
111.5	0.0332857
111.6	0.0337143
111.7	0.0338571
111.8	0.0341429
111.9	0.0344286
112	0.0351429
112.1	0.0354286
112.2	0.0355714
112.3	0.036
112.4	0.0361429
112.5	0.0361429
112.6	0.0372857
112.7	0.038
112.8	0.0381429
112.9	0.0384286
113	0.0388571
113.1	0.0391429
113.2	0.0395714
113.3	0.0402857
113.4	0.0405714
113.5	0.0408571
113.6	0.0411429
113.7	0.0412857
113.8	0.0415714
113.9	0.042
114	0.0421429
114.1	0.0422857
114.2	0.0427143
114.3	0.043
114.4	0.0435714
114.5	0.0438571
114.6	0.0441429
114.7	0.0451429
114.8	0.0458571
114.9	0.0462857
115	0.047
115.1	0.048
115.2	0.0478571
115.3	0.0484286
115.4	0.0491429
115.5	0.05
115.6	0.0508571
115.7	0.0517143
115.8	0.052
115.9	0.0528571
116	0.053
116.1	0.0535714
116.2	0.0537143
116.3	0.0541429
116.4	0.0547143
116.5	0.055
116.6	0.0555714
116.7	0.0557143
116.8	0.0561429
116.9	0.0571429
117	0.0572857
117.1	0.0574286
117.2	0.0582857
117.3	0.0587143
117.4	0.0588571
117.5	0.0595714
117.6	0.0598571
117.7	0.0602857
117.8	0.0604286
117.9	0.0607143
118	0.0611429
118.1	0.0614286
118.2	0.0617143
118.3	0.0618571
118.4	0.062
118.5	0.0622857
118.6	0.0625714
118.7	0.0632857
118.8	0.0635714
118.9	0.0638571
119	0.0641429
119.1	0.0645714
119.2	0.0648571
119.3	0.0652857
119.4	0.0652857
119.5	0.0652857
119.6	0.0655714
119.7	0.0662857
119.8	0.067
119.9	0.0675714
120	0.068
120.1	0.0687143
120.2	0.0692857
120.3	0.0701429
120.4	0.0704286
120.5	0.071
120.6	0.0715714
120.7	0.072
120.8	0.0724286
120.9	0.0724286
121	0.0727143
121.1	0.0727143
121.2	0.0731429
121.3	0.0738571
121.4	0.0742857
121.5	0.0747143
121.6	0.0747143
121.7	0.0754286
121.8	0.076
121.9	0.0767143
122	0.077
122.1	0.0772857
122.2	0.0774286
122.3	0.078
122.4	0.0784286
122.5	0.0791429
122.6	0.0792857
122.7	0.0795714
122.8	0.0797143
122.9	0.08
123	0.0801429
123.1	0.0802857
123.2	0.0805714
123.3	0.0814286
123.4	0.0817143
123.5	0.082
123.6	0.0824286
123.7	0.083
123.8	0.0834286
123.9	0.0837143
124	0.0841429
124.1	0.084
124.2	0.084
124.3	0.0844286
124.4	0.0848571
124.5	0.085
124.6	0.0855714
124.7	0.0858571
124.8	0.0861429
124.9	0.0862857
125	0.087
125.1	0.0875714
125.2	0.0877143
125.3	0.0877143
125.4	0.0877143
125.5	0.088
125.6	0.0881429
125.7	0.0885714
125.8	0.0892857
125.9	0.0892857
126	0.0897143
126.1	0.0898571
126.2	0.0901429
126.3	0.0905714
126.4	0.0911429
126.5	0.0912857
126.6	0.0911429
126.7	0.0911429
126.8	0.0917143
126.9	0.092
127	0.092
127.1	0.0922857
127.2	0.0931429
127.3	0.0932857
127.4	0.0937143
127.5	0.094
127.6	0.0942857
127.7	0.0945714
127.8	0.0947143
127.9	0.095
128	0.0954286
128.1	0.0955714
128.2	0.0957143
128.3	0.0961429
128.4	0.0965714
128.5	0.0965714
128.6	0.0968571
128.7	0.097
128.8	0.0974286
128.9	0.0972857
129	0.0978571
129.1	0.0982857
129.2	0.0991429
129.3	0.0998571
129.4	0.100286
129.5	0.100286
129.6	0.100714
129.7	0.100714
129.8	0.101143
129.9	0.101286
130	0.101714
130.1	0.102
130.2	0.102571
130.3	0.103429
130.4	0.103714
130.5	0.103857
130.6	0.103857
130.7	0.104
130.8	0.104143
130.9	0.104429
131	0.104857
131.1	0.105571
131.2	0.105857
131.3	0.106143
131.4	0.106143
131.5	0.107
131.6	0.108286
131.7	0.108714
131.8	0.109
131.9	0.109714
132	0.110286
132.1	0.110429
132.2	0.110714
132.3	0.110714
132.4	0.110571
132.5	0.110857
132.6	0.111286
132.7	0.111571
132.8	0.112
132.9	0.112286
133	0.112571
133.1	0.113286
133.2	0.114143
133.3	0.114571
133.4	0.114714
133.5	0.115143
133.6	0.115571
133.7	0.115714
133.8	0.115714
133.9	0.116
134	0.116286
134.1	0.117429
134.2	0.118286
134.3	0.118714
134.4	0.119143
134.5	0.119429
134.6	0.119429
134.7	0.119429
134.8	0.12
134.9	0.120143
135	0.121
135.1	0.121571
135.2	0.121714
135.3	0.121571
135.4	0.122143
135.5	0.122714
135.6	0.122857
135.7	0.123143
135.8	0.123286
135.9	0.123429
136	0.123714
136.1	0.124
136.2	0.124429
136.3	0.125
136.4	0.125
136.5	0.125143
136.6	0.125714
136.7	0.126
136.8	0.126
136.9	0.125714
137	0.126
137.1	0.125714
137.2	0.125571
137.3	0.126429
137.4	0.126429
137.5	0.126571
137.6	0.126286
137.7	0.126143
137.8	0.126714
137.9	0.127286
138	0.127571
138.1	0.127714
138.2	0.127714
138.3	0.127571
138.4	0.127857
138.5	0.129143
138.6	0.129286
138.7	0.129571
138.8	0.13
138.9	0.13
139	0.130429
139.1	0.130857
139.2	0.131143
139.3	0.131429
139.4	0.131857
139.5	0.132286
139.6	0.132286
139.7	0.132714
139.8	0.133
139.9	0.133286
140	0.133714
140.1	0.133857
140.2	0.133571
140.3	0.133714
140.4	0.134
140.5	0.134286
140.6	0.134143
140.7	0.134714
140.8	0.135
140.9	0.135429
141	0.135857
141.1	0.136286
141.2	0.136857
141.3	0.137143
141.4	0.137286
141.5	0.137143
141.6	0.137429
141.7	0.138
141.8	0.138286
141.9	0.139
142	0.139286
142.1	0.139857
142.2	0.140286
142.3	0.140571
142.4	0.140286
142.5	0.140714
142.6	0.141429
142.7	0.142143
142.8	0.142
142.9	0.142571
143	0.143
143.1	0.143143
143.2	0.143714
143.3	0.144286
143.4	0.144429
143.5	0.145286
143.6	0.145714
143.7	0.146
143.8	0.146
143.9	0.146
144	0.145857
144.1	0.146143
144.2	0.146143
144.3	0.146714
144.4	0.147286
144.5	0.147286
144.6	0.147714
144.7	0.147857
144.8	0.148143
144.9	0.148143
145	0.148
145.1	0.148286
145.2	0.148286
145.3	0.148714
145.4	0.149143
145.5	0.149143
145.6	0.149
145.7	0.149143
145.8	0.148429
145.9	0.148857
146	0.148571
146.1	0.148714
146.2	0.149143
146.3	0.149857
146.4	0.150143
146.5	0.150429
146.6	0.150714
146.7	0.151143
146.8	0.151143
146.9	0.151429
147	0.151714
147.1	0.152286
147.2	0.152429
147.3	0.152857
147.4	0.153714
147.5	0.154286
147.6	0.154143
147.7	0.154143
147.8	0.154286
147.9	0.154286
148	0.153857
148.1	0.154
148.2	0.154714
148.3	0.154857
148.4	0.155286
148.5	0.155714
148.6	0.155857
148.7	0.156286
148.8	0.156286
148.9	0.156571
149	0.157
149.1	0.157286
149.2	0.157714
149.3	0.158
149.4	0.158714
149.5	0.158571
149.6	0.158571
149.7	0.158571
149.8	0.158571
149.9	0.159
150	0.159
150.1	0.159429
150.2	0.160286
150.3	0.160571
150.4	0.160571
150.5	0.161
150.6	0.160857
150.7	0.161
150.8	0.161571
150.9	0.161286
151	0.161
151.1	0.161429
151.2	0.161857
151.3	0.162429
151.4	0.162286
151.5	0.162429
151.6	0.162857
151.7	0.163143
151.8	0.163143
151.9	0.163429
152	0.163857
152.1	0.163714
152.2	0.163714
152.3	0.163571
152.4	0.163571
152.5	0.163571
152.6	0.163857
152.7	0.164429
152.8	0.164714
152.9	0.165571
153	0.165429
153.1	0.166
153.2	0.166429
153.3	0.166429
153.4	0.167
153.5	0.167429
153.6	0.167857
153.7	0.167571
153.8	0.168286
153.9	0.168571
154	0.168571
154.1	0.169
154.2	0.169143
154.3	0.169714
154.4	0.17
154.5	0.17
154.6	0.170429
154.7	0.170714
154.8	0.171
154.9	0.171286
155	0.171286
155.1	0.171143
155.2	0.171143
155.3	0.171571
155.4	0.172
155.5	0.172571
155.6	0.172857
155.7	0.172857
155.8	0.173
155.9	0.173571
156	0.173857
156.1	0.174429
156.2	0.174571
156.3	0.174714
156.4	0.175286
156.5	0.175143
156.6	0.175714
156.7	0.175429
156.8	0.175857
156.9	0.175571
157	0.175714
157.1	0.175714
157.2	0.175571
157.3	0.175571
157.4	0.175714
157.5	0.176
157.6	0.176429
157.7	0.176429
157.8	0.176714
157.9	0.177143
158	0.177143
158.1	0.177429
158.2	0.177429
158.3	0.178
158.4	0.177857
158.5	0.178143
158.6	0.178286
158.7	0.178857
158.8	0.179143
158.9	0.179286
159	0.179714
159.1	0.18
159.2	0.18
159.3	0.180571
159.4	0.180286
159.5	0.180571
159.6	0.181143
159.7	0.181
159.8	0.181143
159.9	0.181429
160	0.182143
160.1	0.182143
160.2	0.182571
160.3	0.182857
160.4	0.183143
160.5	0.183429
160.6	0.184
160.7	0.184286
160.8	0.184
160.9	0.184429
161	0.185143
161.1	0.185571
161.2	0.186
161.3	0.186
161.4	0.186143
161.5	0.186429
161.6	0.186714
161.7	0.187286
161.8	0.187286
161.9	0.187286
162	0.187714
162.1	0.187857
162.2	0.187857
162.3	0.188143
162.4	0.188857
162.5	0.189
162.6	0.188857
162.7	0.188857
162.8	0.189571
162.9	0.189571
163	0.189571
163.1	0.190143
163.2	0.190571
163.3	0.190714
163.4	0.190714
163.5	0.191286
163.6	0.191429
163.7	0.191429
163.8	0.191143
163.9	0.191571
164	0.192
164.1	0.192
164.2	0.192143
164.3	0.192714
164.4	0.193
164.5	0.193
164.6	0.193286
164.7	0.193714
164.8	0.194
164.9	0.194
165	0.194571
165.1	0.195
165.2	0.195143
165.3	0.195286
165.4	0.195571
165.5	0.196
165.6	0.196143
165.7	0.196
165.8	0.196143
165.9	0.196143
166	0.196143
166.1	0.195571
166.2	0.195857
166.3	0.196143
166.4	0.196571
166.5	0.197143
166.6	0.198143
166.7	0.198143
166.8	0.198429
166.9	0.198857
167	0.199143
167.1	0.199857
167.2	0.199857
167.3	0.199857
167.4	0.2
167.5	0.200286
167.6	0.2
167.7	0.2
167.8	0.200429
167.9	0.201
168	0.201286
168.1	0.202143
168.2	0.202286
168.3	0.202286
168.4	0.202714
168.5	0.202857
168.6	0.203571
168.7	0.203429
168.8	0.203571
168.9	0.203571
169	0.204143
169.1	0.204
169.2	0.204
169.3	0.204
169.4	0.204857
169.5	0.205
169.6	0.204714
169.7	0.205571
169.8	0.205571
169.9	0.205571
170	0.206
170.1	0.205714
170.2	0.206
170.3	0.206286
170.4	0.206571
170.5	0.206857
170.6	0.206571
170.7	0.206714
170.8	0.206857
170.9	0.206857
171	0.207286
171.1	0.207857
171.2	0.208143
171.3	0.208714
171.4	0.209
171.5	0.208571
171.6	0.209
171.7	0.209
171.8	0.208857
171.9	0.209
172	0.209
172.1	0.208857
172.2	0.208857
172.3	0.209
172.4	0.208857
172.5	0.209
172.6	0.209571
172.7	0.209571
172.8	0.209429
172.9	0.209
173	0.209
173.1	0.209286
173.2	0.209286
173.3	0.209714
173.4	0.209714
173.5	0.210286
173.6	0.21
173.7	0.209714
173.8	0.210429
173.9	0.210429
174	0.211286
174.1	0.211286
174.2	0.211429
174.3	0.211857
174.4	0.212143
174.5	0.212286
174.6	0.212857
174.7	0.213
174.8	0.213143
174.9	0.213714
175	0.214
175.1	0.214
175.2	0.213857
175.3	0.214143
175.4	0.214857
175.5	0.215
175.6	0.214857
175.7	0.215429
175.8	0.216714
175.9	0.216571
176	0.217
176.1	0.216714
176.2	0.217143
176.3	0.217286
176.4	0.217857
176.5	0.217857
176.6	0.218
176.7	0.217714
176.8	0.217714
176.9	0.218
177	0.218286
177.1	0.218429
177.2	0.219
177.3	0.22
177.4	0.219714
177.5	0.219714
177.6	0.22
177.7	0.220286
177.8	0.220714
177.9	0.221429
178	0.222286
178.1	0.223
178.2	0.223286
178.3	0.223429
178.4	0.223429
178.5	0.224
178.6	0.224571
178.7	0.225
178.8	0.225571
178.9	0.226286
179	0.226286
179.1	0.226143
179.2	0.226143
179.3	0.226286
179.4	0.226714
179.5	0.226714
179.6	0.227286
179.7	0.227
179.8	0.227286
179.9	0.227714
180	0.227857
180.1	0.227714
180.2	0.228143
180.3	0.228286
180.4	0.228286
180.5	0.228286
180.6	0.228286
180.7	0.228571
180.8	0.229143
180.9	0.229571
181	0.230143
181.1	0.230429
181.2	0.230429
181.3	0.230857
181.4	0.231714
181.5	0.232571
181.6	0.232714
181.7	0.232571
181.8	0.232
181.9	0.233143
182	0.233714
182.1	0.233571
182.2	0.233857
182.3	0.233571
182.4	0.233429
182.5	0.233571
182.6	0.234
182.7	0.234714
182.8	0.234571
182.9	0.235
183	0.235571
183.1	0.235714
183.2	0.235429
183.3	0.235714
183.4	0.236
183.5	0.236
183.6	0.236143
183.7	0.236571
183.8	0.237143
183.9	0.237714
184	0.238429
184.1	0.239
184.2	0.239143
184.3	0.239286
184.4	0.239571
184.5	0.240143
184.6	0.240143
184.7	0.240143
184.8	0.24
184.9	0.240143
185	0.240429
185.1	0.240286
185.2	0.240143
185.3	0.240429
185.4	0.240571
185.5	0.240429
185.6	0.241
185.7	0.241714
185.8	0.241857
185.9	0.241857
186	0.241857
186.1	0.242143
186.2	0.242571
186.3	0.243143
186.4	0.243143
186.5	0.243286
186.6	0.243429
186.7	0.243429
186.8	0.244857
186.9	0.244714
187	0.244571
187.1	0.244286
187.2	0.244143
187.3	0.244143
187.4	0.244143
187.5	0.244429
187.6	0.244286
187.7	0.244429
187.8	0.244143
187.9	0.244286
188	0.244286
188.1	0.244143
188.2	0.244286
188.3	0.244429
188.4	0.244857
188.5	0.244714
188.6	0.245
188.7	0.245714
188.8	0.246143
188.9	0.246286
189	0.246286
189.1	0.246143
189.2	0.246571
189.3	0.246286
189.4	0.246286
189.5	0.246429
189.6	0.246429
189.7	0.247143
189.8	0.247429
189.9	0.247143
190	0.247286
190.1	0.247857
190.2	0.248143
190.3	0.248286
190.4	0.248143
190.5	0.248143
190.6	0.247857
190.7	0.248571
190.8	0.248571
190.9	0.248714
191	0.248429
191.1	0.248714
191.2	0.248571
191.3	0.248714
191.4	0.248714
191.5	0.249286
191.6	0.249714
191.7	0.249714
191.8	0.250571
191.9	0.251
192	0.250857
192.1	0.251286
192.2	0.251714
192.3	0.252143
192.4	0.251857
192.5	0.251857
192.6	0.251857
192.7	0.251857
192.8	0.251571
192.9	0.251857
193	0.251429
193.1	0.251857
193.2	0.251857
193.3	0.252143
193.4	0.252714
193.5	0.252714
193.6	0.252857
193.7	0.252714
193.8	0.252857
193.9	0.252857
194	0.253286
194.1	0.253714
194.2	0.254143
194.3	0.254571
194.4	0.254714
194.5	0.255
194.6	0.254714
194.7	0.255286
194.8	0.255714
194.9	0.256286
195	0.256286
195.1	0.256286
195.2	0.256
195.3	0.255429
195.4	0.255571
195.5	0.255714
195.6	0.255571
195.7	0.255857
195.8	0.256143
195.9	0.256429
196	0.256143
196.1	0.256143
196.2	0.256714
196.3	0.257286
196.4	0.257429
196.5	0.257143
196.6	0.257143
196.7	0.257
196.8	0.257429
196.9	0.257571
197	0.257571
197.1	0.257286
197.2	0.257714
197.3	0.257857
197.4	0.258
197.5	0.258
197.6	0.258
197.7	0.258143
197.8	0.258429
197.9	0.258429
198	0.258571
198.1	0.258429
198.2	0.258714
198.3	0.258714
198.4	0.258857
198.5	0.259
198.6	0.259286
198.7	0.259429
198.8	0.259571
198.9	0.259286
199	0.259857
199.1	0.260143
199.2	0.260429
199.3	0.260571
199.4	0.260143
199.5	0.260286
199.6	0.26
199.7	0.259286
199.8	0.259571
199.9	0.259714
200	0.259714
[truncated: 14,000 more rows]
