# Supplementary material for: Bayesian inference of kinetic schemes for ion channels by Kalman filtering
Source: eLife journal article supplement (doi:10.7554/elife.62714), 2022-05-04
Supplement: fig4-data8 [file 1_Sim_N_10000_Fluor_MW.xlsx]

## Sheet: Tabelle1
0.1	0
0.2	0
0.3	0
0.4	0
0.5	0
0.6	0
0.7	0
0.8	0
0.9	0
1	0
1.1	0
1.2	0
1.3	0
1.4	0
1.5	0
1.6	0
1.7	0
1.8	0
1.9	0
2	0
2.1	0
2.2	0
2.3	0
2.4	0
2.5	0
2.6	0
2.7	0
2.8	0
2.9	0
3	0
3.1	0
3.2	0
3.3	0
3.4	0
3.5	0
3.6	0
3.7	0
3.8	0
3.9	0
4	0
4.1	0
4.2	0
4.3	0
4.4	0
4.5	0
4.6	0
4.7	0
4.8	0
4.9	0
5	0
5.1	0
5.2	0
5.3	0
5.4	0
5.5	0
5.6	0
5.7	0
5.8	0
5.9	0
6	0
6.1	0
6.2	0
6.3	0
6.4	0
6.5	0
6.6	0
6.7	0
6.8	0
6.9	0
7	0
7.1	0
7.2	0
7.3	0
7.4	0
7.5	0
7.6	0
7.7	0
7.8	0
7.9	0
8	0
8.1	0
8.2	0
8.3	0
8.4	0
8.5	0
8.6	0
8.7	0
8.8	0
8.9	0
9	0
9.1	0
9.2	0
9.3	0
9.4	0
9.5	0
9.6	0
9.7	0
9.8	0
9.9	0
10	0
10.1	0
10.2	0
10.3	0
10.4	0
10.5	0
10.6	0
10.7	0
10.8	0
10.9	0
11	0
11.1	0
11.2	0
11.3	0
11.4	0
11.5	0
11.6	0
11.7	0
11.8	0
11.9	0
12	0
12.1	0
12.2	0
12.3	0
12.4	0
12.5	0
12.6	0
12.7	0
12.8	0
12.9	0
13	0
13.1	0
13.2	0
13.3	0
13.4	0
13.5	0
13.6	0
13.7	0
13.8	0
13.9	0
14	0
14.1	0
14.2	0
14.3	0
14.4	0
14.5	0
14.6	0
14.7	0
14.8	0
14.9	0
15	0
15.1	0
15.2	0
15.3	0
15.4	0
15.5	0
15.6	0
15.7	0
15.8	0
15.9	0
16	0
16.1	0
16.2	0
16.3	0
16.4	0
16.5	0
16.6	0
16.7	0
16.8	0
16.9	0
17	0
17.1	0
17.2	0
17.3	0
17.4	0
17.5	0
17.6	0
17.7	0
17.8	0
17.9	0
18	0
18.1	0
18.2	0
18.3	0
18.4	0
18.5	0
18.6	0
18.7	0
18.8	0
18.9	0
19	0
19.1	0
19.2	0
19.3	0
19.4	0
19.5	0
19.6	0
19.7	0
19.8	0
19.9	0
20	0
20.1	0
20.2	0
20.3	0
20.4	0
20.5	0
20.6	0
20.7	0
20.8	0
20.9	0
21	0
21.1	0
21.2	0
21.3	0
21.4	0
21.5	0
21.6	0
21.7	0
21.8	0
21.9	0
22	0
22.1	0
22.2	0
22.3	0
22.4	0
22.5	0
22.6	0
22.7	0
22.8	0
22.9	0
23	0
23.1	0
23.2	0
23.3	0
23.4	0
23.5	0
23.6	0
23.7	0
23.8	0
23.9	0
24	0
24.1	0
24.2	0
24.3	0
24.4	0
24.5	0
24.6	0
24.7	0
24.8	0
24.9	0
25	0
25.1	0
25.2	0
25.3	0
25.4	0
25.5	0
25.6	0
25.7	0
25.8	0
25.9	0
26	0
26.1	0
26.2	0
26.3	0
26.4	0
26.5	0
26.6	0
26.7	0
26.8	0
26.9	0
27	0
27.1	0
27.2	0
27.3	0
27.4	0
27.5	0
27.6	0
27.7	0
27.8	0
27.9	0
28	0
28.1	0
28.2	0
28.3	0
28.4	0
28.5	0
28.6	0
28.7	0
28.8	0
28.9	0
29	0
29.1	0
29.2	0
29.3	0
29.4	0
29.5	0
29.6	0
29.7	0
29.8	0
29.9	0
30	0
30.1	0
30.2	0
30.3	0
30.4	0
30.5	0
30.6	0
30.7	0
30.8	0
30.9	0
31	0
31.1	0
31.2	0
31.3	0
31.4	0
31.5	0
31.6	0
31.7	0
31.8	0
31.9	0
32	0
32.1	0
32.2	0
32.3	0
32.4	0
32.5	0
32.6	0
32.7	0
32.8	0
32.9	0
33	0
33.1	0
33.2	0
33.3	0
33.4	0
33.5	0
33.6	0
33.7	0
33.8	0
33.9	0
34	0
34.1	0
34.2	0
34.3	0
34.4	0
34.5	0
34.6	0
34.7	0
34.8	0
34.9	0
35	0
35.1	0
35.2	0
35.3	0
35.4	0
35.5	0
35.6	0
35.7	0
35.8	0
35.9	0
36	0
36.1	0
36.2	0
36.3	0
36.4	0
36.5	0
36.6	0
36.7	0
36.8	0
36.9	0
37	0
37.1	0
37.2	0
37.3	0
37.4	0
37.5	0
37.6	0
37.7	0
37.8	0
37.9	0
38	0
38.1	0
38.2	0
38.3	0
38.4	0
38.5	0
38.6	0
38.7	0
38.8	0
38.9	0
39	0
39.1	0
39.2	0
39.3	0
39.4	0
39.5	0
39.6	0
39.7	0
39.8	0
39.9	0
40	0
40.1	0
40.2	0
40.3	0
40.4	0
40.5	0
40.6	0
40.7	0
40.8	0
40.9	0
41	0
41.1	0
41.2	0
41.3	0
41.4	0
41.5	0
41.6	0
41.7	0
41.8	0
41.9	0
42	0
42.1	0
42.2	0
42.3	0
42.4	0
42.5	0
42.6	0
42.7	0
42.8	0
42.9	0
43	0
43.1	0
43.2	0
43.3	0
43.4	0
43.5	0
43.6	0
43.7	0
43.8	0
43.9	0
44	0
44.1	0
44.2	0
44.3	0
44.4	0
44.5	0
44.6	0
44.7	0
44.8	0
44.9	0
45	0
45.1	0
45.2	0
45.3	0
45.4	0
45.5	0
45.6	0
45.7	0
45.8	0
45.9	0
46	0
46.1	0
46.2	0
46.3	0
46.4	0
46.5	0
46.6	0
46.7	0
46.8	0
46.9	0
47	0
47.1	0
47.2	0
47.3	0
47.4	0
47.5	0
47.6	0
47.7	0
47.8	0
47.9	0
48	0
48.1	0
48.2	0
48.3	0
48.4	0
48.5	0
48.6	0
48.7	0
48.8	0
48.9	0
49	0
49.1	0
49.2	0
49.3	0
49.4	0
49.5	0
49.6	0
49.7	0
49.8	0
49.9	0
50	0
50.1	0
50.2	0
50.3	0
50.4	0
50.5	0
50.6	0
50.7	0
50.8	0
50.9	0
51	0
51.1	0
51.2	0
51.3	0
51.4	0
51.5	0
51.6	0
51.7	0
51.8	0
51.9	0
52	0
52.1	0
52.2	0
52.3	0
52.4	0
52.5	0
52.6	0
52.7	0
52.8	0
52.9	0
53	0
53.1	0
53.2	0
53.3	0
53.4	0
53.5	0
53.6	0
53.7	0
53.8	0
53.9	0
54	0
54.1	0
54.2	0
54.3	0
54.4	0
54.5	0
54.6	0
54.7	0
54.8	0
54.9	0
55	0
55.1	0
55.2	0
55.3	0
55.4	0
55.5	0
55.6	0
55.7	0
55.8	0
55.9	0
56	0
56.1	0
56.2	0
56.3	0
56.4	0
56.5	0
56.6	0
56.7	0
56.8	0
56.9	0
57	0
57.1	0
57.2	0
57.3	0
57.4	0
57.5	0
57.6	0
57.7	0
57.8	0
57.9	0
58	0
58.1	0
58.2	0
58.3	0
58.4	0
58.5	0
58.6	0
58.7	0
58.8	0
58.9	0
59	0
59.1	0
59.2	0
59.3	0
59.4	0
59.5	0
59.6	0
59.7	0
59.8	0
59.9	0
60	0
60.1	0
60.2	0
60.3	0
60.4	0
60.5	0
60.6	0
60.7	0
60.8	0
60.9	0
61	0
61.1	0
61.2	0
61.3	0
61.4	0
61.5	0
61.6	0
61.7	0
61.8	0
61.9	0
62	0
62.1	0
62.2	0
62.3	0
62.4	0
62.5	0
62.6	0
62.7	0
62.8	0
62.9	0
63	0
63.1	0
63.2	0
63.3	0
63.4	0
63.5	0
63.6	0
63.7	0
63.8	0
63.9	0
64	0
64.1	0
64.2	0
64.3	0
64.4	0
64.5	0
64.6	0
64.7	0
64.8	0
64.9	0
65	0
65.1	0
65.2	0
65.3	0
65.4	0
65.5	0
65.6	0
65.7	0
65.8	0
65.9	0
66	0
66.1	0
66.2	0
66.3	0
66.4	0
66.5	0
66.6	0
66.7	0
66.8	0
66.9	0
67	0
67.1	0
67.2	0
67.3	0
67.4	0
67.5	0
67.6	0
67.7	0
67.8	0
67.9	0
68	0
68.1	0
68.2	0
68.3	0
68.4	0
68.5	0
68.6	0
68.7	0
68.8	0
68.9	0
69	0
69.1	0
69.2	0
69.3	0
69.4	0
69.5	0
69.6	0
69.7	0
69.8	0
69.9	0
70	0
70.1	0
70.2	0
70.3	0
70.4	0
70.5	0
70.6	0
70.7	0
70.8	0
70.9	0
71	0
71.1	0
71.2	0
71.3	0
71.4	0
71.5	0
71.6	0
71.7	0
71.8	0
71.9	0
72	0
72.1	0
72.2	0
72.3	0
72.4	0
72.5	0
72.6	0
72.7	0
72.8	0
72.9	0
73	0
73.1	0
73.2	0
73.3	0
73.4	0
73.5	0
73.6	0
73.7	0
73.8	0
73.9	0
74	0
74.1	0
74.2	0
74.3	0
74.4	0
74.5	0
74.6	0
74.7	0
74.8	0
74.9	0
75	0
75.1	0
75.2	0
75.3	0
75.4	0
75.5	0
75.6	0
75.7	0
75.8	0
75.9	0
76	0
76.1	0
76.2	0
76.3	0
76.4	0
76.5	0
76.6	0
76.7	0
76.8	0
76.9	0
77	0
77.1	0
77.2	0
77.3	0
77.4	0
77.5	0
77.6	0
77.7	0
77.8	0
77.9	0
78	0
78.1	0
78.2	0
78.3	0
78.4	0
78.5	0
78.6	0
78.7	0
78.8	0
78.9	0
79	0
79.1	0
79.2	0
79.3	0
79.4	0
79.5	0
79.6	0
79.7	0
79.8	0
79.9	0
80	0
80.1	0
80.2	0
80.3	0
80.4	0
80.5	0
80.6	0
80.7	0
80.8	0
80.9	0
81	0
81.1	0
81.2	0
81.3	0
81.4	0
81.5	0
81.6	0
81.7	0
81.8	0
81.9	0
82	0
82.1	0
82.2	0
82.3	0
82.4	0
82.5	0
82.6	0
82.7	0
82.8	0
82.9	0
83	0
83.1	0
83.2	0
83.3	0
83.4	0
83.5	0
83.6	0
83.7	0
83.8	0
83.9	0
84	0
84.1	0
84.2	0
84.3	0
84.4	0
84.5	0
84.6	0
84.7	0
84.8	0
84.9	0
85	0
85.1	0
85.2	0
85.3	0
85.4	0
85.5	0
85.6	0
85.7	0
85.8	0
85.9	0
86	0
86.1	0
86.2	0
86.3	0
86.4	0
86.5	0
86.6	0
86.7	0
86.8	0
86.9	0
87	0
87.1	0
87.2	0
87.3	0
87.4	0
87.5	0
87.6	0
87.7	0
87.8	0
87.9	0
88	0
88.1	0
88.2	0
88.3	0
88.4	0
88.5	0
88.6	0
88.7	0
88.8	0
88.9	0
89	0
89.1	0
89.2	0
89.3	0
89.4	0
89.5	0
89.6	0
89.7	0
89.8	0
89.9	0
90	0
90.1	0
90.2	0
90.3	0
90.4	0
90.5	0
90.6	0
90.7	0
90.8	0
90.9	0
91	0
91.1	0
91.2	0
91.3	0
91.4	0
91.5	0
91.6	0
91.7	0
91.8	0
91.9	0
92	0
92.1	0
92.2	0
92.3	0
92.4	0
92.5	0
92.6	0
92.7	0
92.8	0
92.9	0
93	0
93.1	0
93.2	0
93.3	0
93.4	0
93.5	0
93.6	0
93.7	0
93.8	0
93.9	0
94	0
94.1	0
94.2	0
94.3	0
94.4	0
94.5	0
94.6	0
94.7	0
94.8	0
94.9	0
95	0
95.1	0
95.2	0
95.3	0
95.4	0
95.5	0
95.6	0
95.7	0
95.8	0
95.9	0
96	0
96.1	0
96.2	0
96.3	0
96.4	0
96.5	0
96.6	0
96.7	0
96.8	0
96.9	0
97	0
97.1	0
97.2	0
97.3	0
97.4	0
97.5	0
97.6	0
97.7	0
97.8	0
97.9	0
98	0
98.1	0
98.2	0
98.3	0
98.4	0
98.5	0
98.6	0
98.7	0
98.8	0
98.9	0
99	0
99.1	0
99.2	0
99.3	0
99.4	0
99.5	0
99.6	0
99.7	0
99.8	0
99.9	0
100	0
100.1	0.0134
100.2	0.0281
100.3	0.04285
100.4	0.0561
100.5	0.0682
100.6	0.0813
100.7	0.094
100.8	0.10515
100.9	0.1157
101	0.12815
101.1	0.1388
101.2	0.14955
101.3	0.1603
101.4	0.17095
101.5	0.1798
101.6	0.18925
101.7	0.19715
101.8	0.2067
101.9	0.21485
102	0.22305
102.1	0.23055
102.2	0.238
102.3	0.2446
102.4	0.252
102.5	0.2579
102.6	0.26345
102.7	0.26785
102.8	0.2725
102.9	0.27965
103	0.2854
103.1	0.2916
103.2	0.29785
103.3	0.30225
103.4	0.307
103.5	0.31165
103.6	0.31605
103.7	0.3189
103.8	0.32255
103.9	0.3272
104	0.33175
104.1	0.335
104.2	0.34
104.3	0.344
104.4	0.3499
104.5	0.3534
104.6	0.35575
104.7	0.3593
104.8	0.3611
104.9	0.36465
105	0.36865
105.1	0.3711
105.2	0.37365
105.3	0.3758
105.4	0.37755
105.5	0.38125
105.6	0.38465
105.7	0.38765
105.8	0.3912
105.9	0.39395
106	0.3956
106.1	0.3982
106.2	0.39945
106.3	0.4009
106.4	0.4019
106.5	0.4041
106.6	0.40625
106.7	0.40745
106.8	0.4095
106.9	0.41045
107	0.41035
107.1	0.41095
107.2	0.4132
107.3	0.4145
107.4	0.4161
107.5	0.4178
107.6	0.41785
107.7	0.4178
107.8	0.41995
107.9	0.42015
108	0.42275
108.1	0.42445
108.2	0.4244
108.3	0.4258
108.4	0.42625
108.5	0.4267
108.6	0.42575
108.7	0.4264
108.8	0.428
108.9	0.4298
109	0.43115
109.1	0.43215
109.2	0.434
109.3	0.4343
109.4	0.4358
109.5	0.4363
109.6	0.4372
109.7	0.4387
109.8	0.43935
109.9	0.43935
110	0.43895
110.1	0.44015
110.2	0.4418
110.3	0.44205
110.4	0.4429
110.5	0.44405
110.6	0.44375
110.7	0.44375
110.8	0.44405
110.9	0.4441
111	0.44405
111.1	0.44365
111.2	0.44445
111.3	0.44515
111.4	0.44715
111.5	0.44765
111.6	0.44845
111.7	0.4496
111.8	0.4491
111.9	0.44925
112	0.4501
112.1	0.45165
112.2	0.45125
112.3	0.45115
112.4	0.45155
112.5	0.45115
112.6	0.45115
112.7	0.4511
112.8	0.45155
112.9	0.45145
113	0.454
113.1	0.45425
113.2	0.4544
113.3	0.45485
113.4	0.4562
113.5	0.45755
113.6	0.4581
113.7	0.45935
113.8	0.4599
113.9	0.45975
114	0.45925
114.1	0.45945
114.2	0.45955
114.3	0.4602
114.4	0.4614
114.5	0.4614
114.6	0.46215
114.7	0.461
114.8	0.46165
114.9	0.4612
115	0.4618
115.1	0.46145
115.2	0.4611
115.3	0.46095
115.4	0.46135
115.5	0.4605
115.6	0.46115
115.7	0.46165
115.8	0.462
115.9	0.4614
116	0.4601
116.1	0.46005
116.2	0.4602
116.3	0.46055
116.4	0.46095
116.5	0.46025
116.6	0.4597
116.7	0.4603
116.8	0.46065
116.9	0.4607
117	0.46035
117.1	0.4614
117.2	0.4622
117.3	0.4633
117.4	0.4639
117.5	0.46495
117.6	0.46515
117.7	0.4658
117.8	0.4657
117.9	0.466
118	0.46725
118.1	0.46675
118.2	0.4665
118.3	0.4667
118.4	0.46675
118.5	0.4674
118.6	0.46765
118.7	0.46935
118.8	0.4681
118.9	0.46915
119	0.46945
119.1	0.4703
119.2	0.47125
119.3	0.4718
119.4	0.47225
119.5	0.47165
119.6	0.47205
119.7	0.4722
119.8	0.4708
119.9	0.47185
120	0.47155
120.1	0.473
120.2	0.4735
120.3	0.4741
120.4	0.4745
120.5	0.47625
120.6	0.47655
120.7	0.47775
120.8	0.478
120.9	0.47675
121	0.4774
121.1	0.4774
121.2	0.4769
121.3	0.47775
121.4	0.4794
121.5	0.4803
121.6	0.47925
121.7	0.47965
121.8	0.47835
121.9	0.47865
122	0.47875
122.1	0.4785
122.2	0.4783
122.3	0.47735
122.4	0.47755
122.5	0.47805
122.6	0.4774
122.7	0.4777
122.8	0.47825
122.9	0.4785
123	0.4788
123.1	0.47965
123.2	0.48075
123.3	0.481
123.4	0.47935
123.5	0.4804
123.6	0.4811
123.7	0.48025
123.8	0.4816
123.9	0.4822
124	0.48185
124.1	0.4811
124.2	0.48015
124.3	0.48085
124.4	0.4819
124.5	0.4828
124.6	0.483
124.7	0.48355
124.8	0.48425
124.9	0.48515
125	0.484
125.1	0.4831
125.2	0.48375
125.3	0.4839
125.4	0.4836
125.5	0.484
125.6	0.4834
125.7	0.4847
125.8	0.48515
125.9	0.4862
126	0.4872
126.1	0.48675
126.2	0.48635
126.3	0.48585
126.4	0.48665
126.5	0.4869
126.6	0.48635
126.7	0.48735
126.8	0.4877
126.9	0.4881
127	0.4877
127.1	0.4879
127.2	0.48855
127.3	0.48935
127.4	0.4909
127.5	0.49075
127.6	0.4908
127.7	0.49105
127.8	0.49195
127.9	0.4915
128	0.4907
128.1	0.4905
128.2	0.49015
128.3	0.49075
128.4	0.4914
128.5	0.4907
128.6	0.4913
128.7	0.4915
128.8	0.49125
128.9	0.49115
129	0.49135
129.1	0.49155
129.2	0.49145
129.3	0.4915
129.4	0.49225
129.5	0.49245
129.6	0.4932
129.7	0.4942
129.8	0.4945
129.9	0.4954
130	0.4949
130.1	0.49465
130.2	0.494
130.3	0.49575
130.4	0.49615
130.5	0.4967
130.6	0.49715
130.7	0.4973
130.8	0.4976
130.9	0.4977
131	0.4978
131.1	0.49815
131.2	0.49915
131.3	0.49915
131.4	0.4998
131.5	0.49835
131.6	0.49845
131.7	0.49795
131.8	0.49785
131.9	0.4982
132	0.4995
132.1	0.4995
132.2	0.49875
132.3	0.49895
132.4	0.4988
132.5	0.49905
132.6	0.4997
132.7	0.4989
132.8	0.49925
132.9	0.4983
133	0.4991
133.1	0.49975
133.2	0.5008
133.3	0.5006
133.4	0.50075
133.5	0.50125
133.6	0.50225
133.7	0.5013
133.8	0.50075
133.9	0.5022
134	0.5016
134.1	0.50185
134.2	0.50285
134.3	0.5025
134.4	0.5023
134.5	0.5037
134.6	0.5048
134.7	0.50485
134.8	0.50395
134.9	0.50445
135	0.5059
135.1	0.5064
135.2	0.507
135.3	0.50735
135.4	0.5075
135.5	0.5061
135.6	0.5059
135.7	0.50595
135.8	0.5067
135.9	0.5073
136	0.50695
136.1	0.50685
136.2	0.5069
136.3	0.50645
136.4	0.5064
136.5	0.50625
136.6	0.50625
136.7	0.50635
136.8	0.50725
136.9	0.5069
137	0.5063
137.1	0.50675
137.2	0.50595
137.3	0.5057
137.4	0.5055
137.5	0.505
137.6	0.50455
137.7	0.50535
137.8	0.50455
137.9	0.50535
138	0.50575
138.1	0.50595
138.2	0.5065
138.3	0.5078
138.4	0.50815
138.5	0.5078
138.6	0.5079
138.7	0.5076
138.8	0.5077
138.9	0.5075
139	0.5071
139.1	0.50645
139.2	0.5069
139.3	0.5062
139.4	0.50695
139.5	0.50795
139.6	0.5079
139.7	0.5079
139.8	0.5095
139.9	0.5101
140	0.5107
140.1	0.51155
140.2	0.51125
140.3	0.5121
140.4	0.51155
140.5	0.51245
140.6	0.5122
140.7	0.5124
140.8	0.51245
140.9	0.5123
141	0.5124
141.1	0.5121
141.2	0.5121
141.3	0.5117
141.4	0.51095
141.5	0.5103
141.6	0.5105
141.7	0.51135
141.8	0.51095
141.9	0.51055
142	0.5106
142.1	0.51015
142.2	0.50955
142.3	0.5102
142.4	0.5099
142.5	0.5095
142.6	0.5107
142.7	0.5116
142.8	0.51115
142.9	0.51135
143	0.5124
143.1	0.5126
143.2	0.5129
143.3	0.51415
143.4	0.51545
143.5	0.51535
143.6	0.5159
143.7	0.51605
143.8	0.5158
143.9	0.5161
144	0.5155
144.1	0.51725
144.2	0.5187
144.3	0.5196
144.4	0.519
144.5	0.5187
144.6	0.51885
144.7	0.51845
144.8	0.5183
144.9	0.51875
145	0.51945
145.1	0.52
145.2	0.51935
145.3	0.51935
145.4	0.51895
145.5	0.52015
145.6	0.51915
145.7	0.51745
145.8	0.51675
145.9	0.51685
146	0.5178
146.1	0.51895
146.2	0.5171
146.3	0.51625
146.4	0.51565
146.5	0.5154
146.6	0.51555
146.7	0.5154
146.8	0.51565
146.9	0.51615
147	0.51615
147.1	0.51585
147.2	0.51625
147.3	0.5163
147.4	0.5161
147.5	0.51635
147.6	0.51645
147.7	0.5165
147.8	0.5166
147.9	0.51665
148	0.51765
148.1	0.51815
148.2	0.51815
148.3	0.5185
148.4	0.518
148.5	0.51845
148.6	0.51935
148.7	0.51985
148.8	0.5211
148.9	0.52115
149	0.5216
149.1	0.5214
149.2	0.5213
149.3	0.521
149.4	0.52165
149.5	0.522
149.6	0.5225
149.7	0.52265
149.8	0.52305
149.9	0.52345
150	0.524
150.1	0.5246
150.2	0.5242
150.3	0.52395
150.4	0.52405
150.5	0.5246
150.6	0.5237
150.7	0.5236
150.8	0.5241
150.9	0.5236
151	0.52495
151.1	0.5261
151.2	0.5259
151.3	0.5258
151.4	0.5263
151.5	0.52685
151.6	0.52675
151.7	0.52615
151.8	0.5254
151.9	0.52535
152	0.52485
152.1	0.5249
152.2	0.5254
152.3	0.5254
152.4	0.5266
152.5	0.52775
152.6	0.5273
152.7	0.52795
152.8	0.5291
152.9	0.52825
153	0.5285
153.1	0.5288
153.2	0.52875
153.3	0.529
153.4	0.5291
153.5	0.53
153.6	0.52935
153.7	0.53055
153.8	0.53075
153.9	0.5308
154	0.53165
154.1	0.5317
154.2	0.5316
154.3	0.5304
154.4	0.5311
154.5	0.53135
154.6	0.5311
154.7	0.52975
154.8	0.53065
154.9	0.5298
155	0.5293
155.1	0.5305
155.2	0.5305
155.3	0.5321
155.4	0.53195
155.5	0.5313
155.6	0.53185
155.7	0.5311
155.8	0.5323
155.9	0.53305
156	0.5329
156.1	0.53395
156.2	0.53385
156.3	0.5341
156.4	0.5339
156.5	0.5333
156.6	0.53175
156.7	0.53275
156.8	0.53415
156.9	0.535
157	0.53615
157.1	0.53715
157.2	0.53825
157.3	0.53795
157.4	0.53845
157.5	0.53835
157.6	0.53795
157.7	0.53915
157.8	0.5391
157.9	0.5382
158	0.53775
158.1	0.5368
158.2	0.53655
158.3	0.53595
158.4	0.53715
158.5	0.5371
158.6	0.53675
158.7	0.53715
158.8	0.53695
158.9	0.5363
159	0.53665
159.1	0.53625
159.2	0.53705
159.3	0.53725
159.4	0.537
159.5	0.53645
159.6	0.5364
159.7	0.53645
159.8	0.536
159.9	0.53545
160	0.53495
160.1	0.53475
160.2	0.53535
160.3	0.5351
160.4	0.53415
160.5	0.5344
160.6	0.5354
160.7	0.5351
160.8	0.53595
160.9	0.53705
161	0.53735
161.1	0.53835
161.2	0.53885
161.3	0.5385
161.4	0.53835
161.5	0.53865
161.6	0.53905
161.7	0.53935
161.8	0.5399
161.9	0.53895
162	0.5388
162.1	0.53855
162.2	0.53875
162.3	0.5396
162.4	0.54025
162.5	0.54145
162.6	0.5413
162.7	0.5413
162.8	0.54035
162.9	0.5414
163	0.5422
163.1	0.543
163.2	0.54305
163.3	0.5423
163.4	0.543
163.5	0.54375
163.6	0.54275
163.7	0.5415
163.8	0.54035
163.9	0.54125
164	0.5415
164.1	0.54145
164.2	0.54225
164.3	0.5432
164.4	0.544
164.5	0.5436
164.6	0.5451
164.7	0.5455
164.8	0.5453
164.9	0.5473
165	0.5467
165.1	0.5462
165.2	0.546
165.3	0.54595
165.4	0.54485
165.5	0.54545
165.6	0.5456
165.7	0.54705
165.8	0.5467
165.9	0.54695
166	0.54685
166.1	0.5473
166.2	0.5478
166.3	0.548
166.4	0.54675
166.5	0.54785
166.6	0.5487
166.7	0.5499
166.8	0.55085
166.9	0.55125
167	0.55075
167.1	0.55085
167.2	0.551
167.3	0.55135
167.4	0.55
167.5	0.54985
167.6	0.5484
167.7	0.5487
167.8	0.54775
167.9	0.5479
168	0.54765
168.1	0.54865
168.2	0.5478
168.3	0.5479
168.4	0.5483
168.5	0.5466
168.6	0.54655
168.7	0.5474
168.8	0.5473
168.9	0.54775
169	0.5474
169.1	0.54725
169.2	0.54755
169.3	0.54645
169.4	0.5463
169.5	0.5472
169.6	0.54705
169.7	0.5467
169.8	0.5468
169.9	0.5466
170	0.54635
170.1	0.5472
170.2	0.5476
170.3	0.54725
170.4	0.5465
170.5	0.5474
170.6	0.547
170.7	0.54735
170.8	0.5485
170.9	0.549
171	0.54915
171.1	0.54985
171.2	0.5496
171.3	0.54985
171.4	0.55055
171.5	0.5496
171.6	0.54925
171.7	0.5489
171.8	0.54965
171.9	0.551
172	0.55215
172.1	0.5521
172.2	0.5519
172.3	0.55165
172.4	0.5515
172.5	0.5511
172.6	0.5513
172.7	0.5524
172.8	0.55295
172.9	0.553
173	0.55165
173.1	0.55305
173.2	0.55255
173.3	0.55235
173.4	0.55295
173.5	0.5537
173.6	0.55435
173.7	0.55445
173.8	0.55485
173.9	0.5547
174	0.5543
174.1	0.5525
174.2	0.5524
174.3	0.552
174.4	0.5538
174.5	0.55335
174.6	0.55335
174.7	0.5532
174.8	0.5534
174.9	0.55305
175	0.5517
175.1	0.5522
175.2	0.5529
175.3	0.55385
175.4	0.5529
175.5	0.55365
175.6	0.5535
175.7	0.5535
175.8	0.5542
175.9	0.5547
176	0.5547
176.1	0.5553
176.2	0.55455
176.3	0.55545
176.4	0.5558
176.5	0.5567
176.6	0.5563
176.7	0.5578
176.8	0.5592
176.9	0.55895
177	0.55865
177.1	0.5587
177.2	0.5596
177.3	0.55945
177.4	0.5601
177.5	0.5595
177.6	0.5585
177.7	0.5589
177.8	0.55795
177.9	0.55705
178	0.55795
178.1	0.558
178.2	0.55905
178.3	0.56005
178.4	0.55935
178.5	0.55945
178.6	0.55935
178.7	0.56015
178.8	0.5605
178.9	0.56095
179	0.5618
179.1	0.56245
179.2	0.5631
179.3	0.56405
179.4	0.5649
179.5	0.56525
179.6	0.5644
179.7	0.56365
179.8	0.5643
179.9	0.56445
180	0.56425
180.1	0.56375
180.2	0.56465
180.3	0.5646
180.4	0.5645
180.5	0.5642
180.6	0.5638
180.7	0.56395
180.8	0.5652
180.9	0.5654
181	0.5648
181.1	0.56425
181.2	0.56505
181.3	0.56525
181.4	0.56595
181.5	0.5659
181.6	0.56525
181.7	0.5646
181.8	0.5645
181.9	0.56445
182	0.56555
182.1	0.56545
182.2	0.5644
182.3	0.56505
182.4	0.565
182.5	0.5647
182.6	0.5648
182.7	0.56515
182.8	0.56555
182.9	0.5658
183	0.5662
183.1	0.5663
183.2	0.5656
183.3	0.5659
183.4	0.56585
183.5	0.56435
183.6	0.56335
183.7	0.5625
183.8	0.56315
183.9	0.56325
184	0.5648
184.1	0.56465
184.2	0.56535
184.3	0.5657
184.4	0.56735
184.5	0.5663
184.6	0.5661
184.7	0.56745
184.8	0.5658
184.9	0.5658
185	0.5644
185.1	0.5645
185.2	0.56345
185.3	0.5638
185.4	0.5638
185.5	0.5626
185.6	0.56405
185.7	0.5647
185.8	0.5638
185.9	0.56355
186	0.56465
186.1	0.5645
186.2	0.5637
186.3	0.56355
186.4	0.56385
186.5	0.5639
186.6	0.56505
186.7	0.56305
186.8	0.5623
186.9	0.56325
187	0.56515
187.1	0.56445
187.2	0.5652
187.3	0.565
187.4	0.56555
187.5	0.56585
187.6	0.56525
187.7	0.5654
187.8	0.5658
187.9	0.565
188	0.56515
188.1	0.5652
188.2	0.5662
188.3	0.5667
188.4	0.5669
188.5	0.56725
188.6	0.5681
188.7	0.5681
188.8	0.5666
188.9	0.5668
189	0.56675
189.1	0.567
189.2	0.568
189.3	0.56865
189.4	0.56855
189.5	0.56845
189.6	0.5684
189.7	0.56745
189.8	0.5682
189.9	0.56905
190	0.5687
190.1	0.5693
190.2	0.56885
190.3	0.5676
190.4	0.5678
190.5	0.5677
190.6	0.56765
190.7	0.5676
190.8	0.56765
190.9	0.5673
191	0.568
191.1	0.56835
191.2	0.5694
191.3	0.57005
191.4	0.57075
191.5	0.57055
191.6	0.5709
191.7	0.5709
191.8	0.5707
191.9	0.5704
192	0.57135
192.1	0.57075
192.2	0.57005
192.3	0.5705
192.4	0.57005
192.5	0.56995
192.6	0.57015
192.7	0.5711
192.8	0.5708
192.9	0.5702
193	0.5707
193.1	0.57085
193.2	0.57095
193.3	0.57055
193.4	0.5706
193.5	0.57015
193.6	0.5704
193.7	0.56995
193.8	0.5702
193.9	0.56995
194	0.57005
194.1	0.5699
194.2	0.5706
194.3	0.57025
194.4	0.5711
194.5	0.57115
194.6	0.57145
194.7	0.57205
194.8	0.57315
194.9	0.57405
195	0.57395
195.1	0.57305
195.2	0.5725
195.3	0.5714
195.4	0.57105
195.5	0.5711
195.6	0.57025
195.7	0.56985
195.8	0.57
195.9	0.57005
196	0.5692
196.1	0.5699
196.2	0.56975
196.3	0.56945
196.4	0.569
196.5	0.56965
196.6	0.57
196.7	0.5706
196.8	0.5721
196.9	0.57225
197	0.57205
197.1	0.57275
197.2	0.57185
197.3	0.5732
197.4	0.57345
197.5	0.57375
197.6	0.5738
197.7	0.5741
197.8	0.57365
197.9	0.5725
198	0.5725
198.1	0.57175
198.2	0.5714
198.3	0.5708
198.4	0.57045
198.5	0.57065
198.6	0.56935
198.7	0.5702
198.8	0.57185
198.9	0.57195
199	0.5725
199.1	0.57225
199.2	0.57175
199.3	0.57205
199.4	0.572
199.5	0.5721
199.6	0.5722
199.7	0.57285
199.8	0.573
199.9	0.573
200	0.57155
[truncated: 14,000 more rows]
