# Supplementary material for: Bayesian inference of kinetic schemes for ion channels by Kalman filtering
Source: eLife journal article supplement (doi:10.7554/elife.62714), 2022-05-04
Supplement: fig4-data8 [file 1_Sim_N_10000_Strom_MW.xlsx]

## Sheet: Tabelle1
0.1	0
0.2	0
0.3	0
0.4	0
0.5	0
0.6	0
0.7	0
0.8	0
0.9	0
1	0
1.1	0
1.2	0
1.3	0
1.4	0
1.5	0
1.6	0
1.7	0
1.8	0
1.9	0
2	0
2.1	0
2.2	0
2.3	0
2.4	0
2.5	0
2.6	0
2.7	0
2.8	0
2.9	0
3	0
3.1	0
3.2	0
3.3	0
3.4	0
3.5	0
3.6	0
3.7	0
3.8	0
3.9	0
4	0
4.1	0
4.2	0
4.3	0
4.4	0
4.5	0
4.6	0
4.7	0
4.8	0
4.9	0
5	0
5.1	0
5.2	0
5.3	0
5.4	0
5.5	0
5.6	0
5.7	0
5.8	0
5.9	0
6	0
6.1	0
6.2	0
6.3	0
6.4	0
6.5	0
6.6	0
6.7	0
6.8	0
6.9	0
7	0
7.1	0
7.2	0
7.3	0
7.4	0
7.5	0
7.6	0
7.7	0
7.8	0
7.9	0
8	0
8.1	0
8.2	0
8.3	0
8.4	0
8.5	0
8.6	0
8.7	0
8.8	0
8.9	0
9	0
9.1	0
9.2	0
9.3	0
9.4	0
9.5	0
9.6	0
9.7	0
9.8	0
9.9	0
10	0
10.1	0
10.2	0
10.3	0
10.4	0
10.5	0
10.6	0
10.7	0
10.8	0
10.9	0
11	0
11.1	0
11.2	0
11.3	0
11.4	0
11.5	0
11.6	0
11.7	0
11.8	0
11.9	0
12	0
12.1	0
12.2	0
12.3	0
12.4	0
12.5	0
12.6	0
12.7	0
12.8	0
12.9	0
13	0
13.1	0
13.2	0
13.3	0
13.4	0
13.5	0
13.6	0
13.7	0
13.8	0
13.9	0
14	0
14.1	0
14.2	0
14.3	0
14.4	0
14.5	0
14.6	0
14.7	0
14.8	0
14.9	0
15	0
15.1	0
15.2	0
15.3	0
15.4	0
15.5	0
15.6	0
15.7	0
15.8	0
15.9	0
16	0
16.1	0
16.2	0
16.3	0
16.4	0
16.5	0
16.6	0
16.7	0
16.8	0
16.9	0
17	0
17.1	0
17.2	0
17.3	0
17.4	0
17.5	0
17.6	0
17.7	0
17.8	0
17.9	0
18	0
18.1	0
18.2	0
18.3	0
18.4	0
18.5	0
18.6	0
18.7	0
18.8	0
18.9	0
19	0
19.1	0
19.2	0
19.3	0
19.4	0
19.5	0
19.6	0
19.7	0
19.8	0
19.9	0
20	0
20.1	0
20.2	0
20.3	0
20.4	0
20.5	0
20.6	0
20.7	0
20.8	0
20.9	0
21	0
21.1	0
21.2	0
21.3	0
21.4	0
21.5	0
21.6	0
21.7	0
21.8	0
21.9	0
22	0
22.1	0
22.2	0
22.3	0
22.4	0
22.5	0
22.6	0
22.7	0
22.8	0
22.9	0
23	0
23.1	0
23.2	0
23.3	0
23.4	0
23.5	0
23.6	0
23.7	0
23.8	0
23.9	0
24	0
24.1	0
24.2	0
24.3	0
24.4	0
24.5	0
24.6	0
24.7	0
24.8	0
24.9	0
25	0
25.1	0
25.2	0
25.3	0
25.4	0
25.5	0
25.6	0
25.7	0
25.8	0
25.9	0
26	0
26.1	0
26.2	0
26.3	0
26.4	0
26.5	0
26.6	0
26.7	0
26.8	0
26.9	0
27	0
27.1	0
27.2	0
27.3	0
27.4	0
27.5	0
27.6	0
27.7	0
27.8	0
27.9	0
28	0
28.1	0
28.2	0
28.3	0
28.4	0
28.5	0
28.6	0
28.7	0
28.8	0
28.9	0
29	0
29.1	0
29.2	0
29.3	0
29.4	0
29.5	0
29.6	0
29.7	0
29.8	0
29.9	0
30	0
30.1	0
30.2	0
30.3	0
30.4	0
30.5	0
30.6	0
30.7	0
30.8	0
30.9	0
31	0
31.1	0
31.2	0
31.3	0
31.4	0
31.5	0
31.6	0
31.7	0
31.8	0
31.9	0
32	0
32.1	0
32.2	0
32.3	0
32.4	0
32.5	0
32.6	0
32.7	0
32.8	0
32.9	0
33	0
33.1	0
33.2	0
33.3	0
33.4	0
33.5	0
33.6	0
33.7	0
33.8	0
33.9	0
34	0
34.1	0
34.2	0
34.3	0
34.4	0
34.5	0
34.6	0
34.7	0
34.8	0
34.9	0
35	0
35.1	0
35.2	0
35.3	0
35.4	0
35.5	0
35.6	0
35.7	0
35.8	0
35.9	0
36	0
36.1	0
36.2	0
36.3	0
36.4	0
36.5	0
36.6	0
36.7	0
36.8	0
36.9	0
37	0
37.1	0
37.2	0
37.3	0
37.4	0
37.5	0
37.6	0
37.7	0
37.8	0
37.9	0
38	0
38.1	0
38.2	0
38.3	0
38.4	0
38.5	0
38.6	0
38.7	0
38.8	0
38.9	0
39	0
39.1	0
39.2	0
39.3	0
39.4	0
39.5	0
39.6	0
39.7	0
39.8	0
39.9	0
40	0
40.1	0
40.2	0
40.3	0
40.4	0
40.5	0
40.6	0
40.7	0
40.8	0
40.9	0
41	0
41.1	0
41.2	0
41.3	0
41.4	0
41.5	0
41.6	0
41.7	0
41.8	0
41.9	0
42	0
42.1	0
42.2	0
42.3	0
42.4	0
42.5	0
42.6	0
42.7	0
42.8	0
42.9	0
43	0
43.1	0
43.2	0
43.3	0
43.4	0
43.5	0
43.6	0
43.7	0
43.8	0
43.9	0
44	0
44.1	0
44.2	0
44.3	0
44.4	0
44.5	0
44.6	0
44.7	0
44.8	0
44.9	0
45	0
45.1	0
45.2	0
45.3	0
45.4	0
45.5	0
45.6	0
45.7	0
45.8	0
45.9	0
46	0
46.1	0
46.2	0
46.3	0
46.4	0
46.5	0
46.6	0
46.7	0
46.8	0
46.9	0
47	0
47.1	0
47.2	0
47.3	0
47.4	0
47.5	0
47.6	0
47.7	0
47.8	0
47.9	0
48	0
48.1	0
48.2	0
48.3	0
48.4	0
48.5	0
48.6	0
48.7	0
48.8	0
48.9	0
49	0
49.1	0
49.2	0
49.3	0
49.4	0
49.5	0
49.6	0
49.7	0
49.8	0
49.9	0
50	0
50.1	0
50.2	0
50.3	0
50.4	0
50.5	0
50.6	0
50.7	0
50.8	0
50.9	0
51	0
51.1	0
51.2	0
51.3	0
51.4	0
51.5	0
51.6	0
51.7	0
51.8	0
51.9	0
52	0
52.1	0
52.2	0
52.3	0
52.4	0
52.5	0
52.6	0
52.7	0
52.8	0
52.9	0
53	0
53.1	0
53.2	0
53.3	0
53.4	0
53.5	0
53.6	0
53.7	0
53.8	0
53.9	0
54	0
54.1	0
54.2	0
54.3	0
54.4	0
54.5	0
54.6	0
54.7	0
54.8	0
54.9	0
55	0
55.1	0
55.2	0
55.3	0
55.4	0
55.5	0
55.6	0
55.7	0
55.8	0
55.9	0
56	0
56.1	0
56.2	0
56.3	0
56.4	0
56.5	0
56.6	0
56.7	0
56.8	0
56.9	0
57	0
57.1	0
57.2	0
57.3	0
57.4	0
57.5	0
57.6	0
57.7	0
57.8	0
57.9	0
58	0
58.1	0
58.2	0
58.3	0
58.4	0
58.5	0
58.6	0
58.7	0
58.8	0
58.9	0
59	0
59.1	0
59.2	0
59.3	0
59.4	0
59.5	0
59.6	0
59.7	0
59.8	0
59.9	0
60	0
60.1	0
60.2	0
60.3	0
60.4	0
60.5	0
60.6	0
60.7	0
60.8	0
60.9	0
61	0
61.1	0
61.2	0
61.3	0
61.4	0
61.5	0
61.6	0
61.7	0
61.8	0
61.9	0
62	0
62.1	0
62.2	0
62.3	0
62.4	0
62.5	0
62.6	0
62.7	0
62.8	0
62.9	0
63	0
63.1	0
63.2	0
63.3	0
63.4	0
63.5	0
63.6	0
63.7	0
63.8	0
63.9	0
64	0
64.1	0
64.2	0
64.3	0
64.4	0
64.5	0
64.6	0
64.7	0
64.8	0
64.9	0
65	0
65.1	0
65.2	0
65.3	0
65.4	0
65.5	0
65.6	0
65.7	0
65.8	0
65.9	0
66	0
66.1	0
66.2	0
66.3	0
66.4	0
66.5	0
66.6	0
66.7	0
66.8	0
66.9	0
67	0
67.1	0
67.2	0
67.3	0
67.4	0
67.5	0
67.6	0
67.7	0
67.8	0
67.9	0
68	0
68.1	0
68.2	0
68.3	0
68.4	0
68.5	0
68.6	0
68.7	0
68.8	0
68.9	0
69	0
69.1	0
69.2	0
69.3	0
69.4	0
69.5	0
69.6	0
69.7	0
69.8	0
69.9	0
70	0
70.1	0
70.2	0
70.3	0
70.4	0
70.5	0
70.6	0
70.7	0
70.8	0
70.9	0
71	0
71.1	0
71.2	0
71.3	0
71.4	0
71.5	0
71.6	0
71.7	0
71.8	0
71.9	0
72	0
72.1	0
72.2	0
72.3	0
72.4	0
72.5	0
72.6	0
72.7	0
72.8	0
72.9	0
73	0
73.1	0
73.2	0
73.3	0
73.4	0
73.5	0
73.6	0
73.7	0
73.8	0
73.9	0
74	0
74.1	0
74.2	0
74.3	0
74.4	0
74.5	0
74.6	0
74.7	0
74.8	0
74.9	0
75	0
75.1	0
75.2	0
75.3	0
75.4	0
75.5	0
75.6	0
75.7	0
75.8	0
75.9	0
76	0
76.1	0
76.2	0
76.3	0
76.4	0
76.5	0
76.6	0
76.7	0
76.8	0
76.9	0
77	0
77.1	0
77.2	0
77.3	0
77.4	0
77.5	0
77.6	0
77.7	0
77.8	0
77.9	0
78	0
78.1	0
78.2	0
78.3	0
78.4	0
78.5	0
78.6	0
78.7	0
78.8	0
78.9	0
79	0
79.1	0
79.2	0
79.3	0
79.4	0
79.5	0
79.6	0
79.7	0
79.8	0
79.9	0
80	0
80.1	0
80.2	0
80.3	0
80.4	0
80.5	0
80.6	0
80.7	0
80.8	0
80.9	0
81	0
81.1	0
81.2	0
81.3	0
81.4	0
81.5	0
81.6	0
81.7	0
81.8	0
81.9	0
82	0
82.1	0
82.2	0
82.3	0
82.4	0
82.5	0
82.6	0
82.7	0
82.8	0
82.9	0
83	0
83.1	0
83.2	0
83.3	0
83.4	0
83.5	0
83.6	0
83.7	0
83.8	0
83.9	0
84	0
84.1	0
84.2	0
84.3	0
84.4	0
84.5	0
84.6	0
84.7	0
84.8	0
84.9	0
85	0
85.1	0
85.2	0
85.3	0
85.4	0
85.5	0
85.6	0
85.7	0
85.8	0
85.9	0
86	0
86.1	0
86.2	0
86.3	0
86.4	0
86.5	0
86.6	0
86.7	0
86.8	0
86.9	0
87	0
87.1	0
87.2	0
87.3	0
87.4	0
87.5	0
87.6	0
87.7	0
87.8	0
87.9	0
88	0
88.1	0
88.2	0
88.3	0
88.4	0
88.5	0
88.6	0
88.7	0
88.8	0
88.9	0
89	0
89.1	0
89.2	0
89.3	0
89.4	0
89.5	0
89.6	0
89.7	0
89.8	0
89.9	0
90	0
90.1	0
90.2	0
90.3	0
90.4	0
90.5	0
90.6	0
90.7	0
90.8	0
90.9	0
91	0
91.1	0
91.2	0
91.3	0
91.4	0
91.5	0
91.6	0
91.7	0
91.8	0
91.9	0
92	0
92.1	0
92.2	0
92.3	0
92.4	0
92.5	0
92.6	0
92.7	0
92.8	0
92.9	0
93	0
93.1	0
93.2	0
93.3	0
93.4	0
93.5	0
93.6	0
93.7	0
93.8	0
93.9	0
94	0
94.1	0
94.2	0
94.3	0
94.4	0
94.5	0
94.6	0
94.7	0
94.8	0
94.9	0
95	0
95.1	0
95.2	0
95.3	0
95.4	0
95.5	0
95.6	0
95.7	0
95.8	0
95.9	0
96	0
96.1	0
96.2	0
96.3	0
96.4	0
96.5	0
96.6	0
96.7	0
96.8	0
96.9	0
97	0
97.1	0
97.2	0
97.3	0
97.4	0
97.5	0
97.6	0
97.7	0
97.8	0
97.9	0
98	0
98.1	0
98.2	0
98.3	0
98.4	0
98.5	0
98.6	0
98.7	0
98.8	0
98.9	0
99	0
99.1	0
99.2	0
99.3	0
99.4	0
99.5	0
99.6	0
99.7	0
99.8	0
99.9	0
100	0
100.1	0
100.2	0
100.3	0
100.4	0
100.5	0
100.6	0.0001
100.7	0.0001
100.8	0.0001
100.9	0.0001
101	0.0003
101.1	0.0003
101.2	0.0005
101.3	0.0005
101.4	0.0006
101.5	0.0006
101.6	0.0006
101.7	0.0009
101.8	0.0009
101.9	0.0009
102	0.0009
102.1	0.0012
102.2	0.0013
102.3	0.0015
102.4	0.0017
102.5	0.0021
102.6	0.0021
102.7	0.0022
102.8	0.0023
102.9	0.0026
103	0.0028
103.1	0.0029
103.2	0.0033
103.3	0.0034
103.4	0.0034
103.5	0.0036
103.6	0.004
103.7	0.0041
103.8	0.0043
103.9	0.0046
104	0.0047
104.1	0.0051
104.2	0.0051
104.3	0.0053
104.4	0.0055
104.5	0.0058
104.6	0.0061
104.7	0.0063
104.8	0.0064
104.9	0.0069
105	0.0073
105.1	0.0075
105.2	0.0083
105.3	0.0085
105.4	0.009
105.5	0.0096
105.6	0.0098
105.7	0.0102
105.8	0.0105
105.9	0.0109
106	0.0113
106.1	0.0116
106.2	0.0121
106.3	0.0122
106.4	0.0127
106.5	0.0133
106.6	0.0138
106.7	0.014
106.8	0.0141
106.9	0.0144
107	0.0146
107.1	0.0151
107.2	0.0158
107.3	0.0163
107.4	0.0165
107.5	0.017
107.6	0.0171
107.7	0.0174
107.8	0.0177
107.9	0.0181
108	0.0185
108.1	0.019
108.2	0.0196
108.3	0.0198
108.4	0.0201
108.5	0.0209
108.6	0.0214
108.7	0.0216
108.8	0.0217
108.9	0.022
109	0.0224
109.1	0.0227
109.2	0.023
109.3	0.0237
109.4	0.0238
109.5	0.0245
109.6	0.0254
109.7	0.0259
109.8	0.0263
109.9	0.0265
110	0.0272
110.1	0.0274
110.2	0.0278
110.3	0.0283
110.4	0.0289
110.5	0.0291
110.6	0.0295
110.7	0.0299
110.8	0.03
110.9	0.0304
111	0.0307
111.1	0.0311
111.2	0.0314
111.3	0.0316
111.4	0.0322
111.5	0.0328
111.6	0.0334
111.7	0.0338
111.8	0.0339
111.9	0.0345
112	0.0349
112.1	0.0355
112.2	0.0361
112.3	0.0364
112.4	0.0367
112.5	0.037
112.6	0.0375
112.7	0.0378
112.8	0.0381
112.9	0.0384
113	0.0388
113.1	0.0393
113.2	0.0395
113.3	0.04
113.4	0.0401
113.5	0.0407
113.6	0.0413
113.7	0.0419
113.8	0.0422
113.9	0.0428
114	0.0436
114.1	0.0443
114.2	0.0449
114.3	0.0456
114.4	0.0457
114.5	0.0465
114.6	0.0468
114.7	0.0468
114.8	0.0474
114.9	0.0477
115	0.0482
115.1	0.0486
115.2	0.049
115.3	0.0499
115.4	0.0504
115.5	0.0506
115.6	0.0508
115.7	0.0512
115.8	0.0514
115.9	0.0513
116	0.0513
116.1	0.0517
116.2	0.0519
116.3	0.0527
116.4	0.0532
116.5	0.0534
116.6	0.0539
116.7	0.054
116.8	0.0542
116.9	0.0549
117	0.0556
117.1	0.0559
117.2	0.0561
117.3	0.0565
117.4	0.0571
117.5	0.0576
117.6	0.0579
117.7	0.0582
117.8	0.0587
117.9	0.0587
118	0.0595
118.1	0.0605
118.2	0.0611
118.3	0.0614
118.4	0.0616
118.5	0.0621
118.6	0.0627
118.7	0.0632
118.8	0.0639
118.9	0.0643
119	0.0645
119.1	0.0651
119.2	0.0655
119.3	0.0658
119.4	0.066
119.5	0.0668
119.6	0.0672
119.7	0.0675
119.8	0.0678
119.9	0.0685
120	0.0689
120.1	0.0692
120.2	0.0693
120.3	0.0696
120.4	0.0705
120.5	0.0709
120.6	0.0714
120.7	0.0722
120.8	0.0729
120.9	0.073
121	0.0735
121.1	0.0739
121.2	0.0744
121.3	0.0752
121.4	0.0757
121.5	0.076
121.6	0.0764
121.7	0.0771
121.8	0.0771
121.9	0.0775
122	0.078
122.1	0.0783
122.2	0.0789
122.3	0.0793
122.4	0.0796
122.5	0.0799
122.6	0.0802
122.7	0.0805
122.8	0.0809
122.9	0.0811
123	0.0812
123.1	0.0817
123.2	0.082
123.3	0.0821
123.4	0.0823
123.5	0.0825
123.6	0.0829
123.7	0.0834
123.8	0.0841
123.9	0.084
124	0.0844
124.1	0.0845
124.2	0.0848
124.3	0.0851
124.4	0.0854
124.5	0.0859
124.6	0.0866
124.7	0.0871
124.8	0.0875
124.9	0.0881
125	0.0889
125.1	0.0892
125.2	0.0893
125.3	0.0897
125.4	0.0898
125.5	0.0901
125.6	0.0902
125.7	0.091
125.8	0.0914
125.9	0.0916
126	0.0922
126.1	0.0926
126.2	0.093
126.3	0.0936
126.4	0.0941
126.5	0.0946
126.6	0.0953
126.7	0.0957
126.8	0.0963
126.9	0.0963
127	0.0968
127.1	0.0969
127.2	0.0972
127.3	0.0976
127.4	0.098
127.5	0.0982
127.6	0.0986
127.7	0.0986
127.8	0.0988
127.9	0.0991
128	0.0999
128.1	0.1001
128.2	0.1002
128.3	0.1005
128.4	0.101
128.5	0.1012
128.6	0.1018
128.7	0.1019
128.8	0.1023
128.9	0.1022
129	0.1023
129.1	0.1027
129.2	0.1031
129.3	0.1037
129.4	0.1043
129.5	0.1045
129.6	0.1047
129.7	0.1045
129.8	0.1047
129.9	0.1052
130	0.1055
130.1	0.1061
130.2	0.1062
130.3	0.107
130.4	0.1073
130.5	0.1075
130.6	0.1077
130.7	0.108
130.8	0.1083
130.9	0.1089
131	0.1089
131.1	0.1092
131.2	0.1096
131.3	0.1104
131.4	0.1106
131.5	0.1109
131.6	0.1116
131.7	0.1119
131.8	0.1119
131.9	0.1121
132	0.1128
132.1	0.113
132.2	0.1133
132.3	0.1136
132.4	0.1137
132.5	0.1142
132.6	0.1148
132.7	0.115
132.8	0.1154
132.9	0.1156
133	0.1161
133.1	0.1166
133.2	0.1166
133.3	0.1167
133.4	0.1171
133.5	0.1175
133.6	0.1173
133.7	0.1175
133.8	0.1178
133.9	0.1177
134	0.1181
134.1	0.1187
134.2	0.1189
134.3	0.1192
134.4	0.1193
134.5	0.1196
134.6	0.1202
134.7	0.1207
134.8	0.1209
134.9	0.1211
135	0.1211
135.1	0.1212
135.2	0.1213
135.3	0.1214
135.4	0.1216
135.5	0.1218
135.6	0.122
135.7	0.1224
135.8	0.1225
135.9	0.1226
136	0.1229
136.1	0.1231
136.2	0.1233
136.3	0.1236
136.4	0.1239
136.5	0.1244
136.6	0.1243
136.7	0.1252
136.8	0.1258
136.9	0.1262
137	0.1266
137.1	0.1265
137.2	0.1268
137.3	0.1276
137.4	0.1281
137.5	0.1282
137.6	0.1284
137.7	0.1285
137.8	0.1287
137.9	0.129
138	0.1295
138.1	0.1299
138.2	0.1297
138.3	0.1297
138.4	0.1298
138.5	0.1301
138.6	0.1307
138.7	0.1311
138.8	0.1314
138.9	0.1321
139	0.1321
139.1	0.1324
139.2	0.1321
139.3	0.1327
139.4	0.1329
139.5	0.1329
139.6	0.1332
139.7	0.1335
139.8	0.1337
139.9	0.1337
140	0.1336
140.1	0.1336
140.2	0.1336
140.3	0.1335
140.4	0.1344
140.5	0.1345
140.6	0.1347
140.7	0.1353
140.8	0.1356
140.9	0.1361
141	0.1363
141.1	0.1367
141.2	0.137
141.3	0.1374
141.4	0.1375
141.5	0.1376
141.6	0.138
141.7	0.1388
141.8	0.1389
141.9	0.139
142	0.1392
142.1	0.1393
142.2	0.1397
142.3	0.1395
142.4	0.1397
142.5	0.1401
142.6	0.14
142.7	0.1403
142.8	0.1405
142.9	0.141
143	0.1411
143.1	0.1416
143.2	0.142
143.3	0.1421
143.4	0.1423
143.5	0.1425
143.6	0.143
143.7	0.1433
143.8	0.1438
143.9	0.1442
144	0.1448
144.1	0.1453
144.2	0.1456
144.3	0.1461
144.4	0.1462
144.5	0.1467
144.6	0.1467
144.7	0.147
144.8	0.1473
144.9	0.1476
145	0.1477
145.1	0.148
145.2	0.1484
145.3	0.1488
145.4	0.1488
145.5	0.1491
145.6	0.1493
145.7	0.1495
145.8	0.1497
145.9	0.1499
146	0.1503
146.1	0.1504
146.2	0.1506
146.3	0.1509
146.4	0.1515
146.5	0.1519
146.6	0.1518
146.7	0.1522
146.8	0.1525
146.9	0.1528
147	0.1534
147.1	0.1536
147.2	0.1535
147.3	0.153
147.4	0.1534
147.5	0.1537
147.6	0.1543
147.7	0.1542
147.8	0.1544
147.9	0.155
148	0.1553
148.1	0.1553
148.2	0.1555
148.3	0.1562
148.4	0.1563
148.5	0.1566
148.6	0.1571
148.7	0.1578
148.8	0.1576
148.9	0.1578
149	0.1583
149.1	0.1584
149.2	0.1588
149.3	0.1588
149.4	0.1594
149.5	0.1595
149.6	0.1597
149.7	0.1603
149.8	0.1606
149.9	0.161
150	0.1613
150.1	0.1614
150.2	0.1615
150.3	0.1618
150.4	0.1619
150.5	0.1621
150.6	0.1622
150.7	0.1624
150.8	0.1631
150.9	0.1632
151	0.1634
151.1	0.1643
151.2	0.1646
151.3	0.1653
151.4	0.1653
151.5	0.1655
151.6	0.1657
151.7	0.166
151.8	0.1661
151.9	0.1666
152	0.1665
152.1	0.1669
152.2	0.1671
152.3	0.1673
152.4	0.1672
152.5	0.1671
152.6	0.1674
152.7	0.1677
152.8	0.1682
152.9	0.1684
153	0.1681
153.1	0.1676
153.2	0.1684
153.3	0.1687
153.4	0.1689
153.5	0.169
153.6	0.1688
153.7	0.1693
153.8	0.1694
153.9	0.1699
154	0.1703
154.1	0.1706
154.2	0.1708
154.3	0.1712
154.4	0.1714
154.5	0.1716
154.6	0.1715
154.7	0.1719
154.8	0.1724
154.9	0.1729
155	0.1732
155.1	0.1733
155.2	0.1736
155.3	0.1739
155.4	0.1742
155.5	0.1745
155.6	0.1749
155.7	0.1751
155.8	0.175
155.9	0.1754
156	0.1756
156.1	0.1755
156.2	0.176
156.3	0.1759
156.4	0.1762
156.5	0.1765
156.6	0.1765
156.7	0.1765
156.8	0.177
156.9	0.1772
157	0.1774
157.1	0.1774
157.2	0.1776
157.3	0.1776
157.4	0.178
157.5	0.1779
157.6	0.1778
157.7	0.1779
157.8	0.1783
157.9	0.179
158	0.1791
158.1	0.1793
158.2	0.1795
158.3	0.18
158.4	0.1805
158.5	0.1805
158.6	0.1806
158.7	0.1809
158.8	0.1811
158.9	0.1814
159	0.1811
159.1	0.1814
159.2	0.1817
159.3	0.1817
159.4	0.1817
159.5	0.182
159.6	0.1822
159.7	0.1824
159.8	0.1824
159.9	0.1824
160	0.1822
160.1	0.1826
160.2	0.1828
160.3	0.1831
160.4	0.1835
160.5	0.1838
160.6	0.1842
160.7	0.184
160.8	0.1841
160.9	0.1841
161	0.1842
161.1	0.1843
161.2	0.1843
161.3	0.1845
161.4	0.1846
161.5	0.1848
161.6	0.185
161.7	0.1857
161.8	0.1858
161.9	0.1859
162	0.1862
162.1	0.1863
162.2	0.1865
162.3	0.1868
162.4	0.1871
162.5	0.1874
162.6	0.1876
162.7	0.1879
162.8	0.1886
162.9	0.1886
163	0.1887
163.1	0.1887
163.2	0.1888
163.3	0.1886
163.4	0.1888
163.5	0.1894
163.6	0.1896
163.7	0.1897
163.8	0.1897
163.9	0.1897
164	0.1901
164.1	0.1905
164.2	0.1907
164.3	0.1907
164.4	0.1911
164.5	0.1916
164.6	0.192
164.7	0.192
164.8	0.1919
164.9	0.1921
165	0.1923
165.1	0.1926
165.2	0.1928
165.3	0.1928
165.4	0.193
165.5	0.1934
165.6	0.1933
165.7	0.1937
165.8	0.1941
165.9	0.1942
166	0.1945
166.1	0.1945
166.2	0.1947
166.3	0.1947
166.4	0.1945
166.5	0.1943
166.6	0.1945
166.7	0.1947
166.8	0.1948
166.9	0.1949
167	0.1949
167.1	0.1949
167.2	0.1949
167.3	0.1953
167.4	0.1955
167.5	0.1955
167.6	0.1957
167.7	0.196
167.8	0.1964
167.9	0.1967
168	0.1969
168.1	0.1971
168.2	0.1973
168.3	0.1976
168.4	0.1979
168.5	0.1979
168.6	0.198
168.7	0.1981
168.8	0.1979
168.9	0.1983
169	0.1984
169.1	0.1985
169.2	0.1988
169.3	0.1996
169.4	0.1995
169.5	0.1993
169.6	0.1997
169.7	0.1999
169.8	0.2001
169.9	0.2005
170	0.2008
170.1	0.2011
170.2	0.2013
170.3	0.2012
170.4	0.2019
170.5	0.2019
170.6	0.2017
170.7	0.2019
170.8	0.2019
170.9	0.2017
171	0.2016
171.1	0.2019
171.2	0.2019
171.3	0.2021
171.4	0.2019
171.5	0.202
171.6	0.2025
171.7	0.2031
171.8	0.203
171.9	0.2032
172	0.203
172.1	0.2032
172.2	0.2028
172.3	0.2032
172.4	0.2034
172.5	0.2041
172.6	0.2041
172.7	0.2046
172.8	0.2048
172.9	0.2048
173	0.2049
173.1	0.2049
173.2	0.2051
173.3	0.2053
173.4	0.2053
173.5	0.2054
173.6	0.2059
173.7	0.2063
173.8	0.2068
173.9	0.2069
174	0.207
174.1	0.207
174.2	0.2071
174.3	0.2073
174.4	0.2075
174.5	0.2077
174.6	0.2076
174.7	0.2077
174.8	0.2083
174.9	0.2084
175	0.2087
175.1	0.2088
175.2	0.209
175.3	0.2096
175.4	0.2099
175.5	0.2101
175.6	0.2099
175.7	0.2102
175.8	0.2101
175.9	0.2105
176	0.2107
176.1	0.2106
176.2	0.2111
176.3	0.2115
176.4	0.2115
176.5	0.2111
176.6	0.2111
176.7	0.2112
176.8	0.2116
176.9	0.2116
177	0.2119
177.1	0.2124
177.2	0.2129
177.3	0.213
177.4	0.2133
177.5	0.2131
177.6	0.2133
177.7	0.2138
177.8	0.2144
177.9	0.2148
178	0.215
178.1	0.2149
178.2	0.2148
178.3	0.2154
178.4	0.2157
178.5	0.2156
178.6	0.2161
178.7	0.216
178.8	0.2162
178.9	0.2164
179	0.2169
179.1	0.2172
179.2	0.2178
179.3	0.2182
179.4	0.2183
179.5	0.2181
179.6	0.2185
179.7	0.2187
179.8	0.2186
179.9	0.2191
180	0.2196
180.1	0.22
180.2	0.2202
180.3	0.2202
180.4	0.2204
180.5	0.2205
180.6	0.2206
180.7	0.2208
180.8	0.2209
180.9	0.2211
181	0.2216
181.1	0.2217
181.2	0.2227
181.3	0.2229
181.4	0.2229
181.5	0.2233
181.6	0.2239
181.7	0.2237
181.8	0.2239
181.9	0.2245
182	0.2244
182.1	0.2248
182.2	0.2246
182.3	0.2249
182.4	0.2246
182.5	0.2248
182.6	0.2251
182.7	0.2251
182.8	0.2255
182.9	0.2256
183	0.2252
183.1	0.2256
183.2	0.2255
183.3	0.2253
183.4	0.2253
183.5	0.2253
183.6	0.2257
183.7	0.2254
183.8	0.2255
183.9	0.2257
184	0.2259
184.1	0.226
184.2	0.226
184.3	0.2258
184.4	0.2259
184.5	0.2257
184.6	0.2258
184.7	0.2257
184.8	0.2259
184.9	0.2262
185	0.2261
185.1	0.2265
185.2	0.2264
185.3	0.2265
185.4	0.2266
185.5	0.2267
185.6	0.2267
185.7	0.2271
185.8	0.2273
185.9	0.2275
186	0.2273
186.1	0.2269
186.2	0.2275
186.3	0.2276
186.4	0.2276
186.5	0.2279
186.6	0.2278
186.7	0.2278
186.8	0.228
186.9	0.2282
187	0.2283
187.1	0.2286
187.2	0.2288
187.3	0.2295
187.4	0.2293
187.5	0.2294
187.6	0.2295
187.7	0.2292
187.8	0.229
187.9	0.229
188	0.2291
188.1	0.2293
188.2	0.2292
188.3	0.2293
188.4	0.2295
188.5	0.23
188.6	0.2303
188.7	0.2304
188.8	0.2306
188.9	0.2308
189	0.2308
189.1	0.2311
189.2	0.2311
189.3	0.2308
189.4	0.231
189.5	0.231
189.6	0.2311
189.7	0.2321
189.8	0.2323
189.9	0.2325
190	0.2327
190.1	0.2331
190.2	0.2333
190.3	0.2333
190.4	0.2333
190.5	0.2336
190.6	0.2339
190.7	0.2339
190.8	0.2339
190.9	0.234
191	0.2337
191.1	0.2341
191.2	0.2338
191.3	0.2339
191.4	0.2339
191.5	0.2341
191.6	0.2346
191.7	0.2346
191.8	0.2347
191.9	0.2349
192	0.2351
192.1	0.235
192.2	0.235
192.3	0.2351
192.4	0.2355
192.5	0.2356
192.6	0.2361
192.7	0.2362
192.8	0.2366
192.9	0.2367
193	0.2363
193.1	0.2362
193.2	0.2363
193.3	0.2369
193.4	0.2369
193.5	0.2368
193.6	0.2368
193.7	0.237
193.8	0.237
193.9	0.2366
194	0.237
194.1	0.2375
194.2	0.2379
194.3	0.2381
194.4	0.2384
194.5	0.2389
194.6	0.2388
194.7	0.2389
194.8	0.239
194.9	0.2386
195	0.2384
195.1	0.2384
195.2	0.2388
195.3	0.2386
195.4	0.2385
195.5	0.2389
195.6	0.2391
195.7	0.2392
195.8	0.2394
195.9	0.2395
196	0.2396
196.1	0.24
196.2	0.24
196.3	0.2399
196.4	0.2401
196.5	0.2402
196.6	0.2402
196.7	0.2401
196.8	0.2405
196.9	0.2402
197	0.2403
197.1	0.2403
197.2	0.2408
197.3	0.241
197.4	0.2411
197.5	0.2413
197.6	0.2416
197.7	0.2413
197.8	0.2413
197.9	0.2415
198	0.2419
198.1	0.2422
198.2	0.242
198.3	0.242
198.4	0.242
198.5	0.2418
198.6	0.2418
198.7	0.242
198.8	0.242
198.9	0.2419
199	0.2418
199.1	0.2414
199.2	0.2421
199.3	0.2423
199.4	0.2424
199.5	0.2424
199.6	0.2423
199.7	0.242
199.8	0.2421
199.9	0.2423
200	0.2428
[truncated: 14,000 more rows]
