# Supplementary material for: Bayesian inference of kinetic schemes for ion channels by Kalman filtering
Source: eLife journal article supplement (doi:10.7554/elife.62714), 2022-05-04
Supplement: fig4-data8 [file 1_Sim_N_20000_Fluor_MW.xlsx]

## Sheet: Tabelle1
0.1	0
0.2	0
0.3	0
0.4	0
0.5	0
0.6	0
0.7	0
0.8	0
0.9	0
1	0
1.1	0
1.2	0
1.3	0
1.4	0
1.5	0
1.6	0
1.7	0
1.8	0
1.9	0
2	0
2.1	0
2.2	0
2.3	0
2.4	0
2.5	0
2.6	0
2.7	0
2.8	0
2.9	0
3	0
3.1	0
3.2	0
3.3	0
3.4	0
3.5	0
3.6	0
3.7	0
3.8	0
3.9	0
4	0
4.1	0
4.2	0
4.3	0
4.4	0
4.5	0
4.6	0
4.7	0
4.8	0
4.9	0
5	0
5.1	0
5.2	0
5.3	0
5.4	0
5.5	0
5.6	0
5.7	0
5.8	0
5.9	0
6	0
6.1	0
6.2	0
6.3	0
6.4	0
6.5	0
6.6	0
6.7	0
6.8	0
6.9	0
7	0
7.1	0
7.2	0
7.3	0
7.4	0
7.5	0
7.6	0
7.7	0
7.8	0
7.9	0
8	0
8.1	0
8.2	0
8.3	0
8.4	0
8.5	0
8.6	0
8.7	0
8.8	0
8.9	0
9	0
9.1	0
9.2	0
9.3	0
9.4	0
9.5	0
9.6	0
9.7	0
9.8	0
9.9	0
10	0
10.1	0
10.2	0
10.3	0
10.4	0
10.5	0
10.6	0
10.7	0
10.8	0
10.9	0
11	0
11.1	0
11.2	0
11.3	0
11.4	0
11.5	0
11.6	0
11.7	0
11.8	0
11.9	0
12	0
12.1	0
12.2	0
12.3	0
12.4	0
12.5	0
12.6	0
12.7	0
12.8	0
12.9	0
13	0
13.1	0
13.2	0
13.3	0
13.4	0
13.5	0
13.6	0
13.7	0
13.8	0
13.9	0
14	0
14.1	0
14.2	0
14.3	0
14.4	0
14.5	0
14.6	0
14.7	0
14.8	0
14.9	0
15	0
15.1	0
15.2	0
15.3	0
15.4	0
15.5	0
15.6	0
15.7	0
15.8	0
15.9	0
16	0
16.1	0
16.2	0
16.3	0
16.4	0
16.5	0
16.6	0
16.7	0
16.8	0
16.9	0
17	0
17.1	0
17.2	0
17.3	0
17.4	0
17.5	0
17.6	0
17.7	0
17.8	0
17.9	0
18	0
18.1	0
18.2	0
18.3	0
18.4	0
18.5	0
18.6	0
18.7	0
18.8	0
18.9	0
19	0
19.1	0
19.2	0
19.3	0
19.4	0
19.5	0
19.6	0
19.7	0
19.8	0
19.9	0
20	0
20.1	0
20.2	0
20.3	0
20.4	0
20.5	0
20.6	0
20.7	0
20.8	0
20.9	0
21	0
21.1	0
21.2	0
21.3	0
21.4	0
21.5	0
21.6	0
21.7	0
21.8	0
21.9	0
22	0
22.1	0
22.2	0
22.3	0
22.4	0
22.5	0
22.6	0
22.7	0
22.8	0
22.9	0
23	0
23.1	0
23.2	0
23.3	0
23.4	0
23.5	0
23.6	0
23.7	0
23.8	0
23.9	0
24	0
24.1	0
24.2	0
24.3	0
24.4	0
24.5	0
24.6	0
24.7	0
24.8	0
24.9	0
25	0
25.1	0
25.2	0
25.3	0
25.4	0
25.5	0
25.6	0
25.7	0
25.8	0
25.9	0
26	0
26.1	0
26.2	0
26.3	0
26.4	0
26.5	0
26.6	0
26.7	0
26.8	0
26.9	0
27	0
27.1	0
27.2	0
27.3	0
27.4	0
27.5	0
27.6	0
27.7	0
27.8	0
27.9	0
28	0
28.1	0
28.2	0
28.3	0
28.4	0
28.5	0
28.6	0
28.7	0
28.8	0
28.9	0
29	0
29.1	0
29.2	0
29.3	0
29.4	0
29.5	0
29.6	0
29.7	0
29.8	0
29.9	0
30	0
30.1	0
30.2	0
30.3	0
30.4	0
30.5	0
30.6	0
30.7	0
30.8	0
30.9	0
31	0
31.1	0
31.2	0
31.3	0
31.4	0
31.5	0
31.6	0
31.7	0
31.8	0
31.9	0
32	0
32.1	0
32.2	0
32.3	0
32.4	0
32.5	0
32.6	0
32.7	0
32.8	0
32.9	0
33	0
33.1	0
33.2	0
33.3	0
33.4	0
33.5	0
33.6	0
33.7	0
33.8	0
33.9	0
34	0
34.1	0
34.2	0
34.3	0
34.4	0
34.5	0
34.6	0
34.7	0
34.8	0
34.9	0
35	0
35.1	0
35.2	0
35.3	0
35.4	0
35.5	0
35.6	0
35.7	0
35.8	0
35.9	0
36	0
36.1	0
36.2	0
36.3	0
36.4	0
36.5	0
36.6	0
36.7	0
36.8	0
36.9	0
37	0
37.1	0
37.2	0
37.3	0
37.4	0
37.5	0
37.6	0
37.7	0
37.8	0
37.9	0
38	0
38.1	0
38.2	0
38.3	0
38.4	0
38.5	0
38.6	0
38.7	0
38.8	0
38.9	0
39	0
39.1	0
39.2	0
39.3	0
39.4	0
39.5	0
39.6	0
39.7	0
39.8	0
39.9	0
40	0
40.1	0
40.2	0
40.3	0
40.4	0
40.5	0
40.6	0
40.7	0
40.8	0
40.9	0
41	0
41.1	0
41.2	0
41.3	0
41.4	0
41.5	0
41.6	0
41.7	0
41.8	0
41.9	0
42	0
42.1	0
42.2	0
42.3	0
42.4	0
42.5	0
42.6	0
42.7	0
42.8	0
42.9	0
43	0
43.1	0
43.2	0
43.3	0
43.4	0
43.5	0
43.6	0
43.7	0
43.8	0
43.9	0
44	0
44.1	0
44.2	0
44.3	0
44.4	0
44.5	0
44.6	0
44.7	0
44.8	0
44.9	0
45	0
45.1	0
45.2	0
45.3	0
45.4	0
45.5	0
45.6	0
45.7	0
45.8	0
45.9	0
46	0
46.1	0
46.2	0
46.3	0
46.4	0
46.5	0
46.6	0
46.7	0
46.8	0
46.9	0
47	0
47.1	0
47.2	0
47.3	0
47.4	0
47.5	0
47.6	0
47.7	0
47.8	0
47.9	0
48	0
48.1	0
48.2	0
48.3	0
48.4	0
48.5	0
48.6	0
48.7	0
48.8	0
48.9	0
49	0
49.1	0
49.2	0
49.3	0
49.4	0
49.5	0
49.6	0
49.7	0
49.8	0
49.9	0
50	0
50.1	0
50.2	0
50.3	0
50.4	0
50.5	0
50.6	0
50.7	0
50.8	0
50.9	0
51	0
51.1	0
51.2	0
51.3	0
51.4	0
51.5	0
51.6	0
51.7	0
51.8	0
51.9	0
52	0
52.1	0
52.2	0
52.3	0
52.4	0
52.5	0
52.6	0
52.7	0
52.8	0
52.9	0
53	0
53.1	0
53.2	0
53.3	0
53.4	0
53.5	0
53.6	0
53.7	0
53.8	0
53.9	0
54	0
54.1	0
54.2	0
54.3	0
54.4	0
54.5	0
54.6	0
54.7	0
54.8	0
54.9	0
55	0
55.1	0
55.2	0
55.3	0
55.4	0
55.5	0
55.6	0
55.7	0
55.8	0
55.9	0
56	0
56.1	0
56.2	0
56.3	0
56.4	0
56.5	0
56.6	0
56.7	0
56.8	0
56.9	0
57	0
57.1	0
57.2	0
57.3	0
57.4	0
57.5	0
57.6	0
57.7	0
57.8	0
57.9	0
58	0
58.1	0
58.2	0
58.3	0
58.4	0
58.5	0
58.6	0
58.7	0
58.8	0
58.9	0
59	0
59.1	0
59.2	0
59.3	0
59.4	0
59.5	0
59.6	0
59.7	0
59.8	0
59.9	0
60	0
60.1	0
60.2	0
60.3	0
60.4	0
60.5	0
60.6	0
60.7	0
60.8	0
60.9	0
61	0
61.1	0
61.2	0
61.3	0
61.4	0
61.5	0
61.6	0
61.7	0
61.8	0
61.9	0
62	0
62.1	0
62.2	0
62.3	0
62.4	0
62.5	0
62.6	0
62.7	0
62.8	0
62.9	0
63	0
63.1	0
63.2	0
63.3	0
63.4	0
63.5	0
63.6	0
63.7	0
63.8	0
63.9	0
64	0
64.1	0
64.2	0
64.3	0
64.4	0
64.5	0
64.6	0
64.7	0
64.8	0
64.9	0
65	0
65.1	0
65.2	0
65.3	0
65.4	0
65.5	0
65.6	0
65.7	0
65.8	0
65.9	0
66	0
66.1	0
66.2	0
66.3	0
66.4	0
66.5	0
66.6	0
66.7	0
66.8	0
66.9	0
67	0
67.1	0
67.2	0
67.3	0
67.4	0
67.5	0
67.6	0
67.7	0
67.8	0
67.9	0
68	0
68.1	0
68.2	0
68.3	0
68.4	0
68.5	0
68.6	0
68.7	0
68.8	0
68.9	0
69	0
69.1	0
69.2	0
69.3	0
69.4	0
69.5	0
69.6	0
69.7	0
69.8	0
69.9	0
70	0
70.1	0
70.2	0
70.3	0
70.4	0
70.5	0
70.6	0
70.7	0
70.8	0
70.9	0
71	0
71.1	0
71.2	0
71.3	0
71.4	0
71.5	0
71.6	0
71.7	0
71.8	0
71.9	0
72	0
72.1	0
72.2	0
72.3	0
72.4	0
72.5	0
72.6	0
72.7	0
72.8	0
72.9	0
73	0
73.1	0
73.2	0
73.3	0
73.4	0
73.5	0
73.6	0
73.7	0
73.8	0
73.9	0
74	0
74.1	0
74.2	0
74.3	0
74.4	0
74.5	0
74.6	0
74.7	0
74.8	0
74.9	0
75	0
75.1	0
75.2	0
75.3	0
75.4	0
75.5	0
75.6	0
75.7	0
75.8	0
75.9	0
76	0
76.1	0
76.2	0
76.3	0
76.4	0
76.5	0
76.6	0
76.7	0
76.8	0
76.9	0
77	0
77.1	0
77.2	0
77.3	0
77.4	0
77.5	0
77.6	0
77.7	0
77.8	0
77.9	0
78	0
78.1	0
78.2	0
78.3	0
78.4	0
78.5	0
78.6	0
78.7	0
78.8	0
78.9	0
79	0
79.1	0
79.2	0
79.3	0
79.4	0
79.5	0
79.6	0
79.7	0
79.8	0
79.9	0
80	0
80.1	0
80.2	0
80.3	0
80.4	0
80.5	0
80.6	0
80.7	0
80.8	0
80.9	0
81	0
81.1	0
81.2	0
81.3	0
81.4	0
81.5	0
81.6	0
81.7	0
81.8	0
81.9	0
82	0
82.1	0
82.2	0
82.3	0
82.4	0
82.5	0
82.6	0
82.7	0
82.8	0
82.9	0
83	0
83.1	0
83.2	0
83.3	0
83.4	0
83.5	0
83.6	0
83.7	0
83.8	0
83.9	0
84	0
84.1	0
84.2	0
84.3	0
84.4	0
84.5	0
84.6	0
84.7	0
84.8	0
84.9	0
85	0
85.1	0
85.2	0
85.3	0
85.4	0
85.5	0
85.6	0
85.7	0
85.8	0
85.9	0
86	0
86.1	0
86.2	0
86.3	0
86.4	0
86.5	0
86.6	0
86.7	0
86.8	0
86.9	0
87	0
87.1	0
87.2	0
87.3	0
87.4	0
87.5	0
87.6	0
87.7	0
87.8	0
87.9	0
88	0
88.1	0
88.2	0
88.3	0
88.4	0
88.5	0
88.6	0
88.7	0
88.8	0
88.9	0
89	0
89.1	0
89.2	0
89.3	0
89.4	0
89.5	0
89.6	0
89.7	0
89.8	0
89.9	0
90	0
90.1	0
90.2	0
90.3	0
90.4	0
90.5	0
90.6	0
90.7	0
90.8	0
90.9	0
91	0
91.1	0
91.2	0
91.3	0
91.4	0
91.5	0
91.6	0
91.7	0
91.8	0
91.9	0
92	0
92.1	0
92.2	0
92.3	0
92.4	0
92.5	0
92.6	0
92.7	0
92.8	0
92.9	0
93	0
93.1	0
93.2	0
93.3	0
93.4	0
93.5	0
93.6	0
93.7	0
93.8	0
93.9	0
94	0
94.1	0
94.2	0
94.3	0
94.4	0
94.5	0
94.6	0
94.7	0
94.8	0
94.9	0
95	0
95.1	0
95.2	0
95.3	0
95.4	0
95.5	0
95.6	0
95.7	0
95.8	0
95.9	0
96	0
96.1	0
96.2	0
96.3	0
96.4	0
96.5	0
96.6	0
96.7	0
96.8	0
96.9	0
97	0
97.1	0
97.2	0
97.3	0
97.4	0
97.5	0
97.6	0
97.7	0
97.8	0
97.9	0
98	0
98.1	0
98.2	0
98.3	0
98.4	0
98.5	0
98.6	0
98.7	0
98.8	0
98.9	0
99	0
99.1	0
99.2	0
99.3	0
99.4	0
99.5	0
99.6	0
99.7	0
99.8	0
99.9	0
100	0
100.1	0.015
100.2	0.0287
100.3	0.0424
100.4	0.055375
100.5	0.068325
100.6	0.08095
100.7	0.092775
100.8	0.103725
100.9	0.114425
101	0.125825
101.1	0.136725
101.2	0.1464
101.3	0.157
101.4	0.166075
101.5	0.17515
101.6	0.18425
101.7	0.192875
101.8	0.2011
101.9	0.2101
102	0.2182
102.1	0.225325
102.2	0.23275
102.3	0.240025
102.4	0.24745
102.5	0.253725
102.6	0.2601
102.7	0.266075
102.8	0.2719
102.9	0.27725
103	0.282525
103.1	0.28815
103.2	0.293975
103.3	0.299625
103.4	0.3042
103.5	0.309175
103.6	0.3137
103.7	0.31865
103.8	0.3229
103.9	0.3263
104	0.32955
104.1	0.334125
104.2	0.3382
104.3	0.34175
104.4	0.345125
104.5	0.34815
104.6	0.3503
104.7	0.35385
104.8	0.35715
104.9	0.360125
105	0.362825
105.1	0.365
105.2	0.367875
105.3	0.370225
105.4	0.37295
105.5	0.375
105.6	0.377825
105.7	0.3791
105.8	0.3818
105.9	0.38355
106	0.38515
106.1	0.38675
106.2	0.387825
106.3	0.390175
106.4	0.392375
106.5	0.393575
106.6	0.395125
106.7	0.3959
106.8	0.398825
106.9	0.40085
107	0.4024
107.1	0.40395
107.2	0.405825
107.3	0.40765
107.4	0.4091
107.5	0.4105
107.6	0.412625
107.7	0.413875
107.8	0.41485
107.9	0.4162
108	0.416725
108.1	0.417925
108.2	0.4182
108.3	0.419125
108.4	0.420625
108.5	0.421725
108.6	0.422725
108.7	0.423175
108.8	0.424
108.9	0.425175
109	0.425525
109.1	0.4264
109.2	0.428025
109.3	0.427725
109.4	0.429375
109.5	0.429175
109.6	0.429675
109.7	0.43065
109.8	0.431725
109.9	0.4328
110	0.433675
110.1	0.43325
110.2	0.43445
110.3	0.435125
110.4	0.435925
110.5	0.4373
110.6	0.43835
110.7	0.43935
110.8	0.439525
110.9	0.440975
111	0.44095
111.1	0.440825
111.2	0.442075
111.3	0.442275
111.4	0.442425
111.5	0.4437
111.6	0.44405
111.7	0.444475
111.8	0.445075
111.9	0.445625
112	0.4467
112.1	0.44715
112.2	0.447525
112.3	0.448175
112.4	0.4487
112.5	0.44935
112.6	0.450525
112.7	0.451
112.8	0.450925
112.9	0.451
113	0.451025
113.1	0.451675
113.2	0.451375
113.3	0.451375
113.4	0.451375
113.5	0.452025
113.6	0.45295
113.7	0.45335
113.8	0.452875
113.9	0.452975
114	0.454275
114.1	0.4537
114.2	0.454175
114.3	0.453725
114.4	0.45465
114.5	0.45555
114.6	0.45545
114.7	0.455925
114.8	0.455425
114.9	0.455075
115	0.4556
115.1	0.456525
115.2	0.456625
115.3	0.45755
115.4	0.457725
115.5	0.4591
115.6	0.459625
115.7	0.460875
115.8	0.461025
115.9	0.461575
116	0.46185
116.1	0.46315
116.2	0.462675
116.3	0.4641
116.4	0.463175
116.5	0.464275
116.6	0.46425
116.7	0.464975
116.8	0.465375
116.9	0.4656
117	0.4661
117.1	0.46515
117.2	0.46535
117.3	0.465625
117.4	0.46645
117.5	0.465725
117.6	0.466325
117.7	0.467175
117.8	0.467575
117.9	0.467975
118	0.468975
118.1	0.46895
118.2	0.469125
118.3	0.46905
118.4	0.46995
118.5	0.46985
118.6	0.4707
118.7	0.470575
118.8	0.4706
118.9	0.47135
119	0.47225
119.1	0.4719
119.2	0.4711
119.3	0.4697
119.4	0.469975
119.5	0.47015
119.6	0.4714
119.7	0.47145
119.8	0.471225
119.9	0.471175
120	0.47125
120.1	0.47205
120.2	0.472975
120.3	0.473225
120.4	0.472225
120.5	0.471975
120.6	0.472
120.7	0.4722
120.8	0.471925
120.9	0.472625
121	0.47235
121.1	0.47445
121.2	0.475275
121.3	0.4753
121.4	0.475275
121.5	0.4759
121.6	0.4752
121.7	0.47415
121.8	0.47405
121.9	0.474725
122	0.475375
122.1	0.4761
122.2	0.4761
122.3	0.47555
122.4	0.47585
122.5	0.4765
122.6	0.476325
122.7	0.47685
122.8	0.4771
122.9	0.47745
123	0.4769
123.1	0.477375
123.2	0.477325
123.3	0.47725
123.4	0.4773
123.5	0.478
123.6	0.47925
123.7	0.479175
123.8	0.479825
123.9	0.479375
124	0.4807
124.1	0.4806
124.2	0.48045
124.3	0.48045
124.4	0.481175
124.5	0.48165
124.6	0.4813
124.7	0.4803
124.8	0.480675
124.9	0.480825
125	0.481
125.1	0.48065
125.2	0.4806
125.3	0.48085
125.4	0.480825
125.5	0.480925
125.6	0.482125
125.7	0.482575
125.8	0.483275
125.9	0.483075
126	0.483025
126.1	0.482675
126.2	0.4819
126.3	0.481725
126.4	0.4829
126.5	0.483675
126.6	0.483575
126.7	0.483475
126.8	0.483775
126.9	0.484225
127	0.484225
127.1	0.48415
127.2	0.48415
127.3	0.484325
127.4	0.48415
127.5	0.4835
127.6	0.48345
127.7	0.484525
127.8	0.48355
127.9	0.483375
128	0.483775
128.1	0.48425
128.2	0.48455
128.3	0.485075
128.4	0.4851
128.5	0.48605
128.6	0.48725
128.7	0.48695
128.8	0.486525
128.9	0.48615
129	0.4864
129.1	0.48665
129.2	0.486625
129.3	0.487325
129.4	0.48735
129.5	0.48795
129.6	0.487725
129.7	0.487875
129.8	0.488475
129.9	0.488925
130	0.488525
130.1	0.4882
130.2	0.487825
130.3	0.48805
130.4	0.488075
130.5	0.488475
130.6	0.488525
130.7	0.4892
130.8	0.489125
130.9	0.489825
131	0.490125
131.1	0.489875
131.2	0.49035
131.3	0.49015
131.4	0.4902
131.5	0.4911
131.6	0.491675
131.7	0.49225
131.8	0.49205
131.9	0.4922
132	0.492475
132.1	0.492425
132.2	0.4932
132.3	0.493425
132.4	0.493025
132.5	0.49305
132.6	0.4931
132.7	0.493075
132.8	0.4934
132.9	0.493125
133	0.494
133.1	0.4944
133.2	0.49535
133.3	0.495625
133.4	0.496775
133.5	0.496675
133.6	0.496975
133.7	0.4982
133.8	0.4977
133.9	0.498125
134	0.498125
134.1	0.4985
134.2	0.4987
134.3	0.498925
134.4	0.498725
134.5	0.499
134.6	0.499375
134.7	0.49885
134.8	0.497925
134.9	0.4989
135	0.498975
135.1	0.49975
135.2	0.49985
135.3	0.500925
135.4	0.5008
135.5	0.501325
135.6	0.501225
135.7	0.501425
135.8	0.5011
135.9	0.501325
136	0.5028
136.1	0.5016
136.2	0.501575
136.3	0.5009
136.4	0.5006
136.5	0.50095
136.6	0.50095
136.7	0.500425
136.8	0.5001
136.9	0.501025
137	0.500775
137.1	0.500725
137.2	0.500025
137.3	0.499975
137.4	0.4998
137.5	0.500475
137.6	0.5018
137.7	0.5026
137.8	0.50335
137.9	0.503625
138	0.503825
138.1	0.5041
138.2	0.5047
138.3	0.505825
138.4	0.506725
138.5	0.507025
138.6	0.506575
138.7	0.506325
138.8	0.507
138.9	0.50775
139	0.5075
139.1	0.506875
139.2	0.50705
139.3	0.507425
139.4	0.5074
139.5	0.50745
139.6	0.5082
139.7	0.50845
139.8	0.507875
139.9	0.5074
140	0.5075
140.1	0.507475
140.2	0.50755
140.3	0.506925
140.4	0.50655
140.5	0.507325
140.6	0.508325
140.7	0.508325
140.8	0.507875
140.9	0.5086
141	0.508775
141.1	0.508675
141.2	0.508325
141.3	0.5082
141.4	0.50875
141.5	0.50805
141.6	0.5089
141.7	0.50905
141.8	0.508875
141.9	0.508625
142	0.5094
142.1	0.51
142.2	0.509925
142.3	0.51095
142.4	0.510825
142.5	0.5102
142.6	0.510275
142.7	0.511225
142.8	0.51115
142.9	0.511075
143	0.51125
143.1	0.51055
143.2	0.5106
143.3	0.511025
143.4	0.511425
143.5	0.51195
143.6	0.5116
143.7	0.511225
143.8	0.511225
143.9	0.5119
144	0.511375
144.1	0.51185
144.2	0.5132
144.3	0.5138
144.4	0.514075
144.5	0.51505
144.6	0.515175
144.7	0.514125
144.8	0.514125
144.9	0.515175
145	0.5147
145.1	0.514875
145.2	0.514325
145.3	0.515025
145.4	0.514725
145.5	0.51515
145.6	0.514375
145.7	0.514375
145.8	0.51455
145.9	0.5143
146	0.514025
146.1	0.51495
146.2	0.516
146.3	0.5163
146.4	0.51645
146.5	0.5164
146.6	0.51725
146.7	0.51755
146.8	0.51725
146.9	0.51705
147	0.517275
147.1	0.5176
147.2	0.518
147.3	0.517275
147.4	0.517125
147.5	0.5167
147.6	0.516875
147.7	0.517525
147.8	0.517425
147.9	0.5178
148	0.5182
148.1	0.518625
148.2	0.5188
148.3	0.519125
148.4	0.519475
148.5	0.51915
148.6	0.519
148.7	0.51915
148.8	0.518775
148.9	0.518875
149	0.5186
149.1	0.518625
149.2	0.518825
149.3	0.5184
149.4	0.519675
149.5	0.5196
149.6	0.52045
149.7	0.520875
149.8	0.52125
149.9	0.52095
150	0.5216
150.1	0.521725
150.2	0.521875
150.3	0.52215
150.4	0.52205
150.5	0.521925
150.6	0.521725
150.7	0.521475
150.8	0.521625
150.9	0.5216
151	0.52075
151.1	0.52135
151.2	0.52195
151.3	0.522125
151.4	0.521925
151.5	0.522525
151.6	0.522525
151.7	0.522975
151.8	0.523425
151.9	0.524275
152	0.524075
152.1	0.524525
152.2	0.5242
152.3	0.524075
152.4	0.52455
152.5	0.524125
152.6	0.5238
152.7	0.52265
152.8	0.522875
152.9	0.5232
153	0.522525
153.1	0.522725
153.2	0.5238
153.3	0.523975
153.4	0.523975
153.5	0.524075
153.6	0.5245
153.7	0.524775
153.8	0.5257
153.9	0.5253
154	0.52585
154.1	0.52625
154.2	0.526325
154.3	0.526525
154.4	0.5268
154.5	0.528175
154.6	0.528975
154.7	0.529525
154.8	0.5302
154.9	0.531125
155	0.531975
155.1	0.5315
155.2	0.5315
155.3	0.53085
155.4	0.5314
155.5	0.53135
155.6	0.531725
155.7	0.5314
155.8	0.53155
155.9	0.5317
156	0.531525
156.1	0.5314
156.2	0.530925
156.3	0.5305
156.4	0.530525
156.5	0.5298
156.6	0.5298
156.7	0.5296
156.8	0.5297
156.9	0.5297
157	0.52965
157.1	0.5304
157.2	0.530675
157.3	0.53105
157.4	0.53085
157.5	0.531075
157.6	0.5306
157.7	0.530875
157.8	0.531075
157.9	0.531525
158	0.531475
158.1	0.531725
158.2	0.5314
158.3	0.532075
158.4	0.532125
158.5	0.5317
158.6	0.53245
158.7	0.53245
158.8	0.53265
158.9	0.5328
159	0.532175
159.1	0.5318
159.2	0.5311
159.3	0.53065
159.4	0.5312
159.5	0.53145
159.6	0.5315
159.7	0.530825
159.8	0.531725
159.9	0.531775
160	0.5321
160.1	0.5334
160.2	0.533425
160.3	0.533725
160.4	0.533825
160.5	0.53375
160.6	0.533875
160.7	0.5336
160.8	0.5337
160.9	0.533825
161	0.533825
161.1	0.534175
161.2	0.5338
161.3	0.53385
161.4	0.5342
161.5	0.534675
161.6	0.53515
161.7	0.53525
161.8	0.536075
161.9	0.5363
162	0.5357
162.1	0.53575
162.2	0.53605
162.3	0.536475
162.4	0.536925
162.5	0.536825
162.6	0.5371
162.7	0.5369
162.8	0.536825
162.9	0.5368
163	0.53655
163.1	0.536575
163.2	0.536825
163.3	0.5364
163.4	0.5371
163.5	0.53765
163.6	0.53755
163.7	0.538325
163.8	0.538825
163.9	0.539525
164	0.53915
164.1	0.538275
164.2	0.538575
164.3	0.53895
164.4	0.5392
164.5	0.538825
164.6	0.539725
164.7	0.54035
164.8	0.5405
164.9	0.540175
165	0.5403
165.1	0.5398
165.2	0.539875
165.3	0.54035
165.4	0.541575
165.5	0.541775
165.6	0.54235
165.7	0.541775
165.8	0.541825
165.9	0.5423
166	0.542325
166.1	0.54165
166.2	0.541975
166.3	0.5419
166.4	0.542375
166.5	0.54215
166.6	0.54235
166.7	0.542125
166.8	0.542175
166.9	0.541625
167	0.541475
167.1	0.542
167.2	0.54275
167.3	0.542775
167.4	0.54235
167.5	0.5423
167.6	0.5429
167.7	0.54265
167.8	0.542575
167.9	0.5425
168	0.542175
168.1	0.542025
168.2	0.54205
168.3	0.54255
168.4	0.54295
168.5	0.543375
168.6	0.54355
168.7	0.54365
168.8	0.5443
168.9	0.54495
169	0.54525
169.1	0.5456
169.2	0.5458
169.3	0.54575
169.4	0.5458
169.5	0.5466
169.6	0.54655
169.7	0.5464
169.8	0.54675
169.9	0.546825
170	0.547075
170.1	0.54695
170.2	0.547
170.3	0.547075
170.4	0.546975
170.5	0.54685
170.6	0.54715
170.7	0.54685
170.8	0.546925
170.9	0.5473
171	0.54735
171.1	0.548175
171.2	0.548175
171.3	0.548475
171.4	0.5481
171.5	0.549025
171.6	0.549275
171.7	0.5492
171.8	0.549275
171.9	0.549725
172	0.550425
172.1	0.550075
172.2	0.550225
172.3	0.54975
172.4	0.54995
172.5	0.549575
172.6	0.549675
172.7	0.550025
172.8	0.5492
172.9	0.549525
173	0.55015
173.1	0.54995
173.2	0.54995
173.3	0.5502
173.4	0.5509
173.5	0.550125
173.6	0.551275
173.7	0.55115
173.8	0.55125
173.9	0.55235
174	0.55135
174.1	0.551775
174.2	0.5526
174.3	0.552425
174.4	0.5524
174.5	0.553225
174.6	0.5535
174.7	0.55275
174.8	0.55335
174.9	0.553525
175	0.5533
175.1	0.55285
175.2	0.554125
175.3	0.553725
175.4	0.552875
175.5	0.553
175.6	0.5534
175.7	0.5526
175.8	0.5525
175.9	0.55185
176	0.5521
176.1	0.5511
176.2	0.5511
176.3	0.5512
176.4	0.5513
176.5	0.55225
176.6	0.55165
176.7	0.551375
176.8	0.5518
176.9	0.55205
177	0.5526
177.1	0.552525
177.2	0.553125
177.3	0.5528
177.4	0.553375
177.5	0.55375
177.6	0.5534
177.7	0.554375
177.8	0.5542
177.9	0.5545
178	0.5542
178.1	0.554075
178.2	0.5547
178.3	0.555125
178.4	0.55535
178.5	0.55525
178.6	0.554875
178.7	0.555425
178.8	0.555825
178.9	0.5562
179	0.55705
179.1	0.556675
179.2	0.55695
179.3	0.557675
179.4	0.557425
179.5	0.55775
179.6	0.558325
179.7	0.558225
179.8	0.5581
179.9	0.55815
180	0.558325
180.1	0.557475
180.2	0.55805
180.3	0.558675
180.4	0.5593
180.5	0.559175
180.6	0.558975
180.7	0.55855
180.8	0.558675
180.9	0.55855
181	0.559075
181.1	0.559375
181.2	0.5586
181.3	0.558225
181.4	0.5586
181.5	0.55945
181.6	0.55975
181.7	0.55985
181.8	0.56105
181.9	0.5606
182	0.561225
182.1	0.561475
182.2	0.56035
182.3	0.560825
182.4	0.561325
182.5	0.561175
182.6	0.5618
182.7	0.5617
182.8	0.561625
182.9	0.5615
183	0.561675
183.1	0.561225
183.2	0.561775
183.3	0.56185
183.4	0.5619
183.5	0.5621
183.6	0.56175
183.7	0.5618
183.8	0.5614
183.9	0.56125
184	0.561375
184.1	0.561725
184.2	0.56135
184.3	0.561525
184.4	0.5606
184.5	0.560725
184.6	0.5612
184.7	0.561275
184.8	0.56215
184.9	0.562175
185	0.56265
185.1	0.5629
185.2	0.5634
185.3	0.5635
185.4	0.563375
185.5	0.5637
185.6	0.563675
185.7	0.564075
185.8	0.564325
185.9	0.5652
186	0.5646
186.1	0.5643
186.2	0.564225
186.3	0.5647
186.4	0.564425
186.5	0.56525
186.6	0.564925
186.7	0.5658
186.8	0.566
186.9	0.565875
187	0.56635
187.1	0.567
187.2	0.5673
187.3	0.56735
187.4	0.5662
187.5	0.5657
187.6	0.5653
187.7	0.5663
187.8	0.5671
187.9	0.5669
188	0.567175
188.1	0.56715
188.2	0.56645
188.3	0.566375
188.4	0.567
188.5	0.5666
188.6	0.565675
188.7	0.56525
188.8	0.5652
188.9	0.565
189	0.564625
189.1	0.565725
189.2	0.5658
189.3	0.565525
189.4	0.565875
189.5	0.565925
189.6	0.565025
189.7	0.565875
189.8	0.566525
189.9	0.56585
190	0.5658
190.1	0.5657
190.2	0.56565
190.3	0.56625
190.4	0.566175
190.5	0.566975
190.6	0.566575
190.7	0.566725
190.8	0.567775
190.9	0.56875
191	0.5684
191.1	0.56815
191.2	0.5672
191.3	0.567525
191.4	0.5672
191.5	0.5671
191.6	0.566325
191.7	0.566725
191.8	0.5667
191.9	0.567375
192	0.566875
192.1	0.56695
192.2	0.567025
192.3	0.56775
192.4	0.567075
192.5	0.5671
192.6	0.5673
192.7	0.567075
192.8	0.566225
192.9	0.566875
193	0.567125
193.1	0.567625
193.2	0.567325
193.3	0.5673
193.4	0.5672
193.5	0.5679
193.6	0.5677
193.7	0.568075
193.8	0.568825
193.9	0.56935
194	0.56965
194.1	0.568925
194.2	0.568725
194.3	0.56925
194.4	0.569475
194.5	0.569275
194.6	0.568575
194.7	0.56885
194.8	0.568675
194.9	0.568125
195	0.56855
195.1	0.568925
195.2	0.5687
195.3	0.56895
195.4	0.56955
195.5	0.5698
195.6	0.5702
195.7	0.569225
195.8	0.5688
195.9	0.569075
196	0.56945
196.1	0.56925
196.2	0.568825
196.3	0.56865
196.4	0.568525
196.5	0.56875
196.6	0.568625
196.7	0.569375
196.8	0.56945
196.9	0.569975
197	0.57025
197.1	0.569725
197.2	0.569225
197.3	0.569425
197.4	0.569575
197.5	0.569375
197.6	0.569675
197.7	0.5699
197.8	0.569775
197.9	0.5696
198	0.56955
198.1	0.56995
198.2	0.570075
198.3	0.57015
198.4	0.56965
198.5	0.56995
198.6	0.5705
198.7	0.570175
198.8	0.5702
198.9	0.569825
199	0.5693
199.1	0.56975
199.2	0.569675
199.3	0.56905
199.4	0.569325
199.5	0.569075
199.6	0.570075
199.7	0.569275
199.8	0.569825
199.9	0.568975
200	0.568875
[truncated: 14,000 more rows]
