# Supplementary material for: Bayesian inference of kinetic schemes for ion channels by Kalman filtering
Source: eLife journal article supplement (doi:10.7554/elife.62714), 2022-05-04
Supplement: fig4-data8 [file 1_Sim_N_20000_Strom_MW.xlsx]

## Sheet: Tabelle1
0.1	0
0.2	0
0.3	0
0.4	0
0.5	0
0.6	0
0.7	0
0.8	0
0.9	0
1	0
1.1	0
1.2	0
1.3	0
1.4	0
1.5	0
1.6	0
1.7	0
1.8	0
1.9	0
2	0
2.1	0
2.2	0
2.3	0
2.4	0
2.5	0
2.6	0
2.7	0
2.8	0
2.9	0
3	0
3.1	0
3.2	0
3.3	0
3.4	0
3.5	0
3.6	0
3.7	0
3.8	0
3.9	0
4	0
4.1	0
4.2	0
4.3	0
4.4	0
4.5	0
4.6	0
4.7	0
4.8	0
4.9	0
5	0
5.1	0
5.2	0
5.3	0
5.4	0
5.5	0
5.6	0
5.7	0
5.8	0
5.9	0
6	0
6.1	0
6.2	0
6.3	0
6.4	0
6.5	0
6.6	0
6.7	0
6.8	0
6.9	0
7	0
7.1	0
7.2	0
7.3	0
7.4	0
7.5	0
7.6	0
7.7	0
7.8	0
7.9	0
8	0
8.1	0
8.2	0
8.3	0
8.4	0
8.5	0
8.6	0
8.7	0
8.8	0
8.9	0
9	0
9.1	0
9.2	0
9.3	0
9.4	0
9.5	0
9.6	0
9.7	0
9.8	0
9.9	0
10	0
10.1	0
10.2	0
10.3	0
10.4	0
10.5	0
10.6	0
10.7	0
10.8	0
10.9	0
11	0
11.1	0
11.2	0
11.3	0
11.4	0
11.5	0
11.6	0
11.7	0
11.8	0
11.9	0
12	0
12.1	0
12.2	0
12.3	0
12.4	0
12.5	0
12.6	0
12.7	0
12.8	0
12.9	0
13	0
13.1	0
13.2	0
13.3	0
13.4	0
13.5	0
13.6	0
13.7	0
13.8	0
13.9	0
14	0
14.1	0
14.2	0
14.3	0
14.4	0
14.5	0
14.6	0
14.7	0
14.8	0
14.9	0
15	0
15.1	0
15.2	0
15.3	0
15.4	0
15.5	0
15.6	0
15.7	0
15.8	0
15.9	0
16	0
16.1	0
16.2	0
16.3	0
16.4	0
16.5	0
16.6	0
16.7	0
16.8	0
16.9	0
17	0
17.1	0
17.2	0
17.3	0
17.4	0
17.5	0
17.6	0
17.7	0
17.8	0
17.9	0
18	0
18.1	0
18.2	0
18.3	0
18.4	0
18.5	0
18.6	0
18.7	0
18.8	0
18.9	0
19	0
19.1	0
19.2	0
19.3	0
19.4	0
19.5	0
19.6	0
19.7	0
19.8	0
19.9	0
20	0
20.1	0
20.2	0
20.3	0
20.4	0
20.5	0
20.6	0
20.7	0
20.8	0
20.9	0
21	0
21.1	0
21.2	0
21.3	0
21.4	0
21.5	0
21.6	0
21.7	0
21.8	0
21.9	0
22	0
22.1	0
22.2	0
22.3	0
22.4	0
22.5	0
22.6	0
22.7	0
22.8	0
22.9	0
23	0
23.1	0
23.2	0
23.3	0
23.4	0
23.5	0
23.6	0
23.7	0
23.8	0
23.9	0
24	0
24.1	0
24.2	0
24.3	0
24.4	0
24.5	0
24.6	0
24.7	0
24.8	0
24.9	0
25	0
25.1	0
25.2	0
25.3	0
25.4	0
25.5	0
25.6	0
25.7	0
25.8	0
25.9	0
26	0
26.1	0
26.2	0
26.3	0
26.4	0
26.5	0
26.6	0
26.7	0
26.8	0
26.9	0
27	0
27.1	0
27.2	0
27.3	0
27.4	0
27.5	0
27.6	0
27.7	0
27.8	0
27.9	0
28	0
28.1	0
28.2	0
28.3	0
28.4	0
28.5	0
28.6	0
28.7	0
28.8	0
28.9	0
29	0
29.1	0
29.2	0
29.3	0
29.4	0
29.5	0
29.6	0
29.7	0
29.8	0
29.9	0
30	0
30.1	0
30.2	0
30.3	0
30.4	0
30.5	0
30.6	0
30.7	0
30.8	0
30.9	0
31	0
31.1	0
31.2	0
31.3	0
31.4	0
31.5	0
31.6	0
31.7	0
31.8	0
31.9	0
32	0
32.1	0
32.2	0
32.3	0
32.4	0
32.5	0
32.6	0
32.7	0
32.8	0
32.9	0
33	0
33.1	0
33.2	0
33.3	0
33.4	0
33.5	0
33.6	0
33.7	0
33.8	0
33.9	0
34	0
34.1	0
34.2	0
34.3	0
34.4	0
34.5	0
34.6	0
34.7	0
34.8	0
34.9	0
35	0
35.1	0
35.2	0
35.3	0
35.4	0
35.5	0
35.6	0
35.7	0
35.8	0
35.9	0
36	0
36.1	0
36.2	0
36.3	0
36.4	0
36.5	0
36.6	0
36.7	0
36.8	0
36.9	0
37	0
37.1	0
37.2	0
37.3	0
37.4	0
37.5	0
37.6	0
37.7	0
37.8	0
37.9	0
38	0
38.1	0
38.2	0
38.3	0
38.4	0
38.5	0
38.6	0
38.7	0
38.8	0
38.9	0
39	0
39.1	0
39.2	0
39.3	0
39.4	0
39.5	0
39.6	0
39.7	0
39.8	0
39.9	0
40	0
40.1	0
40.2	0
40.3	0
40.4	0
40.5	0
40.6	0
40.7	0
40.8	0
40.9	0
41	0
41.1	0
41.2	0
41.3	0
41.4	0
41.5	0
41.6	0
41.7	0
41.8	0
41.9	0
42	0
42.1	0
42.2	0
42.3	0
42.4	0
42.5	0
42.6	0
42.7	0
42.8	0
42.9	0
43	0
43.1	0
43.2	0
43.3	0
43.4	0
43.5	0
43.6	0
43.7	0
43.8	0
43.9	0
44	0
44.1	0
44.2	0
44.3	0
44.4	0
44.5	0
44.6	0
44.7	0
44.8	0
44.9	0
45	0
45.1	0
45.2	0
45.3	0
45.4	0
45.5	0
45.6	0
45.7	0
45.8	0
45.9	0
46	0
46.1	0
46.2	0
46.3	0
46.4	0
46.5	0
46.6	0
46.7	0
46.8	0
46.9	0
47	0
47.1	0
47.2	0
47.3	0
47.4	0
47.5	0
47.6	0
47.7	0
47.8	0
47.9	0
48	0
48.1	0
48.2	0
48.3	0
48.4	0
48.5	0
48.6	0
48.7	0
48.8	0
48.9	0
49	0
49.1	0
49.2	0
49.3	0
49.4	0
49.5	0
49.6	0
49.7	0
49.8	0
49.9	0
50	0
50.1	0
50.2	0
50.3	0
50.4	0
50.5	0
50.6	0
50.7	0
50.8	0
50.9	0
51	0
51.1	0
51.2	0
51.3	0
51.4	0
51.5	0
51.6	0
51.7	0
51.8	0
51.9	0
52	0
52.1	0
52.2	0
52.3	0
52.4	0
52.5	0
52.6	0
52.7	0
52.8	0
52.9	0
53	0
53.1	0
53.2	0
53.3	0
53.4	0
53.5	0
53.6	0
53.7	0
53.8	0
53.9	0
54	0
54.1	0
54.2	0
54.3	0
54.4	0
54.5	0
54.6	0
54.7	0
54.8	0
54.9	0
55	0
55.1	0
55.2	0
55.3	0
55.4	0
55.5	0
55.6	0
55.7	0
55.8	0
55.9	0
56	0
56.1	0
56.2	0
56.3	0
56.4	0
56.5	0
56.6	0
56.7	0
56.8	0
56.9	0
57	0
57.1	0
57.2	0
57.3	0
57.4	0
57.5	0
57.6	0
57.7	0
57.8	0
57.9	0
58	0
58.1	0
58.2	0
58.3	0
58.4	0
58.5	0
58.6	0
58.7	0
58.8	0
58.9	0
59	0
59.1	0
59.2	0
59.3	0
59.4	0
59.5	0
59.6	0
59.7	0
59.8	0
59.9	0
60	0
60.1	0
60.2	0
60.3	0
60.4	0
60.5	0
60.6	0
60.7	0
60.8	0
60.9	0
61	0
61.1	0
61.2	0
61.3	0
61.4	0
61.5	0
61.6	0
61.7	0
61.8	0
61.9	0
62	0
62.1	0
62.2	0
62.3	0
62.4	0
62.5	0
62.6	0
62.7	0
62.8	0
62.9	0
63	0
63.1	0
63.2	0
63.3	0
63.4	0
63.5	0
63.6	0
63.7	0
63.8	0
63.9	0
64	0
64.1	0
64.2	0
64.3	0
64.4	0
64.5	0
64.6	0
64.7	0
64.8	0
64.9	0
65	0
65.1	0
65.2	0
65.3	0
65.4	0
65.5	0
65.6	0
65.7	0
65.8	0
65.9	0
66	0
66.1	0
66.2	0
66.3	0
66.4	0
66.5	0
66.6	0
66.7	0
66.8	0
66.9	0
67	0
67.1	0
67.2	0
67.3	0
67.4	0
67.5	0
67.6	0
67.7	0
67.8	0
67.9	0
68	0
68.1	0
68.2	0
68.3	0
68.4	0
68.5	0
68.6	0
68.7	0
68.8	0
68.9	0
69	0
69.1	0
69.2	0
69.3	0
69.4	0
69.5	0
69.6	0
69.7	0
69.8	0
69.9	0
70	0
70.1	0
70.2	0
70.3	0
70.4	0
70.5	0
70.6	0
70.7	0
70.8	0
70.9	0
71	0
71.1	0
71.2	0
71.3	0
71.4	0
71.5	0
71.6	0
71.7	0
71.8	0
71.9	0
72	0
72.1	0
72.2	0
72.3	0
72.4	0
72.5	0
72.6	0
72.7	0
72.8	0
72.9	0
73	0
73.1	0
73.2	0
73.3	0
73.4	0
73.5	0
73.6	0
73.7	0
73.8	0
73.9	0
74	0
74.1	0
74.2	0
74.3	0
74.4	0
74.5	0
74.6	0
74.7	0
74.8	0
74.9	0
75	0
75.1	0
75.2	0
75.3	0
75.4	0
75.5	0
75.6	0
75.7	0
75.8	0
75.9	0
76	0
76.1	0
76.2	0
76.3	0
76.4	0
76.5	0
76.6	0
76.7	0
76.8	0
76.9	0
77	0
77.1	0
77.2	0
77.3	0
77.4	0
77.5	0
77.6	0
77.7	0
77.8	0
77.9	0
78	0
78.1	0
78.2	0
78.3	0
78.4	0
78.5	0
78.6	0
78.7	0
78.8	0
78.9	0
79	0
79.1	0
79.2	0
79.3	0
79.4	0
79.5	0
79.6	0
79.7	0
79.8	0
79.9	0
80	0
80.1	0
80.2	0
80.3	0
80.4	0
80.5	0
80.6	0
80.7	0
80.8	0
80.9	0
81	0
81.1	0
81.2	0
81.3	0
81.4	0
81.5	0
81.6	0
81.7	0
81.8	0
81.9	0
82	0
82.1	0
82.2	0
82.3	0
82.4	0
82.5	0
82.6	0
82.7	0
82.8	0
82.9	0
83	0
83.1	0
83.2	0
83.3	0
83.4	0
83.5	0
83.6	0
83.7	0
83.8	0
83.9	0
84	0
84.1	0
84.2	0
84.3	0
84.4	0
84.5	0
84.6	0
84.7	0
84.8	0
84.9	0
85	0
85.1	0
85.2	0
85.3	0
85.4	0
85.5	0
85.6	0
85.7	0
85.8	0
85.9	0
86	0
86.1	0
86.2	0
86.3	0
86.4	0
86.5	0
86.6	0
86.7	0
86.8	0
86.9	0
87	0
87.1	0
87.2	0
87.3	0
87.4	0
87.5	0
87.6	0
87.7	0
87.8	0
87.9	0
88	0
88.1	0
88.2	0
88.3	0
88.4	0
88.5	0
88.6	0
88.7	0
88.8	0
88.9	0
89	0
89.1	0
89.2	0
89.3	0
89.4	0
89.5	0
89.6	0
89.7	0
89.8	0
89.9	0
90	0
90.1	0
90.2	0
90.3	0
90.4	0
90.5	0
90.6	0
90.7	0
90.8	0
90.9	0
91	0
91.1	0
91.2	0
91.3	0
91.4	0
91.5	0
91.6	0
91.7	0
91.8	0
91.9	0
92	0
92.1	0
92.2	0
92.3	0
92.4	0
92.5	0
92.6	0
92.7	0
92.8	0
92.9	0
93	0
93.1	0
93.2	0
93.3	0
93.4	0
93.5	0
93.6	0
93.7	0
93.8	0
93.9	0
94	0
94.1	0
94.2	0
94.3	0
94.4	0
94.5	0
94.6	0
94.7	0
94.8	0
94.9	0
95	0
95.1	0
95.2	0
95.3	0
95.4	0
95.5	0
95.6	0
95.7	0
95.8	0
95.9	0
96	0
96.1	0
96.2	0
96.3	0
96.4	0
96.5	0
96.6	0
96.7	0
96.8	0
96.9	0
97	0
97.1	0
97.2	0
97.3	0
97.4	0
97.5	0
97.6	0
97.7	0
97.8	0
97.9	0
98	0
98.1	0
98.2	0
98.3	0
98.4	0
98.5	0
98.6	0
98.7	0
98.8	0
98.9	0
99	0
99.1	0
99.2	0
99.3	0
99.4	0
99.5	0
99.6	0
99.7	0
99.8	0
99.9	0
100	0
100.1	0
100.2	0
100.3	0
100.4	0
100.5	0
100.6	0
100.7	0
100.8	5e-05
100.9	0.0001
101	0.00015
101.1	0.00015
101.2	0.0002
101.3	0.0004
101.4	0.00045
101.5	0.00055
101.6	0.00065
101.7	0.00065
101.8	0.00065
101.9	0.00075
102	0.00095
102.1	0.00115
102.2	0.00115
102.3	0.00125
102.4	0.00125
102.5	0.0014
102.6	0.00165
102.7	0.00185
102.8	0.00195
102.9	0.00225
103	0.00235
103.1	0.0024
103.2	0.00275
103.3	0.0029
103.4	0.0031
103.5	0.0034
103.6	0.0037
103.7	0.00395
103.8	0.0041
103.9	0.00425
104	0.0044
104.1	0.0047
104.2	0.00495
104.3	0.00525
104.4	0.0055
104.5	0.0056
104.6	0.0059
104.7	0.00595
104.8	0.0063
104.9	0.00665
105	0.00715
105.1	0.0074
105.2	0.0079
105.3	0.00805
105.4	0.00835
105.5	0.00885
105.6	0.00905
105.7	0.00945
105.8	0.00975
105.9	0.01035
106	0.0108
106.1	0.0113
106.2	0.0116
106.3	0.01205
106.4	0.0124
106.5	0.01275
106.6	0.0132
106.7	0.0135
106.8	0.01395
106.9	0.01425
107	0.01455
107.1	0.015
107.2	0.0155
107.3	0.01585
107.4	0.01625
107.5	0.0165
107.6	0.01675
107.7	0.01695
107.8	0.01755
107.9	0.0179
108	0.01825
108.1	0.0187
108.2	0.019
108.3	0.01945
108.4	0.0199
108.5	0.0202
108.6	0.02065
108.7	0.0208
108.8	0.0213
108.9	0.02145
109	0.02185
109.1	0.0221
109.2	0.02255
109.3	0.0232
109.4	0.02355
109.5	0.02415
109.6	0.0246
109.7	0.02485
109.8	0.0252
109.9	0.02545
110	0.02545
110.1	0.0258
110.2	0.0261
110.3	0.02645
110.4	0.0267
110.5	0.027
110.6	0.02755
110.7	0.02815
110.8	0.0285
110.9	0.02895
111	0.0292
111.1	0.02975
111.2	0.03035
111.3	0.0307
111.4	0.03115
111.5	0.0316
111.6	0.0322
111.7	0.03255
111.8	0.03285
111.9	0.03335
112	0.0335
112.1	0.0339
112.2	0.0344
112.3	0.0346
112.4	0.03495
112.5	0.03535
112.6	0.0359
112.7	0.03635
112.8	0.0366
112.9	0.03675
113	0.0369
113.1	0.0372
113.2	0.03755
113.3	0.03785
113.4	0.0382
113.5	0.0385
113.6	0.0391
113.7	0.0395
113.8	0.0401
113.9	0.0403
114	0.04075
114.1	0.0411
114.2	0.04135
114.3	0.04165
114.4	0.04175
114.5	0.0421
114.6	0.04255
114.7	0.0428
114.8	0.04325
114.9	0.0437
115	0.04405
115.1	0.04425
115.2	0.04435
115.3	0.0449
115.4	0.04535
115.5	0.046
115.6	0.0463
115.7	0.04655
115.8	0.0469
115.9	0.0473
116	0.0477
116.1	0.04825
116.2	0.0487
116.3	0.0492
116.4	0.0495
116.5	0.0496
116.6	0.05005
116.7	0.05085
116.8	0.0513
116.9	0.05175
117	0.05235
117.1	0.053
117.2	0.0534
117.3	0.05395
117.4	0.0542
117.5	0.0547
117.6	0.055
117.7	0.05545
117.8	0.0557
117.9	0.05595
118	0.05635
118.1	0.0568
118.2	0.0572
118.3	0.0578
118.4	0.05815
118.5	0.05825
118.6	0.05875
118.7	0.0592
118.8	0.05945
118.9	0.05995
119	0.0605
119.1	0.0609
119.2	0.0613
119.3	0.0616
119.4	0.06195
119.5	0.06265
119.6	0.06295
119.7	0.0632
119.8	0.06355
119.9	0.06385
120	0.0643
120.1	0.0645
120.2	0.0648
120.3	0.06525
120.4	0.06565
120.5	0.0659
120.6	0.06635
120.7	0.06645
120.8	0.0667
120.9	0.06725
121	0.06745
121.1	0.0679
121.2	0.068
121.3	0.0686
121.4	0.06885
121.5	0.0693
121.6	0.0697
121.7	0.07025
121.8	0.0706
121.9	0.0709
122	0.07135
122.1	0.0718
122.2	0.0723
122.3	0.0725
122.4	0.07295
122.5	0.0732
122.6	0.0735
122.7	0.0739
122.8	0.0743
122.9	0.075
123	0.07525
123.1	0.0755
123.2	0.07575
123.3	0.0759
123.4	0.0764
123.5	0.0766
123.6	0.07725
123.7	0.0773
123.8	0.07775
123.9	0.07845
124	0.0788
124.1	0.0791
124.2	0.07935
124.3	0.07975
124.4	0.0801
124.5	0.08045
124.6	0.08075
124.7	0.08135
124.8	0.08165
124.9	0.0822
125	0.0825
125.1	0.08285
125.2	0.0832
125.3	0.08345
125.4	0.08355
125.5	0.08395
125.6	0.0839
125.7	0.08415
125.8	0.0846
125.9	0.0848
126	0.0851
126.1	0.08525
126.2	0.0857
126.3	0.08595
126.4	0.0863
126.5	0.0867
126.6	0.08665
126.7	0.08685
126.8	0.08705
126.9	0.0876
127	0.08795
127.1	0.0881
127.2	0.08845
127.3	0.0886
127.4	0.089
127.5	0.0894
127.6	0.0899
127.7	0.09015
127.8	0.0907
127.9	0.09125
128	0.09145
128.1	0.0916
128.2	0.0922
128.3	0.0923
128.4	0.0927
128.5	0.0932
128.6	0.0934
128.7	0.0936
128.8	0.09365
128.9	0.0936
129	0.09405
129.1	0.094
129.2	0.0942
129.3	0.09435
129.4	0.0945
129.5	0.09475
129.6	0.0954
129.7	0.0957
129.8	0.09615
129.9	0.09645
130	0.0965
130.1	0.0969
130.2	0.0973
130.3	0.09775
130.4	0.098
130.5	0.0986
130.6	0.09915
130.7	0.09965
130.8	0.0998
130.9	0.10035
131	0.10065
131.1	0.10085
131.2	0.10125
131.3	0.10165
131.4	0.1017
131.5	0.1019
131.6	0.10225
131.7	0.10265
131.8	0.10265
131.9	0.1028
132	0.10305
132.1	0.10325
132.2	0.10335
132.3	0.1036
132.4	0.1043
132.5	0.1045
132.6	0.10485
132.7	0.10535
132.8	0.10555
132.9	0.1057
133	0.10605
133.1	0.10655
133.2	0.10685
133.3	0.10765
133.4	0.10795
133.5	0.10845
133.6	0.10895
133.7	0.10935
133.8	0.1097
133.9	0.10995
134	0.1102
134.1	0.1104
134.2	0.11055
134.3	0.11075
134.4	0.11115
134.5	0.1112
134.6	0.1118
134.7	0.1118
134.8	0.1121
134.9	0.1123
135	0.1125
135.1	0.11285
135.2	0.1131
135.3	0.11335
135.4	0.1137
135.5	0.11395
135.6	0.11435
135.7	0.1146
135.8	0.11475
135.9	0.11505
136	0.1153
136.1	0.1155
136.2	0.11555
136.3	0.11575
136.4	0.1163
136.5	0.11665
136.6	0.1168
136.7	0.11705
136.8	0.1177
136.9	0.11775
137	0.11795
137.1	0.11825
137.2	0.11865
137.3	0.11905
137.4	0.1194
137.5	0.1198
137.6	0.1203
137.7	0.12065
137.8	0.12135
137.9	0.12145
138	0.1217
138.1	0.12205
138.2	0.1224
138.3	0.1228
138.4	0.12305
138.5	0.12335
138.6	0.1237
138.7	0.1239
138.8	0.12415
138.9	0.12475
139	0.1251
139.1	0.12535
139.2	0.12545
139.3	0.12575
139.4	0.12595
139.5	0.126
139.6	0.12605
139.7	0.1266
139.8	0.12705
139.9	0.1275
140	0.12755
140.1	0.128
140.2	0.1285
140.3	0.12885
140.4	0.1293
140.5	0.12955
140.6	0.1298
140.7	0.12985
140.8	0.13
140.9	0.1302
141	0.1305
141.1	0.1305
141.2	0.13095
141.3	0.13105
141.4	0.131
141.5	0.1315
141.6	0.13185
141.7	0.13195
141.8	0.1322
141.9	0.1326
142	0.13305
142.1	0.13335
142.2	0.1334
142.3	0.13355
142.4	0.13435
142.5	0.13495
142.6	0.13495
142.7	0.1354
142.8	0.13565
142.9	0.1364
143	0.1367
143.1	0.137
143.2	0.1372
143.3	0.1377
143.4	0.13805
143.5	0.1385
143.6	0.13865
143.7	0.1391
143.8	0.1393
143.9	0.13955
144	0.13995
144.1	0.1402
144.2	0.14045
144.3	0.14075
144.4	0.14105
144.5	0.1412
144.6	0.1416
144.7	0.142
144.8	0.14255
144.9	0.1428
145	0.14305
145.1	0.1437
145.2	0.1442
145.3	0.14475
145.4	0.1447
145.5	0.14495
145.6	0.14515
145.7	0.14535
145.8	0.14545
145.9	0.14565
146	0.14635
146.1	0.14665
146.2	0.14675
146.3	0.1469
146.4	0.14695
146.5	0.14735
146.6	0.1476
146.7	0.1478
146.8	0.14795
146.9	0.1483
147	0.1483
147.1	0.14855
147.2	0.1488
147.3	0.14905
147.4	0.1492
147.5	0.1499
147.6	0.1502
147.7	0.15035
147.8	0.1504
147.9	0.1503
148	0.15045
148.1	0.15045
148.2	0.1506
148.3	0.151
148.4	0.151
148.5	0.15095
148.6	0.1509
148.7	0.15115
148.8	0.1514
148.9	0.1514
149	0.1518
149.1	0.15175
149.2	0.15185
149.3	0.15215
149.4	0.15265
149.5	0.153
149.6	0.1531
149.7	0.1533
149.8	0.15365
149.9	0.1538
150	0.1541
150.1	0.1543
150.2	0.15465
150.3	0.1548
150.4	0.15505
150.5	0.1554
150.6	0.1556
150.7	0.15575
150.8	0.15605
150.9	0.1559
151	0.15625
151.1	0.15685
151.2	0.15705
151.3	0.15725
151.4	0.1575
151.5	0.15795
151.6	0.1583
151.7	0.1585
151.8	0.1587
151.9	0.15885
152	0.15895
152.1	0.1594
152.2	0.1594
152.3	0.16
152.4	0.1606
152.5	0.1607
152.6	0.16085
152.7	0.16125
152.8	0.1616
152.9	0.1617
153	0.1618
153.1	0.16215
153.2	0.1623
153.3	0.16245
153.4	0.1626
153.5	0.16325
153.6	0.1634
153.7	0.1633
153.8	0.16325
153.9	0.1636
154	0.16355
154.1	0.1637
154.2	0.16395
154.3	0.16425
154.4	0.16475
154.5	0.1647
154.6	0.16495
154.7	0.165
154.8	0.16535
154.9	0.1656
155	0.16605
155.1	0.166
155.2	0.16635
155.3	0.16635
155.4	0.1665
155.5	0.16695
155.6	0.1672
155.7	0.1672
155.8	0.1674
155.9	0.1679
156	0.1684
156.1	0.16855
156.2	0.169
156.3	0.16915
156.4	0.1693
156.5	0.16945
156.6	0.16965
156.7	0.1699
156.8	0.17035
156.9	0.17055
157	0.17075
157.1	0.1712
157.2	0.1716
157.3	0.17215
157.4	0.1724
157.5	0.1725
157.6	0.17275
157.7	0.17315
157.8	0.1734
157.9	0.17355
158	0.1739
158.1	0.1739
158.2	0.17415
158.3	0.1741
158.4	0.1746
158.5	0.17485
158.6	0.175
158.7	0.1754
158.8	0.17575
158.9	0.17605
159	0.17635
159.1	0.1764
159.2	0.177
159.3	0.17735
159.4	0.17775
159.5	0.178
159.6	0.17815
159.7	0.17835
159.8	0.1786
159.9	0.17885
160	0.17915
160.1	0.17935
160.2	0.17945
160.3	0.18
160.4	0.1803
160.5	0.1806
160.6	0.1805
160.7	0.18075
160.8	0.18115
160.9	0.1811
161	0.1812
161.1	0.18125
161.2	0.18155
161.3	0.1817
161.4	0.182
161.5	0.18215
161.6	0.1824
161.7	0.18255
161.8	0.18265
161.9	0.18285
162	0.1831
162.1	0.18315
162.2	0.18335
162.3	0.18355
162.4	0.1835
162.5	0.1836
162.6	0.184
162.7	0.1842
162.8	0.18445
162.9	0.18475
163	0.1851
163.1	0.18535
163.2	0.1855
163.3	0.1854
163.4	0.18545
163.5	0.1856
163.6	0.1858
163.7	0.1858
163.8	0.18615
163.9	0.18645
164	0.1866
164.1	0.1868
164.2	0.18695
164.3	0.18715
164.4	0.18735
164.5	0.1876
164.6	0.18765
164.7	0.1878
164.8	0.1879
164.9	0.18795
165	0.18815
165.1	0.18825
165.2	0.18855
165.3	0.1885
165.4	0.18885
165.5	0.18915
165.6	0.1894
165.7	0.18945
165.8	0.1899
165.9	0.19
166	0.19005
166.1	0.19
166.2	0.1903
166.3	0.19065
166.4	0.19075
166.5	0.191
166.6	0.1912
166.7	0.1914
166.8	0.1917
166.9	0.19205
167	0.1923
167.1	0.19245
167.2	0.19275
167.3	0.19295
167.4	0.1931
167.5	0.1933
167.6	0.19365
167.7	0.194
167.8	0.1942
167.9	0.19405
168	0.19425
168.1	0.19425
168.2	0.1942
168.3	0.1945
168.4	0.1946
168.5	0.195
168.6	0.1952
168.7	0.19535
168.8	0.19555
168.9	0.1955
169	0.19585
169.1	0.196
169.2	0.1962
169.3	0.19615
169.4	0.1964
169.5	0.1966
169.6	0.1968
169.7	0.1971
169.8	0.1974
169.9	0.1976
170	0.19765
170.1	0.1978
170.2	0.19835
170.3	0.19845
170.4	0.1983
170.5	0.19835
170.6	0.19865
170.7	0.199
170.8	0.1994
170.9	0.1993
171	0.19935
171.1	0.19945
171.2	0.1997
171.3	0.1998
171.4	0.20005
171.5	0.20015
171.6	0.2003
171.7	0.2006
171.8	0.20095
171.9	0.20135
172	0.20145
172.1	0.2018
172.2	0.202
172.3	0.2022
172.4	0.2023
172.5	0.20245
172.6	0.20235
172.7	0.20245
172.8	0.2027
172.9	0.2029
173	0.2031
173.1	0.2034
173.2	0.2035
173.3	0.2036
173.4	0.20395
173.5	0.20395
173.6	0.20415
173.7	0.20435
173.8	0.2045
173.9	0.20475
174	0.20505
174.1	0.20545
174.2	0.2055
174.3	0.2055
174.4	0.20565
174.5	0.20615
174.6	0.2062
174.7	0.2064
174.8	0.20645
174.9	0.2066
175	0.2068
175.1	0.20695
175.2	0.2071
175.3	0.20745
175.4	0.2076
175.5	0.2081
175.6	0.20805
175.7	0.20805
175.8	0.2081
175.9	0.2081
176	0.20835
176.1	0.20845
176.2	0.20885
176.3	0.2093
176.4	0.2095
176.5	0.20945
176.6	0.20925
176.7	0.2093
176.8	0.20935
176.9	0.2093
177	0.2094
177.1	0.2096
177.2	0.2101
177.3	0.2106
177.4	0.211
177.5	0.2111
177.6	0.21105
177.7	0.21115
177.8	0.2112
177.9	0.2112
178	0.21155
178.1	0.2114
178.2	0.2116
178.3	0.21165
178.4	0.2115
178.5	0.2117
178.6	0.2119
178.7	0.21195
178.8	0.212
178.9	0.212
179	0.2123
179.1	0.2124
179.2	0.21265
179.3	0.21285
179.4	0.2131
179.5	0.21325
179.6	0.21335
179.7	0.2134
179.8	0.21325
179.9	0.2136
180	0.2134
180.1	0.21355
180.2	0.2137
180.3	0.21385
180.4	0.21395
180.5	0.2141
180.6	0.21415
180.7	0.2143
180.8	0.21405
180.9	0.2144
181	0.2146
181.1	0.2146
181.2	0.21455
181.3	0.21485
181.4	0.215
181.5	0.2152
181.6	0.21505
181.7	0.2153
181.8	0.2156
181.9	0.2156
182	0.21585
182.1	0.216
182.2	0.2161
182.3	0.21605
182.4	0.2164
182.5	0.21675
182.6	0.2171
182.7	0.21735
182.8	0.2175
182.9	0.21775
183	0.2176
183.1	0.21775
183.2	0.21785
183.3	0.2179
183.4	0.2181
183.5	0.21805
183.6	0.21825
183.7	0.21845
183.8	0.21875
183.9	0.21895
184	0.2195
184.1	0.2194
184.2	0.2202
184.3	0.22035
184.4	0.22085
184.5	0.2208
184.6	0.22085
184.7	0.221
184.8	0.22115
184.9	0.2213
185	0.2216
185.1	0.22175
185.2	0.222
185.3	0.2222
185.4	0.22235
185.5	0.22265
185.6	0.22255
185.7	0.22265
185.8	0.22295
185.9	0.2232
186	0.22325
186.1	0.22335
186.2	0.22335
186.3	0.22345
186.4	0.2237
186.5	0.22365
186.6	0.22385
186.7	0.22415
186.8	0.22435
186.9	0.2247
187	0.22505
187.1	0.2251
187.2	0.22515
187.3	0.22525
187.4	0.2254
187.5	0.22525
187.6	0.22525
187.7	0.2256
187.8	0.22565
187.9	0.2258
188	0.22585
188.1	0.226
188.2	0.2264
188.3	0.2267
188.4	0.22675
188.5	0.2268
188.6	0.22685
188.7	0.2271
188.8	0.2271
188.9	0.22715
189	0.22735
189.1	0.2275
189.2	0.22765
189.3	0.22785
189.4	0.2282
189.5	0.22855
189.6	0.2285
189.7	0.22865
189.8	0.22895
189.9	0.2291
190	0.22915
190.1	0.22925
190.2	0.2297
190.3	0.2296
190.4	0.22965
190.5	0.22995
190.6	0.23
190.7	0.2303
190.8	0.23045
190.9	0.2302
191	0.23015
191.1	0.2304
191.2	0.23045
191.3	0.2306
191.4	0.23075
191.5	0.2309
191.6	0.231
191.7	0.23145
191.8	0.2317
191.9	0.23235
192	0.23265
192.1	0.23295
192.2	0.2332
192.3	0.2331
192.4	0.23325
192.5	0.2333
192.6	0.2334
192.7	0.2338
192.8	0.23395
192.9	0.23395
193	0.23405
193.1	0.23405
193.2	0.23445
193.3	0.2346
193.4	0.2346
193.5	0.23465
193.6	0.2349
193.7	0.2349
193.8	0.23455
193.9	0.23455
194	0.2346
194.1	0.23465
194.2	0.2349
194.3	0.2351
194.4	0.235
194.5	0.235
194.6	0.235
194.7	0.23485
194.8	0.23485
194.9	0.235
195	0.23495
195.1	0.23495
195.2	0.235
195.3	0.23525
195.4	0.23535
195.5	0.23545
195.6	0.2355
195.7	0.2358
195.8	0.2358
195.9	0.2363
196	0.23675
196.1	0.2367
196.2	0.2368
196.3	0.237
196.4	0.23705
196.5	0.23715
196.6	0.2373
196.7	0.2375
196.8	0.23745
196.9	0.23755
197	0.2379
197.1	0.23825
197.2	0.23835
197.3	0.23845
197.4	0.23855
197.5	0.2386
197.6	0.23855
197.7	0.239
197.8	0.23905
197.9	0.2392
198	0.2393
198.1	0.2396
198.2	0.23985
198.3	0.23995
198.4	0.24005
198.5	0.2406
198.6	0.2408
198.7	0.2407
198.8	0.2406
198.9	0.2408
199	0.2411
199.1	0.2414
199.2	0.24115
199.3	0.2413
199.4	0.2415
199.5	0.2418
199.6	0.242
199.7	0.2423
199.8	0.24265
199.9	0.24255
200	0.24245
[truncated: 14,000 more rows]
