# Supplementary material for: Bayesian inference of kinetic schemes for ion channels by Kalman filtering
Source: eLife journal article supplement (doi:10.7554/elife.62714), 2022-05-04
Supplement: fig4-data8 [file 1_Sim_N_50000_Fluor_MW.xlsx]

## Sheet: 0.25M
0.1	0
0.2	0
0.3	0
0.4	0
0.5	0
0.6	0
0.7	0
0.8	0
0.9	0
1	0
1.1	0
1.2	0
1.3	0
1.4	0
1.5	0
1.6	0
1.7	0
1.8	0
1.9	0
2	0
2.1	0
2.2	0
2.3	0
2.4	0
2.5	0
2.6	0
2.7	0
2.8	0
2.9	0
3	0
3.1	0
3.2	0
3.3	0
3.4	0
3.5	0
3.6	0
3.7	0
3.8	0
3.9	0
4	0
4.1	0
4.2	0
4.3	0
4.4	0
4.5	0
4.6	0
4.7	0
4.8	0
4.9	0
5	0
5.1	0
5.2	0
5.3	0
5.4	0
5.5	0
5.6	0
5.7	0
5.8	0
5.9	0
6	0
6.1	0
6.2	0
6.3	0
6.4	0
6.5	0
6.6	0
6.7	0
6.8	0
6.9	0
7	0
7.1	0
7.2	0
7.3	0
7.4	0
7.5	0
7.6	0
7.7	0
7.8	0
7.9	0
8	0
8.1	0
8.2	0
8.3	0
8.4	0
8.5	0
8.6	0
8.7	0
8.8	0
8.9	0
9	0
9.1	0
9.2	0
9.3	0
9.4	0
9.5	0
9.6	0
9.7	0
9.8	0
9.9	0
10	0
10.1	0
10.2	0
10.3	0
10.4	0
10.5	0
10.6	0
10.7	0
10.8	0
10.9	0
11	0
11.1	0
11.2	0
11.3	0
11.4	0
11.5	0
11.6	0
11.7	0
11.8	0
11.9	0
12	0
12.1	0
12.2	0
12.3	0
12.4	0
12.5	0
12.6	0
12.7	0
12.8	0
12.9	0
13	0
13.1	0
13.2	0
13.3	0
13.4	0
13.5	0
13.6	0
13.7	0
13.8	0
13.9	0
14	0
14.1	0
14.2	0
14.3	0
14.4	0
14.5	0
14.6	0
14.7	0
14.8	0
14.9	0
15	0
15.1	0
15.2	0
15.3	0
15.4	0
15.5	0
15.6	0
15.7	0
15.8	0
15.9	0
16	0
16.1	0
16.2	0
16.3	0
16.4	0
16.5	0
16.6	0
16.7	0
16.8	0
16.9	0
17	0
17.1	0
17.2	0
17.3	0
17.4	0
17.5	0
17.6	0
17.7	0
17.8	0
17.9	0
18	0
18.1	0
18.2	0
18.3	0
18.4	0
18.5	0
18.6	0
18.7	0
18.8	0
18.9	0
19	0
19.1	0
19.2	0
19.3	0
19.4	0
19.5	0
19.6	0
19.7	0
19.8	0
19.9	0
20	0
20.1	0
20.2	0
20.3	0
20.4	0
20.5	0
20.6	0
20.7	0
20.8	0
20.9	0
21	0
21.1	0
21.2	0
21.3	0
21.4	0
21.5	0
21.6	0
21.7	0
21.8	0
21.9	0
22	0
22.1	0
22.2	0
22.3	0
22.4	0
22.5	0
22.6	0
22.7	0
22.8	0
22.9	0
23	0
23.1	0
23.2	0
23.3	0
23.4	0
23.5	0
23.6	0
23.7	0
23.8	0
23.9	0
24	0
24.1	0
24.2	0
24.3	0
24.4	0
24.5	0
24.6	0
24.7	0
24.8	0
24.9	0
25	0
25.1	0
25.2	0
25.3	0
25.4	0
25.5	0
25.6	0
25.7	0
25.8	0
25.9	0
26	0
26.1	0
26.2	0
26.3	0
26.4	0
26.5	0
26.6	0
26.7	0
26.8	0
26.9	0
27	0
27.1	0
27.2	0
27.3	0
27.4	0
27.5	0
27.6	0
27.7	0
27.8	0
27.9	0
28	0
28.1	0
28.2	0
28.3	0
28.4	0
28.5	0
28.6	0
28.7	0
28.8	0
28.9	0
29	0
29.1	0
29.2	0
29.3	0
29.4	0
29.5	0
29.6	0
29.7	0
29.8	0
29.9	0
30	0
30.1	0
30.2	0
30.3	0
30.4	0
30.5	0
30.6	0
30.7	0
30.8	0
30.9	0
31	0
31.1	0
31.2	0
31.3	0
31.4	0
31.5	0
31.6	0
31.7	0
31.8	0
31.9	0
32	0
32.1	0
32.2	0
32.3	0
32.4	0
32.5	0
32.6	0
32.7	0
32.8	0
32.9	0
33	0
33.1	0
33.2	0
33.3	0
33.4	0
33.5	0
33.6	0
33.7	0
33.8	0
33.9	0
34	0
34.1	0
34.2	0
34.3	0
34.4	0
34.5	0
34.6	0
34.7	0
34.8	0
34.9	0
35	0
35.1	0
35.2	0
35.3	0
35.4	0
35.5	0
35.6	0
35.7	0
35.8	0
35.9	0
36	0
36.1	0
36.2	0
36.3	0
36.4	0
36.5	0
36.6	0
36.7	0
36.8	0
36.9	0
37	0
37.1	0
37.2	0
37.3	0
37.4	0
37.5	0
37.6	0
37.7	0
37.8	0
37.9	0
38	0
38.1	0
38.2	0
38.3	0
38.4	0
38.5	0
38.6	0
38.7	0
38.8	0
38.9	0
39	0
39.1	0
39.2	0
39.3	0
39.4	0
39.5	0
39.6	0
39.7	0
39.8	0
39.9	0
40	0
40.1	0
40.2	0
40.3	0
40.4	0
40.5	0
40.6	0
40.7	0
40.8	0
40.9	0
41	0
41.1	0
41.2	0
41.3	0
41.4	0
41.5	0
41.6	0
41.7	0
41.8	0
41.9	0
42	0
42.1	0
42.2	0
42.3	0
42.4	0
42.5	0
42.6	0
42.7	0
42.8	0
42.9	0
43	0
43.1	0
43.2	0
43.3	0
43.4	0
43.5	0
43.6	0
43.7	0
43.8	0
43.9	0
44	0
44.1	0
44.2	0
44.3	0
44.4	0
44.5	0
44.6	0
44.7	0
44.8	0
44.9	0
45	0
45.1	0
45.2	0
45.3	0
45.4	0
45.5	0
45.6	0
45.7	0
45.8	0
45.9	0
46	0
46.1	0
46.2	0
46.3	0
46.4	0
46.5	0
46.6	0
46.7	0
46.8	0
46.9	0
47	0
47.1	0
47.2	0
47.3	0
47.4	0
47.5	0
47.6	0
47.7	0
47.8	0
47.9	0
48	0
48.1	0
48.2	0
48.3	0
48.4	0
48.5	0
48.6	0
48.7	0
48.8	0
48.9	0
49	0
49.1	0
49.2	0
49.3	0
49.4	0
49.5	0
49.6	0
49.7	0
49.8	0
49.9	0
50	0
50.1	0
50.2	0
50.3	0
50.4	0
50.5	0
50.6	0
50.7	0
50.8	0
50.9	0
51	0
51.1	0
51.2	0
51.3	0
51.4	0
51.5	0
51.6	0
51.7	0
51.8	0
51.9	0
52	0
52.1	0
52.2	0
52.3	0
52.4	0
52.5	0
52.6	0
52.7	0
52.8	0
52.9	0
53	0
53.1	0
53.2	0
53.3	0
53.4	0
53.5	0
53.6	0
53.7	0
53.8	0
53.9	0
54	0
54.1	0
54.2	0
54.3	0
54.4	0
54.5	0
54.6	0
54.7	0
54.8	0
54.9	0
55	0
55.1	0
55.2	0
55.3	0
55.4	0
55.5	0
55.6	0
55.7	0
55.8	0
55.9	0
56	0
56.1	0
56.2	0
56.3	0
56.4	0
56.5	0
56.6	0
56.7	0
56.8	0
56.9	0
57	0
57.1	0
57.2	0
57.3	0
57.4	0
57.5	0
57.6	0
57.7	0
57.8	0
57.9	0
58	0
58.1	0
58.2	0
58.3	0
58.4	0
58.5	0
58.6	0
58.7	0
58.8	0
58.9	0
59	0
59.1	0
59.2	0
59.3	0
59.4	0
59.5	0
59.6	0
59.7	0
59.8	0
59.9	0
60	0
60.1	0
60.2	0
60.3	0
60.4	0
60.5	0
60.6	0
60.7	0
60.8	0
60.9	0
61	0
61.1	0
61.2	0
61.3	0
61.4	0
61.5	0
61.6	0
61.7	0
61.8	0
61.9	0
62	0
62.1	0
62.2	0
62.3	0
62.4	0
62.5	0
62.6	0
62.7	0
62.8	0
62.9	0
63	0
63.1	0
63.2	0
63.3	0
63.4	0
63.5	0
63.6	0
63.7	0
63.8	0
63.9	0
64	0
64.1	0
64.2	0
64.3	0
64.4	0
64.5	0
64.6	0
64.7	0
64.8	0
64.9	0
65	0
65.1	0
65.2	0
65.3	0
65.4	0
65.5	0
65.6	0
65.7	0
65.8	0
65.9	0
66	0
66.1	0
66.2	0
66.3	0
66.4	0
66.5	0
66.6	0
66.7	0
66.8	0
66.9	0
67	0
67.1	0
67.2	0
67.3	0
67.4	0
67.5	0
67.6	0
67.7	0
67.8	0
67.9	0
68	0
68.1	0
68.2	0
68.3	0
68.4	0
68.5	0
68.6	0
68.7	0
68.8	0
68.9	0
69	0
69.1	0
69.2	0
69.3	0
69.4	0
69.5	0
69.6	0
69.7	0
69.8	0
69.9	0
70	0
70.1	0
70.2	0
70.3	0
70.4	0
70.5	0
70.6	0
70.7	0
70.8	0
70.9	0
71	0
71.1	0
71.2	0
71.3	0
71.4	0
71.5	0
71.6	0
71.7	0
71.8	0
71.9	0
72	0
72.1	0
72.2	0
72.3	0
72.4	0
72.5	0
72.6	0
72.7	0
72.8	0
72.9	0
73	0
73.1	0
73.2	0
73.3	0
73.4	0
73.5	0
73.6	0
73.7	0
73.8	0
73.9	0
74	0
74.1	0
74.2	0
74.3	0
74.4	0
74.5	0
74.6	0
74.7	0
74.8	0
74.9	0
75	0
75.1	0
75.2	0
75.3	0
75.4	0
75.5	0
75.6	0
75.7	0
75.8	0
75.9	0
76	0
76.1	0
76.2	0
76.3	0
76.4	0
76.5	0
76.6	0
76.7	0
76.8	0
76.9	0
77	0
77.1	0
77.2	0
77.3	0
77.4	0
77.5	0
77.6	0
77.7	0
77.8	0
77.9	0
78	0
78.1	0
78.2	0
78.3	0
78.4	0
78.5	0
78.6	0
78.7	0
78.8	0
78.9	0
79	0
79.1	0
79.2	0
79.3	0
79.4	0
79.5	0
79.6	0
79.7	0
79.8	0
79.9	0
80	0
80.1	0
80.2	0
80.3	0
80.4	0
80.5	0
80.6	0
80.7	0
80.8	0
80.9	0
81	0
81.1	0
81.2	0
81.3	0
81.4	0
81.5	0
81.6	0
81.7	0
81.8	0
81.9	0
82	0
82.1	0
82.2	0
82.3	0
82.4	0
82.5	0
82.6	0
82.7	0
82.8	0
82.9	0
83	0
83.1	0
83.2	0
83.3	0
83.4	0
83.5	0
83.6	0
83.7	0
83.8	0
83.9	0
84	0
84.1	0
84.2	0
84.3	0
84.4	0
84.5	0
84.6	0
84.7	0
84.8	0
84.9	0
85	0
85.1	0
85.2	0
85.3	0
85.4	0
85.5	0
85.6	0
85.7	0
85.8	0
85.9	0
86	0
86.1	0
86.2	0
86.3	0
86.4	0
86.5	0
86.6	0
86.7	0
86.8	0
86.9	0
87	0
87.1	0
87.2	0
87.3	0
87.4	0
87.5	0
87.6	0
87.7	0
87.8	0
87.9	0
88	0
88.1	0
88.2	0
88.3	0
88.4	0
88.5	0
88.6	0
88.7	0
88.8	0
88.9	0
89	0
89.1	0
89.2	0
89.3	0
89.4	0
89.5	0
89.6	0
89.7	0
89.8	0
89.9	0
90	0
90.1	0
90.2	0
90.3	0
90.4	0
90.5	0
90.6	0
90.7	0
90.8	0
90.9	0
91	0
91.1	0
91.2	0
91.3	0
91.4	0
91.5	0
91.6	0
91.7	0
91.8	0
91.9	0
92	0
92.1	0
92.2	0
92.3	0
92.4	0
92.5	0
92.6	0
92.7	0
92.8	0
92.9	0
93	0
93.1	0
93.2	0
93.3	0
93.4	0
93.5	0
93.6	0
93.7	0
93.8	0
93.9	0
94	0
94.1	0
94.2	0
94.3	0
94.4	0
94.5	0
94.6	0
94.7	0
94.8	0
94.9	0
95	0
95.1	0
95.2	0
95.3	0
95.4	0
95.5	0
95.6	0
95.7	0
95.8	0
95.9	0
96	0
96.1	0
96.2	0
96.3	0
96.4	0
96.5	0
96.6	0
96.7	0
96.8	0
96.9	0
97	0
97.1	0
97.2	0
97.3	0
97.4	0
97.5	0
97.6	0
97.7	0
97.8	0
97.9	0
98	0
98.1	0
98.2	0
98.3	0
98.4	0
98.5	0
98.6	0
98.7	0
98.8	0
98.9	0
99	0
99.1	0
99.2	0
99.3	0
99.4	0
99.5	0
99.6	0
99.7	0
99.8	0
99.9	0
100	0
100.1	0.01463
100.2	0.02861
100.3	0.04224
100.4	0.05533
100.5	0.06756
100.6	0.07998
100.7	0.09193
100.8	0.103
100.9	0.11452
101	0.12507
101.1	0.13594
101.2	0.1463
101.3	0.15681
101.4	0.16589
101.5	0.17483
101.6	0.18386
101.7	0.19248
101.8	0.20069
101.9	0.2092
102	0.21774
102.1	0.22534
102.2	0.23295
102.3	0.24042
102.4	0.24705
102.5	0.25357
102.6	0.25996
102.7	0.26617
102.8	0.27183
102.9	0.27742
103	0.28304
103.1	0.2891
103.2	0.29411
103.3	0.29875
103.4	0.30376
103.5	0.3084
103.6	0.31287
103.7	0.31756
103.8	0.3222
103.9	0.32658
104	0.33022
104.1	0.33411
104.2	0.33787
104.3	0.34186
104.4	0.34579
104.5	0.34928
104.6	0.35184
104.7	0.35478
104.8	0.35851
104.9	0.36102
105	0.36352
105.1	0.36583
105.2	0.36867
105.3	0.37126
105.4	0.37379
105.5	0.37603
105.6	0.37851
105.7	0.3806
105.8	0.38292
105.9	0.38512
106	0.38708
106.1	0.38915
106.2	0.39096
106.3	0.39317
106.4	0.39478
106.5	0.39656
106.6	0.39804
106.7	0.39962
106.8	0.4015
106.9	0.40386
107	0.40562
107.1	0.40752
107.2	0.40885
107.3	0.41032
107.4	0.41164
107.5	0.41297
107.6	0.41457
107.7	0.41593
107.8	0.41701
107.9	0.41799
108	0.41899
108.1	0.42009
108.2	0.42067
108.3	0.42154
108.4	0.4226
108.5	0.42337
108.6	0.42422
108.7	0.42496
108.8	0.42535
108.9	0.42608
109	0.42687
109.1	0.42789
109.2	0.42938
109.3	0.43022
109.4	0.43153
109.5	0.43151
109.6	0.43233
109.7	0.43307
109.8	0.43422
109.9	0.43502
110	0.43611
110.1	0.43662
110.2	0.43755
110.3	0.4382
110.4	0.43905
110.5	0.43986
110.6	0.44075
110.7	0.4411
110.8	0.44115
110.9	0.44214
111	0.44197
111.1	0.44299
111.2	0.44382
111.3	0.44433
111.4	0.4449
111.5	0.44561
111.6	0.44592
111.7	0.44637
111.8	0.44676
111.9	0.44694
112	0.44749
112.1	0.44794
112.2	0.44845
112.3	0.44921
112.4	0.44992
112.5	0.45003
112.6	0.44997
112.7	0.45053
112.8	0.4511
112.9	0.45166
113	0.45187
113.1	0.45201
113.2	0.4518
113.3	0.45251
113.4	0.45224
113.5	0.45263
113.6	0.45321
113.7	0.45361
113.8	0.45428
113.9	0.45491
114	0.4554
114.1	0.4555
114.2	0.45592
114.3	0.45578
114.4	0.45608
114.5	0.45653
114.6	0.45694
114.7	0.45721
114.8	0.4575
114.9	0.45712
115	0.45759
115.1	0.45789
115.2	0.45836
115.3	0.45849
115.4	0.45878
115.5	0.45949
115.6	0.45951
115.7	0.46013
115.8	0.46007
115.9	0.46067
116	0.46149
116.1	0.4621
116.2	0.46215
116.3	0.46301
116.4	0.46252
116.5	0.4627
116.6	0.46356
116.7	0.4642
116.8	0.46433
116.9	0.46405
117	0.46465
117.1	0.46465
117.2	0.46486
117.3	0.46522
117.4	0.46556
117.5	0.46562
117.6	0.46586
117.7	0.46614
117.8	0.46657
117.9	0.46681
118	0.46714
118.1	0.46691
118.2	0.4668
118.3	0.46725
118.4	0.46778
118.5	0.46754
118.6	0.46775
118.7	0.46757
118.8	0.4679
118.9	0.46866
119	0.46918
119.1	0.46906
119.2	0.46949
119.3	0.46966
119.4	0.4702
119.5	0.47032
119.6	0.47079
119.7	0.47105
119.8	0.47105
119.9	0.4715
120	0.47143
120.1	0.4716
120.2	0.47228
120.3	0.47281
120.4	0.47284
120.5	0.47268
120.6	0.47269
120.7	0.47258
120.8	0.47259
120.9	0.47242
121	0.4726
121.1	0.47379
121.2	0.47461
121.3	0.4745
121.4	0.47459
121.5	0.47537
121.6	0.47485
121.7	0.47525
121.8	0.4756
121.9	0.47594
122	0.47619
122.1	0.47655
122.2	0.47649
122.3	0.47664
122.4	0.47697
122.5	0.47702
122.6	0.47636
122.7	0.47634
122.8	0.4769
122.9	0.47765
123	0.47751
123.1	0.47771
123.2	0.47739
123.3	0.47715
123.4	0.47755
123.5	0.4778
123.6	0.47798
123.7	0.47816
123.8	0.47867
123.9	0.47865
124	0.48008
124.1	0.48033
124.2	0.4803
124.3	0.4803
124.4	0.48093
124.5	0.48084
124.6	0.48034
124.7	0.48051
124.8	0.48052
124.9	0.48087
125	0.48097
125.1	0.48104
125.2	0.48131
125.3	0.48201
125.4	0.48265
125.5	0.48301
125.6	0.48353
125.7	0.48357
125.8	0.48407
125.9	0.48409
126	0.48436
126.1	0.48466
126.2	0.48486
126.3	0.48484
126.4	0.48511
126.5	0.48534
126.6	0.4855
126.7	0.48549
126.8	0.48573
126.9	0.48575
127	0.48604
127.1	0.48647
127.2	0.48648
127.3	0.48658
127.4	0.48641
127.5	0.48665
127.6	0.48641
127.7	0.48683
127.8	0.48684
127.9	0.4867
128	0.48686
128.1	0.4875
128.2	0.48741
128.3	0.48816
128.4	0.48779
128.5	0.48786
128.6	0.48795
128.7	0.48802
128.8	0.48812
128.9	0.48805
129	0.48823
129.1	0.48816
129.2	0.48868
129.3	0.48907
129.4	0.48939
129.5	0.48965
129.6	0.48951
129.7	0.48974
129.8	0.4894
129.9	0.48965
130	0.4896
130.1	0.49006
130.2	0.49036
130.3	0.49079
130.4	0.49078
130.5	0.49102
130.6	0.49137
130.7	0.49163
130.8	0.49172
130.9	0.49203
131	0.49238
131.1	0.49224
131.2	0.49273
131.3	0.49341
131.4	0.49348
131.5	0.49437
131.6	0.49415
131.7	0.49485
131.8	0.49482
131.9	0.49497
132	0.49534
132.1	0.49558
132.2	0.49592
132.3	0.49551
132.4	0.49515
132.5	0.49494
132.6	0.49531
132.7	0.4954
132.8	0.49565
132.9	0.49508
133	0.49533
133.1	0.49563
133.2	0.49585
133.3	0.49621
133.4	0.49607
133.5	0.4963
133.6	0.49667
133.7	0.49703
133.8	0.49728
133.9	0.49728
134	0.498
134.1	0.49776
134.2	0.49779
134.3	0.49764
134.4	0.49776
134.5	0.49799
134.6	0.49806
134.7	0.49738
134.8	0.49706
134.9	0.49755
135	0.49787
135.1	0.49884
135.2	0.49887
135.3	0.49919
135.4	0.49958
135.5	0.49973
135.6	0.49969
135.7	0.49969
135.8	0.49944
135.9	0.49946
136	0.50033
136.1	0.50014
136.2	0.50041
136.3	0.50039
136.4	0.50069
136.5	0.50098
136.6	0.50065
136.7	0.50115
136.8	0.50109
136.9	0.50181
137	0.50199
137.1	0.50192
137.2	0.50136
137.3	0.50141
137.4	0.50144
137.5	0.50192
137.6	0.50246
137.7	0.50324
137.8	0.50401
137.9	0.50427
138	0.50421
138.1	0.5046
138.2	0.50508
138.3	0.50588
138.4	0.50637
138.5	0.50688
138.6	0.50672
138.7	0.50697
138.8	0.50744
138.9	0.50776
139	0.50776
139.1	0.50724
139.2	0.50723
139.3	0.50728
139.4	0.50758
139.5	0.50789
139.6	0.50829
139.7	0.50889
139.8	0.50893
139.9	0.50889
140	0.50937
140.1	0.50948
140.2	0.50946
140.3	0.50945
140.4	0.5096
140.5	0.51017
140.6	0.51058
140.7	0.5107
140.8	0.51076
140.9	0.51057
141	0.5114
141.1	0.51109
141.2	0.51142
141.3	0.51157
141.4	0.51193
141.5	0.51137
141.6	0.51204
141.7	0.51233
141.8	0.51232
141.9	0.5125
142	0.5129
142.1	0.51318
142.2	0.51275
142.3	0.51301
142.4	0.513
142.5	0.51308
142.6	0.51317
142.7	0.51334
142.8	0.51332
142.9	0.51331
143	0.51337
143.1	0.51396
143.2	0.5143
143.3	0.51499
143.4	0.51542
143.5	0.51544
143.6	0.51527
143.7	0.51514
143.8	0.51521
143.9	0.51548
144	0.51601
144.1	0.51606
144.2	0.5162
144.3	0.51651
144.4	0.51652
144.5	0.51722
144.6	0.51731
144.7	0.5171
144.8	0.51687
144.9	0.51763
145	0.51743
145.1	0.51769
145.2	0.51762
145.3	0.51776
145.4	0.51787
145.5	0.5182
145.6	0.51838
145.7	0.51885
145.8	0.51926
145.9	0.51923
146	0.51907
146.1	0.51936
146.2	0.5198
146.3	0.51969
146.4	0.5198
146.5	0.51985
146.6	0.52046
146.7	0.52044
146.8	0.52022
146.9	0.52034
147	0.52083
147.1	0.52094
147.2	0.52105
147.3	0.52073
147.4	0.52036
147.5	0.52048
147.6	0.52088
147.7	0.52105
147.8	0.52112
147.9	0.52093
148	0.52106
148.1	0.52157
148.2	0.52205
148.3	0.5222
148.4	0.5226
148.5	0.52255
148.6	0.52206
148.7	0.52237
148.8	0.52252
148.9	0.52209
149	0.52221
149.1	0.5222
149.2	0.52211
149.3	0.52222
149.4	0.52243
149.5	0.52247
149.6	0.5231
149.7	0.52348
149.8	0.52356
149.9	0.52349
150	0.52381
150.1	0.52416
150.2	0.52464
150.3	0.52482
150.4	0.52486
150.5	0.52491
150.6	0.52451
150.7	0.52472
150.8	0.52465
150.9	0.52476
151	0.52457
151.1	0.52495
151.2	0.52552
151.3	0.52602
151.4	0.52629
151.5	0.52648
151.6	0.52644
151.7	0.52661
151.8	0.52676
151.9	0.52711
152	0.52742
152.1	0.52759
152.2	0.52738
152.3	0.5275
152.4	0.52815
152.5	0.52817
152.6	0.52795
152.7	0.52743
152.8	0.52806
152.9	0.52779
153	0.52758
153.1	0.52771
153.2	0.528
153.3	0.52826
153.4	0.52853
153.5	0.52872
153.6	0.52895
153.7	0.52911
153.8	0.52975
153.9	0.52975
154	0.52969
154.1	0.53027
154.2	0.5303
154.3	0.53023
154.4	0.53074
154.5	0.53119
154.6	0.53128
154.7	0.53119
154.8	0.53147
154.9	0.53173
155	0.53219
155.1	0.53237
155.2	0.53262
155.3	0.53198
155.4	0.53267
155.5	0.53244
155.6	0.53236
155.7	0.53255
155.8	0.5327
155.9	0.53307
156	0.5333
156.1	0.53328
156.2	0.53284
156.3	0.53258
156.4	0.53293
156.5	0.53267
156.6	0.53247
156.7	0.5331
156.8	0.53299
156.9	0.53314
157	0.53273
157.1	0.53311
157.2	0.53355
157.3	0.5337
157.4	0.53401
157.5	0.534
157.6	0.53378
157.7	0.53414
157.8	0.53455
157.9	0.53481
158	0.53464
158.1	0.53427
158.2	0.53428
158.3	0.53441
158.4	0.53439
158.5	0.53422
158.6	0.53471
158.7	0.53477
158.8	0.53438
158.9	0.53429
159	0.5341
159.1	0.53463
159.2	0.53415
159.3	0.5345
159.4	0.53476
159.5	0.53546
159.6	0.53548
159.7	0.53544
159.8	0.5355
159.9	0.53515
160	0.53558
160.1	0.53598
160.2	0.53591
160.3	0.53637
160.4	0.53662
160.5	0.53648
160.6	0.53664
160.7	0.53643
160.8	0.53648
160.9	0.53674
161	0.53752
161.1	0.53764
161.2	0.53784
161.3	0.53725
161.4	0.53749
161.5	0.53812
161.6	0.53811
161.7	0.53822
161.8	0.53837
161.9	0.53865
162	0.53878
162.1	0.539
162.2	0.53914
162.3	0.53919
162.4	0.53945
162.5	0.53943
162.6	0.5394
162.7	0.5392
162.8	0.53912
162.9	0.53982
163	0.53979
163.1	0.54012
163.2	0.54028
163.3	0.54026
163.4	0.54052
163.5	0.54094
163.6	0.54064
163.7	0.54077
163.8	0.54055
163.9	0.54026
164	0.54057
164.1	0.54052
164.2	0.54102
164.3	0.54084
164.4	0.54122
164.5	0.54193
164.6	0.54179
164.7	0.54227
164.8	0.5421
164.9	0.5417
165	0.54184
165.1	0.54217
165.2	0.54222
165.3	0.54237
165.4	0.54292
165.5	0.54272
165.6	0.54301
165.7	0.543
165.8	0.54318
165.9	0.54382
166	0.54424
166.1	0.54406
166.2	0.54424
166.3	0.54447
166.4	0.54458
166.5	0.5449
166.6	0.54501
166.7	0.54492
166.8	0.54495
166.9	0.54528
167	0.54541
167.1	0.54528
167.2	0.54612
167.3	0.54688
167.4	0.54713
167.5	0.54693
167.6	0.54696
167.7	0.54699
167.8	0.54718
167.9	0.54716
168	0.54702
168.1	0.54708
168.2	0.54701
168.3	0.54704
168.4	0.5469
168.5	0.54717
168.6	0.54714
168.7	0.54689
168.8	0.54692
168.9	0.54764
169	0.54769
169.1	0.54734
169.2	0.5477
169.3	0.54807
169.4	0.54778
169.5	0.54843
169.6	0.54837
169.7	0.54876
169.8	0.54882
169.9	0.54917
170	0.54898
170.1	0.54916
170.2	0.54945
170.3	0.54969
170.4	0.54962
170.5	0.54951
170.6	0.54988
170.7	0.54948
170.8	0.54933
170.9	0.54959
171	0.54991
171.1	0.54996
171.2	0.54977
171.3	0.55024
171.4	0.55004
171.5	0.55023
171.6	0.54984
171.7	0.55015
171.8	0.55032
171.9	0.55064
172	0.55092
172.1	0.55058
172.2	0.55036
172.3	0.55022
172.4	0.55038
172.5	0.55067
172.6	0.55077
172.7	0.55089
172.8	0.55092
172.9	0.5512
173	0.55124
173.1	0.55134
173.2	0.55153
173.3	0.55135
173.4	0.55221
173.5	0.55195
173.6	0.5523
173.7	0.55227
173.8	0.55204
173.9	0.5526
174	0.55238
174.1	0.55259
174.2	0.55302
174.3	0.55241
174.4	0.55265
174.5	0.55359
174.6	0.55375
174.7	0.55337
174.8	0.55392
174.9	0.55426
175	0.55481
175.1	0.55461
175.2	0.55487
175.3	0.55479
175.4	0.55439
175.5	0.55452
175.6	0.55495
175.7	0.55523
175.8	0.55494
175.9	0.55527
176	0.55517
176.1	0.5551
176.2	0.55514
176.3	0.55507
176.4	0.55545
176.5	0.55563
176.6	0.55562
176.7	0.55586
176.8	0.5558
176.9	0.55565
177	0.55604
177.1	0.55664
177.2	0.55675
177.3	0.5565
177.4	0.55686
177.5	0.55688
177.6	0.55709
177.7	0.55711
177.8	0.55719
177.9	0.55715
178	0.55749
178.1	0.55739
178.2	0.55785
178.3	0.55801
178.4	0.55835
178.5	0.55805
178.6	0.55804
178.7	0.55794
178.8	0.5585
178.9	0.55904
179	0.55967
179.1	0.55997
179.2	0.56023
179.3	0.56065
179.4	0.56078
179.5	0.56068
179.6	0.56048
179.7	0.56059
179.8	0.5608
179.9	0.56034
180	0.56054
180.1	0.56047
180.2	0.56114
180.3	0.56156
180.4	0.56118
180.5	0.56154
180.6	0.5614
180.7	0.56127
180.8	0.5613
180.9	0.5613
181	0.56191
181.1	0.56163
181.2	0.56143
181.3	0.5612
181.4	0.56112
181.5	0.56156
181.6	0.56191
181.7	0.56181
181.8	0.56169
181.9	0.56133
182	0.56186
182.1	0.56197
182.2	0.56187
182.3	0.56204
182.4	0.5617
182.5	0.56191
182.6	0.56241
182.7	0.56214
182.8	0.56206
182.9	0.56224
183	0.56275
183.1	0.56253
183.2	0.56257
183.3	0.56274
183.4	0.56242
183.5	0.56223
183.6	0.56234
183.7	0.5623
183.8	0.56254
183.9	0.56249
184	0.56258
184.1	0.56224
184.2	0.56205
184.3	0.56187
184.4	0.56163
184.5	0.56158
184.6	0.56192
184.7	0.56247
184.8	0.56232
184.9	0.56203
185	0.56243
185.1	0.56267
185.2	0.56289
185.3	0.56333
185.4	0.56341
185.5	0.56358
185.6	0.56358
185.7	0.564
185.8	0.56402
185.9	0.56387
186	0.56345
186.1	0.56307
186.2	0.56345
186.3	0.56373
186.4	0.56333
186.5	0.56381
186.6	0.56382
186.7	0.5645
186.8	0.56456
186.9	0.56459
187	0.56464
187.1	0.56501
187.2	0.56536
187.3	0.56521
187.4	0.56494
187.5	0.56471
187.6	0.56517
187.7	0.56553
187.8	0.56606
187.9	0.56598
188	0.5662
188.1	0.56669
188.2	0.56655
188.3	0.56661
188.4	0.56706
188.5	0.5669
188.6	0.56692
188.7	0.56706
188.8	0.56695
188.9	0.56681
189	0.56667
189.1	0.56717
189.2	0.56703
189.3	0.56696
189.4	0.56722
189.5	0.56725
189.6	0.56713
189.7	0.56764
189.8	0.56772
189.9	0.56768
190	0.56814
190.1	0.56835
190.2	0.5681
190.3	0.56838
190.4	0.56812
190.5	0.56839
190.6	0.5685
190.7	0.56864
190.8	0.56905
190.9	0.56894
191	0.56925
191.1	0.56921
191.2	0.56891
191.3	0.5688
191.4	0.56887
191.5	0.56861
191.6	0.56854
191.7	0.56882
191.8	0.56878
191.9	0.56953
192	0.56933
192.1	0.56933
192.2	0.56945
192.3	0.56981
192.4	0.56958
192.5	0.57
192.6	0.5701
192.7	0.56988
192.8	0.56963
192.9	0.56954
193	0.57027
193.1	0.56969
193.2	0.56976
193.3	0.5702
193.4	0.5697
193.5	0.5699
193.6	0.56985
193.7	0.57003
193.8	0.57036
193.9	0.5703
194	0.57051
194.1	0.57014
194.2	0.56993
194.3	0.57045
194.4	0.57129
194.5	0.57103
194.6	0.57095
194.7	0.57108
194.8	0.57135
194.9	0.57148
195	0.57125
195.1	0.5717
195.2	0.5716
195.3	0.57168
195.4	0.57184
195.5	0.57164
195.6	0.57172
195.7	0.5714
195.8	0.57142
195.9	0.5717
196	0.57195
196.1	0.5723
196.2	0.57179
196.3	0.5716
196.4	0.57162
196.5	0.57167
196.6	0.57193
196.7	0.57225
196.8	0.57221
196.9	0.57278
197	0.57272
197.1	0.57257
197.2	0.57255
197.3	0.57278
197.4	0.57282
197.5	0.57285
197.6	0.57289
197.7	0.57266
197.8	0.57264
197.9	0.57254
198	0.57296
198.1	0.57286
198.2	0.57326
198.3	0.57345
198.4	0.57314
198.5	0.57318
198.6	0.57342
198.7	0.5733
198.8	0.57318
198.9	0.57342
199	0.57298
199.1	0.57302
199.2	0.57304
199.3	0.5725
199.4	0.57269
199.5	0.573
199.6	0.57331
199.7	0.57307
199.8	0.5731
199.9	0.57252
200	0.57259
[truncated: 14,000 more rows]
