# Supplementary material for: Bayesian inference of kinetic schemes for ion channels by Kalman filtering
Source: eLife journal article supplement (doi:10.7554/elife.62714), 2022-05-04
Supplement: fig4-data8 [file 1_Sim_N_50000_Strom_MW.xlsx]

## Sheet: 0.25 M
0.1	0
0.2	0
0.3	0
0.4	0
0.5	0
0.6	0
0.7	0
0.8	0
0.9	0
1	0
1.1	0
1.2	0
1.3	0
1.4	0
1.5	0
1.6	0
1.7	0
1.8	0
1.9	0
2	0
2.1	0
2.2	0
2.3	0
2.4	0
2.5	0
2.6	0
2.7	0
2.8	0
2.9	0
3	0
3.1	0
3.2	0
3.3	0
3.4	0
3.5	0
3.6	0
3.7	0
3.8	0
3.9	0
4	0
4.1	0
4.2	0
4.3	0
4.4	0
4.5	0
4.6	0
4.7	0
4.8	0
4.9	0
5	0
5.1	0
5.2	0
5.3	0
5.4	0
5.5	0
5.6	0
5.7	0
5.8	0
5.9	0
6	0
6.1	0
6.2	0
6.3	0
6.4	0
6.5	0
6.6	0
6.7	0
6.8	0
6.9	0
7	0
7.1	0
7.2	0
7.3	0
7.4	0
7.5	0
7.6	0
7.7	0
7.8	0
7.9	0
8	0
8.1	0
8.2	0
8.3	0
8.4	0
8.5	0
8.6	0
8.7	0
8.8	0
8.9	0
9	0
9.1	0
9.2	0
9.3	0
9.4	0
9.5	0
9.6	0
9.7	0
9.8	0
9.9	0
10	0
10.1	0
10.2	0
10.3	0
10.4	0
10.5	0
10.6	0
10.7	0
10.8	0
10.9	0
11	0
11.1	0
11.2	0
11.3	0
11.4	0
11.5	0
11.6	0
11.7	0
11.8	0
11.9	0
12	0
12.1	0
12.2	0
12.3	0
12.4	0
12.5	0
12.6	0
12.7	0
12.8	0
12.9	0
13	0
13.1	0
13.2	0
13.3	0
13.4	0
13.5	0
13.6	0
13.7	0
13.8	0
13.9	0
14	0
14.1	0
14.2	0
14.3	0
14.4	0
14.5	0
14.6	0
14.7	0
14.8	0
14.9	0
15	0
15.1	0
15.2	0
15.3	0
15.4	0
15.5	0
15.6	0
15.7	0
15.8	0
15.9	0
16	0
16.1	0
16.2	0
16.3	0
16.4	0
16.5	0
16.6	0
16.7	0
16.8	0
16.9	0
17	0
17.1	0
17.2	0
17.3	0
17.4	0
17.5	0
17.6	0
17.7	0
17.8	0
17.9	0
18	0
18.1	0
18.2	0
18.3	0
18.4	0
18.5	0
18.6	0
18.7	0
18.8	0
18.9	0
19	0
19.1	0
19.2	0
19.3	0
19.4	0
19.5	0
19.6	0
19.7	0
19.8	0
19.9	0
20	0
20.1	0
20.2	0
20.3	0
20.4	0
20.5	0
20.6	0
20.7	0
20.8	0
20.9	0
21	0
21.1	0
21.2	0
21.3	0
21.4	0
21.5	0
21.6	0
21.7	0
21.8	0
21.9	0
22	0
22.1	0
22.2	0
22.3	0
22.4	0
22.5	0
22.6	0
22.7	0
22.8	0
22.9	0
23	0
23.1	0
23.2	0
23.3	0
23.4	0
23.5	0
23.6	0
23.7	0
23.8	0
23.9	0
24	0
24.1	0
24.2	0
24.3	0
24.4	0
24.5	0
24.6	0
24.7	0
24.8	0
24.9	0
25	0
25.1	0
25.2	0
25.3	0
25.4	0
25.5	0
25.6	0
25.7	0
25.8	0
25.9	0
26	0
26.1	0
26.2	0
26.3	0
26.4	0
26.5	0
26.6	0
26.7	0
26.8	0
26.9	0
27	0
27.1	0
27.2	0
27.3	0
27.4	0
27.5	0
27.6	0
27.7	0
27.8	0
27.9	0
28	0
28.1	0
28.2	0
28.3	0
28.4	0
28.5	0
28.6	0
28.7	0
28.8	0
28.9	0
29	0
29.1	0
29.2	0
29.3	0
29.4	0
29.5	0
29.6	0
29.7	0
29.8	0
29.9	0
30	0
30.1	0
30.2	0
30.3	0
30.4	0
30.5	0
30.6	0
30.7	0
30.8	0
30.9	0
31	0
31.1	0
31.2	0
31.3	0
31.4	0
31.5	0
31.6	0
31.7	0
31.8	0
31.9	0
32	0
32.1	0
32.2	0
32.3	0
32.4	0
32.5	0
32.6	0
32.7	0
32.8	0
32.9	0
33	0
33.1	0
33.2	0
33.3	0
33.4	0
33.5	0
33.6	0
33.7	0
33.8	0
33.9	0
34	0
34.1	0
34.2	0
34.3	0
34.4	0
34.5	0
34.6	0
34.7	0
34.8	0
34.9	0
35	0
35.1	0
35.2	0
35.3	0
35.4	0
35.5	0
35.6	0
35.7	0
35.8	0
35.9	0
36	0
36.1	0
36.2	0
36.3	0
36.4	0
36.5	0
36.6	0
36.7	0
36.8	0
36.9	0
37	0
37.1	0
37.2	0
37.3	0
37.4	0
37.5	0
37.6	0
37.7	0
37.8	0
37.9	0
38	0
38.1	0
38.2	0
38.3	0
38.4	0
38.5	0
38.6	0
38.7	0
38.8	0
38.9	0
39	0
39.1	0
39.2	0
39.3	0
39.4	0
39.5	0
39.6	0
39.7	0
39.8	0
39.9	0
40	0
40.1	0
40.2	0
40.3	0
40.4	0
40.5	0
40.6	0
40.7	0
40.8	0
40.9	0
41	0
41.1	0
41.2	0
41.3	0
41.4	0
41.5	0
41.6	0
41.7	0
41.8	0
41.9	0
42	0
42.1	0
42.2	0
42.3	0
42.4	0
42.5	0
42.6	0
42.7	0
42.8	0
42.9	0
43	0
43.1	0
43.2	0
43.3	0
43.4	0
43.5	0
43.6	0
43.7	0
43.8	0
43.9	0
44	0
44.1	0
44.2	0
44.3	0
44.4	0
44.5	0
44.6	0
44.7	0
44.8	0
44.9	0
45	0
45.1	0
45.2	0
45.3	0
45.4	0
45.5	0
45.6	0
45.7	0
45.8	0
45.9	0
46	0
46.1	0
46.2	0
46.3	0
46.4	0
46.5	0
46.6	0
46.7	0
46.8	0
46.9	0
47	0
47.1	0
47.2	0
47.3	0
47.4	0
47.5	0
47.6	0
47.7	0
47.8	0
47.9	0
48	0
48.1	0
48.2	0
48.3	0
48.4	0
48.5	0
48.6	0
48.7	0
48.8	0
48.9	0
49	0
49.1	0
49.2	0
49.3	0
49.4	0
49.5	0
49.6	0
49.7	0
49.8	0
49.9	0
50	0
50.1	0
50.2	0
50.3	0
50.4	0
50.5	0
50.6	0
50.7	0
50.8	0
50.9	0
51	0
51.1	0
51.2	0
51.3	0
51.4	0
51.5	0
51.6	0
51.7	0
51.8	0
51.9	0
52	0
52.1	0
52.2	0
52.3	0
52.4	0
52.5	0
52.6	0
52.7	0
52.8	0
52.9	0
53	0
53.1	0
53.2	0
53.3	0
53.4	0
53.5	0
53.6	0
53.7	0
53.8	0
53.9	0
54	0
54.1	0
54.2	0
54.3	0
54.4	0
54.5	0
54.6	0
54.7	0
54.8	0
54.9	0
55	0
55.1	0
55.2	0
55.3	0
55.4	0
55.5	0
55.6	0
55.7	0
55.8	0
55.9	0
56	0
56.1	0
56.2	0
56.3	0
56.4	0
56.5	0
56.6	0
56.7	0
56.8	0
56.9	0
57	0
57.1	0
57.2	0
57.3	0
57.4	0
57.5	0
57.6	0
57.7	0
57.8	0
57.9	0
58	0
58.1	0
58.2	0
58.3	0
58.4	0
58.5	0
58.6	0
58.7	0
58.8	0
58.9	0
59	0
59.1	0
59.2	0
59.3	0
59.4	0
59.5	0
59.6	0
59.7	0
59.8	0
59.9	0
60	0
60.1	0
60.2	0
60.3	0
60.4	0
60.5	0
60.6	0
60.7	0
60.8	0
60.9	0
61	0
61.1	0
61.2	0
61.3	0
61.4	0
61.5	0
61.6	0
61.7	0
61.8	0
61.9	0
62	0
62.1	0
62.2	0
62.3	0
62.4	0
62.5	0
62.6	0
62.7	0
62.8	0
62.9	0
63	0
63.1	0
63.2	0
63.3	0
63.4	0
63.5	0
63.6	0
63.7	0
63.8	0
63.9	0
64	0
64.1	0
64.2	0
64.3	0
64.4	0
64.5	0
64.6	0
64.7	0
64.8	0
64.9	0
65	0
65.1	0
65.2	0
65.3	0
65.4	0
65.5	0
65.6	0
65.7	0
65.8	0
65.9	0
66	0
66.1	0
66.2	0
66.3	0
66.4	0
66.5	0
66.6	0
66.7	0
66.8	0
66.9	0
67	0
67.1	0
67.2	0
67.3	0
67.4	0
67.5	0
67.6	0
67.7	0
67.8	0
67.9	0
68	0
68.1	0
68.2	0
68.3	0
68.4	0
68.5	0
68.6	0
68.7	0
68.8	0
68.9	0
69	0
69.1	0
69.2	0
69.3	0
69.4	0
69.5	0
69.6	0
69.7	0
69.8	0
69.9	0
70	0
70.1	0
70.2	0
70.3	0
70.4	0
70.5	0
70.6	0
70.7	0
70.8	0
70.9	0
71	0
71.1	0
71.2	0
71.3	0
71.4	0
71.5	0
71.6	0
71.7	0
71.8	0
71.9	0
72	0
72.1	0
72.2	0
72.3	0
72.4	0
72.5	0
72.6	0
72.7	0
72.8	0
72.9	0
73	0
73.1	0
73.2	0
73.3	0
73.4	0
73.5	0
73.6	0
73.7	0
73.8	0
73.9	0
74	0
74.1	0
74.2	0
74.3	0
74.4	0
74.5	0
74.6	0
74.7	0
74.8	0
74.9	0
75	0
75.1	0
75.2	0
75.3	0
75.4	0
75.5	0
75.6	0
75.7	0
75.8	0
75.9	0
76	0
76.1	0
76.2	0
76.3	0
76.4	0
76.5	0
76.6	0
76.7	0
76.8	0
76.9	0
77	0
77.1	0
77.2	0
77.3	0
77.4	0
77.5	0
77.6	0
77.7	0
77.8	0
77.9	0
78	0
78.1	0
78.2	0
78.3	0
78.4	0
78.5	0
78.6	0
78.7	0
78.8	0
78.9	0
79	0
79.1	0
79.2	0
79.3	0
79.4	0
79.5	0
79.6	0
79.7	0
79.8	0
79.9	0
80	0
80.1	0
80.2	0
80.3	0
80.4	0
80.5	0
80.6	0
80.7	0
80.8	0
80.9	0
81	0
81.1	0
81.2	0
81.3	0
81.4	0
81.5	0
81.6	0
81.7	0
81.8	0
81.9	0
82	0
82.1	0
82.2	0
82.3	0
82.4	0
82.5	0
82.6	0
82.7	0
82.8	0
82.9	0
83	0
83.1	0
83.2	0
83.3	0
83.4	0
83.5	0
83.6	0
83.7	0
83.8	0
83.9	0
84	0
84.1	0
84.2	0
84.3	0
84.4	0
84.5	0
84.6	0
84.7	0
84.8	0
84.9	0
85	0
85.1	0
85.2	0
85.3	0
85.4	0
85.5	0
85.6	0
85.7	0
85.8	0
85.9	0
86	0
86.1	0
86.2	0
86.3	0
86.4	0
86.5	0
86.6	0
86.7	0
86.8	0
86.9	0
87	0
87.1	0
87.2	0
87.3	0
87.4	0
87.5	0
87.6	0
87.7	0
87.8	0
87.9	0
88	0
88.1	0
88.2	0
88.3	0
88.4	0
88.5	0
88.6	0
88.7	0
88.8	0
88.9	0
89	0
89.1	0
89.2	0
89.3	0
89.4	0
89.5	0
89.6	0
89.7	0
89.8	0
89.9	0
90	0
90.1	0
90.2	0
90.3	0
90.4	0
90.5	0
90.6	0
90.7	0
90.8	0
90.9	0
91	0
91.1	0
91.2	0
91.3	0
91.4	0
91.5	0
91.6	0
91.7	0
91.8	0
91.9	0
92	0
92.1	0
92.2	0
92.3	0
92.4	0
92.5	0
92.6	0
92.7	0
92.8	0
92.9	0
93	0
93.1	0
93.2	0
93.3	0
93.4	0
93.5	0
93.6	0
93.7	0
93.8	0
93.9	0
94	0
94.1	0
94.2	0
94.3	0
94.4	0
94.5	0
94.6	0
94.7	0
94.8	0
94.9	0
95	0
95.1	0
95.2	0
95.3	0
95.4	0
95.5	0
95.6	0
95.7	0
95.8	0
95.9	0
96	0
96.1	0
96.2	0
96.3	0
96.4	0
96.5	0
96.6	0
96.7	0
96.8	0
96.9	0
97	0
97.1	0
97.2	0
97.3	0
97.4	0
97.5	0
97.6	0
97.7	0
97.8	0
97.9	0
98	0
98.1	0
98.2	0
98.3	0
98.4	0
98.5	0
98.6	0
98.7	0
98.8	0
98.9	0
99	0
99.1	0
99.2	0
99.3	0
99.4	0
99.5	0
99.6	0
99.7	0
99.8	0
99.9	0
100	0
100.1	0
100.2	0
100.3	0
100.4	0
100.5	0
100.6	0
100.7	2e-05
100.8	4e-05
100.9	8e-05
101	0.0002
101.1	0.00024
101.2	0.00032
101.3	0.00042
101.4	0.00044
101.5	0.0005
101.6	0.00066
101.7	0.00074
101.8	0.0008
101.9	0.0009
102	0.00102
102.1	0.00114
102.2	0.00114
102.3	0.00124
102.4	0.00128
102.5	0.00142
102.6	0.00166
102.7	0.00178
102.8	0.00198
102.9	0.0021
103	0.00222
103.1	0.00236
103.2	0.00268
103.3	0.00288
103.4	0.0031
103.5	0.00324
103.6	0.00352
103.7	0.00366
103.8	0.00404
103.9	0.0043
104	0.00456
104.1	0.00496
104.2	0.00526
104.3	0.00562
104.4	0.00586
104.5	0.00622
104.6	0.00654
104.7	0.0068
104.8	0.00706
104.9	0.00736
105	0.0076
105.1	0.00794
105.2	0.0083
105.3	0.00866
105.4	0.00892
105.5	0.00916
105.6	0.0095
105.7	0.0098
105.8	0.00998
105.9	0.01046
106	0.01082
106.1	0.01106
106.2	0.01138
106.3	0.01182
106.4	0.01212
106.5	0.0126
106.6	0.01302
106.7	0.01332
106.8	0.0137
106.9	0.01412
107	0.01446
107.1	0.01488
107.2	0.01538
107.3	0.01564
107.4	0.01606
107.5	0.01646
107.6	0.01692
107.7	0.0173
107.8	0.01768
107.9	0.0181
108	0.01856
108.1	0.01908
108.2	0.01934
108.3	0.01986
108.4	0.0202
108.5	0.02056
108.6	0.02098
108.7	0.02136
108.8	0.02166
108.9	0.02206
109	0.02236
109.1	0.02278
109.2	0.02314
109.3	0.02362
109.4	0.02394
109.5	0.02442
109.6	0.02482
109.7	0.02522
109.8	0.02554
109.9	0.02604
110	0.02636
110.1	0.02668
110.2	0.02716
110.3	0.02756
110.4	0.02802
110.5	0.02832
110.6	0.0286
110.7	0.02902
110.8	0.02938
110.9	0.02994
111	0.0304
111.1	0.03084
111.2	0.0313
111.3	0.03182
111.4	0.03216
111.5	0.03256
111.6	0.0329
111.7	0.03342
111.8	0.03392
111.9	0.03436
112	0.03464
112.1	0.03502
112.2	0.03552
112.3	0.03586
112.4	0.03638
112.5	0.03688
112.6	0.0372
112.7	0.03758
112.8	0.03776
112.9	0.03828
113	0.0387
113.1	0.03916
113.2	0.0396
113.3	0.04
113.4	0.04034
113.5	0.04066
113.6	0.04112
113.7	0.04142
113.8	0.0417
113.9	0.04212
114	0.0425
114.1	0.0429
114.2	0.04316
114.3	0.04352
114.4	0.04388
114.5	0.0445
114.6	0.04484
114.7	0.0453
114.8	0.04562
114.9	0.04616
115	0.0466
115.1	0.04696
115.2	0.0472
115.3	0.04776
115.4	0.04816
115.5	0.04868
115.6	0.04908
115.7	0.04942
115.8	0.0498
115.9	0.05022
116	0.05064
116.1	0.05104
116.2	0.05142
116.3	0.05152
116.4	0.0518
116.5	0.05214
116.6	0.05258
116.7	0.0532
116.8	0.05354
116.9	0.05398
117	0.05438
117.1	0.05482
117.2	0.05522
117.3	0.05576
117.4	0.05606
117.5	0.05644
117.6	0.0569
117.7	0.05726
117.8	0.05772
117.9	0.05816
118	0.05852
118.1	0.05908
118.2	0.05932
118.3	0.05974
118.4	0.06006
118.5	0.0603
118.6	0.06082
118.7	0.06128
118.8	0.06154
118.9	0.06202
119	0.06244
119.1	0.06268
119.2	0.0631
119.3	0.06346
119.4	0.06382
119.5	0.06426
119.6	0.06472
119.7	0.06524
119.8	0.06542
119.9	0.06574
120	0.06606
120.1	0.06636
120.2	0.06666
120.3	0.06708
120.4	0.06754
120.5	0.06794
120.6	0.06836
120.7	0.06846
120.8	0.06886
120.9	0.0694
121	0.06968
121.1	0.07018
121.2	0.07056
121.3	0.07108
121.4	0.07134
121.5	0.0718
121.6	0.07216
121.7	0.07272
121.8	0.07308
121.9	0.07344
122	0.07374
122.1	0.07422
122.2	0.07454
122.3	0.075
122.4	0.07548
122.5	0.0757
122.6	0.07602
122.7	0.07644
122.8	0.07684
122.9	0.07732
123	0.07774
123.1	0.0781
123.2	0.07846
123.3	0.07862
123.4	0.07912
123.5	0.07944
123.6	0.0798
123.7	0.08014
123.8	0.08042
123.9	0.08084
124	0.0812
124.1	0.08156
124.2	0.08182
124.3	0.0821
124.4	0.08234
124.5	0.08278
124.6	0.08318
124.7	0.08364
124.8	0.08386
124.9	0.0844
125	0.0848
125.1	0.08532
125.2	0.08564
125.3	0.08598
125.4	0.0862
125.5	0.08662
125.6	0.08676
125.7	0.08714
125.8	0.0874
125.9	0.0877
126	0.08796
126.1	0.08828
126.2	0.08888
126.3	0.08912
126.4	0.08948
126.5	0.08976
126.6	0.08994
126.7	0.09018
126.8	0.09046
126.9	0.09096
127	0.0912
127.1	0.09142
127.2	0.09176
127.3	0.09228
127.4	0.09262
127.5	0.09306
127.6	0.0935
127.7	0.09376
127.8	0.0942
127.9	0.0946
128	0.09488
128.1	0.09512
128.2	0.09546
128.3	0.09574
128.4	0.09616
128.5	0.09652
128.6	0.09674
128.7	0.0971
128.8	0.09754
128.9	0.09772
129	0.0982
129.1	0.09844
129.2	0.0987
129.3	0.09888
129.4	0.09916
129.5	0.09928
129.6	0.09964
129.7	0.10008
129.8	0.1004
129.9	0.1007
130	0.10092
130.1	0.10124
130.2	0.10148
130.3	0.1018
130.4	0.10212
130.5	0.10238
130.6	0.1028
130.7	0.1031
130.8	0.10332
130.9	0.10372
131	0.10398
131.1	0.10436
131.2	0.10468
131.3	0.1051
131.4	0.10538
131.5	0.10568
131.6	0.10594
131.7	0.10614
131.8	0.10624
131.9	0.1065
132	0.10684
132.1	0.10706
132.2	0.1072
132.3	0.10752
132.4	0.10782
132.5	0.10812
132.6	0.1083
132.7	0.10878
132.8	0.10894
132.9	0.10912
133	0.10942
133.1	0.10984
133.2	0.11004
133.3	0.11064
133.4	0.1109
133.5	0.11122
133.6	0.1116
133.7	0.11194
133.8	0.11234
133.9	0.11256
134	0.11286
134.1	0.11308
134.2	0.11326
134.3	0.11358
134.4	0.11402
134.5	0.11426
134.6	0.1146
134.7	0.11498
134.8	0.11518
134.9	0.11542
135	0.11596
135.1	0.11634
135.2	0.1168
135.3	0.11718
135.4	0.11756
135.5	0.1177
135.6	0.118
135.7	0.11826
135.8	0.11852
135.9	0.11882
136	0.11914
136.1	0.11948
136.2	0.11978
136.3	0.12004
136.4	0.12052
136.5	0.1208
136.6	0.12108
136.7	0.12142
136.8	0.12176
136.9	0.1218
137	0.1222
137.1	0.12246
137.2	0.12282
137.3	0.12334
137.4	0.12374
137.5	0.12416
137.6	0.12436
137.7	0.12474
137.8	0.12532
137.9	0.12568
138	0.12608
138.1	0.12634
138.2	0.12668
138.3	0.12712
138.4	0.1273
138.5	0.12762
138.6	0.12788
138.7	0.12812
138.8	0.12836
138.9	0.12874
139	0.12908
139.1	0.12932
139.2	0.12942
139.3	0.12964
139.4	0.12988
139.5	0.1301
139.6	0.13034
139.7	0.13086
139.8	0.1313
139.9	0.13162
140	0.13186
140.1	0.13226
140.2	0.13266
140.3	0.13282
140.4	0.13322
140.5	0.13338
140.6	0.13356
140.7	0.1337
140.8	0.13376
140.9	0.1339
141	0.13432
141.1	0.13448
141.2	0.13486
141.3	0.13512
141.4	0.1352
141.5	0.1357
141.6	0.13606
141.7	0.13608
141.8	0.13644
141.9	0.13682
142	0.13716
142.1	0.13748
142.2	0.1377
142.3	0.1381
142.4	0.13852
142.5	0.139
142.6	0.13918
142.7	0.13942
142.8	0.13968
142.9	0.14014
143	0.1404
143.1	0.14072
143.2	0.14088
143.3	0.14128
143.4	0.14152
143.5	0.14194
143.6	0.1422
143.7	0.14262
143.8	0.14292
143.9	0.14326
144	0.14374
144.1	0.144
144.2	0.14422
144.3	0.14454
144.4	0.14468
144.5	0.14496
144.6	0.1453
144.7	0.14546
144.8	0.14584
144.9	0.14622
145	0.1465
145.1	0.14698
145.2	0.1474
145.3	0.1477
145.4	0.14786
145.5	0.14802
145.6	0.14824
145.7	0.14846
145.8	0.14876
145.9	0.1489
146	0.14936
146.1	0.14968
146.2	0.14998
146.3	0.15008
146.4	0.15024
146.5	0.15044
146.6	0.15068
146.7	0.15084
146.8	0.15104
146.9	0.15126
147	0.1514
147.1	0.15172
147.2	0.1521
147.3	0.15226
147.4	0.15262
147.5	0.15314
147.6	0.15338
147.7	0.15366
147.8	0.1538
147.9	0.15402
148	0.15434
148.1	0.15456
148.2	0.15478
148.3	0.15516
148.4	0.15556
148.5	0.15578
148.6	0.15592
148.7	0.15606
148.8	0.15624
148.9	0.15656
149	0.15684
149.1	0.15692
149.2	0.1572
149.3	0.15746
149.4	0.15782
149.5	0.15812
149.6	0.15832
149.7	0.15864
149.8	0.15866
149.9	0.15864
150	0.1588
150.1	0.15906
150.2	0.15932
150.3	0.1596
150.4	0.15994
150.5	0.16034
150.6	0.1605
150.7	0.16066
150.8	0.16072
150.9	0.16064
151	0.16074
151.1	0.16084
151.2	0.16118
151.3	0.16138
151.4	0.16156
151.5	0.1619
151.6	0.16206
151.7	0.16246
151.8	0.16268
151.9	0.16286
152	0.16322
152.1	0.16344
152.2	0.16356
152.3	0.16398
152.4	0.16438
152.5	0.16456
152.6	0.16478
152.7	0.16522
152.8	0.1656
152.9	0.16582
153	0.16588
153.1	0.16606
153.2	0.16642
153.3	0.16656
153.4	0.16662
153.5	0.16702
153.6	0.16706
153.7	0.16716
153.8	0.16726
153.9	0.16752
154	0.16782
154.1	0.16806
154.2	0.16832
154.3	0.16868
154.4	0.16906
154.5	0.16912
154.6	0.16948
154.7	0.16962
154.8	0.17004
154.9	0.17036
155	0.1705
155.1	0.17056
155.2	0.17072
155.3	0.17082
155.4	0.17094
155.5	0.17122
155.6	0.17152
155.7	0.17174
155.8	0.17198
155.9	0.17228
156	0.17258
156.1	0.1728
156.2	0.17294
156.3	0.17318
156.4	0.17344
156.5	0.17378
156.6	0.174
156.7	0.1741
156.8	0.1744
156.9	0.17472
157	0.1749
157.1	0.1753
157.2	0.17542
157.3	0.17578
157.4	0.17582
157.5	0.17606
157.6	0.17618
157.7	0.17658
157.8	0.17678
157.9	0.17688
158	0.1773
158.1	0.1775
158.2	0.1778
158.3	0.17796
158.4	0.17816
158.5	0.17842
158.6	0.17874
158.7	0.17892
158.8	0.17912
158.9	0.1793
159	0.1797
159.1	0.1797
159.2	0.1802
159.3	0.18042
159.4	0.18056
159.5	0.1807
159.6	0.1807
159.7	0.18098
159.8	0.18106
159.9	0.18136
160	0.18146
160.1	0.18162
160.2	0.18196
160.3	0.18232
160.4	0.18266
160.5	0.18294
160.6	0.183
160.7	0.18314
160.8	0.18338
160.9	0.18348
161	0.18368
161.1	0.18378
161.2	0.18414
161.3	0.18422
161.4	0.18434
161.5	0.18454
161.6	0.18476
161.7	0.18488
161.8	0.18506
161.9	0.18516
162	0.18522
162.1	0.18524
162.2	0.18538
162.3	0.18568
162.4	0.18566
162.5	0.18578
162.6	0.18606
162.7	0.18616
162.8	0.18638
162.9	0.1866
163	0.18694
163.1	0.18718
163.2	0.18732
163.3	0.18738
163.4	0.18746
163.5	0.18768
163.6	0.18804
163.7	0.18824
163.8	0.1885
163.9	0.1889
164	0.189
164.1	0.18922
164.2	0.18936
164.3	0.1896
164.4	0.18968
164.5	0.18984
164.6	0.19008
164.7	0.19032
164.8	0.19052
164.9	0.19066
165	0.1908
165.1	0.19102
165.2	0.19128
165.3	0.19138
165.4	0.19148
165.5	0.19172
165.6	0.192
165.7	0.19224
165.8	0.1926
165.9	0.19278
166	0.19292
166.1	0.19304
166.2	0.19324
166.3	0.1935
166.4	0.19378
166.5	0.19414
166.6	0.19436
166.7	0.19484
166.8	0.19502
166.9	0.19514
167	0.19538
167.1	0.1955
167.2	0.1958
167.3	0.19604
167.4	0.1961
167.5	0.19644
167.6	0.19662
167.7	0.1968
167.8	0.197
167.9	0.19714
168	0.19736
168.1	0.1975
168.2	0.19754
168.3	0.19764
168.4	0.19784
168.5	0.19824
168.6	0.19838
168.7	0.19842
168.8	0.1987
168.9	0.19876
169	0.19892
169.1	0.19924
169.2	0.1994
169.3	0.1995
169.4	0.1998
169.5	0.20022
169.6	0.20022
169.7	0.20034
169.8	0.20036
169.9	0.20068
170	0.20092
170.1	0.20112
170.2	0.20132
170.3	0.2015
170.4	0.20162
170.5	0.20196
170.6	0.2021
170.7	0.2024
170.8	0.20258
170.9	0.20268
171	0.20276
171.1	0.20306
171.2	0.20324
171.3	0.20332
171.4	0.20362
171.5	0.2038
171.6	0.2039
171.7	0.2041
171.8	0.20434
171.9	0.2045
172	0.20464
172.1	0.20488
172.2	0.20492
172.3	0.20514
172.4	0.20534
172.5	0.20556
172.6	0.2057
172.7	0.20584
172.8	0.20612
172.9	0.20638
173	0.20654
173.1	0.20676
173.2	0.20704
173.3	0.2072
173.4	0.20748
173.5	0.20746
173.6	0.20762
173.7	0.2077
173.8	0.20792
173.9	0.20822
174	0.20848
174.1	0.20864
174.2	0.20878
174.3	0.20882
174.4	0.20892
174.5	0.20916
174.6	0.2093
174.7	0.20958
174.8	0.20962
174.9	0.20972
175	0.20984
175.1	0.21002
175.2	0.2101
175.3	0.21028
175.4	0.21034
175.5	0.21062
175.6	0.2107
175.7	0.21074
175.8	0.21086
175.9	0.2111
176	0.21122
176.1	0.21128
176.2	0.21164
176.3	0.21202
176.4	0.21218
176.5	0.21222
176.6	0.21228
176.7	0.21236
176.8	0.21254
176.9	0.2127
177	0.21276
177.1	0.213
177.2	0.2134
177.3	0.21374
177.4	0.21394
177.5	0.2142
177.6	0.2144
177.7	0.2146
177.8	0.21468
177.9	0.2149
178	0.21506
178.1	0.2152
178.2	0.21552
178.3	0.21556
178.4	0.2156
178.5	0.21574
178.6	0.21586
178.7	0.216
178.8	0.21616
178.9	0.21642
179	0.21662
179.1	0.21678
179.2	0.21688
179.3	0.21702
179.4	0.21728
179.5	0.21738
179.6	0.21748
179.7	0.21766
179.8	0.21766
179.9	0.2178
180	0.21786
180.1	0.218
180.2	0.21806
180.3	0.2183
180.4	0.21844
180.5	0.21888
180.6	0.21912
180.7	0.2193
180.8	0.21936
180.9	0.2196
181	0.21976
181.1	0.21988
181.2	0.21996
181.3	0.2202
181.4	0.22036
181.5	0.22036
181.6	0.22062
181.7	0.22074
181.8	0.22102
181.9	0.22114
182	0.22138
182.1	0.22146
182.2	0.22158
182.3	0.22182
182.4	0.22192
182.5	0.22206
182.6	0.22226
182.7	0.22248
182.8	0.22256
182.9	0.2227
183	0.22274
183.1	0.223
183.2	0.22298
183.3	0.22312
183.4	0.22336
183.5	0.22346
183.6	0.22368
183.7	0.22378
183.8	0.22388
183.9	0.22414
184	0.22464
184.1	0.22478
184.2	0.22512
184.3	0.22518
184.4	0.22548
184.5	0.22554
184.6	0.22566
184.7	0.2256
184.8	0.22564
184.9	0.2258
185	0.226
185.1	0.22618
185.2	0.2264
185.3	0.22658
185.4	0.22674
185.5	0.22692
185.6	0.22712
185.7	0.22726
185.8	0.2274
185.9	0.2276
186	0.22754
186.1	0.22764
186.2	0.22786
186.3	0.22794
186.4	0.22824
186.5	0.22844
186.6	0.22858
186.7	0.2288
186.8	0.22906
186.9	0.22954
187	0.22964
187.1	0.2298
187.2	0.22988
187.3	0.23018
187.4	0.2303
187.5	0.23014
187.6	0.23028
187.7	0.2305
187.8	0.23064
187.9	0.23058
188	0.23066
188.1	0.23092
188.2	0.23098
188.3	0.23116
188.4	0.2313
188.5	0.23134
188.6	0.23138
188.7	0.2316
188.8	0.23176
188.9	0.2318
189	0.232
189.1	0.23206
189.2	0.23216
189.3	0.23242
189.4	0.23272
189.5	0.23292
189.6	0.2329
189.7	0.23324
189.8	0.23336
189.9	0.23346
190	0.23362
190.1	0.23368
190.2	0.23406
190.3	0.23406
190.4	0.2343
190.5	0.23446
190.6	0.23462
190.7	0.23486
190.8	0.23492
190.9	0.23496
191	0.235
191.1	0.23518
191.2	0.23524
191.3	0.23538
191.4	0.23556
191.5	0.2356
191.6	0.2358
191.7	0.2361
191.8	0.23616
191.9	0.23646
192	0.23658
192.1	0.23684
192.2	0.23702
192.3	0.2371
192.4	0.23718
192.5	0.23736
192.6	0.23734
192.7	0.23742
192.8	0.2376
192.9	0.23764
193	0.23776
193.1	0.23768
193.2	0.23784
193.3	0.2379
193.4	0.23798
193.5	0.23814
193.6	0.23818
193.7	0.23832
193.8	0.23838
193.9	0.23856
194	0.23872
194.1	0.23884
194.2	0.23892
194.3	0.2392
194.4	0.23926
194.5	0.23952
194.6	0.2397
194.7	0.23998
194.8	0.24014
194.9	0.24028
195	0.24034
195.1	0.2402
195.2	0.24016
195.3	0.24038
195.4	0.24052
195.5	0.24076
195.6	0.2409
195.7	0.241
195.8	0.2412
195.9	0.2414
196	0.24158
196.1	0.24182
196.2	0.24184
196.3	0.24188
196.4	0.24198
196.5	0.24216
196.6	0.24222
196.7	0.24248
196.8	0.2426
196.9	0.24294
197	0.24312
197.1	0.2433
197.2	0.24346
197.3	0.24348
197.4	0.24344
197.5	0.24362
197.6	0.24374
197.7	0.24404
197.8	0.24408
197.9	0.24418
198	0.24412
198.1	0.2443
198.2	0.2445
198.3	0.2446
198.4	0.24494
198.5	0.24514
198.6	0.24514
198.7	0.24516
198.8	0.24514
198.9	0.2452
199	0.24528
199.1	0.24546
199.2	0.24536
199.3	0.24556
199.4	0.24584
199.5	0.24584
199.6	0.24614
199.7	0.2465
199.8	0.24682
199.9	0.24688
200	0.24682
[truncated: 14,000 more rows]
