# Supplementary material for: Bayesian inference of kinetic schemes for ion channels by Kalman filtering
Source: eLife journal article supplement (doi:10.7554/elife.62714), 2022-05-04
Supplement: fig4-data9 [file 1_Sim_N_50_Strom_MW_0.5M.xlsx]

## Sheet: 0.50 M
0.1	0
0.2	0
0.3	0
0.4	0
0.5	0
0.6	0
0.7	0
0.8	0
0.9	0
1	0
1.1	0
1.2	0
1.3	0
1.4	0
1.5	0
1.6	0
1.7	0
1.8	0
1.9	0
2	0
2.1	0
2.2	0
2.3	0
2.4	0
2.5	0
2.6	0
2.7	0
2.8	0
2.9	0
3	0
3.1	0
3.2	0
3.3	0
3.4	0
3.5	0
3.6	0
3.7	0
3.8	0
3.9	0
4	0
4.1	0
4.2	0
4.3	0
4.4	0
4.5	0
4.6	0
4.7	0
4.8	0
4.9	0
5	0
5.1	0
5.2	0
5.3	0
5.4	0
5.5	0
5.6	0
5.7	0
5.8	0
5.9	0
6	0
6.1	0
6.2	0
6.3	0
6.4	0
6.5	0
6.6	0
6.7	0
6.8	0
6.9	0
7	0
7.1	0
7.2	0
7.3	0
7.4	0
7.5	0
7.6	0
7.7	0
7.8	0
7.9	0
8	0
8.1	0
8.2	0
8.3	0
8.4	0
8.5	0
8.6	0
8.7	0
8.8	0
8.9	0
9	0
9.1	0
9.2	0
9.3	0
9.4	0
9.5	0
9.6	0
9.7	0
9.8	0
9.9	0
10	0
10.1	0
10.2	0
10.3	0
10.4	0
10.5	0
10.6	0
10.7	0
10.8	0
10.9	0
11	0
11.1	0
11.2	0
11.3	0
11.4	0
11.5	0
11.6	0
11.7	0
11.8	0
11.9	0
12	0
12.1	0
12.2	0
12.3	0
12.4	0
12.5	0
12.6	0
12.7	0
12.8	0
12.9	0
13	0
13.1	0
13.2	0
13.3	0
13.4	0
13.5	0
13.6	0
13.7	0
13.8	0
13.9	0
14	0
14.1	0
14.2	0
14.3	0
14.4	0
14.5	0
14.6	0
14.7	0
14.8	0
14.9	0
15	0
15.1	0
15.2	0
15.3	0
15.4	0
15.5	0
15.6	0
15.7	0
15.8	0
15.9	0
16	0
16.1	0
16.2	0
16.3	0
16.4	0
16.5	0
16.6	0
16.7	0
16.8	0
16.9	0
17	0
17.1	0
17.2	0
17.3	0
17.4	0
17.5	0
17.6	0
17.7	0
17.8	0
17.9	0
18	0
18.1	0
18.2	0
18.3	0
18.4	0
18.5	0
18.6	0
18.7	0
18.8	0
18.9	0
19	0
19.1	0
19.2	0
19.3	0
19.4	0
19.5	0
19.6	0
19.7	0
19.8	0
19.9	0
20	0
20.1	0
20.2	0
20.3	0
20.4	0
20.5	0
20.6	0
20.7	0
20.8	0
20.9	0
21	0
21.1	0
21.2	0
21.3	0
21.4	0
21.5	0
21.6	0
21.7	0
21.8	0
21.9	0
22	0
22.1	0
22.2	0
22.3	0
22.4	0
22.5	0
22.6	0
22.7	0
22.8	0
22.9	0
23	0
23.1	0
23.2	0
23.3	0
23.4	0
23.5	0
23.6	0
23.7	0
23.8	0
23.9	0
24	0
24.1	0
24.2	0
24.3	0
24.4	0
24.5	0
24.6	0
24.7	0
24.8	0
24.9	0
25	0
25.1	0
25.2	0
25.3	0
25.4	0
25.5	0
25.6	0
25.7	0
25.8	0
25.9	0
26	0
26.1	0
26.2	0
26.3	0
26.4	0
26.5	0
26.6	0
26.7	0
26.8	0
26.9	0
27	0
27.1	0
27.2	0
27.3	0
27.4	0
27.5	0
27.6	0
27.7	0
27.8	0
27.9	0
28	0
28.1	0
28.2	0
28.3	0
28.4	0
28.5	0
28.6	0
28.7	0
28.8	0
28.9	0
29	0
29.1	0
29.2	0
29.3	0
29.4	0
29.5	0
29.6	0
29.7	0
29.8	0
29.9	0
30	0
30.1	0
30.2	0
30.3	0
30.4	0
30.5	0
30.6	0
30.7	0
30.8	0
30.9	0
31	0
31.1	0
31.2	0
31.3	0
31.4	0
31.5	0
31.6	0
31.7	0
31.8	0
31.9	0
32	0
32.1	0
32.2	0
32.3	0
32.4	0
32.5	0
32.6	0
32.7	0
32.8	0
32.9	0
33	0
33.1	0
33.2	0
33.3	0
33.4	0
33.5	0
33.6	0
33.7	0
33.8	0
33.9	0
34	0
34.1	0
34.2	0
34.3	0
34.4	0
34.5	0
34.6	0
34.7	0
34.8	0
34.9	0
35	0
35.1	0
35.2	0
35.3	0
35.4	0
35.5	0
35.6	0
35.7	0
35.8	0
35.9	0
36	0
36.1	0
36.2	0
36.3	0
36.4	0
36.5	0
36.6	0
36.7	0
36.8	0
36.9	0
37	0
37.1	0
37.2	0
37.3	0
37.4	0
37.5	0
37.6	0
37.7	0
37.8	0
37.9	0
38	0
38.1	0
38.2	0
38.3	0
38.4	0
38.5	0
38.6	0
38.7	0
38.8	0
38.9	0
39	0
39.1	0
39.2	0
39.3	0
39.4	0
39.5	0
39.6	0
39.7	0
39.8	0
39.9	0
40	0
40.1	0
40.2	0
40.3	0
40.4	0
40.5	0
40.6	0
40.7	0
40.8	0
40.9	0
41	0
41.1	0
41.2	0
41.3	0
41.4	0
41.5	0
41.6	0
41.7	0
41.8	0
41.9	0
42	0
42.1	0
42.2	0
42.3	0
42.4	0
42.5	0
42.6	0
42.7	0
42.8	0
42.9	0
43	0
43.1	0
43.2	0
43.3	0
43.4	0
43.5	0
43.6	0
43.7	0
43.8	0
43.9	0
44	0
44.1	0
44.2	0
44.3	0
44.4	0
44.5	0
44.6	0
44.7	0
44.8	0
44.9	0
45	0
45.1	0
45.2	0
45.3	0
45.4	0
45.5	0
45.6	0
45.7	0
45.8	0
45.9	0
46	0
46.1	0
46.2	0
46.3	0
46.4	0
46.5	0
46.6	0
46.7	0
46.8	0
46.9	0
47	0
47.1	0
47.2	0
47.3	0
47.4	0
47.5	0
47.6	0
47.7	0
47.8	0
47.9	0
48	0
48.1	0
48.2	0
48.3	0
48.4	0
48.5	0
48.6	0
48.7	0
48.8	0
48.9	0
49	0
49.1	0
49.2	0
49.3	0
49.4	0
49.5	0
49.6	0
49.7	0
49.8	0
49.9	0
50	0
50.1	0
50.2	0
50.3	0
50.4	0
50.5	0
50.6	0
50.7	0
50.8	0
50.9	0
51	0
51.1	0
51.2	0
51.3	0
51.4	0
51.5	0
51.6	0
51.7	0
51.8	0
51.9	0
52	0
52.1	0
52.2	0
52.3	0
52.4	0
52.5	0
52.6	0
52.7	0
52.8	0
52.9	0
53	0
53.1	0
53.2	0
53.3	0
53.4	0
53.5	0
53.6	0
53.7	0
53.8	0
53.9	0
54	0
54.1	0
54.2	0
54.3	0
54.4	0
54.5	0
54.6	0
54.7	0
54.8	0
54.9	0
55	0
55.1	0
55.2	0
55.3	0
55.4	0
55.5	0
55.6	0
55.7	0
55.8	0
55.9	0
56	0
56.1	0
56.2	0
56.3	0
56.4	0
56.5	0
56.6	0
56.7	0
56.8	0
56.9	0
57	0
57.1	0
57.2	0
57.3	0
57.4	0
57.5	0
57.6	0
57.7	0
57.8	0
57.9	0
58	0
58.1	0
58.2	0
58.3	0
58.4	0
58.5	0
58.6	0
58.7	0
58.8	0
58.9	0
59	0
59.1	0
59.2	0
59.3	0
59.4	0
59.5	0
59.6	0
59.7	0
59.8	0
59.9	0
60	0
60.1	0
60.2	0
60.3	0
60.4	0
60.5	0
60.6	0
60.7	0
60.8	0
60.9	0
61	0
61.1	0
61.2	0
61.3	0
61.4	0
61.5	0
61.6	0
61.7	0
61.8	0
61.9	0
62	0
62.1	0
62.2	0
62.3	0
62.4	0
62.5	0
62.6	0
62.7	0
62.8	0
62.9	0
63	0
63.1	0
63.2	0
63.3	0
63.4	0
63.5	0
63.6	0
63.7	0
63.8	0
63.9	0
64	0
64.1	0
64.2	0
64.3	0
64.4	0
64.5	0
64.6	0
64.7	0
64.8	0
64.9	0
65	0
65.1	0
65.2	0
65.3	0
65.4	0
65.5	0
65.6	0
65.7	0
65.8	0
65.9	0
66	0
66.1	0
66.2	0
66.3	0
66.4	0
66.5	0
66.6	0
66.7	0
66.8	0
66.9	0
67	0
67.1	0
67.2	0
67.3	0
67.4	0
67.5	0
67.6	0
67.7	0
67.8	0
67.9	0
68	0
68.1	0
68.2	0
68.3	0
68.4	0
68.5	0
68.6	0
68.7	0
68.8	0
68.9	0
69	0
69.1	0
69.2	0
69.3	0
69.4	0
69.5	0
69.6	0
69.7	0
69.8	0
69.9	0
70	0
70.1	0
70.2	0
70.3	0
70.4	0
70.5	0
70.6	0
70.7	0
70.8	0
70.9	0
71	0
71.1	0
71.2	0
71.3	0
71.4	0
71.5	0
71.6	0
71.7	0
71.8	0
71.9	0
72	0
72.1	0
72.2	0
72.3	0
72.4	0
72.5	0
72.6	0
72.7	0
72.8	0
72.9	0
73	0
73.1	0
73.2	0
73.3	0
73.4	0
73.5	0
73.6	0
73.7	0
73.8	0
73.9	0
74	0
74.1	0
74.2	0
74.3	0
74.4	0
74.5	0
74.6	0
74.7	0
74.8	0
74.9	0
75	0
75.1	0
75.2	0
75.3	0
75.4	0
75.5	0
75.6	0
75.7	0
75.8	0
75.9	0
76	0
76.1	0
76.2	0
76.3	0
76.4	0
76.5	0
76.6	0
76.7	0
76.8	0
76.9	0
77	0
77.1	0
77.2	0
77.3	0
77.4	0
77.5	0
77.6	0
77.7	0
77.8	0
77.9	0
78	0
78.1	0
78.2	0
78.3	0
78.4	0
78.5	0
78.6	0
78.7	0
78.8	0
78.9	0
79	0
79.1	0
79.2	0
79.3	0
79.4	0
79.5	0
79.6	0
79.7	0
79.8	0
79.9	0
80	0
80.1	0
80.2	0
80.3	0
80.4	0
80.5	0
80.6	0
80.7	0
80.8	0
80.9	0
81	0
81.1	0
81.2	0
81.3	0
81.4	0
81.5	0
81.6	0
81.7	0
81.8	0
81.9	0
82	0
82.1	0
82.2	0
82.3	0
82.4	0
82.5	0
82.6	0
82.7	0
82.8	0
82.9	0
83	0
83.1	0
83.2	0
83.3	0
83.4	0
83.5	0
83.6	0
83.7	0
83.8	0
83.9	0
84	0
84.1	0
84.2	0
84.3	0
84.4	0
84.5	0
84.6	0
84.7	0
84.8	0
84.9	0
85	0
85.1	0
85.2	0
85.3	0
85.4	0
85.5	0
85.6	0
85.7	0
85.8	0
85.9	0
86	0
86.1	0
86.2	0
86.3	0
86.4	0
86.5	0
86.6	0
86.7	0
86.8	0
86.9	0
87	0
87.1	0
87.2	0
87.3	0
87.4	0
87.5	0
87.6	0
87.7	0
87.8	0
87.9	0
88	0
88.1	0
88.2	0
88.3	0
88.4	0
88.5	0
88.6	0
88.7	0
88.8	0
88.9	0
89	0
89.1	0
89.2	0
89.3	0
89.4	0
89.5	0
89.6	0
89.7	0
89.8	0
89.9	0
90	0
90.1	0
90.2	0
90.3	0
90.4	0
90.5	0
90.6	0
90.7	0
90.8	0
90.9	0
91	0
91.1	0
91.2	0
91.3	0
91.4	0
91.5	0
91.6	0
91.7	0
91.8	0
91.9	0
92	0
92.1	0
92.2	0
92.3	0
92.4	0
92.5	0
92.6	0
92.7	0
92.8	0
92.9	0
93	0
93.1	0
93.2	0
93.3	0
93.4	0
93.5	0
93.6	0
93.7	0
93.8	0
93.9	0
94	0
94.1	0
94.2	0
94.3	0
94.4	0
94.5	0
94.6	0
94.7	0
94.8	0
94.9	0
95	0
95.1	0
95.2	0
95.3	0
95.4	0
95.5	0
95.6	0
95.7	0
95.8	0
95.9	0
96	0
96.1	0
96.2	0
96.3	0
96.4	0
96.5	0
96.6	0
96.7	0
96.8	0
96.9	0
97	0
97.1	0
97.2	0
97.3	0
97.4	0
97.5	0
97.6	0
97.7	0
97.8	0
97.9	0
98	0
98.1	0
98.2	0
98.3	0
98.4	0
98.5	0
98.6	0
98.7	0
98.8	0
98.9	0
99	0
99.1	0
99.2	0
99.3	0
99.4	0
99.5	0
99.6	0
99.7	0
99.8	0
99.9	0
100	0
100.1	0
100.2	0
100.3	0
100.4	0
100.5	0
100.6	0
100.7	0
100.8	0
100.9	0
101	0
101.1	0
101.2	0
101.3	0
101.4	0
101.5	0
101.6	0
101.7	0
101.8	0
101.9	0
102	0.02
102.1	0.02
102.2	0.02
102.3	0.02
102.4	0.02
102.5	0.02
102.6	0.04
102.7	0.04
102.8	0.04
102.9	0.04
103	0.04
103.1	0.04
103.2	0.04
103.3	0.04
103.4	0.04
103.5	0.04
103.6	0.04
103.7	0.04
103.8	0.04
103.9	0.04
104	0.04
104.1	0.04
104.2	0.04
104.3	0.04
104.4	0.04
104.5	0.04
104.6	0.04
104.7	0.04
104.8	0.04
104.9	0.04
105	0.04
105.1	0.04
105.2	0.04
105.3	0.04
105.4	0.04
105.5	0.04
105.6	0.04
105.7	0.04
105.8	0.04
105.9	0.04
106	0.06
106.1	0.06
106.2	0.06
106.3	0.06
106.4	0.06
106.5	0.06
106.6	0.06
106.7	0.06
106.8	0.06
106.9	0.06
107	0.06
107.1	0.06
107.2	0.06
107.3	0.06
107.4	0.06
107.5	0.06
107.6	0.06
107.7	0.06
107.8	0.06
107.9	0.06
108	0.06
108.1	0.06
108.2	0.06
108.3	0.06
108.4	0.06
108.5	0.06
108.6	0.06
108.7	0.06
108.8	0.06
108.9	0.06
109	0.06
109.1	0.06
109.2	0.06
109.3	0.06
109.4	0.06
109.5	0.06
109.6	0.06
109.7	0.06
109.8	0.06
109.9	0.06
110	0.06
110.1	0.06
110.2	0.06
110.3	0.06
110.4	0.06
110.5	0.06
110.6	0.06
110.7	0.06
110.8	0.06
110.9	0.06
111	0.06
111.1	0.06
111.2	0.06
111.3	0.06
111.4	0.06
111.5	0.06
111.6	0.06
111.7	0.06
111.8	0.06
111.9	0.06
112	0.06
112.1	0.06
112.2	0.06
112.3	0.06
112.4	0.06
112.5	0.06
112.6	0.06
112.7	0.06
112.8	0.06
112.9	0.06
113	0.06
113.1	0.06
113.2	0.06
113.3	0.06
113.4	0.06
113.5	0.06
113.6	0.06
113.7	0.06
113.8	0.06
113.9	0.06
114	0.06
114.1	0.06
114.2	0.06
114.3	0.06
114.4	0.06
114.5	0.06
114.6	0.06
114.7	0.06
114.8	0.06
114.9	0.08
115	0.08
115.1	0.08
115.2	0.08
115.3	0.08
115.4	0.08
115.5	0.08
115.6	0.08
115.7	0.08
115.8	0.08
115.9	0.08
116	0.08
116.1	0.08
116.2	0.08
116.3	0.08
116.4	0.08
116.5	0.08
116.6	0.08
116.7	0.08
116.8	0.08
116.9	0.08
117	0.08
117.1	0.08
117.2	0.08
117.3	0.08
117.4	0.08
117.5	0.08
117.6	0.08
117.7	0.08
117.8	0.08
117.9	0.08
118	0.08
118.1	0.1
118.2	0.1
118.3	0.1
118.4	0.1
118.5	0.1
118.6	0.1
118.7	0.1
118.8	0.1
118.9	0.1
119	0.1
119.1	0.1
119.2	0.1
119.3	0.1
119.4	0.12
119.5	0.12
119.6	0.12
119.7	0.12
119.8	0.12
119.9	0.12
120	0.12
120.1	0.12
120.2	0.12
120.3	0.12
120.4	0.12
120.5	0.12
120.6	0.12
120.7	0.12
120.8	0.12
120.9	0.12
121	0.12
121.1	0.12
121.2	0.12
121.3	0.12
121.4	0.12
121.5	0.12
121.6	0.12
121.7	0.14
121.8	0.14
121.9	0.14
122	0.14
122.1	0.14
122.2	0.14
122.3	0.14
122.4	0.14
122.5	0.14
122.6	0.14
122.7	0.14
122.8	0.14
122.9	0.14
123	0.14
123.1	0.14
123.2	0.14
123.3	0.14
123.4	0.14
123.5	0.14
123.6	0.16
123.7	0.16
123.8	0.16
123.9	0.16
124	0.16
124.1	0.16
124.2	0.16
124.3	0.16
124.4	0.16
124.5	0.16
124.6	0.16
124.7	0.16
124.8	0.16
124.9	0.16
125	0.16
125.1	0.16
125.2	0.16
125.3	0.16
125.4	0.16
125.5	0.16
125.6	0.16
125.7	0.16
125.8	0.16
125.9	0.16
126	0.16
126.1	0.16
126.2	0.16
126.3	0.16
126.4	0.16
126.5	0.16
126.6	0.16
126.7	0.16
126.8	0.16
126.9	0.16
127	0.16
127.1	0.16
127.2	0.16
127.3	0.16
127.4	0.16
127.5	0.16
127.6	0.16
127.7	0.16
127.8	0.16
127.9	0.16
128	0.16
128.1	0.16
128.2	0.16
128.3	0.16
128.4	0.18
128.5	0.18
128.6	0.18
128.7	0.18
128.8	0.18
128.9	0.18
129	0.18
129.1	0.18
129.2	0.18
129.3	0.2
129.4	0.2
129.5	0.2
129.6	0.2
129.7	0.2
129.8	0.2
129.9	0.2
130	0.2
130.1	0.2
130.2	0.2
130.3	0.2
130.4	0.2
130.5	0.2
130.6	0.2
130.7	0.2
130.8	0.2
130.9	0.2
131	0.2
131.1	0.2
131.2	0.2
131.3	0.2
131.4	0.2
131.5	0.2
131.6	0.2
131.7	0.2
131.8	0.2
131.9	0.2
132	0.2
132.1	0.2
132.2	0.2
132.3	0.2
132.4	0.2
132.5	0.2
132.6	0.2
132.7	0.2
132.8	0.2
132.9	0.2
133	0.2
133.1	0.2
133.2	0.2
133.3	0.2
133.4	0.2
133.5	0.18
133.6	0.18
133.7	0.18
133.8	0.18
133.9	0.18
134	0.18
134.1	0.18
134.2	0.18
134.3	0.18
134.4	0.18
134.5	0.2
134.6	0.2
134.7	0.2
134.8	0.2
134.9	0.22
135	0.22
135.1	0.22
135.2	0.22
135.3	0.22
135.4	0.22
135.5	0.22
135.6	0.24
135.7	0.24
135.8	0.24
135.9	0.24
136	0.24
136.1	0.24
136.2	0.24
136.3	0.24
136.4	0.24
136.5	0.24
136.6	0.24
136.7	0.24
136.8	0.24
136.9	0.24
137	0.24
137.1	0.24
137.2	0.24
137.3	0.24
137.4	0.24
137.5	0.24
137.6	0.24
137.7	0.24
137.8	0.24
137.9	0.24
138	0.24
138.1	0.24
138.2	0.24
138.3	0.24
138.4	0.24
138.5	0.24
138.6	0.24
138.7	0.24
138.8	0.24
138.9	0.24
139	0.24
139.1	0.24
139.2	0.24
139.3	0.24
139.4	0.24
139.5	0.24
139.6	0.24
139.7	0.24
139.8	0.24
139.9	0.24
140	0.24
140.1	0.24
140.2	0.24
140.3	0.24
140.4	0.24
140.5	0.24
140.6	0.24
140.7	0.24
140.8	0.24
140.9	0.24
141	0.24
141.1	0.24
141.2	0.26
141.3	0.26
141.4	0.26
141.5	0.26
141.6	0.26
141.7	0.26
141.8	0.26
141.9	0.26
142	0.26
142.1	0.26
142.2	0.26
142.3	0.26
142.4	0.26
142.5	0.26
142.6	0.26
142.7	0.26
142.8	0.26
142.9	0.26
143	0.26
143.1	0.26
143.2	0.26
143.3	0.28
143.4	0.28
143.5	0.28
143.6	0.28
143.7	0.28
143.8	0.28
143.9	0.28
144	0.28
144.1	0.28
144.2	0.28
144.3	0.28
144.4	0.28
144.5	0.28
144.6	0.28
144.7	0.28
144.8	0.28
144.9	0.28
145	0.28
145.1	0.28
145.2	0.28
145.3	0.28
145.4	0.28
145.5	0.28
145.6	0.28
145.7	0.28
145.8	0.28
145.9	0.28
146	0.28
146.1	0.28
146.2	0.28
146.3	0.28
146.4	0.28
146.5	0.28
146.6	0.28
146.7	0.28
146.8	0.28
146.9	0.28
147	0.28
147.1	0.28
147.2	0.28
147.3	0.28
147.4	0.28
147.5	0.28
147.6	0.28
147.7	0.28
147.8	0.28
147.9	0.28
148	0.28
148.1	0.28
148.2	0.28
148.3	0.28
148.4	0.28
148.5	0.28
148.6	0.28
148.7	0.28
148.8	0.28
148.9	0.28
149	0.28
149.1	0.28
149.2	0.28
149.3	0.28
149.4	0.28
149.5	0.28
149.6	0.28
149.7	0.28
149.8	0.28
149.9	0.28
150	0.28
150.1	0.28
150.2	0.28
150.3	0.28
150.4	0.28
150.5	0.28
150.6	0.28
150.7	0.28
150.8	0.28
150.9	0.28
151	0.28
151.1	0.28
151.2	0.28
151.3	0.28
151.4	0.28
151.5	0.28
151.6	0.28
151.7	0.28
151.8	0.28
151.9	0.28
152	0.28
152.1	0.28
152.2	0.3
152.3	0.3
152.4	0.3
152.5	0.3
152.6	0.3
152.7	0.3
152.8	0.3
152.9	0.3
153	0.3
153.1	0.3
153.2	0.3
153.3	0.3
153.4	0.3
153.5	0.3
153.6	0.3
153.7	0.3
153.8	0.3
153.9	0.3
154	0.3
154.1	0.3
154.2	0.3
154.3	0.3
154.4	0.3
154.5	0.3
154.6	0.3
154.7	0.3
154.8	0.3
154.9	0.3
155	0.3
155.1	0.3
155.2	0.3
155.3	0.3
155.4	0.3
155.5	0.3
155.6	0.3
155.7	0.3
155.8	0.3
155.9	0.3
156	0.3
156.1	0.3
156.2	0.3
156.3	0.3
156.4	0.3
156.5	0.3
156.6	0.3
156.7	0.3
156.8	0.3
156.9	0.3
157	0.32
157.1	0.3
157.2	0.28
157.3	0.28
157.4	0.28
157.5	0.28
157.6	0.28
157.7	0.28
157.8	0.28
157.9	0.28
158	0.26
158.1	0.26
158.2	0.26
158.3	0.26
158.4	0.26
158.5	0.26
158.6	0.26
158.7	0.26
158.8	0.26
158.9	0.26
159	0.28
159.1	0.28
159.2	0.28
159.3	0.3
159.4	0.3
159.5	0.3
159.6	0.3
159.7	0.3
159.8	0.3
159.9	0.3
160	0.3
160.1	0.3
160.2	0.3
160.3	0.3
160.4	0.3
160.5	0.3
160.6	0.3
160.7	0.3
160.8	0.3
160.9	0.3
161	0.3
161.1	0.3
161.2	0.3
161.3	0.3
161.4	0.3
161.5	0.3
161.6	0.3
161.7	0.3
161.8	0.3
161.9	0.3
162	0.3
162.1	0.3
162.2	0.3
162.3	0.3
162.4	0.3
162.5	0.3
162.6	0.3
162.7	0.3
162.8	0.3
162.9	0.3
163	0.3
163.1	0.3
163.2	0.3
163.3	0.3
163.4	0.3
163.5	0.3
163.6	0.3
163.7	0.3
163.8	0.3
163.9	0.3
164	0.3
164.1	0.3
164.2	0.3
164.3	0.3
164.4	0.3
164.5	0.3
164.6	0.3
164.7	0.3
164.8	0.3
164.9	0.3
165	0.3
165.1	0.3
165.2	0.3
165.3	0.3
165.4	0.28
165.5	0.28
165.6	0.28
165.7	0.28
165.8	0.28
165.9	0.28
166	0.28
166.1	0.28
166.2	0.28
166.3	0.28
166.4	0.28
166.5	0.28
166.6	0.28
166.7	0.28
166.8	0.28
166.9	0.28
167	0.28
167.1	0.28
167.2	0.28
167.3	0.28
167.4	0.28
167.5	0.28
167.6	0.28
167.7	0.28
167.8	0.28
167.9	0.28
168	0.28
168.1	0.28
168.2	0.28
168.3	0.28
168.4	0.28
168.5	0.28
168.6	0.28
168.7	0.28
168.8	0.28
168.9	0.28
169	0.28
169.1	0.28
169.2	0.3
169.3	0.32
169.4	0.32
169.5	0.32
169.6	0.32
169.7	0.32
169.8	0.32
169.9	0.32
170	0.32
170.1	0.32
170.2	0.32
170.3	0.32
170.4	0.32
170.5	0.32
170.6	0.32
170.7	0.32
170.8	0.32
170.9	0.32
171	0.32
171.1	0.34
171.2	0.34
171.3	0.34
171.4	0.36
171.5	0.36
171.6	0.36
171.7	0.36
171.8	0.36
171.9	0.36
172	0.36
172.1	0.36
172.2	0.36
172.3	0.36
172.4	0.36
172.5	0.36
172.6	0.36
172.7	0.36
172.8	0.36
172.9	0.36
173	0.36
173.1	0.36
173.2	0.36
173.3	0.36
173.4	0.36
173.5	0.36
173.6	0.36
173.7	0.36
173.8	0.36
173.9	0.38
174	0.38
174.1	0.38
174.2	0.38
174.3	0.38
174.4	0.38
174.5	0.38
174.6	0.4
174.7	0.4
174.8	0.4
174.9	0.4
175	0.4
175.1	0.4
175.2	0.4
175.3	0.4
175.4	0.4
175.5	0.42
175.6	0.42
175.7	0.42
175.8	0.42
175.9	0.42
176	0.4
176.1	0.4
176.2	0.4
176.3	0.4
176.4	0.4
176.5	0.4
176.6	0.4
176.7	0.4
176.8	0.4
176.9	0.4
177	0.4
177.1	0.4
177.2	0.4
177.3	0.42
177.4	0.42
177.5	0.42
177.6	0.42
177.7	0.42
177.8	0.4
177.9	0.4
178	0.4
178.1	0.4
178.2	0.4
178.3	0.42
178.4	0.42
178.5	0.42
178.6	0.42
178.7	0.42
178.8	0.42
178.9	0.42
179	0.42
179.1	0.42
179.2	0.42
179.3	0.42
179.4	0.42
179.5	0.42
179.6	0.42
179.7	0.42
179.8	0.42
179.9	0.42
180	0.42
180.1	0.42
180.2	0.42
180.3	0.42
180.4	0.42
180.5	0.42
180.6	0.42
180.7	0.42
180.8	0.4
180.9	0.38
181	0.38
181.1	0.38
181.2	0.38
181.3	0.38
181.4	0.38
181.5	0.36
181.6	0.36
181.7	0.36
181.8	0.36
181.9	0.36
182	0.36
182.1	0.36
182.2	0.36
182.3	0.36
182.4	0.36
182.5	0.36
182.6	0.36
182.7	0.36
182.8	0.36
182.9	0.36
183	0.36
183.1	0.36
183.2	0.36
183.3	0.36
183.4	0.38
183.5	0.38
183.6	0.38
183.7	0.38
183.8	0.4
183.9	0.42
184	0.42
184.1	0.42
184.2	0.42
184.3	0.42
184.4	0.44
184.5	0.42
184.6	0.42
184.7	0.42
184.8	0.42
184.9	0.42
185	0.42
185.1	0.42
185.2	0.42
185.3	0.42
185.4	0.42
185.5	0.42
185.6	0.42
185.7	0.44
185.8	0.44
185.9	0.44
186	0.44
186.1	0.44
186.2	0.44
186.3	0.44
186.4	0.44
186.5	0.44
186.6	0.44
186.7	0.44
186.8	0.44
186.9	0.44
187	0.44
187.1	0.44
187.2	0.44
187.3	0.44
187.4	0.44
187.5	0.44
187.6	0.44
187.7	0.44
187.8	0.44
187.9	0.44
188	0.44
188.1	0.44
188.2	0.44
188.3	0.44
188.4	0.44
188.5	0.44
188.6	0.44
188.7	0.44
188.8	0.44
188.9	0.44
189	0.44
189.1	0.44
189.2	0.44
189.3	0.44
189.4	0.44
189.5	0.44
189.6	0.44
189.7	0.44
189.8	0.44
189.9	0.44
190	0.44
190.1	0.44
190.2	0.44
190.3	0.44
190.4	0.44
190.5	0.42
190.6	0.42
190.7	0.42
190.8	0.4
190.9	0.38
191	0.38
191.1	0.36
191.2	0.36
191.3	0.36
191.4	0.36
191.5	0.36
191.6	0.36
191.7	0.34
191.8	0.34
191.9	0.34
192	0.34
192.1	0.34
192.2	0.34
192.3	0.34
192.4	0.34
192.5	0.34
192.6	0.34
192.7	0.34
192.8	0.36
192.9	0.36
193	0.36
193.1	0.36
193.2	0.36
193.3	0.36
193.4	0.36
193.5	0.36
193.6	0.36
193.7	0.36
193.8	0.36
193.9	0.36
194	0.36
194.1	0.36
194.2	0.36
194.3	0.36
194.4	0.36
194.5	0.36
194.6	0.36
194.7	0.36
194.8	0.36
194.9	0.36
195	0.36
195.1	0.36
195.2	0.36
195.3	0.34
195.4	0.34
195.5	0.34
195.6	0.34
195.7	0.34
195.8	0.34
195.9	0.36
196	0.36
196.1	0.36
196.2	0.36
196.3	0.36
196.4	0.36
196.5	0.36
196.6	0.36
196.7	0.36
196.8	0.36
196.9	0.36
197	0.36
197.1	0.36
197.2	0.38
197.3	0.38
197.4	0.4
197.5	0.4
197.6	0.4
197.7	0.4
197.8	0.4
197.9	0.4
198	0.4
198.1	0.4
198.2	0.4
198.3	0.4
198.4	0.4
198.5	0.4
198.6	0.4
198.7	0.4
198.8	0.4
198.9	0.4
199	0.4
199.1	0.4
199.2	0.4
199.3	0.4
199.4	0.4
199.5	0.4
199.6	0.4
199.7	0.4
199.8	0.4
199.9	0.4
200	0.4
[truncated: 14,000 more rows]
