# Supplementary material for: Bayesian inference of kinetic schemes for ion channels by Kalman filtering
Source: eLife journal article supplement (doi:10.7554/elife.62714), 2022-05-04
Supplement: fig4-data9 [file 1_Sim_N_80_Fluor_MW.xlsx]

## Sheet: 0.5 M
0.1	0
0.2	0
0.3	0
0.4	0
0.5	0
0.6	0
0.7	0
0.8	0
0.9	0
1	0
1.1	0
1.2	0
1.3	0
1.4	0
1.5	0
1.6	0
1.7	0
1.8	0
1.9	0
2	0
2.1	0
2.2	0
2.3	0
2.4	0
2.5	0
2.6	0
2.7	0
2.8	0
2.9	0
3	0
3.1	0
3.2	0
3.3	0
3.4	0
3.5	0
3.6	0
3.7	0
3.8	0
3.9	0
4	0
4.1	0
4.2	0
4.3	0
4.4	0
4.5	0
4.6	0
4.7	0
4.8	0
4.9	0
5	0
5.1	0
5.2	0
5.3	0
5.4	0
5.5	0
5.6	0
5.7	0
5.8	0
5.9	0
6	0
6.1	0
6.2	0
6.3	0
6.4	0
6.5	0
6.6	0
6.7	0
6.8	0
6.9	0
7	0
7.1	0
7.2	0
7.3	0
7.4	0
7.5	0
7.6	0
7.7	0
7.8	0
7.9	0
8	0
8.1	0
8.2	0
8.3	0
8.4	0
8.5	0
8.6	0
8.7	0
8.8	0
8.9	0
9	0
9.1	0
9.2	0
9.3	0
9.4	0
9.5	0
9.6	0
9.7	0
9.8	0
9.9	0
10	0
10.1	0
10.2	0
10.3	0
10.4	0
10.5	0
10.6	0
10.7	0
10.8	0
10.9	0
11	0
11.1	0
11.2	0
11.3	0
11.4	0
11.5	0
11.6	0
11.7	0
11.8	0
11.9	0
12	0
12.1	0
12.2	0
12.3	0
12.4	0
12.5	0
12.6	0
12.7	0
12.8	0
12.9	0
13	0
13.1	0
13.2	0
13.3	0
13.4	0
13.5	0
13.6	0
13.7	0
13.8	0
13.9	0
14	0
14.1	0
14.2	0
14.3	0
14.4	0
14.5	0
14.6	0
14.7	0
14.8	0
14.9	0
15	0
15.1	0
15.2	0
15.3	0
15.4	0
15.5	0
15.6	0
15.7	0
15.8	0
15.9	0
16	0
16.1	0
16.2	0
16.3	0
16.4	0
16.5	0
16.6	0
16.7	0
16.8	0
16.9	0
17	0
17.1	0
17.2	0
17.3	0
17.4	0
17.5	0
17.6	0
17.7	0
17.8	0
17.9	0
18	0
18.1	0
18.2	0
18.3	0
18.4	0
18.5	0
18.6	0
18.7	0
18.8	0
18.9	0
19	0
19.1	0
19.2	0
19.3	0
19.4	0
19.5	0
19.6	0
19.7	0
19.8	0
19.9	0
20	0
20.1	0
20.2	0
20.3	0
20.4	0
20.5	0
20.6	0
20.7	0
20.8	0
20.9	0
21	0
21.1	0
21.2	0
21.3	0
21.4	0
21.5	0
21.6	0
21.7	0
21.8	0
21.9	0
22	0
22.1	0
22.2	0
22.3	0
22.4	0
22.5	0
22.6	0
22.7	0
22.8	0
22.9	0
23	0
23.1	0
23.2	0
23.3	0
23.4	0
23.5	0
23.6	0
23.7	0
23.8	0
23.9	0
24	0
24.1	0
24.2	0
24.3	0
24.4	0
24.5	0
24.6	0
24.7	0
24.8	0
24.9	0
25	0
25.1	0
25.2	0
25.3	0
25.4	0
25.5	0
25.6	0
25.7	0
25.8	0
25.9	0
26	0
26.1	0
26.2	0
26.3	0
26.4	0
26.5	0
26.6	0
26.7	0
26.8	0
26.9	0
27	0
27.1	0
27.2	0
27.3	0
27.4	0
27.5	0
27.6	0
27.7	0
27.8	0
27.9	0
28	0
28.1	0
28.2	0
28.3	0
28.4	0
28.5	0
28.6	0
28.7	0
28.8	0
28.9	0
29	0
29.1	0
29.2	0
29.3	0
29.4	0
29.5	0
29.6	0
29.7	0
29.8	0
29.9	0
30	0
30.1	0
30.2	0
30.3	0
30.4	0
30.5	0
30.6	0
30.7	0
30.8	0
30.9	0
31	0
31.1	0
31.2	0
31.3	0
31.4	0
31.5	0
31.6	0
31.7	0
31.8	0
31.9	0
32	0
32.1	0
32.2	0
32.3	0
32.4	0
32.5	0
32.6	0
32.7	0
32.8	0
32.9	0
33	0
33.1	0
33.2	0
33.3	0
33.4	0
33.5	0
33.6	0
33.7	0
33.8	0
33.9	0
34	0
34.1	0
34.2	0
34.3	0
34.4	0
34.5	0
34.6	0
34.7	0
34.8	0
34.9	0
35	0
35.1	0
35.2	0
35.3	0
35.4	0
35.5	0
35.6	0
35.7	0
35.8	0
35.9	0
36	0
36.1	0
36.2	0
36.3	0
36.4	0
36.5	0
36.6	0
36.7	0
36.8	0
36.9	0
37	0
37.1	0
37.2	0
37.3	0
37.4	0
37.5	0
37.6	0
37.7	0
37.8	0
37.9	0
38	0
38.1	0
38.2	0
38.3	0
38.4	0
38.5	0
38.6	0
38.7	0
38.8	0
38.9	0
39	0
39.1	0
39.2	0
39.3	0
39.4	0
39.5	0
39.6	0
39.7	0
39.8	0
39.9	0
40	0
40.1	0
40.2	0
40.3	0
40.4	0
40.5	0
40.6	0
40.7	0
40.8	0
40.9	0
41	0
41.1	0
41.2	0
41.3	0
41.4	0
41.5	0
41.6	0
41.7	0
41.8	0
41.9	0
42	0
42.1	0
42.2	0
42.3	0
42.4	0
42.5	0
42.6	0
42.7	0
42.8	0
42.9	0
43	0
43.1	0
43.2	0
43.3	0
43.4	0
43.5	0
43.6	0
43.7	0
43.8	0
43.9	0
44	0
44.1	0
44.2	0
44.3	0
44.4	0
44.5	0
44.6	0
44.7	0
44.8	0
44.9	0
45	0
45.1	0
45.2	0
45.3	0
45.4	0
45.5	0
45.6	0
45.7	0
45.8	0
45.9	0
46	0
46.1	0
46.2	0
46.3	0
46.4	0
46.5	0
46.6	0
46.7	0
46.8	0
46.9	0
47	0
47.1	0
47.2	0
47.3	0
47.4	0
47.5	0
47.6	0
47.7	0
47.8	0
47.9	0
48	0
48.1	0
48.2	0
48.3	0
48.4	0
48.5	0
48.6	0
48.7	0
48.8	0
48.9	0
49	0
49.1	0
49.2	0
49.3	0
49.4	0
49.5	0
49.6	0
49.7	0
49.8	0
49.9	0
50	0
50.1	0
50.2	0
50.3	0
50.4	0
50.5	0
50.6	0
50.7	0
50.8	0
50.9	0
51	0
51.1	0
51.2	0
51.3	0
51.4	0
51.5	0
51.6	0
51.7	0
51.8	0
51.9	0
52	0
52.1	0
52.2	0
52.3	0
52.4	0
52.5	0
52.6	0
52.7	0
52.8	0
52.9	0
53	0
53.1	0
53.2	0
53.3	0
53.4	0
53.5	0
53.6	0
53.7	0
53.8	0
53.9	0
54	0
54.1	0
54.2	0
54.3	0
54.4	0
54.5	0
54.6	0
54.7	0
54.8	0
54.9	0
55	0
55.1	0
55.2	0
55.3	0
55.4	0
55.5	0
55.6	0
55.7	0
55.8	0
55.9	0
56	0
56.1	0
56.2	0
56.3	0
56.4	0
56.5	0
56.6	0
56.7	0
56.8	0
56.9	0
57	0
57.1	0
57.2	0
57.3	0
57.4	0
57.5	0
57.6	0
57.7	0
57.8	0
57.9	0
58	0
58.1	0
58.2	0
58.3	0
58.4	0
58.5	0
58.6	0
58.7	0
58.8	0
58.9	0
59	0
59.1	0
59.2	0
59.3	0
59.4	0
59.5	0
59.6	0
59.7	0
59.8	0
59.9	0
60	0
60.1	0
60.2	0
60.3	0
60.4	0
60.5	0
60.6	0
60.7	0
60.8	0
60.9	0
61	0
61.1	0
61.2	0
61.3	0
61.4	0
61.5	0
61.6	0
61.7	0
61.8	0
61.9	0
62	0
62.1	0
62.2	0
62.3	0
62.4	0
62.5	0
62.6	0
62.7	0
62.8	0
62.9	0
63	0
63.1	0
63.2	0
63.3	0
63.4	0
63.5	0
63.6	0
63.7	0
63.8	0
63.9	0
64	0
64.1	0
64.2	0
64.3	0
64.4	0
64.5	0
64.6	0
64.7	0
64.8	0
64.9	0
65	0
65.1	0
65.2	0
65.3	0
65.4	0
65.5	0
65.6	0
65.7	0
65.8	0
65.9	0
66	0
66.1	0
66.2	0
66.3	0
66.4	0
66.5	0
66.6	0
66.7	0
66.8	0
66.9	0
67	0
67.1	0
67.2	0
67.3	0
67.4	0
67.5	0
67.6	0
67.7	0
67.8	0
67.9	0
68	0
68.1	0
68.2	0
68.3	0
68.4	0
68.5	0
68.6	0
68.7	0
68.8	0
68.9	0
69	0
69.1	0
69.2	0
69.3	0
69.4	0
69.5	0
69.6	0
69.7	0
69.8	0
69.9	0
70	0
70.1	0
70.2	0
70.3	0
70.4	0
70.5	0
70.6	0
70.7	0
70.8	0
70.9	0
71	0
71.1	0
71.2	0
71.3	0
71.4	0
71.5	0
71.6	0
71.7	0
71.8	0
71.9	0
72	0
72.1	0
72.2	0
72.3	0
72.4	0
72.5	0
72.6	0
72.7	0
72.8	0
72.9	0
73	0
73.1	0
73.2	0
73.3	0
73.4	0
73.5	0
73.6	0
73.7	0
73.8	0
73.9	0
74	0
74.1	0
74.2	0
74.3	0
74.4	0
74.5	0
74.6	0
74.7	0
74.8	0
74.9	0
75	0
75.1	0
75.2	0
75.3	0
75.4	0
75.5	0
75.6	0
75.7	0
75.8	0
75.9	0
76	0
76.1	0
76.2	0
76.3	0
76.4	0
76.5	0
76.6	0
76.7	0
76.8	0
76.9	0
77	0
77.1	0
77.2	0
77.3	0
77.4	0
77.5	0
77.6	0
77.7	0
77.8	0
77.9	0
78	0
78.1	0
78.2	0
78.3	0
78.4	0
78.5	0
78.6	0
78.7	0
78.8	0
78.9	0
79	0
79.1	0
79.2	0
79.3	0
79.4	0
79.5	0
79.6	0
79.7	0
79.8	0
79.9	0
80	0
80.1	0
80.2	0
80.3	0
80.4	0
80.5	0
80.6	0
80.7	0
80.8	0
80.9	0
81	0
81.1	0
81.2	0
81.3	0
81.4	0
81.5	0
81.6	0
81.7	0
81.8	0
81.9	0
82	0
82.1	0
82.2	0
82.3	0
82.4	0
82.5	0
82.6	0
82.7	0
82.8	0
82.9	0
83	0
83.1	0
83.2	0
83.3	0
83.4	0
83.5	0
83.6	0
83.7	0
83.8	0
83.9	0
84	0
84.1	0
84.2	0
84.3	0
84.4	0
84.5	0
84.6	0
84.7	0
84.8	0
84.9	0
85	0
85.1	0
85.2	0
85.3	0
85.4	0
85.5	0
85.6	0
85.7	0
85.8	0
85.9	0
86	0
86.1	0
86.2	0
86.3	0
86.4	0
86.5	0
86.6	0
86.7	0
86.8	0
86.9	0
87	0
87.1	0
87.2	0
87.3	0
87.4	0
87.5	0
87.6	0
87.7	0
87.8	0
87.9	0
88	0
88.1	0
88.2	0
88.3	0
88.4	0
88.5	0
88.6	0
88.7	0
88.8	0
88.9	0
89	0
89.1	0
89.2	0
89.3	0
89.4	0
89.5	0
89.6	0
89.7	0
89.8	0
89.9	0
90	0
90.1	0
90.2	0
90.3	0
90.4	0
90.5	0
90.6	0
90.7	0
90.8	0
90.9	0
91	0
91.1	0
91.2	0
91.3	0
91.4	0
91.5	0
91.6	0
91.7	0
91.8	0
91.9	0
92	0
92.1	0
92.2	0
92.3	0
92.4	0
92.5	0
92.6	0
92.7	0
92.8	0
92.9	0
93	0
93.1	0
93.2	0
93.3	0
93.4	0
93.5	0
93.6	0
93.7	0
93.8	0
93.9	0
94	0
94.1	0
94.2	0
94.3	0
94.4	0
94.5	0
94.6	0
94.7	0
94.8	0
94.9	0
95	0
95.1	0
95.2	0
95.3	0
95.4	0
95.5	0
95.6	0
95.7	0
95.8	0
95.9	0
96	0
96.1	0
96.2	0
96.3	0
96.4	0
96.5	0
96.6	0
96.7	0
96.8	0
96.9	0
97	0
97.1	0
97.2	0
97.3	0
97.4	0
97.5	0
97.6	0
97.7	0
97.8	0
97.9	0
98	0
98.1	0
98.2	0
98.3	0
98.4	0
98.5	0
98.6	0
98.7	0
98.8	0
98.9	0
99	0
99.1	0
99.2	0
99.3	0
99.4	0
99.5	0
99.6	0
99.7	0
99.8	0
99.9	0
100	0
100.1	0.03125
100.2	0.06875
100.3	0.08125
100.4	0.1
100.5	0.11875
100.6	0.14375
100.7	0.1875
100.8	0.2
100.9	0.2125
101	0.24375
101.1	0.25625
101.2	0.26875
101.3	0.2875
101.4	0.29375
101.5	0.3125
101.6	0.33125
101.7	0.3375
101.8	0.34375
101.9	0.3625
102	0.38125
102.1	0.40625
102.2	0.41875
102.3	0.43125
102.4	0.4375
102.5	0.45
102.6	0.46875
102.7	0.4625
102.8	0.475
102.9	0.475
103	0.46875
103.1	0.46875
103.2	0.475
103.3	0.49375
103.4	0.5125
103.5	0.53125
103.6	0.5375
103.7	0.53125
103.8	0.53125
103.9	0.51875
104	0.525
104.1	0.53125
104.2	0.525
104.3	0.5125
104.4	0.51875
104.5	0.525
104.6	0.53125
104.7	0.53125
104.8	0.525
104.9	0.5125
105	0.49375
105.1	0.5
105.2	0.50625
105.3	0.50625
105.4	0.5125
105.5	0.5
105.6	0.50625
105.7	0.51875
105.8	0.5125
105.9	0.51875
106	0.5375
106.1	0.55
106.2	0.54375
106.3	0.5375
106.4	0.55
106.5	0.55
106.6	0.55
106.7	0.55625
106.8	0.54375
106.9	0.5375
107	0.53125
107.1	0.53125
107.2	0.53125
107.3	0.53125
107.4	0.51875
107.5	0.525
107.6	0.525
107.7	0.53125
107.8	0.53125
107.9	0.525
108	0.525
108.1	0.54375
108.2	0.54375
108.3	0.55
108.4	0.5375
108.5	0.53125
108.6	0.53125
108.7	0.53125
108.8	0.525
108.9	0.51875
109	0.525
109.1	0.525
109.2	0.525
109.3	0.53125
109.4	0.55625
109.5	0.5625
109.6	0.55625
109.7	0.54375
109.8	0.54375
109.9	0.54375
110	0.54375
110.1	0.5375
110.2	0.53125
110.3	0.54375
110.4	0.53125
110.5	0.53125
110.6	0.53125
110.7	0.5375
110.8	0.55
110.9	0.54375
111	0.55
111.1	0.5625
111.2	0.56875
111.3	0.56875
111.4	0.5625
111.5	0.55625
111.6	0.56875
111.7	0.56875
111.8	0.5625
111.9	0.56875
112	0.5625
112.1	0.58125
112.2	0.575
112.3	0.5875
112.4	0.56875
112.5	0.6
112.6	0.60625
112.7	0.61875
112.8	0.6125
112.9	0.60625
113	0.6125
113.1	0.60625
113.2	0.58125
113.3	0.58125
113.4	0.575
113.5	0.59375
113.6	0.5875
113.7	0.58125
113.8	0.55625
113.9	0.55625
114	0.5625
114.1	0.58125
114.2	0.58125
114.3	0.5625
114.4	0.5625
114.5	0.5625
114.6	0.575
114.7	0.575
114.8	0.58125
114.9	0.5875
115	0.6
115.1	0.59375
115.2	0.60625
115.3	0.6125
115.4	0.6
115.5	0.60625
115.6	0.59375
115.7	0.59375
115.8	0.5875
115.9	0.6
116	0.5875
116.1	0.60625
116.2	0.60625
116.3	0.60625
116.4	0.6
116.5	0.6
116.6	0.6
116.7	0.60625
116.8	0.6125
116.9	0.60625
117	0.60625
117.1	0.60625
117.2	0.6
117.3	0.6
117.4	0.60625
117.5	0.6125
117.6	0.61875
117.7	0.625
117.8	0.63125
117.9	0.64375
118	0.63125
118.1	0.6375
118.2	0.63125
118.3	0.61875
118.4	0.6375
118.5	0.65
118.6	0.65
118.7	0.65
118.8	0.6375
118.9	0.63125
119	0.625
119.1	0.63125
119.2	0.63125
119.3	0.65
119.4	0.65625
119.5	0.65
119.6	0.65
119.7	0.65625
119.8	0.675
119.9	0.66875
120	0.65625
120.1	0.65625
120.2	0.6375
120.3	0.64375
120.4	0.6375
120.5	0.64375
120.6	0.63125
120.7	0.625
120.8	0.625
120.9	0.6375
121	0.65
121.1	0.64375
121.2	0.65
121.3	0.63125
121.4	0.64375
121.5	0.63125
121.6	0.63125
121.7	0.63125
121.8	0.625
121.9	0.64375
122	0.64375
122.1	0.63125
122.2	0.64375
122.3	0.65
122.4	0.65
122.5	0.65
122.6	0.64375
122.7	0.6375
122.8	0.6375
122.9	0.64375
123	0.64375
123.1	0.65625
123.2	0.65
123.3	0.65
123.4	0.65
123.5	0.65
123.6	0.65
123.7	0.65
123.8	0.6625
123.9	0.64375
124	0.65
124.1	0.65
124.2	0.6625
124.3	0.6625
124.4	0.675
124.5	0.66875
124.6	0.65625
124.7	0.6625
124.8	0.65625
124.9	0.65
125	0.65
125.1	0.64375
125.2	0.6375
125.3	0.625
125.4	0.63125
125.5	0.6375
125.6	0.64375
125.7	0.6375
125.8	0.625
125.9	0.61875
126	0.61875
126.1	0.625
126.2	0.6375
126.3	0.6375
126.4	0.63125
126.5	0.63125
126.6	0.61875
126.7	0.61875
126.8	0.6125
126.9	0.6125
127	0.6125
127.1	0.6125
127.2	0.6
127.3	0.6
127.4	0.58125
127.5	0.59375
127.6	0.59375
127.7	0.5875
127.8	0.6
127.9	0.59375
128	0.58125
128.1	0.575
128.2	0.59375
128.3	0.5875
128.4	0.59375
128.5	0.5875
128.6	0.6
128.7	0.6
128.8	0.6
128.9	0.60625
129	0.6125
129.1	0.6125
129.2	0.60625
129.3	0.6125
129.4	0.61875
129.5	0.6125
129.6	0.60625
129.7	0.61875
129.8	0.61875
129.9	0.63125
130	0.625
130.1	0.63125
130.2	0.63125
130.3	0.6375
130.4	0.63125
130.5	0.63125
130.6	0.6375
130.7	0.6375
130.8	0.65
130.9	0.65
131	0.65625
131.1	0.65625
131.2	0.64375
131.3	0.675
131.4	0.675
131.5	0.65625
131.6	0.6625
131.7	0.675
131.8	0.6625
131.9	0.6625
132	0.66875
132.1	0.68125
132.2	0.675
132.3	0.66875
132.4	0.65625
132.5	0.66875
132.6	0.66875
132.7	0.66875
132.8	0.6625
132.9	0.65625
133	0.6375
133.1	0.63125
133.2	0.6375
133.3	0.64375
133.4	0.6375
133.5	0.65
133.6	0.65
133.7	0.65
133.8	0.66875
133.9	0.675
134	0.675
134.1	0.6625
134.2	0.65625
134.3	0.65625
134.4	0.65
134.5	0.6375
134.6	0.6375
134.7	0.6375
134.8	0.63125
134.9	0.64375
135	0.64375
135.1	0.64375
135.2	0.6375
135.3	0.63125
135.4	0.65
135.5	0.64375
135.6	0.64375
135.7	0.64375
135.8	0.64375
135.9	0.65
136	0.65
136.1	0.6375
136.2	0.6375
136.3	0.61875
136.4	0.60625
136.5	0.61875
136.6	0.63125
136.7	0.625
136.8	0.63125
136.9	0.6375
137	0.63125
137.1	0.6375
137.2	0.64375
137.3	0.6375
137.4	0.64375
137.5	0.65
137.6	0.65625
137.7	0.65625
137.8	0.65
137.9	0.65625
138	0.65
138.1	0.64375
138.2	0.64375
138.3	0.65
138.4	0.64375
138.5	0.6375
138.6	0.61875
138.7	0.61875
138.8	0.6125
138.9	0.6125
139	0.6125
139.1	0.61875
139.2	0.63125
139.3	0.63125
139.4	0.6375
139.5	0.64375
139.6	0.64375
139.7	0.63125
139.8	0.63125
139.9	0.625
140	0.61875
140.1	0.625
140.2	0.61875
140.3	0.61875
140.4	0.6375
140.5	0.6375
140.6	0.6375
140.7	0.64375
140.8	0.6625
140.9	0.65625
141	0.65
141.1	0.65625
141.2	0.66875
141.3	0.65625
141.4	0.6625
141.5	0.65
141.6	0.65
141.7	0.65
141.8	0.6625
141.9	0.66875
142	0.675
142.1	0.68125
142.2	0.68125
142.3	0.69375
142.4	0.68125
142.5	0.675
142.6	0.6875
142.7	0.69375
142.8	0.6875
142.9	0.68125
143	0.6875
143.1	0.68125
143.2	0.675
143.3	0.66875
143.4	0.66875
143.5	0.68125
143.6	0.6625
143.7	0.66875
143.8	0.66875
143.9	0.6625
144	0.65625
144.1	0.64375
144.2	0.65625
144.3	0.66875
144.4	0.66875
144.5	0.65625
144.6	0.65625
144.7	0.64375
144.8	0.63125
144.9	0.61875
145	0.65
145.1	0.64375
145.2	0.63125
145.3	0.63125
145.4	0.6375
145.5	0.63125
145.6	0.6375
145.7	0.64375
145.8	0.65625
145.9	0.65
146	0.64375
146.1	0.6625
146.2	0.6625
146.3	0.66875
146.4	0.68125
146.5	0.6875
146.6	0.6875
146.7	0.6875
146.8	0.68125
146.9	0.66875
147	0.66875
147.1	0.68125
147.2	0.675
147.3	0.65625
147.4	0.65625
147.5	0.64375
147.6	0.65625
147.7	0.65625
147.8	0.66875
147.9	0.66875
148	0.66875
148.1	0.66875
148.2	0.6625
148.3	0.6625
148.4	0.6625
148.5	0.66875
148.6	0.66875
148.7	0.6625
148.8	0.66875
148.9	0.65625
149	0.6375
149.1	0.65
149.2	0.64375
149.3	0.64375
149.4	0.6375
149.5	0.63125
149.6	0.625
149.7	0.61875
149.8	0.61875
149.9	0.61875
150	0.61875
150.1	0.625
150.2	0.63125
150.3	0.63125
150.4	0.63125
150.5	0.65
150.6	0.65
150.7	0.66875
150.8	0.66875
150.9	0.65
151	0.65
151.1	0.65
151.2	0.6625
151.3	0.6625
151.4	0.65625
151.5	0.6625
151.6	0.66875
151.7	0.6625
151.8	0.675
151.9	0.6875
152	0.675
152.1	0.6875
152.2	0.6875
152.3	0.6875
152.4	0.66875
152.5	0.66875
152.6	0.68125
152.7	0.66875
152.8	0.66875
152.9	0.6625
153	0.6625
153.1	0.6625
153.2	0.65625
153.3	0.675
153.4	0.66875
153.5	0.675
153.6	0.6625
153.7	0.6625
153.8	0.65625
153.9	0.64375
154	0.65625
154.1	0.65625
154.2	0.65
154.3	0.66875
154.4	0.675
154.5	0.68125
154.6	0.69375
154.7	0.69375
154.8	0.69375
154.9	0.70625
155	0.7125
155.1	0.71875
155.2	0.73125
155.3	0.725
155.4	0.71875
155.5	0.70625
155.6	0.7125
155.7	0.7125
155.8	0.70625
155.9	0.70625
156	0.7
156.1	0.7
156.2	0.7125
156.3	0.7125
156.4	0.70625
156.5	0.7125
156.6	0.725
156.7	0.71875
156.8	0.71875
156.9	0.70625
157	0.7125
157.1	0.70625
157.2	0.7
157.3	0.68125
157.4	0.68125
157.5	0.68125
157.6	0.675
157.7	0.675
157.8	0.66875
157.9	0.66875
158	0.675
158.1	0.675
158.2	0.65625
158.3	0.65625
158.4	0.6375
158.5	0.61875
158.6	0.63125
158.7	0.6375
158.8	0.63125
158.9	0.6375
159	0.6375
159.1	0.6375
159.2	0.65
159.3	0.65
159.4	0.6625
159.5	0.65625
159.6	0.65625
159.7	0.65
159.8	0.65
159.9	0.65625
160	0.65625
160.1	0.6625
160.2	0.675
160.3	0.675
160.4	0.675
160.5	0.675
160.6	0.66875
160.7	0.66875
160.8	0.66875
160.9	0.66875
161	0.6625
161.1	0.64375
161.2	0.6375
161.3	0.64375
161.4	0.6375
161.5	0.63125
161.6	0.64375
161.7	0.64375
161.8	0.64375
161.9	0.6375
162	0.64375
162.1	0.64375
162.2	0.63125
162.3	0.6375
162.4	0.64375
162.5	0.64375
162.6	0.66875
162.7	0.6625
162.8	0.64375
162.9	0.64375
163	0.64375
163.1	0.65
163.2	0.64375
163.3	0.63125
163.4	0.63125
163.5	0.63125
163.6	0.6375
163.7	0.6375
163.8	0.6375
163.9	0.64375
164	0.65625
164.1	0.6625
164.2	0.6625
164.3	0.6625
164.4	0.66875
164.5	0.6875
164.6	0.68125
164.7	0.675
164.8	0.6625
164.9	0.66875
165	0.65625
165.1	0.64375
165.2	0.64375
165.3	0.64375
165.4	0.6625
165.5	0.66875
165.6	0.6625
165.7	0.66875
165.8	0.6625
165.9	0.65625
166	0.6625
166.1	0.66875
166.2	0.66875
166.3	0.6625
166.4	0.65625
166.5	0.65625
166.6	0.66875
166.7	0.65625
166.8	0.65625
166.9	0.65625
167	0.6625
167.1	0.675
167.2	0.68125
167.3	0.6875
167.4	0.69375
167.5	0.6875
167.6	0.68125
167.7	0.675
167.8	0.675
167.9	0.69375
168	0.7125
168.1	0.7125
168.2	0.725
168.3	0.725
168.4	0.71875
168.5	0.71875
168.6	0.71875
168.7	0.71875
168.8	0.71875
168.9	0.70625
169	0.7125
169.1	0.70625
169.2	0.69375
169.3	0.7
169.4	0.70625
169.5	0.7125
169.6	0.7125
169.7	0.7125
169.8	0.70625
169.9	0.7
170	0.7125
170.1	0.69375
170.2	0.69375
170.3	0.68125
170.4	0.675
170.5	0.675
170.6	0.68125
170.7	0.6875
170.8	0.675
170.9	0.675
171	0.675
171.1	0.6875
171.2	0.6875
171.3	0.70625
171.4	0.7125
171.5	0.7125
171.6	0.7125
171.7	0.7
171.8	0.6875
171.9	0.68125
172	0.68125
172.1	0.675
172.2	0.6875
172.3	0.70625
172.4	0.70625
172.5	0.70625
172.6	0.7125
172.7	0.70625
172.8	0.7
172.9	0.70625
173	0.71875
173.1	0.71875
173.2	0.71875
173.3	0.71875
173.4	0.71875
173.5	0.73125
173.6	0.7375
173.7	0.71875
173.8	0.7125
173.9	0.69375
174	0.675
174.1	0.66875
174.2	0.66875
174.3	0.66875
174.4	0.675
174.5	0.675
174.6	0.675
174.7	0.675
174.8	0.68125
174.9	0.6875
175	0.6875
175.1	0.68125
175.2	0.66875
175.3	0.675
175.4	0.68125
175.5	0.675
175.6	0.675
175.7	0.6875
175.8	0.69375
175.9	0.6875
176	0.69375
176.1	0.7
176.2	0.7
176.3	0.70625
176.4	0.7125
176.5	0.7125
176.6	0.725
176.7	0.725
176.8	0.725
176.9	0.71875
177	0.71875
177.1	0.70625
177.2	0.7125
177.3	0.7125
177.4	0.7125
177.5	0.73125
177.6	0.7375
177.7	0.74375
177.8	0.7625
177.9	0.7625
178	0.76875
178.1	0.76875
178.2	0.75625
178.3	0.76875
178.4	0.7625
178.5	0.75
178.6	0.7375
178.7	0.7375
178.8	0.74375
178.9	0.73125
179	0.73125
179.1	0.725
179.2	0.725
179.3	0.71875
179.4	0.73125
179.5	0.71875
179.6	0.70625
179.7	0.70625
179.8	0.7
179.9	0.70625
180	0.71875
180.1	0.725
180.2	0.73125
180.3	0.7375
180.4	0.75
180.5	0.74375
180.6	0.7375
180.7	0.7375
180.8	0.7375
180.9	0.7125
181	0.71875
181.1	0.725
181.2	0.725
181.3	0.725
181.4	0.73125
181.5	0.725
181.6	0.71875
181.7	0.71875
181.8	0.7125
181.9	0.70625
182	0.7
182.1	0.725
182.2	0.71875
182.3	0.71875
182.4	0.73125
182.5	0.7375
182.6	0.7375
182.7	0.7375
182.8	0.74375
182.9	0.7375
183	0.73125
183.1	0.725
183.2	0.725
183.3	0.725
183.4	0.725
183.5	0.73125
183.6	0.74375
183.7	0.74375
183.8	0.74375
183.9	0.75
184	0.75
184.1	0.7625
184.2	0.76875
184.3	0.76875
184.4	0.775
184.5	0.775
184.6	0.78125
184.7	0.78125
184.8	0.775
184.9	0.775
185	0.7875
185.1	0.7875
185.2	0.7875
185.3	0.78125
185.4	0.78125
185.5	0.76875
185.6	0.7625
185.7	0.75625
185.8	0.7625
185.9	0.7625
186	0.76875
186.1	0.76875
186.2	0.75
186.3	0.75
186.4	0.74375
186.5	0.73125
186.6	0.7375
186.7	0.73125
186.8	0.725
186.9	0.73125
187	0.725
187.1	0.7375
187.2	0.725
187.3	0.725
187.4	0.725
187.5	0.71875
187.6	0.73125
187.7	0.73125
187.8	0.7375
187.9	0.73125
188	0.7375
188.1	0.74375
188.2	0.74375
188.3	0.75625
188.4	0.75
188.5	0.75
188.6	0.75
188.7	0.75
188.8	0.75625
188.9	0.75625
189	0.75625
189.1	0.76875
189.2	0.75625
189.3	0.7625
189.4	0.76875
189.5	0.76875
189.6	0.775
189.7	0.775
189.8	0.76875
189.9	0.76875
190	0.7625
190.1	0.74375
190.2	0.7375
190.3	0.7375
190.4	0.7375
190.5	0.74375
190.6	0.75
190.7	0.75
190.8	0.7625
190.9	0.7625
191	0.7625
191.1	0.7625
191.2	0.7625
191.3	0.75625
191.4	0.7625
191.5	0.75625
191.6	0.7625
191.7	0.7625
191.8	0.7625
191.9	0.7625
192	0.76875
192.1	0.7625
192.2	0.75625
192.3	0.74375
192.4	0.74375
192.5	0.74375
192.6	0.74375
192.7	0.74375
192.8	0.7375
192.9	0.7375
193	0.725
193.1	0.71875
193.2	0.73125
193.3	0.73125
193.4	0.725
193.5	0.74375
193.6	0.75
193.7	0.7375
193.8	0.7375
193.9	0.73125
194	0.725
194.1	0.725
194.2	0.7125
194.3	0.7
194.4	0.7125
194.5	0.7125
194.6	0.7125
194.7	0.7125
194.8	0.7125
194.9	0.725
195	0.71875
195.1	0.725
195.2	0.73125
195.3	0.73125
195.4	0.7375
195.5	0.74375
195.6	0.76875
195.7	0.76875
195.8	0.7625
195.9	0.7625
196	0.7625
196.1	0.775
196.2	0.775
196.3	0.76875
196.4	0.76875
196.5	0.76875
196.6	0.7625
196.7	0.78125
196.8	0.78125
196.9	0.78125
197	0.7875
197.1	0.775
197.2	0.76875
197.3	0.7625
197.4	0.7625
197.5	0.7625
197.6	0.7625
197.7	0.75
197.8	0.75
197.9	0.75
198	0.75
198.1	0.75
198.2	0.75
198.3	0.74375
198.4	0.7375
198.5	0.74375
198.6	0.75
198.7	0.7375
198.8	0.7375
198.9	0.73125
199	0.73125
199.1	0.725
199.2	0.725
199.3	0.74375
199.4	0.74375
199.5	0.73125
199.6	0.71875
199.7	0.71875
199.8	0.70625
199.9	0.7
200	0.69375
[truncated: 14,000 more rows]
