# Supplementary material for: Bayesian inference of kinetic schemes for ion channels by Kalman filtering
Source: eLife journal article supplement (doi:10.7554/elife.62714), 2022-05-04
Supplement: fig4-data9 [file 1_Sim_N_80_Strom_MW.xlsx]

## Sheet: 0.5 M
0.1	0
0.2	0
0.3	0
0.4	0
0.5	0
0.6	0
0.7	0
0.8	0
0.9	0
1	0
1.1	0
1.2	0
1.3	0
1.4	0
1.5	0
1.6	0
1.7	0
1.8	0
1.9	0
2	0
2.1	0
2.2	0
2.3	0
2.4	0
2.5	0
2.6	0
2.7	0
2.8	0
2.9	0
3	0
3.1	0
3.2	0
3.3	0
3.4	0
3.5	0
3.6	0
3.7	0
3.8	0
3.9	0
4	0
4.1	0
4.2	0
4.3	0
4.4	0
4.5	0
4.6	0
4.7	0
4.8	0
4.9	0
5	0
5.1	0
5.2	0
5.3	0
5.4	0
5.5	0
5.6	0
5.7	0
5.8	0
5.9	0
6	0
6.1	0
6.2	0
6.3	0
6.4	0
6.5	0
6.6	0
6.7	0
6.8	0
6.9	0
7	0
7.1	0
7.2	0
7.3	0
7.4	0
7.5	0
7.6	0
7.7	0
7.8	0
7.9	0
8	0
8.1	0
8.2	0
8.3	0
8.4	0
8.5	0
8.6	0
8.7	0
8.8	0
8.9	0
9	0
9.1	0
9.2	0
9.3	0
9.4	0
9.5	0
9.6	0
9.7	0
9.8	0
9.9	0
10	0
10.1	0
10.2	0
10.3	0
10.4	0
10.5	0
10.6	0
10.7	0
10.8	0
10.9	0
11	0
11.1	0
11.2	0
11.3	0
11.4	0
11.5	0
11.6	0
11.7	0
11.8	0
11.9	0
12	0
12.1	0
12.2	0
12.3	0
12.4	0
12.5	0
12.6	0
12.7	0
12.8	0
12.9	0
13	0
13.1	0
13.2	0
13.3	0
13.4	0
13.5	0
13.6	0
13.7	0
13.8	0
13.9	0
14	0
14.1	0
14.2	0
14.3	0
14.4	0
14.5	0
14.6	0
14.7	0
14.8	0
14.9	0
15	0
15.1	0
15.2	0
15.3	0
15.4	0
15.5	0
15.6	0
15.7	0
15.8	0
15.9	0
16	0
16.1	0
16.2	0
16.3	0
16.4	0
16.5	0
16.6	0
16.7	0
16.8	0
16.9	0
17	0
17.1	0
17.2	0
17.3	0
17.4	0
17.5	0
17.6	0
17.7	0
17.8	0
17.9	0
18	0
18.1	0
18.2	0
18.3	0
18.4	0
18.5	0
18.6	0
18.7	0
18.8	0
18.9	0
19	0
19.1	0
19.2	0
19.3	0
19.4	0
19.5	0
19.6	0
19.7	0
19.8	0
19.9	0
20	0
20.1	0
20.2	0
20.3	0
20.4	0
20.5	0
20.6	0
20.7	0
20.8	0
20.9	0
21	0
21.1	0
21.2	0
21.3	0
21.4	0
21.5	0
21.6	0
21.7	0
21.8	0
21.9	0
22	0
22.1	0
22.2	0
22.3	0
22.4	0
22.5	0
22.6	0
22.7	0
22.8	0
22.9	0
23	0
23.1	0
23.2	0
23.3	0
23.4	0
23.5	0
23.6	0
23.7	0
23.8	0
23.9	0
24	0
24.1	0
24.2	0
24.3	0
24.4	0
24.5	0
24.6	0
24.7	0
24.8	0
24.9	0
25	0
25.1	0
25.2	0
25.3	0
25.4	0
25.5	0
25.6	0
25.7	0
25.8	0
25.9	0
26	0
26.1	0
26.2	0
26.3	0
26.4	0
26.5	0
26.6	0
26.7	0
26.8	0
26.9	0
27	0
27.1	0
27.2	0
27.3	0
27.4	0
27.5	0
27.6	0
27.7	0
27.8	0
27.9	0
28	0
28.1	0
28.2	0
28.3	0
28.4	0
28.5	0
28.6	0
28.7	0
28.8	0
28.9	0
29	0
29.1	0
29.2	0
29.3	0
29.4	0
29.5	0
29.6	0
29.7	0
29.8	0
29.9	0
30	0
30.1	0
30.2	0
30.3	0
30.4	0
30.5	0
30.6	0
30.7	0
30.8	0
30.9	0
31	0
31.1	0
31.2	0
31.3	0
31.4	0
31.5	0
31.6	0
31.7	0
31.8	0
31.9	0
32	0
32.1	0
32.2	0
32.3	0
32.4	0
32.5	0
32.6	0
32.7	0
32.8	0
32.9	0
33	0
33.1	0
33.2	0
33.3	0
33.4	0
33.5	0
33.6	0
33.7	0
33.8	0
33.9	0
34	0
34.1	0
34.2	0
34.3	0
34.4	0
34.5	0
34.6	0
34.7	0
34.8	0
34.9	0
35	0
35.1	0
35.2	0
35.3	0
35.4	0
35.5	0
35.6	0
35.7	0
35.8	0
35.9	0
36	0
36.1	0
36.2	0
36.3	0
36.4	0
36.5	0
36.6	0
36.7	0
36.8	0
36.9	0
37	0
37.1	0
37.2	0
37.3	0
37.4	0
37.5	0
37.6	0
37.7	0
37.8	0
37.9	0
38	0
38.1	0
38.2	0
38.3	0
38.4	0
38.5	0
38.6	0
38.7	0
38.8	0
38.9	0
39	0
39.1	0
39.2	0
39.3	0
39.4	0
39.5	0
39.6	0
39.7	0
39.8	0
39.9	0
40	0
40.1	0
40.2	0
40.3	0
40.4	0
40.5	0
40.6	0
40.7	0
40.8	0
40.9	0
41	0
41.1	0
41.2	0
41.3	0
41.4	0
41.5	0
41.6	0
41.7	0
41.8	0
41.9	0
42	0
42.1	0
42.2	0
42.3	0
42.4	0
42.5	0
42.6	0
42.7	0
42.8	0
42.9	0
43	0
43.1	0
43.2	0
43.3	0
43.4	0
43.5	0
43.6	0
43.7	0
43.8	0
43.9	0
44	0
44.1	0
44.2	0
44.3	0
44.4	0
44.5	0
44.6	0
44.7	0
44.8	0
44.9	0
45	0
45.1	0
45.2	0
45.3	0
45.4	0
45.5	0
45.6	0
45.7	0
45.8	0
45.9	0
46	0
46.1	0
46.2	0
46.3	0
46.4	0
46.5	0
46.6	0
46.7	0
46.8	0
46.9	0
47	0
47.1	0
47.2	0
47.3	0
47.4	0
47.5	0
47.6	0
47.7	0
47.8	0
47.9	0
48	0
48.1	0
48.2	0
48.3	0
48.4	0
48.5	0
48.6	0
48.7	0
48.8	0
48.9	0
49	0
49.1	0
49.2	0
49.3	0
49.4	0
49.5	0
49.6	0
49.7	0
49.8	0
49.9	0
50	0
50.1	0
50.2	0
50.3	0
50.4	0
50.5	0
50.6	0
50.7	0
50.8	0
50.9	0
51	0
51.1	0
51.2	0
51.3	0
51.4	0
51.5	0
51.6	0
51.7	0
51.8	0
51.9	0
52	0
52.1	0
52.2	0
52.3	0
52.4	0
52.5	0
52.6	0
52.7	0
52.8	0
52.9	0
53	0
53.1	0
53.2	0
53.3	0
53.4	0
53.5	0
53.6	0
53.7	0
53.8	0
53.9	0
54	0
54.1	0
54.2	0
54.3	0
54.4	0
54.5	0
54.6	0
54.7	0
54.8	0
54.9	0
55	0
55.1	0
55.2	0
55.3	0
55.4	0
55.5	0
55.6	0
55.7	0
55.8	0
55.9	0
56	0
56.1	0
56.2	0
56.3	0
56.4	0
56.5	0
56.6	0
56.7	0
56.8	0
56.9	0
57	0
57.1	0
57.2	0
57.3	0
57.4	0
57.5	0
57.6	0
57.7	0
57.8	0
57.9	0
58	0
58.1	0
58.2	0
58.3	0
58.4	0
58.5	0
58.6	0
58.7	0
58.8	0
58.9	0
59	0
59.1	0
59.2	0
59.3	0
59.4	0
59.5	0
59.6	0
59.7	0
59.8	0
59.9	0
60	0
60.1	0
60.2	0
60.3	0
60.4	0
60.5	0
60.6	0
60.7	0
60.8	0
60.9	0
61	0
61.1	0
61.2	0
61.3	0
61.4	0
61.5	0
61.6	0
61.7	0
61.8	0
61.9	0
62	0
62.1	0
62.2	0
62.3	0
62.4	0
62.5	0
62.6	0
62.7	0
62.8	0
62.9	0
63	0
63.1	0
63.2	0
63.3	0
63.4	0
63.5	0
63.6	0
63.7	0
63.8	0
63.9	0
64	0
64.1	0
64.2	0
64.3	0
64.4	0
64.5	0
64.6	0
64.7	0
64.8	0
64.9	0
65	0
65.1	0
65.2	0
65.3	0
65.4	0
65.5	0
65.6	0
65.7	0
65.8	0
65.9	0
66	0
66.1	0
66.2	0
66.3	0
66.4	0
66.5	0
66.6	0
66.7	0
66.8	0
66.9	0
67	0
67.1	0
67.2	0
67.3	0
67.4	0
67.5	0
67.6	0
67.7	0
67.8	0
67.9	0
68	0
68.1	0
68.2	0
68.3	0
68.4	0
68.5	0
68.6	0
68.7	0
68.8	0
68.9	0
69	0
69.1	0
69.2	0
69.3	0
69.4	0
69.5	0
69.6	0
69.7	0
69.8	0
69.9	0
70	0
70.1	0
70.2	0
70.3	0
70.4	0
70.5	0
70.6	0
70.7	0
70.8	0
70.9	0
71	0
71.1	0
71.2	0
71.3	0
71.4	0
71.5	0
71.6	0
71.7	0
71.8	0
71.9	0
72	0
72.1	0
72.2	0
72.3	0
72.4	0
72.5	0
72.6	0
72.7	0
72.8	0
72.9	0
73	0
73.1	0
73.2	0
73.3	0
73.4	0
73.5	0
73.6	0
73.7	0
73.8	0
73.9	0
74	0
74.1	0
74.2	0
74.3	0
74.4	0
74.5	0
74.6	0
74.7	0
74.8	0
74.9	0
75	0
75.1	0
75.2	0
75.3	0
75.4	0
75.5	0
75.6	0
75.7	0
75.8	0
75.9	0
76	0
76.1	0
76.2	0
76.3	0
76.4	0
76.5	0
76.6	0
76.7	0
76.8	0
76.9	0
77	0
77.1	0
77.2	0
77.3	0
77.4	0
77.5	0
77.6	0
77.7	0
77.8	0
77.9	0
78	0
78.1	0
78.2	0
78.3	0
78.4	0
78.5	0
78.6	0
78.7	0
78.8	0
78.9	0
79	0
79.1	0
79.2	0
79.3	0
79.4	0
79.5	0
79.6	0
79.7	0
79.8	0
79.9	0
80	0
80.1	0
80.2	0
80.3	0
80.4	0
80.5	0
80.6	0
80.7	0
80.8	0
80.9	0
81	0
81.1	0
81.2	0
81.3	0
81.4	0
81.5	0
81.6	0
81.7	0
81.8	0
81.9	0
82	0
82.1	0
82.2	0
82.3	0
82.4	0
82.5	0
82.6	0
82.7	0
82.8	0
82.9	0
83	0
83.1	0
83.2	0
83.3	0
83.4	0
83.5	0
83.6	0
83.7	0
83.8	0
83.9	0
84	0
84.1	0
84.2	0
84.3	0
84.4	0
84.5	0
84.6	0
84.7	0
84.8	0
84.9	0
85	0
85.1	0
85.2	0
85.3	0
85.4	0
85.5	0
85.6	0
85.7	0
85.8	0
85.9	0
86	0
86.1	0
86.2	0
86.3	0
86.4	0
86.5	0
86.6	0
86.7	0
86.8	0
86.9	0
87	0
87.1	0
87.2	0
87.3	0
87.4	0
87.5	0
87.6	0
87.7	0
87.8	0
87.9	0
88	0
88.1	0
88.2	0
88.3	0
88.4	0
88.5	0
88.6	0
88.7	0
88.8	0
88.9	0
89	0
89.1	0
89.2	0
89.3	0
89.4	0
89.5	0
89.6	0
89.7	0
89.8	0
89.9	0
90	0
90.1	0
90.2	0
90.3	0
90.4	0
90.5	0
90.6	0
90.7	0
90.8	0
90.9	0
91	0
91.1	0
91.2	0
91.3	0
91.4	0
91.5	0
91.6	0
91.7	0
91.8	0
91.9	0
92	0
92.1	0
92.2	0
92.3	0
92.4	0
92.5	0
92.6	0
92.7	0
92.8	0
92.9	0
93	0
93.1	0
93.2	0
93.3	0
93.4	0
93.5	0
93.6	0
93.7	0
93.8	0
93.9	0
94	0
94.1	0
94.2	0
94.3	0
94.4	0
94.5	0
94.6	0
94.7	0
94.8	0
94.9	0
95	0
95.1	0
95.2	0
95.3	0
95.4	0
95.5	0
95.6	0
95.7	0
95.8	0
95.9	0
96	0
96.1	0
96.2	0
96.3	0
96.4	0
96.5	0
96.6	0
96.7	0
96.8	0
96.9	0
97	0
97.1	0
97.2	0
97.3	0
97.4	0
97.5	0
97.6	0
97.7	0
97.8	0
97.9	0
98	0
98.1	0
98.2	0
98.3	0
98.4	0
98.5	0
98.6	0
98.7	0
98.8	0
98.9	0
99	0
99.1	0
99.2	0
99.3	0
99.4	0
99.5	0
99.6	0
99.7	0
99.8	0
99.9	0
100	0
100.1	0
100.2	0
100.3	0
100.4	0
100.5	0
100.6	0
100.7	0
100.8	0
100.9	0
101	0
101.1	0
101.2	0
101.3	0
101.4	0
101.5	0
101.6	0
101.7	0
101.8	0
101.9	0
102	0.0125
102.1	0.0125
102.2	0.0125
102.3	0.0125
102.4	0.0125
102.5	0.0125
102.6	0.0125
102.7	0.0125
102.8	0.0125
102.9	0.0125
103	0.0125
103.1	0.025
103.2	0.025
103.3	0.025
103.4	0.025
103.5	0.025
103.6	0.025
103.7	0.025
103.8	0.0375
103.9	0.0375
104	0.0375
104.1	0.0375
104.2	0.0375
104.3	0.0375
104.4	0.0375
104.5	0.0375
104.6	0.0375
104.7	0.0375
104.8	0.0375
104.9	0.0375
105	0.0375
105.1	0.0375
105.2	0.0375
105.3	0.0375
105.4	0.0375
105.5	0.0375
105.6	0.0375
105.7	0.0375
105.8	0.0375
105.9	0.0375
106	0.05
106.1	0.05
106.2	0.05
106.3	0.05
106.4	0.05
106.5	0.05
106.6	0.05
106.7	0.05
106.8	0.05
106.9	0.05
107	0.05
107.1	0.05
107.2	0.05
107.3	0.05
107.4	0.05
107.5	0.05
107.6	0.05
107.7	0.05
107.8	0.05
107.9	0.05
108	0.05
108.1	0.05
108.2	0.0625
108.3	0.075
108.4	0.075
108.5	0.075
108.6	0.075
108.7	0.075
108.8	0.075
108.9	0.075
109	0.075
109.1	0.075
109.2	0.075
109.3	0.075
109.4	0.075
109.5	0.075
109.6	0.075
109.7	0.075
109.8	0.075
109.9	0.075
110	0.075
110.1	0.075
110.2	0.075
110.3	0.075
110.4	0.075
110.5	0.075
110.6	0.075
110.7	0.075
110.8	0.075
110.9	0.075
111	0.075
111.1	0.075
111.2	0.075
111.3	0.075
111.4	0.075
111.5	0.075
111.6	0.075
111.7	0.075
111.8	0.075
111.9	0.0875
112	0.0875
112.1	0.0875
112.2	0.0875
112.3	0.0875
112.4	0.1
112.5	0.1
112.6	0.1
112.7	0.1
112.8	0.1
112.9	0.1125
113	0.1125
113.1	0.1125
113.2	0.1125
113.3	0.1125
113.4	0.1125
113.5	0.1125
113.6	0.1125
113.7	0.1125
113.8	0.1125
113.9	0.1125
114	0.1125
114.1	0.1125
114.2	0.1125
114.3	0.1125
114.4	0.1125
114.5	0.1125
114.6	0.1125
114.7	0.1125
114.8	0.1125
114.9	0.1125
115	0.1125
115.1	0.125
115.2	0.125
115.3	0.125
115.4	0.125
115.5	0.125
115.6	0.125
115.7	0.125
115.8	0.125
115.9	0.125
116	0.125
116.1	0.125
116.2	0.1375
116.3	0.1375
116.4	0.1375
116.5	0.1375
116.6	0.1375
116.7	0.1375
116.8	0.1375
116.9	0.1375
117	0.1375
117.1	0.1375
117.2	0.1375
117.3	0.1375
117.4	0.1375
117.5	0.1375
117.6	0.1375
117.7	0.1375
117.8	0.1375
117.9	0.1375
118	0.1375
118.1	0.1625
118.2	0.175
118.3	0.175
118.4	0.175
118.5	0.175
118.6	0.175
118.7	0.175
118.8	0.175
118.9	0.175
119	0.175
119.1	0.175
119.2	0.175
119.3	0.175
119.4	0.1875
119.5	0.1875
119.6	0.1875
119.7	0.1875
119.8	0.1875
119.9	0.1875
120	0.1875
120.1	0.1875
120.2	0.1875
120.3	0.1875
120.4	0.1875
120.5	0.1875
120.6	0.1875
120.7	0.1875
120.8	0.2
120.9	0.2
121	0.2
121.1	0.2
121.2	0.2
121.3	0.2
121.4	0.2
121.5	0.2
121.6	0.2
121.7	0.2125
121.8	0.2125
121.9	0.2125
122	0.2125
122.1	0.2125
122.2	0.2
122.3	0.2
122.4	0.2
122.5	0.2
122.6	0.2
122.7	0.2
122.8	0.2
122.9	0.2
123	0.2
123.1	0.2
123.2	0.2
123.3	0.2
123.4	0.2
123.5	0.2
123.6	0.2125
123.7	0.2125
123.8	0.2125
123.9	0.2125
124	0.2125
124.1	0.2125
124.2	0.2125
124.3	0.2125
124.4	0.2125
124.5	0.2125
124.6	0.2125
124.7	0.2125
124.8	0.2125
124.9	0.2125
125	0.2125
125.1	0.2125
125.2	0.2125
125.3	0.2125
125.4	0.2125
125.5	0.2125
125.6	0.2125
125.7	0.2125
125.8	0.2125
125.9	0.2125
126	0.2125
126.1	0.2125
126.2	0.2125
126.3	0.2125
126.4	0.2125
126.5	0.2125
126.6	0.2125
126.7	0.2
126.8	0.2
126.9	0.2
127	0.2
127.1	0.2
127.2	0.2
127.3	0.2
127.4	0.2
127.5	0.1875
127.6	0.1875
127.7	0.1875
127.8	0.1875
127.9	0.1875
128	0.1875
128.1	0.2
128.2	0.2
128.3	0.1875
128.4	0.2
128.5	0.2
128.6	0.2
128.7	0.1875
128.8	0.1875
128.9	0.1875
129	0.1875
129.1	0.1875
129.2	0.2
129.3	0.2
129.4	0.2
129.5	0.2
129.6	0.2
129.7	0.2
129.8	0.2
129.9	0.2
130	0.2
130.1	0.2
130.2	0.2
130.3	0.2
130.4	0.2
130.5	0.2
130.6	0.2
130.7	0.2
130.8	0.2
130.9	0.2
131	0.2
131.1	0.2
131.2	0.2
131.3	0.2
131.4	0.2
131.5	0.2
131.6	0.1875
131.7	0.1875
131.8	0.1875
131.9	0.1875
132	0.1875
132.1	0.1875
132.2	0.1875
132.3	0.1875
132.4	0.1875
132.5	0.1875
132.6	0.1875
132.7	0.175
132.8	0.175
132.9	0.175
133	0.175
133.1	0.175
133.2	0.175
133.3	0.175
133.4	0.175
133.5	0.1625
133.6	0.1625
133.7	0.1625
133.8	0.1625
133.9	0.1625
134	0.1625
134.1	0.1625
134.2	0.1625
134.3	0.1625
134.4	0.1625
134.5	0.175
134.6	0.175
134.7	0.175
134.8	0.175
134.9	0.175
135	0.175
135.1	0.175
135.2	0.1875
135.3	0.1875
135.4	0.1875
135.5	0.1875
135.6	0.2
135.7	0.2
135.8	0.2
135.9	0.2
136	0.2
136.1	0.2125
136.2	0.2125
136.3	0.2125
136.4	0.2125
136.5	0.2125
136.6	0.2125
136.7	0.2125
136.8	0.2125
136.9	0.2125
137	0.2125
137.1	0.2125
137.2	0.2125
137.3	0.2125
137.4	0.2125
137.5	0.2125
137.6	0.2125
137.7	0.2125
137.8	0.2125
137.9	0.2125
138	0.2125
138.1	0.2125
138.2	0.2125
138.3	0.2125
138.4	0.2125
138.5	0.2125
138.6	0.2125
138.7	0.2125
138.8	0.2125
138.9	0.2125
139	0.2125
139.1	0.2125
139.2	0.2125
139.3	0.2125
139.4	0.2125
139.5	0.2125
139.6	0.2125
139.7	0.2125
139.8	0.2125
139.9	0.2125
140	0.2125
140.1	0.2125
140.2	0.2125
140.3	0.2125
140.4	0.2125
140.5	0.2125
140.6	0.2125
140.7	0.2125
140.8	0.2125
140.9	0.225
141	0.225
141.1	0.225
141.2	0.225
141.3	0.225
141.4	0.225
141.5	0.225
141.6	0.225
141.7	0.225
141.8	0.225
141.9	0.225
142	0.225
142.1	0.225
142.2	0.225
142.3	0.225
142.4	0.225
142.5	0.225
142.6	0.225
142.7	0.225
142.8	0.225
142.9	0.225
143	0.225
143.1	0.225
143.2	0.225
143.3	0.225
143.4	0.225
143.5	0.225
143.6	0.225
143.7	0.225
143.8	0.225
143.9	0.225
144	0.225
144.1	0.225
144.2	0.225
144.3	0.225
144.4	0.2375
144.5	0.2375
144.6	0.2375
144.7	0.25
144.8	0.25
144.9	0.25
145	0.2625
145.1	0.2625
145.2	0.2625
145.3	0.2625
145.4	0.2625
145.5	0.2625
145.6	0.2625
145.7	0.2625
145.8	0.25
145.9	0.25
146	0.25
146.1	0.2375
146.2	0.2375
146.3	0.2375
146.4	0.2375
146.5	0.2375
146.6	0.2375
146.7	0.2375
146.8	0.2375
146.9	0.2375
147	0.2375
147.1	0.2375
147.2	0.2375
147.3	0.2625
147.4	0.2625
147.5	0.2625
147.6	0.2625
147.7	0.2625
147.8	0.2625
147.9	0.2625
148	0.2625
148.1	0.2625
148.2	0.2625
148.3	0.2625
148.4	0.2625
148.5	0.275
148.6	0.275
148.7	0.275
148.8	0.275
148.9	0.275
149	0.275
149.1	0.275
149.2	0.275
149.3	0.275
149.4	0.275
149.5	0.275
149.6	0.275
149.7	0.275
149.8	0.275
149.9	0.275
150	0.275
150.1	0.275
150.2	0.275
150.3	0.275
150.4	0.275
150.5	0.275
150.6	0.2875
150.7	0.2875
150.8	0.2875
150.9	0.2875
151	0.2875
151.1	0.2875
151.2	0.2875
151.3	0.2875
151.4	0.2875
151.5	0.2875
151.6	0.2875
151.7	0.2875
151.8	0.2875
151.9	0.2875
152	0.2875
152.1	0.2875
152.2	0.2875
152.3	0.2875
152.4	0.2875
152.5	0.2875
152.6	0.2875
152.7	0.2875
152.8	0.2875
152.9	0.2875
153	0.3
153.1	0.3
153.2	0.3
153.3	0.3
153.4	0.3
153.5	0.3
153.6	0.2875
153.7	0.2875
153.8	0.2875
153.9	0.2875
154	0.2875
154.1	0.2875
154.2	0.2875
154.3	0.2875
154.4	0.2875
154.5	0.2875
154.6	0.2875
154.7	0.2875
154.8	0.2875
154.9	0.2875
155	0.2875
155.1	0.2875
155.2	0.2875
155.3	0.2875
155.4	0.2875
155.5	0.2875
155.6	0.2875
155.7	0.3
155.8	0.2875
155.9	0.2875
156	0.2875
156.1	0.2875
156.2	0.2875
156.3	0.2875
156.4	0.2875
156.5	0.2875
156.6	0.2875
156.7	0.2875
156.8	0.2875
156.9	0.2875
157	0.2875
157.1	0.275
157.2	0.2625
157.3	0.2625
157.4	0.2625
157.5	0.2625
157.6	0.2625
157.7	0.2625
157.8	0.2625
157.9	0.2625
158	0.25
158.1	0.25
158.2	0.25
158.3	0.25
158.4	0.25
158.5	0.25
158.6	0.25
158.7	0.25
158.8	0.25
158.9	0.25
159	0.2625
159.1	0.2625
159.2	0.2625
159.3	0.275
159.4	0.2875
159.5	0.2875
159.6	0.2875
159.7	0.2875
159.8	0.2875
159.9	0.2875
160	0.2875
160.1	0.2875
160.2	0.2875
160.3	0.2875
160.4	0.2875
160.5	0.2875
160.6	0.2875
160.7	0.2875
160.8	0.2875
160.9	0.2875
161	0.2875
161.1	0.2875
161.2	0.2875
161.3	0.2875
161.4	0.2875
161.5	0.2875
161.6	0.2875
161.7	0.2875
161.8	0.2875
161.9	0.2875
162	0.2875
162.1	0.2875
162.2	0.2875
162.3	0.2875
162.4	0.2875
162.5	0.2875
162.6	0.2875
162.7	0.2875
162.8	0.2875
162.9	0.2875
163	0.2875
163.1	0.2875
163.2	0.2875
163.3	0.2875
163.4	0.2875
163.5	0.2875
163.6	0.2875
163.7	0.2875
163.8	0.2875
163.9	0.2875
164	0.2875
164.1	0.3
164.2	0.3
164.3	0.3
164.4	0.3
164.5	0.3
164.6	0.3
164.7	0.3
164.8	0.3
164.9	0.3
165	0.3
165.1	0.3
165.2	0.3
165.3	0.3
165.4	0.3
165.5	0.3
165.6	0.3
165.7	0.3
165.8	0.3
165.9	0.3
166	0.3
166.1	0.3
166.2	0.3
166.3	0.3
166.4	0.3
166.5	0.3
166.6	0.3
166.7	0.3
166.8	0.3
166.9	0.3
167	0.3
167.1	0.3
167.2	0.3
167.3	0.3125
167.4	0.3125
167.5	0.3125
167.6	0.3125
167.7	0.3125
167.8	0.3125
167.9	0.3125
168	0.3125
168.1	0.3125
168.2	0.3125
168.3	0.3125
168.4	0.3125
168.5	0.3125
168.6	0.3125
168.7	0.3125
168.8	0.3125
168.9	0.3125
169	0.3125
169.1	0.3125
169.2	0.325
169.3	0.3375
169.4	0.3375
169.5	0.3375
169.6	0.3375
169.7	0.3375
169.8	0.3375
169.9	0.3375
170	0.3375
170.1	0.3375
170.2	0.3375
170.3	0.3375
170.4	0.3375
170.5	0.3375
170.6	0.3375
170.7	0.3375
170.8	0.3375
170.9	0.3375
171	0.3375
171.1	0.3375
171.2	0.3375
171.3	0.3375
171.4	0.35
171.5	0.35
171.6	0.35
171.7	0.35
171.8	0.35
171.9	0.35
172	0.35
172.1	0.35
172.2	0.35
172.3	0.35
172.4	0.35
172.5	0.35
172.6	0.35
172.7	0.35
172.8	0.35
172.9	0.35
173	0.35
173.1	0.35
173.2	0.35
173.3	0.35
173.4	0.35
173.5	0.35
173.6	0.35
173.7	0.3625
173.8	0.3625
173.9	0.3625
174	0.3625
174.1	0.3625
174.2	0.3625
174.3	0.3625
174.4	0.3625
174.5	0.3625
174.6	0.3625
174.7	0.3625
174.8	0.3625
174.9	0.3625
175	0.3625
175.1	0.3625
175.2	0.3625
175.3	0.375
175.4	0.375
175.5	0.375
175.6	0.375
175.7	0.375
175.8	0.375
175.9	0.375
176	0.375
176.1	0.375
176.2	0.375
176.3	0.375
176.4	0.375
176.5	0.375
176.6	0.375
176.7	0.3875
176.8	0.3875
176.9	0.3875
177	0.3875
177.1	0.3875
177.2	0.3875
177.3	0.4
177.4	0.4
177.5	0.4
177.6	0.4
177.7	0.4
177.8	0.4
177.9	0.4
178	0.4
178.1	0.4
178.2	0.4
178.3	0.4
178.4	0.4125
178.5	0.4125
178.6	0.4125
178.7	0.4125
178.8	0.4125
178.9	0.4125
179	0.4125
179.1	0.4125
179.2	0.4125
179.3	0.4125
179.4	0.4125
179.5	0.4125
179.6	0.4125
179.7	0.4125
179.8	0.4125
179.9	0.4125
180	0.4125
180.1	0.4125
180.2	0.4125
180.3	0.4125
180.4	0.4125
180.5	0.4125
180.6	0.4125
180.7	0.4125
180.8	0.4
180.9	0.4
181	0.4
181.1	0.4
181.2	0.4
181.3	0.4
181.4	0.4
181.5	0.3875
181.6	0.3875
181.7	0.3875
181.8	0.3875
181.9	0.3875
182	0.4
182.1	0.4
182.2	0.4
182.3	0.4
182.4	0.4125
182.5	0.4125
182.6	0.4125
182.7	0.4125
182.8	0.4125
182.9	0.4125
183	0.4125
183.1	0.4125
183.2	0.4125
183.3	0.4125
183.4	0.4125
183.5	0.4125
183.6	0.4125
183.7	0.425
183.8	0.4375
183.9	0.4375
184	0.4375
184.1	0.4375
184.2	0.4375
184.3	0.4375
184.4	0.45
184.5	0.45
184.6	0.45
184.7	0.45
184.8	0.45
184.9	0.45
185	0.45
185.1	0.45
185.2	0.45
185.3	0.45
185.4	0.45
185.5	0.45
185.6	0.45
185.7	0.45
185.8	0.45
185.9	0.45
186	0.45
186.1	0.45
186.2	0.45
186.3	0.45
186.4	0.45
186.5	0.45
186.6	0.45
186.7	0.45
186.8	0.45
186.9	0.45
187	0.45
187.1	0.45
187.2	0.45
187.3	0.45
187.4	0.45
187.5	0.45
187.6	0.45
187.7	0.45
187.8	0.45
187.9	0.45
188	0.45
188.1	0.45
188.2	0.45
188.3	0.45
188.4	0.45
188.5	0.45
188.6	0.45
188.7	0.45
188.8	0.4625
188.9	0.4625
189	0.4625
189.1	0.4625
189.2	0.4625
189.3	0.4625
189.4	0.4625
189.5	0.4625
189.6	0.4625
189.7	0.4625
189.8	0.4625
189.9	0.4625
190	0.4625
190.1	0.4625
190.2	0.4625
190.3	0.4625
190.4	0.45
190.5	0.4375
190.6	0.4375
190.7	0.4375
190.8	0.4375
190.9	0.425
191	0.425
191.1	0.425
191.2	0.425
191.3	0.425
191.4	0.425
191.5	0.425
191.6	0.425
191.7	0.4125
191.8	0.4125
191.9	0.4
192	0.4
192.1	0.3875
192.2	0.3875
192.3	0.375
192.4	0.375
192.5	0.375
192.6	0.375
192.7	0.375
192.8	0.3875
192.9	0.3875
193	0.3875
193.1	0.3875
193.2	0.3875
193.3	0.3875
193.4	0.3875
193.5	0.3875
193.6	0.3875
193.7	0.3875
193.8	0.3875
193.9	0.3875
194	0.3875
194.1	0.3875
194.2	0.3875
194.3	0.3875
194.4	0.3875
194.5	0.3875
194.6	0.3875
194.7	0.3875
194.8	0.3875
194.9	0.3875
195	0.3875
195.1	0.3875
195.2	0.3875
195.3	0.375
195.4	0.375
195.5	0.375
195.6	0.375
195.7	0.375
195.8	0.375
195.9	0.3875
196	0.3875
196.1	0.3875
196.2	0.3875
196.3	0.3875
196.4	0.3875
196.5	0.3875
196.6	0.3875
196.7	0.3875
196.8	0.3875
196.9	0.3875
197	0.3875
197.1	0.3875
197.2	0.3875
197.3	0.3875
197.4	0.3875
197.5	0.375
197.6	0.375
197.7	0.375
197.8	0.375
197.9	0.375
198	0.375
198.1	0.375
198.2	0.375
198.3	0.375
198.4	0.375
198.5	0.375
198.6	0.375
198.7	0.375
198.8	0.375
198.9	0.375
199	0.375
199.1	0.375
199.2	0.375
199.3	0.375
199.4	0.375
199.5	0.375
199.6	0.375
199.7	0.375
199.8	0.375
199.9	0.375
200	0.375
[truncated: 14,000 more rows]
