# Supplementary material for: Bayesian inference of kinetic schemes for ion channels by Kalman filtering
Source: eLife journal article supplement (doi:10.7554/elife.62714), 2022-05-04
Supplement: fig4-data9 [file 1_Sim_N_100_Fluor_MW.xlsx]

## Sheet: Tabelle1
0.1	0
0.2	0
0.3	0
0.4	0
0.5	0
0.6	0
0.7	0
0.8	0
0.9	0
1	0
1.1	0
1.2	0
1.3	0
1.4	0
1.5	0
1.6	0
1.7	0
1.8	0
1.9	0
2	0
2.1	0
2.2	0
2.3	0
2.4	0
2.5	0
2.6	0
2.7	0
2.8	0
2.9	0
3	0
3.1	0
3.2	0
3.3	0
3.4	0
3.5	0
3.6	0
3.7	0
3.8	0
3.9	0
4	0
4.1	0
4.2	0
4.3	0
4.4	0
4.5	0
4.6	0
4.7	0
4.8	0
4.9	0
5	0
5.1	0
5.2	0
5.3	0
5.4	0
5.5	0
5.6	0
5.7	0
5.8	0
5.9	0
6	0
6.1	0
6.2	0
6.3	0
6.4	0
6.5	0
6.6	0
6.7	0
6.8	0
6.9	0
7	0
7.1	0
7.2	0
7.3	0
7.4	0
7.5	0
7.6	0
7.7	0
7.8	0
7.9	0
8	0
8.1	0
8.2	0
8.3	0
8.4	0
8.5	0
8.6	0
8.7	0
8.8	0
8.9	0
9	0
9.1	0
9.2	0
9.3	0
9.4	0
9.5	0
9.6	0
9.7	0
9.8	0
9.9	0
10	0
10.1	0
10.2	0
10.3	0
10.4	0
10.5	0
10.6	0
10.7	0
10.8	0
10.9	0
11	0
11.1	0
11.2	0
11.3	0
11.4	0
11.5	0
11.6	0
11.7	0
11.8	0
11.9	0
12	0
12.1	0
12.2	0
12.3	0
12.4	0
12.5	0
12.6	0
12.7	0
12.8	0
12.9	0
13	0
13.1	0
13.2	0
13.3	0
13.4	0
13.5	0
13.6	0
13.7	0
13.8	0
13.9	0
14	0
14.1	0
14.2	0
14.3	0
14.4	0
14.5	0
14.6	0
14.7	0
14.8	0
14.9	0
15	0
15.1	0
15.2	0
15.3	0
15.4	0
15.5	0
15.6	0
15.7	0
15.8	0
15.9	0
16	0
16.1	0
16.2	0
16.3	0
16.4	0
16.5	0
16.6	0
16.7	0
16.8	0
16.9	0
17	0
17.1	0
17.2	0
17.3	0
17.4	0
17.5	0
17.6	0
17.7	0
17.8	0
17.9	0
18	0
18.1	0
18.2	0
18.3	0
18.4	0
18.5	0
18.6	0
18.7	0
18.8	0
18.9	0
19	0
19.1	0
19.2	0
19.3	0
19.4	0
19.5	0
19.6	0
19.7	0
19.8	0
19.9	0
20	0
20.1	0
20.2	0
20.3	0
20.4	0
20.5	0
20.6	0
20.7	0
20.8	0
20.9	0
21	0
21.1	0
21.2	0
21.3	0
21.4	0
21.5	0
21.6	0
21.7	0
21.8	0
21.9	0
22	0
22.1	0
22.2	0
22.3	0
22.4	0
22.5	0
22.6	0
22.7	0
22.8	0
22.9	0
23	0
23.1	0
23.2	0
23.3	0
23.4	0
23.5	0
23.6	0
23.7	0
23.8	0
23.9	0
24	0
24.1	0
24.2	0
24.3	0
24.4	0
24.5	0
24.6	0
24.7	0
24.8	0
24.9	0
25	0
25.1	0
25.2	0
25.3	0
25.4	0
25.5	0
25.6	0
25.7	0
25.8	0
25.9	0
26	0
26.1	0
26.2	0
26.3	0
26.4	0
26.5	0
26.6	0
26.7	0
26.8	0
26.9	0
27	0
27.1	0
27.2	0
27.3	0
27.4	0
27.5	0
27.6	0
27.7	0
27.8	0
27.9	0
28	0
28.1	0
28.2	0
28.3	0
28.4	0
28.5	0
28.6	0
28.7	0
28.8	0
28.9	0
29	0
29.1	0
29.2	0
29.3	0
29.4	0
29.5	0
29.6	0
29.7	0
29.8	0
29.9	0
30	0
30.1	0
30.2	0
30.3	0
30.4	0
30.5	0
30.6	0
30.7	0
30.8	0
30.9	0
31	0
31.1	0
31.2	0
31.3	0
31.4	0
31.5	0
31.6	0
31.7	0
31.8	0
31.9	0
32	0
32.1	0
32.2	0
32.3	0
32.4	0
32.5	0
32.6	0
32.7	0
32.8	0
32.9	0
33	0
33.1	0
33.2	0
33.3	0
33.4	0
33.5	0
33.6	0
33.7	0
33.8	0
33.9	0
34	0
34.1	0
34.2	0
34.3	0
34.4	0
34.5	0
34.6	0
34.7	0
34.8	0
34.9	0
35	0
35.1	0
35.2	0
35.3	0
35.4	0
35.5	0
35.6	0
35.7	0
35.8	0
35.9	0
36	0
36.1	0
36.2	0
36.3	0
36.4	0
36.5	0
36.6	0
36.7	0
36.8	0
36.9	0
37	0
37.1	0
37.2	0
37.3	0
37.4	0
37.5	0
37.6	0
37.7	0
37.8	0
37.9	0
38	0
38.1	0
38.2	0
38.3	0
38.4	0
38.5	0
38.6	0
38.7	0
38.8	0
38.9	0
39	0
39.1	0
39.2	0
39.3	0
39.4	0
39.5	0
39.6	0
39.7	0
39.8	0
39.9	0
40	0
40.1	0
40.2	0
40.3	0
40.4	0
40.5	0
40.6	0
40.7	0
40.8	0
40.9	0
41	0
41.1	0
41.2	0
41.3	0
41.4	0
41.5	0
41.6	0
41.7	0
41.8	0
41.9	0
42	0
42.1	0
42.2	0
42.3	0
42.4	0
42.5	0
42.6	0
42.7	0
42.8	0
42.9	0
43	0
43.1	0
43.2	0
43.3	0
43.4	0
43.5	0
43.6	0
43.7	0
43.8	0
43.9	0
44	0
44.1	0
44.2	0
44.3	0
44.4	0
44.5	0
44.6	0
44.7	0
44.8	0
44.9	0
45	0
45.1	0
45.2	0
45.3	0
45.4	0
45.5	0
45.6	0
45.7	0
45.8	0
45.9	0
46	0
46.1	0
46.2	0
46.3	0
46.4	0
46.5	0
46.6	0
46.7	0
46.8	0
46.9	0
47	0
47.1	0
47.2	0
47.3	0
47.4	0
47.5	0
47.6	0
47.7	0
47.8	0
47.9	0
48	0
48.1	0
48.2	0
48.3	0
48.4	0
48.5	0
48.6	0
48.7	0
48.8	0
48.9	0
49	0
49.1	0
49.2	0
49.3	0
49.4	0
49.5	0
49.6	0
49.7	0
49.8	0
49.9	0
50	0
50.1	0
50.2	0
50.3	0
50.4	0
50.5	0
50.6	0
50.7	0
50.8	0
50.9	0
51	0
51.1	0
51.2	0
51.3	0
51.4	0
51.5	0
51.6	0
51.7	0
51.8	0
51.9	0
52	0
52.1	0
52.2	0
52.3	0
52.4	0
52.5	0
52.6	0
52.7	0
52.8	0
52.9	0
53	0
53.1	0
53.2	0
53.3	0
53.4	0
53.5	0
53.6	0
53.7	0
53.8	0
53.9	0
54	0
54.1	0
54.2	0
54.3	0
54.4	0
54.5	0
54.6	0
54.7	0
54.8	0
54.9	0
55	0
55.1	0
55.2	0
55.3	0
55.4	0
55.5	0
55.6	0
55.7	0
55.8	0
55.9	0
56	0
56.1	0
56.2	0
56.3	0
56.4	0
56.5	0
56.6	0
56.7	0
56.8	0
56.9	0
57	0
57.1	0
57.2	0
57.3	0
57.4	0
57.5	0
57.6	0
57.7	0
57.8	0
57.9	0
58	0
58.1	0
58.2	0
58.3	0
58.4	0
58.5	0
58.6	0
58.7	0
58.8	0
58.9	0
59	0
59.1	0
59.2	0
59.3	0
59.4	0
59.5	0
59.6	0
59.7	0
59.8	0
59.9	0
60	0
60.1	0
60.2	0
60.3	0
60.4	0
60.5	0
60.6	0
60.7	0
60.8	0
60.9	0
61	0
61.1	0
61.2	0
61.3	0
61.4	0
61.5	0
61.6	0
61.7	0
61.8	0
61.9	0
62	0
62.1	0
62.2	0
62.3	0
62.4	0
62.5	0
62.6	0
62.7	0
62.8	0
62.9	0
63	0
63.1	0
63.2	0
63.3	0
63.4	0
63.5	0
63.6	0
63.7	0
63.8	0
63.9	0
64	0
64.1	0
64.2	0
64.3	0
64.4	0
64.5	0
64.6	0
64.7	0
64.8	0
64.9	0
65	0
65.1	0
65.2	0
65.3	0
65.4	0
65.5	0
65.6	0
65.7	0
65.8	0
65.9	0
66	0
66.1	0
66.2	0
66.3	0
66.4	0
66.5	0
66.6	0
66.7	0
66.8	0
66.9	0
67	0
67.1	0
67.2	0
67.3	0
67.4	0
67.5	0
67.6	0
67.7	0
67.8	0
67.9	0
68	0
68.1	0
68.2	0
68.3	0
68.4	0
68.5	0
68.6	0
68.7	0
68.8	0
68.9	0
69	0
69.1	0
69.2	0
69.3	0
69.4	0
69.5	0
69.6	0
69.7	0
69.8	0
69.9	0
70	0
70.1	0
70.2	0
70.3	0
70.4	0
70.5	0
70.6	0
70.7	0
70.8	0
70.9	0
71	0
71.1	0
71.2	0
71.3	0
71.4	0
71.5	0
71.6	0
71.7	0
71.8	0
71.9	0
72	0
72.1	0
72.2	0
72.3	0
72.4	0
72.5	0
72.6	0
72.7	0
72.8	0
72.9	0
73	0
73.1	0
73.2	0
73.3	0
73.4	0
73.5	0
73.6	0
73.7	0
73.8	0
73.9	0
74	0
74.1	0
74.2	0
74.3	0
74.4	0
74.5	0
74.6	0
74.7	0
74.8	0
74.9	0
75	0
75.1	0
75.2	0
75.3	0
75.4	0
75.5	0
75.6	0
75.7	0
75.8	0
75.9	0
76	0
76.1	0
76.2	0
76.3	0
76.4	0
76.5	0
76.6	0
76.7	0
76.8	0
76.9	0
77	0
77.1	0
77.2	0
77.3	0
77.4	0
77.5	0
77.6	0
77.7	0
77.8	0
77.9	0
78	0
78.1	0
78.2	0
78.3	0
78.4	0
78.5	0
78.6	0
78.7	0
78.8	0
78.9	0
79	0
79.1	0
79.2	0
79.3	0
79.4	0
79.5	0
79.6	0
79.7	0
79.8	0
79.9	0
80	0
80.1	0
80.2	0
80.3	0
80.4	0
80.5	0
80.6	0
80.7	0
80.8	0
80.9	0
81	0
81.1	0
81.2	0
81.3	0
81.4	0
81.5	0
81.6	0
81.7	0
81.8	0
81.9	0
82	0
82.1	0
82.2	0
82.3	0
82.4	0
82.5	0
82.6	0
82.7	0
82.8	0
82.9	0
83	0
83.1	0
83.2	0
83.3	0
83.4	0
83.5	0
83.6	0
83.7	0
83.8	0
83.9	0
84	0
84.1	0
84.2	0
84.3	0
84.4	0
84.5	0
84.6	0
84.7	0
84.8	0
84.9	0
85	0
85.1	0
85.2	0
85.3	0
85.4	0
85.5	0
85.6	0
85.7	0
85.8	0
85.9	0
86	0
86.1	0
86.2	0
86.3	0
86.4	0
86.5	0
86.6	0
86.7	0
86.8	0
86.9	0
87	0
87.1	0
87.2	0
87.3	0
87.4	0
87.5	0
87.6	0
87.7	0
87.8	0
87.9	0
88	0
88.1	0
88.2	0
88.3	0
88.4	0
88.5	0
88.6	0
88.7	0
88.8	0
88.9	0
89	0
89.1	0
89.2	0
89.3	0
89.4	0
89.5	0
89.6	0
89.7	0
89.8	0
89.9	0
90	0
90.1	0
90.2	0
90.3	0
90.4	0
90.5	0
90.6	0
90.7	0
90.8	0
90.9	0
91	0
91.1	0
91.2	0
91.3	0
91.4	0
91.5	0
91.6	0
91.7	0
91.8	0
91.9	0
92	0
92.1	0
92.2	0
92.3	0
92.4	0
92.5	0
92.6	0
92.7	0
92.8	0
92.9	0
93	0
93.1	0
93.2	0
93.3	0
93.4	0
93.5	0
93.6	0
93.7	0
93.8	0
93.9	0
94	0
94.1	0
94.2	0
94.3	0
94.4	0
94.5	0
94.6	0
94.7	0
94.8	0
94.9	0
95	0
95.1	0
95.2	0
95.3	0
95.4	0
95.5	0
95.6	0
95.7	0
95.8	0
95.9	0
96	0
96.1	0
96.2	0
96.3	0
96.4	0
96.5	0
96.6	0
96.7	0
96.8	0
96.9	0
97	0
97.1	0
97.2	0
97.3	0
97.4	0
97.5	0
97.6	0
97.7	0
97.8	0
97.9	0
98	0
98.1	0
98.2	0
98.3	0
98.4	0
98.5	0
98.6	0
98.7	0
98.8	0
98.9	0
99	0
99.1	0
99.2	0
99.3	0
99.4	0
99.5	0
99.6	0
99.7	0
99.8	0
99.9	0
100	0
100.1	0.03
100.2	0.05
100.3	0.065
100.4	0.085
100.5	0.115
100.6	0.13
100.7	0.155
100.8	0.185
100.9	0.215
101	0.23
101.1	0.26
101.2	0.26
101.3	0.28
101.4	0.315
101.5	0.33
101.6	0.33
101.7	0.34
101.8	0.36
101.9	0.365
102	0.37
102.1	0.37
102.2	0.37
102.3	0.37
102.4	0.375
102.5	0.39
102.6	0.415
102.7	0.42
102.8	0.41
102.9	0.405
103	0.415
103.1	0.42
103.2	0.44
103.3	0.44
103.4	0.45
103.5	0.465
103.6	0.47
103.7	0.46
103.8	0.47
103.9	0.48
104	0.475
104.1	0.48
104.2	0.48
104.3	0.475
104.4	0.465
104.5	0.455
104.6	0.46
104.7	0.475
104.8	0.485
104.9	0.485
105	0.495
105.1	0.51
105.2	0.51
105.3	0.51
105.4	0.515
105.5	0.515
105.6	0.51
105.7	0.5
105.8	0.525
105.9	0.515
106	0.52
106.1	0.525
106.2	0.53
106.3	0.535
106.4	0.54
106.5	0.535
106.6	0.545
106.7	0.545
106.8	0.53
106.9	0.535
107	0.54
107.1	0.555
107.2	0.565
107.3	0.57
107.4	0.575
107.5	0.575
107.6	0.575
107.7	0.555
107.8	0.57
107.9	0.565
108	0.585
108.1	0.575
108.2	0.585
108.3	0.595
108.4	0.595
108.5	0.59
108.6	0.585
108.7	0.58
108.8	0.585
108.9	0.58
109	0.605
109.1	0.59
109.2	0.59
109.3	0.6
109.4	0.61
109.5	0.61
109.6	0.61
109.7	0.62
109.8	0.615
109.9	0.625
110	0.615
110.1	0.615
110.2	0.61
110.3	0.6
110.4	0.6
110.5	0.605
110.6	0.61
110.7	0.62
110.8	0.62
110.9	0.625
111	0.615
111.1	0.615
111.2	0.625
111.3	0.625
111.4	0.635
111.5	0.64
111.6	0.65
111.7	0.65
111.8	0.655
111.9	0.66
112	0.66
112.1	0.66
112.2	0.65
112.3	0.655
112.4	0.66
112.5	0.65
112.6	0.65
112.7	0.645
112.8	0.655
112.9	0.65
113	0.65
113.1	0.65
113.2	0.655
113.3	0.63
113.4	0.61
113.5	0.615
113.6	0.62
113.7	0.625
113.8	0.63
113.9	0.615
114	0.615
114.1	0.625
114.2	0.625
114.3	0.615
114.4	0.605
114.5	0.63
114.6	0.62
114.7	0.62
114.8	0.615
114.9	0.61
115	0.615
115.1	0.615
115.2	0.61
115.3	0.6
115.4	0.6
115.5	0.595
115.6	0.59
115.7	0.59
115.8	0.595
115.9	0.61
116	0.62
116.1	0.61
116.2	0.61
116.3	0.605
116.4	0.595
116.5	0.595
116.6	0.6
116.7	0.59
116.8	0.59
116.9	0.575
117	0.565
117.1	0.575
117.2	0.585
117.3	0.585
117.4	0.595
117.5	0.595
117.6	0.575
117.7	0.58
117.8	0.6
117.9	0.59
118	0.59
118.1	0.59
118.2	0.605
118.3	0.605
118.4	0.6
118.5	0.575
118.6	0.595
118.7	0.6
118.8	0.6
118.9	0.605
119	0.605
119.1	0.605
119.2	0.61
119.3	0.62
119.4	0.61
119.5	0.605
119.6	0.61
119.7	0.62
119.8	0.615
119.9	0.615
120	0.625
120.1	0.62
120.2	0.62
120.3	0.615
120.4	0.62
120.5	0.62
120.6	0.615
120.7	0.625
120.8	0.62
120.9	0.615
121	0.635
121.1	0.63
121.2	0.63
121.3	0.63
121.4	0.64
121.5	0.645
121.6	0.645
121.7	0.645
121.8	0.65
121.9	0.655
122	0.66
122.1	0.655
122.2	0.65
122.3	0.64
122.4	0.64
122.5	0.645
122.6	0.64
122.7	0.62
122.8	0.605
122.9	0.595
123	0.605
123.1	0.605
123.2	0.605
123.3	0.615
123.4	0.63
123.5	0.635
123.6	0.64
123.7	0.635
123.8	0.625
123.9	0.62
124	0.62
124.1	0.62
124.2	0.615
124.3	0.615
124.4	0.62
124.5	0.625
124.6	0.625
124.7	0.615
124.8	0.62
124.9	0.62
125	0.625
125.1	0.615
125.2	0.61
125.3	0.61
125.4	0.6
125.5	0.6
125.6	0.6
125.7	0.605
125.8	0.61
125.9	0.63
126	0.63
126.1	0.64
126.2	0.64
126.3	0.65
126.4	0.66
126.5	0.66
126.6	0.675
126.7	0.66
126.8	0.66
126.9	0.66
127	0.665
127.1	0.67
127.2	0.66
127.3	0.66
127.4	0.66
127.5	0.655
127.6	0.65
127.7	0.635
127.8	0.645
127.9	0.635
128	0.635
128.1	0.625
128.2	0.62
128.3	0.615
128.4	0.615
128.5	0.62
128.6	0.62
128.7	0.62
128.8	0.63
128.9	0.63
129	0.625
129.1	0.645
129.2	0.64
129.3	0.645
129.4	0.645
129.5	0.65
129.6	0.66
129.7	0.66
129.8	0.655
129.9	0.66
130	0.665
130.1	0.645
130.2	0.655
130.3	0.65
130.4	0.635
130.5	0.64
130.6	0.64
130.7	0.635
130.8	0.65
130.9	0.64
131	0.64
131.1	0.64
131.2	0.64
131.3	0.635
131.4	0.635
131.5	0.635
131.6	0.635
131.7	0.645
131.8	0.65
131.9	0.65
132	0.645
132.1	0.63
132.2	0.625
132.3	0.625
132.4	0.64
132.5	0.645
132.6	0.66
132.7	0.67
132.8	0.66
132.9	0.66
133	0.65
133.1	0.65
133.2	0.645
133.3	0.65
133.4	0.65
133.5	0.645
133.6	0.645
133.7	0.66
133.8	0.66
133.9	0.655
134	0.66
134.1	0.66
134.2	0.66
134.3	0.665
134.4	0.66
134.5	0.645
134.6	0.65
134.7	0.66
134.8	0.655
134.9	0.66
135	0.645
135.1	0.655
135.2	0.66
135.3	0.66
135.4	0.66
135.5	0.66
135.6	0.66
135.7	0.66
135.8	0.66
135.9	0.66
136	0.665
136.1	0.665
136.2	0.655
136.3	0.65
136.4	0.66
136.5	0.655
136.6	0.665
136.7	0.67
136.8	0.67
136.9	0.68
137	0.695
137.1	0.7
137.2	0.69
137.3	0.705
137.4	0.715
137.5	0.715
137.6	0.705
137.7	0.715
137.8	0.72
137.9	0.71
138	0.71
138.1	0.71
138.2	0.72
138.3	0.715
138.4	0.715
138.5	0.705
138.6	0.7
138.7	0.685
138.8	0.68
138.9	0.69
139	0.675
139.1	0.67
139.2	0.685
139.3	0.68
139.4	0.68
139.5	0.69
139.6	0.695
139.7	0.695
139.8	0.695
139.9	0.695
140	0.69
140.1	0.68
140.2	0.68
140.3	0.68
140.4	0.675
140.5	0.675
140.6	0.67
140.7	0.665
140.8	0.67
140.9	0.655
141	0.65
141.1	0.655
141.2	0.655
141.3	0.65
141.4	0.66
141.5	0.67
141.6	0.68
141.7	0.675
141.8	0.67
141.9	0.655
142	0.655
142.1	0.65
142.2	0.65
142.3	0.65
142.4	0.645
142.5	0.65
142.6	0.655
142.7	0.66
142.8	0.655
142.9	0.655
143	0.65
143.1	0.655
143.2	0.66
143.3	0.665
143.4	0.66
143.5	0.65
143.6	0.65
143.7	0.66
143.8	0.66
143.9	0.665
144	0.665
144.1	0.66
144.2	0.665
144.3	0.67
144.4	0.67
144.5	0.67
144.6	0.675
144.7	0.675
144.8	0.69
144.9	0.68
145	0.675
145.1	0.67
145.2	0.675
145.3	0.68
145.4	0.685
145.5	0.675
145.6	0.68
145.7	0.685
145.8	0.695
145.9	0.695
146	0.7
146.1	0.7
146.2	0.7
146.3	0.7
146.4	0.705
146.5	0.71
146.6	0.715
146.7	0.725
146.8	0.72
146.9	0.715
147	0.735
147.1	0.725
147.2	0.725
147.3	0.73
147.4	0.715
147.5	0.71
147.6	0.715
147.7	0.715
147.8	0.705
147.9	0.69
148	0.7
148.1	0.705
148.2	0.705
148.3	0.72
148.4	0.705
148.5	0.71
148.6	0.71
148.7	0.7
148.8	0.69
148.9	0.69
149	0.695
149.1	0.69
149.2	0.7
149.3	0.705
149.4	0.69
149.5	0.695
149.6	0.695
149.7	0.695
149.8	0.695
149.9	0.695
150	0.69
150.1	0.69
150.2	0.695
150.3	0.71
150.4	0.71
150.5	0.71
150.6	0.715
150.7	0.705
150.8	0.705
150.9	0.715
151	0.725
151.1	0.715
151.2	0.71
151.3	0.695
151.4	0.68
151.5	0.68
151.6	0.68
151.7	0.69
151.8	0.685
151.9	0.69
152	0.68
152.1	0.685
152.2	0.685
152.3	0.69
152.4	0.695
152.5	0.695
152.6	0.695
152.7	0.69
152.8	0.69
152.9	0.68
153	0.675
153.1	0.675
153.2	0.675
153.3	0.675
153.4	0.68
153.5	0.685
153.6	0.69
153.7	0.69
153.8	0.685
153.9	0.685
154	0.68
154.1	0.68
154.2	0.68
154.3	0.69
154.4	0.69
154.5	0.675
154.6	0.68
154.7	0.67
154.8	0.68
154.9	0.685
155	0.695
155.1	0.685
155.2	0.68
155.3	0.69
155.4	0.695
155.5	0.69
155.6	0.695
155.7	0.695
155.8	0.69
155.9	0.695
156	0.7
156.1	0.72
156.2	0.72
156.3	0.715
156.4	0.725
156.5	0.72
156.6	0.73
156.7	0.73
156.8	0.725
156.9	0.715
157	0.73
157.1	0.725
157.2	0.72
157.3	0.71
157.4	0.71
157.5	0.715
157.6	0.735
157.7	0.73
157.8	0.73
157.9	0.75
158	0.75
158.1	0.74
158.2	0.74
158.3	0.74
158.4	0.745
158.5	0.745
158.6	0.745
158.7	0.74
158.8	0.74
158.9	0.74
159	0.74
159.1	0.74
159.2	0.74
159.3	0.75
159.4	0.75
159.5	0.745
159.6	0.74
159.7	0.74
159.8	0.735
159.9	0.73
160	0.735
160.1	0.745
160.2	0.74
160.3	0.74
160.4	0.745
160.5	0.745
160.6	0.74
160.7	0.745
160.8	0.75
160.9	0.75
161	0.745
161.1	0.755
161.2	0.76
161.3	0.78
161.4	0.775
161.5	0.775
161.6	0.76
161.7	0.765
161.8	0.765
161.9	0.77
162	0.76
162.1	0.76
162.2	0.76
162.3	0.765
162.4	0.77
162.5	0.77
162.6	0.775
162.7	0.775
162.8	0.775
162.9	0.765
163	0.765
163.1	0.765
163.2	0.77
163.3	0.77
163.4	0.77
163.5	0.76
163.6	0.755
163.7	0.745
163.8	0.74
163.9	0.735
164	0.73
164.1	0.735
164.2	0.735
164.3	0.735
164.4	0.735
164.5	0.735
164.6	0.73
164.7	0.73
164.8	0.72
164.9	0.715
165	0.72
165.1	0.725
165.2	0.73
165.3	0.73
165.4	0.735
165.5	0.745
165.6	0.745
165.7	0.735
165.8	0.74
165.9	0.74
166	0.735
166.1	0.73
166.2	0.74
166.3	0.74
166.4	0.74
166.5	0.74
166.6	0.74
166.7	0.74
166.8	0.75
166.9	0.75
167	0.75
167.1	0.76
167.2	0.76
167.3	0.765
167.4	0.76
167.5	0.755
167.6	0.755
167.7	0.76
167.8	0.76
167.9	0.755
168	0.755
168.1	0.755
168.2	0.76
168.3	0.755
168.4	0.755
168.5	0.75
168.6	0.75
168.7	0.75
168.8	0.755
168.9	0.745
169	0.765
169.1	0.77
169.2	0.765
169.3	0.75
169.4	0.76
169.5	0.765
169.6	0.765
169.7	0.77
169.8	0.765
169.9	0.755
170	0.745
170.1	0.75
170.2	0.75
170.3	0.75
170.4	0.745
170.5	0.745
170.6	0.74
170.7	0.74
170.8	0.735
170.9	0.725
171	0.725
171.1	0.725
171.2	0.735
171.3	0.735
171.4	0.74
171.5	0.74
171.6	0.745
171.7	0.74
171.8	0.74
171.9	0.745
172	0.745
172.1	0.745
172.2	0.74
172.3	0.735
172.4	0.73
172.5	0.735
172.6	0.74
172.7	0.73
172.8	0.72
172.9	0.72
173	0.725
173.1	0.715
173.2	0.705
173.3	0.7
173.4	0.7
173.5	0.71
173.6	0.71
173.7	0.705
173.8	0.71
173.9	0.715
174	0.725
174.1	0.73
174.2	0.735
174.3	0.74
174.4	0.75
174.5	0.745
174.6	0.745
174.7	0.75
174.8	0.745
174.9	0.75
175	0.75
175.1	0.75
175.2	0.755
175.3	0.755
175.4	0.75
175.5	0.745
175.6	0.75
175.7	0.76
175.8	0.755
175.9	0.735
176	0.735
176.1	0.74
176.2	0.725
176.3	0.72
176.4	0.725
176.5	0.725
176.6	0.725
176.7	0.715
176.8	0.71
176.9	0.725
177	0.725
177.1	0.725
177.2	0.72
177.3	0.725
177.4	0.725
177.5	0.725
177.6	0.72
177.7	0.725
177.8	0.72
177.9	0.72
178	0.72
178.1	0.72
178.2	0.72
178.3	0.72
178.4	0.72
178.5	0.725
178.6	0.715
178.7	0.71
178.8	0.7
178.9	0.7
179	0.71
179.1	0.71
179.2	0.7
179.3	0.695
179.4	0.705
179.5	0.72
179.6	0.725
179.7	0.725
179.8	0.725
179.9	0.72
180	0.72
180.1	0.735
180.2	0.735
180.3	0.73
180.4	0.735
180.5	0.735
180.6	0.73
180.7	0.725
180.8	0.715
180.9	0.71
181	0.715
181.1	0.73
181.2	0.735
181.3	0.735
181.4	0.73
181.5	0.715
181.6	0.725
181.7	0.73
181.8	0.725
181.9	0.725
182	0.72
182.1	0.71
182.2	0.715
182.3	0.715
182.4	0.71
182.5	0.705
182.6	0.705
182.7	0.705
182.8	0.71
182.9	0.71
183	0.71
183.1	0.71
183.2	0.71
183.3	0.715
183.4	0.725
183.5	0.73
183.6	0.73
183.7	0.72
183.8	0.715
183.9	0.705
184	0.72
184.1	0.725
184.2	0.725
184.3	0.72
184.4	0.725
184.5	0.72
184.6	0.725
184.7	0.715
184.8	0.715
184.9	0.72
185	0.72
185.1	0.72
185.2	0.72
185.3	0.71
185.4	0.705
185.5	0.705
185.6	0.71
185.7	0.715
185.8	0.725
185.9	0.73
186	0.735
186.1	0.735
186.2	0.73
186.3	0.735
186.4	0.73
186.5	0.725
186.6	0.735
186.7	0.735
186.8	0.73
186.9	0.725
187	0.725
187.1	0.73
187.2	0.735
187.3	0.745
187.4	0.745
187.5	0.75
187.6	0.74
187.7	0.74
187.8	0.74
187.9	0.735
188	0.75
188.1	0.75
188.2	0.755
188.3	0.75
188.4	0.755
188.5	0.755
188.6	0.76
188.7	0.76
188.8	0.76
188.9	0.755
189	0.745
189.1	0.745
189.2	0.74
189.3	0.745
189.4	0.74
189.5	0.745
189.6	0.745
189.7	0.76
189.8	0.76
189.9	0.755
190	0.76
190.1	0.755
190.2	0.755
190.3	0.765
190.4	0.765
190.5	0.77
190.6	0.77
190.7	0.76
190.8	0.76
190.9	0.755
191	0.755
191.1	0.76
191.2	0.76
191.3	0.75
191.4	0.75
191.5	0.755
191.6	0.76
191.7	0.75
191.8	0.75
191.9	0.745
192	0.75
192.1	0.76
192.2	0.755
192.3	0.765
192.4	0.77
192.5	0.77
192.6	0.77
192.7	0.77
192.8	0.78
192.9	0.785
193	0.785
193.1	0.795
193.2	0.795
193.3	0.79
193.4	0.79
193.5	0.785
193.6	0.78
193.7	0.78
193.8	0.78
193.9	0.78
194	0.77
194.1	0.77
194.2	0.76
194.3	0.755
194.4	0.76
194.5	0.765
194.6	0.765
194.7	0.765
194.8	0.76
194.9	0.775
195	0.78
195.1	0.78
195.2	0.79
195.3	0.785
195.4	0.785
195.5	0.78
195.6	0.78
195.7	0.77
195.8	0.775
195.9	0.775
196	0.775
196.1	0.775
196.2	0.775
196.3	0.77
196.4	0.775
196.5	0.78
196.6	0.78
196.7	0.77
196.8	0.775
196.9	0.775
197	0.785
197.1	0.785
197.2	0.785
197.3	0.79
197.4	0.79
197.5	0.8
197.6	0.795
197.7	0.79
197.8	0.78
197.9	0.785
198	0.78
198.1	0.77
198.2	0.765
198.3	0.755
198.4	0.76
198.5	0.76
198.6	0.755
198.7	0.755
198.8	0.755
198.9	0.75
199	0.75
199.1	0.755
199.2	0.755
199.3	0.755
199.4	0.755
199.5	0.76
199.6	0.75
199.7	0.76
199.8	0.775
199.9	0.765
200	0.77
[truncated: 14,000 more rows]
