# Supplementary material for: Bayesian inference of kinetic schemes for ion channels by Kalman filtering
Source: eLife journal article supplement (doi:10.7554/elife.62714), 2022-05-04
Supplement: fig4-data9 [file 1_Sim_N_200_Fluor_MW.xlsx]

## Sheet: 0.5 M
0.1	0
0.2	0
0.3	0
0.4	0
0.5	0
0.6	0
0.7	0
0.8	0
0.9	0
1	0
1.1	0
1.2	0
1.3	0
1.4	0
1.5	0
1.6	0
1.7	0
1.8	0
1.9	0
2	0
2.1	0
2.2	0
2.3	0
2.4	0
2.5	0
2.6	0
2.7	0
2.8	0
2.9	0
3	0
3.1	0
3.2	0
3.3	0
3.4	0
3.5	0
3.6	0
3.7	0
3.8	0
3.9	0
4	0
4.1	0
4.2	0
4.3	0
4.4	0
4.5	0
4.6	0
4.7	0
4.8	0
4.9	0
5	0
5.1	0
5.2	0
5.3	0
5.4	0
5.5	0
5.6	0
5.7	0
5.8	0
5.9	0
6	0
6.1	0
6.2	0
6.3	0
6.4	0
6.5	0
6.6	0
6.7	0
6.8	0
6.9	0
7	0
7.1	0
7.2	0
7.3	0
7.4	0
7.5	0
7.6	0
7.7	0
7.8	0
7.9	0
8	0
8.1	0
8.2	0
8.3	0
8.4	0
8.5	0
8.6	0
8.7	0
8.8	0
8.9	0
9	0
9.1	0
9.2	0
9.3	0
9.4	0
9.5	0
9.6	0
9.7	0
9.8	0
9.9	0
10	0
10.1	0
10.2	0
10.3	0
10.4	0
10.5	0
10.6	0
10.7	0
10.8	0
10.9	0
11	0
11.1	0
11.2	0
11.3	0
11.4	0
11.5	0
11.6	0
11.7	0
11.8	0
11.9	0
12	0
12.1	0
12.2	0
12.3	0
12.4	0
12.5	0
12.6	0
12.7	0
12.8	0
12.9	0
13	0
13.1	0
13.2	0
13.3	0
13.4	0
13.5	0
13.6	0
13.7	0
13.8	0
13.9	0
14	0
14.1	0
14.2	0
14.3	0
14.4	0
14.5	0
14.6	0
14.7	0
14.8	0
14.9	0
15	0
15.1	0
15.2	0
15.3	0
15.4	0
15.5	0
15.6	0
15.7	0
15.8	0
15.9	0
16	0
16.1	0
16.2	0
16.3	0
16.4	0
16.5	0
16.6	0
16.7	0
16.8	0
16.9	0
17	0
17.1	0
17.2	0
17.3	0
17.4	0
17.5	0
17.6	0
17.7	0
17.8	0
17.9	0
18	0
18.1	0
18.2	0
18.3	0
18.4	0
18.5	0
18.6	0
18.7	0
18.8	0
18.9	0
19	0
19.1	0
19.2	0
19.3	0
19.4	0
19.5	0
19.6	0
19.7	0
19.8	0
19.9	0
20	0
20.1	0
20.2	0
20.3	0
20.4	0
20.5	0
20.6	0
20.7	0
20.8	0
20.9	0
21	0
21.1	0
21.2	0
21.3	0
21.4	0
21.5	0
21.6	0
21.7	0
21.8	0
21.9	0
22	0
22.1	0
22.2	0
22.3	0
22.4	0
22.5	0
22.6	0
22.7	0
22.8	0
22.9	0
23	0
23.1	0
23.2	0
23.3	0
23.4	0
23.5	0
23.6	0
23.7	0
23.8	0
23.9	0
24	0
24.1	0
24.2	0
24.3	0
24.4	0
24.5	0
24.6	0
24.7	0
24.8	0
24.9	0
25	0
25.1	0
25.2	0
25.3	0
25.4	0
25.5	0
25.6	0
25.7	0
25.8	0
25.9	0
26	0
26.1	0
26.2	0
26.3	0
26.4	0
26.5	0
26.6	0
26.7	0
26.8	0
26.9	0
27	0
27.1	0
27.2	0
27.3	0
27.4	0
27.5	0
27.6	0
27.7	0
27.8	0
27.9	0
28	0
28.1	0
28.2	0
28.3	0
28.4	0
28.5	0
28.6	0
28.7	0
28.8	0
28.9	0
29	0
29.1	0
29.2	0
29.3	0
29.4	0
29.5	0
29.6	0
29.7	0
29.8	0
29.9	0
30	0
30.1	0
30.2	0
30.3	0
30.4	0
30.5	0
30.6	0
30.7	0
30.8	0
30.9	0
31	0
31.1	0
31.2	0
31.3	0
31.4	0
31.5	0
31.6	0
31.7	0
31.8	0
31.9	0
32	0
32.1	0
32.2	0
32.3	0
32.4	0
32.5	0
32.6	0
32.7	0
32.8	0
32.9	0
33	0
33.1	0
33.2	0
33.3	0
33.4	0
33.5	0
33.6	0
33.7	0
33.8	0
33.9	0
34	0
34.1	0
34.2	0
34.3	0
34.4	0
34.5	0
34.6	0
34.7	0
34.8	0
34.9	0
35	0
35.1	0
35.2	0
35.3	0
35.4	0
35.5	0
35.6	0
35.7	0
35.8	0
35.9	0
36	0
36.1	0
36.2	0
36.3	0
36.4	0
36.5	0
36.6	0
36.7	0
36.8	0
36.9	0
37	0
37.1	0
37.2	0
37.3	0
37.4	0
37.5	0
37.6	0
37.7	0
37.8	0
37.9	0
38	0
38.1	0
38.2	0
38.3	0
38.4	0
38.5	0
38.6	0
38.7	0
38.8	0
38.9	0
39	0
39.1	0
39.2	0
39.3	0
39.4	0
39.5	0
39.6	0
39.7	0
39.8	0
39.9	0
40	0
40.1	0
40.2	0
40.3	0
40.4	0
40.5	0
40.6	0
40.7	0
40.8	0
40.9	0
41	0
41.1	0
41.2	0
41.3	0
41.4	0
41.5	0
41.6	0
41.7	0
41.8	0
41.9	0
42	0
42.1	0
42.2	0
42.3	0
42.4	0
42.5	0
42.6	0
42.7	0
42.8	0
42.9	0
43	0
43.1	0
43.2	0
43.3	0
43.4	0
43.5	0
43.6	0
43.7	0
43.8	0
43.9	0
44	0
44.1	0
44.2	0
44.3	0
44.4	0
44.5	0
44.6	0
44.7	0
44.8	0
44.9	0
45	0
45.1	0
45.2	0
45.3	0
45.4	0
45.5	0
45.6	0
45.7	0
45.8	0
45.9	0
46	0
46.1	0
46.2	0
46.3	0
46.4	0
46.5	0
46.6	0
46.7	0
46.8	0
46.9	0
47	0
47.1	0
47.2	0
47.3	0
47.4	0
47.5	0
47.6	0
47.7	0
47.8	0
47.9	0
48	0
48.1	0
48.2	0
48.3	0
48.4	0
48.5	0
48.6	0
48.7	0
48.8	0
48.9	0
49	0
49.1	0
49.2	0
49.3	0
49.4	0
49.5	0
49.6	0
49.7	0
49.8	0
49.9	0
50	0
50.1	0
50.2	0
50.3	0
50.4	0
50.5	0
50.6	0
50.7	0
50.8	0
50.9	0
51	0
51.1	0
51.2	0
51.3	0
51.4	0
51.5	0
51.6	0
51.7	0
51.8	0
51.9	0
52	0
52.1	0
52.2	0
52.3	0
52.4	0
52.5	0
52.6	0
52.7	0
52.8	0
52.9	0
53	0
53.1	0
53.2	0
53.3	0
53.4	0
53.5	0
53.6	0
53.7	0
53.8	0
53.9	0
54	0
54.1	0
54.2	0
54.3	0
54.4	0
54.5	0
54.6	0
54.7	0
54.8	0
54.9	0
55	0
55.1	0
55.2	0
55.3	0
55.4	0
55.5	0
55.6	0
55.7	0
55.8	0
55.9	0
56	0
56.1	0
56.2	0
56.3	0
56.4	0
56.5	0
56.6	0
56.7	0
56.8	0
56.9	0
57	0
57.1	0
57.2	0
57.3	0
57.4	0
57.5	0
57.6	0
57.7	0
57.8	0
57.9	0
58	0
58.1	0
58.2	0
58.3	0
58.4	0
58.5	0
58.6	0
58.7	0
58.8	0
58.9	0
59	0
59.1	0
59.2	0
59.3	0
59.4	0
59.5	0
59.6	0
59.7	0
59.8	0
59.9	0
60	0
60.1	0
60.2	0
60.3	0
60.4	0
60.5	0
60.6	0
60.7	0
60.8	0
60.9	0
61	0
61.1	0
61.2	0
61.3	0
61.4	0
61.5	0
61.6	0
61.7	0
61.8	0
61.9	0
62	0
62.1	0
62.2	0
62.3	0
62.4	0
62.5	0
62.6	0
62.7	0
62.8	0
62.9	0
63	0
63.1	0
63.2	0
63.3	0
63.4	0
63.5	0
63.6	0
63.7	0
63.8	0
63.9	0
64	0
64.1	0
64.2	0
64.3	0
64.4	0
64.5	0
64.6	0
64.7	0
64.8	0
64.9	0
65	0
65.1	0
65.2	0
65.3	0
65.4	0
65.5	0
65.6	0
65.7	0
65.8	0
65.9	0
66	0
66.1	0
66.2	0
66.3	0
66.4	0
66.5	0
66.6	0
66.7	0
66.8	0
66.9	0
67	0
67.1	0
67.2	0
67.3	0
67.4	0
67.5	0
67.6	0
67.7	0
67.8	0
67.9	0
68	0
68.1	0
68.2	0
68.3	0
68.4	0
68.5	0
68.6	0
68.7	0
68.8	0
68.9	0
69	0
69.1	0
69.2	0
69.3	0
69.4	0
69.5	0
69.6	0
69.7	0
69.8	0
69.9	0
70	0
70.1	0
70.2	0
70.3	0
70.4	0
70.5	0
70.6	0
70.7	0
70.8	0
70.9	0
71	0
71.1	0
71.2	0
71.3	0
71.4	0
71.5	0
71.6	0
71.7	0
71.8	0
71.9	0
72	0
72.1	0
72.2	0
72.3	0
72.4	0
72.5	0
72.6	0
72.7	0
72.8	0
72.9	0
73	0
73.1	0
73.2	0
73.3	0
73.4	0
73.5	0
73.6	0
73.7	0
73.8	0
73.9	0
74	0
74.1	0
74.2	0
74.3	0
74.4	0
74.5	0
74.6	0
74.7	0
74.8	0
74.9	0
75	0
75.1	0
75.2	0
75.3	0
75.4	0
75.5	0
75.6	0
75.7	0
75.8	0
75.9	0
76	0
76.1	0
76.2	0
76.3	0
76.4	0
76.5	0
76.6	0
76.7	0
76.8	0
76.9	0
77	0
77.1	0
77.2	0
77.3	0
77.4	0
77.5	0
77.6	0
77.7	0
77.8	0
77.9	0
78	0
78.1	0
78.2	0
78.3	0
78.4	0
78.5	0
78.6	0
78.7	0
78.8	0
78.9	0
79	0
79.1	0
79.2	0
79.3	0
79.4	0
79.5	0
79.6	0
79.7	0
79.8	0
79.9	0
80	0
80.1	0
80.2	0
80.3	0
80.4	0
80.5	0
80.6	0
80.7	0
80.8	0
80.9	0
81	0
81.1	0
81.2	0
81.3	0
81.4	0
81.5	0
81.6	0
81.7	0
81.8	0
81.9	0
82	0
82.1	0
82.2	0
82.3	0
82.4	0
82.5	0
82.6	0
82.7	0
82.8	0
82.9	0
83	0
83.1	0
83.2	0
83.3	0
83.4	0
83.5	0
83.6	0
83.7	0
83.8	0
83.9	0
84	0
84.1	0
84.2	0
84.3	0
84.4	0
84.5	0
84.6	0
84.7	0
84.8	0
84.9	0
85	0
85.1	0
85.2	0
85.3	0
85.4	0
85.5	0
85.6	0
85.7	0
85.8	0
85.9	0
86	0
86.1	0
86.2	0
86.3	0
86.4	0
86.5	0
86.6	0
86.7	0
86.8	0
86.9	0
87	0
87.1	0
87.2	0
87.3	0
87.4	0
87.5	0
87.6	0
87.7	0
87.8	0
87.9	0
88	0
88.1	0
88.2	0
88.3	0
88.4	0
88.5	0
88.6	0
88.7	0
88.8	0
88.9	0
89	0
89.1	0
89.2	0
89.3	0
89.4	0
89.5	0
89.6	0
89.7	0
89.8	0
89.9	0
90	0
90.1	0
90.2	0
90.3	0
90.4	0
90.5	0
90.6	0
90.7	0
90.8	0
90.9	0
91	0
91.1	0
91.2	0
91.3	0
91.4	0
91.5	0
91.6	0
91.7	0
91.8	0
91.9	0
92	0
92.1	0
92.2	0
92.3	0
92.4	0
92.5	0
92.6	0
92.7	0
92.8	0
92.9	0
93	0
93.1	0
93.2	0
93.3	0
93.4	0
93.5	0
93.6	0
93.7	0
93.8	0
93.9	0
94	0
94.1	0
94.2	0
94.3	0
94.4	0
94.5	0
94.6	0
94.7	0
94.8	0
94.9	0
95	0
95.1	0
95.2	0
95.3	0
95.4	0
95.5	0
95.6	0
95.7	0
95.8	0
95.9	0
96	0
96.1	0
96.2	0
96.3	0
96.4	0
96.5	0
96.6	0
96.7	0
96.8	0
96.9	0
97	0
97.1	0
97.2	0
97.3	0
97.4	0
97.5	0
97.6	0
97.7	0
97.8	0
97.9	0
98	0
98.1	0
98.2	0
98.3	0
98.4	0
98.5	0
98.6	0
98.7	0
98.8	0
98.9	0
99	0
99.1	0
99.2	0
99.3	0
99.4	0
99.5	0
99.6	0
99.7	0
99.8	0
99.9	0
100	0
100.1	0.0225
100.2	0.0625
100.3	0.0825
100.4	0.1025
100.5	0.115
100.6	0.1375
100.7	0.155
100.8	0.1875
100.9	0.2
101	0.225
101.1	0.25
101.2	0.2675
101.3	0.2775
101.4	0.29
101.5	0.2975
101.6	0.3
101.7	0.3175
101.8	0.33
101.9	0.3425
102	0.3475
102.1	0.3575
102.2	0.3625
102.3	0.36
102.4	0.375
102.5	0.395
102.6	0.4025
102.7	0.4
102.8	0.3975
102.9	0.4125
103	0.42
103.1	0.4225
103.2	0.4225
103.3	0.435
103.4	0.4525
103.5	0.4575
103.6	0.46
103.7	0.465
103.8	0.46
103.9	0.465
104	0.4725
104.1	0.47
104.2	0.4825
104.3	0.485
104.4	0.49
104.5	0.5075
104.6	0.51
104.7	0.5075
104.8	0.5125
104.9	0.51
105	0.515
105.1	0.5275
105.2	0.525
105.3	0.5175
105.4	0.515
105.5	0.52
105.6	0.5275
105.7	0.5325
105.8	0.5425
105.9	0.545
106	0.53
106.1	0.53
106.2	0.5225
106.3	0.5225
106.4	0.5125
106.5	0.51
106.6	0.52
106.7	0.52
106.8	0.5225
106.9	0.5375
107	0.5425
107.1	0.56
107.2	0.5575
107.3	0.56
107.4	0.56
107.5	0.545
107.6	0.5375
107.7	0.53
107.8	0.5325
107.9	0.525
108	0.52
108.1	0.5275
108.2	0.53
108.3	0.54
108.4	0.54
108.5	0.54
108.6	0.54
108.7	0.53
108.8	0.535
108.9	0.5425
109	0.54
109.1	0.545
109.2	0.5425
109.3	0.5375
109.4	0.535
109.5	0.54
109.6	0.535
109.7	0.5325
109.8	0.5275
109.9	0.5275
110	0.5275
110.1	0.525
110.2	0.52
110.3	0.515
110.4	0.5175
110.5	0.5275
110.6	0.53
110.7	0.5325
110.8	0.5325
110.9	0.5325
111	0.525
111.1	0.54
111.2	0.5375
111.3	0.5375
111.4	0.5325
111.5	0.5425
111.6	0.5425
111.7	0.5525
111.8	0.5525
111.9	0.555
112	0.5575
112.1	0.5525
112.2	0.545
112.3	0.55
112.4	0.55
112.5	0.545
112.6	0.55
112.7	0.5375
112.8	0.54
112.9	0.5425
113	0.54
113.1	0.54
113.2	0.5375
113.3	0.5375
113.4	0.5375
113.5	0.545
113.6	0.5425
113.7	0.55
113.8	0.5525
113.9	0.565
114	0.5725
114.1	0.58
114.2	0.5775
114.3	0.58
114.4	0.5775
114.5	0.5875
114.6	0.5825
114.7	0.5775
114.8	0.575
114.9	0.5875
115	0.5875
115.1	0.58
115.2	0.5675
115.3	0.5725
115.4	0.5675
115.5	0.56
115.6	0.5575
115.7	0.5625
115.8	0.5625
115.9	0.555
116	0.55
116.1	0.5575
116.2	0.5575
116.3	0.5475
116.4	0.545
116.5	0.5575
116.6	0.555
116.7	0.56
116.8	0.5625
116.9	0.57
117	0.57
117.1	0.5725
117.2	0.5725
117.3	0.5675
117.4	0.5625
117.5	0.565
117.6	0.5575
117.7	0.565
117.8	0.565
117.9	0.57
118	0.5725
118.1	0.575
118.2	0.5825
118.3	0.585
118.4	0.5875
118.5	0.5875
118.6	0.59
118.7	0.585
118.8	0.5825
118.9	0.5825
119	0.575
119.1	0.5725
119.2	0.5825
119.3	0.5825
119.4	0.5875
119.5	0.5975
119.6	0.595
119.7	0.5975
119.8	0.5975
119.9	0.6
120	0.5925
120.1	0.5875
120.2	0.585
120.3	0.5725
120.4	0.575
120.5	0.5725
120.6	0.57
120.7	0.575
120.8	0.575
120.9	0.575
121	0.5875
121.1	0.5825
121.2	0.59
121.3	0.5925
121.4	0.5875
121.5	0.595
121.6	0.5925
121.7	0.595
121.8	0.5975
121.9	0.6
122	0.5925
122.1	0.585
122.2	0.585
122.3	0.585
122.4	0.5725
122.5	0.575
122.6	0.5775
122.7	0.58
122.8	0.58
122.9	0.585
123	0.5875
123.1	0.5875
123.2	0.585
123.3	0.5825
123.4	0.58
123.5	0.5875
123.6	0.5875
123.7	0.5775
123.8	0.5775
123.9	0.585
124	0.585
124.1	0.585
124.2	0.5925
124.3	0.5925
124.4	0.59
124.5	0.6
124.6	0.6
124.7	0.61
124.8	0.615
124.9	0.62
125	0.625
125.1	0.6275
125.2	0.625
125.3	0.6225
125.4	0.62
125.5	0.6275
125.6	0.6225
125.7	0.6325
125.8	0.6325
125.9	0.6375
126	0.6325
126.1	0.6375
126.2	0.635
126.3	0.635
126.4	0.635
126.5	0.6325
126.6	0.63
126.7	0.6325
126.8	0.63
126.9	0.625
127	0.63
127.1	0.6275
127.2	0.6325
127.3	0.6325
127.4	0.6225
127.5	0.6175
127.6	0.6175
127.7	0.6175
127.8	0.62
127.9	0.6175
128	0.6125
128.1	0.6225
128.2	0.6275
128.3	0.63
128.4	0.6325
128.5	0.6275
128.6	0.6275
128.7	0.625
128.8	0.63
128.9	0.625
129	0.6175
129.1	0.6325
129.2	0.63
129.3	0.6325
129.4	0.6325
129.5	0.63
129.6	0.6275
129.7	0.63
129.8	0.6325
129.9	0.6425
130	0.65
130.1	0.655
130.2	0.6525
130.3	0.6475
130.4	0.635
130.5	0.64
130.6	0.64
130.7	0.6425
130.8	0.64
130.9	0.6275
131	0.63
131.1	0.62
131.2	0.6175
131.3	0.62
131.4	0.61
131.5	0.605
131.6	0.6075
131.7	0.6075
131.8	0.6025
131.9	0.6125
132	0.62
132.1	0.625
132.2	0.63
132.3	0.6275
132.4	0.6375
132.5	0.63
132.6	0.6225
132.7	0.6275
132.8	0.625
132.9	0.62
133	0.615
133.1	0.6175
133.2	0.62
133.3	0.625
133.4	0.6225
133.5	0.6325
133.6	0.6425
133.7	0.645
133.8	0.655
133.9	0.6525
134	0.66
134.1	0.6575
134.2	0.655
134.3	0.655
134.4	0.655
134.5	0.6575
134.6	0.6525
134.7	0.655
134.8	0.6575
134.9	0.655
135	0.6625
135.1	0.6525
135.2	0.6475
135.3	0.6475
135.4	0.6425
135.5	0.6475
135.6	0.65
135.7	0.64
135.8	0.635
135.9	0.6375
136	0.635
136.1	0.6275
136.2	0.6225
136.3	0.62
136.4	0.6275
136.5	0.6325
136.6	0.6375
136.7	0.6375
136.8	0.6325
136.9	0.6275
137	0.6325
137.1	0.6325
137.2	0.635
137.3	0.6325
137.4	0.6325
137.5	0.63
137.6	0.6325
137.7	0.625
137.8	0.6275
137.9	0.6225
138	0.62
138.1	0.6175
138.2	0.615
138.3	0.6225
138.4	0.615
138.5	0.62
138.6	0.6275
138.7	0.64
138.8	0.6425
138.9	0.64
139	0.6375
139.1	0.6375
139.2	0.6425
139.3	0.645
139.4	0.6425
139.5	0.6475
139.6	0.645
139.7	0.64
139.8	0.64
139.9	0.64
140	0.6375
140.1	0.6325
140.2	0.6325
140.3	0.63
140.4	0.635
140.5	0.6425
140.6	0.655
140.7	0.6675
140.8	0.6625
140.9	0.6625
141	0.665
141.1	0.6725
141.2	0.6775
141.3	0.6775
141.4	0.68
141.5	0.6725
141.6	0.6675
141.7	0.6575
141.8	0.665
141.9	0.6675
142	0.66
142.1	0.655
142.2	0.655
142.3	0.6475
142.4	0.65
142.5	0.65
142.6	0.645
142.7	0.64
142.8	0.6325
142.9	0.6375
143	0.6375
143.1	0.63
143.2	0.63
143.3	0.6275
143.4	0.6325
143.5	0.6225
143.6	0.63
143.7	0.6375
143.8	0.6425
143.9	0.645
144	0.63
144.1	0.6375
144.2	0.62
144.3	0.625
144.4	0.6325
144.5	0.6275
144.6	0.63
144.7	0.6425
144.8	0.6425
144.9	0.635
145	0.6275
145.1	0.625
145.2	0.64
145.3	0.6425
145.4	0.645
145.5	0.65
145.6	0.645
145.7	0.6475
145.8	0.6475
145.9	0.655
146	0.6575
146.1	0.66
146.2	0.645
146.3	0.6375
146.4	0.63
146.5	0.6275
146.6	0.635
146.7	0.6375
146.8	0.6325
146.9	0.6325
147	0.6325
147.1	0.625
147.2	0.625
147.3	0.62
147.4	0.625
147.5	0.62
147.6	0.62
147.7	0.62
147.8	0.62
147.9	0.63
148	0.645
148.1	0.6425
148.2	0.6425
148.3	0.64
148.4	0.64
148.5	0.64
148.6	0.645
148.7	0.6425
148.8	0.645
148.9	0.645
149	0.64
149.1	0.6425
149.2	0.6375
149.3	0.6375
149.4	0.6375
149.5	0.64
149.6	0.645
149.7	0.655
149.8	0.6625
149.9	0.6575
150	0.66
150.1	0.6575
150.2	0.6625
150.3	0.66
150.4	0.66
150.5	0.66
150.6	0.655
150.7	0.66
150.8	0.66
150.9	0.6625
151	0.6575
151.1	0.66
151.2	0.6575
151.3	0.655
151.4	0.6625
151.5	0.665
151.6	0.66
151.7	0.665
151.8	0.6675
151.9	0.6675
152	0.6675
152.1	0.6725
152.2	0.665
152.3	0.66
152.4	0.6575
152.5	0.655
152.6	0.66
152.7	0.6525
152.8	0.6525
152.9	0.6425
153	0.6525
153.1	0.6525
153.2	0.645
153.3	0.6475
153.4	0.6475
153.5	0.645
153.6	0.655
153.7	0.6575
153.8	0.6575
153.9	0.6575
154	0.66
154.1	0.665
154.2	0.6725
154.3	0.6675
154.4	0.665
154.5	0.6625
154.6	0.6675
154.7	0.67
154.8	0.6775
154.9	0.6725
155	0.6775
155.1	0.67
155.2	0.6675
155.3	0.67
155.4	0.67
155.5	0.6625
155.6	0.655
155.7	0.6525
155.8	0.6575
155.9	0.6575
156	0.675
156.1	0.685
156.2	0.685
156.3	0.6825
156.4	0.6875
156.5	0.6825
156.6	0.6775
156.7	0.6925
156.8	0.6925
156.9	0.6875
157	0.69
157.1	0.6925
157.2	0.6875
157.3	0.675
157.4	0.67
157.5	0.66
157.6	0.66
157.7	0.6575
157.8	0.66
157.9	0.6475
158	0.6475
158.1	0.645
158.2	0.6525
158.3	0.6575
158.4	0.665
158.5	0.6575
158.6	0.6625
158.7	0.6525
158.8	0.6575
158.9	0.6625
159	0.665
159.1	0.67
159.2	0.67
159.3	0.665
159.4	0.67
159.5	0.67
159.6	0.665
159.7	0.66
159.8	0.6625
159.9	0.6675
160	0.6675
160.1	0.67
160.2	0.6675
160.3	0.66
160.4	0.65
160.5	0.6375
160.6	0.65
160.7	0.65
160.8	0.645
160.9	0.6525
161	0.6575
161.1	0.655
161.2	0.65
161.3	0.6575
161.4	0.6475
161.5	0.66
161.6	0.6625
161.7	0.6625
161.8	0.655
161.9	0.665
162	0.665
162.1	0.67
162.2	0.6775
162.3	0.685
162.4	0.6975
162.5	0.7025
162.6	0.7025
162.7	0.695
162.8	0.6875
162.9	0.6775
163	0.68
163.1	0.685
163.2	0.6825
163.3	0.6825
163.4	0.68
163.5	0.68
163.6	0.68
163.7	0.685
163.8	0.685
163.9	0.6825
164	0.685
164.1	0.685
164.2	0.69
164.3	0.6925
164.4	0.6925
164.5	0.69
164.6	0.695
164.7	0.6975
164.8	0.7
164.9	0.7
165	0.6925
165.1	0.6825
165.2	0.685
165.3	0.685
165.4	0.695
165.5	0.695
165.6	0.7
165.7	0.7025
165.8	0.7075
165.9	0.7025
166	0.705
166.1	0.7075
166.2	0.7075
166.3	0.71
166.4	0.71
166.5	0.715
166.6	0.7125
166.7	0.7125
166.8	0.71
166.9	0.7125
167	0.7025
167.1	0.6975
167.2	0.7
167.3	0.705
167.4	0.71
167.5	0.7125
167.6	0.705
167.7	0.705
167.8	0.7
167.9	0.7025
168	0.6925
168.1	0.695
168.2	0.695
168.3	0.6975
168.4	0.7025
168.5	0.7
168.6	0.6975
168.7	0.7
168.8	0.7
168.9	0.7
169	0.7
169.1	0.6925
169.2	0.7025
169.3	0.7025
169.4	0.705
169.5	0.705
169.6	0.7125
169.7	0.71
169.8	0.7075
169.9	0.71
170	0.72
170.1	0.7175
170.2	0.7175
170.3	0.7175
170.4	0.71
170.5	0.705
170.6	0.71
170.7	0.7075
170.8	0.715
170.9	0.705
171	0.7025
171.1	0.695
171.2	0.6925
171.3	0.6875
171.4	0.6975
171.5	0.6925
171.6	0.6925
171.7	0.695
171.8	0.69
171.9	0.6925
172	0.6875
172.1	0.685
172.2	0.69
172.3	0.6975
172.4	0.7
172.5	0.7
172.6	0.695
172.7	0.7
172.8	0.7
172.9	0.7
173	0.6975
173.1	0.7
173.2	0.71
173.3	0.7075
173.4	0.7075
173.5	0.705
173.6	0.715
173.7	0.715
173.8	0.7225
173.9	0.72
174	0.7225
174.1	0.725
174.2	0.73
174.3	0.735
174.4	0.7275
174.5	0.73
174.6	0.7225
174.7	0.7275
174.8	0.7275
174.9	0.73
175	0.7325
175.1	0.735
175.2	0.7375
175.3	0.725
175.4	0.7275
175.5	0.72
175.6	0.71
175.7	0.7175
175.8	0.7225
175.9	0.715
176	0.7125
176.1	0.7075
176.2	0.7125
176.3	0.715
176.4	0.7125
176.5	0.7075
176.6	0.7075
176.7	0.7025
176.8	0.7075
176.9	0.705
177	0.7
177.1	0.7075
177.2	0.71
177.3	0.705
177.4	0.7025
177.5	0.7075
177.6	0.7125
177.7	0.7075
177.8	0.71
177.9	0.715
178	0.715
178.1	0.715
178.2	0.72
178.3	0.7275
178.4	0.725
178.5	0.7225
178.6	0.725
178.7	0.7275
178.8	0.7325
178.9	0.74
179	0.74
179.1	0.74
179.2	0.7375
179.3	0.735
179.4	0.7275
179.5	0.73
179.6	0.72
179.7	0.715
179.8	0.7075
179.9	0.7025
180	0.6975
180.1	0.7025
180.2	0.7125
180.3	0.71
180.4	0.71
180.5	0.7075
180.6	0.7075
180.7	0.71
180.8	0.705
180.9	0.6975
181	0.695
181.1	0.6975
181.2	0.7025
181.3	0.7075
181.4	0.7125
181.5	0.715
181.6	0.7175
181.7	0.72
181.8	0.7175
181.9	0.72
182	0.7225
182.1	0.72
182.2	0.72
182.3	0.7175
182.4	0.7125
182.5	0.71
182.6	0.725
182.7	0.735
182.8	0.7275
182.9	0.7275
183	0.73
183.1	0.7325
183.2	0.73
183.3	0.7275
183.4	0.72
183.5	0.705
183.6	0.71
183.7	0.7175
183.8	0.715
183.9	0.715
184	0.7125
184.1	0.715
184.2	0.72
184.3	0.72
184.4	0.715
184.5	0.72
184.6	0.7175
184.7	0.7225
184.8	0.725
184.9	0.7175
185	0.7175
185.1	0.725
185.2	0.7325
185.3	0.735
185.4	0.7325
185.5	0.725
185.6	0.725
185.7	0.73
185.8	0.73
185.9	0.7325
186	0.7325
186.1	0.735
186.2	0.73
186.3	0.7425
186.4	0.74
186.5	0.7275
186.6	0.7325
186.7	0.7275
186.8	0.7325
186.9	0.7325
187	0.7225
187.1	0.7225
187.2	0.7225
187.3	0.72
187.4	0.725
187.5	0.7225
187.6	0.7225
187.7	0.725
187.8	0.7225
187.9	0.7175
188	0.7125
188.1	0.72
188.2	0.715
188.3	0.7075
188.4	0.715
188.5	0.7075
188.6	0.7125
188.7	0.715
188.8	0.7175
188.9	0.7175
189	0.715
189.1	0.7175
189.2	0.7175
189.3	0.7225
189.4	0.7225
189.5	0.72
189.6	0.72
189.7	0.7175
189.8	0.72
189.9	0.72
190	0.7325
190.1	0.725
190.2	0.725
190.3	0.725
190.4	0.7175
190.5	0.725
190.6	0.73
190.7	0.7425
190.8	0.75
190.9	0.7575
191	0.7575
191.1	0.7625
191.2	0.7625
191.3	0.7625
191.4	0.7625
191.5	0.76
191.6	0.76
191.7	0.75
191.8	0.7475
191.9	0.7425
192	0.735
192.1	0.7375
192.2	0.7325
192.3	0.7375
192.4	0.7425
192.5	0.7375
192.6	0.74
192.7	0.74
192.8	0.7325
192.9	0.7375
193	0.7375
193.1	0.7325
193.2	0.735
193.3	0.73
193.4	0.7325
193.5	0.73
193.6	0.7375
193.7	0.7425
193.8	0.74
193.9	0.7375
194	0.7425
194.1	0.7425
194.2	0.7425
194.3	0.75
194.4	0.745
194.5	0.75
194.6	0.7575
194.7	0.755
194.8	0.755
194.9	0.75
195	0.7575
195.1	0.7525
195.2	0.75
195.3	0.745
195.4	0.745
195.5	0.7375
195.6	0.7375
195.7	0.7425
195.8	0.75
195.9	0.765
196	0.76
196.1	0.765
196.2	0.7625
196.3	0.7625
196.4	0.7575
196.5	0.7525
196.6	0.7475
196.7	0.7475
196.8	0.745
196.9	0.7425
197	0.745
197.1	0.75
197.2	0.7475
197.3	0.755
197.4	0.755
197.5	0.7475
197.6	0.745
197.7	0.745
197.8	0.74
197.9	0.735
198	0.75
198.1	0.75
198.2	0.7475
198.3	0.7425
198.4	0.745
198.5	0.745
198.6	0.74
198.7	0.74
198.8	0.7425
198.9	0.7475
199	0.7475
199.1	0.7425
199.2	0.7425
199.3	0.74
199.4	0.74
199.5	0.735
199.6	0.74
199.7	0.7475
199.8	0.75
199.9	0.7525
200	0.7475
[truncated: 14,000 more rows]
