# Supplementary material for: Bayesian inference of kinetic schemes for ion channels by Kalman filtering
Source: eLife journal article supplement (doi:10.7554/elife.62714), 2022-05-04
Supplement: fig4-data9 [file 1_Sim_N_200_Strom_MW_0.5M.xlsx]

## Sheet: 0.5 M
0.1	0
0.2	0
0.3	0
0.4	0
0.5	0
0.6	0
0.7	0
0.8	0
0.9	0
1	0
1.1	0
1.2	0
1.3	0
1.4	0
1.5	0
1.6	0
1.7	0
1.8	0
1.9	0
2	0
2.1	0
2.2	0
2.3	0
2.4	0
2.5	0
2.6	0
2.7	0
2.8	0
2.9	0
3	0
3.1	0
3.2	0
3.3	0
3.4	0
3.5	0
3.6	0
3.7	0
3.8	0
3.9	0
4	0
4.1	0
4.2	0
4.3	0
4.4	0
4.5	0
4.6	0
4.7	0
4.8	0
4.9	0
5	0
5.1	0
5.2	0
5.3	0
5.4	0
5.5	0
5.6	0
5.7	0
5.8	0
5.9	0
6	0
6.1	0
6.2	0
6.3	0
6.4	0
6.5	0
6.6	0
6.7	0
6.8	0
6.9	0
7	0
7.1	0
7.2	0
7.3	0
7.4	0
7.5	0
7.6	0
7.7	0
7.8	0
7.9	0
8	0
8.1	0
8.2	0
8.3	0
8.4	0
8.5	0
8.6	0
8.7	0
8.8	0
8.9	0
9	0
9.1	0
9.2	0
9.3	0
9.4	0
9.5	0
9.6	0
9.7	0
9.8	0
9.9	0
10	0
10.1	0
10.2	0
10.3	0
10.4	0
10.5	0
10.6	0
10.7	0
10.8	0
10.9	0
11	0
11.1	0
11.2	0
11.3	0
11.4	0
11.5	0
11.6	0
11.7	0
11.8	0
11.9	0
12	0
12.1	0
12.2	0
12.3	0
12.4	0
12.5	0
12.6	0
12.7	0
12.8	0
12.9	0
13	0
13.1	0
13.2	0
13.3	0
13.4	0
13.5	0
13.6	0
13.7	0
13.8	0
13.9	0
14	0
14.1	0
14.2	0
14.3	0
14.4	0
14.5	0
14.6	0
14.7	0
14.8	0
14.9	0
15	0
15.1	0
15.2	0
15.3	0
15.4	0
15.5	0
15.6	0
15.7	0
15.8	0
15.9	0
16	0
16.1	0
16.2	0
16.3	0
16.4	0
16.5	0
16.6	0
16.7	0
16.8	0
16.9	0
17	0
17.1	0
17.2	0
17.3	0
17.4	0
17.5	0
17.6	0
17.7	0
17.8	0
17.9	0
18	0
18.1	0
18.2	0
18.3	0
18.4	0
18.5	0
18.6	0
18.7	0
18.8	0
18.9	0
19	0
19.1	0
19.2	0
19.3	0
19.4	0
19.5	0
19.6	0
19.7	0
19.8	0
19.9	0
20	0
20.1	0
20.2	0
20.3	0
20.4	0
20.5	0
20.6	0
20.7	0
20.8	0
20.9	0
21	0
21.1	0
21.2	0
21.3	0
21.4	0
21.5	0
21.6	0
21.7	0
21.8	0
21.9	0
22	0
22.1	0
22.2	0
22.3	0
22.4	0
22.5	0
22.6	0
22.7	0
22.8	0
22.9	0
23	0
23.1	0
23.2	0
23.3	0
23.4	0
23.5	0
23.6	0
23.7	0
23.8	0
23.9	0
24	0
24.1	0
24.2	0
24.3	0
24.4	0
24.5	0
24.6	0
24.7	0
24.8	0
24.9	0
25	0
25.1	0
25.2	0
25.3	0
25.4	0
25.5	0
25.6	0
25.7	0
25.8	0
25.9	0
26	0
26.1	0
26.2	0
26.3	0
26.4	0
26.5	0
26.6	0
26.7	0
26.8	0
26.9	0
27	0
27.1	0
27.2	0
27.3	0
27.4	0
27.5	0
27.6	0
27.7	0
27.8	0
27.9	0
28	0
28.1	0
28.2	0
28.3	0
28.4	0
28.5	0
28.6	0
28.7	0
28.8	0
28.9	0
29	0
29.1	0
29.2	0
29.3	0
29.4	0
29.5	0
29.6	0
29.7	0
29.8	0
29.9	0
30	0
30.1	0
30.2	0
30.3	0
30.4	0
30.5	0
30.6	0
30.7	0
30.8	0
30.9	0
31	0
31.1	0
31.2	0
31.3	0
31.4	0
31.5	0
31.6	0
31.7	0
31.8	0
31.9	0
32	0
32.1	0
32.2	0
32.3	0
32.4	0
32.5	0
32.6	0
32.7	0
32.8	0
32.9	0
33	0
33.1	0
33.2	0
33.3	0
33.4	0
33.5	0
33.6	0
33.7	0
33.8	0
33.9	0
34	0
34.1	0
34.2	0
34.3	0
34.4	0
34.5	0
34.6	0
34.7	0
34.8	0
34.9	0
35	0
35.1	0
35.2	0
35.3	0
35.4	0
35.5	0
35.6	0
35.7	0
35.8	0
35.9	0
36	0
36.1	0
36.2	0
36.3	0
36.4	0
36.5	0
36.6	0
36.7	0
36.8	0
36.9	0
37	0
37.1	0
37.2	0
37.3	0
37.4	0
37.5	0
37.6	0
37.7	0
37.8	0
37.9	0
38	0
38.1	0
38.2	0
38.3	0
38.4	0
38.5	0
38.6	0
38.7	0
38.8	0
38.9	0
39	0
39.1	0
39.2	0
39.3	0
39.4	0
39.5	0
39.6	0
39.7	0
39.8	0
39.9	0
40	0
40.1	0
40.2	0
40.3	0
40.4	0
40.5	0
40.6	0
40.7	0
40.8	0
40.9	0
41	0
41.1	0
41.2	0
41.3	0
41.4	0
41.5	0
41.6	0
41.7	0
41.8	0
41.9	0
42	0
42.1	0
42.2	0
42.3	0
42.4	0
42.5	0
42.6	0
42.7	0
42.8	0
42.9	0
43	0
43.1	0
43.2	0
43.3	0
43.4	0
43.5	0
43.6	0
43.7	0
43.8	0
43.9	0
44	0
44.1	0
44.2	0
44.3	0
44.4	0
44.5	0
44.6	0
44.7	0
44.8	0
44.9	0
45	0
45.1	0
45.2	0
45.3	0
45.4	0
45.5	0
45.6	0
45.7	0
45.8	0
45.9	0
46	0
46.1	0
46.2	0
46.3	0
46.4	0
46.5	0
46.6	0
46.7	0
46.8	0
46.9	0
47	0
47.1	0
47.2	0
47.3	0
47.4	0
47.5	0
47.6	0
47.7	0
47.8	0
47.9	0
48	0
48.1	0
48.2	0
48.3	0
48.4	0
48.5	0
48.6	0
48.7	0
48.8	0
48.9	0
49	0
49.1	0
49.2	0
49.3	0
49.4	0
49.5	0
49.6	0
49.7	0
49.8	0
49.9	0
50	0
50.1	0
50.2	0
50.3	0
50.4	0
50.5	0
50.6	0
50.7	0
50.8	0
50.9	0
51	0
51.1	0
51.2	0
51.3	0
51.4	0
51.5	0
51.6	0
51.7	0
51.8	0
51.9	0
52	0
52.1	0
52.2	0
52.3	0
52.4	0
52.5	0
52.6	0
52.7	0
52.8	0
52.9	0
53	0
53.1	0
53.2	0
53.3	0
53.4	0
53.5	0
53.6	0
53.7	0
53.8	0
53.9	0
54	0
54.1	0
54.2	0
54.3	0
54.4	0
54.5	0
54.6	0
54.7	0
54.8	0
54.9	0
55	0
55.1	0
55.2	0
55.3	0
55.4	0
55.5	0
55.6	0
55.7	0
55.8	0
55.9	0
56	0
56.1	0
56.2	0
56.3	0
56.4	0
56.5	0
56.6	0
56.7	0
56.8	0
56.9	0
57	0
57.1	0
57.2	0
57.3	0
57.4	0
57.5	0
57.6	0
57.7	0
57.8	0
57.9	0
58	0
58.1	0
58.2	0
58.3	0
58.4	0
58.5	0
58.6	0
58.7	0
58.8	0
58.9	0
59	0
59.1	0
59.2	0
59.3	0
59.4	0
59.5	0
59.6	0
59.7	0
59.8	0
59.9	0
60	0
60.1	0
60.2	0
60.3	0
60.4	0
60.5	0
60.6	0
60.7	0
60.8	0
60.9	0
61	0
61.1	0
61.2	0
61.3	0
61.4	0
61.5	0
61.6	0
61.7	0
61.8	0
61.9	0
62	0
62.1	0
62.2	0
62.3	0
62.4	0
62.5	0
62.6	0
62.7	0
62.8	0
62.9	0
63	0
63.1	0
63.2	0
63.3	0
63.4	0
63.5	0
63.6	0
63.7	0
63.8	0
63.9	0
64	0
64.1	0
64.2	0
64.3	0
64.4	0
64.5	0
64.6	0
64.7	0
64.8	0
64.9	0
65	0
65.1	0
65.2	0
65.3	0
65.4	0
65.5	0
65.6	0
65.7	0
65.8	0
65.9	0
66	0
66.1	0
66.2	0
66.3	0
66.4	0
66.5	0
66.6	0
66.7	0
66.8	0
66.9	0
67	0
67.1	0
67.2	0
67.3	0
67.4	0
67.5	0
67.6	0
67.7	0
67.8	0
67.9	0
68	0
68.1	0
68.2	0
68.3	0
68.4	0
68.5	0
68.6	0
68.7	0
68.8	0
68.9	0
69	0
69.1	0
69.2	0
69.3	0
69.4	0
69.5	0
69.6	0
69.7	0
69.8	0
69.9	0
70	0
70.1	0
70.2	0
70.3	0
70.4	0
70.5	0
70.6	0
70.7	0
70.8	0
70.9	0
71	0
71.1	0
71.2	0
71.3	0
71.4	0
71.5	0
71.6	0
71.7	0
71.8	0
71.9	0
72	0
72.1	0
72.2	0
72.3	0
72.4	0
72.5	0
72.6	0
72.7	0
72.8	0
72.9	0
73	0
73.1	0
73.2	0
73.3	0
73.4	0
73.5	0
73.6	0
73.7	0
73.8	0
73.9	0
74	0
74.1	0
74.2	0
74.3	0
74.4	0
74.5	0
74.6	0
74.7	0
74.8	0
74.9	0
75	0
75.1	0
75.2	0
75.3	0
75.4	0
75.5	0
75.6	0
75.7	0
75.8	0
75.9	0
76	0
76.1	0
76.2	0
76.3	0
76.4	0
76.5	0
76.6	0
76.7	0
76.8	0
76.9	0
77	0
77.1	0
77.2	0
77.3	0
77.4	0
77.5	0
77.6	0
77.7	0
77.8	0
77.9	0
78	0
78.1	0
78.2	0
78.3	0
78.4	0
78.5	0
78.6	0
78.7	0
78.8	0
78.9	0
79	0
79.1	0
79.2	0
79.3	0
79.4	0
79.5	0
79.6	0
79.7	0
79.8	0
79.9	0
80	0
80.1	0
80.2	0
80.3	0
80.4	0
80.5	0
80.6	0
80.7	0
80.8	0
80.9	0
81	0
81.1	0
81.2	0
81.3	0
81.4	0
81.5	0
81.6	0
81.7	0
81.8	0
81.9	0
82	0
82.1	0
82.2	0
82.3	0
82.4	0
82.5	0
82.6	0
82.7	0
82.8	0
82.9	0
83	0
83.1	0
83.2	0
83.3	0
83.4	0
83.5	0
83.6	0
83.7	0
83.8	0
83.9	0
84	0
84.1	0
84.2	0
84.3	0
84.4	0
84.5	0
84.6	0
84.7	0
84.8	0
84.9	0
85	0
85.1	0
85.2	0
85.3	0
85.4	0
85.5	0
85.6	0
85.7	0
85.8	0
85.9	0
86	0
86.1	0
86.2	0
86.3	0
86.4	0
86.5	0
86.6	0
86.7	0
86.8	0
86.9	0
87	0
87.1	0
87.2	0
87.3	0
87.4	0
87.5	0
87.6	0
87.7	0
87.8	0
87.9	0
88	0
88.1	0
88.2	0
88.3	0
88.4	0
88.5	0
88.6	0
88.7	0
88.8	0
88.9	0
89	0
89.1	0
89.2	0
89.3	0
89.4	0
89.5	0
89.6	0
89.7	0
89.8	0
89.9	0
90	0
90.1	0
90.2	0
90.3	0
90.4	0
90.5	0
90.6	0
90.7	0
90.8	0
90.9	0
91	0
91.1	0
91.2	0
91.3	0
91.4	0
91.5	0
91.6	0
91.7	0
91.8	0
91.9	0
92	0
92.1	0
92.2	0
92.3	0
92.4	0
92.5	0
92.6	0
92.7	0
92.8	0
92.9	0
93	0
93.1	0
93.2	0
93.3	0
93.4	0
93.5	0
93.6	0
93.7	0
93.8	0
93.9	0
94	0
94.1	0
94.2	0
94.3	0
94.4	0
94.5	0
94.6	0
94.7	0
94.8	0
94.9	0
95	0
95.1	0
95.2	0
95.3	0
95.4	0
95.5	0
95.6	0
95.7	0
95.8	0
95.9	0
96	0
96.1	0
96.2	0
96.3	0
96.4	0
96.5	0
96.6	0
96.7	0
96.8	0
96.9	0
97	0
97.1	0
97.2	0
97.3	0
97.4	0
97.5	0
97.6	0
97.7	0
97.8	0
97.9	0
98	0
98.1	0
98.2	0
98.3	0
98.4	0
98.5	0
98.6	0
98.7	0
98.8	0
98.9	0
99	0
99.1	0
99.2	0
99.3	0
99.4	0
99.5	0
99.6	0
99.7	0
99.8	0
99.9	0
100	0
100.1	0
100.2	0
100.3	0
100.4	0
100.5	0
100.6	0
100.7	0
100.8	0
100.9	0
101	0
101.1	0
101.2	0
101.3	0
101.4	0
101.5	0
101.6	0
101.7	0
101.8	0
101.9	0
102	0
102.1	0
102.2	0.005
102.3	0.005
102.4	0.005
102.5	0.005
102.6	0.005
102.7	0.005
102.8	0.005
102.9	0.005
103	0.005
103.1	0.01
103.2	0.01
103.3	0.01
103.4	0.01
103.5	0.01
103.6	0.01
103.7	0.01
103.8	0.015
103.9	0.015
104	0.015
104.1	0.015
104.2	0.015
104.3	0.015
104.4	0.015
104.5	0.015
104.6	0.015
104.7	0.015
104.8	0.015
104.9	0.015
105	0.015
105.1	0.015
105.2	0.02
105.3	0.02
105.4	0.02
105.5	0.02
105.6	0.02
105.7	0.02
105.8	0.02
105.9	0.02
106	0.02
106.1	0.025
106.2	0.025
106.3	0.025
106.4	0.025
106.5	0.025
106.6	0.025
106.7	0.025
106.8	0.03
106.9	0.03
107	0.03
107.1	0.03
107.2	0.03
107.3	0.03
107.4	0.03
107.5	0.03
107.6	0.03
107.7	0.03
107.8	0.03
107.9	0.03
108	0.03
108.1	0.03
108.2	0.03
108.3	0.03
108.4	0.03
108.5	0.035
108.6	0.035
108.7	0.035
108.8	0.035
108.9	0.035
109	0.035
109.1	0.035
109.2	0.035
109.3	0.035
109.4	0.04
109.5	0.04
109.6	0.04
109.7	0.04
109.8	0.04
109.9	0.04
110	0.04
110.1	0.04
110.2	0.04
110.3	0.04
110.4	0.04
110.5	0.04
110.6	0.04
110.7	0.04
110.8	0.04
110.9	0.04
111	0.04
111.1	0.04
111.2	0.04
111.3	0.04
111.4	0.04
111.5	0.04
111.6	0.04
111.7	0.045
111.8	0.045
111.9	0.045
112	0.05
112.1	0.05
112.2	0.05
112.3	0.05
112.4	0.05
112.5	0.05
112.6	0.05
112.7	0.05
112.8	0.055
112.9	0.055
113	0.06
113.1	0.06
113.2	0.06
113.3	0.06
113.4	0.06
113.5	0.06
113.6	0.065
113.7	0.065
113.8	0.065
113.9	0.065
114	0.065
114.1	0.07
114.2	0.07
114.3	0.07
114.4	0.07
114.5	0.07
114.6	0.07
114.7	0.07
114.8	0.07
114.9	0.07
115	0.075
115.1	0.075
115.2	0.075
115.3	0.075
115.4	0.08
115.5	0.08
115.6	0.08
115.7	0.08
115.8	0.08
115.9	0.08
116	0.085
116.1	0.085
116.2	0.085
116.3	0.085
116.4	0.085
116.5	0.085
116.6	0.085
116.7	0.085
116.8	0.085
116.9	0.085
117	0.085
117.1	0.085
117.2	0.09
117.3	0.09
117.4	0.09
117.5	0.09
117.6	0.09
117.7	0.09
117.8	0.085
117.9	0.085
118	0.085
118.1	0.085
118.2	0.09
118.3	0.09
118.4	0.09
118.5	0.1
118.6	0.105
118.7	0.105
118.8	0.105
118.9	0.105
119	0.105
119.1	0.105
119.2	0.105
119.3	0.11
119.4	0.11
119.5	0.11
119.6	0.11
119.7	0.11
119.8	0.11
119.9	0.11
120	0.115
120.1	0.115
120.2	0.115
120.3	0.115
120.4	0.115
120.5	0.12
120.6	0.12
120.7	0.12
120.8	0.12
120.9	0.12
121	0.125
121.1	0.13
121.2	0.13
121.3	0.13
121.4	0.13
121.5	0.13
121.6	0.13
121.7	0.13
121.8	0.13
121.9	0.13
122	0.13
122.1	0.13
122.2	0.13
122.3	0.13
122.4	0.13
122.5	0.135
122.6	0.135
122.7	0.135
122.8	0.135
122.9	0.14
123	0.145
123.1	0.145
123.2	0.145
123.3	0.14
123.4	0.14
123.5	0.14
123.6	0.14
123.7	0.14
123.8	0.145
123.9	0.145
124	0.145
124.1	0.145
124.2	0.15
124.3	0.155
124.4	0.155
124.5	0.155
124.6	0.155
124.7	0.155
124.8	0.155
124.9	0.155
125	0.155
125.1	0.155
125.2	0.16
125.3	0.16
125.4	0.16
125.5	0.16
125.6	0.16
125.7	0.16
125.8	0.16
125.9	0.16
126	0.16
126.1	0.16
126.2	0.16
126.3	0.16
126.4	0.16
126.5	0.16
126.6	0.16
126.7	0.16
126.8	0.16
126.9	0.16
127	0.165
127.1	0.165
127.2	0.165
127.3	0.165
127.4	0.165
127.5	0.165
127.6	0.165
127.7	0.17
127.8	0.17
127.9	0.175
128	0.175
128.1	0.18
128.2	0.18
128.3	0.175
128.4	0.175
128.5	0.175
128.6	0.175
128.7	0.175
128.8	0.175
128.9	0.175
129	0.18
129.1	0.18
129.2	0.18
129.3	0.18
129.4	0.18
129.5	0.18
129.6	0.18
129.7	0.18
129.8	0.18
129.9	0.18
130	0.18
130.1	0.18
130.2	0.185
130.3	0.185
130.4	0.185
130.5	0.185
130.6	0.185
130.7	0.185
130.8	0.185
130.9	0.185
131	0.19
131.1	0.19
131.2	0.19
131.3	0.19
131.4	0.19
131.5	0.19
131.6	0.19
131.7	0.19
131.8	0.19
131.9	0.19
132	0.195
132.1	0.195
132.2	0.195
132.3	0.195
132.4	0.2
132.5	0.2
132.6	0.2
132.7	0.2
132.8	0.2
132.9	0.2
133	0.205
133.1	0.21
133.2	0.21
133.3	0.215
133.4	0.215
133.5	0.215
133.6	0.215
133.7	0.215
133.8	0.215
133.9	0.215
134	0.215
134.1	0.22
134.2	0.225
134.3	0.225
134.4	0.225
134.5	0.225
134.6	0.225
134.7	0.22
134.8	0.22
134.9	0.22
135	0.22
135.1	0.225
135.2	0.225
135.3	0.225
135.4	0.225
135.5	0.225
135.6	0.22
135.7	0.22
135.8	0.22
135.9	0.22
136	0.22
136.1	0.22
136.2	0.22
136.3	0.22
136.4	0.22
136.5	0.22
136.6	0.22
136.7	0.215
136.8	0.215
136.9	0.215
137	0.215
137.1	0.22
137.2	0.22
137.3	0.22
137.4	0.22
137.5	0.22
137.6	0.22
137.7	0.22
137.8	0.22
137.9	0.22
138	0.22
138.1	0.22
138.2	0.215
138.3	0.215
138.4	0.215
138.5	0.215
138.6	0.215
138.7	0.22
138.8	0.22
138.9	0.22
139	0.22
139.1	0.22
139.2	0.23
139.3	0.23
139.4	0.23
139.5	0.23
139.6	0.235
139.7	0.235
139.8	0.235
139.9	0.235
140	0.235
140.1	0.235
140.2	0.24
140.3	0.24
140.4	0.24
140.5	0.245
140.6	0.245
140.7	0.245
140.8	0.24
140.9	0.24
141	0.24
141.1	0.24
141.2	0.24
141.3	0.24
141.4	0.24
141.5	0.24
141.6	0.24
141.7	0.24
141.8	0.24
141.9	0.24
142	0.24
142.1	0.245
142.2	0.245
142.3	0.24
142.4	0.24
142.5	0.24
142.6	0.245
142.7	0.245
142.8	0.245
142.9	0.245
143	0.245
143.1	0.245
143.2	0.245
143.3	0.245
143.4	0.245
143.5	0.245
143.6	0.245
143.7	0.245
143.8	0.245
143.9	0.25
144	0.25
144.1	0.25
144.2	0.25
144.3	0.25
144.4	0.25
144.5	0.25
144.6	0.245
144.7	0.245
144.8	0.245
144.9	0.245
145	0.25
145.1	0.245
145.2	0.25
145.3	0.25
145.4	0.25
145.5	0.25
145.6	0.25
145.7	0.25
145.8	0.25
145.9	0.25
146	0.25
146.1	0.255
146.2	0.255
146.3	0.255
146.4	0.26
146.5	0.26
146.6	0.26
146.7	0.26
146.8	0.26
146.9	0.265
147	0.265
147.1	0.265
147.2	0.265
147.3	0.265
147.4	0.265
147.5	0.265
147.6	0.265
147.7	0.265
147.8	0.265
147.9	0.265
148	0.27
148.1	0.27
148.2	0.27
148.3	0.27
148.4	0.27
148.5	0.27
148.6	0.27
148.7	0.27
148.8	0.27
148.9	0.27
149	0.27
149.1	0.27
149.2	0.27
149.3	0.27
149.4	0.27
149.5	0.27
149.6	0.27
149.7	0.265
149.8	0.265
149.9	0.265
150	0.265
150.1	0.265
150.2	0.27
150.3	0.27
150.4	0.27
150.5	0.27
150.6	0.27
150.7	0.28
150.8	0.28
150.9	0.28
151	0.285
151.1	0.285
151.2	0.285
151.3	0.285
151.4	0.285
151.5	0.285
151.6	0.28
151.7	0.28
151.8	0.28
151.9	0.28
152	0.285
152.1	0.29
152.2	0.29
152.3	0.29
152.4	0.295
152.5	0.295
152.6	0.295
152.7	0.295
152.8	0.295
152.9	0.295
153	0.295
153.1	0.295
153.2	0.295
153.3	0.3
153.4	0.3
153.5	0.3
153.6	0.3
153.7	0.3
153.8	0.3
153.9	0.3
154	0.3
154.1	0.3
154.2	0.3
154.3	0.3
154.4	0.295
154.5	0.295
154.6	0.295
154.7	0.3
154.8	0.3
154.9	0.295
155	0.295
155.1	0.295
155.2	0.295
155.3	0.295
155.4	0.295
155.5	0.295
155.6	0.295
155.7	0.295
155.8	0.295
155.9	0.295
156	0.295
156.1	0.295
156.2	0.295
156.3	0.295
156.4	0.295
156.5	0.3
156.6	0.3
156.7	0.3
156.8	0.305
156.9	0.305
157	0.31
157.1	0.31
157.2	0.315
157.3	0.315
157.4	0.315
157.5	0.315
157.6	0.315
157.7	0.315
157.8	0.315
157.9	0.315
158	0.315
158.1	0.315
158.2	0.315
158.3	0.315
158.4	0.315
158.5	0.315
158.6	0.31
158.7	0.31
158.8	0.315
158.9	0.315
159	0.315
159.1	0.315
159.2	0.315
159.3	0.315
159.4	0.305
159.5	0.305
159.6	0.305
159.7	0.31
159.8	0.31
159.9	0.31
160	0.315
160.1	0.315
160.2	0.315
160.3	0.315
160.4	0.315
160.5	0.315
160.6	0.315
160.7	0.315
160.8	0.315
160.9	0.315
161	0.315
161.1	0.315
161.2	0.315
161.3	0.32
161.4	0.32
161.5	0.325
161.6	0.325
161.7	0.325
161.8	0.325
161.9	0.325
162	0.325
162.1	0.325
162.2	0.325
162.3	0.325
162.4	0.325
162.5	0.325
162.6	0.325
162.7	0.325
162.8	0.325
162.9	0.325
163	0.325
163.1	0.325
163.2	0.325
163.3	0.325
163.4	0.325
163.5	0.325
163.6	0.325
163.7	0.34
163.8	0.34
163.9	0.34
164	0.34
164.1	0.34
164.2	0.34
164.3	0.34
164.4	0.34
164.5	0.34
164.6	0.335
164.7	0.335
164.8	0.335
164.9	0.335
165	0.335
165.1	0.335
165.2	0.335
165.3	0.335
165.4	0.335
165.5	0.34
165.6	0.34
165.7	0.34
165.8	0.345
165.9	0.345
166	0.345
166.1	0.345
166.2	0.345
166.3	0.345
166.4	0.345
166.5	0.345
166.6	0.35
166.7	0.355
166.8	0.355
166.9	0.355
167	0.355
167.1	0.355
167.2	0.36
167.3	0.36
167.4	0.36
167.5	0.36
167.6	0.36
167.7	0.365
167.8	0.365
167.9	0.365
168	0.365
168.1	0.365
168.2	0.365
168.3	0.365
168.4	0.365
168.5	0.365
168.6	0.365
168.7	0.365
168.8	0.365
168.9	0.365
169	0.37
169.1	0.37
169.2	0.37
169.3	0.37
169.4	0.37
169.5	0.37
169.6	0.37
169.7	0.37
169.8	0.37
169.9	0.37
170	0.37
170.1	0.37
170.2	0.375
170.3	0.375
170.4	0.375
170.5	0.37
170.6	0.37
170.7	0.37
170.8	0.37
170.9	0.375
171	0.375
171.1	0.38
171.2	0.38
171.3	0.38
171.4	0.38
171.5	0.38
171.6	0.38
171.7	0.385
171.8	0.385
171.9	0.385
172	0.385
172.1	0.385
172.2	0.385
172.3	0.385
172.4	0.385
172.5	0.385
172.6	0.385
172.7	0.385
172.8	0.385
172.9	0.385
173	0.385
173.1	0.385
173.2	0.385
173.3	0.385
173.4	0.385
173.5	0.385
173.6	0.385
173.7	0.385
173.8	0.385
173.9	0.385
174	0.385
174.1	0.385
174.2	0.385
174.3	0.385
174.4	0.385
174.5	0.385
174.6	0.385
174.7	0.385
174.8	0.385
174.9	0.385
175	0.39
175.1	0.39
175.2	0.39
175.3	0.39
175.4	0.39
175.5	0.39
175.6	0.39
175.7	0.39
175.8	0.39
175.9	0.39
176	0.39
176.1	0.39
176.2	0.39
176.3	0.39
176.4	0.39
176.5	0.39
176.6	0.39
176.7	0.39
176.8	0.39
176.9	0.39
177	0.39
177.1	0.39
177.2	0.39
177.3	0.39
177.4	0.39
177.5	0.39
177.6	0.39
177.7	0.385
177.8	0.385
177.9	0.385
178	0.385
178.1	0.385
178.2	0.385
178.3	0.385
178.4	0.385
178.5	0.385
178.6	0.38
178.7	0.385
178.8	0.39
178.9	0.39
179	0.39
179.1	0.39
179.2	0.39
179.3	0.39
179.4	0.39
179.5	0.39
179.6	0.39
179.7	0.39
179.8	0.39
179.9	0.39
180	0.39
180.1	0.39
180.2	0.39
180.3	0.39
180.4	0.39
180.5	0.39
180.6	0.39
180.7	0.39
180.8	0.39
180.9	0.39
181	0.39
181.1	0.39
181.2	0.39
181.3	0.39
181.4	0.39
181.5	0.39
181.6	0.395
181.7	0.395
181.8	0.395
181.9	0.395
182	0.395
182.1	0.395
182.2	0.395
182.3	0.4
182.4	0.4
182.5	0.4
182.6	0.4
182.7	0.4
182.8	0.4
182.9	0.4
183	0.4
183.1	0.4
183.2	0.405
183.3	0.405
183.4	0.405
183.5	0.405
183.6	0.405
183.7	0.415
183.8	0.415
183.9	0.415
184	0.41
184.1	0.41
184.2	0.405
184.3	0.41
184.4	0.41
184.5	0.41
184.6	0.41
184.7	0.41
184.8	0.41
184.9	0.41
185	0.41
185.1	0.41
185.2	0.41
185.3	0.41
185.4	0.41
185.5	0.41
185.6	0.415
185.7	0.415
185.8	0.415
185.9	0.415
186	0.415
186.1	0.415
186.2	0.415
186.3	0.415
186.4	0.415
186.5	0.415
186.6	0.415
186.7	0.415
186.8	0.41
186.9	0.41
187	0.41
187.1	0.41
187.2	0.41
187.3	0.41
187.4	0.41
187.5	0.405
187.6	0.405
187.7	0.405
187.8	0.405
187.9	0.405
188	0.405
188.1	0.405
188.2	0.405
188.3	0.405
188.4	0.41
188.5	0.41
188.6	0.41
188.7	0.41
188.8	0.41
188.9	0.415
189	0.415
189.1	0.415
189.2	0.415
189.3	0.415
189.4	0.415
189.5	0.415
189.6	0.41
189.7	0.41
189.8	0.415
189.9	0.415
190	0.415
190.1	0.415
190.2	0.415
190.3	0.415
190.4	0.415
190.5	0.415
190.6	0.415
190.7	0.415
190.8	0.415
190.9	0.415
191	0.415
191.1	0.415
191.2	0.415
191.3	0.415
191.4	0.42
191.5	0.42
191.6	0.42
191.7	0.42
191.8	0.425
191.9	0.425
192	0.425
192.1	0.425
192.2	0.425
192.3	0.43
192.4	0.43
192.5	0.435
192.6	0.435
192.7	0.43
192.8	0.43
192.9	0.435
193	0.435
193.1	0.435
193.2	0.435
193.3	0.435
193.4	0.435
193.5	0.435
193.6	0.44
193.7	0.44
193.8	0.44
193.9	0.44
194	0.44
194.1	0.445
194.2	0.445
194.3	0.445
194.4	0.445
194.5	0.445
194.6	0.45
194.7	0.45
194.8	0.45
194.9	0.45
195	0.45
195.1	0.45
195.2	0.45
195.3	0.455
195.4	0.46
195.5	0.46
195.6	0.46
195.7	0.46
195.8	0.46
195.9	0.46
196	0.455
196.1	0.455
196.2	0.455
196.3	0.455
196.4	0.455
196.5	0.455
196.6	0.455
196.7	0.455
196.8	0.455
196.9	0.46
197	0.455
197.1	0.45
197.2	0.45
197.3	0.45
197.4	0.45
197.5	0.45
197.6	0.45
197.7	0.445
197.8	0.445
197.9	0.445
198	0.445
198.1	0.45
198.2	0.45
198.3	0.45
198.4	0.45
198.5	0.45
198.6	0.445
198.7	0.445
198.8	0.445
198.9	0.445
199	0.445
199.1	0.445
199.2	0.445
199.3	0.445
199.4	0.445
199.5	0.445
199.6	0.445
199.7	0.445
199.8	0.445
199.9	0.445
200	0.445
[truncated: 14,000 more rows]
