# Supplementary material for: Bayesian inference of kinetic schemes for ion channels by Kalman filtering
Source: eLife journal article supplement (doi:10.7554/elife.62714), 2022-05-04
Supplement: fig4-data9 [file 1_Sim_N_400_Fluor_MW_0.5M.xlsx]

## Sheet: 0.5 M
0.1	0
0.2	0
0.3	0
0.4	0
0.5	0
0.6	0
0.7	0
0.8	0
0.9	0
1	0
1.1	0
1.2	0
1.3	0
1.4	0
1.5	0
1.6	0
1.7	0
1.8	0
1.9	0
2	0
2.1	0
2.2	0
2.3	0
2.4	0
2.5	0
2.6	0
2.7	0
2.8	0
2.9	0
3	0
3.1	0
3.2	0
3.3	0
3.4	0
3.5	0
3.6	0
3.7	0
3.8	0
3.9	0
4	0
4.1	0
4.2	0
4.3	0
4.4	0
4.5	0
4.6	0
4.7	0
4.8	0
4.9	0
5	0
5.1	0
5.2	0
5.3	0
5.4	0
5.5	0
5.6	0
5.7	0
5.8	0
5.9	0
6	0
6.1	0
6.2	0
6.3	0
6.4	0
6.5	0
6.6	0
6.7	0
6.8	0
6.9	0
7	0
7.1	0
7.2	0
7.3	0
7.4	0
7.5	0
7.6	0
7.7	0
7.8	0
7.9	0
8	0
8.1	0
8.2	0
8.3	0
8.4	0
8.5	0
8.6	0
8.7	0
8.8	0
8.9	0
9	0
9.1	0
9.2	0
9.3	0
9.4	0
9.5	0
9.6	0
9.7	0
9.8	0
9.9	0
10	0
10.1	0
10.2	0
10.3	0
10.4	0
10.5	0
10.6	0
10.7	0
10.8	0
10.9	0
11	0
11.1	0
11.2	0
11.3	0
11.4	0
11.5	0
11.6	0
11.7	0
11.8	0
11.9	0
12	0
12.1	0
12.2	0
12.3	0
12.4	0
12.5	0
12.6	0
12.7	0
12.8	0
12.9	0
13	0
13.1	0
13.2	0
13.3	0
13.4	0
13.5	0
13.6	0
13.7	0
13.8	0
13.9	0
14	0
14.1	0
14.2	0
14.3	0
14.4	0
14.5	0
14.6	0
14.7	0
14.8	0
14.9	0
15	0
15.1	0
15.2	0
15.3	0
15.4	0
15.5	0
15.6	0
15.7	0
15.8	0
15.9	0
16	0
16.1	0
16.2	0
16.3	0
16.4	0
16.5	0
16.6	0
16.7	0
16.8	0
16.9	0
17	0
17.1	0
17.2	0
17.3	0
17.4	0
17.5	0
17.6	0
17.7	0
17.8	0
17.9	0
18	0
18.1	0
18.2	0
18.3	0
18.4	0
18.5	0
18.6	0
18.7	0
18.8	0
18.9	0
19	0
19.1	0
19.2	0
19.3	0
19.4	0
19.5	0
19.6	0
19.7	0
19.8	0
19.9	0
20	0
20.1	0
20.2	0
20.3	0
20.4	0
20.5	0
20.6	0
20.7	0
20.8	0
20.9	0
21	0
21.1	0
21.2	0
21.3	0
21.4	0
21.5	0
21.6	0
21.7	0
21.8	0
21.9	0
22	0
22.1	0
22.2	0
22.3	0
22.4	0
22.5	0
22.6	0
22.7	0
22.8	0
22.9	0
23	0
23.1	0
23.2	0
23.3	0
23.4	0
23.5	0
23.6	0
23.7	0
23.8	0
23.9	0
24	0
24.1	0
24.2	0
24.3	0
24.4	0
24.5	0
24.6	0
24.7	0
24.8	0
24.9	0
25	0
25.1	0
25.2	0
25.3	0
25.4	0
25.5	0
25.6	0
25.7	0
25.8	0
25.9	0
26	0
26.1	0
26.2	0
26.3	0
26.4	0
26.5	0
26.6	0
26.7	0
26.8	0
26.9	0
27	0
27.1	0
27.2	0
27.3	0
27.4	0
27.5	0
27.6	0
27.7	0
27.8	0
27.9	0
28	0
28.1	0
28.2	0
28.3	0
28.4	0
28.5	0
28.6	0
28.7	0
28.8	0
28.9	0
29	0
29.1	0
29.2	0
29.3	0
29.4	0
29.5	0
29.6	0
29.7	0
29.8	0
29.9	0
30	0
30.1	0
30.2	0
30.3	0
30.4	0
30.5	0
30.6	0
30.7	0
30.8	0
30.9	0
31	0
31.1	0
31.2	0
31.3	0
31.4	0
31.5	0
31.6	0
31.7	0
31.8	0
31.9	0
32	0
32.1	0
32.2	0
32.3	0
32.4	0
32.5	0
32.6	0
32.7	0
32.8	0
32.9	0
33	0
33.1	0
33.2	0
33.3	0
33.4	0
33.5	0
33.6	0
33.7	0
33.8	0
33.9	0
34	0
34.1	0
34.2	0
34.3	0
34.4	0
34.5	0
34.6	0
34.7	0
34.8	0
34.9	0
35	0
35.1	0
35.2	0
35.3	0
35.4	0
35.5	0
35.6	0
35.7	0
35.8	0
35.9	0
36	0
36.1	0
36.2	0
36.3	0
36.4	0
36.5	0
36.6	0
36.7	0
36.8	0
36.9	0
37	0
37.1	0
37.2	0
37.3	0
37.4	0
37.5	0
37.6	0
37.7	0
37.8	0
37.9	0
38	0
38.1	0
38.2	0
38.3	0
38.4	0
38.5	0
38.6	0
38.7	0
38.8	0
38.9	0
39	0
39.1	0
39.2	0
39.3	0
39.4	0
39.5	0
39.6	0
39.7	0
39.8	0
39.9	0
40	0
40.1	0
40.2	0
40.3	0
40.4	0
40.5	0
40.6	0
40.7	0
40.8	0
40.9	0
41	0
41.1	0
41.2	0
41.3	0
41.4	0
41.5	0
41.6	0
41.7	0
41.8	0
41.9	0
42	0
42.1	0
42.2	0
42.3	0
42.4	0
42.5	0
42.6	0
42.7	0
42.8	0
42.9	0
43	0
43.1	0
43.2	0
43.3	0
43.4	0
43.5	0
43.6	0
43.7	0
43.8	0
43.9	0
44	0
44.1	0
44.2	0
44.3	0
44.4	0
44.5	0
44.6	0
44.7	0
44.8	0
44.9	0
45	0
45.1	0
45.2	0
45.3	0
45.4	0
45.5	0
45.6	0
45.7	0
45.8	0
45.9	0
46	0
46.1	0
46.2	0
46.3	0
46.4	0
46.5	0
46.6	0
46.7	0
46.8	0
46.9	0
47	0
47.1	0
47.2	0
47.3	0
47.4	0
47.5	0
47.6	0
47.7	0
47.8	0
47.9	0
48	0
48.1	0
48.2	0
48.3	0
48.4	0
48.5	0
48.6	0
48.7	0
48.8	0
48.9	0
49	0
49.1	0
49.2	0
49.3	0
49.4	0
49.5	0
49.6	0
49.7	0
49.8	0
49.9	0
50	0
50.1	0
50.2	0
50.3	0
50.4	0
50.5	0
50.6	0
50.7	0
50.8	0
50.9	0
51	0
51.1	0
51.2	0
51.3	0
51.4	0
51.5	0
51.6	0
51.7	0
51.8	0
51.9	0
52	0
52.1	0
52.2	0
52.3	0
52.4	0
52.5	0
52.6	0
52.7	0
52.8	0
52.9	0
53	0
53.1	0
53.2	0
53.3	0
53.4	0
53.5	0
53.6	0
53.7	0
53.8	0
53.9	0
54	0
54.1	0
54.2	0
54.3	0
54.4	0
54.5	0
54.6	0
54.7	0
54.8	0
54.9	0
55	0
55.1	0
55.2	0
55.3	0
55.4	0
55.5	0
55.6	0
55.7	0
55.8	0
55.9	0
56	0
56.1	0
56.2	0
56.3	0
56.4	0
56.5	0
56.6	0
56.7	0
56.8	0
56.9	0
57	0
57.1	0
57.2	0
57.3	0
57.4	0
57.5	0
57.6	0
57.7	0
57.8	0
57.9	0
58	0
58.1	0
58.2	0
58.3	0
58.4	0
58.5	0
58.6	0
58.7	0
58.8	0
58.9	0
59	0
59.1	0
59.2	0
59.3	0
59.4	0
59.5	0
59.6	0
59.7	0
59.8	0
59.9	0
60	0
60.1	0
60.2	0
60.3	0
60.4	0
60.5	0
60.6	0
60.7	0
60.8	0
60.9	0
61	0
61.1	0
61.2	0
61.3	0
61.4	0
61.5	0
61.6	0
61.7	0
61.8	0
61.9	0
62	0
62.1	0
62.2	0
62.3	0
62.4	0
62.5	0
62.6	0
62.7	0
62.8	0
62.9	0
63	0
63.1	0
63.2	0
63.3	0
63.4	0
63.5	0
63.6	0
63.7	0
63.8	0
63.9	0
64	0
64.1	0
64.2	0
64.3	0
64.4	0
64.5	0
64.6	0
64.7	0
64.8	0
64.9	0
65	0
65.1	0
65.2	0
65.3	0
65.4	0
65.5	0
65.6	0
65.7	0
65.8	0
65.9	0
66	0
66.1	0
66.2	0
66.3	0
66.4	0
66.5	0
66.6	0
66.7	0
66.8	0
66.9	0
67	0
67.1	0
67.2	0
67.3	0
67.4	0
67.5	0
67.6	0
67.7	0
67.8	0
67.9	0
68	0
68.1	0
68.2	0
68.3	0
68.4	0
68.5	0
68.6	0
68.7	0
68.8	0
68.9	0
69	0
69.1	0
69.2	0
69.3	0
69.4	0
69.5	0
69.6	0
69.7	0
69.8	0
69.9	0
70	0
70.1	0
70.2	0
70.3	0
70.4	0
70.5	0
70.6	0
70.7	0
70.8	0
70.9	0
71	0
71.1	0
71.2	0
71.3	0
71.4	0
71.5	0
71.6	0
71.7	0
71.8	0
71.9	0
72	0
72.1	0
72.2	0
72.3	0
72.4	0
72.5	0
72.6	0
72.7	0
72.8	0
72.9	0
73	0
73.1	0
73.2	0
73.3	0
73.4	0
73.5	0
73.6	0
73.7	0
73.8	0
73.9	0
74	0
74.1	0
74.2	0
74.3	0
74.4	0
74.5	0
74.6	0
74.7	0
74.8	0
74.9	0
75	0
75.1	0
75.2	0
75.3	0
75.4	0
75.5	0
75.6	0
75.7	0
75.8	0
75.9	0
76	0
76.1	0
76.2	0
76.3	0
76.4	0
76.5	0
76.6	0
76.7	0
76.8	0
76.9	0
77	0
77.1	0
77.2	0
77.3	0
77.4	0
77.5	0
77.6	0
77.7	0
77.8	0
77.9	0
78	0
78.1	0
78.2	0
78.3	0
78.4	0
78.5	0
78.6	0
78.7	0
78.8	0
78.9	0
79	0
79.1	0
79.2	0
79.3	0
79.4	0
79.5	0
79.6	0
79.7	0
79.8	0
79.9	0
80	0
80.1	0
80.2	0
80.3	0
80.4	0
80.5	0
80.6	0
80.7	0
80.8	0
80.9	0
81	0
81.1	0
81.2	0
81.3	0
81.4	0
81.5	0
81.6	0
81.7	0
81.8	0
81.9	0
82	0
82.1	0
82.2	0
82.3	0
82.4	0
82.5	0
82.6	0
82.7	0
82.8	0
82.9	0
83	0
83.1	0
83.2	0
83.3	0
83.4	0
83.5	0
83.6	0
83.7	0
83.8	0
83.9	0
84	0
84.1	0
84.2	0
84.3	0
84.4	0
84.5	0
84.6	0
84.7	0
84.8	0
84.9	0
85	0
85.1	0
85.2	0
85.3	0
85.4	0
85.5	0
85.6	0
85.7	0
85.8	0
85.9	0
86	0
86.1	0
86.2	0
86.3	0
86.4	0
86.5	0
86.6	0
86.7	0
86.8	0
86.9	0
87	0
87.1	0
87.2	0
87.3	0
87.4	0
87.5	0
87.6	0
87.7	0
87.8	0
87.9	0
88	0
88.1	0
88.2	0
88.3	0
88.4	0
88.5	0
88.6	0
88.7	0
88.8	0
88.9	0
89	0
89.1	0
89.2	0
89.3	0
89.4	0
89.5	0
89.6	0
89.7	0
89.8	0
89.9	0
90	0
90.1	0
90.2	0
90.3	0
90.4	0
90.5	0
90.6	0
90.7	0
90.8	0
90.9	0
91	0
91.1	0
91.2	0
91.3	0
91.4	0
91.5	0
91.6	0
91.7	0
91.8	0
91.9	0
92	0
92.1	0
92.2	0
92.3	0
92.4	0
92.5	0
92.6	0
92.7	0
92.8	0
92.9	0
93	0
93.1	0
93.2	0
93.3	0
93.4	0
93.5	0
93.6	0
93.7	0
93.8	0
93.9	0
94	0
94.1	0
94.2	0
94.3	0
94.4	0
94.5	0
94.6	0
94.7	0
94.8	0
94.9	0
95	0
95.1	0
95.2	0
95.3	0
95.4	0
95.5	0
95.6	0
95.7	0
95.8	0
95.9	0
96	0
96.1	0
96.2	0
96.3	0
96.4	0
96.5	0
96.6	0
96.7	0
96.8	0
96.9	0
97	0
97.1	0
97.2	0
97.3	0
97.4	0
97.5	0
97.6	0
97.7	0
97.8	0
97.9	0
98	0
98.1	0
98.2	0
98.3	0
98.4	0
98.5	0
98.6	0
98.7	0
98.8	0
98.9	0
99	0
99.1	0
99.2	0
99.3	0
99.4	0
99.5	0
99.6	0
99.7	0
99.8	0
99.9	0
100	0
100.1	0.0425
100.2	0.0825
100.3	0.0925
100.4	0.13
100.5	0.14625
100.6	0.17
100.7	0.18875
100.8	0.2075
100.9	0.2325
101	0.24625
101.1	0.26375
101.2	0.2825
101.3	0.29375
101.4	0.31
101.5	0.32875
101.6	0.34125
101.7	0.35375
101.8	0.36625
101.9	0.37125
102	0.37625
102.1	0.3825
102.2	0.38375
102.3	0.39125
102.4	0.41125
102.5	0.41625
102.6	0.42625
102.7	0.43625
102.8	0.4425
102.9	0.445
103	0.4625
103.1	0.475
103.2	0.47875
103.3	0.47875
103.4	0.48375
103.5	0.49125
103.6	0.49375
103.7	0.49375
103.8	0.4975
103.9	0.49375
104	0.5
104.1	0.50125
104.2	0.50125
104.3	0.50625
104.4	0.50625
104.5	0.50625
104.6	0.5075
104.7	0.5025
104.8	0.5025
104.9	0.4975
105	0.50125
105.1	0.50625
105.2	0.5125
105.3	0.51875
105.4	0.52625
105.5	0.52625
105.6	0.525
105.7	0.5225
105.8	0.52375
105.9	0.53625
106	0.5325
106.1	0.52875
106.2	0.53125
106.3	0.535
106.4	0.53625
106.5	0.5325
106.6	0.53125
106.7	0.535
106.8	0.53625
106.9	0.53875
107	0.54625
107.1	0.54625
107.2	0.5525
107.3	0.55875
107.4	0.5575
107.5	0.55625
107.6	0.55375
107.7	0.55375
107.8	0.55875
107.9	0.5525
108	0.55375
108.1	0.5525
108.2	0.55875
108.3	0.55875
108.4	0.5625
108.5	0.57125
108.6	0.56875
108.7	0.56625
108.8	0.56375
108.9	0.57
109	0.56375
109.1	0.5675
109.2	0.57125
109.3	0.5775
109.4	0.585
109.5	0.58625
109.6	0.5825
109.7	0.58125
109.8	0.58375
109.9	0.585
110	0.585
110.1	0.58125
110.2	0.58375
110.3	0.5875
110.4	0.58375
110.5	0.585
110.6	0.585
110.7	0.585
110.8	0.58
110.9	0.57875
111	0.57375
111.1	0.57875
111.2	0.5825
111.3	0.58625
111.4	0.5875
111.5	0.5825
111.6	0.58125
111.7	0.58375
111.8	0.58375
111.9	0.5825
112	0.5775
112.1	0.57375
112.2	0.5825
112.3	0.58625
112.4	0.5875
112.5	0.5875
112.6	0.59125
112.7	0.58625
112.8	0.57875
112.9	0.575
113	0.575
113.1	0.58375
113.2	0.5775
113.3	0.58625
113.4	0.58875
113.5	0.58875
113.6	0.5925
113.7	0.59875
113.8	0.6
113.9	0.59625
114	0.5975
114.1	0.60625
114.2	0.6025
114.3	0.60125
114.4	0.5975
114.5	0.6025
114.6	0.60375
114.7	0.60625
114.8	0.6075
114.9	0.605
115	0.60875
115.1	0.6025
115.2	0.61
115.3	0.61625
115.4	0.61125
115.5	0.60125
115.6	0.60125
115.7	0.60125
115.8	0.60375
115.9	0.60625
116	0.5975
116.1	0.60375
116.2	0.6
116.3	0.6025
116.4	0.60125
116.5	0.6
116.6	0.595
116.7	0.59375
116.8	0.59625
116.9	0.6
117	0.5975
117.1	0.5925
117.2	0.59
117.3	0.59
117.4	0.58625
117.5	0.59625
117.6	0.5975
117.7	0.6025
117.8	0.6
117.9	0.60125
118	0.6075
118.1	0.61
118.2	0.60625
118.3	0.6025
118.4	0.60125
118.5	0.60125
118.6	0.60125
118.7	0.5975
118.8	0.5975
118.9	0.59875
119	0.5975
119.1	0.59375
119.2	0.59375
119.3	0.59625
119.4	0.60125
119.5	0.595
119.6	0.5975
119.7	0.6025
119.8	0.6
119.9	0.6
120	0.60625
120.1	0.60375
120.2	0.6
120.3	0.605
120.4	0.61375
120.5	0.6125
120.6	0.60625
120.7	0.61125
120.8	0.6175
120.9	0.625
121	0.62625
121.1	0.625
121.2	0.61875
121.3	0.6175
121.4	0.62
121.5	0.6175
121.6	0.61875
121.7	0.62
121.8	0.6225
121.9	0.625
122	0.6325
122.1	0.63
122.2	0.63375
122.3	0.63375
122.4	0.6325
122.5	0.6325
122.6	0.62875
122.7	0.62
122.8	0.615
122.9	0.6125
123	0.61375
123.1	0.61625
123.2	0.6175
123.3	0.62125
123.4	0.6225
123.5	0.61875
123.6	0.62125
123.7	0.62625
123.8	0.6275
123.9	0.62375
124	0.62
124.1	0.625
124.2	0.63
124.3	0.63875
124.4	0.6425
124.5	0.64125
124.6	0.64125
124.7	0.63875
124.8	0.645
124.9	0.64625
125	0.64125
125.1	0.64
125.2	0.63625
125.3	0.62875
125.4	0.63
125.5	0.6275
125.6	0.6275
125.7	0.62375
125.8	0.63
125.9	0.625
126	0.63125
126.1	0.63375
126.2	0.6425
126.3	0.6475
126.4	0.64625
126.5	0.645
126.6	0.64
126.7	0.63
126.8	0.63
126.9	0.63625
127	0.635
127.1	0.635
127.2	0.6425
127.3	0.64
127.4	0.65125
127.5	0.64875
127.6	0.65375
127.7	0.65
127.8	0.64625
127.9	0.65375
128	0.65375
128.1	0.65375
128.2	0.65375
128.3	0.65
128.4	0.645
128.5	0.64375
128.6	0.6375
128.7	0.6375
128.8	0.64
128.9	0.63875
129	0.6375
129.1	0.64125
129.2	0.64
129.3	0.64625
129.4	0.64875
129.5	0.6475
129.6	0.6375
129.7	0.64
129.8	0.64125
129.9	0.64125
130	0.64
130.1	0.63
130.2	0.63125
130.3	0.63625
130.4	0.63875
130.5	0.63875
130.6	0.635
130.7	0.63375
130.8	0.63
130.9	0.63125
131	0.62875
131.1	0.63125
131.2	0.625
131.3	0.62625
131.4	0.625
131.5	0.63125
131.6	0.63125
131.7	0.6275
131.8	0.62875
131.9	0.63
132	0.63625
132.1	0.6325
132.2	0.6375
132.3	0.635
132.4	0.63125
132.5	0.6275
132.6	0.6275
132.7	0.625
132.8	0.62625
132.9	0.62375
133	0.6225
133.1	0.62375
133.2	0.6275
133.3	0.62125
133.4	0.62625
133.5	0.62375
133.6	0.62375
133.7	0.625
133.8	0.62125
133.9	0.62375
134	0.62625
134.1	0.63125
134.2	0.635
134.3	0.6425
134.4	0.64625
134.5	0.6475
134.6	0.64
134.7	0.63625
134.8	0.63375
134.9	0.635
135	0.6425
135.1	0.6425
135.2	0.64
135.3	0.6375
135.4	0.6425
135.5	0.6425
135.6	0.645
135.7	0.6475
135.8	0.65
135.9	0.65125
136	0.645
136.1	0.64375
136.2	0.645
136.3	0.6425
136.4	0.6375
136.5	0.63375
136.6	0.63875
136.7	0.63875
136.8	0.6375
136.9	0.6325
137	0.635
137.1	0.63
137.2	0.62875
137.3	0.62625
137.4	0.62625
137.5	0.6275
137.6	0.62625
137.7	0.625
137.8	0.625
137.9	0.6325
138	0.63625
138.1	0.6425
138.2	0.64875
138.3	0.64875
138.4	0.65
138.5	0.64375
138.6	0.64625
138.7	0.64375
138.8	0.64375
138.9	0.64625
139	0.64125
139.1	0.6475
139.2	0.645
139.3	0.6475
139.4	0.64
139.5	0.64125
139.6	0.64
139.7	0.63875
139.8	0.63875
139.9	0.6425
140	0.64625
140.1	0.65125
140.2	0.65625
140.3	0.6525
140.4	0.655
140.5	0.65375
140.6	0.65375
140.7	0.6525
140.8	0.65125
140.9	0.65125
141	0.64625
141.1	0.65
141.2	0.65125
141.3	0.655
141.4	0.6525
141.5	0.65375
141.6	0.66125
141.7	0.66375
141.8	0.66
141.9	0.66
142	0.6675
142.1	0.66375
142.2	0.6625
142.3	0.66375
142.4	0.66125
142.5	0.6625
142.6	0.66125
142.7	0.66125
142.8	0.6625
142.9	0.66125
143	0.6675
143.1	0.6625
143.2	0.66375
143.3	0.665
143.4	0.6625
143.5	0.6575
143.6	0.6625
143.7	0.665
143.8	0.66
143.9	0.6575
144	0.6525
144.1	0.65
144.2	0.64875
144.3	0.6525
144.4	0.6575
144.5	0.65875
144.6	0.6575
144.7	0.65625
144.8	0.65875
144.9	0.6675
145	0.67125
145.1	0.6725
145.2	0.67375
145.3	0.6725
145.4	0.665
145.5	0.6575
145.6	0.6575
145.7	0.66
145.8	0.6625
145.9	0.66
146	0.6625
146.1	0.6625
146.2	0.66
146.3	0.65875
146.4	0.65875
146.5	0.655
146.6	0.66
146.7	0.665
146.8	0.67375
146.9	0.67
147	0.67
147.1	0.67
147.2	0.665
147.3	0.66625
147.4	0.66625
147.5	0.66125
147.6	0.66625
147.7	0.67375
147.8	0.67
147.9	0.66875
148	0.6675
148.1	0.66875
148.2	0.67375
148.3	0.67125
148.4	0.66875
148.5	0.67
148.6	0.67
148.7	0.66625
148.8	0.66625
148.9	0.665
149	0.6625
149.1	0.665
149.2	0.665
149.3	0.665
149.4	0.67125
149.5	0.66875
149.6	0.66875
149.7	0.6725
149.8	0.67875
149.9	0.67875
150	0.68
150.1	0.6775
150.2	0.67
150.3	0.6725
150.4	0.67125
150.5	0.66875
150.6	0.66375
150.7	0.66875
150.8	0.665
150.9	0.66375
151	0.66625
151.1	0.6675
151.2	0.6725
151.3	0.67625
151.4	0.67875
151.5	0.6775
151.6	0.685
151.7	0.6875
151.8	0.69125
151.9	0.685
152	0.68375
152.1	0.69
152.2	0.69
152.3	0.69125
152.4	0.69375
152.5	0.69375
152.6	0.69375
152.7	0.69125
152.8	0.695
152.9	0.695
153	0.695
153.1	0.69625
153.2	0.6925
153.3	0.69375
153.4	0.6875
153.5	0.69375
153.6	0.69
153.7	0.68625
153.8	0.68125
153.9	0.6775
154	0.68375
154.1	0.695
154.2	0.69
154.3	0.6925
154.4	0.6925
154.5	0.68
154.6	0.6775
154.7	0.67375
154.8	0.67875
154.9	0.6775
155	0.67375
155.1	0.68
155.2	0.68375
155.3	0.68125
155.4	0.6875
155.5	0.6825
155.6	0.68625
155.7	0.685
155.8	0.68
155.9	0.68625
156	0.68
156.1	0.68375
156.2	0.67625
156.3	0.68125
156.4	0.68625
156.5	0.68375
156.6	0.69
156.7	0.68875
156.8	0.6875
156.9	0.69125
157	0.69125
157.1	0.69375
157.2	0.69375
157.3	0.69625
157.4	0.69875
157.5	0.70625
157.6	0.70625
157.7	0.705
157.8	0.70875
157.9	0.705
158	0.70875
158.1	0.705
158.2	0.70125
158.3	0.705
158.4	0.69875
158.5	0.69875
158.6	0.6975
158.7	0.69
158.8	0.69
158.9	0.68875
159	0.68375
159.1	0.68875
159.2	0.695
159.3	0.69
159.4	0.68375
159.5	0.685
159.6	0.6875
159.7	0.69125
159.8	0.69125
159.9	0.68625
160	0.68375
160.1	0.6825
160.2	0.68375
160.3	0.6875
160.4	0.68875
160.5	0.69375
160.6	0.6875
160.7	0.68875
160.8	0.69
160.9	0.69625
161	0.69625
161.1	0.69375
161.2	0.695
161.3	0.70125
161.4	0.70875
161.5	0.7075
161.6	0.70625
161.7	0.70125
161.8	0.6925
161.9	0.6875
162	0.6925
162.1	0.69125
162.2	0.69375
162.3	0.69125
162.4	0.68375
162.5	0.68
162.6	0.68125
162.7	0.68625
162.8	0.69125
162.9	0.695
163	0.69
163.1	0.685
163.2	0.69125
163.3	0.69
163.4	0.68625
163.5	0.6925
163.6	0.69125
163.7	0.68625
163.8	0.68625
163.9	0.68375
164	0.685
164.1	0.68625
164.2	0.68875
164.3	0.69125
164.4	0.6975
164.5	0.7
164.6	0.6975
164.7	0.695
164.8	0.69875
164.9	0.69625
165	0.69625
165.1	0.69375
165.2	0.7
165.3	0.7
165.4	0.695
165.5	0.695
165.6	0.6925
165.7	0.69125
165.8	0.69375
165.9	0.6975
166	0.7
166.1	0.7
166.2	0.7025
166.3	0.69875
166.4	0.69625
166.5	0.69875
166.6	0.695
166.7	0.695
166.8	0.70375
166.9	0.69875
167	0.70125
167.1	0.705
167.2	0.705
167.3	0.705
167.4	0.70625
167.5	0.70375
167.6	0.6925
167.7	0.69375
167.8	0.69625
167.9	0.70375
168	0.70375
168.1	0.705
168.2	0.7025
168.3	0.70375
168.4	0.7025
168.5	0.7
168.6	0.70375
168.7	0.6975
168.8	0.695
168.9	0.69375
169	0.69125
169.1	0.70125
169.2	0.70125
169.3	0.6975
169.4	0.69875
169.5	0.70125
169.6	0.70125
169.7	0.70625
169.8	0.7025
169.9	0.70125
170	0.70625
170.1	0.71375
170.2	0.70875
170.3	0.7125
170.4	0.7125
170.5	0.7075
170.6	0.71125
170.7	0.70875
170.8	0.7075
170.9	0.70625
171	0.71125
171.1	0.71625
171.2	0.715
171.3	0.71625
171.4	0.71375
171.5	0.71875
171.6	0.71875
171.7	0.7175
171.8	0.7175
171.9	0.715
172	0.71375
172.1	0.71375
172.2	0.72
172.3	0.72375
172.4	0.7275
172.5	0.72625
172.6	0.725
172.7	0.725
172.8	0.725
172.9	0.72
173	0.72
173.1	0.72125
173.2	0.7275
173.3	0.7225
173.4	0.7175
173.5	0.71875
173.6	0.7225
173.7	0.7275
173.8	0.72125
173.9	0.7225
174	0.72125
174.1	0.72
174.2	0.715
174.3	0.7175
174.4	0.7225
174.5	0.72
174.6	0.72875
174.7	0.73375
174.8	0.73875
174.9	0.735
175	0.735
175.1	0.73
175.2	0.725
175.3	0.72
175.4	0.71875
175.5	0.71875
175.6	0.72
175.7	0.71875
175.8	0.71375
175.9	0.7125
176	0.7175
176.1	0.71625
176.2	0.7175
176.3	0.72125
176.4	0.725
176.5	0.72625
176.6	0.72875
176.7	0.735
176.8	0.735
176.9	0.74
177	0.73375
177.1	0.7325
177.2	0.72625
177.3	0.7275
177.4	0.72375
177.5	0.7275
177.6	0.7275
177.7	0.72625
177.8	0.7275
177.9	0.725
178	0.72625
178.1	0.725
178.2	0.72625
178.3	0.72875
178.4	0.73125
178.5	0.73125
178.6	0.73125
178.7	0.73
178.8	0.73375
178.9	0.73125
179	0.73375
179.1	0.735
179.2	0.73625
179.3	0.73375
179.4	0.73375
179.5	0.73125
179.6	0.73125
179.7	0.7325
179.8	0.73125
179.9	0.72875
180	0.73125
180.1	0.73125
180.2	0.73125
180.3	0.73125
180.4	0.73625
180.5	0.7325
180.6	0.7325
180.7	0.72875
180.8	0.7275
180.9	0.72125
181	0.725
181.1	0.72625
181.2	0.73
181.3	0.7275
181.4	0.73125
181.5	0.7325
181.6	0.73
181.7	0.7375
181.8	0.73875
181.9	0.74125
182	0.74125
182.1	0.74125
182.2	0.74375
182.3	0.74
182.4	0.7375
182.5	0.74375
182.6	0.7475
182.7	0.75125
182.8	0.75625
182.9	0.7525
183	0.74875
183.1	0.74625
183.2	0.74625
183.3	0.7475
183.4	0.74875
183.5	0.7525
183.6	0.75
183.7	0.74625
183.8	0.745
183.9	0.7425
184	0.7425
184.1	0.74125
184.2	0.74125
184.3	0.73875
184.4	0.74
184.5	0.74125
184.6	0.745
184.7	0.7425
184.8	0.74125
184.9	0.745
185	0.745
185.1	0.75125
185.2	0.74625
185.3	0.75
185.4	0.745
185.5	0.745
185.6	0.7475
185.7	0.745
185.8	0.74375
185.9	0.75
186	0.74375
186.1	0.7425
186.2	0.74375
186.3	0.7425
186.4	0.7375
186.5	0.73875
186.6	0.74125
186.7	0.74375
186.8	0.74625
186.9	0.7475
187	0.74875
187.1	0.745
187.2	0.74625
187.3	0.74
187.4	0.73875
187.5	0.73875
187.6	0.74
187.7	0.74125
187.8	0.74125
187.9	0.74125
188	0.7425
188.1	0.74125
188.2	0.74
188.3	0.74125
188.4	0.7425
188.5	0.73875
188.6	0.7375
188.7	0.73875
188.8	0.73625
188.9	0.73
189	0.73375
189.1	0.73625
189.2	0.73125
189.3	0.735
189.4	0.73375
189.5	0.73375
189.6	0.73125
189.7	0.7325
189.8	0.73125
189.9	0.73
190	0.72875
190.1	0.7325
190.2	0.72625
190.3	0.72625
190.4	0.72375
190.5	0.71875
190.6	0.725
190.7	0.72375
190.8	0.72625
190.9	0.73625
191	0.7375
191.1	0.73625
191.2	0.73625
191.3	0.74
191.4	0.7375
191.5	0.73875
191.6	0.74125
191.7	0.73875
191.8	0.735
191.9	0.73875
192	0.73875
192.1	0.7425
192.2	0.74
192.3	0.74125
192.4	0.74
192.5	0.735
192.6	0.73625
192.7	0.7375
192.8	0.7425
192.9	0.745
193	0.75125
193.1	0.74875
193.2	0.75375
193.3	0.755
193.4	0.755
193.5	0.755
193.6	0.75625
193.7	0.76125
193.8	0.75875
193.9	0.75875
194	0.76125
194.1	0.765
194.2	0.76375
194.3	0.7625
194.4	0.76125
194.5	0.75875
194.6	0.7575
194.7	0.7575
194.8	0.75625
194.9	0.76125
195	0.755
195.1	0.75125
195.2	0.75
195.3	0.7475
195.4	0.74875
195.5	0.7475
195.6	0.75625
195.7	0.75875
195.8	0.76
195.9	0.75875
196	0.76125
196.1	0.76125
196.2	0.75875
196.3	0.76
196.4	0.76
196.5	0.76125
196.6	0.75625
196.7	0.75875
196.8	0.76125
196.9	0.76375
197	0.76375
197.1	0.76375
197.2	0.76375
197.3	0.76625
197.4	0.76375
197.5	0.76375
197.6	0.76625
197.7	0.76875
197.8	0.7675
197.9	0.76875
198	0.77
198.1	0.76875
198.2	0.76625
198.3	0.7725
198.4	0.77
198.5	0.76875
198.6	0.7675
198.7	0.7625
198.8	0.7575
198.9	0.75375
199	0.75375
199.1	0.76
199.2	0.76
199.3	0.76
199.4	0.75625
199.5	0.76125
199.6	0.76125
199.7	0.76375
199.8	0.76375
199.9	0.765
200	0.765
[truncated: 14,000 more rows]
