# Supplementary material for: Bayesian inference of kinetic schemes for ion channels by Kalman filtering
Source: eLife journal article supplement (doi:10.7554/elife.62714), 2022-05-04
Supplement: fig4-data9 [file 1_Sim_N_400_Strom_MW_0.5M.xlsx]

## Sheet: 0.5 M
0.1	0
0.2	0
0.3	0
0.4	0
0.5	0
0.6	0
0.7	0
0.8	0
0.9	0
1	0
1.1	0
1.2	0
1.3	0
1.4	0
1.5	0
1.6	0
1.7	0
1.8	0
1.9	0
2	0
2.1	0
2.2	0
2.3	0
2.4	0
2.5	0
2.6	0
2.7	0
2.8	0
2.9	0
3	0
3.1	0
3.2	0
3.3	0
3.4	0
3.5	0
3.6	0
3.7	0
3.8	0
3.9	0
4	0
4.1	0
4.2	0
4.3	0
4.4	0
4.5	0
4.6	0
4.7	0
4.8	0
4.9	0
5	0
5.1	0
5.2	0
5.3	0
5.4	0
5.5	0
5.6	0
5.7	0
5.8	0
5.9	0
6	0
6.1	0
6.2	0
6.3	0
6.4	0
6.5	0
6.6	0
6.7	0
6.8	0
6.9	0
7	0
7.1	0
7.2	0
7.3	0
7.4	0
7.5	0
7.6	0
7.7	0
7.8	0
7.9	0
8	0
8.1	0
8.2	0
8.3	0
8.4	0
8.5	0
8.6	0
8.7	0
8.8	0
8.9	0
9	0
9.1	0
9.2	0
9.3	0
9.4	0
9.5	0
9.6	0
9.7	0
9.8	0
9.9	0
10	0
10.1	0
10.2	0
10.3	0
10.4	0
10.5	0
10.6	0
10.7	0
10.8	0
10.9	0
11	0
11.1	0
11.2	0
11.3	0
11.4	0
11.5	0
11.6	0
11.7	0
11.8	0
11.9	0
12	0
12.1	0
12.2	0
12.3	0
12.4	0
12.5	0
12.6	0
12.7	0
12.8	0
12.9	0
13	0
13.1	0
13.2	0
13.3	0
13.4	0
13.5	0
13.6	0
13.7	0
13.8	0
13.9	0
14	0
14.1	0
14.2	0
14.3	0
14.4	0
14.5	0
14.6	0
14.7	0
14.8	0
14.9	0
15	0
15.1	0
15.2	0
15.3	0
15.4	0
15.5	0
15.6	0
15.7	0
15.8	0
15.9	0
16	0
16.1	0
16.2	0
16.3	0
16.4	0
16.5	0
16.6	0
16.7	0
16.8	0
16.9	0
17	0
17.1	0
17.2	0
17.3	0
17.4	0
17.5	0
17.6	0
17.7	0
17.8	0
17.9	0
18	0
18.1	0
18.2	0
18.3	0
18.4	0
18.5	0
18.6	0
18.7	0
18.8	0
18.9	0
19	0
19.1	0
19.2	0
19.3	0
19.4	0
19.5	0
19.6	0
19.7	0
19.8	0
19.9	0
20	0
20.1	0
20.2	0
20.3	0
20.4	0
20.5	0
20.6	0
20.7	0
20.8	0
20.9	0
21	0
21.1	0
21.2	0
21.3	0
21.4	0
21.5	0
21.6	0
21.7	0
21.8	0
21.9	0
22	0
22.1	0
22.2	0
22.3	0
22.4	0
22.5	0
22.6	0
22.7	0
22.8	0
22.9	0
23	0
23.1	0
23.2	0
23.3	0
23.4	0
23.5	0
23.6	0
23.7	0
23.8	0
23.9	0
24	0
24.1	0
24.2	0
24.3	0
24.4	0
24.5	0
24.6	0
24.7	0
24.8	0
24.9	0
25	0
25.1	0
25.2	0
25.3	0
25.4	0
25.5	0
25.6	0
25.7	0
25.8	0
25.9	0
26	0
26.1	0
26.2	0
26.3	0
26.4	0
26.5	0
26.6	0
26.7	0
26.8	0
26.9	0
27	0
27.1	0
27.2	0
27.3	0
27.4	0
27.5	0
27.6	0
27.7	0
27.8	0
27.9	0
28	0
28.1	0
28.2	0
28.3	0
28.4	0
28.5	0
28.6	0
28.7	0
28.8	0
28.9	0
29	0
29.1	0
29.2	0
29.3	0
29.4	0
29.5	0
29.6	0
29.7	0
29.8	0
29.9	0
30	0
30.1	0
30.2	0
30.3	0
30.4	0
30.5	0
30.6	0
30.7	0
30.8	0
30.9	0
31	0
31.1	0
31.2	0
31.3	0
31.4	0
31.5	0
31.6	0
31.7	0
31.8	0
31.9	0
32	0
32.1	0
32.2	0
32.3	0
32.4	0
32.5	0
32.6	0
32.7	0
32.8	0
32.9	0
33	0
33.1	0
33.2	0
33.3	0
33.4	0
33.5	0
33.6	0
33.7	0
33.8	0
33.9	0
34	0
34.1	0
34.2	0
34.3	0
34.4	0
34.5	0
34.6	0
34.7	0
34.8	0
34.9	0
35	0
35.1	0
35.2	0
35.3	0
35.4	0
35.5	0
35.6	0
35.7	0
35.8	0
35.9	0
36	0
36.1	0
36.2	0
36.3	0
36.4	0
36.5	0
36.6	0
36.7	0
36.8	0
36.9	0
37	0
37.1	0
37.2	0
37.3	0
37.4	0
37.5	0
37.6	0
37.7	0
37.8	0
37.9	0
38	0
38.1	0
38.2	0
38.3	0
38.4	0
38.5	0
38.6	0
38.7	0
38.8	0
38.9	0
39	0
39.1	0
39.2	0
39.3	0
39.4	0
39.5	0
39.6	0
39.7	0
39.8	0
39.9	0
40	0
40.1	0
40.2	0
40.3	0
40.4	0
40.5	0
40.6	0
40.7	0
40.8	0
40.9	0
41	0
41.1	0
41.2	0
41.3	0
41.4	0
41.5	0
41.6	0
41.7	0
41.8	0
41.9	0
42	0
42.1	0
42.2	0
42.3	0
42.4	0
42.5	0
42.6	0
42.7	0
42.8	0
42.9	0
43	0
43.1	0
43.2	0
43.3	0
43.4	0
43.5	0
43.6	0
43.7	0
43.8	0
43.9	0
44	0
44.1	0
44.2	0
44.3	0
44.4	0
44.5	0
44.6	0
44.7	0
44.8	0
44.9	0
45	0
45.1	0
45.2	0
45.3	0
45.4	0
45.5	0
45.6	0
45.7	0
45.8	0
45.9	0
46	0
46.1	0
46.2	0
46.3	0
46.4	0
46.5	0
46.6	0
46.7	0
46.8	0
46.9	0
47	0
47.1	0
47.2	0
47.3	0
47.4	0
47.5	0
47.6	0
47.7	0
47.8	0
47.9	0
48	0
48.1	0
48.2	0
48.3	0
48.4	0
48.5	0
48.6	0
48.7	0
48.8	0
48.9	0
49	0
49.1	0
49.2	0
49.3	0
49.4	0
49.5	0
49.6	0
49.7	0
49.8	0
49.9	0
50	0
50.1	0
50.2	0
50.3	0
50.4	0
50.5	0
50.6	0
50.7	0
50.8	0
50.9	0
51	0
51.1	0
51.2	0
51.3	0
51.4	0
51.5	0
51.6	0
51.7	0
51.8	0
51.9	0
52	0
52.1	0
52.2	0
52.3	0
52.4	0
52.5	0
52.6	0
52.7	0
52.8	0
52.9	0
53	0
53.1	0
53.2	0
53.3	0
53.4	0
53.5	0
53.6	0
53.7	0
53.8	0
53.9	0
54	0
54.1	0
54.2	0
54.3	0
54.4	0
54.5	0
54.6	0
54.7	0
54.8	0
54.9	0
55	0
55.1	0
55.2	0
55.3	0
55.4	0
55.5	0
55.6	0
55.7	0
55.8	0
55.9	0
56	0
56.1	0
56.2	0
56.3	0
56.4	0
56.5	0
56.6	0
56.7	0
56.8	0
56.9	0
57	0
57.1	0
57.2	0
57.3	0
57.4	0
57.5	0
57.6	0
57.7	0
57.8	0
57.9	0
58	0
58.1	0
58.2	0
58.3	0
58.4	0
58.5	0
58.6	0
58.7	0
58.8	0
58.9	0
59	0
59.1	0
59.2	0
59.3	0
59.4	0
59.5	0
59.6	0
59.7	0
59.8	0
59.9	0
60	0
60.1	0
60.2	0
60.3	0
60.4	0
60.5	0
60.6	0
60.7	0
60.8	0
60.9	0
61	0
61.1	0
61.2	0
61.3	0
61.4	0
61.5	0
61.6	0
61.7	0
61.8	0
61.9	0
62	0
62.1	0
62.2	0
62.3	0
62.4	0
62.5	0
62.6	0
62.7	0
62.8	0
62.9	0
63	0
63.1	0
63.2	0
63.3	0
63.4	0
63.5	0
63.6	0
63.7	0
63.8	0
63.9	0
64	0
64.1	0
64.2	0
64.3	0
64.4	0
64.5	0
64.6	0
64.7	0
64.8	0
64.9	0
65	0
65.1	0
65.2	0
65.3	0
65.4	0
65.5	0
65.6	0
65.7	0
65.8	0
65.9	0
66	0
66.1	0
66.2	0
66.3	0
66.4	0
66.5	0
66.6	0
66.7	0
66.8	0
66.9	0
67	0
67.1	0
67.2	0
67.3	0
67.4	0
67.5	0
67.6	0
67.7	0
67.8	0
67.9	0
68	0
68.1	0
68.2	0
68.3	0
68.4	0
68.5	0
68.6	0
68.7	0
68.8	0
68.9	0
69	0
69.1	0
69.2	0
69.3	0
69.4	0
69.5	0
69.6	0
69.7	0
69.8	0
69.9	0
70	0
70.1	0
70.2	0
70.3	0
70.4	0
70.5	0
70.6	0
70.7	0
70.8	0
70.9	0
71	0
71.1	0
71.2	0
71.3	0
71.4	0
71.5	0
71.6	0
71.7	0
71.8	0
71.9	0
72	0
72.1	0
72.2	0
72.3	0
72.4	0
72.5	0
72.6	0
72.7	0
72.8	0
72.9	0
73	0
73.1	0
73.2	0
73.3	0
73.4	0
73.5	0
73.6	0
73.7	0
73.8	0
73.9	0
74	0
74.1	0
74.2	0
74.3	0
74.4	0
74.5	0
74.6	0
74.7	0
74.8	0
74.9	0
75	0
75.1	0
75.2	0
75.3	0
75.4	0
75.5	0
75.6	0
75.7	0
75.8	0
75.9	0
76	0
76.1	0
76.2	0
76.3	0
76.4	0
76.5	0
76.6	0
76.7	0
76.8	0
76.9	0
77	0
77.1	0
77.2	0
77.3	0
77.4	0
77.5	0
77.6	0
77.7	0
77.8	0
77.9	0
78	0
78.1	0
78.2	0
78.3	0
78.4	0
78.5	0
78.6	0
78.7	0
78.8	0
78.9	0
79	0
79.1	0
79.2	0
79.3	0
79.4	0
79.5	0
79.6	0
79.7	0
79.8	0
79.9	0
80	0
80.1	0
80.2	0
80.3	0
80.4	0
80.5	0
80.6	0
80.7	0
80.8	0
80.9	0
81	0
81.1	0
81.2	0
81.3	0
81.4	0
81.5	0
81.6	0
81.7	0
81.8	0
81.9	0
82	0
82.1	0
82.2	0
82.3	0
82.4	0
82.5	0
82.6	0
82.7	0
82.8	0
82.9	0
83	0
83.1	0
83.2	0
83.3	0
83.4	0
83.5	0
83.6	0
83.7	0
83.8	0
83.9	0
84	0
84.1	0
84.2	0
84.3	0
84.4	0
84.5	0
84.6	0
84.7	0
84.8	0
84.9	0
85	0
85.1	0
85.2	0
85.3	0
85.4	0
85.5	0
85.6	0
85.7	0
85.8	0
85.9	0
86	0
86.1	0
86.2	0
86.3	0
86.4	0
86.5	0
86.6	0
86.7	0
86.8	0
86.9	0
87	0
87.1	0
87.2	0
87.3	0
87.4	0
87.5	0
87.6	0
87.7	0
87.8	0
87.9	0
88	0
88.1	0
88.2	0
88.3	0
88.4	0
88.5	0
88.6	0
88.7	0
88.8	0
88.9	0
89	0
89.1	0
89.2	0
89.3	0
89.4	0
89.5	0
89.6	0
89.7	0
89.8	0
89.9	0
90	0
90.1	0
90.2	0
90.3	0
90.4	0
90.5	0
90.6	0
90.7	0
90.8	0
90.9	0
91	0
91.1	0
91.2	0
91.3	0
91.4	0
91.5	0
91.6	0
91.7	0
91.8	0
91.9	0
92	0
92.1	0
92.2	0
92.3	0
92.4	0
92.5	0
92.6	0
92.7	0
92.8	0
92.9	0
93	0
93.1	0
93.2	0
93.3	0
93.4	0
93.5	0
93.6	0
93.7	0
93.8	0
93.9	0
94	0
94.1	0
94.2	0
94.3	0
94.4	0
94.5	0
94.6	0
94.7	0
94.8	0
94.9	0
95	0
95.1	0
95.2	0
95.3	0
95.4	0
95.5	0
95.6	0
95.7	0
95.8	0
95.9	0
96	0
96.1	0
96.2	0
96.3	0
96.4	0
96.5	0
96.6	0
96.7	0
96.8	0
96.9	0
97	0
97.1	0
97.2	0
97.3	0
97.4	0
97.5	0
97.6	0
97.7	0
97.8	0
97.9	0
98	0
98.1	0
98.2	0
98.3	0
98.4	0
98.5	0
98.6	0
98.7	0
98.8	0
98.9	0
99	0
99.1	0
99.2	0
99.3	0
99.4	0
99.5	0
99.6	0
99.7	0
99.8	0
99.9	0
100	0
100.1	0
100.2	0
100.3	0
100.4	0
100.5	0
100.6	0
100.7	0
100.8	0
100.9	0
101	0
101.1	0
101.2	0
101.3	0
101.4	0.0025
101.5	0.0025
101.6	0.005
101.7	0.005
101.8	0.005
101.9	0.005
102	0.005
102.1	0.0075
102.2	0.0075
102.3	0.0075
102.4	0.01
102.5	0.01
102.6	0.01
102.7	0.0125
102.8	0.0125
102.9	0.015
103	0.02
103.1	0.02
103.2	0.02
103.3	0.02
103.4	0.02
103.5	0.02
103.6	0.02
103.7	0.02
103.8	0.0225
103.9	0.0225
104	0.025
104.1	0.025
104.2	0.025
104.3	0.025
104.4	0.025
104.5	0.025
104.6	0.0275
104.7	0.0275
104.8	0.0275
104.9	0.0275
105	0.03
105.1	0.03
105.2	0.03
105.3	0.03
105.4	0.03
105.5	0.0325
105.6	0.0325
105.7	0.0325
105.8	0.0325
105.9	0.0325
106	0.0325
106.1	0.0325
106.2	0.0325
106.3	0.0325
106.4	0.0325
106.5	0.035
106.6	0.035
106.7	0.035
106.8	0.0375
106.9	0.0375
107	0.0375
107.1	0.0375
107.2	0.0375
107.3	0.0375
107.4	0.0425
107.5	0.0475
107.6	0.05
107.7	0.05
107.8	0.0525
107.9	0.055
108	0.055
108.1	0.055
108.2	0.0575
108.3	0.0575
108.4	0.06
108.5	0.06
108.6	0.06
108.7	0.065
108.8	0.065
108.9	0.065
109	0.065
109.1	0.065
109.2	0.065
109.3	0.065
109.4	0.0675
109.5	0.065
109.6	0.065
109.7	0.065
109.8	0.065
109.9	0.0675
110	0.0675
110.1	0.0675
110.2	0.0675
110.3	0.07
110.4	0.07
110.5	0.0725
110.6	0.0725
110.7	0.0725
110.8	0.075
110.9	0.08
111	0.08
111.1	0.08
111.2	0.08
111.3	0.085
111.4	0.085
111.5	0.085
111.6	0.0875
111.7	0.0875
111.8	0.0875
111.9	0.0875
112	0.0875
112.1	0.0875
112.2	0.09
112.3	0.09
112.4	0.09
112.5	0.09
112.6	0.09
112.7	0.09
112.8	0.0925
112.9	0.095
113	0.0975
113.1	0.0975
113.2	0.1
113.3	0.1
113.4	0.1025
113.5	0.105
113.6	0.1075
113.7	0.1075
113.8	0.1075
113.9	0.11
114	0.11
114.1	0.11
114.2	0.11
114.3	0.11
114.4	0.11
114.5	0.11
114.6	0.11
114.7	0.1075
114.8	0.1075
114.9	0.1075
115	0.1075
115.1	0.1075
115.2	0.1075
115.3	0.1075
115.4	0.1075
115.5	0.1075
115.6	0.1075
115.7	0.1075
115.8	0.1075
115.9	0.115
116	0.115
116.1	0.115
116.2	0.1175
116.3	0.1175
116.4	0.1175
116.5	0.12
116.6	0.12
116.7	0.12
116.8	0.12
116.9	0.12
117	0.12
117.1	0.12
117.2	0.12
117.3	0.1225
117.4	0.1225
117.5	0.1225
117.6	0.1225
117.7	0.125
117.8	0.125
117.9	0.125
118	0.1275
118.1	0.1275
118.2	0.13
118.3	0.13
118.4	0.13
118.5	0.1325
118.6	0.135
118.7	0.1375
118.8	0.1375
118.9	0.1375
119	0.1375
119.1	0.1375
119.2	0.1375
119.3	0.14
119.4	0.1425
119.5	0.1425
119.6	0.1425
119.7	0.145
119.8	0.145
119.9	0.1475
120	0.1475
120.1	0.1475
120.2	0.1475
120.3	0.15
120.4	0.15
120.5	0.15
120.6	0.1525
120.7	0.1525
120.8	0.1525
120.9	0.1525
121	0.15
121.1	0.15
121.2	0.1525
121.3	0.15
121.4	0.1525
121.5	0.1525
121.6	0.1525
121.7	0.1525
121.8	0.16
121.9	0.1625
122	0.165
122.1	0.165
122.2	0.1675
122.3	0.1675
122.4	0.1675
122.5	0.1675
122.6	0.17
122.7	0.17
122.8	0.1725
122.9	0.1725
123	0.1725
123.1	0.1725
123.2	0.175
123.3	0.175
123.4	0.1775
123.5	0.18
123.6	0.185
123.7	0.1875
123.8	0.1875
123.9	0.1875
124	0.1875
124.1	0.1875
124.2	0.1875
124.3	0.1875
124.4	0.1875
124.5	0.1875
124.6	0.19
124.7	0.19
124.8	0.1925
124.9	0.1925
125	0.195
125.1	0.195
125.2	0.1975
125.3	0.1975
125.4	0.1975
125.5	0.1975
125.6	0.2
125.7	0.2
125.8	0.2
125.9	0.2025
126	0.205
126.1	0.205
126.2	0.2075
126.3	0.2075
126.4	0.2075
126.5	0.2075
126.6	0.205
126.7	0.2075
126.8	0.2075
126.9	0.21
127	0.21
127.1	0.21
127.2	0.21
127.3	0.2075
127.4	0.2075
127.5	0.2075
127.6	0.2075
127.7	0.21
127.8	0.21
127.9	0.2125
128	0.215
128.1	0.2175
128.2	0.2175
128.3	0.2225
128.4	0.225
128.5	0.225
128.6	0.225
128.7	0.2275
128.8	0.2275
128.9	0.2275
129	0.2275
129.1	0.2275
129.2	0.2275
129.3	0.2275
129.4	0.2275
129.5	0.2275
129.6	0.2275
129.7	0.2275
129.8	0.2275
129.9	0.225
130	0.225
130.1	0.225
130.2	0.225
130.3	0.225
130.4	0.2275
130.5	0.2275
130.6	0.2275
130.7	0.2275
130.8	0.2275
130.9	0.2275
131	0.225
131.1	0.225
131.2	0.225
131.3	0.22
131.4	0.22
131.5	0.22
131.6	0.22
131.7	0.2225
131.8	0.2225
131.9	0.2225
132	0.2225
132.1	0.2225
132.2	0.2225
132.3	0.2225
132.4	0.2225
132.5	0.2225
132.6	0.2225
132.7	0.2225
132.8	0.225
132.9	0.2225
133	0.2225
133.1	0.2225
133.2	0.225
133.3	0.225
133.4	0.2275
133.5	0.2275
133.6	0.2275
133.7	0.2275
133.8	0.2275
133.9	0.2275
134	0.2275
134.1	0.2275
134.2	0.2275
134.3	0.225
134.4	0.225
134.5	0.225
134.6	0.225
134.7	0.225
134.8	0.225
134.9	0.225
135	0.225
135.1	0.225
135.2	0.2275
135.3	0.225
135.4	0.2275
135.5	0.2275
135.6	0.23
135.7	0.2325
135.8	0.2325
135.9	0.2325
136	0.2325
136.1	0.2325
136.2	0.2325
136.3	0.235
136.4	0.235
136.5	0.235
136.6	0.235
136.7	0.235
136.8	0.235
136.9	0.2375
137	0.2375
137.1	0.2375
137.2	0.2375
137.3	0.2375
137.4	0.2375
137.5	0.2375
137.6	0.2375
137.7	0.2375
137.8	0.2375
137.9	0.2375
138	0.24
138.1	0.24
138.2	0.24
138.3	0.24
138.4	0.24
138.5	0.24
138.6	0.24
138.7	0.2425
138.8	0.2425
138.9	0.2425
139	0.2425
139.1	0.2425
139.2	0.245
139.3	0.245
139.4	0.2475
139.5	0.245
139.6	0.245
139.7	0.2425
139.8	0.2425
139.9	0.2425
140	0.2425
140.1	0.2425
140.2	0.245
140.3	0.2475
140.4	0.2475
140.5	0.2475
140.6	0.2475
140.7	0.2475
140.8	0.2475
140.9	0.2475
141	0.25
141.1	0.25
141.2	0.25
141.3	0.25
141.4	0.25
141.5	0.2525
141.6	0.2525
141.7	0.2525
141.8	0.2525
141.9	0.2525
142	0.2525
142.1	0.2525
142.2	0.2525
142.3	0.2525
142.4	0.2525
142.5	0.2525
142.6	0.2525
142.7	0.2525
142.8	0.25
142.9	0.25
143	0.25
143.1	0.25
143.2	0.25
143.3	0.25
143.4	0.25
143.5	0.25
143.6	0.25
143.7	0.25
143.8	0.2525
143.9	0.2525
144	0.255
144.1	0.255
144.2	0.255
144.3	0.255
144.4	0.26
144.5	0.26
144.6	0.26
144.7	0.26
144.8	0.2575
144.9	0.2575
145	0.26
145.1	0.26
145.2	0.26
145.3	0.26
145.4	0.2625
145.5	0.265
145.6	0.265
145.7	0.2625
145.8	0.26
145.9	0.2575
146	0.26
146.1	0.26
146.2	0.26
146.3	0.265
146.4	0.2675
146.5	0.27
146.6	0.27
146.7	0.27
146.8	0.27
146.9	0.27
147	0.27
147.1	0.27
147.2	0.27
147.3	0.27
147.4	0.275
147.5	0.275
147.6	0.275
147.7	0.275
147.8	0.275
147.9	0.2725
148	0.2725
148.1	0.2725
148.2	0.275
148.3	0.2775
148.4	0.2775
148.5	0.2775
148.6	0.2775
148.7	0.2775
148.8	0.275
148.9	0.275
149	0.275
149.1	0.275
149.2	0.275
149.3	0.2775
149.4	0.2775
149.5	0.2775
149.6	0.2775
149.7	0.2775
149.8	0.2775
149.9	0.2775
150	0.2775
150.1	0.28
150.2	0.28
150.3	0.2775
150.4	0.2775
150.5	0.2775
150.6	0.2775
150.7	0.28
150.8	0.2825
150.9	0.2825
151	0.2825
151.1	0.285
151.2	0.285
151.3	0.29
151.4	0.29
151.5	0.29
151.6	0.2875
151.7	0.2875
151.8	0.2875
151.9	0.2875
152	0.2875
152.1	0.29
152.2	0.29
152.3	0.29
152.4	0.29
152.5	0.29
152.6	0.29
152.7	0.29
152.8	0.29
152.9	0.29
153	0.29
153.1	0.2925
153.2	0.2925
153.3	0.2925
153.4	0.2925
153.5	0.29
153.6	0.2875
153.7	0.29
153.8	0.29
153.9	0.29
154	0.2875
154.1	0.2875
154.2	0.29
154.3	0.2875
154.4	0.285
154.5	0.2875
154.6	0.2875
154.7	0.2825
154.8	0.2825
154.9	0.2825
155	0.2825
155.1	0.2875
155.2	0.2875
155.3	0.2875
155.4	0.29
155.5	0.29
155.6	0.2925
155.7	0.2925
155.8	0.295
155.9	0.295
156	0.295
156.1	0.295
156.2	0.3025
156.3	0.3025
156.4	0.3025
156.5	0.3025
156.6	0.305
156.7	0.305
156.8	0.305
156.9	0.3075
157	0.3075
157.1	0.3075
157.2	0.3075
157.3	0.3075
157.4	0.3075
157.5	0.3075
157.6	0.3075
157.7	0.3075
157.8	0.3075
157.9	0.3075
158	0.3075
158.1	0.3075
158.2	0.3075
158.3	0.3075
158.4	0.31
158.5	0.3125
158.6	0.31
158.7	0.31
158.8	0.3125
158.9	0.3125
159	0.3125
159.1	0.315
159.2	0.315
159.3	0.3125
159.4	0.3125
159.5	0.3125
159.6	0.3125
159.7	0.3125
159.8	0.3125
159.9	0.3125
160	0.315
160.1	0.315
160.2	0.32
160.3	0.32
160.4	0.32
160.5	0.3225
160.6	0.325
160.7	0.3275
160.8	0.33
160.9	0.33
161	0.335
161.1	0.335
161.2	0.335
161.3	0.34
161.4	0.34
161.5	0.3425
161.6	0.3425
161.7	0.3475
161.8	0.3475
161.9	0.3475
162	0.345
162.1	0.3475
162.2	0.35
162.3	0.35
162.4	0.3525
162.5	0.3525
162.6	0.3525
162.7	0.3525
162.8	0.3525
162.9	0.35
163	0.35
163.1	0.355
163.2	0.3575
163.3	0.3575
163.4	0.36
163.5	0.36
163.6	0.36
163.7	0.36
163.8	0.3575
163.9	0.36
164	0.36
164.1	0.355
164.2	0.355
164.3	0.355
164.4	0.355
164.5	0.3525
164.6	0.3525
164.7	0.355
164.8	0.355
164.9	0.3525
165	0.3525
165.1	0.3525
165.2	0.3525
165.3	0.3525
165.4	0.3525
165.5	0.3525
165.6	0.3525
165.7	0.3525
165.8	0.3525
165.9	0.3525
166	0.3575
166.1	0.3575
166.2	0.3575
166.3	0.3575
166.4	0.3575
166.5	0.3575
166.6	0.3575
166.7	0.3575
166.8	0.355
166.9	0.355
167	0.355
167.1	0.355
167.2	0.355
167.3	0.3575
167.4	0.355
167.5	0.355
167.6	0.355
167.7	0.355
167.8	0.355
167.9	0.355
168	0.355
168.1	0.355
168.2	0.355
168.3	0.355
168.4	0.3575
168.5	0.355
168.6	0.355
168.7	0.355
168.8	0.3575
168.9	0.3575
169	0.3575
169.1	0.365
169.2	0.365
169.3	0.3675
169.4	0.3675
169.5	0.3675
169.6	0.3675
169.7	0.3675
169.8	0.37
169.9	0.37
170	0.37
170.1	0.3725
170.2	0.375
170.3	0.375
170.4	0.375
170.5	0.375
170.6	0.375
170.7	0.38
170.8	0.38
170.9	0.38
171	0.38
171.1	0.3825
171.2	0.3825
171.3	0.385
171.4	0.385
171.5	0.3875
171.6	0.3875
171.7	0.3875
171.8	0.3875
171.9	0.3875
172	0.3875
172.1	0.39
172.2	0.39
172.3	0.3875
172.4	0.3875
172.5	0.385
172.6	0.385
172.7	0.385
172.8	0.385
172.9	0.385
173	0.385
173.1	0.385
173.2	0.385
173.3	0.385
173.4	0.385
173.5	0.3875
173.6	0.3875
173.7	0.39
173.8	0.39
173.9	0.3875
174	0.3875
174.1	0.385
174.2	0.3875
174.3	0.3875
174.4	0.3875
174.5	0.3875
174.6	0.3875
174.7	0.39
174.8	0.3925
174.9	0.395
175	0.3925
175.1	0.39
175.2	0.3925
175.3	0.3925
175.4	0.3925
175.5	0.39
175.6	0.39
175.7	0.3925
175.8	0.3925
175.9	0.3925
176	0.3925
176.1	0.3925
176.2	0.3925
176.3	0.3925
176.4	0.3925
176.5	0.3925
176.6	0.3925
176.7	0.3925
176.8	0.39
176.9	0.39
177	0.3925
177.1	0.395
177.2	0.395
177.3	0.395
177.4	0.3975
177.5	0.4
177.6	0.4025
177.7	0.4025
177.8	0.4025
177.9	0.4
178	0.4
178.1	0.4
178.2	0.4025
178.3	0.4025
178.4	0.4025
178.5	0.4025
178.6	0.4025
178.7	0.4
178.8	0.4
178.9	0.3975
179	0.405
179.1	0.4075
179.2	0.4075
179.3	0.405
179.4	0.4025
179.5	0.4025
179.6	0.4025
179.7	0.4025
179.8	0.4025
179.9	0.4025
180	0.405
180.1	0.4075
180.2	0.41
180.3	0.41
180.4	0.41
180.5	0.4075
180.6	0.4075
180.7	0.41
180.8	0.41
180.9	0.41
181	0.4125
181.1	0.4125
181.2	0.4125
181.3	0.4125
181.4	0.4125
181.5	0.4125
181.6	0.4125
181.7	0.4125
181.8	0.4125
181.9	0.4125
182	0.4125
182.1	0.4125
182.2	0.4125
182.3	0.4125
182.4	0.4175
182.5	0.4175
182.6	0.4175
182.7	0.4175
182.8	0.42
182.9	0.42
183	0.42
183.1	0.42
183.2	0.42
183.3	0.425
183.4	0.425
183.5	0.425
183.6	0.425
183.7	0.425
183.8	0.425
183.9	0.425
184	0.425
184.1	0.425
184.2	0.425
184.3	0.425
184.4	0.425
184.5	0.425
184.6	0.4275
184.7	0.4275
184.8	0.4275
184.9	0.4275
185	0.4275
185.1	0.4275
185.2	0.4275
185.3	0.4275
185.4	0.4275
185.5	0.4275
185.6	0.4275
185.7	0.4275
185.8	0.4275
185.9	0.4275
186	0.4275
186.1	0.425
186.2	0.425
186.3	0.425
186.4	0.425
186.5	0.425
186.6	0.4225
186.7	0.425
186.8	0.425
186.9	0.425
187	0.4225
187.1	0.42
187.2	0.42
187.3	0.42
187.4	0.42
187.5	0.42
187.6	0.42
187.7	0.42
187.8	0.4175
187.9	0.42
188	0.42
188.1	0.4175
188.2	0.4175
188.3	0.4175
188.4	0.4175
188.5	0.4175
188.6	0.4175
188.7	0.4175
188.8	0.4175
188.9	0.4175
189	0.4175
189.1	0.4175
189.2	0.42
189.3	0.4175
189.4	0.4175
189.5	0.4175
189.6	0.4225
189.7	0.4225
189.8	0.4225
189.9	0.4275
190	0.4275
190.1	0.4275
190.2	0.425
190.3	0.4275
190.4	0.425
190.5	0.4275
190.6	0.4275
190.7	0.4275
190.8	0.425
190.9	0.4225
191	0.425
191.1	0.425
191.2	0.425
191.3	0.425
191.4	0.425
191.5	0.43
191.6	0.4325
191.7	0.4325
191.8	0.4325
191.9	0.4325
192	0.4325
192.1	0.4325
192.2	0.435
192.3	0.435
192.4	0.435
192.5	0.435
192.6	0.435
192.7	0.435
192.8	0.4325
192.9	0.435
193	0.435
193.1	0.435
193.2	0.435
193.3	0.4325
193.4	0.4325
193.5	0.4325
193.6	0.4325
193.7	0.4325
193.8	0.435
193.9	0.435
194	0.44
194.1	0.44
194.2	0.4425
194.3	0.44
194.4	0.45
194.5	0.4475
194.6	0.4475
194.7	0.45
194.8	0.4525
194.9	0.4525
195	0.4525
195.1	0.4525
195.2	0.455
195.3	0.455
195.4	0.4575
195.5	0.4575
195.6	0.4575
195.7	0.46
195.8	0.46
195.9	0.4625
196	0.4625
196.1	0.4625
196.2	0.4625
196.3	0.4625
196.4	0.4625
196.5	0.465
196.6	0.465
196.7	0.4675
196.8	0.4675
196.9	0.4675
197	0.4675
197.1	0.4675
197.2	0.4675
197.3	0.47
197.4	0.47
197.5	0.47
197.6	0.47
197.7	0.4675
197.8	0.4675
197.9	0.4675
198	0.47
198.1	0.4725
198.2	0.475
198.3	0.475
198.4	0.475
198.5	0.475
198.6	0.475
198.7	0.4725
198.8	0.4725
198.9	0.4725
199	0.475
199.1	0.475
199.2	0.4725
199.3	0.475
199.4	0.4725
199.5	0.475
199.6	0.4725
199.7	0.4725
199.8	0.47
199.9	0.47
200	0.47
[truncated: 14,000 more rows]
