# Supplementary material for: Bayesian inference of kinetic schemes for ion channels by Kalman filtering
Source: eLife journal article supplement (doi:10.7554/elife.62714), 2022-05-04
Supplement: fig4-data9 [file 1_Sim_N_500_Fluor_MW_0.5M.xlsx]

## Sheet: Tabelle1
0.1	0
0.2	0
0.3	0
0.4	0
0.5	0
0.6	0
0.7	0
0.8	0
0.9	0
1	0
1.1	0
1.2	0
1.3	0
1.4	0
1.5	0
1.6	0
1.7	0
1.8	0
1.9	0
2	0
2.1	0
2.2	0
2.3	0
2.4	0
2.5	0
2.6	0
2.7	0
2.8	0
2.9	0
3	0
3.1	0
3.2	0
3.3	0
3.4	0
3.5	0
3.6	0
3.7	0
3.8	0
3.9	0
4	0
4.1	0
4.2	0
4.3	0
4.4	0
4.5	0
4.6	0
4.7	0
4.8	0
4.9	0
5	0
5.1	0
5.2	0
5.3	0
5.4	0
5.5	0
5.6	0
5.7	0
5.8	0
5.9	0
6	0
6.1	0
6.2	0
6.3	0
6.4	0
6.5	0
6.6	0
6.7	0
6.8	0
6.9	0
7	0
7.1	0
7.2	0
7.3	0
7.4	0
7.5	0
7.6	0
7.7	0
7.8	0
7.9	0
8	0
8.1	0
8.2	0
8.3	0
8.4	0
8.5	0
8.6	0
8.7	0
8.8	0
8.9	0
9	0
9.1	0
9.2	0
9.3	0
9.4	0
9.5	0
9.6	0
9.7	0
9.8	0
9.9	0
10	0
10.1	0
10.2	0
10.3	0
10.4	0
10.5	0
10.6	0
10.7	0
10.8	0
10.9	0
11	0
11.1	0
11.2	0
11.3	0
11.4	0
11.5	0
11.6	0
11.7	0
11.8	0
11.9	0
12	0
12.1	0
12.2	0
12.3	0
12.4	0
12.5	0
12.6	0
12.7	0
12.8	0
12.9	0
13	0
13.1	0
13.2	0
13.3	0
13.4	0
13.5	0
13.6	0
13.7	0
13.8	0
13.9	0
14	0
14.1	0
14.2	0
14.3	0
14.4	0
14.5	0
14.6	0
14.7	0
14.8	0
14.9	0
15	0
15.1	0
15.2	0
15.3	0
15.4	0
15.5	0
15.6	0
15.7	0
15.8	0
15.9	0
16	0
16.1	0
16.2	0
16.3	0
16.4	0
16.5	0
16.6	0
16.7	0
16.8	0
16.9	0
17	0
17.1	0
17.2	0
17.3	0
17.4	0
17.5	0
17.6	0
17.7	0
17.8	0
17.9	0
18	0
18.1	0
18.2	0
18.3	0
18.4	0
18.5	0
18.6	0
18.7	0
18.8	0
18.9	0
19	0
19.1	0
19.2	0
19.3	0
19.4	0
19.5	0
19.6	0
19.7	0
19.8	0
19.9	0
20	0
20.1	0
20.2	0
20.3	0
20.4	0
20.5	0
20.6	0
20.7	0
20.8	0
20.9	0
21	0
21.1	0
21.2	0
21.3	0
21.4	0
21.5	0
21.6	0
21.7	0
21.8	0
21.9	0
22	0
22.1	0
22.2	0
22.3	0
22.4	0
22.5	0
22.6	0
22.7	0
22.8	0
22.9	0
23	0
23.1	0
23.2	0
23.3	0
23.4	0
23.5	0
23.6	0
23.7	0
23.8	0
23.9	0
24	0
24.1	0
24.2	0
24.3	0
24.4	0
24.5	0
24.6	0
24.7	0
24.8	0
24.9	0
25	0
25.1	0
25.2	0
25.3	0
25.4	0
25.5	0
25.6	0
25.7	0
25.8	0
25.9	0
26	0
26.1	0
26.2	0
26.3	0
26.4	0
26.5	0
26.6	0
26.7	0
26.8	0
26.9	0
27	0
27.1	0
27.2	0
27.3	0
27.4	0
27.5	0
27.6	0
27.7	0
27.8	0
27.9	0
28	0
28.1	0
28.2	0
28.3	0
28.4	0
28.5	0
28.6	0
28.7	0
28.8	0
28.9	0
29	0
29.1	0
29.2	0
29.3	0
29.4	0
29.5	0
29.6	0
29.7	0
29.8	0
29.9	0
30	0
30.1	0
30.2	0
30.3	0
30.4	0
30.5	0
30.6	0
30.7	0
30.8	0
30.9	0
31	0
31.1	0
31.2	0
31.3	0
31.4	0
31.5	0
31.6	0
31.7	0
31.8	0
31.9	0
32	0
32.1	0
32.2	0
32.3	0
32.4	0
32.5	0
32.6	0
32.7	0
32.8	0
32.9	0
33	0
33.1	0
33.2	0
33.3	0
33.4	0
33.5	0
33.6	0
33.7	0
33.8	0
33.9	0
34	0
34.1	0
34.2	0
34.3	0
34.4	0
34.5	0
34.6	0
34.7	0
34.8	0
34.9	0
35	0
35.1	0
35.2	0
35.3	0
35.4	0
35.5	0
35.6	0
35.7	0
35.8	0
35.9	0
36	0
36.1	0
36.2	0
36.3	0
36.4	0
36.5	0
36.6	0
36.7	0
36.8	0
36.9	0
37	0
37.1	0
37.2	0
37.3	0
37.4	0
37.5	0
37.6	0
37.7	0
37.8	0
37.9	0
38	0
38.1	0
38.2	0
38.3	0
38.4	0
38.5	0
38.6	0
38.7	0
38.8	0
38.9	0
39	0
39.1	0
39.2	0
39.3	0
39.4	0
39.5	0
39.6	0
39.7	0
39.8	0
39.9	0
40	0
40.1	0
40.2	0
40.3	0
40.4	0
40.5	0
40.6	0
40.7	0
40.8	0
40.9	0
41	0
41.1	0
41.2	0
41.3	0
41.4	0
41.5	0
41.6	0
41.7	0
41.8	0
41.9	0
42	0
42.1	0
42.2	0
42.3	0
42.4	0
42.5	0
42.6	0
42.7	0
42.8	0
42.9	0
43	0
43.1	0
43.2	0
43.3	0
43.4	0
43.5	0
43.6	0
43.7	0
43.8	0
43.9	0
44	0
44.1	0
44.2	0
44.3	0
44.4	0
44.5	0
44.6	0
44.7	0
44.8	0
44.9	0
45	0
45.1	0
45.2	0
45.3	0
45.4	0
45.5	0
45.6	0
45.7	0
45.8	0
45.9	0
46	0
46.1	0
46.2	0
46.3	0
46.4	0
46.5	0
46.6	0
46.7	0
46.8	0
46.9	0
47	0
47.1	0
47.2	0
47.3	0
47.4	0
47.5	0
47.6	0
47.7	0
47.8	0
47.9	0
48	0
48.1	0
48.2	0
48.3	0
48.4	0
48.5	0
48.6	0
48.7	0
48.8	0
48.9	0
49	0
49.1	0
49.2	0
49.3	0
49.4	0
49.5	0
49.6	0
49.7	0
49.8	0
49.9	0
50	0
50.1	0
50.2	0
50.3	0
50.4	0
50.5	0
50.6	0
50.7	0
50.8	0
50.9	0
51	0
51.1	0
51.2	0
51.3	0
51.4	0
51.5	0
51.6	0
51.7	0
51.8	0
51.9	0
52	0
52.1	0
52.2	0
52.3	0
52.4	0
52.5	0
52.6	0
52.7	0
52.8	0
52.9	0
53	0
53.1	0
53.2	0
53.3	0
53.4	0
53.5	0
53.6	0
53.7	0
53.8	0
53.9	0
54	0
54.1	0
54.2	0
54.3	0
54.4	0
54.5	0
54.6	0
54.7	0
54.8	0
54.9	0
55	0
55.1	0
55.2	0
55.3	0
55.4	0
55.5	0
55.6	0
55.7	0
55.8	0
55.9	0
56	0
56.1	0
56.2	0
56.3	0
56.4	0
56.5	0
56.6	0
56.7	0
56.8	0
56.9	0
57	0
57.1	0
57.2	0
57.3	0
57.4	0
57.5	0
57.6	0
57.7	0
57.8	0
57.9	0
58	0
58.1	0
58.2	0
58.3	0
58.4	0
58.5	0
58.6	0
58.7	0
58.8	0
58.9	0
59	0
59.1	0
59.2	0
59.3	0
59.4	0
59.5	0
59.6	0
59.7	0
59.8	0
59.9	0
60	0
60.1	0
60.2	0
60.3	0
60.4	0
60.5	0
60.6	0
60.7	0
60.8	0
60.9	0
61	0
61.1	0
61.2	0
61.3	0
61.4	0
61.5	0
61.6	0
61.7	0
61.8	0
61.9	0
62	0
62.1	0
62.2	0
62.3	0
62.4	0
62.5	0
62.6	0
62.7	0
62.8	0
62.9	0
63	0
63.1	0
63.2	0
63.3	0
63.4	0
63.5	0
63.6	0
63.7	0
63.8	0
63.9	0
64	0
64.1	0
64.2	0
64.3	0
64.4	0
64.5	0
64.6	0
64.7	0
64.8	0
64.9	0
65	0
65.1	0
65.2	0
65.3	0
65.4	0
65.5	0
65.6	0
65.7	0
65.8	0
65.9	0
66	0
66.1	0
66.2	0
66.3	0
66.4	0
66.5	0
66.6	0
66.7	0
66.8	0
66.9	0
67	0
67.1	0
67.2	0
67.3	0
67.4	0
67.5	0
67.6	0
67.7	0
67.8	0
67.9	0
68	0
68.1	0
68.2	0
68.3	0
68.4	0
68.5	0
68.6	0
68.7	0
68.8	0
68.9	0
69	0
69.1	0
69.2	0
69.3	0
69.4	0
69.5	0
69.6	0
69.7	0
69.8	0
69.9	0
70	0
70.1	0
70.2	0
70.3	0
70.4	0
70.5	0
70.6	0
70.7	0
70.8	0
70.9	0
71	0
71.1	0
71.2	0
71.3	0
71.4	0
71.5	0
71.6	0
71.7	0
71.8	0
71.9	0
72	0
72.1	0
72.2	0
72.3	0
72.4	0
72.5	0
72.6	0
72.7	0
72.8	0
72.9	0
73	0
73.1	0
73.2	0
73.3	0
73.4	0
73.5	0
73.6	0
73.7	0
73.8	0
73.9	0
74	0
74.1	0
74.2	0
74.3	0
74.4	0
74.5	0
74.6	0
74.7	0
74.8	0
74.9	0
75	0
75.1	0
75.2	0
75.3	0
75.4	0
75.5	0
75.6	0
75.7	0
75.8	0
75.9	0
76	0
76.1	0
76.2	0
76.3	0
76.4	0
76.5	0
76.6	0
76.7	0
76.8	0
76.9	0
77	0
77.1	0
77.2	0
77.3	0
77.4	0
77.5	0
77.6	0
77.7	0
77.8	0
77.9	0
78	0
78.1	0
78.2	0
78.3	0
78.4	0
78.5	0
78.6	0
78.7	0
78.8	0
78.9	0
79	0
79.1	0
79.2	0
79.3	0
79.4	0
79.5	0
79.6	0
79.7	0
79.8	0
79.9	0
80	0
80.1	0
80.2	0
80.3	0
80.4	0
80.5	0
80.6	0
80.7	0
80.8	0
80.9	0
81	0
81.1	0
81.2	0
81.3	0
81.4	0
81.5	0
81.6	0
81.7	0
81.8	0
81.9	0
82	0
82.1	0
82.2	0
82.3	0
82.4	0
82.5	0
82.6	0
82.7	0
82.8	0
82.9	0
83	0
83.1	0
83.2	0
83.3	0
83.4	0
83.5	0
83.6	0
83.7	0
83.8	0
83.9	0
84	0
84.1	0
84.2	0
84.3	0
84.4	0
84.5	0
84.6	0
84.7	0
84.8	0
84.9	0
85	0
85.1	0
85.2	0
85.3	0
85.4	0
85.5	0
85.6	0
85.7	0
85.8	0
85.9	0
86	0
86.1	0
86.2	0
86.3	0
86.4	0
86.5	0
86.6	0
86.7	0
86.8	0
86.9	0
87	0
87.1	0
87.2	0
87.3	0
87.4	0
87.5	0
87.6	0
87.7	0
87.8	0
87.9	0
88	0
88.1	0
88.2	0
88.3	0
88.4	0
88.5	0
88.6	0
88.7	0
88.8	0
88.9	0
89	0
89.1	0
89.2	0
89.3	0
89.4	0
89.5	0
89.6	0
89.7	0
89.8	0
89.9	0
90	0
90.1	0
90.2	0
90.3	0
90.4	0
90.5	0
90.6	0
90.7	0
90.8	0
90.9	0
91	0
91.1	0
91.2	0
91.3	0
91.4	0
91.5	0
91.6	0
91.7	0
91.8	0
91.9	0
92	0
92.1	0
92.2	0
92.3	0
92.4	0
92.5	0
92.6	0
92.7	0
92.8	0
92.9	0
93	0
93.1	0
93.2	0
93.3	0
93.4	0
93.5	0
93.6	0
93.7	0
93.8	0
93.9	0
94	0
94.1	0
94.2	0
94.3	0
94.4	0
94.5	0
94.6	0
94.7	0
94.8	0
94.9	0
95	0
95.1	0
95.2	0
95.3	0
95.4	0
95.5	0
95.6	0
95.7	0
95.8	0
95.9	0
96	0
96.1	0
96.2	0
96.3	0
96.4	0
96.5	0
96.6	0
96.7	0
96.8	0
96.9	0
97	0
97.1	0
97.2	0
97.3	0
97.4	0
97.5	0
97.6	0
97.7	0
97.8	0
97.9	0
98	0
98.1	0
98.2	0
98.3	0
98.4	0
98.5	0
98.6	0
98.7	0
98.8	0
98.9	0
99	0
99.1	0
99.2	0
99.3	0
99.4	0
99.5	0
99.6	0
99.7	0
99.8	0
99.9	0
100	0
100.1	0.023
100.2	0.057
100.3	0.081
100.4	0.11
100.5	0.136
100.6	0.154
100.7	0.166
100.8	0.187
100.9	0.213
101	0.233
101.1	0.25
101.2	0.268
101.3	0.286
101.4	0.301
101.5	0.317
101.6	0.328
101.7	0.339
101.8	0.347
101.9	0.362
102	0.375
102.1	0.383
102.2	0.388
102.3	0.394
102.4	0.402
102.5	0.41
102.6	0.413
102.7	0.421
102.8	0.432
102.9	0.434
103	0.443
103.1	0.451
103.2	0.457
103.3	0.462
103.4	0.465
103.5	0.465
103.6	0.476
103.7	0.479
103.8	0.483
103.9	0.491
104	0.488
104.1	0.505
104.2	0.507
104.3	0.509
104.4	0.513
104.5	0.517
104.6	0.523
104.7	0.522
104.8	0.522
104.9	0.527
105	0.526
105.1	0.522
105.2	0.529
105.3	0.528
105.4	0.529
105.5	0.526
105.6	0.531
105.7	0.526
105.8	0.53
105.9	0.538
106	0.538
106.1	0.544
106.2	0.55
106.3	0.551
106.4	0.557
106.5	0.551
106.6	0.551
106.7	0.544
106.8	0.543
106.9	0.545
107	0.544
107.1	0.535
107.2	0.547
107.3	0.551
107.4	0.556
107.5	0.56
107.6	0.559
107.7	0.565
107.8	0.573
107.9	0.571
108	0.581
108.1	0.587
108.2	0.579
108.3	0.581
108.4	0.581
108.5	0.581
108.6	0.582
108.7	0.581
108.8	0.577
108.9	0.576
109	0.579
109.1	0.578
109.2	0.579
109.3	0.583
109.4	0.581
109.5	0.578
109.6	0.573
109.7	0.569
109.8	0.568
109.9	0.568
110	0.568
110.1	0.566
110.2	0.57
110.3	0.567
110.4	0.566
110.5	0.565
110.6	0.569
110.7	0.572
110.8	0.565
110.9	0.565
111	0.563
111.1	0.555
111.2	0.556
111.3	0.555
111.4	0.562
111.5	0.567
111.6	0.569
111.7	0.574
111.8	0.573
111.9	0.574
112	0.572
112.1	0.57
112.2	0.565
112.3	0.565
112.4	0.566
112.5	0.572
112.6	0.577
112.7	0.574
112.8	0.575
112.9	0.57
113	0.57
113.1	0.566
113.2	0.565
113.3	0.567
113.4	0.567
113.5	0.571
113.6	0.576
113.7	0.577
113.8	0.579
113.9	0.579
114	0.576
114.1	0.58
114.2	0.584
114.3	0.584
114.4	0.586
114.5	0.587
114.6	0.589
114.7	0.592
114.8	0.595
114.9	0.599
115	0.595
115.1	0.588
115.2	0.584
115.3	0.584
115.4	0.582
115.5	0.579
115.6	0.584
115.7	0.585
115.8	0.588
115.9	0.59
116	0.587
116.1	0.587
116.2	0.582
116.3	0.587
116.4	0.594
116.5	0.6
116.6	0.606
116.7	0.606
116.8	0.608
116.9	0.608
117	0.602
117.1	0.595
117.2	0.593
117.3	0.595
117.4	0.596
117.5	0.597
117.6	0.599
117.7	0.599
117.8	0.599
117.9	0.599
118	0.6
118.1	0.596
118.2	0.598
118.3	0.596
118.4	0.595
118.5	0.598
118.6	0.599
118.7	0.6
118.8	0.603
118.9	0.607
119	0.608
119.1	0.607
119.2	0.61
119.3	0.612
119.4	0.614
119.5	0.61
119.6	0.608
119.7	0.606
119.8	0.604
119.9	0.606
120	0.604
120.1	0.608
120.2	0.612
120.3	0.613
120.4	0.614
120.5	0.614
120.6	0.607
120.7	0.602
120.8	0.602
120.9	0.608
121	0.607
121.1	0.613
121.2	0.613
121.3	0.611
121.4	0.611
121.5	0.602
121.6	0.596
121.7	0.598
121.8	0.591
121.9	0.595
122	0.589
122.1	0.591
122.2	0.595
122.3	0.592
122.4	0.588
122.5	0.587
122.6	0.594
122.7	0.592
122.8	0.595
122.9	0.592
123	0.596
123.1	0.599
123.2	0.602
123.3	0.603
123.4	0.601
123.5	0.606
123.6	0.605
123.7	0.605
123.8	0.598
123.9	0.601
124	0.595
124.1	0.593
124.2	0.589
124.3	0.592
124.4	0.598
124.5	0.601
124.6	0.603
124.7	0.601
124.8	0.607
124.9	0.608
125	0.605
125.1	0.614
125.2	0.61
125.3	0.613
125.4	0.613
125.5	0.615
125.6	0.622
125.7	0.619
125.8	0.611
125.9	0.615
126	0.613
126.1	0.608
126.2	0.61
126.3	0.608
126.4	0.611
126.5	0.609
126.6	0.615
126.7	0.609
126.8	0.608
126.9	0.606
127	0.604
127.1	0.614
127.2	0.611
127.3	0.608
127.4	0.611
127.5	0.615
127.6	0.618
127.7	0.617
127.8	0.617
127.9	0.618
128	0.624
128.1	0.62
128.2	0.622
128.3	0.626
128.4	0.632
128.5	0.631
128.6	0.626
128.7	0.629
128.8	0.631
128.9	0.637
129	0.63
129.1	0.634
129.2	0.628
129.3	0.626
129.4	0.624
129.5	0.627
129.6	0.624
129.7	0.626
129.8	0.632
129.9	0.633
130	0.629
130.1	0.632
130.2	0.634
130.3	0.627
130.4	0.63
130.5	0.636
130.6	0.638
130.7	0.634
130.8	0.638
130.9	0.64
131	0.638
131.1	0.636
131.2	0.646
131.3	0.644
131.4	0.646
131.5	0.634
131.6	0.634
131.7	0.635
131.8	0.635
131.9	0.635
132	0.633
132.1	0.629
132.2	0.631
132.3	0.632
132.4	0.638
132.5	0.641
132.6	0.642
132.7	0.637
132.8	0.64
132.9	0.642
133	0.645
133.1	0.649
133.2	0.648
133.3	0.647
133.4	0.652
133.5	0.65
133.6	0.649
133.7	0.653
133.8	0.658
133.9	0.656
134	0.661
134.1	0.662
134.2	0.663
134.3	0.665
134.4	0.666
134.5	0.668
134.6	0.665
134.7	0.666
134.8	0.666
134.9	0.663
135	0.663
135.1	0.656
135.2	0.655
135.3	0.652
135.4	0.653
135.5	0.652
135.6	0.65
135.7	0.647
135.8	0.643
135.9	0.638
136	0.638
136.1	0.638
136.2	0.642
136.3	0.642
136.4	0.643
136.5	0.652
136.6	0.653
136.7	0.66
136.8	0.658
136.9	0.661
137	0.653
137.1	0.657
137.2	0.656
137.3	0.661
137.4	0.663
137.5	0.662
137.6	0.66
137.7	0.66
137.8	0.663
137.9	0.665
138	0.664
138.1	0.667
138.2	0.663
138.3	0.664
138.4	0.658
138.5	0.651
138.6	0.655
138.7	0.658
138.8	0.659
138.9	0.665
139	0.661
139.1	0.661
139.2	0.662
139.3	0.662
139.4	0.663
139.5	0.66
139.6	0.664
139.7	0.662
139.8	0.659
139.9	0.657
140	0.659
140.1	0.656
140.2	0.655
140.3	0.658
140.4	0.658
140.5	0.662
140.6	0.657
140.7	0.656
140.8	0.656
140.9	0.663
141	0.66
141.1	0.665
141.2	0.669
141.3	0.673
141.4	0.676
141.5	0.667
141.6	0.668
141.7	0.664
141.8	0.67
141.9	0.669
142	0.664
142.1	0.662
142.2	0.662
142.3	0.66
142.4	0.663
142.5	0.666
142.6	0.667
142.7	0.666
142.8	0.664
142.9	0.661
143	0.664
143.1	0.667
143.2	0.666
143.3	0.661
143.4	0.664
143.5	0.663
143.6	0.663
143.7	0.661
143.8	0.658
143.9	0.659
144	0.661
144.1	0.662
144.2	0.663
144.3	0.668
144.4	0.663
144.5	0.656
144.6	0.66
144.7	0.655
144.8	0.656
144.9	0.66
145	0.663
145.1	0.667
145.2	0.669
145.3	0.673
145.4	0.67
145.5	0.672
145.6	0.675
145.7	0.677
145.8	0.68
145.9	0.681
146	0.681
146.1	0.68
146.2	0.678
146.3	0.671
146.4	0.665
146.5	0.667
146.6	0.671
146.7	0.672
146.8	0.665
146.9	0.671
147	0.669
147.1	0.662
147.2	0.666
147.3	0.665
147.4	0.667
147.5	0.671
147.6	0.669
147.7	0.672
147.8	0.672
147.9	0.663
148	0.667
148.1	0.675
148.2	0.678
148.3	0.678
148.4	0.685
148.5	0.684
148.6	0.687
148.7	0.682
148.8	0.683
148.9	0.683
149	0.687
149.1	0.679
149.2	0.677
149.3	0.68
149.4	0.674
149.5	0.676
149.6	0.675
149.7	0.674
149.8	0.676
149.9	0.676
150	0.678
150.1	0.682
150.2	0.681
150.3	0.681
150.4	0.686
150.5	0.691
150.6	0.69
150.7	0.687
150.8	0.685
150.9	0.688
151	0.686
151.1	0.684
151.2	0.687
151.3	0.684
151.4	0.683
151.5	0.68
151.6	0.681
151.7	0.683
151.8	0.684
151.9	0.688
152	0.69
152.1	0.691
152.2	0.692
152.3	0.69
152.4	0.696
152.5	0.696
152.6	0.694
152.7	0.692
152.8	0.694
152.9	0.699
153	0.698
153.1	0.7
153.2	0.704
153.3	0.702
153.4	0.705
153.5	0.703
153.6	0.704
153.7	0.704
153.8	0.704
153.9	0.709
154	0.703
154.1	0.7
154.2	0.695
154.3	0.694
154.4	0.694
154.5	0.694
154.6	0.7
154.7	0.698
154.8	0.697
154.9	0.696
155	0.688
155.1	0.688
155.2	0.691
155.3	0.7
155.4	0.7
155.5	0.693
155.6	0.694
155.7	0.691
155.8	0.69
155.9	0.689
156	0.688
156.1	0.693
156.2	0.694
156.3	0.689
156.4	0.683
156.5	0.686
156.6	0.692
156.7	0.693
156.8	0.694
156.9	0.695
157	0.695
157.1	0.694
157.2	0.69
157.3	0.69
157.4	0.691
157.5	0.696
157.6	0.7
157.7	0.7
157.8	0.7
157.9	0.706
158	0.708
158.1	0.705
158.2	0.699
158.3	0.695
158.4	0.693
158.5	0.69
158.6	0.693
158.7	0.694
158.8	0.695
158.9	0.7
159	0.705
159.1	0.702
159.2	0.709
159.3	0.714
159.4	0.713
159.5	0.705
159.6	0.704
159.7	0.703
159.8	0.702
159.9	0.698
160	0.7
160.1	0.705
160.2	0.698
160.3	0.694
160.4	0.7
160.5	0.706
160.6	0.706
160.7	0.706
160.8	0.705
160.9	0.701
161	0.702
161.1	0.706
161.2	0.703
161.3	0.706
161.4	0.708
161.5	0.708
161.6	0.705
161.7	0.702
161.8	0.7
161.9	0.705
162	0.705
162.1	0.708
162.2	0.712
162.3	0.714
162.4	0.711
162.5	0.717
162.6	0.72
162.7	0.715
162.8	0.711
162.9	0.71
163	0.709
163.1	0.709
163.2	0.709
163.3	0.707
163.4	0.703
163.5	0.701
163.6	0.703
163.7	0.699
163.8	0.7
163.9	0.699
164	0.698
164.1	0.7
164.2	0.701
164.3	0.694
164.4	0.692
164.5	0.694
164.6	0.697
164.7	0.7
164.8	0.702
164.9	0.703
165	0.702
165.1	0.704
165.2	0.707
165.3	0.708
165.4	0.707
165.5	0.704
165.6	0.707
165.7	0.712
165.8	0.71
165.9	0.707
166	0.703
166.1	0.703
166.2	0.703
166.3	0.708
166.4	0.711
166.5	0.713
166.6	0.715
166.7	0.72
166.8	0.72
166.9	0.719
167	0.723
167.1	0.725
167.2	0.725
167.3	0.722
167.4	0.718
167.5	0.722
167.6	0.721
167.7	0.725
167.8	0.719
167.9	0.719
168	0.716
168.1	0.712
168.2	0.71
168.3	0.708
168.4	0.709
168.5	0.707
168.6	0.712
168.7	0.709
168.8	0.71
168.9	0.709
169	0.706
169.1	0.705
169.2	0.707
169.3	0.709
169.4	0.708
169.5	0.703
169.6	0.703
169.7	0.702
169.8	0.702
169.9	0.702
170	0.706
170.1	0.711
170.2	0.712
170.3	0.714
170.4	0.714
170.5	0.713
170.6	0.722
170.7	0.718
170.8	0.712
170.9	0.709
171	0.707
171.1	0.71
171.2	0.71
171.3	0.712
171.4	0.718
171.5	0.72
171.6	0.719
171.7	0.72
171.8	0.72
171.9	0.719
172	0.717
172.1	0.716
172.2	0.713
172.3	0.71
172.4	0.713
172.5	0.712
172.6	0.709
172.7	0.713
172.8	0.717
172.9	0.72
173	0.717
173.1	0.721
173.2	0.72
173.3	0.721
173.4	0.722
173.5	0.723
173.6	0.72
173.7	0.719
173.8	0.719
173.9	0.723
174	0.72
174.1	0.715
174.2	0.71
174.3	0.708
174.4	0.711
174.5	0.709
174.6	0.707
174.7	0.706
174.8	0.706
174.9	0.704
175	0.707
175.1	0.703
175.2	0.699
175.3	0.7
175.4	0.699
175.5	0.7
175.6	0.704
175.7	0.703
175.8	0.702
175.9	0.704
176	0.705
176.1	0.712
176.2	0.716
176.3	0.717
176.4	0.718
176.5	0.718
176.6	0.712
176.7	0.72
176.8	0.717
176.9	0.719
177	0.718
177.1	0.718
177.2	0.717
177.3	0.722
177.4	0.715
177.5	0.711
177.6	0.704
177.7	0.707
177.8	0.704
177.9	0.702
178	0.707
178.1	0.706
178.2	0.712
178.3	0.71
178.4	0.707
178.5	0.709
178.6	0.712
178.7	0.716
178.8	0.713
178.9	0.716
179	0.713
179.1	0.706
179.2	0.708
179.3	0.708
179.4	0.709
179.5	0.708
179.6	0.709
179.7	0.712
179.8	0.709
179.9	0.707
180	0.712
180.1	0.714
180.2	0.709
180.3	0.706
180.4	0.713
180.5	0.713
180.6	0.717
180.7	0.718
180.8	0.716
180.9	0.712
181	0.71
181.1	0.705
181.2	0.704
181.3	0.703
181.4	0.705
181.5	0.705
181.6	0.704
181.7	0.709
181.8	0.717
181.9	0.719
182	0.722
182.1	0.723
182.2	0.722
182.3	0.718
182.4	0.713
182.5	0.715
182.6	0.714
182.7	0.713
182.8	0.717
182.9	0.72
183	0.719
183.1	0.718
183.2	0.719
183.3	0.723
183.4	0.72
183.5	0.719
183.6	0.714
183.7	0.711
183.8	0.713
183.9	0.715
184	0.718
184.1	0.72
184.2	0.721
184.3	0.724
184.4	0.723
184.5	0.72
184.6	0.724
184.7	0.723
184.8	0.719
184.9	0.713
185	0.709
185.1	0.705
185.2	0.7
185.3	0.703
185.4	0.706
185.5	0.703
185.6	0.704
185.7	0.707
185.8	0.704
185.9	0.709
186	0.707
186.1	0.706
186.2	0.708
186.3	0.71
186.4	0.708
186.5	0.707
186.6	0.706
186.7	0.712
186.8	0.714
186.9	0.709
187	0.711
187.1	0.715
187.2	0.714
187.3	0.718
187.4	0.72
187.5	0.718
187.6	0.713
187.7	0.711
187.8	0.714
187.9	0.714
188	0.711
188.1	0.706
188.2	0.706
188.3	0.705
188.4	0.702
188.5	0.706
188.6	0.71
188.7	0.708
188.8	0.71
188.9	0.715
189	0.719
189.1	0.721
189.2	0.721
189.3	0.723
189.4	0.726
189.5	0.729
189.6	0.728
189.7	0.725
189.8	0.721
189.9	0.724
190	0.722
190.1	0.718
190.2	0.717
190.3	0.719
190.4	0.717
190.5	0.719
190.6	0.724
190.7	0.723
190.8	0.725
190.9	0.722
191	0.726
191.1	0.728
191.2	0.723
191.3	0.719
191.4	0.72
191.5	0.725
191.6	0.727
191.7	0.733
191.8	0.733
191.9	0.732
192	0.733
192.1	0.732
192.2	0.735
192.3	0.735
192.4	0.731
192.5	0.728
192.6	0.73
192.7	0.717
192.8	0.709
192.9	0.711
193	0.713
193.1	0.715
193.2	0.72
193.3	0.714
193.4	0.712
193.5	0.709
193.6	0.709
193.7	0.712
193.8	0.714
193.9	0.711
194	0.711
194.1	0.711
194.2	0.717
194.3	0.715
194.4	0.718
194.5	0.716
194.6	0.717
194.7	0.718
194.8	0.714
194.9	0.716
195	0.715
195.1	0.714
195.2	0.721
195.3	0.716
195.4	0.716
195.5	0.714
195.6	0.715
195.7	0.719
195.8	0.718
195.9	0.715
196	0.71
196.1	0.707
196.2	0.708
196.3	0.707
196.4	0.705
196.5	0.706
196.6	0.704
196.7	0.706
196.8	0.712
196.9	0.711
197	0.713
197.1	0.716
197.2	0.719
197.3	0.716
197.4	0.714
197.5	0.715
197.6	0.712
197.7	0.71
197.8	0.714
197.9	0.715
198	0.715
198.1	0.719
198.2	0.717
198.3	0.722
198.4	0.729
198.5	0.732
198.6	0.734
198.7	0.737
198.8	0.735
198.9	0.733
199	0.734
199.1	0.733
199.2	0.742
199.3	0.735
199.4	0.732
199.5	0.73
199.6	0.73
199.7	0.732
199.8	0.735
199.9	0.732
200	0.733
[truncated: 14,000 more rows]
