# Supplementary material for: Bayesian inference of kinetic schemes for ion channels by Kalman filtering
Source: eLife journal article supplement (doi:10.7554/elife.62714), 2022-05-04
Supplement: fig4-data9 [file 1_Sim_N_500_Strom_MW_0.5M.xlsx]

## Sheet: Tabelle1
0.1	0
0.2	0
0.3	0
0.4	0
0.5	0
0.6	0
0.7	0
0.8	0
0.9	0
1	0
1.1	0
1.2	0
1.3	0
1.4	0
1.5	0
1.6	0
1.7	0
1.8	0
1.9	0
2	0
2.1	0
2.2	0
2.3	0
2.4	0
2.5	0
2.6	0
2.7	0
2.8	0
2.9	0
3	0
3.1	0
3.2	0
3.3	0
3.4	0
3.5	0
3.6	0
3.7	0
3.8	0
3.9	0
4	0
4.1	0
4.2	0
4.3	0
4.4	0
4.5	0
4.6	0
4.7	0
4.8	0
4.9	0
5	0
5.1	0
5.2	0
5.3	0
5.4	0
5.5	0
5.6	0
5.7	0
5.8	0
5.9	0
6	0
6.1	0
6.2	0
6.3	0
6.4	0
6.5	0
6.6	0
6.7	0
6.8	0
6.9	0
7	0
7.1	0
7.2	0
7.3	0
7.4	0
7.5	0
7.6	0
7.7	0
7.8	0
7.9	0
8	0
8.1	0
8.2	0
8.3	0
8.4	0
8.5	0
8.6	0
8.7	0
8.8	0
8.9	0
9	0
9.1	0
9.2	0
9.3	0
9.4	0
9.5	0
9.6	0
9.7	0
9.8	0
9.9	0
10	0
10.1	0
10.2	0
10.3	0
10.4	0
10.5	0
10.6	0
10.7	0
10.8	0
10.9	0
11	0
11.1	0
11.2	0
11.3	0
11.4	0
11.5	0
11.6	0
11.7	0
11.8	0
11.9	0
12	0
12.1	0
12.2	0
12.3	0
12.4	0
12.5	0
12.6	0
12.7	0
12.8	0
12.9	0
13	0
13.1	0
13.2	0
13.3	0
13.4	0
13.5	0
13.6	0
13.7	0
13.8	0
13.9	0
14	0
14.1	0
14.2	0
14.3	0
14.4	0
14.5	0
14.6	0
14.7	0
14.8	0
14.9	0
15	0
15.1	0
15.2	0
15.3	0
15.4	0
15.5	0
15.6	0
15.7	0
15.8	0
15.9	0
16	0
16.1	0
16.2	0
16.3	0
16.4	0
16.5	0
16.6	0
16.7	0
16.8	0
16.9	0
17	0
17.1	0
17.2	0
17.3	0
17.4	0
17.5	0
17.6	0
17.7	0
17.8	0
17.9	0
18	0
18.1	0
18.2	0
18.3	0
18.4	0
18.5	0
18.6	0
18.7	0
18.8	0
18.9	0
19	0
19.1	0
19.2	0
19.3	0
19.4	0
19.5	0
19.6	0
19.7	0
19.8	0
19.9	0
20	0
20.1	0
20.2	0
20.3	0
20.4	0
20.5	0
20.6	0
20.7	0
20.8	0
20.9	0
21	0
21.1	0
21.2	0
21.3	0
21.4	0
21.5	0
21.6	0
21.7	0
21.8	0
21.9	0
22	0
22.1	0
22.2	0
22.3	0
22.4	0
22.5	0
22.6	0
22.7	0
22.8	0
22.9	0
23	0
23.1	0
23.2	0
23.3	0
23.4	0
23.5	0
23.6	0
23.7	0
23.8	0
23.9	0
24	0
24.1	0
24.2	0
24.3	0
24.4	0
24.5	0
24.6	0
24.7	0
24.8	0
24.9	0
25	0
25.1	0
25.2	0
25.3	0
25.4	0
25.5	0
25.6	0
25.7	0
25.8	0
25.9	0
26	0
26.1	0
26.2	0
26.3	0
26.4	0
26.5	0
26.6	0
26.7	0
26.8	0
26.9	0
27	0
27.1	0
27.2	0
27.3	0
27.4	0
27.5	0
27.6	0
27.7	0
27.8	0
27.9	0
28	0
28.1	0
28.2	0
28.3	0
28.4	0
28.5	0
28.6	0
28.7	0
28.8	0
28.9	0
29	0
29.1	0
29.2	0
29.3	0
29.4	0
29.5	0
29.6	0
29.7	0
29.8	0
29.9	0
30	0
30.1	0
30.2	0
30.3	0
30.4	0
30.5	0
30.6	0
30.7	0
30.8	0
30.9	0
31	0
31.1	0
31.2	0
31.3	0
31.4	0
31.5	0
31.6	0
31.7	0
31.8	0
31.9	0
32	0
32.1	0
32.2	0
32.3	0
32.4	0
32.5	0
32.6	0
32.7	0
32.8	0
32.9	0
33	0
33.1	0
33.2	0
33.3	0
33.4	0
33.5	0
33.6	0
33.7	0
33.8	0
33.9	0
34	0
34.1	0
34.2	0
34.3	0
34.4	0
34.5	0
34.6	0
34.7	0
34.8	0
34.9	0
35	0
35.1	0
35.2	0
35.3	0
35.4	0
35.5	0
35.6	0
35.7	0
35.8	0
35.9	0
36	0
36.1	0
36.2	0
36.3	0
36.4	0
36.5	0
36.6	0
36.7	0
36.8	0
36.9	0
37	0
37.1	0
37.2	0
37.3	0
37.4	0
37.5	0
37.6	0
37.7	0
37.8	0
37.9	0
38	0
38.1	0
38.2	0
38.3	0
38.4	0
38.5	0
38.6	0
38.7	0
38.8	0
38.9	0
39	0
39.1	0
39.2	0
39.3	0
39.4	0
39.5	0
39.6	0
39.7	0
39.8	0
39.9	0
40	0
40.1	0
40.2	0
40.3	0
40.4	0
40.5	0
40.6	0
40.7	0
40.8	0
40.9	0
41	0
41.1	0
41.2	0
41.3	0
41.4	0
41.5	0
41.6	0
41.7	0
41.8	0
41.9	0
42	0
42.1	0
42.2	0
42.3	0
42.4	0
42.5	0
42.6	0
42.7	0
42.8	0
42.9	0
43	0
43.1	0
43.2	0
43.3	0
43.4	0
43.5	0
43.6	0
43.7	0
43.8	0
43.9	0
44	0
44.1	0
44.2	0
44.3	0
44.4	0
44.5	0
44.6	0
44.7	0
44.8	0
44.9	0
45	0
45.1	0
45.2	0
45.3	0
45.4	0
45.5	0
45.6	0
45.7	0
45.8	0
45.9	0
46	0
46.1	0
46.2	0
46.3	0
46.4	0
46.5	0
46.6	0
46.7	0
46.8	0
46.9	0
47	0
47.1	0
47.2	0
47.3	0
47.4	0
47.5	0
47.6	0
47.7	0
47.8	0
47.9	0
48	0
48.1	0
48.2	0
48.3	0
48.4	0
48.5	0
48.6	0
48.7	0
48.8	0
48.9	0
49	0
49.1	0
49.2	0
49.3	0
49.4	0
49.5	0
49.6	0
49.7	0
49.8	0
49.9	0
50	0
50.1	0
50.2	0
50.3	0
50.4	0
50.5	0
50.6	0
50.7	0
50.8	0
50.9	0
51	0
51.1	0
51.2	0
51.3	0
51.4	0
51.5	0
51.6	0
51.7	0
51.8	0
51.9	0
52	0
52.1	0
52.2	0
52.3	0
52.4	0
52.5	0
52.6	0
52.7	0
52.8	0
52.9	0
53	0
53.1	0
53.2	0
53.3	0
53.4	0
53.5	0
53.6	0
53.7	0
53.8	0
53.9	0
54	0
54.1	0
54.2	0
54.3	0
54.4	0
54.5	0
54.6	0
54.7	0
54.8	0
54.9	0
55	0
55.1	0
55.2	0
55.3	0
55.4	0
55.5	0
55.6	0
55.7	0
55.8	0
55.9	0
56	0
56.1	0
56.2	0
56.3	0
56.4	0
56.5	0
56.6	0
56.7	0
56.8	0
56.9	0
57	0
57.1	0
57.2	0
57.3	0
57.4	0
57.5	0
57.6	0
57.7	0
57.8	0
57.9	0
58	0
58.1	0
58.2	0
58.3	0
58.4	0
58.5	0
58.6	0
58.7	0
58.8	0
58.9	0
59	0
59.1	0
59.2	0
59.3	0
59.4	0
59.5	0
59.6	0
59.7	0
59.8	0
59.9	0
60	0
60.1	0
60.2	0
60.3	0
60.4	0
60.5	0
60.6	0
60.7	0
60.8	0
60.9	0
61	0
61.1	0
61.2	0
61.3	0
61.4	0
61.5	0
61.6	0
61.7	0
61.8	0
61.9	0
62	0
62.1	0
62.2	0
62.3	0
62.4	0
62.5	0
62.6	0
62.7	0
62.8	0
62.9	0
63	0
63.1	0
63.2	0
63.3	0
63.4	0
63.5	0
63.6	0
63.7	0
63.8	0
63.9	0
64	0
64.1	0
64.2	0
64.3	0
64.4	0
64.5	0
64.6	0
64.7	0
64.8	0
64.9	0
65	0
65.1	0
65.2	0
65.3	0
65.4	0
65.5	0
65.6	0
65.7	0
65.8	0
65.9	0
66	0
66.1	0
66.2	0
66.3	0
66.4	0
66.5	0
66.6	0
66.7	0
66.8	0
66.9	0
67	0
67.1	0
67.2	0
67.3	0
67.4	0
67.5	0
67.6	0
67.7	0
67.8	0
67.9	0
68	0
68.1	0
68.2	0
68.3	0
68.4	0
68.5	0
68.6	0
68.7	0
68.8	0
68.9	0
69	0
69.1	0
69.2	0
69.3	0
69.4	0
69.5	0
69.6	0
69.7	0
69.8	0
69.9	0
70	0
70.1	0
70.2	0
70.3	0
70.4	0
70.5	0
70.6	0
70.7	0
70.8	0
70.9	0
71	0
71.1	0
71.2	0
71.3	0
71.4	0
71.5	0
71.6	0
71.7	0
71.8	0
71.9	0
72	0
72.1	0
72.2	0
72.3	0
72.4	0
72.5	0
72.6	0
72.7	0
72.8	0
72.9	0
73	0
73.1	0
73.2	0
73.3	0
73.4	0
73.5	0
73.6	0
73.7	0
73.8	0
73.9	0
74	0
74.1	0
74.2	0
74.3	0
74.4	0
74.5	0
74.6	0
74.7	0
74.8	0
74.9	0
75	0
75.1	0
75.2	0
75.3	0
75.4	0
75.5	0
75.6	0
75.7	0
75.8	0
75.9	0
76	0
76.1	0
76.2	0
76.3	0
76.4	0
76.5	0
76.6	0
76.7	0
76.8	0
76.9	0
77	0
77.1	0
77.2	0
77.3	0
77.4	0
77.5	0
77.6	0
77.7	0
77.8	0
77.9	0
78	0
78.1	0
78.2	0
78.3	0
78.4	0
78.5	0
78.6	0
78.7	0
78.8	0
78.9	0
79	0
79.1	0
79.2	0
79.3	0
79.4	0
79.5	0
79.6	0
79.7	0
79.8	0
79.9	0
80	0
80.1	0
80.2	0
80.3	0
80.4	0
80.5	0
80.6	0
80.7	0
80.8	0
80.9	0
81	0
81.1	0
81.2	0
81.3	0
81.4	0
81.5	0
81.6	0
81.7	0
81.8	0
81.9	0
82	0
82.1	0
82.2	0
82.3	0
82.4	0
82.5	0
82.6	0
82.7	0
82.8	0
82.9	0
83	0
83.1	0
83.2	0
83.3	0
83.4	0
83.5	0
83.6	0
83.7	0
83.8	0
83.9	0
84	0
84.1	0
84.2	0
84.3	0
84.4	0
84.5	0
84.6	0
84.7	0
84.8	0
84.9	0
85	0
85.1	0
85.2	0
85.3	0
85.4	0
85.5	0
85.6	0
85.7	0
85.8	0
85.9	0
86	0
86.1	0
86.2	0
86.3	0
86.4	0
86.5	0
86.6	0
86.7	0
86.8	0
86.9	0
87	0
87.1	0
87.2	0
87.3	0
87.4	0
87.5	0
87.6	0
87.7	0
87.8	0
87.9	0
88	0
88.1	0
88.2	0
88.3	0
88.4	0
88.5	0
88.6	0
88.7	0
88.8	0
88.9	0
89	0
89.1	0
89.2	0
89.3	0
89.4	0
89.5	0
89.6	0
89.7	0
89.8	0
89.9	0
90	0
90.1	0
90.2	0
90.3	0
90.4	0
90.5	0
90.6	0
90.7	0
90.8	0
90.9	0
91	0
91.1	0
91.2	0
91.3	0
91.4	0
91.5	0
91.6	0
91.7	0
91.8	0
91.9	0
92	0
92.1	0
92.2	0
92.3	0
92.4	0
92.5	0
92.6	0
92.7	0
92.8	0
92.9	0
93	0
93.1	0
93.2	0
93.3	0
93.4	0
93.5	0
93.6	0
93.7	0
93.8	0
93.9	0
94	0
94.1	0
94.2	0
94.3	0
94.4	0
94.5	0
94.6	0
94.7	0
94.8	0
94.9	0
95	0
95.1	0
95.2	0
95.3	0
95.4	0
95.5	0
95.6	0
95.7	0
95.8	0
95.9	0
96	0
96.1	0
96.2	0
96.3	0
96.4	0
96.5	0
96.6	0
96.7	0
96.8	0
96.9	0
97	0
97.1	0
97.2	0
97.3	0
97.4	0
97.5	0
97.6	0
97.7	0
97.8	0
97.9	0
98	0
98.1	0
98.2	0
98.3	0
98.4	0
98.5	0
98.6	0
98.7	0
98.8	0
98.9	0
99	0
99.1	0
99.2	0
99.3	0
99.4	0
99.5	0
99.6	0
99.7	0
99.8	0
99.9	0
100	0
100.1	0
100.2	0
100.3	0
100.4	0
100.5	0
100.6	0
100.7	0
100.8	0
100.9	0
101	0.002
101.1	0.002
101.2	0.002
101.3	0.002
101.4	0.002
101.5	0.002
101.6	0.004
101.7	0.004
101.8	0.004
101.9	0.004
102	0.004
102.1	0.004
102.2	0.004
102.3	0.004
102.4	0.004
102.5	0.004
102.6	0.006
102.7	0.008
102.8	0.01
102.9	0.01
103	0.01
103.1	0.012
103.2	0.012
103.3	0.014
103.4	0.014
103.5	0.014
103.6	0.014
103.7	0.014
103.8	0.016
103.9	0.016
104	0.018
104.1	0.018
104.2	0.02
104.3	0.022
104.4	0.022
104.5	0.022
104.6	0.024
104.7	0.024
104.8	0.024
104.9	0.026
105	0.026
105.1	0.026
105.2	0.026
105.3	0.026
105.4	0.026
105.5	0.028
105.6	0.028
105.7	0.028
105.8	0.03
105.9	0.03
106	0.03
106.1	0.03
106.2	0.03
106.3	0.03
106.4	0.03
106.5	0.034
106.6	0.034
106.7	0.034
106.8	0.04
106.9	0.04
107	0.04
107.1	0.04
107.2	0.04
107.3	0.04
107.4	0.04
107.5	0.042
107.6	0.042
107.7	0.042
107.8	0.042
107.9	0.042
108	0.042
108.1	0.044
108.2	0.044
108.3	0.044
108.4	0.044
108.5	0.044
108.6	0.046
108.7	0.05
108.8	0.05
108.9	0.05
109	0.056
109.1	0.056
109.2	0.058
109.3	0.058
109.4	0.058
109.5	0.056
109.6	0.056
109.7	0.056
109.8	0.056
109.9	0.06
110	0.062
110.1	0.062
110.2	0.062
110.3	0.062
110.4	0.064
110.5	0.064
110.6	0.068
110.7	0.068
110.8	0.068
110.9	0.07
111	0.07
111.1	0.07
111.2	0.07
111.3	0.07
111.4	0.072
111.5	0.072
111.6	0.072
111.7	0.076
111.8	0.076
111.9	0.076
112	0.076
112.1	0.076
112.2	0.076
112.3	0.076
112.4	0.078
112.5	0.08
112.6	0.08
112.7	0.082
112.8	0.082
112.9	0.082
113	0.084
113.1	0.088
113.2	0.09
113.3	0.092
113.4	0.092
113.5	0.092
113.6	0.092
113.7	0.094
113.8	0.094
113.9	0.09
114	0.092
114.1	0.094
114.2	0.096
114.3	0.096
114.4	0.098
114.5	0.1
114.6	0.1
114.7	0.1
114.8	0.1
114.9	0.1
115	0.104
115.1	0.106
115.2	0.108
115.3	0.108
115.4	0.11
115.5	0.112
115.6	0.112
115.7	0.112
115.8	0.112
115.9	0.114
116	0.114
116.1	0.114
116.2	0.114
116.3	0.114
116.4	0.118
116.5	0.118
116.6	0.118
116.7	0.12
116.8	0.12
116.9	0.12
117	0.12
117.1	0.12
117.2	0.12
117.3	0.12
117.4	0.122
117.5	0.122
117.6	0.122
117.7	0.122
117.8	0.124
117.9	0.124
118	0.126
118.1	0.128
118.2	0.128
118.3	0.128
118.4	0.132
118.5	0.132
118.6	0.132
118.7	0.132
118.8	0.13
118.9	0.132
119	0.134
119.1	0.134
119.2	0.136
119.3	0.14
119.4	0.142
119.5	0.14
119.6	0.138
119.7	0.138
119.8	0.138
119.9	0.138
120	0.142
120.1	0.144
120.2	0.144
120.3	0.144
120.4	0.146
120.5	0.146
120.6	0.148
120.7	0.148
120.8	0.15
120.9	0.148
121	0.15
121.1	0.154
121.2	0.152
121.3	0.156
121.4	0.158
121.5	0.158
121.6	0.16
121.7	0.158
121.8	0.16
121.9	0.16
122	0.162
122.1	0.162
122.2	0.164
122.3	0.164
122.4	0.164
122.5	0.166
122.6	0.166
122.7	0.166
122.8	0.166
122.9	0.166
123	0.166
123.1	0.168
123.2	0.17
123.3	0.17
123.4	0.17
123.5	0.17
123.6	0.17
123.7	0.17
123.8	0.17
123.9	0.17
124	0.172
124.1	0.174
124.2	0.176
124.3	0.176
124.4	0.176
124.5	0.176
124.6	0.176
124.7	0.176
124.8	0.176
124.9	0.178
125	0.178
125.1	0.178
125.2	0.178
125.3	0.178
125.4	0.178
125.5	0.178
125.6	0.178
125.7	0.176
125.8	0.178
125.9	0.178
126	0.182
126.1	0.18
126.2	0.18
126.3	0.182
126.4	0.182
126.5	0.184
126.6	0.184
126.7	0.184
126.8	0.184
126.9	0.184
127	0.184
127.1	0.184
127.2	0.184
127.3	0.184
127.4	0.186
127.5	0.186
127.6	0.186
127.7	0.188
127.8	0.188
127.9	0.188
128	0.188
128.1	0.188
128.2	0.188
128.3	0.188
128.4	0.19
128.5	0.19
128.6	0.192
128.7	0.192
128.8	0.192
128.9	0.192
129	0.194
129.1	0.198
129.2	0.198
129.3	0.198
129.4	0.2
129.5	0.2
129.6	0.202
129.7	0.202
129.8	0.204
129.9	0.202
130	0.202
130.1	0.202
130.2	0.202
130.3	0.202
130.4	0.202
130.5	0.202
130.6	0.202
130.7	0.202
130.8	0.202
130.9	0.202
131	0.204
131.1	0.204
131.2	0.206
131.3	0.206
131.4	0.21
131.5	0.208
131.6	0.208
131.7	0.21
131.8	0.212
131.9	0.21
132	0.21
132.1	0.208
132.2	0.214
132.3	0.214
132.4	0.214
132.5	0.218
132.6	0.218
132.7	0.22
132.8	0.218
132.9	0.218
133	0.218
133.1	0.218
133.2	0.218
133.3	0.218
133.4	0.218
133.5	0.218
133.6	0.218
133.7	0.22
133.8	0.222
133.9	0.222
134	0.22
134.1	0.218
134.2	0.218
134.3	0.22
134.4	0.22
134.5	0.22
134.6	0.22
134.7	0.222
134.8	0.224
134.9	0.226
135	0.226
135.1	0.228
135.2	0.23
135.3	0.23
135.4	0.23
135.5	0.234
135.6	0.234
135.7	0.234
135.8	0.234
135.9	0.234
136	0.234
136.1	0.234
136.2	0.234
136.3	0.234
136.4	0.236
136.5	0.236
136.6	0.238
136.7	0.238
136.8	0.242
136.9	0.24
137	0.242
137.1	0.246
137.2	0.246
137.3	0.246
137.4	0.246
137.5	0.248
137.6	0.248
137.7	0.248
137.8	0.248
137.9	0.248
138	0.248
138.1	0.248
138.2	0.25
138.3	0.252
138.4	0.252
138.5	0.248
138.6	0.246
138.7	0.248
138.8	0.25
138.9	0.254
139	0.258
139.1	0.258
139.2	0.258
139.3	0.258
139.4	0.258
139.5	0.258
139.6	0.26
139.7	0.262
139.8	0.26
139.9	0.26
140	0.262
140.1	0.262
140.2	0.262
140.3	0.26
140.4	0.258
140.5	0.258
140.6	0.258
140.7	0.258
140.8	0.26
140.9	0.26
141	0.26
141.1	0.26
141.2	0.26
141.3	0.26
141.4	0.258
141.5	0.26
141.6	0.26
141.7	0.258
141.8	0.26
141.9	0.26
142	0.258
142.1	0.258
142.2	0.258
142.3	0.258
142.4	0.256
142.5	0.258
142.6	0.258
142.7	0.258
142.8	0.258
142.9	0.258
143	0.258
143.1	0.256
143.2	0.258
143.3	0.258
143.4	0.258
143.5	0.258
143.6	0.26
143.7	0.26
143.8	0.26
143.9	0.262
144	0.262
144.1	0.262
144.2	0.262
144.3	0.262
144.4	0.262
144.5	0.264
144.6	0.264
144.7	0.264
144.8	0.264
144.9	0.262
145	0.262
145.1	0.262
145.2	0.264
145.3	0.264
145.4	0.264
145.5	0.264
145.6	0.264
145.7	0.262
145.8	0.262
145.9	0.262
146	0.262
146.1	0.262
146.2	0.26
146.3	0.26
146.4	0.264
146.5	0.264
146.6	0.264
146.7	0.264
146.8	0.266
146.9	0.268
147	0.266
147.1	0.268
147.2	0.268
147.3	0.27
147.4	0.274
147.5	0.276
147.6	0.276
147.7	0.276
147.8	0.278
147.9	0.278
148	0.278
148.1	0.28
148.2	0.278
148.3	0.278
148.4	0.276
148.5	0.276
148.6	0.276
148.7	0.276
148.8	0.276
148.9	0.276
149	0.278
149.1	0.278
149.2	0.278
149.3	0.28
149.4	0.278
149.5	0.282
149.6	0.282
149.7	0.284
149.8	0.284
149.9	0.286
150	0.286
150.1	0.288
150.2	0.292
150.3	0.29
150.4	0.29
150.5	0.29
150.6	0.296
150.7	0.296
150.8	0.298
150.9	0.3
151	0.3
151.1	0.3
151.2	0.302
151.3	0.306
151.4	0.306
151.5	0.308
151.6	0.31
151.7	0.31
151.8	0.31
151.9	0.312
152	0.312
152.1	0.312
152.2	0.312
152.3	0.312
152.4	0.312
152.5	0.314
152.6	0.314
152.7	0.314
152.8	0.314
152.9	0.314
153	0.316
153.1	0.316
153.2	0.316
153.3	0.312
153.4	0.312
153.5	0.312
153.6	0.312
153.7	0.312
153.8	0.31
153.9	0.31
154	0.308
154.1	0.31
154.2	0.312
154.3	0.314
154.4	0.314
154.5	0.314
154.6	0.314
154.7	0.314
154.8	0.316
154.9	0.318
155	0.318
155.1	0.32
155.2	0.322
155.3	0.324
155.4	0.324
155.5	0.324
155.6	0.326
155.7	0.326
155.8	0.326
155.9	0.326
156	0.326
156.1	0.326
156.2	0.326
156.3	0.328
156.4	0.328
156.5	0.33
156.6	0.33
156.7	0.33
156.8	0.33
156.9	0.33
157	0.33
157.1	0.33
157.2	0.33
157.3	0.33
157.4	0.33
157.5	0.33
157.6	0.33
157.7	0.33
157.8	0.328
157.9	0.328
158	0.328
158.1	0.328
158.2	0.328
158.3	0.33
158.4	0.328
158.5	0.328
158.6	0.328
158.7	0.33
158.8	0.33
158.9	0.332
159	0.334
159.1	0.334
159.2	0.334
159.3	0.334
159.4	0.334
159.5	0.334
159.6	0.334
159.7	0.336
159.8	0.336
159.9	0.334
160	0.334
160.1	0.332
160.2	0.336
160.3	0.336
160.4	0.338
160.5	0.34
160.6	0.34
160.7	0.34
160.8	0.342
160.9	0.342
161	0.346
161.1	0.346
161.2	0.346
161.3	0.348
161.4	0.348
161.5	0.346
161.6	0.35
161.7	0.35
161.8	0.35
161.9	0.35
162	0.35
162.1	0.35
162.2	0.348
162.3	0.35
162.4	0.35
162.5	0.352
162.6	0.352
162.7	0.35
162.8	0.35
162.9	0.348
163	0.348
163.1	0.348
163.2	0.348
163.3	0.346
163.4	0.348
163.5	0.348
163.6	0.35
163.7	0.35
163.8	0.35
163.9	0.352
164	0.35
164.1	0.35
164.2	0.35
164.3	0.35
164.4	0.35
164.5	0.35
164.6	0.352
164.7	0.348
164.8	0.348
164.9	0.348
165	0.346
165.1	0.346
165.2	0.346
165.3	0.346
165.4	0.346
165.5	0.346
165.6	0.346
165.7	0.344
165.8	0.344
165.9	0.346
166	0.346
166.1	0.346
166.2	0.344
166.3	0.342
166.4	0.344
166.5	0.348
166.6	0.346
166.7	0.348
166.8	0.348
166.9	0.348
167	0.35
167.1	0.35
167.2	0.35
167.3	0.348
167.4	0.348
167.5	0.346
167.6	0.352
167.7	0.356
167.8	0.358
167.9	0.358
168	0.358
168.1	0.36
168.2	0.36
168.3	0.36
168.4	0.358
168.5	0.362
168.6	0.362
168.7	0.36
168.8	0.36
168.9	0.362
169	0.362
169.1	0.362
169.2	0.364
169.3	0.366
169.4	0.366
169.5	0.366
169.6	0.366
169.7	0.368
169.8	0.368
169.9	0.368
170	0.368
170.1	0.37
170.2	0.374
170.3	0.372
170.4	0.372
170.5	0.37
170.6	0.37
170.7	0.37
170.8	0.368
170.9	0.368
171	0.37
171.1	0.37
171.2	0.37
171.3	0.37
171.4	0.37
171.5	0.37
171.6	0.37
171.7	0.37
171.8	0.368
171.9	0.366
172	0.364
172.1	0.362
172.2	0.362
172.3	0.358
172.4	0.358
172.5	0.358
172.6	0.36
172.7	0.362
172.8	0.362
172.9	0.362
173	0.362
173.1	0.362
173.2	0.362
173.3	0.36
173.4	0.362
173.5	0.36
173.6	0.36
173.7	0.36
173.8	0.36
173.9	0.36
174	0.36
174.1	0.358
174.2	0.358
174.3	0.358
174.4	0.358
174.5	0.358
174.6	0.358
174.7	0.358
174.8	0.358
174.9	0.36
175	0.36
175.1	0.362
175.2	0.366
175.3	0.366
175.4	0.366
175.5	0.364
175.6	0.364
175.7	0.364
175.8	0.366
175.9	0.366
176	0.366
176.1	0.366
176.2	0.362
176.3	0.364
176.4	0.366
176.5	0.366
176.6	0.364
176.7	0.364
176.8	0.366
176.9	0.366
177	0.366
177.1	0.366
177.2	0.364
177.3	0.364
177.4	0.364
177.5	0.366
177.6	0.366
177.7	0.364
177.8	0.362
177.9	0.364
178	0.364
178.1	0.364
178.2	0.364
178.3	0.364
178.4	0.364
178.5	0.364
178.6	0.364
178.7	0.368
178.8	0.368
178.9	0.368
179	0.368
179.1	0.368
179.2	0.37
179.3	0.37
179.4	0.374
179.5	0.376
179.6	0.376
179.7	0.378
179.8	0.378
179.9	0.376
180	0.374
180.1	0.374
180.2	0.374
180.3	0.374
180.4	0.374
180.5	0.374
180.6	0.374
180.7	0.376
180.8	0.378
180.9	0.376
181	0.376
181.1	0.376
181.2	0.376
181.3	0.374
181.4	0.374
181.5	0.376
181.6	0.376
181.7	0.376
181.8	0.376
181.9	0.378
182	0.378
182.1	0.378
182.2	0.378
182.3	0.38
182.4	0.38
182.5	0.38
182.6	0.382
182.7	0.382
182.8	0.384
182.9	0.384
183	0.384
183.1	0.382
183.2	0.38
183.3	0.382
183.4	0.382
183.5	0.382
183.6	0.382
183.7	0.384
183.8	0.384
183.9	0.384
184	0.38
184.1	0.38
184.2	0.38
184.3	0.378
184.4	0.378
184.5	0.378
184.6	0.378
184.7	0.382
184.8	0.382
184.9	0.382
185	0.382
185.1	0.382
185.2	0.384
185.3	0.382
185.4	0.384
185.5	0.386
185.6	0.386
185.7	0.388
185.8	0.388
185.9	0.388
186	0.388
186.1	0.388
186.2	0.388
186.3	0.388
186.4	0.386
186.5	0.386
186.6	0.386
186.7	0.386
186.8	0.388
186.9	0.388
187	0.388
187.1	0.386
187.2	0.386
187.3	0.388
187.4	0.39
187.5	0.388
187.6	0.388
187.7	0.388
187.8	0.388
187.9	0.392
188	0.392
188.1	0.392
188.2	0.392
188.3	0.392
188.4	0.39
188.5	0.39
188.6	0.394
188.7	0.394
188.8	0.394
188.9	0.396
189	0.398
189.1	0.398
189.2	0.396
189.3	0.396
189.4	0.394
189.5	0.392
189.6	0.392
189.7	0.392
189.8	0.39
189.9	0.388
190	0.388
190.1	0.388
190.2	0.386
190.3	0.386
190.4	0.386
190.5	0.386
190.6	0.386
190.7	0.388
190.8	0.388
190.9	0.386
191	0.388
191.1	0.388
191.2	0.388
191.3	0.388
191.4	0.388
191.5	0.388
191.6	0.386
191.7	0.386
191.8	0.388
191.9	0.388
192	0.386
192.1	0.386
192.2	0.386
192.3	0.386
192.4	0.386
192.5	0.384
192.6	0.382
192.7	0.382
192.8	0.382
192.9	0.384
193	0.386
193.1	0.386
193.2	0.388
193.3	0.39
193.4	0.392
193.5	0.39
193.6	0.39
193.7	0.388
193.8	0.39
193.9	0.39
194	0.388
194.1	0.388
194.2	0.388
194.3	0.388
194.4	0.388
194.5	0.388
194.6	0.386
194.7	0.386
194.8	0.386
194.9	0.384
195	0.386
195.1	0.386
195.2	0.386
195.3	0.386
195.4	0.386
195.5	0.386
195.6	0.386
195.7	0.388
195.8	0.386
195.9	0.388
196	0.388
196.1	0.388
196.2	0.388
196.3	0.388
196.4	0.39
196.5	0.392
196.6	0.392
196.7	0.394
196.8	0.394
196.9	0.394
197	0.396
197.1	0.396
197.2	0.396
197.3	0.396
197.4	0.396
197.5	0.396
197.6	0.396
197.7	0.396
197.8	0.398
197.9	0.398
198	0.398
198.1	0.4
198.2	0.402
198.3	0.402
198.4	0.402
198.5	0.404
198.6	0.406
198.7	0.404
198.8	0.4
198.9	0.4
199	0.398
199.1	0.398
199.2	0.398
199.3	0.4
199.4	0.4
199.5	0.4
199.6	0.398
199.7	0.398
199.8	0.398
199.9	0.398
200	0.4
[truncated: 14,000 more rows]
