# Supplementary material for: Bayesian inference of kinetic schemes for ion channels by Kalman filtering
Source: eLife journal article supplement (doi:10.7554/elife.62714), 2022-05-04
Supplement: fig4-data9 [file 1_Sim_N_800_Fluor_MW_0.5M.xlsx]

## Sheet: Tabelle1
0.1	0
0.2	0
0.3	0
0.4	0
0.5	0
0.6	0
0.7	0
0.8	0
0.9	0
1	0
1.1	0
1.2	0
1.3	0
1.4	0
1.5	0
1.6	0
1.7	0
1.8	0
1.9	0
2	0
2.1	0
2.2	0
2.3	0
2.4	0
2.5	0
2.6	0
2.7	0
2.8	0
2.9	0
3	0
3.1	0
3.2	0
3.3	0
3.4	0
3.5	0
3.6	0
3.7	0
3.8	0
3.9	0
4	0
4.1	0
4.2	0
4.3	0
4.4	0
4.5	0
4.6	0
4.7	0
4.8	0
4.9	0
5	0
5.1	0
5.2	0
5.3	0
5.4	0
5.5	0
5.6	0
5.7	0
5.8	0
5.9	0
6	0
6.1	0
6.2	0
6.3	0
6.4	0
6.5	0
6.6	0
6.7	0
6.8	0
6.9	0
7	0
7.1	0
7.2	0
7.3	0
7.4	0
7.5	0
7.6	0
7.7	0
7.8	0
7.9	0
8	0
8.1	0
8.2	0
8.3	0
8.4	0
8.5	0
8.6	0
8.7	0
8.8	0
8.9	0
9	0
9.1	0
9.2	0
9.3	0
9.4	0
9.5	0
9.6	0
9.7	0
9.8	0
9.9	0
10	0
10.1	0
10.2	0
10.3	0
10.4	0
10.5	0
10.6	0
10.7	0
10.8	0
10.9	0
11	0
11.1	0
11.2	0
11.3	0
11.4	0
11.5	0
11.6	0
11.7	0
11.8	0
11.9	0
12	0
12.1	0
12.2	0
12.3	0
12.4	0
12.5	0
12.6	0
12.7	0
12.8	0
12.9	0
13	0
13.1	0
13.2	0
13.3	0
13.4	0
13.5	0
13.6	0
13.7	0
13.8	0
13.9	0
14	0
14.1	0
14.2	0
14.3	0
14.4	0
14.5	0
14.6	0
14.7	0
14.8	0
14.9	0
15	0
15.1	0
15.2	0
15.3	0
15.4	0
15.5	0
15.6	0
15.7	0
15.8	0
15.9	0
16	0
16.1	0
16.2	0
16.3	0
16.4	0
16.5	0
16.6	0
16.7	0
16.8	0
16.9	0
17	0
17.1	0
17.2	0
17.3	0
17.4	0
17.5	0
17.6	0
17.7	0
17.8	0
17.9	0
18	0
18.1	0
18.2	0
18.3	0
18.4	0
18.5	0
18.6	0
18.7	0
18.8	0
18.9	0
19	0
19.1	0
19.2	0
19.3	0
19.4	0
19.5	0
19.6	0
19.7	0
19.8	0
19.9	0
20	0
20.1	0
20.2	0
20.3	0
20.4	0
20.5	0
20.6	0
20.7	0
20.8	0
20.9	0
21	0
21.1	0
21.2	0
21.3	0
21.4	0
21.5	0
21.6	0
21.7	0
21.8	0
21.9	0
22	0
22.1	0
22.2	0
22.3	0
22.4	0
22.5	0
22.6	0
22.7	0
22.8	0
22.9	0
23	0
23.1	0
23.2	0
23.3	0
23.4	0
23.5	0
23.6	0
23.7	0
23.8	0
23.9	0
24	0
24.1	0
24.2	0
24.3	0
24.4	0
24.5	0
24.6	0
24.7	0
24.8	0
24.9	0
25	0
25.1	0
25.2	0
25.3	0
25.4	0
25.5	0
25.6	0
25.7	0
25.8	0
25.9	0
26	0
26.1	0
26.2	0
26.3	0
26.4	0
26.5	0
26.6	0
26.7	0
26.8	0
26.9	0
27	0
27.1	0
27.2	0
27.3	0
27.4	0
27.5	0
27.6	0
27.7	0
27.8	0
27.9	0
28	0
28.1	0
28.2	0
28.3	0
28.4	0
28.5	0
28.6	0
28.7	0
28.8	0
28.9	0
29	0
29.1	0
29.2	0
29.3	0
29.4	0
29.5	0
29.6	0
29.7	0
29.8	0
29.9	0
30	0
30.1	0
30.2	0
30.3	0
30.4	0
30.5	0
30.6	0
30.7	0
30.8	0
30.9	0
31	0
31.1	0
31.2	0
31.3	0
31.4	0
31.5	0
31.6	0
31.7	0
31.8	0
31.9	0
32	0
32.1	0
32.2	0
32.3	0
32.4	0
32.5	0
32.6	0
32.7	0
32.8	0
32.9	0
33	0
33.1	0
33.2	0
33.3	0
33.4	0
33.5	0
33.6	0
33.7	0
33.8	0
33.9	0
34	0
34.1	0
34.2	0
34.3	0
34.4	0
34.5	0
34.6	0
34.7	0
34.8	0
34.9	0
35	0
35.1	0
35.2	0
35.3	0
35.4	0
35.5	0
35.6	0
35.7	0
35.8	0
35.9	0
36	0
36.1	0
36.2	0
36.3	0
36.4	0
36.5	0
36.6	0
36.7	0
36.8	0
36.9	0
37	0
37.1	0
37.2	0
37.3	0
37.4	0
37.5	0
37.6	0
37.7	0
37.8	0
37.9	0
38	0
38.1	0
38.2	0
38.3	0
38.4	0
38.5	0
38.6	0
38.7	0
38.8	0
38.9	0
39	0
39.1	0
39.2	0
39.3	0
39.4	0
39.5	0
39.6	0
39.7	0
39.8	0
39.9	0
40	0
40.1	0
40.2	0
40.3	0
40.4	0
40.5	0
40.6	0
40.7	0
40.8	0
40.9	0
41	0
41.1	0
41.2	0
41.3	0
41.4	0
41.5	0
41.6	0
41.7	0
41.8	0
41.9	0
42	0
42.1	0
42.2	0
42.3	0
42.4	0
42.5	0
42.6	0
42.7	0
42.8	0
42.9	0
43	0
43.1	0
43.2	0
43.3	0
43.4	0
43.5	0
43.6	0
43.7	0
43.8	0
43.9	0
44	0
44.1	0
44.2	0
44.3	0
44.4	0
44.5	0
44.6	0
44.7	0
44.8	0
44.9	0
45	0
45.1	0
45.2	0
45.3	0
45.4	0
45.5	0
45.6	0
45.7	0
45.8	0
45.9	0
46	0
46.1	0
46.2	0
46.3	0
46.4	0
46.5	0
46.6	0
46.7	0
46.8	0
46.9	0
47	0
47.1	0
47.2	0
47.3	0
47.4	0
47.5	0
47.6	0
47.7	0
47.8	0
47.9	0
48	0
48.1	0
48.2	0
48.3	0
48.4	0
48.5	0
48.6	0
48.7	0
48.8	0
48.9	0
49	0
49.1	0
49.2	0
49.3	0
49.4	0
49.5	0
49.6	0
49.7	0
49.8	0
49.9	0
50	0
50.1	0
50.2	0
50.3	0
50.4	0
50.5	0
50.6	0
50.7	0
50.8	0
50.9	0
51	0
51.1	0
51.2	0
51.3	0
51.4	0
51.5	0
51.6	0
51.7	0
51.8	0
51.9	0
52	0
52.1	0
52.2	0
52.3	0
52.4	0
52.5	0
52.6	0
52.7	0
52.8	0
52.9	0
53	0
53.1	0
53.2	0
53.3	0
53.4	0
53.5	0
53.6	0
53.7	0
53.8	0
53.9	0
54	0
54.1	0
54.2	0
54.3	0
54.4	0
54.5	0
54.6	0
54.7	0
54.8	0
54.9	0
55	0
55.1	0
55.2	0
55.3	0
55.4	0
55.5	0
55.6	0
55.7	0
55.8	0
55.9	0
56	0
56.1	0
56.2	0
56.3	0
56.4	0
56.5	0
56.6	0
56.7	0
56.8	0
56.9	0
57	0
57.1	0
57.2	0
57.3	0
57.4	0
57.5	0
57.6	0
57.7	0
57.8	0
57.9	0
58	0
58.1	0
58.2	0
58.3	0
58.4	0
58.5	0
58.6	0
58.7	0
58.8	0
58.9	0
59	0
59.1	0
59.2	0
59.3	0
59.4	0
59.5	0
59.6	0
59.7	0
59.8	0
59.9	0
60	0
60.1	0
60.2	0
60.3	0
60.4	0
60.5	0
60.6	0
60.7	0
60.8	0
60.9	0
61	0
61.1	0
61.2	0
61.3	0
61.4	0
61.5	0
61.6	0
61.7	0
61.8	0
61.9	0
62	0
62.1	0
62.2	0
62.3	0
62.4	0
62.5	0
62.6	0
62.7	0
62.8	0
62.9	0
63	0
63.1	0
63.2	0
63.3	0
63.4	0
63.5	0
63.6	0
63.7	0
63.8	0
63.9	0
64	0
64.1	0
64.2	0
64.3	0
64.4	0
64.5	0
64.6	0
64.7	0
64.8	0
64.9	0
65	0
65.1	0
65.2	0
65.3	0
65.4	0
65.5	0
65.6	0
65.7	0
65.8	0
65.9	0
66	0
66.1	0
66.2	0
66.3	0
66.4	0
66.5	0
66.6	0
66.7	0
66.8	0
66.9	0
67	0
67.1	0
67.2	0
67.3	0
67.4	0
67.5	0
67.6	0
67.7	0
67.8	0
67.9	0
68	0
68.1	0
68.2	0
68.3	0
68.4	0
68.5	0
68.6	0
68.7	0
68.8	0
68.9	0
69	0
69.1	0
69.2	0
69.3	0
69.4	0
69.5	0
69.6	0
69.7	0
69.8	0
69.9	0
70	0
70.1	0
70.2	0
70.3	0
70.4	0
70.5	0
70.6	0
70.7	0
70.8	0
70.9	0
71	0
71.1	0
71.2	0
71.3	0
71.4	0
71.5	0
71.6	0
71.7	0
71.8	0
71.9	0
72	0
72.1	0
72.2	0
72.3	0
72.4	0
72.5	0
72.6	0
72.7	0
72.8	0
72.9	0
73	0
73.1	0
73.2	0
73.3	0
73.4	0
73.5	0
73.6	0
73.7	0
73.8	0
73.9	0
74	0
74.1	0
74.2	0
74.3	0
74.4	0
74.5	0
74.6	0
74.7	0
74.8	0
74.9	0
75	0
75.1	0
75.2	0
75.3	0
75.4	0
75.5	0
75.6	0
75.7	0
75.8	0
75.9	0
76	0
76.1	0
76.2	0
76.3	0
76.4	0
76.5	0
76.6	0
76.7	0
76.8	0
76.9	0
77	0
77.1	0
77.2	0
77.3	0
77.4	0
77.5	0
77.6	0
77.7	0
77.8	0
77.9	0
78	0
78.1	0
78.2	0
78.3	0
78.4	0
78.5	0
78.6	0
78.7	0
78.8	0
78.9	0
79	0
79.1	0
79.2	0
79.3	0
79.4	0
79.5	0
79.6	0
79.7	0
79.8	0
79.9	0
80	0
80.1	0
80.2	0
80.3	0
80.4	0
80.5	0
80.6	0
80.7	0
80.8	0
80.9	0
81	0
81.1	0
81.2	0
81.3	0
81.4	0
81.5	0
81.6	0
81.7	0
81.8	0
81.9	0
82	0
82.1	0
82.2	0
82.3	0
82.4	0
82.5	0
82.6	0
82.7	0
82.8	0
82.9	0
83	0
83.1	0
83.2	0
83.3	0
83.4	0
83.5	0
83.6	0
83.7	0
83.8	0
83.9	0
84	0
84.1	0
84.2	0
84.3	0
84.4	0
84.5	0
84.6	0
84.7	0
84.8	0
84.9	0
85	0
85.1	0
85.2	0
85.3	0
85.4	0
85.5	0
85.6	0
85.7	0
85.8	0
85.9	0
86	0
86.1	0
86.2	0
86.3	0
86.4	0
86.5	0
86.6	0
86.7	0
86.8	0
86.9	0
87	0
87.1	0
87.2	0
87.3	0
87.4	0
87.5	0
87.6	0
87.7	0
87.8	0
87.9	0
88	0
88.1	0
88.2	0
88.3	0
88.4	0
88.5	0
88.6	0
88.7	0
88.8	0
88.9	0
89	0
89.1	0
89.2	0
89.3	0
89.4	0
89.5	0
89.6	0
89.7	0
89.8	0
89.9	0
90	0
90.1	0
90.2	0
90.3	0
90.4	0
90.5	0
90.6	0
90.7	0
90.8	0
90.9	0
91	0
91.1	0
91.2	0
91.3	0
91.4	0
91.5	0
91.6	0
91.7	0
91.8	0
91.9	0
92	0
92.1	0
92.2	0
92.3	0
92.4	0
92.5	0
92.6	0
92.7	0
92.8	0
92.9	0
93	0
93.1	0
93.2	0
93.3	0
93.4	0
93.5	0
93.6	0
93.7	0
93.8	0
93.9	0
94	0
94.1	0
94.2	0
94.3	0
94.4	0
94.5	0
94.6	0
94.7	0
94.8	0
94.9	0
95	0
95.1	0
95.2	0
95.3	0
95.4	0
95.5	0
95.6	0
95.7	0
95.8	0
95.9	0
96	0
96.1	0
96.2	0
96.3	0
96.4	0
96.5	0
96.6	0
96.7	0
96.8	0
96.9	0
97	0
97.1	0
97.2	0
97.3	0
97.4	0
97.5	0
97.6	0
97.7	0
97.8	0
97.9	0
98	0
98.1	0
98.2	0
98.3	0
98.4	0
98.5	0
98.6	0
98.7	0
98.8	0
98.9	0
99	0
99.1	0
99.2	0
99.3	0
99.4	0
99.5	0
99.6	0
99.7	0
99.8	0
99.9	0
100	0
100.1	0.02875
100.2	0.06375
100.3	0.085625
100.4	0.108125
100.5	0.129375
100.6	0.15125
100.7	0.17
100.8	0.19625
100.9	0.2175
101	0.23375
101.1	0.254375
101.2	0.27
101.3	0.28375
101.4	0.299375
101.5	0.309375
101.6	0.316875
101.7	0.330625
101.8	0.339375
101.9	0.351875
102	0.361875
102.1	0.371875
102.2	0.38125
102.3	0.389375
102.4	0.4075
102.5	0.415
102.6	0.424375
102.7	0.43
102.8	0.43375
102.9	0.4375
103	0.445625
103.1	0.454375
103.2	0.456875
103.3	0.4675
103.4	0.470625
103.5	0.478125
103.6	0.483125
103.7	0.48875
103.8	0.491875
103.9	0.495
104	0.503125
104.1	0.5025
104.2	0.50875
104.3	0.513125
104.4	0.516875
104.5	0.524375
104.6	0.523125
104.7	0.525
104.8	0.526875
104.9	0.52375
105	0.52375
105.1	0.52875
105.2	0.52875
105.3	0.531875
105.4	0.535625
105.5	0.528125
105.6	0.526875
105.7	0.5275
105.8	0.530625
105.9	0.53125
106	0.536875
106.1	0.540625
106.2	0.541875
106.3	0.5425
106.4	0.53875
106.5	0.540625
106.6	0.5425
106.7	0.54
106.8	0.5425
106.9	0.539375
107	0.53875
107.1	0.5425
107.2	0.54
107.3	0.543125
107.4	0.54375
107.5	0.53875
107.6	0.538125
107.7	0.54
107.8	0.539375
107.9	0.53875
108	0.540625
108.1	0.5425
108.2	0.545625
108.3	0.54375
108.4	0.55
108.5	0.550625
108.6	0.55375
108.7	0.54875
108.8	0.555625
108.9	0.56
109	0.560625
109.1	0.5625
109.2	0.565
109.3	0.57125
109.4	0.568125
109.5	0.566875
109.6	0.56625
109.7	0.56625
109.8	0.57
109.9	0.573125
110	0.57875
110.1	0.57625
110.2	0.57
110.3	0.578125
110.4	0.576875
110.5	0.576875
110.6	0.5775
110.7	0.578125
110.8	0.575
110.9	0.5725
111	0.571875
111.1	0.57875
111.2	0.578125
111.3	0.58
111.4	0.575
111.5	0.575625
111.6	0.573125
111.7	0.575
111.8	0.576875
111.9	0.574375
112	0.580625
112.1	0.5825
112.2	0.579375
112.3	0.579375
112.4	0.571875
112.5	0.5725
112.6	0.57125
112.7	0.57
112.8	0.570625
112.9	0.568125
113	0.566875
113.1	0.57125
113.2	0.574375
113.3	0.56875
113.4	0.566875
113.5	0.569375
113.6	0.571875
113.7	0.571875
113.8	0.573125
113.9	0.574375
114	0.580625
114.1	0.580625
114.2	0.580625
114.3	0.580625
114.4	0.584375
114.5	0.58875
114.6	0.590625
114.7	0.589375
114.8	0.58875
114.9	0.585
115	0.583125
115.1	0.583125
115.2	0.584375
115.3	0.584375
115.4	0.586875
115.5	0.589375
115.6	0.586875
115.7	0.581875
115.8	0.585625
115.9	0.588125
116	0.5875
116.1	0.588125
116.2	0.585
116.3	0.58375
116.4	0.584375
116.5	0.584375
116.6	0.58625
116.7	0.586875
116.8	0.580625
116.9	0.580625
117	0.5875
117.1	0.59125
117.2	0.58875
117.3	0.591875
117.4	0.59
117.5	0.590625
117.6	0.58875
117.7	0.58875
117.8	0.584375
117.9	0.58375
118	0.588125
118.1	0.6
118.2	0.5975
118.3	0.6
118.4	0.600625
118.5	0.604375
118.6	0.60625
118.7	0.6075
118.8	0.6075
118.9	0.61
119	0.615625
119.1	0.615
119.2	0.61625
119.3	0.61375
119.4	0.6125
119.5	0.615625
119.6	0.6175
119.7	0.6125
119.8	0.6125
119.9	0.610625
120	0.610625
120.1	0.608125
120.2	0.60875
120.3	0.61
120.4	0.60875
120.5	0.60875
120.6	0.60625
120.7	0.6075
120.8	0.611875
120.9	0.613125
121	0.608125
121.1	0.609375
121.2	0.601875
121.3	0.60125
121.4	0.603125
121.5	0.601875
121.6	0.60375
121.7	0.60625
121.8	0.60875
121.9	0.614375
122	0.611875
122.1	0.609375
122.2	0.61125
122.3	0.611875
122.4	0.61
122.5	0.605625
122.6	0.61125
122.7	0.61
122.8	0.614375
122.9	0.611875
123	0.611875
123.1	0.610625
123.2	0.610625
123.3	0.61
123.4	0.61125
123.5	0.6125
123.6	0.6125
123.7	0.615
123.8	0.6175
123.9	0.616875
124	0.6175
124.1	0.61625
124.2	0.615625
124.3	0.61625
124.4	0.619375
124.5	0.61875
124.6	0.618125
124.7	0.61375
124.8	0.618125
124.9	0.6175
125	0.62
125.1	0.6175
125.2	0.611875
125.3	0.6125
125.4	0.615
125.5	0.61375
125.6	0.615
125.7	0.614375
125.8	0.620625
125.9	0.61625
126	0.61625
126.1	0.610625
126.2	0.605
126.3	0.603125
126.4	0.60625
126.5	0.606875
126.6	0.611875
126.7	0.60875
126.8	0.6075
126.9	0.611875
127	0.6125
127.1	0.61125
127.2	0.619375
127.3	0.616875
127.4	0.61625
127.5	0.615625
127.6	0.614375
127.7	0.62125
127.8	0.623125
127.9	0.625625
128	0.62625
128.1	0.62875
128.2	0.629375
128.3	0.63375
128.4	0.635
128.5	0.633125
128.6	0.6325
128.7	0.631875
128.8	0.630625
128.9	0.63375
129	0.633125
129.1	0.63
129.2	0.6325
129.3	0.633125
129.4	0.63375
129.5	0.633125
129.6	0.633125
129.7	0.635
129.8	0.63875
129.9	0.640625
130	0.64125
130.1	0.640625
130.2	0.643125
130.3	0.646875
130.4	0.646875
130.5	0.64625
130.6	0.64875
130.7	0.646875
130.8	0.646875
130.9	0.64875
131	0.655625
131.1	0.656875
131.2	0.65625
131.3	0.658125
131.4	0.6625
131.5	0.655625
131.6	0.66
131.7	0.65625
131.8	0.658125
131.9	0.66125
132	0.65875
132.1	0.66
132.2	0.66375
132.3	0.6625
132.4	0.664375
132.5	0.664375
132.6	0.665
132.7	0.664375
132.8	0.659375
132.9	0.663125
133	0.65875
133.1	0.6575
133.2	0.655
133.3	0.665
133.4	0.660625
133.5	0.659375
133.6	0.65875
133.7	0.65875
133.8	0.664375
133.9	0.663125
134	0.665625
134.1	0.666875
134.2	0.67125
134.3	0.66875
134.4	0.6725
134.5	0.671875
134.6	0.6675
134.7	0.67
134.8	0.670625
134.9	0.6725
135	0.669375
135.1	0.663125
135.2	0.665
135.3	0.670625
135.4	0.669375
135.5	0.666875
135.6	0.6725
135.7	0.673125
135.8	0.674375
135.9	0.674375
136	0.671875
136.1	0.67375
136.2	0.67125
136.3	0.67125
136.4	0.669375
136.5	0.665625
136.6	0.664375
136.7	0.666875
136.8	0.668125
136.9	0.664375
137	0.668125
137.1	0.67125
137.2	0.67625
137.3	0.675
137.4	0.671875
137.5	0.6725
137.6	0.669375
137.7	0.670625
137.8	0.669375
137.9	0.67
138	0.670625
138.1	0.66875
138.2	0.665625
138.3	0.66375
138.4	0.663125
138.5	0.6625
138.6	0.663125
138.7	0.665
138.8	0.6675
138.9	0.66375
139	0.665625
139.1	0.663125
139.2	0.66
139.3	0.66
139.4	0.66
139.5	0.660625
139.6	0.65875
139.7	0.658125
139.8	0.656875
139.9	0.65875
140	0.65625
140.1	0.655
140.2	0.65625
140.3	0.65625
140.4	0.653125
140.5	0.655
140.6	0.655625
140.7	0.660625
140.8	0.664375
140.9	0.664375
141	0.661875
141.1	0.661875
141.2	0.660625
141.3	0.66
141.4	0.658125
141.5	0.659375
141.6	0.658125
141.7	0.656875
141.8	0.66375
141.9	0.66625
142	0.6625
142.1	0.66125
142.2	0.664375
142.3	0.6675
142.4	0.66875
142.5	0.67125
142.6	0.669375
142.7	0.66875
142.8	0.673125
142.9	0.6775
143	0.67625
143.1	0.676875
143.2	0.6775
143.3	0.679375
143.4	0.6825
143.5	0.681875
143.6	0.679375
143.7	0.67625
143.8	0.674375
143.9	0.674375
144	0.6725
144.1	0.67125
144.2	0.67
144.3	0.67
144.4	0.670625
144.5	0.66875
144.6	0.665
144.7	0.661875
144.8	0.66625
144.9	0.661875
145	0.6625
145.1	0.6675
145.2	0.66375
145.3	0.659375
145.4	0.66125
145.5	0.659375
145.6	0.65875
145.7	0.656875
145.8	0.655625
145.9	0.65625
146	0.658125
146.1	0.660625
146.2	0.6575
146.3	0.65875
146.4	0.65875
146.5	0.6575
146.6	0.658125
146.7	0.6575
146.8	0.66
146.9	0.663125
147	0.66625
147.1	0.66875
147.2	0.67
147.3	0.666875
147.4	0.6725
147.5	0.670625
147.6	0.669375
147.7	0.670625
147.8	0.673125
147.9	0.67625
148	0.676875
148.1	0.67625
148.2	0.67625
148.3	0.674375
148.4	0.6775
148.5	0.675
148.6	0.67
148.7	0.669375
148.8	0.67
148.9	0.668125
149	0.66625
149.1	0.668125
149.2	0.66875
149.3	0.668125
149.4	0.669375
149.5	0.67125
149.6	0.67375
149.7	0.67375
149.8	0.675
149.9	0.678125
150	0.68
150.1	0.679375
150.2	0.67625
150.3	0.6775
150.4	0.67375
150.5	0.67125
150.6	0.671875
150.7	0.67125
150.8	0.66875
150.9	0.67
151	0.673125
151.1	0.6775
151.2	0.6775
151.3	0.673125
151.4	0.675625
151.5	0.67625
151.6	0.680625
151.7	0.681875
151.8	0.684375
151.9	0.689375
152	0.69
152.1	0.694375
152.2	0.6925
152.3	0.695
152.4	0.695
152.5	0.699375
152.6	0.69625
152.7	0.69
152.8	0.686875
152.9	0.684375
153	0.685
153.1	0.689375
153.2	0.689375
153.3	0.691875
153.4	0.6925
153.5	0.6925
153.6	0.69625
153.7	0.69625
153.8	0.696875
153.9	0.695625
154	0.695
154.1	0.694375
154.2	0.69625
154.3	0.698125
154.4	0.70375
154.5	0.7025
154.6	0.700625
154.7	0.704375
154.8	0.70375
154.9	0.70375
155	0.700625
155.1	0.695625
155.2	0.6975
155.3	0.700625
155.4	0.7
155.5	0.6975
155.6	0.6975
155.7	0.698125
155.8	0.700625
155.9	0.7
156	0.698125
156.1	0.69625
156.2	0.69625
156.3	0.69375
156.4	0.6925
156.5	0.691875
156.6	0.694375
156.7	0.698125
156.8	0.6975
156.9	0.696875
157	0.6975
157.1	0.694375
157.2	0.69125
157.3	0.695
157.4	0.695625
157.5	0.696875
157.6	0.701875
157.7	0.7
157.8	0.7025
157.9	0.705
158	0.70875
158.1	0.71
158.2	0.709375
158.3	0.71
158.4	0.70625
158.5	0.7075
158.6	0.709375
158.7	0.710625
158.8	0.7075
158.9	0.708125
159	0.70625
159.1	0.7075
159.2	0.705625
159.3	0.703125
159.4	0.705
159.5	0.705625
159.6	0.71125
159.7	0.718125
159.8	0.71375
159.9	0.710625
160	0.71
160.1	0.7125
160.2	0.711875
160.3	0.715
160.4	0.7175
160.5	0.71625
160.6	0.716875
160.7	0.715
160.8	0.71375
160.9	0.71375
161	0.715625
161.1	0.715625
161.2	0.714375
161.3	0.71
161.4	0.713125
161.5	0.7125
161.6	0.710625
161.7	0.71125
161.8	0.713125
161.9	0.716875
162	0.7175
162.1	0.7175
162.2	0.720625
162.3	0.72
162.4	0.719375
162.5	0.71875
162.6	0.72
162.7	0.7175
162.8	0.716875
162.9	0.7175
163	0.716875
163.1	0.7175
163.2	0.7175
163.3	0.7175
163.4	0.72
163.5	0.7175
163.6	0.719375
163.7	0.72125
163.8	0.718125
163.9	0.7175
164	0.719375
164.1	0.716875
164.2	0.716875
164.3	0.715
164.4	0.713125
164.5	0.716875
164.6	0.71625
164.7	0.7125
164.8	0.711875
164.9	0.711875
165	0.71375
165.1	0.715625
165.2	0.713125
165.3	0.71375
165.4	0.714375
165.5	0.71375
165.6	0.715
165.7	0.71125
165.8	0.710625
165.9	0.71
166	0.7125
166.1	0.71625
166.2	0.715
166.3	0.7175
166.4	0.719375
166.5	0.715625
166.6	0.718125
166.7	0.71625
166.8	0.7175
166.9	0.715625
167	0.718125
167.1	0.72
167.2	0.718125
167.3	0.7175
167.4	0.71375
167.5	0.710625
167.6	0.709375
167.7	0.7075
167.8	0.706875
167.9	0.70875
168	0.710625
168.1	0.71375
168.2	0.718125
168.3	0.71875
168.4	0.718125
168.5	0.71875
168.6	0.721875
168.7	0.7225
168.8	0.725
168.9	0.726875
169	0.7275
169.1	0.724375
169.2	0.724375
169.3	0.725
169.4	0.725625
169.5	0.724375
169.6	0.72
169.7	0.718125
169.8	0.7175
169.9	0.71875
170	0.71875
170.1	0.721875
170.2	0.724375
170.3	0.725625
170.4	0.72875
170.5	0.724375
170.6	0.7225
170.7	0.721875
170.8	0.723125
170.9	0.7225
171	0.72375
171.1	0.72125
171.2	0.725
171.3	0.7225
171.4	0.723125
171.5	0.721875
171.6	0.723125
171.7	0.72375
171.8	0.725
171.9	0.7225
172	0.72375
172.1	0.7275
172.2	0.724375
172.3	0.726875
172.4	0.724375
172.5	0.725
172.6	0.724375
172.7	0.72375
172.8	0.723125
172.9	0.720625
173	0.7225
173.1	0.725625
173.2	0.7275
173.3	0.725
173.4	0.725
173.5	0.723125
173.6	0.721875
173.7	0.7225
173.8	0.725
173.9	0.726875
174	0.73125
174.1	0.730625
174.2	0.73
174.3	0.731875
174.4	0.7375
174.5	0.73875
174.6	0.738125
174.7	0.740625
174.8	0.739375
174.9	0.735
175	0.73375
175.1	0.735625
175.2	0.7325
175.3	0.7325
175.4	0.731875
175.5	0.734375
175.6	0.72875
175.7	0.729375
175.8	0.730625
175.9	0.729375
176	0.73
176.1	0.73125
176.2	0.735625
176.3	0.73875
176.4	0.73875
176.5	0.74
176.6	0.73875
176.7	0.736875
176.8	0.735
176.9	0.738125
177	0.736875
177.1	0.7325
177.2	0.733125
177.3	0.7325
177.4	0.734375
177.5	0.735
177.6	0.73375
177.7	0.734375
177.8	0.734375
177.9	0.735
178	0.736875
178.1	0.739375
178.2	0.74375
178.3	0.7475
178.4	0.74625
178.5	0.746875
178.6	0.749375
178.7	0.74625
178.8	0.74625
178.9	0.7475
179	0.748125
179.1	0.748125
179.2	0.745625
179.3	0.744375
179.4	0.7425
179.5	0.74125
179.6	0.743125
179.7	0.74
179.8	0.740625
179.9	0.740625
180	0.7425
180.1	0.74375
180.2	0.743125
180.3	0.743125
180.4	0.74625
180.5	0.745
180.6	0.74375
180.7	0.744375
180.8	0.744375
180.9	0.745
181	0.7425
181.1	0.741875
181.2	0.743125
181.3	0.743125
181.4	0.74125
181.5	0.743125
181.6	0.74125
181.7	0.745625
181.8	0.745
181.9	0.741875
182	0.744375
182.1	0.745
182.2	0.7425
182.3	0.745625
182.4	0.74375
182.5	0.746875
182.6	0.74875
182.7	0.744375
182.8	0.74375
182.9	0.745625
183	0.748125
183.1	0.75
183.2	0.75125
183.3	0.7525
183.4	0.751875
183.5	0.75
183.6	0.75
183.7	0.7525
183.8	0.7525
183.9	0.749375
184	0.74875
184.1	0.746875
184.2	0.744375
184.3	0.74125
184.4	0.743125
184.5	0.745625
184.6	0.748125
184.7	0.74625
184.8	0.74625
184.9	0.74375
185	0.74625
185.1	0.745625
185.2	0.748125
185.3	0.74625
185.4	0.748125
185.5	0.74875
185.6	0.748125
185.7	0.751875
185.8	0.746875
185.9	0.748125
186	0.750625
186.1	0.751875
186.2	0.75125
186.3	0.753125
186.4	0.7525
186.5	0.751875
186.6	0.749375
186.7	0.7525
186.8	0.75
186.9	0.7525
187	0.75375
187.1	0.755625
187.2	0.75875
187.3	0.759375
187.4	0.76
187.5	0.761875
187.6	0.76375
187.7	0.764375
187.8	0.76125
187.9	0.76
188	0.759375
188.1	0.758125
188.2	0.7575
188.3	0.755
188.4	0.755625
188.5	0.754375
188.6	0.75625
188.7	0.756875
188.8	0.7575
188.9	0.7575
189	0.760625
189.1	0.761875
189.2	0.760625
189.3	0.7575
189.4	0.760625
189.5	0.76125
189.6	0.760625
189.7	0.7625
189.8	0.76125
189.9	0.7625
190	0.760625
190.1	0.758125
190.2	0.763125
190.3	0.765
190.4	0.7625
190.5	0.7625
190.6	0.761875
190.7	0.76
190.8	0.763125
190.9	0.765
191	0.764375
191.1	0.764375
191.2	0.763125
191.3	0.76375
191.4	0.766875
191.5	0.76625
191.6	0.76375
191.7	0.764375
191.8	0.76625
191.9	0.76625
192	0.76375
192.1	0.765
192.2	0.764375
192.3	0.765
192.4	0.7675
192.5	0.76375
192.6	0.763125
192.7	0.761875
192.8	0.761875
192.9	0.76
193	0.763125
193.1	0.76125
193.2	0.7625
193.3	0.760625
193.4	0.76125
193.5	0.7575
193.6	0.7575
193.7	0.755
193.8	0.755625
193.9	0.75625
194	0.755625
194.1	0.755
194.2	0.7575
194.3	0.75875
194.4	0.7575
194.5	0.75875
194.6	0.759375
194.7	0.761875
194.8	0.759375
194.9	0.76125
195	0.7575
195.1	0.755
195.2	0.751875
195.3	0.75
195.4	0.751875
195.5	0.75125
195.6	0.750625
195.7	0.754375
195.8	0.755
195.9	0.754375
196	0.7525
196.1	0.7475
196.2	0.748125
196.3	0.744375
196.4	0.74125
196.5	0.73875
196.6	0.7375
196.7	0.73625
196.8	0.741875
196.9	0.741875
197	0.7425
197.1	0.73875
197.2	0.74
197.3	0.73875
197.4	0.7425
197.5	0.744375
197.6	0.74375
197.7	0.74875
197.8	0.745
197.9	0.74625
198	0.746875
198.1	0.748125
198.2	0.748125
198.3	0.75
198.4	0.75
198.5	0.751875
198.6	0.75
198.7	0.74625
198.8	0.744375
198.9	0.744375
199	0.745
199.1	0.7475
199.2	0.7475
199.3	0.75125
199.4	0.7525
199.5	0.75125
199.6	0.7525
199.7	0.75125
199.8	0.753125
199.9	0.7525
200	0.75125
[truncated: 14,000 more rows]
