# Supplementary material for: Bayesian inference of kinetic schemes for ion channels by Kalman filtering
Source: eLife journal article supplement (doi:10.7554/elife.62714), 2022-05-04
Supplement: fig4-data9 [file 1_Sim_N_800_Strom_MW_0.5M.xlsx]

## Sheet: Tabelle1
0.1	0
0.2	0
0.3	0
0.4	0
0.5	0
0.6	0
0.7	0
0.8	0
0.9	0
1	0
1.1	0
1.2	0
1.3	0
1.4	0
1.5	0
1.6	0
1.7	0
1.8	0
1.9	0
2	0
2.1	0
2.2	0
2.3	0
2.4	0
2.5	0
2.6	0
2.7	0
2.8	0
2.9	0
3	0
3.1	0
3.2	0
3.3	0
3.4	0
3.5	0
3.6	0
3.7	0
3.8	0
3.9	0
4	0
4.1	0
4.2	0
4.3	0
4.4	0
4.5	0
4.6	0
4.7	0
4.8	0
4.9	0
5	0
5.1	0
5.2	0
5.3	0
5.4	0
5.5	0
5.6	0
5.7	0
5.8	0
5.9	0
6	0
6.1	0
6.2	0
6.3	0
6.4	0
6.5	0
6.6	0
6.7	0
6.8	0
6.9	0
7	0
7.1	0
7.2	0
7.3	0
7.4	0
7.5	0
7.6	0
7.7	0
7.8	0
7.9	0
8	0
8.1	0
8.2	0
8.3	0
8.4	0
8.5	0
8.6	0
8.7	0
8.8	0
8.9	0
9	0
9.1	0
9.2	0
9.3	0
9.4	0
9.5	0
9.6	0
9.7	0
9.8	0
9.9	0
10	0
10.1	0
10.2	0
10.3	0
10.4	0
10.5	0
10.6	0
10.7	0
10.8	0
10.9	0
11	0
11.1	0
11.2	0
11.3	0
11.4	0
11.5	0
11.6	0
11.7	0
11.8	0
11.9	0
12	0
12.1	0
12.2	0
12.3	0
12.4	0
12.5	0
12.6	0
12.7	0
12.8	0
12.9	0
13	0
13.1	0
13.2	0
13.3	0
13.4	0
13.5	0
13.6	0
13.7	0
13.8	0
13.9	0
14	0
14.1	0
14.2	0
14.3	0
14.4	0
14.5	0
14.6	0
14.7	0
14.8	0
14.9	0
15	0
15.1	0
15.2	0
15.3	0
15.4	0
15.5	0
15.6	0
15.7	0
15.8	0
15.9	0
16	0
16.1	0
16.2	0
16.3	0
16.4	0
16.5	0
16.6	0
16.7	0
16.8	0
16.9	0
17	0
17.1	0
17.2	0
17.3	0
17.4	0
17.5	0
17.6	0
17.7	0
17.8	0
17.9	0
18	0
18.1	0
18.2	0
18.3	0
18.4	0
18.5	0
18.6	0
18.7	0
18.8	0
18.9	0
19	0
19.1	0
19.2	0
19.3	0
19.4	0
19.5	0
19.6	0
19.7	0
19.8	0
19.9	0
20	0
20.1	0
20.2	0
20.3	0
20.4	0
20.5	0
20.6	0
20.7	0
20.8	0
20.9	0
21	0
21.1	0
21.2	0
21.3	0
21.4	0
21.5	0
21.6	0
21.7	0
21.8	0
21.9	0
22	0
22.1	0
22.2	0
22.3	0
22.4	0
22.5	0
22.6	0
22.7	0
22.8	0
22.9	0
23	0
23.1	0
23.2	0
23.3	0
23.4	0
23.5	0
23.6	0
23.7	0
23.8	0
23.9	0
24	0
24.1	0
24.2	0
24.3	0
24.4	0
24.5	0
24.6	0
24.7	0
24.8	0
24.9	0
25	0
25.1	0
25.2	0
25.3	0
25.4	0
25.5	0
25.6	0
25.7	0
25.8	0
25.9	0
26	0
26.1	0
26.2	0
26.3	0
26.4	0
26.5	0
26.6	0
26.7	0
26.8	0
26.9	0
27	0
27.1	0
27.2	0
27.3	0
27.4	0
27.5	0
27.6	0
27.7	0
27.8	0
27.9	0
28	0
28.1	0
28.2	0
28.3	0
28.4	0
28.5	0
28.6	0
28.7	0
28.8	0
28.9	0
29	0
29.1	0
29.2	0
29.3	0
29.4	0
29.5	0
29.6	0
29.7	0
29.8	0
29.9	0
30	0
30.1	0
30.2	0
30.3	0
30.4	0
30.5	0
30.6	0
30.7	0
30.8	0
30.9	0
31	0
31.1	0
31.2	0
31.3	0
31.4	0
31.5	0
31.6	0
31.7	0
31.8	0
31.9	0
32	0
32.1	0
32.2	0
32.3	0
32.4	0
32.5	0
32.6	0
32.7	0
32.8	0
32.9	0
33	0
33.1	0
33.2	0
33.3	0
33.4	0
33.5	0
33.6	0
33.7	0
33.8	0
33.9	0
34	0
34.1	0
34.2	0
34.3	0
34.4	0
34.5	0
34.6	0
34.7	0
34.8	0
34.9	0
35	0
35.1	0
35.2	0
35.3	0
35.4	0
35.5	0
35.6	0
35.7	0
35.8	0
35.9	0
36	0
36.1	0
36.2	0
36.3	0
36.4	0
36.5	0
36.6	0
36.7	0
36.8	0
36.9	0
37	0
37.1	0
37.2	0
37.3	0
37.4	0
37.5	0
37.6	0
37.7	0
37.8	0
37.9	0
38	0
38.1	0
38.2	0
38.3	0
38.4	0
38.5	0
38.6	0
38.7	0
38.8	0
38.9	0
39	0
39.1	0
39.2	0
39.3	0
39.4	0
39.5	0
39.6	0
39.7	0
39.8	0
39.9	0
40	0
40.1	0
40.2	0
40.3	0
40.4	0
40.5	0
40.6	0
40.7	0
40.8	0
40.9	0
41	0
41.1	0
41.2	0
41.3	0
41.4	0
41.5	0
41.6	0
41.7	0
41.8	0
41.9	0
42	0
42.1	0
42.2	0
42.3	0
42.4	0
42.5	0
42.6	0
42.7	0
42.8	0
42.9	0
43	0
43.1	0
43.2	0
43.3	0
43.4	0
43.5	0
43.6	0
43.7	0
43.8	0
43.9	0
44	0
44.1	0
44.2	0
44.3	0
44.4	0
44.5	0
44.6	0
44.7	0
44.8	0
44.9	0
45	0
45.1	0
45.2	0
45.3	0
45.4	0
45.5	0
45.6	0
45.7	0
45.8	0
45.9	0
46	0
46.1	0
46.2	0
46.3	0
46.4	0
46.5	0
46.6	0
46.7	0
46.8	0
46.9	0
47	0
47.1	0
47.2	0
47.3	0
47.4	0
47.5	0
47.6	0
47.7	0
47.8	0
47.9	0
48	0
48.1	0
48.2	0
48.3	0
48.4	0
48.5	0
48.6	0
48.7	0
48.8	0
48.9	0
49	0
49.1	0
49.2	0
49.3	0
49.4	0
49.5	0
49.6	0
49.7	0
49.8	0
49.9	0
50	0
50.1	0
50.2	0
50.3	0
50.4	0
50.5	0
50.6	0
50.7	0
50.8	0
50.9	0
51	0
51.1	0
51.2	0
51.3	0
51.4	0
51.5	0
51.6	0
51.7	0
51.8	0
51.9	0
52	0
52.1	0
52.2	0
52.3	0
52.4	0
52.5	0
52.6	0
52.7	0
52.8	0
52.9	0
53	0
53.1	0
53.2	0
53.3	0
53.4	0
53.5	0
53.6	0
53.7	0
53.8	0
53.9	0
54	0
54.1	0
54.2	0
54.3	0
54.4	0
54.5	0
54.6	0
54.7	0
54.8	0
54.9	0
55	0
55.1	0
55.2	0
55.3	0
55.4	0
55.5	0
55.6	0
55.7	0
55.8	0
55.9	0
56	0
56.1	0
56.2	0
56.3	0
56.4	0
56.5	0
56.6	0
56.7	0
56.8	0
56.9	0
57	0
57.1	0
57.2	0
57.3	0
57.4	0
57.5	0
57.6	0
57.7	0
57.8	0
57.9	0
58	0
58.1	0
58.2	0
58.3	0
58.4	0
58.5	0
58.6	0
58.7	0
58.8	0
58.9	0
59	0
59.1	0
59.2	0
59.3	0
59.4	0
59.5	0
59.6	0
59.7	0
59.8	0
59.9	0
60	0
60.1	0
60.2	0
60.3	0
60.4	0
60.5	0
60.6	0
60.7	0
60.8	0
60.9	0
61	0
61.1	0
61.2	0
61.3	0
61.4	0
61.5	0
61.6	0
61.7	0
61.8	0
61.9	0
62	0
62.1	0
62.2	0
62.3	0
62.4	0
62.5	0
62.6	0
62.7	0
62.8	0
62.9	0
63	0
63.1	0
63.2	0
63.3	0
63.4	0
63.5	0
63.6	0
63.7	0
63.8	0
63.9	0
64	0
64.1	0
64.2	0
64.3	0
64.4	0
64.5	0
64.6	0
64.7	0
64.8	0
64.9	0
65	0
65.1	0
65.2	0
65.3	0
65.4	0
65.5	0
65.6	0
65.7	0
65.8	0
65.9	0
66	0
66.1	0
66.2	0
66.3	0
66.4	0
66.5	0
66.6	0
66.7	0
66.8	0
66.9	0
67	0
67.1	0
67.2	0
67.3	0
67.4	0
67.5	0
67.6	0
67.7	0
67.8	0
67.9	0
68	0
68.1	0
68.2	0
68.3	0
68.4	0
68.5	0
68.6	0
68.7	0
68.8	0
68.9	0
69	0
69.1	0
69.2	0
69.3	0
69.4	0
69.5	0
69.6	0
69.7	0
69.8	0
69.9	0
70	0
70.1	0
70.2	0
70.3	0
70.4	0
70.5	0
70.6	0
70.7	0
70.8	0
70.9	0
71	0
71.1	0
71.2	0
71.3	0
71.4	0
71.5	0
71.6	0
71.7	0
71.8	0
71.9	0
72	0
72.1	0
72.2	0
72.3	0
72.4	0
72.5	0
72.6	0
72.7	0
72.8	0
72.9	0
73	0
73.1	0
73.2	0
73.3	0
73.4	0
73.5	0
73.6	0
73.7	0
73.8	0
73.9	0
74	0
74.1	0
74.2	0
74.3	0
74.4	0
74.5	0
74.6	0
74.7	0
74.8	0
74.9	0
75	0
75.1	0
75.2	0
75.3	0
75.4	0
75.5	0
75.6	0
75.7	0
75.8	0
75.9	0
76	0
76.1	0
76.2	0
76.3	0
76.4	0
76.5	0
76.6	0
76.7	0
76.8	0
76.9	0
77	0
77.1	0
77.2	0
77.3	0
77.4	0
77.5	0
77.6	0
77.7	0
77.8	0
77.9	0
78	0
78.1	0
78.2	0
78.3	0
78.4	0
78.5	0
78.6	0
78.7	0
78.8	0
78.9	0
79	0
79.1	0
79.2	0
79.3	0
79.4	0
79.5	0
79.6	0
79.7	0
79.8	0
79.9	0
80	0
80.1	0
80.2	0
80.3	0
80.4	0
80.5	0
80.6	0
80.7	0
80.8	0
80.9	0
81	0
81.1	0
81.2	0
81.3	0
81.4	0
81.5	0
81.6	0
81.7	0
81.8	0
81.9	0
82	0
82.1	0
82.2	0
82.3	0
82.4	0
82.5	0
82.6	0
82.7	0
82.8	0
82.9	0
83	0
83.1	0
83.2	0
83.3	0
83.4	0
83.5	0
83.6	0
83.7	0
83.8	0
83.9	0
84	0
84.1	0
84.2	0
84.3	0
84.4	0
84.5	0
84.6	0
84.7	0
84.8	0
84.9	0
85	0
85.1	0
85.2	0
85.3	0
85.4	0
85.5	0
85.6	0
85.7	0
85.8	0
85.9	0
86	0
86.1	0
86.2	0
86.3	0
86.4	0
86.5	0
86.6	0
86.7	0
86.8	0
86.9	0
87	0
87.1	0
87.2	0
87.3	0
87.4	0
87.5	0
87.6	0
87.7	0
87.8	0
87.9	0
88	0
88.1	0
88.2	0
88.3	0
88.4	0
88.5	0
88.6	0
88.7	0
88.8	0
88.9	0
89	0
89.1	0
89.2	0
89.3	0
89.4	0
89.5	0
89.6	0
89.7	0
89.8	0
89.9	0
90	0
90.1	0
90.2	0
90.3	0
90.4	0
90.5	0
90.6	0
90.7	0
90.8	0
90.9	0
91	0
91.1	0
91.2	0
91.3	0
91.4	0
91.5	0
91.6	0
91.7	0
91.8	0
91.9	0
92	0
92.1	0
92.2	0
92.3	0
92.4	0
92.5	0
92.6	0
92.7	0
92.8	0
92.9	0
93	0
93.1	0
93.2	0
93.3	0
93.4	0
93.5	0
93.6	0
93.7	0
93.8	0
93.9	0
94	0
94.1	0
94.2	0
94.3	0
94.4	0
94.5	0
94.6	0
94.7	0
94.8	0
94.9	0
95	0
95.1	0
95.2	0
95.3	0
95.4	0
95.5	0
95.6	0
95.7	0
95.8	0
95.9	0
96	0
96.1	0
96.2	0
96.3	0
96.4	0
96.5	0
96.6	0
96.7	0
96.8	0
96.9	0
97	0
97.1	0
97.2	0
97.3	0
97.4	0
97.5	0
97.6	0
97.7	0
97.8	0
97.9	0
98	0
98.1	0
98.2	0
98.3	0
98.4	0
98.5	0
98.6	0
98.7	0
98.8	0
98.9	0
99	0
99.1	0
99.2	0
99.3	0
99.4	0
99.5	0
99.6	0
99.7	0
99.8	0
99.9	0
100	0
100.1	0
100.2	0
100.3	0.00125
100.4	0.00125
100.5	0.00125
100.6	0.00125
100.7	0.00125
100.8	0.0025
100.9	0.0025
101	0.0025
101.1	0.0025
101.2	0.0025
101.3	0.0025
101.4	0.0025
101.5	0.0025
101.6	0.005
101.7	0.005
101.8	0.00625
101.9	0.0075
102	0.0075
102.1	0.0075
102.2	0.00875
102.3	0.00875
102.4	0.00875
102.5	0.00875
102.6	0.00875
102.7	0.01
102.8	0.01
102.9	0.01125
103	0.01125
103.1	0.01125
103.2	0.01125
103.3	0.01125
103.4	0.01125
103.5	0.01125
103.6	0.01375
103.7	0.015
103.8	0.015
103.9	0.0175
104	0.01875
104.1	0.01875
104.2	0.01875
104.3	0.01875
104.4	0.02
104.5	0.02125
104.6	0.0225
104.7	0.02375
104.8	0.02625
104.9	0.02625
105	0.03
105.1	0.03125
105.2	0.03125
105.3	0.0325
105.4	0.03375
105.5	0.03375
105.6	0.03375
105.7	0.03375
105.8	0.03375
105.9	0.035
106	0.035
106.1	0.03625
106.2	0.03625
106.3	0.0375
106.4	0.03875
106.5	0.03875
106.6	0.03875
106.7	0.03875
106.8	0.04125
106.9	0.04125
107	0.04125
107.1	0.0425
107.2	0.0425
107.3	0.04375
107.4	0.045
107.5	0.045
107.6	0.04625
107.7	0.0475
107.8	0.04875
107.9	0.04875
108	0.04875
108.1	0.05125
108.2	0.0525
108.3	0.0525
108.4	0.0525
108.5	0.0525
108.6	0.0525
108.7	0.0525
108.8	0.0525
108.9	0.0525
109	0.055
109.1	0.055
109.2	0.055
109.3	0.055
109.4	0.05625
109.5	0.05625
109.6	0.0575
109.7	0.05875
109.8	0.05875
109.9	0.05875
110	0.05875
110.1	0.06
110.2	0.06
110.3	0.06
110.4	0.06
110.5	0.06
110.6	0.06
110.7	0.06125
110.8	0.0625
110.9	0.0625
111	0.0625
111.1	0.0625
111.2	0.06375
111.3	0.06375
111.4	0.065
111.5	0.065
111.6	0.06625
111.7	0.06625
111.8	0.06625
111.9	0.06875
112	0.06875
112.1	0.06875
112.2	0.0725
112.3	0.0725
112.4	0.0725
112.5	0.0725
112.6	0.0725
112.7	0.075
112.8	0.07625
112.9	0.07625
113	0.07625
113.1	0.07625
113.2	0.0775
113.3	0.0775
113.4	0.0775
113.5	0.08
113.6	0.08
113.7	0.08125
113.8	0.0825
113.9	0.08625
114	0.08625
114.1	0.08625
114.2	0.08625
114.3	0.08625
114.4	0.0875
114.5	0.0875
114.6	0.08875
114.7	0.0875
114.8	0.08625
114.9	0.08625
115	0.08625
115.1	0.0875
115.2	0.09125
115.3	0.0925
115.4	0.09375
115.5	0.095
115.6	0.09625
115.7	0.0975
115.8	0.1
115.9	0.1
116	0.1
116.1	0.10125
116.2	0.10125
116.3	0.1025
116.4	0.1025
116.5	0.10375
116.6	0.10375
116.7	0.105
116.8	0.10625
116.9	0.10625
117	0.105
117.1	0.105
117.2	0.10625
117.3	0.10625
117.4	0.10625
117.5	0.1075
117.6	0.1075
117.7	0.1075
117.8	0.1075
117.9	0.1075
118	0.11
118.1	0.11
118.2	0.11
118.3	0.11
118.4	0.11
118.5	0.11125
118.6	0.11125
118.7	0.1125
118.8	0.115
118.9	0.115
119	0.1175
119.1	0.1175
119.2	0.11875
119.3	0.12
119.4	0.12375
119.5	0.12375
119.6	0.12625
119.7	0.1275
119.8	0.1325
119.9	0.135
120	0.135
120.1	0.13625
120.2	0.13875
120.3	0.13875
120.4	0.13875
120.5	0.14125
120.6	0.1425
120.7	0.1425
120.8	0.1425
120.9	0.1425
121	0.1425
121.1	0.14375
121.2	0.14375
121.3	0.14625
121.4	0.145
121.5	0.145
121.6	0.14375
121.7	0.14375
121.8	0.14625
121.9	0.1475
122	0.14875
122.1	0.14875
122.2	0.14875
122.3	0.15125
122.4	0.15125
122.5	0.15125
122.6	0.15125
122.7	0.1525
122.8	0.1525
122.9	0.15375
123	0.15625
123.1	0.15625
123.2	0.155
123.3	0.155
123.4	0.15375
123.5	0.1575
123.6	0.15875
123.7	0.15875
123.8	0.16
123.9	0.1625
124	0.165
124.1	0.165
124.2	0.165
124.3	0.16625
124.4	0.17
124.5	0.17125
124.6	0.17125
124.7	0.1725
124.8	0.1725
124.9	0.1725
125	0.1725
125.1	0.1775
125.2	0.1775
125.3	0.1775
125.4	0.17875
125.5	0.1775
125.6	0.18
125.7	0.17875
125.8	0.18
125.9	0.18125
126	0.1825
126.1	0.1825
126.2	0.18375
126.3	0.18375
126.4	0.18375
126.5	0.18375
126.6	0.185
126.7	0.1875
126.8	0.1875
126.9	0.19
127	0.1925
127.1	0.19375
127.2	0.19375
127.3	0.19375
127.4	0.195
127.5	0.19625
127.6	0.19875
127.7	0.2
127.8	0.2
127.9	0.20125
128	0.20625
128.1	0.2075
128.2	0.2075
128.3	0.20875
128.4	0.20875
128.5	0.21
128.6	0.2125
128.7	0.2125
128.8	0.21375
128.9	0.21375
129	0.21375
129.1	0.21625
129.2	0.2175
129.3	0.21625
129.4	0.22
129.5	0.22
129.6	0.22125
129.7	0.22125
129.8	0.22125
129.9	0.2225
130	0.2225
130.1	0.2225
130.2	0.2225
130.3	0.22125
130.4	0.2225
130.5	0.2225
130.6	0.2225
130.7	0.2225
130.8	0.2225
130.9	0.2225
131	0.2225
131.1	0.2225
131.2	0.2225
131.3	0.2225
131.4	0.2225
131.5	0.2225
131.6	0.2225
131.7	0.225
131.8	0.22625
131.9	0.2275
132	0.2275
132.1	0.22875
132.2	0.22875
132.3	0.22875
132.4	0.22875
132.5	0.22875
132.6	0.2275
132.7	0.22875
132.8	0.2275
132.9	0.2275
133	0.22875
133.1	0.22875
133.2	0.22875
133.3	0.22875
133.4	0.23
133.5	0.23125
133.6	0.23125
133.7	0.23125
133.8	0.2325
133.9	0.23375
134	0.235
134.1	0.23375
134.2	0.23375
134.3	0.23625
134.4	0.2375
134.5	0.2375
134.6	0.2375
134.7	0.2375
134.8	0.2375
134.9	0.23875
135	0.2375
135.1	0.2375
135.2	0.23875
135.3	0.23875
135.4	0.23875
135.5	0.23875
135.6	0.24
135.7	0.2425
135.8	0.24125
135.9	0.2425
136	0.24375
136.1	0.24625
136.2	0.24875
136.3	0.2475
136.4	0.24875
136.5	0.24875
136.6	0.25
136.7	0.25125
136.8	0.2525
136.9	0.25375
137	0.25375
137.1	0.25375
137.2	0.255
137.3	0.255
137.4	0.255
137.5	0.25625
137.6	0.25875
137.7	0.25875
137.8	0.26
137.9	0.2625
138	0.2625
138.1	0.26375
138.2	0.2625
138.3	0.2625
138.4	0.265
138.5	0.26625
138.6	0.2675
138.7	0.2675
138.8	0.2675
138.9	0.2675
139	0.2675
139.1	0.2675
139.2	0.2675
139.3	0.26625
139.4	0.26625
139.5	0.26625
139.6	0.26625
139.7	0.26625
139.8	0.26625
139.9	0.27
140	0.27
140.1	0.27125
140.2	0.2725
140.3	0.2725
140.4	0.27375
140.5	0.2725
140.6	0.2725
140.7	0.2725
140.8	0.27125
140.9	0.2725
141	0.2725
141.1	0.2725
141.2	0.2725
141.3	0.275
141.4	0.275
141.5	0.275
141.6	0.275
141.7	0.275
141.8	0.27625
141.9	0.27625
142	0.27625
142.1	0.27625
142.2	0.27625
142.3	0.27625
142.4	0.27625
142.5	0.275
142.6	0.27375
142.7	0.275
142.8	0.275
142.9	0.275
143	0.27625
143.1	0.275
143.2	0.275
143.3	0.275
143.4	0.275
143.5	0.27375
143.6	0.27375
143.7	0.27375
143.8	0.27375
143.9	0.275
144	0.27625
144.1	0.275
144.2	0.275
144.3	0.27625
144.4	0.275
144.5	0.275
144.6	0.275
144.7	0.27375
144.8	0.27375
144.9	0.27375
145	0.27375
145.1	0.27375
145.2	0.2725
145.3	0.27375
145.4	0.27375
145.5	0.27375
145.6	0.2725
145.7	0.27375
145.8	0.275
145.9	0.275
146	0.2775
146.1	0.2775
146.2	0.275
146.3	0.275
146.4	0.27625
146.5	0.2775
146.6	0.27875
146.7	0.27875
146.8	0.2775
146.9	0.27875
147	0.27875
147.1	0.27875
147.2	0.28
147.3	0.27875
147.4	0.27875
147.5	0.28
147.6	0.28
147.7	0.28125
147.8	0.2825
147.9	0.28375
148	0.28375
148.1	0.28375
148.2	0.28375
148.3	0.28375
148.4	0.28375
148.5	0.28375
148.6	0.28375
148.7	0.28375
148.8	0.285
148.9	0.285
149	0.28625
149.1	0.2875
149.2	0.28875
149.3	0.29
149.4	0.29
149.5	0.29
149.6	0.29
149.7	0.29
149.8	0.29125
149.9	0.2925
150	0.29375
150.1	0.295
150.2	0.29625
150.3	0.295
150.4	0.29625
150.5	0.29625
150.6	0.29625
150.7	0.2975
150.8	0.2975
150.9	0.2975
151	0.29875
151.1	0.3
151.2	0.3025
151.3	0.3025
151.4	0.3025
151.5	0.305
151.6	0.30375
151.7	0.305
151.8	0.305
151.9	0.305
152	0.305
152.1	0.305
152.2	0.305
152.3	0.305
152.4	0.305
152.5	0.30625
152.6	0.30875
152.7	0.3075
152.8	0.31
152.9	0.31
153	0.31125
153.1	0.3125
153.2	0.31375
153.3	0.31375
153.4	0.31375
153.5	0.3175
153.6	0.3175
153.7	0.32
153.8	0.32125
153.9	0.3225
154	0.3225
154.1	0.3225
154.2	0.3225
154.3	0.3225
154.4	0.32375
154.5	0.32375
154.6	0.325
154.7	0.3225
154.8	0.3225
154.9	0.32375
155	0.325
155.1	0.325
155.2	0.325
155.3	0.3275
155.4	0.3275
155.5	0.3275
155.6	0.32875
155.7	0.3325
155.8	0.3325
155.9	0.33375
156	0.335
156.1	0.33625
156.2	0.33625
156.3	0.33625
156.4	0.3375
156.5	0.33875
156.6	0.34
156.7	0.34125
156.8	0.34375
156.9	0.34875
157	0.34875
157.1	0.35
157.2	0.35125
157.3	0.35375
157.4	0.3525
157.5	0.3525
157.6	0.3525
157.7	0.35375
157.8	0.35375
157.9	0.355
158	0.355
158.1	0.355
158.2	0.35625
158.3	0.35625
158.4	0.35625
158.5	0.35625
158.6	0.35625
158.7	0.35625
158.8	0.3575
158.9	0.35625
159	0.35875
159.1	0.35875
159.2	0.35875
159.3	0.36125
159.4	0.36
159.5	0.3625
159.6	0.3625
159.7	0.36375
159.8	0.3625
159.9	0.3625
160	0.36375
160.1	0.36375
160.2	0.365
160.3	0.36375
160.4	0.365
160.5	0.36625
160.6	0.365
160.7	0.36625
160.8	0.3675
160.9	0.3675
161	0.3675
161.1	0.36875
161.2	0.3675
161.3	0.36625
161.4	0.36625
161.5	0.365
161.6	0.365
161.7	0.36625
161.8	0.3675
161.9	0.3675
162	0.36875
162.1	0.3675
162.2	0.3675
162.3	0.3675
162.4	0.3675
162.5	0.36875
162.6	0.3675
162.7	0.37125
162.8	0.37125
162.9	0.3725
163	0.3725
163.1	0.3725
163.2	0.37375
163.3	0.375
163.4	0.3775
163.5	0.3775
163.6	0.37875
163.7	0.3775
163.8	0.3775
163.9	0.37875
164	0.37625
164.1	0.37875
164.2	0.38
164.3	0.38
164.4	0.37875
164.5	0.3825
164.6	0.3825
164.7	0.3825
164.8	0.38375
164.9	0.38375
165	0.38375
165.1	0.38375
165.2	0.38625
165.3	0.385
165.4	0.385
165.5	0.385
165.6	0.385
165.7	0.385
165.8	0.385
165.9	0.385
166	0.385
166.1	0.385
166.2	0.38625
166.3	0.38875
166.4	0.38875
166.5	0.39125
166.6	0.3925
166.7	0.39375
166.8	0.39375
166.9	0.39375
167	0.395
167.1	0.395
167.2	0.395
167.3	0.39625
167.4	0.39625
167.5	0.3975
167.6	0.3975
167.7	0.39875
167.8	0.39875
167.9	0.39875
168	0.4
168.1	0.40125
168.2	0.4
168.3	0.4025
168.4	0.4
168.5	0.4
168.6	0.4
168.7	0.4
168.8	0.4
168.9	0.4
169	0.40125
169.1	0.4
169.2	0.4
169.3	0.40125
169.4	0.40125
169.5	0.40125
169.6	0.4025
169.7	0.4025
169.8	0.4025
169.9	0.4025
170	0.4025
170.1	0.40375
170.2	0.4025
170.3	0.4025
170.4	0.40625
170.5	0.4075
170.6	0.4075
170.7	0.40625
170.8	0.4075
170.9	0.40625
171	0.40875
171.1	0.40875
171.2	0.40875
171.3	0.4075
171.4	0.4075
171.5	0.40875
171.6	0.4075
171.7	0.4075
171.8	0.4075
171.9	0.4075
172	0.40875
172.1	0.4125
172.2	0.41375
172.3	0.41375
172.4	0.41625
172.5	0.4175
172.6	0.4175
172.7	0.41625
172.8	0.41625
172.9	0.41625
173	0.41625
173.1	0.41625
173.2	0.41625
173.3	0.4175
173.4	0.42
173.5	0.41875
173.6	0.41875
173.7	0.41875
173.8	0.41875
173.9	0.42
174	0.42
174.1	0.42125
174.2	0.42125
174.3	0.42375
174.4	0.42375
174.5	0.425
174.6	0.42625
174.7	0.42625
174.8	0.42375
174.9	0.425
175	0.425
175.1	0.42375
175.2	0.4225
175.3	0.4225
175.4	0.42625
175.5	0.4275
175.6	0.42875
175.7	0.43
175.8	0.42875
175.9	0.43
176	0.43125
176.1	0.4325
176.2	0.43375
176.3	0.435
176.4	0.435
176.5	0.43375
176.6	0.43375
176.7	0.43375
176.8	0.43375
176.9	0.435
177	0.43625
177.1	0.43625
177.2	0.43625
177.3	0.43625
177.4	0.43625
177.5	0.43625
177.6	0.435
177.7	0.435
177.8	0.43625
177.9	0.435
178	0.435
178.1	0.43375
178.2	0.435
178.3	0.435
178.4	0.435
178.5	0.43375
178.6	0.4325
178.7	0.43125
178.8	0.43125
178.9	0.43125
179	0.43125
179.1	0.43
179.2	0.43
179.3	0.43
179.4	0.4325
179.5	0.4325
179.6	0.43375
179.7	0.43375
179.8	0.435
179.9	0.435
180	0.43625
180.1	0.435
180.2	0.435
180.3	0.43625
180.4	0.43875
180.5	0.44
180.6	0.44
180.7	0.43875
180.8	0.4375
180.9	0.4375
181	0.435
181.1	0.43125
181.2	0.43375
181.3	0.435
181.4	0.435
181.5	0.43625
181.6	0.43625
181.7	0.43625
181.8	0.435
181.9	0.43375
182	0.43375
182.1	0.4325
182.2	0.4325
182.3	0.4325
182.4	0.4325
182.5	0.4325
182.6	0.43375
182.7	0.43375
182.8	0.43375
182.9	0.435
183	0.43625
183.1	0.43875
183.2	0.43875
183.3	0.4375
183.4	0.4375
183.5	0.4375
183.6	0.43625
183.7	0.43625
183.8	0.4375
183.9	0.4375
184	0.4375
184.1	0.43625
184.2	0.43625
184.3	0.43625
184.4	0.4375
184.5	0.4375
184.6	0.43625
184.7	0.4375
184.8	0.4375
184.9	0.44
185	0.44
185.1	0.44
185.2	0.4425
185.3	0.4425
185.4	0.44
185.5	0.44
185.6	0.43875
185.7	0.44
185.8	0.44125
185.9	0.44125
186	0.44375
186.1	0.44375
186.2	0.44375
186.3	0.4475
186.4	0.44625
186.5	0.44625
186.6	0.44875
186.7	0.4475
186.8	0.4475
186.9	0.44875
187	0.45
187.1	0.45
187.2	0.45
187.3	0.45125
187.4	0.45125
187.5	0.45125
187.6	0.45125
187.7	0.45125
187.8	0.4525
187.9	0.4525
188	0.4525
188.1	0.45125
188.2	0.45375
188.3	0.45375
188.4	0.45375
188.5	0.4525
188.6	0.455
188.7	0.455
188.8	0.455
188.9	0.45625
189	0.45625
189.1	0.4575
189.2	0.45625
189.3	0.45625
189.4	0.45375
189.5	0.455
189.6	0.45625
189.7	0.45375
189.8	0.45375
189.9	0.45375
190	0.45375
190.1	0.45375
190.2	0.45625
190.3	0.45625
190.4	0.45625
190.5	0.4575
190.6	0.45875
190.7	0.45875
190.8	0.46125
190.9	0.46
191	0.46
191.1	0.45875
191.2	0.45875
191.3	0.4575
191.4	0.45875
191.5	0.45875
191.6	0.4575
191.7	0.4575
191.8	0.45625
191.9	0.4575
192	0.4575
192.1	0.4575
192.2	0.4575
192.3	0.4575
192.4	0.4575
192.5	0.4575
192.6	0.45625
192.7	0.4575
192.8	0.455
192.9	0.45375
193	0.455
193.1	0.455
193.2	0.45375
193.3	0.45375
193.4	0.4525
193.5	0.45125
193.6	0.45125
193.7	0.45
193.8	0.45125
193.9	0.4525
194	0.4525
194.1	0.4525
194.2	0.4525
194.3	0.4525
194.4	0.45125
194.5	0.45125
194.6	0.45125
194.7	0.45125
194.8	0.4525
194.9	0.4525
195	0.45375
195.1	0.45125
195.2	0.45375
195.3	0.455
195.4	0.4525
195.5	0.4525
195.6	0.455
195.7	0.45625
195.8	0.45625
195.9	0.45625
196	0.455
196.1	0.455
196.2	0.455
196.3	0.455
196.4	0.45375
196.5	0.4575
196.6	0.4575
196.7	0.4575
196.8	0.4575
196.9	0.45875
197	0.45875
197.1	0.45875
197.2	0.45875
197.3	0.46
197.4	0.46
197.5	0.45875
197.6	0.46
197.7	0.46
197.8	0.45875
197.9	0.46
198	0.46
198.1	0.45875
198.2	0.45875
198.3	0.46
198.4	0.4625
198.5	0.46125
198.6	0.46125
198.7	0.46125
198.8	0.46125
198.9	0.46375
199	0.46375
199.1	0.46375
199.2	0.46375
199.3	0.4675
199.4	0.4675
199.5	0.4675
199.6	0.465
199.7	0.4675
199.8	0.4675
199.9	0.4675
200	0.4675
[truncated: 14,000 more rows]
