# Supplementary material for: Bayesian inference of kinetic schemes for ion channels by Kalman filtering
Source: eLife journal article supplement (doi:10.7554/elife.62714), 2022-05-04
Supplement: fig4-data9 [file 1_Sim_N_1500_Fluor_MW_0.5M.xlsx]

## Sheet: Tabelle1
0.1	0
0.2	0
0.3	0
0.4	0
0.5	0
0.6	0
0.7	0
0.8	0
0.9	0
1	0
1.1	0
1.2	0
1.3	0
1.4	0
1.5	0
1.6	0
1.7	0
1.8	0
1.9	0
2	0
2.1	0
2.2	0
2.3	0
2.4	0
2.5	0
2.6	0
2.7	0
2.8	0
2.9	0
3	0
3.1	0
3.2	0
3.3	0
3.4	0
3.5	0
3.6	0
3.7	0
3.8	0
3.9	0
4	0
4.1	0
4.2	0
4.3	0
4.4	0
4.5	0
4.6	0
4.7	0
4.8	0
4.9	0
5	0
5.1	0
5.2	0
5.3	0
5.4	0
5.5	0
5.6	0
5.7	0
5.8	0
5.9	0
6	0
6.1	0
6.2	0
6.3	0
6.4	0
6.5	0
6.6	0
6.7	0
6.8	0
6.9	0
7	0
7.1	0
7.2	0
7.3	0
7.4	0
7.5	0
7.6	0
7.7	0
7.8	0
7.9	0
8	0
8.1	0
8.2	0
8.3	0
8.4	0
8.5	0
8.6	0
8.7	0
8.8	0
8.9	0
9	0
9.1	0
9.2	0
9.3	0
9.4	0
9.5	0
9.6	0
9.7	0
9.8	0
9.9	0
10	0
10.1	0
10.2	0
10.3	0
10.4	0
10.5	0
10.6	0
10.7	0
10.8	0
10.9	0
11	0
11.1	0
11.2	0
11.3	0
11.4	0
11.5	0
11.6	0
11.7	0
11.8	0
11.9	0
12	0
12.1	0
12.2	0
12.3	0
12.4	0
12.5	0
12.6	0
12.7	0
12.8	0
12.9	0
13	0
13.1	0
13.2	0
13.3	0
13.4	0
13.5	0
13.6	0
13.7	0
13.8	0
13.9	0
14	0
14.1	0
14.2	0
14.3	0
14.4	0
14.5	0
14.6	0
14.7	0
14.8	0
14.9	0
15	0
15.1	0
15.2	0
15.3	0
15.4	0
15.5	0
15.6	0
15.7	0
15.8	0
15.9	0
16	0
16.1	0
16.2	0
16.3	0
16.4	0
16.5	0
16.6	0
16.7	0
16.8	0
16.9	0
17	0
17.1	0
17.2	0
17.3	0
17.4	0
17.5	0
17.6	0
17.7	0
17.8	0
17.9	0
18	0
18.1	0
18.2	0
18.3	0
18.4	0
18.5	0
18.6	0
18.7	0
18.8	0
18.9	0
19	0
19.1	0
19.2	0
19.3	0
19.4	0
19.5	0
19.6	0
19.7	0
19.8	0
19.9	0
20	0
20.1	0
20.2	0
20.3	0
20.4	0
20.5	0
20.6	0
20.7	0
20.8	0
20.9	0
21	0
21.1	0
21.2	0
21.3	0
21.4	0
21.5	0
21.6	0
21.7	0
21.8	0
21.9	0
22	0
22.1	0
22.2	0
22.3	0
22.4	0
22.5	0
22.6	0
22.7	0
22.8	0
22.9	0
23	0
23.1	0
23.2	0
23.3	0
23.4	0
23.5	0
23.6	0
23.7	0
23.8	0
23.9	0
24	0
24.1	0
24.2	0
24.3	0
24.4	0
24.5	0
24.6	0
24.7	0
24.8	0
24.9	0
25	0
25.1	0
25.2	0
25.3	0
25.4	0
25.5	0
25.6	0
25.7	0
25.8	0
25.9	0
26	0
26.1	0
26.2	0
26.3	0
26.4	0
26.5	0
26.6	0
26.7	0
26.8	0
26.9	0
27	0
27.1	0
27.2	0
27.3	0
27.4	0
27.5	0
27.6	0
27.7	0
27.8	0
27.9	0
28	0
28.1	0
28.2	0
28.3	0
28.4	0
28.5	0
28.6	0
28.7	0
28.8	0
28.9	0
29	0
29.1	0
29.2	0
29.3	0
29.4	0
29.5	0
29.6	0
29.7	0
29.8	0
29.9	0
30	0
30.1	0
30.2	0
30.3	0
30.4	0
30.5	0
30.6	0
30.7	0
30.8	0
30.9	0
31	0
31.1	0
31.2	0
31.3	0
31.4	0
31.5	0
31.6	0
31.7	0
31.8	0
31.9	0
32	0
32.1	0
32.2	0
32.3	0
32.4	0
32.5	0
32.6	0
32.7	0
32.8	0
32.9	0
33	0
33.1	0
33.2	0
33.3	0
33.4	0
33.5	0
33.6	0
33.7	0
33.8	0
33.9	0
34	0
34.1	0
34.2	0
34.3	0
34.4	0
34.5	0
34.6	0
34.7	0
34.8	0
34.9	0
35	0
35.1	0
35.2	0
35.3	0
35.4	0
35.5	0
35.6	0
35.7	0
35.8	0
35.9	0
36	0
36.1	0
36.2	0
36.3	0
36.4	0
36.5	0
36.6	0
36.7	0
36.8	0
36.9	0
37	0
37.1	0
37.2	0
37.3	0
37.4	0
37.5	0
37.6	0
37.7	0
37.8	0
37.9	0
38	0
38.1	0
38.2	0
38.3	0
38.4	0
38.5	0
38.6	0
38.7	0
38.8	0
38.9	0
39	0
39.1	0
39.2	0
39.3	0
39.4	0
39.5	0
39.6	0
39.7	0
39.8	0
39.9	0
40	0
40.1	0
40.2	0
40.3	0
40.4	0
40.5	0
40.6	0
40.7	0
40.8	0
40.9	0
41	0
41.1	0
41.2	0
41.3	0
41.4	0
41.5	0
41.6	0
41.7	0
41.8	0
41.9	0
42	0
42.1	0
42.2	0
42.3	0
42.4	0
42.5	0
42.6	0
42.7	0
42.8	0
42.9	0
43	0
43.1	0
43.2	0
43.3	0
43.4	0
43.5	0
43.6	0
43.7	0
43.8	0
43.9	0
44	0
44.1	0
44.2	0
44.3	0
44.4	0
44.5	0
44.6	0
44.7	0
44.8	0
44.9	0
45	0
45.1	0
45.2	0
45.3	0
45.4	0
45.5	0
45.6	0
45.7	0
45.8	0
45.9	0
46	0
46.1	0
46.2	0
46.3	0
46.4	0
46.5	0
46.6	0
46.7	0
46.8	0
46.9	0
47	0
47.1	0
47.2	0
47.3	0
47.4	0
47.5	0
47.6	0
47.7	0
47.8	0
47.9	0
48	0
48.1	0
48.2	0
48.3	0
48.4	0
48.5	0
48.6	0
48.7	0
48.8	0
48.9	0
49	0
49.1	0
49.2	0
49.3	0
49.4	0
49.5	0
49.6	0
49.7	0
49.8	0
49.9	0
50	0
50.1	0
50.2	0
50.3	0
50.4	0
50.5	0
50.6	0
50.7	0
50.8	0
50.9	0
51	0
51.1	0
51.2	0
51.3	0
51.4	0
51.5	0
51.6	0
51.7	0
51.8	0
51.9	0
52	0
52.1	0
52.2	0
52.3	0
52.4	0
52.5	0
52.6	0
52.7	0
52.8	0
52.9	0
53	0
53.1	0
53.2	0
53.3	0
53.4	0
53.5	0
53.6	0
53.7	0
53.8	0
53.9	0
54	0
54.1	0
54.2	0
54.3	0
54.4	0
54.5	0
54.6	0
54.7	0
54.8	0
54.9	0
55	0
55.1	0
55.2	0
55.3	0
55.4	0
55.5	0
55.6	0
55.7	0
55.8	0
55.9	0
56	0
56.1	0
56.2	0
56.3	0
56.4	0
56.5	0
56.6	0
56.7	0
56.8	0
56.9	0
57	0
57.1	0
57.2	0
57.3	0
57.4	0
57.5	0
57.6	0
57.7	0
57.8	0
57.9	0
58	0
58.1	0
58.2	0
58.3	0
58.4	0
58.5	0
58.6	0
58.7	0
58.8	0
58.9	0
59	0
59.1	0
59.2	0
59.3	0
59.4	0
59.5	0
59.6	0
59.7	0
59.8	0
59.9	0
60	0
60.1	0
60.2	0
60.3	0
60.4	0
60.5	0
60.6	0
60.7	0
60.8	0
60.9	0
61	0
61.1	0
61.2	0
61.3	0
61.4	0
61.5	0
61.6	0
61.7	0
61.8	0
61.9	0
62	0
62.1	0
62.2	0
62.3	0
62.4	0
62.5	0
62.6	0
62.7	0
62.8	0
62.9	0
63	0
63.1	0
63.2	0
63.3	0
63.4	0
63.5	0
63.6	0
63.7	0
63.8	0
63.9	0
64	0
64.1	0
64.2	0
64.3	0
64.4	0
64.5	0
64.6	0
64.7	0
64.8	0
64.9	0
65	0
65.1	0
65.2	0
65.3	0
65.4	0
65.5	0
65.6	0
65.7	0
65.8	0
65.9	0
66	0
66.1	0
66.2	0
66.3	0
66.4	0
66.5	0
66.6	0
66.7	0
66.8	0
66.9	0
67	0
67.1	0
67.2	0
67.3	0
67.4	0
67.5	0
67.6	0
67.7	0
67.8	0
67.9	0
68	0
68.1	0
68.2	0
68.3	0
68.4	0
68.5	0
68.6	0
68.7	0
68.8	0
68.9	0
69	0
69.1	0
69.2	0
69.3	0
69.4	0
69.5	0
69.6	0
69.7	0
69.8	0
69.9	0
70	0
70.1	0
70.2	0
70.3	0
70.4	0
70.5	0
70.6	0
70.7	0
70.8	0
70.9	0
71	0
71.1	0
71.2	0
71.3	0
71.4	0
71.5	0
71.6	0
71.7	0
71.8	0
71.9	0
72	0
72.1	0
72.2	0
72.3	0
72.4	0
72.5	0
72.6	0
72.7	0
72.8	0
72.9	0
73	0
73.1	0
73.2	0
73.3	0
73.4	0
73.5	0
73.6	0
73.7	0
73.8	0
73.9	0
74	0
74.1	0
74.2	0
74.3	0
74.4	0
74.5	0
74.6	0
74.7	0
74.8	0
74.9	0
75	0
75.1	0
75.2	0
75.3	0
75.4	0
75.5	0
75.6	0
75.7	0
75.8	0
75.9	0
76	0
76.1	0
76.2	0
76.3	0
76.4	0
76.5	0
76.6	0
76.7	0
76.8	0
76.9	0
77	0
77.1	0
77.2	0
77.3	0
77.4	0
77.5	0
77.6	0
77.7	0
77.8	0
77.9	0
78	0
78.1	0
78.2	0
78.3	0
78.4	0
78.5	0
78.6	0
78.7	0
78.8	0
78.9	0
79	0
79.1	0
79.2	0
79.3	0
79.4	0
79.5	0
79.6	0
79.7	0
79.8	0
79.9	0
80	0
80.1	0
80.2	0
80.3	0
80.4	0
80.5	0
80.6	0
80.7	0
80.8	0
80.9	0
81	0
81.1	0
81.2	0
81.3	0
81.4	0
81.5	0
81.6	0
81.7	0
81.8	0
81.9	0
82	0
82.1	0
82.2	0
82.3	0
82.4	0
82.5	0
82.6	0
82.7	0
82.8	0
82.9	0
83	0
83.1	0
83.2	0
83.3	0
83.4	0
83.5	0
83.6	0
83.7	0
83.8	0
83.9	0
84	0
84.1	0
84.2	0
84.3	0
84.4	0
84.5	0
84.6	0
84.7	0
84.8	0
84.9	0
85	0
85.1	0
85.2	0
85.3	0
85.4	0
85.5	0
85.6	0
85.7	0
85.8	0
85.9	0
86	0
86.1	0
86.2	0
86.3	0
86.4	0
86.5	0
86.6	0
86.7	0
86.8	0
86.9	0
87	0
87.1	0
87.2	0
87.3	0
87.4	0
87.5	0
87.6	0
87.7	0
87.8	0
87.9	0
88	0
88.1	0
88.2	0
88.3	0
88.4	0
88.5	0
88.6	0
88.7	0
88.8	0
88.9	0
89	0
89.1	0
89.2	0
89.3	0
89.4	0
89.5	0
89.6	0
89.7	0
89.8	0
89.9	0
90	0
90.1	0
90.2	0
90.3	0
90.4	0
90.5	0
90.6	0
90.7	0
90.8	0
90.9	0
91	0
91.1	0
91.2	0
91.3	0
91.4	0
91.5	0
91.6	0
91.7	0
91.8	0
91.9	0
92	0
92.1	0
92.2	0
92.3	0
92.4	0
92.5	0
92.6	0
92.7	0
92.8	0
92.9	0
93	0
93.1	0
93.2	0
93.3	0
93.4	0
93.5	0
93.6	0
93.7	0
93.8	0
93.9	0
94	0
94.1	0
94.2	0
94.3	0
94.4	0
94.5	0
94.6	0
94.7	0
94.8	0
94.9	0
95	0
95.1	0
95.2	0
95.3	0
95.4	0
95.5	0
95.6	0
95.7	0
95.8	0
95.9	0
96	0
96.1	0
96.2	0
96.3	0
96.4	0
96.5	0
96.6	0
96.7	0
96.8	0
96.9	0
97	0
97.1	0
97.2	0
97.3	0
97.4	0
97.5	0
97.6	0
97.7	0
97.8	0
97.9	0
98	0
98.1	0
98.2	0
98.3	0
98.4	0
98.5	0
98.6	0
98.7	0
98.8	0
98.9	0
99	0
99.1	0
99.2	0
99.3	0
99.4	0
99.5	0
99.6	0
99.7	0
99.8	0
99.9	0
100	0
100.1	0.031
100.2	0.0556667
100.3	0.0763333
100.4	0.096
100.5	0.114
100.6	0.136
100.7	0.154667
100.8	0.179333
100.9	0.197667
101	0.218
101.1	0.232333
101.2	0.246333
101.3	0.262333
101.4	0.280667
101.5	0.292667
101.6	0.301333
101.7	0.312
101.8	0.323
101.9	0.336667
102	0.348333
102.1	0.357
102.2	0.366667
102.3	0.377
102.4	0.384667
102.5	0.395667
102.6	0.403333
102.7	0.417333
102.8	0.420333
102.9	0.420333
103	0.427333
103.1	0.436667
103.2	0.441667
103.3	0.445667
103.4	0.456667
103.5	0.465333
103.6	0.467
103.7	0.469333
103.8	0.477
103.9	0.478
104	0.482
104.1	0.485
104.2	0.494
104.3	0.496
104.4	0.498
104.5	0.499667
104.6	0.502667
104.7	0.508333
104.8	0.512667
104.9	0.514333
105	0.515
105.1	0.518
105.2	0.521
105.3	0.52
105.4	0.524
105.5	0.525
105.6	0.525333
105.7	0.529
105.8	0.529333
105.9	0.534667
106	0.537333
106.1	0.539
106.2	0.539
106.3	0.543667
106.4	0.544667
106.5	0.548
106.6	0.549
106.7	0.550667
106.8	0.555333
106.9	0.552667
107	0.553667
107.1	0.555333
107.2	0.556667
107.3	0.556333
107.4	0.558667
107.5	0.560667
107.6	0.562667
107.7	0.562667
107.8	0.560667
107.9	0.563333
108	0.564
108.1	0.562
108.2	0.561333
108.3	0.561
108.4	0.562667
108.5	0.562
108.6	0.563
108.7	0.564333
108.8	0.563333
108.9	0.56
109	0.560667
109.1	0.562
109.2	0.564
109.3	0.567
109.4	0.567333
109.5	0.568
109.6	0.567
109.7	0.573333
109.8	0.569
109.9	0.569333
110	0.567333
110.1	0.564
110.2	0.562667
110.3	0.563333
110.4	0.561667
110.5	0.561333
110.6	0.562667
110.7	0.563667
110.8	0.563667
110.9	0.565
111	0.565667
111.1	0.568667
111.2	0.571333
111.3	0.573667
111.4	0.576333
111.5	0.574333
111.6	0.574
111.7	0.571
111.8	0.571
111.9	0.571667
112	0.573667
112.1	0.574
112.2	0.574667
112.3	0.574333
112.4	0.576333
112.5	0.575
112.6	0.581
112.7	0.581
112.8	0.585333
112.9	0.590333
113	0.588333
113.1	0.587667
113.2	0.587
113.3	0.589
113.4	0.592333
113.5	0.594
113.6	0.593667
113.7	0.593667
113.8	0.595
113.9	0.595667
114	0.592667
114.1	0.589333
114.2	0.59
114.3	0.591667
114.4	0.593667
114.5	0.593667
114.6	0.593667
114.7	0.593
114.8	0.593333
114.9	0.590667
115	0.591
115.1	0.587
115.2	0.59
115.3	0.590667
115.4	0.59
115.5	0.592667
115.6	0.594333
115.7	0.594667
115.8	0.592667
115.9	0.591
116	0.593667
116.1	0.592667
116.2	0.593667
116.3	0.593
116.4	0.597333
116.5	0.593667
116.6	0.594333
116.7	0.593
116.8	0.598
116.9	0.596333
117	0.599
117.1	0.596667
117.2	0.595333
117.3	0.59
117.4	0.589667
117.5	0.587333
117.6	0.588
117.7	0.589333
117.8	0.586
117.9	0.587
118	0.59
118.1	0.586667
118.2	0.587333
118.3	0.584
118.4	0.584667
118.5	0.587333
118.6	0.588333
118.7	0.588333
118.8	0.588333
118.9	0.591667
119	0.592333
119.1	0.596
119.2	0.599667
119.3	0.598333
119.4	0.598
119.5	0.603333
119.6	0.606667
119.7	0.605667
119.8	0.605333
119.9	0.607
120	0.605333
120.1	0.603667
120.2	0.610333
120.3	0.616
120.4	0.617667
120.5	0.615667
120.6	0.612333
120.7	0.611667
120.8	0.614333
120.9	0.615333
121	0.613333
121.1	0.613
121.2	0.612
121.3	0.611667
121.4	0.607333
121.5	0.609667
121.6	0.609667
121.7	0.611333
121.8	0.613
121.9	0.613333
122	0.612
122.1	0.611333
122.2	0.612
122.3	0.615667
122.4	0.616333
122.5	0.618
122.6	0.616
122.7	0.613333
122.8	0.613
122.9	0.609667
123	0.610667
123.1	0.609
123.2	0.607333
123.3	0.609
123.4	0.610667
123.5	0.610667
123.6	0.610667
123.7	0.609
123.8	0.611333
123.9	0.612
124	0.612667
124.1	0.612
124.2	0.614
124.3	0.614667
124.4	0.617667
124.5	0.622
124.6	0.622667
124.7	0.623333
124.8	0.623667
124.9	0.623
125	0.621333
125.1	0.618667
125.2	0.617667
125.3	0.622667
125.4	0.622333
125.5	0.624333
125.6	0.620667
125.7	0.618333
125.8	0.62
125.9	0.622333
126	0.619333
126.1	0.620333
126.2	0.619667
126.3	0.621667
126.4	0.619333
126.5	0.619333
126.6	0.62
126.7	0.625
126.8	0.622667
126.9	0.621667
127	0.623
127.1	0.622667
127.2	0.622667
127.3	0.627333
127.4	0.625333
127.5	0.624333
127.6	0.625333
127.7	0.626333
127.8	0.627333
127.9	0.628667
128	0.63
128.1	0.629667
128.2	0.632667
128.3	0.634
128.4	0.635667
128.5	0.640333
128.6	0.639333
128.7	0.640333
128.8	0.641667
128.9	0.641667
129	0.638667
129.1	0.640333
129.2	0.639667
129.3	0.642667
129.4	0.643333
129.5	0.642
129.6	0.64
129.7	0.641333
129.8	0.639333
129.9	0.641333
130	0.640667
130.1	0.641667
130.2	0.639
130.3	0.636
130.4	0.634
130.5	0.634
130.6	0.633667
130.7	0.635667
130.8	0.635667
130.9	0.634333
131	0.636
131.1	0.632333
131.2	0.630333
131.3	0.632
131.4	0.629
131.5	0.631333
131.6	0.635
131.7	0.632667
131.8	0.628667
131.9	0.628333
132	0.627667
132.1	0.629667
132.2	0.628333
132.3	0.629667
132.4	0.63
132.5	0.629667
132.6	0.630667
132.7	0.634
132.8	0.637
132.9	0.638333
133	0.639
133.1	0.638
133.2	0.642333
133.3	0.639333
133.4	0.641333
133.5	0.644667
133.6	0.641333
133.7	0.641333
133.8	0.642667
133.9	0.646
134	0.645
134.1	0.645333
134.2	0.648
134.3	0.645
134.4	0.644667
134.5	0.644667
134.6	0.643667
134.7	0.638333
134.8	0.637667
134.9	0.640333
135	0.641667
135.1	0.638667
135.2	0.640333
135.3	0.640667
135.4	0.642
135.5	0.641667
135.6	0.64
135.7	0.644333
135.8	0.645
135.9	0.646
136	0.644333
136.1	0.644
136.2	0.645
136.3	0.646
136.4	0.646333
136.5	0.649
136.6	0.650667
136.7	0.650667
136.8	0.650333
136.9	0.654
137	0.650667
137.1	0.648
137.2	0.649
137.3	0.648333
137.4	0.646333
137.5	0.643333
137.6	0.644667
137.7	0.646667
137.8	0.643667
137.9	0.642667
138	0.641667
138.1	0.648
138.2	0.652
138.3	0.654333
138.4	0.655667
138.5	0.654333
138.6	0.652333
138.7	0.651333
138.8	0.651667
138.9	0.653333
139	0.651667
139.1	0.653333
139.2	0.653333
139.3	0.651667
139.4	0.657
139.5	0.657
139.6	0.661
139.7	0.662
139.8	0.66
139.9	0.660333
140	0.660667
140.1	0.659667
140.2	0.66
140.3	0.663333
140.4	0.665333
140.5	0.667333
140.6	0.666667
140.7	0.664667
140.8	0.666
140.9	0.663
141	0.668333
141.1	0.664
141.2	0.663
141.3	0.662667
141.4	0.662667
141.5	0.66
141.6	0.655333
141.7	0.658
141.8	0.659
141.9	0.660333
142	0.66
142.1	0.658
142.2	0.657667
142.3	0.656333
142.4	0.657
142.5	0.655667
142.6	0.656667
142.7	0.658667
142.8	0.658333
142.9	0.663
143	0.664
143.1	0.663667
143.2	0.664333
143.3	0.665333
143.4	0.667667
143.5	0.671
143.6	0.671667
143.7	0.672333
143.8	0.673
143.9	0.673667
144	0.675333
144.1	0.673667
144.2	0.672
144.3	0.673667
144.4	0.675
144.5	0.675
144.6	0.674333
144.7	0.676667
144.8	0.675333
144.9	0.673333
145	0.673667
145.1	0.674333
145.2	0.675333
145.3	0.672667
145.4	0.673667
145.5	0.674667
145.6	0.675333
145.7	0.678
145.8	0.678667
145.9	0.678667
146	0.677333
146.1	0.678
146.2	0.678
146.3	0.678
146.4	0.675667
146.5	0.677333
146.6	0.677
146.7	0.677
146.8	0.675
146.9	0.676
147	0.68
147.1	0.684
147.2	0.685
147.3	0.685
147.4	0.685333
147.5	0.686
147.6	0.686333
147.7	0.683667
147.8	0.685333
147.9	0.684333
148	0.683
148.1	0.682667
148.2	0.685667
148.3	0.685
148.4	0.686
148.5	0.688667
148.6	0.689
148.7	0.690333
148.8	0.689333
148.9	0.686
149	0.689
149.1	0.688667
149.2	0.69
149.3	0.693667
149.4	0.691667
149.5	0.691667
149.6	0.689667
149.7	0.684667
149.8	0.684
149.9	0.681
150	0.680333
150.1	0.682
150.2	0.682333
150.3	0.682333
150.4	0.684
150.5	0.686
150.6	0.685
150.7	0.687333
150.8	0.687667
150.9	0.685
151	0.682
151.1	0.681333
151.2	0.68
151.3	0.678
151.4	0.678667
151.5	0.675667
151.6	0.674
151.7	0.675
151.8	0.677333
151.9	0.678
152	0.678333
152.1	0.679333
152.2	0.678667
152.3	0.680333
152.4	0.679333
152.5	0.68
152.6	0.677667
152.7	0.682
152.8	0.68
152.9	0.679667
153	0.682333
153.1	0.681667
153.2	0.680333
153.3	0.681667
153.4	0.683333
153.5	0.684
153.6	0.686333
153.7	0.686667
153.8	0.686333
153.9	0.685333
154	0.685
154.1	0.687667
154.2	0.685667
154.3	0.685333
154.4	0.686
154.5	0.687667
154.6	0.689
154.7	0.686333
154.8	0.687333
154.9	0.689
155	0.692
155.1	0.691
155.2	0.687333
155.3	0.69
155.4	0.689667
155.5	0.689333
155.6	0.688333
155.7	0.688667
155.8	0.691667
155.9	0.689333
156	0.691
156.1	0.690667
156.2	0.690667
156.3	0.688667
156.4	0.689333
156.5	0.69
156.6	0.689
156.7	0.690333
156.8	0.692333
156.9	0.691667
157	0.693333
157.1	0.694333
157.2	0.694333
157.3	0.694667
157.4	0.693
157.5	0.693667
157.6	0.695333
157.7	0.695
157.8	0.693
157.9	0.693
158	0.695667
158.1	0.698
158.2	0.700667
158.3	0.7
158.4	0.702
158.5	0.701333
158.6	0.7
158.7	0.697333
158.8	0.698667
158.9	0.699
159	0.698667
159.1	0.700333
159.2	0.702
159.3	0.700333
159.4	0.699333
159.5	0.699667
159.6	0.702667
159.7	0.703
159.8	0.702
159.9	0.702
160	0.701667
160.1	0.704667
160.2	0.704667
160.3	0.704
160.4	0.704
160.5	0.705
160.6	0.705333
160.7	0.706
160.8	0.706667
160.9	0.707
161	0.707333
161.1	0.705333
161.2	0.707
161.3	0.709333
161.4	0.708667
161.5	0.709667
161.6	0.710667
161.7	0.709667
161.8	0.71
161.9	0.710333
162	0.715
162.1	0.714667
162.2	0.714667
162.3	0.716
162.4	0.714
162.5	0.709
162.6	0.712333
162.7	0.712667
162.8	0.713
162.9	0.713667
163	0.713333
163.1	0.711
163.2	0.713
163.3	0.715
163.4	0.716333
163.5	0.716667
163.6	0.716667
163.7	0.714333
163.8	0.714667
163.9	0.713667
164	0.712
164.1	0.713
164.2	0.714333
164.3	0.712333
164.4	0.714333
164.5	0.712667
164.6	0.713333
164.7	0.710667
164.8	0.713
164.9	0.716667
165	0.716333
165.1	0.714667
165.2	0.713667
165.3	0.714333
165.4	0.713
165.5	0.711667
165.6	0.708333
165.7	0.709667
165.8	0.709333
165.9	0.709333
166	0.707
166.1	0.708
166.2	0.708
166.3	0.707333
166.4	0.710333
166.5	0.708
166.6	0.708
166.7	0.706667
166.8	0.707
166.9	0.707
167	0.706333
167.1	0.71
167.2	0.707
167.3	0.705667
167.4	0.705333
167.5	0.706
167.6	0.708333
167.7	0.708
167.8	0.707667
167.9	0.707333
168	0.707
168.1	0.708
168.2	0.708
168.3	0.712333
168.4	0.715
168.5	0.718667
168.6	0.720667
168.7	0.721667
168.8	0.726
168.9	0.725
169	0.724667
169.1	0.724
169.2	0.722667
169.3	0.724667
169.4	0.726667
169.5	0.724667
169.6	0.722
169.7	0.725667
169.8	0.724
169.9	0.725
170	0.723667
170.1	0.724667
170.2	0.727667
170.3	0.726667
170.4	0.723333
170.5	0.722
170.6	0.718667
170.7	0.717
170.8	0.719
170.9	0.720667
171	0.72
171.1	0.719
171.2	0.72
171.3	0.718333
171.4	0.720667
171.5	0.720333
171.6	0.720333
171.7	0.72
171.8	0.721667
171.9	0.721333
172	0.722
172.1	0.723333
172.2	0.718333
172.3	0.719
172.4	0.719667
172.5	0.72
172.6	0.721333
172.7	0.722667
172.8	0.720667
172.9	0.724667
173	0.726
173.1	0.724667
173.2	0.726
173.3	0.724333
173.4	0.725
173.5	0.726333
173.6	0.726667
173.7	0.723667
173.8	0.724667
173.9	0.727
174	0.729333
174.1	0.730333
174.2	0.729667
174.3	0.730333
174.4	0.729333
174.5	0.731333
174.6	0.73
174.7	0.734333
174.8	0.730667
174.9	0.733667
175	0.732
175.1	0.731333
175.2	0.731
175.3	0.733333
175.4	0.733333
175.5	0.732333
175.6	0.731667
175.7	0.731667
175.8	0.729333
175.9	0.725667
176	0.723333
176.1	0.723
176.2	0.722
176.3	0.723
176.4	0.724667
176.5	0.721667
176.6	0.718667
176.7	0.718667
176.8	0.719667
176.9	0.719667
177	0.721667
177.1	0.721333
177.2	0.719333
177.3	0.719
177.4	0.719333
177.5	0.719333
177.6	0.719333
177.7	0.718333
177.8	0.718333
177.9	0.719333
178	0.722
178.1	0.722667
178.2	0.721667
178.3	0.722333
178.4	0.724
178.5	0.725
178.6	0.725
178.7	0.722
178.8	0.723667
178.9	0.724333
179	0.724
179.1	0.721667
179.2	0.719667
179.3	0.717333
179.4	0.717
179.5	0.717667
179.6	0.72
179.7	0.717
179.8	0.719667
179.9	0.719667
180	0.718
180.1	0.72
180.2	0.719
180.3	0.721333
180.4	0.724333
180.5	0.722
180.6	0.724333
180.7	0.725
180.8	0.723333
180.9	0.725667
181	0.729333
181.1	0.73
181.2	0.727
181.3	0.725
181.4	0.728
181.5	0.728667
181.6	0.731667
181.7	0.730333
181.8	0.731333
181.9	0.728
182	0.730333
182.1	0.731333
182.2	0.731333
182.3	0.727333
182.4	0.725333
182.5	0.725667
182.6	0.726
182.7	0.723667
182.8	0.727
182.9	0.726
183	0.726667
183.1	0.727
183.2	0.724333
183.3	0.723333
183.4	0.722333
183.5	0.724
183.6	0.724
183.7	0.723333
183.8	0.724667
183.9	0.723667
184	0.724667
184.1	0.725333
184.2	0.725667
184.3	0.727667
184.4	0.728667
184.5	0.728333
184.6	0.731667
184.7	0.73
184.8	0.731333
184.9	0.731667
185	0.732333
185.1	0.731667
185.2	0.732667
185.3	0.735667
185.4	0.734667
185.5	0.732667
185.6	0.73
185.7	0.727667
185.8	0.725333
185.9	0.726667
186	0.729333
186.1	0.728667
186.2	0.727
186.3	0.728333
186.4	0.730333
186.5	0.729667
186.6	0.73
186.7	0.732
186.8	0.730333
186.9	0.728667
187	0.728333
187.1	0.726667
187.2	0.726
187.3	0.73
187.4	0.730333
187.5	0.729333
187.6	0.728333
187.7	0.729667
187.8	0.728
187.9	0.728
188	0.728667
188.1	0.730333
188.2	0.732333
188.3	0.731667
188.4	0.729667
188.5	0.730333
188.6	0.728
188.7	0.726333
188.8	0.727667
188.9	0.726333
189	0.726
189.1	0.723667
189.2	0.722333
189.3	0.722667
189.4	0.720667
189.5	0.720667
189.6	0.719667
189.7	0.721
189.8	0.723333
189.9	0.719333
190	0.721667
190.1	0.720667
190.2	0.72
190.3	0.723
190.4	0.724333
190.5	0.725
190.6	0.724333
190.7	0.725333
190.8	0.722667
190.9	0.722
191	0.724
191.1	0.723667
191.2	0.726333
191.3	0.729
191.4	0.729
191.5	0.731
191.6	0.731667
191.7	0.731
191.8	0.729
191.9	0.729
192	0.727667
192.1	0.729333
192.2	0.729667
192.3	0.731333
192.4	0.729667
192.5	0.731
192.6	0.733
192.7	0.733333
192.8	0.732667
192.9	0.735667
193	0.737333
193.1	0.736333
193.2	0.735
193.3	0.732333
193.4	0.732333
193.5	0.729333
193.6	0.733
193.7	0.732333
193.8	0.731333
193.9	0.73
194	0.729
194.1	0.73
194.2	0.731667
194.3	0.733
194.4	0.736667
194.5	0.738667
194.6	0.74
194.7	0.737333
194.8	0.735667
194.9	0.739667
195	0.739333
195.1	0.741667
195.2	0.739
195.3	0.738667
195.4	0.74
195.5	0.736667
195.6	0.737667
195.7	0.739667
195.8	0.740333
195.9	0.741667
196	0.741
196.1	0.741333
196.2	0.744333
196.3	0.745333
196.4	0.747
196.5	0.744
196.6	0.745333
196.7	0.745333
196.8	0.744333
196.9	0.741
197	0.742333
197.1	0.742667
197.2	0.741
197.3	0.740333
197.4	0.738
197.5	0.738667
197.6	0.738
197.7	0.739333
197.8	0.739333
197.9	0.738667
198	0.737667
198.1	0.737667
198.2	0.738667
198.3	0.735333
198.4	0.732
198.5	0.733
198.6	0.737
198.7	0.734667
198.8	0.734667
198.9	0.735667
199	0.733667
199.1	0.732
199.2	0.733333
199.3	0.734
199.4	0.733333
199.5	0.729333
199.6	0.728333
199.7	0.728667
199.8	0.728333
199.9	0.728667
200	0.732333
[truncated: 14,000 more rows]
