# Supplementary material for: Bayesian inference of kinetic schemes for ion channels by Kalman filtering
Source: eLife journal article supplement (doi:10.7554/elife.62714), 2022-05-04
Supplement: fig4-data9 [file 1_Sim_N_1500_Strom_MW_0.5M.xlsx]

## Sheet: Tabelle1
0.1	0
0.2	0
0.3	0
0.4	0
0.5	0
0.6	0
0.7	0
0.8	0
0.9	0
1	0
1.1	0
1.2	0
1.3	0
1.4	0
1.5	0
1.6	0
1.7	0
1.8	0
1.9	0
2	0
2.1	0
2.2	0
2.3	0
2.4	0
2.5	0
2.6	0
2.7	0
2.8	0
2.9	0
3	0
3.1	0
3.2	0
3.3	0
3.4	0
3.5	0
3.6	0
3.7	0
3.8	0
3.9	0
4	0
4.1	0
4.2	0
4.3	0
4.4	0
4.5	0
4.6	0
4.7	0
4.8	0
4.9	0
5	0
5.1	0
5.2	0
5.3	0
5.4	0
5.5	0
5.6	0
5.7	0
5.8	0
5.9	0
6	0
6.1	0
6.2	0
6.3	0
6.4	0
6.5	0
6.6	0
6.7	0
6.8	0
6.9	0
7	0
7.1	0
7.2	0
7.3	0
7.4	0
7.5	0
7.6	0
7.7	0
7.8	0
7.9	0
8	0
8.1	0
8.2	0
8.3	0
8.4	0
8.5	0
8.6	0
8.7	0
8.8	0
8.9	0
9	0
9.1	0
9.2	0
9.3	0
9.4	0
9.5	0
9.6	0
9.7	0
9.8	0
9.9	0
10	0
10.1	0
10.2	0
10.3	0
10.4	0
10.5	0
10.6	0
10.7	0
10.8	0
10.9	0
11	0
11.1	0
11.2	0
11.3	0
11.4	0
11.5	0
11.6	0
11.7	0
11.8	0
11.9	0
12	0
12.1	0
12.2	0
12.3	0
12.4	0
12.5	0
12.6	0
12.7	0
12.8	0
12.9	0
13	0
13.1	0
13.2	0
13.3	0
13.4	0
13.5	0
13.6	0
13.7	0
13.8	0
13.9	0
14	0
14.1	0
14.2	0
14.3	0
14.4	0
14.5	0
14.6	0
14.7	0
14.8	0
14.9	0
15	0
15.1	0
15.2	0
15.3	0
15.4	0
15.5	0
15.6	0
15.7	0
15.8	0
15.9	0
16	0
16.1	0
16.2	0
16.3	0
16.4	0
16.5	0
16.6	0
16.7	0
16.8	0
16.9	0
17	0
17.1	0
17.2	0
17.3	0
17.4	0
17.5	0
17.6	0
17.7	0
17.8	0
17.9	0
18	0
18.1	0
18.2	0
18.3	0
18.4	0
18.5	0
18.6	0
18.7	0
18.8	0
18.9	0
19	0
19.1	0
19.2	0
19.3	0
19.4	0
19.5	0
19.6	0
19.7	0
19.8	0
19.9	0
20	0
20.1	0
20.2	0
20.3	0
20.4	0
20.5	0
20.6	0
20.7	0
20.8	0
20.9	0
21	0
21.1	0
21.2	0
21.3	0
21.4	0
21.5	0
21.6	0
21.7	0
21.8	0
21.9	0
22	0
22.1	0
22.2	0
22.3	0
22.4	0
22.5	0
22.6	0
22.7	0
22.8	0
22.9	0
23	0
23.1	0
23.2	0
23.3	0
23.4	0
23.5	0
23.6	0
23.7	0
23.8	0
23.9	0
24	0
24.1	0
24.2	0
24.3	0
24.4	0
24.5	0
24.6	0
24.7	0
24.8	0
24.9	0
25	0
25.1	0
25.2	0
25.3	0
25.4	0
25.5	0
25.6	0
25.7	0
25.8	0
25.9	0
26	0
26.1	0
26.2	0
26.3	0
26.4	0
26.5	0
26.6	0
26.7	0
26.8	0
26.9	0
27	0
27.1	0
27.2	0
27.3	0
27.4	0
27.5	0
27.6	0
27.7	0
27.8	0
27.9	0
28	0
28.1	0
28.2	0
28.3	0
28.4	0
28.5	0
28.6	0
28.7	0
28.8	0
28.9	0
29	0
29.1	0
29.2	0
29.3	0
29.4	0
29.5	0
29.6	0
29.7	0
29.8	0
29.9	0
30	0
30.1	0
30.2	0
30.3	0
30.4	0
30.5	0
30.6	0
30.7	0
30.8	0
30.9	0
31	0
31.1	0
31.2	0
31.3	0
31.4	0
31.5	0
31.6	0
31.7	0
31.8	0
31.9	0
32	0
32.1	0
32.2	0
32.3	0
32.4	0
32.5	0
32.6	0
32.7	0
32.8	0
32.9	0
33	0
33.1	0
33.2	0
33.3	0
33.4	0
33.5	0
33.6	0
33.7	0
33.8	0
33.9	0
34	0
34.1	0
34.2	0
34.3	0
34.4	0
34.5	0
34.6	0
34.7	0
34.8	0
34.9	0
35	0
35.1	0
35.2	0
35.3	0
35.4	0
35.5	0
35.6	0
35.7	0
35.8	0
35.9	0
36	0
36.1	0
36.2	0
36.3	0
36.4	0
36.5	0
36.6	0
36.7	0
36.8	0
36.9	0
37	0
37.1	0
37.2	0
37.3	0
37.4	0
37.5	0
37.6	0
37.7	0
37.8	0
37.9	0
38	0
38.1	0
38.2	0
38.3	0
38.4	0
38.5	0
38.6	0
38.7	0
38.8	0
38.9	0
39	0
39.1	0
39.2	0
39.3	0
39.4	0
39.5	0
39.6	0
39.7	0
39.8	0
39.9	0
40	0
40.1	0
40.2	0
40.3	0
40.4	0
40.5	0
40.6	0
40.7	0
40.8	0
40.9	0
41	0
41.1	0
41.2	0
41.3	0
41.4	0
41.5	0
41.6	0
41.7	0
41.8	0
41.9	0
42	0
42.1	0
42.2	0
42.3	0
42.4	0
42.5	0
42.6	0
42.7	0
42.8	0
42.9	0
43	0
43.1	0
43.2	0
43.3	0
43.4	0
43.5	0
43.6	0
43.7	0
43.8	0
43.9	0
44	0
44.1	0
44.2	0
44.3	0
44.4	0
44.5	0
44.6	0
44.7	0
44.8	0
44.9	0
45	0
45.1	0
45.2	0
45.3	0
45.4	0
45.5	0
45.6	0
45.7	0
45.8	0
45.9	0
46	0
46.1	0
46.2	0
46.3	0
46.4	0
46.5	0
46.6	0
46.7	0
46.8	0
46.9	0
47	0
47.1	0
47.2	0
47.3	0
47.4	0
47.5	0
47.6	0
47.7	0
47.8	0
47.9	0
48	0
48.1	0
48.2	0
48.3	0
48.4	0
48.5	0
48.6	0
48.7	0
48.8	0
48.9	0
49	0
49.1	0
49.2	0
49.3	0
49.4	0
49.5	0
49.6	0
49.7	0
49.8	0
49.9	0
50	0
50.1	0
50.2	0
50.3	0
50.4	0
50.5	0
50.6	0
50.7	0
50.8	0
50.9	0
51	0
51.1	0
51.2	0
51.3	0
51.4	0
51.5	0
51.6	0
51.7	0
51.8	0
51.9	0
52	0
52.1	0
52.2	0
52.3	0
52.4	0
52.5	0
52.6	0
52.7	0
52.8	0
52.9	0
53	0
53.1	0
53.2	0
53.3	0
53.4	0
53.5	0
53.6	0
53.7	0
53.8	0
53.9	0
54	0
54.1	0
54.2	0
54.3	0
54.4	0
54.5	0
54.6	0
54.7	0
54.8	0
54.9	0
55	0
55.1	0
55.2	0
55.3	0
55.4	0
55.5	0
55.6	0
55.7	0
55.8	0
55.9	0
56	0
56.1	0
56.2	0
56.3	0
56.4	0
56.5	0
56.6	0
56.7	0
56.8	0
56.9	0
57	0
57.1	0
57.2	0
57.3	0
57.4	0
57.5	0
57.6	0
57.7	0
57.8	0
57.9	0
58	0
58.1	0
58.2	0
58.3	0
58.4	0
58.5	0
58.6	0
58.7	0
58.8	0
58.9	0
59	0
59.1	0
59.2	0
59.3	0
59.4	0
59.5	0
59.6	0
59.7	0
59.8	0
59.9	0
60	0
60.1	0
60.2	0
60.3	0
60.4	0
60.5	0
60.6	0
60.7	0
60.8	0
60.9	0
61	0
61.1	0
61.2	0
61.3	0
61.4	0
61.5	0
61.6	0
61.7	0
61.8	0
61.9	0
62	0
62.1	0
62.2	0
62.3	0
62.4	0
62.5	0
62.6	0
62.7	0
62.8	0
62.9	0
63	0
63.1	0
63.2	0
63.3	0
63.4	0
63.5	0
63.6	0
63.7	0
63.8	0
63.9	0
64	0
64.1	0
64.2	0
64.3	0
64.4	0
64.5	0
64.6	0
64.7	0
64.8	0
64.9	0
65	0
65.1	0
65.2	0
65.3	0
65.4	0
65.5	0
65.6	0
65.7	0
65.8	0
65.9	0
66	0
66.1	0
66.2	0
66.3	0
66.4	0
66.5	0
66.6	0
66.7	0
66.8	0
66.9	0
67	0
67.1	0
67.2	0
67.3	0
67.4	0
67.5	0
67.6	0
67.7	0
67.8	0
67.9	0
68	0
68.1	0
68.2	0
68.3	0
68.4	0
68.5	0
68.6	0
68.7	0
68.8	0
68.9	0
69	0
69.1	0
69.2	0
69.3	0
69.4	0
69.5	0
69.6	0
69.7	0
69.8	0
69.9	0
70	0
70.1	0
70.2	0
70.3	0
70.4	0
70.5	0
70.6	0
70.7	0
70.8	0
70.9	0
71	0
71.1	0
71.2	0
71.3	0
71.4	0
71.5	0
71.6	0
71.7	0
71.8	0
71.9	0
72	0
72.1	0
72.2	0
72.3	0
72.4	0
72.5	0
72.6	0
72.7	0
72.8	0
72.9	0
73	0
73.1	0
73.2	0
73.3	0
73.4	0
73.5	0
73.6	0
73.7	0
73.8	0
73.9	0
74	0
74.1	0
74.2	0
74.3	0
74.4	0
74.5	0
74.6	0
74.7	0
74.8	0
74.9	0
75	0
75.1	0
75.2	0
75.3	0
75.4	0
75.5	0
75.6	0
75.7	0
75.8	0
75.9	0
76	0
76.1	0
76.2	0
76.3	0
76.4	0
76.5	0
76.6	0
76.7	0
76.8	0
76.9	0
77	0
77.1	0
77.2	0
77.3	0
77.4	0
77.5	0
77.6	0
77.7	0
77.8	0
77.9	0
78	0
78.1	0
78.2	0
78.3	0
78.4	0
78.5	0
78.6	0
78.7	0
78.8	0
78.9	0
79	0
79.1	0
79.2	0
79.3	0
79.4	0
79.5	0
79.6	0
79.7	0
79.8	0
79.9	0
80	0
80.1	0
80.2	0
80.3	0
80.4	0
80.5	0
80.6	0
80.7	0
80.8	0
80.9	0
81	0
81.1	0
81.2	0
81.3	0
81.4	0
81.5	0
81.6	0
81.7	0
81.8	0
81.9	0
82	0
82.1	0
82.2	0
82.3	0
82.4	0
82.5	0
82.6	0
82.7	0
82.8	0
82.9	0
83	0
83.1	0
83.2	0
83.3	0
83.4	0
83.5	0
83.6	0
83.7	0
83.8	0
83.9	0
84	0
84.1	0
84.2	0
84.3	0
84.4	0
84.5	0
84.6	0
84.7	0
84.8	0
84.9	0
85	0
85.1	0
85.2	0
85.3	0
85.4	0
85.5	0
85.6	0
85.7	0
85.8	0
85.9	0
86	0
86.1	0
86.2	0
86.3	0
86.4	0
86.5	0
86.6	0
86.7	0
86.8	0
86.9	0
87	0
87.1	0
87.2	0
87.3	0
87.4	0
87.5	0
87.6	0
87.7	0
87.8	0
87.9	0
88	0
88.1	0
88.2	0
88.3	0
88.4	0
88.5	0
88.6	0
88.7	0
88.8	0
88.9	0
89	0
89.1	0
89.2	0
89.3	0
89.4	0
89.5	0
89.6	0
89.7	0
89.8	0
89.9	0
90	0
90.1	0
90.2	0
90.3	0
90.4	0
90.5	0
90.6	0
90.7	0
90.8	0
90.9	0
91	0
91.1	0
91.2	0
91.3	0
91.4	0
91.5	0
91.6	0
91.7	0
91.8	0
91.9	0
92	0
92.1	0
92.2	0
92.3	0
92.4	0
92.5	0
92.6	0
92.7	0
92.8	0
92.9	0
93	0
93.1	0
93.2	0
93.3	0
93.4	0
93.5	0
93.6	0
93.7	0
93.8	0
93.9	0
94	0
94.1	0
94.2	0
94.3	0
94.4	0
94.5	0
94.6	0
94.7	0
94.8	0
94.9	0
95	0
95.1	0
95.2	0
95.3	0
95.4	0
95.5	0
95.6	0
95.7	0
95.8	0
95.9	0
96	0
96.1	0
96.2	0
96.3	0
96.4	0
96.5	0
96.6	0
96.7	0
96.8	0
96.9	0
97	0
97.1	0
97.2	0
97.3	0
97.4	0
97.5	0
97.6	0
97.7	0
97.8	0
97.9	0
98	0
98.1	0
98.2	0
98.3	0
98.4	0
98.5	0
98.6	0
98.7	0
98.8	0
98.9	0
99	0
99.1	0
99.2	0
99.3	0
99.4	0
99.5	0
99.6	0
99.7	0
99.8	0
99.9	0
100	0
100.1	0
100.2	0
100.3	0
100.4	0
100.5	0
100.6	0
100.7	0
100.8	0
100.9	0
101	0
101.1	0
101.2	0
101.3	0
101.4	0
101.5	0
101.6	0.000666667
101.7	0.000666667
101.8	0.000666667
101.9	0.000666667
102	0.000666667
102.1	0.000666667
102.2	0.000666667
102.3	0.00333333
102.4	0.00533333
102.5	0.006
102.6	0.006
102.7	0.00666667
102.8	0.008
102.9	0.008
103	0.00933333
103.1	0.01
103.2	0.0106667
103.3	0.0126667
103.4	0.014
103.5	0.0146667
103.6	0.016
103.7	0.016
103.8	0.0166667
103.9	0.0173333
104	0.018
104.1	0.0193333
104.2	0.02
104.3	0.0213333
104.4	0.022
104.5	0.0246667
104.6	0.0246667
104.7	0.0253333
104.8	0.0273333
104.9	0.0293333
105	0.0293333
105.1	0.0293333
105.2	0.032
105.3	0.032
105.4	0.0333333
105.5	0.0346667
105.6	0.0346667
105.7	0.0353333
105.8	0.036
105.9	0.0366667
106	0.0366667
106.1	0.0366667
106.2	0.038
106.3	0.04
106.4	0.0406667
106.5	0.0426667
106.6	0.0446667
106.7	0.046
106.8	0.0466667
106.9	0.0466667
107	0.0473333
107.1	0.0473333
107.2	0.048
107.3	0.048
107.4	0.0486667
107.5	0.0493333
107.6	0.0493333
107.7	0.0486667
107.8	0.05
107.9	0.0506667
108	0.0513333
108.1	0.0533333
108.2	0.0546667
108.3	0.0553333
108.4	0.0553333
108.5	0.0573333
108.6	0.0573333
108.7	0.058
108.8	0.0586667
108.9	0.0613333
109	0.0613333
109.1	0.0626667
109.2	0.064
109.3	0.066
109.4	0.0673333
109.5	0.068
109.6	0.068
109.7	0.07
109.8	0.07
109.9	0.0713333
110	0.072
110.1	0.072
110.2	0.072
110.3	0.072
110.4	0.074
110.5	0.0753333
110.6	0.0753333
110.7	0.0766667
110.8	0.0773333
110.9	0.078
111	0.0806667
111.1	0.0826667
111.2	0.0833333
111.3	0.0833333
111.4	0.0853333
111.5	0.086
111.6	0.0873333
111.7	0.088
111.8	0.0886667
111.9	0.0893333
112	0.09
112.1	0.09
112.2	0.0906667
112.3	0.0913333
112.4	0.092
112.5	0.0933333
112.6	0.0946667
112.7	0.0953333
112.8	0.0966667
112.9	0.0986667
113	0.1
113.1	0.0993333
113.2	0.1
113.3	0.101333
113.4	0.102
113.5	0.103333
113.6	0.105333
113.7	0.105333
113.8	0.105333
113.9	0.105333
114	0.105333
114.1	0.105333
114.2	0.106
114.3	0.106
114.4	0.107333
114.5	0.108
114.6	0.108667
114.7	0.109333
114.8	0.11
114.9	0.112
115	0.113333
115.1	0.114
115.2	0.116
115.3	0.118
115.4	0.119333
115.5	0.119333
115.6	0.12
115.7	0.120667
115.8	0.122
115.9	0.123333
116	0.124
116.1	0.125333
116.2	0.127333
116.3	0.128667
116.4	0.128667
116.5	0.129333
116.6	0.129333
116.7	0.128667
116.8	0.129333
116.9	0.130667
117	0.132
117.1	0.131333
117.2	0.131333
117.3	0.131333
117.4	0.132667
117.5	0.133333
117.6	0.134
117.7	0.134
117.8	0.134
117.9	0.133333
118	0.133333
118.1	0.134
118.2	0.133333
118.3	0.134
118.4	0.134667
118.5	0.135333
118.6	0.135333
118.7	0.135333
118.8	0.136
118.9	0.136
119	0.136667
119.1	0.136667
119.2	0.136667
119.3	0.137333
119.4	0.138
119.5	0.138
119.6	0.138667
119.7	0.138
119.8	0.138667
119.9	0.138667
120	0.14
120.1	0.140667
120.2	0.141333
120.3	0.144
120.4	0.144667
120.5	0.146
120.6	0.15
120.7	0.151333
120.8	0.151333
120.9	0.150667
121	0.152
121.1	0.152
121.2	0.152667
121.3	0.153333
121.4	0.153333
121.5	0.154667
121.6	0.154667
121.7	0.155333
121.8	0.155333
121.9	0.155333
122	0.156
122.1	0.156667
122.2	0.158
122.3	0.157333
122.4	0.157333
122.5	0.158
122.6	0.159333
122.7	0.160667
122.8	0.160667
122.9	0.162
123	0.162
123.1	0.162
123.2	0.163333
123.3	0.164667
123.4	0.166
123.5	0.166667
123.6	0.166
123.7	0.166667
123.8	0.166667
123.9	0.168
124	0.168
124.1	0.168
124.2	0.168
124.3	0.168667
124.4	0.169333
124.5	0.169333
124.6	0.17
124.7	0.170667
124.8	0.170667
124.9	0.170667
125	0.172
125.1	0.172
125.2	0.172
125.3	0.172
125.4	0.173333
125.5	0.174
125.6	0.175333
125.7	0.174667
125.8	0.175333
125.9	0.176667
126	0.176667
126.1	0.176667
126.2	0.178667
126.3	0.178667
126.4	0.18
126.5	0.180667
126.6	0.182
126.7	0.184
126.8	0.184667
126.9	0.186
127	0.188
127.1	0.188667
127.2	0.188
127.3	0.188
127.4	0.189333
127.5	0.189333
127.6	0.191333
127.7	0.191333
127.8	0.192667
127.9	0.193333
128	0.192667
128.1	0.192
128.2	0.192667
128.3	0.192667
128.4	0.192667
128.5	0.193333
128.6	0.194667
128.7	0.195333
128.8	0.197333
128.9	0.198
129	0.199333
129.1	0.201333
129.2	0.204
129.3	0.205333
129.4	0.205333
129.5	0.207333
129.6	0.207333
129.7	0.208
129.8	0.208
129.9	0.208
130	0.207333
130.1	0.209333
130.2	0.211333
130.3	0.212
130.4	0.212
130.5	0.214
130.6	0.214
130.7	0.216
130.8	0.215333
130.9	0.215333
131	0.216
131.1	0.216667
131.2	0.218
131.3	0.218667
131.4	0.22
131.5	0.222
131.6	0.223333
131.7	0.224
131.8	0.228
131.9	0.229333
132	0.23
132.1	0.230667
132.2	0.230667
132.3	0.232667
132.4	0.232
132.5	0.233333
132.6	0.232667
132.7	0.232
132.8	0.232
132.9	0.231333
133	0.231333
133.1	0.232
133.2	0.232
133.3	0.233333
133.4	0.234667
133.5	0.235333
133.6	0.235333
133.7	0.236667
133.8	0.238
133.9	0.238
134	0.238667
134.1	0.238667
134.2	0.238667
134.3	0.239333
134.4	0.240667
134.5	0.241333
134.6	0.241333
134.7	0.242
134.8	0.243333
134.9	0.243333
135	0.244
135.1	0.244667
135.2	0.246
135.3	0.246
135.4	0.247333
135.5	0.248
135.6	0.247333
135.7	0.247333
135.8	0.247333
135.9	0.246667
136	0.247333
136.1	0.246667
136.2	0.247333
136.3	0.248
136.4	0.246667
136.5	0.246
136.6	0.245333
136.7	0.246
136.8	0.246
136.9	0.245333
137	0.246667
137.1	0.246667
137.2	0.248
137.3	0.248667
137.4	0.248667
137.5	0.249333
137.6	0.25
137.7	0.25
137.8	0.25
137.9	0.250667
138	0.252
138.1	0.251333
138.2	0.252667
138.3	0.252667
138.4	0.252667
138.5	0.254
138.6	0.254667
138.7	0.255333
138.8	0.253333
138.9	0.254
139	0.254667
139.1	0.255333
139.2	0.256667
139.3	0.257333
139.4	0.257333
139.5	0.257333
139.6	0.257333
139.7	0.258667
139.8	0.257333
139.9	0.258
140	0.259333
140.1	0.258667
140.2	0.258667
140.3	0.259333
140.4	0.259333
140.5	0.261333
140.6	0.262
140.7	0.263333
140.8	0.265333
140.9	0.265333
141	0.266
141.1	0.266667
141.2	0.266667
141.3	0.267333
141.4	0.268667
141.5	0.270667
141.6	0.270667
141.7	0.270667
141.8	0.270667
141.9	0.272667
142	0.274
142.1	0.274
142.2	0.275333
142.3	0.275333
142.4	0.276
142.5	0.277333
142.6	0.278
142.7	0.279333
142.8	0.28
142.9	0.278667
143	0.278667
143.1	0.278667
143.2	0.279333
143.3	0.28
143.4	0.280667
143.5	0.28
143.6	0.28
143.7	0.280667
143.8	0.282
143.9	0.282
144	0.282
144.1	0.282
144.2	0.284
144.3	0.285333
144.4	0.285333
144.5	0.285333
144.6	0.284667
144.7	0.286
144.8	0.286
144.9	0.286667
145	0.286667
145.1	0.287333
145.2	0.286667
145.3	0.288
145.4	0.286667
145.5	0.286667
145.6	0.286
145.7	0.286
145.8	0.286667
145.9	0.288667
146	0.29
146.1	0.289333
146.2	0.29
146.3	0.29
146.4	0.29
146.5	0.291333
146.6	0.291333
146.7	0.293333
146.8	0.292667
146.9	0.294
147	0.294667
147.1	0.294667
147.2	0.295333
147.3	0.295333
147.4	0.295333
147.5	0.295333
147.6	0.296667
147.7	0.298
147.8	0.298667
147.9	0.298667
148	0.298667
148.1	0.300667
148.2	0.3
148.3	0.300667
148.4	0.301333
148.5	0.300667
148.6	0.301333
148.7	0.302
148.8	0.302
148.9	0.301333
149	0.302667
149.1	0.303333
149.2	0.304667
149.3	0.304
149.4	0.304
149.5	0.304667
149.6	0.305333
149.7	0.306
149.8	0.306
149.9	0.307333
150	0.307333
150.1	0.307333
150.2	0.307333
150.3	0.308
150.4	0.307333
150.5	0.308
150.6	0.308667
150.7	0.309333
150.8	0.309333
150.9	0.308667
151	0.309333
151.1	0.310667
151.2	0.31
151.3	0.310667
151.4	0.311333
151.5	0.312
151.6	0.312
151.7	0.312
151.8	0.313333
151.9	0.314
152	0.315333
152.1	0.316
152.2	0.316
152.3	0.316667
152.4	0.318
152.5	0.318
152.6	0.318
152.7	0.318
152.8	0.319333
152.9	0.32
153	0.320667
153.1	0.322
153.2	0.323333
153.3	0.323333
153.4	0.324
153.5	0.324
153.6	0.324667
153.7	0.324667
153.8	0.328667
153.9	0.328667
154	0.328667
154.1	0.329333
154.2	0.329333
154.3	0.33
154.4	0.33
154.5	0.329333
154.6	0.329333
154.7	0.329333
154.8	0.33
154.9	0.33
155	0.331333
155.1	0.334
155.2	0.334
155.3	0.334667
155.4	0.336
155.5	0.336667
155.6	0.336
155.7	0.336
155.8	0.336
155.9	0.336
156	0.336
156.1	0.337333
156.2	0.338
156.3	0.338667
156.4	0.339333
156.5	0.340667
156.6	0.340667
156.7	0.340667
156.8	0.340667
156.9	0.34
157	0.34
157.1	0.339333
157.2	0.341333
157.3	0.341333
157.4	0.342
157.5	0.342667
157.6	0.341333
157.7	0.340667
157.8	0.341333
157.9	0.340667
158	0.340667
158.1	0.341333
158.2	0.342
158.3	0.342
158.4	0.341333
158.5	0.342
158.6	0.344
158.7	0.344667
158.8	0.344667
158.9	0.344
159	0.343333
159.1	0.342667
159.2	0.342667
159.3	0.342667
159.4	0.343333
159.5	0.343333
159.6	0.344667
159.7	0.346
159.8	0.346667
159.9	0.346
160	0.345333
160.1	0.346667
160.2	0.348
160.3	0.348
160.4	0.348667
160.5	0.348
160.6	0.348667
160.7	0.35
160.8	0.351333
160.9	0.350667
161	0.350667
161.1	0.350667
161.2	0.352667
161.3	0.354
161.4	0.355333
161.5	0.356667
161.6	0.358
161.7	0.358667
161.8	0.359333
161.9	0.358667
162	0.358667
162.1	0.358667
162.2	0.358
162.3	0.358667
162.4	0.359333
162.5	0.359333
162.6	0.359333
162.7	0.36
162.8	0.36
162.9	0.359333
163	0.359333
163.1	0.358667
163.2	0.357333
163.3	0.358
163.4	0.36
163.5	0.360667
163.6	0.362667
163.7	0.364
163.8	0.364
163.9	0.365333
164	0.365333
164.1	0.365333
164.2	0.365333
164.3	0.364
164.4	0.363333
164.5	0.362667
164.6	0.364
164.7	0.364667
164.8	0.364
164.9	0.364
165	0.364667
165.1	0.365333
165.2	0.365333
165.3	0.367333
165.4	0.367333
165.5	0.367333
165.6	0.366667
165.7	0.365333
165.8	0.366
165.9	0.366
166	0.366
166.1	0.366
166.2	0.367333
166.3	0.368
166.4	0.367333
166.5	0.368667
166.6	0.37
166.7	0.37
166.8	0.369333
166.9	0.37
167	0.369333
167.1	0.369333
167.2	0.371333
167.3	0.371333
167.4	0.371333
167.5	0.371333
167.6	0.372
167.7	0.373333
167.8	0.374667
167.9	0.375333
168	0.377333
168.1	0.377333
168.2	0.377333
168.3	0.377333
168.4	0.378667
168.5	0.378
168.6	0.377333
168.7	0.378667
168.8	0.378667
168.9	0.379333
169	0.379333
169.1	0.378667
169.2	0.378667
169.3	0.379333
169.4	0.379333
169.5	0.379333
169.6	0.38
169.7	0.381333
169.8	0.381333
169.9	0.380667
170	0.38
170.1	0.380667
170.2	0.38
170.3	0.38
170.4	0.380667
170.5	0.381333
170.6	0.381333
170.7	0.380667
170.8	0.382
170.9	0.384667
171	0.384
171.1	0.384667
171.2	0.385333
171.3	0.384
171.4	0.388
171.5	0.388667
171.6	0.389333
171.7	0.389333
171.8	0.390667
171.9	0.391333
172	0.391333
172.1	0.390667
172.2	0.392
172.3	0.392667
172.4	0.393333
172.5	0.394
172.6	0.394
172.7	0.394
172.8	0.393333
172.9	0.395333
173	0.395333
173.1	0.395333
173.2	0.395333
173.3	0.396
173.4	0.397333
173.5	0.396667
173.6	0.395333
173.7	0.395333
173.8	0.394
173.9	0.394667
174	0.394667
174.1	0.394667
174.2	0.394667
174.3	0.394667
174.4	0.394667
174.5	0.396
174.6	0.397333
174.7	0.398
174.8	0.398
174.9	0.397333
175	0.396667
175.1	0.396
175.2	0.396667
175.3	0.396667
175.4	0.396
175.5	0.395333
175.6	0.395333
175.7	0.395333
175.8	0.396667
175.9	0.396667
176	0.396667
176.1	0.398667
176.2	0.399333
176.3	0.4
176.4	0.4
176.5	0.4
176.6	0.400667
176.7	0.400667
176.8	0.401333
176.9	0.401333
177	0.400667
177.1	0.398667
177.2	0.399333
177.3	0.399333
177.4	0.398667
177.5	0.398667
177.6	0.398667
177.7	0.399333
177.8	0.399333
177.9	0.4
178	0.4
178.1	0.399333
178.2	0.398
178.3	0.398667
178.4	0.400667
178.5	0.402
178.6	0.401333
178.7	0.402
178.8	0.402
178.9	0.403333
179	0.404
179.1	0.404
179.2	0.404
179.3	0.404667
179.4	0.404
179.5	0.404
179.6	0.403333
179.7	0.403333
179.8	0.403333
179.9	0.403333
180	0.403333
180.1	0.402667
180.2	0.402
180.3	0.402
180.4	0.398667
180.5	0.398667
180.6	0.398667
180.7	0.398
180.8	0.397333
180.9	0.397333
181	0.398
181.1	0.398667
181.2	0.398667
181.3	0.399333
181.4	0.400667
181.5	0.400667
181.6	0.400667
181.7	0.400667
181.8	0.401333
181.9	0.401333
182	0.401333
182.1	0.401333
182.2	0.402
182.3	0.400667
182.4	0.400667
182.5	0.4
182.6	0.399333
182.7	0.400667
182.8	0.399333
182.9	0.399333
183	0.399333
183.1	0.398667
183.2	0.398667
183.3	0.4
183.4	0.400667
183.5	0.401333
183.6	0.401333
183.7	0.401333
183.8	0.402
183.9	0.401333
184	0.401333
184.1	0.400667
184.2	0.4
184.3	0.398667
184.4	0.397333
184.5	0.398
184.6	0.398
184.7	0.399333
184.8	0.399333
184.9	0.4
185	0.4
185.1	0.4
185.2	0.399333
185.3	0.4
185.4	0.4
185.5	0.4
185.6	0.398667
185.7	0.398667
185.8	0.398667
185.9	0.399333
186	0.398667
186.1	0.398
186.2	0.398667
186.3	0.398667
186.4	0.399333
186.5	0.398667
186.6	0.398667
186.7	0.399333
186.8	0.399333
186.9	0.400667
187	0.402
187.1	0.402
187.2	0.402667
187.3	0.402667
187.4	0.402667
187.5	0.404667
187.6	0.405333
187.7	0.405333
187.8	0.405333
187.9	0.405333
188	0.406
188.1	0.406
188.2	0.406667
188.3	0.407333
188.4	0.408
188.5	0.408667
188.6	0.41
188.7	0.408667
188.8	0.408667
188.9	0.410667
189	0.410667
189.1	0.41
189.2	0.409333
189.3	0.409333
189.4	0.41
189.5	0.409333
189.6	0.409333
189.7	0.411333
189.8	0.411333
189.9	0.412
190	0.412667
190.1	0.411333
190.2	0.411333
190.3	0.412667
190.4	0.412667
190.5	0.412667
190.6	0.413333
190.7	0.414
190.8	0.414
190.9	0.414
191	0.414667
191.1	0.413333
191.2	0.412
191.3	0.412667
191.4	0.414
191.5	0.413333
191.6	0.414
191.7	0.413333
191.8	0.413333
191.9	0.412667
192	0.414
192.1	0.416
192.2	0.416
192.3	0.416
192.4	0.416667
192.5	0.417333
192.6	0.417333
192.7	0.418
192.8	0.417333
192.9	0.417333
193	0.417333
193.1	0.416667
193.2	0.416
193.3	0.416
193.4	0.416667
193.5	0.416
193.6	0.416
193.7	0.416
193.8	0.417333
193.9	0.418667
194	0.418
194.1	0.417333
194.2	0.416667
194.3	0.416667
194.4	0.416667
194.5	0.416667
194.6	0.416
194.7	0.415333
194.8	0.415333
194.9	0.414667
195	0.416
195.1	0.414667
195.2	0.415333
195.3	0.414667
195.4	0.415333
195.5	0.416
195.6	0.414667
195.7	0.415333
195.8	0.416667
195.9	0.418
196	0.42
196.1	0.421333
196.2	0.421333
196.3	0.422
196.4	0.422667
196.5	0.424
196.6	0.423333
196.7	0.424
196.8	0.424667
196.9	0.424667
197	0.424
197.1	0.423333
197.2	0.423333
197.3	0.424
197.4	0.424667
197.5	0.425333
197.6	0.425333
197.7	0.426667
197.8	0.428
197.9	0.428
198	0.427333
198.1	0.428
198.2	0.429333
198.3	0.429333
198.4	0.43
198.5	0.430667
198.6	0.430667
198.7	0.430667
198.8	0.43
198.9	0.43
199	0.430667
199.1	0.43
199.2	0.428
199.3	0.428667
199.4	0.430667
199.5	0.431333
199.6	0.430667
199.7	0.43
199.8	0.430667
199.9	0.430667
200	0.431333
[truncated: 14,000 more rows]
