# Supplementary material for: Bayesian inference of kinetic schemes for ion channels by Kalman filtering
Source: eLife journal article supplement (doi:10.7554/elife.62714), 2022-05-04
Supplement: fig4-data9 [file 1_Sim_N_2000_Fluor_MW.xlsx]

## Sheet: Tabelle1
0.1	0
0.2	0
0.3	0
0.4	0
0.5	0
0.6	0
0.7	0
0.8	0
0.9	0
1	0
1.1	0
1.2	0
1.3	0
1.4	0
1.5	0
1.6	0
1.7	0
1.8	0
1.9	0
2	0
2.1	0
2.2	0
2.3	0
2.4	0
2.5	0
2.6	0
2.7	0
2.8	0
2.9	0
3	0
3.1	0
3.2	0
3.3	0
3.4	0
3.5	0
3.6	0
3.7	0
3.8	0
3.9	0
4	0
4.1	0
4.2	0
4.3	0
4.4	0
4.5	0
4.6	0
4.7	0
4.8	0
4.9	0
5	0
5.1	0
5.2	0
5.3	0
5.4	0
5.5	0
5.6	0
5.7	0
5.8	0
5.9	0
6	0
6.1	0
6.2	0
6.3	0
6.4	0
6.5	0
6.6	0
6.7	0
6.8	0
6.9	0
7	0
7.1	0
7.2	0
7.3	0
7.4	0
7.5	0
7.6	0
7.7	0
7.8	0
7.9	0
8	0
8.1	0
8.2	0
8.3	0
8.4	0
8.5	0
8.6	0
8.7	0
8.8	0
8.9	0
9	0
9.1	0
9.2	0
9.3	0
9.4	0
9.5	0
9.6	0
9.7	0
9.8	0
9.9	0
10	0
10.1	0
10.2	0
10.3	0
10.4	0
10.5	0
10.6	0
10.7	0
10.8	0
10.9	0
11	0
11.1	0
11.2	0
11.3	0
11.4	0
11.5	0
11.6	0
11.7	0
11.8	0
11.9	0
12	0
12.1	0
12.2	0
12.3	0
12.4	0
12.5	0
12.6	0
12.7	0
12.8	0
12.9	0
13	0
13.1	0
13.2	0
13.3	0
13.4	0
13.5	0
13.6	0
13.7	0
13.8	0
13.9	0
14	0
14.1	0
14.2	0
14.3	0
14.4	0
14.5	0
14.6	0
14.7	0
14.8	0
14.9	0
15	0
15.1	0
15.2	0
15.3	0
15.4	0
15.5	0
15.6	0
15.7	0
15.8	0
15.9	0
16	0
16.1	0
16.2	0
16.3	0
16.4	0
16.5	0
16.6	0
16.7	0
16.8	0
16.9	0
17	0
17.1	0
17.2	0
17.3	0
17.4	0
17.5	0
17.6	0
17.7	0
17.8	0
17.9	0
18	0
18.1	0
18.2	0
18.3	0
18.4	0
18.5	0
18.6	0
18.7	0
18.8	0
18.9	0
19	0
19.1	0
19.2	0
19.3	0
19.4	0
19.5	0
19.6	0
19.7	0
19.8	0
19.9	0
20	0
20.1	0
20.2	0
20.3	0
20.4	0
20.5	0
20.6	0
20.7	0
20.8	0
20.9	0
21	0
21.1	0
21.2	0
21.3	0
21.4	0
21.5	0
21.6	0
21.7	0
21.8	0
21.9	0
22	0
22.1	0
22.2	0
22.3	0
22.4	0
22.5	0
22.6	0
22.7	0
22.8	0
22.9	0
23	0
23.1	0
23.2	0
23.3	0
23.4	0
23.5	0
23.6	0
23.7	0
23.8	0
23.9	0
24	0
24.1	0
24.2	0
24.3	0
24.4	0
24.5	0
24.6	0
24.7	0
24.8	0
24.9	0
25	0
25.1	0
25.2	0
25.3	0
25.4	0
25.5	0
25.6	0
25.7	0
25.8	0
25.9	0
26	0
26.1	0
26.2	0
26.3	0
26.4	0
26.5	0
26.6	0
26.7	0
26.8	0
26.9	0
27	0
27.1	0
27.2	0
27.3	0
27.4	0
27.5	0
27.6	0
27.7	0
27.8	0
27.9	0
28	0
28.1	0
28.2	0
28.3	0
28.4	0
28.5	0
28.6	0
28.7	0
28.8	0
28.9	0
29	0
29.1	0
29.2	0
29.3	0
29.4	0
29.5	0
29.6	0
29.7	0
29.8	0
29.9	0
30	0
30.1	0
30.2	0
30.3	0
30.4	0
30.5	0
30.6	0
30.7	0
30.8	0
30.9	0
31	0
31.1	0
31.2	0
31.3	0
31.4	0
31.5	0
31.6	0
31.7	0
31.8	0
31.9	0
32	0
32.1	0
32.2	0
32.3	0
32.4	0
32.5	0
32.6	0
32.7	0
32.8	0
32.9	0
33	0
33.1	0
33.2	0
33.3	0
33.4	0
33.5	0
33.6	0
33.7	0
33.8	0
33.9	0
34	0
34.1	0
34.2	0
34.3	0
34.4	0
34.5	0
34.6	0
34.7	0
34.8	0
34.9	0
35	0
35.1	0
35.2	0
35.3	0
35.4	0
35.5	0
35.6	0
35.7	0
35.8	0
35.9	0
36	0
36.1	0
36.2	0
36.3	0
36.4	0
36.5	0
36.6	0
36.7	0
36.8	0
36.9	0
37	0
37.1	0
37.2	0
37.3	0
37.4	0
37.5	0
37.6	0
37.7	0
37.8	0
37.9	0
38	0
38.1	0
38.2	0
38.3	0
38.4	0
38.5	0
38.6	0
38.7	0
38.8	0
38.9	0
39	0
39.1	0
39.2	0
39.3	0
39.4	0
39.5	0
39.6	0
39.7	0
39.8	0
39.9	0
40	0
40.1	0
40.2	0
40.3	0
40.4	0
40.5	0
40.6	0
40.7	0
40.8	0
40.9	0
41	0
41.1	0
41.2	0
41.3	0
41.4	0
41.5	0
41.6	0
41.7	0
41.8	0
41.9	0
42	0
42.1	0
42.2	0
42.3	0
42.4	0
42.5	0
42.6	0
42.7	0
42.8	0
42.9	0
43	0
43.1	0
43.2	0
43.3	0
43.4	0
43.5	0
43.6	0
43.7	0
43.8	0
43.9	0
44	0
44.1	0
44.2	0
44.3	0
44.4	0
44.5	0
44.6	0
44.7	0
44.8	0
44.9	0
45	0
45.1	0
45.2	0
45.3	0
45.4	0
45.5	0
45.6	0
45.7	0
45.8	0
45.9	0
46	0
46.1	0
46.2	0
46.3	0
46.4	0
46.5	0
46.6	0
46.7	0
46.8	0
46.9	0
47	0
47.1	0
47.2	0
47.3	0
47.4	0
47.5	0
47.6	0
47.7	0
47.8	0
47.9	0
48	0
48.1	0
48.2	0
48.3	0
48.4	0
48.5	0
48.6	0
48.7	0
48.8	0
48.9	0
49	0
49.1	0
49.2	0
49.3	0
49.4	0
49.5	0
49.6	0
49.7	0
49.8	0
49.9	0
50	0
50.1	0
50.2	0
50.3	0
50.4	0
50.5	0
50.6	0
50.7	0
50.8	0
50.9	0
51	0
51.1	0
51.2	0
51.3	0
51.4	0
51.5	0
51.6	0
51.7	0
51.8	0
51.9	0
52	0
52.1	0
52.2	0
52.3	0
52.4	0
52.5	0
52.6	0
52.7	0
52.8	0
52.9	0
53	0
53.1	0
53.2	0
53.3	0
53.4	0
53.5	0
53.6	0
53.7	0
53.8	0
53.9	0
54	0
54.1	0
54.2	0
54.3	0
54.4	0
54.5	0
54.6	0
54.7	0
54.8	0
54.9	0
55	0
55.1	0
55.2	0
55.3	0
55.4	0
55.5	0
55.6	0
55.7	0
55.8	0
55.9	0
56	0
56.1	0
56.2	0
56.3	0
56.4	0
56.5	0
56.6	0
56.7	0
56.8	0
56.9	0
57	0
57.1	0
57.2	0
57.3	0
57.4	0
57.5	0
57.6	0
57.7	0
57.8	0
57.9	0
58	0
58.1	0
58.2	0
58.3	0
58.4	0
58.5	0
58.6	0
58.7	0
58.8	0
58.9	0
59	0
59.1	0
59.2	0
59.3	0
59.4	0
59.5	0
59.6	0
59.7	0
59.8	0
59.9	0
60	0
60.1	0
60.2	0
60.3	0
60.4	0
60.5	0
60.6	0
60.7	0
60.8	0
60.9	0
61	0
61.1	0
61.2	0
61.3	0
61.4	0
61.5	0
61.6	0
61.7	0
61.8	0
61.9	0
62	0
62.1	0
62.2	0
62.3	0
62.4	0
62.5	0
62.6	0
62.7	0
62.8	0
62.9	0
63	0
63.1	0
63.2	0
63.3	0
63.4	0
63.5	0
63.6	0
63.7	0
63.8	0
63.9	0
64	0
64.1	0
64.2	0
64.3	0
64.4	0
64.5	0
64.6	0
64.7	0
64.8	0
64.9	0
65	0
65.1	0
65.2	0
65.3	0
65.4	0
65.5	0
65.6	0
65.7	0
65.8	0
65.9	0
66	0
66.1	0
66.2	0
66.3	0
66.4	0
66.5	0
66.6	0
66.7	0
66.8	0
66.9	0
67	0
67.1	0
67.2	0
67.3	0
67.4	0
67.5	0
67.6	0
67.7	0
67.8	0
67.9	0
68	0
68.1	0
68.2	0
68.3	0
68.4	0
68.5	0
68.6	0
68.7	0
68.8	0
68.9	0
69	0
69.1	0
69.2	0
69.3	0
69.4	0
69.5	0
69.6	0
69.7	0
69.8	0
69.9	0
70	0
70.1	0
70.2	0
70.3	0
70.4	0
70.5	0
70.6	0
70.7	0
70.8	0
70.9	0
71	0
71.1	0
71.2	0
71.3	0
71.4	0
71.5	0
71.6	0
71.7	0
71.8	0
71.9	0
72	0
72.1	0
72.2	0
72.3	0
72.4	0
72.5	0
72.6	0
72.7	0
72.8	0
72.9	0
73	0
73.1	0
73.2	0
73.3	0
73.4	0
73.5	0
73.6	0
73.7	0
73.8	0
73.9	0
74	0
74.1	0
74.2	0
74.3	0
74.4	0
74.5	0
74.6	0
74.7	0
74.8	0
74.9	0
75	0
75.1	0
75.2	0
75.3	0
75.4	0
75.5	0
75.6	0
75.7	0
75.8	0
75.9	0
76	0
76.1	0
76.2	0
76.3	0
76.4	0
76.5	0
76.6	0
76.7	0
76.8	0
76.9	0
77	0
77.1	0
77.2	0
77.3	0
77.4	0
77.5	0
77.6	0
77.7	0
77.8	0
77.9	0
78	0
78.1	0
78.2	0
78.3	0
78.4	0
78.5	0
78.6	0
78.7	0
78.8	0
78.9	0
79	0
79.1	0
79.2	0
79.3	0
79.4	0
79.5	0
79.6	0
79.7	0
79.8	0
79.9	0
80	0
80.1	0
80.2	0
80.3	0
80.4	0
80.5	0
80.6	0
80.7	0
80.8	0
80.9	0
81	0
81.1	0
81.2	0
81.3	0
81.4	0
81.5	0
81.6	0
81.7	0
81.8	0
81.9	0
82	0
82.1	0
82.2	0
82.3	0
82.4	0
82.5	0
82.6	0
82.7	0
82.8	0
82.9	0
83	0
83.1	0
83.2	0
83.3	0
83.4	0
83.5	0
83.6	0
83.7	0
83.8	0
83.9	0
84	0
84.1	0
84.2	0
84.3	0
84.4	0
84.5	0
84.6	0
84.7	0
84.8	0
84.9	0
85	0
85.1	0
85.2	0
85.3	0
85.4	0
85.5	0
85.6	0
85.7	0
85.8	0
85.9	0
86	0
86.1	0
86.2	0
86.3	0
86.4	0
86.5	0
86.6	0
86.7	0
86.8	0
86.9	0
87	0
87.1	0
87.2	0
87.3	0
87.4	0
87.5	0
87.6	0
87.7	0
87.8	0
87.9	0
88	0
88.1	0
88.2	0
88.3	0
88.4	0
88.5	0
88.6	0
88.7	0
88.8	0
88.9	0
89	0
89.1	0
89.2	0
89.3	0
89.4	0
89.5	0
89.6	0
89.7	0
89.8	0
89.9	0
90	0
90.1	0
90.2	0
90.3	0
90.4	0
90.5	0
90.6	0
90.7	0
90.8	0
90.9	0
91	0
91.1	0
91.2	0
91.3	0
91.4	0
91.5	0
91.6	0
91.7	0
91.8	0
91.9	0
92	0
92.1	0
92.2	0
92.3	0
92.4	0
92.5	0
92.6	0
92.7	0
92.8	0
92.9	0
93	0
93.1	0
93.2	0
93.3	0
93.4	0
93.5	0
93.6	0
93.7	0
93.8	0
93.9	0
94	0
94.1	0
94.2	0
94.3	0
94.4	0
94.5	0
94.6	0
94.7	0
94.8	0
94.9	0
95	0
95.1	0
95.2	0
95.3	0
95.4	0
95.5	0
95.6	0
95.7	0
95.8	0
95.9	0
96	0
96.1	0
96.2	0
96.3	0
96.4	0
96.5	0
96.6	0
96.7	0
96.8	0
96.9	0
97	0
97.1	0
97.2	0
97.3	0
97.4	0
97.5	0
97.6	0
97.7	0
97.8	0
97.9	0
98	0
98.1	0
98.2	0
98.3	0
98.4	0
98.5	0
98.6	0
98.7	0
98.8	0
98.9	0
99	0
99.1	0
99.2	0
99.3	0
99.4	0
99.5	0
99.6	0
99.7	0
99.8	0
99.9	0
100	0
100.1	0.02725
100.2	0.05525
100.3	0.08475
100.4	0.11025
100.5	0.13525
100.6	0.159
100.7	0.18
100.8	0.198
100.9	0.21575
101	0.2335
101.1	0.25075
101.2	0.264
101.3	0.2775
101.4	0.2925
101.5	0.30725
101.6	0.3175
101.7	0.33275
101.8	0.3455
101.9	0.34975
102	0.36125
102.1	0.37025
102.2	0.3765
102.3	0.38475
102.4	0.39175
102.5	0.39775
102.6	0.4045
102.7	0.41275
102.8	0.42225
102.9	0.428
103	0.4325
103.1	0.44175
103.2	0.45
103.3	0.45575
103.4	0.46275
103.5	0.46325
103.6	0.46825
103.7	0.47125
103.8	0.4765
103.9	0.479
104	0.48175
104.1	0.48525
104.2	0.4895
104.3	0.4925
104.4	0.49825
104.5	0.5035
104.6	0.505
104.7	0.507
104.8	0.51125
104.9	0.5135
105	0.518
105.1	0.517
105.2	0.5195
105.3	0.52075
105.4	0.522
105.5	0.52475
105.6	0.525
105.7	0.52525
105.8	0.52525
105.9	0.5315
106	0.53125
106.1	0.5325
106.2	0.53075
106.3	0.53325
106.4	0.5345
106.5	0.53575
106.6	0.53775
106.7	0.54125
106.8	0.54425
106.9	0.5495
107	0.55
107.1	0.55125
107.2	0.55
107.3	0.55025
107.4	0.5525
107.5	0.558
107.6	0.56075
107.7	0.56425
107.8	0.56725
107.9	0.56425
108	0.56625
108.1	0.566
108.2	0.565
108.3	0.56575
108.4	0.5685
108.5	0.57025
108.6	0.56775
108.7	0.567
108.8	0.56975
108.9	0.56725
109	0.56675
109.1	0.56575
109.2	0.566
109.3	0.565
109.4	0.56275
109.5	0.56275
109.6	0.56175
109.7	0.5635
109.8	0.56425
109.9	0.56275
110	0.5635
110.1	0.5655
110.2	0.56675
110.3	0.5695
110.4	0.57025
110.5	0.57275
110.6	0.573
110.7	0.576
110.8	0.57625
110.9	0.57575
111	0.573
111.1	0.57325
111.2	0.5735
111.3	0.5755
111.4	0.577
111.5	0.5775
111.6	0.57825
111.7	0.5795
111.8	0.581
111.9	0.579
112	0.57975
112.1	0.5815
112.2	0.57875
112.3	0.57925
112.4	0.57975
112.5	0.5775
112.6	0.57775
112.7	0.57975
112.8	0.5815
112.9	0.5845
113	0.589
113.1	0.58975
113.2	0.59025
113.3	0.58925
113.4	0.5905
113.5	0.58925
113.6	0.5865
113.7	0.5865
113.8	0.58775
113.9	0.5885
114	0.5875
114.1	0.5895
114.2	0.59225
114.3	0.594
114.4	0.59575
114.5	0.594
114.6	0.59575
114.7	0.594
114.8	0.59375
114.9	0.59425
115	0.59675
115.1	0.5975
115.2	0.596
115.3	0.6005
115.4	0.5995
115.5	0.599
115.6	0.59675
115.7	0.5975
115.8	0.59875
115.9	0.595
116	0.5965
116.1	0.59875
116.2	0.601
116.3	0.60375
116.4	0.60375
116.5	0.601
116.6	0.59975
116.7	0.6005
116.8	0.59775
116.9	0.5975
117	0.601
117.1	0.602
117.2	0.60525
117.3	0.60425
117.4	0.60325
117.5	0.6025
117.6	0.60125
117.7	0.59775
117.8	0.597
117.9	0.5975
118	0.597
118.1	0.59675
118.2	0.59575
118.3	0.5945
118.4	0.59525
118.5	0.59725
118.6	0.598
118.7	0.59625
118.8	0.59525
118.9	0.596
119	0.5975
119.1	0.59675
119.2	0.59675
119.3	0.59575
119.4	0.597
119.5	0.5995
119.6	0.59825
119.7	0.601
119.8	0.59875
119.9	0.60125
120	0.6
120.1	0.6015
120.2	0.60425
120.3	0.6035
120.4	0.6025
120.5	0.605
120.6	0.604
120.7	0.605
120.8	0.6065
120.9	0.6035
121	0.604
121.1	0.60175
121.2	0.599
121.3	0.60075
121.4	0.601
121.5	0.60025
121.6	0.6035
121.7	0.60375
121.8	0.60475
121.9	0.603
122	0.60225
122.1	0.60275
122.2	0.60125
122.3	0.60625
122.4	0.6035
122.5	0.6065
122.6	0.60675
122.7	0.60475
122.8	0.603
122.9	0.6045
123	0.60275
123.1	0.602
123.2	0.6025
123.3	0.604
123.4	0.604
123.5	0.6075
123.6	0.6105
123.7	0.61325
123.8	0.614
123.9	0.61125
124	0.6105
124.1	0.61175
124.2	0.612
124.3	0.6145
124.4	0.6135
124.5	0.6165
124.6	0.6165
124.7	0.6175
124.8	0.62025
124.9	0.61925
125	0.61875
125.1	0.61825
125.2	0.61675
125.3	0.6165
125.4	0.617
125.5	0.61675
125.6	0.6175
125.7	0.61575
125.8	0.61575
125.9	0.61775
126	0.61925
126.1	0.61725
126.2	0.62
126.3	0.6195
126.4	0.6195
126.5	0.61925
126.6	0.6195
126.7	0.6225
126.8	0.6225
126.9	0.62175
127	0.624
127.1	0.6235
127.2	0.62425
127.3	0.6265
127.4	0.6265
127.5	0.627
127.6	0.62475
127.7	0.6235
127.8	0.627
127.9	0.629
128	0.631
128.1	0.63125
128.2	0.62925
128.3	0.62525
128.4	0.627
128.5	0.626
128.6	0.6255
128.7	0.62775
128.8	0.62825
128.9	0.6305
129	0.631
129.1	0.63
129.2	0.632
129.3	0.63325
129.4	0.63375
129.5	0.632
129.6	0.63575
129.7	0.636
129.8	0.63325
129.9	0.632
130	0.63175
130.1	0.6305
130.2	0.62925
130.3	0.63125
130.4	0.63075
130.5	0.63075
130.6	0.63225
130.7	0.63175
130.8	0.63125
130.9	0.62975
131	0.62925
131.1	0.6295
131.2	0.627
131.3	0.62825
131.4	0.63075
131.5	0.63225
131.6	0.63175
131.7	0.628
131.8	0.6295
131.9	0.633
132	0.6345
132.1	0.63375
132.2	0.63125
132.3	0.631
132.4	0.63125
132.5	0.6325
132.6	0.633
132.7	0.63375
132.8	0.637
132.9	0.638
133	0.63875
133.1	0.63675
133.2	0.63725
133.3	0.637
133.4	0.6375
133.5	0.6365
133.6	0.64
133.7	0.63875
133.8	0.63725
133.9	0.6365
134	0.63925
134.1	0.6385
134.2	0.6405
134.3	0.64175
134.4	0.6455
134.5	0.6455
134.6	0.64775
134.7	0.64425
134.8	0.643
134.9	0.64375
135	0.64525
135.1	0.644
135.2	0.6435
135.3	0.64125
135.4	0.6415
135.5	0.64225
135.6	0.64425
135.7	0.6465
135.8	0.6465
135.9	0.645
136	0.6435
136.1	0.643
136.2	0.64025
136.3	0.64225
136.4	0.6435
136.5	0.64575
136.6	0.64225
136.7	0.64275
136.8	0.63675
136.9	0.64
137	0.63725
137.1	0.637
137.2	0.6365
137.3	0.6385
137.4	0.63775
137.5	0.6375
137.6	0.63975
137.7	0.64175
137.8	0.645
137.9	0.64575
138	0.645
138.1	0.64475
138.2	0.6465
138.3	0.6435
138.4	0.646
138.5	0.6485
138.6	0.6495
138.7	0.6525
138.8	0.6525
138.9	0.653
139	0.65425
139.1	0.65225
139.2	0.65175
139.3	0.65275
139.4	0.6525
139.5	0.65125
139.6	0.65275
139.7	0.65575
139.8	0.656
139.9	0.65525
140	0.656
140.1	0.659
140.2	0.66025
140.3	0.66025
140.4	0.66125
140.5	0.65825
140.6	0.66025
140.7	0.65975
140.8	0.66
140.9	0.65775
141	0.65675
141.1	0.65425
141.2	0.65675
141.3	0.6555
141.4	0.653
141.5	0.6525
141.6	0.65375
141.7	0.654
141.8	0.654
141.9	0.65525
142	0.65575
142.1	0.658
142.2	0.6565
142.3	0.658
142.4	0.662
142.5	0.65975
142.6	0.66175
142.7	0.66225
142.8	0.6615
142.9	0.662
143	0.66075
143.1	0.664
143.2	0.6645
143.3	0.66125
143.4	0.65975
143.5	0.6605
143.6	0.66225
143.7	0.66025
143.8	0.65575
143.9	0.657
144	0.65725
144.1	0.6585
144.2	0.661
144.3	0.65725
144.4	0.65825
144.5	0.6615
144.6	0.66375
144.7	0.665
144.8	0.6665
144.9	0.665
145	0.66375
145.1	0.6645
145.2	0.663
145.3	0.6645
145.4	0.6635
145.5	0.6645
145.6	0.66625
145.7	0.66525
145.8	0.66575
145.9	0.663
146	0.6625
146.1	0.6645
146.2	0.66375
146.3	0.666
146.4	0.66725
146.5	0.66775
146.6	0.66875
146.7	0.6725
146.8	0.668
146.9	0.66925
147	0.66675
147.1	0.667
147.2	0.6685
147.3	0.67075
147.4	0.67325
147.5	0.6705
147.6	0.673
147.7	0.67325
147.8	0.6745
147.9	0.674
148	0.673
148.1	0.6715
148.2	0.671
148.3	0.67525
148.4	0.674
148.5	0.674
148.6	0.6775
148.7	0.675
148.8	0.676
148.9	0.676
149	0.677
149.1	0.67475
149.2	0.6765
149.3	0.6725
149.4	0.67425
149.5	0.67325
149.6	0.67125
149.7	0.671
149.8	0.66825
149.9	0.66725
150	0.6675
150.1	0.66725
150.2	0.66825
150.3	0.66675
150.4	0.668
150.5	0.6695
150.6	0.66975
150.7	0.67025
150.8	0.6695
150.9	0.66725
151	0.667
151.1	0.667
151.2	0.66825
151.3	0.6675
151.4	0.66675
151.5	0.664
151.6	0.6645
151.7	0.66875
151.8	0.672
151.9	0.67175
152	0.67175
152.1	0.671
152.2	0.67325
152.3	0.674
152.4	0.6735
152.5	0.67175
152.6	0.67025
152.7	0.67425
152.8	0.675
152.9	0.67525
153	0.67775
153.1	0.6775
153.2	0.67675
153.3	0.6775
153.4	0.6775
153.5	0.67725
153.6	0.677
153.7	0.67425
153.8	0.673
153.9	0.6715
154	0.673
154.1	0.6745
154.2	0.67425
154.3	0.67425
154.4	0.6745
154.5	0.67475
154.6	0.67425
154.7	0.67425
154.8	0.676
154.9	0.6755
155	0.675
155.1	0.67625
155.2	0.67825
155.3	0.67725
155.4	0.678
155.5	0.678
155.6	0.679
155.7	0.6795
155.8	0.67875
155.9	0.67775
156	0.677
156.1	0.67475
156.2	0.673
156.3	0.675
156.4	0.67525
156.5	0.67725
156.6	0.677
156.7	0.67975
156.8	0.68025
156.9	0.68025
157	0.681
157.1	0.68025
157.2	0.6805
157.3	0.6805
157.4	0.6805
157.5	0.68
157.6	0.68
157.7	0.68075
157.8	0.684
157.9	0.68425
158	0.68375
158.1	0.68625
158.2	0.685
158.3	0.68725
158.4	0.6875
158.5	0.6865
158.6	0.68625
158.7	0.6865
158.8	0.68925
158.9	0.68925
159	0.69025
159.1	0.69275
159.2	0.69225
159.3	0.69225
159.4	0.69175
159.5	0.6915
159.6	0.69025
159.7	0.68925
159.8	0.687
159.9	0.68875
160	0.69
160.1	0.69125
160.2	0.6935
160.3	0.69625
160.4	0.69775
160.5	0.696
160.6	0.69675
160.7	0.69825
160.8	0.69825
160.9	0.697
161	0.69625
161.1	0.695
161.2	0.69775
161.3	0.69825
161.4	0.697
161.5	0.697
161.6	0.69625
161.7	0.69575
161.8	0.69575
161.9	0.69575
162	0.69375
162.1	0.6965
162.2	0.6975
162.3	0.697
162.4	0.699
162.5	0.699
162.6	0.6975
162.7	0.69625
162.8	0.69625
162.9	0.697
163	0.69675
163.1	0.69625
163.2	0.6975
163.3	0.6975
163.4	0.69825
163.5	0.69775
163.6	0.698
163.7	0.696
163.8	0.6945
163.9	0.6945
164	0.6915
164.1	0.6895
164.2	0.69
164.3	0.69125
164.4	0.6925
164.5	0.69425
164.6	0.69225
164.7	0.69425
164.8	0.693
164.9	0.691
165	0.6935
165.1	0.6905
165.2	0.6875
165.3	0.6865
165.4	0.68675
165.5	0.68475
165.6	0.6865
165.7	0.686
165.8	0.6865
165.9	0.68875
166	0.68975
166.1	0.689
166.2	0.6895
166.3	0.6885
166.4	0.689
166.5	0.68825
166.6	0.69025
166.7	0.69125
166.8	0.6925
166.9	0.6945
167	0.6975
167.1	0.697
167.2	0.696
167.3	0.69825
167.4	0.698
167.5	0.7015
167.6	0.7005
167.7	0.7005
167.8	0.7015
167.9	0.703
168	0.7025
168.1	0.70525
168.2	0.70375
168.3	0.70275
168.4	0.70475
168.5	0.70475
168.6	0.70625
168.7	0.707
168.8	0.70675
168.9	0.70725
169	0.708
169.1	0.70725
169.2	0.709
169.3	0.70975
169.4	0.71025
169.5	0.71
169.6	0.71075
169.7	0.70975
169.8	0.7075
169.9	0.70425
170	0.7055
170.1	0.707
170.2	0.706
170.3	0.70825
170.4	0.70925
170.5	0.70775
170.6	0.708
170.7	0.70625
170.8	0.70775
170.9	0.709
171	0.70925
171.1	0.70975
171.2	0.71
171.3	0.71
171.4	0.70925
171.5	0.707
171.6	0.70725
171.7	0.70575
171.8	0.708
171.9	0.7095
172	0.7085
172.1	0.708
172.2	0.70925
172.3	0.7105
172.4	0.7105
172.5	0.708
172.6	0.70725
172.7	0.70575
172.8	0.70625
172.9	0.70725
173	0.7065
173.1	0.70825
173.2	0.7065
173.3	0.70525
173.4	0.70525
173.5	0.70325
173.6	0.70425
173.7	0.70375
173.8	0.70625
173.9	0.70575
174	0.70475
174.1	0.7045
174.2	0.70425
174.3	0.70225
174.4	0.70475
174.5	0.708
174.6	0.70775
174.7	0.70325
174.8	0.70325
174.9	0.706
175	0.70625
175.1	0.70675
175.2	0.70575
175.3	0.7075
175.4	0.708
175.5	0.7055
175.6	0.70375
175.7	0.7055
175.8	0.7065
175.9	0.7045
176	0.70475
176.1	0.7055
176.2	0.70875
176.3	0.70825
176.4	0.7095
176.5	0.707
176.6	0.70475
176.7	0.7035
176.8	0.70475
176.9	0.7055
177	0.707
177.1	0.708
177.2	0.70925
177.3	0.71
177.4	0.712
177.5	0.71175
177.6	0.7095
177.7	0.70825
177.8	0.70425
177.9	0.7065
178	0.7055
178.1	0.7045
178.2	0.7055
178.3	0.7035
178.4	0.705
178.5	0.70425
178.6	0.70675
178.7	0.70675
178.8	0.707
178.9	0.7085
179	0.70875
179.1	0.70875
179.2	0.70925
179.3	0.70825
179.4	0.70925
179.5	0.708
179.6	0.7095
179.7	0.70975
179.8	0.708
179.9	0.707
180	0.7065
180.1	0.70875
180.2	0.70925
180.3	0.7085
180.4	0.71
180.5	0.7085
180.6	0.70975
180.7	0.71075
180.8	0.71125
180.9	0.71175
181	0.7145
181.1	0.71275
181.2	0.71275
181.3	0.71125
181.4	0.7095
181.5	0.7105
181.6	0.71125
181.7	0.7095
181.8	0.71
181.9	0.7085
182	0.7095
182.1	0.71175
182.2	0.71125
182.3	0.70925
182.4	0.70925
182.5	0.711
182.6	0.71225
182.7	0.7115
182.8	0.71375
182.9	0.71575
183	0.716
183.1	0.71775
183.2	0.7165
183.3	0.717
183.4	0.71725
183.5	0.72
183.6	0.72475
183.7	0.7245
183.8	0.725
183.9	0.72475
184	0.724
184.1	0.72575
184.2	0.727
184.3	0.72725
184.4	0.726
184.5	0.7255
184.6	0.72725
184.7	0.72725
184.8	0.72725
184.9	0.72525
185	0.725
185.1	0.7295
185.2	0.72875
185.3	0.72825
185.4	0.729
185.5	0.7295
185.6	0.73075
185.7	0.73025
185.8	0.729
185.9	0.73075
186	0.735
186.1	0.7355
186.2	0.73625
186.3	0.73575
186.4	0.73775
186.5	0.736
186.6	0.734
186.7	0.73375
186.8	0.7345
186.9	0.73275
187	0.73125
187.1	0.73175
187.2	0.73
187.3	0.72675
187.4	0.72875
187.5	0.72875
187.6	0.73
187.7	0.72825
187.8	0.7275
187.9	0.729
188	0.727
188.1	0.7285
188.2	0.7285
188.3	0.726
188.4	0.72625
188.5	0.72775
188.6	0.72725
188.7	0.727
188.8	0.72775
188.9	0.728
189	0.72975
189.1	0.731
189.2	0.729
189.3	0.72875
189.4	0.72975
189.5	0.72975
189.6	0.728
189.7	0.72975
189.8	0.7305
189.9	0.72975
190	0.7285
190.1	0.72875
190.2	0.728
190.3	0.72825
190.4	0.72875
190.5	0.7285
190.6	0.7285
190.7	0.73075
190.8	0.7345
190.9	0.734
191	0.73425
191.1	0.73275
191.2	0.73275
191.3	0.72875
191.4	0.72925
191.5	0.73175
191.6	0.73025
191.7	0.7295
191.8	0.728
191.9	0.731
192	0.7325
192.1	0.7335
192.2	0.73225
192.3	0.7335
192.4	0.7345
192.5	0.7335
192.6	0.736
192.7	0.7365
192.8	0.73775
192.9	0.739
193	0.7395
193.1	0.7375
193.2	0.7365
193.3	0.736
193.4	0.73325
193.5	0.736
193.6	0.73675
193.7	0.738
193.8	0.7385
193.9	0.7395
194	0.73825
194.1	0.73875
194.2	0.73975
194.3	0.73925
194.4	0.73475
194.5	0.7325
194.6	0.734
194.7	0.73625
194.8	0.7365
194.9	0.73775
195	0.73775
195.1	0.7375
195.2	0.73475
195.3	0.7345
195.4	0.73375
195.5	0.73475
195.6	0.735
195.7	0.73525
195.8	0.735
195.9	0.73275
196	0.733
196.1	0.73575
196.2	0.734
196.3	0.73175
196.4	0.7315
196.5	0.73275
196.6	0.73175
196.7	0.7335
196.8	0.7345
196.9	0.73375
197	0.734
197.1	0.73825
197.2	0.7395
197.3	0.73825
197.4	0.738
197.5	0.741
197.6	0.74025
197.7	0.74025
197.8	0.74175
197.9	0.73775
198	0.74275
198.1	0.74575
198.2	0.74675
198.3	0.74475
198.4	0.74525
198.5	0.74375
198.6	0.743
198.7	0.746
198.8	0.7465
198.9	0.74525
199	0.7455
199.1	0.74525
199.2	0.74475
199.3	0.7445
199.4	0.744
199.5	0.74175
199.6	0.7415
199.7	0.7415
199.8	0.73925
199.9	0.73825
200	0.7385
[truncated: 14,000 more rows]
