# Supplementary material for: Bayesian inference of kinetic schemes for ion channels by Kalman filtering
Source: eLife journal article supplement (doi:10.7554/elife.62714), 2022-05-04
Supplement: fig4-data9 [file 1_Sim_N_2000_Strom_MW.xlsx]

## Sheet: Tabelle1
0.1	0
0.2	0
0.3	0
0.4	0
0.5	0
0.6	0
0.7	0
0.8	0
0.9	0
1	0
1.1	0
1.2	0
1.3	0
1.4	0
1.5	0
1.6	0
1.7	0
1.8	0
1.9	0
2	0
2.1	0
2.2	0
2.3	0
2.4	0
2.5	0
2.6	0
2.7	0
2.8	0
2.9	0
3	0
3.1	0
3.2	0
3.3	0
3.4	0
3.5	0
3.6	0
3.7	0
3.8	0
3.9	0
4	0
4.1	0
4.2	0
4.3	0
4.4	0
4.5	0
4.6	0
4.7	0
4.8	0
4.9	0
5	0
5.1	0
5.2	0
5.3	0
5.4	0
5.5	0
5.6	0
5.7	0
5.8	0
5.9	0
6	0
6.1	0
6.2	0
6.3	0
6.4	0
6.5	0
6.6	0
6.7	0
6.8	0
6.9	0
7	0
7.1	0
7.2	0
7.3	0
7.4	0
7.5	0
7.6	0
7.7	0
7.8	0
7.9	0
8	0
8.1	0
8.2	0
8.3	0
8.4	0
8.5	0
8.6	0
8.7	0
8.8	0
8.9	0
9	0
9.1	0
9.2	0
9.3	0
9.4	0
9.5	0
9.6	0
9.7	0
9.8	0
9.9	0
10	0
10.1	0
10.2	0
10.3	0
10.4	0
10.5	0
10.6	0
10.7	0
10.8	0
10.9	0
11	0
11.1	0
11.2	0
11.3	0
11.4	0
11.5	0
11.6	0
11.7	0
11.8	0
11.9	0
12	0
12.1	0
12.2	0
12.3	0
12.4	0
12.5	0
12.6	0
12.7	0
12.8	0
12.9	0
13	0
13.1	0
13.2	0
13.3	0
13.4	0
13.5	0
13.6	0
13.7	0
13.8	0
13.9	0
14	0
14.1	0
14.2	0
14.3	0
14.4	0
14.5	0
14.6	0
14.7	0
14.8	0
14.9	0
15	0
15.1	0
15.2	0
15.3	0
15.4	0
15.5	0
15.6	0
15.7	0
15.8	0
15.9	0
16	0
16.1	0
16.2	0
16.3	0
16.4	0
16.5	0
16.6	0
16.7	0
16.8	0
16.9	0
17	0
17.1	0
17.2	0
17.3	0
17.4	0
17.5	0
17.6	0
17.7	0
17.8	0
17.9	0
18	0
18.1	0
18.2	0
18.3	0
18.4	0
18.5	0
18.6	0
18.7	0
18.8	0
18.9	0
19	0
19.1	0
19.2	0
19.3	0
19.4	0
19.5	0
19.6	0
19.7	0
19.8	0
19.9	0
20	0
20.1	0
20.2	0
20.3	0
20.4	0
20.5	0
20.6	0
20.7	0
20.8	0
20.9	0
21	0
21.1	0
21.2	0
21.3	0
21.4	0
21.5	0
21.6	0
21.7	0
21.8	0
21.9	0
22	0
22.1	0
22.2	0
22.3	0
22.4	0
22.5	0
22.6	0
22.7	0
22.8	0
22.9	0
23	0
23.1	0
23.2	0
23.3	0
23.4	0
23.5	0
23.6	0
23.7	0
23.8	0
23.9	0
24	0
24.1	0
24.2	0
24.3	0
24.4	0
24.5	0
24.6	0
24.7	0
24.8	0
24.9	0
25	0
25.1	0
25.2	0
25.3	0
25.4	0
25.5	0
25.6	0
25.7	0
25.8	0
25.9	0
26	0
26.1	0
26.2	0
26.3	0
26.4	0
26.5	0
26.6	0
26.7	0
26.8	0
26.9	0
27	0
27.1	0
27.2	0
27.3	0
27.4	0
27.5	0
27.6	0
27.7	0
27.8	0
27.9	0
28	0
28.1	0
28.2	0
28.3	0
28.4	0
28.5	0
28.6	0
28.7	0
28.8	0
28.9	0
29	0
29.1	0
29.2	0
29.3	0
29.4	0
29.5	0
29.6	0
29.7	0
29.8	0
29.9	0
30	0
30.1	0
30.2	0
30.3	0
30.4	0
30.5	0
30.6	0
30.7	0
30.8	0
30.9	0
31	0
31.1	0
31.2	0
31.3	0
31.4	0
31.5	0
31.6	0
31.7	0
31.8	0
31.9	0
32	0
32.1	0
32.2	0
32.3	0
32.4	0
32.5	0
32.6	0
32.7	0
32.8	0
32.9	0
33	0
33.1	0
33.2	0
33.3	0
33.4	0
33.5	0
33.6	0
33.7	0
33.8	0
33.9	0
34	0
34.1	0
34.2	0
34.3	0
34.4	0
34.5	0
34.6	0
34.7	0
34.8	0
34.9	0
35	0
35.1	0
35.2	0
35.3	0
35.4	0
35.5	0
35.6	0
35.7	0
35.8	0
35.9	0
36	0
36.1	0
36.2	0
36.3	0
36.4	0
36.5	0
36.6	0
36.7	0
36.8	0
36.9	0
37	0
37.1	0
37.2	0
37.3	0
37.4	0
37.5	0
37.6	0
37.7	0
37.8	0
37.9	0
38	0
38.1	0
38.2	0
38.3	0
38.4	0
38.5	0
38.6	0
38.7	0
38.8	0
38.9	0
39	0
39.1	0
39.2	0
39.3	0
39.4	0
39.5	0
39.6	0
39.7	0
39.8	0
39.9	0
40	0
40.1	0
40.2	0
40.3	0
40.4	0
40.5	0
40.6	0
40.7	0
40.8	0
40.9	0
41	0
41.1	0
41.2	0
41.3	0
41.4	0
41.5	0
41.6	0
41.7	0
41.8	0
41.9	0
42	0
42.1	0
42.2	0
42.3	0
42.4	0
42.5	0
42.6	0
42.7	0
42.8	0
42.9	0
43	0
43.1	0
43.2	0
43.3	0
43.4	0
43.5	0
43.6	0
43.7	0
43.8	0
43.9	0
44	0
44.1	0
44.2	0
44.3	0
44.4	0
44.5	0
44.6	0
44.7	0
44.8	0
44.9	0
45	0
45.1	0
45.2	0
45.3	0
45.4	0
45.5	0
45.6	0
45.7	0
45.8	0
45.9	0
46	0
46.1	0
46.2	0
46.3	0
46.4	0
46.5	0
46.6	0
46.7	0
46.8	0
46.9	0
47	0
47.1	0
47.2	0
47.3	0
47.4	0
47.5	0
47.6	0
47.7	0
47.8	0
47.9	0
48	0
48.1	0
48.2	0
48.3	0
48.4	0
48.5	0
48.6	0
48.7	0
48.8	0
48.9	0
49	0
49.1	0
49.2	0
49.3	0
49.4	0
49.5	0
49.6	0
49.7	0
49.8	0
49.9	0
50	0
50.1	0
50.2	0
50.3	0
50.4	0
50.5	0
50.6	0
50.7	0
50.8	0
50.9	0
51	0
51.1	0
51.2	0
51.3	0
51.4	0
51.5	0
51.6	0
51.7	0
51.8	0
51.9	0
52	0
52.1	0
52.2	0
52.3	0
52.4	0
52.5	0
52.6	0
52.7	0
52.8	0
52.9	0
53	0
53.1	0
53.2	0
53.3	0
53.4	0
53.5	0
53.6	0
53.7	0
53.8	0
53.9	0
54	0
54.1	0
54.2	0
54.3	0
54.4	0
54.5	0
54.6	0
54.7	0
54.8	0
54.9	0
55	0
55.1	0
55.2	0
55.3	0
55.4	0
55.5	0
55.6	0
55.7	0
55.8	0
55.9	0
56	0
56.1	0
56.2	0
56.3	0
56.4	0
56.5	0
56.6	0
56.7	0
56.8	0
56.9	0
57	0
57.1	0
57.2	0
57.3	0
57.4	0
57.5	0
57.6	0
57.7	0
57.8	0
57.9	0
58	0
58.1	0
58.2	0
58.3	0
58.4	0
58.5	0
58.6	0
58.7	0
58.8	0
58.9	0
59	0
59.1	0
59.2	0
59.3	0
59.4	0
59.5	0
59.6	0
59.7	0
59.8	0
59.9	0
60	0
60.1	0
60.2	0
60.3	0
60.4	0
60.5	0
60.6	0
60.7	0
60.8	0
60.9	0
61	0
61.1	0
61.2	0
61.3	0
61.4	0
61.5	0
61.6	0
61.7	0
61.8	0
61.9	0
62	0
62.1	0
62.2	0
62.3	0
62.4	0
62.5	0
62.6	0
62.7	0
62.8	0
62.9	0
63	0
63.1	0
63.2	0
63.3	0
63.4	0
63.5	0
63.6	0
63.7	0
63.8	0
63.9	0
64	0
64.1	0
64.2	0
64.3	0
64.4	0
64.5	0
64.6	0
64.7	0
64.8	0
64.9	0
65	0
65.1	0
65.2	0
65.3	0
65.4	0
65.5	0
65.6	0
65.7	0
65.8	0
65.9	0
66	0
66.1	0
66.2	0
66.3	0
66.4	0
66.5	0
66.6	0
66.7	0
66.8	0
66.9	0
67	0
67.1	0
67.2	0
67.3	0
67.4	0
67.5	0
67.6	0
67.7	0
67.8	0
67.9	0
68	0
68.1	0
68.2	0
68.3	0
68.4	0
68.5	0
68.6	0
68.7	0
68.8	0
68.9	0
69	0
69.1	0
69.2	0
69.3	0
69.4	0
69.5	0
69.6	0
69.7	0
69.8	0
69.9	0
70	0
70.1	0
70.2	0
70.3	0
70.4	0
70.5	0
70.6	0
70.7	0
70.8	0
70.9	0
71	0
71.1	0
71.2	0
71.3	0
71.4	0
71.5	0
71.6	0
71.7	0
71.8	0
71.9	0
72	0
72.1	0
72.2	0
72.3	0
72.4	0
72.5	0
72.6	0
72.7	0
72.8	0
72.9	0
73	0
73.1	0
73.2	0
73.3	0
73.4	0
73.5	0
73.6	0
73.7	0
73.8	0
73.9	0
74	0
74.1	0
74.2	0
74.3	0
74.4	0
74.5	0
74.6	0
74.7	0
74.8	0
74.9	0
75	0
75.1	0
75.2	0
75.3	0
75.4	0
75.5	0
75.6	0
75.7	0
75.8	0
75.9	0
76	0
76.1	0
76.2	0
76.3	0
76.4	0
76.5	0
76.6	0
76.7	0
76.8	0
76.9	0
77	0
77.1	0
77.2	0
77.3	0
77.4	0
77.5	0
77.6	0
77.7	0
77.8	0
77.9	0
78	0
78.1	0
78.2	0
78.3	0
78.4	0
78.5	0
78.6	0
78.7	0
78.8	0
78.9	0
79	0
79.1	0
79.2	0
79.3	0
79.4	0
79.5	0
79.6	0
79.7	0
79.8	0
79.9	0
80	0
80.1	0
80.2	0
80.3	0
80.4	0
80.5	0
80.6	0
80.7	0
80.8	0
80.9	0
81	0
81.1	0
81.2	0
81.3	0
81.4	0
81.5	0
81.6	0
81.7	0
81.8	0
81.9	0
82	0
82.1	0
82.2	0
82.3	0
82.4	0
82.5	0
82.6	0
82.7	0
82.8	0
82.9	0
83	0
83.1	0
83.2	0
83.3	0
83.4	0
83.5	0
83.6	0
83.7	0
83.8	0
83.9	0
84	0
84.1	0
84.2	0
84.3	0
84.4	0
84.5	0
84.6	0
84.7	0
84.8	0
84.9	0
85	0
85.1	0
85.2	0
85.3	0
85.4	0
85.5	0
85.6	0
85.7	0
85.8	0
85.9	0
86	0
86.1	0
86.2	0
86.3	0
86.4	0
86.5	0
86.6	0
86.7	0
86.8	0
86.9	0
87	0
87.1	0
87.2	0
87.3	0
87.4	0
87.5	0
87.6	0
87.7	0
87.8	0
87.9	0
88	0
88.1	0
88.2	0
88.3	0
88.4	0
88.5	0
88.6	0
88.7	0
88.8	0
88.9	0
89	0
89.1	0
89.2	0
89.3	0
89.4	0
89.5	0
89.6	0
89.7	0
89.8	0
89.9	0
90	0
90.1	0
90.2	0
90.3	0
90.4	0
90.5	0
90.6	0
90.7	0
90.8	0
90.9	0
91	0
91.1	0
91.2	0
91.3	0
91.4	0
91.5	0
91.6	0
91.7	0
91.8	0
91.9	0
92	0
92.1	0
92.2	0
92.3	0
92.4	0
92.5	0
92.6	0
92.7	0
92.8	0
92.9	0
93	0
93.1	0
93.2	0
93.3	0
93.4	0
93.5	0
93.6	0
93.7	0
93.8	0
93.9	0
94	0
94.1	0
94.2	0
94.3	0
94.4	0
94.5	0
94.6	0
94.7	0
94.8	0
94.9	0
95	0
95.1	0
95.2	0
95.3	0
95.4	0
95.5	0
95.6	0
95.7	0
95.8	0
95.9	0
96	0
96.1	0
96.2	0
96.3	0
96.4	0
96.5	0
96.6	0
96.7	0
96.8	0
96.9	0
97	0
97.1	0
97.2	0
97.3	0
97.4	0
97.5	0
97.6	0
97.7	0
97.8	0
97.9	0
98	0
98.1	0
98.2	0
98.3	0
98.4	0
98.5	0
98.6	0
98.7	0
98.8	0
98.9	0
99	0
99.1	0
99.2	0
99.3	0
99.4	0
99.5	0
99.6	0
99.7	0
99.8	0
99.9	0
100	0
100.1	0
100.2	0
100.3	0
100.4	0
100.5	0
100.6	0
100.7	0
100.8	0.0005
100.9	0.0005
101	0.001
101.1	0.001
101.2	0.001
101.3	0.001
101.4	0.001
101.5	0.001
101.6	0.001
101.7	0.001
101.8	0.0015
101.9	0.0015
102	0.002
102.1	0.004
102.2	0.004
102.3	0.005
102.4	0.005
102.5	0.005
102.6	0.005
102.7	0.0055
102.8	0.0055
102.9	0.0055
103	0.007
103.1	0.0075
103.2	0.0075
103.3	0.0075
103.4	0.008
103.5	0.009
103.6	0.0115
103.7	0.0125
103.8	0.013
103.9	0.0125
104	0.0125
104.1	0.0125
104.2	0.013
104.3	0.0135
104.4	0.0145
104.5	0.0155
104.6	0.016
104.7	0.016
104.8	0.016
104.9	0.0165
105	0.0165
105.1	0.0165
105.2	0.0175
105.3	0.018
105.4	0.0195
105.5	0.0195
105.6	0.02
105.7	0.0225
105.8	0.024
105.9	0.025
106	0.0255
106.1	0.026
106.2	0.0265
106.3	0.0265
106.4	0.027
106.5	0.0275
106.6	0.028
106.7	0.0285
106.8	0.03
106.9	0.031
107	0.031
107.1	0.032
107.2	0.032
107.3	0.033
107.4	0.034
107.5	0.0355
107.6	0.0365
107.7	0.037
107.8	0.0375
107.9	0.038
108	0.0385
108.1	0.038
108.2	0.04
108.3	0.041
108.4	0.041
108.5	0.042
108.6	0.043
108.7	0.043
108.8	0.0435
108.9	0.0445
109	0.045
109.1	0.0465
109.2	0.0475
109.3	0.048
109.4	0.0485
109.5	0.0495
109.6	0.051
109.7	0.052
109.8	0.0535
109.9	0.0545
110	0.0545
110.1	0.055
110.2	0.0565
110.3	0.057
110.4	0.0585
110.5	0.06
110.6	0.0605
110.7	0.0625
110.8	0.0635
110.9	0.0635
111	0.0635
111.1	0.0645
111.2	0.0645
111.3	0.065
111.4	0.065
111.5	0.0645
111.6	0.0645
111.7	0.0655
111.8	0.0675
111.9	0.069
112	0.0695
112.1	0.0705
112.2	0.0705
112.3	0.0715
112.4	0.072
112.5	0.073
112.6	0.0735
112.7	0.074
112.8	0.076
112.9	0.0765
113	0.079
113.1	0.0795
113.2	0.08
113.3	0.081
113.4	0.081
113.5	0.0815
113.6	0.0835
113.7	0.086
113.8	0.088
113.9	0.088
114	0.089
114.1	0.0895
114.2	0.0895
114.3	0.0905
114.4	0.0905
114.5	0.0915
114.6	0.0935
114.7	0.0935
114.8	0.094
114.9	0.0935
115	0.0945
115.1	0.095
115.2	0.095
115.3	0.096
115.4	0.098
115.5	0.0985
115.6	0.1
115.7	0.101
115.8	0.1025
115.9	0.103
116	0.1035
116.1	0.104
116.2	0.106
116.3	0.1065
116.4	0.108
116.5	0.108
116.6	0.1095
116.7	0.11
116.8	0.111
116.9	0.1125
117	0.1135
117.1	0.1155
117.2	0.116
117.3	0.1175
117.4	0.1175
117.5	0.119
117.6	0.1195
117.7	0.1195
117.8	0.1195
117.9	0.121
118	0.121
118.1	0.121
118.2	0.123
118.3	0.1235
118.4	0.124
118.5	0.1255
118.6	0.128
118.7	0.1275
118.8	0.1275
118.9	0.1285
119	0.1285
119.1	0.13
119.2	0.13
119.3	0.1285
119.4	0.1285
119.5	0.1285
119.6	0.129
119.7	0.1305
119.8	0.1305
119.9	0.131
120	0.1315
120.1	0.1315
120.2	0.133
120.3	0.133
120.4	0.134
120.5	0.1355
120.6	0.1365
120.7	0.1385
120.8	0.139
120.9	0.14
121	0.142
121.1	0.1425
121.2	0.143
121.3	0.144
121.4	0.145
121.5	0.1455
121.6	0.1465
121.7	0.147
121.8	0.1475
121.9	0.148
122	0.1485
122.1	0.15
122.2	0.15
122.3	0.152
122.4	0.1525
122.5	0.1525
122.6	0.1535
122.7	0.1545
122.8	0.1545
122.9	0.1555
123	0.156
123.1	0.157
123.2	0.1585
123.3	0.158
123.4	0.157
123.5	0.157
123.6	0.156
123.7	0.157
123.8	0.157
123.9	0.157
124	0.158
124.1	0.159
124.2	0.1595
124.3	0.159
124.4	0.161
124.5	0.1615
124.6	0.162
124.7	0.1625
124.8	0.1635
124.9	0.163
125	0.164
125.1	0.164
125.2	0.1645
125.3	0.165
125.4	0.166
125.5	0.1665
125.6	0.1675
125.7	0.169
125.8	0.169
125.9	0.172
126	0.1725
126.1	0.1725
126.2	0.1735
126.3	0.1745
126.4	0.1745
126.5	0.1755
126.6	0.1765
126.7	0.1775
126.8	0.1775
126.9	0.178
127	0.18
127.1	0.181
127.2	0.181
127.3	0.1815
127.4	0.1835
127.5	0.1835
127.6	0.183
127.7	0.182
127.8	0.1825
127.9	0.1835
128	0.1825
128.1	0.1835
128.2	0.1845
128.3	0.186
128.4	0.186
128.5	0.187
128.6	0.1885
128.7	0.189
128.8	0.1895
128.9	0.19
129	0.191
129.1	0.1915
129.2	0.1925
129.3	0.193
129.4	0.1935
129.5	0.1945
129.6	0.1955
129.7	0.196
129.8	0.1965
129.9	0.1975
130	0.198
130.1	0.1985
130.2	0.1985
130.3	0.1985
130.4	0.1985
130.5	0.1985
130.6	0.1985
130.7	0.2
130.8	0.2005
130.9	0.2015
131	0.202
131.1	0.202
131.2	0.203
131.3	0.203
131.4	0.2035
131.5	0.2035
131.6	0.2035
131.7	0.204
131.8	0.2035
131.9	0.204
132	0.2035
132.1	0.2035
132.2	0.206
132.3	0.2065
132.4	0.2075
132.5	0.209
132.6	0.2095
132.7	0.2105
132.8	0.212
132.9	0.2125
133	0.2125
133.1	0.2135
133.2	0.2145
133.3	0.2155
133.4	0.215
133.5	0.216
133.6	0.2165
133.7	0.217
133.8	0.218
133.9	0.219
134	0.2185
134.1	0.2195
134.2	0.221
134.3	0.2215
134.4	0.2225
134.5	0.224
134.6	0.224
134.7	0.225
134.8	0.2265
134.9	0.2265
135	0.227
135.1	0.2285
135.2	0.2285
135.3	0.229
135.4	0.2295
135.5	0.2305
135.6	0.2305
135.7	0.2305
135.8	0.2305
135.9	0.2315
136	0.2315
136.1	0.232
136.2	0.2325
136.3	0.233
136.4	0.2335
136.5	0.234
136.6	0.2335
136.7	0.234
136.8	0.235
136.9	0.235
137	0.2345
137.1	0.2355
137.2	0.236
137.3	0.236
137.4	0.236
137.5	0.2355
137.6	0.236
137.7	0.236
137.8	0.235
137.9	0.235
138	0.235
138.1	0.2355
138.2	0.237
138.3	0.2375
138.4	0.2365
138.5	0.237
138.6	0.238
138.7	0.2375
138.8	0.2375
138.9	0.2375
139	0.238
139.1	0.238
139.2	0.2385
139.3	0.2385
139.4	0.2375
139.5	0.2375
139.6	0.2385
139.7	0.239
139.8	0.2395
139.9	0.2405
140	0.2415
140.1	0.2425
140.2	0.242
140.3	0.244
140.4	0.2445
140.5	0.2455
140.6	0.2455
140.7	0.247
140.8	0.2485
140.9	0.2495
141	0.25
141.1	0.25
141.2	0.2505
141.3	0.251
141.4	0.251
141.5	0.2515
141.6	0.251
141.7	0.253
141.8	0.2535
141.9	0.2545
142	0.2545
142.1	0.257
142.2	0.2565
142.3	0.257
142.4	0.2575
142.5	0.257
142.6	0.256
142.7	0.2575
142.8	0.2585
142.9	0.259
143	0.259
143.1	0.259
143.2	0.26
143.3	0.262
143.4	0.263
143.5	0.2645
143.6	0.2655
143.7	0.2645
143.8	0.2645
143.9	0.265
144	0.2645
144.1	0.265
144.2	0.2665
144.3	0.2665
144.4	0.267
144.5	0.2675
144.6	0.2675
144.7	0.2675
144.8	0.2675
144.9	0.267
145	0.2665
145.1	0.2665
145.2	0.269
145.3	0.2695
145.4	0.2695
145.5	0.2695
145.6	0.2715
145.7	0.2725
145.8	0.2725
145.9	0.2725
146	0.273
146.1	0.273
146.2	0.2725
146.3	0.2725
146.4	0.2725
146.5	0.2735
146.6	0.274
146.7	0.2745
146.8	0.275
146.9	0.276
147	0.279
147.1	0.28
147.2	0.281
147.3	0.281
147.4	0.2825
147.5	0.2825
147.6	0.2835
147.7	0.2835
147.8	0.284
147.9	0.285
148	0.285
148.1	0.285
148.2	0.286
148.3	0.286
148.4	0.2865
148.5	0.287
148.6	0.286
148.7	0.2885
148.8	0.288
148.9	0.2885
149	0.289
149.1	0.289
149.2	0.2885
149.3	0.2885
149.4	0.2895
149.5	0.2885
149.6	0.2895
149.7	0.291
149.8	0.291
149.9	0.2915
150	0.2925
150.1	0.293
150.2	0.2945
150.3	0.296
150.4	0.297
150.5	0.2985
150.6	0.298
150.7	0.3
150.8	0.2995
150.9	0.301
151	0.301
151.1	0.3005
151.2	0.3
151.3	0.3
151.4	0.301
151.5	0.3015
151.6	0.3015
151.7	0.3015
151.8	0.302
151.9	0.302
152	0.3015
152.1	0.3025
152.2	0.3025
152.3	0.3025
152.4	0.303
152.5	0.3015
152.6	0.302
152.7	0.3025
152.8	0.302
152.9	0.3025
153	0.304
153.1	0.303
153.2	0.304
153.3	0.3045
153.4	0.305
153.5	0.3045
153.6	0.305
153.7	0.305
153.8	0.3055
153.9	0.3055
154	0.305
154.1	0.306
154.2	0.3055
154.3	0.305
154.4	0.305
154.5	0.3055
154.6	0.3055
154.7	0.305
154.8	0.3055
154.9	0.305
155	0.3065
155.1	0.3075
155.2	0.3085
155.3	0.3095
155.4	0.312
155.5	0.312
155.6	0.312
155.7	0.313
155.8	0.3135
155.9	0.315
156	0.3165
156.1	0.3165
156.2	0.316
156.3	0.316
156.4	0.3165
156.5	0.3165
156.6	0.317
156.7	0.3165
156.8	0.316
156.9	0.316
157	0.3155
157.1	0.316
157.2	0.3165
157.3	0.317
157.4	0.317
157.5	0.317
157.6	0.317
157.7	0.318
157.8	0.3185
157.9	0.319
158	0.3185
158.1	0.32
158.2	0.32
158.3	0.32
158.4	0.3205
158.5	0.3215
158.6	0.322
158.7	0.323
158.8	0.323
158.9	0.3245
159	0.3255
159.1	0.3245
159.2	0.325
159.3	0.325
159.4	0.3255
159.5	0.3255
159.6	0.325
159.7	0.326
159.8	0.326
159.9	0.3265
160	0.3265
160.1	0.3275
160.2	0.3285
160.3	0.3295
160.4	0.3295
160.5	0.3315
160.6	0.332
160.7	0.3325
160.8	0.333
160.9	0.3325
161	0.3325
161.1	0.3325
161.2	0.3315
161.3	0.3305
161.4	0.331
161.5	0.3345
161.6	0.3335
161.7	0.3335
161.8	0.3345
161.9	0.335
162	0.335
162.1	0.336
162.2	0.337
162.3	0.338
162.4	0.338
162.5	0.3365
162.6	0.3365
162.7	0.3365
162.8	0.3365
162.9	0.3365
163	0.3365
163.1	0.337
163.2	0.337
163.3	0.3365
163.4	0.3365
163.5	0.338
163.6	0.3375
163.7	0.339
163.8	0.339
163.9	0.3405
164	0.3405
164.1	0.34
164.2	0.34
164.3	0.34
164.4	0.3405
164.5	0.3395
164.6	0.3395
164.7	0.3405
164.8	0.3395
164.9	0.3405
165	0.34
165.1	0.341
165.2	0.3405
165.3	0.342
165.4	0.3425
165.5	0.3425
165.6	0.3425
165.7	0.344
165.8	0.3435
165.9	0.343
166	0.343
166.1	0.343
166.2	0.3435
166.3	0.344
166.4	0.344
166.5	0.3435
166.6	0.3445
166.7	0.3445
166.8	0.3445
166.9	0.3445
167	0.3445
167.1	0.3435
167.2	0.3445
167.3	0.3455
167.4	0.3445
167.5	0.3445
167.6	0.345
167.7	0.3455
167.8	0.346
167.9	0.347
168	0.3475
168.1	0.347
168.2	0.3485
168.3	0.3485
168.4	0.3485
168.5	0.349
168.6	0.349
168.7	0.349
168.8	0.352
168.9	0.3525
169	0.3545
169.1	0.354
169.2	0.3545
169.3	0.3545
169.4	0.3545
169.5	0.356
169.6	0.3555
169.7	0.3565
169.8	0.3565
169.9	0.357
170	0.357
170.1	0.358
170.2	0.3575
170.3	0.359
170.4	0.3575
170.5	0.357
170.6	0.357
170.7	0.3575
170.8	0.358
170.9	0.3585
171	0.357
171.1	0.357
171.2	0.3565
171.3	0.3565
171.4	0.3565
171.5	0.3565
171.6	0.357
171.7	0.3565
171.8	0.358
171.9	0.3585
172	0.3595
172.1	0.36
172.2	0.36
172.3	0.36
172.4	0.361
172.5	0.362
172.6	0.364
172.7	0.364
172.8	0.365
172.9	0.366
173	0.3655
173.1	0.3645
173.2	0.365
173.3	0.3645
173.4	0.366
173.5	0.366
173.6	0.3665
173.7	0.3665
173.8	0.3665
173.9	0.368
174	0.367
174.1	0.367
174.2	0.3675
174.3	0.3695
174.4	0.3695
174.5	0.3695
174.6	0.3695
174.7	0.37
174.8	0.371
174.9	0.371
175	0.3725
175.1	0.372
175.2	0.372
175.3	0.372
175.4	0.3725
175.5	0.3735
175.6	0.374
175.7	0.3745
175.8	0.375
175.9	0.375
176	0.375
176.1	0.3755
176.2	0.376
176.3	0.376
176.4	0.3765
176.5	0.377
176.6	0.3775
176.7	0.378
176.8	0.379
176.9	0.3805
177	0.38
177.1	0.3795
177.2	0.381
177.3	0.381
177.4	0.381
177.5	0.381
177.6	0.3815
177.7	0.382
177.8	0.382
177.9	0.383
178	0.3835
178.1	0.385
178.2	0.3845
178.3	0.3845
178.4	0.3845
178.5	0.3845
178.6	0.3845
178.7	0.384
178.8	0.3835
178.9	0.383
179	0.383
179.1	0.3825
179.2	0.3825
179.3	0.383
179.4	0.383
179.5	0.3835
179.6	0.3835
179.7	0.383
179.8	0.382
179.9	0.3815
180	0.3825
180.1	0.383
180.2	0.3835
180.3	0.383
180.4	0.383
180.5	0.383
180.6	0.3815
180.7	0.3825
180.8	0.3825
180.9	0.384
181	0.3835
181.1	0.383
181.2	0.3835
181.3	0.3835
181.4	0.3835
181.5	0.384
181.6	0.3835
181.7	0.3835
181.8	0.384
181.9	0.3845
182	0.385
182.1	0.3845
182.2	0.3845
182.3	0.3845
182.4	0.3845
182.5	0.3845
182.6	0.3855
182.7	0.3875
182.8	0.387
182.9	0.387
183	0.387
183.1	0.3865
183.2	0.386
183.3	0.386
183.4	0.3875
183.5	0.3875
183.6	0.3875
183.7	0.3875
183.8	0.3875
183.9	0.388
184	0.388
184.1	0.3885
184.2	0.3885
184.3	0.3885
184.4	0.3885
184.5	0.389
184.6	0.391
184.7	0.3905
184.8	0.391
184.9	0.3905
185	0.3915
185.1	0.3915
185.2	0.3925
185.3	0.3935
185.4	0.395
185.5	0.396
185.6	0.3965
185.7	0.397
185.8	0.398
185.9	0.3985
186	0.398
186.1	0.398
186.2	0.3975
186.3	0.398
186.4	0.398
186.5	0.398
186.6	0.398
186.7	0.3985
186.8	0.399
186.9	0.3995
187	0.4
187.1	0.401
187.2	0.4005
187.3	0.4015
187.4	0.4015
187.5	0.4015
187.6	0.402
187.7	0.402
187.8	0.403
187.9	0.403
188	0.403
188.1	0.4035
188.2	0.4025
188.3	0.4005
188.4	0.4005
188.5	0.402
188.6	0.4025
188.7	0.402
188.8	0.402
188.9	0.402
189	0.402
189.1	0.4025
189.2	0.402
189.3	0.404
189.4	0.4035
189.5	0.404
189.6	0.405
189.7	0.406
189.8	0.4065
189.9	0.4065
190	0.408
190.1	0.409
190.2	0.41
190.3	0.41
190.4	0.4095
190.5	0.409
190.6	0.4095
190.7	0.41
190.8	0.41
190.9	0.409
191	0.4095
191.1	0.4095
191.2	0.409
191.3	0.4085
191.4	0.407
191.5	0.407
191.6	0.4075
191.7	0.4085
191.8	0.408
191.9	0.4075
192	0.4075
192.1	0.4085
192.2	0.409
192.3	0.409
192.4	0.4095
192.5	0.4095
192.6	0.4105
192.7	0.4105
192.8	0.4115
192.9	0.4115
193	0.411
193.1	0.4105
193.2	0.4095
193.3	0.4095
193.4	0.41
193.5	0.4105
193.6	0.41
193.7	0.41
193.8	0.41
193.9	0.4105
194	0.4115
194.1	0.4115
194.2	0.412
194.3	0.412
194.4	0.4115
194.5	0.4125
194.6	0.412
194.7	0.412
194.8	0.413
194.9	0.413
195	0.413
195.1	0.414
195.2	0.413
195.3	0.4125
195.4	0.413
195.5	0.4125
195.6	0.4125
195.7	0.4125
195.8	0.4145
195.9	0.414
196	0.413
196.1	0.4135
196.2	0.4145
196.3	0.415
196.4	0.415
196.5	0.415
196.6	0.4155
196.7	0.4165
196.8	0.4175
196.9	0.4185
197	0.4195
197.1	0.4195
197.2	0.4195
197.3	0.4195
197.4	0.42
197.5	0.422
197.6	0.4205
197.7	0.4205
197.8	0.42
197.9	0.4205
198	0.4205
198.1	0.42
198.2	0.42
198.3	0.421
198.4	0.421
198.5	0.421
198.6	0.421
198.7	0.421
198.8	0.4215
198.9	0.421
199	0.42
199.1	0.4205
199.2	0.42
199.3	0.4215
199.4	0.4215
199.5	0.423
199.6	0.423
199.7	0.424
199.8	0.4245
199.9	0.424
200	0.424
[truncated: 14,000 more rows]
