# Supplementary material for: Bayesian inference of kinetic schemes for ion channels by Kalman filtering
Source: eLife journal article supplement (doi:10.7554/elife.62714), 2022-05-04
Supplement: fig4-data9 [file 1_Sim_N_3000_Fluor_MW_0.5M.xlsx]

## Sheet: Tabelle1
0.1	0
0.2	0
0.3	0
0.4	0
0.5	0
0.6	0
0.7	0
0.8	0
0.9	0
1	0
1.1	0
1.2	0
1.3	0
1.4	0
1.5	0
1.6	0
1.7	0
1.8	0
1.9	0
2	0
2.1	0
2.2	0
2.3	0
2.4	0
2.5	0
2.6	0
2.7	0
2.8	0
2.9	0
3	0
3.1	0
3.2	0
3.3	0
3.4	0
3.5	0
3.6	0
3.7	0
3.8	0
3.9	0
4	0
4.1	0
4.2	0
4.3	0
4.4	0
4.5	0
4.6	0
4.7	0
4.8	0
4.9	0
5	0
5.1	0
5.2	0
5.3	0
5.4	0
5.5	0
5.6	0
5.7	0
5.8	0
5.9	0
6	0
6.1	0
6.2	0
6.3	0
6.4	0
6.5	0
6.6	0
6.7	0
6.8	0
6.9	0
7	0
7.1	0
7.2	0
7.3	0
7.4	0
7.5	0
7.6	0
7.7	0
7.8	0
7.9	0
8	0
8.1	0
8.2	0
8.3	0
8.4	0
8.5	0
8.6	0
8.7	0
8.8	0
8.9	0
9	0
9.1	0
9.2	0
9.3	0
9.4	0
9.5	0
9.6	0
9.7	0
9.8	0
9.9	0
10	0
10.1	0
10.2	0
10.3	0
10.4	0
10.5	0
10.6	0
10.7	0
10.8	0
10.9	0
11	0
11.1	0
11.2	0
11.3	0
11.4	0
11.5	0
11.6	0
11.7	0
11.8	0
11.9	0
12	0
12.1	0
12.2	0
12.3	0
12.4	0
12.5	0
12.6	0
12.7	0
12.8	0
12.9	0
13	0
13.1	0
13.2	0
13.3	0
13.4	0
13.5	0
13.6	0
13.7	0
13.8	0
13.9	0
14	0
14.1	0
14.2	0
14.3	0
14.4	0
14.5	0
14.6	0
14.7	0
14.8	0
14.9	0
15	0
15.1	0
15.2	0
15.3	0
15.4	0
15.5	0
15.6	0
15.7	0
15.8	0
15.9	0
16	0
16.1	0
16.2	0
16.3	0
16.4	0
16.5	0
16.6	0
16.7	0
16.8	0
16.9	0
17	0
17.1	0
17.2	0
17.3	0
17.4	0
17.5	0
17.6	0
17.7	0
17.8	0
17.9	0
18	0
18.1	0
18.2	0
18.3	0
18.4	0
18.5	0
18.6	0
18.7	0
18.8	0
18.9	0
19	0
19.1	0
19.2	0
19.3	0
19.4	0
19.5	0
19.6	0
19.7	0
19.8	0
19.9	0
20	0
20.1	0
20.2	0
20.3	0
20.4	0
20.5	0
20.6	0
20.7	0
20.8	0
20.9	0
21	0
21.1	0
21.2	0
21.3	0
21.4	0
21.5	0
21.6	0
21.7	0
21.8	0
21.9	0
22	0
22.1	0
22.2	0
22.3	0
22.4	0
22.5	0
22.6	0
22.7	0
22.8	0
22.9	0
23	0
23.1	0
23.2	0
23.3	0
23.4	0
23.5	0
23.6	0
23.7	0
23.8	0
23.9	0
24	0
24.1	0
24.2	0
24.3	0
24.4	0
24.5	0
24.6	0
24.7	0
24.8	0
24.9	0
25	0
25.1	0
25.2	0
25.3	0
25.4	0
25.5	0
25.6	0
25.7	0
25.8	0
25.9	0
26	0
26.1	0
26.2	0
26.3	0
26.4	0
26.5	0
26.6	0
26.7	0
26.8	0
26.9	0
27	0
27.1	0
27.2	0
27.3	0
27.4	0
27.5	0
27.6	0
27.7	0
27.8	0
27.9	0
28	0
28.1	0
28.2	0
28.3	0
28.4	0
28.5	0
28.6	0
28.7	0
28.8	0
28.9	0
29	0
29.1	0
29.2	0
29.3	0
29.4	0
29.5	0
29.6	0
29.7	0
29.8	0
29.9	0
30	0
30.1	0
30.2	0
30.3	0
30.4	0
30.5	0
30.6	0
30.7	0
30.8	0
30.9	0
31	0
31.1	0
31.2	0
31.3	0
31.4	0
31.5	0
31.6	0
31.7	0
31.8	0
31.9	0
32	0
32.1	0
32.2	0
32.3	0
32.4	0
32.5	0
32.6	0
32.7	0
32.8	0
32.9	0
33	0
33.1	0
33.2	0
33.3	0
33.4	0
33.5	0
33.6	0
33.7	0
33.8	0
33.9	0
34	0
34.1	0
34.2	0
34.3	0
34.4	0
34.5	0
34.6	0
34.7	0
34.8	0
34.9	0
35	0
35.1	0
35.2	0
35.3	0
35.4	0
35.5	0
35.6	0
35.7	0
35.8	0
35.9	0
36	0
36.1	0
36.2	0
36.3	0
36.4	0
36.5	0
36.6	0
36.7	0
36.8	0
36.9	0
37	0
37.1	0
37.2	0
37.3	0
37.4	0
37.5	0
37.6	0
37.7	0
37.8	0
37.9	0
38	0
38.1	0
38.2	0
38.3	0
38.4	0
38.5	0
38.6	0
38.7	0
38.8	0
38.9	0
39	0
39.1	0
39.2	0
39.3	0
39.4	0
39.5	0
39.6	0
39.7	0
39.8	0
39.9	0
40	0
40.1	0
40.2	0
40.3	0
40.4	0
40.5	0
40.6	0
40.7	0
40.8	0
40.9	0
41	0
41.1	0
41.2	0
41.3	0
41.4	0
41.5	0
41.6	0
41.7	0
41.8	0
41.9	0
42	0
42.1	0
42.2	0
42.3	0
42.4	0
42.5	0
42.6	0
42.7	0
42.8	0
42.9	0
43	0
43.1	0
43.2	0
43.3	0
43.4	0
43.5	0
43.6	0
43.7	0
43.8	0
43.9	0
44	0
44.1	0
44.2	0
44.3	0
44.4	0
44.5	0
44.6	0
44.7	0
44.8	0
44.9	0
45	0
45.1	0
45.2	0
45.3	0
45.4	0
45.5	0
45.6	0
45.7	0
45.8	0
45.9	0
46	0
46.1	0
46.2	0
46.3	0
46.4	0
46.5	0
46.6	0
46.7	0
46.8	0
46.9	0
47	0
47.1	0
47.2	0
47.3	0
47.4	0
47.5	0
47.6	0
47.7	0
47.8	0
47.9	0
48	0
48.1	0
48.2	0
48.3	0
48.4	0
48.5	0
48.6	0
48.7	0
48.8	0
48.9	0
49	0
49.1	0
49.2	0
49.3	0
49.4	0
49.5	0
49.6	0
49.7	0
49.8	0
49.9	0
50	0
50.1	0
50.2	0
50.3	0
50.4	0
50.5	0
50.6	0
50.7	0
50.8	0
50.9	0
51	0
51.1	0
51.2	0
51.3	0
51.4	0
51.5	0
51.6	0
51.7	0
51.8	0
51.9	0
52	0
52.1	0
52.2	0
52.3	0
52.4	0
52.5	0
52.6	0
52.7	0
52.8	0
52.9	0
53	0
53.1	0
53.2	0
53.3	0
53.4	0
53.5	0
53.6	0
53.7	0
53.8	0
53.9	0
54	0
54.1	0
54.2	0
54.3	0
54.4	0
54.5	0
54.6	0
54.7	0
54.8	0
54.9	0
55	0
55.1	0
55.2	0
55.3	0
55.4	0
55.5	0
55.6	0
55.7	0
55.8	0
55.9	0
56	0
56.1	0
56.2	0
56.3	0
56.4	0
56.5	0
56.6	0
56.7	0
56.8	0
56.9	0
57	0
57.1	0
57.2	0
57.3	0
57.4	0
57.5	0
57.6	0
57.7	0
57.8	0
57.9	0
58	0
58.1	0
58.2	0
58.3	0
58.4	0
58.5	0
58.6	0
58.7	0
58.8	0
58.9	0
59	0
59.1	0
59.2	0
59.3	0
59.4	0
59.5	0
59.6	0
59.7	0
59.8	0
59.9	0
60	0
60.1	0
60.2	0
60.3	0
60.4	0
60.5	0
60.6	0
60.7	0
60.8	0
60.9	0
61	0
61.1	0
61.2	0
61.3	0
61.4	0
61.5	0
61.6	0
61.7	0
61.8	0
61.9	0
62	0
62.1	0
62.2	0
62.3	0
62.4	0
62.5	0
62.6	0
62.7	0
62.8	0
62.9	0
63	0
63.1	0
63.2	0
63.3	0
63.4	0
63.5	0
63.6	0
63.7	0
63.8	0
63.9	0
64	0
64.1	0
64.2	0
64.3	0
64.4	0
64.5	0
64.6	0
64.7	0
64.8	0
64.9	0
65	0
65.1	0
65.2	0
65.3	0
65.4	0
65.5	0
65.6	0
65.7	0
65.8	0
65.9	0
66	0
66.1	0
66.2	0
66.3	0
66.4	0
66.5	0
66.6	0
66.7	0
66.8	0
66.9	0
67	0
67.1	0
67.2	0
67.3	0
67.4	0
67.5	0
67.6	0
67.7	0
67.8	0
67.9	0
68	0
68.1	0
68.2	0
68.3	0
68.4	0
68.5	0
68.6	0
68.7	0
68.8	0
68.9	0
69	0
69.1	0
69.2	0
69.3	0
69.4	0
69.5	0
69.6	0
69.7	0
69.8	0
69.9	0
70	0
70.1	0
70.2	0
70.3	0
70.4	0
70.5	0
70.6	0
70.7	0
70.8	0
70.9	0
71	0
71.1	0
71.2	0
71.3	0
71.4	0
71.5	0
71.6	0
71.7	0
71.8	0
71.9	0
72	0
72.1	0
72.2	0
72.3	0
72.4	0
72.5	0
72.6	0
72.7	0
72.8	0
72.9	0
73	0
73.1	0
73.2	0
73.3	0
73.4	0
73.5	0
73.6	0
73.7	0
73.8	0
73.9	0
74	0
74.1	0
74.2	0
74.3	0
74.4	0
74.5	0
74.6	0
74.7	0
74.8	0
74.9	0
75	0
75.1	0
75.2	0
75.3	0
75.4	0
75.5	0
75.6	0
75.7	0
75.8	0
75.9	0
76	0
76.1	0
76.2	0
76.3	0
76.4	0
76.5	0
76.6	0
76.7	0
76.8	0
76.9	0
77	0
77.1	0
77.2	0
77.3	0
77.4	0
77.5	0
77.6	0
77.7	0
77.8	0
77.9	0
78	0
78.1	0
78.2	0
78.3	0
78.4	0
78.5	0
78.6	0
78.7	0
78.8	0
78.9	0
79	0
79.1	0
79.2	0
79.3	0
79.4	0
79.5	0
79.6	0
79.7	0
79.8	0
79.9	0
80	0
80.1	0
80.2	0
80.3	0
80.4	0
80.5	0
80.6	0
80.7	0
80.8	0
80.9	0
81	0
81.1	0
81.2	0
81.3	0
81.4	0
81.5	0
81.6	0
81.7	0
81.8	0
81.9	0
82	0
82.1	0
82.2	0
82.3	0
82.4	0
82.5	0
82.6	0
82.7	0
82.8	0
82.9	0
83	0
83.1	0
83.2	0
83.3	0
83.4	0
83.5	0
83.6	0
83.7	0
83.8	0
83.9	0
84	0
84.1	0
84.2	0
84.3	0
84.4	0
84.5	0
84.6	0
84.7	0
84.8	0
84.9	0
85	0
85.1	0
85.2	0
85.3	0
85.4	0
85.5	0
85.6	0
85.7	0
85.8	0
85.9	0
86	0
86.1	0
86.2	0
86.3	0
86.4	0
86.5	0
86.6	0
86.7	0
86.8	0
86.9	0
87	0
87.1	0
87.2	0
87.3	0
87.4	0
87.5	0
87.6	0
87.7	0
87.8	0
87.9	0
88	0
88.1	0
88.2	0
88.3	0
88.4	0
88.5	0
88.6	0
88.7	0
88.8	0
88.9	0
89	0
89.1	0
89.2	0
89.3	0
89.4	0
89.5	0
89.6	0
89.7	0
89.8	0
89.9	0
90	0
90.1	0
90.2	0
90.3	0
90.4	0
90.5	0
90.6	0
90.7	0
90.8	0
90.9	0
91	0
91.1	0
91.2	0
91.3	0
91.4	0
91.5	0
91.6	0
91.7	0
91.8	0
91.9	0
92	0
92.1	0
92.2	0
92.3	0
92.4	0
92.5	0
92.6	0
92.7	0
92.8	0
92.9	0
93	0
93.1	0
93.2	0
93.3	0
93.4	0
93.5	0
93.6	0
93.7	0
93.8	0
93.9	0
94	0
94.1	0
94.2	0
94.3	0
94.4	0
94.5	0
94.6	0
94.7	0
94.8	0
94.9	0
95	0
95.1	0
95.2	0
95.3	0
95.4	0
95.5	0
95.6	0
95.7	0
95.8	0
95.9	0
96	0
96.1	0
96.2	0
96.3	0
96.4	0
96.5	0
96.6	0
96.7	0
96.8	0
96.9	0
97	0
97.1	0
97.2	0
97.3	0
97.4	0
97.5	0
97.6	0
97.7	0
97.8	0
97.9	0
98	0
98.1	0
98.2	0
98.3	0
98.4	0
98.5	0
98.6	0
98.7	0
98.8	0
98.9	0
99	0
99.1	0
99.2	0
99.3	0
99.4	0
99.5	0
99.6	0
99.7	0
99.8	0
99.9	0
100	0
100.1	0.0295
100.2	0.0551667
100.3	0.0846667
100.4	0.111333
100.5	0.134333
100.6	0.1585
100.7	0.177333
100.8	0.197333
100.9	0.214833
101	0.234
101.1	0.251
101.2	0.2655
101.3	0.282667
101.4	0.2965
101.5	0.310667
101.6	0.323333
101.7	0.337833
101.8	0.351333
101.9	0.360833
102	0.370167
102.1	0.3795
102.2	0.388
102.3	0.393833
102.4	0.3995
102.5	0.405667
102.6	0.414833
102.7	0.421333
102.8	0.43
102.9	0.436333
103	0.439667
103.1	0.446333
103.2	0.452
103.3	0.456667
103.4	0.462167
103.5	0.467667
103.6	0.469
103.7	0.470333
103.8	0.477
103.9	0.480667
104	0.484167
104.1	0.487833
104.2	0.492167
104.3	0.495167
104.4	0.499667
104.5	0.502
104.6	0.505333
104.7	0.506667
104.8	0.511333
104.9	0.516167
105	0.518667
105.1	0.519167
105.2	0.523333
105.3	0.524167
105.4	0.525667
105.5	0.527167
105.6	0.528833
105.7	0.529333
105.8	0.529
105.9	0.527667
106	0.53
106.1	0.529667
106.2	0.532333
106.3	0.5325
106.4	0.533333
106.5	0.534667
106.6	0.536167
106.7	0.536
106.8	0.5375
106.9	0.54
107	0.543
107.1	0.544667
107.2	0.546167
107.3	0.549667
107.4	0.550167
107.5	0.5485
107.6	0.552833
107.7	0.553833
107.8	0.555667
107.9	0.5555
108	0.557167
108.1	0.557
108.2	0.556333
108.3	0.557
108.4	0.557333
108.5	0.559167
108.6	0.558333
108.7	0.559333
108.8	0.561333
108.9	0.559167
109	0.562667
109.1	0.5615
109.2	0.562167
109.3	0.561667
109.4	0.561667
109.5	0.561833
109.6	0.564333
109.7	0.564167
109.8	0.563167
109.9	0.564833
110	0.566
110.1	0.566667
110.2	0.568167
110.3	0.566833
110.4	0.5665
110.5	0.5665
110.6	0.563833
110.7	0.565667
110.8	0.563833
110.9	0.5665
111	0.566833
111.1	0.567667
111.2	0.568167
111.3	0.5685
111.4	0.567833
111.5	0.568
111.6	0.566833
111.7	0.567833
111.8	0.568667
111.9	0.567167
112	0.567667
112.1	0.566833
112.2	0.5675
112.3	0.566333
112.4	0.566667
112.5	0.566833
112.6	0.565333
112.7	0.565333
112.8	0.567
112.9	0.568833
113	0.566667
113.1	0.566
113.2	0.568333
113.3	0.570167
113.4	0.571667
113.5	0.572333
113.6	0.571
113.7	0.572167
113.8	0.571833
113.9	0.573833
114	0.575167
114.1	0.573833
114.2	0.5745
114.3	0.5755
114.4	0.576
114.5	0.578333
114.6	0.576833
114.7	0.578167
114.8	0.579167
114.9	0.578833
115	0.579
115.1	0.577
115.2	0.576333
115.3	0.578667
115.4	0.578667
115.5	0.584
115.6	0.583333
115.7	0.583667
115.8	0.585167
115.9	0.5845
116	0.584333
116.1	0.583333
116.2	0.583
116.3	0.583333
116.4	0.583
116.5	0.5805
116.6	0.580333
116.7	0.583167
116.8	0.583833
116.9	0.584
117	0.583833
117.1	0.584
117.2	0.586333
117.3	0.586333
117.4	0.585333
117.5	0.585
117.6	0.586667
117.7	0.5865
117.8	0.587667
117.9	0.5895
118	0.591833
118.1	0.5915
118.2	0.590833
118.3	0.592833
118.4	0.593167
118.5	0.594667
118.6	0.594833
118.7	0.595833
118.8	0.596667
118.9	0.598667
119	0.598333
119.1	0.594167
119.2	0.596167
119.3	0.595667
119.4	0.5965
119.5	0.597
119.6	0.596667
119.7	0.596833
119.8	0.596167
119.9	0.597333
120	0.597333
120.1	0.598
120.2	0.598833
120.3	0.601333
120.4	0.601167
120.5	0.600833
120.6	0.602167
120.7	0.601667
120.8	0.604333
120.9	0.604167
121	0.602833
121.1	0.605167
121.2	0.606
121.3	0.603167
121.4	0.603333
121.5	0.604833
121.6	0.604833
121.7	0.605167
121.8	0.605833
121.9	0.6085
122	0.607333
122.1	0.605167
122.2	0.6015
122.3	0.601833
122.4	0.6015
122.5	0.603
122.6	0.602
122.7	0.604833
122.8	0.603833
122.9	0.606667
123	0.608833
123.1	0.61
123.2	0.608333
123.3	0.609833
123.4	0.6115
123.5	0.61
123.6	0.612167
123.7	0.610667
123.8	0.611167
123.9	0.610667
124	0.609
124.1	0.608667
124.2	0.608333
124.3	0.609333
124.4	0.611
124.5	0.6115
124.6	0.610167
124.7	0.6085
124.8	0.609667
124.9	0.611333
125	0.612167
125.1	0.612833
125.2	0.613667
125.3	0.613833
125.4	0.6135
125.5	0.616167
125.6	0.617167
125.7	0.616667
125.8	0.6155
125.9	0.613667
126	0.614167
126.1	0.615
126.2	0.615833
126.3	0.615
126.4	0.616667
126.5	0.617
126.6	0.6175
126.7	0.616
126.8	0.6145
126.9	0.613333
127	0.615333
127.1	0.6135
127.2	0.612
127.3	0.6115
127.4	0.613
127.5	0.613667
127.6	0.6175
127.7	0.621333
127.8	0.622667
127.9	0.623833
128	0.622833
128.1	0.623333
128.2	0.623333
128.3	0.621833
128.4	0.620333
128.5	0.622333
128.6	0.6215
128.7	0.624
128.8	0.623667
128.9	0.625333
129	0.626
129.1	0.627167
129.2	0.627667
129.3	0.628167
129.4	0.6295
129.5	0.628
129.6	0.628167
129.7	0.6275
129.8	0.63
129.9	0.630833
130	0.630167
130.1	0.6315
130.2	0.634167
130.3	0.634833
130.4	0.6335
130.5	0.634333
130.6	0.634333
130.7	0.635333
130.8	0.636
130.9	0.635167
131	0.630667
131.1	0.634667
131.2	0.634833
131.3	0.633833
131.4	0.636667
131.5	0.638667
131.6	0.638667
131.7	0.638
131.8	0.638667
131.9	0.638333
132	0.639333
132.1	0.636
132.2	0.637333
132.3	0.6385
132.4	0.6385
132.5	0.637167
132.6	0.6355
132.7	0.635667
132.8	0.633333
132.9	0.6365
133	0.639
133.1	0.640333
133.2	0.640833
133.3	0.64
133.4	0.639333
133.5	0.639167
133.6	0.6415
133.7	0.641667
133.8	0.642167
133.9	0.639667
134	0.64
134.1	0.641167
134.2	0.6405
134.3	0.642833
134.4	0.640833
134.5	0.640667
134.6	0.640333
134.7	0.643
134.8	0.644167
134.9	0.644667
135	0.644667
135.1	0.644667
135.2	0.642667
135.3	0.644333
135.4	0.643
135.5	0.6445
135.6	0.643333
135.7	0.645667
135.8	0.648333
135.9	0.647667
136	0.646333
136.1	0.646833
136.2	0.645833
136.3	0.646167
136.4	0.644333
136.5	0.644167
136.6	0.6475
136.7	0.649667
136.8	0.647333
136.9	0.6475
137	0.646667
137.1	0.646167
137.2	0.647167
137.3	0.648167
137.4	0.647
137.5	0.644833
137.6	0.6445
137.7	0.644333
137.8	0.645833
137.9	0.645667
138	0.644167
138.1	0.644833
138.2	0.644667
138.3	0.646167
138.4	0.649
138.5	0.65
138.6	0.650667
138.7	0.649
138.8	0.646833
138.9	0.6465
139	0.648
139.1	0.649333
139.2	0.648
139.3	0.649333
139.4	0.65
139.5	0.650167
139.6	0.6495
139.7	0.6515
139.8	0.6525
139.9	0.655667
140	0.656333
140.1	0.654833
140.2	0.656333
140.3	0.6555
140.4	0.655833
140.5	0.6565
140.6	0.657
140.7	0.6565
140.8	0.6565
140.9	0.658167
141	0.658833
141.1	0.659
141.2	0.6585
141.3	0.6615
141.4	0.663667
141.5	0.665667
141.6	0.6675
141.7	0.666667
141.8	0.665
141.9	0.666
142	0.667667
142.1	0.666833
142.2	0.666833
142.3	0.6665
142.4	0.665833
142.5	0.666
142.6	0.665833
142.7	0.667
142.8	0.666333
142.9	0.664667
143	0.663333
143.1	0.662167
143.2	0.662833
143.3	0.663833
143.4	0.6645
143.5	0.663167
143.6	0.663333
143.7	0.6625
143.8	0.663667
143.9	0.666167
144	0.666667
144.1	0.667833
144.2	0.667833
144.3	0.6665
144.4	0.667167
144.5	0.667167
144.6	0.667667
144.7	0.666
144.8	0.666167
144.9	0.668167
145	0.668
145.1	0.666667
145.2	0.663667
145.3	0.663333
145.4	0.662833
145.5	0.664667
145.6	0.664833
145.7	0.666
145.8	0.667667
145.9	0.668333
146	0.671
146.1	0.668833
146.2	0.668333
146.3	0.668667
146.4	0.6695
146.5	0.669667
146.6	0.667833
146.7	0.668833
146.8	0.667
146.9	0.6675
147	0.669333
147.1	0.670667
147.2	0.672167
147.3	0.672667
147.4	0.672
147.5	0.67
147.6	0.672167
147.7	0.674333
147.8	0.673
147.9	0.673167
148	0.674333
148.1	0.675167
148.2	0.674167
148.3	0.675167
148.4	0.675333
148.5	0.677667
148.6	0.677333
148.7	0.678667
148.8	0.678667
148.9	0.679167
149	0.681167
149.1	0.681667
149.2	0.678667
149.3	0.6805
149.4	0.679667
149.5	0.679333
149.6	0.679667
149.7	0.677
149.8	0.674833
149.9	0.674667
150	0.674833
150.1	0.676167
150.2	0.6765
150.3	0.677667
150.4	0.678167
150.5	0.678
150.6	0.678
150.7	0.678167
150.8	0.677167
150.9	0.6785
151	0.678667
151.1	0.681167
151.2	0.679333
151.3	0.680833
151.4	0.682167
151.5	0.682
151.6	0.683667
151.7	0.682833
151.8	0.6835
151.9	0.6855
152	0.688
152.1	0.687167
152.2	0.687833
152.3	0.689667
152.4	0.6875
152.5	0.686167
152.6	0.685833
152.7	0.684667
152.8	0.684833
152.9	0.686
153	0.686333
153.1	0.685833
153.2	0.6865
153.3	0.686167
153.4	0.685667
153.5	0.685333
153.6	0.685
153.7	0.684667
153.8	0.686333
153.9	0.688167
154	0.689333
154.1	0.691167
154.2	0.691833
154.3	0.692667
154.4	0.693833
154.5	0.691667
154.6	0.692167
154.7	0.694833
154.8	0.6965
154.9	0.696
155	0.698
155.1	0.697667
155.2	0.696333
155.3	0.697833
155.4	0.698833
155.5	0.698333
155.6	0.699333
155.7	0.700167
155.8	0.7
155.9	0.699167
156	0.6965
156.1	0.6965
156.2	0.697167
156.3	0.696167
156.4	0.697333
156.5	0.693667
156.6	0.695167
156.7	0.696833
156.8	0.698833
156.9	0.699667
157	0.698667
157.1	0.696
157.2	0.698
157.3	0.697667
157.4	0.696167
157.5	0.696333
157.6	0.696
157.7	0.696167
157.8	0.697167
157.9	0.698667
158	0.698833
158.1	0.6985
158.2	0.694833
158.3	0.695833
158.4	0.697667
158.5	0.697
158.6	0.697333
158.7	0.694
158.8	0.697667
158.9	0.696833
159	0.694333
159.1	0.694167
159.2	0.695
159.3	0.696
159.4	0.695167
159.5	0.693667
159.6	0.697333
159.7	0.695833
159.8	0.696833
159.9	0.695333
160	0.6955
160.1	0.694833
160.2	0.6955
160.3	0.6955
160.4	0.6955
160.5	0.695
160.6	0.696
160.7	0.693833
160.8	0.696
160.9	0.699
161	0.699667
161.1	0.698333
161.2	0.7
161.3	0.701833
161.4	0.701833
161.5	0.7035
161.6	0.704
161.7	0.703333
161.8	0.702167
161.9	0.700667
162	0.702
162.1	0.702333
162.2	0.702333
162.3	0.702167
162.4	0.703667
162.5	0.703833
162.6	0.703
162.7	0.701833
162.8	0.702667
162.9	0.704
163	0.705167
163.1	0.705667
163.2	0.704833
163.3	0.704
163.4	0.703667
163.5	0.703333
163.6	0.704667
163.7	0.706833
163.8	0.705833
163.9	0.706167
164	0.707333
164.1	0.708667
164.2	0.709
164.3	0.708167
164.4	0.709833
164.5	0.709333
164.6	0.71
164.7	0.711
164.8	0.709167
164.9	0.709833
165	0.709833
165.1	0.708333
165.2	0.7085
165.3	0.710167
165.4	0.708167
165.5	0.711333
165.6	0.709667
165.7	0.7125
165.8	0.712333
165.9	0.710833
166	0.708167
166.1	0.7085
166.2	0.7075
166.3	0.706333
166.4	0.708333
166.5	0.706833
166.6	0.706333
166.7	0.707167
166.8	0.707667
166.9	0.7075
167	0.7075
167.1	0.709167
167.2	0.708667
167.3	0.708333
167.4	0.708333
167.5	0.71
167.6	0.7125
167.7	0.712833
167.8	0.7115
167.9	0.713833
168	0.715
168.1	0.714833
168.2	0.714667
168.3	0.713667
168.4	0.713167
168.5	0.711833
168.6	0.710667
168.7	0.711
168.8	0.712
168.9	0.713833
169	0.710833
169.1	0.711
169.2	0.708333
169.3	0.7085
169.4	0.708167
169.5	0.709333
169.6	0.709
169.7	0.707333
169.8	0.708667
169.9	0.708833
170	0.708833
170.1	0.708167
170.2	0.707833
170.3	0.709333
170.4	0.709667
170.5	0.711667
170.6	0.712667
170.7	0.713
170.8	0.711833
170.9	0.71
171	0.708667
171.1	0.708833
171.2	0.710833
171.3	0.712833
171.4	0.713667
171.5	0.713167
171.6	0.7115
171.7	0.712833
171.8	0.714
171.9	0.7155
172	0.7145
172.1	0.716667
172.2	0.716833
172.3	0.717
172.4	0.7185
172.5	0.718833
172.6	0.721
172.7	0.7215
172.8	0.721333
172.9	0.719167
173	0.720333
173.1	0.721167
173.2	0.723167
173.3	0.723167
173.4	0.724833
173.5	0.727333
173.6	0.7275
173.7	0.727
173.8	0.727
173.9	0.727
174	0.7285
174.1	0.727167
174.2	0.727
174.3	0.727
174.4	0.727333
174.5	0.7265
174.6	0.728
174.7	0.727667
174.8	0.7265
174.9	0.726667
175	0.728667
175.1	0.728167
175.2	0.726833
175.3	0.726
175.4	0.724167
175.5	0.725167
175.6	0.725333
175.7	0.724833
175.8	0.725
175.9	0.726833
176	0.728667
176.1	0.726167
176.2	0.7285
176.3	0.727833
176.4	0.725333
176.5	0.723667
176.6	0.721667
176.7	0.721333
176.8	0.722333
176.9	0.723
177	0.7215
177.1	0.723
177.2	0.723167
177.3	0.724667
177.4	0.7225
177.5	0.720667
177.6	0.72
177.7	0.718167
177.8	0.716833
177.9	0.716
178	0.717
178.1	0.718667
178.2	0.719
178.3	0.720167
178.4	0.7195
178.5	0.719833
178.6	0.723
178.7	0.724833
178.8	0.725
178.9	0.724833
179	0.725167
179.1	0.725667
179.2	0.7275
179.3	0.726833
179.4	0.726333
179.5	0.726167
179.6	0.726167
179.7	0.728333
179.8	0.726333
179.9	0.726833
180	0.7275
180.1	0.728833
180.2	0.7295
180.3	0.731
180.4	0.733667
180.5	0.734167
180.6	0.731833
180.7	0.729333
180.8	0.731167
180.9	0.731167
181	0.729167
181.1	0.729167
181.2	0.731833
181.3	0.7315
181.4	0.7325
181.5	0.7315
181.6	0.731833
181.7	0.733333
181.8	0.7315
181.9	0.731667
182	0.732
182.1	0.731167
182.2	0.731833
182.3	0.7325
182.4	0.732667
182.5	0.7335
182.6	0.730667
182.7	0.731
182.8	0.731333
182.9	0.730333
183	0.727167
183.1	0.728167
183.2	0.725333
183.3	0.725167
183.4	0.7245
183.5	0.724333
183.6	0.7255
183.7	0.724167
183.8	0.724667
183.9	0.725833
184	0.728333
184.1	0.729667
184.2	0.7295
184.3	0.7305
184.4	0.729833
184.5	0.729667
184.6	0.729333
184.7	0.730833
184.8	0.730167
184.9	0.730167
185	0.731167
185.1	0.729667
185.2	0.728167
185.3	0.726333
185.4	0.724333
185.5	0.723833
185.6	0.7235
185.7	0.727167
185.8	0.7275
185.9	0.729833
186	0.7305
186.1	0.730667
186.2	0.728333
186.3	0.7305
186.4	0.731833
186.5	0.7295
186.6	0.728833
186.7	0.730167
186.8	0.730167
186.9	0.731167
187	0.730333
187.1	0.732167
187.2	0.729333
187.3	0.7295
187.4	0.729
187.5	0.727667
187.6	0.7275
187.7	0.7265
187.8	0.728
187.9	0.728
188	0.726333
188.1	0.728833
188.2	0.727667
188.3	0.727167
188.4	0.728833
188.5	0.727167
188.6	0.726667
188.7	0.727167
188.8	0.728
188.9	0.727333
189	0.728167
189.1	0.726833
189.2	0.7295
189.3	0.732167
189.4	0.731
189.5	0.732167
189.6	0.7325
189.7	0.7325
189.8	0.730667
189.9	0.731833
190	0.731
190.1	0.7295
190.2	0.728
190.3	0.726333
190.4	0.729167
190.5	0.728667
190.6	0.729167
190.7	0.731
190.8	0.733
190.9	0.7325
191	0.733
191.1	0.731833
191.2	0.731667
191.3	0.7315
191.4	0.732167
191.5	0.7325
191.6	0.733333
191.7	0.733
191.8	0.733667
191.9	0.733667
192	0.734
192.1	0.733667
192.2	0.734833
192.3	0.7345
192.4	0.7345
192.5	0.733167
192.6	0.733333
192.7	0.735
192.8	0.735833
192.9	0.736333
193	0.737833
193.1	0.735
193.2	0.736667
193.3	0.737
193.4	0.736167
193.5	0.737
193.6	0.736833
193.7	0.736833
193.8	0.737
193.9	0.736167
194	0.737833
194.1	0.739333
194.2	0.740333
194.3	0.7405
194.4	0.7425
194.5	0.743
194.6	0.743667
194.7	0.744667
194.8	0.745667
194.9	0.745
195	0.746167
195.1	0.746833
195.2	0.746833
195.3	0.747167
195.4	0.746333
195.5	0.746333
195.6	0.747333
195.7	0.7475
195.8	0.745333
195.9	0.745667
196	0.746167
196.1	0.744667
196.2	0.744
196.3	0.740833
196.4	0.740833
196.5	0.741333
196.6	0.739833
196.7	0.739833
196.8	0.74
196.9	0.740333
197	0.740333
197.1	0.743167
197.2	0.743833
197.3	0.744667
197.4	0.743167
197.5	0.743333
197.6	0.745
197.7	0.743167
197.8	0.743
197.9	0.741
198	0.740667
198.1	0.742167
198.2	0.743833
198.3	0.740833
198.4	0.7415
198.5	0.742
198.6	0.742667
198.7	0.743167
198.8	0.743
198.9	0.742
199	0.740667
199.1	0.74
199.2	0.74
199.3	0.739667
199.4	0.740167
199.5	0.738167
199.6	0.735667
199.7	0.735167
199.8	0.734667
199.9	0.734
200	0.735167
[truncated: 14,000 more rows]
