# Supplementary material for: Bayesian inference of kinetic schemes for ion channels by Kalman filtering
Source: eLife journal article supplement (doi:10.7554/elife.62714), 2022-05-04
Supplement: fig4-data9 [file 1_Sim_N_3000_Strom_MW_0.5M.xlsx]

## Sheet: Tabelle1
0.1	0
0.2	0
0.3	0
0.4	0
0.5	0
0.6	0
0.7	0
0.8	0
0.9	0
1	0
1.1	0
1.2	0
1.3	0
1.4	0
1.5	0
1.6	0
1.7	0
1.8	0
1.9	0
2	0
2.1	0
2.2	0
2.3	0
2.4	0
2.5	0
2.6	0
2.7	0
2.8	0
2.9	0
3	0
3.1	0
3.2	0
3.3	0
3.4	0
3.5	0
3.6	0
3.7	0
3.8	0
3.9	0
4	0
4.1	0
4.2	0
4.3	0
4.4	0
4.5	0
4.6	0
4.7	0
4.8	0
4.9	0
5	0
5.1	0
5.2	0
5.3	0
5.4	0
5.5	0
5.6	0
5.7	0
5.8	0
5.9	0
6	0
6.1	0
6.2	0
6.3	0
6.4	0
6.5	0
6.6	0
6.7	0
6.8	0
6.9	0
7	0
7.1	0
7.2	0
7.3	0
7.4	0
7.5	0
7.6	0
7.7	0
7.8	0
7.9	0
8	0
8.1	0
8.2	0
8.3	0
8.4	0
8.5	0
8.6	0
8.7	0
8.8	0
8.9	0
9	0
9.1	0
9.2	0
9.3	0
9.4	0
9.5	0
9.6	0
9.7	0
9.8	0
9.9	0
10	0
10.1	0
10.2	0
10.3	0
10.4	0
10.5	0
10.6	0
10.7	0
10.8	0
10.9	0
11	0
11.1	0
11.2	0
11.3	0
11.4	0
11.5	0
11.6	0
11.7	0
11.8	0
11.9	0
12	0
12.1	0
12.2	0
12.3	0
12.4	0
12.5	0
12.6	0
12.7	0
12.8	0
12.9	0
13	0
13.1	0
13.2	0
13.3	0
13.4	0
13.5	0
13.6	0
13.7	0
13.8	0
13.9	0
14	0
14.1	0
14.2	0
14.3	0
14.4	0
14.5	0
14.6	0
14.7	0
14.8	0
14.9	0
15	0
15.1	0
15.2	0
15.3	0
15.4	0
15.5	0
15.6	0
15.7	0
15.8	0
15.9	0
16	0
16.1	0
16.2	0
16.3	0
16.4	0
16.5	0
16.6	0
16.7	0
16.8	0
16.9	0
17	0
17.1	0
17.2	0
17.3	0
17.4	0
17.5	0
17.6	0
17.7	0
17.8	0
17.9	0
18	0
18.1	0
18.2	0
18.3	0
18.4	0
18.5	0
18.6	0
18.7	0
18.8	0
18.9	0
19	0
19.1	0
19.2	0
19.3	0
19.4	0
19.5	0
19.6	0
19.7	0
19.8	0
19.9	0
20	0
20.1	0
20.2	0
20.3	0
20.4	0
20.5	0
20.6	0
20.7	0
20.8	0
20.9	0
21	0
21.1	0
21.2	0
21.3	0
21.4	0
21.5	0
21.6	0
21.7	0
21.8	0
21.9	0
22	0
22.1	0
22.2	0
22.3	0
22.4	0
22.5	0
22.6	0
22.7	0
22.8	0
22.9	0
23	0
23.1	0
23.2	0
23.3	0
23.4	0
23.5	0
23.6	0
23.7	0
23.8	0
23.9	0
24	0
24.1	0
24.2	0
24.3	0
24.4	0
24.5	0
24.6	0
24.7	0
24.8	0
24.9	0
25	0
25.1	0
25.2	0
25.3	0
25.4	0
25.5	0
25.6	0
25.7	0
25.8	0
25.9	0
26	0
26.1	0
26.2	0
26.3	0
26.4	0
26.5	0
26.6	0
26.7	0
26.8	0
26.9	0
27	0
27.1	0
27.2	0
27.3	0
27.4	0
27.5	0
27.6	0
27.7	0
27.8	0
27.9	0
28	0
28.1	0
28.2	0
28.3	0
28.4	0
28.5	0
28.6	0
28.7	0
28.8	0
28.9	0
29	0
29.1	0
29.2	0
29.3	0
29.4	0
29.5	0
29.6	0
29.7	0
29.8	0
29.9	0
30	0
30.1	0
30.2	0
30.3	0
30.4	0
30.5	0
30.6	0
30.7	0
30.8	0
30.9	0
31	0
31.1	0
31.2	0
31.3	0
31.4	0
31.5	0
31.6	0
31.7	0
31.8	0
31.9	0
32	0
32.1	0
32.2	0
32.3	0
32.4	0
32.5	0
32.6	0
32.7	0
32.8	0
32.9	0
33	0
33.1	0
33.2	0
33.3	0
33.4	0
33.5	0
33.6	0
33.7	0
33.8	0
33.9	0
34	0
34.1	0
34.2	0
34.3	0
34.4	0
34.5	0
34.6	0
34.7	0
34.8	0
34.9	0
35	0
35.1	0
35.2	0
35.3	0
35.4	0
35.5	0
35.6	0
35.7	0
35.8	0
35.9	0
36	0
36.1	0
36.2	0
36.3	0
36.4	0
36.5	0
36.6	0
36.7	0
36.8	0
36.9	0
37	0
37.1	0
37.2	0
37.3	0
37.4	0
37.5	0
37.6	0
37.7	0
37.8	0
37.9	0
38	0
38.1	0
38.2	0
38.3	0
38.4	0
38.5	0
38.6	0
38.7	0
38.8	0
38.9	0
39	0
39.1	0
39.2	0
39.3	0
39.4	0
39.5	0
39.6	0
39.7	0
39.8	0
39.9	0
40	0
40.1	0
40.2	0
40.3	0
40.4	0
40.5	0
40.6	0
40.7	0
40.8	0
40.9	0
41	0
41.1	0
41.2	0
41.3	0
41.4	0
41.5	0
41.6	0
41.7	0
41.8	0
41.9	0
42	0
42.1	0
42.2	0
42.3	0
42.4	0
42.5	0
42.6	0
42.7	0
42.8	0
42.9	0
43	0
43.1	0
43.2	0
43.3	0
43.4	0
43.5	0
43.6	0
43.7	0
43.8	0
43.9	0
44	0
44.1	0
44.2	0
44.3	0
44.4	0
44.5	0
44.6	0
44.7	0
44.8	0
44.9	0
45	0
45.1	0
45.2	0
45.3	0
45.4	0
45.5	0
45.6	0
45.7	0
45.8	0
45.9	0
46	0
46.1	0
46.2	0
46.3	0
46.4	0
46.5	0
46.6	0
46.7	0
46.8	0
46.9	0
47	0
47.1	0
47.2	0
47.3	0
47.4	0
47.5	0
47.6	0
47.7	0
47.8	0
47.9	0
48	0
48.1	0
48.2	0
48.3	0
48.4	0
48.5	0
48.6	0
48.7	0
48.8	0
48.9	0
49	0
49.1	0
49.2	0
49.3	0
49.4	0
49.5	0
49.6	0
49.7	0
49.8	0
49.9	0
50	0
50.1	0
50.2	0
50.3	0
50.4	0
50.5	0
50.6	0
50.7	0
50.8	0
50.9	0
51	0
51.1	0
51.2	0
51.3	0
51.4	0
51.5	0
51.6	0
51.7	0
51.8	0
51.9	0
52	0
52.1	0
52.2	0
52.3	0
52.4	0
52.5	0
52.6	0
52.7	0
52.8	0
52.9	0
53	0
53.1	0
53.2	0
53.3	0
53.4	0
53.5	0
53.6	0
53.7	0
53.8	0
53.9	0
54	0
54.1	0
54.2	0
54.3	0
54.4	0
54.5	0
54.6	0
54.7	0
54.8	0
54.9	0
55	0
55.1	0
55.2	0
55.3	0
55.4	0
55.5	0
55.6	0
55.7	0
55.8	0
55.9	0
56	0
56.1	0
56.2	0
56.3	0
56.4	0
56.5	0
56.6	0
56.7	0
56.8	0
56.9	0
57	0
57.1	0
57.2	0
57.3	0
57.4	0
57.5	0
57.6	0
57.7	0
57.8	0
57.9	0
58	0
58.1	0
58.2	0
58.3	0
58.4	0
58.5	0
58.6	0
58.7	0
58.8	0
58.9	0
59	0
59.1	0
59.2	0
59.3	0
59.4	0
59.5	0
59.6	0
59.7	0
59.8	0
59.9	0
60	0
60.1	0
60.2	0
60.3	0
60.4	0
60.5	0
60.6	0
60.7	0
60.8	0
60.9	0
61	0
61.1	0
61.2	0
61.3	0
61.4	0
61.5	0
61.6	0
61.7	0
61.8	0
61.9	0
62	0
62.1	0
62.2	0
62.3	0
62.4	0
62.5	0
62.6	0
62.7	0
62.8	0
62.9	0
63	0
63.1	0
63.2	0
63.3	0
63.4	0
63.5	0
63.6	0
63.7	0
63.8	0
63.9	0
64	0
64.1	0
64.2	0
64.3	0
64.4	0
64.5	0
64.6	0
64.7	0
64.8	0
64.9	0
65	0
65.1	0
65.2	0
65.3	0
65.4	0
65.5	0
65.6	0
65.7	0
65.8	0
65.9	0
66	0
66.1	0
66.2	0
66.3	0
66.4	0
66.5	0
66.6	0
66.7	0
66.8	0
66.9	0
67	0
67.1	0
67.2	0
67.3	0
67.4	0
67.5	0
67.6	0
67.7	0
67.8	0
67.9	0
68	0
68.1	0
68.2	0
68.3	0
68.4	0
68.5	0
68.6	0
68.7	0
68.8	0
68.9	0
69	0
69.1	0
69.2	0
69.3	0
69.4	0
69.5	0
69.6	0
69.7	0
69.8	0
69.9	0
70	0
70.1	0
70.2	0
70.3	0
70.4	0
70.5	0
70.6	0
70.7	0
70.8	0
70.9	0
71	0
71.1	0
71.2	0
71.3	0
71.4	0
71.5	0
71.6	0
71.7	0
71.8	0
71.9	0
72	0
72.1	0
72.2	0
72.3	0
72.4	0
72.5	0
72.6	0
72.7	0
72.8	0
72.9	0
73	0
73.1	0
73.2	0
73.3	0
73.4	0
73.5	0
73.6	0
73.7	0
73.8	0
73.9	0
74	0
74.1	0
74.2	0
74.3	0
74.4	0
74.5	0
74.6	0
74.7	0
74.8	0
74.9	0
75	0
75.1	0
75.2	0
75.3	0
75.4	0
75.5	0
75.6	0
75.7	0
75.8	0
75.9	0
76	0
76.1	0
76.2	0
76.3	0
76.4	0
76.5	0
76.6	0
76.7	0
76.8	0
76.9	0
77	0
77.1	0
77.2	0
77.3	0
77.4	0
77.5	0
77.6	0
77.7	0
77.8	0
77.9	0
78	0
78.1	0
78.2	0
78.3	0
78.4	0
78.5	0
78.6	0
78.7	0
78.8	0
78.9	0
79	0
79.1	0
79.2	0
79.3	0
79.4	0
79.5	0
79.6	0
79.7	0
79.8	0
79.9	0
80	0
80.1	0
80.2	0
80.3	0
80.4	0
80.5	0
80.6	0
80.7	0
80.8	0
80.9	0
81	0
81.1	0
81.2	0
81.3	0
81.4	0
81.5	0
81.6	0
81.7	0
81.8	0
81.9	0
82	0
82.1	0
82.2	0
82.3	0
82.4	0
82.5	0
82.6	0
82.7	0
82.8	0
82.9	0
83	0
83.1	0
83.2	0
83.3	0
83.4	0
83.5	0
83.6	0
83.7	0
83.8	0
83.9	0
84	0
84.1	0
84.2	0
84.3	0
84.4	0
84.5	0
84.6	0
84.7	0
84.8	0
84.9	0
85	0
85.1	0
85.2	0
85.3	0
85.4	0
85.5	0
85.6	0
85.7	0
85.8	0
85.9	0
86	0
86.1	0
86.2	0
86.3	0
86.4	0
86.5	0
86.6	0
86.7	0
86.8	0
86.9	0
87	0
87.1	0
87.2	0
87.3	0
87.4	0
87.5	0
87.6	0
87.7	0
87.8	0
87.9	0
88	0
88.1	0
88.2	0
88.3	0
88.4	0
88.5	0
88.6	0
88.7	0
88.8	0
88.9	0
89	0
89.1	0
89.2	0
89.3	0
89.4	0
89.5	0
89.6	0
89.7	0
89.8	0
89.9	0
90	0
90.1	0
90.2	0
90.3	0
90.4	0
90.5	0
90.6	0
90.7	0
90.8	0
90.9	0
91	0
91.1	0
91.2	0
91.3	0
91.4	0
91.5	0
91.6	0
91.7	0
91.8	0
91.9	0
92	0
92.1	0
92.2	0
92.3	0
92.4	0
92.5	0
92.6	0
92.7	0
92.8	0
92.9	0
93	0
93.1	0
93.2	0
93.3	0
93.4	0
93.5	0
93.6	0
93.7	0
93.8	0
93.9	0
94	0
94.1	0
94.2	0
94.3	0
94.4	0
94.5	0
94.6	0
94.7	0
94.8	0
94.9	0
95	0
95.1	0
95.2	0
95.3	0
95.4	0
95.5	0
95.6	0
95.7	0
95.8	0
95.9	0
96	0
96.1	0
96.2	0
96.3	0
96.4	0
96.5	0
96.6	0
96.7	0
96.8	0
96.9	0
97	0
97.1	0
97.2	0
97.3	0
97.4	0
97.5	0
97.6	0
97.7	0
97.8	0
97.9	0
98	0
98.1	0
98.2	0
98.3	0
98.4	0
98.5	0
98.6	0
98.7	0
98.8	0
98.9	0
99	0
99.1	0
99.2	0
99.3	0
99.4	0
99.5	0
99.6	0
99.7	0
99.8	0
99.9	0
100	0
100.1	0
100.2	0
100.3	0
100.4	0
100.5	0
100.6	0
100.7	0
100.8	0
100.9	0
101	0.000333333
101.1	0.000333333
101.2	0.000666667
101.3	0.001
101.4	0.001
101.5	0.00133333
101.6	0.00133333
101.7	0.00166667
101.8	0.00266667
101.9	0.00266667
102	0.003
102.1	0.00366667
102.2	0.00366667
102.3	0.00466667
102.4	0.005
102.5	0.005
102.6	0.00533333
102.7	0.00566667
102.8	0.00633333
102.9	0.00633333
103	0.007
103.1	0.008
103.2	0.00833333
103.3	0.00833333
103.4	0.00866667
103.5	0.009
103.6	0.00966667
103.7	0.0103333
103.8	0.0106667
103.9	0.0116667
104	0.0116667
104.1	0.0116667
104.2	0.012
104.3	0.0123333
104.4	0.0126667
104.5	0.0126667
104.6	0.013
104.7	0.013
104.8	0.0133333
104.9	0.015
105	0.015
105.1	0.016
105.2	0.0173333
105.3	0.018
105.4	0.0186667
105.5	0.019
105.6	0.02
105.7	0.021
105.8	0.0216667
105.9	0.0216667
106	0.0223333
106.1	0.023
106.2	0.025
106.3	0.026
106.4	0.0263333
106.5	0.0273333
106.6	0.0286667
106.7	0.0293333
106.8	0.0293333
106.9	0.03
107	0.031
107.1	0.0323333
107.2	0.0333333
107.3	0.0343333
107.4	0.0356667
107.5	0.037
107.6	0.0376667
107.7	0.0383333
107.8	0.0396667
107.9	0.0416667
108	0.0423333
108.1	0.044
108.2	0.0443333
108.3	0.045
108.4	0.0456667
108.5	0.0456667
108.6	0.0463333
108.7	0.047
108.8	0.048
108.9	0.0483333
109	0.0493333
109.1	0.0496667
109.2	0.0513333
109.3	0.0513333
109.4	0.053
109.5	0.054
109.6	0.0556667
109.7	0.057
109.8	0.0583333
109.9	0.0593333
110	0.0606667
110.1	0.0613333
110.2	0.062
110.3	0.0633333
110.4	0.0636667
110.5	0.066
110.6	0.0666667
110.7	0.0676667
110.8	0.0676667
110.9	0.0686667
111	0.0703333
111.1	0.071
111.2	0.0723333
111.3	0.0726667
111.4	0.0733333
111.5	0.0736667
111.6	0.0736667
111.7	0.0736667
111.8	0.0743333
111.9	0.076
112	0.077
112.1	0.0776667
112.2	0.0783333
112.3	0.0783333
112.4	0.079
112.5	0.0796667
112.6	0.0803333
112.7	0.081
112.8	0.0816667
112.9	0.082
113	0.082
113.1	0.083
113.2	0.0826667
113.3	0.083
113.4	0.0833333
113.5	0.0833333
113.6	0.0836667
113.7	0.0836667
113.8	0.0843333
113.9	0.0853333
114	0.086
114.1	0.087
114.2	0.0886667
114.3	0.089
114.4	0.0896667
114.5	0.0903333
114.6	0.09
114.7	0.091
114.8	0.091
114.9	0.092
115	0.0936667
115.1	0.0946667
115.2	0.0963333
115.3	0.0976667
115.4	0.0986667
115.5	0.1
115.6	0.101667
115.7	0.103667
115.8	0.105333
115.9	0.105333
116	0.105667
116.1	0.105667
116.2	0.105667
116.3	0.107
116.4	0.107333
116.5	0.109
116.6	0.109667
116.7	0.110333
116.8	0.113
116.9	0.114
117	0.114667
117.1	0.115333
117.2	0.115667
117.3	0.115667
117.4	0.115667
117.5	0.117
117.6	0.117333
117.7	0.118
117.8	0.118333
117.9	0.119
118	0.119
118.1	0.12
118.2	0.121
118.3	0.121667
118.4	0.122
118.5	0.123
118.6	0.124
118.7	0.124333
118.8	0.124333
118.9	0.125667
119	0.127
119.1	0.128333
119.2	0.129
119.3	0.129333
119.4	0.129333
119.5	0.13
119.6	0.13
119.7	0.131
119.8	0.131667
119.9	0.133
120	0.135
120.1	0.134667
120.2	0.136
120.3	0.136333
120.4	0.136333
120.5	0.138
120.6	0.138
120.7	0.139
120.8	0.140333
120.9	0.140667
121	0.141
121.1	0.142
121.2	0.142333
121.3	0.143667
121.4	0.145
121.5	0.145667
121.6	0.146333
121.7	0.146667
121.8	0.146667
121.9	0.147667
122	0.149
122.1	0.149667
122.2	0.149333
122.3	0.149667
122.4	0.151
122.5	0.151333
122.6	0.152
122.7	0.152333
122.8	0.152667
122.9	0.153
123	0.153
123.1	0.155333
123.2	0.156
123.3	0.157333
123.4	0.158
123.5	0.158
123.6	0.158
123.7	0.158667
123.8	0.159667
123.9	0.16
124	0.161
124.1	0.161
124.2	0.161
124.3	0.162333
124.4	0.162667
124.5	0.163667
124.6	0.164333
124.7	0.165667
124.8	0.166
124.9	0.166667
125	0.168333
125.1	0.168
125.2	0.168667
125.3	0.169
125.4	0.169333
125.5	0.169
125.6	0.17
125.7	0.170333
125.8	0.170333
125.9	0.171667
126	0.172667
126.1	0.173
126.2	0.173
126.3	0.173333
126.4	0.173333
126.5	0.173667
126.6	0.175
126.7	0.176
126.8	0.176333
126.9	0.176333
127	0.177333
127.1	0.179333
127.2	0.180667
127.3	0.180667
127.4	0.181
127.5	0.181667
127.6	0.181667
127.7	0.181333
127.8	0.181667
127.9	0.183333
128	0.183
128.1	0.183667
128.2	0.184667
128.3	0.185333
128.4	0.186333
128.5	0.188
128.6	0.188667
128.7	0.19
128.8	0.191333
128.9	0.192
129	0.191667
129.1	0.192667
129.2	0.192333
129.3	0.192667
129.4	0.193333
129.5	0.195
129.6	0.194667
129.7	0.195
129.8	0.196667
129.9	0.198333
130	0.198667
130.1	0.198667
130.2	0.198667
130.3	0.200333
130.4	0.201333
130.5	0.201333
130.6	0.203
130.7	0.203
130.8	0.203667
130.9	0.203667
131	0.204667
131.1	0.204333
131.2	0.205667
131.3	0.205667
131.4	0.206
131.5	0.207
131.6	0.207667
131.7	0.209333
131.8	0.21
131.9	0.211
132	0.212
132.1	0.212
132.2	0.212667
132.3	0.213
132.4	0.212667
132.5	0.213667
132.6	0.214
132.7	0.215667
132.8	0.215667
132.9	0.217333
133	0.218
133.1	0.218
133.2	0.219667
133.3	0.220333
133.4	0.220667
133.5	0.222667
133.6	0.225
133.7	0.225667
133.8	0.226333
133.9	0.227667
134	0.228667
134.1	0.229
134.2	0.229333
134.3	0.229333
134.4	0.230333
134.5	0.231
134.6	0.232333
134.7	0.232667
134.8	0.233
134.9	0.233333
135	0.234
135.1	0.234
135.2	0.234
135.3	0.234667
135.4	0.234667
135.5	0.235
135.6	0.235667
135.7	0.235667
135.8	0.236
135.9	0.236
136	0.237
136.1	0.237333
136.2	0.237667
136.3	0.238
136.4	0.238333
136.5	0.239
136.6	0.238667
136.7	0.238667
136.8	0.238667
136.9	0.24
137	0.241
137.1	0.241333
137.2	0.241667
137.3	0.242
137.4	0.241333
137.5	0.241667
137.6	0.242
137.7	0.243333
137.8	0.243667
137.9	0.244
138	0.243667
138.1	0.245333
138.2	0.245333
138.3	0.246
138.4	0.246667
138.5	0.247333
138.6	0.249333
138.7	0.249667
138.8	0.249333
138.9	0.249333
139	0.25
139.1	0.250667
139.2	0.250667
139.3	0.251
139.4	0.251667
139.5	0.252667
139.6	0.253
139.7	0.253
139.8	0.253667
139.9	0.254
140	0.254667
140.1	0.253333
140.2	0.253667
140.3	0.253333
140.4	0.254
140.5	0.254667
140.6	0.254667
140.7	0.255333
140.8	0.256
140.9	0.256667
141	0.256667
141.1	0.256667
141.2	0.257
141.3	0.257
141.4	0.256667
141.5	0.257667
141.6	0.259
141.7	0.258667
141.8	0.258667
141.9	0.258667
142	0.259
142.1	0.259667
142.2	0.259667
142.3	0.261
142.4	0.261667
142.5	0.262
142.6	0.262333
142.7	0.262333
142.8	0.263
142.9	0.263333
143	0.263667
143.1	0.263667
143.2	0.264
143.3	0.265
143.4	0.265333
143.5	0.265333
143.6	0.265333
143.7	0.266
143.8	0.266667
143.9	0.266667
144	0.268333
144.1	0.269667
144.2	0.27
144.3	0.270667
144.4	0.271667
144.5	0.272333
144.6	0.272667
144.7	0.272667
144.8	0.273667
144.9	0.275
145	0.276333
145.1	0.277333
145.2	0.277667
145.3	0.278333
145.4	0.279333
145.5	0.279
145.6	0.278667
145.7	0.279
145.8	0.279667
145.9	0.279667
146	0.280333
146.1	0.281333
146.2	0.282
146.3	0.282333
146.4	0.282333
146.5	0.282667
146.6	0.283
146.7	0.284
146.8	0.284333
146.9	0.285
147	0.285333
147.1	0.286333
147.2	0.287667
147.3	0.288667
147.4	0.29
147.5	0.29
147.6	0.291667
147.7	0.291667
147.8	0.292
147.9	0.292333
148	0.292667
148.1	0.292667
148.2	0.293667
148.3	0.293667
148.4	0.295667
148.5	0.297667
148.6	0.298667
148.7	0.299333
148.8	0.299667
148.9	0.300667
149	0.301
149.1	0.300667
149.2	0.300333
149.3	0.300667
149.4	0.3
149.5	0.3
149.6	0.300333
149.7	0.301667
149.8	0.302667
149.9	0.303667
150	0.305333
150.1	0.306667
150.2	0.306333
150.3	0.306667
150.4	0.307333
150.5	0.307333
150.6	0.308
150.7	0.308333
150.8	0.308333
150.9	0.308333
151	0.308333
151.1	0.308667
151.2	0.309
151.3	0.309667
151.4	0.311
151.5	0.310667
151.6	0.311667
151.7	0.312
151.8	0.312
151.9	0.313
152	0.312667
152.1	0.313
152.2	0.313333
152.3	0.312667
152.4	0.313
152.5	0.314333
152.6	0.314667
152.7	0.315333
152.8	0.315667
152.9	0.316
153	0.315333
153.1	0.316333
153.2	0.317333
153.3	0.317333
153.4	0.317
153.5	0.316667
153.6	0.317333
153.7	0.317
153.8	0.316667
153.9	0.316667
154	0.317
154.1	0.317667
154.2	0.317667
154.3	0.318
154.4	0.318333
154.5	0.319
154.6	0.319
154.7	0.319667
154.8	0.32
154.9	0.319667
155	0.320333
155.1	0.320333
155.2	0.321667
155.3	0.323
155.4	0.323667
155.5	0.324667
155.6	0.324667
155.7	0.325333
155.8	0.326333
155.9	0.326667
156	0.327667
156.1	0.328333
156.2	0.327667
156.3	0.327333
156.4	0.327333
156.5	0.327
156.6	0.327333
156.7	0.329
156.8	0.328667
156.9	0.329333
157	0.329333
157.1	0.33
157.2	0.331667
157.3	0.333
157.4	0.333
157.5	0.333
157.6	0.333667
157.7	0.334333
157.8	0.334333
157.9	0.334
158	0.335
158.1	0.336
158.2	0.336667
158.3	0.336333
158.4	0.337
158.5	0.337
158.6	0.337667
158.7	0.338667
158.8	0.339667
158.9	0.339333
159	0.339667
159.1	0.339
159.2	0.339
159.3	0.339
159.4	0.339667
159.5	0.339667
159.6	0.340667
159.7	0.341333
159.8	0.341333
159.9	0.342333
160	0.342667
160.1	0.342667
160.2	0.344
160.3	0.343667
160.4	0.344
160.5	0.344333
160.6	0.345
160.7	0.345
160.8	0.345
160.9	0.344667
161	0.345333
161.1	0.345333
161.2	0.345667
161.3	0.346333
161.4	0.346333
161.5	0.345667
161.6	0.346
161.7	0.346667
161.8	0.346667
161.9	0.347333
162	0.347333
162.1	0.347
162.2	0.347
162.3	0.347333
162.4	0.347
162.5	0.348
162.6	0.347667
162.7	0.347333
162.8	0.347333
162.9	0.347667
163	0.347667
163.1	0.348
163.2	0.349
163.3	0.348667
163.4	0.349667
163.5	0.350667
163.6	0.35
163.7	0.35
163.8	0.350333
163.9	0.350667
164	0.350667
164.1	0.352
164.2	0.352
164.3	0.353
164.4	0.354
164.5	0.355
164.6	0.356333
164.7	0.356667
164.8	0.357333
164.9	0.358333
165	0.358333
165.1	0.358333
165.2	0.358667
165.3	0.359333
165.4	0.359333
165.5	0.359333
165.6	0.359333
165.7	0.359333
165.8	0.359667
165.9	0.36
166	0.360667
166.1	0.360667
166.2	0.360667
166.3	0.361
166.4	0.361
166.5	0.361
166.6	0.361333
166.7	0.362333
166.8	0.363
166.9	0.364
167	0.363667
167.1	0.363667
167.2	0.364
167.3	0.365
167.4	0.365333
167.5	0.365
167.6	0.365
167.7	0.365333
167.8	0.366
167.9	0.366
168	0.365333
168.1	0.366
168.2	0.366667
168.3	0.367
168.4	0.368
168.5	0.368333
168.6	0.368
168.7	0.367333
168.8	0.369
168.9	0.369333
169	0.37
169.1	0.370333
169.2	0.370667
169.3	0.371
169.4	0.371
169.5	0.372
169.6	0.372
169.7	0.373
169.8	0.373
169.9	0.373667
170	0.373333
170.1	0.374333
170.2	0.374
170.3	0.375
170.4	0.375
170.5	0.375
170.6	0.375667
170.7	0.375667
170.8	0.376333
170.9	0.376
171	0.376667
171.1	0.377
171.2	0.377333
171.3	0.377333
171.4	0.377333
171.5	0.378
171.6	0.379
171.7	0.379
171.8	0.38
171.9	0.380667
172	0.381333
172.1	0.382
172.2	0.381333
172.3	0.382333
172.4	0.382667
172.5	0.383333
172.6	0.382667
172.7	0.382667
172.8	0.383667
172.9	0.384
173	0.384333
173.1	0.385
173.2	0.385333
173.3	0.385333
173.4	0.384333
173.5	0.384
173.6	0.384
173.7	0.384333
173.8	0.384
173.9	0.385333
174	0.385333
174.1	0.385
174.2	0.385667
174.3	0.386
174.4	0.385333
174.5	0.385333
174.6	0.384667
174.7	0.384
174.8	0.383667
174.9	0.384
175	0.384
175.1	0.383333
175.2	0.383667
175.3	0.384333
175.4	0.385
175.5	0.386333
175.6	0.386
175.7	0.386
175.8	0.385333
175.9	0.387
176	0.387667
176.1	0.387667
176.2	0.388
176.3	0.388333
176.4	0.388333
176.5	0.388667
176.6	0.389
176.7	0.389333
176.8	0.389667
176.9	0.39
177	0.390667
177.1	0.392333
177.2	0.392667
177.3	0.392667
177.4	0.392667
177.5	0.392
177.6	0.391667
177.7	0.391
177.8	0.391
177.9	0.391333
178	0.392
178.1	0.392667
178.2	0.393
178.3	0.392667
178.4	0.394
178.5	0.395
178.6	0.395
178.7	0.395667
178.8	0.396667
178.9	0.396667
179	0.396
179.1	0.396
179.2	0.396
179.3	0.396333
179.4	0.396333
179.5	0.396333
179.6	0.397
179.7	0.397333
179.8	0.398
179.9	0.398667
180	0.398667
180.1	0.399333
180.2	0.399667
180.3	0.4
180.4	0.399333
180.5	0.399
180.6	0.399
180.7	0.399667
180.8	0.4
180.9	0.400333
181	0.400667
181.1	0.400667
181.2	0.401
181.3	0.401
181.4	0.402333
181.5	0.403333
181.6	0.403667
181.7	0.404
181.8	0.405
181.9	0.405667
182	0.405
182.1	0.405
182.2	0.404667
182.3	0.404
182.4	0.404
182.5	0.404667
182.6	0.405333
182.7	0.404667
182.8	0.404
182.9	0.403333
183	0.403667
183.1	0.403667
183.2	0.403667
183.3	0.403667
183.4	0.403333
183.5	0.402667
183.6	0.403
183.7	0.403667
183.8	0.404667
183.9	0.405
184	0.405333
184.1	0.405667
184.2	0.406
184.3	0.406333
184.4	0.407333
184.5	0.407333
184.6	0.408667
184.7	0.408667
184.8	0.408333
184.9	0.408
185	0.409333
185.1	0.409
185.2	0.409667
185.3	0.410667
185.4	0.411333
185.5	0.411667
185.6	0.411333
185.7	0.411
185.8	0.411
185.9	0.410667
186	0.411333
186.1	0.411333
186.2	0.411
186.3	0.410667
186.4	0.41
186.5	0.409667
186.6	0.41
186.7	0.410333
186.8	0.411
186.9	0.411333
187	0.412
187.1	0.412333
187.2	0.413333
187.3	0.414
187.4	0.414
187.5	0.413667
187.6	0.414
187.7	0.414
187.8	0.414
187.9	0.413667
188	0.414
188.1	0.414
188.2	0.414333
188.3	0.414
188.4	0.413667
188.5	0.413333
188.6	0.414
188.7	0.413667
188.8	0.414667
188.9	0.415333
189	0.415667
189.1	0.415333
189.2	0.414667
189.3	0.415
189.4	0.414667
189.5	0.415667
189.6	0.416333
189.7	0.416667
189.8	0.417333
189.9	0.416667
190	0.416333
190.1	0.416333
190.2	0.417333
190.3	0.417
190.4	0.417667
190.5	0.419333
190.6	0.419
190.7	0.419667
190.8	0.420333
190.9	0.419667
191	0.419333
191.1	0.42
191.2	0.419667
191.3	0.42
191.4	0.42
191.5	0.42
191.6	0.420667
191.7	0.419667
191.8	0.420333
191.9	0.420667
192	0.420333
192.1	0.42
192.2	0.420333
192.3	0.421333
192.4	0.421333
192.5	0.421667
192.6	0.422
192.7	0.422333
192.8	0.422667
192.9	0.423667
193	0.425
193.1	0.425333
193.2	0.425667
193.3	0.425333
193.4	0.426333
193.5	0.427
193.6	0.427
193.7	0.427
193.8	0.428
193.9	0.428667
194	0.428
194.1	0.428333
194.2	0.428667
194.3	0.429333
194.4	0.431
194.5	0.430333
194.6	0.430333
194.7	0.429667
194.8	0.429667
194.9	0.43
195	0.429333
195.1	0.429333
195.2	0.429667
195.3	0.428667
195.4	0.429
195.5	0.428667
195.6	0.427667
195.7	0.427667
195.8	0.427667
195.9	0.427667
196	0.427333
196.1	0.427
196.2	0.427
196.3	0.427333
196.4	0.427667
196.5	0.428
196.6	0.428
196.7	0.428333
196.8	0.429
196.9	0.43
197	0.430667
197.1	0.431
197.2	0.431
197.3	0.430667
197.4	0.431
197.5	0.432333
197.6	0.433667
197.7	0.435
197.8	0.434333
197.9	0.435
198	0.435667
198.1	0.435667
198.2	0.435333
198.3	0.435667
198.4	0.435667
198.5	0.435667
198.6	0.435
198.7	0.434
198.8	0.435
198.9	0.435333
199	0.435333
199.1	0.435667
199.2	0.436333
199.3	0.436
199.4	0.436333
199.5	0.436667
199.6	0.436667
199.7	0.436333
199.8	0.436
199.9	0.436
200	0.437
[truncated: 14,000 more rows]
