# Supplementary material for: Bayesian inference of kinetic schemes for ion channels by Kalman filtering
Source: eLife journal article supplement (doi:10.7554/elife.62714), 2022-05-04
Supplement: fig4-data9 [file 1_Sim_N_4000_Fluor_MW_0.5M.xlsx]

## Sheet: Tabelle1
0.1	0
0.2	0
0.3	0
0.4	0
0.5	0
0.6	0
0.7	0
0.8	0
0.9	0
1	0
1.1	0
1.2	0
1.3	0
1.4	0
1.5	0
1.6	0
1.7	0
1.8	0
1.9	0
2	0
2.1	0
2.2	0
2.3	0
2.4	0
2.5	0
2.6	0
2.7	0
2.8	0
2.9	0
3	0
3.1	0
3.2	0
3.3	0
3.4	0
3.5	0
3.6	0
3.7	0
3.8	0
3.9	0
4	0
4.1	0
4.2	0
4.3	0
4.4	0
4.5	0
4.6	0
4.7	0
4.8	0
4.9	0
5	0
5.1	0
5.2	0
5.3	0
5.4	0
5.5	0
5.6	0
5.7	0
5.8	0
5.9	0
6	0
6.1	0
6.2	0
6.3	0
6.4	0
6.5	0
6.6	0
6.7	0
6.8	0
6.9	0
7	0
7.1	0
7.2	0
7.3	0
7.4	0
7.5	0
7.6	0
7.7	0
7.8	0
7.9	0
8	0
8.1	0
8.2	0
8.3	0
8.4	0
8.5	0
8.6	0
8.7	0
8.8	0
8.9	0
9	0
9.1	0
9.2	0
9.3	0
9.4	0
9.5	0
9.6	0
9.7	0
9.8	0
9.9	0
10	0
10.1	0
10.2	0
10.3	0
10.4	0
10.5	0
10.6	0
10.7	0
10.8	0
10.9	0
11	0
11.1	0
11.2	0
11.3	0
11.4	0
11.5	0
11.6	0
11.7	0
11.8	0
11.9	0
12	0
12.1	0
12.2	0
12.3	0
12.4	0
12.5	0
12.6	0
12.7	0
12.8	0
12.9	0
13	0
13.1	0
13.2	0
13.3	0
13.4	0
13.5	0
13.6	0
13.7	0
13.8	0
13.9	0
14	0
14.1	0
14.2	0
14.3	0
14.4	0
14.5	0
14.6	0
14.7	0
14.8	0
14.9	0
15	0
15.1	0
15.2	0
15.3	0
15.4	0
15.5	0
15.6	0
15.7	0
15.8	0
15.9	0
16	0
16.1	0
16.2	0
16.3	0
16.4	0
16.5	0
16.6	0
16.7	0
16.8	0
16.9	0
17	0
17.1	0
17.2	0
17.3	0
17.4	0
17.5	0
17.6	0
17.7	0
17.8	0
17.9	0
18	0
18.1	0
18.2	0
18.3	0
18.4	0
18.5	0
18.6	0
18.7	0
18.8	0
18.9	0
19	0
19.1	0
19.2	0
19.3	0
19.4	0
19.5	0
19.6	0
19.7	0
19.8	0
19.9	0
20	0
20.1	0
20.2	0
20.3	0
20.4	0
20.5	0
20.6	0
20.7	0
20.8	0
20.9	0
21	0
21.1	0
21.2	0
21.3	0
21.4	0
21.5	0
21.6	0
21.7	0
21.8	0
21.9	0
22	0
22.1	0
22.2	0
22.3	0
22.4	0
22.5	0
22.6	0
22.7	0
22.8	0
22.9	0
23	0
23.1	0
23.2	0
23.3	0
23.4	0
23.5	0
23.6	0
23.7	0
23.8	0
23.9	0
24	0
24.1	0
24.2	0
24.3	0
24.4	0
24.5	0
24.6	0
24.7	0
24.8	0
24.9	0
25	0
25.1	0
25.2	0
25.3	0
25.4	0
25.5	0
25.6	0
25.7	0
25.8	0
25.9	0
26	0
26.1	0
26.2	0
26.3	0
26.4	0
26.5	0
26.6	0
26.7	0
26.8	0
26.9	0
27	0
27.1	0
27.2	0
27.3	0
27.4	0
27.5	0
27.6	0
27.7	0
27.8	0
27.9	0
28	0
28.1	0
28.2	0
28.3	0
28.4	0
28.5	0
28.6	0
28.7	0
28.8	0
28.9	0
29	0
29.1	0
29.2	0
29.3	0
29.4	0
29.5	0
29.6	0
29.7	0
29.8	0
29.9	0
30	0
30.1	0
30.2	0
30.3	0
30.4	0
30.5	0
30.6	0
30.7	0
30.8	0
30.9	0
31	0
31.1	0
31.2	0
31.3	0
31.4	0
31.5	0
31.6	0
31.7	0
31.8	0
31.9	0
32	0
32.1	0
32.2	0
32.3	0
32.4	0
32.5	0
32.6	0
32.7	0
32.8	0
32.9	0
33	0
33.1	0
33.2	0
33.3	0
33.4	0
33.5	0
33.6	0
33.7	0
33.8	0
33.9	0
34	0
34.1	0
34.2	0
34.3	0
34.4	0
34.5	0
34.6	0
34.7	0
34.8	0
34.9	0
35	0
35.1	0
35.2	0
35.3	0
35.4	0
35.5	0
35.6	0
35.7	0
35.8	0
35.9	0
36	0
36.1	0
36.2	0
36.3	0
36.4	0
36.5	0
36.6	0
36.7	0
36.8	0
36.9	0
37	0
37.1	0
37.2	0
37.3	0
37.4	0
37.5	0
37.6	0
37.7	0
37.8	0
37.9	0
38	0
38.1	0
38.2	0
38.3	0
38.4	0
38.5	0
38.6	0
38.7	0
38.8	0
38.9	0
39	0
39.1	0
39.2	0
39.3	0
39.4	0
39.5	0
39.6	0
39.7	0
39.8	0
39.9	0
40	0
40.1	0
40.2	0
40.3	0
40.4	0
40.5	0
40.6	0
40.7	0
40.8	0
40.9	0
41	0
41.1	0
41.2	0
41.3	0
41.4	0
41.5	0
41.6	0
41.7	0
41.8	0
41.9	0
42	0
42.1	0
42.2	0
42.3	0
42.4	0
42.5	0
42.6	0
42.7	0
42.8	0
42.9	0
43	0
43.1	0
43.2	0
43.3	0
43.4	0
43.5	0
43.6	0
43.7	0
43.8	0
43.9	0
44	0
44.1	0
44.2	0
44.3	0
44.4	0
44.5	0
44.6	0
44.7	0
44.8	0
44.9	0
45	0
45.1	0
45.2	0
45.3	0
45.4	0
45.5	0
45.6	0
45.7	0
45.8	0
45.9	0
46	0
46.1	0
46.2	0
46.3	0
46.4	0
46.5	0
46.6	0
46.7	0
46.8	0
46.9	0
47	0
47.1	0
47.2	0
47.3	0
47.4	0
47.5	0
47.6	0
47.7	0
47.8	0
47.9	0
48	0
48.1	0
48.2	0
48.3	0
48.4	0
48.5	0
48.6	0
48.7	0
48.8	0
48.9	0
49	0
49.1	0
49.2	0
49.3	0
49.4	0
49.5	0
49.6	0
49.7	0
49.8	0
49.9	0
50	0
50.1	0
50.2	0
50.3	0
50.4	0
50.5	0
50.6	0
50.7	0
50.8	0
50.9	0
51	0
51.1	0
51.2	0
51.3	0
51.4	0
51.5	0
51.6	0
51.7	0
51.8	0
51.9	0
52	0
52.1	0
52.2	0
52.3	0
52.4	0
52.5	0
52.6	0
52.7	0
52.8	0
52.9	0
53	0
53.1	0
53.2	0
53.3	0
53.4	0
53.5	0
53.6	0
53.7	0
53.8	0
53.9	0
54	0
54.1	0
54.2	0
54.3	0
54.4	0
54.5	0
54.6	0
54.7	0
54.8	0
54.9	0
55	0
55.1	0
55.2	0
55.3	0
55.4	0
55.5	0
55.6	0
55.7	0
55.8	0
55.9	0
56	0
56.1	0
56.2	0
56.3	0
56.4	0
56.5	0
56.6	0
56.7	0
56.8	0
56.9	0
57	0
57.1	0
57.2	0
57.3	0
57.4	0
57.5	0
57.6	0
57.7	0
57.8	0
57.9	0
58	0
58.1	0
58.2	0
58.3	0
58.4	0
58.5	0
58.6	0
58.7	0
58.8	0
58.9	0
59	0
59.1	0
59.2	0
59.3	0
59.4	0
59.5	0
59.6	0
59.7	0
59.8	0
59.9	0
60	0
60.1	0
60.2	0
60.3	0
60.4	0
60.5	0
60.6	0
60.7	0
60.8	0
60.9	0
61	0
61.1	0
61.2	0
61.3	0
61.4	0
61.5	0
61.6	0
61.7	0
61.8	0
61.9	0
62	0
62.1	0
62.2	0
62.3	0
62.4	0
62.5	0
62.6	0
62.7	0
62.8	0
62.9	0
63	0
63.1	0
63.2	0
63.3	0
63.4	0
63.5	0
63.6	0
63.7	0
63.8	0
63.9	0
64	0
64.1	0
64.2	0
64.3	0
64.4	0
64.5	0
64.6	0
64.7	0
64.8	0
64.9	0
65	0
65.1	0
65.2	0
65.3	0
65.4	0
65.5	0
65.6	0
65.7	0
65.8	0
65.9	0
66	0
66.1	0
66.2	0
66.3	0
66.4	0
66.5	0
66.6	0
66.7	0
66.8	0
66.9	0
67	0
67.1	0
67.2	0
67.3	0
67.4	0
67.5	0
67.6	0
67.7	0
67.8	0
67.9	0
68	0
68.1	0
68.2	0
68.3	0
68.4	0
68.5	0
68.6	0
68.7	0
68.8	0
68.9	0
69	0
69.1	0
69.2	0
69.3	0
69.4	0
69.5	0
69.6	0
69.7	0
69.8	0
69.9	0
70	0
70.1	0
70.2	0
70.3	0
70.4	0
70.5	0
70.6	0
70.7	0
70.8	0
70.9	0
71	0
71.1	0
71.2	0
71.3	0
71.4	0
71.5	0
71.6	0
71.7	0
71.8	0
71.9	0
72	0
72.1	0
72.2	0
72.3	0
72.4	0
72.5	0
72.6	0
72.7	0
72.8	0
72.9	0
73	0
73.1	0
73.2	0
73.3	0
73.4	0
73.5	0
73.6	0
73.7	0
73.8	0
73.9	0
74	0
74.1	0
74.2	0
74.3	0
74.4	0
74.5	0
74.6	0
74.7	0
74.8	0
74.9	0
75	0
75.1	0
75.2	0
75.3	0
75.4	0
75.5	0
75.6	0
75.7	0
75.8	0
75.9	0
76	0
76.1	0
76.2	0
76.3	0
76.4	0
76.5	0
76.6	0
76.7	0
76.8	0
76.9	0
77	0
77.1	0
77.2	0
77.3	0
77.4	0
77.5	0
77.6	0
77.7	0
77.8	0
77.9	0
78	0
78.1	0
78.2	0
78.3	0
78.4	0
78.5	0
78.6	0
78.7	0
78.8	0
78.9	0
79	0
79.1	0
79.2	0
79.3	0
79.4	0
79.5	0
79.6	0
79.7	0
79.8	0
79.9	0
80	0
80.1	0
80.2	0
80.3	0
80.4	0
80.5	0
80.6	0
80.7	0
80.8	0
80.9	0
81	0
81.1	0
81.2	0
81.3	0
81.4	0
81.5	0
81.6	0
81.7	0
81.8	0
81.9	0
82	0
82.1	0
82.2	0
82.3	0
82.4	0
82.5	0
82.6	0
82.7	0
82.8	0
82.9	0
83	0
83.1	0
83.2	0
83.3	0
83.4	0
83.5	0
83.6	0
83.7	0
83.8	0
83.9	0
84	0
84.1	0
84.2	0
84.3	0
84.4	0
84.5	0
84.6	0
84.7	0
84.8	0
84.9	0
85	0
85.1	0
85.2	0
85.3	0
85.4	0
85.5	0
85.6	0
85.7	0
85.8	0
85.9	0
86	0
86.1	0
86.2	0
86.3	0
86.4	0
86.5	0
86.6	0
86.7	0
86.8	0
86.9	0
87	0
87.1	0
87.2	0
87.3	0
87.4	0
87.5	0
87.6	0
87.7	0
87.8	0
87.9	0
88	0
88.1	0
88.2	0
88.3	0
88.4	0
88.5	0
88.6	0
88.7	0
88.8	0
88.9	0
89	0
89.1	0
89.2	0
89.3	0
89.4	0
89.5	0
89.6	0
89.7	0
89.8	0
89.9	0
90	0
90.1	0
90.2	0
90.3	0
90.4	0
90.5	0
90.6	0
90.7	0
90.8	0
90.9	0
91	0
91.1	0
91.2	0
91.3	0
91.4	0
91.5	0
91.6	0
91.7	0
91.8	0
91.9	0
92	0
92.1	0
92.2	0
92.3	0
92.4	0
92.5	0
92.6	0
92.7	0
92.8	0
92.9	0
93	0
93.1	0
93.2	0
93.3	0
93.4	0
93.5	0
93.6	0
93.7	0
93.8	0
93.9	0
94	0
94.1	0
94.2	0
94.3	0
94.4	0
94.5	0
94.6	0
94.7	0
94.8	0
94.9	0
95	0
95.1	0
95.2	0
95.3	0
95.4	0
95.5	0
95.6	0
95.7	0
95.8	0
95.9	0
96	0
96.1	0
96.2	0
96.3	0
96.4	0
96.5	0
96.6	0
96.7	0
96.8	0
96.9	0
97	0
97.1	0
97.2	0
97.3	0
97.4	0
97.5	0
97.6	0
97.7	0
97.8	0
97.9	0
98	0
98.1	0
98.2	0
98.3	0
98.4	0
98.5	0
98.6	0
98.7	0
98.8	0
98.9	0
99	0
99.1	0
99.2	0
99.3	0
99.4	0
99.5	0
99.6	0
99.7	0
99.8	0
99.9	0
100	0
100.1	0.02775
100.2	0.056375
100.3	0.08225
100.4	0.106375
100.5	0.1285
100.6	0.149875
100.7	0.171625
100.8	0.193
100.9	0.212375
101	0.227375
101.1	0.24625
101.2	0.26225
101.3	0.279625
101.4	0.293625
101.5	0.306625
101.6	0.318875
101.7	0.329
101.8	0.342625
101.9	0.353625
102	0.363
102.1	0.372875
102.2	0.38275
102.3	0.391875
102.4	0.4005
102.5	0.40925
102.6	0.416875
102.7	0.42425
102.8	0.42925
102.9	0.4335
103	0.438375
103.1	0.445
103.2	0.44975
103.3	0.457875
103.4	0.46375
103.5	0.467625
103.6	0.47
103.7	0.472125
103.8	0.475375
103.9	0.482875
104	0.4865
104.1	0.48775
104.2	0.492
104.3	0.497875
104.4	0.500375
104.5	0.5035
104.6	0.50475
104.7	0.5065
104.8	0.5095
104.9	0.512
105	0.516875
105.1	0.517875
105.2	0.52025
105.3	0.520875
105.4	0.52025
105.5	0.52525
105.6	0.52825
105.7	0.528375
105.8	0.529
105.9	0.5325
106	0.534125
106.1	0.534375
106.2	0.537625
106.3	0.53675
106.4	0.537375
106.5	0.535625
106.6	0.538
106.7	0.53675
106.8	0.539
106.9	0.542625
107	0.544125
107.1	0.545875
107.2	0.547625
107.3	0.548125
107.4	0.5485
107.5	0.552625
107.6	0.55325
107.7	0.551375
107.8	0.552
107.9	0.551875
108	0.553125
108.1	0.55475
108.2	0.554625
108.3	0.55425
108.4	0.5545
108.5	0.554875
108.6	0.556125
108.7	0.556125
108.8	0.557875
108.9	0.557
109	0.55775
109.1	0.56
109.2	0.5605
109.3	0.562375
109.4	0.563375
109.5	0.565625
109.6	0.5655
109.7	0.56725
109.8	0.567375
109.9	0.5685
110	0.5695
110.1	0.56825
110.2	0.568
110.3	0.565625
110.4	0.56375
110.5	0.5645
110.6	0.567125
110.7	0.567
110.8	0.568375
110.9	0.568375
111	0.568375
111.1	0.5695
111.2	0.5725
111.3	0.573875
111.4	0.575375
111.5	0.574
111.6	0.575
111.7	0.575375
111.8	0.575625
111.9	0.574875
112	0.57325
112.1	0.575
112.2	0.57525
112.3	0.5765
112.4	0.57625
112.5	0.5775
112.6	0.57675
112.7	0.577625
112.8	0.577375
112.9	0.578875
113	0.581
113.1	0.58
113.2	0.581125
113.3	0.581
113.4	0.581875
113.5	0.583125
113.6	0.58375
113.7	0.5835
113.8	0.5855
113.9	0.586
114	0.58825
114.1	0.58875
114.2	0.58825
114.3	0.58775
114.4	0.58675
114.5	0.58625
114.6	0.5865
114.7	0.585625
114.8	0.585625
114.9	0.586375
115	0.586875
115.1	0.588625
115.2	0.589
115.3	0.59
115.4	0.589875
115.5	0.5905
115.6	0.5885
115.7	0.589875
115.8	0.5905
115.9	0.592625
116	0.594
116.1	0.5955
116.2	0.5965
116.3	0.597125
116.4	0.597375
116.5	0.598625
116.6	0.59875
116.7	0.599125
116.8	0.600125
116.9	0.599375
117	0.599
117.1	0.600625
117.2	0.60175
117.3	0.600625
117.4	0.601625
117.5	0.599125
117.6	0.59875
117.7	0.59825
117.8	0.597375
117.9	0.6005
118	0.599375
118.1	0.597375
118.2	0.5965
118.3	0.596875
118.4	0.597
118.5	0.598625
118.6	0.599375
118.7	0.598375
118.8	0.599
118.9	0.600625
119	0.601375
119.1	0.60125
119.2	0.600625
119.3	0.601875
119.4	0.59975
119.5	0.6015
119.6	0.600875
119.7	0.602625
119.8	0.60325
119.9	0.606125
120	0.6085
120.1	0.607625
120.2	0.607875
120.3	0.6095
120.4	0.611375
120.5	0.61125
120.6	0.610125
120.7	0.6095
120.8	0.609625
120.9	0.611875
121	0.609125
121.1	0.605
121.2	0.60675
121.3	0.60525
121.4	0.603875
121.5	0.60375
121.6	0.6065
121.7	0.605875
121.8	0.606
121.9	0.605875
122	0.6055
122.1	0.611375
122.2	0.611375
122.3	0.611
122.4	0.61025
122.5	0.61075
122.6	0.611125
122.7	0.612375
122.8	0.6155
122.9	0.6165
123	0.615125
123.1	0.61625
123.2	0.614625
123.3	0.614125
123.4	0.61375
123.5	0.613375
123.6	0.61375
123.7	0.613375
123.8	0.61325
123.9	0.613875
124	0.61425
124.1	0.614875
124.2	0.61425
124.3	0.612875
124.4	0.61625
124.5	0.616375
124.6	0.616625
124.7	0.6145
124.8	0.616125
124.9	0.6155
125	0.617125
125.1	0.61675
125.2	0.61625
125.3	0.615125
125.4	0.61725
125.5	0.61775
125.6	0.61975
125.7	0.62025
125.8	0.61975
125.9	0.6205
126	0.62025
126.1	0.620625
126.2	0.620875
126.3	0.622875
126.4	0.622
126.5	0.6225
126.6	0.623125
126.7	0.625125
126.8	0.625875
126.9	0.626875
127	0.624875
127.1	0.6255
127.2	0.62375
127.3	0.623375
127.4	0.62425
127.5	0.62525
127.6	0.62475
127.7	0.625875
127.8	0.62625
127.9	0.62525
128	0.62575
128.1	0.626625
128.2	0.62675
128.3	0.628625
128.4	0.627875
128.5	0.629625
128.6	0.629875
128.7	0.62875
128.8	0.631125
128.9	0.63425
129	0.6345
129.1	0.637625
129.2	0.637375
129.3	0.638125
129.4	0.639375
129.5	0.64
129.6	0.64025
129.7	0.64
129.8	0.640375
129.9	0.640125
130	0.641125
130.1	0.641375
130.2	0.6415
130.3	0.641375
130.4	0.639625
130.5	0.637625
130.6	0.63925
130.7	0.638875
130.8	0.64025
130.9	0.6395
131	0.639875
131.1	0.639125
131.2	0.6365
131.3	0.63525
131.4	0.634375
131.5	0.636625
131.6	0.637375
131.7	0.64125
131.8	0.641875
131.9	0.642625
132	0.642625
132.1	0.642125
132.2	0.643125
132.3	0.64325
132.4	0.641875
132.5	0.642
132.6	0.641125
132.7	0.640625
132.8	0.641125
132.9	0.642125
133	0.641625
133.1	0.6425
133.2	0.64375
133.3	0.64375
133.4	0.64375
133.5	0.642625
133.6	0.6425
133.7	0.64325
133.8	0.64425
133.9	0.645375
134	0.646875
134.1	0.646
134.2	0.647875
134.3	0.64825
134.4	0.65
134.5	0.65025
134.6	0.649875
134.7	0.6475
134.8	0.644
134.9	0.64575
135	0.644125
135.1	0.64275
135.2	0.642
135.3	0.643875
135.4	0.645375
135.5	0.64425
135.6	0.64475
135.7	0.644
135.8	0.646125
135.9	0.647
136	0.645375
136.1	0.644625
136.2	0.64325
136.3	0.644875
136.4	0.644625
136.5	0.64825
136.6	0.65125
136.7	0.653125
136.8	0.65275
136.9	0.6555
137	0.654375
137.1	0.654875
137.2	0.653
137.3	0.654125
137.4	0.653625
137.5	0.65275
137.6	0.65325
137.7	0.653375
137.8	0.65575
137.9	0.655375
138	0.65425
138.1	0.656375
138.2	0.656125
138.3	0.656875
138.4	0.65675
138.5	0.654125
138.6	0.654375
138.7	0.65575
138.8	0.656375
138.9	0.65875
139	0.66025
139.1	0.660125
139.2	0.66025
139.3	0.65975
139.4	0.66275
139.5	0.664
139.6	0.6645
139.7	0.664375
139.8	0.6635
139.9	0.6625
140	0.664875
140.1	0.664
140.2	0.662625
140.3	0.660875
140.4	0.662875
140.5	0.663375
140.6	0.661875
140.7	0.66225
140.8	0.6615
140.9	0.660625
141	0.65875
141.1	0.65675
141.2	0.65925
141.3	0.659625
141.4	0.6595
141.5	0.661875
141.6	0.661625
141.7	0.660125
141.8	0.659375
141.9	0.66025
142	0.66075
142.1	0.66125
142.2	0.6625
142.3	0.662375
142.4	0.662625
142.5	0.66325
142.6	0.6635
142.7	0.663875
142.8	0.6655
142.9	0.665125
143	0.665625
143.1	0.666125
143.2	0.66525
143.3	0.66675
143.4	0.665875
143.5	0.666375
143.6	0.66675
143.7	0.66675
143.8	0.668375
143.9	0.668625
144	0.66825
144.1	0.667
144.2	0.66725
144.3	0.66875
144.4	0.6665
144.5	0.668875
144.6	0.66875
144.7	0.668375
144.8	0.670125
144.9	0.67125
145	0.670875
145.1	0.671125
145.2	0.6725
145.3	0.673
145.4	0.671125
145.5	0.670625
145.6	0.66975
145.7	0.670125
145.8	0.669125
145.9	0.669625
146	0.67225
146.1	0.672125
146.2	0.67225
146.3	0.6725
146.4	0.67275
146.5	0.6735
146.6	0.675125
146.7	0.67475
146.8	0.67575
146.9	0.674125
147	0.6745
147.1	0.67425
147.2	0.6755
147.3	0.6745
147.4	0.674875
147.5	0.6765
147.6	0.67875
147.7	0.6795
147.8	0.679625
147.9	0.678625
148	0.679625
148.1	0.680125
148.2	0.6805
148.3	0.680125
148.4	0.68
148.5	0.67875
148.6	0.6785
148.7	0.679
148.8	0.6795
148.9	0.68025
149	0.67975
149.1	0.678375
149.2	0.678625
149.3	0.677875
149.4	0.677375
149.5	0.67575
149.6	0.676875
149.7	0.67675
149.8	0.677125
149.9	0.678375
150	0.677
150.1	0.675875
150.2	0.676375
150.3	0.677875
150.4	0.678
150.5	0.678125
150.6	0.6815
150.7	0.682
150.8	0.68375
150.9	0.683625
151	0.682875
151.1	0.6845
151.2	0.686125
151.3	0.685125
151.4	0.68625
151.5	0.685
151.6	0.68425
151.7	0.68475
151.8	0.685375
151.9	0.687375
152	0.688125
152.1	0.687625
152.2	0.686125
152.3	0.685125
152.4	0.68625
152.5	0.6865
152.6	0.685625
152.7	0.687125
152.8	0.68625
152.9	0.6845
153	0.683625
153.1	0.682375
153.2	0.6835
153.3	0.683375
153.4	0.6825
153.5	0.683125
153.6	0.680375
153.7	0.680375
153.8	0.682375
153.9	0.682625
154	0.683375
154.1	0.682875
154.2	0.684125
154.3	0.685625
154.4	0.687625
154.5	0.6875
154.6	0.684875
154.7	0.6845
154.8	0.6845
154.9	0.684
155	0.684625
155.1	0.68375
155.2	0.68575
155.3	0.684375
155.4	0.68325
155.5	0.683875
155.6	0.684625
155.7	0.68475
155.8	0.68475
155.9	0.685375
156	0.6855
156.1	0.6865
156.2	0.685375
156.3	0.685875
156.4	0.68525
156.5	0.685375
156.6	0.685
156.7	0.6815
156.8	0.6815
156.9	0.683375
157	0.68375
157.1	0.683625
157.2	0.684875
157.3	0.682625
157.4	0.682375
157.5	0.683
157.6	0.68325
157.7	0.68375
157.8	0.6835
157.9	0.6845
158	0.684
158.1	0.6845
158.2	0.68625
158.3	0.685375
158.4	0.68425
158.5	0.683125
158.6	0.686125
158.7	0.685875
158.8	0.686375
158.9	0.686875
159	0.68775
159.1	0.68825
159.2	0.68925
159.3	0.690125
159.4	0.6925
159.5	0.691875
159.6	0.693125
159.7	0.693375
159.8	0.694375
159.9	0.694125
160	0.694375
160.1	0.695375
160.2	0.6955
160.3	0.694125
160.4	0.69525
160.5	0.694375
160.6	0.69525
160.7	0.697875
160.8	0.7
160.9	0.69975
161	0.699
161.1	0.697875
161.2	0.697625
161.3	0.696625
161.4	0.6975
161.5	0.69975
161.6	0.69875
161.7	0.697375
161.8	0.697
161.9	0.696375
162	0.697375
162.1	0.697625
162.2	0.698875
162.3	0.700375
162.4	0.698625
162.5	0.700375
162.6	0.7015
162.7	0.702375
162.8	0.70325
162.9	0.70125
163	0.702125
163.1	0.699875
163.2	0.699375
163.3	0.697625
163.4	0.6995
163.5	0.70075
163.6	0.7
163.7	0.699125
163.8	0.701375
163.9	0.702125
164	0.7025
164.1	0.702125
164.2	0.70075
164.3	0.7015
164.4	0.701875
164.5	0.701375
164.6	0.70275
164.7	0.702125
164.8	0.700375
164.9	0.700875
165	0.703
165.1	0.704875
165.2	0.70525
165.3	0.704
165.4	0.703375
165.5	0.704375
165.6	0.703125
165.7	0.705625
165.8	0.70575
165.9	0.704
166	0.70525
166.1	0.703875
166.2	0.70325
166.3	0.7055
166.4	0.70625
166.5	0.70475
166.6	0.70375
166.7	0.703
166.8	0.702625
166.9	0.7025
167	0.703125
167.1	0.702125
167.2	0.702125
167.3	0.70275
167.4	0.702875
167.5	0.70225
167.6	0.700375
167.7	0.70125
167.8	0.702375
167.9	0.702375
168	0.7025
168.1	0.7015
168.2	0.703375
168.3	0.704125
168.4	0.70325
168.5	0.700875
168.6	0.70025
168.7	0.701
168.8	0.70175
168.9	0.70225
169	0.704125
169.1	0.704
169.2	0.706375
169.3	0.708125
169.4	0.709
169.5	0.707125
169.6	0.7055
169.7	0.70525
169.8	0.705625
169.9	0.705
170	0.704
170.1	0.705125
170.2	0.705625
170.3	0.704375
170.4	0.705
170.5	0.706875
170.6	0.708
170.7	0.70825
170.8	0.708625
170.9	0.707125
171	0.706875
171.1	0.7055
171.2	0.705875
171.3	0.70675
171.4	0.706
171.5	0.7075
171.6	0.709375
171.7	0.708125
171.8	0.708625
171.9	0.709375
172	0.709125
172.1	0.709625
172.2	0.710125
172.3	0.710125
172.4	0.708875
172.5	0.71
172.6	0.7095
172.7	0.7105
172.8	0.70925
172.9	0.710875
173	0.71
173.1	0.710625
173.2	0.7085
173.3	0.709
173.4	0.707875
173.5	0.709875
173.6	0.709125
173.7	0.7115
173.8	0.712
173.9	0.713625
174	0.715625
174.1	0.71475
174.2	0.7135
174.3	0.715
174.4	0.715375
174.5	0.715625
174.6	0.715625
174.7	0.71575
174.8	0.716125
174.9	0.71475
175	0.71475
175.1	0.716125
175.2	0.71425
175.3	0.715
175.4	0.71625
175.5	0.715375
175.6	0.716125
175.7	0.717125
175.8	0.71725
175.9	0.718875
176	0.719
176.1	0.719375
176.2	0.720125
176.3	0.719125
176.4	0.719625
176.5	0.71775
176.6	0.718625
176.7	0.72025
176.8	0.719125
176.9	0.718375
177	0.717625
177.1	0.719625
177.2	0.719
177.3	0.720125
177.4	0.719875
177.5	0.72
177.6	0.719875
177.7	0.719125
177.8	0.721125
177.9	0.71975
178	0.720375
178.1	0.718875
178.2	0.718625
178.3	0.718375
178.4	0.71875
178.5	0.718125
178.6	0.7185
178.7	0.71775
178.8	0.717
178.9	0.71825
179	0.7205
179.1	0.719
179.2	0.7185
179.3	0.718
179.4	0.71775
179.5	0.71775
179.6	0.718375
179.7	0.718375
179.8	0.71825
179.9	0.717625
180	0.718375
180.1	0.720125
180.2	0.72175
180.3	0.72225
180.4	0.7235
180.5	0.721625
180.6	0.72175
180.7	0.722375
180.8	0.719
180.9	0.719
181	0.717375
181.1	0.7165
181.2	0.718125
181.3	0.717375
181.4	0.719375
181.5	0.719
181.6	0.71975
181.7	0.720375
181.8	0.721125
181.9	0.7215
182	0.72025
182.1	0.720125
182.2	0.72175
182.3	0.721625
182.4	0.719625
182.5	0.71975
182.6	0.718875
182.7	0.719625
182.8	0.7195
182.9	0.72025
183	0.720875
183.1	0.720875
183.2	0.72175
183.3	0.7215
183.4	0.720875
183.5	0.72125
183.6	0.721375
183.7	0.72
183.8	0.718125
183.9	0.715875
184	0.7165
184.1	0.7155
184.2	0.714875
184.3	0.71675
184.4	0.718
184.5	0.71925
184.6	0.720625
184.7	0.7195
184.8	0.717875
184.9	0.718
185	0.71775
185.1	0.71875
185.2	0.718375
185.3	0.72
185.4	0.7215
185.5	0.722625
185.6	0.724375
185.7	0.724
185.8	0.72575
185.9	0.7255
186	0.724
186.1	0.723
186.2	0.723125
186.3	0.7215
186.4	0.723125
186.5	0.72425
186.6	0.724875
186.7	0.723875
186.8	0.722125
186.9	0.7225
187	0.720125
187.1	0.719375
187.2	0.719875
187.3	0.722
187.4	0.72475
187.5	0.726875
187.6	0.72575
187.7	0.72375
187.8	0.722625
187.9	0.72375
188	0.7235
188.1	0.724625
188.2	0.72625
188.3	0.72475
188.4	0.724875
188.5	0.725875
188.6	0.72425
188.7	0.723875
188.8	0.722875
188.9	0.7225
189	0.7235
189.1	0.7225
189.2	0.722875
189.3	0.723625
189.4	0.72475
189.5	0.725
189.6	0.724125
189.7	0.723375
189.8	0.724625
189.9	0.724875
190	0.72325
190.1	0.72375
190.2	0.72175
190.3	0.721625
190.4	0.722625
190.5	0.7235
190.6	0.724875
190.7	0.7245
190.8	0.724625
190.9	0.723625
191	0.722875
191.1	0.7215
191.2	0.723125
191.3	0.7215
191.4	0.7235
191.5	0.72475
191.6	0.727375
191.7	0.7305
191.8	0.72775
191.9	0.72675
192	0.727625
192.1	0.727375
192.2	0.728125
192.3	0.729625
192.4	0.730625
192.5	0.731375
192.6	0.732375
192.7	0.733
192.8	0.732875
192.9	0.733375
193	0.733
193.1	0.731625
193.2	0.7315
193.3	0.73
193.4	0.73075
193.5	0.73025
193.6	0.731
193.7	0.733125
193.8	0.733875
193.9	0.7355
194	0.733875
194.1	0.735625
194.2	0.73525
194.3	0.73625
194.4	0.737875
194.5	0.737
194.6	0.73725
194.7	0.736875
194.8	0.73775
194.9	0.73925
195	0.739
195.1	0.73725
195.2	0.73575
195.3	0.735
195.4	0.735
195.5	0.7345
195.6	0.73475
195.7	0.733875
195.8	0.73425
195.9	0.73325
196	0.73475
196.1	0.7345
196.2	0.73375
196.3	0.733625
196.4	0.7375
196.5	0.7375
196.6	0.737625
196.7	0.73725
196.8	0.7355
196.9	0.7355
197	0.7345
197.1	0.73425
197.2	0.733125
197.3	0.7325
197.4	0.732125
197.5	0.733
197.6	0.73425
197.7	0.733
197.8	0.73375
197.9	0.73375
198	0.73575
198.1	0.738125
198.2	0.739
198.3	0.7395
198.4	0.739375
198.5	0.74
198.6	0.742125
198.7	0.743125
198.8	0.742625
198.9	0.740375
199	0.7385
199.1	0.738875
199.2	0.739375
199.3	0.738875
199.4	0.7405
199.5	0.740125
199.6	0.741375
199.7	0.74125
199.8	0.743125
199.9	0.743
200	0.74275
[truncated: 14,000 more rows]
