# Supplementary material for: Bayesian inference of kinetic schemes for ion channels by Kalman filtering
Source: eLife journal article supplement (doi:10.7554/elife.62714), 2022-05-04
Supplement: fig4-data9 [file 1_Sim_N_4000_Strom_MW_0.5M.xlsx]

## Sheet: Tabelle1
0.1	0
0.2	0
0.3	0
0.4	0
0.5	0
0.6	0
0.7	0
0.8	0
0.9	0
1	0
1.1	0
1.2	0
1.3	0
1.4	0
1.5	0
1.6	0
1.7	0
1.8	0
1.9	0
2	0
2.1	0
2.2	0
2.3	0
2.4	0
2.5	0
2.6	0
2.7	0
2.8	0
2.9	0
3	0
3.1	0
3.2	0
3.3	0
3.4	0
3.5	0
3.6	0
3.7	0
3.8	0
3.9	0
4	0
4.1	0
4.2	0
4.3	0
4.4	0
4.5	0
4.6	0
4.7	0
4.8	0
4.9	0
5	0
5.1	0
5.2	0
5.3	0
5.4	0
5.5	0
5.6	0
5.7	0
5.8	0
5.9	0
6	0
6.1	0
6.2	0
6.3	0
6.4	0
6.5	0
6.6	0
6.7	0
6.8	0
6.9	0
7	0
7.1	0
7.2	0
7.3	0
7.4	0
7.5	0
7.6	0
7.7	0
7.8	0
7.9	0
8	0
8.1	0
8.2	0
8.3	0
8.4	0
8.5	0
8.6	0
8.7	0
8.8	0
8.9	0
9	0
9.1	0
9.2	0
9.3	0
9.4	0
9.5	0
9.6	0
9.7	0
9.8	0
9.9	0
10	0
10.1	0
10.2	0
10.3	0
10.4	0
10.5	0
10.6	0
10.7	0
10.8	0
10.9	0
11	0
11.1	0
11.2	0
11.3	0
11.4	0
11.5	0
11.6	0
11.7	0
11.8	0
11.9	0
12	0
12.1	0
12.2	0
12.3	0
12.4	0
12.5	0
12.6	0
12.7	0
12.8	0
12.9	0
13	0
13.1	0
13.2	0
13.3	0
13.4	0
13.5	0
13.6	0
13.7	0
13.8	0
13.9	0
14	0
14.1	0
14.2	0
14.3	0
14.4	0
14.5	0
14.6	0
14.7	0
14.8	0
14.9	0
15	0
15.1	0
15.2	0
15.3	0
15.4	0
15.5	0
15.6	0
15.7	0
15.8	0
15.9	0
16	0
16.1	0
16.2	0
16.3	0
16.4	0
16.5	0
16.6	0
16.7	0
16.8	0
16.9	0
17	0
17.1	0
17.2	0
17.3	0
17.4	0
17.5	0
17.6	0
17.7	0
17.8	0
17.9	0
18	0
18.1	0
18.2	0
18.3	0
18.4	0
18.5	0
18.6	0
18.7	0
18.8	0
18.9	0
19	0
19.1	0
19.2	0
19.3	0
19.4	0
19.5	0
19.6	0
19.7	0
19.8	0
19.9	0
20	0
20.1	0
20.2	0
20.3	0
20.4	0
20.5	0
20.6	0
20.7	0
20.8	0
20.9	0
21	0
21.1	0
21.2	0
21.3	0
21.4	0
21.5	0
21.6	0
21.7	0
21.8	0
21.9	0
22	0
22.1	0
22.2	0
22.3	0
22.4	0
22.5	0
22.6	0
22.7	0
22.8	0
22.9	0
23	0
23.1	0
23.2	0
23.3	0
23.4	0
23.5	0
23.6	0
23.7	0
23.8	0
23.9	0
24	0
24.1	0
24.2	0
24.3	0
24.4	0
24.5	0
24.6	0
24.7	0
24.8	0
24.9	0
25	0
25.1	0
25.2	0
25.3	0
25.4	0
25.5	0
25.6	0
25.7	0
25.8	0
25.9	0
26	0
26.1	0
26.2	0
26.3	0
26.4	0
26.5	0
26.6	0
26.7	0
26.8	0
26.9	0
27	0
27.1	0
27.2	0
27.3	0
27.4	0
27.5	0
27.6	0
27.7	0
27.8	0
27.9	0
28	0
28.1	0
28.2	0
28.3	0
28.4	0
28.5	0
28.6	0
28.7	0
28.8	0
28.9	0
29	0
29.1	0
29.2	0
29.3	0
29.4	0
29.5	0
29.6	0
29.7	0
29.8	0
29.9	0
30	0
30.1	0
30.2	0
30.3	0
30.4	0
30.5	0
30.6	0
30.7	0
30.8	0
30.9	0
31	0
31.1	0
31.2	0
31.3	0
31.4	0
31.5	0
31.6	0
31.7	0
31.8	0
31.9	0
32	0
32.1	0
32.2	0
32.3	0
32.4	0
32.5	0
32.6	0
32.7	0
32.8	0
32.9	0
33	0
33.1	0
33.2	0
33.3	0
33.4	0
33.5	0
33.6	0
33.7	0
33.8	0
33.9	0
34	0
34.1	0
34.2	0
34.3	0
34.4	0
34.5	0
34.6	0
34.7	0
34.8	0
34.9	0
35	0
35.1	0
35.2	0
35.3	0
35.4	0
35.5	0
35.6	0
35.7	0
35.8	0
35.9	0
36	0
36.1	0
36.2	0
36.3	0
36.4	0
36.5	0
36.6	0
36.7	0
36.8	0
36.9	0
37	0
37.1	0
37.2	0
37.3	0
37.4	0
37.5	0
37.6	0
37.7	0
37.8	0
37.9	0
38	0
38.1	0
38.2	0
38.3	0
38.4	0
38.5	0
38.6	0
38.7	0
38.8	0
38.9	0
39	0
39.1	0
39.2	0
39.3	0
39.4	0
39.5	0
39.6	0
39.7	0
39.8	0
39.9	0
40	0
40.1	0
40.2	0
40.3	0
40.4	0
40.5	0
40.6	0
40.7	0
40.8	0
40.9	0
41	0
41.1	0
41.2	0
41.3	0
41.4	0
41.5	0
41.6	0
41.7	0
41.8	0
41.9	0
42	0
42.1	0
42.2	0
42.3	0
42.4	0
42.5	0
42.6	0
42.7	0
42.8	0
42.9	0
43	0
43.1	0
43.2	0
43.3	0
43.4	0
43.5	0
43.6	0
43.7	0
43.8	0
43.9	0
44	0
44.1	0
44.2	0
44.3	0
44.4	0
44.5	0
44.6	0
44.7	0
44.8	0
44.9	0
45	0
45.1	0
45.2	0
45.3	0
45.4	0
45.5	0
45.6	0
45.7	0
45.8	0
45.9	0
46	0
46.1	0
46.2	0
46.3	0
46.4	0
46.5	0
46.6	0
46.7	0
46.8	0
46.9	0
47	0
47.1	0
47.2	0
47.3	0
47.4	0
47.5	0
47.6	0
47.7	0
47.8	0
47.9	0
48	0
48.1	0
48.2	0
48.3	0
48.4	0
48.5	0
48.6	0
48.7	0
48.8	0
48.9	0
49	0
49.1	0
49.2	0
49.3	0
49.4	0
49.5	0
49.6	0
49.7	0
49.8	0
49.9	0
50	0
50.1	0
50.2	0
50.3	0
50.4	0
50.5	0
50.6	0
50.7	0
50.8	0
50.9	0
51	0
51.1	0
51.2	0
51.3	0
51.4	0
51.5	0
51.6	0
51.7	0
51.8	0
51.9	0
52	0
52.1	0
52.2	0
52.3	0
52.4	0
52.5	0
52.6	0
52.7	0
52.8	0
52.9	0
53	0
53.1	0
53.2	0
53.3	0
53.4	0
53.5	0
53.6	0
53.7	0
53.8	0
53.9	0
54	0
54.1	0
54.2	0
54.3	0
54.4	0
54.5	0
54.6	0
54.7	0
54.8	0
54.9	0
55	0
55.1	0
55.2	0
55.3	0
55.4	0
55.5	0
55.6	0
55.7	0
55.8	0
55.9	0
56	0
56.1	0
56.2	0
56.3	0
56.4	0
56.5	0
56.6	0
56.7	0
56.8	0
56.9	0
57	0
57.1	0
57.2	0
57.3	0
57.4	0
57.5	0
57.6	0
57.7	0
57.8	0
57.9	0
58	0
58.1	0
58.2	0
58.3	0
58.4	0
58.5	0
58.6	0
58.7	0
58.8	0
58.9	0
59	0
59.1	0
59.2	0
59.3	0
59.4	0
59.5	0
59.6	0
59.7	0
59.8	0
59.9	0
60	0
60.1	0
60.2	0
60.3	0
60.4	0
60.5	0
60.6	0
60.7	0
60.8	0
60.9	0
61	0
61.1	0
61.2	0
61.3	0
61.4	0
61.5	0
61.6	0
61.7	0
61.8	0
61.9	0
62	0
62.1	0
62.2	0
62.3	0
62.4	0
62.5	0
62.6	0
62.7	0
62.8	0
62.9	0
63	0
63.1	0
63.2	0
63.3	0
63.4	0
63.5	0
63.6	0
63.7	0
63.8	0
63.9	0
64	0
64.1	0
64.2	0
64.3	0
64.4	0
64.5	0
64.6	0
64.7	0
64.8	0
64.9	0
65	0
65.1	0
65.2	0
65.3	0
65.4	0
65.5	0
65.6	0
65.7	0
65.8	0
65.9	0
66	0
66.1	0
66.2	0
66.3	0
66.4	0
66.5	0
66.6	0
66.7	0
66.8	0
66.9	0
67	0
67.1	0
67.2	0
67.3	0
67.4	0
67.5	0
67.6	0
67.7	0
67.8	0
67.9	0
68	0
68.1	0
68.2	0
68.3	0
68.4	0
68.5	0
68.6	0
68.7	0
68.8	0
68.9	0
69	0
69.1	0
69.2	0
69.3	0
69.4	0
69.5	0
69.6	0
69.7	0
69.8	0
69.9	0
70	0
70.1	0
70.2	0
70.3	0
70.4	0
70.5	0
70.6	0
70.7	0
70.8	0
70.9	0
71	0
71.1	0
71.2	0
71.3	0
71.4	0
71.5	0
71.6	0
71.7	0
71.8	0
71.9	0
72	0
72.1	0
72.2	0
72.3	0
72.4	0
72.5	0
72.6	0
72.7	0
72.8	0
72.9	0
73	0
73.1	0
73.2	0
73.3	0
73.4	0
73.5	0
73.6	0
73.7	0
73.8	0
73.9	0
74	0
74.1	0
74.2	0
74.3	0
74.4	0
74.5	0
74.6	0
74.7	0
74.8	0
74.9	0
75	0
75.1	0
75.2	0
75.3	0
75.4	0
75.5	0
75.6	0
75.7	0
75.8	0
75.9	0
76	0
76.1	0
76.2	0
76.3	0
76.4	0
76.5	0
76.6	0
76.7	0
76.8	0
76.9	0
77	0
77.1	0
77.2	0
77.3	0
77.4	0
77.5	0
77.6	0
77.7	0
77.8	0
77.9	0
78	0
78.1	0
78.2	0
78.3	0
78.4	0
78.5	0
78.6	0
78.7	0
78.8	0
78.9	0
79	0
79.1	0
79.2	0
79.3	0
79.4	0
79.5	0
79.6	0
79.7	0
79.8	0
79.9	0
80	0
80.1	0
80.2	0
80.3	0
80.4	0
80.5	0
80.6	0
80.7	0
80.8	0
80.9	0
81	0
81.1	0
81.2	0
81.3	0
81.4	0
81.5	0
81.6	0
81.7	0
81.8	0
81.9	0
82	0
82.1	0
82.2	0
82.3	0
82.4	0
82.5	0
82.6	0
82.7	0
82.8	0
82.9	0
83	0
83.1	0
83.2	0
83.3	0
83.4	0
83.5	0
83.6	0
83.7	0
83.8	0
83.9	0
84	0
84.1	0
84.2	0
84.3	0
84.4	0
84.5	0
84.6	0
84.7	0
84.8	0
84.9	0
85	0
85.1	0
85.2	0
85.3	0
85.4	0
85.5	0
85.6	0
85.7	0
85.8	0
85.9	0
86	0
86.1	0
86.2	0
86.3	0
86.4	0
86.5	0
86.6	0
86.7	0
86.8	0
86.9	0
87	0
87.1	0
87.2	0
87.3	0
87.4	0
87.5	0
87.6	0
87.7	0
87.8	0
87.9	0
88	0
88.1	0
88.2	0
88.3	0
88.4	0
88.5	0
88.6	0
88.7	0
88.8	0
88.9	0
89	0
89.1	0
89.2	0
89.3	0
89.4	0
89.5	0
89.6	0
89.7	0
89.8	0
89.9	0
90	0
90.1	0
90.2	0
90.3	0
90.4	0
90.5	0
90.6	0
90.7	0
90.8	0
90.9	0
91	0
91.1	0
91.2	0
91.3	0
91.4	0
91.5	0
91.6	0
91.7	0
91.8	0
91.9	0
92	0
92.1	0
92.2	0
92.3	0
92.4	0
92.5	0
92.6	0
92.7	0
92.8	0
92.9	0
93	0
93.1	0
93.2	0
93.3	0
93.4	0
93.5	0
93.6	0
93.7	0
93.8	0
93.9	0
94	0
94.1	0
94.2	0
94.3	0
94.4	0
94.5	0
94.6	0
94.7	0
94.8	0
94.9	0
95	0
95.1	0
95.2	0
95.3	0
95.4	0
95.5	0
95.6	0
95.7	0
95.8	0
95.9	0
96	0
96.1	0
96.2	0
96.3	0
96.4	0
96.5	0
96.6	0
96.7	0
96.8	0
96.9	0
97	0
97.1	0
97.2	0
97.3	0
97.4	0
97.5	0
97.6	0
97.7	0
97.8	0
97.9	0
98	0
98.1	0
98.2	0
98.3	0
98.4	0
98.5	0
98.6	0
98.7	0
98.8	0
98.9	0
99	0
99.1	0
99.2	0
99.3	0
99.4	0
99.5	0
99.6	0
99.7	0
99.8	0
99.9	0
100	0
100.1	0
100.2	0
100.3	0
100.4	0
100.5	0.00025
100.6	0.00025
100.7	0.00025
100.8	0.00025
100.9	0.0005
101	0.0005
101.1	0.001
101.2	0.001
101.3	0.001
101.4	0.00125
101.5	0.0015
101.6	0.0015
101.7	0.0015
101.8	0.002
101.9	0.00225
102	0.00275
102.1	0.00325
102.2	0.0035
102.3	0.00375
102.4	0.00425
102.5	0.00475
102.6	0.00525
102.7	0.0065
102.8	0.00775
102.9	0.00775
103	0.008
103.1	0.00825
103.2	0.00825
103.3	0.00875
103.4	0.00975
103.5	0.0105
103.6	0.0115
103.7	0.012
103.8	0.0125
103.9	0.01325
104	0.01325
104.1	0.014
104.2	0.0145
104.3	0.01525
104.4	0.01575
104.5	0.017
104.6	0.01825
104.7	0.01925
104.8	0.01925
104.9	0.0195
105	0.02
105.1	0.021
105.2	0.022
105.3	0.0225
105.4	0.02375
105.5	0.024
105.6	0.02525
105.7	0.0255
105.8	0.0265
105.9	0.02775
106	0.0295
106.1	0.03
106.2	0.0305
106.3	0.0315
106.4	0.03275
106.5	0.0325
106.6	0.0335
106.7	0.0335
106.8	0.03475
106.9	0.03475
107	0.03575
107.1	0.03725
107.2	0.03775
107.3	0.03825
107.4	0.0405
107.5	0.041
107.6	0.0415
107.7	0.04325
107.8	0.0445
107.9	0.04575
108	0.04675
108.1	0.0475
108.2	0.04925
108.3	0.05025
108.4	0.0505
108.5	0.05125
108.6	0.0525
108.7	0.05275
108.8	0.05375
108.9	0.05375
109	0.0555
109.1	0.056
109.2	0.057
109.3	0.05725
109.4	0.0575
109.5	0.0585
109.6	0.059
109.7	0.05975
109.8	0.06025
109.9	0.0615
110	0.06175
110.1	0.0625
110.2	0.0625
110.3	0.0645
110.4	0.0645
110.5	0.06475
110.6	0.066
110.7	0.06625
110.8	0.06725
110.9	0.068
111	0.0685
111.1	0.0705
111.2	0.07175
111.3	0.07225
111.4	0.0725
111.5	0.073
111.6	0.07425
111.7	0.07575
111.8	0.07675
111.9	0.07775
112	0.07875
112.1	0.08
112.2	0.08075
112.3	0.081
112.4	0.0815
112.5	0.0825
112.6	0.083
112.7	0.08475
112.8	0.085
112.9	0.08525
113	0.08625
113.1	0.088
113.2	0.08975
113.3	0.0915
113.4	0.09225
113.5	0.09275
113.6	0.09375
113.7	0.095
113.8	0.09525
113.9	0.09525
114	0.09675
114.1	0.0985
114.2	0.099
114.3	0.09975
114.4	0.1005
114.5	0.10125
114.6	0.10325
114.7	0.105
114.8	0.10625
114.9	0.10775
115	0.109
115.1	0.1095
115.2	0.1105
115.3	0.11175
115.4	0.11175
115.5	0.11225
115.6	0.11275
115.7	0.11325
115.8	0.11475
115.9	0.11675
116	0.1175
116.1	0.11725
116.2	0.11825
116.3	0.11775
116.4	0.1195
116.5	0.1205
116.6	0.12075
116.7	0.12125
116.8	0.123
116.9	0.124
117	0.1245
117.1	0.1255
117.2	0.12675
117.3	0.12775
117.4	0.12825
117.5	0.1295
117.6	0.13
117.7	0.13025
117.8	0.1315
117.9	0.132
118	0.13325
118.1	0.1345
118.2	0.13575
118.3	0.13725
118.4	0.1375
118.5	0.13875
118.6	0.13975
118.7	0.14
118.8	0.1395
118.9	0.141
119	0.1415
119.1	0.142
119.2	0.14225
119.3	0.143
119.4	0.14525
119.5	0.14625
119.6	0.147
119.7	0.1475
119.8	0.148
119.9	0.14825
120	0.14925
120.1	0.1495
120.2	0.14975
120.3	0.151
120.4	0.15175
120.5	0.15275
120.6	0.1535
120.7	0.15375
120.8	0.15475
120.9	0.1555
121	0.1565
121.1	0.157
121.2	0.157
121.3	0.1585
121.4	0.1595
121.5	0.16
121.6	0.16225
121.7	0.16325
121.8	0.16425
121.9	0.16425
122	0.16525
122.1	0.16575
122.2	0.166
122.3	0.167
122.4	0.16825
122.5	0.1695
122.6	0.171
122.7	0.1725
122.8	0.1735
122.9	0.17425
123	0.17525
123.1	0.177
123.2	0.177
123.3	0.17775
123.4	0.1775
123.5	0.17775
123.6	0.178
123.7	0.17825
123.8	0.1785
123.9	0.17925
124	0.18075
124.1	0.18125
124.2	0.18175
124.3	0.1825
124.4	0.183
124.5	0.18425
124.6	0.1845
124.7	0.1845
124.8	0.1855
124.9	0.18625
125	0.1875
125.1	0.18875
125.2	0.18875
125.3	0.18925
125.4	0.19
125.5	0.19025
125.6	0.19125
125.7	0.191
125.8	0.1915
125.9	0.1925
126	0.193
126.1	0.194
126.2	0.19475
126.3	0.1955
126.4	0.196
126.5	0.1965
126.6	0.19725
126.7	0.19825
126.8	0.19825
126.9	0.19875
127	0.19875
127.1	0.19925
127.2	0.19975
127.3	0.20025
127.4	0.20075
127.5	0.2015
127.6	0.202
127.7	0.2025
127.8	0.20325
127.9	0.2035
128	0.20475
128.1	0.20525
128.2	0.2065
128.3	0.20725
128.4	0.20825
128.5	0.20875
128.6	0.20925
128.7	0.20975
128.8	0.21
128.9	0.21125
129	0.2115
129.1	0.2115
129.2	0.2125
129.3	0.212
129.4	0.2125
129.5	0.21325
129.6	0.214
129.7	0.21375
129.8	0.21425
129.9	0.215
130	0.21525
130.1	0.21675
130.2	0.21825
130.3	0.219
130.4	0.21975
130.5	0.22025
130.6	0.21975
130.7	0.21975
130.8	0.22125
130.9	0.22275
131	0.22325
131.1	0.22275
131.2	0.223
131.3	0.22325
131.4	0.2245
131.5	0.22525
131.6	0.22575
131.7	0.22625
131.8	0.228
131.9	0.228
132	0.22825
132.1	0.22875
132.2	0.22925
132.3	0.22975
132.4	0.23075
132.5	0.231
132.6	0.23125
132.7	0.23175
132.8	0.23175
132.9	0.232
133	0.233
133.1	0.234
133.2	0.23425
133.3	0.23525
133.4	0.23525
133.5	0.236
133.6	0.2365
133.7	0.23775
133.8	0.2385
133.9	0.2385
134	0.2385
134.1	0.239
134.2	0.239
134.3	0.23975
134.4	0.2405
134.5	0.2415
134.6	0.2415
134.7	0.2415
134.8	0.242
134.9	0.2425
135	0.24225
135.1	0.24275
135.2	0.243
135.3	0.24325
135.4	0.2435
135.5	0.2435
135.6	0.2435
135.7	0.2435
135.8	0.24475
135.9	0.2445
136	0.2445
136.1	0.24525
136.2	0.2455
136.3	0.24575
136.4	0.246
136.5	0.2465
136.6	0.24675
136.7	0.24725
136.8	0.24775
136.9	0.248
137	0.2475
137.1	0.2475
137.2	0.24725
137.3	0.24825
137.4	0.24825
137.5	0.249
137.6	0.25
137.7	0.25025
137.8	0.25075
137.9	0.25125
138	0.2515
138.1	0.25175
138.2	0.252
138.3	0.252
138.4	0.25225
138.5	0.25275
138.6	0.252
138.7	0.2525
138.8	0.2525
138.9	0.253
139	0.254
139.1	0.255
139.2	0.25475
139.3	0.256
139.4	0.256
139.5	0.25575
139.6	0.25625
139.7	0.25725
139.8	0.25825
139.9	0.25775
140	0.258
140.1	0.258
140.2	0.2595
140.3	0.25975
140.4	0.26
140.5	0.2615
140.6	0.262
140.7	0.262
140.8	0.26275
140.9	0.2635
141	0.26275
141.1	0.2635
141.2	0.264
141.3	0.2645
141.4	0.2645
141.5	0.2645
141.6	0.26425
141.7	0.26475
141.8	0.26525
141.9	0.265
142	0.26525
142.1	0.2655
142.2	0.26525
142.3	0.2655
142.4	0.2675
142.5	0.26825
142.6	0.2685
142.7	0.269
142.8	0.27075
142.9	0.272
143	0.27175
143.1	0.2715
143.2	0.272
143.3	0.272
143.4	0.272
143.5	0.27175
143.6	0.27225
143.7	0.27225
143.8	0.27325
143.9	0.2735
144	0.27275
144.1	0.27275
144.2	0.27375
144.3	0.27375
144.4	0.2745
144.5	0.275
144.6	0.276
144.7	0.27625
144.8	0.27575
144.9	0.276
145	0.27625
145.1	0.27675
145.2	0.277
145.3	0.27725
145.4	0.27775
145.5	0.278
145.6	0.279
145.7	0.279
145.8	0.28
145.9	0.28
146	0.2805
146.1	0.2805
146.2	0.2815
146.3	0.282
146.4	0.283
146.5	0.28325
146.6	0.28375
146.7	0.28425
146.8	0.28375
146.9	0.284
147	0.2845
147.1	0.285
147.2	0.28525
147.3	0.28575
147.4	0.286
147.5	0.28575
147.6	0.28625
147.7	0.2875
147.8	0.28825
147.9	0.2885
148	0.28925
148.1	0.289
148.2	0.28975
148.3	0.2895
148.4	0.29075
148.5	0.2905
148.6	0.2905
148.7	0.29
148.8	0.2905
148.9	0.29075
149	0.291
149.1	0.292
149.2	0.29225
149.3	0.29325
149.4	0.29325
149.5	0.293
149.6	0.294
149.7	0.29425
149.8	0.29525
149.9	0.297
150	0.29725
150.1	0.297
150.2	0.297
150.3	0.2975
150.4	0.297
150.5	0.29825
150.6	0.29925
150.7	0.29975
150.8	0.29975
150.9	0.30025
151	0.30025
151.1	0.3005
151.2	0.29975
151.3	0.3005
151.4	0.30125
151.5	0.30225
151.6	0.3025
151.7	0.3025
151.8	0.30375
151.9	0.30425
152	0.3045
152.1	0.305
152.2	0.305
152.3	0.30425
152.4	0.3045
152.5	0.30475
152.6	0.305
152.7	0.306
152.8	0.30725
152.9	0.3075
153	0.30775
153.1	0.30825
153.2	0.309
153.3	0.31025
153.4	0.31025
153.5	0.311
153.6	0.3115
153.7	0.31075
153.8	0.3115
153.9	0.31175
154	0.312
154.1	0.31225
154.2	0.313
154.3	0.3135
154.4	0.3145
154.5	0.31525
154.6	0.31625
154.7	0.31625
154.8	0.31675
154.9	0.3165
155	0.316
155.1	0.317
155.2	0.31675
155.3	0.317
155.4	0.3165
155.5	0.31625
155.6	0.31625
155.7	0.31675
155.8	0.317
155.9	0.3175
156	0.318
156.1	0.3175
156.2	0.31675
156.3	0.31675
156.4	0.318
156.5	0.31775
156.6	0.31825
156.7	0.31925
156.8	0.3195
156.9	0.32075
157	0.3205
157.1	0.3205
157.2	0.321
157.3	0.32
157.4	0.32075
157.5	0.3215
157.6	0.3215
157.7	0.32325
157.8	0.323
157.9	0.324
158	0.324
158.1	0.32425
158.2	0.3245
158.3	0.3255
158.4	0.326
158.5	0.3265
158.6	0.3265
158.7	0.326
158.8	0.3265
158.9	0.32675
159	0.32725
159.1	0.328
159.2	0.32825
159.3	0.32825
159.4	0.3285
159.5	0.3285
159.6	0.328
159.7	0.32875
159.8	0.32925
159.9	0.329
160	0.32975
160.1	0.33025
160.2	0.33025
160.3	0.33125
160.4	0.33225
160.5	0.33225
160.6	0.33225
160.7	0.3315
160.8	0.33175
160.9	0.3315
161	0.33175
161.1	0.33225
161.2	0.3325
161.3	0.33275
161.4	0.33275
161.5	0.333
161.6	0.33275
161.7	0.33375
161.8	0.33375
161.9	0.334
162	0.335
162.1	0.3365
162.2	0.33675
162.3	0.338
162.4	0.33825
162.5	0.33875
162.6	0.3385
162.7	0.339
162.8	0.34
162.9	0.34025
163	0.3405
163.1	0.3405
163.2	0.3405
163.3	0.34025
163.4	0.3405
163.5	0.3405
163.6	0.34025
163.7	0.3405
163.8	0.34075
163.9	0.341
164	0.342
164.1	0.34275
164.2	0.3435
164.3	0.344
164.4	0.3425
164.5	0.34225
164.6	0.34225
164.7	0.34275
164.8	0.34425
164.9	0.344
165	0.344
165.1	0.34375
165.2	0.3445
165.3	0.345
165.4	0.34475
165.5	0.34575
165.6	0.34675
165.7	0.348
165.8	0.348
165.9	0.34875
166	0.34875
166.1	0.3495
166.2	0.34975
166.3	0.34975
166.4	0.35025
166.5	0.35
166.6	0.34975
166.7	0.349
166.8	0.3495
166.9	0.35
167	0.34975
167.1	0.35075
167.2	0.352
167.3	0.35225
167.4	0.35325
167.5	0.3545
167.6	0.35525
167.7	0.355
167.8	0.35575
167.9	0.3565
168	0.35675
168.1	0.35625
168.2	0.35575
168.3	0.35675
168.4	0.35625
168.5	0.35675
168.6	0.35675
168.7	0.35675
168.8	0.358
168.9	0.35925
169	0.35975
169.1	0.3615
169.2	0.3615
169.3	0.3615
169.4	0.36175
169.5	0.3625
169.6	0.36225
169.7	0.3625
169.8	0.36325
169.9	0.36375
170	0.36425
170.1	0.36475
170.2	0.3645
170.3	0.36425
170.4	0.365
170.5	0.36525
170.6	0.3655
170.7	0.3655
170.8	0.36675
170.9	0.367
171	0.368
171.1	0.36825
171.2	0.369
171.3	0.36875
171.4	0.369
171.5	0.36875
171.6	0.369
171.7	0.36925
171.8	0.37
171.9	0.3705
172	0.37075
172.1	0.37125
172.2	0.3715
172.3	0.37225
172.4	0.37225
172.5	0.37225
172.6	0.37225
172.7	0.37175
172.8	0.3725
172.9	0.373
173	0.37325
173.1	0.37275
173.2	0.3725
173.3	0.373
173.4	0.373
173.5	0.3735
173.6	0.3735
173.7	0.37375
173.8	0.3735
173.9	0.3735
174	0.373
174.1	0.373
174.2	0.37325
174.3	0.37375
174.4	0.37425
174.5	0.374
174.6	0.37525
174.7	0.3755
174.8	0.3755
174.9	0.37525
175	0.37625
175.1	0.37675
175.2	0.37575
175.3	0.37575
175.4	0.376
175.5	0.376
175.6	0.3765
175.7	0.37625
175.8	0.376
175.9	0.3765
176	0.376
176.1	0.3775
176.2	0.3775
176.3	0.37725
176.4	0.377
176.5	0.3775
176.6	0.37775
176.7	0.37825
176.8	0.379
176.9	0.37925
177	0.3795
177.1	0.37975
177.2	0.38
177.3	0.38125
177.4	0.382
177.5	0.38275
177.6	0.3825
177.7	0.3825
177.8	0.382
177.9	0.38275
178	0.382
178.1	0.38125
178.2	0.38175
178.3	0.38125
178.4	0.3815
178.5	0.382
178.6	0.38275
178.7	0.38275
178.8	0.38275
178.9	0.3825
179	0.38325
179.1	0.38325
179.2	0.38425
179.3	0.384
179.4	0.38425
179.5	0.38425
179.6	0.38525
179.7	0.38725
179.8	0.38775
179.9	0.38825
180	0.388
180.1	0.387
180.2	0.3865
180.3	0.38675
180.4	0.38675
180.5	0.38725
180.6	0.38775
180.7	0.38775
180.8	0.38825
180.9	0.38825
181	0.38875
181.1	0.3895
181.2	0.38975
181.3	0.3905
181.4	0.39025
181.5	0.39025
181.6	0.3905
181.7	0.39075
181.8	0.391
181.9	0.391
182	0.39075
182.1	0.39125
182.2	0.392
182.3	0.392
182.4	0.393
182.5	0.393
182.6	0.39225
182.7	0.39075
182.8	0.3905
182.9	0.39075
183	0.3915
183.1	0.3915
183.2	0.39125
183.3	0.39125
183.4	0.3915
183.5	0.39175
183.6	0.392
183.7	0.392
183.8	0.39225
183.9	0.39325
184	0.393
184.1	0.39225
184.2	0.39225
184.3	0.39325
184.4	0.3935
184.5	0.3935
184.6	0.39375
184.7	0.39425
184.8	0.39525
184.9	0.39575
185	0.3965
185.1	0.39675
185.2	0.39675
185.3	0.39725
185.4	0.39825
185.5	0.39775
185.6	0.39725
185.7	0.39725
185.8	0.39775
185.9	0.39775
186	0.3975
186.1	0.3975
186.2	0.398
186.3	0.398
186.4	0.39825
186.5	0.3985
186.6	0.3985
186.7	0.39875
186.8	0.398
186.9	0.3975
187	0.39775
187.1	0.39725
187.2	0.3975
187.3	0.398
187.4	0.39775
187.5	0.3985
187.6	0.39875
187.7	0.39875
187.8	0.4005
187.9	0.4005
188	0.3995
188.1	0.39975
188.2	0.39975
188.3	0.3995
188.4	0.39975
188.5	0.39975
188.6	0.39975
188.7	0.39925
188.8	0.3995
188.9	0.39975
189	0.4
189.1	0.4
189.2	0.401
189.3	0.40125
189.4	0.40125
189.5	0.4015
189.6	0.40175
189.7	0.40225
189.8	0.402
189.9	0.402
190	0.4025
190.1	0.40225
190.2	0.402
190.3	0.402
190.4	0.40225
190.5	0.402
190.6	0.4025
190.7	0.40325
190.8	0.40375
190.9	0.404
191	0.40375
191.1	0.404
191.2	0.406
191.3	0.40625
191.4	0.40575
191.5	0.406
191.6	0.406
191.7	0.40675
191.8	0.40675
191.9	0.40725
192	0.40775
192.1	0.40725
192.2	0.4075
192.3	0.408
192.4	0.40925
192.5	0.41
192.6	0.41025
192.7	0.411
192.8	0.41125
192.9	0.412
193	0.4125
193.1	0.41225
193.2	0.41225
193.3	0.4125
193.4	0.41325
193.5	0.41375
193.6	0.4135
193.7	0.413
193.8	0.41325
193.9	0.413
194	0.4135
194.1	0.41375
194.2	0.4135
194.3	0.414
194.4	0.41375
194.5	0.41375
194.6	0.41375
194.7	0.414
194.8	0.41375
194.9	0.41375
195	0.41425
195.1	0.415
195.2	0.41525
195.3	0.4155
195.4	0.41475
195.5	0.414
195.6	0.4145
195.7	0.41475
195.8	0.41525
195.9	0.4155
196	0.4155
196.1	0.4165
196.2	0.41725
196.3	0.41725
196.4	0.4175
196.5	0.4175
196.6	0.4175
196.7	0.41775
196.8	0.41875
196.9	0.419
197	0.41975
197.1	0.41975
197.2	0.42125
197.3	0.421
197.4	0.42075
197.5	0.42175
197.6	0.4215
197.7	0.42175
197.8	0.42175
197.9	0.4215
198	0.42275
198.1	0.42375
198.2	0.424
198.3	0.42425
198.4	0.42425
198.5	0.42425
198.6	0.425
198.7	0.42575
198.8	0.42475
198.9	0.42475
199	0.425
199.1	0.425
199.2	0.4255
199.3	0.42575
199.4	0.4255
199.5	0.42575
199.6	0.426
199.7	0.42675
199.8	0.42675
199.9	0.4265
200	0.42625
[truncated: 14,000 more rows]
