# Supplementary material for: Bayesian inference of kinetic schemes for ion channels by Kalman filtering
Source: eLife journal article supplement (doi:10.7554/elife.62714), 2022-05-04
Supplement: fig4-data9 [file 1_Sim_N_5000_Fluor_MW.xlsx]

## Sheet: Tabelle1
0.1	0
0.2	0
0.3	0
0.4	0
0.5	0
0.6	0
0.7	0
0.8	0
0.9	0
1	0
1.1	0
1.2	0
1.3	0
1.4	0
1.5	0
1.6	0
1.7	0
1.8	0
1.9	0
2	0
2.1	0
2.2	0
2.3	0
2.4	0
2.5	0
2.6	0
2.7	0
2.8	0
2.9	0
3	0
3.1	0
3.2	0
3.3	0
3.4	0
3.5	0
3.6	0
3.7	0
3.8	0
3.9	0
4	0
4.1	0
4.2	0
4.3	0
4.4	0
4.5	0
4.6	0
4.7	0
4.8	0
4.9	0
5	0
5.1	0
5.2	0
5.3	0
5.4	0
5.5	0
5.6	0
5.7	0
5.8	0
5.9	0
6	0
6.1	0
6.2	0
6.3	0
6.4	0
6.5	0
6.6	0
6.7	0
6.8	0
6.9	0
7	0
7.1	0
7.2	0
7.3	0
7.4	0
7.5	0
7.6	0
7.7	0
7.8	0
7.9	0
8	0
8.1	0
8.2	0
8.3	0
8.4	0
8.5	0
8.6	0
8.7	0
8.8	0
8.9	0
9	0
9.1	0
9.2	0
9.3	0
9.4	0
9.5	0
9.6	0
9.7	0
9.8	0
9.9	0
10	0
10.1	0
10.2	0
10.3	0
10.4	0
10.5	0
10.6	0
10.7	0
10.8	0
10.9	0
11	0
11.1	0
11.2	0
11.3	0
11.4	0
11.5	0
11.6	0
11.7	0
11.8	0
11.9	0
12	0
12.1	0
12.2	0
12.3	0
12.4	0
12.5	0
12.6	0
12.7	0
12.8	0
12.9	0
13	0
13.1	0
13.2	0
13.3	0
13.4	0
13.5	0
13.6	0
13.7	0
13.8	0
13.9	0
14	0
14.1	0
14.2	0
14.3	0
14.4	0
14.5	0
14.6	0
14.7	0
14.8	0
14.9	0
15	0
15.1	0
15.2	0
15.3	0
15.4	0
15.5	0
15.6	0
15.7	0
15.8	0
15.9	0
16	0
16.1	0
16.2	0
16.3	0
16.4	0
16.5	0
16.6	0
16.7	0
16.8	0
16.9	0
17	0
17.1	0
17.2	0
17.3	0
17.4	0
17.5	0
17.6	0
17.7	0
17.8	0
17.9	0
18	0
18.1	0
18.2	0
18.3	0
18.4	0
18.5	0
18.6	0
18.7	0
18.8	0
18.9	0
19	0
19.1	0
19.2	0
19.3	0
19.4	0
19.5	0
19.6	0
19.7	0
19.8	0
19.9	0
20	0
20.1	0
20.2	0
20.3	0
20.4	0
20.5	0
20.6	0
20.7	0
20.8	0
20.9	0
21	0
21.1	0
21.2	0
21.3	0
21.4	0
21.5	0
21.6	0
21.7	0
21.8	0
21.9	0
22	0
22.1	0
22.2	0
22.3	0
22.4	0
22.5	0
22.6	0
22.7	0
22.8	0
22.9	0
23	0
23.1	0
23.2	0
23.3	0
23.4	0
23.5	0
23.6	0
23.7	0
23.8	0
23.9	0
24	0
24.1	0
24.2	0
24.3	0
24.4	0
24.5	0
24.6	0
24.7	0
24.8	0
24.9	0
25	0
25.1	0
25.2	0
25.3	0
25.4	0
25.5	0
25.6	0
25.7	0
25.8	0
25.9	0
26	0
26.1	0
26.2	0
26.3	0
26.4	0
26.5	0
26.6	0
26.7	0
26.8	0
26.9	0
27	0
27.1	0
27.2	0
27.3	0
27.4	0
27.5	0
27.6	0
27.7	0
27.8	0
27.9	0
28	0
28.1	0
28.2	0
28.3	0
28.4	0
28.5	0
28.6	0
28.7	0
28.8	0
28.9	0
29	0
29.1	0
29.2	0
29.3	0
29.4	0
29.5	0
29.6	0
29.7	0
29.8	0
29.9	0
30	0
30.1	0
30.2	0
30.3	0
30.4	0
30.5	0
30.6	0
30.7	0
30.8	0
30.9	0
31	0
31.1	0
31.2	0
31.3	0
31.4	0
31.5	0
31.6	0
31.7	0
31.8	0
31.9	0
32	0
32.1	0
32.2	0
32.3	0
32.4	0
32.5	0
32.6	0
32.7	0
32.8	0
32.9	0
33	0
33.1	0
33.2	0
33.3	0
33.4	0
33.5	0
33.6	0
33.7	0
33.8	0
33.9	0
34	0
34.1	0
34.2	0
34.3	0
34.4	0
34.5	0
34.6	0
34.7	0
34.8	0
34.9	0
35	0
35.1	0
35.2	0
35.3	0
35.4	0
35.5	0
35.6	0
35.7	0
35.8	0
35.9	0
36	0
36.1	0
36.2	0
36.3	0
36.4	0
36.5	0
36.6	0
36.7	0
36.8	0
36.9	0
37	0
37.1	0
37.2	0
37.3	0
37.4	0
37.5	0
37.6	0
37.7	0
37.8	0
37.9	0
38	0
38.1	0
38.2	0
38.3	0
38.4	0
38.5	0
38.6	0
38.7	0
38.8	0
38.9	0
39	0
39.1	0
39.2	0
39.3	0
39.4	0
39.5	0
39.6	0
39.7	0
39.8	0
39.9	0
40	0
40.1	0
40.2	0
40.3	0
40.4	0
40.5	0
40.6	0
40.7	0
40.8	0
40.9	0
41	0
41.1	0
41.2	0
41.3	0
41.4	0
41.5	0
41.6	0
41.7	0
41.8	0
41.9	0
42	0
42.1	0
42.2	0
42.3	0
42.4	0
42.5	0
42.6	0
42.7	0
42.8	0
42.9	0
43	0
43.1	0
43.2	0
43.3	0
43.4	0
43.5	0
43.6	0
43.7	0
43.8	0
43.9	0
44	0
44.1	0
44.2	0
44.3	0
44.4	0
44.5	0
44.6	0
44.7	0
44.8	0
44.9	0
45	0
45.1	0
45.2	0
45.3	0
45.4	0
45.5	0
45.6	0
45.7	0
45.8	0
45.9	0
46	0
46.1	0
46.2	0
46.3	0
46.4	0
46.5	0
46.6	0
46.7	0
46.8	0
46.9	0
47	0
47.1	0
47.2	0
47.3	0
47.4	0
47.5	0
47.6	0
47.7	0
47.8	0
47.9	0
48	0
48.1	0
48.2	0
48.3	0
48.4	0
48.5	0
48.6	0
48.7	0
48.8	0
48.9	0
49	0
49.1	0
49.2	0
49.3	0
49.4	0
49.5	0
49.6	0
49.7	0
49.8	0
49.9	0
50	0
50.1	0
50.2	0
50.3	0
50.4	0
50.5	0
50.6	0
50.7	0
50.8	0
50.9	0
51	0
51.1	0
51.2	0
51.3	0
51.4	0
51.5	0
51.6	0
51.7	0
51.8	0
51.9	0
52	0
52.1	0
52.2	0
52.3	0
52.4	0
52.5	0
52.6	0
52.7	0
52.8	0
52.9	0
53	0
53.1	0
53.2	0
53.3	0
53.4	0
53.5	0
53.6	0
53.7	0
53.8	0
53.9	0
54	0
54.1	0
54.2	0
54.3	0
54.4	0
54.5	0
54.6	0
54.7	0
54.8	0
54.9	0
55	0
55.1	0
55.2	0
55.3	0
55.4	0
55.5	0
55.6	0
55.7	0
55.8	0
55.9	0
56	0
56.1	0
56.2	0
56.3	0
56.4	0
56.5	0
56.6	0
56.7	0
56.8	0
56.9	0
57	0
57.1	0
57.2	0
57.3	0
57.4	0
57.5	0
57.6	0
57.7	0
57.8	0
57.9	0
58	0
58.1	0
58.2	0
58.3	0
58.4	0
58.5	0
58.6	0
58.7	0
58.8	0
58.9	0
59	0
59.1	0
59.2	0
59.3	0
59.4	0
59.5	0
59.6	0
59.7	0
59.8	0
59.9	0
60	0
60.1	0
60.2	0
60.3	0
60.4	0
60.5	0
60.6	0
60.7	0
60.8	0
60.9	0
61	0
61.1	0
61.2	0
61.3	0
61.4	0
61.5	0
61.6	0
61.7	0
61.8	0
61.9	0
62	0
62.1	0
62.2	0
62.3	0
62.4	0
62.5	0
62.6	0
62.7	0
62.8	0
62.9	0
63	0
63.1	0
63.2	0
63.3	0
63.4	0
63.5	0
63.6	0
63.7	0
63.8	0
63.9	0
64	0
64.1	0
64.2	0
64.3	0
64.4	0
64.5	0
64.6	0
64.7	0
64.8	0
64.9	0
65	0
65.1	0
65.2	0
65.3	0
65.4	0
65.5	0
65.6	0
65.7	0
65.8	0
65.9	0
66	0
66.1	0
66.2	0
66.3	0
66.4	0
66.5	0
66.6	0
66.7	0
66.8	0
66.9	0
67	0
67.1	0
67.2	0
67.3	0
67.4	0
67.5	0
67.6	0
67.7	0
67.8	0
67.9	0
68	0
68.1	0
68.2	0
68.3	0
68.4	0
68.5	0
68.6	0
68.7	0
68.8	0
68.9	0
69	0
69.1	0
69.2	0
69.3	0
69.4	0
69.5	0
69.6	0
69.7	0
69.8	0
69.9	0
70	0
70.1	0
70.2	0
70.3	0
70.4	0
70.5	0
70.6	0
70.7	0
70.8	0
70.9	0
71	0
71.1	0
71.2	0
71.3	0
71.4	0
71.5	0
71.6	0
71.7	0
71.8	0
71.9	0
72	0
72.1	0
72.2	0
72.3	0
72.4	0
72.5	0
72.6	0
72.7	0
72.8	0
72.9	0
73	0
73.1	0
73.2	0
73.3	0
73.4	0
73.5	0
73.6	0
73.7	0
73.8	0
73.9	0
74	0
74.1	0
74.2	0
74.3	0
74.4	0
74.5	0
74.6	0
74.7	0
74.8	0
74.9	0
75	0
75.1	0
75.2	0
75.3	0
75.4	0
75.5	0
75.6	0
75.7	0
75.8	0
75.9	0
76	0
76.1	0
76.2	0
76.3	0
76.4	0
76.5	0
76.6	0
76.7	0
76.8	0
76.9	0
77	0
77.1	0
77.2	0
77.3	0
77.4	0
77.5	0
77.6	0
77.7	0
77.8	0
77.9	0
78	0
78.1	0
78.2	0
78.3	0
78.4	0
78.5	0
78.6	0
78.7	0
78.8	0
78.9	0
79	0
79.1	0
79.2	0
79.3	0
79.4	0
79.5	0
79.6	0
79.7	0
79.8	0
79.9	0
80	0
80.1	0
80.2	0
80.3	0
80.4	0
80.5	0
80.6	0
80.7	0
80.8	0
80.9	0
81	0
81.1	0
81.2	0
81.3	0
81.4	0
81.5	0
81.6	0
81.7	0
81.8	0
81.9	0
82	0
82.1	0
82.2	0
82.3	0
82.4	0
82.5	0
82.6	0
82.7	0
82.8	0
82.9	0
83	0
83.1	0
83.2	0
83.3	0
83.4	0
83.5	0
83.6	0
83.7	0
83.8	0
83.9	0
84	0
84.1	0
84.2	0
84.3	0
84.4	0
84.5	0
84.6	0
84.7	0
84.8	0
84.9	0
85	0
85.1	0
85.2	0
85.3	0
85.4	0
85.5	0
85.6	0
85.7	0
85.8	0
85.9	0
86	0
86.1	0
86.2	0
86.3	0
86.4	0
86.5	0
86.6	0
86.7	0
86.8	0
86.9	0
87	0
87.1	0
87.2	0
87.3	0
87.4	0
87.5	0
87.6	0
87.7	0
87.8	0
87.9	0
88	0
88.1	0
88.2	0
88.3	0
88.4	0
88.5	0
88.6	0
88.7	0
88.8	0
88.9	0
89	0
89.1	0
89.2	0
89.3	0
89.4	0
89.5	0
89.6	0
89.7	0
89.8	0
89.9	0
90	0
90.1	0
90.2	0
90.3	0
90.4	0
90.5	0
90.6	0
90.7	0
90.8	0
90.9	0
91	0
91.1	0
91.2	0
91.3	0
91.4	0
91.5	0
91.6	0
91.7	0
91.8	0
91.9	0
92	0
92.1	0
92.2	0
92.3	0
92.4	0
92.5	0
92.6	0
92.7	0
92.8	0
92.9	0
93	0
93.1	0
93.2	0
93.3	0
93.4	0
93.5	0
93.6	0
93.7	0
93.8	0
93.9	0
94	0
94.1	0
94.2	0
94.3	0
94.4	0
94.5	0
94.6	0
94.7	0
94.8	0
94.9	0
95	0
95.1	0
95.2	0
95.3	0
95.4	0
95.5	0
95.6	0
95.7	0
95.8	0
95.9	0
96	0
96.1	0
96.2	0
96.3	0
96.4	0
96.5	0
96.6	0
96.7	0
96.8	0
96.9	0
97	0
97.1	0
97.2	0
97.3	0
97.4	0
97.5	0
97.6	0
97.7	0
97.8	0
97.9	0
98	0
98.1	0
98.2	0
98.3	0
98.4	0
98.5	0
98.6	0
98.7	0
98.8	0
98.9	0
99	0
99.1	0
99.2	0
99.3	0
99.4	0
99.5	0
99.6	0
99.7	0
99.8	0
99.9	0
100	0
100.1	0.0269
100.2	0.0575
100.3	0.0846
100.4	0.1095
100.5	0.1323
100.6	0.1554
100.7	0.1733
100.8	0.1935
100.9	0.213
101	0.2318
101.1	0.2474
101.2	0.2629
101.3	0.2777
101.4	0.2926
101.5	0.3077
101.6	0.319
101.7	0.3276
101.8	0.3419
101.9	0.3559
102	0.366
102.1	0.376
102.2	0.3859
102.3	0.3963
102.4	0.4057
102.5	0.4138
102.6	0.42
102.7	0.4275
102.8	0.4331
102.9	0.4383
103	0.445
103.1	0.4517
103.2	0.4563
103.3	0.4617
103.4	0.4662
103.5	0.4698
103.6	0.4742
103.7	0.4776
103.8	0.4814
103.9	0.4862
104	0.4889
104.1	0.4954
104.2	0.4988
104.3	0.5016
104.4	0.5015
104.5	0.5031
104.6	0.5058
104.7	0.5067
104.8	0.5106
104.9	0.5104
105	0.5128
105.1	0.5166
105.2	0.5189
105.3	0.5206
105.4	0.5213
105.5	0.5208
105.6	0.5229
105.7	0.5257
105.8	0.5286
105.9	0.5311
106	0.5322
106.1	0.5345
106.2	0.5369
106.3	0.5376
106.4	0.5385
106.5	0.5381
106.6	0.5374
106.7	0.537
106.8	0.538
106.9	0.5404
107	0.5408
107.1	0.5416
107.2	0.5422
107.3	0.5427
107.4	0.543
107.5	0.5435
107.6	0.5422
107.7	0.5424
107.8	0.5471
107.9	0.55
108	0.5522
108.1	0.5541
108.2	0.555
108.3	0.5563
108.4	0.5572
108.5	0.5588
108.6	0.5605
108.7	0.561
108.8	0.5618
108.9	0.5587
109	0.5596
109.1	0.558
109.2	0.5582
109.3	0.559
109.4	0.5593
109.5	0.5604
109.6	0.5617
109.7	0.5613
109.8	0.562
109.9	0.5627
110	0.5633
110.1	0.5652
110.2	0.5681
110.3	0.5696
110.4	0.5702
110.5	0.5708
110.6	0.571
110.7	0.5729
110.8	0.5708
110.9	0.5714
111	0.5692
111.1	0.5697
111.2	0.5695
111.3	0.5699
111.4	0.5708
111.5	0.5713
111.6	0.5734
111.7	0.5743
111.8	0.5743
111.9	0.574
112	0.5737
112.1	0.5734
112.2	0.5739
112.3	0.5747
112.4	0.5754
112.5	0.5746
112.6	0.5764
112.7	0.5764
112.8	0.5775
112.9	0.5792
113	0.579
113.1	0.5799
113.2	0.5789
113.3	0.5788
113.4	0.582
113.5	0.5814
113.6	0.5823
113.7	0.5831
113.8	0.5817
113.9	0.5826
114	0.5839
114.1	0.5844
114.2	0.5849
114.3	0.5846
114.4	0.5855
114.5	0.5848
114.6	0.5857
114.7	0.5851
114.8	0.5854
114.9	0.5858
115	0.5878
115.1	0.5883
115.2	0.5878
115.3	0.5878
115.4	0.5895
115.5	0.5892
115.6	0.5898
115.7	0.5926
115.8	0.5914
115.9	0.591
116	0.591
116.1	0.5929
116.2	0.5929
116.3	0.5935
116.4	0.5951
116.5	0.5949
116.6	0.5947
116.7	0.5934
116.8	0.5929
116.9	0.5928
117	0.5932
117.1	0.5914
117.2	0.5906
117.3	0.5908
117.4	0.592
117.5	0.5925
117.6	0.5935
117.7	0.5947
117.8	0.5954
117.9	0.5957
118	0.5964
118.1	0.5961
118.2	0.5969
118.3	0.5961
118.4	0.597
118.5	0.5989
118.6	0.597
118.7	0.5979
118.8	0.5989
118.9	0.6
119	0.5997
119.1	0.5982
119.2	0.5998
119.3	0.6001
119.4	0.6018
119.5	0.6
119.6	0.6009
119.7	0.6024
119.8	0.601
119.9	0.6001
120	0.6002
120.1	0.6001
120.2	0.6026
120.3	0.6026
120.4	0.6038
120.5	0.6044
120.6	0.6029
120.7	0.6024
120.8	0.6028
120.9	0.6031
121	0.602
121.1	0.6038
121.2	0.6044
121.3	0.6051
121.4	0.6073
121.5	0.6069
121.6	0.6049
121.7	0.6056
121.8	0.605
121.9	0.6064
122	0.6059
122.1	0.6071
122.2	0.6085
122.3	0.6067
122.4	0.6069
122.5	0.6063
122.6	0.6061
122.7	0.6061
122.8	0.608
122.9	0.6093
123	0.6099
123.1	0.6109
123.2	0.6119
123.3	0.6131
123.4	0.613
123.5	0.6127
123.6	0.6115
123.7	0.6137
123.8	0.6117
123.9	0.6131
124	0.6121
124.1	0.6124
124.2	0.6135
124.3	0.6141
124.4	0.6162
124.5	0.6164
124.6	0.6174
124.7	0.6181
124.8	0.6178
124.9	0.6163
125	0.6171
125.1	0.6171
125.2	0.6183
125.3	0.6216
125.4	0.6215
125.5	0.6215
125.6	0.623
125.7	0.6225
125.8	0.6222
125.9	0.6225
126	0.6218
126.1	0.6203
126.2	0.6221
126.3	0.6206
126.4	0.6218
126.5	0.6212
126.6	0.6216
126.7	0.6201
126.8	0.6225
126.9	0.6218
127	0.6219
127.1	0.624
127.2	0.6247
127.3	0.6248
127.4	0.6262
127.5	0.6259
127.6	0.6262
127.7	0.6268
127.8	0.6282
127.9	0.6291
128	0.6309
128.1	0.6293
128.2	0.6297
128.3	0.631
128.4	0.6316
128.5	0.631
128.6	0.6299
128.7	0.631
128.8	0.6313
128.9	0.6323
129	0.6317
129.1	0.6331
129.2	0.6324
129.3	0.6343
129.4	0.6347
129.5	0.6363
129.6	0.6354
129.7	0.6362
129.8	0.6388
129.9	0.6403
130	0.6409
130.1	0.641
130.2	0.6407
130.3	0.64
130.4	0.6392
130.5	0.6404
130.6	0.6405
130.7	0.6402
130.8	0.6426
130.9	0.6421
131	0.64
131.1	0.64
131.2	0.6413
131.3	0.6407
131.4	0.6422
131.5	0.6423
131.6	0.6425
131.7	0.6425
131.8	0.6436
131.9	0.6433
132	0.6422
132.1	0.6407
132.2	0.6399
132.3	0.6392
132.4	0.6401
132.5	0.6412
132.6	0.6421
132.7	0.6444
132.8	0.6449
132.9	0.6431
133	0.6453
133.1	0.6453
133.2	0.6438
133.3	0.6426
133.4	0.6428
133.5	0.6426
133.6	0.644
133.7	0.6436
133.8	0.6451
133.9	0.6458
134	0.6466
134.1	0.6471
134.2	0.6482
134.3	0.647
134.4	0.6469
134.5	0.6476
134.6	0.648
134.7	0.6472
134.8	0.647
134.9	0.6484
135	0.6485
135.1	0.6488
135.2	0.649
135.3	0.6501
135.4	0.6511
135.5	0.6504
135.6	0.6491
135.7	0.6505
135.8	0.65
135.9	0.6505
136	0.6513
136.1	0.6508
136.2	0.652
136.3	0.652
136.4	0.6532
136.5	0.6542
136.6	0.6543
136.7	0.6541
136.8	0.6543
136.9	0.6535
137	0.6523
137.1	0.6546
137.2	0.6532
137.3	0.6551
137.4	0.6558
137.5	0.6545
137.6	0.6559
137.7	0.656
137.8	0.6561
137.9	0.6573
138	0.657
138.1	0.6566
138.2	0.6572
138.3	0.6573
138.4	0.655
138.5	0.656
138.6	0.6561
138.7	0.656
138.8	0.6564
138.9	0.6574
139	0.6565
139.1	0.6575
139.2	0.6573
139.3	0.6593
139.4	0.6588
139.5	0.6569
139.6	0.6568
139.7	0.6563
139.8	0.6575
139.9	0.6556
140	0.658
140.1	0.658
140.2	0.656
140.3	0.657
140.4	0.657
140.5	0.6591
140.6	0.6609
140.7	0.6612
140.8	0.6609
140.9	0.6615
141	0.6618
141.1	0.6635
141.2	0.6638
141.3	0.6641
141.4	0.6648
141.5	0.6642
141.6	0.6658
141.7	0.6672
141.8	0.6693
141.9	0.6678
142	0.6672
142.1	0.6681
142.2	0.6669
142.3	0.6664
142.4	0.6666
142.5	0.6698
142.6	0.6697
142.7	0.6674
142.8	0.6683
142.9	0.6672
143	0.6672
143.1	0.6685
143.2	0.6683
143.3	0.6663
143.4	0.6675
143.5	0.6671
143.6	0.6665
143.7	0.6682
143.8	0.6695
143.9	0.6691
144	0.6692
144.1	0.6688
144.2	0.6682
144.3	0.6701
144.4	0.6709
144.5	0.6688
144.6	0.669
144.7	0.6692
144.8	0.6675
144.9	0.6692
145	0.6723
145.1	0.6751
145.2	0.6746
145.3	0.6754
145.4	0.6734
145.5	0.6745
145.6	0.6757
145.7	0.6763
145.8	0.6787
145.9	0.6795
146	0.6802
146.1	0.6805
146.2	0.6807
146.3	0.6818
146.4	0.6813
146.5	0.6805
146.6	0.6793
146.7	0.6797
146.8	0.678
146.9	0.679
147	0.6794
147.1	0.678
147.2	0.6784
147.3	0.6784
147.4	0.6798
147.5	0.6799
147.6	0.6807
147.7	0.682
147.8	0.6847
147.9	0.6811
148	0.6807
148.1	0.6819
148.2	0.6811
148.3	0.6807
148.4	0.6822
148.5	0.6823
148.6	0.683
148.7	0.6837
148.8	0.6848
148.9	0.685
149	0.6837
149.1	0.6832
149.2	0.6831
149.3	0.6854
149.4	0.6865
149.5	0.6886
149.6	0.6875
149.7	0.6881
149.8	0.6869
149.9	0.6895
150	0.6896
150.1	0.6898
150.2	0.6896
150.3	0.687
150.4	0.6878
150.5	0.6891
150.6	0.6902
150.7	0.69
150.8	0.6894
150.9	0.6894
151	0.691
151.1	0.6897
151.2	0.689
151.3	0.6895
151.4	0.6885
151.5	0.6883
151.6	0.6887
151.7	0.6879
151.8	0.6899
151.9	0.6897
152	0.6889
152.1	0.6883
152.2	0.6889
152.3	0.6908
152.4	0.6923
152.5	0.6901
152.6	0.6901
152.7	0.6914
152.8	0.6921
152.9	0.6916
153	0.6924
153.1	0.6925
153.2	0.6927
153.3	0.6928
153.4	0.6924
153.5	0.6936
153.6	0.6933
153.7	0.6945
153.8	0.696
153.9	0.6963
154	0.6948
154.1	0.6959
154.2	0.6936
154.3	0.6948
154.4	0.6954
154.5	0.6955
154.6	0.6953
154.7	0.6951
154.8	0.6969
154.9	0.697
155	0.6973
155.1	0.6967
155.2	0.6977
155.3	0.6982
155.4	0.699
155.5	0.6975
155.6	0.6974
155.7	0.6979
155.8	0.696
155.9	0.6962
156	0.6955
156.1	0.6968
156.2	0.6969
156.3	0.6963
156.4	0.6961
156.5	0.6958
156.6	0.6936
156.7	0.6959
156.8	0.695
156.9	0.6961
157	0.6946
157.1	0.6949
157.2	0.6956
157.3	0.6951
157.4	0.6948
157.5	0.6948
157.6	0.6943
157.7	0.6941
157.8	0.6946
157.9	0.6944
158	0.6946
158.1	0.6945
158.2	0.6925
158.3	0.6923
158.4	0.6926
158.5	0.6922
158.6	0.6945
158.7	0.6951
158.8	0.6932
158.9	0.6941
159	0.6968
159.1	0.6954
159.2	0.6982
159.3	0.6982
159.4	0.6989
159.5	0.6985
159.6	0.6995
159.7	0.6996
159.8	0.699
159.9	0.6994
160	0.6996
160.1	0.7012
160.2	0.7003
160.3	0.7017
160.4	0.702
160.5	0.7041
160.6	0.706
160.7	0.7074
160.8	0.7065
160.9	0.7072
161	0.7069
161.1	0.7072
161.2	0.7071
161.3	0.7081
161.4	0.7093
161.5	0.708
161.6	0.7074
161.7	0.7077
161.8	0.7077
161.9	0.7095
162	0.7106
162.1	0.711
162.2	0.7122
162.3	0.7098
162.4	0.7091
162.5	0.7091
162.6	0.7094
162.7	0.7086
162.8	0.7096
162.9	0.7086
163	0.7064
163.1	0.7065
163.2	0.7081
163.3	0.7093
163.4	0.7094
163.5	0.7072
163.6	0.7071
163.7	0.7067
163.8	0.7073
163.9	0.7049
164	0.7049
164.1	0.7049
164.2	0.7052
164.3	0.7046
164.4	0.7042
164.5	0.7046
164.6	0.7057
164.7	0.705
164.8	0.7057
164.9	0.7068
165	0.7066
165.1	0.7073
165.2	0.7083
165.3	0.7078
165.4	0.7087
165.5	0.7093
165.6	0.7099
165.7	0.7119
165.8	0.7099
165.9	0.7111
166	0.7095
166.1	0.7091
166.2	0.7095
166.3	0.71
166.4	0.7088
166.5	0.7098
166.6	0.7117
166.7	0.711
166.8	0.7103
166.9	0.7127
167	0.7121
167.1	0.7118
167.2	0.7129
167.3	0.7139
167.4	0.7137
167.5	0.7132
167.6	0.7128
167.7	0.713
167.8	0.7119
167.9	0.711
168	0.7106
168.1	0.7103
168.2	0.7106
168.3	0.7104
168.4	0.7106
168.5	0.7105
168.6	0.7118
168.7	0.7116
168.8	0.7124
168.9	0.7119
169	0.7109
169.1	0.7126
169.2	0.711
169.3	0.7117
169.4	0.7096
169.5	0.7087
169.6	0.7088
169.7	0.7081
169.8	0.7084
169.9	0.7083
170	0.7105
170.1	0.7107
170.2	0.7088
170.3	0.7098
170.4	0.7095
170.5	0.7102
170.6	0.7116
170.7	0.7121
170.8	0.7115
170.9	0.7102
171	0.7115
171.1	0.7124
171.2	0.7135
171.3	0.7139
171.4	0.7143
171.5	0.7124
171.6	0.7134
171.7	0.7136
171.8	0.7145
171.9	0.7151
172	0.7149
172.1	0.715
172.2	0.7134
172.3	0.7135
172.4	0.7161
172.5	0.7148
172.6	0.7145
172.7	0.716
172.8	0.7154
172.9	0.7157
173	0.715
173.1	0.717
173.2	0.7172
173.3	0.7179
173.4	0.7198
173.5	0.7203
173.6	0.72
173.7	0.7207
173.8	0.7192
173.9	0.7199
174	0.7172
174.1	0.7159
174.2	0.7157
174.3	0.7144
174.4	0.7158
174.5	0.7159
174.6	0.7155
174.7	0.7141
174.8	0.7136
174.9	0.7127
175	0.7129
175.1	0.713
175.2	0.7132
175.3	0.7129
175.4	0.7155
175.5	0.7163
175.6	0.716
175.7	0.717
175.8	0.717
175.9	0.7175
176	0.7154
176.1	0.7162
176.2	0.7174
176.3	0.7192
176.4	0.7175
176.5	0.7185
176.6	0.7184
176.7	0.7185
176.8	0.7184
176.9	0.7204
177	0.7198
177.1	0.7194
177.2	0.7196
177.3	0.7191
177.4	0.7195
177.5	0.719
177.6	0.7178
177.7	0.7172
177.8	0.7174
177.9	0.7187
178	0.7188
178.1	0.7172
178.2	0.7184
178.3	0.7193
178.4	0.7188
178.5	0.7185
178.6	0.7199
178.7	0.7211
178.8	0.7211
178.9	0.7214
179	0.7193
179.1	0.7178
179.2	0.7179
179.3	0.7174
179.4	0.7188
179.5	0.7182
179.6	0.7199
179.7	0.7212
179.8	0.7199
179.9	0.7186
180	0.7186
180.1	0.7194
180.2	0.7184
180.3	0.7188
180.4	0.7217
180.5	0.7225
180.6	0.7233
180.7	0.7229
180.8	0.7243
180.9	0.7224
181	0.7216
181.1	0.7213
181.2	0.721
181.3	0.7206
181.4	0.7208
181.5	0.721
181.6	0.7211
181.7	0.7217
181.8	0.7224
181.9	0.7234
182	0.7253
182.1	0.7271
182.2	0.728
182.3	0.7279
182.4	0.7286
182.5	0.7281
182.6	0.7268
182.7	0.728
182.8	0.7292
182.9	0.7292
183	0.7293
183.1	0.7303
183.2	0.7296
183.3	0.7289
183.4	0.7285
183.5	0.7297
183.6	0.7303
183.7	0.7301
183.8	0.7289
183.9	0.729
184	0.73
184.1	0.7283
184.2	0.729
184.3	0.7285
184.4	0.7271
184.5	0.726
184.6	0.7287
184.7	0.7277
184.8	0.728
184.9	0.7298
185	0.7303
185.1	0.7295
185.2	0.7302
185.3	0.7301
185.4	0.7312
185.5	0.7305
185.6	0.7298
185.7	0.7295
185.8	0.7296
185.9	0.7308
186	0.7308
186.1	0.73
186.2	0.7296
186.3	0.7313
186.4	0.7309
186.5	0.7307
186.6	0.7306
186.7	0.7326
186.8	0.733
186.9	0.7332
187	0.7346
187.1	0.7362
187.2	0.7363
187.3	0.7383
187.4	0.736
187.5	0.7345
187.6	0.7352
187.7	0.7354
187.8	0.736
187.9	0.7362
188	0.7352
188.1	0.7347
188.2	0.7346
188.3	0.7358
188.4	0.7357
188.5	0.7378
188.6	0.7399
188.7	0.7408
188.8	0.7412
188.9	0.7396
189	0.74
189.1	0.7389
189.2	0.7371
189.3	0.7389
189.4	0.7386
189.5	0.7389
189.6	0.7377
189.7	0.7382
189.8	0.738
189.9	0.7373
190	0.7377
190.1	0.7384
190.2	0.7384
190.3	0.7376
190.4	0.7369
190.5	0.7377
190.6	0.7377
190.7	0.7372
190.8	0.7386
190.9	0.739
191	0.7374
191.1	0.7381
191.2	0.7372
191.3	0.7361
191.4	0.7357
191.5	0.7341
191.6	0.7355
191.7	0.7363
191.8	0.737
191.9	0.7377
192	0.7379
192.1	0.7392
192.2	0.7404
192.3	0.7423
192.4	0.7425
192.5	0.7442
192.6	0.7439
192.7	0.7415
192.8	0.7405
192.9	0.7411
193	0.7401
193.1	0.7404
193.2	0.7412
193.3	0.7412
193.4	0.7403
193.5	0.74
193.6	0.7398
193.7	0.7413
193.8	0.7398
193.9	0.7388
194	0.7372
194.1	0.7361
194.2	0.7386
194.3	0.7397
194.4	0.7383
194.5	0.7397
194.6	0.7408
194.7	0.7413
194.8	0.7406
194.9	0.7412
195	0.7411
195.1	0.7405
195.2	0.7414
195.3	0.7403
195.4	0.7415
195.5	0.7405
195.6	0.741
195.7	0.7424
195.8	0.7417
195.9	0.7414
196	0.7402
196.1	0.7397
196.2	0.7395
196.3	0.7394
196.4	0.7396
196.5	0.7403
196.6	0.7407
196.7	0.7401
196.8	0.7397
196.9	0.7418
197	0.7413
197.1	0.7421
197.2	0.7426
197.3	0.743
197.4	0.744
197.5	0.7441
197.6	0.7434
197.7	0.744
197.8	0.7447
197.9	0.7436
198	0.7431
198.1	0.7436
198.2	0.7437
198.3	0.7435
198.4	0.7442
198.5	0.7437
198.6	0.7426
198.7	0.7421
198.8	0.7419
198.9	0.7423
199	0.7429
199.1	0.7438
199.2	0.7465
199.3	0.7469
199.4	0.746
199.5	0.7475
199.6	0.746
199.7	0.7458
199.8	0.7465
199.9	0.7477
200	0.7476
[truncated: 14,000 more rows]
