# Supplementary material for: Bayesian inference of kinetic schemes for ion channels by Kalman filtering
Source: eLife journal article supplement (doi:10.7554/elife.62714), 2022-05-04
Supplement: fig4-data9 [file 1_Sim_N_5000_Strom_MW.xlsx]

## Sheet: Tabelle1
0.1	0
0.2	0
0.3	0
0.4	0
0.5	0
0.6	0
0.7	0
0.8	0
0.9	0
1	0
1.1	0
1.2	0
1.3	0
1.4	0
1.5	0
1.6	0
1.7	0
1.8	0
1.9	0
2	0
2.1	0
2.2	0
2.3	0
2.4	0
2.5	0
2.6	0
2.7	0
2.8	0
2.9	0
3	0
3.1	0
3.2	0
3.3	0
3.4	0
3.5	0
3.6	0
3.7	0
3.8	0
3.9	0
4	0
4.1	0
4.2	0
4.3	0
4.4	0
4.5	0
4.6	0
4.7	0
4.8	0
4.9	0
5	0
5.1	0
5.2	0
5.3	0
5.4	0
5.5	0
5.6	0
5.7	0
5.8	0
5.9	0
6	0
6.1	0
6.2	0
6.3	0
6.4	0
6.5	0
6.6	0
6.7	0
6.8	0
6.9	0
7	0
7.1	0
7.2	0
7.3	0
7.4	0
7.5	0
7.6	0
7.7	0
7.8	0
7.9	0
8	0
8.1	0
8.2	0
8.3	0
8.4	0
8.5	0
8.6	0
8.7	0
8.8	0
8.9	0
9	0
9.1	0
9.2	0
9.3	0
9.4	0
9.5	0
9.6	0
9.7	0
9.8	0
9.9	0
10	0
10.1	0
10.2	0
10.3	0
10.4	0
10.5	0
10.6	0
10.7	0
10.8	0
10.9	0
11	0
11.1	0
11.2	0
11.3	0
11.4	0
11.5	0
11.6	0
11.7	0
11.8	0
11.9	0
12	0
12.1	0
12.2	0
12.3	0
12.4	0
12.5	0
12.6	0
12.7	0
12.8	0
12.9	0
13	0
13.1	0
13.2	0
13.3	0
13.4	0
13.5	0
13.6	0
13.7	0
13.8	0
13.9	0
14	0
14.1	0
14.2	0
14.3	0
14.4	0
14.5	0
14.6	0
14.7	0
14.8	0
14.9	0
15	0
15.1	0
15.2	0
15.3	0
15.4	0
15.5	0
15.6	0
15.7	0
15.8	0
15.9	0
16	0
16.1	0
16.2	0
16.3	0
16.4	0
16.5	0
16.6	0
16.7	0
16.8	0
16.9	0
17	0
17.1	0
17.2	0
17.3	0
17.4	0
17.5	0
17.6	0
17.7	0
17.8	0
17.9	0
18	0
18.1	0
18.2	0
18.3	0
18.4	0
18.5	0
18.6	0
18.7	0
18.8	0
18.9	0
19	0
19.1	0
19.2	0
19.3	0
19.4	0
19.5	0
19.6	0
19.7	0
19.8	0
19.9	0
20	0
20.1	0
20.2	0
20.3	0
20.4	0
20.5	0
20.6	0
20.7	0
20.8	0
20.9	0
21	0
21.1	0
21.2	0
21.3	0
21.4	0
21.5	0
21.6	0
21.7	0
21.8	0
21.9	0
22	0
22.1	0
22.2	0
22.3	0
22.4	0
22.5	0
22.6	0
22.7	0
22.8	0
22.9	0
23	0
23.1	0
23.2	0
23.3	0
23.4	0
23.5	0
23.6	0
23.7	0
23.8	0
23.9	0
24	0
24.1	0
24.2	0
24.3	0
24.4	0
24.5	0
24.6	0
24.7	0
24.8	0
24.9	0
25	0
25.1	0
25.2	0
25.3	0
25.4	0
25.5	0
25.6	0
25.7	0
25.8	0
25.9	0
26	0
26.1	0
26.2	0
26.3	0
26.4	0
26.5	0
26.6	0
26.7	0
26.8	0
26.9	0
27	0
27.1	0
27.2	0
27.3	0
27.4	0
27.5	0
27.6	0
27.7	0
27.8	0
27.9	0
28	0
28.1	0
28.2	0
28.3	0
28.4	0
28.5	0
28.6	0
28.7	0
28.8	0
28.9	0
29	0
29.1	0
29.2	0
29.3	0
29.4	0
29.5	0
29.6	0
29.7	0
29.8	0
29.9	0
30	0
30.1	0
30.2	0
30.3	0
30.4	0
30.5	0
30.6	0
30.7	0
30.8	0
30.9	0
31	0
31.1	0
31.2	0
31.3	0
31.4	0
31.5	0
31.6	0
31.7	0
31.8	0
31.9	0
32	0
32.1	0
32.2	0
32.3	0
32.4	0
32.5	0
32.6	0
32.7	0
32.8	0
32.9	0
33	0
33.1	0
33.2	0
33.3	0
33.4	0
33.5	0
33.6	0
33.7	0
33.8	0
33.9	0
34	0
34.1	0
34.2	0
34.3	0
34.4	0
34.5	0
34.6	0
34.7	0
34.8	0
34.9	0
35	0
35.1	0
35.2	0
35.3	0
35.4	0
35.5	0
35.6	0
35.7	0
35.8	0
35.9	0
36	0
36.1	0
36.2	0
36.3	0
36.4	0
36.5	0
36.6	0
36.7	0
36.8	0
36.9	0
37	0
37.1	0
37.2	0
37.3	0
37.4	0
37.5	0
37.6	0
37.7	0
37.8	0
37.9	0
38	0
38.1	0
38.2	0
38.3	0
38.4	0
38.5	0
38.6	0
38.7	0
38.8	0
38.9	0
39	0
39.1	0
39.2	0
39.3	0
39.4	0
39.5	0
39.6	0
39.7	0
39.8	0
39.9	0
40	0
40.1	0
40.2	0
40.3	0
40.4	0
40.5	0
40.6	0
40.7	0
40.8	0
40.9	0
41	0
41.1	0
41.2	0
41.3	0
41.4	0
41.5	0
41.6	0
41.7	0
41.8	0
41.9	0
42	0
42.1	0
42.2	0
42.3	0
42.4	0
42.5	0
42.6	0
42.7	0
42.8	0
42.9	0
43	0
43.1	0
43.2	0
43.3	0
43.4	0
43.5	0
43.6	0
43.7	0
43.8	0
43.9	0
44	0
44.1	0
44.2	0
44.3	0
44.4	0
44.5	0
44.6	0
44.7	0
44.8	0
44.9	0
45	0
45.1	0
45.2	0
45.3	0
45.4	0
45.5	0
45.6	0
45.7	0
45.8	0
45.9	0
46	0
46.1	0
46.2	0
46.3	0
46.4	0
46.5	0
46.6	0
46.7	0
46.8	0
46.9	0
47	0
47.1	0
47.2	0
47.3	0
47.4	0
47.5	0
47.6	0
47.7	0
47.8	0
47.9	0
48	0
48.1	0
48.2	0
48.3	0
48.4	0
48.5	0
48.6	0
48.7	0
48.8	0
48.9	0
49	0
49.1	0
49.2	0
49.3	0
49.4	0
49.5	0
49.6	0
49.7	0
49.8	0
49.9	0
50	0
50.1	0
50.2	0
50.3	0
50.4	0
50.5	0
50.6	0
50.7	0
50.8	0
50.9	0
51	0
51.1	0
51.2	0
51.3	0
51.4	0
51.5	0
51.6	0
51.7	0
51.8	0
51.9	0
52	0
52.1	0
52.2	0
52.3	0
52.4	0
52.5	0
52.6	0
52.7	0
52.8	0
52.9	0
53	0
53.1	0
53.2	0
53.3	0
53.4	0
53.5	0
53.6	0
53.7	0
53.8	0
53.9	0
54	0
54.1	0
54.2	0
54.3	0
54.4	0
54.5	0
54.6	0
54.7	0
54.8	0
54.9	0
55	0
55.1	0
55.2	0
55.3	0
55.4	0
55.5	0
55.6	0
55.7	0
55.8	0
55.9	0
56	0
56.1	0
56.2	0
56.3	0
56.4	0
56.5	0
56.6	0
56.7	0
56.8	0
56.9	0
57	0
57.1	0
57.2	0
57.3	0
57.4	0
57.5	0
57.6	0
57.7	0
57.8	0
57.9	0
58	0
58.1	0
58.2	0
58.3	0
58.4	0
58.5	0
58.6	0
58.7	0
58.8	0
58.9	0
59	0
59.1	0
59.2	0
59.3	0
59.4	0
59.5	0
59.6	0
59.7	0
59.8	0
59.9	0
60	0
60.1	0
60.2	0
60.3	0
60.4	0
60.5	0
60.6	0
60.7	0
60.8	0
60.9	0
61	0
61.1	0
61.2	0
61.3	0
61.4	0
61.5	0
61.6	0
61.7	0
61.8	0
61.9	0
62	0
62.1	0
62.2	0
62.3	0
62.4	0
62.5	0
62.6	0
62.7	0
62.8	0
62.9	0
63	0
63.1	0
63.2	0
63.3	0
63.4	0
63.5	0
63.6	0
63.7	0
63.8	0
63.9	0
64	0
64.1	0
64.2	0
64.3	0
64.4	0
64.5	0
64.6	0
64.7	0
64.8	0
64.9	0
65	0
65.1	0
65.2	0
65.3	0
65.4	0
65.5	0
65.6	0
65.7	0
65.8	0
65.9	0
66	0
66.1	0
66.2	0
66.3	0
66.4	0
66.5	0
66.6	0
66.7	0
66.8	0
66.9	0
67	0
67.1	0
67.2	0
67.3	0
67.4	0
67.5	0
67.6	0
67.7	0
67.8	0
67.9	0
68	0
68.1	0
68.2	0
68.3	0
68.4	0
68.5	0
68.6	0
68.7	0
68.8	0
68.9	0
69	0
69.1	0
69.2	0
69.3	0
69.4	0
69.5	0
69.6	0
69.7	0
69.8	0
69.9	0
70	0
70.1	0
70.2	0
70.3	0
70.4	0
70.5	0
70.6	0
70.7	0
70.8	0
70.9	0
71	0
71.1	0
71.2	0
71.3	0
71.4	0
71.5	0
71.6	0
71.7	0
71.8	0
71.9	0
72	0
72.1	0
72.2	0
72.3	0
72.4	0
72.5	0
72.6	0
72.7	0
72.8	0
72.9	0
73	0
73.1	0
73.2	0
73.3	0
73.4	0
73.5	0
73.6	0
73.7	0
73.8	0
73.9	0
74	0
74.1	0
74.2	0
74.3	0
74.4	0
74.5	0
74.6	0
74.7	0
74.8	0
74.9	0
75	0
75.1	0
75.2	0
75.3	0
75.4	0
75.5	0
75.6	0
75.7	0
75.8	0
75.9	0
76	0
76.1	0
76.2	0
76.3	0
76.4	0
76.5	0
76.6	0
76.7	0
76.8	0
76.9	0
77	0
77.1	0
77.2	0
77.3	0
77.4	0
77.5	0
77.6	0
77.7	0
77.8	0
77.9	0
78	0
78.1	0
78.2	0
78.3	0
78.4	0
78.5	0
78.6	0
78.7	0
78.8	0
78.9	0
79	0
79.1	0
79.2	0
79.3	0
79.4	0
79.5	0
79.6	0
79.7	0
79.8	0
79.9	0
80	0
80.1	0
80.2	0
80.3	0
80.4	0
80.5	0
80.6	0
80.7	0
80.8	0
80.9	0
81	0
81.1	0
81.2	0
81.3	0
81.4	0
81.5	0
81.6	0
81.7	0
81.8	0
81.9	0
82	0
82.1	0
82.2	0
82.3	0
82.4	0
82.5	0
82.6	0
82.7	0
82.8	0
82.9	0
83	0
83.1	0
83.2	0
83.3	0
83.4	0
83.5	0
83.6	0
83.7	0
83.8	0
83.9	0
84	0
84.1	0
84.2	0
84.3	0
84.4	0
84.5	0
84.6	0
84.7	0
84.8	0
84.9	0
85	0
85.1	0
85.2	0
85.3	0
85.4	0
85.5	0
85.6	0
85.7	0
85.8	0
85.9	0
86	0
86.1	0
86.2	0
86.3	0
86.4	0
86.5	0
86.6	0
86.7	0
86.8	0
86.9	0
87	0
87.1	0
87.2	0
87.3	0
87.4	0
87.5	0
87.6	0
87.7	0
87.8	0
87.9	0
88	0
88.1	0
88.2	0
88.3	0
88.4	0
88.5	0
88.6	0
88.7	0
88.8	0
88.9	0
89	0
89.1	0
89.2	0
89.3	0
89.4	0
89.5	0
89.6	0
89.7	0
89.8	0
89.9	0
90	0
90.1	0
90.2	0
90.3	0
90.4	0
90.5	0
90.6	0
90.7	0
90.8	0
90.9	0
91	0
91.1	0
91.2	0
91.3	0
91.4	0
91.5	0
91.6	0
91.7	0
91.8	0
91.9	0
92	0
92.1	0
92.2	0
92.3	0
92.4	0
92.5	0
92.6	0
92.7	0
92.8	0
92.9	0
93	0
93.1	0
93.2	0
93.3	0
93.4	0
93.5	0
93.6	0
93.7	0
93.8	0
93.9	0
94	0
94.1	0
94.2	0
94.3	0
94.4	0
94.5	0
94.6	0
94.7	0
94.8	0
94.9	0
95	0
95.1	0
95.2	0
95.3	0
95.4	0
95.5	0
95.6	0
95.7	0
95.8	0
95.9	0
96	0
96.1	0
96.2	0
96.3	0
96.4	0
96.5	0
96.6	0
96.7	0
96.8	0
96.9	0
97	0
97.1	0
97.2	0
97.3	0
97.4	0
97.5	0
97.6	0
97.7	0
97.8	0
97.9	0
98	0
98.1	0
98.2	0
98.3	0
98.4	0
98.5	0
98.6	0
98.7	0
98.8	0
98.9	0
99	0
99.1	0
99.2	0
99.3	0
99.4	0
99.5	0
99.6	0
99.7	0
99.8	0
99.9	0
100	0
100.1	0
100.2	0
100.3	0
100.4	0
100.5	0
100.6	0
100.7	0.0002
100.8	0.0002
100.9	0.0004
101	0.0008
101.1	0.001
101.2	0.0016
101.3	0.0016
101.4	0.0016
101.5	0.002
101.6	0.0026
101.7	0.0028
101.8	0.0032
101.9	0.0032
102	0.0032
102.1	0.004
102.2	0.004
102.3	0.0044
102.4	0.0046
102.5	0.0054
102.6	0.0058
102.7	0.0064
102.8	0.007
102.9	0.0072
103	0.0076
103.1	0.0084
103.2	0.0086
103.3	0.0096
103.4	0.0102
103.5	0.011
103.6	0.0112
103.7	0.0118
103.8	0.012
103.9	0.013
104	0.0144
104.1	0.0156
104.2	0.0162
104.3	0.017
104.4	0.0178
104.5	0.0188
104.6	0.0198
104.7	0.0212
104.8	0.022
104.9	0.0228
105	0.0236
105.1	0.0252
105.2	0.0258
105.3	0.0254
105.4	0.0258
105.5	0.0264
105.6	0.0266
105.7	0.0278
105.8	0.0282
105.9	0.0294
106	0.0306
106.1	0.0314
106.2	0.0322
106.3	0.0328
106.4	0.033
106.5	0.0336
106.6	0.035
106.7	0.0356
106.8	0.0366
106.9	0.0372
107	0.038
107.1	0.0386
107.2	0.0392
107.3	0.0398
107.4	0.0402
107.5	0.0414
107.6	0.0424
107.7	0.044
107.8	0.0448
107.9	0.045
108	0.0454
108.1	0.0464
108.2	0.0476
108.3	0.0486
108.4	0.05
108.5	0.0518
108.6	0.0532
108.7	0.0538
108.8	0.054
108.9	0.0544
109	0.0558
109.1	0.0566
109.2	0.058
109.3	0.0592
109.4	0.0602
109.5	0.061
109.6	0.0616
109.7	0.0622
109.8	0.0628
109.9	0.065
110	0.0666
110.1	0.0668
110.2	0.0676
110.3	0.0684
110.4	0.0704
110.5	0.0712
110.6	0.0726
110.7	0.0732
110.8	0.0746
110.9	0.0758
111	0.076
111.1	0.076
111.2	0.0766
111.3	0.0774
111.4	0.078
111.5	0.0784
111.6	0.079
111.7	0.0798
111.8	0.0804
111.9	0.081
112	0.0814
112.1	0.0826
112.2	0.083
112.3	0.0832
112.4	0.0834
112.5	0.0852
112.6	0.0864
112.7	0.0874
112.8	0.0882
112.9	0.089
113	0.09
113.1	0.0914
113.2	0.0928
113.3	0.094
113.4	0.094
113.5	0.095
113.6	0.096
113.7	0.097
113.8	0.0972
113.9	0.097
114	0.0978
114.1	0.0994
114.2	0.1004
114.3	0.1012
114.4	0.1022
114.5	0.1044
114.6	0.1046
114.7	0.1056
114.8	0.1062
114.9	0.107
115	0.1082
115.1	0.1094
115.2	0.1108
115.3	0.1112
115.4	0.1124
115.5	0.1136
115.6	0.114
115.7	0.1146
115.8	0.1154
115.9	0.116
116	0.1168
116.1	0.1172
116.2	0.1182
116.3	0.1188
116.4	0.1198
116.5	0.1204
116.6	0.121
116.7	0.121
116.8	0.1218
116.9	0.1238
117	0.1242
117.1	0.1244
117.2	0.1252
117.3	0.1264
117.4	0.1268
117.5	0.1268
117.6	0.1276
117.7	0.1282
117.8	0.1294
117.9	0.1298
118	0.1308
118.1	0.1322
118.2	0.1328
118.3	0.1334
118.4	0.135
118.5	0.1352
118.6	0.1358
118.7	0.1366
118.8	0.1362
118.9	0.1372
119	0.1382
119.1	0.1392
119.2	0.1398
119.3	0.1408
119.4	0.1414
119.5	0.1416
119.6	0.1426
119.7	0.1434
119.8	0.1442
119.9	0.1446
120	0.1462
120.1	0.1482
120.2	0.148
120.3	0.148
120.4	0.1486
120.5	0.1492
120.6	0.15
120.7	0.1504
120.8	0.1512
120.9	0.1516
121	0.1524
121.1	0.1536
121.2	0.154
121.3	0.1556
121.4	0.1562
121.5	0.1576
121.6	0.1586
121.7	0.1592
121.8	0.1604
121.9	0.1606
122	0.1618
122.1	0.1624
122.2	0.1634
122.3	0.1636
122.4	0.164
122.5	0.1652
122.6	0.1652
122.7	0.1654
122.8	0.1668
122.9	0.1674
123	0.1678
123.1	0.1682
123.2	0.169
123.3	0.1692
123.4	0.1702
123.5	0.1704
123.6	0.1702
123.7	0.1706
123.8	0.1712
123.9	0.1716
124	0.172
124.1	0.1724
124.2	0.1722
124.3	0.1726
124.4	0.1732
124.5	0.1736
124.6	0.174
124.7	0.1738
124.8	0.1746
124.9	0.1754
125	0.1762
125.1	0.1768
125.2	0.1772
125.3	0.178
125.4	0.179
125.5	0.1798
125.6	0.1808
125.7	0.1822
125.8	0.183
125.9	0.1836
126	0.1842
126.1	0.1844
126.2	0.1846
126.3	0.1858
126.4	0.1858
126.5	0.1866
126.6	0.1872
126.7	0.1878
126.8	0.188
126.9	0.1886
127	0.1892
127.1	0.1894
127.2	0.1902
127.3	0.1904
127.4	0.1912
127.5	0.1922
127.6	0.193
127.7	0.1932
127.8	0.1942
127.9	0.1946
128	0.1952
128.1	0.1958
128.2	0.1966
128.3	0.1972
128.4	0.1982
128.5	0.1984
128.6	0.1996
128.7	0.1994
128.8	0.2002
128.9	0.201
129	0.2012
129.1	0.2016
129.2	0.2018
129.3	0.202
129.4	0.2024
129.5	0.2034
129.6	0.204
129.7	0.2046
129.8	0.2056
129.9	0.2058
130	0.2064
130.1	0.2072
130.2	0.2072
130.3	0.2074
130.4	0.208
130.5	0.2088
130.6	0.2092
130.7	0.2096
130.8	0.2096
130.9	0.2102
131	0.2108
131.1	0.2108
131.2	0.2116
131.3	0.2116
131.4	0.2132
131.5	0.2134
131.6	0.214
131.7	0.2146
131.8	0.2154
131.9	0.216
132	0.2166
132.1	0.2168
132.2	0.2184
132.3	0.2188
132.4	0.2192
132.5	0.2204
132.6	0.2206
132.7	0.2212
132.8	0.2216
132.9	0.2226
133	0.223
133.1	0.2238
133.2	0.2252
133.3	0.226
133.4	0.2262
133.5	0.2274
133.6	0.2286
133.7	0.2286
133.8	0.2288
133.9	0.2298
134	0.2296
134.1	0.2298
134.2	0.2306
134.3	0.2306
134.4	0.2316
134.5	0.232
134.6	0.2322
134.7	0.2328
134.8	0.2342
134.9	0.2346
135	0.2348
135.1	0.2358
135.2	0.2368
135.3	0.2374
135.4	0.238
135.5	0.2386
135.6	0.2396
135.7	0.2394
135.8	0.2402
135.9	0.2416
136	0.2416
136.1	0.2422
136.2	0.2432
136.3	0.2442
136.4	0.2456
136.5	0.2458
136.6	0.2464
136.7	0.2472
136.8	0.2482
136.9	0.2484
137	0.249
137.1	0.2494
137.2	0.2504
137.3	0.2506
137.4	0.2512
137.5	0.2518
137.6	0.2522
137.7	0.2524
137.8	0.2536
137.9	0.2538
138	0.2542
138.1	0.2546
138.2	0.2552
138.3	0.2564
138.4	0.2568
138.5	0.2564
138.6	0.2564
138.7	0.2574
138.8	0.2586
138.9	0.2594
139	0.2602
139.1	0.2606
139.2	0.2606
139.3	0.2618
139.4	0.2624
139.5	0.2626
139.6	0.2634
139.7	0.2636
139.8	0.2632
139.9	0.2644
140	0.2656
140.1	0.2658
140.2	0.2664
140.3	0.267
140.4	0.267
140.5	0.2672
140.6	0.2674
140.7	0.268
140.8	0.2688
140.9	0.2692
141	0.2704
141.1	0.2712
141.2	0.2712
141.3	0.2714
141.4	0.2714
141.5	0.2718
141.6	0.2718
141.7	0.272
141.8	0.2732
141.9	0.2742
142	0.2742
142.1	0.2754
142.2	0.2762
142.3	0.2766
142.4	0.2768
142.5	0.2766
142.6	0.2772
142.7	0.2776
142.8	0.278
142.9	0.2788
143	0.2794
143.1	0.28
143.2	0.2802
143.3	0.281
143.4	0.2808
143.5	0.2816
143.6	0.2824
143.7	0.2822
143.8	0.2824
143.9	0.2838
144	0.2856
144.1	0.2858
144.2	0.2856
144.3	0.2856
144.4	0.286
144.5	0.2864
144.6	0.2868
144.7	0.2874
144.8	0.288
144.9	0.2882
145	0.289
145.1	0.2892
145.2	0.29
145.3	0.2904
145.4	0.291
145.5	0.291
145.6	0.2918
145.7	0.2926
145.8	0.293
145.9	0.2924
146	0.2928
146.1	0.2938
146.2	0.2944
146.3	0.2954
146.4	0.296
146.5	0.2972
146.6	0.2972
146.7	0.2974
146.8	0.2988
146.9	0.299
147	0.299
147.1	0.2994
147.2	0.2996
147.3	0.3006
147.4	0.301
147.5	0.302
147.6	0.3026
147.7	0.303
147.8	0.3036
147.9	0.3046
148	0.3048
148.1	0.3046
148.2	0.3048
148.3	0.305
148.4	0.3052
148.5	0.3062
148.6	0.3074
148.7	0.3084
148.8	0.3094
148.9	0.31
149	0.3104
149.1	0.3112
149.2	0.312
149.3	0.3128
149.4	0.3126
149.5	0.3134
149.6	0.3134
149.7	0.3132
149.8	0.3138
149.9	0.3148
150	0.315
150.1	0.3158
150.2	0.3162
150.3	0.3158
150.4	0.3156
150.5	0.3156
150.6	0.3164
150.7	0.317
150.8	0.318
150.9	0.318
151	0.3182
151.1	0.319
151.2	0.3188
151.3	0.3196
151.4	0.3194
151.5	0.3202
151.6	0.3208
151.7	0.3206
151.8	0.3206
151.9	0.3208
152	0.3202
152.1	0.3202
152.2	0.3202
152.3	0.321
152.4	0.3214
152.5	0.3228
152.6	0.3228
152.7	0.3226
152.8	0.3224
152.9	0.3228
153	0.3226
153.1	0.323
153.2	0.3228
153.3	0.3228
153.4	0.3236
153.5	0.3242
153.6	0.325
153.7	0.3248
153.8	0.3248
153.9	0.3252
154	0.3252
154.1	0.3252
154.2	0.3268
154.3	0.327
154.4	0.3262
154.5	0.326
154.6	0.3262
154.7	0.327
154.8	0.3276
154.9	0.3282
155	0.3288
155.1	0.3292
155.2	0.3298
155.3	0.331
155.4	0.3322
155.5	0.332
155.6	0.3314
155.7	0.3326
155.8	0.3326
155.9	0.3328
156	0.3334
156.1	0.3338
156.2	0.3342
156.3	0.3344
156.4	0.3354
156.5	0.3362
156.6	0.3368
156.7	0.3372
156.8	0.3376
156.9	0.3388
157	0.3388
157.1	0.3386
157.2	0.3396
157.3	0.3394
157.4	0.3392
157.5	0.3392
157.6	0.3394
157.7	0.3398
157.8	0.3398
157.9	0.3402
158	0.3398
158.1	0.34
158.2	0.3398
158.3	0.3396
158.4	0.3394
158.5	0.3398
158.6	0.341
158.7	0.3422
158.8	0.3426
158.9	0.3434
159	0.3442
159.1	0.3446
159.2	0.345
159.3	0.3452
159.4	0.3456
159.5	0.346
159.6	0.3464
159.7	0.3474
159.8	0.3478
159.9	0.3482
160	0.348
160.1	0.3476
160.2	0.3482
160.3	0.3486
160.4	0.3498
160.5	0.3498
160.6	0.3508
160.7	0.3504
160.8	0.3518
160.9	0.3522
161	0.353
161.1	0.3528
161.2	0.353
161.3	0.3536
161.4	0.354
161.5	0.3548
161.6	0.356
161.7	0.3564
161.8	0.357
161.9	0.3578
162	0.3582
162.1	0.3588
162.2	0.3588
162.3	0.3596
162.4	0.3596
162.5	0.3602
162.6	0.3606
162.7	0.3604
162.8	0.3602
162.9	0.3604
163	0.3608
163.1	0.36
163.2	0.3606
163.3	0.3608
163.4	0.361
163.5	0.3618
163.6	0.3618
163.7	0.3618
163.8	0.3618
163.9	0.3624
164	0.3622
164.1	0.3628
164.2	0.363
164.3	0.3632
164.4	0.3638
164.5	0.3646
164.6	0.3646
164.7	0.364
164.8	0.3634
164.9	0.3636
165	0.3638
165.1	0.3648
165.2	0.3648
165.3	0.3646
165.4	0.3646
165.5	0.3654
165.6	0.3662
165.7	0.3656
165.8	0.3656
165.9	0.3666
166	0.3672
166.1	0.3668
166.2	0.3668
166.3	0.3664
166.4	0.3668
166.5	0.3672
166.6	0.3678
166.7	0.3684
166.8	0.3684
166.9	0.369
167	0.369
167.1	0.3692
167.2	0.3694
167.3	0.3698
167.4	0.3704
167.5	0.37
167.6	0.3706
167.7	0.3716
167.8	0.3722
167.9	0.3722
168	0.3728
168.1	0.3736
168.2	0.3738
168.3	0.3736
168.4	0.3732
168.5	0.3738
168.6	0.3738
168.7	0.374
168.8	0.3746
168.9	0.3752
169	0.3756
169.1	0.3748
169.2	0.3752
169.3	0.3752
169.4	0.3758
169.5	0.3758
169.6	0.3764
169.7	0.3772
169.8	0.3776
169.9	0.3784
170	0.3792
170.1	0.3794
170.2	0.3802
170.3	0.3802
170.4	0.3804
170.5	0.3806
170.6	0.3804
170.7	0.3808
170.8	0.38
170.9	0.3802
171	0.3802
171.1	0.3806
171.2	0.3806
171.3	0.3818
171.4	0.3822
171.5	0.3824
171.6	0.3824
171.7	0.3824
171.8	0.3822
171.9	0.382
172	0.3814
172.1	0.3808
172.2	0.381
172.3	0.381
172.4	0.381
172.5	0.3814
172.6	0.3816
172.7	0.382
172.8	0.3818
172.9	0.3818
173	0.382
173.1	0.3818
173.2	0.3822
173.3	0.382
173.4	0.3822
173.5	0.3822
173.6	0.3826
173.7	0.3822
173.8	0.3818
173.9	0.3812
174	0.3806
174.1	0.38
174.2	0.3802
174.3	0.3802
174.4	0.3804
174.5	0.3804
174.6	0.3806
174.7	0.3808
174.8	0.3808
174.9	0.3814
175	0.3816
175.1	0.382
175.2	0.3822
175.3	0.3824
175.4	0.3824
175.5	0.382
175.6	0.3814
175.7	0.3822
175.8	0.3828
175.9	0.3838
176	0.3844
176.1	0.3842
176.2	0.3836
176.3	0.3842
176.4	0.3846
176.5	0.3852
176.6	0.3852
176.7	0.3844
176.8	0.3852
176.9	0.385
177	0.3852
177.1	0.3852
177.2	0.386
177.3	0.3872
177.4	0.3874
177.5	0.3882
177.6	0.3882
177.7	0.3876
177.8	0.3882
177.9	0.3886
178	0.389
178.1	0.3888
178.2	0.3898
178.3	0.39
178.4	0.3902
178.5	0.3898
178.6	0.39
178.7	0.3912
178.8	0.3912
178.9	0.3918
179	0.3922
179.1	0.3926
179.2	0.3928
179.3	0.3936
179.4	0.3936
179.5	0.3942
179.6	0.3944
179.7	0.3944
179.8	0.3946
179.9	0.3942
180	0.395
180.1	0.3964
180.2	0.3966
180.3	0.3958
180.4	0.396
180.5	0.3968
180.6	0.3974
180.7	0.3986
180.8	0.3988
180.9	0.3992
181	0.399
181.1	0.3992
181.2	0.3994
181.3	0.3996
181.4	0.4
181.5	0.4006
181.6	0.4006
181.7	0.4014
181.8	0.4018
181.9	0.4026
182	0.4032
182.1	0.4034
182.2	0.4036
182.3	0.4034
182.4	0.4044
182.5	0.405
182.6	0.4052
182.7	0.4062
182.8	0.406
182.9	0.406
183	0.4056
183.1	0.4054
183.2	0.406
183.3	0.406
183.4	0.4066
183.5	0.407
183.6	0.4074
183.7	0.4074
183.8	0.4086
183.9	0.4092
184	0.4096
184.1	0.4098
184.2	0.4098
184.3	0.4102
184.4	0.4108
184.5	0.4102
184.6	0.4106
184.7	0.4112
184.8	0.4108
184.9	0.4104
185	0.411
185.1	0.4114
185.2	0.4122
185.3	0.4124
185.4	0.4128
185.5	0.4134
185.6	0.414
185.7	0.414
185.8	0.414
185.9	0.4138
186	0.4138
186.1	0.414
186.2	0.4138
186.3	0.4138
186.4	0.414
186.5	0.414
186.6	0.4134
186.7	0.4138
186.8	0.4154
186.9	0.4148
187	0.4154
187.1	0.415
187.2	0.415
187.3	0.4152
187.4	0.4152
187.5	0.4156
187.6	0.417
187.7	0.4172
187.8	0.4176
187.9	0.4182
188	0.4182
188.1	0.4184
188.2	0.4174
188.3	0.4178
188.4	0.4182
188.5	0.419
188.6	0.4204
188.7	0.4208
188.8	0.4208
188.9	0.4214
189	0.4216
189.1	0.4218
189.2	0.4222
189.3	0.4224
189.4	0.4222
189.5	0.4226
189.6	0.4226
189.7	0.422
189.8	0.4216
189.9	0.4218
190	0.4218
190.1	0.422
190.2	0.4218
190.3	0.4218
190.4	0.4222
190.5	0.4228
190.6	0.4228
190.7	0.4236
190.8	0.4244
190.9	0.424
191	0.4248
191.1	0.4246
191.2	0.4248
191.3	0.4244
191.4	0.424
191.5	0.4238
191.6	0.4242
191.7	0.4258
191.8	0.427
191.9	0.4264
192	0.426
192.1	0.4264
192.2	0.4264
192.3	0.4262
192.4	0.4264
192.5	0.4266
192.6	0.4258
192.7	0.426
192.8	0.4266
192.9	0.427
193	0.4264
193.1	0.427
193.2	0.4276
193.3	0.428
193.4	0.429
193.5	0.429
193.6	0.4294
193.7	0.4292
193.8	0.4294
193.9	0.4286
194	0.4284
194.1	0.4292
194.2	0.4294
194.3	0.4298
194.4	0.4296
194.5	0.4296
194.6	0.4298
194.7	0.4302
194.8	0.4302
194.9	0.4304
195	0.431
195.1	0.4312
195.2	0.432
195.3	0.4326
195.4	0.4334
195.5	0.434
195.6	0.4352
195.7	0.4352
195.8	0.435
195.9	0.435
196	0.4348
196.1	0.435
196.2	0.4344
196.3	0.4346
196.4	0.435
196.5	0.4356
196.6	0.436
196.7	0.4362
196.8	0.4356
196.9	0.4356
197	0.4356
197.1	0.4362
197.2	0.437
197.3	0.4372
197.4	0.4376
197.5	0.4376
197.6	0.438
197.7	0.4386
197.8	0.4384
197.9	0.438
198	0.439
198.1	0.4392
198.2	0.4394
198.3	0.4396
198.4	0.4398
198.5	0.4404
198.6	0.4406
198.7	0.4394
198.8	0.4398
198.9	0.44
199	0.4402
199.1	0.4398
199.2	0.4404
199.3	0.4406
199.4	0.4406
199.5	0.4414
199.6	0.4414
199.7	0.442
199.8	0.4422
199.9	0.4422
200	0.4426
[truncated: 14,000 more rows]
