# Supplementary material for: Bayesian inference of kinetic schemes for ion channels by Kalman filtering
Source: eLife journal article supplement (doi:10.7554/elife.62714), 2022-05-04
Supplement: fig4-data9 [file 1_Sim_N_6000_Fluor_MW_0.5M.xlsx]

## Sheet: Tabelle1
0.1	0
0.2	0
0.3	0
0.4	0
0.5	0
0.6	0
0.7	0
0.8	0
0.9	0
1	0
1.1	0
1.2	0
1.3	0
1.4	0
1.5	0
1.6	0
1.7	0
1.8	0
1.9	0
2	0
2.1	0
2.2	0
2.3	0
2.4	0
2.5	0
2.6	0
2.7	0
2.8	0
2.9	0
3	0
3.1	0
3.2	0
3.3	0
3.4	0
3.5	0
3.6	0
3.7	0
3.8	0
3.9	0
4	0
4.1	0
4.2	0
4.3	0
4.4	0
4.5	0
4.6	0
4.7	0
4.8	0
4.9	0
5	0
5.1	0
5.2	0
5.3	0
5.4	0
5.5	0
5.6	0
5.7	0
5.8	0
5.9	0
6	0
6.1	0
6.2	0
6.3	0
6.4	0
6.5	0
6.6	0
6.7	0
6.8	0
6.9	0
7	0
7.1	0
7.2	0
7.3	0
7.4	0
7.5	0
7.6	0
7.7	0
7.8	0
7.9	0
8	0
8.1	0
8.2	0
8.3	0
8.4	0
8.5	0
8.6	0
8.7	0
8.8	0
8.9	0
9	0
9.1	0
9.2	0
9.3	0
9.4	0
9.5	0
9.6	0
9.7	0
9.8	0
9.9	0
10	0
10.1	0
10.2	0
10.3	0
10.4	0
10.5	0
10.6	0
10.7	0
10.8	0
10.9	0
11	0
11.1	0
11.2	0
11.3	0
11.4	0
11.5	0
11.6	0
11.7	0
11.8	0
11.9	0
12	0
12.1	0
12.2	0
12.3	0
12.4	0
12.5	0
12.6	0
12.7	0
12.8	0
12.9	0
13	0
13.1	0
13.2	0
13.3	0
13.4	0
13.5	0
13.6	0
13.7	0
13.8	0
13.9	0
14	0
14.1	0
14.2	0
14.3	0
14.4	0
14.5	0
14.6	0
14.7	0
14.8	0
14.9	0
15	0
15.1	0
15.2	0
15.3	0
15.4	0
15.5	0
15.6	0
15.7	0
15.8	0
15.9	0
16	0
16.1	0
16.2	0
16.3	0
16.4	0
16.5	0
16.6	0
16.7	0
16.8	0
16.9	0
17	0
17.1	0
17.2	0
17.3	0
17.4	0
17.5	0
17.6	0
17.7	0
17.8	0
17.9	0
18	0
18.1	0
18.2	0
18.3	0
18.4	0
18.5	0
18.6	0
18.7	0
18.8	0
18.9	0
19	0
19.1	0
19.2	0
19.3	0
19.4	0
19.5	0
19.6	0
19.7	0
19.8	0
19.9	0
20	0
20.1	0
20.2	0
20.3	0
20.4	0
20.5	0
20.6	0
20.7	0
20.8	0
20.9	0
21	0
21.1	0
21.2	0
21.3	0
21.4	0
21.5	0
21.6	0
21.7	0
21.8	0
21.9	0
22	0
22.1	0
22.2	0
22.3	0
22.4	0
22.5	0
22.6	0
22.7	0
22.8	0
22.9	0
23	0
23.1	0
23.2	0
23.3	0
23.4	0
23.5	0
23.6	0
23.7	0
23.8	0
23.9	0
24	0
24.1	0
24.2	0
24.3	0
24.4	0
24.5	0
24.6	0
24.7	0
24.8	0
24.9	0
25	0
25.1	0
25.2	0
25.3	0
25.4	0
25.5	0
25.6	0
25.7	0
25.8	0
25.9	0
26	0
26.1	0
26.2	0
26.3	0
26.4	0
26.5	0
26.6	0
26.7	0
26.8	0
26.9	0
27	0
27.1	0
27.2	0
27.3	0
27.4	0
27.5	0
27.6	0
27.7	0
27.8	0
27.9	0
28	0
28.1	0
28.2	0
28.3	0
28.4	0
28.5	0
28.6	0
28.7	0
28.8	0
28.9	0
29	0
29.1	0
29.2	0
29.3	0
29.4	0
29.5	0
29.6	0
29.7	0
29.8	0
29.9	0
30	0
30.1	0
30.2	0
30.3	0
30.4	0
30.5	0
30.6	0
30.7	0
30.8	0
30.9	0
31	0
31.1	0
31.2	0
31.3	0
31.4	0
31.5	0
31.6	0
31.7	0
31.8	0
31.9	0
32	0
32.1	0
32.2	0
32.3	0
32.4	0
32.5	0
32.6	0
32.7	0
32.8	0
32.9	0
33	0
33.1	0
33.2	0
33.3	0
33.4	0
33.5	0
33.6	0
33.7	0
33.8	0
33.9	0
34	0
34.1	0
34.2	0
34.3	0
34.4	0
34.5	0
34.6	0
34.7	0
34.8	0
34.9	0
35	0
35.1	0
35.2	0
35.3	0
35.4	0
35.5	0
35.6	0
35.7	0
35.8	0
35.9	0
36	0
36.1	0
36.2	0
36.3	0
36.4	0
36.5	0
36.6	0
36.7	0
36.8	0
36.9	0
37	0
37.1	0
37.2	0
37.3	0
37.4	0
37.5	0
37.6	0
37.7	0
37.8	0
37.9	0
38	0
38.1	0
38.2	0
38.3	0
38.4	0
38.5	0
38.6	0
38.7	0
38.8	0
38.9	0
39	0
39.1	0
39.2	0
39.3	0
39.4	0
39.5	0
39.6	0
39.7	0
39.8	0
39.9	0
40	0
40.1	0
40.2	0
40.3	0
40.4	0
40.5	0
40.6	0
40.7	0
40.8	0
40.9	0
41	0
41.1	0
41.2	0
41.3	0
41.4	0
41.5	0
41.6	0
41.7	0
41.8	0
41.9	0
42	0
42.1	0
42.2	0
42.3	0
42.4	0
42.5	0
42.6	0
42.7	0
42.8	0
42.9	0
43	0
43.1	0
43.2	0
43.3	0
43.4	0
43.5	0
43.6	0
43.7	0
43.8	0
43.9	0
44	0
44.1	0
44.2	0
44.3	0
44.4	0
44.5	0
44.6	0
44.7	0
44.8	0
44.9	0
45	0
45.1	0
45.2	0
45.3	0
45.4	0
45.5	0
45.6	0
45.7	0
45.8	0
45.9	0
46	0
46.1	0
46.2	0
46.3	0
46.4	0
46.5	0
46.6	0
46.7	0
46.8	0
46.9	0
47	0
47.1	0
47.2	0
47.3	0
47.4	0
47.5	0
47.6	0
47.7	0
47.8	0
47.9	0
48	0
48.1	0
48.2	0
48.3	0
48.4	0
48.5	0
48.6	0
48.7	0
48.8	0
48.9	0
49	0
49.1	0
49.2	0
49.3	0
49.4	0
49.5	0
49.6	0
49.7	0
49.8	0
49.9	0
50	0
50.1	0
50.2	0
50.3	0
50.4	0
50.5	0
50.6	0
50.7	0
50.8	0
50.9	0
51	0
51.1	0
51.2	0
51.3	0
51.4	0
51.5	0
51.6	0
51.7	0
51.8	0
51.9	0
52	0
52.1	0
52.2	0
52.3	0
52.4	0
52.5	0
52.6	0
52.7	0
52.8	0
52.9	0
53	0
53.1	0
53.2	0
53.3	0
53.4	0
53.5	0
53.6	0
53.7	0
53.8	0
53.9	0
54	0
54.1	0
54.2	0
54.3	0
54.4	0
54.5	0
54.6	0
54.7	0
54.8	0
54.9	0
55	0
55.1	0
55.2	0
55.3	0
55.4	0
55.5	0
55.6	0
55.7	0
55.8	0
55.9	0
56	0
56.1	0
56.2	0
56.3	0
56.4	0
56.5	0
56.6	0
56.7	0
56.8	0
56.9	0
57	0
57.1	0
57.2	0
57.3	0
57.4	0
57.5	0
57.6	0
57.7	0
57.8	0
57.9	0
58	0
58.1	0
58.2	0
58.3	0
58.4	0
58.5	0
58.6	0
58.7	0
58.8	0
58.9	0
59	0
59.1	0
59.2	0
59.3	0
59.4	0
59.5	0
59.6	0
59.7	0
59.8	0
59.9	0
60	0
60.1	0
60.2	0
60.3	0
60.4	0
60.5	0
60.6	0
60.7	0
60.8	0
60.9	0
61	0
61.1	0
61.2	0
61.3	0
61.4	0
61.5	0
61.6	0
61.7	0
61.8	0
61.9	0
62	0
62.1	0
62.2	0
62.3	0
62.4	0
62.5	0
62.6	0
62.7	0
62.8	0
62.9	0
63	0
63.1	0
63.2	0
63.3	0
63.4	0
63.5	0
63.6	0
63.7	0
63.8	0
63.9	0
64	0
64.1	0
64.2	0
64.3	0
64.4	0
64.5	0
64.6	0
64.7	0
64.8	0
64.9	0
65	0
65.1	0
65.2	0
65.3	0
65.4	0
65.5	0
65.6	0
65.7	0
65.8	0
65.9	0
66	0
66.1	0
66.2	0
66.3	0
66.4	0
66.5	0
66.6	0
66.7	0
66.8	0
66.9	0
67	0
67.1	0
67.2	0
67.3	0
67.4	0
67.5	0
67.6	0
67.7	0
67.8	0
67.9	0
68	0
68.1	0
68.2	0
68.3	0
68.4	0
68.5	0
68.6	0
68.7	0
68.8	0
68.9	0
69	0
69.1	0
69.2	0
69.3	0
69.4	0
69.5	0
69.6	0
69.7	0
69.8	0
69.9	0
70	0
70.1	0
70.2	0
70.3	0
70.4	0
70.5	0
70.6	0
70.7	0
70.8	0
70.9	0
71	0
71.1	0
71.2	0
71.3	0
71.4	0
71.5	0
71.6	0
71.7	0
71.8	0
71.9	0
72	0
72.1	0
72.2	0
72.3	0
72.4	0
72.5	0
72.6	0
72.7	0
72.8	0
72.9	0
73	0
73.1	0
73.2	0
73.3	0
73.4	0
73.5	0
73.6	0
73.7	0
73.8	0
73.9	0
74	0
74.1	0
74.2	0
74.3	0
74.4	0
74.5	0
74.6	0
74.7	0
74.8	0
74.9	0
75	0
75.1	0
75.2	0
75.3	0
75.4	0
75.5	0
75.6	0
75.7	0
75.8	0
75.9	0
76	0
76.1	0
76.2	0
76.3	0
76.4	0
76.5	0
76.6	0
76.7	0
76.8	0
76.9	0
77	0
77.1	0
77.2	0
77.3	0
77.4	0
77.5	0
77.6	0
77.7	0
77.8	0
77.9	0
78	0
78.1	0
78.2	0
78.3	0
78.4	0
78.5	0
78.6	0
78.7	0
78.8	0
78.9	0
79	0
79.1	0
79.2	0
79.3	0
79.4	0
79.5	0
79.6	0
79.7	0
79.8	0
79.9	0
80	0
80.1	0
80.2	0
80.3	0
80.4	0
80.5	0
80.6	0
80.7	0
80.8	0
80.9	0
81	0
81.1	0
81.2	0
81.3	0
81.4	0
81.5	0
81.6	0
81.7	0
81.8	0
81.9	0
82	0
82.1	0
82.2	0
82.3	0
82.4	0
82.5	0
82.6	0
82.7	0
82.8	0
82.9	0
83	0
83.1	0
83.2	0
83.3	0
83.4	0
83.5	0
83.6	0
83.7	0
83.8	0
83.9	0
84	0
84.1	0
84.2	0
84.3	0
84.4	0
84.5	0
84.6	0
84.7	0
84.8	0
84.9	0
85	0
85.1	0
85.2	0
85.3	0
85.4	0
85.5	0
85.6	0
85.7	0
85.8	0
85.9	0
86	0
86.1	0
86.2	0
86.3	0
86.4	0
86.5	0
86.6	0
86.7	0
86.8	0
86.9	0
87	0
87.1	0
87.2	0
87.3	0
87.4	0
87.5	0
87.6	0
87.7	0
87.8	0
87.9	0
88	0
88.1	0
88.2	0
88.3	0
88.4	0
88.5	0
88.6	0
88.7	0
88.8	0
88.9	0
89	0
89.1	0
89.2	0
89.3	0
89.4	0
89.5	0
89.6	0
89.7	0
89.8	0
89.9	0
90	0
90.1	0
90.2	0
90.3	0
90.4	0
90.5	0
90.6	0
90.7	0
90.8	0
90.9	0
91	0
91.1	0
91.2	0
91.3	0
91.4	0
91.5	0
91.6	0
91.7	0
91.8	0
91.9	0
92	0
92.1	0
92.2	0
92.3	0
92.4	0
92.5	0
92.6	0
92.7	0
92.8	0
92.9	0
93	0
93.1	0
93.2	0
93.3	0
93.4	0
93.5	0
93.6	0
93.7	0
93.8	0
93.9	0
94	0
94.1	0
94.2	0
94.3	0
94.4	0
94.5	0
94.6	0
94.7	0
94.8	0
94.9	0
95	0
95.1	0
95.2	0
95.3	0
95.4	0
95.5	0
95.6	0
95.7	0
95.8	0
95.9	0
96	0
96.1	0
96.2	0
96.3	0
96.4	0
96.5	0
96.6	0
96.7	0
96.8	0
96.9	0
97	0
97.1	0
97.2	0
97.3	0
97.4	0
97.5	0
97.6	0
97.7	0
97.8	0
97.9	0
98	0
98.1	0
98.2	0
98.3	0
98.4	0
98.5	0
98.6	0
98.7	0
98.8	0
98.9	0
99	0
99.1	0
99.2	0
99.3	0
99.4	0
99.5	0
99.6	0
99.7	0
99.8	0
99.9	0
100	0
100.1	0.0289167
100.2	0.0548333
100.3	0.0793333
100.4	0.102833
100.5	0.125833
100.6	0.14975
100.7	0.17175
100.8	0.193167
100.9	0.214583
101	0.23325
101.1	0.248917
101.2	0.265417
101.3	0.27975
101.4	0.293917
101.5	0.307083
101.6	0.319083
101.7	0.331583
101.8	0.342667
101.9	0.35425
102	0.364333
102.1	0.375917
102.2	0.384417
102.3	0.392417
102.4	0.400333
102.5	0.41
102.6	0.416083
102.7	0.42225
102.8	0.427083
102.9	0.43325
103	0.438083
103.1	0.442833
103.2	0.447333
103.3	0.451917
103.4	0.458083
103.5	0.462
103.6	0.467833
103.7	0.471917
103.8	0.475
103.9	0.477583
104	0.48075
104.1	0.4855
104.2	0.488083
104.3	0.49025
104.4	0.493333
104.5	0.494583
104.6	0.498333
104.7	0.49925
104.8	0.500583
104.9	0.503
105	0.506583
105.1	0.50925
105.2	0.509583
105.3	0.513417
105.4	0.514583
105.5	0.517583
105.6	0.5205
105.7	0.5255
105.8	0.527
105.9	0.527917
106	0.52925
106.1	0.53025
106.2	0.534417
106.3	0.534083
106.4	0.532833
106.5	0.535333
106.6	0.536583
106.7	0.53775
106.8	0.538667
106.9	0.537333
107	0.53975
107.1	0.542083
107.2	0.542667
107.3	0.54225
107.4	0.544833
107.5	0.54625
107.6	0.549
107.7	0.549833
107.8	0.547833
107.9	0.547333
108	0.546583
108.1	0.547083
108.2	0.546667
108.3	0.546417
108.4	0.550417
108.5	0.55125
108.6	0.550167
108.7	0.552083
108.8	0.551333
108.9	0.552667
109	0.553417
109.1	0.555667
109.2	0.557083
109.3	0.557
109.4	0.55875
109.5	0.560917
109.6	0.563583
109.7	0.563583
109.8	0.564
109.9	0.566083
110	0.567083
110.1	0.567583
110.2	0.5685
110.3	0.569333
110.4	0.570917
110.5	0.57375
110.6	0.575583
110.7	0.576917
110.8	0.577417
110.9	0.578
111	0.578667
111.1	0.577583
111.2	0.577
111.3	0.575083
111.4	0.575833
111.5	0.5765
111.6	0.578667
111.7	0.579583
111.8	0.5795
111.9	0.57975
112	0.580417
112.1	0.581167
112.2	0.581167
112.3	0.580833
112.4	0.580083
112.5	0.579833
112.6	0.578
112.7	0.57775
112.8	0.576417
112.9	0.57375
113	0.574083
113.1	0.575583
113.2	0.575583
113.3	0.575833
113.4	0.576417
113.5	0.57775
113.6	0.57875
113.7	0.58125
113.8	0.581583
113.9	0.581333
114	0.581
114.1	0.581917
114.2	0.582
114.3	0.582583
114.4	0.584583
114.5	0.584167
114.6	0.584
114.7	0.583
114.8	0.582583
114.9	0.5845
115	0.585667
115.1	0.586083
115.2	0.588167
115.3	0.588833
115.4	0.588583
115.5	0.58775
115.6	0.588417
115.7	0.587167
115.8	0.588917
115.9	0.589583
116	0.590917
116.1	0.5915
116.2	0.5935
116.3	0.594917
116.4	0.594583
116.5	0.595917
116.6	0.594417
116.7	0.593667
116.8	0.594833
116.9	0.595333
117	0.594917
117.1	0.594
117.2	0.595
117.3	0.5975
117.4	0.597917
117.5	0.597833
117.6	0.599083
117.7	0.59925
117.8	0.597417
117.9	0.598
118	0.598333
118.1	0.597917
118.2	0.597
118.3	0.5985
118.4	0.59875
118.5	0.598667
118.6	0.59875
118.7	0.5985
118.8	0.599083
118.9	0.601417
119	0.602583
119.1	0.60325
119.2	0.603083
119.3	0.603333
119.4	0.603333
119.5	0.604417
119.6	0.603417
119.7	0.602583
119.8	0.602083
119.9	0.603
120	0.605167
120.1	0.603833
120.2	0.60475
120.3	0.603917
120.4	0.603833
120.5	0.604667
120.6	0.607333
120.7	0.608417
120.8	0.608833
120.9	0.609083
121	0.61
121.1	0.6095
121.2	0.611
121.3	0.611667
121.4	0.612
121.5	0.611333
121.6	0.611083
121.7	0.611
121.8	0.611833
121.9	0.61175
122	0.61175
122.1	0.61275
122.2	0.61375
122.3	0.612667
122.4	0.613167
122.5	0.612083
122.6	0.613
122.7	0.61375
122.8	0.612083
122.9	0.612083
123	0.612333
123.1	0.612583
123.2	0.612167
123.3	0.611333
123.4	0.612417
123.5	0.61275
123.6	0.61375
123.7	0.614417
123.8	0.615583
123.9	0.617
124	0.616
124.1	0.6155
124.2	0.61675
124.3	0.618583
124.4	0.620417
124.5	0.619
124.6	0.621167
124.7	0.6215
124.8	0.621833
124.9	0.62125
125	0.621417
125.1	0.620917
125.2	0.6235
125.3	0.625
125.4	0.627667
125.5	0.62825
125.6	0.62675
125.7	0.627417
125.8	0.627
125.9	0.626167
126	0.626833
126.1	0.628083
126.2	0.626833
126.3	0.62775
126.4	0.629333
126.5	0.629083
126.6	0.62975
126.7	0.629667
126.8	0.630917
126.9	0.629583
127	0.6295
127.1	0.631583
127.2	0.63175
127.3	0.629917
127.4	0.628583
127.5	0.629583
127.6	0.630083
127.7	0.630667
127.8	0.63075
127.9	0.631833
128	0.630917
128.1	0.632417
128.2	0.633833
128.3	0.632333
128.4	0.633917
128.5	0.635
128.6	0.633667
128.7	0.63375
128.8	0.634
128.9	0.634
129	0.635417
129.1	0.637833
129.2	0.635917
129.3	0.63675
129.4	0.635667
129.5	0.636833
129.6	0.636417
129.7	0.638083
129.8	0.636833
129.9	0.636667
130	0.635917
130.1	0.63675
130.2	0.636167
130.3	0.637667
130.4	0.63775
130.5	0.637667
130.6	0.639333
130.7	0.639083
130.8	0.638083
130.9	0.638417
131	0.638667
131.1	0.638667
131.2	0.63975
131.3	0.641333
131.4	0.640417
131.5	0.640833
131.6	0.64125
131.7	0.641083
131.8	0.642
131.9	0.6415
132	0.643
132.1	0.642583
132.2	0.643083
132.3	0.643083
132.4	0.644417
132.5	0.645
132.6	0.645
132.7	0.64625
132.8	0.646667
132.9	0.64675
133	0.647583
133.1	0.647
133.2	0.648083
133.3	0.64775
133.4	0.648833
133.5	0.6505
133.6	0.65225
133.7	0.653
133.8	0.654667
133.9	0.654583
134	0.65325
134.1	0.651083
134.2	0.649
134.3	0.649333
134.4	0.649583
134.5	0.649917
134.6	0.650333
134.7	0.650417
134.8	0.6515
134.9	0.650583
135	0.650917
135.1	0.651083
135.2	0.65025
135.3	0.649167
135.4	0.650083
135.5	0.649417
135.6	0.65
135.7	0.64975
135.8	0.650167
135.9	0.650417
136	0.651583
136.1	0.650833
136.2	0.650583
136.3	0.651667
136.4	0.651667
136.5	0.651917
136.6	0.6515
136.7	0.65175
136.8	0.652083
136.9	0.653333
137	0.653333
137.1	0.652167
137.2	0.653333
137.3	0.654083
137.4	0.6545
137.5	0.654083
137.6	0.654917
137.7	0.6565
137.8	0.657083
137.9	0.658083
138	0.65875
138.1	0.658417
138.2	0.659833
138.3	0.662167
138.4	0.661833
138.5	0.662333
138.6	0.662667
138.7	0.66375
138.8	0.663667
138.9	0.663917
139	0.66275
139.1	0.662
139.2	0.66125
139.3	0.660083
139.4	0.660167
139.5	0.65825
139.6	0.65875
139.7	0.656083
139.8	0.65675
139.9	0.657333
140	0.657917
140.1	0.660667
140.2	0.66225
140.3	0.661583
140.4	0.661
140.5	0.66125
140.6	0.6625
140.7	0.662917
140.8	0.66475
140.9	0.666833
141	0.667167
141.1	0.666417
141.2	0.667333
141.3	0.667333
141.4	0.666583
141.5	0.666833
141.6	0.665917
141.7	0.665667
141.8	0.665333
141.9	0.665583
142	0.664667
142.1	0.66525
142.2	0.666667
142.3	0.666
142.4	0.667167
142.5	0.667667
142.6	0.669417
142.7	0.670167
142.8	0.668583
142.9	0.667833
143	0.667417
143.1	0.665917
143.2	0.665917
143.3	0.667083
143.4	0.667833
143.5	0.66825
143.6	0.667417
143.7	0.669167
143.8	0.669583
143.9	0.672333
144	0.671417
144.1	0.672083
144.2	0.672
144.3	0.672083
144.4	0.671417
144.5	0.670833
144.6	0.671833
144.7	0.67375
144.8	0.674417
144.9	0.675833
145	0.676
145.1	0.6745
145.2	0.674583
145.3	0.675083
145.4	0.672583
145.5	0.671833
145.6	0.672083
145.7	0.67225
145.8	0.671167
145.9	0.670417
146	0.670417
146.1	0.669833
146.2	0.672167
146.3	0.671833
146.4	0.674667
146.5	0.675083
146.6	0.675333
146.7	0.673917
146.8	0.672167
146.9	0.672667
147	0.672417
147.1	0.674
147.2	0.675083
147.3	0.674833
147.4	0.674083
147.5	0.67425
147.6	0.673833
147.7	0.67325
147.8	0.67325
147.9	0.673
148	0.67375
148.1	0.67475
148.2	0.674083
148.3	0.674583
148.4	0.675
148.5	0.67525
148.6	0.674917
148.7	0.676667
148.8	0.676167
148.9	0.676
149	0.677
149.1	0.679
149.2	0.68075
149.3	0.680667
149.4	0.68025
149.5	0.6815
149.6	0.681833
149.7	0.682417
149.8	0.682083
149.9	0.681167
150	0.681167
150.1	0.682
150.2	0.682333
150.3	0.683583
150.4	0.684
150.5	0.684667
150.6	0.684417
150.7	0.686083
150.8	0.685083
150.9	0.685583
151	0.685583
151.1	0.685333
151.2	0.684
151.3	0.684333
151.4	0.685417
151.5	0.686833
151.6	0.687333
151.7	0.687917
151.8	0.687167
151.9	0.68675
152	0.686333
152.1	0.68675
152.2	0.685667
152.3	0.68775
152.4	0.688667
152.5	0.689167
152.6	0.689
152.7	0.6885
152.8	0.68825
152.9	0.687333
153	0.685833
153.1	0.685083
153.2	0.687583
153.3	0.686917
153.4	0.686917
153.5	0.68775
153.6	0.687417
153.7	0.687833
153.8	0.68725
153.9	0.687333
154	0.68875
154.1	0.689083
154.2	0.688333
154.3	0.688333
154.4	0.68925
154.5	0.686833
154.6	0.686917
154.7	0.68575
154.8	0.686
154.9	0.686917
155	0.687917
155.1	0.688917
155.2	0.686917
155.3	0.68625
155.4	0.68475
155.5	0.6855
155.6	0.685417
155.7	0.686833
155.8	0.686083
155.9	0.686583
156	0.687417
156.1	0.688833
156.2	0.687667
156.3	0.6875
156.4	0.68775
156.5	0.688917
156.6	0.690083
156.7	0.68975
156.8	0.69
156.9	0.689583
157	0.69075
157.1	0.69125
157.2	0.691333
157.3	0.692833
157.4	0.693583
157.5	0.694833
157.6	0.69575
157.7	0.696833
157.8	0.69725
157.9	0.69825
158	0.69775
158.1	0.6985
158.2	0.699583
158.3	0.699667
158.4	0.700833
158.5	0.69875
158.6	0.697833
158.7	0.697417
158.8	0.69825
158.9	0.696
159	0.694583
159.1	0.695
159.2	0.69575
159.3	0.69575
159.4	0.696167
159.5	0.696
159.6	0.698583
159.7	0.701167
159.8	0.7015
159.9	0.701417
160	0.702917
160.1	0.703833
160.2	0.704167
160.3	0.702833
160.4	0.7035
160.5	0.703333
160.6	0.704
160.7	0.704417
160.8	0.702167
160.9	0.7025
161	0.70175
161.1	0.702083
161.2	0.700083
161.3	0.698917
161.4	0.698417
161.5	0.697333
161.6	0.698417
161.7	0.699167
161.8	0.699667
161.9	0.69875
162	0.698583
162.1	0.698083
162.2	0.698667
162.3	0.699
162.4	0.698833
162.5	0.698417
162.6	0.6995
162.7	0.701667
162.8	0.700917
162.9	0.70175
163	0.702083
163.1	0.703333
163.2	0.704583
163.3	0.705083
163.4	0.70475
163.5	0.70325
163.6	0.703333
163.7	0.705
163.8	0.706
163.9	0.7065
164	0.7055
164.1	0.705083
164.2	0.704333
164.3	0.704083
164.4	0.703917
164.5	0.70425
164.6	0.703
164.7	0.702417
164.8	0.70275
164.9	0.70225
165	0.703667
165.1	0.705167
165.2	0.706417
165.3	0.70525
165.4	0.704
165.5	0.7045
165.6	0.705417
165.7	0.705667
165.8	0.704083
165.9	0.703833
166	0.704667
166.1	0.705583
166.2	0.705167
166.3	0.706333
166.4	0.70525
166.5	0.706417
166.6	0.707583
166.7	0.707583
166.8	0.706833
166.9	0.70575
167	0.706167
167.1	0.705917
167.2	0.705833
167.3	0.70575
167.4	0.705167
167.5	0.705417
167.6	0.704833
167.7	0.70375
167.8	0.703583
167.9	0.705083
168	0.70725
168.1	0.70825
168.2	0.707667
168.3	0.70675
168.4	0.707833
168.5	0.708333
168.6	0.7085
168.7	0.708
168.8	0.7085
168.9	0.7095
169	0.708583
169.1	0.707917
169.2	0.7075
169.3	0.707833
169.4	0.708333
169.5	0.7095
169.6	0.709667
169.7	0.70725
169.8	0.7075
169.9	0.707
170	0.708083
170.1	0.707833
170.2	0.7075
170.3	0.70825
170.4	0.707417
170.5	0.709667
170.6	0.709583
170.7	0.710167
170.8	0.710083
170.9	0.709333
171	0.709833
171.1	0.709833
171.2	0.711
171.3	0.710917
171.4	0.711583
171.5	0.711833
171.6	0.71125
171.7	0.711833
171.8	0.713583
171.9	0.713333
172	0.7125
172.1	0.712
172.2	0.712
172.3	0.712583
172.4	0.713
172.5	0.712917
172.6	0.714417
172.7	0.715167
172.8	0.71525
172.9	0.716083
173	0.714917
173.1	0.713667
173.2	0.714417
173.3	0.713833
173.4	0.715
173.5	0.714417
173.6	0.71375
173.7	0.714167
173.8	0.71375
173.9	0.71275
174	0.7145
174.1	0.716417
174.2	0.7175
174.3	0.717333
174.4	0.717
174.5	0.717167
174.6	0.716917
174.7	0.716667
174.8	0.716667
174.9	0.71775
175	0.717667
175.1	0.717333
175.2	0.716833
175.3	0.717
175.4	0.71725
175.5	0.717667
175.6	0.717917
175.7	0.71975
175.8	0.719917
175.9	0.71825
176	0.717083
176.1	0.718583
176.2	0.71675
176.3	0.71725
176.4	0.717083
176.5	0.715833
176.6	0.716
176.7	0.7155
176.8	0.715417
176.9	0.71575
177	0.718
177.1	0.719083
177.2	0.719917
177.3	0.71875
177.4	0.719083
177.5	0.718833
177.6	0.71925
177.7	0.718833
177.8	0.718583
177.9	0.718333
178	0.717917
178.1	0.7185
178.2	0.721417
178.3	0.720333
178.4	0.720333
178.5	0.71925
178.6	0.7185
178.7	0.717833
178.8	0.718
178.9	0.718167
179	0.719167
179.1	0.719667
179.2	0.719583
179.3	0.720333
179.4	0.720083
179.5	0.721
179.6	0.720917
179.7	0.721083
179.8	0.721
179.9	0.723083
180	0.723
180.1	0.724917
180.2	0.722833
180.3	0.72275
180.4	0.724333
180.5	0.724667
180.6	0.723917
180.7	0.72425
180.8	0.725
180.9	0.725833
181	0.727083
181.1	0.72525
181.2	0.724667
181.3	0.726417
181.4	0.725917
181.5	0.726833
181.6	0.726
181.7	0.725
181.8	0.725417
181.9	0.725167
182	0.727333
182.1	0.727167
182.2	0.7255
182.3	0.726
182.4	0.7265
182.5	0.725
182.6	0.725417
182.7	0.723333
182.8	0.724083
182.9	0.725333
183	0.72525
183.1	0.725
183.2	0.725083
183.3	0.725667
183.4	0.724167
183.5	0.724833
183.6	0.724667
183.7	0.724333
183.8	0.7245
183.9	0.7265
184	0.726417
184.1	0.725917
184.2	0.726
184.3	0.725833
184.4	0.727083
184.5	0.727667
184.6	0.727417
184.7	0.72825
184.8	0.7285
184.9	0.729417
185	0.729167
185.1	0.728417
185.2	0.729917
185.3	0.729417
185.4	0.729917
185.5	0.73075
185.6	0.729333
185.7	0.728333
185.8	0.729417
185.9	0.730833
186	0.72975
186.1	0.729
186.2	0.72975
186.3	0.7285
186.4	0.728833
186.5	0.728667
186.6	0.729
186.7	0.72975
186.8	0.729167
186.9	0.729
187	0.729167
187.1	0.728917
187.2	0.729583
187.3	0.729667
187.4	0.730083
187.5	0.730167
187.6	0.729917
187.7	0.72875
187.8	0.729583
187.9	0.7295
188	0.73025
188.1	0.730583
188.2	0.730417
188.3	0.7305
188.4	0.7305
188.5	0.731
188.6	0.731583
188.7	0.731167
188.8	0.731417
188.9	0.730667
189	0.730083
189.1	0.731583
189.2	0.73425
189.3	0.733667
189.4	0.734583
189.5	0.73425
189.6	0.733083
189.7	0.73375
189.8	0.734083
189.9	0.735917
190	0.735583
190.1	0.735583
190.2	0.7355
190.3	0.73525
190.4	0.736417
190.5	0.7365
190.6	0.736333
190.7	0.736083
190.8	0.73475
190.9	0.736583
191	0.737667
191.1	0.73675
191.2	0.737167
191.3	0.737667
191.4	0.738083
191.5	0.737833
191.6	0.738
191.7	0.738417
191.8	0.738083
191.9	0.737
192	0.735583
192.1	0.736583
192.2	0.737
192.3	0.737167
192.4	0.735833
192.5	0.734833
192.6	0.73425
192.7	0.733583
192.8	0.73325
192.9	0.73325
193	0.734167
193.1	0.734
193.2	0.732583
193.3	0.733417
193.4	0.73375
193.5	0.734333
193.6	0.733917
193.7	0.73375
193.8	0.73475
193.9	0.73375
194	0.73375
194.1	0.734583
194.2	0.735333
194.3	0.735917
194.4	0.73475
194.5	0.734917
194.6	0.73575
194.7	0.736
194.8	0.735917
194.9	0.737667
195	0.738333
195.1	0.73725
195.2	0.73875
195.3	0.740083
195.4	0.7395
195.5	0.741083
195.6	0.739417
195.7	0.73925
195.8	0.740333
195.9	0.738167
196	0.738667
196.1	0.739333
196.2	0.739
196.3	0.736333
196.4	0.7375
196.5	0.736667
196.6	0.7375
196.7	0.737083
196.8	0.73675
196.9	0.736167
197	0.73675
197.1	0.738833
197.2	0.739167
197.3	0.737917
197.4	0.73975
197.5	0.73875
197.6	0.739417
197.7	0.738
197.8	0.737167
197.9	0.736833
198	0.737833
198.1	0.738583
198.2	0.738083
198.3	0.73725
198.4	0.7375
198.5	0.734833
198.6	0.734667
198.7	0.734333
198.8	0.733667
198.9	0.733583
199	0.733833
199.1	0.732
199.2	0.731
199.3	0.7315
199.4	0.73175
199.5	0.73325
199.6	0.733917
199.7	0.73325
199.8	0.733333
199.9	0.734417
200	0.734333
[truncated: 14,000 more rows]
