# Supplementary material for: Bayesian inference of kinetic schemes for ion channels by Kalman filtering
Source: eLife journal article supplement (doi:10.7554/elife.62714), 2022-05-04
Supplement: fig4-data9 [file 1_Sim_N_6000_Strom_MW_0.5M.xlsx]

## Sheet: Tabelle1
0.1	0
0.2	0
0.3	0
0.4	0
0.5	0
0.6	0
0.7	0
0.8	0
0.9	0
1	0
1.1	0
1.2	0
1.3	0
1.4	0
1.5	0
1.6	0
1.7	0
1.8	0
1.9	0
2	0
2.1	0
2.2	0
2.3	0
2.4	0
2.5	0
2.6	0
2.7	0
2.8	0
2.9	0
3	0
3.1	0
3.2	0
3.3	0
3.4	0
3.5	0
3.6	0
3.7	0
3.8	0
3.9	0
4	0
4.1	0
4.2	0
4.3	0
4.4	0
4.5	0
4.6	0
4.7	0
4.8	0
4.9	0
5	0
5.1	0
5.2	0
5.3	0
5.4	0
5.5	0
5.6	0
5.7	0
5.8	0
5.9	0
6	0
6.1	0
6.2	0
6.3	0
6.4	0
6.5	0
6.6	0
6.7	0
6.8	0
6.9	0
7	0
7.1	0
7.2	0
7.3	0
7.4	0
7.5	0
7.6	0
7.7	0
7.8	0
7.9	0
8	0
8.1	0
8.2	0
8.3	0
8.4	0
8.5	0
8.6	0
8.7	0
8.8	0
8.9	0
9	0
9.1	0
9.2	0
9.3	0
9.4	0
9.5	0
9.6	0
9.7	0
9.8	0
9.9	0
10	0
10.1	0
10.2	0
10.3	0
10.4	0
10.5	0
10.6	0
10.7	0
10.8	0
10.9	0
11	0
11.1	0
11.2	0
11.3	0
11.4	0
11.5	0
11.6	0
11.7	0
11.8	0
11.9	0
12	0
12.1	0
12.2	0
12.3	0
12.4	0
12.5	0
12.6	0
12.7	0
12.8	0
12.9	0
13	0
13.1	0
13.2	0
13.3	0
13.4	0
13.5	0
13.6	0
13.7	0
13.8	0
13.9	0
14	0
14.1	0
14.2	0
14.3	0
14.4	0
14.5	0
14.6	0
14.7	0
14.8	0
14.9	0
15	0
15.1	0
15.2	0
15.3	0
15.4	0
15.5	0
15.6	0
15.7	0
15.8	0
15.9	0
16	0
16.1	0
16.2	0
16.3	0
16.4	0
16.5	0
16.6	0
16.7	0
16.8	0
16.9	0
17	0
17.1	0
17.2	0
17.3	0
17.4	0
17.5	0
17.6	0
17.7	0
17.8	0
17.9	0
18	0
18.1	0
18.2	0
18.3	0
18.4	0
18.5	0
18.6	0
18.7	0
18.8	0
18.9	0
19	0
19.1	0
19.2	0
19.3	0
19.4	0
19.5	0
19.6	0
19.7	0
19.8	0
19.9	0
20	0
20.1	0
20.2	0
20.3	0
20.4	0
20.5	0
20.6	0
20.7	0
20.8	0
20.9	0
21	0
21.1	0
21.2	0
21.3	0
21.4	0
21.5	0
21.6	0
21.7	0
21.8	0
21.9	0
22	0
22.1	0
22.2	0
22.3	0
22.4	0
22.5	0
22.6	0
22.7	0
22.8	0
22.9	0
23	0
23.1	0
23.2	0
23.3	0
23.4	0
23.5	0
23.6	0
23.7	0
23.8	0
23.9	0
24	0
24.1	0
24.2	0
24.3	0
24.4	0
24.5	0
24.6	0
24.7	0
24.8	0
24.9	0
25	0
25.1	0
25.2	0
25.3	0
25.4	0
25.5	0
25.6	0
25.7	0
25.8	0
25.9	0
26	0
26.1	0
26.2	0
26.3	0
26.4	0
26.5	0
26.6	0
26.7	0
26.8	0
26.9	0
27	0
27.1	0
27.2	0
27.3	0
27.4	0
27.5	0
27.6	0
27.7	0
27.8	0
27.9	0
28	0
28.1	0
28.2	0
28.3	0
28.4	0
28.5	0
28.6	0
28.7	0
28.8	0
28.9	0
29	0
29.1	0
29.2	0
29.3	0
29.4	0
29.5	0
29.6	0
29.7	0
29.8	0
29.9	0
30	0
30.1	0
30.2	0
30.3	0
30.4	0
30.5	0
30.6	0
30.7	0
30.8	0
30.9	0
31	0
31.1	0
31.2	0
31.3	0
31.4	0
31.5	0
31.6	0
31.7	0
31.8	0
31.9	0
32	0
32.1	0
32.2	0
32.3	0
32.4	0
32.5	0
32.6	0
32.7	0
32.8	0
32.9	0
33	0
33.1	0
33.2	0
33.3	0
33.4	0
33.5	0
33.6	0
33.7	0
33.8	0
33.9	0
34	0
34.1	0
34.2	0
34.3	0
34.4	0
34.5	0
34.6	0
34.7	0
34.8	0
34.9	0
35	0
35.1	0
35.2	0
35.3	0
35.4	0
35.5	0
35.6	0
35.7	0
35.8	0
35.9	0
36	0
36.1	0
36.2	0
36.3	0
36.4	0
36.5	0
36.6	0
36.7	0
36.8	0
36.9	0
37	0
37.1	0
37.2	0
37.3	0
37.4	0
37.5	0
37.6	0
37.7	0
37.8	0
37.9	0
38	0
38.1	0
38.2	0
38.3	0
38.4	0
38.5	0
38.6	0
38.7	0
38.8	0
38.9	0
39	0
39.1	0
39.2	0
39.3	0
39.4	0
39.5	0
39.6	0
39.7	0
39.8	0
39.9	0
40	0
40.1	0
40.2	0
40.3	0
40.4	0
40.5	0
40.6	0
40.7	0
40.8	0
40.9	0
41	0
41.1	0
41.2	0
41.3	0
41.4	0
41.5	0
41.6	0
41.7	0
41.8	0
41.9	0
42	0
42.1	0
42.2	0
42.3	0
42.4	0
42.5	0
42.6	0
42.7	0
42.8	0
42.9	0
43	0
43.1	0
43.2	0
43.3	0
43.4	0
43.5	0
43.6	0
43.7	0
43.8	0
43.9	0
44	0
44.1	0
44.2	0
44.3	0
44.4	0
44.5	0
44.6	0
44.7	0
44.8	0
44.9	0
45	0
45.1	0
45.2	0
45.3	0
45.4	0
45.5	0
45.6	0
45.7	0
45.8	0
45.9	0
46	0
46.1	0
46.2	0
46.3	0
46.4	0
46.5	0
46.6	0
46.7	0
46.8	0
46.9	0
47	0
47.1	0
47.2	0
47.3	0
47.4	0
47.5	0
47.6	0
47.7	0
47.8	0
47.9	0
48	0
48.1	0
48.2	0
48.3	0
48.4	0
48.5	0
48.6	0
48.7	0
48.8	0
48.9	0
49	0
49.1	0
49.2	0
49.3	0
49.4	0
49.5	0
49.6	0
49.7	0
49.8	0
49.9	0
50	0
50.1	0
50.2	0
50.3	0
50.4	0
50.5	0
50.6	0
50.7	0
50.8	0
50.9	0
51	0
51.1	0
51.2	0
51.3	0
51.4	0
51.5	0
51.6	0
51.7	0
51.8	0
51.9	0
52	0
52.1	0
52.2	0
52.3	0
52.4	0
52.5	0
52.6	0
52.7	0
52.8	0
52.9	0
53	0
53.1	0
53.2	0
53.3	0
53.4	0
53.5	0
53.6	0
53.7	0
53.8	0
53.9	0
54	0
54.1	0
54.2	0
54.3	0
54.4	0
54.5	0
54.6	0
54.7	0
54.8	0
54.9	0
55	0
55.1	0
55.2	0
55.3	0
55.4	0
55.5	0
55.6	0
55.7	0
55.8	0
55.9	0
56	0
56.1	0
56.2	0
56.3	0
56.4	0
56.5	0
56.6	0
56.7	0
56.8	0
56.9	0
57	0
57.1	0
57.2	0
57.3	0
57.4	0
57.5	0
57.6	0
57.7	0
57.8	0
57.9	0
58	0
58.1	0
58.2	0
58.3	0
58.4	0
58.5	0
58.6	0
58.7	0
58.8	0
58.9	0
59	0
59.1	0
59.2	0
59.3	0
59.4	0
59.5	0
59.6	0
59.7	0
59.8	0
59.9	0
60	0
60.1	0
60.2	0
60.3	0
60.4	0
60.5	0
60.6	0
60.7	0
60.8	0
60.9	0
61	0
61.1	0
61.2	0
61.3	0
61.4	0
61.5	0
61.6	0
61.7	0
61.8	0
61.9	0
62	0
62.1	0
62.2	0
62.3	0
62.4	0
62.5	0
62.6	0
62.7	0
62.8	0
62.9	0
63	0
63.1	0
63.2	0
63.3	0
63.4	0
63.5	0
63.6	0
63.7	0
63.8	0
63.9	0
64	0
64.1	0
64.2	0
64.3	0
64.4	0
64.5	0
64.6	0
64.7	0
64.8	0
64.9	0
65	0
65.1	0
65.2	0
65.3	0
65.4	0
65.5	0
65.6	0
65.7	0
65.8	0
65.9	0
66	0
66.1	0
66.2	0
66.3	0
66.4	0
66.5	0
66.6	0
66.7	0
66.8	0
66.9	0
67	0
67.1	0
67.2	0
67.3	0
67.4	0
67.5	0
67.6	0
67.7	0
67.8	0
67.9	0
68	0
68.1	0
68.2	0
68.3	0
68.4	0
68.5	0
68.6	0
68.7	0
68.8	0
68.9	0
69	0
69.1	0
69.2	0
69.3	0
69.4	0
69.5	0
69.6	0
69.7	0
69.8	0
69.9	0
70	0
70.1	0
70.2	0
70.3	0
70.4	0
70.5	0
70.6	0
70.7	0
70.8	0
70.9	0
71	0
71.1	0
71.2	0
71.3	0
71.4	0
71.5	0
71.6	0
71.7	0
71.8	0
71.9	0
72	0
72.1	0
72.2	0
72.3	0
72.4	0
72.5	0
72.6	0
72.7	0
72.8	0
72.9	0
73	0
73.1	0
73.2	0
73.3	0
73.4	0
73.5	0
73.6	0
73.7	0
73.8	0
73.9	0
74	0
74.1	0
74.2	0
74.3	0
74.4	0
74.5	0
74.6	0
74.7	0
74.8	0
74.9	0
75	0
75.1	0
75.2	0
75.3	0
75.4	0
75.5	0
75.6	0
75.7	0
75.8	0
75.9	0
76	0
76.1	0
76.2	0
76.3	0
76.4	0
76.5	0
76.6	0
76.7	0
76.8	0
76.9	0
77	0
77.1	0
77.2	0
77.3	0
77.4	0
77.5	0
77.6	0
77.7	0
77.8	0
77.9	0
78	0
78.1	0
78.2	0
78.3	0
78.4	0
78.5	0
78.6	0
78.7	0
78.8	0
78.9	0
79	0
79.1	0
79.2	0
79.3	0
79.4	0
79.5	0
79.6	0
79.7	0
79.8	0
79.9	0
80	0
80.1	0
80.2	0
80.3	0
80.4	0
80.5	0
80.6	0
80.7	0
80.8	0
80.9	0
81	0
81.1	0
81.2	0
81.3	0
81.4	0
81.5	0
81.6	0
81.7	0
81.8	0
81.9	0
82	0
82.1	0
82.2	0
82.3	0
82.4	0
82.5	0
82.6	0
82.7	0
82.8	0
82.9	0
83	0
83.1	0
83.2	0
83.3	0
83.4	0
83.5	0
83.6	0
83.7	0
83.8	0
83.9	0
84	0
84.1	0
84.2	0
84.3	0
84.4	0
84.5	0
84.6	0
84.7	0
84.8	0
84.9	0
85	0
85.1	0
85.2	0
85.3	0
85.4	0
85.5	0
85.6	0
85.7	0
85.8	0
85.9	0
86	0
86.1	0
86.2	0
86.3	0
86.4	0
86.5	0
86.6	0
86.7	0
86.8	0
86.9	0
87	0
87.1	0
87.2	0
87.3	0
87.4	0
87.5	0
87.6	0
87.7	0
87.8	0
87.9	0
88	0
88.1	0
88.2	0
88.3	0
88.4	0
88.5	0
88.6	0
88.7	0
88.8	0
88.9	0
89	0
89.1	0
89.2	0
89.3	0
89.4	0
89.5	0
89.6	0
89.7	0
89.8	0
89.9	0
90	0
90.1	0
90.2	0
90.3	0
90.4	0
90.5	0
90.6	0
90.7	0
90.8	0
90.9	0
91	0
91.1	0
91.2	0
91.3	0
91.4	0
91.5	0
91.6	0
91.7	0
91.8	0
91.9	0
92	0
92.1	0
92.2	0
92.3	0
92.4	0
92.5	0
92.6	0
92.7	0
92.8	0
92.9	0
93	0
93.1	0
93.2	0
93.3	0
93.4	0
93.5	0
93.6	0
93.7	0
93.8	0
93.9	0
94	0
94.1	0
94.2	0
94.3	0
94.4	0
94.5	0
94.6	0
94.7	0
94.8	0
94.9	0
95	0
95.1	0
95.2	0
95.3	0
95.4	0
95.5	0
95.6	0
95.7	0
95.8	0
95.9	0
96	0
96.1	0
96.2	0
96.3	0
96.4	0
96.5	0
96.6	0
96.7	0
96.8	0
96.9	0
97	0
97.1	0
97.2	0
97.3	0
97.4	0
97.5	0
97.6	0
97.7	0
97.8	0
97.9	0
98	0
98.1	0
98.2	0
98.3	0
98.4	0
98.5	0
98.6	0
98.7	0
98.8	0
98.9	0
99	0
99.1	0
99.2	0
99.3	0
99.4	0
99.5	0
99.6	0
99.7	0
99.8	0
99.9	0
100	0
100.1	0
100.2	0
100.3	0
100.4	0
100.5	0.000166667
100.6	0.000166667
100.7	0.000166667
100.8	0.000166667
100.9	0.000333333
101	0.0005
101.1	0.000666667
101.2	0.000666667
101.3	0.000666667
101.4	0.001
101.5	0.00133333
101.6	0.00183333
101.7	0.00216667
101.8	0.00266667
101.9	0.00333333
102	0.00366667
102.1	0.0045
102.2	0.0045
102.3	0.00483333
102.4	0.006
102.5	0.007
102.6	0.00733333
102.7	0.00783333
102.8	0.00866667
102.9	0.00916667
103	0.00916667
103.1	0.0095
103.2	0.00983333
103.3	0.0101667
103.4	0.0108333
103.5	0.0115
103.6	0.0123333
103.7	0.0133333
103.8	0.0138333
103.9	0.0146667
104	0.0156667
104.1	0.0163333
104.2	0.0173333
104.3	0.0181667
104.4	0.0186667
104.5	0.0191667
104.6	0.02
104.7	0.021
104.8	0.0216667
104.9	0.0223333
105	0.0226667
105.1	0.0233333
105.2	0.0238333
105.3	0.0245
105.4	0.025
105.5	0.0258333
105.6	0.0268333
105.7	0.0271667
105.8	0.0276667
105.9	0.0285
106	0.0293333
106.1	0.0296667
106.2	0.0303333
106.3	0.031
106.4	0.0313333
106.5	0.0316667
106.6	0.032
106.7	0.0326667
106.8	0.0341667
106.9	0.0343333
107	0.036
107.1	0.037
107.2	0.039
107.3	0.0403333
107.4	0.041
107.5	0.0415
107.6	0.042
107.7	0.0431667
107.8	0.0438333
107.9	0.045
108	0.0453333
108.1	0.0463333
108.2	0.0476667
108.3	0.0486667
108.4	0.0495
108.5	0.0505
108.6	0.0518333
108.7	0.0521667
108.8	0.0533333
108.9	0.0543333
109	0.0558333
109.1	0.057
109.2	0.058
109.3	0.0586667
109.4	0.0593333
109.5	0.0603333
109.6	0.0615
109.7	0.062
109.8	0.0625
109.9	0.0631667
110	0.0638333
110.1	0.065
110.2	0.0661667
110.3	0.0675
110.4	0.0686667
110.5	0.069
110.6	0.0696667
110.7	0.0703333
110.8	0.0718333
110.9	0.0726667
111	0.0728333
111.1	0.0743333
111.2	0.0751667
111.3	0.076
111.4	0.077
111.5	0.0778333
111.6	0.079
111.7	0.0793333
111.8	0.08
111.9	0.0803333
112	0.0816667
112.1	0.0821667
112.2	0.0831667
112.3	0.0843333
112.4	0.0848333
112.5	0.0855
112.6	0.086
112.7	0.0866667
112.8	0.0871667
112.9	0.0878333
113	0.0883333
113.1	0.0891667
113.2	0.0898333
113.3	0.091
113.4	0.0916667
113.5	0.0935
113.6	0.094
113.7	0.0946667
113.8	0.0958333
113.9	0.097
114	0.0983333
114.1	0.0988333
114.2	0.0993333
114.3	0.1005
114.4	0.101667
114.5	0.1025
114.6	0.102667
114.7	0.103667
114.8	0.105333
114.9	0.107
115	0.107667
115.1	0.1085
115.2	0.1095
115.3	0.1105
115.4	0.1115
115.5	0.112333
115.6	0.113
115.7	0.113667
115.8	0.115
115.9	0.116
116	0.1165
116.1	0.117
116.2	0.118333
116.3	0.12
116.4	0.120667
116.5	0.120833
116.6	0.121167
116.7	0.1215
116.8	0.1225
116.9	0.124
117	0.124833
117.1	0.125833
117.2	0.126333
117.3	0.127
117.4	0.127833
117.5	0.128
117.6	0.128667
117.7	0.1295
117.8	0.130333
117.9	0.131
118	0.132333
118.1	0.133167
118.2	0.133167
118.3	0.133333
118.4	0.134333
118.5	0.135333
118.6	0.1365
118.7	0.137
118.8	0.137833
118.9	0.138833
119	0.139667
119.1	0.1405
119.2	0.141167
119.3	0.1415
119.4	0.1425
119.5	0.144
119.6	0.145
119.7	0.146167
119.8	0.146667
119.9	0.147667
120	0.148
120.1	0.148667
120.2	0.148833
120.3	0.148833
120.4	0.149333
120.5	0.149833
120.6	0.150333
120.7	0.150833
120.8	0.1515
120.9	0.151167
121	0.152
121.1	0.153667
121.2	0.154
121.3	0.154833
121.4	0.1565
121.5	0.157167
121.6	0.157333
121.7	0.1585
121.8	0.158833
121.9	0.160167
122	0.160833
122.1	0.161667
122.2	0.162
122.3	0.163167
122.4	0.163833
122.5	0.164333
122.6	0.164333
122.7	0.1645
122.8	0.1655
122.9	0.166333
123	0.166833
123.1	0.166667
123.2	0.167
123.3	0.167667
123.4	0.1685
123.5	0.169167
123.6	0.169833
123.7	0.170167
123.8	0.170333
123.9	0.1725
124	0.172167
124.1	0.172167
124.2	0.173167
124.3	0.1745
124.4	0.175333
124.5	0.176167
124.6	0.176833
124.7	0.177667
124.8	0.178167
124.9	0.1785
125	0.179667
125.1	0.1805
125.2	0.180167
125.3	0.180333
125.4	0.180667
125.5	0.1815
125.6	0.182
125.7	0.182667
125.8	0.183
125.9	0.183833
126	0.184833
126.1	0.185
126.2	0.185667
126.3	0.186333
126.4	0.187
126.5	0.186833
126.6	0.187833
126.7	0.1885
126.8	0.189
126.9	0.189
127	0.189667
127.1	0.190333
127.2	0.191
127.3	0.192
127.4	0.192333
127.5	0.193
127.6	0.193167
127.7	0.193667
127.8	0.193833
127.9	0.194333
128	0.1945
128.1	0.1945
128.2	0.195833
128.3	0.196667
128.4	0.197167
128.5	0.197333
128.6	0.197833
128.7	0.198833
128.8	0.199333
128.9	0.1995
129	0.200333
129.1	0.200833
129.2	0.202167
129.3	0.2025
129.4	0.203667
129.5	0.204167
129.6	0.204833
129.7	0.205833
129.8	0.206167
129.9	0.206167
130	0.206667
130.1	0.207167
130.2	0.207667
130.3	0.207667
130.4	0.2085
130.5	0.209167
130.6	0.209833
130.7	0.2105
130.8	0.211833
130.9	0.212
131	0.212833
131.1	0.214
131.2	0.2145
131.3	0.214833
131.4	0.215
131.5	0.215667
131.6	0.2165
131.7	0.2175
131.8	0.217833
131.9	0.218333
132	0.2185
132.1	0.218667
132.2	0.2185
132.3	0.219167
132.4	0.220333
132.5	0.221667
132.6	0.221667
132.7	0.222333
132.8	0.222667
132.9	0.2235
133	0.225
133.1	0.226
133.2	0.227
133.3	0.2285
133.4	0.2295
133.5	0.229833
133.6	0.2305
133.7	0.231
133.8	0.231833
133.9	0.232333
134	0.232667
134.1	0.233
134.2	0.2325
134.3	0.233
134.4	0.234333
134.5	0.234833
134.6	0.234667
134.7	0.235167
134.8	0.236
134.9	0.236833
135	0.237667
135.1	0.238333
135.2	0.239
135.3	0.2395
135.4	0.239667
135.5	0.240167
135.6	0.241667
135.7	0.242667
135.8	0.244333
135.9	0.244667
136	0.244833
136.1	0.244833
136.2	0.244667
136.3	0.245833
136.4	0.245667
136.5	0.246333
136.6	0.2465
136.7	0.2475
136.8	0.247833
136.9	0.247833
137	0.248833
137.1	0.249667
137.2	0.250333
137.3	0.250833
137.4	0.251667
137.5	0.252667
137.6	0.253167
137.7	0.253833
137.8	0.254167
137.9	0.255167
138	0.255167
138.1	0.256333
138.2	0.256833
138.3	0.258
138.4	0.258333
138.5	0.258333
138.6	0.258333
138.7	0.258833
138.8	0.259167
138.9	0.259667
139	0.26
139.1	0.26
139.2	0.260333
139.3	0.260333
139.4	0.260833
139.5	0.261333
139.6	0.261667
139.7	0.261833
139.8	0.262
139.9	0.2625
140	0.263167
140.1	0.263667
140.2	0.264333
140.3	0.2655
140.4	0.265167
140.5	0.266167
140.6	0.2665
140.7	0.267
140.8	0.267833
140.9	0.268167
141	0.2685
141.1	0.268667
141.2	0.2685
141.3	0.269667
141.4	0.270167
141.5	0.270333
141.6	0.270833
141.7	0.2715
141.8	0.270833
141.9	0.2715
142	0.272333
142.1	0.273333
142.2	0.2735
142.3	0.273833
142.4	0.274667
142.5	0.274833
142.6	0.275333
142.7	0.275667
142.8	0.275833
142.9	0.276333
143	0.277
143.1	0.276833
143.2	0.2775
143.3	0.2785
143.4	0.2785
143.5	0.279333
143.6	0.280167
143.7	0.281167
143.8	0.281333
143.9	0.282
144	0.2815
144.1	0.281667
144.2	0.2815
144.3	0.2825
144.4	0.282833
144.5	0.282833
144.6	0.283167
144.7	0.2835
144.8	0.284167
144.9	0.285333
145	0.285667
145.1	0.286333
145.2	0.286333
145.3	0.286833
145.4	0.287
145.5	0.288
145.6	0.289
145.7	0.289833
145.8	0.290667
145.9	0.290833
146	0.2915
146.1	0.291833
146.2	0.292667
146.3	0.293333
146.4	0.293333
146.5	0.293667
146.6	0.294667
146.7	0.2945
146.8	0.2945
146.9	0.294167
147	0.294667
147.1	0.2945
147.2	0.295167
147.3	0.295833
147.4	0.296333
147.5	0.296167
147.6	0.296667
147.7	0.2965
147.8	0.2965
147.9	0.297167
148	0.297333
148.1	0.297333
148.2	0.297
148.3	0.298167
148.4	0.299167
148.5	0.299667
148.6	0.299833
148.7	0.299667
148.8	0.300667
148.9	0.300833
149	0.300833
149.1	0.300833
149.2	0.3015
149.3	0.302333
149.4	0.3025
149.5	0.303167
149.6	0.303333
149.7	0.303333
149.8	0.303333
149.9	0.303333
150	0.303667
150.1	0.304833
150.2	0.305167
150.3	0.305667
150.4	0.305833
150.5	0.306333
150.6	0.307333
150.7	0.308167
150.8	0.3085
150.9	0.308833
151	0.309167
151.1	0.310167
151.2	0.311
151.3	0.311
151.4	0.310833
151.5	0.311333
151.6	0.311667
151.7	0.311667
151.8	0.311833
151.9	0.312833
152	0.3135
152.1	0.313333
152.2	0.313667
152.3	0.3145
152.4	0.314833
152.5	0.314667
152.6	0.314833
152.7	0.314833
152.8	0.315333
152.9	0.3155
153	0.316667
153.1	0.316667
153.2	0.316833
153.3	0.317
153.4	0.317833
153.5	0.317667
153.6	0.318333
153.7	0.318333
153.8	0.318333
153.9	0.318167
154	0.3185
154.1	0.318833
154.2	0.3195
154.3	0.319833
154.4	0.320167
154.5	0.3205
154.6	0.321167
154.7	0.321333
154.8	0.321167
154.9	0.3215
155	0.322333
155.1	0.322667
155.2	0.323167
155.3	0.323833
155.4	0.324333
155.5	0.325
155.6	0.325833
155.7	0.325667
155.8	0.325833
155.9	0.326667
156	0.3275
156.1	0.327167
156.2	0.326667
156.3	0.328
156.4	0.329167
156.5	0.329
156.6	0.329167
156.7	0.329167
156.8	0.329667
156.9	0.330167
157	0.3305
157.1	0.330167
157.2	0.3305
157.3	0.3305
157.4	0.330833
157.5	0.3315
157.6	0.331833
157.7	0.332167
157.8	0.3325
157.9	0.3335
158	0.334
158.1	0.334
158.2	0.334667
158.3	0.335667
158.4	0.336333
158.5	0.336667
158.6	0.337
158.7	0.3365
158.8	0.337
158.9	0.337667
159	0.3375
159.1	0.3375
159.2	0.338333
159.3	0.338667
159.4	0.338833
159.5	0.337833
159.6	0.3385
159.7	0.339667
159.8	0.340167
159.9	0.340333
160	0.341167
160.1	0.341167
160.2	0.341333
160.3	0.341833
160.4	0.342833
160.5	0.344333
160.6	0.344667
160.7	0.345333
160.8	0.345667
160.9	0.346167
161	0.3465
161.1	0.347167
161.2	0.347833
161.3	0.347167
161.4	0.347667
161.5	0.3475
161.6	0.348333
161.7	0.348167
161.8	0.3485
161.9	0.348667
162	0.349
162.1	0.349833
162.2	0.3505
162.3	0.351
162.4	0.3515
162.5	0.352
162.6	0.353
162.7	0.353833
162.8	0.354167
162.9	0.3545
163	0.354667
163.1	0.354
163.2	0.354333
163.3	0.3545
163.4	0.354667
163.5	0.355
163.6	0.355167
163.7	0.355167
163.8	0.355
163.9	0.355167
164	0.356
164.1	0.356333
164.2	0.356
164.3	0.356333
164.4	0.356167
164.5	0.356167
164.6	0.357167
164.7	0.357833
164.8	0.358667
164.9	0.359667
165	0.36
165.1	0.360167
165.2	0.36
165.3	0.36
165.4	0.360167
165.5	0.360833
165.6	0.361
165.7	0.361667
165.8	0.362
165.9	0.3625
166	0.363333
166.1	0.363
166.2	0.3625
166.3	0.362333
166.4	0.3625
166.5	0.363167
166.6	0.363167
166.7	0.363
166.8	0.363
166.9	0.363
167	0.363833
167.1	0.364167
167.2	0.3645
167.3	0.365
167.4	0.365333
167.5	0.3655
167.6	0.3655
167.7	0.3655
167.8	0.366167
167.9	0.366667
168	0.3665
168.1	0.3665
168.2	0.367
168.3	0.366833
168.4	0.366667
168.5	0.368167
168.6	0.368333
168.7	0.368833
168.8	0.3695
168.9	0.369333
169	0.3695
169.1	0.3685
169.2	0.368833
169.3	0.369667
169.4	0.370667
169.5	0.370333
169.6	0.371
169.7	0.371333
169.8	0.372
169.9	0.372
170	0.372
170.1	0.372
170.2	0.372
170.3	0.371667
170.4	0.371667
170.5	0.372667
170.6	0.373333
170.7	0.373667
170.8	0.373833
170.9	0.3735
171	0.373667
171.1	0.373833
171.2	0.3745
171.3	0.374667
171.4	0.375
171.5	0.374833
171.6	0.374667
171.7	0.374667
171.8	0.374833
171.9	0.3745
172	0.3745
172.1	0.374833
172.2	0.375
172.3	0.375
172.4	0.3755
172.5	0.375833
172.6	0.376667
172.7	0.376667
172.8	0.377167
172.9	0.377667
173	0.378
173.1	0.378333
173.2	0.379333
173.3	0.379333
173.4	0.379167
173.5	0.379667
173.6	0.379833
173.7	0.38
173.8	0.379833
173.9	0.38
174	0.38
174.1	0.380333
174.2	0.380333
174.3	0.380333
174.4	0.38
174.5	0.380833
174.6	0.380667
174.7	0.3805
174.8	0.381
174.9	0.3815
175	0.3815
175.1	0.3815
175.2	0.381167
175.3	0.381833
175.4	0.3825
175.5	0.382333
175.6	0.382833
175.7	0.383333
175.8	0.384167
175.9	0.383833
176	0.384167
176.1	0.384667
176.2	0.384667
176.3	0.384667
176.4	0.385
176.5	0.385667
176.6	0.3855
176.7	0.386
176.8	0.387
176.9	0.386833
177	0.3875
177.1	0.387667
177.2	0.387833
177.3	0.387833
177.4	0.388167
177.5	0.3885
177.6	0.388833
177.7	0.389333
177.8	0.3885
177.9	0.388333
178	0.388333
178.1	0.388667
178.2	0.389167
178.3	0.389667
178.4	0.390667
178.5	0.391
178.6	0.390167
178.7	0.390833
178.8	0.391
178.9	0.391
179	0.391333
179.1	0.391333
179.2	0.392
179.3	0.392167
179.4	0.392667
179.5	0.3925
179.6	0.3935
179.7	0.393833
179.8	0.394333
179.9	0.3945
180	0.394667
180.1	0.395167
180.2	0.395833
180.3	0.396333
180.4	0.3965
180.5	0.396167
180.6	0.396667
180.7	0.396333
180.8	0.396167
180.9	0.3965
181	0.397167
181.1	0.396667
181.2	0.396667
181.3	0.396333
181.4	0.3975
181.5	0.398
181.6	0.398833
181.7	0.398
181.8	0.399
181.9	0.398833
182	0.398667
182.1	0.399333
182.2	0.399667
182.3	0.4
182.4	0.4005
182.5	0.4005
182.6	0.401167
182.7	0.4015
182.8	0.401333
182.9	0.401667
183	0.4015
183.1	0.401333
183.2	0.402167
183.3	0.402167
183.4	0.402667
183.5	0.403167
183.6	0.404
183.7	0.404667
183.8	0.404667
183.9	0.405667
184	0.405333
184.1	0.405667
184.2	0.405667
184.3	0.406167
184.4	0.406167
184.5	0.406667
184.6	0.406833
184.7	0.406667
184.8	0.407
184.9	0.407333
185	0.407833
185.1	0.408333
185.2	0.408
185.3	0.407333
185.4	0.407333
185.5	0.406667
185.6	0.406833
185.7	0.406833
185.8	0.407167
185.9	0.4075
186	0.407
186.1	0.407
186.2	0.406667
186.3	0.406667
186.4	0.407
186.5	0.406667
186.6	0.407667
186.7	0.408167
186.8	0.407833
186.9	0.407833
187	0.408
187.1	0.408167
187.2	0.408833
187.3	0.408833
187.4	0.408833
187.5	0.408833
187.6	0.409167
187.7	0.410333
187.8	0.409667
187.9	0.4095
188	0.41
188.1	0.4105
188.2	0.410167
188.3	0.41
188.4	0.409667
188.5	0.410167
188.6	0.41
188.7	0.411
188.8	0.4115
188.9	0.4115
189	0.412167
189.1	0.412
189.2	0.412833
189.3	0.413
189.4	0.413667
189.5	0.414167
189.6	0.414333
189.7	0.414333
189.8	0.414167
189.9	0.414333
190	0.414333
190.1	0.414667
190.2	0.415167
190.3	0.415667
190.4	0.415833
190.5	0.416167
190.6	0.416
190.7	0.4165
190.8	0.416667
190.9	0.416833
191	0.417
191.1	0.416833
191.2	0.417333
191.3	0.417833
191.4	0.418333
191.5	0.418167
191.6	0.4185
191.7	0.418
191.8	0.417833
191.9	0.4185
192	0.418833
192.1	0.419
192.2	0.419333
192.3	0.419667
192.4	0.420167
192.5	0.419833
192.6	0.419667
192.7	0.420833
192.8	0.420833
192.9	0.4205
193	0.421
193.1	0.421167
193.2	0.4215
193.3	0.421167
193.4	0.420833
193.5	0.420333
193.6	0.421
193.7	0.421333
193.8	0.421167
193.9	0.421
194	0.420667
194.1	0.420333
194.2	0.4195
194.3	0.42
194.4	0.42
194.5	0.420667
194.6	0.420333
194.7	0.4205
194.8	0.420667
194.9	0.420667
195	0.421167
195.1	0.421333
195.2	0.421667
195.3	0.421667
195.4	0.4215
195.5	0.4215
195.6	0.421167
195.7	0.4215
195.8	0.422
195.9	0.4225
196	0.422167
196.1	0.422
196.2	0.423
196.3	0.423
196.4	0.423833
196.5	0.424
196.6	0.4235
196.7	0.424167
196.8	0.423833
196.9	0.424
197	0.424833
197.1	0.424667
197.2	0.424333
197.3	0.424167
197.4	0.424
197.5	0.424167
197.6	0.425333
197.7	0.426
197.8	0.4265
197.9	0.427167
198	0.427167
198.1	0.426833
198.2	0.426833
198.3	0.427167
198.4	0.4275
198.5	0.427333
198.6	0.427833
198.7	0.428
198.8	0.428167
198.9	0.4285
199	0.429333
199.1	0.430333
199.2	0.429833
199.3	0.430167
199.4	0.430333
199.5	0.429667
199.6	0.429333
199.7	0.429167
199.8	0.429167
199.9	0.4295
200	0.429667
[truncated: 14,000 more rows]
