# Supplementary material for: Bayesian inference of kinetic schemes for ion channels by Kalman filtering
Source: eLife journal article supplement (doi:10.7554/elife.62714), 2022-05-04
Supplement: fig4-data9 [file 1_Sim_N_7000_Fluor_MW_0.5M.xlsx]

## Sheet: Tabelle1
0.1	0
0.2	0
0.3	0
0.4	0
0.5	0
0.6	0
0.7	0
0.8	0
0.9	0
1	0
1.1	0
1.2	0
1.3	0
1.4	0
1.5	0
1.6	0
1.7	0
1.8	0
1.9	0
2	0
2.1	0
2.2	0
2.3	0
2.4	0
2.5	0
2.6	0
2.7	0
2.8	0
2.9	0
3	0
3.1	0
3.2	0
3.3	0
3.4	0
3.5	0
3.6	0
3.7	0
3.8	0
3.9	0
4	0
4.1	0
4.2	0
4.3	0
4.4	0
4.5	0
4.6	0
4.7	0
4.8	0
4.9	0
5	0
5.1	0
5.2	0
5.3	0
5.4	0
5.5	0
5.6	0
5.7	0
5.8	0
5.9	0
6	0
6.1	0
6.2	0
6.3	0
6.4	0
6.5	0
6.6	0
6.7	0
6.8	0
6.9	0
7	0
7.1	0
7.2	0
7.3	0
7.4	0
7.5	0
7.6	0
7.7	0
7.8	0
7.9	0
8	0
8.1	0
8.2	0
8.3	0
8.4	0
8.5	0
8.6	0
8.7	0
8.8	0
8.9	0
9	0
9.1	0
9.2	0
9.3	0
9.4	0
9.5	0
9.6	0
9.7	0
9.8	0
9.9	0
10	0
10.1	0
10.2	0
10.3	0
10.4	0
10.5	0
10.6	0
10.7	0
10.8	0
10.9	0
11	0
11.1	0
11.2	0
11.3	0
11.4	0
11.5	0
11.6	0
11.7	0
11.8	0
11.9	0
12	0
12.1	0
12.2	0
12.3	0
12.4	0
12.5	0
12.6	0
12.7	0
12.8	0
12.9	0
13	0
13.1	0
13.2	0
13.3	0
13.4	0
13.5	0
13.6	0
13.7	0
13.8	0
13.9	0
14	0
14.1	0
14.2	0
14.3	0
14.4	0
14.5	0
14.6	0
14.7	0
14.8	0
14.9	0
15	0
15.1	0
15.2	0
15.3	0
15.4	0
15.5	0
15.6	0
15.7	0
15.8	0
15.9	0
16	0
16.1	0
16.2	0
16.3	0
16.4	0
16.5	0
16.6	0
16.7	0
16.8	0
16.9	0
17	0
17.1	0
17.2	0
17.3	0
17.4	0
17.5	0
17.6	0
17.7	0
17.8	0
17.9	0
18	0
18.1	0
18.2	0
18.3	0
18.4	0
18.5	0
18.6	0
18.7	0
18.8	0
18.9	0
19	0
19.1	0
19.2	0
19.3	0
19.4	0
19.5	0
19.6	0
19.7	0
19.8	0
19.9	0
20	0
20.1	0
20.2	0
20.3	0
20.4	0
20.5	0
20.6	0
20.7	0
20.8	0
20.9	0
21	0
21.1	0
21.2	0
21.3	0
21.4	0
21.5	0
21.6	0
21.7	0
21.8	0
21.9	0
22	0
22.1	0
22.2	0
22.3	0
22.4	0
22.5	0
22.6	0
22.7	0
22.8	0
22.9	0
23	0
23.1	0
23.2	0
23.3	0
23.4	0
23.5	0
23.6	0
23.7	0
23.8	0
23.9	0
24	0
24.1	0
24.2	0
24.3	0
24.4	0
24.5	0
24.6	0
24.7	0
24.8	0
24.9	0
25	0
25.1	0
25.2	0
25.3	0
25.4	0
25.5	0
25.6	0
25.7	0
25.8	0
25.9	0
26	0
26.1	0
26.2	0
26.3	0
26.4	0
26.5	0
26.6	0
26.7	0
26.8	0
26.9	0
27	0
27.1	0
27.2	0
27.3	0
27.4	0
27.5	0
27.6	0
27.7	0
27.8	0
27.9	0
28	0
28.1	0
28.2	0
28.3	0
28.4	0
28.5	0
28.6	0
28.7	0
28.8	0
28.9	0
29	0
29.1	0
29.2	0
29.3	0
29.4	0
29.5	0
29.6	0
29.7	0
29.8	0
29.9	0
30	0
30.1	0
30.2	0
30.3	0
30.4	0
30.5	0
30.6	0
30.7	0
30.8	0
30.9	0
31	0
31.1	0
31.2	0
31.3	0
31.4	0
31.5	0
31.6	0
31.7	0
31.8	0
31.9	0
32	0
32.1	0
32.2	0
32.3	0
32.4	0
32.5	0
32.6	0
32.7	0
32.8	0
32.9	0
33	0
33.1	0
33.2	0
33.3	0
33.4	0
33.5	0
33.6	0
33.7	0
33.8	0
33.9	0
34	0
34.1	0
34.2	0
34.3	0
34.4	0
34.5	0
34.6	0
34.7	0
34.8	0
34.9	0
35	0
35.1	0
35.2	0
35.3	0
35.4	0
35.5	0
35.6	0
35.7	0
35.8	0
35.9	0
36	0
36.1	0
36.2	0
36.3	0
36.4	0
36.5	0
36.6	0
36.7	0
36.8	0
36.9	0
37	0
37.1	0
37.2	0
37.3	0
37.4	0
37.5	0
37.6	0
37.7	0
37.8	0
37.9	0
38	0
38.1	0
38.2	0
38.3	0
38.4	0
38.5	0
38.6	0
38.7	0
38.8	0
38.9	0
39	0
39.1	0
39.2	0
39.3	0
39.4	0
39.5	0
39.6	0
39.7	0
39.8	0
39.9	0
40	0
40.1	0
40.2	0
40.3	0
40.4	0
40.5	0
40.6	0
40.7	0
40.8	0
40.9	0
41	0
41.1	0
41.2	0
41.3	0
41.4	0
41.5	0
41.6	0
41.7	0
41.8	0
41.9	0
42	0
42.1	0
42.2	0
42.3	0
42.4	0
42.5	0
42.6	0
42.7	0
42.8	0
42.9	0
43	0
43.1	0
43.2	0
43.3	0
43.4	0
43.5	0
43.6	0
43.7	0
43.8	0
43.9	0
44	0
44.1	0
44.2	0
44.3	0
44.4	0
44.5	0
44.6	0
44.7	0
44.8	0
44.9	0
45	0
45.1	0
45.2	0
45.3	0
45.4	0
45.5	0
45.6	0
45.7	0
45.8	0
45.9	0
46	0
46.1	0
46.2	0
46.3	0
46.4	0
46.5	0
46.6	0
46.7	0
46.8	0
46.9	0
47	0
47.1	0
47.2	0
47.3	0
47.4	0
47.5	0
47.6	0
47.7	0
47.8	0
47.9	0
48	0
48.1	0
48.2	0
48.3	0
48.4	0
48.5	0
48.6	0
48.7	0
48.8	0
48.9	0
49	0
49.1	0
49.2	0
49.3	0
49.4	0
49.5	0
49.6	0
49.7	0
49.8	0
49.9	0
50	0
50.1	0
50.2	0
50.3	0
50.4	0
50.5	0
50.6	0
50.7	0
50.8	0
50.9	0
51	0
51.1	0
51.2	0
51.3	0
51.4	0
51.5	0
51.6	0
51.7	0
51.8	0
51.9	0
52	0
52.1	0
52.2	0
52.3	0
52.4	0
52.5	0
52.6	0
52.7	0
52.8	0
52.9	0
53	0
53.1	0
53.2	0
53.3	0
53.4	0
53.5	0
53.6	0
53.7	0
53.8	0
53.9	0
54	0
54.1	0
54.2	0
54.3	0
54.4	0
54.5	0
54.6	0
54.7	0
54.8	0
54.9	0
55	0
55.1	0
55.2	0
55.3	0
55.4	0
55.5	0
55.6	0
55.7	0
55.8	0
55.9	0
56	0
56.1	0
56.2	0
56.3	0
56.4	0
56.5	0
56.6	0
56.7	0
56.8	0
56.9	0
57	0
57.1	0
57.2	0
57.3	0
57.4	0
57.5	0
57.6	0
57.7	0
57.8	0
57.9	0
58	0
58.1	0
58.2	0
58.3	0
58.4	0
58.5	0
58.6	0
58.7	0
58.8	0
58.9	0
59	0
59.1	0
59.2	0
59.3	0
59.4	0
59.5	0
59.6	0
59.7	0
59.8	0
59.9	0
60	0
60.1	0
60.2	0
60.3	0
60.4	0
60.5	0
60.6	0
60.7	0
60.8	0
60.9	0
61	0
61.1	0
61.2	0
61.3	0
61.4	0
61.5	0
61.6	0
61.7	0
61.8	0
61.9	0
62	0
62.1	0
62.2	0
62.3	0
62.4	0
62.5	0
62.6	0
62.7	0
62.8	0
62.9	0
63	0
63.1	0
63.2	0
63.3	0
63.4	0
63.5	0
63.6	0
63.7	0
63.8	0
63.9	0
64	0
64.1	0
64.2	0
64.3	0
64.4	0
64.5	0
64.6	0
64.7	0
64.8	0
64.9	0
65	0
65.1	0
65.2	0
65.3	0
65.4	0
65.5	0
65.6	0
65.7	0
65.8	0
65.9	0
66	0
66.1	0
66.2	0
66.3	0
66.4	0
66.5	0
66.6	0
66.7	0
66.8	0
66.9	0
67	0
67.1	0
67.2	0
67.3	0
67.4	0
67.5	0
67.6	0
67.7	0
67.8	0
67.9	0
68	0
68.1	0
68.2	0
68.3	0
68.4	0
68.5	0
68.6	0
68.7	0
68.8	0
68.9	0
69	0
69.1	0
69.2	0
69.3	0
69.4	0
69.5	0
69.6	0
69.7	0
69.8	0
69.9	0
70	0
70.1	0
70.2	0
70.3	0
70.4	0
70.5	0
70.6	0
70.7	0
70.8	0
70.9	0
71	0
71.1	0
71.2	0
71.3	0
71.4	0
71.5	0
71.6	0
71.7	0
71.8	0
71.9	0
72	0
72.1	0
72.2	0
72.3	0
72.4	0
72.5	0
72.6	0
72.7	0
72.8	0
72.9	0
73	0
73.1	0
73.2	0
73.3	0
73.4	0
73.5	0
73.6	0
73.7	0
73.8	0
73.9	0
74	0
74.1	0
74.2	0
74.3	0
74.4	0
74.5	0
74.6	0
74.7	0
74.8	0
74.9	0
75	0
75.1	0
75.2	0
75.3	0
75.4	0
75.5	0
75.6	0
75.7	0
75.8	0
75.9	0
76	0
76.1	0
76.2	0
76.3	0
76.4	0
76.5	0
76.6	0
76.7	0
76.8	0
76.9	0
77	0
77.1	0
77.2	0
77.3	0
77.4	0
77.5	0
77.6	0
77.7	0
77.8	0
77.9	0
78	0
78.1	0
78.2	0
78.3	0
78.4	0
78.5	0
78.6	0
78.7	0
78.8	0
78.9	0
79	0
79.1	0
79.2	0
79.3	0
79.4	0
79.5	0
79.6	0
79.7	0
79.8	0
79.9	0
80	0
80.1	0
80.2	0
80.3	0
80.4	0
80.5	0
80.6	0
80.7	0
80.8	0
80.9	0
81	0
81.1	0
81.2	0
81.3	0
81.4	0
81.5	0
81.6	0
81.7	0
81.8	0
81.9	0
82	0
82.1	0
82.2	0
82.3	0
82.4	0
82.5	0
82.6	0
82.7	0
82.8	0
82.9	0
83	0
83.1	0
83.2	0
83.3	0
83.4	0
83.5	0
83.6	0
83.7	0
83.8	0
83.9	0
84	0
84.1	0
84.2	0
84.3	0
84.4	0
84.5	0
84.6	0
84.7	0
84.8	0
84.9	0
85	0
85.1	0
85.2	0
85.3	0
85.4	0
85.5	0
85.6	0
85.7	0
85.8	0
85.9	0
86	0
86.1	0
86.2	0
86.3	0
86.4	0
86.5	0
86.6	0
86.7	0
86.8	0
86.9	0
87	0
87.1	0
87.2	0
87.3	0
87.4	0
87.5	0
87.6	0
87.7	0
87.8	0
87.9	0
88	0
88.1	0
88.2	0
88.3	0
88.4	0
88.5	0
88.6	0
88.7	0
88.8	0
88.9	0
89	0
89.1	0
89.2	0
89.3	0
89.4	0
89.5	0
89.6	0
89.7	0
89.8	0
89.9	0
90	0
90.1	0
90.2	0
90.3	0
90.4	0
90.5	0
90.6	0
90.7	0
90.8	0
90.9	0
91	0
91.1	0
91.2	0
91.3	0
91.4	0
91.5	0
91.6	0
91.7	0
91.8	0
91.9	0
92	0
92.1	0
92.2	0
92.3	0
92.4	0
92.5	0
92.6	0
92.7	0
92.8	0
92.9	0
93	0
93.1	0
93.2	0
93.3	0
93.4	0
93.5	0
93.6	0
93.7	0
93.8	0
93.9	0
94	0
94.1	0
94.2	0
94.3	0
94.4	0
94.5	0
94.6	0
94.7	0
94.8	0
94.9	0
95	0
95.1	0
95.2	0
95.3	0
95.4	0
95.5	0
95.6	0
95.7	0
95.8	0
95.9	0
96	0
96.1	0
96.2	0
96.3	0
96.4	0
96.5	0
96.6	0
96.7	0
96.8	0
96.9	0
97	0
97.1	0
97.2	0
97.3	0
97.4	0
97.5	0
97.6	0
97.7	0
97.8	0
97.9	0
98	0
98.1	0
98.2	0
98.3	0
98.4	0
98.5	0
98.6	0
98.7	0
98.8	0
98.9	0
99	0
99.1	0
99.2	0
99.3	0
99.4	0
99.5	0
99.6	0
99.7	0
99.8	0
99.9	0
100	0
100.1	0.0305
100.2	0.0597857
100.3	0.0852143
100.4	0.108929
100.5	0.132286
100.6	0.155857
100.7	0.178214
100.8	0.197786
100.9	0.214857
101	0.2345
101.1	0.251357
101.2	0.266571
101.3	0.280714
101.4	0.295143
101.5	0.307357
101.6	0.319571
101.7	0.333143
101.8	0.344571
101.9	0.356214
102	0.367571
102.1	0.377214
102.2	0.385786
102.3	0.394929
102.4	0.403286
102.5	0.408357
102.6	0.414929
102.7	0.421357
102.8	0.428714
102.9	0.434857
103	0.441214
103.1	0.448071
103.2	0.454857
103.3	0.461429
103.4	0.467643
103.5	0.4725
103.6	0.477143
103.7	0.480357
103.8	0.483429
103.9	0.486929
104	0.491214
104.1	0.495429
104.2	0.498786
104.3	0.500286
104.4	0.502286
104.5	0.5045
104.6	0.507
104.7	0.510071
104.8	0.512857
104.9	0.514214
105	0.516143
105.1	0.517643
105.2	0.521357
105.3	0.520786
105.4	0.521643
105.5	0.5235
105.6	0.524786
105.7	0.524714
105.8	0.527786
105.9	0.529786
106	0.530643
106.1	0.532
106.2	0.534214
106.3	0.534714
106.4	0.5375
106.5	0.538929
106.6	0.54
106.7	0.541
106.8	0.543357
106.9	0.545071
107	0.546214
107.1	0.5475
107.2	0.549357
107.3	0.550214
107.4	0.550571
107.5	0.5515
107.6	0.551786
107.7	0.554143
107.8	0.555929
107.9	0.555286
108	0.556
108.1	0.555357
108.2	0.557143
108.3	0.557714
108.4	0.556929
108.5	0.557143
108.6	0.556357
108.7	0.557286
108.8	0.5575
108.9	0.557214
109	0.557571
109.1	0.557071
109.2	0.554929
109.3	0.555857
109.4	0.556214
109.5	0.556714
109.6	0.556214
109.7	0.557357
109.8	0.560214
109.9	0.559643
110	0.559857
110.1	0.559857
110.2	0.560143
110.3	0.560643
110.4	0.5625
110.5	0.5625
110.6	0.564071
110.7	0.565143
110.8	0.565714
110.9	0.566643
111	0.569429
111.1	0.568071
111.2	0.567214
111.3	0.569071
111.4	0.568929
111.5	0.568571
111.6	0.569714
111.7	0.570357
111.8	0.569643
111.9	0.570357
112	0.571143
112.1	0.571857
112.2	0.572786
112.3	0.574857
112.4	0.574929
112.5	0.5765
112.6	0.576143
112.7	0.577643
112.8	0.577643
112.9	0.578571
113	0.579071
113.1	0.578714
113.2	0.579286
113.3	0.578429
113.4	0.578357
113.5	0.578643
113.6	0.578857
113.7	0.579571
113.8	0.579286
113.9	0.579
114	0.577429
114.1	0.578429
114.2	0.578714
114.3	0.579929
114.4	0.579
114.5	0.579429
114.6	0.578857
114.7	0.580643
114.8	0.581286
114.9	0.581357
115	0.582357
115.1	0.583286
115.2	0.582571
115.3	0.585286
115.4	0.585429
115.5	0.5855
115.6	0.586929
115.7	0.587571
115.8	0.587143
115.9	0.585714
116	0.583357
116.1	0.582929
116.2	0.583714
116.3	0.582929
116.4	0.583429
116.5	0.584571
116.6	0.585286
116.7	0.584714
116.8	0.585
116.9	0.585786
117	0.587643
117.1	0.587429
117.2	0.587071
117.3	0.587857
117.4	0.589786
117.5	0.590214
117.6	0.589857
117.7	0.593
117.8	0.593571
117.9	0.594643
118	0.593071
118.1	0.593643
118.2	0.594429
118.3	0.594
118.4	0.594286
118.5	0.594571
118.6	0.5945
118.7	0.593643
118.8	0.594857
118.9	0.596071
119	0.596357
119.1	0.597786
119.2	0.597786
119.3	0.598429
119.4	0.598071
119.5	0.598214
119.6	0.597857
119.7	0.600786
119.8	0.600286
119.9	0.601071
120	0.599143
120.1	0.598786
120.2	0.599357
120.3	0.598143
120.4	0.5985
120.5	0.599929
120.6	0.599643
120.7	0.598857
120.8	0.599857
120.9	0.600143
121	0.600429
121.1	0.600286
121.2	0.600357
121.3	0.600786
121.4	0.601929
121.5	0.602571
121.6	0.602571
121.7	0.6015
121.8	0.602143
121.9	0.601786
122	0.601857
122.1	0.602429
122.2	0.602214
122.3	0.602357
122.4	0.6025
122.5	0.602929
122.6	0.603
122.7	0.604714
122.8	0.604286
122.9	0.607071
123	0.605214
123.1	0.606071
123.2	0.606286
123.3	0.609071
123.4	0.608786
123.5	0.609357
123.6	0.610714
123.7	0.611571
123.8	0.612643
123.9	0.612
124	0.614286
124.1	0.613643
124.2	0.613714
124.3	0.613286
124.4	0.612714
124.5	0.613714
124.6	0.613857
124.7	0.614857
124.8	0.615714
124.9	0.617214
125	0.618071
125.1	0.616857
125.2	0.616929
125.3	0.616786
125.4	0.616857
125.5	0.616929
125.6	0.618
125.7	0.618071
125.8	0.618429
125.9	0.618286
126	0.619357
126.1	0.619286
126.2	0.619214
126.3	0.618071
126.4	0.618929
126.5	0.618571
126.6	0.617214
126.7	0.617357
126.8	0.616571
126.9	0.616357
127	0.615571
127.1	0.616857
127.2	0.616857
127.3	0.618571
127.4	0.620286
127.5	0.621571
127.6	0.622929
127.7	0.622143
127.8	0.622143
127.9	0.622643
128	0.622786
128.1	0.621929
128.2	0.622571
128.3	0.623143
128.4	0.625
128.5	0.626857
128.6	0.627286
128.7	0.626571
128.8	0.625857
128.9	0.625357
129	0.625429
129.1	0.626071
129.2	0.626786
129.3	0.625214
129.4	0.626571
129.5	0.626786
129.6	0.627643
129.7	0.629357
129.8	0.628929
129.9	0.628
130	0.628143
130.1	0.628071
130.2	0.627571
130.3	0.6285
130.4	0.630643
130.5	0.631143
130.6	0.631714
130.7	0.632429
130.8	0.633786
130.9	0.6345
131	0.633643
131.1	0.635143
131.2	0.636286
131.3	0.635571
131.4	0.635929
131.5	0.636071
131.6	0.635929
131.7	0.637429
131.8	0.637857
131.9	0.638071
132	0.637929
132.1	0.638357
132.2	0.6385
132.3	0.636357
132.4	0.637714
132.5	0.637857
132.6	0.636286
132.7	0.636429
132.8	0.639
132.9	0.639143
133	0.640286
133.1	0.640143
133.2	0.640857
133.3	0.640929
133.4	0.641286
133.5	0.642714
133.6	0.644929
133.7	0.644
133.8	0.643571
133.9	0.643214
134	0.642286
134.1	0.642
134.2	0.641071
134.3	0.641429
134.4	0.641929
134.5	0.642286
134.6	0.6405
134.7	0.639714
134.8	0.641214
134.9	0.643
135	0.643071
135.1	0.643214
135.2	0.643714
135.3	0.643429
135.4	0.642286
135.5	0.642857
135.6	0.644
135.7	0.644
135.8	0.645357
135.9	0.644643
136	0.645357
136.1	0.645643
136.2	0.644
136.3	0.643071
136.4	0.642643
136.5	0.643429
136.6	0.644071
136.7	0.643429
136.8	0.641786
136.9	0.643143
137	0.643286
137.1	0.644857
137.2	0.6445
137.3	0.645643
137.4	0.646571
137.5	0.646857
137.6	0.648071
137.7	0.648286
137.8	0.648786
137.9	0.648786
138	0.649357
138.1	0.648714
138.2	0.650357
138.3	0.651357
138.4	0.649643
138.5	0.649929
138.6	0.650071
138.7	0.650286
138.8	0.650071
138.9	0.650786
139	0.650571
139.1	0.651571
139.2	0.651929
139.3	0.653643
139.4	0.654857
139.5	0.654857
139.6	0.655571
139.7	0.654857
139.8	0.655286
139.9	0.655571
140	0.654929
140.1	0.6555
140.2	0.656571
140.3	0.656357
140.4	0.655786
140.5	0.655429
140.6	0.655929
140.7	0.655929
140.8	0.654929
140.9	0.654071
141	0.653714
141.1	0.654214
141.2	0.654429
141.3	0.652929
141.4	0.653429
141.5	0.654143
141.6	0.654571
141.7	0.655357
141.8	0.654357
141.9	0.655643
142	0.657643
142.1	0.657429
142.2	0.659571
142.3	0.659714
142.4	0.659714
142.5	0.658929
142.6	0.659929
142.7	0.660071
142.8	0.660929
142.9	0.660643
143	0.660857
143.1	0.661714
143.2	0.661643
143.3	0.660786
143.4	0.661286
143.5	0.662
143.6	0.663429
143.7	0.664143
143.8	0.664857
143.9	0.664071
144	0.665357
144.1	0.665429
144.2	0.667
144.3	0.666929
144.4	0.668643
144.5	0.669714
144.6	0.670429
144.7	0.670429
144.8	0.67
144.9	0.670571
145	0.670857
145.1	0.671
145.2	0.670857
145.3	0.671286
145.4	0.672143
145.5	0.671357
145.6	0.6695
145.7	0.669429
145.8	0.670143
145.9	0.671071
146	0.672857
146.1	0.673071
146.2	0.673071
146.3	0.671857
146.4	0.669786
146.5	0.6705
146.6	0.671357
146.7	0.671857
146.8	0.672429
146.9	0.672643
147	0.6735
147.1	0.673786
147.2	0.674357
147.3	0.674
147.4	0.672714
147.5	0.672429
147.6	0.672643
147.7	0.673429
147.8	0.673714
147.9	0.6735
148	0.673
148.1	0.673929
148.2	0.674071
148.3	0.675857
148.4	0.675786
148.5	0.674857
148.6	0.674571
148.7	0.675357
148.8	0.674429
148.9	0.674286
149	0.673357
149.1	0.672643
149.2	0.670929
149.3	0.670929
149.4	0.671429
149.5	0.669929
149.6	0.671
149.7	0.670786
149.8	0.671357
149.9	0.671714
150	0.674071
150.1	0.672857
150.2	0.672214
150.3	0.672643
150.4	0.672143
150.5	0.672071
150.6	0.670929
150.7	0.671643
150.8	0.6725
150.9	0.674
151	0.674286
151.1	0.672714
151.2	0.672857
151.3	0.672786
151.4	0.673929
151.5	0.675214
151.6	0.676571
151.7	0.677714
151.8	0.676
151.9	0.676429
152	0.676714
152.1	0.676643
152.2	0.676286
152.3	0.678214
152.4	0.677214
152.5	0.676071
152.6	0.675429
152.7	0.675571
152.8	0.675857
152.9	0.676786
153	0.6775
153.1	0.678571
153.2	0.679643
153.3	0.6795
153.4	0.680214
153.5	0.680571
153.6	0.680143
153.7	0.6795
153.8	0.68
153.9	0.680214
154	0.680571
154.1	0.679429
154.2	0.678643
154.3	0.677643
154.4	0.679286
154.5	0.680429
154.6	0.681214
154.7	0.680786
154.8	0.682357
154.9	0.679643
155	0.679929
155.1	0.681
155.2	0.682286
155.3	0.681571
155.4	0.681071
155.5	0.681714
155.6	0.682071
155.7	0.682714
155.8	0.683714
155.9	0.685643
156	0.685286
156.1	0.6845
156.2	0.684929
156.3	0.683714
156.4	0.6845
156.5	0.684929
156.6	0.686143
156.7	0.686571
156.8	0.686429
156.9	0.686071
157	0.685786
157.1	0.686786
157.2	0.685286
157.3	0.686143
157.4	0.686857
157.5	0.686357
157.6	0.6855
157.7	0.685214
157.8	0.686929
157.9	0.685286
158	0.685071
158.1	0.684571
158.2	0.685429
158.3	0.686214
158.4	0.686786
158.5	0.686429
158.6	0.687
158.7	0.685929
158.8	0.687357
158.9	0.686857
159	0.6865
159.1	0.686714
159.2	0.686786
159.3	0.686357
159.4	0.687714
159.5	0.688714
159.6	0.690357
159.7	0.689429
159.8	0.689429
159.9	0.689357
160	0.689929
160.1	0.691857
160.2	0.691286
160.3	0.692286
160.4	0.692071
160.5	0.692929
160.6	0.691643
160.7	0.691929
160.8	0.691929
160.9	0.691357
161	0.6915
161.1	0.691429
161.2	0.691571
161.3	0.6915
161.4	0.691214
161.5	0.690643
161.6	0.690357
161.7	0.690643
161.8	0.69
161.9	0.690429
162	0.691714
162.1	0.692286
162.2	0.692429
162.3	0.692786
162.4	0.693786
162.5	0.694429
162.6	0.693429
162.7	0.694357
162.8	0.695143
162.9	0.695214
163	0.695071
163.1	0.696071
163.2	0.695429
163.3	0.695929
163.4	0.695643
163.5	0.695357
163.6	0.696571
163.7	0.696071
163.8	0.696429
163.9	0.696429
164	0.696357
164.1	0.696214
164.2	0.6945
164.3	0.694786
164.4	0.693857
164.5	0.6945
164.6	0.695
164.7	0.694643
164.8	0.696071
164.9	0.695643
165	0.696929
165.1	0.696286
165.2	0.696786
165.3	0.6975
165.4	0.697643
165.5	0.698786
165.6	0.699357
165.7	0.699286
165.8	0.699857
165.9	0.699357
166	0.700214
166.1	0.699429
166.2	0.698071
166.3	0.698929
166.4	0.699071
166.5	0.699857
166.6	0.700143
166.7	0.699786
166.8	0.699214
166.9	0.698429
167	0.698286
167.1	0.699071
167.2	0.700357
167.3	0.700786
167.4	0.701143
167.5	0.701286
167.6	0.702143
167.7	0.703429
167.8	0.703571
167.9	0.703286
168	0.7025
168.1	0.702357
168.2	0.702714
168.3	0.702071
168.4	0.703143
168.5	0.703643
168.6	0.702786
168.7	0.703429
168.8	0.704214
168.9	0.705071
169	0.705429
169.1	0.706143
169.2	0.706357
169.3	0.706929
169.4	0.706857
169.5	0.707357
169.6	0.706714
169.7	0.707357
169.8	0.706214
169.9	0.706643
170	0.707286
170.1	0.707571
170.2	0.708786
170.3	0.7085
170.4	0.709857
170.5	0.7075
170.6	0.7075
170.7	0.709214
170.8	0.710786
170.9	0.711
171	0.710429
171.1	0.711857
171.2	0.713
171.3	0.711929
171.4	0.7125
171.5	0.712214
171.6	0.711357
171.7	0.711071
171.8	0.711571
171.9	0.711786
172	0.710429
172.1	0.710929
172.2	0.710571
172.3	0.710214
172.4	0.709929
172.5	0.711
172.6	0.712357
172.7	0.712286
172.8	0.713
172.9	0.712357
173	0.713071
173.1	0.713571
173.2	0.713071
173.3	0.712286
173.4	0.712143
173.5	0.711643
173.6	0.710429
173.7	0.709643
173.8	0.709357
173.9	0.709286
174	0.710286
174.1	0.710357
174.2	0.710286
174.3	0.710571
174.4	0.711
174.5	0.712357
174.6	0.713214
174.7	0.712929
174.8	0.711571
174.9	0.712857
175	0.712786
175.1	0.714286
175.2	0.713357
175.3	0.713786
175.4	0.714714
175.5	0.714357
175.6	0.715429
175.7	0.714929
175.8	0.714714
175.9	0.714857
176	0.714143
176.1	0.713429
176.2	0.713571
176.3	0.715
176.4	0.714571
176.5	0.713
176.6	0.712714
176.7	0.710786
176.8	0.710929
176.9	0.712643
177	0.711214
177.1	0.710786
177.2	0.712357
177.3	0.712214
177.4	0.711857
177.5	0.713143
177.6	0.7135
177.7	0.714286
177.8	0.7145
177.9	0.715071
178	0.715143
178.1	0.716786
178.2	0.715286
178.3	0.716286
178.4	0.715429
178.5	0.714286
178.6	0.7155
178.7	0.714714
178.8	0.715786
178.9	0.715857
179	0.716929
179.1	0.717214
179.2	0.718786
179.3	0.719
179.4	0.719143
179.5	0.719071
179.6	0.718714
179.7	0.718286
179.8	0.717
179.9	0.716143
180	0.716714
180.1	0.716
180.2	0.716929
180.3	0.715857
180.4	0.716786
180.5	0.715357
180.6	0.715143
180.7	0.714429
180.8	0.7155
180.9	0.715214
181	0.715071
181.1	0.716286
181.2	0.716786
181.3	0.716714
181.4	0.716
181.5	0.716286
181.6	0.716786
181.7	0.716714
181.8	0.717714
181.9	0.716286
182	0.716571
182.1	0.7185
182.2	0.719786
182.3	0.719286
182.4	0.719857
182.5	0.720357
182.6	0.718286
182.7	0.7185
182.8	0.718286
182.9	0.717929
183	0.719214
183.1	0.718929
183.2	0.719071
183.3	0.719714
183.4	0.720857
183.5	0.721071
183.6	0.721143
183.7	0.721143
183.8	0.720143
183.9	0.721143
184	0.720929
184.1	0.722857
184.2	0.723714
184.3	0.724071
184.4	0.724071
184.5	0.724714
184.6	0.725
184.7	0.725
184.8	0.725857
184.9	0.726286
185	0.725143
185.1	0.7245
185.2	0.722929
185.3	0.723786
185.4	0.722643
185.5	0.722071
185.6	0.722714
185.7	0.722643
185.8	0.723429
185.9	0.722929
186	0.722214
186.1	0.723214
186.2	0.723143
186.3	0.7235
186.4	0.723214
186.5	0.724286
186.6	0.723214
186.7	0.723429
186.8	0.722714
186.9	0.722857
187	0.722857
187.1	0.722143
187.2	0.723429
187.3	0.7235
187.4	0.722357
187.5	0.723357
187.6	0.722643
187.7	0.723786
187.8	0.724857
187.9	0.723857
188	0.722929
188.1	0.724
188.2	0.724143
188.3	0.725286
188.4	0.726286
188.5	0.727071
188.6	0.726571
188.7	0.727571
188.8	0.726643
188.9	0.727571
189	0.727357
189.1	0.728357
189.2	0.728571
189.3	0.728357
189.4	0.727857
189.5	0.728
189.6	0.728571
189.7	0.728071
189.8	0.727643
189.9	0.726429
190	0.727214
190.1	0.727643
190.2	0.728143
190.3	0.727429
190.4	0.728071
190.5	0.728214
190.6	0.728214
190.7	0.728286
190.8	0.728929
190.9	0.729
191	0.727357
191.1	0.727071
191.2	0.728714
191.3	0.728071
191.4	0.727429
191.5	0.728786
191.6	0.729214
191.7	0.729857
191.8	0.730286
191.9	0.730571
192	0.730857
192.1	0.730857
192.2	0.730857
192.3	0.732071
192.4	0.732143
192.5	0.732
192.6	0.732
192.7	0.732286
192.8	0.731714
192.9	0.732714
193	0.732571
193.1	0.7335
193.2	0.734857
193.3	0.7355
193.4	0.734429
193.5	0.7335
193.6	0.734429
193.7	0.734286
193.8	0.7335
193.9	0.7335
194	0.734286
194.1	0.734214
194.2	0.736357
194.3	0.737786
194.4	0.7385
194.5	0.739
194.6	0.740143
194.7	0.741214
194.8	0.740071
194.9	0.739786
195	0.739857
195.1	0.7395
195.2	0.7415
195.3	0.74
195.4	0.740429
195.5	0.740429
195.6	0.7405
195.7	0.738143
195.8	0.737929
195.9	0.737929
196	0.738929
196.1	0.737143
196.2	0.736786
196.3	0.737286
196.4	0.736929
196.5	0.735929
196.6	0.736
196.7	0.737
196.8	0.737429
196.9	0.737357
197	0.736143
197.1	0.736357
197.2	0.736929
197.3	0.738429
197.4	0.737857
197.5	0.7385
197.6	0.738
197.7	0.7385
197.8	0.738429
197.9	0.737071
198	0.736643
198.1	0.736786
198.2	0.737143
198.3	0.737714
198.4	0.737286
198.5	0.737214
198.6	0.736643
198.7	0.737071
198.8	0.736286
198.9	0.735714
199	0.734929
199.1	0.733929
199.2	0.733571
199.3	0.734929
199.4	0.735571
199.5	0.734429
199.6	0.734643
199.7	0.736857
199.8	0.7365
199.9	0.735357
200	0.7355
[truncated: 14,000 more rows]
