# Supplementary material for: Bayesian inference of kinetic schemes for ion channels by Kalman filtering
Source: eLife journal article supplement (doi:10.7554/elife.62714), 2022-05-04
Supplement: fig4-data9 [file 1_Sim_N_7000_Strom_MW_0.5M.xlsx]

## Sheet: Tabelle1
0.1	0
0.2	0
0.3	0
0.4	0
0.5	0
0.6	0
0.7	0
0.8	0
0.9	0
1	0
1.1	0
1.2	0
1.3	0
1.4	0
1.5	0
1.6	0
1.7	0
1.8	0
1.9	0
2	0
2.1	0
2.2	0
2.3	0
2.4	0
2.5	0
2.6	0
2.7	0
2.8	0
2.9	0
3	0
3.1	0
3.2	0
3.3	0
3.4	0
3.5	0
3.6	0
3.7	0
3.8	0
3.9	0
4	0
4.1	0
4.2	0
4.3	0
4.4	0
4.5	0
4.6	0
4.7	0
4.8	0
4.9	0
5	0
5.1	0
5.2	0
5.3	0
5.4	0
5.5	0
5.6	0
5.7	0
5.8	0
5.9	0
6	0
6.1	0
6.2	0
6.3	0
6.4	0
6.5	0
6.6	0
6.7	0
6.8	0
6.9	0
7	0
7.1	0
7.2	0
7.3	0
7.4	0
7.5	0
7.6	0
7.7	0
7.8	0
7.9	0
8	0
8.1	0
8.2	0
8.3	0
8.4	0
8.5	0
8.6	0
8.7	0
8.8	0
8.9	0
9	0
9.1	0
9.2	0
9.3	0
9.4	0
9.5	0
9.6	0
9.7	0
9.8	0
9.9	0
10	0
10.1	0
10.2	0
10.3	0
10.4	0
10.5	0
10.6	0
10.7	0
10.8	0
10.9	0
11	0
11.1	0
11.2	0
11.3	0
11.4	0
11.5	0
11.6	0
11.7	0
11.8	0
11.9	0
12	0
12.1	0
12.2	0
12.3	0
12.4	0
12.5	0
12.6	0
12.7	0
12.8	0
12.9	0
13	0
13.1	0
13.2	0
13.3	0
13.4	0
13.5	0
13.6	0
13.7	0
13.8	0
13.9	0
14	0
14.1	0
14.2	0
14.3	0
14.4	0
14.5	0
14.6	0
14.7	0
14.8	0
14.9	0
15	0
15.1	0
15.2	0
15.3	0
15.4	0
15.5	0
15.6	0
15.7	0
15.8	0
15.9	0
16	0
16.1	0
16.2	0
16.3	0
16.4	0
16.5	0
16.6	0
16.7	0
16.8	0
16.9	0
17	0
17.1	0
17.2	0
17.3	0
17.4	0
17.5	0
17.6	0
17.7	0
17.8	0
17.9	0
18	0
18.1	0
18.2	0
18.3	0
18.4	0
18.5	0
18.6	0
18.7	0
18.8	0
18.9	0
19	0
19.1	0
19.2	0
19.3	0
19.4	0
19.5	0
19.6	0
19.7	0
19.8	0
19.9	0
20	0
20.1	0
20.2	0
20.3	0
20.4	0
20.5	0
20.6	0
20.7	0
20.8	0
20.9	0
21	0
21.1	0
21.2	0
21.3	0
21.4	0
21.5	0
21.6	0
21.7	0
21.8	0
21.9	0
22	0
22.1	0
22.2	0
22.3	0
22.4	0
22.5	0
22.6	0
22.7	0
22.8	0
22.9	0
23	0
23.1	0
23.2	0
23.3	0
23.4	0
23.5	0
23.6	0
23.7	0
23.8	0
23.9	0
24	0
24.1	0
24.2	0
24.3	0
24.4	0
24.5	0
24.6	0
24.7	0
24.8	0
24.9	0
25	0
25.1	0
25.2	0
25.3	0
25.4	0
25.5	0
25.6	0
25.7	0
25.8	0
25.9	0
26	0
26.1	0
26.2	0
26.3	0
26.4	0
26.5	0
26.6	0
26.7	0
26.8	0
26.9	0
27	0
27.1	0
27.2	0
27.3	0
27.4	0
27.5	0
27.6	0
27.7	0
27.8	0
27.9	0
28	0
28.1	0
28.2	0
28.3	0
28.4	0
28.5	0
28.6	0
28.7	0
28.8	0
28.9	0
29	0
29.1	0
29.2	0
29.3	0
29.4	0
29.5	0
29.6	0
29.7	0
29.8	0
29.9	0
30	0
30.1	0
30.2	0
30.3	0
30.4	0
30.5	0
30.6	0
30.7	0
30.8	0
30.9	0
31	0
31.1	0
31.2	0
31.3	0
31.4	0
31.5	0
31.6	0
31.7	0
31.8	0
31.9	0
32	0
32.1	0
32.2	0
32.3	0
32.4	0
32.5	0
32.6	0
32.7	0
32.8	0
32.9	0
33	0
33.1	0
33.2	0
33.3	0
33.4	0
33.5	0
33.6	0
33.7	0
33.8	0
33.9	0
34	0
34.1	0
34.2	0
34.3	0
34.4	0
34.5	0
34.6	0
34.7	0
34.8	0
34.9	0
35	0
35.1	0
35.2	0
35.3	0
35.4	0
35.5	0
35.6	0
35.7	0
35.8	0
35.9	0
36	0
36.1	0
36.2	0
36.3	0
36.4	0
36.5	0
36.6	0
36.7	0
36.8	0
36.9	0
37	0
37.1	0
37.2	0
37.3	0
37.4	0
37.5	0
37.6	0
37.7	0
37.8	0
37.9	0
38	0
38.1	0
38.2	0
38.3	0
38.4	0
38.5	0
38.6	0
38.7	0
38.8	0
38.9	0
39	0
39.1	0
39.2	0
39.3	0
39.4	0
39.5	0
39.6	0
39.7	0
39.8	0
39.9	0
40	0
40.1	0
40.2	0
40.3	0
40.4	0
40.5	0
40.6	0
40.7	0
40.8	0
40.9	0
41	0
41.1	0
41.2	0
41.3	0
41.4	0
41.5	0
41.6	0
41.7	0
41.8	0
41.9	0
42	0
42.1	0
42.2	0
42.3	0
42.4	0
42.5	0
42.6	0
42.7	0
42.8	0
42.9	0
43	0
43.1	0
43.2	0
43.3	0
43.4	0
43.5	0
43.6	0
43.7	0
43.8	0
43.9	0
44	0
44.1	0
44.2	0
44.3	0
44.4	0
44.5	0
44.6	0
44.7	0
44.8	0
44.9	0
45	0
45.1	0
45.2	0
45.3	0
45.4	0
45.5	0
45.6	0
45.7	0
45.8	0
45.9	0
46	0
46.1	0
46.2	0
46.3	0
46.4	0
46.5	0
46.6	0
46.7	0
46.8	0
46.9	0
47	0
47.1	0
47.2	0
47.3	0
47.4	0
47.5	0
47.6	0
47.7	0
47.8	0
47.9	0
48	0
48.1	0
48.2	0
48.3	0
48.4	0
48.5	0
48.6	0
48.7	0
48.8	0
48.9	0
49	0
49.1	0
49.2	0
49.3	0
49.4	0
49.5	0
49.6	0
49.7	0
49.8	0
49.9	0
50	0
50.1	0
50.2	0
50.3	0
50.4	0
50.5	0
50.6	0
50.7	0
50.8	0
50.9	0
51	0
51.1	0
51.2	0
51.3	0
51.4	0
51.5	0
51.6	0
51.7	0
51.8	0
51.9	0
52	0
52.1	0
52.2	0
52.3	0
52.4	0
52.5	0
52.6	0
52.7	0
52.8	0
52.9	0
53	0
53.1	0
53.2	0
53.3	0
53.4	0
53.5	0
53.6	0
53.7	0
53.8	0
53.9	0
54	0
54.1	0
54.2	0
54.3	0
54.4	0
54.5	0
54.6	0
54.7	0
54.8	0
54.9	0
55	0
55.1	0
55.2	0
55.3	0
55.4	0
55.5	0
55.6	0
55.7	0
55.8	0
55.9	0
56	0
56.1	0
56.2	0
56.3	0
56.4	0
56.5	0
56.6	0
56.7	0
56.8	0
56.9	0
57	0
57.1	0
57.2	0
57.3	0
57.4	0
57.5	0
57.6	0
57.7	0
57.8	0
57.9	0
58	0
58.1	0
58.2	0
58.3	0
58.4	0
58.5	0
58.6	0
58.7	0
58.8	0
58.9	0
59	0
59.1	0
59.2	0
59.3	0
59.4	0
59.5	0
59.6	0
59.7	0
59.8	0
59.9	0
60	0
60.1	0
60.2	0
60.3	0
60.4	0
60.5	0
60.6	0
60.7	0
60.8	0
60.9	0
61	0
61.1	0
61.2	0
61.3	0
61.4	0
61.5	0
61.6	0
61.7	0
61.8	0
61.9	0
62	0
62.1	0
62.2	0
62.3	0
62.4	0
62.5	0
62.6	0
62.7	0
62.8	0
62.9	0
63	0
63.1	0
63.2	0
63.3	0
63.4	0
63.5	0
63.6	0
63.7	0
63.8	0
63.9	0
64	0
64.1	0
64.2	0
64.3	0
64.4	0
64.5	0
64.6	0
64.7	0
64.8	0
64.9	0
65	0
65.1	0
65.2	0
65.3	0
65.4	0
65.5	0
65.6	0
65.7	0
65.8	0
65.9	0
66	0
66.1	0
66.2	0
66.3	0
66.4	0
66.5	0
66.6	0
66.7	0
66.8	0
66.9	0
67	0
67.1	0
67.2	0
67.3	0
67.4	0
67.5	0
67.6	0
67.7	0
67.8	0
67.9	0
68	0
68.1	0
68.2	0
68.3	0
68.4	0
68.5	0
68.6	0
68.7	0
68.8	0
68.9	0
69	0
69.1	0
69.2	0
69.3	0
69.4	0
69.5	0
69.6	0
69.7	0
69.8	0
69.9	0
70	0
70.1	0
70.2	0
70.3	0
70.4	0
70.5	0
70.6	0
70.7	0
70.8	0
70.9	0
71	0
71.1	0
71.2	0
71.3	0
71.4	0
71.5	0
71.6	0
71.7	0
71.8	0
71.9	0
72	0
72.1	0
72.2	0
72.3	0
72.4	0
72.5	0
72.6	0
72.7	0
72.8	0
72.9	0
73	0
73.1	0
73.2	0
73.3	0
73.4	0
73.5	0
73.6	0
73.7	0
73.8	0
73.9	0
74	0
74.1	0
74.2	0
74.3	0
74.4	0
74.5	0
74.6	0
74.7	0
74.8	0
74.9	0
75	0
75.1	0
75.2	0
75.3	0
75.4	0
75.5	0
75.6	0
75.7	0
75.8	0
75.9	0
76	0
76.1	0
76.2	0
76.3	0
76.4	0
76.5	0
76.6	0
76.7	0
76.8	0
76.9	0
77	0
77.1	0
77.2	0
77.3	0
77.4	0
77.5	0
77.6	0
77.7	0
77.8	0
77.9	0
78	0
78.1	0
78.2	0
78.3	0
78.4	0
78.5	0
78.6	0
78.7	0
78.8	0
78.9	0
79	0
79.1	0
79.2	0
79.3	0
79.4	0
79.5	0
79.6	0
79.7	0
79.8	0
79.9	0
80	0
80.1	0
80.2	0
80.3	0
80.4	0
80.5	0
80.6	0
80.7	0
80.8	0
80.9	0
81	0
81.1	0
81.2	0
81.3	0
81.4	0
81.5	0
81.6	0
81.7	0
81.8	0
81.9	0
82	0
82.1	0
82.2	0
82.3	0
82.4	0
82.5	0
82.6	0
82.7	0
82.8	0
82.9	0
83	0
83.1	0
83.2	0
83.3	0
83.4	0
83.5	0
83.6	0
83.7	0
83.8	0
83.9	0
84	0
84.1	0
84.2	0
84.3	0
84.4	0
84.5	0
84.6	0
84.7	0
84.8	0
84.9	0
85	0
85.1	0
85.2	0
85.3	0
85.4	0
85.5	0
85.6	0
85.7	0
85.8	0
85.9	0
86	0
86.1	0
86.2	0
86.3	0
86.4	0
86.5	0
86.6	0
86.7	0
86.8	0
86.9	0
87	0
87.1	0
87.2	0
87.3	0
87.4	0
87.5	0
87.6	0
87.7	0
87.8	0
87.9	0
88	0
88.1	0
88.2	0
88.3	0
88.4	0
88.5	0
88.6	0
88.7	0
88.8	0
88.9	0
89	0
89.1	0
89.2	0
89.3	0
89.4	0
89.5	0
89.6	0
89.7	0
89.8	0
89.9	0
90	0
90.1	0
90.2	0
90.3	0
90.4	0
90.5	0
90.6	0
90.7	0
90.8	0
90.9	0
91	0
91.1	0
91.2	0
91.3	0
91.4	0
91.5	0
91.6	0
91.7	0
91.8	0
91.9	0
92	0
92.1	0
92.2	0
92.3	0
92.4	0
92.5	0
92.6	0
92.7	0
92.8	0
92.9	0
93	0
93.1	0
93.2	0
93.3	0
93.4	0
93.5	0
93.6	0
93.7	0
93.8	0
93.9	0
94	0
94.1	0
94.2	0
94.3	0
94.4	0
94.5	0
94.6	0
94.7	0
94.8	0
94.9	0
95	0
95.1	0
95.2	0
95.3	0
95.4	0
95.5	0
95.6	0
95.7	0
95.8	0
95.9	0
96	0
96.1	0
96.2	0
96.3	0
96.4	0
96.5	0
96.6	0
96.7	0
96.8	0
96.9	0
97	0
97.1	0
97.2	0
97.3	0
97.4	0
97.5	0
97.6	0
97.7	0
97.8	0
97.9	0
98	0
98.1	0
98.2	0
98.3	0
98.4	0
98.5	0
98.6	0
98.7	0
98.8	0
98.9	0
99	0
99.1	0
99.2	0
99.3	0
99.4	0
99.5	0
99.6	0
99.7	0
99.8	0
99.9	0
100	0
100.1	0
100.2	0
100.3	0
100.4	0
100.5	0
100.6	0
100.7	0.000142857
100.8	0.000142857
100.9	0.000285714
101	0.000285714
101.1	0.000285714
101.2	0.000571429
101.3	0.000714286
101.4	0.000714286
101.5	0.001
101.6	0.00157143
101.7	0.00214286
101.8	0.00214286
101.9	0.00257143
102	0.00342857
102.1	0.00342857
102.2	0.00385714
102.3	0.00414286
102.4	0.00457143
102.5	0.00485714
102.6	0.00542857
102.7	0.00557143
102.8	0.006
102.9	0.006
103	0.00657143
103.1	0.00685714
103.2	0.00742857
103.3	0.008
103.4	0.00828571
103.5	0.00885714
103.6	0.0101429
103.7	0.0108571
103.8	0.0121429
103.9	0.0127143
104	0.0135714
104.1	0.0147143
104.2	0.0151429
104.3	0.0168571
104.4	0.017
104.5	0.0181429
104.6	0.019
104.7	0.0201429
104.8	0.021
104.9	0.022
105	0.0227143
105.1	0.0232857
105.2	0.0237143
105.3	0.0244286
105.4	0.0255714
105.5	0.0262857
105.6	0.0272857
105.7	0.0278571
105.8	0.0288571
105.9	0.0292857
106	0.0304286
106.1	0.0311429
106.2	0.0314286
106.3	0.0322857
106.4	0.0332857
106.5	0.0347143
106.6	0.0354286
106.7	0.0358571
106.8	0.0368571
106.9	0.0382857
107	0.0387143
107.1	0.0395714
107.2	0.0408571
107.3	0.042
107.4	0.0422857
107.5	0.0431429
107.6	0.0441429
107.7	0.0451429
107.8	0.0458571
107.9	0.0464286
108	0.0477143
108.1	0.0485714
108.2	0.049
108.3	0.0494286
108.4	0.05
108.5	0.0511429
108.6	0.0518571
108.7	0.0522857
108.8	0.0534286
108.9	0.0541429
109	0.0542857
109.1	0.0548571
109.2	0.0558571
109.3	0.0567143
109.4	0.0572857
109.5	0.0582857
109.6	0.0597143
109.7	0.0601429
109.8	0.0612857
109.9	0.0615714
110	0.0621429
110.1	0.0631429
110.2	0.0645714
110.3	0.0654286
110.4	0.0658571
110.5	0.0665714
110.6	0.0682857
110.7	0.0688571
110.8	0.069
110.9	0.0691429
111	0.0698571
111.1	0.0705714
111.2	0.0717143
111.3	0.0727143
111.4	0.073
111.5	0.0737143
111.6	0.0745714
111.7	0.0755714
111.8	0.0764286
111.9	0.0764286
112	0.077
112.1	0.0774286
112.2	0.0782857
112.3	0.0785714
112.4	0.0795714
112.5	0.0805714
112.6	0.081
112.7	0.082
112.8	0.0824286
112.9	0.0832857
113	0.0837143
113.1	0.0847143
113.2	0.0848571
113.3	0.0861429
113.4	0.0874286
113.5	0.0885714
113.6	0.0902857
113.7	0.0912857
113.8	0.0918571
113.9	0.092
114	0.0922857
114.1	0.0927143
114.2	0.0928571
114.3	0.0937143
114.4	0.0948571
114.5	0.0958571
114.6	0.097
114.7	0.0974286
114.8	0.0984286
114.9	0.0991429
115	0.100714
115.1	0.101429
115.2	0.102143
115.3	0.102429
115.4	0.103429
115.5	0.103429
115.6	0.103714
115.7	0.104286
115.8	0.106
115.9	0.106143
116	0.107
116.1	0.106857
116.2	0.107286
116.3	0.107714
116.4	0.108857
116.5	0.109857
116.6	0.110571
116.7	0.110857
116.8	0.111571
116.9	0.112571
117	0.113429
117.1	0.114286
117.2	0.114571
117.3	0.115143
117.4	0.115857
117.5	0.116429
117.6	0.117429
117.7	0.117714
117.8	0.118429
117.9	0.118429
118	0.118714
118.1	0.118571
118.2	0.119571
118.3	0.120714
118.4	0.121429
118.5	0.121857
118.6	0.123
118.7	0.123429
118.8	0.124429
118.9	0.125714
119	0.127
119.1	0.128
119.2	0.128857
119.3	0.129
119.4	0.129714
119.5	0.13
119.6	0.131
119.7	0.131429
119.8	0.131857
119.9	0.132857
120	0.134143
120.1	0.135
120.2	0.135
120.3	0.135714
120.4	0.136571
120.5	0.136857
120.6	0.137857
120.7	0.138429
120.8	0.139571
120.9	0.140857
121	0.141429
121.1	0.142571
121.2	0.143143
121.3	0.143571
121.4	0.144286
121.5	0.145
121.6	0.145714
121.7	0.146286
121.8	0.146857
121.9	0.147429
122	0.147857
122.1	0.148286
122.2	0.148857
122.3	0.15
122.4	0.150571
122.5	0.151143
122.6	0.151571
122.7	0.152143
122.8	0.152286
122.9	0.152571
123	0.153143
123.1	0.153429
123.2	0.153857
123.3	0.154
123.4	0.154
123.5	0.155143
123.6	0.156429
123.7	0.157429
123.8	0.158857
123.9	0.159286
124	0.16
124.1	0.160857
124.2	0.161
124.3	0.162286
124.4	0.162571
124.5	0.162857
124.6	0.163429
124.7	0.163714
124.8	0.164
124.9	0.165
125	0.165429
125.1	0.166143
125.2	0.167286
125.3	0.167714
125.4	0.168857
125.5	0.17
125.6	0.170571
125.7	0.171
125.8	0.171429
125.9	0.171714
126	0.173
126.1	0.173286
126.2	0.174
126.3	0.174714
126.4	0.174857
126.5	0.175286
126.6	0.175714
126.7	0.176571
126.8	0.176571
126.9	0.177571
127	0.178857
127.1	0.179571
127.2	0.18
127.3	0.18
127.4	0.180857
127.5	0.181571
127.6	0.181857
127.7	0.182571
127.8	0.183
127.9	0.184
128	0.184714
128.1	0.185286
128.2	0.185571
128.3	0.186714
128.4	0.187286
128.5	0.188714
128.6	0.189286
128.7	0.190143
128.8	0.190714
128.9	0.191429
129	0.192143
129.1	0.192429
129.2	0.192857
129.3	0.193714
129.4	0.194429
129.5	0.195
129.6	0.195714
129.7	0.196143
129.8	0.196429
129.9	0.197143
130	0.198143
130.1	0.199143
130.2	0.200286
130.3	0.201286
130.4	0.201571
130.5	0.202429
130.6	0.202571
130.7	0.203143
130.8	0.203
130.9	0.203857
131	0.204714
131.1	0.205
131.2	0.206
131.3	0.206429
131.4	0.206143
131.5	0.206857
131.6	0.206857
131.7	0.207857
131.8	0.208
131.9	0.208286
132	0.208286
132.1	0.208857
132.2	0.209286
132.3	0.209714
132.4	0.210714
132.5	0.212
132.6	0.212571
132.7	0.213143
132.8	0.213286
132.9	0.213857
133	0.214714
133.1	0.215714
133.2	0.216714
133.3	0.216571
133.4	0.217
133.5	0.217714
133.6	0.219
133.7	0.22
133.8	0.220857
133.9	0.221429
134	0.222571
134.1	0.223143
134.2	0.224571
134.3	0.225143
134.4	0.225571
134.5	0.226
134.6	0.226143
134.7	0.226714
134.8	0.227286
134.9	0.227857
135	0.228429
135.1	0.228714
135.2	0.229286
135.3	0.229714
135.4	0.230571
135.5	0.231143
135.6	0.231429
135.7	0.232714
135.8	0.233
135.9	0.233429
136	0.234571
136.1	0.234857
136.2	0.235143
136.3	0.235286
136.4	0.235429
136.5	0.236429
136.6	0.237
136.7	0.237143
136.8	0.237286
136.9	0.237286
137	0.237714
137.1	0.238571
137.2	0.239571
137.3	0.239857
137.4	0.24
137.5	0.240571
137.6	0.241429
137.7	0.241714
137.8	0.241714
137.9	0.242571
138	0.242714
138.1	0.242857
138.2	0.243143
138.3	0.243571
138.4	0.244714
138.5	0.245714
138.6	0.246286
138.7	0.246286
138.8	0.247714
138.9	0.248
139	0.248571
139.1	0.249429
139.2	0.25
139.3	0.251143
139.4	0.251571
139.5	0.252
139.6	0.252
139.7	0.253
139.8	0.253571
139.9	0.253714
140	0.254714
140.1	0.255429
140.2	0.255286
140.3	0.255143
140.4	0.255286
140.5	0.255857
140.6	0.256
140.7	0.256429
140.8	0.256857
140.9	0.257714
141	0.258
141.1	0.258571
141.2	0.259143
141.3	0.259286
141.4	0.259429
141.5	0.259714
141.6	0.260286
141.7	0.260571
141.8	0.260714
141.9	0.261
142	0.261286
142.1	0.261857
142.2	0.262286
142.3	0.262571
142.4	0.263286
142.5	0.263429
142.6	0.264429
142.7	0.265286
142.8	0.265857
142.9	0.267143
143	0.267571
143.1	0.268714
143.2	0.269
143.3	0.269429
143.4	0.269857
143.5	0.270571
143.6	0.272
143.7	0.272429
143.8	0.272714
143.9	0.272714
144	0.273714
144.1	0.273571
144.2	0.274286
144.3	0.274571
144.4	0.275
144.5	0.275286
144.6	0.275286
144.7	0.275
144.8	0.275429
144.9	0.276143
145	0.276714
145.1	0.277857
145.2	0.278143
145.3	0.279143
145.4	0.279714
145.5	0.280286
145.6	0.281286
145.7	0.281714
145.8	0.282714
145.9	0.282571
146	0.282714
146.1	0.282286
146.2	0.282857
146.3	0.282571
146.4	0.283
146.5	0.283
146.6	0.282857
146.7	0.283571
146.8	0.283857
146.9	0.283857
147	0.284857
147.1	0.284286
147.2	0.285
147.3	0.285286
147.4	0.285143
147.5	0.285571
147.6	0.285857
147.7	0.286143
147.8	0.286571
147.9	0.286857
148	0.287857
148.1	0.288
148.2	0.288429
148.3	0.288714
148.4	0.289571
148.5	0.289714
148.6	0.29
148.7	0.290143
148.8	0.291
148.9	0.290857
149	0.291
149.1	0.291714
149.2	0.291429
149.3	0.291857
149.4	0.292714
149.5	0.293143
149.6	0.294
149.7	0.294429
149.8	0.294857
149.9	0.295571
150	0.295857
150.1	0.295429
150.2	0.295857
150.3	0.296143
150.4	0.296286
150.5	0.295857
150.6	0.296714
150.7	0.296857
150.8	0.297286
150.9	0.297857
151	0.297571
151.1	0.298
151.2	0.298571
151.3	0.299
151.4	0.299429
151.5	0.298857
151.6	0.298857
151.7	0.298714
151.8	0.298857
151.9	0.299143
152	0.299286
152.1	0.299
152.2	0.299429
152.3	0.299857
152.4	0.300286
152.5	0.300429
152.6	0.300571
152.7	0.300714
152.8	0.301286
152.9	0.301571
153	0.302286
153.1	0.302714
153.2	0.302714
153.3	0.303143
153.4	0.303571
153.5	0.304143
153.6	0.305286
153.7	0.306429
153.8	0.306429
153.9	0.306143
154	0.306857
154.1	0.307
154.2	0.306714
154.3	0.307857
154.4	0.308571
154.5	0.308571
154.6	0.309143
154.7	0.308857
154.8	0.308286
154.9	0.308286
155	0.308714
155.1	0.309286
155.2	0.309571
155.3	0.310143
155.4	0.310286
155.5	0.310857
155.6	0.311
155.7	0.311143
155.8	0.312143
155.9	0.312286
156	0.312714
156.1	0.312714
156.2	0.313286
156.3	0.314
156.4	0.313857
156.5	0.314
156.6	0.314
156.7	0.314
156.8	0.314714
156.9	0.314714
157	0.314857
157.1	0.314857
157.2	0.315571
157.3	0.316
157.4	0.316571
157.5	0.317286
157.6	0.316857
157.7	0.316571
157.8	0.316857
157.9	0.317429
158	0.317429
158.1	0.318429
158.2	0.318143
158.3	0.319
158.4	0.319286
158.5	0.320286
158.6	0.321143
158.7	0.321286
158.8	0.321857
158.9	0.322
159	0.322429
159.1	0.323571
159.2	0.323571
159.3	0.323429
159.4	0.323429
159.5	0.324143
159.6	0.324286
159.7	0.324429
159.8	0.325286
159.9	0.325286
160	0.325
160.1	0.324429
160.2	0.325
160.3	0.324857
160.4	0.325571
160.5	0.326
160.6	0.327143
160.7	0.327429
160.8	0.328
160.9	0.329
161	0.329143
161.1	0.329429
161.2	0.330286
161.3	0.330571
161.4	0.330571
161.5	0.330429
161.6	0.331143
161.7	0.331571
161.8	0.332143
161.9	0.332714
162	0.332286
162.1	0.332429
162.2	0.332857
162.3	0.332714
162.4	0.332857
162.5	0.333143
162.6	0.333143
162.7	0.333
162.8	0.333429
162.9	0.333429
163	0.334143
163.1	0.334857
163.2	0.334571
163.3	0.335571
163.4	0.336
163.5	0.336286
163.6	0.336857
163.7	0.336714
163.8	0.336857
163.9	0.337
164	0.337143
164.1	0.337571
164.2	0.337714
164.3	0.337571
164.4	0.338286
164.5	0.338571
164.6	0.338857
164.7	0.339429
164.8	0.339571
164.9	0.339857
165	0.340571
165.1	0.341
165.2	0.341429
165.3	0.341714
165.4	0.342286
165.5	0.342
165.6	0.342429
165.7	0.343286
165.8	0.343429
165.9	0.343
166	0.342857
166.1	0.344143
166.2	0.344571
166.3	0.345143
166.4	0.346
166.5	0.347143
166.6	0.347143
166.7	0.348
166.8	0.348571
166.9	0.348429
167	0.348571
167.1	0.348714
167.2	0.349143
167.3	0.349286
167.4	0.349429
167.5	0.349429
167.6	0.349571
167.7	0.349429
167.8	0.349714
167.9	0.349714
168	0.349857
168.1	0.351143
168.2	0.351143
168.3	0.351286
168.4	0.351714
168.5	0.352
168.6	0.352
168.7	0.352429
168.8	0.352143
168.9	0.351857
169	0.352857
169.1	0.353286
169.2	0.353429
169.3	0.354
169.4	0.354429
169.5	0.354286
169.6	0.354857
169.7	0.354857
169.8	0.355143
169.9	0.355286
170	0.355571
170.1	0.356143
170.2	0.356
170.3	0.356286
170.4	0.356429
170.5	0.356286
170.6	0.356571
170.7	0.356857
170.8	0.357286
170.9	0.357571
171	0.357857
171.1	0.358429
171.2	0.359
171.3	0.359429
171.4	0.359286
171.5	0.359286
171.6	0.359714
171.7	0.359714
171.8	0.359286
171.9	0.359714
172	0.359143
172.1	0.359286
172.2	0.359571
172.3	0.359571
172.4	0.36
172.5	0.359714
172.6	0.360286
172.7	0.360571
172.8	0.360857
172.9	0.361143
173	0.361143
173.1	0.361429
173.2	0.361286
173.3	0.361429
173.4	0.361714
173.5	0.362
173.6	0.362429
173.7	0.363286
173.8	0.364
173.9	0.364571
174	0.364571
174.1	0.365
174.2	0.365857
174.3	0.365571
174.4	0.366429
174.5	0.366143
174.6	0.366857
174.7	0.367429
174.8	0.367286
174.9	0.368
175	0.368286
175.1	0.368571
175.2	0.368571
175.3	0.369
175.4	0.368857
175.5	0.368429
175.6	0.368429
175.7	0.368714
175.8	0.369286
175.9	0.369571
176	0.369857
176.1	0.37
176.2	0.370571
176.3	0.370714
176.4	0.372
176.5	0.372429
176.6	0.372714
176.7	0.372857
176.8	0.373286
176.9	0.373
177	0.373143
177.1	0.373571
177.2	0.374286
177.3	0.374714
177.4	0.374714
177.5	0.375429
177.6	0.376143
177.7	0.376571
177.8	0.376857
177.9	0.377143
178	0.377286
178.1	0.377857
178.2	0.378286
178.3	0.378714
178.4	0.378429
178.5	0.378714
178.6	0.378857
178.7	0.379286
178.8	0.379857
178.9	0.379571
179	0.380286
179.1	0.380429
179.2	0.380714
179.3	0.380714
179.4	0.380429
179.5	0.380714
179.6	0.380714
179.7	0.380857
179.8	0.381143
179.9	0.381
180	0.381143
180.1	0.381571
180.2	0.382143
180.3	0.381857
180.4	0.382
180.5	0.382429
180.6	0.382857
180.7	0.383286
180.8	0.384429
180.9	0.384857
181	0.384857
181.1	0.385
181.2	0.385571
181.3	0.385857
181.4	0.385857
181.5	0.386
181.6	0.386857
181.7	0.386714
181.8	0.387143
181.9	0.387286
182	0.387714
182.1	0.388
182.2	0.388286
182.3	0.388143
182.4	0.388286
182.5	0.388429
182.6	0.388571
182.7	0.389
182.8	0.388857
182.9	0.388286
183	0.388143
183.1	0.388857
183.2	0.389143
183.3	0.389571
183.4	0.389429
183.5	0.39
183.6	0.390857
183.7	0.391
183.8	0.390857
183.9	0.391143
184	0.390714
184.1	0.391714
184.2	0.392714
184.3	0.392857
184.4	0.393143
184.5	0.393286
184.6	0.393286
184.7	0.394714
184.8	0.394714
184.9	0.394857
185	0.395286
185.1	0.395714
185.2	0.395857
185.3	0.396143
185.4	0.396714
185.5	0.396857
185.6	0.397429
185.7	0.397286
185.8	0.397714
185.9	0.398429
186	0.399429
186.1	0.400143
186.2	0.400286
186.3	0.399714
186.4	0.399571
186.5	0.399857
186.6	0.400143
186.7	0.400286
186.8	0.400143
186.9	0.400143
187	0.400571
187.1	0.400429
187.2	0.400714
187.3	0.401143
187.4	0.401571
187.5	0.401429
187.6	0.401714
187.7	0.402143
187.8	0.402286
187.9	0.402857
188	0.403429
188.1	0.403714
188.2	0.404714
188.3	0.404571
188.4	0.404857
188.5	0.404857
188.6	0.404714
188.7	0.405
188.8	0.405857
188.9	0.405857
189	0.406286
189.1	0.406286
189.2	0.407
189.3	0.407857
189.4	0.407857
189.5	0.408
189.6	0.408571
189.7	0.408429
189.8	0.408714
189.9	0.408571
190	0.408286
190.1	0.408143
190.2	0.408429
190.3	0.408571
190.4	0.408286
190.5	0.408286
190.6	0.408143
190.7	0.408
190.8	0.408143
190.9	0.408714
191	0.408429
191.1	0.408286
191.2	0.409
191.3	0.409
191.4	0.408857
191.5	0.409286
191.6	0.409857
191.7	0.410571
191.8	0.410571
191.9	0.410143
192	0.410143
192.1	0.41
192.2	0.410286
192.3	0.410286
192.4	0.41
192.5	0.409571
192.6	0.410571
192.7	0.411286
192.8	0.411429
192.9	0.411286
193	0.411857
193.1	0.411857
193.2	0.411857
193.3	0.411571
193.4	0.412
193.5	0.412
193.6	0.412857
193.7	0.413857
193.8	0.413714
193.9	0.413571
194	0.413571
194.1	0.413571
194.2	0.414571
194.3	0.415286
194.4	0.415
194.5	0.415571
194.6	0.415857
194.7	0.416571
194.8	0.416571
194.9	0.417571
195	0.417143
195.1	0.417
195.2	0.417143
195.3	0.417571
195.4	0.417714
195.5	0.417286
195.6	0.417857
195.7	0.417714
195.8	0.418429
195.9	0.418429
196	0.418571
196.1	0.419
196.2	0.418857
196.3	0.418714
196.4	0.418857
196.5	0.419429
196.6	0.419714
196.7	0.419714
196.8	0.419143
196.9	0.418571
197	0.419857
197.1	0.419857
197.2	0.420286
197.3	0.420571
197.4	0.421
197.5	0.421143
197.6	0.422286
197.7	0.422286
197.8	0.421429
197.9	0.421143
198	0.420857
198.1	0.420286
198.2	0.419857
198.3	0.420571
198.4	0.420571
198.5	0.420857
198.6	0.421
198.7	0.420857
198.8	0.421429
198.9	0.421571
199	0.421571
199.1	0.421429
199.2	0.421571
199.3	0.421286
199.4	0.421857
199.5	0.423143
199.6	0.423
199.7	0.422714
199.8	0.422857
199.9	0.422143
200	0.422714
[truncated: 14,000 more rows]
