# Supplementary material for: Bayesian inference of kinetic schemes for ion channels by Kalman filtering
Source: eLife journal article supplement (doi:10.7554/elife.62714), 2022-05-04
Supplement: fig4-data9 [file 1_Sim_N_10000_Fluor_MW_0.5M.xlsx]

## Sheet: Tabelle1
0.1	0
0.2	0
0.3	0
0.4	0
0.5	0
0.6	0
0.7	0
0.8	0
0.9	0
1	0
1.1	0
1.2	0
1.3	0
1.4	0
1.5	0
1.6	0
1.7	0
1.8	0
1.9	0
2	0
2.1	0
2.2	0
2.3	0
2.4	0
2.5	0
2.6	0
2.7	0
2.8	0
2.9	0
3	0
3.1	0
3.2	0
3.3	0
3.4	0
3.5	0
3.6	0
3.7	0
3.8	0
3.9	0
4	0
4.1	0
4.2	0
4.3	0
4.4	0
4.5	0
4.6	0
4.7	0
4.8	0
4.9	0
5	0
5.1	0
5.2	0
5.3	0
5.4	0
5.5	0
5.6	0
5.7	0
5.8	0
5.9	0
6	0
6.1	0
6.2	0
6.3	0
6.4	0
6.5	0
6.6	0
6.7	0
6.8	0
6.9	0
7	0
7.1	0
7.2	0
7.3	0
7.4	0
7.5	0
7.6	0
7.7	0
7.8	0
7.9	0
8	0
8.1	0
8.2	0
8.3	0
8.4	0
8.5	0
8.6	0
8.7	0
8.8	0
8.9	0
9	0
9.1	0
9.2	0
9.3	0
9.4	0
9.5	0
9.6	0
9.7	0
9.8	0
9.9	0
10	0
10.1	0
10.2	0
10.3	0
10.4	0
10.5	0
10.6	0
10.7	0
10.8	0
10.9	0
11	0
11.1	0
11.2	0
11.3	0
11.4	0
11.5	0
11.6	0
11.7	0
11.8	0
11.9	0
12	0
12.1	0
12.2	0
12.3	0
12.4	0
12.5	0
12.6	0
12.7	0
12.8	0
12.9	0
13	0
13.1	0
13.2	0
13.3	0
13.4	0
13.5	0
13.6	0
13.7	0
13.8	0
13.9	0
14	0
14.1	0
14.2	0
14.3	0
14.4	0
14.5	0
14.6	0
14.7	0
14.8	0
14.9	0
15	0
15.1	0
15.2	0
15.3	0
15.4	0
15.5	0
15.6	0
15.7	0
15.8	0
15.9	0
16	0
16.1	0
16.2	0
16.3	0
16.4	0
16.5	0
16.6	0
16.7	0
16.8	0
16.9	0
17	0
17.1	0
17.2	0
17.3	0
17.4	0
17.5	0
17.6	0
17.7	0
17.8	0
17.9	0
18	0
18.1	0
18.2	0
18.3	0
18.4	0
18.5	0
18.6	0
18.7	0
18.8	0
18.9	0
19	0
19.1	0
19.2	0
19.3	0
19.4	0
19.5	0
19.6	0
19.7	0
19.8	0
19.9	0
20	0
20.1	0
20.2	0
20.3	0
20.4	0
20.5	0
20.6	0
20.7	0
20.8	0
20.9	0
21	0
21.1	0
21.2	0
21.3	0
21.4	0
21.5	0
21.6	0
21.7	0
21.8	0
21.9	0
22	0
22.1	0
22.2	0
22.3	0
22.4	0
22.5	0
22.6	0
22.7	0
22.8	0
22.9	0
23	0
23.1	0
23.2	0
23.3	0
23.4	0
23.5	0
23.6	0
23.7	0
23.8	0
23.9	0
24	0
24.1	0
24.2	0
24.3	0
24.4	0
24.5	0
24.6	0
24.7	0
24.8	0
24.9	0
25	0
25.1	0
25.2	0
25.3	0
25.4	0
25.5	0
25.6	0
25.7	0
25.8	0
25.9	0
26	0
26.1	0
26.2	0
26.3	0
26.4	0
26.5	0
26.6	0
26.7	0
26.8	0
26.9	0
27	0
27.1	0
27.2	0
27.3	0
27.4	0
27.5	0
27.6	0
27.7	0
27.8	0
27.9	0
28	0
28.1	0
28.2	0
28.3	0
28.4	0
28.5	0
28.6	0
28.7	0
28.8	0
28.9	0
29	0
29.1	0
29.2	0
29.3	0
29.4	0
29.5	0
29.6	0
29.7	0
29.8	0
29.9	0
30	0
30.1	0
30.2	0
30.3	0
30.4	0
30.5	0
30.6	0
30.7	0
30.8	0
30.9	0
31	0
31.1	0
31.2	0
31.3	0
31.4	0
31.5	0
31.6	0
31.7	0
31.8	0
31.9	0
32	0
32.1	0
32.2	0
32.3	0
32.4	0
32.5	0
32.6	0
32.7	0
32.8	0
32.9	0
33	0
33.1	0
33.2	0
33.3	0
33.4	0
33.5	0
33.6	0
33.7	0
33.8	0
33.9	0
34	0
34.1	0
34.2	0
34.3	0
34.4	0
34.5	0
34.6	0
34.7	0
34.8	0
34.9	0
35	0
35.1	0
35.2	0
35.3	0
35.4	0
35.5	0
35.6	0
35.7	0
35.8	0
35.9	0
36	0
36.1	0
36.2	0
36.3	0
36.4	0
36.5	0
36.6	0
36.7	0
36.8	0
36.9	0
37	0
37.1	0
37.2	0
37.3	0
37.4	0
37.5	0
37.6	0
37.7	0
37.8	0
37.9	0
38	0
38.1	0
38.2	0
38.3	0
38.4	0
38.5	0
38.6	0
38.7	0
38.8	0
38.9	0
39	0
39.1	0
39.2	0
39.3	0
39.4	0
39.5	0
39.6	0
39.7	0
39.8	0
39.9	0
40	0
40.1	0
40.2	0
40.3	0
40.4	0
40.5	0
40.6	0
40.7	0
40.8	0
40.9	0
41	0
41.1	0
41.2	0
41.3	0
41.4	0
41.5	0
41.6	0
41.7	0
41.8	0
41.9	0
42	0
42.1	0
42.2	0
42.3	0
42.4	0
42.5	0
42.6	0
42.7	0
42.8	0
42.9	0
43	0
43.1	0
43.2	0
43.3	0
43.4	0
43.5	0
43.6	0
43.7	0
43.8	0
43.9	0
44	0
44.1	0
44.2	0
44.3	0
44.4	0
44.5	0
44.6	0
44.7	0
44.8	0
44.9	0
45	0
45.1	0
45.2	0
45.3	0
45.4	0
45.5	0
45.6	0
45.7	0
45.8	0
45.9	0
46	0
46.1	0
46.2	0
46.3	0
46.4	0
46.5	0
46.6	0
46.7	0
46.8	0
46.9	0
47	0
47.1	0
47.2	0
47.3	0
47.4	0
47.5	0
47.6	0
47.7	0
47.8	0
47.9	0
48	0
48.1	0
48.2	0
48.3	0
48.4	0
48.5	0
48.6	0
48.7	0
48.8	0
48.9	0
49	0
49.1	0
49.2	0
49.3	0
49.4	0
49.5	0
49.6	0
49.7	0
49.8	0
49.9	0
50	0
50.1	0
50.2	0
50.3	0
50.4	0
50.5	0
50.6	0
50.7	0
50.8	0
50.9	0
51	0
51.1	0
51.2	0
51.3	0
51.4	0
51.5	0
51.6	0
51.7	0
51.8	0
51.9	0
52	0
52.1	0
52.2	0
52.3	0
52.4	0
52.5	0
52.6	0
52.7	0
52.8	0
52.9	0
53	0
53.1	0
53.2	0
53.3	0
53.4	0
53.5	0
53.6	0
53.7	0
53.8	0
53.9	0
54	0
54.1	0
54.2	0
54.3	0
54.4	0
54.5	0
54.6	0
54.7	0
54.8	0
54.9	0
55	0
55.1	0
55.2	0
55.3	0
55.4	0
55.5	0
55.6	0
55.7	0
55.8	0
55.9	0
56	0
56.1	0
56.2	0
56.3	0
56.4	0
56.5	0
56.6	0
56.7	0
56.8	0
56.9	0
57	0
57.1	0
57.2	0
57.3	0
57.4	0
57.5	0
57.6	0
57.7	0
57.8	0
57.9	0
58	0
58.1	0
58.2	0
58.3	0
58.4	0
58.5	0
58.6	0
58.7	0
58.8	0
58.9	0
59	0
59.1	0
59.2	0
59.3	0
59.4	0
59.5	0
59.6	0
59.7	0
59.8	0
59.9	0
60	0
60.1	0
60.2	0
60.3	0
60.4	0
60.5	0
60.6	0
60.7	0
60.8	0
60.9	0
61	0
61.1	0
61.2	0
61.3	0
61.4	0
61.5	0
61.6	0
61.7	0
61.8	0
61.9	0
62	0
62.1	0
62.2	0
62.3	0
62.4	0
62.5	0
62.6	0
62.7	0
62.8	0
62.9	0
63	0
63.1	0
63.2	0
63.3	0
63.4	0
63.5	0
63.6	0
63.7	0
63.8	0
63.9	0
64	0
64.1	0
64.2	0
64.3	0
64.4	0
64.5	0
64.6	0
64.7	0
64.8	0
64.9	0
65	0
65.1	0
65.2	0
65.3	0
65.4	0
65.5	0
65.6	0
65.7	0
65.8	0
65.9	0
66	0
66.1	0
66.2	0
66.3	0
66.4	0
66.5	0
66.6	0
66.7	0
66.8	0
66.9	0
67	0
67.1	0
67.2	0
67.3	0
67.4	0
67.5	0
67.6	0
67.7	0
67.8	0
67.9	0
68	0
68.1	0
68.2	0
68.3	0
68.4	0
68.5	0
68.6	0
68.7	0
68.8	0
68.9	0
69	0
69.1	0
69.2	0
69.3	0
69.4	0
69.5	0
69.6	0
69.7	0
69.8	0
69.9	0
70	0
70.1	0
70.2	0
70.3	0
70.4	0
70.5	0
70.6	0
70.7	0
70.8	0
70.9	0
71	0
71.1	0
71.2	0
71.3	0
71.4	0
71.5	0
71.6	0
71.7	0
71.8	0
71.9	0
72	0
72.1	0
72.2	0
72.3	0
72.4	0
72.5	0
72.6	0
72.7	0
72.8	0
72.9	0
73	0
73.1	0
73.2	0
73.3	0
73.4	0
73.5	0
73.6	0
73.7	0
73.8	0
73.9	0
74	0
74.1	0
74.2	0
74.3	0
74.4	0
74.5	0
74.6	0
74.7	0
74.8	0
74.9	0
75	0
75.1	0
75.2	0
75.3	0
75.4	0
75.5	0
75.6	0
75.7	0
75.8	0
75.9	0
76	0
76.1	0
76.2	0
76.3	0
76.4	0
76.5	0
76.6	0
76.7	0
76.8	0
76.9	0
77	0
77.1	0
77.2	0
77.3	0
77.4	0
77.5	0
77.6	0
77.7	0
77.8	0
77.9	0
78	0
78.1	0
78.2	0
78.3	0
78.4	0
78.5	0
78.6	0
78.7	0
78.8	0
78.9	0
79	0
79.1	0
79.2	0
79.3	0
79.4	0
79.5	0
79.6	0
79.7	0
79.8	0
79.9	0
80	0
80.1	0
80.2	0
80.3	0
80.4	0
80.5	0
80.6	0
80.7	0
80.8	0
80.9	0
81	0
81.1	0
81.2	0
81.3	0
81.4	0
81.5	0
81.6	0
81.7	0
81.8	0
81.9	0
82	0
82.1	0
82.2	0
82.3	0
82.4	0
82.5	0
82.6	0
82.7	0
82.8	0
82.9	0
83	0
83.1	0
83.2	0
83.3	0
83.4	0
83.5	0
83.6	0
83.7	0
83.8	0
83.9	0
84	0
84.1	0
84.2	0
84.3	0
84.4	0
84.5	0
84.6	0
84.7	0
84.8	0
84.9	0
85	0
85.1	0
85.2	0
85.3	0
85.4	0
85.5	0
85.6	0
85.7	0
85.8	0
85.9	0
86	0
86.1	0
86.2	0
86.3	0
86.4	0
86.5	0
86.6	0
86.7	0
86.8	0
86.9	0
87	0
87.1	0
87.2	0
87.3	0
87.4	0
87.5	0
87.6	0
87.7	0
87.8	0
87.9	0
88	0
88.1	0
88.2	0
88.3	0
88.4	0
88.5	0
88.6	0
88.7	0
88.8	0
88.9	0
89	0
89.1	0
89.2	0
89.3	0
89.4	0
89.5	0
89.6	0
89.7	0
89.8	0
89.9	0
90	0
90.1	0
90.2	0
90.3	0
90.4	0
90.5	0
90.6	0
90.7	0
90.8	0
90.9	0
91	0
91.1	0
91.2	0
91.3	0
91.4	0
91.5	0
91.6	0
91.7	0
91.8	0
91.9	0
92	0
92.1	0
92.2	0
92.3	0
92.4	0
92.5	0
92.6	0
92.7	0
92.8	0
92.9	0
93	0
93.1	0
93.2	0
93.3	0
93.4	0
93.5	0
93.6	0
93.7	0
93.8	0
93.9	0
94	0
94.1	0
94.2	0
94.3	0
94.4	0
94.5	0
94.6	0
94.7	0
94.8	0
94.9	0
95	0
95.1	0
95.2	0
95.3	0
95.4	0
95.5	0
95.6	0
95.7	0
95.8	0
95.9	0
96	0
96.1	0
96.2	0
96.3	0
96.4	0
96.5	0
96.6	0
96.7	0
96.8	0
96.9	0
97	0
97.1	0
97.2	0
97.3	0
97.4	0
97.5	0
97.6	0
97.7	0
97.8	0
97.9	0
98	0
98.1	0
98.2	0
98.3	0
98.4	0
98.5	0
98.6	0
98.7	0
98.8	0
98.9	0
99	0
99.1	0
99.2	0
99.3	0
99.4	0
99.5	0
99.6	0
99.7	0
99.8	0
99.9	0
100	0
100.1	0.0269
100.2	0.0549
100.3	0.08005
100.4	0.10495
100.5	0.1285
100.6	0.1511
100.7	0.1721
100.8	0.1923
100.9	0.21125
101	0.2284
101.1	0.24615
101.2	0.2626
101.3	0.27755
101.4	0.29115
101.5	0.3044
101.6	0.31875
101.7	0.332
101.8	0.34405
101.9	0.3548
102	0.3639
102.1	0.37355
102.2	0.3835
102.3	0.39215
102.4	0.4023
102.5	0.40875
102.6	0.41425
102.7	0.4212
102.8	0.42835
102.9	0.43495
103	0.4402
103.1	0.4477
103.2	0.45285
103.3	0.45845
103.4	0.46435
103.5	0.46865
103.6	0.47125
103.7	0.47565
103.8	0.4786
103.9	0.48255
104	0.4854
104.1	0.4889
104.2	0.4918
104.3	0.4957
104.4	0.49765
104.5	0.49935
104.6	0.50285
104.7	0.50665
104.8	0.50925
104.9	0.5119
105	0.51355
105.1	0.51545
105.2	0.51765
105.3	0.52
105.4	0.5225
105.5	0.52395
105.6	0.5279
105.7	0.5295
105.8	0.53225
105.9	0.5344
106	0.53535
106.1	0.5367
106.2	0.5373
106.3	0.53775
106.4	0.54035
106.5	0.5416
106.6	0.54085
106.7	0.5417
106.8	0.54365
106.9	0.5462
107	0.54635
107.1	0.5478
107.2	0.5495
107.3	0.5506
107.4	0.55025
107.5	0.5518
107.6	0.5532
107.7	0.5545
107.8	0.555
107.9	0.55435
108	0.5556
108.1	0.55565
108.2	0.5556
108.3	0.5566
108.4	0.55845
108.5	0.558
108.6	0.55885
108.7	0.55915
108.8	0.5595
108.9	0.55985
109	0.56045
109.1	0.55965
109.2	0.55945
109.3	0.55905
109.4	0.55895
109.5	0.55915
109.6	0.55875
109.7	0.5607
109.8	0.5616
109.9	0.5615
110	0.5624
110.1	0.5637
110.2	0.56565
110.3	0.5668
110.4	0.5658
110.5	0.5644
110.6	0.5652
110.7	0.5663
110.8	0.5665
110.9	0.5659
111	0.5662
111.1	0.5686
111.2	0.5689
111.3	0.57095
111.4	0.57185
111.5	0.57325
111.6	0.57295
111.7	0.57495
111.8	0.57385
111.9	0.5759
112	0.5753
112.1	0.57485
112.2	0.57645
112.3	0.5773
112.4	0.57695
112.5	0.5777
112.6	0.5787
112.7	0.579
112.8	0.57915
112.9	0.57985
113	0.5808
113.1	0.58095
113.2	0.5804
113.3	0.58065
113.4	0.58165
113.5	0.58
113.6	0.5808
113.7	0.58035
113.8	0.5811
113.9	0.58105
114	0.58245
114.1	0.5832
114.2	0.5847
114.3	0.58485
114.4	0.5872
114.5	0.588
114.6	0.5881
114.7	0.5877
114.8	0.587
114.9	0.58745
115	0.58725
115.1	0.58745
115.2	0.5881
115.3	0.5885
115.4	0.59085
115.5	0.5907
115.6	0.5911
115.7	0.5913
115.8	0.59135
115.9	0.59095
116	0.5908
116.1	0.59245
116.2	0.595
116.3	0.5952
116.4	0.5961
116.5	0.59625
116.6	0.59725
116.7	0.5966
116.8	0.5965
116.9	0.59625
117	0.596
117.1	0.5971
117.2	0.59745
117.3	0.59825
117.4	0.5986
117.5	0.59855
117.6	0.5999
117.7	0.5998
117.8	0.5986
117.9	0.59795
118	0.599
118.1	0.59885
118.2	0.598
118.3	0.59895
118.4	0.6002
118.5	0.6005
118.6	0.60095
118.7	0.601
118.8	0.6024
118.9	0.6007
119	0.60105
119.1	0.6008
119.2	0.60035
119.3	0.6006
119.4	0.6013
119.5	0.602
119.6	0.60075
119.7	0.60135
119.8	0.6009
119.9	0.6019
120	0.60375
120.1	0.60455
120.2	0.60375
120.3	0.6032
120.4	0.6038
120.5	0.6054
120.6	0.60525
120.7	0.60625
120.8	0.6061
120.9	0.60625
121	0.60575
121.1	0.60655
121.2	0.6076
121.3	0.6088
121.4	0.60825
121.5	0.60745
121.6	0.6069
121.7	0.607
121.8	0.6066
121.9	0.6077
122	0.60805
122.1	0.6076
122.2	0.6067
122.3	0.60485
122.4	0.60625
122.5	0.60575
122.6	0.6075
122.7	0.6074
122.8	0.6088
122.9	0.6101
123	0.6115
123.1	0.6128
123.2	0.6136
123.3	0.61435
123.4	0.61395
123.5	0.61255
123.6	0.613
123.7	0.6138
123.8	0.61395
123.9	0.61425
124	0.61365
124.1	0.61415
124.2	0.61455
124.3	0.61595
124.4	0.6162
124.5	0.6165
124.6	0.6171
124.7	0.61905
124.8	0.61805
124.9	0.6186
125	0.6185
125.1	0.6182
125.2	0.61905
125.3	0.6201
125.4	0.62005
125.5	0.61905
125.6	0.62005
125.7	0.6189
125.8	0.61985
125.9	0.62035
126	0.6209
126.1	0.6211
126.2	0.6212
126.3	0.6207
126.4	0.6213
126.5	0.6222
126.6	0.62295
126.7	0.62265
126.8	0.6237
126.9	0.6236
127	0.6244
127.1	0.62425
127.2	0.6239
127.3	0.624
127.4	0.62435
127.5	0.6241
127.6	0.62485
127.7	0.62545
127.8	0.6261
127.9	0.6282
128	0.6291
128.1	0.62875
128.2	0.62885
128.3	0.62855
128.4	0.62795
128.5	0.6274
128.6	0.62715
128.7	0.6277
128.8	0.62765
128.9	0.629
129	0.6302
129.1	0.6297
129.2	0.6301
129.3	0.6305
129.4	0.6321
129.5	0.63465
129.6	0.63475
129.7	0.63575
129.8	0.636
129.9	0.63665
130	0.6363
130.1	0.6363
130.2	0.6358
130.3	0.6348
130.4	0.6349
130.5	0.6357
130.6	0.63455
130.7	0.6351
130.8	0.63435
130.9	0.63585
131	0.637
131.1	0.63585
131.2	0.63515
131.3	0.63485
131.4	0.63645
131.5	0.63625
131.6	0.63605
131.7	0.63575
131.8	0.6371
131.9	0.6368
132	0.63665
132.1	0.63835
132.2	0.639
132.3	0.63765
132.4	0.6386
132.5	0.63915
132.6	0.6392
132.7	0.6381
132.8	0.6378
132.9	0.63785
133	0.6381
133.1	0.6374
133.2	0.6391
133.3	0.63925
133.4	0.6396
133.5	0.6416
133.6	0.6419
133.7	0.64315
133.8	0.64265
133.9	0.64395
134	0.64405
134.1	0.64605
134.2	0.64635
134.3	0.64715
134.4	0.64625
134.5	0.64695
134.6	0.64655
134.7	0.64725
134.8	0.6478
134.9	0.647
135	0.6476
135.1	0.648
135.2	0.6485
135.3	0.64965
135.4	0.64985
135.5	0.6507
135.6	0.6505
135.7	0.65155
135.8	0.6509
135.9	0.64875
136	0.6493
136.1	0.6492
136.2	0.65035
136.3	0.6505
136.4	0.651
136.5	0.6515
136.6	0.6515
136.7	0.65185
136.8	0.65215
136.9	0.6526
137	0.65345
137.1	0.65435
137.2	0.65465
137.3	0.6551
137.4	0.6542
137.5	0.6541
137.6	0.6549
137.7	0.65365
137.8	0.6531
137.9	0.6547
138	0.65405
138.1	0.6553
138.2	0.65465
138.3	0.65555
138.4	0.65495
138.5	0.65515
138.6	0.65515
138.7	0.65435
138.8	0.6544
138.9	0.65575
139	0.6568
139.1	0.657
139.2	0.65585
139.3	0.65705
139.4	0.6556
139.5	0.6556
139.6	0.65615
139.7	0.6562
139.8	0.6577
139.9	0.65595
140	0.6563
140.1	0.6575
140.2	0.657
140.3	0.65745
140.4	0.65715
140.5	0.65635
140.6	0.65745
140.7	0.659
140.8	0.65945
140.9	0.6601
141	0.66
141.1	0.6605
141.2	0.66065
141.3	0.66085
141.4	0.6607
141.5	0.65975
141.6	0.65895
141.7	0.6593
141.8	0.6594
141.9	0.6603
142	0.66085
142.1	0.6638
142.2	0.6654
142.3	0.6665
142.4	0.66595
142.5	0.6657
142.6	0.66485
142.7	0.6641
142.8	0.6635
142.9	0.6645
143	0.6656
143.1	0.66615
143.2	0.66625
143.3	0.6667
143.4	0.66765
143.5	0.66805
143.6	0.6684
143.7	0.66925
143.8	0.6681
143.9	0.66845
144	0.6679
144.1	0.66645
144.2	0.66675
144.3	0.66735
144.4	0.66775
144.5	0.6682
144.6	0.66935
144.7	0.67025
144.8	0.67035
144.9	0.67015
145	0.66955
145.1	0.6702
145.2	0.67095
145.3	0.6714
145.4	0.6728
145.5	0.6723
145.6	0.6716
145.7	0.6712
145.8	0.6712
145.9	0.6721
146	0.673
146.1	0.673
146.2	0.6727
146.3	0.6715
146.4	0.67155
146.5	0.672
146.6	0.6716
146.7	0.67155
146.8	0.67095
146.9	0.67075
147	0.6713
147.1	0.67125
147.2	0.67205
147.3	0.6723
147.4	0.67305
147.5	0.67335
147.6	0.6738
147.7	0.6734
147.8	0.67305
147.9	0.67495
148	0.67525
148.1	0.6753
148.2	0.67445
148.3	0.67445
148.4	0.67625
148.5	0.67725
148.6	0.67725
148.7	0.6767
148.8	0.6765
148.9	0.67695
149	0.6765
149.1	0.6761
149.2	0.67745
149.3	0.679
149.4	0.67835
149.5	0.678
149.6	0.67845
149.7	0.67835
149.8	0.67685
149.9	0.6767
150	0.6762
150.1	0.6774
150.2	0.6774
150.3	0.67775
150.4	0.6771
150.5	0.6772
150.6	0.67555
150.7	0.675
150.8	0.67575
150.9	0.67555
151	0.67735
151.1	0.6787
151.2	0.67945
151.3	0.6797
151.4	0.6813
151.5	0.6824
151.6	0.68345
151.7	0.6826
151.8	0.68225
151.9	0.68255
152	0.6827
152.1	0.6834
152.2	0.68345
152.3	0.68265
152.4	0.68345
152.5	0.68285
152.6	0.6831
152.7	0.6832
152.8	0.68325
152.9	0.6827
153	0.6829
153.1	0.6841
153.2	0.684
153.3	0.6841
153.4	0.684
153.5	0.68525
153.6	0.6853
153.7	0.68515
153.8	0.68445
153.9	0.68515
154	0.68505
154.1	0.68535
154.2	0.6843
154.3	0.68465
154.4	0.6851
154.5	0.68575
154.6	0.6856
154.7	0.68725
154.8	0.68735
154.9	0.6864
155	0.68665
155.1	0.6863
155.2	0.68725
155.3	0.6889
155.4	0.68955
155.5	0.6885
155.6	0.6881
155.7	0.6888
155.8	0.6886
155.9	0.6883
156	0.6894
156.1	0.6885
156.2	0.68855
156.3	0.68895
156.4	0.6897
156.5	0.69015
156.6	0.6909
156.7	0.69025
156.8	0.69045
156.9	0.6917
157	0.69225
157.1	0.69285
157.2	0.69355
157.3	0.6939
157.4	0.6939
157.5	0.6942
157.6	0.69605
157.7	0.69545
157.8	0.69485
157.9	0.6945
158	0.6941
158.1	0.695
158.2	0.69635
158.3	0.69705
158.4	0.6971
158.5	0.69535
158.6	0.69635
158.7	0.697
158.8	0.69585
158.9	0.69505
159	0.69435
159.1	0.69455
159.2	0.6955
159.3	0.69645
159.4	0.6953
159.5	0.69585
159.6	0.6966
159.7	0.6959
159.8	0.69585
159.9	0.69695
160	0.69695
160.1	0.69795
160.2	0.6982
160.3	0.6981
160.4	0.6981
160.5	0.69845
160.6	0.6993
160.7	0.6999
160.8	0.6997
160.9	0.69905
161	0.7003
161.1	0.70025
161.2	0.7012
161.3	0.7012
161.4	0.7011
161.5	0.70285
161.6	0.70325
161.7	0.7024
161.8	0.7018
161.9	0.7021
162	0.7029
162.1	0.7028
162.2	0.70185
162.3	0.7018
162.4	0.70175
162.5	0.7017
162.6	0.70215
162.7	0.70245
162.8	0.70225
162.9	0.7027
163	0.7017
163.1	0.7015
163.2	0.70225
163.3	0.7029
163.4	0.70335
163.5	0.70355
163.6	0.70415
163.7	0.7048
163.8	0.70505
163.9	0.7046
164	0.70425
164.1	0.7046
164.2	0.70445
164.3	0.70435
164.4	0.7047
164.5	0.704
164.6	0.7043
164.7	0.70445
164.8	0.7039
164.9	0.704
165	0.70475
165.1	0.7045
165.2	0.7042
165.3	0.7044
165.4	0.7051
165.5	0.70665
165.6	0.70805
165.7	0.7092
165.8	0.7097
165.9	0.70865
166	0.7088
166.1	0.70835
166.2	0.7077
166.3	0.70875
166.4	0.70725
166.5	0.7084
166.6	0.7087
166.7	0.70915
166.8	0.7092
166.9	0.7091
167	0.70935
167.1	0.7101
167.2	0.70955
167.3	0.7085
167.4	0.7088
167.5	0.70915
167.6	0.70935
167.7	0.70945
167.8	0.7094
167.9	0.70955
168	0.7089
168.1	0.7104
168.2	0.7108
168.3	0.71175
168.4	0.71085
168.5	0.7104
168.6	0.71055
168.7	0.71065
168.8	0.7101
168.9	0.7106
169	0.7115
169.1	0.7119
169.2	0.7129
169.3	0.71395
169.4	0.71455
169.5	0.71515
169.6	0.7147
169.7	0.7133
169.8	0.7127
169.9	0.7123
170	0.71185
170.1	0.71305
170.2	0.7126
170.3	0.71315
170.4	0.7134
170.5	0.7131
170.6	0.71445
170.7	0.714
170.8	0.7143
170.9	0.71345
171	0.71365
171.1	0.71375
171.2	0.71325
171.3	0.7141
171.4	0.7135
171.5	0.7132
171.6	0.7139
171.7	0.71415
171.8	0.71325
171.9	0.71315
172	0.7134
172.1	0.71335
172.2	0.7135
172.3	0.71375
172.4	0.7152
172.5	0.71505
172.6	0.7141
172.7	0.71565
172.8	0.7161
172.9	0.71535
173	0.7146
173.1	0.7142
173.2	0.7147
173.3	0.7154
173.4	0.7167
173.5	0.71675
173.6	0.71715
173.7	0.7182
173.8	0.7174
173.9	0.71665
174	0.7159
174.1	0.71605
174.2	0.71685
174.3	0.71645
174.4	0.71685
174.5	0.71695
174.6	0.71765
174.7	0.7165
174.8	0.71615
174.9	0.71705
175	0.71645
175.1	0.7156
175.2	0.7157
175.3	0.7162
175.4	0.71775
175.5	0.71705
175.6	0.7179
175.7	0.71885
175.8	0.71865
175.9	0.71785
176	0.71885
176.1	0.7181
176.2	0.71825
176.3	0.71845
176.4	0.7184
176.5	0.71795
176.6	0.7173
176.7	0.71735
176.8	0.71785
176.9	0.71835
177	0.7175
177.1	0.7175
177.2	0.71775
177.3	0.7176
177.4	0.71725
177.5	0.71725
177.6	0.7177
177.7	0.7181
177.8	0.71755
177.9	0.7173
178	0.7167
178.1	0.71695
178.2	0.71725
178.3	0.7186
178.4	0.71855
178.5	0.71885
178.6	0.7183
178.7	0.7189
178.8	0.7187
178.9	0.7189
179	0.7183
179.1	0.71835
179.2	0.71915
179.3	0.72015
179.4	0.72055
179.5	0.7216
179.6	0.7214
179.7	0.7209
179.8	0.7222
179.9	0.7219
180	0.72355
180.1	0.7245
180.2	0.72335
180.3	0.7241
180.4	0.7242
180.5	0.7224
180.6	0.72225
180.7	0.72235
180.8	0.7227
180.9	0.72205
181	0.7235
181.1	0.72345
181.2	0.72395
181.3	0.72375
181.4	0.7232
181.5	0.72315
181.6	0.724
181.7	0.72475
181.8	0.72515
181.9	0.7253
182	0.72505
182.1	0.72475
182.2	0.7247
182.3	0.7249
182.4	0.72555
182.5	0.7272
182.6	0.7279
182.7	0.72805
182.8	0.72805
182.9	0.7281
183	0.72705
183.1	0.7275
183.2	0.72645
183.3	0.72765
183.4	0.72735
183.5	0.72725
183.6	0.72765
183.7	0.72645
183.8	0.72545
183.9	0.72525
184	0.72665
184.1	0.72665
184.2	0.7255
184.3	0.7264
184.4	0.7264
184.5	0.7261
184.6	0.726
184.7	0.7264
184.8	0.7263
184.9	0.72675
185	0.72695
185.1	0.72625
185.2	0.7267
185.3	0.7255
185.4	0.72655
185.5	0.726
185.6	0.7259
185.7	0.7253
185.8	0.725
185.9	0.72535
186	0.7266
186.1	0.72705
186.2	0.72785
186.3	0.7275
186.4	0.72745
186.5	0.72825
186.6	0.72905
186.7	0.72905
186.8	0.72865
186.9	0.72855
187	0.72965
187.1	0.7303
187.2	0.72985
187.3	0.7307
187.4	0.73105
187.5	0.7305
187.6	0.7318
187.7	0.7318
187.8	0.73185
187.9	0.73125
188	0.731
188.1	0.7299
188.2	0.7302
188.3	0.73045
188.4	0.73085
188.5	0.73055
188.6	0.7299
188.7	0.7301
188.8	0.7305
188.9	0.73085
189	0.7305
189.1	0.73025
189.2	0.72965
189.3	0.7301
189.4	0.7312
189.5	0.7315
189.6	0.7299
189.7	0.7306
189.8	0.73085
189.9	0.73165
190	0.7314
190.1	0.73205
190.2	0.73225
190.3	0.73275
190.4	0.7328
190.5	0.73285
190.6	0.7325
190.7	0.7323
190.8	0.73175
190.9	0.7314
191	0.73065
191.1	0.73115
191.2	0.7317
191.3	0.7307
191.4	0.72935
191.5	0.72945
191.6	0.7296
191.7	0.7302
191.8	0.7297
191.9	0.7292
192	0.72895
192.1	0.72905
192.2	0.72915
192.3	0.72975
192.4	0.7299
192.5	0.7308
192.6	0.73145
192.7	0.73125
192.8	0.7321
192.9	0.7335
193	0.73545
193.1	0.7366
193.2	0.737
193.3	0.73705
193.4	0.7353
193.5	0.73535
193.6	0.735
193.7	0.7343
193.8	0.7346
193.9	0.7333
194	0.7329
194.1	0.73235
194.2	0.7337
194.3	0.7337
194.4	0.7342
194.5	0.7342
194.6	0.7341
194.7	0.73545
194.8	0.73455
194.9	0.7337
195	0.73455
195.1	0.73575
195.2	0.7352
195.3	0.73555
195.4	0.7353
195.5	0.73555
195.6	0.7349
195.7	0.73445
195.8	0.734
195.9	0.7348
196	0.73425
196.1	0.7343
196.2	0.7338
196.3	0.73465
196.4	0.7357
196.5	0.73585
196.6	0.73495
196.7	0.73505
196.8	0.73525
196.9	0.7348
197	0.7351
197.1	0.73545
197.2	0.7349
197.3	0.7351
197.4	0.73475
197.5	0.73465
197.6	0.73455
197.7	0.73565
197.8	0.7354
197.9	0.73575
198	0.73555
198.1	0.7361
198.2	0.7363
198.3	0.73545
198.4	0.73615
198.5	0.736
198.6	0.7364
198.7	0.73685
198.8	0.7377
198.9	0.73755
199	0.73775
199.1	0.7389
199.2	0.7389
199.3	0.7384
199.4	0.73945
199.5	0.74045
199.6	0.73905
199.7	0.73955
199.8	0.73955
199.9	0.7398
200	0.7399
[truncated: 14,000 more rows]
