# Supplementary material for: Bayesian inference of kinetic schemes for ion channels by Kalman filtering
Source: eLife journal article supplement (doi:10.7554/elife.62714), 2022-05-04
Supplement: fig4-data9 [file 1_Sim_N_10000_Strom_MW_0.5M.xlsx]

## Sheet: Tabelle1
0.1	0
0.2	0
0.3	0
0.4	0
0.5	0
0.6	0
0.7	0
0.8	0
0.9	0
1	0
1.1	0
1.2	0
1.3	0
1.4	0
1.5	0
1.6	0
1.7	0
1.8	0
1.9	0
2	0
2.1	0
2.2	0
2.3	0
2.4	0
2.5	0
2.6	0
2.7	0
2.8	0
2.9	0
3	0
3.1	0
3.2	0
3.3	0
3.4	0
3.5	0
3.6	0
3.7	0
3.8	0
3.9	0
4	0
4.1	0
4.2	0
4.3	0
4.4	0
4.5	0
4.6	0
4.7	0
4.8	0
4.9	0
5	0
5.1	0
5.2	0
5.3	0
5.4	0
5.5	0
5.6	0
5.7	0
5.8	0
5.9	0
6	0
6.1	0
6.2	0
6.3	0
6.4	0
6.5	0
6.6	0
6.7	0
6.8	0
6.9	0
7	0
7.1	0
7.2	0
7.3	0
7.4	0
7.5	0
7.6	0
7.7	0
7.8	0
7.9	0
8	0
8.1	0
8.2	0
8.3	0
8.4	0
8.5	0
8.6	0
8.7	0
8.8	0
8.9	0
9	0
9.1	0
9.2	0
9.3	0
9.4	0
9.5	0
9.6	0
9.7	0
9.8	0
9.9	0
10	0
10.1	0
10.2	0
10.3	0
10.4	0
10.5	0
10.6	0
10.7	0
10.8	0
10.9	0
11	0
11.1	0
11.2	0
11.3	0
11.4	0
11.5	0
11.6	0
11.7	0
11.8	0
11.9	0
12	0
12.1	0
12.2	0
12.3	0
12.4	0
12.5	0
12.6	0
12.7	0
12.8	0
12.9	0
13	0
13.1	0
13.2	0
13.3	0
13.4	0
13.5	0
13.6	0
13.7	0
13.8	0
13.9	0
14	0
14.1	0
14.2	0
14.3	0
14.4	0
14.5	0
14.6	0
14.7	0
14.8	0
14.9	0
15	0
15.1	0
15.2	0
15.3	0
15.4	0
15.5	0
15.6	0
15.7	0
15.8	0
15.9	0
16	0
16.1	0
16.2	0
16.3	0
16.4	0
16.5	0
16.6	0
16.7	0
16.8	0
16.9	0
17	0
17.1	0
17.2	0
17.3	0
17.4	0
17.5	0
17.6	0
17.7	0
17.8	0
17.9	0
18	0
18.1	0
18.2	0
18.3	0
18.4	0
18.5	0
18.6	0
18.7	0
18.8	0
18.9	0
19	0
19.1	0
19.2	0
19.3	0
19.4	0
19.5	0
19.6	0
19.7	0
19.8	0
19.9	0
20	0
20.1	0
20.2	0
20.3	0
20.4	0
20.5	0
20.6	0
20.7	0
20.8	0
20.9	0
21	0
21.1	0
21.2	0
21.3	0
21.4	0
21.5	0
21.6	0
21.7	0
21.8	0
21.9	0
22	0
22.1	0
22.2	0
22.3	0
22.4	0
22.5	0
22.6	0
22.7	0
22.8	0
22.9	0
23	0
23.1	0
23.2	0
23.3	0
23.4	0
23.5	0
23.6	0
23.7	0
23.8	0
23.9	0
24	0
24.1	0
24.2	0
24.3	0
24.4	0
24.5	0
24.6	0
24.7	0
24.8	0
24.9	0
25	0
25.1	0
25.2	0
25.3	0
25.4	0
25.5	0
25.6	0
25.7	0
25.8	0
25.9	0
26	0
26.1	0
26.2	0
26.3	0
26.4	0
26.5	0
26.6	0
26.7	0
26.8	0
26.9	0
27	0
27.1	0
27.2	0
27.3	0
27.4	0
27.5	0
27.6	0
27.7	0
27.8	0
27.9	0
28	0
28.1	0
28.2	0
28.3	0
28.4	0
28.5	0
28.6	0
28.7	0
28.8	0
28.9	0
29	0
29.1	0
29.2	0
29.3	0
29.4	0
29.5	0
29.6	0
29.7	0
29.8	0
29.9	0
30	0
30.1	0
30.2	0
30.3	0
30.4	0
30.5	0
30.6	0
30.7	0
30.8	0
30.9	0
31	0
31.1	0
31.2	0
31.3	0
31.4	0
31.5	0
31.6	0
31.7	0
31.8	0
31.9	0
32	0
32.1	0
32.2	0
32.3	0
32.4	0
32.5	0
32.6	0
32.7	0
32.8	0
32.9	0
33	0
33.1	0
33.2	0
33.3	0
33.4	0
33.5	0
33.6	0
33.7	0
33.8	0
33.9	0
34	0
34.1	0
34.2	0
34.3	0
34.4	0
34.5	0
34.6	0
34.7	0
34.8	0
34.9	0
35	0
35.1	0
35.2	0
35.3	0
35.4	0
35.5	0
35.6	0
35.7	0
35.8	0
35.9	0
36	0
36.1	0
36.2	0
36.3	0
36.4	0
36.5	0
36.6	0
36.7	0
36.8	0
36.9	0
37	0
37.1	0
37.2	0
37.3	0
37.4	0
37.5	0
37.6	0
37.7	0
37.8	0
37.9	0
38	0
38.1	0
38.2	0
38.3	0
38.4	0
38.5	0
38.6	0
38.7	0
38.8	0
38.9	0
39	0
39.1	0
39.2	0
39.3	0
39.4	0
39.5	0
39.6	0
39.7	0
39.8	0
39.9	0
40	0
40.1	0
40.2	0
40.3	0
40.4	0
40.5	0
40.6	0
40.7	0
40.8	0
40.9	0
41	0
41.1	0
41.2	0
41.3	0
41.4	0
41.5	0
41.6	0
41.7	0
41.8	0
41.9	0
42	0
42.1	0
42.2	0
42.3	0
42.4	0
42.5	0
42.6	0
42.7	0
42.8	0
42.9	0
43	0
43.1	0
43.2	0
43.3	0
43.4	0
43.5	0
43.6	0
43.7	0
43.8	0
43.9	0
44	0
44.1	0
44.2	0
44.3	0
44.4	0
44.5	0
44.6	0
44.7	0
44.8	0
44.9	0
45	0
45.1	0
45.2	0
45.3	0
45.4	0
45.5	0
45.6	0
45.7	0
45.8	0
45.9	0
46	0
46.1	0
46.2	0
46.3	0
46.4	0
46.5	0
46.6	0
46.7	0
46.8	0
46.9	0
47	0
47.1	0
47.2	0
47.3	0
47.4	0
47.5	0
47.6	0
47.7	0
47.8	0
47.9	0
48	0
48.1	0
48.2	0
48.3	0
48.4	0
48.5	0
48.6	0
48.7	0
48.8	0
48.9	0
49	0
49.1	0
49.2	0
49.3	0
49.4	0
49.5	0
49.6	0
49.7	0
49.8	0
49.9	0
50	0
50.1	0
50.2	0
50.3	0
50.4	0
50.5	0
50.6	0
50.7	0
50.8	0
50.9	0
51	0
51.1	0
51.2	0
51.3	0
51.4	0
51.5	0
51.6	0
51.7	0
51.8	0
51.9	0
52	0
52.1	0
52.2	0
52.3	0
52.4	0
52.5	0
52.6	0
52.7	0
52.8	0
52.9	0
53	0
53.1	0
53.2	0
53.3	0
53.4	0
53.5	0
53.6	0
53.7	0
53.8	0
53.9	0
54	0
54.1	0
54.2	0
54.3	0
54.4	0
54.5	0
54.6	0
54.7	0
54.8	0
54.9	0
55	0
55.1	0
55.2	0
55.3	0
55.4	0
55.5	0
55.6	0
55.7	0
55.8	0
55.9	0
56	0
56.1	0
56.2	0
56.3	0
56.4	0
56.5	0
56.6	0
56.7	0
56.8	0
56.9	0
57	0
57.1	0
57.2	0
57.3	0
57.4	0
57.5	0
57.6	0
57.7	0
57.8	0
57.9	0
58	0
58.1	0
58.2	0
58.3	0
58.4	0
58.5	0
58.6	0
58.7	0
58.8	0
58.9	0
59	0
59.1	0
59.2	0
59.3	0
59.4	0
59.5	0
59.6	0
59.7	0
59.8	0
59.9	0
60	0
60.1	0
60.2	0
60.3	0
60.4	0
60.5	0
60.6	0
60.7	0
60.8	0
60.9	0
61	0
61.1	0
61.2	0
61.3	0
61.4	0
61.5	0
61.6	0
61.7	0
61.8	0
61.9	0
62	0
62.1	0
62.2	0
62.3	0
62.4	0
62.5	0
62.6	0
62.7	0
62.8	0
62.9	0
63	0
63.1	0
63.2	0
63.3	0
63.4	0
63.5	0
63.6	0
63.7	0
63.8	0
63.9	0
64	0
64.1	0
64.2	0
64.3	0
64.4	0
64.5	0
64.6	0
64.7	0
64.8	0
64.9	0
65	0
65.1	0
65.2	0
65.3	0
65.4	0
65.5	0
65.6	0
65.7	0
65.8	0
65.9	0
66	0
66.1	0
66.2	0
66.3	0
66.4	0
66.5	0
66.6	0
66.7	0
66.8	0
66.9	0
67	0
67.1	0
67.2	0
67.3	0
67.4	0
67.5	0
67.6	0
67.7	0
67.8	0
67.9	0
68	0
68.1	0
68.2	0
68.3	0
68.4	0
68.5	0
68.6	0
68.7	0
68.8	0
68.9	0
69	0
69.1	0
69.2	0
69.3	0
69.4	0
69.5	0
69.6	0
69.7	0
69.8	0
69.9	0
70	0
70.1	0
70.2	0
70.3	0
70.4	0
70.5	0
70.6	0
70.7	0
70.8	0
70.9	0
71	0
71.1	0
71.2	0
71.3	0
71.4	0
71.5	0
71.6	0
71.7	0
71.8	0
71.9	0
72	0
72.1	0
72.2	0
72.3	0
72.4	0
72.5	0
72.6	0
72.7	0
72.8	0
72.9	0
73	0
73.1	0
73.2	0
73.3	0
73.4	0
73.5	0
73.6	0
73.7	0
73.8	0
73.9	0
74	0
74.1	0
74.2	0
74.3	0
74.4	0
74.5	0
74.6	0
74.7	0
74.8	0
74.9	0
75	0
75.1	0
75.2	0
75.3	0
75.4	0
75.5	0
75.6	0
75.7	0
75.8	0
75.9	0
76	0
76.1	0
76.2	0
76.3	0
76.4	0
76.5	0
76.6	0
76.7	0
76.8	0
76.9	0
77	0
77.1	0
77.2	0
77.3	0
77.4	0
77.5	0
77.6	0
77.7	0
77.8	0
77.9	0
78	0
78.1	0
78.2	0
78.3	0
78.4	0
78.5	0
78.6	0
78.7	0
78.8	0
78.9	0
79	0
79.1	0
79.2	0
79.3	0
79.4	0
79.5	0
79.6	0
79.7	0
79.8	0
79.9	0
80	0
80.1	0
80.2	0
80.3	0
80.4	0
80.5	0
80.6	0
80.7	0
80.8	0
80.9	0
81	0
81.1	0
81.2	0
81.3	0
81.4	0
81.5	0
81.6	0
81.7	0
81.8	0
81.9	0
82	0
82.1	0
82.2	0
82.3	0
82.4	0
82.5	0
82.6	0
82.7	0
82.8	0
82.9	0
83	0
83.1	0
83.2	0
83.3	0
83.4	0
83.5	0
83.6	0
83.7	0
83.8	0
83.9	0
84	0
84.1	0
84.2	0
84.3	0
84.4	0
84.5	0
84.6	0
84.7	0
84.8	0
84.9	0
85	0
85.1	0
85.2	0
85.3	0
85.4	0
85.5	0
85.6	0
85.7	0
85.8	0
85.9	0
86	0
86.1	0
86.2	0
86.3	0
86.4	0
86.5	0
86.6	0
86.7	0
86.8	0
86.9	0
87	0
87.1	0
87.2	0
87.3	0
87.4	0
87.5	0
87.6	0
87.7	0
87.8	0
87.9	0
88	0
88.1	0
88.2	0
88.3	0
88.4	0
88.5	0
88.6	0
88.7	0
88.8	0
88.9	0
89	0
89.1	0
89.2	0
89.3	0
89.4	0
89.5	0
89.6	0
89.7	0
89.8	0
89.9	0
90	0
90.1	0
90.2	0
90.3	0
90.4	0
90.5	0
90.6	0
90.7	0
90.8	0
90.9	0
91	0
91.1	0
91.2	0
91.3	0
91.4	0
91.5	0
91.6	0
91.7	0
91.8	0
91.9	0
92	0
92.1	0
92.2	0
92.3	0
92.4	0
92.5	0
92.6	0
92.7	0
92.8	0
92.9	0
93	0
93.1	0
93.2	0
93.3	0
93.4	0
93.5	0
93.6	0
93.7	0
93.8	0
93.9	0
94	0
94.1	0
94.2	0
94.3	0
94.4	0
94.5	0
94.6	0
94.7	0
94.8	0
94.9	0
95	0
95.1	0
95.2	0
95.3	0
95.4	0
95.5	0
95.6	0
95.7	0
95.8	0
95.9	0
96	0
96.1	0
96.2	0
96.3	0
96.4	0
96.5	0
96.6	0
96.7	0
96.8	0
96.9	0
97	0
97.1	0
97.2	0
97.3	0
97.4	0
97.5	0
97.6	0
97.7	0
97.8	0
97.9	0
98	0
98.1	0
98.2	0
98.3	0
98.4	0
98.5	0
98.6	0
98.7	0
98.8	0
98.9	0
99	0
99.1	0
99.2	0
99.3	0
99.4	0
99.5	0
99.6	0
99.7	0
99.8	0
99.9	0
100	0
100.1	0
100.2	0
100.3	0
100.4	0.0001
100.5	0.0002
100.6	0.0002
100.7	0.0003
100.8	0.0003
100.9	0.0003
101	0.0006
101.1	0.0006
101.2	0.0008
101.3	0.001
101.4	0.0012
101.5	0.0013
101.6	0.0014
101.7	0.0015
101.8	0.002
101.9	0.0021
102	0.0024
102.1	0.0026
102.2	0.0026
102.3	0.0031
102.4	0.0036
102.5	0.0043
102.6	0.005
102.7	0.006
102.8	0.0068
102.9	0.0071
103	0.0076
103.1	0.0084
103.2	0.0089
103.3	0.0093
103.4	0.0097
103.5	0.0109
103.6	0.0115
103.7	0.012
103.8	0.0123
103.9	0.0128
104	0.0138
104.1	0.0149
104.2	0.0161
104.3	0.0172
104.4	0.0177
104.5	0.0186
104.6	0.019
104.7	0.0203
104.8	0.0208
104.9	0.022
105	0.0228
105.1	0.0237
105.2	0.0246
105.3	0.0254
105.4	0.0265
105.5	0.0273
105.6	0.0281
105.7	0.0288
105.8	0.0292
105.9	0.0304
106	0.0311
106.1	0.0322
106.2	0.033
106.3	0.0339
106.4	0.0346
106.5	0.0354
106.6	0.0361
106.7	0.0366
106.8	0.0374
106.9	0.0386
107	0.0397
107.1	0.041
107.2	0.0417
107.3	0.0434
107.4	0.0436
107.5	0.0447
107.6	0.0457
107.7	0.0469
107.8	0.047
107.9	0.0481
108	0.0492
108.1	0.0499
108.2	0.0513
108.3	0.0515
108.4	0.0525
108.5	0.0532
108.6	0.0538
108.7	0.0549
108.8	0.0552
108.9	0.056
109	0.0566
109.1	0.0575
109.2	0.0583
109.3	0.0588
109.4	0.0605
109.5	0.0619
109.6	0.0626
109.7	0.0636
109.8	0.0644
109.9	0.0657
110	0.0666
110.1	0.0675
110.2	0.0685
110.3	0.0692
110.4	0.07
110.5	0.0712
110.6	0.0718
110.7	0.0727
110.8	0.0732
110.9	0.0739
111	0.0745
111.1	0.0754
111.2	0.0762
111.3	0.0774
111.4	0.0785
111.5	0.0791
111.6	0.0798
111.7	0.0807
111.8	0.0816
111.9	0.0822
112	0.0826
112.1	0.0837
112.2	0.0846
112.3	0.0858
112.4	0.0866
112.5	0.0882
112.6	0.0898
112.7	0.0902
112.8	0.0912
112.9	0.0921
113	0.0926
113.1	0.0936
113.2	0.0944
113.3	0.0955
113.4	0.0968
113.5	0.0975
113.6	0.0982
113.7	0.0994
113.8	0.1001
113.9	0.1006
114	0.1013
114.1	0.1016
114.2	0.1027
114.3	0.1033
114.4	0.1036
114.5	0.1048
114.6	0.1059
114.7	0.1066
114.8	0.1073
114.9	0.1077
115	0.108
115.1	0.1091
115.2	0.11
115.3	0.1101
115.4	0.111
115.5	0.1121
115.6	0.113
115.7	0.1138
115.8	0.1141
115.9	0.1148
116	0.1155
116.1	0.1159
116.2	0.1167
116.3	0.1177
116.4	0.1184
116.5	0.1189
116.6	0.1195
116.7	0.1197
116.8	0.1212
116.9	0.1224
117	0.1232
117.1	0.1241
117.2	0.1253
117.3	0.1266
117.4	0.1277
117.5	0.1285
117.6	0.1289
117.7	0.1296
117.8	0.1307
117.9	0.1312
118	0.1323
118.1	0.1332
118.2	0.134
118.3	0.1351
118.4	0.1358
118.5	0.1366
118.6	0.1372
118.7	0.138
118.8	0.1383
118.9	0.139
119	0.1396
119.1	0.1399
119.2	0.1402
119.3	0.1408
119.4	0.1412
119.5	0.1417
119.6	0.1425
119.7	0.1431
119.8	0.1434
119.9	0.1441
120	0.1446
120.1	0.1453
120.2	0.1461
120.3	0.1464
120.4	0.1468
120.5	0.1475
120.6	0.1481
120.7	0.1495
120.8	0.1497
120.9	0.1504
121	0.1511
121.1	0.1514
121.2	0.1522
121.3	0.1531
121.4	0.1541
121.5	0.1545
121.6	0.1547
121.7	0.1555
121.8	0.1566
121.9	0.1573
122	0.1587
122.1	0.1594
122.2	0.1608
122.3	0.1616
122.4	0.1629
122.5	0.1637
122.6	0.1642
122.7	0.1644
122.8	0.165
122.9	0.1657
123	0.1661
123.1	0.1674
123.2	0.1679
123.3	0.1683
123.4	0.1689
123.5	0.1694
123.6	0.17
123.7	0.1704
123.8	0.1714
123.9	0.172
124	0.1734
124.1	0.1742
124.2	0.1743
124.3	0.1747
124.4	0.1752
124.5	0.1757
124.6	0.1762
124.7	0.1769
124.8	0.1768
124.9	0.1772
125	0.178
125.1	0.1786
125.2	0.1788
125.3	0.1795
125.4	0.1799
125.5	0.1807
125.6	0.1819
125.7	0.1828
125.8	0.1835
125.9	0.1843
126	0.1849
126.1	0.1859
126.2	0.1866
126.3	0.1874
126.4	0.1877
126.5	0.1886
126.6	0.1891
126.7	0.1897
126.8	0.1898
126.9	0.1903
127	0.1912
127.1	0.1917
127.2	0.1924
127.3	0.193
127.4	0.1933
127.5	0.1941
127.6	0.195
127.7	0.1958
127.8	0.1963
127.9	0.1974
128	0.1982
128.1	0.1982
128.2	0.1989
128.3	0.1997
128.4	0.1999
128.5	0.2001
128.6	0.201
128.7	0.2014
128.8	0.2019
128.9	0.2029
129	0.2036
129.1	0.204
129.2	0.2046
129.3	0.2055
129.4	0.2058
129.5	0.2066
129.6	0.2076
129.7	0.2083
129.8	0.2087
129.9	0.2092
130	0.2093
130.1	0.2097
130.2	0.2102
130.3	0.2106
130.4	0.2113
130.5	0.2115
130.6	0.2116
130.7	0.2124
130.8	0.2128
130.9	0.2124
131	0.2129
131.1	0.2133
131.2	0.2135
131.3	0.2141
131.4	0.2146
131.5	0.2151
131.6	0.2154
131.7	0.216
131.8	0.2165
131.9	0.2168
132	0.2175
132.1	0.2176
132.2	0.2188
132.3	0.2196
132.4	0.2203
132.5	0.2206
132.6	0.2214
132.7	0.2219
132.8	0.2225
132.9	0.2232
133	0.2237
133.1	0.2243
133.2	0.2247
133.3	0.2254
133.4	0.2262
133.5	0.227
133.6	0.2276
133.7	0.2278
133.8	0.2285
133.9	0.2292
134	0.2292
134.1	0.2297
134.2	0.2301
134.3	0.2311
134.4	0.2312
134.5	0.2316
134.6	0.2322
134.7	0.2329
134.8	0.2334
134.9	0.2338
135	0.234
135.1	0.2346
135.2	0.2358
135.3	0.2363
135.4	0.2369
135.5	0.2371
135.6	0.238
135.7	0.2382
135.8	0.2387
135.9	0.2394
136	0.2401
136.1	0.241
136.2	0.2419
136.3	0.2426
136.4	0.2435
136.5	0.2442
136.6	0.2444
136.7	0.2452
136.8	0.2459
136.9	0.2461
137	0.2467
137.1	0.2467
137.2	0.2475
137.3	0.2477
137.4	0.2487
137.5	0.2495
137.6	0.25
137.7	0.2501
137.8	0.2502
137.9	0.2507
138	0.2514
138.1	0.2524
138.2	0.2528
138.3	0.2538
138.4	0.254
138.5	0.2542
138.6	0.2548
138.7	0.2555
138.8	0.2559
138.9	0.2566
139	0.257
139.1	0.2575
139.2	0.2579
139.3	0.2582
139.4	0.2587
139.5	0.2592
139.6	0.2594
139.7	0.2597
139.8	0.2601
139.9	0.2603
140	0.2608
140.1	0.2611
140.2	0.2619
140.3	0.2623
140.4	0.2621
140.5	0.2622
140.6	0.2623
140.7	0.2626
140.8	0.2626
140.9	0.2627
141	0.2632
141.1	0.2637
141.2	0.2644
141.3	0.2647
141.4	0.2652
141.5	0.2652
141.6	0.2658
141.7	0.2662
141.8	0.2666
141.9	0.2675
142	0.268
142.1	0.268
142.2	0.2689
142.3	0.2697
142.4	0.2699
142.5	0.2707
142.6	0.2716
142.7	0.2715
142.8	0.272
142.9	0.2725
143	0.2728
143.1	0.2735
143.2	0.2742
143.3	0.2749
143.4	0.2756
143.5	0.2756
143.6	0.2762
143.7	0.2765
143.8	0.2773
143.9	0.2778
144	0.2786
144.1	0.2791
144.2	0.2799
144.3	0.2805
144.4	0.2806
144.5	0.2811
144.6	0.2812
144.7	0.2811
144.8	0.2817
144.9	0.2817
145	0.2823
145.1	0.2828
145.2	0.2835
145.3	0.2838
145.4	0.2842
145.5	0.2843
145.6	0.2848
145.7	0.2853
145.8	0.2853
145.9	0.2853
146	0.2853
146.1	0.2861
146.2	0.2868
146.3	0.2871
146.4	0.2879
146.5	0.2884
146.6	0.289
146.7	0.2897
146.8	0.2899
146.9	0.2904
147	0.2908
147.1	0.2916
147.2	0.2919
147.3	0.2921
147.4	0.2924
147.5	0.2926
147.6	0.2924
147.7	0.2933
147.8	0.2939
147.9	0.2947
148	0.2949
148.1	0.2956
148.2	0.296
148.3	0.2965
148.4	0.2967
148.5	0.2969
148.6	0.2981
148.7	0.2986
148.8	0.2989
148.9	0.2992
149	0.2992
149.1	0.2997
149.2	0.3002
149.3	0.3001
149.4	0.3003
149.5	0.3009
149.6	0.3008
149.7	0.3009
149.8	0.3014
149.9	0.3015
150	0.3021
150.1	0.3031
150.2	0.304
150.3	0.3047
150.4	0.3048
150.5	0.3049
150.6	0.3048
150.7	0.3053
150.8	0.3056
150.9	0.3055
151	0.3056
151.1	0.3058
151.2	0.3058
151.3	0.3062
151.4	0.3064
151.5	0.307
151.6	0.3078
151.7	0.3081
151.8	0.3088
151.9	0.309
152	0.3091
152.1	0.3092
152.2	0.3103
152.3	0.3104
152.4	0.3107
152.5	0.3114
152.6	0.3116
152.7	0.3116
152.8	0.3123
152.9	0.3125
153	0.3129
153.1	0.3134
153.2	0.3134
153.3	0.3136
153.4	0.3141
153.5	0.3142
153.6	0.3149
153.7	0.3154
153.8	0.3162
153.9	0.3164
154	0.3171
154.1	0.3176
154.2	0.3177
154.3	0.3176
154.4	0.3178
154.5	0.3178
154.6	0.3173
154.7	0.3176
154.8	0.3182
154.9	0.3186
155	0.319
155.1	0.3192
155.2	0.32
155.3	0.3198
155.4	0.3204
155.5	0.3204
155.6	0.3211
155.7	0.3217
155.8	0.3221
155.9	0.3228
156	0.3232
156.1	0.3238
156.2	0.3246
156.3	0.3252
156.4	0.3258
156.5	0.3264
156.6	0.3265
156.7	0.3267
156.8	0.3268
156.9	0.3275
157	0.3279
157.1	0.3279
157.2	0.328
157.3	0.3283
157.4	0.329
157.5	0.3289
157.6	0.3293
157.7	0.3294
157.8	0.3293
157.9	0.3293
158	0.3298
158.1	0.3307
158.2	0.3308
158.3	0.3309
158.4	0.3309
158.5	0.3314
158.6	0.3323
158.7	0.333
158.8	0.3335
158.9	0.3335
159	0.3334
159.1	0.3336
159.2	0.3338
159.3	0.3338
159.4	0.3338
159.5	0.3345
159.6	0.3347
159.7	0.335
159.8	0.3355
159.9	0.3357
160	0.336
160.1	0.3363
160.2	0.3368
160.3	0.3371
160.4	0.338
160.5	0.3385
160.6	0.3383
160.7	0.3389
160.8	0.3394
160.9	0.3401
161	0.3406
161.1	0.341
161.2	0.3417
161.3	0.3421
161.4	0.3424
161.5	0.3429
161.6	0.3437
161.7	0.3437
161.8	0.3443
161.9	0.3442
162	0.3442
162.1	0.3443
162.2	0.345
162.3	0.3451
162.4	0.3458
162.5	0.3464
162.6	0.3466
162.7	0.3471
162.8	0.3467
162.9	0.3474
163	0.3478
163.1	0.3477
163.2	0.3481
163.3	0.3478
163.4	0.3477
163.5	0.3484
163.6	0.3483
163.7	0.3489
163.8	0.3494
163.9	0.3498
164	0.3496
164.1	0.35
164.2	0.3504
164.3	0.3505
164.4	0.3508
164.5	0.3513
164.6	0.3516
164.7	0.3515
164.8	0.3516
164.9	0.3519
165	0.3522
165.1	0.353
165.2	0.3529
165.3	0.3531
165.4	0.3535
165.5	0.3539
165.6	0.3537
165.7	0.3539
165.8	0.3543
165.9	0.3545
166	0.355
166.1	0.355
166.2	0.3554
166.3	0.3558
166.4	0.3561
166.5	0.3565
166.6	0.3565
166.7	0.3569
166.8	0.3578
166.9	0.3582
167	0.3588
167.1	0.3595
167.2	0.3599
167.3	0.3604
167.4	0.3606
167.5	0.3612
167.6	0.3615
167.7	0.3623
167.8	0.3626
167.9	0.3628
168	0.363
168.1	0.363
168.2	0.3633
168.3	0.3639
168.4	0.3636
168.5	0.3637
168.6	0.3636
168.7	0.3641
168.8	0.3646
168.9	0.3653
169	0.365
169.1	0.3651
169.2	0.3654
169.3	0.3662
169.4	0.3662
169.5	0.3665
169.6	0.3671
169.7	0.3675
169.8	0.3678
169.9	0.3682
170	0.3685
170.1	0.3687
170.2	0.3692
170.3	0.3695
170.4	0.3699
170.5	0.3701
170.6	0.3706
170.7	0.3711
170.8	0.3716
170.9	0.3717
171	0.372
171.1	0.3725
171.2	0.3727
171.3	0.3729
171.4	0.3728
171.5	0.3734
171.6	0.3737
171.7	0.3733
171.8	0.3742
171.9	0.3744
172	0.3745
172.1	0.3741
172.2	0.3742
172.3	0.3742
172.4	0.3743
172.5	0.3745
172.6	0.3749
172.7	0.376
172.8	0.3761
172.9	0.3763
173	0.3766
173.1	0.3774
173.2	0.3771
173.3	0.3779
173.4	0.378
173.5	0.3784
173.6	0.3782
173.7	0.3788
173.8	0.3787
173.9	0.3792
174	0.3792
174.1	0.3791
174.2	0.3798
174.3	0.3795
174.4	0.3801
174.5	0.38
174.6	0.3807
174.7	0.3806
174.8	0.3806
174.9	0.3808
175	0.3808
175.1	0.3809
175.2	0.3812
175.3	0.381
175.4	0.3812
175.5	0.3816
175.6	0.3816
175.7	0.3821
175.8	0.3821
175.9	0.3824
176	0.3823
176.1	0.3821
176.2	0.3823
176.3	0.3822
176.4	0.3824
176.5	0.3825
176.6	0.3825
176.7	0.383
176.8	0.3837
176.9	0.3841
177	0.384
177.1	0.384
177.2	0.3841
177.3	0.3842
177.4	0.3842
177.5	0.3842
177.6	0.3844
177.7	0.3848
177.8	0.3851
177.9	0.3858
178	0.3859
178.1	0.3862
178.2	0.3872
178.3	0.3874
178.4	0.3877
178.5	0.3878
178.6	0.3875
178.7	0.3878
178.8	0.3879
178.9	0.3881
179	0.3887
179.1	0.3893
179.2	0.3893
179.3	0.3898
179.4	0.3898
179.5	0.3903
179.6	0.3907
179.7	0.3907
179.8	0.3906
179.9	0.3905
180	0.3913
180.1	0.3921
180.2	0.3924
180.3	0.3924
180.4	0.3928
180.5	0.3934
180.6	0.3937
180.7	0.3942
180.8	0.3939
180.9	0.3943
181	0.3944
181.1	0.3949
181.2	0.3943
181.3	0.3947
181.4	0.3958
181.5	0.3959
181.6	0.3967
181.7	0.3971
181.8	0.3973
181.9	0.3974
182	0.3972
182.1	0.3974
182.2	0.3974
182.3	0.3974
182.4	0.3975
182.5	0.3977
182.6	0.3976
182.7	0.3976
182.8	0.3973
182.9	0.3973
183	0.3975
183.1	0.3975
183.2	0.3982
183.3	0.3981
183.4	0.3976
183.5	0.3984
183.6	0.3986
183.7	0.399
183.8	0.3988
183.9	0.3993
184	0.4001
184.1	0.4
184.2	0.4
184.3	0.4
184.4	0.4001
184.5	0.4002
184.6	0.4005
184.7	0.4008
184.8	0.4015
184.9	0.4022
185	0.4024
185.1	0.4028
185.2	0.4033
185.3	0.4035
185.4	0.404
185.5	0.404
185.6	0.404
185.7	0.4047
185.8	0.4045
185.9	0.4044
186	0.4041
186.1	0.4042
186.2	0.404
186.3	0.4044
186.4	0.4041
186.5	0.4039
186.6	0.4045
186.7	0.4045
186.8	0.4048
186.9	0.4049
187	0.4054
187.1	0.4054
187.2	0.4049
187.3	0.4051
187.4	0.4057
187.5	0.4062
187.6	0.4065
187.7	0.4064
187.8	0.4068
187.9	0.4068
188	0.4067
188.1	0.4069
188.2	0.4068
188.3	0.4071
188.4	0.4072
188.5	0.4072
188.6	0.4074
188.7	0.4078
188.8	0.4079
188.9	0.4085
189	0.4091
189.1	0.4087
189.2	0.4087
189.3	0.4081
189.4	0.4087
189.5	0.4091
189.6	0.4099
189.7	0.4101
189.8	0.4104
189.9	0.4106
190	0.4108
190.1	0.4106
190.2	0.4104
190.3	0.4105
190.4	0.4107
190.5	0.4113
190.6	0.411
190.7	0.4118
190.8	0.4123
190.9	0.4127
191	0.4124
191.1	0.4122
191.2	0.4128
191.3	0.4129
191.4	0.4132
191.5	0.4129
191.6	0.4131
191.7	0.4134
191.8	0.4133
191.9	0.4137
192	0.4139
192.1	0.4134
192.2	0.4139
192.3	0.414
192.4	0.4147
192.5	0.415
192.6	0.4151
192.7	0.4154
192.8	0.4158
192.9	0.4164
193	0.4165
193.1	0.4167
193.2	0.4173
193.3	0.4177
193.4	0.4177
193.5	0.4173
193.6	0.4176
193.7	0.4178
193.8	0.4176
193.9	0.4176
194	0.4174
194.1	0.4177
194.2	0.4174
194.3	0.4176
194.4	0.4178
194.5	0.4187
194.6	0.419
194.7	0.4188
194.8	0.4192
194.9	0.4198
195	0.4203
195.1	0.4202
195.2	0.4201
195.3	0.4204
195.4	0.4206
195.5	0.4207
195.6	0.4209
195.7	0.4213
195.8	0.4215
195.9	0.4215
196	0.4214
196.1	0.4212
196.2	0.4209
196.3	0.4211
196.4	0.4211
196.5	0.4209
196.6	0.421
196.7	0.4208
196.8	0.4209
196.9	0.4206
197	0.4204
197.1	0.4207
197.2	0.4209
197.3	0.4207
197.4	0.4212
197.5	0.4215
197.6	0.4217
197.7	0.4212
197.8	0.421
197.9	0.4214
198	0.4215
198.1	0.4215
198.2	0.4216
198.3	0.4215
198.4	0.4215
198.5	0.4218
198.6	0.4217
198.7	0.4219
198.8	0.4223
198.9	0.422
199	0.4215
199.1	0.4216
199.2	0.422
199.3	0.4221
199.4	0.423
199.5	0.4231
199.6	0.4233
199.7	0.4237
199.8	0.4247
199.9	0.4244
200	0.4241
[truncated: 14,000 more rows]
