# Supplementary material for: Bayesian inference of kinetic schemes for ion channels by Kalman filtering
Source: eLife journal article supplement (doi:10.7554/elife.62714), 2022-05-04
Supplement: fig4-data9 [file 1_Sim_N_10000_theor_Fluor_Werte.xlsx]

## Sheet: Tabelle1
0.1	0
0.2	0
0.3	0
0.4	0
0.5	0
0.6	0
0.7	0
0.8	0
0.9	0
1	0
1.1	0
1.2	0
1.3	0
1.4	0
1.5	0
1.6	0
1.7	0
1.8	0
1.9	0
2	0
2.1	0
2.2	0
2.3	0
2.4	0
2.5	0
2.6	0
2.7	0
2.8	0
2.9	0
3	0
3.1	0
3.2	0
3.3	0
3.4	0
3.5	0
3.6	0
3.7	0
3.8	0
3.9	0
4	0
4.1	0
4.2	0
4.3	0
4.4	0
4.5	0
4.6	0
4.7	0
4.8	0
4.9	0
5	0
5.1	0
5.2	0
5.3	0
5.4	0
5.5	0
5.6	0
5.7	0
5.8	0
5.9	0
6	0
6.1	0
6.2	0
6.3	0
6.4	0
6.5	0
6.6	0
6.7	0
6.8	0
6.9	0
7	0
7.1	0
7.2	0
7.3	0
7.4	0
7.5	0
7.6	0
7.7	0
7.8	0
7.9	0
8	0
8.1	0
8.2	0
8.3	0
8.4	0
8.5	0
8.6	0
8.7	0
8.8	0
8.9	0
9	0
9.1	0
9.2	0
9.3	0
9.4	0
9.5	0
9.6	0
9.7	0
9.8	0
9.9	0
10	0
10.1	0
10.2	0
10.3	0
10.4	0
10.5	0
10.6	0
10.7	0
10.8	0
10.9	0
11	0
11.1	0
11.2	0
11.3	0
11.4	0
11.5	0
11.6	0
11.7	0
11.8	0
11.9	0
12	0
12.1	0
12.2	0
12.3	0
12.4	0
12.5	0
12.6	0
12.7	0
12.8	0
12.9	0
13	0
13.1	0
13.2	0
13.3	0
13.4	0
13.5	0
13.6	0
13.7	0
13.8	0
13.9	0
14	0
14.1	0
14.2	0
14.3	0
14.4	0
14.5	0
14.6	0
14.7	0
14.8	0
14.9	0
15	0
15.1	0
15.2	0
15.3	0
15.4	0
15.5	0
15.6	0
15.7	0
15.8	0
15.9	0
16	0
16.1	0
16.2	0
16.3	0
16.4	0
16.5	0
16.6	0
16.7	0
16.8	0
16.9	0
17	0
17.1	0
17.2	0
17.3	0
17.4	0
17.5	0
17.6	0
17.7	0
17.8	0
17.9	0
18	0
18.1	0
18.2	0
18.3	0
18.4	0
18.5	0
18.6	0
18.7	0
18.8	0
18.9	0
19	0
19.1	0
19.2	0
19.3	0
19.4	0
19.5	0
19.6	0
19.7	0
19.8	0
19.9	0
20	0
20.1	0
20.2	0
20.3	0
20.4	0
20.5	0
20.6	0
20.7	0
20.8	0
20.9	0
21	0
21.1	0
21.2	0
21.3	0
21.4	0
21.5	0
21.6	0
21.7	0
21.8	0
21.9	0
22	0
22.1	0
22.2	0
22.3	0
22.4	0
22.5	0
22.6	0
22.7	0
22.8	0
22.9	0
23	0
23.1	0
23.2	0
23.3	0
23.4	0
23.5	0
23.6	0
23.7	0
23.8	0
23.9	0
24	0
24.1	0
24.2	0
24.3	0
24.4	0
24.5	0
24.6	0
24.7	0
24.8	0
24.9	0
25	0
25.1	0
25.2	0
25.3	0
25.4	0
25.5	0
25.6	0
25.7	0
25.8	0
25.9	0
26	0
26.1	0
26.2	0
26.3	0
26.4	0
26.5	0
26.6	0
26.7	0
26.8	0
26.9	0
27	0
27.1	0
27.2	0
27.3	0
27.4	0
27.5	0
27.6	0
27.7	0
27.8	0
27.9	0
28	0
28.1	0
28.2	0
28.3	0
28.4	0
28.5	0
28.6	0
28.7	0
28.8	0
28.9	0
29	0
29.1	0
29.2	0
29.3	0
29.4	0
29.5	0
29.6	0
29.7	0
29.8	0
29.9	0
30	0
30.1	0
30.2	0
30.3	0
30.4	0
30.5	0
30.6	0
30.7	0
30.8	0
30.9	0
31	0
31.1	0
31.2	0
31.3	0
31.4	0
31.5	0
31.6	0
31.7	0
31.8	0
31.9	0
32	0
32.1	0
32.2	0
32.3	0
32.4	0
32.5	0
32.6	0
32.7	0
32.8	0
32.9	0
33	0
33.1	0
33.2	0
33.3	0
33.4	0
33.5	0
33.6	0
33.7	0
33.8	0
33.9	0
34	0
34.1	0
34.2	0
34.3	0
34.4	0
34.5	0
34.6	0
34.7	0
34.8	0
34.9	0
35	0
35.1	0
35.2	0
35.3	0
35.4	0
35.5	0
35.6	0
35.7	0
35.8	0
35.9	0
36	0
36.1	0
36.2	0
36.3	0
36.4	0
36.5	0
36.6	0
36.7	0
36.8	0
36.9	0
37	0
37.1	0
37.2	0
37.3	0
37.4	0
37.5	0
37.6	0
37.7	0
37.8	0
37.9	0
38	0
38.1	0
38.2	0
38.3	0
38.4	0
38.5	0
38.6	0
38.7	0
38.8	0
38.9	0
39	0
39.1	0
39.2	0
39.3	0
39.4	0
39.5	0
39.6	0
39.7	0
39.8	0
39.9	0
40	0
40.1	0
40.2	0
40.3	0
40.4	0
40.5	0
40.6	0
40.7	0
40.8	0
40.9	0
41	0
41.1	0
41.2	0
41.3	0
41.4	0
41.5	0
41.6	0
41.7	0
41.8	0
41.9	0
42	0
42.1	0
42.2	0
42.3	0
42.4	0
42.5	0
42.6	0
42.7	0
42.8	0
42.9	0
43	0
43.1	0
43.2	0
43.3	0
43.4	0
43.5	0
43.6	0
43.7	0
43.8	0
43.9	0
44	0
44.1	0
44.2	0
44.3	0
44.4	0
44.5	0
44.6	0
44.7	0
44.8	0
44.9	0
45	0
45.1	0
45.2	0
45.3	0
45.4	0
45.5	0
45.6	0
45.7	0
45.8	0
45.9	0
46	0
46.1	0
46.2	0
46.3	0
46.4	0
46.5	0
46.6	0
46.7	0
46.8	0
46.9	0
47	0
47.1	0
47.2	0
47.3	0
47.4	0
47.5	0
47.6	0
47.7	0
47.8	0
47.9	0
48	0
48.1	0
48.2	0
48.3	0
48.4	0
48.5	0
48.6	0
48.7	0
48.8	0
48.9	0
49	0
49.1	0
49.2	0
49.3	0
49.4	0
49.5	0
49.6	0
49.7	0
49.8	0
49.9	0
50	0
50.1	0
50.2	0
50.3	0
50.4	0
50.5	0
50.6	0
50.7	0
50.8	0
50.9	0
51	0
51.1	0
51.2	0
51.3	0
51.4	0
51.5	0
51.6	0
51.7	0
51.8	0
51.9	0
52	0
52.1	0
52.2	0
52.3	0
52.4	0
52.5	0
52.6	0
52.7	0
52.8	0
52.9	0
53	0
53.1	0
53.2	0
53.3	0
53.4	0
53.5	0
53.6	0
53.7	0
53.8	0
53.9	0
54	0
54.1	0
54.2	0
54.3	0
54.4	0
54.5	0
54.6	0
54.7	0
54.8	0
54.9	0
55	0
55.1	0
55.2	0
55.3	0
55.4	0
55.5	0
55.6	0
55.7	0
55.8	0
55.9	0
56	0
56.1	0
56.2	0
56.3	0
56.4	0
56.5	0
56.6	0
56.7	0
56.8	0
56.9	0
57	0
57.1	0
57.2	0
57.3	0
57.4	0
57.5	0
57.6	0
57.7	0
57.8	0
57.9	0
58	0
58.1	0
58.2	0
58.3	0
58.4	0
58.5	0
58.6	0
58.7	0
58.8	0
58.9	0
59	0
59.1	0
59.2	0
59.3	0
59.4	0
59.5	0
59.6	0
59.7	0
59.8	0
59.9	0
60	0
60.1	0
60.2	0
60.3	0
60.4	0
60.5	0
60.6	0
60.7	0
60.8	0
60.9	0
61	0
61.1	0
61.2	0
61.3	0
61.4	0
61.5	0
61.6	0
61.7	0
61.8	0
61.9	0
62	0
62.1	0
62.2	0
62.3	0
62.4	0
62.5	0
62.6	0
62.7	0
62.8	0
62.9	0
63	0
63.1	0
63.2	0
63.3	0
63.4	0
63.5	0
63.6	0
63.7	0
63.8	0
63.9	0
64	0
64.1	0
64.2	0
64.3	0
64.4	0
64.5	0
64.6	0
64.7	0
64.8	0
64.9	0
65	0
65.1	0
65.2	0
65.3	0
65.4	0
65.5	0
65.6	0
65.7	0
65.8	0
65.9	0
66	0
66.1	0
66.2	0
66.3	0
66.4	0
66.5	0
66.6	0
66.7	0
66.8	0
66.9	0
67	0
67.1	0
67.2	0
67.3	0
67.4	0
67.5	0
67.6	0
67.7	0
67.8	0
67.9	0
68	0
68.1	0
68.2	0
68.3	0
68.4	0
68.5	0
68.6	0
68.7	0
68.8	0
68.9	0
69	0
69.1	0
69.2	0
69.3	0
69.4	0
69.5	0
69.6	0
69.7	0
69.8	0
69.9	0
70	0
70.1	0
70.2	0
70.3	0
70.4	0
70.5	0
70.6	0
70.7	0
70.8	0
70.9	0
71	0
71.1	0
71.2	0
71.3	0
71.4	0
71.5	0
71.6	0
71.7	0
71.8	0
71.9	0
72	0
72.1	0
72.2	0
72.3	0
72.4	0
72.5	0
72.6	0
72.7	0
72.8	0
72.9	0
73	0
73.1	0
73.2	0
73.3	0
73.4	0
73.5	0
73.6	0
73.7	0
73.8	0
73.9	0
74	0
74.1	0
74.2	0
74.3	0
74.4	0
74.5	0
74.6	0
74.7	0
74.8	0
74.9	0
75	0
75.1	0
75.2	0
75.3	0
75.4	0
75.5	0
75.6	0
75.7	0
75.8	0
75.9	0
76	0
76.1	0
76.2	0
76.3	0
76.4	0
76.5	0
76.6	0
76.7	0
76.8	0
76.9	0
77	0
77.1	0
77.2	0
77.3	0
77.4	0
77.5	0
77.6	0
77.7	0
77.8	0
77.9	0
78	0
78.1	0
78.2	0
78.3	0
78.4	0
78.5	0
78.6	0
78.7	0
78.8	0
78.9	0
79	0
79.1	0
79.2	0
79.3	0
79.4	0
79.5	0
79.6	0
79.7	0
79.8	0
79.9	0
80	0
80.1	0
80.2	0
80.3	0
80.4	0
80.5	0
80.6	0
80.7	0
80.8	0
80.9	0
81	0
81.1	0
81.2	0
81.3	0
81.4	0
81.5	0
81.6	0
81.7	0
81.8	0
81.9	0
82	0
82.1	0
82.2	0
82.3	0
82.4	0
82.5	0
82.6	0
82.7	0
82.8	0
82.9	0
83	0
83.1	0
83.2	0
83.3	0
83.4	0
83.5	0
83.6	0
83.7	0
83.8	0
83.9	0
84	0
84.1	0
84.2	0
84.3	0
84.4	0
84.5	0
84.6	0
84.7	0
84.8	0
84.9	0
85	0
85.1	0
85.2	0
85.3	0
85.4	0
85.5	0
85.6	0
85.7	0
85.8	0
85.9	0
86	0
86.1	0
86.2	0
86.3	0
86.4	0
86.5	0
86.6	0
86.7	0
86.8	0
86.9	0
87	0
87.1	0
87.2	0
87.3	0
87.4	0
87.5	0
87.6	0
87.7	0
87.8	0
87.9	0
88	0
88.1	0
88.2	0
88.3	0
88.4	0
88.5	0
88.6	0
88.7	0
88.8	0
88.9	0
89	0
89.1	0
89.2	0
89.3	0
89.4	0
89.5	0
89.6	0
89.7	0
89.8	0
89.9	0
90	0
90.1	0
90.2	0
90.3	0
90.4	0
90.5	0
90.6	0
90.7	0
90.8	0
90.9	0
91	0
91.1	0
91.2	0
91.3	0
91.4	0
91.5	0
91.6	0
91.7	0
91.8	0
91.9	0
92	0
92.1	0
92.2	0
92.3	0
92.4	0
92.5	0
92.6	0
92.7	0
92.8	0
92.9	0
93	0
93.1	0
93.2	0
93.3	0
93.4	0
93.5	0
93.6	0
93.7	0
93.8	0
93.9	0
94	0
94.1	0
94.2	0
94.3	0
94.4	0
94.5	0
94.6	0
94.7	0
94.8	0
94.9	0
95	0
95.1	0
95.2	0
95.3	0
95.4	0
95.5	0
95.6	0
95.7	0
95.8	0
95.9	0
96	0
96.1	0
96.2	0
96.3	0
96.4	0
96.5	0
96.6	0
96.7	0
96.8	0
96.9	0
97	0
97.1	0
97.2	0
97.3	0
97.4	0
97.5	0
97.6	0
97.7	0
97.8	0
97.9	0
98	0
98.1	0
98.2	0
98.3	0
98.4	0
98.5	0
98.6	0
98.7	0
98.8	0
98.9	0
99	0
99.1	0
99.2	0
99.3	0
99.4	0
99.5	0
99.6	0
99.7	0
99.8	0
99.9	0
100	0
100.1	0.0291899
100.2	0.0568178
100.3	0.0829674
100.4	0.107718
100.5	0.131145
100.6	0.153319
100.7	0.174308
100.8	0.194176
100.9	0.212983
101	0.230787
101.1	0.247641
101.2	0.263597
101.3	0.278704
101.4	0.293008
101.5	0.306552
101.6	0.319377
101.7	0.331523
101.8	0.343026
101.9	0.353922
102	0.364243
102.1	0.374021
102.2	0.383285
102.3	0.392064
102.4	0.400383
102.5	0.408269
102.6	0.415743
102.7	0.42283
102.8	0.42955
102.9	0.435924
103	0.441969
103.1	0.447705
103.2	0.453148
103.3	0.458314
103.4	0.463218
103.5	0.467875
103.6	0.472299
103.7	0.476501
103.8	0.480495
103.9	0.484291
104	0.4879
104.1	0.491334
104.2	0.494601
104.3	0.49771
104.4	0.50067
104.5	0.50349
104.6	0.506177
104.7	0.508738
104.8	0.511181
104.9	0.513511
105	0.515736
105.1	0.51786
105.2	0.519889
105.3	0.521829
105.4	0.523684
105.5	0.525459
105.6	0.527159
105.7	0.528787
105.8	0.530348
105.9	0.531845
106	0.533282
106.1	0.534661
106.2	0.535987
106.3	0.537262
106.4	0.538488
106.5	0.539669
106.6	0.540807
106.7	0.541905
106.8	0.542963
106.9	0.543986
107	0.544974
107.1	0.545929
107.2	0.546854
107.3	0.54775
107.4	0.548618
107.5	0.54946
107.6	0.550278
107.7	0.551072
107.8	0.551844
107.9	0.552595
108	0.553327
108.1	0.55404
108.2	0.554735
108.3	0.555413
108.4	0.556076
108.5	0.556724
108.6	0.557357
108.7	0.557977
108.8	0.558584
108.9	0.559179
109	0.559763
109.1	0.560336
109.2	0.560898
109.3	0.561451
109.4	0.561995
109.5	0.562529
109.6	0.563056
109.7	0.563574
109.8	0.564085
109.9	0.564589
110	0.565086
110.1	0.565577
110.2	0.566061
110.3	0.56654
110.4	0.567013
110.5	0.567481
110.6	0.567944
110.7	0.568403
110.8	0.568856
110.9	0.569306
111	0.569751
111.1	0.570192
111.2	0.57063
111.3	0.571064
111.4	0.571494
111.5	0.571921
111.6	0.572345
111.7	0.572767
111.8	0.573185
111.9	0.5736
112	0.574013
112.1	0.574424
112.2	0.574832
112.3	0.575237
112.4	0.575641
112.5	0.576042
112.6	0.576441
112.7	0.576838
112.8	0.577234
112.9	0.577627
113	0.578019
113.1	0.578409
113.2	0.578797
113.3	0.579184
113.4	0.579569
113.5	0.579953
113.6	0.580335
113.7	0.580716
113.8	0.581095
113.9	0.581473
114	0.58185
114.1	0.582225
114.2	0.582599
114.3	0.582973
114.4	0.583344
114.5	0.583715
114.6	0.584085
114.7	0.584453
114.8	0.584821
114.9	0.585187
115	0.585553
115.1	0.585917
115.2	0.586281
115.3	0.586643
115.4	0.587005
115.5	0.587365
115.6	0.587725
115.7	0.588084
115.8	0.588442
115.9	0.588799
116	0.589155
116.1	0.58951
116.2	0.589865
116.3	0.590218
116.4	0.590571
116.5	0.590923
116.6	0.591274
116.7	0.591625
116.8	0.591974
116.9	0.592323
117	0.592671
117.1	0.593019
117.2	0.593365
117.3	0.593711
117.4	0.594056
117.5	0.594401
117.6	0.594745
117.7	0.595088
117.8	0.59543
117.9	0.595771
118	0.596112
118.1	0.596452
118.2	0.596792
118.3	0.597131
118.4	0.597469
118.5	0.597806
118.6	0.598143
118.7	0.598479
118.8	0.598814
118.9	0.599149
119	0.599483
119.1	0.599816
119.2	0.600149
119.3	0.600481
119.4	0.600812
119.5	0.601143
119.6	0.601473
119.7	0.601802
119.8	0.602131
119.9	0.602459
120	0.602787
120.1	0.603114
120.2	0.60344
120.3	0.603766
120.4	0.604091
120.5	0.604415
120.6	0.604739
120.7	0.605062
120.8	0.605384
120.9	0.605706
121	0.606027
121.1	0.606348
121.2	0.606668
121.3	0.606987
121.4	0.607306
121.5	0.607624
121.6	0.607942
121.7	0.608259
121.8	0.608575
121.9	0.608891
122	0.609206
122.1	0.60952
122.2	0.609834
122.3	0.610148
122.4	0.61046
122.5	0.610772
122.6	0.611084
122.7	0.611395
122.8	0.611705
122.9	0.612015
123	0.612324
123.1	0.612633
123.2	0.612941
123.3	0.613248
123.4	0.613555
123.5	0.613861
123.6	0.614167
123.7	0.614472
123.8	0.614776
123.9	0.61508
124	0.615384
124.1	0.615686
124.2	0.615989
124.3	0.61629
124.4	0.616591
124.5	0.616892
124.6	0.617192
124.7	0.617491
124.8	0.61779
124.9	0.618088
125	0.618386
125.1	0.618683
125.2	0.618979
125.3	0.619275
125.4	0.61957
125.5	0.619865
125.6	0.620159
125.7	0.620453
125.8	0.620746
125.9	0.621039
126	0.621331
126.1	0.621622
126.2	0.621913
126.3	0.622204
126.4	0.622494
126.5	0.622783
126.6	0.623072
126.7	0.62336
126.8	0.623647
126.9	0.623934
127	0.624221
127.1	0.624507
127.2	0.624792
127.3	0.625077
127.4	0.625362
127.5	0.625646
127.6	0.625929
127.7	0.626212
127.8	0.626494
127.9	0.626776
128	0.627057
128.1	0.627337
128.2	0.627618
128.3	0.627897
128.4	0.628176
128.5	0.628455
128.6	0.628733
128.7	0.62901
128.8	0.629287
128.9	0.629563
129	0.629839
129.1	0.630115
129.2	0.63039
129.3	0.630664
129.4	0.630938
129.5	0.631211
129.6	0.631484
129.7	0.631756
129.8	0.632028
129.9	0.632299
130	0.63257
130.1	0.63284
130.2	0.633109
130.3	0.633379
130.4	0.633647
130.5	0.633915
130.6	0.634183
130.7	0.63445
130.8	0.634717
130.9	0.634983
131	0.635249
131.1	0.635514
131.2	0.635778
131.3	0.636042
131.4	0.636306
131.5	0.636569
131.6	0.636832
131.7	0.637094
131.8	0.637356
131.9	0.637617
132	0.637877
132.1	0.638138
132.2	0.638397
132.3	0.638656
132.4	0.638915
132.5	0.639173
132.6	0.639431
132.7	0.639688
132.8	0.639945
132.9	0.640201
133	0.640457
133.1	0.640712
133.2	0.640967
133.3	0.641221
133.4	0.641475
133.5	0.641728
133.6	0.641981
133.7	0.642233
133.8	0.642485
133.9	0.642737
134	0.642988
134.1	0.643238
134.2	0.643488
134.3	0.643738
134.4	0.643987
134.5	0.644235
134.6	0.644483
134.7	0.644731
134.8	0.644978
134.9	0.645225
135	0.645471
135.1	0.645717
135.2	0.645962
135.3	0.646207
135.4	0.646451
135.5	0.646695
135.6	0.646939
135.7	0.647182
135.8	0.647424
135.9	0.647666
136	0.647908
136.1	0.648149
136.2	0.64839
136.3	0.64863
136.4	0.64887
136.5	0.649109
136.6	0.649348
136.7	0.649586
136.8	0.649824
136.9	0.650062
137	0.650299
137.1	0.650536
137.2	0.650772
137.3	0.651008
137.4	0.651243
137.5	0.651478
137.6	0.651712
137.7	0.651946
137.8	0.65218
137.9	0.652413
138	0.652645
138.1	0.652877
138.2	0.653109
138.3	0.65334
138.4	0.653571
138.5	0.653802
138.6	0.654032
138.7	0.654261
138.8	0.65449
138.9	0.654719
139	0.654947
139.1	0.655175
139.2	0.655403
139.3	0.65563
139.4	0.655856
139.5	0.656082
139.6	0.656308
139.7	0.656533
139.8	0.656758
139.9	0.656982
140	0.657206
140.1	0.65743
140.2	0.657653
140.3	0.657876
140.4	0.658098
140.5	0.65832
140.6	0.658541
140.7	0.658762
140.8	0.658983
140.9	0.659203
141	0.659423
141.1	0.659642
141.2	0.659861
141.3	0.66008
141.4	0.660298
141.5	0.660515
141.6	0.660733
141.7	0.66095
141.8	0.661166
141.9	0.661382
142	0.661598
142.1	0.661813
142.2	0.662028
142.3	0.662242
142.4	0.662456
142.5	0.66267
142.6	0.662883
142.7	0.663096
142.8	0.663308
142.9	0.66352
143	0.663732
143.1	0.663943
143.2	0.664154
143.3	0.664364
143.4	0.664574
143.5	0.664784
143.6	0.664993
143.7	0.665202
143.8	0.66541
143.9	0.665618
144	0.665826
144.1	0.666033
144.2	0.66624
144.3	0.666446
144.4	0.666652
144.5	0.666858
144.6	0.667063
144.7	0.667268
144.8	0.667473
144.9	0.667677
145	0.667881
145.1	0.668084
145.2	0.668287
145.3	0.66849
145.4	0.668692
145.5	0.668894
145.6	0.669095
145.7	0.669296
145.8	0.669497
145.9	0.669697
146	0.669897
146.1	0.670096
146.2	0.670295
146.3	0.670494
146.4	0.670693
146.5	0.670891
146.6	0.671088
146.7	0.671286
146.8	0.671482
146.9	0.671679
147	0.671875
147.1	0.672071
147.2	0.672266
147.3	0.672461
147.4	0.672656
147.5	0.67285
147.6	0.673044
147.7	0.673238
147.8	0.673431
147.9	0.673624
148	0.673816
148.1	0.674008
148.2	0.6742
148.3	0.674391
148.4	0.674582
148.5	0.674773
148.6	0.674963
148.7	0.675153
148.8	0.675343
148.9	0.675532
149	0.675721
149.1	0.675909
149.2	0.676098
149.3	0.676285
149.4	0.676473
149.5	0.67666
149.6	0.676847
149.7	0.677033
149.8	0.677219
149.9	0.677405
150	0.67759
150.1	0.677775
150.2	0.67796
150.3	0.678144
150.4	0.678328
150.5	0.678511
150.6	0.678694
150.7	0.678877
150.8	0.67906
150.9	0.679242
151	0.679424
151.1	0.679605
151.2	0.679786
151.3	0.679967
151.4	0.680148
151.5	0.680328
151.6	0.680508
151.7	0.680687
151.8	0.680866
151.9	0.681045
152	0.681223
152.1	0.681401
152.2	0.681579
152.3	0.681757
152.4	0.681934
152.5	0.68211
152.6	0.682287
152.7	0.682463
152.8	0.682639
152.9	0.682814
153	0.682989
153.1	0.683164
153.2	0.683338
153.3	0.683512
153.4	0.683686
153.5	0.683859
153.6	0.684032
153.7	0.684205
153.8	0.684378
153.9	0.68455
154	0.684722
154.1	0.684893
154.2	0.685064
154.3	0.685235
154.4	0.685405
154.5	0.685576
154.6	0.685745
154.7	0.685915
154.8	0.686084
154.9	0.686253
155	0.686422
155.1	0.68659
155.2	0.686758
155.3	0.686925
155.4	0.687093
155.5	0.68726
155.6	0.687426
155.7	0.687593
155.8	0.687759
155.9	0.687924
156	0.68809
156.1	0.688255
156.2	0.688419
156.3	0.688584
156.4	0.688748
156.5	0.688912
156.6	0.689075
156.7	0.689239
156.8	0.689402
156.9	0.689564
157	0.689726
157.1	0.689888
157.2	0.69005
157.3	0.690211
157.4	0.690372
157.5	0.690533
157.6	0.690694
157.7	0.690854
157.8	0.691014
157.9	0.691173
158	0.691332
158.1	0.691491
158.2	0.69165
158.3	0.691808
158.4	0.691966
158.5	0.692124
158.6	0.692282
158.7	0.692439
158.8	0.692596
158.9	0.692752
159	0.692908
159.1	0.693064
159.2	0.69322
159.3	0.693375
159.4	0.69353
159.5	0.693685
159.6	0.69384
159.7	0.693994
159.8	0.694148
159.9	0.694301
160	0.694455
160.1	0.694608
160.2	0.69476
160.3	0.694913
160.4	0.695065
160.5	0.695217
160.6	0.695369
160.7	0.69552
160.8	0.695671
160.9	0.695822
161	0.695972
161.1	0.696122
161.2	0.696272
161.3	0.696422
161.4	0.696571
161.5	0.69672
161.6	0.696869
161.7	0.697017
161.8	0.697165
161.9	0.697313
162	0.697461
162.1	0.697608
162.2	0.697755
162.3	0.697902
162.4	0.698048
162.5	0.698195
162.6	0.698341
162.7	0.698486
162.8	0.698632
162.9	0.698777
163	0.698922
163.1	0.699066
163.2	0.699211
163.3	0.699355
163.4	0.699498
163.5	0.699642
163.6	0.699785
163.7	0.699928
163.8	0.700071
163.9	0.700213
164	0.700355
164.1	0.700497
164.2	0.700639
164.3	0.70078
164.4	0.700921
164.5	0.701062
164.6	0.701202
164.7	0.701342
164.8	0.701482
164.9	0.701622
165	0.701762
165.1	0.701901
165.2	0.70204
165.3	0.702178
165.4	0.702317
165.5	0.702455
165.6	0.702593
165.7	0.70273
165.8	0.702868
165.9	0.703005
166	0.703142
166.1	0.703278
166.2	0.703415
166.3	0.703551
166.4	0.703687
166.5	0.703822
166.6	0.703957
166.7	0.704092
166.8	0.704227
166.9	0.704362
167	0.704496
167.1	0.70463
167.2	0.704764
167.3	0.704897
167.4	0.705031
167.5	0.705164
167.6	0.705296
167.7	0.705429
167.8	0.705561
167.9	0.705693
168	0.705825
168.1	0.705956
168.2	0.706088
168.3	0.706219
168.4	0.706349
168.5	0.70648
168.6	0.70661
168.7	0.70674
168.8	0.70687
168.9	0.706999
169	0.707129
169.1	0.707258
169.2	0.707386
169.3	0.707515
169.4	0.707643
169.5	0.707771
169.6	0.707899
169.7	0.708027
169.8	0.708154
169.9	0.708281
170	0.708408
170.1	0.708535
170.2	0.708661
170.3	0.708787
170.4	0.708913
170.5	0.709039
170.6	0.709164
170.7	0.709289
170.8	0.709414
170.9	0.709539
171	0.709663
171.1	0.709788
171.2	0.709912
171.3	0.710035
171.4	0.710159
171.5	0.710282
171.6	0.710405
171.7	0.710528
171.8	0.710651
171.9	0.710773
172	0.710895
172.1	0.711017
172.2	0.711139
172.3	0.71126
172.4	0.711381
172.5	0.711502
172.6	0.711623
172.7	0.711744
172.8	0.711864
172.9	0.711984
173	0.712104
173.1	0.712223
173.2	0.712343
173.3	0.712462
173.4	0.712581
173.5	0.7127
173.6	0.712818
173.7	0.712936
173.8	0.713054
173.9	0.713172
174	0.71329
174.1	0.713407
174.2	0.713524
174.3	0.713641
174.4	0.713758
174.5	0.713874
174.6	0.713991
174.7	0.714107
174.8	0.714223
174.9	0.714338
175	0.714454
175.1	0.714569
175.2	0.714684
175.3	0.714798
175.4	0.714913
175.5	0.715027
175.6	0.715141
175.7	0.715255
175.8	0.715369
175.9	0.715482
176	0.715595
176.1	0.715708
176.2	0.715821
176.3	0.715934
176.4	0.716046
176.5	0.716158
176.6	0.71627
176.7	0.716382
176.8	0.716493
176.9	0.716605
177	0.716716
177.1	0.716827
177.2	0.716937
177.3	0.717048
177.4	0.717158
177.5	0.717268
177.6	0.717378
177.7	0.717488
177.8	0.717597
177.9	0.717706
178	0.717815
178.1	0.717924
178.2	0.718033
178.3	0.718141
178.4	0.718249
178.5	0.718357
178.6	0.718465
178.7	0.718572
178.8	0.71868
178.9	0.718787
179	0.718894
179.1	0.719001
179.2	0.719107
179.3	0.719214
179.4	0.71932
179.5	0.719426
179.6	0.719531
179.7	0.719637
179.8	0.719742
179.9	0.719848
180	0.719952
180.1	0.720057
180.2	0.720162
180.3	0.720266
180.4	0.72037
180.5	0.720474
180.6	0.720578
180.7	0.720682
180.8	0.720785
180.9	0.720888
181	0.720991
181.1	0.721094
181.2	0.721197
181.3	0.721299
181.4	0.721401
181.5	0.721503
181.6	0.721605
181.7	0.721707
181.8	0.721808
181.9	0.721909
182	0.72201
182.1	0.722111
182.2	0.722212
182.3	0.722312
182.4	0.722413
182.5	0.722513
182.6	0.722613
182.7	0.722712
182.8	0.722812
182.9	0.722911
183	0.72301
183.1	0.723109
183.2	0.723208
183.3	0.723307
183.4	0.723405
183.5	0.723503
183.6	0.723601
183.7	0.723699
183.8	0.723797
183.9	0.723894
184	0.723992
184.1	0.724089
184.2	0.724186
184.3	0.724282
184.4	0.724379
184.5	0.724475
184.6	0.724571
184.7	0.724667
184.8	0.724763
184.9	0.724859
185	0.724954
185.1	0.72505
185.2	0.725145
185.3	0.72524
185.4	0.725334
185.5	0.725429
185.6	0.725523
185.7	0.725618
185.8	0.725712
185.9	0.725805
186	0.725899
186.1	0.725993
186.2	0.726086
186.3	0.726179
186.4	0.726272
186.5	0.726365
186.6	0.726457
186.7	0.72655
186.8	0.726642
186.9	0.726734
187	0.726826
187.1	0.726918
187.2	0.727009
187.3	0.727101
187.4	0.727192
187.5	0.727283
187.6	0.727374
187.7	0.727465
187.8	0.727555
187.9	0.727646
188	0.727736
188.1	0.727826
188.2	0.727916
188.3	0.728005
188.4	0.728095
188.5	0.728184
188.6	0.728273
188.7	0.728362
188.8	0.728451
188.9	0.72854
189	0.728628
189.1	0.728717
189.2	0.728805
189.3	0.728893
189.4	0.728981
189.5	0.729068
189.6	0.729156
189.7	0.729243
189.8	0.72933
189.9	0.729417
190	0.729504
190.1	0.729591
190.2	0.729677
190.3	0.729764
190.4	0.72985
190.5	0.729936
190.6	0.730022
190.7	0.730107
190.8	0.730193
190.9	0.730278
191	0.730363
191.1	0.730448
191.2	0.730533
191.3	0.730618
191.4	0.730703
191.5	0.730787
191.6	0.730871
191.7	0.730955
191.8	0.731039
191.9	0.731123
192	0.731207
192.1	0.73129
192.2	0.731373
192.3	0.731456
192.4	0.731539
192.5	0.731622
192.6	0.731705
192.7	0.731787
192.8	0.73187
192.9	0.731952
193	0.732034
193.1	0.732116
193.2	0.732198
193.3	0.732279
193.4	0.732361
193.5	0.732442
193.6	0.732523
193.7	0.732604
193.8	0.732685
193.9	0.732765
194	0.732846
194.1	0.732926
194.2	0.733006
194.3	0.733086
194.4	0.733166
194.5	0.733246
194.6	0.733326
194.7	0.733405
194.8	0.733484
194.9	0.733563
195	0.733642
195.1	0.733721
195.2	0.7338
195.3	0.733878
195.4	0.733957
195.5	0.734035
195.6	0.734113
195.7	0.734191
195.8	0.734269
195.9	0.734347
196	0.734424
196.1	0.734501
196.2	0.734579
196.3	0.734656
196.4	0.734733
196.5	0.734809
196.6	0.734886
196.7	0.734962
196.8	0.735039
196.9	0.735115
197	0.735191
197.1	0.735267
197.2	0.735343
197.3	0.735418
197.4	0.735494
197.5	0.735569
197.6	0.735644
197.7	0.735719
197.8	0.735794
197.9	0.735869
198	0.735944
198.1	0.736018
198.2	0.736092
198.3	0.736167
198.4	0.736241
198.5	0.736315
198.6	0.736388
198.7	0.736462
198.8	0.736535
198.9	0.736609
199	0.736682
199.1	0.736755
199.2	0.736828
199.3	0.736901
199.4	0.736974
199.5	0.737046
199.6	0.737118
199.7	0.737191
199.8	0.737263
199.9	0.737335
200	0.737407
[truncated: 14,000 more rows]
