# Supplementary material for: Bayesian inference of kinetic schemes for ion channels by Kalman filtering
Source: eLife journal article supplement (doi:10.7554/elife.62714), 2022-05-04
Supplement: fig4-data9 [file 1_Sim_N_20000_Fluor_MW_0.5M.xlsx]

## Sheet: Tabelle1
0.1	0
0.2	0
0.3	0
0.4	0
0.5	0
0.6	0
0.7	0
0.8	0
0.9	0
1	0
1.1	0
1.2	0
1.3	0
1.4	0
1.5	0
1.6	0
1.7	0
1.8	0
1.9	0
2	0
2.1	0
2.2	0
2.3	0
2.4	0
2.5	0
2.6	0
2.7	0
2.8	0
2.9	0
3	0
3.1	0
3.2	0
3.3	0
3.4	0
3.5	0
3.6	0
3.7	0
3.8	0
3.9	0
4	0
4.1	0
4.2	0
4.3	0
4.4	0
4.5	0
4.6	0
4.7	0
4.8	0
4.9	0
5	0
5.1	0
5.2	0
5.3	0
5.4	0
5.5	0
5.6	0
5.7	0
5.8	0
5.9	0
6	0
6.1	0
6.2	0
6.3	0
6.4	0
6.5	0
6.6	0
6.7	0
6.8	0
6.9	0
7	0
7.1	0
7.2	0
7.3	0
7.4	0
7.5	0
7.6	0
7.7	0
7.8	0
7.9	0
8	0
8.1	0
8.2	0
8.3	0
8.4	0
8.5	0
8.6	0
8.7	0
8.8	0
8.9	0
9	0
9.1	0
9.2	0
9.3	0
9.4	0
9.5	0
9.6	0
9.7	0
9.8	0
9.9	0
10	0
10.1	0
10.2	0
10.3	0
10.4	0
10.5	0
10.6	0
10.7	0
10.8	0
10.9	0
11	0
11.1	0
11.2	0
11.3	0
11.4	0
11.5	0
11.6	0
11.7	0
11.8	0
11.9	0
12	0
12.1	0
12.2	0
12.3	0
12.4	0
12.5	0
12.6	0
12.7	0
12.8	0
12.9	0
13	0
13.1	0
13.2	0
13.3	0
13.4	0
13.5	0
13.6	0
13.7	0
13.8	0
13.9	0
14	0
14.1	0
14.2	0
14.3	0
14.4	0
14.5	0
14.6	0
14.7	0
14.8	0
14.9	0
15	0
15.1	0
15.2	0
15.3	0
15.4	0
15.5	0
15.6	0
15.7	0
15.8	0
15.9	0
16	0
16.1	0
16.2	0
16.3	0
16.4	0
16.5	0
16.6	0
16.7	0
16.8	0
16.9	0
17	0
17.1	0
17.2	0
17.3	0
17.4	0
17.5	0
17.6	0
17.7	0
17.8	0
17.9	0
18	0
18.1	0
18.2	0
18.3	0
18.4	0
18.5	0
18.6	0
18.7	0
18.8	0
18.9	0
19	0
19.1	0
19.2	0
19.3	0
19.4	0
19.5	0
19.6	0
19.7	0
19.8	0
19.9	0
20	0
20.1	0
20.2	0
20.3	0
20.4	0
20.5	0
20.6	0
20.7	0
20.8	0
20.9	0
21	0
21.1	0
21.2	0
21.3	0
21.4	0
21.5	0
21.6	0
21.7	0
21.8	0
21.9	0
22	0
22.1	0
22.2	0
22.3	0
22.4	0
22.5	0
22.6	0
22.7	0
22.8	0
22.9	0
23	0
23.1	0
23.2	0
23.3	0
23.4	0
23.5	0
23.6	0
23.7	0
23.8	0
23.9	0
24	0
24.1	0
24.2	0
24.3	0
24.4	0
24.5	0
24.6	0
24.7	0
24.8	0
24.9	0
25	0
25.1	0
25.2	0
25.3	0
25.4	0
25.5	0
25.6	0
25.7	0
25.8	0
25.9	0
26	0
26.1	0
26.2	0
26.3	0
26.4	0
26.5	0
26.6	0
26.7	0
26.8	0
26.9	0
27	0
27.1	0
27.2	0
27.3	0
27.4	0
27.5	0
27.6	0
27.7	0
27.8	0
27.9	0
28	0
28.1	0
28.2	0
28.3	0
28.4	0
28.5	0
28.6	0
28.7	0
28.8	0
28.9	0
29	0
29.1	0
29.2	0
29.3	0
29.4	0
29.5	0
29.6	0
29.7	0
29.8	0
29.9	0
30	0
30.1	0
30.2	0
30.3	0
30.4	0
30.5	0
30.6	0
30.7	0
30.8	0
30.9	0
31	0
31.1	0
31.2	0
31.3	0
31.4	0
31.5	0
31.6	0
31.7	0
31.8	0
31.9	0
32	0
32.1	0
32.2	0
32.3	0
32.4	0
32.5	0
32.6	0
32.7	0
32.8	0
32.9	0
33	0
33.1	0
33.2	0
33.3	0
33.4	0
33.5	0
33.6	0
33.7	0
33.8	0
33.9	0
34	0
34.1	0
34.2	0
34.3	0
34.4	0
34.5	0
34.6	0
34.7	0
34.8	0
34.9	0
35	0
35.1	0
35.2	0
35.3	0
35.4	0
35.5	0
35.6	0
35.7	0
35.8	0
35.9	0
36	0
36.1	0
36.2	0
36.3	0
36.4	0
36.5	0
36.6	0
36.7	0
36.8	0
36.9	0
37	0
37.1	0
37.2	0
37.3	0
37.4	0
37.5	0
37.6	0
37.7	0
37.8	0
37.9	0
38	0
38.1	0
38.2	0
38.3	0
38.4	0
38.5	0
38.6	0
38.7	0
38.8	0
38.9	0
39	0
39.1	0
39.2	0
39.3	0
39.4	0
39.5	0
39.6	0
39.7	0
39.8	0
39.9	0
40	0
40.1	0
40.2	0
40.3	0
40.4	0
40.5	0
40.6	0
40.7	0
40.8	0
40.9	0
41	0
41.1	0
41.2	0
41.3	0
41.4	0
41.5	0
41.6	0
41.7	0
41.8	0
41.9	0
42	0
42.1	0
42.2	0
42.3	0
42.4	0
42.5	0
42.6	0
42.7	0
42.8	0
42.9	0
43	0
43.1	0
43.2	0
43.3	0
43.4	0
43.5	0
43.6	0
43.7	0
43.8	0
43.9	0
44	0
44.1	0
44.2	0
44.3	0
44.4	0
44.5	0
44.6	0
44.7	0
44.8	0
44.9	0
45	0
45.1	0
45.2	0
45.3	0
45.4	0
45.5	0
45.6	0
45.7	0
45.8	0
45.9	0
46	0
46.1	0
46.2	0
46.3	0
46.4	0
46.5	0
46.6	0
46.7	0
46.8	0
46.9	0
47	0
47.1	0
47.2	0
47.3	0
47.4	0
47.5	0
47.6	0
47.7	0
47.8	0
47.9	0
48	0
48.1	0
48.2	0
48.3	0
48.4	0
48.5	0
48.6	0
48.7	0
48.8	0
48.9	0
49	0
49.1	0
49.2	0
49.3	0
49.4	0
49.5	0
49.6	0
49.7	0
49.8	0
49.9	0
50	0
50.1	0
50.2	0
50.3	0
50.4	0
50.5	0
50.6	0
50.7	0
50.8	0
50.9	0
51	0
51.1	0
51.2	0
51.3	0
51.4	0
51.5	0
51.6	0
51.7	0
51.8	0
51.9	0
52	0
52.1	0
52.2	0
52.3	0
52.4	0
52.5	0
52.6	0
52.7	0
52.8	0
52.9	0
53	0
53.1	0
53.2	0
53.3	0
53.4	0
53.5	0
53.6	0
53.7	0
53.8	0
53.9	0
54	0
54.1	0
54.2	0
54.3	0
54.4	0
54.5	0
54.6	0
54.7	0
54.8	0
54.9	0
55	0
55.1	0
55.2	0
55.3	0
55.4	0
55.5	0
55.6	0
55.7	0
55.8	0
55.9	0
56	0
56.1	0
56.2	0
56.3	0
56.4	0
56.5	0
56.6	0
56.7	0
56.8	0
56.9	0
57	0
57.1	0
57.2	0
57.3	0
57.4	0
57.5	0
57.6	0
57.7	0
57.8	0
57.9	0
58	0
58.1	0
58.2	0
58.3	0
58.4	0
58.5	0
58.6	0
58.7	0
58.8	0
58.9	0
59	0
59.1	0
59.2	0
59.3	0
59.4	0
59.5	0
59.6	0
59.7	0
59.8	0
59.9	0
60	0
60.1	0
60.2	0
60.3	0
60.4	0
60.5	0
60.6	0
60.7	0
60.8	0
60.9	0
61	0
61.1	0
61.2	0
61.3	0
61.4	0
61.5	0
61.6	0
61.7	0
61.8	0
61.9	0
62	0
62.1	0
62.2	0
62.3	0
62.4	0
62.5	0
62.6	0
62.7	0
62.8	0
62.9	0
63	0
63.1	0
63.2	0
63.3	0
63.4	0
63.5	0
63.6	0
63.7	0
63.8	0
63.9	0
64	0
64.1	0
64.2	0
64.3	0
64.4	0
64.5	0
64.6	0
64.7	0
64.8	0
64.9	0
65	0
65.1	0
65.2	0
65.3	0
65.4	0
65.5	0
65.6	0
65.7	0
65.8	0
65.9	0
66	0
66.1	0
66.2	0
66.3	0
66.4	0
66.5	0
66.6	0
66.7	0
66.8	0
66.9	0
67	0
67.1	0
67.2	0
67.3	0
67.4	0
67.5	0
67.6	0
67.7	0
67.8	0
67.9	0
68	0
68.1	0
68.2	0
68.3	0
68.4	0
68.5	0
68.6	0
68.7	0
68.8	0
68.9	0
69	0
69.1	0
69.2	0
69.3	0
69.4	0
69.5	0
69.6	0
69.7	0
69.8	0
69.9	0
70	0
70.1	0
70.2	0
70.3	0
70.4	0
70.5	0
70.6	0
70.7	0
70.8	0
70.9	0
71	0
71.1	0
71.2	0
71.3	0
71.4	0
71.5	0
71.6	0
71.7	0
71.8	0
71.9	0
72	0
72.1	0
72.2	0
72.3	0
72.4	0
72.5	0
72.6	0
72.7	0
72.8	0
72.9	0
73	0
73.1	0
73.2	0
73.3	0
73.4	0
73.5	0
73.6	0
73.7	0
73.8	0
73.9	0
74	0
74.1	0
74.2	0
74.3	0
74.4	0
74.5	0
74.6	0
74.7	0
74.8	0
74.9	0
75	0
75.1	0
75.2	0
75.3	0
75.4	0
75.5	0
75.6	0
75.7	0
75.8	0
75.9	0
76	0
76.1	0
76.2	0
76.3	0
76.4	0
76.5	0
76.6	0
76.7	0
76.8	0
76.9	0
77	0
77.1	0
77.2	0
77.3	0
77.4	0
77.5	0
77.6	0
77.7	0
77.8	0
77.9	0
78	0
78.1	0
78.2	0
78.3	0
78.4	0
78.5	0
78.6	0
78.7	0
78.8	0
78.9	0
79	0
79.1	0
79.2	0
79.3	0
79.4	0
79.5	0
79.6	0
79.7	0
79.8	0
79.9	0
80	0
80.1	0
80.2	0
80.3	0
80.4	0
80.5	0
80.6	0
80.7	0
80.8	0
80.9	0
81	0
81.1	0
81.2	0
81.3	0
81.4	0
81.5	0
81.6	0
81.7	0
81.8	0
81.9	0
82	0
82.1	0
82.2	0
82.3	0
82.4	0
82.5	0
82.6	0
82.7	0
82.8	0
82.9	0
83	0
83.1	0
83.2	0
83.3	0
83.4	0
83.5	0
83.6	0
83.7	0
83.8	0
83.9	0
84	0
84.1	0
84.2	0
84.3	0
84.4	0
84.5	0
84.6	0
84.7	0
84.8	0
84.9	0
85	0
85.1	0
85.2	0
85.3	0
85.4	0
85.5	0
85.6	0
85.7	0
85.8	0
85.9	0
86	0
86.1	0
86.2	0
86.3	0
86.4	0
86.5	0
86.6	0
86.7	0
86.8	0
86.9	0
87	0
87.1	0
87.2	0
87.3	0
87.4	0
87.5	0
87.6	0
87.7	0
87.8	0
87.9	0
88	0
88.1	0
88.2	0
88.3	0
88.4	0
88.5	0
88.6	0
88.7	0
88.8	0
88.9	0
89	0
89.1	0
89.2	0
89.3	0
89.4	0
89.5	0
89.6	0
89.7	0
89.8	0
89.9	0
90	0
90.1	0
90.2	0
90.3	0
90.4	0
90.5	0
90.6	0
90.7	0
90.8	0
90.9	0
91	0
91.1	0
91.2	0
91.3	0
91.4	0
91.5	0
91.6	0
91.7	0
91.8	0
91.9	0
92	0
92.1	0
92.2	0
92.3	0
92.4	0
92.5	0
92.6	0
92.7	0
92.8	0
92.9	0
93	0
93.1	0
93.2	0
93.3	0
93.4	0
93.5	0
93.6	0
93.7	0
93.8	0
93.9	0
94	0
94.1	0
94.2	0
94.3	0
94.4	0
94.5	0
94.6	0
94.7	0
94.8	0
94.9	0
95	0
95.1	0
95.2	0
95.3	0
95.4	0
95.5	0
95.6	0
95.7	0
95.8	0
95.9	0
96	0
96.1	0
96.2	0
96.3	0
96.4	0
96.5	0
96.6	0
96.7	0
96.8	0
96.9	0
97	0
97.1	0
97.2	0
97.3	0
97.4	0
97.5	0
97.6	0
97.7	0
97.8	0
97.9	0
98	0
98.1	0
98.2	0
98.3	0
98.4	0
98.5	0
98.6	0
98.7	0
98.8	0
98.9	0
99	0
99.1	0
99.2	0
99.3	0
99.4	0
99.5	0
99.6	0
99.7	0
99.8	0
99.9	0
100	0
100.1	0.0277
100.2	0.0553
100.3	0.08265
100.4	0.107725
100.5	0.13125
100.6	0.154375
100.7	0.17545
100.8	0.1946
100.9	0.2131
101	0.2303
101.1	0.24715
101.2	0.264275
101.3	0.2798
101.4	0.2931
101.5	0.3074
101.6	0.31955
101.7	0.3319
101.8	0.343825
101.9	0.356425
102	0.366575
102.1	0.375575
102.2	0.384975
102.3	0.394125
102.4	0.40245
102.5	0.410075
102.6	0.418475
102.7	0.42575
102.8	0.432125
102.9	0.4381
103	0.4437
103.1	0.449425
103.2	0.45515
103.3	0.45985
103.4	0.464975
103.5	0.47065
103.6	0.4755
103.7	0.47975
103.8	0.484725
103.9	0.488225
104	0.4912
104.1	0.49445
104.2	0.497275
104.3	0.50035
104.4	0.503
104.5	0.5061
104.6	0.50755
104.7	0.510425
104.8	0.51325
104.9	0.515525
105	0.517675
105.1	0.5203
105.2	0.522775
105.3	0.5239
105.4	0.5247
105.5	0.5274
105.6	0.52945
105.7	0.53065
105.8	0.5318
105.9	0.53255
106	0.533775
106.1	0.53545
106.2	0.53685
106.3	0.53735
106.4	0.538075
106.5	0.53845
106.6	0.53915
106.7	0.539975
106.8	0.541325
106.9	0.542925
107	0.544725
107.1	0.545625
107.2	0.547225
107.3	0.54895
107.4	0.550375
107.5	0.55085
107.6	0.5517
107.7	0.552825
107.8	0.5534
107.9	0.5546
108	0.5551
108.1	0.556775
108.2	0.55865
108.3	0.558175
108.4	0.5593
108.5	0.5588
108.6	0.559675
108.7	0.559725
108.8	0.559775
108.9	0.561075
109	0.561575
109.1	0.561675
109.2	0.5633
109.3	0.564075
109.4	0.56395
109.5	0.56435
109.6	0.564925
109.7	0.56645
109.8	0.567275
109.9	0.567225
110	0.567
110.1	0.567425
110.2	0.56895
110.3	0.571725
110.4	0.57215
110.5	0.572825
110.6	0.5727
110.7	0.57135
110.8	0.571075
110.9	0.571075
111	0.571375
111.1	0.572225
111.2	0.572225
111.3	0.571175
111.4	0.571175
111.5	0.57205
111.6	0.573225
111.7	0.573875
111.8	0.57445
111.9	0.57565
112	0.5762
112.1	0.57595
112.2	0.57665
112.3	0.576925
112.4	0.57765
112.5	0.57935
112.6	0.57935
112.7	0.5791
112.8	0.579825
112.9	0.580125
113	0.581125
113.1	0.581375
113.2	0.5819
113.3	0.582975
113.4	0.582975
113.5	0.582875
113.6	0.582625
113.7	0.58145
113.8	0.581575
113.9	0.582425
114	0.582325
114.1	0.583
114.2	0.584325
114.3	0.585125
114.4	0.585125
114.5	0.58505
114.6	0.585225
114.7	0.5866
114.8	0.5861
114.9	0.585325
115	0.585175
115.1	0.5853
115.2	0.5857
115.3	0.585525
115.4	0.58565
115.5	0.5859
115.6	0.586625
115.7	0.58625
115.8	0.586275
115.9	0.586775
116	0.588
116.1	0.587375
116.2	0.587925
116.3	0.587275
116.4	0.587925
116.5	0.58765
116.6	0.588925
116.7	0.58785
116.8	0.58885
116.9	0.589925
117	0.590575
117.1	0.5898
117.2	0.5916
117.3	0.5922
117.4	0.5924
117.5	0.594025
117.6	0.59505
117.7	0.596575
117.8	0.5965
117.9	0.5964
118	0.597225
118.1	0.59865
118.2	0.59905
118.3	0.599
118.4	0.59975
118.5	0.599725
118.6	0.598975
118.7	0.6
118.8	0.601675
118.9	0.602125
119	0.601625
119.1	0.601625
119.2	0.602925
119.3	0.602925
119.4	0.60385
119.5	0.603825
119.6	0.6042
119.7	0.6051
119.8	0.605025
119.9	0.604625
120	0.60465
120.1	0.60515
120.2	0.60585
120.3	0.60515
120.4	0.60625
120.5	0.60635
120.6	0.606425
120.7	0.607075
120.8	0.6072
120.9	0.606725
121	0.607175
121.1	0.607725
121.2	0.608025
121.3	0.60795
121.4	0.609225
121.5	0.60905
121.6	0.60945
121.7	0.60955
121.8	0.61025
121.9	0.611075
122	0.611
122.1	0.611325
122.2	0.61095
122.3	0.6109
122.4	0.612325
122.5	0.613125
122.6	0.61395
122.7	0.6129
122.8	0.6134
122.9	0.6122
123	0.6129
123.1	0.6133
123.2	0.614025
123.3	0.6154
123.4	0.615125
123.5	0.6162
123.6	0.6156
123.7	0.6161
123.8	0.61655
123.9	0.6169
124	0.616475
124.1	0.617175
124.2	0.617325
124.3	0.6174
124.4	0.618275
124.5	0.618725
124.6	0.61935
124.7	0.61995
124.8	0.62015
124.9	0.62015
125	0.620825
125.1	0.6212
125.2	0.6207
125.3	0.620775
125.4	0.62095
125.5	0.62125
125.6	0.621025
125.7	0.62125
125.8	0.62205
125.9	0.622075
126	0.621725
126.1	0.6226
126.2	0.62285
126.3	0.623075
126.4	0.623225
126.5	0.62335
126.6	0.6233
126.7	0.62345
126.8	0.623525
126.9	0.62365
127	0.625175
127.1	0.625775
127.2	0.625975
127.3	0.6261
127.4	0.626625
127.5	0.62605
127.6	0.62635
127.7	0.626075
127.8	0.62595
127.9	0.6267
128	0.626925
128.1	0.628
128.2	0.628025
128.3	0.627875
128.4	0.627625
128.5	0.62795
128.6	0.62835
128.7	0.6287
128.8	0.628825
128.9	0.62935
129	0.629425
129.1	0.6299
129.2	0.630575
129.3	0.6313
129.4	0.63235
129.5	0.632925
129.6	0.63195
129.7	0.632425
129.8	0.6322
129.9	0.63365
130	0.6339
130.1	0.634775
130.2	0.635825
130.3	0.635725
130.4	0.6359
130.5	0.6353
130.6	0.635475
130.7	0.636
130.8	0.636925
130.9	0.637325
131	0.63665
131.1	0.63655
131.2	0.636625
131.3	0.63665
131.4	0.637425
131.5	0.638375
131.6	0.63895
131.7	0.6395
131.8	0.6403
131.9	0.640325
132	0.6406
132.1	0.641425
132.2	0.64125
132.3	0.64075
132.4	0.6408
132.5	0.6414
132.6	0.641625
132.7	0.641825
132.8	0.641875
132.9	0.641425
133	0.641825
133.1	0.64215
133.2	0.64205
133.3	0.643125
133.4	0.643175
133.5	0.6443
133.6	0.6444
133.7	0.6451
133.8	0.645925
133.9	0.64595
134	0.645325
134.1	0.6447
134.2	0.6448
134.3	0.644275
134.4	0.645275
134.5	0.645825
134.6	0.6459
134.7	0.64645
134.8	0.646475
134.9	0.6465
135	0.64645
135.1	0.647025
135.2	0.647375
135.3	0.6476
135.4	0.647175
135.5	0.6468
135.6	0.64645
135.7	0.64715
135.8	0.647025
135.9	0.647525
136	0.64805
136.1	0.64885
136.2	0.64865
136.3	0.648775
136.4	0.6493
136.5	0.6495
136.6	0.650075
136.7	0.649275
136.8	0.649675
136.9	0.65015
137	0.651025
137.1	0.650975
137.2	0.6506
137.3	0.65175
137.4	0.65165
137.5	0.651875
137.6	0.651725
137.7	0.652725
137.8	0.653325
137.9	0.6546
138	0.653275
138.1	0.65295
138.2	0.6534
138.3	0.6535
138.4	0.654575
138.5	0.654675
138.6	0.6551
138.7	0.655225
138.8	0.65605
138.9	0.65765
139	0.65755
139.1	0.65745
139.2	0.657175
139.3	0.65785
139.4	0.658875
139.5	0.6602
139.6	0.660625
139.7	0.660325
139.8	0.660325
139.9	0.66005
140	0.6593
140.1	0.659875
140.2	0.6598
140.3	0.660475
140.4	0.66005
140.5	0.66045
140.6	0.660625
140.7	0.66125
140.8	0.66175
140.9	0.662575
141	0.66315
141.1	0.663
141.2	0.664025
141.3	0.665025
141.4	0.665375
141.5	0.6655
141.6	0.66565
141.7	0.667025
141.8	0.66705
141.9	0.666775
142	0.6681
142.1	0.668825
142.2	0.66805
142.3	0.66835
142.4	0.667325
142.5	0.66665
142.6	0.666375
142.7	0.6664
142.8	0.666375
142.9	0.666825
143	0.666825
143.1	0.6671
143.2	0.667325
143.3	0.66795
143.4	0.668525
143.5	0.668275
143.6	0.667875
143.7	0.667375
143.8	0.6663
143.9	0.6659
144	0.666225
144.1	0.6675
144.2	0.66745
144.3	0.667825
144.4	0.6687
144.5	0.66955
144.6	0.670325
144.7	0.671425
144.8	0.671975
144.9	0.672
145	0.6722
145.1	0.67345
145.2	0.673375
145.3	0.673425
145.4	0.673
145.5	0.6725
145.6	0.672875
145.7	0.673725
145.8	0.67375
145.9	0.674175
146	0.675375
146.1	0.6753
146.2	0.67635
146.3	0.676125
146.4	0.676825
146.5	0.676875
146.6	0.676375
146.7	0.676025
146.8	0.675275
146.9	0.676175
147	0.676425
147.1	0.676475
147.2	0.6764
147.3	0.6759
147.4	0.67585
147.5	0.67615
147.6	0.676325
147.7	0.67795
147.8	0.678225
147.9	0.6773
148	0.677925
148.1	0.677925
148.2	0.6781
148.3	0.678125
148.4	0.6782
148.5	0.677825
148.6	0.678025
148.7	0.6783
148.8	0.67875
148.9	0.679475
149	0.67945
149.1	0.679075
149.2	0.67825
149.3	0.67825
149.4	0.677425
149.5	0.67745
149.6	0.678125
149.7	0.67945
149.8	0.679525
149.9	0.68015
150	0.68015
150.1	0.681175
150.2	0.68125
150.3	0.682175
150.4	0.68195
150.5	0.68185
150.6	0.68175
150.7	0.6811
150.8	0.68125
150.9	0.680825
151	0.680875
151.1	0.6805
151.2	0.68
151.3	0.6792
151.4	0.678975
151.5	0.6799
151.6	0.68065
151.7	0.6801
151.8	0.680275
151.9	0.68115
152	0.68185
152.1	0.68205
152.2	0.682175
152.3	0.68145
152.4	0.682225
152.5	0.6825
152.6	0.68265
152.7	0.682475
152.8	0.6834
152.9	0.6832
153	0.683975
153.1	0.683825
153.2	0.6838
153.3	0.6841
153.4	0.683825
153.5	0.6844
153.6	0.6841
153.7	0.68485
153.8	0.685925
153.9	0.685975
154	0.68605
154.1	0.686325
154.2	0.68745
154.3	0.687225
154.4	0.6878
154.5	0.6873
154.6	0.687475
154.7	0.6879
154.8	0.688875
154.9	0.688475
155	0.688325
155.1	0.689575
155.2	0.688725
155.3	0.6885
155.4	0.688125
155.5	0.688525
155.6	0.689825
155.7	0.6896
155.8	0.68945
155.9	0.689825
156	0.690225
156.1	0.689975
156.2	0.690025
156.3	0.69025
156.4	0.690425
156.5	0.690925
156.6	0.69075
156.7	0.69045
156.8	0.690025
156.9	0.690175
157	0.689925
157.1	0.6901
157.2	0.690925
157.3	0.69155
157.4	0.691925
157.5	0.692175
157.6	0.692625
157.7	0.6925
157.8	0.691925
157.9	0.691725
158	0.692275
158.1	0.693325
158.2	0.6936
158.3	0.694175
158.4	0.694925
158.5	0.69495
158.6	0.694775
158.7	0.695825
158.8	0.696025
158.9	0.695775
159	0.69685
159.1	0.696925
159.2	0.697125
159.3	0.69685
159.4	0.696925
159.5	0.696675
159.6	0.69675
159.7	0.696725
159.8	0.697275
159.9	0.69735
160	0.69755
160.1	0.69755
160.2	0.6974
160.3	0.6975
160.4	0.696575
160.5	0.69745
160.6	0.697475
160.7	0.69805
160.8	0.697925
160.9	0.69775
161	0.698125
161.1	0.69815
161.2	0.6981
161.3	0.697925
161.4	0.6979
161.5	0.698575
161.6	0.698125
161.7	0.698225
161.8	0.698275
161.9	0.6979
162	0.697325
162.1	0.69775
162.2	0.698225
162.3	0.69845
162.4	0.697375
162.5	0.698075
162.6	0.698875
162.7	0.69845
162.8	0.699675
162.9	0.699575
163	0.70015
163.1	0.7003
163.2	0.700125
163.3	0.699675
163.4	0.700325
163.5	0.700375
163.6	0.700725
163.7	0.70145
163.8	0.701775
163.9	0.702125
164	0.702225
164.1	0.702325
164.2	0.70195
164.3	0.7026
164.4	0.70395
164.5	0.704325
164.6	0.703725
164.7	0.70355
164.8	0.703525
164.9	0.703375
165	0.704
165.1	0.702925
165.2	0.702775
165.3	0.7025
165.4	0.702875
165.5	0.703125
165.6	0.70215
165.7	0.7026
165.8	0.702775
165.9	0.702375
166	0.7022
166.1	0.701975
166.2	0.7022
166.3	0.702375
166.4	0.703475
166.5	0.7033
166.6	0.70325
166.7	0.703325
166.8	0.704325
166.9	0.704575
167	0.70435
167.1	0.705025
167.2	0.704925
167.3	0.705375
167.4	0.7058
167.5	0.706175
167.6	0.70625
167.7	0.70595
167.8	0.705425
167.9	0.705375
168	0.704225
168.1	0.7042
168.2	0.7048
168.3	0.704525
168.4	0.704825
168.5	0.7048
168.6	0.70595
168.7	0.7062
168.8	0.7066
168.9	0.7074
169	0.70665
169.1	0.708
169.2	0.70855
169.3	0.708475
169.4	0.7081
169.5	0.707775
169.6	0.70745
169.7	0.706925
169.8	0.70775
169.9	0.7081
170	0.707775
170.1	0.708425
170.2	0.7091
170.3	0.7092
170.4	0.709925
170.5	0.710525
170.6	0.710425
170.7	0.711325
170.8	0.711925
170.9	0.7114
171	0.711675
171.1	0.711525
171.2	0.710275
171.3	0.710775
171.4	0.70995
171.5	0.7097
171.6	0.710025
171.7	0.71075
171.8	0.710125
171.9	0.71
172	0.7104
172.1	0.710775
172.2	0.711475
172.3	0.7125
172.4	0.7126
172.5	0.71245
172.6	0.712925
172.7	0.713475
172.8	0.713675
172.9	0.71395
173	0.713525
173.1	0.71335
173.2	0.713425
173.3	0.713625
173.4	0.714175
173.5	0.713825
173.6	0.714925
173.7	0.715025
173.8	0.71405
173.9	0.713325
174	0.7138
174.1	0.7138
174.2	0.71315
174.3	0.713175
174.4	0.71315
174.5	0.713725
174.6	0.71415
174.7	0.713775
174.8	0.7138
174.9	0.71405
175	0.7135
175.1	0.7142
175.2	0.714275
175.3	0.714675
175.4	0.7156
175.5	0.71555
175.6	0.715625
175.7	0.715675
175.8	0.71615
175.9	0.7167
176	0.717275
176.1	0.717425
176.2	0.716575
176.3	0.7166
176.4	0.716675
176.5	0.716925
176.6	0.716875
176.7	0.7173
176.8	0.716775
176.9	0.7164
177	0.71745
177.1	0.71735
177.2	0.71765
177.3	0.718225
177.4	0.7178
177.5	0.718125
177.6	0.7185
177.7	0.718875
177.8	0.7191
177.9	0.7194
178	0.720125
178.1	0.721025
178.2	0.721525
178.3	0.7224
178.4	0.72205
178.5	0.721525
178.6	0.72155
178.7	0.72135
178.8	0.7215
178.9	0.72145
179	0.721425
179.1	0.7212
179.2	0.721975
179.3	0.721675
179.4	0.7209
179.5	0.721625
179.6	0.721425
179.7	0.721225
179.8	0.7219
179.9	0.721875
180	0.721725
180.1	0.72065
180.2	0.71995
180.3	0.71935
180.4	0.719075
180.5	0.71975
180.6	0.719325
180.7	0.719675
180.8	0.719325
180.9	0.719775
181	0.719525
181.1	0.71985
181.2	0.719775
181.3	0.72025
181.4	0.72075
181.5	0.721875
181.6	0.721975
181.7	0.722925
181.8	0.722525
181.9	0.7228
182	0.722625
182.1	0.72295
182.2	0.723425
182.3	0.723775
182.4	0.723825
182.5	0.723375
182.6	0.72385
182.7	0.72445
182.8	0.72385
182.9	0.7242
183	0.723975
183.1	0.72535
183.2	0.725975
183.3	0.7265
183.4	0.726025
183.5	0.726275
183.6	0.726475
183.7	0.727025
183.8	0.726925
183.9	0.726675
184	0.72665
184.1	0.726225
184.2	0.726425
184.3	0.7267
184.4	0.72675
184.5	0.727175
184.6	0.727475
184.7	0.727975
184.8	0.728225
184.9	0.72825
185	0.728575
185.1	0.72875
185.2	0.729025
185.3	0.7293
185.4	0.72875
185.5	0.7291
185.6	0.729325
185.7	0.7293
185.8	0.72945
185.9	0.729275
186	0.7295
186.1	0.72915
186.2	0.728925
186.3	0.728825
186.4	0.728425
186.5	0.72805
186.6	0.7278
186.7	0.7277
186.8	0.72795
186.9	0.7287
187	0.728525
187.1	0.727175
187.2	0.7276
187.3	0.727875
187.4	0.72845
187.5	0.72775
187.6	0.728125
187.7	0.727975
187.8	0.728475
187.9	0.727625
188	0.7281
188.1	0.728125
188.2	0.72825
188.3	0.728125
188.4	0.728125
188.5	0.72795
188.6	0.727975
188.7	0.728575
188.8	0.72905
188.9	0.729
189	0.729625
189.1	0.7301
189.2	0.73025
189.3	0.730025
189.4	0.730575
189.5	0.7312
189.6	0.730625
189.7	0.730975
189.8	0.731175
189.9	0.731325
190	0.731025
190.1	0.7309
190.2	0.730525
190.3	0.73045
190.4	0.73075
190.5	0.731075
190.6	0.731825
190.7	0.73225
190.8	0.731825
190.9	0.73265
191	0.7324
191.1	0.731875
191.2	0.732175
191.3	0.7314
191.4	0.73135
191.5	0.731575
191.6	0.73205
191.7	0.732175
191.8	0.7317
191.9	0.732625
192	0.7328
192.1	0.732725
192.2	0.732725
192.3	0.732625
192.4	0.733575
192.5	0.733475
192.6	0.7333
192.7	0.733375
192.8	0.734425
192.9	0.734425
193	0.7343
193.1	0.734575
193.2	0.735075
193.3	0.734725
193.4	0.73535
193.5	0.7344
193.6	0.73495
193.7	0.7346
193.8	0.734675
193.9	0.734
194	0.734825
194.1	0.734325
194.2	0.7336
194.3	0.734125
194.4	0.7345
194.5	0.73475
194.6	0.7344
194.7	0.734775
194.8	0.735375
194.9	0.735175
195	0.7355
195.1	0.73615
195.2	0.735525
195.3	0.735275
195.4	0.7361
195.5	0.73565
195.6	0.736725
195.7	0.736275
195.8	0.736075
195.9	0.73715
196	0.73705
196.1	0.73795
196.2	0.737375
196.3	0.7377
196.4	0.737275
196.5	0.73685
196.6	0.73685
196.7	0.73705
196.8	0.736125
196.9	0.73625
197	0.7367
197.1	0.736525
197.2	0.73685
197.3	0.736875
197.4	0.736725
197.5	0.73775
197.6	0.737325
197.7	0.737125
197.8	0.737375
197.9	0.736675
198	0.73695
198.1	0.73665
198.2	0.736675
198.3	0.7372
198.4	0.73715
198.5	0.73675
198.6	0.7372
198.7	0.737975
198.8	0.73825
198.9	0.738175
199	0.737975
199.1	0.7379
199.2	0.7383
199.3	0.73855
199.4	0.73845
199.5	0.73855
199.6	0.739225
199.7	0.739075
199.8	0.738425
199.9	0.738425
200	0.738825
[truncated: 14,000 more rows]
