# Supplementary material for: Bayesian inference of kinetic schemes for ion channels by Kalman filtering
Source: eLife journal article supplement (doi:10.7554/elife.62714), 2022-05-04
Supplement: fig4-data9 [file 1_Sim_N_20000_Strom_MW_0.5M.xlsx]

## Sheet: Tabelle1
0.1	0
0.2	0
0.3	0
0.4	0
0.5	0
0.6	0
0.7	0
0.8	0
0.9	0
1	0
1.1	0
1.2	0
1.3	0
1.4	0
1.5	0
1.6	0
1.7	0
1.8	0
1.9	0
2	0
2.1	0
2.2	0
2.3	0
2.4	0
2.5	0
2.6	0
2.7	0
2.8	0
2.9	0
3	0
3.1	0
3.2	0
3.3	0
3.4	0
3.5	0
3.6	0
3.7	0
3.8	0
3.9	0
4	0
4.1	0
4.2	0
4.3	0
4.4	0
4.5	0
4.6	0
4.7	0
4.8	0
4.9	0
5	0
5.1	0
5.2	0
5.3	0
5.4	0
5.5	0
5.6	0
5.7	0
5.8	0
5.9	0
6	0
6.1	0
6.2	0
6.3	0
6.4	0
6.5	0
6.6	0
6.7	0
6.8	0
6.9	0
7	0
7.1	0
7.2	0
7.3	0
7.4	0
7.5	0
7.6	0
7.7	0
7.8	0
7.9	0
8	0
8.1	0
8.2	0
8.3	0
8.4	0
8.5	0
8.6	0
8.7	0
8.8	0
8.9	0
9	0
9.1	0
9.2	0
9.3	0
9.4	0
9.5	0
9.6	0
9.7	0
9.8	0
9.9	0
10	0
10.1	0
10.2	0
10.3	0
10.4	0
10.5	0
10.6	0
10.7	0
10.8	0
10.9	0
11	0
11.1	0
11.2	0
11.3	0
11.4	0
11.5	0
11.6	0
11.7	0
11.8	0
11.9	0
12	0
12.1	0
12.2	0
12.3	0
12.4	0
12.5	0
12.6	0
12.7	0
12.8	0
12.9	0
13	0
13.1	0
13.2	0
13.3	0
13.4	0
13.5	0
13.6	0
13.7	0
13.8	0
13.9	0
14	0
14.1	0
14.2	0
14.3	0
14.4	0
14.5	0
14.6	0
14.7	0
14.8	0
14.9	0
15	0
15.1	0
15.2	0
15.3	0
15.4	0
15.5	0
15.6	0
15.7	0
15.8	0
15.9	0
16	0
16.1	0
16.2	0
16.3	0
16.4	0
16.5	0
16.6	0
16.7	0
16.8	0
16.9	0
17	0
17.1	0
17.2	0
17.3	0
17.4	0
17.5	0
17.6	0
17.7	0
17.8	0
17.9	0
18	0
18.1	0
18.2	0
18.3	0
18.4	0
18.5	0
18.6	0
18.7	0
18.8	0
18.9	0
19	0
19.1	0
19.2	0
19.3	0
19.4	0
19.5	0
19.6	0
19.7	0
19.8	0
19.9	0
20	0
20.1	0
20.2	0
20.3	0
20.4	0
20.5	0
20.6	0
20.7	0
20.8	0
20.9	0
21	0
21.1	0
21.2	0
21.3	0
21.4	0
21.5	0
21.6	0
21.7	0
21.8	0
21.9	0
22	0
22.1	0
22.2	0
22.3	0
22.4	0
22.5	0
22.6	0
22.7	0
22.8	0
22.9	0
23	0
23.1	0
23.2	0
23.3	0
23.4	0
23.5	0
23.6	0
23.7	0
23.8	0
23.9	0
24	0
24.1	0
24.2	0
24.3	0
24.4	0
24.5	0
24.6	0
24.7	0
24.8	0
24.9	0
25	0
25.1	0
25.2	0
25.3	0
25.4	0
25.5	0
25.6	0
25.7	0
25.8	0
25.9	0
26	0
26.1	0
26.2	0
26.3	0
26.4	0
26.5	0
26.6	0
26.7	0
26.8	0
26.9	0
27	0
27.1	0
27.2	0
27.3	0
27.4	0
27.5	0
27.6	0
27.7	0
27.8	0
27.9	0
28	0
28.1	0
28.2	0
28.3	0
28.4	0
28.5	0
28.6	0
28.7	0
28.8	0
28.9	0
29	0
29.1	0
29.2	0
29.3	0
29.4	0
29.5	0
29.6	0
29.7	0
29.8	0
29.9	0
30	0
30.1	0
30.2	0
30.3	0
30.4	0
30.5	0
30.6	0
30.7	0
30.8	0
30.9	0
31	0
31.1	0
31.2	0
31.3	0
31.4	0
31.5	0
31.6	0
31.7	0
31.8	0
31.9	0
32	0
32.1	0
32.2	0
32.3	0
32.4	0
32.5	0
32.6	0
32.7	0
32.8	0
32.9	0
33	0
33.1	0
33.2	0
33.3	0
33.4	0
33.5	0
33.6	0
33.7	0
33.8	0
33.9	0
34	0
34.1	0
34.2	0
34.3	0
34.4	0
34.5	0
34.6	0
34.7	0
34.8	0
34.9	0
35	0
35.1	0
35.2	0
35.3	0
35.4	0
35.5	0
35.6	0
35.7	0
35.8	0
35.9	0
36	0
36.1	0
36.2	0
36.3	0
36.4	0
36.5	0
36.6	0
36.7	0
36.8	0
36.9	0
37	0
37.1	0
37.2	0
37.3	0
37.4	0
37.5	0
37.6	0
37.7	0
37.8	0
37.9	0
38	0
38.1	0
38.2	0
38.3	0
38.4	0
38.5	0
38.6	0
38.7	0
38.8	0
38.9	0
39	0
39.1	0
39.2	0
39.3	0
39.4	0
39.5	0
39.6	0
39.7	0
39.8	0
39.9	0
40	0
40.1	0
40.2	0
40.3	0
40.4	0
40.5	0
40.6	0
40.7	0
40.8	0
40.9	0
41	0
41.1	0
41.2	0
41.3	0
41.4	0
41.5	0
41.6	0
41.7	0
41.8	0
41.9	0
42	0
42.1	0
42.2	0
42.3	0
42.4	0
42.5	0
42.6	0
42.7	0
42.8	0
42.9	0
43	0
43.1	0
43.2	0
43.3	0
43.4	0
43.5	0
43.6	0
43.7	0
43.8	0
43.9	0
44	0
44.1	0
44.2	0
44.3	0
44.4	0
44.5	0
44.6	0
44.7	0
44.8	0
44.9	0
45	0
45.1	0
45.2	0
45.3	0
45.4	0
45.5	0
45.6	0
45.7	0
45.8	0
45.9	0
46	0
46.1	0
46.2	0
46.3	0
46.4	0
46.5	0
46.6	0
46.7	0
46.8	0
46.9	0
47	0
47.1	0
47.2	0
47.3	0
47.4	0
47.5	0
47.6	0
47.7	0
47.8	0
47.9	0
48	0
48.1	0
48.2	0
48.3	0
48.4	0
48.5	0
48.6	0
48.7	0
48.8	0
48.9	0
49	0
49.1	0
49.2	0
49.3	0
49.4	0
49.5	0
49.6	0
49.7	0
49.8	0
49.9	0
50	0
50.1	0
50.2	0
50.3	0
50.4	0
50.5	0
50.6	0
50.7	0
50.8	0
50.9	0
51	0
51.1	0
51.2	0
51.3	0
51.4	0
51.5	0
51.6	0
51.7	0
51.8	0
51.9	0
52	0
52.1	0
52.2	0
52.3	0
52.4	0
52.5	0
52.6	0
52.7	0
52.8	0
52.9	0
53	0
53.1	0
53.2	0
53.3	0
53.4	0
53.5	0
53.6	0
53.7	0
53.8	0
53.9	0
54	0
54.1	0
54.2	0
54.3	0
54.4	0
54.5	0
54.6	0
54.7	0
54.8	0
54.9	0
55	0
55.1	0
55.2	0
55.3	0
55.4	0
55.5	0
55.6	0
55.7	0
55.8	0
55.9	0
56	0
56.1	0
56.2	0
56.3	0
56.4	0
56.5	0
56.6	0
56.7	0
56.8	0
56.9	0
57	0
57.1	0
57.2	0
57.3	0
57.4	0
57.5	0
57.6	0
57.7	0
57.8	0
57.9	0
58	0
58.1	0
58.2	0
58.3	0
58.4	0
58.5	0
58.6	0
58.7	0
58.8	0
58.9	0
59	0
59.1	0
59.2	0
59.3	0
59.4	0
59.5	0
59.6	0
59.7	0
59.8	0
59.9	0
60	0
60.1	0
60.2	0
60.3	0
60.4	0
60.5	0
60.6	0
60.7	0
60.8	0
60.9	0
61	0
61.1	0
61.2	0
61.3	0
61.4	0
61.5	0
61.6	0
61.7	0
61.8	0
61.9	0
62	0
62.1	0
62.2	0
62.3	0
62.4	0
62.5	0
62.6	0
62.7	0
62.8	0
62.9	0
63	0
63.1	0
63.2	0
63.3	0
63.4	0
63.5	0
63.6	0
63.7	0
63.8	0
63.9	0
64	0
64.1	0
64.2	0
64.3	0
64.4	0
64.5	0
64.6	0
64.7	0
64.8	0
64.9	0
65	0
65.1	0
65.2	0
65.3	0
65.4	0
65.5	0
65.6	0
65.7	0
65.8	0
65.9	0
66	0
66.1	0
66.2	0
66.3	0
66.4	0
66.5	0
66.6	0
66.7	0
66.8	0
66.9	0
67	0
67.1	0
67.2	0
67.3	0
67.4	0
67.5	0
67.6	0
67.7	0
67.8	0
67.9	0
68	0
68.1	0
68.2	0
68.3	0
68.4	0
68.5	0
68.6	0
68.7	0
68.8	0
68.9	0
69	0
69.1	0
69.2	0
69.3	0
69.4	0
69.5	0
69.6	0
69.7	0
69.8	0
69.9	0
70	0
70.1	0
70.2	0
70.3	0
70.4	0
70.5	0
70.6	0
70.7	0
70.8	0
70.9	0
71	0
71.1	0
71.2	0
71.3	0
71.4	0
71.5	0
71.6	0
71.7	0
71.8	0
71.9	0
72	0
72.1	0
72.2	0
72.3	0
72.4	0
72.5	0
72.6	0
72.7	0
72.8	0
72.9	0
73	0
73.1	0
73.2	0
73.3	0
73.4	0
73.5	0
73.6	0
73.7	0
73.8	0
73.9	0
74	0
74.1	0
74.2	0
74.3	0
74.4	0
74.5	0
74.6	0
74.7	0
74.8	0
74.9	0
75	0
75.1	0
75.2	0
75.3	0
75.4	0
75.5	0
75.6	0
75.7	0
75.8	0
75.9	0
76	0
76.1	0
76.2	0
76.3	0
76.4	0
76.5	0
76.6	0
76.7	0
76.8	0
76.9	0
77	0
77.1	0
77.2	0
77.3	0
77.4	0
77.5	0
77.6	0
77.7	0
77.8	0
77.9	0
78	0
78.1	0
78.2	0
78.3	0
78.4	0
78.5	0
78.6	0
78.7	0
78.8	0
78.9	0
79	0
79.1	0
79.2	0
79.3	0
79.4	0
79.5	0
79.6	0
79.7	0
79.8	0
79.9	0
80	0
80.1	0
80.2	0
80.3	0
80.4	0
80.5	0
80.6	0
80.7	0
80.8	0
80.9	0
81	0
81.1	0
81.2	0
81.3	0
81.4	0
81.5	0
81.6	0
81.7	0
81.8	0
81.9	0
82	0
82.1	0
82.2	0
82.3	0
82.4	0
82.5	0
82.6	0
82.7	0
82.8	0
82.9	0
83	0
83.1	0
83.2	0
83.3	0
83.4	0
83.5	0
83.6	0
83.7	0
83.8	0
83.9	0
84	0
84.1	0
84.2	0
84.3	0
84.4	0
84.5	0
84.6	0
84.7	0
84.8	0
84.9	0
85	0
85.1	0
85.2	0
85.3	0
85.4	0
85.5	0
85.6	0
85.7	0
85.8	0
85.9	0
86	0
86.1	0
86.2	0
86.3	0
86.4	0
86.5	0
86.6	0
86.7	0
86.8	0
86.9	0
87	0
87.1	0
87.2	0
87.3	0
87.4	0
87.5	0
87.6	0
87.7	0
87.8	0
87.9	0
88	0
88.1	0
88.2	0
88.3	0
88.4	0
88.5	0
88.6	0
88.7	0
88.8	0
88.9	0
89	0
89.1	0
89.2	0
89.3	0
89.4	0
89.5	0
89.6	0
89.7	0
89.8	0
89.9	0
90	0
90.1	0
90.2	0
90.3	0
90.4	0
90.5	0
90.6	0
90.7	0
90.8	0
90.9	0
91	0
91.1	0
91.2	0
91.3	0
91.4	0
91.5	0
91.6	0
91.7	0
91.8	0
91.9	0
92	0
92.1	0
92.2	0
92.3	0
92.4	0
92.5	0
92.6	0
92.7	0
92.8	0
92.9	0
93	0
93.1	0
93.2	0
93.3	0
93.4	0
93.5	0
93.6	0
93.7	0
93.8	0
93.9	0
94	0
94.1	0
94.2	0
94.3	0
94.4	0
94.5	0
94.6	0
94.7	0
94.8	0
94.9	0
95	0
95.1	0
95.2	0
95.3	0
95.4	0
95.5	0
95.6	0
95.7	0
95.8	0
95.9	0
96	0
96.1	0
96.2	0
96.3	0
96.4	0
96.5	0
96.6	0
96.7	0
96.8	0
96.9	0
97	0
97.1	0
97.2	0
97.3	0
97.4	0
97.5	0
97.6	0
97.7	0
97.8	0
97.9	0
98	0
98.1	0
98.2	0
98.3	0
98.4	0
98.5	0
98.6	0
98.7	0
98.8	0
98.9	0
99	0
99.1	0
99.2	0
99.3	0
99.4	0
99.5	0
99.6	0
99.7	0
99.8	0
99.9	0
100	0
100.1	0
100.2	0
100.3	0
100.4	0
100.5	0.00015
100.6	0.0002
100.7	0.00025
100.8	0.0003
100.9	0.0004
101	0.00065
101.1	0.0008
101.2	0.001
101.3	0.0011
101.4	0.0015
101.5	0.0018
101.6	0.0022
101.7	0.00235
101.8	0.00265
101.9	0.00295
102	0.00325
102.1	0.0037
102.2	0.0042
102.3	0.0046
102.4	0.00505
102.5	0.00535
102.6	0.00565
102.7	0.0061
102.8	0.0064
102.9	0.0073
103	0.00785
103.1	0.0085
103.2	0.00935
103.3	0.01
103.4	0.01075
103.5	0.0115
103.6	0.01215
103.7	0.013
103.8	0.0135
103.9	0.01405
104	0.01445
104.1	0.01515
104.2	0.0156
104.3	0.01645
104.4	0.01705
104.5	0.01785
104.6	0.01865
104.7	0.01935
104.8	0.02065
104.9	0.02175
105	0.02225
105.1	0.0229
105.2	0.0237
105.3	0.02475
105.4	0.0255
105.5	0.02615
105.6	0.02685
105.7	0.02745
105.8	0.0282
105.9	0.02895
106	0.0298
106.1	0.0303
106.2	0.03105
106.3	0.03155
106.4	0.0327
106.5	0.0336
106.6	0.03485
106.7	0.0358
106.8	0.0362
106.9	0.03735
107	0.03835
107.1	0.039
107.2	0.0398
107.3	0.0408
107.4	0.04185
107.5	0.0426
107.6	0.0438
107.7	0.0448
107.8	0.0459
107.9	0.0467
108	0.04715
108.1	0.04805
108.2	0.0489
108.3	0.05005
108.4	0.05105
108.5	0.0521
108.6	0.05285
108.7	0.05375
108.8	0.0548
108.9	0.05595
109	0.05645
109.1	0.0568
109.2	0.05795
109.3	0.0589
109.4	0.0595
109.5	0.06025
109.6	0.0614
109.7	0.0621
109.8	0.0625
109.9	0.0633
110	0.06465
110.1	0.0652
110.2	0.066
110.3	0.0666
110.4	0.0678
110.5	0.06855
110.6	0.06955
110.7	0.07015
110.8	0.0709
110.9	0.07195
111	0.0724
111.1	0.0731
111.2	0.0738
111.3	0.07475
111.4	0.07555
111.5	0.07635
111.6	0.0772
111.7	0.07795
111.8	0.0787
111.9	0.07945
112	0.08025
112.1	0.0809
112.2	0.0818
112.3	0.08255
112.4	0.08385
112.5	0.08465
112.6	0.08555
112.7	0.0866
112.8	0.08745
112.9	0.0885
113	0.0898
113.1	0.09065
113.2	0.09155
113.3	0.09215
113.4	0.0927
113.5	0.0939
113.6	0.0948
113.7	0.0955
113.8	0.0961
113.9	0.09715
114	0.0979
114.1	0.09905
114.2	0.0997
114.3	0.1004
114.4	0.10105
114.5	0.1021
114.6	0.1028
114.7	0.10365
114.8	0.10475
114.9	0.10565
115	0.10665
115.1	0.1077
115.2	0.10785
115.3	0.1083
115.4	0.10885
115.5	0.11
115.6	0.1109
115.7	0.1115
115.8	0.1126
115.9	0.1131
116	0.1139
116.1	0.1146
116.2	0.11515
116.3	0.1159
116.4	0.11645
116.5	0.117
116.6	0.11755
116.7	0.11855
116.8	0.11915
116.9	0.11985
117	0.12055
117.1	0.1209
117.2	0.12185
117.3	0.1225
117.4	0.1234
117.5	0.12405
117.6	0.12455
117.7	0.12565
117.8	0.1264
117.9	0.12695
118	0.1276
118.1	0.1287
118.2	0.12935
118.3	0.1299
118.4	0.13065
118.5	0.1313
118.6	0.1316
118.7	0.1323
118.8	0.13295
118.9	0.1334
119	0.1345
119.1	0.1354
119.2	0.1365
119.3	0.1372
119.4	0.13825
119.5	0.13915
119.6	0.13995
119.7	0.14055
119.8	0.14175
119.9	0.1423
120	0.14295
120.1	0.1437
120.2	0.1445
120.3	0.1455
120.4	0.1463
120.5	0.14685
120.6	0.14725
120.7	0.1478
120.8	0.148
120.9	0.1488
121	0.1495
121.1	0.15
121.2	0.1507
121.3	0.15145
121.4	0.15215
121.5	0.1529
121.6	0.15335
121.7	0.15385
121.8	0.1545
121.9	0.15545
122	0.15615
122.1	0.1569
122.2	0.1576
122.3	0.15835
122.4	0.15875
122.5	0.15935
122.6	0.16035
122.7	0.1611
122.8	0.16205
122.9	0.16215
123	0.1631
123.1	0.16355
123.2	0.1642
123.3	0.1648
123.4	0.16535
123.5	0.1664
123.6	0.16695
123.7	0.1674
123.8	0.16815
123.9	0.16895
124	0.1696
124.1	0.1702
124.2	0.171
124.3	0.1715
124.4	0.172
124.5	0.1728
124.6	0.17335
124.7	0.17395
124.8	0.17455
124.9	0.175
125	0.1755
125.1	0.17585
125.2	0.17665
125.3	0.1771
125.4	0.1775
125.5	0.1779
125.6	0.1785
125.7	0.17925
125.8	0.17955
125.9	0.17985
126	0.18055
126.1	0.1812
126.2	0.1818
126.3	0.1826
126.4	0.18345
126.5	0.18425
126.6	0.18485
126.7	0.185
126.8	0.1859
126.9	0.1863
127	0.18685
127.1	0.1879
127.2	0.18855
127.3	0.1891
127.4	0.18995
127.5	0.19035
127.6	0.19075
127.7	0.19145
127.8	0.1923
127.9	0.19255
128	0.1936
128.1	0.1942
128.2	0.19485
128.3	0.19595
128.4	0.19655
128.5	0.1969
128.6	0.19755
128.7	0.1979
128.8	0.1988
128.9	0.1994
129	0.1999
129.1	0.2005
129.2	0.201
129.3	0.2014
129.4	0.20205
129.5	0.2026
129.6	0.20325
129.7	0.20395
129.8	0.2041
129.9	0.2049
130	0.2051
130.1	0.2061
130.2	0.20685
130.3	0.20715
130.4	0.20745
130.5	0.2082
130.6	0.209
130.7	0.2099
130.8	0.2106
130.9	0.2112
131	0.21175
131.1	0.21225
131.2	0.2124
131.3	0.2131
131.4	0.2136
131.5	0.21405
131.6	0.2143
131.7	0.215
131.8	0.216
131.9	0.21685
132	0.2174
132.1	0.21795
132.2	0.21855
132.3	0.21905
132.4	0.21985
132.5	0.22035
132.6	0.22075
132.7	0.22125
132.8	0.2221
132.9	0.223
133	0.2236
133.1	0.22405
133.2	0.2242
133.3	0.22515
133.4	0.2254
133.5	0.22575
133.6	0.22605
133.7	0.2266
133.8	0.22705
133.9	0.2274
134	0.2277
134.1	0.2282
134.2	0.2287
134.3	0.2292
134.4	0.2295
134.5	0.23025
134.6	0.23095
134.7	0.231
134.8	0.2314
134.9	0.23205
135	0.2327
135.1	0.2332
135.2	0.23385
135.3	0.23415
135.4	0.23465
135.5	0.2352
135.6	0.23555
135.7	0.2361
135.8	0.23635
135.9	0.23685
136	0.23745
136.1	0.23785
136.2	0.23845
136.3	0.23885
136.4	0.2392
136.5	0.23965
136.6	0.24065
136.7	0.24135
136.8	0.24165
136.9	0.242
137	0.2424
137.1	0.24305
137.2	0.2435
137.3	0.24395
137.4	0.24445
137.5	0.24515
137.6	0.2459
137.7	0.24645
137.8	0.2468
137.9	0.2474
138	0.24825
138.1	0.2486
138.2	0.24925
138.3	0.2496
138.4	0.2502
138.5	0.25025
138.6	0.25055
138.7	0.251
138.8	0.25115
138.9	0.25145
139	0.2516
139.1	0.2521
139.2	0.25275
139.3	0.2533
139.4	0.2536
139.5	0.25425
139.6	0.2548
139.7	0.2557
139.8	0.2563
139.9	0.25685
140	0.25745
140.1	0.258
140.2	0.25865
140.3	0.2588
140.4	0.25985
140.5	0.26005
140.6	0.26055
140.7	0.2613
140.8	0.26155
140.9	0.26235
141	0.26255
141.1	0.26335
141.2	0.2638
141.3	0.2641
141.4	0.26475
141.5	0.2654
141.6	0.26575
141.7	0.2665
141.8	0.2669
141.9	0.2675
142	0.26775
142.1	0.26805
142.2	0.26855
142.3	0.26915
142.4	0.26935
142.5	0.2698
142.6	0.27045
142.7	0.2712
142.8	0.2713
142.9	0.27195
143	0.272
143.1	0.2725
143.2	0.27285
143.3	0.2733
143.4	0.2734
143.5	0.2738
143.6	0.27435
143.7	0.2747
143.8	0.2749
143.9	0.2751
144	0.2758
144.1	0.27635
144.2	0.2769
144.3	0.2778
144.4	0.2787
144.5	0.279
144.6	0.27925
144.7	0.2796
144.8	0.27995
144.9	0.28065
145	0.28105
145.1	0.28135
145.2	0.28155
145.3	0.28185
145.4	0.2822
145.5	0.2827
145.6	0.2831
145.7	0.28365
145.8	0.28415
145.9	0.28475
146	0.28525
146.1	0.2858
146.2	0.2862
146.3	0.2871
146.4	0.28735
146.5	0.2877
146.6	0.2879
146.7	0.2881
146.8	0.2887
146.9	0.28925
147	0.2898
147.1	0.29035
147.2	0.29035
147.3	0.2909
147.4	0.29165
147.5	0.292
147.6	0.2923
147.7	0.2928
147.8	0.2932
147.9	0.2938
148	0.2941
148.1	0.29455
148.2	0.2947
148.3	0.2956
148.4	0.29575
148.5	0.29605
148.6	0.296
148.7	0.29615
148.8	0.29655
148.9	0.29695
149	0.2972
149.1	0.29735
149.2	0.298
149.3	0.2983
149.4	0.29885
149.5	0.29935
149.6	0.29945
149.7	0.2999
149.8	0.30065
149.9	0.30095
150	0.30115
150.1	0.3013
150.2	0.3013
150.3	0.30175
150.4	0.30195
150.5	0.3022
150.6	0.30245
150.7	0.3031
150.8	0.3035
150.9	0.3036
151	0.3041
151.1	0.3045
151.2	0.30475
151.3	0.30525
151.4	0.30555
151.5	0.306
151.6	0.3066
151.7	0.3069
151.8	0.3071
151.9	0.3076
152	0.30785
152.1	0.30835
152.2	0.30865
152.3	0.3089
152.4	0.30915
152.5	0.3095
152.6	0.30995
152.7	0.3102
152.8	0.3109
152.9	0.3112
153	0.31185
153.1	0.3121
153.2	0.31295
153.3	0.3132
153.4	0.31305
153.5	0.31325
153.6	0.3134
153.7	0.31385
153.8	0.3144
153.9	0.31465
154	0.3149
154.1	0.3153
154.2	0.3154
154.3	0.3159
154.4	0.31635
154.5	0.31635
154.6	0.3167
154.7	0.317
154.8	0.31775
154.9	0.31805
155	0.3184
155.1	0.31875
155.2	0.31925
155.3	0.32
155.4	0.3207
155.5	0.32135
155.6	0.32155
155.7	0.32165
155.8	0.32175
155.9	0.3221
156	0.32255
156.1	0.3227
156.2	0.32295
156.3	0.32285
156.4	0.3234
156.5	0.3238
156.6	0.3241
156.7	0.32485
156.8	0.32545
156.9	0.32585
157	0.32605
157.1	0.32625
157.2	0.3268
157.3	0.32715
157.4	0.32735
157.5	0.3276
157.6	0.32795
157.7	0.32845
157.8	0.32915
157.9	0.32905
158	0.32965
158.1	0.3298
158.2	0.3302
158.3	0.3306
158.4	0.3309
158.5	0.33135
158.6	0.3312
158.7	0.33155
158.8	0.3319
158.9	0.33195
159	0.3323
159.1	0.3329
159.2	0.33325
159.3	0.3335
159.4	0.33355
159.5	0.3338
159.6	0.3342
159.7	0.3348
159.8	0.33545
159.9	0.3364
160	0.33705
160.1	0.33735
160.2	0.33725
160.3	0.33705
160.4	0.33755
160.5	0.33815
160.6	0.33835
160.7	0.33895
160.8	0.3391
160.9	0.3396
161	0.33975
161.1	0.34025
161.2	0.34105
161.3	0.34145
161.4	0.34165
161.5	0.34215
161.6	0.34285
161.7	0.34315
161.8	0.3437
161.9	0.3439
162	0.3445
162.1	0.3446
162.2	0.3447
162.3	0.34515
162.4	0.3458
162.5	0.3463
162.6	0.3468
162.7	0.3468
162.8	0.347
162.9	0.34695
163	0.34725
163.1	0.3478
163.2	0.34835
163.3	0.3486
163.4	0.34885
163.5	0.34935
163.6	0.34965
163.7	0.34975
163.8	0.3498
163.9	0.35045
164	0.35055
164.1	0.3514
164.2	0.3519
164.3	0.3521
164.4	0.352
164.5	0.35245
164.6	0.35275
164.7	0.35255
164.8	0.35265
164.9	0.3527
165	0.35315
165.1	0.3529
165.2	0.3531
165.3	0.3532
165.4	0.3535
165.5	0.3539
165.6	0.35425
165.7	0.35435
165.8	0.35505
165.9	0.35545
166	0.3556
166.1	0.3559
166.2	0.35645
166.3	0.3565
166.4	0.35675
166.5	0.35705
166.6	0.3576
166.7	0.3579
166.8	0.358
166.9	0.3584
167	0.35855
167.1	0.35885
167.2	0.35925
167.3	0.35925
167.4	0.35955
167.5	0.36025
167.6	0.3603
167.7	0.3604
167.8	0.3607
167.9	0.3606
168	0.36085
168.1	0.3614
168.2	0.3616
168.3	0.36175
168.4	0.3621
168.5	0.3621
168.6	0.36235
168.7	0.36255
168.8	0.36255
168.9	0.36305
169	0.36345
169.1	0.36385
169.2	0.36385
169.3	0.36425
169.4	0.3644
169.5	0.3646
169.6	0.36505
169.7	0.36515
169.8	0.3654
169.9	0.36515
170	0.36505
170.1	0.36515
170.2	0.36525
170.3	0.3658
170.4	0.36595
170.5	0.3661
170.6	0.3667
170.7	0.36695
170.8	0.36685
170.9	0.3674
171	0.36755
171.1	0.3679
171.2	0.368
171.3	0.3682
171.4	0.36815
171.5	0.3684
171.6	0.36855
171.7	0.369
171.8	0.3694
171.9	0.3696
172	0.3702
172.1	0.37015
172.2	0.3703
172.3	0.3707
172.4	0.371
172.5	0.3714
172.6	0.3716
172.7	0.37175
172.8	0.3722
172.9	0.37195
173	0.3723
173.1	0.37235
173.2	0.37255
173.3	0.37285
173.4	0.37365
173.5	0.3741
173.6	0.37425
173.7	0.3746
173.8	0.37485
173.9	0.37505
174	0.3756
174.1	0.3758
174.2	0.376
174.3	0.37645
174.4	0.37645
174.5	0.3769
174.6	0.37735
174.7	0.3773
174.8	0.37735
174.9	0.37765
175	0.37835
175.1	0.3787
175.2	0.3791
175.3	0.37945
175.4	0.37935
175.5	0.3795
175.6	0.37965
175.7	0.3797
175.8	0.37995
175.9	0.38045
176	0.38055
176.1	0.38095
176.2	0.38145
176.3	0.3816
176.4	0.38165
176.5	0.3818
176.6	0.3823
176.7	0.3826
176.8	0.3827
176.9	0.383
177	0.3834
177.1	0.3841
177.2	0.38425
177.3	0.38465
177.4	0.3846
177.5	0.3847
177.6	0.3849
177.7	0.38555
177.8	0.38545
177.9	0.3857
178	0.3855
178.1	0.3858
178.2	0.3861
178.3	0.38605
178.4	0.38665
178.5	0.38725
178.6	0.3874
178.7	0.3875
178.8	0.3882
178.9	0.38845
179	0.38885
179.1	0.38895
179.2	0.38895
179.3	0.38895
179.4	0.38895
179.5	0.389
179.6	0.38935
179.7	0.3893
179.8	0.3896
179.9	0.3898
180	0.38975
180.1	0.39015
180.2	0.3904
180.3	0.39055
180.4	0.3905
180.5	0.391
180.6	0.39095
180.7	0.39135
180.8	0.3912
180.9	0.39115
181	0.39105
181.1	0.39135
181.2	0.3915
181.3	0.3918
181.4	0.3917
181.5	0.39205
181.6	0.3922
181.7	0.39215
181.8	0.3925
181.9	0.3925
182	0.39285
182.1	0.393
182.2	0.3933
182.3	0.39365
182.4	0.39415
182.5	0.3941
182.6	0.3948
182.7	0.39485
182.8	0.3949
182.9	0.39555
183	0.39615
183.1	0.39605
183.2	0.39635
183.3	0.39665
183.4	0.3964
183.5	0.397
183.6	0.3971
183.7	0.39735
183.8	0.3978
183.9	0.3981
184	0.3982
184.1	0.3986
184.2	0.39895
184.3	0.39935
184.4	0.39955
184.5	0.3998
184.6	0.3998
184.7	0.4002
184.8	0.40035
184.9	0.40045
185	0.4008
185.1	0.40085
185.2	0.40045
185.3	0.40075
185.4	0.40135
185.5	0.40125
185.6	0.4014
185.7	0.4018
185.8	0.40245
185.9	0.4027
186	0.4028
186.1	0.403
186.2	0.40325
186.3	0.40315
186.4	0.4032
186.5	0.40325
186.6	0.4032
186.7	0.4036
186.8	0.4037
186.9	0.4041
187	0.40485
187.1	0.4052
187.2	0.4053
187.3	0.4052
187.4	0.40535
187.5	0.4058
187.6	0.40605
187.7	0.40605
187.8	0.4063
187.9	0.40655
188	0.4066
188.1	0.40695
188.2	0.4067
188.3	0.4072
188.4	0.4071
188.5	0.4075
188.6	0.40765
188.7	0.40805
188.8	0.4081
188.9	0.4083
189	0.4087
189.1	0.40895
189.2	0.40925
189.3	0.40965
189.4	0.4096
189.5	0.4098
189.6	0.41015
189.7	0.40995
189.8	0.4099
189.9	0.40985
190	0.4099
190.1	0.4098
190.2	0.4099
190.3	0.40965
190.4	0.4098
190.5	0.4101
190.6	0.4104
190.7	0.41055
190.8	0.41105
190.9	0.4111
191	0.41175
191.1	0.41155
191.2	0.41195
191.3	0.41205
191.4	0.4119
191.5	0.4121
191.6	0.41205
191.7	0.4123
191.8	0.41305
191.9	0.41325
192	0.4138
192.1	0.41405
192.2	0.4143
192.3	0.4144
192.4	0.41465
192.5	0.41455
192.6	0.41495
192.7	0.4148
192.8	0.41495
192.9	0.41505
193	0.4156
193.1	0.4159
193.2	0.4157
193.3	0.4159
193.4	0.4159
193.5	0.41615
193.6	0.41595
193.7	0.416
193.8	0.4164
193.9	0.4165
194	0.41645
194.1	0.4168
194.2	0.4168
194.3	0.417
194.4	0.41725
194.5	0.417
194.6	0.41695
194.7	0.4173
194.8	0.41765
194.9	0.41785
195	0.41805
195.1	0.41815
195.2	0.4183
195.3	0.41895
195.4	0.41895
195.5	0.4195
195.6	0.41965
195.7	0.41965
195.8	0.41965
195.9	0.4194
196	0.41945
196.1	0.41955
196.2	0.4198
196.3	0.4204
196.4	0.4208
196.5	0.4207
196.6	0.4208
196.7	0.42125
196.8	0.42155
196.9	0.42145
197	0.4215
197.1	0.42215
197.2	0.42225
197.3	0.4227
197.4	0.423
197.5	0.42295
197.6	0.42295
197.7	0.42295
197.8	0.4229
197.9	0.4233
198	0.42355
198.1	0.42375
198.2	0.424
198.3	0.42435
198.4	0.42455
198.5	0.4249
198.6	0.42525
198.7	0.42515
198.8	0.4254
198.9	0.4254
199	0.4257
199.1	0.426
199.2	0.4259
199.3	0.4259
199.4	0.42605
199.5	0.42625
199.6	0.42605
199.7	0.42595
199.8	0.4261
199.9	0.42615
200	0.42635
[truncated: 14,000 more rows]
