# Supplementary material for: Bayesian inference of kinetic schemes for ion channels by Kalman filtering
Source: eLife journal article supplement (doi:10.7554/elife.62714), 2022-05-04
Supplement: fig4-data9 [file 1_Sim_N_50000_Fluor_MW_0.5M.xlsx]

## Sheet: 0.5 M
0.1	0
0.2	0
0.3	0
0.4	0
0.5	0
0.6	0
0.7	0
0.8	0
0.9	0
1	0
1.1	0
1.2	0
1.3	0
1.4	0
1.5	0
1.6	0
1.7	0
1.8	0
1.9	0
2	0
2.1	0
2.2	0
2.3	0
2.4	0
2.5	0
2.6	0
2.7	0
2.8	0
2.9	0
3	0
3.1	0
3.2	0
3.3	0
3.4	0
3.5	0
3.6	0
3.7	0
3.8	0
3.9	0
4	0
4.1	0
4.2	0
4.3	0
4.4	0
4.5	0
4.6	0
4.7	0
4.8	0
4.9	0
5	0
5.1	0
5.2	0
5.3	0
5.4	0
5.5	0
5.6	0
5.7	0
5.8	0
5.9	0
6	0
6.1	0
6.2	0
6.3	0
6.4	0
6.5	0
6.6	0
6.7	0
6.8	0
6.9	0
7	0
7.1	0
7.2	0
7.3	0
7.4	0
7.5	0
7.6	0
7.7	0
7.8	0
7.9	0
8	0
8.1	0
8.2	0
8.3	0
8.4	0
8.5	0
8.6	0
8.7	0
8.8	0
8.9	0
9	0
9.1	0
9.2	0
9.3	0
9.4	0
9.5	0
9.6	0
9.7	0
9.8	0
9.9	0
10	0
10.1	0
10.2	0
10.3	0
10.4	0
10.5	0
10.6	0
10.7	0
10.8	0
10.9	0
11	0
11.1	0
11.2	0
11.3	0
11.4	0
11.5	0
11.6	0
11.7	0
11.8	0
11.9	0
12	0
12.1	0
12.2	0
12.3	0
12.4	0
12.5	0
12.6	0
12.7	0
12.8	0
12.9	0
13	0
13.1	0
13.2	0
13.3	0
13.4	0
13.5	0
13.6	0
13.7	0
13.8	0
13.9	0
14	0
14.1	0
14.2	0
14.3	0
14.4	0
14.5	0
14.6	0
14.7	0
14.8	0
14.9	0
15	0
15.1	0
15.2	0
15.3	0
15.4	0
15.5	0
15.6	0
15.7	0
15.8	0
15.9	0
16	0
16.1	0
16.2	0
16.3	0
16.4	0
16.5	0
16.6	0
16.7	0
16.8	0
16.9	0
17	0
17.1	0
17.2	0
17.3	0
17.4	0
17.5	0
17.6	0
17.7	0
17.8	0
17.9	0
18	0
18.1	0
18.2	0
18.3	0
18.4	0
18.5	0
18.6	0
18.7	0
18.8	0
18.9	0
19	0
19.1	0
19.2	0
19.3	0
19.4	0
19.5	0
19.6	0
19.7	0
19.8	0
19.9	0
20	0
20.1	0
20.2	0
20.3	0
20.4	0
20.5	0
20.6	0
20.7	0
20.8	0
20.9	0
21	0
21.1	0
21.2	0
21.3	0
21.4	0
21.5	0
21.6	0
21.7	0
21.8	0
21.9	0
22	0
22.1	0
22.2	0
22.3	0
22.4	0
22.5	0
22.6	0
22.7	0
22.8	0
22.9	0
23	0
23.1	0
23.2	0
23.3	0
23.4	0
23.5	0
23.6	0
23.7	0
23.8	0
23.9	0
24	0
24.1	0
24.2	0
24.3	0
24.4	0
24.5	0
24.6	0
24.7	0
24.8	0
24.9	0
25	0
25.1	0
25.2	0
25.3	0
25.4	0
25.5	0
25.6	0
25.7	0
25.8	0
25.9	0
26	0
26.1	0
26.2	0
26.3	0
26.4	0
26.5	0
26.6	0
26.7	0
26.8	0
26.9	0
27	0
27.1	0
27.2	0
27.3	0
27.4	0
27.5	0
27.6	0
27.7	0
27.8	0
27.9	0
28	0
28.1	0
28.2	0
28.3	0
28.4	0
28.5	0
28.6	0
28.7	0
28.8	0
28.9	0
29	0
29.1	0
29.2	0
29.3	0
29.4	0
29.5	0
29.6	0
29.7	0
29.8	0
29.9	0
30	0
30.1	0
30.2	0
30.3	0
30.4	0
30.5	0
30.6	0
30.7	0
30.8	0
30.9	0
31	0
31.1	0
31.2	0
31.3	0
31.4	0
31.5	0
31.6	0
31.7	0
31.8	0
31.9	0
32	0
32.1	0
32.2	0
32.3	0
32.4	0
32.5	0
32.6	0
32.7	0
32.8	0
32.9	0
33	0
33.1	0
33.2	0
33.3	0
33.4	0
33.5	0
33.6	0
33.7	0
33.8	0
33.9	0
34	0
34.1	0
34.2	0
34.3	0
34.4	0
34.5	0
34.6	0
34.7	0
34.8	0
34.9	0
35	0
35.1	0
35.2	0
35.3	0
35.4	0
35.5	0
35.6	0
35.7	0
35.8	0
35.9	0
36	0
36.1	0
36.2	0
36.3	0
36.4	0
36.5	0
36.6	0
36.7	0
36.8	0
36.9	0
37	0
37.1	0
37.2	0
37.3	0
37.4	0
37.5	0
37.6	0
37.7	0
37.8	0
37.9	0
38	0
38.1	0
38.2	0
38.3	0
38.4	0
38.5	0
38.6	0
38.7	0
38.8	0
38.9	0
39	0
39.1	0
39.2	0
39.3	0
39.4	0
39.5	0
39.6	0
39.7	0
39.8	0
39.9	0
40	0
40.1	0
40.2	0
40.3	0
40.4	0
40.5	0
40.6	0
40.7	0
40.8	0
40.9	0
41	0
41.1	0
41.2	0
41.3	0
41.4	0
41.5	0
41.6	0
41.7	0
41.8	0
41.9	0
42	0
42.1	0
42.2	0
42.3	0
42.4	0
42.5	0
42.6	0
42.7	0
42.8	0
42.9	0
43	0
43.1	0
43.2	0
43.3	0
43.4	0
43.5	0
43.6	0
43.7	0
43.8	0
43.9	0
44	0
44.1	0
44.2	0
44.3	0
44.4	0
44.5	0
44.6	0
44.7	0
44.8	0
44.9	0
45	0
45.1	0
45.2	0
45.3	0
45.4	0
45.5	0
45.6	0
45.7	0
45.8	0
45.9	0
46	0
46.1	0
46.2	0
46.3	0
46.4	0
46.5	0
46.6	0
46.7	0
46.8	0
46.9	0
47	0
47.1	0
47.2	0
47.3	0
47.4	0
47.5	0
47.6	0
47.7	0
47.8	0
47.9	0
48	0
48.1	0
48.2	0
48.3	0
48.4	0
48.5	0
48.6	0
48.7	0
48.8	0
48.9	0
49	0
49.1	0
49.2	0
49.3	0
49.4	0
49.5	0
49.6	0
49.7	0
49.8	0
49.9	0
50	0
50.1	0
50.2	0
50.3	0
50.4	0
50.5	0
50.6	0
50.7	0
50.8	0
50.9	0
51	0
51.1	0
51.2	0
51.3	0
51.4	0
51.5	0
51.6	0
51.7	0
51.8	0
51.9	0
52	0
52.1	0
52.2	0
52.3	0
52.4	0
52.5	0
52.6	0
52.7	0
52.8	0
52.9	0
53	0
53.1	0
53.2	0
53.3	0
53.4	0
53.5	0
53.6	0
53.7	0
53.8	0
53.9	0
54	0
54.1	0
54.2	0
54.3	0
54.4	0
54.5	0
54.6	0
54.7	0
54.8	0
54.9	0
55	0
55.1	0
55.2	0
55.3	0
55.4	0
55.5	0
55.6	0
55.7	0
55.8	0
55.9	0
56	0
56.1	0
56.2	0
56.3	0
56.4	0
56.5	0
56.6	0
56.7	0
56.8	0
56.9	0
57	0
57.1	0
57.2	0
57.3	0
57.4	0
57.5	0
57.6	0
57.7	0
57.8	0
57.9	0
58	0
58.1	0
58.2	0
58.3	0
58.4	0
58.5	0
58.6	0
58.7	0
58.8	0
58.9	0
59	0
59.1	0
59.2	0
59.3	0
59.4	0
59.5	0
59.6	0
59.7	0
59.8	0
59.9	0
60	0
60.1	0
60.2	0
60.3	0
60.4	0
60.5	0
60.6	0
60.7	0
60.8	0
60.9	0
61	0
61.1	0
61.2	0
61.3	0
61.4	0
61.5	0
61.6	0
61.7	0
61.8	0
61.9	0
62	0
62.1	0
62.2	0
62.3	0
62.4	0
62.5	0
62.6	0
62.7	0
62.8	0
62.9	0
63	0
63.1	0
63.2	0
63.3	0
63.4	0
63.5	0
63.6	0
63.7	0
63.8	0
63.9	0
64	0
64.1	0
64.2	0
64.3	0
64.4	0
64.5	0
64.6	0
64.7	0
64.8	0
64.9	0
65	0
65.1	0
65.2	0
65.3	0
65.4	0
65.5	0
65.6	0
65.7	0
65.8	0
65.9	0
66	0
66.1	0
66.2	0
66.3	0
66.4	0
66.5	0
66.6	0
66.7	0
66.8	0
66.9	0
67	0
67.1	0
67.2	0
67.3	0
67.4	0
67.5	0
67.6	0
67.7	0
67.8	0
67.9	0
68	0
68.1	0
68.2	0
68.3	0
68.4	0
68.5	0
68.6	0
68.7	0
68.8	0
68.9	0
69	0
69.1	0
69.2	0
69.3	0
69.4	0
69.5	0
69.6	0
69.7	0
69.8	0
69.9	0
70	0
70.1	0
70.2	0
70.3	0
70.4	0
70.5	0
70.6	0
70.7	0
70.8	0
70.9	0
71	0
71.1	0
71.2	0
71.3	0
71.4	0
71.5	0
71.6	0
71.7	0
71.8	0
71.9	0
72	0
72.1	0
72.2	0
72.3	0
72.4	0
72.5	0
72.6	0
72.7	0
72.8	0
72.9	0
73	0
73.1	0
73.2	0
73.3	0
73.4	0
73.5	0
73.6	0
73.7	0
73.8	0
73.9	0
74	0
74.1	0
74.2	0
74.3	0
74.4	0
74.5	0
74.6	0
74.7	0
74.8	0
74.9	0
75	0
75.1	0
75.2	0
75.3	0
75.4	0
75.5	0
75.6	0
75.7	0
75.8	0
75.9	0
76	0
76.1	0
76.2	0
76.3	0
76.4	0
76.5	0
76.6	0
76.7	0
76.8	0
76.9	0
77	0
77.1	0
77.2	0
77.3	0
77.4	0
77.5	0
77.6	0
77.7	0
77.8	0
77.9	0
78	0
78.1	0
78.2	0
78.3	0
78.4	0
78.5	0
78.6	0
78.7	0
78.8	0
78.9	0
79	0
79.1	0
79.2	0
79.3	0
79.4	0
79.5	0
79.6	0
79.7	0
79.8	0
79.9	0
80	0
80.1	0
80.2	0
80.3	0
80.4	0
80.5	0
80.6	0
80.7	0
80.8	0
80.9	0
81	0
81.1	0
81.2	0
81.3	0
81.4	0
81.5	0
81.6	0
81.7	0
81.8	0
81.9	0
82	0
82.1	0
82.2	0
82.3	0
82.4	0
82.5	0
82.6	0
82.7	0
82.8	0
82.9	0
83	0
83.1	0
83.2	0
83.3	0
83.4	0
83.5	0
83.6	0
83.7	0
83.8	0
83.9	0
84	0
84.1	0
84.2	0
84.3	0
84.4	0
84.5	0
84.6	0
84.7	0
84.8	0
84.9	0
85	0
85.1	0
85.2	0
85.3	0
85.4	0
85.5	0
85.6	0
85.7	0
85.8	0
85.9	0
86	0
86.1	0
86.2	0
86.3	0
86.4	0
86.5	0
86.6	0
86.7	0
86.8	0
86.9	0
87	0
87.1	0
87.2	0
87.3	0
87.4	0
87.5	0
87.6	0
87.7	0
87.8	0
87.9	0
88	0
88.1	0
88.2	0
88.3	0
88.4	0
88.5	0
88.6	0
88.7	0
88.8	0
88.9	0
89	0
89.1	0
89.2	0
89.3	0
89.4	0
89.5	0
89.6	0
89.7	0
89.8	0
89.9	0
90	0
90.1	0
90.2	0
90.3	0
90.4	0
90.5	0
90.6	0
90.7	0
90.8	0
90.9	0
91	0
91.1	0
91.2	0
91.3	0
91.4	0
91.5	0
91.6	0
91.7	0
91.8	0
91.9	0
92	0
92.1	0
92.2	0
92.3	0
92.4	0
92.5	0
92.6	0
92.7	0
92.8	0
92.9	0
93	0
93.1	0
93.2	0
93.3	0
93.4	0
93.5	0
93.6	0
93.7	0
93.8	0
93.9	0
94	0
94.1	0
94.2	0
94.3	0
94.4	0
94.5	0
94.6	0
94.7	0
94.8	0
94.9	0
95	0
95.1	0
95.2	0
95.3	0
95.4	0
95.5	0
95.6	0
95.7	0
95.8	0
95.9	0
96	0
96.1	0
96.2	0
96.3	0
96.4	0
96.5	0
96.6	0
96.7	0
96.8	0
96.9	0
97	0
97.1	0
97.2	0
97.3	0
97.4	0
97.5	0
97.6	0
97.7	0
97.8	0
97.9	0
98	0
98.1	0
98.2	0
98.3	0
98.4	0
98.5	0
98.6	0
98.7	0
98.8	0
98.9	0
99	0
99.1	0
99.2	0
99.3	0
99.4	0
99.5	0
99.6	0
99.7	0
99.8	0
99.9	0
100	0
100.1	0.02943
100.2	0.05663
100.3	0.08272
100.4	0.10827
100.5	0.13186
100.6	0.15427
100.7	0.17583
100.8	0.19545
100.9	0.21334
101	0.23174
101.1	0.24918
101.2	0.26522
101.3	0.28081
101.4	0.29501
101.5	0.30844
101.6	0.32085
101.7	0.33325
101.8	0.34514
101.9	0.35634
102	0.36649
102.1	0.37539
102.2	0.38487
102.3	0.39374
102.4	0.40242
102.5	0.40951
102.6	0.41688
102.7	0.42359
102.8	0.43011
102.9	0.4365
103	0.44321
103.1	0.44903
103.2	0.45428
103.3	0.45938
103.4	0.46441
103.5	0.46927
103.6	0.47367
103.7	0.47792
103.8	0.4816
103.9	0.486
104	0.48977
104.1	0.49392
104.2	0.49657
104.3	0.49933
104.4	0.50256
104.5	0.50552
104.6	0.50798
104.7	0.51012
104.8	0.51283
104.9	0.51499
105	0.51678
105.1	0.51959
105.2	0.52182
105.3	0.52388
105.4	0.52503
105.5	0.52675
105.6	0.52892
105.7	0.53089
105.8	0.53202
105.9	0.53315
106	0.53399
106.1	0.53513
106.2	0.53651
106.3	0.53767
106.4	0.53903
106.5	0.54039
106.6	0.54177
106.7	0.54247
106.8	0.54414
106.9	0.54522
107	0.54666
107.1	0.54783
107.2	0.54817
107.3	0.54898
107.4	0.55028
107.5	0.55103
107.6	0.55232
107.7	0.55373
107.8	0.55436
107.9	0.55573
108	0.55689
108.1	0.55732
108.2	0.55812
108.3	0.55853
108.4	0.55931
108.5	0.55955
108.6	0.56005
108.7	0.56004
108.8	0.56074
108.9	0.56154
109	0.5619
109.1	0.56309
109.2	0.56387
109.3	0.56434
109.4	0.56507
109.5	0.56571
109.6	0.56634
109.7	0.56696
109.8	0.56734
109.9	0.56732
110	0.56785
110.1	0.5684
110.2	0.5695
110.3	0.57
110.4	0.56973
110.5	0.57015
110.6	0.56996
110.7	0.56971
110.8	0.57032
110.9	0.57069
111	0.57162
111.1	0.57216
111.2	0.57264
111.3	0.5736
111.4	0.57424
111.5	0.57486
111.6	0.57537
111.7	0.57547
111.8	0.57546
111.9	0.57589
112	0.57665
112.1	0.57681
112.2	0.57744
112.3	0.57823
112.4	0.57861
112.5	0.57872
112.6	0.57882
112.7	0.57905
112.8	0.57934
112.9	0.58014
113	0.58013
113.1	0.58026
113.2	0.58053
113.3	0.5809
113.4	0.58068
113.5	0.58061
113.6	0.58047
113.7	0.58101
113.8	0.58093
113.9	0.58132
114	0.5816
114.1	0.58168
114.2	0.58223
114.3	0.58285
114.4	0.58299
114.5	0.5836
114.6	0.58402
114.7	0.58428
114.8	0.58446
114.9	0.58472
115	0.5848
115.1	0.58544
115.2	0.58595
115.3	0.58625
115.4	0.58657
115.5	0.58653
115.6	0.58657
115.7	0.58662
115.8	0.58702
115.9	0.58825
116	0.58858
116.1	0.5888
116.2	0.58891
116.3	0.58939
116.4	0.58996
116.5	0.59067
116.6	0.59105
116.7	0.59087
116.8	0.59175
116.9	0.59261
117	0.59218
117.1	0.59205
117.2	0.59237
117.3	0.59258
117.4	0.59301
117.5	0.5941
117.6	0.595
117.7	0.59601
117.8	0.59613
117.9	0.59613
118	0.59646
118.1	0.59684
118.2	0.59775
118.3	0.59808
118.4	0.59851
118.5	0.59914
118.6	0.59849
118.7	0.59893
118.8	0.59987
118.9	0.60003
119	0.60064
119.1	0.60124
119.2	0.60199
119.3	0.60219
119.4	0.60315
119.5	0.60381
119.6	0.60317
119.7	0.60327
119.8	0.60326
119.9	0.60304
120	0.60331
120.1	0.60453
120.2	0.60505
120.3	0.60533
120.4	0.60594
120.5	0.60581
120.6	0.6063
120.7	0.60682
120.8	0.60624
120.9	0.6067
121	0.60692
121.1	0.60695
121.2	0.60718
121.3	0.60707
121.4	0.60717
121.5	0.60739
121.6	0.60711
121.7	0.60791
121.8	0.60844
121.9	0.60993
122	0.60971
122.1	0.60961
122.2	0.60965
122.3	0.60921
122.4	0.6096
122.5	0.61003
122.6	0.61053
122.7	0.61098
122.8	0.61146
122.9	0.61186
123	0.61209
123.1	0.61253
123.2	0.61309
123.3	0.61307
123.4	0.61344
123.5	0.61436
123.6	0.61422
123.7	0.6141
123.8	0.61457
123.9	0.61477
124	0.61468
124.1	0.61496
124.2	0.61511
124.3	0.61534
124.4	0.61556
124.5	0.61572
124.6	0.6167
124.7	0.61715
124.8	0.61739
124.9	0.61774
125	0.6177
125.1	0.6186
125.2	0.61849
125.3	0.61842
125.4	0.6186
125.5	0.61943
125.6	0.61905
125.7	0.61938
125.8	0.61924
125.9	0.61998
126	0.62045
126.1	0.62113
126.2	0.62114
126.3	0.62133
126.4	0.62129
126.5	0.62109
126.6	0.62089
126.7	0.62129
126.8	0.62125
126.9	0.62173
127	0.62234
127.1	0.62312
127.2	0.62383
127.3	0.62409
127.4	0.62397
127.5	0.62423
127.6	0.62422
127.7	0.62422
127.8	0.62477
127.9	0.62508
128	0.62606
128.1	0.62571
128.2	0.62603
128.3	0.62559
128.4	0.62628
128.5	0.62723
128.6	0.62735
128.7	0.62775
128.8	0.62791
128.9	0.62843
129	0.62819
129.1	0.62839
129.2	0.6288
129.3	0.62882
129.4	0.62951
129.5	0.62972
129.6	0.62954
129.7	0.62977
129.8	0.63003
129.9	0.63035
130	0.6309
130.1	0.63112
130.2	0.63214
130.3	0.63281
130.4	0.63303
130.5	0.63374
130.6	0.63359
130.7	0.63346
130.8	0.63415
130.9	0.6346
131	0.63439
131.1	0.63493
131.2	0.63479
131.3	0.63459
131.4	0.63501
131.5	0.63549
131.6	0.63622
131.7	0.63678
131.8	0.63736
131.9	0.63762
132	0.63742
132.1	0.6375
132.2	0.63794
132.3	0.63852
132.4	0.63879
132.5	0.63927
132.6	0.6392
132.7	0.63956
132.8	0.6393
132.9	0.63922
133	0.63967
133.1	0.63968
133.2	0.6395
133.3	0.63982
133.4	0.63973
133.5	0.63974
133.6	0.63989
133.7	0.64054
133.8	0.64081
133.9	0.64102
134	0.64121
134.1	0.64111
134.2	0.64134
134.3	0.64219
134.4	0.64269
134.5	0.64367
134.6	0.64421
134.7	0.64449
134.8	0.64457
134.9	0.64449
135	0.64478
135.1	0.64499
135.2	0.64542
135.3	0.64562
135.4	0.64571
135.5	0.64634
135.6	0.64594
135.7	0.64598
135.8	0.64566
135.9	0.64659
136	0.64715
136.1	0.64721
136.2	0.64703
136.3	0.64714
136.4	0.6475
136.5	0.6482
136.6	0.64889
136.7	0.64851
136.8	0.64931
136.9	0.64931
137	0.64969
137.1	0.64957
137.2	0.64969
137.3	0.65056
137.4	0.65068
137.5	0.65054
137.6	0.65093
137.7	0.6513
137.8	0.65094
137.9	0.65221
138	0.65237
138.1	0.65215
138.2	0.65219
138.3	0.65211
138.4	0.65268
138.5	0.65288
138.6	0.65357
138.7	0.65394
138.8	0.65388
138.9	0.65417
139	0.65447
139.1	0.65498
139.2	0.65536
139.3	0.6557
139.4	0.65589
139.5	0.65656
139.6	0.65683
139.7	0.6568
139.8	0.65692
139.9	0.65665
140	0.65659
140.1	0.657
140.2	0.6571
140.3	0.65708
140.4	0.65702
140.5	0.65722
140.6	0.65763
140.7	0.65718
140.8	0.65767
140.9	0.6582
141	0.65833
141.1	0.65849
141.2	0.65867
141.3	0.65887
141.4	0.65916
141.5	0.65991
141.6	0.65954
141.7	0.66053
141.8	0.66049
141.9	0.66087
142	0.66101
142.1	0.66111
142.2	0.6609
142.3	0.66132
142.4	0.66056
142.5	0.65998
142.6	0.65949
142.7	0.66003
142.8	0.66047
142.9	0.6607
143	0.66117
143.1	0.66157
143.2	0.66243
143.3	0.66291
143.4	0.66325
143.5	0.66362
143.6	0.66409
143.7	0.66398
143.8	0.66414
143.9	0.66407
144	0.66421
144.1	0.66495
144.2	0.66495
144.3	0.66544
144.4	0.66597
144.5	0.66691
144.6	0.66747
144.7	0.6682
144.8	0.6686
144.9	0.66878
145	0.66932
145.1	0.66954
145.2	0.6687
145.3	0.66864
145.4	0.66865
145.5	0.66887
145.6	0.6693
145.7	0.66947
145.8	0.6695
145.9	0.6697
146	0.67009
146.1	0.66974
146.2	0.67003
146.3	0.66986
146.4	0.67043
146.5	0.67028
146.6	0.67009
146.7	0.6701
146.8	0.67031
146.9	0.6707
147	0.67075
147.1	0.67117
147.2	0.67158
147.3	0.67189
147.4	0.67173
147.5	0.67211
147.6	0.67265
147.7	0.6734
147.8	0.67375
147.9	0.6733
148	0.67352
148.1	0.67395
148.2	0.67454
148.3	0.67459
148.4	0.67447
148.5	0.67442
148.6	0.67477
148.7	0.67482
148.8	0.67513
148.9	0.67554
149	0.67609
149.1	0.67583
149.2	0.6756
149.3	0.67618
149.4	0.67658
149.5	0.67671
149.6	0.67631
149.7	0.67667
149.8	0.67694
149.9	0.67682
150	0.67737
150.1	0.67718
150.2	0.67659
150.3	0.67679
150.4	0.6766
150.5	0.67672
150.6	0.67687
150.7	0.67689
150.8	0.6776
150.9	0.67766
151	0.67812
151.1	0.67836
151.2	0.67887
151.3	0.67847
151.4	0.67913
151.5	0.6794
151.6	0.67991
151.7	0.67987
151.8	0.67935
151.9	0.67923
152	0.67981
152.1	0.68011
152.2	0.68034
152.3	0.68017
152.4	0.68043
152.5	0.68099
152.6	0.68132
152.7	0.68142
152.8	0.68204
152.9	0.68199
153	0.68209
153.1	0.68261
153.2	0.6828
153.3	0.68256
153.4	0.68249
153.5	0.68263
153.6	0.68282
153.7	0.68321
153.8	0.6832
153.9	0.68305
154	0.68317
154.1	0.68328
154.2	0.68378
154.3	0.68399
154.4	0.68473
154.5	0.68478
154.6	0.68478
154.7	0.68502
154.8	0.6855
154.9	0.68606
155	0.68605
155.1	0.68639
155.2	0.68629
155.3	0.68648
155.4	0.6861
155.5	0.68625
155.6	0.68673
155.7	0.68669
155.8	0.68654
155.9	0.6867
156	0.68665
156.1	0.68652
156.2	0.68688
156.3	0.68682
156.4	0.68684
156.5	0.6872
156.6	0.68747
156.7	0.68754
156.8	0.68746
156.9	0.687
157	0.68735
157.1	0.68778
157.2	0.68801
157.3	0.68843
157.4	0.68891
157.5	0.68923
157.6	0.68932
157.7	0.68964
157.8	0.68958
157.9	0.68954
158	0.68986
158.1	0.69007
158.2	0.69063
158.3	0.69112
158.4	0.69161
158.5	0.69155
158.6	0.69169
158.7	0.69194
158.8	0.69188
158.9	0.69186
159	0.69214
159.1	0.69243
159.2	0.69215
159.3	0.69228
159.4	0.69277
159.5	0.69301
159.6	0.69313
159.7	0.6929
159.8	0.69318
159.9	0.69322
160	0.69355
160.1	0.69387
160.2	0.69418
160.3	0.69397
160.4	0.69416
160.5	0.69444
160.6	0.69498
160.7	0.69513
160.8	0.6956
160.9	0.69549
161	0.69493
161.1	0.69503
161.2	0.69481
161.3	0.6945
161.4	0.69476
161.5	0.6951
161.6	0.69524
161.7	0.69564
161.8	0.69554
161.9	0.69571
162	0.69593
162.1	0.69533
162.2	0.69552
162.3	0.69589
162.4	0.69596
162.5	0.69638
162.6	0.69681
162.7	0.6962
162.8	0.69625
162.9	0.6963
163	0.6969
163.1	0.69719
163.2	0.69785
163.3	0.69799
163.4	0.6988
163.5	0.69891
163.6	0.6986
163.7	0.69914
163.8	0.69892
163.9	0.6987
164	0.69928
164.1	0.69974
164.2	0.69999
164.3	0.70048
164.4	0.70081
164.5	0.7013
164.6	0.70111
164.7	0.70102
164.8	0.70123
164.9	0.70161
165	0.70174
165.1	0.70131
165.2	0.70091
165.3	0.70106
165.4	0.70122
165.5	0.7012
165.6	0.70104
165.7	0.70177
165.8	0.70195
165.9	0.70189
166	0.70143
166.1	0.70118
166.2	0.70156
166.3	0.70175
166.4	0.70239
166.5	0.70314
166.6	0.70316
166.7	0.70305
166.8	0.7037
166.9	0.70378
167	0.70346
167.1	0.70335
167.2	0.70357
167.3	0.70388
167.4	0.70324
167.5	0.70344
167.6	0.70331
167.7	0.70284
167.8	0.70282
167.9	0.70234
168	0.70209
168.1	0.70223
168.2	0.70239
168.3	0.70234
168.4	0.70224
168.5	0.70209
168.6	0.70316
168.7	0.70296
168.8	0.70343
168.9	0.7039
169	0.70374
169.1	0.70413
169.2	0.70384
169.3	0.70353
169.4	0.70375
169.5	0.70367
169.6	0.70356
169.7	0.70388
169.8	0.70461
169.9	0.70416
170	0.70441
170.1	0.70477
170.2	0.70482
170.3	0.70502
170.4	0.70498
170.5	0.70525
170.6	0.70582
170.7	0.70642
170.8	0.70734
170.9	0.70694
171	0.70721
171.1	0.70738
171.2	0.70813
171.3	0.70849
171.4	0.70805
171.5	0.70851
171.6	0.70838
171.7	0.7088
171.8	0.70854
171.9	0.70855
172	0.70913
172.1	0.7093
172.2	0.70913
172.3	0.70994
172.4	0.71059
172.5	0.71045
172.6	0.7108
172.7	0.71081
172.8	0.71053
172.9	0.71094
173	0.71147
173.1	0.71159
173.2	0.71171
173.3	0.71181
173.4	0.7113
173.5	0.71091
173.6	0.71114
173.7	0.71145
173.8	0.71138
173.9	0.71172
174	0.71112
174.1	0.71156
174.2	0.7112
174.3	0.71144
174.4	0.71227
174.5	0.71244
174.6	0.71257
174.7	0.71244
174.8	0.71239
174.9	0.71247
175	0.71235
175.1	0.71293
175.2	0.71281
175.3	0.71325
175.4	0.71345
175.5	0.71352
175.6	0.71465
175.7	0.71495
175.8	0.71482
175.9	0.71472
176	0.71514
176.1	0.71449
176.2	0.71406
176.3	0.71414
176.4	0.71418
176.5	0.71415
176.6	0.71452
176.7	0.71498
176.8	0.71479
176.9	0.71529
177	0.71557
177.1	0.71564
177.2	0.71606
177.3	0.71655
177.4	0.71664
177.5	0.71678
177.6	0.71748
177.7	0.71774
177.8	0.71805
177.9	0.71815
178	0.71833
178.1	0.71911
178.2	0.71912
178.3	0.71937
178.4	0.71962
178.5	0.71939
178.6	0.71991
178.7	0.71998
178.8	0.72005
178.9	0.71995
179	0.72003
179.1	0.72008
179.2	0.71994
179.3	0.71963
179.4	0.71988
179.5	0.72049
179.6	0.72012
179.7	0.72071
179.8	0.72102
179.9	0.72121
180	0.72165
180.1	0.72144
180.2	0.72116
180.3	0.72092
180.4	0.72088
180.5	0.72091
180.6	0.72048
180.7	0.72137
180.8	0.72143
180.9	0.72192
181	0.72174
181.1	0.72124
181.2	0.72156
181.3	0.72148
181.4	0.7217
181.5	0.72135
181.6	0.7214
181.7	0.72176
181.8	0.72152
181.9	0.72205
182	0.72197
182.1	0.72255
182.2	0.72261
182.3	0.7224
182.4	0.72233
182.5	0.72138
182.6	0.72158
182.7	0.72196
182.8	0.72187
182.9	0.7221
183	0.72189
183.1	0.72255
183.2	0.72276
183.3	0.72326
183.4	0.72337
183.5	0.72383
183.6	0.72402
183.7	0.72402
183.8	0.72451
183.9	0.72457
184	0.72471
184.1	0.72445
184.2	0.72448
184.3	0.72425
184.4	0.72441
184.5	0.72448
184.6	0.72457
184.7	0.72527
184.8	0.72575
184.9	0.72592
185	0.72586
185.1	0.72552
185.2	0.72593
185.3	0.72632
185.4	0.72619
185.5	0.72624
185.6	0.72609
185.7	0.7257
185.8	0.72579
185.9	0.72547
186	0.72563
186.1	0.72529
186.2	0.72551
186.3	0.72542
186.4	0.726
186.5	0.72581
186.6	0.72577
186.7	0.72561
186.8	0.72615
186.9	0.72721
187	0.72698
187.1	0.72638
187.2	0.72636
187.3	0.72669
187.4	0.72695
187.5	0.72723
187.6	0.72672
187.7	0.72671
187.8	0.72726
187.9	0.7268
188	0.72691
188.1	0.72656
188.2	0.72662
188.3	0.72711
188.4	0.72725
188.5	0.72731
188.6	0.7272
188.7	0.72734
188.8	0.72787
188.9	0.72757
189	0.72793
189.1	0.7281
189.2	0.72861
189.3	0.72854
189.4	0.72869
189.5	0.72902
189.6	0.72894
189.7	0.72923
189.8	0.72976
189.9	0.7299
190	0.72997
190.1	0.73035
190.2	0.72995
190.3	0.73
190.4	0.72994
190.5	0.72988
190.6	0.72998
190.7	0.72951
190.8	0.72901
190.9	0.72977
191	0.73009
191.1	0.73038
191.2	0.72987
191.3	0.72953
191.4	0.72998
191.5	0.72986
191.6	0.72974
191.7	0.72988
191.8	0.72994
191.9	0.73017
192	0.73022
192.1	0.73015
192.2	0.73046
192.3	0.73064
192.4	0.73058
192.5	0.73037
192.6	0.7307
192.7	0.73056
192.8	0.73119
192.9	0.73127
193	0.73129
193.1	0.731
193.2	0.73116
193.3	0.73139
193.4	0.7316
193.5	0.73144
193.6	0.73197
193.7	0.73251
193.8	0.73203
193.9	0.73182
194	0.7323
194.1	0.73226
194.2	0.73223
194.3	0.73228
194.4	0.73259
194.5	0.73229
194.6	0.73229
194.7	0.73219
194.8	0.73264
194.9	0.73283
195	0.73343
195.1	0.7333
195.2	0.7335
195.3	0.73398
195.4	0.73418
195.5	0.73335
195.6	0.73373
195.7	0.73392
195.8	0.73418
195.9	0.73434
196	0.73431
196.1	0.73452
196.2	0.7344
196.3	0.73437
196.4	0.73381
196.5	0.7338
196.6	0.73424
196.7	0.73425
196.8	0.73377
196.9	0.73356
197	0.73416
197.1	0.73395
197.2	0.7342
197.3	0.73421
197.4	0.73438
197.5	0.73487
197.6	0.73456
197.7	0.73471
197.8	0.73518
197.9	0.73487
198	0.73462
198.1	0.73479
198.2	0.73537
198.3	0.73543
198.4	0.73531
198.5	0.73505
198.6	0.73478
198.7	0.73553
198.8	0.73562
198.9	0.73563
199	0.73547
199.1	0.73552
199.2	0.73624
199.3	0.73599
199.4	0.73618
199.5	0.73629
199.6	0.73636
199.7	0.73602
199.8	0.7362
199.9	0.73622
200	0.73657
[truncated: 14,000 more rows]
