# Supplementary material for: Bayesian inference of kinetic schemes for ion channels by Kalman filtering
Source: eLife journal article supplement (doi:10.7554/elife.62714), 2022-05-04
Supplement: fig4-data9 [file 1_Sim_N_50000_Strom_MW_0.5M.xlsx]

## Sheet: 0.5 M
0.1	0
0.2	0
0.3	0
0.4	0
0.5	0
0.6	0
0.7	0
0.8	0
0.9	0
1	0
1.1	0
1.2	0
1.3	0
1.4	0
1.5	0
1.6	0
1.7	0
1.8	0
1.9	0
2	0
2.1	0
2.2	0
2.3	0
2.4	0
2.5	0
2.6	0
2.7	0
2.8	0
2.9	0
3	0
3.1	0
3.2	0
3.3	0
3.4	0
3.5	0
3.6	0
3.7	0
3.8	0
3.9	0
4	0
4.1	0
4.2	0
4.3	0
4.4	0
4.5	0
4.6	0
4.7	0
4.8	0
4.9	0
5	0
5.1	0
5.2	0
5.3	0
5.4	0
5.5	0
5.6	0
5.7	0
5.8	0
5.9	0
6	0
6.1	0
6.2	0
6.3	0
6.4	0
6.5	0
6.6	0
6.7	0
6.8	0
6.9	0
7	0
7.1	0
7.2	0
7.3	0
7.4	0
7.5	0
7.6	0
7.7	0
7.8	0
7.9	0
8	0
8.1	0
8.2	0
8.3	0
8.4	0
8.5	0
8.6	0
8.7	0
8.8	0
8.9	0
9	0
9.1	0
9.2	0
9.3	0
9.4	0
9.5	0
9.6	0
9.7	0
9.8	0
9.9	0
10	0
10.1	0
10.2	0
10.3	0
10.4	0
10.5	0
10.6	0
10.7	0
10.8	0
10.9	0
11	0
11.1	0
11.2	0
11.3	0
11.4	0
11.5	0
11.6	0
11.7	0
11.8	0
11.9	0
12	0
12.1	0
12.2	0
12.3	0
12.4	0
12.5	0
12.6	0
12.7	0
12.8	0
12.9	0
13	0
13.1	0
13.2	0
13.3	0
13.4	0
13.5	0
13.6	0
13.7	0
13.8	0
13.9	0
14	0
14.1	0
14.2	0
14.3	0
14.4	0
14.5	0
14.6	0
14.7	0
14.8	0
14.9	0
15	0
15.1	0
15.2	0
15.3	0
15.4	0
15.5	0
15.6	0
15.7	0
15.8	0
15.9	0
16	0
16.1	0
16.2	0
16.3	0
16.4	0
16.5	0
16.6	0
16.7	0
16.8	0
16.9	0
17	0
17.1	0
17.2	0
17.3	0
17.4	0
17.5	0
17.6	0
17.7	0
17.8	0
17.9	0
18	0
18.1	0
18.2	0
18.3	0
18.4	0
18.5	0
18.6	0
18.7	0
18.8	0
18.9	0
19	0
19.1	0
19.2	0
19.3	0
19.4	0
19.5	0
19.6	0
19.7	0
19.8	0
19.9	0
20	0
20.1	0
20.2	0
20.3	0
20.4	0
20.5	0
20.6	0
20.7	0
20.8	0
20.9	0
21	0
21.1	0
21.2	0
21.3	0
21.4	0
21.5	0
21.6	0
21.7	0
21.8	0
21.9	0
22	0
22.1	0
22.2	0
22.3	0
22.4	0
22.5	0
22.6	0
22.7	0
22.8	0
22.9	0
23	0
23.1	0
23.2	0
23.3	0
23.4	0
23.5	0
23.6	0
23.7	0
23.8	0
23.9	0
24	0
24.1	0
24.2	0
24.3	0
24.4	0
24.5	0
24.6	0
24.7	0
24.8	0
24.9	0
25	0
25.1	0
25.2	0
25.3	0
25.4	0
25.5	0
25.6	0
25.7	0
25.8	0
25.9	0
26	0
26.1	0
26.2	0
26.3	0
26.4	0
26.5	0
26.6	0
26.7	0
26.8	0
26.9	0
27	0
27.1	0
27.2	0
27.3	0
27.4	0
27.5	0
27.6	0
27.7	0
27.8	0
27.9	0
28	0
28.1	0
28.2	0
28.3	0
28.4	0
28.5	0
28.6	0
28.7	0
28.8	0
28.9	0
29	0
29.1	0
29.2	0
29.3	0
29.4	0
29.5	0
29.6	0
29.7	0
29.8	0
29.9	0
30	0
30.1	0
30.2	0
30.3	0
30.4	0
30.5	0
30.6	0
30.7	0
30.8	0
30.9	0
31	0
31.1	0
31.2	0
31.3	0
31.4	0
31.5	0
31.6	0
31.7	0
31.8	0
31.9	0
32	0
32.1	0
32.2	0
32.3	0
32.4	0
32.5	0
32.6	0
32.7	0
32.8	0
32.9	0
33	0
33.1	0
33.2	0
33.3	0
33.4	0
33.5	0
33.6	0
33.7	0
33.8	0
33.9	0
34	0
34.1	0
34.2	0
34.3	0
34.4	0
34.5	0
34.6	0
34.7	0
34.8	0
34.9	0
35	0
35.1	0
35.2	0
35.3	0
35.4	0
35.5	0
35.6	0
35.7	0
35.8	0
35.9	0
36	0
36.1	0
36.2	0
36.3	0
36.4	0
36.5	0
36.6	0
36.7	0
36.8	0
36.9	0
37	0
37.1	0
37.2	0
37.3	0
37.4	0
37.5	0
37.6	0
37.7	0
37.8	0
37.9	0
38	0
38.1	0
38.2	0
38.3	0
38.4	0
38.5	0
38.6	0
38.7	0
38.8	0
38.9	0
39	0
39.1	0
39.2	0
39.3	0
39.4	0
39.5	0
39.6	0
39.7	0
39.8	0
39.9	0
40	0
40.1	0
40.2	0
40.3	0
40.4	0
40.5	0
40.6	0
40.7	0
40.8	0
40.9	0
41	0
41.1	0
41.2	0
41.3	0
41.4	0
41.5	0
41.6	0
41.7	0
41.8	0
41.9	0
42	0
42.1	0
42.2	0
42.3	0
42.4	0
42.5	0
42.6	0
42.7	0
42.8	0
42.9	0
43	0
43.1	0
43.2	0
43.3	0
43.4	0
43.5	0
43.6	0
43.7	0
43.8	0
43.9	0
44	0
44.1	0
44.2	0
44.3	0
44.4	0
44.5	0
44.6	0
44.7	0
44.8	0
44.9	0
45	0
45.1	0
45.2	0
45.3	0
45.4	0
45.5	0
45.6	0
45.7	0
45.8	0
45.9	0
46	0
46.1	0
46.2	0
46.3	0
46.4	0
46.5	0
46.6	0
46.7	0
46.8	0
46.9	0
47	0
47.1	0
47.2	0
47.3	0
47.4	0
47.5	0
47.6	0
47.7	0
47.8	0
47.9	0
48	0
48.1	0
48.2	0
48.3	0
48.4	0
48.5	0
48.6	0
48.7	0
48.8	0
48.9	0
49	0
49.1	0
49.2	0
49.3	0
49.4	0
49.5	0
49.6	0
49.7	0
49.8	0
49.9	0
50	0
50.1	0
50.2	0
50.3	0
50.4	0
50.5	0
50.6	0
50.7	0
50.8	0
50.9	0
51	0
51.1	0
51.2	0
51.3	0
51.4	0
51.5	0
51.6	0
51.7	0
51.8	0
51.9	0
52	0
52.1	0
52.2	0
52.3	0
52.4	0
52.5	0
52.6	0
52.7	0
52.8	0
52.9	0
53	0
53.1	0
53.2	0
53.3	0
53.4	0
53.5	0
53.6	0
53.7	0
53.8	0
53.9	0
54	0
54.1	0
54.2	0
54.3	0
54.4	0
54.5	0
54.6	0
54.7	0
54.8	0
54.9	0
55	0
55.1	0
55.2	0
55.3	0
55.4	0
55.5	0
55.6	0
55.7	0
55.8	0
55.9	0
56	0
56.1	0
56.2	0
56.3	0
56.4	0
56.5	0
56.6	0
56.7	0
56.8	0
56.9	0
57	0
57.1	0
57.2	0
57.3	0
57.4	0
57.5	0
57.6	0
57.7	0
57.8	0
57.9	0
58	0
58.1	0
58.2	0
58.3	0
58.4	0
58.5	0
58.6	0
58.7	0
58.8	0
58.9	0
59	0
59.1	0
59.2	0
59.3	0
59.4	0
59.5	0
59.6	0
59.7	0
59.8	0
59.9	0
60	0
60.1	0
60.2	0
60.3	0
60.4	0
60.5	0
60.6	0
60.7	0
60.8	0
60.9	0
61	0
61.1	0
61.2	0
61.3	0
61.4	0
61.5	0
61.6	0
61.7	0
61.8	0
61.9	0
62	0
62.1	0
62.2	0
62.3	0
62.4	0
62.5	0
62.6	0
62.7	0
62.8	0
62.9	0
63	0
63.1	0
63.2	0
63.3	0
63.4	0
63.5	0
63.6	0
63.7	0
63.8	0
63.9	0
64	0
64.1	0
64.2	0
64.3	0
64.4	0
64.5	0
64.6	0
64.7	0
64.8	0
64.9	0
65	0
65.1	0
65.2	0
65.3	0
65.4	0
65.5	0
65.6	0
65.7	0
65.8	0
65.9	0
66	0
66.1	0
66.2	0
66.3	0
66.4	0
66.5	0
66.6	0
66.7	0
66.8	0
66.9	0
67	0
67.1	0
67.2	0
67.3	0
67.4	0
67.5	0
67.6	0
67.7	0
67.8	0
67.9	0
68	0
68.1	0
68.2	0
68.3	0
68.4	0
68.5	0
68.6	0
68.7	0
68.8	0
68.9	0
69	0
69.1	0
69.2	0
69.3	0
69.4	0
69.5	0
69.6	0
69.7	0
69.8	0
69.9	0
70	0
70.1	0
70.2	0
70.3	0
70.4	0
70.5	0
70.6	0
70.7	0
70.8	0
70.9	0
71	0
71.1	0
71.2	0
71.3	0
71.4	0
71.5	0
71.6	0
71.7	0
71.8	0
71.9	0
72	0
72.1	0
72.2	0
72.3	0
72.4	0
72.5	0
72.6	0
72.7	0
72.8	0
72.9	0
73	0
73.1	0
73.2	0
73.3	0
73.4	0
73.5	0
73.6	0
73.7	0
73.8	0
73.9	0
74	0
74.1	0
74.2	0
74.3	0
74.4	0
74.5	0
74.6	0
74.7	0
74.8	0
74.9	0
75	0
75.1	0
75.2	0
75.3	0
75.4	0
75.5	0
75.6	0
75.7	0
75.8	0
75.9	0
76	0
76.1	0
76.2	0
76.3	0
76.4	0
76.5	0
76.6	0
76.7	0
76.8	0
76.9	0
77	0
77.1	0
77.2	0
77.3	0
77.4	0
77.5	0
77.6	0
77.7	0
77.8	0
77.9	0
78	0
78.1	0
78.2	0
78.3	0
78.4	0
78.5	0
78.6	0
78.7	0
78.8	0
78.9	0
79	0
79.1	0
79.2	0
79.3	0
79.4	0
79.5	0
79.6	0
79.7	0
79.8	0
79.9	0
80	0
80.1	0
80.2	0
80.3	0
80.4	0
80.5	0
80.6	0
80.7	0
80.8	0
80.9	0
81	0
81.1	0
81.2	0
81.3	0
81.4	0
81.5	0
81.6	0
81.7	0
81.8	0
81.9	0
82	0
82.1	0
82.2	0
82.3	0
82.4	0
82.5	0
82.6	0
82.7	0
82.8	0
82.9	0
83	0
83.1	0
83.2	0
83.3	0
83.4	0
83.5	0
83.6	0
83.7	0
83.8	0
83.9	0
84	0
84.1	0
84.2	0
84.3	0
84.4	0
84.5	0
84.6	0
84.7	0
84.8	0
84.9	0
85	0
85.1	0
85.2	0
85.3	0
85.4	0
85.5	0
85.6	0
85.7	0
85.8	0
85.9	0
86	0
86.1	0
86.2	0
86.3	0
86.4	0
86.5	0
86.6	0
86.7	0
86.8	0
86.9	0
87	0
87.1	0
87.2	0
87.3	0
87.4	0
87.5	0
87.6	0
87.7	0
87.8	0
87.9	0
88	0
88.1	0
88.2	0
88.3	0
88.4	0
88.5	0
88.6	0
88.7	0
88.8	0
88.9	0
89	0
89.1	0
89.2	0
89.3	0
89.4	0
89.5	0
89.6	0
89.7	0
89.8	0
89.9	0
90	0
90.1	0
90.2	0
90.3	0
90.4	0
90.5	0
90.6	0
90.7	0
90.8	0
90.9	0
91	0
91.1	0
91.2	0
91.3	0
91.4	0
91.5	0
91.6	0
91.7	0
91.8	0
91.9	0
92	0
92.1	0
92.2	0
92.3	0
92.4	0
92.5	0
92.6	0
92.7	0
92.8	0
92.9	0
93	0
93.1	0
93.2	0
93.3	0
93.4	0
93.5	0
93.6	0
93.7	0
93.8	0
93.9	0
94	0
94.1	0
94.2	0
94.3	0
94.4	0
94.5	0
94.6	0
94.7	0
94.8	0
94.9	0
95	0
95.1	0
95.2	0
95.3	0
95.4	0
95.5	0
95.6	0
95.7	0
95.8	0
95.9	0
96	0
96.1	0
96.2	0
96.3	0
96.4	0
96.5	0
96.6	0
96.7	0
96.8	0
96.9	0
97	0
97.1	0
97.2	0
97.3	0
97.4	0
97.5	0
97.6	0
97.7	0
97.8	0
97.9	0
98	0
98.1	0
98.2	0
98.3	0
98.4	0
98.5	0
98.6	0
98.7	0
98.8	0
98.9	0
99	0
99.1	0
99.2	0
99.3	0
99.4	0
99.5	0
99.6	0
99.7	0
99.8	0
99.9	0
100	0
100.1	0
100.2	0
100.3	6e-05
100.4	0.0001
100.5	0.0002
100.6	0.00026
100.7	0.00034
100.8	0.00038
100.9	0.00054
101	0.00074
101.1	0.00086
101.2	0.00106
101.3	0.0012
101.4	0.00142
101.5	0.00168
101.6	0.0019
101.7	0.0021
101.8	0.00242
101.9	0.00278
102	0.00308
102.1	0.0034
102.2	0.00382
102.3	0.00444
102.4	0.00482
102.5	0.0053
102.6	0.00574
102.7	0.0063
102.8	0.00672
102.9	0.00718
103	0.00766
103.1	0.00854
103.2	0.00924
103.3	0.00986
103.4	0.01046
103.5	0.01118
103.6	0.01178
103.7	0.01262
103.8	0.01326
103.9	0.01394
104	0.01454
104.1	0.01528
104.2	0.01598
104.3	0.0169
104.4	0.01756
104.5	0.01844
104.6	0.01936
104.7	0.02008
104.8	0.02086
104.9	0.0217
105	0.02226
105.1	0.023
105.2	0.02382
105.3	0.02484
105.4	0.02556
105.5	0.02642
105.6	0.02726
105.7	0.02792
105.8	0.02874
105.9	0.02946
106	0.0303
106.1	0.03106
106.2	0.03194
106.3	0.03284
106.4	0.03398
106.5	0.03504
106.6	0.03602
106.7	0.0368
106.8	0.03746
106.9	0.03826
107	0.0391
107.1	0.03984
107.2	0.04074
107.3	0.04158
107.4	0.04258
107.5	0.04346
107.6	0.04452
107.7	0.04556
107.8	0.04662
107.9	0.04736
108	0.04828
108.1	0.04898
108.2	0.04958
108.3	0.0506
108.4	0.0516
108.5	0.05252
108.6	0.05336
108.7	0.05416
108.8	0.05498
108.9	0.0559
109	0.05666
109.1	0.05742
109.2	0.05846
109.3	0.05932
109.4	0.06006
109.5	0.06084
109.6	0.06196
109.7	0.06272
109.8	0.06338
109.9	0.06428
110	0.06536
110.1	0.06608
110.2	0.06694
110.3	0.06768
110.4	0.06852
110.5	0.06934
110.6	0.07032
110.7	0.07112
110.8	0.07194
110.9	0.07282
111	0.07368
111.1	0.07432
111.2	0.07518
111.3	0.07602
111.4	0.07692
111.5	0.07778
111.6	0.0785
111.7	0.07922
111.8	0.07994
111.9	0.08076
112	0.08184
112.1	0.08252
112.2	0.08334
112.3	0.0841
112.4	0.085
112.5	0.08576
112.6	0.0864
112.7	0.08712
112.8	0.08782
112.9	0.08852
113	0.08926
113.1	0.09
113.2	0.0908
113.3	0.09146
113.4	0.09196
113.5	0.09294
113.6	0.09358
113.7	0.09432
113.8	0.0951
113.9	0.09594
114	0.09654
114.1	0.09726
114.2	0.0979
114.3	0.09862
114.4	0.09944
114.5	0.10044
114.6	0.10102
114.7	0.10176
114.8	0.10256
114.9	0.10338
115	0.10416
115.1	0.10488
115.2	0.10548
115.3	0.1061
115.4	0.10676
115.5	0.10756
115.6	0.1083
115.7	0.10902
115.8	0.10986
115.9	0.11058
116	0.11118
116.1	0.11174
116.2	0.1124
116.3	0.113
116.4	0.11398
116.5	0.11472
116.6	0.11526
116.7	0.11608
116.8	0.11708
116.9	0.11794
117	0.1184
117.1	0.1188
117.2	0.11952
117.3	0.12036
117.4	0.1212
117.5	0.12186
117.6	0.12248
117.7	0.1231
117.8	0.12384
117.9	0.12462
118	0.12538
118.1	0.12616
118.2	0.12672
118.3	0.12762
118.4	0.12846
118.5	0.12928
118.6	0.13008
118.7	0.1308
118.8	0.1315
118.9	0.13216
119	0.13312
119.1	0.13394
119.2	0.13476
119.3	0.13542
119.4	0.13626
119.5	0.13686
119.6	0.13754
119.7	0.13804
119.8	0.13872
119.9	0.13938
120	0.14006
120.1	0.14098
120.2	0.14172
120.3	0.14224
120.4	0.14296
120.5	0.14362
120.6	0.14422
120.7	0.14482
120.8	0.14518
120.9	0.14592
121	0.1465
121.1	0.1471
121.2	0.14792
121.3	0.1485
121.4	0.1492
121.5	0.14978
121.6	0.15044
121.7	0.15104
121.8	0.1518
121.9	0.15276
122	0.15334
122.1	0.15382
122.2	0.15452
122.3	0.15538
122.4	0.15602
122.5	0.15652
122.6	0.15724
122.7	0.15794
122.8	0.15862
122.9	0.159
123	0.15978
123.1	0.16038
123.2	0.16104
123.3	0.16162
123.4	0.16224
123.5	0.16306
123.6	0.16352
123.7	0.16406
123.8	0.16462
123.9	0.16522
124	0.16564
124.1	0.16612
124.2	0.1666
124.3	0.16728
124.4	0.1678
124.5	0.16864
124.6	0.16944
124.7	0.16972
124.8	0.17032
124.9	0.17096
125	0.1716
125.1	0.17218
125.2	0.17264
125.3	0.17332
125.4	0.17414
125.5	0.17448
125.6	0.17514
125.7	0.17616
125.8	0.17656
125.9	0.17704
126	0.17782
126.1	0.17864
126.2	0.17926
126.3	0.17984
126.4	0.18038
126.5	0.18108
126.6	0.1815
126.7	0.1822
126.8	0.18268
126.9	0.18346
127	0.18414
127.1	0.18502
127.2	0.1856
127.3	0.18628
127.4	0.18696
127.5	0.18778
127.6	0.18824
127.7	0.18892
127.8	0.18954
127.9	0.19002
128	0.19054
128.1	0.19114
128.2	0.19188
128.3	0.19268
128.4	0.1931
128.5	0.1934
128.6	0.19418
128.7	0.19458
128.8	0.19516
128.9	0.19556
129	0.19606
129.1	0.19674
129.2	0.1974
129.3	0.19814
129.4	0.19874
129.5	0.19952
129.6	0.20002
129.7	0.20066
129.8	0.2011
129.9	0.20176
130	0.20224
130.1	0.2029
130.2	0.2035
130.3	0.20412
130.4	0.20452
130.5	0.205
130.6	0.20562
130.7	0.20602
130.8	0.20648
130.9	0.2071
131	0.20746
131.1	0.20776
131.2	0.208
131.3	0.20846
131.4	0.20898
131.5	0.20958
131.6	0.21006
131.7	0.21056
131.8	0.21118
131.9	0.21168
132	0.21222
132.1	0.21286
132.2	0.21324
132.3	0.21372
132.4	0.21432
132.5	0.21482
132.6	0.21526
132.7	0.2159
132.8	0.21652
132.9	0.21714
133	0.21768
133.1	0.21822
133.2	0.21876
133.3	0.21936
133.4	0.22014
133.5	0.22066
133.6	0.2211
133.7	0.2217
133.8	0.22236
133.9	0.22274
134	0.22308
134.1	0.22356
134.2	0.22398
134.3	0.22418
134.4	0.2247
134.5	0.22544
134.6	0.22598
134.7	0.22638
134.8	0.227
134.9	0.22734
135	0.22778
135.1	0.22828
135.2	0.22902
135.3	0.22928
135.4	0.22998
135.5	0.23042
135.6	0.23088
135.7	0.23128
135.8	0.23182
135.9	0.23264
136	0.23302
136.1	0.23344
136.2	0.23404
136.3	0.2344
136.4	0.23486
136.5	0.23528
136.6	0.23582
136.7	0.23612
136.8	0.2365
136.9	0.23676
137	0.23718
137.1	0.23776
137.2	0.23832
137.3	0.23882
137.4	0.23924
137.5	0.23968
137.6	0.2402
137.7	0.24086
137.8	0.24124
137.9	0.24178
138	0.24228
138.1	0.24286
138.2	0.24344
138.3	0.2438
138.4	0.24414
138.5	0.24468
138.6	0.24516
138.7	0.24588
138.8	0.24636
138.9	0.2468
139	0.24692
139.1	0.2473
139.2	0.24788
139.3	0.24838
139.4	0.24888
139.5	0.2493
139.6	0.24984
139.7	0.25042
139.8	0.25112
139.9	0.25142
140	0.2518
140.1	0.2521
140.2	0.25256
140.3	0.25298
140.4	0.2535
140.5	0.25408
140.6	0.25462
140.7	0.25522
140.8	0.25566
140.9	0.25598
141	0.25642
141.1	0.25668
141.2	0.25722
141.3	0.25752
141.4	0.25814
141.5	0.25866
141.6	0.25926
141.7	0.25976
141.8	0.26016
141.9	0.26068
142	0.2611
142.1	0.2615
142.2	0.26198
142.3	0.26254
142.4	0.26316
142.5	0.26376
142.6	0.2643
142.7	0.26472
142.8	0.26508
142.9	0.26568
143	0.2658
143.1	0.26618
143.2	0.26654
143.3	0.26692
143.4	0.26732
143.5	0.26766
143.6	0.26814
143.7	0.2687
143.8	0.26914
143.9	0.26964
144	0.26998
144.1	0.27066
144.2	0.27132
144.3	0.27188
144.4	0.27248
144.5	0.27292
144.6	0.27348
144.7	0.274
144.8	0.27442
144.9	0.27488
145	0.2751
145.1	0.27542
145.2	0.27576
145.3	0.27614
145.4	0.27662
145.5	0.27736
145.6	0.27776
145.7	0.27828
145.8	0.2786
145.9	0.27878
146	0.2791
146.1	0.27952
146.2	0.2798
146.3	0.28028
146.4	0.2807
146.5	0.2814
146.6	0.28174
146.7	0.28214
146.8	0.28264
146.9	0.28318
147	0.28376
147.1	0.28432
147.2	0.28462
147.3	0.28528
147.4	0.28558
147.5	0.28582
147.6	0.28614
147.7	0.28662
147.8	0.287
147.9	0.28752
148	0.28786
148.1	0.28832
148.2	0.28872
148.3	0.28908
148.4	0.28934
148.5	0.2897
148.6	0.29016
148.7	0.29048
148.8	0.29084
148.9	0.29146
149	0.29186
149.1	0.29222
149.2	0.29258
149.3	0.29292
149.4	0.29342
149.5	0.2936
149.6	0.29408
149.7	0.29426
149.8	0.29484
149.9	0.29506
150	0.29568
150.1	0.29584
150.2	0.29632
150.3	0.2965
150.4	0.29678
150.5	0.2972
150.6	0.2976
150.7	0.29806
150.8	0.2983
150.9	0.29846
151	0.29892
151.1	0.29926
151.2	0.29988
151.3	0.30054
151.4	0.30076
151.5	0.30114
151.6	0.30164
151.7	0.302
151.8	0.30224
151.9	0.30286
152	0.30308
152.1	0.30338
152.2	0.30368
152.3	0.30398
152.4	0.30438
152.5	0.30478
152.6	0.3049
152.7	0.30532
152.8	0.30566
152.9	0.306
153	0.30652
153.1	0.30666
153.2	0.30744
153.3	0.30772
153.4	0.30786
153.5	0.30822
153.6	0.3083
153.7	0.30862
153.8	0.30918
153.9	0.30914
154	0.3096
154.1	0.3102
154.2	0.3105
154.3	0.31104
154.4	0.31144
154.5	0.31152
154.6	0.31182
154.7	0.31214
154.8	0.3124
154.9	0.3129
155	0.31336
155.1	0.31378
155.2	0.31418
155.3	0.31472
155.4	0.31512
155.5	0.31568
155.6	0.316
155.7	0.31634
155.8	0.31652
155.9	0.3169
156	0.3172
156.1	0.3175
156.2	0.3179
156.3	0.31816
156.4	0.31844
156.5	0.31874
156.6	0.31896
156.7	0.3193
156.8	0.31974
156.9	0.3201
157	0.32064
157.1	0.32078
157.2	0.32138
157.3	0.32188
157.4	0.32242
157.5	0.32256
157.6	0.32308
157.7	0.32316
157.8	0.32372
157.9	0.3239
158	0.32452
158.1	0.3249
158.2	0.3252
158.3	0.32566
158.4	0.32618
158.5	0.32654
158.6	0.32664
158.7	0.32692
158.8	0.32706
158.9	0.32736
159	0.3277
159.1	0.32832
159.2	0.32872
159.3	0.32872
159.4	0.3291
159.5	0.32942
159.6	0.32976
159.7	0.33018
159.8	0.33064
159.9	0.33104
160	0.33144
160.1	0.3317
160.2	0.33206
160.3	0.33222
160.4	0.33268
160.5	0.33316
160.6	0.33342
160.7	0.3337
160.8	0.334
160.9	0.33416
161	0.3344
161.1	0.33492
161.2	0.33538
161.3	0.3356
161.4	0.33582
161.5	0.33622
161.6	0.3365
161.7	0.33696
161.8	0.33732
161.9	0.33778
162	0.33812
162.1	0.33838
162.2	0.33834
162.3	0.33874
162.4	0.33898
162.5	0.33954
162.6	0.33996
162.7	0.34036
162.8	0.34092
162.9	0.34118
163	0.3415
163.1	0.34208
163.2	0.34244
163.3	0.3426
163.4	0.343
163.5	0.34322
163.6	0.34354
163.7	0.34372
163.8	0.34406
163.9	0.34426
164	0.34442
164.1	0.34492
164.2	0.3452
164.3	0.34542
164.4	0.34556
164.5	0.34602
164.6	0.34634
164.7	0.3466
164.8	0.34678
164.9	0.34666
165	0.34682
165.1	0.34718
165.2	0.34742
165.3	0.34772
165.4	0.34804
165.5	0.34838
165.6	0.34858
165.7	0.34888
165.8	0.34926
165.9	0.3497
166	0.34976
166.1	0.35018
166.2	0.35048
166.3	0.35064
166.4	0.35084
166.5	0.35122
166.6	0.35142
166.7	0.35172
166.8	0.35198
166.9	0.35222
167	0.35246
167.1	0.35284
167.2	0.35312
167.3	0.3533
167.4	0.3535
167.5	0.3538
167.6	0.3539
167.7	0.35416
167.8	0.35424
167.9	0.3544
168	0.35482
168.1	0.35514
168.2	0.35534
168.3	0.35586
168.4	0.35624
168.5	0.35676
168.6	0.35702
168.7	0.35734
168.8	0.35764
168.9	0.35776
169	0.35804
169.1	0.35832
169.2	0.35856
169.3	0.35892
169.4	0.35904
169.5	0.35926
169.6	0.35966
169.7	0.35998
169.8	0.36014
169.9	0.3605
170	0.36066
170.1	0.36074
170.2	0.36082
170.3	0.36128
170.4	0.3615
170.5	0.3618
170.6	0.36196
170.7	0.36224
170.8	0.3622
170.9	0.36254
171	0.36298
171.1	0.36312
171.2	0.36356
171.3	0.36372
171.4	0.3638
171.5	0.3641
171.6	0.36416
171.7	0.36462
171.8	0.36494
171.9	0.3652
172	0.36566
172.1	0.36594
172.2	0.36626
172.3	0.36652
172.4	0.36692
172.5	0.36724
172.6	0.36732
172.7	0.3677
172.8	0.3682
172.9	0.3686
173	0.36882
173.1	0.369
173.2	0.3692
173.3	0.36968
173.4	0.37008
173.5	0.37068
173.6	0.37094
173.7	0.3714
173.8	0.37158
173.9	0.37184
174	0.37226
174.1	0.37284
174.2	0.37316
174.3	0.3736
174.4	0.37392
174.5	0.37404
174.6	0.37444
174.7	0.37484
174.8	0.3752
174.9	0.37546
175	0.37592
175.1	0.37598
175.2	0.37614
175.3	0.37634
175.4	0.3766
175.5	0.37692
175.6	0.37704
175.7	0.37714
175.8	0.3774
175.9	0.37752
176	0.3778
176.1	0.37798
176.2	0.37828
176.3	0.37838
176.4	0.3785
176.5	0.3786
176.6	0.379
176.7	0.37918
176.8	0.37934
176.9	0.37938
177	0.37974
177.1	0.38004
177.2	0.38018
177.3	0.38044
177.4	0.38034
177.5	0.38074
177.6	0.38096
177.7	0.38132
177.8	0.38126
177.9	0.38136
178	0.38116
178.1	0.38142
178.2	0.3818
178.3	0.38202
178.4	0.38216
178.5	0.38264
178.6	0.38286
178.7	0.38286
178.8	0.38338
178.9	0.3838
179	0.38416
179.1	0.38434
179.2	0.38456
179.3	0.38484
179.4	0.385
179.5	0.38538
179.6	0.38558
179.7	0.38602
179.8	0.38626
179.9	0.38642
180	0.38682
180.1	0.38706
180.2	0.38746
180.3	0.3878
180.4	0.38796
180.5	0.3882
180.6	0.38834
180.7	0.38864
180.8	0.38862
180.9	0.3889
181	0.38904
181.1	0.38932
181.2	0.38948
181.3	0.38972
181.4	0.38982
181.5	0.39032
181.6	0.39028
181.7	0.39058
181.8	0.39054
181.9	0.39072
182	0.39096
182.1	0.39102
182.2	0.3912
182.3	0.39146
182.4	0.39182
182.5	0.39202
182.6	0.39228
182.7	0.39228
182.8	0.39256
182.9	0.39274
183	0.39298
183.1	0.39314
183.2	0.39322
183.3	0.39342
183.4	0.39364
183.5	0.39426
183.6	0.3944
183.7	0.39484
183.8	0.39496
183.9	0.39504
184	0.39528
184.1	0.39536
184.2	0.39582
184.3	0.39588
184.4	0.39604
184.5	0.39622
184.6	0.39644
184.7	0.39684
184.8	0.39682
184.9	0.39692
185	0.39696
185.1	0.39728
185.2	0.39734
185.3	0.39752
185.4	0.39782
185.5	0.3983
185.6	0.39856
185.7	0.39856
185.8	0.39878
185.9	0.39896
186	0.39916
186.1	0.39956
186.2	0.39984
186.3	0.39978
186.4	0.40006
186.5	0.40028
186.6	0.40062
186.7	0.40068
186.8	0.4009
186.9	0.40108
187	0.40154
187.1	0.40186
187.2	0.40196
187.3	0.402
187.4	0.40208
187.5	0.4024
187.6	0.4026
187.7	0.40274
187.8	0.40296
187.9	0.40312
188	0.40322
188.1	0.40346
188.2	0.40372
188.3	0.40378
188.4	0.40398
188.5	0.40418
188.6	0.40434
188.7	0.40462
188.8	0.40472
188.9	0.40496
189	0.4051
189.1	0.40536
189.2	0.40544
189.3	0.40568
189.4	0.40592
189.5	0.4062
189.6	0.40646
189.7	0.40634
189.8	0.4065
189.9	0.4065
190	0.40672
190.1	0.40692
190.2	0.40718
190.3	0.40726
190.4	0.40766
190.5	0.40788
190.6	0.40808
190.7	0.40826
190.8	0.40852
190.9	0.40876
191	0.40898
191.1	0.40908
191.2	0.40938
191.3	0.4097
191.4	0.40994
191.5	0.41004
191.6	0.4102
191.7	0.41036
191.8	0.41056
191.9	0.41088
192	0.41116
192.1	0.41152
192.2	0.41162
192.3	0.41162
192.4	0.41192
192.5	0.41224
192.6	0.4125
192.7	0.4125
192.8	0.41252
192.9	0.4127
193	0.41312
193.1	0.41312
193.2	0.41332
193.3	0.4135
193.4	0.4136
193.5	0.41366
193.6	0.41362
193.7	0.41376
193.8	0.41392
193.9	0.41422
194	0.4142
194.1	0.41436
194.2	0.41434
194.3	0.4142
194.4	0.41426
194.5	0.41452
194.6	0.41466
194.7	0.41482
194.8	0.41508
194.9	0.4155
195	0.41568
195.1	0.41572
195.2	0.41598
195.3	0.41636
195.4	0.41628
195.5	0.41654
195.6	0.41648
195.7	0.41678
195.8	0.41688
195.9	0.4169
196	0.41698
196.1	0.41728
196.2	0.41718
196.3	0.41718
196.4	0.41762
196.5	0.41788
196.6	0.4179
196.7	0.41804
196.8	0.41828
196.9	0.41848
197	0.4187
197.1	0.41906
197.2	0.41942
197.3	0.41958
197.4	0.41972
197.5	0.41954
197.6	0.4197
197.7	0.41966
197.8	0.41992
197.9	0.42014
198	0.42038
198.1	0.42076
198.2	0.42108
198.3	0.42112
198.4	0.42152
198.5	0.4218
198.6	0.42194
198.7	0.42208
198.8	0.422
198.9	0.42218
199	0.4223
199.1	0.42246
199.2	0.42268
199.3	0.42292
199.4	0.4233
199.5	0.42358
199.6	0.42386
199.7	0.42364
199.8	0.42368
199.9	0.42378
200	0.42416
[truncated: 14,000 more rows]
