# Supplementary material for: Bayesian inference of kinetic schemes for ion channels by Kalman filtering
Source: eLife journal article supplement (doi:10.7554/elife.62714), 2022-05-04
Supplement: fig4-data9 [file elife-62714-fig4-data9-v2.zip]

## Sheet: Tabelle1
0.1	0
0.2	0
0.3	0
0.4	0
0.5	0
0.6	0
0.7	0
0.8	0
0.9	0
1	0
1.1	0
1.2	0
1.3	0
1.4	0
1.5	0
1.6	0
1.7	0
1.8	0
1.9	0
2	0
2.1	0
2.2	0
2.3	0
2.4	0
2.5	0
2.6	0
2.7	0
2.8	0
2.9	0
3	0
3.1	0
3.2	0
3.3	0
3.4	0
3.5	0
3.6	0
3.7	0
3.8	0
3.9	0
4	0
4.1	0
4.2	0
4.3	0
4.4	0
4.5	0
4.6	0
4.7	0
4.8	0
4.9	0
5	0
5.1	0
5.2	0
5.3	0
5.4	0
5.5	0
5.6	0
5.7	0
5.8	0
5.9	0
6	0
6.1	0
6.2	0
6.3	0
6.4	0
6.5	0
6.6	0
6.7	0
6.8	0
6.9	0
7	0
7.1	0
7.2	0
7.3	0
7.4	0
7.5	0
7.6	0
7.7	0
7.8	0
7.9	0
8	0
8.1	0
8.2	0
8.3	0
8.4	0
8.5	0
8.6	0
8.7	0
8.8	0
8.9	0
9	0
9.1	0
9.2	0
9.3	0
9.4	0
9.5	0
9.6	0
9.7	0
9.8	0
9.9	0
10	0
10.1	0
10.2	0
10.3	0
10.4	0
10.5	0
10.6	0
10.7	0
10.8	0
10.9	0
11	0
11.1	0
11.2	0
11.3	0
11.4	0
11.5	0
11.6	0
11.7	0
11.8	0
11.9	0
12	0
12.1	0
12.2	0
12.3	0
12.4	0
12.5	0
12.6	0
12.7	0
12.8	0
12.9	0
13	0
13.1	0
13.2	0
13.3	0
13.4	0
13.5	0
13.6	0
13.7	0
13.8	0
13.9	0
14	0
14.1	0
14.2	0
14.3	0
14.4	0
14.5	0
14.6	0
14.7	0
14.8	0
14.9	0
15	0
15.1	0
15.2	0
15.3	0
15.4	0
15.5	0
15.6	0
15.7	0
15.8	0
15.9	0
16	0
16.1	0
16.2	0
16.3	0
16.4	0
16.5	0
16.6	0
16.7	0
16.8	0
16.9	0
17	0
17.1	0
17.2	0
17.3	0
17.4	0
17.5	0
17.6	0
17.7	0
17.8	0
17.9	0
18	0
18.1	0
18.2	0
18.3	0
18.4	0
18.5	0
18.6	0
18.7	0
18.8	0
18.9	0
19	0
19.1	0
19.2	0
19.3	0
19.4	0
19.5	0
19.6	0
19.7	0
19.8	0
19.9	0
20	0
20.1	0
20.2	0
20.3	0
20.4	0
20.5	0
20.6	0
20.7	0
20.8	0
20.9	0
21	0
21.1	0
21.2	0
21.3	0
21.4	0
21.5	0
21.6	0
21.7	0
21.8	0
21.9	0
22	0
22.1	0
22.2	0
22.3	0
22.4	0
22.5	0
22.6	0
22.7	0
22.8	0
22.9	0
23	0
23.1	0
23.2	0
23.3	0
23.4	0
23.5	0
23.6	0
23.7	0
23.8	0
23.9	0
24	0
24.1	0
24.2	0
24.3	0
24.4	0
24.5	0
24.6	0
24.7	0
24.8	0
24.9	0
25	0
25.1	0
25.2	0
25.3	0
25.4	0
25.5	0
25.6	0
25.7	0
25.8	0
25.9	0
26	0
26.1	0
26.2	0
26.3	0
26.4	0
26.5	0
26.6	0
26.7	0
26.8	0
26.9	0
27	0
27.1	0
27.2	0
27.3	0
27.4	0
27.5	0
27.6	0
27.7	0
27.8	0
27.9	0
28	0
28.1	0
28.2	0
28.3	0
28.4	0
28.5	0
28.6	0
28.7	0
28.8	0
28.9	0
29	0
29.1	0
29.2	0
29.3	0
29.4	0
29.5	0
29.6	0
29.7	0
29.8	0
29.9	0
30	0
30.1	0
30.2	0
30.3	0
30.4	0
30.5	0
30.6	0
30.7	0
30.8	0
30.9	0
31	0
31.1	0
31.2	0
31.3	0
31.4	0
31.5	0
31.6	0
31.7	0
31.8	0
31.9	0
32	0
32.1	0
32.2	0
32.3	0
32.4	0
32.5	0
32.6	0
32.7	0
32.8	0
32.9	0
33	0
33.1	0
33.2	0
33.3	0
33.4	0
33.5	0
33.6	0
33.7	0
33.8	0
33.9	0
34	0
34.1	0
34.2	0
34.3	0
34.4	0
34.5	0
34.6	0
34.7	0
34.8	0
34.9	0
35	0
35.1	0
35.2	0
35.3	0
35.4	0
35.5	0
35.6	0
35.7	0
35.8	0
35.9	0
36	0
36.1	0
36.2	0
36.3	0
36.4	0
36.5	0
36.6	0
36.7	0
36.8	0
36.9	0
37	0
37.1	0
37.2	0
37.3	0
37.4	0
37.5	0
37.6	0
37.7	0
37.8	0
37.9	0
38	0
38.1	0
38.2	0
38.3	0
38.4	0
38.5	0
38.6	0
38.7	0
38.8	0
38.9	0
39	0
39.1	0
39.2	0
39.3	0
39.4	0
39.5	0
39.6	0
39.7	0
39.8	0
39.9	0
40	0
40.1	0
40.2	0
40.3	0
40.4	0
40.5	0
40.6	0
40.7	0
40.8	0
40.9	0
41	0
41.1	0
41.2	0
41.3	0
41.4	0
41.5	0
41.6	0
41.7	0
41.8	0
41.9	0
42	0
42.1	0
42.2	0
42.3	0
42.4	0
42.5	0
42.6	0
42.7	0
42.8	0
42.9	0
43	0
43.1	0
43.2	0
43.3	0
43.4	0
43.5	0
43.6	0
43.7	0
43.8	0
43.9	0
44	0
44.1	0
44.2	0
44.3	0
44.4	0
44.5	0
44.6	0
44.7	0
44.8	0
44.9	0
45	0
45.1	0
45.2	0
45.3	0
45.4	0
45.5	0
45.6	0
45.7	0
45.8	0
45.9	0
46	0
46.1	0
46.2	0
46.3	0
46.4	0
46.5	0
46.6	0
46.7	0
46.8	0
46.9	0
47	0
47.1	0
47.2	0
47.3	0
47.4	0
47.5	0
47.6	0
47.7	0
47.8	0
47.9	0
48	0
48.1	0
48.2	0
48.3	0
48.4	0
48.5	0
48.6	0
48.7	0
48.8	0
48.9	0
49	0
49.1	0
49.2	0
49.3	0
49.4	0
49.5	0
49.6	0
49.7	0
49.8	0
49.9	0
50	0
50.1	0
50.2	0
50.3	0
50.4	0
50.5	0
50.6	0
50.7	0
50.8	0
50.9	0
51	0
51.1	0
51.2	0
51.3	0
51.4	0
51.5	0
51.6	0
51.7	0
51.8	0
51.9	0
52	0
52.1	0
52.2	0
52.3	0
52.4	0
52.5	0
52.6	0
52.7	0
52.8	0
52.9	0
53	0
53.1	0
53.2	0
53.3	0
53.4	0
53.5	0
53.6	0
53.7	0
53.8	0
53.9	0
54	0
54.1	0
54.2	0
54.3	0
54.4	0
54.5	0
54.6	0
54.7	0
54.8	0
54.9	0
55	0
55.1	0
55.2	0
55.3	0
55.4	0
55.5	0
55.6	0
55.7	0
55.8	0
55.9	0
56	0
56.1	0
56.2	0
56.3	0
56.4	0
56.5	0
56.6	0
56.7	0
56.8	0
56.9	0
57	0
57.1	0
57.2	0
57.3	0
57.4	0
57.5	0
57.6	0
57.7	0
57.8	0
57.9	0
58	0
58.1	0
58.2	0
58.3	0
58.4	0
58.5	0
58.6	0
58.7	0
58.8	0
58.9	0
59	0
59.1	0
59.2	0
59.3	0
59.4	0
59.5	0
59.6	0
59.7	0
59.8	0
59.9	0
60	0
60.1	0
60.2	0
60.3	0
60.4	0
60.5	0
60.6	0
60.7	0
60.8	0
60.9	0
61	0
61.1	0
61.2	0
61.3	0
61.4	0
61.5	0
61.6	0
61.7	0
61.8	0
61.9	0
62	0
62.1	0
62.2	0
62.3	0
62.4	0
62.5	0
62.6	0
62.7	0
62.8	0
62.9	0
63	0
63.1	0
63.2	0
63.3	0
63.4	0
63.5	0
63.6	0
63.7	0
63.8	0
63.9	0
64	0
64.1	0
64.2	0
64.3	0
64.4	0
64.5	0
64.6	0
64.7	0
64.8	0
64.9	0
65	0
65.1	0
65.2	0
65.3	0
65.4	0
65.5	0
65.6	0
65.7	0
65.8	0
65.9	0
66	0
66.1	0
66.2	0
66.3	0
66.4	0
66.5	0
66.6	0
66.7	0
66.8	0
66.9	0
67	0
67.1	0
67.2	0
67.3	0
67.4	0
67.5	0
67.6	0
67.7	0
67.8	0
67.9	0
68	0
68.1	0
68.2	0
68.3	0
68.4	0
68.5	0
68.6	0
68.7	0
68.8	0
68.9	0
69	0
69.1	0
69.2	0
69.3	0
69.4	0
69.5	0
69.6	0
69.7	0
69.8	0
69.9	0
70	0
70.1	0
70.2	0
70.3	0
70.4	0
70.5	0
70.6	0
70.7	0
70.8	0
70.9	0
71	0
71.1	0
71.2	0
71.3	0
71.4	0
71.5	0
71.6	0
71.7	0
71.8	0
71.9	0
72	0
72.1	0
72.2	0
72.3	0
72.4	0
72.5	0
72.6	0
72.7	0
72.8	0
72.9	0
73	0
73.1	0
73.2	0
73.3	0
73.4	0
73.5	0
73.6	0
73.7	0
73.8	0
73.9	0
74	0
74.1	0
74.2	0
74.3	0
74.4	0
74.5	0
74.6	0
74.7	0
74.8	0
74.9	0
75	0
75.1	0
75.2	0
75.3	0
75.4	0
75.5	0
75.6	0
75.7	0
75.8	0
75.9	0
76	0
76.1	0
76.2	0
76.3	0
76.4	0
76.5	0
76.6	0
76.7	0
76.8	0
76.9	0
77	0
77.1	0
77.2	0
77.3	0
77.4	0
77.5	0
77.6	0
77.7	0
77.8	0
77.9	0
78	0
78.1	0
78.2	0
78.3	0
78.4	0
78.5	0
78.6	0
78.7	0
78.8	0
78.9	0
79	0
79.1	0
79.2	0
79.3	0
79.4	0
79.5	0
79.6	0
79.7	0
79.8	0
79.9	0
80	0
80.1	0
80.2	0
80.3	0
80.4	0
80.5	0
80.6	0
80.7	0
80.8	0
80.9	0
81	0
81.1	0
81.2	0
81.3	0
81.4	0
81.5	0
81.6	0
81.7	0
81.8	0
81.9	0
82	0
82.1	0
82.2	0
82.3	0
82.4	0
82.5	0
82.6	0
82.7	0
82.8	0
82.9	0
83	0
83.1	0
83.2	0
83.3	0
83.4	0
83.5	0
83.6	0
83.7	0
83.8	0
83.9	0
84	0
84.1	0
84.2	0
84.3	0
84.4	0
84.5	0
84.6	0
84.7	0
84.8	0
84.9	0
85	0
85.1	0
85.2	0
85.3	0
85.4	0
85.5	0
85.6	0
85.7	0
85.8	0
85.9	0
86	0
86.1	0
86.2	0
86.3	0
86.4	0
86.5	0
86.6	0
86.7	0
86.8	0
86.9	0
87	0
87.1	0
87.2	0
87.3	0
87.4	0
87.5	0
87.6	0
87.7	0
87.8	0
87.9	0
88	0
88.1	0
88.2	0
88.3	0
88.4	0
88.5	0
88.6	0
88.7	0
88.8	0
88.9	0
89	0
89.1	0
89.2	0
89.3	0
89.4	0
89.5	0
89.6	0
89.7	0
89.8	0
89.9	0
90	0
90.1	0
90.2	0
90.3	0
90.4	0
90.5	0
90.6	0
90.7	0
90.8	0
90.9	0
91	0
91.1	0
91.2	0
91.3	0
91.4	0
91.5	0
91.6	0
91.7	0
91.8	0
91.9	0
92	0
92.1	0
92.2	0
92.3	0
92.4	0
92.5	0
92.6	0
92.7	0
92.8	0
92.9	0
93	0
93.1	0
93.2	0
93.3	0
93.4	0
93.5	0
93.6	0
93.7	0
93.8	0
93.9	0
94	0
94.1	0
94.2	0
94.3	0
94.4	0
94.5	0
94.6	0
94.7	0
94.8	0
94.9	0
95	0
95.1	0
95.2	0
95.3	0
95.4	0
95.5	0
95.6	0
95.7	0
95.8	0
95.9	0
96	0
96.1	0
96.2	0
96.3	0
96.4	0
96.5	0
96.6	0
96.7	0
96.8	0
96.9	0
97	0
97.1	0
97.2	0
97.3	0
97.4	0
97.5	0
97.6	0
97.7	0
97.8	0
97.9	0
98	0
98.1	0
98.2	0
98.3	0
98.4	0
98.5	0
98.6	0
98.7	0
98.8	0
98.9	0
99	0
99.1	0
99.2	0
99.3	0
99.4	0
99.5	0
99.6	0
99.7	0
99.8	0
99.9	0
100	0
100.1	7.24113e-07
100.2	5.59435e-06
100.3	1.82383e-05
100.4	4.17706e-05
100.5	7.88455e-05
100.6	0.000131705
100.7	0.000202225
100.8	0.000291949
100.9	0.000402131
101	0.000533763
101.1	0.000687607
101.2	0.000864222
101.3	0.00106398
101.4	0.00128711
101.5	0.00153369
101.6	0.00180367
101.7	0.00209692
101.8	0.00241319
101.9	0.00275218
102	0.0031135
102.1	0.00349671
102.2	0.00390133
102.3	0.00432685
102.4	0.0047727
102.5	0.0052383
102.6	0.00572307
102.7	0.00622638
102.8	0.00674762
102.9	0.00728617
103	0.00784138
103.1	0.00841264
103.2	0.00899932
103.3	0.0096008
103.4	0.0102165
103.5	0.0108457
103.6	0.011488
103.7	0.0121427
103.8	0.0128093
103.9	0.0134871
104	0.0141758
104.1	0.0148747
104.2	0.0155833
104.3	0.0163012
104.4	0.0170279
104.5	0.017763
104.6	0.0185059
104.7	0.0192562
104.8	0.0200136
104.9	0.0207777
105	0.021548
105.1	0.0223242
105.2	0.0231059
105.3	0.0238929
105.4	0.0246848
105.5	0.0254812
105.6	0.0262819
105.7	0.0270866
105.8	0.027895
105.9	0.0287069
106	0.029522
106.1	0.0303401
106.2	0.0311609
106.3	0.0319842
106.4	0.0328099
106.5	0.0336377
106.6	0.0344674
106.7	0.0352989
106.8	0.036132
106.9	0.0369665
107	0.0378023
107.1	0.0386392
107.2	0.0394771
107.3	0.0403158
107.4	0.0411553
107.5	0.0419954
107.6	0.0428359
107.7	0.0436769
107.8	0.0445181
107.9	0.0453595
108	0.046201
108.1	0.0470425
108.2	0.0478839
108.3	0.0487252
108.4	0.0495662
108.5	0.050407
108.6	0.0512473
108.7	0.0520872
108.8	0.0529267
108.9	0.0537655
109	0.0546038
109.1	0.0554414
109.2	0.0562783
109.3	0.0571144
109.4	0.0579498
109.5	0.0587843
109.6	0.059618
109.7	0.0604507
109.8	0.0612825
109.9	0.0621133
110	0.0629431
110.1	0.0637719
110.2	0.0645996
110.3	0.0654263
110.4	0.0662518
110.5	0.0670762
110.6	0.0678994
110.7	0.0687215
110.8	0.0695424
110.9	0.070362
111	0.0711805
111.1	0.0719977
111.2	0.0728136
111.3	0.0736283
111.4	0.0744417
111.5	0.0752538
111.6	0.0760646
111.7	0.076874
111.8	0.0776822
111.9	0.078489
112	0.0792945
112.1	0.0800986
112.2	0.0809014
112.3	0.0817028
112.4	0.0825028
112.5	0.0833015
112.6	0.0840988
112.7	0.0848947
112.8	0.0856892
112.9	0.0864824
113	0.0872741
113.1	0.0880644
113.2	0.0888533
113.3	0.0896409
113.4	0.090427
113.5	0.0912117
113.6	0.091995
113.7	0.0927769
113.8	0.0935574
113.9	0.0943364
114	0.0951141
114.1	0.0958903
114.2	0.0966651
114.3	0.0974385
114.4	0.0982105
114.5	0.0989811
114.6	0.0997502
114.7	0.100518
114.8	0.101284
114.9	0.102049
115	0.102813
115.1	0.103575
115.2	0.104335
115.3	0.105095
115.4	0.105852
115.5	0.106609
115.6	0.107364
115.7	0.108118
115.8	0.10887
115.9	0.109621
116	0.11037
116.1	0.111118
116.2	0.111865
116.3	0.11261
116.4	0.113354
116.5	0.114096
116.6	0.114837
116.7	0.115577
116.8	0.116315
116.9	0.117052
117	0.117787
117.1	0.118521
117.2	0.119254
117.3	0.119985
117.4	0.120715
117.5	0.121444
117.6	0.122171
117.7	0.122897
117.8	0.123622
117.9	0.124345
118	0.125066
118.1	0.125787
118.2	0.126506
118.3	0.127224
118.4	0.12794
118.5	0.128655
118.6	0.129368
118.7	0.130081
118.8	0.130792
118.9	0.131501
119	0.13221
119.1	0.132916
119.2	0.133622
119.3	0.134326
119.4	0.135029
119.5	0.135731
119.6	0.136431
119.7	0.13713
119.8	0.137828
119.9	0.138524
120	0.139219
120.1	0.139912
120.2	0.140605
120.3	0.141296
120.4	0.141986
120.5	0.142674
120.6	0.143361
120.7	0.144047
120.8	0.144732
120.9	0.145415
121	0.146097
121.1	0.146777
121.2	0.147457
121.3	0.148135
121.4	0.148812
121.5	0.149487
121.6	0.150161
121.7	0.150834
121.8	0.151506
121.9	0.152176
122	0.152846
122.1	0.153514
122.2	0.15418
122.3	0.154846
122.4	0.15551
122.5	0.156172
122.6	0.156834
122.7	0.157494
122.8	0.158153
122.9	0.158811
123	0.159468
123.1	0.160123
123.2	0.160777
123.3	0.16143
123.4	0.162082
123.5	0.162732
123.6	0.163381
123.7	0.164029
123.8	0.164676
123.9	0.165322
124	0.165966
124.1	0.166609
124.2	0.167251
124.3	0.167891
124.4	0.168531
124.5	0.169169
124.6	0.169806
124.7	0.170442
124.8	0.171076
124.9	0.17171
125	0.172342
125.1	0.172973
125.2	0.173603
125.3	0.174231
125.4	0.174859
125.5	0.175485
125.6	0.17611
125.7	0.176734
125.8	0.177356
125.9	0.177978
126	0.178598
126.1	0.179217
126.2	0.179835
126.3	0.180452
126.4	0.181068
126.5	0.181682
126.6	0.182296
126.7	0.182908
126.8	0.183519
126.9	0.184129
127	0.184737
127.1	0.185345
127.2	0.185951
127.3	0.186556
127.4	0.18716
127.5	0.187763
127.6	0.188365
127.7	0.188966
127.8	0.189565
127.9	0.190164
128	0.190761
128.1	0.191357
128.2	0.191952
128.3	0.192546
128.4	0.193139
128.5	0.19373
128.6	0.194321
128.7	0.19491
128.8	0.195498
128.9	0.196085
129	0.196671
129.1	0.197256
129.2	0.19784
129.3	0.198423
129.4	0.199005
129.5	0.199585
129.6	0.200164
129.7	0.200743
129.8	0.20132
129.9	0.201896
130	0.202471
130.1	0.203045
130.2	0.203618
130.3	0.20419
130.4	0.20476
130.5	0.20533
130.6	0.205898
130.7	0.206466
130.8	0.207032
130.9	0.207598
131	0.208162
131.1	0.208725
131.2	0.209287
131.3	0.209848
131.4	0.210408
131.5	0.210967
131.6	0.211525
131.7	0.212082
131.8	0.212637
131.9	0.213192
132	0.213746
132.1	0.214298
132.2	0.21485
132.3	0.2154
132.4	0.21595
132.5	0.216498
132.6	0.217046
132.7	0.217592
132.8	0.218137
132.9	0.218682
133	0.219225
133.1	0.219767
133.2	0.220308
133.3	0.220848
133.4	0.221388
133.5	0.221926
133.6	0.222463
133.7	0.222999
133.8	0.223534
133.9	0.224068
134	0.224601
134.1	0.225133
134.2	0.225664
134.3	0.226194
134.4	0.226723
134.5	0.227251
134.6	0.227778
134.7	0.228304
134.8	0.228829
134.9	0.229353
135	0.229876
135.1	0.230399
135.2	0.23092
135.3	0.23144
135.4	0.231959
135.5	0.232477
135.6	0.232994
135.7	0.23351
135.8	0.234025
135.9	0.23454
136	0.235053
136.1	0.235565
136.2	0.236076
136.3	0.236587
136.4	0.237096
136.5	0.237604
136.6	0.238112
136.7	0.238618
136.8	0.239124
136.9	0.239628
137	0.240132
137.1	0.240635
137.2	0.241136
137.3	0.241637
137.4	0.242137
137.5	0.242636
137.6	0.243134
137.7	0.24363
137.8	0.244127
137.9	0.244622
138	0.245116
138.1	0.245609
138.2	0.246101
138.3	0.246593
138.4	0.247083
138.5	0.247572
138.6	0.248061
138.7	0.248549
138.8	0.249035
138.9	0.249521
139	0.250006
139.1	0.25049
139.2	0.250973
139.3	0.251455
139.4	0.251936
139.5	0.252417
139.6	0.252896
139.7	0.253374
139.8	0.253852
139.9	0.254329
140	0.254804
140.1	0.255279
140.2	0.255753
140.3	0.256226
140.4	0.256698
140.5	0.25717
140.6	0.25764
140.7	0.25811
140.8	0.258578
140.9	0.259046
141	0.259513
141.1	0.259979
141.2	0.260444
141.3	0.260908
141.4	0.261371
141.5	0.261834
141.6	0.262295
141.7	0.262756
141.8	0.263216
141.9	0.263675
142	0.264133
142.1	0.26459
142.2	0.265046
142.3	0.265502
142.4	0.265956
142.5	0.26641
142.6	0.266863
142.7	0.267315
142.8	0.267766
142.9	0.268216
143	0.268666
143.1	0.269115
143.2	0.269562
143.3	0.270009
143.4	0.270455
143.5	0.270901
143.6	0.271345
143.7	0.271788
143.8	0.272231
143.9	0.272673
144	0.273114
144.1	0.273554
144.2	0.273994
144.3	0.274432
144.4	0.27487
144.5	0.275307
144.6	0.275743
144.7	0.276178
144.8	0.276612
144.9	0.277046
145	0.277479
145.1	0.277911
145.2	0.278342
145.3	0.278772
145.4	0.279202
145.5	0.27963
145.6	0.280058
145.7	0.280485
145.8	0.280911
145.9	0.281337
146	0.281761
146.1	0.282185
146.2	0.282608
146.3	0.28303
146.4	0.283452
146.5	0.283873
146.6	0.284292
146.7	0.284711
146.8	0.28513
146.9	0.285547
147	0.285964
147.1	0.28638
147.2	0.286795
147.3	0.287209
147.4	0.287622
147.5	0.288035
147.6	0.288447
147.7	0.288858
147.8	0.289269
147.9	0.289678
148	0.290087
148.1	0.290495
148.2	0.290902
148.3	0.291309
148.4	0.291715
148.5	0.29212
148.6	0.292524
148.7	0.292927
148.8	0.29333
148.9	0.293732
149	0.294133
149.1	0.294534
149.2	0.294933
149.3	0.295332
149.4	0.29573
149.5	0.296128
149.6	0.296524
149.7	0.29692
149.8	0.297315
149.9	0.29771
150	0.298103
150.1	0.298496
150.2	0.298888
150.3	0.29928
150.4	0.29967
150.5	0.30006
150.6	0.300449
150.7	0.300838
150.8	0.301226
150.9	0.301612
151	0.301999
151.1	0.302384
151.2	0.302769
151.3	0.303153
151.4	0.303536
151.5	0.303919
151.6	0.304301
151.7	0.304682
151.8	0.305062
151.9	0.305442
152	0.305821
152.1	0.306199
152.2	0.306577
152.3	0.306954
152.4	0.30733
152.5	0.307705
152.6	0.30808
152.7	0.308454
152.8	0.308827
152.9	0.3092
153	0.309572
153.1	0.309943
153.2	0.310313
153.3	0.310683
153.4	0.311052
153.5	0.311421
153.6	0.311788
153.7	0.312155
153.8	0.312522
153.9	0.312887
154	0.313252
154.1	0.313616
154.2	0.31398
154.3	0.314343
154.4	0.314705
154.5	0.315066
154.6	0.315427
154.7	0.315787
154.8	0.316146
154.9	0.316505
155	0.316863
155.1	0.317221
155.2	0.317577
155.3	0.317933
155.4	0.318289
155.5	0.318643
155.6	0.318997
155.7	0.319351
155.8	0.319703
155.9	0.320055
156	0.320407
156.1	0.320757
156.2	0.321107
156.3	0.321457
156.4	0.321805
156.5	0.322153
156.6	0.322501
156.7	0.322847
156.8	0.323193
156.9	0.323539
157	0.323883
157.1	0.324227
157.2	0.324571
157.3	0.324914
157.4	0.325256
157.5	0.325597
157.6	0.325938
157.7	0.326278
157.8	0.326618
157.9	0.326957
158	0.327295
158.1	0.327633
158.2	0.32797
158.3	0.328306
158.4	0.328642
158.5	0.328977
158.6	0.329311
158.7	0.329645
158.8	0.329978
158.9	0.330311
159	0.330642
159.1	0.330974
159.2	0.331304
159.3	0.331634
159.4	0.331964
159.5	0.332293
159.6	0.332621
159.7	0.332948
159.8	0.333275
159.9	0.333602
160	0.333927
160.1	0.334252
160.2	0.334577
160.3	0.334901
160.4	0.335224
160.5	0.335546
160.6	0.335868
160.7	0.33619
160.8	0.33651
160.9	0.336831
161	0.33715
161.1	0.337469
161.2	0.337788
161.3	0.338105
161.4	0.338422
161.5	0.338739
161.6	0.339055
161.7	0.33937
161.8	0.339685
161.9	0.339999
162	0.340313
162.1	0.340626
162.2	0.340938
162.3	0.34125
162.4	0.341561
162.5	0.341872
162.6	0.342182
162.7	0.342491
162.8	0.3428
162.9	0.343108
163	0.343416
163.1	0.343723
163.2	0.34403
163.3	0.344335
163.4	0.344641
163.5	0.344946
163.6	0.34525
163.7	0.345553
163.8	0.345856
163.9	0.346159
164	0.346461
164.1	0.346762
164.2	0.347063
164.3	0.347363
164.4	0.347663
164.5	0.347962
164.6	0.34826
164.7	0.348558
164.8	0.348856
164.9	0.349152
165	0.349449
165.1	0.349744
165.2	0.350039
165.3	0.350334
165.4	0.350628
165.5	0.350921
165.6	0.351214
165.7	0.351507
165.8	0.351798
165.9	0.35209
166	0.35238
166.1	0.35267
166.2	0.35296
166.3	0.353249
166.4	0.353537
166.5	0.353825
166.6	0.354113
166.7	0.3544
166.8	0.354686
166.9	0.354972
167	0.355257
167.1	0.355542
167.2	0.355826
167.3	0.356109
167.4	0.356392
167.5	0.356675
167.6	0.356957
167.7	0.357238
167.8	0.357519
167.9	0.3578
168	0.358079
168.1	0.358359
168.2	0.358638
168.3	0.358916
168.4	0.359194
168.5	0.359471
168.6	0.359748
168.7	0.360024
168.8	0.360299
168.9	0.360574
169	0.360849
169.1	0.361123
169.2	0.361397
169.3	0.36167
169.4	0.361942
169.5	0.362214
169.6	0.362486
169.7	0.362757
169.8	0.363027
169.9	0.363297
170	0.363567
170.1	0.363836
170.2	0.364104
170.3	0.364372
170.4	0.364639
170.5	0.364906
170.6	0.365173
170.7	0.365439
170.8	0.365704
170.9	0.365969
171	0.366233
171.1	0.366497
171.2	0.366761
171.3	0.367024
171.4	0.367286
171.5	0.367548
171.6	0.367809
171.7	0.36807
171.8	0.368331
171.9	0.368591
172	0.36885
172.1	0.369109
172.2	0.369367
172.3	0.369625
172.4	0.369883
172.5	0.37014
172.6	0.370396
172.7	0.370652
172.8	0.370908
172.9	0.371163
173	0.371417
173.1	0.371671
173.2	0.371925
173.3	0.372178
173.4	0.372431
173.5	0.372683
173.6	0.372935
173.7	0.373186
173.8	0.373437
173.9	0.373687
174	0.373937
174.1	0.374186
174.2	0.374435
174.3	0.374683
174.4	0.374931
174.5	0.375178
174.6	0.375425
174.7	0.375672
174.8	0.375918
174.9	0.376164
175	0.376409
175.1	0.376653
175.2	0.376897
175.3	0.377141
175.4	0.377384
175.5	0.377627
175.6	0.377869
175.7	0.378111
175.8	0.378353
175.9	0.378594
176	0.378834
176.1	0.379074
176.2	0.379314
176.3	0.379553
176.4	0.379792
176.5	0.38003
176.6	0.380268
176.7	0.380505
176.8	0.380742
176.9	0.380978
177	0.381214
177.1	0.38145
177.2	0.381685
177.3	0.381919
177.4	0.382154
177.5	0.382387
177.6	0.382621
177.7	0.382854
177.8	0.383086
177.9	0.383318
178	0.38355
178.1	0.383781
178.2	0.384011
178.3	0.384242
178.4	0.384471
178.5	0.384701
178.6	0.38493
178.7	0.385158
178.8	0.385386
178.9	0.385614
179	0.385841
179.1	0.386068
179.2	0.386294
179.3	0.38652
179.4	0.386746
179.5	0.386971
179.6	0.387195
179.7	0.387419
179.8	0.387643
179.9	0.387867
180	0.38809
180.1	0.388312
180.2	0.388534
180.3	0.388756
180.4	0.388977
180.5	0.389198
180.6	0.389418
180.7	0.389638
180.8	0.389858
180.9	0.390077
181	0.390296
181.1	0.390514
181.2	0.390732
181.3	0.39095
181.4	0.391167
181.5	0.391383
181.6	0.3916
181.7	0.391816
181.8	0.392031
181.9	0.392246
182	0.392461
182.1	0.392675
182.2	0.392889
182.3	0.393102
182.4	0.393315
182.5	0.393528
182.6	0.39374
182.7	0.393952
182.8	0.394163
182.9	0.394374
183	0.394585
183.1	0.394795
183.2	0.395005
183.3	0.395214
183.4	0.395423
183.5	0.395632
183.6	0.39584
183.7	0.396048
183.8	0.396256
183.9	0.396463
184	0.396669
184.1	0.396876
184.2	0.397081
184.3	0.397287
184.4	0.397492
184.5	0.397697
184.6	0.397901
184.7	0.398105
184.8	0.398309
184.9	0.398512
185	0.398714
185.1	0.398917
185.2	0.399119
185.3	0.399321
185.4	0.399522
185.5	0.399723
185.6	0.399923
185.7	0.400123
185.8	0.400323
185.9	0.400522
186	0.400721
186.1	0.40092
186.2	0.401118
186.3	0.401316
186.4	0.401513
186.5	0.401711
186.6	0.401907
186.7	0.402104
186.8	0.4023
186.9	0.402495
187	0.40269
187.1	0.402885
187.2	0.40308
187.3	0.403274
187.4	0.403468
187.5	0.403661
187.6	0.403854
187.7	0.404047
187.8	0.404239
187.9	0.404431
188	0.404623
188.1	0.404814
188.2	0.405005
188.3	0.405195
188.4	0.405385
188.5	0.405575
188.6	0.405764
188.7	0.405954
188.8	0.406142
188.9	0.406331
189	0.406519
189.1	0.406706
189.2	0.406893
189.3	0.40708
189.4	0.407267
189.5	0.407453
189.6	0.407639
189.7	0.407824
189.8	0.40801
189.9	0.408194
190	0.408379
190.1	0.408563
190.2	0.408747
190.3	0.40893
190.4	0.409113
190.5	0.409296
190.6	0.409478
190.7	0.40966
190.8	0.409842
190.9	0.410023
191	0.410204
191.1	0.410385
191.2	0.410565
191.3	0.410745
191.4	0.410925
191.5	0.411104
191.6	0.411283
191.7	0.411462
191.8	0.41164
191.9	0.411818
192	0.411995
192.1	0.412173
192.2	0.41235
192.3	0.412526
192.4	0.412702
192.5	0.412878
192.6	0.413054
192.7	0.413229
192.8	0.413404
192.9	0.413579
193	0.413753
193.1	0.413927
193.2	0.4141
193.3	0.414274
193.4	0.414447
193.5	0.414619
193.6	0.414792
193.7	0.414964
193.8	0.415135
193.9	0.415306
194	0.415477
194.1	0.415648
194.2	0.415818
194.3	0.415988
194.4	0.416158
194.5	0.416328
194.6	0.416497
194.7	0.416665
194.8	0.416834
194.9	0.417002
195	0.41717
195.1	0.417337
195.2	0.417504
195.3	0.417671
195.4	0.417838
195.5	0.418004
195.6	0.41817
195.7	0.418335
195.8	0.4185
195.9	0.418665
196	0.41883
196.1	0.418994
196.2	0.419158
196.3	0.419322
196.4	0.419485
196.5	0.419648
196.6	0.419811
196.7	0.419974
196.8	0.420136
196.9	0.420298
197	0.420459
197.1	0.42062
197.2	0.420781
197.3	0.420942
197.4	0.421102
197.5	0.421262
197.6	0.421422
197.7	0.421581
197.8	0.421741
197.9	0.421899
198	0.422058
198.1	0.422216
198.2	0.422374
198.3	0.422532
198.4	0.422689
198.5	0.422846
198.6	0.423003
198.7	0.423159
198.8	0.423315
198.9	0.423471
199	0.423626
199.1	0.423782
199.2	0.423937
199.3	0.424091
199.4	0.424246
199.5	0.4244
199.6	0.424553
199.7	0.424707
199.8	0.42486
199.9	0.425013
200	0.425166
[truncated: 14,000 more rows]
