# Supplementary material for: Bayesian inference of kinetic schemes for ion channels by Kalman filtering
Source: eLife journal article supplement (doi:10.7554/elife.62714), 2022-05-04
Supplement: fig4-data10 [file 1_Sim_N_80_Fluor_MW.xlsx]

## Sheet: 0.0625 M
0.1	0
0.2	0
0.3	0
0.4	0
0.5	0
0.6	0
0.7	0
0.8	0
0.9	0
1	0
1.1	0
1.2	0
1.3	0
1.4	0
1.5	0
1.6	0
1.7	0
1.8	0
1.9	0
2	0
2.1	0
2.2	0
2.3	0
2.4	0
2.5	0
2.6	0
2.7	0
2.8	0
2.9	0
3	0
3.1	0
3.2	0
3.3	0
3.4	0
3.5	0
3.6	0
3.7	0
3.8	0
3.9	0
4	0
4.1	0
4.2	0
4.3	0
4.4	0
4.5	0
4.6	0
4.7	0
4.8	0
4.9	0
5	0
5.1	0
5.2	0
5.3	0
5.4	0
5.5	0
5.6	0
5.7	0
5.8	0
5.9	0
6	0
6.1	0
6.2	0
6.3	0
6.4	0
6.5	0
6.6	0
6.7	0
6.8	0
6.9	0
7	0
7.1	0
7.2	0
7.3	0
7.4	0
7.5	0
7.6	0
7.7	0
7.8	0
7.9	0
8	0
8.1	0
8.2	0
8.3	0
8.4	0
8.5	0
8.6	0
8.7	0
8.8	0
8.9	0
9	0
9.1	0
9.2	0
9.3	0
9.4	0
9.5	0
9.6	0
9.7	0
9.8	0
9.9	0
10	0
10.1	0
10.2	0
10.3	0
10.4	0
10.5	0
10.6	0
10.7	0
10.8	0
10.9	0
11	0
11.1	0
11.2	0
11.3	0
11.4	0
11.5	0
11.6	0
11.7	0
11.8	0
11.9	0
12	0
12.1	0
12.2	0
12.3	0
12.4	0
12.5	0
12.6	0
12.7	0
12.8	0
12.9	0
13	0
13.1	0
13.2	0
13.3	0
13.4	0
13.5	0
13.6	0
13.7	0
13.8	0
13.9	0
14	0
14.1	0
14.2	0
14.3	0
14.4	0
14.5	0
14.6	0
14.7	0
14.8	0
14.9	0
15	0
15.1	0
15.2	0
15.3	0
15.4	0
15.5	0
15.6	0
15.7	0
15.8	0
15.9	0
16	0
16.1	0
16.2	0
16.3	0
16.4	0
16.5	0
16.6	0
16.7	0
16.8	0
16.9	0
17	0
17.1	0
17.2	0
17.3	0
17.4	0
17.5	0
17.6	0
17.7	0
17.8	0
17.9	0
18	0
18.1	0
18.2	0
18.3	0
18.4	0
18.5	0
18.6	0
18.7	0
18.8	0
18.9	0
19	0
19.1	0
19.2	0
19.3	0
19.4	0
19.5	0
19.6	0
19.7	0
19.8	0
19.9	0
20	0
20.1	0
20.2	0
20.3	0
20.4	0
20.5	0
20.6	0
20.7	0
20.8	0
20.9	0
21	0
21.1	0
21.2	0
21.3	0
21.4	0
21.5	0
21.6	0
21.7	0
21.8	0
21.9	0
22	0
22.1	0
22.2	0
22.3	0
22.4	0
22.5	0
22.6	0
22.7	0
22.8	0
22.9	0
23	0
23.1	0
23.2	0
23.3	0
23.4	0
23.5	0
23.6	0
23.7	0
23.8	0
23.9	0
24	0
24.1	0
24.2	0
24.3	0
24.4	0
24.5	0
24.6	0
24.7	0
24.8	0
24.9	0
25	0
25.1	0
25.2	0
25.3	0
25.4	0
25.5	0
25.6	0
25.7	0
25.8	0
25.9	0
26	0
26.1	0
26.2	0
26.3	0
26.4	0
26.5	0
26.6	0
26.7	0
26.8	0
26.9	0
27	0
27.1	0
27.2	0
27.3	0
27.4	0
27.5	0
27.6	0
27.7	0
27.8	0
27.9	0
28	0
28.1	0
28.2	0
28.3	0
28.4	0
28.5	0
28.6	0
28.7	0
28.8	0
28.9	0
29	0
29.1	0
29.2	0
29.3	0
29.4	0
29.5	0
29.6	0
29.7	0
29.8	0
29.9	0
30	0
30.1	0
30.2	0
30.3	0
30.4	0
30.5	0
30.6	0
30.7	0
30.8	0
30.9	0
31	0
31.1	0
31.2	0
31.3	0
31.4	0
31.5	0
31.6	0
31.7	0
31.8	0
31.9	0
32	0
32.1	0
32.2	0
32.3	0
32.4	0
32.5	0
32.6	0
32.7	0
32.8	0
32.9	0
33	0
33.1	0
33.2	0
33.3	0
33.4	0
33.5	0
33.6	0
33.7	0
33.8	0
33.9	0
34	0
34.1	0
34.2	0
34.3	0
34.4	0
34.5	0
34.6	0
34.7	0
34.8	0
34.9	0
35	0
35.1	0
35.2	0
35.3	0
35.4	0
35.5	0
35.6	0
35.7	0
35.8	0
35.9	0
36	0
36.1	0
36.2	0
36.3	0
36.4	0
36.5	0
36.6	0
36.7	0
36.8	0
36.9	0
37	0
37.1	0
37.2	0
37.3	0
37.4	0
37.5	0
37.6	0
37.7	0
37.8	0
37.9	0
38	0
38.1	0
38.2	0
38.3	0
38.4	0
38.5	0
38.6	0
38.7	0
38.8	0
38.9	0
39	0
39.1	0
39.2	0
39.3	0
39.4	0
39.5	0
39.6	0
39.7	0
39.8	0
39.9	0
40	0
40.1	0
40.2	0
40.3	0
40.4	0
40.5	0
40.6	0
40.7	0
40.8	0
40.9	0
41	0
41.1	0
41.2	0
41.3	0
41.4	0
41.5	0
41.6	0
41.7	0
41.8	0
41.9	0
42	0
42.1	0
42.2	0
42.3	0
42.4	0
42.5	0
42.6	0
42.7	0
42.8	0
42.9	0
43	0
43.1	0
43.2	0
43.3	0
43.4	0
43.5	0
43.6	0
43.7	0
43.8	0
43.9	0
44	0
44.1	0
44.2	0
44.3	0
44.4	0
44.5	0
44.6	0
44.7	0
44.8	0
44.9	0
45	0
45.1	0
45.2	0
45.3	0
45.4	0
45.5	0
45.6	0
45.7	0
45.8	0
45.9	0
46	0
46.1	0
46.2	0
46.3	0
46.4	0
46.5	0
46.6	0
46.7	0
46.8	0
46.9	0
47	0
47.1	0
47.2	0
47.3	0
47.4	0
47.5	0
47.6	0
47.7	0
47.8	0
47.9	0
48	0
48.1	0
48.2	0
48.3	0
48.4	0
48.5	0
48.6	0
48.7	0
48.8	0
48.9	0
49	0
49.1	0
49.2	0
49.3	0
49.4	0
49.5	0
49.6	0
49.7	0
49.8	0
49.9	0
50	0
50.1	0
50.2	0
50.3	0
50.4	0
50.5	0
50.6	0
50.7	0
50.8	0
50.9	0
51	0
51.1	0
51.2	0
51.3	0
51.4	0
51.5	0
51.6	0
51.7	0
51.8	0
51.9	0
52	0
52.1	0
52.2	0
52.3	0
52.4	0
52.5	0
52.6	0
52.7	0
52.8	0
52.9	0
53	0
53.1	0
53.2	0
53.3	0
53.4	0
53.5	0
53.6	0
53.7	0
53.8	0
53.9	0
54	0
54.1	0
54.2	0
54.3	0
54.4	0
54.5	0
54.6	0
54.7	0
54.8	0
54.9	0
55	0
55.1	0
55.2	0
55.3	0
55.4	0
55.5	0
55.6	0
55.7	0
55.8	0
55.9	0
56	0
56.1	0
56.2	0
56.3	0
56.4	0
56.5	0
56.6	0
56.7	0
56.8	0
56.9	0
57	0
57.1	0
57.2	0
57.3	0
57.4	0
57.5	0
57.6	0
57.7	0
57.8	0
57.9	0
58	0
58.1	0
58.2	0
58.3	0
58.4	0
58.5	0
58.6	0
58.7	0
58.8	0
58.9	0
59	0
59.1	0
59.2	0
59.3	0
59.4	0
59.5	0
59.6	0
59.7	0
59.8	0
59.9	0
60	0
60.1	0
60.2	0
60.3	0
60.4	0
60.5	0
60.6	0
60.7	0
60.8	0
60.9	0
61	0
61.1	0
61.2	0
61.3	0
61.4	0
61.5	0
61.6	0
61.7	0
61.8	0
61.9	0
62	0
62.1	0
62.2	0
62.3	0
62.4	0
62.5	0
62.6	0
62.7	0
62.8	0
62.9	0
63	0
63.1	0
63.2	0
63.3	0
63.4	0
63.5	0
63.6	0
63.7	0
63.8	0
63.9	0
64	0
64.1	0
64.2	0
64.3	0
64.4	0
64.5	0
64.6	0
64.7	0
64.8	0
64.9	0
65	0
65.1	0
65.2	0
65.3	0
65.4	0
65.5	0
65.6	0
65.7	0
65.8	0
65.9	0
66	0
66.1	0
66.2	0
66.3	0
66.4	0
66.5	0
66.6	0
66.7	0
66.8	0
66.9	0
67	0
67.1	0
67.2	0
67.3	0
67.4	0
67.5	0
67.6	0
67.7	0
67.8	0
67.9	0
68	0
68.1	0
68.2	0
68.3	0
68.4	0
68.5	0
68.6	0
68.7	0
68.8	0
68.9	0
69	0
69.1	0
69.2	0
69.3	0
69.4	0
69.5	0
69.6	0
69.7	0
69.8	0
69.9	0
70	0
70.1	0
70.2	0
70.3	0
70.4	0
70.5	0
70.6	0
70.7	0
70.8	0
70.9	0
71	0
71.1	0
71.2	0
71.3	0
71.4	0
71.5	0
71.6	0
71.7	0
71.8	0
71.9	0
72	0
72.1	0
72.2	0
72.3	0
72.4	0
72.5	0
72.6	0
72.7	0
72.8	0
72.9	0
73	0
73.1	0
73.2	0
73.3	0
73.4	0
73.5	0
73.6	0
73.7	0
73.8	0
73.9	0
74	0
74.1	0
74.2	0
74.3	0
74.4	0
74.5	0
74.6	0
74.7	0
74.8	0
74.9	0
75	0
75.1	0
75.2	0
75.3	0
75.4	0
75.5	0
75.6	0
75.7	0
75.8	0
75.9	0
76	0
76.1	0
76.2	0
76.3	0
76.4	0
76.5	0
76.6	0
76.7	0
76.8	0
76.9	0
77	0
77.1	0
77.2	0
77.3	0
77.4	0
77.5	0
77.6	0
77.7	0
77.8	0
77.9	0
78	0
78.1	0
78.2	0
78.3	0
78.4	0
78.5	0
78.6	0
78.7	0
78.8	0
78.9	0
79	0
79.1	0
79.2	0
79.3	0
79.4	0
79.5	0
79.6	0
79.7	0
79.8	0
79.9	0
80	0
80.1	0
80.2	0
80.3	0
80.4	0
80.5	0
80.6	0
80.7	0
80.8	0
80.9	0
81	0
81.1	0
81.2	0
81.3	0
81.4	0
81.5	0
81.6	0
81.7	0
81.8	0
81.9	0
82	0
82.1	0
82.2	0
82.3	0
82.4	0
82.5	0
82.6	0
82.7	0
82.8	0
82.9	0
83	0
83.1	0
83.2	0
83.3	0
83.4	0
83.5	0
83.6	0
83.7	0
83.8	0
83.9	0
84	0
84.1	0
84.2	0
84.3	0
84.4	0
84.5	0
84.6	0
84.7	0
84.8	0
84.9	0
85	0
85.1	0
85.2	0
85.3	0
85.4	0
85.5	0
85.6	0
85.7	0
85.8	0
85.9	0
86	0
86.1	0
86.2	0
86.3	0
86.4	0
86.5	0
86.6	0
86.7	0
86.8	0
86.9	0
87	0
87.1	0
87.2	0
87.3	0
87.4	0
87.5	0
87.6	0
87.7	0
87.8	0
87.9	0
88	0
88.1	0
88.2	0
88.3	0
88.4	0
88.5	0
88.6	0
88.7	0
88.8	0
88.9	0
89	0
89.1	0
89.2	0
89.3	0
89.4	0
89.5	0
89.6	0
89.7	0
89.8	0
89.9	0
90	0
90.1	0
90.2	0
90.3	0
90.4	0
90.5	0
90.6	0
90.7	0
90.8	0
90.9	0
91	0
91.1	0
91.2	0
91.3	0
91.4	0
91.5	0
91.6	0
91.7	0
91.8	0
91.9	0
92	0
92.1	0
92.2	0
92.3	0
92.4	0
92.5	0
92.6	0
92.7	0
92.8	0
92.9	0
93	0
93.1	0
93.2	0
93.3	0
93.4	0
93.5	0
93.6	0
93.7	0
93.8	0
93.9	0
94	0
94.1	0
94.2	0
94.3	0
94.4	0
94.5	0
94.6	0
94.7	0
94.8	0
94.9	0
95	0
95.1	0
95.2	0
95.3	0
95.4	0
95.5	0
95.6	0
95.7	0
95.8	0
95.9	0
96	0
96.1	0
96.2	0
96.3	0
96.4	0
96.5	0
96.6	0
96.7	0
96.8	0
96.9	0
97	0
97.1	0
97.2	0
97.3	0
97.4	0
97.5	0
97.6	0
97.7	0
97.8	0
97.9	0
98	0
98.1	0
98.2	0
98.3	0
98.4	0
98.5	0
98.6	0
98.7	0
98.8	0
98.9	0
99	0
99.1	0
99.2	0
99.3	0
99.4	0
99.5	0
99.6	0
99.7	0
99.8	0
99.9	0
100	0
100.1	0
100.2	0
100.3	0.00625
100.4	0.00625
100.5	0.00625
100.6	0.0125
100.7	0.0125
100.8	0.01875
100.9	0.025
101	0.03125
101.1	0.03125
101.2	0.03125
101.3	0.03125
101.4	0.03125
101.5	0.03125
101.6	0.03125
101.7	0.03125
101.8	0.04375
101.9	0.04375
102	0.05
102.1	0.05625
102.2	0.05625
102.3	0.05625
102.4	0.05
102.5	0.05
102.6	0.05625
102.7	0.0625
102.8	0.0625
102.9	0.0625
103	0.06875
103.1	0.075
103.2	0.08125
103.3	0.08125
103.4	0.08125
103.5	0.0875
103.6	0.0875
103.7	0.09375
103.8	0.1125
103.9	0.11875
104	0.11875
104.1	0.11875
104.2	0.11875
104.3	0.1125
104.4	0.1125
104.5	0.1125
104.6	0.11875
104.7	0.125
104.8	0.1375
104.9	0.14375
105	0.15
105.1	0.15
105.2	0.1375
105.3	0.14375
105.4	0.15
105.5	0.15
105.6	0.1625
105.7	0.1625
105.8	0.15625
105.9	0.15
106	0.15
106.1	0.1625
106.2	0.1625
106.3	0.1625
106.4	0.16875
106.5	0.16875
106.6	0.18125
106.7	0.18125
106.8	0.18125
106.9	0.18125
107	0.18125
107.1	0.18125
107.2	0.18125
107.3	0.18125
107.4	0.18125
107.5	0.18125
107.6	0.1875
107.7	0.1875
107.8	0.175
107.9	0.16875
108	0.1625
108.1	0.1625
108.2	0.16875
108.3	0.1625
108.4	0.1625
108.5	0.15625
108.6	0.1625
108.7	0.1625
108.8	0.1625
108.9	0.1625
109	0.1625
109.1	0.1625
109.2	0.16875
109.3	0.175
109.4	0.16875
109.5	0.1625
109.6	0.16875
109.7	0.175
109.8	0.18125
109.9	0.18125
110	0.18125
110.1	0.1875
110.2	0.175
110.3	0.18125
110.4	0.18125
110.5	0.175
110.6	0.175
110.7	0.16875
110.8	0.16875
110.9	0.16875
111	0.16875
111.1	0.16875
111.2	0.16875
111.3	0.1625
111.4	0.16875
111.5	0.16875
111.6	0.175
111.7	0.18125
111.8	0.18125
111.9	0.18125
112	0.18125
112.1	0.18125
112.2	0.18125
112.3	0.175
112.4	0.175
112.5	0.175
112.6	0.175
112.7	0.18125
112.8	0.19375
112.9	0.19375
113	0.19375
113.1	0.19375
113.2	0.19375
113.3	0.1875
113.4	0.19375
113.5	0.19375
113.6	0.19375
113.7	0.18125
113.8	0.18125
113.9	0.1875
114	0.1875
114.1	0.1875
114.2	0.1875
114.3	0.1875
114.4	0.19375
114.5	0.19375
114.6	0.19375
114.7	0.1875
114.8	0.19375
114.9	0.19375
115	0.2
115.1	0.2
115.2	0.19375
115.3	0.19375
115.4	0.2
115.5	0.2
115.6	0.2
115.7	0.2
115.8	0.2
115.9	0.20625
116	0.20625
116.1	0.19375
116.2	0.19375
116.3	0.2
116.4	0.2
116.5	0.20625
116.6	0.20625
116.7	0.21875
116.8	0.2125
116.9	0.20625
117	0.20625
117.1	0.20625
117.2	0.20625
117.3	0.2
117.4	0.20625
117.5	0.20625
117.6	0.2125
117.7	0.225
117.8	0.21875
117.9	0.21875
118	0.2125
118.1	0.2125
118.2	0.21875
118.3	0.21875
118.4	0.21875
118.5	0.2125
118.6	0.21875
118.7	0.225
118.8	0.225
118.9	0.225
119	0.225
119.1	0.225
119.2	0.225
119.3	0.225
119.4	0.225
119.5	0.2375
119.6	0.2375
119.7	0.23125
119.8	0.23125
119.9	0.23125
120	0.225
120.1	0.21875
120.2	0.21875
120.3	0.21875
120.4	0.225
120.5	0.225
120.6	0.225
120.7	0.2375
120.8	0.24375
120.9	0.24375
121	0.24375
121.1	0.25
121.2	0.25625
121.3	0.25
121.4	0.24375
121.5	0.2375
121.6	0.225
121.7	0.24375
121.8	0.23125
121.9	0.23125
122	0.23125
122.1	0.23125
122.2	0.23125
122.3	0.23125
122.4	0.23125
122.5	0.23125
122.6	0.225
122.7	0.2375
122.8	0.23125
122.9	0.23125
123	0.23125
123.1	0.2375
123.2	0.2375
123.3	0.23125
123.4	0.2375
123.5	0.23125
123.6	0.23125
123.7	0.225
123.8	0.21875
123.9	0.20625
124	0.20625
124.1	0.19375
124.2	0.2
124.3	0.2
124.4	0.2125
124.5	0.2125
124.6	0.2125
124.7	0.21875
124.8	0.21875
124.9	0.2125
125	0.2125
125.1	0.225
125.2	0.225
125.3	0.225
125.4	0.21875
125.5	0.21875
125.6	0.225
125.7	0.225
125.8	0.225
125.9	0.225
126	0.23125
126.1	0.23125
126.2	0.23125
126.3	0.23125
126.4	0.23125
126.5	0.23125
126.6	0.23125
126.7	0.2375
126.8	0.23125
126.9	0.23125
127	0.2375
127.1	0.24375
127.2	0.2375
127.3	0.2375
127.4	0.24375
127.5	0.24375
127.6	0.24375
127.7	0.24375
127.8	0.24375
127.9	0.24375
128	0.24375
128.1	0.2375
128.2	0.23125
128.3	0.23125
128.4	0.225
128.5	0.21875
128.6	0.2125
128.7	0.2
128.8	0.2
128.9	0.2
129	0.20625
129.1	0.20625
129.2	0.20625
129.3	0.20625
129.4	0.2
129.5	0.2
129.6	0.2
129.7	0.2
129.8	0.20625
129.9	0.20625
130	0.20625
130.1	0.2
130.2	0.2
130.3	0.2
130.4	0.19375
130.5	0.2
130.6	0.20625
130.7	0.20625
130.8	0.20625
130.9	0.20625
131	0.2
131.1	0.2
131.2	0.2
131.3	0.20625
131.4	0.2125
131.5	0.21875
131.6	0.21875
131.7	0.2125
131.8	0.2125
131.9	0.2
132	0.2
132.1	0.2
132.2	0.2
132.3	0.2125
132.4	0.20625
132.5	0.20625
132.6	0.20625
132.7	0.2125
132.8	0.21875
132.9	0.2125
133	0.21875
133.1	0.225
133.2	0.225
133.3	0.225
133.4	0.225
133.5	0.225
133.6	0.225
133.7	0.21875
133.8	0.21875
133.9	0.21875
134	0.21875
134.1	0.21875
134.2	0.23125
134.3	0.225
134.4	0.225
134.5	0.21875
134.6	0.21875
134.7	0.225
134.8	0.23125
134.9	0.23125
135	0.23125
135.1	0.23125
135.2	0.23125
135.3	0.23125
135.4	0.23125
135.5	0.2375
135.6	0.2375
135.7	0.2375
135.8	0.2375
135.9	0.24375
136	0.24375
136.1	0.24375
136.2	0.24375
136.3	0.24375
136.4	0.24375
136.5	0.24375
136.6	0.24375
136.7	0.24375
136.8	0.24375
136.9	0.2375
137	0.2375
137.1	0.2375
137.2	0.24375
137.3	0.24375
137.4	0.24375
137.5	0.25
137.6	0.25625
137.7	0.2625
137.8	0.2625
137.9	0.2625
138	0.2625
138.1	0.2625
138.2	0.26875
138.3	0.25625
138.4	0.25625
138.5	0.25
138.6	0.2375
138.7	0.2375
138.8	0.2375
138.9	0.2375
139	0.23125
139.1	0.23125
139.2	0.23125
139.3	0.23125
139.4	0.23125
139.5	0.225
139.6	0.225
139.7	0.2125
139.8	0.2125
139.9	0.2125
140	0.2125
140.1	0.225
140.2	0.23125
140.3	0.23125
140.4	0.23125
140.5	0.2375
140.6	0.2375
140.7	0.2375
140.8	0.23125
140.9	0.23125
141	0.23125
141.1	0.23125
141.2	0.225
141.3	0.225
141.4	0.23125
141.5	0.23125
141.6	0.2375
141.7	0.2375
141.8	0.2375
141.9	0.2375
142	0.2375
142.1	0.24375
142.2	0.2375
142.3	0.2375
142.4	0.2375
142.5	0.2375
142.6	0.23125
142.7	0.23125
142.8	0.23125
142.9	0.23125
143	0.23125
143.1	0.225
143.2	0.225
143.3	0.225
143.4	0.21875
143.5	0.21875
143.6	0.2125
143.7	0.2125
143.8	0.20625
143.9	0.20625
144	0.20625
144.1	0.20625
144.2	0.20625
144.3	0.2
144.4	0.20625
144.5	0.20625
144.6	0.20625
144.7	0.2
144.8	0.2125
144.9	0.21875
145	0.21875
145.1	0.225
145.2	0.225
145.3	0.23125
145.4	0.2375
145.5	0.2375
145.6	0.23125
145.7	0.225
145.8	0.21875
145.9	0.21875
146	0.21875
146.1	0.21875
146.2	0.21875
146.3	0.2125
146.4	0.225
146.5	0.225
146.6	0.23125
146.7	0.2375
146.8	0.23125
146.9	0.23125
147	0.225
147.1	0.225
147.2	0.23125
147.3	0.225
147.4	0.225
147.5	0.23125
147.6	0.24375
147.7	0.24375
147.8	0.24375
147.9	0.24375
148	0.24375
148.1	0.24375
148.2	0.24375
148.3	0.24375
148.4	0.24375
148.5	0.24375
148.6	0.24375
148.7	0.24375
148.8	0.25
148.9	0.24375
149	0.2375
149.1	0.2375
149.2	0.23125
149.3	0.23125
149.4	0.23125
149.5	0.23125
149.6	0.225
149.7	0.23125
149.8	0.2375
149.9	0.2375
150	0.2375
150.1	0.24375
150.2	0.2375
150.3	0.23125
150.4	0.23125
150.5	0.225
150.6	0.225
150.7	0.23125
150.8	0.23125
150.9	0.23125
151	0.23125
151.1	0.23125
151.2	0.2375
151.3	0.24375
151.4	0.24375
151.5	0.24375
151.6	0.25
151.7	0.25
151.8	0.2625
151.9	0.2625
152	0.2625
152.1	0.2625
152.2	0.26875
152.3	0.26875
152.4	0.2625
152.5	0.2625
152.6	0.25625
152.7	0.275
152.8	0.275
152.9	0.28125
153	0.28125
153.1	0.275
153.2	0.275
153.3	0.275
153.4	0.2875
153.5	0.28125
153.6	0.28125
153.7	0.275
153.8	0.275
153.9	0.28125
154	0.26875
154.1	0.2625
154.2	0.2625
154.3	0.2625
154.4	0.2625
154.5	0.25625
154.6	0.25625
154.7	0.26875
154.8	0.2625
154.9	0.26875
155	0.26875
155.1	0.2625
155.2	0.2625
155.3	0.25625
155.4	0.25
155.5	0.25625
155.6	0.25625
155.7	0.2625
155.8	0.2625
155.9	0.25625
156	0.25625
156.1	0.25625
156.2	0.25
156.3	0.25
156.4	0.25
156.5	0.25
156.6	0.25
156.7	0.25
156.8	0.25
156.9	0.23125
157	0.23125
157.1	0.23125
157.2	0.2375
157.3	0.24375
157.4	0.24375
157.5	0.24375
157.6	0.2375
157.7	0.2375
157.8	0.2375
157.9	0.2375
158	0.2375
158.1	0.225
158.2	0.21875
158.3	0.21875
158.4	0.21875
158.5	0.21875
158.6	0.2125
158.7	0.20625
158.8	0.20625
158.9	0.21875
159	0.2125
159.1	0.2125
159.2	0.20625
159.3	0.2
159.4	0.1875
159.5	0.1875
159.6	0.19375
159.7	0.20625
159.8	0.20625
159.9	0.20625
160	0.20625
160.1	0.20625
160.2	0.2
160.3	0.20625
160.4	0.20625
160.5	0.2125
160.6	0.21875
160.7	0.225
160.8	0.21875
160.9	0.2125
161	0.2125
161.1	0.2125
161.2	0.20625
161.3	0.20625
161.4	0.2
161.5	0.2
161.6	0.20625
161.7	0.2125
161.8	0.21875
161.9	0.225
162	0.21875
162.1	0.225
162.2	0.23125
162.3	0.225
162.4	0.225
162.5	0.225
162.6	0.225
162.7	0.2375
162.8	0.23125
162.9	0.23125
163	0.23125
163.1	0.225
163.2	0.23125
163.3	0.225
163.4	0.23125
163.5	0.23125
163.6	0.23125
163.7	0.23125
163.8	0.23125
163.9	0.23125
164	0.23125
164.1	0.23125
164.2	0.2375
164.3	0.24375
164.4	0.25625
164.5	0.25
164.6	0.25
164.7	0.25
164.8	0.25625
164.9	0.25625
165	0.2625
165.1	0.24375
165.2	0.25625
165.3	0.25625
165.4	0.2625
165.5	0.2625
165.6	0.2625
165.7	0.2625
165.8	0.25
165.9	0.2375
166	0.2375
166.1	0.2375
166.2	0.2375
166.3	0.23125
166.4	0.23125
166.5	0.23125
166.6	0.23125
166.7	0.24375
166.8	0.24375
166.9	0.2375
167	0.23125
167.1	0.23125
167.2	0.2375
167.3	0.2375
167.4	0.24375
167.5	0.24375
167.6	0.2375
167.7	0.2375
167.8	0.2375
167.9	0.2375
168	0.2375
168.1	0.23125
168.2	0.23125
168.3	0.23125
168.4	0.23125
168.5	0.23125
168.6	0.24375
168.7	0.24375
168.8	0.24375
168.9	0.25625
169	0.25625
169.1	0.25
169.2	0.25625
169.3	0.25625
169.4	0.2625
169.5	0.2625
169.6	0.2625
169.7	0.2625
169.8	0.25625
169.9	0.25625
170	0.2625
170.1	0.26875
170.2	0.26875
170.3	0.28125
170.4	0.275
170.5	0.2875
170.6	0.275
170.7	0.25625
170.8	0.25625
170.9	0.25625
171	0.25
171.1	0.25625
171.2	0.25625
171.3	0.25625
171.4	0.25625
171.5	0.25625
171.6	0.26875
171.7	0.26875
171.8	0.26875
171.9	0.26875
172	0.26875
172.1	0.2625
172.2	0.2625
172.3	0.2625
172.4	0.25
172.5	0.25
172.6	0.25
172.7	0.25
172.8	0.25
172.9	0.24375
173	0.25
173.1	0.24375
173.2	0.24375
173.3	0.2375
173.4	0.23125
173.5	0.23125
173.6	0.225
173.7	0.21875
173.8	0.225
173.9	0.23125
174	0.23125
174.1	0.225
174.2	0.225
174.3	0.21875
174.4	0.21875
174.5	0.21875
174.6	0.21875
174.7	0.21875
174.8	0.225
174.9	0.23125
175	0.24375
175.1	0.24375
175.2	0.25
175.3	0.25
175.4	0.25
175.5	0.25
175.6	0.25
175.7	0.25
175.8	0.25
175.9	0.25
176	0.25
176.1	0.24375
176.2	0.2375
176.3	0.24375
176.4	0.25
176.5	0.25
176.6	0.25
176.7	0.25
176.8	0.25
176.9	0.25
177	0.25
177.1	0.25
177.2	0.24375
177.3	0.25
177.4	0.25
177.5	0.25625
177.6	0.25625
177.7	0.2375
177.8	0.2375
177.9	0.2375
178	0.2375
178.1	0.24375
178.2	0.25
178.3	0.25
178.4	0.25
178.5	0.25
178.6	0.24375
178.7	0.25
178.8	0.2625
178.9	0.2625
179	0.2625
179.1	0.25625
179.2	0.25625
179.3	0.25
179.4	0.24375
179.5	0.2375
179.6	0.2375
179.7	0.2375
179.8	0.23125
179.9	0.23125
180	0.225
180.1	0.225
180.2	0.23125
180.3	0.2375
180.4	0.2375
180.5	0.23125
180.6	0.225
180.7	0.225
180.8	0.225
180.9	0.225
181	0.21875
181.1	0.225
181.2	0.225
181.3	0.23125
181.4	0.23125
181.5	0.23125
181.6	0.225
181.7	0.21875
181.8	0.21875
181.9	0.225
182	0.225
182.1	0.225
182.2	0.225
182.3	0.225
182.4	0.225
182.5	0.225
182.6	0.225
182.7	0.23125
182.8	0.23125
182.9	0.23125
183	0.23125
183.1	0.23125
183.2	0.225
183.3	0.23125
183.4	0.23125
183.5	0.2125
183.6	0.2125
183.7	0.2125
183.8	0.20625
183.9	0.2125
184	0.2125
184.1	0.2
184.2	0.20625
184.3	0.2
184.4	0.2
184.5	0.2
184.6	0.19375
184.7	0.19375
184.8	0.19375
184.9	0.19375
185	0.19375
185.1	0.19375
185.2	0.2
185.3	0.2
185.4	0.2
185.5	0.2
185.6	0.1875
185.7	0.19375
185.8	0.19375
185.9	0.19375
186	0.1875
186.1	0.2
186.2	0.2
186.3	0.20625
186.4	0.20625
186.5	0.20625
186.6	0.2125
186.7	0.21875
186.8	0.2125
186.9	0.20625
187	0.21875
187.1	0.225
187.2	0.225
187.3	0.23125
187.4	0.225
187.5	0.23125
187.6	0.23125
187.7	0.2375
187.8	0.23125
187.9	0.23125
188	0.23125
188.1	0.2375
188.2	0.2375
188.3	0.2375
188.4	0.2375
188.5	0.24375
188.6	0.24375
188.7	0.24375
188.8	0.24375
188.9	0.24375
189	0.2375
189.1	0.2375
189.2	0.2375
189.3	0.2375
189.4	0.2375
189.5	0.2375
189.6	0.23125
189.7	0.2375
189.8	0.2375
189.9	0.23125
190	0.24375
190.1	0.24375
190.2	0.2375
190.3	0.2375
190.4	0.2375
190.5	0.2375
190.6	0.2375
190.7	0.24375
190.8	0.24375
190.9	0.24375
191	0.24375
191.1	0.25625
191.2	0.25625
191.3	0.25
191.4	0.25
191.5	0.25
191.6	0.2375
191.7	0.2375
191.8	0.2375
191.9	0.24375
192	0.2375
192.1	0.25
192.2	0.25
192.3	0.24375
192.4	0.23125
192.5	0.2375
192.6	0.2375
192.7	0.24375
192.8	0.2375
192.9	0.2375
193	0.24375
193.1	0.24375
193.2	0.25
193.3	0.25
193.4	0.25625
193.5	0.2625
193.6	0.25625
193.7	0.25625
193.8	0.25625
193.9	0.25625
194	0.24375
194.1	0.24375
194.2	0.24375
194.3	0.25
194.4	0.25
194.5	0.25
194.6	0.25
194.7	0.25625
194.8	0.25625
194.9	0.25
195	0.25625
195.1	0.24375
195.2	0.2375
195.3	0.24375
195.4	0.2375
195.5	0.23125
195.6	0.2375
195.7	0.2375
195.8	0.24375
195.9	0.2375
196	0.2375
196.1	0.23125
196.2	0.2375
196.3	0.2375
196.4	0.2375
196.5	0.2375
196.6	0.225
196.7	0.225
196.8	0.225
196.9	0.23125
197	0.225
197.1	0.225
197.2	0.225
197.3	0.21875
197.4	0.21875
197.5	0.21875
197.6	0.21875
197.7	0.21875
197.8	0.2125
197.9	0.21875
198	0.2125
198.1	0.2125
198.2	0.20625
198.3	0.19375
198.4	0.2
198.5	0.2
198.6	0.20625
198.7	0.20625
198.8	0.20625
198.9	0.20625
199	0.20625
199.1	0.2125
199.2	0.2125
199.3	0.20625
199.4	0.20625
199.5	0.2125
199.6	0.21875
199.7	0.21875
199.8	0.21875
199.9	0.21875
200	0.23125
[truncated: 14,000 more rows]
