# Supplementary material for: Bayesian inference of kinetic schemes for ion channels by Kalman filtering
Source: eLife journal article supplement (doi:10.7554/elife.62714), 2022-05-04
Supplement: fig4-data10 [file 1_Sim_N_80_Strom_MW.xlsx]

## Sheet: 0.0625 M
0.1	0
0.2	0
0.3	0
0.4	0
0.5	0
0.6	0
0.7	0
0.8	0
0.9	0
1	0
1.1	0
1.2	0
1.3	0
1.4	0
1.5	0
1.6	0
1.7	0
1.8	0
1.9	0
2	0
2.1	0
2.2	0
2.3	0
2.4	0
2.5	0
2.6	0
2.7	0
2.8	0
2.9	0
3	0
3.1	0
3.2	0
3.3	0
3.4	0
3.5	0
3.6	0
3.7	0
3.8	0
3.9	0
4	0
4.1	0
4.2	0
4.3	0
4.4	0
4.5	0
4.6	0
4.7	0
4.8	0
4.9	0
5	0
5.1	0
5.2	0
5.3	0
5.4	0
5.5	0
5.6	0
5.7	0
5.8	0
5.9	0
6	0
6.1	0
6.2	0
6.3	0
6.4	0
6.5	0
6.6	0
6.7	0
6.8	0
6.9	0
7	0
7.1	0
7.2	0
7.3	0
7.4	0
7.5	0
7.6	0
7.7	0
7.8	0
7.9	0
8	0
8.1	0
8.2	0
8.3	0
8.4	0
8.5	0
8.6	0
8.7	0
8.8	0
8.9	0
9	0
9.1	0
9.2	0
9.3	0
9.4	0
9.5	0
9.6	0
9.7	0
9.8	0
9.9	0
10	0
10.1	0
10.2	0
10.3	0
10.4	0
10.5	0
10.6	0
10.7	0
10.8	0
10.9	0
11	0
11.1	0
11.2	0
11.3	0
11.4	0
11.5	0
11.6	0
11.7	0
11.8	0
11.9	0
12	0
12.1	0
12.2	0
12.3	0
12.4	0
12.5	0
12.6	0
12.7	0
12.8	0
12.9	0
13	0
13.1	0
13.2	0
13.3	0
13.4	0
13.5	0
13.6	0
13.7	0
13.8	0
13.9	0
14	0
14.1	0
14.2	0
14.3	0
14.4	0
14.5	0
14.6	0
14.7	0
14.8	0
14.9	0
15	0
15.1	0
15.2	0
15.3	0
15.4	0
15.5	0
15.6	0
15.7	0
15.8	0
15.9	0
16	0
16.1	0
16.2	0
16.3	0
16.4	0
16.5	0
16.6	0
16.7	0
16.8	0
16.9	0
17	0
17.1	0
17.2	0
17.3	0
17.4	0
17.5	0
17.6	0
17.7	0
17.8	0
17.9	0
18	0
18.1	0
18.2	0
18.3	0
18.4	0
18.5	0
18.6	0
18.7	0
18.8	0
18.9	0
19	0
19.1	0
19.2	0
19.3	0
19.4	0
19.5	0
19.6	0
19.7	0
19.8	0
19.9	0
20	0
20.1	0
20.2	0
20.3	0
20.4	0
20.5	0
20.6	0
20.7	0
20.8	0
20.9	0
21	0
21.1	0
21.2	0
21.3	0
21.4	0
21.5	0
21.6	0
21.7	0
21.8	0
21.9	0
22	0
22.1	0
22.2	0
22.3	0
22.4	0
22.5	0
22.6	0
22.7	0
22.8	0
22.9	0
23	0
23.1	0
23.2	0
23.3	0
23.4	0
23.5	0
23.6	0
23.7	0
23.8	0
23.9	0
24	0
24.1	0
24.2	0
24.3	0
24.4	0
24.5	0
24.6	0
24.7	0
24.8	0
24.9	0
25	0
25.1	0
25.2	0
25.3	0
25.4	0
25.5	0
25.6	0
25.7	0
25.8	0
25.9	0
26	0
26.1	0
26.2	0
26.3	0
26.4	0
26.5	0
26.6	0
26.7	0
26.8	0
26.9	0
27	0
27.1	0
27.2	0
27.3	0
27.4	0
27.5	0
27.6	0
27.7	0
27.8	0
27.9	0
28	0
28.1	0
28.2	0
28.3	0
28.4	0
28.5	0
28.6	0
28.7	0
28.8	0
28.9	0
29	0
29.1	0
29.2	0
29.3	0
29.4	0
29.5	0
29.6	0
29.7	0
29.8	0
29.9	0
30	0
30.1	0
30.2	0
30.3	0
30.4	0
30.5	0
30.6	0
30.7	0
30.8	0
30.9	0
31	0
31.1	0
31.2	0
31.3	0
31.4	0
31.5	0
31.6	0
31.7	0
31.8	0
31.9	0
32	0
32.1	0
32.2	0
32.3	0
32.4	0
32.5	0
32.6	0
32.7	0
32.8	0
32.9	0
33	0
33.1	0
33.2	0
33.3	0
33.4	0
33.5	0
33.6	0
33.7	0
33.8	0
33.9	0
34	0
34.1	0
34.2	0
34.3	0
34.4	0
34.5	0
34.6	0
34.7	0
34.8	0
34.9	0
35	0
35.1	0
35.2	0
35.3	0
35.4	0
35.5	0
35.6	0
35.7	0
35.8	0
35.9	0
36	0
36.1	0
36.2	0
36.3	0
36.4	0
36.5	0
36.6	0
36.7	0
36.8	0
36.9	0
37	0
37.1	0
37.2	0
37.3	0
37.4	0
37.5	0
37.6	0
37.7	0
37.8	0
37.9	0
38	0
38.1	0
38.2	0
38.3	0
38.4	0
38.5	0
38.6	0
38.7	0
38.8	0
38.9	0
39	0
39.1	0
39.2	0
39.3	0
39.4	0
39.5	0
39.6	0
39.7	0
39.8	0
39.9	0
40	0
40.1	0
40.2	0
40.3	0
40.4	0
40.5	0
40.6	0
40.7	0
40.8	0
40.9	0
41	0
41.1	0
41.2	0
41.3	0
41.4	0
41.5	0
41.6	0
41.7	0
41.8	0
41.9	0
42	0
42.1	0
42.2	0
42.3	0
42.4	0
42.5	0
42.6	0
42.7	0
42.8	0
42.9	0
43	0
43.1	0
43.2	0
43.3	0
43.4	0
43.5	0
43.6	0
43.7	0
43.8	0
43.9	0
44	0
44.1	0
44.2	0
44.3	0
44.4	0
44.5	0
44.6	0
44.7	0
44.8	0
44.9	0
45	0
45.1	0
45.2	0
45.3	0
45.4	0
45.5	0
45.6	0
45.7	0
45.8	0
45.9	0
46	0
46.1	0
46.2	0
46.3	0
46.4	0
46.5	0
46.6	0
46.7	0
46.8	0
46.9	0
47	0
47.1	0
47.2	0
47.3	0
47.4	0
47.5	0
47.6	0
47.7	0
47.8	0
47.9	0
48	0
48.1	0
48.2	0
48.3	0
48.4	0
48.5	0
48.6	0
48.7	0
48.8	0
48.9	0
49	0
49.1	0
49.2	0
49.3	0
49.4	0
49.5	0
49.6	0
49.7	0
49.8	0
49.9	0
50	0
50.1	0
50.2	0
50.3	0
50.4	0
50.5	0
50.6	0
50.7	0
50.8	0
50.9	0
51	0
51.1	0
51.2	0
51.3	0
51.4	0
51.5	0
51.6	0
51.7	0
51.8	0
51.9	0
52	0
52.1	0
52.2	0
52.3	0
52.4	0
52.5	0
52.6	0
52.7	0
52.8	0
52.9	0
53	0
53.1	0
53.2	0
53.3	0
53.4	0
53.5	0
53.6	0
53.7	0
53.8	0
53.9	0
54	0
54.1	0
54.2	0
54.3	0
54.4	0
54.5	0
54.6	0
54.7	0
54.8	0
54.9	0
55	0
55.1	0
55.2	0
55.3	0
55.4	0
55.5	0
55.6	0
55.7	0
55.8	0
55.9	0
56	0
56.1	0
56.2	0
56.3	0
56.4	0
56.5	0
56.6	0
56.7	0
56.8	0
56.9	0
57	0
57.1	0
57.2	0
57.3	0
57.4	0
57.5	0
57.6	0
57.7	0
57.8	0
57.9	0
58	0
58.1	0
58.2	0
58.3	0
58.4	0
58.5	0
58.6	0
58.7	0
58.8	0
58.9	0
59	0
59.1	0
59.2	0
59.3	0
59.4	0
59.5	0
59.6	0
59.7	0
59.8	0
59.9	0
60	0
60.1	0
60.2	0
60.3	0
60.4	0
60.5	0
60.6	0
60.7	0
60.8	0
60.9	0
61	0
61.1	0
61.2	0
61.3	0
61.4	0
61.5	0
61.6	0
61.7	0
61.8	0
61.9	0
62	0
62.1	0
62.2	0
62.3	0
62.4	0
62.5	0
62.6	0
62.7	0
62.8	0
62.9	0
63	0
63.1	0
63.2	0
63.3	0
63.4	0
63.5	0
63.6	0
63.7	0
63.8	0
63.9	0
64	0
64.1	0
64.2	0
64.3	0
64.4	0
64.5	0
64.6	0
64.7	0
64.8	0
64.9	0
65	0
65.1	0
65.2	0
65.3	0
65.4	0
65.5	0
65.6	0
65.7	0
65.8	0
65.9	0
66	0
66.1	0
66.2	0
66.3	0
66.4	0
66.5	0
66.6	0
66.7	0
66.8	0
66.9	0
67	0
67.1	0
67.2	0
67.3	0
67.4	0
67.5	0
67.6	0
67.7	0
67.8	0
67.9	0
68	0
68.1	0
68.2	0
68.3	0
68.4	0
68.5	0
68.6	0
68.7	0
68.8	0
68.9	0
69	0
69.1	0
69.2	0
69.3	0
69.4	0
69.5	0
69.6	0
69.7	0
69.8	0
69.9	0
70	0
70.1	0
70.2	0
70.3	0
70.4	0
70.5	0
70.6	0
70.7	0
70.8	0
70.9	0
71	0
71.1	0
71.2	0
71.3	0
71.4	0
71.5	0
71.6	0
71.7	0
71.8	0
71.9	0
72	0
72.1	0
72.2	0
72.3	0
72.4	0
72.5	0
72.6	0
72.7	0
72.8	0
72.9	0
73	0
73.1	0
73.2	0
73.3	0
73.4	0
73.5	0
73.6	0
73.7	0
73.8	0
73.9	0
74	0
74.1	0
74.2	0
74.3	0
74.4	0
74.5	0
74.6	0
74.7	0
74.8	0
74.9	0
75	0
75.1	0
75.2	0
75.3	0
75.4	0
75.5	0
75.6	0
75.7	0
75.8	0
75.9	0
76	0
76.1	0
76.2	0
76.3	0
76.4	0
76.5	0
76.6	0
76.7	0
76.8	0
76.9	0
77	0
77.1	0
77.2	0
77.3	0
77.4	0
77.5	0
77.6	0
77.7	0
77.8	0
77.9	0
78	0
78.1	0
78.2	0
78.3	0
78.4	0
78.5	0
78.6	0
78.7	0
78.8	0
78.9	0
79	0
79.1	0
79.2	0
79.3	0
79.4	0
79.5	0
79.6	0
79.7	0
79.8	0
79.9	0
80	0
80.1	0
80.2	0
80.3	0
80.4	0
80.5	0
80.6	0
80.7	0
80.8	0
80.9	0
81	0
81.1	0
81.2	0
81.3	0
81.4	0
81.5	0
81.6	0
81.7	0
81.8	0
81.9	0
82	0
82.1	0
82.2	0
82.3	0
82.4	0
82.5	0
82.6	0
82.7	0
82.8	0
82.9	0
83	0
83.1	0
83.2	0
83.3	0
83.4	0
83.5	0
83.6	0
83.7	0
83.8	0
83.9	0
84	0
84.1	0
84.2	0
84.3	0
84.4	0
84.5	0
84.6	0
84.7	0
84.8	0
84.9	0
85	0
85.1	0
85.2	0
85.3	0
85.4	0
85.5	0
85.6	0
85.7	0
85.8	0
85.9	0
86	0
86.1	0
86.2	0
86.3	0
86.4	0
86.5	0
86.6	0
86.7	0
86.8	0
86.9	0
87	0
87.1	0
87.2	0
87.3	0
87.4	0
87.5	0
87.6	0
87.7	0
87.8	0
87.9	0
88	0
88.1	0
88.2	0
88.3	0
88.4	0
88.5	0
88.6	0
88.7	0
88.8	0
88.9	0
89	0
89.1	0
89.2	0
89.3	0
89.4	0
89.5	0
89.6	0
89.7	0
89.8	0
89.9	0
90	0
90.1	0
90.2	0
90.3	0
90.4	0
90.5	0
90.6	0
90.7	0
90.8	0
90.9	0
91	0
91.1	0
91.2	0
91.3	0
91.4	0
91.5	0
91.6	0
91.7	0
91.8	0
91.9	0
92	0
92.1	0
92.2	0
92.3	0
92.4	0
92.5	0
92.6	0
92.7	0
92.8	0
92.9	0
93	0
93.1	0
93.2	0
93.3	0
93.4	0
93.5	0
93.6	0
93.7	0
93.8	0
93.9	0
94	0
94.1	0
94.2	0
94.3	0
94.4	0
94.5	0
94.6	0
94.7	0
94.8	0
94.9	0
95	0
95.1	0
95.2	0
95.3	0
95.4	0
95.5	0
95.6	0
95.7	0
95.8	0
95.9	0
96	0
96.1	0
96.2	0
96.3	0
96.4	0
96.5	0
96.6	0
96.7	0
96.8	0
96.9	0
97	0
97.1	0
97.2	0
97.3	0
97.4	0
97.5	0
97.6	0
97.7	0
97.8	0
97.9	0
98	0
98.1	0
98.2	0
98.3	0
98.4	0
98.5	0
98.6	0
98.7	0
98.8	0
98.9	0
99	0
99.1	0
99.2	0
99.3	0
99.4	0
99.5	0
99.6	0
99.7	0
99.8	0
99.9	0
100	0
100.1	0
100.2	0
100.3	0
100.4	0
100.5	0
100.6	0
100.7	0
100.8	0
100.9	0
101	0
101.1	0
101.2	0
101.3	0
101.4	0
101.5	0
101.6	0
101.7	0
101.8	0
101.9	0
102	0
102.1	0
102.2	0
102.3	0
102.4	0
102.5	0
102.6	0
102.7	0
102.8	0
102.9	0
103	0
103.1	0
103.2	0
103.3	0
103.4	0
103.5	0
103.6	0
103.7	0
103.8	0
103.9	0
104	0
104.1	0
104.2	0
104.3	0
104.4	0
104.5	0
104.6	0
104.7	0
104.8	0
104.9	0
105	0
105.1	0
105.2	0
105.3	0
105.4	0
105.5	0
105.6	0
105.7	0
105.8	0
105.9	0
106	0
106.1	0
106.2	0
106.3	0
106.4	0
106.5	0
106.6	0
106.7	0
106.8	0
106.9	0
107	0
107.1	0
107.2	0
107.3	0
107.4	0
107.5	0
107.6	0
107.7	0
107.8	0
107.9	0
108	0
108.1	0
108.2	0
108.3	0
108.4	0
108.5	0
108.6	0
108.7	0
108.8	0
108.9	0
109	0
109.1	0
109.2	0
109.3	0
109.4	0
109.5	0
109.6	0
109.7	0
109.8	0
109.9	0
110	0
110.1	0
110.2	0
110.3	0
110.4	0
110.5	0
110.6	0
110.7	0
110.8	0
110.9	0
111	0
111.1	0
111.2	0
111.3	0
111.4	0
111.5	0
111.6	0
111.7	0
111.8	0
111.9	0
112	0
112.1	0
112.2	0
112.3	0
112.4	0
112.5	0
112.6	0
112.7	0
112.8	0
112.9	0
113	0
113.1	0
113.2	0
113.3	0
113.4	0
113.5	0
113.6	0
113.7	0
113.8	0
113.9	0
114	0
114.1	0
114.2	0
114.3	0
114.4	0
114.5	0
114.6	0
114.7	0
114.8	0
114.9	0
115	0
115.1	0
115.2	0
115.3	0
115.4	0
115.5	0
115.6	0
115.7	0
115.8	0
115.9	0
116	0
116.1	0
116.2	0
116.3	0
116.4	0
116.5	0
116.6	0
116.7	0
116.8	0
116.9	0
117	0
117.1	0
117.2	0
117.3	0
117.4	0
117.5	0
117.6	0
117.7	0
117.8	0
117.9	0
118	0
118.1	0
118.2	0
118.3	0
118.4	0
118.5	0
118.6	0
118.7	0
118.8	0
118.9	0
119	0
119.1	0
119.2	0
119.3	0
119.4	0
119.5	0
119.6	0
119.7	0
119.8	0
119.9	0
120	0
120.1	0
120.2	0
120.3	0
120.4	0
120.5	0
120.6	0
120.7	0.0125
120.8	0.0125
120.9	0.0125
121	0.0125
121.1	0.0125
121.2	0.0125
121.3	0.0125
121.4	0.0125
121.5	0.0125
121.6	0.0125
121.7	0.0125
121.8	0.0125
121.9	0.0125
122	0.0125
122.1	0.0125
122.2	0.0125
122.3	0.0125
122.4	0.0125
122.5	0.0125
122.6	0.0125
122.7	0.0125
122.8	0.0125
122.9	0.0125
123	0.0125
123.1	0.0125
123.2	0.0125
123.3	0.0125
123.4	0.0125
123.5	0.0125
123.6	0.0125
123.7	0.0125
123.8	0.0125
123.9	0.0125
124	0.0125
124.1	0.0125
124.2	0.0125
124.3	0.0125
124.4	0.0125
124.5	0.0125
124.6	0.0125
124.7	0.0125
124.8	0.0125
124.9	0.0125
125	0.0125
125.1	0.0125
125.2	0.0125
125.3	0.0125
125.4	0.0125
125.5	0.0125
125.6	0.0125
125.7	0.0125
125.8	0.0125
125.9	0.0125
126	0.0125
126.1	0.0125
126.2	0.0125
126.3	0.0125
126.4	0.0125
126.5	0.0125
126.6	0.0125
126.7	0.0125
126.8	0.0125
126.9	0.0125
127	0.0125
127.1	0.0125
127.2	0.0125
127.3	0.0125
127.4	0.0125
127.5	0.0125
127.6	0.0125
127.7	0.0125
127.8	0.0125
127.9	0.0125
128	0.0125
128.1	0.0125
128.2	0.0125
128.3	0.0125
128.4	0.0125
128.5	0.0125
128.6	0.0125
128.7	0.0125
128.8	0.0125
128.9	0.0125
129	0.0125
129.1	0.0125
129.2	0.0125
129.3	0.0125
129.4	0.0125
129.5	0.0125
129.6	0.0125
129.7	0.0125
129.8	0.0125
129.9	0.0125
130	0.0125
130.1	0.0125
130.2	0.0125
130.3	0.0125
130.4	0.0125
130.5	0.0125
130.6	0.0125
130.7	0.0125
130.8	0.0125
130.9	0.0125
131	0.0125
131.1	0.0125
131.2	0.0125
131.3	0.0125
131.4	0.0125
131.5	0.0125
131.6	0.0125
131.7	0.0125
131.8	0.0125
131.9	0.0125
132	0.0125
132.1	0.0125
132.2	0.0125
132.3	0.0125
132.4	0.0125
132.5	0.0125
132.6	0.0125
132.7	0.0125
132.8	0.0125
132.9	0.0125
133	0.025
133.1	0.025
133.2	0.025
133.3	0.025
133.4	0.025
133.5	0.025
133.6	0.025
133.7	0.025
133.8	0.025
133.9	0.025
134	0.025
134.1	0.025
134.2	0.025
134.3	0.025
134.4	0.025
134.5	0.025
134.6	0.025
134.7	0.025
134.8	0.025
134.9	0.025
135	0.025
135.1	0.025
135.2	0.025
135.3	0.025
135.4	0.025
135.5	0.025
135.6	0.025
135.7	0.025
135.8	0.025
135.9	0.025
136	0.025
136.1	0.025
136.2	0.025
136.3	0.025
136.4	0.025
136.5	0.025
136.6	0.025
136.7	0.025
136.8	0.025
136.9	0.025
137	0.025
137.1	0.025
137.2	0.025
137.3	0.025
137.4	0.025
137.5	0.025
137.6	0.025
137.7	0.025
137.8	0.025
137.9	0.025
138	0.025
138.1	0.025
138.2	0.025
138.3	0.025
138.4	0.025
138.5	0.025
138.6	0.025
138.7	0.025
138.8	0.025
138.9	0.025
139	0.025
139.1	0.025
139.2	0.025
139.3	0.025
139.4	0.025
139.5	0.025
139.6	0.025
139.7	0.025
139.8	0.025
139.9	0.025
140	0.025
140.1	0.025
140.2	0.025
140.3	0.025
140.4	0.025
140.5	0.025
140.6	0.025
140.7	0.025
140.8	0.025
140.9	0.025
141	0.025
141.1	0.025
141.2	0.025
141.3	0.025
141.4	0.025
141.5	0.025
141.6	0.025
141.7	0.025
141.8	0.025
141.9	0.025
142	0.025
142.1	0.025
142.2	0.025
142.3	0.025
142.4	0.025
142.5	0.025
142.6	0.025
142.7	0.025
142.8	0.025
142.9	0.025
143	0.025
143.1	0.025
143.2	0.025
143.3	0.025
143.4	0.025
143.5	0.025
143.6	0.025
143.7	0.025
143.8	0.025
143.9	0.025
144	0.025
144.1	0.025
144.2	0.025
144.3	0.025
144.4	0.025
144.5	0.025
144.6	0.025
144.7	0.025
144.8	0.025
144.9	0.025
145	0.025
145.1	0.025
145.2	0.025
145.3	0.025
145.4	0.025
145.5	0.025
145.6	0.025
145.7	0.025
145.8	0.025
145.9	0.025
146	0.025
146.1	0.025
146.2	0.025
146.3	0.025
146.4	0.025
146.5	0.025
146.6	0.025
146.7	0.025
146.8	0.025
146.9	0.025
147	0.025
147.1	0.025
147.2	0.025
147.3	0.025
147.4	0.025
147.5	0.025
147.6	0.025
147.7	0.025
147.8	0.025
147.9	0.025
148	0.025
148.1	0.025
148.2	0.025
148.3	0.025
148.4	0.025
148.5	0.025
148.6	0.025
148.7	0.025
148.8	0.025
148.9	0.025
149	0.025
149.1	0.025
149.2	0.025
149.3	0.025
149.4	0.025
149.5	0.025
149.6	0.025
149.7	0.025
149.8	0.025
149.9	0.025
150	0.025
150.1	0.025
150.2	0.025
150.3	0.025
150.4	0.025
150.5	0.025
150.6	0.025
150.7	0.025
150.8	0.025
150.9	0.025
151	0.025
151.1	0.025
151.2	0.025
151.3	0.025
151.4	0.025
151.5	0.025
151.6	0.025
151.7	0.025
151.8	0.025
151.9	0.025
152	0.025
152.1	0.025
152.2	0.025
152.3	0.025
152.4	0.025
152.5	0.025
152.6	0.025
152.7	0.025
152.8	0.025
152.9	0.025
153	0.025
153.1	0.025
153.2	0.025
153.3	0.025
153.4	0.025
153.5	0.025
153.6	0.025
153.7	0.025
153.8	0.025
153.9	0.025
154	0.025
154.1	0.025
154.2	0.025
154.3	0.025
154.4	0.025
154.5	0.025
154.6	0.025
154.7	0.025
154.8	0.025
154.9	0.025
155	0.025
155.1	0.025
155.2	0.025
155.3	0.025
155.4	0.025
155.5	0.025
155.6	0.025
155.7	0.025
155.8	0.025
155.9	0.025
156	0.025
156.1	0.025
156.2	0.025
156.3	0.025
156.4	0.025
156.5	0.025
156.6	0.025
156.7	0.025
156.8	0.025
156.9	0.025
157	0.025
157.1	0.025
157.2	0.025
157.3	0.025
157.4	0.025
157.5	0.025
157.6	0.025
157.7	0.025
157.8	0.025
157.9	0.025
158	0.025
158.1	0.025
158.2	0.025
158.3	0.025
158.4	0.025
158.5	0.025
158.6	0.025
158.7	0.025
158.8	0.025
158.9	0.025
159	0.025
159.1	0.025
159.2	0.025
159.3	0.025
159.4	0.025
159.5	0.025
159.6	0.025
159.7	0.025
159.8	0.025
159.9	0.025
160	0.025
160.1	0.025
160.2	0.025
160.3	0.025
160.4	0.025
160.5	0.025
160.6	0.025
160.7	0.025
160.8	0.025
160.9	0.025
161	0.025
161.1	0.025
161.2	0.025
161.3	0.025
161.4	0.025
161.5	0.025
161.6	0.025
161.7	0.025
161.8	0.025
161.9	0.025
162	0.025
162.1	0.025
162.2	0.025
162.3	0.025
162.4	0.025
162.5	0.025
162.6	0.025
162.7	0.025
162.8	0.025
162.9	0.025
163	0.025
163.1	0.025
163.2	0.025
163.3	0.025
163.4	0.025
163.5	0.025
163.6	0.025
163.7	0.025
163.8	0.025
163.9	0.025
164	0.025
164.1	0.025
164.2	0.025
164.3	0.025
164.4	0.0125
164.5	0.0125
164.6	0.0125
164.7	0.0125
164.8	0.0125
164.9	0.0125
165	0.0125
165.1	0.0125
165.2	0.0125
165.3	0.0125
165.4	0.0125
165.5	0.0125
165.6	0.0125
165.7	0.0125
165.8	0.0125
165.9	0.0125
166	0.0125
166.1	0.0125
166.2	0.0125
166.3	0.0125
166.4	0.0125
166.5	0.0125
166.6	0.0125
166.7	0.0125
166.8	0.0125
166.9	0.0125
167	0.0125
167.1	0.0125
167.2	0.0125
167.3	0.0125
167.4	0.0125
167.5	0.0125
167.6	0.0125
167.7	0.0125
167.8	0.0125
167.9	0.0125
168	0.0125
168.1	0.0125
168.2	0.0125
168.3	0.0125
168.4	0.0125
168.5	0.0125
168.6	0.0125
168.7	0.0125
168.8	0.0125
168.9	0.0125
169	0.0125
169.1	0.0125
169.2	0.0125
169.3	0.0125
169.4	0.0125
169.5	0.0125
169.6	0.0125
169.7	0.0125
169.8	0.0125
169.9	0.0125
170	0.0125
170.1	0.0125
170.2	0.0125
170.3	0.0125
170.4	0.0125
170.5	0.0125
170.6	0.0125
170.7	0.0125
170.8	0.0125
170.9	0.0125
171	0.0125
171.1	0.0125
171.2	0.0125
171.3	0.0125
171.4	0.0125
171.5	0.0125
171.6	0.0125
171.7	0.0125
171.8	0.0125
171.9	0.0125
172	0.0125
172.1	0.0125
172.2	0.0125
172.3	0.0125
172.4	0.0125
172.5	0.0125
172.6	0.0125
172.7	0.0125
172.8	0.0125
172.9	0.0125
173	0.0125
173.1	0.0125
173.2	0.0125
173.3	0.0125
173.4	0.0125
173.5	0.0125
173.6	0.0125
173.7	0.0125
173.8	0.0125
173.9	0.0125
174	0.0125
174.1	0.0125
174.2	0.0125
174.3	0.0125
174.4	0.0125
174.5	0.0125
174.6	0.0125
174.7	0.0125
174.8	0.0125
174.9	0.0125
175	0.0125
175.1	0.0125
175.2	0.0125
175.3	0.0125
175.4	0.0125
175.5	0.0125
175.6	0.0125
175.7	0.0125
175.8	0.0125
175.9	0.0125
176	0.0125
176.1	0.0125
176.2	0.0125
176.3	0.0125
176.4	0.0125
176.5	0.0125
176.6	0.0125
176.7	0.0125
176.8	0.0125
176.9	0.0125
177	0.0125
177.1	0.0125
177.2	0.0125
177.3	0.0125
177.4	0.0125
177.5	0.0125
177.6	0.0125
177.7	0.0125
177.8	0.025
177.9	0.025
178	0.025
178.1	0.025
178.2	0.025
178.3	0.025
178.4	0.025
178.5	0.025
178.6	0.025
178.7	0.025
178.8	0.025
178.9	0.025
179	0.025
179.1	0.025
179.2	0.025
179.3	0.025
179.4	0.025
179.5	0.025
179.6	0.025
179.7	0.025
179.8	0.025
179.9	0.025
180	0.025
180.1	0.025
180.2	0.025
180.3	0.025
180.4	0.025
180.5	0.025
180.6	0.025
180.7	0.025
180.8	0.025
180.9	0.025
181	0.025
181.1	0.025
181.2	0.025
181.3	0.025
181.4	0.025
181.5	0.025
181.6	0.025
181.7	0.025
181.8	0.025
181.9	0.025
182	0.025
182.1	0.025
182.2	0.025
182.3	0.025
182.4	0.025
182.5	0.025
182.6	0.025
182.7	0.025
182.8	0.025
182.9	0.025
183	0.025
183.1	0.025
183.2	0.025
183.3	0.025
183.4	0.025
183.5	0.025
183.6	0.025
183.7	0.025
183.8	0.025
183.9	0.025
184	0.025
184.1	0.025
184.2	0.025
184.3	0.025
184.4	0.025
184.5	0.025
184.6	0.025
184.7	0.025
184.8	0.025
184.9	0.025
185	0.025
185.1	0.025
185.2	0.025
185.3	0.025
185.4	0.025
185.5	0.025
185.6	0.025
185.7	0.025
185.8	0.025
185.9	0.025
186	0.025
186.1	0.025
186.2	0.025
186.3	0.025
186.4	0.025
186.5	0.025
186.6	0.025
186.7	0.025
186.8	0.025
186.9	0.025
187	0.025
187.1	0.025
187.2	0.025
187.3	0.025
187.4	0.025
187.5	0.025
187.6	0.025
187.7	0.025
187.8	0.025
187.9	0.025
188	0.025
188.1	0.025
188.2	0.025
188.3	0.025
188.4	0.025
188.5	0.025
188.6	0.025
188.7	0.025
188.8	0.025
188.9	0.025
189	0.025
189.1	0.025
189.2	0.025
189.3	0.025
189.4	0.025
189.5	0.025
189.6	0.025
189.7	0.025
189.8	0.025
189.9	0.025
190	0.025
190.1	0.025
190.2	0.025
190.3	0.025
190.4	0.025
190.5	0.025
190.6	0.025
190.7	0.025
190.8	0.025
190.9	0.025
191	0.025
191.1	0.025
191.2	0.025
191.3	0.025
191.4	0.025
191.5	0.025
191.6	0.025
191.7	0.025
191.8	0.025
191.9	0.025
192	0.025
192.1	0.025
192.2	0.025
192.3	0.025
192.4	0.025
192.5	0.025
192.6	0.025
192.7	0.025
192.8	0.025
192.9	0.025
193	0.025
193.1	0.025
193.2	0.025
193.3	0.025
193.4	0.025
193.5	0.025
193.6	0.025
193.7	0.025
193.8	0.025
193.9	0.025
194	0.025
194.1	0.025
194.2	0.025
194.3	0.025
194.4	0.025
194.5	0.025
194.6	0.025
194.7	0.025
194.8	0.025
194.9	0.025
195	0.025
195.1	0.025
195.2	0.025
195.3	0.025
195.4	0.025
195.5	0.025
195.6	0.025
195.7	0.025
195.8	0.025
195.9	0.025
196	0.025
196.1	0.025
196.2	0.025
196.3	0.025
196.4	0.025
196.5	0.025
196.6	0.025
196.7	0.025
196.8	0.025
196.9	0.025
197	0.025
197.1	0.025
197.2	0.025
197.3	0.025
197.4	0.025
197.5	0.0125
197.6	0.0125
197.7	0.0125
197.8	0.0125
197.9	0.0125
198	0.0125
198.1	0.0125
198.2	0.0125
198.3	0.0125
198.4	0.0125
198.5	0.0125
198.6	0.0125
198.7	0.0125
198.8	0.0125
198.9	0.0125
199	0.0125
199.1	0.0125
199.2	0.0125
199.3	0.0125
199.4	0.0125
199.5	0.0125
199.6	0.0125
199.7	0.0125
199.8	0.0125
199.9	0.0125
200	0.0125
[truncated: 14,000 more rows]
