# Supplementary material for: Bayesian inference of kinetic schemes for ion channels by Kalman filtering
Source: eLife journal article supplement (doi:10.7554/elife.62714), 2022-05-04
Supplement: fig4-data10 [file 1_Sim_N_100_Fluor_MW.xlsx]

## Sheet: Tabelle1
0.1	0
0.2	0
0.3	0
0.4	0
0.5	0
0.6	0
0.7	0
0.8	0
0.9	0
1	0
1.1	0
1.2	0
1.3	0
1.4	0
1.5	0
1.6	0
1.7	0
1.8	0
1.9	0
2	0
2.1	0
2.2	0
2.3	0
2.4	0
2.5	0
2.6	0
2.7	0
2.8	0
2.9	0
3	0
3.1	0
3.2	0
3.3	0
3.4	0
3.5	0
3.6	0
3.7	0
3.8	0
3.9	0
4	0
4.1	0
4.2	0
4.3	0
4.4	0
4.5	0
4.6	0
4.7	0
4.8	0
4.9	0
5	0
5.1	0
5.2	0
5.3	0
5.4	0
5.5	0
5.6	0
5.7	0
5.8	0
5.9	0
6	0
6.1	0
6.2	0
6.3	0
6.4	0
6.5	0
6.6	0
6.7	0
6.8	0
6.9	0
7	0
7.1	0
7.2	0
7.3	0
7.4	0
7.5	0
7.6	0
7.7	0
7.8	0
7.9	0
8	0
8.1	0
8.2	0
8.3	0
8.4	0
8.5	0
8.6	0
8.7	0
8.8	0
8.9	0
9	0
9.1	0
9.2	0
9.3	0
9.4	0
9.5	0
9.6	0
9.7	0
9.8	0
9.9	0
10	0
10.1	0
10.2	0
10.3	0
10.4	0
10.5	0
10.6	0
10.7	0
10.8	0
10.9	0
11	0
11.1	0
11.2	0
11.3	0
11.4	0
11.5	0
11.6	0
11.7	0
11.8	0
11.9	0
12	0
12.1	0
12.2	0
12.3	0
12.4	0
12.5	0
12.6	0
12.7	0
12.8	0
12.9	0
13	0
13.1	0
13.2	0
13.3	0
13.4	0
13.5	0
13.6	0
13.7	0
13.8	0
13.9	0
14	0
14.1	0
14.2	0
14.3	0
14.4	0
14.5	0
14.6	0
14.7	0
14.8	0
14.9	0
15	0
15.1	0
15.2	0
15.3	0
15.4	0
15.5	0
15.6	0
15.7	0
15.8	0
15.9	0
16	0
16.1	0
16.2	0
16.3	0
16.4	0
16.5	0
16.6	0
16.7	0
16.8	0
16.9	0
17	0
17.1	0
17.2	0
17.3	0
17.4	0
17.5	0
17.6	0
17.7	0
17.8	0
17.9	0
18	0
18.1	0
18.2	0
18.3	0
18.4	0
18.5	0
18.6	0
18.7	0
18.8	0
18.9	0
19	0
19.1	0
19.2	0
19.3	0
19.4	0
19.5	0
19.6	0
19.7	0
19.8	0
19.9	0
20	0
20.1	0
20.2	0
20.3	0
20.4	0
20.5	0
20.6	0
20.7	0
20.8	0
20.9	0
21	0
21.1	0
21.2	0
21.3	0
21.4	0
21.5	0
21.6	0
21.7	0
21.8	0
21.9	0
22	0
22.1	0
22.2	0
22.3	0
22.4	0
22.5	0
22.6	0
22.7	0
22.8	0
22.9	0
23	0
23.1	0
23.2	0
23.3	0
23.4	0
23.5	0
23.6	0
23.7	0
23.8	0
23.9	0
24	0
24.1	0
24.2	0
24.3	0
24.4	0
24.5	0
24.6	0
24.7	0
24.8	0
24.9	0
25	0
25.1	0
25.2	0
25.3	0
25.4	0
25.5	0
25.6	0
25.7	0
25.8	0
25.9	0
26	0
26.1	0
26.2	0
26.3	0
26.4	0
26.5	0
26.6	0
26.7	0
26.8	0
26.9	0
27	0
27.1	0
27.2	0
27.3	0
27.4	0
27.5	0
27.6	0
27.7	0
27.8	0
27.9	0
28	0
28.1	0
28.2	0
28.3	0
28.4	0
28.5	0
28.6	0
28.7	0
28.8	0
28.9	0
29	0
29.1	0
29.2	0
29.3	0
29.4	0
29.5	0
29.6	0
29.7	0
29.8	0
29.9	0
30	0
30.1	0
30.2	0
30.3	0
30.4	0
30.5	0
30.6	0
30.7	0
30.8	0
30.9	0
31	0
31.1	0
31.2	0
31.3	0
31.4	0
31.5	0
31.6	0
31.7	0
31.8	0
31.9	0
32	0
32.1	0
32.2	0
32.3	0
32.4	0
32.5	0
32.6	0
32.7	0
32.8	0
32.9	0
33	0
33.1	0
33.2	0
33.3	0
33.4	0
33.5	0
33.6	0
33.7	0
33.8	0
33.9	0
34	0
34.1	0
34.2	0
34.3	0
34.4	0
34.5	0
34.6	0
34.7	0
34.8	0
34.9	0
35	0
35.1	0
35.2	0
35.3	0
35.4	0
35.5	0
35.6	0
35.7	0
35.8	0
35.9	0
36	0
36.1	0
36.2	0
36.3	0
36.4	0
36.5	0
36.6	0
36.7	0
36.8	0
36.9	0
37	0
37.1	0
37.2	0
37.3	0
37.4	0
37.5	0
37.6	0
37.7	0
37.8	0
37.9	0
38	0
38.1	0
38.2	0
38.3	0
38.4	0
38.5	0
38.6	0
38.7	0
38.8	0
38.9	0
39	0
39.1	0
39.2	0
39.3	0
39.4	0
39.5	0
39.6	0
39.7	0
39.8	0
39.9	0
40	0
40.1	0
40.2	0
40.3	0
40.4	0
40.5	0
40.6	0
40.7	0
40.8	0
40.9	0
41	0
41.1	0
41.2	0
41.3	0
41.4	0
41.5	0
41.6	0
41.7	0
41.8	0
41.9	0
42	0
42.1	0
42.2	0
42.3	0
42.4	0
42.5	0
42.6	0
42.7	0
42.8	0
42.9	0
43	0
43.1	0
43.2	0
43.3	0
43.4	0
43.5	0
43.6	0
43.7	0
43.8	0
43.9	0
44	0
44.1	0
44.2	0
44.3	0
44.4	0
44.5	0
44.6	0
44.7	0
44.8	0
44.9	0
45	0
45.1	0
45.2	0
45.3	0
45.4	0
45.5	0
45.6	0
45.7	0
45.8	0
45.9	0
46	0
46.1	0
46.2	0
46.3	0
46.4	0
46.5	0
46.6	0
46.7	0
46.8	0
46.9	0
47	0
47.1	0
47.2	0
47.3	0
47.4	0
47.5	0
47.6	0
47.7	0
47.8	0
47.9	0
48	0
48.1	0
48.2	0
48.3	0
48.4	0
48.5	0
48.6	0
48.7	0
48.8	0
48.9	0
49	0
49.1	0
49.2	0
49.3	0
49.4	0
49.5	0
49.6	0
49.7	0
49.8	0
49.9	0
50	0
50.1	0
50.2	0
50.3	0
50.4	0
50.5	0
50.6	0
50.7	0
50.8	0
50.9	0
51	0
51.1	0
51.2	0
51.3	0
51.4	0
51.5	0
51.6	0
51.7	0
51.8	0
51.9	0
52	0
52.1	0
52.2	0
52.3	0
52.4	0
52.5	0
52.6	0
52.7	0
52.8	0
52.9	0
53	0
53.1	0
53.2	0
53.3	0
53.4	0
53.5	0
53.6	0
53.7	0
53.8	0
53.9	0
54	0
54.1	0
54.2	0
54.3	0
54.4	0
54.5	0
54.6	0
54.7	0
54.8	0
54.9	0
55	0
55.1	0
55.2	0
55.3	0
55.4	0
55.5	0
55.6	0
55.7	0
55.8	0
55.9	0
56	0
56.1	0
56.2	0
56.3	0
56.4	0
56.5	0
56.6	0
56.7	0
56.8	0
56.9	0
57	0
57.1	0
57.2	0
57.3	0
57.4	0
57.5	0
57.6	0
57.7	0
57.8	0
57.9	0
58	0
58.1	0
58.2	0
58.3	0
58.4	0
58.5	0
58.6	0
58.7	0
58.8	0
58.9	0
59	0
59.1	0
59.2	0
59.3	0
59.4	0
59.5	0
59.6	0
59.7	0
59.8	0
59.9	0
60	0
60.1	0
60.2	0
60.3	0
60.4	0
60.5	0
60.6	0
60.7	0
60.8	0
60.9	0
61	0
61.1	0
61.2	0
61.3	0
61.4	0
61.5	0
61.6	0
61.7	0
61.8	0
61.9	0
62	0
62.1	0
62.2	0
62.3	0
62.4	0
62.5	0
62.6	0
62.7	0
62.8	0
62.9	0
63	0
63.1	0
63.2	0
63.3	0
63.4	0
63.5	0
63.6	0
63.7	0
63.8	0
63.9	0
64	0
64.1	0
64.2	0
64.3	0
64.4	0
64.5	0
64.6	0
64.7	0
64.8	0
64.9	0
65	0
65.1	0
65.2	0
65.3	0
65.4	0
65.5	0
65.6	0
65.7	0
65.8	0
65.9	0
66	0
66.1	0
66.2	0
66.3	0
66.4	0
66.5	0
66.6	0
66.7	0
66.8	0
66.9	0
67	0
67.1	0
67.2	0
67.3	0
67.4	0
67.5	0
67.6	0
67.7	0
67.8	0
67.9	0
68	0
68.1	0
68.2	0
68.3	0
68.4	0
68.5	0
68.6	0
68.7	0
68.8	0
68.9	0
69	0
69.1	0
69.2	0
69.3	0
69.4	0
69.5	0
69.6	0
69.7	0
69.8	0
69.9	0
70	0
70.1	0
70.2	0
70.3	0
70.4	0
70.5	0
70.6	0
70.7	0
70.8	0
70.9	0
71	0
71.1	0
71.2	0
71.3	0
71.4	0
71.5	0
71.6	0
71.7	0
71.8	0
71.9	0
72	0
72.1	0
72.2	0
72.3	0
72.4	0
72.5	0
72.6	0
72.7	0
72.8	0
72.9	0
73	0
73.1	0
73.2	0
73.3	0
73.4	0
73.5	0
73.6	0
73.7	0
73.8	0
73.9	0
74	0
74.1	0
74.2	0
74.3	0
74.4	0
74.5	0
74.6	0
74.7	0
74.8	0
74.9	0
75	0
75.1	0
75.2	0
75.3	0
75.4	0
75.5	0
75.6	0
75.7	0
75.8	0
75.9	0
76	0
76.1	0
76.2	0
76.3	0
76.4	0
76.5	0
76.6	0
76.7	0
76.8	0
76.9	0
77	0
77.1	0
77.2	0
77.3	0
77.4	0
77.5	0
77.6	0
77.7	0
77.8	0
77.9	0
78	0
78.1	0
78.2	0
78.3	0
78.4	0
78.5	0
78.6	0
78.7	0
78.8	0
78.9	0
79	0
79.1	0
79.2	0
79.3	0
79.4	0
79.5	0
79.6	0
79.7	0
79.8	0
79.9	0
80	0
80.1	0
80.2	0
80.3	0
80.4	0
80.5	0
80.6	0
80.7	0
80.8	0
80.9	0
81	0
81.1	0
81.2	0
81.3	0
81.4	0
81.5	0
81.6	0
81.7	0
81.8	0
81.9	0
82	0
82.1	0
82.2	0
82.3	0
82.4	0
82.5	0
82.6	0
82.7	0
82.8	0
82.9	0
83	0
83.1	0
83.2	0
83.3	0
83.4	0
83.5	0
83.6	0
83.7	0
83.8	0
83.9	0
84	0
84.1	0
84.2	0
84.3	0
84.4	0
84.5	0
84.6	0
84.7	0
84.8	0
84.9	0
85	0
85.1	0
85.2	0
85.3	0
85.4	0
85.5	0
85.6	0
85.7	0
85.8	0
85.9	0
86	0
86.1	0
86.2	0
86.3	0
86.4	0
86.5	0
86.6	0
86.7	0
86.8	0
86.9	0
87	0
87.1	0
87.2	0
87.3	0
87.4	0
87.5	0
87.6	0
87.7	0
87.8	0
87.9	0
88	0
88.1	0
88.2	0
88.3	0
88.4	0
88.5	0
88.6	0
88.7	0
88.8	0
88.9	0
89	0
89.1	0
89.2	0
89.3	0
89.4	0
89.5	0
89.6	0
89.7	0
89.8	0
89.9	0
90	0
90.1	0
90.2	0
90.3	0
90.4	0
90.5	0
90.6	0
90.7	0
90.8	0
90.9	0
91	0
91.1	0
91.2	0
91.3	0
91.4	0
91.5	0
91.6	0
91.7	0
91.8	0
91.9	0
92	0
92.1	0
92.2	0
92.3	0
92.4	0
92.5	0
92.6	0
92.7	0
92.8	0
92.9	0
93	0
93.1	0
93.2	0
93.3	0
93.4	0
93.5	0
93.6	0
93.7	0
93.8	0
93.9	0
94	0
94.1	0
94.2	0
94.3	0
94.4	0
94.5	0
94.6	0
94.7	0
94.8	0
94.9	0
95	0
95.1	0
95.2	0
95.3	0
95.4	0
95.5	0
95.6	0
95.7	0
95.8	0
95.9	0
96	0
96.1	0
96.2	0
96.3	0
96.4	0
96.5	0
96.6	0
96.7	0
96.8	0
96.9	0
97	0
97.1	0
97.2	0
97.3	0
97.4	0
97.5	0
97.6	0
97.7	0
97.8	0
97.9	0
98	0
98.1	0
98.2	0
98.3	0
98.4	0
98.5	0
98.6	0
98.7	0
98.8	0
98.9	0
99	0
99.1	0
99.2	0
99.3	0
99.4	0
99.5	0
99.6	0
99.7	0
99.8	0
99.9	0
100	0
100.1	0.005
100.2	0.005
100.3	0.005
100.4	0.01
100.5	0.01
100.6	0.015
100.7	0.015
100.8	0.015
100.9	0.02
101	0.03
101.1	0.03
101.2	0.035
101.3	0.04
101.4	0.04
101.5	0.04
101.6	0.04
101.7	0.045
101.8	0.045
101.9	0.045
102	0.045
102.1	0.05
102.2	0.05
102.3	0.055
102.4	0.055
102.5	0.065
102.6	0.075
102.7	0.08
102.8	0.08
102.9	0.085
103	0.1
103.1	0.1
103.2	0.105
103.3	0.105
103.4	0.105
103.5	0.11
103.6	0.11
103.7	0.11
103.8	0.135
103.9	0.14
104	0.145
104.1	0.145
104.2	0.145
104.3	0.145
104.4	0.15
104.5	0.15
104.6	0.165
104.7	0.175
104.8	0.17
104.9	0.175
105	0.175
105.1	0.18
105.2	0.18
105.3	0.175
105.4	0.18
105.5	0.185
105.6	0.19
105.7	0.19
105.8	0.18
105.9	0.175
106	0.18
106.1	0.195
106.2	0.19
106.3	0.19
106.4	0.195
106.5	0.2
106.6	0.2
106.7	0.185
106.8	0.18
106.9	0.18
107	0.18
107.1	0.175
107.2	0.17
107.3	0.17
107.4	0.17
107.5	0.175
107.6	0.185
107.7	0.185
107.8	0.19
107.9	0.185
108	0.195
108.1	0.195
108.2	0.205
108.3	0.2
108.4	0.2
108.5	0.195
108.6	0.195
108.7	0.195
108.8	0.195
108.9	0.19
109	0.19
109.1	0.19
109.2	0.195
109.3	0.205
109.4	0.2
109.5	0.2
109.6	0.21
109.7	0.215
109.8	0.225
109.9	0.23
110	0.235
110.1	0.23
110.2	0.23
110.3	0.235
110.4	0.23
110.5	0.23
110.6	0.23
110.7	0.23
110.8	0.23
110.9	0.235
111	0.235
111.1	0.23
111.2	0.235
111.3	0.235
111.4	0.25
111.5	0.25
111.6	0.25
111.7	0.255
111.8	0.255
111.9	0.25
112	0.25
112.1	0.245
112.2	0.245
112.3	0.245
112.4	0.245
112.5	0.245
112.6	0.245
112.7	0.245
112.8	0.24
112.9	0.245
113	0.24
113.1	0.24
113.2	0.24
113.3	0.24
113.4	0.245
113.5	0.245
113.6	0.25
113.7	0.24
113.8	0.24
113.9	0.245
114	0.245
114.1	0.25
114.2	0.25
114.3	0.255
114.4	0.255
114.5	0.255
114.6	0.255
114.7	0.245
114.8	0.25
114.9	0.25
115	0.255
115.1	0.26
115.2	0.265
115.3	0.265
115.4	0.265
115.5	0.265
115.6	0.265
115.7	0.265
115.8	0.26
115.9	0.27
116	0.275
116.1	0.26
116.2	0.26
116.3	0.26
116.4	0.255
116.5	0.25
116.6	0.255
116.7	0.255
116.8	0.25
116.9	0.245
117	0.25
117.1	0.25
117.2	0.25
117.3	0.245
117.4	0.245
117.5	0.245
117.6	0.24
117.7	0.245
117.8	0.245
117.9	0.245
118	0.245
118.1	0.245
118.2	0.25
118.3	0.24
118.4	0.23
118.5	0.225
118.6	0.225
118.7	0.225
118.8	0.225
118.9	0.225
119	0.225
119.1	0.24
119.2	0.235
119.3	0.235
119.4	0.235
119.5	0.24
119.6	0.24
119.7	0.24
119.8	0.24
119.9	0.24
120	0.235
120.1	0.225
120.2	0.235
120.3	0.24
120.4	0.25
120.5	0.245
120.6	0.245
120.7	0.255
120.8	0.26
120.9	0.245
121	0.245
121.1	0.25
121.2	0.255
121.3	0.245
121.4	0.24
121.5	0.235
121.6	0.23
121.7	0.235
121.8	0.22
121.9	0.22
122	0.22
122.1	0.22
122.2	0.225
122.3	0.22
122.4	0.225
122.5	0.23
122.6	0.22
122.7	0.235
122.8	0.23
122.9	0.23
123	0.23
123.1	0.24
123.2	0.245
123.3	0.24
123.4	0.25
123.5	0.25
123.6	0.24
123.7	0.235
123.8	0.23
123.9	0.22
124	0.22
124.1	0.21
124.2	0.215
124.3	0.215
124.4	0.215
124.5	0.215
124.6	0.215
124.7	0.215
124.8	0.215
124.9	0.215
125	0.22
125.1	0.23
125.2	0.23
125.3	0.225
125.4	0.23
125.5	0.235
125.6	0.25
125.7	0.25
125.8	0.245
125.9	0.245
126	0.25
126.1	0.25
126.2	0.255
126.3	0.255
126.4	0.255
126.5	0.245
126.6	0.25
126.7	0.25
126.8	0.24
126.9	0.24
127	0.25
127.1	0.255
127.2	0.25
127.3	0.25
127.4	0.25
127.5	0.255
127.6	0.255
127.7	0.255
127.8	0.255
127.9	0.26
128	0.26
128.1	0.255
128.2	0.25
128.3	0.25
128.4	0.25
128.5	0.245
128.6	0.24
128.7	0.24
128.8	0.24
128.9	0.245
129	0.245
129.1	0.245
129.2	0.24
129.3	0.235
129.4	0.245
129.5	0.25
129.6	0.265
129.7	0.27
129.8	0.27
129.9	0.28
130	0.28
130.1	0.275
130.2	0.275
130.3	0.275
130.4	0.275
130.5	0.275
130.6	0.28
130.7	0.27
130.8	0.27
130.9	0.265
131	0.275
131.1	0.265
131.2	0.255
131.3	0.25
131.4	0.26
131.5	0.26
131.6	0.255
131.7	0.265
131.8	0.26
131.9	0.26
132	0.26
132.1	0.255
132.2	0.255
132.3	0.265
132.4	0.265
132.5	0.265
132.6	0.255
132.7	0.255
132.8	0.26
132.9	0.25
133	0.255
133.1	0.25
133.2	0.25
133.3	0.255
133.4	0.255
133.5	0.255
133.6	0.255
133.7	0.25
133.8	0.245
133.9	0.245
134	0.24
134.1	0.235
134.2	0.24
134.3	0.24
134.4	0.24
134.5	0.24
134.6	0.245
134.7	0.245
134.8	0.25
134.9	0.25
135	0.25
135.1	0.255
135.2	0.26
135.3	0.26
135.4	0.26
135.5	0.26
135.6	0.26
135.7	0.255
135.8	0.245
135.9	0.255
136	0.25
136.1	0.255
136.2	0.255
136.3	0.255
136.4	0.25
136.5	0.25
136.6	0.25
136.7	0.26
136.8	0.255
136.9	0.25
137	0.25
137.1	0.24
137.2	0.235
137.3	0.24
137.4	0.24
137.5	0.24
137.6	0.24
137.7	0.24
137.8	0.245
137.9	0.24
138	0.24
138.1	0.24
138.2	0.24
138.3	0.245
138.4	0.24
138.5	0.23
138.6	0.225
138.7	0.225
138.8	0.23
138.9	0.23
139	0.235
139.1	0.23
139.2	0.235
139.3	0.235
139.4	0.235
139.5	0.23
139.6	0.225
139.7	0.215
139.8	0.215
139.9	0.215
140	0.215
140.1	0.23
140.2	0.23
140.3	0.22
140.4	0.22
140.5	0.23
140.6	0.23
140.7	0.23
140.8	0.23
140.9	0.235
141	0.235
141.1	0.235
141.2	0.23
141.3	0.23
141.4	0.235
141.5	0.235
141.6	0.24
141.7	0.235
141.8	0.235
141.9	0.24
142	0.24
142.1	0.24
142.2	0.23
142.3	0.23
142.4	0.23
142.5	0.23
142.6	0.23
142.7	0.225
142.8	0.225
142.9	0.23
143	0.23
143.1	0.23
143.2	0.23
143.3	0.23
143.4	0.225
143.5	0.22
143.6	0.215
143.7	0.22
143.8	0.22
143.9	0.22
144	0.22
144.1	0.22
144.2	0.225
144.3	0.225
144.4	0.23
144.5	0.235
144.6	0.235
144.7	0.235
144.8	0.235
144.9	0.245
145	0.245
145.1	0.25
145.2	0.25
145.3	0.255
145.4	0.255
145.5	0.255
145.6	0.25
145.7	0.25
145.8	0.245
145.9	0.245
146	0.245
146.1	0.245
146.2	0.245
146.3	0.245
146.4	0.25
146.5	0.25
146.6	0.25
146.7	0.255
146.8	0.25
146.9	0.25
147	0.245
147.1	0.245
147.2	0.25
147.3	0.25
147.4	0.25
147.5	0.25
147.6	0.255
147.7	0.255
147.8	0.255
147.9	0.255
148	0.255
148.1	0.255
148.2	0.26
148.3	0.265
148.4	0.265
148.5	0.265
148.6	0.27
148.7	0.27
148.8	0.27
148.9	0.27
149	0.275
149.1	0.28
149.2	0.285
149.3	0.285
149.4	0.285
149.5	0.285
149.6	0.285
149.7	0.29
149.8	0.295
149.9	0.295
150	0.3
150.1	0.295
150.2	0.29
150.3	0.285
150.4	0.285
150.5	0.285
150.6	0.285
150.7	0.28
150.8	0.28
150.9	0.28
151	0.28
151.1	0.28
151.2	0.27
151.3	0.27
151.4	0.265
151.5	0.27
151.6	0.27
151.7	0.27
151.8	0.275
151.9	0.275
152	0.28
152.1	0.28
152.2	0.28
152.3	0.28
152.4	0.275
152.5	0.275
152.6	0.27
152.7	0.265
152.8	0.265
152.9	0.275
153	0.275
153.1	0.27
153.2	0.27
153.3	0.265
153.4	0.275
153.5	0.265
153.6	0.26
153.7	0.255
153.8	0.255
153.9	0.26
154	0.25
154.1	0.25
154.2	0.25
154.3	0.25
154.4	0.245
154.5	0.245
154.6	0.24
154.7	0.25
154.8	0.25
154.9	0.25
155	0.25
155.1	0.25
155.2	0.26
155.3	0.26
155.4	0.26
155.5	0.265
155.6	0.26
155.7	0.26
155.8	0.265
155.9	0.27
156	0.27
156.1	0.275
156.2	0.265
156.3	0.26
156.4	0.26
156.5	0.265
156.6	0.265
156.7	0.255
156.8	0.255
156.9	0.25
157	0.245
157.1	0.245
157.2	0.245
157.3	0.24
157.4	0.24
157.5	0.24
157.6	0.24
157.7	0.245
157.8	0.245
157.9	0.245
158	0.245
158.1	0.25
158.2	0.245
158.3	0.245
158.4	0.245
158.5	0.245
158.6	0.235
158.7	0.23
158.8	0.23
158.9	0.225
159	0.215
159.1	0.215
159.2	0.21
159.3	0.21
159.4	0.21
159.5	0.21
159.6	0.21
159.7	0.22
159.8	0.22
159.9	0.22
160	0.215
160.1	0.215
160.2	0.21
160.3	0.215
160.4	0.215
160.5	0.22
160.6	0.22
160.7	0.225
160.8	0.225
160.9	0.22
161	0.22
161.1	0.225
161.2	0.225
161.3	0.23
161.4	0.235
161.5	0.23
161.6	0.235
161.7	0.245
161.8	0.25
161.9	0.255
162	0.255
162.1	0.255
162.2	0.26
162.3	0.26
162.4	0.26
162.5	0.255
162.6	0.25
162.7	0.255
162.8	0.26
162.9	0.26
163	0.26
163.1	0.265
163.2	0.255
163.3	0.25
163.4	0.25
163.5	0.255
163.6	0.25
163.7	0.25
163.8	0.25
163.9	0.255
164	0.26
164.1	0.26
164.2	0.27
164.3	0.28
164.4	0.275
164.5	0.27
164.6	0.27
164.7	0.27
164.8	0.265
164.9	0.265
165	0.265
165.1	0.26
165.2	0.255
165.3	0.265
165.4	0.27
165.5	0.275
165.6	0.275
165.7	0.275
165.8	0.275
165.9	0.26
166	0.26
166.1	0.26
166.2	0.26
166.3	0.255
166.4	0.255
166.5	0.25
166.6	0.25
166.7	0.26
166.8	0.26
166.9	0.265
167	0.26
167.1	0.265
167.2	0.26
167.3	0.265
167.4	0.27
167.5	0.275
167.6	0.265
167.7	0.26
167.8	0.26
167.9	0.26
168	0.26
168.1	0.26
168.2	0.26
168.3	0.26
168.4	0.255
168.5	0.255
168.6	0.26
168.7	0.26
168.8	0.26
168.9	0.265
169	0.27
169.1	0.27
169.2	0.275
169.3	0.275
169.4	0.275
169.5	0.275
169.6	0.27
169.7	0.27
169.8	0.26
169.9	0.255
170	0.255
170.1	0.255
170.2	0.255
170.3	0.26
170.4	0.255
170.5	0.265
170.6	0.265
170.7	0.255
170.8	0.255
170.9	0.25
171	0.25
171.1	0.255
171.2	0.25
171.3	0.255
171.4	0.25
171.5	0.25
171.6	0.26
171.7	0.26
171.8	0.26
171.9	0.255
172	0.255
172.1	0.25
172.2	0.245
172.3	0.25
172.4	0.245
172.5	0.255
172.6	0.25
172.7	0.245
172.8	0.245
172.9	0.245
173	0.245
173.1	0.25
173.2	0.245
173.3	0.24
173.4	0.235
173.5	0.235
173.6	0.225
173.7	0.225
173.8	0.225
173.9	0.23
174	0.23
174.1	0.22
174.2	0.22
174.3	0.22
174.4	0.225
174.5	0.225
174.6	0.225
174.7	0.225
174.8	0.23
174.9	0.235
175	0.235
175.1	0.24
175.2	0.25
175.3	0.255
175.4	0.255
175.5	0.255
175.6	0.26
175.7	0.275
175.8	0.275
175.9	0.27
176	0.265
176.1	0.26
176.2	0.26
176.3	0.27
176.4	0.275
176.5	0.28
176.6	0.28
176.7	0.28
176.8	0.275
176.9	0.275
177	0.275
177.1	0.275
177.2	0.27
177.3	0.27
177.4	0.27
177.5	0.27
177.6	0.27
177.7	0.265
177.8	0.27
177.9	0.27
178	0.27
178.1	0.28
178.2	0.285
178.3	0.285
178.4	0.285
178.5	0.285
178.6	0.28
178.7	0.28
178.8	0.275
178.9	0.275
179	0.275
179.1	0.265
179.2	0.265
179.3	0.26
179.4	0.255
179.5	0.255
179.6	0.25
179.7	0.25
179.8	0.25
179.9	0.245
180	0.24
180.1	0.25
180.2	0.25
180.3	0.25
180.4	0.255
180.5	0.255
180.6	0.26
180.7	0.26
180.8	0.265
180.9	0.28
181	0.27
181.1	0.275
181.2	0.275
181.3	0.275
181.4	0.275
181.5	0.275
181.6	0.27
181.7	0.265
181.8	0.265
181.9	0.265
182	0.26
182.1	0.255
182.2	0.25
182.3	0.245
182.4	0.245
182.5	0.24
182.6	0.245
182.7	0.245
182.8	0.24
182.9	0.245
183	0.245
183.1	0.24
183.2	0.24
183.3	0.245
183.4	0.245
183.5	0.23
183.6	0.235
183.7	0.235
183.8	0.235
183.9	0.235
184	0.235
184.1	0.235
184.2	0.245
184.3	0.235
184.4	0.235
184.5	0.235
184.6	0.235
184.7	0.225
184.8	0.225
184.9	0.225
185	0.225
185.1	0.22
185.2	0.23
185.3	0.23
185.4	0.22
185.5	0.22
185.6	0.22
185.7	0.22
185.8	0.21
185.9	0.21
186	0.205
186.1	0.21
186.2	0.215
186.3	0.22
186.4	0.22
186.5	0.215
186.6	0.22
186.7	0.22
186.8	0.21
186.9	0.21
187	0.22
187.1	0.225
187.2	0.22
187.3	0.225
187.4	0.23
187.5	0.23
187.6	0.235
187.7	0.24
187.8	0.235
187.9	0.24
188	0.24
188.1	0.24
188.2	0.24
188.3	0.235
188.4	0.24
188.5	0.24
188.6	0.24
188.7	0.24
188.8	0.24
188.9	0.24
189	0.24
189.1	0.245
189.2	0.24
189.3	0.24
189.4	0.24
189.5	0.245
189.6	0.245
189.7	0.25
189.8	0.25
189.9	0.25
190	0.25
190.1	0.25
190.2	0.245
190.3	0.245
190.4	0.26
190.5	0.26
190.6	0.26
190.7	0.265
190.8	0.265
190.9	0.27
191	0.27
191.1	0.285
191.2	0.28
191.3	0.275
191.4	0.275
191.5	0.28
191.6	0.27
191.7	0.275
191.8	0.275
191.9	0.275
192	0.27
192.1	0.275
192.2	0.275
192.3	0.265
192.4	0.26
192.5	0.265
192.6	0.27
192.7	0.28
192.8	0.27
192.9	0.265
193	0.27
193.1	0.27
193.2	0.275
193.3	0.28
193.4	0.28
193.5	0.27
193.6	0.26
193.7	0.265
193.8	0.265
193.9	0.265
194	0.265
194.1	0.265
194.2	0.265
194.3	0.265
194.4	0.265
194.5	0.265
194.6	0.265
194.7	0.265
194.8	0.265
194.9	0.27
195	0.275
195.1	0.255
195.2	0.26
195.3	0.27
195.4	0.265
195.5	0.265
195.6	0.265
195.7	0.26
195.8	0.265
195.9	0.26
196	0.27
196.1	0.27
196.2	0.27
196.3	0.27
196.4	0.265
196.5	0.265
196.6	0.255
196.7	0.255
196.8	0.255
196.9	0.26
197	0.265
197.1	0.265
197.2	0.26
197.3	0.265
197.4	0.265
197.5	0.27
197.6	0.265
197.7	0.265
197.8	0.27
197.9	0.265
198	0.26
198.1	0.26
198.2	0.255
198.3	0.255
198.4	0.26
198.5	0.255
198.6	0.255
198.7	0.255
198.8	0.26
198.9	0.255
199	0.255
199.1	0.265
199.2	0.265
199.3	0.26
199.4	0.26
199.5	0.275
199.6	0.27
199.7	0.27
199.8	0.27
199.9	0.27
200	0.27
[truncated: 14,000 more rows]
