# Supplementary material for: Bayesian inference of kinetic schemes for ion channels by Kalman filtering
Source: eLife journal article supplement (doi:10.7554/elife.62714), 2022-05-04
Supplement: fig4-data10 [file 1_Sim_N_100_theor_Strom_Werte.xlsx]

## Sheet: Tabelle1
0.1	0
0.2	0
0.3	0
0.4	0
0.5	0
0.6	0
0.7	0
0.8	0
0.9	0
1	0
1.1	0
1.2	0
1.3	0
1.4	0
1.5	0
1.6	0
1.7	0
1.8	0
1.9	0
2	0
2.1	0
2.2	0
2.3	0
2.4	0
2.5	0
2.6	0
2.7	0
2.8	0
2.9	0
3	0
3.1	0
3.2	0
3.3	0
3.4	0
3.5	0
3.6	0
3.7	0
3.8	0
3.9	0
4	0
4.1	0
4.2	0
4.3	0
4.4	0
4.5	0
4.6	0
4.7	0
4.8	0
4.9	0
5	0
5.1	0
5.2	0
5.3	0
5.4	0
5.5	0
5.6	0
5.7	0
5.8	0
5.9	0
6	0
6.1	0
6.2	0
6.3	0
6.4	0
6.5	0
6.6	0
6.7	0
6.8	0
6.9	0
7	0
7.1	0
7.2	0
7.3	0
7.4	0
7.5	0
7.6	0
7.7	0
7.8	0
7.9	0
8	0
8.1	0
8.2	0
8.3	0
8.4	0
8.5	0
8.6	0
8.7	0
8.8	0
8.9	0
9	0
9.1	0
9.2	0
9.3	0
9.4	0
9.5	0
9.6	0
9.7	0
9.8	0
9.9	0
10	0
10.1	0
10.2	0
10.3	0
10.4	0
10.5	0
10.6	0
10.7	0
10.8	0
10.9	0
11	0
11.1	0
11.2	0
11.3	0
11.4	0
11.5	0
11.6	0
11.7	0
11.8	0
11.9	0
12	0
12.1	0
12.2	0
12.3	0
12.4	0
12.5	0
12.6	0
12.7	0
12.8	0
12.9	0
13	0
13.1	0
13.2	0
13.3	0
13.4	0
13.5	0
13.6	0
13.7	0
13.8	0
13.9	0
14	0
14.1	0
14.2	0
14.3	0
14.4	0
14.5	0
14.6	0
14.7	0
14.8	0
14.9	0
15	0
15.1	0
15.2	0
15.3	0
15.4	0
15.5	0
15.6	0
15.7	0
15.8	0
15.9	0
16	0
16.1	0
16.2	0
16.3	0
16.4	0
16.5	0
16.6	0
16.7	0
16.8	0
16.9	0
17	0
17.1	0
17.2	0
17.3	0
17.4	0
17.5	0
17.6	0
17.7	0
17.8	0
17.9	0
18	0
18.1	0
18.2	0
18.3	0
18.4	0
18.5	0
18.6	0
18.7	0
18.8	0
18.9	0
19	0
19.1	0
19.2	0
19.3	0
19.4	0
19.5	0
19.6	0
19.7	0
19.8	0
19.9	0
20	0
20.1	0
20.2	0
20.3	0
20.4	0
20.5	0
20.6	0
20.7	0
20.8	0
20.9	0
21	0
21.1	0
21.2	0
21.3	0
21.4	0
21.5	0
21.6	0
21.7	0
21.8	0
21.9	0
22	0
22.1	0
22.2	0
22.3	0
22.4	0
22.5	0
22.6	0
22.7	0
22.8	0
22.9	0
23	0
23.1	0
23.2	0
23.3	0
23.4	0
23.5	0
23.6	0
23.7	0
23.8	0
23.9	0
24	0
24.1	0
24.2	0
24.3	0
24.4	0
24.5	0
24.6	0
24.7	0
24.8	0
24.9	0
25	0
25.1	0
25.2	0
25.3	0
25.4	0
25.5	0
25.6	0
25.7	0
25.8	0
25.9	0
26	0
26.1	0
26.2	0
26.3	0
26.4	0
26.5	0
26.6	0
26.7	0
26.8	0
26.9	0
27	0
27.1	0
27.2	0
27.3	0
27.4	0
27.5	0
27.6	0
27.7	0
27.8	0
27.9	0
28	0
28.1	0
28.2	0
28.3	0
28.4	0
28.5	0
28.6	0
28.7	0
28.8	0
28.9	0
29	0
29.1	0
29.2	0
29.3	0
29.4	0
29.5	0
29.6	0
29.7	0
29.8	0
29.9	0
30	0
30.1	0
30.2	0
30.3	0
30.4	0
30.5	0
30.6	0
30.7	0
30.8	0
30.9	0
31	0
31.1	0
31.2	0
31.3	0
31.4	0
31.5	0
31.6	0
31.7	0
31.8	0
31.9	0
32	0
32.1	0
32.2	0
32.3	0
32.4	0
32.5	0
32.6	0
32.7	0
32.8	0
32.9	0
33	0
33.1	0
33.2	0
33.3	0
33.4	0
33.5	0
33.6	0
33.7	0
33.8	0
33.9	0
34	0
34.1	0
34.2	0
34.3	0
34.4	0
34.5	0
34.6	0
34.7	0
34.8	0
34.9	0
35	0
35.1	0
35.2	0
35.3	0
35.4	0
35.5	0
35.6	0
35.7	0
35.8	0
35.9	0
36	0
36.1	0
36.2	0
36.3	0
36.4	0
36.5	0
36.6	0
36.7	0
36.8	0
36.9	0
37	0
37.1	0
37.2	0
37.3	0
37.4	0
37.5	0
37.6	0
37.7	0
37.8	0
37.9	0
38	0
38.1	0
38.2	0
38.3	0
38.4	0
38.5	0
38.6	0
38.7	0
38.8	0
38.9	0
39	0
39.1	0
39.2	0
39.3	0
39.4	0
39.5	0
39.6	0
39.7	0
39.8	0
39.9	0
40	0
40.1	0
40.2	0
40.3	0
40.4	0
40.5	0
40.6	0
40.7	0
40.8	0
40.9	0
41	0
41.1	0
41.2	0
41.3	0
41.4	0
41.5	0
41.6	0
41.7	0
41.8	0
41.9	0
42	0
42.1	0
42.2	0
42.3	0
42.4	0
42.5	0
42.6	0
42.7	0
42.8	0
42.9	0
43	0
43.1	0
43.2	0
43.3	0
43.4	0
43.5	0
43.6	0
43.7	0
43.8	0
43.9	0
44	0
44.1	0
44.2	0
44.3	0
44.4	0
44.5	0
44.6	0
44.7	0
44.8	0
44.9	0
45	0
45.1	0
45.2	0
45.3	0
45.4	0
45.5	0
45.6	0
45.7	0
45.8	0
45.9	0
46	0
46.1	0
46.2	0
46.3	0
46.4	0
46.5	0
46.6	0
46.7	0
46.8	0
46.9	0
47	0
47.1	0
47.2	0
47.3	0
47.4	0
47.5	0
47.6	0
47.7	0
47.8	0
47.9	0
48	0
48.1	0
48.2	0
48.3	0
48.4	0
48.5	0
48.6	0
48.7	0
48.8	0
48.9	0
49	0
49.1	0
49.2	0
49.3	0
49.4	0
49.5	0
49.6	0
49.7	0
49.8	0
49.9	0
50	0
50.1	0
50.2	0
50.3	0
50.4	0
50.5	0
50.6	0
50.7	0
50.8	0
50.9	0
51	0
51.1	0
51.2	0
51.3	0
51.4	0
51.5	0
51.6	0
51.7	0
51.8	0
51.9	0
52	0
52.1	0
52.2	0
52.3	0
52.4	0
52.5	0
52.6	0
52.7	0
52.8	0
52.9	0
53	0
53.1	0
53.2	0
53.3	0
53.4	0
53.5	0
53.6	0
53.7	0
53.8	0
53.9	0
54	0
54.1	0
54.2	0
54.3	0
54.4	0
54.5	0
54.6	0
54.7	0
54.8	0
54.9	0
55	0
55.1	0
55.2	0
55.3	0
55.4	0
55.5	0
55.6	0
55.7	0
55.8	0
55.9	0
56	0
56.1	0
56.2	0
56.3	0
56.4	0
56.5	0
56.6	0
56.7	0
56.8	0
56.9	0
57	0
57.1	0
57.2	0
57.3	0
57.4	0
57.5	0
57.6	0
57.7	0
57.8	0
57.9	0
58	0
58.1	0
58.2	0
58.3	0
58.4	0
58.5	0
58.6	0
58.7	0
58.8	0
58.9	0
59	0
59.1	0
59.2	0
59.3	0
59.4	0
59.5	0
59.6	0
59.7	0
59.8	0
59.9	0
60	0
60.1	0
60.2	0
60.3	0
60.4	0
60.5	0
60.6	0
60.7	0
60.8	0
60.9	0
61	0
61.1	0
61.2	0
61.3	0
61.4	0
61.5	0
61.6	0
61.7	0
61.8	0
61.9	0
62	0
62.1	0
62.2	0
62.3	0
62.4	0
62.5	0
62.6	0
62.7	0
62.8	0
62.9	0
63	0
63.1	0
63.2	0
63.3	0
63.4	0
63.5	0
63.6	0
63.7	0
63.8	0
63.9	0
64	0
64.1	0
64.2	0
64.3	0
64.4	0
64.5	0
64.6	0
64.7	0
64.8	0
64.9	0
65	0
65.1	0
65.2	0
65.3	0
65.4	0
65.5	0
65.6	0
65.7	0
65.8	0
65.9	0
66	0
66.1	0
66.2	0
66.3	0
66.4	0
66.5	0
66.6	0
66.7	0
66.8	0
66.9	0
67	0
67.1	0
67.2	0
67.3	0
67.4	0
67.5	0
67.6	0
67.7	0
67.8	0
67.9	0
68	0
68.1	0
68.2	0
68.3	0
68.4	0
68.5	0
68.6	0
68.7	0
68.8	0
68.9	0
69	0
69.1	0
69.2	0
69.3	0
69.4	0
69.5	0
69.6	0
69.7	0
69.8	0
69.9	0
70	0
70.1	0
70.2	0
70.3	0
70.4	0
70.5	0
70.6	0
70.7	0
70.8	0
70.9	0
71	0
71.1	0
71.2	0
71.3	0
71.4	0
71.5	0
71.6	0
71.7	0
71.8	0
71.9	0
72	0
72.1	0
72.2	0
72.3	0
72.4	0
72.5	0
72.6	0
72.7	0
72.8	0
72.9	0
73	0
73.1	0
73.2	0
73.3	0
73.4	0
73.5	0
73.6	0
73.7	0
73.8	0
73.9	0
74	0
74.1	0
74.2	0
74.3	0
74.4	0
74.5	0
74.6	0
74.7	0
74.8	0
74.9	0
75	0
75.1	0
75.2	0
75.3	0
75.4	0
75.5	0
75.6	0
75.7	0
75.8	0
75.9	0
76	0
76.1	0
76.2	0
76.3	0
76.4	0
76.5	0
76.6	0
76.7	0
76.8	0
76.9	0
77	0
77.1	0
77.2	0
77.3	0
77.4	0
77.5	0
77.6	0
77.7	0
77.8	0
77.9	0
78	0
78.1	0
78.2	0
78.3	0
78.4	0
78.5	0
78.6	0
78.7	0
78.8	0
78.9	0
79	0
79.1	0
79.2	0
79.3	0
79.4	0
79.5	0
79.6	0
79.7	0
79.8	0
79.9	0
80	0
80.1	0
80.2	0
80.3	0
80.4	0
80.5	0
80.6	0
80.7	0
80.8	0
80.9	0
81	0
81.1	0
81.2	0
81.3	0
81.4	0
81.5	0
81.6	0
81.7	0
81.8	0
81.9	0
82	0
82.1	0
82.2	0
82.3	0
82.4	0
82.5	0
82.6	0
82.7	0
82.8	0
82.9	0
83	0
83.1	0
83.2	0
83.3	0
83.4	0
83.5	0
83.6	0
83.7	0
83.8	0
83.9	0
84	0
84.1	0
84.2	0
84.3	0
84.4	0
84.5	0
84.6	0
84.7	0
84.8	0
84.9	0
85	0
85.1	0
85.2	0
85.3	0
85.4	0
85.5	0
85.6	0
85.7	0
85.8	0
85.9	0
86	0
86.1	0
86.2	0
86.3	0
86.4	0
86.5	0
86.6	0
86.7	0
86.8	0
86.9	0
87	0
87.1	0
87.2	0
87.3	0
87.4	0
87.5	0
87.6	0
87.7	0
87.8	0
87.9	0
88	0
88.1	0
88.2	0
88.3	0
88.4	0
88.5	0
88.6	0
88.7	0
88.8	0
88.9	0
89	0
89.1	0
89.2	0
89.3	0
89.4	0
89.5	0
89.6	0
89.7	0
89.8	0
89.9	0
90	0
90.1	0
90.2	0
90.3	0
90.4	0
90.5	0
90.6	0
90.7	0
90.8	0
90.9	0
91	0
91.1	0
91.2	0
91.3	0
91.4	0
91.5	0
91.6	0
91.7	0
91.8	0
91.9	0
92	0
92.1	0
92.2	0
92.3	0
92.4	0
92.5	0
92.6	0
92.7	0
92.8	0
92.9	0
93	0
93.1	0
93.2	0
93.3	0
93.4	0
93.5	0
93.6	0
93.7	0
93.8	0
93.9	0
94	0
94.1	0
94.2	0
94.3	0
94.4	0
94.5	0
94.6	0
94.7	0
94.8	0
94.9	0
95	0
95.1	0
95.2	0
95.3	0
95.4	0
95.5	0
95.6	0
95.7	0
95.8	0
95.9	0
96	0
96.1	0
96.2	0
96.3	0
96.4	0
96.5	0
96.6	0
96.7	0
96.8	0
96.9	0
97	0
97.1	0
97.2	0
97.3	0
97.4	0
97.5	0
97.6	0
97.7	0
97.8	0
97.9	0
98	0
98.1	0
98.2	0
98.3	0
98.4	0
98.5	0
98.6	0
98.7	0
98.8	0
98.9	0
99	0
99.1	0
99.2	0
99.3	0
99.4	0
99.5	0
99.6	0
99.7	0
99.8	0
99.9	0
100	0
100.1	1.15006e-08
100.2	9.03019e-08
100.3	2.99159e-07
100.4	6.9614e-07
100.5	1.3349e-06
100.6	2.26497e-06
100.7	3.53195e-06
100.8	5.17784e-06
100.9	7.24115e-06
101	9.7572e-06
101.1	1.27583e-05
101.2	1.62738e-05
101.3	2.03307e-05
101.4	2.4953e-05
101.5	3.01628e-05
101.6	3.59799e-05
101.7	4.24219e-05
101.8	4.95046e-05
101.9	5.72419e-05
102	6.56461e-05
102.1	7.4728e-05
102.2	8.44967e-05
102.3	9.49602e-05
102.4	0.000106125
102.5	0.000117996
102.6	0.000130578
102.7	0.000143875
102.8	0.000157887
102.9	0.000172618
103	0.000188066
103.1	0.000204232
103.2	0.000221116
103.3	0.000238714
103.4	0.000257025
103.5	0.000276046
103.6	0.000295774
103.7	0.000316204
103.8	0.000337333
103.9	0.000359156
104	0.000381666
104.1	0.00040486
104.2	0.000428731
104.3	0.000453273
104.4	0.00047848
104.5	0.000504345
104.6	0.000530861
104.7	0.000558021
104.8	0.000585819
104.9	0.000614246
105	0.000643296
105.1	0.000672961
105.2	0.000703232
105.3	0.000734104
105.4	0.000765566
105.5	0.000797613
105.6	0.000830234
105.7	0.000863424
105.8	0.000897173
105.9	0.000931474
106	0.000966319
106.1	0.0010017
106.2	0.00103761
106.3	0.00107403
106.4	0.00111097
106.5	0.00114842
106.6	0.00118635
106.7	0.00122478
106.8	0.00126368
106.9	0.00130306
107	0.0013429
107.1	0.0013832
107.2	0.00142395
107.3	0.00146514
107.4	0.00150676
107.5	0.00154881
107.6	0.00159128
107.7	0.00163416
107.8	0.00167744
107.9	0.00172112
108	0.00176519
108.1	0.00180965
108.2	0.00185448
108.3	0.00189968
108.4	0.00194524
108.5	0.00199116
108.6	0.00203743
108.7	0.00208404
108.8	0.00213098
108.9	0.00217826
109	0.00222586
109.1	0.00227378
109.2	0.00232201
109.3	0.00237054
109.4	0.00241938
109.5	0.0024685
109.6	0.00251792
109.7	0.00256762
109.8	0.00261759
109.9	0.00266784
110	0.00271835
110.1	0.00276912
110.2	0.00282014
110.3	0.00287141
110.4	0.00292293
110.5	0.00297469
110.6	0.00302668
110.7	0.00307891
110.8	0.00313135
110.9	0.00318402
111	0.0032369
111.1	0.00328999
111.2	0.00334329
111.3	0.00339679
111.4	0.00345049
111.5	0.00350438
111.6	0.00355845
111.7	0.00361272
111.8	0.00366716
111.9	0.00372178
112	0.00377657
112.1	0.00383153
112.2	0.00388665
112.3	0.00394193
112.4	0.00399737
112.5	0.00405297
112.6	0.00410871
112.7	0.0041646
112.8	0.00422063
112.9	0.0042768
113	0.00433311
113.1	0.00438954
113.2	0.00444611
113.3	0.00450281
113.4	0.00455962
113.5	0.00461656
113.6	0.00467361
113.7	0.00473077
113.8	0.00478805
113.9	0.00484543
114	0.00490292
114.1	0.00496051
114.2	0.0050182
114.3	0.00507598
114.4	0.00513386
114.5	0.00519183
114.6	0.00524989
114.7	0.00530803
114.8	0.00536626
114.9	0.00542457
115	0.00548295
115.1	0.00554142
115.2	0.00559995
115.3	0.00565856
115.4	0.00571724
115.5	0.00577599
115.6	0.0058348
115.7	0.00589367
115.8	0.0059526
115.9	0.00601159
116	0.00607064
116.1	0.00612975
116.2	0.0061889
116.3	0.00624811
116.4	0.00630737
116.5	0.00636667
116.6	0.00642602
116.7	0.00648541
116.8	0.00654484
116.9	0.00660432
117	0.00666383
117.1	0.00672338
117.2	0.00678296
117.3	0.00684257
117.4	0.00690222
117.5	0.0069619
117.6	0.00702161
117.7	0.00708134
117.8	0.0071411
117.9	0.00720088
118	0.00726069
118.1	0.00732052
118.2	0.00738036
118.3	0.00744023
118.4	0.00750011
118.5	0.00756001
118.6	0.00761993
118.7	0.00767985
118.8	0.00773979
118.9	0.00779974
119	0.00785971
119.1	0.00791967
119.2	0.00797965
119.3	0.00803963
119.4	0.00809962
119.5	0.00815961
119.6	0.00821961
119.7	0.00827961
119.8	0.00833961
119.9	0.0083996
120	0.0084596
120.1	0.0085196
120.2	0.00857959
120.3	0.00863958
120.4	0.00869956
120.5	0.00875954
120.6	0.00881951
120.7	0.00887948
120.8	0.00893943
120.9	0.00899938
121	0.00905932
121.1	0.00911924
121.2	0.00917916
121.3	0.00923906
121.4	0.00929895
121.5	0.00935882
121.6	0.00941868
121.7	0.00947852
121.8	0.00953835
121.9	0.00959816
122	0.00965796
122.1	0.00971773
122.2	0.00977749
122.3	0.00983723
122.4	0.00989694
122.5	0.00995664
122.6	0.0100163
122.7	0.010076
122.8	0.0101356
122.9	0.0101952
123	0.0102548
123.1	0.0103143
123.2	0.0103739
123.3	0.0104334
123.4	0.0104929
123.5	0.0105523
123.6	0.0106118
123.7	0.0106712
123.8	0.0107305
123.9	0.0107899
124	0.0108492
124.1	0.0109085
124.2	0.0109677
124.3	0.011027
124.4	0.0110862
124.5	0.0111453
124.6	0.0112045
124.7	0.0112636
124.8	0.0113226
124.9	0.0113817
125	0.0114407
125.1	0.0114996
125.2	0.0115586
125.3	0.0116175
125.4	0.0116763
125.5	0.0117352
125.6	0.011794
125.7	0.0118527
125.8	0.0119114
125.9	0.0119701
126	0.0120288
126.1	0.0120874
126.2	0.012146
126.3	0.0122045
126.4	0.012263
126.5	0.0123215
126.6	0.0123799
126.7	0.0124383
126.8	0.0124966
126.9	0.0125549
127	0.0126132
127.1	0.0126714
127.2	0.0127296
127.3	0.0127878
127.4	0.0128459
127.5	0.0129039
127.6	0.0129619
127.7	0.0130199
127.8	0.0130779
127.9	0.0131358
128	0.0131936
128.1	0.0132514
128.2	0.0133092
128.3	0.0133669
128.4	0.0134246
128.5	0.0134823
128.6	0.0135399
128.7	0.0135974
128.8	0.013655
128.9	0.0137124
129	0.0137699
129.1	0.0138272
129.2	0.0138846
129.3	0.0139419
129.4	0.0139991
129.5	0.0140563
129.6	0.0141135
129.7	0.0141706
129.8	0.0142277
129.9	0.0142847
130	0.0143417
130.1	0.0143986
130.2	0.0144555
130.3	0.0145124
130.4	0.0145692
130.5	0.0146259
130.6	0.0146826
130.7	0.0147393
130.8	0.0147959
130.9	0.0148525
131	0.014909
131.1	0.0149655
131.2	0.0150219
131.3	0.0150783
131.4	0.0151346
131.5	0.0151909
131.6	0.0152471
131.7	0.0153033
131.8	0.0153595
131.9	0.0154156
132	0.0154716
132.1	0.0155276
132.2	0.0155836
132.3	0.0156395
132.4	0.0156953
132.5	0.0157512
132.6	0.0158069
132.7	0.0158626
132.8	0.0159183
132.9	0.0159739
133	0.0160295
133.1	0.016085
133.2	0.0161405
133.3	0.0161959
133.4	0.0162513
133.5	0.0163066
133.6	0.0163619
133.7	0.0164172
133.8	0.0164723
133.9	0.0165275
134	0.0165826
134.1	0.0166376
134.2	0.0166926
134.3	0.0167475
134.4	0.0168024
134.5	0.0168573
134.6	0.0169121
134.7	0.0169668
134.8	0.0170215
134.9	0.0170762
135	0.0171308
135.1	0.0171853
135.2	0.0172398
135.3	0.0172943
135.4	0.0173487
135.5	0.0174031
135.6	0.0174574
135.7	0.0175116
135.8	0.0175658
135.9	0.01762
136	0.0176741
136.1	0.0177282
136.2	0.0177822
136.3	0.0178361
136.4	0.01789
136.5	0.0179439
136.6	0.0179977
136.7	0.0180515
136.8	0.0181052
136.9	0.0181589
137	0.0182125
137.1	0.0182661
137.2	0.0183196
137.3	0.018373
137.4	0.0184265
137.5	0.0184798
137.6	0.0185332
137.7	0.0185864
137.8	0.0186397
137.9	0.0186928
138	0.018746
138.1	0.018799
138.2	0.0188521
138.3	0.018905
138.4	0.018958
138.5	0.0190108
138.6	0.0190637
138.7	0.0191165
138.8	0.0191692
138.9	0.0192219
139	0.0192745
139.1	0.0193271
139.2	0.0193796
139.3	0.0194321
139.4	0.0194845
139.5	0.0195369
139.6	0.0195893
139.7	0.0196416
139.8	0.0196938
139.9	0.019746
140	0.0197981
140.1	0.0198502
140.2	0.0199023
140.3	0.0199543
140.4	0.0200062
140.5	0.0200581
140.6	0.0201099
140.7	0.0201617
140.8	0.0202135
140.9	0.0202652
141	0.0203168
141.1	0.0203685
141.2	0.02042
141.3	0.0204715
141.4	0.020523
141.5	0.0205744
141.6	0.0206257
141.7	0.020677
141.8	0.0207283
141.9	0.0207795
142	0.0208307
142.1	0.0208818
142.2	0.0209329
142.3	0.0209839
142.4	0.0210349
142.5	0.0210858
142.6	0.0211366
142.7	0.0211875
142.8	0.0212382
142.9	0.021289
143	0.0213397
143.1	0.0213903
143.2	0.0214409
143.3	0.0214914
143.4	0.0215419
143.5	0.0215923
143.6	0.0216427
143.7	0.0216931
143.8	0.0217433
143.9	0.0217936
144	0.0218438
144.1	0.0218939
144.2	0.021944
144.3	0.0219941
144.4	0.0220441
144.5	0.0220941
144.6	0.022144
144.7	0.0221938
144.8	0.0222436
144.9	0.0222934
145	0.0223431
145.1	0.0223928
145.2	0.0224424
145.3	0.022492
145.4	0.0225415
145.5	0.022591
145.6	0.0226404
145.7	0.0226898
145.8	0.0227391
145.9	0.0227884
146	0.0228377
146.1	0.0228869
146.2	0.022936
146.3	0.0229851
146.4	0.0230342
146.5	0.0230832
146.6	0.0231321
146.7	0.023181
146.8	0.0232299
146.9	0.0232787
147	0.0233275
147.1	0.0233762
147.2	0.0234249
147.3	0.0234735
147.4	0.0235221
147.5	0.0235706
147.6	0.0236191
147.7	0.0236676
147.8	0.0237159
147.9	0.0237643
148	0.0238126
148.1	0.0238608
148.2	0.0239091
148.3	0.0239572
148.4	0.0240053
148.5	0.0240534
148.6	0.0241014
148.7	0.0241494
148.8	0.0241973
148.9	0.0242452
149	0.024293
149.1	0.0243408
149.2	0.0243886
149.3	0.0244363
149.4	0.0244839
149.5	0.0245315
149.6	0.0245791
149.7	0.0246266
149.8	0.0246741
149.9	0.0247215
150	0.0247689
150.1	0.0248162
150.2	0.0248635
150.3	0.0249107
150.4	0.0249579
150.5	0.025005
150.6	0.0250521
150.7	0.0250992
150.8	0.0251462
150.9	0.0251932
151	0.0252401
151.1	0.025287
151.2	0.0253338
151.3	0.0253806
151.4	0.0254273
151.5	0.025474
151.6	0.0255206
151.7	0.0255672
151.8	0.0256138
151.9	0.0256603
152	0.0257068
152.1	0.0257532
152.2	0.0257995
152.3	0.0258459
152.4	0.0258922
152.5	0.0259384
152.6	0.0259846
152.7	0.0260307
152.8	0.0260768
152.9	0.0261229
153	0.0261689
153.1	0.0262149
153.2	0.0262608
153.3	0.0263067
153.4	0.0263525
153.5	0.0263983
153.6	0.0264441
153.7	0.0264898
153.8	0.0265354
153.9	0.026581
154	0.0266266
154.1	0.0266721
154.2	0.0267176
154.3	0.0267631
154.4	0.0268084
154.5	0.0268538
154.6	0.0268991
154.7	0.0269444
154.8	0.0269896
154.9	0.0270347
155	0.0270799
155.1	0.027125
155.2	0.02717
155.3	0.027215
155.4	0.0272599
155.5	0.0273049
155.6	0.0273497
155.7	0.0273945
155.8	0.0274393
155.9	0.0274841
156	0.0275287
156.1	0.0275734
156.2	0.027618
156.3	0.0276626
156.4	0.0277071
156.5	0.0277515
156.6	0.027796
156.7	0.0278404
156.8	0.0278847
156.9	0.027929
157	0.0279733
157.1	0.0280175
157.2	0.0280617
157.3	0.0281058
157.4	0.0281499
157.5	0.0281939
157.6	0.0282379
157.7	0.0282819
157.8	0.0283258
157.9	0.0283697
158	0.0284135
158.1	0.0284573
158.2	0.028501
158.3	0.0285447
158.4	0.0285884
158.5	0.028632
158.6	0.0286756
158.7	0.0287191
158.8	0.0287626
158.9	0.028806
159	0.0288494
159.1	0.0288928
159.2	0.0289361
159.3	0.0289794
159.4	0.0290226
159.5	0.0290658
159.6	0.029109
159.7	0.0291521
159.8	0.0291951
159.9	0.0292382
160	0.0292811
160.1	0.0293241
160.2	0.029367
160.3	0.0294098
160.4	0.0294527
160.5	0.0294954
160.6	0.0295382
160.7	0.0295809
160.8	0.0296235
160.9	0.0296661
161	0.0297087
161.1	0.0297512
161.2	0.0297937
161.3	0.0298361
161.4	0.0298785
161.5	0.0299209
161.6	0.0299632
161.7	0.0300055
161.8	0.0300477
161.9	0.0300899
162	0.0301321
162.1	0.0301742
162.2	0.0302162
162.3	0.0302583
162.4	0.0303003
162.5	0.0303422
162.6	0.0303841
162.7	0.030426
162.8	0.0304678
162.9	0.0305096
163	0.0305513
163.1	0.030593
163.2	0.0306347
163.3	0.0306763
163.4	0.0307179
163.5	0.0307594
163.6	0.0308009
163.7	0.0308424
163.8	0.0308838
163.9	0.0309252
164	0.0309665
164.1	0.0310078
164.2	0.0310491
164.3	0.0310903
164.4	0.0311315
164.5	0.0311726
164.6	0.0312137
164.7	0.0312548
164.8	0.0312958
164.9	0.0313368
165	0.0313777
165.1	0.0314186
165.2	0.0314595
165.3	0.0315003
165.4	0.0315411
165.5	0.0315818
165.6	0.0316225
165.7	0.0316631
165.8	0.0317038
165.9	0.0317443
166	0.0317849
166.1	0.0318254
166.2	0.0318658
166.3	0.0319063
166.4	0.0319466
166.5	0.031987
166.6	0.0320273
166.7	0.0320676
166.8	0.0321078
166.9	0.032148
167	0.0321881
167.1	0.0322282
167.2	0.0322683
167.3	0.0323083
167.4	0.0323483
167.5	0.0323882
167.6	0.0324282
167.7	0.032468
167.8	0.0325079
167.9	0.0325477
168	0.0325874
168.1	0.0326271
168.2	0.0326668
168.3	0.0327065
168.4	0.0327461
168.5	0.0327856
168.6	0.0328251
168.7	0.0328646
168.8	0.0329041
168.9	0.0329435
169	0.0329828
169.1	0.0330222
169.2	0.0330615
169.3	0.0331007
169.4	0.0331399
169.5	0.0331791
169.6	0.0332183
169.7	0.0332574
169.8	0.0332964
169.9	0.0333355
170	0.0333744
170.1	0.0334134
170.2	0.0334523
170.3	0.0334912
170.4	0.03353
170.5	0.0335688
170.6	0.0336076
170.7	0.0336463
170.8	0.033685
170.9	0.0337236
171	0.0337622
171.1	0.0338008
171.2	0.0338393
171.3	0.0338778
171.4	0.0339163
171.5	0.0339547
171.6	0.0339931
171.7	0.0340314
171.8	0.0340697
171.9	0.034108
172	0.0341462
172.1	0.0341844
172.2	0.0342226
172.3	0.0342607
172.4	0.0342988
172.5	0.0343369
172.6	0.0343749
172.7	0.0344128
172.8	0.0344508
172.9	0.0344887
173	0.0345265
173.1	0.0345644
173.2	0.0346022
173.3	0.0346399
173.4	0.0346776
173.5	0.0347153
173.6	0.0347529
173.7	0.0347905
173.8	0.0348281
173.9	0.0348656
174	0.0349031
174.1	0.0349406
174.2	0.034978
174.3	0.0350154
174.4	0.0350527
174.5	0.0350901
174.6	0.0351273
174.7	0.0351646
174.8	0.0352018
174.9	0.0352389
175	0.0352761
175.1	0.0353132
175.2	0.0353502
175.3	0.0353872
175.4	0.0354242
175.5	0.0354612
175.6	0.0354981
175.7	0.035535
175.8	0.0355718
175.9	0.0356086
176	0.0356454
176.1	0.0356821
176.2	0.0357188
176.3	0.0357555
176.4	0.0357921
176.5	0.0358287
176.6	0.0358653
176.7	0.0359018
176.8	0.0359383
176.9	0.0359747
177	0.0360111
177.1	0.0360475
177.2	0.0360838
177.3	0.0361201
177.4	0.0361564
177.5	0.0361926
177.6	0.0362288
177.7	0.036265
177.8	0.0363011
177.9	0.0363372
178	0.0363733
178.1	0.0364093
178.2	0.0364453
178.3	0.0364813
178.4	0.0365172
178.5	0.0365531
178.6	0.0365889
178.7	0.0366247
178.8	0.0366605
178.9	0.0366962
179	0.0367319
179.1	0.0367676
179.2	0.0368033
179.3	0.0368389
179.4	0.0368744
179.5	0.03691
179.6	0.0369455
179.7	0.0369809
179.8	0.0370164
179.9	0.0370518
180	0.0370871
180.1	0.0371224
180.2	0.0371577
180.3	0.037193
180.4	0.0372282
180.5	0.0372634
180.6	0.0372986
180.7	0.0373337
180.8	0.0373688
180.9	0.0374038
181	0.0374388
181.1	0.0374738
181.2	0.0375088
181.3	0.0375437
181.4	0.0375786
181.5	0.0376134
181.6	0.0376482
181.7	0.037683
181.8	0.0377178
181.9	0.0377525
182	0.0377871
182.1	0.0378218
182.2	0.0378564
182.3	0.037891
182.4	0.0379255
182.5	0.03796
182.6	0.0379945
182.7	0.0380289
182.8	0.0380634
182.9	0.0380977
183	0.0381321
183.1	0.0381664
183.2	0.0382007
183.3	0.0382349
183.4	0.0382691
183.5	0.0383033
183.6	0.0383374
183.7	0.0383715
183.8	0.0384056
183.9	0.0384396
184	0.0384736
184.1	0.0385076
184.2	0.0385416
184.3	0.0385755
184.4	0.0386093
184.5	0.0386432
184.6	0.038677
184.7	0.0387108
184.8	0.0387445
184.9	0.0387782
185	0.0388119
185.1	0.0388455
185.2	0.0388791
185.3	0.0389127
185.4	0.0389463
185.5	0.0389798
185.6	0.0390133
185.7	0.0390467
185.8	0.0390801
185.9	0.0391135
186	0.0391469
186.1	0.0391802
186.2	0.0392135
186.3	0.0392467
186.4	0.0392799
186.5	0.0393131
186.6	0.0393463
186.7	0.0393794
186.8	0.0394125
186.9	0.0394455
187	0.0394786
187.1	0.0395116
187.2	0.0395445
187.3	0.0395775
187.4	0.0396104
187.5	0.0396432
187.6	0.039676
187.7	0.0397088
187.8	0.0397416
187.9	0.0397744
188	0.0398071
188.1	0.0398397
188.2	0.0398724
188.3	0.039905
188.4	0.0399376
188.5	0.0399701
188.6	0.0400026
188.7	0.0400351
188.8	0.0400676
188.9	0.0401
189	0.0401324
189.1	0.0401647
189.2	0.040197
189.3	0.0402293
189.4	0.0402616
189.5	0.0402938
189.6	0.040326
189.7	0.0403582
189.8	0.0403903
189.9	0.0404224
190	0.0404545
190.1	0.0404865
190.2	0.0405185
190.3	0.0405505
190.4	0.0405825
190.5	0.0406144
190.6	0.0406463
190.7	0.0406781
190.8	0.0407099
190.9	0.0407417
191	0.0407735
191.1	0.0408052
191.2	0.0408369
191.3	0.0408686
191.4	0.0409002
191.5	0.0409318
191.6	0.0409634
191.7	0.040995
191.8	0.0410265
191.9	0.041058
192	0.0410894
192.1	0.0411208
192.2	0.0411522
192.3	0.0411836
192.4	0.0412149
192.5	0.0412462
192.6	0.0412775
192.7	0.0413087
192.8	0.0413399
192.9	0.0413711
193	0.0414022
193.1	0.0414334
193.2	0.0414645
193.3	0.0414955
193.4	0.0415265
193.5	0.0415575
193.6	0.0415885
193.7	0.0416194
193.8	0.0416503
193.9	0.0416812
194	0.041712
194.1	0.0417429
194.2	0.0417736
194.3	0.0418044
194.4	0.0418351
194.5	0.0418658
194.6	0.0418965
194.7	0.0419271
194.8	0.0419577
194.9	0.0419883
195	0.0420188
195.1	0.0420494
195.2	0.0420798
195.3	0.0421103
195.4	0.0421407
195.5	0.0421711
195.6	0.0422015
195.7	0.0422318
195.8	0.0422621
195.9	0.0422924
196	0.0423226
196.1	0.0423529
196.2	0.0423831
196.3	0.0424132
196.4	0.0424433
196.5	0.0424734
196.6	0.0425035
196.7	0.0425336
196.8	0.0425636
196.9	0.0425936
197	0.0426235
197.1	0.0426534
197.2	0.0426833
197.3	0.0427132
197.4	0.042743
197.5	0.0427728
197.6	0.0428026
197.7	0.0428324
197.8	0.0428621
197.9	0.0428918
198	0.0429214
198.1	0.0429511
198.2	0.0429807
198.3	0.0430103
198.4	0.0430398
198.5	0.0430693
198.6	0.0430988
198.7	0.0431283
198.8	0.0431577
198.9	0.0431871
199	0.0432165
199.1	0.0432458
199.2	0.0432751
199.3	0.0433044
199.4	0.0433337
199.5	0.0433629
199.6	0.0433921
199.7	0.0434213
199.8	0.0434504
199.9	0.0434796
200	0.0435087
[truncated: 14,000 more rows]
