# Supplementary material for: Bayesian inference of kinetic schemes for ion channels by Kalman filtering
Source: eLife journal article supplement (doi:10.7554/elife.62714), 2022-05-04
Supplement: fig4-data10 [file 1_Sim_N_200_Fluor_MW_0.0625M.xlsx]

## Sheet: 0.0625 M
0.1	0
0.2	0
0.3	0
0.4	0
0.5	0
0.6	0
0.7	0
0.8	0
0.9	0
1	0
1.1	0
1.2	0
1.3	0
1.4	0
1.5	0
1.6	0
1.7	0
1.8	0
1.9	0
2	0
2.1	0
2.2	0
2.3	0
2.4	0
2.5	0
2.6	0
2.7	0
2.8	0
2.9	0
3	0
3.1	0
3.2	0
3.3	0
3.4	0
3.5	0
3.6	0
3.7	0
3.8	0
3.9	0
4	0
4.1	0
4.2	0
4.3	0
4.4	0
4.5	0
4.6	0
4.7	0
4.8	0
4.9	0
5	0
5.1	0
5.2	0
5.3	0
5.4	0
5.5	0
5.6	0
5.7	0
5.8	0
5.9	0
6	0
6.1	0
6.2	0
6.3	0
6.4	0
6.5	0
6.6	0
6.7	0
6.8	0
6.9	0
7	0
7.1	0
7.2	0
7.3	0
7.4	0
7.5	0
7.6	0
7.7	0
7.8	0
7.9	0
8	0
8.1	0
8.2	0
8.3	0
8.4	0
8.5	0
8.6	0
8.7	0
8.8	0
8.9	0
9	0
9.1	0
9.2	0
9.3	0
9.4	0
9.5	0
9.6	0
9.7	0
9.8	0
9.9	0
10	0
10.1	0
10.2	0
10.3	0
10.4	0
10.5	0
10.6	0
10.7	0
10.8	0
10.9	0
11	0
11.1	0
11.2	0
11.3	0
11.4	0
11.5	0
11.6	0
11.7	0
11.8	0
11.9	0
12	0
12.1	0
12.2	0
12.3	0
12.4	0
12.5	0
12.6	0
12.7	0
12.8	0
12.9	0
13	0
13.1	0
13.2	0
13.3	0
13.4	0
13.5	0
13.6	0
13.7	0
13.8	0
13.9	0
14	0
14.1	0
14.2	0
14.3	0
14.4	0
14.5	0
14.6	0
14.7	0
14.8	0
14.9	0
15	0
15.1	0
15.2	0
15.3	0
15.4	0
15.5	0
15.6	0
15.7	0
15.8	0
15.9	0
16	0
16.1	0
16.2	0
16.3	0
16.4	0
16.5	0
16.6	0
16.7	0
16.8	0
16.9	0
17	0
17.1	0
17.2	0
17.3	0
17.4	0
17.5	0
17.6	0
17.7	0
17.8	0
17.9	0
18	0
18.1	0
18.2	0
18.3	0
18.4	0
18.5	0
18.6	0
18.7	0
18.8	0
18.9	0
19	0
19.1	0
19.2	0
19.3	0
19.4	0
19.5	0
19.6	0
19.7	0
19.8	0
19.9	0
20	0
20.1	0
20.2	0
20.3	0
20.4	0
20.5	0
20.6	0
20.7	0
20.8	0
20.9	0
21	0
21.1	0
21.2	0
21.3	0
21.4	0
21.5	0
21.6	0
21.7	0
21.8	0
21.9	0
22	0
22.1	0
22.2	0
22.3	0
22.4	0
22.5	0
22.6	0
22.7	0
22.8	0
22.9	0
23	0
23.1	0
23.2	0
23.3	0
23.4	0
23.5	0
23.6	0
23.7	0
23.8	0
23.9	0
24	0
24.1	0
24.2	0
24.3	0
24.4	0
24.5	0
24.6	0
24.7	0
24.8	0
24.9	0
25	0
25.1	0
25.2	0
25.3	0
25.4	0
25.5	0
25.6	0
25.7	0
25.8	0
25.9	0
26	0
26.1	0
26.2	0
26.3	0
26.4	0
26.5	0
26.6	0
26.7	0
26.8	0
26.9	0
27	0
27.1	0
27.2	0
27.3	0
27.4	0
27.5	0
27.6	0
27.7	0
27.8	0
27.9	0
28	0
28.1	0
28.2	0
28.3	0
28.4	0
28.5	0
28.6	0
28.7	0
28.8	0
28.9	0
29	0
29.1	0
29.2	0
29.3	0
29.4	0
29.5	0
29.6	0
29.7	0
29.8	0
29.9	0
30	0
30.1	0
30.2	0
30.3	0
30.4	0
30.5	0
30.6	0
30.7	0
30.8	0
30.9	0
31	0
31.1	0
31.2	0
31.3	0
31.4	0
31.5	0
31.6	0
31.7	0
31.8	0
31.9	0
32	0
32.1	0
32.2	0
32.3	0
32.4	0
32.5	0
32.6	0
32.7	0
32.8	0
32.9	0
33	0
33.1	0
33.2	0
33.3	0
33.4	0
33.5	0
33.6	0
33.7	0
33.8	0
33.9	0
34	0
34.1	0
34.2	0
34.3	0
34.4	0
34.5	0
34.6	0
34.7	0
34.8	0
34.9	0
35	0
35.1	0
35.2	0
35.3	0
35.4	0
35.5	0
35.6	0
35.7	0
35.8	0
35.9	0
36	0
36.1	0
36.2	0
36.3	0
36.4	0
36.5	0
36.6	0
36.7	0
36.8	0
36.9	0
37	0
37.1	0
37.2	0
37.3	0
37.4	0
37.5	0
37.6	0
37.7	0
37.8	0
37.9	0
38	0
38.1	0
38.2	0
38.3	0
38.4	0
38.5	0
38.6	0
38.7	0
38.8	0
38.9	0
39	0
39.1	0
39.2	0
39.3	0
39.4	0
39.5	0
39.6	0
39.7	0
39.8	0
39.9	0
40	0
40.1	0
40.2	0
40.3	0
40.4	0
40.5	0
40.6	0
40.7	0
40.8	0
40.9	0
41	0
41.1	0
41.2	0
41.3	0
41.4	0
41.5	0
41.6	0
41.7	0
41.8	0
41.9	0
42	0
42.1	0
42.2	0
42.3	0
42.4	0
42.5	0
42.6	0
42.7	0
42.8	0
42.9	0
43	0
43.1	0
43.2	0
43.3	0
43.4	0
43.5	0
43.6	0
43.7	0
43.8	0
43.9	0
44	0
44.1	0
44.2	0
44.3	0
44.4	0
44.5	0
44.6	0
44.7	0
44.8	0
44.9	0
45	0
45.1	0
45.2	0
45.3	0
45.4	0
45.5	0
45.6	0
45.7	0
45.8	0
45.9	0
46	0
46.1	0
46.2	0
46.3	0
46.4	0
46.5	0
46.6	0
46.7	0
46.8	0
46.9	0
47	0
47.1	0
47.2	0
47.3	0
47.4	0
47.5	0
47.6	0
47.7	0
47.8	0
47.9	0
48	0
48.1	0
48.2	0
48.3	0
48.4	0
48.5	0
48.6	0
48.7	0
48.8	0
48.9	0
49	0
49.1	0
49.2	0
49.3	0
49.4	0
49.5	0
49.6	0
49.7	0
49.8	0
49.9	0
50	0
50.1	0
50.2	0
50.3	0
50.4	0
50.5	0
50.6	0
50.7	0
50.8	0
50.9	0
51	0
51.1	0
51.2	0
51.3	0
51.4	0
51.5	0
51.6	0
51.7	0
51.8	0
51.9	0
52	0
52.1	0
52.2	0
52.3	0
52.4	0
52.5	0
52.6	0
52.7	0
52.8	0
52.9	0
53	0
53.1	0
53.2	0
53.3	0
53.4	0
53.5	0
53.6	0
53.7	0
53.8	0
53.9	0
54	0
54.1	0
54.2	0
54.3	0
54.4	0
54.5	0
54.6	0
54.7	0
54.8	0
54.9	0
55	0
55.1	0
55.2	0
55.3	0
55.4	0
55.5	0
55.6	0
55.7	0
55.8	0
55.9	0
56	0
56.1	0
56.2	0
56.3	0
56.4	0
56.5	0
56.6	0
56.7	0
56.8	0
56.9	0
57	0
57.1	0
57.2	0
57.3	0
57.4	0
57.5	0
57.6	0
57.7	0
57.8	0
57.9	0
58	0
58.1	0
58.2	0
58.3	0
58.4	0
58.5	0
58.6	0
58.7	0
58.8	0
58.9	0
59	0
59.1	0
59.2	0
59.3	0
59.4	0
59.5	0
59.6	0
59.7	0
59.8	0
59.9	0
60	0
60.1	0
60.2	0
60.3	0
60.4	0
60.5	0
60.6	0
60.7	0
60.8	0
60.9	0
61	0
61.1	0
61.2	0
61.3	0
61.4	0
61.5	0
61.6	0
61.7	0
61.8	0
61.9	0
62	0
62.1	0
62.2	0
62.3	0
62.4	0
62.5	0
62.6	0
62.7	0
62.8	0
62.9	0
63	0
63.1	0
63.2	0
63.3	0
63.4	0
63.5	0
63.6	0
63.7	0
63.8	0
63.9	0
64	0
64.1	0
64.2	0
64.3	0
64.4	0
64.5	0
64.6	0
64.7	0
64.8	0
64.9	0
65	0
65.1	0
65.2	0
65.3	0
65.4	0
65.5	0
65.6	0
65.7	0
65.8	0
65.9	0
66	0
66.1	0
66.2	0
66.3	0
66.4	0
66.5	0
66.6	0
66.7	0
66.8	0
66.9	0
67	0
67.1	0
67.2	0
67.3	0
67.4	0
67.5	0
67.6	0
67.7	0
67.8	0
67.9	0
68	0
68.1	0
68.2	0
68.3	0
68.4	0
68.5	0
68.6	0
68.7	0
68.8	0
68.9	0
69	0
69.1	0
69.2	0
69.3	0
69.4	0
69.5	0
69.6	0
69.7	0
69.8	0
69.9	0
70	0
70.1	0
70.2	0
70.3	0
70.4	0
70.5	0
70.6	0
70.7	0
70.8	0
70.9	0
71	0
71.1	0
71.2	0
71.3	0
71.4	0
71.5	0
71.6	0
71.7	0
71.8	0
71.9	0
72	0
72.1	0
72.2	0
72.3	0
72.4	0
72.5	0
72.6	0
72.7	0
72.8	0
72.9	0
73	0
73.1	0
73.2	0
73.3	0
73.4	0
73.5	0
73.6	0
73.7	0
73.8	0
73.9	0
74	0
74.1	0
74.2	0
74.3	0
74.4	0
74.5	0
74.6	0
74.7	0
74.8	0
74.9	0
75	0
75.1	0
75.2	0
75.3	0
75.4	0
75.5	0
75.6	0
75.7	0
75.8	0
75.9	0
76	0
76.1	0
76.2	0
76.3	0
76.4	0
76.5	0
76.6	0
76.7	0
76.8	0
76.9	0
77	0
77.1	0
77.2	0
77.3	0
77.4	0
77.5	0
77.6	0
77.7	0
77.8	0
77.9	0
78	0
78.1	0
78.2	0
78.3	0
78.4	0
78.5	0
78.6	0
78.7	0
78.8	0
78.9	0
79	0
79.1	0
79.2	0
79.3	0
79.4	0
79.5	0
79.6	0
79.7	0
79.8	0
79.9	0
80	0
80.1	0
80.2	0
80.3	0
80.4	0
80.5	0
80.6	0
80.7	0
80.8	0
80.9	0
81	0
81.1	0
81.2	0
81.3	0
81.4	0
81.5	0
81.6	0
81.7	0
81.8	0
81.9	0
82	0
82.1	0
82.2	0
82.3	0
82.4	0
82.5	0
82.6	0
82.7	0
82.8	0
82.9	0
83	0
83.1	0
83.2	0
83.3	0
83.4	0
83.5	0
83.6	0
83.7	0
83.8	0
83.9	0
84	0
84.1	0
84.2	0
84.3	0
84.4	0
84.5	0
84.6	0
84.7	0
84.8	0
84.9	0
85	0
85.1	0
85.2	0
85.3	0
85.4	0
85.5	0
85.6	0
85.7	0
85.8	0
85.9	0
86	0
86.1	0
86.2	0
86.3	0
86.4	0
86.5	0
86.6	0
86.7	0
86.8	0
86.9	0
87	0
87.1	0
87.2	0
87.3	0
87.4	0
87.5	0
87.6	0
87.7	0
87.8	0
87.9	0
88	0
88.1	0
88.2	0
88.3	0
88.4	0
88.5	0
88.6	0
88.7	0
88.8	0
88.9	0
89	0
89.1	0
89.2	0
89.3	0
89.4	0
89.5	0
89.6	0
89.7	0
89.8	0
89.9	0
90	0
90.1	0
90.2	0
90.3	0
90.4	0
90.5	0
90.6	0
90.7	0
90.8	0
90.9	0
91	0
91.1	0
91.2	0
91.3	0
91.4	0
91.5	0
91.6	0
91.7	0
91.8	0
91.9	0
92	0
92.1	0
92.2	0
92.3	0
92.4	0
92.5	0
92.6	0
92.7	0
92.8	0
92.9	0
93	0
93.1	0
93.2	0
93.3	0
93.4	0
93.5	0
93.6	0
93.7	0
93.8	0
93.9	0
94	0
94.1	0
94.2	0
94.3	0
94.4	0
94.5	0
94.6	0
94.7	0
94.8	0
94.9	0
95	0
95.1	0
95.2	0
95.3	0
95.4	0
95.5	0
95.6	0
95.7	0
95.8	0
95.9	0
96	0
96.1	0
96.2	0
96.3	0
96.4	0
96.5	0
96.6	0
96.7	0
96.8	0
96.9	0
97	0
97.1	0
97.2	0
97.3	0
97.4	0
97.5	0
97.6	0
97.7	0
97.8	0
97.9	0
98	0
98.1	0
98.2	0
98.3	0
98.4	0
98.5	0
98.6	0
98.7	0
98.8	0
98.9	0
99	0
99.1	0
99.2	0
99.3	0
99.4	0
99.5	0
99.6	0
99.7	0
99.8	0
99.9	0
100	0
100.1	0
100.2	0.0025
100.3	0.0075
100.4	0.01
100.5	0.015
100.6	0.02
100.7	0.0325
100.8	0.0425
100.9	0.05
101	0.05
101.1	0.05
101.2	0.05
101.3	0.055
101.4	0.06
101.5	0.06
101.6	0.06
101.7	0.0625
101.8	0.065
101.9	0.0675
102	0.075
102.1	0.0775
102.2	0.0775
102.3	0.0825
102.4	0.085
102.5	0.085
102.6	0.09
102.7	0.0975
102.8	0.0975
102.9	0.0975
103	0.1
103.1	0.1025
103.2	0.11
103.3	0.115
103.4	0.1125
103.5	0.1175
103.6	0.1225
103.7	0.13
103.8	0.1275
103.9	0.1275
104	0.125
104.1	0.125
104.2	0.1225
104.3	0.12
104.4	0.115
104.5	0.12
104.6	0.12
104.7	0.12
104.8	0.1225
104.9	0.1225
105	0.125
105.1	0.1275
105.2	0.1325
105.3	0.135
105.4	0.135
105.5	0.135
105.6	0.1375
105.7	0.14
105.8	0.1425
105.9	0.1475
106	0.1525
106.1	0.16
106.2	0.1625
106.3	0.165
106.4	0.1675
106.5	0.165
106.6	0.17
106.7	0.1675
106.8	0.17
106.9	0.1725
107	0.1725
107.1	0.1725
107.2	0.1725
107.3	0.175
107.4	0.1725
107.5	0.18
107.6	0.1825
107.7	0.185
107.8	0.1875
107.9	0.1875
108	0.185
108.1	0.1825
108.2	0.18
108.3	0.1825
108.4	0.185
108.5	0.1875
108.6	0.1875
108.7	0.19
108.8	0.19
108.9	0.195
109	0.195
109.1	0.1925
109.2	0.195
109.3	0.1925
109.4	0.19
109.5	0.195
109.6	0.195
109.7	0.1975
109.8	0.195
109.9	0.1975
110	0.2
110.1	0.2
110.2	0.2
110.3	0.1975
110.4	0.2
110.5	0.2
110.6	0.2025
110.7	0.2025
110.8	0.2025
110.9	0.2
111	0.2025
111.1	0.2025
111.2	0.2025
111.3	0.205
111.4	0.2075
111.5	0.21
111.6	0.21
111.7	0.2075
111.8	0.2125
111.9	0.2125
112	0.2125
112.1	0.215
112.2	0.215
112.3	0.2175
112.4	0.215
112.5	0.2125
112.6	0.21
112.7	0.2075
112.8	0.2025
112.9	0.2
113	0.2025
113.1	0.2
113.2	0.205
113.3	0.2
113.4	0.2
113.5	0.205
113.6	0.2025
113.7	0.205
113.8	0.2025
113.9	0.2
114	0.2025
114.1	0.2025
114.2	0.2025
114.3	0.2075
114.4	0.2075
114.5	0.2075
114.6	0.21
114.7	0.21
114.8	0.21
114.9	0.205
115	0.2075
115.1	0.21
115.2	0.2075
115.3	0.2075
115.4	0.2075
115.5	0.2025
115.6	0.21
115.7	0.21
115.8	0.2125
115.9	0.2125
116	0.2125
116.1	0.215
116.2	0.2225
116.3	0.215
116.4	0.22
116.5	0.2175
116.6	0.22
116.7	0.2175
116.8	0.215
116.9	0.215
117	0.2125
117.1	0.2175
117.2	0.2125
117.3	0.2175
117.4	0.2175
117.5	0.2225
117.6	0.2225
117.7	0.2225
117.8	0.2225
117.9	0.225
118	0.2275
118.1	0.225
118.2	0.2275
118.3	0.225
118.4	0.225
118.5	0.2275
118.6	0.22
118.7	0.22
118.8	0.2225
118.9	0.22
119	0.22
119.1	0.22
119.2	0.215
119.3	0.2125
119.4	0.2175
119.5	0.22
119.6	0.2225
119.7	0.2225
119.8	0.225
119.9	0.225
120	0.225
120.1	0.225
120.2	0.225
120.3	0.2175
120.4	0.2175
120.5	0.22
120.6	0.22
120.7	0.215
120.8	0.2125
120.9	0.2125
121	0.215
121.1	0.215
121.2	0.2175
121.3	0.2125
121.4	0.21
121.5	0.2075
121.6	0.215
121.7	0.215
121.8	0.2175
121.9	0.215
122	0.215
122.1	0.2175
122.2	0.2075
122.3	0.2125
122.4	0.2175
122.5	0.2125
122.6	0.2125
122.7	0.21
122.8	0.2075
122.9	0.2075
123	0.2125
123.1	0.215
123.2	0.2175
123.3	0.2225
123.4	0.2225
123.5	0.2175
123.6	0.2175
123.7	0.21
123.8	0.205
123.9	0.205
124	0.21
124.1	0.2075
124.2	0.2125
124.3	0.2125
124.4	0.215
124.5	0.215
124.6	0.215
124.7	0.215
124.8	0.2125
124.9	0.21
125	0.215
125.1	0.22
125.2	0.22
125.3	0.215
125.4	0.225
125.5	0.225
125.6	0.225
125.7	0.23
125.8	0.225
125.9	0.2225
126	0.225
126.1	0.23
126.2	0.2325
126.3	0.225
126.4	0.23
126.5	0.23
126.6	0.2225
126.7	0.225
126.8	0.2225
126.9	0.215
127	0.2175
127.1	0.2175
127.2	0.2175
127.3	0.215
127.4	0.215
127.5	0.215
127.6	0.21
127.7	0.205
127.8	0.1975
127.9	0.195
128	0.1975
128.1	0.2025
128.2	0.2025
128.3	0.2
128.4	0.205
128.5	0.21
128.6	0.21
128.7	0.21
128.8	0.205
128.9	0.205
129	0.205
129.1	0.2025
129.2	0.205
129.3	0.205
129.4	0.205
129.5	0.2025
129.6	0.205
129.7	0.2075
129.8	0.21
129.9	0.2125
130	0.2125
130.1	0.22
130.2	0.2225
130.3	0.22
130.4	0.22
130.5	0.22
130.6	0.225
130.7	0.225
130.8	0.2275
130.9	0.2275
131	0.225
131.1	0.2225
131.2	0.225
131.3	0.2275
131.4	0.23
131.5	0.2275
131.6	0.235
131.7	0.23
131.8	0.2275
131.9	0.2325
132	0.2325
132.1	0.2325
132.2	0.235
132.3	0.2375
132.4	0.2375
132.5	0.2425
132.6	0.245
132.7	0.2475
132.8	0.25
132.9	0.2475
133	0.24
133.1	0.24
133.2	0.24
133.3	0.24
133.4	0.24
133.5	0.2375
133.6	0.2425
133.7	0.2425
133.8	0.245
133.9	0.245
134	0.2475
134.1	0.2475
134.2	0.245
134.3	0.2425
134.4	0.245
134.5	0.2475
134.6	0.245
134.7	0.2425
134.8	0.245
134.9	0.2425
135	0.2425
135.1	0.2475
135.2	0.2425
135.3	0.2475
135.4	0.2475
135.5	0.2475
135.6	0.2475
135.7	0.25
135.8	0.2475
135.9	0.24
136	0.24
136.1	0.2425
136.2	0.24
136.3	0.2375
136.4	0.2375
136.5	0.24
136.6	0.235
136.7	0.225
136.8	0.225
136.9	0.2275
137	0.2325
137.1	0.2325
137.2	0.2425
137.3	0.2425
137.4	0.2425
137.5	0.245
137.6	0.2475
137.7	0.255
137.8	0.255
137.9	0.255
138	0.26
138.1	0.2625
138.2	0.2675
138.3	0.2675
138.4	0.2675
138.5	0.26
138.6	0.2575
138.7	0.26
138.8	0.255
138.9	0.26
139	0.2625
139.1	0.2675
139.2	0.265
139.3	0.2725
139.4	0.27
139.5	0.265
139.6	0.27
139.7	0.2725
139.8	0.2725
139.9	0.275
140	0.2675
140.1	0.265
140.2	0.2675
140.3	0.2725
140.4	0.275
140.5	0.27
140.6	0.2725
140.7	0.2675
140.8	0.265
140.9	0.26
141	0.2625
141.1	0.26
141.2	0.255
141.3	0.255
141.4	0.25
141.5	0.245
141.6	0.2425
141.7	0.2425
141.8	0.2375
141.9	0.2375
142	0.2375
142.1	0.2375
142.2	0.235
142.3	0.23
142.4	0.23
142.5	0.23
142.6	0.2325
142.7	0.23
142.8	0.23
142.9	0.2275
143	0.2275
143.1	0.225
143.2	0.2275
143.3	0.2325
143.4	0.235
143.5	0.235
143.6	0.2325
143.7	0.2375
143.8	0.2375
143.9	0.2325
144	0.24
144.1	0.2425
144.2	0.2425
144.3	0.2425
144.4	0.24
144.5	0.2375
144.6	0.2375
144.7	0.2375
144.8	0.2375
144.9	0.2375
145	0.2375
145.1	0.245
145.2	0.2475
145.3	0.2475
145.4	0.2475
145.5	0.2475
145.6	0.25
145.7	0.255
145.8	0.26
145.9	0.2625
146	0.2625
146.1	0.26
146.2	0.2575
146.3	0.2625
146.4	0.255
146.5	0.2525
146.6	0.255
146.7	0.255
146.8	0.2575
146.9	0.26
147	0.26
147.1	0.26
147.2	0.2575
147.3	0.2575
147.4	0.2625
147.5	0.2625
147.6	0.265
147.7	0.27
147.8	0.2725
147.9	0.2725
148	0.2625
148.1	0.265
148.2	0.2625
148.3	0.2625
148.4	0.2625
148.5	0.265
148.6	0.2575
148.7	0.255
148.8	0.255
148.9	0.2525
149	0.26
149.1	0.2625
149.2	0.265
149.3	0.2625
149.4	0.2625
149.5	0.265
149.6	0.2725
149.7	0.2775
149.8	0.275
149.9	0.275
150	0.275
150.1	0.2675
150.2	0.2675
150.3	0.2675
150.4	0.26
150.5	0.2525
150.6	0.2525
150.7	0.25
150.8	0.25
150.9	0.26
151	0.26
151.1	0.26
151.2	0.2575
151.3	0.2625
151.4	0.255
151.5	0.2525
151.6	0.2525
151.7	0.2525
151.8	0.2575
151.9	0.255
152	0.2525
152.1	0.25
152.2	0.25
152.3	0.2475
152.4	0.2525
152.5	0.255
152.6	0.255
152.7	0.2525
152.8	0.2525
152.9	0.26
153	0.26
153.1	0.26
153.2	0.2575
153.3	0.265
153.4	0.26
153.5	0.26
153.6	0.26
153.7	0.26
153.8	0.26
153.9	0.26
154	0.265
154.1	0.2675
154.2	0.265
154.3	0.2625
154.4	0.2625
154.5	0.26
154.6	0.2575
154.7	0.26
154.8	0.2675
154.9	0.2675
155	0.26
155.1	0.26
155.2	0.26
155.3	0.26
155.4	0.26
155.5	0.2625
155.6	0.2675
155.7	0.2675
155.8	0.27
155.9	0.2675
156	0.27
156.1	0.2675
156.2	0.265
156.3	0.2625
156.4	0.2575
156.5	0.255
156.6	0.255
156.7	0.2575
156.8	0.2625
156.9	0.265
157	0.2625
157.1	0.2625
157.2	0.26
157.3	0.255
157.4	0.26
157.5	0.26
157.6	0.26
157.7	0.2625
157.8	0.2575
157.9	0.26
158	0.26
158.1	0.2575
158.2	0.255
158.3	0.2575
158.4	0.255
158.5	0.2525
158.6	0.2475
158.7	0.245
158.8	0.245
158.9	0.25
159	0.2475
159.1	0.2525
159.2	0.255
159.3	0.26
159.4	0.2575
159.5	0.255
159.6	0.2575
159.7	0.255
159.8	0.255
159.9	0.2525
160	0.2475
160.1	0.25
160.2	0.2475
160.3	0.255
160.4	0.2525
160.5	0.2475
160.6	0.2475
160.7	0.25
160.8	0.255
160.9	0.255
161	0.2575
161.1	0.25
161.2	0.25
161.3	0.2475
161.4	0.245
161.5	0.2475
161.6	0.255
161.7	0.26
161.8	0.255
161.9	0.2625
162	0.2625
162.1	0.26
162.2	0.2575
162.3	0.2575
162.4	0.2575
162.5	0.255
162.6	0.2525
162.7	0.2525
162.8	0.25
162.9	0.25
163	0.2475
163.1	0.245
163.2	0.245
163.3	0.2475
163.4	0.2475
163.5	0.2475
163.6	0.25
163.7	0.255
163.8	0.2625
163.9	0.265
164	0.265
164.1	0.26
164.2	0.26
164.3	0.2575
164.4	0.26
164.5	0.265
164.6	0.265
164.7	0.265
164.8	0.265
164.9	0.27
165	0.27
165.1	0.275
165.2	0.275
165.3	0.27
165.4	0.27
165.5	0.2725
165.6	0.2725
165.7	0.2775
165.8	0.2825
165.9	0.285
166	0.2825
166.1	0.2825
166.2	0.28
166.3	0.2825
166.4	0.285
166.5	0.28
166.6	0.2775
166.7	0.2825
166.8	0.2875
166.9	0.29
167	0.29
167.1	0.285
167.2	0.29
167.3	0.295
167.4	0.29
167.5	0.29
167.6	0.2875
167.7	0.2875
167.8	0.29
167.9	0.2875
168	0.2875
168.1	0.28
168.2	0.2775
168.3	0.275
168.4	0.2725
168.5	0.2725
168.6	0.2725
168.7	0.2725
168.8	0.27
168.9	0.2675
169	0.265
169.1	0.265
169.2	0.265
169.3	0.2625
169.4	0.26
169.5	0.2625
169.6	0.26
169.7	0.2625
169.8	0.26
169.9	0.2625
170	0.265
170.1	0.27
170.2	0.27
170.3	0.2675
170.4	0.2675
170.5	0.265
170.6	0.265
170.7	0.265
170.8	0.2675
170.9	0.265
171	0.26
171.1	0.2575
171.2	0.255
171.3	0.255
171.4	0.26
171.5	0.255
171.6	0.2475
171.7	0.2425
171.8	0.2425
171.9	0.2475
172	0.25
172.1	0.255
172.2	0.2525
172.3	0.25
172.4	0.2475
172.5	0.2475
172.6	0.25
172.7	0.245
172.8	0.2475
172.9	0.245
173	0.2425
173.1	0.2425
173.2	0.245
173.3	0.245
173.4	0.2475
173.5	0.245
173.6	0.2475
173.7	0.26
173.8	0.2625
173.9	0.2575
174	0.25
174.1	0.25
174.2	0.25
174.3	0.2475
174.4	0.25
174.5	0.2475
174.6	0.2475
174.7	0.2475
174.8	0.2525
174.9	0.25
175	0.2525
175.1	0.2525
175.2	0.2525
175.3	0.25
175.4	0.2525
175.5	0.25
175.6	0.255
175.7	0.25
175.8	0.2525
175.9	0.25
176	0.2525
176.1	0.25
176.2	0.245
176.3	0.245
176.4	0.25
176.5	0.25
176.6	0.25
176.7	0.2475
176.8	0.255
176.9	0.255
177	0.2575
177.1	0.2625
177.2	0.265
177.3	0.265
177.4	0.265
177.5	0.2675
177.6	0.265
177.7	0.2625
177.8	0.26
177.9	0.26
178	0.2575
178.1	0.255
178.2	0.26
178.3	0.26
178.4	0.2625
178.5	0.2625
178.6	0.2575
178.7	0.26
178.8	0.26
178.9	0.255
179	0.2525
179.1	0.2525
179.2	0.2525
179.3	0.25
179.4	0.2525
179.5	0.25
179.6	0.25
179.7	0.2475
179.8	0.245
179.9	0.2375
180	0.2375
180.1	0.2325
180.2	0.2275
180.3	0.225
180.4	0.2225
180.5	0.2175
180.6	0.215
180.7	0.215
180.8	0.22
180.9	0.22
181	0.2175
181.1	0.2125
181.2	0.2125
181.3	0.2125
181.4	0.21
181.5	0.2125
181.6	0.21
181.7	0.2125
181.8	0.2175
181.9	0.22
182	0.22
182.1	0.2225
182.2	0.225
182.3	0.2225
182.4	0.22
182.5	0.2225
182.6	0.225
182.7	0.225
182.8	0.2275
182.9	0.2325
183	0.2375
183.1	0.235
183.2	0.2375
183.3	0.2425
183.4	0.2375
183.5	0.24
183.6	0.2425
183.7	0.245
183.8	0.24
183.9	0.24
184	0.2375
184.1	0.245
184.2	0.2475
184.3	0.2525
184.4	0.2525
184.5	0.2525
184.6	0.25
184.7	0.2525
184.8	0.2575
184.9	0.255
185	0.255
185.1	0.2525
185.2	0.245
185.3	0.2425
185.4	0.245
185.5	0.2425
185.6	0.245
185.7	0.2425
185.8	0.245
185.9	0.2425
186	0.24
186.1	0.245
186.2	0.245
186.3	0.2475
186.4	0.24
186.5	0.2375
186.6	0.24
186.7	0.2375
186.8	0.235
186.9	0.23
187	0.2325
187.1	0.2325
187.2	0.235
187.3	0.235
187.4	0.235
187.5	0.2325
187.6	0.23
187.7	0.2375
187.8	0.2375
187.9	0.245
188	0.25
188.1	0.25
188.2	0.255
188.3	0.25
188.4	0.25
188.5	0.2525
188.6	0.2575
188.7	0.255
188.8	0.2525
188.9	0.2475
189	0.2475
189.1	0.2475
189.2	0.2475
189.3	0.2475
189.4	0.2475
189.5	0.2475
189.6	0.25
189.7	0.2525
189.8	0.25
189.9	0.2575
190	0.2525
190.1	0.255
190.2	0.255
190.3	0.2575
190.4	0.255
190.5	0.2625
190.6	0.2625
190.7	0.265
190.8	0.26
190.9	0.26
191	0.2625
191.1	0.2675
191.2	0.265
191.3	0.2675
191.4	0.2625
191.5	0.265
191.6	0.2625
191.7	0.26
191.8	0.26
191.9	0.2625
192	0.265
192.1	0.2675
192.2	0.27
192.3	0.27
192.4	0.2675
192.5	0.2725
192.6	0.2725
192.7	0.275
192.8	0.28
192.9	0.28
193	0.28
193.1	0.285
193.2	0.28
193.3	0.2775
193.4	0.2725
193.5	0.275
193.6	0.2775
193.7	0.275
193.8	0.2775
193.9	0.2775
194	0.275
194.1	0.275
194.2	0.275
194.3	0.2775
194.4	0.2825
194.5	0.29
194.6	0.29
194.7	0.29
194.8	0.2975
194.9	0.295
195	0.295
195.1	0.295
195.2	0.2875
195.3	0.2825
195.4	0.2775
195.5	0.2775
195.6	0.28
195.7	0.275
195.8	0.275
195.9	0.275
196	0.2825
196.1	0.2925
196.2	0.2925
196.3	0.2925
196.4	0.2975
196.5	0.2975
196.6	0.2975
196.7	0.305
196.8	0.31
196.9	0.3125
197	0.3125
197.1	0.31
197.2	0.3125
197.3	0.315
197.4	0.3125
197.5	0.31
197.6	0.315
197.7	0.315
197.8	0.3125
197.9	0.3175
198	0.3075
198.1	0.3075
198.2	0.305
198.3	0.31
198.4	0.305
198.5	0.305
198.6	0.295
198.7	0.295
198.8	0.295
198.9	0.2925
199	0.2925
199.1	0.2925
199.2	0.2925
199.3	0.2875
199.4	0.2825
199.5	0.2825
199.6	0.2875
199.7	0.2875
199.8	0.2875
199.9	0.29
200	0.2925
[truncated: 14,000 more rows]
