# Supplementary material for: Bayesian inference of kinetic schemes for ion channels by Kalman filtering
Source: eLife journal article supplement (doi:10.7554/elife.62714), 2022-05-04
Supplement: fig4-data10 [file 1_Sim_N_200_Strom_MW_0.0625M.xlsx]

## Sheet: 0.0625 M_2
0.1	0
0.2	0
0.3	0
0.4	0
0.5	0
0.6	0
0.7	0
0.8	0
0.9	0
1	0
1.1	0
1.2	0
1.3	0
1.4	0
1.5	0
1.6	0
1.7	0
1.8	0
1.9	0
2	0
2.1	0
2.2	0
2.3	0
2.4	0
2.5	0
2.6	0
2.7	0
2.8	0
2.9	0
3	0
3.1	0
3.2	0
3.3	0
3.4	0
3.5	0
3.6	0
3.7	0
3.8	0
3.9	0
4	0
4.1	0
4.2	0
4.3	0
4.4	0
4.5	0
4.6	0
4.7	0
4.8	0
4.9	0
5	0
5.1	0
5.2	0
5.3	0
5.4	0
5.5	0
5.6	0
5.7	0
5.8	0
5.9	0
6	0
6.1	0
6.2	0
6.3	0
6.4	0
6.5	0
6.6	0
6.7	0
6.8	0
6.9	0
7	0
7.1	0
7.2	0
7.3	0
7.4	0
7.5	0
7.6	0
7.7	0
7.8	0
7.9	0
8	0
8.1	0
8.2	0
8.3	0
8.4	0
8.5	0
8.6	0
8.7	0
8.8	0
8.9	0
9	0
9.1	0
9.2	0
9.3	0
9.4	0
9.5	0
9.6	0
9.7	0
9.8	0
9.9	0
10	0
10.1	0
10.2	0
10.3	0
10.4	0
10.5	0
10.6	0
10.7	0
10.8	0
10.9	0
11	0
11.1	0
11.2	0
11.3	0
11.4	0
11.5	0
11.6	0
11.7	0
11.8	0
11.9	0
12	0
12.1	0
12.2	0
12.3	0
12.4	0
12.5	0
12.6	0
12.7	0
12.8	0
12.9	0
13	0
13.1	0
13.2	0
13.3	0
13.4	0
13.5	0
13.6	0
13.7	0
13.8	0
13.9	0
14	0
14.1	0
14.2	0
14.3	0
14.4	0
14.5	0
14.6	0
14.7	0
14.8	0
14.9	0
15	0
15.1	0
15.2	0
15.3	0
15.4	0
15.5	0
15.6	0
15.7	0
15.8	0
15.9	0
16	0
16.1	0
16.2	0
16.3	0
16.4	0
16.5	0
16.6	0
16.7	0
16.8	0
16.9	0
17	0
17.1	0
17.2	0
17.3	0
17.4	0
17.5	0
17.6	0
17.7	0
17.8	0
17.9	0
18	0
18.1	0
18.2	0
18.3	0
18.4	0
18.5	0
18.6	0
18.7	0
18.8	0
18.9	0
19	0
19.1	0
19.2	0
19.3	0
19.4	0
19.5	0
19.6	0
19.7	0
19.8	0
19.9	0
20	0
20.1	0
20.2	0
20.3	0
20.4	0
20.5	0
20.6	0
20.7	0
20.8	0
20.9	0
21	0
21.1	0
21.2	0
21.3	0
21.4	0
21.5	0
21.6	0
21.7	0
21.8	0
21.9	0
22	0
22.1	0
22.2	0
22.3	0
22.4	0
22.5	0
22.6	0
22.7	0
22.8	0
22.9	0
23	0
23.1	0
23.2	0
23.3	0
23.4	0
23.5	0
23.6	0
23.7	0
23.8	0
23.9	0
24	0
24.1	0
24.2	0
24.3	0
24.4	0
24.5	0
24.6	0
24.7	0
24.8	0
24.9	0
25	0
25.1	0
25.2	0
25.3	0
25.4	0
25.5	0
25.6	0
25.7	0
25.8	0
25.9	0
26	0
26.1	0
26.2	0
26.3	0
26.4	0
26.5	0
26.6	0
26.7	0
26.8	0
26.9	0
27	0
27.1	0
27.2	0
27.3	0
27.4	0
27.5	0
27.6	0
27.7	0
27.8	0
27.9	0
28	0
28.1	0
28.2	0
28.3	0
28.4	0
28.5	0
28.6	0
28.7	0
28.8	0
28.9	0
29	0
29.1	0
29.2	0
29.3	0
29.4	0
29.5	0
29.6	0
29.7	0
29.8	0
29.9	0
30	0
30.1	0
30.2	0
30.3	0
30.4	0
30.5	0
30.6	0
30.7	0
30.8	0
30.9	0
31	0
31.1	0
31.2	0
31.3	0
31.4	0
31.5	0
31.6	0
31.7	0
31.8	0
31.9	0
32	0
32.1	0
32.2	0
32.3	0
32.4	0
32.5	0
32.6	0
32.7	0
32.8	0
32.9	0
33	0
33.1	0
33.2	0
33.3	0
33.4	0
33.5	0
33.6	0
33.7	0
33.8	0
33.9	0
34	0
34.1	0
34.2	0
34.3	0
34.4	0
34.5	0
34.6	0
34.7	0
34.8	0
34.9	0
35	0
35.1	0
35.2	0
35.3	0
35.4	0
35.5	0
35.6	0
35.7	0
35.8	0
35.9	0
36	0
36.1	0
36.2	0
36.3	0
36.4	0
36.5	0
36.6	0
36.7	0
36.8	0
36.9	0
37	0
37.1	0
37.2	0
37.3	0
37.4	0
37.5	0
37.6	0
37.7	0
37.8	0
37.9	0
38	0
38.1	0
38.2	0
38.3	0
38.4	0
38.5	0
38.6	0
38.7	0
38.8	0
38.9	0
39	0
39.1	0
39.2	0
39.3	0
39.4	0
39.5	0
39.6	0
39.7	0
39.8	0
39.9	0
40	0
40.1	0
40.2	0
40.3	0
40.4	0
40.5	0
40.6	0
40.7	0
40.8	0
40.9	0
41	0
41.1	0
41.2	0
41.3	0
41.4	0
41.5	0
41.6	0
41.7	0
41.8	0
41.9	0
42	0
42.1	0
42.2	0
42.3	0
42.4	0
42.5	0
42.6	0
42.7	0
42.8	0
42.9	0
43	0
43.1	0
43.2	0
43.3	0
43.4	0
43.5	0
43.6	0
43.7	0
43.8	0
43.9	0
44	0
44.1	0
44.2	0
44.3	0
44.4	0
44.5	0
44.6	0
44.7	0
44.8	0
44.9	0
45	0
45.1	0
45.2	0
45.3	0
45.4	0
45.5	0
45.6	0
45.7	0
45.8	0
45.9	0
46	0
46.1	0
46.2	0
46.3	0
46.4	0
46.5	0
46.6	0
46.7	0
46.8	0
46.9	0
47	0
47.1	0
47.2	0
47.3	0
47.4	0
47.5	0
47.6	0
47.7	0
47.8	0
47.9	0
48	0
48.1	0
48.2	0
48.3	0
48.4	0
48.5	0
48.6	0
48.7	0
48.8	0
48.9	0
49	0
49.1	0
49.2	0
49.3	0
49.4	0
49.5	0
49.6	0
49.7	0
49.8	0
49.9	0
50	0
50.1	0
50.2	0
50.3	0
50.4	0
50.5	0
50.6	0
50.7	0
50.8	0
50.9	0
51	0
51.1	0
51.2	0
51.3	0
51.4	0
51.5	0
51.6	0
51.7	0
51.8	0
51.9	0
52	0
52.1	0
52.2	0
52.3	0
52.4	0
52.5	0
52.6	0
52.7	0
52.8	0
52.9	0
53	0
53.1	0
53.2	0
53.3	0
53.4	0
53.5	0
53.6	0
53.7	0
53.8	0
53.9	0
54	0
54.1	0
54.2	0
54.3	0
54.4	0
54.5	0
54.6	0
54.7	0
54.8	0
54.9	0
55	0
55.1	0
55.2	0
55.3	0
55.4	0
55.5	0
55.6	0
55.7	0
55.8	0
55.9	0
56	0
56.1	0
56.2	0
56.3	0
56.4	0
56.5	0
56.6	0
56.7	0
56.8	0
56.9	0
57	0
57.1	0
57.2	0
57.3	0
57.4	0
57.5	0
57.6	0
57.7	0
57.8	0
57.9	0
58	0
58.1	0
58.2	0
58.3	0
58.4	0
58.5	0
58.6	0
58.7	0
58.8	0
58.9	0
59	0
59.1	0
59.2	0
59.3	0
59.4	0
59.5	0
59.6	0
59.7	0
59.8	0
59.9	0
60	0
60.1	0
60.2	0
60.3	0
60.4	0
60.5	0
60.6	0
60.7	0
60.8	0
60.9	0
61	0
61.1	0
61.2	0
61.3	0
61.4	0
61.5	0
61.6	0
61.7	0
61.8	0
61.9	0
62	0
62.1	0
62.2	0
62.3	0
62.4	0
62.5	0
62.6	0
62.7	0
62.8	0
62.9	0
63	0
63.1	0
63.2	0
63.3	0
63.4	0
63.5	0
63.6	0
63.7	0
63.8	0
63.9	0
64	0
64.1	0
64.2	0
64.3	0
64.4	0
64.5	0
64.6	0
64.7	0
64.8	0
64.9	0
65	0
65.1	0
65.2	0
65.3	0
65.4	0
65.5	0
65.6	0
65.7	0
65.8	0
65.9	0
66	0
66.1	0
66.2	0
66.3	0
66.4	0
66.5	0
66.6	0
66.7	0
66.8	0
66.9	0
67	0
67.1	0
67.2	0
67.3	0
67.4	0
67.5	0
67.6	0
67.7	0
67.8	0
67.9	0
68	0
68.1	0
68.2	0
68.3	0
68.4	0
68.5	0
68.6	0
68.7	0
68.8	0
68.9	0
69	0
69.1	0
69.2	0
69.3	0
69.4	0
69.5	0
69.6	0
69.7	0
69.8	0
69.9	0
70	0
70.1	0
70.2	0
70.3	0
70.4	0
70.5	0
70.6	0
70.7	0
70.8	0
70.9	0
71	0
71.1	0
71.2	0
71.3	0
71.4	0
71.5	0
71.6	0
71.7	0
71.8	0
71.9	0
72	0
72.1	0
72.2	0
72.3	0
72.4	0
72.5	0
72.6	0
72.7	0
72.8	0
72.9	0
73	0
73.1	0
73.2	0
73.3	0
73.4	0
73.5	0
73.6	0
73.7	0
73.8	0
73.9	0
74	0
74.1	0
74.2	0
74.3	0
74.4	0
74.5	0
74.6	0
74.7	0
74.8	0
74.9	0
75	0
75.1	0
75.2	0
75.3	0
75.4	0
75.5	0
75.6	0
75.7	0
75.8	0
75.9	0
76	0
76.1	0
76.2	0
76.3	0
76.4	0
76.5	0
76.6	0
76.7	0
76.8	0
76.9	0
77	0
77.1	0
77.2	0
77.3	0
77.4	0
77.5	0
77.6	0
77.7	0
77.8	0
77.9	0
78	0
78.1	0
78.2	0
78.3	0
78.4	0
78.5	0
78.6	0
78.7	0
78.8	0
78.9	0
79	0
79.1	0
79.2	0
79.3	0
79.4	0
79.5	0
79.6	0
79.7	0
79.8	0
79.9	0
80	0
80.1	0
80.2	0
80.3	0
80.4	0
80.5	0
80.6	0
80.7	0
80.8	0
80.9	0
81	0
81.1	0
81.2	0
81.3	0
81.4	0
81.5	0
81.6	0
81.7	0
81.8	0
81.9	0
82	0
82.1	0
82.2	0
82.3	0
82.4	0
82.5	0
82.6	0
82.7	0
82.8	0
82.9	0
83	0
83.1	0
83.2	0
83.3	0
83.4	0
83.5	0
83.6	0
83.7	0
83.8	0
83.9	0
84	0
84.1	0
84.2	0
84.3	0
84.4	0
84.5	0
84.6	0
84.7	0
84.8	0
84.9	0
85	0
85.1	0
85.2	0
85.3	0
85.4	0
85.5	0
85.6	0
85.7	0
85.8	0
85.9	0
86	0
86.1	0
86.2	0
86.3	0
86.4	0
86.5	0
86.6	0
86.7	0
86.8	0
86.9	0
87	0
87.1	0
87.2	0
87.3	0
87.4	0
87.5	0
87.6	0
87.7	0
87.8	0
87.9	0
88	0
88.1	0
88.2	0
88.3	0
88.4	0
88.5	0
88.6	0
88.7	0
88.8	0
88.9	0
89	0
89.1	0
89.2	0
89.3	0
89.4	0
89.5	0
89.6	0
89.7	0
89.8	0
89.9	0
90	0
90.1	0
90.2	0
90.3	0
90.4	0
90.5	0
90.6	0
90.7	0
90.8	0
90.9	0
91	0
91.1	0
91.2	0
91.3	0
91.4	0
91.5	0
91.6	0
91.7	0
91.8	0
91.9	0
92	0
92.1	0
92.2	0
92.3	0
92.4	0
92.5	0
92.6	0
92.7	0
92.8	0
92.9	0
93	0
93.1	0
93.2	0
93.3	0
93.4	0
93.5	0
93.6	0
93.7	0
93.8	0
93.9	0
94	0
94.1	0
94.2	0
94.3	0
94.4	0
94.5	0
94.6	0
94.7	0
94.8	0
94.9	0
95	0
95.1	0
95.2	0
95.3	0
95.4	0
95.5	0
95.6	0
95.7	0
95.8	0
95.9	0
96	0
96.1	0
96.2	0
96.3	0
96.4	0
96.5	0
96.6	0
96.7	0
96.8	0
96.9	0
97	0
97.1	0
97.2	0
97.3	0
97.4	0
97.5	0
97.6	0
97.7	0
97.8	0
97.9	0
98	0
98.1	0
98.2	0
98.3	0
98.4	0
98.5	0
98.6	0
98.7	0
98.8	0
98.9	0
99	0
99.1	0
99.2	0
99.3	0
99.4	0
99.5	0
99.6	0
99.7	0
99.8	0
99.9	0
100	0
100.1	0
100.2	0
100.3	0
100.4	0
100.5	0
100.6	0
100.7	0
100.8	0
100.9	0
101	0
101.1	0
101.2	0
101.3	0
101.4	0
101.5	0
101.6	0
101.7	0
101.8	0.005
101.9	0.005
102	0.005
102.1	0.005
102.2	0.005
102.3	0.005
102.4	0.005
102.5	0.005
102.6	0.005
102.7	0.005
102.8	0.005
102.9	0.005
103	0.005
103.1	0.005
103.2	0.005
103.3	0.005
103.4	0.005
103.5	0.005
103.6	0.005
103.7	0.005
103.8	0.005
103.9	0.005
104	0.005
104.1	0.005
104.2	0.005
104.3	0.005
104.4	0.005
104.5	0.005
104.6	0.005
104.7	0.005
104.8	0.005
104.9	0.005
105	0.005
105.1	0.005
105.2	0.005
105.3	0.005
105.4	0.005
105.5	0.005
105.6	0.005
105.7	0.005
105.8	0.005
105.9	0.005
106	0.005
106.1	0.005
106.2	0.01
106.3	0.01
106.4	0.01
106.5	0.01
106.6	0.01
106.7	0.01
106.8	0.01
106.9	0.01
107	0.01
107.1	0.01
107.2	0.01
107.3	0.01
107.4	0.01
107.5	0.01
107.6	0.01
107.7	0.01
107.8	0.01
107.9	0.01
108	0.01
108.1	0.01
108.2	0.01
108.3	0.01
108.4	0.01
108.5	0.01
108.6	0.01
108.7	0.01
108.8	0.01
108.9	0.01
109	0.01
109.1	0.01
109.2	0.01
109.3	0.01
109.4	0.01
109.5	0.01
109.6	0.01
109.7	0.01
109.8	0.01
109.9	0.01
110	0.01
110.1	0.01
110.2	0.01
110.3	0.01
110.4	0.01
110.5	0.01
110.6	0.01
110.7	0.01
110.8	0.01
110.9	0.01
111	0.01
111.1	0.01
111.2	0.01
111.3	0.01
111.4	0.01
111.5	0.01
111.6	0.01
111.7	0.01
111.8	0.01
111.9	0.01
112	0.01
112.1	0.01
112.2	0.01
112.3	0.01
112.4	0.01
112.5	0.01
112.6	0.01
112.7	0.01
112.8	0.01
112.9	0.01
113	0.01
113.1	0.01
113.2	0.01
113.3	0.01
113.4	0.015
113.5	0.015
113.6	0.015
113.7	0.015
113.8	0.015
113.9	0.015
114	0.015
114.1	0.015
114.2	0.015
114.3	0.015
114.4	0.015
114.5	0.015
114.6	0.015
114.7	0.015
114.8	0.015
114.9	0.015
115	0.02
115.1	0.02
115.2	0.02
115.3	0.02
115.4	0.02
115.5	0.02
115.6	0.02
115.7	0.02
115.8	0.02
115.9	0.02
116	0.02
116.1	0.02
116.2	0.02
116.3	0.02
116.4	0.02
116.5	0.02
116.6	0.02
116.7	0.02
116.8	0.02
116.9	0.02
117	0.02
117.1	0.02
117.2	0.02
117.3	0.02
117.4	0.02
117.5	0.02
117.6	0.02
117.7	0.02
117.8	0.02
117.9	0.02
118	0.02
118.1	0.02
118.2	0.02
118.3	0.02
118.4	0.02
118.5	0.02
118.6	0.02
118.7	0.02
118.8	0.02
118.9	0.02
119	0.02
119.1	0.02
119.2	0.02
119.3	0.02
119.4	0.02
119.5	0.02
119.6	0.02
119.7	0.02
119.8	0.02
119.9	0.02
120	0.02
120.1	0.02
120.2	0.02
120.3	0.02
120.4	0.025
120.5	0.025
120.6	0.025
120.7	0.025
120.8	0.025
120.9	0.025
121	0.025
121.1	0.025
121.2	0.025
121.3	0.025
121.4	0.025
121.5	0.025
121.6	0.025
121.7	0.025
121.8	0.025
121.9	0.025
122	0.025
122.1	0.025
122.2	0.025
122.3	0.025
122.4	0.025
122.5	0.03
122.6	0.03
122.7	0.03
122.8	0.03
122.9	0.03
123	0.03
123.1	0.03
123.2	0.03
123.3	0.03
123.4	0.03
123.5	0.03
123.6	0.03
123.7	0.03
123.8	0.03
123.9	0.03
124	0.03
124.1	0.03
124.2	0.03
124.3	0.03
124.4	0.03
124.5	0.03
124.6	0.03
124.7	0.03
124.8	0.03
124.9	0.03
125	0.03
125.1	0.03
125.2	0.03
125.3	0.03
125.4	0.03
125.5	0.03
125.6	0.03
125.7	0.03
125.8	0.03
125.9	0.03
126	0.03
126.1	0.03
126.2	0.03
126.3	0.03
126.4	0.03
126.5	0.03
126.6	0.03
126.7	0.03
126.8	0.03
126.9	0.03
127	0.03
127.1	0.03
127.2	0.03
127.3	0.03
127.4	0.03
127.5	0.03
127.6	0.03
127.7	0.03
127.8	0.03
127.9	0.03
128	0.03
128.1	0.03
128.2	0.03
128.3	0.03
128.4	0.03
128.5	0.03
128.6	0.03
128.7	0.03
128.8	0.03
128.9	0.03
129	0.03
129.1	0.03
129.2	0.03
129.3	0.03
129.4	0.03
129.5	0.03
129.6	0.03
129.7	0.03
129.8	0.03
129.9	0.03
130	0.03
130.1	0.03
130.2	0.03
130.3	0.03
130.4	0.03
130.5	0.03
130.6	0.03
130.7	0.03
130.8	0.03
130.9	0.03
131	0.03
131.1	0.03
131.2	0.03
131.3	0.03
131.4	0.03
131.5	0.03
131.6	0.03
131.7	0.03
131.8	0.03
131.9	0.03
132	0.03
132.1	0.03
132.2	0.03
132.3	0.03
132.4	0.03
132.5	0.03
132.6	0.03
132.7	0.03
132.8	0.03
132.9	0.03
133	0.03
133.1	0.03
133.2	0.03
133.3	0.03
133.4	0.03
133.5	0.03
133.6	0.03
133.7	0.03
133.8	0.03
133.9	0.03
134	0.03
134.1	0.03
134.2	0.03
134.3	0.03
134.4	0.03
134.5	0.03
134.6	0.03
134.7	0.03
134.8	0.03
134.9	0.03
135	0.03
135.1	0.025
135.2	0.025
135.3	0.025
135.4	0.025
135.5	0.025
135.6	0.025
135.7	0.025
135.8	0.025
135.9	0.025
136	0.025
136.1	0.025
136.2	0.025
136.3	0.025
136.4	0.025
136.5	0.025
136.6	0.025
136.7	0.025
136.8	0.025
136.9	0.025
137	0.025
137.1	0.025
137.2	0.025
137.3	0.025
137.4	0.025
137.5	0.025
137.6	0.025
137.7	0.025
137.8	0.025
137.9	0.025
138	0.025
138.1	0.025
138.2	0.03
138.3	0.03
138.4	0.03
138.5	0.03
138.6	0.03
138.7	0.03
138.8	0.03
138.9	0.03
139	0.03
139.1	0.03
139.2	0.03
139.3	0.03
139.4	0.03
139.5	0.03
139.6	0.03
139.7	0.03
139.8	0.03
139.9	0.03
140	0.03
140.1	0.03
140.2	0.03
140.3	0.03
140.4	0.03
140.5	0.03
140.6	0.03
140.7	0.03
140.8	0.03
140.9	0.03
141	0.03
141.1	0.03
141.2	0.03
141.3	0.03
141.4	0.03
141.5	0.03
141.6	0.03
141.7	0.03
141.8	0.03
141.9	0.03
142	0.03
142.1	0.03
142.2	0.03
142.3	0.03
142.4	0.03
142.5	0.03
142.6	0.03
142.7	0.03
142.8	0.03
142.9	0.03
143	0.03
143.1	0.03
143.2	0.03
143.3	0.03
143.4	0.03
143.5	0.03
143.6	0.03
143.7	0.03
143.8	0.03
143.9	0.03
144	0.03
144.1	0.03
144.2	0.03
144.3	0.03
144.4	0.03
144.5	0.03
144.6	0.035
144.7	0.035
144.8	0.035
144.9	0.035
145	0.035
145.1	0.035
145.2	0.035
145.3	0.035
145.4	0.035
145.5	0.035
145.6	0.035
145.7	0.035
145.8	0.035
145.9	0.035
146	0.035
146.1	0.035
146.2	0.035
146.3	0.035
146.4	0.035
146.5	0.035
146.6	0.035
146.7	0.035
146.8	0.035
146.9	0.04
147	0.04
147.1	0.04
147.2	0.04
147.3	0.04
147.4	0.04
147.5	0.04
147.6	0.04
147.7	0.04
147.8	0.04
147.9	0.04
148	0.04
148.1	0.04
148.2	0.04
148.3	0.04
148.4	0.04
148.5	0.04
148.6	0.04
148.7	0.04
148.8	0.04
148.9	0.04
149	0.04
149.1	0.04
149.2	0.04
149.3	0.04
149.4	0.04
149.5	0.04
149.6	0.035
149.7	0.04
149.8	0.04
149.9	0.04
150	0.04
150.1	0.04
150.2	0.04
150.3	0.04
150.4	0.04
150.5	0.04
150.6	0.04
150.7	0.04
150.8	0.04
150.9	0.04
151	0.04
151.1	0.04
151.2	0.04
151.3	0.04
151.4	0.04
151.5	0.04
151.6	0.04
151.7	0.04
151.8	0.04
151.9	0.04
152	0.04
152.1	0.04
152.2	0.04
152.3	0.04
152.4	0.04
152.5	0.04
152.6	0.04
152.7	0.04
152.8	0.04
152.9	0.04
153	0.04
153.1	0.04
153.2	0.04
153.3	0.04
153.4	0.04
153.5	0.04
153.6	0.04
153.7	0.04
153.8	0.035
153.9	0.035
154	0.035
154.1	0.035
154.2	0.035
154.3	0.035
154.4	0.035
154.5	0.035
154.6	0.035
154.7	0.035
154.8	0.035
154.9	0.035
155	0.035
155.1	0.035
155.2	0.035
155.3	0.035
155.4	0.04
155.5	0.04
155.6	0.04
155.7	0.04
155.8	0.04
155.9	0.04
156	0.04
156.1	0.04
156.2	0.04
156.3	0.04
156.4	0.04
156.5	0.04
156.6	0.04
156.7	0.04
156.8	0.045
156.9	0.045
157	0.05
157.1	0.05
157.2	0.05
157.3	0.05
157.4	0.05
157.5	0.05
157.6	0.05
157.7	0.05
157.8	0.05
157.9	0.05
158	0.05
158.1	0.05
158.2	0.05
158.3	0.05
158.4	0.05
158.5	0.05
158.6	0.05
158.7	0.05
158.8	0.05
158.9	0.05
159	0.05
159.1	0.05
159.2	0.05
159.3	0.05
159.4	0.05
159.5	0.05
159.6	0.05
159.7	0.05
159.8	0.05
159.9	0.05
160	0.05
160.1	0.05
160.2	0.05
160.3	0.05
160.4	0.05
160.5	0.05
160.6	0.05
160.7	0.05
160.8	0.05
160.9	0.05
161	0.05
161.1	0.05
161.2	0.05
161.3	0.05
161.4	0.05
161.5	0.05
161.6	0.05
161.7	0.045
161.8	0.045
161.9	0.045
162	0.045
162.1	0.045
162.2	0.045
162.3	0.045
162.4	0.045
162.5	0.045
162.6	0.045
162.7	0.045
162.8	0.045
162.9	0.045
163	0.045
163.1	0.045
163.2	0.045
163.3	0.045
163.4	0.045
163.5	0.045
163.6	0.045
163.7	0.045
163.8	0.045
163.9	0.045
164	0.045
164.1	0.045
164.2	0.045
164.3	0.045
164.4	0.045
164.5	0.045
164.6	0.045
164.7	0.045
164.8	0.045
164.9	0.045
165	0.045
165.1	0.045
165.2	0.045
165.3	0.045
165.4	0.045
165.5	0.045
165.6	0.045
165.7	0.045
165.8	0.045
165.9	0.045
166	0.045
166.1	0.045
166.2	0.045
166.3	0.045
166.4	0.045
166.5	0.045
166.6	0.045
166.7	0.045
166.8	0.04
166.9	0.04
167	0.04
167.1	0.04
167.2	0.04
167.3	0.04
167.4	0.045
167.5	0.045
167.6	0.045
167.7	0.045
167.8	0.045
167.9	0.045
168	0.045
168.1	0.045
168.2	0.045
168.3	0.045
168.4	0.045
168.5	0.045
168.6	0.045
168.7	0.045
168.8	0.045
168.9	0.045
169	0.045
169.1	0.045
169.2	0.045
169.3	0.045
169.4	0.05
169.5	0.05
169.6	0.05
169.7	0.05
169.8	0.05
169.9	0.05
170	0.05
170.1	0.05
170.2	0.05
170.3	0.05
170.4	0.05
170.5	0.05
170.6	0.05
170.7	0.05
170.8	0.05
170.9	0.05
171	0.05
171.1	0.05
171.2	0.05
171.3	0.05
171.4	0.05
171.5	0.05
171.6	0.05
171.7	0.05
171.8	0.05
171.9	0.05
172	0.05
172.1	0.05
172.2	0.05
172.3	0.05
172.4	0.05
172.5	0.05
172.6	0.05
172.7	0.05
172.8	0.05
172.9	0.05
173	0.05
173.1	0.05
173.2	0.05
173.3	0.05
173.4	0.05
173.5	0.05
173.6	0.05
173.7	0.05
173.8	0.05
173.9	0.05
174	0.05
174.1	0.05
174.2	0.05
174.3	0.05
174.4	0.05
174.5	0.05
174.6	0.05
174.7	0.05
174.8	0.05
174.9	0.055
175	0.055
175.1	0.055
175.2	0.055
175.3	0.055
175.4	0.055
175.5	0.055
175.6	0.055
175.7	0.055
175.8	0.055
175.9	0.055
176	0.055
176.1	0.055
176.2	0.055
176.3	0.055
176.4	0.055
176.5	0.055
176.6	0.055
176.7	0.055
176.8	0.055
176.9	0.055
177	0.055
177.1	0.055
177.2	0.055
177.3	0.055
177.4	0.055
177.5	0.055
177.6	0.055
177.7	0.055
177.8	0.055
177.9	0.055
178	0.055
178.1	0.055
178.2	0.055
178.3	0.055
178.4	0.055
178.5	0.055
178.6	0.055
178.7	0.055
178.8	0.055
178.9	0.055
179	0.055
179.1	0.055
179.2	0.055
179.3	0.055
179.4	0.055
179.5	0.055
179.6	0.055
179.7	0.055
179.8	0.055
179.9	0.055
180	0.055
180.1	0.055
180.2	0.055
180.3	0.055
180.4	0.055
180.5	0.055
180.6	0.055
180.7	0.055
180.8	0.055
180.9	0.055
181	0.055
181.1	0.055
181.2	0.055
181.3	0.055
181.4	0.055
181.5	0.055
181.6	0.055
181.7	0.055
181.8	0.055
181.9	0.055
182	0.055
182.1	0.055
182.2	0.055
182.3	0.055
182.4	0.055
182.5	0.055
182.6	0.055
182.7	0.055
182.8	0.055
182.9	0.055
183	0.055
183.1	0.055
183.2	0.055
183.3	0.055
183.4	0.055
183.5	0.055
183.6	0.055
183.7	0.055
183.8	0.055
183.9	0.055
184	0.055
184.1	0.055
184.2	0.055
184.3	0.055
184.4	0.055
184.5	0.055
184.6	0.055
184.7	0.055
184.8	0.055
184.9	0.055
185	0.055
185.1	0.055
185.2	0.055
185.3	0.055
185.4	0.055
185.5	0.055
185.6	0.055
185.7	0.055
185.8	0.055
185.9	0.055
186	0.055
186.1	0.055
186.2	0.055
186.3	0.055
186.4	0.055
186.5	0.055
186.6	0.055
186.7	0.055
186.8	0.055
186.9	0.055
187	0.055
187.1	0.055
187.2	0.055
187.3	0.055
187.4	0.055
187.5	0.055
187.6	0.055
187.7	0.055
187.8	0.055
187.9	0.055
188	0.055
188.1	0.055
188.2	0.055
188.3	0.055
188.4	0.055
188.5	0.055
188.6	0.055
188.7	0.055
188.8	0.055
188.9	0.055
189	0.055
189.1	0.055
189.2	0.055
189.3	0.055
189.4	0.055
189.5	0.055
189.6	0.055
189.7	0.055
189.8	0.055
189.9	0.06
190	0.06
190.1	0.06
190.2	0.06
190.3	0.06
190.4	0.06
190.5	0.06
190.6	0.06
190.7	0.06
190.8	0.06
190.9	0.06
191	0.06
191.1	0.06
191.2	0.06
191.3	0.06
191.4	0.06
191.5	0.065
191.6	0.065
191.7	0.065
191.8	0.065
191.9	0.065
192	0.065
192.1	0.065
192.2	0.065
192.3	0.065
192.4	0.065
192.5	0.065
192.6	0.065
192.7	0.065
192.8	0.065
192.9	0.065
193	0.065
193.1	0.065
193.2	0.065
193.3	0.065
193.4	0.065
193.5	0.065
193.6	0.065
193.7	0.065
193.8	0.065
193.9	0.065
194	0.065
194.1	0.065
194.2	0.065
194.3	0.065
194.4	0.065
194.5	0.065
194.6	0.065
194.7	0.065
194.8	0.065
194.9	0.065
195	0.065
195.1	0.065
195.2	0.065
195.3	0.065
195.4	0.065
195.5	0.065
195.6	0.065
195.7	0.065
195.8	0.065
195.9	0.065
196	0.065
196.1	0.065
196.2	0.065
196.3	0.065
196.4	0.065
196.5	0.065
196.6	0.065
196.7	0.065
196.8	0.065
196.9	0.065
197	0.065
197.1	0.065
197.2	0.065
197.3	0.065
197.4	0.065
197.5	0.065
197.6	0.065
197.7	0.065
197.8	0.065
197.9	0.065
198	0.065
198.1	0.065
198.2	0.065
198.3	0.065
198.4	0.065
198.5	0.065
198.6	0.065
198.7	0.065
198.8	0.065
198.9	0.065
199	0.065
199.1	0.065
199.2	0.065
199.3	0.065
199.4	0.065
199.5	0.065
199.6	0.065
199.7	0.065
199.8	0.065
199.9	0.065
200	0.065
[truncated: 14,000 more rows]
