# Supplementary material for: Bayesian inference of kinetic schemes for ion channels by Kalman filtering
Source: eLife journal article supplement (doi:10.7554/elife.62714), 2022-05-04
Supplement: fig4-data10 [file 1_Sim_N_400_Fluor_MW_0.0625M.xlsx]

## Sheet: 0.0625 M
0.1	0
0.2	0
0.3	0
0.4	0
0.5	0
0.6	0
0.7	0
0.8	0
0.9	0
1	0
1.1	0
1.2	0
1.3	0
1.4	0
1.5	0
1.6	0
1.7	0
1.8	0
1.9	0
2	0
2.1	0
2.2	0
2.3	0
2.4	0
2.5	0
2.6	0
2.7	0
2.8	0
2.9	0
3	0
3.1	0
3.2	0
3.3	0
3.4	0
3.5	0
3.6	0
3.7	0
3.8	0
3.9	0
4	0
4.1	0
4.2	0
4.3	0
4.4	0
4.5	0
4.6	0
4.7	0
4.8	0
4.9	0
5	0
5.1	0
5.2	0
5.3	0
5.4	0
5.5	0
5.6	0
5.7	0
5.8	0
5.9	0
6	0
6.1	0
6.2	0
6.3	0
6.4	0
6.5	0
6.6	0
6.7	0
6.8	0
6.9	0
7	0
7.1	0
7.2	0
7.3	0
7.4	0
7.5	0
7.6	0
7.7	0
7.8	0
7.9	0
8	0
8.1	0
8.2	0
8.3	0
8.4	0
8.5	0
8.6	0
8.7	0
8.8	0
8.9	0
9	0
9.1	0
9.2	0
9.3	0
9.4	0
9.5	0
9.6	0
9.7	0
9.8	0
9.9	0
10	0
10.1	0
10.2	0
10.3	0
10.4	0
10.5	0
10.6	0
10.7	0
10.8	0
10.9	0
11	0
11.1	0
11.2	0
11.3	0
11.4	0
11.5	0
11.6	0
11.7	0
11.8	0
11.9	0
12	0
12.1	0
12.2	0
12.3	0
12.4	0
12.5	0
12.6	0
12.7	0
12.8	0
12.9	0
13	0
13.1	0
13.2	0
13.3	0
13.4	0
13.5	0
13.6	0
13.7	0
13.8	0
13.9	0
14	0
14.1	0
14.2	0
14.3	0
14.4	0
14.5	0
14.6	0
14.7	0
14.8	0
14.9	0
15	0
15.1	0
15.2	0
15.3	0
15.4	0
15.5	0
15.6	0
15.7	0
15.8	0
15.9	0
16	0
16.1	0
16.2	0
16.3	0
16.4	0
16.5	0
16.6	0
16.7	0
16.8	0
16.9	0
17	0
17.1	0
17.2	0
17.3	0
17.4	0
17.5	0
17.6	0
17.7	0
17.8	0
17.9	0
18	0
18.1	0
18.2	0
18.3	0
18.4	0
18.5	0
18.6	0
18.7	0
18.8	0
18.9	0
19	0
19.1	0
19.2	0
19.3	0
19.4	0
19.5	0
19.6	0
19.7	0
19.8	0
19.9	0
20	0
20.1	0
20.2	0
20.3	0
20.4	0
20.5	0
20.6	0
20.7	0
20.8	0
20.9	0
21	0
21.1	0
21.2	0
21.3	0
21.4	0
21.5	0
21.6	0
21.7	0
21.8	0
21.9	0
22	0
22.1	0
22.2	0
22.3	0
22.4	0
22.5	0
22.6	0
22.7	0
22.8	0
22.9	0
23	0
23.1	0
23.2	0
23.3	0
23.4	0
23.5	0
23.6	0
23.7	0
23.8	0
23.9	0
24	0
24.1	0
24.2	0
24.3	0
24.4	0
24.5	0
24.6	0
24.7	0
24.8	0
24.9	0
25	0
25.1	0
25.2	0
25.3	0
25.4	0
25.5	0
25.6	0
25.7	0
25.8	0
25.9	0
26	0
26.1	0
26.2	0
26.3	0
26.4	0
26.5	0
26.6	0
26.7	0
26.8	0
26.9	0
27	0
27.1	0
27.2	0
27.3	0
27.4	0
27.5	0
27.6	0
27.7	0
27.8	0
27.9	0
28	0
28.1	0
28.2	0
28.3	0
28.4	0
28.5	0
28.6	0
28.7	0
28.8	0
28.9	0
29	0
29.1	0
29.2	0
29.3	0
29.4	0
29.5	0
29.6	0
29.7	0
29.8	0
29.9	0
30	0
30.1	0
30.2	0
30.3	0
30.4	0
30.5	0
30.6	0
30.7	0
30.8	0
30.9	0
31	0
31.1	0
31.2	0
31.3	0
31.4	0
31.5	0
31.6	0
31.7	0
31.8	0
31.9	0
32	0
32.1	0
32.2	0
32.3	0
32.4	0
32.5	0
32.6	0
32.7	0
32.8	0
32.9	0
33	0
33.1	0
33.2	0
33.3	0
33.4	0
33.5	0
33.6	0
33.7	0
33.8	0
33.9	0
34	0
34.1	0
34.2	0
34.3	0
34.4	0
34.5	0
34.6	0
34.7	0
34.8	0
34.9	0
35	0
35.1	0
35.2	0
35.3	0
35.4	0
35.5	0
35.6	0
35.7	0
35.8	0
35.9	0
36	0
36.1	0
36.2	0
36.3	0
36.4	0
36.5	0
36.6	0
36.7	0
36.8	0
36.9	0
37	0
37.1	0
37.2	0
37.3	0
37.4	0
37.5	0
37.6	0
37.7	0
37.8	0
37.9	0
38	0
38.1	0
38.2	0
38.3	0
38.4	0
38.5	0
38.6	0
38.7	0
38.8	0
38.9	0
39	0
39.1	0
39.2	0
39.3	0
39.4	0
39.5	0
39.6	0
39.7	0
39.8	0
39.9	0
40	0
40.1	0
40.2	0
40.3	0
40.4	0
40.5	0
40.6	0
40.7	0
40.8	0
40.9	0
41	0
41.1	0
41.2	0
41.3	0
41.4	0
41.5	0
41.6	0
41.7	0
41.8	0
41.9	0
42	0
42.1	0
42.2	0
42.3	0
42.4	0
42.5	0
42.6	0
42.7	0
42.8	0
42.9	0
43	0
43.1	0
43.2	0
43.3	0
43.4	0
43.5	0
43.6	0
43.7	0
43.8	0
43.9	0
44	0
44.1	0
44.2	0
44.3	0
44.4	0
44.5	0
44.6	0
44.7	0
44.8	0
44.9	0
45	0
45.1	0
45.2	0
45.3	0
45.4	0
45.5	0
45.6	0
45.7	0
45.8	0
45.9	0
46	0
46.1	0
46.2	0
46.3	0
46.4	0
46.5	0
46.6	0
46.7	0
46.8	0
46.9	0
47	0
47.1	0
47.2	0
47.3	0
47.4	0
47.5	0
47.6	0
47.7	0
47.8	0
47.9	0
48	0
48.1	0
48.2	0
48.3	0
48.4	0
48.5	0
48.6	0
48.7	0
48.8	0
48.9	0
49	0
49.1	0
49.2	0
49.3	0
49.4	0
49.5	0
49.6	0
49.7	0
49.8	0
49.9	0
50	0
50.1	0
50.2	0
50.3	0
50.4	0
50.5	0
50.6	0
50.7	0
50.8	0
50.9	0
51	0
51.1	0
51.2	0
51.3	0
51.4	0
51.5	0
51.6	0
51.7	0
51.8	0
51.9	0
52	0
52.1	0
52.2	0
52.3	0
52.4	0
52.5	0
52.6	0
52.7	0
52.8	0
52.9	0
53	0
53.1	0
53.2	0
53.3	0
53.4	0
53.5	0
53.6	0
53.7	0
53.8	0
53.9	0
54	0
54.1	0
54.2	0
54.3	0
54.4	0
54.5	0
54.6	0
54.7	0
54.8	0
54.9	0
55	0
55.1	0
55.2	0
55.3	0
55.4	0
55.5	0
55.6	0
55.7	0
55.8	0
55.9	0
56	0
56.1	0
56.2	0
56.3	0
56.4	0
56.5	0
56.6	0
56.7	0
56.8	0
56.9	0
57	0
57.1	0
57.2	0
57.3	0
57.4	0
57.5	0
57.6	0
57.7	0
57.8	0
57.9	0
58	0
58.1	0
58.2	0
58.3	0
58.4	0
58.5	0
58.6	0
58.7	0
58.8	0
58.9	0
59	0
59.1	0
59.2	0
59.3	0
59.4	0
59.5	0
59.6	0
59.7	0
59.8	0
59.9	0
60	0
60.1	0
60.2	0
60.3	0
60.4	0
60.5	0
60.6	0
60.7	0
60.8	0
60.9	0
61	0
61.1	0
61.2	0
61.3	0
61.4	0
61.5	0
61.6	0
61.7	0
61.8	0
61.9	0
62	0
62.1	0
62.2	0
62.3	0
62.4	0
62.5	0
62.6	0
62.7	0
62.8	0
62.9	0
63	0
63.1	0
63.2	0
63.3	0
63.4	0
63.5	0
63.6	0
63.7	0
63.8	0
63.9	0
64	0
64.1	0
64.2	0
64.3	0
64.4	0
64.5	0
64.6	0
64.7	0
64.8	0
64.9	0
65	0
65.1	0
65.2	0
65.3	0
65.4	0
65.5	0
65.6	0
65.7	0
65.8	0
65.9	0
66	0
66.1	0
66.2	0
66.3	0
66.4	0
66.5	0
66.6	0
66.7	0
66.8	0
66.9	0
67	0
67.1	0
67.2	0
67.3	0
67.4	0
67.5	0
67.6	0
67.7	0
67.8	0
67.9	0
68	0
68.1	0
68.2	0
68.3	0
68.4	0
68.5	0
68.6	0
68.7	0
68.8	0
68.9	0
69	0
69.1	0
69.2	0
69.3	0
69.4	0
69.5	0
69.6	0
69.7	0
69.8	0
69.9	0
70	0
70.1	0
70.2	0
70.3	0
70.4	0
70.5	0
70.6	0
70.7	0
70.8	0
70.9	0
71	0
71.1	0
71.2	0
71.3	0
71.4	0
71.5	0
71.6	0
71.7	0
71.8	0
71.9	0
72	0
72.1	0
72.2	0
72.3	0
72.4	0
72.5	0
72.6	0
72.7	0
72.8	0
72.9	0
73	0
73.1	0
73.2	0
73.3	0
73.4	0
73.5	0
73.6	0
73.7	0
73.8	0
73.9	0
74	0
74.1	0
74.2	0
74.3	0
74.4	0
74.5	0
74.6	0
74.7	0
74.8	0
74.9	0
75	0
75.1	0
75.2	0
75.3	0
75.4	0
75.5	0
75.6	0
75.7	0
75.8	0
75.9	0
76	0
76.1	0
76.2	0
76.3	0
76.4	0
76.5	0
76.6	0
76.7	0
76.8	0
76.9	0
77	0
77.1	0
77.2	0
77.3	0
77.4	0
77.5	0
77.6	0
77.7	0
77.8	0
77.9	0
78	0
78.1	0
78.2	0
78.3	0
78.4	0
78.5	0
78.6	0
78.7	0
78.8	0
78.9	0
79	0
79.1	0
79.2	0
79.3	0
79.4	0
79.5	0
79.6	0
79.7	0
79.8	0
79.9	0
80	0
80.1	0
80.2	0
80.3	0
80.4	0
80.5	0
80.6	0
80.7	0
80.8	0
80.9	0
81	0
81.1	0
81.2	0
81.3	0
81.4	0
81.5	0
81.6	0
81.7	0
81.8	0
81.9	0
82	0
82.1	0
82.2	0
82.3	0
82.4	0
82.5	0
82.6	0
82.7	0
82.8	0
82.9	0
83	0
83.1	0
83.2	0
83.3	0
83.4	0
83.5	0
83.6	0
83.7	0
83.8	0
83.9	0
84	0
84.1	0
84.2	0
84.3	0
84.4	0
84.5	0
84.6	0
84.7	0
84.8	0
84.9	0
85	0
85.1	0
85.2	0
85.3	0
85.4	0
85.5	0
85.6	0
85.7	0
85.8	0
85.9	0
86	0
86.1	0
86.2	0
86.3	0
86.4	0
86.5	0
86.6	0
86.7	0
86.8	0
86.9	0
87	0
87.1	0
87.2	0
87.3	0
87.4	0
87.5	0
87.6	0
87.7	0
87.8	0
87.9	0
88	0
88.1	0
88.2	0
88.3	0
88.4	0
88.5	0
88.6	0
88.7	0
88.8	0
88.9	0
89	0
89.1	0
89.2	0
89.3	0
89.4	0
89.5	0
89.6	0
89.7	0
89.8	0
89.9	0
90	0
90.1	0
90.2	0
90.3	0
90.4	0
90.5	0
90.6	0
90.7	0
90.8	0
90.9	0
91	0
91.1	0
91.2	0
91.3	0
91.4	0
91.5	0
91.6	0
91.7	0
91.8	0
91.9	0
92	0
92.1	0
92.2	0
92.3	0
92.4	0
92.5	0
92.6	0
92.7	0
92.8	0
92.9	0
93	0
93.1	0
93.2	0
93.3	0
93.4	0
93.5	0
93.6	0
93.7	0
93.8	0
93.9	0
94	0
94.1	0
94.2	0
94.3	0
94.4	0
94.5	0
94.6	0
94.7	0
94.8	0
94.9	0
95	0
95.1	0
95.2	0
95.3	0
95.4	0
95.5	0
95.6	0
95.7	0
95.8	0
95.9	0
96	0
96.1	0
96.2	0
96.3	0
96.4	0
96.5	0
96.6	0
96.7	0
96.8	0
96.9	0
97	0
97.1	0
97.2	0
97.3	0
97.4	0
97.5	0
97.6	0
97.7	0
97.8	0
97.9	0
98	0
98.1	0
98.2	0
98.3	0
98.4	0
98.5	0
98.6	0
98.7	0
98.8	0
98.9	0
99	0
99.1	0
99.2	0
99.3	0
99.4	0
99.5	0
99.6	0
99.7	0
99.8	0
99.9	0
100	0
100.1	0.005
100.2	0.00875
100.3	0.0125
100.4	0.01875
100.5	0.0175
100.6	0.01875
100.7	0.0225
100.8	0.0225
100.9	0.02375
101	0.02625
101.1	0.02875
101.2	0.03375
101.3	0.03625
101.4	0.035
101.5	0.03625
101.6	0.0425
101.7	0.045
101.8	0.04875
101.9	0.05125
102	0.055
102.1	0.05625
102.2	0.05625
102.3	0.055
102.4	0.0525
102.5	0.055
102.6	0.05875
102.7	0.06
102.8	0.0625
102.9	0.065
103	0.0675
103.1	0.07
103.2	0.06875
103.3	0.0675
103.4	0.06625
103.5	0.07
103.6	0.07
103.7	0.07375
103.8	0.0825
103.9	0.08625
104	0.0925
104.1	0.0925
104.2	0.09625
104.3	0.0975
104.4	0.0975
104.5	0.10125
104.6	0.10375
104.7	0.11
104.8	0.11
104.9	0.1125
105	0.1175
105.1	0.11625
105.2	0.115
105.3	0.12
105.4	0.12
105.5	0.125
105.6	0.12875
105.7	0.1325
105.8	0.1375
105.9	0.14375
106	0.14625
106.1	0.145
106.2	0.14625
106.3	0.14375
106.4	0.1475
106.5	0.14625
106.6	0.14625
106.7	0.15
106.8	0.14875
106.9	0.15
107	0.1525
107.1	0.1525
107.2	0.155
107.3	0.155
107.4	0.1575
107.5	0.16125
107.6	0.165
107.7	0.16875
107.8	0.17125
107.9	0.17625
108	0.1775
108.1	0.17375
108.2	0.17375
108.3	0.17875
108.4	0.17875
108.5	0.17875
108.6	0.18
108.7	0.17875
108.8	0.18875
108.9	0.19
109	0.1925
109.1	0.1925
109.2	0.19375
109.3	0.1925
109.4	0.19
109.5	0.19125
109.6	0.19125
109.7	0.19375
109.8	0.19375
109.9	0.1925
110	0.1925
110.1	0.18875
110.2	0.18875
110.3	0.19125
110.4	0.19625
110.5	0.19625
110.6	0.19625
110.7	0.19375
110.8	0.19125
110.9	0.19375
111	0.195
111.1	0.19625
111.2	0.2
111.3	0.2
111.4	0.2
111.5	0.20125
111.6	0.20125
111.7	0.2025
111.8	0.20125
111.9	0.20125
112	0.19875
112.1	0.2
112.2	0.20375
112.3	0.205
112.4	0.2025
112.5	0.2025
112.6	0.205
112.7	0.205
112.8	0.20375
112.9	0.205
113	0.20375
113.1	0.20625
113.2	0.2075
113.3	0.2075
113.4	0.20375
113.5	0.20125
113.6	0.1925
113.7	0.19625
113.8	0.19625
113.9	0.19625
114	0.1975
114.1	0.195
114.2	0.195
114.3	0.1925
114.4	0.1925
114.5	0.19125
114.6	0.19375
114.7	0.1975
114.8	0.2
114.9	0.19875
115	0.2
115.1	0.1975
115.2	0.20125
115.3	0.2
115.4	0.19375
115.5	0.1925
115.6	0.1925
115.7	0.19375
115.8	0.19375
115.9	0.19625
116	0.19625
116.1	0.19375
116.2	0.19125
116.3	0.1925
116.4	0.195
116.5	0.19375
116.6	0.1975
116.7	0.2
116.8	0.19375
116.9	0.19125
117	0.1925
117.1	0.19375
117.2	0.195
117.3	0.20125
117.4	0.19875
117.5	0.20375
117.6	0.205
117.7	0.205
117.8	0.20625
117.9	0.20625
118	0.20875
118.1	0.21
118.2	0.20625
118.3	0.2075
118.4	0.2025
118.5	0.20375
118.6	0.2
118.7	0.20125
118.8	0.2025
118.9	0.20625
119	0.2075
119.1	0.2125
119.2	0.21125
119.3	0.21
119.4	0.20625
119.5	0.21
119.6	0.21125
119.7	0.21125
119.8	0.20875
119.9	0.2075
120	0.20625
120.1	0.2075
120.2	0.21125
120.3	0.20875
120.4	0.21125
120.5	0.2125
120.6	0.21625
120.7	0.21625
120.8	0.21375
120.9	0.2125
121	0.21625
121.1	0.21875
121.2	0.21875
121.3	0.21875
121.4	0.2225
121.5	0.21875
121.6	0.2175
121.7	0.2125
121.8	0.21
121.9	0.21
122	0.21
122.1	0.20375
122.2	0.20375
122.3	0.205
122.4	0.20875
122.5	0.2075
122.6	0.20875
122.7	0.20875
122.8	0.2075
122.9	0.20625
123	0.2075
123.1	0.20625
123.2	0.205
123.3	0.20375
123.4	0.2025
123.5	0.2025
123.6	0.2025
123.7	0.20625
123.8	0.2075
123.9	0.21125
124	0.2075
124.1	0.2125
124.2	0.21375
124.3	0.215
124.4	0.2125
124.5	0.21625
124.6	0.21625
124.7	0.2175
124.8	0.22
124.9	0.2175
125	0.22
125.1	0.22
125.2	0.22
125.3	0.2225
125.4	0.22375
125.5	0.22625
125.6	0.22875
125.7	0.22625
125.8	0.22625
125.9	0.22625
126	0.22625
126.1	0.23
126.2	0.23
126.3	0.2325
126.4	0.23
126.5	0.22875
126.6	0.2275
126.7	0.22875
126.8	0.22625
126.9	0.2275
127	0.225
127.1	0.22375
127.2	0.22375
127.3	0.22625
127.4	0.2275
127.5	0.22625
127.6	0.2275
127.7	0.23125
127.8	0.2275
127.9	0.2275
128	0.22875
128.1	0.22875
128.2	0.225
128.3	0.22375
128.4	0.22125
128.5	0.22125
128.6	0.225
128.7	0.225
128.8	0.2275
128.9	0.2275
129	0.22625
129.1	0.2275
129.2	0.2275
129.3	0.225
129.4	0.2275
129.5	0.22375
129.6	0.2225
129.7	0.22375
129.8	0.22625
129.9	0.22625
130	0.23
130.1	0.23125
130.2	0.23125
130.3	0.23
130.4	0.22875
130.5	0.2325
130.6	0.23625
130.7	0.2375
130.8	0.24
130.9	0.24
131	0.24125
131.1	0.24
131.2	0.24
131.3	0.24
131.4	0.24125
131.5	0.23625
131.6	0.2375
131.7	0.23625
131.8	0.23625
131.9	0.2325
132	0.2325
132.1	0.23625
132.2	0.23375
132.3	0.235
132.4	0.235
132.5	0.23375
132.6	0.23125
132.7	0.23
132.8	0.2325
132.9	0.2325
133	0.2325
133.1	0.23625
133.2	0.2375
133.3	0.2375
133.4	0.2325
133.5	0.2325
133.6	0.235
133.7	0.2375
133.8	0.23625
133.9	0.2375
134	0.23625
134.1	0.235
134.2	0.235
134.3	0.23375
134.4	0.23125
134.5	0.2325
134.6	0.23375
134.7	0.23125
134.8	0.2325
134.9	0.2325
135	0.23375
135.1	0.23125
135.2	0.23375
135.3	0.2325
135.4	0.23125
135.5	0.23875
135.6	0.24125
135.7	0.24
135.8	0.24
135.9	0.23875
136	0.2375
136.1	0.23625
136.2	0.2375
136.3	0.23625
136.4	0.23625
136.5	0.23625
136.6	0.235
136.7	0.23125
136.8	0.23
136.9	0.23
137	0.2275
137.1	0.22625
137.2	0.22625
137.3	0.22375
137.4	0.2275
137.5	0.22875
137.6	0.23125
137.7	0.23125
137.8	0.22875
137.9	0.23
138	0.23
138.1	0.2275
138.2	0.2275
138.3	0.22625
138.4	0.22875
138.5	0.22625
138.6	0.22625
138.7	0.22375
138.8	0.225
138.9	0.22375
139	0.22
139.1	0.2225
139.2	0.2225
139.3	0.2175
139.4	0.21875
139.5	0.22
139.6	0.21875
139.7	0.2175
139.8	0.22
139.9	0.22
140	0.21875
140.1	0.22375
140.2	0.22875
140.3	0.23125
140.4	0.23125
140.5	0.2375
140.6	0.2375
140.7	0.2375
140.8	0.24125
140.9	0.23875
141	0.23875
141.1	0.245
141.2	0.2475
141.3	0.24625
141.4	0.245
141.5	0.24625
141.6	0.24375
141.7	0.24375
141.8	0.2425
141.9	0.24
142	0.24125
142.1	0.2425
142.2	0.245
142.3	0.2475
142.4	0.24375
142.5	0.2425
142.6	0.24375
142.7	0.23875
142.8	0.235
142.9	0.23625
143	0.23625
143.1	0.2375
143.2	0.23
143.3	0.23125
143.4	0.235
143.5	0.2375
143.6	0.23625
143.7	0.23375
143.8	0.23125
143.9	0.22875
144	0.23375
144.1	0.2325
144.2	0.23375
144.3	0.23625
144.4	0.23375
144.5	0.23
144.6	0.23
144.7	0.2275
144.8	0.23125
144.9	0.23125
145	0.2325
145.1	0.2325
145.2	0.23125
145.3	0.23375
145.4	0.235
145.5	0.2375
145.6	0.24
145.7	0.2375
145.8	0.235
145.9	0.235
146	0.2325
146.1	0.23625
146.2	0.235
146.3	0.24
146.4	0.23875
146.5	0.24125
146.6	0.245
146.7	0.245
146.8	0.2425
146.9	0.245
147	0.24625
147.1	0.24875
147.2	0.25125
147.3	0.2475
147.4	0.25125
147.5	0.25375
147.6	0.2525
147.7	0.25
147.8	0.24875
147.9	0.24875
148	0.24875
148.1	0.25125
148.2	0.25
148.3	0.25125
148.4	0.25375
148.5	0.2575
148.6	0.25625
148.7	0.25625
148.8	0.2575
148.9	0.2575
149	0.2575
149.1	0.25875
149.2	0.255
149.3	0.25375
149.4	0.2575
149.5	0.25875
149.6	0.26
149.7	0.26125
149.8	0.25875
149.9	0.2575
150	0.25375
150.1	0.25
150.2	0.2525
150.3	0.2525
150.4	0.25125
150.5	0.25375
150.6	0.25625
150.7	0.25625
150.8	0.25625
150.9	0.255
151	0.2525
151.1	0.25125
151.2	0.24875
151.3	0.25
151.4	0.24875
151.5	0.245
151.6	0.245
151.7	0.2475
151.8	0.24625
151.9	0.2475
152	0.2475
152.1	0.2475
152.2	0.24375
152.3	0.245
152.4	0.245
152.5	0.24625
152.6	0.24375
152.7	0.24375
152.8	0.2425
152.9	0.2425
153	0.2425
153.1	0.2425
153.2	0.24375
153.3	0.24875
153.4	0.25
153.5	0.24875
153.6	0.245
153.7	0.24875
153.8	0.2475
153.9	0.24875
154	0.25125
154.1	0.245
154.2	0.24375
154.3	0.245
154.4	0.24125
154.5	0.24375
154.6	0.23875
154.7	0.23625
154.8	0.24
154.9	0.24
155	0.24
155.1	0.24375
155.2	0.24125
155.3	0.23375
155.4	0.235
155.5	0.23375
155.6	0.23125
155.7	0.23375
155.8	0.23
155.9	0.23
156	0.23125
156.1	0.23375
156.2	0.2325
156.3	0.23125
156.4	0.23125
156.5	0.23125
156.6	0.23
156.7	0.23
156.8	0.23375
156.9	0.2325
157	0.23375
157.1	0.23125
157.2	0.23125
157.3	0.23375
157.4	0.23625
157.5	0.23625
157.6	0.24
157.7	0.24
157.8	0.245
157.9	0.245
158	0.2475
158.1	0.24875
158.2	0.24875
158.3	0.2475
158.4	0.24625
158.5	0.245
158.6	0.24625
158.7	0.24
158.8	0.23875
158.9	0.24
159	0.235
159.1	0.23625
159.2	0.23875
159.3	0.24
159.4	0.2425
159.5	0.245
159.6	0.24625
159.7	0.245
159.8	0.24625
159.9	0.2475
160	0.2475
160.1	0.24875
160.2	0.2525
160.3	0.25125
160.4	0.25625
160.5	0.25875
160.6	0.255
160.7	0.25375
160.8	0.25375
160.9	0.2525
161	0.25125
161.1	0.25125
161.2	0.25125
161.3	0.2525
161.4	0.2525
161.5	0.25375
161.6	0.25125
161.7	0.25125
161.8	0.25
161.9	0.2475
162	0.2475
162.1	0.2475
162.2	0.245
162.3	0.24125
162.4	0.23875
162.5	0.24
162.6	0.245
162.7	0.245
162.8	0.24375
162.9	0.24125
163	0.23875
163.1	0.2375
163.2	0.23875
163.3	0.24125
163.4	0.24125
163.5	0.24
163.6	0.2375
163.7	0.23875
163.8	0.23625
163.9	0.235
164	0.2325
164.1	0.2325
164.2	0.2375
164.3	0.24
164.4	0.24
164.5	0.24
164.6	0.23625
164.7	0.24
164.8	0.2375
164.9	0.23875
165	0.23625
165.1	0.235
165.2	0.235
165.3	0.2325
165.4	0.235
165.5	0.23375
165.6	0.2325
165.7	0.23125
165.8	0.2375
165.9	0.23625
166	0.24125
166.1	0.24625
166.2	0.24625
166.3	0.24625
166.4	0.25
166.5	0.24625
166.6	0.2425
166.7	0.23875
166.8	0.2425
166.9	0.24
167	0.23875
167.1	0.2375
167.2	0.235
167.3	0.235
167.4	0.2325
167.5	0.23375
167.6	0.235
167.7	0.23625
167.8	0.2375
167.9	0.24
168	0.24
168.1	0.24125
168.2	0.2375
168.3	0.23375
168.4	0.23375
168.5	0.235
168.6	0.2375
168.7	0.23375
168.8	0.2375
168.9	0.235
169	0.23625
169.1	0.23625
169.2	0.23
169.3	0.22875
169.4	0.22875
169.5	0.2225
169.6	0.2225
169.7	0.2225
169.8	0.22125
169.9	0.22125
170	0.22
170.1	0.22125
170.2	0.22
170.3	0.21875
170.4	0.22125
170.5	0.22125
170.6	0.22
170.7	0.22
170.8	0.215
170.9	0.21375
171	0.215
171.1	0.21
171.2	0.2125
171.3	0.215
171.4	0.215
171.5	0.21375
171.6	0.21375
171.7	0.215
171.8	0.21625
171.9	0.21625
172	0.21875
172.1	0.2225
172.2	0.21875
172.3	0.2175
172.4	0.21625
172.5	0.215
172.6	0.21875
172.7	0.21875
172.8	0.22125
172.9	0.22375
173	0.22625
173.1	0.22875
173.2	0.22875
173.3	0.22625
173.4	0.22875
173.5	0.2275
173.6	0.2275
173.7	0.225
173.8	0.22625
173.9	0.225
174	0.225
174.1	0.22375
174.2	0.225
174.3	0.225
174.4	0.22625
174.5	0.22625
174.6	0.22375
174.7	0.225
174.8	0.22625
174.9	0.22125
175	0.22
175.1	0.2225
175.2	0.22125
175.3	0.225
175.4	0.22375
175.5	0.225
175.6	0.22125
175.7	0.22
175.8	0.22125
175.9	0.2225
176	0.22625
176.1	0.22625
176.2	0.22625
176.3	0.22375
176.4	0.22875
176.5	0.23
176.6	0.23125
176.7	0.2275
176.8	0.225
176.9	0.22875
177	0.22375
177.1	0.22375
177.2	0.22375
177.3	0.22875
177.4	0.2325
177.5	0.2325
177.6	0.23375
177.7	0.2275
177.8	0.2275
177.9	0.22875
178	0.2275
178.1	0.2275
178.2	0.22375
178.3	0.22125
178.4	0.22375
178.5	0.22
178.6	0.21875
178.7	0.2175
178.8	0.21875
178.9	0.22125
179	0.22125
179.1	0.21875
179.2	0.215
179.3	0.215
179.4	0.21125
179.5	0.21
179.6	0.21125
179.7	0.20875
179.8	0.21125
179.9	0.2125
180	0.21375
180.1	0.215
180.2	0.21
180.3	0.20875
180.4	0.2075
180.5	0.20875
180.6	0.2125
180.7	0.2125
180.8	0.2125
180.9	0.215
181	0.21375
181.1	0.21375
181.2	0.21625
181.3	0.22
181.4	0.22
181.5	0.22375
181.6	0.22375
181.7	0.225
181.8	0.22625
181.9	0.22875
182	0.22625
182.1	0.2225
182.2	0.22125
182.3	0.2225
182.4	0.2225
182.5	0.22125
182.6	0.2225
182.7	0.22
182.8	0.2225
182.9	0.22375
183	0.22875
183.1	0.225
183.2	0.22375
183.3	0.22375
183.4	0.22375
183.5	0.2225
183.6	0.2225
183.7	0.21875
183.8	0.21875
183.9	0.22125
184	0.22
184.1	0.2175
184.2	0.21125
184.3	0.21375
184.4	0.215
184.5	0.21625
184.6	0.21375
184.7	0.2125
184.8	0.215
184.9	0.2175
185	0.21625
185.1	0.2225
185.2	0.22125
185.3	0.22125
185.4	0.22125
185.5	0.22125
185.6	0.22125
185.7	0.22125
185.8	0.2225
185.9	0.22
186	0.2225
186.1	0.225
186.2	0.2225
186.3	0.22625
186.4	0.22625
186.5	0.225
186.6	0.22375
186.7	0.22625
186.8	0.2275
186.9	0.23
187	0.2325
187.1	0.2325
187.2	0.2325
187.3	0.2325
187.4	0.22875
187.5	0.23125
187.6	0.2275
187.7	0.2275
187.8	0.22625
187.9	0.22625
188	0.22875
188.1	0.23
188.2	0.23125
188.3	0.23375
188.4	0.2375
188.5	0.2375
188.6	0.23875
188.7	0.2375
188.8	0.24
188.9	0.2425
189	0.2425
189.1	0.23875
189.2	0.235
189.3	0.2325
189.4	0.2325
189.5	0.23125
189.6	0.23125
189.7	0.23375
189.8	0.23625
189.9	0.23625
190	0.23375
190.1	0.2325
190.2	0.23
190.3	0.22875
190.4	0.22625
190.5	0.2225
190.6	0.22125
190.7	0.22125
190.8	0.225
190.9	0.225
191	0.22375
191.1	0.22125
191.2	0.22
191.3	0.22
191.4	0.21875
191.5	0.21875
191.6	0.2225
191.7	0.22
191.8	0.21875
191.9	0.2225
192	0.2225
192.1	0.22625
192.2	0.225
192.3	0.23
192.4	0.2325
192.5	0.23625
192.6	0.235
192.7	0.23375
192.8	0.2325
192.9	0.2325
193	0.23125
193.1	0.2325
193.2	0.23375
193.3	0.22875
193.4	0.2275
193.5	0.22375
193.6	0.2275
193.7	0.22875
193.8	0.2275
193.9	0.2275
194	0.22875
194.1	0.2275
194.2	0.22875
194.3	0.23
194.4	0.23375
194.5	0.23625
194.6	0.24125
194.7	0.24125
194.8	0.24
194.9	0.23875
195	0.245
195.1	0.245
195.2	0.24375
195.3	0.245
195.4	0.24375
195.5	0.24375
195.6	0.24375
195.7	0.2375
195.8	0.23875
195.9	0.23875
196	0.24125
196.1	0.2425
196.2	0.24375
196.3	0.24375
196.4	0.245
196.5	0.24625
196.6	0.2475
196.7	0.24875
196.8	0.2525
196.9	0.25375
197	0.2575
197.1	0.255
197.2	0.2575
197.3	0.255
197.4	0.25375
197.5	0.2525
197.6	0.255
197.7	0.2575
197.8	0.25625
197.9	0.255
198	0.2525
198.1	0.2525
198.2	0.25375
198.3	0.2525
198.4	0.2525
198.5	0.24875
198.6	0.25
198.7	0.2525
198.8	0.2525
198.9	0.25
199	0.25
199.1	0.25125
199.2	0.25125
199.3	0.25125
199.4	0.25125
199.5	0.25125
199.6	0.24875
199.7	0.24875
199.8	0.24875
199.9	0.2475
200	0.24875
[truncated: 14,000 more rows]
