# Supplementary material for: Bayesian inference of kinetic schemes for ion channels by Kalman filtering
Source: eLife journal article supplement (doi:10.7554/elife.62714), 2022-05-04
Supplement: fig4-data10 [file 1_Sim_N_400_Strom_MW_0.0625M.xlsx]

## Sheet: 0.0625 M
0.1	0
0.2	0
0.3	0
0.4	0
0.5	0
0.6	0
0.7	0
0.8	0
0.9	0
1	0
1.1	0
1.2	0
1.3	0
1.4	0
1.5	0
1.6	0
1.7	0
1.8	0
1.9	0
2	0
2.1	0
2.2	0
2.3	0
2.4	0
2.5	0
2.6	0
2.7	0
2.8	0
2.9	0
3	0
3.1	0
3.2	0
3.3	0
3.4	0
3.5	0
3.6	0
3.7	0
3.8	0
3.9	0
4	0
4.1	0
4.2	0
4.3	0
4.4	0
4.5	0
4.6	0
4.7	0
4.8	0
4.9	0
5	0
5.1	0
5.2	0
5.3	0
5.4	0
5.5	0
5.6	0
5.7	0
5.8	0
5.9	0
6	0
6.1	0
6.2	0
6.3	0
6.4	0
6.5	0
6.6	0
6.7	0
6.8	0
6.9	0
7	0
7.1	0
7.2	0
7.3	0
7.4	0
7.5	0
7.6	0
7.7	0
7.8	0
7.9	0
8	0
8.1	0
8.2	0
8.3	0
8.4	0
8.5	0
8.6	0
8.7	0
8.8	0
8.9	0
9	0
9.1	0
9.2	0
9.3	0
9.4	0
9.5	0
9.6	0
9.7	0
9.8	0
9.9	0
10	0
10.1	0
10.2	0
10.3	0
10.4	0
10.5	0
10.6	0
10.7	0
10.8	0
10.9	0
11	0
11.1	0
11.2	0
11.3	0
11.4	0
11.5	0
11.6	0
11.7	0
11.8	0
11.9	0
12	0
12.1	0
12.2	0
12.3	0
12.4	0
12.5	0
12.6	0
12.7	0
12.8	0
12.9	0
13	0
13.1	0
13.2	0
13.3	0
13.4	0
13.5	0
13.6	0
13.7	0
13.8	0
13.9	0
14	0
14.1	0
14.2	0
14.3	0
14.4	0
14.5	0
14.6	0
14.7	0
14.8	0
14.9	0
15	0
15.1	0
15.2	0
15.3	0
15.4	0
15.5	0
15.6	0
15.7	0
15.8	0
15.9	0
16	0
16.1	0
16.2	0
16.3	0
16.4	0
16.5	0
16.6	0
16.7	0
16.8	0
16.9	0
17	0
17.1	0
17.2	0
17.3	0
17.4	0
17.5	0
17.6	0
17.7	0
17.8	0
17.9	0
18	0
18.1	0
18.2	0
18.3	0
18.4	0
18.5	0
18.6	0
18.7	0
18.8	0
18.9	0
19	0
19.1	0
19.2	0
19.3	0
19.4	0
19.5	0
19.6	0
19.7	0
19.8	0
19.9	0
20	0
20.1	0
20.2	0
20.3	0
20.4	0
20.5	0
20.6	0
20.7	0
20.8	0
20.9	0
21	0
21.1	0
21.2	0
21.3	0
21.4	0
21.5	0
21.6	0
21.7	0
21.8	0
21.9	0
22	0
22.1	0
22.2	0
22.3	0
22.4	0
22.5	0
22.6	0
22.7	0
22.8	0
22.9	0
23	0
23.1	0
23.2	0
23.3	0
23.4	0
23.5	0
23.6	0
23.7	0
23.8	0
23.9	0
24	0
24.1	0
24.2	0
24.3	0
24.4	0
24.5	0
24.6	0
24.7	0
24.8	0
24.9	0
25	0
25.1	0
25.2	0
25.3	0
25.4	0
25.5	0
25.6	0
25.7	0
25.8	0
25.9	0
26	0
26.1	0
26.2	0
26.3	0
26.4	0
26.5	0
26.6	0
26.7	0
26.8	0
26.9	0
27	0
27.1	0
27.2	0
27.3	0
27.4	0
27.5	0
27.6	0
27.7	0
27.8	0
27.9	0
28	0
28.1	0
28.2	0
28.3	0
28.4	0
28.5	0
28.6	0
28.7	0
28.8	0
28.9	0
29	0
29.1	0
29.2	0
29.3	0
29.4	0
29.5	0
29.6	0
29.7	0
29.8	0
29.9	0
30	0
30.1	0
30.2	0
30.3	0
30.4	0
30.5	0
30.6	0
30.7	0
30.8	0
30.9	0
31	0
31.1	0
31.2	0
31.3	0
31.4	0
31.5	0
31.6	0
31.7	0
31.8	0
31.9	0
32	0
32.1	0
32.2	0
32.3	0
32.4	0
32.5	0
32.6	0
32.7	0
32.8	0
32.9	0
33	0
33.1	0
33.2	0
33.3	0
33.4	0
33.5	0
33.6	0
33.7	0
33.8	0
33.9	0
34	0
34.1	0
34.2	0
34.3	0
34.4	0
34.5	0
34.6	0
34.7	0
34.8	0
34.9	0
35	0
35.1	0
35.2	0
35.3	0
35.4	0
35.5	0
35.6	0
35.7	0
35.8	0
35.9	0
36	0
36.1	0
36.2	0
36.3	0
36.4	0
36.5	0
36.6	0
36.7	0
36.8	0
36.9	0
37	0
37.1	0
37.2	0
37.3	0
37.4	0
37.5	0
37.6	0
37.7	0
37.8	0
37.9	0
38	0
38.1	0
38.2	0
38.3	0
38.4	0
38.5	0
38.6	0
38.7	0
38.8	0
38.9	0
39	0
39.1	0
39.2	0
39.3	0
39.4	0
39.5	0
39.6	0
39.7	0
39.8	0
39.9	0
40	0
40.1	0
40.2	0
40.3	0
40.4	0
40.5	0
40.6	0
40.7	0
40.8	0
40.9	0
41	0
41.1	0
41.2	0
41.3	0
41.4	0
41.5	0
41.6	0
41.7	0
41.8	0
41.9	0
42	0
42.1	0
42.2	0
42.3	0
42.4	0
42.5	0
42.6	0
42.7	0
42.8	0
42.9	0
43	0
43.1	0
43.2	0
43.3	0
43.4	0
43.5	0
43.6	0
43.7	0
43.8	0
43.9	0
44	0
44.1	0
44.2	0
44.3	0
44.4	0
44.5	0
44.6	0
44.7	0
44.8	0
44.9	0
45	0
45.1	0
45.2	0
45.3	0
45.4	0
45.5	0
45.6	0
45.7	0
45.8	0
45.9	0
46	0
46.1	0
46.2	0
46.3	0
46.4	0
46.5	0
46.6	0
46.7	0
46.8	0
46.9	0
47	0
47.1	0
47.2	0
47.3	0
47.4	0
47.5	0
47.6	0
47.7	0
47.8	0
47.9	0
48	0
48.1	0
48.2	0
48.3	0
48.4	0
48.5	0
48.6	0
48.7	0
48.8	0
48.9	0
49	0
49.1	0
49.2	0
49.3	0
49.4	0
49.5	0
49.6	0
49.7	0
49.8	0
49.9	0
50	0
50.1	0
50.2	0
50.3	0
50.4	0
50.5	0
50.6	0
50.7	0
50.8	0
50.9	0
51	0
51.1	0
51.2	0
51.3	0
51.4	0
51.5	0
51.6	0
51.7	0
51.8	0
51.9	0
52	0
52.1	0
52.2	0
52.3	0
52.4	0
52.5	0
52.6	0
52.7	0
52.8	0
52.9	0
53	0
53.1	0
53.2	0
53.3	0
53.4	0
53.5	0
53.6	0
53.7	0
53.8	0
53.9	0
54	0
54.1	0
54.2	0
54.3	0
54.4	0
54.5	0
54.6	0
54.7	0
54.8	0
54.9	0
55	0
55.1	0
55.2	0
55.3	0
55.4	0
55.5	0
55.6	0
55.7	0
55.8	0
55.9	0
56	0
56.1	0
56.2	0
56.3	0
56.4	0
56.5	0
56.6	0
56.7	0
56.8	0
56.9	0
57	0
57.1	0
57.2	0
57.3	0
57.4	0
57.5	0
57.6	0
57.7	0
57.8	0
57.9	0
58	0
58.1	0
58.2	0
58.3	0
58.4	0
58.5	0
58.6	0
58.7	0
58.8	0
58.9	0
59	0
59.1	0
59.2	0
59.3	0
59.4	0
59.5	0
59.6	0
59.7	0
59.8	0
59.9	0
60	0
60.1	0
60.2	0
60.3	0
60.4	0
60.5	0
60.6	0
60.7	0
60.8	0
60.9	0
61	0
61.1	0
61.2	0
61.3	0
61.4	0
61.5	0
61.6	0
61.7	0
61.8	0
61.9	0
62	0
62.1	0
62.2	0
62.3	0
62.4	0
62.5	0
62.6	0
62.7	0
62.8	0
62.9	0
63	0
63.1	0
63.2	0
63.3	0
63.4	0
63.5	0
63.6	0
63.7	0
63.8	0
63.9	0
64	0
64.1	0
64.2	0
64.3	0
64.4	0
64.5	0
64.6	0
64.7	0
64.8	0
64.9	0
65	0
65.1	0
65.2	0
65.3	0
65.4	0
65.5	0
65.6	0
65.7	0
65.8	0
65.9	0
66	0
66.1	0
66.2	0
66.3	0
66.4	0
66.5	0
66.6	0
66.7	0
66.8	0
66.9	0
67	0
67.1	0
67.2	0
67.3	0
67.4	0
67.5	0
67.6	0
67.7	0
67.8	0
67.9	0
68	0
68.1	0
68.2	0
68.3	0
68.4	0
68.5	0
68.6	0
68.7	0
68.8	0
68.9	0
69	0
69.1	0
69.2	0
69.3	0
69.4	0
69.5	0
69.6	0
69.7	0
69.8	0
69.9	0
70	0
70.1	0
70.2	0
70.3	0
70.4	0
70.5	0
70.6	0
70.7	0
70.8	0
70.9	0
71	0
71.1	0
71.2	0
71.3	0
71.4	0
71.5	0
71.6	0
71.7	0
71.8	0
71.9	0
72	0
72.1	0
72.2	0
72.3	0
72.4	0
72.5	0
72.6	0
72.7	0
72.8	0
72.9	0
73	0
73.1	0
73.2	0
73.3	0
73.4	0
73.5	0
73.6	0
73.7	0
73.8	0
73.9	0
74	0
74.1	0
74.2	0
74.3	0
74.4	0
74.5	0
74.6	0
74.7	0
74.8	0
74.9	0
75	0
75.1	0
75.2	0
75.3	0
75.4	0
75.5	0
75.6	0
75.7	0
75.8	0
75.9	0
76	0
76.1	0
76.2	0
76.3	0
76.4	0
76.5	0
76.6	0
76.7	0
76.8	0
76.9	0
77	0
77.1	0
77.2	0
77.3	0
77.4	0
77.5	0
77.6	0
77.7	0
77.8	0
77.9	0
78	0
78.1	0
78.2	0
78.3	0
78.4	0
78.5	0
78.6	0
78.7	0
78.8	0
78.9	0
79	0
79.1	0
79.2	0
79.3	0
79.4	0
79.5	0
79.6	0
79.7	0
79.8	0
79.9	0
80	0
80.1	0
80.2	0
80.3	0
80.4	0
80.5	0
80.6	0
80.7	0
80.8	0
80.9	0
81	0
81.1	0
81.2	0
81.3	0
81.4	0
81.5	0
81.6	0
81.7	0
81.8	0
81.9	0
82	0
82.1	0
82.2	0
82.3	0
82.4	0
82.5	0
82.6	0
82.7	0
82.8	0
82.9	0
83	0
83.1	0
83.2	0
83.3	0
83.4	0
83.5	0
83.6	0
83.7	0
83.8	0
83.9	0
84	0
84.1	0
84.2	0
84.3	0
84.4	0
84.5	0
84.6	0
84.7	0
84.8	0
84.9	0
85	0
85.1	0
85.2	0
85.3	0
85.4	0
85.5	0
85.6	0
85.7	0
85.8	0
85.9	0
86	0
86.1	0
86.2	0
86.3	0
86.4	0
86.5	0
86.6	0
86.7	0
86.8	0
86.9	0
87	0
87.1	0
87.2	0
87.3	0
87.4	0
87.5	0
87.6	0
87.7	0
87.8	0
87.9	0
88	0
88.1	0
88.2	0
88.3	0
88.4	0
88.5	0
88.6	0
88.7	0
88.8	0
88.9	0
89	0
89.1	0
89.2	0
89.3	0
89.4	0
89.5	0
89.6	0
89.7	0
89.8	0
89.9	0
90	0
90.1	0
90.2	0
90.3	0
90.4	0
90.5	0
90.6	0
90.7	0
90.8	0
90.9	0
91	0
91.1	0
91.2	0
91.3	0
91.4	0
91.5	0
91.6	0
91.7	0
91.8	0
91.9	0
92	0
92.1	0
92.2	0
92.3	0
92.4	0
92.5	0
92.6	0
92.7	0
92.8	0
92.9	0
93	0
93.1	0
93.2	0
93.3	0
93.4	0
93.5	0
93.6	0
93.7	0
93.8	0
93.9	0
94	0
94.1	0
94.2	0
94.3	0
94.4	0
94.5	0
94.6	0
94.7	0
94.8	0
94.9	0
95	0
95.1	0
95.2	0
95.3	0
95.4	0
95.5	0
95.6	0
95.7	0
95.8	0
95.9	0
96	0
96.1	0
96.2	0
96.3	0
96.4	0
96.5	0
96.6	0
96.7	0
96.8	0
96.9	0
97	0
97.1	0
97.2	0
97.3	0
97.4	0
97.5	0
97.6	0
97.7	0
97.8	0
97.9	0
98	0
98.1	0
98.2	0
98.3	0
98.4	0
98.5	0
98.6	0
98.7	0
98.8	0
98.9	0
99	0
99.1	0
99.2	0
99.3	0
99.4	0
99.5	0
99.6	0
99.7	0
99.8	0
99.9	0
100	0
100.1	0
100.2	0
100.3	0
100.4	0
100.5	0
100.6	0
100.7	0
100.8	0
100.9	0
101	0
101.1	0
101.2	0
101.3	0
101.4	0
101.5	0
101.6	0
101.7	0
101.8	0
101.9	0
102	0
102.1	0
102.2	0
102.3	0
102.4	0
102.5	0
102.6	0
102.7	0
102.8	0
102.9	0
103	0
103.1	0
103.2	0
103.3	0
103.4	0
103.5	0
103.6	0
103.7	0
103.8	0
103.9	0
104	0
104.1	0
104.2	0
104.3	0
104.4	0
104.5	0
104.6	0
104.7	0
104.8	0
104.9	0
105	0
105.1	0
105.2	0
105.3	0
105.4	0
105.5	0
105.6	0
105.7	0
105.8	0
105.9	0
106	0
106.1	0
106.2	0
106.3	0
106.4	0
106.5	0
106.6	0
106.7	0
106.8	0
106.9	0
107	0
107.1	0
107.2	0
107.3	0
107.4	0
107.5	0
107.6	0
107.7	0
107.8	0
107.9	0
108	0
108.1	0
108.2	0
108.3	0
108.4	0
108.5	0
108.6	0
108.7	0
108.8	0
108.9	0
109	0
109.1	0
109.2	0
109.3	0
109.4	0
109.5	0
109.6	0
109.7	0
109.8	0
109.9	0
110	0
110.1	0
110.2	0
110.3	0
110.4	0
110.5	0
110.6	0
110.7	0
110.8	0
110.9	0.0025
111	0.0025
111.1	0.0025
111.2	0.0025
111.3	0.0025
111.4	0.0025
111.5	0.0025
111.6	0.0025
111.7	0.0025
111.8	0.0025
111.9	0.0025
112	0.0025
112.1	0.0025
112.2	0.0025
112.3	0.0025
112.4	0.0025
112.5	0.0025
112.6	0.0025
112.7	0.0025
112.8	0.0025
112.9	0.0025
113	0.0025
113.1	0.0025
113.2	0.005
113.3	0.005
113.4	0.005
113.5	0.005
113.6	0.005
113.7	0.005
113.8	0.005
113.9	0.005
114	0.005
114.1	0.005
114.2	0.005
114.3	0.005
114.4	0.005
114.5	0.005
114.6	0.005
114.7	0.005
114.8	0.005
114.9	0.005
115	0.005
115.1	0.005
115.2	0.005
115.3	0.005
115.4	0.005
115.5	0.005
115.6	0.005
115.7	0.005
115.8	0.005
115.9	0.005
116	0.0025
116.1	0.0025
116.2	0.0025
116.3	0.0025
116.4	0.0025
116.5	0.0025
116.6	0.005
116.7	0.005
116.8	0.005
116.9	0.005
117	0.005
117.1	0.005
117.2	0.005
117.3	0.005
117.4	0.005
117.5	0.005
117.6	0.005
117.7	0.005
117.8	0.005
117.9	0.005
118	0.005
118.1	0.005
118.2	0.005
118.3	0.005
118.4	0.005
118.5	0.005
118.6	0.005
118.7	0.005
118.8	0.005
118.9	0.005
119	0.005
119.1	0.005
119.2	0.005
119.3	0.005
119.4	0.005
119.5	0.005
119.6	0.005
119.7	0.005
119.8	0.005
119.9	0.005
120	0.005
120.1	0.005
120.2	0.005
120.3	0.005
120.4	0.005
120.5	0.005
120.6	0.005
120.7	0.005
120.8	0.0075
120.9	0.0075
121	0.0075
121.1	0.0075
121.2	0.0075
121.3	0.0075
121.4	0.0075
121.5	0.01
121.6	0.01
121.7	0.01
121.8	0.01
121.9	0.01
122	0.01
122.1	0.01
122.2	0.01
122.3	0.01
122.4	0.01
122.5	0.01
122.6	0.0125
122.7	0.0125
122.8	0.0125
122.9	0.0125
123	0.0125
123.1	0.0125
123.2	0.0125
123.3	0.0125
123.4	0.0125
123.5	0.0125
123.6	0.0125
123.7	0.0125
123.8	0.0125
123.9	0.0125
124	0.0125
124.1	0.0125
124.2	0.0125
124.3	0.0125
124.4	0.0125
124.5	0.015
124.6	0.015
124.7	0.015
124.8	0.015
124.9	0.015
125	0.015
125.1	0.015
125.2	0.015
125.3	0.015
125.4	0.015
125.5	0.015
125.6	0.015
125.7	0.015
125.8	0.015
125.9	0.015
126	0.015
126.1	0.015
126.2	0.015
126.3	0.015
126.4	0.015
126.5	0.015
126.6	0.015
126.7	0.015
126.8	0.015
126.9	0.015
127	0.015
127.1	0.015
127.2	0.015
127.3	0.015
127.4	0.015
127.5	0.0175
127.6	0.02
127.7	0.02
127.8	0.02
127.9	0.02
128	0.02
128.1	0.02
128.2	0.02
128.3	0.02
128.4	0.02
128.5	0.02
128.6	0.02
128.7	0.02
128.8	0.02
128.9	0.02
129	0.02
129.1	0.02
129.2	0.02
129.3	0.02
129.4	0.02
129.5	0.02
129.6	0.02
129.7	0.02
129.8	0.02
129.9	0.0225
130	0.0225
130.1	0.0225
130.2	0.0225
130.3	0.0225
130.4	0.0225
130.5	0.0225
130.6	0.0225
130.7	0.0225
130.8	0.0225
130.9	0.0225
131	0.0225
131.1	0.0225
131.2	0.0225
131.3	0.0225
131.4	0.0225
131.5	0.02
131.6	0.02
131.7	0.02
131.8	0.02
131.9	0.02
132	0.02
132.1	0.02
132.2	0.02
132.3	0.02
132.4	0.02
132.5	0.02
132.6	0.02
132.7	0.02
132.8	0.02
132.9	0.02
133	0.02
133.1	0.02
133.2	0.02
133.3	0.02
133.4	0.0175
133.5	0.0175
133.6	0.0175
133.7	0.0175
133.8	0.0175
133.9	0.0175
134	0.0175
134.1	0.0175
134.2	0.0175
134.3	0.0175
134.4	0.0175
134.5	0.0175
134.6	0.0175
134.7	0.0175
134.8	0.0175
134.9	0.0175
135	0.0175
135.1	0.0175
135.2	0.0175
135.3	0.0175
135.4	0.02
135.5	0.02
135.6	0.02
135.7	0.02
135.8	0.02
135.9	0.02
136	0.02
136.1	0.0225
136.2	0.0225
136.3	0.0225
136.4	0.0225
136.5	0.0225
136.6	0.0225
136.7	0.0225
136.8	0.0225
136.9	0.0225
137	0.0225
137.1	0.0225
137.2	0.0225
137.3	0.0225
137.4	0.0225
137.5	0.0225
137.6	0.0225
137.7	0.0225
137.8	0.0225
137.9	0.0225
138	0.0225
138.1	0.0225
138.2	0.0225
138.3	0.0225
138.4	0.0225
138.5	0.0225
138.6	0.0225
138.7	0.0225
138.8	0.0225
138.9	0.0225
139	0.0225
139.1	0.0225
139.2	0.0225
139.3	0.0225
139.4	0.0225
139.5	0.0225
139.6	0.0275
139.7	0.0275
139.8	0.0275
139.9	0.0275
140	0.0275
140.1	0.0275
140.2	0.0275
140.3	0.0275
140.4	0.0275
140.5	0.0275
140.6	0.0275
140.7	0.025
140.8	0.025
140.9	0.025
141	0.025
141.1	0.025
141.2	0.025
141.3	0.025
141.4	0.025
141.5	0.025
141.6	0.025
141.7	0.025
141.8	0.025
141.9	0.025
142	0.025
142.1	0.025
142.2	0.025
142.3	0.025
142.4	0.025
142.5	0.025
142.6	0.025
142.7	0.025
142.8	0.025
142.9	0.025
143	0.025
143.1	0.025
143.2	0.025
143.3	0.025
143.4	0.025
143.5	0.025
143.6	0.025
143.7	0.025
143.8	0.025
143.9	0.025
144	0.025
144.1	0.025
144.2	0.025
144.3	0.025
144.4	0.025
144.5	0.025
144.6	0.025
144.7	0.025
144.8	0.025
144.9	0.025
145	0.025
145.1	0.025
145.2	0.025
145.3	0.025
145.4	0.025
145.5	0.025
145.6	0.025
145.7	0.025
145.8	0.025
145.9	0.025
146	0.025
146.1	0.025
146.2	0.025
146.3	0.025
146.4	0.025
146.5	0.025
146.6	0.025
146.7	0.025
146.8	0.025
146.9	0.025
147	0.025
147.1	0.025
147.2	0.025
147.3	0.025
147.4	0.025
147.5	0.025
147.6	0.025
147.7	0.025
147.8	0.025
147.9	0.0275
148	0.0275
148.1	0.0275
148.2	0.0275
148.3	0.0275
148.4	0.0275
148.5	0.0275
148.6	0.0275
148.7	0.0275
148.8	0.0275
148.9	0.0275
149	0.0275
149.1	0.0275
149.2	0.0275
149.3	0.0275
149.4	0.0275
149.5	0.0275
149.6	0.0275
149.7	0.0275
149.8	0.03
149.9	0.03
150	0.03
150.1	0.03
150.2	0.03
150.3	0.03
150.4	0.03
150.5	0.03
150.6	0.03
150.7	0.03
150.8	0.03
150.9	0.03
151	0.03
151.1	0.03
151.2	0.03
151.3	0.03
151.4	0.03
151.5	0.03
151.6	0.03
151.7	0.03
151.8	0.03
151.9	0.03
152	0.03
152.1	0.03
152.2	0.03
152.3	0.03
152.4	0.03
152.5	0.03
152.6	0.03
152.7	0.03
152.8	0.03
152.9	0.03
153	0.03
153.1	0.03
153.2	0.03
153.3	0.03
153.4	0.03
153.5	0.03
153.6	0.03
153.7	0.03
153.8	0.03
153.9	0.03
154	0.03
154.1	0.03
154.2	0.03
154.3	0.03
154.4	0.03
154.5	0.03
154.6	0.03
154.7	0.03
154.8	0.03
154.9	0.03
155	0.03
155.1	0.03
155.2	0.03
155.3	0.03
155.4	0.03
155.5	0.03
155.6	0.03
155.7	0.03
155.8	0.03
155.9	0.03
156	0.03
156.1	0.03
156.2	0.03
156.3	0.03
156.4	0.03
156.5	0.03
156.6	0.03
156.7	0.03
156.8	0.03
156.9	0.03
157	0.03
157.1	0.03
157.2	0.0275
157.3	0.0275
157.4	0.0275
157.5	0.0275
157.6	0.0275
157.7	0.0275
157.8	0.0275
157.9	0.0275
158	0.0275
158.1	0.0275
158.2	0.0275
158.3	0.0275
158.4	0.0275
158.5	0.0275
158.6	0.0275
158.7	0.0275
158.8	0.0275
158.9	0.025
159	0.025
159.1	0.025
159.2	0.025
159.3	0.025
159.4	0.025
159.5	0.025
159.6	0.025
159.7	0.025
159.8	0.025
159.9	0.025
160	0.025
160.1	0.025
160.2	0.025
160.3	0.025
160.4	0.025
160.5	0.025
160.6	0.025
160.7	0.025
160.8	0.025
160.9	0.025
161	0.025
161.1	0.025
161.2	0.025
161.3	0.025
161.4	0.025
161.5	0.025
161.6	0.025
161.7	0.025
161.8	0.025
161.9	0.025
162	0.025
162.1	0.025
162.2	0.025
162.3	0.025
162.4	0.025
162.5	0.0275
162.6	0.0275
162.7	0.0275
162.8	0.0275
162.9	0.0275
163	0.0275
163.1	0.025
163.2	0.025
163.3	0.025
163.4	0.025
163.5	0.025
163.6	0.025
163.7	0.025
163.8	0.025
163.9	0.025
164	0.025
164.1	0.025
164.2	0.025
164.3	0.025
164.4	0.025
164.5	0.025
164.6	0.025
164.7	0.025
164.8	0.025
164.9	0.025
165	0.025
165.1	0.025
165.2	0.025
165.3	0.025
165.4	0.025
165.5	0.025
165.6	0.025
165.7	0.025
165.8	0.025
165.9	0.025
166	0.025
166.1	0.025
166.2	0.025
166.3	0.025
166.4	0.025
166.5	0.025
166.6	0.025
166.7	0.025
166.8	0.025
166.9	0.025
167	0.025
167.1	0.025
167.2	0.025
167.3	0.025
167.4	0.025
167.5	0.025
167.6	0.025
167.7	0.025
167.8	0.025
167.9	0.025
168	0.025
168.1	0.025
168.2	0.025
168.3	0.025
168.4	0.025
168.5	0.025
168.6	0.025
168.7	0.025
168.8	0.025
168.9	0.025
169	0.025
169.1	0.025
169.2	0.025
169.3	0.025
169.4	0.025
169.5	0.025
169.6	0.025
169.7	0.025
169.8	0.025
169.9	0.025
170	0.025
170.1	0.025
170.2	0.025
170.3	0.025
170.4	0.025
170.5	0.025
170.6	0.0275
170.7	0.0275
170.8	0.0275
170.9	0.025
171	0.0225
171.1	0.0225
171.2	0.0225
171.3	0.0225
171.4	0.0225
171.5	0.0225
171.6	0.0225
171.7	0.0225
171.8	0.0225
171.9	0.0225
172	0.0225
172.1	0.0225
172.2	0.0225
172.3	0.0225
172.4	0.0225
172.5	0.0225
172.6	0.0225
172.7	0.0225
172.8	0.0225
172.9	0.0225
173	0.0225
173.1	0.0225
173.2	0.0225
173.3	0.0225
173.4	0.0225
173.5	0.0225
173.6	0.0225
173.7	0.0225
173.8	0.0225
173.9	0.0225
174	0.0225
174.1	0.0225
174.2	0.02
174.3	0.02
174.4	0.02
174.5	0.02
174.6	0.02
174.7	0.02
174.8	0.02
174.9	0.02
175	0.02
175.1	0.02
175.2	0.02
175.3	0.02
175.4	0.02
175.5	0.02
175.6	0.02
175.7	0.02
175.8	0.02
175.9	0.02
176	0.02
176.1	0.02
176.2	0.02
176.3	0.02
176.4	0.02
176.5	0.02
176.6	0.02
176.7	0.02
176.8	0.02
176.9	0.02
177	0.02
177.1	0.02
177.2	0.02
177.3	0.02
177.4	0.02
177.5	0.02
177.6	0.02
177.7	0.02
177.8	0.02
177.9	0.02
178	0.02
178.1	0.02
178.2	0.02
178.3	0.02
178.4	0.02
178.5	0.02
178.6	0.02
178.7	0.02
178.8	0.02
178.9	0.02
179	0.02
179.1	0.02
179.2	0.02
179.3	0.02
179.4	0.02
179.5	0.02
179.6	0.02
179.7	0.02
179.8	0.02
179.9	0.02
180	0.02
180.1	0.02
180.2	0.02
180.3	0.02
180.4	0.02
180.5	0.02
180.6	0.02
180.7	0.02
180.8	0.02
180.9	0.0225
181	0.0225
181.1	0.0225
181.2	0.0225
181.3	0.0225
181.4	0.0225
181.5	0.0225
181.6	0.0225
181.7	0.0225
181.8	0.0225
181.9	0.0225
182	0.0225
182.1	0.0225
182.2	0.0225
182.3	0.0225
182.4	0.0225
182.5	0.0225
182.6	0.0225
182.7	0.0225
182.8	0.0225
182.9	0.0225
183	0.0225
183.1	0.0225
183.2	0.0225
183.3	0.0225
183.4	0.0225
183.5	0.0225
183.6	0.0225
183.7	0.0225
183.8	0.0225
183.9	0.0225
184	0.0225
184.1	0.0225
184.2	0.0225
184.3	0.0225
184.4	0.0225
184.5	0.0225
184.6	0.0225
184.7	0.0225
184.8	0.0225
184.9	0.0225
185	0.0225
185.1	0.0225
185.2	0.0225
185.3	0.0225
185.4	0.0225
185.5	0.0225
185.6	0.0225
185.7	0.0225
185.8	0.0225
185.9	0.0225
186	0.0225
186.1	0.0225
186.2	0.0225
186.3	0.0225
186.4	0.0225
186.5	0.0225
186.6	0.0225
186.7	0.0225
186.8	0.0225
186.9	0.0225
187	0.0225
187.1	0.0225
187.2	0.0225
187.3	0.0225
187.4	0.0225
187.5	0.0225
187.6	0.0225
187.7	0.0225
187.8	0.0225
187.9	0.0225
188	0.0225
188.1	0.0225
188.2	0.0225
188.3	0.0225
188.4	0.0225
188.5	0.0225
188.6	0.0225
188.7	0.0225
188.8	0.0225
188.9	0.0225
189	0.0225
189.1	0.0225
189.2	0.0225
189.3	0.0225
189.4	0.0225
189.5	0.0225
189.6	0.0225
189.7	0.02
189.8	0.02
189.9	0.02
190	0.02
190.1	0.02
190.2	0.02
190.3	0.02
190.4	0.02
190.5	0.02
190.6	0.02
190.7	0.02
190.8	0.02
190.9	0.02
191	0.02
191.1	0.02
191.2	0.02
191.3	0.02
191.4	0.02
191.5	0.02
191.6	0.02
191.7	0.02
191.8	0.02
191.9	0.02
192	0.02
192.1	0.02
192.2	0.02
192.3	0.02
192.4	0.02
192.5	0.02
192.6	0.02
192.7	0.02
192.8	0.02
192.9	0.02
193	0.02
193.1	0.02
193.2	0.02
193.3	0.02
193.4	0.02
193.5	0.02
193.6	0.02
193.7	0.02
193.8	0.02
193.9	0.02
194	0.02
194.1	0.02
194.2	0.02
194.3	0.02
194.4	0.02
194.5	0.02
194.6	0.02
194.7	0.02
194.8	0.0175
194.9	0.0175
195	0.0175
195.1	0.02
195.2	0.02
195.3	0.02
195.4	0.02
195.5	0.02
195.6	0.0225
195.7	0.0225
195.8	0.0225
195.9	0.0225
196	0.0225
196.1	0.0225
196.2	0.0225
196.3	0.0225
196.4	0.0225
196.5	0.0225
196.6	0.0225
196.7	0.0225
196.8	0.0225
196.9	0.0225
197	0.0225
197.1	0.0225
197.2	0.0225
197.3	0.0225
197.4	0.0225
197.5	0.0225
197.6	0.0225
197.7	0.0225
197.8	0.0225
197.9	0.0225
198	0.0225
198.1	0.0225
198.2	0.0225
198.3	0.0225
198.4	0.0225
198.5	0.0225
198.6	0.0225
198.7	0.0225
198.8	0.0225
198.9	0.0225
199	0.0225
199.1	0.0225
199.2	0.0225
199.3	0.0225
199.4	0.0225
199.5	0.0225
199.6	0.0225
199.7	0.0225
199.8	0.0225
199.9	0.025
200	0.025
[truncated: 14,000 more rows]
