# Supplementary material for: Bayesian inference of kinetic schemes for ion channels by Kalman filtering
Source: eLife journal article supplement (doi:10.7554/elife.62714), 2022-05-04
Supplement: fig4-data10 [file 1_Sim_N_500_Fluor_MW.xlsx]

## Sheet: Tabelle1
0.1	0
0.2	0
0.3	0
0.4	0
0.5	0
0.6	0
0.7	0
0.8	0
0.9	0
1	0
1.1	0
1.2	0
1.3	0
1.4	0
1.5	0
1.6	0
1.7	0
1.8	0
1.9	0
2	0
2.1	0
2.2	0
2.3	0
2.4	0
2.5	0
2.6	0
2.7	0
2.8	0
2.9	0
3	0
3.1	0
3.2	0
3.3	0
3.4	0
3.5	0
3.6	0
3.7	0
3.8	0
3.9	0
4	0
4.1	0
4.2	0
4.3	0
4.4	0
4.5	0
4.6	0
4.7	0
4.8	0
4.9	0
5	0
5.1	0
5.2	0
5.3	0
5.4	0
5.5	0
5.6	0
5.7	0
5.8	0
5.9	0
6	0
6.1	0
6.2	0
6.3	0
6.4	0
6.5	0
6.6	0
6.7	0
6.8	0
6.9	0
7	0
7.1	0
7.2	0
7.3	0
7.4	0
7.5	0
7.6	0
7.7	0
7.8	0
7.9	0
8	0
8.1	0
8.2	0
8.3	0
8.4	0
8.5	0
8.6	0
8.7	0
8.8	0
8.9	0
9	0
9.1	0
9.2	0
9.3	0
9.4	0
9.5	0
9.6	0
9.7	0
9.8	0
9.9	0
10	0
10.1	0
10.2	0
10.3	0
10.4	0
10.5	0
10.6	0
10.7	0
10.8	0
10.9	0
11	0
11.1	0
11.2	0
11.3	0
11.4	0
11.5	0
11.6	0
11.7	0
11.8	0
11.9	0
12	0
12.1	0
12.2	0
12.3	0
12.4	0
12.5	0
12.6	0
12.7	0
12.8	0
12.9	0
13	0
13.1	0
13.2	0
13.3	0
13.4	0
13.5	0
13.6	0
13.7	0
13.8	0
13.9	0
14	0
14.1	0
14.2	0
14.3	0
14.4	0
14.5	0
14.6	0
14.7	0
14.8	0
14.9	0
15	0
15.1	0
15.2	0
15.3	0
15.4	0
15.5	0
15.6	0
15.7	0
15.8	0
15.9	0
16	0
16.1	0
16.2	0
16.3	0
16.4	0
16.5	0
16.6	0
16.7	0
16.8	0
16.9	0
17	0
17.1	0
17.2	0
17.3	0
17.4	0
17.5	0
17.6	0
17.7	0
17.8	0
17.9	0
18	0
18.1	0
18.2	0
18.3	0
18.4	0
18.5	0
18.6	0
18.7	0
18.8	0
18.9	0
19	0
19.1	0
19.2	0
19.3	0
19.4	0
19.5	0
19.6	0
19.7	0
19.8	0
19.9	0
20	0
20.1	0
20.2	0
20.3	0
20.4	0
20.5	0
20.6	0
20.7	0
20.8	0
20.9	0
21	0
21.1	0
21.2	0
21.3	0
21.4	0
21.5	0
21.6	0
21.7	0
21.8	0
21.9	0
22	0
22.1	0
22.2	0
22.3	0
22.4	0
22.5	0
22.6	0
22.7	0
22.8	0
22.9	0
23	0
23.1	0
23.2	0
23.3	0
23.4	0
23.5	0
23.6	0
23.7	0
23.8	0
23.9	0
24	0
24.1	0
24.2	0
24.3	0
24.4	0
24.5	0
24.6	0
24.7	0
24.8	0
24.9	0
25	0
25.1	0
25.2	0
25.3	0
25.4	0
25.5	0
25.6	0
25.7	0
25.8	0
25.9	0
26	0
26.1	0
26.2	0
26.3	0
26.4	0
26.5	0
26.6	0
26.7	0
26.8	0
26.9	0
27	0
27.1	0
27.2	0
27.3	0
27.4	0
27.5	0
27.6	0
27.7	0
27.8	0
27.9	0
28	0
28.1	0
28.2	0
28.3	0
28.4	0
28.5	0
28.6	0
28.7	0
28.8	0
28.9	0
29	0
29.1	0
29.2	0
29.3	0
29.4	0
29.5	0
29.6	0
29.7	0
29.8	0
29.9	0
30	0
30.1	0
30.2	0
30.3	0
30.4	0
30.5	0
30.6	0
30.7	0
30.8	0
30.9	0
31	0
31.1	0
31.2	0
31.3	0
31.4	0
31.5	0
31.6	0
31.7	0
31.8	0
31.9	0
32	0
32.1	0
32.2	0
32.3	0
32.4	0
32.5	0
32.6	0
32.7	0
32.8	0
32.9	0
33	0
33.1	0
33.2	0
33.3	0
33.4	0
33.5	0
33.6	0
33.7	0
33.8	0
33.9	0
34	0
34.1	0
34.2	0
34.3	0
34.4	0
34.5	0
34.6	0
34.7	0
34.8	0
34.9	0
35	0
35.1	0
35.2	0
35.3	0
35.4	0
35.5	0
35.6	0
35.7	0
35.8	0
35.9	0
36	0
36.1	0
36.2	0
36.3	0
36.4	0
36.5	0
36.6	0
36.7	0
36.8	0
36.9	0
37	0
37.1	0
37.2	0
37.3	0
37.4	0
37.5	0
37.6	0
37.7	0
37.8	0
37.9	0
38	0
38.1	0
38.2	0
38.3	0
38.4	0
38.5	0
38.6	0
38.7	0
38.8	0
38.9	0
39	0
39.1	0
39.2	0
39.3	0
39.4	0
39.5	0
39.6	0
39.7	0
39.8	0
39.9	0
40	0
40.1	0
40.2	0
40.3	0
40.4	0
40.5	0
40.6	0
40.7	0
40.8	0
40.9	0
41	0
41.1	0
41.2	0
41.3	0
41.4	0
41.5	0
41.6	0
41.7	0
41.8	0
41.9	0
42	0
42.1	0
42.2	0
42.3	0
42.4	0
42.5	0
42.6	0
42.7	0
42.8	0
42.9	0
43	0
43.1	0
43.2	0
43.3	0
43.4	0
43.5	0
43.6	0
43.7	0
43.8	0
43.9	0
44	0
44.1	0
44.2	0
44.3	0
44.4	0
44.5	0
44.6	0
44.7	0
44.8	0
44.9	0
45	0
45.1	0
45.2	0
45.3	0
45.4	0
45.5	0
45.6	0
45.7	0
45.8	0
45.9	0
46	0
46.1	0
46.2	0
46.3	0
46.4	0
46.5	0
46.6	0
46.7	0
46.8	0
46.9	0
47	0
47.1	0
47.2	0
47.3	0
47.4	0
47.5	0
47.6	0
47.7	0
47.8	0
47.9	0
48	0
48.1	0
48.2	0
48.3	0
48.4	0
48.5	0
48.6	0
48.7	0
48.8	0
48.9	0
49	0
49.1	0
49.2	0
49.3	0
49.4	0
49.5	0
49.6	0
49.7	0
49.8	0
49.9	0
50	0
50.1	0
50.2	0
50.3	0
50.4	0
50.5	0
50.6	0
50.7	0
50.8	0
50.9	0
51	0
51.1	0
51.2	0
51.3	0
51.4	0
51.5	0
51.6	0
51.7	0
51.8	0
51.9	0
52	0
52.1	0
52.2	0
52.3	0
52.4	0
52.5	0
52.6	0
52.7	0
52.8	0
52.9	0
53	0
53.1	0
53.2	0
53.3	0
53.4	0
53.5	0
53.6	0
53.7	0
53.8	0
53.9	0
54	0
54.1	0
54.2	0
54.3	0
54.4	0
54.5	0
54.6	0
54.7	0
54.8	0
54.9	0
55	0
55.1	0
55.2	0
55.3	0
55.4	0
55.5	0
55.6	0
55.7	0
55.8	0
55.9	0
56	0
56.1	0
56.2	0
56.3	0
56.4	0
56.5	0
56.6	0
56.7	0
56.8	0
56.9	0
57	0
57.1	0
57.2	0
57.3	0
57.4	0
57.5	0
57.6	0
57.7	0
57.8	0
57.9	0
58	0
58.1	0
58.2	0
58.3	0
58.4	0
58.5	0
58.6	0
58.7	0
58.8	0
58.9	0
59	0
59.1	0
59.2	0
59.3	0
59.4	0
59.5	0
59.6	0
59.7	0
59.8	0
59.9	0
60	0
60.1	0
60.2	0
60.3	0
60.4	0
60.5	0
60.6	0
60.7	0
60.8	0
60.9	0
61	0
61.1	0
61.2	0
61.3	0
61.4	0
61.5	0
61.6	0
61.7	0
61.8	0
61.9	0
62	0
62.1	0
62.2	0
62.3	0
62.4	0
62.5	0
62.6	0
62.7	0
62.8	0
62.9	0
63	0
63.1	0
63.2	0
63.3	0
63.4	0
63.5	0
63.6	0
63.7	0
63.8	0
63.9	0
64	0
64.1	0
64.2	0
64.3	0
64.4	0
64.5	0
64.6	0
64.7	0
64.8	0
64.9	0
65	0
65.1	0
65.2	0
65.3	0
65.4	0
65.5	0
65.6	0
65.7	0
65.8	0
65.9	0
66	0
66.1	0
66.2	0
66.3	0
66.4	0
66.5	0
66.6	0
66.7	0
66.8	0
66.9	0
67	0
67.1	0
67.2	0
67.3	0
67.4	0
67.5	0
67.6	0
67.7	0
67.8	0
67.9	0
68	0
68.1	0
68.2	0
68.3	0
68.4	0
68.5	0
68.6	0
68.7	0
68.8	0
68.9	0
69	0
69.1	0
69.2	0
69.3	0
69.4	0
69.5	0
69.6	0
69.7	0
69.8	0
69.9	0
70	0
70.1	0
70.2	0
70.3	0
70.4	0
70.5	0
70.6	0
70.7	0
70.8	0
70.9	0
71	0
71.1	0
71.2	0
71.3	0
71.4	0
71.5	0
71.6	0
71.7	0
71.8	0
71.9	0
72	0
72.1	0
72.2	0
72.3	0
72.4	0
72.5	0
72.6	0
72.7	0
72.8	0
72.9	0
73	0
73.1	0
73.2	0
73.3	0
73.4	0
73.5	0
73.6	0
73.7	0
73.8	0
73.9	0
74	0
74.1	0
74.2	0
74.3	0
74.4	0
74.5	0
74.6	0
74.7	0
74.8	0
74.9	0
75	0
75.1	0
75.2	0
75.3	0
75.4	0
75.5	0
75.6	0
75.7	0
75.8	0
75.9	0
76	0
76.1	0
76.2	0
76.3	0
76.4	0
76.5	0
76.6	0
76.7	0
76.8	0
76.9	0
77	0
77.1	0
77.2	0
77.3	0
77.4	0
77.5	0
77.6	0
77.7	0
77.8	0
77.9	0
78	0
78.1	0
78.2	0
78.3	0
78.4	0
78.5	0
78.6	0
78.7	0
78.8	0
78.9	0
79	0
79.1	0
79.2	0
79.3	0
79.4	0
79.5	0
79.6	0
79.7	0
79.8	0
79.9	0
80	0
80.1	0
80.2	0
80.3	0
80.4	0
80.5	0
80.6	0
80.7	0
80.8	0
80.9	0
81	0
81.1	0
81.2	0
81.3	0
81.4	0
81.5	0
81.6	0
81.7	0
81.8	0
81.9	0
82	0
82.1	0
82.2	0
82.3	0
82.4	0
82.5	0
82.6	0
82.7	0
82.8	0
82.9	0
83	0
83.1	0
83.2	0
83.3	0
83.4	0
83.5	0
83.6	0
83.7	0
83.8	0
83.9	0
84	0
84.1	0
84.2	0
84.3	0
84.4	0
84.5	0
84.6	0
84.7	0
84.8	0
84.9	0
85	0
85.1	0
85.2	0
85.3	0
85.4	0
85.5	0
85.6	0
85.7	0
85.8	0
85.9	0
86	0
86.1	0
86.2	0
86.3	0
86.4	0
86.5	0
86.6	0
86.7	0
86.8	0
86.9	0
87	0
87.1	0
87.2	0
87.3	0
87.4	0
87.5	0
87.6	0
87.7	0
87.8	0
87.9	0
88	0
88.1	0
88.2	0
88.3	0
88.4	0
88.5	0
88.6	0
88.7	0
88.8	0
88.9	0
89	0
89.1	0
89.2	0
89.3	0
89.4	0
89.5	0
89.6	0
89.7	0
89.8	0
89.9	0
90	0
90.1	0
90.2	0
90.3	0
90.4	0
90.5	0
90.6	0
90.7	0
90.8	0
90.9	0
91	0
91.1	0
91.2	0
91.3	0
91.4	0
91.5	0
91.6	0
91.7	0
91.8	0
91.9	0
92	0
92.1	0
92.2	0
92.3	0
92.4	0
92.5	0
92.6	0
92.7	0
92.8	0
92.9	0
93	0
93.1	0
93.2	0
93.3	0
93.4	0
93.5	0
93.6	0
93.7	0
93.8	0
93.9	0
94	0
94.1	0
94.2	0
94.3	0
94.4	0
94.5	0
94.6	0
94.7	0
94.8	0
94.9	0
95	0
95.1	0
95.2	0
95.3	0
95.4	0
95.5	0
95.6	0
95.7	0
95.8	0
95.9	0
96	0
96.1	0
96.2	0
96.3	0
96.4	0
96.5	0
96.6	0
96.7	0
96.8	0
96.9	0
97	0
97.1	0
97.2	0
97.3	0
97.4	0
97.5	0
97.6	0
97.7	0
97.8	0
97.9	0
98	0
98.1	0
98.2	0
98.3	0
98.4	0
98.5	0
98.6	0
98.7	0
98.8	0
98.9	0
99	0
99.1	0
99.2	0
99.3	0
99.4	0
99.5	0
99.6	0
99.7	0
99.8	0
99.9	0
100	0
100.1	0.003
100.2	0.006
100.3	0.013
100.4	0.015
100.5	0.017
100.6	0.02
100.7	0.022
100.8	0.028
100.9	0.03
101	0.035
101.1	0.036
101.2	0.038
101.3	0.042
101.4	0.047
101.5	0.051
101.6	0.052
101.7	0.056
101.8	0.062
101.9	0.065
102	0.065
102.1	0.069
102.2	0.072
102.3	0.073
102.4	0.074
102.5	0.075
102.6	0.077
102.7	0.079
102.8	0.082
102.9	0.082
103	0.09
103.1	0.095
103.2	0.096
103.3	0.1
103.4	0.105
103.5	0.108
103.6	0.108
103.7	0.111
103.8	0.113
103.9	0.117
104	0.12
104.1	0.123
104.2	0.124
104.3	0.126
104.4	0.126
104.5	0.131
104.6	0.134
104.7	0.137
104.8	0.136
104.9	0.14
105	0.141
105.1	0.139
105.2	0.139
105.3	0.137
105.4	0.143
105.5	0.145
105.6	0.145
105.7	0.146
105.8	0.149
105.9	0.148
106	0.149
106.1	0.152
106.2	0.155
106.3	0.152
106.4	0.152
106.5	0.151
106.6	0.151
106.7	0.15
106.8	0.151
106.9	0.152
107	0.151
107.1	0.152
107.2	0.153
107.3	0.152
107.4	0.154
107.5	0.154
107.6	0.156
107.7	0.159
107.8	0.157
107.9	0.159
108	0.161
108.1	0.161
108.2	0.165
108.3	0.167
108.4	0.166
108.5	0.165
108.6	0.169
108.7	0.17
108.8	0.173
108.9	0.172
109	0.166
109.1	0.169
109.2	0.169
109.3	0.168
109.4	0.168
109.5	0.165
109.6	0.167
109.7	0.167
109.8	0.167
109.9	0.175
110	0.176
110.1	0.183
110.2	0.184
110.3	0.181
110.4	0.182
110.5	0.182
110.6	0.184
110.7	0.184
110.8	0.187
110.9	0.188
111	0.187
111.1	0.185
111.2	0.186
111.3	0.187
111.4	0.188
111.5	0.187
111.6	0.188
111.7	0.189
111.8	0.188
111.9	0.187
112	0.191
112.1	0.191
112.2	0.191
112.3	0.191
112.4	0.189
112.5	0.19
112.6	0.191
112.7	0.193
112.8	0.19
112.9	0.191
113	0.194
113.1	0.196
113.2	0.197
113.3	0.199
113.4	0.203
113.5	0.204
113.6	0.203
113.7	0.205
113.8	0.208
113.9	0.208
114	0.211
114.1	0.211
114.2	0.211
114.3	0.21
114.4	0.211
114.5	0.209
114.6	0.209
114.7	0.208
114.8	0.207
114.9	0.208
115	0.208
115.1	0.206
115.2	0.203
115.3	0.204
115.4	0.205
115.5	0.209
115.6	0.208
115.7	0.21
115.8	0.21
115.9	0.208
116	0.207
116.1	0.208
116.2	0.207
116.3	0.209
116.4	0.209
116.5	0.21
116.6	0.215
116.7	0.213
116.8	0.213
116.9	0.216
117	0.216
117.1	0.216
117.2	0.213
117.3	0.213
117.4	0.216
117.5	0.214
117.6	0.21
117.7	0.21
117.8	0.209
117.9	0.207
118	0.208
118.1	0.205
118.2	0.211
118.3	0.211
118.4	0.21
118.5	0.208
118.6	0.209
118.7	0.209
118.8	0.209
118.9	0.206
119	0.205
119.1	0.209
119.2	0.208
119.3	0.207
119.4	0.203
119.5	0.201
119.6	0.199
119.7	0.2
119.8	0.202
119.9	0.203
120	0.203
120.1	0.206
120.2	0.206
120.3	0.21
120.4	0.211
120.5	0.21
120.6	0.211
120.7	0.209
120.8	0.206
120.9	0.201
121	0.202
121.1	0.201
121.2	0.203
121.3	0.203
121.4	0.206
121.5	0.207
121.6	0.209
121.7	0.211
121.8	0.21
121.9	0.21
122	0.211
122.1	0.21
122.2	0.212
122.3	0.213
122.4	0.214
122.5	0.215
122.6	0.217
122.7	0.218
122.8	0.214
122.9	0.215
123	0.215
123.1	0.217
123.2	0.214
123.3	0.21
123.4	0.212
123.5	0.212
123.6	0.217
123.7	0.218
123.8	0.217
123.9	0.212
124	0.209
124.1	0.211
124.2	0.213
124.3	0.214
124.4	0.213
124.5	0.215
124.6	0.218
124.7	0.216
124.8	0.213
124.9	0.215
125	0.211
125.1	0.21
125.2	0.212
125.3	0.211
125.4	0.21
125.5	0.21
125.6	0.214
125.7	0.219
125.8	0.222
125.9	0.223
126	0.223
126.1	0.226
126.2	0.225
126.3	0.223
126.4	0.224
126.5	0.225
126.6	0.223
126.7	0.223
126.8	0.225
126.9	0.225
127	0.225
127.1	0.226
127.2	0.226
127.3	0.226
127.4	0.228
127.5	0.229
127.6	0.225
127.7	0.226
127.8	0.228
127.9	0.228
128	0.228
128.1	0.232
128.2	0.236
128.3	0.238
128.4	0.239
128.5	0.238
128.6	0.238
128.7	0.239
128.8	0.234
128.9	0.234
129	0.233
129.1	0.236
129.2	0.236
129.3	0.238
129.4	0.239
129.5	0.243
129.6	0.243
129.7	0.239
129.8	0.242
129.9	0.242
130	0.241
130.1	0.24
130.2	0.24
130.3	0.24
130.4	0.241
130.5	0.241
130.6	0.24
130.7	0.239
130.8	0.239
130.9	0.24
131	0.237
131.1	0.236
131.2	0.236
131.3	0.237
131.4	0.237
131.5	0.237
131.6	0.238
131.7	0.238
131.8	0.234
131.9	0.234
132	0.236
132.1	0.237
132.2	0.239
132.3	0.24
132.4	0.242
132.5	0.244
132.6	0.243
132.7	0.246
132.8	0.251
132.9	0.248
133	0.247
133.1	0.246
133.2	0.24
133.3	0.236
133.4	0.242
133.5	0.245
133.6	0.242
133.7	0.241
133.8	0.243
133.9	0.244
134	0.246
134.1	0.245
134.2	0.245
134.3	0.242
134.4	0.242
134.5	0.242
134.6	0.24
134.7	0.238
134.8	0.244
134.9	0.247
135	0.249
135.1	0.248
135.2	0.245
135.3	0.242
135.4	0.237
135.5	0.236
135.6	0.237
135.7	0.234
135.8	0.234
135.9	0.23
136	0.23
136.1	0.232
136.2	0.234
136.3	0.238
136.4	0.236
136.5	0.235
136.6	0.234
136.7	0.232
136.8	0.233
136.9	0.233
137	0.229
137.1	0.229
137.2	0.23
137.3	0.228
137.4	0.23
137.5	0.231
137.6	0.236
137.7	0.234
137.8	0.236
137.9	0.238
138	0.238
138.1	0.237
138.2	0.235
138.3	0.235
138.4	0.237
138.5	0.238
138.6	0.235
138.7	0.235
138.8	0.238
138.9	0.238
139	0.237
139.1	0.239
139.2	0.24
139.3	0.239
139.4	0.237
139.5	0.237
139.6	0.24
139.7	0.243
139.8	0.242
139.9	0.241
140	0.24
140.1	0.236
140.2	0.238
140.3	0.237
140.4	0.238
140.5	0.242
140.6	0.242
140.7	0.243
140.8	0.242
140.9	0.242
141	0.247
141.1	0.249
141.2	0.247
141.3	0.249
141.4	0.251
141.5	0.252
141.6	0.25
141.7	0.253
141.8	0.253
141.9	0.255
142	0.251
142.1	0.249
142.2	0.25
142.3	0.251
142.4	0.253
142.5	0.251
142.6	0.249
142.7	0.246
142.8	0.244
142.9	0.243
143	0.243
143.1	0.241
143.2	0.24
143.3	0.243
143.4	0.243
143.5	0.239
143.6	0.238
143.7	0.237
143.8	0.239
143.9	0.236
144	0.237
144.1	0.237
144.2	0.238
144.3	0.237
144.4	0.239
144.5	0.237
144.6	0.24
144.7	0.24
144.8	0.238
144.9	0.237
145	0.235
145.1	0.233
145.2	0.231
145.3	0.229
145.4	0.228
145.5	0.231
145.6	0.231
145.7	0.229
145.8	0.223
145.9	0.224
146	0.228
146.1	0.231
146.2	0.233
146.3	0.23
146.4	0.226
146.5	0.226
146.6	0.227
146.7	0.229
146.8	0.23
146.9	0.229
147	0.23
147.1	0.23
147.2	0.23
147.3	0.227
147.4	0.228
147.5	0.23
147.6	0.231
147.7	0.231
147.8	0.228
147.9	0.225
148	0.225
148.1	0.227
148.2	0.228
148.3	0.227
148.4	0.227
148.5	0.225
148.6	0.226
148.7	0.229
148.8	0.228
148.9	0.227
149	0.228
149.1	0.23
149.2	0.233
149.3	0.233
149.4	0.233
149.5	0.234
149.6	0.235
149.7	0.235
149.8	0.234
149.9	0.231
150	0.234
150.1	0.233
150.2	0.229
150.3	0.225
150.4	0.227
150.5	0.226
150.6	0.221
150.7	0.222
150.8	0.223
150.9	0.221
151	0.223
151.1	0.222
151.2	0.217
151.3	0.218
151.4	0.213
151.5	0.215
151.6	0.216
151.7	0.216
151.8	0.215
151.9	0.216
152	0.217
152.1	0.218
152.2	0.218
152.3	0.215
152.4	0.217
152.5	0.22
152.6	0.222
152.7	0.221
152.8	0.219
152.9	0.222
153	0.222
153.1	0.224
153.2	0.226
153.3	0.226
153.4	0.231
153.5	0.232
153.6	0.232
153.7	0.231
153.8	0.234
153.9	0.235
154	0.234
154.1	0.236
154.2	0.237
154.3	0.236
154.4	0.235
154.5	0.234
154.6	0.231
154.7	0.23
154.8	0.234
154.9	0.237
155	0.235
155.1	0.236
155.2	0.237
155.3	0.239
155.4	0.24
155.5	0.241
155.6	0.241
155.7	0.244
155.8	0.247
155.9	0.247
156	0.251
156.1	0.25
156.2	0.253
156.3	0.25
156.4	0.249
156.5	0.247
156.6	0.244
156.7	0.249
156.8	0.25
156.9	0.252
157	0.251
157.1	0.248
157.2	0.25
157.3	0.25
157.4	0.246
157.5	0.246
157.6	0.248
157.7	0.248
157.8	0.249
157.9	0.252
158	0.252
158.1	0.254
158.2	0.255
158.3	0.252
158.4	0.251
158.5	0.251
158.6	0.249
158.7	0.249
158.8	0.249
158.9	0.251
159	0.252
159.1	0.251
159.2	0.249
159.3	0.25
159.4	0.252
159.5	0.251
159.6	0.251
159.7	0.25
159.8	0.248
159.9	0.248
160	0.245
160.1	0.247
160.2	0.248
160.3	0.244
160.4	0.244
160.5	0.245
160.6	0.242
160.7	0.244
160.8	0.245
160.9	0.247
161	0.243
161.1	0.241
161.2	0.245
161.3	0.247
161.4	0.247
161.5	0.245
161.6	0.249
161.7	0.247
161.8	0.248
161.9	0.246
162	0.245
162.1	0.246
162.2	0.248
162.3	0.25
162.4	0.249
162.5	0.25
162.6	0.249
162.7	0.248
162.8	0.245
162.9	0.246
163	0.244
163.1	0.246
163.2	0.243
163.3	0.247
163.4	0.241
163.5	0.236
163.6	0.236
163.7	0.239
163.8	0.243
163.9	0.242
164	0.247
164.1	0.249
164.2	0.253
164.3	0.252
164.4	0.251
164.5	0.252
164.6	0.254
164.7	0.253
164.8	0.252
164.9	0.25
165	0.25
165.1	0.251
165.2	0.248
165.3	0.248
165.4	0.248
165.5	0.246
165.6	0.247
165.7	0.249
165.8	0.249
165.9	0.249
166	0.249
166.1	0.248
166.2	0.25
166.3	0.254
166.4	0.254
166.5	0.253
166.6	0.254
166.7	0.256
166.8	0.258
166.9	0.256
167	0.255
167.1	0.257
167.2	0.257
167.3	0.259
167.4	0.26
167.5	0.26
167.6	0.262
167.7	0.262
167.8	0.262
167.9	0.264
168	0.265
168.1	0.264
168.2	0.265
168.3	0.267
168.4	0.27
168.5	0.268
168.6	0.266
168.7	0.261
168.8	0.264
168.9	0.264
169	0.265
169.1	0.267
169.2	0.268
169.3	0.267
169.4	0.266
169.5	0.265
169.6	0.266
169.7	0.268
169.8	0.267
169.9	0.267
170	0.265
170.1	0.263
170.2	0.264
170.3	0.262
170.4	0.261
170.5	0.262
170.6	0.261
170.7	0.259
170.8	0.261
170.9	0.262
171	0.259
171.1	0.261
171.2	0.264
171.3	0.263
171.4	0.266
171.5	0.268
171.6	0.268
171.7	0.265
171.8	0.266
171.9	0.267
172	0.265
172.1	0.265
172.2	0.266
172.3	0.264
172.4	0.267
172.5	0.266
172.6	0.265
172.7	0.265
172.8	0.266
172.9	0.265
173	0.265
173.1	0.266
173.2	0.267
173.3	0.268
173.4	0.265
173.5	0.266
173.6	0.268
173.7	0.27
173.8	0.272
173.9	0.269
174	0.265
174.1	0.266
174.2	0.269
174.3	0.268
174.4	0.268
174.5	0.266
174.6	0.264
174.7	0.264
174.8	0.264
174.9	0.265
175	0.264
175.1	0.263
175.2	0.263
175.3	0.264
175.4	0.264
175.5	0.263
175.6	0.262
175.7	0.259
175.8	0.262
175.9	0.263
176	0.267
176.1	0.268
176.2	0.27
176.3	0.268
176.4	0.268
176.5	0.267
176.6	0.269
176.7	0.268
176.8	0.27
176.9	0.267
177	0.266
177.1	0.267
177.2	0.266
177.3	0.266
177.4	0.265
177.5	0.266
177.6	0.268
177.7	0.268
177.8	0.267
177.9	0.268
178	0.27
178.1	0.269
178.2	0.269
178.3	0.266
178.4	0.267
178.5	0.268
178.6	0.266
178.7	0.27
178.8	0.266
178.9	0.266
179	0.266
179.1	0.269
179.2	0.268
179.3	0.266
179.4	0.268
179.5	0.271
179.6	0.265
179.7	0.262
179.8	0.261
179.9	0.26
180	0.26
180.1	0.26
180.2	0.262
180.3	0.26
180.4	0.263
180.5	0.264
180.6	0.264
180.7	0.263
180.8	0.265
180.9	0.267
181	0.267
181.1	0.271
181.2	0.271
181.3	0.266
181.4	0.268
181.5	0.266
181.6	0.264
181.7	0.263
181.8	0.258
181.9	0.257
182	0.258
182.1	0.255
182.2	0.255
182.3	0.253
182.4	0.253
182.5	0.252
182.6	0.253
182.7	0.257
182.8	0.255
182.9	0.252
183	0.249
183.1	0.248
183.2	0.245
183.3	0.246
183.4	0.246
183.5	0.25
183.6	0.252
183.7	0.251
183.8	0.25
183.9	0.249
184	0.248
184.1	0.245
184.2	0.249
184.3	0.25
184.4	0.252
184.5	0.255
184.6	0.254
184.7	0.255
184.8	0.256
184.9	0.257
185	0.253
185.1	0.253
185.2	0.252
185.3	0.249
185.4	0.252
185.5	0.251
185.6	0.253
185.7	0.255
185.8	0.254
185.9	0.255
186	0.258
186.1	0.263
186.2	0.264
186.3	0.259
186.4	0.259
186.5	0.259
186.6	0.257
186.7	0.256
186.8	0.254
186.9	0.256
187	0.255
187.1	0.254
187.2	0.255
187.3	0.251
187.4	0.253
187.5	0.253
187.6	0.254
187.7	0.256
187.8	0.259
187.9	0.26
188	0.26
188.1	0.26
188.2	0.261
188.3	0.26
188.4	0.259
188.5	0.262
188.6	0.265
188.7	0.267
188.8	0.266
188.9	0.264
189	0.266
189.1	0.266
189.2	0.268
189.3	0.269
189.4	0.267
189.5	0.262
189.6	0.262
189.7	0.264
189.8	0.265
189.9	0.263
190	0.26
190.1	0.261
190.2	0.257
190.3	0.258
190.4	0.261
190.5	0.258
190.6	0.256
190.7	0.259
190.8	0.259
190.9	0.262
191	0.259
191.1	0.26
191.2	0.263
191.3	0.266
191.4	0.268
191.5	0.267
191.6	0.268
191.7	0.267
191.8	0.27
191.9	0.272
192	0.274
192.1	0.276
192.2	0.274
192.3	0.27
192.4	0.271
192.5	0.276
192.6	0.275
192.7	0.274
192.8	0.274
192.9	0.274
193	0.274
193.1	0.277
193.2	0.276
193.3	0.278
193.4	0.276
193.5	0.277
193.6	0.28
193.7	0.278
193.8	0.276
193.9	0.276
194	0.28
194.1	0.284
194.2	0.284
194.3	0.284
194.4	0.281
194.5	0.279
194.6	0.281
194.7	0.286
194.8	0.287
194.9	0.288
195	0.288
195.1	0.289
195.2	0.292
195.3	0.292
195.4	0.294
195.5	0.29
195.6	0.293
195.7	0.29
195.8	0.287
195.9	0.285
196	0.286
196.1	0.286
196.2	0.287
196.3	0.288
196.4	0.287
196.5	0.287
196.6	0.287
196.7	0.284
196.8	0.284
196.9	0.284
197	0.282
197.1	0.276
197.2	0.276
197.3	0.275
197.4	0.274
197.5	0.274
197.6	0.274
197.7	0.275
197.8	0.272
197.9	0.27
198	0.271
198.1	0.271
198.2	0.272
198.3	0.269
198.4	0.27
198.5	0.27
198.6	0.273
198.7	0.272
198.8	0.271
198.9	0.271
199	0.268
199.1	0.269
199.2	0.269
199.3	0.268
199.4	0.27
199.5	0.272
199.6	0.269
199.7	0.27
199.8	0.268
199.9	0.269
200	0.267
[truncated: 14,000 more rows]
