# Supplementary material for: Bayesian inference of kinetic schemes for ion channels by Kalman filtering
Source: eLife journal article supplement (doi:10.7554/elife.62714), 2022-05-04
Supplement: fig4-data10 [file 1_Sim_N_500_Strom_MW.xlsx]

## Sheet: Tabelle1
0.1	0
0.2	0
0.3	0
0.4	0
0.5	0
0.6	0
0.7	0
0.8	0
0.9	0
1	0
1.1	0
1.2	0
1.3	0
1.4	0
1.5	0
1.6	0
1.7	0
1.8	0
1.9	0
2	0
2.1	0
2.2	0
2.3	0
2.4	0
2.5	0
2.6	0
2.7	0
2.8	0
2.9	0
3	0
3.1	0
3.2	0
3.3	0
3.4	0
3.5	0
3.6	0
3.7	0
3.8	0
3.9	0
4	0
4.1	0
4.2	0
4.3	0
4.4	0
4.5	0
4.6	0
4.7	0
4.8	0
4.9	0
5	0
5.1	0
5.2	0
5.3	0
5.4	0
5.5	0
5.6	0
5.7	0
5.8	0
5.9	0
6	0
6.1	0
6.2	0
6.3	0
6.4	0
6.5	0
6.6	0
6.7	0
6.8	0
6.9	0
7	0
7.1	0
7.2	0
7.3	0
7.4	0
7.5	0
7.6	0
7.7	0
7.8	0
7.9	0
8	0
8.1	0
8.2	0
8.3	0
8.4	0
8.5	0
8.6	0
8.7	0
8.8	0
8.9	0
9	0
9.1	0
9.2	0
9.3	0
9.4	0
9.5	0
9.6	0
9.7	0
9.8	0
9.9	0
10	0
10.1	0
10.2	0
10.3	0
10.4	0
10.5	0
10.6	0
10.7	0
10.8	0
10.9	0
11	0
11.1	0
11.2	0
11.3	0
11.4	0
11.5	0
11.6	0
11.7	0
11.8	0
11.9	0
12	0
12.1	0
12.2	0
12.3	0
12.4	0
12.5	0
12.6	0
12.7	0
12.8	0
12.9	0
13	0
13.1	0
13.2	0
13.3	0
13.4	0
13.5	0
13.6	0
13.7	0
13.8	0
13.9	0
14	0
14.1	0
14.2	0
14.3	0
14.4	0
14.5	0
14.6	0
14.7	0
14.8	0
14.9	0
15	0
15.1	0
15.2	0
15.3	0
15.4	0
15.5	0
15.6	0
15.7	0
15.8	0
15.9	0
16	0
16.1	0
16.2	0
16.3	0
16.4	0
16.5	0
16.6	0
16.7	0
16.8	0
16.9	0
17	0
17.1	0
17.2	0
17.3	0
17.4	0
17.5	0
17.6	0
17.7	0
17.8	0
17.9	0
18	0
18.1	0
18.2	0
18.3	0
18.4	0
18.5	0
18.6	0
18.7	0
18.8	0
18.9	0
19	0
19.1	0
19.2	0
19.3	0
19.4	0
19.5	0
19.6	0
19.7	0
19.8	0
19.9	0
20	0
20.1	0
20.2	0
20.3	0
20.4	0
20.5	0
20.6	0
20.7	0
20.8	0
20.9	0
21	0
21.1	0
21.2	0
21.3	0
21.4	0
21.5	0
21.6	0
21.7	0
21.8	0
21.9	0
22	0
22.1	0
22.2	0
22.3	0
22.4	0
22.5	0
22.6	0
22.7	0
22.8	0
22.9	0
23	0
23.1	0
23.2	0
23.3	0
23.4	0
23.5	0
23.6	0
23.7	0
23.8	0
23.9	0
24	0
24.1	0
24.2	0
24.3	0
24.4	0
24.5	0
24.6	0
24.7	0
24.8	0
24.9	0
25	0
25.1	0
25.2	0
25.3	0
25.4	0
25.5	0
25.6	0
25.7	0
25.8	0
25.9	0
26	0
26.1	0
26.2	0
26.3	0
26.4	0
26.5	0
26.6	0
26.7	0
26.8	0
26.9	0
27	0
27.1	0
27.2	0
27.3	0
27.4	0
27.5	0
27.6	0
27.7	0
27.8	0
27.9	0
28	0
28.1	0
28.2	0
28.3	0
28.4	0
28.5	0
28.6	0
28.7	0
28.8	0
28.9	0
29	0
29.1	0
29.2	0
29.3	0
29.4	0
29.5	0
29.6	0
29.7	0
29.8	0
29.9	0
30	0
30.1	0
30.2	0
30.3	0
30.4	0
30.5	0
30.6	0
30.7	0
30.8	0
30.9	0
31	0
31.1	0
31.2	0
31.3	0
31.4	0
31.5	0
31.6	0
31.7	0
31.8	0
31.9	0
32	0
32.1	0
32.2	0
32.3	0
32.4	0
32.5	0
32.6	0
32.7	0
32.8	0
32.9	0
33	0
33.1	0
33.2	0
33.3	0
33.4	0
33.5	0
33.6	0
33.7	0
33.8	0
33.9	0
34	0
34.1	0
34.2	0
34.3	0
34.4	0
34.5	0
34.6	0
34.7	0
34.8	0
34.9	0
35	0
35.1	0
35.2	0
35.3	0
35.4	0
35.5	0
35.6	0
35.7	0
35.8	0
35.9	0
36	0
36.1	0
36.2	0
36.3	0
36.4	0
36.5	0
36.6	0
36.7	0
36.8	0
36.9	0
37	0
37.1	0
37.2	0
37.3	0
37.4	0
37.5	0
37.6	0
37.7	0
37.8	0
37.9	0
38	0
38.1	0
38.2	0
38.3	0
38.4	0
38.5	0
38.6	0
38.7	0
38.8	0
38.9	0
39	0
39.1	0
39.2	0
39.3	0
39.4	0
39.5	0
39.6	0
39.7	0
39.8	0
39.9	0
40	0
40.1	0
40.2	0
40.3	0
40.4	0
40.5	0
40.6	0
40.7	0
40.8	0
40.9	0
41	0
41.1	0
41.2	0
41.3	0
41.4	0
41.5	0
41.6	0
41.7	0
41.8	0
41.9	0
42	0
42.1	0
42.2	0
42.3	0
42.4	0
42.5	0
42.6	0
42.7	0
42.8	0
42.9	0
43	0
43.1	0
43.2	0
43.3	0
43.4	0
43.5	0
43.6	0
43.7	0
43.8	0
43.9	0
44	0
44.1	0
44.2	0
44.3	0
44.4	0
44.5	0
44.6	0
44.7	0
44.8	0
44.9	0
45	0
45.1	0
45.2	0
45.3	0
45.4	0
45.5	0
45.6	0
45.7	0
45.8	0
45.9	0
46	0
46.1	0
46.2	0
46.3	0
46.4	0
46.5	0
46.6	0
46.7	0
46.8	0
46.9	0
47	0
47.1	0
47.2	0
47.3	0
47.4	0
47.5	0
47.6	0
47.7	0
47.8	0
47.9	0
48	0
48.1	0
48.2	0
48.3	0
48.4	0
48.5	0
48.6	0
48.7	0
48.8	0
48.9	0
49	0
49.1	0
49.2	0
49.3	0
49.4	0
49.5	0
49.6	0
49.7	0
49.8	0
49.9	0
50	0
50.1	0
50.2	0
50.3	0
50.4	0
50.5	0
50.6	0
50.7	0
50.8	0
50.9	0
51	0
51.1	0
51.2	0
51.3	0
51.4	0
51.5	0
51.6	0
51.7	0
51.8	0
51.9	0
52	0
52.1	0
52.2	0
52.3	0
52.4	0
52.5	0
52.6	0
52.7	0
52.8	0
52.9	0
53	0
53.1	0
53.2	0
53.3	0
53.4	0
53.5	0
53.6	0
53.7	0
53.8	0
53.9	0
54	0
54.1	0
54.2	0
54.3	0
54.4	0
54.5	0
54.6	0
54.7	0
54.8	0
54.9	0
55	0
55.1	0
55.2	0
55.3	0
55.4	0
55.5	0
55.6	0
55.7	0
55.8	0
55.9	0
56	0
56.1	0
56.2	0
56.3	0
56.4	0
56.5	0
56.6	0
56.7	0
56.8	0
56.9	0
57	0
57.1	0
57.2	0
57.3	0
57.4	0
57.5	0
57.6	0
57.7	0
57.8	0
57.9	0
58	0
58.1	0
58.2	0
58.3	0
58.4	0
58.5	0
58.6	0
58.7	0
58.8	0
58.9	0
59	0
59.1	0
59.2	0
59.3	0
59.4	0
59.5	0
59.6	0
59.7	0
59.8	0
59.9	0
60	0
60.1	0
60.2	0
60.3	0
60.4	0
60.5	0
60.6	0
60.7	0
60.8	0
60.9	0
61	0
61.1	0
61.2	0
61.3	0
61.4	0
61.5	0
61.6	0
61.7	0
61.8	0
61.9	0
62	0
62.1	0
62.2	0
62.3	0
62.4	0
62.5	0
62.6	0
62.7	0
62.8	0
62.9	0
63	0
63.1	0
63.2	0
63.3	0
63.4	0
63.5	0
63.6	0
63.7	0
63.8	0
63.9	0
64	0
64.1	0
64.2	0
64.3	0
64.4	0
64.5	0
64.6	0
64.7	0
64.8	0
64.9	0
65	0
65.1	0
65.2	0
65.3	0
65.4	0
65.5	0
65.6	0
65.7	0
65.8	0
65.9	0
66	0
66.1	0
66.2	0
66.3	0
66.4	0
66.5	0
66.6	0
66.7	0
66.8	0
66.9	0
67	0
67.1	0
67.2	0
67.3	0
67.4	0
67.5	0
67.6	0
67.7	0
67.8	0
67.9	0
68	0
68.1	0
68.2	0
68.3	0
68.4	0
68.5	0
68.6	0
68.7	0
68.8	0
68.9	0
69	0
69.1	0
69.2	0
69.3	0
69.4	0
69.5	0
69.6	0
69.7	0
69.8	0
69.9	0
70	0
70.1	0
70.2	0
70.3	0
70.4	0
70.5	0
70.6	0
70.7	0
70.8	0
70.9	0
71	0
71.1	0
71.2	0
71.3	0
71.4	0
71.5	0
71.6	0
71.7	0
71.8	0
71.9	0
72	0
72.1	0
72.2	0
72.3	0
72.4	0
72.5	0
72.6	0
72.7	0
72.8	0
72.9	0
73	0
73.1	0
73.2	0
73.3	0
73.4	0
73.5	0
73.6	0
73.7	0
73.8	0
73.9	0
74	0
74.1	0
74.2	0
74.3	0
74.4	0
74.5	0
74.6	0
74.7	0
74.8	0
74.9	0
75	0
75.1	0
75.2	0
75.3	0
75.4	0
75.5	0
75.6	0
75.7	0
75.8	0
75.9	0
76	0
76.1	0
76.2	0
76.3	0
76.4	0
76.5	0
76.6	0
76.7	0
76.8	0
76.9	0
77	0
77.1	0
77.2	0
77.3	0
77.4	0
77.5	0
77.6	0
77.7	0
77.8	0
77.9	0
78	0
78.1	0
78.2	0
78.3	0
78.4	0
78.5	0
78.6	0
78.7	0
78.8	0
78.9	0
79	0
79.1	0
79.2	0
79.3	0
79.4	0
79.5	0
79.6	0
79.7	0
79.8	0
79.9	0
80	0
80.1	0
80.2	0
80.3	0
80.4	0
80.5	0
80.6	0
80.7	0
80.8	0
80.9	0
81	0
81.1	0
81.2	0
81.3	0
81.4	0
81.5	0
81.6	0
81.7	0
81.8	0
81.9	0
82	0
82.1	0
82.2	0
82.3	0
82.4	0
82.5	0
82.6	0
82.7	0
82.8	0
82.9	0
83	0
83.1	0
83.2	0
83.3	0
83.4	0
83.5	0
83.6	0
83.7	0
83.8	0
83.9	0
84	0
84.1	0
84.2	0
84.3	0
84.4	0
84.5	0
84.6	0
84.7	0
84.8	0
84.9	0
85	0
85.1	0
85.2	0
85.3	0
85.4	0
85.5	0
85.6	0
85.7	0
85.8	0
85.9	0
86	0
86.1	0
86.2	0
86.3	0
86.4	0
86.5	0
86.6	0
86.7	0
86.8	0
86.9	0
87	0
87.1	0
87.2	0
87.3	0
87.4	0
87.5	0
87.6	0
87.7	0
87.8	0
87.9	0
88	0
88.1	0
88.2	0
88.3	0
88.4	0
88.5	0
88.6	0
88.7	0
88.8	0
88.9	0
89	0
89.1	0
89.2	0
89.3	0
89.4	0
89.5	0
89.6	0
89.7	0
89.8	0
89.9	0
90	0
90.1	0
90.2	0
90.3	0
90.4	0
90.5	0
90.6	0
90.7	0
90.8	0
90.9	0
91	0
91.1	0
91.2	0
91.3	0
91.4	0
91.5	0
91.6	0
91.7	0
91.8	0
91.9	0
92	0
92.1	0
92.2	0
92.3	0
92.4	0
92.5	0
92.6	0
92.7	0
92.8	0
92.9	0
93	0
93.1	0
93.2	0
93.3	0
93.4	0
93.5	0
93.6	0
93.7	0
93.8	0
93.9	0
94	0
94.1	0
94.2	0
94.3	0
94.4	0
94.5	0
94.6	0
94.7	0
94.8	0
94.9	0
95	0
95.1	0
95.2	0
95.3	0
95.4	0
95.5	0
95.6	0
95.7	0
95.8	0
95.9	0
96	0
96.1	0
96.2	0
96.3	0
96.4	0
96.5	0
96.6	0
96.7	0
96.8	0
96.9	0
97	0
97.1	0
97.2	0
97.3	0
97.4	0
97.5	0
97.6	0
97.7	0
97.8	0
97.9	0
98	0
98.1	0
98.2	0
98.3	0
98.4	0
98.5	0
98.6	0
98.7	0
98.8	0
98.9	0
99	0
99.1	0
99.2	0
99.3	0
99.4	0
99.5	0
99.6	0
99.7	0
99.8	0
99.9	0
100	0
100.1	0
100.2	0
100.3	0
100.4	0
100.5	0
100.6	0
100.7	0
100.8	0
100.9	0
101	0
101.1	0
101.2	0
101.3	0
101.4	0
101.5	0
101.6	0
101.7	0
101.8	0
101.9	0
102	0
102.1	0
102.2	0
102.3	0
102.4	0
102.5	0
102.6	0
102.7	0
102.8	0
102.9	0
103	0
103.1	0
103.2	0
103.3	0
103.4	0
103.5	0
103.6	0
103.7	0
103.8	0
103.9	0
104	0
104.1	0
104.2	0
104.3	0
104.4	0
104.5	0
104.6	0
104.7	0
104.8	0
104.9	0
105	0
105.1	0
105.2	0
105.3	0
105.4	0
105.5	0
105.6	0
105.7	0
105.8	0.002
105.9	0.002
106	0.002
106.1	0.002
106.2	0.002
106.3	0.002
106.4	0.002
106.5	0.002
106.6	0.002
106.7	0.002
106.8	0.002
106.9	0.002
107	0.002
107.1	0.002
107.2	0.002
107.3	0.002
107.4	0.002
107.5	0.002
107.6	0.002
107.7	0.002
107.8	0.002
107.9	0.002
108	0.002
108.1	0.002
108.2	0.002
108.3	0.002
108.4	0.002
108.5	0.002
108.6	0.002
108.7	0.002
108.8	0.002
108.9	0.002
109	0.002
109.1	0.002
109.2	0.002
109.3	0.002
109.4	0.002
109.5	0.002
109.6	0.002
109.7	0.002
109.8	0.002
109.9	0.002
110	0.002
110.1	0.002
110.2	0.004
110.3	0.004
110.4	0.004
110.5	0.006
110.6	0.006
110.7	0.006
110.8	0.006
110.9	0.006
111	0.006
111.1	0.006
111.2	0.006
111.3	0.006
111.4	0.006
111.5	0.008
111.6	0.008
111.7	0.008
111.8	0.008
111.9	0.008
112	0.008
112.1	0.008
112.2	0.008
112.3	0.008
112.4	0.008
112.5	0.008
112.6	0.008
112.7	0.008
112.8	0.008
112.9	0.008
113	0.008
113.1	0.008
113.2	0.008
113.3	0.008
113.4	0.008
113.5	0.008
113.6	0.008
113.7	0.008
113.8	0.008
113.9	0.008
114	0.008
114.1	0.008
114.2	0.008
114.3	0.008
114.4	0.008
114.5	0.008
114.6	0.008
114.7	0.008
114.8	0.008
114.9	0.008
115	0.008
115.1	0.008
115.2	0.008
115.3	0.008
115.4	0.008
115.5	0.008
115.6	0.008
115.7	0.008
115.8	0.008
115.9	0.008
116	0.008
116.1	0.008
116.2	0.008
116.3	0.008
116.4	0.008
116.5	0.008
116.6	0.008
116.7	0.008
116.8	0.008
116.9	0.008
117	0.008
117.1	0.008
117.2	0.008
117.3	0.008
117.4	0.006
117.5	0.006
117.6	0.006
117.7	0.006
117.8	0.006
117.9	0.006
118	0.006
118.1	0.006
118.2	0.008
118.3	0.008
118.4	0.008
118.5	0.008
118.6	0.008
118.7	0.008
118.8	0.008
118.9	0.008
119	0.008
119.1	0.008
119.2	0.008
119.3	0.008
119.4	0.008
119.5	0.008
119.6	0.008
119.7	0.008
119.8	0.008
119.9	0.008
120	0.008
120.1	0.008
120.2	0.008
120.3	0.008
120.4	0.008
120.5	0.008
120.6	0.008
120.7	0.008
120.8	0.008
120.9	0.008
121	0.008
121.1	0.008
121.2	0.008
121.3	0.008
121.4	0.008
121.5	0.008
121.6	0.008
121.7	0.008
121.8	0.008
121.9	0.008
122	0.008
122.1	0.008
122.2	0.008
122.3	0.008
122.4	0.008
122.5	0.008
122.6	0.008
122.7	0.008
122.8	0.008
122.9	0.008
123	0.008
123.1	0.008
123.2	0.008
123.3	0.008
123.4	0.008
123.5	0.008
123.6	0.008
123.7	0.008
123.8	0.008
123.9	0.008
124	0.008
124.1	0.008
124.2	0.008
124.3	0.008
124.4	0.008
124.5	0.008
124.6	0.008
124.7	0.008
124.8	0.008
124.9	0.008
125	0.008
125.1	0.008
125.2	0.008
125.3	0.008
125.4	0.008
125.5	0.008
125.6	0.01
125.7	0.01
125.8	0.01
125.9	0.012
126	0.012
126.1	0.012
126.2	0.012
126.3	0.012
126.4	0.012
126.5	0.012
126.6	0.012
126.7	0.012
126.8	0.012
126.9	0.012
127	0.012
127.1	0.012
127.2	0.012
127.3	0.012
127.4	0.012
127.5	0.012
127.6	0.012
127.7	0.012
127.8	0.012
127.9	0.012
128	0.012
128.1	0.012
128.2	0.012
128.3	0.012
128.4	0.012
128.5	0.012
128.6	0.012
128.7	0.01
128.8	0.01
128.9	0.01
129	0.012
129.1	0.012
129.2	0.012
129.3	0.012
129.4	0.012
129.5	0.012
129.6	0.012
129.7	0.012
129.8	0.012
129.9	0.012
130	0.012
130.1	0.012
130.2	0.012
130.3	0.012
130.4	0.012
130.5	0.012
130.6	0.012
130.7	0.012
130.8	0.012
130.9	0.012
131	0.012
131.1	0.012
131.2	0.012
131.3	0.012
131.4	0.012
131.5	0.012
131.6	0.012
131.7	0.012
131.8	0.012
131.9	0.012
132	0.012
132.1	0.012
132.2	0.012
132.3	0.012
132.4	0.012
132.5	0.012
132.6	0.012
132.7	0.012
132.8	0.012
132.9	0.012
133	0.012
133.1	0.012
133.2	0.012
133.3	0.012
133.4	0.012
133.5	0.012
133.6	0.012
133.7	0.012
133.8	0.012
133.9	0.012
134	0.012
134.1	0.012
134.2	0.012
134.3	0.012
134.4	0.014
134.5	0.014
134.6	0.014
134.7	0.014
134.8	0.014
134.9	0.014
135	0.014
135.1	0.014
135.2	0.014
135.3	0.014
135.4	0.014
135.5	0.014
135.6	0.014
135.7	0.014
135.8	0.014
135.9	0.014
136	0.014
136.1	0.014
136.2	0.014
136.3	0.014
136.4	0.016
136.5	0.018
136.6	0.018
136.7	0.018
136.8	0.018
136.9	0.018
137	0.018
137.1	0.018
137.2	0.018
137.3	0.018
137.4	0.018
137.5	0.018
137.6	0.018
137.7	0.018
137.8	0.018
137.9	0.018
138	0.018
138.1	0.018
138.2	0.018
138.3	0.018
138.4	0.018
138.5	0.018
138.6	0.018
138.7	0.018
138.8	0.018
138.9	0.018
139	0.018
139.1	0.018
139.2	0.018
139.3	0.018
139.4	0.018
139.5	0.018
139.6	0.018
139.7	0.018
139.8	0.018
139.9	0.018
140	0.018
140.1	0.018
140.2	0.018
140.3	0.018
140.4	0.018
140.5	0.018
140.6	0.018
140.7	0.018
140.8	0.018
140.9	0.018
141	0.02
141.1	0.02
141.2	0.02
141.3	0.02
141.4	0.02
141.5	0.02
141.6	0.02
141.7	0.02
141.8	0.02
141.9	0.02
142	0.02
142.1	0.02
142.2	0.02
142.3	0.02
142.4	0.02
142.5	0.02
142.6	0.02
142.7	0.02
142.8	0.022
142.9	0.024
143	0.024
143.1	0.024
143.2	0.024
143.3	0.024
143.4	0.024
143.5	0.024
143.6	0.024
143.7	0.024
143.8	0.024
143.9	0.024
144	0.024
144.1	0.024
144.2	0.024
144.3	0.024
144.4	0.024
144.5	0.024
144.6	0.024
144.7	0.024
144.8	0.024
144.9	0.024
145	0.024
145.1	0.024
145.2	0.024
145.3	0.024
145.4	0.024
145.5	0.024
145.6	0.024
145.7	0.024
145.8	0.024
145.9	0.024
146	0.024
146.1	0.024
146.2	0.024
146.3	0.024
146.4	0.024
146.5	0.024
146.6	0.024
146.7	0.024
146.8	0.024
146.9	0.024
147	0.024
147.1	0.024
147.2	0.024
147.3	0.024
147.4	0.024
147.5	0.024
147.6	0.024
147.7	0.024
147.8	0.024
147.9	0.024
148	0.024
148.1	0.024
148.2	0.026
148.3	0.026
148.4	0.026
148.5	0.026
148.6	0.026
148.7	0.026
148.8	0.026
148.9	0.026
149	0.026
149.1	0.026
149.2	0.026
149.3	0.026
149.4	0.026
149.5	0.026
149.6	0.026
149.7	0.028
149.8	0.028
149.9	0.028
150	0.03
150.1	0.03
150.2	0.03
150.3	0.03
150.4	0.03
150.5	0.03
150.6	0.03
150.7	0.03
150.8	0.03
150.9	0.03
151	0.03
151.1	0.03
151.2	0.03
151.3	0.03
151.4	0.03
151.5	0.03
151.6	0.03
151.7	0.03
151.8	0.032
151.9	0.032
152	0.032
152.1	0.032
152.2	0.032
152.3	0.032
152.4	0.032
152.5	0.032
152.6	0.032
152.7	0.032
152.8	0.032
152.9	0.032
153	0.032
153.1	0.032
153.2	0.032
153.3	0.032
153.4	0.032
153.5	0.032
153.6	0.032
153.7	0.032
153.8	0.032
153.9	0.032
154	0.032
154.1	0.032
154.2	0.032
154.3	0.032
154.4	0.032
154.5	0.032
154.6	0.032
154.7	0.032
154.8	0.032
154.9	0.032
155	0.032
155.1	0.032
155.2	0.032
155.3	0.032
155.4	0.032
155.5	0.032
155.6	0.032
155.7	0.032
155.8	0.032
155.9	0.032
156	0.034
156.1	0.034
156.2	0.034
156.3	0.034
156.4	0.034
156.5	0.034
156.6	0.034
156.7	0.034
156.8	0.034
156.9	0.034
157	0.034
157.1	0.034
157.2	0.034
157.3	0.034
157.4	0.034
157.5	0.034
157.6	0.034
157.7	0.034
157.8	0.034
157.9	0.034
158	0.034
158.1	0.034
158.2	0.034
158.3	0.034
158.4	0.034
158.5	0.034
158.6	0.034
158.7	0.034
158.8	0.034
158.9	0.034
159	0.034
159.1	0.034
159.2	0.034
159.3	0.034
159.4	0.034
159.5	0.034
159.6	0.034
159.7	0.034
159.8	0.034
159.9	0.034
160	0.034
160.1	0.034
160.2	0.034
160.3	0.034
160.4	0.034
160.5	0.034
160.6	0.034
160.7	0.034
160.8	0.034
160.9	0.034
161	0.034
161.1	0.034
161.2	0.034
161.3	0.034
161.4	0.034
161.5	0.034
161.6	0.034
161.7	0.034
161.8	0.034
161.9	0.036
162	0.036
162.1	0.036
162.2	0.036
162.3	0.038
162.4	0.038
162.5	0.038
162.6	0.038
162.7	0.038
162.8	0.038
162.9	0.038
163	0.038
163.1	0.038
163.2	0.038
163.3	0.038
163.4	0.038
163.5	0.038
163.6	0.04
163.7	0.04
163.8	0.04
163.9	0.04
164	0.04
164.1	0.04
164.2	0.04
164.3	0.04
164.4	0.04
164.5	0.04
164.6	0.04
164.7	0.04
164.8	0.04
164.9	0.04
165	0.04
165.1	0.04
165.2	0.04
165.3	0.04
165.4	0.04
165.5	0.04
165.6	0.04
165.7	0.04
165.8	0.04
165.9	0.04
166	0.04
166.1	0.04
166.2	0.04
166.3	0.04
166.4	0.04
166.5	0.04
166.6	0.04
166.7	0.04
166.8	0.04
166.9	0.04
167	0.04
167.1	0.04
167.2	0.04
167.3	0.04
167.4	0.04
167.5	0.04
167.6	0.04
167.7	0.04
167.8	0.04
167.9	0.04
168	0.04
168.1	0.04
168.2	0.04
168.3	0.04
168.4	0.04
168.5	0.04
168.6	0.04
168.7	0.04
168.8	0.04
168.9	0.04
169	0.04
169.1	0.04
169.2	0.04
169.3	0.04
169.4	0.04
169.5	0.04
169.6	0.04
169.7	0.042
169.8	0.042
169.9	0.042
170	0.042
170.1	0.042
170.2	0.042
170.3	0.042
170.4	0.042
170.5	0.042
170.6	0.042
170.7	0.042
170.8	0.042
170.9	0.042
171	0.042
171.1	0.042
171.2	0.042
171.3	0.042
171.4	0.042
171.5	0.042
171.6	0.042
171.7	0.042
171.8	0.042
171.9	0.042
172	0.042
172.1	0.042
172.2	0.042
172.3	0.042
172.4	0.042
172.5	0.042
172.6	0.044
172.7	0.044
172.8	0.044
172.9	0.044
173	0.044
173.1	0.044
173.2	0.044
173.3	0.044
173.4	0.044
173.5	0.044
173.6	0.044
173.7	0.044
173.8	0.046
173.9	0.046
174	0.046
174.1	0.046
174.2	0.046
174.3	0.046
174.4	0.046
174.5	0.046
174.6	0.046
174.7	0.046
174.8	0.046
174.9	0.046
175	0.046
175.1	0.046
175.2	0.046
175.3	0.048
175.4	0.048
175.5	0.048
175.6	0.048
175.7	0.048
175.8	0.048
175.9	0.048
176	0.048
176.1	0.048
176.2	0.048
176.3	0.048
176.4	0.048
176.5	0.048
176.6	0.048
176.7	0.048
176.8	0.048
176.9	0.048
177	0.048
177.1	0.048
177.2	0.048
177.3	0.048
177.4	0.048
177.5	0.048
177.6	0.048
177.7	0.048
177.8	0.048
177.9	0.05
178	0.048
178.1	0.048
178.2	0.048
178.3	0.048
178.4	0.048
178.5	0.048
178.6	0.048
178.7	0.048
178.8	0.048
178.9	0.048
179	0.048
179.1	0.048
179.2	0.048
179.3	0.048
179.4	0.048
179.5	0.05
179.6	0.05
179.7	0.05
179.8	0.05
179.9	0.05
180	0.05
180.1	0.05
180.2	0.05
180.3	0.05
180.4	0.05
180.5	0.05
180.6	0.05
180.7	0.05
180.8	0.05
180.9	0.05
181	0.05
181.1	0.05
181.2	0.05
181.3	0.05
181.4	0.05
181.5	0.05
181.6	0.052
181.7	0.052
181.8	0.052
181.9	0.052
182	0.052
182.1	0.052
182.2	0.052
182.3	0.052
182.4	0.052
182.5	0.052
182.6	0.052
182.7	0.052
182.8	0.052
182.9	0.052
183	0.052
183.1	0.052
183.2	0.052
183.3	0.054
183.4	0.054
183.5	0.054
183.6	0.054
183.7	0.054
183.8	0.054
183.9	0.054
184	0.054
184.1	0.054
184.2	0.054
184.3	0.054
184.4	0.054
184.5	0.054
184.6	0.054
184.7	0.054
184.8	0.054
184.9	0.054
185	0.054
185.1	0.054
185.2	0.054
185.3	0.054
185.4	0.054
185.5	0.054
185.6	0.054
185.7	0.052
185.8	0.052
185.9	0.052
186	0.052
186.1	0.054
186.2	0.054
186.3	0.054
186.4	0.054
186.5	0.054
186.6	0.054
186.7	0.054
186.8	0.054
186.9	0.054
187	0.054
187.1	0.054
187.2	0.054
187.3	0.054
187.4	0.054
187.5	0.054
187.6	0.054
187.7	0.054
187.8	0.054
187.9	0.054
188	0.054
188.1	0.054
188.2	0.054
188.3	0.054
188.4	0.054
188.5	0.054
188.6	0.054
188.7	0.054
188.8	0.054
188.9	0.054
189	0.054
189.1	0.054
189.2	0.052
189.3	0.052
189.4	0.052
189.5	0.052
189.6	0.052
189.7	0.052
189.8	0.052
189.9	0.052
190	0.052
190.1	0.052
190.2	0.052
190.3	0.052
190.4	0.052
190.5	0.052
190.6	0.05
190.7	0.05
190.8	0.05
190.9	0.05
191	0.05
191.1	0.05
191.2	0.05
191.3	0.05
191.4	0.05
191.5	0.05
191.6	0.048
191.7	0.048
191.8	0.048
191.9	0.048
192	0.048
192.1	0.048
192.2	0.048
192.3	0.048
192.4	0.048
192.5	0.048
192.6	0.048
192.7	0.048
192.8	0.048
192.9	0.048
193	0.048
193.1	0.048
193.2	0.048
193.3	0.048
193.4	0.048
193.5	0.048
193.6	0.048
193.7	0.048
193.8	0.048
193.9	0.048
194	0.048
194.1	0.048
194.2	0.048
194.3	0.048
194.4	0.048
194.5	0.048
194.6	0.048
194.7	0.048
194.8	0.048
194.9	0.05
195	0.05
195.1	0.05
195.2	0.05
195.3	0.05
195.4	0.05
195.5	0.05
195.6	0.05
195.7	0.05
195.8	0.05
195.9	0.05
196	0.05
196.1	0.05
196.2	0.05
196.3	0.05
196.4	0.05
196.5	0.05
196.6	0.05
196.7	0.05
196.8	0.05
196.9	0.05
197	0.05
197.1	0.05
197.2	0.05
197.3	0.05
197.4	0.05
197.5	0.05
197.6	0.05
197.7	0.05
197.8	0.05
197.9	0.05
198	0.05
198.1	0.05
198.2	0.05
198.3	0.05
198.4	0.05
198.5	0.05
198.6	0.048
198.7	0.048
198.8	0.048
198.9	0.048
199	0.048
199.1	0.048
199.2	0.048
199.3	0.048
199.4	0.048
199.5	0.048
199.6	0.048
199.7	0.048
199.8	0.048
199.9	0.048
200	0.048
[truncated: 14,000 more rows]
