# Supplementary material for: Bayesian inference of kinetic schemes for ion channels by Kalman filtering
Source: eLife journal article supplement (doi:10.7554/elife.62714), 2022-05-04
Supplement: fig4-data10 [file 1_Sim_N_800_Fluor_MW_0.0625M.xlsx]

## Sheet: Tabelle1
0.1	0
0.2	0
0.3	0
0.4	0
0.5	0
0.6	0
0.7	0
0.8	0
0.9	0
1	0
1.1	0
1.2	0
1.3	0
1.4	0
1.5	0
1.6	0
1.7	0
1.8	0
1.9	0
2	0
2.1	0
2.2	0
2.3	0
2.4	0
2.5	0
2.6	0
2.7	0
2.8	0
2.9	0
3	0
3.1	0
3.2	0
3.3	0
3.4	0
3.5	0
3.6	0
3.7	0
3.8	0
3.9	0
4	0
4.1	0
4.2	0
4.3	0
4.4	0
4.5	0
4.6	0
4.7	0
4.8	0
4.9	0
5	0
5.1	0
5.2	0
5.3	0
5.4	0
5.5	0
5.6	0
5.7	0
5.8	0
5.9	0
6	0
6.1	0
6.2	0
6.3	0
6.4	0
6.5	0
6.6	0
6.7	0
6.8	0
6.9	0
7	0
7.1	0
7.2	0
7.3	0
7.4	0
7.5	0
7.6	0
7.7	0
7.8	0
7.9	0
8	0
8.1	0
8.2	0
8.3	0
8.4	0
8.5	0
8.6	0
8.7	0
8.8	0
8.9	0
9	0
9.1	0
9.2	0
9.3	0
9.4	0
9.5	0
9.6	0
9.7	0
9.8	0
9.9	0
10	0
10.1	0
10.2	0
10.3	0
10.4	0
10.5	0
10.6	0
10.7	0
10.8	0
10.9	0
11	0
11.1	0
11.2	0
11.3	0
11.4	0
11.5	0
11.6	0
11.7	0
11.8	0
11.9	0
12	0
12.1	0
12.2	0
12.3	0
12.4	0
12.5	0
12.6	0
12.7	0
12.8	0
12.9	0
13	0
13.1	0
13.2	0
13.3	0
13.4	0
13.5	0
13.6	0
13.7	0
13.8	0
13.9	0
14	0
14.1	0
14.2	0
14.3	0
14.4	0
14.5	0
14.6	0
14.7	0
14.8	0
14.9	0
15	0
15.1	0
15.2	0
15.3	0
15.4	0
15.5	0
15.6	0
15.7	0
15.8	0
15.9	0
16	0
16.1	0
16.2	0
16.3	0
16.4	0
16.5	0
16.6	0
16.7	0
16.8	0
16.9	0
17	0
17.1	0
17.2	0
17.3	0
17.4	0
17.5	0
17.6	0
17.7	0
17.8	0
17.9	0
18	0
18.1	0
18.2	0
18.3	0
18.4	0
18.5	0
18.6	0
18.7	0
18.8	0
18.9	0
19	0
19.1	0
19.2	0
19.3	0
19.4	0
19.5	0
19.6	0
19.7	0
19.8	0
19.9	0
20	0
20.1	0
20.2	0
20.3	0
20.4	0
20.5	0
20.6	0
20.7	0
20.8	0
20.9	0
21	0
21.1	0
21.2	0
21.3	0
21.4	0
21.5	0
21.6	0
21.7	0
21.8	0
21.9	0
22	0
22.1	0
22.2	0
22.3	0
22.4	0
22.5	0
22.6	0
22.7	0
22.8	0
22.9	0
23	0
23.1	0
23.2	0
23.3	0
23.4	0
23.5	0
23.6	0
23.7	0
23.8	0
23.9	0
24	0
24.1	0
24.2	0
24.3	0
24.4	0
24.5	0
24.6	0
24.7	0
24.8	0
24.9	0
25	0
25.1	0
25.2	0
25.3	0
25.4	0
25.5	0
25.6	0
25.7	0
25.8	0
25.9	0
26	0
26.1	0
26.2	0
26.3	0
26.4	0
26.5	0
26.6	0
26.7	0
26.8	0
26.9	0
27	0
27.1	0
27.2	0
27.3	0
27.4	0
27.5	0
27.6	0
27.7	0
27.8	0
27.9	0
28	0
28.1	0
28.2	0
28.3	0
28.4	0
28.5	0
28.6	0
28.7	0
28.8	0
28.9	0
29	0
29.1	0
29.2	0
29.3	0
29.4	0
29.5	0
29.6	0
29.7	0
29.8	0
29.9	0
30	0
30.1	0
30.2	0
30.3	0
30.4	0
30.5	0
30.6	0
30.7	0
30.8	0
30.9	0
31	0
31.1	0
31.2	0
31.3	0
31.4	0
31.5	0
31.6	0
31.7	0
31.8	0
31.9	0
32	0
32.1	0
32.2	0
32.3	0
32.4	0
32.5	0
32.6	0
32.7	0
32.8	0
32.9	0
33	0
33.1	0
33.2	0
33.3	0
33.4	0
33.5	0
33.6	0
33.7	0
33.8	0
33.9	0
34	0
34.1	0
34.2	0
34.3	0
34.4	0
34.5	0
34.6	0
34.7	0
34.8	0
34.9	0
35	0
35.1	0
35.2	0
35.3	0
35.4	0
35.5	0
35.6	0
35.7	0
35.8	0
35.9	0
36	0
36.1	0
36.2	0
36.3	0
36.4	0
36.5	0
36.6	0
36.7	0
36.8	0
36.9	0
37	0
37.1	0
37.2	0
37.3	0
37.4	0
37.5	0
37.6	0
37.7	0
37.8	0
37.9	0
38	0
38.1	0
38.2	0
38.3	0
38.4	0
38.5	0
38.6	0
38.7	0
38.8	0
38.9	0
39	0
39.1	0
39.2	0
39.3	0
39.4	0
39.5	0
39.6	0
39.7	0
39.8	0
39.9	0
40	0
40.1	0
40.2	0
40.3	0
40.4	0
40.5	0
40.6	0
40.7	0
40.8	0
40.9	0
41	0
41.1	0
41.2	0
41.3	0
41.4	0
41.5	0
41.6	0
41.7	0
41.8	0
41.9	0
42	0
42.1	0
42.2	0
42.3	0
42.4	0
42.5	0
42.6	0
42.7	0
42.8	0
42.9	0
43	0
43.1	0
43.2	0
43.3	0
43.4	0
43.5	0
43.6	0
43.7	0
43.8	0
43.9	0
44	0
44.1	0
44.2	0
44.3	0
44.4	0
44.5	0
44.6	0
44.7	0
44.8	0
44.9	0
45	0
45.1	0
45.2	0
45.3	0
45.4	0
45.5	0
45.6	0
45.7	0
45.8	0
45.9	0
46	0
46.1	0
46.2	0
46.3	0
46.4	0
46.5	0
46.6	0
46.7	0
46.8	0
46.9	0
47	0
47.1	0
47.2	0
47.3	0
47.4	0
47.5	0
47.6	0
47.7	0
47.8	0
47.9	0
48	0
48.1	0
48.2	0
48.3	0
48.4	0
48.5	0
48.6	0
48.7	0
48.8	0
48.9	0
49	0
49.1	0
49.2	0
49.3	0
49.4	0
49.5	0
49.6	0
49.7	0
49.8	0
49.9	0
50	0
50.1	0
50.2	0
50.3	0
50.4	0
50.5	0
50.6	0
50.7	0
50.8	0
50.9	0
51	0
51.1	0
51.2	0
51.3	0
51.4	0
51.5	0
51.6	0
51.7	0
51.8	0
51.9	0
52	0
52.1	0
52.2	0
52.3	0
52.4	0
52.5	0
52.6	0
52.7	0
52.8	0
52.9	0
53	0
53.1	0
53.2	0
53.3	0
53.4	0
53.5	0
53.6	0
53.7	0
53.8	0
53.9	0
54	0
54.1	0
54.2	0
54.3	0
54.4	0
54.5	0
54.6	0
54.7	0
54.8	0
54.9	0
55	0
55.1	0
55.2	0
55.3	0
55.4	0
55.5	0
55.6	0
55.7	0
55.8	0
55.9	0
56	0
56.1	0
56.2	0
56.3	0
56.4	0
56.5	0
56.6	0
56.7	0
56.8	0
56.9	0
57	0
57.1	0
57.2	0
57.3	0
57.4	0
57.5	0
57.6	0
57.7	0
57.8	0
57.9	0
58	0
58.1	0
58.2	0
58.3	0
58.4	0
58.5	0
58.6	0
58.7	0
58.8	0
58.9	0
59	0
59.1	0
59.2	0
59.3	0
59.4	0
59.5	0
59.6	0
59.7	0
59.8	0
59.9	0
60	0
60.1	0
60.2	0
60.3	0
60.4	0
60.5	0
60.6	0
60.7	0
60.8	0
60.9	0
61	0
61.1	0
61.2	0
61.3	0
61.4	0
61.5	0
61.6	0
61.7	0
61.8	0
61.9	0
62	0
62.1	0
62.2	0
62.3	0
62.4	0
62.5	0
62.6	0
62.7	0
62.8	0
62.9	0
63	0
63.1	0
63.2	0
63.3	0
63.4	0
63.5	0
63.6	0
63.7	0
63.8	0
63.9	0
64	0
64.1	0
64.2	0
64.3	0
64.4	0
64.5	0
64.6	0
64.7	0
64.8	0
64.9	0
65	0
65.1	0
65.2	0
65.3	0
65.4	0
65.5	0
65.6	0
65.7	0
65.8	0
65.9	0
66	0
66.1	0
66.2	0
66.3	0
66.4	0
66.5	0
66.6	0
66.7	0
66.8	0
66.9	0
67	0
67.1	0
67.2	0
67.3	0
67.4	0
67.5	0
67.6	0
67.7	0
67.8	0
67.9	0
68	0
68.1	0
68.2	0
68.3	0
68.4	0
68.5	0
68.6	0
68.7	0
68.8	0
68.9	0
69	0
69.1	0
69.2	0
69.3	0
69.4	0
69.5	0
69.6	0
69.7	0
69.8	0
69.9	0
70	0
70.1	0
70.2	0
70.3	0
70.4	0
70.5	0
70.6	0
70.7	0
70.8	0
70.9	0
71	0
71.1	0
71.2	0
71.3	0
71.4	0
71.5	0
71.6	0
71.7	0
71.8	0
71.9	0
72	0
72.1	0
72.2	0
72.3	0
72.4	0
72.5	0
72.6	0
72.7	0
72.8	0
72.9	0
73	0
73.1	0
73.2	0
73.3	0
73.4	0
73.5	0
73.6	0
73.7	0
73.8	0
73.9	0
74	0
74.1	0
74.2	0
74.3	0
74.4	0
74.5	0
74.6	0
74.7	0
74.8	0
74.9	0
75	0
75.1	0
75.2	0
75.3	0
75.4	0
75.5	0
75.6	0
75.7	0
75.8	0
75.9	0
76	0
76.1	0
76.2	0
76.3	0
76.4	0
76.5	0
76.6	0
76.7	0
76.8	0
76.9	0
77	0
77.1	0
77.2	0
77.3	0
77.4	0
77.5	0
77.6	0
77.7	0
77.8	0
77.9	0
78	0
78.1	0
78.2	0
78.3	0
78.4	0
78.5	0
78.6	0
78.7	0
78.8	0
78.9	0
79	0
79.1	0
79.2	0
79.3	0
79.4	0
79.5	0
79.6	0
79.7	0
79.8	0
79.9	0
80	0
80.1	0
80.2	0
80.3	0
80.4	0
80.5	0
80.6	0
80.7	0
80.8	0
80.9	0
81	0
81.1	0
81.2	0
81.3	0
81.4	0
81.5	0
81.6	0
81.7	0
81.8	0
81.9	0
82	0
82.1	0
82.2	0
82.3	0
82.4	0
82.5	0
82.6	0
82.7	0
82.8	0
82.9	0
83	0
83.1	0
83.2	0
83.3	0
83.4	0
83.5	0
83.6	0
83.7	0
83.8	0
83.9	0
84	0
84.1	0
84.2	0
84.3	0
84.4	0
84.5	0
84.6	0
84.7	0
84.8	0
84.9	0
85	0
85.1	0
85.2	0
85.3	0
85.4	0
85.5	0
85.6	0
85.7	0
85.8	0
85.9	0
86	0
86.1	0
86.2	0
86.3	0
86.4	0
86.5	0
86.6	0
86.7	0
86.8	0
86.9	0
87	0
87.1	0
87.2	0
87.3	0
87.4	0
87.5	0
87.6	0
87.7	0
87.8	0
87.9	0
88	0
88.1	0
88.2	0
88.3	0
88.4	0
88.5	0
88.6	0
88.7	0
88.8	0
88.9	0
89	0
89.1	0
89.2	0
89.3	0
89.4	0
89.5	0
89.6	0
89.7	0
89.8	0
89.9	0
90	0
90.1	0
90.2	0
90.3	0
90.4	0
90.5	0
90.6	0
90.7	0
90.8	0
90.9	0
91	0
91.1	0
91.2	0
91.3	0
91.4	0
91.5	0
91.6	0
91.7	0
91.8	0
91.9	0
92	0
92.1	0
92.2	0
92.3	0
92.4	0
92.5	0
92.6	0
92.7	0
92.8	0
92.9	0
93	0
93.1	0
93.2	0
93.3	0
93.4	0
93.5	0
93.6	0
93.7	0
93.8	0
93.9	0
94	0
94.1	0
94.2	0
94.3	0
94.4	0
94.5	0
94.6	0
94.7	0
94.8	0
94.9	0
95	0
95.1	0
95.2	0
95.3	0
95.4	0
95.5	0
95.6	0
95.7	0
95.8	0
95.9	0
96	0
96.1	0
96.2	0
96.3	0
96.4	0
96.5	0
96.6	0
96.7	0
96.8	0
96.9	0
97	0
97.1	0
97.2	0
97.3	0
97.4	0
97.5	0
97.6	0
97.7	0
97.8	0
97.9	0
98	0
98.1	0
98.2	0
98.3	0
98.4	0
98.5	0
98.6	0
98.7	0
98.8	0
98.9	0
99	0
99.1	0
99.2	0
99.3	0
99.4	0
99.5	0
99.6	0
99.7	0
99.8	0
99.9	0
100	0
100.1	0.001875
100.2	0.005
100.3	0.008125
100.4	0.01125
100.5	0.01375
100.6	0.0175
100.7	0.020625
100.8	0.023125
100.9	0.025625
101	0.030625
101.1	0.030625
101.2	0.036875
101.3	0.0375
101.4	0.0425
101.5	0.04625
101.6	0.05125
101.7	0.056875
101.8	0.059375
101.9	0.06125
102	0.06625
102.1	0.066875
102.2	0.068125
102.3	0.07125
102.4	0.073125
102.5	0.075
102.6	0.075625
102.7	0.0775
102.8	0.08
102.9	0.084375
103	0.085
103.1	0.0875
103.2	0.089375
103.3	0.091875
103.4	0.095
103.5	0.09875
103.6	0.10125
103.7	0.10375
103.8	0.106875
103.9	0.110625
104	0.113125
104.1	0.116875
104.2	0.119375
104.3	0.12
104.4	0.12
104.5	0.12375
104.6	0.1225
104.7	0.12375
104.8	0.128125
104.9	0.13125
105	0.134375
105.1	0.13625
105.2	0.138125
105.3	0.141875
105.4	0.143125
105.5	0.144375
105.6	0.145
105.7	0.148125
105.8	0.151875
105.9	0.153125
106	0.15625
106.1	0.1575
106.2	0.1625
106.3	0.16375
106.4	0.159375
106.5	0.163125
106.6	0.164375
106.7	0.165625
106.8	0.16625
106.9	0.165
107	0.16625
107.1	0.168125
107.2	0.16625
107.3	0.168125
107.4	0.170625
107.5	0.170625
107.6	0.17
107.7	0.17
107.8	0.1725
107.9	0.171875
108	0.175
108.1	0.176875
108.2	0.1775
108.3	0.176875
108.4	0.176875
108.5	0.176875
108.6	0.180625
108.7	0.18125
108.8	0.185
108.9	0.183125
109	0.185
109.1	0.18375
109.2	0.185
109.3	0.188125
109.4	0.188125
109.5	0.19
109.6	0.193125
109.7	0.193125
109.8	0.191875
109.9	0.194375
110	0.195625
110.1	0.195
110.2	0.1975
110.3	0.2
110.4	0.199375
110.5	0.201875
110.6	0.203125
110.7	0.203125
110.8	0.205625
110.9	0.205625
111	0.20625
111.1	0.208125
111.2	0.209375
111.3	0.210625
111.4	0.209375
111.5	0.20875
111.6	0.210625
111.7	0.211875
111.8	0.21125
111.9	0.214375
112	0.214375
112.1	0.2125
112.2	0.2125
112.3	0.213125
112.4	0.21375
112.5	0.215
112.6	0.2175
112.7	0.216875
112.8	0.21875
112.9	0.22125
113	0.221875
113.1	0.219375
113.2	0.22125
113.3	0.220625
113.4	0.215625
113.5	0.21375
113.6	0.21375
113.7	0.21375
113.8	0.214375
113.9	0.21625
114	0.215
114.1	0.215
114.2	0.21625
114.3	0.216875
114.4	0.218125
114.5	0.218125
114.6	0.21625
114.7	0.216875
114.8	0.216875
114.9	0.215625
115	0.214375
115.1	0.216875
115.2	0.218125
115.3	0.22
115.4	0.216875
115.5	0.21875
115.6	0.218125
115.7	0.21875
115.8	0.2175
115.9	0.22
116	0.22125
116.1	0.220625
116.2	0.221875
116.3	0.22125
116.4	0.22125
116.5	0.221875
116.6	0.220625
116.7	0.22125
116.8	0.22
116.9	0.21875
117	0.2225
117.1	0.220625
117.2	0.221875
117.3	0.22375
117.4	0.2225
117.5	0.22125
117.6	0.2225
117.7	0.225
117.8	0.225625
117.9	0.225
118	0.226875
118.1	0.22875
118.2	0.22875
118.3	0.23
118.4	0.228125
118.5	0.228125
118.6	0.228125
118.7	0.2275
118.8	0.22875
118.9	0.2275
119	0.2275
119.1	0.225625
119.2	0.225
119.3	0.2225
119.4	0.223125
119.5	0.224375
119.6	0.224375
119.7	0.22375
119.8	0.225
119.9	0.224375
120	0.225625
120.1	0.225
120.2	0.226875
120.3	0.225625
120.4	0.226875
120.5	0.226875
120.6	0.226875
120.7	0.22625
120.8	0.226875
120.9	0.225625
121	0.226875
121.1	0.22625
121.2	0.226875
121.3	0.225
121.4	0.224375
121.5	0.226875
121.6	0.22625
121.7	0.228125
121.8	0.228125
121.9	0.230625
122	0.229375
122.1	0.2275
122.2	0.22875
122.3	0.230625
122.4	0.231875
122.5	0.231875
122.6	0.234375
122.7	0.2375
122.8	0.236875
122.9	0.235625
123	0.23375
123.1	0.2325
123.2	0.234375
123.3	0.235625
123.4	0.235625
123.5	0.235625
123.6	0.2375
123.7	0.235625
123.8	0.23625
123.9	0.23625
124	0.238125
124.1	0.236875
124.2	0.235
124.3	0.234375
124.4	0.234375
124.5	0.23625
124.6	0.235625
124.7	0.235
124.8	0.2325
124.9	0.23125
125	0.230625
125.1	0.23125
125.2	0.228125
125.3	0.2275
125.4	0.23125
125.5	0.23
125.6	0.22625
125.7	0.226875
125.8	0.229375
125.9	0.2275
126	0.226875
126.1	0.2275
126.2	0.22625
126.3	0.226875
126.4	0.225625
126.5	0.226875
126.6	0.224375
126.7	0.225625
126.8	0.22625
126.9	0.228125
127	0.230625
127.1	0.2325
127.2	0.2325
127.3	0.2325
127.4	0.235
127.5	0.235625
127.6	0.235
127.7	0.235625
127.8	0.2375
127.9	0.234375
128	0.231875
128.1	0.23
128.2	0.22875
128.3	0.229375
128.4	0.23
128.5	0.230625
128.6	0.229375
128.7	0.225625
128.8	0.2275
128.9	0.228125
129	0.228125
129.1	0.228125
129.2	0.23375
129.3	0.23625
129.4	0.2375
129.5	0.239375
129.6	0.238125
129.7	0.23875
129.8	0.23875
129.9	0.239375
130	0.239375
130.1	0.24125
130.2	0.240625
130.3	0.240625
130.4	0.24125
130.5	0.243125
130.6	0.2425
130.7	0.2425
130.8	0.244375
130.9	0.245625
131	0.24625
131.1	0.241875
131.2	0.24125
131.3	0.245
131.4	0.245625
131.5	0.2475
131.6	0.2475
131.7	0.251875
131.8	0.251875
131.9	0.25125
132	0.250625
132.1	0.250625
132.2	0.2525
132.3	0.253125
132.4	0.253125
132.5	0.253125
132.6	0.25125
132.7	0.25375
132.8	0.251875
132.9	0.256875
133	0.256875
133.1	0.2575
133.2	0.259375
133.3	0.254375
133.4	0.253125
133.5	0.2525
133.6	0.25125
133.7	0.2525
133.8	0.253125
133.9	0.255
134	0.25625
134.1	0.255
134.2	0.255
134.3	0.251875
134.4	0.251875
134.5	0.251875
134.6	0.24875
134.7	0.25125
134.8	0.25125
134.9	0.249375
135	0.25
135.1	0.253125
135.2	0.255
135.3	0.254375
135.4	0.253125
135.5	0.25125
135.6	0.250625
135.7	0.254375
135.8	0.255
135.9	0.255
136	0.255
136.1	0.253125
136.2	0.255
136.3	0.25625
136.4	0.2575
136.5	0.254375
136.6	0.256875
136.7	0.258125
136.8	0.26
136.9	0.258125
137	0.2575
137.1	0.256875
137.2	0.2575
137.3	0.256875
137.4	0.2575
137.5	0.258125
137.6	0.25375
137.7	0.255
137.8	0.2575
137.9	0.25875
138	0.256875
138.1	0.256875
138.2	0.259375
138.3	0.25875
138.4	0.25875
138.5	0.25875
138.6	0.260625
138.7	0.26
138.8	0.26
138.9	0.26375
139	0.264375
139.1	0.26375
139.2	0.263125
139.3	0.26125
139.4	0.263125
139.5	0.266875
139.6	0.26625
139.7	0.265
139.8	0.265
139.9	0.265
140	0.265
140.1	0.265
140.2	0.264375
140.3	0.263125
140.4	0.2675
140.5	0.265625
140.6	0.264375
140.7	0.265625
140.8	0.263125
140.9	0.264375
141	0.265
141.1	0.2625
141.2	0.26375
141.3	0.26375
141.4	0.2675
141.5	0.265625
141.6	0.265625
141.7	0.264375
141.8	0.261875
141.9	0.2625
142	0.261875
142.1	0.2625
142.2	0.263125
142.3	0.263125
142.4	0.263125
142.5	0.26125
142.6	0.26
142.7	0.261875
142.8	0.26125
142.9	0.26
143	0.260625
143.1	0.26125
143.2	0.261875
143.3	0.264375
143.4	0.2625
143.5	0.26
143.6	0.259375
143.7	0.259375
143.8	0.2625
143.9	0.2625
144	0.264375
144.1	0.2625
144.2	0.260625
144.3	0.26125
144.4	0.263125
144.5	0.263125
144.6	0.26125
144.7	0.258125
144.8	0.256875
144.9	0.255
145	0.255
145.1	0.258125
145.2	0.254375
145.3	0.253125
145.4	0.2525
145.5	0.25375
145.6	0.255
145.7	0.256875
145.8	0.255625
145.9	0.258125
146	0.26125
146.1	0.26125
146.2	0.259375
146.3	0.26
146.4	0.256875
146.5	0.25625
146.6	0.255
146.7	0.254375
146.8	0.25125
146.9	0.250625
147	0.250625
147.1	0.2525
147.2	0.250625
147.3	0.249375
147.4	0.25
147.5	0.25125
147.6	0.25125
147.7	0.25125
147.8	0.249375
147.9	0.2475
148	0.2475
148.1	0.248125
148.2	0.248125
148.3	0.248125
148.4	0.248125
148.5	0.24875
148.6	0.24875
148.7	0.246875
148.8	0.249375
148.9	0.248125
149	0.249375
149.1	0.249375
149.2	0.248125
149.3	0.2475
149.4	0.24875
149.5	0.25125
149.6	0.25375
149.7	0.25375
149.8	0.2525
149.9	0.254375
150	0.25375
150.1	0.2525
150.2	0.25375
150.3	0.25125
150.4	0.249375
150.5	0.248125
150.6	0.250625
150.7	0.249375
150.8	0.250625
150.9	0.250625
151	0.25125
151.1	0.250625
151.2	0.249375
151.3	0.2525
151.4	0.250625
151.5	0.250625
151.6	0.250625
151.7	0.2525
151.8	0.2525
151.9	0.25125
152	0.2525
152.1	0.25125
152.2	0.2475
152.3	0.24625
152.4	0.246875
152.5	0.24875
152.6	0.248125
152.7	0.249375
152.8	0.25125
152.9	0.25
153	0.251875
153.1	0.24875
153.2	0.245
153.3	0.244375
153.4	0.2475
153.5	0.248125
153.6	0.25
153.7	0.24875
153.8	0.2475
153.9	0.246875
154	0.245
154.1	0.24625
154.2	0.248125
154.3	0.2475
154.4	0.25125
154.5	0.251875
154.6	0.25
154.7	0.24625
154.8	0.246875
154.9	0.2475
155	0.250625
155.1	0.248125
155.2	0.24625
155.3	0.248125
155.4	0.24875
155.5	0.248125
155.6	0.24625
155.7	0.248125
155.8	0.248125
155.9	0.248125
156	0.24625
156.1	0.246875
156.2	0.245
156.3	0.24625
156.4	0.245625
156.5	0.24875
156.6	0.2475
156.7	0.249375
156.8	0.248125
156.9	0.248125
157	0.24875
157.1	0.2525
157.2	0.2525
157.3	0.251875
157.4	0.254375
157.5	0.25375
157.6	0.254375
157.7	0.253125
157.8	0.25375
157.9	0.251875
158	0.254375
158.1	0.255
158.2	0.258125
158.3	0.25375
158.4	0.25375
158.5	0.2525
158.6	0.254375
158.7	0.25375
158.8	0.255
158.9	0.254375
159	0.25375
159.1	0.253125
159.2	0.25125
159.3	0.253125
159.4	0.253125
159.5	0.253125
159.6	0.251875
159.7	0.25
159.8	0.249375
159.9	0.248125
160	0.251875
160.1	0.255625
160.2	0.258125
160.3	0.25875
160.4	0.25875
160.5	0.25875
160.6	0.25625
160.7	0.255625
160.8	0.254375
160.9	0.253125
161	0.2525
161.1	0.251875
161.2	0.25375
161.3	0.25375
161.4	0.25375
161.5	0.25125
161.6	0.25
161.7	0.250625
161.8	0.249375
161.9	0.251875
162	0.2525
162.1	0.250625
162.2	0.253125
162.3	0.256875
162.4	0.256875
162.5	0.258125
162.6	0.26
162.7	0.26125
162.8	0.261875
162.9	0.25875
163	0.260625
163.1	0.260625
163.2	0.25875
163.3	0.25875
163.4	0.25625
163.5	0.2575
163.6	0.256875
163.7	0.25625
163.8	0.256875
163.9	0.25875
164	0.25625
164.1	0.254375
164.2	0.254375
164.3	0.2575
164.4	0.255
164.5	0.258125
164.6	0.2575
164.7	0.259375
164.8	0.2575
164.9	0.2575
165	0.258125
165.1	0.25875
165.2	0.256875
165.3	0.255625
165.4	0.26
165.5	0.2575
165.6	0.25875
165.7	0.26
165.8	0.258125
165.9	0.258125
166	0.258125
166.1	0.25625
166.2	0.25875
166.3	0.258125
166.4	0.259375
166.5	0.26125
166.6	0.26375
166.7	0.260625
166.8	0.263125
166.9	0.26125
167	0.2625
167.1	0.261875
167.2	0.26125
167.3	0.260625
167.4	0.26125
167.5	0.26
167.6	0.260625
167.7	0.263125
167.8	0.2625
167.9	0.261875
168	0.263125
168.1	0.261875
168.2	0.26375
168.3	0.265
168.4	0.263125
168.5	0.265
168.6	0.265625
168.7	0.265625
168.8	0.26375
168.9	0.261875
169	0.263125
169.1	0.26125
169.2	0.26125
169.3	0.263125
169.4	0.263125
169.5	0.26375
169.6	0.26125
169.7	0.261875
169.8	0.26125
169.9	0.263125
170	0.261875
170.1	0.2625
170.2	0.263125
170.3	0.260625
170.4	0.26
170.5	0.2575
170.6	0.2575
170.7	0.258125
170.8	0.260625
170.9	0.25625
171	0.25375
171.1	0.25
171.2	0.251875
171.3	0.25
171.4	0.25125
171.5	0.253125
171.6	0.2525
171.7	0.25125
171.8	0.249375
171.9	0.2525
172	0.253125
172.1	0.253125
172.2	0.251875
172.3	0.2475
172.4	0.24875
172.5	0.251875
172.6	0.25125
172.7	0.248125
172.8	0.25125
172.9	0.25375
173	0.2575
173.1	0.26
173.2	0.258125
173.3	0.26
173.4	0.25875
173.5	0.259375
173.6	0.259375
173.7	0.26125
173.8	0.259375
173.9	0.256875
174	0.25625
174.1	0.25375
174.2	0.2525
174.3	0.2525
174.4	0.255
174.5	0.255
174.6	0.25625
174.7	0.2575
174.8	0.255
174.9	0.255625
175	0.25875
175.1	0.26
175.2	0.25875
175.3	0.2575
175.4	0.255625
175.5	0.254375
175.6	0.254375
175.7	0.25625
175.8	0.258125
175.9	0.2575
176	0.259375
176.1	0.26125
176.2	0.25875
176.3	0.260625
176.4	0.261875
176.5	0.260625
176.6	0.259375
176.7	0.256875
176.8	0.26
176.9	0.26
177	0.261875
177.1	0.26125
177.2	0.26
177.3	0.260625
177.4	0.26
177.5	0.258125
177.6	0.260625
177.7	0.258125
177.8	0.260625
177.9	0.25875
178	0.258125
178.1	0.26125
178.2	0.261875
178.3	0.260625
178.4	0.26
178.5	0.260625
178.6	0.2625
178.7	0.261875
178.8	0.260625
178.9	0.26125
179	0.26125
179.1	0.260625
179.2	0.26125
179.3	0.25875
179.4	0.258125
179.5	0.2575
179.6	0.256875
179.7	0.25625
179.8	0.255625
179.9	0.256875
180	0.258125
180.1	0.258125
180.2	0.259375
180.3	0.259375
180.4	0.259375
180.5	0.260625
180.6	0.25875
180.7	0.2575
180.8	0.260625
180.9	0.2625
181	0.2625
181.1	0.2625
181.2	0.26125
181.3	0.26
181.4	0.25625
181.5	0.25625
181.6	0.25625
181.7	0.25875
181.8	0.2575
181.9	0.253125
182	0.253125
182.1	0.253125
182.2	0.25375
182.3	0.256875
182.4	0.258125
182.5	0.26125
182.6	0.261875
182.7	0.261875
182.8	0.2625
182.9	0.2625
183	0.263125
183.1	0.266875
183.2	0.26625
183.3	0.268125
183.4	0.2675
183.5	0.26875
183.6	0.268125
183.7	0.2675
183.8	0.265625
183.9	0.2675
184	0.2675
184.1	0.268125
184.2	0.268125
184.3	0.266875
184.4	0.264375
184.5	0.265
184.6	0.260625
184.7	0.26
184.8	0.25875
184.9	0.2575
185	0.259375
185.1	0.26
185.2	0.256875
185.3	0.25625
185.4	0.255
185.5	0.255625
185.6	0.255
185.7	0.255625
185.8	0.255625
185.9	0.25625
186	0.255
186.1	0.258125
186.2	0.259375
186.3	0.25625
186.4	0.255625
186.5	0.2575
186.6	0.255625
186.7	0.255
186.8	0.25375
186.9	0.25125
187	0.251875
187.1	0.255
187.2	0.25875
187.3	0.2575
187.4	0.25625
187.5	0.2575
187.6	0.2575
187.7	0.251875
187.8	0.25
187.9	0.25125
188	0.251875
188.1	0.25
188.2	0.249375
188.3	0.24875
188.4	0.248125
188.5	0.250625
188.6	0.25125
188.7	0.254375
188.8	0.2575
188.9	0.25875
189	0.26125
189.1	0.260625
189.2	0.26125
189.3	0.259375
189.4	0.260625
189.5	0.263125
189.6	0.263125
189.7	0.26
189.8	0.261875
189.9	0.26
190	0.263125
190.1	0.264375
190.2	0.263125
190.3	0.265
190.4	0.264375
190.5	0.26375
190.6	0.2625
190.7	0.263125
190.8	0.264375
190.9	0.265625
191	0.266875
191.1	0.266875
191.2	0.26375
191.3	0.2625
191.4	0.263125
191.5	0.25875
191.6	0.26
191.7	0.258125
191.8	0.25625
191.9	0.25625
192	0.255
192.1	0.255
192.2	0.254375
192.3	0.2525
192.4	0.250625
192.5	0.249375
192.6	0.249375
192.7	0.250625
192.8	0.25125
192.9	0.24875
193	0.24875
193.1	0.24875
193.2	0.25125
193.3	0.249375
193.4	0.25
193.5	0.2475
193.6	0.24625
193.7	0.245625
193.8	0.245
193.9	0.24
194	0.24125
194.1	0.24
194.2	0.239375
194.3	0.235625
194.4	0.235
194.5	0.238125
194.6	0.236875
194.7	0.235
194.8	0.234375
194.9	0.230625
195	0.229375
195.1	0.2325
195.2	0.233125
195.3	0.2325
195.4	0.2325
195.5	0.235
195.6	0.235
195.7	0.235625
195.8	0.235
195.9	0.235
196	0.235625
196.1	0.235625
196.2	0.239375
196.3	0.2375
196.4	0.240625
196.5	0.2425
196.6	0.2425
196.7	0.245
196.8	0.245
196.9	0.243125
197	0.24375
197.1	0.241875
197.2	0.2475
197.3	0.250625
197.4	0.251875
197.5	0.253125
197.6	0.253125
197.7	0.2525
197.8	0.25125
197.9	0.25375
198	0.256875
198.1	0.254375
198.2	0.25625
198.3	0.255625
198.4	0.254375
198.5	0.2525
198.6	0.25125
198.7	0.255
198.8	0.25375
198.9	0.254375
199	0.254375
199.1	0.25375
199.2	0.255625
199.3	0.260625
199.4	0.259375
199.5	0.2625
199.6	0.2625
199.7	0.263125
199.8	0.263125
199.9	0.263125
200	0.264375
[truncated: 14,000 more rows]
