# Supplementary material for: Bayesian inference of kinetic schemes for ion channels by Kalman filtering
Source: eLife journal article supplement (doi:10.7554/elife.62714), 2022-05-04
Supplement: fig4-data10 [file 1_Sim_N_800_Strom_MW_0.0625M.xlsx]

## Sheet: Tabelle1
0.1	0
0.2	0
0.3	0
0.4	0
0.5	0
0.6	0
0.7	0
0.8	0
0.9	0
1	0
1.1	0
1.2	0
1.3	0
1.4	0
1.5	0
1.6	0
1.7	0
1.8	0
1.9	0
2	0
2.1	0
2.2	0
2.3	0
2.4	0
2.5	0
2.6	0
2.7	0
2.8	0
2.9	0
3	0
3.1	0
3.2	0
3.3	0
3.4	0
3.5	0
3.6	0
3.7	0
3.8	0
3.9	0
4	0
4.1	0
4.2	0
4.3	0
4.4	0
4.5	0
4.6	0
4.7	0
4.8	0
4.9	0
5	0
5.1	0
5.2	0
5.3	0
5.4	0
5.5	0
5.6	0
5.7	0
5.8	0
5.9	0
6	0
6.1	0
6.2	0
6.3	0
6.4	0
6.5	0
6.6	0
6.7	0
6.8	0
6.9	0
7	0
7.1	0
7.2	0
7.3	0
7.4	0
7.5	0
7.6	0
7.7	0
7.8	0
7.9	0
8	0
8.1	0
8.2	0
8.3	0
8.4	0
8.5	0
8.6	0
8.7	0
8.8	0
8.9	0
9	0
9.1	0
9.2	0
9.3	0
9.4	0
9.5	0
9.6	0
9.7	0
9.8	0
9.9	0
10	0
10.1	0
10.2	0
10.3	0
10.4	0
10.5	0
10.6	0
10.7	0
10.8	0
10.9	0
11	0
11.1	0
11.2	0
11.3	0
11.4	0
11.5	0
11.6	0
11.7	0
11.8	0
11.9	0
12	0
12.1	0
12.2	0
12.3	0
12.4	0
12.5	0
12.6	0
12.7	0
12.8	0
12.9	0
13	0
13.1	0
13.2	0
13.3	0
13.4	0
13.5	0
13.6	0
13.7	0
13.8	0
13.9	0
14	0
14.1	0
14.2	0
14.3	0
14.4	0
14.5	0
14.6	0
14.7	0
14.8	0
14.9	0
15	0
15.1	0
15.2	0
15.3	0
15.4	0
15.5	0
15.6	0
15.7	0
15.8	0
15.9	0
16	0
16.1	0
16.2	0
16.3	0
16.4	0
16.5	0
16.6	0
16.7	0
16.8	0
16.9	0
17	0
17.1	0
17.2	0
17.3	0
17.4	0
17.5	0
17.6	0
17.7	0
17.8	0
17.9	0
18	0
18.1	0
18.2	0
18.3	0
18.4	0
18.5	0
18.6	0
18.7	0
18.8	0
18.9	0
19	0
19.1	0
19.2	0
19.3	0
19.4	0
19.5	0
19.6	0
19.7	0
19.8	0
19.9	0
20	0
20.1	0
20.2	0
20.3	0
20.4	0
20.5	0
20.6	0
20.7	0
20.8	0
20.9	0
21	0
21.1	0
21.2	0
21.3	0
21.4	0
21.5	0
21.6	0
21.7	0
21.8	0
21.9	0
22	0
22.1	0
22.2	0
22.3	0
22.4	0
22.5	0
22.6	0
22.7	0
22.8	0
22.9	0
23	0
23.1	0
23.2	0
23.3	0
23.4	0
23.5	0
23.6	0
23.7	0
23.8	0
23.9	0
24	0
24.1	0
24.2	0
24.3	0
24.4	0
24.5	0
24.6	0
24.7	0
24.8	0
24.9	0
25	0
25.1	0
25.2	0
25.3	0
25.4	0
25.5	0
25.6	0
25.7	0
25.8	0
25.9	0
26	0
26.1	0
26.2	0
26.3	0
26.4	0
26.5	0
26.6	0
26.7	0
26.8	0
26.9	0
27	0
27.1	0
27.2	0
27.3	0
27.4	0
27.5	0
27.6	0
27.7	0
27.8	0
27.9	0
28	0
28.1	0
28.2	0
28.3	0
28.4	0
28.5	0
28.6	0
28.7	0
28.8	0
28.9	0
29	0
29.1	0
29.2	0
29.3	0
29.4	0
29.5	0
29.6	0
29.7	0
29.8	0
29.9	0
30	0
30.1	0
30.2	0
30.3	0
30.4	0
30.5	0
30.6	0
30.7	0
30.8	0
30.9	0
31	0
31.1	0
31.2	0
31.3	0
31.4	0
31.5	0
31.6	0
31.7	0
31.8	0
31.9	0
32	0
32.1	0
32.2	0
32.3	0
32.4	0
32.5	0
32.6	0
32.7	0
32.8	0
32.9	0
33	0
33.1	0
33.2	0
33.3	0
33.4	0
33.5	0
33.6	0
33.7	0
33.8	0
33.9	0
34	0
34.1	0
34.2	0
34.3	0
34.4	0
34.5	0
34.6	0
34.7	0
34.8	0
34.9	0
35	0
35.1	0
35.2	0
35.3	0
35.4	0
35.5	0
35.6	0
35.7	0
35.8	0
35.9	0
36	0
36.1	0
36.2	0
36.3	0
36.4	0
36.5	0
36.6	0
36.7	0
36.8	0
36.9	0
37	0
37.1	0
37.2	0
37.3	0
37.4	0
37.5	0
37.6	0
37.7	0
37.8	0
37.9	0
38	0
38.1	0
38.2	0
38.3	0
38.4	0
38.5	0
38.6	0
38.7	0
38.8	0
38.9	0
39	0
39.1	0
39.2	0
39.3	0
39.4	0
39.5	0
39.6	0
39.7	0
39.8	0
39.9	0
40	0
40.1	0
40.2	0
40.3	0
40.4	0
40.5	0
40.6	0
40.7	0
40.8	0
40.9	0
41	0
41.1	0
41.2	0
41.3	0
41.4	0
41.5	0
41.6	0
41.7	0
41.8	0
41.9	0
42	0
42.1	0
42.2	0
42.3	0
42.4	0
42.5	0
42.6	0
42.7	0
42.8	0
42.9	0
43	0
43.1	0
43.2	0
43.3	0
43.4	0
43.5	0
43.6	0
43.7	0
43.8	0
43.9	0
44	0
44.1	0
44.2	0
44.3	0
44.4	0
44.5	0
44.6	0
44.7	0
44.8	0
44.9	0
45	0
45.1	0
45.2	0
45.3	0
45.4	0
45.5	0
45.6	0
45.7	0
45.8	0
45.9	0
46	0
46.1	0
46.2	0
46.3	0
46.4	0
46.5	0
46.6	0
46.7	0
46.8	0
46.9	0
47	0
47.1	0
47.2	0
47.3	0
47.4	0
47.5	0
47.6	0
47.7	0
47.8	0
47.9	0
48	0
48.1	0
48.2	0
48.3	0
48.4	0
48.5	0
48.6	0
48.7	0
48.8	0
48.9	0
49	0
49.1	0
49.2	0
49.3	0
49.4	0
49.5	0
49.6	0
49.7	0
49.8	0
49.9	0
50	0
50.1	0
50.2	0
50.3	0
50.4	0
50.5	0
50.6	0
50.7	0
50.8	0
50.9	0
51	0
51.1	0
51.2	0
51.3	0
51.4	0
51.5	0
51.6	0
51.7	0
51.8	0
51.9	0
52	0
52.1	0
52.2	0
52.3	0
52.4	0
52.5	0
52.6	0
52.7	0
52.8	0
52.9	0
53	0
53.1	0
53.2	0
53.3	0
53.4	0
53.5	0
53.6	0
53.7	0
53.8	0
53.9	0
54	0
54.1	0
54.2	0
54.3	0
54.4	0
54.5	0
54.6	0
54.7	0
54.8	0
54.9	0
55	0
55.1	0
55.2	0
55.3	0
55.4	0
55.5	0
55.6	0
55.7	0
55.8	0
55.9	0
56	0
56.1	0
56.2	0
56.3	0
56.4	0
56.5	0
56.6	0
56.7	0
56.8	0
56.9	0
57	0
57.1	0
57.2	0
57.3	0
57.4	0
57.5	0
57.6	0
57.7	0
57.8	0
57.9	0
58	0
58.1	0
58.2	0
58.3	0
58.4	0
58.5	0
58.6	0
58.7	0
58.8	0
58.9	0
59	0
59.1	0
59.2	0
59.3	0
59.4	0
59.5	0
59.6	0
59.7	0
59.8	0
59.9	0
60	0
60.1	0
60.2	0
60.3	0
60.4	0
60.5	0
60.6	0
60.7	0
60.8	0
60.9	0
61	0
61.1	0
61.2	0
61.3	0
61.4	0
61.5	0
61.6	0
61.7	0
61.8	0
61.9	0
62	0
62.1	0
62.2	0
62.3	0
62.4	0
62.5	0
62.6	0
62.7	0
62.8	0
62.9	0
63	0
63.1	0
63.2	0
63.3	0
63.4	0
63.5	0
63.6	0
63.7	0
63.8	0
63.9	0
64	0
64.1	0
64.2	0
64.3	0
64.4	0
64.5	0
64.6	0
64.7	0
64.8	0
64.9	0
65	0
65.1	0
65.2	0
65.3	0
65.4	0
65.5	0
65.6	0
65.7	0
65.8	0
65.9	0
66	0
66.1	0
66.2	0
66.3	0
66.4	0
66.5	0
66.6	0
66.7	0
66.8	0
66.9	0
67	0
67.1	0
67.2	0
67.3	0
67.4	0
67.5	0
67.6	0
67.7	0
67.8	0
67.9	0
68	0
68.1	0
68.2	0
68.3	0
68.4	0
68.5	0
68.6	0
68.7	0
68.8	0
68.9	0
69	0
69.1	0
69.2	0
69.3	0
69.4	0
69.5	0
69.6	0
69.7	0
69.8	0
69.9	0
70	0
70.1	0
70.2	0
70.3	0
70.4	0
70.5	0
70.6	0
70.7	0
70.8	0
70.9	0
71	0
71.1	0
71.2	0
71.3	0
71.4	0
71.5	0
71.6	0
71.7	0
71.8	0
71.9	0
72	0
72.1	0
72.2	0
72.3	0
72.4	0
72.5	0
72.6	0
72.7	0
72.8	0
72.9	0
73	0
73.1	0
73.2	0
73.3	0
73.4	0
73.5	0
73.6	0
73.7	0
73.8	0
73.9	0
74	0
74.1	0
74.2	0
74.3	0
74.4	0
74.5	0
74.6	0
74.7	0
74.8	0
74.9	0
75	0
75.1	0
75.2	0
75.3	0
75.4	0
75.5	0
75.6	0
75.7	0
75.8	0
75.9	0
76	0
76.1	0
76.2	0
76.3	0
76.4	0
76.5	0
76.6	0
76.7	0
76.8	0
76.9	0
77	0
77.1	0
77.2	0
77.3	0
77.4	0
77.5	0
77.6	0
77.7	0
77.8	0
77.9	0
78	0
78.1	0
78.2	0
78.3	0
78.4	0
78.5	0
78.6	0
78.7	0
78.8	0
78.9	0
79	0
79.1	0
79.2	0
79.3	0
79.4	0
79.5	0
79.6	0
79.7	0
79.8	0
79.9	0
80	0
80.1	0
80.2	0
80.3	0
80.4	0
80.5	0
80.6	0
80.7	0
80.8	0
80.9	0
81	0
81.1	0
81.2	0
81.3	0
81.4	0
81.5	0
81.6	0
81.7	0
81.8	0
81.9	0
82	0
82.1	0
82.2	0
82.3	0
82.4	0
82.5	0
82.6	0
82.7	0
82.8	0
82.9	0
83	0
83.1	0
83.2	0
83.3	0
83.4	0
83.5	0
83.6	0
83.7	0
83.8	0
83.9	0
84	0
84.1	0
84.2	0
84.3	0
84.4	0
84.5	0
84.6	0
84.7	0
84.8	0
84.9	0
85	0
85.1	0
85.2	0
85.3	0
85.4	0
85.5	0
85.6	0
85.7	0
85.8	0
85.9	0
86	0
86.1	0
86.2	0
86.3	0
86.4	0
86.5	0
86.6	0
86.7	0
86.8	0
86.9	0
87	0
87.1	0
87.2	0
87.3	0
87.4	0
87.5	0
87.6	0
87.7	0
87.8	0
87.9	0
88	0
88.1	0
88.2	0
88.3	0
88.4	0
88.5	0
88.6	0
88.7	0
88.8	0
88.9	0
89	0
89.1	0
89.2	0
89.3	0
89.4	0
89.5	0
89.6	0
89.7	0
89.8	0
89.9	0
90	0
90.1	0
90.2	0
90.3	0
90.4	0
90.5	0
90.6	0
90.7	0
90.8	0
90.9	0
91	0
91.1	0
91.2	0
91.3	0
91.4	0
91.5	0
91.6	0
91.7	0
91.8	0
91.9	0
92	0
92.1	0
92.2	0
92.3	0
92.4	0
92.5	0
92.6	0
92.7	0
92.8	0
92.9	0
93	0
93.1	0
93.2	0
93.3	0
93.4	0
93.5	0
93.6	0
93.7	0
93.8	0
93.9	0
94	0
94.1	0
94.2	0
94.3	0
94.4	0
94.5	0
94.6	0
94.7	0
94.8	0
94.9	0
95	0
95.1	0
95.2	0
95.3	0
95.4	0
95.5	0
95.6	0
95.7	0
95.8	0
95.9	0
96	0
96.1	0
96.2	0
96.3	0
96.4	0
96.5	0
96.6	0
96.7	0
96.8	0
96.9	0
97	0
97.1	0
97.2	0
97.3	0
97.4	0
97.5	0
97.6	0
97.7	0
97.8	0
97.9	0
98	0
98.1	0
98.2	0
98.3	0
98.4	0
98.5	0
98.6	0
98.7	0
98.8	0
98.9	0
99	0
99.1	0
99.2	0
99.3	0
99.4	0
99.5	0
99.6	0
99.7	0
99.8	0
99.9	0
100	0
100.1	0
100.2	0
100.3	0
100.4	0
100.5	0
100.6	0
100.7	0
100.8	0
100.9	0
101	0
101.1	0
101.2	0
101.3	0
101.4	0
101.5	0
101.6	0
101.7	0
101.8	0
101.9	0
102	0
102.1	0
102.2	0
102.3	0
102.4	0
102.5	0
102.6	0
102.7	0
102.8	0
102.9	0
103	0
103.1	0
103.2	0
103.3	0
103.4	0
103.5	0
103.6	0
103.7	0
103.8	0
103.9	0
104	0
104.1	0
104.2	0
104.3	0
104.4	0
104.5	0
104.6	0
104.7	0
104.8	0
104.9	0
105	0
105.1	0
105.2	0
105.3	0
105.4	0
105.5	0
105.6	0
105.7	0
105.8	0
105.9	0
106	0
106.1	0
106.2	0
106.3	0
106.4	0
106.5	0.00125
106.6	0.00125
106.7	0.0025
106.8	0.0025
106.9	0.0025
107	0.0025
107.1	0.0025
107.2	0.0025
107.3	0.0025
107.4	0.0025
107.5	0.00375
107.6	0.00375
107.7	0.00375
107.8	0.00375
107.9	0.00375
108	0.00375
108.1	0.00375
108.2	0.00375
108.3	0.00375
108.4	0.00375
108.5	0.00375
108.6	0.00375
108.7	0.00375
108.8	0.00375
108.9	0.005
109	0.005
109.1	0.005
109.2	0.005
109.3	0.005
109.4	0.005
109.5	0.005
109.6	0.005
109.7	0.005
109.8	0.005
109.9	0.005
110	0.005
110.1	0.005
110.2	0.005
110.3	0.005
110.4	0.005
110.5	0.005
110.6	0.005
110.7	0.005
110.8	0.005
110.9	0.005
111	0.005
111.1	0.005
111.2	0.005
111.3	0.005
111.4	0.005
111.5	0.005
111.6	0.005
111.7	0.005
111.8	0.005
111.9	0.005
112	0.005
112.1	0.005
112.2	0.005
112.3	0.005
112.4	0.005
112.5	0.005
112.6	0.005
112.7	0.005
112.8	0.005
112.9	0.005
113	0.005
113.1	0.005
113.2	0.005
113.3	0.00375
113.4	0.00375
113.5	0.005
113.6	0.005
113.7	0.005
113.8	0.005
113.9	0.005
114	0.005
114.1	0.005
114.2	0.00625
114.3	0.00625
114.4	0.00625
114.5	0.00625
114.6	0.00625
114.7	0.00625
114.8	0.00625
114.9	0.00625
115	0.00625
115.1	0.00625
115.2	0.00625
115.3	0.00625
115.4	0.0075
115.5	0.0075
115.6	0.0075
115.7	0.0075
115.8	0.0075
115.9	0.0075
116	0.0075
116.1	0.0075
116.2	0.0075
116.3	0.0075
116.4	0.0075
116.5	0.0075
116.6	0.0075
116.7	0.0075
116.8	0.0075
116.9	0.0075
117	0.0075
117.1	0.0075
117.2	0.00875
117.3	0.00875
117.4	0.00875
117.5	0.00875
117.6	0.00875
117.7	0.00875
117.8	0.00875
117.9	0.00875
118	0.00875
118.1	0.00875
118.2	0.00875
118.3	0.00875
118.4	0.00875
118.5	0.00875
118.6	0.00875
118.7	0.00875
118.8	0.00875
118.9	0.00875
119	0.00875
119.1	0.00875
119.2	0.00875
119.3	0.00875
119.4	0.00875
119.5	0.00875
119.6	0.00875
119.7	0.00875
119.8	0.00875
119.9	0.00875
120	0.00875
120.1	0.00875
120.2	0.00875
120.3	0.01
120.4	0.01
120.5	0.01
120.6	0.01
120.7	0.01
120.8	0.01
120.9	0.01
121	0.01
121.1	0.01
121.2	0.01
121.3	0.01
121.4	0.01
121.5	0.01
121.6	0.01
121.7	0.01
121.8	0.01
121.9	0.01
122	0.01
122.1	0.01
122.2	0.01
122.3	0.01125
122.4	0.01125
122.5	0.01125
122.6	0.01125
122.7	0.01125
122.8	0.01125
122.9	0.01125
123	0.01125
123.1	0.01125
123.2	0.01125
123.3	0.01125
123.4	0.0125
123.5	0.0125
123.6	0.0125
123.7	0.0125
123.8	0.0125
123.9	0.0125
124	0.0125
124.1	0.0125
124.2	0.0125
124.3	0.0125
124.4	0.0125
124.5	0.0125
124.6	0.0125
124.7	0.0125
124.8	0.0125
124.9	0.0125
125	0.0125
125.1	0.0125
125.2	0.01375
125.3	0.01375
125.4	0.01375
125.5	0.01375
125.6	0.015
125.7	0.015
125.8	0.015
125.9	0.015
126	0.015
126.1	0.015
126.2	0.015
126.3	0.015
126.4	0.015
126.5	0.01625
126.6	0.0175
126.7	0.01875
126.8	0.01875
126.9	0.01875
127	0.01875
127.1	0.01875
127.2	0.01875
127.3	0.01875
127.4	0.01875
127.5	0.01875
127.6	0.01875
127.7	0.01875
127.8	0.01875
127.9	0.01875
128	0.01875
128.1	0.01875
128.2	0.01875
128.3	0.01875
128.4	0.01875
128.5	0.01875
128.6	0.01875
128.7	0.01875
128.8	0.01875
128.9	0.01875
129	0.01875
129.1	0.01875
129.2	0.02
129.3	0.02
129.4	0.02
129.5	0.02
129.6	0.02
129.7	0.02
129.8	0.02
129.9	0.02
130	0.02
130.1	0.02
130.2	0.02
130.3	0.02
130.4	0.02
130.5	0.02
130.6	0.02
130.7	0.02
130.8	0.02
130.9	0.02
131	0.02
131.1	0.02
131.2	0.02
131.3	0.02
131.4	0.02
131.5	0.02
131.6	0.02
131.7	0.02125
131.8	0.02125
131.9	0.02125
132	0.02125
132.1	0.02125
132.2	0.02125
132.3	0.02125
132.4	0.02125
132.5	0.02125
132.6	0.02125
132.7	0.02125
132.8	0.0225
132.9	0.0225
133	0.0225
133.1	0.0225
133.2	0.0225
133.3	0.0225
133.4	0.0225
133.5	0.0225
133.6	0.02375
133.7	0.02375
133.8	0.02375
133.9	0.02375
134	0.02375
134.1	0.02375
134.2	0.02375
134.3	0.02375
134.4	0.02375
134.5	0.02375
134.6	0.02375
134.7	0.02375
134.8	0.02375
134.9	0.02375
135	0.025
135.1	0.025
135.2	0.025
135.3	0.025
135.4	0.025
135.5	0.025
135.6	0.025
135.7	0.025
135.8	0.02625
135.9	0.02625
136	0.02625
136.1	0.02625
136.2	0.02625
136.3	0.02625
136.4	0.02625
136.5	0.02625
136.6	0.02625
136.7	0.02625
136.8	0.02625
136.9	0.02625
137	0.02625
137.1	0.0275
137.2	0.0275
137.3	0.0275
137.4	0.0275
137.5	0.0275
137.6	0.0275
137.7	0.0275
137.8	0.0275
137.9	0.0275
138	0.0275
138.1	0.0275
138.2	0.02875
138.3	0.02875
138.4	0.02875
138.5	0.02875
138.6	0.02875
138.7	0.02875
138.8	0.02875
138.9	0.02875
139	0.0275
139.1	0.0275
139.2	0.0275
139.3	0.0275
139.4	0.02875
139.5	0.02875
139.6	0.0275
139.7	0.0275
139.8	0.0275
139.9	0.0275
140	0.0275
140.1	0.0275
140.2	0.0275
140.3	0.0275
140.4	0.0275
140.5	0.0275
140.6	0.0275
140.7	0.0275
140.8	0.0275
140.9	0.0275
141	0.0275
141.1	0.0275
141.2	0.0275
141.3	0.0275
141.4	0.0275
141.5	0.0275
141.6	0.0275
141.7	0.0275
141.8	0.0275
141.9	0.0275
142	0.02875
142.1	0.02875
142.2	0.03
142.3	0.03
142.4	0.03
142.5	0.03125
142.6	0.03125
142.7	0.03125
142.8	0.03125
142.9	0.03125
143	0.03
143.1	0.03
143.2	0.03
143.3	0.03
143.4	0.03
143.5	0.03
143.6	0.03
143.7	0.03
143.8	0.03
143.9	0.03
144	0.03
144.1	0.03
144.2	0.03
144.3	0.03
144.4	0.03
144.5	0.02875
144.6	0.02875
144.7	0.02875
144.8	0.02875
144.9	0.02875
145	0.02875
145.1	0.02875
145.2	0.02875
145.3	0.02875
145.4	0.02875
145.5	0.02875
145.6	0.02875
145.7	0.02875
145.8	0.02875
145.9	0.02875
146	0.02875
146.1	0.02875
146.2	0.02875
146.3	0.02875
146.4	0.0275
146.5	0.0275
146.6	0.0275
146.7	0.0275
146.8	0.0275
146.9	0.0275
147	0.0275
147.1	0.0275
147.2	0.0275
147.3	0.0275
147.4	0.0275
147.5	0.02625
147.6	0.02625
147.7	0.02625
147.8	0.0275
147.9	0.0275
148	0.0275
148.1	0.02625
148.2	0.02625
148.3	0.02625
148.4	0.02625
148.5	0.025
148.6	0.02375
148.7	0.02375
148.8	0.02375
148.9	0.02375
149	0.02375
149.1	0.02375
149.2	0.02375
149.3	0.02375
149.4	0.025
149.5	0.025
149.6	0.025
149.7	0.025
149.8	0.025
149.9	0.025
150	0.025
150.1	0.025
150.2	0.025
150.3	0.025
150.4	0.025
150.5	0.025
150.6	0.025
150.7	0.025
150.8	0.025
150.9	0.025
151	0.025
151.1	0.025
151.2	0.025
151.3	0.025
151.4	0.025
151.5	0.025
151.6	0.025
151.7	0.025
151.8	0.025
151.9	0.025
152	0.025
152.1	0.025
152.2	0.025
152.3	0.025
152.4	0.025
152.5	0.025
152.6	0.02625
152.7	0.02625
152.8	0.02625
152.9	0.02625
153	0.02625
153.1	0.02625
153.2	0.02625
153.3	0.02625
153.4	0.02625
153.5	0.02625
153.6	0.02625
153.7	0.02625
153.8	0.02625
153.9	0.02625
154	0.02625
154.1	0.02625
154.2	0.02625
154.3	0.02625
154.4	0.02625
154.5	0.02625
154.6	0.0275
154.7	0.0275
154.8	0.0275
154.9	0.02875
155	0.02875
155.1	0.02875
155.2	0.0275
155.3	0.0275
155.4	0.0275
155.5	0.0275
155.6	0.0275
155.7	0.0275
155.8	0.0275
155.9	0.0275
156	0.0275
156.1	0.0275
156.2	0.0275
156.3	0.0275
156.4	0.0275
156.5	0.0275
156.6	0.0275
156.7	0.0275
156.8	0.0275
156.9	0.0275
157	0.0275
157.1	0.0275
157.2	0.0275
157.3	0.0275
157.4	0.0275
157.5	0.0275
157.6	0.02875
157.7	0.02875
157.8	0.02875
157.9	0.02875
158	0.02875
158.1	0.02875
158.2	0.02875
158.3	0.02875
158.4	0.02875
158.5	0.02875
158.6	0.0275
158.7	0.0275
158.8	0.0275
158.9	0.0275
159	0.0275
159.1	0.0275
159.2	0.0275
159.3	0.0275
159.4	0.0275
159.5	0.0275
159.6	0.0275
159.7	0.0275
159.8	0.0275
159.9	0.0275
160	0.0275
160.1	0.0275
160.2	0.0275
160.3	0.0275
160.4	0.0275
160.5	0.0275
160.6	0.0275
160.7	0.0275
160.8	0.0275
160.9	0.0275
161	0.0275
161.1	0.0275
161.2	0.0275
161.3	0.0275
161.4	0.0275
161.5	0.0275
161.6	0.0275
161.7	0.0275
161.8	0.0275
161.9	0.0275
162	0.0275
162.1	0.0275
162.2	0.0275
162.3	0.0275
162.4	0.0275
162.5	0.0275
162.6	0.0275
162.7	0.0275
162.8	0.0275
162.9	0.0275
163	0.0275
163.1	0.0275
163.2	0.0275
163.3	0.02875
163.4	0.02875
163.5	0.03
163.6	0.03
163.7	0.03
163.8	0.03
163.9	0.03
164	0.03
164.1	0.03
164.2	0.03125
164.3	0.03125
164.4	0.03125
164.5	0.03125
164.6	0.03125
164.7	0.0325
164.8	0.0325
164.9	0.0325
165	0.03375
165.1	0.03375
165.2	0.03375
165.3	0.03375
165.4	0.03375
165.5	0.03375
165.6	0.03375
165.7	0.03375
165.8	0.03375
165.9	0.03375
166	0.03375
166.1	0.03375
166.2	0.03375
166.3	0.03375
166.4	0.03375
166.5	0.03375
166.6	0.03375
166.7	0.03375
166.8	0.03375
166.9	0.03375
167	0.03375
167.1	0.035
167.2	0.035
167.3	0.035
167.4	0.035
167.5	0.035
167.6	0.035
167.7	0.035
167.8	0.035
167.9	0.035
168	0.035
168.1	0.035
168.2	0.035
168.3	0.035
168.4	0.035
168.5	0.035
168.6	0.035
168.7	0.035
168.8	0.035
168.9	0.035
169	0.03625
169.1	0.03625
169.2	0.03625
169.3	0.03625
169.4	0.03625
169.5	0.03625
169.6	0.03625
169.7	0.03625
169.8	0.03625
169.9	0.03625
170	0.03625
170.1	0.03625
170.2	0.03625
170.3	0.03625
170.4	0.03625
170.5	0.03625
170.6	0.03625
170.7	0.03625
170.8	0.0375
170.9	0.0375
171	0.0375
171.1	0.0375
171.2	0.0375
171.3	0.0375
171.4	0.0375
171.5	0.0375
171.6	0.0375
171.7	0.0375
171.8	0.0375
171.9	0.0375
172	0.0375
172.1	0.0375
172.2	0.0375
172.3	0.0375
172.4	0.0375
172.5	0.0375
172.6	0.0375
172.7	0.0375
172.8	0.0375
172.9	0.0375
173	0.0375
173.1	0.0375
173.2	0.0375
173.3	0.0375
173.4	0.0375
173.5	0.0375
173.6	0.0375
173.7	0.0375
173.8	0.0375
173.9	0.0375
174	0.0375
174.1	0.0375
174.2	0.0375
174.3	0.0375
174.4	0.03875
174.5	0.03875
174.6	0.03875
174.7	0.03875
174.8	0.03875
174.9	0.03875
175	0.03875
175.1	0.03875
175.2	0.03875
175.3	0.03875
175.4	0.03875
175.5	0.03875
175.6	0.03875
175.7	0.03875
175.8	0.03875
175.9	0.03875
176	0.03875
176.1	0.03875
176.2	0.03875
176.3	0.03875
176.4	0.03875
176.5	0.03875
176.6	0.03875
176.7	0.03875
176.8	0.03875
176.9	0.03875
177	0.03875
177.1	0.03875
177.2	0.03875
177.3	0.03875
177.4	0.03875
177.5	0.03875
177.6	0.03875
177.7	0.03875
177.8	0.03875
177.9	0.03875
178	0.03875
178.1	0.03875
178.2	0.03875
178.3	0.03875
178.4	0.03875
178.5	0.03875
178.6	0.03875
178.7	0.03875
178.8	0.0375
178.9	0.03875
179	0.03875
179.1	0.03875
179.2	0.03875
179.3	0.03875
179.4	0.03875
179.5	0.03875
179.6	0.03875
179.7	0.03875
179.8	0.03875
179.9	0.03875
180	0.03875
180.1	0.03875
180.2	0.03875
180.3	0.03875
180.4	0.03875
180.5	0.03875
180.6	0.03875
180.7	0.03875
180.8	0.03875
180.9	0.0375
181	0.0375
181.1	0.0375
181.2	0.0375
181.3	0.0375
181.4	0.0375
181.5	0.0375
181.6	0.0375
181.7	0.0375
181.8	0.0375
181.9	0.0375
182	0.0375
182.1	0.0375
182.2	0.0375
182.3	0.0375
182.4	0.0375
182.5	0.0375
182.6	0.0375
182.7	0.0375
182.8	0.0375
182.9	0.0375
183	0.0375
183.1	0.0375
183.2	0.0375
183.3	0.0375
183.4	0.03875
183.5	0.03875
183.6	0.03875
183.7	0.03875
183.8	0.03875
183.9	0.03875
184	0.04
184.1	0.04
184.2	0.04
184.3	0.04
184.4	0.04
184.5	0.04
184.6	0.04
184.7	0.04
184.8	0.04
184.9	0.04
185	0.04
185.1	0.04
185.2	0.04
185.3	0.04
185.4	0.04125
185.5	0.04125
185.6	0.04125
185.7	0.04125
185.8	0.04125
185.9	0.04125
186	0.04125
186.1	0.04125
186.2	0.04125
186.3	0.04125
186.4	0.04125
186.5	0.04125
186.6	0.04125
186.7	0.04125
186.8	0.04
186.9	0.04
187	0.04
187.1	0.04
187.2	0.04
187.3	0.04
187.4	0.04
187.5	0.04
187.6	0.04
187.7	0.04
187.8	0.04
187.9	0.04
188	0.04
188.1	0.04
188.2	0.04
188.3	0.04
188.4	0.04
188.5	0.04
188.6	0.04
188.7	0.04
188.8	0.04
188.9	0.04
189	0.04
189.1	0.04
189.2	0.04
189.3	0.04
189.4	0.04
189.5	0.04
189.6	0.04
189.7	0.04125
189.8	0.04125
189.9	0.04125
190	0.04125
190.1	0.04125
190.2	0.04125
190.3	0.04125
190.4	0.04125
190.5	0.04125
190.6	0.04125
190.7	0.04125
190.8	0.04125
190.9	0.04125
191	0.04125
191.1	0.04125
191.2	0.04125
191.3	0.04125
191.4	0.04125
191.5	0.04125
191.6	0.04125
191.7	0.04125
191.8	0.04125
191.9	0.04125
192	0.04125
192.1	0.04125
192.2	0.04125
192.3	0.04125
192.4	0.04125
192.5	0.04125
192.6	0.04125
192.7	0.04125
192.8	0.04125
192.9	0.04125
193	0.04125
193.1	0.04125
193.2	0.04125
193.3	0.04125
193.4	0.04125
193.5	0.04125
193.6	0.04125
193.7	0.04125
193.8	0.04125
193.9	0.04125
194	0.04125
194.1	0.04125
194.2	0.04125
194.3	0.04125
194.4	0.04125
194.5	0.04125
194.6	0.04125
194.7	0.04125
194.8	0.04125
194.9	0.04125
195	0.04125
195.1	0.04125
195.2	0.04125
195.3	0.04125
195.4	0.04125
195.5	0.04125
195.6	0.04125
195.7	0.04125
195.8	0.04125
195.9	0.04125
196	0.04125
196.1	0.04125
196.2	0.04125
196.3	0.04125
196.4	0.04125
196.5	0.04125
196.6	0.04125
196.7	0.04125
196.8	0.04125
196.9	0.04125
197	0.04125
197.1	0.04125
197.2	0.04125
197.3	0.04125
197.4	0.04125
197.5	0.04125
197.6	0.04125
197.7	0.04125
197.8	0.04125
197.9	0.0425
198	0.04375
198.1	0.04375
198.2	0.04375
198.3	0.04375
198.4	0.04375
198.5	0.04375
198.6	0.04375
198.7	0.04375
198.8	0.04375
198.9	0.04375
199	0.04375
199.1	0.04375
199.2	0.04375
199.3	0.04375
199.4	0.04375
199.5	0.04375
199.6	0.04375
199.7	0.04375
199.8	0.04375
199.9	0.04375
200	0.04375
[truncated: 14,000 more rows]
