# Supplementary material for: Bayesian inference of kinetic schemes for ion channels by Kalman filtering
Source: eLife journal article supplement (doi:10.7554/elife.62714), 2022-05-04
Supplement: fig4-data10 [file 1_Sim_N_1500_Fluor_MW_0.0625M.xlsx]

## Sheet: Tabelle1
0.1	0
0.2	0
0.3	0
0.4	0
0.5	0
0.6	0
0.7	0
0.8	0
0.9	0
1	0
1.1	0
1.2	0
1.3	0
1.4	0
1.5	0
1.6	0
1.7	0
1.8	0
1.9	0
2	0
2.1	0
2.2	0
2.3	0
2.4	0
2.5	0
2.6	0
2.7	0
2.8	0
2.9	0
3	0
3.1	0
3.2	0
3.3	0
3.4	0
3.5	0
3.6	0
3.7	0
3.8	0
3.9	0
4	0
4.1	0
4.2	0
4.3	0
4.4	0
4.5	0
4.6	0
4.7	0
4.8	0
4.9	0
5	0
5.1	0
5.2	0
5.3	0
5.4	0
5.5	0
5.6	0
5.7	0
5.8	0
5.9	0
6	0
6.1	0
6.2	0
6.3	0
6.4	0
6.5	0
6.6	0
6.7	0
6.8	0
6.9	0
7	0
7.1	0
7.2	0
7.3	0
7.4	0
7.5	0
7.6	0
7.7	0
7.8	0
7.9	0
8	0
8.1	0
8.2	0
8.3	0
8.4	0
8.5	0
8.6	0
8.7	0
8.8	0
8.9	0
9	0
9.1	0
9.2	0
9.3	0
9.4	0
9.5	0
9.6	0
9.7	0
9.8	0
9.9	0
10	0
10.1	0
10.2	0
10.3	0
10.4	0
10.5	0
10.6	0
10.7	0
10.8	0
10.9	0
11	0
11.1	0
11.2	0
11.3	0
11.4	0
11.5	0
11.6	0
11.7	0
11.8	0
11.9	0
12	0
12.1	0
12.2	0
12.3	0
12.4	0
12.5	0
12.6	0
12.7	0
12.8	0
12.9	0
13	0
13.1	0
13.2	0
13.3	0
13.4	0
13.5	0
13.6	0
13.7	0
13.8	0
13.9	0
14	0
14.1	0
14.2	0
14.3	0
14.4	0
14.5	0
14.6	0
14.7	0
14.8	0
14.9	0
15	0
15.1	0
15.2	0
15.3	0
15.4	0
15.5	0
15.6	0
15.7	0
15.8	0
15.9	0
16	0
16.1	0
16.2	0
16.3	0
16.4	0
16.5	0
16.6	0
16.7	0
16.8	0
16.9	0
17	0
17.1	0
17.2	0
17.3	0
17.4	0
17.5	0
17.6	0
17.7	0
17.8	0
17.9	0
18	0
18.1	0
18.2	0
18.3	0
18.4	0
18.5	0
18.6	0
18.7	0
18.8	0
18.9	0
19	0
19.1	0
19.2	0
19.3	0
19.4	0
19.5	0
19.6	0
19.7	0
19.8	0
19.9	0
20	0
20.1	0
20.2	0
20.3	0
20.4	0
20.5	0
20.6	0
20.7	0
20.8	0
20.9	0
21	0
21.1	0
21.2	0
21.3	0
21.4	0
21.5	0
21.6	0
21.7	0
21.8	0
21.9	0
22	0
22.1	0
22.2	0
22.3	0
22.4	0
22.5	0
22.6	0
22.7	0
22.8	0
22.9	0
23	0
23.1	0
23.2	0
23.3	0
23.4	0
23.5	0
23.6	0
23.7	0
23.8	0
23.9	0
24	0
24.1	0
24.2	0
24.3	0
24.4	0
24.5	0
24.6	0
24.7	0
24.8	0
24.9	0
25	0
25.1	0
25.2	0
25.3	0
25.4	0
25.5	0
25.6	0
25.7	0
25.8	0
25.9	0
26	0
26.1	0
26.2	0
26.3	0
26.4	0
26.5	0
26.6	0
26.7	0
26.8	0
26.9	0
27	0
27.1	0
27.2	0
27.3	0
27.4	0
27.5	0
27.6	0
27.7	0
27.8	0
27.9	0
28	0
28.1	0
28.2	0
28.3	0
28.4	0
28.5	0
28.6	0
28.7	0
28.8	0
28.9	0
29	0
29.1	0
29.2	0
29.3	0
29.4	0
29.5	0
29.6	0
29.7	0
29.8	0
29.9	0
30	0
30.1	0
30.2	0
30.3	0
30.4	0
30.5	0
30.6	0
30.7	0
30.8	0
30.9	0
31	0
31.1	0
31.2	0
31.3	0
31.4	0
31.5	0
31.6	0
31.7	0
31.8	0
31.9	0
32	0
32.1	0
32.2	0
32.3	0
32.4	0
32.5	0
32.6	0
32.7	0
32.8	0
32.9	0
33	0
33.1	0
33.2	0
33.3	0
33.4	0
33.5	0
33.6	0
33.7	0
33.8	0
33.9	0
34	0
34.1	0
34.2	0
34.3	0
34.4	0
34.5	0
34.6	0
34.7	0
34.8	0
34.9	0
35	0
35.1	0
35.2	0
35.3	0
35.4	0
35.5	0
35.6	0
35.7	0
35.8	0
35.9	0
36	0
36.1	0
36.2	0
36.3	0
36.4	0
36.5	0
36.6	0
36.7	0
36.8	0
36.9	0
37	0
37.1	0
37.2	0
37.3	0
37.4	0
37.5	0
37.6	0
37.7	0
37.8	0
37.9	0
38	0
38.1	0
38.2	0
38.3	0
38.4	0
38.5	0
38.6	0
38.7	0
38.8	0
38.9	0
39	0
39.1	0
39.2	0
39.3	0
39.4	0
39.5	0
39.6	0
39.7	0
39.8	0
39.9	0
40	0
40.1	0
40.2	0
40.3	0
40.4	0
40.5	0
40.6	0
40.7	0
40.8	0
40.9	0
41	0
41.1	0
41.2	0
41.3	0
41.4	0
41.5	0
41.6	0
41.7	0
41.8	0
41.9	0
42	0
42.1	0
42.2	0
42.3	0
42.4	0
42.5	0
42.6	0
42.7	0
42.8	0
42.9	0
43	0
43.1	0
43.2	0
43.3	0
43.4	0
43.5	0
43.6	0
43.7	0
43.8	0
43.9	0
44	0
44.1	0
44.2	0
44.3	0
44.4	0
44.5	0
44.6	0
44.7	0
44.8	0
44.9	0
45	0
45.1	0
45.2	0
45.3	0
45.4	0
45.5	0
45.6	0
45.7	0
45.8	0
45.9	0
46	0
46.1	0
46.2	0
46.3	0
46.4	0
46.5	0
46.6	0
46.7	0
46.8	0
46.9	0
47	0
47.1	0
47.2	0
47.3	0
47.4	0
47.5	0
47.6	0
47.7	0
47.8	0
47.9	0
48	0
48.1	0
48.2	0
48.3	0
48.4	0
48.5	0
48.6	0
48.7	0
48.8	0
48.9	0
49	0
49.1	0
49.2	0
49.3	0
49.4	0
49.5	0
49.6	0
49.7	0
49.8	0
49.9	0
50	0
50.1	0
50.2	0
50.3	0
50.4	0
50.5	0
50.6	0
50.7	0
50.8	0
50.9	0
51	0
51.1	0
51.2	0
51.3	0
51.4	0
51.5	0
51.6	0
51.7	0
51.8	0
51.9	0
52	0
52.1	0
52.2	0
52.3	0
52.4	0
52.5	0
52.6	0
52.7	0
52.8	0
52.9	0
53	0
53.1	0
53.2	0
53.3	0
53.4	0
53.5	0
53.6	0
53.7	0
53.8	0
53.9	0
54	0
54.1	0
54.2	0
54.3	0
54.4	0
54.5	0
54.6	0
54.7	0
54.8	0
54.9	0
55	0
55.1	0
55.2	0
55.3	0
55.4	0
55.5	0
55.6	0
55.7	0
55.8	0
55.9	0
56	0
56.1	0
56.2	0
56.3	0
56.4	0
56.5	0
56.6	0
56.7	0
56.8	0
56.9	0
57	0
57.1	0
57.2	0
57.3	0
57.4	0
57.5	0
57.6	0
57.7	0
57.8	0
57.9	0
58	0
58.1	0
58.2	0
58.3	0
58.4	0
58.5	0
58.6	0
58.7	0
58.8	0
58.9	0
59	0
59.1	0
59.2	0
59.3	0
59.4	0
59.5	0
59.6	0
59.7	0
59.8	0
59.9	0
60	0
60.1	0
60.2	0
60.3	0
60.4	0
60.5	0
60.6	0
60.7	0
60.8	0
60.9	0
61	0
61.1	0
61.2	0
61.3	0
61.4	0
61.5	0
61.6	0
61.7	0
61.8	0
61.9	0
62	0
62.1	0
62.2	0
62.3	0
62.4	0
62.5	0
62.6	0
62.7	0
62.8	0
62.9	0
63	0
63.1	0
63.2	0
63.3	0
63.4	0
63.5	0
63.6	0
63.7	0
63.8	0
63.9	0
64	0
64.1	0
64.2	0
64.3	0
64.4	0
64.5	0
64.6	0
64.7	0
64.8	0
64.9	0
65	0
65.1	0
65.2	0
65.3	0
65.4	0
65.5	0
65.6	0
65.7	0
65.8	0
65.9	0
66	0
66.1	0
66.2	0
66.3	0
66.4	0
66.5	0
66.6	0
66.7	0
66.8	0
66.9	0
67	0
67.1	0
67.2	0
67.3	0
67.4	0
67.5	0
67.6	0
67.7	0
67.8	0
67.9	0
68	0
68.1	0
68.2	0
68.3	0
68.4	0
68.5	0
68.6	0
68.7	0
68.8	0
68.9	0
69	0
69.1	0
69.2	0
69.3	0
69.4	0
69.5	0
69.6	0
69.7	0
69.8	0
69.9	0
70	0
70.1	0
70.2	0
70.3	0
70.4	0
70.5	0
70.6	0
70.7	0
70.8	0
70.9	0
71	0
71.1	0
71.2	0
71.3	0
71.4	0
71.5	0
71.6	0
71.7	0
71.8	0
71.9	0
72	0
72.1	0
72.2	0
72.3	0
72.4	0
72.5	0
72.6	0
72.7	0
72.8	0
72.9	0
73	0
73.1	0
73.2	0
73.3	0
73.4	0
73.5	0
73.6	0
73.7	0
73.8	0
73.9	0
74	0
74.1	0
74.2	0
74.3	0
74.4	0
74.5	0
74.6	0
74.7	0
74.8	0
74.9	0
75	0
75.1	0
75.2	0
75.3	0
75.4	0
75.5	0
75.6	0
75.7	0
75.8	0
75.9	0
76	0
76.1	0
76.2	0
76.3	0
76.4	0
76.5	0
76.6	0
76.7	0
76.8	0
76.9	0
77	0
77.1	0
77.2	0
77.3	0
77.4	0
77.5	0
77.6	0
77.7	0
77.8	0
77.9	0
78	0
78.1	0
78.2	0
78.3	0
78.4	0
78.5	0
78.6	0
78.7	0
78.8	0
78.9	0
79	0
79.1	0
79.2	0
79.3	0
79.4	0
79.5	0
79.6	0
79.7	0
79.8	0
79.9	0
80	0
80.1	0
80.2	0
80.3	0
80.4	0
80.5	0
80.6	0
80.7	0
80.8	0
80.9	0
81	0
81.1	0
81.2	0
81.3	0
81.4	0
81.5	0
81.6	0
81.7	0
81.8	0
81.9	0
82	0
82.1	0
82.2	0
82.3	0
82.4	0
82.5	0
82.6	0
82.7	0
82.8	0
82.9	0
83	0
83.1	0
83.2	0
83.3	0
83.4	0
83.5	0
83.6	0
83.7	0
83.8	0
83.9	0
84	0
84.1	0
84.2	0
84.3	0
84.4	0
84.5	0
84.6	0
84.7	0
84.8	0
84.9	0
85	0
85.1	0
85.2	0
85.3	0
85.4	0
85.5	0
85.6	0
85.7	0
85.8	0
85.9	0
86	0
86.1	0
86.2	0
86.3	0
86.4	0
86.5	0
86.6	0
86.7	0
86.8	0
86.9	0
87	0
87.1	0
87.2	0
87.3	0
87.4	0
87.5	0
87.6	0
87.7	0
87.8	0
87.9	0
88	0
88.1	0
88.2	0
88.3	0
88.4	0
88.5	0
88.6	0
88.7	0
88.8	0
88.9	0
89	0
89.1	0
89.2	0
89.3	0
89.4	0
89.5	0
89.6	0
89.7	0
89.8	0
89.9	0
90	0
90.1	0
90.2	0
90.3	0
90.4	0
90.5	0
90.6	0
90.7	0
90.8	0
90.9	0
91	0
91.1	0
91.2	0
91.3	0
91.4	0
91.5	0
91.6	0
91.7	0
91.8	0
91.9	0
92	0
92.1	0
92.2	0
92.3	0
92.4	0
92.5	0
92.6	0
92.7	0
92.8	0
92.9	0
93	0
93.1	0
93.2	0
93.3	0
93.4	0
93.5	0
93.6	0
93.7	0
93.8	0
93.9	0
94	0
94.1	0
94.2	0
94.3	0
94.4	0
94.5	0
94.6	0
94.7	0
94.8	0
94.9	0
95	0
95.1	0
95.2	0
95.3	0
95.4	0
95.5	0
95.6	0
95.7	0
95.8	0
95.9	0
96	0
96.1	0
96.2	0
96.3	0
96.4	0
96.5	0
96.6	0
96.7	0
96.8	0
96.9	0
97	0
97.1	0
97.2	0
97.3	0
97.4	0
97.5	0
97.6	0
97.7	0
97.8	0
97.9	0
98	0
98.1	0
98.2	0
98.3	0
98.4	0
98.5	0
98.6	0
98.7	0
98.8	0
98.9	0
99	0
99.1	0
99.2	0
99.3	0
99.4	0
99.5	0
99.6	0
99.7	0
99.8	0
99.9	0
100	0
100.1	0.00533333
100.2	0.011
100.3	0.0153333
100.4	0.0163333
100.5	0.0203333
100.6	0.0256667
100.7	0.0296667
100.8	0.0323333
100.9	0.0356667
101	0.04
101.1	0.0436667
101.2	0.046
101.3	0.0496667
101.4	0.0536667
101.5	0.0566667
101.6	0.058
101.7	0.063
101.8	0.067
101.9	0.07
102	0.0723333
102.1	0.0753333
102.2	0.078
102.3	0.0796667
102.4	0.0826667
102.5	0.0856667
102.6	0.0866667
102.7	0.0896667
102.8	0.092
102.9	0.0956667
103	0.0986667
103.1	0.101
103.2	0.104667
103.3	0.108
103.4	0.110667
103.5	0.111667
103.6	0.114
103.7	0.115
103.8	0.119333
103.9	0.121667
104	0.123667
104.1	0.125333
104.2	0.126
104.3	0.126667
104.4	0.128
104.5	0.129333
104.6	0.131667
104.7	0.133333
104.8	0.134667
104.9	0.133667
105	0.135
105.1	0.136667
105.2	0.138
105.3	0.138
105.4	0.140333
105.5	0.142
105.6	0.142
105.7	0.142667
105.8	0.144667
105.9	0.145333
106	0.147333
106.1	0.15
106.2	0.151
106.3	0.152333
106.4	0.153667
106.5	0.155333
106.6	0.157
106.7	0.157667
106.8	0.158667
106.9	0.158
107	0.159667
107.1	0.161667
107.2	0.163667
107.3	0.164667
107.4	0.165333
107.5	0.165333
107.6	0.167667
107.7	0.171
107.8	0.172
107.9	0.172333
108	0.172333
108.1	0.172333
108.2	0.172333
108.3	0.174
108.4	0.175
108.5	0.174333
108.6	0.175
108.7	0.180333
108.8	0.181667
108.9	0.183
109	0.185
109.1	0.182
109.2	0.182333
109.3	0.183
109.4	0.185333
109.5	0.186333
109.6	0.187333
109.7	0.188
109.8	0.187667
109.9	0.188333
110	0.19
110.1	0.191333
110.2	0.194
110.3	0.197667
110.4	0.198
110.5	0.198667
110.6	0.197667
110.7	0.198
110.8	0.198333
110.9	0.198667
111	0.199
111.1	0.200333
111.2	0.201667
111.3	0.201667
111.4	0.203667
111.5	0.204
111.6	0.204
111.7	0.202333
111.8	0.204333
111.9	0.206
112	0.207333
112.1	0.207333
112.2	0.205667
112.3	0.206333
112.4	0.207667
112.5	0.209667
112.6	0.21
112.7	0.208667
112.8	0.208
112.9	0.206667
113	0.206333
113.1	0.205333
113.2	0.207667
113.3	0.208333
113.4	0.207333
113.5	0.207333
113.6	0.21
113.7	0.209667
113.8	0.210667
113.9	0.209667
114	0.212333
114.1	0.211667
114.2	0.209333
114.3	0.210667
114.4	0.211333
114.5	0.213333
114.6	0.215333
114.7	0.216
114.8	0.216
114.9	0.217667
115	0.217667
115.1	0.217333
115.2	0.219
115.3	0.218667
115.4	0.219333
115.5	0.219
115.6	0.217333
115.7	0.219333
115.8	0.217333
115.9	0.218667
116	0.216667
116.1	0.215
116.2	0.217
116.3	0.218
116.4	0.214667
116.5	0.213667
116.6	0.213333
116.7	0.215333
116.8	0.217
116.9	0.214333
117	0.214
117.1	0.213
117.2	0.212667
117.3	0.214333
117.4	0.215333
117.5	0.216
117.6	0.215
117.7	0.215667
117.8	0.215
117.9	0.214667
118	0.215
118.1	0.213667
118.2	0.215
118.3	0.214667
118.4	0.216
118.5	0.219
118.6	0.219667
118.7	0.22
118.8	0.22
118.9	0.218667
119	0.216333
119.1	0.215667
119.2	0.217
119.3	0.217333
119.4	0.218
119.5	0.219667
119.6	0.219333
119.7	0.218667
119.8	0.218333
119.9	0.220333
120	0.218667
120.1	0.218667
120.2	0.219
120.3	0.219333
120.4	0.220333
120.5	0.222
120.6	0.222333
120.7	0.225333
120.8	0.225333
120.9	0.225333
121	0.226
121.1	0.228
121.2	0.227667
121.3	0.23
121.4	0.231
121.5	0.231667
121.6	0.233
121.7	0.233667
121.8	0.234667
121.9	0.233667
122	0.231333
122.1	0.231667
122.2	0.231333
122.3	0.234
122.4	0.233
122.5	0.234
122.6	0.232667
122.7	0.231667
122.8	0.230667
122.9	0.23
123	0.230667
123.1	0.231333
123.2	0.231667
123.3	0.232
123.4	0.232667
123.5	0.233
123.6	0.232667
123.7	0.232
123.8	0.232667
123.9	0.232667
124	0.233333
124.1	0.232333
124.2	0.232
124.3	0.231667
124.4	0.232
124.5	0.233333
124.6	0.233667
124.7	0.23
124.8	0.229
124.9	0.229
125	0.227667
125.1	0.229333
125.2	0.231
125.3	0.231333
125.4	0.230667
125.5	0.229333
125.6	0.230667
125.7	0.230333
125.8	0.230333
125.9	0.230667
126	0.230667
126.1	0.232
126.2	0.234
126.3	0.233667
126.4	0.231
126.5	0.231
126.6	0.23
126.7	0.228333
126.8	0.229333
126.9	0.227333
127	0.227333
127.1	0.228667
127.2	0.231667
127.3	0.232
127.4	0.231333
127.5	0.232667
127.6	0.231333
127.7	0.230667
127.8	0.231
127.9	0.231333
128	0.233
128.1	0.236333
128.2	0.235333
128.3	0.234667
128.4	0.234
128.5	0.235667
128.6	0.236333
128.7	0.236333
128.8	0.236333
128.9	0.234667
129	0.233333
129.1	0.233667
129.2	0.234
129.3	0.234667
129.4	0.237333
129.5	0.237
129.6	0.238333
129.7	0.240333
129.8	0.241667
129.9	0.240667
130	0.239333
130.1	0.240333
130.2	0.241667
130.3	0.241
130.4	0.239333
130.5	0.24
130.6	0.24
130.7	0.239333
130.8	0.238667
130.9	0.240667
131	0.240667
131.1	0.241333
131.2	0.241667
131.3	0.241667
131.4	0.239333
131.5	0.236
131.6	0.236
131.7	0.238333
131.8	0.240333
131.9	0.242333
132	0.242
132.1	0.241
132.2	0.239333
132.3	0.239
132.4	0.24
132.5	0.239
132.6	0.24
132.7	0.241
132.8	0.241333
132.9	0.241667
133	0.241
133.1	0.240333
133.2	0.242
133.3	0.243333
133.4	0.244333
133.5	0.246667
133.6	0.246667
133.7	0.246667
133.8	0.247
133.9	0.244667
134	0.242667
134.1	0.243667
134.2	0.244
134.3	0.242667
134.4	0.242667
134.5	0.241667
134.6	0.239667
134.7	0.240667
134.8	0.239
134.9	0.238333
135	0.24
135.1	0.239333
135.2	0.239333
135.3	0.242
135.4	0.241
135.5	0.242667
135.6	0.245333
135.7	0.243667
135.8	0.243
135.9	0.242
136	0.242
136.1	0.243667
136.2	0.243333
136.3	0.244333
136.4	0.245667
136.5	0.246667
136.6	0.247
136.7	0.247
136.8	0.249333
136.9	0.249667
137	0.248333
137.1	0.248
137.2	0.245333
137.3	0.244667
137.4	0.244667
137.5	0.246667
137.6	0.246667
137.7	0.246
137.8	0.244667
137.9	0.245667
138	0.247333
138.1	0.245667
138.2	0.245333
138.3	0.245333
138.4	0.245667
138.5	0.245333
138.6	0.246
138.7	0.244333
138.8	0.245
138.9	0.244667
139	0.245
139.1	0.244
139.2	0.243667
139.3	0.244333
139.4	0.242333
139.5	0.242333
139.6	0.243333
139.7	0.242
139.8	0.24
139.9	0.239333
140	0.240667
140.1	0.239
140.2	0.238
140.3	0.238667
140.4	0.238667
140.5	0.238
140.6	0.240333
140.7	0.24
140.8	0.241
140.9	0.243
141	0.243
141.1	0.243667
141.2	0.243333
141.3	0.240333
141.4	0.242
141.5	0.241667
141.6	0.242
141.7	0.24
141.8	0.238333
141.9	0.239667
142	0.238667
142.1	0.237667
142.2	0.238
142.3	0.237333
142.4	0.238333
142.5	0.238
142.6	0.238333
142.7	0.239667
142.8	0.239667
142.9	0.241333
143	0.241
143.1	0.240333
143.2	0.238
143.3	0.238333
143.4	0.238333
143.5	0.240667
143.6	0.241333
143.7	0.241667
143.8	0.239333
143.9	0.237667
144	0.238
144.1	0.235667
144.2	0.237
144.3	0.235333
144.4	0.235667
144.5	0.236333
144.6	0.237333
144.7	0.237
144.8	0.238
144.9	0.235667
145	0.236333
145.1	0.236667
145.2	0.237333
145.3	0.238333
145.4	0.239
145.5	0.240667
145.6	0.239333
145.7	0.238667
145.8	0.239
145.9	0.239667
146	0.24
146.1	0.238333
146.2	0.239333
146.3	0.238333
146.4	0.236667
146.5	0.236
146.6	0.236333
146.7	0.237
146.8	0.237
146.9	0.238
147	0.238333
147.1	0.238667
147.2	0.241333
147.3	0.241667
147.4	0.242667
147.5	0.24
147.6	0.237667
147.7	0.238667
147.8	0.240333
147.9	0.24
148	0.238
148.1	0.238
148.2	0.235667
148.3	0.234667
148.4	0.234
148.5	0.234333
148.6	0.235
148.7	0.236
148.8	0.238333
148.9	0.238333
149	0.239333
149.1	0.239667
149.2	0.239
149.3	0.238667
149.4	0.239333
149.5	0.239333
149.6	0.243667
149.7	0.243333
149.8	0.243333
149.9	0.242
150	0.242
150.1	0.242
150.2	0.243333
150.3	0.245
150.4	0.242333
150.5	0.243333
150.6	0.242667
150.7	0.240667
150.8	0.238333
150.9	0.239
151	0.24
151.1	0.240667
151.2	0.24
151.3	0.239667
151.4	0.239333
151.5	0.24
151.6	0.238333
151.7	0.235
151.8	0.236333
151.9	0.235333
152	0.232
152.1	0.232333
152.2	0.233667
152.3	0.236
152.4	0.236667
152.5	0.237667
152.6	0.239333
152.7	0.240667
152.8	0.240333
152.9	0.241667
153	0.243667
153.1	0.242
153.2	0.244
153.3	0.243333
153.4	0.242
153.5	0.242
153.6	0.242333
153.7	0.241333
153.8	0.239
153.9	0.240333
154	0.241
154.1	0.240667
154.2	0.241
154.3	0.240667
154.4	0.239667
154.5	0.243333
154.6	0.245
154.7	0.244333
154.8	0.243333
154.9	0.246
155	0.245667
155.1	0.246
155.2	0.249
155.3	0.25
155.4	0.248333
155.5	0.249333
155.6	0.250667
155.7	0.251333
155.8	0.252667
155.9	0.254
156	0.252
156.1	0.252
156.2	0.253
156.3	0.252
156.4	0.252333
156.5	0.252333
156.6	0.252667
156.7	0.251667
156.8	0.251667
156.9	0.251333
157	0.25
157.1	0.25
157.2	0.250667
157.3	0.250333
157.4	0.250667
157.5	0.249667
157.6	0.249333
157.7	0.249
157.8	0.247333
157.9	0.247667
158	0.245667
158.1	0.247
158.2	0.248
158.3	0.246667
158.4	0.248667
158.5	0.248667
158.6	0.247333
158.7	0.244
158.8	0.242
158.9	0.242
159	0.244333
159.1	0.243667
159.2	0.243333
159.3	0.242
159.4	0.244
159.5	0.244667
159.6	0.245
159.7	0.244
159.8	0.244667
159.9	0.243667
160	0.242
160.1	0.241667
160.2	0.240333
160.3	0.240667
160.4	0.239
160.5	0.241333
160.6	0.241333
160.7	0.242667
160.8	0.242
160.9	0.240667
161	0.242667
161.1	0.242667
161.2	0.244
161.3	0.243333
161.4	0.244333
161.5	0.243
161.6	0.241667
161.7	0.241
161.8	0.240333
161.9	0.241
162	0.242333
162.1	0.242
162.2	0.242667
162.3	0.243667
162.4	0.244333
162.5	0.244667
162.6	0.243667
162.7	0.241667
162.8	0.243
162.9	0.243667
163	0.246333
163.1	0.246667
163.2	0.248333
163.3	0.250333
163.4	0.251
163.5	0.252
163.6	0.250333
163.7	0.249333
163.8	0.25
163.9	0.248667
164	0.248667
164.1	0.246333
164.2	0.244333
164.3	0.244
164.4	0.246
164.5	0.247
164.6	0.245
164.7	0.243667
164.8	0.244333
164.9	0.242333
165	0.241
165.1	0.239333
165.2	0.238
165.3	0.236
165.4	0.236667
165.5	0.238667
165.6	0.236
165.7	0.237
165.8	0.235667
165.9	0.234333
166	0.232333
166.1	0.231
166.2	0.232333
166.3	0.231
166.4	0.231333
166.5	0.232
166.6	0.233
166.7	0.231667
166.8	0.232333
166.9	0.233
167	0.232667
167.1	0.233667
167.2	0.234667
167.3	0.236667
167.4	0.234
167.5	0.235333
167.6	0.235333
167.7	0.236333
167.8	0.237667
167.9	0.238
168	0.238333
168.1	0.237667
168.2	0.24
168.3	0.239
168.4	0.24
168.5	0.239667
168.6	0.238
168.7	0.240333
168.8	0.241667
168.9	0.242
169	0.241333
169.1	0.242667
169.2	0.242
169.3	0.241
169.4	0.241
169.5	0.242333
169.6	0.242
169.7	0.242
169.8	0.242333
169.9	0.24
170	0.240333
170.1	0.241333
170.2	0.243333
170.3	0.242667
170.4	0.243
170.5	0.243333
170.6	0.247667
170.7	0.246667
170.8	0.245333
170.9	0.245333
171	0.247
171.1	0.248
171.2	0.248
171.3	0.248333
171.4	0.247667
171.5	0.248333
171.6	0.25
171.7	0.252
171.8	0.253333
171.9	0.252667
172	0.253333
172.1	0.254667
172.2	0.256333
172.3	0.256
172.4	0.256667
172.5	0.259
172.6	0.26
172.7	0.258
172.8	0.258667
172.9	0.258
173	0.256667
173.1	0.255667
173.2	0.254
173.3	0.255667
173.4	0.254333
173.5	0.256
173.6	0.256667
173.7	0.258333
173.8	0.259667
173.9	0.261
174	0.261
174.1	0.262333
174.2	0.263667
174.3	0.266667
174.4	0.266333
174.5	0.265333
174.6	0.264333
174.7	0.264333
174.8	0.264333
174.9	0.264333
175	0.263
175.1	0.263667
175.2	0.265333
175.3	0.265667
175.4	0.266333
175.5	0.265
175.6	0.265667
175.7	0.265333
175.8	0.265
175.9	0.264
176	0.263
176.1	0.263667
176.2	0.263667
176.3	0.265
176.4	0.266667
176.5	0.268333
176.6	0.269
176.7	0.270333
176.8	0.269
176.9	0.269667
177	0.268333
177.1	0.267333
177.2	0.267
177.3	0.266667
177.4	0.266333
177.5	0.265333
177.6	0.267
177.7	0.267333
177.8	0.266
177.9	0.266333
178	0.265333
178.1	0.265
178.2	0.264333
178.3	0.267
178.4	0.268333
178.5	0.270333
178.6	0.27
178.7	0.272333
178.8	0.272667
178.9	0.271333
179	0.272
179.1	0.270667
179.2	0.269667
179.3	0.269
179.4	0.268333
179.5	0.269
179.6	0.268667
179.7	0.267667
179.8	0.267333
179.9	0.266667
180	0.265
180.1	0.265333
180.2	0.264667
180.3	0.264
180.4	0.263
180.5	0.265333
180.6	0.263333
180.7	0.264667
180.8	0.263
180.9	0.263333
181	0.263667
181.1	0.261
181.2	0.262667
181.3	0.261
181.4	0.261667
181.5	0.261667
181.6	0.261
181.7	0.260333
181.8	0.260667
181.9	0.261
182	0.261333
182.1	0.260667
182.2	0.260333
182.3	0.262333
182.4	0.259667
182.5	0.259
182.6	0.260667
182.7	0.262333
182.8	0.261
182.9	0.26
183	0.258
183.1	0.256333
183.2	0.257333
183.3	0.259667
183.4	0.259
183.5	0.261333
183.6	0.261333
183.7	0.262667
183.8	0.261667
183.9	0.261
184	0.261
184.1	0.26
184.2	0.258667
184.3	0.258333
184.4	0.258333
184.5	0.257333
184.6	0.256
184.7	0.254333
184.8	0.255333
184.9	0.256
185	0.256333
185.1	0.257
185.2	0.257667
185.3	0.256
185.4	0.258
185.5	0.256333
185.6	0.257667
185.7	0.259
185.8	0.255667
185.9	0.257333
186	0.259
186.1	0.259
186.2	0.259
186.3	0.259333
186.4	0.258
186.5	0.259
186.6	0.259333
186.7	0.257333
186.8	0.257667
186.9	0.256667
187	0.257333
187.1	0.255333
187.2	0.255333
187.3	0.256
187.4	0.255333
187.5	0.256
187.6	0.257667
187.7	0.257
187.8	0.256333
187.9	0.256333
188	0.256
188.1	0.256
188.2	0.255667
188.3	0.255333
188.4	0.255
188.5	0.258
188.6	0.259333
188.7	0.257667
188.8	0.257
188.9	0.256333
189	0.256
189.1	0.256667
189.2	0.256333
189.3	0.255333
189.4	0.254333
189.5	0.253667
189.6	0.253
189.7	0.251333
189.8	0.249333
189.9	0.249
190	0.249333
190.1	0.248
190.2	0.246667
190.3	0.244
190.4	0.242333
190.5	0.242
190.6	0.241333
190.7	0.242333
190.8	0.244
190.9	0.244333
191	0.243667
191.1	0.244667
191.2	0.246333
191.3	0.245333
191.4	0.245667
191.5	0.248333
191.6	0.250667
191.7	0.250667
191.8	0.251
191.9	0.251333
192	0.252
192.1	0.251333
192.2	0.249
192.3	0.249
192.4	0.249333
192.5	0.25
192.6	0.249333
192.7	0.249333
192.8	0.247667
192.9	0.249
193	0.248
193.1	0.249
193.2	0.248333
193.3	0.247667
193.4	0.248
193.5	0.247
193.6	0.247667
193.7	0.247667
193.8	0.247667
193.9	0.249
194	0.249667
194.1	0.247667
194.2	0.247667
194.3	0.245333
194.4	0.245
194.5	0.244333
194.6	0.244
194.7	0.244667
194.8	0.245333
194.9	0.246333
195	0.246667
195.1	0.247333
195.2	0.245667
195.3	0.246
195.4	0.247
195.5	0.248333
195.6	0.25
195.7	0.250667
195.8	0.250333
195.9	0.251333
196	0.252
196.1	0.253
196.2	0.253
196.3	0.253667
196.4	0.254
196.5	0.255
196.6	0.255667
196.7	0.254667
196.8	0.254
196.9	0.256
197	0.255
197.1	0.254333
197.2	0.252
197.3	0.251333
197.4	0.251667
197.5	0.253667
197.6	0.253667
197.7	0.254
197.8	0.252333
197.9	0.252333
198	0.253667
198.1	0.254667
198.2	0.253667
198.3	0.252333
198.4	0.252333
198.5	0.251333
198.6	0.249
198.7	0.249
198.8	0.249333
198.9	0.249333
199	0.249
199.1	0.250667
199.2	0.249333
199.3	0.251
199.4	0.248333
199.5	0.245667
199.6	0.244667
199.7	0.246667
199.8	0.246
199.9	0.247333
200	0.247
[truncated: 14,000 more rows]
