# Supplementary material for: Bayesian inference of kinetic schemes for ion channels by Kalman filtering
Source: eLife journal article supplement (doi:10.7554/elife.62714), 2022-05-04
Supplement: fig4-data10 [file 1_Sim_N_1500_Strom_MW_0.0625M.xlsx]

## Sheet: Tabelle1
0.1	0
0.2	0
0.3	0
0.4	0
0.5	0
0.6	0
0.7	0
0.8	0
0.9	0
1	0
1.1	0
1.2	0
1.3	0
1.4	0
1.5	0
1.6	0
1.7	0
1.8	0
1.9	0
2	0
2.1	0
2.2	0
2.3	0
2.4	0
2.5	0
2.6	0
2.7	0
2.8	0
2.9	0
3	0
3.1	0
3.2	0
3.3	0
3.4	0
3.5	0
3.6	0
3.7	0
3.8	0
3.9	0
4	0
4.1	0
4.2	0
4.3	0
4.4	0
4.5	0
4.6	0
4.7	0
4.8	0
4.9	0
5	0
5.1	0
5.2	0
5.3	0
5.4	0
5.5	0
5.6	0
5.7	0
5.8	0
5.9	0
6	0
6.1	0
6.2	0
6.3	0
6.4	0
6.5	0
6.6	0
6.7	0
6.8	0
6.9	0
7	0
7.1	0
7.2	0
7.3	0
7.4	0
7.5	0
7.6	0
7.7	0
7.8	0
7.9	0
8	0
8.1	0
8.2	0
8.3	0
8.4	0
8.5	0
8.6	0
8.7	0
8.8	0
8.9	0
9	0
9.1	0
9.2	0
9.3	0
9.4	0
9.5	0
9.6	0
9.7	0
9.8	0
9.9	0
10	0
10.1	0
10.2	0
10.3	0
10.4	0
10.5	0
10.6	0
10.7	0
10.8	0
10.9	0
11	0
11.1	0
11.2	0
11.3	0
11.4	0
11.5	0
11.6	0
11.7	0
11.8	0
11.9	0
12	0
12.1	0
12.2	0
12.3	0
12.4	0
12.5	0
12.6	0
12.7	0
12.8	0
12.9	0
13	0
13.1	0
13.2	0
13.3	0
13.4	0
13.5	0
13.6	0
13.7	0
13.8	0
13.9	0
14	0
14.1	0
14.2	0
14.3	0
14.4	0
14.5	0
14.6	0
14.7	0
14.8	0
14.9	0
15	0
15.1	0
15.2	0
15.3	0
15.4	0
15.5	0
15.6	0
15.7	0
15.8	0
15.9	0
16	0
16.1	0
16.2	0
16.3	0
16.4	0
16.5	0
16.6	0
16.7	0
16.8	0
16.9	0
17	0
17.1	0
17.2	0
17.3	0
17.4	0
17.5	0
17.6	0
17.7	0
17.8	0
17.9	0
18	0
18.1	0
18.2	0
18.3	0
18.4	0
18.5	0
18.6	0
18.7	0
18.8	0
18.9	0
19	0
19.1	0
19.2	0
19.3	0
19.4	0
19.5	0
19.6	0
19.7	0
19.8	0
19.9	0
20	0
20.1	0
20.2	0
20.3	0
20.4	0
20.5	0
20.6	0
20.7	0
20.8	0
20.9	0
21	0
21.1	0
21.2	0
21.3	0
21.4	0
21.5	0
21.6	0
21.7	0
21.8	0
21.9	0
22	0
22.1	0
22.2	0
22.3	0
22.4	0
22.5	0
22.6	0
22.7	0
22.8	0
22.9	0
23	0
23.1	0
23.2	0
23.3	0
23.4	0
23.5	0
23.6	0
23.7	0
23.8	0
23.9	0
24	0
24.1	0
24.2	0
24.3	0
24.4	0
24.5	0
24.6	0
24.7	0
24.8	0
24.9	0
25	0
25.1	0
25.2	0
25.3	0
25.4	0
25.5	0
25.6	0
25.7	0
25.8	0
25.9	0
26	0
26.1	0
26.2	0
26.3	0
26.4	0
26.5	0
26.6	0
26.7	0
26.8	0
26.9	0
27	0
27.1	0
27.2	0
27.3	0
27.4	0
27.5	0
27.6	0
27.7	0
27.8	0
27.9	0
28	0
28.1	0
28.2	0
28.3	0
28.4	0
28.5	0
28.6	0
28.7	0
28.8	0
28.9	0
29	0
29.1	0
29.2	0
29.3	0
29.4	0
29.5	0
29.6	0
29.7	0
29.8	0
29.9	0
30	0
30.1	0
30.2	0
30.3	0
30.4	0
30.5	0
30.6	0
30.7	0
30.8	0
30.9	0
31	0
31.1	0
31.2	0
31.3	0
31.4	0
31.5	0
31.6	0
31.7	0
31.8	0
31.9	0
32	0
32.1	0
32.2	0
32.3	0
32.4	0
32.5	0
32.6	0
32.7	0
32.8	0
32.9	0
33	0
33.1	0
33.2	0
33.3	0
33.4	0
33.5	0
33.6	0
33.7	0
33.8	0
33.9	0
34	0
34.1	0
34.2	0
34.3	0
34.4	0
34.5	0
34.6	0
34.7	0
34.8	0
34.9	0
35	0
35.1	0
35.2	0
35.3	0
35.4	0
35.5	0
35.6	0
35.7	0
35.8	0
35.9	0
36	0
36.1	0
36.2	0
36.3	0
36.4	0
36.5	0
36.6	0
36.7	0
36.8	0
36.9	0
37	0
37.1	0
37.2	0
37.3	0
37.4	0
37.5	0
37.6	0
37.7	0
37.8	0
37.9	0
38	0
38.1	0
38.2	0
38.3	0
38.4	0
38.5	0
38.6	0
38.7	0
38.8	0
38.9	0
39	0
39.1	0
39.2	0
39.3	0
39.4	0
39.5	0
39.6	0
39.7	0
39.8	0
39.9	0
40	0
40.1	0
40.2	0
40.3	0
40.4	0
40.5	0
40.6	0
40.7	0
40.8	0
40.9	0
41	0
41.1	0
41.2	0
41.3	0
41.4	0
41.5	0
41.6	0
41.7	0
41.8	0
41.9	0
42	0
42.1	0
42.2	0
42.3	0
42.4	0
42.5	0
42.6	0
42.7	0
42.8	0
42.9	0
43	0
43.1	0
43.2	0
43.3	0
43.4	0
43.5	0
43.6	0
43.7	0
43.8	0
43.9	0
44	0
44.1	0
44.2	0
44.3	0
44.4	0
44.5	0
44.6	0
44.7	0
44.8	0
44.9	0
45	0
45.1	0
45.2	0
45.3	0
45.4	0
45.5	0
45.6	0
45.7	0
45.8	0
45.9	0
46	0
46.1	0
46.2	0
46.3	0
46.4	0
46.5	0
46.6	0
46.7	0
46.8	0
46.9	0
47	0
47.1	0
47.2	0
47.3	0
47.4	0
47.5	0
47.6	0
47.7	0
47.8	0
47.9	0
48	0
48.1	0
48.2	0
48.3	0
48.4	0
48.5	0
48.6	0
48.7	0
48.8	0
48.9	0
49	0
49.1	0
49.2	0
49.3	0
49.4	0
49.5	0
49.6	0
49.7	0
49.8	0
49.9	0
50	0
50.1	0
50.2	0
50.3	0
50.4	0
50.5	0
50.6	0
50.7	0
50.8	0
50.9	0
51	0
51.1	0
51.2	0
51.3	0
51.4	0
51.5	0
51.6	0
51.7	0
51.8	0
51.9	0
52	0
52.1	0
52.2	0
52.3	0
52.4	0
52.5	0
52.6	0
52.7	0
52.8	0
52.9	0
53	0
53.1	0
53.2	0
53.3	0
53.4	0
53.5	0
53.6	0
53.7	0
53.8	0
53.9	0
54	0
54.1	0
54.2	0
54.3	0
54.4	0
54.5	0
54.6	0
54.7	0
54.8	0
54.9	0
55	0
55.1	0
55.2	0
55.3	0
55.4	0
55.5	0
55.6	0
55.7	0
55.8	0
55.9	0
56	0
56.1	0
56.2	0
56.3	0
56.4	0
56.5	0
56.6	0
56.7	0
56.8	0
56.9	0
57	0
57.1	0
57.2	0
57.3	0
57.4	0
57.5	0
57.6	0
57.7	0
57.8	0
57.9	0
58	0
58.1	0
58.2	0
58.3	0
58.4	0
58.5	0
58.6	0
58.7	0
58.8	0
58.9	0
59	0
59.1	0
59.2	0
59.3	0
59.4	0
59.5	0
59.6	0
59.7	0
59.8	0
59.9	0
60	0
60.1	0
60.2	0
60.3	0
60.4	0
60.5	0
60.6	0
60.7	0
60.8	0
60.9	0
61	0
61.1	0
61.2	0
61.3	0
61.4	0
61.5	0
61.6	0
61.7	0
61.8	0
61.9	0
62	0
62.1	0
62.2	0
62.3	0
62.4	0
62.5	0
62.6	0
62.7	0
62.8	0
62.9	0
63	0
63.1	0
63.2	0
63.3	0
63.4	0
63.5	0
63.6	0
63.7	0
63.8	0
63.9	0
64	0
64.1	0
64.2	0
64.3	0
64.4	0
64.5	0
64.6	0
64.7	0
64.8	0
64.9	0
65	0
65.1	0
65.2	0
65.3	0
65.4	0
65.5	0
65.6	0
65.7	0
65.8	0
65.9	0
66	0
66.1	0
66.2	0
66.3	0
66.4	0
66.5	0
66.6	0
66.7	0
66.8	0
66.9	0
67	0
67.1	0
67.2	0
67.3	0
67.4	0
67.5	0
67.6	0
67.7	0
67.8	0
67.9	0
68	0
68.1	0
68.2	0
68.3	0
68.4	0
68.5	0
68.6	0
68.7	0
68.8	0
68.9	0
69	0
69.1	0
69.2	0
69.3	0
69.4	0
69.5	0
69.6	0
69.7	0
69.8	0
69.9	0
70	0
70.1	0
70.2	0
70.3	0
70.4	0
70.5	0
70.6	0
70.7	0
70.8	0
70.9	0
71	0
71.1	0
71.2	0
71.3	0
71.4	0
71.5	0
71.6	0
71.7	0
71.8	0
71.9	0
72	0
72.1	0
72.2	0
72.3	0
72.4	0
72.5	0
72.6	0
72.7	0
72.8	0
72.9	0
73	0
73.1	0
73.2	0
73.3	0
73.4	0
73.5	0
73.6	0
73.7	0
73.8	0
73.9	0
74	0
74.1	0
74.2	0
74.3	0
74.4	0
74.5	0
74.6	0
74.7	0
74.8	0
74.9	0
75	0
75.1	0
75.2	0
75.3	0
75.4	0
75.5	0
75.6	0
75.7	0
75.8	0
75.9	0
76	0
76.1	0
76.2	0
76.3	0
76.4	0
76.5	0
76.6	0
76.7	0
76.8	0
76.9	0
77	0
77.1	0
77.2	0
77.3	0
77.4	0
77.5	0
77.6	0
77.7	0
77.8	0
77.9	0
78	0
78.1	0
78.2	0
78.3	0
78.4	0
78.5	0
78.6	0
78.7	0
78.8	0
78.9	0
79	0
79.1	0
79.2	0
79.3	0
79.4	0
79.5	0
79.6	0
79.7	0
79.8	0
79.9	0
80	0
80.1	0
80.2	0
80.3	0
80.4	0
80.5	0
80.6	0
80.7	0
80.8	0
80.9	0
81	0
81.1	0
81.2	0
81.3	0
81.4	0
81.5	0
81.6	0
81.7	0
81.8	0
81.9	0
82	0
82.1	0
82.2	0
82.3	0
82.4	0
82.5	0
82.6	0
82.7	0
82.8	0
82.9	0
83	0
83.1	0
83.2	0
83.3	0
83.4	0
83.5	0
83.6	0
83.7	0
83.8	0
83.9	0
84	0
84.1	0
84.2	0
84.3	0
84.4	0
84.5	0
84.6	0
84.7	0
84.8	0
84.9	0
85	0
85.1	0
85.2	0
85.3	0
85.4	0
85.5	0
85.6	0
85.7	0
85.8	0
85.9	0
86	0
86.1	0
86.2	0
86.3	0
86.4	0
86.5	0
86.6	0
86.7	0
86.8	0
86.9	0
87	0
87.1	0
87.2	0
87.3	0
87.4	0
87.5	0
87.6	0
87.7	0
87.8	0
87.9	0
88	0
88.1	0
88.2	0
88.3	0
88.4	0
88.5	0
88.6	0
88.7	0
88.8	0
88.9	0
89	0
89.1	0
89.2	0
89.3	0
89.4	0
89.5	0
89.6	0
89.7	0
89.8	0
89.9	0
90	0
90.1	0
90.2	0
90.3	0
90.4	0
90.5	0
90.6	0
90.7	0
90.8	0
90.9	0
91	0
91.1	0
91.2	0
91.3	0
91.4	0
91.5	0
91.6	0
91.7	0
91.8	0
91.9	0
92	0
92.1	0
92.2	0
92.3	0
92.4	0
92.5	0
92.6	0
92.7	0
92.8	0
92.9	0
93	0
93.1	0
93.2	0
93.3	0
93.4	0
93.5	0
93.6	0
93.7	0
93.8	0
93.9	0
94	0
94.1	0
94.2	0
94.3	0
94.4	0
94.5	0
94.6	0
94.7	0
94.8	0
94.9	0
95	0
95.1	0
95.2	0
95.3	0
95.4	0
95.5	0
95.6	0
95.7	0
95.8	0
95.9	0
96	0
96.1	0
96.2	0
96.3	0
96.4	0
96.5	0
96.6	0
96.7	0
96.8	0
96.9	0
97	0
97.1	0
97.2	0
97.3	0
97.4	0
97.5	0
97.6	0
97.7	0
97.8	0
97.9	0
98	0
98.1	0
98.2	0
98.3	0
98.4	0
98.5	0
98.6	0
98.7	0
98.8	0
98.9	0
99	0
99.1	0
99.2	0
99.3	0
99.4	0
99.5	0
99.6	0
99.7	0
99.8	0
99.9	0
100	0
100.1	0
100.2	0
100.3	0
100.4	0
100.5	0
100.6	0
100.7	0
100.8	0
100.9	0
101	0
101.1	0
101.2	0
101.3	0
101.4	0
101.5	0
101.6	0
101.7	0
101.8	0
101.9	0
102	0
102.1	0.000666667
102.2	0.000666667
102.3	0.000666667
102.4	0.000666667
102.5	0.000666667
102.6	0.000666667
102.7	0.000666667
102.8	0.000666667
102.9	0.000666667
103	0.000666667
103.1	0.000666667
103.2	0.000666667
103.3	0.000666667
103.4	0.000666667
103.5	0.000666667
103.6	0.000666667
103.7	0.000666667
103.8	0.000666667
103.9	0.000666667
104	0.000666667
104.1	0.000666667
104.2	0.000666667
104.3	0.00133333
104.4	0.00133333
104.5	0.00133333
104.6	0.00133333
104.7	0.002
104.8	0.00266667
104.9	0.00266667
105	0.00266667
105.1	0.00266667
105.2	0.00266667
105.3	0.00266667
105.4	0.00266667
105.5	0.00266667
105.6	0.00266667
105.7	0.00266667
105.8	0.00266667
105.9	0.00266667
106	0.00266667
106.1	0.00266667
106.2	0.00266667
106.3	0.00266667
106.4	0.00266667
106.5	0.00266667
106.6	0.00266667
106.7	0.00266667
106.8	0.00266667
106.9	0.00266667
107	0.00266667
107.1	0.00266667
107.2	0.00266667
107.3	0.00266667
107.4	0.00266667
107.5	0.00333333
107.6	0.00333333
107.7	0.00333333
107.8	0.00333333
107.9	0.00333333
108	0.00333333
108.1	0.00333333
108.2	0.00333333
108.3	0.00333333
108.4	0.00333333
108.5	0.00333333
108.6	0.00333333
108.7	0.00333333
108.8	0.00333333
108.9	0.004
109	0.00333333
109.1	0.00333333
109.2	0.00333333
109.3	0.00333333
109.4	0.00333333
109.5	0.00333333
109.6	0.00333333
109.7	0.00333333
109.8	0.00333333
109.9	0.00333333
110	0.00333333
110.1	0.00333333
110.2	0.00333333
110.3	0.00333333
110.4	0.00333333
110.5	0.00333333
110.6	0.00333333
110.7	0.00333333
110.8	0.00333333
110.9	0.004
111	0.004
111.1	0.004
111.2	0.004
111.3	0.004
111.4	0.004
111.5	0.004
111.6	0.004
111.7	0.004
111.8	0.004
111.9	0.004
112	0.004
112.1	0.00466667
112.2	0.00466667
112.3	0.00466667
112.4	0.00466667
112.5	0.00466667
112.6	0.00466667
112.7	0.00466667
112.8	0.00466667
112.9	0.00466667
113	0.00533333
113.1	0.00533333
113.2	0.00533333
113.3	0.00533333
113.4	0.00533333
113.5	0.00533333
113.6	0.00533333
113.7	0.00533333
113.8	0.00533333
113.9	0.00533333
114	0.00533333
114.1	0.00533333
114.2	0.006
114.3	0.006
114.4	0.006
114.5	0.006
114.6	0.006
114.7	0.006
114.8	0.006
114.9	0.006
115	0.006
115.1	0.006
115.2	0.006
115.3	0.006
115.4	0.006
115.5	0.006
115.6	0.006
115.7	0.006
115.8	0.006
115.9	0.006
116	0.006
116.1	0.006
116.2	0.006
116.3	0.006
116.4	0.00666667
116.5	0.00666667
116.6	0.00666667
116.7	0.00666667
116.8	0.00666667
116.9	0.00666667
117	0.00666667
117.1	0.00733333
117.2	0.00866667
117.3	0.00866667
117.4	0.00866667
117.5	0.00866667
117.6	0.00866667
117.7	0.01
117.8	0.01
117.9	0.01
118	0.01
118.1	0.01
118.2	0.01
118.3	0.0106667
118.4	0.0106667
118.5	0.0106667
118.6	0.0106667
118.7	0.0113333
118.8	0.0113333
118.9	0.0113333
119	0.0113333
119.1	0.0113333
119.2	0.0113333
119.3	0.0113333
119.4	0.012
119.5	0.012
119.6	0.012
119.7	0.012
119.8	0.012
119.9	0.012
120	0.012
120.1	0.012
120.2	0.012
120.3	0.012
120.4	0.012
120.5	0.012
120.6	0.012
120.7	0.012
120.8	0.012
120.9	0.012
121	0.012
121.1	0.012
121.2	0.012
121.3	0.012
121.4	0.012
121.5	0.012
121.6	0.012
121.7	0.012
121.8	0.012
121.9	0.012
122	0.012
122.1	0.012
122.2	0.0113333
122.3	0.0113333
122.4	0.0113333
122.5	0.0113333
122.6	0.0113333
122.7	0.0113333
122.8	0.012
122.9	0.0126667
123	0.0126667
123.1	0.0133333
123.2	0.0133333
123.3	0.0133333
123.4	0.0133333
123.5	0.0133333
123.6	0.014
123.7	0.014
123.8	0.014
123.9	0.014
124	0.014
124.1	0.014
124.2	0.014
124.3	0.014
124.4	0.014
124.5	0.014
124.6	0.014
124.7	0.014
124.8	0.014
124.9	0.014
125	0.014
125.1	0.014
125.2	0.014
125.3	0.014
125.4	0.014
125.5	0.0146667
125.6	0.0146667
125.7	0.0146667
125.8	0.0146667
125.9	0.0146667
126	0.0153333
126.1	0.0153333
126.2	0.0153333
126.3	0.016
126.4	0.016
126.5	0.016
126.6	0.016
126.7	0.016
126.8	0.0153333
126.9	0.0153333
127	0.0153333
127.1	0.0146667
127.2	0.0146667
127.3	0.0146667
127.4	0.0146667
127.5	0.0146667
127.6	0.0146667
127.7	0.0146667
127.8	0.0146667
127.9	0.0146667
128	0.0146667
128.1	0.0146667
128.2	0.0146667
128.3	0.0146667
128.4	0.0146667
128.5	0.0146667
128.6	0.0146667
128.7	0.0146667
128.8	0.0146667
128.9	0.014
129	0.014
129.1	0.014
129.2	0.014
129.3	0.0146667
129.4	0.0146667
129.5	0.0146667
129.6	0.0146667
129.7	0.0146667
129.8	0.0153333
129.9	0.0153333
130	0.0153333
130.1	0.0146667
130.2	0.0146667
130.3	0.0146667
130.4	0.0146667
130.5	0.0146667
130.6	0.0153333
130.7	0.0153333
130.8	0.0153333
130.9	0.0153333
131	0.0153333
131.1	0.0153333
131.2	0.0153333
131.3	0.0153333
131.4	0.016
131.5	0.016
131.6	0.0166667
131.7	0.0166667
131.8	0.0166667
131.9	0.0166667
132	0.0166667
132.1	0.0166667
132.2	0.0166667
132.3	0.0166667
132.4	0.0166667
132.5	0.0166667
132.6	0.0173333
132.7	0.0173333
132.8	0.0173333
132.9	0.018
133	0.018
133.1	0.018
133.2	0.018
133.3	0.0186667
133.4	0.0193333
133.5	0.0193333
133.6	0.0193333
133.7	0.0193333
133.8	0.0193333
133.9	0.0193333
134	0.0193333
134.1	0.0193333
134.2	0.0193333
134.3	0.0193333
134.4	0.0193333
134.5	0.02
134.6	0.02
134.7	0.02
134.8	0.02
134.9	0.02
135	0.02
135.1	0.02
135.2	0.02
135.3	0.02
135.4	0.02
135.5	0.02
135.6	0.02
135.7	0.02
135.8	0.02
135.9	0.02
136	0.02
136.1	0.02
136.2	0.02
136.3	0.02
136.4	0.02
136.5	0.02
136.6	0.02
136.7	0.02
136.8	0.02
136.9	0.02
137	0.02
137.1	0.02
137.2	0.02
137.3	0.02
137.4	0.02
137.5	0.0206667
137.6	0.0206667
137.7	0.0206667
137.8	0.0206667
137.9	0.0206667
138	0.0206667
138.1	0.0206667
138.2	0.0206667
138.3	0.0213333
138.4	0.0206667
138.5	0.0206667
138.6	0.0213333
138.7	0.0213333
138.8	0.0213333
138.9	0.0213333
139	0.0213333
139.1	0.0213333
139.2	0.0213333
139.3	0.0213333
139.4	0.0213333
139.5	0.0213333
139.6	0.0206667
139.7	0.0206667
139.8	0.0206667
139.9	0.0206667
140	0.0206667
140.1	0.0206667
140.2	0.0206667
140.3	0.0206667
140.4	0.0206667
140.5	0.0206667
140.6	0.0206667
140.7	0.0213333
140.8	0.0213333
140.9	0.0213333
141	0.0206667
141.1	0.0206667
141.2	0.0206667
141.3	0.0206667
141.4	0.0206667
141.5	0.0206667
141.6	0.0206667
141.7	0.0206667
141.8	0.0206667
141.9	0.0206667
142	0.0206667
142.1	0.0206667
142.2	0.0206667
142.3	0.0213333
142.4	0.0213333
142.5	0.0213333
142.6	0.0213333
142.7	0.0213333
142.8	0.0213333
142.9	0.0213333
143	0.0213333
143.1	0.0213333
143.2	0.0213333
143.3	0.0226667
143.4	0.0226667
143.5	0.0226667
143.6	0.0226667
143.7	0.0226667
143.8	0.0226667
143.9	0.0226667
144	0.0226667
144.1	0.022
144.2	0.022
144.3	0.0226667
144.4	0.0226667
144.5	0.0226667
144.6	0.0226667
144.7	0.0226667
144.8	0.0233333
144.9	0.024
145	0.024
145.1	0.024
145.2	0.0233333
145.3	0.0233333
145.4	0.0233333
145.5	0.0233333
145.6	0.0233333
145.7	0.0233333
145.8	0.024
145.9	0.0246667
146	0.0246667
146.1	0.0246667
146.2	0.024
146.3	0.024
146.4	0.024
146.5	0.024
146.6	0.024
146.7	0.024
146.8	0.024
146.9	0.024
147	0.024
147.1	0.024
147.2	0.024
147.3	0.024
147.4	0.024
147.5	0.024
147.6	0.024
147.7	0.024
147.8	0.024
147.9	0.024
148	0.024
148.1	0.024
148.2	0.024
148.3	0.024
148.4	0.024
148.5	0.024
148.6	0.024
148.7	0.024
148.8	0.024
148.9	0.024
149	0.024
149.1	0.024
149.2	0.024
149.3	0.024
149.4	0.024
149.5	0.024
149.6	0.024
149.7	0.024
149.8	0.0246667
149.9	0.0246667
150	0.0246667
150.1	0.0246667
150.2	0.0246667
150.3	0.0246667
150.4	0.0246667
150.5	0.0246667
150.6	0.0246667
150.7	0.0246667
150.8	0.0246667
150.9	0.0246667
151	0.0246667
151.1	0.0246667
151.2	0.0246667
151.3	0.0253333
151.4	0.0253333
151.5	0.0253333
151.6	0.0253333
151.7	0.0253333
151.8	0.0253333
151.9	0.0253333
152	0.0253333
152.1	0.0253333
152.2	0.0253333
152.3	0.0253333
152.4	0.0253333
152.5	0.0253333
152.6	0.0253333
152.7	0.0253333
152.8	0.0253333
152.9	0.0253333
153	0.0253333
153.1	0.0253333
153.2	0.0253333
153.3	0.0253333
153.4	0.0253333
153.5	0.0253333
153.6	0.0253333
153.7	0.0253333
153.8	0.0253333
153.9	0.0253333
154	0.026
154.1	0.026
154.2	0.026
154.3	0.026
154.4	0.026
154.5	0.026
154.6	0.026
154.7	0.0266667
154.8	0.0266667
154.9	0.0266667
155	0.0266667
155.1	0.0266667
155.2	0.0266667
155.3	0.0273333
155.4	0.0273333
155.5	0.0273333
155.6	0.0273333
155.7	0.0273333
155.8	0.0273333
155.9	0.028
156	0.0286667
156.1	0.0286667
156.2	0.0286667
156.3	0.0286667
156.4	0.0286667
156.5	0.0286667
156.6	0.0286667
156.7	0.0286667
156.8	0.0293333
156.9	0.0286667
157	0.0286667
157.1	0.0286667
157.2	0.0286667
157.3	0.0286667
157.4	0.0286667
157.5	0.0286667
157.6	0.0293333
157.7	0.0293333
157.8	0.03
157.9	0.03
158	0.03
158.1	0.03
158.2	0.03
158.3	0.03
158.4	0.03
158.5	0.03
158.6	0.03
158.7	0.03
158.8	0.03
158.9	0.0306667
159	0.0306667
159.1	0.0306667
159.2	0.0306667
159.3	0.0306667
159.4	0.0306667
159.5	0.0306667
159.6	0.0306667
159.7	0.0306667
159.8	0.0306667
159.9	0.0306667
160	0.03
160.1	0.03
160.2	0.03
160.3	0.03
160.4	0.03
160.5	0.03
160.6	0.03
160.7	0.03
160.8	0.0293333
160.9	0.0293333
161	0.0293333
161.1	0.0293333
161.2	0.0293333
161.3	0.03
161.4	0.03
161.5	0.03
161.6	0.03
161.7	0.03
161.8	0.03
161.9	0.03
162	0.03
162.1	0.03
162.2	0.03
162.3	0.03
162.4	0.03
162.5	0.03
162.6	0.03
162.7	0.03
162.8	0.03
162.9	0.03
163	0.03
163.1	0.03
163.2	0.03
163.3	0.03
163.4	0.03
163.5	0.0306667
163.6	0.0306667
163.7	0.0306667
163.8	0.0313333
163.9	0.032
164	0.032
164.1	0.032
164.2	0.032
164.3	0.0326667
164.4	0.0326667
164.5	0.0326667
164.6	0.0326667
164.7	0.0333333
164.8	0.0333333
164.9	0.0333333
165	0.0326667
165.1	0.0326667
165.2	0.0326667
165.3	0.0326667
165.4	0.0326667
165.5	0.0333333
165.6	0.0333333
165.7	0.0326667
165.8	0.0326667
165.9	0.0326667
166	0.032
166.1	0.032
166.2	0.032
166.3	0.032
166.4	0.032
166.5	0.032
166.6	0.032
166.7	0.032
166.8	0.0326667
166.9	0.0326667
167	0.0326667
167.1	0.0326667
167.2	0.0333333
167.3	0.0333333
167.4	0.0333333
167.5	0.0333333
167.6	0.0333333
167.7	0.0333333
167.8	0.0333333
167.9	0.0333333
168	0.0333333
168.1	0.0333333
168.2	0.0333333
168.3	0.0333333
168.4	0.0333333
168.5	0.0333333
168.6	0.034
168.7	0.034
168.8	0.034
168.9	0.034
169	0.0346667
169.1	0.0346667
169.2	0.034
169.3	0.034
169.4	0.034
169.5	0.034
169.6	0.034
169.7	0.034
169.8	0.034
169.9	0.034
170	0.034
170.1	0.034
170.2	0.034
170.3	0.034
170.4	0.034
170.5	0.034
170.6	0.034
170.7	0.034
170.8	0.034
170.9	0.034
171	0.034
171.1	0.034
171.2	0.0333333
171.3	0.0333333
171.4	0.0333333
171.5	0.0333333
171.6	0.0333333
171.7	0.0333333
171.8	0.034
171.9	0.034
172	0.034
172.1	0.034
172.2	0.034
172.3	0.034
172.4	0.0346667
172.5	0.0353333
172.6	0.0353333
172.7	0.0353333
172.8	0.0346667
172.9	0.0346667
173	0.0346667
173.1	0.0346667
173.2	0.0346667
173.3	0.0346667
173.4	0.0346667
173.5	0.0346667
173.6	0.0346667
173.7	0.0346667
173.8	0.0346667
173.9	0.0346667
174	0.0346667
174.1	0.0346667
174.2	0.0346667
174.3	0.0346667
174.4	0.0346667
174.5	0.0346667
174.6	0.0346667
174.7	0.0346667
174.8	0.0346667
174.9	0.0346667
175	0.0346667
175.1	0.0346667
175.2	0.0353333
175.3	0.0353333
175.4	0.0353333
175.5	0.0353333
175.6	0.0353333
175.7	0.0353333
175.8	0.0353333
175.9	0.0353333
176	0.0353333
176.1	0.0353333
176.2	0.036
176.3	0.036
176.4	0.036
176.5	0.036
176.6	0.036
176.7	0.036
176.8	0.036
176.9	0.036
177	0.036
177.1	0.036
177.2	0.0353333
177.3	0.0353333
177.4	0.0353333
177.5	0.0353333
177.6	0.0366667
177.7	0.0366667
177.8	0.0366667
177.9	0.0366667
178	0.038
178.1	0.038
178.2	0.038
178.3	0.0386667
178.4	0.0386667
178.5	0.038
178.6	0.038
178.7	0.0386667
178.8	0.0386667
178.9	0.0386667
179	0.0386667
179.1	0.0386667
179.2	0.0386667
179.3	0.0386667
179.4	0.0386667
179.5	0.0386667
179.6	0.0386667
179.7	0.0386667
179.8	0.0386667
179.9	0.0393333
180	0.0386667
180.1	0.0386667
180.2	0.0386667
180.3	0.0386667
180.4	0.0386667
180.5	0.038
180.6	0.038
180.7	0.0386667
180.8	0.0386667
180.9	0.0386667
181	0.0386667
181.1	0.0386667
181.2	0.0393333
181.3	0.0393333
181.4	0.0393333
181.5	0.0393333
181.6	0.0393333
181.7	0.0393333
181.8	0.0393333
181.9	0.0393333
182	0.0393333
182.1	0.0393333
182.2	0.04
182.3	0.04
182.4	0.04
182.5	0.04
182.6	0.04
182.7	0.04
182.8	0.04
182.9	0.04
183	0.04
183.1	0.04
183.2	0.0393333
183.3	0.0393333
183.4	0.0393333
183.5	0.0393333
183.6	0.0393333
183.7	0.0393333
183.8	0.0393333
183.9	0.0393333
184	0.0393333
184.1	0.0393333
184.2	0.04
184.3	0.0406667
184.4	0.0406667
184.5	0.0406667
184.6	0.0413333
184.7	0.042
184.8	0.042
184.9	0.042
185	0.042
185.1	0.042
185.2	0.042
185.3	0.042
185.4	0.042
185.5	0.042
185.6	0.042
185.7	0.0433333
185.8	0.0426667
185.9	0.0426667
186	0.0426667
186.1	0.0426667
186.2	0.0426667
186.3	0.0426667
186.4	0.042
186.5	0.0413333
186.6	0.0413333
186.7	0.0413333
186.8	0.0413333
186.9	0.0413333
187	0.0413333
187.1	0.0413333
187.2	0.0413333
187.3	0.0413333
187.4	0.0426667
187.5	0.0433333
187.6	0.0433333
187.7	0.0433333
187.8	0.0433333
187.9	0.0433333
188	0.0433333
188.1	0.0433333
188.2	0.0433333
188.3	0.0433333
188.4	0.0433333
188.5	0.0433333
188.6	0.0433333
188.7	0.0433333
188.8	0.0433333
188.9	0.0433333
189	0.0433333
189.1	0.0426667
189.2	0.0426667
189.3	0.0426667
189.4	0.0426667
189.5	0.0426667
189.6	0.0426667
189.7	0.0426667
189.8	0.0426667
189.9	0.0426667
190	0.042
190.1	0.042
190.2	0.042
190.3	0.042
190.4	0.042
190.5	0.042
190.6	0.0426667
190.7	0.0426667
190.8	0.0426667
190.9	0.0426667
191	0.0433333
191.1	0.0426667
191.2	0.0426667
191.3	0.0426667
191.4	0.0426667
191.5	0.0426667
191.6	0.0426667
191.7	0.0433333
191.8	0.0433333
191.9	0.0433333
192	0.0433333
192.1	0.0433333
192.2	0.0433333
192.3	0.042
192.4	0.0426667
192.5	0.042
192.6	0.042
192.7	0.042
192.8	0.042
192.9	0.042
193	0.042
193.1	0.042
193.2	0.0426667
193.3	0.0426667
193.4	0.0426667
193.5	0.0426667
193.6	0.0426667
193.7	0.0433333
193.8	0.0433333
193.9	0.044
194	0.044
194.1	0.044
194.2	0.044
194.3	0.044
194.4	0.044
194.5	0.044
194.6	0.0446667
194.7	0.0446667
194.8	0.0446667
194.9	0.0446667
195	0.0446667
195.1	0.0446667
195.2	0.0446667
195.3	0.044
195.4	0.0446667
195.5	0.0446667
195.6	0.0446667
195.7	0.0446667
195.8	0.0446667
195.9	0.0446667
196	0.0446667
196.1	0.0446667
196.2	0.0446667
196.3	0.0446667
196.4	0.046
196.5	0.046
196.6	0.046
196.7	0.046
196.8	0.046
196.9	0.046
197	0.0453333
197.1	0.0453333
197.2	0.0446667
197.3	0.0446667
197.4	0.0446667
197.5	0.0446667
197.6	0.046
197.7	0.046
197.8	0.046
197.9	0.0453333
198	0.0453333
198.1	0.046
198.2	0.0453333
198.3	0.0453333
198.4	0.0453333
198.5	0.0453333
198.6	0.0453333
198.7	0.0453333
198.8	0.0453333
198.9	0.0453333
199	0.046
199.1	0.0453333
199.2	0.0453333
199.3	0.0446667
199.4	0.0446667
199.5	0.0453333
199.6	0.046
199.7	0.046
199.8	0.0473333
199.9	0.0473333
200	0.0466667
[truncated: 14,000 more rows]
