# Supplementary material for: Bayesian inference of kinetic schemes for ion channels by Kalman filtering
Source: eLife journal article supplement (doi:10.7554/elife.62714), 2022-05-04
Supplement: fig4-data10 [file 1_Sim_N_2000_Fluor_MW.xlsx]

## Sheet: Tabelle1
0.1	0
0.2	0
0.3	0
0.4	0
0.5	0
0.6	0
0.7	0
0.8	0
0.9	0
1	0
1.1	0
1.2	0
1.3	0
1.4	0
1.5	0
1.6	0
1.7	0
1.8	0
1.9	0
2	0
2.1	0
2.2	0
2.3	0
2.4	0
2.5	0
2.6	0
2.7	0
2.8	0
2.9	0
3	0
3.1	0
3.2	0
3.3	0
3.4	0
3.5	0
3.6	0
3.7	0
3.8	0
3.9	0
4	0
4.1	0
4.2	0
4.3	0
4.4	0
4.5	0
4.6	0
4.7	0
4.8	0
4.9	0
5	0
5.1	0
5.2	0
5.3	0
5.4	0
5.5	0
5.6	0
5.7	0
5.8	0
5.9	0
6	0
6.1	0
6.2	0
6.3	0
6.4	0
6.5	0
6.6	0
6.7	0
6.8	0
6.9	0
7	0
7.1	0
7.2	0
7.3	0
7.4	0
7.5	0
7.6	0
7.7	0
7.8	0
7.9	0
8	0
8.1	0
8.2	0
8.3	0
8.4	0
8.5	0
8.6	0
8.7	0
8.8	0
8.9	0
9	0
9.1	0
9.2	0
9.3	0
9.4	0
9.5	0
9.6	0
9.7	0
9.8	0
9.9	0
10	0
10.1	0
10.2	0
10.3	0
10.4	0
10.5	0
10.6	0
10.7	0
10.8	0
10.9	0
11	0
11.1	0
11.2	0
11.3	0
11.4	0
11.5	0
11.6	0
11.7	0
11.8	0
11.9	0
12	0
12.1	0
12.2	0
12.3	0
12.4	0
12.5	0
12.6	0
12.7	0
12.8	0
12.9	0
13	0
13.1	0
13.2	0
13.3	0
13.4	0
13.5	0
13.6	0
13.7	0
13.8	0
13.9	0
14	0
14.1	0
14.2	0
14.3	0
14.4	0
14.5	0
14.6	0
14.7	0
14.8	0
14.9	0
15	0
15.1	0
15.2	0
15.3	0
15.4	0
15.5	0
15.6	0
15.7	0
15.8	0
15.9	0
16	0
16.1	0
16.2	0
16.3	0
16.4	0
16.5	0
16.6	0
16.7	0
16.8	0
16.9	0
17	0
17.1	0
17.2	0
17.3	0
17.4	0
17.5	0
17.6	0
17.7	0
17.8	0
17.9	0
18	0
18.1	0
18.2	0
18.3	0
18.4	0
18.5	0
18.6	0
18.7	0
18.8	0
18.9	0
19	0
19.1	0
19.2	0
19.3	0
19.4	0
19.5	0
19.6	0
19.7	0
19.8	0
19.9	0
20	0
20.1	0
20.2	0
20.3	0
20.4	0
20.5	0
20.6	0
20.7	0
20.8	0
20.9	0
21	0
21.1	0
21.2	0
21.3	0
21.4	0
21.5	0
21.6	0
21.7	0
21.8	0
21.9	0
22	0
22.1	0
22.2	0
22.3	0
22.4	0
22.5	0
22.6	0
22.7	0
22.8	0
22.9	0
23	0
23.1	0
23.2	0
23.3	0
23.4	0
23.5	0
23.6	0
23.7	0
23.8	0
23.9	0
24	0
24.1	0
24.2	0
24.3	0
24.4	0
24.5	0
24.6	0
24.7	0
24.8	0
24.9	0
25	0
25.1	0
25.2	0
25.3	0
25.4	0
25.5	0
25.6	0
25.7	0
25.8	0
25.9	0
26	0
26.1	0
26.2	0
26.3	0
26.4	0
26.5	0
26.6	0
26.7	0
26.8	0
26.9	0
27	0
27.1	0
27.2	0
27.3	0
27.4	0
27.5	0
27.6	0
27.7	0
27.8	0
27.9	0
28	0
28.1	0
28.2	0
28.3	0
28.4	0
28.5	0
28.6	0
28.7	0
28.8	0
28.9	0
29	0
29.1	0
29.2	0
29.3	0
29.4	0
29.5	0
29.6	0
29.7	0
29.8	0
29.9	0
30	0
30.1	0
30.2	0
30.3	0
30.4	0
30.5	0
30.6	0
30.7	0
30.8	0
30.9	0
31	0
31.1	0
31.2	0
31.3	0
31.4	0
31.5	0
31.6	0
31.7	0
31.8	0
31.9	0
32	0
32.1	0
32.2	0
32.3	0
32.4	0
32.5	0
32.6	0
32.7	0
32.8	0
32.9	0
33	0
33.1	0
33.2	0
33.3	0
33.4	0
33.5	0
33.6	0
33.7	0
33.8	0
33.9	0
34	0
34.1	0
34.2	0
34.3	0
34.4	0
34.5	0
34.6	0
34.7	0
34.8	0
34.9	0
35	0
35.1	0
35.2	0
35.3	0
35.4	0
35.5	0
35.6	0
35.7	0
35.8	0
35.9	0
36	0
36.1	0
36.2	0
36.3	0
36.4	0
36.5	0
36.6	0
36.7	0
36.8	0
36.9	0
37	0
37.1	0
37.2	0
37.3	0
37.4	0
37.5	0
37.6	0
37.7	0
37.8	0
37.9	0
38	0
38.1	0
38.2	0
38.3	0
38.4	0
38.5	0
38.6	0
38.7	0
38.8	0
38.9	0
39	0
39.1	0
39.2	0
39.3	0
39.4	0
39.5	0
39.6	0
39.7	0
39.8	0
39.9	0
40	0
40.1	0
40.2	0
40.3	0
40.4	0
40.5	0
40.6	0
40.7	0
40.8	0
40.9	0
41	0
41.1	0
41.2	0
41.3	0
41.4	0
41.5	0
41.6	0
41.7	0
41.8	0
41.9	0
42	0
42.1	0
42.2	0
42.3	0
42.4	0
42.5	0
42.6	0
42.7	0
42.8	0
42.9	0
43	0
43.1	0
43.2	0
43.3	0
43.4	0
43.5	0
43.6	0
43.7	0
43.8	0
43.9	0
44	0
44.1	0
44.2	0
44.3	0
44.4	0
44.5	0
44.6	0
44.7	0
44.8	0
44.9	0
45	0
45.1	0
45.2	0
45.3	0
45.4	0
45.5	0
45.6	0
45.7	0
45.8	0
45.9	0
46	0
46.1	0
46.2	0
46.3	0
46.4	0
46.5	0
46.6	0
46.7	0
46.8	0
46.9	0
47	0
47.1	0
47.2	0
47.3	0
47.4	0
47.5	0
47.6	0
47.7	0
47.8	0
47.9	0
48	0
48.1	0
48.2	0
48.3	0
48.4	0
48.5	0
48.6	0
48.7	0
48.8	0
48.9	0
49	0
49.1	0
49.2	0
49.3	0
49.4	0
49.5	0
49.6	0
49.7	0
49.8	0
49.9	0
50	0
50.1	0
50.2	0
50.3	0
50.4	0
50.5	0
50.6	0
50.7	0
50.8	0
50.9	0
51	0
51.1	0
51.2	0
51.3	0
51.4	0
51.5	0
51.6	0
51.7	0
51.8	0
51.9	0
52	0
52.1	0
52.2	0
52.3	0
52.4	0
52.5	0
52.6	0
52.7	0
52.8	0
52.9	0
53	0
53.1	0
53.2	0
53.3	0
53.4	0
53.5	0
53.6	0
53.7	0
53.8	0
53.9	0
54	0
54.1	0
54.2	0
54.3	0
54.4	0
54.5	0
54.6	0
54.7	0
54.8	0
54.9	0
55	0
55.1	0
55.2	0
55.3	0
55.4	0
55.5	0
55.6	0
55.7	0
55.8	0
55.9	0
56	0
56.1	0
56.2	0
56.3	0
56.4	0
56.5	0
56.6	0
56.7	0
56.8	0
56.9	0
57	0
57.1	0
57.2	0
57.3	0
57.4	0
57.5	0
57.6	0
57.7	0
57.8	0
57.9	0
58	0
58.1	0
58.2	0
58.3	0
58.4	0
58.5	0
58.6	0
58.7	0
58.8	0
58.9	0
59	0
59.1	0
59.2	0
59.3	0
59.4	0
59.5	0
59.6	0
59.7	0
59.8	0
59.9	0
60	0
60.1	0
60.2	0
60.3	0
60.4	0
60.5	0
60.6	0
60.7	0
60.8	0
60.9	0
61	0
61.1	0
61.2	0
61.3	0
61.4	0
61.5	0
61.6	0
61.7	0
61.8	0
61.9	0
62	0
62.1	0
62.2	0
62.3	0
62.4	0
62.5	0
62.6	0
62.7	0
62.8	0
62.9	0
63	0
63.1	0
63.2	0
63.3	0
63.4	0
63.5	0
63.6	0
63.7	0
63.8	0
63.9	0
64	0
64.1	0
64.2	0
64.3	0
64.4	0
64.5	0
64.6	0
64.7	0
64.8	0
64.9	0
65	0
65.1	0
65.2	0
65.3	0
65.4	0
65.5	0
65.6	0
65.7	0
65.8	0
65.9	0
66	0
66.1	0
66.2	0
66.3	0
66.4	0
66.5	0
66.6	0
66.7	0
66.8	0
66.9	0
67	0
67.1	0
67.2	0
67.3	0
67.4	0
67.5	0
67.6	0
67.7	0
67.8	0
67.9	0
68	0
68.1	0
68.2	0
68.3	0
68.4	0
68.5	0
68.6	0
68.7	0
68.8	0
68.9	0
69	0
69.1	0
69.2	0
69.3	0
69.4	0
69.5	0
69.6	0
69.7	0
69.8	0
69.9	0
70	0
70.1	0
70.2	0
70.3	0
70.4	0
70.5	0
70.6	0
70.7	0
70.8	0
70.9	0
71	0
71.1	0
71.2	0
71.3	0
71.4	0
71.5	0
71.6	0
71.7	0
71.8	0
71.9	0
72	0
72.1	0
72.2	0
72.3	0
72.4	0
72.5	0
72.6	0
72.7	0
72.8	0
72.9	0
73	0
73.1	0
73.2	0
73.3	0
73.4	0
73.5	0
73.6	0
73.7	0
73.8	0
73.9	0
74	0
74.1	0
74.2	0
74.3	0
74.4	0
74.5	0
74.6	0
74.7	0
74.8	0
74.9	0
75	0
75.1	0
75.2	0
75.3	0
75.4	0
75.5	0
75.6	0
75.7	0
75.8	0
75.9	0
76	0
76.1	0
76.2	0
76.3	0
76.4	0
76.5	0
76.6	0
76.7	0
76.8	0
76.9	0
77	0
77.1	0
77.2	0
77.3	0
77.4	0
77.5	0
77.6	0
77.7	0
77.8	0
77.9	0
78	0
78.1	0
78.2	0
78.3	0
78.4	0
78.5	0
78.6	0
78.7	0
78.8	0
78.9	0
79	0
79.1	0
79.2	0
79.3	0
79.4	0
79.5	0
79.6	0
79.7	0
79.8	0
79.9	0
80	0
80.1	0
80.2	0
80.3	0
80.4	0
80.5	0
80.6	0
80.7	0
80.8	0
80.9	0
81	0
81.1	0
81.2	0
81.3	0
81.4	0
81.5	0
81.6	0
81.7	0
81.8	0
81.9	0
82	0
82.1	0
82.2	0
82.3	0
82.4	0
82.5	0
82.6	0
82.7	0
82.8	0
82.9	0
83	0
83.1	0
83.2	0
83.3	0
83.4	0
83.5	0
83.6	0
83.7	0
83.8	0
83.9	0
84	0
84.1	0
84.2	0
84.3	0
84.4	0
84.5	0
84.6	0
84.7	0
84.8	0
84.9	0
85	0
85.1	0
85.2	0
85.3	0
85.4	0
85.5	0
85.6	0
85.7	0
85.8	0
85.9	0
86	0
86.1	0
86.2	0
86.3	0
86.4	0
86.5	0
86.6	0
86.7	0
86.8	0
86.9	0
87	0
87.1	0
87.2	0
87.3	0
87.4	0
87.5	0
87.6	0
87.7	0
87.8	0
87.9	0
88	0
88.1	0
88.2	0
88.3	0
88.4	0
88.5	0
88.6	0
88.7	0
88.8	0
88.9	0
89	0
89.1	0
89.2	0
89.3	0
89.4	0
89.5	0
89.6	0
89.7	0
89.8	0
89.9	0
90	0
90.1	0
90.2	0
90.3	0
90.4	0
90.5	0
90.6	0
90.7	0
90.8	0
90.9	0
91	0
91.1	0
91.2	0
91.3	0
91.4	0
91.5	0
91.6	0
91.7	0
91.8	0
91.9	0
92	0
92.1	0
92.2	0
92.3	0
92.4	0
92.5	0
92.6	0
92.7	0
92.8	0
92.9	0
93	0
93.1	0
93.2	0
93.3	0
93.4	0
93.5	0
93.6	0
93.7	0
93.8	0
93.9	0
94	0
94.1	0
94.2	0
94.3	0
94.4	0
94.5	0
94.6	0
94.7	0
94.8	0
94.9	0
95	0
95.1	0
95.2	0
95.3	0
95.4	0
95.5	0
95.6	0
95.7	0
95.8	0
95.9	0
96	0
96.1	0
96.2	0
96.3	0
96.4	0
96.5	0
96.6	0
96.7	0
96.8	0
96.9	0
97	0
97.1	0
97.2	0
97.3	0
97.4	0
97.5	0
97.6	0
97.7	0
97.8	0
97.9	0
98	0
98.1	0
98.2	0
98.3	0
98.4	0
98.5	0
98.6	0
98.7	0
98.8	0
98.9	0
99	0
99.1	0
99.2	0
99.3	0
99.4	0
99.5	0
99.6	0
99.7	0
99.8	0
99.9	0
100	0
100.1	0.00425
100.2	0.00775
100.3	0.012
100.4	0.015
100.5	0.01725
100.6	0.01975
100.7	0.0245
100.8	0.0275
100.9	0.02875
101	0.031
101.1	0.03475
101.2	0.03875
101.3	0.04175
101.4	0.0445
101.5	0.046
101.6	0.04825
101.7	0.05075
101.8	0.0525
101.9	0.054
102	0.05675
102.1	0.059
102.2	0.0625
102.3	0.06375
102.4	0.065
102.5	0.068
102.6	0.07075
102.7	0.07225
102.8	0.0745
102.9	0.0775
103	0.08
103.1	0.081
103.2	0.08275
103.3	0.0835
103.4	0.084
103.5	0.0865
103.6	0.08775
103.7	0.08975
103.8	0.09275
103.9	0.09475
104	0.0965
104.1	0.0995
104.2	0.1045
104.3	0.10625
104.4	0.10725
104.5	0.1095
104.6	0.112
104.7	0.11475
104.8	0.116
104.9	0.1165
105	0.11775
105.1	0.119
105.2	0.119
105.3	0.12025
105.4	0.1225
105.5	0.1235
105.6	0.12575
105.7	0.12575
105.8	0.1275
105.9	0.1295
106	0.1305
106.1	0.1315
106.2	0.133
106.3	0.13375
106.4	0.136
106.5	0.1385
106.6	0.13975
106.7	0.143
106.8	0.14375
106.9	0.145
107	0.144
107.1	0.14625
107.2	0.14725
107.3	0.1475
107.4	0.14925
107.5	0.15025
107.6	0.15125
107.7	0.15125
107.8	0.15175
107.9	0.15325
108	0.1555
108.1	0.15375
108.2	0.15475
108.3	0.1575
108.4	0.1575
108.5	0.15875
108.6	0.1615
108.7	0.162
108.8	0.166
108.9	0.16675
109	0.1695
109.1	0.168
109.2	0.1705
109.3	0.17175
109.4	0.1725
109.5	0.17275
109.6	0.1745
109.7	0.1755
109.8	0.175
109.9	0.1745
110	0.177
110.1	0.17775
110.2	0.17775
110.3	0.17875
110.4	0.182
110.5	0.1835
110.6	0.18275
110.7	0.18325
110.8	0.183
110.9	0.18575
111	0.18725
111.1	0.1885
111.2	0.19025
111.3	0.19025
111.4	0.18975
111.5	0.1915
111.6	0.194
111.7	0.19425
111.8	0.1965
111.9	0.1975
112	0.19875
112.1	0.1985
112.2	0.19975
112.3	0.19875
112.4	0.19725
112.5	0.1965
112.6	0.19625
112.7	0.19775
112.8	0.19725
112.9	0.19725
113	0.1955
113.1	0.19575
113.2	0.197
113.3	0.19725
113.4	0.19675
113.5	0.19725
113.6	0.1975
113.7	0.19975
113.8	0.2015
113.9	0.2005
114	0.20125
114.1	0.20075
114.2	0.201
114.3	0.19925
114.4	0.2005
114.5	0.201
114.6	0.20325
114.7	0.203
114.8	0.2035
114.9	0.2035
115	0.204
115.1	0.205
115.2	0.20475
115.3	0.20575
115.4	0.2065
115.5	0.2065
115.6	0.208
115.7	0.209
115.8	0.2085
115.9	0.2105
116	0.21025
116.1	0.20925
116.2	0.20975
116.3	0.20925
116.4	0.21125
116.5	0.212
116.6	0.212
116.7	0.21225
116.8	0.212
116.9	0.212
117	0.212
117.1	0.21175
117.2	0.21125
117.3	0.2105
117.4	0.20825
117.5	0.211
117.6	0.21175
117.7	0.2135
117.8	0.21575
117.9	0.2175
118	0.21825
118.1	0.2195
118.2	0.21925
118.3	0.2185
118.4	0.2175
118.5	0.2175
118.6	0.2185
118.7	0.219
118.8	0.22
118.9	0.219
119	0.22
119.1	0.2215
119.2	0.22075
119.3	0.222
119.4	0.22025
119.5	0.222
119.6	0.2225
119.7	0.22425
119.8	0.226
119.9	0.227
120	0.22875
120.1	0.22875
120.2	0.22975
120.3	0.22875
120.4	0.2305
120.5	0.23025
120.6	0.23025
120.7	0.23175
120.8	0.23075
120.9	0.23025
121	0.231
121.1	0.232
121.2	0.23275
121.3	0.234
121.4	0.235
121.5	0.2365
121.6	0.2345
121.7	0.2335
121.8	0.231
121.9	0.23075
122	0.231
122.1	0.2295
122.2	0.22975
122.3	0.23025
122.4	0.2315
122.5	0.23075
122.6	0.23125
122.7	0.233
122.8	0.23375
122.9	0.23425
123	0.2325
123.1	0.23325
123.2	0.2315
123.3	0.23
123.4	0.22925
123.5	0.23025
123.6	0.23
123.7	0.23125
123.8	0.23075
123.9	0.23125
124	0.23075
124.1	0.23175
124.2	0.2325
124.3	0.23325
124.4	0.2315
124.5	0.23075
124.6	0.23
124.7	0.22925
124.8	0.2315
124.9	0.23175
125	0.232
125.1	0.233
125.2	0.23175
125.3	0.231
125.4	0.23225
125.5	0.232
125.6	0.233
125.7	0.2325
125.8	0.23175
125.9	0.23475
126	0.2345
126.1	0.2355
126.2	0.2355
126.3	0.23575
126.4	0.236
126.5	0.236
126.6	0.236
126.7	0.23675
126.8	0.236
126.9	0.2355
127	0.23575
127.1	0.23825
127.2	0.23775
127.3	0.239
127.4	0.23875
127.5	0.23925
127.6	0.23975
127.7	0.2415
127.8	0.24125
127.9	0.242
128	0.24225
128.1	0.2415
128.2	0.241
128.3	0.24075
128.4	0.24175
128.5	0.24025
128.6	0.2405
128.7	0.2405
128.8	0.2425
128.9	0.24125
129	0.24025
129.1	0.24275
129.2	0.2425
129.3	0.2425
129.4	0.243
129.5	0.24025
129.6	0.2415
129.7	0.2425
129.8	0.24375
129.9	0.24425
130	0.2445
130.1	0.24475
130.2	0.24375
130.3	0.24325
130.4	0.24325
130.5	0.24375
130.6	0.24475
130.7	0.245
130.8	0.24575
130.9	0.24625
131	0.247
131.1	0.247
131.2	0.24775
131.3	0.2465
131.4	0.246
131.5	0.2455
131.6	0.24675
131.7	0.24725
131.8	0.2465
131.9	0.24675
132	0.24675
132.1	0.2475
132.2	0.24725
132.3	0.24525
132.4	0.2455
132.5	0.24775
132.6	0.24825
132.7	0.249
132.8	0.2495
132.9	0.249
133	0.249
133.1	0.24975
133.2	0.24825
133.3	0.24875
133.4	0.2465
133.5	0.2455
133.6	0.24375
133.7	0.24325
133.8	0.243
133.9	0.24375
134	0.2445
134.1	0.24325
134.2	0.24225
134.3	0.2415
134.4	0.242
134.5	0.241
134.6	0.23975
134.7	0.24075
134.8	0.2415
134.9	0.24125
135	0.24075
135.1	0.23975
135.2	0.24075
135.3	0.239
135.4	0.23925
135.5	0.24075
135.6	0.2415
135.7	0.2415
135.8	0.2415
135.9	0.242
136	0.2425
136.1	0.24325
136.2	0.24375
136.3	0.2445
136.4	0.2445
136.5	0.24375
136.6	0.2435
136.7	0.2435
136.8	0.24225
136.9	0.2425
137	0.242
137.1	0.2415
137.2	0.24125
137.3	0.23925
137.4	0.238
137.5	0.238
137.6	0.23725
137.7	0.236
137.8	0.2375
137.9	0.23675
138	0.2365
138.1	0.236
138.2	0.23825
138.3	0.2385
138.4	0.24
138.5	0.2395
138.6	0.2385
138.7	0.23925
138.8	0.23875
138.9	0.23825
139	0.2375
139.1	0.2385
139.2	0.239
139.3	0.23825
139.4	0.2385
139.5	0.2395
139.6	0.2395
139.7	0.24025
139.8	0.2415
139.9	0.2415
140	0.2415
140.1	0.2425
140.2	0.2435
140.3	0.2425
140.4	0.24375
140.5	0.24325
140.6	0.24425
140.7	0.2455
140.8	0.24575
140.9	0.2465
141	0.2465
141.1	0.24875
141.2	0.2485
141.3	0.2495
141.4	0.2505
141.5	0.251
141.6	0.25
141.7	0.24775
141.8	0.2465
141.9	0.24575
142	0.24575
142.1	0.245
142.2	0.24525
142.3	0.24575
142.4	0.24525
142.5	0.245
142.6	0.245
142.7	0.244
142.8	0.244
142.9	0.244
143	0.2445
143.1	0.24475
143.2	0.243
143.3	0.24325
143.4	0.244
143.5	0.2445
143.6	0.24525
143.7	0.24375
143.8	0.24525
143.9	0.245
144	0.24525
144.1	0.244
144.2	0.242
144.3	0.24125
144.4	0.242
144.5	0.24025
144.6	0.2395
144.7	0.2395
144.8	0.2415
144.9	0.2425
145	0.24275
145.1	0.24425
145.2	0.24425
145.3	0.2435
145.4	0.24325
145.5	0.244
145.6	0.24325
145.7	0.24275
145.8	0.24175
145.9	0.243
146	0.24475
146.1	0.2455
146.2	0.2465
146.3	0.2475
146.4	0.247
146.5	0.24625
146.6	0.249
146.7	0.24775
146.8	0.24825
146.9	0.24725
147	0.24575
147.1	0.24775
147.2	0.24625
147.3	0.2465
147.4	0.24675
147.5	0.249
147.6	0.2495
147.7	0.2485
147.8	0.24775
147.9	0.24725
148	0.248
148.1	0.24675
148.2	0.24575
148.3	0.24525
148.4	0.248
148.5	0.247
148.6	0.2465
148.7	0.24675
148.8	0.24775
148.9	0.24725
149	0.2465
149.1	0.24625
149.2	0.2455
149.3	0.2465
149.4	0.24675
149.5	0.246
149.6	0.24575
149.7	0.24575
149.8	0.24575
149.9	0.24775
150	0.2485
150.1	0.248
150.2	0.24875
150.3	0.24875
150.4	0.24675
150.5	0.24825
150.6	0.24775
150.7	0.248
150.8	0.24725
150.9	0.24625
151	0.24775
151.1	0.24675
151.2	0.24475
151.3	0.2455
151.4	0.24525
151.5	0.24575
151.6	0.247
151.7	0.24675
151.8	0.246
151.9	0.2455
152	0.245
152.1	0.24525
152.2	0.244
152.3	0.244
152.4	0.24525
152.5	0.245
152.6	0.245
152.7	0.245
152.8	0.24575
152.9	0.247
153	0.247
153.1	0.246
153.2	0.2455
153.3	0.24575
153.4	0.24525
153.5	0.2445
153.6	0.243
153.7	0.243
153.8	0.24275
153.9	0.24375
154	0.245
154.1	0.2425
154.2	0.24175
154.3	0.242
154.4	0.24
154.5	0.24125
154.6	0.241
154.7	0.24175
154.8	0.24075
154.9	0.23975
155	0.24
155.1	0.241
155.2	0.239
155.3	0.23675
155.4	0.23675
155.5	0.237
155.6	0.237
155.7	0.23925
155.8	0.23875
155.9	0.23825
156	0.23775
156.1	0.23975
156.2	0.23775
156.3	0.23575
156.4	0.237
156.5	0.23725
156.6	0.23725
156.7	0.23725
156.8	0.23875
156.9	0.23775
157	0.23725
157.1	0.23775
157.2	0.23975
157.3	0.24025
157.4	0.2395
157.5	0.2385
157.6	0.24025
157.7	0.23925
157.8	0.24
157.9	0.24025
158	0.24125
158.1	0.23925
158.2	0.24
158.3	0.2405
158.4	0.241
158.5	0.23975
158.6	0.24125
158.7	0.24125
158.8	0.241
158.9	0.24125
159	0.24025
159.1	0.2395
159.2	0.238
159.3	0.239
159.4	0.24025
159.5	0.24025
159.6	0.24075
159.7	0.2415
159.8	0.242
159.9	0.243
160	0.243
160.1	0.243
160.2	0.24475
160.3	0.24475
160.4	0.24525
160.5	0.2455
160.6	0.24525
160.7	0.246
160.8	0.24425
160.9	0.24325
161	0.2415
161.1	0.24075
161.2	0.24075
161.3	0.24025
161.4	0.2405
161.5	0.2405
161.6	0.24025
161.7	0.2405
161.8	0.23975
161.9	0.23925
162	0.2375
162.1	0.237
162.2	0.237
162.3	0.2365
162.4	0.2355
162.5	0.2365
162.6	0.2375
162.7	0.238
162.8	0.2385
162.9	0.23875
163	0.2395
163.1	0.2395
163.2	0.2385
163.3	0.23975
163.4	0.2395
163.5	0.2395
163.6	0.239
163.7	0.23925
163.8	0.2395
163.9	0.24025
164	0.23875
164.1	0.238
164.2	0.23925
164.3	0.2395
164.4	0.23925
164.5	0.24075
164.6	0.24125
164.7	0.24275
164.8	0.2425
164.9	0.24325
165	0.2435
165.1	0.243
165.2	0.243
165.3	0.2425
165.4	0.24425
165.5	0.2435
165.6	0.24375
165.7	0.24275
165.8	0.244
165.9	0.244
166	0.24375
166.1	0.24375
166.2	0.2435
166.3	0.24425
166.4	0.2445
166.5	0.24525
166.6	0.2445
166.7	0.2445
166.8	0.24475
166.9	0.245
167	0.2455
167.1	0.24775
167.2	0.248
167.3	0.249
167.4	0.2485
167.5	0.25075
167.6	0.2515
167.7	0.2515
167.8	0.253
167.9	0.25425
168	0.254
168.1	0.254
168.2	0.25425
168.3	0.2535
168.4	0.25525
168.5	0.2565
168.6	0.258
168.7	0.25775
168.8	0.259
168.9	0.2595
169	0.2615
169.1	0.26075
169.2	0.2595
169.3	0.25775
169.4	0.25825
169.5	0.256
169.6	0.256
169.7	0.2555
169.8	0.25375
169.9	0.25325
170	0.25375
170.1	0.25525
170.2	0.2535
170.3	0.25325
170.4	0.25525
170.5	0.25475
170.6	0.25475
170.7	0.25475
170.8	0.25275
170.9	0.254
171	0.25225
171.1	0.25175
171.2	0.25225
171.3	0.2535
171.4	0.2535
171.5	0.25475
171.6	0.25375
171.7	0.255
171.8	0.256
171.9	0.25525
172	0.25625
172.1	0.256
172.2	0.256
172.3	0.25275
172.4	0.2535
172.5	0.25325
172.6	0.25275
172.7	0.253
172.8	0.25425
172.9	0.2555
173	0.257
173.1	0.25825
173.2	0.25825
173.3	0.2565
173.4	0.25725
173.5	0.2565
173.6	0.25675
173.7	0.255
173.8	0.2545
173.9	0.25425
174	0.255
174.1	0.2545
174.2	0.2545
174.3	0.25475
174.4	0.25525
174.5	0.2545
174.6	0.25325
174.7	0.2525
174.8	0.2505
174.9	0.24875
175	0.25
175.1	0.24925
175.2	0.24925
175.3	0.24975
175.4	0.2495
175.5	0.25125
175.6	0.25175
175.7	0.25225
175.8	0.25325
175.9	0.255
176	0.257
176.1	0.25675
176.2	0.256
176.3	0.255
176.4	0.25675
176.5	0.25725
176.6	0.2555
176.7	0.25275
176.8	0.25225
176.9	0.25225
177	0.25125
177.1	0.25175
177.2	0.2505
177.3	0.253
177.4	0.25375
177.5	0.25425
177.6	0.25475
177.7	0.25375
177.8	0.2545
177.9	0.25325
178	0.2535
178.1	0.254
178.2	0.25525
178.3	0.25575
178.4	0.25475
178.5	0.254
178.6	0.25575
178.7	0.25525
178.8	0.2565
178.9	0.25575
179	0.2555
179.1	0.255
179.2	0.256
179.3	0.25525
179.4	0.25325
179.5	0.25475
179.6	0.25575
179.7	0.25425
179.8	0.25325
179.9	0.2535
180	0.2555
180.1	0.25375
180.2	0.2535
180.3	0.25275
180.4	0.2525
180.5	0.252
180.6	0.25325
180.7	0.253
180.8	0.25275
180.9	0.25375
181	0.25375
181.1	0.25475
181.2	0.254
181.3	0.2535
181.4	0.25475
181.5	0.2565
181.6	0.257
181.7	0.258
181.8	0.258
181.9	0.2595
182	0.2595
182.1	0.2605
182.2	0.2605
182.3	0.259
182.4	0.2605
182.5	0.26075
182.6	0.26125
182.7	0.261
182.8	0.263
182.9	0.26425
183	0.26575
183.1	0.26575
183.2	0.26575
183.3	0.2655
183.4	0.2675
183.5	0.26625
183.6	0.2655
183.7	0.26475
183.8	0.2645
183.9	0.265
184	0.26425
184.1	0.26425
184.2	0.2615
184.3	0.26275
184.4	0.263
184.5	0.263
184.6	0.26325
184.7	0.261
184.8	0.2635
184.9	0.26375
185	0.2625
185.1	0.26375
185.2	0.262
185.3	0.262
185.4	0.261
185.5	0.26075
185.6	0.2605
185.7	0.25875
185.8	0.25675
185.9	0.256
186	0.2585
186.1	0.258
186.2	0.257
186.3	0.25825
186.4	0.25725
186.5	0.2555
186.6	0.25475
186.7	0.25525
186.8	0.25575
186.9	0.25625
187	0.257
187.1	0.25625
187.2	0.25625
187.3	0.25775
187.4	0.25725
187.5	0.2585
187.6	0.2565
187.7	0.25625
187.8	0.25525
187.9	0.256
188	0.25575
188.1	0.25575
188.2	0.25625
188.3	0.25625
188.4	0.258
188.5	0.25825
188.6	0.2595
188.7	0.25825
188.8	0.2585
188.9	0.25825
189	0.258
189.1	0.257
189.2	0.257
189.3	0.255
189.4	0.25425
189.5	0.25375
189.6	0.2525
189.7	0.25275
189.8	0.25275
189.9	0.253
190	0.2535
190.1	0.2525
190.2	0.25125
190.3	0.252
190.4	0.2515
190.5	0.24975
190.6	0.25125
190.7	0.251
190.8	0.2515
190.9	0.25225
191	0.25125
191.1	0.25125
191.2	0.24825
191.3	0.24675
191.4	0.24725
191.5	0.24725
191.6	0.2475
191.7	0.2465
191.8	0.245
191.9	0.24725
192	0.24875
192.1	0.24825
192.2	0.24725
192.3	0.24775
192.4	0.2485
192.5	0.2495
192.6	0.249
192.7	0.2495
192.8	0.249
192.9	0.24875
193	0.2485
193.1	0.24725
193.2	0.24775
193.3	0.248
193.4	0.24875
193.5	0.24725
193.6	0.2465
193.7	0.247
193.8	0.247
193.9	0.24725
194	0.24775
194.1	0.24725
194.2	0.24525
194.3	0.2455
194.4	0.244
194.5	0.24375
194.6	0.2455
194.7	0.246
194.8	0.24725
194.9	0.247
195	0.24825
195.1	0.24825
195.2	0.24925
195.3	0.248
195.4	0.24925
195.5	0.24775
195.6	0.24775
195.7	0.24575
195.8	0.24725
195.9	0.248
196	0.2505
196.1	0.24975
196.2	0.24975
196.3	0.25175
196.4	0.25125
196.5	0.25025
196.6	0.25075
196.7	0.252
196.8	0.2515
196.9	0.25325
197	0.255
197.1	0.25325
197.2	0.25325
197.3	0.255
197.4	0.25325
197.5	0.254
197.6	0.2545
197.7	0.25625
197.8	0.25475
197.9	0.25375
198	0.2545
198.1	0.25425
198.2	0.2565
198.3	0.2565
198.4	0.25575
198.5	0.255
198.6	0.256
198.7	0.25825
198.8	0.259
198.9	0.2585
199	0.25775
199.1	0.2565
199.2	0.257
199.3	0.257
199.4	0.2575
199.5	0.25775
199.6	0.25725
199.7	0.2585
199.8	0.25925
199.9	0.25925
200	0.2595
[truncated: 14,000 more rows]
