# Supplementary material for: Bayesian inference of kinetic schemes for ion channels by Kalman filtering
Source: eLife journal article supplement (doi:10.7554/elife.62714), 2022-05-04
Supplement: fig4-data10 [file 1_Sim_N_2000_Strom_MW.xlsx]

## Sheet: Tabelle1
0.1	0
0.2	0
0.3	0
0.4	0
0.5	0
0.6	0
0.7	0
0.8	0
0.9	0
1	0
1.1	0
1.2	0
1.3	0
1.4	0
1.5	0
1.6	0
1.7	0
1.8	0
1.9	0
2	0
2.1	0
2.2	0
2.3	0
2.4	0
2.5	0
2.6	0
2.7	0
2.8	0
2.9	0
3	0
3.1	0
3.2	0
3.3	0
3.4	0
3.5	0
3.6	0
3.7	0
3.8	0
3.9	0
4	0
4.1	0
4.2	0
4.3	0
4.4	0
4.5	0
4.6	0
4.7	0
4.8	0
4.9	0
5	0
5.1	0
5.2	0
5.3	0
5.4	0
5.5	0
5.6	0
5.7	0
5.8	0
5.9	0
6	0
6.1	0
6.2	0
6.3	0
6.4	0
6.5	0
6.6	0
6.7	0
6.8	0
6.9	0
7	0
7.1	0
7.2	0
7.3	0
7.4	0
7.5	0
7.6	0
7.7	0
7.8	0
7.9	0
8	0
8.1	0
8.2	0
8.3	0
8.4	0
8.5	0
8.6	0
8.7	0
8.8	0
8.9	0
9	0
9.1	0
9.2	0
9.3	0
9.4	0
9.5	0
9.6	0
9.7	0
9.8	0
9.9	0
10	0
10.1	0
10.2	0
10.3	0
10.4	0
10.5	0
10.6	0
10.7	0
10.8	0
10.9	0
11	0
11.1	0
11.2	0
11.3	0
11.4	0
11.5	0
11.6	0
11.7	0
11.8	0
11.9	0
12	0
12.1	0
12.2	0
12.3	0
12.4	0
12.5	0
12.6	0
12.7	0
12.8	0
12.9	0
13	0
13.1	0
13.2	0
13.3	0
13.4	0
13.5	0
13.6	0
13.7	0
13.8	0
13.9	0
14	0
14.1	0
14.2	0
14.3	0
14.4	0
14.5	0
14.6	0
14.7	0
14.8	0
14.9	0
15	0
15.1	0
15.2	0
15.3	0
15.4	0
15.5	0
15.6	0
15.7	0
15.8	0
15.9	0
16	0
16.1	0
16.2	0
16.3	0
16.4	0
16.5	0
16.6	0
16.7	0
16.8	0
16.9	0
17	0
17.1	0
17.2	0
17.3	0
17.4	0
17.5	0
17.6	0
17.7	0
17.8	0
17.9	0
18	0
18.1	0
18.2	0
18.3	0
18.4	0
18.5	0
18.6	0
18.7	0
18.8	0
18.9	0
19	0
19.1	0
19.2	0
19.3	0
19.4	0
19.5	0
19.6	0
19.7	0
19.8	0
19.9	0
20	0
20.1	0
20.2	0
20.3	0
20.4	0
20.5	0
20.6	0
20.7	0
20.8	0
20.9	0
21	0
21.1	0
21.2	0
21.3	0
21.4	0
21.5	0
21.6	0
21.7	0
21.8	0
21.9	0
22	0
22.1	0
22.2	0
22.3	0
22.4	0
22.5	0
22.6	0
22.7	0
22.8	0
22.9	0
23	0
23.1	0
23.2	0
23.3	0
23.4	0
23.5	0
23.6	0
23.7	0
23.8	0
23.9	0
24	0
24.1	0
24.2	0
24.3	0
24.4	0
24.5	0
24.6	0
24.7	0
24.8	0
24.9	0
25	0
25.1	0
25.2	0
25.3	0
25.4	0
25.5	0
25.6	0
25.7	0
25.8	0
25.9	0
26	0
26.1	0
26.2	0
26.3	0
26.4	0
26.5	0
26.6	0
26.7	0
26.8	0
26.9	0
27	0
27.1	0
27.2	0
27.3	0
27.4	0
27.5	0
27.6	0
27.7	0
27.8	0
27.9	0
28	0
28.1	0
28.2	0
28.3	0
28.4	0
28.5	0
28.6	0
28.7	0
28.8	0
28.9	0
29	0
29.1	0
29.2	0
29.3	0
29.4	0
29.5	0
29.6	0
29.7	0
29.8	0
29.9	0
30	0
30.1	0
30.2	0
30.3	0
30.4	0
30.5	0
30.6	0
30.7	0
30.8	0
30.9	0
31	0
31.1	0
31.2	0
31.3	0
31.4	0
31.5	0
31.6	0
31.7	0
31.8	0
31.9	0
32	0
32.1	0
32.2	0
32.3	0
32.4	0
32.5	0
32.6	0
32.7	0
32.8	0
32.9	0
33	0
33.1	0
33.2	0
33.3	0
33.4	0
33.5	0
33.6	0
33.7	0
33.8	0
33.9	0
34	0
34.1	0
34.2	0
34.3	0
34.4	0
34.5	0
34.6	0
34.7	0
34.8	0
34.9	0
35	0
35.1	0
35.2	0
35.3	0
35.4	0
35.5	0
35.6	0
35.7	0
35.8	0
35.9	0
36	0
36.1	0
36.2	0
36.3	0
36.4	0
36.5	0
36.6	0
36.7	0
36.8	0
36.9	0
37	0
37.1	0
37.2	0
37.3	0
37.4	0
37.5	0
37.6	0
37.7	0
37.8	0
37.9	0
38	0
38.1	0
38.2	0
38.3	0
38.4	0
38.5	0
38.6	0
38.7	0
38.8	0
38.9	0
39	0
39.1	0
39.2	0
39.3	0
39.4	0
39.5	0
39.6	0
39.7	0
39.8	0
39.9	0
40	0
40.1	0
40.2	0
40.3	0
40.4	0
40.5	0
40.6	0
40.7	0
40.8	0
40.9	0
41	0
41.1	0
41.2	0
41.3	0
41.4	0
41.5	0
41.6	0
41.7	0
41.8	0
41.9	0
42	0
42.1	0
42.2	0
42.3	0
42.4	0
42.5	0
42.6	0
42.7	0
42.8	0
42.9	0
43	0
43.1	0
43.2	0
43.3	0
43.4	0
43.5	0
43.6	0
43.7	0
43.8	0
43.9	0
44	0
44.1	0
44.2	0
44.3	0
44.4	0
44.5	0
44.6	0
44.7	0
44.8	0
44.9	0
45	0
45.1	0
45.2	0
45.3	0
45.4	0
45.5	0
45.6	0
45.7	0
45.8	0
45.9	0
46	0
46.1	0
46.2	0
46.3	0
46.4	0
46.5	0
46.6	0
46.7	0
46.8	0
46.9	0
47	0
47.1	0
47.2	0
47.3	0
47.4	0
47.5	0
47.6	0
47.7	0
47.8	0
47.9	0
48	0
48.1	0
48.2	0
48.3	0
48.4	0
48.5	0
48.6	0
48.7	0
48.8	0
48.9	0
49	0
49.1	0
49.2	0
49.3	0
49.4	0
49.5	0
49.6	0
49.7	0
49.8	0
49.9	0
50	0
50.1	0
50.2	0
50.3	0
50.4	0
50.5	0
50.6	0
50.7	0
50.8	0
50.9	0
51	0
51.1	0
51.2	0
51.3	0
51.4	0
51.5	0
51.6	0
51.7	0
51.8	0
51.9	0
52	0
52.1	0
52.2	0
52.3	0
52.4	0
52.5	0
52.6	0
52.7	0
52.8	0
52.9	0
53	0
53.1	0
53.2	0
53.3	0
53.4	0
53.5	0
53.6	0
53.7	0
53.8	0
53.9	0
54	0
54.1	0
54.2	0
54.3	0
54.4	0
54.5	0
54.6	0
54.7	0
54.8	0
54.9	0
55	0
55.1	0
55.2	0
55.3	0
55.4	0
55.5	0
55.6	0
55.7	0
55.8	0
55.9	0
56	0
56.1	0
56.2	0
56.3	0
56.4	0
56.5	0
56.6	0
56.7	0
56.8	0
56.9	0
57	0
57.1	0
57.2	0
57.3	0
57.4	0
57.5	0
57.6	0
57.7	0
57.8	0
57.9	0
58	0
58.1	0
58.2	0
58.3	0
58.4	0
58.5	0
58.6	0
58.7	0
58.8	0
58.9	0
59	0
59.1	0
59.2	0
59.3	0
59.4	0
59.5	0
59.6	0
59.7	0
59.8	0
59.9	0
60	0
60.1	0
60.2	0
60.3	0
60.4	0
60.5	0
60.6	0
60.7	0
60.8	0
60.9	0
61	0
61.1	0
61.2	0
61.3	0
61.4	0
61.5	0
61.6	0
61.7	0
61.8	0
61.9	0
62	0
62.1	0
62.2	0
62.3	0
62.4	0
62.5	0
62.6	0
62.7	0
62.8	0
62.9	0
63	0
63.1	0
63.2	0
63.3	0
63.4	0
63.5	0
63.6	0
63.7	0
63.8	0
63.9	0
64	0
64.1	0
64.2	0
64.3	0
64.4	0
64.5	0
64.6	0
64.7	0
64.8	0
64.9	0
65	0
65.1	0
65.2	0
65.3	0
65.4	0
65.5	0
65.6	0
65.7	0
65.8	0
65.9	0
66	0
66.1	0
66.2	0
66.3	0
66.4	0
66.5	0
66.6	0
66.7	0
66.8	0
66.9	0
67	0
67.1	0
67.2	0
67.3	0
67.4	0
67.5	0
67.6	0
67.7	0
67.8	0
67.9	0
68	0
68.1	0
68.2	0
68.3	0
68.4	0
68.5	0
68.6	0
68.7	0
68.8	0
68.9	0
69	0
69.1	0
69.2	0
69.3	0
69.4	0
69.5	0
69.6	0
69.7	0
69.8	0
69.9	0
70	0
70.1	0
70.2	0
70.3	0
70.4	0
70.5	0
70.6	0
70.7	0
70.8	0
70.9	0
71	0
71.1	0
71.2	0
71.3	0
71.4	0
71.5	0
71.6	0
71.7	0
71.8	0
71.9	0
72	0
72.1	0
72.2	0
72.3	0
72.4	0
72.5	0
72.6	0
72.7	0
72.8	0
72.9	0
73	0
73.1	0
73.2	0
73.3	0
73.4	0
73.5	0
73.6	0
73.7	0
73.8	0
73.9	0
74	0
74.1	0
74.2	0
74.3	0
74.4	0
74.5	0
74.6	0
74.7	0
74.8	0
74.9	0
75	0
75.1	0
75.2	0
75.3	0
75.4	0
75.5	0
75.6	0
75.7	0
75.8	0
75.9	0
76	0
76.1	0
76.2	0
76.3	0
76.4	0
76.5	0
76.6	0
76.7	0
76.8	0
76.9	0
77	0
77.1	0
77.2	0
77.3	0
77.4	0
77.5	0
77.6	0
77.7	0
77.8	0
77.9	0
78	0
78.1	0
78.2	0
78.3	0
78.4	0
78.5	0
78.6	0
78.7	0
78.8	0
78.9	0
79	0
79.1	0
79.2	0
79.3	0
79.4	0
79.5	0
79.6	0
79.7	0
79.8	0
79.9	0
80	0
80.1	0
80.2	0
80.3	0
80.4	0
80.5	0
80.6	0
80.7	0
80.8	0
80.9	0
81	0
81.1	0
81.2	0
81.3	0
81.4	0
81.5	0
81.6	0
81.7	0
81.8	0
81.9	0
82	0
82.1	0
82.2	0
82.3	0
82.4	0
82.5	0
82.6	0
82.7	0
82.8	0
82.9	0
83	0
83.1	0
83.2	0
83.3	0
83.4	0
83.5	0
83.6	0
83.7	0
83.8	0
83.9	0
84	0
84.1	0
84.2	0
84.3	0
84.4	0
84.5	0
84.6	0
84.7	0
84.8	0
84.9	0
85	0
85.1	0
85.2	0
85.3	0
85.4	0
85.5	0
85.6	0
85.7	0
85.8	0
85.9	0
86	0
86.1	0
86.2	0
86.3	0
86.4	0
86.5	0
86.6	0
86.7	0
86.8	0
86.9	0
87	0
87.1	0
87.2	0
87.3	0
87.4	0
87.5	0
87.6	0
87.7	0
87.8	0
87.9	0
88	0
88.1	0
88.2	0
88.3	0
88.4	0
88.5	0
88.6	0
88.7	0
88.8	0
88.9	0
89	0
89.1	0
89.2	0
89.3	0
89.4	0
89.5	0
89.6	0
89.7	0
89.8	0
89.9	0
90	0
90.1	0
90.2	0
90.3	0
90.4	0
90.5	0
90.6	0
90.7	0
90.8	0
90.9	0
91	0
91.1	0
91.2	0
91.3	0
91.4	0
91.5	0
91.6	0
91.7	0
91.8	0
91.9	0
92	0
92.1	0
92.2	0
92.3	0
92.4	0
92.5	0
92.6	0
92.7	0
92.8	0
92.9	0
93	0
93.1	0
93.2	0
93.3	0
93.4	0
93.5	0
93.6	0
93.7	0
93.8	0
93.9	0
94	0
94.1	0
94.2	0
94.3	0
94.4	0
94.5	0
94.6	0
94.7	0
94.8	0
94.9	0
95	0
95.1	0
95.2	0
95.3	0
95.4	0
95.5	0
95.6	0
95.7	0
95.8	0
95.9	0
96	0
96.1	0
96.2	0
96.3	0
96.4	0
96.5	0
96.6	0
96.7	0
96.8	0
96.9	0
97	0
97.1	0
97.2	0
97.3	0
97.4	0
97.5	0
97.6	0
97.7	0
97.8	0
97.9	0
98	0
98.1	0
98.2	0
98.3	0
98.4	0
98.5	0
98.6	0
98.7	0
98.8	0
98.9	0
99	0
99.1	0
99.2	0
99.3	0
99.4	0
99.5	0
99.6	0
99.7	0
99.8	0
99.9	0
100	0
100.1	0
100.2	0
100.3	0
100.4	0
100.5	0
100.6	0
100.7	0
100.8	0
100.9	0
101	0
101.1	0
101.2	0
101.3	0
101.4	0
101.5	0
101.6	0
101.7	0
101.8	0
101.9	0
102	0
102.1	0
102.2	0
102.3	0
102.4	0
102.5	0
102.6	0
102.7	0
102.8	0
102.9	0
103	0
103.1	0
103.2	0
103.3	0
103.4	0
103.5	0
103.6	0.0005
103.7	0.0005
103.8	0.0005
103.9	0.0005
104	0.0005
104.1	0.0005
104.2	0.0005
104.3	0.0005
104.4	0.0005
104.5	0.0005
104.6	0.0005
104.7	0.0005
104.8	0.0005
104.9	0.0005
105	0.0005
105.1	0.0005
105.2	0.0005
105.3	0.0005
105.4	0.0005
105.5	0.0005
105.6	0.0005
105.7	0.0005
105.8	0.0005
105.9	0.0005
106	0.0005
106.1	0.001
106.2	0.001
106.3	0.001
106.4	0.001
106.5	0.0015
106.6	0.0015
106.7	0.0015
106.8	0.0015
106.9	0.0015
107	0.0015
107.1	0.0015
107.2	0.0015
107.3	0.0015
107.4	0.0015
107.5	0.0015
107.6	0.0015
107.7	0.0015
107.8	0.0015
107.9	0.0015
108	0.0015
108.1	0.0015
108.2	0.0015
108.3	0.0025
108.4	0.0025
108.5	0.0025
108.6	0.0025
108.7	0.0025
108.8	0.0025
108.9	0.0025
109	0.0025
109.1	0.0025
109.2	0.0025
109.3	0.0025
109.4	0.0025
109.5	0.0025
109.6	0.0025
109.7	0.0025
109.8	0.0025
109.9	0.0025
110	0.0025
110.1	0.0025
110.2	0.0025
110.3	0.0025
110.4	0.0025
110.5	0.0025
110.6	0.0025
110.7	0.0025
110.8	0.0025
110.9	0.003
111	0.0035
111.1	0.0035
111.2	0.0035
111.3	0.0035
111.4	0.0035
111.5	0.0035
111.6	0.0035
111.7	0.0035
111.8	0.0035
111.9	0.0035
112	0.0035
112.1	0.0035
112.2	0.0035
112.3	0.0035
112.4	0.004
112.5	0.0045
112.6	0.0045
112.7	0.0045
112.8	0.0045
112.9	0.0045
113	0.0045
113.1	0.0045
113.2	0.005
113.3	0.005
113.4	0.005
113.5	0.005
113.6	0.005
113.7	0.005
113.8	0.0055
113.9	0.0055
114	0.0055
114.1	0.0055
114.2	0.006
114.3	0.006
114.4	0.006
114.5	0.006
114.6	0.006
114.7	0.006
114.8	0.006
114.9	0.006
115	0.006
115.1	0.006
115.2	0.006
115.3	0.006
115.4	0.006
115.5	0.006
115.6	0.006
115.7	0.006
115.8	0.006
115.9	0.006
116	0.0055
116.1	0.0055
116.2	0.0055
116.3	0.0055
116.4	0.0055
116.5	0.0055
116.6	0.006
116.7	0.006
116.8	0.006
116.9	0.006
117	0.006
117.1	0.006
117.2	0.006
117.3	0.006
117.4	0.0065
117.5	0.0065
117.6	0.0065
117.7	0.0065
117.8	0.0065
117.9	0.0065
118	0.0065
118.1	0.0065
118.2	0.0065
118.3	0.0065
118.4	0.0065
118.5	0.0065
118.6	0.0065
118.7	0.0065
118.8	0.0065
118.9	0.0065
119	0.0065
119.1	0.0065
119.2	0.0065
119.3	0.0065
119.4	0.0075
119.5	0.0075
119.6	0.0075
119.7	0.0075
119.8	0.0075
119.9	0.0075
120	0.0075
120.1	0.0075
120.2	0.008
120.3	0.0085
120.4	0.0085
120.5	0.0085
120.6	0.0085
120.7	0.0085
120.8	0.009
120.9	0.009
121	0.009
121.1	0.009
121.2	0.009
121.3	0.009
121.4	0.0095
121.5	0.01
121.6	0.01
121.7	0.01
121.8	0.01
121.9	0.01
122	0.01
122.1	0.01
122.2	0.01
122.3	0.01
122.4	0.01
122.5	0.0105
122.6	0.011
122.7	0.011
122.8	0.0115
122.9	0.0115
123	0.0115
123.1	0.0115
123.2	0.0115
123.3	0.0115
123.4	0.0115
123.5	0.012
123.6	0.012
123.7	0.012
123.8	0.012
123.9	0.012
124	0.012
124.1	0.012
124.2	0.012
124.3	0.012
124.4	0.0125
124.5	0.0125
124.6	0.0125
124.7	0.012
124.8	0.012
124.9	0.012
125	0.012
125.1	0.0115
125.2	0.0115
125.3	0.012
125.4	0.0125
125.5	0.0125
125.6	0.0125
125.7	0.0125
125.8	0.0125
125.9	0.0125
126	0.0125
126.1	0.0125
126.2	0.0125
126.3	0.0125
126.4	0.0125
126.5	0.013
126.6	0.013
126.7	0.013
126.8	0.013
126.9	0.013
127	0.0135
127.1	0.0135
127.2	0.0135
127.3	0.0135
127.4	0.0135
127.5	0.014
127.6	0.0145
127.7	0.0145
127.8	0.0145
127.9	0.0145
128	0.0145
128.1	0.0145
128.2	0.0145
128.3	0.0145
128.4	0.0155
128.5	0.0155
128.6	0.0155
128.7	0.0155
128.8	0.016
128.9	0.017
129	0.017
129.1	0.017
129.2	0.0175
129.3	0.0175
129.4	0.0175
129.5	0.0175
129.6	0.018
129.7	0.018
129.8	0.018
129.9	0.0185
130	0.0185
130.1	0.0185
130.2	0.0185
130.3	0.0185
130.4	0.019
130.5	0.019
130.6	0.019
130.7	0.019
130.8	0.019
130.9	0.019
131	0.019
131.1	0.019
131.2	0.019
131.3	0.0195
131.4	0.02
131.5	0.0195
131.6	0.0195
131.7	0.019
131.8	0.019
131.9	0.0195
132	0.0195
132.1	0.0195
132.2	0.019
132.3	0.019
132.4	0.019
132.5	0.019
132.6	0.019
132.7	0.019
132.8	0.019
132.9	0.019
133	0.019
133.1	0.019
133.2	0.019
133.3	0.019
133.4	0.019
133.5	0.0195
133.6	0.0195
133.7	0.0195
133.8	0.02
133.9	0.02
134	0.02
134.1	0.02
134.2	0.02
134.3	0.02
134.4	0.02
134.5	0.02
134.6	0.02
134.7	0.02
134.8	0.0205
134.9	0.0205
135	0.021
135.1	0.021
135.2	0.021
135.3	0.021
135.4	0.0215
135.5	0.022
135.6	0.022
135.7	0.022
135.8	0.022
135.9	0.022
136	0.022
136.1	0.0225
136.2	0.0225
136.3	0.023
136.4	0.023
136.5	0.023
136.6	0.023
136.7	0.023
136.8	0.023
136.9	0.023
137	0.023
137.1	0.023
137.2	0.023
137.3	0.023
137.4	0.0235
137.5	0.0235
137.6	0.0235
137.7	0.0235
137.8	0.0235
137.9	0.024
138	0.024
138.1	0.024
138.2	0.024
138.3	0.024
138.4	0.0235
138.5	0.0235
138.6	0.0235
138.7	0.0235
138.8	0.0235
138.9	0.0235
139	0.0235
139.1	0.0235
139.2	0.0235
139.3	0.0235
139.4	0.0235
139.5	0.0235
139.6	0.0245
139.7	0.0245
139.8	0.0245
139.9	0.0245
140	0.0245
140.1	0.0245
140.2	0.0245
140.3	0.0245
140.4	0.0245
140.5	0.0245
140.6	0.0245
140.7	0.024
140.8	0.024
140.9	0.024
141	0.024
141.1	0.024
141.2	0.024
141.3	0.024
141.4	0.024
141.5	0.024
141.6	0.024
141.7	0.024
141.8	0.024
141.9	0.024
142	0.024
142.1	0.025
142.2	0.025
142.3	0.025
142.4	0.025
142.5	0.025
142.6	0.0255
142.7	0.0255
142.8	0.0255
142.9	0.0255
143	0.0255
143.1	0.0255
143.2	0.0255
143.3	0.0255
143.4	0.0255
143.5	0.0255
143.6	0.0255
143.7	0.0255
143.8	0.0255
143.9	0.0255
144	0.0255
144.1	0.0255
144.2	0.0255
144.3	0.0255
144.4	0.0255
144.5	0.0255
144.6	0.0255
144.7	0.0255
144.8	0.0255
144.9	0.0255
145	0.0255
145.1	0.0255
145.2	0.0255
145.3	0.0255
145.4	0.0255
145.5	0.0255
145.6	0.025
145.7	0.025
145.8	0.025
145.9	0.025
146	0.025
146.1	0.025
146.2	0.025
146.3	0.025
146.4	0.025
146.5	0.0255
146.6	0.026
146.7	0.026
146.8	0.026
146.9	0.026
147	0.0265
147.1	0.0265
147.2	0.0265
147.3	0.0265
147.4	0.0265
147.5	0.0265
147.6	0.0265
147.7	0.026
147.8	0.026
147.9	0.0265
148	0.0265
148.1	0.0265
148.2	0.0265
148.3	0.026
148.4	0.026
148.5	0.026
148.6	0.026
148.7	0.026
148.8	0.026
148.9	0.026
149	0.026
149.1	0.026
149.2	0.026
149.3	0.026
149.4	0.026
149.5	0.026
149.6	0.0265
149.7	0.0265
149.8	0.027
149.9	0.027
150	0.027
150.1	0.027
150.2	0.027
150.3	0.0275
150.4	0.0275
150.5	0.028
150.6	0.028
150.7	0.028
150.8	0.0275
150.9	0.0275
151	0.0275
151.1	0.0275
151.2	0.0275
151.3	0.0275
151.4	0.0275
151.5	0.0275
151.6	0.0275
151.7	0.0275
151.8	0.0275
151.9	0.0275
152	0.0275
152.1	0.0275
152.2	0.0275
152.3	0.028
152.4	0.028
152.5	0.028
152.6	0.0275
152.7	0.028
152.8	0.028
152.9	0.028
153	0.028
153.1	0.028
153.2	0.028
153.3	0.028
153.4	0.028
153.5	0.0275
153.6	0.0275
153.7	0.0275
153.8	0.028
153.9	0.028
154	0.028
154.1	0.028
154.2	0.028
154.3	0.028
154.4	0.028
154.5	0.028
154.6	0.028
154.7	0.028
154.8	0.0285
154.9	0.0285
155	0.0285
155.1	0.0285
155.2	0.0285
155.3	0.0285
155.4	0.0285
155.5	0.0285
155.6	0.0285
155.7	0.0285
155.8	0.028
155.9	0.028
156	0.028
156.1	0.028
156.2	0.028
156.3	0.028
156.4	0.028
156.5	0.028
156.6	0.028
156.7	0.028
156.8	0.028
156.9	0.0285
157	0.029
157.1	0.0295
157.2	0.029
157.3	0.029
157.4	0.029
157.5	0.029
157.6	0.029
157.7	0.0295
157.8	0.03
157.9	0.03
158	0.03
158.1	0.03
158.2	0.03
158.3	0.03
158.4	0.03
158.5	0.03
158.6	0.03
158.7	0.03
158.8	0.0295
158.9	0.029
159	0.0295
159.1	0.0295
159.2	0.0295
159.3	0.0295
159.4	0.0295
159.5	0.0295
159.6	0.0295
159.7	0.0295
159.8	0.0295
159.9	0.0295
160	0.0295
160.1	0.0295
160.2	0.0295
160.3	0.0295
160.4	0.0295
160.5	0.0295
160.6	0.0295
160.7	0.0295
160.8	0.029
160.9	0.029
161	0.029
161.1	0.029
161.2	0.029
161.3	0.029
161.4	0.0295
161.5	0.0295
161.6	0.0295
161.7	0.0295
161.8	0.0295
161.9	0.0295
162	0.0295
162.1	0.0295
162.2	0.0295
162.3	0.0295
162.4	0.0295
162.5	0.0305
162.6	0.0305
162.7	0.0305
162.8	0.0305
162.9	0.0305
163	0.031
163.1	0.03
163.2	0.03
163.3	0.0305
163.4	0.0305
163.5	0.0305
163.6	0.0305
163.7	0.031
163.8	0.031
163.9	0.031
164	0.031
164.1	0.031
164.2	0.031
164.3	0.031
164.4	0.031
164.5	0.031
164.6	0.0315
164.7	0.0315
164.8	0.0315
164.9	0.0315
165	0.0315
165.1	0.0315
165.2	0.0315
165.3	0.032
165.4	0.032
165.5	0.032
165.6	0.0325
165.7	0.0325
165.8	0.0325
165.9	0.033
166	0.033
166.1	0.033
166.2	0.033
166.3	0.033
166.4	0.033
166.5	0.033
166.6	0.033
166.7	0.033
166.8	0.034
166.9	0.034
167	0.0345
167.1	0.0345
167.2	0.0345
167.3	0.0345
167.4	0.0345
167.5	0.0345
167.6	0.034
167.7	0.034
167.8	0.034
167.9	0.0345
168	0.0345
168.1	0.0335
168.2	0.0335
168.3	0.0335
168.4	0.034
168.5	0.034
168.6	0.034
168.7	0.034
168.8	0.034
168.9	0.034
169	0.034
169.1	0.034
169.2	0.034
169.3	0.034
169.4	0.034
169.5	0.034
169.6	0.034
169.7	0.0345
169.8	0.0345
169.9	0.0345
170	0.0345
170.1	0.0345
170.2	0.0345
170.3	0.0345
170.4	0.0345
170.5	0.0345
170.6	0.0345
170.7	0.0345
170.8	0.0345
170.9	0.034
171	0.034
171.1	0.034
171.2	0.034
171.3	0.035
171.4	0.035
171.5	0.035
171.6	0.0355
171.7	0.036
171.8	0.036
171.9	0.036
172	0.036
172.1	0.036
172.2	0.035
172.3	0.0355
172.4	0.0355
172.5	0.0355
172.6	0.0355
172.7	0.0355
172.8	0.0355
172.9	0.0355
173	0.0355
173.1	0.0355
173.2	0.0355
173.3	0.0355
173.4	0.0355
173.5	0.0355
173.6	0.035
173.7	0.035
173.8	0.035
173.9	0.035
174	0.0355
174.1	0.0355
174.2	0.035
174.3	0.035
174.4	0.035
174.5	0.036
174.6	0.036
174.7	0.0365
174.8	0.0365
174.9	0.0365
175	0.0365
175.1	0.0365
175.2	0.037
175.3	0.0375
175.4	0.0375
175.5	0.038
175.6	0.038
175.7	0.038
175.8	0.0385
175.9	0.0385
176	0.0385
176.1	0.0385
176.2	0.0385
176.3	0.0385
176.4	0.0385
176.5	0.0385
176.6	0.039
176.7	0.039
176.8	0.039
176.9	0.039
177	0.039
177.1	0.039
177.2	0.0385
177.3	0.0385
177.4	0.0385
177.5	0.0385
177.6	0.0385
177.7	0.0385
177.8	0.0385
177.9	0.0385
178	0.0385
178.1	0.0385
178.2	0.0385
178.3	0.0385
178.4	0.0385
178.5	0.039
178.6	0.039
178.7	0.039
178.8	0.0395
178.9	0.0395
179	0.0395
179.1	0.041
179.2	0.041
179.3	0.041
179.4	0.041
179.5	0.041
179.6	0.041
179.7	0.041
179.8	0.041
179.9	0.041
180	0.041
180.1	0.041
180.2	0.0405
180.3	0.0405
180.4	0.0405
180.5	0.0405
180.6	0.0405
180.7	0.0405
180.8	0.0405
180.9	0.041
181	0.041
181.1	0.041
181.2	0.041
181.3	0.041
181.4	0.041
181.5	0.041
181.6	0.041
181.7	0.041
181.8	0.0415
181.9	0.0415
182	0.0415
182.1	0.0415
182.2	0.0415
182.3	0.041
182.4	0.0415
182.5	0.0415
182.6	0.041
182.7	0.0405
182.8	0.0405
182.9	0.041
183	0.041
183.1	0.041
183.2	0.041
183.3	0.041
183.4	0.0415
183.5	0.0415
183.6	0.0415
183.7	0.0415
183.8	0.0415
183.9	0.0415
184	0.042
184.1	0.043
184.2	0.043
184.3	0.043
184.4	0.043
184.5	0.043
184.6	0.043
184.7	0.043
184.8	0.043
184.9	0.0425
185	0.0425
185.1	0.0425
185.2	0.0425
185.3	0.0425
185.4	0.0425
185.5	0.043
185.6	0.043
185.7	0.043
185.8	0.043
185.9	0.043
186	0.043
186.1	0.043
186.2	0.043
186.3	0.0425
186.4	0.0425
186.5	0.0425
186.6	0.0425
186.7	0.0425
186.8	0.043
186.9	0.043
187	0.043
187.1	0.043
187.2	0.043
187.3	0.043
187.4	0.0435
187.5	0.0435
187.6	0.0435
187.7	0.0435
187.8	0.044
187.9	0.044
188	0.044
188.1	0.044
188.2	0.044
188.3	0.044
188.4	0.044
188.5	0.0435
188.6	0.0435
188.7	0.0435
188.8	0.0435
188.9	0.0435
189	0.0435
189.1	0.0435
189.2	0.0435
189.3	0.043
189.4	0.043
189.5	0.043
189.6	0.043
189.7	0.0425
189.8	0.0425
189.9	0.043
190	0.043
190.1	0.043
190.2	0.043
190.3	0.043
190.4	0.043
190.5	0.043
190.6	0.043
190.7	0.043
190.8	0.043
190.9	0.043
191	0.043
191.1	0.043
191.2	0.043
191.3	0.043
191.4	0.0435
191.5	0.0435
191.6	0.0435
191.7	0.0435
191.8	0.0435
191.9	0.0435
192	0.0435
192.1	0.0435
192.2	0.0435
192.3	0.0435
192.4	0.044
192.5	0.044
192.6	0.0435
192.7	0.0435
192.8	0.0435
192.9	0.0435
193	0.0435
193.1	0.0435
193.2	0.0435
193.3	0.0435
193.4	0.0435
193.5	0.0435
193.6	0.0435
193.7	0.0435
193.8	0.0435
193.9	0.044
194	0.044
194.1	0.044
194.2	0.044
194.3	0.044
194.4	0.044
194.5	0.044
194.6	0.044
194.7	0.044
194.8	0.0435
194.9	0.0435
195	0.0435
195.1	0.044
195.2	0.0445
195.3	0.0445
195.4	0.0445
195.5	0.044
195.6	0.0445
195.7	0.0445
195.8	0.0445
195.9	0.0445
196	0.0445
196.1	0.0445
196.2	0.0445
196.3	0.0445
196.4	0.0445
196.5	0.0445
196.6	0.0445
196.7	0.0445
196.8	0.045
196.9	0.045
197	0.045
197.1	0.045
197.2	0.045
197.3	0.045
197.4	0.046
197.5	0.046
197.6	0.046
197.7	0.046
197.8	0.046
197.9	0.046
198	0.046
198.1	0.046
198.2	0.046
198.3	0.046
198.4	0.046
198.5	0.046
198.6	0.046
198.7	0.046
198.8	0.046
198.9	0.046
199	0.046
199.1	0.046
199.2	0.046
199.3	0.046
199.4	0.046
199.5	0.046
199.6	0.046
199.7	0.046
199.8	0.046
199.9	0.0465
200	0.0465
[truncated: 14,000 more rows]
