# Supplementary material for: Bayesian inference of kinetic schemes for ion channels by Kalman filtering
Source: eLife journal article supplement (doi:10.7554/elife.62714), 2022-05-04
Supplement: fig4-data10 [file 1_Sim_N_3000_Fluor_MW_0.0625M.xlsx]

## Sheet: Tabelle1
0.1	0
0.2	0
0.3	0
0.4	0
0.5	0
0.6	0
0.7	0
0.8	0
0.9	0
1	0
1.1	0
1.2	0
1.3	0
1.4	0
1.5	0
1.6	0
1.7	0
1.8	0
1.9	0
2	0
2.1	0
2.2	0
2.3	0
2.4	0
2.5	0
2.6	0
2.7	0
2.8	0
2.9	0
3	0
3.1	0
3.2	0
3.3	0
3.4	0
3.5	0
3.6	0
3.7	0
3.8	0
3.9	0
4	0
4.1	0
4.2	0
4.3	0
4.4	0
4.5	0
4.6	0
4.7	0
4.8	0
4.9	0
5	0
5.1	0
5.2	0
5.3	0
5.4	0
5.5	0
5.6	0
5.7	0
5.8	0
5.9	0
6	0
6.1	0
6.2	0
6.3	0
6.4	0
6.5	0
6.6	0
6.7	0
6.8	0
6.9	0
7	0
7.1	0
7.2	0
7.3	0
7.4	0
7.5	0
7.6	0
7.7	0
7.8	0
7.9	0
8	0
8.1	0
8.2	0
8.3	0
8.4	0
8.5	0
8.6	0
8.7	0
8.8	0
8.9	0
9	0
9.1	0
9.2	0
9.3	0
9.4	0
9.5	0
9.6	0
9.7	0
9.8	0
9.9	0
10	0
10.1	0
10.2	0
10.3	0
10.4	0
10.5	0
10.6	0
10.7	0
10.8	0
10.9	0
11	0
11.1	0
11.2	0
11.3	0
11.4	0
11.5	0
11.6	0
11.7	0
11.8	0
11.9	0
12	0
12.1	0
12.2	0
12.3	0
12.4	0
12.5	0
12.6	0
12.7	0
12.8	0
12.9	0
13	0
13.1	0
13.2	0
13.3	0
13.4	0
13.5	0
13.6	0
13.7	0
13.8	0
13.9	0
14	0
14.1	0
14.2	0
14.3	0
14.4	0
14.5	0
14.6	0
14.7	0
14.8	0
14.9	0
15	0
15.1	0
15.2	0
15.3	0
15.4	0
15.5	0
15.6	0
15.7	0
15.8	0
15.9	0
16	0
16.1	0
16.2	0
16.3	0
16.4	0
16.5	0
16.6	0
16.7	0
16.8	0
16.9	0
17	0
17.1	0
17.2	0
17.3	0
17.4	0
17.5	0
17.6	0
17.7	0
17.8	0
17.9	0
18	0
18.1	0
18.2	0
18.3	0
18.4	0
18.5	0
18.6	0
18.7	0
18.8	0
18.9	0
19	0
19.1	0
19.2	0
19.3	0
19.4	0
19.5	0
19.6	0
19.7	0
19.8	0
19.9	0
20	0
20.1	0
20.2	0
20.3	0
20.4	0
20.5	0
20.6	0
20.7	0
20.8	0
20.9	0
21	0
21.1	0
21.2	0
21.3	0
21.4	0
21.5	0
21.6	0
21.7	0
21.8	0
21.9	0
22	0
22.1	0
22.2	0
22.3	0
22.4	0
22.5	0
22.6	0
22.7	0
22.8	0
22.9	0
23	0
23.1	0
23.2	0
23.3	0
23.4	0
23.5	0
23.6	0
23.7	0
23.8	0
23.9	0
24	0
24.1	0
24.2	0
24.3	0
24.4	0
24.5	0
24.6	0
24.7	0
24.8	0
24.9	0
25	0
25.1	0
25.2	0
25.3	0
25.4	0
25.5	0
25.6	0
25.7	0
25.8	0
25.9	0
26	0
26.1	0
26.2	0
26.3	0
26.4	0
26.5	0
26.6	0
26.7	0
26.8	0
26.9	0
27	0
27.1	0
27.2	0
27.3	0
27.4	0
27.5	0
27.6	0
27.7	0
27.8	0
27.9	0
28	0
28.1	0
28.2	0
28.3	0
28.4	0
28.5	0
28.6	0
28.7	0
28.8	0
28.9	0
29	0
29.1	0
29.2	0
29.3	0
29.4	0
29.5	0
29.6	0
29.7	0
29.8	0
29.9	0
30	0
30.1	0
30.2	0
30.3	0
30.4	0
30.5	0
30.6	0
30.7	0
30.8	0
30.9	0
31	0
31.1	0
31.2	0
31.3	0
31.4	0
31.5	0
31.6	0
31.7	0
31.8	0
31.9	0
32	0
32.1	0
32.2	0
32.3	0
32.4	0
32.5	0
32.6	0
32.7	0
32.8	0
32.9	0
33	0
33.1	0
33.2	0
33.3	0
33.4	0
33.5	0
33.6	0
33.7	0
33.8	0
33.9	0
34	0
34.1	0
34.2	0
34.3	0
34.4	0
34.5	0
34.6	0
34.7	0
34.8	0
34.9	0
35	0
35.1	0
35.2	0
35.3	0
35.4	0
35.5	0
35.6	0
35.7	0
35.8	0
35.9	0
36	0
36.1	0
36.2	0
36.3	0
36.4	0
36.5	0
36.6	0
36.7	0
36.8	0
36.9	0
37	0
37.1	0
37.2	0
37.3	0
37.4	0
37.5	0
37.6	0
37.7	0
37.8	0
37.9	0
38	0
38.1	0
38.2	0
38.3	0
38.4	0
38.5	0
38.6	0
38.7	0
38.8	0
38.9	0
39	0
39.1	0
39.2	0
39.3	0
39.4	0
39.5	0
39.6	0
39.7	0
39.8	0
39.9	0
40	0
40.1	0
40.2	0
40.3	0
40.4	0
40.5	0
40.6	0
40.7	0
40.8	0
40.9	0
41	0
41.1	0
41.2	0
41.3	0
41.4	0
41.5	0
41.6	0
41.7	0
41.8	0
41.9	0
42	0
42.1	0
42.2	0
42.3	0
42.4	0
42.5	0
42.6	0
42.7	0
42.8	0
42.9	0
43	0
43.1	0
43.2	0
43.3	0
43.4	0
43.5	0
43.6	0
43.7	0
43.8	0
43.9	0
44	0
44.1	0
44.2	0
44.3	0
44.4	0
44.5	0
44.6	0
44.7	0
44.8	0
44.9	0
45	0
45.1	0
45.2	0
45.3	0
45.4	0
45.5	0
45.6	0
45.7	0
45.8	0
45.9	0
46	0
46.1	0
46.2	0
46.3	0
46.4	0
46.5	0
46.6	0
46.7	0
46.8	0
46.9	0
47	0
47.1	0
47.2	0
47.3	0
47.4	0
47.5	0
47.6	0
47.7	0
47.8	0
47.9	0
48	0
48.1	0
48.2	0
48.3	0
48.4	0
48.5	0
48.6	0
48.7	0
48.8	0
48.9	0
49	0
49.1	0
49.2	0
49.3	0
49.4	0
49.5	0
49.6	0
49.7	0
49.8	0
49.9	0
50	0
50.1	0
50.2	0
50.3	0
50.4	0
50.5	0
50.6	0
50.7	0
50.8	0
50.9	0
51	0
51.1	0
51.2	0
51.3	0
51.4	0
51.5	0
51.6	0
51.7	0
51.8	0
51.9	0
52	0
52.1	0
52.2	0
52.3	0
52.4	0
52.5	0
52.6	0
52.7	0
52.8	0
52.9	0
53	0
53.1	0
53.2	0
53.3	0
53.4	0
53.5	0
53.6	0
53.7	0
53.8	0
53.9	0
54	0
54.1	0
54.2	0
54.3	0
54.4	0
54.5	0
54.6	0
54.7	0
54.8	0
54.9	0
55	0
55.1	0
55.2	0
55.3	0
55.4	0
55.5	0
55.6	0
55.7	0
55.8	0
55.9	0
56	0
56.1	0
56.2	0
56.3	0
56.4	0
56.5	0
56.6	0
56.7	0
56.8	0
56.9	0
57	0
57.1	0
57.2	0
57.3	0
57.4	0
57.5	0
57.6	0
57.7	0
57.8	0
57.9	0
58	0
58.1	0
58.2	0
58.3	0
58.4	0
58.5	0
58.6	0
58.7	0
58.8	0
58.9	0
59	0
59.1	0
59.2	0
59.3	0
59.4	0
59.5	0
59.6	0
59.7	0
59.8	0
59.9	0
60	0
60.1	0
60.2	0
60.3	0
60.4	0
60.5	0
60.6	0
60.7	0
60.8	0
60.9	0
61	0
61.1	0
61.2	0
61.3	0
61.4	0
61.5	0
61.6	0
61.7	0
61.8	0
61.9	0
62	0
62.1	0
62.2	0
62.3	0
62.4	0
62.5	0
62.6	0
62.7	0
62.8	0
62.9	0
63	0
63.1	0
63.2	0
63.3	0
63.4	0
63.5	0
63.6	0
63.7	0
63.8	0
63.9	0
64	0
64.1	0
64.2	0
64.3	0
64.4	0
64.5	0
64.6	0
64.7	0
64.8	0
64.9	0
65	0
65.1	0
65.2	0
65.3	0
65.4	0
65.5	0
65.6	0
65.7	0
65.8	0
65.9	0
66	0
66.1	0
66.2	0
66.3	0
66.4	0
66.5	0
66.6	0
66.7	0
66.8	0
66.9	0
67	0
67.1	0
67.2	0
67.3	0
67.4	0
67.5	0
67.6	0
67.7	0
67.8	0
67.9	0
68	0
68.1	0
68.2	0
68.3	0
68.4	0
68.5	0
68.6	0
68.7	0
68.8	0
68.9	0
69	0
69.1	0
69.2	0
69.3	0
69.4	0
69.5	0
69.6	0
69.7	0
69.8	0
69.9	0
70	0
70.1	0
70.2	0
70.3	0
70.4	0
70.5	0
70.6	0
70.7	0
70.8	0
70.9	0
71	0
71.1	0
71.2	0
71.3	0
71.4	0
71.5	0
71.6	0
71.7	0
71.8	0
71.9	0
72	0
72.1	0
72.2	0
72.3	0
72.4	0
72.5	0
72.6	0
72.7	0
72.8	0
72.9	0
73	0
73.1	0
73.2	0
73.3	0
73.4	0
73.5	0
73.6	0
73.7	0
73.8	0
73.9	0
74	0
74.1	0
74.2	0
74.3	0
74.4	0
74.5	0
74.6	0
74.7	0
74.8	0
74.9	0
75	0
75.1	0
75.2	0
75.3	0
75.4	0
75.5	0
75.6	0
75.7	0
75.8	0
75.9	0
76	0
76.1	0
76.2	0
76.3	0
76.4	0
76.5	0
76.6	0
76.7	0
76.8	0
76.9	0
77	0
77.1	0
77.2	0
77.3	0
77.4	0
77.5	0
77.6	0
77.7	0
77.8	0
77.9	0
78	0
78.1	0
78.2	0
78.3	0
78.4	0
78.5	0
78.6	0
78.7	0
78.8	0
78.9	0
79	0
79.1	0
79.2	0
79.3	0
79.4	0
79.5	0
79.6	0
79.7	0
79.8	0
79.9	0
80	0
80.1	0
80.2	0
80.3	0
80.4	0
80.5	0
80.6	0
80.7	0
80.8	0
80.9	0
81	0
81.1	0
81.2	0
81.3	0
81.4	0
81.5	0
81.6	0
81.7	0
81.8	0
81.9	0
82	0
82.1	0
82.2	0
82.3	0
82.4	0
82.5	0
82.6	0
82.7	0
82.8	0
82.9	0
83	0
83.1	0
83.2	0
83.3	0
83.4	0
83.5	0
83.6	0
83.7	0
83.8	0
83.9	0
84	0
84.1	0
84.2	0
84.3	0
84.4	0
84.5	0
84.6	0
84.7	0
84.8	0
84.9	0
85	0
85.1	0
85.2	0
85.3	0
85.4	0
85.5	0
85.6	0
85.7	0
85.8	0
85.9	0
86	0
86.1	0
86.2	0
86.3	0
86.4	0
86.5	0
86.6	0
86.7	0
86.8	0
86.9	0
87	0
87.1	0
87.2	0
87.3	0
87.4	0
87.5	0
87.6	0
87.7	0
87.8	0
87.9	0
88	0
88.1	0
88.2	0
88.3	0
88.4	0
88.5	0
88.6	0
88.7	0
88.8	0
88.9	0
89	0
89.1	0
89.2	0
89.3	0
89.4	0
89.5	0
89.6	0
89.7	0
89.8	0
89.9	0
90	0
90.1	0
90.2	0
90.3	0
90.4	0
90.5	0
90.6	0
90.7	0
90.8	0
90.9	0
91	0
91.1	0
91.2	0
91.3	0
91.4	0
91.5	0
91.6	0
91.7	0
91.8	0
91.9	0
92	0
92.1	0
92.2	0
92.3	0
92.4	0
92.5	0
92.6	0
92.7	0
92.8	0
92.9	0
93	0
93.1	0
93.2	0
93.3	0
93.4	0
93.5	0
93.6	0
93.7	0
93.8	0
93.9	0
94	0
94.1	0
94.2	0
94.3	0
94.4	0
94.5	0
94.6	0
94.7	0
94.8	0
94.9	0
95	0
95.1	0
95.2	0
95.3	0
95.4	0
95.5	0
95.6	0
95.7	0
95.8	0
95.9	0
96	0
96.1	0
96.2	0
96.3	0
96.4	0
96.5	0
96.6	0
96.7	0
96.8	0
96.9	0
97	0
97.1	0
97.2	0
97.3	0
97.4	0
97.5	0
97.6	0
97.7	0
97.8	0
97.9	0
98	0
98.1	0
98.2	0
98.3	0
98.4	0
98.5	0
98.6	0
98.7	0
98.8	0
98.9	0
99	0
99.1	0
99.2	0
99.3	0
99.4	0
99.5	0
99.6	0
99.7	0
99.8	0
99.9	0
100	0
100.1	0.00333333
100.2	0.00616667
100.3	0.0101667
100.4	0.014
100.5	0.0173333
100.6	0.021
100.7	0.0233333
100.8	0.0268333
100.9	0.0301667
101	0.033
101.1	0.0373333
101.2	0.041
101.3	0.0446667
101.4	0.0488333
101.5	0.0508333
101.6	0.0533333
101.7	0.0565
101.8	0.0596667
101.9	0.0618333
102	0.0648333
102.1	0.0685
102.2	0.0715
102.3	0.0753333
102.4	0.078
102.5	0.0815
102.6	0.0848333
102.7	0.087
102.8	0.0895
102.9	0.091
103	0.0935
103.1	0.0963333
103.2	0.0996667
103.3	0.102667
103.4	0.104333
103.5	0.105833
103.6	0.109167
103.7	0.1115
103.8	0.113
103.9	0.115
104	0.117
104.1	0.118833
104.2	0.121833
104.3	0.123667
104.4	0.124833
104.5	0.127167
104.6	0.13
104.7	0.1315
104.8	0.133667
104.9	0.135
105	0.1365
105.1	0.139333
105.2	0.142667
105.3	0.142833
105.4	0.144833
105.5	0.146
105.6	0.1485
105.7	0.150333
105.8	0.1525
105.9	0.153167
106	0.155
106.1	0.155333
106.2	0.156667
106.3	0.1595
106.4	0.161333
106.5	0.160833
106.6	0.161833
106.7	0.162167
106.8	0.162167
106.9	0.163167
107	0.163833
107.1	0.1655
107.2	0.166667
107.3	0.169333
107.4	0.171
107.5	0.172333
107.6	0.173
107.7	0.175667
107.8	0.177
107.9	0.176167
108	0.177833
108.1	0.1775
108.2	0.179333
108.3	0.18
108.4	0.182333
108.5	0.181833
108.6	0.183333
108.7	0.185833
108.8	0.1855
108.9	0.186
109	0.185667
109.1	0.1865
109.2	0.186167
109.3	0.188167
109.4	0.189
109.5	0.191
109.6	0.1915
109.7	0.192
109.8	0.193
109.9	0.1955
110	0.1965
110.1	0.199833
110.2	0.200333
110.3	0.1995
110.4	0.198667
110.5	0.199833
110.6	0.201333
110.7	0.200667
110.8	0.201333
110.9	0.202833
111	0.203167
111.1	0.204
111.2	0.2045
111.3	0.205833
111.4	0.2065
111.5	0.207
111.6	0.207167
111.7	0.208833
111.8	0.209333
111.9	0.209667
112	0.209667
112.1	0.209667
112.2	0.210167
112.3	0.211
112.4	0.210833
112.5	0.210667
112.6	0.210667
112.7	0.210833
112.8	0.209
112.9	0.209167
113	0.210333
113.1	0.2095
113.2	0.211167
113.3	0.2115
113.4	0.212
113.5	0.211333
113.6	0.211167
113.7	0.212333
113.8	0.212
113.9	0.212333
114	0.2135
114.1	0.213167
114.2	0.214333
114.3	0.215
114.4	0.214333
114.5	0.213333
114.6	0.2155
114.7	0.2155
114.8	0.215833
114.9	0.216
115	0.216667
115.1	0.215667
115.2	0.214
115.3	0.215
115.4	0.214667
115.5	0.214
115.6	0.214667
115.7	0.215167
115.8	0.2165
115.9	0.215833
116	0.217
116.1	0.217833
116.2	0.217667
116.3	0.216667
116.4	0.216833
116.5	0.217833
116.6	0.2175
116.7	0.218333
116.8	0.219
116.9	0.218333
117	0.2175
117.1	0.216833
117.2	0.216667
117.3	0.2165
117.4	0.2185
117.5	0.218667
117.6	0.217667
117.7	0.218333
117.8	0.218333
117.9	0.218167
118	0.218667
118.1	0.2185
118.2	0.219167
118.3	0.219333
118.4	0.219667
118.5	0.2195
118.6	0.220833
118.7	0.221167
118.8	0.221
118.9	0.221167
119	0.2205
119.1	0.222667
119.2	0.223
119.3	0.222333
119.4	0.222167
119.5	0.222167
119.6	0.222833
119.7	0.223333
119.8	0.2215
119.9	0.221
120	0.221667
120.1	0.221833
120.2	0.222167
120.3	0.221667
120.4	0.223167
120.5	0.2225
120.6	0.220833
120.7	0.221833
120.8	0.221667
120.9	0.220833
121	0.221667
121.1	0.2215
121.2	0.2225
121.3	0.221333
121.4	0.221
121.5	0.222333
121.6	0.222667
121.7	0.2225
121.8	0.222
121.9	0.222833
122	0.223667
122.1	0.223667
122.2	0.222167
122.3	0.222667
122.4	0.222667
122.5	0.223167
122.6	0.223167
122.7	0.223
122.8	0.222333
122.9	0.222833
123	0.222667
123.1	0.2225
123.2	0.221333
123.3	0.220667
123.4	0.2225
123.5	0.222
123.6	0.222167
123.7	0.223
123.8	0.222833
123.9	0.222833
124	0.223667
124.1	0.225167
124.2	0.225167
124.3	0.225
124.4	0.225667
124.5	0.226667
124.6	0.226167
124.7	0.223833
124.8	0.2235
124.9	0.225
125	0.223833
125.1	0.2235
125.2	0.224167
125.3	0.224
125.4	0.223167
125.5	0.225167
125.6	0.226833
125.7	0.229
125.8	0.230833
125.9	0.2315
126	0.2315
126.1	0.232
126.2	0.232667
126.3	0.2325
126.4	0.232333
126.5	0.232167
126.6	0.231667
126.7	0.232833
126.8	0.234833
126.9	0.234833
127	0.233833
127.1	0.234167
127.2	0.234833
127.3	0.234167
127.4	0.235167
127.5	0.236
127.6	0.2345
127.7	0.234333
127.8	0.2355
127.9	0.236667
128	0.236167
128.1	0.2375
128.2	0.236333
128.3	0.2355
128.4	0.234833
128.5	0.234333
128.6	0.234667
128.7	0.2345
128.8	0.233667
128.9	0.233833
129	0.2335
129.1	0.233833
129.2	0.233667
129.3	0.233
129.4	0.232167
129.5	0.232167
129.6	0.2345
129.7	0.235833
129.8	0.237
129.9	0.2355
130	0.234833
130.1	0.234
130.2	0.232667
130.3	0.2335
130.4	0.233833
130.5	0.2335
130.6	0.233167
130.7	0.233833
130.8	0.234
130.9	0.2355
131	0.235167
131.1	0.234
131.2	0.235167
131.3	0.235833
131.4	0.2355
131.5	0.2365
131.6	0.236667
131.7	0.238
131.8	0.2395
131.9	0.2385
132	0.24
132.1	0.241167
132.2	0.242667
132.3	0.242833
132.4	0.243333
132.5	0.243
132.6	0.244
132.7	0.244667
132.8	0.246333
132.9	0.245
133	0.245667
133.1	0.245167
133.2	0.244167
133.3	0.245167
133.4	0.246667
133.5	0.247167
133.6	0.244833
133.7	0.2445
133.8	0.2445
133.9	0.245833
134	0.246833
134.1	0.2475
134.2	0.247333
134.3	0.246
134.4	0.247167
134.5	0.246667
134.6	0.2465
134.7	0.246833
134.8	0.248333
134.9	0.247333
135	0.2485
135.1	0.247833
135.2	0.247333
135.3	0.245333
135.4	0.244667
135.5	0.245333
135.6	0.2455
135.7	0.244333
135.8	0.243
135.9	0.242
136	0.2415
136.1	0.243
136.2	0.243167
136.3	0.243333
136.4	0.242833
136.5	0.2435
136.6	0.2435
136.7	0.2425
136.8	0.242333
136.9	0.2425
137	0.242
137.1	0.242
137.2	0.242833
137.3	0.243
137.4	0.243167
137.5	0.2435
137.6	0.246
137.7	0.245167
137.8	0.247167
137.9	0.249333
138	0.249167
138.1	0.248333
138.2	0.249667
138.3	0.25
138.4	0.250333
138.5	0.248
138.6	0.247
138.7	0.2475
138.8	0.249
138.9	0.2495
139	0.2495
139.1	0.249333
139.2	0.251
139.3	0.2505
139.4	0.2505
139.5	0.251
139.6	0.252167
139.7	0.2525
139.8	0.253167
139.9	0.252667
140	0.253667
140.1	0.2525
140.2	0.253
140.3	0.2535
140.4	0.253167
140.5	0.254333
140.6	0.2535
140.7	0.255
140.8	0.254167
140.9	0.2545
141	0.255
141.1	0.255
141.2	0.256167
141.3	0.257167
141.4	0.257333
141.5	0.2565
141.6	0.255833
141.7	0.256
141.8	0.256
141.9	0.254833
142	0.253833
142.1	0.255333
142.2	0.254333
142.3	0.255333
142.4	0.256
142.5	0.254667
142.6	0.253667
142.7	0.2525
142.8	0.2525
142.9	0.251333
143	0.250833
143.1	0.250167
143.2	0.25
143.3	0.248833
143.4	0.250167
143.5	0.250333
143.6	0.249
143.7	0.248333
143.8	0.248333
143.9	0.248667
144	0.249333
144.1	0.247833
144.2	0.2475
144.3	0.246667
144.4	0.2455
144.5	0.246333
144.6	0.247333
144.7	0.247667
144.8	0.2495
144.9	0.249167
145	0.249833
145.1	0.249167
145.2	0.249333
145.3	0.248833
145.4	0.248
145.5	0.247833
145.6	0.247667
145.7	0.247167
145.8	0.247333
145.9	0.247167
146	0.247667
146.1	0.247833
146.2	0.248333
146.3	0.248333
146.4	0.248833
146.5	0.2475
146.6	0.248
146.7	0.2485
146.8	0.248667
146.9	0.2465
147	0.246833
147.1	0.248333
147.2	0.249
147.3	0.249167
147.4	0.2485
147.5	0.248667
147.6	0.2495
147.7	0.25
147.8	0.248667
147.9	0.247833
148	0.247667
148.1	0.247667
148.2	0.248333
148.3	0.248167
148.4	0.248167
148.5	0.249
148.6	0.249
148.7	0.25
148.8	0.2495
148.9	0.250667
149	0.250333
149.1	0.249667
149.2	0.250667
149.3	0.2505
149.4	0.251
149.5	0.2515
149.6	0.251833
149.7	0.251833
149.8	0.251
149.9	0.249667
150	0.249167
150.1	0.249833
150.2	0.25
150.3	0.2505
150.4	0.251167
150.5	0.252667
150.6	0.251167
150.7	0.250667
150.8	0.249333
150.9	0.250167
151	0.251667
151.1	0.250667
151.2	0.25
151.3	0.249833
151.4	0.248667
151.5	0.250833
151.6	0.251667
151.7	0.251833
151.8	0.250667
151.9	0.25
152	0.25
152.1	0.250167
152.2	0.250833
152.3	0.2495
152.4	0.249833
152.5	0.250167
152.6	0.250833
152.7	0.25
152.8	0.249
152.9	0.249833
153	0.249
153.1	0.248167
153.2	0.248333
153.3	0.248333
153.4	0.248833
153.5	0.249667
153.6	0.249833
153.7	0.250667
153.8	0.250833
153.9	0.251167
154	0.251
154.1	0.251333
154.2	0.251167
154.3	0.2505
154.4	0.249667
154.5	0.2505
154.6	0.250167
154.7	0.251667
154.8	0.251667
154.9	0.2515
155	0.2515
155.1	0.251667
155.2	0.253
155.3	0.254667
155.4	0.255167
155.5	0.255833
155.6	0.255833
155.7	0.255833
155.8	0.255833
155.9	0.255
156	0.2535
156.1	0.253167
156.2	0.254333
156.3	0.253167
156.4	0.252333
156.5	0.250833
156.6	0.251
156.7	0.249333
156.8	0.249167
156.9	0.249
157	0.249
157.1	0.249
157.2	0.2495
157.3	0.248833
157.4	0.2485
157.5	0.247833
157.6	0.247167
157.7	0.247667
157.8	0.247333
157.9	0.247167
158	0.248167
158.1	0.2495
158.2	0.251167
158.3	0.252167
158.4	0.251833
158.5	0.2535
158.6	0.253167
158.7	0.252667
158.8	0.252667
158.9	0.253167
159	0.252167
159.1	0.251833
159.2	0.251
159.3	0.250333
159.4	0.250333
159.5	0.250833
159.6	0.2515
159.7	0.2525
159.8	0.2525
159.9	0.253167
160	0.2525
160.1	0.252833
160.2	0.2535
160.3	0.253167
160.4	0.254
160.5	0.255
160.6	0.2555
160.7	0.256167
160.8	0.2555
160.9	0.2565
161	0.255667
161.1	0.253667
161.2	0.253833
161.3	0.254333
161.4	0.254833
161.5	0.2545
161.6	0.254667
161.7	0.253667
161.8	0.2535
161.9	0.254833
162	0.254667
162.1	0.255833
162.2	0.256
162.3	0.2565
162.4	0.256667
162.5	0.256833
162.6	0.256833
162.7	0.2565
162.8	0.254667
162.9	0.254167
163	0.254
163.1	0.255
163.2	0.254333
163.3	0.2545
163.4	0.2535
163.5	0.2545
163.6	0.254167
163.7	0.253667
163.8	0.253667
163.9	0.2535
164	0.254667
164.1	0.254333
164.2	0.253
164.3	0.252667
164.4	0.251667
164.5	0.252
164.6	0.253
164.7	0.251167
164.8	0.2505
164.9	0.249667
165	0.250333
165.1	0.2495
165.2	0.248333
165.3	0.2495
165.4	0.250667
165.5	0.250167
165.6	0.250167
165.7	0.251
165.8	0.251167
165.9	0.251667
166	0.251
166.1	0.2505
166.2	0.250833
166.3	0.252167
166.4	0.253667
166.5	0.254333
166.6	0.254333
166.7	0.254333
166.8	0.254
166.9	0.253833
167	0.254167
167.1	0.254833
167.2	0.255167
167.3	0.256167
167.4	0.255833
167.5	0.255
167.6	0.255
167.7	0.255
167.8	0.255
167.9	0.254333
168	0.253333
168.1	0.2545
168.2	0.2535
168.3	0.2545
168.4	0.255667
168.5	0.255167
168.6	0.253333
168.7	0.253
168.8	0.252167
168.9	0.251667
169	0.2535
169.1	0.253333
169.2	0.252833
169.3	0.252333
169.4	0.2515
169.5	0.251833
169.6	0.251333
169.7	0.250333
169.8	0.2505
169.9	0.250667
170	0.2515
170.1	0.250833
170.2	0.250333
170.3	0.250667
170.4	0.251
170.5	0.2525
170.6	0.251833
170.7	0.252167
170.8	0.253667
170.9	0.254333
171	0.254167
171.1	0.255833
171.2	0.256333
171.3	0.255333
171.4	0.258
171.5	0.257167
171.6	0.256333
171.7	0.255167
171.8	0.2565
171.9	0.257167
172	0.255667
172.1	0.254667
172.2	0.255167
172.3	0.255333
172.4	0.254
172.5	0.2535
172.6	0.254667
172.7	0.2555
172.8	0.255667
172.9	0.255833
173	0.2555
173.1	0.255667
173.2	0.255833
173.3	0.256333
173.4	0.256167
173.5	0.2555
173.6	0.255167
173.7	0.255667
173.8	0.256833
173.9	0.256333
174	0.256667
174.1	0.2575
174.2	0.258667
174.3	0.257667
174.4	0.257167
174.5	0.257833
174.6	0.256
174.7	0.256667
174.8	0.2575
174.9	0.2565
175	0.2555
175.1	0.256333
175.2	0.2555
175.3	0.2575
175.4	0.2575
175.5	0.256667
175.6	0.257667
175.7	0.2585
175.8	0.260167
175.9	0.261
176	0.262667
176.1	0.263333
176.2	0.264833
176.3	0.265833
176.4	0.2645
176.5	0.264333
176.6	0.264
176.7	0.262667
176.8	0.263667
176.9	0.263
177	0.264333
177.1	0.266167
177.2	0.2675
177.3	0.266833
177.4	0.267667
177.5	0.266167
177.6	0.266167
177.7	0.266667
177.8	0.265333
177.9	0.266
178	0.266167
178.1	0.264667
178.2	0.265
178.3	0.265333
178.4	0.267
178.5	0.269167
178.6	0.268
178.7	0.269
178.8	0.269
178.9	0.267667
179	0.267833
179.1	0.269667
179.2	0.2685
179.3	0.267
179.4	0.265333
179.5	0.267
179.6	0.265667
179.7	0.264
179.8	0.265
179.9	0.265
180	0.264833
180.1	0.264167
180.2	0.264
180.3	0.262667
180.4	0.263333
180.5	0.265
180.6	0.2635
180.7	0.2645
180.8	0.264167
180.9	0.2645
181	0.266333
181.1	0.267833
181.2	0.266667
181.3	0.265667
181.4	0.265667
181.5	0.265333
181.6	0.264167
181.7	0.264833
181.8	0.263667
181.9	0.2635
182	0.264333
182.1	0.263
182.2	0.264667
182.3	0.264167
182.4	0.264
182.5	0.263167
182.6	0.263667
182.7	0.263167
182.8	0.262
182.9	0.261167
183	0.260667
183.1	0.259833
183.2	0.259333
183.3	0.260333
183.4	0.2595
183.5	0.261
183.6	0.261
183.7	0.260167
183.8	0.2605
183.9	0.259667
184	0.258667
184.1	0.259167
184.2	0.261667
184.3	0.262167
184.4	0.262667
184.5	0.261667
184.6	0.261333
184.7	0.2615
184.8	0.261333
184.9	0.261
185	0.260833
185.1	0.261
185.2	0.260667
185.3	0.26
185.4	0.259333
185.5	0.2595
185.6	0.260167
185.7	0.260167
185.8	0.260667
185.9	0.2605
186	0.261833
186.1	0.2635
186.2	0.263333
186.3	0.264
186.4	0.264167
186.5	0.263
186.6	0.264833
186.7	0.264833
186.8	0.264833
186.9	0.265667
187	0.267667
187.1	0.267667
187.2	0.268167
187.3	0.268
187.4	0.267333
187.5	0.2665
187.6	0.266333
187.7	0.267667
187.8	0.2685
187.9	0.2685
188	0.268167
188.1	0.269167
188.2	0.269333
188.3	0.2685
188.4	0.2675
188.5	0.269
188.6	0.270167
188.7	0.269667
188.8	0.270167
188.9	0.269167
189	0.270333
189.1	0.271167
189.2	0.271333
189.3	0.272833
189.4	0.272
189.5	0.2715
189.6	0.272167
189.7	0.271833
189.8	0.272
189.9	0.272167
190	0.270667
190.1	0.271667
190.2	0.270667
190.3	0.2685
190.4	0.268667
190.5	0.268667
190.6	0.269
190.7	0.268167
190.8	0.2695
190.9	0.269667
191	0.2695
191.1	0.2695
191.2	0.269833
191.3	0.270667
191.4	0.271333
191.5	0.270667
191.6	0.270667
191.7	0.2705
191.8	0.271
191.9	0.271833
192	0.271
192.1	0.270833
192.2	0.270333
192.3	0.2695
192.4	0.270667
192.5	0.271667
192.6	0.272
192.7	0.2725
192.8	0.2735
192.9	0.273667
193	0.274
193.1	0.2745
193.2	0.2755
193.3	0.276
193.4	0.274833
193.5	0.2775
193.6	0.278667
193.7	0.277833
193.8	0.276333
193.9	0.276
194	0.2755
194.1	0.276333
194.2	0.276167
194.3	0.276667
194.4	0.277
194.5	0.276833
194.6	0.277333
194.7	0.277833
194.8	0.276667
194.9	0.277333
195	0.276667
195.1	0.277167
195.2	0.276833
195.3	0.276833
195.4	0.277333
195.5	0.276833
195.6	0.277
195.7	0.275667
195.8	0.273333
195.9	0.2735
196	0.273667
196.1	0.274
196.2	0.2735
196.3	0.273667
196.4	0.2755
196.5	0.274167
196.6	0.273333
196.7	0.273333
196.8	0.2735
196.9	0.272833
197	0.273667
197.1	0.272833
197.2	0.273
197.3	0.274333
197.4	0.272667
197.5	0.272333
197.6	0.274167
197.7	0.2735
197.8	0.273833
197.9	0.273
198	0.273333
198.1	0.273333
198.2	0.273667
198.3	0.274167
198.4	0.272167
198.5	0.272667
198.6	0.273667
198.7	0.2735
198.8	0.2735
198.9	0.272
199	0.271667
199.1	0.271667
199.2	0.270833
199.3	0.271167
199.4	0.2715
199.5	0.269333
199.6	0.268833
199.7	0.269167
199.8	0.269667
199.9	0.269833
200	0.269167
[truncated: 14,000 more rows]
