# Supplementary material for: Bayesian inference of kinetic schemes for ion channels by Kalman filtering
Source: eLife journal article supplement (doi:10.7554/elife.62714), 2022-05-04
Supplement: fig4-data10 [file 1_Sim_N_3000_Strom_MW_0.0625M.xlsx]

## Sheet: Tabelle1
0.1	0
0.2	0
0.3	0
0.4	0
0.5	0
0.6	0
0.7	0
0.8	0
0.9	0
1	0
1.1	0
1.2	0
1.3	0
1.4	0
1.5	0
1.6	0
1.7	0
1.8	0
1.9	0
2	0
2.1	0
2.2	0
2.3	0
2.4	0
2.5	0
2.6	0
2.7	0
2.8	0
2.9	0
3	0
3.1	0
3.2	0
3.3	0
3.4	0
3.5	0
3.6	0
3.7	0
3.8	0
3.9	0
4	0
4.1	0
4.2	0
4.3	0
4.4	0
4.5	0
4.6	0
4.7	0
4.8	0
4.9	0
5	0
5.1	0
5.2	0
5.3	0
5.4	0
5.5	0
5.6	0
5.7	0
5.8	0
5.9	0
6	0
6.1	0
6.2	0
6.3	0
6.4	0
6.5	0
6.6	0
6.7	0
6.8	0
6.9	0
7	0
7.1	0
7.2	0
7.3	0
7.4	0
7.5	0
7.6	0
7.7	0
7.8	0
7.9	0
8	0
8.1	0
8.2	0
8.3	0
8.4	0
8.5	0
8.6	0
8.7	0
8.8	0
8.9	0
9	0
9.1	0
9.2	0
9.3	0
9.4	0
9.5	0
9.6	0
9.7	0
9.8	0
9.9	0
10	0
10.1	0
10.2	0
10.3	0
10.4	0
10.5	0
10.6	0
10.7	0
10.8	0
10.9	0
11	0
11.1	0
11.2	0
11.3	0
11.4	0
11.5	0
11.6	0
11.7	0
11.8	0
11.9	0
12	0
12.1	0
12.2	0
12.3	0
12.4	0
12.5	0
12.6	0
12.7	0
12.8	0
12.9	0
13	0
13.1	0
13.2	0
13.3	0
13.4	0
13.5	0
13.6	0
13.7	0
13.8	0
13.9	0
14	0
14.1	0
14.2	0
14.3	0
14.4	0
14.5	0
14.6	0
14.7	0
14.8	0
14.9	0
15	0
15.1	0
15.2	0
15.3	0
15.4	0
15.5	0
15.6	0
15.7	0
15.8	0
15.9	0
16	0
16.1	0
16.2	0
16.3	0
16.4	0
16.5	0
16.6	0
16.7	0
16.8	0
16.9	0
17	0
17.1	0
17.2	0
17.3	0
17.4	0
17.5	0
17.6	0
17.7	0
17.8	0
17.9	0
18	0
18.1	0
18.2	0
18.3	0
18.4	0
18.5	0
18.6	0
18.7	0
18.8	0
18.9	0
19	0
19.1	0
19.2	0
19.3	0
19.4	0
19.5	0
19.6	0
19.7	0
19.8	0
19.9	0
20	0
20.1	0
20.2	0
20.3	0
20.4	0
20.5	0
20.6	0
20.7	0
20.8	0
20.9	0
21	0
21.1	0
21.2	0
21.3	0
21.4	0
21.5	0
21.6	0
21.7	0
21.8	0
21.9	0
22	0
22.1	0
22.2	0
22.3	0
22.4	0
22.5	0
22.6	0
22.7	0
22.8	0
22.9	0
23	0
23.1	0
23.2	0
23.3	0
23.4	0
23.5	0
23.6	0
23.7	0
23.8	0
23.9	0
24	0
24.1	0
24.2	0
24.3	0
24.4	0
24.5	0
24.6	0
24.7	0
24.8	0
24.9	0
25	0
25.1	0
25.2	0
25.3	0
25.4	0
25.5	0
25.6	0
25.7	0
25.8	0
25.9	0
26	0
26.1	0
26.2	0
26.3	0
26.4	0
26.5	0
26.6	0
26.7	0
26.8	0
26.9	0
27	0
27.1	0
27.2	0
27.3	0
27.4	0
27.5	0
27.6	0
27.7	0
27.8	0
27.9	0
28	0
28.1	0
28.2	0
28.3	0
28.4	0
28.5	0
28.6	0
28.7	0
28.8	0
28.9	0
29	0
29.1	0
29.2	0
29.3	0
29.4	0
29.5	0
29.6	0
29.7	0
29.8	0
29.9	0
30	0
30.1	0
30.2	0
30.3	0
30.4	0
30.5	0
30.6	0
30.7	0
30.8	0
30.9	0
31	0
31.1	0
31.2	0
31.3	0
31.4	0
31.5	0
31.6	0
31.7	0
31.8	0
31.9	0
32	0
32.1	0
32.2	0
32.3	0
32.4	0
32.5	0
32.6	0
32.7	0
32.8	0
32.9	0
33	0
33.1	0
33.2	0
33.3	0
33.4	0
33.5	0
33.6	0
33.7	0
33.8	0
33.9	0
34	0
34.1	0
34.2	0
34.3	0
34.4	0
34.5	0
34.6	0
34.7	0
34.8	0
34.9	0
35	0
35.1	0
35.2	0
35.3	0
35.4	0
35.5	0
35.6	0
35.7	0
35.8	0
35.9	0
36	0
36.1	0
36.2	0
36.3	0
36.4	0
36.5	0
36.6	0
36.7	0
36.8	0
36.9	0
37	0
37.1	0
37.2	0
37.3	0
37.4	0
37.5	0
37.6	0
37.7	0
37.8	0
37.9	0
38	0
38.1	0
38.2	0
38.3	0
38.4	0
38.5	0
38.6	0
38.7	0
38.8	0
38.9	0
39	0
39.1	0
39.2	0
39.3	0
39.4	0
39.5	0
39.6	0
39.7	0
39.8	0
39.9	0
40	0
40.1	0
40.2	0
40.3	0
40.4	0
40.5	0
40.6	0
40.7	0
40.8	0
40.9	0
41	0
41.1	0
41.2	0
41.3	0
41.4	0
41.5	0
41.6	0
41.7	0
41.8	0
41.9	0
42	0
42.1	0
42.2	0
42.3	0
42.4	0
42.5	0
42.6	0
42.7	0
42.8	0
42.9	0
43	0
43.1	0
43.2	0
43.3	0
43.4	0
43.5	0
43.6	0
43.7	0
43.8	0
43.9	0
44	0
44.1	0
44.2	0
44.3	0
44.4	0
44.5	0
44.6	0
44.7	0
44.8	0
44.9	0
45	0
45.1	0
45.2	0
45.3	0
45.4	0
45.5	0
45.6	0
45.7	0
45.8	0
45.9	0
46	0
46.1	0
46.2	0
46.3	0
46.4	0
46.5	0
46.6	0
46.7	0
46.8	0
46.9	0
47	0
47.1	0
47.2	0
47.3	0
47.4	0
47.5	0
47.6	0
47.7	0
47.8	0
47.9	0
48	0
48.1	0
48.2	0
48.3	0
48.4	0
48.5	0
48.6	0
48.7	0
48.8	0
48.9	0
49	0
49.1	0
49.2	0
49.3	0
49.4	0
49.5	0
49.6	0
49.7	0
49.8	0
49.9	0
50	0
50.1	0
50.2	0
50.3	0
50.4	0
50.5	0
50.6	0
50.7	0
50.8	0
50.9	0
51	0
51.1	0
51.2	0
51.3	0
51.4	0
51.5	0
51.6	0
51.7	0
51.8	0
51.9	0
52	0
52.1	0
52.2	0
52.3	0
52.4	0
52.5	0
52.6	0
52.7	0
52.8	0
52.9	0
53	0
53.1	0
53.2	0
53.3	0
53.4	0
53.5	0
53.6	0
53.7	0
53.8	0
53.9	0
54	0
54.1	0
54.2	0
54.3	0
54.4	0
54.5	0
54.6	0
54.7	0
54.8	0
54.9	0
55	0
55.1	0
55.2	0
55.3	0
55.4	0
55.5	0
55.6	0
55.7	0
55.8	0
55.9	0
56	0
56.1	0
56.2	0
56.3	0
56.4	0
56.5	0
56.6	0
56.7	0
56.8	0
56.9	0
57	0
57.1	0
57.2	0
57.3	0
57.4	0
57.5	0
57.6	0
57.7	0
57.8	0
57.9	0
58	0
58.1	0
58.2	0
58.3	0
58.4	0
58.5	0
58.6	0
58.7	0
58.8	0
58.9	0
59	0
59.1	0
59.2	0
59.3	0
59.4	0
59.5	0
59.6	0
59.7	0
59.8	0
59.9	0
60	0
60.1	0
60.2	0
60.3	0
60.4	0
60.5	0
60.6	0
60.7	0
60.8	0
60.9	0
61	0
61.1	0
61.2	0
61.3	0
61.4	0
61.5	0
61.6	0
61.7	0
61.8	0
61.9	0
62	0
62.1	0
62.2	0
62.3	0
62.4	0
62.5	0
62.6	0
62.7	0
62.8	0
62.9	0
63	0
63.1	0
63.2	0
63.3	0
63.4	0
63.5	0
63.6	0
63.7	0
63.8	0
63.9	0
64	0
64.1	0
64.2	0
64.3	0
64.4	0
64.5	0
64.6	0
64.7	0
64.8	0
64.9	0
65	0
65.1	0
65.2	0
65.3	0
65.4	0
65.5	0
65.6	0
65.7	0
65.8	0
65.9	0
66	0
66.1	0
66.2	0
66.3	0
66.4	0
66.5	0
66.6	0
66.7	0
66.8	0
66.9	0
67	0
67.1	0
67.2	0
67.3	0
67.4	0
67.5	0
67.6	0
67.7	0
67.8	0
67.9	0
68	0
68.1	0
68.2	0
68.3	0
68.4	0
68.5	0
68.6	0
68.7	0
68.8	0
68.9	0
69	0
69.1	0
69.2	0
69.3	0
69.4	0
69.5	0
69.6	0
69.7	0
69.8	0
69.9	0
70	0
70.1	0
70.2	0
70.3	0
70.4	0
70.5	0
70.6	0
70.7	0
70.8	0
70.9	0
71	0
71.1	0
71.2	0
71.3	0
71.4	0
71.5	0
71.6	0
71.7	0
71.8	0
71.9	0
72	0
72.1	0
72.2	0
72.3	0
72.4	0
72.5	0
72.6	0
72.7	0
72.8	0
72.9	0
73	0
73.1	0
73.2	0
73.3	0
73.4	0
73.5	0
73.6	0
73.7	0
73.8	0
73.9	0
74	0
74.1	0
74.2	0
74.3	0
74.4	0
74.5	0
74.6	0
74.7	0
74.8	0
74.9	0
75	0
75.1	0
75.2	0
75.3	0
75.4	0
75.5	0
75.6	0
75.7	0
75.8	0
75.9	0
76	0
76.1	0
76.2	0
76.3	0
76.4	0
76.5	0
76.6	0
76.7	0
76.8	0
76.9	0
77	0
77.1	0
77.2	0
77.3	0
77.4	0
77.5	0
77.6	0
77.7	0
77.8	0
77.9	0
78	0
78.1	0
78.2	0
78.3	0
78.4	0
78.5	0
78.6	0
78.7	0
78.8	0
78.9	0
79	0
79.1	0
79.2	0
79.3	0
79.4	0
79.5	0
79.6	0
79.7	0
79.8	0
79.9	0
80	0
80.1	0
80.2	0
80.3	0
80.4	0
80.5	0
80.6	0
80.7	0
80.8	0
80.9	0
81	0
81.1	0
81.2	0
81.3	0
81.4	0
81.5	0
81.6	0
81.7	0
81.8	0
81.9	0
82	0
82.1	0
82.2	0
82.3	0
82.4	0
82.5	0
82.6	0
82.7	0
82.8	0
82.9	0
83	0
83.1	0
83.2	0
83.3	0
83.4	0
83.5	0
83.6	0
83.7	0
83.8	0
83.9	0
84	0
84.1	0
84.2	0
84.3	0
84.4	0
84.5	0
84.6	0
84.7	0
84.8	0
84.9	0
85	0
85.1	0
85.2	0
85.3	0
85.4	0
85.5	0
85.6	0
85.7	0
85.8	0
85.9	0
86	0
86.1	0
86.2	0
86.3	0
86.4	0
86.5	0
86.6	0
86.7	0
86.8	0
86.9	0
87	0
87.1	0
87.2	0
87.3	0
87.4	0
87.5	0
87.6	0
87.7	0
87.8	0
87.9	0
88	0
88.1	0
88.2	0
88.3	0
88.4	0
88.5	0
88.6	0
88.7	0
88.8	0
88.9	0
89	0
89.1	0
89.2	0
89.3	0
89.4	0
89.5	0
89.6	0
89.7	0
89.8	0
89.9	0
90	0
90.1	0
90.2	0
90.3	0
90.4	0
90.5	0
90.6	0
90.7	0
90.8	0
90.9	0
91	0
91.1	0
91.2	0
91.3	0
91.4	0
91.5	0
91.6	0
91.7	0
91.8	0
91.9	0
92	0
92.1	0
92.2	0
92.3	0
92.4	0
92.5	0
92.6	0
92.7	0
92.8	0
92.9	0
93	0
93.1	0
93.2	0
93.3	0
93.4	0
93.5	0
93.6	0
93.7	0
93.8	0
93.9	0
94	0
94.1	0
94.2	0
94.3	0
94.4	0
94.5	0
94.6	0
94.7	0
94.8	0
94.9	0
95	0
95.1	0
95.2	0
95.3	0
95.4	0
95.5	0
95.6	0
95.7	0
95.8	0
95.9	0
96	0
96.1	0
96.2	0
96.3	0
96.4	0
96.5	0
96.6	0
96.7	0
96.8	0
96.9	0
97	0
97.1	0
97.2	0
97.3	0
97.4	0
97.5	0
97.6	0
97.7	0
97.8	0
97.9	0
98	0
98.1	0
98.2	0
98.3	0
98.4	0
98.5	0
98.6	0
98.7	0
98.8	0
98.9	0
99	0
99.1	0
99.2	0
99.3	0
99.4	0
99.5	0
99.6	0
99.7	0
99.8	0
99.9	0
100	0
100.1	0
100.2	0
100.3	0
100.4	0
100.5	0
100.6	0
100.7	0
100.8	0
100.9	0
101	0
101.1	0
101.2	0
101.3	0
101.4	0
101.5	0
101.6	0
101.7	0
101.8	0
101.9	0.000333333
102	0.000333333
102.1	0.000333333
102.2	0.000333333
102.3	0.000333333
102.4	0.000333333
102.5	0.000333333
102.6	0.000333333
102.7	0.000333333
102.8	0.000333333
102.9	0.000333333
103	0.000333333
103.1	0.000333333
103.2	0.000666667
103.3	0.000666667
103.4	0.000666667
103.5	0.000666667
103.6	0.000666667
103.7	0.000666667
103.8	0.000666667
103.9	0.000666667
104	0.000666667
104.1	0.000666667
104.2	0.000666667
104.3	0.000666667
104.4	0.000666667
104.5	0.000666667
104.6	0.001
104.7	0.001
104.8	0.00133333
104.9	0.00133333
105	0.00133333
105.1	0.00133333
105.2	0.00133333
105.3	0.00133333
105.4	0.00166667
105.5	0.00166667
105.6	0.00166667
105.7	0.002
105.8	0.00266667
105.9	0.003
106	0.003
106.1	0.003
106.2	0.003
106.3	0.003
106.4	0.003
106.5	0.00333333
106.6	0.003
106.7	0.003
106.8	0.003
106.9	0.003
107	0.003
107.1	0.003
107.2	0.003
107.3	0.003
107.4	0.003
107.5	0.003
107.6	0.00333333
107.7	0.00333333
107.8	0.00333333
107.9	0.00333333
108	0.00366667
108.1	0.00366667
108.2	0.00366667
108.3	0.00366667
108.4	0.00366667
108.5	0.00366667
108.6	0.00366667
108.7	0.00366667
108.8	0.00366667
108.9	0.00366667
109	0.00366667
109.1	0.00366667
109.2	0.00366667
109.3	0.00366667
109.4	0.00366667
109.5	0.00366667
109.6	0.00366667
109.7	0.00366667
109.8	0.00366667
109.9	0.00366667
110	0.00366667
110.1	0.004
110.2	0.00433333
110.3	0.00433333
110.4	0.00433333
110.5	0.00466667
110.6	0.00466667
110.7	0.00466667
110.8	0.00466667
110.9	0.00466667
111	0.00466667
111.1	0.00466667
111.2	0.00466667
111.3	0.00466667
111.4	0.00466667
111.5	0.00466667
111.6	0.00466667
111.7	0.00466667
111.8	0.00466667
111.9	0.00466667
112	0.00466667
112.1	0.00466667
112.2	0.00466667
112.3	0.005
112.4	0.005
112.5	0.00566667
112.6	0.00566667
112.7	0.00566667
112.8	0.00566667
112.9	0.00566667
113	0.006
113.1	0.006
113.2	0.006
113.3	0.006
113.4	0.006
113.5	0.00633333
113.6	0.00633333
113.7	0.00666667
113.8	0.00666667
113.9	0.00666667
114	0.00666667
114.1	0.00666667
114.2	0.00666667
114.3	0.00666667
114.4	0.007
114.5	0.007
114.6	0.007
114.7	0.007
114.8	0.00666667
114.9	0.00666667
115	0.00666667
115.1	0.007
115.2	0.00733333
115.3	0.00766667
115.4	0.00766667
115.5	0.00766667
115.6	0.00766667
115.7	0.00766667
115.8	0.00766667
115.9	0.00766667
116	0.00766667
116.1	0.00766667
116.2	0.00766667
116.3	0.00766667
116.4	0.00766667
116.5	0.00766667
116.6	0.00766667
116.7	0.00766667
116.8	0.00766667
116.9	0.00733333
117	0.00733333
117.1	0.00733333
117.2	0.00733333
117.3	0.00733333
117.4	0.008
117.5	0.00833333
117.6	0.00833333
117.7	0.00833333
117.8	0.00833333
117.9	0.00833333
118	0.008
118.1	0.008
118.2	0.00833333
118.3	0.00833333
118.4	0.00866667
118.5	0.00866667
118.6	0.00866667
118.7	0.00866667
118.8	0.00866667
118.9	0.00866667
119	0.00866667
119.1	0.00866667
119.2	0.00866667
119.3	0.009
119.4	0.009
119.5	0.009
119.6	0.00933333
119.7	0.00933333
119.8	0.00933333
119.9	0.00933333
120	0.00966667
120.1	0.00966667
120.2	0.00966667
120.3	0.00966667
120.4	0.01
120.5	0.01
120.6	0.01
120.7	0.01
120.8	0.0103333
120.9	0.0103333
121	0.0103333
121.1	0.0103333
121.2	0.0106667
121.3	0.0106667
121.4	0.0106667
121.5	0.0106667
121.6	0.0106667
121.7	0.011
121.8	0.011
121.9	0.0113333
122	0.0116667
122.1	0.012
122.2	0.012
122.3	0.0123333
122.4	0.0123333
122.5	0.0123333
122.6	0.0123333
122.7	0.012
122.8	0.012
122.9	0.012
123	0.012
123.1	0.012
123.2	0.012
123.3	0.012
123.4	0.012
123.5	0.0123333
123.6	0.0123333
123.7	0.0123333
123.8	0.0123333
123.9	0.0123333
124	0.0123333
124.1	0.0123333
124.2	0.0123333
124.3	0.0123333
124.4	0.0126667
124.5	0.0126667
124.6	0.0126667
124.7	0.0133333
124.8	0.0133333
124.9	0.0133333
125	0.0133333
125.1	0.0133333
125.2	0.0133333
125.3	0.0133333
125.4	0.0133333
125.5	0.0133333
125.6	0.0133333
125.7	0.0133333
125.8	0.0133333
125.9	0.0136667
126	0.0136667
126.1	0.014
126.2	0.014
126.3	0.014
126.4	0.014
126.5	0.014
126.6	0.014
126.7	0.014
126.8	0.0136667
126.9	0.0136667
127	0.0136667
127.1	0.0136667
127.2	0.0133333
127.3	0.0136667
127.4	0.0136667
127.5	0.0136667
127.6	0.014
127.7	0.014
127.8	0.014
127.9	0.014
128	0.0136667
128.1	0.0133333
128.2	0.0133333
128.3	0.0133333
128.4	0.0133333
128.5	0.0136667
128.6	0.014
128.7	0.014
128.8	0.014
128.9	0.014
129	0.0146667
129.1	0.0146667
129.2	0.0146667
129.3	0.0146667
129.4	0.0146667
129.5	0.0146667
129.6	0.0143333
129.7	0.0143333
129.8	0.0143333
129.9	0.0143333
130	0.0143333
130.1	0.0146667
130.2	0.0153333
130.3	0.0153333
130.4	0.0153333
130.5	0.0153333
130.6	0.0156667
130.7	0.0156667
130.8	0.016
130.9	0.016
131	0.016
131.1	0.0163333
131.2	0.016
131.3	0.016
131.4	0.0163333
131.5	0.0163333
131.6	0.0163333
131.7	0.0163333
131.8	0.0163333
131.9	0.0163333
132	0.0163333
132.1	0.0163333
132.2	0.0166667
132.3	0.017
132.4	0.017
132.5	0.017
132.6	0.0173333
132.7	0.0176667
132.8	0.0176667
132.9	0.018
133	0.0186667
133.1	0.0186667
133.2	0.0186667
133.3	0.0186667
133.4	0.0186667
133.5	0.0186667
133.6	0.0186667
133.7	0.0186667
133.8	0.0186667
133.9	0.0186667
134	0.019
134.1	0.019
134.2	0.0193333
134.3	0.0193333
134.4	0.0196667
134.5	0.0196667
134.6	0.0196667
134.7	0.0193333
134.8	0.0193333
134.9	0.0193333
135	0.0193333
135.1	0.02
135.2	0.0196667
135.3	0.0196667
135.4	0.0196667
135.5	0.0196667
135.6	0.02
135.7	0.0196667
135.8	0.02
135.9	0.0203333
136	0.0203333
136.1	0.0203333
136.2	0.02
136.3	0.02
136.4	0.02
136.5	0.0203333
136.6	0.0206667
136.7	0.0206667
136.8	0.0206667
136.9	0.0206667
137	0.0206667
137.1	0.021
137.2	0.021
137.3	0.0213333
137.4	0.0213333
137.5	0.0216667
137.6	0.022
137.7	0.0216667
137.8	0.0216667
137.9	0.0216667
138	0.0216667
138.1	0.0216667
138.2	0.0216667
138.3	0.0216667
138.4	0.0216667
138.5	0.022
138.6	0.0226667
138.7	0.023
138.8	0.023
138.9	0.023
139	0.023
139.1	0.0233333
139.2	0.0236667
139.3	0.0236667
139.4	0.0236667
139.5	0.0236667
139.6	0.0236667
139.7	0.0236667
139.8	0.024
139.9	0.024
140	0.024
140.1	0.0243333
140.2	0.0243333
140.3	0.0243333
140.4	0.024
140.5	0.024
140.6	0.0243333
140.7	0.0246667
140.8	0.0246667
140.9	0.0246667
141	0.025
141.1	0.025
141.2	0.025
141.3	0.0253333
141.4	0.0253333
141.5	0.0253333
141.6	0.0253333
141.7	0.025
141.8	0.0253333
141.9	0.0253333
142	0.0253333
142.1	0.0256667
142.2	0.0256667
142.3	0.0256667
142.4	0.026
142.5	0.026
142.6	0.0263333
142.7	0.0263333
142.8	0.0263333
142.9	0.0266667
143	0.0266667
143.1	0.027
143.2	0.0273333
143.3	0.0276667
143.4	0.0276667
143.5	0.0276667
143.6	0.0276667
143.7	0.0276667
143.8	0.0276667
143.9	0.0276667
144	0.0276667
144.1	0.0276667
144.2	0.0276667
144.3	0.0276667
144.4	0.0276667
144.5	0.028
144.6	0.028
144.7	0.0283333
144.8	0.0283333
144.9	0.0283333
145	0.028
145.1	0.028
145.2	0.0283333
145.3	0.0283333
145.4	0.0283333
145.5	0.0286667
145.6	0.0286667
145.7	0.0286667
145.8	0.0286667
145.9	0.0286667
146	0.0286667
146.1	0.0286667
146.2	0.0286667
146.3	0.0283333
146.4	0.0286667
146.5	0.0286667
146.6	0.0286667
146.7	0.0286667
146.8	0.0286667
146.9	0.0286667
147	0.029
147.1	0.029
147.2	0.0293333
147.3	0.0293333
147.4	0.0293333
147.5	0.0293333
147.6	0.0296667
147.7	0.0303333
147.8	0.03
147.9	0.03
148	0.0303333
148.1	0.0306667
148.2	0.0313333
148.3	0.0313333
148.4	0.0313333
148.5	0.0313333
148.6	0.032
148.7	0.032
148.8	0.032
148.9	0.032
149	0.032
149.1	0.032
149.2	0.032
149.3	0.032
149.4	0.0323333
149.5	0.0323333
149.6	0.0323333
149.7	0.0323333
149.8	0.0326667
149.9	0.0326667
150	0.033
150.1	0.0333333
150.2	0.0333333
150.3	0.0336667
150.4	0.0336667
150.5	0.0336667
150.6	0.0336667
150.7	0.034
150.8	0.034
150.9	0.0336667
151	0.034
151.1	0.034
151.2	0.034
151.3	0.034
151.4	0.034
151.5	0.034
151.6	0.034
151.7	0.034
151.8	0.0343333
151.9	0.0343333
152	0.0343333
152.1	0.0343333
152.2	0.0343333
152.3	0.0343333
152.4	0.0343333
152.5	0.0343333
152.6	0.0343333
152.7	0.035
152.8	0.035
152.9	0.035
153	0.035
153.1	0.035
153.2	0.035
153.3	0.0346667
153.4	0.035
153.5	0.035
153.6	0.035
153.7	0.035
153.8	0.035
153.9	0.035
154	0.035
154.1	0.0346667
154.2	0.0346667
154.3	0.0343333
154.4	0.0343333
154.5	0.034
154.6	0.034
154.7	0.034
154.8	0.0336667
154.9	0.0336667
155	0.0336667
155.1	0.0336667
155.2	0.0336667
155.3	0.0336667
155.4	0.034
155.5	0.0343333
155.6	0.0343333
155.7	0.0346667
155.8	0.0346667
155.9	0.035
156	0.0353333
156.1	0.0353333
156.2	0.0353333
156.3	0.0353333
156.4	0.035
156.5	0.035
156.6	0.035
156.7	0.035
156.8	0.035
156.9	0.0346667
157	0.0346667
157.1	0.0346667
157.2	0.0346667
157.3	0.0343333
157.4	0.0346667
157.5	0.0346667
157.6	0.0346667
157.7	0.035
157.8	0.035
157.9	0.0353333
158	0.0353333
158.1	0.0353333
158.2	0.0353333
158.3	0.0356667
158.4	0.0356667
158.5	0.0356667
158.6	0.036
158.7	0.036
158.8	0.0363333
158.9	0.0363333
159	0.0363333
159.1	0.0363333
159.2	0.0363333
159.3	0.0363333
159.4	0.0363333
159.5	0.0363333
159.6	0.0363333
159.7	0.0366667
159.8	0.0366667
159.9	0.0366667
160	0.0366667
160.1	0.0366667
160.2	0.0366667
160.3	0.0366667
160.4	0.0366667
160.5	0.037
160.6	0.037
160.7	0.037
160.8	0.0366667
160.9	0.0366667
161	0.037
161.1	0.0373333
161.2	0.0373333
161.3	0.0373333
161.4	0.0373333
161.5	0.0376667
161.6	0.0376667
161.7	0.0376667
161.8	0.0376667
161.9	0.038
162	0.038
162.1	0.0383333
162.2	0.0383333
162.3	0.0386667
162.4	0.0386667
162.5	0.0386667
162.6	0.039
162.7	0.039
162.8	0.039
162.9	0.0393333
163	0.039
163.1	0.039
163.2	0.039
163.3	0.0386667
163.4	0.039
163.5	0.039
163.6	0.0393333
163.7	0.0393333
163.8	0.0393333
163.9	0.0393333
164	0.04
164.1	0.0396667
164.2	0.0396667
164.3	0.0396667
164.4	0.0403333
164.5	0.0403333
164.6	0.0403333
164.7	0.0403333
164.8	0.0403333
164.9	0.0403333
165	0.0403333
165.1	0.04
165.2	0.0403333
165.3	0.0406667
165.4	0.0406667
165.5	0.0406667
165.6	0.0406667
165.7	0.041
165.8	0.0413333
165.9	0.0413333
166	0.0413333
166.1	0.0413333
166.2	0.0413333
166.3	0.041
166.4	0.0406667
166.5	0.0406667
166.6	0.0406667
166.7	0.0406667
166.8	0.0406667
166.9	0.0406667
167	0.0406667
167.1	0.0406667
167.2	0.0406667
167.3	0.0406667
167.4	0.041
167.5	0.041
167.6	0.041
167.7	0.041
167.8	0.041
167.9	0.041
168	0.041
168.1	0.041
168.2	0.0413333
168.3	0.0413333
168.4	0.041
168.5	0.041
168.6	0.041
168.7	0.0406667
168.8	0.0406667
168.9	0.0406667
169	0.041
169.1	0.041
169.2	0.0413333
169.3	0.0413333
169.4	0.0413333
169.5	0.041
169.6	0.041
169.7	0.0413333
169.8	0.0413333
169.9	0.0413333
170	0.0413333
170.1	0.0416667
170.2	0.0416667
170.3	0.0416667
170.4	0.0416667
170.5	0.0416667
170.6	0.0416667
170.7	0.0416667
170.8	0.0416667
170.9	0.0416667
171	0.0413333
171.1	0.0413333
171.2	0.0413333
171.3	0.0416667
171.4	0.042
171.5	0.0423333
171.6	0.0423333
171.7	0.0423333
171.8	0.0423333
171.9	0.0426667
172	0.0423333
172.1	0.042
172.2	0.042
172.3	0.042
172.4	0.0423333
172.5	0.0423333
172.6	0.0423333
172.7	0.0423333
172.8	0.0423333
172.9	0.0423333
173	0.0423333
173.1	0.0426667
173.2	0.0426667
173.3	0.0423333
173.4	0.042
173.5	0.042
173.6	0.042
173.7	0.0423333
173.8	0.0426667
173.9	0.0426667
174	0.0426667
174.1	0.0426667
174.2	0.0426667
174.3	0.0426667
174.4	0.0426667
174.5	0.0426667
174.6	0.0426667
174.7	0.043
174.8	0.0433333
174.9	0.0433333
175	0.0436667
175.1	0.0436667
175.2	0.0436667
175.3	0.044
175.4	0.044
175.5	0.044
175.6	0.0443333
175.7	0.044
175.8	0.0446667
175.9	0.0446667
176	0.045
176.1	0.045
176.2	0.045
176.3	0.045
176.4	0.045
176.5	0.045
176.6	0.045
176.7	0.045
176.8	0.045
176.9	0.045
177	0.045
177.1	0.045
177.2	0.0446667
177.3	0.0446667
177.4	0.045
177.5	0.0453333
177.6	0.0456667
177.7	0.0456667
177.8	0.0456667
177.9	0.046
178	0.0456667
178.1	0.0456667
178.2	0.0456667
178.3	0.0453333
178.4	0.0453333
178.5	0.0453333
178.6	0.0453333
178.7	0.0456667
178.8	0.046
178.9	0.0456667
179	0.0456667
179.1	0.0456667
179.2	0.046
179.3	0.046
179.4	0.046
179.5	0.0466667
179.6	0.0466667
179.7	0.0466667
179.8	0.0466667
179.9	0.0466667
180	0.0466667
180.1	0.0466667
180.2	0.0466667
180.3	0.047
180.4	0.047
180.5	0.0473333
180.6	0.0473333
180.7	0.0473333
180.8	0.0473333
180.9	0.0473333
181	0.048
181.1	0.048
181.2	0.048
181.3	0.048
181.4	0.048
181.5	0.048
181.6	0.0476667
181.7	0.048
181.8	0.048
181.9	0.048
182	0.048
182.1	0.048
182.2	0.048
182.3	0.0483333
182.4	0.0483333
182.5	0.0483333
182.6	0.0483333
182.7	0.048
182.8	0.048
182.9	0.048
183	0.0483333
183.1	0.0483333
183.2	0.048
183.3	0.0483333
183.4	0.0483333
183.5	0.0483333
183.6	0.0483333
183.7	0.0486667
183.8	0.0483333
183.9	0.0483333
184	0.0486667
184.1	0.0486667
184.2	0.0486667
184.3	0.0486667
184.4	0.0486667
184.5	0.0486667
184.6	0.0486667
184.7	0.0486667
184.8	0.0486667
184.9	0.0486667
185	0.0486667
185.1	0.0486667
185.2	0.0486667
185.3	0.0486667
185.4	0.0486667
185.5	0.0483333
185.6	0.0483333
185.7	0.048
185.8	0.0483333
185.9	0.0483333
186	0.0483333
186.1	0.0486667
186.2	0.049
186.3	0.049
186.4	0.049
186.5	0.049
186.6	0.049
186.7	0.0493333
186.8	0.0493333
186.9	0.0496667
187	0.05
187.1	0.05
187.2	0.05
187.3	0.05
187.4	0.0496667
187.5	0.0496667
187.6	0.0496667
187.7	0.0496667
187.8	0.0496667
187.9	0.05
188	0.0496667
188.1	0.0496667
188.2	0.0496667
188.3	0.0496667
188.4	0.0496667
188.5	0.0496667
188.6	0.0496667
188.7	0.0493333
188.8	0.0493333
188.9	0.0493333
189	0.0493333
189.1	0.0493333
189.2	0.049
189.3	0.0493333
189.4	0.0493333
189.5	0.0493333
189.6	0.0493333
189.7	0.049
189.8	0.049
189.9	0.049
190	0.049
190.1	0.049
190.2	0.049
190.3	0.049
190.4	0.049
190.5	0.049
190.6	0.0486667
190.7	0.0486667
190.8	0.049
190.9	0.049
191	0.0493333
191.1	0.0496667
191.2	0.0496667
191.3	0.0496667
191.4	0.0496667
191.5	0.0496667
191.6	0.0493333
191.7	0.0493333
191.8	0.0496667
191.9	0.0496667
192	0.05
192.1	0.05
192.2	0.05
192.3	0.05
192.4	0.05
192.5	0.0496667
192.6	0.0493333
192.7	0.049
192.8	0.049
192.9	0.049
193	0.049
193.1	0.0493333
193.2	0.0493333
193.3	0.0493333
193.4	0.0493333
193.5	0.0493333
193.6	0.0493333
193.7	0.0493333
193.8	0.0493333
193.9	0.0496667
194	0.0496667
194.1	0.0496667
194.2	0.0496667
194.3	0.05
194.4	0.05
194.5	0.0506667
194.6	0.0503333
194.7	0.0503333
194.8	0.0503333
194.9	0.0506667
195	0.051
195.1	0.051
195.2	0.051
195.3	0.051
195.4	0.051
195.5	0.0506667
195.6	0.051
195.7	0.051
195.8	0.0513333
195.9	0.0513333
196	0.0513333
196.1	0.0513333
196.2	0.0516667
196.3	0.0516667
196.4	0.052
196.5	0.052
196.6	0.052
196.7	0.0523333
196.8	0.0523333
196.9	0.0523333
197	0.0523333
197.1	0.0523333
197.2	0.052
197.3	0.0516667
197.4	0.0516667
197.5	0.0513333
197.6	0.0513333
197.7	0.0513333
197.8	0.0513333
197.9	0.0513333
198	0.0516667
198.1	0.0516667
198.2	0.0516667
198.3	0.0513333
198.4	0.0513333
198.5	0.0513333
198.6	0.051
198.7	0.051
198.8	0.0513333
198.9	0.0513333
199	0.0513333
199.1	0.0513333
199.2	0.0513333
199.3	0.0513333
199.4	0.051
199.5	0.051
199.6	0.051
199.7	0.051
199.8	0.051
199.9	0.051
200	0.051
[truncated: 14,000 more rows]
