# Supplementary material for: Bayesian inference of kinetic schemes for ion channels by Kalman filtering
Source: eLife journal article supplement (doi:10.7554/elife.62714), 2022-05-04
Supplement: fig4-data10 [file 1_Sim_N_4000_Fluor_MW_0.0625M.xlsx]

## Sheet: Tabelle1
0.1	0
0.2	0
0.3	0
0.4	0
0.5	0
0.6	0
0.7	0
0.8	0
0.9	0
1	0
1.1	0
1.2	0
1.3	0
1.4	0
1.5	0
1.6	0
1.7	0
1.8	0
1.9	0
2	0
2.1	0
2.2	0
2.3	0
2.4	0
2.5	0
2.6	0
2.7	0
2.8	0
2.9	0
3	0
3.1	0
3.2	0
3.3	0
3.4	0
3.5	0
3.6	0
3.7	0
3.8	0
3.9	0
4	0
4.1	0
4.2	0
4.3	0
4.4	0
4.5	0
4.6	0
4.7	0
4.8	0
4.9	0
5	0
5.1	0
5.2	0
5.3	0
5.4	0
5.5	0
5.6	0
5.7	0
5.8	0
5.9	0
6	0
6.1	0
6.2	0
6.3	0
6.4	0
6.5	0
6.6	0
6.7	0
6.8	0
6.9	0
7	0
7.1	0
7.2	0
7.3	0
7.4	0
7.5	0
7.6	0
7.7	0
7.8	0
7.9	0
8	0
8.1	0
8.2	0
8.3	0
8.4	0
8.5	0
8.6	0
8.7	0
8.8	0
8.9	0
9	0
9.1	0
9.2	0
9.3	0
9.4	0
9.5	0
9.6	0
9.7	0
9.8	0
9.9	0
10	0
10.1	0
10.2	0
10.3	0
10.4	0
10.5	0
10.6	0
10.7	0
10.8	0
10.9	0
11	0
11.1	0
11.2	0
11.3	0
11.4	0
11.5	0
11.6	0
11.7	0
11.8	0
11.9	0
12	0
12.1	0
12.2	0
12.3	0
12.4	0
12.5	0
12.6	0
12.7	0
12.8	0
12.9	0
13	0
13.1	0
13.2	0
13.3	0
13.4	0
13.5	0
13.6	0
13.7	0
13.8	0
13.9	0
14	0
14.1	0
14.2	0
14.3	0
14.4	0
14.5	0
14.6	0
14.7	0
14.8	0
14.9	0
15	0
15.1	0
15.2	0
15.3	0
15.4	0
15.5	0
15.6	0
15.7	0
15.8	0
15.9	0
16	0
16.1	0
16.2	0
16.3	0
16.4	0
16.5	0
16.6	0
16.7	0
16.8	0
16.9	0
17	0
17.1	0
17.2	0
17.3	0
17.4	0
17.5	0
17.6	0
17.7	0
17.8	0
17.9	0
18	0
18.1	0
18.2	0
18.3	0
18.4	0
18.5	0
18.6	0
18.7	0
18.8	0
18.9	0
19	0
19.1	0
19.2	0
19.3	0
19.4	0
19.5	0
19.6	0
19.7	0
19.8	0
19.9	0
20	0
20.1	0
20.2	0
20.3	0
20.4	0
20.5	0
20.6	0
20.7	0
20.8	0
20.9	0
21	0
21.1	0
21.2	0
21.3	0
21.4	0
21.5	0
21.6	0
21.7	0
21.8	0
21.9	0
22	0
22.1	0
22.2	0
22.3	0
22.4	0
22.5	0
22.6	0
22.7	0
22.8	0
22.9	0
23	0
23.1	0
23.2	0
23.3	0
23.4	0
23.5	0
23.6	0
23.7	0
23.8	0
23.9	0
24	0
24.1	0
24.2	0
24.3	0
24.4	0
24.5	0
24.6	0
24.7	0
24.8	0
24.9	0
25	0
25.1	0
25.2	0
25.3	0
25.4	0
25.5	0
25.6	0
25.7	0
25.8	0
25.9	0
26	0
26.1	0
26.2	0
26.3	0
26.4	0
26.5	0
26.6	0
26.7	0
26.8	0
26.9	0
27	0
27.1	0
27.2	0
27.3	0
27.4	0
27.5	0
27.6	0
27.7	0
27.8	0
27.9	0
28	0
28.1	0
28.2	0
28.3	0
28.4	0
28.5	0
28.6	0
28.7	0
28.8	0
28.9	0
29	0
29.1	0
29.2	0
29.3	0
29.4	0
29.5	0
29.6	0
29.7	0
29.8	0
29.9	0
30	0
30.1	0
30.2	0
30.3	0
30.4	0
30.5	0
30.6	0
30.7	0
30.8	0
30.9	0
31	0
31.1	0
31.2	0
31.3	0
31.4	0
31.5	0
31.6	0
31.7	0
31.8	0
31.9	0
32	0
32.1	0
32.2	0
32.3	0
32.4	0
32.5	0
32.6	0
32.7	0
32.8	0
32.9	0
33	0
33.1	0
33.2	0
33.3	0
33.4	0
33.5	0
33.6	0
33.7	0
33.8	0
33.9	0
34	0
34.1	0
34.2	0
34.3	0
34.4	0
34.5	0
34.6	0
34.7	0
34.8	0
34.9	0
35	0
35.1	0
35.2	0
35.3	0
35.4	0
35.5	0
35.6	0
35.7	0
35.8	0
35.9	0
36	0
36.1	0
36.2	0
36.3	0
36.4	0
36.5	0
36.6	0
36.7	0
36.8	0
36.9	0
37	0
37.1	0
37.2	0
37.3	0
37.4	0
37.5	0
37.6	0
37.7	0
37.8	0
37.9	0
38	0
38.1	0
38.2	0
38.3	0
38.4	0
38.5	0
38.6	0
38.7	0
38.8	0
38.9	0
39	0
39.1	0
39.2	0
39.3	0
39.4	0
39.5	0
39.6	0
39.7	0
39.8	0
39.9	0
40	0
40.1	0
40.2	0
40.3	0
40.4	0
40.5	0
40.6	0
40.7	0
40.8	0
40.9	0
41	0
41.1	0
41.2	0
41.3	0
41.4	0
41.5	0
41.6	0
41.7	0
41.8	0
41.9	0
42	0
42.1	0
42.2	0
42.3	0
42.4	0
42.5	0
42.6	0
42.7	0
42.8	0
42.9	0
43	0
43.1	0
43.2	0
43.3	0
43.4	0
43.5	0
43.6	0
43.7	0
43.8	0
43.9	0
44	0
44.1	0
44.2	0
44.3	0
44.4	0
44.5	0
44.6	0
44.7	0
44.8	0
44.9	0
45	0
45.1	0
45.2	0
45.3	0
45.4	0
45.5	0
45.6	0
45.7	0
45.8	0
45.9	0
46	0
46.1	0
46.2	0
46.3	0
46.4	0
46.5	0
46.6	0
46.7	0
46.8	0
46.9	0
47	0
47.1	0
47.2	0
47.3	0
47.4	0
47.5	0
47.6	0
47.7	0
47.8	0
47.9	0
48	0
48.1	0
48.2	0
48.3	0
48.4	0
48.5	0
48.6	0
48.7	0
48.8	0
48.9	0
49	0
49.1	0
49.2	0
49.3	0
49.4	0
49.5	0
49.6	0
49.7	0
49.8	0
49.9	0
50	0
50.1	0
50.2	0
50.3	0
50.4	0
50.5	0
50.6	0
50.7	0
50.8	0
50.9	0
51	0
51.1	0
51.2	0
51.3	0
51.4	0
51.5	0
51.6	0
51.7	0
51.8	0
51.9	0
52	0
52.1	0
52.2	0
52.3	0
52.4	0
52.5	0
52.6	0
52.7	0
52.8	0
52.9	0
53	0
53.1	0
53.2	0
53.3	0
53.4	0
53.5	0
53.6	0
53.7	0
53.8	0
53.9	0
54	0
54.1	0
54.2	0
54.3	0
54.4	0
54.5	0
54.6	0
54.7	0
54.8	0
54.9	0
55	0
55.1	0
55.2	0
55.3	0
55.4	0
55.5	0
55.6	0
55.7	0
55.8	0
55.9	0
56	0
56.1	0
56.2	0
56.3	0
56.4	0
56.5	0
56.6	0
56.7	0
56.8	0
56.9	0
57	0
57.1	0
57.2	0
57.3	0
57.4	0
57.5	0
57.6	0
57.7	0
57.8	0
57.9	0
58	0
58.1	0
58.2	0
58.3	0
58.4	0
58.5	0
58.6	0
58.7	0
58.8	0
58.9	0
59	0
59.1	0
59.2	0
59.3	0
59.4	0
59.5	0
59.6	0
59.7	0
59.8	0
59.9	0
60	0
60.1	0
60.2	0
60.3	0
60.4	0
60.5	0
60.6	0
60.7	0
60.8	0
60.9	0
61	0
61.1	0
61.2	0
61.3	0
61.4	0
61.5	0
61.6	0
61.7	0
61.8	0
61.9	0
62	0
62.1	0
62.2	0
62.3	0
62.4	0
62.5	0
62.6	0
62.7	0
62.8	0
62.9	0
63	0
63.1	0
63.2	0
63.3	0
63.4	0
63.5	0
63.6	0
63.7	0
63.8	0
63.9	0
64	0
64.1	0
64.2	0
64.3	0
64.4	0
64.5	0
64.6	0
64.7	0
64.8	0
64.9	0
65	0
65.1	0
65.2	0
65.3	0
65.4	0
65.5	0
65.6	0
65.7	0
65.8	0
65.9	0
66	0
66.1	0
66.2	0
66.3	0
66.4	0
66.5	0
66.6	0
66.7	0
66.8	0
66.9	0
67	0
67.1	0
67.2	0
67.3	0
67.4	0
67.5	0
67.6	0
67.7	0
67.8	0
67.9	0
68	0
68.1	0
68.2	0
68.3	0
68.4	0
68.5	0
68.6	0
68.7	0
68.8	0
68.9	0
69	0
69.1	0
69.2	0
69.3	0
69.4	0
69.5	0
69.6	0
69.7	0
69.8	0
69.9	0
70	0
70.1	0
70.2	0
70.3	0
70.4	0
70.5	0
70.6	0
70.7	0
70.8	0
70.9	0
71	0
71.1	0
71.2	0
71.3	0
71.4	0
71.5	0
71.6	0
71.7	0
71.8	0
71.9	0
72	0
72.1	0
72.2	0
72.3	0
72.4	0
72.5	0
72.6	0
72.7	0
72.8	0
72.9	0
73	0
73.1	0
73.2	0
73.3	0
73.4	0
73.5	0
73.6	0
73.7	0
73.8	0
73.9	0
74	0
74.1	0
74.2	0
74.3	0
74.4	0
74.5	0
74.6	0
74.7	0
74.8	0
74.9	0
75	0
75.1	0
75.2	0
75.3	0
75.4	0
75.5	0
75.6	0
75.7	0
75.8	0
75.9	0
76	0
76.1	0
76.2	0
76.3	0
76.4	0
76.5	0
76.6	0
76.7	0
76.8	0
76.9	0
77	0
77.1	0
77.2	0
77.3	0
77.4	0
77.5	0
77.6	0
77.7	0
77.8	0
77.9	0
78	0
78.1	0
78.2	0
78.3	0
78.4	0
78.5	0
78.6	0
78.7	0
78.8	0
78.9	0
79	0
79.1	0
79.2	0
79.3	0
79.4	0
79.5	0
79.6	0
79.7	0
79.8	0
79.9	0
80	0
80.1	0
80.2	0
80.3	0
80.4	0
80.5	0
80.6	0
80.7	0
80.8	0
80.9	0
81	0
81.1	0
81.2	0
81.3	0
81.4	0
81.5	0
81.6	0
81.7	0
81.8	0
81.9	0
82	0
82.1	0
82.2	0
82.3	0
82.4	0
82.5	0
82.6	0
82.7	0
82.8	0
82.9	0
83	0
83.1	0
83.2	0
83.3	0
83.4	0
83.5	0
83.6	0
83.7	0
83.8	0
83.9	0
84	0
84.1	0
84.2	0
84.3	0
84.4	0
84.5	0
84.6	0
84.7	0
84.8	0
84.9	0
85	0
85.1	0
85.2	0
85.3	0
85.4	0
85.5	0
85.6	0
85.7	0
85.8	0
85.9	0
86	0
86.1	0
86.2	0
86.3	0
86.4	0
86.5	0
86.6	0
86.7	0
86.8	0
86.9	0
87	0
87.1	0
87.2	0
87.3	0
87.4	0
87.5	0
87.6	0
87.7	0
87.8	0
87.9	0
88	0
88.1	0
88.2	0
88.3	0
88.4	0
88.5	0
88.6	0
88.7	0
88.8	0
88.9	0
89	0
89.1	0
89.2	0
89.3	0
89.4	0
89.5	0
89.6	0
89.7	0
89.8	0
89.9	0
90	0
90.1	0
90.2	0
90.3	0
90.4	0
90.5	0
90.6	0
90.7	0
90.8	0
90.9	0
91	0
91.1	0
91.2	0
91.3	0
91.4	0
91.5	0
91.6	0
91.7	0
91.8	0
91.9	0
92	0
92.1	0
92.2	0
92.3	0
92.4	0
92.5	0
92.6	0
92.7	0
92.8	0
92.9	0
93	0
93.1	0
93.2	0
93.3	0
93.4	0
93.5	0
93.6	0
93.7	0
93.8	0
93.9	0
94	0
94.1	0
94.2	0
94.3	0
94.4	0
94.5	0
94.6	0
94.7	0
94.8	0
94.9	0
95	0
95.1	0
95.2	0
95.3	0
95.4	0
95.5	0
95.6	0
95.7	0
95.8	0
95.9	0
96	0
96.1	0
96.2	0
96.3	0
96.4	0
96.5	0
96.6	0
96.7	0
96.8	0
96.9	0
97	0
97.1	0
97.2	0
97.3	0
97.4	0
97.5	0
97.6	0
97.7	0
97.8	0
97.9	0
98	0
98.1	0
98.2	0
98.3	0
98.4	0
98.5	0
98.6	0
98.7	0
98.8	0
98.9	0
99	0
99.1	0
99.2	0
99.3	0
99.4	0
99.5	0
99.6	0
99.7	0
99.8	0
99.9	0
100	0
100.1	0.003625
100.2	0.009
100.3	0.011625
100.4	0.014875
100.5	0.017375
100.6	0.02025
100.7	0.024375
100.8	0.027375
100.9	0.030375
101	0.034
101.1	0.036625
101.2	0.039
101.3	0.0425
101.4	0.044625
101.5	0.049125
101.6	0.053
101.7	0.055625
101.8	0.05925
101.9	0.062
102	0.065375
102.1	0.069
102.2	0.07075
102.3	0.07325
102.4	0.07675
102.5	0.07975
102.6	0.08375
102.7	0.085125
102.8	0.087
102.9	0.089625
103	0.091375
103.1	0.093875
103.2	0.095625
103.3	0.099
103.4	0.101375
103.5	0.10275
103.6	0.10475
103.7	0.106625
103.8	0.10875
103.9	0.111
104	0.11325
104.1	0.114375
104.2	0.117375
104.3	0.12
104.4	0.120875
104.5	0.122375
104.6	0.122875
104.7	0.125125
104.8	0.126875
104.9	0.13
105	0.131
105.1	0.132125
105.2	0.132625
105.3	0.133125
105.4	0.13475
105.5	0.136625
105.6	0.13775
105.7	0.137625
105.8	0.138375
105.9	0.14075
106	0.1425
106.1	0.14375
106.2	0.143125
106.3	0.144625
106.4	0.147
106.5	0.148625
106.6	0.15025
106.7	0.152625
106.8	0.154125
106.9	0.15575
107	0.156875
107.1	0.157625
107.2	0.158
107.3	0.159125
107.4	0.161375
107.5	0.1625
107.6	0.162125
107.7	0.163125
107.8	0.164375
107.9	0.165
108	0.166375
108.1	0.168375
108.2	0.169125
108.3	0.169875
108.4	0.17125
108.5	0.173125
108.6	0.17325
108.7	0.174
108.8	0.173875
108.9	0.174125
109	0.175125
109.1	0.177375
109.2	0.17825
109.3	0.179
109.4	0.1805
109.5	0.1805
109.6	0.181375
109.7	0.181
109.8	0.182125
109.9	0.183125
110	0.18375
110.1	0.1855
110.2	0.186375
110.3	0.186625
110.4	0.186125
110.5	0.187875
110.6	0.189375
110.7	0.18975
110.8	0.19075
110.9	0.190625
111	0.19025
111.1	0.19075
111.2	0.1925
111.3	0.194375
111.4	0.19575
111.5	0.194625
111.6	0.195875
111.7	0.195875
111.8	0.196375
111.9	0.197125
112	0.19825
112.1	0.198125
112.2	0.199125
112.3	0.19925
112.4	0.20175
112.5	0.20275
112.6	0.203875
112.7	0.20425
112.8	0.204
112.9	0.205
113	0.205625
113.1	0.20575
113.2	0.20575
113.3	0.205875
113.4	0.206375
113.5	0.207125
113.6	0.208375
113.7	0.209125
113.8	0.2115
113.9	0.214
114	0.21325
114.1	0.212375
114.2	0.213
114.3	0.213625
114.4	0.2125
114.5	0.214125
114.6	0.214
114.7	0.21425
114.8	0.214875
114.9	0.216375
115	0.215375
115.1	0.21525
115.2	0.214875
115.3	0.21475
115.4	0.214375
115.5	0.216125
115.6	0.216875
115.7	0.217625
115.8	0.217625
115.9	0.21825
116	0.218125
116.1	0.218125
116.2	0.21875
116.3	0.21975
116.4	0.219
116.5	0.218375
116.6	0.218375
116.7	0.218375
116.8	0.21925
116.9	0.2195
117	0.21975
117.1	0.219875
117.2	0.22025
117.3	0.221375
117.4	0.2215
117.5	0.221625
117.6	0.2225
117.7	0.224
117.8	0.224125
117.9	0.22325
118	0.22225
118.1	0.223
118.2	0.2225
118.3	0.22175
118.4	0.221
118.5	0.220625
118.6	0.222125
118.7	0.22225
118.8	0.222625
118.9	0.22275
119	0.22275
119.1	0.223
119.2	0.221125
119.3	0.221125
119.4	0.221
119.5	0.2205
119.6	0.221875
119.7	0.222375
119.8	0.22275
119.9	0.220875
120	0.221625
120.1	0.22275
120.2	0.223625
120.3	0.222875
120.4	0.22325
120.5	0.22425
120.6	0.224
120.7	0.224875
120.8	0.224375
120.9	0.224125
121	0.22425
121.1	0.2245
121.2	0.224875
121.3	0.225875
121.4	0.226625
121.5	0.22725
121.6	0.22725
121.7	0.228375
121.8	0.2295
121.9	0.230125
122	0.22975
122.1	0.2305
122.2	0.230625
122.3	0.229625
122.4	0.23
122.5	0.23
122.6	0.230125
122.7	0.229625
122.8	0.23
122.9	0.229625
123	0.229625
123.1	0.2305
123.2	0.230125
123.3	0.230125
123.4	0.22925
123.5	0.230375
123.6	0.23025
123.7	0.23075
123.8	0.2295
123.9	0.23
124	0.23025
124.1	0.229375
124.2	0.23075
124.3	0.2315
124.4	0.232
124.5	0.232375
124.6	0.232375
124.7	0.233625
124.8	0.233125
124.9	0.233375
125	0.2335
125.1	0.23325
125.2	0.233125
125.3	0.2315
125.4	0.230125
125.5	0.230375
125.6	0.228875
125.7	0.22925
125.8	0.23
125.9	0.23025
126	0.23075
126.1	0.230625
126.2	0.230375
126.3	0.23
126.4	0.22975
126.5	0.231
126.6	0.2315
126.7	0.231
126.8	0.232875
126.9	0.232625
127	0.23275
127.1	0.23275
127.2	0.232875
127.3	0.23225
127.4	0.232375
127.5	0.23175
127.6	0.23225
127.7	0.23375
127.8	0.232875
127.9	0.233875
128	0.235
128.1	0.234375
128.2	0.234625
128.3	0.235375
128.4	0.234875
128.5	0.235625
128.6	0.23675
128.7	0.23575
128.8	0.23525
128.9	0.234875
129	0.23375
129.1	0.234125
129.2	0.233125
129.3	0.233125
129.4	0.2315
129.5	0.2315
129.6	0.2305
129.7	0.22925
129.8	0.228375
129.9	0.228
130	0.227375
130.1	0.22775
130.2	0.22775
130.3	0.2285
130.4	0.229375
130.5	0.2305
130.6	0.23
130.7	0.23125
130.8	0.230375
130.9	0.23025
131	0.23075
131.1	0.2305
131.2	0.229
131.3	0.229125
131.4	0.2305
131.5	0.2315
131.6	0.2325
131.7	0.232625
131.8	0.23175
131.9	0.230625
132	0.231
132.1	0.231375
132.2	0.231375
132.3	0.2305
132.4	0.23125
132.5	0.23275
132.6	0.232
132.7	0.2315
132.8	0.231625
132.9	0.233125
133	0.23325
133.1	0.233
133.2	0.232625
133.3	0.233
133.4	0.23275
133.5	0.232125
133.6	0.231125
133.7	0.2305
133.8	0.230625
133.9	0.230875
134	0.231125
134.1	0.23075
134.2	0.23225
134.3	0.233125
134.4	0.2335
134.5	0.233625
134.6	0.23475
134.7	0.235375
134.8	0.23525
134.9	0.235625
135	0.2355
135.1	0.235875
135.2	0.235875
135.3	0.236375
135.4	0.23625
135.5	0.236
135.6	0.23675
135.7	0.236
135.8	0.23675
135.9	0.237625
136	0.23775
136.1	0.238625
136.2	0.239
136.3	0.23825
136.4	0.238375
136.5	0.238125
136.6	0.2385
136.7	0.23875
136.8	0.239375
136.9	0.239125
137	0.23875
137.1	0.23925
137.2	0.23925
137.3	0.23925
137.4	0.23925
137.5	0.23875
137.6	0.239375
137.7	0.239625
137.8	0.241
137.9	0.241
138	0.240375
138.1	0.240375
138.2	0.241375
138.3	0.240875
138.4	0.239625
138.5	0.239625
138.6	0.24025
138.7	0.238625
138.8	0.237375
138.9	0.237
139	0.236625
139.1	0.235625
139.2	0.235
139.3	0.23425
139.4	0.23375
139.5	0.23375
139.6	0.234625
139.7	0.23425
139.8	0.235
139.9	0.234375
140	0.235125
140.1	0.234875
140.2	0.235875
140.3	0.236125
140.4	0.235625
140.5	0.234375
140.6	0.23475
140.7	0.23475
140.8	0.235125
140.9	0.2355
141	0.235625
141.1	0.236875
141.2	0.23675
141.3	0.2365
141.4	0.23775
141.5	0.238375
141.6	0.23925
141.7	0.23825
141.8	0.237125
141.9	0.23625
142	0.235
142.1	0.23525
142.2	0.23525
142.3	0.2355
142.4	0.235875
142.5	0.235625
142.6	0.236125
142.7	0.236875
142.8	0.23775
142.9	0.237
143	0.237
143.1	0.2375
143.2	0.23975
143.3	0.240625
143.4	0.240125
143.5	0.2405
143.6	0.241
143.7	0.240875
143.8	0.24175
143.9	0.242625
144	0.24225
144.1	0.241875
144.2	0.243625
144.3	0.244125
144.4	0.244125
144.5	0.243375
144.6	0.24175
144.7	0.24125
144.8	0.240875
144.9	0.241375
145	0.242125
145.1	0.24175
145.2	0.241625
145.3	0.241875
145.4	0.241625
145.5	0.243
145.6	0.241625
145.7	0.241125
145.8	0.2405
145.9	0.24
146	0.23925
146.1	0.238625
146.2	0.239375
146.3	0.24
146.4	0.239125
146.5	0.23925
146.6	0.2395
146.7	0.2395
146.8	0.239125
146.9	0.239
147	0.239
147.1	0.239625
147.2	0.24025
147.3	0.2405
147.4	0.241625
147.5	0.24225
147.6	0.2415
147.7	0.242
147.8	0.241875
147.9	0.2415
148	0.242125
148.1	0.242125
148.2	0.2425
148.3	0.242125
148.4	0.2415
148.5	0.242
148.6	0.24075
148.7	0.240625
148.8	0.240375
148.9	0.24075
149	0.240875
149.1	0.241125
149.2	0.242125
149.3	0.24225
149.4	0.243625
149.5	0.243125
149.6	0.243125
149.7	0.24425
149.8	0.243875
149.9	0.243125
150	0.2425
150.1	0.241375
150.2	0.24175
150.3	0.2405
150.4	0.240875
150.5	0.241
150.6	0.24125
150.7	0.241375
150.8	0.242875
150.9	0.240875
151	0.24075
151.1	0.240625
151.2	0.239625
151.3	0.238875
151.4	0.237375
151.5	0.237875
151.6	0.238
151.7	0.2375
151.8	0.236625
151.9	0.236625
152	0.237125
152.1	0.237625
152.2	0.23775
152.3	0.23625
152.4	0.23625
152.5	0.236875
152.6	0.237
152.7	0.237
152.8	0.23725
152.9	0.237125
153	0.23775
153.1	0.23725
153.2	0.237
153.3	0.237
153.4	0.237625
153.5	0.23775
153.6	0.238
153.7	0.238
153.8	0.23725
153.9	0.2385
154	0.2385
154.1	0.238625
154.2	0.23775
154.3	0.238
154.4	0.239375
154.5	0.239125
154.6	0.238125
154.7	0.2375
154.8	0.238625
154.9	0.239375
155	0.2395
155.1	0.239875
155.2	0.23925
155.3	0.239875
155.4	0.2395
155.5	0.241
155.6	0.24125
155.7	0.240125
155.8	0.24025
155.9	0.24025
156	0.2405
156.1	0.241
156.2	0.24125
156.3	0.24325
156.4	0.24325
156.5	0.242
156.6	0.241125
156.7	0.24225
156.8	0.242875
156.9	0.2435
157	0.243875
157.1	0.243125
157.2	0.244
157.3	0.2445
157.4	0.244125
157.5	0.245
157.6	0.245
157.7	0.245125
157.8	0.244
157.9	0.246
158	0.246
158.1	0.24575
158.2	0.24425
158.3	0.24475
158.4	0.244875
158.5	0.246625
158.6	0.24725
158.7	0.247
158.8	0.24775
158.9	0.2475
159	0.247
159.1	0.246875
159.2	0.247375
159.3	0.246625
159.4	0.246
159.5	0.248
159.6	0.249
159.7	0.24975
159.8	0.24875
159.9	0.24825
160	0.24875
160.1	0.24875
160.2	0.248875
160.3	0.24925
160.4	0.247625
160.5	0.24675
160.6	0.246875
160.7	0.246625
160.8	0.24625
160.9	0.247
161	0.2465
161.1	0.247625
161.2	0.248625
161.3	0.2475
161.4	0.24775
161.5	0.248125
161.6	0.24925
161.7	0.249625
161.8	0.25025
161.9	0.248875
162	0.249125
162.1	0.248875
162.2	0.249625
162.3	0.24875
162.4	0.248625
162.5	0.248875
162.6	0.24875
162.7	0.2475
162.8	0.246875
162.9	0.2475
163	0.246875
163.1	0.246875
163.2	0.24775
163.3	0.249875
163.4	0.25025
163.5	0.25025
163.6	0.250375
163.7	0.2505
163.8	0.25075
163.9	0.24975
164	0.25
164.1	0.24975
164.2	0.251875
164.3	0.250875
164.4	0.25
164.5	0.249375
164.6	0.251375
164.7	0.251875
164.8	0.25225
164.9	0.25225
165	0.2525
165.1	0.2525
165.2	0.251375
165.3	0.250375
165.4	0.250625
165.5	0.250625
165.6	0.2495
165.7	0.24925
165.8	0.249375
165.9	0.248625
166	0.2485
166.1	0.247375
166.2	0.247375
166.3	0.247375
166.4	0.247375
166.5	0.247625
166.6	0.247
166.7	0.247
166.8	0.247375
166.9	0.246625
167	0.247
167.1	0.246625
167.2	0.247625
167.3	0.24825
167.4	0.249375
167.5	0.249375
167.6	0.249375
167.7	0.2485
167.8	0.24825
167.9	0.2485
168	0.24925
168.1	0.248625
168.2	0.248375
168.3	0.24925
168.4	0.2495
168.5	0.246375
168.6	0.2465
168.7	0.24575
168.8	0.24525
168.9	0.24575
169	0.2445
169.1	0.244125
169.2	0.2445
169.3	0.2435
169.4	0.243125
169.5	0.242
169.6	0.243375
169.7	0.24375
169.8	0.244
169.9	0.244125
170	0.2435
170.1	0.243125
170.2	0.2425
170.3	0.2435
170.4	0.243875
170.5	0.24525
170.6	0.24475
170.7	0.244125
170.8	0.242875
170.9	0.24325
171	0.2435
171.1	0.24425
171.2	0.24425
171.3	0.242875
171.4	0.24425
171.5	0.243625
171.6	0.2445
171.7	0.244625
171.8	0.245875
171.9	0.24325
172	0.24225
172.1	0.242
172.2	0.24225
172.3	0.24225
172.4	0.242375
172.5	0.243625
172.6	0.244875
172.7	0.245625
172.8	0.246125
172.9	0.24675
173	0.24675
173.1	0.248375
173.2	0.248
173.3	0.248875
173.4	0.24925
173.5	0.25025
173.6	0.251
173.7	0.252
173.8	0.251375
173.9	0.24975
174	0.25125
174.1	0.2515
174.2	0.251375
174.3	0.252375
174.4	0.251625
174.5	0.25
174.6	0.25025
174.7	0.25
174.8	0.25025
174.9	0.250875
175	0.249875
175.1	0.24925
175.2	0.249625
175.3	0.25025
175.4	0.249
175.5	0.248875
175.6	0.248875
175.7	0.250375
175.8	0.24975
175.9	0.2505
176	0.250625
176.1	0.25
176.2	0.250875
176.3	0.251
176.4	0.251
176.5	0.25
176.6	0.249125
176.7	0.246625
176.8	0.2475
176.9	0.24675
177	0.247125
177.1	0.2475
177.2	0.247625
177.3	0.248375
177.4	0.2485
177.5	0.249875
177.6	0.2505
177.7	0.250125
177.8	0.250875
177.9	0.25075
178	0.251875
178.1	0.251125
178.2	0.250375
178.3	0.2495
178.4	0.248125
178.5	0.248875
178.6	0.248
178.7	0.247625
178.8	0.249625
178.9	0.247875
179	0.247625
179.1	0.247
179.2	0.247125
179.3	0.246625
179.4	0.247
179.5	0.247125
179.6	0.24875
179.7	0.248625
179.8	0.248875
179.9	0.24925
180	0.249125
180.1	0.249875
180.2	0.248625
180.3	0.2495
180.4	0.249875
180.5	0.24925
180.6	0.251125
180.7	0.249125
180.8	0.24925
180.9	0.248875
181	0.24825
181.1	0.24825
181.2	0.248
181.3	0.248625
181.4	0.248125
181.5	0.248625
181.6	0.249
181.7	0.24875
181.8	0.2485
181.9	0.247125
182	0.248125
182.1	0.249125
182.2	0.2475
182.3	0.24925
182.4	0.248875
182.5	0.248
182.6	0.248125
182.7	0.248375
182.8	0.248
182.9	0.248
183	0.24775
183.1	0.247
183.2	0.24725
183.3	0.24875
183.4	0.249875
183.5	0.249875
183.6	0.250375
183.7	0.2505
183.8	0.25025
183.9	0.2505
184	0.251625
184.1	0.25125
184.2	0.25125
184.3	0.25075
184.4	0.25075
184.5	0.250625
184.6	0.250125
184.7	0.250625
184.8	0.250125
184.9	0.2485
185	0.248375
185.1	0.249625
185.2	0.250375
185.3	0.250875
185.4	0.251875
185.5	0.252375
185.6	0.250875
185.7	0.251125
185.8	0.2515
185.9	0.250625
186	0.250625
186.1	0.25025
186.2	0.2485
186.3	0.249125
186.4	0.25
186.5	0.250625
186.6	0.25025
186.7	0.249875
186.8	0.25
186.9	0.2505
187	0.2505
187.1	0.250375
187.2	0.251
187.3	0.251125
187.4	0.25075
187.5	0.25
187.6	0.248875
187.7	0.25
187.8	0.24975
187.9	0.2505
188	0.251
188.1	0.25125
188.2	0.250875
188.3	0.248875
188.4	0.249375
188.5	0.249125
188.6	0.250375
188.7	0.2505
188.8	0.25175
188.9	0.252
189	0.25175
189.1	0.2535
189.2	0.25375
189.3	0.2535
189.4	0.25375
189.5	0.254375
189.6	0.255
189.7	0.255875
189.8	0.254875
189.9	0.25575
190	0.255
190.1	0.256
190.2	0.25575
190.3	0.25575
190.4	0.255625
190.5	0.254
190.6	0.255875
190.7	0.255125
190.8	0.254875
190.9	0.254875
191	0.25475
191.1	0.255125
191.2	0.25425
191.3	0.254375
191.4	0.25425
191.5	0.254
191.6	0.254625
191.7	0.256375
191.8	0.256625
191.9	0.25625
192	0.2565
192.1	0.25625
192.2	0.2555
192.3	0.25625
192.4	0.2575
192.5	0.2575
192.6	0.25625
192.7	0.256125
192.8	0.256375
192.9	0.257
193	0.25675
193.1	0.257
193.2	0.257375
193.3	0.25875
193.4	0.258
193.5	0.258625
193.6	0.2565
193.7	0.256375
193.8	0.25625
193.9	0.25725
194	0.256625
194.1	0.258
194.2	0.257375
194.3	0.258375
194.4	0.259125
194.5	0.259125
194.6	0.2595
194.7	0.25825
194.8	0.257125
194.9	0.256875
195	0.258
195.1	0.258875
195.2	0.257625
195.3	0.258
195.4	0.2565
195.5	0.258125
195.6	0.2565
195.7	0.256875
195.8	0.257375
195.9	0.2565
196	0.255875
196.1	0.2565
196.2	0.2575
196.3	0.256125
196.4	0.257
196.5	0.257875
196.6	0.258875
196.7	0.259625
196.8	0.259
196.9	0.259
197	0.25875
197.1	0.25875
197.2	0.25875
197.3	0.25825
197.4	0.25975
197.5	0.259
197.6	0.259
197.7	0.258375
197.8	0.259125
197.9	0.259
198	0.259375
198.1	0.2595
198.2	0.257625
198.3	0.257
198.4	0.258125
198.5	0.257875
198.6	0.2575
198.7	0.2565
198.8	0.256875
198.9	0.25775
199	0.259
199.1	0.25975
199.2	0.260875
199.3	0.26125
199.4	0.2595
199.5	0.26025
199.6	0.261125
199.7	0.261875
199.8	0.263125
199.9	0.26375
200	0.2615
[truncated: 14,000 more rows]
