# Supplementary material for: Bayesian inference of kinetic schemes for ion channels by Kalman filtering
Source: eLife journal article supplement (doi:10.7554/elife.62714), 2022-05-04
Supplement: fig4-data10 [file 1_Sim_N_4000_Strom_MW_0.0625M.xlsx]

## Sheet: Tabelle1
0.1	0
0.2	0
0.3	0
0.4	0
0.5	0
0.6	0
0.7	0
0.8	0
0.9	0
1	0
1.1	0
1.2	0
1.3	0
1.4	0
1.5	0
1.6	0
1.7	0
1.8	0
1.9	0
2	0
2.1	0
2.2	0
2.3	0
2.4	0
2.5	0
2.6	0
2.7	0
2.8	0
2.9	0
3	0
3.1	0
3.2	0
3.3	0
3.4	0
3.5	0
3.6	0
3.7	0
3.8	0
3.9	0
4	0
4.1	0
4.2	0
4.3	0
4.4	0
4.5	0
4.6	0
4.7	0
4.8	0
4.9	0
5	0
5.1	0
5.2	0
5.3	0
5.4	0
5.5	0
5.6	0
5.7	0
5.8	0
5.9	0
6	0
6.1	0
6.2	0
6.3	0
6.4	0
6.5	0
6.6	0
6.7	0
6.8	0
6.9	0
7	0
7.1	0
7.2	0
7.3	0
7.4	0
7.5	0
7.6	0
7.7	0
7.8	0
7.9	0
8	0
8.1	0
8.2	0
8.3	0
8.4	0
8.5	0
8.6	0
8.7	0
8.8	0
8.9	0
9	0
9.1	0
9.2	0
9.3	0
9.4	0
9.5	0
9.6	0
9.7	0
9.8	0
9.9	0
10	0
10.1	0
10.2	0
10.3	0
10.4	0
10.5	0
10.6	0
10.7	0
10.8	0
10.9	0
11	0
11.1	0
11.2	0
11.3	0
11.4	0
11.5	0
11.6	0
11.7	0
11.8	0
11.9	0
12	0
12.1	0
12.2	0
12.3	0
12.4	0
12.5	0
12.6	0
12.7	0
12.8	0
12.9	0
13	0
13.1	0
13.2	0
13.3	0
13.4	0
13.5	0
13.6	0
13.7	0
13.8	0
13.9	0
14	0
14.1	0
14.2	0
14.3	0
14.4	0
14.5	0
14.6	0
14.7	0
14.8	0
14.9	0
15	0
15.1	0
15.2	0
15.3	0
15.4	0
15.5	0
15.6	0
15.7	0
15.8	0
15.9	0
16	0
16.1	0
16.2	0
16.3	0
16.4	0
16.5	0
16.6	0
16.7	0
16.8	0
16.9	0
17	0
17.1	0
17.2	0
17.3	0
17.4	0
17.5	0
17.6	0
17.7	0
17.8	0
17.9	0
18	0
18.1	0
18.2	0
18.3	0
18.4	0
18.5	0
18.6	0
18.7	0
18.8	0
18.9	0
19	0
19.1	0
19.2	0
19.3	0
19.4	0
19.5	0
19.6	0
19.7	0
19.8	0
19.9	0
20	0
20.1	0
20.2	0
20.3	0
20.4	0
20.5	0
20.6	0
20.7	0
20.8	0
20.9	0
21	0
21.1	0
21.2	0
21.3	0
21.4	0
21.5	0
21.6	0
21.7	0
21.8	0
21.9	0
22	0
22.1	0
22.2	0
22.3	0
22.4	0
22.5	0
22.6	0
22.7	0
22.8	0
22.9	0
23	0
23.1	0
23.2	0
23.3	0
23.4	0
23.5	0
23.6	0
23.7	0
23.8	0
23.9	0
24	0
24.1	0
24.2	0
24.3	0
24.4	0
24.5	0
24.6	0
24.7	0
24.8	0
24.9	0
25	0
25.1	0
25.2	0
25.3	0
25.4	0
25.5	0
25.6	0
25.7	0
25.8	0
25.9	0
26	0
26.1	0
26.2	0
26.3	0
26.4	0
26.5	0
26.6	0
26.7	0
26.8	0
26.9	0
27	0
27.1	0
27.2	0
27.3	0
27.4	0
27.5	0
27.6	0
27.7	0
27.8	0
27.9	0
28	0
28.1	0
28.2	0
28.3	0
28.4	0
28.5	0
28.6	0
28.7	0
28.8	0
28.9	0
29	0
29.1	0
29.2	0
29.3	0
29.4	0
29.5	0
29.6	0
29.7	0
29.8	0
29.9	0
30	0
30.1	0
30.2	0
30.3	0
30.4	0
30.5	0
30.6	0
30.7	0
30.8	0
30.9	0
31	0
31.1	0
31.2	0
31.3	0
31.4	0
31.5	0
31.6	0
31.7	0
31.8	0
31.9	0
32	0
32.1	0
32.2	0
32.3	0
32.4	0
32.5	0
32.6	0
32.7	0
32.8	0
32.9	0
33	0
33.1	0
33.2	0
33.3	0
33.4	0
33.5	0
33.6	0
33.7	0
33.8	0
33.9	0
34	0
34.1	0
34.2	0
34.3	0
34.4	0
34.5	0
34.6	0
34.7	0
34.8	0
34.9	0
35	0
35.1	0
35.2	0
35.3	0
35.4	0
35.5	0
35.6	0
35.7	0
35.8	0
35.9	0
36	0
36.1	0
36.2	0
36.3	0
36.4	0
36.5	0
36.6	0
36.7	0
36.8	0
36.9	0
37	0
37.1	0
37.2	0
37.3	0
37.4	0
37.5	0
37.6	0
37.7	0
37.8	0
37.9	0
38	0
38.1	0
38.2	0
38.3	0
38.4	0
38.5	0
38.6	0
38.7	0
38.8	0
38.9	0
39	0
39.1	0
39.2	0
39.3	0
39.4	0
39.5	0
39.6	0
39.7	0
39.8	0
39.9	0
40	0
40.1	0
40.2	0
40.3	0
40.4	0
40.5	0
40.6	0
40.7	0
40.8	0
40.9	0
41	0
41.1	0
41.2	0
41.3	0
41.4	0
41.5	0
41.6	0
41.7	0
41.8	0
41.9	0
42	0
42.1	0
42.2	0
42.3	0
42.4	0
42.5	0
42.6	0
42.7	0
42.8	0
42.9	0
43	0
43.1	0
43.2	0
43.3	0
43.4	0
43.5	0
43.6	0
43.7	0
43.8	0
43.9	0
44	0
44.1	0
44.2	0
44.3	0
44.4	0
44.5	0
44.6	0
44.7	0
44.8	0
44.9	0
45	0
45.1	0
45.2	0
45.3	0
45.4	0
45.5	0
45.6	0
45.7	0
45.8	0
45.9	0
46	0
46.1	0
46.2	0
46.3	0
46.4	0
46.5	0
46.6	0
46.7	0
46.8	0
46.9	0
47	0
47.1	0
47.2	0
47.3	0
47.4	0
47.5	0
47.6	0
47.7	0
47.8	0
47.9	0
48	0
48.1	0
48.2	0
48.3	0
48.4	0
48.5	0
48.6	0
48.7	0
48.8	0
48.9	0
49	0
49.1	0
49.2	0
49.3	0
49.4	0
49.5	0
49.6	0
49.7	0
49.8	0
49.9	0
50	0
50.1	0
50.2	0
50.3	0
50.4	0
50.5	0
50.6	0
50.7	0
50.8	0
50.9	0
51	0
51.1	0
51.2	0
51.3	0
51.4	0
51.5	0
51.6	0
51.7	0
51.8	0
51.9	0
52	0
52.1	0
52.2	0
52.3	0
52.4	0
52.5	0
52.6	0
52.7	0
52.8	0
52.9	0
53	0
53.1	0
53.2	0
53.3	0
53.4	0
53.5	0
53.6	0
53.7	0
53.8	0
53.9	0
54	0
54.1	0
54.2	0
54.3	0
54.4	0
54.5	0
54.6	0
54.7	0
54.8	0
54.9	0
55	0
55.1	0
55.2	0
55.3	0
55.4	0
55.5	0
55.6	0
55.7	0
55.8	0
55.9	0
56	0
56.1	0
56.2	0
56.3	0
56.4	0
56.5	0
56.6	0
56.7	0
56.8	0
56.9	0
57	0
57.1	0
57.2	0
57.3	0
57.4	0
57.5	0
57.6	0
57.7	0
57.8	0
57.9	0
58	0
58.1	0
58.2	0
58.3	0
58.4	0
58.5	0
58.6	0
58.7	0
58.8	0
58.9	0
59	0
59.1	0
59.2	0
59.3	0
59.4	0
59.5	0
59.6	0
59.7	0
59.8	0
59.9	0
60	0
60.1	0
60.2	0
60.3	0
60.4	0
60.5	0
60.6	0
60.7	0
60.8	0
60.9	0
61	0
61.1	0
61.2	0
61.3	0
61.4	0
61.5	0
61.6	0
61.7	0
61.8	0
61.9	0
62	0
62.1	0
62.2	0
62.3	0
62.4	0
62.5	0
62.6	0
62.7	0
62.8	0
62.9	0
63	0
63.1	0
63.2	0
63.3	0
63.4	0
63.5	0
63.6	0
63.7	0
63.8	0
63.9	0
64	0
64.1	0
64.2	0
64.3	0
64.4	0
64.5	0
64.6	0
64.7	0
64.8	0
64.9	0
65	0
65.1	0
65.2	0
65.3	0
65.4	0
65.5	0
65.6	0
65.7	0
65.8	0
65.9	0
66	0
66.1	0
66.2	0
66.3	0
66.4	0
66.5	0
66.6	0
66.7	0
66.8	0
66.9	0
67	0
67.1	0
67.2	0
67.3	0
67.4	0
67.5	0
67.6	0
67.7	0
67.8	0
67.9	0
68	0
68.1	0
68.2	0
68.3	0
68.4	0
68.5	0
68.6	0
68.7	0
68.8	0
68.9	0
69	0
69.1	0
69.2	0
69.3	0
69.4	0
69.5	0
69.6	0
69.7	0
69.8	0
69.9	0
70	0
70.1	0
70.2	0
70.3	0
70.4	0
70.5	0
70.6	0
70.7	0
70.8	0
70.9	0
71	0
71.1	0
71.2	0
71.3	0
71.4	0
71.5	0
71.6	0
71.7	0
71.8	0
71.9	0
72	0
72.1	0
72.2	0
72.3	0
72.4	0
72.5	0
72.6	0
72.7	0
72.8	0
72.9	0
73	0
73.1	0
73.2	0
73.3	0
73.4	0
73.5	0
73.6	0
73.7	0
73.8	0
73.9	0
74	0
74.1	0
74.2	0
74.3	0
74.4	0
74.5	0
74.6	0
74.7	0
74.8	0
74.9	0
75	0
75.1	0
75.2	0
75.3	0
75.4	0
75.5	0
75.6	0
75.7	0
75.8	0
75.9	0
76	0
76.1	0
76.2	0
76.3	0
76.4	0
76.5	0
76.6	0
76.7	0
76.8	0
76.9	0
77	0
77.1	0
77.2	0
77.3	0
77.4	0
77.5	0
77.6	0
77.7	0
77.8	0
77.9	0
78	0
78.1	0
78.2	0
78.3	0
78.4	0
78.5	0
78.6	0
78.7	0
78.8	0
78.9	0
79	0
79.1	0
79.2	0
79.3	0
79.4	0
79.5	0
79.6	0
79.7	0
79.8	0
79.9	0
80	0
80.1	0
80.2	0
80.3	0
80.4	0
80.5	0
80.6	0
80.7	0
80.8	0
80.9	0
81	0
81.1	0
81.2	0
81.3	0
81.4	0
81.5	0
81.6	0
81.7	0
81.8	0
81.9	0
82	0
82.1	0
82.2	0
82.3	0
82.4	0
82.5	0
82.6	0
82.7	0
82.8	0
82.9	0
83	0
83.1	0
83.2	0
83.3	0
83.4	0
83.5	0
83.6	0
83.7	0
83.8	0
83.9	0
84	0
84.1	0
84.2	0
84.3	0
84.4	0
84.5	0
84.6	0
84.7	0
84.8	0
84.9	0
85	0
85.1	0
85.2	0
85.3	0
85.4	0
85.5	0
85.6	0
85.7	0
85.8	0
85.9	0
86	0
86.1	0
86.2	0
86.3	0
86.4	0
86.5	0
86.6	0
86.7	0
86.8	0
86.9	0
87	0
87.1	0
87.2	0
87.3	0
87.4	0
87.5	0
87.6	0
87.7	0
87.8	0
87.9	0
88	0
88.1	0
88.2	0
88.3	0
88.4	0
88.5	0
88.6	0
88.7	0
88.8	0
88.9	0
89	0
89.1	0
89.2	0
89.3	0
89.4	0
89.5	0
89.6	0
89.7	0
89.8	0
89.9	0
90	0
90.1	0
90.2	0
90.3	0
90.4	0
90.5	0
90.6	0
90.7	0
90.8	0
90.9	0
91	0
91.1	0
91.2	0
91.3	0
91.4	0
91.5	0
91.6	0
91.7	0
91.8	0
91.9	0
92	0
92.1	0
92.2	0
92.3	0
92.4	0
92.5	0
92.6	0
92.7	0
92.8	0
92.9	0
93	0
93.1	0
93.2	0
93.3	0
93.4	0
93.5	0
93.6	0
93.7	0
93.8	0
93.9	0
94	0
94.1	0
94.2	0
94.3	0
94.4	0
94.5	0
94.6	0
94.7	0
94.8	0
94.9	0
95	0
95.1	0
95.2	0
95.3	0
95.4	0
95.5	0
95.6	0
95.7	0
95.8	0
95.9	0
96	0
96.1	0
96.2	0
96.3	0
96.4	0
96.5	0
96.6	0
96.7	0
96.8	0
96.9	0
97	0
97.1	0
97.2	0
97.3	0
97.4	0
97.5	0
97.6	0
97.7	0
97.8	0
97.9	0
98	0
98.1	0
98.2	0
98.3	0
98.4	0
98.5	0
98.6	0
98.7	0
98.8	0
98.9	0
99	0
99.1	0
99.2	0
99.3	0
99.4	0
99.5	0
99.6	0
99.7	0
99.8	0
99.9	0
100	0
100.1	0
100.2	0
100.3	0
100.4	0
100.5	0
100.6	0
100.7	0
100.8	0
100.9	0
101	0
101.1	0
101.2	0
101.3	0
101.4	0
101.5	0
101.6	0
101.7	0
101.8	0
101.9	0
102	0
102.1	0
102.2	0
102.3	0
102.4	0
102.5	0
102.6	0
102.7	0
102.8	0
102.9	0
103	0
103.1	0
103.2	0
103.3	0
103.4	0.00025
103.5	0.00025
103.6	0.00025
103.7	0.00025
103.8	0.00025
103.9	0.00025
104	0.00025
104.1	0.00025
104.2	0.00025
104.3	0.00025
104.4	0.00025
104.5	0.00025
104.6	0.00025
104.7	0.00025
104.8	0.00025
104.9	0.00025
105	0.00025
105.1	0.00025
105.2	0.00025
105.3	0.00025
105.4	0.00025
105.5	0.0005
105.6	0.0005
105.7	0.00075
105.8	0.00075
105.9	0.00075
106	0.001
106.1	0.001
106.2	0.001
106.3	0.001
106.4	0.001
106.5	0.001
106.6	0.001
106.7	0.001
106.8	0.001
106.9	0.001
107	0.0015
107.1	0.0015
107.2	0.0015
107.3	0.0015
107.4	0.0015
107.5	0.0015
107.6	0.0015
107.7	0.0015
107.8	0.0015
107.9	0.00175
108	0.00175
108.1	0.00175
108.2	0.002
108.3	0.002
108.4	0.002
108.5	0.002
108.6	0.002
108.7	0.002
108.8	0.002
108.9	0.002
109	0.002
109.1	0.002
109.2	0.002
109.3	0.002
109.4	0.002
109.5	0.002
109.6	0.00225
109.7	0.00225
109.8	0.00225
109.9	0.00225
110	0.00225
110.1	0.00225
110.2	0.00225
110.3	0.0025
110.4	0.0025
110.5	0.0025
110.6	0.0025
110.7	0.00275
110.8	0.003
110.9	0.003
111	0.003
111.1	0.003
111.2	0.00325
111.3	0.00375
111.4	0.00425
111.5	0.0045
111.6	0.0045
111.7	0.0045
111.8	0.00475
111.9	0.00475
112	0.00475
112.1	0.005
112.2	0.005
112.3	0.005
112.4	0.005
112.5	0.005
112.6	0.005
112.7	0.00525
112.8	0.00525
112.9	0.00525
113	0.00525
113.1	0.0055
113.2	0.0055
113.3	0.00575
113.4	0.00575
113.5	0.006
113.6	0.006
113.7	0.006
113.8	0.00575
113.9	0.0055
114	0.0055
114.1	0.00575
114.2	0.00575
114.3	0.006
114.4	0.006
114.5	0.006
114.6	0.006
114.7	0.006
114.8	0.006
114.9	0.006
115	0.0065
115.1	0.0065
115.2	0.0065
115.3	0.0065
115.4	0.0065
115.5	0.0065
115.6	0.0065
115.7	0.0065
115.8	0.00675
115.9	0.00675
116	0.00675
116.1	0.00725
116.2	0.0075
116.3	0.00775
116.4	0.008
116.5	0.008
116.6	0.00825
116.7	0.00825
116.8	0.00825
116.9	0.0085
117	0.0085
117.1	0.0085
117.2	0.0085
117.3	0.00875
117.4	0.00875
117.5	0.00875
117.6	0.00875
117.7	0.00875
117.8	0.00875
117.9	0.009
118	0.009
118.1	0.009
118.2	0.009
118.3	0.00925
118.4	0.00925
118.5	0.00925
118.6	0.00925
118.7	0.00925
118.8	0.00925
118.9	0.00925
119	0.00925
119.1	0.00925
119.2	0.00925
119.3	0.00925
119.4	0.00925
119.5	0.0095
119.6	0.0095
119.7	0.0095
119.8	0.0095
119.9	0.0095
120	0.0095
120.1	0.0095
120.2	0.0095
120.3	0.0095
120.4	0.0095
120.5	0.0095
120.6	0.0095
120.7	0.0095
120.8	0.01
120.9	0.01
121	0.01
121.1	0.01025
121.2	0.01025
121.3	0.01025
121.4	0.0105
121.5	0.0105
121.6	0.0105
121.7	0.011
121.8	0.011
121.9	0.011
122	0.011
122.1	0.01075
122.2	0.01075
122.3	0.01075
122.4	0.01075
122.5	0.01075
122.6	0.011
122.7	0.0115
122.8	0.0115
122.9	0.01175
123	0.01175
123.1	0.01175
123.2	0.01175
123.3	0.01175
123.4	0.01175
123.5	0.01175
123.6	0.01175
123.7	0.0115
123.8	0.01125
123.9	0.0115
124	0.0115
124.1	0.0115
124.2	0.0115
124.3	0.01175
124.4	0.01175
124.5	0.01175
124.6	0.01175
124.7	0.01225
124.8	0.0125
124.9	0.0125
125	0.0125
125.1	0.0125
125.2	0.0125
125.3	0.0125
125.4	0.01275
125.5	0.01275
125.6	0.01275
125.7	0.01275
125.8	0.01275
125.9	0.01275
126	0.01275
126.1	0.01275
126.2	0.01275
126.3	0.01275
126.4	0.01275
126.5	0.01275
126.6	0.013
126.7	0.013
126.8	0.013
126.9	0.0135
127	0.01375
127.1	0.01375
127.2	0.01375
127.3	0.01375
127.4	0.01375
127.5	0.014
127.6	0.014
127.7	0.01375
127.8	0.01375
127.9	0.0135
128	0.0135
128.1	0.01375
128.2	0.01375
128.3	0.01375
128.4	0.0135
128.5	0.0135
128.6	0.01375
128.7	0.0135
128.8	0.0135
128.9	0.01375
129	0.01375
129.1	0.01375
129.2	0.01375
129.3	0.014
129.4	0.01375
129.5	0.014
129.6	0.014
129.7	0.01375
129.8	0.01375
129.9	0.0135
130	0.0135
130.1	0.0135
130.2	0.01375
130.3	0.01375
130.4	0.01375
130.5	0.014
130.6	0.014
130.7	0.014
130.8	0.014
130.9	0.014
131	0.014
131.1	0.01425
131.2	0.01425
131.3	0.0145
131.4	0.0145
131.5	0.0145
131.6	0.01425
131.7	0.01425
131.8	0.01425
131.9	0.01425
132	0.01425
132.1	0.01425
132.2	0.01425
132.3	0.0145
132.4	0.0145
132.5	0.0145
132.6	0.0145
132.7	0.0145
132.8	0.01475
132.9	0.01475
133	0.015
133.1	0.015
133.2	0.015
133.3	0.015
133.4	0.01525
133.5	0.0155
133.6	0.01575
133.7	0.016
133.8	0.01575
133.9	0.01575
134	0.0155
134.1	0.01575
134.2	0.01575
134.3	0.01575
134.4	0.01575
134.5	0.01575
134.6	0.016
134.7	0.016
134.8	0.016
134.9	0.016
135	0.016
135.1	0.016
135.2	0.016
135.3	0.01625
135.4	0.01625
135.5	0.0165
135.6	0.01625
135.7	0.01625
135.8	0.016
135.9	0.01625
136	0.0165
136.1	0.0165
136.2	0.0165
136.3	0.01625
136.4	0.01625
136.5	0.0165
136.6	0.0165
136.7	0.0165
136.8	0.0165
136.9	0.01675
137	0.017
137.1	0.017
137.2	0.017
137.3	0.01725
137.4	0.0175
137.5	0.018
137.6	0.01775
137.7	0.0175
137.8	0.0175
137.9	0.0175
138	0.0175
138.1	0.0175
138.2	0.01775
138.3	0.01775
138.4	0.01775
138.5	0.01775
138.6	0.01825
138.7	0.01875
138.8	0.01875
138.9	0.019
139	0.01925
139.1	0.01925
139.2	0.0195
139.3	0.0195
139.4	0.01975
139.5	0.01975
139.6	0.01975
139.7	0.01975
139.8	0.02
139.9	0.02
140	0.02
140.1	0.02
140.2	0.02025
140.3	0.02025
140.4	0.02025
140.5	0.02025
140.6	0.02025
140.7	0.02025
140.8	0.02025
140.9	0.02025
141	0.02025
141.1	0.02025
141.2	0.02025
141.3	0.02025
141.4	0.02025
141.5	0.02
141.6	0.02
141.7	0.02
141.8	0.02025
141.9	0.02025
142	0.02025
142.1	0.02025
142.2	0.02025
142.3	0.02025
142.4	0.02025
142.5	0.0205
142.6	0.0205
142.7	0.0205
142.8	0.0205
142.9	0.02025
143	0.02025
143.1	0.02025
143.2	0.02025
143.3	0.0205
143.4	0.0205
143.5	0.0205
143.6	0.0205
143.7	0.0205
143.8	0.0205
143.9	0.02075
144	0.02075
144.1	0.02075
144.2	0.02075
144.3	0.02075
144.4	0.02125
144.5	0.02125
144.6	0.0215
144.7	0.0215
144.8	0.02125
144.9	0.0215
145	0.0215
145.1	0.02175
145.2	0.02175
145.3	0.02175
145.4	0.02175
145.5	0.02175
145.6	0.02175
145.7	0.02175
145.8	0.022
145.9	0.02225
146	0.02225
146.1	0.02225
146.2	0.02225
146.3	0.022
146.4	0.02175
146.5	0.02175
146.6	0.022
146.7	0.022
146.8	0.022
146.9	0.022
147	0.022
147.1	0.022
147.2	0.0225
147.3	0.0225
147.4	0.02275
147.5	0.02275
147.6	0.02275
147.7	0.0225
147.8	0.0225
147.9	0.0225
148	0.02275
148.1	0.02275
148.2	0.02275
148.3	0.02275
148.4	0.023
148.5	0.023
148.6	0.023
148.7	0.023
148.8	0.023
148.9	0.023
149	0.023
149.1	0.02275
149.2	0.02275
149.3	0.02275
149.4	0.023
149.5	0.023
149.6	0.023
149.7	0.023
149.8	0.02325
149.9	0.02325
150	0.02325
150.1	0.02325
150.2	0.02325
150.3	0.023
150.4	0.023
150.5	0.02325
150.6	0.02325
150.7	0.0235
150.8	0.02375
150.9	0.0235
151	0.0235
151.1	0.02375
151.2	0.024
151.3	0.024
151.4	0.02375
151.5	0.02375
151.6	0.02375
151.7	0.02375
151.8	0.02375
151.9	0.024
152	0.02375
152.1	0.02375
152.2	0.02375
152.3	0.02375
152.4	0.02375
152.5	0.02375
152.6	0.02375
152.7	0.02375
152.8	0.02375
152.9	0.0245
153	0.0245
153.1	0.02475
153.2	0.0245
153.3	0.0245
153.4	0.0245
153.5	0.0245
153.6	0.02475
153.7	0.02475
153.8	0.0245
153.9	0.0245
154	0.0245
154.1	0.02425
154.2	0.024
154.3	0.024
154.4	0.024
154.5	0.024
154.6	0.024
154.7	0.024
154.8	0.024
154.9	0.024
155	0.02375
155.1	0.02375
155.2	0.02375
155.3	0.02375
155.4	0.02375
155.5	0.02375
155.6	0.02375
155.7	0.02375
155.8	0.0235
155.9	0.02375
156	0.02375
156.1	0.02375
156.2	0.024
156.3	0.024
156.4	0.024
156.5	0.02375
156.6	0.02375
156.7	0.02375
156.8	0.02375
156.9	0.0235
157	0.02375
157.1	0.02375
157.2	0.02375
157.3	0.02375
157.4	0.02375
157.5	0.02375
157.6	0.02375
157.7	0.02375
157.8	0.024
157.9	0.024
158	0.02425
158.1	0.02425
158.2	0.02425
158.3	0.02425
158.4	0.02425
158.5	0.02425
158.6	0.02425
158.7	0.02425
158.8	0.02425
158.9	0.0245
159	0.0245
159.1	0.0245
159.2	0.0245
159.3	0.02475
159.4	0.025
159.5	0.02525
159.6	0.02525
159.7	0.02525
159.8	0.025
159.9	0.025
160	0.025
160.1	0.02525
160.2	0.0255
160.3	0.02575
160.4	0.02575
160.5	0.02575
160.6	0.02575
160.7	0.026
160.8	0.026
160.9	0.026
161	0.026
161.1	0.026
161.2	0.026
161.3	0.026
161.4	0.02625
161.5	0.02625
161.6	0.02625
161.7	0.0265
161.8	0.02675
161.9	0.027
162	0.027
162.1	0.02725
162.2	0.02725
162.3	0.0275
162.4	0.02725
162.5	0.02725
162.6	0.02725
162.7	0.02725
162.8	0.02725
162.9	0.02725
163	0.02725
163.1	0.02725
163.2	0.0275
163.3	0.0275
163.4	0.0275
163.5	0.0275
163.6	0.0275
163.7	0.0275
163.8	0.02775
163.9	0.02775
164	0.0275
164.1	0.02775
164.2	0.028
164.3	0.02825
164.4	0.0285
164.5	0.02875
164.6	0.02875
164.7	0.02875
164.8	0.02875
164.9	0.02875
165	0.02875
165.1	0.02925
165.2	0.0295
165.3	0.0295
165.4	0.02925
165.5	0.02925
165.6	0.02925
165.7	0.02925
165.8	0.02925
165.9	0.02925
166	0.02925
166.1	0.02975
166.2	0.02975
166.3	0.03
166.4	0.03
166.5	0.03
166.6	0.03025
166.7	0.03025
166.8	0.03025
166.9	0.03025
167	0.0305
167.1	0.0305
167.2	0.03075
167.3	0.03075
167.4	0.03075
167.5	0.03075
167.6	0.03075
167.7	0.0305
167.8	0.03075
167.9	0.03125
168	0.03125
168.1	0.03125
168.2	0.03125
168.3	0.031
168.4	0.031
168.5	0.031
168.6	0.031
168.7	0.03125
168.8	0.031
168.9	0.03125
169	0.0315
169.1	0.0315
169.2	0.0315
169.3	0.03125
169.4	0.03125
169.5	0.03125
169.6	0.03125
169.7	0.0315
169.8	0.0315
169.9	0.0315
170	0.03175
170.1	0.03175
170.2	0.03175
170.3	0.03175
170.4	0.03175
170.5	0.03225
170.6	0.03225
170.7	0.0325
170.8	0.0325
170.9	0.03275
171	0.0325
171.1	0.03275
171.2	0.033
171.3	0.033
171.4	0.033
171.5	0.033
171.6	0.03325
171.7	0.0335
171.8	0.0335
171.9	0.0335
172	0.0335
172.1	0.0335
172.2	0.03375
172.3	0.03375
172.4	0.03375
172.5	0.0335
172.6	0.034
172.7	0.03375
172.8	0.03375
172.9	0.03375
173	0.03375
173.1	0.03375
173.2	0.03375
173.3	0.034
173.4	0.034
173.5	0.034
173.6	0.034
173.7	0.03425
173.8	0.0345
173.9	0.0345
174	0.03475
174.1	0.03475
174.2	0.035
174.3	0.035
174.4	0.035
174.5	0.035
174.6	0.035
174.7	0.03475
174.8	0.035
174.9	0.035
175	0.035
175.1	0.03525
175.2	0.03525
175.3	0.03525
175.4	0.03525
175.5	0.03525
175.6	0.03525
175.7	0.0355
175.8	0.03525
175.9	0.03525
176	0.035
176.1	0.035
176.2	0.035
176.3	0.035
176.4	0.0355
176.5	0.0355
176.6	0.0355
176.7	0.0355
176.8	0.036
176.9	0.036
177	0.036
177.1	0.036
177.2	0.036
177.3	0.03575
177.4	0.036
177.5	0.03625
177.6	0.03625
177.7	0.03625
177.8	0.036
177.9	0.036
178	0.036
178.1	0.036
178.2	0.03625
178.3	0.0365
178.4	0.0365
178.5	0.0365
178.6	0.03675
178.7	0.03675
178.8	0.03675
178.9	0.03675
179	0.03675
179.1	0.03675
179.2	0.0365
179.3	0.0365
179.4	0.0365
179.5	0.03675
179.6	0.03675
179.7	0.03675
179.8	0.03675
179.9	0.03675
180	0.037
180.1	0.037
180.2	0.037
180.3	0.037
180.4	0.037
180.5	0.037
180.6	0.03725
180.7	0.0375
180.8	0.0375
180.9	0.03775
181	0.038
181.1	0.038
181.2	0.038
181.3	0.038
181.4	0.03825
181.5	0.03825
181.6	0.03825
181.7	0.0385
181.8	0.0385
181.9	0.03825
182	0.03825
182.1	0.03825
182.2	0.0385
182.3	0.0385
182.4	0.0385
182.5	0.03875
182.6	0.03925
182.7	0.039
182.8	0.039
182.9	0.039
183	0.039
183.1	0.039
183.2	0.03925
183.3	0.03925
183.4	0.03925
183.5	0.03925
183.6	0.03925
183.7	0.0395
183.8	0.03975
183.9	0.03975
184	0.03975
184.1	0.03975
184.2	0.03975
184.3	0.04
184.4	0.04
184.5	0.04
184.6	0.04
184.7	0.04
184.8	0.04
184.9	0.04
185	0.04
185.1	0.03975
185.2	0.0395
185.3	0.0395
185.4	0.03925
185.5	0.03925
185.6	0.03925
185.7	0.0395
185.8	0.0395
185.9	0.03975
186	0.03975
186.1	0.03975
186.2	0.0395
186.3	0.03975
186.4	0.03975
186.5	0.03975
186.6	0.03975
186.7	0.04
186.8	0.0405
186.9	0.04025
187	0.04025
187.1	0.04025
187.2	0.04025
187.3	0.04025
187.4	0.04025
187.5	0.0405
187.6	0.041
187.7	0.041
187.8	0.04075
187.9	0.041
188	0.041
188.1	0.04075
188.2	0.04075
188.3	0.04075
188.4	0.04075
188.5	0.0405
188.6	0.04025
188.7	0.04025
188.8	0.0405
188.9	0.04
189	0.04
189.1	0.03975
189.2	0.03975
189.3	0.04
189.4	0.04
189.5	0.04025
189.6	0.04025
189.7	0.0405
189.8	0.0405
189.9	0.041
190	0.04125
190.1	0.04125
190.2	0.0415
190.3	0.0415
190.4	0.0415
190.5	0.04175
190.6	0.04175
190.7	0.042
190.8	0.04225
190.9	0.0425
191	0.0425
191.1	0.04275
191.2	0.04275
191.3	0.043
191.4	0.04275
191.5	0.0425
191.6	0.0425
191.7	0.0425
191.8	0.0425
191.9	0.0425
192	0.0425
192.1	0.04225
192.2	0.04225
192.3	0.04225
192.4	0.0425
192.5	0.04275
192.6	0.04275
192.7	0.043
192.8	0.043
192.9	0.0435
193	0.0435
193.1	0.0435
193.2	0.0435
193.3	0.0435
193.4	0.0435
193.5	0.0435
193.6	0.0435
193.7	0.0435
193.8	0.0435
193.9	0.0435
194	0.0435
194.1	0.0435
194.2	0.04325
194.3	0.04325
194.4	0.04325
194.5	0.0435
194.6	0.0435
194.7	0.0435
194.8	0.0435
194.9	0.0435
195	0.04375
195.1	0.04375
195.2	0.04375
195.3	0.04375
195.4	0.04375
195.5	0.04375
195.6	0.04375
195.7	0.04375
195.8	0.044
195.9	0.044
196	0.044
196.1	0.044
196.2	0.04375
196.3	0.044
196.4	0.04425
196.5	0.044
196.6	0.044
196.7	0.044
196.8	0.04375
196.9	0.04375
197	0.0435
197.1	0.0435
197.2	0.0435
197.3	0.0435
197.4	0.0435
197.5	0.0435
197.6	0.0435
197.7	0.04325
197.8	0.04325
197.9	0.04325
198	0.04325
198.1	0.04325
198.2	0.043
198.3	0.0435
198.4	0.0435
198.5	0.04325
198.6	0.04325
198.7	0.04325
198.8	0.0435
198.9	0.04375
199	0.04425
199.1	0.04425
199.2	0.0445
199.3	0.0445
199.4	0.0445
199.5	0.04425
199.6	0.04425
199.7	0.04425
199.8	0.0445
199.9	0.0445
200	0.0445
[truncated: 14,000 more rows]
