# Supplementary material for: Bayesian inference of kinetic schemes for ion channels by Kalman filtering
Source: eLife journal article supplement (doi:10.7554/elife.62714), 2022-05-04
Supplement: fig4-data10 [file 1_Sim_N_5000_Fluor_MW.xlsx]

## Sheet: Tabelle1
0.1	0
0.2	0
0.3	0
0.4	0
0.5	0
0.6	0
0.7	0
0.8	0
0.9	0
1	0
1.1	0
1.2	0
1.3	0
1.4	0
1.5	0
1.6	0
1.7	0
1.8	0
1.9	0
2	0
2.1	0
2.2	0
2.3	0
2.4	0
2.5	0
2.6	0
2.7	0
2.8	0
2.9	0
3	0
3.1	0
3.2	0
3.3	0
3.4	0
3.5	0
3.6	0
3.7	0
3.8	0
3.9	0
4	0
4.1	0
4.2	0
4.3	0
4.4	0
4.5	0
4.6	0
4.7	0
4.8	0
4.9	0
5	0
5.1	0
5.2	0
5.3	0
5.4	0
5.5	0
5.6	0
5.7	0
5.8	0
5.9	0
6	0
6.1	0
6.2	0
6.3	0
6.4	0
6.5	0
6.6	0
6.7	0
6.8	0
6.9	0
7	0
7.1	0
7.2	0
7.3	0
7.4	0
7.5	0
7.6	0
7.7	0
7.8	0
7.9	0
8	0
8.1	0
8.2	0
8.3	0
8.4	0
8.5	0
8.6	0
8.7	0
8.8	0
8.9	0
9	0
9.1	0
9.2	0
9.3	0
9.4	0
9.5	0
9.6	0
9.7	0
9.8	0
9.9	0
10	0
10.1	0
10.2	0
10.3	0
10.4	0
10.5	0
10.6	0
10.7	0
10.8	0
10.9	0
11	0
11.1	0
11.2	0
11.3	0
11.4	0
11.5	0
11.6	0
11.7	0
11.8	0
11.9	0
12	0
12.1	0
12.2	0
12.3	0
12.4	0
12.5	0
12.6	0
12.7	0
12.8	0
12.9	0
13	0
13.1	0
13.2	0
13.3	0
13.4	0
13.5	0
13.6	0
13.7	0
13.8	0
13.9	0
14	0
14.1	0
14.2	0
14.3	0
14.4	0
14.5	0
14.6	0
14.7	0
14.8	0
14.9	0
15	0
15.1	0
15.2	0
15.3	0
15.4	0
15.5	0
15.6	0
15.7	0
15.8	0
15.9	0
16	0
16.1	0
16.2	0
16.3	0
16.4	0
16.5	0
16.6	0
16.7	0
16.8	0
16.9	0
17	0
17.1	0
17.2	0
17.3	0
17.4	0
17.5	0
17.6	0
17.7	0
17.8	0
17.9	0
18	0
18.1	0
18.2	0
18.3	0
18.4	0
18.5	0
18.6	0
18.7	0
18.8	0
18.9	0
19	0
19.1	0
19.2	0
19.3	0
19.4	0
19.5	0
19.6	0
19.7	0
19.8	0
19.9	0
20	0
20.1	0
20.2	0
20.3	0
20.4	0
20.5	0
20.6	0
20.7	0
20.8	0
20.9	0
21	0
21.1	0
21.2	0
21.3	0
21.4	0
21.5	0
21.6	0
21.7	0
21.8	0
21.9	0
22	0
22.1	0
22.2	0
22.3	0
22.4	0
22.5	0
22.6	0
22.7	0
22.8	0
22.9	0
23	0
23.1	0
23.2	0
23.3	0
23.4	0
23.5	0
23.6	0
23.7	0
23.8	0
23.9	0
24	0
24.1	0
24.2	0
24.3	0
24.4	0
24.5	0
24.6	0
24.7	0
24.8	0
24.9	0
25	0
25.1	0
25.2	0
25.3	0
25.4	0
25.5	0
25.6	0
25.7	0
25.8	0
25.9	0
26	0
26.1	0
26.2	0
26.3	0
26.4	0
26.5	0
26.6	0
26.7	0
26.8	0
26.9	0
27	0
27.1	0
27.2	0
27.3	0
27.4	0
27.5	0
27.6	0
27.7	0
27.8	0
27.9	0
28	0
28.1	0
28.2	0
28.3	0
28.4	0
28.5	0
28.6	0
28.7	0
28.8	0
28.9	0
29	0
29.1	0
29.2	0
29.3	0
29.4	0
29.5	0
29.6	0
29.7	0
29.8	0
29.9	0
30	0
30.1	0
30.2	0
30.3	0
30.4	0
30.5	0
30.6	0
30.7	0
30.8	0
30.9	0
31	0
31.1	0
31.2	0
31.3	0
31.4	0
31.5	0
31.6	0
31.7	0
31.8	0
31.9	0
32	0
32.1	0
32.2	0
32.3	0
32.4	0
32.5	0
32.6	0
32.7	0
32.8	0
32.9	0
33	0
33.1	0
33.2	0
33.3	0
33.4	0
33.5	0
33.6	0
33.7	0
33.8	0
33.9	0
34	0
34.1	0
34.2	0
34.3	0
34.4	0
34.5	0
34.6	0
34.7	0
34.8	0
34.9	0
35	0
35.1	0
35.2	0
35.3	0
35.4	0
35.5	0
35.6	0
35.7	0
35.8	0
35.9	0
36	0
36.1	0
36.2	0
36.3	0
36.4	0
36.5	0
36.6	0
36.7	0
36.8	0
36.9	0
37	0
37.1	0
37.2	0
37.3	0
37.4	0
37.5	0
37.6	0
37.7	0
37.8	0
37.9	0
38	0
38.1	0
38.2	0
38.3	0
38.4	0
38.5	0
38.6	0
38.7	0
38.8	0
38.9	0
39	0
39.1	0
39.2	0
39.3	0
39.4	0
39.5	0
39.6	0
39.7	0
39.8	0
39.9	0
40	0
40.1	0
40.2	0
40.3	0
40.4	0
40.5	0
40.6	0
40.7	0
40.8	0
40.9	0
41	0
41.1	0
41.2	0
41.3	0
41.4	0
41.5	0
41.6	0
41.7	0
41.8	0
41.9	0
42	0
42.1	0
42.2	0
42.3	0
42.4	0
42.5	0
42.6	0
42.7	0
42.8	0
42.9	0
43	0
43.1	0
43.2	0
43.3	0
43.4	0
43.5	0
43.6	0
43.7	0
43.8	0
43.9	0
44	0
44.1	0
44.2	0
44.3	0
44.4	0
44.5	0
44.6	0
44.7	0
44.8	0
44.9	0
45	0
45.1	0
45.2	0
45.3	0
45.4	0
45.5	0
45.6	0
45.7	0
45.8	0
45.9	0
46	0
46.1	0
46.2	0
46.3	0
46.4	0
46.5	0
46.6	0
46.7	0
46.8	0
46.9	0
47	0
47.1	0
47.2	0
47.3	0
47.4	0
47.5	0
47.6	0
47.7	0
47.8	0
47.9	0
48	0
48.1	0
48.2	0
48.3	0
48.4	0
48.5	0
48.6	0
48.7	0
48.8	0
48.9	0
49	0
49.1	0
49.2	0
49.3	0
49.4	0
49.5	0
49.6	0
49.7	0
49.8	0
49.9	0
50	0
50.1	0
50.2	0
50.3	0
50.4	0
50.5	0
50.6	0
50.7	0
50.8	0
50.9	0
51	0
51.1	0
51.2	0
51.3	0
51.4	0
51.5	0
51.6	0
51.7	0
51.8	0
51.9	0
52	0
52.1	0
52.2	0
52.3	0
52.4	0
52.5	0
52.6	0
52.7	0
52.8	0
52.9	0
53	0
53.1	0
53.2	0
53.3	0
53.4	0
53.5	0
53.6	0
53.7	0
53.8	0
53.9	0
54	0
54.1	0
54.2	0
54.3	0
54.4	0
54.5	0
54.6	0
54.7	0
54.8	0
54.9	0
55	0
55.1	0
55.2	0
55.3	0
55.4	0
55.5	0
55.6	0
55.7	0
55.8	0
55.9	0
56	0
56.1	0
56.2	0
56.3	0
56.4	0
56.5	0
56.6	0
56.7	0
56.8	0
56.9	0
57	0
57.1	0
57.2	0
57.3	0
57.4	0
57.5	0
57.6	0
57.7	0
57.8	0
57.9	0
58	0
58.1	0
58.2	0
58.3	0
58.4	0
58.5	0
58.6	0
58.7	0
58.8	0
58.9	0
59	0
59.1	0
59.2	0
59.3	0
59.4	0
59.5	0
59.6	0
59.7	0
59.8	0
59.9	0
60	0
60.1	0
60.2	0
60.3	0
60.4	0
60.5	0
60.6	0
60.7	0
60.8	0
60.9	0
61	0
61.1	0
61.2	0
61.3	0
61.4	0
61.5	0
61.6	0
61.7	0
61.8	0
61.9	0
62	0
62.1	0
62.2	0
62.3	0
62.4	0
62.5	0
62.6	0
62.7	0
62.8	0
62.9	0
63	0
63.1	0
63.2	0
63.3	0
63.4	0
63.5	0
63.6	0
63.7	0
63.8	0
63.9	0
64	0
64.1	0
64.2	0
64.3	0
64.4	0
64.5	0
64.6	0
64.7	0
64.8	0
64.9	0
65	0
65.1	0
65.2	0
65.3	0
65.4	0
65.5	0
65.6	0
65.7	0
65.8	0
65.9	0
66	0
66.1	0
66.2	0
66.3	0
66.4	0
66.5	0
66.6	0
66.7	0
66.8	0
66.9	0
67	0
67.1	0
67.2	0
67.3	0
67.4	0
67.5	0
67.6	0
67.7	0
67.8	0
67.9	0
68	0
68.1	0
68.2	0
68.3	0
68.4	0
68.5	0
68.6	0
68.7	0
68.8	0
68.9	0
69	0
69.1	0
69.2	0
69.3	0
69.4	0
69.5	0
69.6	0
69.7	0
69.8	0
69.9	0
70	0
70.1	0
70.2	0
70.3	0
70.4	0
70.5	0
70.6	0
70.7	0
70.8	0
70.9	0
71	0
71.1	0
71.2	0
71.3	0
71.4	0
71.5	0
71.6	0
71.7	0
71.8	0
71.9	0
72	0
72.1	0
72.2	0
72.3	0
72.4	0
72.5	0
72.6	0
72.7	0
72.8	0
72.9	0
73	0
73.1	0
73.2	0
73.3	0
73.4	0
73.5	0
73.6	0
73.7	0
73.8	0
73.9	0
74	0
74.1	0
74.2	0
74.3	0
74.4	0
74.5	0
74.6	0
74.7	0
74.8	0
74.9	0
75	0
75.1	0
75.2	0
75.3	0
75.4	0
75.5	0
75.6	0
75.7	0
75.8	0
75.9	0
76	0
76.1	0
76.2	0
76.3	0
76.4	0
76.5	0
76.6	0
76.7	0
76.8	0
76.9	0
77	0
77.1	0
77.2	0
77.3	0
77.4	0
77.5	0
77.6	0
77.7	0
77.8	0
77.9	0
78	0
78.1	0
78.2	0
78.3	0
78.4	0
78.5	0
78.6	0
78.7	0
78.8	0
78.9	0
79	0
79.1	0
79.2	0
79.3	0
79.4	0
79.5	0
79.6	0
79.7	0
79.8	0
79.9	0
80	0
80.1	0
80.2	0
80.3	0
80.4	0
80.5	0
80.6	0
80.7	0
80.8	0
80.9	0
81	0
81.1	0
81.2	0
81.3	0
81.4	0
81.5	0
81.6	0
81.7	0
81.8	0
81.9	0
82	0
82.1	0
82.2	0
82.3	0
82.4	0
82.5	0
82.6	0
82.7	0
82.8	0
82.9	0
83	0
83.1	0
83.2	0
83.3	0
83.4	0
83.5	0
83.6	0
83.7	0
83.8	0
83.9	0
84	0
84.1	0
84.2	0
84.3	0
84.4	0
84.5	0
84.6	0
84.7	0
84.8	0
84.9	0
85	0
85.1	0
85.2	0
85.3	0
85.4	0
85.5	0
85.6	0
85.7	0
85.8	0
85.9	0
86	0
86.1	0
86.2	0
86.3	0
86.4	0
86.5	0
86.6	0
86.7	0
86.8	0
86.9	0
87	0
87.1	0
87.2	0
87.3	0
87.4	0
87.5	0
87.6	0
87.7	0
87.8	0
87.9	0
88	0
88.1	0
88.2	0
88.3	0
88.4	0
88.5	0
88.6	0
88.7	0
88.8	0
88.9	0
89	0
89.1	0
89.2	0
89.3	0
89.4	0
89.5	0
89.6	0
89.7	0
89.8	0
89.9	0
90	0
90.1	0
90.2	0
90.3	0
90.4	0
90.5	0
90.6	0
90.7	0
90.8	0
90.9	0
91	0
91.1	0
91.2	0
91.3	0
91.4	0
91.5	0
91.6	0
91.7	0
91.8	0
91.9	0
92	0
92.1	0
92.2	0
92.3	0
92.4	0
92.5	0
92.6	0
92.7	0
92.8	0
92.9	0
93	0
93.1	0
93.2	0
93.3	0
93.4	0
93.5	0
93.6	0
93.7	0
93.8	0
93.9	0
94	0
94.1	0
94.2	0
94.3	0
94.4	0
94.5	0
94.6	0
94.7	0
94.8	0
94.9	0
95	0
95.1	0
95.2	0
95.3	0
95.4	0
95.5	0
95.6	0
95.7	0
95.8	0
95.9	0
96	0
96.1	0
96.2	0
96.3	0
96.4	0
96.5	0
96.6	0
96.7	0
96.8	0
96.9	0
97	0
97.1	0
97.2	0
97.3	0
97.4	0
97.5	0
97.6	0
97.7	0
97.8	0
97.9	0
98	0
98.1	0
98.2	0
98.3	0
98.4	0
98.5	0
98.6	0
98.7	0
98.8	0
98.9	0
99	0
99.1	0
99.2	0
99.3	0
99.4	0
99.5	0
99.6	0
99.7	0
99.8	0
99.9	0
100	0
100.1	0.0037
100.2	0.0071
100.3	0.0099
100.4	0.0133
100.5	0.017
100.6	0.0206
100.7	0.0227
100.8	0.025
100.9	0.028
101	0.0318
101.1	0.035
101.2	0.0382
101.3	0.0411
101.4	0.0443
101.5	0.0463
101.6	0.0483
101.7	0.0512
101.8	0.0547
101.9	0.0564
102	0.0592
102.1	0.0621
102.2	0.0646
102.3	0.0667
102.4	0.0682
102.5	0.0706
102.6	0.0734
102.7	0.075
102.8	0.0773
102.9	0.0793
103	0.0808
103.1	0.0822
103.2	0.0846
103.3	0.0869
103.4	0.0891
103.5	0.0908
103.6	0.0933
103.7	0.0949
103.8	0.097
103.9	0.0991
104	0.1004
104.1	0.1033
104.2	0.1051
104.3	0.106
104.4	0.1075
104.5	0.1087
104.6	0.1109
104.7	0.1125
104.8	0.1141
104.9	0.1156
105	0.117
105.1	0.1184
105.2	0.1207
105.3	0.1232
105.4	0.1251
105.5	0.1272
105.6	0.1295
105.7	0.131
105.8	0.1327
105.9	0.1345
106	0.1353
106.1	0.1366
106.2	0.1386
106.3	0.1394
106.4	0.1405
106.5	0.1418
106.6	0.1435
106.7	0.1439
106.8	0.1449
106.9	0.1472
107	0.1486
107.1	0.1505
107.2	0.1527
107.3	0.1541
107.4	0.1556
107.5	0.1561
107.6	0.1563
107.7	0.1571
107.8	0.1571
107.9	0.1578
108	0.1583
108.1	0.159
108.2	0.161
108.3	0.1623
108.4	0.1633
108.5	0.1649
108.6	0.1643
108.7	0.1651
108.8	0.1661
108.9	0.1662
109	0.1672
109.1	0.1677
109.2	0.1689
109.3	0.17
109.4	0.17
109.5	0.1704
109.6	0.1719
109.7	0.1727
109.8	0.1732
109.9	0.1746
110	0.1755
110.1	0.1772
110.2	0.1779
110.3	0.1785
110.4	0.179
110.5	0.1791
110.6	0.1804
110.7	0.1807
110.8	0.1815
110.9	0.1822
111	0.1833
111.1	0.185
111.2	0.186
111.3	0.1865
111.4	0.188
111.5	0.1891
111.6	0.1896
111.7	0.1904
111.8	0.1913
111.9	0.1918
112	0.1929
112.1	0.194
112.2	0.1952
112.3	0.1965
112.4	0.1968
112.5	0.197
112.6	0.1992
112.7	0.2002
112.8	0.2008
112.9	0.2001
113	0.2009
113.1	0.2016
113.2	0.2025
113.3	0.2009
113.4	0.2013
113.5	0.2015
113.6	0.2019
113.7	0.201
113.8	0.2008
113.9	0.2024
114	0.2029
114.1	0.2031
114.2	0.2035
114.3	0.2049
114.4	0.2063
114.5	0.2054
114.6	0.2047
114.7	0.2053
114.8	0.2049
114.9	0.2052
115	0.2059
115.1	0.2058
115.2	0.2056
115.3	0.2066
115.4	0.2068
115.5	0.2074
115.6	0.2076
115.7	0.2077
115.8	0.2071
115.9	0.2088
116	0.2096
116.1	0.2094
116.2	0.2103
116.3	0.211
116.4	0.2123
116.5	0.2127
116.6	0.2124
116.7	0.2117
116.8	0.212
116.9	0.2125
117	0.2123
117.1	0.2132
117.2	0.214
117.3	0.2148
117.4	0.215
117.5	0.2161
117.6	0.2162
117.7	0.2169
117.8	0.2175
117.9	0.2184
118	0.2196
118.1	0.2209
118.2	0.2227
118.3	0.2223
118.4	0.2219
118.5	0.2224
118.6	0.2227
118.7	0.2229
118.8	0.2229
118.9	0.2225
119	0.2217
119.1	0.2214
119.2	0.2222
119.3	0.224
119.4	0.2247
119.5	0.2247
119.6	0.225
119.7	0.2242
119.8	0.2241
119.9	0.225
120	0.2255
120.1	0.2251
120.2	0.2252
120.3	0.2252
120.4	0.225
120.5	0.2255
120.6	0.2247
120.7	0.2248
120.8	0.2251
120.9	0.2244
121	0.2248
121.1	0.2237
121.2	0.2255
121.3	0.2243
121.4	0.2244
121.5	0.2254
121.6	0.2254
121.7	0.226
121.8	0.2255
121.9	0.2251
122	0.226
122.1	0.2268
122.2	0.2263
122.3	0.2265
122.4	0.2276
122.5	0.2274
122.6	0.227
122.7	0.2271
122.8	0.2274
122.9	0.2272
123	0.2282
123.1	0.2286
123.2	0.2294
123.3	0.2294
123.4	0.2298
123.5	0.2301
123.6	0.2302
123.7	0.2294
123.8	0.2292
123.9	0.2281
124	0.2281
124.1	0.2282
124.2	0.2281
124.3	0.229
124.4	0.2288
124.5	0.2287
124.6	0.2286
124.7	0.2299
124.8	0.2295
124.9	0.2307
125	0.2299
125.1	0.2295
125.2	0.2298
125.3	0.2297
125.4	0.2292
125.5	0.23
125.6	0.2298
125.7	0.2298
125.8	0.2302
125.9	0.2297
126	0.2304
126.1	0.2304
126.2	0.2304
126.3	0.231
126.4	0.231
126.5	0.2322
126.6	0.2323
126.7	0.2325
126.8	0.2326
126.9	0.232
127	0.233
127.1	0.2326
127.2	0.2323
127.3	0.2315
127.4	0.2311
127.5	0.2314
127.6	0.2306
127.7	0.2325
127.8	0.2324
127.9	0.2321
128	0.2322
128.1	0.2325
128.2	0.2342
128.3	0.2354
128.4	0.2353
128.5	0.2355
128.6	0.2367
128.7	0.2364
128.8	0.2365
128.9	0.2376
129	0.2378
129.1	0.2392
129.2	0.2384
129.3	0.2374
129.4	0.2369
129.5	0.2364
129.6	0.2356
129.7	0.2344
129.8	0.2342
129.9	0.2335
130	0.2326
130.1	0.2331
130.2	0.2327
130.3	0.2325
130.4	0.2331
130.5	0.2333
130.6	0.2336
130.7	0.2325
130.8	0.2325
130.9	0.2329
131	0.2326
131.1	0.2331
131.2	0.2329
131.3	0.2325
131.4	0.2333
131.5	0.233
131.6	0.2329
131.7	0.234
131.8	0.2351
131.9	0.2356
132	0.2356
132.1	0.236
132.2	0.2362
132.3	0.2368
132.4	0.2358
132.5	0.2363
132.6	0.2366
132.7	0.2379
132.8	0.2386
132.9	0.2399
133	0.2397
133.1	0.2392
133.2	0.2389
133.3	0.2403
133.4	0.2408
133.5	0.2409
133.6	0.2396
133.7	0.2395
133.8	0.2407
133.9	0.241
134	0.2409
134.1	0.2407
134.2	0.2421
134.3	0.2427
134.4	0.2417
134.5	0.2405
134.6	0.2409
134.7	0.2411
134.8	0.2403
134.9	0.2416
135	0.2418
135.1	0.2399
135.2	0.2401
135.3	0.2401
135.4	0.2397
135.5	0.2393
135.6	0.2386
135.7	0.2391
135.8	0.2386
135.9	0.2391
136	0.2405
136.1	0.2407
136.2	0.2403
136.3	0.2408
136.4	0.2404
136.5	0.2398
136.6	0.2382
136.7	0.2381
136.8	0.2383
136.9	0.2386
137	0.2389
137.1	0.2394
137.2	0.239
137.3	0.2396
137.4	0.2394
137.5	0.2395
137.6	0.24
137.7	0.24
137.8	0.2396
137.9	0.2393
138	0.2398
138.1	0.2403
138.2	0.2409
138.3	0.24
138.4	0.2399
138.5	0.2402
138.6	0.2395
138.7	0.2397
138.8	0.2408
138.9	0.2403
139	0.24
139.1	0.2406
139.2	0.2409
139.3	0.2402
139.4	0.2397
139.5	0.2394
139.6	0.2402
139.7	0.2398
139.8	0.2389
139.9	0.2393
140	0.2394
140.1	0.2395
140.2	0.2395
140.3	0.2402
140.4	0.2405
140.5	0.2405
140.6	0.2407
140.7	0.2411
140.8	0.2426
140.9	0.2429
141	0.2422
141.1	0.2429
141.2	0.2434
141.3	0.2432
141.4	0.2429
141.5	0.2417
141.6	0.242
141.7	0.2409
141.8	0.2407
141.9	0.2405
142	0.2406
142.1	0.2404
142.2	0.2394
142.3	0.239
142.4	0.2391
142.5	0.2391
142.6	0.2388
142.7	0.2386
142.8	0.2381
142.9	0.2387
143	0.2389
143.1	0.2394
143.2	0.2394
143.3	0.238
143.4	0.2372
143.5	0.2366
143.6	0.2359
143.7	0.2363
143.8	0.2356
143.9	0.2367
144	0.2369
144.1	0.2367
144.2	0.2373
144.3	0.2364
144.4	0.2361
144.5	0.2362
144.6	0.2362
144.7	0.2365
144.8	0.2357
144.9	0.235
145	0.2341
145.1	0.2342
145.2	0.2341
145.3	0.2348
145.4	0.2354
145.5	0.2348
145.6	0.2347
145.7	0.2352
145.8	0.2353
145.9	0.2349
146	0.2354
146.1	0.2354
146.2	0.2367
146.3	0.2362
146.4	0.2368
146.5	0.2376
146.6	0.2375
146.7	0.2378
146.8	0.237
146.9	0.2378
147	0.2376
147.1	0.2384
147.2	0.2366
147.3	0.2364
147.4	0.2374
147.5	0.237
147.6	0.2369
147.7	0.2365
147.8	0.2361
147.9	0.2367
148	0.2359
148.1	0.2367
148.2	0.2373
148.3	0.2374
148.4	0.2371
148.5	0.2367
148.6	0.2369
148.7	0.2365
148.8	0.2373
148.9	0.2369
149	0.2384
149.1	0.2374
149.2	0.2379
149.3	0.2377
149.4	0.2383
149.5	0.2382
149.6	0.2384
149.7	0.2395
149.8	0.239
149.9	0.2388
150	0.2384
150.1	0.239
150.2	0.2386
150.3	0.2389
150.4	0.2391
150.5	0.2389
150.6	0.2389
150.7	0.2391
150.8	0.2383
150.9	0.2393
151	0.2398
151.1	0.2413
151.2	0.2407
151.3	0.2407
151.4	0.2404
151.5	0.2408
151.6	0.2408
151.7	0.2408
151.8	0.2394
151.9	0.2385
152	0.2388
152.1	0.2385
152.2	0.2389
152.3	0.2394
152.4	0.2392
152.5	0.2403
152.6	0.2404
152.7	0.2411
152.8	0.2408
152.9	0.2413
153	0.2421
153.1	0.2418
153.2	0.2416
153.3	0.242
153.4	0.2419
153.5	0.2412
153.6	0.2421
153.7	0.2422
153.8	0.2424
153.9	0.2423
154	0.2431
154.1	0.2424
154.2	0.2424
154.3	0.2431
154.4	0.2424
154.5	0.2426
154.6	0.2428
154.7	0.2429
154.8	0.2421
154.9	0.2409
155	0.2411
155.1	0.2404
155.2	0.2399
155.3	0.2401
155.4	0.2396
155.5	0.2406
155.6	0.2427
155.7	0.2428
155.8	0.2417
155.9	0.2415
156	0.2423
156.1	0.2421
156.2	0.2409
156.3	0.2414
156.4	0.241
156.5	0.241
156.6	0.2412
156.7	0.2412
156.8	0.2399
156.9	0.2408
157	0.2408
157.1	0.2404
157.2	0.2403
157.3	0.2418
157.4	0.2425
157.5	0.2416
157.6	0.2411
157.7	0.2408
157.8	0.2395
157.9	0.2391
158	0.2399
158.1	0.2402
158.2	0.2395
158.3	0.2404
158.4	0.2409
158.5	0.2406
158.6	0.2407
158.7	0.2402
158.8	0.2404
158.9	0.2405
159	0.2401
159.1	0.2417
159.2	0.2426
159.3	0.2421
159.4	0.2417
159.5	0.2423
159.6	0.2417
159.7	0.2415
159.8	0.2406
159.9	0.2408
160	0.2408
160.1	0.2401
160.2	0.24
160.3	0.2395
160.4	0.2403
160.5	0.2413
160.6	0.2404
160.7	0.2398
160.8	0.2395
160.9	0.2409
161	0.2417
161.1	0.2419
161.2	0.2425
161.3	0.2433
161.4	0.2427
161.5	0.2443
161.6	0.2449
161.7	0.2454
161.8	0.2458
161.9	0.2467
162	0.2464
162.1	0.2463
162.2	0.2455
162.3	0.245
162.4	0.2455
162.5	0.2464
162.6	0.2478
162.7	0.2476
162.8	0.2478
162.9	0.2472
163	0.2474
163.1	0.2478
163.2	0.2472
163.3	0.2464
163.4	0.2457
163.5	0.2454
163.6	0.2466
163.7	0.2467
163.8	0.2474
163.9	0.249
164	0.2509
164.1	0.251
164.2	0.249
164.3	0.2491
164.4	0.2487
164.5	0.2488
164.6	0.249
164.7	0.249
164.8	0.2497
164.9	0.2484
165	0.2487
165.1	0.2492
165.2	0.2498
165.3	0.2498
165.4	0.249
165.5	0.2498
165.6	0.2503
165.7	0.2491
165.8	0.2491
165.9	0.2483
166	0.2486
166.1	0.2485
166.2	0.2482
166.3	0.2481
166.4	0.2478
166.5	0.2491
166.6	0.2503
166.7	0.2503
166.8	0.2509
166.9	0.2507
167	0.2498
167.1	0.2504
167.2	0.25
167.3	0.249
167.4	0.2496
167.5	0.2491
167.6	0.2498
167.7	0.2503
167.8	0.2492
167.9	0.2499
168	0.2496
168.1	0.2493
168.2	0.2509
168.3	0.251
168.4	0.2514
168.5	0.2511
168.6	0.2524
168.7	0.251
168.8	0.2495
168.9	0.2485
169	0.2485
169.1	0.247
169.2	0.247
169.3	0.2477
169.4	0.2482
169.5	0.2495
169.6	0.2492
169.7	0.2489
169.8	0.2486
169.9	0.2491
170	0.25
170.1	0.2493
170.2	0.249
170.3	0.2486
170.4	0.2487
170.5	0.2487
170.6	0.2473
170.7	0.2478
170.8	0.2479
170.9	0.2473
171	0.2486
171.1	0.2483
171.2	0.2484
171.3	0.2482
171.4	0.2473
171.5	0.2466
171.6	0.2473
171.7	0.2476
171.8	0.2472
171.9	0.2477
172	0.2467
172.1	0.2467
172.2	0.2471
172.3	0.2466
172.4	0.2466
172.5	0.2461
172.6	0.2456
172.7	0.2445
172.8	0.2446
172.9	0.2456
173	0.246
173.1	0.2465
173.2	0.2478
173.3	0.2476
173.4	0.2477
173.5	0.248
173.6	0.2483
173.7	0.249
173.8	0.2492
173.9	0.2497
174	0.2494
174.1	0.2492
174.2	0.2494
174.3	0.2499
174.4	0.2499
174.5	0.2493
174.6	0.2491
174.7	0.2497
174.8	0.2492
174.9	0.2493
175	0.2491
175.1	0.2492
175.2	0.2494
175.3	0.25
175.4	0.2508
175.5	0.2504
175.6	0.25
175.7	0.2507
175.8	0.2508
175.9	0.2506
176	0.2512
176.1	0.2498
176.2	0.2499
176.3	0.2506
176.4	0.251
176.5	0.2504
176.6	0.2498
176.7	0.2501
176.8	0.2499
176.9	0.2503
177	0.2502
177.1	0.2507
177.2	0.2505
177.3	0.2504
177.4	0.2503
177.5	0.2508
177.6	0.2506
177.7	0.2507
177.8	0.2506
177.9	0.2519
178	0.2525
178.1	0.2529
178.2	0.2525
178.3	0.2526
178.4	0.2537
178.5	0.2554
178.6	0.2552
178.7	0.255
178.8	0.2551
178.9	0.254
179	0.2545
179.1	0.2531
179.2	0.2534
179.3	0.2537
179.4	0.2534
179.5	0.2534
179.6	0.2532
179.7	0.2534
179.8	0.2525
179.9	0.2513
180	0.2523
180.1	0.2521
180.2	0.2522
180.3	0.2509
180.4	0.2496
180.5	0.2491
180.6	0.2492
180.7	0.2492
180.8	0.2492
180.9	0.2507
181	0.2517
181.1	0.2517
181.2	0.251
181.3	0.2525
181.4	0.253
181.5	0.2525
181.6	0.2523
181.7	0.2532
181.8	0.2538
181.9	0.2539
182	0.2548
182.1	0.2554
182.2	0.2554
182.3	0.2551
182.4	0.2549
182.5	0.2543
182.6	0.2537
182.7	0.2537
182.8	0.2535
182.9	0.2527
183	0.2514
183.1	0.2512
183.2	0.2516
183.3	0.2525
183.4	0.2525
183.5	0.2523
183.6	0.2521
183.7	0.2524
183.8	0.2522
183.9	0.2524
184	0.2528
184.1	0.2533
184.2	0.2535
184.3	0.2542
184.4	0.2542
184.5	0.2536
184.6	0.2537
184.7	0.254
184.8	0.253
184.9	0.2541
185	0.253
185.1	0.2544
185.2	0.2541
185.3	0.2531
185.4	0.2534
185.5	0.254
185.6	0.2525
185.7	0.2538
185.8	0.2547
185.9	0.2534
186	0.2537
186.1	0.2532
186.2	0.2534
186.3	0.254
186.4	0.254
186.5	0.2547
186.6	0.2557
186.7	0.2557
186.8	0.2556
186.9	0.2558
187	0.2561
187.1	0.2551
187.2	0.256
187.3	0.2558
187.4	0.257
187.5	0.257
187.6	0.2573
187.7	0.257
187.8	0.2567
187.9	0.2569
188	0.2558
188.1	0.2562
188.2	0.2566
188.3	0.2562
188.4	0.2566
188.5	0.2564
188.6	0.255
188.7	0.2544
188.8	0.256
188.9	0.2562
189	0.256
189.1	0.2564
189.2	0.2557
189.3	0.2551
189.4	0.256
189.5	0.2567
189.6	0.2565
189.7	0.2568
189.8	0.2576
189.9	0.2576
190	0.2576
190.1	0.2572
190.2	0.2575
190.3	0.2569
190.4	0.2568
190.5	0.2571
190.6	0.2579
190.7	0.2575
190.8	0.2571
190.9	0.2578
191	0.2571
191.1	0.2566
191.2	0.2564
191.3	0.256
191.4	0.2557
191.5	0.2548
191.6	0.255
191.7	0.254
191.8	0.2543
191.9	0.2547
192	0.2545
192.1	0.255
192.2	0.2556
192.3	0.2552
192.4	0.2548
192.5	0.2559
192.6	0.2567
192.7	0.2571
192.8	0.2568
192.9	0.2581
193	0.2574
193.1	0.2586
193.2	0.258
193.3	0.2581
193.4	0.2569
193.5	0.259
193.6	0.2595
193.7	0.2588
193.8	0.2589
193.9	0.2595
194	0.259
194.1	0.2592
194.2	0.2589
194.3	0.2583
194.4	0.2586
194.5	0.2593
194.6	0.2589
194.7	0.2582
194.8	0.2575
194.9	0.2574
195	0.258
195.1	0.2582
195.2	0.258
195.3	0.2582
195.4	0.2587
195.5	0.26
195.6	0.2606
195.7	0.2609
195.8	0.261
195.9	0.2612
196	0.261
196.1	0.2599
196.2	0.2597
196.3	0.2591
196.4	0.2605
196.5	0.2604
196.6	0.2598
196.7	0.2605
196.8	0.2593
196.9	0.2588
197	0.2584
197.1	0.2579
197.2	0.2584
197.3	0.2584
197.4	0.2586
197.5	0.2572
197.6	0.2565
197.7	0.2561
197.8	0.2564
197.9	0.2568
198	0.2562
198.1	0.2561
198.2	0.2552
198.3	0.2556
198.4	0.2547
198.5	0.2544
198.6	0.2543
198.7	0.2553
198.8	0.2562
198.9	0.2563
199	0.2559
199.1	0.2554
199.2	0.2555
199.3	0.2555
199.4	0.2566
199.5	0.2577
199.6	0.2568
199.7	0.2562
199.8	0.257
199.9	0.2577
200	0.2581
[truncated: 14,000 more rows]
