# Supplementary material for: Bayesian inference of kinetic schemes for ion channels by Kalman filtering
Source: eLife journal article supplement (doi:10.7554/elife.62714), 2022-05-04
Supplement: fig4-data10 [file 1_Sim_N_5000_Strom_MW.xlsx]

## Sheet: Tabelle1
0.1	0
0.2	0
0.3	0
0.4	0
0.5	0
0.6	0
0.7	0
0.8	0
0.9	0
1	0
1.1	0
1.2	0
1.3	0
1.4	0
1.5	0
1.6	0
1.7	0
1.8	0
1.9	0
2	0
2.1	0
2.2	0
2.3	0
2.4	0
2.5	0
2.6	0
2.7	0
2.8	0
2.9	0
3	0
3.1	0
3.2	0
3.3	0
3.4	0
3.5	0
3.6	0
3.7	0
3.8	0
3.9	0
4	0
4.1	0
4.2	0
4.3	0
4.4	0
4.5	0
4.6	0
4.7	0
4.8	0
4.9	0
5	0
5.1	0
5.2	0
5.3	0
5.4	0
5.5	0
5.6	0
5.7	0
5.8	0
5.9	0
6	0
6.1	0
6.2	0
6.3	0
6.4	0
6.5	0
6.6	0
6.7	0
6.8	0
6.9	0
7	0
7.1	0
7.2	0
7.3	0
7.4	0
7.5	0
7.6	0
7.7	0
7.8	0
7.9	0
8	0
8.1	0
8.2	0
8.3	0
8.4	0
8.5	0
8.6	0
8.7	0
8.8	0
8.9	0
9	0
9.1	0
9.2	0
9.3	0
9.4	0
9.5	0
9.6	0
9.7	0
9.8	0
9.9	0
10	0
10.1	0
10.2	0
10.3	0
10.4	0
10.5	0
10.6	0
10.7	0
10.8	0
10.9	0
11	0
11.1	0
11.2	0
11.3	0
11.4	0
11.5	0
11.6	0
11.7	0
11.8	0
11.9	0
12	0
12.1	0
12.2	0
12.3	0
12.4	0
12.5	0
12.6	0
12.7	0
12.8	0
12.9	0
13	0
13.1	0
13.2	0
13.3	0
13.4	0
13.5	0
13.6	0
13.7	0
13.8	0
13.9	0
14	0
14.1	0
14.2	0
14.3	0
14.4	0
14.5	0
14.6	0
14.7	0
14.8	0
14.9	0
15	0
15.1	0
15.2	0
15.3	0
15.4	0
15.5	0
15.6	0
15.7	0
15.8	0
15.9	0
16	0
16.1	0
16.2	0
16.3	0
16.4	0
16.5	0
16.6	0
16.7	0
16.8	0
16.9	0
17	0
17.1	0
17.2	0
17.3	0
17.4	0
17.5	0
17.6	0
17.7	0
17.8	0
17.9	0
18	0
18.1	0
18.2	0
18.3	0
18.4	0
18.5	0
18.6	0
18.7	0
18.8	0
18.9	0
19	0
19.1	0
19.2	0
19.3	0
19.4	0
19.5	0
19.6	0
19.7	0
19.8	0
19.9	0
20	0
20.1	0
20.2	0
20.3	0
20.4	0
20.5	0
20.6	0
20.7	0
20.8	0
20.9	0
21	0
21.1	0
21.2	0
21.3	0
21.4	0
21.5	0
21.6	0
21.7	0
21.8	0
21.9	0
22	0
22.1	0
22.2	0
22.3	0
22.4	0
22.5	0
22.6	0
22.7	0
22.8	0
22.9	0
23	0
23.1	0
23.2	0
23.3	0
23.4	0
23.5	0
23.6	0
23.7	0
23.8	0
23.9	0
24	0
24.1	0
24.2	0
24.3	0
24.4	0
24.5	0
24.6	0
24.7	0
24.8	0
24.9	0
25	0
25.1	0
25.2	0
25.3	0
25.4	0
25.5	0
25.6	0
25.7	0
25.8	0
25.9	0
26	0
26.1	0
26.2	0
26.3	0
26.4	0
26.5	0
26.6	0
26.7	0
26.8	0
26.9	0
27	0
27.1	0
27.2	0
27.3	0
27.4	0
27.5	0
27.6	0
27.7	0
27.8	0
27.9	0
28	0
28.1	0
28.2	0
28.3	0
28.4	0
28.5	0
28.6	0
28.7	0
28.8	0
28.9	0
29	0
29.1	0
29.2	0
29.3	0
29.4	0
29.5	0
29.6	0
29.7	0
29.8	0
29.9	0
30	0
30.1	0
30.2	0
30.3	0
30.4	0
30.5	0
30.6	0
30.7	0
30.8	0
30.9	0
31	0
31.1	0
31.2	0
31.3	0
31.4	0
31.5	0
31.6	0
31.7	0
31.8	0
31.9	0
32	0
32.1	0
32.2	0
32.3	0
32.4	0
32.5	0
32.6	0
32.7	0
32.8	0
32.9	0
33	0
33.1	0
33.2	0
33.3	0
33.4	0
33.5	0
33.6	0
33.7	0
33.8	0
33.9	0
34	0
34.1	0
34.2	0
34.3	0
34.4	0
34.5	0
34.6	0
34.7	0
34.8	0
34.9	0
35	0
35.1	0
35.2	0
35.3	0
35.4	0
35.5	0
35.6	0
35.7	0
35.8	0
35.9	0
36	0
36.1	0
36.2	0
36.3	0
36.4	0
36.5	0
36.6	0
36.7	0
36.8	0
36.9	0
37	0
37.1	0
37.2	0
37.3	0
37.4	0
37.5	0
37.6	0
37.7	0
37.8	0
37.9	0
38	0
38.1	0
38.2	0
38.3	0
38.4	0
38.5	0
38.6	0
38.7	0
38.8	0
38.9	0
39	0
39.1	0
39.2	0
39.3	0
39.4	0
39.5	0
39.6	0
39.7	0
39.8	0
39.9	0
40	0
40.1	0
40.2	0
40.3	0
40.4	0
40.5	0
40.6	0
40.7	0
40.8	0
40.9	0
41	0
41.1	0
41.2	0
41.3	0
41.4	0
41.5	0
41.6	0
41.7	0
41.8	0
41.9	0
42	0
42.1	0
42.2	0
42.3	0
42.4	0
42.5	0
42.6	0
42.7	0
42.8	0
42.9	0
43	0
43.1	0
43.2	0
43.3	0
43.4	0
43.5	0
43.6	0
43.7	0
43.8	0
43.9	0
44	0
44.1	0
44.2	0
44.3	0
44.4	0
44.5	0
44.6	0
44.7	0
44.8	0
44.9	0
45	0
45.1	0
45.2	0
45.3	0
45.4	0
45.5	0
45.6	0
45.7	0
45.8	0
45.9	0
46	0
46.1	0
46.2	0
46.3	0
46.4	0
46.5	0
46.6	0
46.7	0
46.8	0
46.9	0
47	0
47.1	0
47.2	0
47.3	0
47.4	0
47.5	0
47.6	0
47.7	0
47.8	0
47.9	0
48	0
48.1	0
48.2	0
48.3	0
48.4	0
48.5	0
48.6	0
48.7	0
48.8	0
48.9	0
49	0
49.1	0
49.2	0
49.3	0
49.4	0
49.5	0
49.6	0
49.7	0
49.8	0
49.9	0
50	0
50.1	0
50.2	0
50.3	0
50.4	0
50.5	0
50.6	0
50.7	0
50.8	0
50.9	0
51	0
51.1	0
51.2	0
51.3	0
51.4	0
51.5	0
51.6	0
51.7	0
51.8	0
51.9	0
52	0
52.1	0
52.2	0
52.3	0
52.4	0
52.5	0
52.6	0
52.7	0
52.8	0
52.9	0
53	0
53.1	0
53.2	0
53.3	0
53.4	0
53.5	0
53.6	0
53.7	0
53.8	0
53.9	0
54	0
54.1	0
54.2	0
54.3	0
54.4	0
54.5	0
54.6	0
54.7	0
54.8	0
54.9	0
55	0
55.1	0
55.2	0
55.3	0
55.4	0
55.5	0
55.6	0
55.7	0
55.8	0
55.9	0
56	0
56.1	0
56.2	0
56.3	0
56.4	0
56.5	0
56.6	0
56.7	0
56.8	0
56.9	0
57	0
57.1	0
57.2	0
57.3	0
57.4	0
57.5	0
57.6	0
57.7	0
57.8	0
57.9	0
58	0
58.1	0
58.2	0
58.3	0
58.4	0
58.5	0
58.6	0
58.7	0
58.8	0
58.9	0
59	0
59.1	0
59.2	0
59.3	0
59.4	0
59.5	0
59.6	0
59.7	0
59.8	0
59.9	0
60	0
60.1	0
60.2	0
60.3	0
60.4	0
60.5	0
60.6	0
60.7	0
60.8	0
60.9	0
61	0
61.1	0
61.2	0
61.3	0
61.4	0
61.5	0
61.6	0
61.7	0
61.8	0
61.9	0
62	0
62.1	0
62.2	0
62.3	0
62.4	0
62.5	0
62.6	0
62.7	0
62.8	0
62.9	0
63	0
63.1	0
63.2	0
63.3	0
63.4	0
63.5	0
63.6	0
63.7	0
63.8	0
63.9	0
64	0
64.1	0
64.2	0
64.3	0
64.4	0
64.5	0
64.6	0
64.7	0
64.8	0
64.9	0
65	0
65.1	0
65.2	0
65.3	0
65.4	0
65.5	0
65.6	0
65.7	0
65.8	0
65.9	0
66	0
66.1	0
66.2	0
66.3	0
66.4	0
66.5	0
66.6	0
66.7	0
66.8	0
66.9	0
67	0
67.1	0
67.2	0
67.3	0
67.4	0
67.5	0
67.6	0
67.7	0
67.8	0
67.9	0
68	0
68.1	0
68.2	0
68.3	0
68.4	0
68.5	0
68.6	0
68.7	0
68.8	0
68.9	0
69	0
69.1	0
69.2	0
69.3	0
69.4	0
69.5	0
69.6	0
69.7	0
69.8	0
69.9	0
70	0
70.1	0
70.2	0
70.3	0
70.4	0
70.5	0
70.6	0
70.7	0
70.8	0
70.9	0
71	0
71.1	0
71.2	0
71.3	0
71.4	0
71.5	0
71.6	0
71.7	0
71.8	0
71.9	0
72	0
72.1	0
72.2	0
72.3	0
72.4	0
72.5	0
72.6	0
72.7	0
72.8	0
72.9	0
73	0
73.1	0
73.2	0
73.3	0
73.4	0
73.5	0
73.6	0
73.7	0
73.8	0
73.9	0
74	0
74.1	0
74.2	0
74.3	0
74.4	0
74.5	0
74.6	0
74.7	0
74.8	0
74.9	0
75	0
75.1	0
75.2	0
75.3	0
75.4	0
75.5	0
75.6	0
75.7	0
75.8	0
75.9	0
76	0
76.1	0
76.2	0
76.3	0
76.4	0
76.5	0
76.6	0
76.7	0
76.8	0
76.9	0
77	0
77.1	0
77.2	0
77.3	0
77.4	0
77.5	0
77.6	0
77.7	0
77.8	0
77.9	0
78	0
78.1	0
78.2	0
78.3	0
78.4	0
78.5	0
78.6	0
78.7	0
78.8	0
78.9	0
79	0
79.1	0
79.2	0
79.3	0
79.4	0
79.5	0
79.6	0
79.7	0
79.8	0
79.9	0
80	0
80.1	0
80.2	0
80.3	0
80.4	0
80.5	0
80.6	0
80.7	0
80.8	0
80.9	0
81	0
81.1	0
81.2	0
81.3	0
81.4	0
81.5	0
81.6	0
81.7	0
81.8	0
81.9	0
82	0
82.1	0
82.2	0
82.3	0
82.4	0
82.5	0
82.6	0
82.7	0
82.8	0
82.9	0
83	0
83.1	0
83.2	0
83.3	0
83.4	0
83.5	0
83.6	0
83.7	0
83.8	0
83.9	0
84	0
84.1	0
84.2	0
84.3	0
84.4	0
84.5	0
84.6	0
84.7	0
84.8	0
84.9	0
85	0
85.1	0
85.2	0
85.3	0
85.4	0
85.5	0
85.6	0
85.7	0
85.8	0
85.9	0
86	0
86.1	0
86.2	0
86.3	0
86.4	0
86.5	0
86.6	0
86.7	0
86.8	0
86.9	0
87	0
87.1	0
87.2	0
87.3	0
87.4	0
87.5	0
87.6	0
87.7	0
87.8	0
87.9	0
88	0
88.1	0
88.2	0
88.3	0
88.4	0
88.5	0
88.6	0
88.7	0
88.8	0
88.9	0
89	0
89.1	0
89.2	0
89.3	0
89.4	0
89.5	0
89.6	0
89.7	0
89.8	0
89.9	0
90	0
90.1	0
90.2	0
90.3	0
90.4	0
90.5	0
90.6	0
90.7	0
90.8	0
90.9	0
91	0
91.1	0
91.2	0
91.3	0
91.4	0
91.5	0
91.6	0
91.7	0
91.8	0
91.9	0
92	0
92.1	0
92.2	0
92.3	0
92.4	0
92.5	0
92.6	0
92.7	0
92.8	0
92.9	0
93	0
93.1	0
93.2	0
93.3	0
93.4	0
93.5	0
93.6	0
93.7	0
93.8	0
93.9	0
94	0
94.1	0
94.2	0
94.3	0
94.4	0
94.5	0
94.6	0
94.7	0
94.8	0
94.9	0
95	0
95.1	0
95.2	0
95.3	0
95.4	0
95.5	0
95.6	0
95.7	0
95.8	0
95.9	0
96	0
96.1	0
96.2	0
96.3	0
96.4	0
96.5	0
96.6	0
96.7	0
96.8	0
96.9	0
97	0
97.1	0
97.2	0
97.3	0
97.4	0
97.5	0
97.6	0
97.7	0
97.8	0
97.9	0
98	0
98.1	0
98.2	0
98.3	0
98.4	0
98.5	0
98.6	0
98.7	0
98.8	0
98.9	0
99	0
99.1	0
99.2	0
99.3	0
99.4	0
99.5	0
99.6	0
99.7	0
99.8	0
99.9	0
100	0
100.1	0
100.2	0
100.3	0
100.4	0
100.5	0
100.6	0
100.7	0
100.8	0
100.9	0
101	0
101.1	0
101.2	0
101.3	0
101.4	0
101.5	0
101.6	0
101.7	0
101.8	0
101.9	0
102	0
102.1	0
102.2	0
102.3	0
102.4	0
102.5	0
102.6	0
102.7	0
102.8	0
102.9	0
103	0
103.1	0.0002
103.2	0.0002
103.3	0.0002
103.4	0.0002
103.5	0.0002
103.6	0.0002
103.7	0.0002
103.8	0.0002
103.9	0.0002
104	0.0002
104.1	0.0004
104.2	0.0004
104.3	0.0004
104.4	0.0004
104.5	0.0006
104.6	0.0006
104.7	0.0006
104.8	0.0006
104.9	0.0006
105	0.0006
105.1	0.0006
105.2	0.0006
105.3	0.0006
105.4	0.0006
105.5	0.0006
105.6	0.0006
105.7	0.0006
105.8	0.0006
105.9	0.0006
106	0.0006
106.1	0.0006
106.2	0.0008
106.3	0.0008
106.4	0.0008
106.5	0.0008
106.6	0.0008
106.7	0.0008
106.8	0.0008
106.9	0.0008
107	0.0008
107.1	0.001
107.2	0.0014
107.3	0.0014
107.4	0.0016
107.5	0.0016
107.6	0.0016
107.7	0.0016
107.8	0.0016
107.9	0.0016
108	0.0016
108.1	0.0018
108.2	0.0018
108.3	0.0018
108.4	0.0018
108.5	0.002
108.6	0.002
108.7	0.002
108.8	0.002
108.9	0.002
109	0.0024
109.1	0.0026
109.2	0.0026
109.3	0.0026
109.4	0.0026
109.5	0.0026
109.6	0.0026
109.7	0.0026
109.8	0.0026
109.9	0.0026
110	0.0026
110.1	0.0026
110.2	0.0026
110.3	0.0026
110.4	0.0026
110.5	0.0026
110.6	0.0026
110.7	0.0026
110.8	0.0026
110.9	0.0026
111	0.0028
111.1	0.0028
111.2	0.0028
111.3	0.0028
111.4	0.0028
111.5	0.0028
111.6	0.0028
111.7	0.0028
111.8	0.0028
111.9	0.0028
112	0.0028
112.1	0.0028
112.2	0.0028
112.3	0.0028
112.4	0.0028
112.5	0.0028
112.6	0.0028
112.7	0.0032
112.8	0.0032
112.9	0.0032
113	0.0032
113.1	0.0032
113.2	0.0032
113.3	0.0032
113.4	0.0034
113.5	0.0034
113.6	0.0034
113.7	0.0034
113.8	0.0036
113.9	0.0036
114	0.0036
114.1	0.0036
114.2	0.0036
114.3	0.0036
114.4	0.0036
114.5	0.0036
114.6	0.0036
114.7	0.0038
114.8	0.0038
114.9	0.0038
115	0.0038
115.1	0.0038
115.2	0.0038
115.3	0.0038
115.4	0.004
115.5	0.0042
115.6	0.0042
115.7	0.0042
115.8	0.0044
115.9	0.0044
116	0.0044
116.1	0.0044
116.2	0.0046
116.3	0.0046
116.4	0.0048
116.5	0.0048
116.6	0.0048
116.7	0.005
116.8	0.0052
116.9	0.0054
117	0.0054
117.1	0.0054
117.2	0.0054
117.3	0.0056
117.4	0.0056
117.5	0.0056
117.6	0.0056
117.7	0.0056
117.8	0.0056
117.9	0.0056
118	0.0056
118.1	0.0056
118.2	0.0056
118.3	0.0056
118.4	0.0058
118.5	0.0058
118.6	0.006
118.7	0.0062
118.8	0.0062
118.9	0.0062
119	0.0062
119.1	0.0064
119.2	0.0066
119.3	0.0066
119.4	0.0066
119.5	0.0066
119.6	0.0066
119.7	0.0068
119.8	0.0068
119.9	0.0068
120	0.007
120.1	0.007
120.2	0.007
120.3	0.007
120.4	0.007
120.5	0.007
120.6	0.007
120.7	0.007
120.8	0.0068
120.9	0.0068
121	0.0068
121.1	0.0068
121.2	0.0068
121.3	0.007
121.4	0.007
121.5	0.007
121.6	0.007
121.7	0.007
121.8	0.007
121.9	0.007
122	0.007
122.1	0.007
122.2	0.007
122.3	0.0072
122.4	0.0072
122.5	0.0072
122.6	0.0072
122.7	0.0072
122.8	0.0074
122.9	0.0076
123	0.0076
123.1	0.0076
123.2	0.0076
123.3	0.0078
123.4	0.0078
123.5	0.0078
123.6	0.008
123.7	0.008
123.8	0.008
123.9	0.0082
124	0.0084
124.1	0.0084
124.2	0.0086
124.3	0.0088
124.4	0.0088
124.5	0.009
124.6	0.009
124.7	0.009
124.8	0.009
124.9	0.009
125	0.009
125.1	0.009
125.2	0.009
125.3	0.009
125.4	0.009
125.5	0.009
125.6	0.009
125.7	0.009
125.8	0.009
125.9	0.009
126	0.0092
126.1	0.0092
126.2	0.009
126.3	0.0094
126.4	0.0094
126.5	0.0096
126.6	0.0098
126.7	0.0098
126.8	0.0098
126.9	0.0098
127	0.0098
127.1	0.0102
127.2	0.0104
127.3	0.0104
127.4	0.0104
127.5	0.0104
127.6	0.0106
127.7	0.0106
127.8	0.0106
127.9	0.0106
128	0.0106
128.1	0.0106
128.2	0.0108
128.3	0.0108
128.4	0.011
128.5	0.0112
128.6	0.0112
128.7	0.011
128.8	0.011
128.9	0.0112
129	0.0112
129.1	0.0114
129.2	0.0112
129.3	0.0112
129.4	0.0112
129.5	0.0112
129.6	0.0114
129.7	0.0114
129.8	0.0114
129.9	0.0114
130	0.0114
130.1	0.0114
130.2	0.0114
130.3	0.0114
130.4	0.0114
130.5	0.0114
130.6	0.0114
130.7	0.0114
130.8	0.0114
130.9	0.0114
131	0.0116
131.1	0.0118
131.2	0.0118
131.3	0.0118
131.4	0.0118
131.5	0.0118
131.6	0.0118
131.7	0.0118
131.8	0.0118
131.9	0.0122
132	0.0122
132.1	0.0126
132.2	0.0126
132.3	0.0128
132.4	0.0128
132.5	0.0128
132.6	0.0128
132.7	0.0128
132.8	0.0128
132.9	0.0128
133	0.0132
133.1	0.0134
133.2	0.0136
133.3	0.0138
133.4	0.0138
133.5	0.0138
133.6	0.0138
133.7	0.0138
133.8	0.0138
133.9	0.014
134	0.0142
134.1	0.0146
134.2	0.0146
134.3	0.0146
134.4	0.0146
134.5	0.0146
134.6	0.0146
134.7	0.0148
134.8	0.0148
134.9	0.0148
135	0.015
135.1	0.015
135.2	0.015
135.3	0.015
135.4	0.015
135.5	0.015
135.6	0.0152
135.7	0.0152
135.8	0.0152
135.9	0.0152
136	0.0152
136.1	0.0152
136.2	0.0152
136.3	0.0154
136.4	0.0152
136.5	0.0152
136.6	0.0152
136.7	0.0152
136.8	0.0152
136.9	0.0152
137	0.0152
137.1	0.015
137.2	0.015
137.3	0.0156
137.4	0.0156
137.5	0.0156
137.6	0.016
137.7	0.016
137.8	0.0162
137.9	0.016
138	0.016
138.1	0.0162
138.2	0.0162
138.3	0.0162
138.4	0.0162
138.5	0.0164
138.6	0.0166
138.7	0.0166
138.8	0.017
138.9	0.0172
139	0.0172
139.1	0.0172
139.2	0.0172
139.3	0.0174
139.4	0.0174
139.5	0.0174
139.6	0.0172
139.7	0.0172
139.8	0.0172
139.9	0.0174
140	0.0174
140.1	0.0174
140.2	0.0174
140.3	0.0174
140.4	0.0174
140.5	0.0174
140.6	0.0174
140.7	0.0176
140.8	0.0176
140.9	0.0176
141	0.018
141.1	0.0182
141.2	0.0182
141.3	0.018
141.4	0.018
141.5	0.018
141.6	0.018
141.7	0.018
141.8	0.018
141.9	0.018
142	0.018
142.1	0.018
142.2	0.0182
142.3	0.0182
142.4	0.0182
142.5	0.0186
142.6	0.0188
142.7	0.0188
142.8	0.0188
142.9	0.019
143	0.019
143.1	0.0194
143.2	0.0194
143.3	0.0194
143.4	0.0194
143.5	0.0194
143.6	0.0194
143.7	0.0194
143.8	0.0192
143.9	0.019
144	0.0192
144.1	0.0192
144.2	0.0194
144.3	0.0194
144.4	0.0196
144.5	0.0194
144.6	0.0194
144.7	0.0194
144.8	0.0194
144.9	0.0192
145	0.0192
145.1	0.0194
145.2	0.0192
145.3	0.0192
145.4	0.019
145.5	0.019
145.6	0.019
145.7	0.019
145.8	0.019
145.9	0.019
146	0.019
146.1	0.0192
146.2	0.0192
146.3	0.0192
146.4	0.0194
146.5	0.0194
146.6	0.0194
146.7	0.0194
146.8	0.0194
146.9	0.0194
147	0.0194
147.1	0.0194
147.2	0.0194
147.3	0.0194
147.4	0.0194
147.5	0.0196
147.6	0.0196
147.7	0.0196
147.8	0.0196
147.9	0.0196
148	0.0196
148.1	0.0192
148.2	0.0194
148.3	0.0194
148.4	0.0196
148.5	0.0196
148.6	0.0196
148.7	0.0196
148.8	0.0196
148.9	0.0196
149	0.0196
149.1	0.0198
149.2	0.0198
149.3	0.02
149.4	0.0202
149.5	0.0202
149.6	0.0202
149.7	0.0202
149.8	0.0202
149.9	0.0202
150	0.0204
150.1	0.0204
150.2	0.0206
150.3	0.0208
150.4	0.021
150.5	0.021
150.6	0.021
150.7	0.021
150.8	0.0214
150.9	0.0214
151	0.0214
151.1	0.0218
151.2	0.0218
151.3	0.0224
151.4	0.0224
151.5	0.0224
151.6	0.0226
151.7	0.0224
151.8	0.0224
151.9	0.0224
152	0.0228
152.1	0.0228
152.2	0.0228
152.3	0.0228
152.4	0.0228
152.5	0.0228
152.6	0.0226
152.7	0.0226
152.8	0.0226
152.9	0.0226
153	0.0226
153.1	0.0228
153.2	0.0228
153.3	0.0228
153.4	0.023
153.5	0.023
153.6	0.023
153.7	0.023
153.8	0.023
153.9	0.023
154	0.023
154.1	0.0228
154.2	0.023
154.3	0.023
154.4	0.0228
154.5	0.0228
154.6	0.0228
154.7	0.0228
154.8	0.0228
154.9	0.0226
155	0.0226
155.1	0.0226
155.2	0.0226
155.3	0.023
155.4	0.023
155.5	0.023
155.6	0.023
155.7	0.023
155.8	0.0232
155.9	0.0236
156	0.0236
156.1	0.0238
156.2	0.0238
156.3	0.0236
156.4	0.0236
156.5	0.0234
156.6	0.0234
156.7	0.0234
156.8	0.0234
156.9	0.0238
157	0.024
157.1	0.024
157.2	0.024
157.3	0.024
157.4	0.0238
157.5	0.0238
157.6	0.0238
157.7	0.0236
157.8	0.0234
157.9	0.0236
158	0.0236
158.1	0.0236
158.2	0.0236
158.3	0.0236
158.4	0.0238
158.5	0.0238
158.6	0.0236
158.7	0.0236
158.8	0.0236
158.9	0.0236
159	0.0238
159.1	0.0238
159.2	0.0238
159.3	0.024
159.4	0.0242
159.5	0.0244
159.6	0.0244
159.7	0.0246
159.8	0.0246
159.9	0.0246
160	0.0246
160.1	0.0246
160.2	0.0246
160.3	0.0248
160.4	0.0248
160.5	0.0248
160.6	0.0246
160.7	0.0248
160.8	0.0248
160.9	0.0248
161	0.0246
161.1	0.0246
161.2	0.0248
161.3	0.0252
161.4	0.0252
161.5	0.0252
161.6	0.0254
161.7	0.0256
161.8	0.0256
161.9	0.0256
162	0.0256
162.1	0.0256
162.2	0.0256
162.3	0.0258
162.4	0.0258
162.5	0.0258
162.6	0.0256
162.7	0.0256
162.8	0.0256
162.9	0.0256
163	0.026
163.1	0.026
163.2	0.026
163.3	0.0262
163.4	0.0264
163.5	0.0264
163.6	0.0264
163.7	0.0266
163.8	0.0266
163.9	0.0266
164	0.0266
164.1	0.027
164.2	0.027
164.3	0.0272
164.4	0.0272
164.5	0.0274
164.6	0.0276
164.7	0.0278
164.8	0.0282
164.9	0.0282
165	0.0284
165.1	0.0284
165.2	0.0284
165.3	0.0284
165.4	0.0284
165.5	0.0284
165.6	0.0284
165.7	0.0284
165.8	0.0284
165.9	0.0284
166	0.0286
166.1	0.0286
166.2	0.0284
166.3	0.0284
166.4	0.0284
166.5	0.0284
166.6	0.0284
166.7	0.0284
166.8	0.0284
166.9	0.0284
167	0.0284
167.1	0.0286
167.2	0.0288
167.3	0.029
167.4	0.029
167.5	0.029
167.6	0.029
167.7	0.029
167.8	0.0292
167.9	0.0292
168	0.0292
168.1	0.0292
168.2	0.0292
168.3	0.0292
168.4	0.0294
168.5	0.0296
168.6	0.0296
168.7	0.0296
168.8	0.0294
168.9	0.0294
169	0.0296
169.1	0.0296
169.2	0.0296
169.3	0.0296
169.4	0.03
169.5	0.03
169.6	0.03
169.7	0.03
169.8	0.03
169.9	0.03
170	0.0298
170.1	0.0298
170.2	0.0296
170.3	0.0296
170.4	0.0296
170.5	0.0296
170.6	0.0296
170.7	0.0296
170.8	0.0294
170.9	0.0298
171	0.0298
171.1	0.03
171.2	0.0302
171.3	0.0304
171.4	0.0306
171.5	0.0308
171.6	0.031
171.7	0.031
171.8	0.031
171.9	0.031
172	0.0308
172.1	0.0308
172.2	0.0308
172.3	0.0308
172.4	0.0308
172.5	0.031
172.6	0.031
172.7	0.031
172.8	0.0312
172.9	0.0314
173	0.0314
173.1	0.0314
173.2	0.0316
173.3	0.0316
173.4	0.0316
173.5	0.0318
173.6	0.0318
173.7	0.0318
173.8	0.0318
173.9	0.0318
174	0.032
174.1	0.032
174.2	0.0322
174.3	0.0324
174.4	0.0324
174.5	0.0326
174.6	0.0328
174.7	0.0328
174.8	0.0328
174.9	0.0328
175	0.0328
175.1	0.0328
175.2	0.0328
175.3	0.0328
175.4	0.0328
175.5	0.0328
175.6	0.0328
175.7	0.0328
175.8	0.0326
175.9	0.0328
176	0.033
176.1	0.0332
176.2	0.0334
176.3	0.0334
176.4	0.0334
176.5	0.0338
176.6	0.0338
176.7	0.0338
176.8	0.0336
176.9	0.0334
177	0.0334
177.1	0.0338
177.2	0.0338
177.3	0.0338
177.4	0.0336
177.5	0.0336
177.6	0.0338
177.7	0.034
177.8	0.034
177.9	0.034
178	0.0338
178.1	0.0338
178.2	0.0338
178.3	0.0338
178.4	0.034
178.5	0.0344
178.6	0.0344
178.7	0.0342
178.8	0.0342
178.9	0.0342
179	0.0338
179.1	0.0338
179.2	0.034
179.3	0.034
179.4	0.0342
179.5	0.034
179.6	0.034
179.7	0.034
179.8	0.034
179.9	0.034
180	0.0342
180.1	0.0344
180.2	0.0344
180.3	0.0344
180.4	0.0346
180.5	0.0346
180.6	0.0346
180.7	0.0346
180.8	0.0346
180.9	0.0348
181	0.0346
181.1	0.0344
181.2	0.0344
181.3	0.0346
181.4	0.0346
181.5	0.0346
181.6	0.0346
181.7	0.0348
181.8	0.0348
181.9	0.035
182	0.035
182.1	0.035
182.2	0.0348
182.3	0.0348
182.4	0.0348
182.5	0.0348
182.6	0.0348
182.7	0.0348
182.8	0.0348
182.9	0.0346
183	0.0348
183.1	0.035
183.2	0.035
183.3	0.035
183.4	0.0352
183.5	0.0354
183.6	0.0352
183.7	0.0352
183.8	0.0352
183.9	0.0352
184	0.0352
184.1	0.0352
184.2	0.0354
184.3	0.0354
184.4	0.0354
184.5	0.0354
184.6	0.0358
184.7	0.036
184.8	0.0362
184.9	0.0362
185	0.0362
185.1	0.0364
185.2	0.0368
185.3	0.0368
185.4	0.037
185.5	0.037
185.6	0.0372
185.7	0.0374
185.8	0.0374
185.9	0.0372
186	0.0372
186.1	0.0372
186.2	0.0372
186.3	0.0374
186.4	0.0374
186.5	0.0374
186.6	0.0376
186.7	0.0376
186.8	0.0376
186.9	0.0376
187	0.0378
187.1	0.0378
187.2	0.0378
187.3	0.0378
187.4	0.0376
187.5	0.0378
187.6	0.038
187.7	0.038
187.8	0.0378
187.9	0.0378
188	0.0378
188.1	0.0378
188.2	0.0378
188.3	0.038
188.4	0.038
188.5	0.0378
188.6	0.0378
188.7	0.0378
188.8	0.0378
188.9	0.0378
189	0.038
189.1	0.0382
189.2	0.0384
189.3	0.0384
189.4	0.0384
189.5	0.0384
189.6	0.0386
189.7	0.0388
189.8	0.0388
189.9	0.0388
190	0.0388
190.1	0.0386
190.2	0.0386
190.3	0.0388
190.4	0.0388
190.5	0.0388
190.6	0.0388
190.7	0.0388
190.8	0.039
190.9	0.039
191	0.039
191.1	0.0394
191.2	0.0396
191.3	0.0396
191.4	0.0402
191.5	0.0402
191.6	0.0404
191.7	0.0402
191.8	0.0402
191.9	0.0402
192	0.0404
192.1	0.0404
192.2	0.0404
192.3	0.0404
192.4	0.0404
192.5	0.0404
192.6	0.0404
192.7	0.0406
192.8	0.0406
192.9	0.0408
193	0.0408
193.1	0.0406
193.2	0.0406
193.3	0.0408
193.4	0.041
193.5	0.0412
193.6	0.0412
193.7	0.041
193.8	0.041
193.9	0.0412
194	0.0412
194.1	0.0408
194.2	0.0408
194.3	0.0408
194.4	0.041
194.5	0.041
194.6	0.041
194.7	0.041
194.8	0.041
194.9	0.041
195	0.041
195.1	0.0412
195.2	0.0412
195.3	0.0412
195.4	0.0412
195.5	0.0412
195.6	0.041
195.7	0.041
195.8	0.0412
195.9	0.0412
196	0.0412
196.1	0.041
196.2	0.041
196.3	0.0412
196.4	0.0414
196.5	0.0414
196.6	0.0414
196.7	0.0414
196.8	0.0416
196.9	0.0416
197	0.0414
197.1	0.0416
197.2	0.0418
197.3	0.0418
197.4	0.0418
197.5	0.0418
197.6	0.0422
197.7	0.0422
197.8	0.0422
197.9	0.0422
198	0.0422
198.1	0.0424
198.2	0.0424
198.3	0.0424
198.4	0.0422
198.5	0.042
198.6	0.042
198.7	0.042
198.8	0.042
198.9	0.042
199	0.042
199.1	0.042
199.2	0.0418
199.3	0.0418
199.4	0.0418
199.5	0.0418
199.6	0.042
199.7	0.042
199.8	0.042
199.9	0.042
200	0.042
[truncated: 14,000 more rows]
