# Supplementary material for: Bayesian inference of kinetic schemes for ion channels by Kalman filtering
Source: eLife journal article supplement (doi:10.7554/elife.62714), 2022-05-04
Supplement: fig4-data10 [file 1_Sim_N_6000_Fluor_MW_0.0625M.xlsx]

## Sheet: Tabelle1
0.1	0
0.2	0
0.3	0
0.4	0
0.5	0
0.6	0
0.7	0
0.8	0
0.9	0
1	0
1.1	0
1.2	0
1.3	0
1.4	0
1.5	0
1.6	0
1.7	0
1.8	0
1.9	0
2	0
2.1	0
2.2	0
2.3	0
2.4	0
2.5	0
2.6	0
2.7	0
2.8	0
2.9	0
3	0
3.1	0
3.2	0
3.3	0
3.4	0
3.5	0
3.6	0
3.7	0
3.8	0
3.9	0
4	0
4.1	0
4.2	0
4.3	0
4.4	0
4.5	0
4.6	0
4.7	0
4.8	0
4.9	0
5	0
5.1	0
5.2	0
5.3	0
5.4	0
5.5	0
5.6	0
5.7	0
5.8	0
5.9	0
6	0
6.1	0
6.2	0
6.3	0
6.4	0
6.5	0
6.6	0
6.7	0
6.8	0
6.9	0
7	0
7.1	0
7.2	0
7.3	0
7.4	0
7.5	0
7.6	0
7.7	0
7.8	0
7.9	0
8	0
8.1	0
8.2	0
8.3	0
8.4	0
8.5	0
8.6	0
8.7	0
8.8	0
8.9	0
9	0
9.1	0
9.2	0
9.3	0
9.4	0
9.5	0
9.6	0
9.7	0
9.8	0
9.9	0
10	0
10.1	0
10.2	0
10.3	0
10.4	0
10.5	0
10.6	0
10.7	0
10.8	0
10.9	0
11	0
11.1	0
11.2	0
11.3	0
11.4	0
11.5	0
11.6	0
11.7	0
11.8	0
11.9	0
12	0
12.1	0
12.2	0
12.3	0
12.4	0
12.5	0
12.6	0
12.7	0
12.8	0
12.9	0
13	0
13.1	0
13.2	0
13.3	0
13.4	0
13.5	0
13.6	0
13.7	0
13.8	0
13.9	0
14	0
14.1	0
14.2	0
14.3	0
14.4	0
14.5	0
14.6	0
14.7	0
14.8	0
14.9	0
15	0
15.1	0
15.2	0
15.3	0
15.4	0
15.5	0
15.6	0
15.7	0
15.8	0
15.9	0
16	0
16.1	0
16.2	0
16.3	0
16.4	0
16.5	0
16.6	0
16.7	0
16.8	0
16.9	0
17	0
17.1	0
17.2	0
17.3	0
17.4	0
17.5	0
17.6	0
17.7	0
17.8	0
17.9	0
18	0
18.1	0
18.2	0
18.3	0
18.4	0
18.5	0
18.6	0
18.7	0
18.8	0
18.9	0
19	0
19.1	0
19.2	0
19.3	0
19.4	0
19.5	0
19.6	0
19.7	0
19.8	0
19.9	0
20	0
20.1	0
20.2	0
20.3	0
20.4	0
20.5	0
20.6	0
20.7	0
20.8	0
20.9	0
21	0
21.1	0
21.2	0
21.3	0
21.4	0
21.5	0
21.6	0
21.7	0
21.8	0
21.9	0
22	0
22.1	0
22.2	0
22.3	0
22.4	0
22.5	0
22.6	0
22.7	0
22.8	0
22.9	0
23	0
23.1	0
23.2	0
23.3	0
23.4	0
23.5	0
23.6	0
23.7	0
23.8	0
23.9	0
24	0
24.1	0
24.2	0
24.3	0
24.4	0
24.5	0
24.6	0
24.7	0
24.8	0
24.9	0
25	0
25.1	0
25.2	0
25.3	0
25.4	0
25.5	0
25.6	0
25.7	0
25.8	0
25.9	0
26	0
26.1	0
26.2	0
26.3	0
26.4	0
26.5	0
26.6	0
26.7	0
26.8	0
26.9	0
27	0
27.1	0
27.2	0
27.3	0
27.4	0
27.5	0
27.6	0
27.7	0
27.8	0
27.9	0
28	0
28.1	0
28.2	0
28.3	0
28.4	0
28.5	0
28.6	0
28.7	0
28.8	0
28.9	0
29	0
29.1	0
29.2	0
29.3	0
29.4	0
29.5	0
29.6	0
29.7	0
29.8	0
29.9	0
30	0
30.1	0
30.2	0
30.3	0
30.4	0
30.5	0
30.6	0
30.7	0
30.8	0
30.9	0
31	0
31.1	0
31.2	0
31.3	0
31.4	0
31.5	0
31.6	0
31.7	0
31.8	0
31.9	0
32	0
32.1	0
32.2	0
32.3	0
32.4	0
32.5	0
32.6	0
32.7	0
32.8	0
32.9	0
33	0
33.1	0
33.2	0
33.3	0
33.4	0
33.5	0
33.6	0
33.7	0
33.8	0
33.9	0
34	0
34.1	0
34.2	0
34.3	0
34.4	0
34.5	0
34.6	0
34.7	0
34.8	0
34.9	0
35	0
35.1	0
35.2	0
35.3	0
35.4	0
35.5	0
35.6	0
35.7	0
35.8	0
35.9	0
36	0
36.1	0
36.2	0
36.3	0
36.4	0
36.5	0
36.6	0
36.7	0
36.8	0
36.9	0
37	0
37.1	0
37.2	0
37.3	0
37.4	0
37.5	0
37.6	0
37.7	0
37.8	0
37.9	0
38	0
38.1	0
38.2	0
38.3	0
38.4	0
38.5	0
38.6	0
38.7	0
38.8	0
38.9	0
39	0
39.1	0
39.2	0
39.3	0
39.4	0
39.5	0
39.6	0
39.7	0
39.8	0
39.9	0
40	0
40.1	0
40.2	0
40.3	0
40.4	0
40.5	0
40.6	0
40.7	0
40.8	0
40.9	0
41	0
41.1	0
41.2	0
41.3	0
41.4	0
41.5	0
41.6	0
41.7	0
41.8	0
41.9	0
42	0
42.1	0
42.2	0
42.3	0
42.4	0
42.5	0
42.6	0
42.7	0
42.8	0
42.9	0
43	0
43.1	0
43.2	0
43.3	0
43.4	0
43.5	0
43.6	0
43.7	0
43.8	0
43.9	0
44	0
44.1	0
44.2	0
44.3	0
44.4	0
44.5	0
44.6	0
44.7	0
44.8	0
44.9	0
45	0
45.1	0
45.2	0
45.3	0
45.4	0
45.5	0
45.6	0
45.7	0
45.8	0
45.9	0
46	0
46.1	0
46.2	0
46.3	0
46.4	0
46.5	0
46.6	0
46.7	0
46.8	0
46.9	0
47	0
47.1	0
47.2	0
47.3	0
47.4	0
47.5	0
47.6	0
47.7	0
47.8	0
47.9	0
48	0
48.1	0
48.2	0
48.3	0
48.4	0
48.5	0
48.6	0
48.7	0
48.8	0
48.9	0
49	0
49.1	0
49.2	0
49.3	0
49.4	0
49.5	0
49.6	0
49.7	0
49.8	0
49.9	0
50	0
50.1	0
50.2	0
50.3	0
50.4	0
50.5	0
50.6	0
50.7	0
50.8	0
50.9	0
51	0
51.1	0
51.2	0
51.3	0
51.4	0
51.5	0
51.6	0
51.7	0
51.8	0
51.9	0
52	0
52.1	0
52.2	0
52.3	0
52.4	0
52.5	0
52.6	0
52.7	0
52.8	0
52.9	0
53	0
53.1	0
53.2	0
53.3	0
53.4	0
53.5	0
53.6	0
53.7	0
53.8	0
53.9	0
54	0
54.1	0
54.2	0
54.3	0
54.4	0
54.5	0
54.6	0
54.7	0
54.8	0
54.9	0
55	0
55.1	0
55.2	0
55.3	0
55.4	0
55.5	0
55.6	0
55.7	0
55.8	0
55.9	0
56	0
56.1	0
56.2	0
56.3	0
56.4	0
56.5	0
56.6	0
56.7	0
56.8	0
56.9	0
57	0
57.1	0
57.2	0
57.3	0
57.4	0
57.5	0
57.6	0
57.7	0
57.8	0
57.9	0
58	0
58.1	0
58.2	0
58.3	0
58.4	0
58.5	0
58.6	0
58.7	0
58.8	0
58.9	0
59	0
59.1	0
59.2	0
59.3	0
59.4	0
59.5	0
59.6	0
59.7	0
59.8	0
59.9	0
60	0
60.1	0
60.2	0
60.3	0
60.4	0
60.5	0
60.6	0
60.7	0
60.8	0
60.9	0
61	0
61.1	0
61.2	0
61.3	0
61.4	0
61.5	0
61.6	0
61.7	0
61.8	0
61.9	0
62	0
62.1	0
62.2	0
62.3	0
62.4	0
62.5	0
62.6	0
62.7	0
62.8	0
62.9	0
63	0
63.1	0
63.2	0
63.3	0
63.4	0
63.5	0
63.6	0
63.7	0
63.8	0
63.9	0
64	0
64.1	0
64.2	0
64.3	0
64.4	0
64.5	0
64.6	0
64.7	0
64.8	0
64.9	0
65	0
65.1	0
65.2	0
65.3	0
65.4	0
65.5	0
65.6	0
65.7	0
65.8	0
65.9	0
66	0
66.1	0
66.2	0
66.3	0
66.4	0
66.5	0
66.6	0
66.7	0
66.8	0
66.9	0
67	0
67.1	0
67.2	0
67.3	0
67.4	0
67.5	0
67.6	0
67.7	0
67.8	0
67.9	0
68	0
68.1	0
68.2	0
68.3	0
68.4	0
68.5	0
68.6	0
68.7	0
68.8	0
68.9	0
69	0
69.1	0
69.2	0
69.3	0
69.4	0
69.5	0
69.6	0
69.7	0
69.8	0
69.9	0
70	0
70.1	0
70.2	0
70.3	0
70.4	0
70.5	0
70.6	0
70.7	0
70.8	0
70.9	0
71	0
71.1	0
71.2	0
71.3	0
71.4	0
71.5	0
71.6	0
71.7	0
71.8	0
71.9	0
72	0
72.1	0
72.2	0
72.3	0
72.4	0
72.5	0
72.6	0
72.7	0
72.8	0
72.9	0
73	0
73.1	0
73.2	0
73.3	0
73.4	0
73.5	0
73.6	0
73.7	0
73.8	0
73.9	0
74	0
74.1	0
74.2	0
74.3	0
74.4	0
74.5	0
74.6	0
74.7	0
74.8	0
74.9	0
75	0
75.1	0
75.2	0
75.3	0
75.4	0
75.5	0
75.6	0
75.7	0
75.8	0
75.9	0
76	0
76.1	0
76.2	0
76.3	0
76.4	0
76.5	0
76.6	0
76.7	0
76.8	0
76.9	0
77	0
77.1	0
77.2	0
77.3	0
77.4	0
77.5	0
77.6	0
77.7	0
77.8	0
77.9	0
78	0
78.1	0
78.2	0
78.3	0
78.4	0
78.5	0
78.6	0
78.7	0
78.8	0
78.9	0
79	0
79.1	0
79.2	0
79.3	0
79.4	0
79.5	0
79.6	0
79.7	0
79.8	0
79.9	0
80	0
80.1	0
80.2	0
80.3	0
80.4	0
80.5	0
80.6	0
80.7	0
80.8	0
80.9	0
81	0
81.1	0
81.2	0
81.3	0
81.4	0
81.5	0
81.6	0
81.7	0
81.8	0
81.9	0
82	0
82.1	0
82.2	0
82.3	0
82.4	0
82.5	0
82.6	0
82.7	0
82.8	0
82.9	0
83	0
83.1	0
83.2	0
83.3	0
83.4	0
83.5	0
83.6	0
83.7	0
83.8	0
83.9	0
84	0
84.1	0
84.2	0
84.3	0
84.4	0
84.5	0
84.6	0
84.7	0
84.8	0
84.9	0
85	0
85.1	0
85.2	0
85.3	0
85.4	0
85.5	0
85.6	0
85.7	0
85.8	0
85.9	0
86	0
86.1	0
86.2	0
86.3	0
86.4	0
86.5	0
86.6	0
86.7	0
86.8	0
86.9	0
87	0
87.1	0
87.2	0
87.3	0
87.4	0
87.5	0
87.6	0
87.7	0
87.8	0
87.9	0
88	0
88.1	0
88.2	0
88.3	0
88.4	0
88.5	0
88.6	0
88.7	0
88.8	0
88.9	0
89	0
89.1	0
89.2	0
89.3	0
89.4	0
89.5	0
89.6	0
89.7	0
89.8	0
89.9	0
90	0
90.1	0
90.2	0
90.3	0
90.4	0
90.5	0
90.6	0
90.7	0
90.8	0
90.9	0
91	0
91.1	0
91.2	0
91.3	0
91.4	0
91.5	0
91.6	0
91.7	0
91.8	0
91.9	0
92	0
92.1	0
92.2	0
92.3	0
92.4	0
92.5	0
92.6	0
92.7	0
92.8	0
92.9	0
93	0
93.1	0
93.2	0
93.3	0
93.4	0
93.5	0
93.6	0
93.7	0
93.8	0
93.9	0
94	0
94.1	0
94.2	0
94.3	0
94.4	0
94.5	0
94.6	0
94.7	0
94.8	0
94.9	0
95	0
95.1	0
95.2	0
95.3	0
95.4	0
95.5	0
95.6	0
95.7	0
95.8	0
95.9	0
96	0
96.1	0
96.2	0
96.3	0
96.4	0
96.5	0
96.6	0
96.7	0
96.8	0
96.9	0
97	0
97.1	0
97.2	0
97.3	0
97.4	0
97.5	0
97.6	0
97.7	0
97.8	0
97.9	0
98	0
98.1	0
98.2	0
98.3	0
98.4	0
98.5	0
98.6	0
98.7	0
98.8	0
98.9	0
99	0
99.1	0
99.2	0
99.3	0
99.4	0
99.5	0
99.6	0
99.7	0
99.8	0
99.9	0
100	0
100.1	0.00416667
100.2	0.00783333
100.3	0.0109167
100.4	0.01475
100.5	0.0186667
100.6	0.0211667
100.7	0.0245833
100.8	0.0275
100.9	0.0304167
101	0.035
101.1	0.03775
101.2	0.04125
101.3	0.0444167
101.4	0.048
101.5	0.05125
101.6	0.0539167
101.7	0.05825
101.8	0.0621667
101.9	0.0645833
102	0.0670833
102.1	0.0696667
102.2	0.0715
102.3	0.074
102.4	0.0768333
102.5	0.0791667
102.6	0.0818333
102.7	0.0845833
102.8	0.0868333
102.9	0.08775
103	0.0900833
103.1	0.0923333
103.2	0.0945
103.3	0.0963333
103.4	0.0981667
103.5	0.100583
103.6	0.104
103.7	0.104417
103.8	0.107083
103.9	0.109667
104	0.11
104.1	0.112167
104.2	0.115083
104.3	0.117583
104.4	0.120917
104.5	0.121917
104.6	0.123083
104.7	0.123333
104.8	0.124667
104.9	0.126
105	0.1275
105.1	0.1305
105.2	0.132583
105.3	0.1335
105.4	0.134833
105.5	0.13675
105.6	0.137333
105.7	0.139333
105.8	0.1405
105.9	0.141083
106	0.143333
106.1	0.14375
106.2	0.144833
106.3	0.147
106.4	0.148333
106.5	0.150083
106.6	0.151417
106.7	0.151583
106.8	0.152667
106.9	0.153667
107	0.153583
107.1	0.154583
107.2	0.154917
107.3	0.156083
107.4	0.157667
107.5	0.159833
107.6	0.162
107.7	0.16375
107.8	0.1645
107.9	0.166167
108	0.166417
108.1	0.167917
108.2	0.167833
108.3	0.16925
108.4	0.1695
108.5	0.170667
108.6	0.171917
108.7	0.172
108.8	0.173333
108.9	0.174083
109	0.175333
109.1	0.17675
109.2	0.177333
109.3	0.17925
109.4	0.178917
109.5	0.177833
109.6	0.178583
109.7	0.179
109.8	0.179667
109.9	0.18075
110	0.181917
110.1	0.182917
110.2	0.183917
110.3	0.1855
110.4	0.186167
110.5	0.186833
110.6	0.187417
110.7	0.188333
110.8	0.189667
110.9	0.189417
111	0.18975
111.1	0.190083
111.2	0.190917
111.3	0.191417
111.4	0.1925
111.5	0.1925
111.6	0.192917
111.7	0.193917
111.8	0.19575
111.9	0.196417
112	0.196917
112.1	0.197417
112.2	0.1975
112.3	0.1985
112.4	0.199083
112.5	0.198167
112.6	0.199167
112.7	0.199417
112.8	0.200417
112.9	0.200833
113	0.20125
113.1	0.201667
113.2	0.202417
113.3	0.203
113.4	0.2025
113.5	0.203167
113.6	0.203417
113.7	0.203917
113.8	0.203583
113.9	0.203667
114	0.204083
114.1	0.204917
114.2	0.20525
114.3	0.206
114.4	0.2065
114.5	0.206667
114.6	0.20725
114.7	0.20775
114.8	0.207917
114.9	0.208
115	0.208417
115.1	0.20875
115.2	0.209667
115.3	0.20925
115.4	0.208917
115.5	0.209583
115.6	0.20975
115.7	0.211333
115.8	0.211917
115.9	0.212583
116	0.212917
116.1	0.21275
116.2	0.212667
116.3	0.212417
116.4	0.213333
116.5	0.213833
116.6	0.21525
116.7	0.216333
116.8	0.21775
116.9	0.217833
117	0.21875
117.1	0.218167
117.2	0.219
117.3	0.219333
117.4	0.219167
117.5	0.219083
117.6	0.220333
117.7	0.22025
117.8	0.220583
117.9	0.219583
118	0.218333
118.1	0.21925
118.2	0.221
118.3	0.22075
118.4	0.219417
118.5	0.21925
118.6	0.218417
118.7	0.219333
118.8	0.218417
118.9	0.218833
119	0.219333
119.1	0.21925
119.2	0.219083
119.3	0.22
119.4	0.219583
119.5	0.219083
119.6	0.219333
119.7	0.21925
119.8	0.21975
119.9	0.220417
120	0.2215
120.1	0.221667
120.2	0.22125
120.3	0.220333
120.4	0.2205
120.5	0.220167
120.6	0.220167
120.7	0.221
120.8	0.221917
120.9	0.222
121	0.2205
121.1	0.222417
121.2	0.2225
121.3	0.224083
121.4	0.224167
121.5	0.223583
121.6	0.224583
121.7	0.224083
121.8	0.223917
121.9	0.223167
122	0.223
122.1	0.222833
122.2	0.22375
122.3	0.223833
122.4	0.224333
122.5	0.225
122.6	0.225
122.7	0.225083
122.8	0.225333
122.9	0.225333
123	0.225417
123.1	0.225083
123.2	0.225417
123.3	0.22625
123.4	0.226417
123.5	0.224333
123.6	0.2255
123.7	0.225333
123.8	0.225583
123.9	0.225833
124	0.226333
124.1	0.2265
124.2	0.226333
124.3	0.224
124.4	0.224083
124.5	0.224333
124.6	0.22475
124.7	0.225833
124.8	0.226083
124.9	0.226083
125	0.226167
125.1	0.2255
125.2	0.225833
125.3	0.224583
125.4	0.225083
125.5	0.22475
125.6	0.224833
125.7	0.22525
125.8	0.225917
125.9	0.227083
126	0.2275
126.1	0.22775
126.2	0.227417
126.3	0.228
126.4	0.228
126.5	0.22875
126.6	0.228583
126.7	0.228083
126.8	0.227333
126.9	0.226667
127	0.226333
127.1	0.226
127.2	0.225333
127.3	0.224583
127.4	0.225167
127.5	0.225417
127.6	0.2265
127.7	0.22675
127.8	0.226833
127.9	0.2275
128	0.22775
128.1	0.2285
128.2	0.2295
128.3	0.22925
128.4	0.228
128.5	0.228333
128.6	0.227833
128.7	0.229167
128.8	0.229
128.9	0.228917
129	0.229667
129.1	0.2285
129.2	0.23025
129.3	0.23
129.4	0.229917
129.5	0.2295
129.6	0.229917
129.7	0.229583
129.8	0.229333
129.9	0.229833
130	0.23
130.1	0.229667
130.2	0.229583
130.3	0.2305
130.4	0.229667
130.5	0.228667
130.6	0.22825
130.7	0.228667
130.8	0.22825
130.9	0.228167
131	0.22875
131.1	0.229417
131.2	0.22975
131.3	0.23125
131.4	0.231667
131.5	0.232833
131.6	0.232083
131.7	0.231917
131.8	0.23225
131.9	0.231167
132	0.231583
132.1	0.231833
132.2	0.23275
132.3	0.23325
132.4	0.23325
132.5	0.23325
132.6	0.2335
132.7	0.234333
132.8	0.234
132.9	0.234583
133	0.234167
133.1	0.23375
133.2	0.23325
133.3	0.234417
133.4	0.234833
133.5	0.234833
133.6	0.23525
133.7	0.235167
133.8	0.235583
133.9	0.2355
134	0.23575
134.1	0.23575
134.2	0.235333
134.3	0.2365
134.4	0.235917
134.5	0.236167
134.6	0.23625
134.7	0.23675
134.8	0.237083
134.9	0.238083
135	0.238417
135.1	0.239333
135.2	0.2405
135.3	0.240917
135.4	0.240417
135.5	0.241417
135.6	0.239667
135.7	0.239583
135.8	0.238167
135.9	0.237583
136	0.238167
136.1	0.237417
136.2	0.23675
136.3	0.236083
136.4	0.236333
136.5	0.237167
136.6	0.237
136.7	0.2375
136.8	0.23825
136.9	0.237833
137	0.238833
137.1	0.239417
137.2	0.23925
137.3	0.24
137.4	0.240833
137.5	0.241083
137.6	0.240917
137.7	0.24
137.8	0.2405
137.9	0.240417
138	0.240833
138.1	0.240667
138.2	0.241
138.3	0.240417
138.4	0.241417
138.5	0.242417
138.6	0.24275
138.7	0.24125
138.8	0.241167
138.9	0.241
139	0.242333
139.1	0.241167
139.2	0.241333
139.3	0.241333
139.4	0.240583
139.5	0.24025
139.6	0.239667
139.7	0.239167
139.8	0.238833
139.9	0.239083
140	0.23925
140.1	0.239583
140.2	0.239583
140.3	0.239583
140.4	0.240583
140.5	0.240833
140.6	0.24025
140.7	0.240833
140.8	0.240333
140.9	0.240583
141	0.24025
141.1	0.241417
141.2	0.24125
141.3	0.241667
141.4	0.241083
141.5	0.241917
141.6	0.241833
141.7	0.242833
141.8	0.2425
141.9	0.242917
142	0.243667
142.1	0.243
142.2	0.243
142.3	0.2435
142.4	0.243667
142.5	0.24375
142.6	0.2445
142.7	0.245333
142.8	0.246
142.9	0.24725
143	0.245833
143.1	0.245
143.2	0.245
143.3	0.2455
143.4	0.244833
143.5	0.244167
143.6	0.244333
143.7	0.244083
143.8	0.245167
143.9	0.246417
144	0.247917
144.1	0.248167
144.2	0.247667
144.3	0.247333
144.4	0.24825
144.5	0.247833
144.6	0.248
144.7	0.247667
144.8	0.24675
144.9	0.245917
145	0.245
145.1	0.2445
145.2	0.243667
145.3	0.243667
145.4	0.2435
145.5	0.244
145.6	0.244833
145.7	0.24425
145.8	0.24425
145.9	0.245
146	0.245833
146.1	0.2465
146.2	0.246583
146.3	0.246583
146.4	0.24725
146.5	0.248
146.6	0.249417
146.7	0.249667
146.8	0.249083
146.9	0.248917
147	0.24925
147.1	0.24825
147.2	0.247917
147.3	0.247417
147.4	0.246583
147.5	0.247083
147.6	0.246167
147.7	0.245833
147.8	0.24675
147.9	0.246583
148	0.24625
148.1	0.2465
148.2	0.245583
148.3	0.245583
148.4	0.246083
148.5	0.245167
148.6	0.243917
148.7	0.243833
148.8	0.24325
148.9	0.24275
149	0.243
149.1	0.243667
149.2	0.243833
149.3	0.243417
149.4	0.243667
149.5	0.242667
149.6	0.243
149.7	0.243417
149.8	0.243083
149.9	0.243583
150	0.244333
150.1	0.244917
150.2	0.244833
150.3	0.244833
150.4	0.244167
150.5	0.24475
150.6	0.244583
150.7	0.244333
150.8	0.244333
150.9	0.244833
151	0.244
151.1	0.244833
151.2	0.243333
151.3	0.244
151.4	0.243583
151.5	0.243083
151.6	0.2425
151.7	0.242917
151.8	0.24375
151.9	0.24325
152	0.241583
152.1	0.242583
152.2	0.24275
152.3	0.2415
152.4	0.241833
152.5	0.241583
152.6	0.2415
152.7	0.241417
152.8	0.2405
152.9	0.241167
153	0.241833
153.1	0.242417
153.2	0.241833
153.3	0.241417
153.4	0.240667
153.5	0.241833
153.6	0.241667
153.7	0.241583
153.8	0.240417
153.9	0.240583
154	0.2415
154.1	0.242083
154.2	0.24275
154.3	0.244583
154.4	0.245167
154.5	0.2455
154.6	0.2455
154.7	0.2465
154.8	0.246083
154.9	0.246083
155	0.246917
155.1	0.246833
155.2	0.24675
155.3	0.246083
155.4	0.24575
155.5	0.24675
155.6	0.246333
155.7	0.24625
155.8	0.246417
155.9	0.247
156	0.247
156.1	0.24725
156.2	0.246667
156.3	0.246583
156.4	0.24675
156.5	0.246
156.6	0.245583
156.7	0.245583
156.8	0.246583
156.9	0.246917
157	0.2465
157.1	0.246583
157.2	0.246333
157.3	0.246667
157.4	0.2465
157.5	0.246083
157.6	0.246333
157.7	0.24675
157.8	0.246
157.9	0.245667
158	0.246167
158.1	0.245667
158.2	0.24575
158.3	0.245833
158.4	0.245167
158.5	0.244
158.6	0.243917
158.7	0.24525
158.8	0.245667
158.9	0.245333
159	0.24425
159.1	0.244083
159.2	0.244167
159.3	0.2445
159.4	0.24525
159.5	0.24575
159.6	0.246083
159.7	0.24675
159.8	0.246583
159.9	0.245667
160	0.245167
160.1	0.24575
160.2	0.246
160.3	0.247
160.4	0.2465
160.5	0.246167
160.6	0.246
160.7	0.246583
160.8	0.2465
160.9	0.246083
161	0.24675
161.1	0.246833
161.2	0.247
161.3	0.246833
161.4	0.24675
161.5	0.24725
161.6	0.247
161.7	0.247167
161.8	0.247083
161.9	0.247583
162	0.248917
162.1	0.248333
162.2	0.249667
162.3	0.2495
162.4	0.25
162.5	0.25075
162.6	0.25125
162.7	0.25
162.8	0.250333
162.9	0.250083
163	0.250667
163.1	0.249917
163.2	0.2505
163.3	0.250083
163.4	0.250417
163.5	0.2515
163.6	0.251333
163.7	0.25175
163.8	0.2515
163.9	0.252417
164	0.252667
164.1	0.25425
164.2	0.25475
164.3	0.254667
164.4	0.255583
164.5	0.255417
164.6	0.2555
164.7	0.255167
164.8	0.256417
164.9	0.257667
165	0.2575
165.1	0.25675
165.2	0.256833
165.3	0.256583
165.4	0.256167
165.5	0.255917
165.6	0.2565
165.7	0.256
165.8	0.255833
165.9	0.255667
166	0.2555
166.1	0.2555
166.2	0.255917
166.3	0.256167
166.4	0.255917
166.5	0.25475
166.6	0.255
166.7	0.254333
166.8	0.255167
166.9	0.254167
167	0.253333
167.1	0.253333
167.2	0.253833
167.3	0.254917
167.4	0.2545
167.5	0.254417
167.6	0.253917
167.7	0.25275
167.8	0.2525
167.9	0.251667
168	0.251
168.1	0.251833
168.2	0.25175
168.3	0.251083
168.4	0.25075
168.5	0.251833
168.6	0.253
168.7	0.252167
168.8	0.252917
168.9	0.251583
169	0.252417
169.1	0.251333
169.2	0.25125
169.3	0.25125
169.4	0.250167
169.5	0.250333
169.6	0.25
169.7	0.2495
169.8	0.248417
169.9	0.248667
170	0.249
170.1	0.249
170.2	0.248917
170.3	0.248417
170.4	0.2485
170.5	0.2485
170.6	0.2475
170.7	0.248167
170.8	0.248083
170.9	0.2475
171	0.247583
171.1	0.247667
171.2	0.2475
171.3	0.24725
171.4	0.247333
171.5	0.246
171.6	0.245583
171.7	0.24575
171.8	0.245333
171.9	0.245083
172	0.246083
172.1	0.245583
172.2	0.245833
172.3	0.247
172.4	0.247667
172.5	0.247333
172.6	0.247167
172.7	0.247083
172.8	0.246417
172.9	0.247167
173	0.247417
173.1	0.246833
173.2	0.246417
173.3	0.246417
173.4	0.246833
173.5	0.247167
173.6	0.249083
173.7	0.249583
173.8	0.249833
173.9	0.250333
174	0.250083
174.1	0.249917
174.2	0.250167
174.3	0.251667
174.4	0.251083
174.5	0.251583
174.6	0.252
174.7	0.252417
174.8	0.252583
174.9	0.25325
175	0.25425
175.1	0.255083
175.2	0.255167
175.3	0.2555
175.4	0.255
175.5	0.253917
175.6	0.254
175.7	0.254167
175.8	0.25475
175.9	0.255083
176	0.25475
176.1	0.255667
176.2	0.255417
176.3	0.25525
176.4	0.254333
176.5	0.25425
176.6	0.253917
176.7	0.253333
176.8	0.254083
176.9	0.254167
177	0.254083
177.1	0.2535
177.2	0.253833
177.3	0.255167
177.4	0.255583
177.5	0.2555
177.6	0.255333
177.7	0.2555
177.8	0.256167
177.9	0.2565
178	0.25675
178.1	0.256667
178.2	0.256833
178.3	0.256667
178.4	0.25675
178.5	0.256917
178.6	0.257083
178.7	0.256333
178.8	0.256
178.9	0.2545
179	0.254167
179.1	0.254917
179.2	0.254667
179.3	0.254667
179.4	0.255667
179.5	0.256667
179.6	0.256
179.7	0.255
179.8	0.254917
179.9	0.255333
180	0.255
180.1	0.255
180.2	0.255333
180.3	0.255667
180.4	0.255417
180.5	0.255583
180.6	0.254667
180.7	0.253833
180.8	0.255333
180.9	0.2555
181	0.255
181.1	0.255167
181.2	0.254083
181.3	0.25425
181.4	0.253083
181.5	0.253667
181.6	0.254167
181.7	0.25375
181.8	0.253917
181.9	0.254667
182	0.252917
182.1	0.255167
182.2	0.255167
182.3	0.254333
182.4	0.253833
182.5	0.253417
182.6	0.254833
182.7	0.254417
182.8	0.253583
182.9	0.253333
183	0.253083
183.1	0.25425
183.2	0.255083
183.3	0.25375
183.4	0.25375
183.5	0.253
183.6	0.254333
183.7	0.254583
183.8	0.254417
183.9	0.255083
184	0.25425
184.1	0.25375
184.2	0.254917
184.3	0.25525
184.4	0.255167
184.5	0.25575
184.6	0.255833
184.7	0.255417
184.8	0.255333
184.9	0.254833
185	0.254167
185.1	0.253083
185.2	0.252083
185.3	0.251083
185.4	0.251
185.5	0.250833
185.6	0.2505
185.7	0.252
185.8	0.25275
185.9	0.25275
186	0.252167
186.1	0.2525
186.2	0.252167
186.3	0.252583
186.4	0.25275
186.5	0.2535
186.6	0.25325
186.7	0.252667
186.8	0.250833
186.9	0.249583
187	0.250167
187.1	0.250333
187.2	0.2505
187.3	0.251167
187.4	0.251167
187.5	0.250083
187.6	0.250583
187.7	0.250167
187.8	0.250167
187.9	0.250583
188	0.251583
188.1	0.252833
188.2	0.25175
188.3	0.25125
188.4	0.2515
188.5	0.250667
188.6	0.2495
188.7	0.2495
188.8	0.2495
188.9	0.249833
189	0.249333
189.1	0.248833
189.2	0.249167
189.3	0.249083
189.4	0.24925
189.5	0.24975
189.6	0.249083
189.7	0.24875
189.8	0.249417
189.9	0.25
190	0.25
190.1	0.248417
190.2	0.24875
190.3	0.248667
190.4	0.248667
190.5	0.2495
190.6	0.2495
190.7	0.24925
190.8	0.249583
190.9	0.250583
191	0.250583
191.1	0.250917
191.2	0.251917
191.3	0.250667
191.4	0.251
191.5	0.2515
191.6	0.25175
191.7	0.25225
191.8	0.252167
191.9	0.2515
192	0.252583
192.1	0.252417
192.2	0.252083
192.3	0.252333
192.4	0.252917
192.5	0.2535
192.6	0.2535
192.7	0.2545
192.8	0.25475
192.9	0.254417
193	0.254667
193.1	0.254583
193.2	0.255667
193.3	0.256333
193.4	0.256167
193.5	0.257333
193.6	0.256667
193.7	0.257333
193.8	0.256833
193.9	0.256667
194	0.25625
194.1	0.256
194.2	0.256083
194.3	0.255667
194.4	0.255667
194.5	0.256333
194.6	0.255583
194.7	0.255083
194.8	0.255833
194.9	0.255333
195	0.25575
195.1	0.256083
195.2	0.255083
195.3	0.254917
195.4	0.254833
195.5	0.254083
195.6	0.254417
195.7	0.253083
195.8	0.2535
195.9	0.252583
196	0.253
196.1	0.253583
196.2	0.253
196.3	0.252833
196.4	0.253667
196.5	0.25325
196.6	0.25375
196.7	0.254583
196.8	0.255333
196.9	0.256417
197	0.255333
197.1	0.254833
197.2	0.254667
197.3	0.254167
197.4	0.253917
197.5	0.252917
197.6	0.253417
197.7	0.254083
197.8	0.254917
197.9	0.255333
198	0.254417
198.1	0.254417
198.2	0.254083
198.3	0.2545
198.4	0.254833
198.5	0.255167
198.6	0.254667
198.7	0.255
198.8	0.256667
198.9	0.256667
199	0.256667
199.1	0.256583
199.2	0.256083
199.3	0.256833
199.4	0.257917
199.5	0.258333
199.6	0.257417
199.7	0.257583
199.8	0.258083
199.9	0.258167
200	0.258
[truncated: 14,000 more rows]
