# Supplementary material for: Bayesian inference of kinetic schemes for ion channels by Kalman filtering
Source: eLife journal article supplement (doi:10.7554/elife.62714), 2022-05-04
Supplement: fig4-data10 [file 1_Sim_N_6000_Strom_MW_0.0625M.xlsx]

## Sheet: Tabelle1
0.1	0
0.2	0
0.3	0
0.4	0
0.5	0
0.6	0
0.7	0
0.8	0
0.9	0
1	0
1.1	0
1.2	0
1.3	0
1.4	0
1.5	0
1.6	0
1.7	0
1.8	0
1.9	0
2	0
2.1	0
2.2	0
2.3	0
2.4	0
2.5	0
2.6	0
2.7	0
2.8	0
2.9	0
3	0
3.1	0
3.2	0
3.3	0
3.4	0
3.5	0
3.6	0
3.7	0
3.8	0
3.9	0
4	0
4.1	0
4.2	0
4.3	0
4.4	0
4.5	0
4.6	0
4.7	0
4.8	0
4.9	0
5	0
5.1	0
5.2	0
5.3	0
5.4	0
5.5	0
5.6	0
5.7	0
5.8	0
5.9	0
6	0
6.1	0
6.2	0
6.3	0
6.4	0
6.5	0
6.6	0
6.7	0
6.8	0
6.9	0
7	0
7.1	0
7.2	0
7.3	0
7.4	0
7.5	0
7.6	0
7.7	0
7.8	0
7.9	0
8	0
8.1	0
8.2	0
8.3	0
8.4	0
8.5	0
8.6	0
8.7	0
8.8	0
8.9	0
9	0
9.1	0
9.2	0
9.3	0
9.4	0
9.5	0
9.6	0
9.7	0
9.8	0
9.9	0
10	0
10.1	0
10.2	0
10.3	0
10.4	0
10.5	0
10.6	0
10.7	0
10.8	0
10.9	0
11	0
11.1	0
11.2	0
11.3	0
11.4	0
11.5	0
11.6	0
11.7	0
11.8	0
11.9	0
12	0
12.1	0
12.2	0
12.3	0
12.4	0
12.5	0
12.6	0
12.7	0
12.8	0
12.9	0
13	0
13.1	0
13.2	0
13.3	0
13.4	0
13.5	0
13.6	0
13.7	0
13.8	0
13.9	0
14	0
14.1	0
14.2	0
14.3	0
14.4	0
14.5	0
14.6	0
14.7	0
14.8	0
14.9	0
15	0
15.1	0
15.2	0
15.3	0
15.4	0
15.5	0
15.6	0
15.7	0
15.8	0
15.9	0
16	0
16.1	0
16.2	0
16.3	0
16.4	0
16.5	0
16.6	0
16.7	0
16.8	0
16.9	0
17	0
17.1	0
17.2	0
17.3	0
17.4	0
17.5	0
17.6	0
17.7	0
17.8	0
17.9	0
18	0
18.1	0
18.2	0
18.3	0
18.4	0
18.5	0
18.6	0
18.7	0
18.8	0
18.9	0
19	0
19.1	0
19.2	0
19.3	0
19.4	0
19.5	0
19.6	0
19.7	0
19.8	0
19.9	0
20	0
20.1	0
20.2	0
20.3	0
20.4	0
20.5	0
20.6	0
20.7	0
20.8	0
20.9	0
21	0
21.1	0
21.2	0
21.3	0
21.4	0
21.5	0
21.6	0
21.7	0
21.8	0
21.9	0
22	0
22.1	0
22.2	0
22.3	0
22.4	0
22.5	0
22.6	0
22.7	0
22.8	0
22.9	0
23	0
23.1	0
23.2	0
23.3	0
23.4	0
23.5	0
23.6	0
23.7	0
23.8	0
23.9	0
24	0
24.1	0
24.2	0
24.3	0
24.4	0
24.5	0
24.6	0
24.7	0
24.8	0
24.9	0
25	0
25.1	0
25.2	0
25.3	0
25.4	0
25.5	0
25.6	0
25.7	0
25.8	0
25.9	0
26	0
26.1	0
26.2	0
26.3	0
26.4	0
26.5	0
26.6	0
26.7	0
26.8	0
26.9	0
27	0
27.1	0
27.2	0
27.3	0
27.4	0
27.5	0
27.6	0
27.7	0
27.8	0
27.9	0
28	0
28.1	0
28.2	0
28.3	0
28.4	0
28.5	0
28.6	0
28.7	0
28.8	0
28.9	0
29	0
29.1	0
29.2	0
29.3	0
29.4	0
29.5	0
29.6	0
29.7	0
29.8	0
29.9	0
30	0
30.1	0
30.2	0
30.3	0
30.4	0
30.5	0
30.6	0
30.7	0
30.8	0
30.9	0
31	0
31.1	0
31.2	0
31.3	0
31.4	0
31.5	0
31.6	0
31.7	0
31.8	0
31.9	0
32	0
32.1	0
32.2	0
32.3	0
32.4	0
32.5	0
32.6	0
32.7	0
32.8	0
32.9	0
33	0
33.1	0
33.2	0
33.3	0
33.4	0
33.5	0
33.6	0
33.7	0
33.8	0
33.9	0
34	0
34.1	0
34.2	0
34.3	0
34.4	0
34.5	0
34.6	0
34.7	0
34.8	0
34.9	0
35	0
35.1	0
35.2	0
35.3	0
35.4	0
35.5	0
35.6	0
35.7	0
35.8	0
35.9	0
36	0
36.1	0
36.2	0
36.3	0
36.4	0
36.5	0
36.6	0
36.7	0
36.8	0
36.9	0
37	0
37.1	0
37.2	0
37.3	0
37.4	0
37.5	0
37.6	0
37.7	0
37.8	0
37.9	0
38	0
38.1	0
38.2	0
38.3	0
38.4	0
38.5	0
38.6	0
38.7	0
38.8	0
38.9	0
39	0
39.1	0
39.2	0
39.3	0
39.4	0
39.5	0
39.6	0
39.7	0
39.8	0
39.9	0
40	0
40.1	0
40.2	0
40.3	0
40.4	0
40.5	0
40.6	0
40.7	0
40.8	0
40.9	0
41	0
41.1	0
41.2	0
41.3	0
41.4	0
41.5	0
41.6	0
41.7	0
41.8	0
41.9	0
42	0
42.1	0
42.2	0
42.3	0
42.4	0
42.5	0
42.6	0
42.7	0
42.8	0
42.9	0
43	0
43.1	0
43.2	0
43.3	0
43.4	0
43.5	0
43.6	0
43.7	0
43.8	0
43.9	0
44	0
44.1	0
44.2	0
44.3	0
44.4	0
44.5	0
44.6	0
44.7	0
44.8	0
44.9	0
45	0
45.1	0
45.2	0
45.3	0
45.4	0
45.5	0
45.6	0
45.7	0
45.8	0
45.9	0
46	0
46.1	0
46.2	0
46.3	0
46.4	0
46.5	0
46.6	0
46.7	0
46.8	0
46.9	0
47	0
47.1	0
47.2	0
47.3	0
47.4	0
47.5	0
47.6	0
47.7	0
47.8	0
47.9	0
48	0
48.1	0
48.2	0
48.3	0
48.4	0
48.5	0
48.6	0
48.7	0
48.8	0
48.9	0
49	0
49.1	0
49.2	0
49.3	0
49.4	0
49.5	0
49.6	0
49.7	0
49.8	0
49.9	0
50	0
50.1	0
50.2	0
50.3	0
50.4	0
50.5	0
50.6	0
50.7	0
50.8	0
50.9	0
51	0
51.1	0
51.2	0
51.3	0
51.4	0
51.5	0
51.6	0
51.7	0
51.8	0
51.9	0
52	0
52.1	0
52.2	0
52.3	0
52.4	0
52.5	0
52.6	0
52.7	0
52.8	0
52.9	0
53	0
53.1	0
53.2	0
53.3	0
53.4	0
53.5	0
53.6	0
53.7	0
53.8	0
53.9	0
54	0
54.1	0
54.2	0
54.3	0
54.4	0
54.5	0
54.6	0
54.7	0
54.8	0
54.9	0
55	0
55.1	0
55.2	0
55.3	0
55.4	0
55.5	0
55.6	0
55.7	0
55.8	0
55.9	0
56	0
56.1	0
56.2	0
56.3	0
56.4	0
56.5	0
56.6	0
56.7	0
56.8	0
56.9	0
57	0
57.1	0
57.2	0
57.3	0
57.4	0
57.5	0
57.6	0
57.7	0
57.8	0
57.9	0
58	0
58.1	0
58.2	0
58.3	0
58.4	0
58.5	0
58.6	0
58.7	0
58.8	0
58.9	0
59	0
59.1	0
59.2	0
59.3	0
59.4	0
59.5	0
59.6	0
59.7	0
59.8	0
59.9	0
60	0
60.1	0
60.2	0
60.3	0
60.4	0
60.5	0
60.6	0
60.7	0
60.8	0
60.9	0
61	0
61.1	0
61.2	0
61.3	0
61.4	0
61.5	0
61.6	0
61.7	0
61.8	0
61.9	0
62	0
62.1	0
62.2	0
62.3	0
62.4	0
62.5	0
62.6	0
62.7	0
62.8	0
62.9	0
63	0
63.1	0
63.2	0
63.3	0
63.4	0
63.5	0
63.6	0
63.7	0
63.8	0
63.9	0
64	0
64.1	0
64.2	0
64.3	0
64.4	0
64.5	0
64.6	0
64.7	0
64.8	0
64.9	0
65	0
65.1	0
65.2	0
65.3	0
65.4	0
65.5	0
65.6	0
65.7	0
65.8	0
65.9	0
66	0
66.1	0
66.2	0
66.3	0
66.4	0
66.5	0
66.6	0
66.7	0
66.8	0
66.9	0
67	0
67.1	0
67.2	0
67.3	0
67.4	0
67.5	0
67.6	0
67.7	0
67.8	0
67.9	0
68	0
68.1	0
68.2	0
68.3	0
68.4	0
68.5	0
68.6	0
68.7	0
68.8	0
68.9	0
69	0
69.1	0
69.2	0
69.3	0
69.4	0
69.5	0
69.6	0
69.7	0
69.8	0
69.9	0
70	0
70.1	0
70.2	0
70.3	0
70.4	0
70.5	0
70.6	0
70.7	0
70.8	0
70.9	0
71	0
71.1	0
71.2	0
71.3	0
71.4	0
71.5	0
71.6	0
71.7	0
71.8	0
71.9	0
72	0
72.1	0
72.2	0
72.3	0
72.4	0
72.5	0
72.6	0
72.7	0
72.8	0
72.9	0
73	0
73.1	0
73.2	0
73.3	0
73.4	0
73.5	0
73.6	0
73.7	0
73.8	0
73.9	0
74	0
74.1	0
74.2	0
74.3	0
74.4	0
74.5	0
74.6	0
74.7	0
74.8	0
74.9	0
75	0
75.1	0
75.2	0
75.3	0
75.4	0
75.5	0
75.6	0
75.7	0
75.8	0
75.9	0
76	0
76.1	0
76.2	0
76.3	0
76.4	0
76.5	0
76.6	0
76.7	0
76.8	0
76.9	0
77	0
77.1	0
77.2	0
77.3	0
77.4	0
77.5	0
77.6	0
77.7	0
77.8	0
77.9	0
78	0
78.1	0
78.2	0
78.3	0
78.4	0
78.5	0
78.6	0
78.7	0
78.8	0
78.9	0
79	0
79.1	0
79.2	0
79.3	0
79.4	0
79.5	0
79.6	0
79.7	0
79.8	0
79.9	0
80	0
80.1	0
80.2	0
80.3	0
80.4	0
80.5	0
80.6	0
80.7	0
80.8	0
80.9	0
81	0
81.1	0
81.2	0
81.3	0
81.4	0
81.5	0
81.6	0
81.7	0
81.8	0
81.9	0
82	0
82.1	0
82.2	0
82.3	0
82.4	0
82.5	0
82.6	0
82.7	0
82.8	0
82.9	0
83	0
83.1	0
83.2	0
83.3	0
83.4	0
83.5	0
83.6	0
83.7	0
83.8	0
83.9	0
84	0
84.1	0
84.2	0
84.3	0
84.4	0
84.5	0
84.6	0
84.7	0
84.8	0
84.9	0
85	0
85.1	0
85.2	0
85.3	0
85.4	0
85.5	0
85.6	0
85.7	0
85.8	0
85.9	0
86	0
86.1	0
86.2	0
86.3	0
86.4	0
86.5	0
86.6	0
86.7	0
86.8	0
86.9	0
87	0
87.1	0
87.2	0
87.3	0
87.4	0
87.5	0
87.6	0
87.7	0
87.8	0
87.9	0
88	0
88.1	0
88.2	0
88.3	0
88.4	0
88.5	0
88.6	0
88.7	0
88.8	0
88.9	0
89	0
89.1	0
89.2	0
89.3	0
89.4	0
89.5	0
89.6	0
89.7	0
89.8	0
89.9	0
90	0
90.1	0
90.2	0
90.3	0
90.4	0
90.5	0
90.6	0
90.7	0
90.8	0
90.9	0
91	0
91.1	0
91.2	0
91.3	0
91.4	0
91.5	0
91.6	0
91.7	0
91.8	0
91.9	0
92	0
92.1	0
92.2	0
92.3	0
92.4	0
92.5	0
92.6	0
92.7	0
92.8	0
92.9	0
93	0
93.1	0
93.2	0
93.3	0
93.4	0
93.5	0
93.6	0
93.7	0
93.8	0
93.9	0
94	0
94.1	0
94.2	0
94.3	0
94.4	0
94.5	0
94.6	0
94.7	0
94.8	0
94.9	0
95	0
95.1	0
95.2	0
95.3	0
95.4	0
95.5	0
95.6	0
95.7	0
95.8	0
95.9	0
96	0
96.1	0
96.2	0
96.3	0
96.4	0
96.5	0
96.6	0
96.7	0
96.8	0
96.9	0
97	0
97.1	0
97.2	0
97.3	0
97.4	0
97.5	0
97.6	0
97.7	0
97.8	0
97.9	0
98	0
98.1	0
98.2	0
98.3	0
98.4	0
98.5	0
98.6	0
98.7	0
98.8	0
98.9	0
99	0
99.1	0
99.2	0
99.3	0
99.4	0
99.5	0
99.6	0
99.7	0
99.8	0
99.9	0
100	0
100.1	0
100.2	0
100.3	0
100.4	0
100.5	0
100.6	0
100.7	0
100.8	0
100.9	0
101	0
101.1	0
101.2	0
101.3	0
101.4	0
101.5	0
101.6	0
101.7	0
101.8	0
101.9	0
102	0
102.1	0
102.2	0
102.3	0
102.4	0
102.5	0
102.6	0
102.7	0
102.8	0
102.9	0
103	0
103.1	0
103.2	0
103.3	0
103.4	0
103.5	0
103.6	0.000166667
103.7	0.000166667
103.8	0.000166667
103.9	0.000333333
104	0.000333333
104.1	0.000333333
104.2	0.000333333
104.3	0.000333333
104.4	0.000333333
104.5	0.000333333
104.6	0.000333333
104.7	0.0005
104.8	0.0005
104.9	0.0005
105	0.0005
105.1	0.0005
105.2	0.0005
105.3	0.0005
105.4	0.0005
105.5	0.0005
105.6	0.0005
105.7	0.0005
105.8	0.0005
105.9	0.0005
106	0.0005
106.1	0.000666667
106.2	0.000666667
106.3	0.000666667
106.4	0.000666667
106.5	0.000666667
106.6	0.000666667
106.7	0.000666667
106.8	0.000666667
106.9	0.000833333
107	0.000833333
107.1	0.000833333
107.2	0.000833333
107.3	0.000833333
107.4	0.000833333
107.5	0.000833333
107.6	0.000833333
107.7	0.001
107.8	0.001
107.9	0.001
108	0.001
108.1	0.001
108.2	0.00116667
108.3	0.00116667
108.4	0.00116667
108.5	0.00116667
108.6	0.00116667
108.7	0.00116667
108.8	0.00116667
108.9	0.00116667
109	0.00116667
109.1	0.00116667
109.2	0.00116667
109.3	0.00116667
109.4	0.00116667
109.5	0.00116667
109.6	0.00116667
109.7	0.00116667
109.8	0.00116667
109.9	0.00133333
110	0.00133333
110.1	0.00133333
110.2	0.0015
110.3	0.0015
110.4	0.0015
110.5	0.0015
110.6	0.0015
110.7	0.00166667
110.8	0.00166667
110.9	0.00166667
111	0.00166667
111.1	0.00166667
111.2	0.00183333
111.3	0.00183333
111.4	0.00183333
111.5	0.00183333
111.6	0.00183333
111.7	0.00183333
111.8	0.00183333
111.9	0.00183333
112	0.00183333
112.1	0.00183333
112.2	0.00183333
112.3	0.002
112.4	0.002
112.5	0.002
112.6	0.002
112.7	0.002
112.8	0.00233333
112.9	0.00233333
113	0.00233333
113.1	0.00233333
113.2	0.0025
113.3	0.0025
113.4	0.0025
113.5	0.00266667
113.6	0.00266667
113.7	0.00266667
113.8	0.00266667
113.9	0.00266667
114	0.00266667
114.1	0.00266667
114.2	0.00266667
114.3	0.00266667
114.4	0.00283333
114.5	0.00283333
114.6	0.00283333
114.7	0.003
114.8	0.00316667
114.9	0.00316667
115	0.00316667
115.1	0.00316667
115.2	0.00316667
115.3	0.00316667
115.4	0.00316667
115.5	0.00316667
115.6	0.00316667
115.7	0.00333333
115.8	0.00366667
115.9	0.00366667
116	0.00383333
116.1	0.00383333
116.2	0.00383333
116.3	0.00416667
116.4	0.00416667
116.5	0.00416667
116.6	0.00416667
116.7	0.00416667
116.8	0.00416667
116.9	0.00433333
117	0.0045
117.1	0.00466667
117.2	0.00466667
117.3	0.00466667
117.4	0.00483333
117.5	0.005
117.6	0.005
117.7	0.005
117.8	0.005
117.9	0.005
118	0.005
118.1	0.005
118.2	0.005
118.3	0.00516667
118.4	0.00516667
118.5	0.00516667
118.6	0.00533333
118.7	0.00566667
118.8	0.00566667
118.9	0.00566667
119	0.00566667
119.1	0.00583333
119.2	0.00583333
119.3	0.006
119.4	0.006
119.5	0.006
119.6	0.006
119.7	0.00616667
119.8	0.00616667
119.9	0.00616667
120	0.00616667
120.1	0.00616667
120.2	0.00633333
120.3	0.00633333
120.4	0.00633333
120.5	0.00633333
120.6	0.00633333
120.7	0.00633333
120.8	0.00633333
120.9	0.00633333
121	0.00633333
121.1	0.0065
121.2	0.00683333
121.3	0.00683333
121.4	0.007
121.5	0.007
121.6	0.007
121.7	0.00716667
121.8	0.00716667
121.9	0.00733333
122	0.0075
122.1	0.00766667
122.2	0.00766667
122.3	0.00783333
122.4	0.008
122.5	0.008
122.6	0.00833333
122.7	0.00816667
122.8	0.00833333
122.9	0.00833333
123	0.00833333
123.1	0.008
123.2	0.008
123.3	0.00816667
123.4	0.00816667
123.5	0.00833333
123.6	0.0085
123.7	0.00866667
123.8	0.00866667
123.9	0.00866667
124	0.00866667
124.1	0.00866667
124.2	0.00866667
124.3	0.00866667
124.4	0.00866667
124.5	0.00866667
124.6	0.00866667
124.7	0.00866667
124.8	0.00866667
124.9	0.00866667
125	0.00866667
125.1	0.00866667
125.2	0.00883333
125.3	0.00883333
125.4	0.00883333
125.5	0.00883333
125.6	0.00883333
125.7	0.009
125.8	0.009
125.9	0.009
126	0.00916667
126.1	0.00916667
126.2	0.0095
126.3	0.00966667
126.4	0.00966667
126.5	0.00983333
126.6	0.00983333
126.7	0.00983333
126.8	0.00983333
126.9	0.00983333
127	0.00983333
127.1	0.00983333
127.2	0.00983333
127.3	0.00983333
127.4	0.00983333
127.5	0.00983333
127.6	0.01
127.7	0.0101667
127.8	0.0101667
127.9	0.0103333
128	0.0103333
128.1	0.0105
128.2	0.0105
128.3	0.0105
128.4	0.0106667
128.5	0.0108333
128.6	0.011
128.7	0.0111667
128.8	0.0111667
128.9	0.0111667
129	0.0111667
129.1	0.0111667
129.2	0.0111667
129.3	0.0111667
129.4	0.0111667
129.5	0.0111667
129.6	0.0111667
129.7	0.0113333
129.8	0.0115
129.9	0.0115
130	0.0115
130.1	0.0115
130.2	0.0116667
130.3	0.0116667
130.4	0.0116667
130.5	0.0116667
130.6	0.0116667
130.7	0.012
130.8	0.012
130.9	0.0121667
131	0.0123333
131.1	0.0123333
131.2	0.0123333
131.3	0.0123333
131.4	0.0121667
131.5	0.0126667
131.6	0.0126667
131.7	0.0126667
131.8	0.0126667
131.9	0.0125
132	0.0125
132.1	0.0126667
132.2	0.0126667
132.3	0.0126667
132.4	0.0126667
132.5	0.0126667
132.6	0.0128333
132.7	0.0128333
132.8	0.0128333
132.9	0.0128333
133	0.0128333
133.1	0.013
133.2	0.013
133.3	0.0131667
133.4	0.0135
133.5	0.0135
133.6	0.0135
133.7	0.0136667
133.8	0.0138333
133.9	0.0138333
134	0.014
134.1	0.014
134.2	0.014
134.3	0.0138333
134.4	0.0138333
134.5	0.0138333
134.6	0.0138333
134.7	0.0138333
134.8	0.0141667
134.9	0.0141667
135	0.0143333
135.1	0.0143333
135.2	0.0143333
135.3	0.0145
135.4	0.0148333
135.5	0.0148333
135.6	0.0148333
135.7	0.015
135.8	0.015
135.9	0.015
136	0.0151667
136.1	0.0151667
136.2	0.0151667
136.3	0.0153333
136.4	0.0153333
136.5	0.0153333
136.6	0.0153333
136.7	0.0153333
136.8	0.0153333
136.9	0.0153333
137	0.0153333
137.1	0.0153333
137.2	0.0153333
137.3	0.0156667
137.4	0.0156667
137.5	0.0156667
137.6	0.016
137.7	0.016
137.8	0.016
137.9	0.016
138	0.016
138.1	0.0158333
138.2	0.0156667
138.3	0.0158333
138.4	0.0158333
138.5	0.0158333
138.6	0.0161667
138.7	0.0161667
138.8	0.0161667
138.9	0.0161667
139	0.0163333
139.1	0.0165
139.2	0.0165
139.3	0.0168333
139.4	0.0168333
139.5	0.0168333
139.6	0.0168333
139.7	0.017
139.8	0.017
139.9	0.017
140	0.017
140.1	0.017
140.2	0.0171667
140.3	0.0173333
140.4	0.0173333
140.5	0.0173333
140.6	0.0175
140.7	0.0176667
140.8	0.0178333
140.9	0.0178333
141	0.0178333
141.1	0.0181667
141.2	0.0181667
141.3	0.0181667
141.4	0.0181667
141.5	0.0181667
141.6	0.0181667
141.7	0.0183333
141.8	0.0183333
141.9	0.0183333
142	0.0183333
142.1	0.0183333
142.2	0.0185
142.3	0.0186667
142.4	0.0186667
142.5	0.0186667
142.6	0.0188333
142.7	0.0188333
142.8	0.0188333
142.9	0.0186667
143	0.0186667
143.1	0.0186667
143.2	0.0186667
143.3	0.0186667
143.4	0.0186667
143.5	0.0186667
143.6	0.0186667
143.7	0.0186667
143.8	0.0186667
143.9	0.0188333
144	0.019
144.1	0.0191667
144.2	0.0193333
144.3	0.0191667
144.4	0.0191667
144.5	0.0191667
144.6	0.0191667
144.7	0.0195
144.8	0.0195
144.9	0.0196667
145	0.0198333
145.1	0.0198333
145.2	0.0198333
145.3	0.0198333
145.4	0.0198333
145.5	0.0198333
145.6	0.0198333
145.7	0.02
145.8	0.02
145.9	0.02
146	0.02
146.1	0.02
146.2	0.02
146.3	0.0201667
146.4	0.02
146.5	0.02
146.6	0.0203333
146.7	0.0205
146.8	0.0205
146.9	0.0205
147	0.0206667
147.1	0.0208333
147.2	0.0208333
147.3	0.0208333
147.4	0.0208333
147.5	0.021
147.6	0.0206667
147.7	0.0208333
147.8	0.0208333
147.9	0.021
148	0.021
148.1	0.0211667
148.2	0.0211667
148.3	0.0211667
148.4	0.0213333
148.5	0.0213333
148.6	0.0213333
148.7	0.0213333
148.8	0.0213333
148.9	0.0213333
149	0.0215
149.1	0.0215
149.2	0.0216667
149.3	0.0216667
149.4	0.0216667
149.5	0.0216667
149.6	0.0218333
149.7	0.0218333
149.8	0.022
149.9	0.022
150	0.0221667
150.1	0.022
150.2	0.022
150.3	0.0221667
150.4	0.022
150.5	0.0221667
150.6	0.0221667
150.7	0.0221667
150.8	0.0221667
150.9	0.0221667
151	0.0221667
151.1	0.0225
151.2	0.0226667
151.3	0.0226667
151.4	0.0225
151.5	0.0225
151.6	0.0226667
151.7	0.0226667
151.8	0.0228333
151.9	0.023
152	0.023
152.1	0.023
152.2	0.023
152.3	0.023
152.4	0.023
152.5	0.0228333
152.6	0.023
152.7	0.023
152.8	0.023
152.9	0.0231667
153	0.0233333
153.1	0.0235
153.2	0.0235
153.3	0.0235
153.4	0.0235
153.5	0.0236667
153.6	0.024
153.7	0.024
153.8	0.024
153.9	0.0241667
154	0.0241667
154.1	0.0241667
154.2	0.0241667
154.3	0.0241667
154.4	0.0241667
154.5	0.0238333
154.6	0.0238333
154.7	0.0238333
154.8	0.0238333
154.9	0.0238333
155	0.0238333
155.1	0.024
155.2	0.024
155.3	0.024
155.4	0.024
155.5	0.024
155.6	0.024
155.7	0.0241667
155.8	0.0241667
155.9	0.0243333
156	0.0245
156.1	0.0248333
156.2	0.0248333
156.3	0.0248333
156.4	0.0248333
156.5	0.0248333
156.6	0.0248333
156.7	0.0248333
156.8	0.025
156.9	0.025
157	0.025
157.1	0.025
157.2	0.0251667
157.3	0.0255
157.4	0.0255
157.5	0.0255
157.6	0.0253333
157.7	0.0253333
157.8	0.0253333
157.9	0.0253333
158	0.0253333
158.1	0.0253333
158.2	0.0253333
158.3	0.0253333
158.4	0.0255
158.5	0.0255
158.6	0.0253333
158.7	0.0255
158.8	0.0256667
158.9	0.0256667
159	0.0258333
159.1	0.026
159.2	0.0265
159.3	0.0266667
159.4	0.0268333
159.5	0.027
159.6	0.027
159.7	0.0271667
159.8	0.0271667
159.9	0.0273333
160	0.0273333
160.1	0.0273333
160.2	0.0273333
160.3	0.0273333
160.4	0.0273333
160.5	0.0273333
160.6	0.027
160.7	0.0268333
160.8	0.027
160.9	0.0271667
161	0.027
161.1	0.027
161.2	0.027
161.3	0.027
161.4	0.027
161.5	0.027
161.6	0.027
161.7	0.027
161.8	0.0268333
161.9	0.0266667
162	0.0268333
162.1	0.0268333
162.2	0.0268333
162.3	0.0266667
162.4	0.0268333
162.5	0.0268333
162.6	0.0268333
162.7	0.027
162.8	0.0271667
162.9	0.0275
163	0.0276667
163.1	0.028
163.2	0.028
163.3	0.0281667
163.4	0.0283333
163.5	0.0283333
163.6	0.0283333
163.7	0.0283333
163.8	0.0283333
163.9	0.0281667
164	0.0285
164.1	0.0286667
164.2	0.0288333
164.3	0.029
164.4	0.029
164.5	0.0291667
164.6	0.0291667
164.7	0.0291667
164.8	0.0291667
164.9	0.0293333
165	0.0291667
165.1	0.0291667
165.2	0.0291667
165.3	0.0291667
165.4	0.0293333
165.5	0.0293333
165.6	0.0296667
165.7	0.0296667
165.8	0.0296667
165.9	0.0296667
166	0.0296667
166.1	0.0298333
166.2	0.0298333
166.3	0.0296667
166.4	0.0296667
166.5	0.0296667
166.6	0.0296667
166.7	0.0296667
166.8	0.0296667
166.9	0.0298333
167	0.03
167.1	0.0303333
167.2	0.0305
167.3	0.0305
167.4	0.0306667
167.5	0.0306667
167.6	0.0308333
167.7	0.0308333
167.8	0.031
167.9	0.031
168	0.0313333
168.1	0.0315
168.2	0.0315
168.3	0.0316667
168.4	0.0315
168.5	0.0316667
168.6	0.0316667
168.7	0.0316667
168.8	0.0316667
168.9	0.0315
169	0.0315
169.1	0.0316667
169.2	0.0316667
169.3	0.0318333
169.4	0.0318333
169.5	0.0318333
169.6	0.0318333
169.7	0.0318333
169.8	0.0316667
169.9	0.0316667
170	0.0316667
170.1	0.0316667
170.2	0.0318333
170.3	0.0318333
170.4	0.0318333
170.5	0.0321667
170.6	0.0323333
170.7	0.0323333
170.8	0.0323333
170.9	0.0323333
171	0.0325
171.1	0.0325
171.2	0.0325
171.3	0.0325
171.4	0.0326667
171.5	0.0326667
171.6	0.0328333
171.7	0.0328333
171.8	0.0328333
171.9	0.0328333
172	0.0328333
172.1	0.0328333
172.2	0.033
172.3	0.0331667
172.4	0.0333333
172.5	0.0333333
172.6	0.0333333
172.7	0.0333333
172.8	0.0335
172.9	0.0336667
173	0.0336667
173.1	0.0336667
173.2	0.0335
173.3	0.0333333
173.4	0.0333333
173.5	0.0331667
173.6	0.0333333
173.7	0.0333333
173.8	0.0331667
173.9	0.0331667
174	0.0331667
174.1	0.0331667
174.2	0.0331667
174.3	0.0331667
174.4	0.0333333
174.5	0.0331667
174.6	0.0331667
174.7	0.0333333
174.8	0.0333333
174.9	0.0333333
175	0.0335
175.1	0.0333333
175.2	0.0335
175.3	0.0336667
175.4	0.0338333
175.5	0.034
175.6	0.0341667
175.7	0.0341667
175.8	0.0341667
175.9	0.0343333
176	0.0346667
176.1	0.0346667
176.2	0.0345
176.3	0.0348333
176.4	0.0346667
176.5	0.0346667
176.6	0.0346667
176.7	0.035
176.8	0.0348333
176.9	0.0348333
177	0.0348333
177.1	0.0348333
177.2	0.0348333
177.3	0.0348333
177.4	0.0348333
177.5	0.0346667
177.6	0.0346667
177.7	0.0346667
177.8	0.0346667
177.9	0.0348333
178	0.0348333
178.1	0.0348333
178.2	0.0348333
178.3	0.0348333
178.4	0.0348333
178.5	0.0345
178.6	0.0345
178.7	0.0345
178.8	0.0341667
178.9	0.0341667
179	0.0341667
179.1	0.0343333
179.2	0.0343333
179.3	0.0343333
179.4	0.0343333
179.5	0.0343333
179.6	0.0343333
179.7	0.0345
179.8	0.0345
179.9	0.0345
180	0.0345
180.1	0.0345
180.2	0.0346667
180.3	0.0346667
180.4	0.0346667
180.5	0.0346667
180.6	0.0346667
180.7	0.0348333
180.8	0.0348333
180.9	0.0348333
181	0.035
181.1	0.0348333
181.2	0.0346667
181.3	0.0346667
181.4	0.0348333
181.5	0.035
181.6	0.0351667
181.7	0.0351667
181.8	0.0351667
181.9	0.035
182	0.0351667
182.1	0.0355
182.2	0.0355
182.3	0.0355
182.4	0.0356667
182.5	0.036
182.6	0.036
182.7	0.036
182.8	0.036
182.9	0.036
183	0.036
183.1	0.0358333
183.2	0.036
183.3	0.036
183.4	0.036
183.5	0.036
183.6	0.036
183.7	0.0361667
183.8	0.036
183.9	0.036
184	0.0358333
184.1	0.0358333
184.2	0.0358333
184.3	0.036
184.4	0.036
184.5	0.0361667
184.6	0.0361667
184.7	0.0361667
184.8	0.0361667
184.9	0.0363333
185	0.0363333
185.1	0.0365
185.2	0.0366667
185.3	0.0366667
185.4	0.0366667
185.5	0.0365
185.6	0.0365
185.7	0.037
185.8	0.0368333
185.9	0.0371667
186	0.037
186.1	0.037
186.2	0.037
186.3	0.0368333
186.4	0.0366667
186.5	0.0366667
186.6	0.0365
186.7	0.0365
186.8	0.0365
186.9	0.0365
187	0.0365
187.1	0.0365
187.2	0.0363333
187.3	0.0366667
187.4	0.0365
187.5	0.0366667
187.6	0.0366667
187.7	0.0366667
187.8	0.0365
187.9	0.0366667
188	0.0368333
188.1	0.037
188.2	0.037
188.3	0.0368333
188.4	0.0368333
188.5	0.0366667
188.6	0.0368333
188.7	0.0371667
188.8	0.037
188.9	0.0368333
189	0.0368333
189.1	0.037
189.2	0.037
189.3	0.037
189.4	0.037
189.5	0.037
189.6	0.0368333
189.7	0.037
189.8	0.037
189.9	0.037
190	0.0371667
190.1	0.037
190.2	0.037
190.3	0.0368333
190.4	0.037
190.5	0.037
190.6	0.037
190.7	0.037
190.8	0.0368333
190.9	0.037
191	0.037
191.1	0.0373333
191.2	0.0376667
191.3	0.0378333
191.4	0.0378333
191.5	0.038
191.6	0.038
191.7	0.038
191.8	0.038
191.9	0.038
192	0.0381667
192.1	0.0385
192.2	0.0385
192.3	0.0386667
192.4	0.0386667
192.5	0.0386667
192.6	0.0386667
192.7	0.0385
192.8	0.0386667
192.9	0.0386667
193	0.0388333
193.1	0.0388333
193.2	0.039
193.3	0.039
193.4	0.039
193.5	0.039
193.6	0.039
193.7	0.039
193.8	0.0391667
193.9	0.039
194	0.0391667
194.1	0.0391667
194.2	0.0391667
194.3	0.0393333
194.4	0.0393333
194.5	0.0395
194.6	0.0395
194.7	0.0395
194.8	0.0396667
194.9	0.0396667
195	0.0398333
195.1	0.04
195.2	0.0401667
195.3	0.0401667
195.4	0.0403333
195.5	0.0403333
195.6	0.0403333
195.7	0.0403333
195.8	0.0401667
195.9	0.04
196	0.04
196.1	0.04
196.2	0.0401667
196.3	0.0401667
196.4	0.0403333
196.5	0.0405
196.6	0.0405
196.7	0.0405
196.8	0.0405
196.9	0.0406667
197	0.0406667
197.1	0.0405
197.2	0.0405
197.3	0.0405
197.4	0.0406667
197.5	0.0406667
197.6	0.0405
197.7	0.0406667
197.8	0.0408333
197.9	0.0408333
198	0.0408333
198.1	0.0406667
198.2	0.041
198.3	0.041
198.4	0.041
198.5	0.0411667
198.6	0.0411667
198.7	0.0413333
198.8	0.0413333
198.9	0.0415
199	0.0416667
199.1	0.0416667
199.2	0.0416667
199.3	0.0415
199.4	0.0415
199.5	0.0416667
199.6	0.0416667
199.7	0.0418333
199.8	0.0423333
199.9	0.0425
200	0.0425
[truncated: 14,000 more rows]
