# Supplementary material for: Bayesian inference of kinetic schemes for ion channels by Kalman filtering
Source: eLife journal article supplement (doi:10.7554/elife.62714), 2022-05-04
Supplement: fig4-data10 [file 1_Sim_N_7000_Fluor_MW_0.0625M.xlsx]

## Sheet: Tabelle1
0.1	0
0.2	0
0.3	0
0.4	0
0.5	0
0.6	0
0.7	0
0.8	0
0.9	0
1	0
1.1	0
1.2	0
1.3	0
1.4	0
1.5	0
1.6	0
1.7	0
1.8	0
1.9	0
2	0
2.1	0
2.2	0
2.3	0
2.4	0
2.5	0
2.6	0
2.7	0
2.8	0
2.9	0
3	0
3.1	0
3.2	0
3.3	0
3.4	0
3.5	0
3.6	0
3.7	0
3.8	0
3.9	0
4	0
4.1	0
4.2	0
4.3	0
4.4	0
4.5	0
4.6	0
4.7	0
4.8	0
4.9	0
5	0
5.1	0
5.2	0
5.3	0
5.4	0
5.5	0
5.6	0
5.7	0
5.8	0
5.9	0
6	0
6.1	0
6.2	0
6.3	0
6.4	0
6.5	0
6.6	0
6.7	0
6.8	0
6.9	0
7	0
7.1	0
7.2	0
7.3	0
7.4	0
7.5	0
7.6	0
7.7	0
7.8	0
7.9	0
8	0
8.1	0
8.2	0
8.3	0
8.4	0
8.5	0
8.6	0
8.7	0
8.8	0
8.9	0
9	0
9.1	0
9.2	0
9.3	0
9.4	0
9.5	0
9.6	0
9.7	0
9.8	0
9.9	0
10	0
10.1	0
10.2	0
10.3	0
10.4	0
10.5	0
10.6	0
10.7	0
10.8	0
10.9	0
11	0
11.1	0
11.2	0
11.3	0
11.4	0
11.5	0
11.6	0
11.7	0
11.8	0
11.9	0
12	0
12.1	0
12.2	0
12.3	0
12.4	0
12.5	0
12.6	0
12.7	0
12.8	0
12.9	0
13	0
13.1	0
13.2	0
13.3	0
13.4	0
13.5	0
13.6	0
13.7	0
13.8	0
13.9	0
14	0
14.1	0
14.2	0
14.3	0
14.4	0
14.5	0
14.6	0
14.7	0
14.8	0
14.9	0
15	0
15.1	0
15.2	0
15.3	0
15.4	0
15.5	0
15.6	0
15.7	0
15.8	0
15.9	0
16	0
16.1	0
16.2	0
16.3	0
16.4	0
16.5	0
16.6	0
16.7	0
16.8	0
16.9	0
17	0
17.1	0
17.2	0
17.3	0
17.4	0
17.5	0
17.6	0
17.7	0
17.8	0
17.9	0
18	0
18.1	0
18.2	0
18.3	0
18.4	0
18.5	0
18.6	0
18.7	0
18.8	0
18.9	0
19	0
19.1	0
19.2	0
19.3	0
19.4	0
19.5	0
19.6	0
19.7	0
19.8	0
19.9	0
20	0
20.1	0
20.2	0
20.3	0
20.4	0
20.5	0
20.6	0
20.7	0
20.8	0
20.9	0
21	0
21.1	0
21.2	0
21.3	0
21.4	0
21.5	0
21.6	0
21.7	0
21.8	0
21.9	0
22	0
22.1	0
22.2	0
22.3	0
22.4	0
22.5	0
22.6	0
22.7	0
22.8	0
22.9	0
23	0
23.1	0
23.2	0
23.3	0
23.4	0
23.5	0
23.6	0
23.7	0
23.8	0
23.9	0
24	0
24.1	0
24.2	0
24.3	0
24.4	0
24.5	0
24.6	0
24.7	0
24.8	0
24.9	0
25	0
25.1	0
25.2	0
25.3	0
25.4	0
25.5	0
25.6	0
25.7	0
25.8	0
25.9	0
26	0
26.1	0
26.2	0
26.3	0
26.4	0
26.5	0
26.6	0
26.7	0
26.8	0
26.9	0
27	0
27.1	0
27.2	0
27.3	0
27.4	0
27.5	0
27.6	0
27.7	0
27.8	0
27.9	0
28	0
28.1	0
28.2	0
28.3	0
28.4	0
28.5	0
28.6	0
28.7	0
28.8	0
28.9	0
29	0
29.1	0
29.2	0
29.3	0
29.4	0
29.5	0
29.6	0
29.7	0
29.8	0
29.9	0
30	0
30.1	0
30.2	0
30.3	0
30.4	0
30.5	0
30.6	0
30.7	0
30.8	0
30.9	0
31	0
31.1	0
31.2	0
31.3	0
31.4	0
31.5	0
31.6	0
31.7	0
31.8	0
31.9	0
32	0
32.1	0
32.2	0
32.3	0
32.4	0
32.5	0
32.6	0
32.7	0
32.8	0
32.9	0
33	0
33.1	0
33.2	0
33.3	0
33.4	0
33.5	0
33.6	0
33.7	0
33.8	0
33.9	0
34	0
34.1	0
34.2	0
34.3	0
34.4	0
34.5	0
34.6	0
34.7	0
34.8	0
34.9	0
35	0
35.1	0
35.2	0
35.3	0
35.4	0
35.5	0
35.6	0
35.7	0
35.8	0
35.9	0
36	0
36.1	0
36.2	0
36.3	0
36.4	0
36.5	0
36.6	0
36.7	0
36.8	0
36.9	0
37	0
37.1	0
37.2	0
37.3	0
37.4	0
37.5	0
37.6	0
37.7	0
37.8	0
37.9	0
38	0
38.1	0
38.2	0
38.3	0
38.4	0
38.5	0
38.6	0
38.7	0
38.8	0
38.9	0
39	0
39.1	0
39.2	0
39.3	0
39.4	0
39.5	0
39.6	0
39.7	0
39.8	0
39.9	0
40	0
40.1	0
40.2	0
40.3	0
40.4	0
40.5	0
40.6	0
40.7	0
40.8	0
40.9	0
41	0
41.1	0
41.2	0
41.3	0
41.4	0
41.5	0
41.6	0
41.7	0
41.8	0
41.9	0
42	0
42.1	0
42.2	0
42.3	0
42.4	0
42.5	0
42.6	0
42.7	0
42.8	0
42.9	0
43	0
43.1	0
43.2	0
43.3	0
43.4	0
43.5	0
43.6	0
43.7	0
43.8	0
43.9	0
44	0
44.1	0
44.2	0
44.3	0
44.4	0
44.5	0
44.6	0
44.7	0
44.8	0
44.9	0
45	0
45.1	0
45.2	0
45.3	0
45.4	0
45.5	0
45.6	0
45.7	0
45.8	0
45.9	0
46	0
46.1	0
46.2	0
46.3	0
46.4	0
46.5	0
46.6	0
46.7	0
46.8	0
46.9	0
47	0
47.1	0
47.2	0
47.3	0
47.4	0
47.5	0
47.6	0
47.7	0
47.8	0
47.9	0
48	0
48.1	0
48.2	0
48.3	0
48.4	0
48.5	0
48.6	0
48.7	0
48.8	0
48.9	0
49	0
49.1	0
49.2	0
49.3	0
49.4	0
49.5	0
49.6	0
49.7	0
49.8	0
49.9	0
50	0
50.1	0
50.2	0
50.3	0
50.4	0
50.5	0
50.6	0
50.7	0
50.8	0
50.9	0
51	0
51.1	0
51.2	0
51.3	0
51.4	0
51.5	0
51.6	0
51.7	0
51.8	0
51.9	0
52	0
52.1	0
52.2	0
52.3	0
52.4	0
52.5	0
52.6	0
52.7	0
52.8	0
52.9	0
53	0
53.1	0
53.2	0
53.3	0
53.4	0
53.5	0
53.6	0
53.7	0
53.8	0
53.9	0
54	0
54.1	0
54.2	0
54.3	0
54.4	0
54.5	0
54.6	0
54.7	0
54.8	0
54.9	0
55	0
55.1	0
55.2	0
55.3	0
55.4	0
55.5	0
55.6	0
55.7	0
55.8	0
55.9	0
56	0
56.1	0
56.2	0
56.3	0
56.4	0
56.5	0
56.6	0
56.7	0
56.8	0
56.9	0
57	0
57.1	0
57.2	0
57.3	0
57.4	0
57.5	0
57.6	0
57.7	0
57.8	0
57.9	0
58	0
58.1	0
58.2	0
58.3	0
58.4	0
58.5	0
58.6	0
58.7	0
58.8	0
58.9	0
59	0
59.1	0
59.2	0
59.3	0
59.4	0
59.5	0
59.6	0
59.7	0
59.8	0
59.9	0
60	0
60.1	0
60.2	0
60.3	0
60.4	0
60.5	0
60.6	0
60.7	0
60.8	0
60.9	0
61	0
61.1	0
61.2	0
61.3	0
61.4	0
61.5	0
61.6	0
61.7	0
61.8	0
61.9	0
62	0
62.1	0
62.2	0
62.3	0
62.4	0
62.5	0
62.6	0
62.7	0
62.8	0
62.9	0
63	0
63.1	0
63.2	0
63.3	0
63.4	0
63.5	0
63.6	0
63.7	0
63.8	0
63.9	0
64	0
64.1	0
64.2	0
64.3	0
64.4	0
64.5	0
64.6	0
64.7	0
64.8	0
64.9	0
65	0
65.1	0
65.2	0
65.3	0
65.4	0
65.5	0
65.6	0
65.7	0
65.8	0
65.9	0
66	0
66.1	0
66.2	0
66.3	0
66.4	0
66.5	0
66.6	0
66.7	0
66.8	0
66.9	0
67	0
67.1	0
67.2	0
67.3	0
67.4	0
67.5	0
67.6	0
67.7	0
67.8	0
67.9	0
68	0
68.1	0
68.2	0
68.3	0
68.4	0
68.5	0
68.6	0
68.7	0
68.8	0
68.9	0
69	0
69.1	0
69.2	0
69.3	0
69.4	0
69.5	0
69.6	0
69.7	0
69.8	0
69.9	0
70	0
70.1	0
70.2	0
70.3	0
70.4	0
70.5	0
70.6	0
70.7	0
70.8	0
70.9	0
71	0
71.1	0
71.2	0
71.3	0
71.4	0
71.5	0
71.6	0
71.7	0
71.8	0
71.9	0
72	0
72.1	0
72.2	0
72.3	0
72.4	0
72.5	0
72.6	0
72.7	0
72.8	0
72.9	0
73	0
73.1	0
73.2	0
73.3	0
73.4	0
73.5	0
73.6	0
73.7	0
73.8	0
73.9	0
74	0
74.1	0
74.2	0
74.3	0
74.4	0
74.5	0
74.6	0
74.7	0
74.8	0
74.9	0
75	0
75.1	0
75.2	0
75.3	0
75.4	0
75.5	0
75.6	0
75.7	0
75.8	0
75.9	0
76	0
76.1	0
76.2	0
76.3	0
76.4	0
76.5	0
76.6	0
76.7	0
76.8	0
76.9	0
77	0
77.1	0
77.2	0
77.3	0
77.4	0
77.5	0
77.6	0
77.7	0
77.8	0
77.9	0
78	0
78.1	0
78.2	0
78.3	0
78.4	0
78.5	0
78.6	0
78.7	0
78.8	0
78.9	0
79	0
79.1	0
79.2	0
79.3	0
79.4	0
79.5	0
79.6	0
79.7	0
79.8	0
79.9	0
80	0
80.1	0
80.2	0
80.3	0
80.4	0
80.5	0
80.6	0
80.7	0
80.8	0
80.9	0
81	0
81.1	0
81.2	0
81.3	0
81.4	0
81.5	0
81.6	0
81.7	0
81.8	0
81.9	0
82	0
82.1	0
82.2	0
82.3	0
82.4	0
82.5	0
82.6	0
82.7	0
82.8	0
82.9	0
83	0
83.1	0
83.2	0
83.3	0
83.4	0
83.5	0
83.6	0
83.7	0
83.8	0
83.9	0
84	0
84.1	0
84.2	0
84.3	0
84.4	0
84.5	0
84.6	0
84.7	0
84.8	0
84.9	0
85	0
85.1	0
85.2	0
85.3	0
85.4	0
85.5	0
85.6	0
85.7	0
85.8	0
85.9	0
86	0
86.1	0
86.2	0
86.3	0
86.4	0
86.5	0
86.6	0
86.7	0
86.8	0
86.9	0
87	0
87.1	0
87.2	0
87.3	0
87.4	0
87.5	0
87.6	0
87.7	0
87.8	0
87.9	0
88	0
88.1	0
88.2	0
88.3	0
88.4	0
88.5	0
88.6	0
88.7	0
88.8	0
88.9	0
89	0
89.1	0
89.2	0
89.3	0
89.4	0
89.5	0
89.6	0
89.7	0
89.8	0
89.9	0
90	0
90.1	0
90.2	0
90.3	0
90.4	0
90.5	0
90.6	0
90.7	0
90.8	0
90.9	0
91	0
91.1	0
91.2	0
91.3	0
91.4	0
91.5	0
91.6	0
91.7	0
91.8	0
91.9	0
92	0
92.1	0
92.2	0
92.3	0
92.4	0
92.5	0
92.6	0
92.7	0
92.8	0
92.9	0
93	0
93.1	0
93.2	0
93.3	0
93.4	0
93.5	0
93.6	0
93.7	0
93.8	0
93.9	0
94	0
94.1	0
94.2	0
94.3	0
94.4	0
94.5	0
94.6	0
94.7	0
94.8	0
94.9	0
95	0
95.1	0
95.2	0
95.3	0
95.4	0
95.5	0
95.6	0
95.7	0
95.8	0
95.9	0
96	0
96.1	0
96.2	0
96.3	0
96.4	0
96.5	0
96.6	0
96.7	0
96.8	0
96.9	0
97	0
97.1	0
97.2	0
97.3	0
97.4	0
97.5	0
97.6	0
97.7	0
97.8	0
97.9	0
98	0
98.1	0
98.2	0
98.3	0
98.4	0
98.5	0
98.6	0
98.7	0
98.8	0
98.9	0
99	0
99.1	0
99.2	0
99.3	0
99.4	0
99.5	0
99.6	0
99.7	0
99.8	0
99.9	0
100	0
100.1	0.00335714
100.2	0.00728571
100.3	0.0107143
100.4	0.0143571
100.5	0.0175714
100.6	0.0208571
100.7	0.0230714
100.8	0.0257857
100.9	0.0287143
101	0.0322143
101.1	0.0352857
101.2	0.0392857
101.3	0.0420714
101.4	0.0453571
101.5	0.0475
101.6	0.05
101.7	0.0527857
101.8	0.0559286
101.9	0.0577143
102	0.0603571
102.1	0.0635714
102.2	0.0660714
102.3	0.0686429
102.4	0.0704286
102.5	0.0732857
102.6	0.0759286
102.7	0.0779286
102.8	0.0801429
102.9	0.0822857
103	0.0841429
103.1	0.0859286
103.2	0.0890714
103.3	0.0912143
103.4	0.0938571
103.5	0.0955
103.6	0.0977143
103.7	0.0995714
103.8	0.101857
103.9	0.103571
104	0.104857
104.1	0.1075
104.2	0.1095
104.3	0.110357
104.4	0.112071
104.5	0.112714
104.6	0.114786
104.7	0.116286
104.8	0.118286
104.9	0.119857
105	0.1215
105.1	0.122857
105.2	0.124786
105.3	0.126786
105.4	0.129
105.5	0.131286
105.6	0.133214
105.7	0.135
105.8	0.136571
105.9	0.137643
106	0.138286
106.1	0.139714
106.2	0.141429
106.3	0.142429
106.4	0.143929
106.5	0.1455
106.6	0.146786
106.7	0.147571
106.8	0.148857
106.9	0.150643
107	0.151643
107.1	0.153714
107.2	0.155857
107.3	0.157357
107.4	0.158571
107.5	0.159
107.6	0.1595
107.7	0.160143
107.8	0.161
107.9	0.162143
108	0.162786
108.1	0.163
108.2	0.164286
108.3	0.165571
108.4	0.166786
108.5	0.168857
108.6	0.1685
108.7	0.169429
108.8	0.170571
108.9	0.1705
109	0.171214
109.1	0.171929
109.2	0.173214
109.3	0.174214
109.4	0.173786
109.5	0.174286
109.6	0.175786
109.7	0.1765
109.8	0.177143
109.9	0.178143
110	0.179
110.1	0.181286
110.2	0.182286
110.3	0.182286
110.4	0.183143
110.5	0.182929
110.6	0.184214
110.7	0.184929
110.8	0.1855
110.9	0.186429
111	0.187143
111.1	0.188643
111.2	0.189143
111.3	0.189286
111.4	0.190786
111.5	0.191429
111.6	0.191929
111.7	0.1925
111.8	0.192857
111.9	0.192857
112	0.193929
112.1	0.194571
112.2	0.195714
112.3	0.196929
112.4	0.197286
112.5	0.197786
112.6	0.199214
112.7	0.199786
112.8	0.199643
112.9	0.198643
113	0.199286
113.1	0.199929
113.2	0.200786
113.3	0.199714
113.4	0.200214
113.5	0.200571
113.6	0.200571
113.7	0.200214
113.8	0.201
113.9	0.2025
114	0.202786
114.1	0.203357
114.2	0.203857
114.3	0.205429
114.4	0.206786
114.5	0.206643
114.6	0.206143
114.7	0.206429
114.8	0.206571
114.9	0.206143
115	0.206714
115.1	0.206429
115.2	0.206143
115.3	0.206714
115.4	0.207429
115.5	0.207857
115.6	0.207929
115.7	0.208071
115.8	0.208143
115.9	0.209286
116	0.210286
116.1	0.210429
116.2	0.210571
116.3	0.211071
116.4	0.211929
116.5	0.212643
116.6	0.212357
116.7	0.212071
116.8	0.212214
116.9	0.213071
117	0.213143
117.1	0.213714
117.2	0.214
117.3	0.214857
117.4	0.215429
117.5	0.216
117.6	0.216
117.7	0.216643
117.8	0.217143
117.9	0.217857
118	0.218643
118.1	0.220214
118.2	0.221071
118.3	0.221214
118.4	0.221786
118.5	0.222714
118.6	0.223214
118.7	0.222714
118.8	0.222786
118.9	0.222714
119	0.222143
119.1	0.221357
119.2	0.222357
119.3	0.2235
119.4	0.224071
119.5	0.224
119.6	0.224143
119.7	0.223571
119.8	0.223286
119.9	0.224214
120	0.224429
120.1	0.224571
120.2	0.2245
120.3	0.225143
120.4	0.224571
120.5	0.225143
120.6	0.225
120.7	0.225071
120.8	0.2255
120.9	0.224714
121	0.225929
121.1	0.225
121.2	0.226071
121.3	0.225
121.4	0.224643
121.5	0.226
121.6	0.225786
121.7	0.2265
121.8	0.226071
121.9	0.225643
122	0.226929
122.1	0.227357
122.2	0.227143
122.3	0.226857
122.4	0.227071
122.5	0.227714
122.6	0.228
122.7	0.228071
122.8	0.228143
122.9	0.228786
123	0.229214
123.1	0.2295
123.2	0.229214
123.3	0.229286
123.4	0.230214
123.5	0.230643
123.6	0.231071
123.7	0.231357
123.8	0.231286
123.9	0.230286
124	0.230286
124.1	0.231
124.2	0.231071
124.3	0.231643
124.4	0.2315
124.5	0.231
124.6	0.230857
124.7	0.231571
124.8	0.231786
124.9	0.232429
125	0.231357
125.1	0.2315
125.2	0.231643
125.3	0.231286
125.4	0.230571
125.5	0.231071
125.6	0.231143
125.7	0.231143
125.8	0.231714
125.9	0.231357
126	0.231357
126.1	0.231643
126.2	0.231357
126.3	0.231857
126.4	0.231857
126.5	0.233286
126.6	0.233857
126.7	0.234214
126.8	0.234286
126.9	0.233857
127	0.234929
127.1	0.234286
127.2	0.234071
127.3	0.233571
127.4	0.233
127.5	0.233357
127.6	0.232857
127.7	0.234214
127.8	0.234786
127.9	0.235143
128	0.235714
128.1	0.236214
128.2	0.237143
128.3	0.238571
128.4	0.238214
128.5	0.238286
128.6	0.238929
128.7	0.239
128.8	0.238786
128.9	0.239
129	0.238857
129.1	0.239857
129.2	0.239857
129.3	0.239714
129.4	0.239714
129.5	0.238357
129.6	0.238
129.7	0.237357
129.8	0.237286
129.9	0.236571
130	0.235429
130.1	0.235714
130.2	0.235357
130.3	0.235
130.4	0.235571
130.5	0.2355
130.6	0.2365
130.7	0.2355
130.8	0.235643
130.9	0.235429
131	0.235571
131.1	0.235571
131.2	0.235857
131.3	0.235643
131.4	0.236429
131.5	0.236857
131.6	0.236429
131.7	0.236929
131.8	0.237071
131.9	0.236357
132	0.236071
132.1	0.235571
132.2	0.2355
132.3	0.235643
132.4	0.234929
132.5	0.235643
132.6	0.236286
132.7	0.237357
132.8	0.237429
132.9	0.237786
133	0.238214
133.1	0.2375
133.2	0.237786
133.3	0.239143
133.4	0.239429
133.5	0.239571
133.6	0.238071
133.7	0.237786
133.8	0.238286
133.9	0.238429
134	0.238786
134.1	0.239
134.2	0.239786
134.3	0.240071
134.4	0.239786
134.5	0.239143
134.6	0.239286
134.7	0.239429
134.8	0.238714
134.9	0.239714
135	0.239286
135.1	0.238143
135.2	0.238429
135.3	0.238857
135.4	0.238286
135.5	0.237857
135.6	0.237071
135.7	0.237714
135.8	0.236786
135.9	0.237
136	0.237857
136.1	0.238429
136.2	0.237929
136.3	0.237929
136.4	0.237857
136.5	0.236929
136.6	0.236
136.7	0.235286
136.8	0.235929
136.9	0.236571
137	0.2375
137.1	0.237214
137.2	0.2365
137.3	0.237286
137.4	0.237214
137.5	0.236643
137.6	0.237357
137.7	0.236429
137.8	0.236571
137.9	0.236
138	0.236571
138.1	0.236929
138.2	0.237571
138.3	0.237071
138.4	0.237429
138.5	0.237929
138.6	0.237429
138.7	0.237143
138.8	0.237857
138.9	0.238
139	0.238357
139.1	0.239
139.2	0.238929
139.3	0.238214
139.4	0.237357
139.5	0.237429
139.6	0.237643
139.7	0.237143
139.8	0.2365
139.9	0.236571
140	0.236929
140.1	0.237429
140.2	0.237143
140.3	0.237357
140.4	0.237429
140.5	0.237714
140.6	0.238214
140.7	0.238429
140.8	0.239286
140.9	0.240071
141	0.239643
141.1	0.240571
141.2	0.241429
141.3	0.240571
141.4	0.240929
141.5	0.239857
141.6	0.240357
141.7	0.239643
141.8	0.239286
141.9	0.238643
142	0.237857
142.1	0.237357
142.2	0.237
142.3	0.235857
142.4	0.235786
142.5	0.235214
142.6	0.234929
142.7	0.234643
142.8	0.234214
142.9	0.234571
143	0.234286
143.1	0.235
143.2	0.235286
143.3	0.234429
143.4	0.233714
143.5	0.233071
143.6	0.233071
143.7	0.233786
143.8	0.233643
143.9	0.234286
144	0.235571
144.1	0.2355
144.2	0.235857
144.3	0.235357
144.4	0.235357
144.5	0.235571
144.6	0.2355
144.7	0.236143
144.8	0.236571
144.9	0.236
145	0.236214
145.1	0.236
145.2	0.235286
145.3	0.2355
145.4	0.236071
145.5	0.235071
145.6	0.235143
145.7	0.235643
145.8	0.235643
145.9	0.235643
146	0.236143
146.1	0.236
146.2	0.236357
146.3	0.236
146.4	0.236429
146.5	0.2365
146.6	0.236214
146.7	0.236643
146.8	0.236071
146.9	0.236286
147	0.236214
147.1	0.236643
147.2	0.235571
147.3	0.235571
147.4	0.2365
147.5	0.236357
147.6	0.236286
147.7	0.235643
147.8	0.235429
147.9	0.235786
148	0.235071
148.1	0.236214
148.2	0.236286
148.3	0.235429
148.4	0.236286
148.5	0.236286
148.6	0.236357
148.7	0.236643
148.8	0.238143
148.9	0.237571
149	0.238786
149.1	0.238143
149.2	0.238714
149.3	0.239
149.4	0.238929
149.5	0.239071
149.6	0.2385
149.7	0.239643
149.8	0.239143
149.9	0.238857
150	0.239071
150.1	0.239429
150.2	0.239571
150.3	0.239571
150.4	0.239571
150.5	0.239714
150.6	0.240643
150.7	0.240429
150.8	0.2405
150.9	0.241714
151	0.242071
151.1	0.242429
151.2	0.242
151.3	0.242071
151.4	0.241357
151.5	0.241857
151.6	0.242071
151.7	0.241786
151.8	0.240786
151.9	0.240071
152	0.240286
152.1	0.2405
152.2	0.240714
152.3	0.241
152.4	0.240929
152.5	0.242286
152.6	0.242429
152.7	0.243
152.8	0.242929
152.9	0.242714
153	0.242643
153.1	0.242357
153.2	0.242071
153.3	0.242214
153.4	0.242643
153.5	0.242
153.6	0.242214
153.7	0.242643
153.8	0.242929
153.9	0.243214
154	0.243929
154.1	0.2435
154.2	0.243429
154.3	0.244357
154.4	0.243929
154.5	0.244357
154.6	0.2445
154.7	0.2445
154.8	0.243857
154.9	0.243429
155	0.242929
155.1	0.242357
155.2	0.241857
155.3	0.241857
155.4	0.241857
155.5	0.242071
155.6	0.243714
155.7	0.243786
155.8	0.242214
155.9	0.241929
156	0.242571
156.1	0.241786
156.2	0.241714
156.3	0.241571
156.4	0.241857
156.5	0.241857
156.6	0.242357
156.7	0.242429
156.8	0.241429
156.9	0.241143
157	0.240929
157.1	0.240857
157.2	0.2405
157.3	0.241714
157.4	0.242929
157.5	0.2425
157.6	0.242214
157.7	0.241929
157.8	0.241071
157.9	0.241143
158	0.242214
158.1	0.242286
158.2	0.241214
158.3	0.242143
158.4	0.242571
158.5	0.241929
158.6	0.242143
158.7	0.242214
158.8	0.242929
158.9	0.243571
159	0.243571
159.1	0.244786
159.2	0.245429
159.3	0.244857
159.4	0.244857
159.5	0.244857
159.6	0.244714
159.7	0.244714
159.8	0.244
159.9	0.244429
160	0.244286
160.1	0.244
160.2	0.243571
160.3	0.243643
160.4	0.244214
160.5	0.244429
160.6	0.244
160.7	0.244
160.8	0.244786
160.9	0.245357
161	0.245714
161.1	0.246143
161.2	0.246429
161.3	0.247071
161.4	0.247071
161.5	0.248714
161.6	0.248571
161.7	0.248214
161.8	0.247714
161.9	0.248357
162	0.248571
162.1	0.248286
162.2	0.247571
162.3	0.246929
162.4	0.247786
162.5	0.248786
162.6	0.2495
162.7	0.249214
162.8	0.249
162.9	0.248
163	0.247429
163.1	0.248214
163.2	0.247929
163.3	0.247214
163.4	0.246714
163.5	0.246571
163.6	0.247714
163.7	0.248143
163.8	0.248643
163.9	0.2495
164	0.250857
164.1	0.2505
164.2	0.249214
164.3	0.249214
164.4	0.2495
164.5	0.249286
164.6	0.2495
164.7	0.249857
164.8	0.2505
164.9	0.249286
165	0.249
165.1	0.249429
165.2	0.250286
165.3	0.249929
165.4	0.250071
165.5	0.250714
165.6	0.251071
165.7	0.250571
165.8	0.250571
165.9	0.250429
166	0.250071
166.1	0.250071
166.2	0.249714
166.3	0.249357
166.4	0.249643
166.5	0.2505
166.6	0.250857
166.7	0.251071
166.8	0.250857
166.9	0.250143
167	0.249429
167.1	0.250143
167.2	0.249857
167.3	0.25
167.4	0.251357
167.5	0.250143
167.6	0.250643
167.7	0.2505
167.8	0.25
167.9	0.250286
168	0.249714
168.1	0.249643
168.2	0.250571
168.3	0.250071
168.4	0.250786
168.5	0.250714
168.6	0.251857
168.7	0.250643
168.8	0.249357
168.9	0.248643
169	0.248857
169.1	0.247929
169.2	0.247786
169.3	0.2485
169.4	0.248857
169.5	0.249429
169.6	0.248857
169.7	0.248143
169.8	0.247714
169.9	0.248071
170	0.248714
170.1	0.248429
170.2	0.248786
170.3	0.248786
170.4	0.248571
170.5	0.248286
170.6	0.246786
170.7	0.246929
170.8	0.2465
170.9	0.246714
171	0.247429
171.1	0.246286
171.2	0.246571
171.3	0.246571
171.4	0.245929
171.5	0.245071
171.6	0.246
171.7	0.247214
171.8	0.247143
171.9	0.247429
172	0.246857
172.1	0.246571
172.2	0.246571
172.3	0.246214
172.4	0.246143
172.5	0.246143
172.6	0.245929
172.7	0.2455
172.8	0.245571
172.9	0.246
173	0.246214
173.1	0.246643
173.2	0.247143
173.3	0.246571
173.4	0.246286
173.5	0.246643
173.6	0.246929
173.7	0.247857
173.8	0.247357
173.9	0.247643
174	0.247429
174.1	0.246714
174.2	0.246286
174.3	0.246857
174.4	0.247071
174.5	0.247143
174.6	0.247071
174.7	0.248286
174.8	0.247929
174.9	0.247571
175	0.247571
175.1	0.247571
175.2	0.248286
175.3	0.248929
175.4	0.249357
175.5	0.248929
175.6	0.248857
175.7	0.249
175.8	0.249357
175.9	0.248643
176	0.248857
176.1	0.248929
176.2	0.249143
176.3	0.249714
176.4	0.249857
176.5	0.249071
176.6	0.248786
176.7	0.248643
176.8	0.248143
176.9	0.248071
177	0.247786
177.1	0.248429
177.2	0.248429
177.3	0.248429
177.4	0.248357
177.5	0.249214
177.6	0.2495
177.7	0.249714
177.8	0.249714
177.9	0.250929
178	0.2505
178.1	0.250214
178.2	0.249857
178.3	0.250429
178.4	0.251286
178.5	0.252214
178.6	0.252714
178.7	0.252357
178.8	0.251929
178.9	0.251571
179	0.252429
179.1	0.251214
179.2	0.251429
179.3	0.251429
179.4	0.250786
179.5	0.251571
179.6	0.251571
179.7	0.251571
179.8	0.250929
179.9	0.25
180	0.250571
180.1	0.249786
180.2	0.249571
180.3	0.2485
180.4	0.247357
180.5	0.247571
180.6	0.247357
180.7	0.2475
180.8	0.247714
180.9	0.248571
181	0.249071
181.1	0.248786
181.2	0.248071
181.3	0.249786
181.4	0.249786
181.5	0.249643
181.6	0.249643
181.7	0.250643
181.8	0.250929
181.9	0.251286
182	0.252714
182.1	0.253286
182.2	0.253429
182.3	0.253643
182.4	0.253214
182.5	0.252929
182.6	0.252857
182.7	0.252286
182.8	0.252786
182.9	0.252071
183	0.250929
183.1	0.251214
183.2	0.251214
183.3	0.252357
183.4	0.252286
183.5	0.252286
183.6	0.252571
183.7	0.253143
183.8	0.2535
183.9	0.253
184	0.252786
184.1	0.253214
184.2	0.253214
184.3	0.254071
184.4	0.254429
184.5	0.254714
184.6	0.254357
184.7	0.254286
184.8	0.253929
184.9	0.255071
185	0.254214
185.1	0.255
185.2	0.255
185.3	0.254
185.4	0.253786
185.5	0.254571
185.6	0.253857
185.7	0.254429
185.8	0.255143
185.9	0.254357
186	0.254357
186.1	0.254
186.2	0.254071
186.3	0.255429
186.4	0.255143
186.5	0.255786
186.6	0.256357
186.7	0.256286
186.8	0.255929
186.9	0.256714
187	0.256786
187.1	0.256
187.2	0.256643
187.3	0.256286
187.4	0.257143
187.5	0.257
187.6	0.257143
187.7	0.256643
187.8	0.256571
187.9	0.256429
188	0.255929
188.1	0.256286
188.2	0.256357
188.3	0.256214
188.4	0.256643
188.5	0.257571
188.6	0.256929
188.7	0.256357
188.8	0.256857
188.9	0.256929
189	0.256071
189.1	0.255929
189.2	0.255571
189.3	0.254786
189.4	0.254929
189.5	0.255786
189.6	0.255929
189.7	0.255643
189.8	0.2565
189.9	0.257071
190	0.256857
190.1	0.256286
190.2	0.257
190.3	0.256643
190.4	0.256571
190.5	0.256643
190.6	0.257214
190.7	0.256929
190.8	0.257214
190.9	0.257929
191	0.257071
191.1	0.2565
191.2	0.256
191.3	0.2565
191.4	0.2565
191.5	0.254857
191.6	0.255071
191.7	0.254571
191.8	0.255071
191.9	0.255071
192	0.255643
192.1	0.2565
192.2	0.257143
192.3	0.256786
192.4	0.256143
192.5	0.257214
192.6	0.257429
192.7	0.257857
192.8	0.257357
192.9	0.257929
193	0.258071
193.1	0.258857
193.2	0.258857
193.3	0.259214
193.4	0.2585
193.5	0.259857
193.6	0.260357
193.7	0.26
193.8	0.260286
193.9	0.261
194	0.260714
194.1	0.261143
194.2	0.261786
194.3	0.261071
194.4	0.261143
194.5	0.261214
194.6	0.260571
194.7	0.260571
194.8	0.259929
194.9	0.259786
195	0.260214
195.1	0.260143
195.2	0.2595
195.3	0.259571
195.4	0.2595
195.5	0.260714
195.6	0.261143
195.7	0.261571
195.8	0.262071
195.9	0.261786
196	0.261429
196.1	0.2605
196.2	0.259643
196.3	0.258786
196.4	0.259929
196.5	0.26
196.6	0.259929
196.7	0.261071
196.8	0.260286
196.9	0.260286
197	0.259714
197.1	0.259071
197.2	0.259357
197.3	0.258786
197.4	0.2585
197.5	0.257286
197.6	0.256857
197.7	0.256643
197.8	0.257
197.9	0.257
198	0.257214
198.1	0.256714
198.2	0.255857
198.3	0.256071
198.4	0.255
198.5	0.254929
198.6	0.254429
198.7	0.255
198.8	0.2555
198.9	0.255571
199	0.255643
199.1	0.256071
199.2	0.256
199.3	0.255643
199.4	0.256357
199.5	0.257214
199.6	0.256143
199.7	0.256429
199.8	0.257071
199.9	0.258214
200	0.258643
[truncated: 14,000 more rows]
