# Supplementary material for: Bayesian inference of kinetic schemes for ion channels by Kalman filtering
Source: eLife journal article supplement (doi:10.7554/elife.62714), 2022-05-04
Supplement: fig4-data10 [file 1_Sim_N_7000_Strom_MW_0.0625M.xlsx]

## Sheet: Tabelle1
0.1	0
0.2	0
0.3	0
0.4	0
0.5	0
0.6	0
0.7	0
0.8	0
0.9	0
1	0
1.1	0
1.2	0
1.3	0
1.4	0
1.5	0
1.6	0
1.7	0
1.8	0
1.9	0
2	0
2.1	0
2.2	0
2.3	0
2.4	0
2.5	0
2.6	0
2.7	0
2.8	0
2.9	0
3	0
3.1	0
3.2	0
3.3	0
3.4	0
3.5	0
3.6	0
3.7	0
3.8	0
3.9	0
4	0
4.1	0
4.2	0
4.3	0
4.4	0
4.5	0
4.6	0
4.7	0
4.8	0
4.9	0
5	0
5.1	0
5.2	0
5.3	0
5.4	0
5.5	0
5.6	0
5.7	0
5.8	0
5.9	0
6	0
6.1	0
6.2	0
6.3	0
6.4	0
6.5	0
6.6	0
6.7	0
6.8	0
6.9	0
7	0
7.1	0
7.2	0
7.3	0
7.4	0
7.5	0
7.6	0
7.7	0
7.8	0
7.9	0
8	0
8.1	0
8.2	0
8.3	0
8.4	0
8.5	0
8.6	0
8.7	0
8.8	0
8.9	0
9	0
9.1	0
9.2	0
9.3	0
9.4	0
9.5	0
9.6	0
9.7	0
9.8	0
9.9	0
10	0
10.1	0
10.2	0
10.3	0
10.4	0
10.5	0
10.6	0
10.7	0
10.8	0
10.9	0
11	0
11.1	0
11.2	0
11.3	0
11.4	0
11.5	0
11.6	0
11.7	0
11.8	0
11.9	0
12	0
12.1	0
12.2	0
12.3	0
12.4	0
12.5	0
12.6	0
12.7	0
12.8	0
12.9	0
13	0
13.1	0
13.2	0
13.3	0
13.4	0
13.5	0
13.6	0
13.7	0
13.8	0
13.9	0
14	0
14.1	0
14.2	0
14.3	0
14.4	0
14.5	0
14.6	0
14.7	0
14.8	0
14.9	0
15	0
15.1	0
15.2	0
15.3	0
15.4	0
15.5	0
15.6	0
15.7	0
15.8	0
15.9	0
16	0
16.1	0
16.2	0
16.3	0
16.4	0
16.5	0
16.6	0
16.7	0
16.8	0
16.9	0
17	0
17.1	0
17.2	0
17.3	0
17.4	0
17.5	0
17.6	0
17.7	0
17.8	0
17.9	0
18	0
18.1	0
18.2	0
18.3	0
18.4	0
18.5	0
18.6	0
18.7	0
18.8	0
18.9	0
19	0
19.1	0
19.2	0
19.3	0
19.4	0
19.5	0
19.6	0
19.7	0
19.8	0
19.9	0
20	0
20.1	0
20.2	0
20.3	0
20.4	0
20.5	0
20.6	0
20.7	0
20.8	0
20.9	0
21	0
21.1	0
21.2	0
21.3	0
21.4	0
21.5	0
21.6	0
21.7	0
21.8	0
21.9	0
22	0
22.1	0
22.2	0
22.3	0
22.4	0
22.5	0
22.6	0
22.7	0
22.8	0
22.9	0
23	0
23.1	0
23.2	0
23.3	0
23.4	0
23.5	0
23.6	0
23.7	0
23.8	0
23.9	0
24	0
24.1	0
24.2	0
24.3	0
24.4	0
24.5	0
24.6	0
24.7	0
24.8	0
24.9	0
25	0
25.1	0
25.2	0
25.3	0
25.4	0
25.5	0
25.6	0
25.7	0
25.8	0
25.9	0
26	0
26.1	0
26.2	0
26.3	0
26.4	0
26.5	0
26.6	0
26.7	0
26.8	0
26.9	0
27	0
27.1	0
27.2	0
27.3	0
27.4	0
27.5	0
27.6	0
27.7	0
27.8	0
27.9	0
28	0
28.1	0
28.2	0
28.3	0
28.4	0
28.5	0
28.6	0
28.7	0
28.8	0
28.9	0
29	0
29.1	0
29.2	0
29.3	0
29.4	0
29.5	0
29.6	0
29.7	0
29.8	0
29.9	0
30	0
30.1	0
30.2	0
30.3	0
30.4	0
30.5	0
30.6	0
30.7	0
30.8	0
30.9	0
31	0
31.1	0
31.2	0
31.3	0
31.4	0
31.5	0
31.6	0
31.7	0
31.8	0
31.9	0
32	0
32.1	0
32.2	0
32.3	0
32.4	0
32.5	0
32.6	0
32.7	0
32.8	0
32.9	0
33	0
33.1	0
33.2	0
33.3	0
33.4	0
33.5	0
33.6	0
33.7	0
33.8	0
33.9	0
34	0
34.1	0
34.2	0
34.3	0
34.4	0
34.5	0
34.6	0
34.7	0
34.8	0
34.9	0
35	0
35.1	0
35.2	0
35.3	0
35.4	0
35.5	0
35.6	0
35.7	0
35.8	0
35.9	0
36	0
36.1	0
36.2	0
36.3	0
36.4	0
36.5	0
36.6	0
36.7	0
36.8	0
36.9	0
37	0
37.1	0
37.2	0
37.3	0
37.4	0
37.5	0
37.6	0
37.7	0
37.8	0
37.9	0
38	0
38.1	0
38.2	0
38.3	0
38.4	0
38.5	0
38.6	0
38.7	0
38.8	0
38.9	0
39	0
39.1	0
39.2	0
39.3	0
39.4	0
39.5	0
39.6	0
39.7	0
39.8	0
39.9	0
40	0
40.1	0
40.2	0
40.3	0
40.4	0
40.5	0
40.6	0
40.7	0
40.8	0
40.9	0
41	0
41.1	0
41.2	0
41.3	0
41.4	0
41.5	0
41.6	0
41.7	0
41.8	0
41.9	0
42	0
42.1	0
42.2	0
42.3	0
42.4	0
42.5	0
42.6	0
42.7	0
42.8	0
42.9	0
43	0
43.1	0
43.2	0
43.3	0
43.4	0
43.5	0
43.6	0
43.7	0
43.8	0
43.9	0
44	0
44.1	0
44.2	0
44.3	0
44.4	0
44.5	0
44.6	0
44.7	0
44.8	0
44.9	0
45	0
45.1	0
45.2	0
45.3	0
45.4	0
45.5	0
45.6	0
45.7	0
45.8	0
45.9	0
46	0
46.1	0
46.2	0
46.3	0
46.4	0
46.5	0
46.6	0
46.7	0
46.8	0
46.9	0
47	0
47.1	0
47.2	0
47.3	0
47.4	0
47.5	0
47.6	0
47.7	0
47.8	0
47.9	0
48	0
48.1	0
48.2	0
48.3	0
48.4	0
48.5	0
48.6	0
48.7	0
48.8	0
48.9	0
49	0
49.1	0
49.2	0
49.3	0
49.4	0
49.5	0
49.6	0
49.7	0
49.8	0
49.9	0
50	0
50.1	0
50.2	0
50.3	0
50.4	0
50.5	0
50.6	0
50.7	0
50.8	0
50.9	0
51	0
51.1	0
51.2	0
51.3	0
51.4	0
51.5	0
51.6	0
51.7	0
51.8	0
51.9	0
52	0
52.1	0
52.2	0
52.3	0
52.4	0
52.5	0
52.6	0
52.7	0
52.8	0
52.9	0
53	0
53.1	0
53.2	0
53.3	0
53.4	0
53.5	0
53.6	0
53.7	0
53.8	0
53.9	0
54	0
54.1	0
54.2	0
54.3	0
54.4	0
54.5	0
54.6	0
54.7	0
54.8	0
54.9	0
55	0
55.1	0
55.2	0
55.3	0
55.4	0
55.5	0
55.6	0
55.7	0
55.8	0
55.9	0
56	0
56.1	0
56.2	0
56.3	0
56.4	0
56.5	0
56.6	0
56.7	0
56.8	0
56.9	0
57	0
57.1	0
57.2	0
57.3	0
57.4	0
57.5	0
57.6	0
57.7	0
57.8	0
57.9	0
58	0
58.1	0
58.2	0
58.3	0
58.4	0
58.5	0
58.6	0
58.7	0
58.8	0
58.9	0
59	0
59.1	0
59.2	0
59.3	0
59.4	0
59.5	0
59.6	0
59.7	0
59.8	0
59.9	0
60	0
60.1	0
60.2	0
60.3	0
60.4	0
60.5	0
60.6	0
60.7	0
60.8	0
60.9	0
61	0
61.1	0
61.2	0
61.3	0
61.4	0
61.5	0
61.6	0
61.7	0
61.8	0
61.9	0
62	0
62.1	0
62.2	0
62.3	0
62.4	0
62.5	0
62.6	0
62.7	0
62.8	0
62.9	0
63	0
63.1	0
63.2	0
63.3	0
63.4	0
63.5	0
63.6	0
63.7	0
63.8	0
63.9	0
64	0
64.1	0
64.2	0
64.3	0
64.4	0
64.5	0
64.6	0
64.7	0
64.8	0
64.9	0
65	0
65.1	0
65.2	0
65.3	0
65.4	0
65.5	0
65.6	0
65.7	0
65.8	0
65.9	0
66	0
66.1	0
66.2	0
66.3	0
66.4	0
66.5	0
66.6	0
66.7	0
66.8	0
66.9	0
67	0
67.1	0
67.2	0
67.3	0
67.4	0
67.5	0
67.6	0
67.7	0
67.8	0
67.9	0
68	0
68.1	0
68.2	0
68.3	0
68.4	0
68.5	0
68.6	0
68.7	0
68.8	0
68.9	0
69	0
69.1	0
69.2	0
69.3	0
69.4	0
69.5	0
69.6	0
69.7	0
69.8	0
69.9	0
70	0
70.1	0
70.2	0
70.3	0
70.4	0
70.5	0
70.6	0
70.7	0
70.8	0
70.9	0
71	0
71.1	0
71.2	0
71.3	0
71.4	0
71.5	0
71.6	0
71.7	0
71.8	0
71.9	0
72	0
72.1	0
72.2	0
72.3	0
72.4	0
72.5	0
72.6	0
72.7	0
72.8	0
72.9	0
73	0
73.1	0
73.2	0
73.3	0
73.4	0
73.5	0
73.6	0
73.7	0
73.8	0
73.9	0
74	0
74.1	0
74.2	0
74.3	0
74.4	0
74.5	0
74.6	0
74.7	0
74.8	0
74.9	0
75	0
75.1	0
75.2	0
75.3	0
75.4	0
75.5	0
75.6	0
75.7	0
75.8	0
75.9	0
76	0
76.1	0
76.2	0
76.3	0
76.4	0
76.5	0
76.6	0
76.7	0
76.8	0
76.9	0
77	0
77.1	0
77.2	0
77.3	0
77.4	0
77.5	0
77.6	0
77.7	0
77.8	0
77.9	0
78	0
78.1	0
78.2	0
78.3	0
78.4	0
78.5	0
78.6	0
78.7	0
78.8	0
78.9	0
79	0
79.1	0
79.2	0
79.3	0
79.4	0
79.5	0
79.6	0
79.7	0
79.8	0
79.9	0
80	0
80.1	0
80.2	0
80.3	0
80.4	0
80.5	0
80.6	0
80.7	0
80.8	0
80.9	0
81	0
81.1	0
81.2	0
81.3	0
81.4	0
81.5	0
81.6	0
81.7	0
81.8	0
81.9	0
82	0
82.1	0
82.2	0
82.3	0
82.4	0
82.5	0
82.6	0
82.7	0
82.8	0
82.9	0
83	0
83.1	0
83.2	0
83.3	0
83.4	0
83.5	0
83.6	0
83.7	0
83.8	0
83.9	0
84	0
84.1	0
84.2	0
84.3	0
84.4	0
84.5	0
84.6	0
84.7	0
84.8	0
84.9	0
85	0
85.1	0
85.2	0
85.3	0
85.4	0
85.5	0
85.6	0
85.7	0
85.8	0
85.9	0
86	0
86.1	0
86.2	0
86.3	0
86.4	0
86.5	0
86.6	0
86.7	0
86.8	0
86.9	0
87	0
87.1	0
87.2	0
87.3	0
87.4	0
87.5	0
87.6	0
87.7	0
87.8	0
87.9	0
88	0
88.1	0
88.2	0
88.3	0
88.4	0
88.5	0
88.6	0
88.7	0
88.8	0
88.9	0
89	0
89.1	0
89.2	0
89.3	0
89.4	0
89.5	0
89.6	0
89.7	0
89.8	0
89.9	0
90	0
90.1	0
90.2	0
90.3	0
90.4	0
90.5	0
90.6	0
90.7	0
90.8	0
90.9	0
91	0
91.1	0
91.2	0
91.3	0
91.4	0
91.5	0
91.6	0
91.7	0
91.8	0
91.9	0
92	0
92.1	0
92.2	0
92.3	0
92.4	0
92.5	0
92.6	0
92.7	0
92.8	0
92.9	0
93	0
93.1	0
93.2	0
93.3	0
93.4	0
93.5	0
93.6	0
93.7	0
93.8	0
93.9	0
94	0
94.1	0
94.2	0
94.3	0
94.4	0
94.5	0
94.6	0
94.7	0
94.8	0
94.9	0
95	0
95.1	0
95.2	0
95.3	0
95.4	0
95.5	0
95.6	0
95.7	0
95.8	0
95.9	0
96	0
96.1	0
96.2	0
96.3	0
96.4	0
96.5	0
96.6	0
96.7	0
96.8	0
96.9	0
97	0
97.1	0
97.2	0
97.3	0
97.4	0
97.5	0
97.6	0
97.7	0
97.8	0
97.9	0
98	0
98.1	0
98.2	0
98.3	0
98.4	0
98.5	0
98.6	0
98.7	0
98.8	0
98.9	0
99	0
99.1	0
99.2	0
99.3	0
99.4	0
99.5	0
99.6	0
99.7	0
99.8	0
99.9	0
100	0
100.1	0
100.2	0
100.3	0
100.4	0
100.5	0
100.6	0
100.7	0
100.8	0
100.9	0
101	0
101.1	0
101.2	0
101.3	0
101.4	0
101.5	0
101.6	0
101.7	0
101.8	0
101.9	0
102	0
102.1	0
102.2	0
102.3	0
102.4	0
102.5	0
102.6	0
102.7	0
102.8	0
102.9	0
103	0
103.1	0.000142857
103.2	0.000142857
103.3	0.000142857
103.4	0.000142857
103.5	0.000142857
103.6	0.000142857
103.7	0.000142857
103.8	0.000285714
103.9	0.000285714
104	0.000285714
104.1	0.000428571
104.2	0.000428571
104.3	0.000428571
104.4	0.000428571
104.5	0.000571429
104.6	0.000571429
104.7	0.000571429
104.8	0.000571429
104.9	0.000571429
105	0.000571429
105.1	0.000571429
105.2	0.000571429
105.3	0.000571429
105.4	0.000571429
105.5	0.000571429
105.6	0.000571429
105.7	0.000714286
105.8	0.000714286
105.9	0.000714286
106	0.000714286
106.1	0.000857143
106.2	0.001
106.3	0.001
106.4	0.00114286
106.5	0.00114286
106.6	0.00114286
106.7	0.00114286
106.8	0.00114286
106.9	0.00114286
107	0.00114286
107.1	0.00128571
107.2	0.00142857
107.3	0.00142857
107.4	0.00171429
107.5	0.00171429
107.6	0.00171429
107.7	0.00171429
107.8	0.00171429
107.9	0.00171429
108	0.00171429
108.1	0.00185714
108.2	0.00185714
108.3	0.00185714
108.4	0.00185714
108.5	0.002
108.6	0.002
108.7	0.002
108.8	0.00214286
108.9	0.00214286
109	0.00242857
109.1	0.00257143
109.2	0.00257143
109.3	0.00257143
109.4	0.00257143
109.5	0.00257143
109.6	0.00257143
109.7	0.00257143
109.8	0.00257143
109.9	0.00271429
110	0.00271429
110.1	0.00271429
110.2	0.00271429
110.3	0.00271429
110.4	0.00271429
110.5	0.00271429
110.6	0.00271429
110.7	0.00271429
110.8	0.00271429
110.9	0.00271429
111	0.00285714
111.1	0.00285714
111.2	0.00285714
111.3	0.00285714
111.4	0.00285714
111.5	0.003
111.6	0.003
111.7	0.003
111.8	0.003
111.9	0.003
112	0.003
112.1	0.003
112.2	0.003
112.3	0.00314286
112.4	0.00328571
112.5	0.00328571
112.6	0.00328571
112.7	0.00357143
112.8	0.00357143
112.9	0.00357143
113	0.00357143
113.1	0.00357143
113.2	0.00357143
113.3	0.00357143
113.4	0.00371429
113.5	0.00371429
113.6	0.00371429
113.7	0.00371429
113.8	0.004
113.9	0.004
114	0.004
114.1	0.00414286
114.2	0.00414286
114.3	0.00414286
114.4	0.00414286
114.5	0.00414286
114.6	0.00414286
114.7	0.00428571
114.8	0.00428571
114.9	0.00428571
115	0.00442857
115.1	0.00442857
115.2	0.00442857
115.3	0.00442857
115.4	0.00471429
115.5	0.00471429
115.6	0.00471429
115.7	0.00471429
115.8	0.00471429
115.9	0.00471429
116	0.00471429
116.1	0.00471429
116.2	0.00485714
116.3	0.00485714
116.4	0.005
116.5	0.00514286
116.6	0.005
116.7	0.00514286
116.8	0.00528571
116.9	0.00557143
117	0.00571429
117.1	0.00571429
117.2	0.00585714
117.3	0.006
117.4	0.00614286
117.5	0.00614286
117.6	0.00628571
117.7	0.00628571
117.8	0.00657143
117.9	0.00657143
118	0.00657143
118.1	0.00657143
118.2	0.00657143
118.3	0.00657143
118.4	0.00671429
118.5	0.00671429
118.6	0.00685714
118.7	0.007
118.8	0.00714286
118.9	0.00714286
119	0.00714286
119.1	0.00728571
119.2	0.00757143
119.3	0.00771429
119.4	0.00771429
119.5	0.00771429
119.6	0.00771429
119.7	0.00785714
119.8	0.00785714
119.9	0.00785714
120	0.00814286
120.1	0.00814286
120.2	0.00814286
120.3	0.00814286
120.4	0.00814286
120.5	0.00814286
120.6	0.00814286
120.7	0.00814286
120.8	0.008
120.9	0.008
121	0.008
121.1	0.00814286
121.2	0.00814286
121.3	0.00828571
121.4	0.00828571
121.5	0.00828571
121.6	0.00828571
121.7	0.00842857
121.8	0.00842857
121.9	0.00857143
122	0.00857143
122.1	0.00857143
122.2	0.00857143
122.3	0.00871429
122.4	0.00871429
122.5	0.00871429
122.6	0.00871429
122.7	0.00885714
122.8	0.009
122.9	0.00914286
123	0.00914286
123.1	0.00914286
123.2	0.009
123.3	0.00914286
123.4	0.00914286
123.5	0.00914286
123.6	0.00928571
123.7	0.00928571
123.8	0.00928571
123.9	0.00928571
124	0.00942857
124.1	0.00957143
124.2	0.00957143
124.3	0.00971429
124.4	0.00971429
124.5	0.01
124.6	0.01
124.7	0.01
124.8	0.01
124.9	0.01
125	0.0101429
125.1	0.0101429
125.2	0.0101429
125.3	0.0101429
125.4	0.0102857
125.5	0.0102857
125.6	0.0102857
125.7	0.0105714
125.8	0.0105714
125.9	0.0105714
126	0.0107143
126.1	0.0107143
126.2	0.0105714
126.3	0.011
126.4	0.0108571
126.5	0.011
126.6	0.0111429
126.7	0.0111429
126.8	0.0112857
126.9	0.0112857
127	0.0112857
127.1	0.0115714
127.2	0.0117143
127.3	0.0117143
127.4	0.0117143
127.5	0.0117143
127.6	0.0118571
127.7	0.0118571
127.8	0.0118571
127.9	0.0118571
128	0.0118571
128.1	0.0118571
128.2	0.0118571
128.3	0.0118571
128.4	0.012
128.5	0.0121429
128.6	0.0121429
128.7	0.012
128.8	0.012
128.9	0.0121429
129	0.0122857
129.1	0.0124286
129.2	0.0122857
129.3	0.0122857
129.4	0.0122857
129.5	0.0122857
129.6	0.0124286
129.7	0.0124286
129.8	0.0124286
129.9	0.0124286
130	0.0124286
130.1	0.0124286
130.2	0.0122857
130.3	0.0122857
130.4	0.0122857
130.5	0.0122857
130.6	0.0122857
130.7	0.0122857
130.8	0.0122857
130.9	0.0122857
131	0.0124286
131.1	0.0125714
131.2	0.0125714
131.3	0.0125714
131.4	0.0125714
131.5	0.0127143
131.6	0.0127143
131.7	0.0125714
131.8	0.0125714
131.9	0.0128571
132	0.0128571
132.1	0.0131429
132.2	0.0131429
132.3	0.0132857
132.4	0.0132857
132.5	0.0132857
132.6	0.0132857
132.7	0.0132857
132.8	0.0132857
132.9	0.0132857
133	0.0135714
133.1	0.0137143
133.2	0.0137143
133.3	0.0138571
133.4	0.0138571
133.5	0.0138571
133.6	0.0138571
133.7	0.0138571
133.8	0.0138571
133.9	0.014
134	0.0141429
134.1	0.0142857
134.2	0.0142857
134.3	0.0142857
134.4	0.0142857
134.5	0.0142857
134.6	0.0142857
134.7	0.0144286
134.8	0.0144286
134.9	0.0145714
135	0.0148571
135.1	0.0148571
135.2	0.0148571
135.3	0.0148571
135.4	0.0148571
135.5	0.0148571
135.6	0.015
135.7	0.015
135.8	0.015
135.9	0.015
136	0.015
136.1	0.0151429
136.2	0.0151429
136.3	0.0152857
136.4	0.0152857
136.5	0.0152857
136.6	0.0151429
136.7	0.0151429
136.8	0.0151429
136.9	0.0151429
137	0.0151429
137.1	0.015
137.2	0.015
137.3	0.0154286
137.4	0.0154286
137.5	0.0154286
137.6	0.0157143
137.7	0.0157143
137.8	0.0158571
137.9	0.0157143
138	0.0157143
138.1	0.0158571
138.2	0.016
138.3	0.016
138.4	0.016
138.5	0.0161429
138.6	0.0162857
138.7	0.0162857
138.8	0.0165714
138.9	0.0168571
139	0.0168571
139.1	0.017
139.2	0.0171429
139.3	0.0172857
139.4	0.0172857
139.5	0.0172857
139.6	0.0171429
139.7	0.0171429
139.8	0.0171429
139.9	0.0172857
140	0.0172857
140.1	0.0172857
140.2	0.0172857
140.3	0.0172857
140.4	0.0172857
140.5	0.0174286
140.6	0.0174286
140.7	0.0175714
140.8	0.0175714
140.9	0.0175714
141	0.0178571
141.1	0.0181429
141.2	0.0181429
141.3	0.018
141.4	0.018
141.5	0.0181429
141.6	0.0181429
141.7	0.0181429
141.8	0.0181429
141.9	0.0181429
142	0.0181429
142.1	0.0181429
142.2	0.0182857
142.3	0.0182857
142.4	0.0182857
142.5	0.0185714
142.6	0.0187143
142.7	0.0187143
142.8	0.0187143
142.9	0.0188571
143	0.0188571
143.1	0.019
143.2	0.019
143.3	0.019
143.4	0.019
143.5	0.019
143.6	0.019
143.7	0.019
143.8	0.0188571
143.9	0.0187143
144	0.0188571
144.1	0.0188571
144.2	0.019
144.3	0.019
144.4	0.0192857
144.5	0.0191429
144.6	0.0191429
144.7	0.0191429
144.8	0.0192857
144.9	0.0191429
145	0.0191429
145.1	0.0192857
145.2	0.0192857
145.3	0.0192857
145.4	0.0191429
145.5	0.0191429
145.6	0.0191429
145.7	0.0192857
145.8	0.0191429
145.9	0.0192857
146	0.0192857
146.1	0.0194286
146.2	0.0194286
146.3	0.0194286
146.4	0.0195714
146.5	0.0195714
146.6	0.0195714
146.7	0.0195714
146.8	0.0195714
146.9	0.0195714
147	0.0195714
147.1	0.0195714
147.2	0.0195714
147.3	0.0197143
147.4	0.0198571
147.5	0.02
147.6	0.02
147.7	0.0202857
147.8	0.0202857
147.9	0.0202857
148	0.0202857
148.1	0.02
148.2	0.0201429
148.3	0.0202857
148.4	0.0204286
148.5	0.0205714
148.6	0.0205714
148.7	0.0207143
148.8	0.0207143
148.9	0.0207143
149	0.0207143
149.1	0.0207143
149.2	0.0208571
149.3	0.021
149.4	0.0211429
149.5	0.0212857
149.6	0.0212857
149.7	0.0214286
149.8	0.0214286
149.9	0.0214286
150	0.0215714
150.1	0.0217143
150.2	0.0218571
150.3	0.022
150.4	0.0222857
150.5	0.0224286
150.6	0.0224286
150.7	0.0225714
150.8	0.0228571
150.9	0.0228571
151	0.0228571
151.1	0.0231429
151.2	0.0231429
151.3	0.0234286
151.4	0.0234286
151.5	0.0234286
151.6	0.0235714
151.7	0.0234286
151.8	0.0234286
151.9	0.0234286
152	0.0237143
152.1	0.0237143
152.2	0.0237143
152.3	0.0237143
152.4	0.0237143
152.5	0.0237143
152.6	0.0235714
152.7	0.0237143
152.8	0.0238571
152.9	0.024
153	0.024
153.1	0.024
153.2	0.024
153.3	0.0238571
153.4	0.024
153.5	0.024
153.6	0.024
153.7	0.0241429
153.8	0.0242857
153.9	0.0244286
154	0.0244286
154.1	0.0242857
154.2	0.0244286
154.3	0.0244286
154.4	0.0242857
154.5	0.0242857
154.6	0.0242857
154.7	0.0242857
154.8	0.0242857
154.9	0.0242857
155	0.0244286
155.1	0.0244286
155.2	0.0242857
155.3	0.0242857
155.4	0.0242857
155.5	0.0242857
155.6	0.0242857
155.7	0.0242857
155.8	0.0244286
155.9	0.0247143
156	0.0247143
156.1	0.0247143
156.2	0.0248571
156.3	0.0247143
156.4	0.0247143
156.5	0.0245714
156.6	0.0245714
156.7	0.0245714
156.8	0.0245714
156.9	0.0248571
157	0.0248571
157.1	0.025
157.2	0.025
157.3	0.025
157.4	0.025
157.5	0.025
157.6	0.025
157.7	0.0248571
157.8	0.0247143
157.9	0.0248571
158	0.0248571
158.1	0.0248571
158.2	0.0248571
158.3	0.025
158.4	0.0251429
158.5	0.0252857
158.6	0.0252857
158.7	0.0252857
158.8	0.025
158.9	0.0251429
159	0.0252857
159.1	0.0252857
159.2	0.0252857
159.3	0.0254286
159.4	0.0255714
159.5	0.0257143
159.6	0.0257143
159.7	0.0258571
159.8	0.0258571
159.9	0.0258571
160	0.0258571
160.1	0.0258571
160.2	0.026
160.3	0.0261429
160.4	0.0262857
160.5	0.0262857
160.6	0.0261429
160.7	0.0262857
160.8	0.0262857
160.9	0.0262857
161	0.026
161.1	0.0261429
161.2	0.0262857
161.3	0.0265714
161.4	0.0265714
161.5	0.0267143
161.6	0.0267143
161.7	0.027
161.8	0.027
161.9	0.0271429
162	0.0272857
162.1	0.0272857
162.2	0.0271429
162.3	0.0271429
162.4	0.0272857
162.5	0.0272857
162.6	0.0271429
162.7	0.0271429
162.8	0.0272857
162.9	0.0272857
163	0.0275714
163.1	0.0275714
163.2	0.0274286
163.3	0.0275714
163.4	0.0277143
163.5	0.0277143
163.6	0.0277143
163.7	0.0278571
163.8	0.0278571
163.9	0.0278571
164	0.0278571
164.1	0.028
164.2	0.028
164.3	0.0281429
164.4	0.0281429
164.5	0.0282857
164.6	0.0284286
164.7	0.0285714
164.8	0.0287143
164.9	0.0287143
165	0.0288571
165.1	0.0288571
165.2	0.0288571
165.3	0.0288571
165.4	0.0288571
165.5	0.029
165.6	0.029
165.7	0.029
165.8	0.029
165.9	0.0291429
166	0.0292857
166.1	0.0291429
166.2	0.029
166.3	0.029
166.4	0.029
166.5	0.029
166.6	0.029
166.7	0.029
166.8	0.029
166.9	0.0291429
167	0.029
167.1	0.0291429
167.2	0.0292857
167.3	0.0294286
167.4	0.0294286
167.5	0.0294286
167.6	0.0294286
167.7	0.0294286
167.8	0.0295714
167.9	0.0295714
168	0.0297143
168.1	0.0297143
168.2	0.0298571
168.3	0.0298571
168.4	0.0298571
168.5	0.03
168.6	0.0298571
168.7	0.0298571
168.8	0.0297143
168.9	0.0297143
169	0.0298571
169.1	0.0298571
169.2	0.0297143
169.3	0.0297143
169.4	0.03
169.5	0.03
169.6	0.03
169.7	0.03
169.8	0.03
169.9	0.03
170	0.03
170.1	0.0298571
170.2	0.0298571
170.3	0.03
170.4	0.03
170.5	0.0301429
170.6	0.0301429
170.7	0.0301429
170.8	0.0301429
170.9	0.0302857
171	0.0302857
171.1	0.0304286
171.2	0.0304286
171.3	0.0305714
171.4	0.0308571
171.5	0.0308571
171.6	0.0308571
171.7	0.031
171.8	0.031
171.9	0.031
172	0.0308571
172.1	0.0308571
172.2	0.0308571
172.3	0.0308571
172.4	0.0308571
172.5	0.031
172.6	0.031
172.7	0.031
172.8	0.0311429
172.9	0.0312857
173	0.0312857
173.1	0.0312857
173.2	0.0314286
173.3	0.0314286
173.4	0.0314286
173.5	0.0315714
173.6	0.0315714
173.7	0.0315714
173.8	0.0317143
173.9	0.0317143
174	0.0318571
174.1	0.032
174.2	0.0321429
174.3	0.0324286
174.4	0.0324286
174.5	0.0325714
174.6	0.0327143
174.7	0.0327143
174.8	0.0327143
174.9	0.0327143
175	0.0328571
175.1	0.0328571
175.2	0.033
175.3	0.033
175.4	0.033
175.5	0.033
175.6	0.033
175.7	0.033
175.8	0.0328571
175.9	0.033
176	0.033
176.1	0.0334286
176.2	0.0335714
176.3	0.0335714
176.4	0.0335714
176.5	0.0338571
176.6	0.0338571
176.7	0.0338571
176.8	0.0337143
176.9	0.0335714
177	0.0335714
177.1	0.0337143
177.2	0.0337143
177.3	0.0337143
177.4	0.0335714
177.5	0.0334286
177.6	0.034
177.7	0.0341429
177.8	0.0341429
177.9	0.0341429
178	0.0342857
178.1	0.0341429
178.2	0.0341429
178.3	0.0341429
178.4	0.0342857
178.5	0.0345714
178.6	0.0345714
178.7	0.0344286
178.8	0.0344286
178.9	0.0344286
179	0.0344286
179.1	0.0344286
179.2	0.0345714
179.3	0.0345714
179.4	0.0347143
179.5	0.0345714
179.6	0.0345714
179.7	0.0345714
179.8	0.0345714
179.9	0.0345714
180	0.0347143
180.1	0.035
180.2	0.035
180.3	0.0348571
180.4	0.0351429
180.5	0.0351429
180.6	0.035
180.7	0.035
180.8	0.035
180.9	0.0351429
181	0.035
181.1	0.035
181.2	0.0351429
181.3	0.0354286
181.4	0.0354286
181.5	0.0354286
181.6	0.0354286
181.7	0.0357143
181.8	0.0357143
181.9	0.0358571
182	0.0358571
182.1	0.0358571
182.2	0.0357143
182.3	0.0357143
182.4	0.0357143
182.5	0.0357143
182.6	0.0357143
182.7	0.0358571
182.8	0.0357143
182.9	0.0355714
183	0.0355714
183.1	0.0358571
183.2	0.0358571
183.3	0.0358571
183.4	0.036
183.5	0.0362857
183.6	0.0361429
183.7	0.036
183.8	0.0361429
183.9	0.0361429
184	0.0361429
184.1	0.036
184.2	0.0361429
184.3	0.0361429
184.4	0.0361429
184.5	0.0361429
184.6	0.0364286
184.7	0.0367143
184.8	0.0368571
184.9	0.0368571
185	0.0368571
185.1	0.0371429
185.2	0.0372857
185.3	0.0372857
185.4	0.0375714
185.5	0.0375714
185.6	0.0377143
185.7	0.0378571
185.8	0.038
185.9	0.0378571
186	0.0377143
186.1	0.0377143
186.2	0.0377143
186.3	0.0378571
186.4	0.038
186.5	0.038
186.6	0.0381429
186.7	0.0382857
186.8	0.0382857
186.9	0.0382857
187	0.0384286
187.1	0.0384286
187.2	0.0384286
187.3	0.0384286
187.4	0.0382857
187.5	0.0384286
187.6	0.0385714
187.7	0.0385714
187.8	0.0384286
187.9	0.0384286
188	0.0384286
188.1	0.0384286
188.2	0.0384286
188.3	0.0385714
188.4	0.0385714
188.5	0.0384286
188.6	0.0384286
188.7	0.0384286
188.8	0.0384286
188.9	0.0384286
189	0.0387143
189.1	0.0388571
189.2	0.039
189.3	0.039
189.4	0.039
189.5	0.039
189.6	0.0392857
189.7	0.0392857
189.8	0.0391429
189.9	0.0391429
190	0.0391429
190.1	0.0391429
190.2	0.0391429
190.3	0.0394286
190.4	0.0394286
190.5	0.0394286
190.6	0.0392857
190.7	0.0391429
190.8	0.0392857
190.9	0.0392857
191	0.0394286
191.1	0.0395714
191.2	0.0397143
191.3	0.0397143
191.4	0.0401429
191.5	0.0401429
191.6	0.0402857
191.7	0.0401429
191.8	0.0401429
191.9	0.0401429
192	0.0402857
192.1	0.0402857
192.2	0.0401429
192.3	0.0401429
192.4	0.0401429
192.5	0.0401429
192.6	0.0401429
192.7	0.0401429
192.8	0.0401429
192.9	0.0402857
193	0.0402857
193.1	0.0401429
193.2	0.0401429
193.3	0.0402857
193.4	0.0404286
193.5	0.0405714
193.6	0.0405714
193.7	0.0404286
193.8	0.0404286
193.9	0.0405714
194	0.0405714
194.1	0.0402857
194.2	0.0402857
194.3	0.0404286
194.4	0.0405714
194.5	0.0405714
194.6	0.0405714
194.7	0.0407143
194.8	0.0408571
194.9	0.0408571
195	0.0408571
195.1	0.0411429
195.2	0.0411429
195.3	0.0411429
195.4	0.0411429
195.5	0.0411429
195.6	0.0411429
195.7	0.0411429
195.8	0.0414286
195.9	0.0415714
196	0.0415714
196.1	0.0415714
196.2	0.0414286
196.3	0.0415714
196.4	0.0417143
196.5	0.0417143
196.6	0.0418571
196.7	0.042
196.8	0.042
196.9	0.042
197	0.042
197.1	0.0421429
197.2	0.0422857
197.3	0.0422857
197.4	0.0422857
197.5	0.0422857
197.6	0.0424286
197.7	0.0424286
197.8	0.0425714
197.9	0.0425714
198	0.0425714
198.1	0.0427143
198.2	0.0427143
198.3	0.0427143
198.4	0.0427143
198.5	0.0425714
198.6	0.0427143
198.7	0.0427143
198.8	0.0427143
198.9	0.0427143
199	0.0427143
199.1	0.0427143
199.2	0.0427143
199.3	0.0425714
199.4	0.0425714
199.5	0.0425714
199.6	0.0427143
199.7	0.0427143
199.8	0.0427143
199.9	0.0427143
200	0.0427143
[truncated: 14,000 more rows]
