# Supplementary material for: Bayesian inference of kinetic schemes for ion channels by Kalman filtering
Source: eLife journal article supplement (doi:10.7554/elife.62714), 2022-05-04
Supplement: fig4-data10 [file 1_Sim_N_10000_Fluor_MW.xlsx]

## Sheet: Tabelle1
0.1	0
0.2	0
0.3	0
0.4	0
0.5	0
0.6	0
0.7	0
0.8	0
0.9	0
1	0
1.1	0
1.2	0
1.3	0
1.4	0
1.5	0
1.6	0
1.7	0
1.8	0
1.9	0
2	0
2.1	0
2.2	0
2.3	0
2.4	0
2.5	0
2.6	0
2.7	0
2.8	0
2.9	0
3	0
3.1	0
3.2	0
3.3	0
3.4	0
3.5	0
3.6	0
3.7	0
3.8	0
3.9	0
4	0
4.1	0
4.2	0
4.3	0
4.4	0
4.5	0
4.6	0
4.7	0
4.8	0
4.9	0
5	0
5.1	0
5.2	0
5.3	0
5.4	0
5.5	0
5.6	0
5.7	0
5.8	0
5.9	0
6	0
6.1	0
6.2	0
6.3	0
6.4	0
6.5	0
6.6	0
6.7	0
6.8	0
6.9	0
7	0
7.1	0
7.2	0
7.3	0
7.4	0
7.5	0
7.6	0
7.7	0
7.8	0
7.9	0
8	0
8.1	0
8.2	0
8.3	0
8.4	0
8.5	0
8.6	0
8.7	0
8.8	0
8.9	0
9	0
9.1	0
9.2	0
9.3	0
9.4	0
9.5	0
9.6	0
9.7	0
9.8	0
9.9	0
10	0
10.1	0
10.2	0
10.3	0
10.4	0
10.5	0
10.6	0
10.7	0
10.8	0
10.9	0
11	0
11.1	0
11.2	0
11.3	0
11.4	0
11.5	0
11.6	0
11.7	0
11.8	0
11.9	0
12	0
12.1	0
12.2	0
12.3	0
12.4	0
12.5	0
12.6	0
12.7	0
12.8	0
12.9	0
13	0
13.1	0
13.2	0
13.3	0
13.4	0
13.5	0
13.6	0
13.7	0
13.8	0
13.9	0
14	0
14.1	0
14.2	0
14.3	0
14.4	0
14.5	0
14.6	0
14.7	0
14.8	0
14.9	0
15	0
15.1	0
15.2	0
15.3	0
15.4	0
15.5	0
15.6	0
15.7	0
15.8	0
15.9	0
16	0
16.1	0
16.2	0
16.3	0
16.4	0
16.5	0
16.6	0
16.7	0
16.8	0
16.9	0
17	0
17.1	0
17.2	0
17.3	0
17.4	0
17.5	0
17.6	0
17.7	0
17.8	0
17.9	0
18	0
18.1	0
18.2	0
18.3	0
18.4	0
18.5	0
18.6	0
18.7	0
18.8	0
18.9	0
19	0
19.1	0
19.2	0
19.3	0
19.4	0
19.5	0
19.6	0
19.7	0
19.8	0
19.9	0
20	0
20.1	0
20.2	0
20.3	0
20.4	0
20.5	0
20.6	0
20.7	0
20.8	0
20.9	0
21	0
21.1	0
21.2	0
21.3	0
21.4	0
21.5	0
21.6	0
21.7	0
21.8	0
21.9	0
22	0
22.1	0
22.2	0
22.3	0
22.4	0
22.5	0
22.6	0
22.7	0
22.8	0
22.9	0
23	0
23.1	0
23.2	0
23.3	0
23.4	0
23.5	0
23.6	0
23.7	0
23.8	0
23.9	0
24	0
24.1	0
24.2	0
24.3	0
24.4	0
24.5	0
24.6	0
24.7	0
24.8	0
24.9	0
25	0
25.1	0
25.2	0
25.3	0
25.4	0
25.5	0
25.6	0
25.7	0
25.8	0
25.9	0
26	0
26.1	0
26.2	0
26.3	0
26.4	0
26.5	0
26.6	0
26.7	0
26.8	0
26.9	0
27	0
27.1	0
27.2	0
27.3	0
27.4	0
27.5	0
27.6	0
27.7	0
27.8	0
27.9	0
28	0
28.1	0
28.2	0
28.3	0
28.4	0
28.5	0
28.6	0
28.7	0
28.8	0
28.9	0
29	0
29.1	0
29.2	0
29.3	0
29.4	0
29.5	0
29.6	0
29.7	0
29.8	0
29.9	0
30	0
30.1	0
30.2	0
30.3	0
30.4	0
30.5	0
30.6	0
30.7	0
30.8	0
30.9	0
31	0
31.1	0
31.2	0
31.3	0
31.4	0
31.5	0
31.6	0
31.7	0
31.8	0
31.9	0
32	0
32.1	0
32.2	0
32.3	0
32.4	0
32.5	0
32.6	0
32.7	0
32.8	0
32.9	0
33	0
33.1	0
33.2	0
33.3	0
33.4	0
33.5	0
33.6	0
33.7	0
33.8	0
33.9	0
34	0
34.1	0
34.2	0
34.3	0
34.4	0
34.5	0
34.6	0
34.7	0
34.8	0
34.9	0
35	0
35.1	0
35.2	0
35.3	0
35.4	0
35.5	0
35.6	0
35.7	0
35.8	0
35.9	0
36	0
36.1	0
36.2	0
36.3	0
36.4	0
36.5	0
36.6	0
36.7	0
36.8	0
36.9	0
37	0
37.1	0
37.2	0
37.3	0
37.4	0
37.5	0
37.6	0
37.7	0
37.8	0
37.9	0
38	0
38.1	0
38.2	0
38.3	0
38.4	0
38.5	0
38.6	0
38.7	0
38.8	0
38.9	0
39	0
39.1	0
39.2	0
39.3	0
39.4	0
39.5	0
39.6	0
39.7	0
39.8	0
39.9	0
40	0
40.1	0
40.2	0
40.3	0
40.4	0
40.5	0
40.6	0
40.7	0
40.8	0
40.9	0
41	0
41.1	0
41.2	0
41.3	0
41.4	0
41.5	0
41.6	0
41.7	0
41.8	0
41.9	0
42	0
42.1	0
42.2	0
42.3	0
42.4	0
42.5	0
42.6	0
42.7	0
42.8	0
42.9	0
43	0
43.1	0
43.2	0
43.3	0
43.4	0
43.5	0
43.6	0
43.7	0
43.8	0
43.9	0
44	0
44.1	0
44.2	0
44.3	0
44.4	0
44.5	0
44.6	0
44.7	0
44.8	0
44.9	0
45	0
45.1	0
45.2	0
45.3	0
45.4	0
45.5	0
45.6	0
45.7	0
45.8	0
45.9	0
46	0
46.1	0
46.2	0
46.3	0
46.4	0
46.5	0
46.6	0
46.7	0
46.8	0
46.9	0
47	0
47.1	0
47.2	0
47.3	0
47.4	0
47.5	0
47.6	0
47.7	0
47.8	0
47.9	0
48	0
48.1	0
48.2	0
48.3	0
48.4	0
48.5	0
48.6	0
48.7	0
48.8	0
48.9	0
49	0
49.1	0
49.2	0
49.3	0
49.4	0
49.5	0
49.6	0
49.7	0
49.8	0
49.9	0
50	0
50.1	0
50.2	0
50.3	0
50.4	0
50.5	0
50.6	0
50.7	0
50.8	0
50.9	0
51	0
51.1	0
51.2	0
51.3	0
51.4	0
51.5	0
51.6	0
51.7	0
51.8	0
51.9	0
52	0
52.1	0
52.2	0
52.3	0
52.4	0
52.5	0
52.6	0
52.7	0
52.8	0
52.9	0
53	0
53.1	0
53.2	0
53.3	0
53.4	0
53.5	0
53.6	0
53.7	0
53.8	0
53.9	0
54	0
54.1	0
54.2	0
54.3	0
54.4	0
54.5	0
54.6	0
54.7	0
54.8	0
54.9	0
55	0
55.1	0
55.2	0
55.3	0
55.4	0
55.5	0
55.6	0
55.7	0
55.8	0
55.9	0
56	0
56.1	0
56.2	0
56.3	0
56.4	0
56.5	0
56.6	0
56.7	0
56.8	0
56.9	0
57	0
57.1	0
57.2	0
57.3	0
57.4	0
57.5	0
57.6	0
57.7	0
57.8	0
57.9	0
58	0
58.1	0
58.2	0
58.3	0
58.4	0
58.5	0
58.6	0
58.7	0
58.8	0
58.9	0
59	0
59.1	0
59.2	0
59.3	0
59.4	0
59.5	0
59.6	0
59.7	0
59.8	0
59.9	0
60	0
60.1	0
60.2	0
60.3	0
60.4	0
60.5	0
60.6	0
60.7	0
60.8	0
60.9	0
61	0
61.1	0
61.2	0
61.3	0
61.4	0
61.5	0
61.6	0
61.7	0
61.8	0
61.9	0
62	0
62.1	0
62.2	0
62.3	0
62.4	0
62.5	0
62.6	0
62.7	0
62.8	0
62.9	0
63	0
63.1	0
63.2	0
63.3	0
63.4	0
63.5	0
63.6	0
63.7	0
63.8	0
63.9	0
64	0
64.1	0
64.2	0
64.3	0
64.4	0
64.5	0
64.6	0
64.7	0
64.8	0
64.9	0
65	0
65.1	0
65.2	0
65.3	0
65.4	0
65.5	0
65.6	0
65.7	0
65.8	0
65.9	0
66	0
66.1	0
66.2	0
66.3	0
66.4	0
66.5	0
66.6	0
66.7	0
66.8	0
66.9	0
67	0
67.1	0
67.2	0
67.3	0
67.4	0
67.5	0
67.6	0
67.7	0
67.8	0
67.9	0
68	0
68.1	0
68.2	0
68.3	0
68.4	0
68.5	0
68.6	0
68.7	0
68.8	0
68.9	0
69	0
69.1	0
69.2	0
69.3	0
69.4	0
69.5	0
69.6	0
69.7	0
69.8	0
69.9	0
70	0
70.1	0
70.2	0
70.3	0
70.4	0
70.5	0
70.6	0
70.7	0
70.8	0
70.9	0
71	0
71.1	0
71.2	0
71.3	0
71.4	0
71.5	0
71.6	0
71.7	0
71.8	0
71.9	0
72	0
72.1	0
72.2	0
72.3	0
72.4	0
72.5	0
72.6	0
72.7	0
72.8	0
72.9	0
73	0
73.1	0
73.2	0
73.3	0
73.4	0
73.5	0
73.6	0
73.7	0
73.8	0
73.9	0
74	0
74.1	0
74.2	0
74.3	0
74.4	0
74.5	0
74.6	0
74.7	0
74.8	0
74.9	0
75	0
75.1	0
75.2	0
75.3	0
75.4	0
75.5	0
75.6	0
75.7	0
75.8	0
75.9	0
76	0
76.1	0
76.2	0
76.3	0
76.4	0
76.5	0
76.6	0
76.7	0
76.8	0
76.9	0
77	0
77.1	0
77.2	0
77.3	0
77.4	0
77.5	0
77.6	0
77.7	0
77.8	0
77.9	0
78	0
78.1	0
78.2	0
78.3	0
78.4	0
78.5	0
78.6	0
78.7	0
78.8	0
78.9	0
79	0
79.1	0
79.2	0
79.3	0
79.4	0
79.5	0
79.6	0
79.7	0
79.8	0
79.9	0
80	0
80.1	0
80.2	0
80.3	0
80.4	0
80.5	0
80.6	0
80.7	0
80.8	0
80.9	0
81	0
81.1	0
81.2	0
81.3	0
81.4	0
81.5	0
81.6	0
81.7	0
81.8	0
81.9	0
82	0
82.1	0
82.2	0
82.3	0
82.4	0
82.5	0
82.6	0
82.7	0
82.8	0
82.9	0
83	0
83.1	0
83.2	0
83.3	0
83.4	0
83.5	0
83.6	0
83.7	0
83.8	0
83.9	0
84	0
84.1	0
84.2	0
84.3	0
84.4	0
84.5	0
84.6	0
84.7	0
84.8	0
84.9	0
85	0
85.1	0
85.2	0
85.3	0
85.4	0
85.5	0
85.6	0
85.7	0
85.8	0
85.9	0
86	0
86.1	0
86.2	0
86.3	0
86.4	0
86.5	0
86.6	0
86.7	0
86.8	0
86.9	0
87	0
87.1	0
87.2	0
87.3	0
87.4	0
87.5	0
87.6	0
87.7	0
87.8	0
87.9	0
88	0
88.1	0
88.2	0
88.3	0
88.4	0
88.5	0
88.6	0
88.7	0
88.8	0
88.9	0
89	0
89.1	0
89.2	0
89.3	0
89.4	0
89.5	0
89.6	0
89.7	0
89.8	0
89.9	0
90	0
90.1	0
90.2	0
90.3	0
90.4	0
90.5	0
90.6	0
90.7	0
90.8	0
90.9	0
91	0
91.1	0
91.2	0
91.3	0
91.4	0
91.5	0
91.6	0
91.7	0
91.8	0
91.9	0
92	0
92.1	0
92.2	0
92.3	0
92.4	0
92.5	0
92.6	0
92.7	0
92.8	0
92.9	0
93	0
93.1	0
93.2	0
93.3	0
93.4	0
93.5	0
93.6	0
93.7	0
93.8	0
93.9	0
94	0
94.1	0
94.2	0
94.3	0
94.4	0
94.5	0
94.6	0
94.7	0
94.8	0
94.9	0
95	0
95.1	0
95.2	0
95.3	0
95.4	0
95.5	0
95.6	0
95.7	0
95.8	0
95.9	0
96	0
96.1	0
96.2	0
96.3	0
96.4	0
96.5	0
96.6	0
96.7	0
96.8	0
96.9	0
97	0
97.1	0
97.2	0
97.3	0
97.4	0
97.5	0
97.6	0
97.7	0
97.8	0
97.9	0
98	0
98.1	0
98.2	0
98.3	0
98.4	0
98.5	0
98.6	0
98.7	0
98.8	0
98.9	0
99	0
99.1	0
99.2	0
99.3	0
99.4	0
99.5	0
99.6	0
99.7	0
99.8	0
99.9	0
100	0
100.1	0.00385
100.2	0.00795
100.3	0.0109
100.4	0.0145
100.5	0.01785
100.6	0.02065
100.7	0.0244
100.8	0.02735
100.9	0.0303
101	0.0344
101.1	0.03735
101.2	0.0406
101.3	0.04405
101.4	0.04705
101.5	0.05095
101.6	0.05405
101.7	0.0577
101.8	0.06125
101.9	0.06395
102	0.0669
102.1	0.0696
102.2	0.0714
102.3	0.074
102.4	0.0772
102.5	0.0796
102.6	0.08265
102.7	0.08465
102.8	0.08675
102.9	0.08825
103	0.0904
103.1	0.09275
103.2	0.09465
103.3	0.09705
103.4	0.099
103.5	0.10085
103.6	0.10375
103.7	0.1048
103.8	0.1073
103.9	0.10975
104	0.11065
104.1	0.11255
104.2	0.11535
104.3	0.1178
104.4	0.1202
104.5	0.1214
104.6	0.1224
104.7	0.12345
104.8	0.12495
104.9	0.1271
105	0.12825
105.1	0.1304
105.2	0.1321
105.3	0.1329
105.4	0.13445
105.5	0.13645
105.6	0.13735
105.7	0.1386
105.8	0.1397
105.9	0.1409
106	0.1428
106.1	0.1434
106.2	0.1439
106.3	0.1459
106.4	0.1476
106.5	0.14915
106.6	0.1504
106.7	0.15155
106.8	0.1529
106.9	0.1541
107	0.15425
107.1	0.15535
107.2	0.1558
107.3	0.15705
107.4	0.1588
107.5	0.1605
107.6	0.1617
107.7	0.16325
107.8	0.16415
107.9	0.16545
108	0.16595
108.1	0.16755
108.2	0.16765
108.3	0.16875
108.4	0.16965
108.5	0.17115
108.6	0.17195
108.7	0.17235
108.8	0.1732
108.9	0.1738
109	0.17515
109.1	0.17685
109.2	0.1777
109.3	0.1791
109.4	0.17935
109.5	0.17855
109.6	0.1794
109.7	0.1795
109.8	0.18025
109.9	0.18115
110	0.18235
110.1	0.18375
110.2	0.18485
110.3	0.18605
110.4	0.1864
110.5	0.1873
110.6	0.188
110.7	0.18875
110.8	0.1899
110.9	0.18955
111	0.18975
111.1	0.19015
111.2	0.1914
111.3	0.19245
111.4	0.1938
111.5	0.19335
111.6	0.19415
111.7	0.1948
111.8	0.1961
111.9	0.19685
112	0.1974
112.1	0.1976
112.2	0.1979
112.3	0.1986
112.4	0.2
112.5	0.19985
112.6	0.20095
112.7	0.20135
112.8	0.2018
112.9	0.20235
113	0.20285
113.1	0.2032
113.2	0.20385
113.3	0.2042
113.4	0.204
113.5	0.20465
113.6	0.20515
113.7	0.2056
113.8	0.2064
113.9	0.2075
114	0.20755
114.1	0.2079
114.2	0.208
114.3	0.20865
114.4	0.20855
114.5	0.2093
114.6	0.20925
114.7	0.2098
114.8	0.2101
114.9	0.2107
115	0.2108
115.1	0.2111
115.2	0.2117
115.3	0.21155
115.4	0.21105
115.5	0.21185
115.6	0.21235
115.7	0.21375
115.8	0.2141
115.9	0.21475
116	0.2151
116.1	0.2151
116.2	0.21535
116.3	0.2156
116.4	0.21595
116.5	0.21615
116.6	0.21695
116.7	0.2177
116.8	0.21895
116.9	0.21925
117	0.2201
117.1	0.21975
117.2	0.22045
117.3	0.2209
117.4	0.2208
117.5	0.22095
117.6	0.22225
117.7	0.2227
117.8	0.22315
117.9	0.22225
118	0.221
118.1	0.222
118.2	0.22285
118.3	0.2223
118.4	0.22115
118.5	0.221
118.6	0.2208
118.7	0.22155
118.8	0.22115
118.9	0.2215
119	0.22195
119.1	0.22205
119.2	0.2214
119.3	0.222
119.4	0.22185
119.5	0.2212
119.6	0.22175
119.7	0.2219
119.8	0.22225
119.9	0.2219
120	0.22285
120.1	0.22335
120.2	0.2234
120.3	0.2226
120.4	0.2225
120.5	0.22265
120.6	0.2224
120.7	0.2232
120.8	0.22355
120.9	0.22355
121	0.2228
121.1	0.22395
121.2	0.22415
121.3	0.2253
121.4	0.2255
121.5	0.22525
121.6	0.2261
121.7	0.2261
121.8	0.22655
121.9	0.2263
122	0.22605
122.1	0.2262
122.2	0.2269
122.3	0.2266
122.4	0.227
122.5	0.2275
122.6	0.2276
122.7	0.2276
122.8	0.22775
122.9	0.2277
123	0.2277
123.1	0.22785
123.2	0.2278
123.3	0.2283
123.4	0.22795
123.5	0.22695
123.6	0.2276
123.7	0.2276
123.8	0.22725
123.9	0.2276
124	0.2279
124.1	0.22785
124.2	0.22835
124.3	0.22705
124.4	0.2274
124.5	0.22755
124.6	0.22765
124.7	0.22895
124.8	0.229
124.9	0.229
125	0.22875
125.1	0.22825
125.2	0.2284
125.3	0.2269
125.4	0.22695
125.5	0.2268
125.6	0.22625
125.7	0.22665
125.8	0.2273
125.9	0.22795
126	0.22825
126.1	0.2281
126.2	0.22775
126.3	0.2281
126.4	0.22805
126.5	0.229
126.6	0.2291
126.7	0.22865
126.8	0.2289
126.9	0.22835
127	0.2283
127.1	0.228
127.2	0.22775
127.3	0.22695
127.4	0.22745
127.5	0.2274
127.6	0.228
127.7	0.22875
127.8	0.22855
127.9	0.2294
128	0.23015
128.1	0.2304
128.2	0.2311
128.3	0.23165
128.4	0.2306
128.5	0.2311
128.6	0.2313
128.7	0.2319
128.8	0.2316
128.9	0.23135
129	0.2315
129.1	0.2311
129.2	0.23185
129.3	0.2318
129.4	0.2309
129.5	0.2304
129.6	0.23035
129.7	0.2296
129.8	0.22895
129.9	0.22915
130	0.22875
130.1	0.22875
130.2	0.22875
130.3	0.22965
130.4	0.2296
130.5	0.22935
130.6	0.229
130.7	0.2297
130.8	0.2292
130.9	0.22915
131	0.2297
131.1	0.23005
131.2	0.22955
131.3	0.23035
131.4	0.2312
131.5	0.2324
131.6	0.2323
131.7	0.2321
131.8	0.2317
131.9	0.23035
132	0.2309
132.1	0.23125
132.2	0.2318
132.3	0.23195
132.4	0.23225
132.5	0.23305
132.6	0.233
132.7	0.23325
132.8	0.23305
132.9	0.23365
133	0.2334
133.1	0.2332
133.2	0.23305
133.3	0.2338
133.4	0.23385
133.5	0.23355
133.6	0.23335
133.7	0.2329
133.8	0.2333
133.9	0.23325
134	0.2334
134.1	0.233
134.2	0.23345
134.3	0.2346
134.4	0.23445
134.5	0.2345
134.6	0.23505
134.7	0.23565
134.8	0.2359
134.9	0.2366
135	0.2368
135.1	0.2375
135.2	0.2382
135.3	0.2384
135.4	0.23795
135.5	0.2384
135.6	0.23755
135.7	0.23715
135.8	0.2363
135.9	0.2361
136	0.2365
136.1	0.23625
136.2	0.2357
136.3	0.2349
136.4	0.23505
136.5	0.2356
136.6	0.2358
136.7	0.2362
136.8	0.2368
136.9	0.2366
137	0.23705
137.1	0.23765
137.2	0.2376
137.3	0.2381
137.4	0.2387
137.5	0.2387
137.6	0.2391
137.7	0.2386
137.8	0.2396
137.9	0.23945
138	0.2393
138.1	0.2393
138.2	0.2399
138.3	0.23935
138.4	0.23965
138.5	0.24045
138.6	0.24085
138.7	0.2394
138.8	0.2388
138.9	0.23855
139	0.23925
139.1	0.23845
139.2	0.23815
139.3	0.23785
139.4	0.23715
139.5	0.237
139.6	0.23685
139.7	0.23635
139.8	0.23635
139.9	0.2364
140	0.2368
140.1	0.23685
140.2	0.23725
140.3	0.2372
140.4	0.2377
140.5	0.23735
140.6	0.2373
140.7	0.23755
140.8	0.2375
140.9	0.23805
141	0.23785
141.1	0.23895
141.2	0.23875
141.3	0.23875
141.4	0.2388
141.5	0.23975
141.6	0.24
141.7	0.24035
141.8	0.2397
141.9	0.23955
142	0.2396
142.1	0.23925
142.2	0.23915
142.3	0.23945
142.4	0.23975
142.5	0.2394
142.6	0.24015
142.7	0.24095
142.8	0.2415
142.9	0.24205
143	0.2412
143.1	0.2409
143.2	0.2417
143.3	0.24235
143.4	0.24195
143.5	0.2417
143.6	0.2421
143.7	0.24195
143.8	0.24295
143.9	0.244
144	0.24485
144.1	0.24495
144.2	0.2453
144.3	0.2452
144.4	0.24575
144.5	0.2452
144.6	0.24465
144.7	0.2443
144.8	0.24355
144.9	0.2431
145	0.2427
145.1	0.2422
145.2	0.2416
145.3	0.2418
145.4	0.2416
145.5	0.24245
145.6	0.24255
145.7	0.24215
145.8	0.24185
145.9	0.2421
146	0.2424
146.1	0.2426
146.2	0.24295
146.3	0.2432
146.4	0.24315
146.5	0.2436
146.6	0.24435
146.7	0.24455
146.8	0.24395
146.9	0.2439
147	0.24405
147.1	0.24345
147.2	0.24345
147.3	0.2433
147.4	0.24315
147.5	0.24365
147.6	0.2431
147.7	0.2433
147.8	0.244
147.9	0.2437
148	0.24355
148.1	0.2438
148.2	0.2432
148.3	0.24305
148.4	0.24315
148.5	0.24275
148.6	0.2416
148.7	0.24165
148.8	0.24135
148.9	0.24115
149	0.2414
149.1	0.24185
149.2	0.2424
149.3	0.2423
149.4	0.24275
149.5	0.24195
149.6	0.24205
149.7	0.2427
149.8	0.24225
149.9	0.2424
150	0.24265
150.1	0.24255
150.2	0.2428
150.3	0.2425
150.4	0.24225
150.5	0.2424
150.6	0.2423
150.7	0.24235
150.8	0.24295
150.9	0.24265
151	0.24225
151.1	0.24265
151.2	0.24125
151.3	0.24145
151.4	0.24045
151.5	0.24045
151.6	0.24015
151.7	0.2402
151.8	0.24045
151.9	0.24025
152	0.2393
152.1	0.2401
152.2	0.2403
152.3	0.23905
152.4	0.2393
152.5	0.23935
152.6	0.2394
152.7	0.23925
152.8	0.2389
152.9	0.2392
153	0.2399
153.1	0.23995
153.2	0.23945
153.3	0.2392
153.4	0.2389
153.5	0.23975
153.6	0.2395
153.7	0.2395
153.8	0.2384
153.9	0.23885
154	0.23955
154.1	0.23995
154.2	0.2402
154.3	0.2415
154.4	0.24235
154.5	0.24245
154.6	0.242
154.7	0.24245
154.8	0.2427
154.9	0.24315
155	0.2437
155.1	0.2437
155.2	0.2437
155.3	0.24355
155.4	0.24315
155.5	0.24425
155.6	0.2441
155.7	0.2437
155.8	0.2438
155.9	0.24405
156	0.24415
156.1	0.24445
156.2	0.2443
156.3	0.24515
156.4	0.2454
156.5	0.2447
156.6	0.2441
156.7	0.2447
156.8	0.24565
156.9	0.2458
157	0.24565
157.1	0.24535
157.2	0.24535
157.3	0.24555
157.4	0.24525
157.5	0.24545
157.6	0.2456
157.7	0.24575
157.8	0.2447
157.9	0.245
158	0.24555
158.1	0.2451
158.2	0.24445
158.3	0.2447
158.4	0.2443
158.5	0.24415
158.6	0.24435
158.7	0.24525
158.8	0.2459
158.9	0.24565
159	0.2448
159.1	0.2446
159.2	0.24495
159.3	0.24495
159.4	0.24505
159.5	0.2459
159.6	0.24645
159.7	0.2473
159.8	0.24665
159.9	0.2459
160	0.24595
160.1	0.2464
160.2	0.2468
160.3	0.2476
160.4	0.24665
160.5	0.24595
160.6	0.2461
160.7	0.2464
160.8	0.24625
160.9	0.2462
161	0.24625
161.1	0.24655
161.2	0.24705
161.3	0.2464
161.4	0.24645
161.5	0.24695
161.6	0.24715
161.7	0.2473
161.8	0.24725
161.9	0.24725
162	0.2482
162.1	0.2476
162.2	0.24885
162.3	0.2485
162.4	0.2488
162.5	0.24935
162.6	0.2496
162.7	0.2484
162.8	0.24835
162.9	0.2484
163	0.2485
163.1	0.24795
163.2	0.24865
163.3	0.2489
163.4	0.2493
163.5	0.2498
163.6	0.24965
163.7	0.25005
163.8	0.24995
163.9	0.2502
164	0.2505
164.1	0.2515
164.2	0.2527
164.3	0.25235
164.4	0.2526
164.5	0.2521
164.6	0.2528
164.7	0.25295
164.8	0.2537
164.9	0.2546
165	0.2547
165.1	0.2543
165.2	0.25405
165.3	0.25355
165.4	0.2533
165.5	0.25315
165.6	0.25325
165.7	0.253
165.8	0.2529
165.9	0.2528
166	0.2525
166.1	0.25205
166.2	0.2522
166.3	0.25235
166.4	0.25245
166.5	0.252
166.6	0.25185
166.7	0.25145
166.8	0.2521
166.9	0.2513
167	0.2513
167.1	0.2511
167.2	0.2517
167.3	0.25265
167.4	0.253
167.5	0.25285
167.6	0.2526
167.7	0.25145
167.8	0.25105
167.9	0.2506
168	0.25035
168.1	0.25055
168.2	0.25025
168.3	0.2502
168.4	0.2504
168.5	0.25
168.6	0.2508
168.7	0.25
168.8	0.2504
168.9	0.2496
169	0.2495
169.1	0.2486
169.2	0.2487
169.3	0.2484
169.4	0.2475
169.5	0.24745
169.6	0.24785
169.7	0.2476
169.8	0.2471
169.9	0.2474
170	0.2474
170.1	0.24725
170.2	0.2471
170.3	0.2471
170.4	0.2473
170.5	0.2479
170.6	0.24725
170.7	0.2474
170.8	0.2467
170.9	0.24655
171	0.24685
171.1	0.24695
171.2	0.24695
171.3	0.24635
171.4	0.24695
171.5	0.24595
171.6	0.2461
171.7	0.24605
171.8	0.2463
171.9	0.2451
172	0.2453
172.1	0.24485
172.2	0.245
172.3	0.2456
172.4	0.2459
172.5	0.2461
172.6	0.24645
172.7	0.2466
172.8	0.24605
172.9	0.2468
173	0.2468
173.1	0.2473
173.2	0.24695
173.3	0.2472
173.4	0.2476
173.5	0.24805
173.6	0.2495
173.7	0.25005
173.8	0.2498
173.9	0.2496
174	0.25
174.1	0.2499
174.2	0.24995
174.3	0.25125
174.4	0.2505
174.5	0.25025
174.6	0.25055
174.7	0.2507
174.8	0.25095
174.9	0.2516
175	0.25175
175.1	0.252
175.2	0.2522
175.3	0.2526
175.4	0.252
175.5	0.25115
175.6	0.2514
175.7	0.25205
175.8	0.2522
175.9	0.2524
176	0.2523
176.1	0.2529
176.2	0.25305
176.3	0.25295
176.4	0.25245
176.5	0.25215
176.6	0.25175
176.7	0.2504
176.8	0.25105
176.9	0.25075
177	0.25095
177.1	0.2504
177.2	0.25055
177.3	0.25175
177.4	0.25205
177.5	0.25265
177.6	0.25285
177.7	0.253
177.8	0.2537
177.9	0.2539
178	0.25445
178.1	0.25425
178.2	0.2542
178.3	0.2539
178.4	0.25335
178.5	0.25355
178.6	0.25355
178.7	0.2529
178.8	0.25345
178.9	0.25205
179	0.25195
179.1	0.2521
179.2	0.25195
179.3	0.25175
179.4	0.2525
179.5	0.2531
179.6	0.2533
179.7	0.25225
179.8	0.2523
179.9	0.2526
180	0.2523
180.1	0.25245
180.2	0.2522
180.3	0.25255
180.4	0.2525
180.5	0.2526
180.6	0.2524
180.7	0.2511
180.8	0.25225
180.9	0.252
181	0.2516
181.1	0.25175
181.2	0.25105
181.3	0.25145
181.4	0.25045
181.5	0.251
181.6	0.25145
181.7	0.2511
181.8	0.2511
181.9	0.251
182	0.2504
182.1	0.25205
182.2	0.2512
182.3	0.2514
182.4	0.251
182.5	0.25055
182.6	0.25155
182.7	0.2511
182.8	0.2506
182.9	0.2504
183	0.2501
183.1	0.2503
183.2	0.2507
183.3	0.2503
183.4	0.25055
183.5	0.2503
183.6	0.25135
183.7	0.25165
183.8	0.25145
183.9	0.2519
184	0.2518
184.1	0.25135
184.2	0.2523
184.3	0.2523
184.4	0.25225
184.5	0.25275
184.6	0.2527
184.7	0.2526
184.8	0.2523
184.9	0.2513
185	0.2507
185.1	0.2507
185.2	0.2504
185.3	0.2499
185.4	0.2503
185.5	0.25045
185.6	0.24995
185.7	0.25085
185.8	0.25145
185.9	0.2511
186	0.2507
186.1	0.2509
186.2	0.2502
186.3	0.25075
186.4	0.2514
186.5	0.25195
186.6	0.25165
186.7	0.25125
186.8	0.2503
186.9	0.2498
187	0.2499
187.1	0.25005
187.2	0.2504
187.3	0.25105
187.4	0.25075
187.5	0.24975
187.6	0.2496
187.7	0.24985
187.8	0.2496
187.9	0.25005
188	0.2509
188.1	0.25195
188.2	0.25115
188.3	0.25015
188.4	0.2503
188.5	0.2498
188.6	0.24955
188.7	0.2495
188.8	0.25015
188.9	0.2504
189	0.2502
189.1	0.2506
189.2	0.2511
189.3	0.2507
189.4	0.25075
189.5	0.25125
189.6	0.2509
189.7	0.2509
189.8	0.25085
189.9	0.2516
190	0.2511
190.1	0.25035
190.2	0.2507
190.3	0.25055
190.4	0.2507
190.5	0.25065
190.6	0.2514
190.7	0.25105
190.8	0.25145
190.9	0.25205
191	0.252
191.1	0.2523
191.2	0.2526
191.3	0.2519
191.4	0.25225
191.5	0.25245
191.6	0.25275
191.7	0.2536
191.8	0.25395
191.9	0.2532
192	0.254
192.1	0.25405
192.2	0.25375
192.3	0.25415
192.4	0.255
192.5	0.25535
192.6	0.255
192.7	0.2554
192.8	0.2556
192.9	0.25565
193	0.25555
193.1	0.2557
193.2	0.25655
193.3	0.2575
193.4	0.2572
193.5	0.2581
193.6	0.25695
193.7	0.25725
193.8	0.25695
193.9	0.257
194	0.25645
194.1	0.25695
194.2	0.2568
194.3	0.25695
194.4	0.25715
194.5	0.2575
194.6	0.25735
194.7	0.25665
194.8	0.2567
194.9	0.2564
195	0.25705
195.1	0.2575
195.2	0.25625
195.3	0.2562
195.4	0.25535
195.5	0.25555
195.6	0.25485
195.7	0.2542
195.8	0.2545
195.9	0.25335
196	0.25335
196.1	0.2538
196.2	0.25365
196.3	0.253
196.4	0.2538
196.5	0.25405
196.6	0.2548
196.7	0.25575
196.8	0.256
196.9	0.25655
197	0.2558
197.1	0.2552
197.2	0.25515
197.3	0.25465
197.4	0.25495
197.5	0.254
197.6	0.2543
197.7	0.25455
197.8	0.2553
197.9	0.25545
198	0.2552
198.1	0.2553
198.2	0.25445
198.3	0.25435
198.4	0.255
198.5	0.25535
198.6	0.2549
198.7	0.2546
198.8	0.2559
198.9	0.2562
199	0.25685
199.1	0.25705
199.2	0.25725
199.3	0.25785
199.4	0.2578
199.5	0.2584
199.6	0.25805
199.7	0.25855
199.8	0.25925
199.9	0.25975
200	0.2588
[truncated: 14,000 more rows]
