# Supplementary material for: Bayesian inference of kinetic schemes for ion channels by Kalman filtering
Source: eLife journal article supplement (doi:10.7554/elife.62714), 2022-05-04
Supplement: fig4-data10 [file 1_Sim_N_10000_Strom_MW.xlsx]

## Sheet: Tabelle1
0.1	0
0.2	0
0.3	0
0.4	0
0.5	0
0.6	0
0.7	0
0.8	0
0.9	0
1	0
1.1	0
1.2	0
1.3	0
1.4	0
1.5	0
1.6	0
1.7	0
1.8	0
1.9	0
2	0
2.1	0
2.2	0
2.3	0
2.4	0
2.5	0
2.6	0
2.7	0
2.8	0
2.9	0
3	0
3.1	0
3.2	0
3.3	0
3.4	0
3.5	0
3.6	0
3.7	0
3.8	0
3.9	0
4	0
4.1	0
4.2	0
4.3	0
4.4	0
4.5	0
4.6	0
4.7	0
4.8	0
4.9	0
5	0
5.1	0
5.2	0
5.3	0
5.4	0
5.5	0
5.6	0
5.7	0
5.8	0
5.9	0
6	0
6.1	0
6.2	0
6.3	0
6.4	0
6.5	0
6.6	0
6.7	0
6.8	0
6.9	0
7	0
7.1	0
7.2	0
7.3	0
7.4	0
7.5	0
7.6	0
7.7	0
7.8	0
7.9	0
8	0
8.1	0
8.2	0
8.3	0
8.4	0
8.5	0
8.6	0
8.7	0
8.8	0
8.9	0
9	0
9.1	0
9.2	0
9.3	0
9.4	0
9.5	0
9.6	0
9.7	0
9.8	0
9.9	0
10	0
10.1	0
10.2	0
10.3	0
10.4	0
10.5	0
10.6	0
10.7	0
10.8	0
10.9	0
11	0
11.1	0
11.2	0
11.3	0
11.4	0
11.5	0
11.6	0
11.7	0
11.8	0
11.9	0
12	0
12.1	0
12.2	0
12.3	0
12.4	0
12.5	0
12.6	0
12.7	0
12.8	0
12.9	0
13	0
13.1	0
13.2	0
13.3	0
13.4	0
13.5	0
13.6	0
13.7	0
13.8	0
13.9	0
14	0
14.1	0
14.2	0
14.3	0
14.4	0
14.5	0
14.6	0
14.7	0
14.8	0
14.9	0
15	0
15.1	0
15.2	0
15.3	0
15.4	0
15.5	0
15.6	0
15.7	0
15.8	0
15.9	0
16	0
16.1	0
16.2	0
16.3	0
16.4	0
16.5	0
16.6	0
16.7	0
16.8	0
16.9	0
17	0
17.1	0
17.2	0
17.3	0
17.4	0
17.5	0
17.6	0
17.7	0
17.8	0
17.9	0
18	0
18.1	0
18.2	0
18.3	0
18.4	0
18.5	0
18.6	0
18.7	0
18.8	0
18.9	0
19	0
19.1	0
19.2	0
19.3	0
19.4	0
19.5	0
19.6	0
19.7	0
19.8	0
19.9	0
20	0
20.1	0
20.2	0
20.3	0
20.4	0
20.5	0
20.6	0
20.7	0
20.8	0
20.9	0
21	0
21.1	0
21.2	0
21.3	0
21.4	0
21.5	0
21.6	0
21.7	0
21.8	0
21.9	0
22	0
22.1	0
22.2	0
22.3	0
22.4	0
22.5	0
22.6	0
22.7	0
22.8	0
22.9	0
23	0
23.1	0
23.2	0
23.3	0
23.4	0
23.5	0
23.6	0
23.7	0
23.8	0
23.9	0
24	0
24.1	0
24.2	0
24.3	0
24.4	0
24.5	0
24.6	0
24.7	0
24.8	0
24.9	0
25	0
25.1	0
25.2	0
25.3	0
25.4	0
25.5	0
25.6	0
25.7	0
25.8	0
25.9	0
26	0
26.1	0
26.2	0
26.3	0
26.4	0
26.5	0
26.6	0
26.7	0
26.8	0
26.9	0
27	0
27.1	0
27.2	0
27.3	0
27.4	0
27.5	0
27.6	0
27.7	0
27.8	0
27.9	0
28	0
28.1	0
28.2	0
28.3	0
28.4	0
28.5	0
28.6	0
28.7	0
28.8	0
28.9	0
29	0
29.1	0
29.2	0
29.3	0
29.4	0
29.5	0
29.6	0
29.7	0
29.8	0
29.9	0
30	0
30.1	0
30.2	0
30.3	0
30.4	0
30.5	0
30.6	0
30.7	0
30.8	0
30.9	0
31	0
31.1	0
31.2	0
31.3	0
31.4	0
31.5	0
31.6	0
31.7	0
31.8	0
31.9	0
32	0
32.1	0
32.2	0
32.3	0
32.4	0
32.5	0
32.6	0
32.7	0
32.8	0
32.9	0
33	0
33.1	0
33.2	0
33.3	0
33.4	0
33.5	0
33.6	0
33.7	0
33.8	0
33.9	0
34	0
34.1	0
34.2	0
34.3	0
34.4	0
34.5	0
34.6	0
34.7	0
34.8	0
34.9	0
35	0
35.1	0
35.2	0
35.3	0
35.4	0
35.5	0
35.6	0
35.7	0
35.8	0
35.9	0
36	0
36.1	0
36.2	0
36.3	0
36.4	0
36.5	0
36.6	0
36.7	0
36.8	0
36.9	0
37	0
37.1	0
37.2	0
37.3	0
37.4	0
37.5	0
37.6	0
37.7	0
37.8	0
37.9	0
38	0
38.1	0
38.2	0
38.3	0
38.4	0
38.5	0
38.6	0
38.7	0
38.8	0
38.9	0
39	0
39.1	0
39.2	0
39.3	0
39.4	0
39.5	0
39.6	0
39.7	0
39.8	0
39.9	0
40	0
40.1	0
40.2	0
40.3	0
40.4	0
40.5	0
40.6	0
40.7	0
40.8	0
40.9	0
41	0
41.1	0
41.2	0
41.3	0
41.4	0
41.5	0
41.6	0
41.7	0
41.8	0
41.9	0
42	0
42.1	0
42.2	0
42.3	0
42.4	0
42.5	0
42.6	0
42.7	0
42.8	0
42.9	0
43	0
43.1	0
43.2	0
43.3	0
43.4	0
43.5	0
43.6	0
43.7	0
43.8	0
43.9	0
44	0
44.1	0
44.2	0
44.3	0
44.4	0
44.5	0
44.6	0
44.7	0
44.8	0
44.9	0
45	0
45.1	0
45.2	0
45.3	0
45.4	0
45.5	0
45.6	0
45.7	0
45.8	0
45.9	0
46	0
46.1	0
46.2	0
46.3	0
46.4	0
46.5	0
46.6	0
46.7	0
46.8	0
46.9	0
47	0
47.1	0
47.2	0
47.3	0
47.4	0
47.5	0
47.6	0
47.7	0
47.8	0
47.9	0
48	0
48.1	0
48.2	0
48.3	0
48.4	0
48.5	0
48.6	0
48.7	0
48.8	0
48.9	0
49	0
49.1	0
49.2	0
49.3	0
49.4	0
49.5	0
49.6	0
49.7	0
49.8	0
49.9	0
50	0
50.1	0
50.2	0
50.3	0
50.4	0
50.5	0
50.6	0
50.7	0
50.8	0
50.9	0
51	0
51.1	0
51.2	0
51.3	0
51.4	0
51.5	0
51.6	0
51.7	0
51.8	0
51.9	0
52	0
52.1	0
52.2	0
52.3	0
52.4	0
52.5	0
52.6	0
52.7	0
52.8	0
52.9	0
53	0
53.1	0
53.2	0
53.3	0
53.4	0
53.5	0
53.6	0
53.7	0
53.8	0
53.9	0
54	0
54.1	0
54.2	0
54.3	0
54.4	0
54.5	0
54.6	0
54.7	0
54.8	0
54.9	0
55	0
55.1	0
55.2	0
55.3	0
55.4	0
55.5	0
55.6	0
55.7	0
55.8	0
55.9	0
56	0
56.1	0
56.2	0
56.3	0
56.4	0
56.5	0
56.6	0
56.7	0
56.8	0
56.9	0
57	0
57.1	0
57.2	0
57.3	0
57.4	0
57.5	0
57.6	0
57.7	0
57.8	0
57.9	0
58	0
58.1	0
58.2	0
58.3	0
58.4	0
58.5	0
58.6	0
58.7	0
58.8	0
58.9	0
59	0
59.1	0
59.2	0
59.3	0
59.4	0
59.5	0
59.6	0
59.7	0
59.8	0
59.9	0
60	0
60.1	0
60.2	0
60.3	0
60.4	0
60.5	0
60.6	0
60.7	0
60.8	0
60.9	0
61	0
61.1	0
61.2	0
61.3	0
61.4	0
61.5	0
61.6	0
61.7	0
61.8	0
61.9	0
62	0
62.1	0
62.2	0
62.3	0
62.4	0
62.5	0
62.6	0
62.7	0
62.8	0
62.9	0
63	0
63.1	0
63.2	0
63.3	0
63.4	0
63.5	0
63.6	0
63.7	0
63.8	0
63.9	0
64	0
64.1	0
64.2	0
64.3	0
64.4	0
64.5	0
64.6	0
64.7	0
64.8	0
64.9	0
65	0
65.1	0
65.2	0
65.3	0
65.4	0
65.5	0
65.6	0
65.7	0
65.8	0
65.9	0
66	0
66.1	0
66.2	0
66.3	0
66.4	0
66.5	0
66.6	0
66.7	0
66.8	0
66.9	0
67	0
67.1	0
67.2	0
67.3	0
67.4	0
67.5	0
67.6	0
67.7	0
67.8	0
67.9	0
68	0
68.1	0
68.2	0
68.3	0
68.4	0
68.5	0
68.6	0
68.7	0
68.8	0
68.9	0
69	0
69.1	0
69.2	0
69.3	0
69.4	0
69.5	0
69.6	0
69.7	0
69.8	0
69.9	0
70	0
70.1	0
70.2	0
70.3	0
70.4	0
70.5	0
70.6	0
70.7	0
70.8	0
70.9	0
71	0
71.1	0
71.2	0
71.3	0
71.4	0
71.5	0
71.6	0
71.7	0
71.8	0
71.9	0
72	0
72.1	0
72.2	0
72.3	0
72.4	0
72.5	0
72.6	0
72.7	0
72.8	0
72.9	0
73	0
73.1	0
73.2	0
73.3	0
73.4	0
73.5	0
73.6	0
73.7	0
73.8	0
73.9	0
74	0
74.1	0
74.2	0
74.3	0
74.4	0
74.5	0
74.6	0
74.7	0
74.8	0
74.9	0
75	0
75.1	0
75.2	0
75.3	0
75.4	0
75.5	0
75.6	0
75.7	0
75.8	0
75.9	0
76	0
76.1	0
76.2	0
76.3	0
76.4	0
76.5	0
76.6	0
76.7	0
76.8	0
76.9	0
77	0
77.1	0
77.2	0
77.3	0
77.4	0
77.5	0
77.6	0
77.7	0
77.8	0
77.9	0
78	0
78.1	0
78.2	0
78.3	0
78.4	0
78.5	0
78.6	0
78.7	0
78.8	0
78.9	0
79	0
79.1	0
79.2	0
79.3	0
79.4	0
79.5	0
79.6	0
79.7	0
79.8	0
79.9	0
80	0
80.1	0
80.2	0
80.3	0
80.4	0
80.5	0
80.6	0
80.7	0
80.8	0
80.9	0
81	0
81.1	0
81.2	0
81.3	0
81.4	0
81.5	0
81.6	0
81.7	0
81.8	0
81.9	0
82	0
82.1	0
82.2	0
82.3	0
82.4	0
82.5	0
82.6	0
82.7	0
82.8	0
82.9	0
83	0
83.1	0
83.2	0
83.3	0
83.4	0
83.5	0
83.6	0
83.7	0
83.8	0
83.9	0
84	0
84.1	0
84.2	0
84.3	0
84.4	0
84.5	0
84.6	0
84.7	0
84.8	0
84.9	0
85	0
85.1	0
85.2	0
85.3	0
85.4	0
85.5	0
85.6	0
85.7	0
85.8	0
85.9	0
86	0
86.1	0
86.2	0
86.3	0
86.4	0
86.5	0
86.6	0
86.7	0
86.8	0
86.9	0
87	0
87.1	0
87.2	0
87.3	0
87.4	0
87.5	0
87.6	0
87.7	0
87.8	0
87.9	0
88	0
88.1	0
88.2	0
88.3	0
88.4	0
88.5	0
88.6	0
88.7	0
88.8	0
88.9	0
89	0
89.1	0
89.2	0
89.3	0
89.4	0
89.5	0
89.6	0
89.7	0
89.8	0
89.9	0
90	0
90.1	0
90.2	0
90.3	0
90.4	0
90.5	0
90.6	0
90.7	0
90.8	0
90.9	0
91	0
91.1	0
91.2	0
91.3	0
91.4	0
91.5	0
91.6	0
91.7	0
91.8	0
91.9	0
92	0
92.1	0
92.2	0
92.3	0
92.4	0
92.5	0
92.6	0
92.7	0
92.8	0
92.9	0
93	0
93.1	0
93.2	0
93.3	0
93.4	0
93.5	0
93.6	0
93.7	0
93.8	0
93.9	0
94	0
94.1	0
94.2	0
94.3	0
94.4	0
94.5	0
94.6	0
94.7	0
94.8	0
94.9	0
95	0
95.1	0
95.2	0
95.3	0
95.4	0
95.5	0
95.6	0
95.7	0
95.8	0
95.9	0
96	0
96.1	0
96.2	0
96.3	0
96.4	0
96.5	0
96.6	0
96.7	0
96.8	0
96.9	0
97	0
97.1	0
97.2	0
97.3	0
97.4	0
97.5	0
97.6	0
97.7	0
97.8	0
97.9	0
98	0
98.1	0
98.2	0
98.3	0
98.4	0
98.5	0
98.6	0
98.7	0
98.8	0
98.9	0
99	0
99.1	0
99.2	0
99.3	0
99.4	0
99.5	0
99.6	0
99.7	0
99.8	0
99.9	0
100	0
100.1	0
100.2	0
100.3	0
100.4	0
100.5	0
100.6	0
100.7	0
100.8	0
100.9	0
101	0
101.1	0
101.2	0
101.3	0
101.4	0
101.5	0
101.6	0
101.7	0
101.8	0
101.9	0
102	0
102.1	0
102.2	0
102.3	0
102.4	0
102.5	0
102.6	0
102.7	0
102.8	0
102.9	0
103	0
103.1	0
103.2	0
103.3	0
103.4	0.0001
103.5	0.0001
103.6	0.0002
103.7	0.0002
103.8	0.0002
103.9	0.0003
104	0.0003
104.1	0.0003
104.2	0.0003
104.3	0.0003
104.4	0.0003
104.5	0.0003
104.6	0.0003
104.7	0.0004
104.8	0.0004
104.9	0.0004
105	0.0004
105.1	0.0004
105.2	0.0004
105.3	0.0004
105.4	0.0004
105.5	0.0005
105.6	0.0005
105.7	0.0006
105.8	0.0006
105.9	0.0006
106	0.0007
106.1	0.0008
106.2	0.0008
106.3	0.0008
106.4	0.0008
106.5	0.0008
106.6	0.0008
106.7	0.0008
106.8	0.0008
106.9	0.0009
107	0.0011
107.1	0.0011
107.2	0.0011
107.3	0.0011
107.4	0.0012
107.5	0.0012
107.6	0.0012
107.7	0.0013
107.8	0.0013
107.9	0.0014
108	0.0014
108.1	0.0014
108.2	0.0016
108.3	0.0016
108.4	0.0016
108.5	0.0016
108.6	0.0016
108.7	0.0016
108.8	0.0016
108.9	0.0016
109	0.0016
109.1	0.0016
109.2	0.0016
109.3	0.0016
109.4	0.0016
109.5	0.0016
109.6	0.0017
109.7	0.0017
109.8	0.0017
109.9	0.0018
110	0.0018
110.1	0.0018
110.2	0.0019
110.3	0.002
110.4	0.002
110.5	0.002
110.6	0.002
110.7	0.0021
110.8	0.0022
110.9	0.0022
111	0.0022
111.1	0.0022
111.2	0.0024
111.3	0.0026
111.4	0.0027
111.5	0.0028
111.6	0.0028
111.7	0.0028
111.8	0.0029
111.9	0.0029
112	0.0029
112.1	0.003
112.2	0.003
112.3	0.0032
112.4	0.0032
112.5	0.0032
112.6	0.0032
112.7	0.0033
112.8	0.0035
112.9	0.0035
113	0.0035
113.1	0.0036
113.2	0.0037
113.3	0.0038
113.4	0.0038
113.5	0.004
113.6	0.004
113.7	0.004
113.8	0.0039
113.9	0.0038
114	0.0038
114.1	0.0039
114.2	0.0039
114.3	0.004
114.4	0.0041
114.5	0.0041
114.6	0.0041
114.7	0.0042
114.8	0.0043
114.9	0.0043
115	0.0045
115.1	0.0045
115.2	0.0045
115.3	0.0045
115.4	0.0045
115.5	0.0045
115.6	0.0045
115.7	0.0046
115.8	0.0049
115.9	0.0049
116	0.005
116.1	0.0052
116.2	0.0053
116.3	0.0056
116.4	0.0057
116.5	0.0058
116.6	0.0058
116.7	0.0058
116.8	0.0058
116.9	0.0059
117	0.006
117.1	0.0061
117.2	0.0061
117.3	0.0062
117.4	0.0064
117.5	0.0065
117.6	0.0065
117.7	0.0065
117.8	0.0065
117.9	0.0065
118	0.0065
118.1	0.0065
118.2	0.0065
118.3	0.0067
118.4	0.0067
118.5	0.0067
118.6	0.0068
118.7	0.007
118.8	0.007
118.9	0.007
119	0.007
119.1	0.0071
119.2	0.0072
119.3	0.0073
119.4	0.0073
119.5	0.0074
119.6	0.0074
119.7	0.0075
119.8	0.0075
119.9	0.0075
120	0.0075
120.1	0.0075
120.2	0.0076
120.3	0.0076
120.4	0.0076
120.5	0.0076
120.6	0.0076
120.7	0.0076
120.8	0.0078
120.9	0.0078
121	0.0078
121.1	0.008
121.2	0.0082
121.3	0.0082
121.4	0.0084
121.5	0.0084
121.6	0.0084
121.7	0.0087
121.8	0.0087
121.9	0.0089
122	0.009
122.1	0.009
122.2	0.009
122.3	0.0091
122.4	0.0092
122.5	0.0092
122.6	0.0095
122.7	0.0096
122.8	0.0097
122.9	0.0098
123	0.0098
123.1	0.0096
123.2	0.0096
123.3	0.0097
123.4	0.0097
123.5	0.0098
123.6	0.0099
123.7	0.0099
123.8	0.0098
123.9	0.0098
124	0.0098
124.1	0.0098
124.2	0.0097
124.3	0.0098
124.4	0.0098
124.5	0.0098
124.6	0.0098
124.7	0.0099
124.8	0.01
124.9	0.01
125	0.01
125.1	0.01
125.2	0.0101
125.3	0.0101
125.4	0.0103
125.5	0.0103
125.6	0.0103
125.7	0.0104
125.8	0.0104
125.9	0.0104
126	0.0105
126.1	0.0105
126.2	0.0107
126.3	0.0108
126.4	0.0108
126.5	0.0109
126.6	0.011
126.7	0.011
126.8	0.011
126.9	0.0112
127	0.0113
127.1	0.0113
127.2	0.0113
127.3	0.0113
127.4	0.0113
127.5	0.0114
127.6	0.0115
127.7	0.0115
127.8	0.0115
127.9	0.0115
128	0.0115
128.1	0.0117
128.2	0.0117
128.3	0.0117
128.4	0.0117
128.5	0.0118
128.6	0.012
128.7	0.012
128.8	0.012
128.9	0.012
129	0.012
129.1	0.012
129.2	0.012
129.3	0.0121
129.4	0.012
129.5	0.0121
129.6	0.0121
129.7	0.0121
129.8	0.0122
129.9	0.0121
130	0.0121
130.1	0.0121
130.2	0.0123
130.3	0.0123
130.4	0.0123
130.5	0.0124
130.6	0.0124
130.7	0.0126
130.8	0.0126
130.9	0.0127
131	0.0128
131.1	0.0129
131.2	0.0129
131.3	0.013
131.4	0.0129
131.5	0.0132
131.6	0.0131
131.7	0.0131
131.8	0.0131
131.9	0.013
132	0.013
132.1	0.0131
132.2	0.0131
132.3	0.0132
132.4	0.0132
132.5	0.0132
132.6	0.0133
132.7	0.0133
132.8	0.0134
132.9	0.0134
133	0.0135
133.1	0.0136
133.2	0.0136
133.3	0.0137
133.4	0.014
133.5	0.0141
133.6	0.0142
133.7	0.0144
133.8	0.0144
133.9	0.0144
134	0.0144
134.1	0.0145
134.2	0.0145
134.3	0.0144
134.4	0.0144
134.5	0.0144
134.6	0.0145
134.7	0.0145
134.8	0.0147
134.9	0.0147
135	0.0148
135.1	0.0148
135.2	0.0148
135.3	0.015
135.4	0.0152
135.5	0.0153
135.6	0.0152
135.7	0.0153
135.8	0.0152
135.9	0.0153
136	0.0155
136.1	0.0155
136.2	0.0155
136.3	0.0155
136.4	0.0155
136.5	0.0155
136.6	0.0155
136.7	0.0155
136.8	0.0155
136.9	0.0155
137	0.0155
137.1	0.0155
137.2	0.0155
137.3	0.0158
137.4	0.0159
137.5	0.0161
137.6	0.0162
137.7	0.0161
137.8	0.0161
137.9	0.0161
138	0.0161
138.1	0.016
138.2	0.016
138.3	0.0161
138.4	0.0161
138.5	0.0161
138.6	0.0165
138.7	0.0166
138.8	0.0166
138.9	0.0167
139	0.0169
139.1	0.017
139.2	0.0171
139.3	0.0173
139.4	0.0174
139.5	0.0174
139.6	0.0174
139.7	0.0175
139.8	0.0176
139.9	0.0176
140	0.0176
140.1	0.0176
140.2	0.0178
140.3	0.0179
140.4	0.0179
140.5	0.0179
140.6	0.018
140.7	0.0181
140.8	0.0182
140.9	0.0182
141	0.0182
141.1	0.0185
141.2	0.0185
141.3	0.0185
141.4	0.0185
141.5	0.0184
141.6	0.0184
141.7	0.0185
141.8	0.0186
141.9	0.0186
142	0.0186
142.1	0.0186
142.2	0.0187
142.3	0.0188
142.4	0.0188
142.5	0.0189
142.6	0.019
142.7	0.019
142.8	0.019
142.9	0.0188
143	0.0188
143.1	0.0188
143.2	0.0188
143.3	0.0189
143.4	0.0189
143.5	0.0189
143.6	0.0189
143.7	0.0189
143.8	0.0189
143.9	0.0191
144	0.0192
144.1	0.0193
144.2	0.0194
144.3	0.0193
144.4	0.0196
144.5	0.0196
144.6	0.0197
144.7	0.0199
144.8	0.0198
144.9	0.02
145	0.0201
145.1	0.0201
145.2	0.0201
145.3	0.0201
145.4	0.0201
145.5	0.0201
145.6	0.0201
145.7	0.0202
145.8	0.0203
145.9	0.0205
146	0.0205
146.1	0.0205
146.2	0.0205
146.3	0.0205
146.4	0.0203
146.5	0.0203
146.6	0.0206
146.7	0.0207
146.8	0.0207
146.9	0.0207
147	0.0208
147.1	0.0209
147.2	0.0211
147.3	0.0211
147.4	0.0212
147.5	0.0213
147.6	0.0211
147.7	0.0211
147.8	0.0211
147.9	0.0212
148	0.0213
148.1	0.0214
148.2	0.0214
148.3	0.0214
148.4	0.0216
148.5	0.0216
148.6	0.0216
148.7	0.0216
148.8	0.0216
148.9	0.0216
149	0.0217
149.1	0.0215
149.2	0.0217
149.3	0.0217
149.4	0.0218
149.5	0.0218
149.6	0.0219
149.7	0.0219
149.8	0.0221
149.9	0.0221
150	0.0222
150.1	0.0221
150.2	0.0221
150.3	0.0222
150.4	0.0221
150.5	0.0222
150.6	0.0222
150.7	0.0223
150.8	0.0224
150.9	0.0223
151	0.0223
151.1	0.0225
151.2	0.0227
151.3	0.0227
151.4	0.0225
151.5	0.0225
151.6	0.0226
151.7	0.0226
151.8	0.0227
151.9	0.0229
152	0.0228
152.1	0.0228
152.2	0.0228
152.3	0.0228
152.4	0.0228
152.5	0.0227
152.6	0.0228
152.7	0.0228
152.8	0.0228
152.9	0.0232
153	0.0233
153.1	0.0235
153.2	0.0234
153.3	0.0234
153.4	0.0234
153.5	0.0235
153.6	0.0238
153.7	0.0238
153.8	0.0238
153.9	0.0239
154	0.0239
154.1	0.0238
154.2	0.0237
154.3	0.0237
154.4	0.0237
154.5	0.0235
154.6	0.0235
154.7	0.0235
154.8	0.0235
154.9	0.0235
155	0.0234
155.1	0.0235
155.2	0.0235
155.3	0.0235
155.4	0.0235
155.5	0.0235
155.6	0.0235
155.7	0.0236
155.8	0.0235
155.9	0.0237
156	0.0238
156.1	0.024
156.2	0.0242
156.3	0.0242
156.4	0.0242
156.5	0.0242
156.6	0.0242
156.7	0.0242
156.8	0.0243
156.9	0.0242
157	0.0243
157.1	0.0243
157.2	0.0244
157.3	0.0246
157.4	0.0246
157.5	0.0246
157.6	0.0245
157.7	0.0245
157.8	0.0246
157.9	0.0246
158	0.0247
158.1	0.0247
158.2	0.0247
158.3	0.0247
158.4	0.0248
158.5	0.0248
158.6	0.0247
158.7	0.0248
158.8	0.0249
158.9	0.0251
159	0.0252
159.1	0.0253
159.2	0.0256
159.3	0.0258
159.4	0.026
159.5	0.0262
159.6	0.0262
159.7	0.0263
159.8	0.0263
159.9	0.0264
160	0.0264
160.1	0.0265
160.2	0.0266
160.3	0.0267
160.4	0.0267
160.5	0.0267
160.6	0.0265
160.7	0.0265
160.8	0.0266
160.9	0.0267
161	0.0266
161.1	0.0266
161.2	0.0266
161.3	0.0266
161.4	0.0267
161.5	0.0267
161.6	0.0267
161.7	0.0268
161.8	0.0268
161.9	0.0268
162	0.0269
162.1	0.027
162.2	0.027
162.3	0.027
162.4	0.027
162.5	0.027
162.6	0.027
162.7	0.0271
162.8	0.0272
162.9	0.0274
163	0.0275
163.1	0.0277
163.2	0.0277
163.3	0.0278
163.4	0.0279
163.5	0.0279
163.6	0.0279
163.7	0.0279
163.8	0.028
163.9	0.0279
164	0.0281
164.1	0.0283
164.2	0.0285
164.3	0.0287
164.4	0.0288
164.5	0.029
164.6	0.029
164.7	0.029
164.8	0.029
164.9	0.0291
165	0.029
165.1	0.0292
165.2	0.0293
165.3	0.0293
165.4	0.0293
165.5	0.0293
165.6	0.0295
165.7	0.0295
165.8	0.0295
165.9	0.0295
166	0.0295
166.1	0.0298
166.2	0.0298
166.3	0.0298
166.4	0.0298
166.5	0.0298
166.6	0.0299
166.7	0.0299
166.8	0.0299
166.9	0.03
167	0.0302
167.1	0.0304
167.2	0.0306
167.3	0.0306
167.4	0.0307
167.5	0.0307
167.6	0.0308
167.7	0.0307
167.8	0.0309
167.9	0.0311
168	0.0314
168.1	0.0315
168.2	0.0314
168.3	0.0314
168.4	0.0313
168.5	0.0314
168.6	0.0314
168.7	0.0315
168.8	0.0314
168.9	0.0314
169	0.0315
169.1	0.0317
169.2	0.0317
169.3	0.0318
169.4	0.0318
169.5	0.0318
169.6	0.0318
169.7	0.0318
169.8	0.0317
169.9	0.0317
170	0.0318
170.1	0.0318
170.2	0.0319
170.3	0.0319
170.4	0.0319
170.5	0.0324
170.6	0.0325
170.7	0.0326
170.8	0.0326
170.9	0.0327
171	0.0327
171.1	0.0328
171.2	0.0328
171.3	0.0328
171.4	0.033
171.5	0.033
171.6	0.0332
171.7	0.0333
171.8	0.0333
171.9	0.0333
172	0.0333
172.1	0.0333
172.2	0.0335
172.3	0.0336
172.4	0.0337
172.5	0.0336
172.6	0.0338
172.7	0.0337
172.8	0.0338
172.9	0.0339
173	0.0339
173.1	0.0339
173.2	0.0338
173.3	0.0338
173.4	0.0338
173.5	0.0337
173.6	0.0338
173.7	0.0339
173.8	0.0339
173.9	0.0339
174	0.034
174.1	0.034
174.2	0.0341
174.3	0.0341
174.4	0.0342
174.5	0.0341
174.6	0.0341
174.7	0.0341
174.8	0.0342
174.9	0.0342
175	0.0343
175.1	0.0343
175.2	0.0344
175.3	0.0345
175.4	0.0346
175.5	0.0347
175.6	0.0348
175.7	0.0349
175.8	0.0348
175.9	0.0349
176	0.035
176.1	0.035
176.2	0.0349
176.3	0.0351
176.4	0.0352
176.5	0.0352
176.6	0.0352
176.7	0.0354
176.8	0.0355
176.9	0.0355
177	0.0355
177.1	0.0355
177.2	0.0355
177.3	0.0354
177.4	0.0355
177.5	0.0355
177.6	0.0355
177.7	0.0355
177.8	0.0354
177.9	0.0355
178	0.0355
178.1	0.0355
178.2	0.0356
178.3	0.0357
178.4	0.0357
178.5	0.0355
178.6	0.0355
178.7	0.0355
178.8	0.0353
178.9	0.0353
179	0.0353
179.1	0.0354
179.2	0.0354
179.3	0.0354
179.4	0.0355
179.5	0.0356
179.6	0.0356
179.7	0.0357
179.8	0.0357
179.9	0.0357
180	0.0358
180.1	0.0358
180.2	0.0359
180.3	0.0359
180.4	0.0359
180.5	0.0359
180.6	0.036
180.7	0.0362
180.8	0.0362
180.9	0.0363
181	0.0365
181.1	0.0364
181.2	0.0363
181.3	0.0363
181.4	0.0365
181.5	0.0366
181.6	0.0367
181.7	0.0368
181.8	0.0368
181.9	0.0367
182	0.0368
182.1	0.037
182.2	0.0371
182.3	0.0371
182.4	0.0372
182.5	0.0375
182.6	0.0377
182.7	0.0376
182.8	0.0376
182.9	0.0376
183	0.0376
183.1	0.0375
183.2	0.0377
183.3	0.0377
183.4	0.0377
183.5	0.0377
183.6	0.0377
183.7	0.0379
183.8	0.0379
183.9	0.0379
184	0.0378
184.1	0.0378
184.2	0.0378
184.3	0.038
184.4	0.038
184.5	0.0381
184.6	0.0381
184.7	0.0381
184.8	0.0381
184.9	0.0382
185	0.0382
185.1	0.0382
185.2	0.0382
185.3	0.0382
185.4	0.0381
185.5	0.038
185.6	0.038
185.7	0.0384
185.8	0.0383
185.9	0.0386
186	0.0385
186.1	0.0385
186.2	0.0384
186.3	0.0384
186.4	0.0383
186.5	0.0383
186.6	0.0382
186.7	0.0383
186.8	0.0385
186.9	0.0384
187	0.0384
187.1	0.0384
187.2	0.0383
187.3	0.0385
187.4	0.0384
187.5	0.0386
187.6	0.0388
187.7	0.0388
187.8	0.0386
187.9	0.0388
188	0.0389
188.1	0.0389
188.2	0.0389
188.3	0.0388
188.4	0.0388
188.5	0.0386
188.6	0.0386
188.7	0.0388
188.8	0.0388
188.9	0.0385
189	0.0386
189.1	0.0386
189.2	0.0386
189.3	0.0387
189.4	0.0387
189.5	0.0388
189.6	0.0387
189.7	0.0388
189.8	0.0388
189.9	0.039
190	0.0392
190.1	0.0391
190.2	0.0391
190.3	0.039
190.4	0.0391
190.5	0.0392
190.6	0.0392
190.7	0.0393
190.8	0.0393
190.9	0.0395
191	0.0395
191.1	0.0398
191.2	0.04
191.3	0.0402
191.4	0.0401
191.5	0.0401
191.6	0.0401
191.7	0.0401
191.8	0.0401
191.9	0.0401
192	0.0402
192.1	0.0403
192.2	0.0402
192.3	0.0403
192.4	0.0404
192.5	0.0404
192.6	0.0404
192.7	0.0404
192.8	0.0405
192.9	0.0406
193	0.0407
193.1	0.0407
193.2	0.0408
193.3	0.0408
193.4	0.0407
193.5	0.0407
193.6	0.0407
193.7	0.0407
193.8	0.0408
193.9	0.0407
194	0.0408
194.1	0.0408
194.2	0.0407
194.3	0.0409
194.4	0.0409
194.5	0.0411
194.6	0.0411
194.7	0.0412
194.8	0.0413
194.9	0.0413
195	0.0415
195.1	0.0416
195.2	0.0417
195.3	0.0417
195.4	0.0418
195.5	0.0418
195.6	0.0418
195.7	0.0418
195.8	0.0417
195.9	0.0416
196	0.0416
196.1	0.0416
196.2	0.0416
196.3	0.0417
196.4	0.0419
196.5	0.0419
196.6	0.0419
196.7	0.0419
196.8	0.0418
196.9	0.0419
197	0.0418
197.1	0.0417
197.2	0.0417
197.3	0.0417
197.4	0.0418
197.5	0.0418
197.6	0.0417
197.7	0.0417
197.8	0.0418
197.9	0.0418
198	0.0418
198.1	0.0417
198.2	0.0419
198.3	0.0421
198.4	0.0421
198.5	0.0421
198.6	0.0421
198.7	0.0422
198.8	0.0423
198.9	0.0425
199	0.0428
199.1	0.0428
199.2	0.0429
199.3	0.0427
199.4	0.0427
199.5	0.0427
199.6	0.0428
199.7	0.0429
199.8	0.0432
199.9	0.0433
200	0.0433
[truncated: 14,000 more rows]
