# Supplementary material for: Bayesian inference of kinetic schemes for ion channels by Kalman filtering
Source: eLife journal article supplement (doi:10.7554/elife.62714), 2022-05-04
Supplement: fig4-data10 [file 1_Sim_N_20000_Fluor_MW_0.0625M.xlsx]

## Sheet: Tabelle1
0.1	0
0.2	0
0.3	0
0.4	0
0.5	0
0.6	0
0.7	0
0.8	0
0.9	0
1	0
1.1	0
1.2	0
1.3	0
1.4	0
1.5	0
1.6	0
1.7	0
1.8	0
1.9	0
2	0
2.1	0
2.2	0
2.3	0
2.4	0
2.5	0
2.6	0
2.7	0
2.8	0
2.9	0
3	0
3.1	0
3.2	0
3.3	0
3.4	0
3.5	0
3.6	0
3.7	0
3.8	0
3.9	0
4	0
4.1	0
4.2	0
4.3	0
4.4	0
4.5	0
4.6	0
4.7	0
4.8	0
4.9	0
5	0
5.1	0
5.2	0
5.3	0
5.4	0
5.5	0
5.6	0
5.7	0
5.8	0
5.9	0
6	0
6.1	0
6.2	0
6.3	0
6.4	0
6.5	0
6.6	0
6.7	0
6.8	0
6.9	0
7	0
7.1	0
7.2	0
7.3	0
7.4	0
7.5	0
7.6	0
7.7	0
7.8	0
7.9	0
8	0
8.1	0
8.2	0
8.3	0
8.4	0
8.5	0
8.6	0
8.7	0
8.8	0
8.9	0
9	0
9.1	0
9.2	0
9.3	0
9.4	0
9.5	0
9.6	0
9.7	0
9.8	0
9.9	0
10	0
10.1	0
10.2	0
10.3	0
10.4	0
10.5	0
10.6	0
10.7	0
10.8	0
10.9	0
11	0
11.1	0
11.2	0
11.3	0
11.4	0
11.5	0
11.6	0
11.7	0
11.8	0
11.9	0
12	0
12.1	0
12.2	0
12.3	0
12.4	0
12.5	0
12.6	0
12.7	0
12.8	0
12.9	0
13	0
13.1	0
13.2	0
13.3	0
13.4	0
13.5	0
13.6	0
13.7	0
13.8	0
13.9	0
14	0
14.1	0
14.2	0
14.3	0
14.4	0
14.5	0
14.6	0
14.7	0
14.8	0
14.9	0
15	0
15.1	0
15.2	0
15.3	0
15.4	0
15.5	0
15.6	0
15.7	0
15.8	0
15.9	0
16	0
16.1	0
16.2	0
16.3	0
16.4	0
16.5	0
16.6	0
16.7	0
16.8	0
16.9	0
17	0
17.1	0
17.2	0
17.3	0
17.4	0
17.5	0
17.6	0
17.7	0
17.8	0
17.9	0
18	0
18.1	0
18.2	0
18.3	0
18.4	0
18.5	0
18.6	0
18.7	0
18.8	0
18.9	0
19	0
19.1	0
19.2	0
19.3	0
19.4	0
19.5	0
19.6	0
19.7	0
19.8	0
19.9	0
20	0
20.1	0
20.2	0
20.3	0
20.4	0
20.5	0
20.6	0
20.7	0
20.8	0
20.9	0
21	0
21.1	0
21.2	0
21.3	0
21.4	0
21.5	0
21.6	0
21.7	0
21.8	0
21.9	0
22	0
22.1	0
22.2	0
22.3	0
22.4	0
22.5	0
22.6	0
22.7	0
22.8	0
22.9	0
23	0
23.1	0
23.2	0
23.3	0
23.4	0
23.5	0
23.6	0
23.7	0
23.8	0
23.9	0
24	0
24.1	0
24.2	0
24.3	0
24.4	0
24.5	0
24.6	0
24.7	0
24.8	0
24.9	0
25	0
25.1	0
25.2	0
25.3	0
25.4	0
25.5	0
25.6	0
25.7	0
25.8	0
25.9	0
26	0
26.1	0
26.2	0
26.3	0
26.4	0
26.5	0
26.6	0
26.7	0
26.8	0
26.9	0
27	0
27.1	0
27.2	0
27.3	0
27.4	0
27.5	0
27.6	0
27.7	0
27.8	0
27.9	0
28	0
28.1	0
28.2	0
28.3	0
28.4	0
28.5	0
28.6	0
28.7	0
28.8	0
28.9	0
29	0
29.1	0
29.2	0
29.3	0
29.4	0
29.5	0
29.6	0
29.7	0
29.8	0
29.9	0
30	0
30.1	0
30.2	0
30.3	0
30.4	0
30.5	0
30.6	0
30.7	0
30.8	0
30.9	0
31	0
31.1	0
31.2	0
31.3	0
31.4	0
31.5	0
31.6	0
31.7	0
31.8	0
31.9	0
32	0
32.1	0
32.2	0
32.3	0
32.4	0
32.5	0
32.6	0
32.7	0
32.8	0
32.9	0
33	0
33.1	0
33.2	0
33.3	0
33.4	0
33.5	0
33.6	0
33.7	0
33.8	0
33.9	0
34	0
34.1	0
34.2	0
34.3	0
34.4	0
34.5	0
34.6	0
34.7	0
34.8	0
34.9	0
35	0
35.1	0
35.2	0
35.3	0
35.4	0
35.5	0
35.6	0
35.7	0
35.8	0
35.9	0
36	0
36.1	0
36.2	0
36.3	0
36.4	0
36.5	0
36.6	0
36.7	0
36.8	0
36.9	0
37	0
37.1	0
37.2	0
37.3	0
37.4	0
37.5	0
37.6	0
37.7	0
37.8	0
37.9	0
38	0
38.1	0
38.2	0
38.3	0
38.4	0
38.5	0
38.6	0
38.7	0
38.8	0
38.9	0
39	0
39.1	0
39.2	0
39.3	0
39.4	0
39.5	0
39.6	0
39.7	0
39.8	0
39.9	0
40	0
40.1	0
40.2	0
40.3	0
40.4	0
40.5	0
40.6	0
40.7	0
40.8	0
40.9	0
41	0
41.1	0
41.2	0
41.3	0
41.4	0
41.5	0
41.6	0
41.7	0
41.8	0
41.9	0
42	0
42.1	0
42.2	0
42.3	0
42.4	0
42.5	0
42.6	0
42.7	0
42.8	0
42.9	0
43	0
43.1	0
43.2	0
43.3	0
43.4	0
43.5	0
43.6	0
43.7	0
43.8	0
43.9	0
44	0
44.1	0
44.2	0
44.3	0
44.4	0
44.5	0
44.6	0
44.7	0
44.8	0
44.9	0
45	0
45.1	0
45.2	0
45.3	0
45.4	0
45.5	0
45.6	0
45.7	0
45.8	0
45.9	0
46	0
46.1	0
46.2	0
46.3	0
46.4	0
46.5	0
46.6	0
46.7	0
46.8	0
46.9	0
47	0
47.1	0
47.2	0
47.3	0
47.4	0
47.5	0
47.6	0
47.7	0
47.8	0
47.9	0
48	0
48.1	0
48.2	0
48.3	0
48.4	0
48.5	0
48.6	0
48.7	0
48.8	0
48.9	0
49	0
49.1	0
49.2	0
49.3	0
49.4	0
49.5	0
49.6	0
49.7	0
49.8	0
49.9	0
50	0
50.1	0
50.2	0
50.3	0
50.4	0
50.5	0
50.6	0
50.7	0
50.8	0
50.9	0
51	0
51.1	0
51.2	0
51.3	0
51.4	0
51.5	0
51.6	0
51.7	0
51.8	0
51.9	0
52	0
52.1	0
52.2	0
52.3	0
52.4	0
52.5	0
52.6	0
52.7	0
52.8	0
52.9	0
53	0
53.1	0
53.2	0
53.3	0
53.4	0
53.5	0
53.6	0
53.7	0
53.8	0
53.9	0
54	0
54.1	0
54.2	0
54.3	0
54.4	0
54.5	0
54.6	0
54.7	0
54.8	0
54.9	0
55	0
55.1	0
55.2	0
55.3	0
55.4	0
55.5	0
55.6	0
55.7	0
55.8	0
55.9	0
56	0
56.1	0
56.2	0
56.3	0
56.4	0
56.5	0
56.6	0
56.7	0
56.8	0
56.9	0
57	0
57.1	0
57.2	0
57.3	0
57.4	0
57.5	0
57.6	0
57.7	0
57.8	0
57.9	0
58	0
58.1	0
58.2	0
58.3	0
58.4	0
58.5	0
58.6	0
58.7	0
58.8	0
58.9	0
59	0
59.1	0
59.2	0
59.3	0
59.4	0
59.5	0
59.6	0
59.7	0
59.8	0
59.9	0
60	0
60.1	0
60.2	0
60.3	0
60.4	0
60.5	0
60.6	0
60.7	0
60.8	0
60.9	0
61	0
61.1	0
61.2	0
61.3	0
61.4	0
61.5	0
61.6	0
61.7	0
61.8	0
61.9	0
62	0
62.1	0
62.2	0
62.3	0
62.4	0
62.5	0
62.6	0
62.7	0
62.8	0
62.9	0
63	0
63.1	0
63.2	0
63.3	0
63.4	0
63.5	0
63.6	0
63.7	0
63.8	0
63.9	0
64	0
64.1	0
64.2	0
64.3	0
64.4	0
64.5	0
64.6	0
64.7	0
64.8	0
64.9	0
65	0
65.1	0
65.2	0
65.3	0
65.4	0
65.5	0
65.6	0
65.7	0
65.8	0
65.9	0
66	0
66.1	0
66.2	0
66.3	0
66.4	0
66.5	0
66.6	0
66.7	0
66.8	0
66.9	0
67	0
67.1	0
67.2	0
67.3	0
67.4	0
67.5	0
67.6	0
67.7	0
67.8	0
67.9	0
68	0
68.1	0
68.2	0
68.3	0
68.4	0
68.5	0
68.6	0
68.7	0
68.8	0
68.9	0
69	0
69.1	0
69.2	0
69.3	0
69.4	0
69.5	0
69.6	0
69.7	0
69.8	0
69.9	0
70	0
70.1	0
70.2	0
70.3	0
70.4	0
70.5	0
70.6	0
70.7	0
70.8	0
70.9	0
71	0
71.1	0
71.2	0
71.3	0
71.4	0
71.5	0
71.6	0
71.7	0
71.8	0
71.9	0
72	0
72.1	0
72.2	0
72.3	0
72.4	0
72.5	0
72.6	0
72.7	0
72.8	0
72.9	0
73	0
73.1	0
73.2	0
73.3	0
73.4	0
73.5	0
73.6	0
73.7	0
73.8	0
73.9	0
74	0
74.1	0
74.2	0
74.3	0
74.4	0
74.5	0
74.6	0
74.7	0
74.8	0
74.9	0
75	0
75.1	0
75.2	0
75.3	0
75.4	0
75.5	0
75.6	0
75.7	0
75.8	0
75.9	0
76	0
76.1	0
76.2	0
76.3	0
76.4	0
76.5	0
76.6	0
76.7	0
76.8	0
76.9	0
77	0
77.1	0
77.2	0
77.3	0
77.4	0
77.5	0
77.6	0
77.7	0
77.8	0
77.9	0
78	0
78.1	0
78.2	0
78.3	0
78.4	0
78.5	0
78.6	0
78.7	0
78.8	0
78.9	0
79	0
79.1	0
79.2	0
79.3	0
79.4	0
79.5	0
79.6	0
79.7	0
79.8	0
79.9	0
80	0
80.1	0
80.2	0
80.3	0
80.4	0
80.5	0
80.6	0
80.7	0
80.8	0
80.9	0
81	0
81.1	0
81.2	0
81.3	0
81.4	0
81.5	0
81.6	0
81.7	0
81.8	0
81.9	0
82	0
82.1	0
82.2	0
82.3	0
82.4	0
82.5	0
82.6	0
82.7	0
82.8	0
82.9	0
83	0
83.1	0
83.2	0
83.3	0
83.4	0
83.5	0
83.6	0
83.7	0
83.8	0
83.9	0
84	0
84.1	0
84.2	0
84.3	0
84.4	0
84.5	0
84.6	0
84.7	0
84.8	0
84.9	0
85	0
85.1	0
85.2	0
85.3	0
85.4	0
85.5	0
85.6	0
85.7	0
85.8	0
85.9	0
86	0
86.1	0
86.2	0
86.3	0
86.4	0
86.5	0
86.6	0
86.7	0
86.8	0
86.9	0
87	0
87.1	0
87.2	0
87.3	0
87.4	0
87.5	0
87.6	0
87.7	0
87.8	0
87.9	0
88	0
88.1	0
88.2	0
88.3	0
88.4	0
88.5	0
88.6	0
88.7	0
88.8	0
88.9	0
89	0
89.1	0
89.2	0
89.3	0
89.4	0
89.5	0
89.6	0
89.7	0
89.8	0
89.9	0
90	0
90.1	0
90.2	0
90.3	0
90.4	0
90.5	0
90.6	0
90.7	0
90.8	0
90.9	0
91	0
91.1	0
91.2	0
91.3	0
91.4	0
91.5	0
91.6	0
91.7	0
91.8	0
91.9	0
92	0
92.1	0
92.2	0
92.3	0
92.4	0
92.5	0
92.6	0
92.7	0
92.8	0
92.9	0
93	0
93.1	0
93.2	0
93.3	0
93.4	0
93.5	0
93.6	0
93.7	0
93.8	0
93.9	0
94	0
94.1	0
94.2	0
94.3	0
94.4	0
94.5	0
94.6	0
94.7	0
94.8	0
94.9	0
95	0
95.1	0
95.2	0
95.3	0
95.4	0
95.5	0
95.6	0
95.7	0
95.8	0
95.9	0
96	0
96.1	0
96.2	0
96.3	0
96.4	0
96.5	0
96.6	0
96.7	0
96.8	0
96.9	0
97	0
97.1	0
97.2	0
97.3	0
97.4	0
97.5	0
97.6	0
97.7	0
97.8	0
97.9	0
98	0
98.1	0
98.2	0
98.3	0
98.4	0
98.5	0
98.6	0
98.7	0
98.8	0
98.9	0
99	0
99.1	0
99.2	0
99.3	0
99.4	0
99.5	0
99.6	0
99.7	0
99.8	0
99.9	0
100	0
100.1	0.00355
100.2	0.00725
100.3	0.01115
100.4	0.014925
100.5	0.017825
100.6	0.020875
100.7	0.0248
100.8	0.02825
100.9	0.031525
101	0.03465
101.1	0.03825
101.2	0.04095
101.3	0.044625
101.4	0.0484
101.5	0.0512
101.6	0.05465
101.7	0.05775
101.8	0.060475
101.9	0.06295
102	0.065675
102.1	0.0683
102.2	0.070775
102.3	0.0739
102.4	0.0766
102.5	0.0794
102.6	0.081775
102.7	0.08435
102.8	0.086375
102.9	0.088525
103	0.090425
103.1	0.093025
103.2	0.0949
103.3	0.097925
103.4	0.09975
103.5	0.1019
103.6	0.103525
103.7	0.105
103.8	0.1067
103.9	0.1086
104	0.10985
104.1	0.111875
104.2	0.113875
104.3	0.115875
104.4	0.118075
104.5	0.1203
104.6	0.12205
104.7	0.124175
104.8	0.1259
104.9	0.12735
105	0.129325
105.1	0.13095
105.2	0.132725
105.3	0.1346
105.4	0.135275
105.5	0.136875
105.6	0.1384
105.7	0.14015
105.8	0.1419
105.9	0.143075
106	0.1449
106.1	0.146075
106.2	0.147325
106.3	0.14865
106.4	0.1492
106.5	0.151
106.6	0.15255
106.7	0.154125
106.8	0.15565
106.9	0.157
107	0.157975
107.1	0.15945
107.2	0.160575
107.3	0.161575
107.4	0.163075
107.5	0.1641
107.6	0.1651
107.7	0.1662
107.8	0.16715
107.9	0.168175
108	0.169
108.1	0.169625
108.2	0.17115
108.3	0.17205
108.4	0.1733
108.5	0.1744
108.6	0.174825
108.7	0.1756
108.8	0.1758
108.9	0.176675
109	0.1777
109.1	0.178825
109.2	0.179425
109.3	0.1801
109.4	0.180325
109.5	0.180725
109.6	0.181875
109.7	0.182625
109.8	0.18315
109.9	0.184525
110	0.184725
110.1	0.185775
110.2	0.18625
110.3	0.18665
110.4	0.187
110.5	0.1874
110.6	0.188125
110.7	0.18845
110.8	0.189525
110.9	0.189875
111	0.19095
111.1	0.191475
111.2	0.19255
111.3	0.1944
111.4	0.194925
111.5	0.19545
111.6	0.19605
111.7	0.1969
111.8	0.197725
111.9	0.197925
112	0.198675
112.1	0.1989
112.2	0.199275
112.3	0.1999
112.4	0.20105
112.5	0.2013
112.6	0.20185
112.7	0.20215
112.8	0.20305
112.9	0.2037
113	0.20395
113.1	0.20405
113.2	0.204425
113.3	0.20485
113.4	0.20475
113.5	0.20415
113.6	0.204775
113.7	0.20535
113.8	0.2058
113.9	0.206425
114	0.207025
114.1	0.207675
114.2	0.20825
114.3	0.2084
114.4	0.20915
114.5	0.209525
114.6	0.210525
114.7	0.211425
114.8	0.211525
114.9	0.2115
115	0.2114
115.1	0.2117
115.2	0.2119
115.3	0.2125
115.4	0.212525
115.5	0.213175
115.6	0.213475
115.7	0.214275
115.8	0.2147
115.9	0.2154
116	0.214675
116.1	0.2148
116.2	0.21455
116.3	0.214475
116.4	0.21435
116.5	0.2149
116.6	0.2159
116.7	0.21605
116.8	0.2161
116.9	0.2157
117	0.2161
117.1	0.2162
117.2	0.21645
117.3	0.21645
117.4	0.21715
117.5	0.216975
117.6	0.21745
117.7	0.217475
117.8	0.217975
117.9	0.218375
118	0.218325
118.1	0.217675
118.2	0.2184
118.3	0.2185
118.4	0.218575
118.5	0.2192
118.6	0.219375
118.7	0.218775
118.8	0.218975
118.9	0.219375
119	0.219875
119.1	0.22045
119.2	0.22015
119.3	0.22025
119.4	0.220425
119.5	0.22065
119.6	0.2212
119.7	0.2214
119.8	0.221475
119.9	0.22175
120	0.221975
120.1	0.221375
120.2	0.221725
120.3	0.222
120.4	0.222375
120.5	0.222475
120.6	0.223225
120.7	0.2236
120.8	0.223975
120.9	0.2237
121	0.223175
121.1	0.22295
121.2	0.223275
121.3	0.22295
121.4	0.222825
121.5	0.22275
121.6	0.223325
121.7	0.223425
121.8	0.223075
121.9	0.22305
122	0.222825
122.1	0.2228
122.2	0.22275
122.3	0.222775
122.4	0.222925
122.5	0.223325
122.6	0.22355
122.7	0.2238
122.8	0.22335
122.9	0.22345
123	0.223875
123.1	0.224125
123.2	0.2242
123.3	0.224475
123.4	0.224475
123.5	0.22475
123.6	0.224575
123.7	0.22495
123.8	0.225775
123.9	0.226375
124	0.226975
124.1	0.227075
124.2	0.226725
124.3	0.227125
124.4	0.227025
124.5	0.226675
124.6	0.226425
124.7	0.22675
124.8	0.2273
124.9	0.227325
125	0.2277
125.1	0.228125
125.2	0.22845
125.3	0.2284
125.4	0.228425
125.5	0.22865
125.6	0.22865
125.7	0.229125
125.8	0.22865
125.9	0.228575
126	0.2285
126.1	0.22885
126.2	0.22895
126.3	0.229575
126.4	0.229775
126.5	0.2299
126.6	0.22995
126.7	0.22915
126.8	0.22895
126.9	0.228975
127	0.229425
127.1	0.229075
127.2	0.2293
127.3	0.22985
127.4	0.2295
127.5	0.2295
127.6	0.2299
127.7	0.23025
127.8	0.230125
127.9	0.23
128	0.230525
128.1	0.230725
128.2	0.231075
128.3	0.23095
128.4	0.230725
128.5	0.230125
128.6	0.230275
128.7	0.2297
128.8	0.229925
128.9	0.230175
129	0.2309
129.1	0.231025
129.2	0.231775
129.3	0.231975
129.4	0.23225
129.5	0.23195
129.6	0.232275
129.7	0.23255
129.8	0.23245
129.9	0.232875
130	0.232375
130.1	0.232525
130.2	0.2318
130.3	0.232775
130.4	0.23275
130.5	0.232725
130.6	0.2327
130.7	0.233025
130.8	0.232325
130.9	0.23185
131	0.2316
131.1	0.231575
131.2	0.23145
131.3	0.23155
131.4	0.23125
131.5	0.231775
131.6	0.23185
131.7	0.231925
131.8	0.23195
131.9	0.232275
132	0.232575
132.1	0.232625
132.2	0.232875
132.3	0.23265
132.4	0.2329
132.5	0.2324
132.6	0.2327
132.7	0.2328
132.8	0.233075
132.9	0.233625
133	0.2334
133.1	0.233325
133.2	0.233025
133.3	0.233125
133.4	0.233275
133.5	0.23365
133.6	0.2339
133.7	0.234
133.8	0.23375
133.9	0.234075
134	0.234075
134.1	0.23415
134.2	0.234475
134.3	0.23405
134.4	0.234475
134.5	0.234475
134.6	0.2345
134.7	0.234475
134.8	0.23425
134.9	0.234325
135	0.234375
135.1	0.23445
135.2	0.234225
135.3	0.233925
135.4	0.233575
135.5	0.2331
135.6	0.233075
135.7	0.2333
135.8	0.2333
135.9	0.23335
136	0.234025
136.1	0.234
136.2	0.233775
136.3	0.234
136.4	0.233875
136.5	0.233725
136.6	0.234075
136.7	0.2338
136.8	0.234475
136.9	0.23505
137	0.2347
137.1	0.234625
137.2	0.234825
137.3	0.23485
137.4	0.235075
137.5	0.23585
137.6	0.23515
137.7	0.2349
137.8	0.234975
137.9	0.23525
138	0.235475
138.1	0.23585
138.2	0.2359
138.3	0.236225
138.4	0.236575
138.5	0.2361
138.6	0.235875
138.7	0.2362
138.8	0.236175
138.9	0.2361
139	0.23615
139.1	0.236475
139.2	0.236375
139.3	0.236475
139.4	0.236225
139.5	0.23595
139.6	0.236175
139.7	0.23575
139.8	0.235725
139.9	0.23555
140	0.236
140.1	0.236175
140.2	0.236
140.3	0.236375
140.4	0.235875
140.5	0.236075
140.6	0.236275
140.7	0.2363
140.8	0.2361
140.9	0.2361
141	0.236225
141.1	0.236525
141.2	0.2366
141.3	0.236825
141.4	0.23655
141.5	0.236575
141.6	0.23705
141.7	0.236425
141.8	0.236925
141.9	0.2367
142	0.23725
142.1	0.236625
142.2	0.236675
142.3	0.2367
142.4	0.23655
142.5	0.236325
142.6	0.236575
142.7	0.23695
142.8	0.236925
142.9	0.23665
143	0.2365
143.1	0.236075
143.2	0.23565
143.3	0.236075
143.4	0.2358
143.5	0.235825
143.6	0.236
143.7	0.2361
143.8	0.23595
143.9	0.23595
144	0.23615
144.1	0.235775
144.2	0.2358
144.3	0.2362
144.4	0.23615
144.5	0.23635
144.6	0.2363
144.7	0.236675
144.8	0.236025
144.9	0.2357
145	0.235425
145.1	0.235075
145.2	0.235125
145.3	0.23525
145.4	0.2356
145.5	0.23535
145.6	0.2352
145.7	0.235
145.8	0.234875
145.9	0.235225
146	0.235425
146.1	0.23555
146.2	0.236175
146.3	0.2362
146.4	0.237225
146.5	0.2369
146.6	0.23755
146.7	0.2373
146.8	0.236975
146.9	0.23775
147	0.237975
147.1	0.23745
147.2	0.237075
147.3	0.237425
147.4	0.237725
147.5	0.237875
147.6	0.23785
147.7	0.237875
147.8	0.237975
147.9	0.2383
148	0.238775
148.1	0.23865
148.2	0.238775
148.3	0.23935
148.4	0.239525
148.5	0.239975
148.6	0.2399
148.7	0.24055
148.8	0.241375
148.9	0.241275
149	0.241175
149.1	0.241175
149.2	0.241075
149.3	0.241375
149.4	0.2416
149.5	0.24215
149.6	0.2424
149.7	0.242325
149.8	0.2422
149.9	0.24205
150	0.242
150.1	0.24225
150.2	0.2425
150.3	0.242575
150.4	0.2421
150.5	0.24215
150.6	0.242025
150.7	0.2422
150.8	0.242025
150.9	0.2419
151	0.241875
151.1	0.242075
151.2	0.24215
151.3	0.24195
151.4	0.24175
151.5	0.24185
151.6	0.241875
151.7	0.242
151.8	0.24175
151.9	0.242025
152	0.2419
152.1	0.242275
152.2	0.242375
152.3	0.242
152.4	0.242025
152.5	0.24205
152.6	0.24215
152.7	0.242425
152.8	0.2421
152.9	0.24175
153	0.2413
153.1	0.241
153.2	0.240675
153.3	0.240375
153.4	0.24005
153.5	0.2395
153.6	0.2399
153.7	0.239825
153.8	0.2396
153.9	0.239725
154	0.23925
154.1	0.239375
154.2	0.239925
154.3	0.23985
154.4	0.240225
154.5	0.24005
154.6	0.240375
154.7	0.2404
154.8	0.240375
154.9	0.240725
155	0.241075
155.1	0.2416
155.2	0.242075
155.3	0.24245
155.4	0.242325
155.5	0.242575
155.6	0.2423
155.7	0.242725
155.8	0.242825
155.9	0.242775
156	0.24305
156.1	0.24335
156.2	0.24375
156.3	0.2439
156.4	0.243725
156.5	0.24395
156.6	0.2439
156.7	0.2438
156.8	0.243775
156.9	0.2438
157	0.243575
157.1	0.24405
157.2	0.244175
157.3	0.244375
157.4	0.24485
157.5	0.244575
157.6	0.2445
157.7	0.244975
157.8	0.2448
157.9	0.2452
158	0.245275
158.1	0.245025
158.2	0.2459
158.3	0.245875
158.4	0.246025
158.5	0.246225
158.6	0.245675
158.7	0.24545
158.8	0.245525
158.9	0.245475
159	0.2462
159.1	0.24615
159.2	0.246025
159.3	0.245425
159.4	0.245225
159.5	0.246325
159.6	0.24695
159.7	0.247175
159.8	0.24715
159.9	0.24725
160	0.2474
160.1	0.247325
160.2	0.247775
160.3	0.247325
160.4	0.247
160.5	0.247125
160.6	0.247025
160.7	0.2466
160.8	0.246575
160.9	0.2465
161	0.2461
161.1	0.245675
161.2	0.245675
161.3	0.2465
161.4	0.246225
161.5	0.2463
161.6	0.246075
161.7	0.246275
161.8	0.245875
161.9	0.246475
162	0.246625
162.1	0.246075
162.2	0.24605
162.3	0.24585
162.4	0.245625
162.5	0.245625
162.6	0.24575
162.7	0.24615
162.8	0.2468
162.9	0.246475
163	0.246025
163.1	0.245725
163.2	0.245725
163.3	0.2464
163.4	0.24675
163.5	0.246575
163.6	0.246475
163.7	0.24675
163.8	0.245725
163.9	0.245925
164	0.2463
164.1	0.245925
164.2	0.24595
164.3	0.24615
164.4	0.246025
164.5	0.245925
164.6	0.245925
164.7	0.246525
164.8	0.246175
164.9	0.247075
165	0.247025
165.1	0.24725
165.2	0.247625
165.3	0.247925
165.4	0.24815
165.5	0.2487
165.6	0.248525
165.7	0.24855
165.8	0.24875
165.9	0.248975
166	0.24935
166.1	0.2493
166.2	0.249225
166.3	0.24945
166.4	0.24945
166.5	0.249575
166.6	0.2495
166.7	0.249975
166.8	0.250625
166.9	0.250475
167	0.25005
167.1	0.250075
167.2	0.249275
167.3	0.2492
167.4	0.24945
167.5	0.248825
167.6	0.24915
167.7	0.24935
167.8	0.249
167.9	0.249675
168	0.25005
168.1	0.2504
168.2	0.250775
168.3	0.251025
168.4	0.2511
168.5	0.250675
168.6	0.2513
168.7	0.25065
168.8	0.250725
168.9	0.250575
169	0.250675
169.1	0.250725
169.2	0.25125
169.3	0.251325
169.4	0.251225
169.5	0.25045
169.6	0.250675
169.7	0.250775
169.8	0.2513
169.9	0.251775
170	0.25215
170.1	0.251875
170.2	0.252025
170.3	0.252525
170.4	0.252425
170.5	0.25265
170.6	0.2523
170.7	0.252525
170.8	0.2518
170.9	0.251625
171	0.251925
171.1	0.25235
171.2	0.2525
171.3	0.25225
171.4	0.252125
171.5	0.251925
171.6	0.25235
171.7	0.252975
171.8	0.2528
171.9	0.252825
172	0.253325
172.1	0.253125
172.2	0.2534
172.3	0.253225
172.4	0.25275
172.5	0.2533
172.6	0.253175
172.7	0.25305
172.8	0.25325
172.9	0.254
173	0.25485
173.1	0.2552
173.2	0.255
173.3	0.254975
173.4	0.254625
173.5	0.254125
173.6	0.2542
173.7	0.2543
173.8	0.2542
173.9	0.25455
174	0.255025
174.1	0.2546
174.2	0.2542
174.3	0.254475
174.4	0.2547
174.5	0.2549
174.6	0.25475
174.7	0.254425
174.8	0.25485
174.9	0.25515
175	0.25505
175.1	0.25485
175.2	0.254475
175.3	0.2549
175.4	0.254925
175.5	0.2545
175.6	0.2541
175.7	0.25385
175.8	0.2535
175.9	0.2536
176	0.25385
176.1	0.2544
176.2	0.254475
176.3	0.25455
176.4	0.254575
176.5	0.254475
176.6	0.255125
176.7	0.255
176.8	0.25455
176.9	0.254575
177	0.254375
177.1	0.25445
177.2	0.2546
177.3	0.2546
177.4	0.255025
177.5	0.255025
177.6	0.2546
177.7	0.2547
177.8	0.254775
177.9	0.254925
178	0.254725
178.1	0.254475
178.2	0.25435
178.3	0.254475
178.4	0.254725
178.5	0.2547
178.6	0.25475
178.7	0.255225
178.8	0.254775
178.9	0.2548
179	0.25425
179.1	0.2541
179.2	0.254075
179.3	0.254075
179.4	0.254025
179.5	0.253725
179.6	0.2541
179.7	0.25425
179.8	0.254975
179.9	0.254825
180	0.255
180.1	0.2551
180.2	0.2555
180.3	0.25535
180.4	0.255025
180.5	0.254975
180.6	0.25545
180.7	0.256125
180.8	0.256075
180.9	0.2564
181	0.257
181.1	0.2571
181.2	0.257125
181.3	0.257275
181.4	0.2575
181.5	0.257525
181.6	0.257225
181.7	0.257
181.8	0.257
181.9	0.257
182	0.257325
182.1	0.25675
182.2	0.25645
182.3	0.255675
182.4	0.2559
182.5	0.255775
182.6	0.256225
182.7	0.25535
182.8	0.255225
182.9	0.25525
183	0.255325
183.1	0.255725
183.2	0.2564
183.3	0.255925
183.4	0.256
183.5	0.256375
183.6	0.25625
183.7	0.25655
183.8	0.256275
183.9	0.255975
184	0.255875
184.1	0.2556
184.2	0.25605
184.3	0.2561
184.4	0.256525
184.5	0.25655
184.6	0.2569
184.7	0.256625
184.8	0.256525
184.9	0.25635
185	0.256575
185.1	0.256375
185.2	0.257125
185.3	0.25745
185.4	0.2576
185.5	0.25775
185.6	0.258125
185.7	0.25805
185.8	0.258275
185.9	0.258225
186	0.257575
186.1	0.257925
186.2	0.257475
186.3	0.257575
186.4	0.25765
186.5	0.25735
186.6	0.2576
186.7	0.2582
186.8	0.258075
186.9	0.25805
187	0.258225
187.1	0.25815
187.2	0.258
187.3	0.257475
187.4	0.25785
187.5	0.2579
187.6	0.257775
187.7	0.25805
187.8	0.25835
187.9	0.25825
188	0.257925
188.1	0.2579
188.2	0.257675
188.3	0.258125
188.4	0.258075
188.5	0.25755
188.6	0.25715
188.7	0.257525
188.8	0.25745
188.9	0.256675
189	0.256675
189.1	0.256925
189.2	0.256825
189.3	0.2573
189.4	0.25705
189.5	0.257375
189.6	0.2575
189.7	0.257325
189.8	0.257175
189.9	0.257125
190	0.257275
190.1	0.25715
190.2	0.25775
190.3	0.25825
190.4	0.2581
190.5	0.257275
190.6	0.25745
190.7	0.256925
190.8	0.25675
190.9	0.25685
191	0.256625
191.1	0.256625
191.2	0.256075
191.3	0.256375
191.4	0.256425
191.5	0.25585
191.6	0.256575
191.7	0.256125
191.8	0.2561
191.9	0.2561
192	0.25615
192.1	0.256375
192.2	0.256775
192.3	0.256775
192.4	0.25735
192.5	0.2574
192.6	0.257775
192.7	0.25745
192.8	0.25785
192.9	0.258
193	0.2582
193.1	0.25805
193.2	0.258175
193.3	0.258125
193.4	0.25825
193.5	0.258725
193.6	0.258375
193.7	0.257475
193.8	0.2573
193.9	0.2578
194	0.25765
194.1	0.257775
194.2	0.25755
194.3	0.257675
194.4	0.25735
194.5	0.257525
194.6	0.2571
194.7	0.256525
194.8	0.25645
194.9	0.256525
195	0.256225
195.1	0.2566
195.2	0.2564
195.3	0.2562
195.4	0.25595
195.5	0.2562
195.6	0.256275
195.7	0.256475
195.8	0.256925
195.9	0.257275
196	0.25745
196.1	0.257575
196.2	0.257125
196.3	0.256975
196.4	0.257225
196.5	0.257825
196.6	0.258025
196.7	0.2581
196.8	0.257375
196.9	0.25775
197	0.257075
197.1	0.256975
197.2	0.2574
197.3	0.257225
197.4	0.2576
197.5	0.257775
197.6	0.2581
197.7	0.25835
197.8	0.258475
197.9	0.258675
198	0.258525
198.1	0.25885
198.2	0.259325
198.3	0.25965
198.4	0.25955
198.5	0.2594
198.6	0.259275
198.7	0.25965
198.8	0.260275
198.9	0.259925
199	0.260325
199.1	0.260325
199.2	0.260475
199.3	0.26035
199.4	0.26015
199.5	0.259975
199.6	0.26035
199.7	0.260125
199.8	0.260425
199.9	0.2604
200	0.26015
[truncated: 14,000 more rows]
