# Supplementary material for: Bayesian inference of kinetic schemes for ion channels by Kalman filtering
Source: eLife journal article supplement (doi:10.7554/elife.62714), 2022-05-04
Supplement: fig4-data10 [file 1_Sim_N_20000_Strom_MW_0.0625M.xlsx]

## Sheet: Tabelle1
0.1	0
0.2	0
0.3	0
0.4	0
0.5	0
0.6	0
0.7	0
0.8	0
0.9	0
1	0
1.1	0
1.2	0
1.3	0
1.4	0
1.5	0
1.6	0
1.7	0
1.8	0
1.9	0
2	0
2.1	0
2.2	0
2.3	0
2.4	0
2.5	0
2.6	0
2.7	0
2.8	0
2.9	0
3	0
3.1	0
3.2	0
3.3	0
3.4	0
3.5	0
3.6	0
3.7	0
3.8	0
3.9	0
4	0
4.1	0
4.2	0
4.3	0
4.4	0
4.5	0
4.6	0
4.7	0
4.8	0
4.9	0
5	0
5.1	0
5.2	0
5.3	0
5.4	0
5.5	0
5.6	0
5.7	0
5.8	0
5.9	0
6	0
6.1	0
6.2	0
6.3	0
6.4	0
6.5	0
6.6	0
6.7	0
6.8	0
6.9	0
7	0
7.1	0
7.2	0
7.3	0
7.4	0
7.5	0
7.6	0
7.7	0
7.8	0
7.9	0
8	0
8.1	0
8.2	0
8.3	0
8.4	0
8.5	0
8.6	0
8.7	0
8.8	0
8.9	0
9	0
9.1	0
9.2	0
9.3	0
9.4	0
9.5	0
9.6	0
9.7	0
9.8	0
9.9	0
10	0
10.1	0
10.2	0
10.3	0
10.4	0
10.5	0
10.6	0
10.7	0
10.8	0
10.9	0
11	0
11.1	0
11.2	0
11.3	0
11.4	0
11.5	0
11.6	0
11.7	0
11.8	0
11.9	0
12	0
12.1	0
12.2	0
12.3	0
12.4	0
12.5	0
12.6	0
12.7	0
12.8	0
12.9	0
13	0
13.1	0
13.2	0
13.3	0
13.4	0
13.5	0
13.6	0
13.7	0
13.8	0
13.9	0
14	0
14.1	0
14.2	0
14.3	0
14.4	0
14.5	0
14.6	0
14.7	0
14.8	0
14.9	0
15	0
15.1	0
15.2	0
15.3	0
15.4	0
15.5	0
15.6	0
15.7	0
15.8	0
15.9	0
16	0
16.1	0
16.2	0
16.3	0
16.4	0
16.5	0
16.6	0
16.7	0
16.8	0
16.9	0
17	0
17.1	0
17.2	0
17.3	0
17.4	0
17.5	0
17.6	0
17.7	0
17.8	0
17.9	0
18	0
18.1	0
18.2	0
18.3	0
18.4	0
18.5	0
18.6	0
18.7	0
18.8	0
18.9	0
19	0
19.1	0
19.2	0
19.3	0
19.4	0
19.5	0
19.6	0
19.7	0
19.8	0
19.9	0
20	0
20.1	0
20.2	0
20.3	0
20.4	0
20.5	0
20.6	0
20.7	0
20.8	0
20.9	0
21	0
21.1	0
21.2	0
21.3	0
21.4	0
21.5	0
21.6	0
21.7	0
21.8	0
21.9	0
22	0
22.1	0
22.2	0
22.3	0
22.4	0
22.5	0
22.6	0
22.7	0
22.8	0
22.9	0
23	0
23.1	0
23.2	0
23.3	0
23.4	0
23.5	0
23.6	0
23.7	0
23.8	0
23.9	0
24	0
24.1	0
24.2	0
24.3	0
24.4	0
24.5	0
24.6	0
24.7	0
24.8	0
24.9	0
25	0
25.1	0
25.2	0
25.3	0
25.4	0
25.5	0
25.6	0
25.7	0
25.8	0
25.9	0
26	0
26.1	0
26.2	0
26.3	0
26.4	0
26.5	0
26.6	0
26.7	0
26.8	0
26.9	0
27	0
27.1	0
27.2	0
27.3	0
27.4	0
27.5	0
27.6	0
27.7	0
27.8	0
27.9	0
28	0
28.1	0
28.2	0
28.3	0
28.4	0
28.5	0
28.6	0
28.7	0
28.8	0
28.9	0
29	0
29.1	0
29.2	0
29.3	0
29.4	0
29.5	0
29.6	0
29.7	0
29.8	0
29.9	0
30	0
30.1	0
30.2	0
30.3	0
30.4	0
30.5	0
30.6	0
30.7	0
30.8	0
30.9	0
31	0
31.1	0
31.2	0
31.3	0
31.4	0
31.5	0
31.6	0
31.7	0
31.8	0
31.9	0
32	0
32.1	0
32.2	0
32.3	0
32.4	0
32.5	0
32.6	0
32.7	0
32.8	0
32.9	0
33	0
33.1	0
33.2	0
33.3	0
33.4	0
33.5	0
33.6	0
33.7	0
33.8	0
33.9	0
34	0
34.1	0
34.2	0
34.3	0
34.4	0
34.5	0
34.6	0
34.7	0
34.8	0
34.9	0
35	0
35.1	0
35.2	0
35.3	0
35.4	0
35.5	0
35.6	0
35.7	0
35.8	0
35.9	0
36	0
36.1	0
36.2	0
36.3	0
36.4	0
36.5	0
36.6	0
36.7	0
36.8	0
36.9	0
37	0
37.1	0
37.2	0
37.3	0
37.4	0
37.5	0
37.6	0
37.7	0
37.8	0
37.9	0
38	0
38.1	0
38.2	0
38.3	0
38.4	0
38.5	0
38.6	0
38.7	0
38.8	0
38.9	0
39	0
39.1	0
39.2	0
39.3	0
39.4	0
39.5	0
39.6	0
39.7	0
39.8	0
39.9	0
40	0
40.1	0
40.2	0
40.3	0
40.4	0
40.5	0
40.6	0
40.7	0
40.8	0
40.9	0
41	0
41.1	0
41.2	0
41.3	0
41.4	0
41.5	0
41.6	0
41.7	0
41.8	0
41.9	0
42	0
42.1	0
42.2	0
42.3	0
42.4	0
42.5	0
42.6	0
42.7	0
42.8	0
42.9	0
43	0
43.1	0
43.2	0
43.3	0
43.4	0
43.5	0
43.6	0
43.7	0
43.8	0
43.9	0
44	0
44.1	0
44.2	0
44.3	0
44.4	0
44.5	0
44.6	0
44.7	0
44.8	0
44.9	0
45	0
45.1	0
45.2	0
45.3	0
45.4	0
45.5	0
45.6	0
45.7	0
45.8	0
45.9	0
46	0
46.1	0
46.2	0
46.3	0
46.4	0
46.5	0
46.6	0
46.7	0
46.8	0
46.9	0
47	0
47.1	0
47.2	0
47.3	0
47.4	0
47.5	0
47.6	0
47.7	0
47.8	0
47.9	0
48	0
48.1	0
48.2	0
48.3	0
48.4	0
48.5	0
48.6	0
48.7	0
48.8	0
48.9	0
49	0
49.1	0
49.2	0
49.3	0
49.4	0
49.5	0
49.6	0
49.7	0
49.8	0
49.9	0
50	0
50.1	0
50.2	0
50.3	0
50.4	0
50.5	0
50.6	0
50.7	0
50.8	0
50.9	0
51	0
51.1	0
51.2	0
51.3	0
51.4	0
51.5	0
51.6	0
51.7	0
51.8	0
51.9	0
52	0
52.1	0
52.2	0
52.3	0
52.4	0
52.5	0
52.6	0
52.7	0
52.8	0
52.9	0
53	0
53.1	0
53.2	0
53.3	0
53.4	0
53.5	0
53.6	0
53.7	0
53.8	0
53.9	0
54	0
54.1	0
54.2	0
54.3	0
54.4	0
54.5	0
54.6	0
54.7	0
54.8	0
54.9	0
55	0
55.1	0
55.2	0
55.3	0
55.4	0
55.5	0
55.6	0
55.7	0
55.8	0
55.9	0
56	0
56.1	0
56.2	0
56.3	0
56.4	0
56.5	0
56.6	0
56.7	0
56.8	0
56.9	0
57	0
57.1	0
57.2	0
57.3	0
57.4	0
57.5	0
57.6	0
57.7	0
57.8	0
57.9	0
58	0
58.1	0
58.2	0
58.3	0
58.4	0
58.5	0
58.6	0
58.7	0
58.8	0
58.9	0
59	0
59.1	0
59.2	0
59.3	0
59.4	0
59.5	0
59.6	0
59.7	0
59.8	0
59.9	0
60	0
60.1	0
60.2	0
60.3	0
60.4	0
60.5	0
60.6	0
60.7	0
60.8	0
60.9	0
61	0
61.1	0
61.2	0
61.3	0
61.4	0
61.5	0
61.6	0
61.7	0
61.8	0
61.9	0
62	0
62.1	0
62.2	0
62.3	0
62.4	0
62.5	0
62.6	0
62.7	0
62.8	0
62.9	0
63	0
63.1	0
63.2	0
63.3	0
63.4	0
63.5	0
63.6	0
63.7	0
63.8	0
63.9	0
64	0
64.1	0
64.2	0
64.3	0
64.4	0
64.5	0
64.6	0
64.7	0
64.8	0
64.9	0
65	0
65.1	0
65.2	0
65.3	0
65.4	0
65.5	0
65.6	0
65.7	0
65.8	0
65.9	0
66	0
66.1	0
66.2	0
66.3	0
66.4	0
66.5	0
66.6	0
66.7	0
66.8	0
66.9	0
67	0
67.1	0
67.2	0
67.3	0
67.4	0
67.5	0
67.6	0
67.7	0
67.8	0
67.9	0
68	0
68.1	0
68.2	0
68.3	0
68.4	0
68.5	0
68.6	0
68.7	0
68.8	0
68.9	0
69	0
69.1	0
69.2	0
69.3	0
69.4	0
69.5	0
69.6	0
69.7	0
69.8	0
69.9	0
70	0
70.1	0
70.2	0
70.3	0
70.4	0
70.5	0
70.6	0
70.7	0
70.8	0
70.9	0
71	0
71.1	0
71.2	0
71.3	0
71.4	0
71.5	0
71.6	0
71.7	0
71.8	0
71.9	0
72	0
72.1	0
72.2	0
72.3	0
72.4	0
72.5	0
72.6	0
72.7	0
72.8	0
72.9	0
73	0
73.1	0
73.2	0
73.3	0
73.4	0
73.5	0
73.6	0
73.7	0
73.8	0
73.9	0
74	0
74.1	0
74.2	0
74.3	0
74.4	0
74.5	0
74.6	0
74.7	0
74.8	0
74.9	0
75	0
75.1	0
75.2	0
75.3	0
75.4	0
75.5	0
75.6	0
75.7	0
75.8	0
75.9	0
76	0
76.1	0
76.2	0
76.3	0
76.4	0
76.5	0
76.6	0
76.7	0
76.8	0
76.9	0
77	0
77.1	0
77.2	0
77.3	0
77.4	0
77.5	0
77.6	0
77.7	0
77.8	0
77.9	0
78	0
78.1	0
78.2	0
78.3	0
78.4	0
78.5	0
78.6	0
78.7	0
78.8	0
78.9	0
79	0
79.1	0
79.2	0
79.3	0
79.4	0
79.5	0
79.6	0
79.7	0
79.8	0
79.9	0
80	0
80.1	0
80.2	0
80.3	0
80.4	0
80.5	0
80.6	0
80.7	0
80.8	0
80.9	0
81	0
81.1	0
81.2	0
81.3	0
81.4	0
81.5	0
81.6	0
81.7	0
81.8	0
81.9	0
82	0
82.1	0
82.2	0
82.3	0
82.4	0
82.5	0
82.6	0
82.7	0
82.8	0
82.9	0
83	0
83.1	0
83.2	0
83.3	0
83.4	0
83.5	0
83.6	0
83.7	0
83.8	0
83.9	0
84	0
84.1	0
84.2	0
84.3	0
84.4	0
84.5	0
84.6	0
84.7	0
84.8	0
84.9	0
85	0
85.1	0
85.2	0
85.3	0
85.4	0
85.5	0
85.6	0
85.7	0
85.8	0
85.9	0
86	0
86.1	0
86.2	0
86.3	0
86.4	0
86.5	0
86.6	0
86.7	0
86.8	0
86.9	0
87	0
87.1	0
87.2	0
87.3	0
87.4	0
87.5	0
87.6	0
87.7	0
87.8	0
87.9	0
88	0
88.1	0
88.2	0
88.3	0
88.4	0
88.5	0
88.6	0
88.7	0
88.8	0
88.9	0
89	0
89.1	0
89.2	0
89.3	0
89.4	0
89.5	0
89.6	0
89.7	0
89.8	0
89.9	0
90	0
90.1	0
90.2	0
90.3	0
90.4	0
90.5	0
90.6	0
90.7	0
90.8	0
90.9	0
91	0
91.1	0
91.2	0
91.3	0
91.4	0
91.5	0
91.6	0
91.7	0
91.8	0
91.9	0
92	0
92.1	0
92.2	0
92.3	0
92.4	0
92.5	0
92.6	0
92.7	0
92.8	0
92.9	0
93	0
93.1	0
93.2	0
93.3	0
93.4	0
93.5	0
93.6	0
93.7	0
93.8	0
93.9	0
94	0
94.1	0
94.2	0
94.3	0
94.4	0
94.5	0
94.6	0
94.7	0
94.8	0
94.9	0
95	0
95.1	0
95.2	0
95.3	0
95.4	0
95.5	0
95.6	0
95.7	0
95.8	0
95.9	0
96	0
96.1	0
96.2	0
96.3	0
96.4	0
96.5	0
96.6	0
96.7	0
96.8	0
96.9	0
97	0
97.1	0
97.2	0
97.3	0
97.4	0
97.5	0
97.6	0
97.7	0
97.8	0
97.9	0
98	0
98.1	0
98.2	0
98.3	0
98.4	0
98.5	0
98.6	0
98.7	0
98.8	0
98.9	0
99	0
99.1	0
99.2	0
99.3	0
99.4	0
99.5	0
99.6	0
99.7	0
99.8	0
99.9	0
100	0
100.1	0
100.2	0
100.3	0
100.4	0
100.5	0
100.6	0
100.7	0
100.8	0
100.9	0
101	0
101.1	0
101.2	0
101.3	0
101.4	0
101.5	0
101.6	0
101.7	0
101.8	0
101.9	0
102	0
102.1	5e-05
102.2	5e-05
102.3	5e-05
102.4	5e-05
102.5	5e-05
102.6	5e-05
102.7	5e-05
102.8	5e-05
102.9	5e-05
103	5e-05
103.1	5e-05
103.2	5e-05
103.3	5e-05
103.4	5e-05
103.5	5e-05
103.6	0.0001
103.7	0.0001
103.8	0.00015
103.9	0.00015
104	0.0002
104.1	0.00025
104.2	0.0003
104.3	0.0003
104.4	0.00035
104.5	0.0004
104.6	0.0004
104.7	0.00045
104.8	0.00055
104.9	0.00065
105	0.00065
105.1	0.0007
105.2	0.00075
105.3	0.00075
105.4	0.0008
105.5	0.0008
105.6	0.00085
105.7	0.0009
105.8	0.001
105.9	0.001
106	0.00105
106.1	0.00105
106.2	0.00105
106.3	0.00105
106.4	0.0011
106.5	0.00115
106.6	0.00115
106.7	0.0012
106.8	0.00125
106.9	0.00125
107	0.00125
107.1	0.0013
107.2	0.0013
107.3	0.0013
107.4	0.00135
107.5	0.00135
107.6	0.00135
107.7	0.00135
107.8	0.0014
107.9	0.0014
108	0.0014
108.1	0.0014
108.2	0.0014
108.3	0.0014
108.4	0.0014
108.5	0.00145
108.6	0.0015
108.7	0.00155
108.8	0.0016
108.9	0.0017
109	0.00175
109.1	0.0018
109.2	0.00185
109.3	0.0019
109.4	0.00195
109.5	0.002
109.6	0.00205
109.7	0.0021
109.8	0.00215
109.9	0.0022
110	0.0022
110.1	0.00225
110.2	0.00225
110.3	0.0024
110.4	0.00245
110.5	0.00245
110.6	0.00245
110.7	0.00245
110.8	0.0024
110.9	0.0025
111	0.00255
111.1	0.0026
111.2	0.0028
111.3	0.00285
111.4	0.00285
111.5	0.00295
111.6	0.00305
111.7	0.00305
111.8	0.0032
111.9	0.0033
112	0.00335
112.1	0.00335
112.2	0.00335
112.3	0.00335
112.4	0.00335
112.5	0.00345
112.6	0.00345
112.7	0.00345
112.8	0.00345
112.9	0.0035
113	0.00365
113.1	0.00365
113.2	0.00375
113.3	0.00385
113.4	0.00385
113.5	0.00395
113.6	0.00405
113.7	0.0041
113.8	0.0041
113.9	0.0041
114	0.0042
114.1	0.00425
114.2	0.0043
114.3	0.0044
114.4	0.0044
114.5	0.0045
114.6	0.00455
114.7	0.00465
114.8	0.0048
114.9	0.0049
115	0.0049
115.1	0.005
115.2	0.005
115.3	0.00505
115.4	0.0051
115.5	0.00515
115.6	0.0052
115.7	0.00535
115.8	0.0054
115.9	0.0055
116	0.0056
116.1	0.0057
116.2	0.00585
116.3	0.006
116.4	0.006
116.5	0.0061
116.6	0.00615
116.7	0.0062
116.8	0.00625
116.9	0.00635
117	0.00635
117.1	0.0065
117.2	0.0065
117.3	0.0065
117.4	0.0065
117.5	0.0065
117.6	0.00655
117.7	0.0066
117.8	0.00665
117.9	0.0067
118	0.00675
118.1	0.0069
118.2	0.0069
118.3	0.00685
118.4	0.0068
118.5	0.00685
118.6	0.007
118.7	0.00705
118.8	0.0071
118.9	0.00715
119	0.00725
119.1	0.00735
119.2	0.0074
119.3	0.00745
119.4	0.00745
119.5	0.00755
119.6	0.0076
119.7	0.0077
119.8	0.00775
119.9	0.00785
120	0.0079
120.1	0.0079
120.2	0.00785
120.3	0.00795
120.4	0.008
120.5	0.0081
120.6	0.00815
120.7	0.00815
120.8	0.00825
120.9	0.00835
121	0.0084
121.1	0.0085
121.2	0.00855
121.3	0.00865
121.4	0.0087
121.5	0.0087
121.6	0.00875
121.7	0.00875
121.8	0.00875
121.9	0.00885
122	0.0089
122.1	0.00905
122.2	0.00915
122.3	0.00915
122.4	0.00915
122.5	0.0092
122.6	0.0092
122.7	0.00915
122.8	0.00935
122.9	0.00955
123	0.0095
123.1	0.00955
123.2	0.0097
123.3	0.0097
123.4	0.00975
123.5	0.00975
123.6	0.00975
123.7	0.00975
123.8	0.0098
123.9	0.0099
124	0.00985
124.1	0.00995
124.2	0.01
124.3	0.01
124.4	0.01005
124.5	0.0101
124.6	0.0102
124.7	0.01035
124.8	0.01025
124.9	0.0103
125	0.01035
125.1	0.01045
125.2	0.0106
125.3	0.0106
125.4	0.0107
125.5	0.01065
125.6	0.0107
125.7	0.01075
125.8	0.01075
125.9	0.01075
126	0.0108
126.1	0.01085
126.2	0.011
126.3	0.0111
126.4	0.01115
126.5	0.0112
126.6	0.01125
126.7	0.01125
126.8	0.01135
126.9	0.0114
127	0.01145
127.1	0.01155
127.2	0.01155
127.3	0.01155
127.4	0.01155
127.5	0.0117
127.6	0.01175
127.7	0.0118
127.8	0.0118
127.9	0.0117
128	0.01175
128.1	0.01175
128.2	0.0118
128.3	0.01185
128.4	0.012
128.5	0.01205
128.6	0.01205
128.7	0.0122
128.8	0.01225
128.9	0.01225
129	0.01245
129.1	0.01245
129.2	0.0125
129.3	0.0125
129.4	0.01265
129.5	0.0127
129.6	0.0128
129.7	0.01285
129.8	0.01295
129.9	0.0129
130	0.013
130.1	0.013
130.2	0.0132
130.3	0.0132
130.4	0.01315
130.5	0.01315
130.6	0.0132
130.7	0.01325
130.8	0.0134
130.9	0.01345
131	0.01355
131.1	0.01355
131.2	0.01365
131.3	0.0138
131.4	0.01385
131.5	0.0139
131.6	0.01385
131.7	0.01385
131.8	0.01385
131.9	0.01385
132	0.0139
132.1	0.014
132.2	0.01405
132.3	0.01415
132.4	0.01435
132.5	0.01445
132.6	0.0145
132.7	0.01445
132.8	0.01455
132.9	0.01455
133	0.01465
133.1	0.01465
133.2	0.0147
133.3	0.01465
133.4	0.01465
133.5	0.0147
133.6	0.01475
133.7	0.01475
133.8	0.01475
133.9	0.015
134	0.01505
134.1	0.01515
134.2	0.01515
134.3	0.01525
134.4	0.0152
134.5	0.0152
134.6	0.01525
134.7	0.01535
134.8	0.01545
134.9	0.01545
135	0.0154
135.1	0.01555
135.2	0.01555
135.3	0.0156
135.4	0.01565
135.5	0.0157
135.6	0.01585
135.7	0.01595
135.8	0.01595
135.9	0.016
136	0.01615
136.1	0.0163
136.2	0.01645
136.3	0.0165
136.4	0.01645
136.5	0.0165
136.6	0.01655
136.7	0.01665
136.8	0.01675
136.9	0.01675
137	0.0168
137.1	0.0168
137.2	0.0169
137.3	0.01695
137.4	0.017
137.5	0.01705
137.6	0.01705
137.7	0.017
137.8	0.01705
137.9	0.0171
138	0.0171
138.1	0.01715
138.2	0.01715
138.3	0.0172
138.4	0.0173
138.5	0.0173
138.6	0.0173
138.7	0.01745
138.8	0.0175
138.9	0.0174
139	0.0174
139.1	0.0174
139.2	0.01745
139.3	0.0175
139.4	0.01755
139.5	0.01765
139.6	0.01775
139.7	0.0178
139.8	0.0179
139.9	0.0181
140	0.0182
140.1	0.0182
140.2	0.0182
140.3	0.0183
140.4	0.01825
140.5	0.01825
140.6	0.0182
140.7	0.0182
140.8	0.01825
140.9	0.0182
141	0.01825
141.1	0.0184
141.2	0.01845
141.3	0.0185
141.4	0.01845
141.5	0.0186
141.6	0.01875
141.7	0.0188
141.8	0.01885
141.9	0.019
142	0.019
142.1	0.01915
142.2	0.01915
142.3	0.01925
142.4	0.0193
142.5	0.0193
142.6	0.01945
142.7	0.01955
142.8	0.0195
142.9	0.01955
143	0.01965
143.1	0.0199
143.2	0.01985
143.3	0.01995
143.4	0.01995
143.5	0.01995
143.6	0.02015
143.7	0.0202
143.8	0.0202
143.9	0.0202
144	0.02035
144.1	0.02035
144.2	0.0205
144.3	0.02065
144.4	0.02075
144.5	0.0207
144.6	0.02065
144.7	0.0207
144.8	0.0208
144.9	0.02075
145	0.0208
145.1	0.02085
145.2	0.02105
145.3	0.02105
145.4	0.0212
145.5	0.02135
145.6	0.0214
145.7	0.02145
145.8	0.02155
145.9	0.0216
146	0.0217
146.1	0.02165
146.2	0.0218
146.3	0.02185
146.4	0.02195
146.5	0.02195
146.6	0.02205
146.7	0.022
146.8	0.022
146.9	0.0222
147	0.0223
147.1	0.0224
147.2	0.0224
147.3	0.0225
147.4	0.0225
147.5	0.0226
147.6	0.0226
147.7	0.0226
147.8	0.02255
147.9	0.0226
148	0.0226
148.1	0.0226
148.2	0.0226
148.3	0.0226
148.4	0.02275
148.5	0.02275
148.6	0.0229
148.7	0.02305
148.8	0.0232
148.9	0.02325
149	0.0232
149.1	0.02335
149.2	0.02345
149.3	0.02355
149.4	0.0235
149.5	0.0234
149.6	0.0234
149.7	0.02345
149.8	0.0235
149.9	0.02355
150	0.0236
150.1	0.0236
150.2	0.02355
150.3	0.0236
150.4	0.0237
150.5	0.0238
150.6	0.0238
150.7	0.0239
150.8	0.02405
150.9	0.02405
151	0.024
151.1	0.02405
151.2	0.0241
151.3	0.0243
151.4	0.02435
151.5	0.0244
151.6	0.0245
151.7	0.0246
151.8	0.02455
151.9	0.02455
152	0.02455
152.1	0.02465
152.2	0.02465
152.3	0.02475
152.4	0.02475
152.5	0.0248
152.6	0.02485
152.7	0.02485
152.8	0.02495
152.9	0.02495
153	0.02505
153.1	0.02505
153.2	0.0251
153.3	0.02505
153.4	0.02505
153.5	0.02515
153.6	0.02515
153.7	0.0252
153.8	0.02535
153.9	0.02535
154	0.02545
154.1	0.02545
154.2	0.02545
154.3	0.0256
154.4	0.0257
154.5	0.02575
154.6	0.02575
154.7	0.02585
154.8	0.0258
154.9	0.02595
155	0.02605
155.1	0.02615
155.2	0.02625
155.3	0.02635
155.4	0.02635
155.5	0.0264
155.6	0.0264
155.7	0.0264
155.8	0.02635
155.9	0.0264
156	0.0264
156.1	0.0264
156.2	0.0265
156.3	0.0266
156.4	0.0267
156.5	0.0268
156.6	0.02675
156.7	0.0267
156.8	0.02675
156.9	0.02685
157	0.027
157.1	0.0272
157.2	0.02725
157.3	0.0273
157.4	0.02725
157.5	0.0272
157.6	0.02725
157.7	0.0273
157.8	0.02725
157.9	0.0273
158	0.02735
158.1	0.02745
158.2	0.0275
158.3	0.02755
158.4	0.02755
158.5	0.02755
158.6	0.02745
158.7	0.0276
158.8	0.02765
158.9	0.02765
159	0.02765
159.1	0.0276
159.2	0.0276
159.3	0.02755
159.4	0.02755
159.5	0.0275
159.6	0.02755
159.7	0.0277
159.8	0.0277
159.9	0.02765
160	0.0277
160.1	0.0276
160.2	0.02765
160.3	0.02755
160.4	0.02745
160.5	0.02755
160.6	0.0276
160.7	0.02765
160.8	0.02765
160.9	0.0277
161	0.0277
161.1	0.0277
161.2	0.0278
161.3	0.02775
161.4	0.02795
161.5	0.02815
161.6	0.02815
161.7	0.02825
161.8	0.0283
161.9	0.0283
162	0.02825
162.1	0.02835
162.2	0.0284
162.3	0.0284
162.4	0.02835
162.5	0.0284
162.6	0.02845
162.7	0.02855
162.8	0.02855
162.9	0.0286
163	0.0287
163.1	0.02865
163.2	0.02865
163.3	0.0288
163.4	0.02875
163.5	0.02875
163.6	0.02885
163.7	0.02885
163.8	0.0289
163.9	0.02885
164	0.02895
164.1	0.02905
164.2	0.0291
164.3	0.02905
164.4	0.02925
164.5	0.0293
164.6	0.02935
164.7	0.0294
164.8	0.02945
164.9	0.0295
165	0.0295
165.1	0.0294
165.2	0.02945
165.3	0.0295
165.4	0.02965
165.5	0.02965
165.6	0.02985
165.7	0.02985
165.8	0.02985
165.9	0.0298
166	0.02985
166.1	0.02995
166.2	0.02995
166.3	0.02995
166.4	0.03
166.5	0.03015
166.6	0.03015
166.7	0.0302
166.8	0.03025
166.9	0.03045
167	0.0304
167.1	0.03045
167.2	0.0305
167.3	0.03055
167.4	0.0306
167.5	0.03065
167.6	0.0307
167.7	0.03075
167.8	0.0307
167.9	0.0307
168	0.0307
168.1	0.0307
168.2	0.0308
168.3	0.03085
168.4	0.03095
168.5	0.0309
168.6	0.0308
168.7	0.03075
168.8	0.03085
168.9	0.03085
169	0.0309
169.1	0.03095
169.2	0.0309
169.3	0.03095
169.4	0.03095
169.5	0.031
169.6	0.03095
169.7	0.03095
169.8	0.031
169.9	0.031
170	0.03105
170.1	0.0311
170.2	0.0309
170.3	0.031
170.4	0.03105
170.5	0.03105
170.6	0.03115
170.7	0.0311
170.8	0.03115
170.9	0.0315
171	0.0315
171.1	0.0315
171.2	0.03155
171.3	0.03155
171.4	0.0316
171.5	0.03175
171.6	0.03175
171.7	0.03165
171.8	0.03165
171.9	0.03165
172	0.03165
172.1	0.0317
172.2	0.0317
172.3	0.0317
172.4	0.0318
172.5	0.0318
172.6	0.03185
172.7	0.0318
172.8	0.0318
172.9	0.0318
173	0.03185
173.1	0.032
173.2	0.032
173.3	0.03205
173.4	0.0322
173.5	0.0323
173.6	0.0324
173.7	0.0324
173.8	0.0324
173.9	0.03245
174	0.0325
174.1	0.03245
174.2	0.03245
174.3	0.0326
174.4	0.03265
174.5	0.03265
174.6	0.03265
174.7	0.03265
174.8	0.0327
174.9	0.03275
175	0.03285
175.1	0.033
175.2	0.0329
175.3	0.03305
175.4	0.0331
175.5	0.0331
175.6	0.0331
175.7	0.03315
175.8	0.0332
175.9	0.0334
176	0.03365
176.1	0.0337
176.2	0.0337
176.3	0.03375
176.4	0.0339
176.5	0.034
176.6	0.03405
176.7	0.0341
176.8	0.03435
176.9	0.0344
177	0.03445
177.1	0.0345
177.2	0.0346
177.3	0.03465
177.4	0.0346
177.5	0.0346
177.6	0.0346
177.7	0.03465
177.8	0.0346
177.9	0.03475
178	0.03475
178.1	0.03485
178.2	0.03485
178.3	0.035
178.4	0.0352
178.5	0.0353
178.6	0.03535
178.7	0.03535
178.8	0.0354
178.9	0.0354
179	0.03535
179.1	0.0354
179.2	0.03555
179.3	0.0355
179.4	0.03555
179.5	0.0357
179.6	0.03575
179.7	0.03565
179.8	0.0357
179.9	0.03575
180	0.0357
180.1	0.03575
180.2	0.0359
180.3	0.0359
180.4	0.036
180.5	0.0361
180.6	0.03625
180.7	0.03625
180.8	0.0363
180.9	0.03635
181	0.0364
181.1	0.03635
181.2	0.0365
181.3	0.0366
181.4	0.0367
181.5	0.03675
181.6	0.0368
181.7	0.0369
181.8	0.03695
181.9	0.03695
182	0.03695
182.1	0.0369
182.2	0.0369
182.3	0.03685
182.4	0.0369
182.5	0.0369
182.6	0.0369
182.7	0.03695
182.8	0.03705
182.9	0.0372
183	0.03725
183.1	0.0372
183.2	0.0373
183.3	0.0374
183.4	0.03745
183.5	0.0375
183.6	0.03755
183.7	0.0375
183.8	0.0376
183.9	0.03755
184	0.0376
184.1	0.03765
184.2	0.0376
184.3	0.03765
184.4	0.03765
184.5	0.0377
184.6	0.0376
184.7	0.03765
184.8	0.0377
184.9	0.03785
185	0.038
185.1	0.03795
185.2	0.03815
185.3	0.0383
185.4	0.0383
185.5	0.0384
185.6	0.0386
185.7	0.03855
185.8	0.03865
185.9	0.0386
186	0.0387
186.1	0.03875
186.2	0.03875
186.3	0.0388
186.4	0.0387
186.5	0.0387
186.6	0.03875
186.7	0.03875
186.8	0.03875
186.9	0.0388
187	0.03875
187.1	0.0389
187.2	0.03895
187.3	0.0389
187.4	0.039
187.5	0.03895
187.6	0.0389
187.7	0.039
187.8	0.039
187.9	0.03895
188	0.03895
188.1	0.03905
188.2	0.039
188.3	0.0389
188.4	0.03895
188.5	0.039
188.6	0.03915
188.7	0.0391
188.8	0.03905
188.9	0.03895
189	0.03895
189.1	0.03905
189.2	0.03915
189.3	0.03915
189.4	0.03915
189.5	0.0392
189.6	0.03925
189.7	0.0392
189.8	0.03925
189.9	0.0394
190	0.0393
190.1	0.0392
190.2	0.0393
190.3	0.0392
190.4	0.03925
190.5	0.0393
190.6	0.03935
190.7	0.03935
190.8	0.03935
190.9	0.03935
191	0.0393
191.1	0.03935
191.2	0.03925
191.3	0.0393
191.4	0.03935
191.5	0.03935
191.6	0.0393
191.7	0.03935
191.8	0.03945
191.9	0.0395
192	0.03945
192.1	0.03955
192.2	0.0396
192.3	0.0396
192.4	0.03965
192.5	0.03965
192.6	0.0397
192.7	0.0398
192.8	0.03985
192.9	0.0399
193	0.03995
193.1	0.03995
193.2	0.03995
193.3	0.04005
193.4	0.04005
193.5	0.04005
193.6	0.03995
193.7	0.03995
193.8	0.0399
193.9	0.03985
194	0.0399
194.1	0.0399
194.2	0.0399
194.3	0.0399
194.4	0.03985
194.5	0.04
194.6	0.04005
194.7	0.04
194.8	0.03995
194.9	0.04
195	0.04005
195.1	0.04
195.2	0.0401
195.3	0.0399
195.4	0.0399
195.5	0.04
195.6	0.04
195.7	0.0401
195.8	0.0402
195.9	0.0402
196	0.0403
196.1	0.0401
196.2	0.0401
196.3	0.0402
196.4	0.0402
196.5	0.0404
196.6	0.04035
196.7	0.04035
196.8	0.04035
196.9	0.0404
197	0.04035
197.1	0.0405
197.2	0.0406
197.3	0.04065
197.4	0.04065
197.5	0.04065
197.6	0.04075
197.7	0.04085
197.8	0.04095
197.9	0.04105
198	0.041
198.1	0.0409
198.2	0.041
198.3	0.04095
198.4	0.041
198.5	0.04095
198.6	0.0409
198.7	0.0408
198.8	0.0408
198.9	0.04075
199	0.04095
199.1	0.04105
199.2	0.04115
199.3	0.04115
199.4	0.0411
199.5	0.04115
199.6	0.04125
199.7	0.0413
199.8	0.04135
199.9	0.0414
200	0.0414
[truncated: 14,000 more rows]
