# Supplementary material for: Bayesian inference of kinetic schemes for ion channels by Kalman filtering
Source: eLife journal article supplement (doi:10.7554/elife.62714), 2022-05-04
Supplement: fig4-data10 [file 1_Sim_N_50000_Fluor_MW_0.0625M.xlsx]

## Sheet: 0.0625 M
0.1	0
0.2	0
0.3	0
0.4	0
0.5	0
0.6	0
0.7	0
0.8	0
0.9	0
1	0
1.1	0
1.2	0
1.3	0
1.4	0
1.5	0
1.6	0
1.7	0
1.8	0
1.9	0
2	0
2.1	0
2.2	0
2.3	0
2.4	0
2.5	0
2.6	0
2.7	0
2.8	0
2.9	0
3	0
3.1	0
3.2	0
3.3	0
3.4	0
3.5	0
3.6	0
3.7	0
3.8	0
3.9	0
4	0
4.1	0
4.2	0
4.3	0
4.4	0
4.5	0
4.6	0
4.7	0
4.8	0
4.9	0
5	0
5.1	0
5.2	0
5.3	0
5.4	0
5.5	0
5.6	0
5.7	0
5.8	0
5.9	0
6	0
6.1	0
6.2	0
6.3	0
6.4	0
6.5	0
6.6	0
6.7	0
6.8	0
6.9	0
7	0
7.1	0
7.2	0
7.3	0
7.4	0
7.5	0
7.6	0
7.7	0
7.8	0
7.9	0
8	0
8.1	0
8.2	0
8.3	0
8.4	0
8.5	0
8.6	0
8.7	0
8.8	0
8.9	0
9	0
9.1	0
9.2	0
9.3	0
9.4	0
9.5	0
9.6	0
9.7	0
9.8	0
9.9	0
10	0
10.1	0
10.2	0
10.3	0
10.4	0
10.5	0
10.6	0
10.7	0
10.8	0
10.9	0
11	0
11.1	0
11.2	0
11.3	0
11.4	0
11.5	0
11.6	0
11.7	0
11.8	0
11.9	0
12	0
12.1	0
12.2	0
12.3	0
12.4	0
12.5	0
12.6	0
12.7	0
12.8	0
12.9	0
13	0
13.1	0
13.2	0
13.3	0
13.4	0
13.5	0
13.6	0
13.7	0
13.8	0
13.9	0
14	0
14.1	0
14.2	0
14.3	0
14.4	0
14.5	0
14.6	0
14.7	0
14.8	0
14.9	0
15	0
15.1	0
15.2	0
15.3	0
15.4	0
15.5	0
15.6	0
15.7	0
15.8	0
15.9	0
16	0
16.1	0
16.2	0
16.3	0
16.4	0
16.5	0
16.6	0
16.7	0
16.8	0
16.9	0
17	0
17.1	0
17.2	0
17.3	0
17.4	0
17.5	0
17.6	0
17.7	0
17.8	0
17.9	0
18	0
18.1	0
18.2	0
18.3	0
18.4	0
18.5	0
18.6	0
18.7	0
18.8	0
18.9	0
19	0
19.1	0
19.2	0
19.3	0
19.4	0
19.5	0
19.6	0
19.7	0
19.8	0
19.9	0
20	0
20.1	0
20.2	0
20.3	0
20.4	0
20.5	0
20.6	0
20.7	0
20.8	0
20.9	0
21	0
21.1	0
21.2	0
21.3	0
21.4	0
21.5	0
21.6	0
21.7	0
21.8	0
21.9	0
22	0
22.1	0
22.2	0
22.3	0
22.4	0
22.5	0
22.6	0
22.7	0
22.8	0
22.9	0
23	0
23.1	0
23.2	0
23.3	0
23.4	0
23.5	0
23.6	0
23.7	0
23.8	0
23.9	0
24	0
24.1	0
24.2	0
24.3	0
24.4	0
24.5	0
24.6	0
24.7	0
24.8	0
24.9	0
25	0
25.1	0
25.2	0
25.3	0
25.4	0
25.5	0
25.6	0
25.7	0
25.8	0
25.9	0
26	0
26.1	0
26.2	0
26.3	0
26.4	0
26.5	0
26.6	0
26.7	0
26.8	0
26.9	0
27	0
27.1	0
27.2	0
27.3	0
27.4	0
27.5	0
27.6	0
27.7	0
27.8	0
27.9	0
28	0
28.1	0
28.2	0
28.3	0
28.4	0
28.5	0
28.6	0
28.7	0
28.8	0
28.9	0
29	0
29.1	0
29.2	0
29.3	0
29.4	0
29.5	0
29.6	0
29.7	0
29.8	0
29.9	0
30	0
30.1	0
30.2	0
30.3	0
30.4	0
30.5	0
30.6	0
30.7	0
30.8	0
30.9	0
31	0
31.1	0
31.2	0
31.3	0
31.4	0
31.5	0
31.6	0
31.7	0
31.8	0
31.9	0
32	0
32.1	0
32.2	0
32.3	0
32.4	0
32.5	0
32.6	0
32.7	0
32.8	0
32.9	0
33	0
33.1	0
33.2	0
33.3	0
33.4	0
33.5	0
33.6	0
33.7	0
33.8	0
33.9	0
34	0
34.1	0
34.2	0
34.3	0
34.4	0
34.5	0
34.6	0
34.7	0
34.8	0
34.9	0
35	0
35.1	0
35.2	0
35.3	0
35.4	0
35.5	0
35.6	0
35.7	0
35.8	0
35.9	0
36	0
36.1	0
36.2	0
36.3	0
36.4	0
36.5	0
36.6	0
36.7	0
36.8	0
36.9	0
37	0
37.1	0
37.2	0
37.3	0
37.4	0
37.5	0
37.6	0
37.7	0
37.8	0
37.9	0
38	0
38.1	0
38.2	0
38.3	0
38.4	0
38.5	0
38.6	0
38.7	0
38.8	0
38.9	0
39	0
39.1	0
39.2	0
39.3	0
39.4	0
39.5	0
39.6	0
39.7	0
39.8	0
39.9	0
40	0
40.1	0
40.2	0
40.3	0
40.4	0
40.5	0
40.6	0
40.7	0
40.8	0
40.9	0
41	0
41.1	0
41.2	0
41.3	0
41.4	0
41.5	0
41.6	0
41.7	0
41.8	0
41.9	0
42	0
42.1	0
42.2	0
42.3	0
42.4	0
42.5	0
42.6	0
42.7	0
42.8	0
42.9	0
43	0
43.1	0
43.2	0
43.3	0
43.4	0
43.5	0
43.6	0
43.7	0
43.8	0
43.9	0
44	0
44.1	0
44.2	0
44.3	0
44.4	0
44.5	0
44.6	0
44.7	0
44.8	0
44.9	0
45	0
45.1	0
45.2	0
45.3	0
45.4	0
45.5	0
45.6	0
45.7	0
45.8	0
45.9	0
46	0
46.1	0
46.2	0
46.3	0
46.4	0
46.5	0
46.6	0
46.7	0
46.8	0
46.9	0
47	0
47.1	0
47.2	0
47.3	0
47.4	0
47.5	0
47.6	0
47.7	0
47.8	0
47.9	0
48	0
48.1	0
48.2	0
48.3	0
48.4	0
48.5	0
48.6	0
48.7	0
48.8	0
48.9	0
49	0
49.1	0
49.2	0
49.3	0
49.4	0
49.5	0
49.6	0
49.7	0
49.8	0
49.9	0
50	0
50.1	0
50.2	0
50.3	0
50.4	0
50.5	0
50.6	0
50.7	0
50.8	0
50.9	0
51	0
51.1	0
51.2	0
51.3	0
51.4	0
51.5	0
51.6	0
51.7	0
51.8	0
51.9	0
52	0
52.1	0
52.2	0
52.3	0
52.4	0
52.5	0
52.6	0
52.7	0
52.8	0
52.9	0
53	0
53.1	0
53.2	0
53.3	0
53.4	0
53.5	0
53.6	0
53.7	0
53.8	0
53.9	0
54	0
54.1	0
54.2	0
54.3	0
54.4	0
54.5	0
54.6	0
54.7	0
54.8	0
54.9	0
55	0
55.1	0
55.2	0
55.3	0
55.4	0
55.5	0
55.6	0
55.7	0
55.8	0
55.9	0
56	0
56.1	0
56.2	0
56.3	0
56.4	0
56.5	0
56.6	0
56.7	0
56.8	0
56.9	0
57	0
57.1	0
57.2	0
57.3	0
57.4	0
57.5	0
57.6	0
57.7	0
57.8	0
57.9	0
58	0
58.1	0
58.2	0
58.3	0
58.4	0
58.5	0
58.6	0
58.7	0
58.8	0
58.9	0
59	0
59.1	0
59.2	0
59.3	0
59.4	0
59.5	0
59.6	0
59.7	0
59.8	0
59.9	0
60	0
60.1	0
60.2	0
60.3	0
60.4	0
60.5	0
60.6	0
60.7	0
60.8	0
60.9	0
61	0
61.1	0
61.2	0
61.3	0
61.4	0
61.5	0
61.6	0
61.7	0
61.8	0
61.9	0
62	0
62.1	0
62.2	0
62.3	0
62.4	0
62.5	0
62.6	0
62.7	0
62.8	0
62.9	0
63	0
63.1	0
63.2	0
63.3	0
63.4	0
63.5	0
63.6	0
63.7	0
63.8	0
63.9	0
64	0
64.1	0
64.2	0
64.3	0
64.4	0
64.5	0
64.6	0
64.7	0
64.8	0
64.9	0
65	0
65.1	0
65.2	0
65.3	0
65.4	0
65.5	0
65.6	0
65.7	0
65.8	0
65.9	0
66	0
66.1	0
66.2	0
66.3	0
66.4	0
66.5	0
66.6	0
66.7	0
66.8	0
66.9	0
67	0
67.1	0
67.2	0
67.3	0
67.4	0
67.5	0
67.6	0
67.7	0
67.8	0
67.9	0
68	0
68.1	0
68.2	0
68.3	0
68.4	0
68.5	0
68.6	0
68.7	0
68.8	0
68.9	0
69	0
69.1	0
69.2	0
69.3	0
69.4	0
69.5	0
69.6	0
69.7	0
69.8	0
69.9	0
70	0
70.1	0
70.2	0
70.3	0
70.4	0
70.5	0
70.6	0
70.7	0
70.8	0
70.9	0
71	0
71.1	0
71.2	0
71.3	0
71.4	0
71.5	0
71.6	0
71.7	0
71.8	0
71.9	0
72	0
72.1	0
72.2	0
72.3	0
72.4	0
72.5	0
72.6	0
72.7	0
72.8	0
72.9	0
73	0
73.1	0
73.2	0
73.3	0
73.4	0
73.5	0
73.6	0
73.7	0
73.8	0
73.9	0
74	0
74.1	0
74.2	0
74.3	0
74.4	0
74.5	0
74.6	0
74.7	0
74.8	0
74.9	0
75	0
75.1	0
75.2	0
75.3	0
75.4	0
75.5	0
75.6	0
75.7	0
75.8	0
75.9	0
76	0
76.1	0
76.2	0
76.3	0
76.4	0
76.5	0
76.6	0
76.7	0
76.8	0
76.9	0
77	0
77.1	0
77.2	0
77.3	0
77.4	0
77.5	0
77.6	0
77.7	0
77.8	0
77.9	0
78	0
78.1	0
78.2	0
78.3	0
78.4	0
78.5	0
78.6	0
78.7	0
78.8	0
78.9	0
79	0
79.1	0
79.2	0
79.3	0
79.4	0
79.5	0
79.6	0
79.7	0
79.8	0
79.9	0
80	0
80.1	0
80.2	0
80.3	0
80.4	0
80.5	0
80.6	0
80.7	0
80.8	0
80.9	0
81	0
81.1	0
81.2	0
81.3	0
81.4	0
81.5	0
81.6	0
81.7	0
81.8	0
81.9	0
82	0
82.1	0
82.2	0
82.3	0
82.4	0
82.5	0
82.6	0
82.7	0
82.8	0
82.9	0
83	0
83.1	0
83.2	0
83.3	0
83.4	0
83.5	0
83.6	0
83.7	0
83.8	0
83.9	0
84	0
84.1	0
84.2	0
84.3	0
84.4	0
84.5	0
84.6	0
84.7	0
84.8	0
84.9	0
85	0
85.1	0
85.2	0
85.3	0
85.4	0
85.5	0
85.6	0
85.7	0
85.8	0
85.9	0
86	0
86.1	0
86.2	0
86.3	0
86.4	0
86.5	0
86.6	0
86.7	0
86.8	0
86.9	0
87	0
87.1	0
87.2	0
87.3	0
87.4	0
87.5	0
87.6	0
87.7	0
87.8	0
87.9	0
88	0
88.1	0
88.2	0
88.3	0
88.4	0
88.5	0
88.6	0
88.7	0
88.8	0
88.9	0
89	0
89.1	0
89.2	0
89.3	0
89.4	0
89.5	0
89.6	0
89.7	0
89.8	0
89.9	0
90	0
90.1	0
90.2	0
90.3	0
90.4	0
90.5	0
90.6	0
90.7	0
90.8	0
90.9	0
91	0
91.1	0
91.2	0
91.3	0
91.4	0
91.5	0
91.6	0
91.7	0
91.8	0
91.9	0
92	0
92.1	0
92.2	0
92.3	0
92.4	0
92.5	0
92.6	0
92.7	0
92.8	0
92.9	0
93	0
93.1	0
93.2	0
93.3	0
93.4	0
93.5	0
93.6	0
93.7	0
93.8	0
93.9	0
94	0
94.1	0
94.2	0
94.3	0
94.4	0
94.5	0
94.6	0
94.7	0
94.8	0
94.9	0
95	0
95.1	0
95.2	0
95.3	0
95.4	0
95.5	0
95.6	0
95.7	0
95.8	0
95.9	0
96	0
96.1	0
96.2	0
96.3	0
96.4	0
96.5	0
96.6	0
96.7	0
96.8	0
96.9	0
97	0
97.1	0
97.2	0
97.3	0
97.4	0
97.5	0
97.6	0
97.7	0
97.8	0
97.9	0
98	0
98.1	0
98.2	0
98.3	0
98.4	0
98.5	0
98.6	0
98.7	0
98.8	0
98.9	0
99	0
99.1	0
99.2	0
99.3	0
99.4	0
99.5	0
99.6	0
99.7	0
99.8	0
99.9	0
100	0
100.1	0.00323
100.2	0.00681
100.3	0.01067
100.4	0.01457
100.5	0.01785
100.6	0.02117
100.7	0.0251
100.8	0.02855
100.9	0.03175
101	0.0349
101.1	0.03853
101.2	0.04168
101.3	0.04501
101.4	0.04815
101.5	0.05105
101.6	0.05387
101.7	0.05701
101.8	0.05934
101.9	0.06245
102	0.06528
102.1	0.06829
102.2	0.07078
102.3	0.07364
102.4	0.07651
102.5	0.07894
102.6	0.08153
102.7	0.08383
102.8	0.08615
102.9	0.08859
103	0.09071
103.1	0.09326
103.2	0.09545
103.3	0.09799
103.4	0.10054
103.5	0.10258
103.6	0.10446
103.7	0.10603
103.8	0.10794
103.9	0.10999
104	0.1116
104.1	0.11353
104.2	0.1156
104.3	0.11739
104.4	0.11941
104.5	0.1212
104.6	0.12297
104.7	0.12456
104.8	0.12607
104.9	0.12764
105	0.1296
105.1	0.13177
105.2	0.13328
105.3	0.13496
105.4	0.13648
105.5	0.1382
105.6	0.13982
105.7	0.14117
105.8	0.1426
105.9	0.1438
106	0.14559
106.1	0.14624
106.2	0.14759
106.3	0.14929
106.4	0.15068
106.5	0.15218
106.6	0.15346
106.7	0.15459
106.8	0.15606
106.9	0.1571
107	0.1579
107.1	0.15906
107.2	0.16049
107.3	0.16131
107.4	0.16256
107.5	0.16371
107.6	0.16487
107.7	0.16597
107.8	0.16707
107.9	0.16795
108	0.16882
108.1	0.1697
108.2	0.17074
108.3	0.17157
108.4	0.17292
108.5	0.17381
108.6	0.17446
108.7	0.17508
108.8	0.17578
108.9	0.17654
109	0.17712
109.1	0.17803
109.2	0.17874
109.3	0.17957
109.4	0.18029
109.5	0.18108
109.6	0.18211
109.7	0.18296
109.8	0.18355
109.9	0.18402
110	0.18423
110.1	0.18501
110.2	0.18544
110.3	0.18638
110.4	0.18697
110.5	0.1873
110.6	0.18798
110.7	0.18823
110.8	0.18876
110.9	0.18954
111	0.19038
111.1	0.1911
111.2	0.19216
111.3	0.193
111.4	0.19355
111.5	0.19407
111.6	0.19468
111.7	0.19562
111.8	0.19643
111.9	0.19629
112	0.19695
112.1	0.19775
112.2	0.19853
112.3	0.19947
112.4	0.20014
112.5	0.20057
112.6	0.20064
112.7	0.20094
112.8	0.20173
112.9	0.20237
113	0.20282
113.1	0.20337
113.2	0.20355
113.3	0.20406
113.4	0.20448
113.5	0.20472
113.6	0.20541
113.7	0.20631
113.8	0.20696
113.9	0.2075
114	0.20803
114.1	0.20828
114.2	0.20887
114.3	0.20968
114.4	0.21019
114.5	0.21091
114.6	0.21168
114.7	0.21231
114.8	0.21224
114.9	0.21229
115	0.21252
115.1	0.21314
115.2	0.21313
115.3	0.21337
115.4	0.2131
115.5	0.21373
115.6	0.21415
115.7	0.21459
115.8	0.21511
115.9	0.21529
116	0.21508
116.1	0.21553
116.2	0.21564
116.3	0.21535
116.4	0.21558
116.5	0.21599
116.6	0.21635
116.7	0.21693
116.8	0.2173
116.9	0.21746
117	0.2178
117.1	0.21801
117.2	0.21815
117.3	0.21819
117.4	0.21876
117.5	0.21882
117.6	0.21939
117.7	0.21977
117.8	0.22028
117.9	0.22076
118	0.22074
118.1	0.22068
118.2	0.2206
118.3	0.22065
118.4	0.22068
118.5	0.22128
118.6	0.22144
118.7	0.22127
118.8	0.22121
118.9	0.2216
119	0.222
119.1	0.22208
119.2	0.22221
119.3	0.22214
119.4	0.22201
119.5	0.22223
119.6	0.22207
119.7	0.22222
119.8	0.2228
119.9	0.22308
120	0.22326
120.1	0.22285
120.2	0.22304
120.3	0.22347
120.4	0.22366
120.5	0.22368
120.6	0.22412
120.7	0.22422
120.8	0.22467
120.9	0.22466
121	0.22483
121.1	0.22511
121.2	0.22537
121.3	0.2254
121.4	0.22507
121.5	0.22488
121.6	0.22494
121.7	0.22492
121.8	0.22526
121.9	0.22525
122	0.22547
122.1	0.22593
122.2	0.22579
122.3	0.22588
122.4	0.22616
122.5	0.22592
122.6	0.2261
122.7	0.22664
122.8	0.2266
122.9	0.22637
123	0.22664
123.1	0.22668
123.2	0.22689
123.3	0.22702
123.4	0.22721
123.5	0.22768
123.6	0.2278
123.7	0.22805
123.8	0.22826
123.9	0.22835
124	0.22845
124.1	0.22877
124.2	0.22851
124.3	0.22868
124.4	0.2288
124.5	0.2286
124.6	0.22848
124.7	0.2283
124.8	0.22859
124.9	0.22888
125	0.22922
125.1	0.22926
125.2	0.2295
125.3	0.22957
125.4	0.22973
125.5	0.23016
125.6	0.23031
125.7	0.23068
125.8	0.23072
125.9	0.23121
126	0.23108
126.1	0.2313
126.2	0.23119
126.3	0.23149
126.4	0.23143
126.5	0.23156
126.6	0.23175
126.7	0.23181
126.8	0.23182
126.9	0.23208
127	0.23227
127.1	0.2318
127.2	0.23165
127.3	0.23163
127.4	0.23162
127.5	0.23196
127.6	0.23206
127.7	0.23244
127.8	0.23282
127.9	0.23256
128	0.23258
128.1	0.23273
128.2	0.23297
128.3	0.23295
128.4	0.23305
128.5	0.23308
128.6	0.23339
128.7	0.23335
128.8	0.23366
128.9	0.23345
129	0.23362
129.1	0.23373
129.2	0.23376
129.3	0.23398
129.4	0.23438
129.5	0.23431
129.6	0.23458
129.7	0.23477
129.8	0.2351
129.9	0.23501
130	0.23447
130.1	0.23446
130.2	0.2342
130.3	0.2345
130.4	0.23491
130.5	0.2351
130.6	0.23513
130.7	0.23516
130.8	0.23466
130.9	0.23455
131	0.23457
131.1	0.23487
131.2	0.23505
131.3	0.2349
131.4	0.23494
131.5	0.2352
131.6	0.23508
131.7	0.23563
131.8	0.23568
131.9	0.2358
132	0.23568
132.1	0.23585
132.2	0.23593
132.3	0.23578
132.4	0.23571
132.5	0.23587
132.6	0.23571
132.7	0.23579
132.8	0.23592
132.9	0.23615
133	0.2363
133.1	0.23636
133.2	0.23633
133.3	0.23653
133.4	0.23661
133.5	0.23672
133.6	0.2371
133.7	0.23708
133.8	0.23715
133.9	0.23705
134	0.23701
134.1	0.2371
134.2	0.23715
134.3	0.23686
134.4	0.23712
134.5	0.23715
134.6	0.23706
134.7	0.23716
134.8	0.23724
134.9	0.23742
135	0.23757
135.1	0.23762
135.2	0.23772
135.3	0.23743
135.4	0.23717
135.5	0.23692
135.6	0.2371
135.7	0.23686
135.8	0.23664
135.9	0.23643
136	0.23627
136.1	0.23622
136.2	0.23614
136.3	0.23623
136.4	0.23612
136.5	0.23564
136.6	0.23582
136.7	0.23561
136.8	0.23619
136.9	0.23638
137	0.23667
137.1	0.23647
137.2	0.23628
137.3	0.23639
137.4	0.2367
137.5	0.23743
137.6	0.2376
137.7	0.23747
137.8	0.23767
137.9	0.23795
138	0.23818
138.1	0.2383
138.2	0.23875
138.3	0.23918
138.4	0.23892
138.5	0.23887
138.6	0.23914
138.7	0.2395
138.8	0.23947
138.9	0.23924
139	0.23932
139.1	0.23921
139.2	0.23932
139.3	0.23911
139.4	0.23913
139.5	0.23902
139.6	0.23918
139.7	0.23917
139.8	0.23895
139.9	0.23893
140	0.23895
140.1	0.23897
140.2	0.23863
140.3	0.23822
140.4	0.23821
140.5	0.23862
140.6	0.23846
140.7	0.23888
140.8	0.23909
140.9	0.23959
141	0.23955
141.1	0.23955
141.2	0.23978
141.3	0.24028
141.4	0.24009
141.5	0.24042
141.6	0.24076
141.7	0.24045
141.8	0.24077
141.9	0.24056
142	0.24089
142.1	0.24099
142.2	0.24089
142.3	0.24086
142.4	0.24084
142.5	0.24076
142.6	0.24094
142.7	0.24108
142.8	0.24113
142.9	0.24099
143	0.24129
143.1	0.24101
143.2	0.241
143.3	0.24095
143.4	0.24096
143.5	0.24077
143.6	0.2408
143.7	0.24085
143.8	0.24071
143.9	0.24073
144	0.24063
144.1	0.24076
144.2	0.2407
144.3	0.2407
144.4	0.24095
144.5	0.24066
144.6	0.24089
144.7	0.24091
144.8	0.24042
144.9	0.24042
145	0.24014
145.1	0.24023
145.2	0.24027
145.3	0.23993
145.4	0.23984
145.5	0.23947
145.6	0.23952
145.7	0.23976
145.8	0.23983
145.9	0.23997
146	0.23999
146.1	0.24008
146.2	0.24039
146.3	0.24053
146.4	0.24095
146.5	0.24121
146.6	0.24125
146.7	0.24118
146.8	0.24086
146.9	0.24094
147	0.24093
147.1	0.24078
147.2	0.24057
147.3	0.24078
147.4	0.24123
147.5	0.24114
147.6	0.24114
147.7	0.24114
147.8	0.24104
147.9	0.24133
148	0.24163
148.1	0.24147
148.2	0.2417
148.3	0.24211
148.4	0.242
148.5	0.24204
148.6	0.24205
148.7	0.24245
148.8	0.24249
148.9	0.24269
149	0.24241
149.1	0.24233
149.2	0.24252
149.3	0.24236
149.4	0.24261
149.5	0.24299
149.6	0.24309
149.7	0.24338
149.8	0.24321
149.9	0.24334
150	0.24329
150.1	0.24303
150.2	0.24319
150.3	0.24308
150.4	0.24302
150.5	0.24323
150.6	0.24295
150.7	0.24322
150.8	0.2429
150.9	0.24289
151	0.24282
151.1	0.24291
151.2	0.24285
151.3	0.24264
151.4	0.24233
151.5	0.24222
151.6	0.24211
151.7	0.24215
151.8	0.24203
151.9	0.242
152	0.24172
152.1	0.24179
152.2	0.24192
152.3	0.24206
152.4	0.24203
152.5	0.24221
152.6	0.24228
152.7	0.24217
152.8	0.24209
152.9	0.24202
153	0.24185
153.1	0.24172
153.2	0.24193
153.3	0.24196
153.4	0.24191
153.5	0.24191
153.6	0.24221
153.7	0.24219
153.8	0.24248
153.9	0.24265
154	0.24224
154.1	0.24249
154.2	0.24266
154.3	0.24253
154.4	0.24227
154.5	0.24256
154.6	0.24236
154.7	0.24244
154.8	0.24258
154.9	0.24275
155	0.24306
155.1	0.24333
155.2	0.24334
155.3	0.24343
155.4	0.2434
155.5	0.2436
155.6	0.24354
155.7	0.2436
155.8	0.24358
155.9	0.24334
156	0.2433
156.1	0.24306
156.2	0.24343
156.3	0.24321
156.4	0.24311
156.5	0.2431
156.6	0.2434
156.7	0.24328
156.8	0.24347
156.9	0.24336
157	0.24345
157.1	0.24393
157.2	0.24428
157.3	0.24414
157.4	0.24416
157.5	0.24403
157.6	0.24411
157.7	0.24417
157.8	0.24398
157.9	0.24398
158	0.24425
158.1	0.24427
158.2	0.24471
158.3	0.24488
158.4	0.24491
158.5	0.24496
158.6	0.24486
158.7	0.2448
158.8	0.24498
158.9	0.24506
159	0.24513
159.1	0.24517
159.2	0.24492
159.3	0.24531
159.4	0.24515
159.5	0.2453
159.6	0.24548
159.7	0.24561
159.8	0.24569
159.9	0.24573
160	0.24601
160.1	0.24601
160.2	0.24618
160.3	0.24629
160.4	0.2461
160.5	0.24614
160.6	0.24635
160.7	0.24632
160.8	0.24646
160.9	0.24678
161	0.24665
161.1	0.24659
161.2	0.24677
161.3	0.24715
161.4	0.24719
161.5	0.24736
161.6	0.24731
161.7	0.24747
161.8	0.2474
161.9	0.24771
162	0.2478
162.1	0.24791
162.2	0.24829
162.3	0.2482
162.4	0.24812
162.5	0.24848
162.6	0.24879
162.7	0.24918
162.8	0.24922
162.9	0.2491
163	0.24892
163.1	0.2487
163.2	0.2488
163.3	0.249
163.4	0.24887
163.5	0.24905
163.6	0.24915
163.7	0.24937
163.8	0.24873
163.9	0.24859
164	0.24863
164.1	0.24866
164.2	0.24866
164.3	0.24908
164.4	0.2487
164.5	0.24884
164.6	0.24884
164.7	0.24947
164.8	0.2494
164.9	0.24963
165	0.24971
165.1	0.24995
165.2	0.25002
165.3	0.25017
165.4	0.25025
165.5	0.25049
165.6	0.25043
165.7	0.25034
165.8	0.2505
165.9	0.25043
166	0.25014
166.1	0.25043
166.2	0.25056
166.3	0.25073
166.4	0.2507
166.5	0.25071
166.6	0.25082
166.7	0.25066
166.8	0.25082
166.9	0.25096
167	0.2509
167.1	0.25107
167.2	0.25069
167.3	0.25089
167.4	0.25091
167.5	0.25076
167.6	0.25063
167.7	0.25088
167.8	0.25065
167.9	0.25086
168	0.25094
168.1	0.25105
168.2	0.2513
168.3	0.25144
168.4	0.25138
168.5	0.25078
168.6	0.25087
168.7	0.25061
168.8	0.25061
168.9	0.25012
169	0.24992
169.1	0.24993
169.2	0.25011
169.3	0.25043
169.4	0.25057
169.5	0.25019
169.6	0.25038
169.7	0.25048
169.8	0.25047
169.9	0.25081
170	0.25082
170.1	0.25086
170.2	0.25087
170.3	0.25134
170.4	0.25099
170.5	0.25123
170.6	0.25105
170.7	0.25105
170.8	0.25123
170.9	0.25118
171	0.25105
171.1	0.25118
171.2	0.25108
171.3	0.2511
171.4	0.2513
171.5	0.25134
171.6	0.25139
171.7	0.25126
171.8	0.25117
171.9	0.25154
172	0.25149
172.1	0.25153
172.2	0.25147
172.3	0.25173
172.4	0.25156
172.5	0.25165
172.6	0.25182
172.7	0.25169
172.8	0.25192
172.9	0.25216
173	0.25231
173.1	0.25233
173.2	0.25263
173.3	0.25281
173.4	0.25293
173.5	0.25293
173.6	0.25303
173.7	0.25305
173.8	0.25307
173.9	0.25331
174	0.25337
174.1	0.25307
174.2	0.25349
174.3	0.25348
174.4	0.25345
174.5	0.25341
174.6	0.25332
174.7	0.2531
174.8	0.2531
174.9	0.25311
175	0.25298
175.1	0.25294
175.2	0.25295
175.3	0.25327
175.4	0.2534
175.5	0.25313
175.6	0.25298
175.7	0.25315
175.8	0.25248
175.9	0.25285
176	0.2533
176.1	0.25374
176.2	0.25381
176.3	0.25405
176.4	0.25384
176.5	0.2535
176.6	0.25364
176.7	0.2532
176.8	0.25302
176.9	0.25308
177	0.25248
177.1	0.25253
177.2	0.25281
177.3	0.25278
177.4	0.25324
177.5	0.2532
177.6	0.25335
177.7	0.2535
177.8	0.25323
177.9	0.25284
178	0.25278
178.1	0.25284
178.2	0.25294
178.3	0.2526
178.4	0.25267
178.5	0.25237
178.6	0.25244
178.7	0.25255
178.8	0.25239
178.9	0.25272
179	0.25261
179.1	0.25299
179.2	0.25304
179.3	0.25336
179.4	0.25357
179.5	0.25365
179.6	0.25368
179.7	0.25374
179.8	0.25387
179.9	0.25389
180	0.25383
180.1	0.25411
180.2	0.25382
180.3	0.25394
180.4	0.25385
180.5	0.25387
180.6	0.25393
180.7	0.25388
180.8	0.25408
180.9	0.25435
181	0.2545
181.1	0.25481
181.2	0.25473
181.3	0.25479
181.4	0.25487
181.5	0.25467
181.6	0.25469
181.7	0.25475
181.8	0.25473
181.9	0.25467
182	0.25495
182.1	0.25486
182.2	0.25467
182.3	0.25451
182.4	0.25463
182.5	0.25454
182.6	0.25499
182.7	0.25478
182.8	0.25496
182.9	0.25487
183	0.25535
183.1	0.25563
183.2	0.2559
183.3	0.25584
183.4	0.2558
183.5	0.25597
183.6	0.25605
183.7	0.25638
183.8	0.25621
183.9	0.25595
184	0.25601
184.1	0.25573
184.2	0.25581
184.3	0.25576
184.4	0.25572
184.5	0.2557
184.6	0.25587
184.7	0.25597
184.8	0.25639
184.9	0.25663
185	0.25702
185.1	0.25695
185.2	0.25691
185.3	0.25683
185.4	0.25658
185.5	0.25668
185.6	0.25679
185.7	0.25664
185.8	0.25667
185.9	0.25692
186	0.25648
186.1	0.25642
186.2	0.25641
186.3	0.25635
186.4	0.25647
186.5	0.25666
186.6	0.25704
186.7	0.25741
186.8	0.25729
186.9	0.25702
187	0.25745
187.1	0.25743
187.2	0.25752
187.3	0.25734
187.4	0.25751
187.5	0.25715
187.6	0.25723
187.7	0.25708
187.8	0.2574
187.9	0.25745
188	0.25718
188.1	0.25706
188.2	0.25704
188.3	0.25717
188.4	0.25712
188.5	0.25662
188.6	0.25637
188.7	0.25654
188.8	0.2568
188.9	0.25654
189	0.25689
189.1	0.2571
189.2	0.25705
189.3	0.25735
189.4	0.25735
189.5	0.25777
189.6	0.25778
189.7	0.25753
189.8	0.25745
189.9	0.25758
190	0.25759
190.1	0.25735
190.2	0.2575
190.3	0.25756
190.4	0.2578
190.5	0.25792
190.6	0.25806
190.7	0.25811
190.8	0.25813
190.9	0.25829
191	0.25833
191.1	0.2579
191.2	0.25773
191.3	0.25756
191.4	0.2576
191.5	0.25742
191.6	0.25796
191.7	0.2578
191.8	0.25782
191.9	0.25795
192	0.25792
192.1	0.25805
192.2	0.25773
192.3	0.25778
192.4	0.25799
192.5	0.25786
192.6	0.25805
192.7	0.25799
192.8	0.25832
192.9	0.25843
193	0.25864
193.1	0.25851
193.2	0.2584
193.3	0.25844
193.4	0.25803
193.5	0.25801
193.6	0.25818
193.7	0.25758
193.8	0.2577
193.9	0.2576
194	0.25772
194.1	0.25786
194.2	0.2575
194.3	0.2575
194.4	0.25734
194.5	0.25733
194.6	0.25722
194.7	0.257
194.8	0.25677
194.9	0.25706
195	0.25701
195.1	0.25719
195.2	0.2572
195.3	0.25697
195.4	0.25696
195.5	0.25684
195.6	0.25676
195.7	0.25669
195.8	0.25719
195.9	0.25731
196	0.25714
196.1	0.25704
196.2	0.25736
196.3	0.25742
196.4	0.25761
196.5	0.25773
196.6	0.25786
196.7	0.258
196.8	0.2578
196.9	0.258
197	0.25845
197.1	0.25824
197.2	0.25835
197.3	0.2585
197.4	0.25871
197.5	0.25905
197.6	0.25967
197.7	0.25964
197.8	0.25993
197.9	0.2599
198	0.26004
198.1	0.26028
198.2	0.26038
198.3	0.26038
198.4	0.26045
198.5	0.26063
198.6	0.2603
198.7	0.26093
198.8	0.26059
198.9	0.26077
199	0.26086
199.1	0.26086
199.2	0.26087
199.3	0.26083
199.4	0.26071
199.5	0.26051
199.6	0.26069
199.7	0.26057
199.8	0.26064
199.9	0.26095
200	0.26098
[truncated: 14,000 more rows]
