# Supplementary material for: Bayesian inference of kinetic schemes for ion channels by Kalman filtering
Source: eLife journal article supplement (doi:10.7554/elife.62714), 2022-05-04
Supplement: fig4-data10 [file 1_Sim_N_50000_Strom_MW_0.0625M.xlsx]

## Sheet: 0.0625 M
0.1	0
0.2	0
0.3	0
0.4	0
0.5	0
0.6	0
0.7	0
0.8	0
0.9	0
1	0
1.1	0
1.2	0
1.3	0
1.4	0
1.5	0
1.6	0
1.7	0
1.8	0
1.9	0
2	0
2.1	0
2.2	0
2.3	0
2.4	0
2.5	0
2.6	0
2.7	0
2.8	0
2.9	0
3	0
3.1	0
3.2	0
3.3	0
3.4	0
3.5	0
3.6	0
3.7	0
3.8	0
3.9	0
4	0
4.1	0
4.2	0
4.3	0
4.4	0
4.5	0
4.6	0
4.7	0
4.8	0
4.9	0
5	0
5.1	0
5.2	0
5.3	0
5.4	0
5.5	0
5.6	0
5.7	0
5.8	0
5.9	0
6	0
6.1	0
6.2	0
6.3	0
6.4	0
6.5	0
6.6	0
6.7	0
6.8	0
6.9	0
7	0
7.1	0
7.2	0
7.3	0
7.4	0
7.5	0
7.6	0
7.7	0
7.8	0
7.9	0
8	0
8.1	0
8.2	0
8.3	0
8.4	0
8.5	0
8.6	0
8.7	0
8.8	0
8.9	0
9	0
9.1	0
9.2	0
9.3	0
9.4	0
9.5	0
9.6	0
9.7	0
9.8	0
9.9	0
10	0
10.1	0
10.2	0
10.3	0
10.4	0
10.5	0
10.6	0
10.7	0
10.8	0
10.9	0
11	0
11.1	0
11.2	0
11.3	0
11.4	0
11.5	0
11.6	0
11.7	0
11.8	0
11.9	0
12	0
12.1	0
12.2	0
12.3	0
12.4	0
12.5	0
12.6	0
12.7	0
12.8	0
12.9	0
13	0
13.1	0
13.2	0
13.3	0
13.4	0
13.5	0
13.6	0
13.7	0
13.8	0
13.9	0
14	0
14.1	0
14.2	0
14.3	0
14.4	0
14.5	0
14.6	0
14.7	0
14.8	0
14.9	0
15	0
15.1	0
15.2	0
15.3	0
15.4	0
15.5	0
15.6	0
15.7	0
15.8	0
15.9	0
16	0
16.1	0
16.2	0
16.3	0
16.4	0
16.5	0
16.6	0
16.7	0
16.8	0
16.9	0
17	0
17.1	0
17.2	0
17.3	0
17.4	0
17.5	0
17.6	0
17.7	0
17.8	0
17.9	0
18	0
18.1	0
18.2	0
18.3	0
18.4	0
18.5	0
18.6	0
18.7	0
18.8	0
18.9	0
19	0
19.1	0
19.2	0
19.3	0
19.4	0
19.5	0
19.6	0
19.7	0
19.8	0
19.9	0
20	0
20.1	0
20.2	0
20.3	0
20.4	0
20.5	0
20.6	0
20.7	0
20.8	0
20.9	0
21	0
21.1	0
21.2	0
21.3	0
21.4	0
21.5	0
21.6	0
21.7	0
21.8	0
21.9	0
22	0
22.1	0
22.2	0
22.3	0
22.4	0
22.5	0
22.6	0
22.7	0
22.8	0
22.9	0
23	0
23.1	0
23.2	0
23.3	0
23.4	0
23.5	0
23.6	0
23.7	0
23.8	0
23.9	0
24	0
24.1	0
24.2	0
24.3	0
24.4	0
24.5	0
24.6	0
24.7	0
24.8	0
24.9	0
25	0
25.1	0
25.2	0
25.3	0
25.4	0
25.5	0
25.6	0
25.7	0
25.8	0
25.9	0
26	0
26.1	0
26.2	0
26.3	0
26.4	0
26.5	0
26.6	0
26.7	0
26.8	0
26.9	0
27	0
27.1	0
27.2	0
27.3	0
27.4	0
27.5	0
27.6	0
27.7	0
27.8	0
27.9	0
28	0
28.1	0
28.2	0
28.3	0
28.4	0
28.5	0
28.6	0
28.7	0
28.8	0
28.9	0
29	0
29.1	0
29.2	0
29.3	0
29.4	0
29.5	0
29.6	0
29.7	0
29.8	0
29.9	0
30	0
30.1	0
30.2	0
30.3	0
30.4	0
30.5	0
30.6	0
30.7	0
30.8	0
30.9	0
31	0
31.1	0
31.2	0
31.3	0
31.4	0
31.5	0
31.6	0
31.7	0
31.8	0
31.9	0
32	0
32.1	0
32.2	0
32.3	0
32.4	0
32.5	0
32.6	0
32.7	0
32.8	0
32.9	0
33	0
33.1	0
33.2	0
33.3	0
33.4	0
33.5	0
33.6	0
33.7	0
33.8	0
33.9	0
34	0
34.1	0
34.2	0
34.3	0
34.4	0
34.5	0
34.6	0
34.7	0
34.8	0
34.9	0
35	0
35.1	0
35.2	0
35.3	0
35.4	0
35.5	0
35.6	0
35.7	0
35.8	0
35.9	0
36	0
36.1	0
36.2	0
36.3	0
36.4	0
36.5	0
36.6	0
36.7	0
36.8	0
36.9	0
37	0
37.1	0
37.2	0
37.3	0
37.4	0
37.5	0
37.6	0
37.7	0
37.8	0
37.9	0
38	0
38.1	0
38.2	0
38.3	0
38.4	0
38.5	0
38.6	0
38.7	0
38.8	0
38.9	0
39	0
39.1	0
39.2	0
39.3	0
39.4	0
39.5	0
39.6	0
39.7	0
39.8	0
39.9	0
40	0
40.1	0
40.2	0
40.3	0
40.4	0
40.5	0
40.6	0
40.7	0
40.8	0
40.9	0
41	0
41.1	0
41.2	0
41.3	0
41.4	0
41.5	0
41.6	0
41.7	0
41.8	0
41.9	0
42	0
42.1	0
42.2	0
42.3	0
42.4	0
42.5	0
42.6	0
42.7	0
42.8	0
42.9	0
43	0
43.1	0
43.2	0
43.3	0
43.4	0
43.5	0
43.6	0
43.7	0
43.8	0
43.9	0
44	0
44.1	0
44.2	0
44.3	0
44.4	0
44.5	0
44.6	0
44.7	0
44.8	0
44.9	0
45	0
45.1	0
45.2	0
45.3	0
45.4	0
45.5	0
45.6	0
45.7	0
45.8	0
45.9	0
46	0
46.1	0
46.2	0
46.3	0
46.4	0
46.5	0
46.6	0
46.7	0
46.8	0
46.9	0
47	0
47.1	0
47.2	0
47.3	0
47.4	0
47.5	0
47.6	0
47.7	0
47.8	0
47.9	0
48	0
48.1	0
48.2	0
48.3	0
48.4	0
48.5	0
48.6	0
48.7	0
48.8	0
48.9	0
49	0
49.1	0
49.2	0
49.3	0
49.4	0
49.5	0
49.6	0
49.7	0
49.8	0
49.9	0
50	0
50.1	0
50.2	0
50.3	0
50.4	0
50.5	0
50.6	0
50.7	0
50.8	0
50.9	0
51	0
51.1	0
51.2	0
51.3	0
51.4	0
51.5	0
51.6	0
51.7	0
51.8	0
51.9	0
52	0
52.1	0
52.2	0
52.3	0
52.4	0
52.5	0
52.6	0
52.7	0
52.8	0
52.9	0
53	0
53.1	0
53.2	0
53.3	0
53.4	0
53.5	0
53.6	0
53.7	0
53.8	0
53.9	0
54	0
54.1	0
54.2	0
54.3	0
54.4	0
54.5	0
54.6	0
54.7	0
54.8	0
54.9	0
55	0
55.1	0
55.2	0
55.3	0
55.4	0
55.5	0
55.6	0
55.7	0
55.8	0
55.9	0
56	0
56.1	0
56.2	0
56.3	0
56.4	0
56.5	0
56.6	0
56.7	0
56.8	0
56.9	0
57	0
57.1	0
57.2	0
57.3	0
57.4	0
57.5	0
57.6	0
57.7	0
57.8	0
57.9	0
58	0
58.1	0
58.2	0
58.3	0
58.4	0
58.5	0
58.6	0
58.7	0
58.8	0
58.9	0
59	0
59.1	0
59.2	0
59.3	0
59.4	0
59.5	0
59.6	0
59.7	0
59.8	0
59.9	0
60	0
60.1	0
60.2	0
60.3	0
60.4	0
60.5	0
60.6	0
60.7	0
60.8	0
60.9	0
61	0
61.1	0
61.2	0
61.3	0
61.4	0
61.5	0
61.6	0
61.7	0
61.8	0
61.9	0
62	0
62.1	0
62.2	0
62.3	0
62.4	0
62.5	0
62.6	0
62.7	0
62.8	0
62.9	0
63	0
63.1	0
63.2	0
63.3	0
63.4	0
63.5	0
63.6	0
63.7	0
63.8	0
63.9	0
64	0
64.1	0
64.2	0
64.3	0
64.4	0
64.5	0
64.6	0
64.7	0
64.8	0
64.9	0
65	0
65.1	0
65.2	0
65.3	0
65.4	0
65.5	0
65.6	0
65.7	0
65.8	0
65.9	0
66	0
66.1	0
66.2	0
66.3	0
66.4	0
66.5	0
66.6	0
66.7	0
66.8	0
66.9	0
67	0
67.1	0
67.2	0
67.3	0
67.4	0
67.5	0
67.6	0
67.7	0
67.8	0
67.9	0
68	0
68.1	0
68.2	0
68.3	0
68.4	0
68.5	0
68.6	0
68.7	0
68.8	0
68.9	0
69	0
69.1	0
69.2	0
69.3	0
69.4	0
69.5	0
69.6	0
69.7	0
69.8	0
69.9	0
70	0
70.1	0
70.2	0
70.3	0
70.4	0
70.5	0
70.6	0
70.7	0
70.8	0
70.9	0
71	0
71.1	0
71.2	0
71.3	0
71.4	0
71.5	0
71.6	0
71.7	0
71.8	0
71.9	0
72	0
72.1	0
72.2	0
72.3	0
72.4	0
72.5	0
72.6	0
72.7	0
72.8	0
72.9	0
73	0
73.1	0
73.2	0
73.3	0
73.4	0
73.5	0
73.6	0
73.7	0
73.8	0
73.9	0
74	0
74.1	0
74.2	0
74.3	0
74.4	0
74.5	0
74.6	0
74.7	0
74.8	0
74.9	0
75	0
75.1	0
75.2	0
75.3	0
75.4	0
75.5	0
75.6	0
75.7	0
75.8	0
75.9	0
76	0
76.1	0
76.2	0
76.3	0
76.4	0
76.5	0
76.6	0
76.7	0
76.8	0
76.9	0
77	0
77.1	0
77.2	0
77.3	0
77.4	0
77.5	0
77.6	0
77.7	0
77.8	0
77.9	0
78	0
78.1	0
78.2	0
78.3	0
78.4	0
78.5	0
78.6	0
78.7	0
78.8	0
78.9	0
79	0
79.1	0
79.2	0
79.3	0
79.4	0
79.5	0
79.6	0
79.7	0
79.8	0
79.9	0
80	0
80.1	0
80.2	0
80.3	0
80.4	0
80.5	0
80.6	0
80.7	0
80.8	0
80.9	0
81	0
81.1	0
81.2	0
81.3	0
81.4	0
81.5	0
81.6	0
81.7	0
81.8	0
81.9	0
82	0
82.1	0
82.2	0
82.3	0
82.4	0
82.5	0
82.6	0
82.7	0
82.8	0
82.9	0
83	0
83.1	0
83.2	0
83.3	0
83.4	0
83.5	0
83.6	0
83.7	0
83.8	0
83.9	0
84	0
84.1	0
84.2	0
84.3	0
84.4	0
84.5	0
84.6	0
84.7	0
84.8	0
84.9	0
85	0
85.1	0
85.2	0
85.3	0
85.4	0
85.5	0
85.6	0
85.7	0
85.8	0
85.9	0
86	0
86.1	0
86.2	0
86.3	0
86.4	0
86.5	0
86.6	0
86.7	0
86.8	0
86.9	0
87	0
87.1	0
87.2	0
87.3	0
87.4	0
87.5	0
87.6	0
87.7	0
87.8	0
87.9	0
88	0
88.1	0
88.2	0
88.3	0
88.4	0
88.5	0
88.6	0
88.7	0
88.8	0
88.9	0
89	0
89.1	0
89.2	0
89.3	0
89.4	0
89.5	0
89.6	0
89.7	0
89.8	0
89.9	0
90	0
90.1	0
90.2	0
90.3	0
90.4	0
90.5	0
90.6	0
90.7	0
90.8	0
90.9	0
91	0
91.1	0
91.2	0
91.3	0
91.4	0
91.5	0
91.6	0
91.7	0
91.8	0
91.9	0
92	0
92.1	0
92.2	0
92.3	0
92.4	0
92.5	0
92.6	0
92.7	0
92.8	0
92.9	0
93	0
93.1	0
93.2	0
93.3	0
93.4	0
93.5	0
93.6	0
93.7	0
93.8	0
93.9	0
94	0
94.1	0
94.2	0
94.3	0
94.4	0
94.5	0
94.6	0
94.7	0
94.8	0
94.9	0
95	0
95.1	0
95.2	0
95.3	0
95.4	0
95.5	0
95.6	0
95.7	0
95.8	0
95.9	0
96	0
96.1	0
96.2	0
96.3	0
96.4	0
96.5	0
96.6	0
96.7	0
96.8	0
96.9	0
97	0
97.1	0
97.2	0
97.3	0
97.4	0
97.5	0
97.6	0
97.7	0
97.8	0
97.9	0
98	0
98.1	0
98.2	0
98.3	0
98.4	0
98.5	0
98.6	0
98.7	0
98.8	0
98.9	0
99	0
99.1	0
99.2	0
99.3	0
99.4	0
99.5	0
99.6	0
99.7	0
99.8	0
99.9	0
100	0
100.1	0
100.2	0
100.3	0
100.4	0
100.5	0
100.6	0
100.7	0
100.8	0
100.9	0
101	0
101.1	0
101.2	0
101.3	0
101.4	4e-05
101.5	4e-05
101.6	4e-05
101.7	4e-05
101.8	6e-05
101.9	6e-05
102	6e-05
102.1	6e-05
102.2	6e-05
102.3	6e-05
102.4	6e-05
102.5	8e-05
102.6	8e-05
102.7	8e-05
102.8	8e-05
102.9	8e-05
103	0.0001
103.1	0.00012
103.2	0.00012
103.3	0.00014
103.4	0.00014
103.5	0.00014
103.6	0.00016
103.7	0.00018
103.8	0.0002
103.9	0.0002
104	0.00024
104.1	0.00024
104.2	0.00028
104.3	0.00028
104.4	0.00032
104.5	0.00036
104.6	0.00036
104.7	0.00038
104.8	0.00044
104.9	0.00048
105	0.00056
105.1	0.00058
105.2	0.00066
105.3	0.00068
105.4	0.00068
105.5	0.0007
105.6	0.00072
105.7	0.00074
105.8	0.00082
105.9	0.00086
106	0.0009
106.1	0.0009
106.2	0.00094
106.3	0.00096
106.4	0.00102
106.5	0.00106
106.6	0.00112
106.7	0.00118
106.8	0.00122
106.9	0.00126
107	0.00128
107.1	0.00132
107.2	0.00134
107.3	0.0014
107.4	0.0015
107.5	0.00148
107.6	0.00154
107.7	0.0016
107.8	0.00162
107.9	0.00164
108	0.00164
108.1	0.00166
108.2	0.00168
108.3	0.00166
108.4	0.00166
108.5	0.00166
108.6	0.0017
108.7	0.00172
108.8	0.00178
108.9	0.00186
109	0.0019
109.1	0.00196
109.2	0.002
109.3	0.00202
109.4	0.00214
109.5	0.00218
109.6	0.00226
109.7	0.0023
109.8	0.00228
109.9	0.0023
110	0.00236
110.1	0.00242
110.2	0.00246
110.3	0.0025
110.4	0.0025
110.5	0.00254
110.6	0.0026
110.7	0.00264
110.8	0.00272
110.9	0.00278
111	0.0028
111.1	0.00282
111.2	0.0029
111.3	0.00294
111.4	0.00302
111.5	0.0031
111.6	0.00312
111.7	0.00312
111.8	0.0032
111.9	0.00328
112	0.00326
112.1	0.00334
112.2	0.00338
112.3	0.00346
112.4	0.00346
112.5	0.0035
112.6	0.0035
112.7	0.00356
112.8	0.00364
112.9	0.00366
113	0.0037
113.1	0.00374
113.2	0.00384
113.3	0.0039
113.4	0.00394
113.5	0.00404
113.6	0.00408
113.7	0.00414
113.8	0.0042
113.9	0.00426
114	0.00426
114.1	0.00434
114.2	0.00442
114.3	0.0045
114.4	0.00454
114.5	0.00456
114.6	0.0046
114.7	0.00468
114.8	0.00474
114.9	0.0048
115	0.0049
115.1	0.00496
115.2	0.00504
115.3	0.00506
115.4	0.00508
115.5	0.00506
115.6	0.00512
115.7	0.00524
115.8	0.00524
115.9	0.00528
116	0.00536
116.1	0.00544
116.2	0.00548
116.3	0.00558
116.4	0.00566
116.5	0.0057
116.6	0.00572
116.7	0.0058
116.8	0.00582
116.9	0.00592
117	0.00592
117.1	0.00598
117.2	0.00604
117.3	0.00606
117.4	0.0061
117.5	0.00614
117.6	0.0062
117.7	0.00622
117.8	0.00624
117.9	0.00628
118	0.00632
118.1	0.00638
118.2	0.00642
118.3	0.00644
118.4	0.00642
118.5	0.00642
118.6	0.00656
118.7	0.00662
118.8	0.00672
118.9	0.00674
119	0.00678
119.1	0.0069
119.2	0.00694
119.3	0.00698
119.4	0.00702
119.5	0.00704
119.6	0.0071
119.7	0.00718
119.8	0.00722
119.9	0.00728
120	0.00732
120.1	0.00738
120.2	0.00736
120.3	0.00744
120.4	0.00744
120.5	0.0075
120.6	0.00756
120.7	0.00772
120.8	0.00778
120.9	0.00782
121	0.00788
121.1	0.008
121.2	0.00806
121.3	0.00812
121.4	0.00818
121.5	0.00822
121.6	0.0083
121.7	0.00834
121.8	0.00846
121.9	0.00848
122	0.00852
122.1	0.00864
122.2	0.00866
122.3	0.0087
122.4	0.00874
122.5	0.00876
122.6	0.00882
122.7	0.00888
122.8	0.00898
122.9	0.00906
123	0.0091
123.1	0.00916
123.2	0.00926
123.3	0.00926
123.4	0.0093
123.5	0.00942
123.6	0.00944
123.7	0.00944
123.8	0.00948
123.9	0.00952
124	0.00962
124.1	0.00972
124.2	0.00976
124.3	0.0098
124.4	0.00984
124.5	0.0099
124.6	0.01
124.7	0.01012
124.8	0.01012
124.9	0.01024
125	0.0103
125.1	0.0104
125.2	0.01046
125.3	0.0105
125.4	0.01058
125.5	0.01058
125.6	0.01058
125.7	0.01066
125.8	0.01066
125.9	0.0107
126	0.01076
126.1	0.01082
126.2	0.01092
126.3	0.01104
126.4	0.0112
126.5	0.01128
126.6	0.01128
126.7	0.01132
126.8	0.01138
126.9	0.01144
127	0.0115
127.1	0.0115
127.2	0.01156
127.3	0.01162
127.4	0.01168
127.5	0.01178
127.6	0.01182
127.7	0.01186
127.8	0.01188
127.9	0.01188
128	0.01194
128.1	0.01198
128.2	0.01198
128.3	0.01196
128.4	0.01204
128.5	0.01208
128.6	0.01212
128.7	0.01216
128.8	0.01214
128.9	0.01222
129	0.01234
129.1	0.01242
129.2	0.01246
129.3	0.0125
129.4	0.01254
129.5	0.0126
129.6	0.01266
129.7	0.0127
129.8	0.01278
129.9	0.01282
130	0.01288
130.1	0.01296
130.2	0.01318
130.3	0.01326
130.4	0.01332
130.5	0.0134
130.6	0.01348
130.7	0.01352
130.8	0.01358
130.9	0.01364
131	0.01374
131.1	0.01378
131.2	0.01384
131.3	0.01398
131.4	0.01402
131.5	0.01402
131.6	0.01408
131.7	0.01412
131.8	0.01412
131.9	0.01424
132	0.01434
132.1	0.01444
132.2	0.01452
132.3	0.01462
132.4	0.01468
132.5	0.0148
132.6	0.01482
132.7	0.01492
132.8	0.01504
132.9	0.0151
133	0.01516
133.1	0.01528
133.2	0.01528
133.3	0.0153
133.4	0.01532
133.5	0.0154
133.6	0.01542
133.7	0.01538
133.8	0.01544
133.9	0.01552
134	0.01558
134.1	0.01566
134.2	0.01574
134.3	0.01588
134.4	0.01592
134.5	0.01594
134.6	0.01606
134.7	0.01612
134.8	0.0162
134.9	0.01622
135	0.01624
135.1	0.01634
135.2	0.01632
135.3	0.01642
135.4	0.01648
135.5	0.01652
135.6	0.01656
135.7	0.0167
135.8	0.01672
135.9	0.01676
136	0.01688
136.1	0.01692
136.2	0.01694
136.3	0.01698
136.4	0.01696
136.5	0.01698
136.6	0.01704
136.7	0.0171
136.8	0.01712
136.9	0.01716
137	0.01724
137.1	0.0173
137.2	0.01744
137.3	0.01752
137.4	0.01756
137.5	0.0176
137.6	0.0176
137.7	0.01764
137.8	0.0177
137.9	0.01772
138	0.01786
138.1	0.01786
138.2	0.01784
138.3	0.0179
138.4	0.01794
138.5	0.01796
138.6	0.018
138.7	0.01814
138.8	0.01816
138.9	0.0182
139	0.01822
139.1	0.01826
139.2	0.0183
139.3	0.01836
139.4	0.0184
139.5	0.01844
139.6	0.01846
139.7	0.01848
139.8	0.01854
139.9	0.01866
140	0.01878
140.1	0.01886
140.2	0.0189
140.3	0.01896
140.4	0.01902
140.5	0.01902
140.6	0.01908
140.7	0.01908
140.8	0.01916
140.9	0.01924
141	0.01936
141.1	0.0194
141.2	0.0194
141.3	0.01944
141.4	0.0195
141.5	0.0196
141.6	0.01968
141.7	0.01984
141.8	0.01996
141.9	0.02014
142	0.02016
142.1	0.02028
142.2	0.02032
142.3	0.02034
142.4	0.0203
142.5	0.02034
142.6	0.02034
142.7	0.02042
142.8	0.02042
142.9	0.02048
143	0.02052
143.1	0.02066
143.2	0.0207
143.3	0.02076
143.4	0.02086
143.5	0.02086
143.6	0.02102
143.7	0.02108
143.8	0.02108
143.9	0.02114
144	0.02122
144.1	0.02128
144.2	0.02134
144.3	0.02144
144.4	0.02154
144.5	0.02156
144.6	0.02156
144.7	0.0216
144.8	0.02166
144.9	0.0217
145	0.02172
145.1	0.02176
145.2	0.02186
145.3	0.02194
145.4	0.022
145.5	0.02204
145.6	0.02208
145.7	0.0221
145.8	0.02216
145.9	0.02224
146	0.02226
146.1	0.02228
146.2	0.02236
146.3	0.02242
146.4	0.02246
146.5	0.02248
146.6	0.02256
146.7	0.0226
146.8	0.02268
146.9	0.02272
147	0.02274
147.1	0.02274
147.2	0.0228
147.3	0.02286
147.4	0.02286
147.5	0.0229
147.6	0.02294
147.7	0.02298
147.8	0.02296
147.9	0.023
148	0.02302
148.1	0.02302
148.2	0.02304
148.3	0.02304
148.4	0.02314
148.5	0.0232
148.6	0.0232
148.7	0.0233
148.8	0.02338
148.9	0.02344
149	0.02352
149.1	0.02362
149.2	0.0237
149.3	0.02372
149.4	0.02376
149.5	0.02384
149.6	0.02386
149.7	0.02392
149.8	0.024
149.9	0.02408
150	0.02414
150.1	0.02418
150.2	0.02412
150.3	0.0241
150.4	0.02416
150.5	0.02422
150.6	0.0242
150.7	0.02436
150.8	0.02446
150.9	0.0245
151	0.02454
151.1	0.02462
151.2	0.02466
151.3	0.02476
151.4	0.02476
151.5	0.02478
151.6	0.02482
151.7	0.02494
151.8	0.02498
151.9	0.02502
152	0.02502
152.1	0.0251
152.2	0.02508
152.3	0.02512
152.4	0.02512
152.5	0.02508
152.6	0.02516
152.7	0.0252
152.8	0.02524
152.9	0.02522
153	0.02526
153.1	0.02534
153.2	0.02538
153.3	0.02538
153.4	0.02546
153.5	0.02556
153.6	0.0256
153.7	0.02566
153.8	0.0257
153.9	0.02568
154	0.02572
154.1	0.02576
154.2	0.02584
154.3	0.02594
154.4	0.02596
154.5	0.02602
154.6	0.02604
154.7	0.02606
154.8	0.02608
154.9	0.02612
155	0.02628
155.1	0.0264
155.2	0.02654
155.3	0.02654
155.4	0.0266
155.5	0.02658
155.6	0.02656
155.7	0.0266
155.8	0.02662
155.9	0.02668
156	0.02668
156.1	0.02672
156.2	0.02686
156.3	0.02702
156.4	0.0271
156.5	0.02716
156.6	0.02714
156.7	0.02716
156.8	0.0272
156.9	0.02726
157	0.02736
157.1	0.02742
157.2	0.02738
157.3	0.02746
157.4	0.02748
157.5	0.02746
157.6	0.0275
157.7	0.02756
157.8	0.02752
157.9	0.02754
158	0.02762
158.1	0.0277
158.2	0.02774
158.3	0.02784
158.4	0.02788
158.5	0.02796
158.6	0.028
158.7	0.0281
158.8	0.02818
158.9	0.0282
159	0.02818
159.1	0.0282
159.2	0.02824
159.3	0.02826
159.4	0.02832
159.5	0.02836
159.6	0.0284
159.7	0.0284
159.8	0.02846
159.9	0.02844
160	0.02852
160.1	0.02844
160.2	0.02848
160.3	0.02842
160.4	0.02842
160.5	0.02846
160.6	0.0285
160.7	0.02864
160.8	0.0287
160.9	0.02878
161	0.02882
161.1	0.02886
161.2	0.0289
161.3	0.02896
161.4	0.02904
161.5	0.02918
161.6	0.02922
161.7	0.02926
161.8	0.02934
161.9	0.0293
162	0.02934
162.1	0.0294
162.2	0.02944
162.3	0.02948
162.4	0.02954
162.5	0.02962
162.6	0.02968
162.7	0.02974
162.8	0.02974
162.9	0.02976
163	0.02982
163.1	0.02986
163.2	0.02992
163.3	0.03
163.4	0.02998
163.5	0.02998
163.6	0.03006
163.7	0.0301
163.8	0.03016
163.9	0.03014
164	0.03024
164.1	0.0302
164.2	0.0302
164.3	0.03024
164.4	0.03028
164.5	0.0304
164.6	0.03056
164.7	0.03058
164.8	0.03056
164.9	0.03064
165	0.03066
165.1	0.03058
165.2	0.0306
165.3	0.0307
165.4	0.03082
165.5	0.03094
165.6	0.03098
165.7	0.03104
165.8	0.03114
165.9	0.0311
166	0.03114
166.1	0.03116
166.2	0.0312
166.3	0.0312
166.4	0.03118
166.5	0.03128
166.6	0.03134
166.7	0.0314
166.8	0.0315
166.9	0.03152
167	0.03154
167.1	0.0317
167.2	0.03174
167.3	0.03178
167.4	0.03186
167.5	0.03184
167.6	0.03188
167.7	0.0319
167.8	0.03198
167.9	0.03212
168	0.0321
168.1	0.03216
168.2	0.0322
168.3	0.03222
168.4	0.03232
168.5	0.0323
168.6	0.03238
168.7	0.0324
168.8	0.03244
168.9	0.03248
169	0.03244
169.1	0.03244
169.2	0.03252
169.3	0.03254
169.4	0.03254
169.5	0.03254
169.6	0.03254
169.7	0.03258
169.8	0.0326
169.9	0.03262
170	0.0327
170.1	0.03268
170.2	0.03262
170.3	0.03258
170.4	0.0326
170.5	0.03254
170.6	0.03262
170.7	0.03262
170.8	0.03268
170.9	0.03286
171	0.0329
171.1	0.03288
171.2	0.03298
171.3	0.03302
171.4	0.03302
171.5	0.03306
171.6	0.03308
171.7	0.033
171.8	0.03308
171.9	0.03314
172	0.03314
172.1	0.0332
172.2	0.03322
172.3	0.0333
172.4	0.03332
172.5	0.03336
172.6	0.03334
172.7	0.03336
172.8	0.03338
172.9	0.03342
173	0.03342
173.1	0.03346
173.2	0.03352
173.3	0.03354
173.4	0.03358
173.5	0.03362
173.6	0.03374
173.7	0.03376
173.8	0.0339
173.9	0.03402
174	0.03402
174.1	0.03402
174.2	0.03398
174.3	0.03406
174.4	0.0341
174.5	0.03416
174.6	0.03416
174.7	0.03418
174.8	0.03418
174.9	0.0342
175	0.0342
175.1	0.0343
175.2	0.03426
175.3	0.03428
175.4	0.03432
175.5	0.03436
175.6	0.03444
175.7	0.0345
175.8	0.03446
175.9	0.03454
176	0.03468
176.1	0.0347
176.2	0.0347
176.3	0.0347
176.4	0.03472
176.5	0.03478
176.6	0.03474
176.7	0.03478
176.8	0.03494
176.9	0.03494
177	0.03502
177.1	0.03504
177.2	0.0351
177.3	0.0352
177.4	0.03524
177.5	0.03532
177.6	0.03536
177.7	0.0354
177.8	0.03542
177.9	0.0355
178	0.03554
178.1	0.03554
178.2	0.03564
178.3	0.03566
178.4	0.03576
178.5	0.0358
178.6	0.03596
178.7	0.03604
178.8	0.03612
178.9	0.03618
179	0.03628
179.1	0.03634
179.2	0.0364
179.3	0.03644
179.4	0.03644
179.5	0.0365
179.6	0.0365
179.7	0.03648
179.8	0.03654
179.9	0.0366
180	0.03664
180.1	0.03666
180.2	0.03676
180.3	0.03676
180.4	0.03672
180.5	0.03676
180.6	0.03686
180.7	0.03698
180.8	0.03698
180.9	0.03704
181	0.03716
181.1	0.03716
181.2	0.03738
181.3	0.03738
181.4	0.03736
181.5	0.03738
181.6	0.03748
181.7	0.03754
181.8	0.03754
181.9	0.03758
182	0.0376
182.1	0.0376
182.2	0.03756
182.3	0.03754
182.4	0.03762
182.5	0.03772
182.6	0.03778
182.7	0.03786
182.8	0.03786
182.9	0.03794
183	0.038
183.1	0.03806
183.2	0.03814
183.3	0.0382
183.4	0.03822
183.5	0.03828
183.6	0.03832
183.7	0.03828
183.8	0.03836
183.9	0.0384
184	0.03838
184.1	0.03838
184.2	0.03842
184.3	0.03848
184.4	0.0385
184.5	0.03852
184.6	0.03846
184.7	0.03848
184.8	0.03856
184.9	0.03862
185	0.03872
185.1	0.03878
185.2	0.03886
185.3	0.03902
185.4	0.03906
185.5	0.03916
185.6	0.03926
185.7	0.03924
185.8	0.0393
185.9	0.03932
186	0.0393
186.1	0.03942
186.2	0.03946
186.3	0.03952
186.4	0.03948
186.5	0.0395
186.6	0.03954
186.7	0.03954
186.8	0.03956
186.9	0.03956
187	0.03952
187.1	0.03956
187.2	0.03966
187.3	0.0397
187.4	0.0398
187.5	0.0398
187.6	0.03976
187.7	0.03982
187.8	0.03984
187.9	0.03978
188	0.03982
188.1	0.03982
188.2	0.0398
188.3	0.03978
188.4	0.03978
188.5	0.0398
188.6	0.03986
188.7	0.03994
188.8	0.04004
188.9	0.04002
189	0.04004
189.1	0.04012
189.2	0.0401
189.3	0.04016
189.4	0.04018
189.5	0.0402
189.6	0.0402
189.7	0.0403
189.8	0.04032
189.9	0.04032
190	0.04032
190.1	0.04026
190.2	0.0403
190.3	0.04036
190.4	0.0404
190.5	0.0404
190.6	0.04044
190.7	0.04044
190.8	0.04042
190.9	0.04046
191	0.04052
191.1	0.0405
191.2	0.0405
191.3	0.0405
191.4	0.04054
191.5	0.04058
191.6	0.04066
191.7	0.0407
191.8	0.04074
191.9	0.04072
192	0.04074
192.1	0.04084
192.2	0.04082
192.3	0.04084
192.4	0.04086
192.5	0.0409
192.6	0.041
192.7	0.041
192.8	0.04106
192.9	0.04108
193	0.0411
193.1	0.04116
193.2	0.04116
193.3	0.04122
193.4	0.04126
193.5	0.0413
193.6	0.04128
193.7	0.04138
193.8	0.04138
193.9	0.04136
194	0.04136
194.1	0.0414
194.2	0.04138
194.3	0.04146
194.4	0.04136
194.5	0.04142
194.6	0.04146
194.7	0.04152
194.8	0.04148
194.9	0.0416
195	0.04162
195.1	0.04168
195.2	0.04174
195.3	0.04174
195.4	0.0417
195.5	0.04172
195.6	0.04172
195.7	0.04172
195.8	0.0418
195.9	0.04186
196	0.04182
196.1	0.04176
196.2	0.04178
196.3	0.04182
196.4	0.04186
196.5	0.04198
196.6	0.04196
196.7	0.04198
196.8	0.04192
196.9	0.04196
197	0.04198
197.1	0.04202
197.2	0.04212
197.3	0.04216
197.4	0.04222
197.5	0.04222
197.6	0.04218
197.7	0.04218
197.8	0.04224
197.9	0.04238
198	0.04252
198.1	0.04248
198.2	0.04256
198.3	0.04258
198.4	0.04264
198.5	0.04262
198.6	0.04264
198.7	0.04262
198.8	0.04268
198.9	0.04266
199	0.04278
199.1	0.0428
199.2	0.04284
199.3	0.0429
199.4	0.04288
199.5	0.0429
199.6	0.04292
199.7	0.04298
199.8	0.04306
199.9	0.0431
200	0.04304
[truncated: 14,000 more rows]
