# Supplementary material for: Bayesian inference of kinetic schemes for ion channels by Kalman filtering
Source: eLife journal article supplement (doi:10.7554/elife.62714), 2022-05-04
Supplement: fig4-data10 [file elife-62714-fig4-data10-v2.zip]

## Sheet: Tabelle1
0.1	0
0.2	0
0.3	0
0.4	0
0.5	0
0.6	0
0.7	0
0.8	0
0.9	0
1	0
1.1	0
1.2	0
1.3	0
1.4	0
1.5	0
1.6	0
1.7	0
1.8	0
1.9	0
2	0
2.1	0
2.2	0
2.3	0
2.4	0
2.5	0
2.6	0
2.7	0
2.8	0
2.9	0
3	0
3.1	0
3.2	0
3.3	0
3.4	0
3.5	0
3.6	0
3.7	0
3.8	0
3.9	0
4	0
4.1	0
4.2	0
4.3	0
4.4	0
4.5	0
4.6	0
4.7	0
4.8	0
4.9	0
5	0
5.1	0
5.2	0
5.3	0
5.4	0
5.5	0
5.6	0
5.7	0
5.8	0
5.9	0
6	0
6.1	0
6.2	0
6.3	0
6.4	0
6.5	0
6.6	0
6.7	0
6.8	0
6.9	0
7	0
7.1	0
7.2	0
7.3	0
7.4	0
7.5	0
7.6	0
7.7	0
7.8	0
7.9	0
8	0
8.1	0
8.2	0
8.3	0
8.4	0
8.5	0
8.6	0
8.7	0
8.8	0
8.9	0
9	0
9.1	0
9.2	0
9.3	0
9.4	0
9.5	0
9.6	0
9.7	0
9.8	0
9.9	0
10	0
10.1	0
10.2	0
10.3	0
10.4	0
10.5	0
10.6	0
10.7	0
10.8	0
10.9	0
11	0
11.1	0
11.2	0
11.3	0
11.4	0
11.5	0
11.6	0
11.7	0
11.8	0
11.9	0
12	0
12.1	0
12.2	0
12.3	0
12.4	0
12.5	0
12.6	0
12.7	0
12.8	0
12.9	0
13	0
13.1	0
13.2	0
13.3	0
13.4	0
13.5	0
13.6	0
13.7	0
13.8	0
13.9	0
14	0
14.1	0
14.2	0
14.3	0
14.4	0
14.5	0
14.6	0
14.7	0
14.8	0
14.9	0
15	0
15.1	0
15.2	0
15.3	0
15.4	0
15.5	0
15.6	0
15.7	0
15.8	0
15.9	0
16	0
16.1	0
16.2	0
16.3	0
16.4	0
16.5	0
16.6	0
16.7	0
16.8	0
16.9	0
17	0
17.1	0
17.2	0
17.3	0
17.4	0
17.5	0
17.6	0
17.7	0
17.8	0
17.9	0
18	0
18.1	0
18.2	0
18.3	0
18.4	0
18.5	0
18.6	0
18.7	0
18.8	0
18.9	0
19	0
19.1	0
19.2	0
19.3	0
19.4	0
19.5	0
19.6	0
19.7	0
19.8	0
19.9	0
20	0
20.1	0
20.2	0
20.3	0
20.4	0
20.5	0
20.6	0
20.7	0
20.8	0
20.9	0
21	0
21.1	0
21.2	0
21.3	0
21.4	0
21.5	0
21.6	0
21.7	0
21.8	0
21.9	0
22	0
22.1	0
22.2	0
22.3	0
22.4	0
22.5	0
22.6	0
22.7	0
22.8	0
22.9	0
23	0
23.1	0
23.2	0
23.3	0
23.4	0
23.5	0
23.6	0
23.7	0
23.8	0
23.9	0
24	0
24.1	0
24.2	0
24.3	0
24.4	0
24.5	0
24.6	0
24.7	0
24.8	0
24.9	0
25	0
25.1	0
25.2	0
25.3	0
25.4	0
25.5	0
25.6	0
25.7	0
25.8	0
25.9	0
26	0
26.1	0
26.2	0
26.3	0
26.4	0
26.5	0
26.6	0
26.7	0
26.8	0
26.9	0
27	0
27.1	0
27.2	0
27.3	0
27.4	0
27.5	0
27.6	0
27.7	0
27.8	0
27.9	0
28	0
28.1	0
28.2	0
28.3	0
28.4	0
28.5	0
28.6	0
28.7	0
28.8	0
28.9	0
29	0
29.1	0
29.2	0
29.3	0
29.4	0
29.5	0
29.6	0
29.7	0
29.8	0
29.9	0
30	0
30.1	0
30.2	0
30.3	0
30.4	0
30.5	0
30.6	0
30.7	0
30.8	0
30.9	0
31	0
31.1	0
31.2	0
31.3	0
31.4	0
31.5	0
31.6	0
31.7	0
31.8	0
31.9	0
32	0
32.1	0
32.2	0
32.3	0
32.4	0
32.5	0
32.6	0
32.7	0
32.8	0
32.9	0
33	0
33.1	0
33.2	0
33.3	0
33.4	0
33.5	0
33.6	0
33.7	0
33.8	0
33.9	0
34	0
34.1	0
34.2	0
34.3	0
34.4	0
34.5	0
34.6	0
34.7	0
34.8	0
34.9	0
35	0
35.1	0
35.2	0
35.3	0
35.4	0
35.5	0
35.6	0
35.7	0
35.8	0
35.9	0
36	0
36.1	0
36.2	0
36.3	0
36.4	0
36.5	0
36.6	0
36.7	0
36.8	0
36.9	0
37	0
37.1	0
37.2	0
37.3	0
37.4	0
37.5	0
37.6	0
37.7	0
37.8	0
37.9	0
38	0
38.1	0
38.2	0
38.3	0
38.4	0
38.5	0
38.6	0
38.7	0
38.8	0
38.9	0
39	0
39.1	0
39.2	0
39.3	0
39.4	0
39.5	0
39.6	0
39.7	0
39.8	0
39.9	0
40	0
40.1	0
40.2	0
40.3	0
40.4	0
40.5	0
40.6	0
40.7	0
40.8	0
40.9	0
41	0
41.1	0
41.2	0
41.3	0
41.4	0
41.5	0
41.6	0
41.7	0
41.8	0
41.9	0
42	0
42.1	0
42.2	0
42.3	0
42.4	0
42.5	0
42.6	0
42.7	0
42.8	0
42.9	0
43	0
43.1	0
43.2	0
43.3	0
43.4	0
43.5	0
43.6	0
43.7	0
43.8	0
43.9	0
44	0
44.1	0
44.2	0
44.3	0
44.4	0
44.5	0
44.6	0
44.7	0
44.8	0
44.9	0
45	0
45.1	0
45.2	0
45.3	0
45.4	0
45.5	0
45.6	0
45.7	0
45.8	0
45.9	0
46	0
46.1	0
46.2	0
46.3	0
46.4	0
46.5	0
46.6	0
46.7	0
46.8	0
46.9	0
47	0
47.1	0
47.2	0
47.3	0
47.4	0
47.5	0
47.6	0
47.7	0
47.8	0
47.9	0
48	0
48.1	0
48.2	0
48.3	0
48.4	0
48.5	0
48.6	0
48.7	0
48.8	0
48.9	0
49	0
49.1	0
49.2	0
49.3	0
49.4	0
49.5	0
49.6	0
49.7	0
49.8	0
49.9	0
50	0
50.1	0
50.2	0
50.3	0
50.4	0
50.5	0
50.6	0
50.7	0
50.8	0
50.9	0
51	0
51.1	0
51.2	0
51.3	0
51.4	0
51.5	0
51.6	0
51.7	0
51.8	0
51.9	0
52	0
52.1	0
52.2	0
52.3	0
52.4	0
52.5	0
52.6	0
52.7	0
52.8	0
52.9	0
53	0
53.1	0
53.2	0
53.3	0
53.4	0
53.5	0
53.6	0
53.7	0
53.8	0
53.9	0
54	0
54.1	0
54.2	0
54.3	0
54.4	0
54.5	0
54.6	0
54.7	0
54.8	0
54.9	0
55	0
55.1	0
55.2	0
55.3	0
55.4	0
55.5	0
55.6	0
55.7	0
55.8	0
55.9	0
56	0
56.1	0
56.2	0
56.3	0
56.4	0
56.5	0
56.6	0
56.7	0
56.8	0
56.9	0
57	0
57.1	0
57.2	0
57.3	0
57.4	0
57.5	0
57.6	0
57.7	0
57.8	0
57.9	0
58	0
58.1	0
58.2	0
58.3	0
58.4	0
58.5	0
58.6	0
58.7	0
58.8	0
58.9	0
59	0
59.1	0
59.2	0
59.3	0
59.4	0
59.5	0
59.6	0
59.7	0
59.8	0
59.9	0
60	0
60.1	0
60.2	0
60.3	0
60.4	0
60.5	0
60.6	0
60.7	0
60.8	0
60.9	0
61	0
61.1	0
61.2	0
61.3	0
61.4	0
61.5	0
61.6	0
61.7	0
61.8	0
61.9	0
62	0
62.1	0
62.2	0
62.3	0
62.4	0
62.5	0
62.6	0
62.7	0
62.8	0
62.9	0
63	0
63.1	0
63.2	0
63.3	0
63.4	0
63.5	0
63.6	0
63.7	0
63.8	0
63.9	0
64	0
64.1	0
64.2	0
64.3	0
64.4	0
64.5	0
64.6	0
64.7	0
64.8	0
64.9	0
65	0
65.1	0
65.2	0
65.3	0
65.4	0
65.5	0
65.6	0
65.7	0
65.8	0
65.9	0
66	0
66.1	0
66.2	0
66.3	0
66.4	0
66.5	0
66.6	0
66.7	0
66.8	0
66.9	0
67	0
67.1	0
67.2	0
67.3	0
67.4	0
67.5	0
67.6	0
67.7	0
67.8	0
67.9	0
68	0
68.1	0
68.2	0
68.3	0
68.4	0
68.5	0
68.6	0
68.7	0
68.8	0
68.9	0
69	0
69.1	0
69.2	0
69.3	0
69.4	0
69.5	0
69.6	0
69.7	0
69.8	0
69.9	0
70	0
70.1	0
70.2	0
70.3	0
70.4	0
70.5	0
70.6	0
70.7	0
70.8	0
70.9	0
71	0
71.1	0
71.2	0
71.3	0
71.4	0
71.5	0
71.6	0
71.7	0
71.8	0
71.9	0
72	0
72.1	0
72.2	0
72.3	0
72.4	0
72.5	0
72.6	0
72.7	0
72.8	0
72.9	0
73	0
73.1	0
73.2	0
73.3	0
73.4	0
73.5	0
73.6	0
73.7	0
73.8	0
73.9	0
74	0
74.1	0
74.2	0
74.3	0
74.4	0
74.5	0
74.6	0
74.7	0
74.8	0
74.9	0
75	0
75.1	0
75.2	0
75.3	0
75.4	0
75.5	0
75.6	0
75.7	0
75.8	0
75.9	0
76	0
76.1	0
76.2	0
76.3	0
76.4	0
76.5	0
76.6	0
76.7	0
76.8	0
76.9	0
77	0
77.1	0
77.2	0
77.3	0
77.4	0
77.5	0
77.6	0
77.7	0
77.8	0
77.9	0
78	0
78.1	0
78.2	0
78.3	0
78.4	0
78.5	0
78.6	0
78.7	0
78.8	0
78.9	0
79	0
79.1	0
79.2	0
79.3	0
79.4	0
79.5	0
79.6	0
79.7	0
79.8	0
79.9	0
80	0
80.1	0
80.2	0
80.3	0
80.4	0
80.5	0
80.6	0
80.7	0
80.8	0
80.9	0
81	0
81.1	0
81.2	0
81.3	0
81.4	0
81.5	0
81.6	0
81.7	0
81.8	0
81.9	0
82	0
82.1	0
82.2	0
82.3	0
82.4	0
82.5	0
82.6	0
82.7	0
82.8	0
82.9	0
83	0
83.1	0
83.2	0
83.3	0
83.4	0
83.5	0
83.6	0
83.7	0
83.8	0
83.9	0
84	0
84.1	0
84.2	0
84.3	0
84.4	0
84.5	0
84.6	0
84.7	0
84.8	0
84.9	0
85	0
85.1	0
85.2	0
85.3	0
85.4	0
85.5	0
85.6	0
85.7	0
85.8	0
85.9	0
86	0
86.1	0
86.2	0
86.3	0
86.4	0
86.5	0
86.6	0
86.7	0
86.8	0
86.9	0
87	0
87.1	0
87.2	0
87.3	0
87.4	0
87.5	0
87.6	0
87.7	0
87.8	0
87.9	0
88	0
88.1	0
88.2	0
88.3	0
88.4	0
88.5	0
88.6	0
88.7	0
88.8	0
88.9	0
89	0
89.1	0
89.2	0
89.3	0
89.4	0
89.5	0
89.6	0
89.7	0
89.8	0
89.9	0
90	0
90.1	0
90.2	0
90.3	0
90.4	0
90.5	0
90.6	0
90.7	0
90.8	0
90.9	0
91	0
91.1	0
91.2	0
91.3	0
91.4	0
91.5	0
91.6	0
91.7	0
91.8	0
91.9	0
92	0
92.1	0
92.2	0
92.3	0
92.4	0
92.5	0
92.6	0
92.7	0
92.8	0
92.9	0
93	0
93.1	0
93.2	0
93.3	0
93.4	0
93.5	0
93.6	0
93.7	0
93.8	0
93.9	0
94	0
94.1	0
94.2	0
94.3	0
94.4	0
94.5	0
94.6	0
94.7	0
94.8	0
94.9	0
95	0
95.1	0
95.2	0
95.3	0
95.4	0
95.5	0
95.6	0
95.7	0
95.8	0
95.9	0
96	0
96.1	0
96.2	0
96.3	0
96.4	0
96.5	0
96.6	0
96.7	0
96.8	0
96.9	0
97	0
97.1	0
97.2	0
97.3	0
97.4	0
97.5	0
97.6	0
97.7	0
97.8	0
97.9	0
98	0
98.1	0
98.2	0
98.3	0
98.4	0
98.5	0
98.6	0
98.7	0
98.8	0
98.9	0
99	0
99.1	0
99.2	0
99.3	0
99.4	0
99.5	0
99.6	0
99.7	0
99.8	0
99.9	0
100	0
100.1	0.00372083
100.2	0.00738379
100.3	0.0109896
100.4	0.0145391
100.5	0.0180329
100.6	0.0214717
100.7	0.0248564
100.8	0.0281877
100.9	0.0314662
101	0.0346927
101.1	0.037868
101.2	0.0409928
101.3	0.0440677
101.4	0.0470935
101.5	0.0500709
101.6	0.0530006
101.7	0.0558834
101.8	0.0587198
101.9	0.0615106
102	0.0642565
102.1	0.0669582
102.2	0.0696162
102.3	0.0722313
102.4	0.0748042
102.5	0.0773354
102.6	0.0798257
102.7	0.0822756
102.8	0.0846857
102.9	0.0870568
103	0.0893894
103.1	0.0916841
103.2	0.0939415
103.3	0.0961622
103.4	0.0983468
103.5	0.100496
103.6	0.10261
103.7	0.104689
103.8	0.106735
103.9	0.108748
104	0.110727
104.1	0.112675
104.2	0.11459
104.3	0.116475
104.4	0.118328
104.5	0.120152
104.6	0.121946
104.7	0.12371
104.8	0.125446
104.9	0.127153
105	0.128833
105.1	0.130485
105.2	0.132111
105.3	0.13371
105.4	0.135282
105.5	0.13683
105.6	0.138352
105.7	0.139849
105.8	0.141322
105.9	0.142771
106	0.144196
106.1	0.145598
106.2	0.146977
106.3	0.148334
106.4	0.149669
106.5	0.150983
106.6	0.152275
106.7	0.153546
106.8	0.154796
106.9	0.156026
107	0.157237
107.1	0.158427
107.2	0.159599
107.3	0.160751
107.4	0.161885
107.5	0.163001
107.6	0.164098
107.7	0.165178
107.8	0.166241
107.9	0.167286
108	0.168314
108.1	0.169326
108.2	0.170322
108.3	0.171302
108.4	0.172266
108.5	0.173215
108.6	0.174148
108.7	0.175066
108.8	0.17597
108.9	0.176859
109	0.177735
109.1	0.178596
109.2	0.179443
109.3	0.180277
109.4	0.181098
109.5	0.181906
109.6	0.1827
109.7	0.183483
109.8	0.184253
109.9	0.18501
110	0.185756
110.1	0.18649
110.2	0.187212
110.3	0.187923
110.4	0.188623
110.5	0.189312
110.6	0.18999
110.7	0.190657
110.8	0.191314
110.9	0.19196
111	0.192597
111.1	0.193224
111.2	0.19384
111.3	0.194448
111.4	0.195045
111.5	0.195634
111.6	0.196213
111.7	0.196784
111.8	0.197345
111.9	0.197898
112	0.198443
112.1	0.198979
112.2	0.199507
112.3	0.200026
112.4	0.200538
112.5	0.201042
112.6	0.201538
112.7	0.202027
112.8	0.202508
112.9	0.202982
113	0.203449
113.1	0.203909
113.2	0.204361
113.3	0.204807
113.4	0.205247
113.5	0.205679
113.6	0.206105
113.7	0.206525
113.8	0.206939
113.9	0.207346
114	0.207747
114.1	0.208142
114.2	0.208532
114.3	0.208916
114.4	0.209294
114.5	0.209666
114.6	0.210033
114.7	0.210395
114.8	0.210751
114.9	0.211102
115	0.211448
115.1	0.211789
115.2	0.212125
115.3	0.212456
115.4	0.212783
115.5	0.213104
115.6	0.213421
115.7	0.213734
115.8	0.214042
115.9	0.214346
116	0.214645
116.1	0.21494
116.2	0.215231
116.3	0.215518
116.4	0.215801
116.5	0.21608
116.6	0.216355
116.7	0.216626
116.8	0.216893
116.9	0.217157
117	0.217417
117.1	0.217673
117.2	0.217926
117.3	0.218176
117.4	0.218422
117.5	0.218665
117.6	0.218904
117.7	0.21914
117.8	0.219373
117.9	0.219603
118	0.21983
118.1	0.220054
118.2	0.220275
118.3	0.220493
118.4	0.220708
118.5	0.22092
118.6	0.221129
118.7	0.221336
118.8	0.22154
118.9	0.221741
119	0.22194
119.1	0.222136
119.2	0.22233
119.3	0.222521
119.4	0.22271
119.5	0.222896
119.6	0.22308
119.7	0.223262
119.8	0.223442
119.9	0.223619
120	0.223794
120.1	0.223967
120.2	0.224138
120.3	0.224306
120.4	0.224473
120.5	0.224638
120.6	0.2248
120.7	0.224961
120.8	0.22512
120.9	0.225277
121	0.225432
121.1	0.225585
121.2	0.225736
121.3	0.225886
121.4	0.226034
121.5	0.22618
121.6	0.226325
121.7	0.226467
121.8	0.226609
121.9	0.226748
122	0.226886
122.1	0.227023
122.2	0.227158
122.3	0.227291
122.4	0.227424
122.5	0.227554
122.6	0.227683
122.7	0.227811
122.8	0.227938
122.9	0.228063
123	0.228186
123.1	0.228309
123.2	0.22843
123.3	0.22855
123.4	0.228668
123.5	0.228786
123.6	0.228902
123.7	0.229017
123.8	0.229131
123.9	0.229244
124	0.229355
124.1	0.229466
124.2	0.229575
124.3	0.229683
124.4	0.22979
124.5	0.229897
124.6	0.230002
124.7	0.230106
124.8	0.230209
124.9	0.230311
125	0.230413
125.1	0.230513
125.2	0.230612
125.3	0.230711
125.4	0.230809
125.5	0.230905
125.6	0.231001
125.7	0.231096
125.8	0.23119
125.9	0.231284
126	0.231376
126.1	0.231468
126.2	0.231559
126.3	0.231649
126.4	0.231738
126.5	0.231827
126.6	0.231915
126.7	0.232002
126.8	0.232088
126.9	0.232174
127	0.232259
127.1	0.232344
127.2	0.232427
127.3	0.23251
127.4	0.232593
127.5	0.232675
127.6	0.232756
127.7	0.232836
127.8	0.232916
127.9	0.232995
128	0.233074
128.1	0.233152
128.2	0.23323
128.3	0.233307
128.4	0.233383
128.5	0.233459
128.6	0.233535
128.7	0.23361
128.8	0.233684
128.9	0.233758
129	0.233831
129.1	0.233904
129.2	0.233976
129.3	0.234048
129.4	0.234119
129.5	0.23419
129.6	0.234261
129.7	0.234331
129.8	0.2344
129.9	0.234469
130	0.234538
130.1	0.234606
130.2	0.234674
130.3	0.234742
130.4	0.234809
130.5	0.234875
130.6	0.234942
130.7	0.235008
130.8	0.235073
130.9	0.235138
131	0.235203
131.1	0.235267
131.2	0.235331
131.3	0.235395
131.4	0.235458
131.5	0.235521
131.6	0.235584
131.7	0.235646
131.8	0.235708
131.9	0.23577
132	0.235831
132.1	0.235892
132.2	0.235953
132.3	0.236013
132.4	0.236073
132.5	0.236133
132.6	0.236193
132.7	0.236252
132.8	0.236311
132.9	0.23637
133	0.236428
133.1	0.236486
133.2	0.236544
133.3	0.236602
133.4	0.236659
133.5	0.236716
133.6	0.236773
133.7	0.23683
133.8	0.236886
133.9	0.236942
134	0.236998
134.1	0.237053
134.2	0.237109
134.3	0.237164
134.4	0.237219
134.5	0.237274
134.6	0.237328
134.7	0.237383
134.8	0.237437
134.9	0.237491
135	0.237544
135.1	0.237598
135.2	0.237651
135.3	0.237704
135.4	0.237757
135.5	0.23781
135.6	0.237862
135.7	0.237914
135.8	0.237966
135.9	0.238018
136	0.23807
136.1	0.238122
136.2	0.238173
136.3	0.238224
136.4	0.238275
136.5	0.238326
136.6	0.238377
136.7	0.238428
136.8	0.238478
136.9	0.238528
137	0.238578
137.1	0.238628
137.2	0.238678
137.3	0.238728
137.4	0.238777
137.5	0.238826
137.6	0.238876
137.7	0.238925
137.8	0.238973
137.9	0.239022
138	0.239071
138.1	0.239119
138.2	0.239168
138.3	0.239216
138.4	0.239264
138.5	0.239312
138.6	0.23936
138.7	0.239407
138.8	0.239455
138.9	0.239502
139	0.239549
139.1	0.239597
139.2	0.239644
139.3	0.239691
139.4	0.239737
139.5	0.239784
139.6	0.239831
139.7	0.239877
139.8	0.239924
139.9	0.23997
140	0.240016
140.1	0.240062
140.2	0.240108
140.3	0.240154
140.4	0.240199
140.5	0.240245
140.6	0.24029
140.7	0.240336
140.8	0.240381
140.9	0.240426
141	0.240471
141.1	0.240516
141.2	0.240561
141.3	0.240606
141.4	0.240651
141.5	0.240695
141.6	0.24074
141.7	0.240784
141.8	0.240829
141.9	0.240873
142	0.240917
142.1	0.240961
142.2	0.241005
142.3	0.241049
142.4	0.241093
142.5	0.241137
142.6	0.24118
142.7	0.241224
142.8	0.241267
142.9	0.241311
143	0.241354
143.1	0.241397
143.2	0.24144
143.3	0.241483
143.4	0.241526
143.5	0.241569
143.6	0.241612
143.7	0.241655
143.8	0.241698
143.9	0.24174
144	0.241783
144.1	0.241825
144.2	0.241868
144.3	0.24191
144.4	0.241952
144.5	0.241994
144.6	0.242036
144.7	0.242078
144.8	0.24212
144.9	0.242162
145	0.242204
145.1	0.242246
145.2	0.242288
145.3	0.242329
145.4	0.242371
145.5	0.242412
145.6	0.242454
145.7	0.242495
145.8	0.242536
145.9	0.242577
146	0.242619
146.1	0.24266
146.2	0.242701
146.3	0.242742
146.4	0.242783
146.5	0.242824
146.6	0.242864
146.7	0.242905
146.8	0.242946
146.9	0.242986
147	0.243027
147.1	0.243067
147.2	0.243108
147.3	0.243148
147.4	0.243189
147.5	0.243229
147.6	0.243269
147.7	0.243309
147.8	0.243349
147.9	0.243389
148	0.243429
148.1	0.243469
148.2	0.243509
148.3	0.243549
148.4	0.243589
148.5	0.243628
148.6	0.243668
148.7	0.243708
148.8	0.243747
148.9	0.243787
149	0.243826
149.1	0.243866
149.2	0.243905
149.3	0.243944
149.4	0.243983
149.5	0.244023
149.6	0.244062
149.7	0.244101
149.8	0.24414
149.9	0.244179
150	0.244218
150.1	0.244257
150.2	0.244296
150.3	0.244334
150.4	0.244373
150.5	0.244412
150.6	0.24445
150.7	0.244489
150.8	0.244528
150.9	0.244566
151	0.244604
151.1	0.244643
151.2	0.244681
151.3	0.24472
151.4	0.244758
151.5	0.244796
151.6	0.244834
151.7	0.244872
151.8	0.24491
151.9	0.244948
152	0.244986
152.1	0.245024
152.2	0.245062
152.3	0.2451
152.4	0.245138
152.5	0.245176
152.6	0.245213
152.7	0.245251
152.8	0.245289
152.9	0.245326
153	0.245364
153.1	0.245401
153.2	0.245439
153.3	0.245476
153.4	0.245514
153.5	0.245551
153.6	0.245588
153.7	0.245625
153.8	0.245663
153.9	0.2457
154	0.245737
154.1	0.245774
154.2	0.245811
154.3	0.245848
154.4	0.245885
154.5	0.245922
154.6	0.245959
154.7	0.245996
154.8	0.246032
154.9	0.246069
155	0.246106
155.1	0.246142
155.2	0.246179
155.3	0.246216
155.4	0.246252
155.5	0.246289
155.6	0.246325
155.7	0.246362
155.8	0.246398
155.9	0.246434
156	0.246471
156.1	0.246507
156.2	0.246543
156.3	0.246579
156.4	0.246615
156.5	0.246652
156.6	0.246688
156.7	0.246724
156.8	0.24676
156.9	0.246796
157	0.246831
157.1	0.246867
157.2	0.246903
157.3	0.246939
157.4	0.246975
157.5	0.24701
157.6	0.247046
157.7	0.247082
157.8	0.247117
157.9	0.247153
158	0.247188
158.1	0.247224
158.2	0.247259
158.3	0.247295
158.4	0.24733
158.5	0.247366
158.6	0.247401
158.7	0.247436
158.8	0.247471
158.9	0.247507
159	0.247542
159.1	0.247577
159.2	0.247612
159.3	0.247647
159.4	0.247682
159.5	0.247717
159.6	0.247752
159.7	0.247787
159.8	0.247822
159.9	0.247856
160	0.247891
160.1	0.247926
160.2	0.247961
160.3	0.247995
160.4	0.24803
160.5	0.248065
160.6	0.248099
160.7	0.248134
160.8	0.248168
160.9	0.248203
161	0.248237
161.1	0.248272
161.2	0.248306
161.3	0.24834
161.4	0.248375
161.5	0.248409
161.6	0.248443
161.7	0.248477
161.8	0.248511
161.9	0.248546
162	0.24858
162.1	0.248614
162.2	0.248648
162.3	0.248682
162.4	0.248716
162.5	0.24875
162.6	0.248783
162.7	0.248817
162.8	0.248851
162.9	0.248885
163	0.248919
163.1	0.248952
163.2	0.248986
163.3	0.24902
163.4	0.249053
163.5	0.249087
163.6	0.24912
163.7	0.249154
163.8	0.249187
163.9	0.249221
164	0.249254
164.1	0.249288
164.2	0.249321
164.3	0.249354
164.4	0.249387
164.5	0.249421
164.6	0.249454
164.7	0.249487
164.8	0.24952
164.9	0.249553
165	0.249586
165.1	0.249619
165.2	0.249652
165.3	0.249685
165.4	0.249718
165.5	0.249751
165.6	0.249784
165.7	0.249817
165.8	0.24985
165.9	0.249882
166	0.249915
166.1	0.249948
166.2	0.249981
166.3	0.250013
166.4	0.250046
166.5	0.250078
166.6	0.250111
166.7	0.250143
166.8	0.250176
166.9	0.250208
167	0.250241
167.1	0.250273
167.2	0.250305
167.3	0.250338
167.4	0.25037
167.5	0.250402
167.6	0.250435
167.7	0.250467
167.8	0.250499
167.9	0.250531
168	0.250563
168.1	0.250595
168.2	0.250627
168.3	0.250659
168.4	0.250691
168.5	0.250723
168.6	0.250755
168.7	0.250787
168.8	0.250819
168.9	0.250851
169	0.250882
169.1	0.250914
169.2	0.250946
169.3	0.250977
169.4	0.251009
169.5	0.251041
169.6	0.251072
169.7	0.251104
169.8	0.251135
169.9	0.251167
170	0.251198
170.1	0.25123
170.2	0.251261
170.3	0.251293
170.4	0.251324
170.5	0.251355
170.6	0.251386
170.7	0.251418
170.8	0.251449
170.9	0.25148
171	0.251511
171.1	0.251542
171.2	0.251573
171.3	0.251605
171.4	0.251636
171.5	0.251667
171.6	0.251698
171.7	0.251728
171.8	0.251759
171.9	0.25179
172	0.251821
172.1	0.251852
172.2	0.251883
172.3	0.251913
172.4	0.251944
172.5	0.251975
172.6	0.252006
172.7	0.252036
172.8	0.252067
172.9	0.252097
173	0.252128
173.1	0.252158
173.2	0.252189
173.3	0.252219
173.4	0.25225
173.5	0.25228
173.6	0.252311
173.7	0.252341
173.8	0.252371
173.9	0.252402
174	0.252432
174.1	0.252462
174.2	0.252492
174.3	0.252522
174.4	0.252552
174.5	0.252583
174.6	0.252613
174.7	0.252643
174.8	0.252673
174.9	0.252703
175	0.252733
175.1	0.252763
175.2	0.252792
175.3	0.252822
175.4	0.252852
175.5	0.252882
175.6	0.252912
175.7	0.252941
175.8	0.252971
175.9	0.253001
176	0.253031
176.1	0.25306
176.2	0.25309
176.3	0.253119
176.4	0.253149
176.5	0.253178
176.6	0.253208
176.7	0.253237
176.8	0.253267
176.9	0.253296
177	0.253326
177.1	0.253355
177.2	0.253384
177.3	0.253413
177.4	0.253443
177.5	0.253472
177.6	0.253501
177.7	0.25353
177.8	0.253559
177.9	0.253589
178	0.253618
178.1	0.253647
178.2	0.253676
178.3	0.253705
178.4	0.253734
178.5	0.253763
178.6	0.253792
178.7	0.25382
178.8	0.253849
178.9	0.253878
179	0.253907
179.1	0.253936
179.2	0.253964
179.3	0.253993
179.4	0.254022
179.5	0.254051
179.6	0.254079
179.7	0.254108
179.8	0.254136
179.9	0.254165
180	0.254193
180.1	0.254222
180.2	0.25425
180.3	0.254279
180.4	0.254307
180.5	0.254336
180.6	0.254364
180.7	0.254392
180.8	0.254421
180.9	0.254449
181	0.254477
181.1	0.254505
181.2	0.254533
181.3	0.254562
181.4	0.25459
181.5	0.254618
181.6	0.254646
181.7	0.254674
181.8	0.254702
181.9	0.25473
182	0.254758
182.1	0.254786
182.2	0.254814
182.3	0.254842
182.4	0.25487
182.5	0.254897
182.6	0.254925
182.7	0.254953
182.8	0.254981
182.9	0.255008
183	0.255036
183.1	0.255064
183.2	0.255091
183.3	0.255119
183.4	0.255147
183.5	0.255174
183.6	0.255202
183.7	0.255229
183.8	0.255257
183.9	0.255284
184	0.255312
184.1	0.255339
184.2	0.255366
184.3	0.255394
184.4	0.255421
184.5	0.255448
184.6	0.255476
184.7	0.255503
184.8	0.25553
184.9	0.255557
185	0.255584
185.1	0.255612
185.2	0.255639
185.3	0.255666
185.4	0.255693
185.5	0.25572
185.6	0.255747
185.7	0.255774
185.8	0.255801
185.9	0.255828
186	0.255855
186.1	0.255881
186.2	0.255908
186.3	0.255935
186.4	0.255962
186.5	0.255989
186.6	0.256015
186.7	0.256042
186.8	0.256069
186.9	0.256095
187	0.256122
187.1	0.256149
187.2	0.256175
187.3	0.256202
187.4	0.256228
187.5	0.256255
187.6	0.256281
187.7	0.256308
187.8	0.256334
187.9	0.256361
188	0.256387
188.1	0.256413
188.2	0.25644
188.3	0.256466
188.4	0.256492
188.5	0.256518
188.6	0.256545
188.7	0.256571
188.8	0.256597
188.9	0.256623
189	0.256649
189.1	0.256675
189.2	0.256701
189.3	0.256727
189.4	0.256753
189.5	0.256779
189.6	0.256805
189.7	0.256831
189.8	0.256857
189.9	0.256883
190	0.256909
190.1	0.256935
190.2	0.256961
190.3	0.256986
190.4	0.257012
190.5	0.257038
190.6	0.257064
190.7	0.257089
190.8	0.257115
190.9	0.257141
191	0.257166
191.1	0.257192
191.2	0.257217
191.3	0.257243
191.4	0.257268
191.5	0.257294
191.6	0.257319
191.7	0.257345
191.8	0.25737
191.9	0.257396
192	0.257421
192.1	0.257446
192.2	0.257472
192.3	0.257497
192.4	0.257522
192.5	0.257547
192.6	0.257573
192.7	0.257598
192.8	0.257623
192.9	0.257648
193	0.257673
193.1	0.257698
193.2	0.257723
193.3	0.257749
193.4	0.257774
193.5	0.257799
193.6	0.257824
193.7	0.257848
193.8	0.257873
193.9	0.257898
194	0.257923
194.1	0.257948
194.2	0.257973
194.3	0.257998
194.4	0.258022
194.5	0.258047
194.6	0.258072
194.7	0.258097
194.8	0.258121
194.9	0.258146
195	0.258171
195.1	0.258195
195.2	0.25822
195.3	0.258244
195.4	0.258269
195.5	0.258293
195.6	0.258318
195.7	0.258342
195.8	0.258367
195.9	0.258391
196	0.258416
196.1	0.25844
196.2	0.258464
196.3	0.258489
196.4	0.258513
196.5	0.258537
196.6	0.258561
196.7	0.258586
196.8	0.25861
196.9	0.258634
197	0.258658
197.1	0.258682
197.2	0.258706
197.3	0.25873
197.4	0.258755
197.5	0.258779
197.6	0.258803
197.7	0.258827
197.8	0.258851
197.9	0.258875
198	0.258898
198.1	0.258922
198.2	0.258946
198.3	0.25897
198.4	0.258994
198.5	0.259018
198.6	0.259041
198.7	0.259065
198.8	0.259089
198.9	0.259113
199	0.259136
199.1	0.25916
199.2	0.259184
199.3	0.259207
199.4	0.259231
199.5	0.259254
199.6	0.259278
199.7	0.259302
199.8	0.259325
199.9	0.259349
200	0.259372
[truncated: 14,000 more rows]
