# Supplementary material for: Bayesian inference of kinetic schemes for ion channels by Kalman filtering
Source: eLife journal article supplement (doi:10.7554/elife.62714), 2022-05-04
Supplement: fig4-data11 [file 0.03125M_Curr_400.xlsx]

## Sheet: 0.03125 M
0.1	0
0.2	0
0.3	0
0.4	0
0.5	0
0.6	0
0.7	0
0.8	0
0.9	0
1	0
1.1	0
1.2	0
1.3	0
1.4	0
1.5	0
1.6	0
1.7	0
1.8	0
1.9	0
2	0
2.1	0
2.2	0
2.3	0
2.4	0
2.5	0
2.6	0
2.7	0
2.8	0
2.9	0
3	0
3.1	0
3.2	0
3.3	0
3.4	0
3.5	0
3.6	0
3.7	0
3.8	0
3.9	0
4	0
4.1	0
4.2	0
4.3	0
4.4	0
4.5	0
4.6	0
4.7	0
4.8	0
4.9	0
5	0
5.1	0
5.2	0
5.3	0
5.4	0
5.5	0
5.6	0
5.7	0
5.8	0
5.9	0
6	0
6.1	0
6.2	0
6.3	0
6.4	0
6.5	0
6.6	0
6.7	0
6.8	0
6.9	0
7	0
7.1	0
7.2	0
7.3	0
7.4	0
7.5	0
7.6	0
7.7	0
7.8	0
7.9	0
8	0
8.1	0
8.2	0
8.3	0
8.4	0
8.5	0
8.6	0
8.7	0
8.8	0
8.9	0
9	0
9.1	0
9.2	0
9.3	0
9.4	0
9.5	0
9.6	0
9.7	0
9.8	0
9.9	0
10	0
10.1	0
10.2	0
10.3	0
10.4	0
10.5	0
10.6	0
10.7	0
10.8	0
10.9	0
11	0
11.1	0
11.2	0
11.3	0
11.4	0
11.5	0
11.6	0
11.7	0
11.8	0
11.9	0
12	0
12.1	0
12.2	0
12.3	0
12.4	0
12.5	0
12.6	0
12.7	0
12.8	0
12.9	0
13	0
13.1	0
13.2	0
13.3	0
13.4	0
13.5	0
13.6	0
13.7	0
13.8	0
13.9	0
14	0
14.1	0
14.2	0
14.3	0
14.4	0
14.5	0
14.6	0
14.7	0
14.8	0
14.9	0
15	0
15.1	0
15.2	0
15.3	0
15.4	0
15.5	0
15.6	0
15.7	0
15.8	0
15.9	0
16	0
16.1	0
16.2	0
16.3	0
16.4	0
16.5	0
16.6	0
16.7	0
16.8	0
16.9	0
17	0
17.1	0
17.2	0
17.3	0
17.4	0
17.5	0
17.6	0
17.7	0
17.8	0
17.9	0
18	0
18.1	0
18.2	0
18.3	0
18.4	0
18.5	0
18.6	0
18.7	0
18.8	0
18.9	0
19	0
19.1	0
19.2	0
19.3	0
19.4	0
19.5	0
19.6	0
19.7	0
19.8	0
19.9	0
20	0
20.1	0
20.2	0
20.3	0
20.4	0
20.5	0
20.6	0
20.7	0
20.8	0
20.9	0
21	0
21.1	0
21.2	0
21.3	0
21.4	0
21.5	0
21.6	0
21.7	0
21.8	0
21.9	0
22	0
22.1	0
22.2	0
22.3	0
22.4	0
22.5	0
22.6	0
22.7	0
22.8	0
22.9	0
23	0
23.1	0
23.2	0
23.3	0
23.4	0
23.5	0
23.6	0
23.7	0
23.8	0
23.9	0
24	0
24.1	0
24.2	0
24.3	0
24.4	0
24.5	0
24.6	0
24.7	0
24.8	0
24.9	0
25	0
25.1	0
25.2	0
25.3	0
25.4	0
25.5	0
25.6	0
25.7	0
25.8	0
25.9	0
26	0
26.1	0
26.2	0
26.3	0
26.4	0
26.5	0
26.6	0
26.7	0
26.8	0
26.9	0
27	0
27.1	0
27.2	0
27.3	0
27.4	0
27.5	0
27.6	0
27.7	0
27.8	0
27.9	0
28	0
28.1	0
28.2	0
28.3	0
28.4	0
28.5	0
28.6	0
28.7	0
28.8	0
28.9	0
29	0
29.1	0
29.2	0
29.3	0
29.4	0
29.5	0
29.6	0
29.7	0
29.8	0
29.9	0
30	0
30.1	0
30.2	0
30.3	0
30.4	0
30.5	0
30.6	0
30.7	0
30.8	0
30.9	0
31	0
31.1	0
31.2	0
31.3	0
31.4	0
31.5	0
31.6	0
31.7	0
31.8	0
31.9	0
32	0
32.1	0
32.2	0
32.3	0
32.4	0
32.5	0
32.6	0
32.7	0
32.8	0
32.9	0
33	0
33.1	0
33.2	0
33.3	0
33.4	0
33.5	0
33.6	0
33.7	0
33.8	0
33.9	0
34	0
34.1	0
34.2	0
34.3	0
34.4	0
34.5	0
34.6	0
34.7	0
34.8	0
34.9	0
35	0
35.1	0
35.2	0
35.3	0
35.4	0
35.5	0
35.6	0
35.7	0
35.8	0
35.9	0
36	0
36.1	0
36.2	0
36.3	0
36.4	0
36.5	0
36.6	0
36.7	0
36.8	0
36.9	0
37	0
37.1	0
37.2	0
37.3	0
37.4	0
37.5	0
37.6	0
37.7	0
37.8	0
37.9	0
38	0
38.1	0
38.2	0
38.3	0
38.4	0
38.5	0
38.6	0
38.7	0
38.8	0
38.9	0
39	0
39.1	0
39.2	0
39.3	0
39.4	0
39.5	0
39.6	0
39.7	0
39.8	0
39.9	0
40	0
40.1	0
40.2	0
40.3	0
40.4	0
40.5	0
40.6	0
40.7	0
40.8	0
40.9	0
41	0
41.1	0
41.2	0
41.3	0
41.4	0
41.5	0
41.6	0
41.7	0
41.8	0
41.9	0
42	0
42.1	0
42.2	0
42.3	0
42.4	0
42.5	0
42.6	0
42.7	0
42.8	0
42.9	0
43	0
43.1	0
43.2	0
43.3	0
43.4	0
43.5	0
43.6	0
43.7	0
43.8	0
43.9	0
44	0
44.1	0
44.2	0
44.3	0
44.4	0
44.5	0
44.6	0
44.7	0
44.8	0
44.9	0
45	0
45.1	0
45.2	0
45.3	0
45.4	0
45.5	0
45.6	0
45.7	0
45.8	0
45.9	0
46	0
46.1	0
46.2	0
46.3	0
46.4	0
46.5	0
46.6	0
46.7	0
46.8	0
46.9	0
47	0
47.1	0
47.2	0
47.3	0
47.4	0
47.5	0
47.6	0
47.7	0
47.8	0
47.9	0
48	0
48.1	0
48.2	0
48.3	0
48.4	0
48.5	0
48.6	0
48.7	0
48.8	0
48.9	0
49	0
49.1	0
49.2	0
49.3	0
49.4	0
49.5	0
49.6	0
49.7	0
49.8	0
49.9	0
50	0
50.1	0
50.2	0
50.3	0
50.4	0
50.5	0
50.6	0
50.7	0
50.8	0
50.9	0
51	0
51.1	0
51.2	0
51.3	0
51.4	0
51.5	0
51.6	0
51.7	0
51.8	0
51.9	0
52	0
52.1	0
52.2	0
52.3	0
52.4	0
52.5	0
52.6	0
52.7	0
52.8	0
52.9	0
53	0
53.1	0
53.2	0
53.3	0
53.4	0
53.5	0
53.6	0
53.7	0
53.8	0
53.9	0
54	0
54.1	0
54.2	0
54.3	0
54.4	0
54.5	0
54.6	0
54.7	0
54.8	0
54.9	0
55	0
55.1	0
55.2	0
55.3	0
55.4	0
55.5	0
55.6	0
55.7	0
55.8	0
55.9	0
56	0
56.1	0
56.2	0
56.3	0
56.4	0
56.5	0
56.6	0
56.7	0
56.8	0
56.9	0
57	0
57.1	0
57.2	0
57.3	0
57.4	0
57.5	0
57.6	0
57.7	0
57.8	0
57.9	0
58	0
58.1	0
58.2	0
58.3	0
58.4	0
58.5	0
58.6	0
58.7	0
58.8	0
58.9	0
59	0
59.1	0
59.2	0
59.3	0
59.4	0
59.5	0
59.6	0
59.7	0
59.8	0
59.9	0
60	0
60.1	0
60.2	0
60.3	0
60.4	0
60.5	0
60.6	0
60.7	0
60.8	0
60.9	0
61	0
61.1	0
61.2	0
61.3	0
61.4	0
61.5	0
61.6	0
61.7	0
61.8	0
61.9	0
62	0
62.1	0
62.2	0
62.3	0
62.4	0
62.5	0
62.6	0
62.7	0
62.8	0
62.9	0
63	0
63.1	0
63.2	0
63.3	0
63.4	0
63.5	0
63.6	0
63.7	0
63.8	0
63.9	0
64	0
64.1	0
64.2	0
64.3	0
64.4	0
64.5	0
64.6	0
64.7	0
64.8	0
64.9	0
65	0
65.1	0
65.2	0
65.3	0
65.4	0
65.5	0
65.6	0
65.7	0
65.8	0
65.9	0
66	0
66.1	0
66.2	0
66.3	0
66.4	0
66.5	0
66.6	0
66.7	0
66.8	0
66.9	0
67	0
67.1	0
67.2	0
67.3	0
67.4	0
67.5	0
67.6	0
67.7	0
67.8	0
67.9	0
68	0
68.1	0
68.2	0
68.3	0
68.4	0
68.5	0
68.6	0
68.7	0
68.8	0
68.9	0
69	0
69.1	0
69.2	0
69.3	0
69.4	0
69.5	0
69.6	0
69.7	0
69.8	0
69.9	0
70	0
70.1	0
70.2	0
70.3	0
70.4	0
70.5	0
70.6	0
70.7	0
70.8	0
70.9	0
71	0
71.1	0
71.2	0
71.3	0
71.4	0
71.5	0
71.6	0
71.7	0
71.8	0
71.9	0
72	0
72.1	0
72.2	0
72.3	0
72.4	0
72.5	0
72.6	0
72.7	0
72.8	0
72.9	0
73	0
73.1	0
73.2	0
73.3	0
73.4	0
73.5	0
73.6	0
73.7	0
73.8	0
73.9	0
74	0
74.1	0
74.2	0
74.3	0
74.4	0
74.5	0
74.6	0
74.7	0
74.8	0
74.9	0
75	0
75.1	0
75.2	0
75.3	0
75.4	0
75.5	0
75.6	0
75.7	0
75.8	0
75.9	0
76	0
76.1	0
76.2	0
76.3	0
76.4	0
76.5	0
76.6	0
76.7	0
76.8	0
76.9	0
77	0
77.1	0
77.2	0
77.3	0
77.4	0
77.5	0
77.6	0
77.7	0
77.8	0
77.9	0
78	0
78.1	0
78.2	0
78.3	0
78.4	0
78.5	0
78.6	0
78.7	0
78.8	0
78.9	0
79	0
79.1	0
79.2	0
79.3	0
79.4	0
79.5	0
79.6	0
79.7	0
79.8	0
79.9	0
80	0
80.1	0
80.2	0
80.3	0
80.4	0
80.5	0
80.6	0
80.7	0
80.8	0
80.9	0
81	0
81.1	0
81.2	0
81.3	0
81.4	0
81.5	0
81.6	0
81.7	0
81.8	0
81.9	0
82	0
82.1	0
82.2	0
82.3	0
82.4	0
82.5	0
82.6	0
82.7	0
82.8	0
82.9	0
83	0
83.1	0
83.2	0
83.3	0
83.4	0
83.5	0
83.6	0
83.7	0
83.8	0
83.9	0
84	0
84.1	0
84.2	0
84.3	0
84.4	0
84.5	0
84.6	0
84.7	0
84.8	0
84.9	0
85	0
85.1	0
85.2	0
85.3	0
85.4	0
85.5	0
85.6	0
85.7	0
85.8	0
85.9	0
86	0
86.1	0
86.2	0
86.3	0
86.4	0
86.5	0
86.6	0
86.7	0
86.8	0
86.9	0
87	0
87.1	0
87.2	0
87.3	0
87.4	0
87.5	0
87.6	0
87.7	0
87.8	0
87.9	0
88	0
88.1	0
88.2	0
88.3	0
88.4	0
88.5	0
88.6	0
88.7	0
88.8	0
88.9	0
89	0
89.1	0
89.2	0
89.3	0
89.4	0
89.5	0
89.6	0
89.7	0
89.8	0
89.9	0
90	0
90.1	0
90.2	0
90.3	0
90.4	0
90.5	0
90.6	0
90.7	0
90.8	0
90.9	0
91	0
91.1	0
91.2	0
91.3	0
91.4	0
91.5	0
91.6	0
91.7	0
91.8	0
91.9	0
92	0
92.1	0
92.2	0
92.3	0
92.4	0
92.5	0
92.6	0
92.7	0
92.8	0
92.9	0
93	0
93.1	0
93.2	0
93.3	0
93.4	0
93.5	0
93.6	0
93.7	0
93.8	0
93.9	0
94	0
94.1	0
94.2	0
94.3	0
94.4	0
94.5	0
94.6	0
94.7	0
94.8	0
94.9	0
95	0
95.1	0
95.2	0
95.3	0
95.4	0
95.5	0
95.6	0
95.7	0
95.8	0
95.9	0
96	0
96.1	0
96.2	0
96.3	0
96.4	0
96.5	0
96.6	0
96.7	0
96.8	0
96.9	0
97	0
97.1	0
97.2	0
97.3	0
97.4	0
97.5	0
97.6	0
97.7	0
97.8	0
97.9	0
98	0
98.1	0
98.2	0
98.3	0
98.4	0
98.5	0
98.6	0
98.7	0
98.8	0
98.9	0
99	0
99.1	0
99.2	0
99.3	0
99.4	0
99.5	0
99.6	0
99.7	0
99.8	0
99.9	0
100	0
100.1	0
100.2	0
100.3	0
100.4	0
100.5	0
100.6	0
100.7	0
100.8	0
100.9	0
101	0
101.1	0
101.2	0
101.3	0
101.4	0
101.5	0
101.6	0
101.7	0
101.8	0
101.9	0
102	0
102.1	0
102.2	0
102.3	0
102.4	0
102.5	0
102.6	0
102.7	0
102.8	0
102.9	0
103	0
103.1	0
103.2	0
103.3	0
103.4	0
103.5	0
103.6	0
103.7	0
103.8	0
103.9	0
104	0
104.1	0
104.2	0
104.3	0
104.4	0
104.5	0
104.6	0
104.7	0
104.8	0
104.9	0
105	0
105.1	0
105.2	0
105.3	0
105.4	0
105.5	0
105.6	0
105.7	0
105.8	0
105.9	0
106	0
106.1	0
106.2	0
106.3	0
106.4	0
106.5	0
106.6	0
106.7	0
106.8	0
106.9	0
107	0
107.1	0
107.2	0
107.3	0
107.4	0
107.5	0
107.6	0
107.7	0
107.8	0
107.9	0
108	0
108.1	0
108.2	0
108.3	0
108.4	0
108.5	0
108.6	0
108.7	0
108.8	0
108.9	0
109	0
109.1	0
109.2	0
109.3	0
109.4	0
109.5	0
109.6	0
109.7	0
109.8	0
109.9	0
110	0
110.1	0
110.2	0
110.3	0
110.4	0
110.5	0
110.6	0
110.7	0
110.8	0
110.9	0
111	0
111.1	0
111.2	0
111.3	0
111.4	0
111.5	0
111.6	0
111.7	0
111.8	0
111.9	0
112	0
112.1	0
112.2	0
112.3	0
112.4	0
112.5	0
112.6	0
112.7	0
112.8	0
112.9	0
113	0
113.1	0
113.2	0
113.3	0
113.4	0
113.5	0
113.6	0
113.7	0
113.8	0
113.9	0
114	0
114.1	0
114.2	0
114.3	0
114.4	0
114.5	0
114.6	0
114.7	0
114.8	0
114.9	0
115	0
115.1	0
115.2	0
115.3	0
115.4	0
115.5	0
115.6	0
115.7	0
115.8	0
115.9	0
116	0
116.1	0
116.2	0
116.3	0
116.4	0
116.5	0
116.6	0
116.7	0
116.8	0
116.9	0
117	0
117.1	0
117.2	0
117.3	0
117.4	0
117.5	0
117.6	0
117.7	0
117.8	0
117.9	0
118	0
118.1	0
118.2	0
118.3	0
118.4	0
118.5	0
118.6	0
118.7	0
118.8	0
118.9	0
119	0
119.1	0
119.2	0
119.3	0
119.4	0
119.5	0
119.6	0
119.7	0
119.8	0
119.9	0
120	0
120.1	0
120.2	0
120.3	0
120.4	0
120.5	0
120.6	0
120.7	0
120.8	0
120.9	0
121	0
121.1	0
121.2	0
121.3	0
121.4	0
121.5	0
121.6	0
121.7	0
121.8	0
121.9	0
122	0
122.1	0
122.2	0
122.3	0
122.4	0
122.5	0
122.6	0
122.7	0
122.8	0
122.9	0
123	0
123.1	0
123.2	0
123.3	0
123.4	0
123.5	0
123.6	0
123.7	0
123.8	0
123.9	0
124	0
124.1	0
124.2	0
124.3	0
124.4	0
124.5	0
124.6	0
124.7	0
124.8	0
124.9	0
125	0
125.1	0
125.2	0
125.3	0
125.4	0
125.5	0
125.6	0
125.7	0
125.8	0
125.9	0
126	0
126.1	0
126.2	0
126.3	0
126.4	0
126.5	0
126.6	0
126.7	0
126.8	0
126.9	0
127	0
127.1	0
127.2	0
127.3	0
127.4	0
127.5	0
127.6	0
127.7	0
127.8	0
127.9	0
128	0
128.1	0
128.2	0
128.3	0
128.4	0
128.5	0
128.6	0
128.7	0
128.8	0
128.9	0
129	0
129.1	0
129.2	0
129.3	0
129.4	0
129.5	0
129.6	0
129.7	0
129.8	0
129.9	0
130	0
130.1	0
130.2	0
130.3	0
130.4	0
130.5	0
130.6	0
130.7	0
130.8	0
130.9	0
131	0
131.1	0
131.2	0
131.3	0
131.4	0
131.5	0
131.6	0
131.7	0
131.8	0
131.9	0
132	0
132.1	0
132.2	0
132.3	0
132.4	0
132.5	0
132.6	0
132.7	0
132.8	0
132.9	0
133	0
133.1	0
133.2	0
133.3	0
133.4	0
133.5	0
133.6	0
133.7	0
133.8	0
133.9	0
134	0
134.1	0
134.2	0
134.3	0
134.4	0
134.5	0
134.6	0
134.7	0
134.8	0
134.9	0
135	0
135.1	0
135.2	0
135.3	0
135.4	0
135.5	0
135.6	0
135.7	0
135.8	0
135.9	0
136	0
136.1	0
136.2	0
136.3	0
136.4	0
136.5	0
136.6	0
136.7	0
136.8	0
136.9	0
137	0
137.1	0
137.2	0
137.3	0
137.4	0
137.5	0
137.6	0
137.7	0
137.8	0
137.9	0
138	0
138.1	0
138.2	0
138.3	0
138.4	0
138.5	0
138.6	0
138.7	0
138.8	0
138.9	0
139	0
139.1	0
139.2	0
139.3	0
139.4	0
139.5	0
139.6	0
139.7	0
139.8	0
139.9	0
140	0
140.1	0
140.2	0
140.3	0
140.4	0
140.5	0
140.6	0
140.7	0
140.8	0
140.9	0
141	0
141.1	0
141.2	0
141.3	0
141.4	0
141.5	0
141.6	0
141.7	0
141.8	0
141.9	0
142	0
142.1	0
142.2	0
142.3	0
142.4	0
142.5	0
142.6	0
142.7	0
142.8	0
142.9	0
143	0
143.1	0
143.2	0
143.3	0
143.4	0
143.5	0
143.6	0
143.7	0
143.8	0
143.9	0
144	0
144.1	0
144.2	0
144.3	0
144.4	0
144.5	0
144.6	0
144.7	0
144.8	0
144.9	0
145	0
145.1	0
145.2	0
145.3	0
145.4	0
145.5	0
145.6	0
145.7	0.0025
145.8	0.0025
145.9	0.0025
146	0.0025
146.1	0.0025
146.2	0.0025
146.3	0.0025
146.4	0.0025
146.5	0.0025
146.6	0.0025
146.7	0.0025
146.8	0.0025
146.9	0.0025
147	0.0025
147.1	0.0025
147.2	0.0025
147.3	0.0025
147.4	0.0025
147.5	0.0025
147.6	0.0025
147.7	0.0025
147.8	0.0025
147.9	0.0025
148	0.0025
148.1	0.0025
148.2	0.0025
148.3	0.0025
148.4	0.0025
148.5	0.0025
148.6	0.0025
148.7	0.0025
148.8	0.0025
148.9	0.0025
149	0.0025
149.1	0.0025
149.2	0.0025
149.3	0.0025
149.4	0.0025
149.5	0.0025
149.6	0.0025
149.7	0.0025
149.8	0.0025
149.9	0.0025
150	0.0025
150.1	0.0025
150.2	0.0025
150.3	0.0025
150.4	0.0025
150.5	0.0025
150.6	0.005
150.7	0.005
150.8	0.005
150.9	0.005
151	0.005
151.1	0.005
151.2	0.005
151.3	0.005
151.4	0.005
151.5	0.005
151.6	0.005
151.7	0.005
151.8	0.005
151.9	0.005
152	0.005
152.1	0.005
152.2	0.005
152.3	0.005
152.4	0.005
152.5	0.005
152.6	0.005
152.7	0.005
152.8	0.005
152.9	0.005
153	0.005
153.1	0.005
153.2	0.005
153.3	0.005
153.4	0.005
153.5	0.005
153.6	0.005
153.7	0.005
153.8	0.005
153.9	0.005
154	0.005
154.1	0.005
154.2	0.005
154.3	0.005
154.4	0.005
154.5	0.005
154.6	0.005
154.7	0.005
154.8	0.005
154.9	0.005
155	0.005
155.1	0.005
155.2	0.005
155.3	0.005
155.4	0.005
155.5	0.005
155.6	0.005
155.7	0.005
155.8	0.005
155.9	0.005
156	0.005
156.1	0.005
156.2	0.005
156.3	0.005
156.4	0.005
156.5	0.005
156.6	0.005
156.7	0.005
156.8	0.005
156.9	0.005
157	0.005
157.1	0.005
157.2	0.005
157.3	0.005
157.4	0.005
157.5	0.005
157.6	0.005
157.7	0.005
157.8	0.005
157.9	0.005
158	0.005
158.1	0.005
158.2	0.005
158.3	0.005
158.4	0.005
158.5	0.005
158.6	0.005
158.7	0.005
158.8	0.005
158.9	0.005
159	0.005
159.1	0.005
159.2	0.005
159.3	0.005
159.4	0.005
159.5	0.005
159.6	0.005
159.7	0.005
159.8	0.005
159.9	0.005
160	0.005
160.1	0.005
160.2	0.005
160.3	0.005
160.4	0.005
160.5	0.005
160.6	0.005
160.7	0.005
160.8	0.005
160.9	0.005
161	0.005
161.1	0.005
161.2	0.005
161.3	0.005
161.4	0.005
161.5	0.005
161.6	0.005
161.7	0.005
161.8	0.005
161.9	0.005
162	0.005
162.1	0.005
162.2	0.005
162.3	0.005
162.4	0.005
162.5	0.005
162.6	0.005
162.7	0.005
162.8	0.005
162.9	0.005
163	0.005
163.1	0.005
163.2	0.005
163.3	0.005
163.4	0.005
163.5	0.005
163.6	0.005
163.7	0.005
163.8	0.005
163.9	0.005
164	0.005
164.1	0.005
164.2	0.005
164.3	0.005
164.4	0.005
164.5	0.005
164.6	0.005
164.7	0.005
164.8	0.005
164.9	0.005
165	0.005
165.1	0.005
165.2	0.005
165.3	0.005
165.4	0.005
165.5	0.005
165.6	0.005
165.7	0.005
165.8	0.005
165.9	0.005
166	0.005
166.1	0.005
166.2	0.005
166.3	0.005
166.4	0.005
166.5	0.005
166.6	0.005
166.7	0.005
166.8	0.005
166.9	0.005
167	0.005
167.1	0.005
167.2	0.005
167.3	0.005
167.4	0.005
167.5	0.005
167.6	0.005
167.7	0.005
167.8	0.005
167.9	0.005
168	0.005
168.1	0.005
168.2	0.005
168.3	0.005
168.4	0.005
168.5	0.005
168.6	0.005
168.7	0.0075
168.8	0.0075
168.9	0.0075
169	0.0075
169.1	0.0075
169.2	0.0075
169.3	0.0075
169.4	0.0075
169.5	0.0075
169.6	0.0075
169.7	0.0075
169.8	0.0075
169.9	0.0075
170	0.0075
170.1	0.01
170.2	0.01
170.3	0.01
170.4	0.01
170.5	0.01
170.6	0.01
170.7	0.01
170.8	0.01
170.9	0.01
171	0.01
171.1	0.01
171.2	0.01
171.3	0.01
171.4	0.01
171.5	0.01
171.6	0.01
171.7	0.01
171.8	0.01
171.9	0.01
172	0.01
172.1	0.01
172.2	0.01
172.3	0.01
172.4	0.01
172.5	0.01
172.6	0.01
172.7	0.01
172.8	0.01
172.9	0.01
173	0.01
173.1	0.01
173.2	0.01
173.3	0.0125
173.4	0.0125
173.5	0.0125
173.6	0.0125
173.7	0.0125
173.8	0.0125
173.9	0.0125
174	0.0125
174.1	0.0125
174.2	0.0125
174.3	0.0125
174.4	0.0125
174.5	0.0125
174.6	0.0125
174.7	0.0125
174.8	0.0125
174.9	0.0125
175	0.0125
175.1	0.0125
175.2	0.0125
175.3	0.015
175.4	0.015
175.5	0.015
175.6	0.015
175.7	0.015
175.8	0.015
175.9	0.015
176	0.015
176.1	0.015
176.2	0.015
176.3	0.015
176.4	0.015
176.5	0.015
176.6	0.015
176.7	0.015
176.8	0.015
176.9	0.015
177	0.015
177.1	0.015
177.2	0.015
177.3	0.015
177.4	0.015
177.5	0.015
177.6	0.015
177.7	0.015
177.8	0.015
177.9	0.015
178	0.015
178.1	0.015
178.2	0.015
178.3	0.015
178.4	0.015
178.5	0.015
178.6	0.015
178.7	0.015
178.8	0.015
178.9	0.015
179	0.015
179.1	0.015
179.2	0.015
179.3	0.015
179.4	0.015
179.5	0.015
179.6	0.015
179.7	0.015
179.8	0.015
179.9	0.015
180	0.015
180.1	0.015
180.2	0.015
180.3	0.015
180.4	0.015
180.5	0.015
180.6	0.015
180.7	0.015
180.8	0.015
180.9	0.015
181	0.015
181.1	0.015
181.2	0.015
181.3	0.015
181.4	0.015
181.5	0.015
181.6	0.015
181.7	0.015
181.8	0.015
181.9	0.015
182	0.015
182.1	0.015
182.2	0.015
182.3	0.015
182.4	0.015
182.5	0.015
182.6	0.015
182.7	0.015
182.8	0.015
182.9	0.015
183	0.015
183.1	0.015
183.2	0.015
183.3	0.015
183.4	0.015
183.5	0.015
183.6	0.015
183.7	0.015
183.8	0.015
183.9	0.015
184	0.015
184.1	0.015
184.2	0.015
184.3	0.015
184.4	0.015
184.5	0.015
184.6	0.015
184.7	0.015
184.8	0.015
184.9	0.015
185	0.015
185.1	0.015
185.2	0.015
185.3	0.015
185.4	0.015
185.5	0.015
185.6	0.015
185.7	0.015
185.8	0.015
185.9	0.015
186	0.015
186.1	0.015
186.2	0.015
186.3	0.015
186.4	0.015
186.5	0.015
186.6	0.0175
186.7	0.0175
186.8	0.0175
186.9	0.0175
187	0.0175
187.1	0.0175
187.2	0.0175
187.3	0.0175
187.4	0.0175
187.5	0.0175
187.6	0.0175
187.7	0.0175
187.8	0.0175
187.9	0.0175
188	0.0175
188.1	0.0175
188.2	0.0175
188.3	0.0175
188.4	0.0175
188.5	0.0175
188.6	0.0175
188.7	0.0175
188.8	0.0175
188.9	0.02
189	0.02
189.1	0.02
189.2	0.02
189.3	0.02
189.4	0.02
189.5	0.02
189.6	0.02
189.7	0.02
189.8	0.02
189.9	0.02
190	0.02
190.1	0.02
190.2	0.02
190.3	0.02
190.4	0.02
190.5	0.02
190.6	0.02
190.7	0.02
190.8	0.02
190.9	0.02
191	0.02
191.1	0.0175
191.2	0.0175
191.3	0.0175
191.4	0.0175
191.5	0.0175
191.6	0.0175
191.7	0.0175
191.8	0.0175
191.9	0.0175
192	0.0175
192.1	0.0175
192.2	0.0175
192.3	0.0175
192.4	0.0175
192.5	0.0175
192.6	0.0175
192.7	0.0175
192.8	0.0175
192.9	0.0175
193	0.0175
193.1	0.0175
193.2	0.0175
193.3	0.0175
193.4	0.0175
193.5	0.0175
193.6	0.02
193.7	0.02
193.8	0.02
193.9	0.02
194	0.02
194.1	0.02
194.2	0.02
194.3	0.02
194.4	0.02
194.5	0.02
194.6	0.02
194.7	0.02
194.8	0.02
194.9	0.02
195	0.02
195.1	0.02
195.2	0.02
195.3	0.02
195.4	0.02
195.5	0.02
195.6	0.02
195.7	0.02
195.8	0.02
195.9	0.02
196	0.02
196.1	0.02
196.2	0.02
196.3	0.02
196.4	0.02
196.5	0.02
196.6	0.02
196.7	0.02
196.8	0.02
196.9	0.02
197	0.02
197.1	0.02
197.2	0.02
197.3	0.02
197.4	0.02
197.5	0.02
197.6	0.02
197.7	0.02
197.8	0.02
197.9	0.02
198	0.02
198.1	0.02
198.2	0.02
198.3	0.02
198.4	0.02
198.5	0.02
198.6	0.02
198.7	0.02
198.8	0.02
198.9	0.02
199	0.02
199.1	0.02
199.2	0.02
199.3	0.02
199.4	0.02
199.5	0.02
199.6	0.02
199.7	0.02
199.8	0.02
199.9	0.02
200	0.02
[truncated: 14,000 more rows]
