# Supplementary material for: Bayesian inference of kinetic schemes for ion channels by Kalman filtering
Source: eLife journal article supplement (doi:10.7554/elife.62714), 2022-05-04
Supplement: fig4-data11 [file 1_Sim_N_80_Fluor_MW.xlsx]

## Sheet: 0.03125 M
0.1	0
0.2	0
0.3	0
0.4	0
0.5	0
0.6	0
0.7	0
0.8	0
0.9	0
1	0
1.1	0
1.2	0
1.3	0
1.4	0
1.5	0
1.6	0
1.7	0
1.8	0
1.9	0
2	0
2.1	0
2.2	0
2.3	0
2.4	0
2.5	0
2.6	0
2.7	0
2.8	0
2.9	0
3	0
3.1	0
3.2	0
3.3	0
3.4	0
3.5	0
3.6	0
3.7	0
3.8	0
3.9	0
4	0
4.1	0
4.2	0
4.3	0
4.4	0
4.5	0
4.6	0
4.7	0
4.8	0
4.9	0
5	0
5.1	0
5.2	0
5.3	0
5.4	0
5.5	0
5.6	0
5.7	0
5.8	0
5.9	0
6	0
6.1	0
6.2	0
6.3	0
6.4	0
6.5	0
6.6	0
6.7	0
6.8	0
6.9	0
7	0
7.1	0
7.2	0
7.3	0
7.4	0
7.5	0
7.6	0
7.7	0
7.8	0
7.9	0
8	0
8.1	0
8.2	0
8.3	0
8.4	0
8.5	0
8.6	0
8.7	0
8.8	0
8.9	0
9	0
9.1	0
9.2	0
9.3	0
9.4	0
9.5	0
9.6	0
9.7	0
9.8	0
9.9	0
10	0
10.1	0
10.2	0
10.3	0
10.4	0
10.5	0
10.6	0
10.7	0
10.8	0
10.9	0
11	0
11.1	0
11.2	0
11.3	0
11.4	0
11.5	0
11.6	0
11.7	0
11.8	0
11.9	0
12	0
12.1	0
12.2	0
12.3	0
12.4	0
12.5	0
12.6	0
12.7	0
12.8	0
12.9	0
13	0
13.1	0
13.2	0
13.3	0
13.4	0
13.5	0
13.6	0
13.7	0
13.8	0
13.9	0
14	0
14.1	0
14.2	0
14.3	0
14.4	0
14.5	0
14.6	0
14.7	0
14.8	0
14.9	0
15	0
15.1	0
15.2	0
15.3	0
15.4	0
15.5	0
15.6	0
15.7	0
15.8	0
15.9	0
16	0
16.1	0
16.2	0
16.3	0
16.4	0
16.5	0
16.6	0
16.7	0
16.8	0
16.9	0
17	0
17.1	0
17.2	0
17.3	0
17.4	0
17.5	0
17.6	0
17.7	0
17.8	0
17.9	0
18	0
18.1	0
18.2	0
18.3	0
18.4	0
18.5	0
18.6	0
18.7	0
18.8	0
18.9	0
19	0
19.1	0
19.2	0
19.3	0
19.4	0
19.5	0
19.6	0
19.7	0
19.8	0
19.9	0
20	0
20.1	0
20.2	0
20.3	0
20.4	0
20.5	0
20.6	0
20.7	0
20.8	0
20.9	0
21	0
21.1	0
21.2	0
21.3	0
21.4	0
21.5	0
21.6	0
21.7	0
21.8	0
21.9	0
22	0
22.1	0
22.2	0
22.3	0
22.4	0
22.5	0
22.6	0
22.7	0
22.8	0
22.9	0
23	0
23.1	0
23.2	0
23.3	0
23.4	0
23.5	0
23.6	0
23.7	0
23.8	0
23.9	0
24	0
24.1	0
24.2	0
24.3	0
24.4	0
24.5	0
24.6	0
24.7	0
24.8	0
24.9	0
25	0
25.1	0
25.2	0
25.3	0
25.4	0
25.5	0
25.6	0
25.7	0
25.8	0
25.9	0
26	0
26.1	0
26.2	0
26.3	0
26.4	0
26.5	0
26.6	0
26.7	0
26.8	0
26.9	0
27	0
27.1	0
27.2	0
27.3	0
27.4	0
27.5	0
27.6	0
27.7	0
27.8	0
27.9	0
28	0
28.1	0
28.2	0
28.3	0
28.4	0
28.5	0
28.6	0
28.7	0
28.8	0
28.9	0
29	0
29.1	0
29.2	0
29.3	0
29.4	0
29.5	0
29.6	0
29.7	0
29.8	0
29.9	0
30	0
30.1	0
30.2	0
30.3	0
30.4	0
30.5	0
30.6	0
30.7	0
30.8	0
30.9	0
31	0
31.1	0
31.2	0
31.3	0
31.4	0
31.5	0
31.6	0
31.7	0
31.8	0
31.9	0
32	0
32.1	0
32.2	0
32.3	0
32.4	0
32.5	0
32.6	0
32.7	0
32.8	0
32.9	0
33	0
33.1	0
33.2	0
33.3	0
33.4	0
33.5	0
33.6	0
33.7	0
33.8	0
33.9	0
34	0
34.1	0
34.2	0
34.3	0
34.4	0
34.5	0
34.6	0
34.7	0
34.8	0
34.9	0
35	0
35.1	0
35.2	0
35.3	0
35.4	0
35.5	0
35.6	0
35.7	0
35.8	0
35.9	0
36	0
36.1	0
36.2	0
36.3	0
36.4	0
36.5	0
36.6	0
36.7	0
36.8	0
36.9	0
37	0
37.1	0
37.2	0
37.3	0
37.4	0
37.5	0
37.6	0
37.7	0
37.8	0
37.9	0
38	0
38.1	0
38.2	0
38.3	0
38.4	0
38.5	0
38.6	0
38.7	0
38.8	0
38.9	0
39	0
39.1	0
39.2	0
39.3	0
39.4	0
39.5	0
39.6	0
39.7	0
39.8	0
39.9	0
40	0
40.1	0
40.2	0
40.3	0
40.4	0
40.5	0
40.6	0
40.7	0
40.8	0
40.9	0
41	0
41.1	0
41.2	0
41.3	0
41.4	0
41.5	0
41.6	0
41.7	0
41.8	0
41.9	0
42	0
42.1	0
42.2	0
42.3	0
42.4	0
42.5	0
42.6	0
42.7	0
42.8	0
42.9	0
43	0
43.1	0
43.2	0
43.3	0
43.4	0
43.5	0
43.6	0
43.7	0
43.8	0
43.9	0
44	0
44.1	0
44.2	0
44.3	0
44.4	0
44.5	0
44.6	0
44.7	0
44.8	0
44.9	0
45	0
45.1	0
45.2	0
45.3	0
45.4	0
45.5	0
45.6	0
45.7	0
45.8	0
45.9	0
46	0
46.1	0
46.2	0
46.3	0
46.4	0
46.5	0
46.6	0
46.7	0
46.8	0
46.9	0
47	0
47.1	0
47.2	0
47.3	0
47.4	0
47.5	0
47.6	0
47.7	0
47.8	0
47.9	0
48	0
48.1	0
48.2	0
48.3	0
48.4	0
48.5	0
48.6	0
48.7	0
48.8	0
48.9	0
49	0
49.1	0
49.2	0
49.3	0
49.4	0
49.5	0
49.6	0
49.7	0
49.8	0
49.9	0
50	0
50.1	0
50.2	0
50.3	0
50.4	0
50.5	0
50.6	0
50.7	0
50.8	0
50.9	0
51	0
51.1	0
51.2	0
51.3	0
51.4	0
51.5	0
51.6	0
51.7	0
51.8	0
51.9	0
52	0
52.1	0
52.2	0
52.3	0
52.4	0
52.5	0
52.6	0
52.7	0
52.8	0
52.9	0
53	0
53.1	0
53.2	0
53.3	0
53.4	0
53.5	0
53.6	0
53.7	0
53.8	0
53.9	0
54	0
54.1	0
54.2	0
54.3	0
54.4	0
54.5	0
54.6	0
54.7	0
54.8	0
54.9	0
55	0
55.1	0
55.2	0
55.3	0
55.4	0
55.5	0
55.6	0
55.7	0
55.8	0
55.9	0
56	0
56.1	0
56.2	0
56.3	0
56.4	0
56.5	0
56.6	0
56.7	0
56.8	0
56.9	0
57	0
57.1	0
57.2	0
57.3	0
57.4	0
57.5	0
57.6	0
57.7	0
57.8	0
57.9	0
58	0
58.1	0
58.2	0
58.3	0
58.4	0
58.5	0
58.6	0
58.7	0
58.8	0
58.9	0
59	0
59.1	0
59.2	0
59.3	0
59.4	0
59.5	0
59.6	0
59.7	0
59.8	0
59.9	0
60	0
60.1	0
60.2	0
60.3	0
60.4	0
60.5	0
60.6	0
60.7	0
60.8	0
60.9	0
61	0
61.1	0
61.2	0
61.3	0
61.4	0
61.5	0
61.6	0
61.7	0
61.8	0
61.9	0
62	0
62.1	0
62.2	0
62.3	0
62.4	0
62.5	0
62.6	0
62.7	0
62.8	0
62.9	0
63	0
63.1	0
63.2	0
63.3	0
63.4	0
63.5	0
63.6	0
63.7	0
63.8	0
63.9	0
64	0
64.1	0
64.2	0
64.3	0
64.4	0
64.5	0
64.6	0
64.7	0
64.8	0
64.9	0
65	0
65.1	0
65.2	0
65.3	0
65.4	0
65.5	0
65.6	0
65.7	0
65.8	0
65.9	0
66	0
66.1	0
66.2	0
66.3	0
66.4	0
66.5	0
66.6	0
66.7	0
66.8	0
66.9	0
67	0
67.1	0
67.2	0
67.3	0
67.4	0
67.5	0
67.6	0
67.7	0
67.8	0
67.9	0
68	0
68.1	0
68.2	0
68.3	0
68.4	0
68.5	0
68.6	0
68.7	0
68.8	0
68.9	0
69	0
69.1	0
69.2	0
69.3	0
69.4	0
69.5	0
69.6	0
69.7	0
69.8	0
69.9	0
70	0
70.1	0
70.2	0
70.3	0
70.4	0
70.5	0
70.6	0
70.7	0
70.8	0
70.9	0
71	0
71.1	0
71.2	0
71.3	0
71.4	0
71.5	0
71.6	0
71.7	0
71.8	0
71.9	0
72	0
72.1	0
72.2	0
72.3	0
72.4	0
72.5	0
72.6	0
72.7	0
72.8	0
72.9	0
73	0
73.1	0
73.2	0
73.3	0
73.4	0
73.5	0
73.6	0
73.7	0
73.8	0
73.9	0
74	0
74.1	0
74.2	0
74.3	0
74.4	0
74.5	0
74.6	0
74.7	0
74.8	0
74.9	0
75	0
75.1	0
75.2	0
75.3	0
75.4	0
75.5	0
75.6	0
75.7	0
75.8	0
75.9	0
76	0
76.1	0
76.2	0
76.3	0
76.4	0
76.5	0
76.6	0
76.7	0
76.8	0
76.9	0
77	0
77.1	0
77.2	0
77.3	0
77.4	0
77.5	0
77.6	0
77.7	0
77.8	0
77.9	0
78	0
78.1	0
78.2	0
78.3	0
78.4	0
78.5	0
78.6	0
78.7	0
78.8	0
78.9	0
79	0
79.1	0
79.2	0
79.3	0
79.4	0
79.5	0
79.6	0
79.7	0
79.8	0
79.9	0
80	0
80.1	0
80.2	0
80.3	0
80.4	0
80.5	0
80.6	0
80.7	0
80.8	0
80.9	0
81	0
81.1	0
81.2	0
81.3	0
81.4	0
81.5	0
81.6	0
81.7	0
81.8	0
81.9	0
82	0
82.1	0
82.2	0
82.3	0
82.4	0
82.5	0
82.6	0
82.7	0
82.8	0
82.9	0
83	0
83.1	0
83.2	0
83.3	0
83.4	0
83.5	0
83.6	0
83.7	0
83.8	0
83.9	0
84	0
84.1	0
84.2	0
84.3	0
84.4	0
84.5	0
84.6	0
84.7	0
84.8	0
84.9	0
85	0
85.1	0
85.2	0
85.3	0
85.4	0
85.5	0
85.6	0
85.7	0
85.8	0
85.9	0
86	0
86.1	0
86.2	0
86.3	0
86.4	0
86.5	0
86.6	0
86.7	0
86.8	0
86.9	0
87	0
87.1	0
87.2	0
87.3	0
87.4	0
87.5	0
87.6	0
87.7	0
87.8	0
87.9	0
88	0
88.1	0
88.2	0
88.3	0
88.4	0
88.5	0
88.6	0
88.7	0
88.8	0
88.9	0
89	0
89.1	0
89.2	0
89.3	0
89.4	0
89.5	0
89.6	0
89.7	0
89.8	0
89.9	0
90	0
90.1	0
90.2	0
90.3	0
90.4	0
90.5	0
90.6	0
90.7	0
90.8	0
90.9	0
91	0
91.1	0
91.2	0
91.3	0
91.4	0
91.5	0
91.6	0
91.7	0
91.8	0
91.9	0
92	0
92.1	0
92.2	0
92.3	0
92.4	0
92.5	0
92.6	0
92.7	0
92.8	0
92.9	0
93	0
93.1	0
93.2	0
93.3	0
93.4	0
93.5	0
93.6	0
93.7	0
93.8	0
93.9	0
94	0
94.1	0
94.2	0
94.3	0
94.4	0
94.5	0
94.6	0
94.7	0
94.8	0
94.9	0
95	0
95.1	0
95.2	0
95.3	0
95.4	0
95.5	0
95.6	0
95.7	0
95.8	0
95.9	0
96	0
96.1	0
96.2	0
96.3	0
96.4	0
96.5	0
96.6	0
96.7	0
96.8	0
96.9	0
97	0
97.1	0
97.2	0
97.3	0
97.4	0
97.5	0
97.6	0
97.7	0
97.8	0
97.9	0
98	0
98.1	0
98.2	0
98.3	0
98.4	0
98.5	0
98.6	0
98.7	0
98.8	0
98.9	0
99	0
99.1	0
99.2	0
99.3	0
99.4	0
99.5	0
99.6	0
99.7	0
99.8	0
99.9	0
100	0
100.1	0
100.2	0.00625
100.3	0.00625
100.4	0.0125
100.5	0.0125
100.6	0.01875
100.7	0.01875
100.8	0.01875
100.9	0.01875
101	0.01875
101.1	0.01875
101.2	0.025
101.3	0.025
101.4	0.025
101.5	0.025
101.6	0.025
101.7	0.03125
101.8	0.03125
101.9	0.03125
102	0.0375
102.1	0.0375
102.2	0.0375
102.3	0.0375
102.4	0.0375
102.5	0.04375
102.6	0.04375
102.7	0.04375
102.8	0.04375
102.9	0.04375
103	0.04375
103.1	0.04375
103.2	0.04375
103.3	0.05
103.4	0.05
103.5	0.0625
103.6	0.0625
103.7	0.0625
103.8	0.0625
103.9	0.0625
104	0.06875
104.1	0.075
104.2	0.075
104.3	0.08125
104.4	0.0875
104.5	0.0875
104.6	0.0875
104.7	0.08125
104.8	0.08125
104.9	0.08125
105	0.08125
105.1	0.08125
105.2	0.08125
105.3	0.0875
105.4	0.09375
105.5	0.1
105.6	0.0875
105.7	0.0875
105.8	0.0875
105.9	0.0875
106	0.0875
106.1	0.0875
106.2	0.0875
106.3	0.0875
106.4	0.09375
106.5	0.09375
106.6	0.09375
106.7	0.09375
106.8	0.09375
106.9	0.09375
107	0.09375
107.1	0.09375
107.2	0.09375
107.3	0.09375
107.4	0.09375
107.5	0.1
107.6	0.1
107.7	0.1
107.8	0.1
107.9	0.1
108	0.1
108.1	0.10625
108.2	0.10625
108.3	0.10625
108.4	0.10625
108.5	0.10625
108.6	0.10625
108.7	0.10625
108.8	0.10625
108.9	0.10625
109	0.10625
109.1	0.11875
109.2	0.125
109.3	0.13125
109.4	0.1375
109.5	0.1375
109.6	0.1375
109.7	0.1375
109.8	0.1375
109.9	0.1375
110	0.13125
110.1	0.13125
110.2	0.13125
110.3	0.13125
110.4	0.13125
110.5	0.1375
110.6	0.1375
110.7	0.1375
110.8	0.1375
110.9	0.13125
111	0.13125
111.1	0.13125
111.2	0.13125
111.3	0.125
111.4	0.125
111.5	0.125
111.6	0.11875
111.7	0.1125
111.8	0.10625
111.9	0.10625
112	0.1125
112.1	0.10625
112.2	0.11875
112.3	0.11875
112.4	0.11875
112.5	0.125
112.6	0.13125
112.7	0.125
112.8	0.125
112.9	0.125
113	0.11875
113.1	0.11875
113.2	0.11875
113.3	0.11875
113.4	0.1125
113.5	0.10625
113.6	0.10625
113.7	0.10625
113.8	0.10625
113.9	0.10625
114	0.10625
114.1	0.10625
114.2	0.10625
114.3	0.1
114.4	0.1
114.5	0.1
114.6	0.09375
114.7	0.09375
114.8	0.0875
114.9	0.0875
115	0.0875
115.1	0.08125
115.2	0.08125
115.3	0.08125
115.4	0.08125
115.5	0.08125
115.6	0.0875
115.7	0.0875
115.8	0.0875
115.9	0.0875
116	0.0875
116.1	0.09375
116.2	0.0875
116.3	0.08125
116.4	0.08125
116.5	0.0875
116.6	0.0875
116.7	0.0875
116.8	0.0875
116.9	0.08125
117	0.075
117.1	0.08125
117.2	0.08125
117.3	0.0875
117.4	0.0875
117.5	0.0875
117.6	0.0875
117.7	0.0875
117.8	0.0875
117.9	0.0875
118	0.0875
118.1	0.0875
118.2	0.0875
118.3	0.0875
118.4	0.0875
118.5	0.0875
118.6	0.0875
118.7	0.09375
118.8	0.0875
118.9	0.0875
119	0.09375
119.1	0.09375
119.2	0.09375
119.3	0.0875
119.4	0.0875
119.5	0.0875
119.6	0.0875
119.7	0.0875
119.8	0.0875
119.9	0.0875
120	0.0875
120.1	0.0875
120.2	0.0875
120.3	0.0875
120.4	0.1
120.5	0.1
120.6	0.1
120.7	0.1
120.8	0.1
120.9	0.1
121	0.09375
121.1	0.0875
121.2	0.0875
121.3	0.08125
121.4	0.0875
121.5	0.0875
121.6	0.0875
121.7	0.09375
121.8	0.0875
121.9	0.08125
122	0.0875
122.1	0.1
122.2	0.10625
122.3	0.10625
122.4	0.1
122.5	0.09375
122.6	0.1
122.7	0.10625
122.8	0.10625
122.9	0.10625
123	0.10625
123.1	0.11875
123.2	0.11875
123.3	0.11875
123.4	0.11875
123.5	0.11875
123.6	0.1125
123.7	0.10625
123.8	0.10625
123.9	0.10625
124	0.10625
124.1	0.10625
124.2	0.1
124.3	0.1
124.4	0.1
124.5	0.10625
124.6	0.10625
124.7	0.10625
124.8	0.10625
124.9	0.1
125	0.1
125.1	0.10625
125.2	0.1125
125.3	0.1125
125.4	0.1125
125.5	0.1125
125.6	0.1125
125.7	0.1125
125.8	0.10625
125.9	0.10625
126	0.1125
126.1	0.1125
126.2	0.11875
126.3	0.11875
126.4	0.11875
126.5	0.1125
126.6	0.1125
126.7	0.1125
126.8	0.1125
126.9	0.10625
127	0.10625
127.1	0.10625
127.2	0.1125
127.3	0.11875
127.4	0.13125
127.5	0.13125
127.6	0.13125
127.7	0.125
127.8	0.125
127.9	0.125
128	0.11875
128.1	0.11875
128.2	0.11875
128.3	0.11875
128.4	0.11875
128.5	0.11875
128.6	0.125
128.7	0.125
128.8	0.125
128.9	0.13125
129	0.1375
129.1	0.1375
129.2	0.14375
129.3	0.14375
129.4	0.14375
129.5	0.14375
129.6	0.1375
129.7	0.14375
129.8	0.15
129.9	0.15
130	0.15
130.1	0.15625
130.2	0.15625
130.3	0.15625
130.4	0.15625
130.5	0.15625
130.6	0.1625
130.7	0.15625
130.8	0.15
130.9	0.15
131	0.15625
131.1	0.15625
131.2	0.15625
131.3	0.15625
131.4	0.1625
131.5	0.1625
131.6	0.1625
131.7	0.15625
131.8	0.15625
131.9	0.15625
132	0.15625
132.1	0.15625
132.2	0.1625
132.3	0.15625
132.4	0.15625
132.5	0.15
132.6	0.14375
132.7	0.14375
132.8	0.14375
132.9	0.14375
133	0.1375
133.1	0.13125
133.2	0.1375
133.3	0.1375
133.4	0.1375
133.5	0.13125
133.6	0.13125
133.7	0.13125
133.8	0.13125
133.9	0.1375
134	0.1375
134.1	0.1375
134.2	0.1375
134.3	0.1375
134.4	0.14375
134.5	0.14375
134.6	0.1375
134.7	0.1375
134.8	0.1375
134.9	0.1375
135	0.1375
135.1	0.1375
135.2	0.1375
135.3	0.1375
135.4	0.1375
135.5	0.1375
135.6	0.14375
135.7	0.15
135.8	0.15
135.9	0.15
136	0.14375
136.1	0.15
136.2	0.15
136.3	0.15
136.4	0.15625
136.5	0.15
136.6	0.15
136.7	0.15625
136.8	0.1625
136.9	0.1625
137	0.16875
137.1	0.16875
137.2	0.16875
137.3	0.1625
137.4	0.1625
137.5	0.1625
137.6	0.15625
137.7	0.15625
137.8	0.15625
137.9	0.15625
138	0.15625
138.1	0.15
138.2	0.15
138.3	0.15
138.4	0.15
138.5	0.15
138.6	0.15
138.7	0.14375
138.8	0.14375
138.9	0.14375
139	0.14375
139.1	0.15625
139.2	0.15625
139.3	0.15625
139.4	0.15
139.5	0.14375
139.6	0.14375
139.7	0.14375
139.8	0.15
139.9	0.14375
140	0.15
140.1	0.1375
140.2	0.13125
140.3	0.13125
140.4	0.13125
140.5	0.1375
140.6	0.1375
140.7	0.1375
140.8	0.1375
140.9	0.14375
141	0.15625
141.1	0.1625
141.2	0.1625
141.3	0.1625
141.4	0.1625
141.5	0.15625
141.6	0.15625
141.7	0.15
141.8	0.15
141.9	0.14375
142	0.14375
142.1	0.14375
142.2	0.14375
142.3	0.14375
142.4	0.1375
142.5	0.1375
142.6	0.1375
142.7	0.1375
142.8	0.1375
142.9	0.14375
143	0.14375
143.1	0.14375
143.2	0.1375
143.3	0.1375
143.4	0.1375
143.5	0.14375
143.6	0.14375
143.7	0.15625
143.8	0.15625
143.9	0.15625
144	0.15625
144.1	0.15625
144.2	0.15625
144.3	0.15625
144.4	0.15625
144.5	0.15625
144.6	0.1625
144.7	0.1625
144.8	0.1625
144.9	0.1625
145	0.1625
145.1	0.1625
145.2	0.1625
145.3	0.15
145.4	0.15
145.5	0.15
145.6	0.15
145.7	0.15
145.8	0.15
145.9	0.14375
146	0.14375
146.1	0.14375
146.2	0.14375
146.3	0.14375
146.4	0.14375
146.5	0.14375
146.6	0.15
146.7	0.15
146.8	0.15
146.9	0.15
147	0.15
147.1	0.15625
147.2	0.15625
147.3	0.15625
147.4	0.15625
147.5	0.15625
147.6	0.15
147.7	0.15
147.8	0.15625
147.9	0.15625
148	0.15625
148.1	0.15625
148.2	0.15625
148.3	0.1625
148.4	0.1625
148.5	0.1625
148.6	0.1625
148.7	0.1625
148.8	0.1625
148.9	0.1625
149	0.1625
149.1	0.1625
149.2	0.1625
149.3	0.1625
149.4	0.1625
149.5	0.1625
149.6	0.1625
149.7	0.15625
149.8	0.15
149.9	0.15
150	0.15
150.1	0.15625
150.2	0.15625
150.3	0.15625
150.4	0.15625
150.5	0.15
150.6	0.15
150.7	0.15
150.8	0.1625
150.9	0.15625
151	0.15625
151.1	0.1625
151.2	0.16875
151.3	0.16875
151.4	0.175
151.5	0.175
151.6	0.18125
151.7	0.175
151.8	0.175
151.9	0.175
152	0.175
152.1	0.16875
152.2	0.16875
152.3	0.1625
152.4	0.1625
152.5	0.1625
152.6	0.15625
152.7	0.1625
152.8	0.1625
152.9	0.1625
153	0.16875
153.1	0.1625
153.2	0.16875
153.3	0.16875
153.4	0.1625
153.5	0.1625
153.6	0.175
153.7	0.16875
153.8	0.16875
153.9	0.16875
154	0.175
154.1	0.175
154.2	0.16875
154.3	0.16875
154.4	0.1625
154.5	0.1625
154.6	0.16875
154.7	0.16875
154.8	0.16875
154.9	0.16875
155	0.15625
155.1	0.15625
155.2	0.1625
155.3	0.1625
155.4	0.15
155.5	0.15
155.6	0.15
155.7	0.15
155.8	0.15
155.9	0.15
156	0.15625
156.1	0.15625
156.2	0.15625
156.3	0.15625
156.4	0.1625
156.5	0.1625
156.6	0.1625
156.7	0.1625
156.8	0.15625
156.9	0.16875
157	0.16875
157.1	0.16875
157.2	0.16875
157.3	0.16875
157.4	0.16875
157.5	0.16875
157.6	0.16875
157.7	0.16875
157.8	0.16875
157.9	0.1625
158	0.1625
158.1	0.1625
158.2	0.1625
158.3	0.1625
158.4	0.1625
158.5	0.1625
158.6	0.15625
158.7	0.1625
158.8	0.16875
158.9	0.16875
159	0.16875
159.1	0.16875
159.2	0.16875
159.3	0.1625
159.4	0.16875
159.5	0.16875
159.6	0.175
159.7	0.175
159.8	0.1875
159.9	0.1875
160	0.18125
160.1	0.175
160.2	0.16875
160.3	0.16875
160.4	0.1625
160.5	0.1625
160.6	0.1625
160.7	0.1625
160.8	0.1625
160.9	0.1625
161	0.1625
161.1	0.16875
161.2	0.16875
161.3	0.16875
161.4	0.16875
161.5	0.175
161.6	0.1625
161.7	0.1625
161.8	0.16875
161.9	0.175
162	0.18125
162.1	0.175
162.2	0.16875
162.3	0.16875
162.4	0.16875
162.5	0.16875
162.6	0.16875
162.7	0.1625
162.8	0.16875
162.9	0.16875
163	0.175
163.1	0.175
163.2	0.175
163.3	0.175
163.4	0.175
163.5	0.16875
163.6	0.16875
163.7	0.16875
163.8	0.16875
163.9	0.16875
164	0.175
164.1	0.1625
164.2	0.1625
164.3	0.1625
164.4	0.1625
164.5	0.16875
164.6	0.16875
164.7	0.16875
164.8	0.16875
164.9	0.175
165	0.175
165.1	0.16875
165.2	0.16875
165.3	0.175
165.4	0.18125
165.5	0.19375
165.6	0.19375
165.7	0.19375
165.8	0.19375
165.9	0.19375
166	0.19375
166.1	0.19375
166.2	0.19375
166.3	0.1875
166.4	0.1875
166.5	0.1875
166.6	0.1875
166.7	0.18125
166.8	0.18125
166.9	0.18125
167	0.18125
167.1	0.18125
167.2	0.18125
167.3	0.18125
167.4	0.18125
167.5	0.16875
167.6	0.16875
167.7	0.16875
167.8	0.1625
167.9	0.15625
168	0.15625
168.1	0.1625
168.2	0.15625
168.3	0.16875
168.4	0.175
168.5	0.16875
168.6	0.175
168.7	0.16875
168.8	0.16875
168.9	0.16875
169	0.16875
169.1	0.16875
169.2	0.16875
169.3	0.16875
169.4	0.16875
169.5	0.175
169.6	0.175
169.7	0.18125
169.8	0.175
169.9	0.16875
170	0.16875
170.1	0.16875
170.2	0.16875
170.3	0.1625
170.4	0.16875
170.5	0.175
170.6	0.1875
170.7	0.18125
170.8	0.18125
170.9	0.18125
171	0.18125
171.1	0.18125
171.2	0.1875
171.3	0.1875
171.4	0.1875
171.5	0.1875
171.6	0.1875
171.7	0.1875
171.8	0.175
171.9	0.16875
172	0.16875
172.1	0.1625
172.2	0.1625
172.3	0.16875
172.4	0.1625
172.5	0.1625
172.6	0.1625
172.7	0.1625
172.8	0.1625
172.9	0.16875
173	0.16875
173.1	0.16875
173.2	0.175
173.3	0.18125
173.4	0.175
173.5	0.175
173.6	0.175
173.7	0.18125
173.8	0.18125
173.9	0.18125
174	0.18125
174.1	0.175
174.2	0.16875
174.3	0.16875
174.4	0.1625
174.5	0.16875
174.6	0.175
174.7	0.18125
174.8	0.18125
174.9	0.18125
175	0.1875
175.1	0.18125
175.2	0.1875
175.3	0.19375
175.4	0.1875
175.5	0.1875
175.6	0.18125
175.7	0.18125
175.8	0.18125
175.9	0.18125
176	0.18125
176.1	0.18125
176.2	0.18125
176.3	0.16875
176.4	0.15625
176.5	0.16875
176.6	0.16875
176.7	0.1625
176.8	0.1625
176.9	0.175
177	0.175
177.1	0.16875
177.2	0.16875
177.3	0.1625
177.4	0.1625
177.5	0.1625
177.6	0.1625
177.7	0.1625
177.8	0.16875
177.9	0.16875
178	0.1625
178.1	0.1625
178.2	0.1625
178.3	0.1625
178.4	0.1625
178.5	0.1625
178.6	0.16875
178.7	0.16875
178.8	0.16875
178.9	0.16875
179	0.16875
179.1	0.16875
179.2	0.16875
179.3	0.16875
179.4	0.16875
179.5	0.16875
179.6	0.16875
179.7	0.1625
179.8	0.1625
179.9	0.1625
180	0.1625
180.1	0.15625
180.2	0.15625
180.3	0.15625
180.4	0.15625
180.5	0.14375
180.6	0.14375
180.7	0.15
180.8	0.15
180.9	0.15
181	0.15625
181.1	0.1625
181.2	0.1625
181.3	0.15625
181.4	0.15625
181.5	0.16875
181.6	0.16875
181.7	0.1625
181.8	0.15625
181.9	0.15625
182	0.15625
182.1	0.15625
182.2	0.1625
182.3	0.1625
182.4	0.16875
182.5	0.1625
182.6	0.1625
182.7	0.15625
182.8	0.15625
182.9	0.15625
183	0.15625
183.1	0.15625
183.2	0.15625
183.3	0.1625
183.4	0.15625
183.5	0.1625
183.6	0.15625
183.7	0.15625
183.8	0.15
183.9	0.15
184	0.15625
184.1	0.15625
184.2	0.14375
184.3	0.15625
184.4	0.15625
184.5	0.15625
184.6	0.1625
184.7	0.1625
184.8	0.1625
184.9	0.1625
185	0.15625
185.1	0.15625
185.2	0.1625
185.3	0.1625
185.4	0.1625
185.5	0.1625
185.6	0.1625
185.7	0.15625
185.8	0.15625
185.9	0.14375
186	0.1375
186.1	0.13125
186.2	0.125
186.3	0.125
186.4	0.125
186.5	0.125
186.6	0.125
186.7	0.13125
186.8	0.13125
186.9	0.13125
187	0.13125
187.1	0.13125
187.2	0.13125
187.3	0.13125
187.4	0.13125
187.5	0.13125
187.6	0.13125
187.7	0.14375
187.8	0.14375
187.9	0.14375
188	0.1375
188.1	0.1375
188.2	0.1375
188.3	0.1375
188.4	0.1375
188.5	0.1375
188.6	0.1375
188.7	0.1375
188.8	0.1375
188.9	0.1375
189	0.14375
189.1	0.14375
189.2	0.15
189.3	0.14375
189.4	0.14375
189.5	0.14375
189.6	0.14375
189.7	0.14375
189.8	0.14375
189.9	0.15
190	0.15
190.1	0.15
190.2	0.15
190.3	0.1375
190.4	0.1375
190.5	0.1375
190.6	0.1375
190.7	0.14375
190.8	0.14375
190.9	0.14375
191	0.14375
191.1	0.1375
191.2	0.14375
191.3	0.14375
191.4	0.15
191.5	0.15
191.6	0.15
191.7	0.14375
191.8	0.15
191.9	0.15625
192	0.15625
192.1	0.15625
192.2	0.15625
192.3	0.15625
192.4	0.15625
192.5	0.1375
192.6	0.1375
192.7	0.1375
192.8	0.1375
192.9	0.1375
193	0.1375
193.1	0.13125
193.2	0.13125
193.3	0.13125
193.4	0.1375
193.5	0.1375
193.6	0.1375
193.7	0.1375
193.8	0.1375
193.9	0.14375
194	0.14375
194.1	0.14375
194.2	0.14375
194.3	0.15
194.4	0.15
194.5	0.15
194.6	0.15625
194.7	0.1625
194.8	0.1625
194.9	0.1625
195	0.15625
195.1	0.15625
195.2	0.15
195.3	0.15
195.4	0.15
195.5	0.15
195.6	0.1625
195.7	0.1625
195.8	0.1625
195.9	0.1625
196	0.1625
196.1	0.1625
196.2	0.15
196.3	0.15
196.4	0.15
196.5	0.15625
196.6	0.15625
196.7	0.15625
196.8	0.15625
196.9	0.15625
197	0.15625
197.1	0.15625
197.2	0.15625
197.3	0.15
197.4	0.15
197.5	0.15625
197.6	0.15625
197.7	0.15625
197.8	0.15625
197.9	0.15625
198	0.15
198.1	0.15
198.2	0.15
198.3	0.15
198.4	0.15
198.5	0.14375
198.6	0.14375
198.7	0.15
198.8	0.15625
198.9	0.15625
199	0.15625
199.1	0.15625
199.2	0.15625
199.3	0.15625
199.4	0.1625
199.5	0.1625
199.6	0.1625
199.7	0.1625
199.8	0.1625
199.9	0.1625
200	0.1625
[truncated: 14,000 more rows]
