# Supplementary material for: Bayesian inference of kinetic schemes for ion channels by Kalman filtering
Source: eLife journal article supplement (doi:10.7554/elife.62714), 2022-05-04
Supplement: fig4-data11 [file 1_Sim_N_80_Strom_MW.xlsx]

## Sheet: 0.03125 M
0.1	0
0.2	0
0.3	0
0.4	0
0.5	0
0.6	0
0.7	0
0.8	0
0.9	0
1	0
1.1	0
1.2	0
1.3	0
1.4	0
1.5	0
1.6	0
1.7	0
1.8	0
1.9	0
2	0
2.1	0
2.2	0
2.3	0
2.4	0
2.5	0
2.6	0
2.7	0
2.8	0
2.9	0
3	0
3.1	0
3.2	0
3.3	0
3.4	0
3.5	0
3.6	0
3.7	0
3.8	0
3.9	0
4	0
4.1	0
4.2	0
4.3	0
4.4	0
4.5	0
4.6	0
4.7	0
4.8	0
4.9	0
5	0
5.1	0
5.2	0
5.3	0
5.4	0
5.5	0
5.6	0
5.7	0
5.8	0
5.9	0
6	0
6.1	0
6.2	0
6.3	0
6.4	0
6.5	0
6.6	0
6.7	0
6.8	0
6.9	0
7	0
7.1	0
7.2	0
7.3	0
7.4	0
7.5	0
7.6	0
7.7	0
7.8	0
7.9	0
8	0
8.1	0
8.2	0
8.3	0
8.4	0
8.5	0
8.6	0
8.7	0
8.8	0
8.9	0
9	0
9.1	0
9.2	0
9.3	0
9.4	0
9.5	0
9.6	0
9.7	0
9.8	0
9.9	0
10	0
10.1	0
10.2	0
10.3	0
10.4	0
10.5	0
10.6	0
10.7	0
10.8	0
10.9	0
11	0
11.1	0
11.2	0
11.3	0
11.4	0
11.5	0
11.6	0
11.7	0
11.8	0
11.9	0
12	0
12.1	0
12.2	0
12.3	0
12.4	0
12.5	0
12.6	0
12.7	0
12.8	0
12.9	0
13	0
13.1	0
13.2	0
13.3	0
13.4	0
13.5	0
13.6	0
13.7	0
13.8	0
13.9	0
14	0
14.1	0
14.2	0
14.3	0
14.4	0
14.5	0
14.6	0
14.7	0
14.8	0
14.9	0
15	0
15.1	0
15.2	0
15.3	0
15.4	0
15.5	0
15.6	0
15.7	0
15.8	0
15.9	0
16	0
16.1	0
16.2	0
16.3	0
16.4	0
16.5	0
16.6	0
16.7	0
16.8	0
16.9	0
17	0
17.1	0
17.2	0
17.3	0
17.4	0
17.5	0
17.6	0
17.7	0
17.8	0
17.9	0
18	0
18.1	0
18.2	0
18.3	0
18.4	0
18.5	0
18.6	0
18.7	0
18.8	0
18.9	0
19	0
19.1	0
19.2	0
19.3	0
19.4	0
19.5	0
19.6	0
19.7	0
19.8	0
19.9	0
20	0
20.1	0
20.2	0
20.3	0
20.4	0
20.5	0
20.6	0
20.7	0
20.8	0
20.9	0
21	0
21.1	0
21.2	0
21.3	0
21.4	0
21.5	0
21.6	0
21.7	0
21.8	0
21.9	0
22	0
22.1	0
22.2	0
22.3	0
22.4	0
22.5	0
22.6	0
22.7	0
22.8	0
22.9	0
23	0
23.1	0
23.2	0
23.3	0
23.4	0
23.5	0
23.6	0
23.7	0
23.8	0
23.9	0
24	0
24.1	0
24.2	0
24.3	0
24.4	0
24.5	0
24.6	0
24.7	0
24.8	0
24.9	0
25	0
25.1	0
25.2	0
25.3	0
25.4	0
25.5	0
25.6	0
25.7	0
25.8	0
25.9	0
26	0
26.1	0
26.2	0
26.3	0
26.4	0
26.5	0
26.6	0
26.7	0
26.8	0
26.9	0
27	0
27.1	0
27.2	0
27.3	0
27.4	0
27.5	0
27.6	0
27.7	0
27.8	0
27.9	0
28	0
28.1	0
28.2	0
28.3	0
28.4	0
28.5	0
28.6	0
28.7	0
28.8	0
28.9	0
29	0
29.1	0
29.2	0
29.3	0
29.4	0
29.5	0
29.6	0
29.7	0
29.8	0
29.9	0
30	0
30.1	0
30.2	0
30.3	0
30.4	0
30.5	0
30.6	0
30.7	0
30.8	0
30.9	0
31	0
31.1	0
31.2	0
31.3	0
31.4	0
31.5	0
31.6	0
31.7	0
31.8	0
31.9	0
32	0
32.1	0
32.2	0
32.3	0
32.4	0
32.5	0
32.6	0
32.7	0
32.8	0
32.9	0
33	0
33.1	0
33.2	0
33.3	0
33.4	0
33.5	0
33.6	0
33.7	0
33.8	0
33.9	0
34	0
34.1	0
34.2	0
34.3	0
34.4	0
34.5	0
34.6	0
34.7	0
34.8	0
34.9	0
35	0
35.1	0
35.2	0
35.3	0
35.4	0
35.5	0
35.6	0
35.7	0
35.8	0
35.9	0
36	0
36.1	0
36.2	0
36.3	0
36.4	0
36.5	0
36.6	0
36.7	0
36.8	0
36.9	0
37	0
37.1	0
37.2	0
37.3	0
37.4	0
37.5	0
37.6	0
37.7	0
37.8	0
37.9	0
38	0
38.1	0
38.2	0
38.3	0
38.4	0
38.5	0
38.6	0
38.7	0
38.8	0
38.9	0
39	0
39.1	0
39.2	0
39.3	0
39.4	0
39.5	0
39.6	0
39.7	0
39.8	0
39.9	0
40	0
40.1	0
40.2	0
40.3	0
40.4	0
40.5	0
40.6	0
40.7	0
40.8	0
40.9	0
41	0
41.1	0
41.2	0
41.3	0
41.4	0
41.5	0
41.6	0
41.7	0
41.8	0
41.9	0
42	0
42.1	0
42.2	0
42.3	0
42.4	0
42.5	0
42.6	0
42.7	0
42.8	0
42.9	0
43	0
43.1	0
43.2	0
43.3	0
43.4	0
43.5	0
43.6	0
43.7	0
43.8	0
43.9	0
44	0
44.1	0
44.2	0
44.3	0
44.4	0
44.5	0
44.6	0
44.7	0
44.8	0
44.9	0
45	0
45.1	0
45.2	0
45.3	0
45.4	0
45.5	0
45.6	0
45.7	0
45.8	0
45.9	0
46	0
46.1	0
46.2	0
46.3	0
46.4	0
46.5	0
46.6	0
46.7	0
46.8	0
46.9	0
47	0
47.1	0
47.2	0
47.3	0
47.4	0
47.5	0
47.6	0
47.7	0
47.8	0
47.9	0
48	0
48.1	0
48.2	0
48.3	0
48.4	0
48.5	0
48.6	0
48.7	0
48.8	0
48.9	0
49	0
49.1	0
49.2	0
49.3	0
49.4	0
49.5	0
49.6	0
49.7	0
49.8	0
49.9	0
50	0
50.1	0
50.2	0
50.3	0
50.4	0
50.5	0
50.6	0
50.7	0
50.8	0
50.9	0
51	0
51.1	0
51.2	0
51.3	0
51.4	0
51.5	0
51.6	0
51.7	0
51.8	0
51.9	0
52	0
52.1	0
52.2	0
52.3	0
52.4	0
52.5	0
52.6	0
52.7	0
52.8	0
52.9	0
53	0
53.1	0
53.2	0
53.3	0
53.4	0
53.5	0
53.6	0
53.7	0
53.8	0
53.9	0
54	0
54.1	0
54.2	0
54.3	0
54.4	0
54.5	0
54.6	0
54.7	0
54.8	0
54.9	0
55	0
55.1	0
55.2	0
55.3	0
55.4	0
55.5	0
55.6	0
55.7	0
55.8	0
55.9	0
56	0
56.1	0
56.2	0
56.3	0
56.4	0
56.5	0
56.6	0
56.7	0
56.8	0
56.9	0
57	0
57.1	0
57.2	0
57.3	0
57.4	0
57.5	0
57.6	0
57.7	0
57.8	0
57.9	0
58	0
58.1	0
58.2	0
58.3	0
58.4	0
58.5	0
58.6	0
58.7	0
58.8	0
58.9	0
59	0
59.1	0
59.2	0
59.3	0
59.4	0
59.5	0
59.6	0
59.7	0
59.8	0
59.9	0
60	0
60.1	0
60.2	0
60.3	0
60.4	0
60.5	0
60.6	0
60.7	0
60.8	0
60.9	0
61	0
61.1	0
61.2	0
61.3	0
61.4	0
61.5	0
61.6	0
61.7	0
61.8	0
61.9	0
62	0
62.1	0
62.2	0
62.3	0
62.4	0
62.5	0
62.6	0
62.7	0
62.8	0
62.9	0
63	0
63.1	0
63.2	0
63.3	0
63.4	0
63.5	0
63.6	0
63.7	0
63.8	0
63.9	0
64	0
64.1	0
64.2	0
64.3	0
64.4	0
64.5	0
64.6	0
64.7	0
64.8	0
64.9	0
65	0
65.1	0
65.2	0
65.3	0
65.4	0
65.5	0
65.6	0
65.7	0
65.8	0
65.9	0
66	0
66.1	0
66.2	0
66.3	0
66.4	0
66.5	0
66.6	0
66.7	0
66.8	0
66.9	0
67	0
67.1	0
67.2	0
67.3	0
67.4	0
67.5	0
67.6	0
67.7	0
67.8	0
67.9	0
68	0
68.1	0
68.2	0
68.3	0
68.4	0
68.5	0
68.6	0
68.7	0
68.8	0
68.9	0
69	0
69.1	0
69.2	0
69.3	0
69.4	0
69.5	0
69.6	0
69.7	0
69.8	0
69.9	0
70	0
70.1	0
70.2	0
70.3	0
70.4	0
70.5	0
70.6	0
70.7	0
70.8	0
70.9	0
71	0
71.1	0
71.2	0
71.3	0
71.4	0
71.5	0
71.6	0
71.7	0
71.8	0
71.9	0
72	0
72.1	0
72.2	0
72.3	0
72.4	0
72.5	0
72.6	0
72.7	0
72.8	0
72.9	0
73	0
73.1	0
73.2	0
73.3	0
73.4	0
73.5	0
73.6	0
73.7	0
73.8	0
73.9	0
74	0
74.1	0
74.2	0
74.3	0
74.4	0
74.5	0
74.6	0
74.7	0
74.8	0
74.9	0
75	0
75.1	0
75.2	0
75.3	0
75.4	0
75.5	0
75.6	0
75.7	0
75.8	0
75.9	0
76	0
76.1	0
76.2	0
76.3	0
76.4	0
76.5	0
76.6	0
76.7	0
76.8	0
76.9	0
77	0
77.1	0
77.2	0
77.3	0
77.4	0
77.5	0
77.6	0
77.7	0
77.8	0
77.9	0
78	0
78.1	0
78.2	0
78.3	0
78.4	0
78.5	0
78.6	0
78.7	0
78.8	0
78.9	0
79	0
79.1	0
79.2	0
79.3	0
79.4	0
79.5	0
79.6	0
79.7	0
79.8	0
79.9	0
80	0
80.1	0
80.2	0
80.3	0
80.4	0
80.5	0
80.6	0
80.7	0
80.8	0
80.9	0
81	0
81.1	0
81.2	0
81.3	0
81.4	0
81.5	0
81.6	0
81.7	0
81.8	0
81.9	0
82	0
82.1	0
82.2	0
82.3	0
82.4	0
82.5	0
82.6	0
82.7	0
82.8	0
82.9	0
83	0
83.1	0
83.2	0
83.3	0
83.4	0
83.5	0
83.6	0
83.7	0
83.8	0
83.9	0
84	0
84.1	0
84.2	0
84.3	0
84.4	0
84.5	0
84.6	0
84.7	0
84.8	0
84.9	0
85	0
85.1	0
85.2	0
85.3	0
85.4	0
85.5	0
85.6	0
85.7	0
85.8	0
85.9	0
86	0
86.1	0
86.2	0
86.3	0
86.4	0
86.5	0
86.6	0
86.7	0
86.8	0
86.9	0
87	0
87.1	0
87.2	0
87.3	0
87.4	0
87.5	0
87.6	0
87.7	0
87.8	0
87.9	0
88	0
88.1	0
88.2	0
88.3	0
88.4	0
88.5	0
88.6	0
88.7	0
88.8	0
88.9	0
89	0
89.1	0
89.2	0
89.3	0
89.4	0
89.5	0
89.6	0
89.7	0
89.8	0
89.9	0
90	0
90.1	0
90.2	0
90.3	0
90.4	0
90.5	0
90.6	0
90.7	0
90.8	0
90.9	0
91	0
91.1	0
91.2	0
91.3	0
91.4	0
91.5	0
91.6	0
91.7	0
91.8	0
91.9	0
92	0
92.1	0
92.2	0
92.3	0
92.4	0
92.5	0
92.6	0
92.7	0
92.8	0
92.9	0
93	0
93.1	0
93.2	0
93.3	0
93.4	0
93.5	0
93.6	0
93.7	0
93.8	0
93.9	0
94	0
94.1	0
94.2	0
94.3	0
94.4	0
94.5	0
94.6	0
94.7	0
94.8	0
94.9	0
95	0
95.1	0
95.2	0
95.3	0
95.4	0
95.5	0
95.6	0
95.7	0
95.8	0
95.9	0
96	0
96.1	0
96.2	0
96.3	0
96.4	0
96.5	0
96.6	0
96.7	0
96.8	0
96.9	0
97	0
97.1	0
97.2	0
97.3	0
97.4	0
97.5	0
97.6	0
97.7	0
97.8	0
97.9	0
98	0
98.1	0
98.2	0
98.3	0
98.4	0
98.5	0
98.6	0
98.7	0
98.8	0
98.9	0
99	0
99.1	0
99.2	0
99.3	0
99.4	0
99.5	0
99.6	0
99.7	0
99.8	0
99.9	0
100	0
100.1	0
100.2	0
100.3	0
100.4	0
100.5	0
100.6	0
100.7	0
100.8	0
100.9	0
101	0
101.1	0
101.2	0
101.3	0
101.4	0
101.5	0
101.6	0
101.7	0
101.8	0
101.9	0
102	0
102.1	0
102.2	0
102.3	0
102.4	0
102.5	0
102.6	0
102.7	0
102.8	0
102.9	0
103	0
103.1	0
103.2	0
103.3	0
103.4	0
103.5	0
103.6	0
103.7	0
103.8	0
103.9	0
104	0
104.1	0
104.2	0
104.3	0
104.4	0
104.5	0
104.6	0
104.7	0
104.8	0
104.9	0
105	0
105.1	0
105.2	0
105.3	0
105.4	0
105.5	0
105.6	0
105.7	0
105.8	0
105.9	0
106	0
106.1	0
106.2	0
106.3	0
106.4	0
106.5	0
106.6	0
106.7	0
106.8	0
106.9	0
107	0
107.1	0
107.2	0
107.3	0
107.4	0
107.5	0
107.6	0
107.7	0
107.8	0
107.9	0
108	0
108.1	0
108.2	0
108.3	0
108.4	0
108.5	0
108.6	0
108.7	0
108.8	0
108.9	0
109	0
109.1	0
109.2	0
109.3	0
109.4	0
109.5	0
109.6	0
109.7	0
109.8	0
109.9	0
110	0
110.1	0
110.2	0
110.3	0
110.4	0
110.5	0
110.6	0
110.7	0
110.8	0
110.9	0
111	0
111.1	0
111.2	0
111.3	0
111.4	0
111.5	0
111.6	0
111.7	0
111.8	0
111.9	0
112	0
112.1	0
112.2	0
112.3	0
112.4	0
112.5	0
112.6	0
112.7	0
112.8	0
112.9	0
113	0
113.1	0
113.2	0
113.3	0
113.4	0
113.5	0
113.6	0
113.7	0
113.8	0
113.9	0
114	0
114.1	0
114.2	0
114.3	0
114.4	0
114.5	0
114.6	0
114.7	0
114.8	0
114.9	0
115	0
115.1	0
115.2	0
115.3	0
115.4	0
115.5	0
115.6	0
115.7	0
115.8	0
115.9	0
116	0
116.1	0
116.2	0
116.3	0
116.4	0
116.5	0
116.6	0
116.7	0
116.8	0
116.9	0
117	0
117.1	0
117.2	0
117.3	0
117.4	0
117.5	0
117.6	0
117.7	0
117.8	0
117.9	0
118	0
118.1	0
118.2	0
118.3	0
118.4	0
118.5	0
118.6	0
118.7	0
118.8	0
118.9	0
119	0
119.1	0
119.2	0
119.3	0
119.4	0
119.5	0
119.6	0
119.7	0
119.8	0
119.9	0
120	0
120.1	0
120.2	0
120.3	0
120.4	0
120.5	0
120.6	0
120.7	0
120.8	0
120.9	0
121	0
121.1	0
121.2	0
121.3	0
121.4	0
121.5	0
121.6	0
121.7	0
121.8	0
121.9	0
122	0
122.1	0
122.2	0
122.3	0
122.4	0
122.5	0
122.6	0
122.7	0
122.8	0
122.9	0
123	0
123.1	0
123.2	0
123.3	0
123.4	0
123.5	0
123.6	0
123.7	0
123.8	0
123.9	0
124	0
124.1	0
124.2	0
124.3	0
124.4	0
124.5	0
124.6	0
124.7	0
124.8	0
124.9	0
125	0
125.1	0
125.2	0
125.3	0
125.4	0.0125
125.5	0.0125
125.6	0.0125
125.7	0.0125
125.8	0.0125
125.9	0.0125
126	0.0125
126.1	0.0125
126.2	0.0125
126.3	0.0125
126.4	0.0125
126.5	0.0125
126.6	0.0125
126.7	0.0125
126.8	0.0125
126.9	0.0125
127	0.0125
127.1	0.0125
127.2	0.0125
127.3	0.0125
127.4	0.0125
127.5	0.0125
127.6	0.0125
127.7	0.0125
127.8	0.0125
127.9	0.0125
128	0.0125
128.1	0.0125
128.2	0.0125
128.3	0.0125
128.4	0.0125
128.5	0.0125
128.6	0.0125
128.7	0.0125
128.8	0.0125
128.9	0.0125
129	0.0125
129.1	0.0125
129.2	0.0125
129.3	0.0125
129.4	0.0125
129.5	0.0125
129.6	0.0125
129.7	0.0125
129.8	0.0125
129.9	0.0125
130	0.0125
130.1	0.0125
130.2	0.0125
130.3	0.0125
130.4	0.0125
130.5	0.0125
130.6	0.0125
130.7	0.0125
130.8	0.0125
130.9	0.0125
131	0.0125
131.1	0.0125
131.2	0.0125
131.3	0.0125
131.4	0.0125
131.5	0.0125
131.6	0.0125
131.7	0.0125
131.8	0.0125
131.9	0.0125
132	0.0125
132.1	0.0125
132.2	0.0125
132.3	0.0125
132.4	0.0125
132.5	0.0125
132.6	0.0125
132.7	0.0125
132.8	0.0125
132.9	0.0125
133	0.0125
133.1	0.0125
133.2	0.0125
133.3	0.0125
133.4	0.0125
133.5	0.0125
133.6	0.0125
133.7	0.0125
133.8	0.0125
133.9	0.0125
134	0.0125
134.1	0.0125
134.2	0.0125
134.3	0.0125
134.4	0.0125
134.5	0.0125
134.6	0.0125
134.7	0.0125
134.8	0.0125
134.9	0.0125
135	0.0125
135.1	0.0125
135.2	0.0125
135.3	0.0125
135.4	0.0125
135.5	0.0125
135.6	0.0125
135.7	0.0125
135.8	0.0125
135.9	0.0125
136	0.0125
136.1	0.0125
136.2	0.0125
136.3	0.0125
136.4	0.0125
136.5	0.0125
136.6	0.0125
136.7	0.0125
136.8	0.0125
136.9	0.0125
137	0.0125
137.1	0.0125
137.2	0.0125
137.3	0.0125
137.4	0.0125
137.5	0.0125
137.6	0.0125
137.7	0.0125
137.8	0.0125
137.9	0.0125
138	0.0125
138.1	0.0125
138.2	0.0125
138.3	0.0125
138.4	0.0125
138.5	0.0125
138.6	0.0125
138.7	0.0125
138.8	0.0125
138.9	0.0125
139	0.0125
139.1	0.0125
139.2	0.0125
139.3	0.0125
139.4	0.0125
139.5	0.0125
139.6	0.0125
139.7	0.0125
139.8	0.0125
139.9	0.0125
140	0.0125
140.1	0.0125
140.2	0.0125
140.3	0.0125
140.4	0.0125
140.5	0.0125
140.6	0.0125
140.7	0.0125
140.8	0.0125
140.9	0.0125
141	0.0125
141.1	0.0125
141.2	0.0125
141.3	0.0125
141.4	0.0125
141.5	0.0125
141.6	0.0125
141.7	0.0125
141.8	0.0125
141.9	0.0125
142	0.0125
142.1	0.0125
142.2	0.0125
142.3	0.0125
142.4	0.0125
142.5	0.0125
142.6	0.0125
142.7	0.0125
142.8	0.0125
142.9	0.0125
143	0.0125
143.1	0.0125
143.2	0.0125
143.3	0.0125
143.4	0.0125
143.5	0.0125
143.6	0.0125
143.7	0.0125
143.8	0.0125
143.9	0.0125
144	0.0125
144.1	0.0125
144.2	0.0125
144.3	0.0125
144.4	0.0125
144.5	0.0125
144.6	0.0125
144.7	0.0125
144.8	0.0125
144.9	0.0125
145	0.0125
145.1	0.0125
145.2	0.0125
145.3	0.0125
145.4	0.0125
145.5	0.0125
145.6	0.0125
145.7	0.0125
145.8	0.0125
145.9	0.0125
146	0.0125
146.1	0.0125
146.2	0.0125
146.3	0.0125
146.4	0.0125
146.5	0.0125
146.6	0.0125
146.7	0.0125
146.8	0.0125
146.9	0.0125
147	0.0125
147.1	0.0125
147.2	0.0125
147.3	0.0125
147.4	0.0125
147.5	0.0125
147.6	0.0125
147.7	0.0125
147.8	0.0125
147.9	0.0125
148	0.0125
148.1	0.025
148.2	0.025
148.3	0.025
148.4	0.025
148.5	0.025
148.6	0.025
148.7	0.025
148.8	0.025
148.9	0.025
149	0.025
149.1	0.025
149.2	0.025
149.3	0.025
149.4	0.025
149.5	0.025
149.6	0.025
149.7	0.025
149.8	0.025
149.9	0.025
150	0.025
150.1	0.025
150.2	0.025
150.3	0.025
150.4	0.025
150.5	0.025
150.6	0.025
150.7	0.025
150.8	0.025
150.9	0.025
151	0.025
151.1	0.025
151.2	0.025
151.3	0.025
151.4	0.025
151.5	0.025
151.6	0.025
151.7	0.025
151.8	0.025
151.9	0.025
152	0.025
152.1	0.025
152.2	0.025
152.3	0.025
152.4	0.025
152.5	0.025
152.6	0.025
152.7	0.025
152.8	0.025
152.9	0.025
153	0.025
153.1	0.025
153.2	0.025
153.3	0.025
153.4	0.025
153.5	0.025
153.6	0.025
153.7	0.025
153.8	0.025
153.9	0.025
154	0.025
154.1	0.025
154.2	0.025
154.3	0.025
154.4	0.025
154.5	0.025
154.6	0.025
154.7	0.025
154.8	0.025
154.9	0.025
155	0.025
155.1	0.025
155.2	0.025
155.3	0.025
155.4	0.025
155.5	0.025
155.6	0.025
155.7	0.025
155.8	0.025
155.9	0.025
156	0.025
156.1	0.025
156.2	0.025
156.3	0.025
156.4	0.025
156.5	0.025
156.6	0.025
156.7	0.025
156.8	0.025
156.9	0.025
157	0.025
157.1	0.025
157.2	0.025
157.3	0.025
157.4	0.025
157.5	0.025
157.6	0.025
157.7	0.025
157.8	0.025
157.9	0.025
158	0.025
158.1	0.025
158.2	0.025
158.3	0.025
158.4	0.025
158.5	0.025
158.6	0.025
158.7	0.025
158.8	0.025
158.9	0.025
159	0.025
159.1	0.025
159.2	0.025
159.3	0.025
159.4	0.025
159.5	0.025
159.6	0.025
159.7	0.025
159.8	0.025
159.9	0.025
160	0.025
160.1	0.025
160.2	0.025
160.3	0.025
160.4	0.025
160.5	0.025
160.6	0.025
160.7	0.025
160.8	0.025
160.9	0.025
161	0.025
161.1	0.025
161.2	0.025
161.3	0.025
161.4	0.025
161.5	0.025
161.6	0.025
161.7	0.025
161.8	0.025
161.9	0.025
162	0.025
162.1	0.025
162.2	0.025
162.3	0.025
162.4	0.025
162.5	0.025
162.6	0.025
162.7	0.025
162.8	0.025
162.9	0.025
163	0.025
163.1	0.025
163.2	0.025
163.3	0.025
163.4	0.025
163.5	0.025
163.6	0.025
163.7	0.025
163.8	0.025
163.9	0.025
164	0.025
164.1	0.025
164.2	0.025
164.3	0.025
164.4	0.025
164.5	0.025
164.6	0.025
164.7	0.025
164.8	0.025
164.9	0.025
165	0.025
165.1	0.025
165.2	0.025
165.3	0.025
165.4	0.025
165.5	0.025
165.6	0.025
165.7	0.025
165.8	0.025
165.9	0.025
166	0.025
166.1	0.025
166.2	0.025
166.3	0.025
166.4	0.025
166.5	0.025
166.6	0.025
166.7	0.025
166.8	0.025
166.9	0.025
167	0.025
167.1	0.025
167.2	0.025
167.3	0.025
167.4	0.025
167.5	0.025
167.6	0.025
167.7	0.025
167.8	0.025
167.9	0.025
168	0.025
168.1	0.025
168.2	0.025
168.3	0.025
168.4	0.025
168.5	0.025
168.6	0.025
168.7	0.025
168.8	0.025
168.9	0.025
169	0.025
169.1	0.025
169.2	0.025
169.3	0.025
169.4	0.025
169.5	0.025
169.6	0.025
169.7	0.0125
169.8	0.0125
169.9	0.0125
170	0.0125
170.1	0.0125
170.2	0.0125
170.3	0.0125
170.4	0.0125
170.5	0.0125
170.6	0.0125
170.7	0.0125
170.8	0.0125
170.9	0.0125
171	0.0125
171.1	0.0125
171.2	0.0125
171.3	0.0125
171.4	0.0125
171.5	0.0125
171.6	0.0125
171.7	0.0125
171.8	0.0125
171.9	0.0125
172	0.0125
172.1	0.0125
172.2	0.0125
172.3	0.0125
172.4	0.0125
172.5	0.0125
172.6	0.0125
172.7	0.0125
172.8	0.0125
172.9	0.0125
173	0.0125
173.1	0.0125
173.2	0.0125
173.3	0.0125
173.4	0.0125
173.5	0.0125
173.6	0.0125
173.7	0.0125
173.8	0.0125
173.9	0.0125
174	0.0125
174.1	0.0125
174.2	0.0125
174.3	0.0125
174.4	0.0125
174.5	0.0125
174.6	0.0125
174.7	0.0125
174.8	0.0125
174.9	0.0125
175	0.0125
175.1	0.0125
175.2	0.0125
175.3	0.0125
175.4	0.0125
175.5	0.0125
175.6	0.0125
175.7	0.0125
175.8	0.0125
175.9	0.0125
176	0.0125
176.1	0.0125
176.2	0.0125
176.3	0.0125
176.4	0.0125
176.5	0.0125
176.6	0.0125
176.7	0.0125
176.8	0.0125
176.9	0.0125
177	0.0125
177.1	0.0125
177.2	0.0125
177.3	0.0125
177.4	0.0125
177.5	0.0125
177.6	0.0125
177.7	0.0125
177.8	0.0125
177.9	0.0125
178	0.0125
178.1	0.0125
178.2	0.0125
178.3	0.0125
178.4	0.0125
178.5	0.0125
178.6	0.0125
178.7	0.0125
178.8	0.0125
178.9	0.0125
179	0.0125
179.1	0.0125
179.2	0.0125
179.3	0.0125
179.4	0.0125
179.5	0.0125
179.6	0.0125
179.7	0.0125
179.8	0.0125
179.9	0.0125
180	0.0125
180.1	0.0125
180.2	0.0125
180.3	0.0125
180.4	0.0125
180.5	0.0125
180.6	0.0125
180.7	0.0125
180.8	0.0125
180.9	0.0125
181	0.0125
181.1	0.0125
181.2	0.0125
181.3	0.0125
181.4	0.0125
181.5	0.0125
181.6	0.0125
181.7	0.0125
181.8	0.0125
181.9	0.0125
182	0.0125
182.1	0.0125
182.2	0.0125
182.3	0.0125
182.4	0.0125
182.5	0.0125
182.6	0.0125
182.7	0.0125
182.8	0.0125
182.9	0.0125
183	0.0125
183.1	0.0125
183.2	0.0125
183.3	0.0125
183.4	0.0125
183.5	0.0125
183.6	0.0125
183.7	0.0125
183.8	0.0125
183.9	0.0125
184	0.0125
184.1	0.0125
184.2	0.0125
184.3	0.0125
184.4	0.0125
184.5	0.0125
184.6	0.0125
184.7	0.0125
184.8	0.0125
184.9	0.0125
185	0.0125
185.1	0.0125
185.2	0.0125
185.3	0.0125
185.4	0.0125
185.5	0.0125
185.6	0.0125
185.7	0.0125
185.8	0.0125
185.9	0.0125
186	0.0125
186.1	0.0125
186.2	0.0125
186.3	0.0125
186.4	0.0125
186.5	0.0125
186.6	0.0125
186.7	0.0125
186.8	0.0125
186.9	0.0125
187	0.0125
187.1	0.0125
187.2	0.0125
187.3	0.0125
187.4	0.0125
187.5	0.0125
187.6	0.0125
187.7	0.0125
187.8	0.0125
187.9	0.0125
188	0.0125
188.1	0.0125
188.2	0.0125
188.3	0.0125
188.4	0.0125
188.5	0.0125
188.6	0.0125
188.7	0.0125
188.8	0.0125
188.9	0.0125
189	0.0125
189.1	0.0125
189.2	0.0125
189.3	0.0125
189.4	0.0125
189.5	0.0125
189.6	0.0125
189.7	0.0125
189.8	0.0125
189.9	0.0125
190	0.0125
190.1	0.0125
190.2	0.0125
190.3	0.0125
190.4	0.0125
190.5	0.0125
190.6	0.0125
190.7	0.0125
190.8	0.0125
190.9	0.0125
191	0.0125
191.1	0.0125
191.2	0.0125
191.3	0.0125
191.4	0.0125
191.5	0.0125
191.6	0.0125
191.7	0.0125
191.8	0.0125
191.9	0.0125
192	0.0125
192.1	0.0125
192.2	0.0125
192.3	0.0125
192.4	0.0125
192.5	0.0125
192.6	0.0125
192.7	0.0125
192.8	0.0125
192.9	0.0125
193	0.0125
193.1	0.0125
193.2	0.0125
193.3	0.0125
193.4	0.0125
193.5	0.0125
193.6	0.0125
193.7	0.0125
193.8	0.0125
193.9	0.0125
194	0.0125
194.1	0.0125
194.2	0.0125
194.3	0.0125
194.4	0.0125
194.5	0.0125
194.6	0.0125
194.7	0.0125
194.8	0.0125
194.9	0.0125
195	0.0125
195.1	0.0125
195.2	0.0125
195.3	0.0125
195.4	0.0125
195.5	0.0125
195.6	0.0125
195.7	0.0125
195.8	0.0125
195.9	0.0125
196	0.0125
196.1	0.0125
196.2	0.0125
196.3	0.0125
196.4	0.0125
196.5	0.0125
196.6	0.0125
196.7	0.0125
196.8	0.0125
196.9	0.0125
197	0.0125
197.1	0.0125
197.2	0.0125
197.3	0.0125
197.4	0.0125
197.5	0.0125
197.6	0.0125
197.7	0.0125
197.8	0.0125
197.9	0.0125
198	0.0125
198.1	0.0125
198.2	0.0125
198.3	0.0125
198.4	0.0125
198.5	0.0125
198.6	0.0125
198.7	0.0125
198.8	0.0125
198.9	0.0125
199	0.0125
199.1	0.0125
199.2	0.0125
199.3	0.0125
199.4	0.0125
199.5	0.0125
199.6	0.0125
199.7	0.0125
199.8	0.0125
199.9	0.0125
200	0.0125
[truncated: 14,000 more rows]
