# Supplementary material for: Bayesian inference of kinetic schemes for ion channels by Kalman filtering
Source: eLife journal article supplement (doi:10.7554/elife.62714), 2022-05-04
Supplement: fig4-data11 [file 1_Sim_N_200_Fluor_MW.xlsx]

## Sheet: 0.03125 M
0.1	0
0.2	0
0.3	0
0.4	0
0.5	0
0.6	0
0.7	0
0.8	0
0.9	0
1	0
1.1	0
1.2	0
1.3	0
1.4	0
1.5	0
1.6	0
1.7	0
1.8	0
1.9	0
2	0
2.1	0
2.2	0
2.3	0
2.4	0
2.5	0
2.6	0
2.7	0
2.8	0
2.9	0
3	0
3.1	0
3.2	0
3.3	0
3.4	0
3.5	0
3.6	0
3.7	0
3.8	0
3.9	0
4	0
4.1	0
4.2	0
4.3	0
4.4	0
4.5	0
4.6	0
4.7	0
4.8	0
4.9	0
5	0
5.1	0
5.2	0
5.3	0
5.4	0
5.5	0
5.6	0
5.7	0
5.8	0
5.9	0
6	0
6.1	0
6.2	0
6.3	0
6.4	0
6.5	0
6.6	0
6.7	0
6.8	0
6.9	0
7	0
7.1	0
7.2	0
7.3	0
7.4	0
7.5	0
7.6	0
7.7	0
7.8	0
7.9	0
8	0
8.1	0
8.2	0
8.3	0
8.4	0
8.5	0
8.6	0
8.7	0
8.8	0
8.9	0
9	0
9.1	0
9.2	0
9.3	0
9.4	0
9.5	0
9.6	0
9.7	0
9.8	0
9.9	0
10	0
10.1	0
10.2	0
10.3	0
10.4	0
10.5	0
10.6	0
10.7	0
10.8	0
10.9	0
11	0
11.1	0
11.2	0
11.3	0
11.4	0
11.5	0
11.6	0
11.7	0
11.8	0
11.9	0
12	0
12.1	0
12.2	0
12.3	0
12.4	0
12.5	0
12.6	0
12.7	0
12.8	0
12.9	0
13	0
13.1	0
13.2	0
13.3	0
13.4	0
13.5	0
13.6	0
13.7	0
13.8	0
13.9	0
14	0
14.1	0
14.2	0
14.3	0
14.4	0
14.5	0
14.6	0
14.7	0
14.8	0
14.9	0
15	0
15.1	0
15.2	0
15.3	0
15.4	0
15.5	0
15.6	0
15.7	0
15.8	0
15.9	0
16	0
16.1	0
16.2	0
16.3	0
16.4	0
16.5	0
16.6	0
16.7	0
16.8	0
16.9	0
17	0
17.1	0
17.2	0
17.3	0
17.4	0
17.5	0
17.6	0
17.7	0
17.8	0
17.9	0
18	0
18.1	0
18.2	0
18.3	0
18.4	0
18.5	0
18.6	0
18.7	0
18.8	0
18.9	0
19	0
19.1	0
19.2	0
19.3	0
19.4	0
19.5	0
19.6	0
19.7	0
19.8	0
19.9	0
20	0
20.1	0
20.2	0
20.3	0
20.4	0
20.5	0
20.6	0
20.7	0
20.8	0
20.9	0
21	0
21.1	0
21.2	0
21.3	0
21.4	0
21.5	0
21.6	0
21.7	0
21.8	0
21.9	0
22	0
22.1	0
22.2	0
22.3	0
22.4	0
22.5	0
22.6	0
22.7	0
22.8	0
22.9	0
23	0
23.1	0
23.2	0
23.3	0
23.4	0
23.5	0
23.6	0
23.7	0
23.8	0
23.9	0
24	0
24.1	0
24.2	0
24.3	0
24.4	0
24.5	0
24.6	0
24.7	0
24.8	0
24.9	0
25	0
25.1	0
25.2	0
25.3	0
25.4	0
25.5	0
25.6	0
25.7	0
25.8	0
25.9	0
26	0
26.1	0
26.2	0
26.3	0
26.4	0
26.5	0
26.6	0
26.7	0
26.8	0
26.9	0
27	0
27.1	0
27.2	0
27.3	0
27.4	0
27.5	0
27.6	0
27.7	0
27.8	0
27.9	0
28	0
28.1	0
28.2	0
28.3	0
28.4	0
28.5	0
28.6	0
28.7	0
28.8	0
28.9	0
29	0
29.1	0
29.2	0
29.3	0
29.4	0
29.5	0
29.6	0
29.7	0
29.8	0
29.9	0
30	0
30.1	0
30.2	0
30.3	0
30.4	0
30.5	0
30.6	0
30.7	0
30.8	0
30.9	0
31	0
31.1	0
31.2	0
31.3	0
31.4	0
31.5	0
31.6	0
31.7	0
31.8	0
31.9	0
32	0
32.1	0
32.2	0
32.3	0
32.4	0
32.5	0
32.6	0
32.7	0
32.8	0
32.9	0
33	0
33.1	0
33.2	0
33.3	0
33.4	0
33.5	0
33.6	0
33.7	0
33.8	0
33.9	0
34	0
34.1	0
34.2	0
34.3	0
34.4	0
34.5	0
34.6	0
34.7	0
34.8	0
34.9	0
35	0
35.1	0
35.2	0
35.3	0
35.4	0
35.5	0
35.6	0
35.7	0
35.8	0
35.9	0
36	0
36.1	0
36.2	0
36.3	0
36.4	0
36.5	0
36.6	0
36.7	0
36.8	0
36.9	0
37	0
37.1	0
37.2	0
37.3	0
37.4	0
37.5	0
37.6	0
37.7	0
37.8	0
37.9	0
38	0
38.1	0
38.2	0
38.3	0
38.4	0
38.5	0
38.6	0
38.7	0
38.8	0
38.9	0
39	0
39.1	0
39.2	0
39.3	0
39.4	0
39.5	0
39.6	0
39.7	0
39.8	0
39.9	0
40	0
40.1	0
40.2	0
40.3	0
40.4	0
40.5	0
40.6	0
40.7	0
40.8	0
40.9	0
41	0
41.1	0
41.2	0
41.3	0
41.4	0
41.5	0
41.6	0
41.7	0
41.8	0
41.9	0
42	0
42.1	0
42.2	0
42.3	0
42.4	0
42.5	0
42.6	0
42.7	0
42.8	0
42.9	0
43	0
43.1	0
43.2	0
43.3	0
43.4	0
43.5	0
43.6	0
43.7	0
43.8	0
43.9	0
44	0
44.1	0
44.2	0
44.3	0
44.4	0
44.5	0
44.6	0
44.7	0
44.8	0
44.9	0
45	0
45.1	0
45.2	0
45.3	0
45.4	0
45.5	0
45.6	0
45.7	0
45.8	0
45.9	0
46	0
46.1	0
46.2	0
46.3	0
46.4	0
46.5	0
46.6	0
46.7	0
46.8	0
46.9	0
47	0
47.1	0
47.2	0
47.3	0
47.4	0
47.5	0
47.6	0
47.7	0
47.8	0
47.9	0
48	0
48.1	0
48.2	0
48.3	0
48.4	0
48.5	0
48.6	0
48.7	0
48.8	0
48.9	0
49	0
49.1	0
49.2	0
49.3	0
49.4	0
49.5	0
49.6	0
49.7	0
49.8	0
49.9	0
50	0
50.1	0
50.2	0
50.3	0
50.4	0
50.5	0
50.6	0
50.7	0
50.8	0
50.9	0
51	0
51.1	0
51.2	0
51.3	0
51.4	0
51.5	0
51.6	0
51.7	0
51.8	0
51.9	0
52	0
52.1	0
52.2	0
52.3	0
52.4	0
52.5	0
52.6	0
52.7	0
52.8	0
52.9	0
53	0
53.1	0
53.2	0
53.3	0
53.4	0
53.5	0
53.6	0
53.7	0
53.8	0
53.9	0
54	0
54.1	0
54.2	0
54.3	0
54.4	0
54.5	0
54.6	0
54.7	0
54.8	0
54.9	0
55	0
55.1	0
55.2	0
55.3	0
55.4	0
55.5	0
55.6	0
55.7	0
55.8	0
55.9	0
56	0
56.1	0
56.2	0
56.3	0
56.4	0
56.5	0
56.6	0
56.7	0
56.8	0
56.9	0
57	0
57.1	0
57.2	0
57.3	0
57.4	0
57.5	0
57.6	0
57.7	0
57.8	0
57.9	0
58	0
58.1	0
58.2	0
58.3	0
58.4	0
58.5	0
58.6	0
58.7	0
58.8	0
58.9	0
59	0
59.1	0
59.2	0
59.3	0
59.4	0
59.5	0
59.6	0
59.7	0
59.8	0
59.9	0
60	0
60.1	0
60.2	0
60.3	0
60.4	0
60.5	0
60.6	0
60.7	0
60.8	0
60.9	0
61	0
61.1	0
61.2	0
61.3	0
61.4	0
61.5	0
61.6	0
61.7	0
61.8	0
61.9	0
62	0
62.1	0
62.2	0
62.3	0
62.4	0
62.5	0
62.6	0
62.7	0
62.8	0
62.9	0
63	0
63.1	0
63.2	0
63.3	0
63.4	0
63.5	0
63.6	0
63.7	0
63.8	0
63.9	0
64	0
64.1	0
64.2	0
64.3	0
64.4	0
64.5	0
64.6	0
64.7	0
64.8	0
64.9	0
65	0
65.1	0
65.2	0
65.3	0
65.4	0
65.5	0
65.6	0
65.7	0
65.8	0
65.9	0
66	0
66.1	0
66.2	0
66.3	0
66.4	0
66.5	0
66.6	0
66.7	0
66.8	0
66.9	0
67	0
67.1	0
67.2	0
67.3	0
67.4	0
67.5	0
67.6	0
67.7	0
67.8	0
67.9	0
68	0
68.1	0
68.2	0
68.3	0
68.4	0
68.5	0
68.6	0
68.7	0
68.8	0
68.9	0
69	0
69.1	0
69.2	0
69.3	0
69.4	0
69.5	0
69.6	0
69.7	0
69.8	0
69.9	0
70	0
70.1	0
70.2	0
70.3	0
70.4	0
70.5	0
70.6	0
70.7	0
70.8	0
70.9	0
71	0
71.1	0
71.2	0
71.3	0
71.4	0
71.5	0
71.6	0
71.7	0
71.8	0
71.9	0
72	0
72.1	0
72.2	0
72.3	0
72.4	0
72.5	0
72.6	0
72.7	0
72.8	0
72.9	0
73	0
73.1	0
73.2	0
73.3	0
73.4	0
73.5	0
73.6	0
73.7	0
73.8	0
73.9	0
74	0
74.1	0
74.2	0
74.3	0
74.4	0
74.5	0
74.6	0
74.7	0
74.8	0
74.9	0
75	0
75.1	0
75.2	0
75.3	0
75.4	0
75.5	0
75.6	0
75.7	0
75.8	0
75.9	0
76	0
76.1	0
76.2	0
76.3	0
76.4	0
76.5	0
76.6	0
76.7	0
76.8	0
76.9	0
77	0
77.1	0
77.2	0
77.3	0
77.4	0
77.5	0
77.6	0
77.7	0
77.8	0
77.9	0
78	0
78.1	0
78.2	0
78.3	0
78.4	0
78.5	0
78.6	0
78.7	0
78.8	0
78.9	0
79	0
79.1	0
79.2	0
79.3	0
79.4	0
79.5	0
79.6	0
79.7	0
79.8	0
79.9	0
80	0
80.1	0
80.2	0
80.3	0
80.4	0
80.5	0
80.6	0
80.7	0
80.8	0
80.9	0
81	0
81.1	0
81.2	0
81.3	0
81.4	0
81.5	0
81.6	0
81.7	0
81.8	0
81.9	0
82	0
82.1	0
82.2	0
82.3	0
82.4	0
82.5	0
82.6	0
82.7	0
82.8	0
82.9	0
83	0
83.1	0
83.2	0
83.3	0
83.4	0
83.5	0
83.6	0
83.7	0
83.8	0
83.9	0
84	0
84.1	0
84.2	0
84.3	0
84.4	0
84.5	0
84.6	0
84.7	0
84.8	0
84.9	0
85	0
85.1	0
85.2	0
85.3	0
85.4	0
85.5	0
85.6	0
85.7	0
85.8	0
85.9	0
86	0
86.1	0
86.2	0
86.3	0
86.4	0
86.5	0
86.6	0
86.7	0
86.8	0
86.9	0
87	0
87.1	0
87.2	0
87.3	0
87.4	0
87.5	0
87.6	0
87.7	0
87.8	0
87.9	0
88	0
88.1	0
88.2	0
88.3	0
88.4	0
88.5	0
88.6	0
88.7	0
88.8	0
88.9	0
89	0
89.1	0
89.2	0
89.3	0
89.4	0
89.5	0
89.6	0
89.7	0
89.8	0
89.9	0
90	0
90.1	0
90.2	0
90.3	0
90.4	0
90.5	0
90.6	0
90.7	0
90.8	0
90.9	0
91	0
91.1	0
91.2	0
91.3	0
91.4	0
91.5	0
91.6	0
91.7	0
91.8	0
91.9	0
92	0
92.1	0
92.2	0
92.3	0
92.4	0
92.5	0
92.6	0
92.7	0
92.8	0
92.9	0
93	0
93.1	0
93.2	0
93.3	0
93.4	0
93.5	0
93.6	0
93.7	0
93.8	0
93.9	0
94	0
94.1	0
94.2	0
94.3	0
94.4	0
94.5	0
94.6	0
94.7	0
94.8	0
94.9	0
95	0
95.1	0
95.2	0
95.3	0
95.4	0
95.5	0
95.6	0
95.7	0
95.8	0
95.9	0
96	0
96.1	0
96.2	0
96.3	0
96.4	0
96.5	0
96.6	0
96.7	0
96.8	0
96.9	0
97	0
97.1	0
97.2	0
97.3	0
97.4	0
97.5	0
97.6	0
97.7	0
97.8	0
97.9	0
98	0
98.1	0
98.2	0
98.3	0
98.4	0
98.5	0
98.6	0
98.7	0
98.8	0
98.9	0
99	0
99.1	0
99.2	0
99.3	0
99.4	0
99.5	0
99.6	0
99.7	0
99.8	0
99.9	0
100	0
100.1	0.0025
100.2	0.0025
100.3	0.0025
100.4	0.005
100.5	0.0075
100.6	0.0075
100.7	0.01
100.8	0.0125
100.9	0.0125
101	0.0125
101.1	0.0125
101.2	0.0175
101.3	0.0175
101.4	0.02
101.5	0.02
101.6	0.025
101.7	0.03
101.8	0.035
101.9	0.0375
102	0.0375
102.1	0.0375
102.2	0.035
102.3	0.035
102.4	0.035
102.5	0.035
102.6	0.035
102.7	0.035
102.8	0.035
102.9	0.04
103	0.0425
103.1	0.04
103.2	0.045
103.3	0.045
103.4	0.045
103.5	0.045
103.6	0.0475
103.7	0.05
103.8	0.0475
103.9	0.0475
104	0.05
104.1	0.055
104.2	0.06
104.3	0.0575
104.4	0.0575
104.5	0.0575
104.6	0.06
104.7	0.06
104.8	0.0675
104.9	0.07
105	0.0725
105.1	0.075
105.2	0.075
105.3	0.0775
105.4	0.08
105.5	0.08
105.6	0.08
105.7	0.08
105.8	0.08
105.9	0.08
106	0.075
106.1	0.0775
106.2	0.08
106.3	0.08
106.4	0.08
106.5	0.0825
106.6	0.0825
106.7	0.085
106.8	0.085
106.9	0.0825
107	0.0825
107.1	0.0825
107.2	0.085
107.3	0.085
107.4	0.085
107.5	0.085
107.6	0.0875
107.7	0.0875
107.8	0.0875
107.9	0.0875
108	0.0875
108.1	0.085
108.2	0.085
108.3	0.0875
108.4	0.0925
108.5	0.0925
108.6	0.095
108.7	0.0925
108.8	0.095
108.9	0.095
109	0.0925
109.1	0.0925
109.2	0.095
109.3	0.0925
109.4	0.095
109.5	0.095
109.6	0.0975
109.7	0.1
109.8	0.1025
109.9	0.105
110	0.105
110.1	0.105
110.2	0.105
110.3	0.11
110.4	0.1075
110.5	0.1075
110.6	0.11
110.7	0.11
110.8	0.11
110.9	0.11
111	0.11
111.1	0.11
111.2	0.11
111.3	0.11
111.4	0.1125
111.5	0.115
111.6	0.115
111.7	0.115
111.8	0.1125
111.9	0.11
112	0.115
112.1	0.11
112.2	0.11
112.3	0.11
112.4	0.1125
112.5	0.1125
112.6	0.115
112.7	0.115
112.8	0.115
112.9	0.1125
113	0.1175
113.1	0.12
113.2	0.1175
113.3	0.12
113.4	0.125
113.5	0.125
113.6	0.1275
113.7	0.1275
113.8	0.1275
113.9	0.1275
114	0.1275
114.1	0.1275
114.2	0.1275
114.3	0.1275
114.4	0.1275
114.5	0.1275
114.6	0.125
114.7	0.125
114.8	0.1275
114.9	0.1275
115	0.135
115.1	0.1375
115.2	0.1375
115.3	0.1375
115.4	0.1375
115.5	0.1425
115.6	0.14
115.7	0.14
115.8	0.1425
115.9	0.1425
116	0.14
116.1	0.1375
116.2	0.1425
116.3	0.1425
116.4	0.145
116.5	0.145
116.6	0.1425
116.7	0.1425
116.8	0.14
116.9	0.14
117	0.1425
117.1	0.1425
117.2	0.1375
117.3	0.135
117.4	0.14
117.5	0.14
117.6	0.14
117.7	0.1375
117.8	0.1325
117.9	0.1325
118	0.1325
118.1	0.13
118.2	0.13
118.3	0.1325
118.4	0.1325
118.5	0.1325
118.6	0.1325
118.7	0.13
118.8	0.1275
118.9	0.125
119	0.125
119.1	0.125
119.2	0.1275
119.3	0.1275
119.4	0.1275
119.5	0.1275
119.6	0.1275
119.7	0.125
119.8	0.125
119.9	0.125
120	0.125
120.1	0.125
120.2	0.12
120.3	0.12
120.4	0.1225
120.5	0.1225
120.6	0.1225
120.7	0.1275
120.8	0.13
120.9	0.1325
121	0.1325
121.1	0.1325
121.2	0.1375
121.3	0.135
121.4	0.1325
121.5	0.135
121.6	0.135
121.7	0.1375
121.8	0.135
121.9	0.1325
122	0.1325
122.1	0.13
122.2	0.13
122.3	0.1325
122.4	0.1325
122.5	0.1325
122.6	0.13
122.7	0.1275
122.8	0.125
122.9	0.1275
123	0.1225
123.1	0.125
123.2	0.125
123.3	0.1275
123.4	0.1275
123.5	0.1275
123.6	0.13
123.7	0.13
123.8	0.13
123.9	0.1275
124	0.125
124.1	0.125
124.2	0.1275
124.3	0.1275
124.4	0.13
124.5	0.135
124.6	0.14
124.7	0.14
124.8	0.14
124.9	0.1425
125	0.145
125.1	0.145
125.2	0.1475
125.3	0.15
125.4	0.15
125.5	0.1475
125.6	0.1475
125.7	0.1425
125.8	0.145
125.9	0.145
126	0.1425
126.1	0.145
126.2	0.145
126.3	0.145
126.4	0.15
126.5	0.1475
126.6	0.145
126.7	0.15
126.8	0.1525
126.9	0.155
127	0.1525
127.1	0.1525
127.2	0.1525
127.3	0.155
127.4	0.1525
127.5	0.155
127.6	0.155
127.7	0.1525
127.8	0.1525
127.9	0.155
128	0.16
128.1	0.16
128.2	0.1575
128.3	0.1575
128.4	0.1575
128.5	0.155
128.6	0.1575
128.7	0.155
128.8	0.1525
128.9	0.15
129	0.1475
129.1	0.145
129.2	0.145
129.3	0.1475
129.4	0.1475
129.5	0.15
129.6	0.1525
129.7	0.1525
129.8	0.15
129.9	0.145
130	0.1475
130.1	0.15
130.2	0.15
130.3	0.15
130.4	0.15
130.5	0.15
130.6	0.15
130.7	0.15
130.8	0.15
130.9	0.1475
131	0.1475
131.1	0.15
131.2	0.1475
131.3	0.15
131.4	0.145
131.5	0.1425
131.6	0.1425
131.7	0.1375
131.8	0.135
131.9	0.1425
132	0.1425
132.1	0.1425
132.2	0.1425
132.3	0.145
132.4	0.145
132.5	0.145
132.6	0.1375
132.7	0.135
132.8	0.1375
132.9	0.1375
133	0.1375
133.1	0.14
133.2	0.1425
133.3	0.145
133.4	0.1425
133.5	0.145
133.6	0.145
133.7	0.1475
133.8	0.1475
133.9	0.145
134	0.1425
134.1	0.1425
134.2	0.1375
134.3	0.14
134.4	0.1425
134.5	0.1425
134.6	0.1425
134.7	0.145
134.8	0.1475
134.9	0.15
135	0.1475
135.1	0.145
135.2	0.145
135.3	0.14
135.4	0.1425
135.5	0.1425
135.6	0.145
135.7	0.145
135.8	0.1475
135.9	0.1475
136	0.145
136.1	0.14
136.2	0.1375
136.3	0.1325
136.4	0.1375
136.5	0.14
136.6	0.1425
136.7	0.14
136.8	0.135
136.9	0.14
137	0.14
137.1	0.1375
137.2	0.135
137.3	0.135
137.4	0.1425
137.5	0.145
137.6	0.1475
137.7	0.1475
137.8	0.15
137.9	0.145
138	0.145
138.1	0.145
138.2	0.145
138.3	0.145
138.4	0.145
138.5	0.145
138.6	0.1425
138.7	0.1425
138.8	0.1425
138.9	0.1425
139	0.1425
139.1	0.1475
139.2	0.145
139.3	0.15
139.4	0.15
139.5	0.1525
139.6	0.1525
139.7	0.15
139.8	0.1525
139.9	0.155
140	0.1575
140.1	0.1525
140.2	0.1525
140.3	0.1525
140.4	0.155
140.5	0.1575
140.6	0.1575
140.7	0.16
140.8	0.16
140.9	0.16
141	0.16
141.1	0.16
141.2	0.155
141.3	0.155
141.4	0.1575
141.5	0.155
141.6	0.1525
141.7	0.1525
141.8	0.15
141.9	0.1525
142	0.15
142.1	0.1525
142.2	0.15
142.3	0.1475
142.4	0.1475
142.5	0.145
142.6	0.1475
142.7	0.1425
142.8	0.1425
142.9	0.145
143	0.1425
143.1	0.1475
143.2	0.14
143.3	0.1425
143.4	0.145
143.5	0.1425
143.6	0.14
143.7	0.14
143.8	0.145
143.9	0.15
144	0.15
144.1	0.1525
144.2	0.155
144.3	0.155
144.4	0.155
144.5	0.155
144.6	0.155
144.7	0.155
144.8	0.155
144.9	0.155
145	0.155
145.1	0.1575
145.2	0.1575
145.3	0.16
145.4	0.1625
145.5	0.16
145.6	0.1575
145.7	0.155
145.8	0.155
145.9	0.1575
146	0.1575
146.1	0.1575
146.2	0.1575
146.3	0.1575
146.4	0.1575
146.5	0.1575
146.6	0.1575
146.7	0.16
146.8	0.1525
146.9	0.155
147	0.1525
147.1	0.1525
147.2	0.1525
147.3	0.1525
147.4	0.1575
147.5	0.16
147.6	0.1575
147.7	0.1575
147.8	0.1525
147.9	0.1525
148	0.15
148.1	0.1475
148.2	0.1475
148.3	0.1475
148.4	0.1475
148.5	0.1525
148.6	0.15
148.7	0.15
148.8	0.145
148.9	0.1475
149	0.1475
149.1	0.1525
149.2	0.1475
149.3	0.145
149.4	0.145
149.5	0.1425
149.6	0.1425
149.7	0.1425
149.8	0.145
149.9	0.1475
150	0.1475
150.1	0.155
150.2	0.1525
150.3	0.1575
150.4	0.1575
150.5	0.1575
150.6	0.1525
150.7	0.1575
150.8	0.155
150.9	0.1575
151	0.16
151.1	0.16
151.2	0.16
151.3	0.16
151.4	0.1575
151.5	0.1575
151.6	0.16
151.7	0.1575
151.8	0.1525
151.9	0.1525
152	0.15
152.1	0.15
152.2	0.15
152.3	0.15
152.4	0.15
152.5	0.15
152.6	0.15
152.7	0.15
152.8	0.1475
152.9	0.1475
153	0.15
153.1	0.15
153.2	0.15
153.3	0.15
153.4	0.1525
153.5	0.1525
153.6	0.1525
153.7	0.1525
153.8	0.16
153.9	0.1575
154	0.16
154.1	0.1575
154.2	0.155
154.3	0.16
154.4	0.16
154.5	0.16
154.6	0.16
154.7	0.1525
154.8	0.15
154.9	0.1475
155	0.14
155.1	0.14
155.2	0.1475
155.3	0.145
155.4	0.145
155.5	0.14
155.6	0.14
155.7	0.14
155.8	0.14
155.9	0.14
156	0.13
156.1	0.13
156.2	0.13
156.3	0.1275
156.4	0.1275
156.5	0.13
156.6	0.13
156.7	0.1275
156.8	0.1275
156.9	0.125
157	0.125
157.1	0.125
157.2	0.125
157.3	0.125
157.4	0.125
157.5	0.125
157.6	0.1275
157.7	0.1275
157.8	0.1275
157.9	0.1275
158	0.1275
158.1	0.1275
158.2	0.1275
158.3	0.1225
158.4	0.1225
158.5	0.125
158.6	0.1225
158.7	0.1225
158.8	0.1225
158.9	0.12
159	0.12
159.1	0.1175
159.2	0.1175
159.3	0.1175
159.4	0.115
159.5	0.115
159.6	0.1125
159.7	0.115
159.8	0.1125
159.9	0.1175
160	0.12
160.1	0.1175
160.2	0.12
160.3	0.1175
160.4	0.1175
160.5	0.12
160.6	0.12
160.7	0.1175
160.8	0.1175
160.9	0.1175
161	0.12
161.1	0.12
161.2	0.115
161.3	0.115
161.4	0.115
161.5	0.115
161.6	0.1175
161.7	0.12
161.8	0.12
161.9	0.12
162	0.1225
162.1	0.12
162.2	0.12
162.3	0.115
162.4	0.115
162.5	0.1125
162.6	0.1075
162.7	0.1075
162.8	0.105
162.9	0.1075
163	0.105
163.1	0.1075
163.2	0.11
163.3	0.11
163.4	0.11
163.5	0.115
163.6	0.115
163.7	0.115
163.8	0.12
163.9	0.1175
164	0.115
164.1	0.115
164.2	0.115
164.3	0.1175
164.4	0.1175
164.5	0.115
164.6	0.1175
164.7	0.115
164.8	0.115
164.9	0.1175
165	0.1175
165.1	0.1175
165.2	0.1175
165.3	0.1175
165.4	0.1125
165.5	0.1125
165.6	0.1125
165.7	0.11
165.8	0.1125
165.9	0.115
166	0.1175
166.1	0.1225
166.2	0.1275
166.3	0.1225
166.4	0.1225
166.5	0.1225
166.6	0.12
166.7	0.1225
166.8	0.1275
166.9	0.1275
167	0.1275
167.1	0.1275
167.2	0.1275
167.3	0.125
167.4	0.125
167.5	0.13
167.6	0.13
167.7	0.1325
167.8	0.13
167.9	0.13
168	0.1325
168.1	0.1325
168.2	0.1325
168.3	0.1325
168.4	0.135
168.5	0.1325
168.6	0.1325
168.7	0.135
168.8	0.135
168.9	0.135
169	0.1375
169.1	0.1425
169.2	0.145
169.3	0.145
169.4	0.14
169.5	0.14
169.6	0.14
169.7	0.1425
169.8	0.1375
169.9	0.1375
170	0.1375
170.1	0.14
170.2	0.1375
170.3	0.14
170.4	0.1375
170.5	0.145
170.6	0.14
170.7	0.14
170.8	0.1375
170.9	0.14
171	0.14
171.1	0.14
171.2	0.1375
171.3	0.1375
171.4	0.1375
171.5	0.1325
171.6	0.135
171.7	0.1325
171.8	0.1375
171.9	0.14
172	0.1375
172.1	0.1375
172.2	0.1425
172.3	0.145
172.4	0.1475
172.5	0.145
172.6	0.1425
172.7	0.145
172.8	0.1425
172.9	0.145
173	0.1425
173.1	0.1425
173.2	0.1425
173.3	0.1425
173.4	0.145
173.5	0.145
173.6	0.145
173.7	0.1475
173.8	0.145
173.9	0.14
174	0.1425
174.1	0.1425
174.2	0.1375
174.3	0.1375
174.4	0.135
174.5	0.1325
174.6	0.1325
174.7	0.1325
174.8	0.13
174.9	0.1275
175	0.13
175.1	0.125
175.2	0.125
175.3	0.13
175.4	0.13
175.5	0.135
175.6	0.135
175.7	0.135
175.8	0.135
175.9	0.135
176	0.14
176.1	0.14
176.2	0.1425
176.3	0.1425
176.4	0.1425
176.5	0.135
176.6	0.135
176.7	0.1375
176.8	0.14
176.9	0.145
177	0.1425
177.1	0.1425
177.2	0.1425
177.3	0.1425
177.4	0.1475
177.5	0.1475
177.6	0.1475
177.7	0.1475
177.8	0.145
177.9	0.1525
178	0.15
178.1	0.15
178.2	0.15
178.3	0.155
178.4	0.155
178.5	0.15
178.6	0.145
178.7	0.1475
178.8	0.1475
178.9	0.1475
179	0.145
179.1	0.1475
179.2	0.145
179.3	0.145
179.4	0.145
179.5	0.1475
179.6	0.1475
179.7	0.155
179.8	0.155
179.9	0.1575
180	0.1625
180.1	0.165
180.2	0.165
180.3	0.165
180.4	0.165
180.5	0.16
180.6	0.1675
180.7	0.1675
180.8	0.1675
180.9	0.1675
181	0.1725
181.1	0.1775
181.2	0.1725
181.3	0.1775
181.4	0.175
181.5	0.18
181.6	0.1825
181.7	0.1825
181.8	0.1825
181.9	0.1875
182	0.1775
182.1	0.1775
182.2	0.1775
182.3	0.1775
182.4	0.1775
182.5	0.1775
182.6	0.18
182.7	0.1775
182.8	0.1775
182.9	0.1775
183	0.1775
183.1	0.18
183.2	0.1825
183.3	0.1825
183.4	0.1825
183.5	0.1775
183.6	0.1725
183.7	0.17
183.8	0.1675
183.9	0.165
184	0.1625
184.1	0.16
184.2	0.1625
184.3	0.1625
184.4	0.155
184.5	0.1575
184.6	0.1575
184.7	0.1575
184.8	0.155
184.9	0.155
185	0.16
185.1	0.16
185.2	0.1625
185.3	0.165
185.4	0.165
185.5	0.165
185.6	0.1625
185.7	0.1625
185.8	0.16
185.9	0.1625
186	0.165
186.1	0.1675
186.2	0.1625
186.3	0.1625
186.4	0.165
186.5	0.1625
186.6	0.1675
186.7	0.1675
186.8	0.1675
186.9	0.165
187	0.1625
187.1	0.16
187.2	0.1625
187.3	0.1625
187.4	0.16
187.5	0.1675
187.6	0.1675
187.7	0.1625
187.8	0.17
187.9	0.1675
188	0.1675
188.1	0.16
188.2	0.155
188.3	0.1575
188.4	0.1575
188.5	0.155
188.6	0.15
188.7	0.15
188.8	0.15
188.9	0.1475
189	0.1475
189.1	0.145
189.2	0.1425
189.3	0.14
189.4	0.1375
189.5	0.14
189.6	0.1425
189.7	0.15
189.8	0.1525
189.9	0.1525
190	0.1525
190.1	0.1525
190.2	0.155
190.3	0.155
190.4	0.1575
190.5	0.16
190.6	0.155
190.7	0.1525
190.8	0.15
190.9	0.145
191	0.1425
191.1	0.145
191.2	0.1475
191.3	0.1525
191.4	0.1525
191.5	0.155
191.6	0.16
191.7	0.16
191.8	0.1575
191.9	0.16
192	0.1625
192.1	0.165
192.2	0.165
192.3	0.16
192.4	0.1625
192.5	0.165
192.6	0.16
192.7	0.1625
192.8	0.1625
192.9	0.16
193	0.155
193.1	0.155
193.2	0.1575
193.3	0.155
193.4	0.1575
193.5	0.155
193.6	0.15
193.7	0.15
193.8	0.15
193.9	0.1475
194	0.1475
194.1	0.1425
194.2	0.1375
194.3	0.1375
194.4	0.14
194.5	0.145
194.6	0.1475
194.7	0.1475
194.8	0.145
194.9	0.14
195	0.145
195.1	0.145
195.2	0.1425
195.3	0.1425
195.4	0.145
195.5	0.145
195.6	0.1425
195.7	0.1425
195.8	0.1425
195.9	0.1425
196	0.1375
196.1	0.135
196.2	0.1375
196.3	0.135
196.4	0.135
196.5	0.1325
196.6	0.1275
196.7	0.1325
196.8	0.1275
196.9	0.125
197	0.1225
197.1	0.1225
197.2	0.125
197.3	0.125
197.4	0.125
197.5	0.1225
197.6	0.1225
197.7	0.1225
197.8	0.125
197.9	0.125
198	0.125
198.1	0.1275
198.2	0.1275
198.3	0.1325
198.4	0.135
198.5	0.135
198.6	0.1325
198.7	0.13
198.8	0.13
198.9	0.13
199	0.12
199.1	0.1175
199.2	0.12
199.3	0.12
199.4	0.1225
199.5	0.1225
199.6	0.125
199.7	0.125
199.8	0.125
199.9	0.1225
200	0.1225
[truncated: 14,000 more rows]
