# Supplementary material for: Bayesian inference of kinetic schemes for ion channels by Kalman filtering
Source: eLife journal article supplement (doi:10.7554/elife.62714), 2022-05-04
Supplement: fig4-data11 [file 1_Sim_N_400_Fluor_MW.xlsx]

## Sheet: 0.03125 M
0.1	0
0.2	0
0.3	0
0.4	0
0.5	0
0.6	0
0.7	0
0.8	0
0.9	0
1	0
1.1	0
1.2	0
1.3	0
1.4	0
1.5	0
1.6	0
1.7	0
1.8	0
1.9	0
2	0
2.1	0
2.2	0
2.3	0
2.4	0
2.5	0
2.6	0
2.7	0
2.8	0
2.9	0
3	0
3.1	0
3.2	0
3.3	0
3.4	0
3.5	0
3.6	0
3.7	0
3.8	0
3.9	0
4	0
4.1	0
4.2	0
4.3	0
4.4	0
4.5	0
4.6	0
4.7	0
4.8	0
4.9	0
5	0
5.1	0
5.2	0
5.3	0
5.4	0
5.5	0
5.6	0
5.7	0
5.8	0
5.9	0
6	0
6.1	0
6.2	0
6.3	0
6.4	0
6.5	0
6.6	0
6.7	0
6.8	0
6.9	0
7	0
7.1	0
7.2	0
7.3	0
7.4	0
7.5	0
7.6	0
7.7	0
7.8	0
7.9	0
8	0
8.1	0
8.2	0
8.3	0
8.4	0
8.5	0
8.6	0
8.7	0
8.8	0
8.9	0
9	0
9.1	0
9.2	0
9.3	0
9.4	0
9.5	0
9.6	0
9.7	0
9.8	0
9.9	0
10	0
10.1	0
10.2	0
10.3	0
10.4	0
10.5	0
10.6	0
10.7	0
10.8	0
10.9	0
11	0
11.1	0
11.2	0
11.3	0
11.4	0
11.5	0
11.6	0
11.7	0
11.8	0
11.9	0
12	0
12.1	0
12.2	0
12.3	0
12.4	0
12.5	0
12.6	0
12.7	0
12.8	0
12.9	0
13	0
13.1	0
13.2	0
13.3	0
13.4	0
13.5	0
13.6	0
13.7	0
13.8	0
13.9	0
14	0
14.1	0
14.2	0
14.3	0
14.4	0
14.5	0
14.6	0
14.7	0
14.8	0
14.9	0
15	0
15.1	0
15.2	0
15.3	0
15.4	0
15.5	0
15.6	0
15.7	0
15.8	0
15.9	0
16	0
16.1	0
16.2	0
16.3	0
16.4	0
16.5	0
16.6	0
16.7	0
16.8	0
16.9	0
17	0
17.1	0
17.2	0
17.3	0
17.4	0
17.5	0
17.6	0
17.7	0
17.8	0
17.9	0
18	0
18.1	0
18.2	0
18.3	0
18.4	0
18.5	0
18.6	0
18.7	0
18.8	0
18.9	0
19	0
19.1	0
19.2	0
19.3	0
19.4	0
19.5	0
19.6	0
19.7	0
19.8	0
19.9	0
20	0
20.1	0
20.2	0
20.3	0
20.4	0
20.5	0
20.6	0
20.7	0
20.8	0
20.9	0
21	0
21.1	0
21.2	0
21.3	0
21.4	0
21.5	0
21.6	0
21.7	0
21.8	0
21.9	0
22	0
22.1	0
22.2	0
22.3	0
22.4	0
22.5	0
22.6	0
22.7	0
22.8	0
22.9	0
23	0
23.1	0
23.2	0
23.3	0
23.4	0
23.5	0
23.6	0
23.7	0
23.8	0
23.9	0
24	0
24.1	0
24.2	0
24.3	0
24.4	0
24.5	0
24.6	0
24.7	0
24.8	0
24.9	0
25	0
25.1	0
25.2	0
25.3	0
25.4	0
25.5	0
25.6	0
25.7	0
25.8	0
25.9	0
26	0
26.1	0
26.2	0
26.3	0
26.4	0
26.5	0
26.6	0
26.7	0
26.8	0
26.9	0
27	0
27.1	0
27.2	0
27.3	0
27.4	0
27.5	0
27.6	0
27.7	0
27.8	0
27.9	0
28	0
28.1	0
28.2	0
28.3	0
28.4	0
28.5	0
28.6	0
28.7	0
28.8	0
28.9	0
29	0
29.1	0
29.2	0
29.3	0
29.4	0
29.5	0
29.6	0
29.7	0
29.8	0
29.9	0
30	0
30.1	0
30.2	0
30.3	0
30.4	0
30.5	0
30.6	0
30.7	0
30.8	0
30.9	0
31	0
31.1	0
31.2	0
31.3	0
31.4	0
31.5	0
31.6	0
31.7	0
31.8	0
31.9	0
32	0
32.1	0
32.2	0
32.3	0
32.4	0
32.5	0
32.6	0
32.7	0
32.8	0
32.9	0
33	0
33.1	0
33.2	0
33.3	0
33.4	0
33.5	0
33.6	0
33.7	0
33.8	0
33.9	0
34	0
34.1	0
34.2	0
34.3	0
34.4	0
34.5	0
34.6	0
34.7	0
34.8	0
34.9	0
35	0
35.1	0
35.2	0
35.3	0
35.4	0
35.5	0
35.6	0
35.7	0
35.8	0
35.9	0
36	0
36.1	0
36.2	0
36.3	0
36.4	0
36.5	0
36.6	0
36.7	0
36.8	0
36.9	0
37	0
37.1	0
37.2	0
37.3	0
37.4	0
37.5	0
37.6	0
37.7	0
37.8	0
37.9	0
38	0
38.1	0
38.2	0
38.3	0
38.4	0
38.5	0
38.6	0
38.7	0
38.8	0
38.9	0
39	0
39.1	0
39.2	0
39.3	0
39.4	0
39.5	0
39.6	0
39.7	0
39.8	0
39.9	0
40	0
40.1	0
40.2	0
40.3	0
40.4	0
40.5	0
40.6	0
40.7	0
40.8	0
40.9	0
41	0
41.1	0
41.2	0
41.3	0
41.4	0
41.5	0
41.6	0
41.7	0
41.8	0
41.9	0
42	0
42.1	0
42.2	0
42.3	0
42.4	0
42.5	0
42.6	0
42.7	0
42.8	0
42.9	0
43	0
43.1	0
43.2	0
43.3	0
43.4	0
43.5	0
43.6	0
43.7	0
43.8	0
43.9	0
44	0
44.1	0
44.2	0
44.3	0
44.4	0
44.5	0
44.6	0
44.7	0
44.8	0
44.9	0
45	0
45.1	0
45.2	0
45.3	0
45.4	0
45.5	0
45.6	0
45.7	0
45.8	0
45.9	0
46	0
46.1	0
46.2	0
46.3	0
46.4	0
46.5	0
46.6	0
46.7	0
46.8	0
46.9	0
47	0
47.1	0
47.2	0
47.3	0
47.4	0
47.5	0
47.6	0
47.7	0
47.8	0
47.9	0
48	0
48.1	0
48.2	0
48.3	0
48.4	0
48.5	0
48.6	0
48.7	0
48.8	0
48.9	0
49	0
49.1	0
49.2	0
49.3	0
49.4	0
49.5	0
49.6	0
49.7	0
49.8	0
49.9	0
50	0
50.1	0
50.2	0
50.3	0
50.4	0
50.5	0
50.6	0
50.7	0
50.8	0
50.9	0
51	0
51.1	0
51.2	0
51.3	0
51.4	0
51.5	0
51.6	0
51.7	0
51.8	0
51.9	0
52	0
52.1	0
52.2	0
52.3	0
52.4	0
52.5	0
52.6	0
52.7	0
52.8	0
52.9	0
53	0
53.1	0
53.2	0
53.3	0
53.4	0
53.5	0
53.6	0
53.7	0
53.8	0
53.9	0
54	0
54.1	0
54.2	0
54.3	0
54.4	0
54.5	0
54.6	0
54.7	0
54.8	0
54.9	0
55	0
55.1	0
55.2	0
55.3	0
55.4	0
55.5	0
55.6	0
55.7	0
55.8	0
55.9	0
56	0
56.1	0
56.2	0
56.3	0
56.4	0
56.5	0
56.6	0
56.7	0
56.8	0
56.9	0
57	0
57.1	0
57.2	0
57.3	0
57.4	0
57.5	0
57.6	0
57.7	0
57.8	0
57.9	0
58	0
58.1	0
58.2	0
58.3	0
58.4	0
58.5	0
58.6	0
58.7	0
58.8	0
58.9	0
59	0
59.1	0
59.2	0
59.3	0
59.4	0
59.5	0
59.6	0
59.7	0
59.8	0
59.9	0
60	0
60.1	0
60.2	0
60.3	0
60.4	0
60.5	0
60.6	0
60.7	0
60.8	0
60.9	0
61	0
61.1	0
61.2	0
61.3	0
61.4	0
61.5	0
61.6	0
61.7	0
61.8	0
61.9	0
62	0
62.1	0
62.2	0
62.3	0
62.4	0
62.5	0
62.6	0
62.7	0
62.8	0
62.9	0
63	0
63.1	0
63.2	0
63.3	0
63.4	0
63.5	0
63.6	0
63.7	0
63.8	0
63.9	0
64	0
64.1	0
64.2	0
64.3	0
64.4	0
64.5	0
64.6	0
64.7	0
64.8	0
64.9	0
65	0
65.1	0
65.2	0
65.3	0
65.4	0
65.5	0
65.6	0
65.7	0
65.8	0
65.9	0
66	0
66.1	0
66.2	0
66.3	0
66.4	0
66.5	0
66.6	0
66.7	0
66.8	0
66.9	0
67	0
67.1	0
67.2	0
67.3	0
67.4	0
67.5	0
67.6	0
67.7	0
67.8	0
67.9	0
68	0
68.1	0
68.2	0
68.3	0
68.4	0
68.5	0
68.6	0
68.7	0
68.8	0
68.9	0
69	0
69.1	0
69.2	0
69.3	0
69.4	0
69.5	0
69.6	0
69.7	0
69.8	0
69.9	0
70	0
70.1	0
70.2	0
70.3	0
70.4	0
70.5	0
70.6	0
70.7	0
70.8	0
70.9	0
71	0
71.1	0
71.2	0
71.3	0
71.4	0
71.5	0
71.6	0
71.7	0
71.8	0
71.9	0
72	0
72.1	0
72.2	0
72.3	0
72.4	0
72.5	0
72.6	0
72.7	0
72.8	0
72.9	0
73	0
73.1	0
73.2	0
73.3	0
73.4	0
73.5	0
73.6	0
73.7	0
73.8	0
73.9	0
74	0
74.1	0
74.2	0
74.3	0
74.4	0
74.5	0
74.6	0
74.7	0
74.8	0
74.9	0
75	0
75.1	0
75.2	0
75.3	0
75.4	0
75.5	0
75.6	0
75.7	0
75.8	0
75.9	0
76	0
76.1	0
76.2	0
76.3	0
76.4	0
76.5	0
76.6	0
76.7	0
76.8	0
76.9	0
77	0
77.1	0
77.2	0
77.3	0
77.4	0
77.5	0
77.6	0
77.7	0
77.8	0
77.9	0
78	0
78.1	0
78.2	0
78.3	0
78.4	0
78.5	0
78.6	0
78.7	0
78.8	0
78.9	0
79	0
79.1	0
79.2	0
79.3	0
79.4	0
79.5	0
79.6	0
79.7	0
79.8	0
79.9	0
80	0
80.1	0
80.2	0
80.3	0
80.4	0
80.5	0
80.6	0
80.7	0
80.8	0
80.9	0
81	0
81.1	0
81.2	0
81.3	0
81.4	0
81.5	0
81.6	0
81.7	0
81.8	0
81.9	0
82	0
82.1	0
82.2	0
82.3	0
82.4	0
82.5	0
82.6	0
82.7	0
82.8	0
82.9	0
83	0
83.1	0
83.2	0
83.3	0
83.4	0
83.5	0
83.6	0
83.7	0
83.8	0
83.9	0
84	0
84.1	0
84.2	0
84.3	0
84.4	0
84.5	0
84.6	0
84.7	0
84.8	0
84.9	0
85	0
85.1	0
85.2	0
85.3	0
85.4	0
85.5	0
85.6	0
85.7	0
85.8	0
85.9	0
86	0
86.1	0
86.2	0
86.3	0
86.4	0
86.5	0
86.6	0
86.7	0
86.8	0
86.9	0
87	0
87.1	0
87.2	0
87.3	0
87.4	0
87.5	0
87.6	0
87.7	0
87.8	0
87.9	0
88	0
88.1	0
88.2	0
88.3	0
88.4	0
88.5	0
88.6	0
88.7	0
88.8	0
88.9	0
89	0
89.1	0
89.2	0
89.3	0
89.4	0
89.5	0
89.6	0
89.7	0
89.8	0
89.9	0
90	0
90.1	0
90.2	0
90.3	0
90.4	0
90.5	0
90.6	0
90.7	0
90.8	0
90.9	0
91	0
91.1	0
91.2	0
91.3	0
91.4	0
91.5	0
91.6	0
91.7	0
91.8	0
91.9	0
92	0
92.1	0
92.2	0
92.3	0
92.4	0
92.5	0
92.6	0
92.7	0
92.8	0
92.9	0
93	0
93.1	0
93.2	0
93.3	0
93.4	0
93.5	0
93.6	0
93.7	0
93.8	0
93.9	0
94	0
94.1	0
94.2	0
94.3	0
94.4	0
94.5	0
94.6	0
94.7	0
94.8	0
94.9	0
95	0
95.1	0
95.2	0
95.3	0
95.4	0
95.5	0
95.6	0
95.7	0
95.8	0
95.9	0
96	0
96.1	0
96.2	0
96.3	0
96.4	0
96.5	0
96.6	0
96.7	0
96.8	0
96.9	0
97	0
97.1	0
97.2	0
97.3	0
97.4	0
97.5	0
97.6	0
97.7	0
97.8	0
97.9	0
98	0
98.1	0
98.2	0
98.3	0
98.4	0
98.5	0
98.6	0
98.7	0
98.8	0
98.9	0
99	0
99.1	0
99.2	0
99.3	0
99.4	0
99.5	0
99.6	0
99.7	0
99.8	0
99.9	0
100	0
100.1	0
100.2	0.00375
100.3	0.00625
100.4	0.0075
100.5	0.01
100.6	0.01125
100.7	0.015
100.8	0.015
100.9	0.015
101	0.01875
101.1	0.02125
101.2	0.0225
101.3	0.02375
101.4	0.025
101.5	0.0275
101.6	0.02875
101.7	0.03125
101.8	0.0325
101.9	0.03625
102	0.04
102.1	0.04
102.2	0.04125
102.3	0.04
102.4	0.04
102.5	0.03875
102.6	0.04
102.7	0.0425
102.8	0.04375
102.9	0.045
103	0.04625
103.1	0.0475
103.2	0.04625
103.3	0.04875
103.4	0.05125
103.5	0.05125
103.6	0.0525
103.7	0.05375
103.8	0.05625
103.9	0.05625
104	0.05625
104.1	0.055
104.2	0.0575
104.3	0.05875
104.4	0.05875
104.5	0.0575
104.6	0.0625
104.7	0.06
104.8	0.06125
104.9	0.06125
105	0.0625
105.1	0.0625
105.2	0.06
105.3	0.06375
105.4	0.06375
105.5	0.06375
105.6	0.06375
105.7	0.06375
105.8	0.0675
105.9	0.06875
106	0.06875
106.1	0.07125
106.2	0.07375
106.3	0.075
106.4	0.07625
106.5	0.075
106.6	0.075
106.7	0.075
106.8	0.075
106.9	0.0775
107	0.08125
107.1	0.08125
107.2	0.0825
107.3	0.0825
107.4	0.08
107.5	0.08
107.6	0.07875
107.7	0.0775
107.8	0.0775
107.9	0.07875
108	0.0825
108.1	0.0825
108.2	0.0825
108.3	0.0825
108.4	0.085
108.5	0.085
108.6	0.08625
108.7	0.085
108.8	0.08375
108.9	0.08875
109	0.0925
109.1	0.09125
109.2	0.09375
109.3	0.0925
109.4	0.0925
109.5	0.09375
109.6	0.09375
109.7	0.09375
109.8	0.09125
109.9	0.0925
110	0.0925
110.1	0.0925
110.2	0.095
110.3	0.09875
110.4	0.1
110.5	0.1
110.6	0.10125
110.7	0.10125
110.8	0.10375
110.9	0.10375
111	0.11
111.1	0.11375
111.2	0.11375
111.3	0.115
111.4	0.11625
111.5	0.1175
111.6	0.11875
111.7	0.11875
111.8	0.1175
111.9	0.1175
112	0.12
112.1	0.12375
112.2	0.125
112.3	0.125
112.4	0.12375
112.5	0.1225
112.6	0.1225
112.7	0.12125
112.8	0.12375
112.9	0.1225
113	0.12125
113.1	0.11875
113.2	0.12
113.3	0.12
113.4	0.12125
113.5	0.11875
113.6	0.1175
113.7	0.115
113.8	0.11375
113.9	0.115
114	0.1175
114.1	0.1175
114.2	0.11625
114.3	0.115
114.4	0.11625
114.5	0.1175
114.6	0.115
114.7	0.115
114.8	0.11375
114.9	0.11375
115	0.11375
115.1	0.1125
115.2	0.115
115.3	0.115
115.4	0.115
115.5	0.11375
115.6	0.115
115.7	0.115
115.8	0.11625
115.9	0.12125
116	0.12125
116.1	0.12125
116.2	0.125
116.3	0.1225
116.4	0.1225
116.5	0.12375
116.6	0.12375
116.7	0.12125
116.8	0.11875
116.9	0.1225
117	0.12125
117.1	0.1225
117.2	0.125
117.3	0.1275
117.4	0.13
117.5	0.13375
117.6	0.13125
117.7	0.12875
117.8	0.12625
117.9	0.125
118	0.1225
118.1	0.12125
118.2	0.1225
118.3	0.12125
118.4	0.1175
118.5	0.1175
118.6	0.11875
118.7	0.12125
118.8	0.11875
118.9	0.11625
119	0.1175
119.1	0.1175
119.2	0.1175
119.3	0.1175
119.4	0.115
119.5	0.11625
119.6	0.1175
119.7	0.1175
119.8	0.1175
119.9	0.12
120	0.12
120.1	0.12
120.2	0.12125
120.3	0.12
120.4	0.12125
120.5	0.12375
120.6	0.12375
120.7	0.125
120.8	0.1225
120.9	0.125
121	0.1275
121.1	0.1275
121.2	0.12875
121.3	0.13125
121.4	0.13
121.5	0.13
121.6	0.12625
121.7	0.12625
121.8	0.12625
121.9	0.1225
122	0.125
122.1	0.12625
122.2	0.12375
122.3	0.12375
122.4	0.12625
122.5	0.125
122.6	0.12375
122.7	0.11875
122.8	0.12125
122.9	0.12125
123	0.1225
123.1	0.1225
123.2	0.12625
123.3	0.1275
123.4	0.12625
123.5	0.12625
123.6	0.12375
123.7	0.125
123.8	0.1275
123.9	0.12625
124	0.12375
124.1	0.12375
124.2	0.12625
124.3	0.12625
124.4	0.125
124.5	0.12375
124.6	0.125
124.7	0.125
124.8	0.1275
124.9	0.125
125	0.1275
125.1	0.1275
125.2	0.12875
125.3	0.13
125.4	0.12625
125.5	0.12625
125.6	0.125
125.7	0.125
125.8	0.125
125.9	0.12375
126	0.1275
126.1	0.12875
126.2	0.1275
126.3	0.1275
126.4	0.1275
126.5	0.12875
126.6	0.12875
126.7	0.13
126.8	0.13
126.9	0.12875
127	0.13
127.1	0.1275
127.2	0.1275
127.3	0.125
127.4	0.12625
127.5	0.12375
127.6	0.12375
127.7	0.1225
127.8	0.12375
127.9	0.12625
128	0.125
128.1	0.12375
128.2	0.12375
128.3	0.125
128.4	0.12625
128.5	0.12625
128.6	0.12625
128.7	0.12625
128.8	0.125
128.9	0.1225
129	0.1225
129.1	0.12375
129.2	0.12625
129.3	0.12375
129.4	0.1225
129.5	0.12125
129.6	0.1225
129.7	0.125
129.8	0.12375
129.9	0.125
130	0.12375
130.1	0.125
130.2	0.12625
130.3	0.12875
130.4	0.13
130.5	0.12875
130.6	0.13125
130.7	0.13
130.8	0.1325
130.9	0.13375
131	0.13375
131.1	0.1325
131.2	0.13125
131.3	0.12875
131.4	0.12625
131.5	0.1275
131.6	0.13
131.7	0.13
131.8	0.13125
131.9	0.13125
132	0.13375
132.1	0.13375
132.2	0.135
132.3	0.135
132.4	0.13375
132.5	0.1325
132.6	0.13125
132.7	0.13375
132.8	0.13
132.9	0.12875
133	0.12625
133.1	0.12625
133.2	0.12625
133.3	0.125
133.4	0.12375
133.5	0.1225
133.6	0.1225
133.7	0.11875
133.8	0.11625
133.9	0.11625
134	0.1175
134.1	0.12
134.2	0.12
134.3	0.12125
134.4	0.12
134.5	0.1225
134.6	0.12375
134.7	0.12375
134.8	0.12875
134.9	0.13
135	0.13
135.1	0.1275
135.2	0.1275
135.3	0.12875
135.4	0.13125
135.5	0.13
135.6	0.1325
135.7	0.135
135.8	0.1325
135.9	0.13
136	0.12875
136.1	0.12875
136.2	0.12875
136.3	0.125
136.4	0.12625
136.5	0.1275
136.6	0.12875
136.7	0.12875
136.8	0.13125
136.9	0.13125
137	0.1325
137.1	0.1325
137.2	0.13125
137.3	0.13
137.4	0.13125
137.5	0.13125
137.6	0.13125
137.7	0.12875
137.8	0.1275
137.9	0.13
138	0.13
138.1	0.13125
138.2	0.13375
138.3	0.1325
138.4	0.1325
138.5	0.1325
138.6	0.13125
138.7	0.1325
138.8	0.13375
138.9	0.135
139	0.13625
139.1	0.13625
139.2	0.135
139.3	0.135
139.4	0.135
139.5	0.1375
139.6	0.1375
139.7	0.14125
139.8	0.14125
139.9	0.14
140	0.1425
140.1	0.1425
140.2	0.145
140.3	0.14625
140.4	0.14625
140.5	0.1475
140.6	0.14875
140.7	0.15
140.8	0.15
140.9	0.14875
141	0.15
141.1	0.14875
141.2	0.14875
141.3	0.14875
141.4	0.1475
141.5	0.14875
141.6	0.14875
141.7	0.15125
141.8	0.1525
141.9	0.15375
142	0.1525
142.1	0.15
142.2	0.15
142.3	0.1475
142.4	0.145
142.5	0.1425
142.6	0.14
142.7	0.14
142.8	0.13875
142.9	0.14
143	0.1425
143.1	0.14375
143.2	0.145
143.3	0.1425
143.4	0.145
143.5	0.1425
143.6	0.1425
143.7	0.14125
143.8	0.14125
143.9	0.14
144	0.14
144.1	0.13875
144.2	0.1375
144.3	0.13875
144.4	0.14
144.5	0.1375
144.6	0.13875
144.7	0.1375
144.8	0.14125
144.9	0.13625
145	0.135
145.1	0.1375
145.2	0.1375
145.3	0.13625
145.4	0.135
145.5	0.1325
145.6	0.1325
145.7	0.13125
145.8	0.1325
145.9	0.1325
146	0.1325
146.1	0.1325
146.2	0.1325
146.3	0.13375
146.4	0.1325
146.5	0.1325
146.6	0.1325
146.7	0.13375
146.8	0.135
146.9	0.1325
147	0.13375
147.1	0.135
147.2	0.13875
147.3	0.14
147.4	0.14375
147.5	0.14375
147.6	0.1425
147.7	0.14375
147.8	0.1425
147.9	0.14125
148	0.14
148.1	0.145
148.2	0.14375
148.3	0.1425
148.4	0.145
148.5	0.14375
148.6	0.14375
148.7	0.1425
148.8	0.14
148.9	0.14125
149	0.14125
149.1	0.1425
149.2	0.1425
149.3	0.1425
149.4	0.145
149.5	0.145
149.6	0.14625
149.7	0.1475
149.8	0.14625
149.9	0.14625
150	0.14625
150.1	0.15125
150.2	0.155
150.3	0.15625
150.4	0.155
150.5	0.15625
150.6	0.155
150.7	0.155
150.8	0.155
150.9	0.15625
151	0.15625
151.1	0.15625
151.2	0.15375
151.3	0.15375
151.4	0.155
151.5	0.155
151.6	0.155
151.7	0.15375
151.8	0.155
151.9	0.15375
152	0.1525
152.1	0.1525
152.2	0.1525
152.3	0.15125
152.4	0.1525
152.5	0.1525
152.6	0.15
152.7	0.14875
152.8	0.14625
152.9	0.14625
153	0.145
153.1	0.14875
153.2	0.15
153.3	0.14625
153.4	0.145
153.5	0.14625
153.6	0.145
153.7	0.145
153.8	0.14125
153.9	0.14125
154	0.14125
154.1	0.1375
154.2	0.1375
154.3	0.13625
154.4	0.1375
154.5	0.1375
154.6	0.13625
154.7	0.135
154.8	0.13375
154.9	0.13375
155	0.13375
155.1	0.135
155.2	0.13375
155.3	0.13125
155.4	0.13375
155.5	0.13625
155.6	0.13375
155.7	0.1375
155.8	0.13875
155.9	0.1375
156	0.135
156.1	0.135
156.2	0.13625
156.3	0.135
156.4	0.135
156.5	0.13375
156.6	0.13375
156.7	0.1325
156.8	0.13375
156.9	0.135
157	0.13625
157.1	0.1375
157.2	0.1375
157.3	0.13875
157.4	0.14375
157.5	0.14125
157.6	0.13875
157.7	0.14
157.8	0.14125
157.9	0.1425
158	0.1425
158.1	0.1425
158.2	0.14
158.3	0.1375
158.4	0.13875
158.5	0.13875
158.6	0.13875
158.7	0.14
158.8	0.14125
158.9	0.1425
159	0.14125
159.1	0.14
159.2	0.14125
159.3	0.14
159.4	0.14
159.5	0.14125
159.6	0.14
159.7	0.14
159.8	0.13875
159.9	0.13875
160	0.14
160.1	0.1425
160.2	0.1425
160.3	0.14625
160.4	0.14625
160.5	0.14875
160.6	0.1475
160.7	0.1475
160.8	0.1475
160.9	0.1475
161	0.14625
161.1	0.14375
161.2	0.14625
161.3	0.14625
161.4	0.14625
161.5	0.14625
161.6	0.14875
161.7	0.14875
161.8	0.1475
161.9	0.15
162	0.15125
162.1	0.15125
162.2	0.15
162.3	0.15
162.4	0.1475
162.5	0.1475
162.6	0.1475
162.7	0.1475
162.8	0.14875
162.9	0.145
163	0.14375
163.1	0.145
163.2	0.1425
163.3	0.1425
163.4	0.14
163.5	0.14
163.6	0.14
163.7	0.13875
163.8	0.13875
163.9	0.14125
164	0.1425
164.1	0.13875
164.2	0.1375
164.3	0.135
164.4	0.1325
164.5	0.13125
164.6	0.13125
164.7	0.135
164.8	0.13375
164.9	0.13375
165	0.135
165.1	0.135
165.2	0.13625
165.3	0.13625
165.4	0.13625
165.5	0.1375
165.6	0.1375
165.7	0.1375
165.8	0.1375
165.9	0.13625
166	0.1375
166.1	0.135
166.2	0.13625
166.3	0.13375
166.4	0.1325
166.5	0.13375
166.6	0.1325
166.7	0.13125
166.8	0.13125
166.9	0.13625
167	0.13625
167.1	0.13875
167.2	0.13875
167.3	0.14
167.4	0.14
167.5	0.14
167.6	0.13875
167.7	0.14
167.8	0.13875
167.9	0.135
168	0.135
168.1	0.13625
168.2	0.13625
168.3	0.135
168.4	0.135
168.5	0.13625
168.6	0.13875
168.7	0.14125
168.8	0.14
168.9	0.1375
169	0.1375
169.1	0.1375
169.2	0.14
169.3	0.13875
169.4	0.13875
169.5	0.13875
169.6	0.1375
169.7	0.1375
169.8	0.13875
169.9	0.14
170	0.14125
170.1	0.14
170.2	0.14125
170.3	0.14
170.4	0.135
170.5	0.13375
170.6	0.1325
170.7	0.13125
170.8	0.13125
170.9	0.13375
171	0.135
171.1	0.135
171.2	0.135
171.3	0.13375
171.4	0.13375
171.5	0.1325
171.6	0.1325
171.7	0.1325
171.8	0.1325
171.9	0.13125
172	0.13125
172.1	0.13
172.2	0.13375
172.3	0.13375
172.4	0.135
172.5	0.1425
172.6	0.14125
172.7	0.14
172.8	0.14125
172.9	0.1425
173	0.14125
173.1	0.14375
173.2	0.14375
173.3	0.14375
173.4	0.14375
173.5	0.14375
173.6	0.14625
173.7	0.14375
173.8	0.14375
173.9	0.14625
174	0.14875
174.1	0.14625
174.2	0.14875
174.3	0.15
174.4	0.15
174.5	0.15125
174.6	0.1525
174.7	0.15125
174.8	0.15375
174.9	0.15375
175	0.1525
175.1	0.15375
175.2	0.1575
175.3	0.15625
175.4	0.1575
175.5	0.16
175.6	0.15875
175.7	0.16
175.8	0.15875
175.9	0.15875
176	0.15875
176.1	0.15875
176.2	0.16
176.3	0.15875
176.4	0.155
176.5	0.15625
176.6	0.15625
176.7	0.16
176.8	0.16
176.9	0.165
177	0.1625
177.1	0.15875
177.2	0.15625
177.3	0.15625
177.4	0.155
177.5	0.15875
177.6	0.1575
177.7	0.15625
177.8	0.155
177.9	0.15125
178	0.15125
178.1	0.1525
178.2	0.15375
178.3	0.155
178.4	0.15375
178.5	0.15375
178.6	0.155
178.7	0.155
178.8	0.155
178.9	0.15375
179	0.15125
179.1	0.15125
179.2	0.15375
179.3	0.15125
179.4	0.15
179.5	0.14625
179.6	0.14625
179.7	0.1475
179.8	0.15
179.9	0.15
180	0.15125
180.1	0.15125
180.2	0.1475
180.3	0.1475
180.4	0.14625
180.5	0.14625
180.6	0.14625
180.7	0.14625
180.8	0.14625
180.9	0.14625
181	0.145
181.1	0.1425
181.2	0.14125
181.3	0.1425
181.4	0.14375
181.5	0.14375
181.6	0.14375
181.7	0.1425
181.8	0.14375
181.9	0.14125
182	0.13625
182.1	0.13625
182.2	0.135
182.3	0.135
182.4	0.13625
182.5	0.1325
182.6	0.12875
182.7	0.1275
182.8	0.1275
182.9	0.13125
183	0.13125
183.1	0.13
183.2	0.12875
183.3	0.1275
183.4	0.12875
183.5	0.1275
183.6	0.1275
183.7	0.1275
183.8	0.1275
183.9	0.1275
184	0.12875
184.1	0.12875
184.2	0.1275
184.3	0.125
184.4	0.125
184.5	0.12625
184.6	0.12875
184.7	0.13
184.8	0.13
184.9	0.13375
185	0.1375
185.1	0.13875
185.2	0.14
185.3	0.14125
185.4	0.14
185.5	0.1375
185.6	0.13875
185.7	0.13625
185.8	0.1375
185.9	0.135
186	0.1325
186.1	0.135
186.2	0.13375
186.3	0.13
186.4	0.1275
186.5	0.12375
186.6	0.12375
186.7	0.1275
186.8	0.12625
186.9	0.1275
187	0.1275
187.1	0.1275
187.2	0.12875
187.3	0.1275
187.4	0.1275
187.5	0.1275
187.6	0.12875
187.7	0.13
187.8	0.13125
187.9	0.1325
188	0.13375
188.1	0.13625
188.2	0.1375
188.3	0.13625
188.4	0.13625
188.5	0.13625
188.6	0.13375
188.7	0.135
188.8	0.13625
188.9	0.14
189	0.14375
189.1	0.145
189.2	0.145
189.3	0.145
189.4	0.14625
189.5	0.14625
189.6	0.15125
189.7	0.15
189.8	0.15125
189.9	0.15125
190	0.15
190.1	0.15
190.2	0.15125
190.3	0.15125
190.4	0.15125
190.5	0.15125
190.6	0.1525
190.7	0.15375
190.8	0.15375
190.9	0.1475
191	0.14625
191.1	0.145
191.2	0.14375
191.3	0.14375
191.4	0.14
191.5	0.13875
191.6	0.13875
191.7	0.14
191.8	0.14125
191.9	0.14125
192	0.14125
192.1	0.1375
192.2	0.1375
192.3	0.14
192.4	0.13875
192.5	0.13625
192.6	0.13875
192.7	0.1375
192.8	0.1375
192.9	0.13625
193	0.14125
193.1	0.14125
193.2	0.14625
193.3	0.145
193.4	0.14625
193.5	0.1425
193.6	0.145
193.7	0.14625
193.8	0.14875
193.9	0.15
194	0.15125
194.1	0.1525
194.2	0.15375
194.3	0.15375
194.4	0.1575
194.5	0.15625
194.6	0.155
194.7	0.1525
194.8	0.155
194.9	0.1575
195	0.16125
195.1	0.15875
195.2	0.155
195.3	0.15375
195.4	0.15125
195.5	0.15375
195.6	0.1525
195.7	0.155
195.8	0.15375
195.9	0.1525
196	0.15375
196.1	0.15125
196.2	0.1525
196.3	0.15125
196.4	0.15125
196.5	0.14875
196.6	0.15
196.7	0.15375
196.8	0.155
196.9	0.15375
197	0.15375
197.1	0.15125
197.2	0.155
197.3	0.1525
197.4	0.1525
197.5	0.15375
197.6	0.155
197.7	0.15375
197.8	0.15375
197.9	0.15375
198	0.15125
198.1	0.14875
198.2	0.14875
198.3	0.15375
198.4	0.155
198.5	0.15375
198.6	0.15375
198.7	0.15625
198.8	0.15625
198.9	0.15875
199	0.1575
199.1	0.15875
199.2	0.15875
199.3	0.155
199.4	0.1525
199.5	0.155
199.6	0.1575
199.7	0.1575
199.8	0.16
199.9	0.15875
200	0.1575
[truncated: 14,000 more rows]
