# Supplementary material for: Bayesian inference of kinetic schemes for ion channels by Kalman filtering
Source: eLife journal article supplement (doi:10.7554/elife.62714), 2022-05-04
Supplement: fig4-data11 [file 1_Sim_N_500_Fluor_MW.xlsx]

## Sheet: Tabelle1
0.1	0
0.2	0
0.3	0
0.4	0
0.5	0
0.6	0
0.7	0
0.8	0
0.9	0
1	0
1.1	0
1.2	0
1.3	0
1.4	0
1.5	0
1.6	0
1.7	0
1.8	0
1.9	0
2	0
2.1	0
2.2	0
2.3	0
2.4	0
2.5	0
2.6	0
2.7	0
2.8	0
2.9	0
3	0
3.1	0
3.2	0
3.3	0
3.4	0
3.5	0
3.6	0
3.7	0
3.8	0
3.9	0
4	0
4.1	0
4.2	0
4.3	0
4.4	0
4.5	0
4.6	0
4.7	0
4.8	0
4.9	0
5	0
5.1	0
5.2	0
5.3	0
5.4	0
5.5	0
5.6	0
5.7	0
5.8	0
5.9	0
6	0
6.1	0
6.2	0
6.3	0
6.4	0
6.5	0
6.6	0
6.7	0
6.8	0
6.9	0
7	0
7.1	0
7.2	0
7.3	0
7.4	0
7.5	0
7.6	0
7.7	0
7.8	0
7.9	0
8	0
8.1	0
8.2	0
8.3	0
8.4	0
8.5	0
8.6	0
8.7	0
8.8	0
8.9	0
9	0
9.1	0
9.2	0
9.3	0
9.4	0
9.5	0
9.6	0
9.7	0
9.8	0
9.9	0
10	0
10.1	0
10.2	0
10.3	0
10.4	0
10.5	0
10.6	0
10.7	0
10.8	0
10.9	0
11	0
11.1	0
11.2	0
11.3	0
11.4	0
11.5	0
11.6	0
11.7	0
11.8	0
11.9	0
12	0
12.1	0
12.2	0
12.3	0
12.4	0
12.5	0
12.6	0
12.7	0
12.8	0
12.9	0
13	0
13.1	0
13.2	0
13.3	0
13.4	0
13.5	0
13.6	0
13.7	0
13.8	0
13.9	0
14	0
14.1	0
14.2	0
14.3	0
14.4	0
14.5	0
14.6	0
14.7	0
14.8	0
14.9	0
15	0
15.1	0
15.2	0
15.3	0
15.4	0
15.5	0
15.6	0
15.7	0
15.8	0
15.9	0
16	0
16.1	0
16.2	0
16.3	0
16.4	0
16.5	0
16.6	0
16.7	0
16.8	0
16.9	0
17	0
17.1	0
17.2	0
17.3	0
17.4	0
17.5	0
17.6	0
17.7	0
17.8	0
17.9	0
18	0
18.1	0
18.2	0
18.3	0
18.4	0
18.5	0
18.6	0
18.7	0
18.8	0
18.9	0
19	0
19.1	0
19.2	0
19.3	0
19.4	0
19.5	0
19.6	0
19.7	0
19.8	0
19.9	0
20	0
20.1	0
20.2	0
20.3	0
20.4	0
20.5	0
20.6	0
20.7	0
20.8	0
20.9	0
21	0
21.1	0
21.2	0
21.3	0
21.4	0
21.5	0
21.6	0
21.7	0
21.8	0
21.9	0
22	0
22.1	0
22.2	0
22.3	0
22.4	0
22.5	0
22.6	0
22.7	0
22.8	0
22.9	0
23	0
23.1	0
23.2	0
23.3	0
23.4	0
23.5	0
23.6	0
23.7	0
23.8	0
23.9	0
24	0
24.1	0
24.2	0
24.3	0
24.4	0
24.5	0
24.6	0
24.7	0
24.8	0
24.9	0
25	0
25.1	0
25.2	0
25.3	0
25.4	0
25.5	0
25.6	0
25.7	0
25.8	0
25.9	0
26	0
26.1	0
26.2	0
26.3	0
26.4	0
26.5	0
26.6	0
26.7	0
26.8	0
26.9	0
27	0
27.1	0
27.2	0
27.3	0
27.4	0
27.5	0
27.6	0
27.7	0
27.8	0
27.9	0
28	0
28.1	0
28.2	0
28.3	0
28.4	0
28.5	0
28.6	0
28.7	0
28.8	0
28.9	0
29	0
29.1	0
29.2	0
29.3	0
29.4	0
29.5	0
29.6	0
29.7	0
29.8	0
29.9	0
30	0
30.1	0
30.2	0
30.3	0
30.4	0
30.5	0
30.6	0
30.7	0
30.8	0
30.9	0
31	0
31.1	0
31.2	0
31.3	0
31.4	0
31.5	0
31.6	0
31.7	0
31.8	0
31.9	0
32	0
32.1	0
32.2	0
32.3	0
32.4	0
32.5	0
32.6	0
32.7	0
32.8	0
32.9	0
33	0
33.1	0
33.2	0
33.3	0
33.4	0
33.5	0
33.6	0
33.7	0
33.8	0
33.9	0
34	0
34.1	0
34.2	0
34.3	0
34.4	0
34.5	0
34.6	0
34.7	0
34.8	0
34.9	0
35	0
35.1	0
35.2	0
35.3	0
35.4	0
35.5	0
35.6	0
35.7	0
35.8	0
35.9	0
36	0
36.1	0
36.2	0
36.3	0
36.4	0
36.5	0
36.6	0
36.7	0
36.8	0
36.9	0
37	0
37.1	0
37.2	0
37.3	0
37.4	0
37.5	0
37.6	0
37.7	0
37.8	0
37.9	0
38	0
38.1	0
38.2	0
38.3	0
38.4	0
38.5	0
38.6	0
38.7	0
38.8	0
38.9	0
39	0
39.1	0
39.2	0
39.3	0
39.4	0
39.5	0
39.6	0
39.7	0
39.8	0
39.9	0
40	0
40.1	0
40.2	0
40.3	0
40.4	0
40.5	0
40.6	0
40.7	0
40.8	0
40.9	0
41	0
41.1	0
41.2	0
41.3	0
41.4	0
41.5	0
41.6	0
41.7	0
41.8	0
41.9	0
42	0
42.1	0
42.2	0
42.3	0
42.4	0
42.5	0
42.6	0
42.7	0
42.8	0
42.9	0
43	0
43.1	0
43.2	0
43.3	0
43.4	0
43.5	0
43.6	0
43.7	0
43.8	0
43.9	0
44	0
44.1	0
44.2	0
44.3	0
44.4	0
44.5	0
44.6	0
44.7	0
44.8	0
44.9	0
45	0
45.1	0
45.2	0
45.3	0
45.4	0
45.5	0
45.6	0
45.7	0
45.8	0
45.9	0
46	0
46.1	0
46.2	0
46.3	0
46.4	0
46.5	0
46.6	0
46.7	0
46.8	0
46.9	0
47	0
47.1	0
47.2	0
47.3	0
47.4	0
47.5	0
47.6	0
47.7	0
47.8	0
47.9	0
48	0
48.1	0
48.2	0
48.3	0
48.4	0
48.5	0
48.6	0
48.7	0
48.8	0
48.9	0
49	0
49.1	0
49.2	0
49.3	0
49.4	0
49.5	0
49.6	0
49.7	0
49.8	0
49.9	0
50	0
50.1	0
50.2	0
50.3	0
50.4	0
50.5	0
50.6	0
50.7	0
50.8	0
50.9	0
51	0
51.1	0
51.2	0
51.3	0
51.4	0
51.5	0
51.6	0
51.7	0
51.8	0
51.9	0
52	0
52.1	0
52.2	0
52.3	0
52.4	0
52.5	0
52.6	0
52.7	0
52.8	0
52.9	0
53	0
53.1	0
53.2	0
53.3	0
53.4	0
53.5	0
53.6	0
53.7	0
53.8	0
53.9	0
54	0
54.1	0
54.2	0
54.3	0
54.4	0
54.5	0
54.6	0
54.7	0
54.8	0
54.9	0
55	0
55.1	0
55.2	0
55.3	0
55.4	0
55.5	0
55.6	0
55.7	0
55.8	0
55.9	0
56	0
56.1	0
56.2	0
56.3	0
56.4	0
56.5	0
56.6	0
56.7	0
56.8	0
56.9	0
57	0
57.1	0
57.2	0
57.3	0
57.4	0
57.5	0
57.6	0
57.7	0
57.8	0
57.9	0
58	0
58.1	0
58.2	0
58.3	0
58.4	0
58.5	0
58.6	0
58.7	0
58.8	0
58.9	0
59	0
59.1	0
59.2	0
59.3	0
59.4	0
59.5	0
59.6	0
59.7	0
59.8	0
59.9	0
60	0
60.1	0
60.2	0
60.3	0
60.4	0
60.5	0
60.6	0
60.7	0
60.8	0
60.9	0
61	0
61.1	0
61.2	0
61.3	0
61.4	0
61.5	0
61.6	0
61.7	0
61.8	0
61.9	0
62	0
62.1	0
62.2	0
62.3	0
62.4	0
62.5	0
62.6	0
62.7	0
62.8	0
62.9	0
63	0
63.1	0
63.2	0
63.3	0
63.4	0
63.5	0
63.6	0
63.7	0
63.8	0
63.9	0
64	0
64.1	0
64.2	0
64.3	0
64.4	0
64.5	0
64.6	0
64.7	0
64.8	0
64.9	0
65	0
65.1	0
65.2	0
65.3	0
65.4	0
65.5	0
65.6	0
65.7	0
65.8	0
65.9	0
66	0
66.1	0
66.2	0
66.3	0
66.4	0
66.5	0
66.6	0
66.7	0
66.8	0
66.9	0
67	0
67.1	0
67.2	0
67.3	0
67.4	0
67.5	0
67.6	0
67.7	0
67.8	0
67.9	0
68	0
68.1	0
68.2	0
68.3	0
68.4	0
68.5	0
68.6	0
68.7	0
68.8	0
68.9	0
69	0
69.1	0
69.2	0
69.3	0
69.4	0
69.5	0
69.6	0
69.7	0
69.8	0
69.9	0
70	0
70.1	0
70.2	0
70.3	0
70.4	0
70.5	0
70.6	0
70.7	0
70.8	0
70.9	0
71	0
71.1	0
71.2	0
71.3	0
71.4	0
71.5	0
71.6	0
71.7	0
71.8	0
71.9	0
72	0
72.1	0
72.2	0
72.3	0
72.4	0
72.5	0
72.6	0
72.7	0
72.8	0
72.9	0
73	0
73.1	0
73.2	0
73.3	0
73.4	0
73.5	0
73.6	0
73.7	0
73.8	0
73.9	0
74	0
74.1	0
74.2	0
74.3	0
74.4	0
74.5	0
74.6	0
74.7	0
74.8	0
74.9	0
75	0
75.1	0
75.2	0
75.3	0
75.4	0
75.5	0
75.6	0
75.7	0
75.8	0
75.9	0
76	0
76.1	0
76.2	0
76.3	0
76.4	0
76.5	0
76.6	0
76.7	0
76.8	0
76.9	0
77	0
77.1	0
77.2	0
77.3	0
77.4	0
77.5	0
77.6	0
77.7	0
77.8	0
77.9	0
78	0
78.1	0
78.2	0
78.3	0
78.4	0
78.5	0
78.6	0
78.7	0
78.8	0
78.9	0
79	0
79.1	0
79.2	0
79.3	0
79.4	0
79.5	0
79.6	0
79.7	0
79.8	0
79.9	0
80	0
80.1	0
80.2	0
80.3	0
80.4	0
80.5	0
80.6	0
80.7	0
80.8	0
80.9	0
81	0
81.1	0
81.2	0
81.3	0
81.4	0
81.5	0
81.6	0
81.7	0
81.8	0
81.9	0
82	0
82.1	0
82.2	0
82.3	0
82.4	0
82.5	0
82.6	0
82.7	0
82.8	0
82.9	0
83	0
83.1	0
83.2	0
83.3	0
83.4	0
83.5	0
83.6	0
83.7	0
83.8	0
83.9	0
84	0
84.1	0
84.2	0
84.3	0
84.4	0
84.5	0
84.6	0
84.7	0
84.8	0
84.9	0
85	0
85.1	0
85.2	0
85.3	0
85.4	0
85.5	0
85.6	0
85.7	0
85.8	0
85.9	0
86	0
86.1	0
86.2	0
86.3	0
86.4	0
86.5	0
86.6	0
86.7	0
86.8	0
86.9	0
87	0
87.1	0
87.2	0
87.3	0
87.4	0
87.5	0
87.6	0
87.7	0
87.8	0
87.9	0
88	0
88.1	0
88.2	0
88.3	0
88.4	0
88.5	0
88.6	0
88.7	0
88.8	0
88.9	0
89	0
89.1	0
89.2	0
89.3	0
89.4	0
89.5	0
89.6	0
89.7	0
89.8	0
89.9	0
90	0
90.1	0
90.2	0
90.3	0
90.4	0
90.5	0
90.6	0
90.7	0
90.8	0
90.9	0
91	0
91.1	0
91.2	0
91.3	0
91.4	0
91.5	0
91.6	0
91.7	0
91.8	0
91.9	0
92	0
92.1	0
92.2	0
92.3	0
92.4	0
92.5	0
92.6	0
92.7	0
92.8	0
92.9	0
93	0
93.1	0
93.2	0
93.3	0
93.4	0
93.5	0
93.6	0
93.7	0
93.8	0
93.9	0
94	0
94.1	0
94.2	0
94.3	0
94.4	0
94.5	0
94.6	0
94.7	0
94.8	0
94.9	0
95	0
95.1	0
95.2	0
95.3	0
95.4	0
95.5	0
95.6	0
95.7	0
95.8	0
95.9	0
96	0
96.1	0
96.2	0
96.3	0
96.4	0
96.5	0
96.6	0
96.7	0
96.8	0
96.9	0
97	0
97.1	0
97.2	0
97.3	0
97.4	0
97.5	0
97.6	0
97.7	0
97.8	0
97.9	0
98	0
98.1	0
98.2	0
98.3	0
98.4	0
98.5	0
98.6	0
98.7	0
98.8	0
98.9	0
99	0
99.1	0
99.2	0
99.3	0
99.4	0
99.5	0
99.6	0
99.7	0
99.8	0
99.9	0
100	0
100.1	0.001
100.2	0.003
100.3	0.003
100.4	0.005
100.5	0.006
100.6	0.008
100.7	0.01
100.8	0.015
100.9	0.015
101	0.016
101.1	0.015
101.2	0.019
101.3	0.02
101.4	0.021
101.5	0.022
101.6	0.024
101.7	0.029
101.8	0.034
101.9	0.034
102	0.035
102.1	0.036
102.2	0.035
102.3	0.038
102.4	0.039
102.5	0.041
102.6	0.042
102.7	0.042
102.8	0.042
102.9	0.044
103	0.046
103.1	0.045
103.2	0.048
103.3	0.049
103.4	0.049
103.5	0.052
103.6	0.053
103.7	0.054
103.8	0.053
103.9	0.054
104	0.055
104.1	0.061
104.2	0.063
104.3	0.064
104.4	0.065
104.5	0.065
104.6	0.066
104.7	0.065
104.8	0.071
104.9	0.072
105	0.074
105.1	0.076
105.2	0.076
105.3	0.079
105.4	0.082
105.5	0.084
105.6	0.082
105.7	0.083
105.8	0.082
105.9	0.081
106	0.079
106.1	0.082
106.2	0.085
106.3	0.084
106.4	0.087
106.5	0.091
106.6	0.091
106.7	0.093
106.8	0.093
106.9	0.093
107	0.095
107.1	0.095
107.2	0.098
107.3	0.098
107.4	0.098
107.5	0.099
107.6	0.099
107.7	0.1
107.8	0.101
107.9	0.099
108	0.099
108.1	0.1
108.2	0.101
108.3	0.102
108.4	0.103
108.5	0.103
108.6	0.102
108.7	0.102
108.8	0.103
108.9	0.102
109	0.101
109.1	0.104
109.2	0.106
109.3	0.105
109.4	0.107
109.5	0.107
109.6	0.109
109.7	0.108
109.8	0.11
109.9	0.111
110	0.11
110.1	0.111
110.2	0.111
110.3	0.113
110.4	0.112
110.5	0.115
110.6	0.117
110.7	0.115
110.8	0.116
110.9	0.116
111	0.116
111.1	0.116
111.2	0.117
111.3	0.115
111.4	0.116
111.5	0.117
111.6	0.116
111.7	0.117
111.8	0.116
111.9	0.115
112	0.12
112.1	0.118
112.2	0.121
112.3	0.121
112.4	0.122
112.5	0.123
112.6	0.126
112.7	0.125
112.8	0.125
112.9	0.124
113	0.126
113.1	0.129
113.2	0.128
113.3	0.13
113.4	0.131
113.5	0.128
113.6	0.129
113.7	0.127
113.8	0.127
113.9	0.127
114	0.127
114.1	0.127
114.2	0.126
114.3	0.127
114.4	0.128
114.5	0.128
114.6	0.124
114.7	0.124
114.8	0.125
114.9	0.126
115	0.127
115.1	0.127
115.2	0.128
115.3	0.126
115.4	0.127
115.5	0.129
115.6	0.13
115.7	0.131
115.8	0.13
115.9	0.129
116	0.128
116.1	0.129
116.2	0.131
116.3	0.13
116.4	0.132
116.5	0.132
116.6	0.13
116.7	0.131
116.8	0.13
116.9	0.127
117	0.127
117.1	0.126
117.2	0.124
117.3	0.123
117.4	0.125
117.5	0.122
117.6	0.121
117.7	0.119
117.8	0.119
117.9	0.119
118	0.121
118.1	0.12
118.2	0.119
118.3	0.119
118.4	0.119
118.5	0.121
118.6	0.121
118.7	0.123
118.8	0.121
118.9	0.121
119	0.124
119.1	0.124
119.2	0.125
119.3	0.124
119.4	0.125
119.5	0.125
119.6	0.124
119.7	0.123
119.8	0.124
119.9	0.123
120	0.124
120.1	0.123
120.2	0.122
120.3	0.123
120.4	0.126
120.5	0.129
120.6	0.129
120.7	0.131
120.8	0.133
120.9	0.134
121	0.133
121.1	0.134
121.2	0.137
121.3	0.136
121.4	0.138
121.5	0.138
121.6	0.137
121.7	0.139
121.8	0.136
121.9	0.133
122	0.134
122.1	0.135
122.2	0.136
122.3	0.137
122.4	0.138
122.5	0.14
122.6	0.138
122.7	0.139
122.8	0.138
122.9	0.14
123	0.138
123.1	0.141
123.2	0.142
123.3	0.14
123.4	0.139
123.5	0.139
123.6	0.14
123.7	0.135
123.8	0.136
123.9	0.135
124	0.131
124.1	0.131
124.2	0.131
124.3	0.129
124.4	0.131
124.5	0.132
124.6	0.132
124.7	0.133
124.8	0.131
124.9	0.133
125	0.132
125.1	0.133
125.2	0.136
125.3	0.136
125.4	0.138
125.5	0.136
125.6	0.135
125.7	0.133
125.8	0.134
125.9	0.134
126	0.135
126.1	0.137
126.2	0.139
126.3	0.138
126.4	0.142
126.5	0.14
126.6	0.14
126.7	0.142
126.8	0.143
126.9	0.143
127	0.142
127.1	0.142
127.2	0.144
127.3	0.146
127.4	0.149
127.5	0.148
127.6	0.147
127.7	0.144
127.8	0.144
127.9	0.143
128	0.142
128.1	0.142
128.2	0.142
128.3	0.141
128.4	0.141
128.5	0.141
128.6	0.145
128.7	0.144
128.8	0.144
128.9	0.145
129	0.145
129.1	0.144
129.2	0.144
129.3	0.145
129.4	0.147
129.5	0.147
129.6	0.147
129.7	0.15
129.8	0.149
129.9	0.147
130	0.147
130.1	0.149
130.2	0.148
130.3	0.148
130.4	0.148
130.5	0.146
130.6	0.149
130.7	0.149
130.8	0.15
130.9	0.149
131	0.15
131.1	0.151
131.2	0.149
131.3	0.151
131.4	0.149
131.5	0.148
131.6	0.148
131.7	0.147
131.8	0.148
131.9	0.152
132	0.152
132.1	0.153
132.2	0.155
132.3	0.154
132.4	0.154
132.5	0.152
132.6	0.146
132.7	0.144
132.8	0.142
132.9	0.144
133	0.144
133.1	0.144
133.2	0.146
133.3	0.147
133.4	0.146
133.5	0.145
133.6	0.145
133.7	0.146
133.8	0.145
133.9	0.144
134	0.143
134.1	0.143
134.2	0.141
134.3	0.142
134.4	0.145
134.5	0.142
134.6	0.142
134.7	0.145
134.8	0.145
134.9	0.145
135	0.145
135.1	0.145
135.2	0.145
135.3	0.14
135.4	0.141
135.5	0.141
135.6	0.144
135.7	0.145
135.8	0.146
135.9	0.144
136	0.143
136.1	0.143
136.2	0.143
136.3	0.141
136.4	0.143
136.5	0.141
136.6	0.141
136.7	0.142
136.8	0.141
136.9	0.144
137	0.145
137.1	0.144
137.2	0.143
137.3	0.141
137.4	0.143
137.5	0.143
137.6	0.143
137.7	0.144
137.8	0.145
137.9	0.142
138	0.139
138.1	0.138
138.2	0.137
138.3	0.137
138.4	0.138
138.5	0.139
138.6	0.139
138.7	0.137
138.8	0.135
138.9	0.134
139	0.135
139.1	0.141
139.2	0.138
139.3	0.142
139.4	0.14
139.5	0.141
139.6	0.142
139.7	0.14
139.8	0.142
139.9	0.142
140	0.145
140.1	0.141
140.2	0.141
140.3	0.14
140.4	0.14
140.5	0.142
140.6	0.145
140.7	0.146
140.8	0.146
140.9	0.149
141	0.152
141.1	0.154
141.2	0.151
141.3	0.152
141.4	0.154
141.5	0.153
141.6	0.151
141.7	0.15
141.8	0.149
141.9	0.149
142	0.148
142.1	0.149
142.2	0.148
142.3	0.149
142.4	0.147
142.5	0.146
142.6	0.147
142.7	0.144
142.8	0.145
142.9	0.147
143	0.148
143.1	0.148
143.2	0.145
143.3	0.146
143.4	0.147
143.5	0.148
143.6	0.146
143.7	0.147
143.8	0.151
143.9	0.153
144	0.152
144.1	0.153
144.2	0.157
144.3	0.158
144.4	0.157
144.5	0.16
144.6	0.161
144.7	0.159
144.8	0.158
144.9	0.158
145	0.158
145.1	0.159
145.2	0.159
145.3	0.156
145.4	0.158
145.5	0.156
145.6	0.155
145.7	0.152
145.8	0.154
145.9	0.155
146	0.155
146.1	0.155
146.2	0.155
146.3	0.155
146.4	0.154
146.5	0.153
146.6	0.154
146.7	0.156
146.8	0.152
146.9	0.152
147	0.151
147.1	0.15
147.2	0.149
147.3	0.149
147.4	0.149
147.5	0.15
147.6	0.146
147.7	0.145
147.8	0.144
147.9	0.143
148	0.141
148.1	0.141
148.2	0.142
148.3	0.144
148.4	0.144
148.5	0.145
148.6	0.145
148.7	0.146
148.8	0.143
148.9	0.144
149	0.142
149.1	0.143
149.2	0.142
149.3	0.143
149.4	0.142
149.5	0.142
149.6	0.143
149.7	0.142
149.8	0.143
149.9	0.144
150	0.143
150.1	0.146
150.2	0.145
150.3	0.146
150.4	0.146
150.5	0.145
150.6	0.143
150.7	0.146
150.8	0.145
150.9	0.144
151	0.147
151.1	0.148
151.2	0.149
151.3	0.149
151.4	0.15
151.5	0.15
151.6	0.152
151.7	0.149
151.8	0.147
151.9	0.147
152	0.147
152.1	0.148
152.2	0.15
152.3	0.149
152.4	0.151
152.5	0.152
152.6	0.153
152.7	0.156
152.8	0.156
152.9	0.152
153	0.156
153.1	0.158
153.2	0.157
153.3	0.157
153.4	0.157
153.5	0.156
153.6	0.157
153.7	0.155
153.8	0.16
153.9	0.158
154	0.16
154.1	0.158
154.2	0.158
154.3	0.159
154.4	0.156
154.5	0.156
154.6	0.156
154.7	0.152
154.8	0.151
154.9	0.149
155	0.144
155.1	0.144
155.2	0.147
155.3	0.146
155.4	0.145
155.5	0.146
155.6	0.148
155.7	0.148
155.8	0.147
155.9	0.147
156	0.144
156.1	0.143
156.2	0.146
156.3	0.145
156.4	0.147
156.5	0.146
156.6	0.146
156.7	0.144
156.8	0.144
156.9	0.144
157	0.145
157.1	0.144
157.2	0.144
157.3	0.144
157.4	0.143
157.5	0.144
157.6	0.144
157.7	0.143
157.8	0.141
157.9	0.14
158	0.139
158.1	0.141
158.2	0.142
158.3	0.141
158.4	0.142
158.5	0.143
158.6	0.141
158.7	0.142
158.8	0.143
158.9	0.142
159	0.143
159.1	0.141
159.2	0.141
159.3	0.141
159.4	0.141
159.5	0.14
159.6	0.139
159.7	0.14
159.8	0.142
159.9	0.143
160	0.143
160.1	0.141
160.2	0.141
160.3	0.143
160.4	0.142
160.5	0.144
160.6	0.145
160.7	0.144
160.8	0.144
160.9	0.144
161	0.144
161.1	0.144
161.2	0.142
161.3	0.143
161.4	0.144
161.5	0.146
161.6	0.145
161.7	0.147
161.8	0.149
161.9	0.15
162	0.151
162.1	0.147
162.2	0.147
162.3	0.145
162.4	0.144
162.5	0.143
162.6	0.141
162.7	0.139
162.8	0.139
162.9	0.137
163	0.138
163.1	0.139
163.2	0.14
163.3	0.14
163.4	0.14
163.5	0.14
163.6	0.141
163.7	0.141
163.8	0.143
163.9	0.141
164	0.143
164.1	0.139
164.2	0.139
164.3	0.139
164.4	0.137
164.5	0.136
164.6	0.136
164.7	0.136
164.8	0.135
164.9	0.137
165	0.138
165.1	0.136
165.2	0.135
165.3	0.136
165.4	0.137
165.5	0.136
165.6	0.137
165.7	0.136
165.8	0.137
165.9	0.137
166	0.139
166.1	0.14
166.2	0.142
166.3	0.14
166.4	0.14
166.5	0.142
166.6	0.142
166.7	0.142
166.8	0.145
166.9	0.147
167	0.147
167.1	0.147
167.2	0.147
167.3	0.147
167.4	0.146
167.5	0.146
167.6	0.147
167.7	0.148
167.8	0.146
167.9	0.145
168	0.146
168.1	0.146
168.2	0.145
168.3	0.147
168.4	0.15
168.5	0.149
168.6	0.15
168.7	0.151
168.8	0.148
168.9	0.148
169	0.152
169.1	0.156
169.2	0.158
169.3	0.159
169.4	0.158
169.5	0.157
169.6	0.159
169.7	0.162
169.8	0.159
169.9	0.157
170	0.154
170.1	0.155
170.2	0.155
170.3	0.157
170.4	0.156
170.5	0.161
170.6	0.164
170.7	0.163
170.8	0.162
170.9	0.164
171	0.163
171.1	0.162
171.2	0.162
171.3	0.162
171.4	0.163
171.5	0.163
171.6	0.163
171.7	0.162
171.8	0.162
171.9	0.161
172	0.16
172.1	0.159
172.2	0.16
172.3	0.162
172.4	0.162
172.5	0.16
172.6	0.16
172.7	0.163
172.8	0.162
172.9	0.164
173	0.164
173.1	0.163
173.2	0.163
173.3	0.164
173.4	0.163
173.5	0.16
173.6	0.161
173.7	0.165
173.8	0.163
173.9	0.162
174	0.165
174.1	0.162
174.2	0.161
174.3	0.161
174.4	0.161
174.5	0.16
174.6	0.16
174.7	0.163
174.8	0.16
174.9	0.158
175	0.16
175.1	0.159
175.2	0.159
175.3	0.16
175.4	0.16
175.5	0.162
175.6	0.16
175.7	0.159
175.8	0.158
175.9	0.157
176	0.158
176.1	0.156
176.2	0.158
176.3	0.156
176.4	0.154
176.5	0.153
176.6	0.153
176.7	0.154
176.8	0.154
176.9	0.156
177	0.154
177.1	0.153
177.2	0.154
177.3	0.153
177.4	0.154
177.5	0.153
177.6	0.152
177.7	0.154
177.8	0.154
177.9	0.156
178	0.155
178.1	0.156
178.2	0.155
178.3	0.157
178.4	0.155
178.5	0.152
178.6	0.152
178.7	0.153
178.8	0.153
178.9	0.154
179	0.152
179.1	0.154
179.2	0.154
179.3	0.153
179.4	0.152
179.5	0.155
179.6	0.153
179.7	0.153
179.8	0.154
179.9	0.155
180	0.158
180.1	0.158
180.2	0.159
180.3	0.159
180.4	0.159
180.5	0.155
180.6	0.16
180.7	0.162
180.8	0.163
180.9	0.163
181	0.165
181.1	0.168
181.2	0.167
181.3	0.17
181.4	0.168
181.5	0.172
181.6	0.172
181.7	0.173
181.8	0.172
181.9	0.175
182	0.17
182.1	0.17
182.2	0.171
182.3	0.171
182.4	0.171
182.5	0.172
182.6	0.175
182.7	0.173
182.8	0.173
182.9	0.172
183	0.172
183.1	0.173
183.2	0.173
183.3	0.175
183.4	0.173
183.5	0.172
183.6	0.169
183.7	0.169
183.8	0.166
183.9	0.166
184	0.168
184.1	0.168
184.2	0.166
184.3	0.168
184.4	0.165
184.5	0.165
184.6	0.166
184.7	0.165
184.8	0.166
184.9	0.166
185	0.166
185.1	0.166
185.2	0.168
185.3	0.17
185.4	0.171
185.5	0.171
185.6	0.17
185.7	0.169
185.8	0.168
185.9	0.167
186	0.169
186.1	0.169
186.2	0.167
186.3	0.167
186.4	0.168
186.5	0.167
186.6	0.168
186.7	0.17
186.8	0.17
186.9	0.169
187	0.168
187.1	0.169
187.2	0.169
187.3	0.169
187.4	0.165
187.5	0.167
187.6	0.166
187.7	0.167
187.8	0.169
187.9	0.168
188	0.167
188.1	0.165
188.2	0.163
188.3	0.164
188.4	0.164
188.5	0.162
188.6	0.158
188.7	0.157
188.8	0.156
188.9	0.154
189	0.156
189.1	0.154
189.2	0.154
189.3	0.153
189.4	0.153
189.5	0.154
189.6	0.153
189.7	0.156
189.8	0.158
189.9	0.16
190	0.16
190.1	0.159
190.2	0.16
190.3	0.158
190.4	0.158
190.5	0.16
190.6	0.158
190.7	0.159
190.8	0.157
190.9	0.156
191	0.158
191.1	0.155
191.2	0.157
191.3	0.159
191.4	0.16
191.5	0.162
191.6	0.164
191.7	0.163
191.8	0.162
191.9	0.163
192	0.164
192.1	0.165
192.2	0.166
192.3	0.165
192.4	0.166
192.5	0.163
192.6	0.161
192.7	0.16
192.8	0.161
192.9	0.16
193	0.156
193.1	0.156
193.2	0.158
193.3	0.157
193.4	0.159
193.5	0.158
193.6	0.156
193.7	0.157
193.8	0.156
193.9	0.155
194	0.154
194.1	0.152
194.2	0.15
194.3	0.151
194.4	0.151
194.5	0.154
194.6	0.155
194.7	0.156
194.8	0.156
194.9	0.153
195	0.154
195.1	0.154
195.2	0.152
195.3	0.154
195.4	0.156
195.5	0.154
195.6	0.155
195.7	0.154
195.8	0.154
195.9	0.153
196	0.154
196.1	0.154
196.2	0.154
196.3	0.154
196.4	0.155
196.5	0.154
196.6	0.152
196.7	0.155
196.8	0.152
196.9	0.151
197	0.152
197.1	0.152
197.2	0.153
197.3	0.149
197.4	0.149
197.5	0.149
197.6	0.15
197.7	0.15
197.8	0.151
197.9	0.152
198	0.15
198.1	0.153
198.2	0.153
198.3	0.154
198.4	0.155
198.5	0.155
198.6	0.154
198.7	0.156
198.8	0.158
198.9	0.156
199	0.152
199.1	0.151
199.2	0.153
199.3	0.154
199.4	0.155
199.5	0.155
199.6	0.156
199.7	0.156
199.8	0.157
199.9	0.157
200	0.158
[truncated: 14,000 more rows]
