# Supplementary material for: Bayesian inference of kinetic schemes for ion channels by Kalman filtering
Source: eLife journal article supplement (doi:10.7554/elife.62714), 2022-05-04
Supplement: fig4-data11 [file 1_Sim_N_500_Strom_MW.xlsx]

## Sheet: Tabelle1
0.1	0
0.2	0
0.3	0
0.4	0
0.5	0
0.6	0
0.7	0
0.8	0
0.9	0
1	0
1.1	0
1.2	0
1.3	0
1.4	0
1.5	0
1.6	0
1.7	0
1.8	0
1.9	0
2	0
2.1	0
2.2	0
2.3	0
2.4	0
2.5	0
2.6	0
2.7	0
2.8	0
2.9	0
3	0
3.1	0
3.2	0
3.3	0
3.4	0
3.5	0
3.6	0
3.7	0
3.8	0
3.9	0
4	0
4.1	0
4.2	0
4.3	0
4.4	0
4.5	0
4.6	0
4.7	0
4.8	0
4.9	0
5	0
5.1	0
5.2	0
5.3	0
5.4	0
5.5	0
5.6	0
5.7	0
5.8	0
5.9	0
6	0
6.1	0
6.2	0
6.3	0
6.4	0
6.5	0
6.6	0
6.7	0
6.8	0
6.9	0
7	0
7.1	0
7.2	0
7.3	0
7.4	0
7.5	0
7.6	0
7.7	0
7.8	0
7.9	0
8	0
8.1	0
8.2	0
8.3	0
8.4	0
8.5	0
8.6	0
8.7	0
8.8	0
8.9	0
9	0
9.1	0
9.2	0
9.3	0
9.4	0
9.5	0
9.6	0
9.7	0
9.8	0
9.9	0
10	0
10.1	0
10.2	0
10.3	0
10.4	0
10.5	0
10.6	0
10.7	0
10.8	0
10.9	0
11	0
11.1	0
11.2	0
11.3	0
11.4	0
11.5	0
11.6	0
11.7	0
11.8	0
11.9	0
12	0
12.1	0
12.2	0
12.3	0
12.4	0
12.5	0
12.6	0
12.7	0
12.8	0
12.9	0
13	0
13.1	0
13.2	0
13.3	0
13.4	0
13.5	0
13.6	0
13.7	0
13.8	0
13.9	0
14	0
14.1	0
14.2	0
14.3	0
14.4	0
14.5	0
14.6	0
14.7	0
14.8	0
14.9	0
15	0
15.1	0
15.2	0
15.3	0
15.4	0
15.5	0
15.6	0
15.7	0
15.8	0
15.9	0
16	0
16.1	0
16.2	0
16.3	0
16.4	0
16.5	0
16.6	0
16.7	0
16.8	0
16.9	0
17	0
17.1	0
17.2	0
17.3	0
17.4	0
17.5	0
17.6	0
17.7	0
17.8	0
17.9	0
18	0
18.1	0
18.2	0
18.3	0
18.4	0
18.5	0
18.6	0
18.7	0
18.8	0
18.9	0
19	0
19.1	0
19.2	0
19.3	0
19.4	0
19.5	0
19.6	0
19.7	0
19.8	0
19.9	0
20	0
20.1	0
20.2	0
20.3	0
20.4	0
20.5	0
20.6	0
20.7	0
20.8	0
20.9	0
21	0
21.1	0
21.2	0
21.3	0
21.4	0
21.5	0
21.6	0
21.7	0
21.8	0
21.9	0
22	0
22.1	0
22.2	0
22.3	0
22.4	0
22.5	0
22.6	0
22.7	0
22.8	0
22.9	0
23	0
23.1	0
23.2	0
23.3	0
23.4	0
23.5	0
23.6	0
23.7	0
23.8	0
23.9	0
24	0
24.1	0
24.2	0
24.3	0
24.4	0
24.5	0
24.6	0
24.7	0
24.8	0
24.9	0
25	0
25.1	0
25.2	0
25.3	0
25.4	0
25.5	0
25.6	0
25.7	0
25.8	0
25.9	0
26	0
26.1	0
26.2	0
26.3	0
26.4	0
26.5	0
26.6	0
26.7	0
26.8	0
26.9	0
27	0
27.1	0
27.2	0
27.3	0
27.4	0
27.5	0
27.6	0
27.7	0
27.8	0
27.9	0
28	0
28.1	0
28.2	0
28.3	0
28.4	0
28.5	0
28.6	0
28.7	0
28.8	0
28.9	0
29	0
29.1	0
29.2	0
29.3	0
29.4	0
29.5	0
29.6	0
29.7	0
29.8	0
29.9	0
30	0
30.1	0
30.2	0
30.3	0
30.4	0
30.5	0
30.6	0
30.7	0
30.8	0
30.9	0
31	0
31.1	0
31.2	0
31.3	0
31.4	0
31.5	0
31.6	0
31.7	0
31.8	0
31.9	0
32	0
32.1	0
32.2	0
32.3	0
32.4	0
32.5	0
32.6	0
32.7	0
32.8	0
32.9	0
33	0
33.1	0
33.2	0
33.3	0
33.4	0
33.5	0
33.6	0
33.7	0
33.8	0
33.9	0
34	0
34.1	0
34.2	0
34.3	0
34.4	0
34.5	0
34.6	0
34.7	0
34.8	0
34.9	0
35	0
35.1	0
35.2	0
35.3	0
35.4	0
35.5	0
35.6	0
35.7	0
35.8	0
35.9	0
36	0
36.1	0
36.2	0
36.3	0
36.4	0
36.5	0
36.6	0
36.7	0
36.8	0
36.9	0
37	0
37.1	0
37.2	0
37.3	0
37.4	0
37.5	0
37.6	0
37.7	0
37.8	0
37.9	0
38	0
38.1	0
38.2	0
38.3	0
38.4	0
38.5	0
38.6	0
38.7	0
38.8	0
38.9	0
39	0
39.1	0
39.2	0
39.3	0
39.4	0
39.5	0
39.6	0
39.7	0
39.8	0
39.9	0
40	0
40.1	0
40.2	0
40.3	0
40.4	0
40.5	0
40.6	0
40.7	0
40.8	0
40.9	0
41	0
41.1	0
41.2	0
41.3	0
41.4	0
41.5	0
41.6	0
41.7	0
41.8	0
41.9	0
42	0
42.1	0
42.2	0
42.3	0
42.4	0
42.5	0
42.6	0
42.7	0
42.8	0
42.9	0
43	0
43.1	0
43.2	0
43.3	0
43.4	0
43.5	0
43.6	0
43.7	0
43.8	0
43.9	0
44	0
44.1	0
44.2	0
44.3	0
44.4	0
44.5	0
44.6	0
44.7	0
44.8	0
44.9	0
45	0
45.1	0
45.2	0
45.3	0
45.4	0
45.5	0
45.6	0
45.7	0
45.8	0
45.9	0
46	0
46.1	0
46.2	0
46.3	0
46.4	0
46.5	0
46.6	0
46.7	0
46.8	0
46.9	0
47	0
47.1	0
47.2	0
47.3	0
47.4	0
47.5	0
47.6	0
47.7	0
47.8	0
47.9	0
48	0
48.1	0
48.2	0
48.3	0
48.4	0
48.5	0
48.6	0
48.7	0
48.8	0
48.9	0
49	0
49.1	0
49.2	0
49.3	0
49.4	0
49.5	0
49.6	0
49.7	0
49.8	0
49.9	0
50	0
50.1	0
50.2	0
50.3	0
50.4	0
50.5	0
50.6	0
50.7	0
50.8	0
50.9	0
51	0
51.1	0
51.2	0
51.3	0
51.4	0
51.5	0
51.6	0
51.7	0
51.8	0
51.9	0
52	0
52.1	0
52.2	0
52.3	0
52.4	0
52.5	0
52.6	0
52.7	0
52.8	0
52.9	0
53	0
53.1	0
53.2	0
53.3	0
53.4	0
53.5	0
53.6	0
53.7	0
53.8	0
53.9	0
54	0
54.1	0
54.2	0
54.3	0
54.4	0
54.5	0
54.6	0
54.7	0
54.8	0
54.9	0
55	0
55.1	0
55.2	0
55.3	0
55.4	0
55.5	0
55.6	0
55.7	0
55.8	0
55.9	0
56	0
56.1	0
56.2	0
56.3	0
56.4	0
56.5	0
56.6	0
56.7	0
56.8	0
56.9	0
57	0
57.1	0
57.2	0
57.3	0
57.4	0
57.5	0
57.6	0
57.7	0
57.8	0
57.9	0
58	0
58.1	0
58.2	0
58.3	0
58.4	0
58.5	0
58.6	0
58.7	0
58.8	0
58.9	0
59	0
59.1	0
59.2	0
59.3	0
59.4	0
59.5	0
59.6	0
59.7	0
59.8	0
59.9	0
60	0
60.1	0
60.2	0
60.3	0
60.4	0
60.5	0
60.6	0
60.7	0
60.8	0
60.9	0
61	0
61.1	0
61.2	0
61.3	0
61.4	0
61.5	0
61.6	0
61.7	0
61.8	0
61.9	0
62	0
62.1	0
62.2	0
62.3	0
62.4	0
62.5	0
62.6	0
62.7	0
62.8	0
62.9	0
63	0
63.1	0
63.2	0
63.3	0
63.4	0
63.5	0
63.6	0
63.7	0
63.8	0
63.9	0
64	0
64.1	0
64.2	0
64.3	0
64.4	0
64.5	0
64.6	0
64.7	0
64.8	0
64.9	0
65	0
65.1	0
65.2	0
65.3	0
65.4	0
65.5	0
65.6	0
65.7	0
65.8	0
65.9	0
66	0
66.1	0
66.2	0
66.3	0
66.4	0
66.5	0
66.6	0
66.7	0
66.8	0
66.9	0
67	0
67.1	0
67.2	0
67.3	0
67.4	0
67.5	0
67.6	0
67.7	0
67.8	0
67.9	0
68	0
68.1	0
68.2	0
68.3	0
68.4	0
68.5	0
68.6	0
68.7	0
68.8	0
68.9	0
69	0
69.1	0
69.2	0
69.3	0
69.4	0
69.5	0
69.6	0
69.7	0
69.8	0
69.9	0
70	0
70.1	0
70.2	0
70.3	0
70.4	0
70.5	0
70.6	0
70.7	0
70.8	0
70.9	0
71	0
71.1	0
71.2	0
71.3	0
71.4	0
71.5	0
71.6	0
71.7	0
71.8	0
71.9	0
72	0
72.1	0
72.2	0
72.3	0
72.4	0
72.5	0
72.6	0
72.7	0
72.8	0
72.9	0
73	0
73.1	0
73.2	0
73.3	0
73.4	0
73.5	0
73.6	0
73.7	0
73.8	0
73.9	0
74	0
74.1	0
74.2	0
74.3	0
74.4	0
74.5	0
74.6	0
74.7	0
74.8	0
74.9	0
75	0
75.1	0
75.2	0
75.3	0
75.4	0
75.5	0
75.6	0
75.7	0
75.8	0
75.9	0
76	0
76.1	0
76.2	0
76.3	0
76.4	0
76.5	0
76.6	0
76.7	0
76.8	0
76.9	0
77	0
77.1	0
77.2	0
77.3	0
77.4	0
77.5	0
77.6	0
77.7	0
77.8	0
77.9	0
78	0
78.1	0
78.2	0
78.3	0
78.4	0
78.5	0
78.6	0
78.7	0
78.8	0
78.9	0
79	0
79.1	0
79.2	0
79.3	0
79.4	0
79.5	0
79.6	0
79.7	0
79.8	0
79.9	0
80	0
80.1	0
80.2	0
80.3	0
80.4	0
80.5	0
80.6	0
80.7	0
80.8	0
80.9	0
81	0
81.1	0
81.2	0
81.3	0
81.4	0
81.5	0
81.6	0
81.7	0
81.8	0
81.9	0
82	0
82.1	0
82.2	0
82.3	0
82.4	0
82.5	0
82.6	0
82.7	0
82.8	0
82.9	0
83	0
83.1	0
83.2	0
83.3	0
83.4	0
83.5	0
83.6	0
83.7	0
83.8	0
83.9	0
84	0
84.1	0
84.2	0
84.3	0
84.4	0
84.5	0
84.6	0
84.7	0
84.8	0
84.9	0
85	0
85.1	0
85.2	0
85.3	0
85.4	0
85.5	0
85.6	0
85.7	0
85.8	0
85.9	0
86	0
86.1	0
86.2	0
86.3	0
86.4	0
86.5	0
86.6	0
86.7	0
86.8	0
86.9	0
87	0
87.1	0
87.2	0
87.3	0
87.4	0
87.5	0
87.6	0
87.7	0
87.8	0
87.9	0
88	0
88.1	0
88.2	0
88.3	0
88.4	0
88.5	0
88.6	0
88.7	0
88.8	0
88.9	0
89	0
89.1	0
89.2	0
89.3	0
89.4	0
89.5	0
89.6	0
89.7	0
89.8	0
89.9	0
90	0
90.1	0
90.2	0
90.3	0
90.4	0
90.5	0
90.6	0
90.7	0
90.8	0
90.9	0
91	0
91.1	0
91.2	0
91.3	0
91.4	0
91.5	0
91.6	0
91.7	0
91.8	0
91.9	0
92	0
92.1	0
92.2	0
92.3	0
92.4	0
92.5	0
92.6	0
92.7	0
92.8	0
92.9	0
93	0
93.1	0
93.2	0
93.3	0
93.4	0
93.5	0
93.6	0
93.7	0
93.8	0
93.9	0
94	0
94.1	0
94.2	0
94.3	0
94.4	0
94.5	0
94.6	0
94.7	0
94.8	0
94.9	0
95	0
95.1	0
95.2	0
95.3	0
95.4	0
95.5	0
95.6	0
95.7	0
95.8	0
95.9	0
96	0
96.1	0
96.2	0
96.3	0
96.4	0
96.5	0
96.6	0
96.7	0
96.8	0
96.9	0
97	0
97.1	0
97.2	0
97.3	0
97.4	0
97.5	0
97.6	0
97.7	0
97.8	0
97.9	0
98	0
98.1	0
98.2	0
98.3	0
98.4	0
98.5	0
98.6	0
98.7	0
98.8	0
98.9	0
99	0
99.1	0
99.2	0
99.3	0
99.4	0
99.5	0
99.6	0
99.7	0
99.8	0
99.9	0
100	0
100.1	0
100.2	0
100.3	0
100.4	0
100.5	0
100.6	0
100.7	0
100.8	0
100.9	0
101	0
101.1	0
101.2	0
101.3	0
101.4	0
101.5	0
101.6	0
101.7	0
101.8	0
101.9	0
102	0
102.1	0
102.2	0
102.3	0
102.4	0
102.5	0
102.6	0
102.7	0
102.8	0
102.9	0
103	0
103.1	0
103.2	0
103.3	0
103.4	0
103.5	0
103.6	0
103.7	0
103.8	0
103.9	0
104	0
104.1	0
104.2	0
104.3	0
104.4	0
104.5	0
104.6	0
104.7	0
104.8	0
104.9	0
105	0
105.1	0
105.2	0
105.3	0
105.4	0
105.5	0
105.6	0
105.7	0
105.8	0
105.9	0
106	0
106.1	0
106.2	0
106.3	0
106.4	0
106.5	0
106.6	0
106.7	0
106.8	0
106.9	0
107	0.002
107.1	0.002
107.2	0.002
107.3	0.002
107.4	0.002
107.5	0.002
107.6	0.002
107.7	0.002
107.8	0.002
107.9	0.002
108	0.002
108.1	0.002
108.2	0.002
108.3	0.002
108.4	0.002
108.5	0.002
108.6	0.002
108.7	0.002
108.8	0.002
108.9	0.002
109	0.002
109.1	0.002
109.2	0.002
109.3	0.002
109.4	0.002
109.5	0.002
109.6	0.002
109.7	0.002
109.8	0.002
109.9	0.002
110	0.002
110.1	0.002
110.2	0.002
110.3	0.002
110.4	0.002
110.5	0.002
110.6	0.002
110.7	0.002
110.8	0.002
110.9	0.002
111	0.002
111.1	0.002
111.2	0.002
111.3	0.002
111.4	0.002
111.5	0.002
111.6	0.002
111.7	0.002
111.8	0.002
111.9	0.002
112	0.002
112.1	0.002
112.2	0.002
112.3	0.002
112.4	0.002
112.5	0.002
112.6	0.002
112.7	0.002
112.8	0.002
112.9	0.002
113	0.002
113.1	0.002
113.2	0.002
113.3	0.002
113.4	0.002
113.5	0.002
113.6	0.002
113.7	0.002
113.8	0.002
113.9	0.002
114	0.002
114.1	0.002
114.2	0.002
114.3	0.002
114.4	0.002
114.5	0.002
114.6	0.002
114.7	0.002
114.8	0.002
114.9	0.002
115	0.002
115.1	0.002
115.2	0.002
115.3	0.002
115.4	0.002
115.5	0.002
115.6	0.002
115.7	0.002
115.8	0.002
115.9	0.002
116	0.002
116.1	0.002
116.2	0.002
116.3	0.002
116.4	0.002
116.5	0.002
116.6	0.002
116.7	0.002
116.8	0.002
116.9	0.002
117	0.002
117.1	0.002
117.2	0.002
117.3	0.002
117.4	0.002
117.5	0.002
117.6	0.002
117.7	0.002
117.8	0.002
117.9	0.002
118	0.002
118.1	0.002
118.2	0.002
118.3	0.002
118.4	0.002
118.5	0.002
118.6	0.002
118.7	0.002
118.8	0.002
118.9	0.002
119	0.002
119.1	0.002
119.2	0.002
119.3	0.002
119.4	0.002
119.5	0.002
119.6	0.002
119.7	0.002
119.8	0.002
119.9	0.002
120	0.002
120.1	0.002
120.2	0.002
120.3	0.002
120.4	0.002
120.5	0.002
120.6	0.002
120.7	0.002
120.8	0.002
120.9	0.002
121	0.002
121.1	0.002
121.2	0.002
121.3	0.002
121.4	0.002
121.5	0.002
121.6	0.002
121.7	0.002
121.8	0.002
121.9	0.002
122	0.002
122.1	0.002
122.2	0.004
122.3	0.004
122.4	0.004
122.5	0.004
122.6	0.004
122.7	0.004
122.8	0.004
122.9	0.004
123	0.004
123.1	0.004
123.2	0.004
123.3	0.004
123.4	0.004
123.5	0.004
123.6	0.004
123.7	0.004
123.8	0.004
123.9	0.004
124	0.004
124.1	0.004
124.2	0.004
124.3	0.004
124.4	0.004
124.5	0.004
124.6	0.004
124.7	0.004
124.8	0.004
124.9	0.004
125	0.004
125.1	0.004
125.2	0.004
125.3	0.004
125.4	0.006
125.5	0.006
125.6	0.006
125.7	0.006
125.8	0.006
125.9	0.006
126	0.006
126.1	0.006
126.2	0.006
126.3	0.006
126.4	0.006
126.5	0.006
126.6	0.006
126.7	0.006
126.8	0.006
126.9	0.006
127	0.006
127.1	0.006
127.2	0.006
127.3	0.006
127.4	0.006
127.5	0.006
127.6	0.006
127.7	0.006
127.8	0.006
127.9	0.006
128	0.006
128.1	0.006
128.2	0.006
128.3	0.006
128.4	0.006
128.5	0.006
128.6	0.006
128.7	0.006
128.8	0.006
128.9	0.008
129	0.008
129.1	0.008
129.2	0.008
129.3	0.008
129.4	0.008
129.5	0.008
129.6	0.008
129.7	0.008
129.8	0.008
129.9	0.008
130	0.008
130.1	0.008
130.2	0.008
130.3	0.008
130.4	0.008
130.5	0.008
130.6	0.008
130.7	0.008
130.8	0.008
130.9	0.008
131	0.008
131.1	0.008
131.2	0.008
131.3	0.008
131.4	0.008
131.5	0.008
131.6	0.008
131.7	0.008
131.8	0.008
131.9	0.008
132	0.008
132.1	0.008
132.2	0.008
132.3	0.008
132.4	0.008
132.5	0.008
132.6	0.008
132.7	0.008
132.8	0.008
132.9	0.008
133	0.008
133.1	0.008
133.2	0.008
133.3	0.008
133.4	0.008
133.5	0.008
133.6	0.008
133.7	0.008
133.8	0.006
133.9	0.006
134	0.006
134.1	0.006
134.2	0.006
134.3	0.006
134.4	0.006
134.5	0.006
134.6	0.006
134.7	0.006
134.8	0.006
134.9	0.006
135	0.006
135.1	0.006
135.2	0.006
135.3	0.006
135.4	0.006
135.5	0.006
135.6	0.006
135.7	0.006
135.8	0.006
135.9	0.006
136	0.006
136.1	0.006
136.2	0.006
136.3	0.006
136.4	0.006
136.5	0.006
136.6	0.006
136.7	0.006
136.8	0.006
136.9	0.006
137	0.006
137.1	0.006
137.2	0.006
137.3	0.006
137.4	0.006
137.5	0.006
137.6	0.006
137.7	0.006
137.8	0.006
137.9	0.006
138	0.006
138.1	0.006
138.2	0.006
138.3	0.006
138.4	0.008
138.5	0.008
138.6	0.008
138.7	0.008
138.8	0.008
138.9	0.008
139	0.008
139.1	0.008
139.2	0.008
139.3	0.008
139.4	0.008
139.5	0.008
139.6	0.008
139.7	0.008
139.8	0.008
139.9	0.008
140	0.008
140.1	0.008
140.2	0.008
140.3	0.008
140.4	0.008
140.5	0.008
140.6	0.008
140.7	0.008
140.8	0.008
140.9	0.008
141	0.008
141.1	0.008
141.2	0.008
141.3	0.008
141.4	0.008
141.5	0.008
141.6	0.008
141.7	0.008
141.8	0.008
141.9	0.008
142	0.008
142.1	0.008
142.2	0.008
142.3	0.008
142.4	0.008
142.5	0.008
142.6	0.008
142.7	0.008
142.8	0.008
142.9	0.01
143	0.01
143.1	0.01
143.2	0.01
143.3	0.01
143.4	0.01
143.5	0.01
143.6	0.01
143.7	0.01
143.8	0.01
143.9	0.01
144	0.01
144.1	0.01
144.2	0.01
144.3	0.01
144.4	0.01
144.5	0.01
144.6	0.01
144.7	0.01
144.8	0.01
144.9	0.01
145	0.01
145.1	0.01
145.2	0.01
145.3	0.01
145.4	0.01
145.5	0.01
145.6	0.01
145.7	0.01
145.8	0.01
145.9	0.01
146	0.01
146.1	0.01
146.2	0.01
146.3	0.01
146.4	0.01
146.5	0.01
146.6	0.01
146.7	0.01
146.8	0.01
146.9	0.01
147	0.01
147.1	0.01
147.2	0.01
147.3	0.01
147.4	0.01
147.5	0.01
147.6	0.01
147.7	0.01
147.8	0.01
147.9	0.01
148	0.01
148.1	0.012
148.2	0.012
148.3	0.012
148.4	0.012
148.5	0.012
148.6	0.012
148.7	0.012
148.8	0.012
148.9	0.012
149	0.012
149.1	0.014
149.2	0.014
149.3	0.014
149.4	0.014
149.5	0.014
149.6	0.014
149.7	0.014
149.8	0.014
149.9	0.014
150	0.014
150.1	0.014
150.2	0.014
150.3	0.014
150.4	0.014
150.5	0.014
150.6	0.014
150.7	0.014
150.8	0.014
150.9	0.014
151	0.014
151.1	0.014
151.2	0.014
151.3	0.014
151.4	0.014
151.5	0.014
151.6	0.014
151.7	0.014
151.8	0.014
151.9	0.014
152	0.014
152.1	0.014
152.2	0.014
152.3	0.014
152.4	0.014
152.5	0.012
152.6	0.012
152.7	0.012
152.8	0.012
152.9	0.012
153	0.012
153.1	0.012
153.2	0.012
153.3	0.012
153.4	0.012
153.5	0.012
153.6	0.012
153.7	0.012
153.8	0.012
153.9	0.012
154	0.012
154.1	0.012
154.2	0.012
154.3	0.012
154.4	0.012
154.5	0.012
154.6	0.012
154.7	0.012
154.8	0.012
154.9	0.012
155	0.012
155.1	0.012
155.2	0.012
155.3	0.012
155.4	0.012
155.5	0.012
155.6	0.012
155.7	0.012
155.8	0.012
155.9	0.012
156	0.012
156.1	0.012
156.2	0.012
156.3	0.014
156.4	0.014
156.5	0.014
156.6	0.014
156.7	0.014
156.8	0.014
156.9	0.014
157	0.014
157.1	0.014
157.2	0.016
157.3	0.016
157.4	0.016
157.5	0.016
157.6	0.016
157.7	0.016
157.8	0.016
157.9	0.016
158	0.016
158.1	0.016
158.2	0.016
158.3	0.016
158.4	0.016
158.5	0.016
158.6	0.016
158.7	0.016
158.8	0.016
158.9	0.016
159	0.016
159.1	0.016
159.2	0.016
159.3	0.016
159.4	0.016
159.5	0.016
159.6	0.016
159.7	0.016
159.8	0.016
159.9	0.016
160	0.016
160.1	0.016
160.2	0.016
160.3	0.016
160.4	0.018
160.5	0.018
160.6	0.018
160.7	0.018
160.8	0.018
160.9	0.018
161	0.018
161.1	0.018
161.2	0.018
161.3	0.018
161.4	0.018
161.5	0.018
161.6	0.018
161.7	0.02
161.8	0.02
161.9	0.02
162	0.02
162.1	0.02
162.2	0.02
162.3	0.02
162.4	0.02
162.5	0.02
162.6	0.02
162.7	0.02
162.8	0.02
162.9	0.02
163	0.02
163.1	0.02
163.2	0.02
163.3	0.02
163.4	0.02
163.5	0.02
163.6	0.02
163.7	0.02
163.8	0.018
163.9	0.018
164	0.018
164.1	0.018
164.2	0.018
164.3	0.018
164.4	0.018
164.5	0.018
164.6	0.018
164.7	0.018
164.8	0.018
164.9	0.018
165	0.018
165.1	0.018
165.2	0.018
165.3	0.02
165.4	0.02
165.5	0.02
165.6	0.02
165.7	0.02
165.8	0.02
165.9	0.02
166	0.02
166.1	0.02
166.2	0.02
166.3	0.02
166.4	0.02
166.5	0.02
166.6	0.02
166.7	0.02
166.8	0.02
166.9	0.02
167	0.02
167.1	0.02
167.2	0.02
167.3	0.02
167.4	0.02
167.5	0.02
167.6	0.02
167.7	0.02
167.8	0.02
167.9	0.02
168	0.02
168.1	0.02
168.2	0.02
168.3	0.02
168.4	0.02
168.5	0.02
168.6	0.02
168.7	0.02
168.8	0.02
168.9	0.02
169	0.02
169.1	0.02
169.2	0.02
169.3	0.02
169.4	0.02
169.5	0.02
169.6	0.022
169.7	0.022
169.8	0.022
169.9	0.022
170	0.022
170.1	0.022
170.2	0.022
170.3	0.022
170.4	0.022
170.5	0.022
170.6	0.022
170.7	0.022
170.8	0.02
170.9	0.02
171	0.02
171.1	0.02
171.2	0.02
171.3	0.02
171.4	0.02
171.5	0.02
171.6	0.02
171.7	0.02
171.8	0.02
171.9	0.02
172	0.02
172.1	0.02
172.2	0.02
172.3	0.02
172.4	0.02
172.5	0.02
172.6	0.02
172.7	0.02
172.8	0.02
172.9	0.02
173	0.02
173.1	0.02
173.2	0.02
173.3	0.02
173.4	0.018
173.5	0.018
173.6	0.018
173.7	0.018
173.8	0.018
173.9	0.018
174	0.018
174.1	0.018
174.2	0.018
174.3	0.018
174.4	0.018
174.5	0.018
174.6	0.018
174.7	0.018
174.8	0.018
174.9	0.018
175	0.018
175.1	0.018
175.2	0.018
175.3	0.018
175.4	0.018
175.5	0.018
175.6	0.018
175.7	0.018
175.8	0.018
175.9	0.018
176	0.018
176.1	0.018
176.2	0.018
176.3	0.018
176.4	0.018
176.5	0.018
176.6	0.018
176.7	0.018
176.8	0.018
176.9	0.018
177	0.018
177.1	0.018
177.2	0.018
177.3	0.018
177.4	0.018
177.5	0.018
177.6	0.018
177.7	0.018
177.8	0.018
177.9	0.018
178	0.018
178.1	0.018
178.2	0.018
178.3	0.018
178.4	0.018
178.5	0.018
178.6	0.018
178.7	0.018
178.8	0.018
178.9	0.018
179	0.018
179.1	0.018
179.2	0.018
179.3	0.018
179.4	0.018
179.5	0.018
179.6	0.018
179.7	0.018
179.8	0.018
179.9	0.018
180	0.018
180.1	0.018
180.2	0.018
180.3	0.018
180.4	0.018
180.5	0.018
180.6	0.018
180.7	0.018
180.8	0.018
180.9	0.018
181	0.018
181.1	0.018
181.2	0.018
181.3	0.018
181.4	0.018
181.5	0.018
181.6	0.018
181.7	0.018
181.8	0.018
181.9	0.018
182	0.018
182.1	0.018
182.2	0.018
182.3	0.018
182.4	0.018
182.5	0.018
182.6	0.018
182.7	0.018
182.8	0.018
182.9	0.018
183	0.018
183.1	0.016
183.2	0.016
183.3	0.016
183.4	0.016
183.5	0.016
183.6	0.016
183.7	0.016
183.8	0.016
183.9	0.016
184	0.016
184.1	0.016
184.2	0.016
184.3	0.016
184.4	0.016
184.5	0.016
184.6	0.016
184.7	0.016
184.8	0.016
184.9	0.016
185	0.016
185.1	0.016
185.2	0.016
185.3	0.016
185.4	0.016
185.5	0.016
185.6	0.016
185.7	0.016
185.8	0.016
185.9	0.016
186	0.016
186.1	0.016
186.2	0.016
186.3	0.016
186.4	0.016
186.5	0.016
186.6	0.016
186.7	0.016
186.8	0.016
186.9	0.016
187	0.016
187.1	0.016
187.2	0.016
187.3	0.016
187.4	0.016
187.5	0.016
187.6	0.016
187.7	0.016
187.8	0.016
187.9	0.016
188	0.016
188.1	0.016
188.2	0.016
188.3	0.016
188.4	0.016
188.5	0.016
188.6	0.016
188.7	0.016
188.8	0.016
188.9	0.016
189	0.016
189.1	0.016
189.2	0.016
189.3	0.016
189.4	0.016
189.5	0.016
189.6	0.016
189.7	0.016
189.8	0.016
189.9	0.016
190	0.016
190.1	0.016
190.2	0.018
190.3	0.018
190.4	0.018
190.5	0.018
190.6	0.018
190.7	0.018
190.8	0.018
190.9	0.018
191	0.018
191.1	0.02
191.2	0.02
191.3	0.02
191.4	0.02
191.5	0.02
191.6	0.02
191.7	0.02
191.8	0.02
191.9	0.02
192	0.02
192.1	0.02
192.2	0.02
192.3	0.02
192.4	0.02
192.5	0.02
192.6	0.02
192.7	0.02
192.8	0.02
192.9	0.02
193	0.02
193.1	0.02
193.2	0.02
193.3	0.02
193.4	0.02
193.5	0.02
193.6	0.02
193.7	0.02
193.8	0.02
193.9	0.018
194	0.018
194.1	0.02
194.2	0.02
194.3	0.02
194.4	0.02
194.5	0.02
194.6	0.02
194.7	0.02
194.8	0.02
194.9	0.02
195	0.02
195.1	0.02
195.2	0.02
195.3	0.02
195.4	0.02
195.5	0.02
195.6	0.02
195.7	0.02
195.8	0.02
195.9	0.02
196	0.02
196.1	0.02
196.2	0.02
196.3	0.02
196.4	0.02
196.5	0.02
196.6	0.02
196.7	0.02
196.8	0.02
196.9	0.02
197	0.02
197.1	0.02
197.2	0.02
197.3	0.02
197.4	0.02
197.5	0.02
197.6	0.02
197.7	0.02
197.8	0.02
197.9	0.02
198	0.02
198.1	0.02
198.2	0.02
198.3	0.018
198.4	0.018
198.5	0.018
198.6	0.018
198.7	0.018
198.8	0.018
198.9	0.018
199	0.018
199.1	0.018
199.2	0.018
199.3	0.018
199.4	0.018
199.5	0.018
199.6	0.018
199.7	0.018
199.8	0.018
199.9	0.018
200	0.018
[truncated: 14,000 more rows]
