# Supplementary material for: Bayesian inference of kinetic schemes for ion channels by Kalman filtering
Source: eLife journal article supplement (doi:10.7554/elife.62714), 2022-05-04
Supplement: fig4-data11 [file 1_Sim_N_800_Fluor_MW.xlsx]

## Sheet: Tabelle1
0.1	0
0.2	0
0.3	0
0.4	0
0.5	0
0.6	0
0.7	0
0.8	0
0.9	0
1	0
1.1	0
1.2	0
1.3	0
1.4	0
1.5	0
1.6	0
1.7	0
1.8	0
1.9	0
2	0
2.1	0
2.2	0
2.3	0
2.4	0
2.5	0
2.6	0
2.7	0
2.8	0
2.9	0
3	0
3.1	0
3.2	0
3.3	0
3.4	0
3.5	0
3.6	0
3.7	0
3.8	0
3.9	0
4	0
4.1	0
4.2	0
4.3	0
4.4	0
4.5	0
4.6	0
4.7	0
4.8	0
4.9	0
5	0
5.1	0
5.2	0
5.3	0
5.4	0
5.5	0
5.6	0
5.7	0
5.8	0
5.9	0
6	0
6.1	0
6.2	0
6.3	0
6.4	0
6.5	0
6.6	0
6.7	0
6.8	0
6.9	0
7	0
7.1	0
7.2	0
7.3	0
7.4	0
7.5	0
7.6	0
7.7	0
7.8	0
7.9	0
8	0
8.1	0
8.2	0
8.3	0
8.4	0
8.5	0
8.6	0
8.7	0
8.8	0
8.9	0
9	0
9.1	0
9.2	0
9.3	0
9.4	0
9.5	0
9.6	0
9.7	0
9.8	0
9.9	0
10	0
10.1	0
10.2	0
10.3	0
10.4	0
10.5	0
10.6	0
10.7	0
10.8	0
10.9	0
11	0
11.1	0
11.2	0
11.3	0
11.4	0
11.5	0
11.6	0
11.7	0
11.8	0
11.9	0
12	0
12.1	0
12.2	0
12.3	0
12.4	0
12.5	0
12.6	0
12.7	0
12.8	0
12.9	0
13	0
13.1	0
13.2	0
13.3	0
13.4	0
13.5	0
13.6	0
13.7	0
13.8	0
13.9	0
14	0
14.1	0
14.2	0
14.3	0
14.4	0
14.5	0
14.6	0
14.7	0
14.8	0
14.9	0
15	0
15.1	0
15.2	0
15.3	0
15.4	0
15.5	0
15.6	0
15.7	0
15.8	0
15.9	0
16	0
16.1	0
16.2	0
16.3	0
16.4	0
16.5	0
16.6	0
16.7	0
16.8	0
16.9	0
17	0
17.1	0
17.2	0
17.3	0
17.4	0
17.5	0
17.6	0
17.7	0
17.8	0
17.9	0
18	0
18.1	0
18.2	0
18.3	0
18.4	0
18.5	0
18.6	0
18.7	0
18.8	0
18.9	0
19	0
19.1	0
19.2	0
19.3	0
19.4	0
19.5	0
19.6	0
19.7	0
19.8	0
19.9	0
20	0
20.1	0
20.2	0
20.3	0
20.4	0
20.5	0
20.6	0
20.7	0
20.8	0
20.9	0
21	0
21.1	0
21.2	0
21.3	0
21.4	0
21.5	0
21.6	0
21.7	0
21.8	0
21.9	0
22	0
22.1	0
22.2	0
22.3	0
22.4	0
22.5	0
22.6	0
22.7	0
22.8	0
22.9	0
23	0
23.1	0
23.2	0
23.3	0
23.4	0
23.5	0
23.6	0
23.7	0
23.8	0
23.9	0
24	0
24.1	0
24.2	0
24.3	0
24.4	0
24.5	0
24.6	0
24.7	0
24.8	0
24.9	0
25	0
25.1	0
25.2	0
25.3	0
25.4	0
25.5	0
25.6	0
25.7	0
25.8	0
25.9	0
26	0
26.1	0
26.2	0
26.3	0
26.4	0
26.5	0
26.6	0
26.7	0
26.8	0
26.9	0
27	0
27.1	0
27.2	0
27.3	0
27.4	0
27.5	0
27.6	0
27.7	0
27.8	0
27.9	0
28	0
28.1	0
28.2	0
28.3	0
28.4	0
28.5	0
28.6	0
28.7	0
28.8	0
28.9	0
29	0
29.1	0
29.2	0
29.3	0
29.4	0
29.5	0
29.6	0
29.7	0
29.8	0
29.9	0
30	0
30.1	0
30.2	0
30.3	0
30.4	0
30.5	0
30.6	0
30.7	0
30.8	0
30.9	0
31	0
31.1	0
31.2	0
31.3	0
31.4	0
31.5	0
31.6	0
31.7	0
31.8	0
31.9	0
32	0
32.1	0
32.2	0
32.3	0
32.4	0
32.5	0
32.6	0
32.7	0
32.8	0
32.9	0
33	0
33.1	0
33.2	0
33.3	0
33.4	0
33.5	0
33.6	0
33.7	0
33.8	0
33.9	0
34	0
34.1	0
34.2	0
34.3	0
34.4	0
34.5	0
34.6	0
34.7	0
34.8	0
34.9	0
35	0
35.1	0
35.2	0
35.3	0
35.4	0
35.5	0
35.6	0
35.7	0
35.8	0
35.9	0
36	0
36.1	0
36.2	0
36.3	0
36.4	0
36.5	0
36.6	0
36.7	0
36.8	0
36.9	0
37	0
37.1	0
37.2	0
37.3	0
37.4	0
37.5	0
37.6	0
37.7	0
37.8	0
37.9	0
38	0
38.1	0
38.2	0
38.3	0
38.4	0
38.5	0
38.6	0
38.7	0
38.8	0
38.9	0
39	0
39.1	0
39.2	0
39.3	0
39.4	0
39.5	0
39.6	0
39.7	0
39.8	0
39.9	0
40	0
40.1	0
40.2	0
40.3	0
40.4	0
40.5	0
40.6	0
40.7	0
40.8	0
40.9	0
41	0
41.1	0
41.2	0
41.3	0
41.4	0
41.5	0
41.6	0
41.7	0
41.8	0
41.9	0
42	0
42.1	0
42.2	0
42.3	0
42.4	0
42.5	0
42.6	0
42.7	0
42.8	0
42.9	0
43	0
43.1	0
43.2	0
43.3	0
43.4	0
43.5	0
43.6	0
43.7	0
43.8	0
43.9	0
44	0
44.1	0
44.2	0
44.3	0
44.4	0
44.5	0
44.6	0
44.7	0
44.8	0
44.9	0
45	0
45.1	0
45.2	0
45.3	0
45.4	0
45.5	0
45.6	0
45.7	0
45.8	0
45.9	0
46	0
46.1	0
46.2	0
46.3	0
46.4	0
46.5	0
46.6	0
46.7	0
46.8	0
46.9	0
47	0
47.1	0
47.2	0
47.3	0
47.4	0
47.5	0
47.6	0
47.7	0
47.8	0
47.9	0
48	0
48.1	0
48.2	0
48.3	0
48.4	0
48.5	0
48.6	0
48.7	0
48.8	0
48.9	0
49	0
49.1	0
49.2	0
49.3	0
49.4	0
49.5	0
49.6	0
49.7	0
49.8	0
49.9	0
50	0
50.1	0
50.2	0
50.3	0
50.4	0
50.5	0
50.6	0
50.7	0
50.8	0
50.9	0
51	0
51.1	0
51.2	0
51.3	0
51.4	0
51.5	0
51.6	0
51.7	0
51.8	0
51.9	0
52	0
52.1	0
52.2	0
52.3	0
52.4	0
52.5	0
52.6	0
52.7	0
52.8	0
52.9	0
53	0
53.1	0
53.2	0
53.3	0
53.4	0
53.5	0
53.6	0
53.7	0
53.8	0
53.9	0
54	0
54.1	0
54.2	0
54.3	0
54.4	0
54.5	0
54.6	0
54.7	0
54.8	0
54.9	0
55	0
55.1	0
55.2	0
55.3	0
55.4	0
55.5	0
55.6	0
55.7	0
55.8	0
55.9	0
56	0
56.1	0
56.2	0
56.3	0
56.4	0
56.5	0
56.6	0
56.7	0
56.8	0
56.9	0
57	0
57.1	0
57.2	0
57.3	0
57.4	0
57.5	0
57.6	0
57.7	0
57.8	0
57.9	0
58	0
58.1	0
58.2	0
58.3	0
58.4	0
58.5	0
58.6	0
58.7	0
58.8	0
58.9	0
59	0
59.1	0
59.2	0
59.3	0
59.4	0
59.5	0
59.6	0
59.7	0
59.8	0
59.9	0
60	0
60.1	0
60.2	0
60.3	0
60.4	0
60.5	0
60.6	0
60.7	0
60.8	0
60.9	0
61	0
61.1	0
61.2	0
61.3	0
61.4	0
61.5	0
61.6	0
61.7	0
61.8	0
61.9	0
62	0
62.1	0
62.2	0
62.3	0
62.4	0
62.5	0
62.6	0
62.7	0
62.8	0
62.9	0
63	0
63.1	0
63.2	0
63.3	0
63.4	0
63.5	0
63.6	0
63.7	0
63.8	0
63.9	0
64	0
64.1	0
64.2	0
64.3	0
64.4	0
64.5	0
64.6	0
64.7	0
64.8	0
64.9	0
65	0
65.1	0
65.2	0
65.3	0
65.4	0
65.5	0
65.6	0
65.7	0
65.8	0
65.9	0
66	0
66.1	0
66.2	0
66.3	0
66.4	0
66.5	0
66.6	0
66.7	0
66.8	0
66.9	0
67	0
67.1	0
67.2	0
67.3	0
67.4	0
67.5	0
67.6	0
67.7	0
67.8	0
67.9	0
68	0
68.1	0
68.2	0
68.3	0
68.4	0
68.5	0
68.6	0
68.7	0
68.8	0
68.9	0
69	0
69.1	0
69.2	0
69.3	0
69.4	0
69.5	0
69.6	0
69.7	0
69.8	0
69.9	0
70	0
70.1	0
70.2	0
70.3	0
70.4	0
70.5	0
70.6	0
70.7	0
70.8	0
70.9	0
71	0
71.1	0
71.2	0
71.3	0
71.4	0
71.5	0
71.6	0
71.7	0
71.8	0
71.9	0
72	0
72.1	0
72.2	0
72.3	0
72.4	0
72.5	0
72.6	0
72.7	0
72.8	0
72.9	0
73	0
73.1	0
73.2	0
73.3	0
73.4	0
73.5	0
73.6	0
73.7	0
73.8	0
73.9	0
74	0
74.1	0
74.2	0
74.3	0
74.4	0
74.5	0
74.6	0
74.7	0
74.8	0
74.9	0
75	0
75.1	0
75.2	0
75.3	0
75.4	0
75.5	0
75.6	0
75.7	0
75.8	0
75.9	0
76	0
76.1	0
76.2	0
76.3	0
76.4	0
76.5	0
76.6	0
76.7	0
76.8	0
76.9	0
77	0
77.1	0
77.2	0
77.3	0
77.4	0
77.5	0
77.6	0
77.7	0
77.8	0
77.9	0
78	0
78.1	0
78.2	0
78.3	0
78.4	0
78.5	0
78.6	0
78.7	0
78.8	0
78.9	0
79	0
79.1	0
79.2	0
79.3	0
79.4	0
79.5	0
79.6	0
79.7	0
79.8	0
79.9	0
80	0
80.1	0
80.2	0
80.3	0
80.4	0
80.5	0
80.6	0
80.7	0
80.8	0
80.9	0
81	0
81.1	0
81.2	0
81.3	0
81.4	0
81.5	0
81.6	0
81.7	0
81.8	0
81.9	0
82	0
82.1	0
82.2	0
82.3	0
82.4	0
82.5	0
82.6	0
82.7	0
82.8	0
82.9	0
83	0
83.1	0
83.2	0
83.3	0
83.4	0
83.5	0
83.6	0
83.7	0
83.8	0
83.9	0
84	0
84.1	0
84.2	0
84.3	0
84.4	0
84.5	0
84.6	0
84.7	0
84.8	0
84.9	0
85	0
85.1	0
85.2	0
85.3	0
85.4	0
85.5	0
85.6	0
85.7	0
85.8	0
85.9	0
86	0
86.1	0
86.2	0
86.3	0
86.4	0
86.5	0
86.6	0
86.7	0
86.8	0
86.9	0
87	0
87.1	0
87.2	0
87.3	0
87.4	0
87.5	0
87.6	0
87.7	0
87.8	0
87.9	0
88	0
88.1	0
88.2	0
88.3	0
88.4	0
88.5	0
88.6	0
88.7	0
88.8	0
88.9	0
89	0
89.1	0
89.2	0
89.3	0
89.4	0
89.5	0
89.6	0
89.7	0
89.8	0
89.9	0
90	0
90.1	0
90.2	0
90.3	0
90.4	0
90.5	0
90.6	0
90.7	0
90.8	0
90.9	0
91	0
91.1	0
91.2	0
91.3	0
91.4	0
91.5	0
91.6	0
91.7	0
91.8	0
91.9	0
92	0
92.1	0
92.2	0
92.3	0
92.4	0
92.5	0
92.6	0
92.7	0
92.8	0
92.9	0
93	0
93.1	0
93.2	0
93.3	0
93.4	0
93.5	0
93.6	0
93.7	0
93.8	0
93.9	0
94	0
94.1	0
94.2	0
94.3	0
94.4	0
94.5	0
94.6	0
94.7	0
94.8	0
94.9	0
95	0
95.1	0
95.2	0
95.3	0
95.4	0
95.5	0
95.6	0
95.7	0
95.8	0
95.9	0
96	0
96.1	0
96.2	0
96.3	0
96.4	0
96.5	0
96.6	0
96.7	0
96.8	0
96.9	0
97	0
97.1	0
97.2	0
97.3	0
97.4	0
97.5	0
97.6	0
97.7	0
97.8	0
97.9	0
98	0
98.1	0
98.2	0
98.3	0
98.4	0
98.5	0
98.6	0
98.7	0
98.8	0
98.9	0
99	0
99.1	0
99.2	0
99.3	0
99.4	0
99.5	0
99.6	0
99.7	0
99.8	0
99.9	0
100	0
100.1	0.0025
100.2	0.005
100.3	0.006875
100.4	0.01
100.5	0.01125
100.6	0.013125
100.7	0.01375
100.8	0.01375
100.9	0.014375
101	0.016875
101.1	0.016875
101.2	0.019375
101.3	0.02125
101.4	0.02125
101.5	0.023125
101.6	0.025625
101.7	0.025625
101.8	0.025625
101.9	0.0275
102	0.03
102.1	0.030625
102.2	0.030625
102.3	0.031875
102.4	0.034375
102.5	0.034375
102.6	0.03875
102.7	0.03875
102.8	0.040625
102.9	0.043125
103	0.04375
103.1	0.04375
103.2	0.045625
103.3	0.048125
103.4	0.05125
103.5	0.053125
103.6	0.05375
103.7	0.056875
103.8	0.0575
103.9	0.05875
104	0.060625
104.1	0.061875
104.2	0.0625
104.3	0.065625
104.4	0.0675
104.5	0.06875
104.6	0.07
104.7	0.073125
104.8	0.07625
104.9	0.0775
105	0.078125
105.1	0.078125
105.2	0.078125
105.3	0.0775
105.4	0.078125
105.5	0.078125
105.6	0.0775
105.7	0.078125
105.8	0.079375
105.9	0.08125
106	0.083125
106.1	0.084375
106.2	0.084375
106.3	0.085
106.4	0.083125
106.5	0.085625
106.6	0.086875
106.7	0.0875
106.8	0.0875
106.9	0.088125
107	0.08625
107.1	0.08625
107.2	0.085625
107.3	0.085625
107.4	0.085
107.5	0.08625
107.6	0.085625
107.7	0.08625
107.8	0.085625
107.9	0.089375
108	0.089375
108.1	0.09
108.2	0.090625
108.3	0.089375
108.4	0.09
108.5	0.089375
108.6	0.08875
108.7	0.09125
108.8	0.093125
108.9	0.0925
109	0.09125
109.1	0.09125
109.2	0.090625
109.3	0.094375
109.4	0.095625
109.5	0.09875
109.6	0.09875
109.7	0.100625
109.8	0.100625
109.9	0.100625
110	0.1025
110.1	0.108125
110.2	0.11125
110.3	0.11
110.4	0.110625
110.5	0.11125
110.6	0.110625
110.7	0.109375
110.8	0.11
110.9	0.11125
111	0.110625
111.1	0.11125
111.2	0.109375
111.3	0.111875
111.4	0.111875
111.5	0.113125
111.6	0.113125
111.7	0.11375
111.8	0.115625
111.9	0.114375
112	0.11375
112.1	0.1125
112.2	0.1125
112.3	0.111875
112.4	0.111875
112.5	0.111875
112.6	0.1125
112.7	0.11375
112.8	0.11375
112.9	0.113125
113	0.113125
113.1	0.115625
113.2	0.114375
113.3	0.114375
113.4	0.11375
113.5	0.113125
113.6	0.113125
113.7	0.114375
113.8	0.115
113.9	0.11625
114	0.116875
114.1	0.11625
114.2	0.116875
114.3	0.116875
114.4	0.1175
114.5	0.1175
114.6	0.11625
114.7	0.115625
114.8	0.115
114.9	0.114375
115	0.115
115.1	0.115
115.2	0.11375
115.3	0.114375
115.4	0.115625
115.5	0.116875
115.6	0.118125
115.7	0.120625
115.8	0.12125
115.9	0.121875
116	0.1225
116.1	0.12375
116.2	0.123125
116.3	0.124375
116.4	0.12625
116.5	0.128125
116.6	0.1275
116.7	0.130625
116.8	0.131875
116.9	0.130625
117	0.130625
117.1	0.13375
117.2	0.135
117.3	0.13375
117.4	0.133125
117.5	0.134375
117.6	0.13375
117.7	0.1325
117.8	0.13
117.9	0.130625
118	0.13125
118.1	0.128125
118.2	0.12875
118.3	0.12875
118.4	0.128125
118.5	0.126875
118.6	0.126875
118.7	0.12625
118.8	0.125
118.9	0.125625
119	0.12625
119.1	0.12625
119.2	0.125625
119.3	0.128125
119.4	0.12875
119.5	0.130625
119.6	0.131875
119.7	0.1325
119.8	0.13375
119.9	0.133125
120	0.13
120.1	0.130625
120.2	0.128125
120.3	0.128125
120.4	0.128125
120.5	0.12875
120.6	0.1275
120.7	0.1275
120.8	0.13125
120.9	0.133125
121	0.133125
121.1	0.13375
121.2	0.135
121.3	0.13375
121.4	0.13375
121.5	0.131875
121.6	0.131875
121.7	0.130625
121.8	0.12875
121.9	0.130625
122	0.130625
122.1	0.129375
122.2	0.130625
122.3	0.13125
122.4	0.130625
122.5	0.13375
122.6	0.1325
122.7	0.13375
122.8	0.1325
122.9	0.1325
123	0.131875
123.1	0.13375
123.2	0.131875
123.3	0.13
123.4	0.13
123.5	0.12875
123.6	0.129375
123.7	0.130625
123.8	0.13125
123.9	0.13625
124	0.1375
124.1	0.139375
124.2	0.13875
124.3	0.1375
124.4	0.13875
124.5	0.139375
124.6	0.14
124.7	0.139375
124.8	0.1375
124.9	0.14
125	0.14125
125.1	0.145
125.2	0.14625
125.3	0.145625
125.4	0.14875
125.5	0.1475
125.6	0.14875
125.7	0.1475
125.8	0.1475
125.9	0.14875
126	0.148125
126.1	0.144375
126.2	0.145
126.3	0.145625
126.4	0.145
126.5	0.14625
126.6	0.146875
126.7	0.1475
126.8	0.149375
126.9	0.15125
127	0.15
127.1	0.149375
127.2	0.148125
127.3	0.149375
127.4	0.15
127.5	0.15125
127.6	0.15
127.7	0.15
127.8	0.15
127.9	0.148125
128	0.145625
128.1	0.14375
128.2	0.144375
128.3	0.145625
128.4	0.143125
128.5	0.14
128.6	0.140625
128.7	0.140625
128.8	0.13875
128.9	0.136875
129	0.1375
129.1	0.139375
129.2	0.13875
129.3	0.13875
129.4	0.138125
129.5	0.13875
129.6	0.138125
129.7	0.1375
129.8	0.1375
129.9	0.138125
130	0.1375
130.1	0.138125
130.2	0.136875
130.3	0.13625
130.4	0.131875
130.5	0.13125
130.6	0.12875
130.7	0.12875
130.8	0.129375
130.9	0.12875
131	0.125625
131.1	0.12625
131.2	0.124375
131.3	0.1275
131.4	0.1275
131.5	0.12875
131.6	0.13125
131.7	0.129375
131.8	0.12875
131.9	0.12625
132	0.126875
132.1	0.12625
132.2	0.128125
132.3	0.13
132.4	0.13375
132.5	0.13375
132.6	0.131875
132.7	0.13375
132.8	0.135
132.9	0.13625
133	0.136875
133.1	0.136875
133.2	0.136875
133.3	0.13625
133.4	0.13625
133.5	0.136875
133.6	0.135
133.7	0.135625
133.8	0.135
133.9	0.1375
134	0.139375
134.1	0.138125
134.2	0.1375
134.3	0.135625
134.4	0.135625
134.5	0.136875
134.6	0.1375
134.7	0.138125
134.8	0.138125
134.9	0.1375
135	0.138125
135.1	0.14
135.2	0.140625
135.3	0.139375
135.4	0.14
135.5	0.144375
135.6	0.146875
135.7	0.148125
135.8	0.148125
135.9	0.148125
136	0.149375
136.1	0.150625
136.2	0.15
136.3	0.150625
136.4	0.15
136.5	0.151875
136.6	0.15125
136.7	0.14875
136.8	0.15
136.9	0.15
137	0.148125
137.1	0.14625
137.2	0.145625
137.3	0.145625
137.4	0.145625
137.5	0.14625
137.6	0.14625
137.7	0.145625
137.8	0.14625
137.9	0.146875
138	0.14625
138.1	0.14625
138.2	0.14625
138.3	0.148125
138.4	0.150625
138.5	0.151875
138.6	0.15375
138.7	0.15125
138.8	0.15375
138.9	0.15625
139	0.155
139.1	0.158125
139.2	0.16
139.3	0.1575
139.4	0.156875
139.5	0.159375
139.6	0.16
139.7	0.161875
139.8	0.160625
139.9	0.160625
140	0.160625
140.1	0.159375
140.2	0.16
140.3	0.156875
140.4	0.15625
140.5	0.158125
140.6	0.159375
140.7	0.15875
140.8	0.159375
140.9	0.159375
141	0.15875
141.1	0.15875
141.2	0.159375
141.3	0.158125
141.4	0.158125
141.5	0.158125
141.6	0.158125
141.7	0.15625
141.8	0.15375
141.9	0.153125
142	0.155
142.1	0.155625
142.2	0.153125
142.3	0.153125
142.4	0.15375
142.5	0.153125
142.6	0.15
142.7	0.1475
142.8	0.14875
142.9	0.148125
143	0.14875
143.1	0.149375
143.2	0.15
143.3	0.149375
143.4	0.149375
143.5	0.15
143.6	0.150625
143.7	0.15
143.8	0.149375
143.9	0.14875
144	0.148125
144.1	0.146875
144.2	0.148125
144.3	0.14875
144.4	0.14875
144.5	0.1475
144.6	0.145625
144.7	0.144375
144.8	0.145625
144.9	0.14375
145	0.143125
145.1	0.14375
145.2	0.143125
145.3	0.144375
145.4	0.144375
145.5	0.146875
145.6	0.145
145.7	0.145625
145.8	0.145
145.9	0.144375
146	0.145625
146.1	0.145625
146.2	0.143125
146.3	0.145
146.4	0.14375
146.5	0.144375
146.6	0.143125
146.7	0.14375
146.8	0.144375
146.9	0.143125
147	0.143125
147.1	0.14375
147.2	0.1425
147.3	0.144375
147.4	0.14375
147.5	0.144375
147.6	0.144375
147.7	0.145625
147.8	0.14625
147.9	0.146875
148	0.145625
148.1	0.148125
148.2	0.1475
148.3	0.1475
148.4	0.14875
148.5	0.15
148.6	0.15
148.7	0.15125
148.8	0.15125
148.9	0.15
149	0.15125
149.1	0.151875
149.2	0.14875
149.3	0.148125
149.4	0.145
149.5	0.144375
149.6	0.14375
149.7	0.141875
149.8	0.143125
149.9	0.144375
150	0.144375
150.1	0.143125
150.2	0.144375
150.3	0.14125
150.4	0.143125
150.5	0.141875
150.6	0.14375
150.7	0.1425
150.8	0.1425
150.9	0.14125
151	0.14375
151.1	0.144375
151.2	0.145625
151.3	0.146875
151.4	0.144375
151.5	0.143125
151.6	0.14
151.7	0.141875
151.8	0.14375
151.9	0.1425
152	0.141875
152.1	0.143125
152.2	0.1425
152.3	0.1425
152.4	0.141875
152.5	0.14125
152.6	0.14
152.7	0.139375
152.8	0.14
152.9	0.13875
153	0.139375
153.1	0.140625
153.2	0.139375
153.3	0.14
153.4	0.14
153.5	0.140625
153.6	0.140625
153.7	0.140625
153.8	0.1425
153.9	0.140625
154	0.140625
154.1	0.143125
154.2	0.14625
154.3	0.14625
154.4	0.145625
154.5	0.146875
154.6	0.143125
154.7	0.141875
154.8	0.141875
154.9	0.14125
155	0.141875
155.1	0.138125
155.2	0.14
155.3	0.14
155.4	0.14125
155.5	0.14125
155.6	0.141875
155.7	0.14125
155.8	0.14125
155.9	0.1425
156	0.1425
156.1	0.14375
156.2	0.14375
156.3	0.145
156.4	0.145625
156.5	0.1475
156.6	0.148125
156.7	0.148125
156.8	0.15
156.9	0.149375
157	0.14875
157.1	0.1475
157.2	0.146875
157.3	0.145
157.4	0.145625
157.5	0.1425
157.6	0.143125
157.7	0.1425
157.8	0.143125
157.9	0.1425
158	0.1425
158.1	0.14375
158.2	0.144375
158.3	0.144375
158.4	0.141875
158.5	0.14125
158.6	0.140625
158.7	0.138125
158.8	0.135625
158.9	0.136875
159	0.136875
159.1	0.1375
159.2	0.13625
159.3	0.13625
159.4	0.136875
159.5	0.135625
159.6	0.135
159.7	0.135
159.8	0.134375
159.9	0.135
160	0.138125
160.1	0.140625
160.2	0.14
160.3	0.14125
160.4	0.143125
160.5	0.1425
160.6	0.14125
160.7	0.141875
160.8	0.14125
160.9	0.141875
161	0.1425
161.1	0.1425
161.2	0.1425
161.3	0.141875
161.4	0.141875
161.5	0.1425
161.6	0.14125
161.7	0.139375
161.8	0.139375
161.9	0.140625
162	0.14125
162.1	0.14125
162.2	0.14125
162.3	0.143125
162.4	0.14375
162.5	0.145
162.6	0.1425
162.7	0.141875
162.8	0.143125
162.9	0.14375
163	0.14375
163.1	0.14125
163.2	0.13875
163.3	0.13875
163.4	0.139375
163.5	0.136875
163.6	0.134375
163.7	0.13375
163.8	0.134375
163.9	0.133125
164	0.1325
164.1	0.13375
164.2	0.135625
164.3	0.13375
164.4	0.133125
164.5	0.133125
164.6	0.13375
164.7	0.1325
164.8	0.13375
164.9	0.135
165	0.134375
165.1	0.135625
165.2	0.134375
165.3	0.134375
165.4	0.135625
165.5	0.134375
165.6	0.134375
165.7	0.134375
165.8	0.135
165.9	0.135625
166	0.135625
166.1	0.13625
166.2	0.1375
166.3	0.1375
166.4	0.138125
166.5	0.138125
166.6	0.138125
166.7	0.136875
166.8	0.135625
166.9	0.1375
167	0.13625
167.1	0.135625
167.2	0.134375
167.3	0.13375
167.4	0.134375
167.5	0.13625
167.6	0.135625
167.7	0.134375
167.8	0.13375
167.9	0.134375
168	0.136875
168.1	0.136875
168.2	0.1375
168.3	0.1375
168.4	0.136875
168.5	0.138125
168.6	0.138125
168.7	0.13875
168.8	0.14
168.9	0.14
169	0.139375
169.1	0.14
169.2	0.1425
169.3	0.14375
169.4	0.14375
169.5	0.145625
169.6	0.146875
169.7	0.14875
169.8	0.149375
169.9	0.149375
170	0.148125
170.1	0.1475
170.2	0.1475
170.3	0.145
170.4	0.145625
170.5	0.145625
170.6	0.148125
170.7	0.146875
170.8	0.146875
170.9	0.145
171	0.14625
171.1	0.145625
171.2	0.145625
171.3	0.145625
171.4	0.15
171.5	0.15
171.6	0.15125
171.7	0.15125
171.8	0.151875
171.9	0.150625
172	0.1525
172.1	0.1525
172.2	0.1525
172.3	0.15
172.4	0.148125
172.5	0.14875
172.6	0.149375
172.7	0.15
172.8	0.150625
172.9	0.15
173	0.150625
173.1	0.15125
173.2	0.150625
173.3	0.1525
173.4	0.153125
173.5	0.15375
173.6	0.155
173.7	0.154375
173.8	0.15375
173.9	0.15375
174	0.155
174.1	0.155625
174.2	0.154375
174.3	0.15375
174.4	0.155625
174.5	0.15375
174.6	0.153125
174.7	0.155625
174.8	0.1575
174.9	0.1575
175	0.15625
175.1	0.1575
175.2	0.156875
175.3	0.156875
175.4	0.158125
175.5	0.15875
175.6	0.16
175.7	0.156875
175.8	0.15625
175.9	0.155625
176	0.155625
176.1	0.15375
176.2	0.154375
176.3	0.1525
176.4	0.153125
176.5	0.153125
176.6	0.154375
176.7	0.155
176.8	0.1575
176.9	0.156875
177	0.159375
177.1	0.15875
177.2	0.15875
177.3	0.16
177.4	0.159375
177.5	0.15875
177.6	0.15625
177.7	0.15625
177.8	0.156875
177.9	0.156875
178	0.158125
178.1	0.155
178.2	0.154375
178.3	0.153125
178.4	0.15625
178.5	0.15625
178.6	0.155625
178.7	0.154375
178.8	0.15375
178.9	0.153125
179	0.151875
179.1	0.15125
179.2	0.150625
179.3	0.15125
179.4	0.15125
179.5	0.149375
179.6	0.150625
179.7	0.149375
179.8	0.148125
179.9	0.14875
180	0.154375
180.1	0.15375
180.2	0.15125
180.3	0.151875
180.4	0.153125
180.5	0.15375
180.6	0.155
180.7	0.15375
180.8	0.156875
180.9	0.1575
181	0.155625
181.1	0.1575
181.2	0.155
181.3	0.15625
181.4	0.15625
181.5	0.15375
181.6	0.15375
181.7	0.1525
181.8	0.151875
181.9	0.153125
182	0.155
182.1	0.155625
182.2	0.155625
182.3	0.155
182.4	0.153125
182.5	0.15375
182.6	0.155
182.7	0.153125
182.8	0.15375
182.9	0.1525
183	0.15125
183.1	0.150625
183.2	0.150625
183.3	0.154375
183.4	0.15375
183.5	0.153125
183.6	0.15375
183.7	0.15375
183.8	0.153125
183.9	0.1525
184	0.153125
184.1	0.15375
184.2	0.15375
184.3	0.1525
184.4	0.1525
184.5	0.1525
184.6	0.151875
184.7	0.149375
184.8	0.1475
184.9	0.1475
185	0.145
185.1	0.145
185.2	0.143125
185.3	0.14125
185.4	0.140625
185.5	0.140625
185.6	0.13875
185.7	0.1375
185.8	0.139375
185.9	0.140625
186	0.13875
186.1	0.139375
186.2	0.13875
186.3	0.139375
186.4	0.13875
186.5	0.136875
186.6	0.140625
186.7	0.14125
186.8	0.14125
186.9	0.14125
187	0.1425
187.1	0.1425
187.2	0.14375
187.3	0.144375
187.4	0.145
187.5	0.145
187.6	0.144375
187.7	0.145
187.8	0.14375
187.9	0.143125
188	0.14125
188.1	0.14125
188.2	0.14125
188.3	0.140625
188.4	0.141875
188.5	0.1425
188.6	0.144375
188.7	0.14375
188.8	0.143125
188.9	0.144375
189	0.146875
189.1	0.148125
189.2	0.146875
189.3	0.14625
189.4	0.146875
189.5	0.14625
189.6	0.1475
189.7	0.148125
189.8	0.14875
189.9	0.15
190	0.1475
190.1	0.148125
190.2	0.1475
190.3	0.146875
190.4	0.1475
190.5	0.14625
190.6	0.145
190.7	0.14625
190.8	0.148125
190.9	0.1475
191	0.14875
191.1	0.151875
191.2	0.1525
191.3	0.1525
191.4	0.151875
191.5	0.1525
191.6	0.151875
191.7	0.1525
191.8	0.15125
191.9	0.15
192	0.148125
192.1	0.148125
192.2	0.148125
192.3	0.150625
192.4	0.15125
192.5	0.153125
192.6	0.15125
192.7	0.151875
192.8	0.149375
192.9	0.150625
193	0.15125
193.1	0.154375
193.2	0.153125
193.3	0.15125
193.4	0.1525
193.5	0.1525
193.6	0.15375
193.7	0.154375
193.8	0.154375
193.9	0.153125
194	0.15125
194.1	0.15
194.2	0.150625
194.3	0.14875
194.4	0.149375
194.5	0.148125
194.6	0.14875
194.7	0.145
194.8	0.146875
194.9	0.149375
195	0.15125
195.1	0.15125
195.2	0.15
195.3	0.15
195.4	0.150625
195.5	0.151875
195.6	0.149375
195.7	0.15125
195.8	0.151875
195.9	0.15
196	0.14875
196.1	0.148125
196.2	0.148125
196.3	0.14875
196.4	0.148125
196.5	0.1475
196.6	0.149375
196.7	0.15125
196.8	0.15125
196.9	0.150625
197	0.1525
197.1	0.1525
197.2	0.150625
197.3	0.148125
197.4	0.146875
197.5	0.14625
197.6	0.1475
197.7	0.146875
197.8	0.14625
197.9	0.145625
198	0.145625
198.1	0.145
198.2	0.146875
198.3	0.1475
198.4	0.14875
198.5	0.146875
198.6	0.148125
198.7	0.145625
198.8	0.1425
198.9	0.143125
199	0.14375
199.1	0.144375
199.2	0.145
199.3	0.144375
199.4	0.144375
199.5	0.14375
199.6	0.14125
199.7	0.143125
199.8	0.144375
199.9	0.145625
200	0.146875
[truncated: 14,000 more rows]
