# Supplementary material for: Bayesian inference of kinetic schemes for ion channels by Kalman filtering
Source: eLife journal article supplement (doi:10.7554/elife.62714), 2022-05-04
Supplement: fig4-data11 [file 1_Sim_N_800_Strom_MW.xlsx]

## Sheet: Tabelle1
0.1	0
0.2	0
0.3	0
0.4	0
0.5	0
0.6	0
0.7	0
0.8	0
0.9	0
1	0
1.1	0
1.2	0
1.3	0
1.4	0
1.5	0
1.6	0
1.7	0
1.8	0
1.9	0
2	0
2.1	0
2.2	0
2.3	0
2.4	0
2.5	0
2.6	0
2.7	0
2.8	0
2.9	0
3	0
3.1	0
3.2	0
3.3	0
3.4	0
3.5	0
3.6	0
3.7	0
3.8	0
3.9	0
4	0
4.1	0
4.2	0
4.3	0
4.4	0
4.5	0
4.6	0
4.7	0
4.8	0
4.9	0
5	0
5.1	0
5.2	0
5.3	0
5.4	0
5.5	0
5.6	0
5.7	0
5.8	0
5.9	0
6	0
6.1	0
6.2	0
6.3	0
6.4	0
6.5	0
6.6	0
6.7	0
6.8	0
6.9	0
7	0
7.1	0
7.2	0
7.3	0
7.4	0
7.5	0
7.6	0
7.7	0
7.8	0
7.9	0
8	0
8.1	0
8.2	0
8.3	0
8.4	0
8.5	0
8.6	0
8.7	0
8.8	0
8.9	0
9	0
9.1	0
9.2	0
9.3	0
9.4	0
9.5	0
9.6	0
9.7	0
9.8	0
9.9	0
10	0
10.1	0
10.2	0
10.3	0
10.4	0
10.5	0
10.6	0
10.7	0
10.8	0
10.9	0
11	0
11.1	0
11.2	0
11.3	0
11.4	0
11.5	0
11.6	0
11.7	0
11.8	0
11.9	0
12	0
12.1	0
12.2	0
12.3	0
12.4	0
12.5	0
12.6	0
12.7	0
12.8	0
12.9	0
13	0
13.1	0
13.2	0
13.3	0
13.4	0
13.5	0
13.6	0
13.7	0
13.8	0
13.9	0
14	0
14.1	0
14.2	0
14.3	0
14.4	0
14.5	0
14.6	0
14.7	0
14.8	0
14.9	0
15	0
15.1	0
15.2	0
15.3	0
15.4	0
15.5	0
15.6	0
15.7	0
15.8	0
15.9	0
16	0
16.1	0
16.2	0
16.3	0
16.4	0
16.5	0
16.6	0
16.7	0
16.8	0
16.9	0
17	0
17.1	0
17.2	0
17.3	0
17.4	0
17.5	0
17.6	0
17.7	0
17.8	0
17.9	0
18	0
18.1	0
18.2	0
18.3	0
18.4	0
18.5	0
18.6	0
18.7	0
18.8	0
18.9	0
19	0
19.1	0
19.2	0
19.3	0
19.4	0
19.5	0
19.6	0
19.7	0
19.8	0
19.9	0
20	0
20.1	0
20.2	0
20.3	0
20.4	0
20.5	0
20.6	0
20.7	0
20.8	0
20.9	0
21	0
21.1	0
21.2	0
21.3	0
21.4	0
21.5	0
21.6	0
21.7	0
21.8	0
21.9	0
22	0
22.1	0
22.2	0
22.3	0
22.4	0
22.5	0
22.6	0
22.7	0
22.8	0
22.9	0
23	0
23.1	0
23.2	0
23.3	0
23.4	0
23.5	0
23.6	0
23.7	0
23.8	0
23.9	0
24	0
24.1	0
24.2	0
24.3	0
24.4	0
24.5	0
24.6	0
24.7	0
24.8	0
24.9	0
25	0
25.1	0
25.2	0
25.3	0
25.4	0
25.5	0
25.6	0
25.7	0
25.8	0
25.9	0
26	0
26.1	0
26.2	0
26.3	0
26.4	0
26.5	0
26.6	0
26.7	0
26.8	0
26.9	0
27	0
27.1	0
27.2	0
27.3	0
27.4	0
27.5	0
27.6	0
27.7	0
27.8	0
27.9	0
28	0
28.1	0
28.2	0
28.3	0
28.4	0
28.5	0
28.6	0
28.7	0
28.8	0
28.9	0
29	0
29.1	0
29.2	0
29.3	0
29.4	0
29.5	0
29.6	0
29.7	0
29.8	0
29.9	0
30	0
30.1	0
30.2	0
30.3	0
30.4	0
30.5	0
30.6	0
30.7	0
30.8	0
30.9	0
31	0
31.1	0
31.2	0
31.3	0
31.4	0
31.5	0
31.6	0
31.7	0
31.8	0
31.9	0
32	0
32.1	0
32.2	0
32.3	0
32.4	0
32.5	0
32.6	0
32.7	0
32.8	0
32.9	0
33	0
33.1	0
33.2	0
33.3	0
33.4	0
33.5	0
33.6	0
33.7	0
33.8	0
33.9	0
34	0
34.1	0
34.2	0
34.3	0
34.4	0
34.5	0
34.6	0
34.7	0
34.8	0
34.9	0
35	0
35.1	0
35.2	0
35.3	0
35.4	0
35.5	0
35.6	0
35.7	0
35.8	0
35.9	0
36	0
36.1	0
36.2	0
36.3	0
36.4	0
36.5	0
36.6	0
36.7	0
36.8	0
36.9	0
37	0
37.1	0
37.2	0
37.3	0
37.4	0
37.5	0
37.6	0
37.7	0
37.8	0
37.9	0
38	0
38.1	0
38.2	0
38.3	0
38.4	0
38.5	0
38.6	0
38.7	0
38.8	0
38.9	0
39	0
39.1	0
39.2	0
39.3	0
39.4	0
39.5	0
39.6	0
39.7	0
39.8	0
39.9	0
40	0
40.1	0
40.2	0
40.3	0
40.4	0
40.5	0
40.6	0
40.7	0
40.8	0
40.9	0
41	0
41.1	0
41.2	0
41.3	0
41.4	0
41.5	0
41.6	0
41.7	0
41.8	0
41.9	0
42	0
42.1	0
42.2	0
42.3	0
42.4	0
42.5	0
42.6	0
42.7	0
42.8	0
42.9	0
43	0
43.1	0
43.2	0
43.3	0
43.4	0
43.5	0
43.6	0
43.7	0
43.8	0
43.9	0
44	0
44.1	0
44.2	0
44.3	0
44.4	0
44.5	0
44.6	0
44.7	0
44.8	0
44.9	0
45	0
45.1	0
45.2	0
45.3	0
45.4	0
45.5	0
45.6	0
45.7	0
45.8	0
45.9	0
46	0
46.1	0
46.2	0
46.3	0
46.4	0
46.5	0
46.6	0
46.7	0
46.8	0
46.9	0
47	0
47.1	0
47.2	0
47.3	0
47.4	0
47.5	0
47.6	0
47.7	0
47.8	0
47.9	0
48	0
48.1	0
48.2	0
48.3	0
48.4	0
48.5	0
48.6	0
48.7	0
48.8	0
48.9	0
49	0
49.1	0
49.2	0
49.3	0
49.4	0
49.5	0
49.6	0
49.7	0
49.8	0
49.9	0
50	0
50.1	0
50.2	0
50.3	0
50.4	0
50.5	0
50.6	0
50.7	0
50.8	0
50.9	0
51	0
51.1	0
51.2	0
51.3	0
51.4	0
51.5	0
51.6	0
51.7	0
51.8	0
51.9	0
52	0
52.1	0
52.2	0
52.3	0
52.4	0
52.5	0
52.6	0
52.7	0
52.8	0
52.9	0
53	0
53.1	0
53.2	0
53.3	0
53.4	0
53.5	0
53.6	0
53.7	0
53.8	0
53.9	0
54	0
54.1	0
54.2	0
54.3	0
54.4	0
54.5	0
54.6	0
54.7	0
54.8	0
54.9	0
55	0
55.1	0
55.2	0
55.3	0
55.4	0
55.5	0
55.6	0
55.7	0
55.8	0
55.9	0
56	0
56.1	0
56.2	0
56.3	0
56.4	0
56.5	0
56.6	0
56.7	0
56.8	0
56.9	0
57	0
57.1	0
57.2	0
57.3	0
57.4	0
57.5	0
57.6	0
57.7	0
57.8	0
57.9	0
58	0
58.1	0
58.2	0
58.3	0
58.4	0
58.5	0
58.6	0
58.7	0
58.8	0
58.9	0
59	0
59.1	0
59.2	0
59.3	0
59.4	0
59.5	0
59.6	0
59.7	0
59.8	0
59.9	0
60	0
60.1	0
60.2	0
60.3	0
60.4	0
60.5	0
60.6	0
60.7	0
60.8	0
60.9	0
61	0
61.1	0
61.2	0
61.3	0
61.4	0
61.5	0
61.6	0
61.7	0
61.8	0
61.9	0
62	0
62.1	0
62.2	0
62.3	0
62.4	0
62.5	0
62.6	0
62.7	0
62.8	0
62.9	0
63	0
63.1	0
63.2	0
63.3	0
63.4	0
63.5	0
63.6	0
63.7	0
63.8	0
63.9	0
64	0
64.1	0
64.2	0
64.3	0
64.4	0
64.5	0
64.6	0
64.7	0
64.8	0
64.9	0
65	0
65.1	0
65.2	0
65.3	0
65.4	0
65.5	0
65.6	0
65.7	0
65.8	0
65.9	0
66	0
66.1	0
66.2	0
66.3	0
66.4	0
66.5	0
66.6	0
66.7	0
66.8	0
66.9	0
67	0
67.1	0
67.2	0
67.3	0
67.4	0
67.5	0
67.6	0
67.7	0
67.8	0
67.9	0
68	0
68.1	0
68.2	0
68.3	0
68.4	0
68.5	0
68.6	0
68.7	0
68.8	0
68.9	0
69	0
69.1	0
69.2	0
69.3	0
69.4	0
69.5	0
69.6	0
69.7	0
69.8	0
69.9	0
70	0
70.1	0
70.2	0
70.3	0
70.4	0
70.5	0
70.6	0
70.7	0
70.8	0
70.9	0
71	0
71.1	0
71.2	0
71.3	0
71.4	0
71.5	0
71.6	0
71.7	0
71.8	0
71.9	0
72	0
72.1	0
72.2	0
72.3	0
72.4	0
72.5	0
72.6	0
72.7	0
72.8	0
72.9	0
73	0
73.1	0
73.2	0
73.3	0
73.4	0
73.5	0
73.6	0
73.7	0
73.8	0
73.9	0
74	0
74.1	0
74.2	0
74.3	0
74.4	0
74.5	0
74.6	0
74.7	0
74.8	0
74.9	0
75	0
75.1	0
75.2	0
75.3	0
75.4	0
75.5	0
75.6	0
75.7	0
75.8	0
75.9	0
76	0
76.1	0
76.2	0
76.3	0
76.4	0
76.5	0
76.6	0
76.7	0
76.8	0
76.9	0
77	0
77.1	0
77.2	0
77.3	0
77.4	0
77.5	0
77.6	0
77.7	0
77.8	0
77.9	0
78	0
78.1	0
78.2	0
78.3	0
78.4	0
78.5	0
78.6	0
78.7	0
78.8	0
78.9	0
79	0
79.1	0
79.2	0
79.3	0
79.4	0
79.5	0
79.6	0
79.7	0
79.8	0
79.9	0
80	0
80.1	0
80.2	0
80.3	0
80.4	0
80.5	0
80.6	0
80.7	0
80.8	0
80.9	0
81	0
81.1	0
81.2	0
81.3	0
81.4	0
81.5	0
81.6	0
81.7	0
81.8	0
81.9	0
82	0
82.1	0
82.2	0
82.3	0
82.4	0
82.5	0
82.6	0
82.7	0
82.8	0
82.9	0
83	0
83.1	0
83.2	0
83.3	0
83.4	0
83.5	0
83.6	0
83.7	0
83.8	0
83.9	0
84	0
84.1	0
84.2	0
84.3	0
84.4	0
84.5	0
84.6	0
84.7	0
84.8	0
84.9	0
85	0
85.1	0
85.2	0
85.3	0
85.4	0
85.5	0
85.6	0
85.7	0
85.8	0
85.9	0
86	0
86.1	0
86.2	0
86.3	0
86.4	0
86.5	0
86.6	0
86.7	0
86.8	0
86.9	0
87	0
87.1	0
87.2	0
87.3	0
87.4	0
87.5	0
87.6	0
87.7	0
87.8	0
87.9	0
88	0
88.1	0
88.2	0
88.3	0
88.4	0
88.5	0
88.6	0
88.7	0
88.8	0
88.9	0
89	0
89.1	0
89.2	0
89.3	0
89.4	0
89.5	0
89.6	0
89.7	0
89.8	0
89.9	0
90	0
90.1	0
90.2	0
90.3	0
90.4	0
90.5	0
90.6	0
90.7	0
90.8	0
90.9	0
91	0
91.1	0
91.2	0
91.3	0
91.4	0
91.5	0
91.6	0
91.7	0
91.8	0
91.9	0
92	0
92.1	0
92.2	0
92.3	0
92.4	0
92.5	0
92.6	0
92.7	0
92.8	0
92.9	0
93	0
93.1	0
93.2	0
93.3	0
93.4	0
93.5	0
93.6	0
93.7	0
93.8	0
93.9	0
94	0
94.1	0
94.2	0
94.3	0
94.4	0
94.5	0
94.6	0
94.7	0
94.8	0
94.9	0
95	0
95.1	0
95.2	0
95.3	0
95.4	0
95.5	0
95.6	0
95.7	0
95.8	0
95.9	0
96	0
96.1	0
96.2	0
96.3	0
96.4	0
96.5	0
96.6	0
96.7	0
96.8	0
96.9	0
97	0
97.1	0
97.2	0
97.3	0
97.4	0
97.5	0
97.6	0
97.7	0
97.8	0
97.9	0
98	0
98.1	0
98.2	0
98.3	0
98.4	0
98.5	0
98.6	0
98.7	0
98.8	0
98.9	0
99	0
99.1	0
99.2	0
99.3	0
99.4	0
99.5	0
99.6	0
99.7	0
99.8	0
99.9	0
100	0
100.1	0
100.2	0
100.3	0
100.4	0
100.5	0
100.6	0
100.7	0
100.8	0
100.9	0
101	0
101.1	0
101.2	0
101.3	0
101.4	0
101.5	0
101.6	0
101.7	0
101.8	0
101.9	0
102	0
102.1	0
102.2	0
102.3	0
102.4	0
102.5	0
102.6	0
102.7	0
102.8	0
102.9	0
103	0
103.1	0
103.2	0
103.3	0
103.4	0
103.5	0
103.6	0
103.7	0
103.8	0
103.9	0
104	0
104.1	0
104.2	0
104.3	0
104.4	0
104.5	0
104.6	0
104.7	0
104.8	0
104.9	0
105	0
105.1	0
105.2	0
105.3	0
105.4	0
105.5	0.00125
105.6	0.00125
105.7	0.00125
105.8	0.00125
105.9	0.00125
106	0.00125
106.1	0.00125
106.2	0.00125
106.3	0.00125
106.4	0.00125
106.5	0.00125
106.6	0.00125
106.7	0.00125
106.8	0.00125
106.9	0.00125
107	0.00125
107.1	0.00125
107.2	0.00125
107.3	0.00125
107.4	0.00125
107.5	0.00125
107.6	0.00125
107.7	0.00125
107.8	0.00125
107.9	0.00125
108	0.00125
108.1	0.00125
108.2	0.00125
108.3	0.00125
108.4	0.00125
108.5	0.00125
108.6	0.00125
108.7	0.00125
108.8	0.00125
108.9	0.00125
109	0.00125
109.1	0.00125
109.2	0.00125
109.3	0.00125
109.4	0.00125
109.5	0.00125
109.6	0.00125
109.7	0.00125
109.8	0.00125
109.9	0.00125
110	0.00125
110.1	0.00125
110.2	0.00125
110.3	0.00125
110.4	0.00125
110.5	0.00125
110.6	0.00125
110.7	0.00125
110.8	0.00125
110.9	0.00125
111	0.00125
111.1	0.00125
111.2	0.00125
111.3	0.00125
111.4	0.00125
111.5	0.00125
111.6	0.00125
111.7	0.00125
111.8	0.00125
111.9	0.00125
112	0.00125
112.1	0.00125
112.2	0.00125
112.3	0.00125
112.4	0.00125
112.5	0.00125
112.6	0.0025
112.7	0.0025
112.8	0.0025
112.9	0.0025
113	0.0025
113.1	0.0025
113.2	0.0025
113.3	0.0025
113.4	0.0025
113.5	0.0025
113.6	0.0025
113.7	0.0025
113.8	0.0025
113.9	0.0025
114	0.0025
114.1	0.0025
114.2	0.0025
114.3	0.0025
114.4	0.0025
114.5	0.0025
114.6	0.0025
114.7	0.0025
114.8	0.0025
114.9	0.0025
115	0.0025
115.1	0.0025
115.2	0.0025
115.3	0.0025
115.4	0.0025
115.5	0.0025
115.6	0.00375
115.7	0.00375
115.8	0.00375
115.9	0.00375
116	0.00375
116.1	0.00375
116.2	0.00375
116.3	0.00375
116.4	0.00375
116.5	0.00375
116.6	0.00375
116.7	0.00375
116.8	0.00375
116.9	0.00375
117	0.00375
117.1	0.00375
117.2	0.00375
117.3	0.00375
117.4	0.00375
117.5	0.00375
117.6	0.00375
117.7	0.00375
117.8	0.00375
117.9	0.00375
118	0.00375
118.1	0.00375
118.2	0.00375
118.3	0.005
118.4	0.005
118.5	0.005
118.6	0.005
118.7	0.005
118.8	0.005
118.9	0.005
119	0.005
119.1	0.005
119.2	0.005
119.3	0.005
119.4	0.005
119.5	0.005
119.6	0.005
119.7	0.005
119.8	0.005
119.9	0.00625
120	0.00625
120.1	0.00625
120.2	0.00625
120.3	0.00625
120.4	0.00625
120.5	0.00625
120.6	0.00625
120.7	0.00625
120.8	0.0075
120.9	0.0075
121	0.0075
121.1	0.0075
121.2	0.0075
121.3	0.0075
121.4	0.0075
121.5	0.0075
121.6	0.0075
121.7	0.0075
121.8	0.0075
121.9	0.0075
122	0.0075
122.1	0.0075
122.2	0.0075
122.3	0.0075
122.4	0.0075
122.5	0.0075
122.6	0.0075
122.7	0.0075
122.8	0.0075
122.9	0.0075
123	0.0075
123.1	0.0075
123.2	0.0075
123.3	0.0075
123.4	0.00625
123.5	0.00625
123.6	0.00625
123.7	0.00625
123.8	0.00625
123.9	0.00625
124	0.00625
124.1	0.00625
124.2	0.00625
124.3	0.00625
124.4	0.00625
124.5	0.00625
124.6	0.00625
124.7	0.00625
124.8	0.00625
124.9	0.00625
125	0.00625
125.1	0.00625
125.2	0.00625
125.3	0.00625
125.4	0.00625
125.5	0.00625
125.6	0.00625
125.7	0.00625
125.8	0.00625
125.9	0.00625
126	0.00625
126.1	0.00625
126.2	0.00625
126.3	0.00625
126.4	0.00625
126.5	0.00625
126.6	0.00625
126.7	0.00625
126.8	0.00625
126.9	0.00625
127	0.00625
127.1	0.00625
127.2	0.00625
127.3	0.00625
127.4	0.00625
127.5	0.00625
127.6	0.00625
127.7	0.0075
127.8	0.0075
127.9	0.0075
128	0.00625
128.1	0.00625
128.2	0.00625
128.3	0.00625
128.4	0.00625
128.5	0.00625
128.6	0.00625
128.7	0.00625
128.8	0.00625
128.9	0.00625
129	0.00625
129.1	0.00625
129.2	0.00625
129.3	0.00625
129.4	0.00625
129.5	0.00625
129.6	0.00625
129.7	0.00625
129.8	0.00625
129.9	0.0075
130	0.0075
130.1	0.0075
130.2	0.0075
130.3	0.0075
130.4	0.0075
130.5	0.0075
130.6	0.0075
130.7	0.0075
130.8	0.0075
130.9	0.0075
131	0.0075
131.1	0.0075
131.2	0.0075
131.3	0.0075
131.4	0.0075
131.5	0.0075
131.6	0.0075
131.7	0.0075
131.8	0.0075
131.9	0.0075
132	0.0075
132.1	0.0075
132.2	0.0075
132.3	0.0075
132.4	0.0075
132.5	0.00875
132.6	0.00875
132.7	0.00875
132.8	0.00875
132.9	0.00875
133	0.00875
133.1	0.00875
133.2	0.00875
133.3	0.00875
133.4	0.00875
133.5	0.00875
133.6	0.00875
133.7	0.00875
133.8	0.00875
133.9	0.00875
134	0.01
134.1	0.01
134.2	0.01
134.3	0.01
134.4	0.01
134.5	0.01
134.6	0.01
134.7	0.01
134.8	0.01
134.9	0.01
135	0.01
135.1	0.01
135.2	0.01
135.3	0.01
135.4	0.01
135.5	0.01
135.6	0.01
135.7	0.01
135.8	0.01
135.9	0.01
136	0.01
136.1	0.01
136.2	0.01
136.3	0.01
136.4	0.01
136.5	0.01
136.6	0.01
136.7	0.01
136.8	0.01
136.9	0.01
137	0.01
137.1	0.01
137.2	0.01
137.3	0.01
137.4	0.01
137.5	0.01
137.6	0.01
137.7	0.01
137.8	0.01
137.9	0.01
138	0.01
138.1	0.01
138.2	0.01
138.3	0.01
138.4	0.01
138.5	0.01
138.6	0.01
138.7	0.01
138.8	0.01
138.9	0.01
139	0.01
139.1	0.01
139.2	0.01
139.3	0.01
139.4	0.01
139.5	0.01
139.6	0.01
139.7	0.01
139.8	0.01
139.9	0.01
140	0.01
140.1	0.01
140.2	0.01
140.3	0.01
140.4	0.01
140.5	0.01
140.6	0.01
140.7	0.01
140.8	0.01
140.9	0.01
141	0.01
141.1	0.01
141.2	0.01
141.3	0.01
141.4	0.01
141.5	0.01
141.6	0.01
141.7	0.01
141.8	0.00875
141.9	0.00875
142	0.00875
142.1	0.00875
142.2	0.00875
142.3	0.00875
142.4	0.00875
142.5	0.00875
142.6	0.00875
142.7	0.00875
142.8	0.00875
142.9	0.01
143	0.01
143.1	0.01
143.2	0.01
143.3	0.01
143.4	0.01
143.5	0.01
143.6	0.01
143.7	0.01
143.8	0.01
143.9	0.01
144	0.01
144.1	0.01
144.2	0.01
144.3	0.01
144.4	0.01
144.5	0.01
144.6	0.01
144.7	0.01
144.8	0.01
144.9	0.01
145	0.01
145.1	0.01
145.2	0.01
145.3	0.01
145.4	0.01
145.5	0.01
145.6	0.01
145.7	0.01
145.8	0.01
145.9	0.01
146	0.01
146.1	0.01
146.2	0.01
146.3	0.01
146.4	0.01
146.5	0.01
146.6	0.01
146.7	0.01
146.8	0.01
146.9	0.01
147	0.01
147.1	0.01
147.2	0.01
147.3	0.01
147.4	0.01
147.5	0.01
147.6	0.01
147.7	0.01
147.8	0.01
147.9	0.01
148	0.01
148.1	0.01
148.2	0.01
148.3	0.01
148.4	0.01
148.5	0.01
148.6	0.01
148.7	0.01
148.8	0.01
148.9	0.01
149	0.01
149.1	0.01
149.2	0.01
149.3	0.01
149.4	0.01
149.5	0.01
149.6	0.01
149.7	0.01
149.8	0.01
149.9	0.01
150	0.01
150.1	0.01
150.2	0.01
150.3	0.01
150.4	0.01
150.5	0.01
150.6	0.01
150.7	0.01
150.8	0.01
150.9	0.01
151	0.01
151.1	0.01
151.2	0.01
151.3	0.01
151.4	0.01
151.5	0.01
151.6	0.01
151.7	0.01
151.8	0.01
151.9	0.01
152	0.01
152.1	0.01
152.2	0.01
152.3	0.01
152.4	0.01
152.5	0.01
152.6	0.01
152.7	0.01
152.8	0.01
152.9	0.01
153	0.01
153.1	0.01
153.2	0.01
153.3	0.01
153.4	0.01
153.5	0.01
153.6	0.01
153.7	0.01
153.8	0.01
153.9	0.01
154	0.01
154.1	0.01
154.2	0.01
154.3	0.01
154.4	0.01
154.5	0.01
154.6	0.01
154.7	0.01
154.8	0.01
154.9	0.01
155	0.01
155.1	0.01
155.2	0.01
155.3	0.01
155.4	0.01
155.5	0.01
155.6	0.01125
155.7	0.01125
155.8	0.01125
155.9	0.01125
156	0.01125
156.1	0.01125
156.2	0.01125
156.3	0.01125
156.4	0.01125
156.5	0.01125
156.6	0.01125
156.7	0.01125
156.8	0.0125
156.9	0.0125
157	0.0125
157.1	0.0125
157.2	0.0125
157.3	0.0125
157.4	0.0125
157.5	0.0125
157.6	0.0125
157.7	0.0125
157.8	0.0125
157.9	0.0125
158	0.0125
158.1	0.0125
158.2	0.0125
158.3	0.0125
158.4	0.0125
158.5	0.0125
158.6	0.0125
158.7	0.0125
158.8	0.0125
158.9	0.0125
159	0.0125
159.1	0.0125
159.2	0.0125
159.3	0.0125
159.4	0.0125
159.5	0.0125
159.6	0.0125
159.7	0.0125
159.8	0.0125
159.9	0.0125
160	0.0125
160.1	0.0125
160.2	0.0125
160.3	0.0125
160.4	0.0125
160.5	0.0125
160.6	0.0125
160.7	0.0125
160.8	0.0125
160.9	0.0125
161	0.0125
161.1	0.0125
161.2	0.0125
161.3	0.0125
161.4	0.0125
161.5	0.0125
161.6	0.0125
161.7	0.0125
161.8	0.0125
161.9	0.0125
162	0.0125
162.1	0.0125
162.2	0.0125
162.3	0.0125
162.4	0.01125
162.5	0.01125
162.6	0.01125
162.7	0.01125
162.8	0.01125
162.9	0.01125
163	0.01125
163.1	0.01125
163.2	0.01
163.3	0.01
163.4	0.01
163.5	0.01
163.6	0.01
163.7	0.01
163.8	0.01
163.9	0.01
164	0.01
164.1	0.01
164.2	0.01
164.3	0.01
164.4	0.01
164.5	0.01
164.6	0.01
164.7	0.01
164.8	0.01
164.9	0.01
165	0.01
165.1	0.01
165.2	0.01
165.3	0.01
165.4	0.01
165.5	0.01
165.6	0.01
165.7	0.01
165.8	0.01
165.9	0.01
166	0.01
166.1	0.01
166.2	0.01
166.3	0.01
166.4	0.01
166.5	0.01
166.6	0.01
166.7	0.01
166.8	0.01
166.9	0.01
167	0.01
167.1	0.01
167.2	0.01
167.3	0.01
167.4	0.01
167.5	0.01
167.6	0.01
167.7	0.01
167.8	0.01
167.9	0.01
168	0.01
168.1	0.01
168.2	0.01
168.3	0.01
168.4	0.01
168.5	0.01
168.6	0.01
168.7	0.01
168.8	0.01
168.9	0.01
169	0.01
169.1	0.01
169.2	0.01
169.3	0.01
169.4	0.01
169.5	0.01
169.6	0.01
169.7	0.01
169.8	0.01
169.9	0.01
170	0.01
170.1	0.01
170.2	0.01
170.3	0.01
170.4	0.01
170.5	0.01
170.6	0.01
170.7	0.01
170.8	0.01
170.9	0.01
171	0.01
171.1	0.01
171.2	0.01
171.3	0.01
171.4	0.01
171.5	0.01
171.6	0.01
171.7	0.01
171.8	0.01
171.9	0.01
172	0.00875
172.1	0.00875
172.2	0.00875
172.3	0.00875
172.4	0.00875
172.5	0.00875
172.6	0.00875
172.7	0.00875
172.8	0.00875
172.9	0.00875
173	0.00875
173.1	0.00875
173.2	0.00875
173.3	0.00875
173.4	0.00875
173.5	0.00875
173.6	0.00875
173.7	0.00875
173.8	0.00875
173.9	0.00875
174	0.00875
174.1	0.00875
174.2	0.00875
174.3	0.00875
174.4	0.00875
174.5	0.00875
174.6	0.00875
174.7	0.00875
174.8	0.00875
174.9	0.00875
175	0.00875
175.1	0.00875
175.2	0.00875
175.3	0.00875
175.4	0.00875
175.5	0.00875
175.6	0.00875
175.7	0.00875
175.8	0.00875
175.9	0.00875
176	0.00875
176.1	0.00875
176.2	0.00875
176.3	0.00875
176.4	0.00875
176.5	0.00875
176.6	0.00875
176.7	0.00875
176.8	0.00875
176.9	0.00875
177	0.00875
177.1	0.00875
177.2	0.00875
177.3	0.00875
177.4	0.00875
177.5	0.00875
177.6	0.00875
177.7	0.00875
177.8	0.00875
177.9	0.00875
178	0.00875
178.1	0.00875
178.2	0.00875
178.3	0.00875
178.4	0.00875
178.5	0.00875
178.6	0.00875
178.7	0.00875
178.8	0.00875
178.9	0.00875
179	0.00875
179.1	0.00875
179.2	0.00875
179.3	0.00875
179.4	0.00875
179.5	0.00875
179.6	0.00875
179.7	0.00875
179.8	0.00875
179.9	0.00875
180	0.00875
180.1	0.00875
180.2	0.00875
180.3	0.00875
180.4	0.00875
180.5	0.00875
180.6	0.00875
180.7	0.00875
180.8	0.00875
180.9	0.00875
181	0.00875
181.1	0.00875
181.2	0.00875
181.3	0.00875
181.4	0.00875
181.5	0.0075
181.6	0.0075
181.7	0.0075
181.8	0.0075
181.9	0.0075
182	0.0075
182.1	0.0075
182.2	0.0075
182.3	0.0075
182.4	0.0075
182.5	0.0075
182.6	0.0075
182.7	0.0075
182.8	0.0075
182.9	0.00875
183	0.00875
183.1	0.01
183.2	0.01
183.3	0.01
183.4	0.01
183.5	0.01
183.6	0.01
183.7	0.01
183.8	0.01
183.9	0.01
184	0.01
184.1	0.01
184.2	0.01
184.3	0.01
184.4	0.01
184.5	0.01125
184.6	0.01125
184.7	0.01125
184.8	0.01125
184.9	0.01125
185	0.01125
185.1	0.01125
185.2	0.01125
185.3	0.01125
185.4	0.01125
185.5	0.01125
185.6	0.01125
185.7	0.01125
185.8	0.01125
185.9	0.01125
186	0.01125
186.1	0.01125
186.2	0.01125
186.3	0.01125
186.4	0.01125
186.5	0.01125
186.6	0.01125
186.7	0.01125
186.8	0.01125
186.9	0.01125
187	0.01125
187.1	0.01125
187.2	0.01125
187.3	0.01125
187.4	0.01125
187.5	0.01125
187.6	0.01125
187.7	0.01125
187.8	0.01125
187.9	0.01125
188	0.01125
188.1	0.01125
188.2	0.01125
188.3	0.01125
188.4	0.01125
188.5	0.01125
188.6	0.01125
188.7	0.01125
188.8	0.01125
188.9	0.01125
189	0.01125
189.1	0.01125
189.2	0.01125
189.3	0.01125
189.4	0.01125
189.5	0.01125
189.6	0.01125
189.7	0.01125
189.8	0.01125
189.9	0.01125
190	0.01125
190.1	0.01125
190.2	0.01125
190.3	0.01125
190.4	0.01125
190.5	0.01125
190.6	0.01125
190.7	0.01125
190.8	0.01125
190.9	0.01125
191	0.01125
191.1	0.01125
191.2	0.01125
191.3	0.01125
191.4	0.0125
191.5	0.0125
191.6	0.0125
191.7	0.0125
191.8	0.0125
191.9	0.0125
192	0.0125
192.1	0.0125
192.2	0.0125
192.3	0.0125
192.4	0.0125
192.5	0.0125
192.6	0.0125
192.7	0.0125
192.8	0.0125
192.9	0.0125
193	0.0125
193.1	0.0125
193.2	0.0125
193.3	0.0125
193.4	0.0125
193.5	0.0125
193.6	0.0125
193.7	0.0125
193.8	0.0125
193.9	0.0125
194	0.0125
194.1	0.0125
194.2	0.0125
194.3	0.0125
194.4	0.01375
194.5	0.01375
194.6	0.01375
194.7	0.01375
194.8	0.01375
194.9	0.01375
195	0.01375
195.1	0.01375
195.2	0.01375
195.3	0.01375
195.4	0.01375
195.5	0.01375
195.6	0.01375
195.7	0.01375
195.8	0.01375
195.9	0.01375
196	0.01375
196.1	0.01375
196.2	0.01375
196.3	0.01375
196.4	0.01375
196.5	0.01375
196.6	0.01375
196.7	0.01375
196.8	0.0125
196.9	0.0125
197	0.0125
197.1	0.0125
197.2	0.0125
197.3	0.0125
197.4	0.0125
197.5	0.0125
197.6	0.0125
197.7	0.0125
197.8	0.0125
197.9	0.0125
198	0.0125
198.1	0.0125
198.2	0.0125
198.3	0.0125
198.4	0.0125
198.5	0.0125
198.6	0.0125
198.7	0.01125
198.8	0.01125
198.9	0.01125
199	0.01125
199.1	0.01125
199.2	0.01125
199.3	0.01125
199.4	0.01125
199.5	0.01125
199.6	0.01125
199.7	0.01125
199.8	0.01125
199.9	0.01125
200	0.01125
[truncated: 14,000 more rows]
