# Supplementary material for: Bayesian inference of kinetic schemes for ion channels by Kalman filtering
Source: eLife journal article supplement (doi:10.7554/elife.62714), 2022-05-04
Supplement: fig4-data11 [file 1_Sim_N_1500_Fluor_MW.xlsx]

## Sheet: Tabelle1
0.1	0
0.2	0
0.3	0
0.4	0
0.5	0
0.6	0
0.7	0
0.8	0
0.9	0
1	0
1.1	0
1.2	0
1.3	0
1.4	0
1.5	0
1.6	0
1.7	0
1.8	0
1.9	0
2	0
2.1	0
2.2	0
2.3	0
2.4	0
2.5	0
2.6	0
2.7	0
2.8	0
2.9	0
3	0
3.1	0
3.2	0
3.3	0
3.4	0
3.5	0
3.6	0
3.7	0
3.8	0
3.9	0
4	0
4.1	0
4.2	0
4.3	0
4.4	0
4.5	0
4.6	0
4.7	0
4.8	0
4.9	0
5	0
5.1	0
5.2	0
5.3	0
5.4	0
5.5	0
5.6	0
5.7	0
5.8	0
5.9	0
6	0
6.1	0
6.2	0
6.3	0
6.4	0
6.5	0
6.6	0
6.7	0
6.8	0
6.9	0
7	0
7.1	0
7.2	0
7.3	0
7.4	0
7.5	0
7.6	0
7.7	0
7.8	0
7.9	0
8	0
8.1	0
8.2	0
8.3	0
8.4	0
8.5	0
8.6	0
8.7	0
8.8	0
8.9	0
9	0
9.1	0
9.2	0
9.3	0
9.4	0
9.5	0
9.6	0
9.7	0
9.8	0
9.9	0
10	0
10.1	0
10.2	0
10.3	0
10.4	0
10.5	0
10.6	0
10.7	0
10.8	0
10.9	0
11	0
11.1	0
11.2	0
11.3	0
11.4	0
11.5	0
11.6	0
11.7	0
11.8	0
11.9	0
12	0
12.1	0
12.2	0
12.3	0
12.4	0
12.5	0
12.6	0
12.7	0
12.8	0
12.9	0
13	0
13.1	0
13.2	0
13.3	0
13.4	0
13.5	0
13.6	0
13.7	0
13.8	0
13.9	0
14	0
14.1	0
14.2	0
14.3	0
14.4	0
14.5	0
14.6	0
14.7	0
14.8	0
14.9	0
15	0
15.1	0
15.2	0
15.3	0
15.4	0
15.5	0
15.6	0
15.7	0
15.8	0
15.9	0
16	0
16.1	0
16.2	0
16.3	0
16.4	0
16.5	0
16.6	0
16.7	0
16.8	0
16.9	0
17	0
17.1	0
17.2	0
17.3	0
17.4	0
17.5	0
17.6	0
17.7	0
17.8	0
17.9	0
18	0
18.1	0
18.2	0
18.3	0
18.4	0
18.5	0
18.6	0
18.7	0
18.8	0
18.9	0
19	0
19.1	0
19.2	0
19.3	0
19.4	0
19.5	0
19.6	0
19.7	0
19.8	0
19.9	0
20	0
20.1	0
20.2	0
20.3	0
20.4	0
20.5	0
20.6	0
20.7	0
20.8	0
20.9	0
21	0
21.1	0
21.2	0
21.3	0
21.4	0
21.5	0
21.6	0
21.7	0
21.8	0
21.9	0
22	0
22.1	0
22.2	0
22.3	0
22.4	0
22.5	0
22.6	0
22.7	0
22.8	0
22.9	0
23	0
23.1	0
23.2	0
23.3	0
23.4	0
23.5	0
23.6	0
23.7	0
23.8	0
23.9	0
24	0
24.1	0
24.2	0
24.3	0
24.4	0
24.5	0
24.6	0
24.7	0
24.8	0
24.9	0
25	0
25.1	0
25.2	0
25.3	0
25.4	0
25.5	0
25.6	0
25.7	0
25.8	0
25.9	0
26	0
26.1	0
26.2	0
26.3	0
26.4	0
26.5	0
26.6	0
26.7	0
26.8	0
26.9	0
27	0
27.1	0
27.2	0
27.3	0
27.4	0
27.5	0
27.6	0
27.7	0
27.8	0
27.9	0
28	0
28.1	0
28.2	0
28.3	0
28.4	0
28.5	0
28.6	0
28.7	0
28.8	0
28.9	0
29	0
29.1	0
29.2	0
29.3	0
29.4	0
29.5	0
29.6	0
29.7	0
29.8	0
29.9	0
30	0
30.1	0
30.2	0
30.3	0
30.4	0
30.5	0
30.6	0
30.7	0
30.8	0
30.9	0
31	0
31.1	0
31.2	0
31.3	0
31.4	0
31.5	0
31.6	0
31.7	0
31.8	0
31.9	0
32	0
32.1	0
32.2	0
32.3	0
32.4	0
32.5	0
32.6	0
32.7	0
32.8	0
32.9	0
33	0
33.1	0
33.2	0
33.3	0
33.4	0
33.5	0
33.6	0
33.7	0
33.8	0
33.9	0
34	0
34.1	0
34.2	0
34.3	0
34.4	0
34.5	0
34.6	0
34.7	0
34.8	0
34.9	0
35	0
35.1	0
35.2	0
35.3	0
35.4	0
35.5	0
35.6	0
35.7	0
35.8	0
35.9	0
36	0
36.1	0
36.2	0
36.3	0
36.4	0
36.5	0
36.6	0
36.7	0
36.8	0
36.9	0
37	0
37.1	0
37.2	0
37.3	0
37.4	0
37.5	0
37.6	0
37.7	0
37.8	0
37.9	0
38	0
38.1	0
38.2	0
38.3	0
38.4	0
38.5	0
38.6	0
38.7	0
38.8	0
38.9	0
39	0
39.1	0
39.2	0
39.3	0
39.4	0
39.5	0
39.6	0
39.7	0
39.8	0
39.9	0
40	0
40.1	0
40.2	0
40.3	0
40.4	0
40.5	0
40.6	0
40.7	0
40.8	0
40.9	0
41	0
41.1	0
41.2	0
41.3	0
41.4	0
41.5	0
41.6	0
41.7	0
41.8	0
41.9	0
42	0
42.1	0
42.2	0
42.3	0
42.4	0
42.5	0
42.6	0
42.7	0
42.8	0
42.9	0
43	0
43.1	0
43.2	0
43.3	0
43.4	0
43.5	0
43.6	0
43.7	0
43.8	0
43.9	0
44	0
44.1	0
44.2	0
44.3	0
44.4	0
44.5	0
44.6	0
44.7	0
44.8	0
44.9	0
45	0
45.1	0
45.2	0
45.3	0
45.4	0
45.5	0
45.6	0
45.7	0
45.8	0
45.9	0
46	0
46.1	0
46.2	0
46.3	0
46.4	0
46.5	0
46.6	0
46.7	0
46.8	0
46.9	0
47	0
47.1	0
47.2	0
47.3	0
47.4	0
47.5	0
47.6	0
47.7	0
47.8	0
47.9	0
48	0
48.1	0
48.2	0
48.3	0
48.4	0
48.5	0
48.6	0
48.7	0
48.8	0
48.9	0
49	0
49.1	0
49.2	0
49.3	0
49.4	0
49.5	0
49.6	0
49.7	0
49.8	0
49.9	0
50	0
50.1	0
50.2	0
50.3	0
50.4	0
50.5	0
50.6	0
50.7	0
50.8	0
50.9	0
51	0
51.1	0
51.2	0
51.3	0
51.4	0
51.5	0
51.6	0
51.7	0
51.8	0
51.9	0
52	0
52.1	0
52.2	0
52.3	0
52.4	0
52.5	0
52.6	0
52.7	0
52.8	0
52.9	0
53	0
53.1	0
53.2	0
53.3	0
53.4	0
53.5	0
53.6	0
53.7	0
53.8	0
53.9	0
54	0
54.1	0
54.2	0
54.3	0
54.4	0
54.5	0
54.6	0
54.7	0
54.8	0
54.9	0
55	0
55.1	0
55.2	0
55.3	0
55.4	0
55.5	0
55.6	0
55.7	0
55.8	0
55.9	0
56	0
56.1	0
56.2	0
56.3	0
56.4	0
56.5	0
56.6	0
56.7	0
56.8	0
56.9	0
57	0
57.1	0
57.2	0
57.3	0
57.4	0
57.5	0
57.6	0
57.7	0
57.8	0
57.9	0
58	0
58.1	0
58.2	0
58.3	0
58.4	0
58.5	0
58.6	0
58.7	0
58.8	0
58.9	0
59	0
59.1	0
59.2	0
59.3	0
59.4	0
59.5	0
59.6	0
59.7	0
59.8	0
59.9	0
60	0
60.1	0
60.2	0
60.3	0
60.4	0
60.5	0
60.6	0
60.7	0
60.8	0
60.9	0
61	0
61.1	0
61.2	0
61.3	0
61.4	0
61.5	0
61.6	0
61.7	0
61.8	0
61.9	0
62	0
62.1	0
62.2	0
62.3	0
62.4	0
62.5	0
62.6	0
62.7	0
62.8	0
62.9	0
63	0
63.1	0
63.2	0
63.3	0
63.4	0
63.5	0
63.6	0
63.7	0
63.8	0
63.9	0
64	0
64.1	0
64.2	0
64.3	0
64.4	0
64.5	0
64.6	0
64.7	0
64.8	0
64.9	0
65	0
65.1	0
65.2	0
65.3	0
65.4	0
65.5	0
65.6	0
65.7	0
65.8	0
65.9	0
66	0
66.1	0
66.2	0
66.3	0
66.4	0
66.5	0
66.6	0
66.7	0
66.8	0
66.9	0
67	0
67.1	0
67.2	0
67.3	0
67.4	0
67.5	0
67.6	0
67.7	0
67.8	0
67.9	0
68	0
68.1	0
68.2	0
68.3	0
68.4	0
68.5	0
68.6	0
68.7	0
68.8	0
68.9	0
69	0
69.1	0
69.2	0
69.3	0
69.4	0
69.5	0
69.6	0
69.7	0
69.8	0
69.9	0
70	0
70.1	0
70.2	0
70.3	0
70.4	0
70.5	0
70.6	0
70.7	0
70.8	0
70.9	0
71	0
71.1	0
71.2	0
71.3	0
71.4	0
71.5	0
71.6	0
71.7	0
71.8	0
71.9	0
72	0
72.1	0
72.2	0
72.3	0
72.4	0
72.5	0
72.6	0
72.7	0
72.8	0
72.9	0
73	0
73.1	0
73.2	0
73.3	0
73.4	0
73.5	0
73.6	0
73.7	0
73.8	0
73.9	0
74	0
74.1	0
74.2	0
74.3	0
74.4	0
74.5	0
74.6	0
74.7	0
74.8	0
74.9	0
75	0
75.1	0
75.2	0
75.3	0
75.4	0
75.5	0
75.6	0
75.7	0
75.8	0
75.9	0
76	0
76.1	0
76.2	0
76.3	0
76.4	0
76.5	0
76.6	0
76.7	0
76.8	0
76.9	0
77	0
77.1	0
77.2	0
77.3	0
77.4	0
77.5	0
77.6	0
77.7	0
77.8	0
77.9	0
78	0
78.1	0
78.2	0
78.3	0
78.4	0
78.5	0
78.6	0
78.7	0
78.8	0
78.9	0
79	0
79.1	0
79.2	0
79.3	0
79.4	0
79.5	0
79.6	0
79.7	0
79.8	0
79.9	0
80	0
80.1	0
80.2	0
80.3	0
80.4	0
80.5	0
80.6	0
80.7	0
80.8	0
80.9	0
81	0
81.1	0
81.2	0
81.3	0
81.4	0
81.5	0
81.6	0
81.7	0
81.8	0
81.9	0
82	0
82.1	0
82.2	0
82.3	0
82.4	0
82.5	0
82.6	0
82.7	0
82.8	0
82.9	0
83	0
83.1	0
83.2	0
83.3	0
83.4	0
83.5	0
83.6	0
83.7	0
83.8	0
83.9	0
84	0
84.1	0
84.2	0
84.3	0
84.4	0
84.5	0
84.6	0
84.7	0
84.8	0
84.9	0
85	0
85.1	0
85.2	0
85.3	0
85.4	0
85.5	0
85.6	0
85.7	0
85.8	0
85.9	0
86	0
86.1	0
86.2	0
86.3	0
86.4	0
86.5	0
86.6	0
86.7	0
86.8	0
86.9	0
87	0
87.1	0
87.2	0
87.3	0
87.4	0
87.5	0
87.6	0
87.7	0
87.8	0
87.9	0
88	0
88.1	0
88.2	0
88.3	0
88.4	0
88.5	0
88.6	0
88.7	0
88.8	0
88.9	0
89	0
89.1	0
89.2	0
89.3	0
89.4	0
89.5	0
89.6	0
89.7	0
89.8	0
89.9	0
90	0
90.1	0
90.2	0
90.3	0
90.4	0
90.5	0
90.6	0
90.7	0
90.8	0
90.9	0
91	0
91.1	0
91.2	0
91.3	0
91.4	0
91.5	0
91.6	0
91.7	0
91.8	0
91.9	0
92	0
92.1	0
92.2	0
92.3	0
92.4	0
92.5	0
92.6	0
92.7	0
92.8	0
92.9	0
93	0
93.1	0
93.2	0
93.3	0
93.4	0
93.5	0
93.6	0
93.7	0
93.8	0
93.9	0
94	0
94.1	0
94.2	0
94.3	0
94.4	0
94.5	0
94.6	0
94.7	0
94.8	0
94.9	0
95	0
95.1	0
95.2	0
95.3	0
95.4	0
95.5	0
95.6	0
95.7	0
95.8	0
95.9	0
96	0
96.1	0
96.2	0
96.3	0
96.4	0
96.5	0
96.6	0
96.7	0
96.8	0
96.9	0
97	0
97.1	0
97.2	0
97.3	0
97.4	0
97.5	0
97.6	0
97.7	0
97.8	0
97.9	0
98	0
98.1	0
98.2	0
98.3	0
98.4	0
98.5	0
98.6	0
98.7	0
98.8	0
98.9	0
99	0
99.1	0
99.2	0
99.3	0
99.4	0
99.5	0
99.6	0
99.7	0
99.8	0
99.9	0
100	0
100.1	0.00233333
100.2	0.004
100.3	0.00566667
100.4	0.007
100.5	0.009
100.6	0.01
100.7	0.013
100.8	0.014
100.9	0.015
101	0.0153333
101.1	0.018
101.2	0.0186667
101.3	0.019
101.4	0.0203333
101.5	0.023
101.6	0.0243333
101.7	0.0256667
101.8	0.0276667
101.9	0.0283333
102	0.0313333
102.1	0.0326667
102.2	0.034
102.3	0.0336667
102.4	0.0356667
102.5	0.0363333
102.6	0.037
102.7	0.039
102.8	0.0393333
102.9	0.042
103	0.0443333
103.1	0.0476667
103.2	0.0486667
103.3	0.051
103.4	0.0516667
103.5	0.0533333
103.6	0.0536667
103.7	0.055
103.8	0.055
103.9	0.0543333
104	0.0553333
104.1	0.0576667
104.2	0.06
104.3	0.061
104.4	0.0613333
104.5	0.063
104.6	0.0643333
104.7	0.066
104.8	0.067
104.9	0.067
105	0.0676667
105.1	0.0703333
105.2	0.0706667
105.3	0.0713333
105.4	0.0716667
105.5	0.0756667
105.6	0.077
105.7	0.0763333
105.8	0.077
105.9	0.0773333
106	0.0773333
106.1	0.0786667
106.2	0.078
106.3	0.0793333
106.4	0.0786667
106.5	0.078
106.6	0.0776667
106.7	0.0786667
106.8	0.0803333
106.9	0.0823333
107	0.0816667
107.1	0.0833333
107.2	0.0853333
107.3	0.087
107.4	0.0876667
107.5	0.0876667
107.6	0.088
107.7	0.0883333
107.8	0.09
107.9	0.0906667
108	0.09
108.1	0.0906667
108.2	0.091
108.3	0.0913333
108.4	0.092
108.5	0.0933333
108.6	0.092
108.7	0.092
108.8	0.0926667
108.9	0.094
109	0.0946667
109.1	0.0966667
109.2	0.0986667
109.3	0.099
109.4	0.1
109.5	0.100333
109.6	0.1
109.7	0.0996667
109.8	0.100333
109.9	0.100667
110	0.101
110.1	0.101333
110.2	0.102333
110.3	0.102
110.4	0.102333
110.5	0.102333
110.6	0.103333
110.7	0.105
110.8	0.105667
110.9	0.107667
111	0.108
111.1	0.110667
111.2	0.109667
111.3	0.108667
111.4	0.108
111.5	0.110667
111.6	0.111667
111.7	0.113
111.8	0.113
111.9	0.114667
112	0.116
112.1	0.116333
112.2	0.118
112.3	0.119
112.4	0.119
112.5	0.118333
112.6	0.118
112.7	0.119
112.8	0.119
112.9	0.118333
113	0.119
113.1	0.121333
113.2	0.121
113.3	0.120333
113.4	0.120667
113.5	0.121
113.6	0.121667
113.7	0.122
113.8	0.122667
113.9	0.122667
114	0.122333
114.1	0.123667
114.2	0.122667
114.3	0.122667
114.4	0.122333
114.5	0.122667
114.6	0.123
114.7	0.123
114.8	0.124
114.9	0.124667
115	0.124333
115.1	0.123333
115.2	0.124333
115.3	0.123
115.4	0.125333
115.5	0.125333
115.6	0.125333
115.7	0.126
115.8	0.128
115.9	0.124667
116	0.125
116.1	0.124667
116.2	0.123667
116.3	0.124
116.4	0.124
116.5	0.124333
116.6	0.123
116.7	0.123333
116.8	0.123
116.9	0.123333
117	0.122333
117.1	0.123667
117.2	0.123667
117.3	0.122333
117.4	0.122333
117.5	0.124333
117.6	0.125667
117.7	0.125
117.8	0.125333
117.9	0.125
118	0.126
118.1	0.126
118.2	0.127
118.3	0.126333
118.4	0.126667
118.5	0.126333
118.6	0.129333
118.7	0.129
118.8	0.130667
118.9	0.131
119	0.131333
119.1	0.132667
119.2	0.133
119.3	0.132
119.4	0.132
119.5	0.133667
119.6	0.134
119.7	0.134
119.8	0.135
119.9	0.133333
120	0.132667
120.1	0.132667
120.2	0.133333
120.3	0.134
120.4	0.135667
120.5	0.135667
120.6	0.135
120.7	0.135333
120.8	0.136333
120.9	0.138
121	0.139333
121.1	0.141333
121.2	0.141
121.3	0.141
121.4	0.141333
121.5	0.143
121.6	0.143333
121.7	0.144333
121.8	0.145333
121.9	0.145667
122	0.142667
122.1	0.142667
122.2	0.141667
122.3	0.142667
122.4	0.145
122.5	0.145333
122.6	0.145
122.7	0.142333
122.8	0.142
122.9	0.141333
123	0.143
123.1	0.142
123.2	0.142667
123.3	0.143667
123.4	0.144333
123.5	0.144
123.6	0.145
123.7	0.143667
123.8	0.143
123.9	0.141
124	0.141
124.1	0.141333
124.2	0.141
124.3	0.141333
124.4	0.142
124.5	0.143333
124.6	0.143333
124.7	0.143667
124.8	0.143333
124.9	0.144667
125	0.145
125.1	0.147
125.2	0.147667
125.3	0.148333
125.4	0.148667
125.5	0.149667
125.6	0.151333
125.7	0.151
125.8	0.149333
125.9	0.147333
126	0.147
126.1	0.146667
126.2	0.147
126.3	0.148
126.4	0.148667
126.5	0.148333
126.6	0.15
126.7	0.148
126.8	0.149667
126.9	0.149
127	0.148333
127.1	0.15
127.2	0.149333
127.3	0.149667
127.4	0.148333
127.5	0.148667
127.6	0.149667
127.7	0.150333
127.8	0.150667
127.9	0.152667
128	0.150333
128.1	0.149667
128.2	0.149
128.3	0.148667
128.4	0.148667
128.5	0.149
128.6	0.149333
128.7	0.149333
128.8	0.148333
128.9	0.145667
129	0.145
129.1	0.144333
129.2	0.143333
129.3	0.143667
129.4	0.142667
129.5	0.143667
129.6	0.143
129.7	0.143667
129.8	0.143
129.9	0.142
130	0.142667
130.1	0.143333
130.2	0.144667
130.3	0.144333
130.4	0.144667
130.5	0.145667
130.6	0.146333
130.7	0.146
130.8	0.145667
130.9	0.147333
131	0.147667
131.1	0.146333
131.2	0.147
131.3	0.148333
131.4	0.149667
131.5	0.151
131.6	0.152
131.7	0.152667
131.8	0.152667
131.9	0.153
132	0.152333
132.1	0.152333
132.2	0.153333
132.3	0.152333
132.4	0.152667
132.5	0.151667
132.6	0.150667
132.7	0.151
132.8	0.150333
132.9	0.151
133	0.151
133.1	0.15
133.2	0.150667
133.3	0.151333
133.4	0.151667
133.5	0.152333
133.6	0.154
133.7	0.154667
133.8	0.154
133.9	0.153333
134	0.152
134.1	0.152333
134.2	0.152
134.3	0.152
134.4	0.151667
134.5	0.15
134.6	0.149667
134.7	0.151667
134.8	0.151667
134.9	0.152667
135	0.153667
135.1	0.153667
135.2	0.153333
135.3	0.154667
135.4	0.155
135.5	0.155333
135.6	0.155
135.7	0.156333
135.8	0.156333
135.9	0.157
136	0.155
136.1	0.155
136.2	0.155333
136.3	0.155
136.4	0.155333
136.5	0.153333
136.6	0.153
136.7	0.152667
136.8	0.153333
136.9	0.152333
137	0.152
137.1	0.152333
137.2	0.151333
137.3	0.151
137.4	0.151667
137.5	0.151
137.6	0.151333
137.7	0.149667
137.8	0.149667
137.9	0.148667
138	0.15
138.1	0.151667
138.2	0.152667
138.3	0.153667
138.4	0.153
138.5	0.153667
138.6	0.155333
138.7	0.155
138.8	0.156
138.9	0.153333
139	0.151667
139.1	0.150333
139.2	0.151
139.3	0.151333
139.4	0.151
139.5	0.152
139.6	0.150333
139.7	0.15
139.8	0.149
139.9	0.149333
140	0.149
140.1	0.148333
140.2	0.149333
140.3	0.149
140.4	0.149
140.5	0.148667
140.6	0.147667
140.7	0.149
140.8	0.149333
140.9	0.150667
141	0.151
141.1	0.151333
141.2	0.151667
141.3	0.151667
141.4	0.152
141.5	0.151
141.6	0.149667
141.7	0.147667
141.8	0.148
141.9	0.146333
142	0.146
142.1	0.144667
142.2	0.145
142.3	0.145333
142.4	0.144
142.5	0.144
142.6	0.144667
142.7	0.144333
142.8	0.143333
142.9	0.142667
143	0.142667
143.1	0.143
143.2	0.143333
143.3	0.144667
143.4	0.146667
143.5	0.146333
143.6	0.147
143.7	0.145667
143.8	0.146667
143.9	0.147
144	0.146667
144.1	0.147
144.2	0.148667
144.3	0.148
144.4	0.147667
144.5	0.147667
144.6	0.147333
144.7	0.147333
144.8	0.146333
144.9	0.147
145	0.148333
145.1	0.148333
145.2	0.149333
145.3	0.15
145.4	0.15
145.5	0.151
145.6	0.151333
145.7	0.152667
145.8	0.151
145.9	0.152667
146	0.154333
146.1	0.153333
146.2	0.154
146.3	0.153667
146.4	0.154667
146.5	0.155667
146.6	0.156
146.7	0.153667
146.8	0.155
146.9	0.153667
147	0.153333
147.1	0.155333
147.2	0.154667
147.3	0.156667
147.4	0.158
147.5	0.158
147.6	0.158
147.7	0.160667
147.8	0.161
147.9	0.160667
148	0.159333
148.1	0.161
148.2	0.161
148.3	0.160667
148.4	0.159
148.5	0.158333
148.6	0.158
148.7	0.157
148.8	0.157
148.9	0.156
149	0.156333
149.1	0.158
149.2	0.157333
149.3	0.156
149.4	0.156
149.5	0.156
149.6	0.155667
149.7	0.154667
149.8	0.155333
149.9	0.155333
150	0.156
150.1	0.155
150.2	0.154667
150.3	0.152667
150.4	0.154333
150.5	0.154333
150.6	0.153667
150.7	0.154667
150.8	0.156667
150.9	0.156
151	0.155
151.1	0.155
151.2	0.154667
151.3	0.153
151.4	0.153667
151.5	0.154333
151.6	0.155
151.7	0.154667
151.8	0.154333
151.9	0.153667
152	0.152667
152.1	0.152
152.2	0.153667
152.3	0.153
152.4	0.153
152.5	0.151667
152.6	0.150333
152.7	0.150333
152.8	0.149
152.9	0.148667
153	0.149
153.1	0.150333
153.2	0.151
153.3	0.150333
153.4	0.149667
153.5	0.149333
153.6	0.146667
153.7	0.145667
153.8	0.146667
153.9	0.145
154	0.144667
154.1	0.144
154.2	0.145
154.3	0.144667
154.4	0.145
154.5	0.145
154.6	0.144
154.7	0.143333
154.8	0.142333
154.9	0.143333
155	0.143667
155.1	0.142667
155.2	0.143333
155.3	0.144
155.4	0.143667
155.5	0.144333
155.6	0.144
155.7	0.145333
155.8	0.146
155.9	0.145
156	0.144667
156.1	0.145667
156.2	0.146333
156.3	0.146333
156.4	0.145667
156.5	0.145333
156.6	0.146667
156.7	0.146
156.8	0.145667
156.9	0.146
157	0.147
157.1	0.144667
157.2	0.145333
157.3	0.145
157.4	0.144333
157.5	0.143667
157.6	0.144333
157.7	0.145667
157.8	0.145333
157.9	0.145667
158	0.146333
158.1	0.145667
158.2	0.145
158.3	0.145
158.4	0.144
158.5	0.144333
158.6	0.143
158.7	0.143333
158.8	0.143667
158.9	0.143667
159	0.142
159.1	0.142
159.2	0.140667
159.3	0.140667
159.4	0.141
159.5	0.142667
159.6	0.142333
159.7	0.142667
159.8	0.140667
159.9	0.140333
160	0.140333
160.1	0.14
160.2	0.140667
160.3	0.142
160.4	0.143333
160.5	0.144333
160.6	0.144
160.7	0.143667
160.8	0.144333
160.9	0.144333
161	0.143333
161.1	0.143333
161.2	0.143667
161.3	0.143667
161.4	0.141667
161.5	0.143
161.6	0.143
161.7	0.143
161.8	0.143333
161.9	0.144667
162	0.144667
162.1	0.144667
162.2	0.144
162.3	0.143667
162.4	0.143667
162.5	0.144333
162.6	0.143
162.7	0.143333
162.8	0.144
162.9	0.142
163	0.142
163.1	0.141
163.2	0.140667
163.3	0.139667
163.4	0.14
163.5	0.140333
163.6	0.139667
163.7	0.139
163.8	0.138333
163.9	0.139
164	0.138667
164.1	0.14
164.2	0.14
164.3	0.141
164.4	0.141
164.5	0.143333
164.6	0.145333
164.7	0.145333
164.8	0.146333
164.9	0.145667
165	0.149
165.1	0.149667
165.2	0.152333
165.3	0.151667
165.4	0.150667
165.5	0.15
165.6	0.15
165.7	0.150667
165.8	0.151333
165.9	0.151667
166	0.151333
166.1	0.15
166.2	0.149667
166.3	0.149667
166.4	0.148333
166.5	0.148667
166.6	0.148333
166.7	0.146333
166.8	0.145667
166.9	0.144
167	0.144
167.1	0.143
167.2	0.141667
167.3	0.142
167.4	0.141333
167.5	0.143
167.6	0.143
167.7	0.144333
167.8	0.145
167.9	0.144333
168	0.144667
168.1	0.146333
168.2	0.145667
168.3	0.146
168.4	0.146333
168.5	0.145667
168.6	0.144667
168.7	0.144667
168.8	0.145333
168.9	0.146667
169	0.146333
169.1	0.146
169.2	0.145333
169.3	0.145667
169.4	0.146333
169.5	0.146
169.6	0.144333
169.7	0.145667
169.8	0.144667
169.9	0.144333
170	0.142667
170.1	0.141
170.2	0.142
170.3	0.141
170.4	0.14
170.5	0.140333
170.6	0.141
170.7	0.14
170.8	0.139
170.9	0.138667
171	0.139
171.1	0.138667
171.2	0.138333
171.3	0.139667
171.4	0.140333
171.5	0.140333
171.6	0.139
171.7	0.138333
171.8	0.136
171.9	0.135667
172	0.137333
172.1	0.137333
172.2	0.136667
172.3	0.138
172.4	0.135667
172.5	0.136333
172.6	0.136
172.7	0.136667
172.8	0.137667
172.9	0.138
173	0.139
173.1	0.137333
173.2	0.137333
173.3	0.139
173.4	0.138667
173.5	0.137
173.6	0.136667
173.7	0.136
173.8	0.137333
173.9	0.138
174	0.136333
174.1	0.137667
174.2	0.137333
174.3	0.137333
174.4	0.137
174.5	0.137333
174.6	0.137333
174.7	0.136667
174.8	0.137333
174.9	0.136333
175	0.136333
175.1	0.137
175.2	0.137
175.3	0.138333
175.4	0.138333
175.5	0.139
175.6	0.139
175.7	0.140333
175.8	0.139667
175.9	0.138333
176	0.139
176.1	0.139333
176.2	0.14
176.3	0.140333
176.4	0.142
176.5	0.142333
176.6	0.141
176.7	0.142
176.8	0.142
176.9	0.141
177	0.140667
177.1	0.140333
177.2	0.140667
177.3	0.141333
177.4	0.143
177.5	0.142
177.6	0.143667
177.7	0.144333
177.8	0.146
177.9	0.145667
178	0.146
178.1	0.145333
178.2	0.145
178.3	0.144667
178.4	0.143667
178.5	0.144333
178.6	0.143333
178.7	0.145
178.8	0.145
178.9	0.145
179	0.144667
179.1	0.145333
179.2	0.147333
179.3	0.145333
179.4	0.146
179.5	0.145667
179.6	0.145667
179.7	0.146333
179.8	0.145667
179.9	0.143667
180	0.144
180.1	0.147
180.2	0.146333
180.3	0.145667
180.4	0.145
180.5	0.145333
180.6	0.146333
180.7	0.145333
180.8	0.144
180.9	0.144
181	0.144
181.1	0.144
181.2	0.144
181.3	0.145333
181.4	0.145333
181.5	0.145667
181.6	0.147333
181.7	0.146667
181.8	0.146333
181.9	0.147
182	0.147333
182.1	0.148667
182.2	0.149
182.3	0.148667
182.4	0.149333
182.5	0.148
182.6	0.147
182.7	0.146667
182.8	0.146
182.9	0.146333
183	0.145667
183.1	0.145667
183.2	0.144667
183.3	0.145
183.4	0.145
183.5	0.144333
183.6	0.144667
183.7	0.143333
183.8	0.143
183.9	0.145
184	0.145333
184.1	0.146
184.2	0.146667
184.3	0.147667
184.4	0.149
184.5	0.148333
184.6	0.149333
184.7	0.148667
184.8	0.147333
184.9	0.146667
185	0.146333
185.1	0.146667
185.2	0.148
185.3	0.149
185.4	0.148
185.5	0.150333
185.6	0.151333
185.7	0.151667
185.8	0.152667
185.9	0.154
186	0.153
186.1	0.153667
186.2	0.155
186.3	0.154
186.4	0.151667
186.5	0.151333
186.6	0.152
186.7	0.153
186.8	0.153333
186.9	0.152667
187	0.152
187.1	0.151
187.2	0.151667
187.3	0.153333
187.4	0.151333
187.5	0.151667
187.6	0.15
187.7	0.149667
187.8	0.149
187.9	0.150667
188	0.150333
188.1	0.151333
188.2	0.153667
188.3	0.153
188.4	0.151333
188.5	0.151667
188.6	0.153
188.7	0.153
188.8	0.153667
188.9	0.153
189	0.154333
189.1	0.154
189.2	0.154
189.3	0.154667
189.4	0.153333
189.5	0.153
189.6	0.153
189.7	0.152667
189.8	0.153333
189.9	0.155
190	0.154667
190.1	0.154667
190.2	0.154333
190.3	0.154667
190.4	0.155667
190.5	0.154667
190.6	0.154333
190.7	0.154667
190.8	0.153667
190.9	0.152
191	0.152
191.1	0.152333
191.2	0.151333
191.3	0.151667
191.4	0.151667
191.5	0.153667
191.6	0.152333
191.7	0.151
191.8	0.149667
191.9	0.149
192	0.147
192.1	0.146667
192.2	0.145333
192.3	0.148333
192.4	0.147667
192.5	0.148
192.6	0.147667
192.7	0.147333
192.8	0.148
192.9	0.148333
193	0.148
193.1	0.149
193.2	0.148667
193.3	0.148
193.4	0.148333
193.5	0.147
193.6	0.147333
193.7	0.147667
193.8	0.148
193.9	0.148
194	0.149333
194.1	0.149333
194.2	0.147
194.3	0.147667
194.4	0.147667
194.5	0.148
194.6	0.148333
194.7	0.15
194.8	0.150333
194.9	0.150667
195	0.149667
195.1	0.149667
195.2	0.150667
195.3	0.150667
195.4	0.150333
195.5	0.152667
195.6	0.153
195.7	0.153
195.8	0.152667
195.9	0.153
196	0.153667
196.1	0.155
196.2	0.155333
196.3	0.154
196.4	0.155
196.5	0.155333
196.6	0.155333
196.7	0.155
196.8	0.155667
196.9	0.155333
197	0.155667
197.1	0.157
197.2	0.157667
197.3	0.158
197.4	0.159
197.5	0.159333
197.6	0.158667
197.7	0.158333
197.8	0.156333
197.9	0.156667
198	0.156333
198.1	0.156333
198.2	0.156333
198.3	0.155667
198.4	0.155667
198.5	0.156
198.6	0.157333
198.7	0.156333
198.8	0.155333
198.9	0.154
199	0.153667
199.1	0.155
199.2	0.156667
199.3	0.157667
199.4	0.157
199.5	0.156
199.6	0.157667
199.7	0.158667
199.8	0.157333
199.9	0.157333
200	0.157333
[truncated: 14,000 more rows]
