# Supplementary material for: Bayesian inference of kinetic schemes for ion channels by Kalman filtering
Source: eLife journal article supplement (doi:10.7554/elife.62714), 2022-05-04
Supplement: fig4-data11 [file 1_Sim_N_1500_Strom_MW.xlsx]

## Sheet: Tabelle1
0.1	0
0.2	0
0.3	0
0.4	0
0.5	0
0.6	0
0.7	0
0.8	0
0.9	0
1	0
1.1	0
1.2	0
1.3	0
1.4	0
1.5	0
1.6	0
1.7	0
1.8	0
1.9	0
2	0
2.1	0
2.2	0
2.3	0
2.4	0
2.5	0
2.6	0
2.7	0
2.8	0
2.9	0
3	0
3.1	0
3.2	0
3.3	0
3.4	0
3.5	0
3.6	0
3.7	0
3.8	0
3.9	0
4	0
4.1	0
4.2	0
4.3	0
4.4	0
4.5	0
4.6	0
4.7	0
4.8	0
4.9	0
5	0
5.1	0
5.2	0
5.3	0
5.4	0
5.5	0
5.6	0
5.7	0
5.8	0
5.9	0
6	0
6.1	0
6.2	0
6.3	0
6.4	0
6.5	0
6.6	0
6.7	0
6.8	0
6.9	0
7	0
7.1	0
7.2	0
7.3	0
7.4	0
7.5	0
7.6	0
7.7	0
7.8	0
7.9	0
8	0
8.1	0
8.2	0
8.3	0
8.4	0
8.5	0
8.6	0
8.7	0
8.8	0
8.9	0
9	0
9.1	0
9.2	0
9.3	0
9.4	0
9.5	0
9.6	0
9.7	0
9.8	0
9.9	0
10	0
10.1	0
10.2	0
10.3	0
10.4	0
10.5	0
10.6	0
10.7	0
10.8	0
10.9	0
11	0
11.1	0
11.2	0
11.3	0
11.4	0
11.5	0
11.6	0
11.7	0
11.8	0
11.9	0
12	0
12.1	0
12.2	0
12.3	0
12.4	0
12.5	0
12.6	0
12.7	0
12.8	0
12.9	0
13	0
13.1	0
13.2	0
13.3	0
13.4	0
13.5	0
13.6	0
13.7	0
13.8	0
13.9	0
14	0
14.1	0
14.2	0
14.3	0
14.4	0
14.5	0
14.6	0
14.7	0
14.8	0
14.9	0
15	0
15.1	0
15.2	0
15.3	0
15.4	0
15.5	0
15.6	0
15.7	0
15.8	0
15.9	0
16	0
16.1	0
16.2	0
16.3	0
16.4	0
16.5	0
16.6	0
16.7	0
16.8	0
16.9	0
17	0
17.1	0
17.2	0
17.3	0
17.4	0
17.5	0
17.6	0
17.7	0
17.8	0
17.9	0
18	0
18.1	0
18.2	0
18.3	0
18.4	0
18.5	0
18.6	0
18.7	0
18.8	0
18.9	0
19	0
19.1	0
19.2	0
19.3	0
19.4	0
19.5	0
19.6	0
19.7	0
19.8	0
19.9	0
20	0
20.1	0
20.2	0
20.3	0
20.4	0
20.5	0
20.6	0
20.7	0
20.8	0
20.9	0
21	0
21.1	0
21.2	0
21.3	0
21.4	0
21.5	0
21.6	0
21.7	0
21.8	0
21.9	0
22	0
22.1	0
22.2	0
22.3	0
22.4	0
22.5	0
22.6	0
22.7	0
22.8	0
22.9	0
23	0
23.1	0
23.2	0
23.3	0
23.4	0
23.5	0
23.6	0
23.7	0
23.8	0
23.9	0
24	0
24.1	0
24.2	0
24.3	0
24.4	0
24.5	0
24.6	0
24.7	0
24.8	0
24.9	0
25	0
25.1	0
25.2	0
25.3	0
25.4	0
25.5	0
25.6	0
25.7	0
25.8	0
25.9	0
26	0
26.1	0
26.2	0
26.3	0
26.4	0
26.5	0
26.6	0
26.7	0
26.8	0
26.9	0
27	0
27.1	0
27.2	0
27.3	0
27.4	0
27.5	0
27.6	0
27.7	0
27.8	0
27.9	0
28	0
28.1	0
28.2	0
28.3	0
28.4	0
28.5	0
28.6	0
28.7	0
28.8	0
28.9	0
29	0
29.1	0
29.2	0
29.3	0
29.4	0
29.5	0
29.6	0
29.7	0
29.8	0
29.9	0
30	0
30.1	0
30.2	0
30.3	0
30.4	0
30.5	0
30.6	0
30.7	0
30.8	0
30.9	0
31	0
31.1	0
31.2	0
31.3	0
31.4	0
31.5	0
31.6	0
31.7	0
31.8	0
31.9	0
32	0
32.1	0
32.2	0
32.3	0
32.4	0
32.5	0
32.6	0
32.7	0
32.8	0
32.9	0
33	0
33.1	0
33.2	0
33.3	0
33.4	0
33.5	0
33.6	0
33.7	0
33.8	0
33.9	0
34	0
34.1	0
34.2	0
34.3	0
34.4	0
34.5	0
34.6	0
34.7	0
34.8	0
34.9	0
35	0
35.1	0
35.2	0
35.3	0
35.4	0
35.5	0
35.6	0
35.7	0
35.8	0
35.9	0
36	0
36.1	0
36.2	0
36.3	0
36.4	0
36.5	0
36.6	0
36.7	0
36.8	0
36.9	0
37	0
37.1	0
37.2	0
37.3	0
37.4	0
37.5	0
37.6	0
37.7	0
37.8	0
37.9	0
38	0
38.1	0
38.2	0
38.3	0
38.4	0
38.5	0
38.6	0
38.7	0
38.8	0
38.9	0
39	0
39.1	0
39.2	0
39.3	0
39.4	0
39.5	0
39.6	0
39.7	0
39.8	0
39.9	0
40	0
40.1	0
40.2	0
40.3	0
40.4	0
40.5	0
40.6	0
40.7	0
40.8	0
40.9	0
41	0
41.1	0
41.2	0
41.3	0
41.4	0
41.5	0
41.6	0
41.7	0
41.8	0
41.9	0
42	0
42.1	0
42.2	0
42.3	0
42.4	0
42.5	0
42.6	0
42.7	0
42.8	0
42.9	0
43	0
43.1	0
43.2	0
43.3	0
43.4	0
43.5	0
43.6	0
43.7	0
43.8	0
43.9	0
44	0
44.1	0
44.2	0
44.3	0
44.4	0
44.5	0
44.6	0
44.7	0
44.8	0
44.9	0
45	0
45.1	0
45.2	0
45.3	0
45.4	0
45.5	0
45.6	0
45.7	0
45.8	0
45.9	0
46	0
46.1	0
46.2	0
46.3	0
46.4	0
46.5	0
46.6	0
46.7	0
46.8	0
46.9	0
47	0
47.1	0
47.2	0
47.3	0
47.4	0
47.5	0
47.6	0
47.7	0
47.8	0
47.9	0
48	0
48.1	0
48.2	0
48.3	0
48.4	0
48.5	0
48.6	0
48.7	0
48.8	0
48.9	0
49	0
49.1	0
49.2	0
49.3	0
49.4	0
49.5	0
49.6	0
49.7	0
49.8	0
49.9	0
50	0
50.1	0
50.2	0
50.3	0
50.4	0
50.5	0
50.6	0
50.7	0
50.8	0
50.9	0
51	0
51.1	0
51.2	0
51.3	0
51.4	0
51.5	0
51.6	0
51.7	0
51.8	0
51.9	0
52	0
52.1	0
52.2	0
52.3	0
52.4	0
52.5	0
52.6	0
52.7	0
52.8	0
52.9	0
53	0
53.1	0
53.2	0
53.3	0
53.4	0
53.5	0
53.6	0
53.7	0
53.8	0
53.9	0
54	0
54.1	0
54.2	0
54.3	0
54.4	0
54.5	0
54.6	0
54.7	0
54.8	0
54.9	0
55	0
55.1	0
55.2	0
55.3	0
55.4	0
55.5	0
55.6	0
55.7	0
55.8	0
55.9	0
56	0
56.1	0
56.2	0
56.3	0
56.4	0
56.5	0
56.6	0
56.7	0
56.8	0
56.9	0
57	0
57.1	0
57.2	0
57.3	0
57.4	0
57.5	0
57.6	0
57.7	0
57.8	0
57.9	0
58	0
58.1	0
58.2	0
58.3	0
58.4	0
58.5	0
58.6	0
58.7	0
58.8	0
58.9	0
59	0
59.1	0
59.2	0
59.3	0
59.4	0
59.5	0
59.6	0
59.7	0
59.8	0
59.9	0
60	0
60.1	0
60.2	0
60.3	0
60.4	0
60.5	0
60.6	0
60.7	0
60.8	0
60.9	0
61	0
61.1	0
61.2	0
61.3	0
61.4	0
61.5	0
61.6	0
61.7	0
61.8	0
61.9	0
62	0
62.1	0
62.2	0
62.3	0
62.4	0
62.5	0
62.6	0
62.7	0
62.8	0
62.9	0
63	0
63.1	0
63.2	0
63.3	0
63.4	0
63.5	0
63.6	0
63.7	0
63.8	0
63.9	0
64	0
64.1	0
64.2	0
64.3	0
64.4	0
64.5	0
64.6	0
64.7	0
64.8	0
64.9	0
65	0
65.1	0
65.2	0
65.3	0
65.4	0
65.5	0
65.6	0
65.7	0
65.8	0
65.9	0
66	0
66.1	0
66.2	0
66.3	0
66.4	0
66.5	0
66.6	0
66.7	0
66.8	0
66.9	0
67	0
67.1	0
67.2	0
67.3	0
67.4	0
67.5	0
67.6	0
67.7	0
67.8	0
67.9	0
68	0
68.1	0
68.2	0
68.3	0
68.4	0
68.5	0
68.6	0
68.7	0
68.8	0
68.9	0
69	0
69.1	0
69.2	0
69.3	0
69.4	0
69.5	0
69.6	0
69.7	0
69.8	0
69.9	0
70	0
70.1	0
70.2	0
70.3	0
70.4	0
70.5	0
70.6	0
70.7	0
70.8	0
70.9	0
71	0
71.1	0
71.2	0
71.3	0
71.4	0
71.5	0
71.6	0
71.7	0
71.8	0
71.9	0
72	0
72.1	0
72.2	0
72.3	0
72.4	0
72.5	0
72.6	0
72.7	0
72.8	0
72.9	0
73	0
73.1	0
73.2	0
73.3	0
73.4	0
73.5	0
73.6	0
73.7	0
73.8	0
73.9	0
74	0
74.1	0
74.2	0
74.3	0
74.4	0
74.5	0
74.6	0
74.7	0
74.8	0
74.9	0
75	0
75.1	0
75.2	0
75.3	0
75.4	0
75.5	0
75.6	0
75.7	0
75.8	0
75.9	0
76	0
76.1	0
76.2	0
76.3	0
76.4	0
76.5	0
76.6	0
76.7	0
76.8	0
76.9	0
77	0
77.1	0
77.2	0
77.3	0
77.4	0
77.5	0
77.6	0
77.7	0
77.8	0
77.9	0
78	0
78.1	0
78.2	0
78.3	0
78.4	0
78.5	0
78.6	0
78.7	0
78.8	0
78.9	0
79	0
79.1	0
79.2	0
79.3	0
79.4	0
79.5	0
79.6	0
79.7	0
79.8	0
79.9	0
80	0
80.1	0
80.2	0
80.3	0
80.4	0
80.5	0
80.6	0
80.7	0
80.8	0
80.9	0
81	0
81.1	0
81.2	0
81.3	0
81.4	0
81.5	0
81.6	0
81.7	0
81.8	0
81.9	0
82	0
82.1	0
82.2	0
82.3	0
82.4	0
82.5	0
82.6	0
82.7	0
82.8	0
82.9	0
83	0
83.1	0
83.2	0
83.3	0
83.4	0
83.5	0
83.6	0
83.7	0
83.8	0
83.9	0
84	0
84.1	0
84.2	0
84.3	0
84.4	0
84.5	0
84.6	0
84.7	0
84.8	0
84.9	0
85	0
85.1	0
85.2	0
85.3	0
85.4	0
85.5	0
85.6	0
85.7	0
85.8	0
85.9	0
86	0
86.1	0
86.2	0
86.3	0
86.4	0
86.5	0
86.6	0
86.7	0
86.8	0
86.9	0
87	0
87.1	0
87.2	0
87.3	0
87.4	0
87.5	0
87.6	0
87.7	0
87.8	0
87.9	0
88	0
88.1	0
88.2	0
88.3	0
88.4	0
88.5	0
88.6	0
88.7	0
88.8	0
88.9	0
89	0
89.1	0
89.2	0
89.3	0
89.4	0
89.5	0
89.6	0
89.7	0
89.8	0
89.9	0
90	0
90.1	0
90.2	0
90.3	0
90.4	0
90.5	0
90.6	0
90.7	0
90.8	0
90.9	0
91	0
91.1	0
91.2	0
91.3	0
91.4	0
91.5	0
91.6	0
91.7	0
91.8	0
91.9	0
92	0
92.1	0
92.2	0
92.3	0
92.4	0
92.5	0
92.6	0
92.7	0
92.8	0
92.9	0
93	0
93.1	0
93.2	0
93.3	0
93.4	0
93.5	0
93.6	0
93.7	0
93.8	0
93.9	0
94	0
94.1	0
94.2	0
94.3	0
94.4	0
94.5	0
94.6	0
94.7	0
94.8	0
94.9	0
95	0
95.1	0
95.2	0
95.3	0
95.4	0
95.5	0
95.6	0
95.7	0
95.8	0
95.9	0
96	0
96.1	0
96.2	0
96.3	0
96.4	0
96.5	0
96.6	0
96.7	0
96.8	0
96.9	0
97	0
97.1	0
97.2	0
97.3	0
97.4	0
97.5	0
97.6	0
97.7	0
97.8	0
97.9	0
98	0
98.1	0
98.2	0
98.3	0
98.4	0
98.5	0
98.6	0
98.7	0
98.8	0
98.9	0
99	0
99.1	0
99.2	0
99.3	0
99.4	0
99.5	0
99.6	0
99.7	0
99.8	0
99.9	0
100	0
100.1	0
100.2	0
100.3	0
100.4	0
100.5	0
100.6	0
100.7	0
100.8	0
100.9	0
101	0
101.1	0
101.2	0
101.3	0
101.4	0
101.5	0
101.6	0
101.7	0
101.8	0
101.9	0
102	0
102.1	0
102.2	0
102.3	0
102.4	0
102.5	0
102.6	0
102.7	0
102.8	0
102.9	0
103	0
103.1	0
103.2	0
103.3	0
103.4	0
103.5	0
103.6	0
103.7	0
103.8	0
103.9	0
104	0
104.1	0
104.2	0
104.3	0
104.4	0
104.5	0
104.6	0
104.7	0
104.8	0
104.9	0
105	0
105.1	0
105.2	0
105.3	0
105.4	0
105.5	0
105.6	0
105.7	0
105.8	0
105.9	0
106	0
106.1	0
106.2	0
106.3	0
106.4	0
106.5	0
106.6	0
106.7	0
106.8	0
106.9	0
107	0
107.1	0
107.2	0
107.3	0
107.4	0
107.5	0
107.6	0
107.7	0
107.8	0
107.9	0
108	0
108.1	0
108.2	0
108.3	0
108.4	0
108.5	0
108.6	0
108.7	0
108.8	0
108.9	0
109	0
109.1	0
109.2	0.000666667
109.3	0.000666667
109.4	0.000666667
109.5	0.000666667
109.6	0.000666667
109.7	0.000666667
109.8	0.000666667
109.9	0.000666667
110	0.000666667
110.1	0.000666667
110.2	0.000666667
110.3	0.000666667
110.4	0.000666667
110.5	0.000666667
110.6	0.000666667
110.7	0.000666667
110.8	0.000666667
110.9	0.000666667
111	0.000666667
111.1	0.000666667
111.2	0.000666667
111.3	0.000666667
111.4	0.000666667
111.5	0.000666667
111.6	0.000666667
111.7	0.000666667
111.8	0.000666667
111.9	0.000666667
112	0.000666667
112.1	0.000666667
112.2	0.000666667
112.3	0.000666667
112.4	0.000666667
112.5	0.000666667
112.6	0.000666667
112.7	0.000666667
112.8	0.000666667
112.9	0.000666667
113	0.000666667
113.1	0.000666667
113.2	0.000666667
113.3	0.000666667
113.4	0.000666667
113.5	0.000666667
113.6	0.000666667
113.7	0.000666667
113.8	0.000666667
113.9	0.000666667
114	0.000666667
114.1	0.000666667
114.2	0.000666667
114.3	0.000666667
114.4	0.000666667
114.5	0.000666667
114.6	0.000666667
114.7	0.000666667
114.8	0.000666667
114.9	0.000666667
115	0.000666667
115.1	0.000666667
115.2	0.000666667
115.3	0.000666667
115.4	0.000666667
115.5	0.000666667
115.6	0.000666667
115.7	0.000666667
115.8	0.000666667
115.9	0.000666667
116	0.000666667
116.1	0.000666667
116.2	0.000666667
116.3	0.000666667
116.4	0.000666667
116.5	0.000666667
116.6	0.000666667
116.7	0.000666667
116.8	0.000666667
116.9	0.000666667
117	0.000666667
117.1	0.000666667
117.2	0.000666667
117.3	0.000666667
117.4	0.000666667
117.5	0.000666667
117.6	0.000666667
117.7	0.000666667
117.8	0.00133333
117.9	0.00133333
118	0.00133333
118.1	0.00133333
118.2	0.00133333
118.3	0.00133333
118.4	0.00133333
118.5	0.00133333
118.6	0.00133333
118.7	0.00133333
118.8	0.00133333
118.9	0.00133333
119	0.00133333
119.1	0.00133333
119.2	0.00133333
119.3	0.00133333
119.4	0.00133333
119.5	0.00133333
119.6	0.002
119.7	0.002
119.8	0.002
119.9	0.00266667
120	0.00266667
120.1	0.00266667
120.2	0.00333333
120.3	0.00333333
120.4	0.00333333
120.5	0.00333333
120.6	0.00333333
120.7	0.00333333
120.8	0.00333333
120.9	0.00333333
121	0.00333333
121.1	0.00333333
121.2	0.00333333
121.3	0.00333333
121.4	0.00333333
121.5	0.004
121.6	0.004
121.7	0.00466667
121.8	0.00466667
121.9	0.00466667
122	0.00466667
122.1	0.00466667
122.2	0.00533333
122.3	0.00533333
122.4	0.00533333
122.5	0.00533333
122.6	0.00533333
122.7	0.00533333
122.8	0.00533333
122.9	0.00533333
123	0.00533333
123.1	0.00533333
123.2	0.00533333
123.3	0.00533333
123.4	0.006
123.5	0.006
123.6	0.006
123.7	0.006
123.8	0.006
123.9	0.006
124	0.006
124.1	0.006
124.2	0.006
124.3	0.006
124.4	0.006
124.5	0.006
124.6	0.006
124.7	0.006
124.8	0.006
124.9	0.006
125	0.006
125.1	0.006
125.2	0.006
125.3	0.00533333
125.4	0.00533333
125.5	0.00533333
125.6	0.00533333
125.7	0.00533333
125.8	0.00533333
125.9	0.00533333
126	0.00533333
126.1	0.00533333
126.2	0.00533333
126.3	0.00533333
126.4	0.00533333
126.5	0.00533333
126.6	0.00533333
126.7	0.00533333
126.8	0.00533333
126.9	0.00533333
127	0.00533333
127.1	0.00533333
127.2	0.00533333
127.3	0.00533333
127.4	0.00533333
127.5	0.00533333
127.6	0.00533333
127.7	0.00533333
127.8	0.00533333
127.9	0.00533333
128	0.00533333
128.1	0.00533333
128.2	0.00533333
128.3	0.00533333
128.4	0.00533333
128.5	0.00533333
128.6	0.00533333
128.7	0.00533333
128.8	0.00533333
128.9	0.00533333
129	0.00533333
129.1	0.00533333
129.2	0.00533333
129.3	0.00533333
129.4	0.006
129.5	0.006
129.6	0.006
129.7	0.006
129.8	0.006
129.9	0.006
130	0.006
130.1	0.006
130.2	0.006
130.3	0.006
130.4	0.006
130.5	0.006
130.6	0.006
130.7	0.006
130.8	0.006
130.9	0.006
131	0.006
131.1	0.006
131.2	0.006
131.3	0.006
131.4	0.006
131.5	0.006
131.6	0.006
131.7	0.006
131.8	0.006
131.9	0.006
132	0.006
132.1	0.006
132.2	0.006
132.3	0.006
132.4	0.006
132.5	0.006
132.6	0.006
132.7	0.006
132.8	0.00666667
132.9	0.00666667
133	0.006
133.1	0.006
133.2	0.006
133.3	0.006
133.4	0.006
133.5	0.006
133.6	0.006
133.7	0.006
133.8	0.006
133.9	0.006
134	0.006
134.1	0.006
134.2	0.006
134.3	0.006
134.4	0.006
134.5	0.00666667
134.6	0.006
134.7	0.006
134.8	0.006
134.9	0.006
135	0.006
135.1	0.006
135.2	0.006
135.3	0.006
135.4	0.006
135.5	0.006
135.6	0.00666667
135.7	0.00733333
135.8	0.00733333
135.9	0.00733333
136	0.00733333
136.1	0.00666667
136.2	0.00666667
136.3	0.00666667
136.4	0.00666667
136.5	0.00666667
136.6	0.00666667
136.7	0.00666667
136.8	0.00666667
136.9	0.00666667
137	0.00666667
137.1	0.00666667
137.2	0.00666667
137.3	0.00666667
137.4	0.00666667
137.5	0.00666667
137.6	0.00666667
137.7	0.00666667
137.8	0.00666667
137.9	0.00666667
138	0.00666667
138.1	0.00666667
138.2	0.00733333
138.3	0.00733333
138.4	0.00733333
138.5	0.00733333
138.6	0.00733333
138.7	0.00733333
138.8	0.00733333
138.9	0.00733333
139	0.00733333
139.1	0.00733333
139.2	0.00733333
139.3	0.00733333
139.4	0.008
139.5	0.008
139.6	0.008
139.7	0.008
139.8	0.008
139.9	0.008
140	0.008
140.1	0.00866667
140.2	0.00866667
140.3	0.00866667
140.4	0.00866667
140.5	0.00866667
140.6	0.00866667
140.7	0.008
140.8	0.008
140.9	0.008
141	0.008
141.1	0.008
141.2	0.008
141.3	0.008
141.4	0.008
141.5	0.008
141.6	0.00866667
141.7	0.00866667
141.8	0.00933333
141.9	0.00933333
142	0.00933333
142.1	0.00933333
142.2	0.00933333
142.3	0.00933333
142.4	0.00933333
142.5	0.00933333
142.6	0.00933333
142.7	0.00933333
142.8	0.00933333
142.9	0.00933333
143	0.00933333
143.1	0.00933333
143.2	0.00933333
143.3	0.00933333
143.4	0.00933333
143.5	0.00933333
143.6	0.00933333
143.7	0.00933333
143.8	0.00933333
143.9	0.00933333
144	0.00933333
144.1	0.00933333
144.2	0.00933333
144.3	0.00933333
144.4	0.00933333
144.5	0.00933333
144.6	0.00933333
144.7	0.00933333
144.8	0.00933333
144.9	0.00933333
145	0.01
145.1	0.01
145.2	0.01
145.3	0.01
145.4	0.01
145.5	0.01
145.6	0.01
145.7	0.01
145.8	0.01
145.9	0.01
146	0.01
146.1	0.01
146.2	0.01
146.3	0.01
146.4	0.01
146.5	0.01
146.6	0.01
146.7	0.01
146.8	0.01
146.9	0.01
147	0.01
147.1	0.01
147.2	0.01
147.3	0.01
147.4	0.01
147.5	0.01
147.6	0.01
147.7	0.01
147.8	0.01
147.9	0.01
148	0.01
148.1	0.01
148.2	0.01
148.3	0.01
148.4	0.01
148.5	0.01
148.6	0.01
148.7	0.01
148.8	0.01
148.9	0.01
149	0.01
149.1	0.01
149.2	0.01
149.3	0.01
149.4	0.01
149.5	0.01
149.6	0.0106667
149.7	0.0106667
149.8	0.0106667
149.9	0.0106667
150	0.0106667
150.1	0.0106667
150.2	0.0106667
150.3	0.0106667
150.4	0.0106667
150.5	0.0106667
150.6	0.0106667
150.7	0.0106667
150.8	0.0106667
150.9	0.0106667
151	0.0106667
151.1	0.0106667
151.2	0.0106667
151.3	0.0106667
151.4	0.0106667
151.5	0.0106667
151.6	0.0106667
151.7	0.0106667
151.8	0.0106667
151.9	0.0106667
152	0.0113333
152.1	0.0113333
152.2	0.0113333
152.3	0.0113333
152.4	0.0113333
152.5	0.0113333
152.6	0.0113333
152.7	0.0113333
152.8	0.0113333
152.9	0.0113333
153	0.0113333
153.1	0.0113333
153.2	0.0113333
153.3	0.0113333
153.4	0.0113333
153.5	0.0106667
153.6	0.0106667
153.7	0.0106667
153.8	0.0106667
153.9	0.0106667
154	0.0106667
154.1	0.01
154.2	0.01
154.3	0.01
154.4	0.01
154.5	0.01
154.6	0.01
154.7	0.01
154.8	0.01
154.9	0.01
155	0.01
155.1	0.01
155.2	0.01
155.3	0.01
155.4	0.01
155.5	0.01
155.6	0.01
155.7	0.01
155.8	0.01
155.9	0.01
156	0.0106667
156.1	0.0106667
156.2	0.0106667
156.3	0.0106667
156.4	0.0106667
156.5	0.0106667
156.6	0.0106667
156.7	0.0106667
156.8	0.0106667
156.9	0.0106667
157	0.0106667
157.1	0.0106667
157.2	0.0106667
157.3	0.0106667
157.4	0.0106667
157.5	0.0106667
157.6	0.0106667
157.7	0.0106667
157.8	0.0106667
157.9	0.01
158	0.01
158.1	0.01
158.2	0.01
158.3	0.0106667
158.4	0.0106667
158.5	0.0106667
158.6	0.0106667
158.7	0.0106667
158.8	0.0106667
158.9	0.0113333
159	0.0113333
159.1	0.0113333
159.2	0.0113333
159.3	0.0113333
159.4	0.0113333
159.5	0.0113333
159.6	0.0113333
159.7	0.0113333
159.8	0.0113333
159.9	0.0113333
160	0.0113333
160.1	0.0113333
160.2	0.0113333
160.3	0.0113333
160.4	0.0113333
160.5	0.0113333
160.6	0.0113333
160.7	0.0113333
160.8	0.0113333
160.9	0.0113333
161	0.012
161.1	0.012
161.2	0.012
161.3	0.012
161.4	0.012
161.5	0.012
161.6	0.012
161.7	0.0113333
161.8	0.0113333
161.9	0.0113333
162	0.0113333
162.1	0.0113333
162.2	0.0113333
162.3	0.0113333
162.4	0.0113333
162.5	0.0113333
162.6	0.0113333
162.7	0.0113333
162.8	0.0113333
162.9	0.0113333
163	0.0113333
163.1	0.0113333
163.2	0.0113333
163.3	0.0113333
163.4	0.0113333
163.5	0.0113333
163.6	0.0113333
163.7	0.0113333
163.8	0.0113333
163.9	0.0113333
164	0.0113333
164.1	0.0113333
164.2	0.0113333
164.3	0.0113333
164.4	0.0113333
164.5	0.0113333
164.6	0.0113333
164.7	0.0113333
164.8	0.0113333
164.9	0.0113333
165	0.0113333
165.1	0.0113333
165.2	0.0113333
165.3	0.0113333
165.4	0.0113333
165.5	0.0113333
165.6	0.0113333
165.7	0.0113333
165.8	0.0113333
165.9	0.0113333
166	0.0113333
166.1	0.0113333
166.2	0.0113333
166.3	0.0113333
166.4	0.0113333
166.5	0.0113333
166.6	0.0113333
166.7	0.0113333
166.8	0.0113333
166.9	0.0113333
167	0.0113333
167.1	0.0113333
167.2	0.0113333
167.3	0.0113333
167.4	0.0113333
167.5	0.0113333
167.6	0.0113333
167.7	0.0113333
167.8	0.0113333
167.9	0.0113333
168	0.0113333
168.1	0.0113333
168.2	0.0113333
168.3	0.0113333
168.4	0.0113333
168.5	0.0113333
168.6	0.0113333
168.7	0.0113333
168.8	0.0113333
168.9	0.0113333
169	0.0113333
169.1	0.0113333
169.2	0.0113333
169.3	0.0113333
169.4	0.0113333
169.5	0.0113333
169.6	0.0113333
169.7	0.0113333
169.8	0.0113333
169.9	0.0113333
170	0.0113333
170.1	0.0113333
170.2	0.0113333
170.3	0.0113333
170.4	0.0113333
170.5	0.0113333
170.6	0.0113333
170.7	0.0113333
170.8	0.0113333
170.9	0.0113333
171	0.0113333
171.1	0.0113333
171.2	0.0113333
171.3	0.0113333
171.4	0.0113333
171.5	0.0113333
171.6	0.0113333
171.7	0.0113333
171.8	0.0113333
171.9	0.0113333
172	0.0113333
172.1	0.0113333
172.2	0.0113333
172.3	0.0113333
172.4	0.0113333
172.5	0.0113333
172.6	0.0113333
172.7	0.0113333
172.8	0.0113333
172.9	0.0113333
173	0.0113333
173.1	0.0113333
173.2	0.0113333
173.3	0.0113333
173.4	0.0113333
173.5	0.0113333
173.6	0.0113333
173.7	0.0113333
173.8	0.0113333
173.9	0.0113333
174	0.0113333
174.1	0.0113333
174.2	0.0113333
174.3	0.0113333
174.4	0.0113333
174.5	0.0113333
174.6	0.012
174.7	0.012
174.8	0.012
174.9	0.012
175	0.012
175.1	0.012
175.2	0.012
175.3	0.012
175.4	0.012
175.5	0.012
175.6	0.012
175.7	0.012
175.8	0.012
175.9	0.012
176	0.012
176.1	0.012
176.2	0.012
176.3	0.012
176.4	0.012
176.5	0.012
176.6	0.012
176.7	0.012
176.8	0.012
176.9	0.012
177	0.012
177.1	0.012
177.2	0.012
177.3	0.012
177.4	0.012
177.5	0.012
177.6	0.012
177.7	0.012
177.8	0.012
177.9	0.012
178	0.012
178.1	0.012
178.2	0.012
178.3	0.012
178.4	0.012
178.5	0.012
178.6	0.0126667
178.7	0.0126667
178.8	0.0126667
178.9	0.0126667
179	0.0126667
179.1	0.0126667
179.2	0.0126667
179.3	0.012
179.4	0.0126667
179.5	0.0126667
179.6	0.0126667
179.7	0.0126667
179.8	0.0126667
179.9	0.0126667
180	0.0126667
180.1	0.012
180.2	0.0126667
180.3	0.0126667
180.4	0.0126667
180.5	0.0126667
180.6	0.0126667
180.7	0.0126667
180.8	0.0126667
180.9	0.0126667
181	0.0126667
181.1	0.0126667
181.2	0.0126667
181.3	0.0126667
181.4	0.0126667
181.5	0.0126667
181.6	0.012
181.7	0.012
181.8	0.012
181.9	0.012
182	0.012
182.1	0.012
182.2	0.012
182.3	0.012
182.4	0.012
182.5	0.012
182.6	0.012
182.7	0.012
182.8	0.012
182.9	0.012
183	0.012
183.1	0.012
183.2	0.012
183.3	0.012
183.4	0.012
183.5	0.012
183.6	0.012
183.7	0.0126667
183.8	0.0126667
183.9	0.0126667
184	0.0126667
184.1	0.012
184.2	0.012
184.3	0.012
184.4	0.012
184.5	0.012
184.6	0.012
184.7	0.012
184.8	0.012
184.9	0.0113333
185	0.012
185.1	0.012
185.2	0.012
185.3	0.012
185.4	0.012
185.5	0.012
185.6	0.012
185.7	0.012
185.8	0.012
185.9	0.012
186	0.012
186.1	0.012
186.2	0.012
186.3	0.012
186.4	0.012
186.5	0.012
186.6	0.012
186.7	0.012
186.8	0.012
186.9	0.012
187	0.012
187.1	0.0126667
187.2	0.0126667
187.3	0.0126667
187.4	0.0126667
187.5	0.0133333
187.6	0.0133333
187.7	0.0133333
187.8	0.0133333
187.9	0.0133333
188	0.0133333
188.1	0.0133333
188.2	0.0133333
188.3	0.0133333
188.4	0.0133333
188.5	0.0133333
188.6	0.0133333
188.7	0.0133333
188.8	0.014
188.9	0.0146667
189	0.0146667
189.1	0.0146667
189.2	0.0146667
189.3	0.0146667
189.4	0.0146667
189.5	0.0146667
189.6	0.0146667
189.7	0.0146667
189.8	0.0146667
189.9	0.0146667
190	0.0146667
190.1	0.0146667
190.2	0.0146667
190.3	0.0146667
190.4	0.0146667
190.5	0.0146667
190.6	0.0146667
190.7	0.0146667
190.8	0.0146667
190.9	0.0146667
191	0.0146667
191.1	0.0146667
191.2	0.0146667
191.3	0.0146667
191.4	0.0146667
191.5	0.0146667
191.6	0.0146667
191.7	0.0146667
191.8	0.0146667
191.9	0.0146667
192	0.0146667
192.1	0.0146667
192.2	0.0146667
192.3	0.0146667
192.4	0.0146667
192.5	0.0146667
192.6	0.0146667
192.7	0.0146667
192.8	0.0146667
192.9	0.0146667
193	0.0146667
193.1	0.0146667
193.2	0.0146667
193.3	0.0146667
193.4	0.0146667
193.5	0.0146667
193.6	0.0146667
193.7	0.0146667
193.8	0.0146667
193.9	0.0146667
194	0.0146667
194.1	0.0146667
194.2	0.0146667
194.3	0.0146667
194.4	0.0146667
194.5	0.0146667
194.6	0.014
194.7	0.014
194.8	0.014
194.9	0.014
195	0.014
195.1	0.014
195.2	0.014
195.3	0.014
195.4	0.014
195.5	0.014
195.6	0.014
195.7	0.014
195.8	0.014
195.9	0.014
196	0.014
196.1	0.014
196.2	0.014
196.3	0.014
196.4	0.0133333
196.5	0.0133333
196.6	0.0133333
196.7	0.0133333
196.8	0.0133333
196.9	0.0133333
197	0.014
197.1	0.014
197.2	0.014
197.3	0.0133333
197.4	0.0133333
197.5	0.0133333
197.6	0.0133333
197.7	0.0133333
197.8	0.0133333
197.9	0.0133333
198	0.0133333
198.1	0.0133333
198.2	0.0133333
198.3	0.0133333
198.4	0.0133333
198.5	0.0133333
198.6	0.0133333
198.7	0.0133333
198.8	0.0126667
198.9	0.0126667
199	0.0126667
199.1	0.0126667
199.2	0.0126667
199.3	0.0126667
199.4	0.0126667
199.5	0.0126667
199.6	0.0126667
199.7	0.0126667
199.8	0.0126667
199.9	0.0126667
200	0.0126667
[truncated: 14,000 more rows]
