# Supplementary material for: Bayesian inference of kinetic schemes for ion channels by Kalman filtering
Source: eLife journal article supplement (doi:10.7554/elife.62714), 2022-05-04
Supplement: fig4-data11 [file 1_Sim_N_2000_Fluor_MW.xlsx]

## Sheet: Tabelle1
0.1	0
0.2	0
0.3	0
0.4	0
0.5	0
0.6	0
0.7	0
0.8	0
0.9	0
1	0
1.1	0
1.2	0
1.3	0
1.4	0
1.5	0
1.6	0
1.7	0
1.8	0
1.9	0
2	0
2.1	0
2.2	0
2.3	0
2.4	0
2.5	0
2.6	0
2.7	0
2.8	0
2.9	0
3	0
3.1	0
3.2	0
3.3	0
3.4	0
3.5	0
3.6	0
3.7	0
3.8	0
3.9	0
4	0
4.1	0
4.2	0
4.3	0
4.4	0
4.5	0
4.6	0
4.7	0
4.8	0
4.9	0
5	0
5.1	0
5.2	0
5.3	0
5.4	0
5.5	0
5.6	0
5.7	0
5.8	0
5.9	0
6	0
6.1	0
6.2	0
6.3	0
6.4	0
6.5	0
6.6	0
6.7	0
6.8	0
6.9	0
7	0
7.1	0
7.2	0
7.3	0
7.4	0
7.5	0
7.6	0
7.7	0
7.8	0
7.9	0
8	0
8.1	0
8.2	0
8.3	0
8.4	0
8.5	0
8.6	0
8.7	0
8.8	0
8.9	0
9	0
9.1	0
9.2	0
9.3	0
9.4	0
9.5	0
9.6	0
9.7	0
9.8	0
9.9	0
10	0
10.1	0
10.2	0
10.3	0
10.4	0
10.5	0
10.6	0
10.7	0
10.8	0
10.9	0
11	0
11.1	0
11.2	0
11.3	0
11.4	0
11.5	0
11.6	0
11.7	0
11.8	0
11.9	0
12	0
12.1	0
12.2	0
12.3	0
12.4	0
12.5	0
12.6	0
12.7	0
12.8	0
12.9	0
13	0
13.1	0
13.2	0
13.3	0
13.4	0
13.5	0
13.6	0
13.7	0
13.8	0
13.9	0
14	0
14.1	0
14.2	0
14.3	0
14.4	0
14.5	0
14.6	0
14.7	0
14.8	0
14.9	0
15	0
15.1	0
15.2	0
15.3	0
15.4	0
15.5	0
15.6	0
15.7	0
15.8	0
15.9	0
16	0
16.1	0
16.2	0
16.3	0
16.4	0
16.5	0
16.6	0
16.7	0
16.8	0
16.9	0
17	0
17.1	0
17.2	0
17.3	0
17.4	0
17.5	0
17.6	0
17.7	0
17.8	0
17.9	0
18	0
18.1	0
18.2	0
18.3	0
18.4	0
18.5	0
18.6	0
18.7	0
18.8	0
18.9	0
19	0
19.1	0
19.2	0
19.3	0
19.4	0
19.5	0
19.6	0
19.7	0
19.8	0
19.9	0
20	0
20.1	0
20.2	0
20.3	0
20.4	0
20.5	0
20.6	0
20.7	0
20.8	0
20.9	0
21	0
21.1	0
21.2	0
21.3	0
21.4	0
21.5	0
21.6	0
21.7	0
21.8	0
21.9	0
22	0
22.1	0
22.2	0
22.3	0
22.4	0
22.5	0
22.6	0
22.7	0
22.8	0
22.9	0
23	0
23.1	0
23.2	0
23.3	0
23.4	0
23.5	0
23.6	0
23.7	0
23.8	0
23.9	0
24	0
24.1	0
24.2	0
24.3	0
24.4	0
24.5	0
24.6	0
24.7	0
24.8	0
24.9	0
25	0
25.1	0
25.2	0
25.3	0
25.4	0
25.5	0
25.6	0
25.7	0
25.8	0
25.9	0
26	0
26.1	0
26.2	0
26.3	0
26.4	0
26.5	0
26.6	0
26.7	0
26.8	0
26.9	0
27	0
27.1	0
27.2	0
27.3	0
27.4	0
27.5	0
27.6	0
27.7	0
27.8	0
27.9	0
28	0
28.1	0
28.2	0
28.3	0
28.4	0
28.5	0
28.6	0
28.7	0
28.8	0
28.9	0
29	0
29.1	0
29.2	0
29.3	0
29.4	0
29.5	0
29.6	0
29.7	0
29.8	0
29.9	0
30	0
30.1	0
30.2	0
30.3	0
30.4	0
30.5	0
30.6	0
30.7	0
30.8	0
30.9	0
31	0
31.1	0
31.2	0
31.3	0
31.4	0
31.5	0
31.6	0
31.7	0
31.8	0
31.9	0
32	0
32.1	0
32.2	0
32.3	0
32.4	0
32.5	0
32.6	0
32.7	0
32.8	0
32.9	0
33	0
33.1	0
33.2	0
33.3	0
33.4	0
33.5	0
33.6	0
33.7	0
33.8	0
33.9	0
34	0
34.1	0
34.2	0
34.3	0
34.4	0
34.5	0
34.6	0
34.7	0
34.8	0
34.9	0
35	0
35.1	0
35.2	0
35.3	0
35.4	0
35.5	0
35.6	0
35.7	0
35.8	0
35.9	0
36	0
36.1	0
36.2	0
36.3	0
36.4	0
36.5	0
36.6	0
36.7	0
36.8	0
36.9	0
37	0
37.1	0
37.2	0
37.3	0
37.4	0
37.5	0
37.6	0
37.7	0
37.8	0
37.9	0
38	0
38.1	0
38.2	0
38.3	0
38.4	0
38.5	0
38.6	0
38.7	0
38.8	0
38.9	0
39	0
39.1	0
39.2	0
39.3	0
39.4	0
39.5	0
39.6	0
39.7	0
39.8	0
39.9	0
40	0
40.1	0
40.2	0
40.3	0
40.4	0
40.5	0
40.6	0
40.7	0
40.8	0
40.9	0
41	0
41.1	0
41.2	0
41.3	0
41.4	0
41.5	0
41.6	0
41.7	0
41.8	0
41.9	0
42	0
42.1	0
42.2	0
42.3	0
42.4	0
42.5	0
42.6	0
42.7	0
42.8	0
42.9	0
43	0
43.1	0
43.2	0
43.3	0
43.4	0
43.5	0
43.6	0
43.7	0
43.8	0
43.9	0
44	0
44.1	0
44.2	0
44.3	0
44.4	0
44.5	0
44.6	0
44.7	0
44.8	0
44.9	0
45	0
45.1	0
45.2	0
45.3	0
45.4	0
45.5	0
45.6	0
45.7	0
45.8	0
45.9	0
46	0
46.1	0
46.2	0
46.3	0
46.4	0
46.5	0
46.6	0
46.7	0
46.8	0
46.9	0
47	0
47.1	0
47.2	0
47.3	0
47.4	0
47.5	0
47.6	0
47.7	0
47.8	0
47.9	0
48	0
48.1	0
48.2	0
48.3	0
48.4	0
48.5	0
48.6	0
48.7	0
48.8	0
48.9	0
49	0
49.1	0
49.2	0
49.3	0
49.4	0
49.5	0
49.6	0
49.7	0
49.8	0
49.9	0
50	0
50.1	0
50.2	0
50.3	0
50.4	0
50.5	0
50.6	0
50.7	0
50.8	0
50.9	0
51	0
51.1	0
51.2	0
51.3	0
51.4	0
51.5	0
51.6	0
51.7	0
51.8	0
51.9	0
52	0
52.1	0
52.2	0
52.3	0
52.4	0
52.5	0
52.6	0
52.7	0
52.8	0
52.9	0
53	0
53.1	0
53.2	0
53.3	0
53.4	0
53.5	0
53.6	0
53.7	0
53.8	0
53.9	0
54	0
54.1	0
54.2	0
54.3	0
54.4	0
54.5	0
54.6	0
54.7	0
54.8	0
54.9	0
55	0
55.1	0
55.2	0
55.3	0
55.4	0
55.5	0
55.6	0
55.7	0
55.8	0
55.9	0
56	0
56.1	0
56.2	0
56.3	0
56.4	0
56.5	0
56.6	0
56.7	0
56.8	0
56.9	0
57	0
57.1	0
57.2	0
57.3	0
57.4	0
57.5	0
57.6	0
57.7	0
57.8	0
57.9	0
58	0
58.1	0
58.2	0
58.3	0
58.4	0
58.5	0
58.6	0
58.7	0
58.8	0
58.9	0
59	0
59.1	0
59.2	0
59.3	0
59.4	0
59.5	0
59.6	0
59.7	0
59.8	0
59.9	0
60	0
60.1	0
60.2	0
60.3	0
60.4	0
60.5	0
60.6	0
60.7	0
60.8	0
60.9	0
61	0
61.1	0
61.2	0
61.3	0
61.4	0
61.5	0
61.6	0
61.7	0
61.8	0
61.9	0
62	0
62.1	0
62.2	0
62.3	0
62.4	0
62.5	0
62.6	0
62.7	0
62.8	0
62.9	0
63	0
63.1	0
63.2	0
63.3	0
63.4	0
63.5	0
63.6	0
63.7	0
63.8	0
63.9	0
64	0
64.1	0
64.2	0
64.3	0
64.4	0
64.5	0
64.6	0
64.7	0
64.8	0
64.9	0
65	0
65.1	0
65.2	0
65.3	0
65.4	0
65.5	0
65.6	0
65.7	0
65.8	0
65.9	0
66	0
66.1	0
66.2	0
66.3	0
66.4	0
66.5	0
66.6	0
66.7	0
66.8	0
66.9	0
67	0
67.1	0
67.2	0
67.3	0
67.4	0
67.5	0
67.6	0
67.7	0
67.8	0
67.9	0
68	0
68.1	0
68.2	0
68.3	0
68.4	0
68.5	0
68.6	0
68.7	0
68.8	0
68.9	0
69	0
69.1	0
69.2	0
69.3	0
69.4	0
69.5	0
69.6	0
69.7	0
69.8	0
69.9	0
70	0
70.1	0
70.2	0
70.3	0
70.4	0
70.5	0
70.6	0
70.7	0
70.8	0
70.9	0
71	0
71.1	0
71.2	0
71.3	0
71.4	0
71.5	0
71.6	0
71.7	0
71.8	0
71.9	0
72	0
72.1	0
72.2	0
72.3	0
72.4	0
72.5	0
72.6	0
72.7	0
72.8	0
72.9	0
73	0
73.1	0
73.2	0
73.3	0
73.4	0
73.5	0
73.6	0
73.7	0
73.8	0
73.9	0
74	0
74.1	0
74.2	0
74.3	0
74.4	0
74.5	0
74.6	0
74.7	0
74.8	0
74.9	0
75	0
75.1	0
75.2	0
75.3	0
75.4	0
75.5	0
75.6	0
75.7	0
75.8	0
75.9	0
76	0
76.1	0
76.2	0
76.3	0
76.4	0
76.5	0
76.6	0
76.7	0
76.8	0
76.9	0
77	0
77.1	0
77.2	0
77.3	0
77.4	0
77.5	0
77.6	0
77.7	0
77.8	0
77.9	0
78	0
78.1	0
78.2	0
78.3	0
78.4	0
78.5	0
78.6	0
78.7	0
78.8	0
78.9	0
79	0
79.1	0
79.2	0
79.3	0
79.4	0
79.5	0
79.6	0
79.7	0
79.8	0
79.9	0
80	0
80.1	0
80.2	0
80.3	0
80.4	0
80.5	0
80.6	0
80.7	0
80.8	0
80.9	0
81	0
81.1	0
81.2	0
81.3	0
81.4	0
81.5	0
81.6	0
81.7	0
81.8	0
81.9	0
82	0
82.1	0
82.2	0
82.3	0
82.4	0
82.5	0
82.6	0
82.7	0
82.8	0
82.9	0
83	0
83.1	0
83.2	0
83.3	0
83.4	0
83.5	0
83.6	0
83.7	0
83.8	0
83.9	0
84	0
84.1	0
84.2	0
84.3	0
84.4	0
84.5	0
84.6	0
84.7	0
84.8	0
84.9	0
85	0
85.1	0
85.2	0
85.3	0
85.4	0
85.5	0
85.6	0
85.7	0
85.8	0
85.9	0
86	0
86.1	0
86.2	0
86.3	0
86.4	0
86.5	0
86.6	0
86.7	0
86.8	0
86.9	0
87	0
87.1	0
87.2	0
87.3	0
87.4	0
87.5	0
87.6	0
87.7	0
87.8	0
87.9	0
88	0
88.1	0
88.2	0
88.3	0
88.4	0
88.5	0
88.6	0
88.7	0
88.8	0
88.9	0
89	0
89.1	0
89.2	0
89.3	0
89.4	0
89.5	0
89.6	0
89.7	0
89.8	0
89.9	0
90	0
90.1	0
90.2	0
90.3	0
90.4	0
90.5	0
90.6	0
90.7	0
90.8	0
90.9	0
91	0
91.1	0
91.2	0
91.3	0
91.4	0
91.5	0
91.6	0
91.7	0
91.8	0
91.9	0
92	0
92.1	0
92.2	0
92.3	0
92.4	0
92.5	0
92.6	0
92.7	0
92.8	0
92.9	0
93	0
93.1	0
93.2	0
93.3	0
93.4	0
93.5	0
93.6	0
93.7	0
93.8	0
93.9	0
94	0
94.1	0
94.2	0
94.3	0
94.4	0
94.5	0
94.6	0
94.7	0
94.8	0
94.9	0
95	0
95.1	0
95.2	0
95.3	0
95.4	0
95.5	0
95.6	0
95.7	0
95.8	0
95.9	0
96	0
96.1	0
96.2	0
96.3	0
96.4	0
96.5	0
96.6	0
96.7	0
96.8	0
96.9	0
97	0
97.1	0
97.2	0
97.3	0
97.4	0
97.5	0
97.6	0
97.7	0
97.8	0
97.9	0
98	0
98.1	0
98.2	0
98.3	0
98.4	0
98.5	0
98.6	0
98.7	0
98.8	0
98.9	0
99	0
99.1	0
99.2	0
99.3	0
99.4	0
99.5	0
99.6	0
99.7	0
99.8	0
99.9	0
100	0
100.1	0.00175
100.2	0.0045
100.3	0.00625
100.4	0.00925
100.5	0.01125
100.6	0.013
100.7	0.0155
100.8	0.0175
100.9	0.02025
101	0.02175
101.1	0.0235
101.2	0.0255
101.3	0.02725
101.4	0.02875
101.5	0.03
101.6	0.03175
101.7	0.0335
101.8	0.03525
101.9	0.03525
102	0.038
102.1	0.0385
102.2	0.039
102.3	0.04025
102.4	0.0415
102.5	0.04425
102.6	0.0445
102.7	0.0455
102.8	0.046
102.9	0.0485
103	0.05025
103.1	0.05025
103.2	0.0525
103.3	0.05225
103.4	0.05425
103.5	0.056
103.6	0.05625
103.7	0.057
103.8	0.05725
103.9	0.05875
104	0.05925
104.1	0.06075
104.2	0.06275
104.3	0.06375
104.4	0.065
104.5	0.06575
104.6	0.06625
104.7	0.066
104.8	0.06775
104.9	0.06875
105	0.07025
105.1	0.07175
105.2	0.07225
105.3	0.07325
105.4	0.07375
105.5	0.0755
105.6	0.0755
105.7	0.07675
105.8	0.0765
105.9	0.0775
106	0.07825
106.1	0.081
106.2	0.082
106.3	0.08275
106.4	0.0845
106.5	0.08575
106.6	0.0865
106.7	0.08775
106.8	0.0885
106.9	0.0885
107	0.08975
107.1	0.09025
107.2	0.09225
107.3	0.093
107.4	0.0935
107.5	0.09325
107.6	0.09325
107.7	0.09375
107.8	0.09425
107.9	0.09425
108	0.095
108.1	0.096
108.2	0.09725
108.3	0.098
108.4	0.0975
108.5	0.09875
108.6	0.0995
108.7	0.1
108.8	0.0995
108.9	0.09925
109	0.099
109.1	0.1
109.2	0.10025
109.3	0.09975
109.4	0.10025
109.5	0.09975
109.6	0.10075
109.7	0.1
109.8	0.10125
109.9	0.10075
110	0.101
110.1	0.102
110.2	0.103
110.3	0.103
110.4	0.103
110.5	0.1035
110.6	0.10525
110.7	0.105
110.8	0.10525
110.9	0.107
111	0.10625
111.1	0.106
111.2	0.1075
111.3	0.10725
111.4	0.10875
111.5	0.1095
111.6	0.1095
111.7	0.11025
111.8	0.11125
111.9	0.11125
112	0.11275
112.1	0.1125
112.2	0.114
112.3	0.114
112.4	0.11325
112.5	0.11275
112.6	0.11425
112.7	0.1145
112.8	0.1145
112.9	0.11475
113	0.11525
113.1	0.1165
113.2	0.1165
113.3	0.11725
113.4	0.1175
113.5	0.11675
113.6	0.11675
113.7	0.11625
113.8	0.11675
113.9	0.117
114	0.1175
114.1	0.1175
114.2	0.118
114.3	0.1185
114.4	0.11875
114.5	0.1185
114.6	0.1165
114.7	0.1165
114.8	0.116
114.9	0.11625
115	0.11825
115.1	0.11775
115.2	0.118
115.3	0.117
115.4	0.11675
115.5	0.11875
115.6	0.12
115.7	0.12
115.8	0.12
115.9	0.12075
116	0.1215
116.1	0.12175
116.2	0.12275
116.3	0.12275
116.4	0.12425
116.5	0.1245
116.6	0.124
116.7	0.1255
116.8	0.12475
116.9	0.12425
117	0.125
117.1	0.12425
117.2	0.1245
117.3	0.1245
117.4	0.125
117.5	0.12425
117.6	0.1235
117.7	0.12225
117.8	0.12225
117.9	0.1215
118	0.12375
118.1	0.12375
118.2	0.12425
118.3	0.12425
118.4	0.12375
118.5	0.1245
118.6	0.124
118.7	0.12625
118.8	0.126
118.9	0.126
119	0.127
119.1	0.12725
119.2	0.127
119.3	0.127
119.4	0.12825
119.5	0.12975
119.6	0.12975
119.7	0.12975
119.8	0.13125
119.9	0.1315
120	0.1325
120.1	0.132
120.2	0.13075
120.3	0.13025
120.4	0.129
120.5	0.1285
120.6	0.12825
120.7	0.128
120.8	0.12825
120.9	0.12775
121	0.12725
121.1	0.128
121.2	0.1285
121.3	0.12775
121.4	0.1295
121.5	0.13025
121.6	0.13025
121.7	0.13
121.8	0.12975
121.9	0.1285
122	0.12825
122.1	0.1275
122.2	0.1275
122.3	0.1285
122.4	0.12925
122.5	0.12975
122.6	0.129
122.7	0.12925
122.8	0.128
122.9	0.1295
123	0.129
123.1	0.1295
123.2	0.129
123.3	0.12825
123.4	0.12775
123.5	0.13025
123.6	0.13225
123.7	0.1305
123.8	0.131
123.9	0.132
124	0.13225
124.1	0.13225
124.2	0.13125
124.3	0.13
124.4	0.131
124.5	0.132
124.6	0.13225
124.7	0.13325
124.8	0.132
124.9	0.133
125	0.13225
125.1	0.13275
125.2	0.1355
125.3	0.13575
125.4	0.1365
125.5	0.1355
125.6	0.134
125.7	0.13425
125.8	0.13375
125.9	0.134
126	0.1335
126.1	0.1345
126.2	0.1345
126.3	0.13525
126.4	0.1365
126.5	0.13575
126.6	0.1365
126.7	0.1375
126.8	0.1375
126.9	0.13825
127	0.1385
127.1	0.1385
127.2	0.14
127.3	0.1405
127.4	0.142
127.5	0.14225
127.6	0.1425
127.7	0.14125
127.8	0.14075
127.9	0.1415
128	0.142
128.1	0.14225
128.2	0.1425
128.3	0.14175
128.4	0.14225
128.5	0.1415
128.6	0.1425
128.7	0.14175
128.8	0.14225
128.9	0.14225
129	0.14175
129.1	0.14175
129.2	0.1425
129.3	0.1435
129.4	0.14375
129.5	0.14425
129.6	0.1435
129.7	0.144
129.8	0.14375
129.9	0.14325
130	0.14275
130.1	0.14175
130.2	0.141
130.3	0.14075
130.4	0.14075
130.5	0.14
130.6	0.1405
130.7	0.141
130.8	0.142
130.9	0.1425
131	0.14125
131.1	0.141
131.2	0.141
131.3	0.14125
131.4	0.1405
131.5	0.13975
131.6	0.1405
131.7	0.139
131.8	0.138
131.9	0.1395
132	0.13925
132.1	0.139
132.2	0.13875
132.3	0.1385
132.4	0.13875
132.5	0.13875
132.6	0.13775
132.7	0.13625
132.8	0.1355
132.9	0.13575
133	0.13625
133.1	0.137
133.2	0.13725
133.3	0.1385
133.4	0.13775
133.5	0.13725
133.6	0.137
133.7	0.1375
133.8	0.1375
133.9	0.13675
134	0.136
134.1	0.13575
134.2	0.136
134.3	0.136
134.4	0.137
134.5	0.13675
134.6	0.137
134.7	0.137
134.8	0.13725
134.9	0.138
135	0.13825
135.1	0.138
135.2	0.13775
135.3	0.13625
135.4	0.137
135.5	0.13575
135.6	0.1365
135.7	0.13675
135.8	0.13725
135.9	0.137
136	0.13725
136.1	0.138
136.2	0.1385
136.3	0.1395
136.4	0.14025
136.5	0.14025
136.6	0.139
136.7	0.13975
136.8	0.1405
136.9	0.14025
137	0.14
137.1	0.14
137.2	0.1385
137.3	0.13875
137.4	0.13875
137.5	0.13825
137.6	0.13825
137.7	0.13775
137.8	0.13775
137.9	0.1365
138	0.13375
138.1	0.13425
138.2	0.134
138.3	0.13425
138.4	0.13475
138.5	0.13425
138.6	0.134
138.7	0.13475
138.8	0.1355
138.9	0.13525
139	0.13625
139.1	0.139
139.2	0.138
139.3	0.1395
139.4	0.13975
139.5	0.141
139.6	0.14175
139.7	0.141
139.8	0.14175
139.9	0.1415
140	0.142
140.1	0.14225
140.2	0.142
140.3	0.14025
140.4	0.1395
140.5	0.14025
140.6	0.14075
140.7	0.141
140.8	0.1415
140.9	0.142
141	0.14225
141.1	0.14225
141.2	0.14275
141.3	0.143
141.4	0.14375
141.5	0.14375
141.6	0.1425
141.7	0.1415
141.8	0.14075
141.9	0.141
142	0.14175
142.1	0.1415
142.2	0.142
142.3	0.142
142.4	0.142
142.5	0.14075
142.6	0.1415
142.7	0.142
142.8	0.14175
142.9	0.14225
143	0.14325
143.1	0.1425
143.2	0.14275
143.3	0.1425
143.4	0.1425
143.5	0.1435
143.6	0.143
143.7	0.14275
143.8	0.14475
143.9	0.1465
144	0.14575
144.1	0.146
144.2	0.14725
144.3	0.1485
144.4	0.1485
144.5	0.15025
144.6	0.149
144.7	0.148
144.8	0.147
144.9	0.14775
145	0.14825
145.1	0.149
145.2	0.14975
145.3	0.1495
145.4	0.15025
145.5	0.15
145.6	0.14975
145.7	0.15
145.8	0.15075
145.9	0.1505
146	0.15125
146.1	0.1515
146.2	0.151
146.3	0.15025
146.4	0.1505
146.5	0.1505
146.6	0.151
146.7	0.1525
146.8	0.1505
146.9	0.15075
147	0.15075
147.1	0.14925
147.2	0.14825
147.3	0.14875
147.4	0.14775
147.5	0.14875
147.6	0.1475
147.7	0.147
147.8	0.14625
147.9	0.14675
148	0.14725
148.1	0.14575
148.2	0.14575
148.3	0.14475
148.4	0.14425
148.5	0.1445
148.6	0.1445
148.7	0.144
148.8	0.143
148.9	0.1435
149	0.142
149.1	0.14325
149.2	0.1435
149.3	0.1435
149.4	0.145
149.5	0.1445
149.6	0.14525
149.7	0.1455
149.8	0.1455
149.9	0.14525
150	0.1455
150.1	0.14525
150.2	0.14475
150.3	0.14525
150.4	0.1435
150.5	0.1445
150.6	0.1445
150.7	0.14525
150.8	0.1455
150.9	0.14525
151	0.146
151.1	0.14575
151.2	0.146
151.3	0.14575
151.4	0.14675
151.5	0.1465
151.6	0.14675
151.7	0.14625
151.8	0.1455
151.9	0.1455
152	0.14675
152.1	0.14675
152.2	0.148
152.3	0.147
152.4	0.147
152.5	0.1475
152.6	0.14875
152.7	0.149
152.8	0.1495
152.9	0.14825
153	0.15025
153.1	0.1515
153.2	0.1515
153.3	0.151
153.4	0.151
153.5	0.15025
153.6	0.14925
153.7	0.1485
153.8	0.149
153.9	0.14875
154	0.149
154.1	0.1485
154.2	0.1495
154.3	0.15
154.4	0.14975
154.5	0.15
154.6	0.1505
154.7	0.15075
154.8	0.1505
154.9	0.15075
155	0.14925
155.1	0.14875
155.2	0.14875
155.3	0.148
155.4	0.1475
155.5	0.14925
155.6	0.15
155.7	0.151
155.8	0.15175
155.9	0.152
156	0.15
156.1	0.15025
156.2	0.15025
156.3	0.14875
156.4	0.14975
156.5	0.1495
156.6	0.14875
156.7	0.14775
156.8	0.1465
156.9	0.14525
157	0.14675
157.1	0.145
157.2	0.1445
157.3	0.145
157.4	0.14425
157.5	0.1435
157.6	0.14425
157.7	0.1445
157.8	0.144
157.9	0.1435
158	0.144
158.1	0.145
158.2	0.14475
158.3	0.14475
158.4	0.144
158.5	0.14425
158.6	0.144
158.7	0.145
158.8	0.1455
158.9	0.1455
159	0.14575
159.1	0.14475
159.2	0.14475
159.3	0.14475
159.4	0.14425
159.5	0.1435
159.6	0.143
159.7	0.14325
159.8	0.144
159.9	0.14375
160	0.14325
160.1	0.14275
160.2	0.14175
160.3	0.14225
160.4	0.142
160.5	0.143
160.6	0.143
160.7	0.14425
160.8	0.14475
160.9	0.14525
161	0.1445
161.1	0.14525
161.2	0.14375
161.3	0.14425
161.4	0.14575
161.5	0.14575
161.6	0.1465
161.7	0.148
161.8	0.149
161.9	0.151
162	0.15175
162.1	0.1515
162.2	0.151
162.3	0.1495
162.4	0.149
162.5	0.14875
162.6	0.148
162.7	0.147
162.8	0.147
162.9	0.146
163	0.14675
163.1	0.14725
163.2	0.1465
163.3	0.14625
163.4	0.1465
163.5	0.14575
163.6	0.14625
163.7	0.14525
163.8	0.146
163.9	0.1455
164	0.1455
164.1	0.145
164.2	0.14575
164.3	0.14575
164.4	0.14475
164.5	0.14525
164.6	0.146
164.7	0.1465
164.8	0.14575
164.9	0.14525
165	0.14475
165.1	0.14425
165.2	0.14425
165.3	0.1445
165.4	0.1455
165.5	0.14675
165.6	0.14725
165.7	0.14675
165.8	0.1475
165.9	0.14675
166	0.14875
166.1	0.14925
166.2	0.14825
166.3	0.14825
166.4	0.14775
166.5	0.1485
166.6	0.149
166.7	0.149
166.8	0.14975
166.9	0.15025
167	0.15075
167.1	0.1505
167.2	0.1495
167.3	0.14975
167.4	0.15
167.5	0.151
167.6	0.1505
167.7	0.15025
167.8	0.15
167.9	0.15025
168	0.151
168.1	0.15175
168.2	0.152
168.3	0.153
168.4	0.15475
168.5	0.155
168.6	0.15425
168.7	0.15425
168.8	0.1535
168.9	0.153
169	0.15425
169.1	0.15475
169.2	0.15575
169.3	0.1565
169.4	0.15575
169.5	0.15525
169.6	0.1565
169.7	0.15675
169.8	0.156
169.9	0.15525
170	0.1555
170.1	0.15675
170.2	0.157
170.3	0.15675
170.4	0.15575
170.5	0.15775
170.6	0.156
170.7	0.15425
170.8	0.15475
170.9	0.15675
171	0.156
171.1	0.1555
171.2	0.1575
171.3	0.15725
171.4	0.1575
171.5	0.1575
171.6	0.15725
171.7	0.15625
171.8	0.1565
171.9	0.1565
172	0.1555
172.1	0.155
172.2	0.15675
172.3	0.159
172.4	0.159
172.5	0.1585
172.6	0.15925
172.7	0.1615
172.8	0.162
172.9	0.16275
173	0.16175
173.1	0.1615
173.2	0.1615
173.3	0.1605
173.4	0.16025
173.5	0.159
173.6	0.159
173.7	0.15975
173.8	0.159
173.9	0.16025
174	0.16
174.1	0.1595
174.2	0.16
174.3	0.15875
174.4	0.15725
174.5	0.15675
174.6	0.156
174.7	0.156
174.8	0.1545
174.9	0.15475
175	0.15575
175.1	0.15525
175.2	0.1555
175.3	0.15575
175.4	0.15575
175.5	0.15575
175.6	0.15475
175.7	0.1525
175.8	0.153
175.9	0.152
176	0.1525
176.1	0.15125
176.2	0.1525
176.3	0.15125
176.4	0.15075
176.5	0.15
176.6	0.15
176.7	0.14975
176.8	0.15
176.9	0.14975
177	0.14825
177.1	0.14825
177.2	0.14775
177.3	0.14725
177.4	0.14675
177.5	0.1465
177.6	0.14675
177.7	0.148
177.8	0.14725
177.9	0.14775
178	0.147
178.1	0.1475
178.2	0.14775
178.3	0.14825
178.4	0.14725
178.5	0.147
178.6	0.1465
178.7	0.146
178.8	0.145
178.9	0.1455
179	0.14625
179.1	0.1475
179.2	0.148
179.3	0.14675
179.4	0.146
179.5	0.146
179.6	0.1465
179.7	0.14625
179.8	0.147
179.9	0.1465
180	0.1475
180.1	0.1475
180.2	0.147
180.3	0.1465
180.4	0.14625
180.5	0.145
180.6	0.1465
180.7	0.14675
180.8	0.146
180.9	0.1445
181	0.14425
181.1	0.14475
181.2	0.146
181.3	0.1475
181.4	0.14725
181.5	0.14825
181.6	0.14775
181.7	0.14725
181.8	0.1475
181.9	0.14825
182	0.1465
182.1	0.147
182.2	0.14725
182.3	0.14775
182.4	0.14675
182.5	0.147
182.6	0.1475
182.7	0.14775
182.8	0.148
182.9	0.149
183	0.14975
183.1	0.15
183.2	0.15025
183.3	0.151
183.4	0.152
183.5	0.15125
183.6	0.1505
183.7	0.15075
183.8	0.1505
183.9	0.1505
184	0.15125
184.1	0.15075
184.2	0.14875
184.3	0.14925
184.4	0.1485
184.5	0.14925
184.6	0.15
184.7	0.14975
184.8	0.15075
184.9	0.151
185	0.15075
185.1	0.1505
185.2	0.15125
185.3	0.1515
185.4	0.15125
185.5	0.1515
185.6	0.152
185.7	0.15075
185.8	0.15
185.9	0.14775
186	0.14875
186.1	0.148
186.2	0.14775
186.3	0.14725
186.4	0.14825
186.5	0.14875
186.6	0.14975
186.7	0.15075
186.8	0.15025
186.9	0.14975
187	0.15
187.1	0.15025
187.2	0.1495
187.3	0.14925
187.4	0.1495
187.5	0.14875
187.6	0.1495
187.7	0.15025
187.8	0.15025
187.9	0.15025
188	0.1495
188.1	0.14875
188.2	0.14875
188.3	0.14875
188.4	0.14875
188.5	0.147
188.6	0.1455
188.7	0.145
188.8	0.146
188.9	0.1455
189	0.147
189.1	0.14475
189.2	0.14575
189.3	0.1445
189.4	0.14575
189.5	0.146
189.6	0.14575
189.7	0.14725
189.8	0.14675
189.9	0.14775
190	0.14775
190.1	0.14825
190.2	0.14875
190.3	0.147
190.4	0.1485
190.5	0.14925
190.6	0.15025
190.7	0.1495
190.8	0.14775
190.9	0.146
191	0.1465
191.1	0.1465
191.2	0.14675
191.3	0.14725
191.4	0.148
191.5	0.14775
191.6	0.148
191.7	0.14775
191.8	0.147
191.9	0.147
192	0.14725
192.1	0.14775
192.2	0.14875
192.3	0.147
192.4	0.14675
192.5	0.14725
192.6	0.14625
192.7	0.14575
192.8	0.14625
192.9	0.14675
193	0.145
193.1	0.14675
193.2	0.14725
193.3	0.1475
193.4	0.147
193.5	0.14675
193.6	0.1465
193.7	0.1465
193.8	0.14525
193.9	0.14425
194	0.143
194.1	0.14125
194.2	0.142
194.3	0.14075
194.4	0.14125
194.5	0.14275
194.6	0.143
194.7	0.14375
194.8	0.1435
194.9	0.143
195	0.144
195.1	0.1445
195.2	0.1435
195.3	0.14425
195.4	0.14575
195.5	0.14625
195.6	0.147
195.7	0.1465
195.8	0.14625
195.9	0.146
196	0.146
196.1	0.14625
196.2	0.14575
196.3	0.14575
196.4	0.14725
196.5	0.14675
196.6	0.1465
196.7	0.1475
196.8	0.14575
196.9	0.145
197	0.1445
197.1	0.144
197.2	0.14425
197.3	0.1435
197.4	0.14475
197.5	0.14375
197.6	0.14475
197.7	0.14625
197.8	0.14575
197.9	0.146
198	0.14525
198.1	0.146
198.2	0.14675
198.3	0.146
198.4	0.14725
198.5	0.14825
198.6	0.14875
198.7	0.149
198.8	0.14875
198.9	0.15
199	0.14725
199.1	0.14725
199.2	0.149
199.3	0.14925
199.4	0.14825
199.5	0.14825
199.6	0.14925
199.7	0.15075
199.8	0.15175
199.9	0.15025
200	0.15
[truncated: 14,000 more rows]
