# Supplementary material for: Bayesian inference of kinetic schemes for ion channels by Kalman filtering
Source: eLife journal article supplement (doi:10.7554/elife.62714), 2022-05-04
Supplement: fig4-data11 [file 1_Sim_N_2000_Strom_MW.xlsx]

## Sheet: Tabelle1
0.1	0
0.2	0
0.3	0
0.4	0
0.5	0
0.6	0
0.7	0
0.8	0
0.9	0
1	0
1.1	0
1.2	0
1.3	0
1.4	0
1.5	0
1.6	0
1.7	0
1.8	0
1.9	0
2	0
2.1	0
2.2	0
2.3	0
2.4	0
2.5	0
2.6	0
2.7	0
2.8	0
2.9	0
3	0
3.1	0
3.2	0
3.3	0
3.4	0
3.5	0
3.6	0
3.7	0
3.8	0
3.9	0
4	0
4.1	0
4.2	0
4.3	0
4.4	0
4.5	0
4.6	0
4.7	0
4.8	0
4.9	0
5	0
5.1	0
5.2	0
5.3	0
5.4	0
5.5	0
5.6	0
5.7	0
5.8	0
5.9	0
6	0
6.1	0
6.2	0
6.3	0
6.4	0
6.5	0
6.6	0
6.7	0
6.8	0
6.9	0
7	0
7.1	0
7.2	0
7.3	0
7.4	0
7.5	0
7.6	0
7.7	0
7.8	0
7.9	0
8	0
8.1	0
8.2	0
8.3	0
8.4	0
8.5	0
8.6	0
8.7	0
8.8	0
8.9	0
9	0
9.1	0
9.2	0
9.3	0
9.4	0
9.5	0
9.6	0
9.7	0
9.8	0
9.9	0
10	0
10.1	0
10.2	0
10.3	0
10.4	0
10.5	0
10.6	0
10.7	0
10.8	0
10.9	0
11	0
11.1	0
11.2	0
11.3	0
11.4	0
11.5	0
11.6	0
11.7	0
11.8	0
11.9	0
12	0
12.1	0
12.2	0
12.3	0
12.4	0
12.5	0
12.6	0
12.7	0
12.8	0
12.9	0
13	0
13.1	0
13.2	0
13.3	0
13.4	0
13.5	0
13.6	0
13.7	0
13.8	0
13.9	0
14	0
14.1	0
14.2	0
14.3	0
14.4	0
14.5	0
14.6	0
14.7	0
14.8	0
14.9	0
15	0
15.1	0
15.2	0
15.3	0
15.4	0
15.5	0
15.6	0
15.7	0
15.8	0
15.9	0
16	0
16.1	0
16.2	0
16.3	0
16.4	0
16.5	0
16.6	0
16.7	0
16.8	0
16.9	0
17	0
17.1	0
17.2	0
17.3	0
17.4	0
17.5	0
17.6	0
17.7	0
17.8	0
17.9	0
18	0
18.1	0
18.2	0
18.3	0
18.4	0
18.5	0
18.6	0
18.7	0
18.8	0
18.9	0
19	0
19.1	0
19.2	0
19.3	0
19.4	0
19.5	0
19.6	0
19.7	0
19.8	0
19.9	0
20	0
20.1	0
20.2	0
20.3	0
20.4	0
20.5	0
20.6	0
20.7	0
20.8	0
20.9	0
21	0
21.1	0
21.2	0
21.3	0
21.4	0
21.5	0
21.6	0
21.7	0
21.8	0
21.9	0
22	0
22.1	0
22.2	0
22.3	0
22.4	0
22.5	0
22.6	0
22.7	0
22.8	0
22.9	0
23	0
23.1	0
23.2	0
23.3	0
23.4	0
23.5	0
23.6	0
23.7	0
23.8	0
23.9	0
24	0
24.1	0
24.2	0
24.3	0
24.4	0
24.5	0
24.6	0
24.7	0
24.8	0
24.9	0
25	0
25.1	0
25.2	0
25.3	0
25.4	0
25.5	0
25.6	0
25.7	0
25.8	0
25.9	0
26	0
26.1	0
26.2	0
26.3	0
26.4	0
26.5	0
26.6	0
26.7	0
26.8	0
26.9	0
27	0
27.1	0
27.2	0
27.3	0
27.4	0
27.5	0
27.6	0
27.7	0
27.8	0
27.9	0
28	0
28.1	0
28.2	0
28.3	0
28.4	0
28.5	0
28.6	0
28.7	0
28.8	0
28.9	0
29	0
29.1	0
29.2	0
29.3	0
29.4	0
29.5	0
29.6	0
29.7	0
29.8	0
29.9	0
30	0
30.1	0
30.2	0
30.3	0
30.4	0
30.5	0
30.6	0
30.7	0
30.8	0
30.9	0
31	0
31.1	0
31.2	0
31.3	0
31.4	0
31.5	0
31.6	0
31.7	0
31.8	0
31.9	0
32	0
32.1	0
32.2	0
32.3	0
32.4	0
32.5	0
32.6	0
32.7	0
32.8	0
32.9	0
33	0
33.1	0
33.2	0
33.3	0
33.4	0
33.5	0
33.6	0
33.7	0
33.8	0
33.9	0
34	0
34.1	0
34.2	0
34.3	0
34.4	0
34.5	0
34.6	0
34.7	0
34.8	0
34.9	0
35	0
35.1	0
35.2	0
35.3	0
35.4	0
35.5	0
35.6	0
35.7	0
35.8	0
35.9	0
36	0
36.1	0
36.2	0
36.3	0
36.4	0
36.5	0
36.6	0
36.7	0
36.8	0
36.9	0
37	0
37.1	0
37.2	0
37.3	0
37.4	0
37.5	0
37.6	0
37.7	0
37.8	0
37.9	0
38	0
38.1	0
38.2	0
38.3	0
38.4	0
38.5	0
38.6	0
38.7	0
38.8	0
38.9	0
39	0
39.1	0
39.2	0
39.3	0
39.4	0
39.5	0
39.6	0
39.7	0
39.8	0
39.9	0
40	0
40.1	0
40.2	0
40.3	0
40.4	0
40.5	0
40.6	0
40.7	0
40.8	0
40.9	0
41	0
41.1	0
41.2	0
41.3	0
41.4	0
41.5	0
41.6	0
41.7	0
41.8	0
41.9	0
42	0
42.1	0
42.2	0
42.3	0
42.4	0
42.5	0
42.6	0
42.7	0
42.8	0
42.9	0
43	0
43.1	0
43.2	0
43.3	0
43.4	0
43.5	0
43.6	0
43.7	0
43.8	0
43.9	0
44	0
44.1	0
44.2	0
44.3	0
44.4	0
44.5	0
44.6	0
44.7	0
44.8	0
44.9	0
45	0
45.1	0
45.2	0
45.3	0
45.4	0
45.5	0
45.6	0
45.7	0
45.8	0
45.9	0
46	0
46.1	0
46.2	0
46.3	0
46.4	0
46.5	0
46.6	0
46.7	0
46.8	0
46.9	0
47	0
47.1	0
47.2	0
47.3	0
47.4	0
47.5	0
47.6	0
47.7	0
47.8	0
47.9	0
48	0
48.1	0
48.2	0
48.3	0
48.4	0
48.5	0
48.6	0
48.7	0
48.8	0
48.9	0
49	0
49.1	0
49.2	0
49.3	0
49.4	0
49.5	0
49.6	0
49.7	0
49.8	0
49.9	0
50	0
50.1	0
50.2	0
50.3	0
50.4	0
50.5	0
50.6	0
50.7	0
50.8	0
50.9	0
51	0
51.1	0
51.2	0
51.3	0
51.4	0
51.5	0
51.6	0
51.7	0
51.8	0
51.9	0
52	0
52.1	0
52.2	0
52.3	0
52.4	0
52.5	0
52.6	0
52.7	0
52.8	0
52.9	0
53	0
53.1	0
53.2	0
53.3	0
53.4	0
53.5	0
53.6	0
53.7	0
53.8	0
53.9	0
54	0
54.1	0
54.2	0
54.3	0
54.4	0
54.5	0
54.6	0
54.7	0
54.8	0
54.9	0
55	0
55.1	0
55.2	0
55.3	0
55.4	0
55.5	0
55.6	0
55.7	0
55.8	0
55.9	0
56	0
56.1	0
56.2	0
56.3	0
56.4	0
56.5	0
56.6	0
56.7	0
56.8	0
56.9	0
57	0
57.1	0
57.2	0
57.3	0
57.4	0
57.5	0
57.6	0
57.7	0
57.8	0
57.9	0
58	0
58.1	0
58.2	0
58.3	0
58.4	0
58.5	0
58.6	0
58.7	0
58.8	0
58.9	0
59	0
59.1	0
59.2	0
59.3	0
59.4	0
59.5	0
59.6	0
59.7	0
59.8	0
59.9	0
60	0
60.1	0
60.2	0
60.3	0
60.4	0
60.5	0
60.6	0
60.7	0
60.8	0
60.9	0
61	0
61.1	0
61.2	0
61.3	0
61.4	0
61.5	0
61.6	0
61.7	0
61.8	0
61.9	0
62	0
62.1	0
62.2	0
62.3	0
62.4	0
62.5	0
62.6	0
62.7	0
62.8	0
62.9	0
63	0
63.1	0
63.2	0
63.3	0
63.4	0
63.5	0
63.6	0
63.7	0
63.8	0
63.9	0
64	0
64.1	0
64.2	0
64.3	0
64.4	0
64.5	0
64.6	0
64.7	0
64.8	0
64.9	0
65	0
65.1	0
65.2	0
65.3	0
65.4	0
65.5	0
65.6	0
65.7	0
65.8	0
65.9	0
66	0
66.1	0
66.2	0
66.3	0
66.4	0
66.5	0
66.6	0
66.7	0
66.8	0
66.9	0
67	0
67.1	0
67.2	0
67.3	0
67.4	0
67.5	0
67.6	0
67.7	0
67.8	0
67.9	0
68	0
68.1	0
68.2	0
68.3	0
68.4	0
68.5	0
68.6	0
68.7	0
68.8	0
68.9	0
69	0
69.1	0
69.2	0
69.3	0
69.4	0
69.5	0
69.6	0
69.7	0
69.8	0
69.9	0
70	0
70.1	0
70.2	0
70.3	0
70.4	0
70.5	0
70.6	0
70.7	0
70.8	0
70.9	0
71	0
71.1	0
71.2	0
71.3	0
71.4	0
71.5	0
71.6	0
71.7	0
71.8	0
71.9	0
72	0
72.1	0
72.2	0
72.3	0
72.4	0
72.5	0
72.6	0
72.7	0
72.8	0
72.9	0
73	0
73.1	0
73.2	0
73.3	0
73.4	0
73.5	0
73.6	0
73.7	0
73.8	0
73.9	0
74	0
74.1	0
74.2	0
74.3	0
74.4	0
74.5	0
74.6	0
74.7	0
74.8	0
74.9	0
75	0
75.1	0
75.2	0
75.3	0
75.4	0
75.5	0
75.6	0
75.7	0
75.8	0
75.9	0
76	0
76.1	0
76.2	0
76.3	0
76.4	0
76.5	0
76.6	0
76.7	0
76.8	0
76.9	0
77	0
77.1	0
77.2	0
77.3	0
77.4	0
77.5	0
77.6	0
77.7	0
77.8	0
77.9	0
78	0
78.1	0
78.2	0
78.3	0
78.4	0
78.5	0
78.6	0
78.7	0
78.8	0
78.9	0
79	0
79.1	0
79.2	0
79.3	0
79.4	0
79.5	0
79.6	0
79.7	0
79.8	0
79.9	0
80	0
80.1	0
80.2	0
80.3	0
80.4	0
80.5	0
80.6	0
80.7	0
80.8	0
80.9	0
81	0
81.1	0
81.2	0
81.3	0
81.4	0
81.5	0
81.6	0
81.7	0
81.8	0
81.9	0
82	0
82.1	0
82.2	0
82.3	0
82.4	0
82.5	0
82.6	0
82.7	0
82.8	0
82.9	0
83	0
83.1	0
83.2	0
83.3	0
83.4	0
83.5	0
83.6	0
83.7	0
83.8	0
83.9	0
84	0
84.1	0
84.2	0
84.3	0
84.4	0
84.5	0
84.6	0
84.7	0
84.8	0
84.9	0
85	0
85.1	0
85.2	0
85.3	0
85.4	0
85.5	0
85.6	0
85.7	0
85.8	0
85.9	0
86	0
86.1	0
86.2	0
86.3	0
86.4	0
86.5	0
86.6	0
86.7	0
86.8	0
86.9	0
87	0
87.1	0
87.2	0
87.3	0
87.4	0
87.5	0
87.6	0
87.7	0
87.8	0
87.9	0
88	0
88.1	0
88.2	0
88.3	0
88.4	0
88.5	0
88.6	0
88.7	0
88.8	0
88.9	0
89	0
89.1	0
89.2	0
89.3	0
89.4	0
89.5	0
89.6	0
89.7	0
89.8	0
89.9	0
90	0
90.1	0
90.2	0
90.3	0
90.4	0
90.5	0
90.6	0
90.7	0
90.8	0
90.9	0
91	0
91.1	0
91.2	0
91.3	0
91.4	0
91.5	0
91.6	0
91.7	0
91.8	0
91.9	0
92	0
92.1	0
92.2	0
92.3	0
92.4	0
92.5	0
92.6	0
92.7	0
92.8	0
92.9	0
93	0
93.1	0
93.2	0
93.3	0
93.4	0
93.5	0
93.6	0
93.7	0
93.8	0
93.9	0
94	0
94.1	0
94.2	0
94.3	0
94.4	0
94.5	0
94.6	0
94.7	0
94.8	0
94.9	0
95	0
95.1	0
95.2	0
95.3	0
95.4	0
95.5	0
95.6	0
95.7	0
95.8	0
95.9	0
96	0
96.1	0
96.2	0
96.3	0
96.4	0
96.5	0
96.6	0
96.7	0
96.8	0
96.9	0
97	0
97.1	0
97.2	0
97.3	0
97.4	0
97.5	0
97.6	0
97.7	0
97.8	0
97.9	0
98	0
98.1	0
98.2	0
98.3	0
98.4	0
98.5	0
98.6	0
98.7	0
98.8	0
98.9	0
99	0
99.1	0
99.2	0
99.3	0
99.4	0
99.5	0
99.6	0
99.7	0
99.8	0
99.9	0
100	0
100.1	0
100.2	0
100.3	0
100.4	0
100.5	0
100.6	0
100.7	0
100.8	0
100.9	0
101	0
101.1	0
101.2	0
101.3	0
101.4	0
101.5	0
101.6	0
101.7	0
101.8	0
101.9	0
102	0
102.1	0
102.2	0
102.3	0
102.4	0
102.5	0
102.6	0
102.7	0
102.8	0
102.9	0
103	0
103.1	0
103.2	0
103.3	0
103.4	0
103.5	0
103.6	0
103.7	0
103.8	0
103.9	0
104	0
104.1	0
104.2	0
104.3	0
104.4	0
104.5	0
104.6	0
104.7	0
104.8	0
104.9	0
105	0
105.1	0
105.2	0
105.3	0
105.4	0
105.5	0
105.6	0
105.7	0
105.8	0
105.9	0
106	0
106.1	0
106.2	0
106.3	0
106.4	0
106.5	0
106.6	0
106.7	0
106.8	0
106.9	0
107	0.0005
107.1	0.0005
107.2	0.0005
107.3	0.0005
107.4	0.0005
107.5	0.0005
107.6	0.0005
107.7	0.0005
107.8	0.0005
107.9	0.0005
108	0.0005
108.1	0.0005
108.2	0.0005
108.3	0.0005
108.4	0.0005
108.5	0.0005
108.6	0.0005
108.7	0.0005
108.8	0.0005
108.9	0.0005
109	0.0005
109.1	0.0005
109.2	0.0005
109.3	0.0005
109.4	0.0005
109.5	0.0005
109.6	0.0005
109.7	0.0005
109.8	0.0005
109.9	0.0005
110	0.0005
110.1	0.0005
110.2	0.0005
110.3	0.0005
110.4	0.0005
110.5	0.0005
110.6	0.0005
110.7	0.0005
110.8	0.0005
110.9	0.0005
111	0.0005
111.1	0.0005
111.2	0.0005
111.3	0.0005
111.4	0.0005
111.5	0.0005
111.6	0.0005
111.7	0.0005
111.8	0.0005
111.9	0.0005
112	0.001
112.1	0.001
112.2	0.001
112.3	0.001
112.4	0.001
112.5	0.001
112.6	0.001
112.7	0.001
112.8	0.001
112.9	0.001
113	0.001
113.1	0.001
113.2	0.001
113.3	0.001
113.4	0.001
113.5	0.001
113.6	0.001
113.7	0.001
113.8	0.001
113.9	0.001
114	0.001
114.1	0.001
114.2	0.001
114.3	0.001
114.4	0.001
114.5	0.001
114.6	0.001
114.7	0.001
114.8	0.001
114.9	0.001
115	0.001
115.1	0.001
115.2	0.001
115.3	0.001
115.4	0.001
115.5	0.001
115.6	0.001
115.7	0.001
115.8	0.001
115.9	0.001
116	0.001
116.1	0.001
116.2	0.001
116.3	0.001
116.4	0.001
116.5	0.001
116.6	0.001
116.7	0.001
116.8	0.001
116.9	0.0015
117	0.0015
117.1	0.0015
117.2	0.0015
117.3	0.0015
117.4	0.0015
117.5	0.0015
117.6	0.0015
117.7	0.0015
117.8	0.0015
117.9	0.0015
118	0.0015
118.1	0.0015
118.2	0.0015
118.3	0.0015
118.4	0.0015
118.5	0.0015
118.6	0.0015
118.7	0.0015
118.8	0.0015
118.9	0.0015
119	0.0015
119.1	0.0015
119.2	0.0015
119.3	0.0015
119.4	0.0015
119.5	0.0015
119.6	0.0015
119.7	0.0015
119.8	0.0015
119.9	0.0015
120	0.0015
120.1	0.0015
120.2	0.0015
120.3	0.0015
120.4	0.0015
120.5	0.0015
120.6	0.0015
120.7	0.0015
120.8	0.0015
120.9	0.0015
121	0.0015
121.1	0.0015
121.2	0.0015
121.3	0.0015
121.4	0.0015
121.5	0.0015
121.6	0.0015
121.7	0.0015
121.8	0.0015
121.9	0.0015
122	0.0015
122.1	0.0015
122.2	0.002
122.3	0.002
122.4	0.002
122.5	0.002
122.6	0.002
122.7	0.002
122.8	0.002
122.9	0.002
123	0.002
123.1	0.002
123.2	0.002
123.3	0.002
123.4	0.002
123.5	0.002
123.6	0.002
123.7	0.002
123.8	0.002
123.9	0.002
124	0.002
124.1	0.002
124.2	0.002
124.3	0.002
124.4	0.002
124.5	0.002
124.6	0.002
124.7	0.002
124.8	0.002
124.9	0.002
125	0.002
125.1	0.002
125.2	0.002
125.3	0.002
125.4	0.0025
125.5	0.0025
125.6	0.0025
125.7	0.0025
125.8	0.0025
125.9	0.0025
126	0.0025
126.1	0.0025
126.2	0.0025
126.3	0.0025
126.4	0.0025
126.5	0.0025
126.6	0.0025
126.7	0.0025
126.8	0.0025
126.9	0.0025
127	0.0025
127.1	0.0025
127.2	0.0025
127.3	0.0025
127.4	0.0025
127.5	0.0025
127.6	0.0025
127.7	0.0025
127.8	0.0025
127.9	0.0025
128	0.0025
128.1	0.0025
128.2	0.0025
128.3	0.0025
128.4	0.0025
128.5	0.0025
128.6	0.0025
128.7	0.0025
128.8	0.0025
128.9	0.003
129	0.003
129.1	0.003
129.2	0.003
129.3	0.003
129.4	0.003
129.5	0.003
129.6	0.003
129.7	0.003
129.8	0.003
129.9	0.003
130	0.0035
130.1	0.003
130.2	0.003
130.3	0.003
130.4	0.003
130.5	0.0035
130.6	0.0035
130.7	0.0035
130.8	0.0035
130.9	0.0035
131	0.004
131.1	0.004
131.2	0.004
131.3	0.004
131.4	0.004
131.5	0.004
131.6	0.004
131.7	0.004
131.8	0.004
131.9	0.004
132	0.004
132.1	0.004
132.2	0.004
132.3	0.004
132.4	0.004
132.5	0.004
132.6	0.004
132.7	0.004
132.8	0.004
132.9	0.004
133	0.004
133.1	0.004
133.2	0.004
133.3	0.004
133.4	0.004
133.5	0.004
133.6	0.004
133.7	0.004
133.8	0.0035
133.9	0.0035
134	0.0035
134.1	0.0035
134.2	0.0035
134.3	0.0035
134.4	0.0035
134.5	0.0035
134.6	0.0035
134.7	0.0035
134.8	0.0035
134.9	0.0035
135	0.0035
135.1	0.0035
135.2	0.0035
135.3	0.0035
135.4	0.0035
135.5	0.0035
135.6	0.0035
135.7	0.0035
135.8	0.0035
135.9	0.0035
136	0.0035
136.1	0.004
136.2	0.004
136.3	0.004
136.4	0.004
136.5	0.004
136.6	0.004
136.7	0.004
136.8	0.004
136.9	0.004
137	0.004
137.1	0.004
137.2	0.004
137.3	0.004
137.4	0.004
137.5	0.004
137.6	0.004
137.7	0.004
137.8	0.004
137.9	0.004
138	0.004
138.1	0.004
138.2	0.004
138.3	0.004
138.4	0.0045
138.5	0.0045
138.6	0.0045
138.7	0.0045
138.8	0.0045
138.9	0.0045
139	0.0045
139.1	0.0045
139.2	0.0045
139.3	0.0045
139.4	0.0045
139.5	0.0045
139.6	0.0045
139.7	0.0045
139.8	0.0045
139.9	0.0045
140	0.005
140.1	0.005
140.2	0.005
140.3	0.005
140.4	0.005
140.5	0.005
140.6	0.0055
140.7	0.0055
140.8	0.0055
140.9	0.0055
141	0.0055
141.1	0.0055
141.2	0.0055
141.3	0.0055
141.4	0.0055
141.5	0.0055
141.6	0.0055
141.7	0.0055
141.8	0.0055
141.9	0.0055
142	0.0055
142.1	0.0055
142.2	0.0055
142.3	0.0055
142.4	0.0055
142.5	0.0055
142.6	0.006
142.7	0.0065
142.8	0.0065
142.9	0.007
143	0.007
143.1	0.007
143.2	0.007
143.3	0.007
143.4	0.007
143.5	0.007
143.6	0.007
143.7	0.0075
143.8	0.0075
143.9	0.0075
144	0.0075
144.1	0.0075
144.2	0.0075
144.3	0.0075
144.4	0.0075
144.5	0.0075
144.6	0.008
144.7	0.008
144.8	0.008
144.9	0.008
145	0.008
145.1	0.008
145.2	0.008
145.3	0.008
145.4	0.008
145.5	0.008
145.6	0.008
145.7	0.008
145.8	0.008
145.9	0.008
146	0.008
146.1	0.008
146.2	0.008
146.3	0.0085
146.4	0.0085
146.5	0.0085
146.6	0.0085
146.7	0.0085
146.8	0.008
146.9	0.008
147	0.008
147.1	0.0085
147.2	0.0085
147.3	0.009
147.4	0.009
147.5	0.009
147.6	0.0095
147.7	0.0095
147.8	0.0095
147.9	0.0095
148	0.0095
148.1	0.01
148.2	0.01
148.3	0.01
148.4	0.01
148.5	0.01
148.6	0.01
148.7	0.0105
148.8	0.0105
148.9	0.0105
149	0.0105
149.1	0.011
149.2	0.011
149.3	0.011
149.4	0.011
149.5	0.011
149.6	0.011
149.7	0.011
149.8	0.011
149.9	0.011
150	0.011
150.1	0.011
150.2	0.011
150.3	0.011
150.4	0.011
150.5	0.011
150.6	0.011
150.7	0.011
150.8	0.011
150.9	0.0115
151	0.0115
151.1	0.0115
151.2	0.0115
151.3	0.0115
151.4	0.0115
151.5	0.0115
151.6	0.0115
151.7	0.0115
151.8	0.0115
151.9	0.0115
152	0.0115
152.1	0.0115
152.2	0.0115
152.3	0.0115
152.4	0.0115
152.5	0.011
152.6	0.011
152.7	0.011
152.8	0.011
152.9	0.011
153	0.011
153.1	0.011
153.2	0.011
153.3	0.011
153.4	0.011
153.5	0.011
153.6	0.011
153.7	0.011
153.8	0.011
153.9	0.011
154	0.011
154.1	0.011
154.2	0.011
154.3	0.011
154.4	0.011
154.5	0.011
154.6	0.011
154.7	0.011
154.8	0.011
154.9	0.011
155	0.011
155.1	0.011
155.2	0.011
155.3	0.011
155.4	0.011
155.5	0.0105
155.6	0.0105
155.7	0.0105
155.8	0.0105
155.9	0.0105
156	0.0105
156.1	0.0105
156.2	0.011
156.3	0.0115
156.4	0.0115
156.5	0.0115
156.6	0.0115
156.7	0.0115
156.8	0.0115
156.9	0.0115
157	0.012
157.1	0.012
157.2	0.0125
157.3	0.0125
157.4	0.0125
157.5	0.013
157.6	0.013
157.7	0.0135
157.8	0.0135
157.9	0.0135
158	0.0135
158.1	0.0135
158.2	0.0135
158.3	0.0135
158.4	0.0135
158.5	0.0135
158.6	0.0135
158.7	0.0135
158.8	0.0135
158.9	0.0135
159	0.0135
159.1	0.0135
159.2	0.0135
159.3	0.0135
159.4	0.0135
159.5	0.0135
159.6	0.0135
159.7	0.0135
159.8	0.0135
159.9	0.0135
160	0.0135
160.1	0.0135
160.2	0.0135
160.3	0.0135
160.4	0.014
160.5	0.014
160.6	0.014
160.7	0.014
160.8	0.014
160.9	0.014
161	0.014
161.1	0.014
161.2	0.014
161.3	0.014
161.4	0.014
161.5	0.014
161.6	0.014
161.7	0.0145
161.8	0.0145
161.9	0.0145
162	0.0145
162.1	0.0145
162.2	0.0145
162.3	0.0145
162.4	0.0145
162.5	0.0145
162.6	0.0145
162.7	0.0145
162.8	0.0145
162.9	0.0145
163	0.0145
163.1	0.0145
163.2	0.0145
163.3	0.0145
163.4	0.0145
163.5	0.0145
163.6	0.0145
163.7	0.0145
163.8	0.014
163.9	0.014
164	0.014
164.1	0.014
164.2	0.014
164.3	0.014
164.4	0.014
164.5	0.014
164.6	0.014
164.7	0.014
164.8	0.014
164.9	0.014
165	0.014
165.1	0.014
165.2	0.014
165.3	0.0145
165.4	0.0145
165.5	0.0145
165.6	0.0145
165.7	0.0145
165.8	0.0145
165.9	0.0145
166	0.0145
166.1	0.0145
166.2	0.0145
166.3	0.0145
166.4	0.0145
166.5	0.0145
166.6	0.0145
166.7	0.0145
166.8	0.0145
166.9	0.0145
167	0.0145
167.1	0.0145
167.2	0.0145
167.3	0.0145
167.4	0.0145
167.5	0.0145
167.6	0.0145
167.7	0.0145
167.8	0.0145
167.9	0.0145
168	0.015
168.1	0.015
168.2	0.015
168.3	0.015
168.4	0.015
168.5	0.0145
168.6	0.0145
168.7	0.0145
168.8	0.0145
168.9	0.0145
169	0.0155
169.1	0.0155
169.2	0.0155
169.3	0.0155
169.4	0.0155
169.5	0.0155
169.6	0.016
169.7	0.016
169.8	0.016
169.9	0.016
170	0.0165
170.1	0.0165
170.2	0.0165
170.3	0.0165
170.4	0.0165
170.5	0.0165
170.6	0.0165
170.7	0.0165
170.8	0.016
170.9	0.0165
171	0.0165
171.1	0.0165
171.2	0.0165
171.3	0.0165
171.4	0.017
171.5	0.017
171.6	0.017
171.7	0.017
171.8	0.017
171.9	0.017
172	0.017
172.1	0.017
172.2	0.017
172.3	0.017
172.4	0.017
172.5	0.017
172.6	0.017
172.7	0.017
172.8	0.017
172.9	0.017
173	0.017
173.1	0.017
173.2	0.017
173.3	0.017
173.4	0.0165
173.5	0.0165
173.6	0.0165
173.7	0.0165
173.8	0.0165
173.9	0.0165
174	0.0165
174.1	0.0165
174.2	0.0165
174.3	0.0165
174.4	0.0165
174.5	0.0165
174.6	0.0165
174.7	0.0165
174.8	0.0165
174.9	0.0165
175	0.0165
175.1	0.0165
175.2	0.0165
175.3	0.0165
175.4	0.0165
175.5	0.0165
175.6	0.0165
175.7	0.0165
175.8	0.0165
175.9	0.0165
176	0.0165
176.1	0.0165
176.2	0.0165
176.3	0.0165
176.4	0.0165
176.5	0.0165
176.6	0.0165
176.7	0.0165
176.8	0.0165
176.9	0.0165
177	0.0165
177.1	0.0165
177.2	0.0165
177.3	0.016
177.4	0.016
177.5	0.016
177.6	0.016
177.7	0.016
177.8	0.016
177.9	0.0155
178	0.0155
178.1	0.0155
178.2	0.0155
178.3	0.0155
178.4	0.0155
178.5	0.0155
178.6	0.0155
178.7	0.0155
178.8	0.0155
178.9	0.0155
179	0.0155
179.1	0.0155
179.2	0.0155
179.3	0.0155
179.4	0.0155
179.5	0.0155
179.6	0.0155
179.7	0.0155
179.8	0.0155
179.9	0.0155
180	0.0155
180.1	0.0155
180.2	0.0155
180.3	0.0155
180.4	0.0155
180.5	0.0155
180.6	0.0155
180.7	0.0155
180.8	0.0155
180.9	0.0155
181	0.015
181.1	0.015
181.2	0.015
181.3	0.015
181.4	0.015
181.5	0.015
181.6	0.015
181.7	0.015
181.8	0.015
181.9	0.015
182	0.015
182.1	0.015
182.2	0.015
182.3	0.015
182.4	0.015
182.5	0.015
182.6	0.015
182.7	0.015
182.8	0.015
182.9	0.0145
183	0.0145
183.1	0.014
183.2	0.014
183.3	0.014
183.4	0.014
183.5	0.014
183.6	0.014
183.7	0.0135
183.8	0.014
183.9	0.014
184	0.014
184.1	0.014
184.2	0.014
184.3	0.014
184.4	0.0145
184.5	0.0145
184.6	0.0145
184.7	0.0145
184.8	0.0145
184.9	0.0145
185	0.0145
185.1	0.0145
185.2	0.0145
185.3	0.0145
185.4	0.0145
185.5	0.0145
185.6	0.0145
185.7	0.0145
185.8	0.0145
185.9	0.0145
186	0.0145
186.1	0.0145
186.2	0.0145
186.3	0.0145
186.4	0.015
186.5	0.015
186.6	0.015
186.7	0.015
186.8	0.015
186.9	0.0145
187	0.0145
187.1	0.0145
187.2	0.0145
187.3	0.0145
187.4	0.0145
187.5	0.0145
187.6	0.0145
187.7	0.0145
187.8	0.0145
187.9	0.0145
188	0.0145
188.1	0.0145
188.2	0.0145
188.3	0.0145
188.4	0.0145
188.5	0.0145
188.6	0.0145
188.7	0.0145
188.8	0.0145
188.9	0.0145
189	0.0145
189.1	0.0145
189.2	0.0145
189.3	0.0145
189.4	0.0145
189.5	0.0145
189.6	0.0145
189.7	0.0145
189.8	0.0145
189.9	0.0145
190	0.0145
190.1	0.0145
190.2	0.015
190.3	0.015
190.4	0.015
190.5	0.015
190.6	0.015
190.7	0.015
190.8	0.015
190.9	0.015
191	0.015
191.1	0.0155
191.2	0.0155
191.3	0.0155
191.4	0.0155
191.5	0.016
191.6	0.016
191.7	0.016
191.8	0.016
191.9	0.016
192	0.016
192.1	0.016
192.2	0.016
192.3	0.0165
192.4	0.0165
192.5	0.0165
192.6	0.0165
192.7	0.0165
192.8	0.0165
192.9	0.0165
193	0.0165
193.1	0.0165
193.2	0.0165
193.3	0.0165
193.4	0.0165
193.5	0.0165
193.6	0.0165
193.7	0.0165
193.8	0.0165
193.9	0.016
194	0.016
194.1	0.0165
194.2	0.0165
194.3	0.0165
194.4	0.0165
194.5	0.0165
194.6	0.0165
194.7	0.0165
194.8	0.0165
194.9	0.0165
195	0.0165
195.1	0.0165
195.2	0.0165
195.3	0.017
195.4	0.017
195.5	0.017
195.6	0.017
195.7	0.017
195.8	0.017
195.9	0.017
196	0.017
196.1	0.017
196.2	0.017
196.3	0.017
196.4	0.017
196.5	0.017
196.6	0.017
196.7	0.017
196.8	0.017
196.9	0.017
197	0.017
197.1	0.017
197.2	0.017
197.3	0.017
197.4	0.017
197.5	0.0175
197.6	0.0175
197.7	0.0175
197.8	0.0175
197.9	0.0175
198	0.0175
198.1	0.0175
198.2	0.0175
198.3	0.017
198.4	0.017
198.5	0.017
198.6	0.017
198.7	0.017
198.8	0.017
198.9	0.017
199	0.017
199.1	0.017
199.2	0.017
199.3	0.017
199.4	0.017
199.5	0.017
199.6	0.017
199.7	0.017
199.8	0.017
199.9	0.017
200	0.017
[truncated: 14,000 more rows]
