# Supplementary material for: Bayesian inference of kinetic schemes for ion channels by Kalman filtering
Source: eLife journal article supplement (doi:10.7554/elife.62714), 2022-05-04
Supplement: fig4-data11 [file 1_Sim_N_2000_theor_Fluor_Werte.xlsx]

## Sheet: Tabelle1
0.1	0
0.2	0
0.3	0
0.4	0
0.5	0
0.6	0
0.7	0
0.8	0
0.9	0
1	0
1.1	0
1.2	0
1.3	0
1.4	0
1.5	0
1.6	0
1.7	0
1.8	0
1.9	0
2	0
2.1	0
2.2	0
2.3	0
2.4	0
2.5	0
2.6	0
2.7	0
2.8	0
2.9	0
3	0
3.1	0
3.2	0
3.3	0
3.4	0
3.5	0
3.6	0
3.7	0
3.8	0
3.9	0
4	0
4.1	0
4.2	0
4.3	0
4.4	0
4.5	0
4.6	0
4.7	0
4.8	0
4.9	0
5	0
5.1	0
5.2	0
5.3	0
5.4	0
5.5	0
5.6	0
5.7	0
5.8	0
5.9	0
6	0
6.1	0
6.2	0
6.3	0
6.4	0
6.5	0
6.6	0
6.7	0
6.8	0
6.9	0
7	0
7.1	0
7.2	0
7.3	0
7.4	0
7.5	0
7.6	0
7.7	0
7.8	0
7.9	0
8	0
8.1	0
8.2	0
8.3	0
8.4	0
8.5	0
8.6	0
8.7	0
8.8	0
8.9	0
9	0
9.1	0
9.2	0
9.3	0
9.4	0
9.5	0
9.6	0
9.7	0
9.8	0
9.9	0
10	0
10.1	0
10.2	0
10.3	0
10.4	0
10.5	0
10.6	0
10.7	0
10.8	0
10.9	0
11	0
11.1	0
11.2	0
11.3	0
11.4	0
11.5	0
11.6	0
11.7	0
11.8	0
11.9	0
12	0
12.1	0
12.2	0
12.3	0
12.4	0
12.5	0
12.6	0
12.7	0
12.8	0
12.9	0
13	0
13.1	0
13.2	0
13.3	0
13.4	0
13.5	0
13.6	0
13.7	0
13.8	0
13.9	0
14	0
14.1	0
14.2	0
14.3	0
14.4	0
14.5	0
14.6	0
14.7	0
14.8	0
14.9	0
15	0
15.1	0
15.2	0
15.3	0
15.4	0
15.5	0
15.6	0
15.7	0
15.8	0
15.9	0
16	0
16.1	0
16.2	0
16.3	0
16.4	0
16.5	0
16.6	0
16.7	0
16.8	0
16.9	0
17	0
17.1	0
17.2	0
17.3	0
17.4	0
17.5	0
17.6	0
17.7	0
17.8	0
17.9	0
18	0
18.1	0
18.2	0
18.3	0
18.4	0
18.5	0
18.6	0
18.7	0
18.8	0
18.9	0
19	0
19.1	0
19.2	0
19.3	0
19.4	0
19.5	0
19.6	0
19.7	0
19.8	0
19.9	0
20	0
20.1	0
20.2	0
20.3	0
20.4	0
20.5	0
20.6	0
20.7	0
20.8	0
20.9	0
21	0
21.1	0
21.2	0
21.3	0
21.4	0
21.5	0
21.6	0
21.7	0
21.8	0
21.9	0
22	0
22.1	0
22.2	0
22.3	0
22.4	0
22.5	0
22.6	0
22.7	0
22.8	0
22.9	0
23	0
23.1	0
23.2	0
23.3	0
23.4	0
23.5	0
23.6	0
23.7	0
23.8	0
23.9	0
24	0
24.1	0
24.2	0
24.3	0
24.4	0
24.5	0
24.6	0
24.7	0
24.8	0
24.9	0
25	0
25.1	0
25.2	0
25.3	0
25.4	0
25.5	0
25.6	0
25.7	0
25.8	0
25.9	0
26	0
26.1	0
26.2	0
26.3	0
26.4	0
26.5	0
26.6	0
26.7	0
26.8	0
26.9	0
27	0
27.1	0
27.2	0
27.3	0
27.4	0
27.5	0
27.6	0
27.7	0
27.8	0
27.9	0
28	0
28.1	0
28.2	0
28.3	0
28.4	0
28.5	0
28.6	0
28.7	0
28.8	0
28.9	0
29	0
29.1	0
29.2	0
29.3	0
29.4	0
29.5	0
29.6	0
29.7	0
29.8	0
29.9	0
30	0
30.1	0
30.2	0
30.3	0
30.4	0
30.5	0
30.6	0
30.7	0
30.8	0
30.9	0
31	0
31.1	0
31.2	0
31.3	0
31.4	0
31.5	0
31.6	0
31.7	0
31.8	0
31.9	0
32	0
32.1	0
32.2	0
32.3	0
32.4	0
32.5	0
32.6	0
32.7	0
32.8	0
32.9	0
33	0
33.1	0
33.2	0
33.3	0
33.4	0
33.5	0
33.6	0
33.7	0
33.8	0
33.9	0
34	0
34.1	0
34.2	0
34.3	0
34.4	0
34.5	0
34.6	0
34.7	0
34.8	0
34.9	0
35	0
35.1	0
35.2	0
35.3	0
35.4	0
35.5	0
35.6	0
35.7	0
35.8	0
35.9	0
36	0
36.1	0
36.2	0
36.3	0
36.4	0
36.5	0
36.6	0
36.7	0
36.8	0
36.9	0
37	0
37.1	0
37.2	0
37.3	0
37.4	0
37.5	0
37.6	0
37.7	0
37.8	0
37.9	0
38	0
38.1	0
38.2	0
38.3	0
38.4	0
38.5	0
38.6	0
38.7	0
38.8	0
38.9	0
39	0
39.1	0
39.2	0
39.3	0
39.4	0
39.5	0
39.6	0
39.7	0
39.8	0
39.9	0
40	0
40.1	0
40.2	0
40.3	0
40.4	0
40.5	0
40.6	0
40.7	0
40.8	0
40.9	0
41	0
41.1	0
41.2	0
41.3	0
41.4	0
41.5	0
41.6	0
41.7	0
41.8	0
41.9	0
42	0
42.1	0
42.2	0
42.3	0
42.4	0
42.5	0
42.6	0
42.7	0
42.8	0
42.9	0
43	0
43.1	0
43.2	0
43.3	0
43.4	0
43.5	0
43.6	0
43.7	0
43.8	0
43.9	0
44	0
44.1	0
44.2	0
44.3	0
44.4	0
44.5	0
44.6	0
44.7	0
44.8	0
44.9	0
45	0
45.1	0
45.2	0
45.3	0
45.4	0
45.5	0
45.6	0
45.7	0
45.8	0
45.9	0
46	0
46.1	0
46.2	0
46.3	0
46.4	0
46.5	0
46.6	0
46.7	0
46.8	0
46.9	0
47	0
47.1	0
47.2	0
47.3	0
47.4	0
47.5	0
47.6	0
47.7	0
47.8	0
47.9	0
48	0
48.1	0
48.2	0
48.3	0
48.4	0
48.5	0
48.6	0
48.7	0
48.8	0
48.9	0
49	0
49.1	0
49.2	0
49.3	0
49.4	0
49.5	0
49.6	0
49.7	0
49.8	0
49.9	0
50	0
50.1	0
50.2	0
50.3	0
50.4	0
50.5	0
50.6	0
50.7	0
50.8	0
50.9	0
51	0
51.1	0
51.2	0
51.3	0
51.4	0
51.5	0
51.6	0
51.7	0
51.8	0
51.9	0
52	0
52.1	0
52.2	0
52.3	0
52.4	0
52.5	0
52.6	0
52.7	0
52.8	0
52.9	0
53	0
53.1	0
53.2	0
53.3	0
53.4	0
53.5	0
53.6	0
53.7	0
53.8	0
53.9	0
54	0
54.1	0
54.2	0
54.3	0
54.4	0
54.5	0
54.6	0
54.7	0
54.8	0
54.9	0
55	0
55.1	0
55.2	0
55.3	0
55.4	0
55.5	0
55.6	0
55.7	0
55.8	0
55.9	0
56	0
56.1	0
56.2	0
56.3	0
56.4	0
56.5	0
56.6	0
56.7	0
56.8	0
56.9	0
57	0
57.1	0
57.2	0
57.3	0
57.4	0
57.5	0
57.6	0
57.7	0
57.8	0
57.9	0
58	0
58.1	0
58.2	0
58.3	0
58.4	0
58.5	0
58.6	0
58.7	0
58.8	0
58.9	0
59	0
59.1	0
59.2	0
59.3	0
59.4	0
59.5	0
59.6	0
59.7	0
59.8	0
59.9	0
60	0
60.1	0
60.2	0
60.3	0
60.4	0
60.5	0
60.6	0
60.7	0
60.8	0
60.9	0
61	0
61.1	0
61.2	0
61.3	0
61.4	0
61.5	0
61.6	0
61.7	0
61.8	0
61.9	0
62	0
62.1	0
62.2	0
62.3	0
62.4	0
62.5	0
62.6	0
62.7	0
62.8	0
62.9	0
63	0
63.1	0
63.2	0
63.3	0
63.4	0
63.5	0
63.6	0
63.7	0
63.8	0
63.9	0
64	0
64.1	0
64.2	0
64.3	0
64.4	0
64.5	0
64.6	0
64.7	0
64.8	0
64.9	0
65	0
65.1	0
65.2	0
65.3	0
65.4	0
65.5	0
65.6	0
65.7	0
65.8	0
65.9	0
66	0
66.1	0
66.2	0
66.3	0
66.4	0
66.5	0
66.6	0
66.7	0
66.8	0
66.9	0
67	0
67.1	0
67.2	0
67.3	0
67.4	0
67.5	0
67.6	0
67.7	0
67.8	0
67.9	0
68	0
68.1	0
68.2	0
68.3	0
68.4	0
68.5	0
68.6	0
68.7	0
68.8	0
68.9	0
69	0
69.1	0
69.2	0
69.3	0
69.4	0
69.5	0
69.6	0
69.7	0
69.8	0
69.9	0
70	0
70.1	0
70.2	0
70.3	0
70.4	0
70.5	0
70.6	0
70.7	0
70.8	0
70.9	0
71	0
71.1	0
71.2	0
71.3	0
71.4	0
71.5	0
71.6	0
71.7	0
71.8	0
71.9	0
72	0
72.1	0
72.2	0
72.3	0
72.4	0
72.5	0
72.6	0
72.7	0
72.8	0
72.9	0
73	0
73.1	0
73.2	0
73.3	0
73.4	0
73.5	0
73.6	0
73.7	0
73.8	0
73.9	0
74	0
74.1	0
74.2	0
74.3	0
74.4	0
74.5	0
74.6	0
74.7	0
74.8	0
74.9	0
75	0
75.1	0
75.2	0
75.3	0
75.4	0
75.5	0
75.6	0
75.7	0
75.8	0
75.9	0
76	0
76.1	0
76.2	0
76.3	0
76.4	0
76.5	0
76.6	0
76.7	0
76.8	0
76.9	0
77	0
77.1	0
77.2	0
77.3	0
77.4	0
77.5	0
77.6	0
77.7	0
77.8	0
77.9	0
78	0
78.1	0
78.2	0
78.3	0
78.4	0
78.5	0
78.6	0
78.7	0
78.8	0
78.9	0
79	0
79.1	0
79.2	0
79.3	0
79.4	0
79.5	0
79.6	0
79.7	0
79.8	0
79.9	0
80	0
80.1	0
80.2	0
80.3	0
80.4	0
80.5	0
80.6	0
80.7	0
80.8	0
80.9	0
81	0
81.1	0
81.2	0
81.3	0
81.4	0
81.5	0
81.6	0
81.7	0
81.8	0
81.9	0
82	0
82.1	0
82.2	0
82.3	0
82.4	0
82.5	0
82.6	0
82.7	0
82.8	0
82.9	0
83	0
83.1	0
83.2	0
83.3	0
83.4	0
83.5	0
83.6	0
83.7	0
83.8	0
83.9	0
84	0
84.1	0
84.2	0
84.3	0
84.4	0
84.5	0
84.6	0
84.7	0
84.8	0
84.9	0
85	0
85.1	0
85.2	0
85.3	0
85.4	0
85.5	0
85.6	0
85.7	0
85.8	0
85.9	0
86	0
86.1	0
86.2	0
86.3	0
86.4	0
86.5	0
86.6	0
86.7	0
86.8	0
86.9	0
87	0
87.1	0
87.2	0
87.3	0
87.4	0
87.5	0
87.6	0
87.7	0
87.8	0
87.9	0
88	0
88.1	0
88.2	0
88.3	0
88.4	0
88.5	0
88.6	0
88.7	0
88.8	0
88.9	0
89	0
89.1	0
89.2	0
89.3	0
89.4	0
89.5	0
89.6	0
89.7	0
89.8	0
89.9	0
90	0
90.1	0
90.2	0
90.3	0
90.4	0
90.5	0
90.6	0
90.7	0
90.8	0
90.9	0
91	0
91.1	0
91.2	0
91.3	0
91.4	0
91.5	0
91.6	0
91.7	0
91.8	0
91.9	0
92	0
92.1	0
92.2	0
92.3	0
92.4	0
92.5	0
92.6	0
92.7	0
92.8	0
92.9	0
93	0
93.1	0
93.2	0
93.3	0
93.4	0
93.5	0
93.6	0
93.7	0
93.8	0
93.9	0
94	0
94.1	0
94.2	0
94.3	0
94.4	0
94.5	0
94.6	0
94.7	0
94.8	0
94.9	0
95	0
95.1	0
95.2	0
95.3	0
95.4	0
95.5	0
95.6	0
95.7	0
95.8	0
95.9	0
96	0
96.1	0
96.2	0
96.3	0
96.4	0
96.5	0
96.6	0
96.7	0
96.8	0
96.9	0
97	0
97.1	0
97.2	0
97.3	0
97.4	0
97.5	0
97.6	0
97.7	0
97.8	0
97.9	0
98	0
98.1	0
98.2	0
98.3	0
98.4	0
98.5	0
98.6	0
98.7	0
98.8	0
98.9	0
99	0
99.1	0
99.2	0
99.3	0
99.4	0
99.5	0
99.6	0
99.7	0
99.8	0
99.9	0
100	0
100.1	0.00186303
100.2	0.0037023
100.3	0.00551806
100.4	0.00731057
100.5	0.00908009
100.6	0.0108269
100.7	0.0125512
100.8	0.0142533
100.9	0.0159334
101	0.0175919
101.1	0.0192288
101.2	0.0208446
101.3	0.0224394
101.4	0.0240135
101.5	0.0255672
101.6	0.0271007
101.7	0.0286141
101.8	0.0301079
101.9	0.0315822
102	0.0330372
102.1	0.0344733
102.2	0.0358906
102.3	0.0372893
102.4	0.0386697
102.5	0.0400321
102.6	0.0413766
102.7	0.0427035
102.8	0.044013
102.9	0.0453053
103	0.0465807
103.1	0.0478393
103.2	0.0490813
103.3	0.0503071
103.4	0.0515167
103.5	0.0527105
103.6	0.0538885
103.7	0.0550511
103.8	0.0561983
103.9	0.0573305
104	0.0584477
104.1	0.0595503
104.2	0.0606383
104.3	0.061712
104.4	0.0627716
104.5	0.0638172
104.6	0.064849
104.7	0.0658673
104.8	0.0668721
104.9	0.0678637
105	0.0688423
105.1	0.069808
105.2	0.0707609
105.3	0.0717013
105.4	0.0726293
105.5	0.0735451
105.6	0.0744488
105.7	0.0753407
105.8	0.0762207
105.9	0.0770892
106	0.0779463
106.1	0.0787921
106.2	0.0796268
106.3	0.0804505
106.4	0.0812633
106.5	0.0820655
106.6	0.0828571
106.7	0.0836383
106.8	0.0844092
106.9	0.08517
107	0.0859208
107.1	0.0866618
107.2	0.087393
107.3	0.0881146
107.4	0.0888267
107.5	0.0895295
107.6	0.0902231
107.7	0.0909076
107.8	0.0915831
107.9	0.0922497
108	0.0929077
108.1	0.0935569
108.2	0.0941977
108.3	0.0948301
108.4	0.0954543
108.5	0.0960702
108.6	0.0966781
108.7	0.0972781
108.8	0.0978702
108.9	0.0984546
109	0.0990313
109.1	0.0996005
109.2	0.100162
109.3	0.100717
109.4	0.101264
109.5	0.101804
109.6	0.102337
109.7	0.102863
109.8	0.103383
109.9	0.103895
110	0.104401
110.1	0.1049
110.2	0.105393
110.3	0.105879
110.4	0.106359
110.5	0.106833
110.6	0.107301
110.7	0.107763
110.8	0.108218
110.9	0.108668
111	0.109112
111.1	0.10955
111.2	0.109983
111.3	0.110409
111.4	0.110831
111.5	0.111247
111.6	0.111657
111.7	0.112063
111.8	0.112463
111.9	0.112858
112	0.113248
112.1	0.113632
112.2	0.114012
112.3	0.114387
112.4	0.114757
112.5	0.115123
112.6	0.115484
112.7	0.11584
112.8	0.116191
112.9	0.116538
113	0.116881
113.1	0.117219
113.2	0.117553
113.3	0.117883
113.4	0.118208
113.5	0.11853
113.6	0.118847
113.7	0.11916
113.8	0.119469
113.9	0.119774
114	0.120076
114.1	0.120373
114.2	0.120667
114.3	0.120957
114.4	0.121244
114.5	0.121526
114.6	0.121806
114.7	0.122081
114.8	0.122353
114.9	0.122622
115	0.122888
115.1	0.12315
115.2	0.123408
115.3	0.123664
115.4	0.123916
115.5	0.124165
115.6	0.124411
115.7	0.124654
115.8	0.124894
115.9	0.125131
116	0.125365
116.1	0.125596
116.2	0.125824
116.3	0.126049
116.4	0.126272
116.5	0.126491
116.6	0.126708
116.7	0.126923
116.8	0.127134
116.9	0.127343
117	0.12755
117.1	0.127754
117.2	0.127955
117.3	0.128154
117.4	0.128351
117.5	0.128545
117.6	0.128736
117.7	0.128926
117.8	0.129113
117.9	0.129297
118	0.12948
118.1	0.12966
118.2	0.129838
118.3	0.130014
118.4	0.130188
118.5	0.130359
118.6	0.130529
118.7	0.130696
118.8	0.130862
118.9	0.131025
119	0.131187
119.1	0.131346
119.2	0.131504
119.3	0.13166
119.4	0.131813
119.5	0.131965
119.6	0.132116
119.7	0.132264
119.8	0.132411
119.9	0.132556
120	0.132699
120.1	0.13284
120.2	0.13298
120.3	0.133118
120.4	0.133255
120.5	0.13339
120.6	0.133523
120.7	0.133655
120.8	0.133785
120.9	0.133914
121	0.134041
121.1	0.134167
121.2	0.134291
121.3	0.134414
121.4	0.134535
121.5	0.134655
121.6	0.134773
121.7	0.134891
121.8	0.135006
121.9	0.135121
122	0.135234
122.1	0.135346
122.2	0.135457
122.3	0.135566
122.4	0.135674
122.5	0.135781
122.6	0.135887
122.7	0.135991
122.8	0.136094
122.9	0.136196
123	0.136297
123.1	0.136397
123.2	0.136496
123.3	0.136594
123.4	0.13669
123.5	0.136785
123.6	0.13688
123.7	0.136973
123.8	0.137065
123.9	0.137157
124	0.137247
124.1	0.137336
124.2	0.137425
124.3	0.137512
124.4	0.137598
124.5	0.137684
124.6	0.137768
124.7	0.137852
124.8	0.137935
124.9	0.138016
125	0.138097
125.1	0.138177
125.2	0.138257
125.3	0.138335
125.4	0.138412
125.5	0.138489
125.6	0.138565
125.7	0.13864
125.8	0.138714
125.9	0.138788
126	0.138861
126.1	0.138933
126.2	0.139004
126.3	0.139074
126.4	0.139144
126.5	0.139213
126.6	0.139282
126.7	0.139349
126.8	0.139416
126.9	0.139482
127	0.139548
127.1	0.139613
127.2	0.139677
127.3	0.139741
127.4	0.139804
127.5	0.139866
127.6	0.139928
127.7	0.139989
127.8	0.140049
127.9	0.140109
128	0.140169
128.1	0.140227
128.2	0.140286
128.3	0.140343
128.4	0.1404
128.5	0.140457
128.6	0.140513
128.7	0.140568
128.8	0.140623
128.9	0.140677
129	0.140731
129.1	0.140784
129.2	0.140837
129.3	0.14089
129.4	0.140941
129.5	0.140993
129.6	0.141044
129.7	0.141094
129.8	0.141144
129.9	0.141193
130	0.141242
130.1	0.141291
130.2	0.141339
130.3	0.141387
130.4	0.141434
130.5	0.141481
130.6	0.141527
130.7	0.141573
130.8	0.141619
130.9	0.141664
131	0.141709
131.1	0.141753
131.2	0.141798
131.3	0.141841
131.4	0.141884
131.5	0.141927
131.6	0.14197
131.7	0.142012
131.8	0.142054
131.9	0.142095
132	0.142136
132.1	0.142177
132.2	0.142218
132.3	0.142258
132.4	0.142298
132.5	0.142337
132.6	0.142376
132.7	0.142415
132.8	0.142453
132.9	0.142492
133	0.142529
133.1	0.142567
133.2	0.142604
133.3	0.142641
133.4	0.142678
133.5	0.142714
133.6	0.14275
133.7	0.142786
133.8	0.142822
133.9	0.142857
134	0.142892
134.1	0.142927
134.2	0.142961
134.3	0.142996
134.4	0.14303
134.5	0.143063
134.6	0.143097
134.7	0.14313
134.8	0.143163
134.9	0.143196
135	0.143228
135.1	0.143261
135.2	0.143293
135.3	0.143324
135.4	0.143356
135.5	0.143387
135.6	0.143419
135.7	0.143449
135.8	0.14348
135.9	0.143511
136	0.143541
136.1	0.143571
136.2	0.143601
136.3	0.143631
136.4	0.14366
136.5	0.14369
136.6	0.143719
136.7	0.143748
136.8	0.143776
136.9	0.143805
137	0.143833
137.1	0.143861
137.2	0.143889
137.3	0.143917
137.4	0.143945
137.5	0.143972
137.6	0.144
137.7	0.144027
137.8	0.144054
137.9	0.144081
138	0.144107
138.1	0.144134
138.2	0.14416
138.3	0.144186
138.4	0.144212
138.5	0.144238
138.6	0.144264
138.7	0.14429
138.8	0.144315
138.9	0.14434
139	0.144365
139.1	0.14439
139.2	0.144415
139.3	0.14444
139.4	0.144465
139.5	0.144489
139.6	0.144513
139.7	0.144538
139.8	0.144562
139.9	0.144586
140	0.144609
140.1	0.144633
140.2	0.144657
140.3	0.14468
140.4	0.144703
140.5	0.144727
140.6	0.14475
140.7	0.144773
140.8	0.144795
140.9	0.144818
141	0.144841
141.1	0.144863
141.2	0.144886
141.3	0.144908
141.4	0.14493
141.5	0.144952
141.6	0.144974
141.7	0.144996
141.8	0.145018
141.9	0.14504
142	0.145061
142.1	0.145083
142.2	0.145104
142.3	0.145125
142.4	0.145146
142.5	0.145168
142.6	0.145189
142.7	0.145209
142.8	0.14523
142.9	0.145251
143	0.145272
143.1	0.145292
143.2	0.145313
143.3	0.145333
143.4	0.145353
143.5	0.145374
143.6	0.145394
143.7	0.145414
143.8	0.145434
143.9	0.145454
144	0.145473
144.1	0.145493
144.2	0.145513
144.3	0.145532
144.4	0.145552
144.5	0.145571
144.6	0.145591
144.7	0.14561
144.8	0.145629
144.9	0.145648
145	0.145667
145.1	0.145686
145.2	0.145705
145.3	0.145724
145.4	0.145743
145.5	0.145762
145.6	0.14578
145.7	0.145799
145.8	0.145817
145.9	0.145836
146	0.145854
146.1	0.145873
146.2	0.145891
146.3	0.145909
146.4	0.145927
146.5	0.145945
146.6	0.145963
146.7	0.145981
146.8	0.145999
146.9	0.146017
147	0.146035
147.1	0.146053
147.2	0.14607
147.3	0.146088
147.4	0.146106
147.5	0.146123
147.6	0.146141
147.7	0.146158
147.8	0.146175
147.9	0.146193
148	0.14621
148.1	0.146227
148.2	0.146244
148.3	0.146262
148.4	0.146279
148.5	0.146296
148.6	0.146313
148.7	0.14633
148.8	0.146346
148.9	0.146363
149	0.14638
149.1	0.146397
149.2	0.146414
149.3	0.14643
149.4	0.146447
149.5	0.146463
149.6	0.14648
149.7	0.146496
149.8	0.146513
149.9	0.146529
150	0.146546
150.1	0.146562
150.2	0.146578
150.3	0.146594
150.4	0.146611
150.5	0.146627
150.6	0.146643
150.7	0.146659
150.8	0.146675
150.9	0.146691
151	0.146707
151.1	0.146723
151.2	0.146739
151.3	0.146754
151.4	0.14677
151.5	0.146786
151.6	0.146802
151.7	0.146817
151.8	0.146833
151.9	0.146849
152	0.146864
152.1	0.14688
152.2	0.146895
152.3	0.146911
152.4	0.146926
152.5	0.146942
152.6	0.146957
152.7	0.146972
152.8	0.146988
152.9	0.147003
153	0.147018
153.1	0.147034
153.2	0.147049
153.3	0.147064
153.4	0.147079
153.5	0.147094
153.6	0.147109
153.7	0.147124
153.8	0.147139
153.9	0.147154
154	0.147169
154.1	0.147184
154.2	0.147199
154.3	0.147214
154.4	0.147229
154.5	0.147244
154.6	0.147258
154.7	0.147273
154.8	0.147288
154.9	0.147302
155	0.147317
155.1	0.147332
155.2	0.147346
155.3	0.147361
155.4	0.147376
155.5	0.14739
155.6	0.147405
155.7	0.147419
155.8	0.147434
155.9	0.147448
156	0.147462
156.1	0.147477
156.2	0.147491
156.3	0.147505
156.4	0.14752
156.5	0.147534
156.6	0.147548
156.7	0.147563
156.8	0.147577
156.9	0.147591
157	0.147605
157.1	0.147619
157.2	0.147633
157.3	0.147648
157.4	0.147662
157.5	0.147676
157.6	0.14769
157.7	0.147704
157.8	0.147718
157.9	0.147732
158	0.147746
158.1	0.14776
158.2	0.147773
158.3	0.147787
158.4	0.147801
158.5	0.147815
158.6	0.147829
158.7	0.147843
158.8	0.147856
158.9	0.14787
159	0.147884
159.1	0.147898
159.2	0.147911
159.3	0.147925
159.4	0.147939
159.5	0.147952
159.6	0.147966
159.7	0.147979
159.8	0.147993
159.9	0.148007
160	0.14802
160.1	0.148034
160.2	0.148047
160.3	0.148061
160.4	0.148074
160.5	0.148087
160.6	0.148101
160.7	0.148114
160.8	0.148128
160.9	0.148141
161	0.148154
161.1	0.148168
161.2	0.148181
161.3	0.148194
161.4	0.148208
161.5	0.148221
161.6	0.148234
161.7	0.148247
161.8	0.14826
161.9	0.148274
162	0.148287
162.1	0.1483
162.2	0.148313
162.3	0.148326
162.4	0.148339
162.5	0.148352
162.6	0.148365
162.7	0.148378
162.8	0.148391
162.9	0.148404
163	0.148417
163.1	0.14843
163.2	0.148443
163.3	0.148456
163.4	0.148469
163.5	0.148482
163.6	0.148495
163.7	0.148508
163.8	0.148521
163.9	0.148534
164	0.148547
164.1	0.148559
164.2	0.148572
164.3	0.148585
164.4	0.148598
164.5	0.14861
164.6	0.148623
164.7	0.148636
164.8	0.148649
164.9	0.148661
165	0.148674
165.1	0.148687
165.2	0.148699
165.3	0.148712
165.4	0.148725
165.5	0.148737
165.6	0.14875
165.7	0.148762
165.8	0.148775
165.9	0.148787
166	0.1488
166.1	0.148812
166.2	0.148825
166.3	0.148837
166.4	0.14885
166.5	0.148862
166.6	0.148875
166.7	0.148887
166.8	0.1489
166.9	0.148912
167	0.148924
167.1	0.148937
167.2	0.148949
167.3	0.148962
167.4	0.148974
167.5	0.148986
167.6	0.148998
167.7	0.149011
167.8	0.149023
167.9	0.149035
168	0.149048
168.1	0.14906
168.2	0.149072
168.3	0.149084
168.4	0.149096
168.5	0.149109
168.6	0.149121
168.7	0.149133
168.8	0.149145
168.9	0.149157
169	0.149169
169.1	0.149181
169.2	0.149193
169.3	0.149206
169.4	0.149218
169.5	0.14923
169.6	0.149242
169.7	0.149254
169.8	0.149266
169.9	0.149278
170	0.14929
170.1	0.149302
170.2	0.149314
170.3	0.149326
170.4	0.149337
170.5	0.149349
170.6	0.149361
170.7	0.149373
170.8	0.149385
170.9	0.149397
171	0.149409
171.1	0.149421
171.2	0.149432
171.3	0.149444
171.4	0.149456
171.5	0.149468
171.6	0.14948
171.7	0.149491
171.8	0.149503
171.9	0.149515
172	0.149527
172.1	0.149538
172.2	0.14955
172.3	0.149562
172.4	0.149573
172.5	0.149585
172.6	0.149597
172.7	0.149608
172.8	0.14962
172.9	0.149632
173	0.149643
173.1	0.149655
173.2	0.149666
173.3	0.149678
173.4	0.14969
173.5	0.149701
173.6	0.149713
173.7	0.149724
173.8	0.149736
173.9	0.149747
174	0.149759
174.1	0.14977
174.2	0.149782
174.3	0.149793
174.4	0.149805
174.5	0.149816
174.6	0.149827
174.7	0.149839
174.8	0.14985
174.9	0.149862
175	0.149873
175.1	0.149884
175.2	0.149896
175.3	0.149907
175.4	0.149918
175.5	0.14993
175.6	0.149941
175.7	0.149952
175.8	0.149964
175.9	0.149975
176	0.149986
176.1	0.149997
176.2	0.150009
176.3	0.15002
176.4	0.150031
176.5	0.150042
176.6	0.150054
176.7	0.150065
176.8	0.150076
176.9	0.150087
177	0.150098
177.1	0.150109
177.2	0.150121
177.3	0.150132
177.4	0.150143
177.5	0.150154
177.6	0.150165
177.7	0.150176
177.8	0.150187
177.9	0.150198
178	0.150209
178.1	0.15022
178.2	0.150231
178.3	0.150242
178.4	0.150253
178.5	0.150264
178.6	0.150275
178.7	0.150286
178.8	0.150297
178.9	0.150308
179	0.150319
179.1	0.15033
179.2	0.150341
179.3	0.150352
179.4	0.150363
179.5	0.150374
179.6	0.150384
179.7	0.150395
179.8	0.150406
179.9	0.150417
180	0.150428
180.1	0.150439
180.2	0.150449
180.3	0.15046
180.4	0.150471
180.5	0.150482
180.6	0.150493
180.7	0.150503
180.8	0.150514
180.9	0.150525
181	0.150536
181.1	0.150546
181.2	0.150557
181.3	0.150568
181.4	0.150578
181.5	0.150589
181.6	0.1506
181.7	0.15061
181.8	0.150621
181.9	0.150632
182	0.150642
182.1	0.150653
182.2	0.150664
182.3	0.150674
182.4	0.150685
182.5	0.150695
182.6	0.150706
182.7	0.150716
182.8	0.150727
182.9	0.150737
183	0.150748
183.1	0.150758
183.2	0.150769
183.3	0.150779
183.4	0.15079
183.5	0.1508
183.6	0.150811
183.7	0.150821
183.8	0.150832
183.9	0.150842
184	0.150853
184.1	0.150863
184.2	0.150873
184.3	0.150884
184.4	0.150894
184.5	0.150905
184.6	0.150915
184.7	0.150925
184.8	0.150936
184.9	0.150946
185	0.150956
185.1	0.150967
185.2	0.150977
185.3	0.150987
185.4	0.150998
185.5	0.151008
185.6	0.151018
185.7	0.151028
185.8	0.151039
185.9	0.151049
186	0.151059
186.1	0.151069
186.2	0.151079
186.3	0.15109
186.4	0.1511
186.5	0.15111
186.6	0.15112
186.7	0.15113
186.8	0.151141
186.9	0.151151
187	0.151161
187.1	0.151171
187.2	0.151181
187.3	0.151191
187.4	0.151201
187.5	0.151211
187.6	0.151221
187.7	0.151231
187.8	0.151242
187.9	0.151252
188	0.151262
188.1	0.151272
188.2	0.151282
188.3	0.151292
188.4	0.151302
188.5	0.151312
188.6	0.151322
188.7	0.151332
188.8	0.151342
188.9	0.151352
189	0.151361
189.1	0.151371
189.2	0.151381
189.3	0.151391
189.4	0.151401
189.5	0.151411
189.6	0.151421
189.7	0.151431
189.8	0.151441
189.9	0.151451
190	0.15146
190.1	0.15147
190.2	0.15148
190.3	0.15149
190.4	0.1515
190.5	0.151509
190.6	0.151519
190.7	0.151529
190.8	0.151539
190.9	0.151549
191	0.151558
191.1	0.151568
191.2	0.151578
191.3	0.151588
191.4	0.151597
191.5	0.151607
191.6	0.151617
191.7	0.151626
191.8	0.151636
191.9	0.151646
192	0.151655
192.1	0.151665
192.2	0.151675
192.3	0.151684
192.4	0.151694
192.5	0.151704
192.6	0.151713
192.7	0.151723
192.8	0.151732
192.9	0.151742
193	0.151752
193.1	0.151761
193.2	0.151771
193.3	0.15178
193.4	0.15179
193.5	0.151799
193.6	0.151809
193.7	0.151818
193.8	0.151828
193.9	0.151837
194	0.151847
194.1	0.151856
194.2	0.151866
194.3	0.151875
194.4	0.151885
194.5	0.151894
194.6	0.151904
194.7	0.151913
194.8	0.151922
194.9	0.151932
195	0.151941
195.1	0.151951
195.2	0.15196
195.3	0.151969
195.4	0.151979
195.5	0.151988
195.6	0.151997
195.7	0.152007
195.8	0.152016
195.9	0.152025
196	0.152035
196.1	0.152044
196.2	0.152053
196.3	0.152063
196.4	0.152072
196.5	0.152081
196.6	0.15209
196.7	0.1521
196.8	0.152109
196.9	0.152118
197	0.152127
197.1	0.152137
197.2	0.152146
197.3	0.152155
197.4	0.152164
197.5	0.152173
197.6	0.152183
197.7	0.152192
197.8	0.152201
197.9	0.15221
198	0.152219
198.1	0.152228
198.2	0.152237
198.3	0.152247
198.4	0.152256
198.5	0.152265
198.6	0.152274
198.7	0.152283
198.8	0.152292
198.9	0.152301
199	0.15231
199.1	0.152319
199.2	0.152328
199.3	0.152337
199.4	0.152346
199.5	0.152355
199.6	0.152364
199.7	0.152373
199.8	0.152382
199.9	0.152391
200	0.1524
[truncated: 14,000 more rows]
