# Supplementary material for: Bayesian inference of kinetic schemes for ion channels by Kalman filtering
Source: eLife journal article supplement (doi:10.7554/elife.62714), 2022-05-04
Supplement: fig4-data11 [file 1_Sim_N_2000_theor_Strom_Werte.xlsx]

## Sheet: Tabelle1
0.1	0
0.2	0
0.3	0
0.4	0
0.5	0
0.6	0
0.7	0
0.8	0
0.9	0
1	0
1.1	0
1.2	0
1.3	0
1.4	0
1.5	0
1.6	0
1.7	0
1.8	0
1.9	0
2	0
2.1	0
2.2	0
2.3	0
2.4	0
2.5	0
2.6	0
2.7	0
2.8	0
2.9	0
3	0
3.1	0
3.2	0
3.3	0
3.4	0
3.5	0
3.6	0
3.7	0
3.8	0
3.9	0
4	0
4.1	0
4.2	0
4.3	0
4.4	0
4.5	0
4.6	0
4.7	0
4.8	0
4.9	0
5	0
5.1	0
5.2	0
5.3	0
5.4	0
5.5	0
5.6	0
5.7	0
5.8	0
5.9	0
6	0
6.1	0
6.2	0
6.3	0
6.4	0
6.5	0
6.6	0
6.7	0
6.8	0
6.9	0
7	0
7.1	0
7.2	0
7.3	0
7.4	0
7.5	0
7.6	0
7.7	0
7.8	0
7.9	0
8	0
8.1	0
8.2	0
8.3	0
8.4	0
8.5	0
8.6	0
8.7	0
8.8	0
8.9	0
9	0
9.1	0
9.2	0
9.3	0
9.4	0
9.5	0
9.6	0
9.7	0
9.8	0
9.9	0
10	0
10.1	0
10.2	0
10.3	0
10.4	0
10.5	0
10.6	0
10.7	0
10.8	0
10.9	0
11	0
11.1	0
11.2	0
11.3	0
11.4	0
11.5	0
11.6	0
11.7	0
11.8	0
11.9	0
12	0
12.1	0
12.2	0
12.3	0
12.4	0
12.5	0
12.6	0
12.7	0
12.8	0
12.9	0
13	0
13.1	0
13.2	0
13.3	0
13.4	0
13.5	0
13.6	0
13.7	0
13.8	0
13.9	0
14	0
14.1	0
14.2	0
14.3	0
14.4	0
14.5	0
14.6	0
14.7	0
14.8	0
14.9	0
15	0
15.1	0
15.2	0
15.3	0
15.4	0
15.5	0
15.6	0
15.7	0
15.8	0
15.9	0
16	0
16.1	0
16.2	0
16.3	0
16.4	0
16.5	0
16.6	0
16.7	0
16.8	0
16.9	0
17	0
17.1	0
17.2	0
17.3	0
17.4	0
17.5	0
17.6	0
17.7	0
17.8	0
17.9	0
18	0
18.1	0
18.2	0
18.3	0
18.4	0
18.5	0
18.6	0
18.7	0
18.8	0
18.9	0
19	0
19.1	0
19.2	0
19.3	0
19.4	0
19.5	0
19.6	0
19.7	0
19.8	0
19.9	0
20	0
20.1	0
20.2	0
20.3	0
20.4	0
20.5	0
20.6	0
20.7	0
20.8	0
20.9	0
21	0
21.1	0
21.2	0
21.3	0
21.4	0
21.5	0
21.6	0
21.7	0
21.8	0
21.9	0
22	0
22.1	0
22.2	0
22.3	0
22.4	0
22.5	0
22.6	0
22.7	0
22.8	0
22.9	0
23	0
23.1	0
23.2	0
23.3	0
23.4	0
23.5	0
23.6	0
23.7	0
23.8	0
23.9	0
24	0
24.1	0
24.2	0
24.3	0
24.4	0
24.5	0
24.6	0
24.7	0
24.8	0
24.9	0
25	0
25.1	0
25.2	0
25.3	0
25.4	0
25.5	0
25.6	0
25.7	0
25.8	0
25.9	0
26	0
26.1	0
26.2	0
26.3	0
26.4	0
26.5	0
26.6	0
26.7	0
26.8	0
26.9	0
27	0
27.1	0
27.2	0
27.3	0
27.4	0
27.5	0
27.6	0
27.7	0
27.8	0
27.9	0
28	0
28.1	0
28.2	0
28.3	0
28.4	0
28.5	0
28.6	0
28.7	0
28.8	0
28.9	0
29	0
29.1	0
29.2	0
29.3	0
29.4	0
29.5	0
29.6	0
29.7	0
29.8	0
29.9	0
30	0
30.1	0
30.2	0
30.3	0
30.4	0
30.5	0
30.6	0
30.7	0
30.8	0
30.9	0
31	0
31.1	0
31.2	0
31.3	0
31.4	0
31.5	0
31.6	0
31.7	0
31.8	0
31.9	0
32	0
32.1	0
32.2	0
32.3	0
32.4	0
32.5	0
32.6	0
32.7	0
32.8	0
32.9	0
33	0
33.1	0
33.2	0
33.3	0
33.4	0
33.5	0
33.6	0
33.7	0
33.8	0
33.9	0
34	0
34.1	0
34.2	0
34.3	0
34.4	0
34.5	0
34.6	0
34.7	0
34.8	0
34.9	0
35	0
35.1	0
35.2	0
35.3	0
35.4	0
35.5	0
35.6	0
35.7	0
35.8	0
35.9	0
36	0
36.1	0
36.2	0
36.3	0
36.4	0
36.5	0
36.6	0
36.7	0
36.8	0
36.9	0
37	0
37.1	0
37.2	0
37.3	0
37.4	0
37.5	0
37.6	0
37.7	0
37.8	0
37.9	0
38	0
38.1	0
38.2	0
38.3	0
38.4	0
38.5	0
38.6	0
38.7	0
38.8	0
38.9	0
39	0
39.1	0
39.2	0
39.3	0
39.4	0
39.5	0
39.6	0
39.7	0
39.8	0
39.9	0
40	0
40.1	0
40.2	0
40.3	0
40.4	0
40.5	0
40.6	0
40.7	0
40.8	0
40.9	0
41	0
41.1	0
41.2	0
41.3	0
41.4	0
41.5	0
41.6	0
41.7	0
41.8	0
41.9	0
42	0
42.1	0
42.2	0
42.3	0
42.4	0
42.5	0
42.6	0
42.7	0
42.8	0
42.9	0
43	0
43.1	0
43.2	0
43.3	0
43.4	0
43.5	0
43.6	0
43.7	0
43.8	0
43.9	0
44	0
44.1	0
44.2	0
44.3	0
44.4	0
44.5	0
44.6	0
44.7	0
44.8	0
44.9	0
45	0
45.1	0
45.2	0
45.3	0
45.4	0
45.5	0
45.6	0
45.7	0
45.8	0
45.9	0
46	0
46.1	0
46.2	0
46.3	0
46.4	0
46.5	0
46.6	0
46.7	0
46.8	0
46.9	0
47	0
47.1	0
47.2	0
47.3	0
47.4	0
47.5	0
47.6	0
47.7	0
47.8	0
47.9	0
48	0
48.1	0
48.2	0
48.3	0
48.4	0
48.5	0
48.6	0
48.7	0
48.8	0
48.9	0
49	0
49.1	0
49.2	0
49.3	0
49.4	0
49.5	0
49.6	0
49.7	0
49.8	0
49.9	0
50	0
50.1	0
50.2	0
50.3	0
50.4	0
50.5	0
50.6	0
50.7	0
50.8	0
50.9	0
51	0
51.1	0
51.2	0
51.3	0
51.4	0
51.5	0
51.6	0
51.7	0
51.8	0
51.9	0
52	0
52.1	0
52.2	0
52.3	0
52.4	0
52.5	0
52.6	0
52.7	0
52.8	0
52.9	0
53	0
53.1	0
53.2	0
53.3	0
53.4	0
53.5	0
53.6	0
53.7	0
53.8	0
53.9	0
54	0
54.1	0
54.2	0
54.3	0
54.4	0
54.5	0
54.6	0
54.7	0
54.8	0
54.9	0
55	0
55.1	0
55.2	0
55.3	0
55.4	0
55.5	0
55.6	0
55.7	0
55.8	0
55.9	0
56	0
56.1	0
56.2	0
56.3	0
56.4	0
56.5	0
56.6	0
56.7	0
56.8	0
56.9	0
57	0
57.1	0
57.2	0
57.3	0
57.4	0
57.5	0
57.6	0
57.7	0
57.8	0
57.9	0
58	0
58.1	0
58.2	0
58.3	0
58.4	0
58.5	0
58.6	0
58.7	0
58.8	0
58.9	0
59	0
59.1	0
59.2	0
59.3	0
59.4	0
59.5	0
59.6	0
59.7	0
59.8	0
59.9	0
60	0
60.1	0
60.2	0
60.3	0
60.4	0
60.5	0
60.6	0
60.7	0
60.8	0
60.9	0
61	0
61.1	0
61.2	0
61.3	0
61.4	0
61.5	0
61.6	0
61.7	0
61.8	0
61.9	0
62	0
62.1	0
62.2	0
62.3	0
62.4	0
62.5	0
62.6	0
62.7	0
62.8	0
62.9	0
63	0
63.1	0
63.2	0
63.3	0
63.4	0
63.5	0
63.6	0
63.7	0
63.8	0
63.9	0
64	0
64.1	0
64.2	0
64.3	0
64.4	0
64.5	0
64.6	0
64.7	0
64.8	0
64.9	0
65	0
65.1	0
65.2	0
65.3	0
65.4	0
65.5	0
65.6	0
65.7	0
65.8	0
65.9	0
66	0
66.1	0
66.2	0
66.3	0
66.4	0
66.5	0
66.6	0
66.7	0
66.8	0
66.9	0
67	0
67.1	0
67.2	0
67.3	0
67.4	0
67.5	0
67.6	0
67.7	0
67.8	0
67.9	0
68	0
68.1	0
68.2	0
68.3	0
68.4	0
68.5	0
68.6	0
68.7	0
68.8	0
68.9	0
69	0
69.1	0
69.2	0
69.3	0
69.4	0
69.5	0
69.6	0
69.7	0
69.8	0
69.9	0
70	0
70.1	0
70.2	0
70.3	0
70.4	0
70.5	0
70.6	0
70.7	0
70.8	0
70.9	0
71	0
71.1	0
71.2	0
71.3	0
71.4	0
71.5	0
71.6	0
71.7	0
71.8	0
71.9	0
72	0
72.1	0
72.2	0
72.3	0
72.4	0
72.5	0
72.6	0
72.7	0
72.8	0
72.9	0
73	0
73.1	0
73.2	0
73.3	0
73.4	0
73.5	0
73.6	0
73.7	0
73.8	0
73.9	0
74	0
74.1	0
74.2	0
74.3	0
74.4	0
74.5	0
74.6	0
74.7	0
74.8	0
74.9	0
75	0
75.1	0
75.2	0
75.3	0
75.4	0
75.5	0
75.6	0
75.7	0
75.8	0
75.9	0
76	0
76.1	0
76.2	0
76.3	0
76.4	0
76.5	0
76.6	0
76.7	0
76.8	0
76.9	0
77	0
77.1	0
77.2	0
77.3	0
77.4	0
77.5	0
77.6	0
77.7	0
77.8	0
77.9	0
78	0
78.1	0
78.2	0
78.3	0
78.4	0
78.5	0
78.6	0
78.7	0
78.8	0
78.9	0
79	0
79.1	0
79.2	0
79.3	0
79.4	0
79.5	0
79.6	0
79.7	0
79.8	0
79.9	0
80	0
80.1	0
80.2	0
80.3	0
80.4	0
80.5	0
80.6	0
80.7	0
80.8	0
80.9	0
81	0
81.1	0
81.2	0
81.3	0
81.4	0
81.5	0
81.6	0
81.7	0
81.8	0
81.9	0
82	0
82.1	0
82.2	0
82.3	0
82.4	0
82.5	0
82.6	0
82.7	0
82.8	0
82.9	0
83	0
83.1	0
83.2	0
83.3	0
83.4	0
83.5	0
83.6	0
83.7	0
83.8	0
83.9	0
84	0
84.1	0
84.2	0
84.3	0
84.4	0
84.5	0
84.6	0
84.7	0
84.8	0
84.9	0
85	0
85.1	0
85.2	0
85.3	0
85.4	0
85.5	0
85.6	0
85.7	0
85.8	0
85.9	0
86	0
86.1	0
86.2	0
86.3	0
86.4	0
86.5	0
86.6	0
86.7	0
86.8	0
86.9	0
87	0
87.1	0
87.2	0
87.3	0
87.4	0
87.5	0
87.6	0
87.7	0
87.8	0
87.9	0
88	0
88.1	0
88.2	0
88.3	0
88.4	0
88.5	0
88.6	0
88.7	0
88.8	0
88.9	0
89	0
89.1	0
89.2	0
89.3	0
89.4	0
89.5	0
89.6	0
89.7	0
89.8	0
89.9	0
90	0
90.1	0
90.2	0
90.3	0
90.4	0
90.5	0
90.6	0
90.7	0
90.8	0
90.9	0
91	0
91.1	0
91.2	0
91.3	0
91.4	0
91.5	0
91.6	0
91.7	0
91.8	0
91.9	0
92	0
92.1	0
92.2	0
92.3	0
92.4	0
92.5	0
92.6	0
92.7	0
92.8	0
92.9	0
93	0
93.1	0
93.2	0
93.3	0
93.4	0
93.5	0
93.6	0
93.7	0
93.8	0
93.9	0
94	0
94.1	0
94.2	0
94.3	0
94.4	0
94.5	0
94.6	0
94.7	0
94.8	0
94.9	0
95	0
95.1	0
95.2	0
95.3	0
95.4	0
95.5	0
95.6	0
95.7	0
95.8	0
95.9	0
96	0
96.1	0
96.2	0
96.3	0
96.4	0
96.5	0
96.6	0
96.7	0
96.8	0
96.9	0
97	0
97.1	0
97.2	0
97.3	0
97.4	0
97.5	0
97.6	0
97.7	0
97.8	0
97.9	0
98	0
98.1	0
98.2	0
98.3	0
98.4	0
98.5	0
98.6	0
98.7	0
98.8	0
98.9	0
99	0
99.1	0
99.2	0
99.3	0
99.4	0
99.5	0
99.6	0
99.7	0
99.8	0
99.9	0
100	0
100.1	2.87852e-09
100.2	2.26283e-08
100.3	7.50522e-08
100.4	1.74848e-07
100.5	3.35674e-07
100.6	5.70205e-07
100.7	8.90193e-07
100.8	1.30652e-06
100.9	1.82925e-06
101	2.46766e-06
101.1	3.23033e-06
101.2	4.12512e-06
101.3	5.15928e-06
101.4	6.33943e-06
101.5	7.67163e-06
101.6	9.16139e-06
101.7	1.08137e-05
101.8	1.26332e-05
101.9	1.4624e-05
102	1.67896e-05
102.1	1.91334e-05
102.2	2.16584e-05
102.3	2.43671e-05
102.4	2.72617e-05
102.5	3.03441e-05
102.6	3.36162e-05
102.7	3.70792e-05
102.8	4.07342e-05
102.9	4.45823e-05
103	4.86241e-05
103.1	5.286e-05
103.2	5.72904e-05
103.3	6.19153e-05
103.4	6.67348e-05
103.5	7.17486e-05
103.6	7.69564e-05
103.7	8.23576e-05
103.8	8.79517e-05
103.9	9.37379e-05
104	9.97155e-05
104.1	0.000105883
104.2	0.000112241
104.3	0.000118786
104.4	0.000125519
104.5	0.000132437
104.6	0.000139539
104.7	0.000146825
104.8	0.000154292
104.9	0.00016194
105	0.000169766
105.1	0.000177769
105.2	0.000185947
105.3	0.000194298
105.4	0.000202822
105.5	0.000211516
105.6	0.000220378
105.7	0.000229408
105.8	0.000238602
105.9	0.000247959
106	0.000257477
106.1	0.000267155
106.2	0.000276991
106.3	0.000286982
106.4	0.000297127
106.5	0.000307424
106.6	0.000317872
106.7	0.000328468
106.8	0.00033921
106.9	0.000350097
107	0.000361127
107.1	0.000372298
107.2	0.000383608
107.3	0.000395055
107.4	0.000406637
107.5	0.000418353
107.6	0.000430201
107.7	0.000442179
107.8	0.000454286
107.9	0.000466518
108	0.000478876
108.1	0.000491356
108.2	0.000503957
108.3	0.000516678
108.4	0.000529517
108.5	0.000542472
108.6	0.000555541
108.7	0.000568722
108.8	0.000582015
108.9	0.000595417
109	0.000608927
109.1	0.000622543
109.2	0.000636264
109.3	0.000650087
109.4	0.000664012
109.5	0.000678037
109.6	0.00069216
109.7	0.00070638
109.8	0.000720696
109.9	0.000735105
110	0.000749607
110.1	0.000764199
110.2	0.000778881
110.3	0.000793651
110.4	0.000808508
110.5	0.00082345
110.6	0.000838476
110.7	0.000853584
110.8	0.000868774
110.9	0.000884043
111	0.000899392
111.1	0.000914817
111.2	0.000930319
111.3	0.000945895
111.4	0.000961545
111.5	0.000977267
111.6	0.00099306
111.7	0.00100892
111.8	0.00102486
111.9	0.00104085
112	0.00105692
112.1	0.00107305
112.2	0.00108925
112.3	0.00110551
112.4	0.00112183
112.5	0.00113821
112.6	0.00115465
112.7	0.00117115
112.8	0.0011877
112.9	0.00120432
113	0.00122099
113.1	0.00123771
113.2	0.00125449
113.3	0.00127132
113.4	0.0012882
113.5	0.00130513
113.6	0.00132212
113.7	0.00133915
113.8	0.00135623
113.9	0.00137335
114	0.00139053
114.1	0.00140775
114.2	0.00142501
114.3	0.00144232
114.4	0.00145966
114.5	0.00147706
114.6	0.00149449
114.7	0.00151196
114.8	0.00152947
114.9	0.00154702
115	0.00156461
115.1	0.00158224
115.2	0.0015999
115.3	0.0016176
115.4	0.00163533
115.5	0.0016531
115.6	0.0016709
115.7	0.00168873
115.8	0.0017066
115.9	0.0017245
116	0.00174243
116.1	0.00176038
116.2	0.00177837
116.3	0.00179639
116.4	0.00181443
116.5	0.0018325
116.6	0.0018506
116.7	0.00186873
116.8	0.00188688
116.9	0.00190506
117	0.00192326
117.1	0.00194148
117.2	0.00195973
117.3	0.001978
117.4	0.00199629
117.5	0.00201461
117.6	0.00203294
117.7	0.0020513
117.8	0.00206968
117.9	0.00208807
118	0.00210649
118.1	0.00212492
118.2	0.00214337
118.3	0.00216184
118.4	0.00218033
118.5	0.00219883
118.6	0.00221735
118.7	0.00223588
118.8	0.00225443
118.9	0.002273
119	0.00229158
119.1	0.00231017
119.2	0.00232878
119.3	0.00234739
119.4	0.00236603
119.5	0.00238467
119.6	0.00240333
119.7	0.00242199
119.8	0.00244067
119.9	0.00245936
120	0.00247806
120.1	0.00249677
120.2	0.00251548
120.3	0.00253421
120.4	0.00255295
120.5	0.00257169
120.6	0.00259044
120.7	0.0026092
120.8	0.00262797
120.9	0.00264674
121	0.00266552
121.1	0.00268431
121.2	0.0027031
121.3	0.0027219
121.4	0.0027407
121.5	0.00275951
121.6	0.00277833
121.7	0.00279714
121.8	0.00281596
121.9	0.00283479
122	0.00285362
122.1	0.00287245
122.2	0.00289129
122.3	0.00291012
122.4	0.00292896
122.5	0.00294781
122.6	0.00296665
122.7	0.0029855
122.8	0.00300434
122.9	0.00302319
123	0.00304204
123.1	0.00306089
123.2	0.00307974
123.3	0.00309859
123.4	0.00311744
123.5	0.00313629
123.6	0.00315514
123.7	0.00317398
123.8	0.00319283
123.9	0.00321168
124	0.00323052
124.1	0.00324936
124.2	0.0032682
124.3	0.00328704
124.4	0.00330588
124.5	0.00332471
124.6	0.00334354
124.7	0.00336237
124.8	0.00338119
124.9	0.00340001
125	0.00341883
125.1	0.00343765
125.2	0.00345646
125.3	0.00347526
125.4	0.00349406
125.5	0.00351286
125.6	0.00353165
125.7	0.00355044
125.8	0.00356922
125.9	0.003588
126	0.00360677
126.1	0.00362554
126.2	0.0036443
126.3	0.00366306
126.4	0.00368181
126.5	0.00370055
126.6	0.00371929
126.7	0.00373802
126.8	0.00375675
126.9	0.00377547
127	0.00379418
127.1	0.00381288
127.2	0.00383158
127.3	0.00385027
127.4	0.00386896
127.5	0.00388763
127.6	0.0039063
127.7	0.00392496
127.8	0.00394361
127.9	0.00396226
128	0.0039809
128.1	0.00399953
128.2	0.00401815
128.3	0.00403676
128.4	0.00405536
128.5	0.00407396
128.6	0.00409254
128.7	0.00411112
128.8	0.00412969
128.9	0.00414825
129	0.0041668
129.1	0.00418534
129.2	0.00420388
129.3	0.0042224
129.4	0.00424091
129.5	0.00425942
129.6	0.00427791
129.7	0.00429639
129.8	0.00431487
129.9	0.00433333
130	0.00435179
130.1	0.00437023
130.2	0.00438866
130.3	0.00440709
130.4	0.0044255
130.5	0.0044439
130.6	0.0044623
130.7	0.00448068
130.8	0.00449905
130.9	0.00451741
131	0.00453576
131.1	0.0045541
131.2	0.00457242
131.3	0.00459074
131.4	0.00460904
131.5	0.00462734
131.6	0.00464562
131.7	0.00466389
131.8	0.00468215
131.9	0.0047004
132	0.00471864
132.1	0.00473686
132.2	0.00475507
132.3	0.00477328
132.4	0.00479147
132.5	0.00480964
132.6	0.00482781
132.7	0.00484596
132.8	0.00486411
132.9	0.00488224
133	0.00490036
133.1	0.00491846
133.2	0.00493656
133.3	0.00495464
133.4	0.00497271
133.5	0.00499076
133.6	0.00500881
133.7	0.00502684
133.8	0.00504486
133.9	0.00506286
134	0.00508086
134.1	0.00509884
134.2	0.00511681
134.3	0.00513477
134.4	0.00515271
134.5	0.00517064
134.6	0.00518856
134.7	0.00520646
134.8	0.00522435
134.9	0.00524223
135	0.0052601
135.1	0.00527795
135.2	0.00529579
135.3	0.00531362
135.4	0.00533143
135.5	0.00534923
135.6	0.00536702
135.7	0.00538479
135.8	0.00540255
135.9	0.0054203
136	0.00543804
136.1	0.00545576
136.2	0.00547346
136.3	0.00549116
136.4	0.00550884
136.5	0.00552651
136.6	0.00554416
136.7	0.0055618
136.8	0.00557943
136.9	0.00559704
137	0.00561464
137.1	0.00563222
137.2	0.0056498
137.3	0.00566735
137.4	0.0056849
137.5	0.00570243
137.6	0.00571995
137.7	0.00573745
137.8	0.00575494
137.9	0.00577242
138	0.00578988
138.1	0.00580733
138.2	0.00582476
138.3	0.00584218
138.4	0.00585959
138.5	0.00587698
138.6	0.00589436
138.7	0.00591172
138.8	0.00592908
138.9	0.00594641
139	0.00596373
139.1	0.00598104
139.2	0.00599834
139.3	0.00601562
139.4	0.00603289
139.5	0.00605014
139.6	0.00606738
139.7	0.0060846
139.8	0.00610181
139.9	0.00611901
140	0.00613619
140.1	0.00615336
140.2	0.00617051
140.3	0.00618765
140.4	0.00620478
140.5	0.00622189
140.6	0.00623899
140.7	0.00625607
140.8	0.00627314
140.9	0.00629019
141	0.00630723
141.1	0.00632426
141.2	0.00634127
141.3	0.00635827
141.4	0.00637525
141.5	0.00639222
141.6	0.00640918
141.7	0.00642612
141.8	0.00644304
141.9	0.00645995
142	0.00647685
142.1	0.00649374
142.2	0.0065106
142.3	0.00652746
142.4	0.0065443
142.5	0.00656113
142.6	0.00657794
142.7	0.00659474
142.8	0.00661152
142.9	0.00662829
143	0.00664504
143.1	0.00666178
143.2	0.00667851
143.3	0.00669522
143.4	0.00671192
143.5	0.0067286
143.6	0.00674527
143.7	0.00676192
143.8	0.00677856
143.9	0.00679519
144	0.0068118
144.1	0.00682839
144.2	0.00684498
144.3	0.00686154
144.4	0.0068781
144.5	0.00689464
144.6	0.00691116
144.7	0.00692767
144.8	0.00694417
144.9	0.00696065
145	0.00697712
145.1	0.00699357
145.2	0.00701001
145.3	0.00702643
145.4	0.00704284
145.5	0.00705924
145.6	0.00707562
145.7	0.00709199
145.8	0.00710834
145.9	0.00712468
146	0.007141
146.1	0.00715731
146.2	0.00717361
146.3	0.00718989
146.4	0.00720616
146.5	0.00722241
146.6	0.00723865
146.7	0.00725487
146.8	0.00727108
146.9	0.00728727
147	0.00730345
147.1	0.00731962
147.2	0.00733577
147.3	0.00735191
147.4	0.00736803
147.5	0.00738414
147.6	0.00740024
147.7	0.00741632
147.8	0.00743239
147.9	0.00744844
148	0.00746448
148.1	0.0074805
148.2	0.00749651
148.3	0.0075125
148.4	0.00752849
148.5	0.00754445
148.6	0.0075604
148.7	0.00757634
148.8	0.00759227
148.9	0.00760818
149	0.00762407
149.1	0.00763995
149.2	0.00765582
149.3	0.00767167
149.4	0.00768751
149.5	0.00770334
149.6	0.00771915
149.7	0.00773494
149.8	0.00775073
149.9	0.00776649
150	0.00778225
150.1	0.00779799
150.2	0.00781371
150.3	0.00782942
150.4	0.00784512
150.5	0.0078608
150.6	0.00787647
150.7	0.00789213
150.8	0.00790777
150.9	0.0079234
151	0.00793901
151.1	0.00795461
151.2	0.00797019
151.3	0.00798576
151.4	0.00800132
151.5	0.00801686
151.6	0.00803239
151.7	0.0080479
151.8	0.0080634
151.9	0.00807889
152	0.00809436
152.1	0.00810982
152.2	0.00812527
152.3	0.0081407
152.4	0.00815611
152.5	0.00817152
152.6	0.0081869
152.7	0.00820228
152.8	0.00821764
152.9	0.00823299
153	0.00824832
153.1	0.00826364
153.2	0.00827894
153.3	0.00829423
153.4	0.00830951
153.5	0.00832477
153.6	0.00834002
153.7	0.00835526
153.8	0.00837048
153.9	0.00838569
154	0.00840088
154.1	0.00841607
154.2	0.00843123
154.3	0.00844638
154.4	0.00846152
154.5	0.00847665
154.6	0.00849176
154.7	0.00850686
154.8	0.00852194
154.9	0.00853701
155	0.00855207
155.1	0.00856711
155.2	0.00858214
155.3	0.00859716
155.4	0.00861216
155.5	0.00862715
155.6	0.00864212
155.7	0.00865708
155.8	0.00867203
155.9	0.00868696
156	0.00870188
156.1	0.00871679
156.2	0.00873168
156.3	0.00874656
156.4	0.00876143
156.5	0.00877628
156.6	0.00879112
156.7	0.00880594
156.8	0.00882075
156.9	0.00883555
157	0.00885033
157.1	0.0088651
157.2	0.00887986
157.3	0.0088946
157.4	0.00890933
157.5	0.00892405
157.6	0.00893875
157.7	0.00895344
157.8	0.00896812
157.9	0.00898278
158	0.00899743
158.1	0.00901207
158.2	0.00902669
158.3	0.0090413
158.4	0.00905589
158.5	0.00907048
158.6	0.00908505
158.7	0.0090996
158.8	0.00911414
158.9	0.00912867
159	0.00914319
159.1	0.00915769
159.2	0.00917218
159.3	0.00918666
159.4	0.00920112
159.5	0.00921557
159.6	0.00923
159.7	0.00924443
159.8	0.00925883
159.9	0.00927323
160	0.00928761
160.1	0.00930198
160.2	0.00931634
160.3	0.00933068
160.4	0.00934501
160.5	0.00935933
160.6	0.00937363
160.7	0.00938793
160.8	0.0094022
160.9	0.00941647
161	0.00943072
161.1	0.00944496
161.2	0.00945918
161.3	0.00947339
161.4	0.00948759
161.5	0.00950178
161.6	0.00951595
161.7	0.00953011
161.8	0.00954426
161.9	0.00955839
162	0.00957251
162.1	0.00958662
162.2	0.00960072
162.3	0.0096148
162.4	0.00962887
162.5	0.00964292
162.6	0.00965697
162.7	0.009671
162.8	0.00968501
162.9	0.00969902
163	0.00971301
163.1	0.00972699
163.2	0.00974095
163.3	0.00975491
163.4	0.00976885
163.5	0.00978277
163.6	0.00979669
163.7	0.00981059
163.8	0.00982448
163.9	0.00983835
164	0.00985222
164.1	0.00986607
164.2	0.0098799
164.3	0.00989373
164.4	0.00990754
164.5	0.00992134
164.6	0.00993513
164.7	0.0099489
164.8	0.00996266
164.9	0.00997641
165	0.00999014
165.1	0.0100039
165.2	0.0100176
165.3	0.0100313
165.4	0.010045
165.5	0.0100586
165.6	0.0100723
165.7	0.0100859
165.8	0.0100996
165.9	0.0101132
166	0.0101268
166.1	0.0101404
166.2	0.010154
166.3	0.0101676
166.4	0.0101811
166.5	0.0101947
166.6	0.0102082
166.7	0.0102217
166.8	0.0102352
166.9	0.0102487
167	0.0102622
167.1	0.0102757
167.2	0.0102891
167.3	0.0103026
167.4	0.010316
167.5	0.0103294
167.6	0.0103429
167.7	0.0103563
167.8	0.0103696
167.9	0.010383
168	0.0103964
168.1	0.0104097
168.2	0.0104231
168.3	0.0104364
168.4	0.0104497
168.5	0.010463
168.6	0.0104763
168.7	0.0104896
168.8	0.0105028
168.9	0.0105161
169	0.0105293
169.1	0.0105425
169.2	0.0105557
169.3	0.0105689
169.4	0.0105821
169.5	0.0105953
169.6	0.0106085
169.7	0.0106216
169.8	0.0106348
169.9	0.0106479
170	0.010661
170.1	0.0106741
170.2	0.0106872
170.3	0.0107003
170.4	0.0107134
170.5	0.0107264
170.6	0.0107394
170.7	0.0107525
170.8	0.0107655
170.9	0.0107785
171	0.0107915
171.1	0.0108045
171.2	0.0108175
171.3	0.0108304
171.4	0.0108434
171.5	0.0108563
171.6	0.0108692
171.7	0.0108821
171.8	0.010895
171.9	0.0109079
172	0.0109208
172.1	0.0109337
172.2	0.0109465
172.3	0.0109593
172.4	0.0109722
172.5	0.010985
172.6	0.0109978
172.7	0.0110106
172.8	0.0110234
172.9	0.0110361
173	0.0110489
173.1	0.0110616
173.2	0.0110744
173.3	0.0110871
173.4	0.0110998
173.5	0.0111125
173.6	0.0111252
173.7	0.0111379
173.8	0.0111505
173.9	0.0111632
174	0.0111758
174.1	0.0111884
174.2	0.0112011
174.3	0.0112137
174.4	0.0112263
174.5	0.0112388
174.6	0.0112514
174.7	0.011264
174.8	0.0112765
174.9	0.011289
175	0.0113016
175.1	0.0113141
175.2	0.0113266
175.3	0.0113391
175.4	0.0113515
175.5	0.011364
175.6	0.0113765
175.7	0.0113889
175.8	0.0114013
175.9	0.0114138
176	0.0114262
176.1	0.0114386
176.2	0.0114509
176.3	0.0114633
176.4	0.0114757
176.5	0.011488
176.6	0.0115004
176.7	0.0115127
176.8	0.011525
176.9	0.0115373
177	0.0115496
177.1	0.0115619
177.2	0.0115742
177.3	0.0115864
177.4	0.0115987
177.5	0.0116109
177.6	0.0116231
177.7	0.0116353
177.8	0.0116475
177.9	0.0116597
178	0.0116719
178.1	0.0116841
178.2	0.0116962
178.3	0.0117084
178.4	0.0117205
178.5	0.0117326
178.6	0.0117448
178.7	0.0117569
178.8	0.0117689
178.9	0.011781
179	0.0117931
179.1	0.0118051
179.2	0.0118172
179.3	0.0118292
179.4	0.0118413
179.5	0.0118533
179.6	0.0118653
179.7	0.0118773
179.8	0.0118892
179.9	0.0119012
180	0.0119132
180.1	0.0119251
180.2	0.011937
180.3	0.011949
180.4	0.0119609
180.5	0.0119728
180.6	0.0119847
180.7	0.0119965
180.8	0.0120084
180.9	0.0120203
181	0.0120321
181.1	0.0120439
181.2	0.0120558
181.3	0.0120676
181.4	0.0120794
181.5	0.0120912
181.6	0.012103
181.7	0.0121147
181.8	0.0121265
181.9	0.0121382
182	0.01215
182.1	0.0121617
182.2	0.0121734
182.3	0.0121851
182.4	0.0121968
182.5	0.0122085
182.6	0.0122202
182.7	0.0122318
182.8	0.0122435
182.9	0.0122551
183	0.0122667
183.1	0.0122784
183.2	0.01229
183.3	0.0123016
183.4	0.0123131
183.5	0.0123247
183.6	0.0123363
183.7	0.0123478
183.8	0.0123594
183.9	0.0123709
184	0.0123824
184.1	0.0123939
184.2	0.0124054
184.3	0.0124169
184.4	0.0124284
184.5	0.0124399
184.6	0.0124513
184.7	0.0124628
184.8	0.0124742
184.9	0.0124857
185	0.0124971
185.1	0.0125085
185.2	0.0125199
185.3	0.0125312
185.4	0.0125426
185.5	0.012554
185.6	0.0125653
185.7	0.0125767
185.8	0.012588
185.9	0.0125993
186	0.0126106
186.1	0.0126219
186.2	0.0126332
186.3	0.0126445
186.4	0.0126558
186.5	0.012667
186.6	0.0126783
186.7	0.0126895
186.8	0.0127007
186.9	0.012712
187	0.0127232
187.1	0.0127344
187.2	0.0127455
187.3	0.0127567
187.4	0.0127679
187.5	0.012779
187.6	0.0127902
187.7	0.0128013
187.8	0.0128124
187.9	0.0128235
188	0.0128346
188.1	0.0128457
188.2	0.0128568
188.3	0.0128679
188.4	0.012879
188.5	0.01289
188.6	0.012901
188.7	0.0129121
188.8	0.0129231
188.9	0.0129341
189	0.0129451
189.1	0.0129561
189.2	0.0129671
189.3	0.012978
189.4	0.012989
189.5	0.0129999
189.6	0.0130109
189.7	0.0130218
189.8	0.0130327
189.9	0.0130436
190	0.0130545
190.1	0.0130654
190.2	0.0130763
190.3	0.0130872
190.4	0.013098
190.5	0.0131089
190.6	0.0131197
190.7	0.0131305
190.8	0.0131414
190.9	0.0131522
191	0.013163
191.1	0.0131738
191.2	0.0131845
191.3	0.0131953
191.4	0.0132061
191.5	0.0132168
191.6	0.0132275
191.7	0.0132383
191.8	0.013249
191.9	0.0132597
192	0.0132704
192.1	0.0132811
192.2	0.0132918
192.3	0.0133024
192.4	0.0133131
192.5	0.0133237
192.6	0.0133344
192.7	0.013345
192.8	0.0133556
192.9	0.0133662
193	0.0133768
193.1	0.0133874
193.2	0.013398
193.3	0.0134086
193.4	0.0134191
193.5	0.0134297
193.6	0.0134402
193.7	0.0134508
193.8	0.0134613
193.9	0.0134718
194	0.0134823
194.1	0.0134928
194.2	0.0135033
194.3	0.0135137
194.4	0.0135242
194.5	0.0135347
194.6	0.0135451
194.7	0.0135555
194.8	0.013566
194.9	0.0135764
195	0.0135868
195.1	0.0135972
195.2	0.0136076
195.3	0.0136179
195.4	0.0136283
195.5	0.0136387
195.6	0.013649
195.7	0.0136593
195.8	0.0136697
195.9	0.01368
196	0.0136903
196.1	0.0137006
196.2	0.0137109
196.3	0.0137212
196.4	0.0137314
196.5	0.0137417
196.6	0.0137519
196.7	0.0137622
196.8	0.0137724
196.9	0.0137826
197	0.0137929
197.1	0.0138031
197.2	0.0138133
197.3	0.0138234
197.4	0.0138336
197.5	0.0138438
197.6	0.0138539
197.7	0.0138641
197.8	0.0138742
197.9	0.0138844
198	0.0138945
198.1	0.0139046
198.2	0.0139147
198.3	0.0139248
198.4	0.0139349
198.5	0.0139449
198.6	0.013955
198.7	0.0139651
198.8	0.0139751
198.9	0.0139851
199	0.0139952
199.1	0.0140052
199.2	0.0140152
199.3	0.0140252
199.4	0.0140352
199.5	0.0140451
199.6	0.0140551
199.7	0.0140651
199.8	0.014075
199.9	0.014085
200	0.0140949
[truncated: 14,000 more rows]
