# Supplementary material for: Bayesian inference of kinetic schemes for ion channels by Kalman filtering
Source: eLife journal article supplement (doi:10.7554/elife.62714), 2022-05-04
Supplement: fig4-data11 [file 1_Sim_N_3000_Fluor_MW.xlsx]

## Sheet: Tabelle1
0.1	0
0.2	0
0.3	0
0.4	0
0.5	0
0.6	0
0.7	0
0.8	0
0.9	0
1	0
1.1	0
1.2	0
1.3	0
1.4	0
1.5	0
1.6	0
1.7	0
1.8	0
1.9	0
2	0
2.1	0
2.2	0
2.3	0
2.4	0
2.5	0
2.6	0
2.7	0
2.8	0
2.9	0
3	0
3.1	0
3.2	0
3.3	0
3.4	0
3.5	0
3.6	0
3.7	0
3.8	0
3.9	0
4	0
4.1	0
4.2	0
4.3	0
4.4	0
4.5	0
4.6	0
4.7	0
4.8	0
4.9	0
5	0
5.1	0
5.2	0
5.3	0
5.4	0
5.5	0
5.6	0
5.7	0
5.8	0
5.9	0
6	0
6.1	0
6.2	0
6.3	0
6.4	0
6.5	0
6.6	0
6.7	0
6.8	0
6.9	0
7	0
7.1	0
7.2	0
7.3	0
7.4	0
7.5	0
7.6	0
7.7	0
7.8	0
7.9	0
8	0
8.1	0
8.2	0
8.3	0
8.4	0
8.5	0
8.6	0
8.7	0
8.8	0
8.9	0
9	0
9.1	0
9.2	0
9.3	0
9.4	0
9.5	0
9.6	0
9.7	0
9.8	0
9.9	0
10	0
10.1	0
10.2	0
10.3	0
10.4	0
10.5	0
10.6	0
10.7	0
10.8	0
10.9	0
11	0
11.1	0
11.2	0
11.3	0
11.4	0
11.5	0
11.6	0
11.7	0
11.8	0
11.9	0
12	0
12.1	0
12.2	0
12.3	0
12.4	0
12.5	0
12.6	0
12.7	0
12.8	0
12.9	0
13	0
13.1	0
13.2	0
13.3	0
13.4	0
13.5	0
13.6	0
13.7	0
13.8	0
13.9	0
14	0
14.1	0
14.2	0
14.3	0
14.4	0
14.5	0
14.6	0
14.7	0
14.8	0
14.9	0
15	0
15.1	0
15.2	0
15.3	0
15.4	0
15.5	0
15.6	0
15.7	0
15.8	0
15.9	0
16	0
16.1	0
16.2	0
16.3	0
16.4	0
16.5	0
16.6	0
16.7	0
16.8	0
16.9	0
17	0
17.1	0
17.2	0
17.3	0
17.4	0
17.5	0
17.6	0
17.7	0
17.8	0
17.9	0
18	0
18.1	0
18.2	0
18.3	0
18.4	0
18.5	0
18.6	0
18.7	0
18.8	0
18.9	0
19	0
19.1	0
19.2	0
19.3	0
19.4	0
19.5	0
19.6	0
19.7	0
19.8	0
19.9	0
20	0
20.1	0
20.2	0
20.3	0
20.4	0
20.5	0
20.6	0
20.7	0
20.8	0
20.9	0
21	0
21.1	0
21.2	0
21.3	0
21.4	0
21.5	0
21.6	0
21.7	0
21.8	0
21.9	0
22	0
22.1	0
22.2	0
22.3	0
22.4	0
22.5	0
22.6	0
22.7	0
22.8	0
22.9	0
23	0
23.1	0
23.2	0
23.3	0
23.4	0
23.5	0
23.6	0
23.7	0
23.8	0
23.9	0
24	0
24.1	0
24.2	0
24.3	0
24.4	0
24.5	0
24.6	0
24.7	0
24.8	0
24.9	0
25	0
25.1	0
25.2	0
25.3	0
25.4	0
25.5	0
25.6	0
25.7	0
25.8	0
25.9	0
26	0
26.1	0
26.2	0
26.3	0
26.4	0
26.5	0
26.6	0
26.7	0
26.8	0
26.9	0
27	0
27.1	0
27.2	0
27.3	0
27.4	0
27.5	0
27.6	0
27.7	0
27.8	0
27.9	0
28	0
28.1	0
28.2	0
28.3	0
28.4	0
28.5	0
28.6	0
28.7	0
28.8	0
28.9	0
29	0
29.1	0
29.2	0
29.3	0
29.4	0
29.5	0
29.6	0
29.7	0
29.8	0
29.9	0
30	0
30.1	0
30.2	0
30.3	0
30.4	0
30.5	0
30.6	0
30.7	0
30.8	0
30.9	0
31	0
31.1	0
31.2	0
31.3	0
31.4	0
31.5	0
31.6	0
31.7	0
31.8	0
31.9	0
32	0
32.1	0
32.2	0
32.3	0
32.4	0
32.5	0
32.6	0
32.7	0
32.8	0
32.9	0
33	0
33.1	0
33.2	0
33.3	0
33.4	0
33.5	0
33.6	0
33.7	0
33.8	0
33.9	0
34	0
34.1	0
34.2	0
34.3	0
34.4	0
34.5	0
34.6	0
34.7	0
34.8	0
34.9	0
35	0
35.1	0
35.2	0
35.3	0
35.4	0
35.5	0
35.6	0
35.7	0
35.8	0
35.9	0
36	0
36.1	0
36.2	0
36.3	0
36.4	0
36.5	0
36.6	0
36.7	0
36.8	0
36.9	0
37	0
37.1	0
37.2	0
37.3	0
37.4	0
37.5	0
37.6	0
37.7	0
37.8	0
37.9	0
38	0
38.1	0
38.2	0
38.3	0
38.4	0
38.5	0
38.6	0
38.7	0
38.8	0
38.9	0
39	0
39.1	0
39.2	0
39.3	0
39.4	0
39.5	0
39.6	0
39.7	0
39.8	0
39.9	0
40	0
40.1	0
40.2	0
40.3	0
40.4	0
40.5	0
40.6	0
40.7	0
40.8	0
40.9	0
41	0
41.1	0
41.2	0
41.3	0
41.4	0
41.5	0
41.6	0
41.7	0
41.8	0
41.9	0
42	0
42.1	0
42.2	0
42.3	0
42.4	0
42.5	0
42.6	0
42.7	0
42.8	0
42.9	0
43	0
43.1	0
43.2	0
43.3	0
43.4	0
43.5	0
43.6	0
43.7	0
43.8	0
43.9	0
44	0
44.1	0
44.2	0
44.3	0
44.4	0
44.5	0
44.6	0
44.7	0
44.8	0
44.9	0
45	0
45.1	0
45.2	0
45.3	0
45.4	0
45.5	0
45.6	0
45.7	0
45.8	0
45.9	0
46	0
46.1	0
46.2	0
46.3	0
46.4	0
46.5	0
46.6	0
46.7	0
46.8	0
46.9	0
47	0
47.1	0
47.2	0
47.3	0
47.4	0
47.5	0
47.6	0
47.7	0
47.8	0
47.9	0
48	0
48.1	0
48.2	0
48.3	0
48.4	0
48.5	0
48.6	0
48.7	0
48.8	0
48.9	0
49	0
49.1	0
49.2	0
49.3	0
49.4	0
49.5	0
49.6	0
49.7	0
49.8	0
49.9	0
50	0
50.1	0
50.2	0
50.3	0
50.4	0
50.5	0
50.6	0
50.7	0
50.8	0
50.9	0
51	0
51.1	0
51.2	0
51.3	0
51.4	0
51.5	0
51.6	0
51.7	0
51.8	0
51.9	0
52	0
52.1	0
52.2	0
52.3	0
52.4	0
52.5	0
52.6	0
52.7	0
52.8	0
52.9	0
53	0
53.1	0
53.2	0
53.3	0
53.4	0
53.5	0
53.6	0
53.7	0
53.8	0
53.9	0
54	0
54.1	0
54.2	0
54.3	0
54.4	0
54.5	0
54.6	0
54.7	0
54.8	0
54.9	0
55	0
55.1	0
55.2	0
55.3	0
55.4	0
55.5	0
55.6	0
55.7	0
55.8	0
55.9	0
56	0
56.1	0
56.2	0
56.3	0
56.4	0
56.5	0
56.6	0
56.7	0
56.8	0
56.9	0
57	0
57.1	0
57.2	0
57.3	0
57.4	0
57.5	0
57.6	0
57.7	0
57.8	0
57.9	0
58	0
58.1	0
58.2	0
58.3	0
58.4	0
58.5	0
58.6	0
58.7	0
58.8	0
58.9	0
59	0
59.1	0
59.2	0
59.3	0
59.4	0
59.5	0
59.6	0
59.7	0
59.8	0
59.9	0
60	0
60.1	0
60.2	0
60.3	0
60.4	0
60.5	0
60.6	0
60.7	0
60.8	0
60.9	0
61	0
61.1	0
61.2	0
61.3	0
61.4	0
61.5	0
61.6	0
61.7	0
61.8	0
61.9	0
62	0
62.1	0
62.2	0
62.3	0
62.4	0
62.5	0
62.6	0
62.7	0
62.8	0
62.9	0
63	0
63.1	0
63.2	0
63.3	0
63.4	0
63.5	0
63.6	0
63.7	0
63.8	0
63.9	0
64	0
64.1	0
64.2	0
64.3	0
64.4	0
64.5	0
64.6	0
64.7	0
64.8	0
64.9	0
65	0
65.1	0
65.2	0
65.3	0
65.4	0
65.5	0
65.6	0
65.7	0
65.8	0
65.9	0
66	0
66.1	0
66.2	0
66.3	0
66.4	0
66.5	0
66.6	0
66.7	0
66.8	0
66.9	0
67	0
67.1	0
67.2	0
67.3	0
67.4	0
67.5	0
67.6	0
67.7	0
67.8	0
67.9	0
68	0
68.1	0
68.2	0
68.3	0
68.4	0
68.5	0
68.6	0
68.7	0
68.8	0
68.9	0
69	0
69.1	0
69.2	0
69.3	0
69.4	0
69.5	0
69.6	0
69.7	0
69.8	0
69.9	0
70	0
70.1	0
70.2	0
70.3	0
70.4	0
70.5	0
70.6	0
70.7	0
70.8	0
70.9	0
71	0
71.1	0
71.2	0
71.3	0
71.4	0
71.5	0
71.6	0
71.7	0
71.8	0
71.9	0
72	0
72.1	0
72.2	0
72.3	0
72.4	0
72.5	0
72.6	0
72.7	0
72.8	0
72.9	0
73	0
73.1	0
73.2	0
73.3	0
73.4	0
73.5	0
73.6	0
73.7	0
73.8	0
73.9	0
74	0
74.1	0
74.2	0
74.3	0
74.4	0
74.5	0
74.6	0
74.7	0
74.8	0
74.9	0
75	0
75.1	0
75.2	0
75.3	0
75.4	0
75.5	0
75.6	0
75.7	0
75.8	0
75.9	0
76	0
76.1	0
76.2	0
76.3	0
76.4	0
76.5	0
76.6	0
76.7	0
76.8	0
76.9	0
77	0
77.1	0
77.2	0
77.3	0
77.4	0
77.5	0
77.6	0
77.7	0
77.8	0
77.9	0
78	0
78.1	0
78.2	0
78.3	0
78.4	0
78.5	0
78.6	0
78.7	0
78.8	0
78.9	0
79	0
79.1	0
79.2	0
79.3	0
79.4	0
79.5	0
79.6	0
79.7	0
79.8	0
79.9	0
80	0
80.1	0
80.2	0
80.3	0
80.4	0
80.5	0
80.6	0
80.7	0
80.8	0
80.9	0
81	0
81.1	0
81.2	0
81.3	0
81.4	0
81.5	0
81.6	0
81.7	0
81.8	0
81.9	0
82	0
82.1	0
82.2	0
82.3	0
82.4	0
82.5	0
82.6	0
82.7	0
82.8	0
82.9	0
83	0
83.1	0
83.2	0
83.3	0
83.4	0
83.5	0
83.6	0
83.7	0
83.8	0
83.9	0
84	0
84.1	0
84.2	0
84.3	0
84.4	0
84.5	0
84.6	0
84.7	0
84.8	0
84.9	0
85	0
85.1	0
85.2	0
85.3	0
85.4	0
85.5	0
85.6	0
85.7	0
85.8	0
85.9	0
86	0
86.1	0
86.2	0
86.3	0
86.4	0
86.5	0
86.6	0
86.7	0
86.8	0
86.9	0
87	0
87.1	0
87.2	0
87.3	0
87.4	0
87.5	0
87.6	0
87.7	0
87.8	0
87.9	0
88	0
88.1	0
88.2	0
88.3	0
88.4	0
88.5	0
88.6	0
88.7	0
88.8	0
88.9	0
89	0
89.1	0
89.2	0
89.3	0
89.4	0
89.5	0
89.6	0
89.7	0
89.8	0
89.9	0
90	0
90.1	0
90.2	0
90.3	0
90.4	0
90.5	0
90.6	0
90.7	0
90.8	0
90.9	0
91	0
91.1	0
91.2	0
91.3	0
91.4	0
91.5	0
91.6	0
91.7	0
91.8	0
91.9	0
92	0
92.1	0
92.2	0
92.3	0
92.4	0
92.5	0
92.6	0
92.7	0
92.8	0
92.9	0
93	0
93.1	0
93.2	0
93.3	0
93.4	0
93.5	0
93.6	0
93.7	0
93.8	0
93.9	0
94	0
94.1	0
94.2	0
94.3	0
94.4	0
94.5	0
94.6	0
94.7	0
94.8	0
94.9	0
95	0
95.1	0
95.2	0
95.3	0
95.4	0
95.5	0
95.6	0
95.7	0
95.8	0
95.9	0
96	0
96.1	0
96.2	0
96.3	0
96.4	0
96.5	0
96.6	0
96.7	0
96.8	0
96.9	0
97	0
97.1	0
97.2	0
97.3	0
97.4	0
97.5	0
97.6	0
97.7	0
97.8	0
97.9	0
98	0
98.1	0
98.2	0
98.3	0
98.4	0
98.5	0
98.6	0
98.7	0
98.8	0
98.9	0
99	0
99.1	0
99.2	0
99.3	0
99.4	0
99.5	0
99.6	0
99.7	0
99.8	0
99.9	0
100	0
100.1	0.0015
100.2	0.00333333
100.3	0.00466667
100.4	0.007
100.5	0.00766667
100.6	0.009
100.7	0.0113333
100.8	0.0126667
100.9	0.0148333
101	0.0175
101.1	0.0183333
101.2	0.0191667
101.3	0.0205
101.4	0.0216667
101.5	0.024
101.6	0.025
101.7	0.0256667
101.8	0.028
101.9	0.0305
102	0.0316667
102.1	0.0326667
102.2	0.0338333
102.3	0.0353333
102.4	0.0373333
102.5	0.0376667
102.6	0.0405
102.7	0.0418333
102.8	0.0433333
102.9	0.0443333
103	0.0458333
103.1	0.0485
103.2	0.0496667
103.3	0.0505
103.4	0.051
103.5	0.052
103.6	0.0531667
103.7	0.0541667
103.8	0.0548333
103.9	0.0568333
104	0.0593333
104.1	0.0605
104.2	0.0611667
104.3	0.0631667
104.4	0.0636667
104.5	0.0648333
104.6	0.0653333
104.7	0.065
104.8	0.0646667
104.9	0.0653333
105	0.0668333
105.1	0.0683333
105.2	0.0685
105.3	0.0693333
105.4	0.0703333
105.5	0.0718333
105.6	0.0726667
105.7	0.0743333
105.8	0.0751667
105.9	0.0756667
106	0.0765
106.1	0.0765
106.2	0.078
106.3	0.0788333
106.4	0.0801667
106.5	0.082
106.6	0.0828333
106.7	0.0846667
106.8	0.0858333
106.9	0.0871667
107	0.0873333
107.1	0.089
107.2	0.09
107.3	0.0906667
107.4	0.0916667
107.5	0.0936667
107.6	0.0945
107.7	0.0948333
107.8	0.0965
107.9	0.097
108	0.0973333
108.1	0.097
108.2	0.0988333
108.3	0.0991667
108.4	0.1005
108.5	0.101
108.6	0.1015
108.7	0.101333
108.8	0.102
108.9	0.103
109	0.103667
109.1	0.104667
109.2	0.104333
109.3	0.104667
109.4	0.105333
109.5	0.1065
109.6	0.107
109.7	0.106667
109.8	0.107
109.9	0.107
110	0.107
110.1	0.107833
110.2	0.107833
110.3	0.108167
110.4	0.108667
110.5	0.109333
110.6	0.1095
110.7	0.110333
110.8	0.1105
110.9	0.111167
111	0.1125
111.1	0.114333
111.2	0.113667
111.3	0.114
111.4	0.115333
111.5	0.117
111.6	0.116167
111.7	0.116333
111.8	0.1175
111.9	0.117
112	0.117667
112.1	0.116833
112.2	0.117167
112.3	0.116833
112.4	0.117
112.5	0.116833
112.6	0.117
112.7	0.117333
112.8	0.1175
112.9	0.1175
113	0.116
113.1	0.116667
113.2	0.116667
113.3	0.1165
113.4	0.116667
113.5	0.1165
113.6	0.115667
113.7	0.116
113.8	0.116833
113.9	0.1165
114	0.1175
114.1	0.1175
114.2	0.118
114.3	0.1195
114.4	0.120333
114.5	0.120667
114.6	0.1205
114.7	0.1205
114.8	0.121667
114.9	0.1215
115	0.121333
115.1	0.120667
115.2	0.1205
115.3	0.121667
115.4	0.1225
115.5	0.1225
115.6	0.1235
115.7	0.124167
115.8	0.124333
115.9	0.123333
116	0.123
116.1	0.122833
116.2	0.124333
116.3	0.126167
116.4	0.126667
116.5	0.127167
116.6	0.126667
116.7	0.125667
116.8	0.124667
116.9	0.125
117	0.1255
117.1	0.126333
117.2	0.126333
117.3	0.1275
117.4	0.1275
117.5	0.128
117.6	0.128167
117.7	0.13
117.8	0.1305
117.9	0.1315
118	0.131667
118.1	0.131333
118.2	0.131333
118.3	0.131333
118.4	0.131833
118.5	0.133
118.6	0.1325
118.7	0.132667
118.8	0.1325
118.9	0.133
119	0.132667
119.1	0.131833
119.2	0.131833
119.3	0.132333
119.4	0.131667
119.5	0.131833
119.6	0.1325
119.7	0.131833
119.8	0.131667
119.9	0.132167
120	0.1335
120.1	0.133667
120.2	0.134
120.3	0.134833
120.4	0.134
120.5	0.132833
120.6	0.134
120.7	0.1345
120.8	0.134833
120.9	0.135667
121	0.1365
121.1	0.137667
121.2	0.137333
121.3	0.137667
121.4	0.137167
121.5	0.138667
121.6	0.138167
121.7	0.139
121.8	0.140333
121.9	0.139833
122	0.139167
122.1	0.139
122.2	0.139833
122.3	0.140667
122.4	0.140167
122.5	0.140333
122.6	0.140667
122.7	0.141667
122.8	0.1405
122.9	0.14
123	0.139833
123.1	0.1405
123.2	0.14
123.3	0.139833
123.4	0.139667
123.5	0.1385
123.6	0.139333
123.7	0.140833
123.8	0.140167
123.9	0.140333
124	0.140333
124.1	0.141
124.2	0.140167
124.3	0.1395
124.4	0.1395
124.5	0.1385
124.6	0.137667
124.7	0.137333
124.8	0.137
124.9	0.137167
125	0.137833
125.1	0.137167
125.2	0.135833
125.3	0.136833
125.4	0.137667
125.5	0.136833
125.6	0.136833
125.7	0.136833
125.8	0.136833
125.9	0.137333
126	0.137667
126.1	0.138833
126.2	0.137833
126.3	0.137167
126.4	0.138
126.5	0.138
126.6	0.139
126.7	0.1385
126.8	0.139167
126.9	0.139
127	0.14
127.1	0.140667
127.2	0.140333
127.3	0.140667
127.4	0.141167
127.5	0.141667
127.6	0.141167
127.7	0.141
127.8	0.1415
127.9	0.1415
128	0.142167
128.1	0.142667
128.2	0.142167
128.3	0.1425
128.4	0.1425
128.5	0.142
128.6	0.141833
128.7	0.142333
128.8	0.1415
128.9	0.142333
129	0.142667
129.1	0.142667
129.2	0.143167
129.3	0.1435
129.4	0.144167
129.5	0.144
129.6	0.143
129.7	0.1425
129.8	0.143333
129.9	0.143333
130	0.143
130.1	0.141667
130.2	0.139667
130.3	0.139167
130.4	0.139167
130.5	0.139333
130.6	0.140167
130.7	0.140333
130.8	0.14
130.9	0.139833
131	0.140167
131.1	0.140667
131.2	0.1415
131.3	0.141
131.4	0.141833
131.5	0.141167
131.6	0.1415
131.7	0.142667
131.8	0.1425
131.9	0.142833
132	0.142833
132.1	0.1425
132.2	0.140667
132.3	0.139667
132.4	0.139833
132.5	0.139333
132.6	0.1395
132.7	0.138667
132.8	0.138667
132.9	0.138167
133	0.137833
133.1	0.1375
133.2	0.137833
133.3	0.138833
133.4	0.1405
133.5	0.140333
133.6	0.140167
133.7	0.140167
133.8	0.139833
133.9	0.14
134	0.140167
134.1	0.1405
134.2	0.1405
134.3	0.14
134.4	0.14
134.5	0.1395
134.6	0.140667
134.7	0.141
134.8	0.141333
134.9	0.141333
135	0.142
135.1	0.142833
135.2	0.1415
135.3	0.141
135.4	0.140667
135.5	0.141667
135.6	0.141833
135.7	0.1415
135.8	0.142
135.9	0.142
136	0.1415
136.1	0.141167
136.2	0.140833
136.3	0.141
136.4	0.140667
136.5	0.140833
136.6	0.140667
136.7	0.140333
136.8	0.141
136.9	0.141333
137	0.143
137.1	0.143667
137.2	0.1445
137.3	0.144
137.4	0.144
137.5	0.143833
137.6	0.143667
137.7	0.144167
137.8	0.1445
137.9	0.144
138	0.145167
138.1	0.146333
138.2	0.145333
138.3	0.145333
138.4	0.145833
138.5	0.145333
138.6	0.145167
138.7	0.145333
138.8	0.145833
138.9	0.145333
139	0.143333
139.1	0.143
139.2	0.143333
139.3	0.1435
139.4	0.142667
139.5	0.1425
139.6	0.143333
139.7	0.143833
139.8	0.144333
139.9	0.143667
140	0.142833
140.1	0.1435
140.2	0.143667
140.3	0.145167
140.4	0.144333
140.5	0.144167
140.6	0.143167
140.7	0.143667
140.8	0.143167
140.9	0.142833
141	0.143333
141.1	0.144167
141.2	0.144333
141.3	0.1425
141.4	0.143167
141.5	0.143833
141.6	0.143167
141.7	0.1435
141.8	0.143333
141.9	0.144667
142	0.144333
142.1	0.145333
142.2	0.145
142.3	0.145667
142.4	0.146167
142.5	0.146667
142.6	0.145833
142.7	0.146
142.8	0.146667
142.9	0.147333
143	0.146833
143.1	0.147167
143.2	0.146333
143.3	0.146333
143.4	0.145833
143.5	0.146
143.6	0.146667
143.7	0.147167
143.8	0.146667
143.9	0.146833
144	0.146667
144.1	0.145167
144.2	0.1445
144.3	0.1445
144.4	0.143
144.5	0.1435
144.6	0.144167
144.7	0.1445
144.8	0.144333
144.9	0.142667
145	0.141667
145.1	0.141
145.2	0.141333
145.3	0.139333
145.4	0.1395
145.5	0.1385
145.6	0.138167
145.7	0.138833
145.8	0.138333
145.9	0.138833
146	0.1385
146.1	0.1385
146.2	0.1385
146.3	0.140333
146.4	0.140167
146.5	0.141167
146.6	0.141667
146.7	0.142167
146.8	0.142167
146.9	0.142667
147	0.141
147.1	0.140833
147.2	0.140833
147.3	0.141167
147.4	0.141833
147.5	0.142167
147.6	0.142333
147.7	0.143333
147.8	0.143333
147.9	0.1435
148	0.141833
148.1	0.140833
148.2	0.141
148.3	0.142
148.4	0.141167
148.5	0.142667
148.6	0.1425
148.7	0.142667
148.8	0.1425
148.9	0.142833
149	0.143667
149.1	0.143833
149.2	0.1445
149.3	0.145167
149.4	0.144833
149.5	0.144167
149.6	0.143667
149.7	0.144
149.8	0.143833
149.9	0.143667
150	0.143667
150.1	0.144333
150.2	0.143833
150.3	0.143167
150.4	0.144
150.5	0.144
150.6	0.144667
150.7	0.143667
150.8	0.143167
150.9	0.142667
151	0.143333
151.1	0.144333
151.2	0.143667
151.3	0.143667
151.4	0.1435
151.5	0.144833
151.6	0.1455
151.7	0.146667
151.8	0.146
151.9	0.146833
152	0.147833
152.1	0.147167
152.2	0.147667
152.3	0.148667
152.4	0.149833
152.5	0.148333
152.6	0.146833
152.7	0.148667
152.8	0.1475
152.9	0.147833
153	0.148167
153.1	0.149167
153.2	0.149833
153.3	0.150333
153.4	0.1495
153.5	0.148833
153.6	0.148333
153.7	0.1485
153.8	0.1485
153.9	0.148833
154	0.150833
154.1	0.150333
154.2	0.15
154.3	0.150333
154.4	0.150333
154.5	0.150667
154.6	0.150167
154.7	0.149667
154.8	0.15
154.9	0.149667
155	0.149667
155.1	0.150167
155.2	0.150833
155.3	0.150667
155.4	0.151667
155.5	0.151
155.6	0.150833
155.7	0.1515
155.8	0.1515
155.9	0.151667
156	0.1525
156.1	0.152167
156.2	0.152833
156.3	0.1515
156.4	0.151833
156.5	0.151167
156.6	0.151333
156.7	0.151167
156.8	0.1515
156.9	0.151167
157	0.151667
157.1	0.1515
157.2	0.1505
157.3	0.1515
157.4	0.151333
157.5	0.1515
157.6	0.151333
157.7	0.151333
157.8	0.151
157.9	0.15
158	0.151333
158.1	0.1515
158.2	0.151
158.3	0.152
158.4	0.152167
158.5	0.152833
158.6	0.151667
158.7	0.152667
158.8	0.152
158.9	0.151833
159	0.151333
159.1	0.151
159.2	0.150833
159.3	0.152833
159.4	0.1525
159.5	0.151333
159.6	0.149
159.7	0.148667
159.8	0.150333
159.9	0.150167
160	0.150833
160.1	0.151833
160.2	0.152
160.3	0.151333
160.4	0.152
160.5	0.1525
160.6	0.151333
160.7	0.150667
160.8	0.150833
160.9	0.1525
161	0.152833
161.1	0.1525
161.2	0.1525
161.3	0.153333
161.4	0.152667
161.5	0.152333
161.6	0.152833
161.7	0.153167
161.8	0.153
161.9	0.152833
162	0.1525
162.1	0.153833
162.2	0.154667
162.3	0.154833
162.4	0.154167
162.5	0.1525
162.6	0.1515
162.7	0.150833
162.8	0.1515
162.9	0.151667
163	0.151667
163.1	0.150333
163.2	0.15
163.3	0.15
163.4	0.150167
163.5	0.149167
163.6	0.148833
163.7	0.148667
163.8	0.148333
163.9	0.147167
164	0.147167
164.1	0.147
164.2	0.145667
164.3	0.144833
164.4	0.144833
164.5	0.144167
164.6	0.143167
164.7	0.142833
164.8	0.141833
164.9	0.1425
165	0.142333
165.1	0.141833
165.2	0.142
165.3	0.141833
165.4	0.1425
165.5	0.143667
165.6	0.143167
165.7	0.143333
165.8	0.1425
165.9	0.142667
166	0.142833
166.1	0.1435
166.2	0.143833
166.3	0.144667
166.4	0.1445
166.5	0.144167
166.6	0.143833
166.7	0.145
166.8	0.144333
166.9	0.1435
167	0.143167
167.1	0.144333
167.2	0.144167
167.3	0.144833
167.4	0.145167
167.5	0.146167
167.6	0.145833
167.7	0.145167
167.8	0.144833
167.9	0.145167
168	0.145333
168.1	0.145
168.2	0.144
168.3	0.143167
168.4	0.1425
168.5	0.142333
168.6	0.142667
168.7	0.143
168.8	0.143
168.9	0.142
169	0.142167
169.1	0.141667
169.2	0.142
169.3	0.142667
169.4	0.143333
169.5	0.1435
169.6	0.143833
169.7	0.144667
169.8	0.1435
169.9	0.143667
170	0.144333
170.1	0.142167
170.2	0.143333
170.3	0.143333
170.4	0.143833
170.5	0.143
170.6	0.143667
170.7	0.143167
170.8	0.142167
170.9	0.143167
171	0.143833
171.1	0.142167
171.2	0.141833
171.3	0.142
171.4	0.143167
171.5	0.144667
171.6	0.143833
171.7	0.143833
171.8	0.144333
171.9	0.144833
172	0.145167
172.1	0.145167
172.2	0.1455
172.3	0.145667
172.4	0.145333
172.5	0.144667
172.6	0.143333
172.7	0.1435
172.8	0.143333
172.9	0.143333
173	0.144333
173.1	0.144
173.2	0.145
173.3	0.145833
173.4	0.1465
173.5	0.145333
173.6	0.146167
173.7	0.145833
173.8	0.1445
173.9	0.143333
174	0.143333
174.1	0.1435
174.2	0.143333
174.3	0.144833
174.4	0.144667
174.5	0.144333
174.6	0.144333
174.7	0.144
174.8	0.143
174.9	0.1435
175	0.142833
175.1	0.142667
175.2	0.143167
175.3	0.143
175.4	0.142333
175.5	0.143
175.6	0.143167
175.7	0.143667
175.8	0.143333
175.9	0.142833
176	0.143333
176.1	0.1435
176.2	0.143667
176.3	0.143667
176.4	0.142333
176.5	0.142
176.6	0.142167
176.7	0.141833
176.8	0.142667
176.9	0.143
177	0.143333
177.1	0.143
177.2	0.1425
177.3	0.142333
177.4	0.1415
177.5	0.142333
177.6	0.142833
177.7	0.1425
177.8	0.142833
177.9	0.143667
178	0.142833
178.1	0.142
178.2	0.142167
178.3	0.143833
178.4	0.144333
178.5	0.145167
178.6	0.144167
178.7	0.144
178.8	0.142833
178.9	0.142667
179	0.143333
179.1	0.143667
179.2	0.144
179.3	0.1445
179.4	0.144
179.5	0.143
179.6	0.142667
179.7	0.141833
179.8	0.142833
179.9	0.143167
180	0.143333
180.1	0.1435
180.2	0.144167
180.3	0.142833
180.4	0.142833
180.5	0.142167
180.6	0.143
180.7	0.1415
180.8	0.141833
180.9	0.143333
181	0.143333
181.1	0.143833
181.2	0.144167
181.3	0.144667
181.4	0.144333
181.5	0.144833
181.6	0.144167
181.7	0.1455
181.8	0.145833
181.9	0.1455
182	0.146333
182.1	0.146833
182.2	0.147333
182.3	0.146833
182.4	0.146833
182.5	0.148333
182.6	0.1485
182.7	0.149167
182.8	0.149167
182.9	0.148667
183	0.1485
183.1	0.147833
183.2	0.149333
183.3	0.1505
183.4	0.150333
183.5	0.150667
183.6	0.151167
183.7	0.151667
183.8	0.150833
183.9	0.151167
184	0.151833
184.1	0.151833
184.2	0.150667
184.3	0.1515
184.4	0.150833
184.5	0.151
184.6	0.151167
184.7	0.151333
184.8	0.1515
184.9	0.150667
185	0.150833
185.1	0.15
185.2	0.149667
185.3	0.150167
185.4	0.149667
185.5	0.149333
185.6	0.1505
185.7	0.151
185.8	0.150667
185.9	0.150833
186	0.149833
186.1	0.149833
186.2	0.148667
186.3	0.15
186.4	0.149333
186.5	0.149333
186.6	0.149
186.7	0.149167
186.8	0.1495
186.9	0.149667
187	0.149833
187.1	0.149
187.2	0.149333
187.3	0.149667
187.4	0.15
187.5	0.1515
187.6	0.150667
187.7	0.1505
187.8	0.151167
187.9	0.150833
188	0.150833
188.1	0.151833
188.2	0.153167
188.3	0.153333
188.4	0.153167
188.5	0.1535
188.6	0.151833
188.7	0.151667
188.8	0.151167
188.9	0.151
189	0.150667
189.1	0.151
189.2	0.149667
189.3	0.15
189.4	0.150167
189.5	0.150833
189.6	0.151167
189.7	0.150167
189.8	0.150167
189.9	0.15
190	0.150167
190.1	0.150833
190.2	0.152167
190.3	0.152833
190.4	0.154167
190.5	0.153833
190.6	0.1525
190.7	0.152333
190.8	0.154167
190.9	0.1545
191	0.155667
191.1	0.155167
191.2	0.154667
191.3	0.154333
191.4	0.154167
191.5	0.153833
191.6	0.1525
191.7	0.152
191.8	0.1525
191.9	0.1525
192	0.153167
192.1	0.1525
192.2	0.151333
192.3	0.151833
192.4	0.152167
192.5	0.152333
192.6	0.152667
192.7	0.153333
192.8	0.1545
192.9	0.154333
193	0.154333
193.1	0.153833
193.2	0.1555
193.3	0.155167
193.4	0.153833
193.5	0.1545
193.6	0.1555
193.7	0.156167
193.8	0.155333
193.9	0.1555
194	0.156833
194.1	0.1575
194.2	0.158
194.3	0.158667
194.4	0.159167
194.5	0.159
194.6	0.158333
194.7	0.158833
194.8	0.1585
194.9	0.159667
195	0.159833
195.1	0.1595
195.2	0.159167
195.3	0.159
195.4	0.1595
195.5	0.160333
195.6	0.161
195.7	0.16
195.8	0.160833
195.9	0.1615
196	0.1625
196.1	0.162333
196.2	0.162167
196.3	0.161833
196.4	0.160833
196.5	0.161
196.6	0.1615
196.7	0.161167
196.8	0.160333
196.9	0.159833
197	0.159167
197.1	0.1595
197.2	0.16
197.3	0.1605
197.4	0.159833
197.5	0.1595
197.6	0.159167
197.7	0.159333
197.8	0.159
197.9	0.16
198	0.159667
198.1	0.159
198.2	0.1585
198.3	0.158833
198.4	0.159
198.5	0.159667
198.6	0.158667
198.7	0.157833
198.8	0.156667
198.9	0.157
199	0.157667
199.1	0.1575
199.2	0.156833
199.3	0.156333
199.4	0.156
199.5	0.155833
199.6	0.155
199.7	0.154833
199.8	0.154333
199.9	0.155333
200	0.154167
[truncated: 14,000 more rows]
