# Supplementary material for: Bayesian inference of kinetic schemes for ion channels by Kalman filtering
Source: eLife journal article supplement (doi:10.7554/elife.62714), 2022-05-04
Supplement: fig4-data11 [file 1_Sim_N_3000_Strom_MW.xlsx]

## Sheet: Tabelle1
0.1	0
0.2	0
0.3	0
0.4	0
0.5	0
0.6	0
0.7	0
0.8	0
0.9	0
1	0
1.1	0
1.2	0
1.3	0
1.4	0
1.5	0
1.6	0
1.7	0
1.8	0
1.9	0
2	0
2.1	0
2.2	0
2.3	0
2.4	0
2.5	0
2.6	0
2.7	0
2.8	0
2.9	0
3	0
3.1	0
3.2	0
3.3	0
3.4	0
3.5	0
3.6	0
3.7	0
3.8	0
3.9	0
4	0
4.1	0
4.2	0
4.3	0
4.4	0
4.5	0
4.6	0
4.7	0
4.8	0
4.9	0
5	0
5.1	0
5.2	0
5.3	0
5.4	0
5.5	0
5.6	0
5.7	0
5.8	0
5.9	0
6	0
6.1	0
6.2	0
6.3	0
6.4	0
6.5	0
6.6	0
6.7	0
6.8	0
6.9	0
7	0
7.1	0
7.2	0
7.3	0
7.4	0
7.5	0
7.6	0
7.7	0
7.8	0
7.9	0
8	0
8.1	0
8.2	0
8.3	0
8.4	0
8.5	0
8.6	0
8.7	0
8.8	0
8.9	0
9	0
9.1	0
9.2	0
9.3	0
9.4	0
9.5	0
9.6	0
9.7	0
9.8	0
9.9	0
10	0
10.1	0
10.2	0
10.3	0
10.4	0
10.5	0
10.6	0
10.7	0
10.8	0
10.9	0
11	0
11.1	0
11.2	0
11.3	0
11.4	0
11.5	0
11.6	0
11.7	0
11.8	0
11.9	0
12	0
12.1	0
12.2	0
12.3	0
12.4	0
12.5	0
12.6	0
12.7	0
12.8	0
12.9	0
13	0
13.1	0
13.2	0
13.3	0
13.4	0
13.5	0
13.6	0
13.7	0
13.8	0
13.9	0
14	0
14.1	0
14.2	0
14.3	0
14.4	0
14.5	0
14.6	0
14.7	0
14.8	0
14.9	0
15	0
15.1	0
15.2	0
15.3	0
15.4	0
15.5	0
15.6	0
15.7	0
15.8	0
15.9	0
16	0
16.1	0
16.2	0
16.3	0
16.4	0
16.5	0
16.6	0
16.7	0
16.8	0
16.9	0
17	0
17.1	0
17.2	0
17.3	0
17.4	0
17.5	0
17.6	0
17.7	0
17.8	0
17.9	0
18	0
18.1	0
18.2	0
18.3	0
18.4	0
18.5	0
18.6	0
18.7	0
18.8	0
18.9	0
19	0
19.1	0
19.2	0
19.3	0
19.4	0
19.5	0
19.6	0
19.7	0
19.8	0
19.9	0
20	0
20.1	0
20.2	0
20.3	0
20.4	0
20.5	0
20.6	0
20.7	0
20.8	0
20.9	0
21	0
21.1	0
21.2	0
21.3	0
21.4	0
21.5	0
21.6	0
21.7	0
21.8	0
21.9	0
22	0
22.1	0
22.2	0
22.3	0
22.4	0
22.5	0
22.6	0
22.7	0
22.8	0
22.9	0
23	0
23.1	0
23.2	0
23.3	0
23.4	0
23.5	0
23.6	0
23.7	0
23.8	0
23.9	0
24	0
24.1	0
24.2	0
24.3	0
24.4	0
24.5	0
24.6	0
24.7	0
24.8	0
24.9	0
25	0
25.1	0
25.2	0
25.3	0
25.4	0
25.5	0
25.6	0
25.7	0
25.8	0
25.9	0
26	0
26.1	0
26.2	0
26.3	0
26.4	0
26.5	0
26.6	0
26.7	0
26.8	0
26.9	0
27	0
27.1	0
27.2	0
27.3	0
27.4	0
27.5	0
27.6	0
27.7	0
27.8	0
27.9	0
28	0
28.1	0
28.2	0
28.3	0
28.4	0
28.5	0
28.6	0
28.7	0
28.8	0
28.9	0
29	0
29.1	0
29.2	0
29.3	0
29.4	0
29.5	0
29.6	0
29.7	0
29.8	0
29.9	0
30	0
30.1	0
30.2	0
30.3	0
30.4	0
30.5	0
30.6	0
30.7	0
30.8	0
30.9	0
31	0
31.1	0
31.2	0
31.3	0
31.4	0
31.5	0
31.6	0
31.7	0
31.8	0
31.9	0
32	0
32.1	0
32.2	0
32.3	0
32.4	0
32.5	0
32.6	0
32.7	0
32.8	0
32.9	0
33	0
33.1	0
33.2	0
33.3	0
33.4	0
33.5	0
33.6	0
33.7	0
33.8	0
33.9	0
34	0
34.1	0
34.2	0
34.3	0
34.4	0
34.5	0
34.6	0
34.7	0
34.8	0
34.9	0
35	0
35.1	0
35.2	0
35.3	0
35.4	0
35.5	0
35.6	0
35.7	0
35.8	0
35.9	0
36	0
36.1	0
36.2	0
36.3	0
36.4	0
36.5	0
36.6	0
36.7	0
36.8	0
36.9	0
37	0
37.1	0
37.2	0
37.3	0
37.4	0
37.5	0
37.6	0
37.7	0
37.8	0
37.9	0
38	0
38.1	0
38.2	0
38.3	0
38.4	0
38.5	0
38.6	0
38.7	0
38.8	0
38.9	0
39	0
39.1	0
39.2	0
39.3	0
39.4	0
39.5	0
39.6	0
39.7	0
39.8	0
39.9	0
40	0
40.1	0
40.2	0
40.3	0
40.4	0
40.5	0
40.6	0
40.7	0
40.8	0
40.9	0
41	0
41.1	0
41.2	0
41.3	0
41.4	0
41.5	0
41.6	0
41.7	0
41.8	0
41.9	0
42	0
42.1	0
42.2	0
42.3	0
42.4	0
42.5	0
42.6	0
42.7	0
42.8	0
42.9	0
43	0
43.1	0
43.2	0
43.3	0
43.4	0
43.5	0
43.6	0
43.7	0
43.8	0
43.9	0
44	0
44.1	0
44.2	0
44.3	0
44.4	0
44.5	0
44.6	0
44.7	0
44.8	0
44.9	0
45	0
45.1	0
45.2	0
45.3	0
45.4	0
45.5	0
45.6	0
45.7	0
45.8	0
45.9	0
46	0
46.1	0
46.2	0
46.3	0
46.4	0
46.5	0
46.6	0
46.7	0
46.8	0
46.9	0
47	0
47.1	0
47.2	0
47.3	0
47.4	0
47.5	0
47.6	0
47.7	0
47.8	0
47.9	0
48	0
48.1	0
48.2	0
48.3	0
48.4	0
48.5	0
48.6	0
48.7	0
48.8	0
48.9	0
49	0
49.1	0
49.2	0
49.3	0
49.4	0
49.5	0
49.6	0
49.7	0
49.8	0
49.9	0
50	0
50.1	0
50.2	0
50.3	0
50.4	0
50.5	0
50.6	0
50.7	0
50.8	0
50.9	0
51	0
51.1	0
51.2	0
51.3	0
51.4	0
51.5	0
51.6	0
51.7	0
51.8	0
51.9	0
52	0
52.1	0
52.2	0
52.3	0
52.4	0
52.5	0
52.6	0
52.7	0
52.8	0
52.9	0
53	0
53.1	0
53.2	0
53.3	0
53.4	0
53.5	0
53.6	0
53.7	0
53.8	0
53.9	0
54	0
54.1	0
54.2	0
54.3	0
54.4	0
54.5	0
54.6	0
54.7	0
54.8	0
54.9	0
55	0
55.1	0
55.2	0
55.3	0
55.4	0
55.5	0
55.6	0
55.7	0
55.8	0
55.9	0
56	0
56.1	0
56.2	0
56.3	0
56.4	0
56.5	0
56.6	0
56.7	0
56.8	0
56.9	0
57	0
57.1	0
57.2	0
57.3	0
57.4	0
57.5	0
57.6	0
57.7	0
57.8	0
57.9	0
58	0
58.1	0
58.2	0
58.3	0
58.4	0
58.5	0
58.6	0
58.7	0
58.8	0
58.9	0
59	0
59.1	0
59.2	0
59.3	0
59.4	0
59.5	0
59.6	0
59.7	0
59.8	0
59.9	0
60	0
60.1	0
60.2	0
60.3	0
60.4	0
60.5	0
60.6	0
60.7	0
60.8	0
60.9	0
61	0
61.1	0
61.2	0
61.3	0
61.4	0
61.5	0
61.6	0
61.7	0
61.8	0
61.9	0
62	0
62.1	0
62.2	0
62.3	0
62.4	0
62.5	0
62.6	0
62.7	0
62.8	0
62.9	0
63	0
63.1	0
63.2	0
63.3	0
63.4	0
63.5	0
63.6	0
63.7	0
63.8	0
63.9	0
64	0
64.1	0
64.2	0
64.3	0
64.4	0
64.5	0
64.6	0
64.7	0
64.8	0
64.9	0
65	0
65.1	0
65.2	0
65.3	0
65.4	0
65.5	0
65.6	0
65.7	0
65.8	0
65.9	0
66	0
66.1	0
66.2	0
66.3	0
66.4	0
66.5	0
66.6	0
66.7	0
66.8	0
66.9	0
67	0
67.1	0
67.2	0
67.3	0
67.4	0
67.5	0
67.6	0
67.7	0
67.8	0
67.9	0
68	0
68.1	0
68.2	0
68.3	0
68.4	0
68.5	0
68.6	0
68.7	0
68.8	0
68.9	0
69	0
69.1	0
69.2	0
69.3	0
69.4	0
69.5	0
69.6	0
69.7	0
69.8	0
69.9	0
70	0
70.1	0
70.2	0
70.3	0
70.4	0
70.5	0
70.6	0
70.7	0
70.8	0
70.9	0
71	0
71.1	0
71.2	0
71.3	0
71.4	0
71.5	0
71.6	0
71.7	0
71.8	0
71.9	0
72	0
72.1	0
72.2	0
72.3	0
72.4	0
72.5	0
72.6	0
72.7	0
72.8	0
72.9	0
73	0
73.1	0
73.2	0
73.3	0
73.4	0
73.5	0
73.6	0
73.7	0
73.8	0
73.9	0
74	0
74.1	0
74.2	0
74.3	0
74.4	0
74.5	0
74.6	0
74.7	0
74.8	0
74.9	0
75	0
75.1	0
75.2	0
75.3	0
75.4	0
75.5	0
75.6	0
75.7	0
75.8	0
75.9	0
76	0
76.1	0
76.2	0
76.3	0
76.4	0
76.5	0
76.6	0
76.7	0
76.8	0
76.9	0
77	0
77.1	0
77.2	0
77.3	0
77.4	0
77.5	0
77.6	0
77.7	0
77.8	0
77.9	0
78	0
78.1	0
78.2	0
78.3	0
78.4	0
78.5	0
78.6	0
78.7	0
78.8	0
78.9	0
79	0
79.1	0
79.2	0
79.3	0
79.4	0
79.5	0
79.6	0
79.7	0
79.8	0
79.9	0
80	0
80.1	0
80.2	0
80.3	0
80.4	0
80.5	0
80.6	0
80.7	0
80.8	0
80.9	0
81	0
81.1	0
81.2	0
81.3	0
81.4	0
81.5	0
81.6	0
81.7	0
81.8	0
81.9	0
82	0
82.1	0
82.2	0
82.3	0
82.4	0
82.5	0
82.6	0
82.7	0
82.8	0
82.9	0
83	0
83.1	0
83.2	0
83.3	0
83.4	0
83.5	0
83.6	0
83.7	0
83.8	0
83.9	0
84	0
84.1	0
84.2	0
84.3	0
84.4	0
84.5	0
84.6	0
84.7	0
84.8	0
84.9	0
85	0
85.1	0
85.2	0
85.3	0
85.4	0
85.5	0
85.6	0
85.7	0
85.8	0
85.9	0
86	0
86.1	0
86.2	0
86.3	0
86.4	0
86.5	0
86.6	0
86.7	0
86.8	0
86.9	0
87	0
87.1	0
87.2	0
87.3	0
87.4	0
87.5	0
87.6	0
87.7	0
87.8	0
87.9	0
88	0
88.1	0
88.2	0
88.3	0
88.4	0
88.5	0
88.6	0
88.7	0
88.8	0
88.9	0
89	0
89.1	0
89.2	0
89.3	0
89.4	0
89.5	0
89.6	0
89.7	0
89.8	0
89.9	0
90	0
90.1	0
90.2	0
90.3	0
90.4	0
90.5	0
90.6	0
90.7	0
90.8	0
90.9	0
91	0
91.1	0
91.2	0
91.3	0
91.4	0
91.5	0
91.6	0
91.7	0
91.8	0
91.9	0
92	0
92.1	0
92.2	0
92.3	0
92.4	0
92.5	0
92.6	0
92.7	0
92.8	0
92.9	0
93	0
93.1	0
93.2	0
93.3	0
93.4	0
93.5	0
93.6	0
93.7	0
93.8	0
93.9	0
94	0
94.1	0
94.2	0
94.3	0
94.4	0
94.5	0
94.6	0
94.7	0
94.8	0
94.9	0
95	0
95.1	0
95.2	0
95.3	0
95.4	0
95.5	0
95.6	0
95.7	0
95.8	0
95.9	0
96	0
96.1	0
96.2	0
96.3	0
96.4	0
96.5	0
96.6	0
96.7	0
96.8	0
96.9	0
97	0
97.1	0
97.2	0
97.3	0
97.4	0
97.5	0
97.6	0
97.7	0
97.8	0
97.9	0
98	0
98.1	0
98.2	0
98.3	0
98.4	0
98.5	0
98.6	0
98.7	0
98.8	0
98.9	0
99	0
99.1	0
99.2	0
99.3	0
99.4	0
99.5	0
99.6	0
99.7	0
99.8	0
99.9	0
100	0
100.1	0
100.2	0
100.3	0
100.4	0
100.5	0
100.6	0
100.7	0
100.8	0
100.9	0
101	0
101.1	0
101.2	0
101.3	0
101.4	0
101.5	0
101.6	0
101.7	0
101.8	0
101.9	0
102	0
102.1	0
102.2	0
102.3	0
102.4	0
102.5	0
102.6	0
102.7	0
102.8	0
102.9	0
103	0
103.1	0
103.2	0
103.3	0
103.4	0
103.5	0
103.6	0
103.7	0
103.8	0
103.9	0
104	0
104.1	0
104.2	0
104.3	0
104.4	0
104.5	0
104.6	0.000333333
104.7	0.000333333
104.8	0.000333333
104.9	0.000333333
105	0.000333333
105.1	0.000333333
105.2	0.000333333
105.3	0.000333333
105.4	0.000333333
105.5	0.000333333
105.6	0.000333333
105.7	0.000333333
105.8	0.000333333
105.9	0.000333333
106	0.000333333
106.1	0.000333333
106.2	0.000333333
106.3	0.000333333
106.4	0.000333333
106.5	0.000333333
106.6	0.000333333
106.7	0.000333333
106.8	0.000333333
106.9	0.000333333
107	0.000333333
107.1	0.000333333
107.2	0.000333333
107.3	0.000333333
107.4	0.000333333
107.5	0.000333333
107.6	0.000333333
107.7	0.000333333
107.8	0.000333333
107.9	0.000333333
108	0.000333333
108.1	0.000333333
108.2	0.000333333
108.3	0.000666667
108.4	0.000666667
108.5	0.000666667
108.6	0.000666667
108.7	0.000666667
108.8	0.000666667
108.9	0.000666667
109	0.000666667
109.1	0.000666667
109.2	0.000666667
109.3	0.000666667
109.4	0.000666667
109.5	0.000666667
109.6	0.000666667
109.7	0.000666667
109.8	0.000666667
109.9	0.000666667
110	0.000666667
110.1	0.000666667
110.2	0.000666667
110.3	0.000666667
110.4	0.000666667
110.5	0.000666667
110.6	0.000666667
110.7	0.000666667
110.8	0.000666667
110.9	0.000666667
111	0.000666667
111.1	0.000666667
111.2	0.000666667
111.3	0.000666667
111.4	0.000666667
111.5	0.000666667
111.6	0.000666667
111.7	0.000666667
111.8	0.000666667
111.9	0.000666667
112	0.000666667
112.1	0.000666667
112.2	0.000666667
112.3	0.000666667
112.4	0.000666667
112.5	0.000666667
112.6	0.000666667
112.7	0.000666667
112.8	0.000666667
112.9	0.000666667
113	0.000666667
113.1	0.000666667
113.2	0.000666667
113.3	0.000666667
113.4	0.000666667
113.5	0.001
113.6	0.001
113.7	0.001
113.8	0.001
113.9	0.001
114	0.001
114.1	0.001
114.2	0.001
114.3	0.001
114.4	0.001
114.5	0.001
114.6	0.001
114.7	0.001
114.8	0.001
114.9	0.001
115	0.001
115.1	0.001
115.2	0.001
115.3	0.001
115.4	0.001
115.5	0.001
115.6	0.001
115.7	0.001
115.8	0.001
115.9	0.001
116	0.001
116.1	0.001
116.2	0.001
116.3	0.001
116.4	0.00133333
116.5	0.00133333
116.6	0.00133333
116.7	0.00133333
116.8	0.00133333
116.9	0.00133333
117	0.00133333
117.1	0.00133333
117.2	0.00133333
117.3	0.00133333
117.4	0.00133333
117.5	0.00133333
117.6	0.00133333
117.7	0.00133333
117.8	0.00133333
117.9	0.00133333
118	0.00133333
118.1	0.00133333
118.2	0.00133333
118.3	0.00133333
118.4	0.00133333
118.5	0.00133333
118.6	0.00133333
118.7	0.00133333
118.8	0.00133333
118.9	0.00133333
119	0.00133333
119.1	0.00133333
119.2	0.00133333
119.3	0.00133333
119.4	0.00133333
119.5	0.00133333
119.6	0.00133333
119.7	0.00133333
119.8	0.00133333
119.9	0.00133333
120	0.00133333
120.1	0.00133333
120.2	0.00133333
120.3	0.00133333
120.4	0.00133333
120.5	0.00133333
120.6	0.00133333
120.7	0.00166667
120.8	0.00166667
120.9	0.00166667
121	0.00166667
121.1	0.00166667
121.2	0.00166667
121.3	0.00166667
121.4	0.00166667
121.5	0.00166667
121.6	0.00166667
121.7	0.00166667
121.8	0.00166667
121.9	0.00166667
122	0.00166667
122.1	0.00166667
122.2	0.00166667
122.3	0.00166667
122.4	0.00166667
122.5	0.00166667
122.6	0.00166667
122.7	0.00166667
122.8	0.00166667
122.9	0.00166667
123	0.00166667
123.1	0.00166667
123.2	0.00166667
123.3	0.00166667
123.4	0.00166667
123.5	0.002
123.6	0.002
123.7	0.002
123.8	0.002
123.9	0.002
124	0.002
124.1	0.00233333
124.2	0.00233333
124.3	0.00233333
124.4	0.00233333
124.5	0.00233333
124.6	0.00233333
124.7	0.00233333
124.8	0.00233333
124.9	0.00233333
125	0.00233333
125.1	0.00233333
125.2	0.00233333
125.3	0.00233333
125.4	0.00233333
125.5	0.00233333
125.6	0.00233333
125.7	0.00233333
125.8	0.00233333
125.9	0.00233333
126	0.00233333
126.1	0.00233333
126.2	0.00233333
126.3	0.00233333
126.4	0.00233333
126.5	0.00233333
126.6	0.00233333
126.7	0.00233333
126.8	0.00233333
126.9	0.00233333
127	0.00233333
127.1	0.00233333
127.2	0.00233333
127.3	0.00233333
127.4	0.00233333
127.5	0.00233333
127.6	0.00233333
127.7	0.00266667
127.8	0.00266667
127.9	0.00266667
128	0.00266667
128.1	0.003
128.2	0.003
128.3	0.003
128.4	0.003
128.5	0.003
128.6	0.003
128.7	0.003
128.8	0.003
128.9	0.003
129	0.003
129.1	0.003
129.2	0.003
129.3	0.003
129.4	0.003
129.5	0.003
129.6	0.003
129.7	0.00333333
129.8	0.00333333
129.9	0.00333333
130	0.003
130.1	0.003
130.2	0.003
130.3	0.003
130.4	0.003
130.5	0.003
130.6	0.003
130.7	0.003
130.8	0.003
130.9	0.00333333
131	0.00333333
131.1	0.00333333
131.2	0.00333333
131.3	0.00333333
131.4	0.00333333
131.5	0.00333333
131.6	0.00333333
131.7	0.00333333
131.8	0.003
131.9	0.00333333
132	0.00333333
132.1	0.00333333
132.2	0.00333333
132.3	0.00333333
132.4	0.00333333
132.5	0.00333333
132.6	0.00333333
132.7	0.00333333
132.8	0.00333333
132.9	0.00333333
133	0.00333333
133.1	0.00333333
133.2	0.00366667
133.3	0.00366667
133.4	0.00366667
133.5	0.00366667
133.6	0.00366667
133.7	0.00366667
133.8	0.00366667
133.9	0.00366667
134	0.00366667
134.1	0.00366667
134.2	0.00366667
134.3	0.00366667
134.4	0.00366667
134.5	0.00366667
134.6	0.00366667
134.7	0.00366667
134.8	0.00366667
134.9	0.00366667
135	0.00366667
135.1	0.00366667
135.2	0.00366667
135.3	0.00366667
135.4	0.004
135.5	0.004
135.6	0.004
135.7	0.004
135.8	0.004
135.9	0.004
136	0.004
136.1	0.004
136.2	0.004
136.3	0.004
136.4	0.004
136.5	0.004
136.6	0.004
136.7	0.004
136.8	0.004
136.9	0.004
137	0.004
137.1	0.004
137.2	0.004
137.3	0.004
137.4	0.004
137.5	0.004
137.6	0.00366667
137.7	0.00366667
137.8	0.00366667
137.9	0.00366667
138	0.004
138.1	0.004
138.2	0.004
138.3	0.004
138.4	0.004
138.5	0.004
138.6	0.004
138.7	0.004
138.8	0.004
138.9	0.004
139	0.004
139.1	0.00433333
139.2	0.00433333
139.3	0.00433333
139.4	0.00433333
139.5	0.00466667
139.6	0.00466667
139.7	0.00433333
139.8	0.00433333
139.9	0.00433333
140	0.00433333
140.1	0.00433333
140.2	0.00433333
140.3	0.00433333
140.4	0.00433333
140.5	0.00433333
140.6	0.00433333
140.7	0.00433333
140.8	0.00466667
140.9	0.00466667
141	0.00466667
141.1	0.00466667
141.2	0.00466667
141.3	0.00466667
141.4	0.00466667
141.5	0.005
141.6	0.005
141.7	0.005
141.8	0.005
141.9	0.005
142	0.005
142.1	0.005
142.2	0.005
142.3	0.00533333
142.4	0.00533333
142.5	0.00566667
142.6	0.00566667
142.7	0.00566667
142.8	0.00566667
142.9	0.00566667
143	0.006
143.1	0.006
143.2	0.006
143.3	0.006
143.4	0.006
143.5	0.00633333
143.6	0.00666667
143.7	0.00666667
143.8	0.00666667
143.9	0.00666667
144	0.00666667
144.1	0.00666667
144.2	0.00666667
144.3	0.00666667
144.4	0.00666667
144.5	0.00666667
144.6	0.00666667
144.7	0.00666667
144.8	0.00666667
144.9	0.00666667
145	0.00666667
145.1	0.00666667
145.2	0.00666667
145.3	0.00666667
145.4	0.00666667
145.5	0.00666667
145.6	0.00666667
145.7	0.007
145.8	0.007
145.9	0.007
146	0.007
146.1	0.007
146.2	0.007
146.3	0.00733333
146.4	0.00733333
146.5	0.00733333
146.6	0.00733333
146.7	0.00733333
146.8	0.00733333
146.9	0.00733333
147	0.00733333
147.1	0.00766667
147.2	0.00766667
147.3	0.00766667
147.4	0.00766667
147.5	0.00766667
147.6	0.00766667
147.7	0.00766667
147.8	0.00766667
147.9	0.00766667
148	0.00766667
148.1	0.00766667
148.2	0.00766667
148.3	0.00766667
148.4	0.00766667
148.5	0.00766667
148.6	0.00766667
148.7	0.00766667
148.8	0.00766667
148.9	0.00766667
149	0.00766667
149.1	0.00766667
149.2	0.00766667
149.3	0.00766667
149.4	0.00766667
149.5	0.00766667
149.6	0.00766667
149.7	0.00766667
149.8	0.00766667
149.9	0.00766667
150	0.00766667
150.1	0.00766667
150.2	0.00766667
150.3	0.00766667
150.4	0.00733333
150.5	0.00733333
150.6	0.00733333
150.7	0.00733333
150.8	0.00733333
150.9	0.00733333
151	0.00733333
151.1	0.00733333
151.2	0.00733333
151.3	0.00733333
151.4	0.00733333
151.5	0.00733333
151.6	0.00733333
151.7	0.00733333
151.8	0.00733333
151.9	0.00733333
152	0.00733333
152.1	0.00733333
152.2	0.00733333
152.3	0.00733333
152.4	0.00733333
152.5	0.00733333
152.6	0.00733333
152.7	0.00733333
152.8	0.00733333
152.9	0.00733333
153	0.007
153.1	0.007
153.2	0.007
153.3	0.007
153.4	0.007
153.5	0.007
153.6	0.007
153.7	0.007
153.8	0.007
153.9	0.007
154	0.007
154.1	0.007
154.2	0.007
154.3	0.007
154.4	0.00733333
154.5	0.00733333
154.6	0.00733333
154.7	0.00733333
154.8	0.00733333
154.9	0.00766667
155	0.00766667
155.1	0.00766667
155.2	0.00766667
155.3	0.00766667
155.4	0.00766667
155.5	0.00766667
155.6	0.00766667
155.7	0.00766667
155.8	0.00766667
155.9	0.00766667
156	0.00766667
156.1	0.00766667
156.2	0.00766667
156.3	0.00766667
156.4	0.00766667
156.5	0.00766667
156.6	0.00733333
156.7	0.00766667
156.8	0.00766667
156.9	0.00766667
157	0.00766667
157.1	0.00766667
157.2	0.00766667
157.3	0.00766667
157.4	0.00766667
157.5	0.00766667
157.6	0.00766667
157.7	0.00766667
157.8	0.00766667
157.9	0.00766667
158	0.00766667
158.1	0.00766667
158.2	0.00766667
158.3	0.00733333
158.4	0.00733333
158.5	0.00733333
158.6	0.00733333
158.7	0.00733333
158.8	0.00733333
158.9	0.00733333
159	0.00733333
159.1	0.00733333
159.2	0.00733333
159.3	0.00733333
159.4	0.00733333
159.5	0.00733333
159.6	0.00733333
159.7	0.00766667
159.8	0.00766667
159.9	0.00766667
160	0.00766667
160.1	0.00766667
160.2	0.00766667
160.3	0.00766667
160.4	0.00766667
160.5	0.00766667
160.6	0.00766667
160.7	0.00766667
160.8	0.00766667
160.9	0.00766667
161	0.00766667
161.1	0.00766667
161.2	0.00766667
161.3	0.00766667
161.4	0.00766667
161.5	0.00766667
161.6	0.00766667
161.7	0.00766667
161.8	0.00766667
161.9	0.00766667
162	0.00766667
162.1	0.00766667
162.2	0.008
162.3	0.008
162.4	0.008
162.5	0.008
162.6	0.00833333
162.7	0.00833333
162.8	0.00833333
162.9	0.00833333
163	0.00833333
163.1	0.00833333
163.2	0.00833333
163.3	0.00833333
163.4	0.00833333
163.5	0.00833333
163.6	0.00833333
163.7	0.00833333
163.8	0.00866667
163.9	0.00866667
164	0.00866667
164.1	0.009
164.2	0.009
164.3	0.00866667
164.4	0.00866667
164.5	0.00866667
164.6	0.00866667
164.7	0.00866667
164.8	0.00866667
164.9	0.00866667
165	0.00866667
165.1	0.00866667
165.2	0.00866667
165.3	0.00866667
165.4	0.00866667
165.5	0.00866667
165.6	0.00866667
165.7	0.00866667
165.8	0.00866667
165.9	0.00866667
166	0.00866667
166.1	0.00866667
166.2	0.00866667
166.3	0.00866667
166.4	0.00866667
166.5	0.00866667
166.6	0.00866667
166.7	0.00866667
166.8	0.00866667
166.9	0.00866667
167	0.00866667
167.1	0.00866667
167.2	0.00866667
167.3	0.00866667
167.4	0.00866667
167.5	0.00866667
167.6	0.00866667
167.7	0.00866667
167.8	0.00866667
167.9	0.00866667
168	0.00866667
168.1	0.00866667
168.2	0.00866667
168.3	0.00866667
168.4	0.00866667
168.5	0.00866667
168.6	0.00866667
168.7	0.00866667
168.8	0.00866667
168.9	0.00866667
169	0.00866667
169.1	0.00866667
169.2	0.00866667
169.3	0.00866667
169.4	0.009
169.5	0.00933333
169.6	0.00933333
169.7	0.00933333
169.8	0.00933333
169.9	0.00933333
170	0.00966667
170.1	0.00966667
170.2	0.00966667
170.3	0.00966667
170.4	0.00966667
170.5	0.00966667
170.6	0.00966667
170.7	0.00966667
170.8	0.00966667
170.9	0.00966667
171	0.00966667
171.1	0.00966667
171.2	0.00966667
171.3	0.00966667
171.4	0.00966667
171.5	0.00966667
171.6	0.00966667
171.7	0.00966667
171.8	0.00966667
171.9	0.00966667
172	0.00966667
172.1	0.00966667
172.2	0.00966667
172.3	0.00966667
172.4	0.00966667
172.5	0.00966667
172.6	0.00966667
172.7	0.00966667
172.8	0.00966667
172.9	0.01
173	0.01
173.1	0.01
173.2	0.01
173.3	0.01
173.4	0.01
173.5	0.01
173.6	0.01
173.7	0.00966667
173.8	0.00966667
173.9	0.01
174	0.01
174.1	0.0103333
174.2	0.0103333
174.3	0.0103333
174.4	0.0103333
174.5	0.0103333
174.6	0.0103333
174.7	0.0103333
174.8	0.0103333
174.9	0.0103333
175	0.0103333
175.1	0.0103333
175.2	0.0103333
175.3	0.0103333
175.4	0.0103333
175.5	0.0103333
175.6	0.0103333
175.7	0.0103333
175.8	0.0103333
175.9	0.0103333
176	0.0103333
176.1	0.0103333
176.2	0.0103333
176.3	0.0103333
176.4	0.0103333
176.5	0.01
176.6	0.01
176.7	0.0103333
176.8	0.0103333
176.9	0.0103333
177	0.0103333
177.1	0.01
177.2	0.01
177.3	0.01
177.4	0.01
177.5	0.01
177.6	0.01
177.7	0.01
177.8	0.01
177.9	0.01
178	0.01
178.1	0.01
178.2	0.01
178.3	0.01
178.4	0.01
178.5	0.01
178.6	0.01
178.7	0.01
178.8	0.01
178.9	0.01
179	0.01
179.1	0.00966667
179.2	0.00966667
179.3	0.00966667
179.4	0.00966667
179.5	0.00966667
179.6	0.00933333
179.7	0.00933333
179.8	0.00933333
179.9	0.00933333
180	0.00933333
180.1	0.009
180.2	0.009
180.3	0.009
180.4	0.009
180.5	0.009
180.6	0.009
180.7	0.009
180.8	0.009
180.9	0.009
181	0.009
181.1	0.009
181.2	0.009
181.3	0.009
181.4	0.009
181.5	0.009
181.6	0.00933333
181.7	0.00933333
181.8	0.00933333
181.9	0.00933333
182	0.00933333
182.1	0.00933333
182.2	0.00966667
182.3	0.00966667
182.4	0.00966667
182.5	0.00966667
182.6	0.01
182.7	0.01
182.8	0.01
182.9	0.01
183	0.01
183.1	0.01
183.2	0.01
183.3	0.01
183.4	0.01
183.5	0.01
183.6	0.01
183.7	0.01
183.8	0.01
183.9	0.0103333
184	0.0103333
184.1	0.0103333
184.2	0.0103333
184.3	0.0103333
184.4	0.0103333
184.5	0.0103333
184.6	0.0106667
184.7	0.0106667
184.8	0.0106667
184.9	0.0106667
185	0.0106667
185.1	0.0106667
185.2	0.0106667
185.3	0.0106667
185.4	0.0106667
185.5	0.0106667
185.6	0.0106667
185.7	0.0106667
185.8	0.0106667
185.9	0.0106667
186	0.0106667
186.1	0.0106667
186.2	0.0106667
186.3	0.0106667
186.4	0.0106667
186.5	0.0106667
186.6	0.0106667
186.7	0.0106667
186.8	0.0106667
186.9	0.011
187	0.011
187.1	0.011
187.2	0.011
187.3	0.011
187.4	0.0113333
187.5	0.0113333
187.6	0.0113333
187.7	0.0113333
187.8	0.0113333
187.9	0.0113333
188	0.0113333
188.1	0.0113333
188.2	0.0113333
188.3	0.0113333
188.4	0.0113333
188.5	0.0113333
188.6	0.0113333
188.7	0.0113333
188.8	0.0113333
188.9	0.0113333
189	0.0113333
189.1	0.0113333
189.2	0.0113333
189.3	0.0113333
189.4	0.011
189.5	0.011
189.6	0.011
189.7	0.0113333
189.8	0.0113333
189.9	0.0113333
190	0.0113333
190.1	0.0113333
190.2	0.0116667
190.3	0.0116667
190.4	0.0116667
190.5	0.0116667
190.6	0.0116667
190.7	0.0116667
190.8	0.0116667
190.9	0.012
191	0.012
191.1	0.012
191.2	0.012
191.3	0.012
191.4	0.012
191.5	0.012
191.6	0.012
191.7	0.012
191.8	0.0116667
191.9	0.0116667
192	0.012
192.1	0.012
192.2	0.012
192.3	0.012
192.4	0.012
192.5	0.012
192.6	0.012
192.7	0.012
192.8	0.0123333
192.9	0.0123333
193	0.0123333
193.1	0.0123333
193.2	0.0123333
193.3	0.0123333
193.4	0.0123333
193.5	0.013
193.6	0.013
193.7	0.013
193.8	0.013
193.9	0.013
194	0.013
194.1	0.013
194.2	0.013
194.3	0.013
194.4	0.013
194.5	0.013
194.6	0.013
194.7	0.013
194.8	0.013
194.9	0.013
195	0.013
195.1	0.013
195.2	0.013
195.3	0.013
195.4	0.013
195.5	0.013
195.6	0.013
195.7	0.013
195.8	0.0133333
195.9	0.0133333
196	0.013
196.1	0.013
196.2	0.013
196.3	0.013
196.4	0.013
196.5	0.0133333
196.6	0.0133333
196.7	0.0133333
196.8	0.0133333
196.9	0.0133333
197	0.0133333
197.1	0.0133333
197.2	0.0133333
197.3	0.0133333
197.4	0.0133333
197.5	0.0133333
197.6	0.0133333
197.7	0.013
197.8	0.013
197.9	0.013
198	0.0133333
198.1	0.0133333
198.2	0.0133333
198.3	0.0133333
198.4	0.0133333
198.5	0.0133333
198.6	0.0133333
198.7	0.0133333
198.8	0.0133333
198.9	0.0133333
199	0.0133333
199.1	0.0133333
199.2	0.0133333
199.3	0.0133333
199.4	0.0133333
199.5	0.0133333
199.6	0.0133333
199.7	0.0133333
199.8	0.0133333
199.9	0.0133333
200	0.0133333
[truncated: 14,000 more rows]
