# Supplementary material for: Bayesian inference of kinetic schemes for ion channels by Kalman filtering
Source: eLife journal article supplement (doi:10.7554/elife.62714), 2022-05-04
Supplement: fig4-data11 [file 1_Sim_N_4000_Fluor_MW.xlsx]

## Sheet: Tabelle1
0.1	0
0.2	0
0.3	0
0.4	0
0.5	0
0.6	0
0.7	0
0.8	0
0.9	0
1	0
1.1	0
1.2	0
1.3	0
1.4	0
1.5	0
1.6	0
1.7	0
1.8	0
1.9	0
2	0
2.1	0
2.2	0
2.3	0
2.4	0
2.5	0
2.6	0
2.7	0
2.8	0
2.9	0
3	0
3.1	0
3.2	0
3.3	0
3.4	0
3.5	0
3.6	0
3.7	0
3.8	0
3.9	0
4	0
4.1	0
4.2	0
4.3	0
4.4	0
4.5	0
4.6	0
4.7	0
4.8	0
4.9	0
5	0
5.1	0
5.2	0
5.3	0
5.4	0
5.5	0
5.6	0
5.7	0
5.8	0
5.9	0
6	0
6.1	0
6.2	0
6.3	0
6.4	0
6.5	0
6.6	0
6.7	0
6.8	0
6.9	0
7	0
7.1	0
7.2	0
7.3	0
7.4	0
7.5	0
7.6	0
7.7	0
7.8	0
7.9	0
8	0
8.1	0
8.2	0
8.3	0
8.4	0
8.5	0
8.6	0
8.7	0
8.8	0
8.9	0
9	0
9.1	0
9.2	0
9.3	0
9.4	0
9.5	0
9.6	0
9.7	0
9.8	0
9.9	0
10	0
10.1	0
10.2	0
10.3	0
10.4	0
10.5	0
10.6	0
10.7	0
10.8	0
10.9	0
11	0
11.1	0
11.2	0
11.3	0
11.4	0
11.5	0
11.6	0
11.7	0
11.8	0
11.9	0
12	0
12.1	0
12.2	0
12.3	0
12.4	0
12.5	0
12.6	0
12.7	0
12.8	0
12.9	0
13	0
13.1	0
13.2	0
13.3	0
13.4	0
13.5	0
13.6	0
13.7	0
13.8	0
13.9	0
14	0
14.1	0
14.2	0
14.3	0
14.4	0
14.5	0
14.6	0
14.7	0
14.8	0
14.9	0
15	0
15.1	0
15.2	0
15.3	0
15.4	0
15.5	0
15.6	0
15.7	0
15.8	0
15.9	0
16	0
16.1	0
16.2	0
16.3	0
16.4	0
16.5	0
16.6	0
16.7	0
16.8	0
16.9	0
17	0
17.1	0
17.2	0
17.3	0
17.4	0
17.5	0
17.6	0
17.7	0
17.8	0
17.9	0
18	0
18.1	0
18.2	0
18.3	0
18.4	0
18.5	0
18.6	0
18.7	0
18.8	0
18.9	0
19	0
19.1	0
19.2	0
19.3	0
19.4	0
19.5	0
19.6	0
19.7	0
19.8	0
19.9	0
20	0
20.1	0
20.2	0
20.3	0
20.4	0
20.5	0
20.6	0
20.7	0
20.8	0
20.9	0
21	0
21.1	0
21.2	0
21.3	0
21.4	0
21.5	0
21.6	0
21.7	0
21.8	0
21.9	0
22	0
22.1	0
22.2	0
22.3	0
22.4	0
22.5	0
22.6	0
22.7	0
22.8	0
22.9	0
23	0
23.1	0
23.2	0
23.3	0
23.4	0
23.5	0
23.6	0
23.7	0
23.8	0
23.9	0
24	0
24.1	0
24.2	0
24.3	0
24.4	0
24.5	0
24.6	0
24.7	0
24.8	0
24.9	0
25	0
25.1	0
25.2	0
25.3	0
25.4	0
25.5	0
25.6	0
25.7	0
25.8	0
25.9	0
26	0
26.1	0
26.2	0
26.3	0
26.4	0
26.5	0
26.6	0
26.7	0
26.8	0
26.9	0
27	0
27.1	0
27.2	0
27.3	0
27.4	0
27.5	0
27.6	0
27.7	0
27.8	0
27.9	0
28	0
28.1	0
28.2	0
28.3	0
28.4	0
28.5	0
28.6	0
28.7	0
28.8	0
28.9	0
29	0
29.1	0
29.2	0
29.3	0
29.4	0
29.5	0
29.6	0
29.7	0
29.8	0
29.9	0
30	0
30.1	0
30.2	0
30.3	0
30.4	0
30.5	0
30.6	0
30.7	0
30.8	0
30.9	0
31	0
31.1	0
31.2	0
31.3	0
31.4	0
31.5	0
31.6	0
31.7	0
31.8	0
31.9	0
32	0
32.1	0
32.2	0
32.3	0
32.4	0
32.5	0
32.6	0
32.7	0
32.8	0
32.9	0
33	0
33.1	0
33.2	0
33.3	0
33.4	0
33.5	0
33.6	0
33.7	0
33.8	0
33.9	0
34	0
34.1	0
34.2	0
34.3	0
34.4	0
34.5	0
34.6	0
34.7	0
34.8	0
34.9	0
35	0
35.1	0
35.2	0
35.3	0
35.4	0
35.5	0
35.6	0
35.7	0
35.8	0
35.9	0
36	0
36.1	0
36.2	0
36.3	0
36.4	0
36.5	0
36.6	0
36.7	0
36.8	0
36.9	0
37	0
37.1	0
37.2	0
37.3	0
37.4	0
37.5	0
37.6	0
37.7	0
37.8	0
37.9	0
38	0
38.1	0
38.2	0
38.3	0
38.4	0
38.5	0
38.6	0
38.7	0
38.8	0
38.9	0
39	0
39.1	0
39.2	0
39.3	0
39.4	0
39.5	0
39.6	0
39.7	0
39.8	0
39.9	0
40	0
40.1	0
40.2	0
40.3	0
40.4	0
40.5	0
40.6	0
40.7	0
40.8	0
40.9	0
41	0
41.1	0
41.2	0
41.3	0
41.4	0
41.5	0
41.6	0
41.7	0
41.8	0
41.9	0
42	0
42.1	0
42.2	0
42.3	0
42.4	0
42.5	0
42.6	0
42.7	0
42.8	0
42.9	0
43	0
43.1	0
43.2	0
43.3	0
43.4	0
43.5	0
43.6	0
43.7	0
43.8	0
43.9	0
44	0
44.1	0
44.2	0
44.3	0
44.4	0
44.5	0
44.6	0
44.7	0
44.8	0
44.9	0
45	0
45.1	0
45.2	0
45.3	0
45.4	0
45.5	0
45.6	0
45.7	0
45.8	0
45.9	0
46	0
46.1	0
46.2	0
46.3	0
46.4	0
46.5	0
46.6	0
46.7	0
46.8	0
46.9	0
47	0
47.1	0
47.2	0
47.3	0
47.4	0
47.5	0
47.6	0
47.7	0
47.8	0
47.9	0
48	0
48.1	0
48.2	0
48.3	0
48.4	0
48.5	0
48.6	0
48.7	0
48.8	0
48.9	0
49	0
49.1	0
49.2	0
49.3	0
49.4	0
49.5	0
49.6	0
49.7	0
49.8	0
49.9	0
50	0
50.1	0
50.2	0
50.3	0
50.4	0
50.5	0
50.6	0
50.7	0
50.8	0
50.9	0
51	0
51.1	0
51.2	0
51.3	0
51.4	0
51.5	0
51.6	0
51.7	0
51.8	0
51.9	0
52	0
52.1	0
52.2	0
52.3	0
52.4	0
52.5	0
52.6	0
52.7	0
52.8	0
52.9	0
53	0
53.1	0
53.2	0
53.3	0
53.4	0
53.5	0
53.6	0
53.7	0
53.8	0
53.9	0
54	0
54.1	0
54.2	0
54.3	0
54.4	0
54.5	0
54.6	0
54.7	0
54.8	0
54.9	0
55	0
55.1	0
55.2	0
55.3	0
55.4	0
55.5	0
55.6	0
55.7	0
55.8	0
55.9	0
56	0
56.1	0
56.2	0
56.3	0
56.4	0
56.5	0
56.6	0
56.7	0
56.8	0
56.9	0
57	0
57.1	0
57.2	0
57.3	0
57.4	0
57.5	0
57.6	0
57.7	0
57.8	0
57.9	0
58	0
58.1	0
58.2	0
58.3	0
58.4	0
58.5	0
58.6	0
58.7	0
58.8	0
58.9	0
59	0
59.1	0
59.2	0
59.3	0
59.4	0
59.5	0
59.6	0
59.7	0
59.8	0
59.9	0
60	0
60.1	0
60.2	0
60.3	0
60.4	0
60.5	0
60.6	0
60.7	0
60.8	0
60.9	0
61	0
61.1	0
61.2	0
61.3	0
61.4	0
61.5	0
61.6	0
61.7	0
61.8	0
61.9	0
62	0
62.1	0
62.2	0
62.3	0
62.4	0
62.5	0
62.6	0
62.7	0
62.8	0
62.9	0
63	0
63.1	0
63.2	0
63.3	0
63.4	0
63.5	0
63.6	0
63.7	0
63.8	0
63.9	0
64	0
64.1	0
64.2	0
64.3	0
64.4	0
64.5	0
64.6	0
64.7	0
64.8	0
64.9	0
65	0
65.1	0
65.2	0
65.3	0
65.4	0
65.5	0
65.6	0
65.7	0
65.8	0
65.9	0
66	0
66.1	0
66.2	0
66.3	0
66.4	0
66.5	0
66.6	0
66.7	0
66.8	0
66.9	0
67	0
67.1	0
67.2	0
67.3	0
67.4	0
67.5	0
67.6	0
67.7	0
67.8	0
67.9	0
68	0
68.1	0
68.2	0
68.3	0
68.4	0
68.5	0
68.6	0
68.7	0
68.8	0
68.9	0
69	0
69.1	0
69.2	0
69.3	0
69.4	0
69.5	0
69.6	0
69.7	0
69.8	0
69.9	0
70	0
70.1	0
70.2	0
70.3	0
70.4	0
70.5	0
70.6	0
70.7	0
70.8	0
70.9	0
71	0
71.1	0
71.2	0
71.3	0
71.4	0
71.5	0
71.6	0
71.7	0
71.8	0
71.9	0
72	0
72.1	0
72.2	0
72.3	0
72.4	0
72.5	0
72.6	0
72.7	0
72.8	0
72.9	0
73	0
73.1	0
73.2	0
73.3	0
73.4	0
73.5	0
73.6	0
73.7	0
73.8	0
73.9	0
74	0
74.1	0
74.2	0
74.3	0
74.4	0
74.5	0
74.6	0
74.7	0
74.8	0
74.9	0
75	0
75.1	0
75.2	0
75.3	0
75.4	0
75.5	0
75.6	0
75.7	0
75.8	0
75.9	0
76	0
76.1	0
76.2	0
76.3	0
76.4	0
76.5	0
76.6	0
76.7	0
76.8	0
76.9	0
77	0
77.1	0
77.2	0
77.3	0
77.4	0
77.5	0
77.6	0
77.7	0
77.8	0
77.9	0
78	0
78.1	0
78.2	0
78.3	0
78.4	0
78.5	0
78.6	0
78.7	0
78.8	0
78.9	0
79	0
79.1	0
79.2	0
79.3	0
79.4	0
79.5	0
79.6	0
79.7	0
79.8	0
79.9	0
80	0
80.1	0
80.2	0
80.3	0
80.4	0
80.5	0
80.6	0
80.7	0
80.8	0
80.9	0
81	0
81.1	0
81.2	0
81.3	0
81.4	0
81.5	0
81.6	0
81.7	0
81.8	0
81.9	0
82	0
82.1	0
82.2	0
82.3	0
82.4	0
82.5	0
82.6	0
82.7	0
82.8	0
82.9	0
83	0
83.1	0
83.2	0
83.3	0
83.4	0
83.5	0
83.6	0
83.7	0
83.8	0
83.9	0
84	0
84.1	0
84.2	0
84.3	0
84.4	0
84.5	0
84.6	0
84.7	0
84.8	0
84.9	0
85	0
85.1	0
85.2	0
85.3	0
85.4	0
85.5	0
85.6	0
85.7	0
85.8	0
85.9	0
86	0
86.1	0
86.2	0
86.3	0
86.4	0
86.5	0
86.6	0
86.7	0
86.8	0
86.9	0
87	0
87.1	0
87.2	0
87.3	0
87.4	0
87.5	0
87.6	0
87.7	0
87.8	0
87.9	0
88	0
88.1	0
88.2	0
88.3	0
88.4	0
88.5	0
88.6	0
88.7	0
88.8	0
88.9	0
89	0
89.1	0
89.2	0
89.3	0
89.4	0
89.5	0
89.6	0
89.7	0
89.8	0
89.9	0
90	0
90.1	0
90.2	0
90.3	0
90.4	0
90.5	0
90.6	0
90.7	0
90.8	0
90.9	0
91	0
91.1	0
91.2	0
91.3	0
91.4	0
91.5	0
91.6	0
91.7	0
91.8	0
91.9	0
92	0
92.1	0
92.2	0
92.3	0
92.4	0
92.5	0
92.6	0
92.7	0
92.8	0
92.9	0
93	0
93.1	0
93.2	0
93.3	0
93.4	0
93.5	0
93.6	0
93.7	0
93.8	0
93.9	0
94	0
94.1	0
94.2	0
94.3	0
94.4	0
94.5	0
94.6	0
94.7	0
94.8	0
94.9	0
95	0
95.1	0
95.2	0
95.3	0
95.4	0
95.5	0
95.6	0
95.7	0
95.8	0
95.9	0
96	0
96.1	0
96.2	0
96.3	0
96.4	0
96.5	0
96.6	0
96.7	0
96.8	0
96.9	0
97	0
97.1	0
97.2	0
97.3	0
97.4	0
97.5	0
97.6	0
97.7	0
97.8	0
97.9	0
98	0
98.1	0
98.2	0
98.3	0
98.4	0
98.5	0
98.6	0
98.7	0
98.8	0
98.9	0
99	0
99.1	0
99.2	0
99.3	0
99.4	0
99.5	0
99.6	0
99.7	0
99.8	0
99.9	0
100	0
100.1	0.002
100.2	0.004375
100.3	0.00575
100.4	0.006625
100.5	0.00875
100.6	0.01025
100.7	0.012375
100.8	0.0145
100.9	0.016375
101	0.017375
101.1	0.019625
101.2	0.02125
101.3	0.023125
101.4	0.024625
101.5	0.026125
101.6	0.027
101.7	0.028
101.8	0.02975
101.9	0.031125
102	0.0335
102.1	0.034625
102.2	0.03625
102.3	0.038125
102.4	0.03975
102.5	0.042125
102.6	0.044625
102.7	0.045875
102.8	0.047875
102.9	0.048875
103	0.0505
103.1	0.052125
103.2	0.054
103.3	0.05475
103.4	0.055125
103.5	0.0565
103.6	0.0565
103.7	0.057625
103.8	0.058625
103.9	0.05975
104	0.0605
104.1	0.06225
104.2	0.063375
104.3	0.064125
104.4	0.065
104.5	0.064875
104.6	0.06675
104.7	0.06825
104.8	0.069
104.9	0.069875
105	0.07075
105.1	0.072
105.2	0.072125
105.3	0.072625
105.4	0.0735
105.5	0.074125
105.6	0.0745
105.7	0.0755
105.8	0.076375
105.9	0.077
106	0.077375
106.1	0.07825
106.2	0.07975
106.3	0.0805
106.4	0.080875
106.5	0.08225
106.6	0.08325
106.7	0.084125
106.8	0.084875
106.9	0.086
107	0.08575
107.1	0.086375
107.2	0.086875
107.3	0.0875
107.4	0.088125
107.5	0.0885
107.6	0.08875
107.7	0.089125
107.8	0.08975
107.9	0.09125
108	0.091375
108.1	0.091875
108.2	0.09175
108.3	0.092125
108.4	0.092875
108.5	0.09275
108.6	0.0935
108.7	0.093875
108.8	0.095625
108.9	0.09625
109	0.0975
109.1	0.097375
109.2	0.098125
109.3	0.09925
109.4	0.101125
109.5	0.10075
109.6	0.100625
109.7	0.100875
109.8	0.10175
109.9	0.102125
110	0.102125
110.1	0.1025
110.2	0.103375
110.3	0.104
110.4	0.1045
110.5	0.105
110.6	0.105625
110.7	0.10575
110.8	0.106125
110.9	0.107125
111	0.108375
111.1	0.10975
111.2	0.110375
111.3	0.110625
111.4	0.11
111.5	0.10925
111.6	0.10975
111.7	0.1095
111.8	0.109625
111.9	0.10875
112	0.1105
112.1	0.1115
112.2	0.112
112.3	0.112375
112.4	0.1125
112.5	0.113125
112.6	0.112875
112.7	0.113375
112.8	0.11425
112.9	0.11525
113	0.115375
113.1	0.115875
113.2	0.11725
113.3	0.116875
113.4	0.11725
113.5	0.118125
113.6	0.118375
113.7	0.119
113.8	0.119
113.9	0.119625
114	0.12075
114.1	0.1205
114.2	0.120375
114.3	0.12
114.4	0.1195
114.5	0.12
114.6	0.120375
114.7	0.1205
114.8	0.12075
114.9	0.119875
115	0.12
115.1	0.120875
115.2	0.12225
115.3	0.122125
115.4	0.122625
115.5	0.121875
115.6	0.121625
115.7	0.121875
115.8	0.12175
115.9	0.122625
116	0.1215
116.1	0.122
116.2	0.121875
116.3	0.12125
116.4	0.121
116.5	0.121
116.6	0.120875
116.7	0.121875
116.8	0.122125
116.9	0.122875
117	0.12375
117.1	0.12425
117.2	0.125
117.3	0.125625
117.4	0.126
117.5	0.126625
117.6	0.12675
117.7	0.12775
117.8	0.128625
117.9	0.12775
118	0.1285
118.1	0.12875
118.2	0.129375
118.3	0.128875
118.4	0.129625
118.5	0.130875
118.6	0.13125
118.7	0.1315
118.8	0.131375
118.9	0.132
119	0.131375
119.1	0.130875
119.2	0.1305
119.3	0.13
119.4	0.130125
119.5	0.1315
119.6	0.131125
119.7	0.130125
119.8	0.13075
119.9	0.129875
120	0.13
120.1	0.130625
120.2	0.130375
120.3	0.1305
120.4	0.1305
120.5	0.130625
120.6	0.13025
120.7	0.13025
120.8	0.1315
120.9	0.13175
121	0.132
121.1	0.13125
121.2	0.13225
121.3	0.132125
121.4	0.131
121.5	0.129875
121.6	0.130625
121.7	0.131375
121.8	0.131
121.9	0.13075
122	0.13225
122.1	0.132375
122.2	0.1325
122.3	0.1325
122.4	0.13225
122.5	0.132
122.6	0.133125
122.7	0.133
122.8	0.133125
122.9	0.132875
123	0.133625
123.1	0.134
123.2	0.13325
123.3	0.134
123.4	0.134125
123.5	0.1335
123.6	0.133625
123.7	0.13325
123.8	0.1335
123.9	0.13325
124	0.133375
124.1	0.133
124.2	0.133125
124.3	0.13325
124.4	0.13425
124.5	0.133625
124.6	0.133375
124.7	0.134125
124.8	0.1335
124.9	0.133625
125	0.134125
125.1	0.133625
125.2	0.13275
125.3	0.133
125.4	0.133625
125.5	0.133125
125.6	0.132375
125.7	0.1325
125.8	0.132625
125.9	0.13175
126	0.13125
126.1	0.130875
126.2	0.13225
126.3	0.132625
126.4	0.133375
126.5	0.132625
126.6	0.132125
126.7	0.131875
126.8	0.1315
126.9	0.131375
127	0.1315
127.1	0.132125
127.2	0.13325
127.3	0.134
127.4	0.134
127.5	0.13325
127.6	0.1335
127.7	0.134875
127.8	0.135875
127.9	0.136125
128	0.136875
128.1	0.1375
128.2	0.136875
128.3	0.137625
128.4	0.138
128.5	0.1385
128.6	0.137125
128.7	0.137625
128.8	0.13675
128.9	0.136125
129	0.13625
129.1	0.13625
129.2	0.136625
129.3	0.136375
129.4	0.13675
129.5	0.13725
129.6	0.137875
129.7	0.13775
129.8	0.137375
129.9	0.138125
130	0.13925
130.1	0.13875
130.2	0.139375
130.3	0.139125
130.4	0.13875
130.5	0.13775
130.6	0.13775
130.7	0.13825
130.8	0.13825
130.9	0.138375
131	0.138375
131.1	0.1375
131.2	0.13775
131.3	0.137125
131.4	0.137625
131.5	0.138
131.6	0.137375
131.7	0.138125
131.8	0.13825
131.9	0.138875
132	0.139375
132.1	0.139
132.2	0.139125
132.3	0.1385
132.4	0.137625
132.5	0.1385
132.6	0.139125
132.7	0.140125
132.8	0.14075
132.9	0.141625
133	0.139875
133.1	0.14
133.2	0.140125
133.3	0.13975
133.4	0.139625
133.5	0.14075
133.6	0.140875
133.7	0.13925
133.8	0.139125
133.9	0.138875
134	0.138375
134.1	0.137375
134.2	0.137625
134.3	0.1375
134.4	0.13875
134.5	0.137875
134.6	0.13775
134.7	0.1395
134.8	0.139375
134.9	0.1405
135	0.1395
135.1	0.139375
135.2	0.14
135.3	0.140125
135.4	0.1405
135.5	0.139125
135.6	0.13925
135.7	0.1385
135.8	0.137875
135.9	0.1385
136	0.138375
136.1	0.138625
136.2	0.13925
136.3	0.139625
136.4	0.139125
136.5	0.141
136.6	0.1415
136.7	0.142
136.8	0.143375
136.9	0.14325
137	0.143625
137.1	0.143375
137.2	0.145
137.3	0.145375
137.4	0.146
137.5	0.1455
137.6	0.14625
137.7	0.14675
137.8	0.146875
137.9	0.146375
138	0.1465
138.1	0.147125
138.2	0.14775
138.3	0.148
138.4	0.147875
138.5	0.147125
138.6	0.148125
138.7	0.14875
138.8	0.14825
138.9	0.14875
139	0.149375
139.1	0.14925
139.2	0.149875
139.3	0.15
139.4	0.1495
139.5	0.149875
139.6	0.14825
139.7	0.147625
139.8	0.147375
139.9	0.147375
140	0.1475
140.1	0.148125
140.2	0.1475
140.3	0.14825
140.4	0.149
140.5	0.14925
140.6	0.149375
140.7	0.149
140.8	0.149375
140.9	0.14825
141	0.14875
141.1	0.148125
141.2	0.148875
141.3	0.147875
141.4	0.147625
141.5	0.14675
141.6	0.147375
141.7	0.14725
141.8	0.147875
141.9	0.146875
142	0.147375
142.1	0.1465
142.2	0.14575
142.3	0.145375
142.4	0.146
142.5	0.147625
142.6	0.148125
142.7	0.149125
142.8	0.149
142.9	0.147875
143	0.147875
143.1	0.1475
143.2	0.147
143.3	0.147
143.4	0.146875
143.5	0.148375
143.6	0.14725
143.7	0.147125
143.8	0.146625
143.9	0.14675
144	0.147125
144.1	0.148
144.2	0.148375
144.3	0.148875
144.4	0.147875
144.5	0.149375
144.6	0.148875
144.7	0.148875
144.8	0.14825
144.9	0.14825
145	0.148875
145.1	0.1485
145.2	0.1485
145.3	0.148375
145.4	0.147125
145.5	0.146125
145.6	0.146125
145.7	0.144875
145.8	0.144875
145.9	0.1445
146	0.14325
146.1	0.141625
146.2	0.1425
146.3	0.143375
146.4	0.142875
146.5	0.143375
146.6	0.1435
146.7	0.142375
146.8	0.14275
146.9	0.143
147	0.142625
147.1	0.141375
147.2	0.1415
147.3	0.141625
147.4	0.141375
147.5	0.141125
147.6	0.142
147.7	0.14225
147.8	0.14275
147.9	0.142625
148	0.143125
148.1	0.14425
148.2	0.14475
148.3	0.144875
148.4	0.144875
148.5	0.145625
148.6	0.144875
148.7	0.144625
148.8	0.144625
148.9	0.145
149	0.1455
149.1	0.145625
149.2	0.14575
149.3	0.144875
149.4	0.1455
149.5	0.14575
149.6	0.1465
149.7	0.146625
149.8	0.14675
149.9	0.147125
150	0.146875
150.1	0.1475
150.2	0.146625
150.3	0.146375
150.4	0.147125
150.5	0.146875
150.6	0.146625
150.7	0.146125
150.8	0.146
150.9	0.145125
151	0.144875
151.1	0.144375
151.2	0.144625
151.3	0.144
151.4	0.144375
151.5	0.145
151.6	0.144625
151.7	0.145375
151.8	0.14575
151.9	0.146
152	0.146125
152.1	0.146625
152.2	0.14675
152.3	0.146875
152.4	0.147875
152.5	0.148625
152.6	0.148625
152.7	0.1485
152.8	0.148375
152.9	0.14775
153	0.14825
153.1	0.148625
153.2	0.14825
153.3	0.148375
153.4	0.148875
153.5	0.14875
153.6	0.14875
153.7	0.148125
153.8	0.147125
153.9	0.146625
154	0.1465
154.1	0.147125
154.2	0.147625
154.3	0.147125
154.4	0.146875
154.5	0.147
154.6	0.146125
154.7	0.1465
154.8	0.14775
154.9	0.1485
155	0.14875
155.1	0.14825
155.2	0.147875
155.3	0.14725
155.4	0.14675
155.5	0.146625
155.6	0.147125
155.7	0.146875
155.8	0.148
155.9	0.147375
156	0.1475
156.1	0.147625
156.2	0.14825
156.3	0.147875
156.4	0.148
156.5	0.148
156.6	0.14775
156.7	0.14725
156.8	0.147875
156.9	0.147625
157	0.145625
157.1	0.1465
157.2	0.146125
157.3	0.146
157.4	0.146875
157.5	0.14675
157.6	0.146625
157.7	0.145875
157.8	0.14575
157.9	0.146125
158	0.14625
158.1	0.147
158.2	0.1465
158.3	0.146
158.4	0.146125
158.5	0.146875
158.6	0.147125
158.7	0.145625
158.8	0.145125
158.9	0.1455
159	0.145875
159.1	0.14575
159.2	0.145875
159.3	0.14575
159.4	0.146625
159.5	0.1465
159.6	0.14575
159.7	0.145875
159.8	0.14575
159.9	0.14625
160	0.146875
160.1	0.146375
160.2	0.145625
160.3	0.145
160.4	0.144625
160.5	0.145
160.6	0.1465
160.7	0.146375
160.8	0.145375
160.9	0.144375
161	0.144
161.1	0.145
161.2	0.14475
161.3	0.144125
161.4	0.144625
161.5	0.1445
161.6	0.1445
161.7	0.144375
161.8	0.144375
161.9	0.144625
162	0.144125
162.1	0.145
162.2	0.14575
162.3	0.145875
162.4	0.146
162.5	0.14575
162.6	0.14575
162.7	0.1455
162.8	0.144625
162.9	0.14475
163	0.144875
163.1	0.144375
163.2	0.14425
163.3	0.143625
163.4	0.143875
163.5	0.143625
163.6	0.143625
163.7	0.14375
163.8	0.144375
163.9	0.145375
164	0.14525
164.1	0.145375
164.2	0.146125
164.3	0.146875
164.4	0.14775
164.5	0.148375
164.6	0.147875
164.7	0.14725
164.8	0.146125
164.9	0.14525
165	0.145125
165.1	0.145625
165.2	0.1445
165.3	0.145
165.4	0.1455
165.5	0.145625
165.6	0.145
165.7	0.145625
165.8	0.1455
165.9	0.144875
166	0.1445
166.1	0.144625
166.2	0.1445
166.3	0.14525
166.4	0.1455
166.5	0.1465
166.6	0.147
166.7	0.147625
166.8	0.148375
166.9	0.149375
167	0.149875
167.1	0.150125
167.2	0.150875
167.3	0.150625
167.4	0.15
167.5	0.149625
167.6	0.151125
167.7	0.150625
167.8	0.150875
167.9	0.15
168	0.15
168.1	0.150125
168.2	0.149875
168.3	0.150625
168.4	0.149875
168.5	0.150375
168.6	0.150875
168.7	0.151
168.8	0.151125
168.9	0.15125
169	0.151625
169.1	0.152
169.2	0.152875
169.3	0.152625
169.4	0.1525
169.5	0.1525
169.6	0.152
169.7	0.150625
169.8	0.15175
169.9	0.152125
170	0.151875
170.1	0.152
170.2	0.15275
170.3	0.152125
170.4	0.151125
170.5	0.1515
170.6	0.151
170.7	0.15025
170.8	0.1515
170.9	0.150625
171	0.1505
171.1	0.1505
171.2	0.15125
171.3	0.1525
171.4	0.153
171.5	0.152625
171.6	0.15225
171.7	0.151875
171.8	0.1515
171.9	0.152875
172	0.152375
172.1	0.151875
172.2	0.15175
172.3	0.15175
172.4	0.152125
172.5	0.15175
172.6	0.15075
172.7	0.150625
172.8	0.15
172.9	0.149625
173	0.149375
173.1	0.149125
173.2	0.15
173.3	0.149625
173.4	0.14975
173.5	0.14975
173.6	0.1495
173.7	0.149875
173.8	0.14925
173.9	0.149625
174	0.150375
174.1	0.15125
174.2	0.150375
174.3	0.15025
174.4	0.149875
174.5	0.149625
174.6	0.149
174.7	0.14875
174.8	0.148125
174.9	0.148
175	0.1485
175.1	0.149
175.2	0.148375
175.3	0.149875
175.4	0.15
175.5	0.149875
175.6	0.149125
175.7	0.150125
175.8	0.15
175.9	0.150375
176	0.152
176.1	0.152125
176.2	0.152625
176.3	0.151875
176.4	0.152125
176.5	0.15125
176.6	0.152625
176.7	0.1525
176.8	0.152375
176.9	0.152375
177	0.152375
177.1	0.152125
177.2	0.152
177.3	0.152375
177.4	0.151375
177.5	0.151375
177.6	0.15275
177.7	0.153125
177.8	0.154125
177.9	0.154
178	0.154
178.1	0.154
178.2	0.154
178.3	0.154125
178.4	0.156
178.5	0.156125
178.6	0.15675
178.7	0.156125
178.8	0.15625
178.9	0.15675
179	0.156375
179.1	0.1565
179.2	0.155375
179.3	0.15525
179.4	0.155375
179.5	0.154875
179.6	0.15425
179.7	0.155875
179.8	0.156125
179.9	0.155875
180	0.1555
180.1	0.155
180.2	0.154125
180.3	0.15525
180.4	0.155625
180.5	0.15575
180.6	0.155125
180.7	0.1555
180.8	0.154375
180.9	0.15425
181	0.154625
181.1	0.155125
181.2	0.1565
181.3	0.156125
181.4	0.15575
181.5	0.156125
181.6	0.155875
181.7	0.1555
181.8	0.15475
181.9	0.154875
182	0.155125
182.1	0.15525
182.2	0.15475
182.3	0.154875
182.4	0.15425
182.5	0.154875
182.6	0.15525
182.7	0.155375
182.8	0.155875
182.9	0.1555
183	0.1555
183.1	0.15575
183.2	0.1565
183.3	0.156375
183.4	0.156875
183.5	0.157375
183.6	0.1575
183.7	0.1575
183.8	0.157875
183.9	0.159125
184	0.159375
184.1	0.159875
184.2	0.1605
184.3	0.16025
184.4	0.15975
184.5	0.159
184.6	0.159
184.7	0.158875
184.8	0.15775
184.9	0.1575
185	0.157625
185.1	0.157375
185.2	0.157375
185.3	0.157375
185.4	0.157375
185.5	0.15725
185.6	0.1565
185.7	0.156625
185.8	0.15575
185.9	0.1555
186	0.155625
186.1	0.1555
186.2	0.154875
186.3	0.1545
186.4	0.154625
186.5	0.1545
186.6	0.154125
186.7	0.154375
186.8	0.15275
186.9	0.15275
187	0.152375
187.1	0.152625
187.2	0.15175
187.3	0.153625
187.4	0.1535
187.5	0.1535
187.6	0.15275
187.7	0.152625
187.8	0.1525
187.9	0.15325
188	0.15275
188.1	0.153375
188.2	0.15375
188.3	0.154375
188.4	0.154875
188.5	0.155
188.6	0.15575
188.7	0.15625
188.8	0.155875
188.9	0.156625
189	0.156
189.1	0.155375
189.2	0.15575
189.3	0.155625
189.4	0.15625
189.5	0.156
189.6	0.15625
189.7	0.15625
189.8	0.1565
189.9	0.156
190	0.155375
190.1	0.155625
190.2	0.15575
190.3	0.155
190.4	0.154875
190.5	0.154375
190.6	0.1545
190.7	0.15475
190.8	0.155125
190.9	0.155375
191	0.1565
191.1	0.156875
191.2	0.157
191.3	0.15775
191.4	0.157
191.5	0.157
191.6	0.157375
191.7	0.1565
191.8	0.156625
191.9	0.157375
192	0.157
192.1	0.157125
192.2	0.156875
192.3	0.1565
192.4	0.15775
192.5	0.157125
192.6	0.15625
192.7	0.156375
192.8	0.156125
192.9	0.155875
193	0.156
193.1	0.156875
193.2	0.157
193.3	0.157
193.4	0.157625
193.5	0.156875
193.6	0.156125
193.7	0.155625
193.8	0.155875
193.9	0.156
194	0.155875
194.1	0.155625
194.2	0.15525
194.3	0.1555
194.4	0.155375
194.5	0.154625
194.6	0.154125
194.7	0.15475
194.8	0.155
194.9	0.15575
195	0.156125
195.1	0.156
195.2	0.154875
195.3	0.153875
195.4	0.153
195.5	0.152125
195.6	0.15125
195.7	0.15175
195.8	0.151125
195.9	0.151375
196	0.15175
196.1	0.150875
196.2	0.15125
196.3	0.15075
196.4	0.1505
196.5	0.151125
196.6	0.1525
196.7	0.15275
196.8	0.152875
196.9	0.153875
197	0.153
197.1	0.153125
197.2	0.154125
197.3	0.154125
197.4	0.154625
197.5	0.154875
197.6	0.154
197.7	0.153625
197.8	0.15325
197.9	0.153375
198	0.153
198.1	0.15275
198.2	0.152875
198.3	0.153375
198.4	0.15375
198.5	0.15475
198.6	0.154125
198.7	0.154375
198.8	0.1535
198.9	0.153625
199	0.154
199.1	0.154125
199.2	0.154
199.3	0.154125
199.4	0.1535
199.5	0.153125
199.6	0.15275
199.7	0.1535
199.8	0.15375
199.9	0.154375
200	0.154875
[truncated: 14,000 more rows]
