# Supplementary material for: Bayesian inference of kinetic schemes for ion channels by Kalman filtering
Source: eLife journal article supplement (doi:10.7554/elife.62714), 2022-05-04
Supplement: fig4-data11 [file 1_Sim_N_4000_Strom_MW.xlsx]

## Sheet: Tabelle1
0.1	0
0.2	0
0.3	0
0.4	0
0.5	0
0.6	0
0.7	0
0.8	0
0.9	0
1	0
1.1	0
1.2	0
1.3	0
1.4	0
1.5	0
1.6	0
1.7	0
1.8	0
1.9	0
2	0
2.1	0
2.2	0
2.3	0
2.4	0
2.5	0
2.6	0
2.7	0
2.8	0
2.9	0
3	0
3.1	0
3.2	0
3.3	0
3.4	0
3.5	0
3.6	0
3.7	0
3.8	0
3.9	0
4	0
4.1	0
4.2	0
4.3	0
4.4	0
4.5	0
4.6	0
4.7	0
4.8	0
4.9	0
5	0
5.1	0
5.2	0
5.3	0
5.4	0
5.5	0
5.6	0
5.7	0
5.8	0
5.9	0
6	0
6.1	0
6.2	0
6.3	0
6.4	0
6.5	0
6.6	0
6.7	0
6.8	0
6.9	0
7	0
7.1	0
7.2	0
7.3	0
7.4	0
7.5	0
7.6	0
7.7	0
7.8	0
7.9	0
8	0
8.1	0
8.2	0
8.3	0
8.4	0
8.5	0
8.6	0
8.7	0
8.8	0
8.9	0
9	0
9.1	0
9.2	0
9.3	0
9.4	0
9.5	0
9.6	0
9.7	0
9.8	0
9.9	0
10	0
10.1	0
10.2	0
10.3	0
10.4	0
10.5	0
10.6	0
10.7	0
10.8	0
10.9	0
11	0
11.1	0
11.2	0
11.3	0
11.4	0
11.5	0
11.6	0
11.7	0
11.8	0
11.9	0
12	0
12.1	0
12.2	0
12.3	0
12.4	0
12.5	0
12.6	0
12.7	0
12.8	0
12.9	0
13	0
13.1	0
13.2	0
13.3	0
13.4	0
13.5	0
13.6	0
13.7	0
13.8	0
13.9	0
14	0
14.1	0
14.2	0
14.3	0
14.4	0
14.5	0
14.6	0
14.7	0
14.8	0
14.9	0
15	0
15.1	0
15.2	0
15.3	0
15.4	0
15.5	0
15.6	0
15.7	0
15.8	0
15.9	0
16	0
16.1	0
16.2	0
16.3	0
16.4	0
16.5	0
16.6	0
16.7	0
16.8	0
16.9	0
17	0
17.1	0
17.2	0
17.3	0
17.4	0
17.5	0
17.6	0
17.7	0
17.8	0
17.9	0
18	0
18.1	0
18.2	0
18.3	0
18.4	0
18.5	0
18.6	0
18.7	0
18.8	0
18.9	0
19	0
19.1	0
19.2	0
19.3	0
19.4	0
19.5	0
19.6	0
19.7	0
19.8	0
19.9	0
20	0
20.1	0
20.2	0
20.3	0
20.4	0
20.5	0
20.6	0
20.7	0
20.8	0
20.9	0
21	0
21.1	0
21.2	0
21.3	0
21.4	0
21.5	0
21.6	0
21.7	0
21.8	0
21.9	0
22	0
22.1	0
22.2	0
22.3	0
22.4	0
22.5	0
22.6	0
22.7	0
22.8	0
22.9	0
23	0
23.1	0
23.2	0
23.3	0
23.4	0
23.5	0
23.6	0
23.7	0
23.8	0
23.9	0
24	0
24.1	0
24.2	0
24.3	0
24.4	0
24.5	0
24.6	0
24.7	0
24.8	0
24.9	0
25	0
25.1	0
25.2	0
25.3	0
25.4	0
25.5	0
25.6	0
25.7	0
25.8	0
25.9	0
26	0
26.1	0
26.2	0
26.3	0
26.4	0
26.5	0
26.6	0
26.7	0
26.8	0
26.9	0
27	0
27.1	0
27.2	0
27.3	0
27.4	0
27.5	0
27.6	0
27.7	0
27.8	0
27.9	0
28	0
28.1	0
28.2	0
28.3	0
28.4	0
28.5	0
28.6	0
28.7	0
28.8	0
28.9	0
29	0
29.1	0
29.2	0
29.3	0
29.4	0
29.5	0
29.6	0
29.7	0
29.8	0
29.9	0
30	0
30.1	0
30.2	0
30.3	0
30.4	0
30.5	0
30.6	0
30.7	0
30.8	0
30.9	0
31	0
31.1	0
31.2	0
31.3	0
31.4	0
31.5	0
31.6	0
31.7	0
31.8	0
31.9	0
32	0
32.1	0
32.2	0
32.3	0
32.4	0
32.5	0
32.6	0
32.7	0
32.8	0
32.9	0
33	0
33.1	0
33.2	0
33.3	0
33.4	0
33.5	0
33.6	0
33.7	0
33.8	0
33.9	0
34	0
34.1	0
34.2	0
34.3	0
34.4	0
34.5	0
34.6	0
34.7	0
34.8	0
34.9	0
35	0
35.1	0
35.2	0
35.3	0
35.4	0
35.5	0
35.6	0
35.7	0
35.8	0
35.9	0
36	0
36.1	0
36.2	0
36.3	0
36.4	0
36.5	0
36.6	0
36.7	0
36.8	0
36.9	0
37	0
37.1	0
37.2	0
37.3	0
37.4	0
37.5	0
37.6	0
37.7	0
37.8	0
37.9	0
38	0
38.1	0
38.2	0
38.3	0
38.4	0
38.5	0
38.6	0
38.7	0
38.8	0
38.9	0
39	0
39.1	0
39.2	0
39.3	0
39.4	0
39.5	0
39.6	0
39.7	0
39.8	0
39.9	0
40	0
40.1	0
40.2	0
40.3	0
40.4	0
40.5	0
40.6	0
40.7	0
40.8	0
40.9	0
41	0
41.1	0
41.2	0
41.3	0
41.4	0
41.5	0
41.6	0
41.7	0
41.8	0
41.9	0
42	0
42.1	0
42.2	0
42.3	0
42.4	0
42.5	0
42.6	0
42.7	0
42.8	0
42.9	0
43	0
43.1	0
43.2	0
43.3	0
43.4	0
43.5	0
43.6	0
43.7	0
43.8	0
43.9	0
44	0
44.1	0
44.2	0
44.3	0
44.4	0
44.5	0
44.6	0
44.7	0
44.8	0
44.9	0
45	0
45.1	0
45.2	0
45.3	0
45.4	0
45.5	0
45.6	0
45.7	0
45.8	0
45.9	0
46	0
46.1	0
46.2	0
46.3	0
46.4	0
46.5	0
46.6	0
46.7	0
46.8	0
46.9	0
47	0
47.1	0
47.2	0
47.3	0
47.4	0
47.5	0
47.6	0
47.7	0
47.8	0
47.9	0
48	0
48.1	0
48.2	0
48.3	0
48.4	0
48.5	0
48.6	0
48.7	0
48.8	0
48.9	0
49	0
49.1	0
49.2	0
49.3	0
49.4	0
49.5	0
49.6	0
49.7	0
49.8	0
49.9	0
50	0
50.1	0
50.2	0
50.3	0
50.4	0
50.5	0
50.6	0
50.7	0
50.8	0
50.9	0
51	0
51.1	0
51.2	0
51.3	0
51.4	0
51.5	0
51.6	0
51.7	0
51.8	0
51.9	0
52	0
52.1	0
52.2	0
52.3	0
52.4	0
52.5	0
52.6	0
52.7	0
52.8	0
52.9	0
53	0
53.1	0
53.2	0
53.3	0
53.4	0
53.5	0
53.6	0
53.7	0
53.8	0
53.9	0
54	0
54.1	0
54.2	0
54.3	0
54.4	0
54.5	0
54.6	0
54.7	0
54.8	0
54.9	0
55	0
55.1	0
55.2	0
55.3	0
55.4	0
55.5	0
55.6	0
55.7	0
55.8	0
55.9	0
56	0
56.1	0
56.2	0
56.3	0
56.4	0
56.5	0
56.6	0
56.7	0
56.8	0
56.9	0
57	0
57.1	0
57.2	0
57.3	0
57.4	0
57.5	0
57.6	0
57.7	0
57.8	0
57.9	0
58	0
58.1	0
58.2	0
58.3	0
58.4	0
58.5	0
58.6	0
58.7	0
58.8	0
58.9	0
59	0
59.1	0
59.2	0
59.3	0
59.4	0
59.5	0
59.6	0
59.7	0
59.8	0
59.9	0
60	0
60.1	0
60.2	0
60.3	0
60.4	0
60.5	0
60.6	0
60.7	0
60.8	0
60.9	0
61	0
61.1	0
61.2	0
61.3	0
61.4	0
61.5	0
61.6	0
61.7	0
61.8	0
61.9	0
62	0
62.1	0
62.2	0
62.3	0
62.4	0
62.5	0
62.6	0
62.7	0
62.8	0
62.9	0
63	0
63.1	0
63.2	0
63.3	0
63.4	0
63.5	0
63.6	0
63.7	0
63.8	0
63.9	0
64	0
64.1	0
64.2	0
64.3	0
64.4	0
64.5	0
64.6	0
64.7	0
64.8	0
64.9	0
65	0
65.1	0
65.2	0
65.3	0
65.4	0
65.5	0
65.6	0
65.7	0
65.8	0
65.9	0
66	0
66.1	0
66.2	0
66.3	0
66.4	0
66.5	0
66.6	0
66.7	0
66.8	0
66.9	0
67	0
67.1	0
67.2	0
67.3	0
67.4	0
67.5	0
67.6	0
67.7	0
67.8	0
67.9	0
68	0
68.1	0
68.2	0
68.3	0
68.4	0
68.5	0
68.6	0
68.7	0
68.8	0
68.9	0
69	0
69.1	0
69.2	0
69.3	0
69.4	0
69.5	0
69.6	0
69.7	0
69.8	0
69.9	0
70	0
70.1	0
70.2	0
70.3	0
70.4	0
70.5	0
70.6	0
70.7	0
70.8	0
70.9	0
71	0
71.1	0
71.2	0
71.3	0
71.4	0
71.5	0
71.6	0
71.7	0
71.8	0
71.9	0
72	0
72.1	0
72.2	0
72.3	0
72.4	0
72.5	0
72.6	0
72.7	0
72.8	0
72.9	0
73	0
73.1	0
73.2	0
73.3	0
73.4	0
73.5	0
73.6	0
73.7	0
73.8	0
73.9	0
74	0
74.1	0
74.2	0
74.3	0
74.4	0
74.5	0
74.6	0
74.7	0
74.8	0
74.9	0
75	0
75.1	0
75.2	0
75.3	0
75.4	0
75.5	0
75.6	0
75.7	0
75.8	0
75.9	0
76	0
76.1	0
76.2	0
76.3	0
76.4	0
76.5	0
76.6	0
76.7	0
76.8	0
76.9	0
77	0
77.1	0
77.2	0
77.3	0
77.4	0
77.5	0
77.6	0
77.7	0
77.8	0
77.9	0
78	0
78.1	0
78.2	0
78.3	0
78.4	0
78.5	0
78.6	0
78.7	0
78.8	0
78.9	0
79	0
79.1	0
79.2	0
79.3	0
79.4	0
79.5	0
79.6	0
79.7	0
79.8	0
79.9	0
80	0
80.1	0
80.2	0
80.3	0
80.4	0
80.5	0
80.6	0
80.7	0
80.8	0
80.9	0
81	0
81.1	0
81.2	0
81.3	0
81.4	0
81.5	0
81.6	0
81.7	0
81.8	0
81.9	0
82	0
82.1	0
82.2	0
82.3	0
82.4	0
82.5	0
82.6	0
82.7	0
82.8	0
82.9	0
83	0
83.1	0
83.2	0
83.3	0
83.4	0
83.5	0
83.6	0
83.7	0
83.8	0
83.9	0
84	0
84.1	0
84.2	0
84.3	0
84.4	0
84.5	0
84.6	0
84.7	0
84.8	0
84.9	0
85	0
85.1	0
85.2	0
85.3	0
85.4	0
85.5	0
85.6	0
85.7	0
85.8	0
85.9	0
86	0
86.1	0
86.2	0
86.3	0
86.4	0
86.5	0
86.6	0
86.7	0
86.8	0
86.9	0
87	0
87.1	0
87.2	0
87.3	0
87.4	0
87.5	0
87.6	0
87.7	0
87.8	0
87.9	0
88	0
88.1	0
88.2	0
88.3	0
88.4	0
88.5	0
88.6	0
88.7	0
88.8	0
88.9	0
89	0
89.1	0
89.2	0
89.3	0
89.4	0
89.5	0
89.6	0
89.7	0
89.8	0
89.9	0
90	0
90.1	0
90.2	0
90.3	0
90.4	0
90.5	0
90.6	0
90.7	0
90.8	0
90.9	0
91	0
91.1	0
91.2	0
91.3	0
91.4	0
91.5	0
91.6	0
91.7	0
91.8	0
91.9	0
92	0
92.1	0
92.2	0
92.3	0
92.4	0
92.5	0
92.6	0
92.7	0
92.8	0
92.9	0
93	0
93.1	0
93.2	0
93.3	0
93.4	0
93.5	0
93.6	0
93.7	0
93.8	0
93.9	0
94	0
94.1	0
94.2	0
94.3	0
94.4	0
94.5	0
94.6	0
94.7	0
94.8	0
94.9	0
95	0
95.1	0
95.2	0
95.3	0
95.4	0
95.5	0
95.6	0
95.7	0
95.8	0
95.9	0
96	0
96.1	0
96.2	0
96.3	0
96.4	0
96.5	0
96.6	0
96.7	0
96.8	0
96.9	0
97	0
97.1	0
97.2	0
97.3	0
97.4	0
97.5	0
97.6	0
97.7	0
97.8	0
97.9	0
98	0
98.1	0
98.2	0
98.3	0
98.4	0
98.5	0
98.6	0
98.7	0
98.8	0
98.9	0
99	0
99.1	0
99.2	0
99.3	0
99.4	0
99.5	0
99.6	0
99.7	0
99.8	0
99.9	0
100	0
100.1	0
100.2	0
100.3	0
100.4	0
100.5	0
100.6	0
100.7	0
100.8	0
100.9	0
101	0
101.1	0
101.2	0
101.3	0
101.4	0
101.5	0
101.6	0
101.7	0
101.8	0
101.9	0
102	0
102.1	0
102.2	0
102.3	0
102.4	0
102.5	0
102.6	0
102.7	0
102.8	0.00025
102.9	0.00025
103	0.00025
103.1	0.00025
103.2	0.00025
103.3	0.00025
103.4	0.00025
103.5	0.00025
103.6	0.00025
103.7	0.00025
103.8	0.00025
103.9	0.00025
104	0.00025
104.1	0.00025
104.2	0.00025
104.3	0.00025
104.4	0.00025
104.5	0.00025
104.6	0.00025
104.7	0.00025
104.8	0.00025
104.9	0.00025
105	0.0005
105.1	0.0005
105.2	0.0005
105.3	0.0005
105.4	0.0005
105.5	0.00075
105.6	0.00075
105.7	0.00075
105.8	0.00075
105.9	0.00075
106	0.00075
106.1	0.00075
106.2	0.00075
106.3	0.00075
106.4	0.00075
106.5	0.00075
106.6	0.00075
106.7	0.00075
106.8	0.00075
106.9	0.00075
107	0.00075
107.1	0.00075
107.2	0.00075
107.3	0.00075
107.4	0.00075
107.5	0.00075
107.6	0.00075
107.7	0.00075
107.8	0.00075
107.9	0.00075
108	0.00075
108.1	0.00075
108.2	0.00075
108.3	0.00075
108.4	0.00075
108.5	0.00075
108.6	0.00075
108.7	0.00075
108.8	0.00075
108.9	0.00075
109	0.00075
109.1	0.00075
109.2	0.00075
109.3	0.00075
109.4	0.00075
109.5	0.00075
109.6	0.00075
109.7	0.00075
109.8	0.00075
109.9	0.00075
110	0.00075
110.1	0.00075
110.2	0.00075
110.3	0.00075
110.4	0.00075
110.5	0.00075
110.6	0.00075
110.7	0.00075
110.8	0.00075
110.9	0.00075
111	0.00075
111.1	0.00075
111.2	0.00075
111.3	0.00075
111.4	0.00075
111.5	0.00075
111.6	0.00075
111.7	0.00075
111.8	0.00075
111.9	0.00075
112	0.00075
112.1	0.00075
112.2	0.00075
112.3	0.00075
112.4	0.00075
112.5	0.00075
112.6	0.00075
112.7	0.00075
112.8	0.00075
112.9	0.00075
113	0.00075
113.1	0.00075
113.2	0.00075
113.3	0.00075
113.4	0.00075
113.5	0.00075
113.6	0.00075
113.7	0.00075
113.8	0.00075
113.9	0.00075
114	0.00075
114.1	0.00075
114.2	0.00075
114.3	0.001
114.4	0.001
114.5	0.001
114.6	0.001
114.7	0.00125
114.8	0.00125
114.9	0.00125
115	0.00125
115.1	0.00125
115.2	0.00125
115.3	0.00125
115.4	0.00125
115.5	0.00125
115.6	0.00125
115.7	0.00125
115.8	0.00125
115.9	0.00125
116	0.00125
116.1	0.00125
116.2	0.00125
116.3	0.00125
116.4	0.00125
116.5	0.0015
116.6	0.0015
116.7	0.0015
116.8	0.0015
116.9	0.0015
117	0.0015
117.1	0.0015
117.2	0.0015
117.3	0.00125
117.4	0.00125
117.5	0.00125
117.6	0.00125
117.7	0.0015
117.8	0.0015
117.9	0.0015
118	0.0015
118.1	0.0015
118.2	0.0015
118.3	0.0015
118.4	0.0015
118.5	0.0015
118.6	0.0015
118.7	0.0015
118.8	0.0015
118.9	0.0015
119	0.0015
119.1	0.0015
119.2	0.0015
119.3	0.0015
119.4	0.0015
119.5	0.0015
119.6	0.0015
119.7	0.0015
119.8	0.0015
119.9	0.0015
120	0.0015
120.1	0.0015
120.2	0.0015
120.3	0.0015
120.4	0.0015
120.5	0.0015
120.6	0.0015
120.7	0.0015
120.8	0.0015
120.9	0.0015
121	0.0015
121.1	0.0015
121.2	0.0015
121.3	0.0015
121.4	0.0015
121.5	0.0015
121.6	0.00125
121.7	0.00125
121.8	0.00125
121.9	0.00125
122	0.00125
122.1	0.00125
122.2	0.00125
122.3	0.00125
122.4	0.00125
122.5	0.0015
122.6	0.0015
122.7	0.0015
122.8	0.0015
122.9	0.0015
123	0.00175
123.1	0.00175
123.2	0.00175
123.3	0.00175
123.4	0.00175
123.5	0.00175
123.6	0.00175
123.7	0.00175
123.8	0.00175
123.9	0.00175
124	0.00175
124.1	0.00175
124.2	0.00175
124.3	0.00175
124.4	0.002
124.5	0.002
124.6	0.002
124.7	0.002
124.8	0.002
124.9	0.002
125	0.002
125.1	0.002
125.2	0.002
125.3	0.00225
125.4	0.00225
125.5	0.00225
125.6	0.00225
125.7	0.00225
125.8	0.00225
125.9	0.00225
126	0.00225
126.1	0.00225
126.2	0.00225
126.3	0.00225
126.4	0.00225
126.5	0.00225
126.6	0.0025
126.7	0.0025
126.8	0.0025
126.9	0.0025
127	0.0025
127.1	0.0025
127.2	0.0025
127.3	0.0025
127.4	0.0025
127.5	0.0025
127.6	0.0025
127.7	0.0025
127.8	0.0025
127.9	0.0025
128	0.0025
128.1	0.0025
128.2	0.0025
128.3	0.0025
128.4	0.0025
128.5	0.0025
128.6	0.0025
128.7	0.0025
128.8	0.0025
128.9	0.00225
129	0.0025
129.1	0.0025
129.2	0.0025
129.3	0.0025
129.4	0.0025
129.5	0.0025
129.6	0.0025
129.7	0.0025
129.8	0.0025
129.9	0.0025
130	0.0025
130.1	0.0025
130.2	0.0025
130.3	0.0025
130.4	0.0025
130.5	0.0025
130.6	0.0025
130.7	0.0025
130.8	0.0025
130.9	0.0025
131	0.0025
131.1	0.0025
131.2	0.0025
131.3	0.0025
131.4	0.0025
131.5	0.0025
131.6	0.0025
131.7	0.0025
131.8	0.00275
131.9	0.00275
132	0.00275
132.1	0.00275
132.2	0.00275
132.3	0.00275
132.4	0.00275
132.5	0.00275
132.6	0.00275
132.7	0.00275
132.8	0.00275
132.9	0.00275
133	0.00275
133.1	0.00275
133.2	0.00275
133.3	0.00275
133.4	0.00275
133.5	0.003
133.6	0.003
133.7	0.003
133.8	0.003
133.9	0.003
134	0.003
134.1	0.003
134.2	0.003
134.3	0.003
134.4	0.003
134.5	0.003
134.6	0.003
134.7	0.003
134.8	0.003
134.9	0.003
135	0.003
135.1	0.003
135.2	0.003
135.3	0.003
135.4	0.003
135.5	0.00325
135.6	0.00325
135.7	0.0035
135.8	0.0035
135.9	0.0035
136	0.0035
136.1	0.0035
136.2	0.0035
136.3	0.0035
136.4	0.00375
136.5	0.00375
136.6	0.00375
136.7	0.00375
136.8	0.00375
136.9	0.00375
137	0.00375
137.1	0.00375
137.2	0.00375
137.3	0.00375
137.4	0.00375
137.5	0.004
137.6	0.004
137.7	0.004
137.8	0.004
137.9	0.004
138	0.00425
138.1	0.00425
138.2	0.0045
138.3	0.0045
138.4	0.0045
138.5	0.0045
138.6	0.0045
138.7	0.0045
138.8	0.0045
138.9	0.0045
139	0.0045
139.1	0.0045
139.2	0.0045
139.3	0.0045
139.4	0.0045
139.5	0.0045
139.6	0.0045
139.7	0.0045
139.8	0.0045
139.9	0.0045
140	0.0045
140.1	0.0045
140.2	0.0045
140.3	0.0045
140.4	0.0045
140.5	0.0045
140.6	0.0045
140.7	0.0045
140.8	0.0045
140.9	0.0045
141	0.0045
141.1	0.0045
141.2	0.0045
141.3	0.0045
141.4	0.0045
141.5	0.0045
141.6	0.00475
141.7	0.00475
141.8	0.00475
141.9	0.00475
142	0.00475
142.1	0.00475
142.2	0.00475
142.3	0.00475
142.4	0.00475
142.5	0.00475
142.6	0.00475
142.7	0.00475
142.8	0.00475
142.9	0.00475
143	0.00475
143.1	0.00475
143.2	0.00475
143.3	0.005
143.4	0.005
143.5	0.005
143.6	0.005
143.7	0.005
143.8	0.005
143.9	0.005
144	0.005
144.1	0.005
144.2	0.00525
144.3	0.00525
144.4	0.00525
144.5	0.00525
144.6	0.00525
144.7	0.0055
144.8	0.0055
144.9	0.0055
145	0.00525
145.1	0.00525
145.2	0.00525
145.3	0.00525
145.4	0.00525
145.5	0.005
145.6	0.00525
145.7	0.00525
145.8	0.00525
145.9	0.00525
146	0.00525
146.1	0.00525
146.2	0.00525
146.3	0.00525
146.4	0.00525
146.5	0.00525
146.6	0.00525
146.7	0.00525
146.8	0.00525
146.9	0.00525
147	0.00525
147.1	0.0055
147.2	0.0055
147.3	0.0055
147.4	0.0055
147.5	0.0055
147.6	0.0055
147.7	0.0055
147.8	0.00575
147.9	0.00575
148	0.00575
148.1	0.00575
148.2	0.00575
148.3	0.006
148.4	0.006
148.5	0.006
148.6	0.006
148.7	0.006
148.8	0.006
148.9	0.006
149	0.006
149.1	0.006
149.2	0.00625
149.3	0.00625
149.4	0.0065
149.5	0.0065
149.6	0.0065
149.7	0.00675
149.8	0.00675
149.9	0.00675
150	0.00675
150.1	0.00675
150.2	0.0065
150.3	0.0065
150.4	0.0065
150.5	0.0065
150.6	0.0065
150.7	0.0065
150.8	0.0065
150.9	0.0065
151	0.0065
151.1	0.0065
151.2	0.0065
151.3	0.0065
151.4	0.0065
151.5	0.0065
151.6	0.0065
151.7	0.0065
151.8	0.0065
151.9	0.0065
152	0.0065
152.1	0.0065
152.2	0.0065
152.3	0.0065
152.4	0.0065
152.5	0.0065
152.6	0.0065
152.7	0.0065
152.8	0.0065
152.9	0.0065
153	0.0065
153.1	0.0065
153.2	0.00625
153.3	0.00625
153.4	0.00625
153.5	0.00625
153.6	0.00625
153.7	0.00625
153.8	0.00625
153.9	0.00625
154	0.0065
154.1	0.0065
154.2	0.0065
154.3	0.0065
154.4	0.0065
154.5	0.0065
154.6	0.0065
154.7	0.0065
154.8	0.00675
154.9	0.007
155	0.007
155.1	0.007
155.2	0.007
155.3	0.00725
155.4	0.00725
155.5	0.00725
155.6	0.00725
155.7	0.00725
155.8	0.0075
155.9	0.0075
156	0.0075
156.1	0.0075
156.2	0.0075
156.3	0.0075
156.4	0.0075
156.5	0.00775
156.6	0.00775
156.7	0.00775
156.8	0.008
156.9	0.008
157	0.008
157.1	0.008
157.2	0.008
157.3	0.00825
157.4	0.00825
157.5	0.00825
157.6	0.00825
157.7	0.00825
157.8	0.00825
157.9	0.00825
158	0.00825
158.1	0.00825
158.2	0.00825
158.3	0.00825
158.4	0.00825
158.5	0.00825
158.6	0.00825
158.7	0.00825
158.8	0.00825
158.9	0.00825
159	0.00825
159.1	0.00825
159.2	0.00825
159.3	0.00825
159.4	0.00825
159.5	0.00825
159.6	0.00825
159.7	0.0085
159.8	0.0085
159.9	0.0085
160	0.0085
160.1	0.0085
160.2	0.0085
160.3	0.0085
160.4	0.0085
160.5	0.0085
160.6	0.0085
160.7	0.0085
160.8	0.0085
160.9	0.0085
161	0.0085
161.1	0.0085
161.2	0.00875
161.3	0.00875
161.4	0.00875
161.5	0.0085
161.6	0.0085
161.7	0.0085
161.8	0.0085
161.9	0.0085
162	0.0085
162.1	0.0085
162.2	0.0085
162.3	0.0085
162.4	0.0085
162.5	0.0085
162.6	0.0085
162.7	0.0085
162.8	0.0085
162.9	0.0085
163	0.00875
163.1	0.00875
163.2	0.00875
163.3	0.00875
163.4	0.00875
163.5	0.00875
163.6	0.009
163.7	0.009
163.8	0.009
163.9	0.009
164	0.009
164.1	0.009
164.2	0.009
164.3	0.009
164.4	0.009
164.5	0.009
164.6	0.00925
164.7	0.00925
164.8	0.00925
164.9	0.00925
165	0.00925
165.1	0.00925
165.2	0.00925
165.3	0.00925
165.4	0.00925
165.5	0.00925
165.6	0.00925
165.7	0.00925
165.8	0.00925
165.9	0.00925
166	0.00925
166.1	0.00925
166.2	0.00925
166.3	0.00925
166.4	0.00925
166.5	0.0095
166.6	0.0095
166.7	0.0095
166.8	0.0095
166.9	0.0095
167	0.0095
167.1	0.00975
167.2	0.00975
167.3	0.00975
167.4	0.00975
167.5	0.00975
167.6	0.00975
167.7	0.00975
167.8	0.00975
167.9	0.00975
168	0.00975
168.1	0.00975
168.2	0.00975
168.3	0.00975
168.4	0.0095
168.5	0.0095
168.6	0.0095
168.7	0.00975
168.8	0.00975
168.9	0.00975
169	0.00975
169.1	0.00975
169.2	0.00975
169.3	0.00975
169.4	0.00975
169.5	0.00975
169.6	0.00975
169.7	0.01
169.8	0.01
169.9	0.01
170	0.01
170.1	0.01
170.2	0.01
170.3	0.01
170.4	0.01025
170.5	0.01025
170.6	0.01025
170.7	0.01025
170.8	0.01025
170.9	0.01025
171	0.0105
171.1	0.0105
171.2	0.01075
171.3	0.01075
171.4	0.01075
171.5	0.01075
171.6	0.01075
171.7	0.01075
171.8	0.01075
171.9	0.0105
172	0.01075
172.1	0.011
172.2	0.011
172.3	0.011
172.4	0.011
172.5	0.011
172.6	0.011
172.7	0.01125
172.8	0.01125
172.9	0.01125
173	0.01125
173.1	0.01125
173.2	0.01125
173.3	0.01125
173.4	0.01125
173.5	0.0115
173.6	0.0115
173.7	0.0115
173.8	0.0115
173.9	0.0115
174	0.0115
174.1	0.0115
174.2	0.0115
174.3	0.0115
174.4	0.0115
174.5	0.01125
174.6	0.011
174.7	0.011
174.8	0.011
174.9	0.011
175	0.011
175.1	0.011
175.2	0.011
175.3	0.011
175.4	0.011
175.5	0.011
175.6	0.011
175.7	0.011
175.8	0.011
175.9	0.01125
176	0.0115
176.1	0.01175
176.2	0.01175
176.3	0.012
176.4	0.012
176.5	0.012
176.6	0.012
176.7	0.012
176.8	0.012
176.9	0.012
177	0.012
177.1	0.012
177.2	0.012
177.3	0.012
177.4	0.01225
177.5	0.01225
177.6	0.01225
177.7	0.012
177.8	0.012
177.9	0.012
178	0.012
178.1	0.012
178.2	0.012
178.3	0.012
178.4	0.012
178.5	0.012
178.6	0.012
178.7	0.012
178.8	0.012
178.9	0.012
179	0.012
179.1	0.01225
179.2	0.0125
179.3	0.0125
179.4	0.0125
179.5	0.0125
179.6	0.0125
179.7	0.0125
179.8	0.0125
179.9	0.0125
180	0.0125
180.1	0.0125
180.2	0.0125
180.3	0.0125
180.4	0.0125
180.5	0.0125
180.6	0.0125
180.7	0.0125
180.8	0.0125
180.9	0.0125
181	0.0125
181.1	0.0125
181.2	0.0125
181.3	0.0125
181.4	0.0125
181.5	0.0125
181.6	0.0125
181.7	0.0125
181.8	0.0125
181.9	0.01225
182	0.01225
182.1	0.01225
182.2	0.01225
182.3	0.01225
182.4	0.01225
182.5	0.0125
182.6	0.0125
182.7	0.0125
182.8	0.0125
182.9	0.0125
183	0.01275
183.1	0.01275
183.2	0.01275
183.3	0.01275
183.4	0.01275
183.5	0.01275
183.6	0.01275
183.7	0.01275
183.8	0.01275
183.9	0.01275
184	0.01275
184.1	0.01275
184.2	0.013
184.3	0.013
184.4	0.013
184.5	0.013
184.6	0.013
184.7	0.013
184.8	0.013
184.9	0.013
185	0.013
185.1	0.013
185.2	0.013
185.3	0.013
185.4	0.013
185.5	0.013
185.6	0.013
185.7	0.013
185.8	0.013
185.9	0.013
186	0.01325
186.1	0.01325
186.2	0.01325
186.3	0.0135
186.4	0.0135
186.5	0.0135
186.6	0.0135
186.7	0.0135
186.8	0.0135
186.9	0.0135
187	0.0135
187.1	0.0135
187.2	0.0135
187.3	0.0135
187.4	0.0135
187.5	0.0135
187.6	0.0135
187.7	0.01375
187.8	0.01375
187.9	0.01375
188	0.01375
188.1	0.01375
188.2	0.01375
188.3	0.01375
188.4	0.01375
188.5	0.01375
188.6	0.01375
188.7	0.014
188.8	0.014
188.9	0.014
189	0.014
189.1	0.014
189.2	0.014
189.3	0.01375
189.4	0.014
189.5	0.014
189.6	0.014
189.7	0.014
189.8	0.014
189.9	0.014
190	0.014
190.1	0.014
190.2	0.014
190.3	0.014
190.4	0.014
190.5	0.014
190.6	0.014
190.7	0.014
190.8	0.014
190.9	0.01425
191	0.01425
191.1	0.01425
191.2	0.01425
191.3	0.01425
191.4	0.0145
191.5	0.0145
191.6	0.0145
191.7	0.0145
191.8	0.0145
191.9	0.0145
192	0.0145
192.1	0.0145
192.2	0.0145
192.3	0.01425
192.4	0.01425
192.5	0.01425
192.6	0.01425
192.7	0.01425
192.8	0.01425
192.9	0.01425
193	0.01425
193.1	0.01425
193.2	0.01425
193.3	0.014
193.4	0.0145
193.5	0.0145
193.6	0.0145
193.7	0.01475
193.8	0.01475
193.9	0.01475
194	0.01475
194.1	0.01475
194.2	0.01475
194.3	0.01475
194.4	0.01475
194.5	0.0145
194.6	0.0145
194.7	0.0145
194.8	0.0145
194.9	0.0145
195	0.0145
195.1	0.0145
195.2	0.0145
195.3	0.0145
195.4	0.0145
195.5	0.0145
195.6	0.0145
195.7	0.0145
195.8	0.0145
195.9	0.01425
196	0.01425
196.1	0.01425
196.2	0.01425
196.3	0.01425
196.4	0.01425
196.5	0.01425
196.6	0.01425
196.7	0.01425
196.8	0.01425
196.9	0.01425
197	0.01425
197.1	0.01425
197.2	0.01425
197.3	0.01425
197.4	0.01425
197.5	0.01425
197.6	0.01425
197.7	0.01425
197.8	0.01425
197.9	0.0145
198	0.0145
198.1	0.0145
198.2	0.0145
198.3	0.0145
198.4	0.0145
198.5	0.0145
198.6	0.0145
198.7	0.0145
198.8	0.0145
198.9	0.0145
199	0.0145
199.1	0.0145
199.2	0.0145
199.3	0.0145
199.4	0.0145
199.5	0.0145
199.6	0.0145
199.7	0.0145
199.8	0.0145
199.9	0.0145
200	0.0145
[truncated: 14,000 more rows]
