# Supplementary material for: Bayesian inference of kinetic schemes for ion channels by Kalman filtering
Source: eLife journal article supplement (doi:10.7554/elife.62714), 2022-05-04
Supplement: fig4-data11 [file 1_Sim_N_5000_Fluor_MW.xlsx]

## Sheet: Tabelle1
0.1	0
0.2	0
0.3	0
0.4	0
0.5	0
0.6	0
0.7	0
0.8	0
0.9	0
1	0
1.1	0
1.2	0
1.3	0
1.4	0
1.5	0
1.6	0
1.7	0
1.8	0
1.9	0
2	0
2.1	0
2.2	0
2.3	0
2.4	0
2.5	0
2.6	0
2.7	0
2.8	0
2.9	0
3	0
3.1	0
3.2	0
3.3	0
3.4	0
3.5	0
3.6	0
3.7	0
3.8	0
3.9	0
4	0
4.1	0
4.2	0
4.3	0
4.4	0
4.5	0
4.6	0
4.7	0
4.8	0
4.9	0
5	0
5.1	0
5.2	0
5.3	0
5.4	0
5.5	0
5.6	0
5.7	0
5.8	0
5.9	0
6	0
6.1	0
6.2	0
6.3	0
6.4	0
6.5	0
6.6	0
6.7	0
6.8	0
6.9	0
7	0
7.1	0
7.2	0
7.3	0
7.4	0
7.5	0
7.6	0
7.7	0
7.8	0
7.9	0
8	0
8.1	0
8.2	0
8.3	0
8.4	0
8.5	0
8.6	0
8.7	0
8.8	0
8.9	0
9	0
9.1	0
9.2	0
9.3	0
9.4	0
9.5	0
9.6	0
9.7	0
9.8	0
9.9	0
10	0
10.1	0
10.2	0
10.3	0
10.4	0
10.5	0
10.6	0
10.7	0
10.8	0
10.9	0
11	0
11.1	0
11.2	0
11.3	0
11.4	0
11.5	0
11.6	0
11.7	0
11.8	0
11.9	0
12	0
12.1	0
12.2	0
12.3	0
12.4	0
12.5	0
12.6	0
12.7	0
12.8	0
12.9	0
13	0
13.1	0
13.2	0
13.3	0
13.4	0
13.5	0
13.6	0
13.7	0
13.8	0
13.9	0
14	0
14.1	0
14.2	0
14.3	0
14.4	0
14.5	0
14.6	0
14.7	0
14.8	0
14.9	0
15	0
15.1	0
15.2	0
15.3	0
15.4	0
15.5	0
15.6	0
15.7	0
15.8	0
15.9	0
16	0
16.1	0
16.2	0
16.3	0
16.4	0
16.5	0
16.6	0
16.7	0
16.8	0
16.9	0
17	0
17.1	0
17.2	0
17.3	0
17.4	0
17.5	0
17.6	0
17.7	0
17.8	0
17.9	0
18	0
18.1	0
18.2	0
18.3	0
18.4	0
18.5	0
18.6	0
18.7	0
18.8	0
18.9	0
19	0
19.1	0
19.2	0
19.3	0
19.4	0
19.5	0
19.6	0
19.7	0
19.8	0
19.9	0
20	0
20.1	0
20.2	0
20.3	0
20.4	0
20.5	0
20.6	0
20.7	0
20.8	0
20.9	0
21	0
21.1	0
21.2	0
21.3	0
21.4	0
21.5	0
21.6	0
21.7	0
21.8	0
21.9	0
22	0
22.1	0
22.2	0
22.3	0
22.4	0
22.5	0
22.6	0
22.7	0
22.8	0
22.9	0
23	0
23.1	0
23.2	0
23.3	0
23.4	0
23.5	0
23.6	0
23.7	0
23.8	0
23.9	0
24	0
24.1	0
24.2	0
24.3	0
24.4	0
24.5	0
24.6	0
24.7	0
24.8	0
24.9	0
25	0
25.1	0
25.2	0
25.3	0
25.4	0
25.5	0
25.6	0
25.7	0
25.8	0
25.9	0
26	0
26.1	0
26.2	0
26.3	0
26.4	0
26.5	0
26.6	0
26.7	0
26.8	0
26.9	0
27	0
27.1	0
27.2	0
27.3	0
27.4	0
27.5	0
27.6	0
27.7	0
27.8	0
27.9	0
28	0
28.1	0
28.2	0
28.3	0
28.4	0
28.5	0
28.6	0
28.7	0
28.8	0
28.9	0
29	0
29.1	0
29.2	0
29.3	0
29.4	0
29.5	0
29.6	0
29.7	0
29.8	0
29.9	0
30	0
30.1	0
30.2	0
30.3	0
30.4	0
30.5	0
30.6	0
30.7	0
30.8	0
30.9	0
31	0
31.1	0
31.2	0
31.3	0
31.4	0
31.5	0
31.6	0
31.7	0
31.8	0
31.9	0
32	0
32.1	0
32.2	0
32.3	0
32.4	0
32.5	0
32.6	0
32.7	0
32.8	0
32.9	0
33	0
33.1	0
33.2	0
33.3	0
33.4	0
33.5	0
33.6	0
33.7	0
33.8	0
33.9	0
34	0
34.1	0
34.2	0
34.3	0
34.4	0
34.5	0
34.6	0
34.7	0
34.8	0
34.9	0
35	0
35.1	0
35.2	0
35.3	0
35.4	0
35.5	0
35.6	0
35.7	0
35.8	0
35.9	0
36	0
36.1	0
36.2	0
36.3	0
36.4	0
36.5	0
36.6	0
36.7	0
36.8	0
36.9	0
37	0
37.1	0
37.2	0
37.3	0
37.4	0
37.5	0
37.6	0
37.7	0
37.8	0
37.9	0
38	0
38.1	0
38.2	0
38.3	0
38.4	0
38.5	0
38.6	0
38.7	0
38.8	0
38.9	0
39	0
39.1	0
39.2	0
39.3	0
39.4	0
39.5	0
39.6	0
39.7	0
39.8	0
39.9	0
40	0
40.1	0
40.2	0
40.3	0
40.4	0
40.5	0
40.6	0
40.7	0
40.8	0
40.9	0
41	0
41.1	0
41.2	0
41.3	0
41.4	0
41.5	0
41.6	0
41.7	0
41.8	0
41.9	0
42	0
42.1	0
42.2	0
42.3	0
42.4	0
42.5	0
42.6	0
42.7	0
42.8	0
42.9	0
43	0
43.1	0
43.2	0
43.3	0
43.4	0
43.5	0
43.6	0
43.7	0
43.8	0
43.9	0
44	0
44.1	0
44.2	0
44.3	0
44.4	0
44.5	0
44.6	0
44.7	0
44.8	0
44.9	0
45	0
45.1	0
45.2	0
45.3	0
45.4	0
45.5	0
45.6	0
45.7	0
45.8	0
45.9	0
46	0
46.1	0
46.2	0
46.3	0
46.4	0
46.5	0
46.6	0
46.7	0
46.8	0
46.9	0
47	0
47.1	0
47.2	0
47.3	0
47.4	0
47.5	0
47.6	0
47.7	0
47.8	0
47.9	0
48	0
48.1	0
48.2	0
48.3	0
48.4	0
48.5	0
48.6	0
48.7	0
48.8	0
48.9	0
49	0
49.1	0
49.2	0
49.3	0
49.4	0
49.5	0
49.6	0
49.7	0
49.8	0
49.9	0
50	0
50.1	0
50.2	0
50.3	0
50.4	0
50.5	0
50.6	0
50.7	0
50.8	0
50.9	0
51	0
51.1	0
51.2	0
51.3	0
51.4	0
51.5	0
51.6	0
51.7	0
51.8	0
51.9	0
52	0
52.1	0
52.2	0
52.3	0
52.4	0
52.5	0
52.6	0
52.7	0
52.8	0
52.9	0
53	0
53.1	0
53.2	0
53.3	0
53.4	0
53.5	0
53.6	0
53.7	0
53.8	0
53.9	0
54	0
54.1	0
54.2	0
54.3	0
54.4	0
54.5	0
54.6	0
54.7	0
54.8	0
54.9	0
55	0
55.1	0
55.2	0
55.3	0
55.4	0
55.5	0
55.6	0
55.7	0
55.8	0
55.9	0
56	0
56.1	0
56.2	0
56.3	0
56.4	0
56.5	0
56.6	0
56.7	0
56.8	0
56.9	0
57	0
57.1	0
57.2	0
57.3	0
57.4	0
57.5	0
57.6	0
57.7	0
57.8	0
57.9	0
58	0
58.1	0
58.2	0
58.3	0
58.4	0
58.5	0
58.6	0
58.7	0
58.8	0
58.9	0
59	0
59.1	0
59.2	0
59.3	0
59.4	0
59.5	0
59.6	0
59.7	0
59.8	0
59.9	0
60	0
60.1	0
60.2	0
60.3	0
60.4	0
60.5	0
60.6	0
60.7	0
60.8	0
60.9	0
61	0
61.1	0
61.2	0
61.3	0
61.4	0
61.5	0
61.6	0
61.7	0
61.8	0
61.9	0
62	0
62.1	0
62.2	0
62.3	0
62.4	0
62.5	0
62.6	0
62.7	0
62.8	0
62.9	0
63	0
63.1	0
63.2	0
63.3	0
63.4	0
63.5	0
63.6	0
63.7	0
63.8	0
63.9	0
64	0
64.1	0
64.2	0
64.3	0
64.4	0
64.5	0
64.6	0
64.7	0
64.8	0
64.9	0
65	0
65.1	0
65.2	0
65.3	0
65.4	0
65.5	0
65.6	0
65.7	0
65.8	0
65.9	0
66	0
66.1	0
66.2	0
66.3	0
66.4	0
66.5	0
66.6	0
66.7	0
66.8	0
66.9	0
67	0
67.1	0
67.2	0
67.3	0
67.4	0
67.5	0
67.6	0
67.7	0
67.8	0
67.9	0
68	0
68.1	0
68.2	0
68.3	0
68.4	0
68.5	0
68.6	0
68.7	0
68.8	0
68.9	0
69	0
69.1	0
69.2	0
69.3	0
69.4	0
69.5	0
69.6	0
69.7	0
69.8	0
69.9	0
70	0
70.1	0
70.2	0
70.3	0
70.4	0
70.5	0
70.6	0
70.7	0
70.8	0
70.9	0
71	0
71.1	0
71.2	0
71.3	0
71.4	0
71.5	0
71.6	0
71.7	0
71.8	0
71.9	0
72	0
72.1	0
72.2	0
72.3	0
72.4	0
72.5	0
72.6	0
72.7	0
72.8	0
72.9	0
73	0
73.1	0
73.2	0
73.3	0
73.4	0
73.5	0
73.6	0
73.7	0
73.8	0
73.9	0
74	0
74.1	0
74.2	0
74.3	0
74.4	0
74.5	0
74.6	0
74.7	0
74.8	0
74.9	0
75	0
75.1	0
75.2	0
75.3	0
75.4	0
75.5	0
75.6	0
75.7	0
75.8	0
75.9	0
76	0
76.1	0
76.2	0
76.3	0
76.4	0
76.5	0
76.6	0
76.7	0
76.8	0
76.9	0
77	0
77.1	0
77.2	0
77.3	0
77.4	0
77.5	0
77.6	0
77.7	0
77.8	0
77.9	0
78	0
78.1	0
78.2	0
78.3	0
78.4	0
78.5	0
78.6	0
78.7	0
78.8	0
78.9	0
79	0
79.1	0
79.2	0
79.3	0
79.4	0
79.5	0
79.6	0
79.7	0
79.8	0
79.9	0
80	0
80.1	0
80.2	0
80.3	0
80.4	0
80.5	0
80.6	0
80.7	0
80.8	0
80.9	0
81	0
81.1	0
81.2	0
81.3	0
81.4	0
81.5	0
81.6	0
81.7	0
81.8	0
81.9	0
82	0
82.1	0
82.2	0
82.3	0
82.4	0
82.5	0
82.6	0
82.7	0
82.8	0
82.9	0
83	0
83.1	0
83.2	0
83.3	0
83.4	0
83.5	0
83.6	0
83.7	0
83.8	0
83.9	0
84	0
84.1	0
84.2	0
84.3	0
84.4	0
84.5	0
84.6	0
84.7	0
84.8	0
84.9	0
85	0
85.1	0
85.2	0
85.3	0
85.4	0
85.5	0
85.6	0
85.7	0
85.8	0
85.9	0
86	0
86.1	0
86.2	0
86.3	0
86.4	0
86.5	0
86.6	0
86.7	0
86.8	0
86.9	0
87	0
87.1	0
87.2	0
87.3	0
87.4	0
87.5	0
87.6	0
87.7	0
87.8	0
87.9	0
88	0
88.1	0
88.2	0
88.3	0
88.4	0
88.5	0
88.6	0
88.7	0
88.8	0
88.9	0
89	0
89.1	0
89.2	0
89.3	0
89.4	0
89.5	0
89.6	0
89.7	0
89.8	0
89.9	0
90	0
90.1	0
90.2	0
90.3	0
90.4	0
90.5	0
90.6	0
90.7	0
90.8	0
90.9	0
91	0
91.1	0
91.2	0
91.3	0
91.4	0
91.5	0
91.6	0
91.7	0
91.8	0
91.9	0
92	0
92.1	0
92.2	0
92.3	0
92.4	0
92.5	0
92.6	0
92.7	0
92.8	0
92.9	0
93	0
93.1	0
93.2	0
93.3	0
93.4	0
93.5	0
93.6	0
93.7	0
93.8	0
93.9	0
94	0
94.1	0
94.2	0
94.3	0
94.4	0
94.5	0
94.6	0
94.7	0
94.8	0
94.9	0
95	0
95.1	0
95.2	0
95.3	0
95.4	0
95.5	0
95.6	0
95.7	0
95.8	0
95.9	0
96	0
96.1	0
96.2	0
96.3	0
96.4	0
96.5	0
96.6	0
96.7	0
96.8	0
96.9	0
97	0
97.1	0
97.2	0
97.3	0
97.4	0
97.5	0
97.6	0
97.7	0
97.8	0
97.9	0
98	0
98.1	0
98.2	0
98.3	0
98.4	0
98.5	0
98.6	0
98.7	0
98.8	0
98.9	0
99	0
99.1	0
99.2	0
99.3	0
99.4	0
99.5	0
99.6	0
99.7	0
99.8	0
99.9	0
100	0
100.1	0.0014
100.2	0.0024
100.3	0.004
100.4	0.0061
100.5	0.0076
100.6	0.0101
100.7	0.0111
100.8	0.0128
100.9	0.0141
101	0.015
101.1	0.0169
101.2	0.019
101.3	0.0205
101.4	0.0221
101.5	0.024
101.6	0.0254
101.7	0.0271
101.8	0.0285
101.9	0.0305
102	0.032
102.1	0.0336
102.2	0.035
102.3	0.0362
102.4	0.038
102.5	0.0394
102.6	0.0414
102.7	0.0423
102.8	0.0431
102.9	0.0437
103	0.0445
103.1	0.0458
103.2	0.0472
103.3	0.0487
103.4	0.0495
103.5	0.0506
103.6	0.0514
103.7	0.0518
103.8	0.0541
103.9	0.0554
104	0.0569
104.1	0.0577
104.2	0.0584
104.3	0.0598
104.4	0.061
104.5	0.0612
104.6	0.0617
104.7	0.0617
104.8	0.0624
104.9	0.0636
105	0.0649
105.1	0.0653
105.2	0.0667
105.3	0.0679
105.4	0.0687
105.5	0.0693
105.6	0.0699
105.7	0.0711
105.8	0.0722
105.9	0.0734
106	0.0736
106.1	0.075
106.2	0.0761
106.3	0.0775
106.4	0.0785
106.5	0.0794
106.6	0.0801
106.7	0.0815
106.8	0.0822
106.9	0.0827
107	0.084
107.1	0.0847
107.2	0.0855
107.3	0.0857
107.4	0.0869
107.5	0.0865
107.6	0.0869
107.7	0.0873
107.8	0.0872
107.9	0.0871
108	0.0875
108.1	0.0881
108.2	0.0894
108.3	0.0893
108.4	0.0898
108.5	0.0903
108.6	0.0913
108.7	0.0919
108.8	0.0925
108.9	0.0935
109	0.0945
109.1	0.0955
109.2	0.0962
109.3	0.096
109.4	0.0971
109.5	0.098
109.6	0.0992
109.7	0.0994
109.8	0.1002
109.9	0.1011
110	0.1014
110.1	0.1021
110.2	0.1032
110.3	0.103
110.4	0.1035
110.5	0.1047
110.6	0.1051
110.7	0.1062
110.8	0.106
110.9	0.1079
111	0.108
111.1	0.1091
111.2	0.1104
111.3	0.1112
111.4	0.1112
111.5	0.1118
111.6	0.1129
111.7	0.1143
111.8	0.1143
111.9	0.1143
112	0.1152
112.1	0.1157
112.2	0.1167
112.3	0.1162
112.4	0.1173
112.5	0.1179
112.6	0.1178
112.7	0.1173
112.8	0.1169
112.9	0.1179
113	0.1179
113.1	0.119
113.2	0.1188
113.3	0.1194
113.4	0.12
113.5	0.1199
113.6	0.1205
113.7	0.1208
113.8	0.1212
113.9	0.1215
114	0.1214
114.1	0.1217
114.2	0.1225
114.3	0.124
114.4	0.1244
114.5	0.1243
114.6	0.1245
114.7	0.1249
114.8	0.1251
114.9	0.1254
115	0.1256
115.1	0.1248
115.2	0.1247
115.3	0.1251
115.4	0.1256
115.5	0.125
115.6	0.1267
115.7	0.127
115.8	0.1275
115.9	0.1272
116	0.1276
116.1	0.1282
116.2	0.1285
116.3	0.1295
116.4	0.1297
116.5	0.129
116.6	0.1295
116.7	0.13
116.8	0.1306
116.9	0.1314
117	0.1318
117.1	0.132
117.2	0.1325
117.3	0.1323
117.4	0.1327
117.5	0.1322
117.6	0.1331
117.7	0.1331
117.8	0.1333
117.9	0.1335
118	0.1337
118.1	0.1338
118.2	0.1335
118.3	0.1339
118.4	0.1346
118.5	0.1353
118.6	0.136
118.7	0.1366
118.8	0.1359
118.9	0.1367
119	0.1365
119.1	0.1369
119.2	0.137
119.3	0.1371
119.4	0.1372
119.5	0.1366
119.6	0.1363
119.7	0.1355
119.8	0.135
119.9	0.1354
120	0.1355
120.1	0.1356
120.2	0.1353
120.3	0.1364
120.4	0.1365
120.5	0.1356
120.6	0.1362
120.7	0.1366
120.8	0.1361
120.9	0.1365
121	0.1371
121.1	0.137
121.2	0.1366
121.3	0.1373
121.4	0.1386
121.5	0.1383
121.6	0.138
121.7	0.1389
121.8	0.1389
121.9	0.1386
122	0.1384
122.1	0.1382
122.2	0.1385
122.3	0.1389
122.4	0.1392
122.5	0.139
122.6	0.1384
122.7	0.1376
122.8	0.138
122.9	0.1379
123	0.1378
123.1	0.1384
123.2	0.1388
123.3	0.1384
123.4	0.138
123.5	0.137
123.6	0.1363
123.7	0.1358
123.8	0.1367
123.9	0.1357
124	0.1349
124.1	0.1346
124.2	0.135
124.3	0.136
124.4	0.1367
124.5	0.1378
124.6	0.137
124.7	0.1379
124.8	0.1385
124.9	0.1388
125	0.1398
125.1	0.1398
125.2	0.1401
125.3	0.14
125.4	0.1401
125.5	0.141
125.6	0.1412
125.7	0.1412
125.8	0.1417
125.9	0.141
126	0.1414
126.1	0.1407
126.2	0.1408
126.3	0.1415
126.4	0.1419
126.5	0.1414
126.6	0.1418
126.7	0.1417
126.8	0.1412
126.9	0.1404
127	0.1399
127.1	0.1398
127.2	0.1395
127.3	0.1396
127.4	0.1392
127.5	0.139
127.6	0.1388
127.7	0.1393
127.8	0.1389
127.9	0.1386
128	0.1391
128.1	0.1395
128.2	0.1396
128.3	0.1392
128.4	0.1399
128.5	0.1407
128.6	0.1408
128.7	0.1401
128.8	0.1409
128.9	0.1417
129	0.1421
129.1	0.1424
129.2	0.143
129.3	0.1432
129.4	0.1424
129.5	0.1433
129.6	0.1437
129.7	0.1432
129.8	0.1432
129.9	0.1433
130	0.1434
130.1	0.1434
130.2	0.1429
130.3	0.1422
130.4	0.1428
130.5	0.1421
130.6	0.1415
130.7	0.1413
130.8	0.1406
130.9	0.1405
131	0.1409
131.1	0.1397
131.2	0.1415
131.3	0.1409
131.4	0.1403
131.5	0.1407
131.6	0.1412
131.7	0.1421
131.8	0.1424
131.9	0.1421
132	0.1426
132.1	0.1424
132.2	0.143
132.3	0.1425
132.4	0.1416
132.5	0.1419
132.6	0.1416
132.7	0.1413
132.8	0.1408
132.9	0.1401
133	0.1408
133.1	0.1406
133.2	0.1403
133.3	0.1397
133.4	0.1392
133.5	0.139
133.6	0.1392
133.7	0.14
133.8	0.14
133.9	0.1403
134	0.1395
134.1	0.1393
134.2	0.1411
134.3	0.1402
134.4	0.1399
134.5	0.141
134.6	0.1406
134.7	0.1411
134.8	0.1418
134.9	0.1415
135	0.1417
135.1	0.1415
135.2	0.1404
135.3	0.1407
135.4	0.1413
135.5	0.142
135.6	0.1414
135.7	0.1408
135.8	0.1406
135.9	0.1406
136	0.1406
136.1	0.1404
136.2	0.1402
136.3	0.1395
136.4	0.1397
136.5	0.1387
136.6	0.1379
136.7	0.1381
136.8	0.1389
136.9	0.1382
137	0.1382
137.1	0.137
137.2	0.1373
137.3	0.1377
137.4	0.1383
137.5	0.1389
137.6	0.1393
137.7	0.1399
137.8	0.1401
137.9	0.1407
138	0.1409
138.1	0.1406
138.2	0.1396
138.3	0.1401
138.4	0.1401
138.5	0.14
138.6	0.1404
138.7	0.1404
138.8	0.1398
138.9	0.1403
139	0.1389
139.1	0.1385
139.2	0.1391
139.3	0.1395
139.4	0.139
139.5	0.1385
139.6	0.1385
139.7	0.1382
139.8	0.1379
139.9	0.1387
140	0.1395
140.1	0.1394
140.2	0.1388
140.3	0.1388
140.4	0.1381
140.5	0.1378
140.6	0.1381
140.7	0.1387
140.8	0.1382
140.9	0.1378
141	0.1385
141.1	0.1392
141.2	0.14
141.3	0.141
141.4	0.1411
141.5	0.1396
141.6	0.1395
141.7	0.1394
141.8	0.1395
141.9	0.14
142	0.1399
142.1	0.1399
142.2	0.1395
142.3	0.1391
142.4	0.1392
142.5	0.1407
142.6	0.1407
142.7	0.1401
142.8	0.1395
142.9	0.1396
143	0.1398
143.1	0.1399
143.2	0.1394
143.3	0.1389
143.4	0.1383
143.5	0.1391
143.6	0.1384
143.7	0.139
143.8	0.1396
143.9	0.1399
144	0.1404
144.1	0.1407
144.2	0.1408
144.3	0.141
144.4	0.1414
144.5	0.1423
144.6	0.142
144.7	0.1412
144.8	0.1407
144.9	0.1417
145	0.1415
145.1	0.1412
145.2	0.1415
145.3	0.1412
145.4	0.1419
145.5	0.1427
145.6	0.1417
145.7	0.1425
145.8	0.1426
145.9	0.1422
146	0.1429
146.1	0.1426
146.2	0.1422
146.3	0.1428
146.4	0.1434
146.5	0.1437
146.6	0.1442
146.7	0.1448
146.8	0.1445
146.9	0.1444
147	0.1442
147.1	0.1435
147.2	0.1435
147.3	0.1428
147.4	0.1429
147.5	0.1444
147.6	0.1445
147.7	0.1441
147.8	0.144
147.9	0.1442
148	0.1434
148.1	0.144
148.2	0.1431
148.3	0.1428
148.4	0.1428
148.5	0.1423
148.6	0.1433
148.7	0.1435
148.8	0.1447
148.9	0.1437
149	0.1445
149.1	0.145
149.2	0.1448
149.3	0.1443
149.4	0.1447
149.5	0.1444
149.6	0.1445
149.7	0.1444
149.8	0.1443
149.9	0.144
150	0.1434
150.1	0.144
150.2	0.1426
150.3	0.1423
150.4	0.1416
150.5	0.1423
150.6	0.1437
150.7	0.1446
150.8	0.1451
150.9	0.1461
151	0.1472
151.1	0.1479
151.2	0.148
151.3	0.1483
151.4	0.1477
151.5	0.1477
151.6	0.1486
151.7	0.1485
151.8	0.1491
151.9	0.1492
152	0.15
152.1	0.1501
152.2	0.1507
152.3	0.1516
152.4	0.1515
152.5	0.1519
152.6	0.1524
152.7	0.1518
152.8	0.1508
152.9	0.1503
153	0.1508
153.1	0.1506
153.2	0.1508
153.3	0.151
153.4	0.15
153.5	0.1498
153.6	0.1501
153.7	0.15
153.8	0.1508
153.9	0.1502
154	0.1501
154.1	0.1508
154.2	0.1507
154.3	0.1506
154.4	0.1508
154.5	0.1506
154.6	0.1504
154.7	0.1501
154.8	0.1499
154.9	0.1504
155	0.15
155.1	0.1496
155.2	0.1488
155.3	0.1493
155.4	0.1504
155.5	0.1496
155.6	0.1496
155.7	0.1499
155.8	0.1506
155.9	0.1519
156	0.1514
156.1	0.1514
156.2	0.152
156.3	0.1524
156.4	0.1526
156.5	0.1536
156.6	0.1544
156.7	0.1553
156.8	0.1551
156.9	0.155
157	0.155
157.1	0.1551
157.2	0.1536
157.3	0.1538
157.4	0.1548
157.5	0.1546
157.6	0.1539
157.7	0.1543
157.8	0.1542
157.9	0.1536
158	0.1535
158.1	0.1525
158.2	0.1523
158.3	0.1525
158.4	0.1524
158.5	0.1524
158.6	0.1524
158.7	0.152
158.8	0.1516
158.9	0.1523
159	0.1524
159.1	0.1515
159.2	0.1522
159.3	0.1517
159.4	0.1516
159.5	0.1522
159.6	0.1524
159.7	0.1526
159.8	0.1529
159.9	0.1527
160	0.1525
160.1	0.1519
160.2	0.1518
160.3	0.1532
160.4	0.1537
160.5	0.1528
160.6	0.1523
160.7	0.1528
160.8	0.1524
160.9	0.1528
161	0.1523
161.1	0.1525
161.2	0.1519
161.3	0.1519
161.4	0.1521
161.5	0.1516
161.6	0.1512
161.7	0.1517
161.8	0.1504
161.9	0.1508
162	0.1502
162.1	0.1503
162.2	0.1502
162.3	0.151
162.4	0.1505
162.5	0.1502
162.6	0.1503
162.7	0.15
162.8	0.15
162.9	0.1496
163	0.1488
163.1	0.1495
163.2	0.1491
163.3	0.1484
163.4	0.1489
163.5	0.1494
163.6	0.1495
163.7	0.1487
163.8	0.1495
163.9	0.1496
164	0.1499
164.1	0.1491
164.2	0.1489
164.3	0.1487
164.4	0.1489
164.5	0.1493
164.6	0.1493
164.7	0.1486
164.8	0.149
164.9	0.1486
165	0.1492
165.1	0.1492
165.2	0.1495
165.3	0.1491
165.4	0.1491
165.5	0.1494
165.6	0.1501
165.7	0.15
165.8	0.1494
165.9	0.1487
166	0.1483
166.1	0.1479
166.2	0.1487
166.3	0.1482
166.4	0.1484
166.5	0.1485
166.6	0.149
166.7	0.1489
166.8	0.1485
166.9	0.1492
167	0.1487
167.1	0.1478
167.2	0.1479
167.3	0.1477
167.4	0.1476
167.5	0.1478
167.6	0.1478
167.7	0.1488
167.8	0.1488
167.9	0.1493
168	0.1493
168.1	0.1489
168.2	0.148
168.3	0.1482
168.4	0.1481
168.5	0.1481
168.6	0.1486
168.7	0.1491
168.8	0.1494
168.9	0.1498
169	0.1499
169.1	0.1499
169.2	0.1497
169.3	0.1507
169.4	0.15
169.5	0.1499
169.6	0.1504
169.7	0.1503
169.8	0.1501
169.9	0.1508
170	0.1508
170.1	0.1503
170.2	0.1491
170.3	0.1484
170.4	0.1497
170.5	0.1493
170.6	0.1495
170.7	0.1489
170.8	0.148
170.9	0.148
171	0.1476
171.1	0.1476
171.2	0.1479
171.3	0.148
171.4	0.148
171.5	0.147
171.6	0.1475
171.7	0.148
171.8	0.1487
171.9	0.1489
172	0.1498
172.1	0.1496
172.2	0.1498
172.3	0.1491
172.4	0.1491
172.5	0.1485
172.6	0.1487
172.7	0.1482
172.8	0.1484
172.9	0.149
173	0.1488
173.1	0.1493
173.2	0.1501
173.3	0.1503
173.4	0.1509
173.5	0.1508
173.6	0.1511
173.7	0.1504
173.8	0.15
173.9	0.1495
174	0.1498
174.1	0.1498
174.2	0.1506
174.3	0.1513
174.4	0.1515
174.5	0.1509
174.6	0.1512
174.7	0.1517
174.8	0.1514
174.9	0.1521
175	0.1516
175.1	0.1513
175.2	0.1506
175.3	0.1514
175.4	0.1523
175.5	0.1521
175.6	0.1517
175.7	0.1519
175.8	0.1508
175.9	0.1504
176	0.15
176.1	0.1501
176.2	0.1498
176.3	0.1501
176.4	0.1508
176.5	0.1509
176.6	0.1508
176.7	0.1506
176.8	0.1496
176.9	0.1496
177	0.1496
177.1	0.1494
177.2	0.1491
177.3	0.1497
177.4	0.15
177.5	0.149
177.6	0.1488
177.7	0.1476
177.8	0.1476
177.9	0.1476
178	0.1482
178.1	0.1486
178.2	0.1484
178.3	0.1487
178.4	0.1489
178.5	0.1486
178.6	0.1477
178.7	0.1481
178.8	0.1472
178.9	0.147
179	0.1476
179.1	0.1472
179.2	0.1473
179.3	0.1475
179.4	0.1475
179.5	0.1471
179.6	0.1468
179.7	0.1476
179.8	0.1481
179.9	0.146
180	0.1454
180.1	0.1455
180.2	0.1451
180.3	0.1448
180.4	0.1451
180.5	0.1454
180.6	0.1452
180.7	0.1446
180.8	0.1446
180.9	0.1444
181	0.1449
181.1	0.1446
181.2	0.1444
181.3	0.144
181.4	0.1444
181.5	0.1443
181.6	0.1452
181.7	0.1451
181.8	0.1447
181.9	0.1445
182	0.1449
182.1	0.1447
182.2	0.145
182.3	0.1454
182.4	0.1454
182.5	0.1448
182.6	0.1456
182.7	0.1451
182.8	0.1455
182.9	0.1465
183	0.1466
183.1	0.1475
183.2	0.1477
183.3	0.1474
183.4	0.1471
183.5	0.1472
183.6	0.1466
183.7	0.1471
183.8	0.1468
183.9	0.147
184	0.1474
184.1	0.1464
184.2	0.1469
184.3	0.1469
184.4	0.147
184.5	0.1482
184.6	0.148
184.7	0.1478
184.8	0.1483
184.9	0.1488
185	0.1492
185.1	0.149
185.2	0.1489
185.3	0.1495
185.4	0.1491
185.5	0.1485
185.6	0.1475
185.7	0.1466
185.8	0.1458
185.9	0.1458
186	0.1464
186.1	0.1462
186.2	0.1468
186.3	0.1454
186.4	0.1452
186.5	0.1457
186.6	0.1452
186.7	0.1443
186.8	0.1445
186.9	0.1441
187	0.1448
187.1	0.1437
187.2	0.1441
187.3	0.1443
187.4	0.1449
187.5	0.1448
187.6	0.1451
187.7	0.1459
187.8	0.145
187.9	0.1451
188	0.1444
188.1	0.144
188.2	0.1453
188.3	0.1446
188.4	0.1444
188.5	0.1446
188.6	0.1442
188.7	0.1444
188.8	0.1441
188.9	0.1454
189	0.1449
189.1	0.1452
189.2	0.1449
189.3	0.1459
189.4	0.1466
189.5	0.1464
189.6	0.1469
189.7	0.1467
189.8	0.1472
189.9	0.147
190	0.1471
190.1	0.1479
190.2	0.1477
190.3	0.1482
190.4	0.1489
190.5	0.1493
190.6	0.1483
190.7	0.1489
190.8	0.1493
190.9	0.149
191	0.1479
191.1	0.147
191.2	0.1463
191.3	0.1462
191.4	0.1452
191.5	0.1448
191.6	0.1453
191.7	0.1454
191.8	0.145
191.9	0.1455
192	0.1457
192.1	0.1455
192.2	0.1456
192.3	0.1458
192.4	0.1452
192.5	0.1451
192.6	0.1453
192.7	0.1455
192.8	0.1448
192.9	0.1457
193	0.146
193.1	0.1461
193.2	0.1462
193.3	0.1456
193.4	0.1452
193.5	0.145
193.6	0.1434
193.7	0.1435
193.8	0.144
193.9	0.1437
194	0.1432
194.1	0.144
194.2	0.1449
194.3	0.1452
194.4	0.146
194.5	0.1451
194.6	0.1451
194.7	0.1442
194.8	0.1443
194.9	0.1441
195	0.1444
195.1	0.1443
195.2	0.1446
195.3	0.1436
195.4	0.1439
195.5	0.1429
195.6	0.1428
195.7	0.143
195.8	0.1439
195.9	0.1438
196	0.1435
196.1	0.1437
196.2	0.1429
196.3	0.1428
196.4	0.144
196.5	0.1442
196.6	0.1447
196.7	0.1452
196.8	0.145
196.9	0.1448
197	0.145
197.1	0.145
197.2	0.1441
197.3	0.1451
197.4	0.1459
197.5	0.1458
197.6	0.1463
197.7	0.1461
197.8	0.1465
197.9	0.1463
198	0.1466
198.1	0.1468
198.2	0.1469
198.3	0.1469
198.4	0.1474
198.5	0.1467
198.6	0.1464
198.7	0.1461
198.8	0.1458
198.9	0.1458
199	0.1455
199.1	0.1451
199.2	0.1458
199.3	0.1456
199.4	0.1446
199.5	0.1453
199.6	0.146
199.7	0.146
199.8	0.1464
199.9	0.1462
200	0.1459
[truncated: 14,000 more rows]
