# Supplementary material for: Bayesian inference of kinetic schemes for ion channels by Kalman filtering
Source: eLife journal article supplement (doi:10.7554/elife.62714), 2022-05-04
Supplement: fig4-data11 [file 1_Sim_N_5000_Strom_MW.xlsx]

## Sheet: Tabelle1
0.1	0
0.2	0
0.3	0
0.4	0
0.5	0
0.6	0
0.7	0
0.8	0
0.9	0
1	0
1.1	0
1.2	0
1.3	0
1.4	0
1.5	0
1.6	0
1.7	0
1.8	0
1.9	0
2	0
2.1	0
2.2	0
2.3	0
2.4	0
2.5	0
2.6	0
2.7	0
2.8	0
2.9	0
3	0
3.1	0
3.2	0
3.3	0
3.4	0
3.5	0
3.6	0
3.7	0
3.8	0
3.9	0
4	0
4.1	0
4.2	0
4.3	0
4.4	0
4.5	0
4.6	0
4.7	0
4.8	0
4.9	0
5	0
5.1	0
5.2	0
5.3	0
5.4	0
5.5	0
5.6	0
5.7	0
5.8	0
5.9	0
6	0
6.1	0
6.2	0
6.3	0
6.4	0
6.5	0
6.6	0
6.7	0
6.8	0
6.9	0
7	0
7.1	0
7.2	0
7.3	0
7.4	0
7.5	0
7.6	0
7.7	0
7.8	0
7.9	0
8	0
8.1	0
8.2	0
8.3	0
8.4	0
8.5	0
8.6	0
8.7	0
8.8	0
8.9	0
9	0
9.1	0
9.2	0
9.3	0
9.4	0
9.5	0
9.6	0
9.7	0
9.8	0
9.9	0
10	0
10.1	0
10.2	0
10.3	0
10.4	0
10.5	0
10.6	0
10.7	0
10.8	0
10.9	0
11	0
11.1	0
11.2	0
11.3	0
11.4	0
11.5	0
11.6	0
11.7	0
11.8	0
11.9	0
12	0
12.1	0
12.2	0
12.3	0
12.4	0
12.5	0
12.6	0
12.7	0
12.8	0
12.9	0
13	0
13.1	0
13.2	0
13.3	0
13.4	0
13.5	0
13.6	0
13.7	0
13.8	0
13.9	0
14	0
14.1	0
14.2	0
14.3	0
14.4	0
14.5	0
14.6	0
14.7	0
14.8	0
14.9	0
15	0
15.1	0
15.2	0
15.3	0
15.4	0
15.5	0
15.6	0
15.7	0
15.8	0
15.9	0
16	0
16.1	0
16.2	0
16.3	0
16.4	0
16.5	0
16.6	0
16.7	0
16.8	0
16.9	0
17	0
17.1	0
17.2	0
17.3	0
17.4	0
17.5	0
17.6	0
17.7	0
17.8	0
17.9	0
18	0
18.1	0
18.2	0
18.3	0
18.4	0
18.5	0
18.6	0
18.7	0
18.8	0
18.9	0
19	0
19.1	0
19.2	0
19.3	0
19.4	0
19.5	0
19.6	0
19.7	0
19.8	0
19.9	0
20	0
20.1	0
20.2	0
20.3	0
20.4	0
20.5	0
20.6	0
20.7	0
20.8	0
20.9	0
21	0
21.1	0
21.2	0
21.3	0
21.4	0
21.5	0
21.6	0
21.7	0
21.8	0
21.9	0
22	0
22.1	0
22.2	0
22.3	0
22.4	0
22.5	0
22.6	0
22.7	0
22.8	0
22.9	0
23	0
23.1	0
23.2	0
23.3	0
23.4	0
23.5	0
23.6	0
23.7	0
23.8	0
23.9	0
24	0
24.1	0
24.2	0
24.3	0
24.4	0
24.5	0
24.6	0
24.7	0
24.8	0
24.9	0
25	0
25.1	0
25.2	0
25.3	0
25.4	0
25.5	0
25.6	0
25.7	0
25.8	0
25.9	0
26	0
26.1	0
26.2	0
26.3	0
26.4	0
26.5	0
26.6	0
26.7	0
26.8	0
26.9	0
27	0
27.1	0
27.2	0
27.3	0
27.4	0
27.5	0
27.6	0
27.7	0
27.8	0
27.9	0
28	0
28.1	0
28.2	0
28.3	0
28.4	0
28.5	0
28.6	0
28.7	0
28.8	0
28.9	0
29	0
29.1	0
29.2	0
29.3	0
29.4	0
29.5	0
29.6	0
29.7	0
29.8	0
29.9	0
30	0
30.1	0
30.2	0
30.3	0
30.4	0
30.5	0
30.6	0
30.7	0
30.8	0
30.9	0
31	0
31.1	0
31.2	0
31.3	0
31.4	0
31.5	0
31.6	0
31.7	0
31.8	0
31.9	0
32	0
32.1	0
32.2	0
32.3	0
32.4	0
32.5	0
32.6	0
32.7	0
32.8	0
32.9	0
33	0
33.1	0
33.2	0
33.3	0
33.4	0
33.5	0
33.6	0
33.7	0
33.8	0
33.9	0
34	0
34.1	0
34.2	0
34.3	0
34.4	0
34.5	0
34.6	0
34.7	0
34.8	0
34.9	0
35	0
35.1	0
35.2	0
35.3	0
35.4	0
35.5	0
35.6	0
35.7	0
35.8	0
35.9	0
36	0
36.1	0
36.2	0
36.3	0
36.4	0
36.5	0
36.6	0
36.7	0
36.8	0
36.9	0
37	0
37.1	0
37.2	0
37.3	0
37.4	0
37.5	0
37.6	0
37.7	0
37.8	0
37.9	0
38	0
38.1	0
38.2	0
38.3	0
38.4	0
38.5	0
38.6	0
38.7	0
38.8	0
38.9	0
39	0
39.1	0
39.2	0
39.3	0
39.4	0
39.5	0
39.6	0
39.7	0
39.8	0
39.9	0
40	0
40.1	0
40.2	0
40.3	0
40.4	0
40.5	0
40.6	0
40.7	0
40.8	0
40.9	0
41	0
41.1	0
41.2	0
41.3	0
41.4	0
41.5	0
41.6	0
41.7	0
41.8	0
41.9	0
42	0
42.1	0
42.2	0
42.3	0
42.4	0
42.5	0
42.6	0
42.7	0
42.8	0
42.9	0
43	0
43.1	0
43.2	0
43.3	0
43.4	0
43.5	0
43.6	0
43.7	0
43.8	0
43.9	0
44	0
44.1	0
44.2	0
44.3	0
44.4	0
44.5	0
44.6	0
44.7	0
44.8	0
44.9	0
45	0
45.1	0
45.2	0
45.3	0
45.4	0
45.5	0
45.6	0
45.7	0
45.8	0
45.9	0
46	0
46.1	0
46.2	0
46.3	0
46.4	0
46.5	0
46.6	0
46.7	0
46.8	0
46.9	0
47	0
47.1	0
47.2	0
47.3	0
47.4	0
47.5	0
47.6	0
47.7	0
47.8	0
47.9	0
48	0
48.1	0
48.2	0
48.3	0
48.4	0
48.5	0
48.6	0
48.7	0
48.8	0
48.9	0
49	0
49.1	0
49.2	0
49.3	0
49.4	0
49.5	0
49.6	0
49.7	0
49.8	0
49.9	0
50	0
50.1	0
50.2	0
50.3	0
50.4	0
50.5	0
50.6	0
50.7	0
50.8	0
50.9	0
51	0
51.1	0
51.2	0
51.3	0
51.4	0
51.5	0
51.6	0
51.7	0
51.8	0
51.9	0
52	0
52.1	0
52.2	0
52.3	0
52.4	0
52.5	0
52.6	0
52.7	0
52.8	0
52.9	0
53	0
53.1	0
53.2	0
53.3	0
53.4	0
53.5	0
53.6	0
53.7	0
53.8	0
53.9	0
54	0
54.1	0
54.2	0
54.3	0
54.4	0
54.5	0
54.6	0
54.7	0
54.8	0
54.9	0
55	0
55.1	0
55.2	0
55.3	0
55.4	0
55.5	0
55.6	0
55.7	0
55.8	0
55.9	0
56	0
56.1	0
56.2	0
56.3	0
56.4	0
56.5	0
56.6	0
56.7	0
56.8	0
56.9	0
57	0
57.1	0
57.2	0
57.3	0
57.4	0
57.5	0
57.6	0
57.7	0
57.8	0
57.9	0
58	0
58.1	0
58.2	0
58.3	0
58.4	0
58.5	0
58.6	0
58.7	0
58.8	0
58.9	0
59	0
59.1	0
59.2	0
59.3	0
59.4	0
59.5	0
59.6	0
59.7	0
59.8	0
59.9	0
60	0
60.1	0
60.2	0
60.3	0
60.4	0
60.5	0
60.6	0
60.7	0
60.8	0
60.9	0
61	0
61.1	0
61.2	0
61.3	0
61.4	0
61.5	0
61.6	0
61.7	0
61.8	0
61.9	0
62	0
62.1	0
62.2	0
62.3	0
62.4	0
62.5	0
62.6	0
62.7	0
62.8	0
62.9	0
63	0
63.1	0
63.2	0
63.3	0
63.4	0
63.5	0
63.6	0
63.7	0
63.8	0
63.9	0
64	0
64.1	0
64.2	0
64.3	0
64.4	0
64.5	0
64.6	0
64.7	0
64.8	0
64.9	0
65	0
65.1	0
65.2	0
65.3	0
65.4	0
65.5	0
65.6	0
65.7	0
65.8	0
65.9	0
66	0
66.1	0
66.2	0
66.3	0
66.4	0
66.5	0
66.6	0
66.7	0
66.8	0
66.9	0
67	0
67.1	0
67.2	0
67.3	0
67.4	0
67.5	0
67.6	0
67.7	0
67.8	0
67.9	0
68	0
68.1	0
68.2	0
68.3	0
68.4	0
68.5	0
68.6	0
68.7	0
68.8	0
68.9	0
69	0
69.1	0
69.2	0
69.3	0
69.4	0
69.5	0
69.6	0
69.7	0
69.8	0
69.9	0
70	0
70.1	0
70.2	0
70.3	0
70.4	0
70.5	0
70.6	0
70.7	0
70.8	0
70.9	0
71	0
71.1	0
71.2	0
71.3	0
71.4	0
71.5	0
71.6	0
71.7	0
71.8	0
71.9	0
72	0
72.1	0
72.2	0
72.3	0
72.4	0
72.5	0
72.6	0
72.7	0
72.8	0
72.9	0
73	0
73.1	0
73.2	0
73.3	0
73.4	0
73.5	0
73.6	0
73.7	0
73.8	0
73.9	0
74	0
74.1	0
74.2	0
74.3	0
74.4	0
74.5	0
74.6	0
74.7	0
74.8	0
74.9	0
75	0
75.1	0
75.2	0
75.3	0
75.4	0
75.5	0
75.6	0
75.7	0
75.8	0
75.9	0
76	0
76.1	0
76.2	0
76.3	0
76.4	0
76.5	0
76.6	0
76.7	0
76.8	0
76.9	0
77	0
77.1	0
77.2	0
77.3	0
77.4	0
77.5	0
77.6	0
77.7	0
77.8	0
77.9	0
78	0
78.1	0
78.2	0
78.3	0
78.4	0
78.5	0
78.6	0
78.7	0
78.8	0
78.9	0
79	0
79.1	0
79.2	0
79.3	0
79.4	0
79.5	0
79.6	0
79.7	0
79.8	0
79.9	0
80	0
80.1	0
80.2	0
80.3	0
80.4	0
80.5	0
80.6	0
80.7	0
80.8	0
80.9	0
81	0
81.1	0
81.2	0
81.3	0
81.4	0
81.5	0
81.6	0
81.7	0
81.8	0
81.9	0
82	0
82.1	0
82.2	0
82.3	0
82.4	0
82.5	0
82.6	0
82.7	0
82.8	0
82.9	0
83	0
83.1	0
83.2	0
83.3	0
83.4	0
83.5	0
83.6	0
83.7	0
83.8	0
83.9	0
84	0
84.1	0
84.2	0
84.3	0
84.4	0
84.5	0
84.6	0
84.7	0
84.8	0
84.9	0
85	0
85.1	0
85.2	0
85.3	0
85.4	0
85.5	0
85.6	0
85.7	0
85.8	0
85.9	0
86	0
86.1	0
86.2	0
86.3	0
86.4	0
86.5	0
86.6	0
86.7	0
86.8	0
86.9	0
87	0
87.1	0
87.2	0
87.3	0
87.4	0
87.5	0
87.6	0
87.7	0
87.8	0
87.9	0
88	0
88.1	0
88.2	0
88.3	0
88.4	0
88.5	0
88.6	0
88.7	0
88.8	0
88.9	0
89	0
89.1	0
89.2	0
89.3	0
89.4	0
89.5	0
89.6	0
89.7	0
89.8	0
89.9	0
90	0
90.1	0
90.2	0
90.3	0
90.4	0
90.5	0
90.6	0
90.7	0
90.8	0
90.9	0
91	0
91.1	0
91.2	0
91.3	0
91.4	0
91.5	0
91.6	0
91.7	0
91.8	0
91.9	0
92	0
92.1	0
92.2	0
92.3	0
92.4	0
92.5	0
92.6	0
92.7	0
92.8	0
92.9	0
93	0
93.1	0
93.2	0
93.3	0
93.4	0
93.5	0
93.6	0
93.7	0
93.8	0
93.9	0
94	0
94.1	0
94.2	0
94.3	0
94.4	0
94.5	0
94.6	0
94.7	0
94.8	0
94.9	0
95	0
95.1	0
95.2	0
95.3	0
95.4	0
95.5	0
95.6	0
95.7	0
95.8	0
95.9	0
96	0
96.1	0
96.2	0
96.3	0
96.4	0
96.5	0
96.6	0
96.7	0
96.8	0
96.9	0
97	0
97.1	0
97.2	0
97.3	0
97.4	0
97.5	0
97.6	0
97.7	0
97.8	0
97.9	0
98	0
98.1	0
98.2	0
98.3	0
98.4	0
98.5	0
98.6	0
98.7	0
98.8	0
98.9	0
99	0
99.1	0
99.2	0
99.3	0
99.4	0
99.5	0
99.6	0
99.7	0
99.8	0
99.9	0
100	0
100.1	0
100.2	0
100.3	0
100.4	0
100.5	0
100.6	0
100.7	0
100.8	0
100.9	0
101	0
101.1	0
101.2	0
101.3	0
101.4	0
101.5	0
101.6	0
101.7	0
101.8	0
101.9	0
102	0
102.1	0
102.2	0
102.3	0
102.4	0
102.5	0
102.6	0
102.7	0
102.8	0
102.9	0
103	0
103.1	0
103.2	0
103.3	0
103.4	0
103.5	0
103.6	0
103.7	0
103.8	0
103.9	0
104	0
104.1	0
104.2	0
104.3	0
104.4	0
104.5	0
104.6	0
104.7	0.0002
104.8	0.0002
104.9	0.0002
105	0.0002
105.1	0.0002
105.2	0.0002
105.3	0.0002
105.4	0.0002
105.5	0.0002
105.6	0.0002
105.7	0.0002
105.8	0.0002
105.9	0.0002
106	0.0002
106.1	0.0002
106.2	0.0002
106.3	0.0002
106.4	0.0002
106.5	0.0002
106.6	0.0002
106.7	0.0002
106.8	0.0002
106.9	0.0002
107	0.0002
107.1	0.0002
107.2	0.0002
107.3	0.0002
107.4	0.0002
107.5	0.0002
107.6	0.0002
107.7	0.0002
107.8	0.0002
107.9	0.0002
108	0.0002
108.1	0.0002
108.2	0.0002
108.3	0.0002
108.4	0.0002
108.5	0.0002
108.6	0.0002
108.7	0.0002
108.8	0.0002
108.9	0.0002
109	0.0002
109.1	0.0002
109.2	0.0002
109.3	0.0002
109.4	0.0004
109.5	0.0004
109.6	0.0004
109.7	0.0004
109.8	0.0004
109.9	0.0004
110	0.0004
110.1	0.0004
110.2	0.0004
110.3	0.0004
110.4	0.0004
110.5	0.0004
110.6	0.0004
110.7	0.0004
110.8	0.0004
110.9	0.0004
111	0.0004
111.1	0.0004
111.2	0.0004
111.3	0.0004
111.4	0.0006
111.5	0.0006
111.6	0.0006
111.7	0.0006
111.8	0.0008
111.9	0.0008
112	0.0008
112.1	0.0008
112.2	0.0008
112.3	0.0008
112.4	0.0008
112.5	0.001
112.6	0.0012
112.7	0.0012
112.8	0.0012
112.9	0.0012
113	0.0012
113.1	0.0012
113.2	0.0012
113.3	0.0014
113.4	0.0014
113.5	0.0014
113.6	0.0014
113.7	0.0014
113.8	0.0014
113.9	0.0014
114	0.0014
114.1	0.0014
114.2	0.0014
114.3	0.0014
114.4	0.0014
114.5	0.0014
114.6	0.0014
114.7	0.0014
114.8	0.0014
114.9	0.0014
115	0.0014
115.1	0.0014
115.2	0.0014
115.3	0.0014
115.4	0.0014
115.5	0.0014
115.6	0.0014
115.7	0.0016
115.8	0.0016
115.9	0.0016
116	0.0016
116.1	0.0016
116.2	0.0016
116.3	0.0016
116.4	0.0018
116.5	0.0018
116.6	0.0018
116.7	0.0018
116.8	0.0018
116.9	0.0018
117	0.0018
117.1	0.0018
117.2	0.0018
117.3	0.0018
117.4	0.0018
117.5	0.0018
117.6	0.0018
117.7	0.0018
117.8	0.0018
117.9	0.0018
118	0.0018
118.1	0.0018
118.2	0.0018
118.3	0.002
118.4	0.002
118.5	0.002
118.6	0.002
118.7	0.002
118.8	0.002
118.9	0.002
119	0.002
119.1	0.002
119.2	0.002
119.3	0.002
119.4	0.002
119.5	0.002
119.6	0.002
119.7	0.002
119.8	0.002
119.9	0.002
120	0.002
120.1	0.002
120.2	0.002
120.3	0.002
120.4	0.002
120.5	0.002
120.6	0.002
120.7	0.002
120.8	0.002
120.9	0.002
121	0.002
121.1	0.002
121.2	0.002
121.3	0.002
121.4	0.002
121.5	0.002
121.6	0.002
121.7	0.002
121.8	0.002
121.9	0.002
122	0.002
122.1	0.002
122.2	0.002
122.3	0.002
122.4	0.002
122.5	0.002
122.6	0.002
122.7	0.002
122.8	0.002
122.9	0.002
123	0.002
123.1	0.002
123.2	0.002
123.3	0.002
123.4	0.0022
123.5	0.0022
123.6	0.0024
123.7	0.0024
123.8	0.0024
123.9	0.0024
124	0.0024
124.1	0.0024
124.2	0.0024
124.3	0.0024
124.4	0.0026
124.5	0.0026
124.6	0.0026
124.7	0.0026
124.8	0.0026
124.9	0.0026
125	0.0026
125.1	0.0026
125.2	0.0026
125.3	0.0026
125.4	0.0026
125.5	0.0026
125.6	0.0026
125.7	0.0026
125.8	0.0026
125.9	0.0026
126	0.0026
126.1	0.0028
126.2	0.0028
126.3	0.0028
126.4	0.0028
126.5	0.0028
126.6	0.0028
126.7	0.0028
126.8	0.0028
126.9	0.0028
127	0.0028
127.1	0.0028
127.2	0.003
127.3	0.003
127.4	0.003
127.5	0.003
127.6	0.003
127.7	0.003
127.8	0.003
127.9	0.003
128	0.003
128.1	0.003
128.2	0.003
128.3	0.003
128.4	0.003
128.5	0.003
128.6	0.003
128.7	0.003
128.8	0.003
128.9	0.003
129	0.0032
129.1	0.0032
129.2	0.0032
129.3	0.0032
129.4	0.0032
129.5	0.0032
129.6	0.0034
129.7	0.0034
129.8	0.0034
129.9	0.0034
130	0.0034
130.1	0.0034
130.2	0.0034
130.3	0.0034
130.4	0.0034
130.5	0.0034
130.6	0.0034
130.7	0.0034
130.8	0.0034
130.9	0.0034
131	0.0034
131.1	0.0034
131.2	0.0034
131.3	0.0034
131.4	0.0034
131.5	0.0034
131.6	0.0034
131.7	0.0034
131.8	0.0034
131.9	0.0034
132	0.0034
132.1	0.0034
132.2	0.0034
132.3	0.0034
132.4	0.0034
132.5	0.0034
132.6	0.0034
132.7	0.0034
132.8	0.0034
132.9	0.0034
133	0.0034
133.1	0.004
133.2	0.0042
133.3	0.0042
133.4	0.0044
133.5	0.0044
133.6	0.0044
133.7	0.0044
133.8	0.0044
133.9	0.0044
134	0.0044
134.1	0.0044
134.2	0.0044
134.3	0.0044
134.4	0.0044
134.5	0.0044
134.6	0.0042
134.7	0.0042
134.8	0.0042
134.9	0.0042
135	0.0042
135.1	0.0042
135.2	0.0042
135.3	0.0042
135.4	0.0042
135.5	0.0042
135.6	0.0042
135.7	0.0042
135.8	0.0044
135.9	0.0044
136	0.0046
136.1	0.0046
136.2	0.0046
136.3	0.0046
136.4	0.0046
136.5	0.0046
136.6	0.0046
136.7	0.0046
136.8	0.0046
136.9	0.0046
137	0.0046
137.1	0.0046
137.2	0.0046
137.3	0.0046
137.4	0.0046
137.5	0.0046
137.6	0.0046
137.7	0.0046
137.8	0.0046
137.9	0.0046
138	0.0046
138.1	0.0046
138.2	0.0046
138.3	0.0046
138.4	0.0046
138.5	0.0046
138.6	0.0046
138.7	0.0044
138.8	0.0044
138.9	0.0044
139	0.0044
139.1	0.0044
139.2	0.0044
139.3	0.0044
139.4	0.0044
139.5	0.0044
139.6	0.0044
139.7	0.0044
139.8	0.0044
139.9	0.0044
140	0.0044
140.1	0.0046
140.2	0.0046
140.3	0.0046
140.4	0.0046
140.5	0.0046
140.6	0.0046
140.7	0.0046
140.8	0.0048
140.9	0.0048
141	0.0048
141.1	0.0048
141.2	0.0048
141.3	0.0048
141.4	0.0048
141.5	0.0048
141.6	0.0048
141.7	0.0048
141.8	0.005
141.9	0.005
142	0.005
142.1	0.005
142.2	0.005
142.3	0.005
142.4	0.005
142.5	0.005
142.6	0.005
142.7	0.005
142.8	0.005
142.9	0.005
143	0.005
143.1	0.005
143.2	0.005
143.3	0.005
143.4	0.005
143.5	0.005
143.6	0.0048
143.7	0.005
143.8	0.005
143.9	0.005
144	0.005
144.1	0.005
144.2	0.005
144.3	0.005
144.4	0.005
144.5	0.0052
144.6	0.0052
144.7	0.0052
144.8	0.0052
144.9	0.005
145	0.005
145.1	0.005
145.2	0.005
145.3	0.005
145.4	0.005
145.5	0.0052
145.6	0.0054
145.7	0.0054
145.8	0.0054
145.9	0.0054
146	0.0056
146.1	0.0056
146.2	0.0056
146.3	0.0056
146.4	0.0056
146.5	0.0056
146.6	0.0056
146.7	0.0056
146.8	0.0056
146.9	0.0056
147	0.0056
147.1	0.0056
147.2	0.0056
147.3	0.0054
147.4	0.0054
147.5	0.0054
147.6	0.0054
147.7	0.0054
147.8	0.0054
147.9	0.0056
148	0.0056
148.1	0.0056
148.2	0.0056
148.3	0.0056
148.4	0.0056
148.5	0.0056
148.6	0.0056
148.7	0.0056
148.8	0.0056
148.9	0.0056
149	0.0056
149.1	0.0056
149.2	0.0056
149.3	0.0056
149.4	0.0056
149.5	0.0056
149.6	0.0056
149.7	0.0056
149.8	0.0056
149.9	0.0056
150	0.0056
150.1	0.0056
150.2	0.0056
150.3	0.0056
150.4	0.0056
150.5	0.0056
150.6	0.0056
150.7	0.0058
150.8	0.0058
150.9	0.0058
151	0.0058
151.1	0.006
151.2	0.006
151.3	0.006
151.4	0.0062
151.5	0.0062
151.6	0.0062
151.7	0.0062
151.8	0.0062
151.9	0.0062
152	0.0062
152.1	0.0062
152.2	0.0062
152.3	0.0062
152.4	0.0064
152.5	0.0064
152.6	0.0066
152.7	0.0066
152.8	0.0066
152.9	0.0068
153	0.0068
153.1	0.0068
153.2	0.0068
153.3	0.0068
153.4	0.0068
153.5	0.0068
153.6	0.0068
153.7	0.0068
153.8	0.0068
153.9	0.0068
154	0.0068
154.1	0.0068
154.2	0.0068
154.3	0.0068
154.4	0.0068
154.5	0.0068
154.6	0.0066
154.7	0.0066
154.8	0.0066
154.9	0.0066
155	0.0066
155.1	0.0066
155.2	0.0066
155.3	0.0066
155.4	0.0066
155.5	0.0064
155.6	0.0064
155.7	0.0064
155.8	0.0066
155.9	0.0066
156	0.0066
156.1	0.0066
156.2	0.0066
156.3	0.0066
156.4	0.0066
156.5	0.0066
156.6	0.0066
156.7	0.0066
156.8	0.0068
156.9	0.0068
157	0.007
157.1	0.007
157.2	0.007
157.3	0.007
157.4	0.007
157.5	0.007
157.6	0.007
157.7	0.0072
157.8	0.0072
157.9	0.0072
158	0.0072
158.1	0.0072
158.2	0.0072
158.3	0.0072
158.4	0.0072
158.5	0.0074
158.6	0.0074
158.7	0.0074
158.8	0.0074
158.9	0.0074
159	0.0074
159.1	0.0076
159.2	0.0076
159.3	0.0076
159.4	0.0076
159.5	0.0076
159.6	0.0076
159.7	0.0078
159.8	0.0078
159.9	0.0078
160	0.0078
160.1	0.0078
160.2	0.008
160.3	0.008
160.4	0.008
160.5	0.0082
160.6	0.008
160.7	0.008
160.8	0.008
160.9	0.008
161	0.008
161.1	0.008
161.2	0.008
161.3	0.008
161.4	0.008
161.5	0.008
161.6	0.008
161.7	0.008
161.8	0.008
161.9	0.008
162	0.0082
162.1	0.0082
162.2	0.0082
162.3	0.0082
162.4	0.0082
162.5	0.0082
162.6	0.0082
162.7	0.0084
162.8	0.0084
162.9	0.0084
163	0.0084
163.1	0.0084
163.2	0.0084
163.3	0.0084
163.4	0.0084
163.5	0.0084
163.6	0.0084
163.7	0.0084
163.8	0.0084
163.9	0.0084
164	0.0086
164.1	0.0086
164.2	0.0084
164.3	0.0084
164.4	0.0084
164.5	0.0084
164.6	0.0084
164.7	0.0084
164.8	0.0084
164.9	0.0084
165	0.0084
165.1	0.0084
165.2	0.0084
165.3	0.0086
165.4	0.0086
165.5	0.0086
165.6	0.0086
165.7	0.0086
165.8	0.0086
165.9	0.0086
166	0.0086
166.1	0.0086
166.2	0.0086
166.3	0.0086
166.4	0.0086
166.5	0.0086
166.6	0.0086
166.7	0.0086
166.8	0.0086
166.9	0.0084
167	0.0084
167.1	0.0084
167.2	0.0086
167.3	0.0086
167.4	0.0086
167.5	0.0086
167.6	0.0086
167.7	0.0086
167.8	0.0084
167.9	0.0082
168	0.008
168.1	0.008
168.2	0.008
168.3	0.008
168.4	0.008
168.5	0.008
168.6	0.008
168.7	0.008
168.8	0.008
168.9	0.008
169	0.008
169.1	0.0082
169.2	0.0082
169.3	0.0082
169.4	0.0082
169.5	0.0082
169.6	0.0082
169.7	0.0082
169.8	0.0082
169.9	0.0082
170	0.0082
170.1	0.0082
170.2	0.0084
170.3	0.0084
170.4	0.0084
170.5	0.0084
170.6	0.0084
170.7	0.0084
170.8	0.0084
170.9	0.0084
171	0.0084
171.1	0.0084
171.2	0.0084
171.3	0.0084
171.4	0.0084
171.5	0.0082
171.6	0.0082
171.7	0.0082
171.8	0.0082
171.9	0.0082
172	0.0082
172.1	0.0082
172.2	0.0082
172.3	0.008
172.4	0.008
172.5	0.008
172.6	0.008
172.7	0.008
172.8	0.008
172.9	0.008
173	0.008
173.1	0.008
173.2	0.0078
173.3	0.0078
173.4	0.008
173.5	0.008
173.6	0.0082
173.7	0.0082
173.8	0.0082
173.9	0.0082
174	0.0082
174.1	0.0082
174.2	0.0082
174.3	0.0082
174.4	0.0082
174.5	0.0082
174.6	0.008
174.7	0.0078
174.8	0.008
174.9	0.008
175	0.008
175.1	0.008
175.2	0.008
175.3	0.008
175.4	0.008
175.5	0.008
175.6	0.008
175.7	0.008
175.8	0.008
175.9	0.0082
176	0.0082
176.1	0.0082
176.2	0.008
176.3	0.0078
176.4	0.0078
176.5	0.0078
176.6	0.008
176.7	0.0082
176.8	0.0082
176.9	0.0082
177	0.0082
177.1	0.0082
177.2	0.0082
177.3	0.0082
177.4	0.0082
177.5	0.0082
177.6	0.0082
177.7	0.0082
177.8	0.0082
177.9	0.0082
178	0.0082
178.1	0.0082
178.2	0.0082
178.3	0.0082
178.4	0.0082
178.5	0.0082
178.6	0.0082
178.7	0.0082
178.8	0.0082
178.9	0.0082
179	0.0082
179.1	0.008
179.2	0.008
179.3	0.008
179.4	0.0078
179.5	0.0078
179.6	0.0078
179.7	0.0078
179.8	0.0078
179.9	0.0078
180	0.0078
180.1	0.0078
180.2	0.0078
180.3	0.008
180.4	0.008
180.5	0.008
180.6	0.008
180.7	0.008
180.8	0.008
180.9	0.008
181	0.008
181.1	0.008
181.2	0.008
181.3	0.008
181.4	0.008
181.5	0.008
181.6	0.008
181.7	0.008
181.8	0.008
181.9	0.008
182	0.008
182.1	0.008
182.2	0.008
182.3	0.008
182.4	0.008
182.5	0.008
182.6	0.008
182.7	0.008
182.8	0.008
182.9	0.008
183	0.008
183.1	0.008
183.2	0.008
183.3	0.008
183.4	0.0082
183.5	0.0082
183.6	0.0082
183.7	0.0082
183.8	0.0082
183.9	0.0082
184	0.0082
184.1	0.0082
184.2	0.0082
184.3	0.0082
184.4	0.0082
184.5	0.0082
184.6	0.0082
184.7	0.0082
184.8	0.0082
184.9	0.0082
185	0.0082
185.1	0.0082
185.2	0.0082
185.3	0.0084
185.4	0.0084
185.5	0.0084
185.6	0.0084
185.7	0.0084
185.8	0.0084
185.9	0.0084
186	0.0084
186.1	0.0084
186.2	0.0084
186.3	0.0084
186.4	0.0084
186.5	0.0084
186.6	0.0084
186.7	0.0084
186.8	0.0084
186.9	0.0084
187	0.0084
187.1	0.0082
187.2	0.0082
187.3	0.0082
187.4	0.0082
187.5	0.0082
187.6	0.0082
187.7	0.0082
187.8	0.0082
187.9	0.0082
188	0.0082
188.1	0.008
188.2	0.008
188.3	0.008
188.4	0.008
188.5	0.008
188.6	0.008
188.7	0.008
188.8	0.008
188.9	0.008
189	0.008
189.1	0.008
189.2	0.008
189.3	0.008
189.4	0.008
189.5	0.008
189.6	0.0082
189.7	0.0082
189.8	0.0082
189.9	0.0082
190	0.0082
190.1	0.0082
190.2	0.0084
190.3	0.0086
190.4	0.0086
190.5	0.0088
190.6	0.0088
190.7	0.0088
190.8	0.0088
190.9	0.0088
191	0.0088
191.1	0.0088
191.2	0.0088
191.3	0.0088
191.4	0.0088
191.5	0.0088
191.6	0.0086
191.7	0.0086
191.8	0.0086
191.9	0.0086
192	0.0086
192.1	0.0086
192.2	0.0086
192.3	0.0086
192.4	0.0086
192.5	0.0086
192.6	0.0086
192.7	0.0086
192.8	0.0086
192.9	0.0086
193	0.0088
193.1	0.0088
193.2	0.0088
193.3	0.0088
193.4	0.0088
193.5	0.0088
193.6	0.009
193.7	0.009
193.8	0.009
193.9	0.009
194	0.009
194.1	0.0092
194.2	0.0092
194.3	0.0092
194.4	0.0092
194.5	0.0092
194.6	0.0092
194.7	0.0092
194.8	0.0092
194.9	0.0092
195	0.0092
195.1	0.0094
195.2	0.0094
195.3	0.0094
195.4	0.0094
195.5	0.0096
195.6	0.0096
195.7	0.0096
195.8	0.0096
195.9	0.0096
196	0.0098
196.1	0.0098
196.2	0.01
196.3	0.01
196.4	0.01
196.5	0.01
196.6	0.01
196.7	0.01
196.8	0.01
196.9	0.0102
197	0.0102
197.1	0.0104
197.2	0.0104
197.3	0.0104
197.4	0.0104
197.5	0.0104
197.6	0.0104
197.7	0.0104
197.8	0.0104
197.9	0.0104
198	0.0104
198.1	0.0104
198.2	0.0104
198.3	0.0104
198.4	0.0104
198.5	0.0106
198.6	0.0106
198.7	0.0108
198.8	0.0108
198.9	0.011
199	0.011
199.1	0.011
199.2	0.0112
199.3	0.0112
199.4	0.0112
199.5	0.0112
199.6	0.0114
199.7	0.0114
199.8	0.0114
199.9	0.0114
200	0.0114
[truncated: 14,000 more rows]
