# Supplementary material for: Bayesian inference of kinetic schemes for ion channels by Kalman filtering
Source: eLife journal article supplement (doi:10.7554/elife.62714), 2022-05-04
Supplement: fig4-data11 [file 1_Sim_N_6000_Fluor_MW.xlsx]

## Sheet: Tabelle1
0.1	0
0.2	0
0.3	0
0.4	0
0.5	0
0.6	0
0.7	0
0.8	0
0.9	0
1	0
1.1	0
1.2	0
1.3	0
1.4	0
1.5	0
1.6	0
1.7	0
1.8	0
1.9	0
2	0
2.1	0
2.2	0
2.3	0
2.4	0
2.5	0
2.6	0
2.7	0
2.8	0
2.9	0
3	0
3.1	0
3.2	0
3.3	0
3.4	0
3.5	0
3.6	0
3.7	0
3.8	0
3.9	0
4	0
4.1	0
4.2	0
4.3	0
4.4	0
4.5	0
4.6	0
4.7	0
4.8	0
4.9	0
5	0
5.1	0
5.2	0
5.3	0
5.4	0
5.5	0
5.6	0
5.7	0
5.8	0
5.9	0
6	0
6.1	0
6.2	0
6.3	0
6.4	0
6.5	0
6.6	0
6.7	0
6.8	0
6.9	0
7	0
7.1	0
7.2	0
7.3	0
7.4	0
7.5	0
7.6	0
7.7	0
7.8	0
7.9	0
8	0
8.1	0
8.2	0
8.3	0
8.4	0
8.5	0
8.6	0
8.7	0
8.8	0
8.9	0
9	0
9.1	0
9.2	0
9.3	0
9.4	0
9.5	0
9.6	0
9.7	0
9.8	0
9.9	0
10	0
10.1	0
10.2	0
10.3	0
10.4	0
10.5	0
10.6	0
10.7	0
10.8	0
10.9	0
11	0
11.1	0
11.2	0
11.3	0
11.4	0
11.5	0
11.6	0
11.7	0
11.8	0
11.9	0
12	0
12.1	0
12.2	0
12.3	0
12.4	0
12.5	0
12.6	0
12.7	0
12.8	0
12.9	0
13	0
13.1	0
13.2	0
13.3	0
13.4	0
13.5	0
13.6	0
13.7	0
13.8	0
13.9	0
14	0
14.1	0
14.2	0
14.3	0
14.4	0
14.5	0
14.6	0
14.7	0
14.8	0
14.9	0
15	0
15.1	0
15.2	0
15.3	0
15.4	0
15.5	0
15.6	0
15.7	0
15.8	0
15.9	0
16	0
16.1	0
16.2	0
16.3	0
16.4	0
16.5	0
16.6	0
16.7	0
16.8	0
16.9	0
17	0
17.1	0
17.2	0
17.3	0
17.4	0
17.5	0
17.6	0
17.7	0
17.8	0
17.9	0
18	0
18.1	0
18.2	0
18.3	0
18.4	0
18.5	0
18.6	0
18.7	0
18.8	0
18.9	0
19	0
19.1	0
19.2	0
19.3	0
19.4	0
19.5	0
19.6	0
19.7	0
19.8	0
19.9	0
20	0
20.1	0
20.2	0
20.3	0
20.4	0
20.5	0
20.6	0
20.7	0
20.8	0
20.9	0
21	0
21.1	0
21.2	0
21.3	0
21.4	0
21.5	0
21.6	0
21.7	0
21.8	0
21.9	0
22	0
22.1	0
22.2	0
22.3	0
22.4	0
22.5	0
22.6	0
22.7	0
22.8	0
22.9	0
23	0
23.1	0
23.2	0
23.3	0
23.4	0
23.5	0
23.6	0
23.7	0
23.8	0
23.9	0
24	0
24.1	0
24.2	0
24.3	0
24.4	0
24.5	0
24.6	0
24.7	0
24.8	0
24.9	0
25	0
25.1	0
25.2	0
25.3	0
25.4	0
25.5	0
25.6	0
25.7	0
25.8	0
25.9	0
26	0
26.1	0
26.2	0
26.3	0
26.4	0
26.5	0
26.6	0
26.7	0
26.8	0
26.9	0
27	0
27.1	0
27.2	0
27.3	0
27.4	0
27.5	0
27.6	0
27.7	0
27.8	0
27.9	0
28	0
28.1	0
28.2	0
28.3	0
28.4	0
28.5	0
28.6	0
28.7	0
28.8	0
28.9	0
29	0
29.1	0
29.2	0
29.3	0
29.4	0
29.5	0
29.6	0
29.7	0
29.8	0
29.9	0
30	0
30.1	0
30.2	0
30.3	0
30.4	0
30.5	0
30.6	0
30.7	0
30.8	0
30.9	0
31	0
31.1	0
31.2	0
31.3	0
31.4	0
31.5	0
31.6	0
31.7	0
31.8	0
31.9	0
32	0
32.1	0
32.2	0
32.3	0
32.4	0
32.5	0
32.6	0
32.7	0
32.8	0
32.9	0
33	0
33.1	0
33.2	0
33.3	0
33.4	0
33.5	0
33.6	0
33.7	0
33.8	0
33.9	0
34	0
34.1	0
34.2	0
34.3	0
34.4	0
34.5	0
34.6	0
34.7	0
34.8	0
34.9	0
35	0
35.1	0
35.2	0
35.3	0
35.4	0
35.5	0
35.6	0
35.7	0
35.8	0
35.9	0
36	0
36.1	0
36.2	0
36.3	0
36.4	0
36.5	0
36.6	0
36.7	0
36.8	0
36.9	0
37	0
37.1	0
37.2	0
37.3	0
37.4	0
37.5	0
37.6	0
37.7	0
37.8	0
37.9	0
38	0
38.1	0
38.2	0
38.3	0
38.4	0
38.5	0
38.6	0
38.7	0
38.8	0
38.9	0
39	0
39.1	0
39.2	0
39.3	0
39.4	0
39.5	0
39.6	0
39.7	0
39.8	0
39.9	0
40	0
40.1	0
40.2	0
40.3	0
40.4	0
40.5	0
40.6	0
40.7	0
40.8	0
40.9	0
41	0
41.1	0
41.2	0
41.3	0
41.4	0
41.5	0
41.6	0
41.7	0
41.8	0
41.9	0
42	0
42.1	0
42.2	0
42.3	0
42.4	0
42.5	0
42.6	0
42.7	0
42.8	0
42.9	0
43	0
43.1	0
43.2	0
43.3	0
43.4	0
43.5	0
43.6	0
43.7	0
43.8	0
43.9	0
44	0
44.1	0
44.2	0
44.3	0
44.4	0
44.5	0
44.6	0
44.7	0
44.8	0
44.9	0
45	0
45.1	0
45.2	0
45.3	0
45.4	0
45.5	0
45.6	0
45.7	0
45.8	0
45.9	0
46	0
46.1	0
46.2	0
46.3	0
46.4	0
46.5	0
46.6	0
46.7	0
46.8	0
46.9	0
47	0
47.1	0
47.2	0
47.3	0
47.4	0
47.5	0
47.6	0
47.7	0
47.8	0
47.9	0
48	0
48.1	0
48.2	0
48.3	0
48.4	0
48.5	0
48.6	0
48.7	0
48.8	0
48.9	0
49	0
49.1	0
49.2	0
49.3	0
49.4	0
49.5	0
49.6	0
49.7	0
49.8	0
49.9	0
50	0
50.1	0
50.2	0
50.3	0
50.4	0
50.5	0
50.6	0
50.7	0
50.8	0
50.9	0
51	0
51.1	0
51.2	0
51.3	0
51.4	0
51.5	0
51.6	0
51.7	0
51.8	0
51.9	0
52	0
52.1	0
52.2	0
52.3	0
52.4	0
52.5	0
52.6	0
52.7	0
52.8	0
52.9	0
53	0
53.1	0
53.2	0
53.3	0
53.4	0
53.5	0
53.6	0
53.7	0
53.8	0
53.9	0
54	0
54.1	0
54.2	0
54.3	0
54.4	0
54.5	0
54.6	0
54.7	0
54.8	0
54.9	0
55	0
55.1	0
55.2	0
55.3	0
55.4	0
55.5	0
55.6	0
55.7	0
55.8	0
55.9	0
56	0
56.1	0
56.2	0
56.3	0
56.4	0
56.5	0
56.6	0
56.7	0
56.8	0
56.9	0
57	0
57.1	0
57.2	0
57.3	0
57.4	0
57.5	0
57.6	0
57.7	0
57.8	0
57.9	0
58	0
58.1	0
58.2	0
58.3	0
58.4	0
58.5	0
58.6	0
58.7	0
58.8	0
58.9	0
59	0
59.1	0
59.2	0
59.3	0
59.4	0
59.5	0
59.6	0
59.7	0
59.8	0
59.9	0
60	0
60.1	0
60.2	0
60.3	0
60.4	0
60.5	0
60.6	0
60.7	0
60.8	0
60.9	0
61	0
61.1	0
61.2	0
61.3	0
61.4	0
61.5	0
61.6	0
61.7	0
61.8	0
61.9	0
62	0
62.1	0
62.2	0
62.3	0
62.4	0
62.5	0
62.6	0
62.7	0
62.8	0
62.9	0
63	0
63.1	0
63.2	0
63.3	0
63.4	0
63.5	0
63.6	0
63.7	0
63.8	0
63.9	0
64	0
64.1	0
64.2	0
64.3	0
64.4	0
64.5	0
64.6	0
64.7	0
64.8	0
64.9	0
65	0
65.1	0
65.2	0
65.3	0
65.4	0
65.5	0
65.6	0
65.7	0
65.8	0
65.9	0
66	0
66.1	0
66.2	0
66.3	0
66.4	0
66.5	0
66.6	0
66.7	0
66.8	0
66.9	0
67	0
67.1	0
67.2	0
67.3	0
67.4	0
67.5	0
67.6	0
67.7	0
67.8	0
67.9	0
68	0
68.1	0
68.2	0
68.3	0
68.4	0
68.5	0
68.6	0
68.7	0
68.8	0
68.9	0
69	0
69.1	0
69.2	0
69.3	0
69.4	0
69.5	0
69.6	0
69.7	0
69.8	0
69.9	0
70	0
70.1	0
70.2	0
70.3	0
70.4	0
70.5	0
70.6	0
70.7	0
70.8	0
70.9	0
71	0
71.1	0
71.2	0
71.3	0
71.4	0
71.5	0
71.6	0
71.7	0
71.8	0
71.9	0
72	0
72.1	0
72.2	0
72.3	0
72.4	0
72.5	0
72.6	0
72.7	0
72.8	0
72.9	0
73	0
73.1	0
73.2	0
73.3	0
73.4	0
73.5	0
73.6	0
73.7	0
73.8	0
73.9	0
74	0
74.1	0
74.2	0
74.3	0
74.4	0
74.5	0
74.6	0
74.7	0
74.8	0
74.9	0
75	0
75.1	0
75.2	0
75.3	0
75.4	0
75.5	0
75.6	0
75.7	0
75.8	0
75.9	0
76	0
76.1	0
76.2	0
76.3	0
76.4	0
76.5	0
76.6	0
76.7	0
76.8	0
76.9	0
77	0
77.1	0
77.2	0
77.3	0
77.4	0
77.5	0
77.6	0
77.7	0
77.8	0
77.9	0
78	0
78.1	0
78.2	0
78.3	0
78.4	0
78.5	0
78.6	0
78.7	0
78.8	0
78.9	0
79	0
79.1	0
79.2	0
79.3	0
79.4	0
79.5	0
79.6	0
79.7	0
79.8	0
79.9	0
80	0
80.1	0
80.2	0
80.3	0
80.4	0
80.5	0
80.6	0
80.7	0
80.8	0
80.9	0
81	0
81.1	0
81.2	0
81.3	0
81.4	0
81.5	0
81.6	0
81.7	0
81.8	0
81.9	0
82	0
82.1	0
82.2	0
82.3	0
82.4	0
82.5	0
82.6	0
82.7	0
82.8	0
82.9	0
83	0
83.1	0
83.2	0
83.3	0
83.4	0
83.5	0
83.6	0
83.7	0
83.8	0
83.9	0
84	0
84.1	0
84.2	0
84.3	0
84.4	0
84.5	0
84.6	0
84.7	0
84.8	0
84.9	0
85	0
85.1	0
85.2	0
85.3	0
85.4	0
85.5	0
85.6	0
85.7	0
85.8	0
85.9	0
86	0
86.1	0
86.2	0
86.3	0
86.4	0
86.5	0
86.6	0
86.7	0
86.8	0
86.9	0
87	0
87.1	0
87.2	0
87.3	0
87.4	0
87.5	0
87.6	0
87.7	0
87.8	0
87.9	0
88	0
88.1	0
88.2	0
88.3	0
88.4	0
88.5	0
88.6	0
88.7	0
88.8	0
88.9	0
89	0
89.1	0
89.2	0
89.3	0
89.4	0
89.5	0
89.6	0
89.7	0
89.8	0
89.9	0
90	0
90.1	0
90.2	0
90.3	0
90.4	0
90.5	0
90.6	0
90.7	0
90.8	0
90.9	0
91	0
91.1	0
91.2	0
91.3	0
91.4	0
91.5	0
91.6	0
91.7	0
91.8	0
91.9	0
92	0
92.1	0
92.2	0
92.3	0
92.4	0
92.5	0
92.6	0
92.7	0
92.8	0
92.9	0
93	0
93.1	0
93.2	0
93.3	0
93.4	0
93.5	0
93.6	0
93.7	0
93.8	0
93.9	0
94	0
94.1	0
94.2	0
94.3	0
94.4	0
94.5	0
94.6	0
94.7	0
94.8	0
94.9	0
95	0
95.1	0
95.2	0
95.3	0
95.4	0
95.5	0
95.6	0
95.7	0
95.8	0
95.9	0
96	0
96.1	0
96.2	0
96.3	0
96.4	0
96.5	0
96.6	0
96.7	0
96.8	0
96.9	0
97	0
97.1	0
97.2	0
97.3	0
97.4	0
97.5	0
97.6	0
97.7	0
97.8	0
97.9	0
98	0
98.1	0
98.2	0
98.3	0
98.4	0
98.5	0
98.6	0
98.7	0
98.8	0
98.9	0
99	0
99.1	0
99.2	0
99.3	0
99.4	0
99.5	0
99.6	0
99.7	0
99.8	0
99.9	0
100	0
100.1	0.00241667
100.2	0.00441667
100.3	0.00608333
100.4	0.008
100.5	0.0104167
100.6	0.0115
100.7	0.0130833
100.8	0.015
100.9	0.0169167
101	0.0188333
101.1	0.02
101.2	0.0214167
101.3	0.0230833
101.4	0.0250833
101.5	0.0278333
101.6	0.0291667
101.7	0.03125
101.8	0.033
101.9	0.0345833
102	0.03475
102.1	0.03675
102.2	0.0389167
102.3	0.0400833
102.4	0.0413333
102.5	0.04275
102.6	0.0444167
102.7	0.04525
102.8	0.0455
102.9	0.0473333
103	0.0480833
103.1	0.0495833
103.2	0.0505833
103.3	0.05175
103.4	0.05275
103.5	0.05475
103.6	0.05525
103.7	0.05625
103.8	0.0571667
103.9	0.0579167
104	0.0596667
104.1	0.0606667
104.2	0.062
104.3	0.0635833
104.4	0.0648333
104.5	0.0659167
104.6	0.0674167
104.7	0.0685833
104.8	0.0696667
104.9	0.0709167
105	0.0718333
105.1	0.0724167
105.2	0.0731667
105.3	0.0745833
105.4	0.0750833
105.5	0.0759167
105.6	0.0764167
105.7	0.0768333
105.8	0.0779167
105.9	0.0785
106	0.07975
106.1	0.0799167
106.2	0.0803333
106.3	0.08125
106.4	0.08175
106.5	0.0821667
106.6	0.082
106.7	0.0826667
106.8	0.0831667
106.9	0.0846667
107	0.0854167
107.1	0.0865
107.2	0.0875
107.3	0.0879167
107.4	0.0891667
107.5	0.0899167
107.6	0.0909167
107.7	0.0915833
107.8	0.0934167
107.9	0.094
108	0.0949167
108.1	0.0949167
108.2	0.0958333
108.3	0.0964167
108.4	0.09675
108.5	0.09725
108.6	0.0980833
108.7	0.09825
108.8	0.0993333
108.9	0.101
109	0.1005
109.1	0.101667
109.2	0.102
109.3	0.103
109.4	0.1035
109.5	0.1045
109.6	0.105167
109.7	0.106083
109.8	0.106
109.9	0.10675
110	0.1075
110.1	0.107667
110.2	0.108583
110.3	0.10925
110.4	0.109417
110.5	0.1105
110.6	0.110833
110.7	0.11125
110.8	0.110167
110.9	0.110333
111	0.1105
111.1	0.110333
111.2	0.110667
111.3	0.110833
111.4	0.110167
111.5	0.110417
111.6	0.111
111.7	0.111583
111.8	0.112
111.9	0.112167
112	0.112333
112.1	0.113167
112.2	0.113667
112.3	0.11425
112.4	0.11475
112.5	0.115167
112.6	0.115583
112.7	0.116083
112.8	0.116583
112.9	0.1175
113	0.1185
113.1	0.11875
113.2	0.119667
113.3	0.119333
113.4	0.119917
113.5	0.120167
113.6	0.119667
113.7	0.119667
113.8	0.11925
113.9	0.119667
114	0.1195
114.1	0.119333
114.2	0.12
114.3	0.12
114.4	0.120083
114.5	0.12
114.6	0.12075
114.7	0.120333
114.8	0.121
114.9	0.121417
115	0.121417
115.1	0.12125
115.2	0.12175
115.3	0.121167
115.4	0.121167
115.5	0.121167
115.6	0.12125
115.7	0.12175
115.8	0.121583
115.9	0.1225
116	0.123167
116.1	0.12375
116.2	0.124333
116.3	0.124417
116.4	0.124583
116.5	0.124333
116.6	0.125167
116.7	0.12475
116.8	0.125333
116.9	0.126167
117	0.126083
117.1	0.127167
117.2	0.127083
117.3	0.127583
117.4	0.127917
117.5	0.128167
117.6	0.128
117.7	0.127917
117.8	0.128333
117.9	0.128
118	0.128083
118.1	0.12875
118.2	0.129083
118.3	0.12925
118.4	0.128333
118.5	0.12825
118.6	0.128333
118.7	0.128583
118.8	0.128083
118.9	0.128583
119	0.12925
119.1	0.1295
119.2	0.129833
119.3	0.130417
119.4	0.1305
119.5	0.130333
119.6	0.129917
119.7	0.12975
119.8	0.130333
119.9	0.131167
120	0.130667
120.1	0.130833
120.2	0.13125
120.3	0.13125
120.4	0.131583
120.5	0.132333
120.6	0.132083
120.7	0.1325
120.8	0.132083
120.9	0.132917
121	0.133
121.1	0.132833
121.2	0.131833
121.3	0.132667
121.4	0.13325
121.5	0.133667
121.6	0.133833
121.7	0.134417
121.8	0.133583
121.9	0.133333
122	0.133667
122.1	0.133583
122.2	0.134083
122.3	0.13425
122.4	0.134583
122.5	0.134917
122.6	0.135417
122.7	0.135667
122.8	0.136083
122.9	0.136667
123	0.13775
123.1	0.137917
123.2	0.1375
123.3	0.137583
123.4	0.137583
123.5	0.13725
123.6	0.137167
123.7	0.137417
123.8	0.136667
123.9	0.136333
124	0.136417
124.1	0.136333
124.2	0.136333
124.3	0.1365
124.4	0.1365
124.5	0.13675
124.6	0.137
124.7	0.136583
124.8	0.13675
124.9	0.136667
125	0.1375
125.1	0.137167
125.2	0.13775
125.3	0.138167
125.4	0.137917
125.5	0.139333
125.6	0.139
125.7	0.13925
125.8	0.139667
125.9	0.139833
126	0.139667
126.1	0.139417
126.2	0.139417
126.3	0.139917
126.4	0.1395
126.5	0.139417
126.6	0.1395
126.7	0.140417
126.8	0.139833
126.9	0.139917
127	0.139667
127.1	0.139917
127.2	0.1405
127.3	0.141917
127.4	0.141583
127.5	0.142167
127.6	0.141833
127.7	0.141917
127.8	0.142333
127.9	0.142333
128	0.141417
128.1	0.14275
128.2	0.143
128.3	0.144167
128.4	0.144083
128.5	0.143917
128.6	0.1435
128.7	0.143667
128.8	0.143583
128.9	0.142417
129	0.142917
129.1	0.142833
129.2	0.143583
129.3	0.143667
129.4	0.142917
129.5	0.142083
129.6	0.141833
129.7	0.141917
129.8	0.142417
129.9	0.1425
130	0.14275
130.1	0.143083
130.2	0.143
130.3	0.143083
130.4	0.144083
130.5	0.145083
130.6	0.144417
130.7	0.14475
130.8	0.145
130.9	0.144833
131	0.144083
131.1	0.143833
131.2	0.143333
131.3	0.143167
131.4	0.142833
131.5	0.142583
131.6	0.143333
131.7	0.143417
131.8	0.143583
131.9	0.142833
132	0.144
132.1	0.14475
132.2	0.145083
132.3	0.144583
132.4	0.145333
132.5	0.144833
132.6	0.145
132.7	0.144833
132.8	0.144833
132.9	0.145
133	0.144167
133.1	0.143583
133.2	0.143417
133.3	0.143417
133.4	0.143167
133.5	0.1435
133.6	0.144083
133.7	0.144
133.8	0.143417
133.9	0.142833
134	0.142583
134.1	0.14325
134.2	0.143583
134.3	0.144833
134.4	0.1455
134.5	0.146417
134.6	0.146
134.7	0.14575
134.8	0.145417
134.9	0.14525
135	0.145167
135.1	0.144833
135.2	0.144667
135.3	0.144917
135.4	0.145083
135.5	0.1445
135.6	0.14525
135.7	0.145417
135.8	0.144833
135.9	0.144417
136	0.144333
136.1	0.144167
136.2	0.144833
136.3	0.145
136.4	0.145667
136.5	0.145833
136.6	0.146083
136.7	0.146167
136.8	0.146583
136.9	0.145
137	0.1455
137.1	0.1465
137.2	0.146917
137.3	0.147667
137.4	0.148167
137.5	0.1485
137.6	0.147333
137.7	0.147167
137.8	0.147
137.9	0.146917
138	0.146833
138.1	0.14675
138.2	0.146833
138.3	0.146833
138.4	0.147333
138.5	0.14675
138.6	0.147833
138.7	0.147333
138.8	0.147167
138.9	0.14625
139	0.146917
139.1	0.146
139.2	0.145667
139.3	0.145667
139.4	0.145833
139.5	0.14575
139.6	0.145083
139.7	0.145
139.8	0.145083
139.9	0.144667
140	0.144333
140.1	0.143917
140.2	0.14375
140.3	0.143583
140.4	0.143
140.5	0.142833
140.6	0.142917
140.7	0.143167
140.8	0.14225
140.9	0.142
141	0.1425
141.1	0.143
141.2	0.144167
141.3	0.144417
141.4	0.14375
141.5	0.14375
141.6	0.144333
141.7	0.145167
141.8	0.14525
141.9	0.1455
142	0.145583
142.1	0.145583
142.2	0.145833
142.3	0.14575
142.4	0.146417
142.5	0.145917
142.6	0.146333
142.7	0.14625
142.8	0.146083
142.9	0.146333
143	0.145917
143.1	0.14575
143.2	0.146083
143.3	0.145417
143.4	0.145583
143.5	0.145417
143.6	0.1455
143.7	0.144667
143.8	0.144917
143.9	0.14475
144	0.144
144.1	0.144667
144.2	0.144083
144.3	0.143333
144.4	0.143333
144.5	0.142833
144.6	0.143667
144.7	0.144167
144.8	0.145167
144.9	0.145417
145	0.146
145.1	0.1465
145.2	0.1465
145.3	0.1455
145.4	0.145333
145.5	0.144417
145.6	0.144
145.7	0.144
145.8	0.143667
145.9	0.144333
146	0.144667
146.1	0.14475
146.2	0.145083
146.3	0.145917
146.4	0.14525
146.5	0.144667
146.6	0.144583
146.7	0.145583
146.8	0.146167
146.9	0.146083
147	0.146333
147.1	0.145917
147.2	0.14625
147.3	0.14525
147.4	0.144917
147.5	0.144083
147.6	0.14425
147.7	0.144083
147.8	0.143917
147.9	0.144833
148	0.14425
148.1	0.1445
148.2	0.144333
148.3	0.144917
148.4	0.14475
148.5	0.144583
148.6	0.144
148.7	0.143917
148.8	0.144083
148.9	0.143333
149	0.1425
149.1	0.14275
149.2	0.142
149.3	0.142333
149.4	0.142167
149.5	0.142583
149.6	0.142583
149.7	0.14275
149.8	0.142333
149.9	0.142417
150	0.142417
150.1	0.143167
150.2	0.142917
150.3	0.143333
150.4	0.14325
150.5	0.14475
150.6	0.144583
150.7	0.145333
150.8	0.14475
150.9	0.143917
151	0.144083
151.1	0.143833
151.2	0.144333
151.3	0.1445
151.4	0.145167
151.5	0.145167
151.6	0.14575
151.7	0.14575
151.8	0.14575
151.9	0.145333
152	0.146
152.1	0.146
152.2	0.145583
152.3	0.146083
152.4	0.14675
152.5	0.146667
152.6	0.146667
152.7	0.146417
152.8	0.14675
152.9	0.146917
153	0.146833
153.1	0.147167
153.2	0.1475
153.3	0.146083
153.4	0.146583
153.5	0.146833
153.6	0.1465
153.7	0.146917
153.8	0.147083
153.9	0.148333
154	0.14825
154.1	0.14875
154.2	0.149583
154.3	0.15025
154.4	0.149833
154.5	0.149583
154.6	0.15
154.7	0.15
154.8	0.150167
154.9	0.149583
155	0.14875
155.1	0.14875
155.2	0.14875
155.3	0.148667
155.4	0.1485
155.5	0.149083
155.6	0.149167
155.7	0.148667
155.8	0.149667
155.9	0.149833
156	0.149917
156.1	0.149667
156.2	0.149333
156.3	0.149
156.4	0.149333
156.5	0.149667
156.6	0.149167
156.7	0.149
156.8	0.149583
156.9	0.150417
157	0.149833
157.1	0.149667
157.2	0.1495
157.3	0.149333
157.4	0.14825
157.5	0.148333
157.6	0.14875
157.7	0.14875
157.8	0.1485
157.9	0.148333
158	0.14825
158.1	0.147917
158.2	0.14775
158.3	0.148167
158.4	0.147917
158.5	0.148583
158.6	0.148583
158.7	0.148333
158.8	0.148083
158.9	0.148083
159	0.147333
159.1	0.147
159.2	0.147167
159.3	0.147333
159.4	0.147917
159.5	0.147917
159.6	0.148417
159.7	0.148
159.8	0.148417
159.9	0.148417
160	0.149083
160.1	0.149833
160.2	0.149667
160.3	0.148583
160.4	0.149417
160.5	0.149583
160.6	0.14975
160.7	0.14975
160.8	0.15
160.9	0.150167
161	0.150583
161.1	0.151667
161.2	0.151583
161.3	0.151583
161.4	0.1505
161.5	0.150333
161.6	0.150667
161.7	0.149083
161.8	0.149667
161.9	0.150083
162	0.15025
162.1	0.15025
162.2	0.1495
162.3	0.149417
162.4	0.149417
162.5	0.14875
162.6	0.14875
162.7	0.148667
162.8	0.1485
162.9	0.148833
163	0.148417
163.1	0.14925
163.2	0.148917
163.3	0.149667
163.4	0.150667
163.5	0.151833
163.6	0.152083
163.7	0.152083
163.8	0.151833
163.9	0.151833
164	0.151667
164.1	0.151583
164.2	0.150667
164.3	0.151167
164.4	0.15225
164.5	0.152417
164.6	0.152583
164.7	0.152167
164.8	0.1525
164.9	0.152167
165	0.15275
165.1	0.15275
165.2	0.15275
165.3	0.153167
165.4	0.152917
165.5	0.153167
165.6	0.1525
165.7	0.1525
165.8	0.152167
165.9	0.1515
166	0.151167
166.1	0.151167
166.2	0.150833
166.3	0.150917
166.4	0.150167
166.5	0.15075
166.6	0.150833
166.7	0.1505
166.8	0.150167
166.9	0.15
167	0.149833
167.1	0.149833
167.2	0.14925
167.3	0.149333
167.4	0.149
167.5	0.1485
167.6	0.148083
167.7	0.147917
167.8	0.1485
167.9	0.148667
168	0.148667
168.1	0.148833
168.2	0.148167
168.3	0.147833
168.4	0.147833
168.5	0.148167
168.6	0.148833
168.7	0.148333
168.8	0.14825
168.9	0.148167
169	0.148167
169.1	0.1485
169.2	0.148917
169.3	0.1485
169.4	0.148083
169.5	0.148083
169.6	0.148917
169.7	0.148917
169.8	0.1485
169.9	0.1485
170	0.148917
170.1	0.148833
170.2	0.148583
170.3	0.148417
170.4	0.148667
170.5	0.14825
170.6	0.148667
170.7	0.148083
170.8	0.147583
170.9	0.1485
171	0.14925
171.1	0.15
171.2	0.150083
171.3	0.15075
171.4	0.150333
171.5	0.15025
171.6	0.1495
171.7	0.14975
171.8	0.150333
171.9	0.151083
172	0.150667
172.1	0.150167
172.2	0.150083
172.3	0.150667
172.4	0.149833
172.5	0.150083
172.6	0.151417
172.7	0.151417
172.8	0.150583
172.9	0.150167
173	0.150083
173.1	0.15
173.2	0.150333
173.3	0.151417
173.4	0.1515
173.5	0.151833
173.6	0.150917
173.7	0.150667
173.8	0.150417
173.9	0.151333
174	0.152083
174.1	0.152417
174.2	0.153
174.3	0.15325
174.4	0.152917
174.5	0.153
174.6	0.152833
174.7	0.152833
174.8	0.15275
174.9	0.152583
175	0.153167
175.1	0.1525
175.2	0.1525
175.3	0.151583
175.4	0.151
175.5	0.150833
175.6	0.150167
175.7	0.150833
175.8	0.151333
175.9	0.151583
176	0.151333
176.1	0.151417
176.2	0.151333
176.3	0.15075
176.4	0.150417
176.5	0.15075
176.6	0.15075
176.7	0.151167
176.8	0.152083
176.9	0.151917
177	0.151917
177.1	0.153
177.2	0.153583
177.3	0.1535
177.4	0.154583
177.5	0.154167
177.6	0.154833
177.7	0.15425
177.8	0.155
177.9	0.15475
178	0.155417
178.1	0.154917
178.2	0.155333
178.3	0.154333
178.4	0.154667
178.5	0.154833
178.6	0.1545
178.7	0.154167
178.8	0.153667
178.9	0.1545
179	0.154583
179.1	0.155167
179.2	0.155333
179.3	0.155083
179.4	0.155083
179.5	0.155083
179.6	0.155917
179.7	0.156083
179.8	0.156
179.9	0.15575
180	0.1555
180.1	0.155167
180.2	0.155167
180.3	0.1555
180.4	0.155
180.5	0.154833
180.6	0.155333
180.7	0.155083
180.8	0.1555
180.9	0.15525
181	0.154667
181.1	0.154083
181.2	0.1545
181.3	0.154583
181.4	0.154917
181.5	0.154833
181.6	0.153917
181.7	0.154417
181.8	0.154
181.9	0.155
182	0.15525
182.1	0.1555
182.2	0.156833
182.3	0.157
182.4	0.15725
182.5	0.157583
182.6	0.157417
182.7	0.157083
182.8	0.157417
182.9	0.158083
183	0.158833
183.1	0.1585
183.2	0.15825
183.3	0.157833
183.4	0.1585
183.5	0.158167
183.6	0.15725
183.7	0.157083
183.8	0.156667
183.9	0.156667
184	0.157
184.1	0.156667
184.2	0.15575
184.3	0.156417
184.4	0.156917
184.5	0.157
184.6	0.1575
184.7	0.157167
184.8	0.157333
184.9	0.156917
185	0.15625
185.1	0.156167
185.2	0.1565
185.3	0.156417
185.4	0.156333
185.5	0.155583
185.6	0.154667
185.7	0.154833
185.8	0.155083
185.9	0.155417
186	0.156083
186.1	0.155083
186.2	0.155167
186.3	0.155833
186.4	0.156583
186.5	0.156417
186.6	0.155583
186.7	0.155667
186.8	0.155583
186.9	0.15575
187	0.155583
187.1	0.15475
187.2	0.154917
187.3	0.1545
187.4	0.154583
187.5	0.154917
187.6	0.155083
187.7	0.154917
187.8	0.154083
187.9	0.154167
188	0.153583
188.1	0.15375
188.2	0.15275
188.3	0.152833
188.4	0.152583
188.5	0.153
188.6	0.152667
188.7	0.153
188.8	0.153917
188.9	0.153917
189	0.153583
189.1	0.153417
189.2	0.15325
189.3	0.152833
189.4	0.152833
189.5	0.153083
189.6	0.153417
189.7	0.153083
189.8	0.153
189.9	0.152583
190	0.153
190.1	0.152667
190.2	0.152417
190.3	0.15275
190.4	0.153083
190.5	0.152167
190.6	0.151333
190.7	0.151167
190.8	0.15025
190.9	0.1505
191	0.150583
191.1	0.150167
191.2	0.150167
191.3	0.149833
191.4	0.149333
191.5	0.148833
191.6	0.148917
191.7	0.148167
191.8	0.148417
191.9	0.149417
192	0.149417
192.1	0.150083
192.2	0.149583
192.3	0.149583
192.4	0.14975
192.5	0.149417
192.6	0.149667
192.7	0.149667
192.8	0.149667
192.9	0.1495
193	0.15
193.1	0.150083
193.2	0.149833
193.3	0.150167
193.4	0.15025
193.5	0.150333
193.6	0.15125
193.7	0.15075
193.8	0.151667
193.9	0.151917
194	0.1515
194.1	0.151833
194.2	0.151167
194.3	0.150667
194.4	0.151917
194.5	0.1525
194.6	0.152667
194.7	0.153333
194.8	0.153417
194.9	0.153917
195	0.15375
195.1	0.15325
195.2	0.1535
195.3	0.153167
195.4	0.153167
195.5	0.1535
195.6	0.154
195.7	0.15325
195.8	0.153167
195.9	0.152583
196	0.152667
196.1	0.153083
196.2	0.153
196.3	0.1525
196.4	0.153667
196.5	0.15325
196.6	0.153
196.7	0.153083
196.8	0.15275
196.9	0.15325
197	0.154083
197.1	0.154167
197.2	0.15475
197.3	0.154667
197.4	0.154
197.5	0.1545
197.6	0.153417
197.7	0.152333
197.8	0.15325
197.9	0.153583
198	0.15325
198.1	0.152833
198.2	0.1525
198.3	0.152333
198.4	0.151417
198.5	0.15075
198.6	0.15025
198.7	0.150083
198.8	0.14975
198.9	0.149833
199	0.149917
199.1	0.14975
199.2	0.149417
199.3	0.149333
199.4	0.14975
199.5	0.14975
199.6	0.150417
199.7	0.150333
199.8	0.150167
199.9	0.15
200	0.149667
[truncated: 14,000 more rows]
