# Supplementary material for: Bayesian inference of kinetic schemes for ion channels by Kalman filtering
Source: eLife journal article supplement (doi:10.7554/elife.62714), 2022-05-04
Supplement: fig4-data11 [file 1_Sim_N_6000_Strom_MW.xlsx]

## Sheet: Tabelle1
0.1	0
0.2	0
0.3	0
0.4	0
0.5	0
0.6	0
0.7	0
0.8	0
0.9	0
1	0
1.1	0
1.2	0
1.3	0
1.4	0
1.5	0
1.6	0
1.7	0
1.8	0
1.9	0
2	0
2.1	0
2.2	0
2.3	0
2.4	0
2.5	0
2.6	0
2.7	0
2.8	0
2.9	0
3	0
3.1	0
3.2	0
3.3	0
3.4	0
3.5	0
3.6	0
3.7	0
3.8	0
3.9	0
4	0
4.1	0
4.2	0
4.3	0
4.4	0
4.5	0
4.6	0
4.7	0
4.8	0
4.9	0
5	0
5.1	0
5.2	0
5.3	0
5.4	0
5.5	0
5.6	0
5.7	0
5.8	0
5.9	0
6	0
6.1	0
6.2	0
6.3	0
6.4	0
6.5	0
6.6	0
6.7	0
6.8	0
6.9	0
7	0
7.1	0
7.2	0
7.3	0
7.4	0
7.5	0
7.6	0
7.7	0
7.8	0
7.9	0
8	0
8.1	0
8.2	0
8.3	0
8.4	0
8.5	0
8.6	0
8.7	0
8.8	0
8.9	0
9	0
9.1	0
9.2	0
9.3	0
9.4	0
9.5	0
9.6	0
9.7	0
9.8	0
9.9	0
10	0
10.1	0
10.2	0
10.3	0
10.4	0
10.5	0
10.6	0
10.7	0
10.8	0
10.9	0
11	0
11.1	0
11.2	0
11.3	0
11.4	0
11.5	0
11.6	0
11.7	0
11.8	0
11.9	0
12	0
12.1	0
12.2	0
12.3	0
12.4	0
12.5	0
12.6	0
12.7	0
12.8	0
12.9	0
13	0
13.1	0
13.2	0
13.3	0
13.4	0
13.5	0
13.6	0
13.7	0
13.8	0
13.9	0
14	0
14.1	0
14.2	0
14.3	0
14.4	0
14.5	0
14.6	0
14.7	0
14.8	0
14.9	0
15	0
15.1	0
15.2	0
15.3	0
15.4	0
15.5	0
15.6	0
15.7	0
15.8	0
15.9	0
16	0
16.1	0
16.2	0
16.3	0
16.4	0
16.5	0
16.6	0
16.7	0
16.8	0
16.9	0
17	0
17.1	0
17.2	0
17.3	0
17.4	0
17.5	0
17.6	0
17.7	0
17.8	0
17.9	0
18	0
18.1	0
18.2	0
18.3	0
18.4	0
18.5	0
18.6	0
18.7	0
18.8	0
18.9	0
19	0
19.1	0
19.2	0
19.3	0
19.4	0
19.5	0
19.6	0
19.7	0
19.8	0
19.9	0
20	0
20.1	0
20.2	0
20.3	0
20.4	0
20.5	0
20.6	0
20.7	0
20.8	0
20.9	0
21	0
21.1	0
21.2	0
21.3	0
21.4	0
21.5	0
21.6	0
21.7	0
21.8	0
21.9	0
22	0
22.1	0
22.2	0
22.3	0
22.4	0
22.5	0
22.6	0
22.7	0
22.8	0
22.9	0
23	0
23.1	0
23.2	0
23.3	0
23.4	0
23.5	0
23.6	0
23.7	0
23.8	0
23.9	0
24	0
24.1	0
24.2	0
24.3	0
24.4	0
24.5	0
24.6	0
24.7	0
24.8	0
24.9	0
25	0
25.1	0
25.2	0
25.3	0
25.4	0
25.5	0
25.6	0
25.7	0
25.8	0
25.9	0
26	0
26.1	0
26.2	0
26.3	0
26.4	0
26.5	0
26.6	0
26.7	0
26.8	0
26.9	0
27	0
27.1	0
27.2	0
27.3	0
27.4	0
27.5	0
27.6	0
27.7	0
27.8	0
27.9	0
28	0
28.1	0
28.2	0
28.3	0
28.4	0
28.5	0
28.6	0
28.7	0
28.8	0
28.9	0
29	0
29.1	0
29.2	0
29.3	0
29.4	0
29.5	0
29.6	0
29.7	0
29.8	0
29.9	0
30	0
30.1	0
30.2	0
30.3	0
30.4	0
30.5	0
30.6	0
30.7	0
30.8	0
30.9	0
31	0
31.1	0
31.2	0
31.3	0
31.4	0
31.5	0
31.6	0
31.7	0
31.8	0
31.9	0
32	0
32.1	0
32.2	0
32.3	0
32.4	0
32.5	0
32.6	0
32.7	0
32.8	0
32.9	0
33	0
33.1	0
33.2	0
33.3	0
33.4	0
33.5	0
33.6	0
33.7	0
33.8	0
33.9	0
34	0
34.1	0
34.2	0
34.3	0
34.4	0
34.5	0
34.6	0
34.7	0
34.8	0
34.9	0
35	0
35.1	0
35.2	0
35.3	0
35.4	0
35.5	0
35.6	0
35.7	0
35.8	0
35.9	0
36	0
36.1	0
36.2	0
36.3	0
36.4	0
36.5	0
36.6	0
36.7	0
36.8	0
36.9	0
37	0
37.1	0
37.2	0
37.3	0
37.4	0
37.5	0
37.6	0
37.7	0
37.8	0
37.9	0
38	0
38.1	0
38.2	0
38.3	0
38.4	0
38.5	0
38.6	0
38.7	0
38.8	0
38.9	0
39	0
39.1	0
39.2	0
39.3	0
39.4	0
39.5	0
39.6	0
39.7	0
39.8	0
39.9	0
40	0
40.1	0
40.2	0
40.3	0
40.4	0
40.5	0
40.6	0
40.7	0
40.8	0
40.9	0
41	0
41.1	0
41.2	0
41.3	0
41.4	0
41.5	0
41.6	0
41.7	0
41.8	0
41.9	0
42	0
42.1	0
42.2	0
42.3	0
42.4	0
42.5	0
42.6	0
42.7	0
42.8	0
42.9	0
43	0
43.1	0
43.2	0
43.3	0
43.4	0
43.5	0
43.6	0
43.7	0
43.8	0
43.9	0
44	0
44.1	0
44.2	0
44.3	0
44.4	0
44.5	0
44.6	0
44.7	0
44.8	0
44.9	0
45	0
45.1	0
45.2	0
45.3	0
45.4	0
45.5	0
45.6	0
45.7	0
45.8	0
45.9	0
46	0
46.1	0
46.2	0
46.3	0
46.4	0
46.5	0
46.6	0
46.7	0
46.8	0
46.9	0
47	0
47.1	0
47.2	0
47.3	0
47.4	0
47.5	0
47.6	0
47.7	0
47.8	0
47.9	0
48	0
48.1	0
48.2	0
48.3	0
48.4	0
48.5	0
48.6	0
48.7	0
48.8	0
48.9	0
49	0
49.1	0
49.2	0
49.3	0
49.4	0
49.5	0
49.6	0
49.7	0
49.8	0
49.9	0
50	0
50.1	0
50.2	0
50.3	0
50.4	0
50.5	0
50.6	0
50.7	0
50.8	0
50.9	0
51	0
51.1	0
51.2	0
51.3	0
51.4	0
51.5	0
51.6	0
51.7	0
51.8	0
51.9	0
52	0
52.1	0
52.2	0
52.3	0
52.4	0
52.5	0
52.6	0
52.7	0
52.8	0
52.9	0
53	0
53.1	0
53.2	0
53.3	0
53.4	0
53.5	0
53.6	0
53.7	0
53.8	0
53.9	0
54	0
54.1	0
54.2	0
54.3	0
54.4	0
54.5	0
54.6	0
54.7	0
54.8	0
54.9	0
55	0
55.1	0
55.2	0
55.3	0
55.4	0
55.5	0
55.6	0
55.7	0
55.8	0
55.9	0
56	0
56.1	0
56.2	0
56.3	0
56.4	0
56.5	0
56.6	0
56.7	0
56.8	0
56.9	0
57	0
57.1	0
57.2	0
57.3	0
57.4	0
57.5	0
57.6	0
57.7	0
57.8	0
57.9	0
58	0
58.1	0
58.2	0
58.3	0
58.4	0
58.5	0
58.6	0
58.7	0
58.8	0
58.9	0
59	0
59.1	0
59.2	0
59.3	0
59.4	0
59.5	0
59.6	0
59.7	0
59.8	0
59.9	0
60	0
60.1	0
60.2	0
60.3	0
60.4	0
60.5	0
60.6	0
60.7	0
60.8	0
60.9	0
61	0
61.1	0
61.2	0
61.3	0
61.4	0
61.5	0
61.6	0
61.7	0
61.8	0
61.9	0
62	0
62.1	0
62.2	0
62.3	0
62.4	0
62.5	0
62.6	0
62.7	0
62.8	0
62.9	0
63	0
63.1	0
63.2	0
63.3	0
63.4	0
63.5	0
63.6	0
63.7	0
63.8	0
63.9	0
64	0
64.1	0
64.2	0
64.3	0
64.4	0
64.5	0
64.6	0
64.7	0
64.8	0
64.9	0
65	0
65.1	0
65.2	0
65.3	0
65.4	0
65.5	0
65.6	0
65.7	0
65.8	0
65.9	0
66	0
66.1	0
66.2	0
66.3	0
66.4	0
66.5	0
66.6	0
66.7	0
66.8	0
66.9	0
67	0
67.1	0
67.2	0
67.3	0
67.4	0
67.5	0
67.6	0
67.7	0
67.8	0
67.9	0
68	0
68.1	0
68.2	0
68.3	0
68.4	0
68.5	0
68.6	0
68.7	0
68.8	0
68.9	0
69	0
69.1	0
69.2	0
69.3	0
69.4	0
69.5	0
69.6	0
69.7	0
69.8	0
69.9	0
70	0
70.1	0
70.2	0
70.3	0
70.4	0
70.5	0
70.6	0
70.7	0
70.8	0
70.9	0
71	0
71.1	0
71.2	0
71.3	0
71.4	0
71.5	0
71.6	0
71.7	0
71.8	0
71.9	0
72	0
72.1	0
72.2	0
72.3	0
72.4	0
72.5	0
72.6	0
72.7	0
72.8	0
72.9	0
73	0
73.1	0
73.2	0
73.3	0
73.4	0
73.5	0
73.6	0
73.7	0
73.8	0
73.9	0
74	0
74.1	0
74.2	0
74.3	0
74.4	0
74.5	0
74.6	0
74.7	0
74.8	0
74.9	0
75	0
75.1	0
75.2	0
75.3	0
75.4	0
75.5	0
75.6	0
75.7	0
75.8	0
75.9	0
76	0
76.1	0
76.2	0
76.3	0
76.4	0
76.5	0
76.6	0
76.7	0
76.8	0
76.9	0
77	0
77.1	0
77.2	0
77.3	0
77.4	0
77.5	0
77.6	0
77.7	0
77.8	0
77.9	0
78	0
78.1	0
78.2	0
78.3	0
78.4	0
78.5	0
78.6	0
78.7	0
78.8	0
78.9	0
79	0
79.1	0
79.2	0
79.3	0
79.4	0
79.5	0
79.6	0
79.7	0
79.8	0
79.9	0
80	0
80.1	0
80.2	0
80.3	0
80.4	0
80.5	0
80.6	0
80.7	0
80.8	0
80.9	0
81	0
81.1	0
81.2	0
81.3	0
81.4	0
81.5	0
81.6	0
81.7	0
81.8	0
81.9	0
82	0
82.1	0
82.2	0
82.3	0
82.4	0
82.5	0
82.6	0
82.7	0
82.8	0
82.9	0
83	0
83.1	0
83.2	0
83.3	0
83.4	0
83.5	0
83.6	0
83.7	0
83.8	0
83.9	0
84	0
84.1	0
84.2	0
84.3	0
84.4	0
84.5	0
84.6	0
84.7	0
84.8	0
84.9	0
85	0
85.1	0
85.2	0
85.3	0
85.4	0
85.5	0
85.6	0
85.7	0
85.8	0
85.9	0
86	0
86.1	0
86.2	0
86.3	0
86.4	0
86.5	0
86.6	0
86.7	0
86.8	0
86.9	0
87	0
87.1	0
87.2	0
87.3	0
87.4	0
87.5	0
87.6	0
87.7	0
87.8	0
87.9	0
88	0
88.1	0
88.2	0
88.3	0
88.4	0
88.5	0
88.6	0
88.7	0
88.8	0
88.9	0
89	0
89.1	0
89.2	0
89.3	0
89.4	0
89.5	0
89.6	0
89.7	0
89.8	0
89.9	0
90	0
90.1	0
90.2	0
90.3	0
90.4	0
90.5	0
90.6	0
90.7	0
90.8	0
90.9	0
91	0
91.1	0
91.2	0
91.3	0
91.4	0
91.5	0
91.6	0
91.7	0
91.8	0
91.9	0
92	0
92.1	0
92.2	0
92.3	0
92.4	0
92.5	0
92.6	0
92.7	0
92.8	0
92.9	0
93	0
93.1	0
93.2	0
93.3	0
93.4	0
93.5	0
93.6	0
93.7	0
93.8	0
93.9	0
94	0
94.1	0
94.2	0
94.3	0
94.4	0
94.5	0
94.6	0
94.7	0
94.8	0
94.9	0
95	0
95.1	0
95.2	0
95.3	0
95.4	0
95.5	0
95.6	0
95.7	0
95.8	0
95.9	0
96	0
96.1	0
96.2	0
96.3	0
96.4	0
96.5	0
96.6	0
96.7	0
96.8	0
96.9	0
97	0
97.1	0
97.2	0
97.3	0
97.4	0
97.5	0
97.6	0
97.7	0
97.8	0
97.9	0
98	0
98.1	0
98.2	0
98.3	0
98.4	0
98.5	0
98.6	0
98.7	0
98.8	0
98.9	0
99	0
99.1	0
99.2	0
99.3	0
99.4	0
99.5	0
99.6	0
99.7	0
99.8	0
99.9	0
100	0
100.1	0
100.2	0
100.3	0
100.4	0
100.5	0
100.6	0
100.7	0
100.8	0
100.9	0
101	0
101.1	0
101.2	0
101.3	0
101.4	0
101.5	0
101.6	0
101.7	0
101.8	0
101.9	0
102	0
102.1	0.000166667
102.2	0.000166667
102.3	0.000166667
102.4	0.000333333
102.5	0.000333333
102.6	0.000333333
102.7	0.000333333
102.8	0.000333333
102.9	0.000333333
103	0.000333333
103.1	0.000333333
103.2	0.000333333
103.3	0.000333333
103.4	0.000333333
103.5	0.000333333
103.6	0.000333333
103.7	0.000333333
103.8	0.000333333
103.9	0.000333333
104	0.000333333
104.1	0.000333333
104.2	0.000333333
104.3	0.000333333
104.4	0.000333333
104.5	0.000333333
104.6	0.000333333
104.7	0.000333333
104.8	0.000333333
104.9	0.000333333
105	0.000333333
105.1	0.000333333
105.2	0.000333333
105.3	0.000333333
105.4	0.000333333
105.5	0.000333333
105.6	0.000333333
105.7	0.000333333
105.8	0.000333333
105.9	0.000333333
106	0.000333333
106.1	0.000333333
106.2	0.000333333
106.3	0.000333333
106.4	0.000333333
106.5	0.000333333
106.6	0.000333333
106.7	0.000333333
106.8	0.000333333
106.9	0.000333333
107	0.000333333
107.1	0.0005
107.2	0.0005
107.3	0.0005
107.4	0.0005
107.5	0.0005
107.6	0.0005
107.7	0.0005
107.8	0.000833333
107.9	0.000833333
108	0.000833333
108.1	0.000833333
108.2	0.000833333
108.3	0.000833333
108.4	0.000833333
108.5	0.000833333
108.6	0.000833333
108.7	0.000833333
108.8	0.001
108.9	0.001
109	0.001
109.1	0.001
109.2	0.001
109.3	0.001
109.4	0.001
109.5	0.001
109.6	0.001
109.7	0.001
109.8	0.001
109.9	0.001
110	0.001
110.1	0.001
110.2	0.001
110.3	0.001
110.4	0.001
110.5	0.001
110.6	0.001
110.7	0.001
110.8	0.001
110.9	0.001
111	0.001
111.1	0.00116667
111.2	0.00116667
111.3	0.00116667
111.4	0.00116667
111.5	0.00116667
111.6	0.00116667
111.7	0.00116667
111.8	0.00116667
111.9	0.00116667
112	0.00116667
112.1	0.00116667
112.2	0.00116667
112.3	0.00116667
112.4	0.00116667
112.5	0.00116667
112.6	0.00116667
112.7	0.00133333
112.8	0.00133333
112.9	0.00133333
113	0.0015
113.1	0.0015
113.2	0.0015
113.3	0.0015
113.4	0.0015
113.5	0.0015
113.6	0.0015
113.7	0.0015
113.8	0.00166667
113.9	0.00183333
114	0.00183333
114.1	0.00183333
114.2	0.00183333
114.3	0.00183333
114.4	0.002
114.5	0.002
114.6	0.002
114.7	0.002
114.8	0.002
114.9	0.002
115	0.002
115.1	0.002
115.2	0.002
115.3	0.002
115.4	0.002
115.5	0.002
115.6	0.002
115.7	0.00216667
115.8	0.00216667
115.9	0.00216667
116	0.00216667
116.1	0.00216667
116.2	0.00216667
116.3	0.00216667
116.4	0.00233333
116.5	0.0025
116.6	0.0025
116.7	0.0025
116.8	0.0025
116.9	0.0025
117	0.0025
117.1	0.0025
117.2	0.0025
117.3	0.00233333
117.4	0.00233333
117.5	0.00233333
117.6	0.00233333
117.7	0.00233333
117.8	0.00233333
117.9	0.00233333
118	0.0025
118.1	0.0025
118.2	0.0025
118.3	0.0025
118.4	0.0025
118.5	0.0025
118.6	0.00266667
118.7	0.00266667
118.8	0.00266667
118.9	0.00266667
119	0.00266667
119.1	0.00266667
119.2	0.00266667
119.3	0.00266667
119.4	0.00283333
119.5	0.00283333
119.6	0.00283333
119.7	0.00283333
119.8	0.00283333
119.9	0.00283333
120	0.00283333
120.1	0.003
120.2	0.003
120.3	0.003
120.4	0.003
120.5	0.003
120.6	0.003
120.7	0.003
120.8	0.003
120.9	0.00316667
121	0.00316667
121.1	0.00316667
121.2	0.00316667
121.3	0.00316667
121.4	0.00316667
121.5	0.00316667
121.6	0.00316667
121.7	0.00316667
121.8	0.00316667
121.9	0.00316667
122	0.00316667
122.1	0.00333333
122.2	0.00333333
122.3	0.00333333
122.4	0.00333333
122.5	0.0035
122.6	0.00333333
122.7	0.00333333
122.8	0.00333333
122.9	0.00333333
123	0.00333333
123.1	0.00333333
123.2	0.00333333
123.3	0.0035
123.4	0.00366667
123.5	0.00383333
123.6	0.00383333
123.7	0.00383333
123.8	0.00383333
123.9	0.00383333
124	0.004
124.1	0.004
124.2	0.004
124.3	0.00383333
124.4	0.00383333
124.5	0.00383333
124.6	0.00383333
124.7	0.004
124.8	0.004
124.9	0.004
125	0.004
125.1	0.00416667
125.2	0.00416667
125.3	0.00416667
125.4	0.00433333
125.5	0.00433333
125.6	0.00433333
125.7	0.00433333
125.8	0.00416667
125.9	0.00416667
126	0.00416667
126.1	0.00416667
126.2	0.00416667
126.3	0.004
126.4	0.004
126.5	0.004
126.6	0.004
126.7	0.004
126.8	0.004
126.9	0.004
127	0.004
127.1	0.004
127.2	0.004
127.3	0.00383333
127.4	0.00383333
127.5	0.00383333
127.6	0.00383333
127.7	0.00383333
127.8	0.00383333
127.9	0.00383333
128	0.00383333
128.1	0.00383333
128.2	0.00383333
128.3	0.00383333
128.4	0.00383333
128.5	0.00383333
128.6	0.00383333
128.7	0.00383333
128.8	0.00383333
128.9	0.004
129	0.004
129.1	0.004
129.2	0.00416667
129.3	0.00416667
129.4	0.00416667
129.5	0.00416667
129.6	0.00416667
129.7	0.00416667
129.8	0.00416667
129.9	0.00416667
130	0.00416667
130.1	0.00416667
130.2	0.00416667
130.3	0.00416667
130.4	0.00416667
130.5	0.00416667
130.6	0.00416667
130.7	0.00416667
130.8	0.00433333
130.9	0.00433333
131	0.00433333
131.1	0.00433333
131.2	0.00433333
131.3	0.0045
131.4	0.00466667
131.5	0.00466667
131.6	0.00466667
131.7	0.00466667
131.8	0.00466667
131.9	0.00483333
132	0.00483333
132.1	0.00483333
132.2	0.00466667
132.3	0.00466667
132.4	0.00466667
132.5	0.00466667
132.6	0.00466667
132.7	0.00466667
132.8	0.005
132.9	0.005
133	0.005
133.1	0.005
133.2	0.005
133.3	0.005
133.4	0.005
133.5	0.005
133.6	0.005
133.7	0.005
133.8	0.005
133.9	0.005
134	0.005
134.1	0.005
134.2	0.005
134.3	0.00516667
134.4	0.00516667
134.5	0.00516667
134.6	0.00516667
134.7	0.00516667
134.8	0.00516667
134.9	0.00516667
135	0.00516667
135.1	0.00516667
135.2	0.00516667
135.3	0.00533333
135.4	0.00533333
135.5	0.00533333
135.6	0.00533333
135.7	0.00533333
135.8	0.00533333
135.9	0.0055
136	0.0055
136.1	0.0055
136.2	0.0055
136.3	0.0055
136.4	0.0055
136.5	0.0055
136.6	0.0055
136.7	0.00566667
136.8	0.00566667
136.9	0.00566667
137	0.00566667
137.1	0.00566667
137.2	0.00566667
137.3	0.00566667
137.4	0.00566667
137.5	0.00566667
137.6	0.00566667
137.7	0.00566667
137.8	0.00566667
137.9	0.00566667
138	0.00566667
138.1	0.00566667
138.2	0.00566667
138.3	0.0055
138.4	0.0055
138.5	0.0055
138.6	0.00566667
138.7	0.00566667
138.8	0.00566667
138.9	0.00566667
139	0.00566667
139.1	0.00566667
139.2	0.00566667
139.3	0.00583333
139.4	0.00583333
139.5	0.00583333
139.6	0.00583333
139.7	0.00583333
139.8	0.00583333
139.9	0.00583333
140	0.00583333
140.1	0.00583333
140.2	0.00583333
140.3	0.006
140.4	0.00616667
140.5	0.00616667
140.6	0.00616667
140.7	0.00616667
140.8	0.00616667
140.9	0.00616667
141	0.00616667
141.1	0.00616667
141.2	0.00616667
141.3	0.00633333
141.4	0.00633333
141.5	0.00633333
141.6	0.00633333
141.7	0.00633333
141.8	0.0065
141.9	0.0065
142	0.0065
142.1	0.0065
142.2	0.0065
142.3	0.0065
142.4	0.0065
142.5	0.00633333
142.6	0.00633333
142.7	0.00633333
142.8	0.00616667
142.9	0.00616667
143	0.00616667
143.1	0.00616667
143.2	0.00616667
143.3	0.00616667
143.4	0.00616667
143.5	0.00616667
143.6	0.00616667
143.7	0.00616667
143.8	0.00633333
143.9	0.00633333
144	0.00633333
144.1	0.00633333
144.2	0.00633333
144.3	0.00633333
144.4	0.00633333
144.5	0.00633333
144.6	0.00633333
144.7	0.00633333
144.8	0.00633333
144.9	0.00633333
145	0.00633333
145.1	0.0065
145.2	0.00633333
145.3	0.00633333
145.4	0.00633333
145.5	0.00633333
145.6	0.00633333
145.7	0.00633333
145.8	0.00633333
145.9	0.00633333
146	0.00633333
146.1	0.00633333
146.2	0.0065
146.3	0.0065
146.4	0.0065
146.5	0.0065
146.6	0.0065
146.7	0.0065
146.8	0.00666667
146.9	0.00666667
147	0.00666667
147.1	0.00666667
147.2	0.0065
147.3	0.0065
147.4	0.0065
147.5	0.0065
147.6	0.0065
147.7	0.0065
147.8	0.0065
147.9	0.0065
148	0.00666667
148.1	0.00666667
148.2	0.00666667
148.3	0.00666667
148.4	0.00666667
148.5	0.00666667
148.6	0.00666667
148.7	0.00666667
148.8	0.00666667
148.9	0.00666667
149	0.00666667
149.1	0.00666667
149.2	0.00666667
149.3	0.00666667
149.4	0.00666667
149.5	0.00666667
149.6	0.00666667
149.7	0.00666667
149.8	0.00666667
149.9	0.00666667
150	0.00666667
150.1	0.00666667
150.2	0.00666667
150.3	0.00666667
150.4	0.00666667
150.5	0.00683333
150.6	0.00683333
150.7	0.00683333
150.8	0.007
150.9	0.007
151	0.007
151.1	0.007
151.2	0.007
151.3	0.007
151.4	0.007
151.5	0.007
151.6	0.007
151.7	0.007
151.8	0.007
151.9	0.007
152	0.007
152.1	0.007
152.2	0.007
152.3	0.00733333
152.4	0.00733333
152.5	0.00733333
152.6	0.00733333
152.7	0.0075
152.8	0.00766667
152.9	0.00783333
153	0.00783333
153.1	0.00783333
153.2	0.00783333
153.3	0.00783333
153.4	0.00783333
153.5	0.00783333
153.6	0.00783333
153.7	0.00783333
153.8	0.008
153.9	0.008
154	0.008
154.1	0.008
154.2	0.008
154.3	0.008
154.4	0.008
154.5	0.008
154.6	0.008
154.7	0.008
154.8	0.00816667
154.9	0.00816667
155	0.00816667
155.1	0.00816667
155.2	0.00816667
155.3	0.00833333
155.4	0.00833333
155.5	0.00833333
155.6	0.00833333
155.7	0.00833333
155.8	0.00833333
155.9	0.00833333
156	0.00833333
156.1	0.00833333
156.2	0.00816667
156.3	0.00816667
156.4	0.00816667
156.5	0.00816667
156.6	0.00833333
156.7	0.00833333
156.8	0.00833333
156.9	0.0085
157	0.0085
157.1	0.0085
157.2	0.00833333
157.3	0.00833333
157.4	0.00833333
157.5	0.00833333
157.6	0.00833333
157.7	0.00833333
157.8	0.0085
157.9	0.0085
158	0.0085
158.1	0.0085
158.2	0.0085
158.3	0.0085
158.4	0.0085
158.5	0.0085
158.6	0.0085
158.7	0.0085
158.8	0.00866667
158.9	0.00883333
159	0.009
159.1	0.009
159.2	0.009
159.3	0.009
159.4	0.00916667
159.5	0.00916667
159.6	0.00933333
159.7	0.00933333
159.8	0.00933333
159.9	0.00933333
160	0.00933333
160.1	0.0095
160.2	0.0095
160.3	0.0095
160.4	0.0095
160.5	0.0095
160.6	0.0095
160.7	0.0095
160.8	0.0095
160.9	0.0095
161	0.0095
161.1	0.0095
161.2	0.0095
161.3	0.00933333
161.4	0.0095
161.5	0.00966667
161.6	0.00966667
161.7	0.00966667
161.8	0.00966667
161.9	0.00966667
162	0.00983333
162.1	0.00983333
162.2	0.01
162.3	0.01
162.4	0.01
162.5	0.01
162.6	0.01
162.7	0.01
162.8	0.01
162.9	0.01
163	0.01
163.1	0.01
163.2	0.01
163.3	0.01
163.4	0.01
163.5	0.01
163.6	0.01
163.7	0.00983333
163.8	0.00983333
163.9	0.00983333
164	0.01
164.1	0.01
164.2	0.01
164.3	0.0101667
164.4	0.0101667
164.5	0.0101667
164.6	0.0101667
164.7	0.0103333
164.8	0.0101667
164.9	0.0101667
165	0.0101667
165.1	0.0101667
165.2	0.01
165.3	0.01
165.4	0.01
165.5	0.00983333
165.6	0.00983333
165.7	0.00983333
165.8	0.01
165.9	0.01
166	0.01
166.1	0.01
166.2	0.01
166.3	0.01
166.4	0.01
166.5	0.01
166.6	0.01
166.7	0.01
166.8	0.01
166.9	0.01
167	0.01
167.1	0.01
167.2	0.01
167.3	0.01
167.4	0.01
167.5	0.01
167.6	0.0101667
167.7	0.0101667
167.8	0.0103333
167.9	0.0106667
168	0.0106667
168.1	0.0108333
168.2	0.0108333
168.3	0.0108333
168.4	0.0108333
168.5	0.0108333
168.6	0.0108333
168.7	0.0108333
168.8	0.0108333
168.9	0.0108333
169	0.0108333
169.1	0.0108333
169.2	0.0108333
169.3	0.0108333
169.4	0.0108333
169.5	0.011
169.6	0.011
169.7	0.011
169.8	0.011
169.9	0.011
170	0.0111667
170.1	0.0111667
170.2	0.0113333
170.3	0.0113333
170.4	0.0111667
170.5	0.0111667
170.6	0.0111667
170.7	0.0111667
170.8	0.0111667
170.9	0.0111667
171	0.0111667
171.1	0.0111667
171.2	0.0113333
171.3	0.0113333
171.4	0.0113333
171.5	0.0113333
171.6	0.0115
171.7	0.0115
171.8	0.0115
171.9	0.0115
172	0.0116667
172.1	0.0116667
172.2	0.0115
172.3	0.0115
172.4	0.0115
172.5	0.0116667
172.6	0.0116667
172.7	0.0116667
172.8	0.0116667
172.9	0.0116667
173	0.0116667
173.1	0.0116667
173.2	0.0116667
173.3	0.0116667
173.4	0.0116667
173.5	0.0116667
173.6	0.0116667
173.7	0.0116667
173.8	0.0116667
173.9	0.0116667
174	0.0116667
174.1	0.012
174.2	0.0118333
174.3	0.0118333
174.4	0.0118333
174.5	0.0118333
174.6	0.0118333
174.7	0.0118333
174.8	0.0118333
174.9	0.0118333
175	0.0116667
175.1	0.0116667
175.2	0.0116667
175.3	0.0116667
175.4	0.0116667
175.5	0.0116667
175.6	0.0116667
175.7	0.0116667
175.8	0.0116667
175.9	0.0116667
176	0.0118333
176.1	0.0118333
176.2	0.012
176.3	0.012
176.4	0.012
176.5	0.012
176.6	0.012
176.7	0.012
176.8	0.012
176.9	0.012
177	0.0121667
177.1	0.0121667
177.2	0.0121667
177.3	0.0121667
177.4	0.012
177.5	0.012
177.6	0.0118333
177.7	0.0118333
177.8	0.0118333
177.9	0.0118333
178	0.0118333
178.1	0.012
178.2	0.012
178.3	0.012
178.4	0.0121667
178.5	0.0121667
178.6	0.0121667
178.7	0.0121667
178.8	0.0121667
178.9	0.0121667
179	0.0121667
179.1	0.0121667
179.2	0.0121667
179.3	0.0121667
179.4	0.0123333
179.5	0.0123333
179.6	0.0123333
179.7	0.0123333
179.8	0.0123333
179.9	0.0123333
180	0.0123333
180.1	0.0123333
180.2	0.0125
180.3	0.0125
180.4	0.0125
180.5	0.0125
180.6	0.0125
180.7	0.0125
180.8	0.0125
180.9	0.0125
181	0.0123333
181.1	0.0123333
181.2	0.0123333
181.3	0.0123333
181.4	0.0125
181.5	0.0125
181.6	0.0125
181.7	0.0126667
181.8	0.0126667
181.9	0.0126667
182	0.0128333
182.1	0.0128333
182.2	0.0128333
182.3	0.0128333
182.4	0.0128333
182.5	0.0128333
182.6	0.0128333
182.7	0.0128333
182.8	0.0128333
182.9	0.0128333
183	0.0126667
183.1	0.0126667
183.2	0.0126667
183.3	0.0128333
183.4	0.0128333
183.5	0.0128333
183.6	0.0128333
183.7	0.0128333
183.8	0.013
183.9	0.013
184	0.013
184.1	0.013
184.2	0.013
184.3	0.013
184.4	0.013
184.5	0.013
184.6	0.013
184.7	0.013
184.8	0.0133333
184.9	0.0133333
185	0.0133333
185.1	0.0133333
185.2	0.0135
185.3	0.0135
185.4	0.0135
185.5	0.0133333
185.6	0.0133333
185.7	0.0133333
185.8	0.0135
185.9	0.0135
186	0.0135
186.1	0.0135
186.2	0.0135
186.3	0.0135
186.4	0.0135
186.5	0.0136667
186.6	0.0136667
186.7	0.0136667
186.8	0.0136667
186.9	0.0136667
187	0.0136667
187.1	0.0136667
187.2	0.0135
187.3	0.0135
187.4	0.0135
187.5	0.0135
187.6	0.0135
187.7	0.0135
187.8	0.0135
187.9	0.0136667
188	0.0136667
188.1	0.0136667
188.2	0.0138333
188.3	0.0138333
188.4	0.0136667
188.5	0.0136667
188.6	0.0136667
188.7	0.0136667
188.8	0.0136667
188.9	0.0136667
189	0.0136667
189.1	0.0136667
189.2	0.0136667
189.3	0.0136667
189.4	0.0138333
189.5	0.0138333
189.6	0.0138333
189.7	0.0138333
189.8	0.0138333
189.9	0.0138333
190	0.0138333
190.1	0.0138333
190.2	0.0138333
190.3	0.0138333
190.4	0.014
190.5	0.0138333
190.6	0.0138333
190.7	0.0138333
190.8	0.0138333
190.9	0.0138333
191	0.014
191.1	0.014
191.2	0.0138333
191.3	0.0138333
191.4	0.0138333
191.5	0.0138333
191.6	0.0138333
191.7	0.0138333
191.8	0.0136667
191.9	0.0138333
192	0.0138333
192.1	0.0138333
192.2	0.0136667
192.3	0.0136667
192.4	0.0136667
192.5	0.0136667
192.6	0.0136667
192.7	0.0136667
192.8	0.0136667
192.9	0.0138333
193	0.014
193.1	0.014
193.2	0.014
193.3	0.014
193.4	0.014
193.5	0.014
193.6	0.014
193.7	0.0138333
193.8	0.0138333
193.9	0.0138333
194	0.0138333
194.1	0.0138333
194.2	0.0138333
194.3	0.014
194.4	0.0138333
194.5	0.014
194.6	0.014
194.7	0.014
194.8	0.014
194.9	0.014
195	0.014
195.1	0.014
195.2	0.0138333
195.3	0.0138333
195.4	0.0138333
195.5	0.0138333
195.6	0.0138333
195.7	0.0138333
195.8	0.0138333
195.9	0.0138333
196	0.0138333
196.1	0.014
196.2	0.014
196.3	0.014
196.4	0.014
196.5	0.014
196.6	0.014
196.7	0.0138333
196.8	0.0136667
196.9	0.0136667
197	0.0135
197.1	0.0135
197.2	0.0135
197.3	0.0135
197.4	0.0135
197.5	0.0135
197.6	0.0135
197.7	0.0133333
197.8	0.0133333
197.9	0.0133333
198	0.0133333
198.1	0.0133333
198.2	0.0133333
198.3	0.0135
198.4	0.0135
198.5	0.0135
198.6	0.0135
198.7	0.0135
198.8	0.0131667
198.9	0.0131667
199	0.0131667
199.1	0.0131667
199.2	0.0133333
199.3	0.0133333
199.4	0.0135
199.5	0.0135
199.6	0.0135
199.7	0.0133333
199.8	0.0133333
199.9	0.0133333
200	0.0133333
[truncated: 14,000 more rows]
