# Supplementary material for: Bayesian inference of kinetic schemes for ion channels by Kalman filtering
Source: eLife journal article supplement (doi:10.7554/elife.62714), 2022-05-04
Supplement: fig4-data11 [file 1_Sim_N_7000_Fluor_MW.xlsx]

## Sheet: Tabelle1
0.1	0
0.2	0
0.3	0
0.4	0
0.5	0
0.6	0
0.7	0
0.8	0
0.9	0
1	0
1.1	0
1.2	0
1.3	0
1.4	0
1.5	0
1.6	0
1.7	0
1.8	0
1.9	0
2	0
2.1	0
2.2	0
2.3	0
2.4	0
2.5	0
2.6	0
2.7	0
2.8	0
2.9	0
3	0
3.1	0
3.2	0
3.3	0
3.4	0
3.5	0
3.6	0
3.7	0
3.8	0
3.9	0
4	0
4.1	0
4.2	0
4.3	0
4.4	0
4.5	0
4.6	0
4.7	0
4.8	0
4.9	0
5	0
5.1	0
5.2	0
5.3	0
5.4	0
5.5	0
5.6	0
5.7	0
5.8	0
5.9	0
6	0
6.1	0
6.2	0
6.3	0
6.4	0
6.5	0
6.6	0
6.7	0
6.8	0
6.9	0
7	0
7.1	0
7.2	0
7.3	0
7.4	0
7.5	0
7.6	0
7.7	0
7.8	0
7.9	0
8	0
8.1	0
8.2	0
8.3	0
8.4	0
8.5	0
8.6	0
8.7	0
8.8	0
8.9	0
9	0
9.1	0
9.2	0
9.3	0
9.4	0
9.5	0
9.6	0
9.7	0
9.8	0
9.9	0
10	0
10.1	0
10.2	0
10.3	0
10.4	0
10.5	0
10.6	0
10.7	0
10.8	0
10.9	0
11	0
11.1	0
11.2	0
11.3	0
11.4	0
11.5	0
11.6	0
11.7	0
11.8	0
11.9	0
12	0
12.1	0
12.2	0
12.3	0
12.4	0
12.5	0
12.6	0
12.7	0
12.8	0
12.9	0
13	0
13.1	0
13.2	0
13.3	0
13.4	0
13.5	0
13.6	0
13.7	0
13.8	0
13.9	0
14	0
14.1	0
14.2	0
14.3	0
14.4	0
14.5	0
14.6	0
14.7	0
14.8	0
14.9	0
15	0
15.1	0
15.2	0
15.3	0
15.4	0
15.5	0
15.6	0
15.7	0
15.8	0
15.9	0
16	0
16.1	0
16.2	0
16.3	0
16.4	0
16.5	0
16.6	0
16.7	0
16.8	0
16.9	0
17	0
17.1	0
17.2	0
17.3	0
17.4	0
17.5	0
17.6	0
17.7	0
17.8	0
17.9	0
18	0
18.1	0
18.2	0
18.3	0
18.4	0
18.5	0
18.6	0
18.7	0
18.8	0
18.9	0
19	0
19.1	0
19.2	0
19.3	0
19.4	0
19.5	0
19.6	0
19.7	0
19.8	0
19.9	0
20	0
20.1	0
20.2	0
20.3	0
20.4	0
20.5	0
20.6	0
20.7	0
20.8	0
20.9	0
21	0
21.1	0
21.2	0
21.3	0
21.4	0
21.5	0
21.6	0
21.7	0
21.8	0
21.9	0
22	0
22.1	0
22.2	0
22.3	0
22.4	0
22.5	0
22.6	0
22.7	0
22.8	0
22.9	0
23	0
23.1	0
23.2	0
23.3	0
23.4	0
23.5	0
23.6	0
23.7	0
23.8	0
23.9	0
24	0
24.1	0
24.2	0
24.3	0
24.4	0
24.5	0
24.6	0
24.7	0
24.8	0
24.9	0
25	0
25.1	0
25.2	0
25.3	0
25.4	0
25.5	0
25.6	0
25.7	0
25.8	0
25.9	0
26	0
26.1	0
26.2	0
26.3	0
26.4	0
26.5	0
26.6	0
26.7	0
26.8	0
26.9	0
27	0
27.1	0
27.2	0
27.3	0
27.4	0
27.5	0
27.6	0
27.7	0
27.8	0
27.9	0
28	0
28.1	0
28.2	0
28.3	0
28.4	0
28.5	0
28.6	0
28.7	0
28.8	0
28.9	0
29	0
29.1	0
29.2	0
29.3	0
29.4	0
29.5	0
29.6	0
29.7	0
29.8	0
29.9	0
30	0
30.1	0
30.2	0
30.3	0
30.4	0
30.5	0
30.6	0
30.7	0
30.8	0
30.9	0
31	0
31.1	0
31.2	0
31.3	0
31.4	0
31.5	0
31.6	0
31.7	0
31.8	0
31.9	0
32	0
32.1	0
32.2	0
32.3	0
32.4	0
32.5	0
32.6	0
32.7	0
32.8	0
32.9	0
33	0
33.1	0
33.2	0
33.3	0
33.4	0
33.5	0
33.6	0
33.7	0
33.8	0
33.9	0
34	0
34.1	0
34.2	0
34.3	0
34.4	0
34.5	0
34.6	0
34.7	0
34.8	0
34.9	0
35	0
35.1	0
35.2	0
35.3	0
35.4	0
35.5	0
35.6	0
35.7	0
35.8	0
35.9	0
36	0
36.1	0
36.2	0
36.3	0
36.4	0
36.5	0
36.6	0
36.7	0
36.8	0
36.9	0
37	0
37.1	0
37.2	0
37.3	0
37.4	0
37.5	0
37.6	0
37.7	0
37.8	0
37.9	0
38	0
38.1	0
38.2	0
38.3	0
38.4	0
38.5	0
38.6	0
38.7	0
38.8	0
38.9	0
39	0
39.1	0
39.2	0
39.3	0
39.4	0
39.5	0
39.6	0
39.7	0
39.8	0
39.9	0
40	0
40.1	0
40.2	0
40.3	0
40.4	0
40.5	0
40.6	0
40.7	0
40.8	0
40.9	0
41	0
41.1	0
41.2	0
41.3	0
41.4	0
41.5	0
41.6	0
41.7	0
41.8	0
41.9	0
42	0
42.1	0
42.2	0
42.3	0
42.4	0
42.5	0
42.6	0
42.7	0
42.8	0
42.9	0
43	0
43.1	0
43.2	0
43.3	0
43.4	0
43.5	0
43.6	0
43.7	0
43.8	0
43.9	0
44	0
44.1	0
44.2	0
44.3	0
44.4	0
44.5	0
44.6	0
44.7	0
44.8	0
44.9	0
45	0
45.1	0
45.2	0
45.3	0
45.4	0
45.5	0
45.6	0
45.7	0
45.8	0
45.9	0
46	0
46.1	0
46.2	0
46.3	0
46.4	0
46.5	0
46.6	0
46.7	0
46.8	0
46.9	0
47	0
47.1	0
47.2	0
47.3	0
47.4	0
47.5	0
47.6	0
47.7	0
47.8	0
47.9	0
48	0
48.1	0
48.2	0
48.3	0
48.4	0
48.5	0
48.6	0
48.7	0
48.8	0
48.9	0
49	0
49.1	0
49.2	0
49.3	0
49.4	0
49.5	0
49.6	0
49.7	0
49.8	0
49.9	0
50	0
50.1	0
50.2	0
50.3	0
50.4	0
50.5	0
50.6	0
50.7	0
50.8	0
50.9	0
51	0
51.1	0
51.2	0
51.3	0
51.4	0
51.5	0
51.6	0
51.7	0
51.8	0
51.9	0
52	0
52.1	0
52.2	0
52.3	0
52.4	0
52.5	0
52.6	0
52.7	0
52.8	0
52.9	0
53	0
53.1	0
53.2	0
53.3	0
53.4	0
53.5	0
53.6	0
53.7	0
53.8	0
53.9	0
54	0
54.1	0
54.2	0
54.3	0
54.4	0
54.5	0
54.6	0
54.7	0
54.8	0
54.9	0
55	0
55.1	0
55.2	0
55.3	0
55.4	0
55.5	0
55.6	0
55.7	0
55.8	0
55.9	0
56	0
56.1	0
56.2	0
56.3	0
56.4	0
56.5	0
56.6	0
56.7	0
56.8	0
56.9	0
57	0
57.1	0
57.2	0
57.3	0
57.4	0
57.5	0
57.6	0
57.7	0
57.8	0
57.9	0
58	0
58.1	0
58.2	0
58.3	0
58.4	0
58.5	0
58.6	0
58.7	0
58.8	0
58.9	0
59	0
59.1	0
59.2	0
59.3	0
59.4	0
59.5	0
59.6	0
59.7	0
59.8	0
59.9	0
60	0
60.1	0
60.2	0
60.3	0
60.4	0
60.5	0
60.6	0
60.7	0
60.8	0
60.9	0
61	0
61.1	0
61.2	0
61.3	0
61.4	0
61.5	0
61.6	0
61.7	0
61.8	0
61.9	0
62	0
62.1	0
62.2	0
62.3	0
62.4	0
62.5	0
62.6	0
62.7	0
62.8	0
62.9	0
63	0
63.1	0
63.2	0
63.3	0
63.4	0
63.5	0
63.6	0
63.7	0
63.8	0
63.9	0
64	0
64.1	0
64.2	0
64.3	0
64.4	0
64.5	0
64.6	0
64.7	0
64.8	0
64.9	0
65	0
65.1	0
65.2	0
65.3	0
65.4	0
65.5	0
65.6	0
65.7	0
65.8	0
65.9	0
66	0
66.1	0
66.2	0
66.3	0
66.4	0
66.5	0
66.6	0
66.7	0
66.8	0
66.9	0
67	0
67.1	0
67.2	0
67.3	0
67.4	0
67.5	0
67.6	0
67.7	0
67.8	0
67.9	0
68	0
68.1	0
68.2	0
68.3	0
68.4	0
68.5	0
68.6	0
68.7	0
68.8	0
68.9	0
69	0
69.1	0
69.2	0
69.3	0
69.4	0
69.5	0
69.6	0
69.7	0
69.8	0
69.9	0
70	0
70.1	0
70.2	0
70.3	0
70.4	0
70.5	0
70.6	0
70.7	0
70.8	0
70.9	0
71	0
71.1	0
71.2	0
71.3	0
71.4	0
71.5	0
71.6	0
71.7	0
71.8	0
71.9	0
72	0
72.1	0
72.2	0
72.3	0
72.4	0
72.5	0
72.6	0
72.7	0
72.8	0
72.9	0
73	0
73.1	0
73.2	0
73.3	0
73.4	0
73.5	0
73.6	0
73.7	0
73.8	0
73.9	0
74	0
74.1	0
74.2	0
74.3	0
74.4	0
74.5	0
74.6	0
74.7	0
74.8	0
74.9	0
75	0
75.1	0
75.2	0
75.3	0
75.4	0
75.5	0
75.6	0
75.7	0
75.8	0
75.9	0
76	0
76.1	0
76.2	0
76.3	0
76.4	0
76.5	0
76.6	0
76.7	0
76.8	0
76.9	0
77	0
77.1	0
77.2	0
77.3	0
77.4	0
77.5	0
77.6	0
77.7	0
77.8	0
77.9	0
78	0
78.1	0
78.2	0
78.3	0
78.4	0
78.5	0
78.6	0
78.7	0
78.8	0
78.9	0
79	0
79.1	0
79.2	0
79.3	0
79.4	0
79.5	0
79.6	0
79.7	0
79.8	0
79.9	0
80	0
80.1	0
80.2	0
80.3	0
80.4	0
80.5	0
80.6	0
80.7	0
80.8	0
80.9	0
81	0
81.1	0
81.2	0
81.3	0
81.4	0
81.5	0
81.6	0
81.7	0
81.8	0
81.9	0
82	0
82.1	0
82.2	0
82.3	0
82.4	0
82.5	0
82.6	0
82.7	0
82.8	0
82.9	0
83	0
83.1	0
83.2	0
83.3	0
83.4	0
83.5	0
83.6	0
83.7	0
83.8	0
83.9	0
84	0
84.1	0
84.2	0
84.3	0
84.4	0
84.5	0
84.6	0
84.7	0
84.8	0
84.9	0
85	0
85.1	0
85.2	0
85.3	0
85.4	0
85.5	0
85.6	0
85.7	0
85.8	0
85.9	0
86	0
86.1	0
86.2	0
86.3	0
86.4	0
86.5	0
86.6	0
86.7	0
86.8	0
86.9	0
87	0
87.1	0
87.2	0
87.3	0
87.4	0
87.5	0
87.6	0
87.7	0
87.8	0
87.9	0
88	0
88.1	0
88.2	0
88.3	0
88.4	0
88.5	0
88.6	0
88.7	0
88.8	0
88.9	0
89	0
89.1	0
89.2	0
89.3	0
89.4	0
89.5	0
89.6	0
89.7	0
89.8	0
89.9	0
90	0
90.1	0
90.2	0
90.3	0
90.4	0
90.5	0
90.6	0
90.7	0
90.8	0
90.9	0
91	0
91.1	0
91.2	0
91.3	0
91.4	0
91.5	0
91.6	0
91.7	0
91.8	0
91.9	0
92	0
92.1	0
92.2	0
92.3	0
92.4	0
92.5	0
92.6	0
92.7	0
92.8	0
92.9	0
93	0
93.1	0
93.2	0
93.3	0
93.4	0
93.5	0
93.6	0
93.7	0
93.8	0
93.9	0
94	0
94.1	0
94.2	0
94.3	0
94.4	0
94.5	0
94.6	0
94.7	0
94.8	0
94.9	0
95	0
95.1	0
95.2	0
95.3	0
95.4	0
95.5	0
95.6	0
95.7	0
95.8	0
95.9	0
96	0
96.1	0
96.2	0
96.3	0
96.4	0
96.5	0
96.6	0
96.7	0
96.8	0
96.9	0
97	0
97.1	0
97.2	0
97.3	0
97.4	0
97.5	0
97.6	0
97.7	0
97.8	0
97.9	0
98	0
98.1	0
98.2	0
98.3	0
98.4	0
98.5	0
98.6	0
98.7	0
98.8	0
98.9	0
99	0
99.1	0
99.2	0
99.3	0
99.4	0
99.5	0
99.6	0
99.7	0
99.8	0
99.9	0
100	0
100.1	0.00171429
100.2	0.00342857
100.3	0.005
100.4	0.00707143
100.5	0.00864286
100.6	0.0104286
100.7	0.0121429
100.8	0.0135714
100.9	0.0151429
101	0.0163571
101.1	0.0178571
101.2	0.0199286
101.3	0.0215714
101.4	0.0237857
101.5	0.0253571
101.6	0.0271429
101.7	0.0285714
101.8	0.0297143
101.9	0.0313571
102	0.0330714
102.1	0.0344286
102.2	0.0357143
102.3	0.0364286
102.4	0.0376429
102.5	0.0382857
102.6	0.0395714
102.7	0.0404286
102.8	0.0420714
102.9	0.0437143
103	0.0448571
103.1	0.046
103.2	0.0475714
103.3	0.0486429
103.4	0.0498571
103.5	0.0514286
103.6	0.0522857
103.7	0.0533571
103.8	0.0542857
103.9	0.0548571
104	0.0558571
104.1	0.0565714
104.2	0.0580714
104.3	0.0600714
104.4	0.0607857
104.5	0.0627857
104.6	0.0630714
104.7	0.0645
104.8	0.0661429
104.9	0.0672143
105	0.0680714
105.1	0.0687143
105.2	0.0698571
105.3	0.0701429
105.4	0.0710714
105.5	0.0720714
105.6	0.0732143
105.7	0.0743571
105.8	0.0757143
105.9	0.0772857
106	0.0788571
106.1	0.0793571
106.2	0.0794286
106.3	0.08
106.4	0.0807857
106.5	0.0822143
106.6	0.083
106.7	0.0837143
106.8	0.0846429
106.9	0.0855714
107	0.0862143
107.1	0.0872143
107.2	0.0877857
107.3	0.0886429
107.4	0.0900714
107.5	0.091
107.6	0.0918571
107.7	0.0920714
107.8	0.0929286
107.9	0.0935
108	0.0950714
108.1	0.0957857
108.2	0.0964286
108.3	0.0967857
108.4	0.0974286
108.5	0.098
108.6	0.0988571
108.7	0.0997857
108.8	0.100286
108.9	0.100786
109	0.1015
109.1	0.102286
109.2	0.102714
109.3	0.103643
109.4	0.103714
109.5	0.103429
109.6	0.104714
109.7	0.104857
109.8	0.105571
109.9	0.105571
110	0.105786
110.1	0.106643
110.2	0.107714
110.3	0.108571
110.4	0.108857
110.5	0.109214
110.6	0.11
110.7	0.1105
110.8	0.112286
110.9	0.113071
111	0.114
111.1	0.115214
111.2	0.115714
111.3	0.116
111.4	0.116
111.5	0.116071
111.6	0.116143
111.7	0.1165
111.8	0.116786
111.9	0.117714
112	0.118
112.1	0.118786
112.2	0.120071
112.3	0.120357
112.4	0.121429
112.5	0.122
112.6	0.122929
112.7	0.123357
112.8	0.123143
112.9	0.124071
113	0.125
113.1	0.125143
113.2	0.125143
113.3	0.125071
113.4	0.125357
113.5	0.126143
113.6	0.125571
113.7	0.125571
113.8	0.1265
113.9	0.127
114	0.127214
114.1	0.127429
114.2	0.127571
114.3	0.127143
114.4	0.127071
114.5	0.127214
114.6	0.128071
114.7	0.127714
114.8	0.127643
114.9	0.127643
115	0.1275
115.1	0.127857
115.2	0.128429
115.3	0.128857
115.4	0.129714
115.5	0.130143
115.6	0.130786
115.7	0.130786
115.8	0.130857
115.9	0.131429
116	0.131071
116.1	0.131786
116.2	0.1315
116.3	0.131429
116.4	0.132071
116.5	0.131643
116.6	0.131786
116.7	0.131714
116.8	0.131571
116.9	0.131714
117	0.131929
117.1	0.132
117.2	0.133071
117.3	0.1335
117.4	0.133857
117.5	0.134214
117.6	0.1345
117.7	0.134786
117.8	0.135
117.9	0.135071
118	0.135429
118.1	0.135143
118.2	0.135071
118.3	0.134786
118.4	0.1365
118.5	0.136786
118.6	0.136286
118.7	0.136929
118.8	0.137643
118.9	0.138429
119	0.138643
119.1	0.139286
119.2	0.139286
119.3	0.1395
119.4	0.139786
119.5	0.139714
119.6	0.139357
119.7	0.1395
119.8	0.139571
119.9	0.139357
120	0.138643
120.1	0.139071
120.2	0.139
120.3	0.139071
120.4	0.138857
120.5	0.139
120.6	0.1385
120.7	0.138857
120.8	0.138786
120.9	0.138643
121	0.139143
121.1	0.139
121.2	0.139357
121.3	0.139429
121.4	0.139929
121.5	0.139143
121.6	0.139
121.7	0.139214
121.8	0.139714
121.9	0.139429
122	0.139857
122.1	0.139857
122.2	0.1395
122.3	0.139643
122.4	0.140357
122.5	0.140214
122.6	0.140357
122.7	0.139929
122.8	0.140286
122.9	0.1395
123	0.139214
123.1	0.138929
123.2	0.138786
123.3	0.139286
123.4	0.138929
123.5	0.1395
123.6	0.139
123.7	0.139143
123.8	0.139
123.9	0.139214
124	0.139429
124.1	0.139429
124.2	0.139714
124.3	0.140429
124.4	0.140571
124.5	0.140857
124.6	0.140857
124.7	0.1405
124.8	0.139786
124.9	0.139571
125	0.139643
125.1	0.139857
125.2	0.140714
125.3	0.1405
125.4	0.140714
125.5	0.140786
125.6	0.141357
125.7	0.141786
125.8	0.140857
125.9	0.141643
126	0.141357
126.1	0.141
126.2	0.141071
126.3	0.141214
126.4	0.141071
126.5	0.140857
126.6	0.141
126.7	0.141
126.8	0.140786
126.9	0.140643
127	0.140357
127.1	0.140571
127.2	0.140357
127.3	0.14
127.4	0.140714
127.5	0.140429
127.6	0.140571
127.7	0.141357
127.8	0.141786
127.9	0.1415
128	0.141143
128.1	0.141286
128.2	0.141429
128.3	0.140786
128.4	0.141357
128.5	0.141071
128.6	0.140714
128.7	0.140857
128.8	0.141214
128.9	0.140929
129	0.140429
129.1	0.140929
129.2	0.141
129.3	0.141929
129.4	0.142286
129.5	0.142786
129.6	0.142929
129.7	0.141357
129.8	0.141429
129.9	0.142071
130	0.142143
130.1	0.140929
130.2	0.141
130.3	0.141071
130.4	0.141071
130.5	0.1415
130.6	0.140857
130.7	0.141
130.8	0.141
130.9	0.140714
131	0.140429
131.1	0.140571
131.2	0.140571
131.3	0.140429
131.4	0.140071
131.5	0.139357
131.6	0.139857
131.7	0.140714
131.8	0.141071
131.9	0.140929
132	0.140429
132.1	0.140214
132.2	0.140071
132.3	0.139643
132.4	0.139929
132.5	0.1395
132.6	0.139786
132.7	0.139357
132.8	0.139429
132.9	0.139214
133	0.1385
133.1	0.138286
133.2	0.138643
133.3	0.139429
133.4	0.139643
133.5	0.139857
133.6	0.139929
133.7	0.140429
133.8	0.139571
133.9	0.139571
134	0.140571
134.1	0.140286
134.2	0.140429
134.3	0.141
134.4	0.141214
134.5	0.1415
134.6	0.141143
134.7	0.141071
134.8	0.141286
134.9	0.141071
135	0.140929
135.1	0.141286
135.2	0.141571
135.3	0.141429
135.4	0.140714
135.5	0.141071
135.6	0.141071
135.7	0.141143
135.8	0.141143
135.9	0.141643
136	0.141429
136.1	0.140286
136.2	0.140429
136.3	0.14
136.4	0.140571
136.5	0.1415
136.6	0.141929
136.7	0.142
136.8	0.141714
136.9	0.141857
137	0.141786
137.1	0.1425
137.2	0.143
137.3	0.143
137.4	0.142786
137.5	0.142214
137.6	0.142071
137.7	0.142071
137.8	0.143
137.9	0.143714
138	0.143929
138.1	0.143643
138.2	0.142643
138.3	0.142143
138.4	0.142857
138.5	0.1425
138.6	0.142571
138.7	0.142786
138.8	0.142786
138.9	0.142571
139	0.142571
139.1	0.142929
139.2	0.142643
139.3	0.142429
139.4	0.142857
139.5	0.143571
139.6	0.143
139.7	0.142929
139.8	0.142929
139.9	0.142643
140	0.141929
140.1	0.142
140.2	0.142286
140.3	0.143
140.4	0.144071
140.5	0.144286
140.6	0.144214
140.7	0.144571
140.8	0.144786
140.9	0.145286
141	0.145643
141.1	0.145857
141.2	0.145786
141.3	0.145286
141.4	0.145286
141.5	0.145071
141.6	0.145571
141.7	0.1465
141.8	0.147071
141.9	0.147286
142	0.147
142.1	0.147357
142.2	0.147714
142.3	0.147786
142.4	0.147857
142.5	0.1485
142.6	0.147929
142.7	0.148857
142.8	0.149143
142.9	0.1485
143	0.147786
143.1	0.148643
143.2	0.147643
143.3	0.147
143.4	0.146929
143.5	0.146571
143.6	0.145571
143.7	0.1455
143.8	0.145786
143.9	0.145429
144	0.145071
144.1	0.145071
144.2	0.145143
144.3	0.144643
144.4	0.144429
144.5	0.1445
144.6	0.143786
144.7	0.144
144.8	0.143571
144.9	0.143286
145	0.143643
145.1	0.142643
145.2	0.142429
145.3	0.142571
145.4	0.142357
145.5	0.142786
145.6	0.141929
145.7	0.142357
145.8	0.1425
145.9	0.142786
146	0.141429
146.1	0.141714
146.2	0.142143
146.3	0.141643
146.4	0.141786
146.5	0.1415
146.6	0.142143
146.7	0.142643
146.8	0.142786
146.9	0.142857
147	0.142571
147.1	0.142357
147.2	0.142214
147.3	0.142
147.4	0.141857
147.5	0.142214
147.6	0.142214
147.7	0.142
147.8	0.1425
147.9	0.142786
148	0.143286
148.1	0.142643
148.2	0.142357
148.3	0.141929
148.4	0.141857
148.5	0.142714
148.6	0.142286
148.7	0.142143
148.8	0.1415
148.9	0.142286
149	0.142214
149.1	0.142857
149.2	0.143429
149.3	0.143714
149.4	0.143286
149.5	0.143571
149.6	0.142929
149.7	0.142714
149.8	0.142857
149.9	0.143357
150	0.143643
150.1	0.143
150.2	0.142214
150.3	0.141929
150.4	0.141929
150.5	0.142357
150.6	0.142571
150.7	0.1435
150.8	0.143429
150.9	0.142857
151	0.143071
151.1	0.1435
151.2	0.143143
151.3	0.142857
151.4	0.142643
151.5	0.143286
151.6	0.143286
151.7	0.142857
151.8	0.142571
151.9	0.143429
152	0.142357
152.1	0.142714
152.2	0.1435
152.3	0.143286
152.4	0.143643
152.5	0.143286
152.6	0.143714
152.7	0.143643
152.8	0.143786
152.9	0.142357
153	0.142714
153.1	0.143286
153.2	0.143857
153.3	0.143786
153.4	0.143643
153.5	0.142643
153.6	0.142286
153.7	0.1425
153.8	0.142429
153.9	0.142929
154	0.142571
154.1	0.142429
154.2	0.141714
154.3	0.141857
154.4	0.142
154.5	0.142071
154.6	0.143286
154.7	0.143571
154.8	0.143714
154.9	0.143214
155	0.143429
155.1	0.144071
155.2	0.143786
155.3	0.143786
155.4	0.1435
155.5	0.143714
155.6	0.144071
155.7	0.144357
155.8	0.144286
155.9	0.144786
156	0.145286
156.1	0.145786
156.2	0.146571
156.3	0.146286
156.4	0.146714
156.5	0.146214
156.6	0.146786
156.7	0.146714
156.8	0.146714
156.9	0.146857
157	0.1465
157.1	0.146786
157.2	0.146714
157.3	0.146214
157.4	0.146643
157.5	0.147214
157.6	0.147786
157.7	0.146929
157.8	0.146214
157.9	0.146214
158	0.146071
158.1	0.146214
158.2	0.146286
158.3	0.146214
158.4	0.147
158.5	0.147071
158.6	0.146857
158.7	0.146643
158.8	0.147214
158.9	0.147286
159	0.1465
159.1	0.146429
159.2	0.146214
159.3	0.146214
159.4	0.146357
159.5	0.146643
159.6	0.1465
159.7	0.146929
159.8	0.147214
159.9	0.147929
160	0.147857
160.1	0.147714
160.2	0.147286
160.3	0.146429
160.4	0.1465
160.5	0.146357
160.6	0.145786
160.7	0.145643
160.8	0.146
160.9	0.145929
161	0.145643
161.1	0.145357
161.2	0.145357
161.3	0.145786
161.4	0.145429
161.5	0.146143
161.6	0.146357
161.7	0.146643
161.8	0.147
161.9	0.147214
162	0.146786
162.1	0.147429
162.2	0.147429
162.3	0.147357
162.4	0.148
162.5	0.148357
162.6	0.148357
162.7	0.147786
162.8	0.146929
162.9	0.147143
163	0.1475
163.1	0.147357
163.2	0.147429
163.3	0.147929
163.4	0.147929
163.5	0.147786
163.6	0.147857
163.7	0.147857
163.8	0.147714
163.9	0.147143
164	0.146429
164.1	0.146357
164.2	0.1465
164.3	0.145857
164.4	0.146286
164.5	0.1465
164.6	0.147071
164.7	0.147643
164.8	0.147643
164.9	0.148286
165	0.148071
165.1	0.148214
165.2	0.148286
165.3	0.148571
165.4	0.148571
165.5	0.149429
165.6	0.149786
165.7	0.150929
165.8	0.151071
165.9	0.151429
166	0.151786
166.1	0.152286
166.2	0.1525
166.3	0.152571
166.4	0.152571
166.5	0.152571
166.6	0.152357
166.7	0.152786
166.8	0.152143
166.9	0.151571
167	0.150714
167.1	0.1505
167.2	0.150143
167.3	0.1495
167.4	0.149857
167.5	0.149429
167.6	0.149429
167.7	0.148714
167.8	0.149214
167.9	0.149286
168	0.149357
168.1	0.149286
168.2	0.149286
168.3	0.149571
168.4	0.1495
168.5	0.148643
168.6	0.148143
168.7	0.147786
168.8	0.148071
168.9	0.148
169	0.147857
169.1	0.1475
169.2	0.147714
169.3	0.148214
169.4	0.148643
169.5	0.147714
169.6	0.147643
169.7	0.147214
169.8	0.146786
169.9	0.146714
170	0.146786
170.1	0.147
170.2	0.147286
170.3	0.147071
170.4	0.146214
170.5	0.146929
170.6	0.146143
170.7	0.145786
170.8	0.146143
170.9	0.145857
171	0.145857
171.1	0.146357
171.2	0.146286
171.3	0.146143
171.4	0.146143
171.5	0.145857
171.6	0.146071
171.7	0.146071
171.8	0.145714
171.9	0.145
172	0.144571
172.1	0.143786
172.2	0.143857
172.3	0.144643
172.4	0.1445
172.5	0.144571
172.6	0.145
172.7	0.145286
172.8	0.145143
172.9	0.145857
173	0.145357
173.1	0.145357
173.2	0.145643
173.3	0.145714
173.4	0.146
173.5	0.145429
173.6	0.145
173.7	0.145286
173.8	0.144786
173.9	0.1455
174	0.145786
174.1	0.145786
174.2	0.145929
174.3	0.146286
174.4	0.146214
174.5	0.146643
174.6	0.146143
174.7	0.146
174.8	0.146714
174.9	0.146786
175	0.146643
175.1	0.146929
175.2	0.147286
175.3	0.147857
175.4	0.148571
175.5	0.149143
175.6	0.1495
175.7	0.149286
175.8	0.149357
175.9	0.149143
176	0.149429
176.1	0.149357
176.2	0.149571
176.3	0.149286
176.4	0.148714
176.5	0.1485
176.6	0.148571
176.7	0.148786
176.8	0.149071
176.9	0.149571
177	0.15
177.1	0.150357
177.2	0.1505
177.3	0.151143
177.4	0.150786
177.5	0.151643
177.6	0.151643
177.7	0.151786
177.8	0.151143
177.9	0.151429
178	0.151071
178.1	0.151071
178.2	0.151357
178.3	0.151071
178.4	0.151571
178.5	0.152143
178.6	0.152429
178.7	0.152929
178.8	0.153071
178.9	0.153214
179	0.152929
179.1	0.152929
179.2	0.153214
179.3	0.153286
179.4	0.153357
179.5	0.153214
179.6	0.152857
179.7	0.1535
179.8	0.153429
179.9	0.153786
180	0.153786
180.1	0.152643
180.2	0.153071
180.3	0.153429
180.4	0.153143
180.5	0.152929
180.6	0.152643
180.7	0.153143
180.8	0.153286
180.9	0.153071
181	0.153429
181.1	0.153857
181.2	0.153857
181.3	0.154
181.4	0.154143
181.5	0.154643
181.6	0.154286
181.7	0.154643
181.8	0.154429
181.9	0.154143
182	0.154643
182.1	0.154786
182.2	0.154786
182.3	0.154857
182.4	0.153929
182.5	0.153857
182.6	0.153143
182.7	0.153
182.8	0.153
182.9	0.152857
183	0.152929
183.1	0.153429
183.2	0.153143
183.3	0.153
183.4	0.152714
183.5	0.152786
183.6	0.153714
183.7	0.1545
183.8	0.154143
183.9	0.153714
184	0.154
184.1	0.153714
184.2	0.153571
184.3	0.153857
184.4	0.154214
184.5	0.153857
184.6	0.153071
184.7	0.153429
184.8	0.153857
184.9	0.153429
185	0.153214
185.1	0.152571
185.2	0.152643
185.3	0.152786
185.4	0.152857
185.5	0.1535
185.6	0.152643
185.7	0.152571
185.8	0.152643
185.9	0.152286
186	0.152857
186.1	0.153429
186.2	0.153071
186.3	0.153071
186.4	0.153214
186.5	0.153214
186.6	0.1535
186.7	0.153143
186.8	0.153429
186.9	0.153643
187	0.154071
187.1	0.153929
187.2	0.153357
187.3	0.153429
187.4	0.153143
187.5	0.152929
187.6	0.153143
187.7	0.152714
187.8	0.152286
187.9	0.152071
188	0.152
188.1	0.151857
188.2	0.152286
188.3	0.152143
188.4	0.152214
188.5	0.151857
188.6	0.151571
188.7	0.151643
188.8	0.151571
188.9	0.152071
189	0.152071
189.1	0.152429
189.2	0.151714
189.3	0.151857
189.4	0.151214
189.5	0.150857
189.6	0.150571
189.7	0.150357
189.8	0.1505
189.9	0.150571
190	0.151214
190.1	0.151071
190.2	0.151714
190.3	0.151286
190.4	0.151071
190.5	0.151357
190.6	0.151643
190.7	0.150714
190.8	0.150857
190.9	0.150286
191	0.1505
191.1	0.149929
191.2	0.149857
191.3	0.149357
191.4	0.148929
191.5	0.148857
191.6	0.149214
191.7	0.148929
191.8	0.148571
191.9	0.149786
192	0.149714
192.1	0.149357
192.2	0.149643
192.3	0.149714
192.4	0.150071
192.5	0.1495
192.6	0.150214
192.7	0.150643
192.8	0.150929
192.9	0.151214
193	0.151214
193.1	0.151643
193.2	0.151857
193.3	0.151286
193.4	0.151714
193.5	0.151357
193.6	0.151286
193.7	0.151929
193.8	0.151786
193.9	0.151071
194	0.1515
194.1	0.151643
194.2	0.151214
194.3	0.152071
194.4	0.152143
194.5	0.152357
194.6	0.152786
194.7	0.152857
194.8	0.152929
194.9	0.153429
195	0.153429
195.1	0.153571
195.2	0.153143
195.3	0.152786
195.4	0.152929
195.5	0.153357
195.6	0.153286
195.7	0.153429
195.8	0.152857
195.9	0.153143
196	0.152571
196.1	0.153
196.2	0.153571
196.3	0.153357
196.4	0.153286
196.5	0.1535
196.6	0.153357
196.7	0.152714
196.8	0.152357
196.9	0.152571
197	0.153429
197.1	0.1535
197.2	0.153143
197.3	0.153786
197.4	0.152857
197.5	0.153357
197.6	0.1525
197.7	0.152143
197.8	0.151857
197.9	0.151929
198	0.151643
198.1	0.152
198.2	0.1525
198.3	0.151857
198.4	0.151714
198.5	0.152714
198.6	0.1525
198.7	0.152714
198.8	0.152643
198.9	0.1525
199	0.153357
199.1	0.153286
199.2	0.153143
199.3	0.153429
199.4	0.154357
199.5	0.153857
199.6	0.153714
199.7	0.153786
199.8	0.153643
199.9	0.1535
200	0.153
[truncated: 14,000 more rows]
