# Supplementary material for: Bayesian inference of kinetic schemes for ion channels by Kalman filtering
Source: eLife journal article supplement (doi:10.7554/elife.62714), 2022-05-04
Supplement: fig4-data11 [file 1_Sim_N_7000_Strom_MW.xlsx]

## Sheet: Tabelle1
0.1	0
0.2	0
0.3	0
0.4	0
0.5	0
0.6	0
0.7	0
0.8	0
0.9	0
1	0
1.1	0
1.2	0
1.3	0
1.4	0
1.5	0
1.6	0
1.7	0
1.8	0
1.9	0
2	0
2.1	0
2.2	0
2.3	0
2.4	0
2.5	0
2.6	0
2.7	0
2.8	0
2.9	0
3	0
3.1	0
3.2	0
3.3	0
3.4	0
3.5	0
3.6	0
3.7	0
3.8	0
3.9	0
4	0
4.1	0
4.2	0
4.3	0
4.4	0
4.5	0
4.6	0
4.7	0
4.8	0
4.9	0
5	0
5.1	0
5.2	0
5.3	0
5.4	0
5.5	0
5.6	0
5.7	0
5.8	0
5.9	0
6	0
6.1	0
6.2	0
6.3	0
6.4	0
6.5	0
6.6	0
6.7	0
6.8	0
6.9	0
7	0
7.1	0
7.2	0
7.3	0
7.4	0
7.5	0
7.6	0
7.7	0
7.8	0
7.9	0
8	0
8.1	0
8.2	0
8.3	0
8.4	0
8.5	0
8.6	0
8.7	0
8.8	0
8.9	0
9	0
9.1	0
9.2	0
9.3	0
9.4	0
9.5	0
9.6	0
9.7	0
9.8	0
9.9	0
10	0
10.1	0
10.2	0
10.3	0
10.4	0
10.5	0
10.6	0
10.7	0
10.8	0
10.9	0
11	0
11.1	0
11.2	0
11.3	0
11.4	0
11.5	0
11.6	0
11.7	0
11.8	0
11.9	0
12	0
12.1	0
12.2	0
12.3	0
12.4	0
12.5	0
12.6	0
12.7	0
12.8	0
12.9	0
13	0
13.1	0
13.2	0
13.3	0
13.4	0
13.5	0
13.6	0
13.7	0
13.8	0
13.9	0
14	0
14.1	0
14.2	0
14.3	0
14.4	0
14.5	0
14.6	0
14.7	0
14.8	0
14.9	0
15	0
15.1	0
15.2	0
15.3	0
15.4	0
15.5	0
15.6	0
15.7	0
15.8	0
15.9	0
16	0
16.1	0
16.2	0
16.3	0
16.4	0
16.5	0
16.6	0
16.7	0
16.8	0
16.9	0
17	0
17.1	0
17.2	0
17.3	0
17.4	0
17.5	0
17.6	0
17.7	0
17.8	0
17.9	0
18	0
18.1	0
18.2	0
18.3	0
18.4	0
18.5	0
18.6	0
18.7	0
18.8	0
18.9	0
19	0
19.1	0
19.2	0
19.3	0
19.4	0
19.5	0
19.6	0
19.7	0
19.8	0
19.9	0
20	0
20.1	0
20.2	0
20.3	0
20.4	0
20.5	0
20.6	0
20.7	0
20.8	0
20.9	0
21	0
21.1	0
21.2	0
21.3	0
21.4	0
21.5	0
21.6	0
21.7	0
21.8	0
21.9	0
22	0
22.1	0
22.2	0
22.3	0
22.4	0
22.5	0
22.6	0
22.7	0
22.8	0
22.9	0
23	0
23.1	0
23.2	0
23.3	0
23.4	0
23.5	0
23.6	0
23.7	0
23.8	0
23.9	0
24	0
24.1	0
24.2	0
24.3	0
24.4	0
24.5	0
24.6	0
24.7	0
24.8	0
24.9	0
25	0
25.1	0
25.2	0
25.3	0
25.4	0
25.5	0
25.6	0
25.7	0
25.8	0
25.9	0
26	0
26.1	0
26.2	0
26.3	0
26.4	0
26.5	0
26.6	0
26.7	0
26.8	0
26.9	0
27	0
27.1	0
27.2	0
27.3	0
27.4	0
27.5	0
27.6	0
27.7	0
27.8	0
27.9	0
28	0
28.1	0
28.2	0
28.3	0
28.4	0
28.5	0
28.6	0
28.7	0
28.8	0
28.9	0
29	0
29.1	0
29.2	0
29.3	0
29.4	0
29.5	0
29.6	0
29.7	0
29.8	0
29.9	0
30	0
30.1	0
30.2	0
30.3	0
30.4	0
30.5	0
30.6	0
30.7	0
30.8	0
30.9	0
31	0
31.1	0
31.2	0
31.3	0
31.4	0
31.5	0
31.6	0
31.7	0
31.8	0
31.9	0
32	0
32.1	0
32.2	0
32.3	0
32.4	0
32.5	0
32.6	0
32.7	0
32.8	0
32.9	0
33	0
33.1	0
33.2	0
33.3	0
33.4	0
33.5	0
33.6	0
33.7	0
33.8	0
33.9	0
34	0
34.1	0
34.2	0
34.3	0
34.4	0
34.5	0
34.6	0
34.7	0
34.8	0
34.9	0
35	0
35.1	0
35.2	0
35.3	0
35.4	0
35.5	0
35.6	0
35.7	0
35.8	0
35.9	0
36	0
36.1	0
36.2	0
36.3	0
36.4	0
36.5	0
36.6	0
36.7	0
36.8	0
36.9	0
37	0
37.1	0
37.2	0
37.3	0
37.4	0
37.5	0
37.6	0
37.7	0
37.8	0
37.9	0
38	0
38.1	0
38.2	0
38.3	0
38.4	0
38.5	0
38.6	0
38.7	0
38.8	0
38.9	0
39	0
39.1	0
39.2	0
39.3	0
39.4	0
39.5	0
39.6	0
39.7	0
39.8	0
39.9	0
40	0
40.1	0
40.2	0
40.3	0
40.4	0
40.5	0
40.6	0
40.7	0
40.8	0
40.9	0
41	0
41.1	0
41.2	0
41.3	0
41.4	0
41.5	0
41.6	0
41.7	0
41.8	0
41.9	0
42	0
42.1	0
42.2	0
42.3	0
42.4	0
42.5	0
42.6	0
42.7	0
42.8	0
42.9	0
43	0
43.1	0
43.2	0
43.3	0
43.4	0
43.5	0
43.6	0
43.7	0
43.8	0
43.9	0
44	0
44.1	0
44.2	0
44.3	0
44.4	0
44.5	0
44.6	0
44.7	0
44.8	0
44.9	0
45	0
45.1	0
45.2	0
45.3	0
45.4	0
45.5	0
45.6	0
45.7	0
45.8	0
45.9	0
46	0
46.1	0
46.2	0
46.3	0
46.4	0
46.5	0
46.6	0
46.7	0
46.8	0
46.9	0
47	0
47.1	0
47.2	0
47.3	0
47.4	0
47.5	0
47.6	0
47.7	0
47.8	0
47.9	0
48	0
48.1	0
48.2	0
48.3	0
48.4	0
48.5	0
48.6	0
48.7	0
48.8	0
48.9	0
49	0
49.1	0
49.2	0
49.3	0
49.4	0
49.5	0
49.6	0
49.7	0
49.8	0
49.9	0
50	0
50.1	0
50.2	0
50.3	0
50.4	0
50.5	0
50.6	0
50.7	0
50.8	0
50.9	0
51	0
51.1	0
51.2	0
51.3	0
51.4	0
51.5	0
51.6	0
51.7	0
51.8	0
51.9	0
52	0
52.1	0
52.2	0
52.3	0
52.4	0
52.5	0
52.6	0
52.7	0
52.8	0
52.9	0
53	0
53.1	0
53.2	0
53.3	0
53.4	0
53.5	0
53.6	0
53.7	0
53.8	0
53.9	0
54	0
54.1	0
54.2	0
54.3	0
54.4	0
54.5	0
54.6	0
54.7	0
54.8	0
54.9	0
55	0
55.1	0
55.2	0
55.3	0
55.4	0
55.5	0
55.6	0
55.7	0
55.8	0
55.9	0
56	0
56.1	0
56.2	0
56.3	0
56.4	0
56.5	0
56.6	0
56.7	0
56.8	0
56.9	0
57	0
57.1	0
57.2	0
57.3	0
57.4	0
57.5	0
57.6	0
57.7	0
57.8	0
57.9	0
58	0
58.1	0
58.2	0
58.3	0
58.4	0
58.5	0
58.6	0
58.7	0
58.8	0
58.9	0
59	0
59.1	0
59.2	0
59.3	0
59.4	0
59.5	0
59.6	0
59.7	0
59.8	0
59.9	0
60	0
60.1	0
60.2	0
60.3	0
60.4	0
60.5	0
60.6	0
60.7	0
60.8	0
60.9	0
61	0
61.1	0
61.2	0
61.3	0
61.4	0
61.5	0
61.6	0
61.7	0
61.8	0
61.9	0
62	0
62.1	0
62.2	0
62.3	0
62.4	0
62.5	0
62.6	0
62.7	0
62.8	0
62.9	0
63	0
63.1	0
63.2	0
63.3	0
63.4	0
63.5	0
63.6	0
63.7	0
63.8	0
63.9	0
64	0
64.1	0
64.2	0
64.3	0
64.4	0
64.5	0
64.6	0
64.7	0
64.8	0
64.9	0
65	0
65.1	0
65.2	0
65.3	0
65.4	0
65.5	0
65.6	0
65.7	0
65.8	0
65.9	0
66	0
66.1	0
66.2	0
66.3	0
66.4	0
66.5	0
66.6	0
66.7	0
66.8	0
66.9	0
67	0
67.1	0
67.2	0
67.3	0
67.4	0
67.5	0
67.6	0
67.7	0
67.8	0
67.9	0
68	0
68.1	0
68.2	0
68.3	0
68.4	0
68.5	0
68.6	0
68.7	0
68.8	0
68.9	0
69	0
69.1	0
69.2	0
69.3	0
69.4	0
69.5	0
69.6	0
69.7	0
69.8	0
69.9	0
70	0
70.1	0
70.2	0
70.3	0
70.4	0
70.5	0
70.6	0
70.7	0
70.8	0
70.9	0
71	0
71.1	0
71.2	0
71.3	0
71.4	0
71.5	0
71.6	0
71.7	0
71.8	0
71.9	0
72	0
72.1	0
72.2	0
72.3	0
72.4	0
72.5	0
72.6	0
72.7	0
72.8	0
72.9	0
73	0
73.1	0
73.2	0
73.3	0
73.4	0
73.5	0
73.6	0
73.7	0
73.8	0
73.9	0
74	0
74.1	0
74.2	0
74.3	0
74.4	0
74.5	0
74.6	0
74.7	0
74.8	0
74.9	0
75	0
75.1	0
75.2	0
75.3	0
75.4	0
75.5	0
75.6	0
75.7	0
75.8	0
75.9	0
76	0
76.1	0
76.2	0
76.3	0
76.4	0
76.5	0
76.6	0
76.7	0
76.8	0
76.9	0
77	0
77.1	0
77.2	0
77.3	0
77.4	0
77.5	0
77.6	0
77.7	0
77.8	0
77.9	0
78	0
78.1	0
78.2	0
78.3	0
78.4	0
78.5	0
78.6	0
78.7	0
78.8	0
78.9	0
79	0
79.1	0
79.2	0
79.3	0
79.4	0
79.5	0
79.6	0
79.7	0
79.8	0
79.9	0
80	0
80.1	0
80.2	0
80.3	0
80.4	0
80.5	0
80.6	0
80.7	0
80.8	0
80.9	0
81	0
81.1	0
81.2	0
81.3	0
81.4	0
81.5	0
81.6	0
81.7	0
81.8	0
81.9	0
82	0
82.1	0
82.2	0
82.3	0
82.4	0
82.5	0
82.6	0
82.7	0
82.8	0
82.9	0
83	0
83.1	0
83.2	0
83.3	0
83.4	0
83.5	0
83.6	0
83.7	0
83.8	0
83.9	0
84	0
84.1	0
84.2	0
84.3	0
84.4	0
84.5	0
84.6	0
84.7	0
84.8	0
84.9	0
85	0
85.1	0
85.2	0
85.3	0
85.4	0
85.5	0
85.6	0
85.7	0
85.8	0
85.9	0
86	0
86.1	0
86.2	0
86.3	0
86.4	0
86.5	0
86.6	0
86.7	0
86.8	0
86.9	0
87	0
87.1	0
87.2	0
87.3	0
87.4	0
87.5	0
87.6	0
87.7	0
87.8	0
87.9	0
88	0
88.1	0
88.2	0
88.3	0
88.4	0
88.5	0
88.6	0
88.7	0
88.8	0
88.9	0
89	0
89.1	0
89.2	0
89.3	0
89.4	0
89.5	0
89.6	0
89.7	0
89.8	0
89.9	0
90	0
90.1	0
90.2	0
90.3	0
90.4	0
90.5	0
90.6	0
90.7	0
90.8	0
90.9	0
91	0
91.1	0
91.2	0
91.3	0
91.4	0
91.5	0
91.6	0
91.7	0
91.8	0
91.9	0
92	0
92.1	0
92.2	0
92.3	0
92.4	0
92.5	0
92.6	0
92.7	0
92.8	0
92.9	0
93	0
93.1	0
93.2	0
93.3	0
93.4	0
93.5	0
93.6	0
93.7	0
93.8	0
93.9	0
94	0
94.1	0
94.2	0
94.3	0
94.4	0
94.5	0
94.6	0
94.7	0
94.8	0
94.9	0
95	0
95.1	0
95.2	0
95.3	0
95.4	0
95.5	0
95.6	0
95.7	0
95.8	0
95.9	0
96	0
96.1	0
96.2	0
96.3	0
96.4	0
96.5	0
96.6	0
96.7	0
96.8	0
96.9	0
97	0
97.1	0
97.2	0
97.3	0
97.4	0
97.5	0
97.6	0
97.7	0
97.8	0
97.9	0
98	0
98.1	0
98.2	0
98.3	0
98.4	0
98.5	0
98.6	0
98.7	0
98.8	0
98.9	0
99	0
99.1	0
99.2	0
99.3	0
99.4	0
99.5	0
99.6	0
99.7	0
99.8	0
99.9	0
100	0
100.1	0
100.2	0
100.3	0
100.4	0
100.5	0
100.6	0
100.7	0
100.8	0
100.9	0
101	0
101.1	0
101.2	0
101.3	0
101.4	0
101.5	0
101.6	0
101.7	0
101.8	0
101.9	0
102	0
102.1	0
102.2	0
102.3	0
102.4	0
102.5	0
102.6	0
102.7	0
102.8	0
102.9	0
103	0
103.1	0
103.2	0
103.3	0
103.4	0
103.5	0
103.6	0
103.7	0
103.8	0
103.9	0
104	0
104.1	0
104.2	0.000142857
104.3	0.000142857
104.4	0.000142857
104.5	0.000142857
104.6	0.000142857
104.7	0.000142857
104.8	0.000142857
104.9	0.000142857
105	0.000142857
105.1	0.000142857
105.2	0.000142857
105.3	0.000142857
105.4	0.000285714
105.5	0.000285714
105.6	0.000285714
105.7	0.000285714
105.8	0.000428571
105.9	0.000428571
106	0.000428571
106.1	0.000428571
106.2	0.000428571
106.3	0.000428571
106.4	0.000428571
106.5	0.000428571
106.6	0.000428571
106.7	0.000428571
106.8	0.000428571
106.9	0.000428571
107	0.000428571
107.1	0.000428571
107.2	0.000571429
107.3	0.000571429
107.4	0.000571429
107.5	0.000571429
107.6	0.000571429
107.7	0.000571429
107.8	0.000571429
107.9	0.000571429
108	0.000571429
108.1	0.000571429
108.2	0.000571429
108.3	0.000571429
108.4	0.000571429
108.5	0.000571429
108.6	0.000714286
108.7	0.000714286
108.8	0.000714286
108.9	0.000714286
109	0.000714286
109.1	0.000714286
109.2	0.000714286
109.3	0.000714286
109.4	0.000714286
109.5	0.000714286
109.6	0.000714286
109.7	0.000714286
109.8	0.000714286
109.9	0.000714286
110	0.000714286
110.1	0.000714286
110.2	0.000714286
110.3	0.000714286
110.4	0.000714286
110.5	0.000714286
110.6	0.000714286
110.7	0.000714286
110.8	0.000714286
110.9	0.000714286
111	0.000714286
111.1	0.000714286
111.2	0.000857143
111.3	0.000857143
111.4	0.000857143
111.5	0.000857143
111.6	0.000857143
111.7	0.000857143
111.8	0.000857143
111.9	0.000857143
112	0.000857143
112.1	0.000857143
112.2	0.000857143
112.3	0.000857143
112.4	0.000857143
112.5	0.000857143
112.6	0.000857143
112.7	0.000857143
112.8	0.000857143
112.9	0.000857143
113	0.000857143
113.1	0.000857143
113.2	0.000857143
113.3	0.000857143
113.4	0.000857143
113.5	0.000857143
113.6	0.000857143
113.7	0.000857143
113.8	0.000857143
113.9	0.000857143
114	0.001
114.1	0.001
114.2	0.001
114.3	0.001
114.4	0.001
114.5	0.001
114.6	0.001
114.7	0.001
114.8	0.001
114.9	0.001
115	0.001
115.1	0.00114286
115.2	0.00114286
115.3	0.00114286
115.4	0.00114286
115.5	0.00114286
115.6	0.00128571
115.7	0.00128571
115.8	0.00128571
115.9	0.00128571
116	0.00142857
116.1	0.00142857
116.2	0.00142857
116.3	0.00142857
116.4	0.00142857
116.5	0.00142857
116.6	0.00142857
116.7	0.00142857
116.8	0.00157143
116.9	0.00157143
117	0.00157143
117.1	0.00157143
117.2	0.00157143
117.3	0.00157143
117.4	0.00157143
117.5	0.00157143
117.6	0.00157143
117.7	0.00157143
117.8	0.00157143
117.9	0.00157143
118	0.00157143
118.1	0.00171429
118.2	0.00171429
118.3	0.00171429
118.4	0.00171429
118.5	0.00171429
118.6	0.00171429
118.7	0.00171429
118.8	0.00171429
118.9	0.00171429
119	0.00171429
119.1	0.00171429
119.2	0.00171429
119.3	0.00171429
119.4	0.00171429
119.5	0.00171429
119.6	0.00171429
119.7	0.00171429
119.8	0.00171429
119.9	0.00171429
120	0.00171429
120.1	0.00171429
120.2	0.00171429
120.3	0.00171429
120.4	0.00171429
120.5	0.00171429
120.6	0.00171429
120.7	0.00171429
120.8	0.00171429
120.9	0.00171429
121	0.00171429
121.1	0.00171429
121.2	0.00171429
121.3	0.00171429
121.4	0.00171429
121.5	0.00171429
121.6	0.00185714
121.7	0.00185714
121.8	0.00214286
121.9	0.00214286
122	0.00214286
122.1	0.00214286
122.2	0.00214286
122.3	0.00214286
122.4	0.00214286
122.5	0.00214286
122.6	0.00214286
122.7	0.00214286
122.8	0.00214286
122.9	0.00214286
123	0.00214286
123.1	0.00228571
123.2	0.00228571
123.3	0.00228571
123.4	0.00228571
123.5	0.00228571
123.6	0.00228571
123.7	0.00228571
123.8	0.00228571
123.9	0.00242857
124	0.00242857
124.1	0.00242857
124.2	0.00242857
124.3	0.00242857
124.4	0.00242857
124.5	0.00242857
124.6	0.00228571
124.7	0.00228571
124.8	0.00228571
124.9	0.00228571
125	0.00228571
125.1	0.00228571
125.2	0.00228571
125.3	0.00228571
125.4	0.00228571
125.5	0.00228571
125.6	0.00228571
125.7	0.00228571
125.8	0.00228571
125.9	0.00228571
126	0.00228571
126.1	0.00228571
126.2	0.00242857
126.3	0.00242857
126.4	0.00242857
126.5	0.00242857
126.6	0.00242857
126.7	0.00242857
126.8	0.00228571
126.9	0.00228571
127	0.00214286
127.1	0.002
127.2	0.002
127.3	0.00214286
127.4	0.00214286
127.5	0.00214286
127.6	0.00228571
127.7	0.00228571
127.8	0.00228571
127.9	0.00228571
128	0.00228571
128.1	0.00228571
128.2	0.00228571
128.3	0.00228571
128.4	0.00242857
128.5	0.00257143
128.6	0.00271429
128.7	0.00271429
128.8	0.00271429
128.9	0.00271429
129	0.00271429
129.1	0.00271429
129.2	0.00271429
129.3	0.00271429
129.4	0.00271429
129.5	0.00271429
129.6	0.00285714
129.7	0.00285714
129.8	0.00285714
129.9	0.00285714
130	0.00285714
130.1	0.003
130.2	0.003
130.3	0.003
130.4	0.003
130.5	0.003
130.6	0.00314286
130.7	0.00328571
130.8	0.00328571
130.9	0.00328571
131	0.00328571
131.1	0.00328571
131.2	0.00328571
131.3	0.00371429
131.4	0.00385714
131.5	0.00385714
131.6	0.00385714
131.7	0.00371429
131.8	0.00385714
131.9	0.00385714
132	0.00385714
132.1	0.00385714
132.2	0.00385714
132.3	0.00385714
132.4	0.00385714
132.5	0.00385714
132.6	0.00385714
132.7	0.00385714
132.8	0.00385714
132.9	0.00385714
133	0.00385714
133.1	0.00385714
133.2	0.00385714
133.3	0.00385714
133.4	0.004
133.5	0.004
133.6	0.004
133.7	0.00414286
133.8	0.00414286
133.9	0.00428571
134	0.00428571
134.1	0.00442857
134.2	0.00442857
134.3	0.00442857
134.4	0.00442857
134.5	0.00442857
134.6	0.00471429
134.7	0.00471429
134.8	0.00471429
134.9	0.00471429
135	0.00471429
135.1	0.00471429
135.2	0.00471429
135.3	0.00471429
135.4	0.00471429
135.5	0.00471429
135.6	0.00471429
135.7	0.00485714
135.8	0.00485714
135.9	0.00485714
136	0.00485714
136.1	0.00485714
136.2	0.00485714
136.3	0.005
136.4	0.005
136.5	0.005
136.6	0.005
136.7	0.005
136.8	0.005
136.9	0.00514286
137	0.00514286
137.1	0.00528571
137.2	0.00528571
137.3	0.00542857
137.4	0.00542857
137.5	0.00542857
137.6	0.00542857
137.7	0.00542857
137.8	0.00528571
137.9	0.00528571
138	0.00528571
138.1	0.00528571
138.2	0.00528571
138.3	0.00528571
138.4	0.00528571
138.5	0.00528571
138.6	0.00542857
138.7	0.00542857
138.8	0.00542857
138.9	0.00542857
139	0.00542857
139.1	0.00542857
139.2	0.00542857
139.3	0.00542857
139.4	0.00542857
139.5	0.00542857
139.6	0.00571429
139.7	0.00571429
139.8	0.00571429
139.9	0.00571429
140	0.00571429
140.1	0.00571429
140.2	0.00571429
140.3	0.00571429
140.4	0.00571429
140.5	0.00571429
140.6	0.00571429
140.7	0.00571429
140.8	0.00571429
140.9	0.00571429
141	0.00571429
141.1	0.00571429
141.2	0.00571429
141.3	0.00571429
141.4	0.00571429
141.5	0.006
141.6	0.006
141.7	0.006
141.8	0.006
141.9	0.006
142	0.006
142.1	0.006
142.2	0.006
142.3	0.006
142.4	0.006
142.5	0.006
142.6	0.006
142.7	0.006
142.8	0.00614286
142.9	0.00614286
143	0.00614286
143.1	0.00614286
143.2	0.00614286
143.3	0.00614286
143.4	0.00614286
143.5	0.00614286
143.6	0.00614286
143.7	0.00614286
143.8	0.00614286
143.9	0.00614286
144	0.00614286
144.1	0.00614286
144.2	0.00614286
144.3	0.00614286
144.4	0.00614286
144.5	0.00614286
144.6	0.00614286
144.7	0.00614286
144.8	0.00614286
144.9	0.00614286
145	0.00614286
145.1	0.00614286
145.2	0.00628571
145.3	0.00628571
145.4	0.00628571
145.5	0.00628571
145.6	0.00628571
145.7	0.00628571
145.8	0.00628571
145.9	0.00628571
146	0.00628571
146.1	0.00628571
146.2	0.00642857
146.3	0.00642857
146.4	0.00642857
146.5	0.00642857
146.6	0.00642857
146.7	0.00642857
146.8	0.00642857
146.9	0.00642857
147	0.00657143
147.1	0.00657143
147.2	0.00657143
147.3	0.00657143
147.4	0.00657143
147.5	0.00657143
147.6	0.00657143
147.7	0.00657143
147.8	0.00657143
147.9	0.00657143
148	0.00657143
148.1	0.00657143
148.2	0.00657143
148.3	0.00657143
148.4	0.00657143
148.5	0.00657143
148.6	0.00657143
148.7	0.00657143
148.8	0.00671429
148.9	0.00671429
149	0.00671429
149.1	0.00671429
149.2	0.00671429
149.3	0.00671429
149.4	0.00671429
149.5	0.00671429
149.6	0.00671429
149.7	0.00671429
149.8	0.00685714
149.9	0.00685714
150	0.007
150.1	0.007
150.2	0.007
150.3	0.00714286
150.4	0.007
150.5	0.007
150.6	0.007
150.7	0.007
150.8	0.007
150.9	0.007
151	0.007
151.1	0.007
151.2	0.007
151.3	0.007
151.4	0.007
151.5	0.007
151.6	0.007
151.7	0.00714286
151.8	0.00714286
151.9	0.00714286
152	0.00714286
152.1	0.00714286
152.2	0.00714286
152.3	0.00714286
152.4	0.00728571
152.5	0.00728571
152.6	0.00728571
152.7	0.00742857
152.8	0.00742857
152.9	0.00742857
153	0.00742857
153.1	0.00742857
153.2	0.00742857
153.3	0.00742857
153.4	0.00742857
153.5	0.00742857
153.6	0.00757143
153.7	0.00757143
153.8	0.00757143
153.9	0.00757143
154	0.00742857
154.1	0.00742857
154.2	0.00742857
154.3	0.00742857
154.4	0.00742857
154.5	0.00742857
154.6	0.00742857
154.7	0.00728571
154.8	0.00728571
154.9	0.00742857
155	0.00742857
155.1	0.00742857
155.2	0.00742857
155.3	0.00742857
155.4	0.00742857
155.5	0.00742857
155.6	0.00742857
155.7	0.00742857
155.8	0.00742857
155.9	0.00742857
156	0.00742857
156.1	0.00742857
156.2	0.00728571
156.3	0.00728571
156.4	0.00728571
156.5	0.00728571
156.6	0.00742857
156.7	0.00742857
156.8	0.00742857
156.9	0.00742857
157	0.00742857
157.1	0.00742857
157.2	0.00742857
157.3	0.00742857
157.4	0.00742857
157.5	0.00742857
157.6	0.00757143
157.7	0.00757143
157.8	0.00757143
157.9	0.00771429
158	0.00771429
158.1	0.00757143
158.2	0.00757143
158.3	0.00757143
158.4	0.00757143
158.5	0.00757143
158.6	0.00757143
158.7	0.00771429
158.8	0.00771429
158.9	0.00771429
159	0.00757143
159.1	0.00757143
159.2	0.00757143
159.3	0.00757143
159.4	0.00757143
159.5	0.00771429
159.6	0.00771429
159.7	0.008
159.8	0.008
159.9	0.00814286
160	0.00814286
160.1	0.00814286
160.2	0.00814286
160.3	0.00814286
160.4	0.00814286
160.5	0.00814286
160.6	0.00814286
160.7	0.00814286
160.8	0.00814286
160.9	0.00814286
161	0.00814286
161.1	0.00814286
161.2	0.00828571
161.3	0.00828571
161.4	0.00828571
161.5	0.00828571
161.6	0.00828571
161.7	0.00828571
161.8	0.00828571
161.9	0.00828571
162	0.00828571
162.1	0.00828571
162.2	0.00828571
162.3	0.00828571
162.4	0.00842857
162.5	0.00842857
162.6	0.00842857
162.7	0.00842857
162.8	0.00842857
162.9	0.00857143
163	0.00857143
163.1	0.00871429
163.2	0.00871429
163.3	0.00871429
163.4	0.00885714
163.5	0.00885714
163.6	0.00885714
163.7	0.009
163.8	0.009
163.9	0.009
164	0.009
164.1	0.009
164.2	0.009
164.3	0.009
164.4	0.009
164.5	0.009
164.6	0.00928571
164.7	0.00914286
164.8	0.00914286
164.9	0.00914286
165	0.00914286
165.1	0.00914286
165.2	0.00928571
165.3	0.00942857
165.4	0.00942857
165.5	0.00942857
165.6	0.00942857
165.7	0.00942857
165.8	0.00942857
165.9	0.00942857
166	0.00942857
166.1	0.00957143
166.2	0.00957143
166.3	0.00957143
166.4	0.00971429
166.5	0.00971429
166.6	0.00971429
166.7	0.00971429
166.8	0.00971429
166.9	0.00957143
167	0.00971429
167.1	0.00971429
167.2	0.00971429
167.3	0.00971429
167.4	0.01
167.5	0.01
167.6	0.01
167.7	0.01
167.8	0.01
167.9	0.01
168	0.01
168.1	0.00985714
168.2	0.01
168.3	0.01
168.4	0.01
168.5	0.01
168.6	0.01
168.7	0.01
168.8	0.01
168.9	0.01
169	0.01
169.1	0.01
169.2	0.01
169.3	0.01
169.4	0.0101429
169.5	0.0101429
169.6	0.0101429
169.7	0.0101429
169.8	0.0102857
169.9	0.0102857
170	0.0104286
170.1	0.0104286
170.2	0.0104286
170.3	0.0104286
170.4	0.0105714
170.5	0.0105714
170.6	0.0105714
170.7	0.0105714
170.8	0.0105714
170.9	0.0104286
171	0.0104286
171.1	0.0104286
171.2	0.0104286
171.3	0.0104286
171.4	0.0104286
171.5	0.0104286
171.6	0.0104286
171.7	0.0104286
171.8	0.0104286
171.9	0.0105714
172	0.0105714
172.1	0.0105714
172.2	0.0107143
172.3	0.0108571
172.4	0.0108571
172.5	0.0107143
172.6	0.0107143
172.7	0.0107143
172.8	0.0105714
172.9	0.0105714
173	0.0104286
173.1	0.0104286
173.2	0.0102857
173.3	0.0102857
173.4	0.0102857
173.5	0.0104286
173.6	0.0105714
173.7	0.0105714
173.8	0.0105714
173.9	0.0105714
174	0.0105714
174.1	0.0105714
174.2	0.0107143
174.3	0.0105714
174.4	0.0105714
174.5	0.0105714
174.6	0.0105714
174.7	0.0105714
174.8	0.0105714
174.9	0.0105714
175	0.0105714
175.1	0.0105714
175.2	0.0107143
175.3	0.0107143
175.4	0.0107143
175.5	0.0107143
175.6	0.0107143
175.7	0.0107143
175.8	0.0107143
175.9	0.0107143
176	0.0107143
176.1	0.0107143
176.2	0.0107143
176.3	0.0107143
176.4	0.0108571
176.5	0.0108571
176.6	0.0108571
176.7	0.0108571
176.8	0.0108571
176.9	0.0108571
177	0.0108571
177.1	0.011
177.2	0.0111429
177.3	0.0111429
177.4	0.0111429
177.5	0.0111429
177.6	0.0111429
177.7	0.0111429
177.8	0.0112857
177.9	0.0112857
178	0.0112857
178.1	0.0112857
178.2	0.0111429
178.3	0.0112857
178.4	0.0112857
178.5	0.0112857
178.6	0.0112857
178.7	0.0115714
178.8	0.0115714
178.9	0.0115714
179	0.0117143
179.1	0.0117143
179.2	0.0117143
179.3	0.0117143
179.4	0.0115714
179.5	0.0115714
179.6	0.0117143
179.7	0.0117143
179.8	0.0117143
179.9	0.012
180	0.012
180.1	0.0122857
180.2	0.0124286
180.3	0.0124286
180.4	0.0122857
180.5	0.0124286
180.6	0.0125714
180.7	0.0125714
180.8	0.0125714
180.9	0.0125714
181	0.0125714
181.1	0.0127143
181.2	0.0127143
181.3	0.0127143
181.4	0.0127143
181.5	0.0127143
181.6	0.0127143
181.7	0.0127143
181.8	0.0127143
181.9	0.0127143
182	0.0127143
182.1	0.0128571
182.2	0.0128571
182.3	0.0128571
182.4	0.0128571
182.5	0.0128571
182.6	0.0128571
182.7	0.0128571
182.8	0.0128571
182.9	0.0128571
183	0.0128571
183.1	0.0128571
183.2	0.0128571
183.3	0.013
183.4	0.013
183.5	0.013
183.6	0.013
183.7	0.013
183.8	0.013
183.9	0.013
184	0.013
184.1	0.013
184.2	0.013
184.3	0.013
184.4	0.013
184.5	0.013
184.6	0.013
184.7	0.013
184.8	0.013
184.9	0.013
185	0.0131429
185.1	0.0132857
185.2	0.0132857
185.3	0.0132857
185.4	0.0132857
185.5	0.0132857
185.6	0.0132857
185.7	0.0132857
185.8	0.0132857
185.9	0.0132857
186	0.0132857
186.1	0.0132857
186.2	0.0132857
186.3	0.0132857
186.4	0.0132857
186.5	0.0131429
186.6	0.0131429
186.7	0.0131429
186.8	0.0131429
186.9	0.0131429
187	0.0131429
187.1	0.0131429
187.2	0.0132857
187.3	0.0134286
187.4	0.0134286
187.5	0.0134286
187.6	0.0134286
187.7	0.0134286
187.8	0.0134286
187.9	0.0134286
188	0.0134286
188.1	0.0134286
188.2	0.0134286
188.3	0.0134286
188.4	0.0134286
188.5	0.0134286
188.6	0.0134286
188.7	0.0134286
188.8	0.0134286
188.9	0.0134286
189	0.0134286
189.1	0.0132857
189.2	0.0132857
189.3	0.0131429
189.4	0.0131429
189.5	0.0131429
189.6	0.013
189.7	0.013
189.8	0.0131429
189.9	0.013
190	0.013
190.1	0.0128571
190.2	0.0128571
190.3	0.0128571
190.4	0.0128571
190.5	0.0127143
190.6	0.0127143
190.7	0.0127143
190.8	0.0127143
190.9	0.0127143
191	0.0127143
191.1	0.0127143
191.2	0.0128571
191.3	0.0127143
191.4	0.0127143
191.5	0.0127143
191.6	0.0127143
191.7	0.0127143
191.8	0.0127143
191.9	0.0127143
192	0.0127143
192.1	0.0127143
192.2	0.013
192.3	0.013
192.4	0.013
192.5	0.013
192.6	0.013
192.7	0.013
192.8	0.013
192.9	0.013
193	0.013
193.1	0.013
193.2	0.0128571
193.3	0.0128571
193.4	0.0128571
193.5	0.0128571
193.6	0.0128571
193.7	0.0128571
193.8	0.0128571
193.9	0.013
194	0.013
194.1	0.013
194.2	0.013
194.3	0.013
194.4	0.013
194.5	0.013
194.6	0.0131429
194.7	0.0131429
194.8	0.0132857
194.9	0.0132857
195	0.0131429
195.1	0.0131429
195.2	0.0131429
195.3	0.0131429
195.4	0.0131429
195.5	0.0131429
195.6	0.0131429
195.7	0.0131429
195.8	0.0131429
195.9	0.0131429
196	0.0131429
196.1	0.0131429
196.2	0.0131429
196.3	0.0131429
196.4	0.0131429
196.5	0.0131429
196.6	0.0131429
196.7	0.0132857
196.8	0.0131429
196.9	0.0131429
197	0.0131429
197.1	0.0131429
197.2	0.0131429
197.3	0.0131429
197.4	0.0131429
197.5	0.0131429
197.6	0.0131429
197.7	0.0131429
197.8	0.0132857
197.9	0.0132857
198	0.0135714
198.1	0.0135714
198.2	0.0135714
198.3	0.0135714
198.4	0.0137143
198.5	0.0137143
198.6	0.0137143
198.7	0.0137143
198.8	0.0137143
198.9	0.0137143
199	0.0138571
199.1	0.0138571
199.2	0.0137143
199.3	0.0137143
199.4	0.014
199.5	0.014
199.6	0.014
199.7	0.014
199.8	0.014
199.9	0.0141429
200	0.0141429
[truncated: 14,000 more rows]
