# Supplementary material for: Bayesian inference of kinetic schemes for ion channels by Kalman filtering
Source: eLife journal article supplement (doi:10.7554/elife.62714), 2022-05-04
Supplement: fig4-data11 [file 1_Sim_N_10000_Fluor_MW.xlsx]

## Sheet: Tabelle1
0.1	0
0.2	0
0.3	0
0.4	0
0.5	0
0.6	0
0.7	0
0.8	0
0.9	0
1	0
1.1	0
1.2	0
1.3	0
1.4	0
1.5	0
1.6	0
1.7	0
1.8	0
1.9	0
2	0
2.1	0
2.2	0
2.3	0
2.4	0
2.5	0
2.6	0
2.7	0
2.8	0
2.9	0
3	0
3.1	0
3.2	0
3.3	0
3.4	0
3.5	0
3.6	0
3.7	0
3.8	0
3.9	0
4	0
4.1	0
4.2	0
4.3	0
4.4	0
4.5	0
4.6	0
4.7	0
4.8	0
4.9	0
5	0
5.1	0
5.2	0
5.3	0
5.4	0
5.5	0
5.6	0
5.7	0
5.8	0
5.9	0
6	0
6.1	0
6.2	0
6.3	0
6.4	0
6.5	0
6.6	0
6.7	0
6.8	0
6.9	0
7	0
7.1	0
7.2	0
7.3	0
7.4	0
7.5	0
7.6	0
7.7	0
7.8	0
7.9	0
8	0
8.1	0
8.2	0
8.3	0
8.4	0
8.5	0
8.6	0
8.7	0
8.8	0
8.9	0
9	0
9.1	0
9.2	0
9.3	0
9.4	0
9.5	0
9.6	0
9.7	0
9.8	0
9.9	0
10	0
10.1	0
10.2	0
10.3	0
10.4	0
10.5	0
10.6	0
10.7	0
10.8	0
10.9	0
11	0
11.1	0
11.2	0
11.3	0
11.4	0
11.5	0
11.6	0
11.7	0
11.8	0
11.9	0
12	0
12.1	0
12.2	0
12.3	0
12.4	0
12.5	0
12.6	0
12.7	0
12.8	0
12.9	0
13	0
13.1	0
13.2	0
13.3	0
13.4	0
13.5	0
13.6	0
13.7	0
13.8	0
13.9	0
14	0
14.1	0
14.2	0
14.3	0
14.4	0
14.5	0
14.6	0
14.7	0
14.8	0
14.9	0
15	0
15.1	0
15.2	0
15.3	0
15.4	0
15.5	0
15.6	0
15.7	0
15.8	0
15.9	0
16	0
16.1	0
16.2	0
16.3	0
16.4	0
16.5	0
16.6	0
16.7	0
16.8	0
16.9	0
17	0
17.1	0
17.2	0
17.3	0
17.4	0
17.5	0
17.6	0
17.7	0
17.8	0
17.9	0
18	0
18.1	0
18.2	0
18.3	0
18.4	0
18.5	0
18.6	0
18.7	0
18.8	0
18.9	0
19	0
19.1	0
19.2	0
19.3	0
19.4	0
19.5	0
19.6	0
19.7	0
19.8	0
19.9	0
20	0
20.1	0
20.2	0
20.3	0
20.4	0
20.5	0
20.6	0
20.7	0
20.8	0
20.9	0
21	0
21.1	0
21.2	0
21.3	0
21.4	0
21.5	0
21.6	0
21.7	0
21.8	0
21.9	0
22	0
22.1	0
22.2	0
22.3	0
22.4	0
22.5	0
22.6	0
22.7	0
22.8	0
22.9	0
23	0
23.1	0
23.2	0
23.3	0
23.4	0
23.5	0
23.6	0
23.7	0
23.8	0
23.9	0
24	0
24.1	0
24.2	0
24.3	0
24.4	0
24.5	0
24.6	0
24.7	0
24.8	0
24.9	0
25	0
25.1	0
25.2	0
25.3	0
25.4	0
25.5	0
25.6	0
25.7	0
25.8	0
25.9	0
26	0
26.1	0
26.2	0
26.3	0
26.4	0
26.5	0
26.6	0
26.7	0
26.8	0
26.9	0
27	0
27.1	0
27.2	0
27.3	0
27.4	0
27.5	0
27.6	0
27.7	0
27.8	0
27.9	0
28	0
28.1	0
28.2	0
28.3	0
28.4	0
28.5	0
28.6	0
28.7	0
28.8	0
28.9	0
29	0
29.1	0
29.2	0
29.3	0
29.4	0
29.5	0
29.6	0
29.7	0
29.8	0
29.9	0
30	0
30.1	0
30.2	0
30.3	0
30.4	0
30.5	0
30.6	0
30.7	0
30.8	0
30.9	0
31	0
31.1	0
31.2	0
31.3	0
31.4	0
31.5	0
31.6	0
31.7	0
31.8	0
31.9	0
32	0
32.1	0
32.2	0
32.3	0
32.4	0
32.5	0
32.6	0
32.7	0
32.8	0
32.9	0
33	0
33.1	0
33.2	0
33.3	0
33.4	0
33.5	0
33.6	0
33.7	0
33.8	0
33.9	0
34	0
34.1	0
34.2	0
34.3	0
34.4	0
34.5	0
34.6	0
34.7	0
34.8	0
34.9	0
35	0
35.1	0
35.2	0
35.3	0
35.4	0
35.5	0
35.6	0
35.7	0
35.8	0
35.9	0
36	0
36.1	0
36.2	0
36.3	0
36.4	0
36.5	0
36.6	0
36.7	0
36.8	0
36.9	0
37	0
37.1	0
37.2	0
37.3	0
37.4	0
37.5	0
37.6	0
37.7	0
37.8	0
37.9	0
38	0
38.1	0
38.2	0
38.3	0
38.4	0
38.5	0
38.6	0
38.7	0
38.8	0
38.9	0
39	0
39.1	0
39.2	0
39.3	0
39.4	0
39.5	0
39.6	0
39.7	0
39.8	0
39.9	0
40	0
40.1	0
40.2	0
40.3	0
40.4	0
40.5	0
40.6	0
40.7	0
40.8	0
40.9	0
41	0
41.1	0
41.2	0
41.3	0
41.4	0
41.5	0
41.6	0
41.7	0
41.8	0
41.9	0
42	0
42.1	0
42.2	0
42.3	0
42.4	0
42.5	0
42.6	0
42.7	0
42.8	0
42.9	0
43	0
43.1	0
43.2	0
43.3	0
43.4	0
43.5	0
43.6	0
43.7	0
43.8	0
43.9	0
44	0
44.1	0
44.2	0
44.3	0
44.4	0
44.5	0
44.6	0
44.7	0
44.8	0
44.9	0
45	0
45.1	0
45.2	0
45.3	0
45.4	0
45.5	0
45.6	0
45.7	0
45.8	0
45.9	0
46	0
46.1	0
46.2	0
46.3	0
46.4	0
46.5	0
46.6	0
46.7	0
46.8	0
46.9	0
47	0
47.1	0
47.2	0
47.3	0
47.4	0
47.5	0
47.6	0
47.7	0
47.8	0
47.9	0
48	0
48.1	0
48.2	0
48.3	0
48.4	0
48.5	0
48.6	0
48.7	0
48.8	0
48.9	0
49	0
49.1	0
49.2	0
49.3	0
49.4	0
49.5	0
49.6	0
49.7	0
49.8	0
49.9	0
50	0
50.1	0
50.2	0
50.3	0
50.4	0
50.5	0
50.6	0
50.7	0
50.8	0
50.9	0
51	0
51.1	0
51.2	0
51.3	0
51.4	0
51.5	0
51.6	0
51.7	0
51.8	0
51.9	0
52	0
52.1	0
52.2	0
52.3	0
52.4	0
52.5	0
52.6	0
52.7	0
52.8	0
52.9	0
53	0
53.1	0
53.2	0
53.3	0
53.4	0
53.5	0
53.6	0
53.7	0
53.8	0
53.9	0
54	0
54.1	0
54.2	0
54.3	0
54.4	0
54.5	0
54.6	0
54.7	0
54.8	0
54.9	0
55	0
55.1	0
55.2	0
55.3	0
55.4	0
55.5	0
55.6	0
55.7	0
55.8	0
55.9	0
56	0
56.1	0
56.2	0
56.3	0
56.4	0
56.5	0
56.6	0
56.7	0
56.8	0
56.9	0
57	0
57.1	0
57.2	0
57.3	0
57.4	0
57.5	0
57.6	0
57.7	0
57.8	0
57.9	0
58	0
58.1	0
58.2	0
58.3	0
58.4	0
58.5	0
58.6	0
58.7	0
58.8	0
58.9	0
59	0
59.1	0
59.2	0
59.3	0
59.4	0
59.5	0
59.6	0
59.7	0
59.8	0
59.9	0
60	0
60.1	0
60.2	0
60.3	0
60.4	0
60.5	0
60.6	0
60.7	0
60.8	0
60.9	0
61	0
61.1	0
61.2	0
61.3	0
61.4	0
61.5	0
61.6	0
61.7	0
61.8	0
61.9	0
62	0
62.1	0
62.2	0
62.3	0
62.4	0
62.5	0
62.6	0
62.7	0
62.8	0
62.9	0
63	0
63.1	0
63.2	0
63.3	0
63.4	0
63.5	0
63.6	0
63.7	0
63.8	0
63.9	0
64	0
64.1	0
64.2	0
64.3	0
64.4	0
64.5	0
64.6	0
64.7	0
64.8	0
64.9	0
65	0
65.1	0
65.2	0
65.3	0
65.4	0
65.5	0
65.6	0
65.7	0
65.8	0
65.9	0
66	0
66.1	0
66.2	0
66.3	0
66.4	0
66.5	0
66.6	0
66.7	0
66.8	0
66.9	0
67	0
67.1	0
67.2	0
67.3	0
67.4	0
67.5	0
67.6	0
67.7	0
67.8	0
67.9	0
68	0
68.1	0
68.2	0
68.3	0
68.4	0
68.5	0
68.6	0
68.7	0
68.8	0
68.9	0
69	0
69.1	0
69.2	0
69.3	0
69.4	0
69.5	0
69.6	0
69.7	0
69.8	0
69.9	0
70	0
70.1	0
70.2	0
70.3	0
70.4	0
70.5	0
70.6	0
70.7	0
70.8	0
70.9	0
71	0
71.1	0
71.2	0
71.3	0
71.4	0
71.5	0
71.6	0
71.7	0
71.8	0
71.9	0
72	0
72.1	0
72.2	0
72.3	0
72.4	0
72.5	0
72.6	0
72.7	0
72.8	0
72.9	0
73	0
73.1	0
73.2	0
73.3	0
73.4	0
73.5	0
73.6	0
73.7	0
73.8	0
73.9	0
74	0
74.1	0
74.2	0
74.3	0
74.4	0
74.5	0
74.6	0
74.7	0
74.8	0
74.9	0
75	0
75.1	0
75.2	0
75.3	0
75.4	0
75.5	0
75.6	0
75.7	0
75.8	0
75.9	0
76	0
76.1	0
76.2	0
76.3	0
76.4	0
76.5	0
76.6	0
76.7	0
76.8	0
76.9	0
77	0
77.1	0
77.2	0
77.3	0
77.4	0
77.5	0
77.6	0
77.7	0
77.8	0
77.9	0
78	0
78.1	0
78.2	0
78.3	0
78.4	0
78.5	0
78.6	0
78.7	0
78.8	0
78.9	0
79	0
79.1	0
79.2	0
79.3	0
79.4	0
79.5	0
79.6	0
79.7	0
79.8	0
79.9	0
80	0
80.1	0
80.2	0
80.3	0
80.4	0
80.5	0
80.6	0
80.7	0
80.8	0
80.9	0
81	0
81.1	0
81.2	0
81.3	0
81.4	0
81.5	0
81.6	0
81.7	0
81.8	0
81.9	0
82	0
82.1	0
82.2	0
82.3	0
82.4	0
82.5	0
82.6	0
82.7	0
82.8	0
82.9	0
83	0
83.1	0
83.2	0
83.3	0
83.4	0
83.5	0
83.6	0
83.7	0
83.8	0
83.9	0
84	0
84.1	0
84.2	0
84.3	0
84.4	0
84.5	0
84.6	0
84.7	0
84.8	0
84.9	0
85	0
85.1	0
85.2	0
85.3	0
85.4	0
85.5	0
85.6	0
85.7	0
85.8	0
85.9	0
86	0
86.1	0
86.2	0
86.3	0
86.4	0
86.5	0
86.6	0
86.7	0
86.8	0
86.9	0
87	0
87.1	0
87.2	0
87.3	0
87.4	0
87.5	0
87.6	0
87.7	0
87.8	0
87.9	0
88	0
88.1	0
88.2	0
88.3	0
88.4	0
88.5	0
88.6	0
88.7	0
88.8	0
88.9	0
89	0
89.1	0
89.2	0
89.3	0
89.4	0
89.5	0
89.6	0
89.7	0
89.8	0
89.9	0
90	0
90.1	0
90.2	0
90.3	0
90.4	0
90.5	0
90.6	0
90.7	0
90.8	0
90.9	0
91	0
91.1	0
91.2	0
91.3	0
91.4	0
91.5	0
91.6	0
91.7	0
91.8	0
91.9	0
92	0
92.1	0
92.2	0
92.3	0
92.4	0
92.5	0
92.6	0
92.7	0
92.8	0
92.9	0
93	0
93.1	0
93.2	0
93.3	0
93.4	0
93.5	0
93.6	0
93.7	0
93.8	0
93.9	0
94	0
94.1	0
94.2	0
94.3	0
94.4	0
94.5	0
94.6	0
94.7	0
94.8	0
94.9	0
95	0
95.1	0
95.2	0
95.3	0
95.4	0
95.5	0
95.6	0
95.7	0
95.8	0
95.9	0
96	0
96.1	0
96.2	0
96.3	0
96.4	0
96.5	0
96.6	0
96.7	0
96.8	0
96.9	0
97	0
97.1	0
97.2	0
97.3	0
97.4	0
97.5	0
97.6	0
97.7	0
97.8	0
97.9	0
98	0
98.1	0
98.2	0
98.3	0
98.4	0
98.5	0
98.6	0
98.7	0
98.8	0
98.9	0
99	0
99.1	0
99.2	0
99.3	0
99.4	0
99.5	0
99.6	0
99.7	0
99.8	0
99.9	0
100	0
100.1	0.00175
100.2	0.00415
100.3	0.0058
100.4	0.00765
100.5	0.00925
100.6	0.0107
100.7	0.01285
100.8	0.0145
100.9	0.01625
101	0.01805
101.1	0.0199
101.2	0.02085
101.3	0.02235
101.4	0.02365
101.5	0.02555
101.6	0.027
101.7	0.028
101.8	0.02965
101.9	0.0313
102	0.0332
102.1	0.0342
102.2	0.03565
102.3	0.0365
102.4	0.03835
102.5	0.0397
102.6	0.04165
102.7	0.043
102.8	0.0447
102.9	0.04625
103	0.0477
103.1	0.0495
103.2	0.05035
103.3	0.0518
103.4	0.05255
103.5	0.05395
103.6	0.05455
103.7	0.0556
103.8	0.05635
103.9	0.05715
104	0.0587
104.1	0.0598
104.2	0.061
104.3	0.06225
104.4	0.06325
104.5	0.06395
104.6	0.0653
104.7	0.06615
104.8	0.0669
104.9	0.0675
105	0.0686
105.1	0.07005
105.2	0.06995
105.3	0.07055
105.4	0.07125
105.5	0.0726
105.6	0.0732
105.7	0.0742
105.8	0.07555
105.9	0.07615
106	0.0771
106.1	0.0778
106.2	0.07905
106.3	0.07995
106.4	0.0802
106.5	0.08125
106.6	0.08195
106.7	0.08315
106.8	0.08415
106.9	0.08565
107	0.0857
107.1	0.08695
107.2	0.08785
107.3	0.0885
107.4	0.0892
107.5	0.09025
107.6	0.09055
107.7	0.09105
107.8	0.0918
107.9	0.0928
108	0.09315
108.1	0.09345
108.2	0.0941
108.3	0.0944
108.4	0.0951
108.5	0.09555
108.6	0.0958
108.7	0.0962
108.8	0.09705
108.9	0.09785
109	0.09865
109.1	0.0993
109.2	0.0998
109.3	0.1007
109.4	0.10165
109.5	0.10225
109.6	0.1021
109.7	0.1024
109.8	0.1029
109.9	0.10335
110	0.10345
110.1	0.10415
110.2	0.1049
110.3	0.1054
110.4	0.10605
110.5	0.1063
110.6	0.10685
110.7	0.1076
110.8	0.1082
110.9	0.10935
111	0.1101
111.1	0.11145
111.2	0.11145
111.3	0.11155
111.4	0.11165
111.5	0.11265
111.6	0.1127
111.7	0.1133
111.8	0.11385
111.9	0.11395
112	0.1148
112.1	0.1148
112.2	0.1152
112.3	0.1154
112.4	0.1153
112.5	0.1153
112.6	0.11555
112.7	0.11605
112.8	0.1166
112.9	0.1167
113	0.11635
113.1	0.11715
113.2	0.1173
113.3	0.1171
113.4	0.1175
113.5	0.1177
113.6	0.1175
113.7	0.11765
113.8	0.11815
113.9	0.1182
114	0.11885
114.1	0.1191
114.2	0.11945
114.3	0.1194
114.4	0.11955
114.5	0.12
114.6	0.12005
114.7	0.1201
114.8	0.12045
114.9	0.12035
115	0.12075
115.1	0.12055
115.2	0.12135
115.3	0.12175
115.4	0.1225
115.5	0.1226
115.6	0.12315
115.7	0.12385
115.8	0.12405
115.9	0.1241
116	0.1237
116.1	0.12375
116.2	0.124
116.3	0.1245
116.4	0.12485
116.5	0.12555
116.6	0.1254
116.7	0.12605
116.8	0.1256
116.9	0.126
117	0.1263
117.1	0.1269
117.2	0.1277
117.3	0.1279
117.4	0.1277
117.5	0.12845
117.6	0.12835
117.7	0.12895
117.8	0.12945
117.9	0.1296
118	0.1296
118.1	0.1292
118.2	0.12975
118.3	0.1292
118.4	0.1295
118.5	0.13005
118.6	0.13085
118.7	0.13085
118.8	0.13095
118.9	0.13105
119	0.1308
119.1	0.13075
119.2	0.1308
119.3	0.1309
119.4	0.1307
119.5	0.1316
119.6	0.13165
119.7	0.13145
119.8	0.13205
119.9	0.1323
120	0.13245
120.1	0.1325
120.2	0.1325
120.3	0.13305
120.4	0.13285
120.5	0.13265
120.6	0.13275
120.7	0.1331
120.8	0.13415
120.9	0.1348
121	0.1357
121.1	0.13655
121.2	0.13685
121.3	0.137
121.4	0.1368
121.5	0.1371
121.6	0.1371
121.7	0.13785
121.8	0.13835
121.9	0.1381
122	0.13805
122.1	0.13745
122.2	0.13775
122.3	0.13825
122.4	0.1385
122.5	0.13865
122.6	0.139
122.7	0.1387
122.8	0.13835
122.9	0.1382
123	0.1385
123.1	0.13885
123.2	0.1386
123.3	0.13845
123.4	0.1384
123.5	0.1379
123.6	0.1381
123.7	0.13805
123.8	0.13825
123.9	0.13845
124	0.13795
124.1	0.1385
124.2	0.1381
124.3	0.13745
124.4	0.138
124.5	0.1377
124.6	0.1374
124.7	0.13785
124.8	0.13775
124.9	0.13835
125	0.1389
125.1	0.1389
125.2	0.13885
125.3	0.1395
125.4	0.1401
125.5	0.1399
125.6	0.1398
125.7	0.13975
125.8	0.1396
125.9	0.13905
126	0.13895
126.1	0.1389
126.2	0.13885
126.3	0.13895
126.4	0.13975
126.5	0.1398
126.6	0.14035
126.7	0.1401
126.8	0.1405
126.9	0.14065
127	0.1408
127.1	0.1413
127.2	0.14095
127.3	0.14145
127.4	0.1413
127.5	0.1413
127.6	0.14135
127.7	0.1419
127.8	0.14215
127.9	0.14255
128	0.1424
128.1	0.14225
128.2	0.142
128.3	0.1426
128.4	0.1429
128.5	0.14235
128.6	0.14205
128.7	0.14225
128.8	0.1413
128.9	0.14035
129	0.14005
129.1	0.14
129.2	0.14015
129.3	0.1402
129.4	0.1404
129.5	0.1408
129.6	0.14055
129.7	0.1406
129.8	0.1406
129.9	0.1406
130	0.14115
130.1	0.1407
130.2	0.14055
130.3	0.1403
130.4	0.1398
130.5	0.1395
130.6	0.13975
130.7	0.13985
130.8	0.1397
130.9	0.13995
131	0.13955
131.1	0.1391
131.2	0.13955
131.3	0.1396
131.4	0.14015
131.5	0.1402
131.6	0.1403
131.7	0.1406
131.8	0.14045
131.9	0.14055
132	0.1408
132.1	0.1403
132.2	0.14005
132.3	0.13945
132.4	0.1399
132.5	0.13975
132.6	0.13955
132.7	0.1396
132.8	0.13955
132.9	0.13985
133	0.1393
133.1	0.13905
133.2	0.1391
133.3	0.1395
133.4	0.14025
133.5	0.14055
133.6	0.14055
133.7	0.14005
133.8	0.13975
133.9	0.13945
134	0.13925
134.1	0.1393
134.2	0.13945
134.3	0.13935
134.4	0.13965
134.5	0.1392
134.6	0.1394
134.7	0.14025
134.8	0.1406
134.9	0.14125
135	0.14175
135.1	0.14205
135.2	0.1421
135.3	0.14205
135.4	0.142
135.5	0.14255
135.6	0.14295
135.7	0.14315
135.8	0.1428
135.9	0.14305
136	0.14275
136.1	0.1424
136.2	0.1424
136.3	0.1426
136.4	0.14215
136.5	0.1429
136.6	0.142
136.7	0.14165
136.8	0.14275
136.9	0.1427
137	0.1432
137.1	0.143
137.2	0.1432
137.3	0.1431
137.4	0.1432
137.5	0.1431
137.6	0.14335
137.7	0.1427
137.8	0.14285
137.9	0.14245
138	0.143
138.1	0.14365
138.2	0.1439
138.3	0.14425
138.4	0.1446
138.5	0.14445
138.6	0.14475
138.7	0.1454
138.8	0.14585
138.9	0.1453
139	0.1448
139.1	0.1445
139.2	0.1448
139.3	0.1449
139.4	0.1446
139.5	0.14495
139.6	0.14495
139.7	0.1448
139.8	0.1447
139.9	0.14445
140	0.1447
140.1	0.1451
140.2	0.1453
140.3	0.1457
140.4	0.14545
140.5	0.14555
140.6	0.1452
140.7	0.14555
140.8	0.1459
140.9	0.14575
141	0.14595
141.1	0.1461
141.2	0.14665
141.3	0.1456
141.4	0.146
141.5	0.1461
141.6	0.14575
141.7	0.1453
141.8	0.1455
141.9	0.14525
142	0.1452
142.1	0.1453
142.2	0.1451
142.3	0.1451
142.4	0.14515
142.5	0.1455
142.6	0.14525
142.7	0.14535
142.8	0.1456
142.9	0.14525
143	0.14545
143.1	0.14525
143.2	0.1452
143.3	0.14525
143.4	0.14555
143.5	0.146
143.6	0.1457
143.7	0.14535
143.8	0.145
143.9	0.14525
144	0.14535
144.1	0.1449
144.2	0.1452
144.3	0.14475
144.4	0.14415
144.5	0.14465
144.6	0.1445
144.7	0.14425
144.8	0.14425
144.9	0.14325
145	0.14355
145.1	0.14335
145.2	0.1435
145.3	0.143
145.4	0.1427
145.5	0.14225
145.6	0.14235
145.7	0.14245
145.8	0.14235
145.9	0.14285
146	0.14265
146.1	0.1421
146.2	0.1424
146.3	0.14365
146.4	0.14345
146.5	0.1441
146.6	0.14405
146.7	0.1435
146.8	0.14375
146.9	0.1434
147	0.1432
147.1	0.1431
147.2	0.1426
147.3	0.1432
147.4	0.1438
147.5	0.14395
147.6	0.1444
147.7	0.14535
147.8	0.14555
147.9	0.1459
148	0.14515
148.1	0.1455
148.2	0.1455
148.3	0.14555
148.4	0.1451
148.5	0.14575
148.6	0.1457
148.7	0.1454
148.8	0.1455
148.9	0.1456
149	0.146
149.1	0.1464
149.2	0.1467
149.3	0.14635
149.4	0.14605
149.5	0.14595
149.6	0.146
149.7	0.1459
149.8	0.1463
149.9	0.14615
150	0.1462
150.1	0.14695
150.2	0.1467
150.3	0.14595
150.4	0.1462
150.5	0.1461
150.6	0.1461
150.7	0.14585
150.8	0.1462
150.9	0.1455
151	0.14555
151.1	0.14585
151.2	0.1454
151.3	0.1452
151.4	0.1455
151.5	0.146
151.6	0.1458
151.7	0.14615
151.8	0.1465
151.9	0.14665
152	0.1467
152.1	0.147
152.2	0.14765
152.3	0.14795
152.4	0.1485
152.5	0.14825
152.6	0.1477
152.7	0.1483
152.8	0.1475
152.9	0.1472
153	0.14745
153.1	0.14825
153.2	0.14835
153.3	0.1485
153.4	0.14825
153.5	0.14795
153.6	0.14685
153.7	0.14705
153.8	0.14675
153.9	0.1461
154	0.1466
154.1	0.1469
154.2	0.14695
154.3	0.1463
154.4	0.1462
154.5	0.14655
154.6	0.14595
154.7	0.1459
154.8	0.1459
154.9	0.1463
155	0.1465
155.1	0.14615
155.2	0.1464
155.3	0.1462
155.4	0.1466
155.5	0.14675
155.6	0.1467
155.7	0.14725
155.8	0.14755
155.9	0.1476
156	0.14735
156.1	0.1475
156.2	0.14785
156.3	0.14765
156.4	0.14775
156.5	0.14745
156.6	0.1473
156.7	0.1468
156.8	0.1472
156.9	0.1474
157	0.1474
157.1	0.14725
157.2	0.147
157.3	0.1472
157.4	0.14785
157.5	0.14705
157.6	0.1473
157.7	0.1471
157.8	0.1471
157.9	0.14685
158	0.14715
158.1	0.14755
158.2	0.14725
158.3	0.1472
158.4	0.14665
158.5	0.1469
158.6	0.14645
158.7	0.1462
158.8	0.1462
158.9	0.1464
159	0.146
159.1	0.1459
159.2	0.14595
159.3	0.14665
159.4	0.1463
159.5	0.146
159.6	0.1449
159.7	0.14505
159.8	0.1452
159.9	0.1453
160	0.1459
160.1	0.1463
160.2	0.1459
160.3	0.1459
160.4	0.14625
160.5	0.14675
160.6	0.14605
160.7	0.1462
160.8	0.14655
160.9	0.14675
161	0.1465
161.1	0.14655
161.2	0.1467
161.3	0.1468
161.4	0.1463
161.5	0.1463
161.6	0.147
161.7	0.14725
161.8	0.14715
161.9	0.1473
162	0.1472
162.1	0.14805
162.2	0.1486
162.3	0.1489
162.4	0.1487
162.5	0.14865
162.6	0.14785
162.7	0.1476
162.8	0.14785
162.9	0.1472
163	0.1472
163.1	0.14635
163.2	0.14585
163.3	0.14565
163.4	0.1461
163.5	0.14535
163.6	0.14515
163.7	0.1444
163.8	0.1443
163.9	0.1444
164	0.14425
164.1	0.1449
164.2	0.1454
164.3	0.14515
164.4	0.1453
164.5	0.1454
164.6	0.1453
164.7	0.14495
164.8	0.14455
164.9	0.1446
165	0.14505
165.1	0.14485
165.2	0.1452
165.3	0.1449
165.4	0.1453
165.5	0.14555
165.6	0.1452
165.7	0.14545
165.8	0.14565
165.9	0.14555
166	0.1455
166.1	0.14565
166.2	0.1457
166.3	0.1458
166.4	0.1458
166.5	0.1461
166.6	0.1464
166.7	0.146
166.8	0.1456
166.9	0.14575
167	0.1456
167.1	0.14575
167.2	0.1458
167.3	0.14605
167.4	0.1461
167.5	0.1466
167.6	0.14695
167.7	0.1469
167.8	0.1467
167.9	0.14635
168	0.1466
168.1	0.14705
168.2	0.1471
168.3	0.14685
168.4	0.14635
168.5	0.1464
168.6	0.1464
168.7	0.14665
168.8	0.147
168.9	0.1469
169	0.14665
169.1	0.14645
169.2	0.1466
169.3	0.1468
169.4	0.14715
169.5	0.14735
169.6	0.1473
169.7	0.1479
169.8	0.14785
169.9	0.14785
170	0.1477
170.1	0.1469
170.2	0.1479
170.3	0.14745
170.4	0.14715
170.5	0.1472
170.6	0.14715
170.7	0.14625
170.8	0.1459
170.9	0.14575
171	0.14615
171.1	0.1458
171.2	0.14615
171.3	0.14665
171.4	0.14735
171.5	0.14735
171.6	0.147
171.7	0.1467
171.8	0.1466
171.9	0.1468
172	0.1473
172.1	0.14685
172.2	0.1473
172.3	0.14735
172.4	0.14675
172.5	0.14685
172.6	0.1465
172.7	0.1467
172.8	0.14665
172.9	0.14665
173	0.1468
173.1	0.1467
173.2	0.14695
173.3	0.1479
173.4	0.1478
173.5	0.14745
173.6	0.1479
173.7	0.14795
173.8	0.14765
173.9	0.1474
174	0.14735
174.1	0.14745
174.2	0.1474
174.3	0.1474
174.4	0.14735
174.5	0.1472
174.6	0.1469
174.7	0.14705
174.8	0.14695
174.9	0.1471
175	0.1469
175.1	0.14735
175.2	0.14735
175.3	0.1479
175.4	0.148
175.5	0.14815
175.6	0.148
175.7	0.1481
175.8	0.1481
175.9	0.14775
176	0.14855
176.1	0.14805
176.2	0.1483
176.3	0.14755
176.4	0.1473
176.5	0.14665
176.6	0.14685
176.7	0.1469
176.8	0.14725
176.9	0.14745
177	0.1476
177.1	0.1471
177.2	0.147
177.3	0.1468
177.4	0.14615
177.5	0.1465
177.6	0.1468
177.7	0.14685
177.8	0.1472
177.9	0.1472
178	0.147
178.1	0.14635
178.2	0.14625
178.3	0.14655
178.4	0.1475
178.5	0.14795
178.6	0.1479
178.7	0.1477
178.8	0.1469
178.9	0.1469
179	0.14665
179.1	0.14695
179.2	0.14705
179.3	0.14645
179.4	0.14645
179.5	0.14595
179.6	0.146
179.7	0.14625
179.8	0.1466
179.9	0.1467
180	0.14745
180.1	0.14775
180.2	0.1469
180.3	0.1466
180.4	0.14645
180.5	0.1467
180.6	0.1471
180.7	0.1466
180.8	0.14665
180.9	0.14665
181	0.14665
181.1	0.14695
181.2	0.14755
181.3	0.14785
181.4	0.1477
181.5	0.1478
181.6	0.1472
181.7	0.1473
181.8	0.1472
181.9	0.14715
182	0.14735
182.1	0.14785
182.2	0.14795
182.3	0.1478
182.4	0.14765
182.5	0.1479
182.6	0.1479
182.7	0.14795
182.8	0.14825
182.9	0.14865
183	0.1486
183.1	0.1483
183.2	0.14875
183.3	0.1493
183.4	0.1494
183.5	0.1496
183.6	0.1497
183.7	0.1496
183.8	0.14925
183.9	0.14955
184	0.1503
184.1	0.1505
184.2	0.1502
184.3	0.1501
184.4	0.1499
184.5	0.1499
184.6	0.15015
184.7	0.15015
184.8	0.1494
184.9	0.1494
185	0.14935
185.1	0.1487
185.2	0.14865
185.3	0.1488
185.4	0.1488
185.5	0.1491
185.6	0.1492
185.7	0.1488
185.8	0.14875
185.9	0.1492
186	0.14835
186.1	0.1484
186.2	0.14785
186.3	0.14825
186.4	0.14745
186.5	0.14735
186.6	0.14765
186.7	0.1481
186.8	0.1478
186.9	0.1481
187	0.14795
187.1	0.1478
187.2	0.14795
187.3	0.14845
187.4	0.14825
187.5	0.1487
187.6	0.14825
187.7	0.14815
187.8	0.148
187.9	0.1482
188	0.1479
188.1	0.1489
188.2	0.15015
188.3	0.1501
188.4	0.15005
188.5	0.15035
188.6	0.15005
188.7	0.15005
188.8	0.1498
188.9	0.15005
189	0.15095
189.1	0.1509
189.2	0.15025
189.3	0.1504
189.4	0.1502
189.5	0.15035
189.6	0.1508
189.7	0.15075
189.8	0.1509
189.9	0.1512
190	0.1509
190.1	0.15125
190.2	0.15155
190.3	0.1514
190.4	0.1522
190.5	0.1518
190.6	0.15165
190.7	0.15165
190.8	0.15235
190.9	0.15205
191	0.1527
191.1	0.15325
191.2	0.15285
191.3	0.1529
191.4	0.1527
191.5	0.1528
191.6	0.1523
191.7	0.1517
191.8	0.1519
191.9	0.1517
192	0.15095
192.1	0.1507
192.2	0.15005
192.3	0.15025
192.4	0.15075
192.5	0.15045
192.6	0.1503
192.7	0.15025
192.8	0.15025
192.9	0.15045
193	0.15055
193.1	0.1512
193.2	0.1515
193.3	0.15105
193.4	0.1511
193.5	0.1506
193.6	0.1513
193.7	0.15145
193.8	0.15125
193.9	0.15155
194	0.1518
194.1	0.1519
194.2	0.15165
194.3	0.1517
194.4	0.1521
194.5	0.15205
194.6	0.15195
194.7	0.1524
194.8	0.1526
194.9	0.1536
195	0.15385
195.1	0.15395
195.2	0.1537
195.3	0.15325
195.4	0.15315
195.5	0.15385
195.6	0.1537
195.7	0.15355
195.8	0.1535
195.9	0.1536
196	0.154
196.1	0.15405
196.2	0.1543
196.3	0.1542
196.4	0.15425
196.5	0.1543
196.6	0.1549
196.7	0.15495
196.8	0.15495
196.9	0.1551
197	0.1548
197.1	0.15495
197.2	0.1553
197.3	0.15545
197.4	0.1552
197.5	0.1552
197.6	0.1553
197.7	0.1552
197.8	0.1548
197.9	0.1551
198	0.1547
198.1	0.1546
198.2	0.15475
198.3	0.155
198.4	0.1552
198.5	0.15565
198.6	0.15565
198.7	0.1553
198.8	0.15405
198.9	0.15435
199	0.15495
199.1	0.15535
199.2	0.1554
199.3	0.15525
199.4	0.1548
199.5	0.15445
199.6	0.15415
199.7	0.15495
199.8	0.15495
199.9	0.15555
200	0.15495
[truncated: 14,000 more rows]
