# Supplementary material for: Bayesian inference of kinetic schemes for ion channels by Kalman filtering
Source: eLife journal article supplement (doi:10.7554/elife.62714), 2022-05-04
Supplement: fig4-data11 [file 1_Sim_N_10000_Strom_MW.xlsx]

## Sheet: Tabelle1
0.1	0
0.2	0
0.3	0
0.4	0
0.5	0
0.6	0
0.7	0
0.8	0
0.9	0
1	0
1.1	0
1.2	0
1.3	0
1.4	0
1.5	0
1.6	0
1.7	0
1.8	0
1.9	0
2	0
2.1	0
2.2	0
2.3	0
2.4	0
2.5	0
2.6	0
2.7	0
2.8	0
2.9	0
3	0
3.1	0
3.2	0
3.3	0
3.4	0
3.5	0
3.6	0
3.7	0
3.8	0
3.9	0
4	0
4.1	0
4.2	0
4.3	0
4.4	0
4.5	0
4.6	0
4.7	0
4.8	0
4.9	0
5	0
5.1	0
5.2	0
5.3	0
5.4	0
5.5	0
5.6	0
5.7	0
5.8	0
5.9	0
6	0
6.1	0
6.2	0
6.3	0
6.4	0
6.5	0
6.6	0
6.7	0
6.8	0
6.9	0
7	0
7.1	0
7.2	0
7.3	0
7.4	0
7.5	0
7.6	0
7.7	0
7.8	0
7.9	0
8	0
8.1	0
8.2	0
8.3	0
8.4	0
8.5	0
8.6	0
8.7	0
8.8	0
8.9	0
9	0
9.1	0
9.2	0
9.3	0
9.4	0
9.5	0
9.6	0
9.7	0
9.8	0
9.9	0
10	0
10.1	0
10.2	0
10.3	0
10.4	0
10.5	0
10.6	0
10.7	0
10.8	0
10.9	0
11	0
11.1	0
11.2	0
11.3	0
11.4	0
11.5	0
11.6	0
11.7	0
11.8	0
11.9	0
12	0
12.1	0
12.2	0
12.3	0
12.4	0
12.5	0
12.6	0
12.7	0
12.8	0
12.9	0
13	0
13.1	0
13.2	0
13.3	0
13.4	0
13.5	0
13.6	0
13.7	0
13.8	0
13.9	0
14	0
14.1	0
14.2	0
14.3	0
14.4	0
14.5	0
14.6	0
14.7	0
14.8	0
14.9	0
15	0
15.1	0
15.2	0
15.3	0
15.4	0
15.5	0
15.6	0
15.7	0
15.8	0
15.9	0
16	0
16.1	0
16.2	0
16.3	0
16.4	0
16.5	0
16.6	0
16.7	0
16.8	0
16.9	0
17	0
17.1	0
17.2	0
17.3	0
17.4	0
17.5	0
17.6	0
17.7	0
17.8	0
17.9	0
18	0
18.1	0
18.2	0
18.3	0
18.4	0
18.5	0
18.6	0
18.7	0
18.8	0
18.9	0
19	0
19.1	0
19.2	0
19.3	0
19.4	0
19.5	0
19.6	0
19.7	0
19.8	0
19.9	0
20	0
20.1	0
20.2	0
20.3	0
20.4	0
20.5	0
20.6	0
20.7	0
20.8	0
20.9	0
21	0
21.1	0
21.2	0
21.3	0
21.4	0
21.5	0
21.6	0
21.7	0
21.8	0
21.9	0
22	0
22.1	0
22.2	0
22.3	0
22.4	0
22.5	0
22.6	0
22.7	0
22.8	0
22.9	0
23	0
23.1	0
23.2	0
23.3	0
23.4	0
23.5	0
23.6	0
23.7	0
23.8	0
23.9	0
24	0
24.1	0
24.2	0
24.3	0
24.4	0
24.5	0
24.6	0
24.7	0
24.8	0
24.9	0
25	0
25.1	0
25.2	0
25.3	0
25.4	0
25.5	0
25.6	0
25.7	0
25.8	0
25.9	0
26	0
26.1	0
26.2	0
26.3	0
26.4	0
26.5	0
26.6	0
26.7	0
26.8	0
26.9	0
27	0
27.1	0
27.2	0
27.3	0
27.4	0
27.5	0
27.6	0
27.7	0
27.8	0
27.9	0
28	0
28.1	0
28.2	0
28.3	0
28.4	0
28.5	0
28.6	0
28.7	0
28.8	0
28.9	0
29	0
29.1	0
29.2	0
29.3	0
29.4	0
29.5	0
29.6	0
29.7	0
29.8	0
29.9	0
30	0
30.1	0
30.2	0
30.3	0
30.4	0
30.5	0
30.6	0
30.7	0
30.8	0
30.9	0
31	0
31.1	0
31.2	0
31.3	0
31.4	0
31.5	0
31.6	0
31.7	0
31.8	0
31.9	0
32	0
32.1	0
32.2	0
32.3	0
32.4	0
32.5	0
32.6	0
32.7	0
32.8	0
32.9	0
33	0
33.1	0
33.2	0
33.3	0
33.4	0
33.5	0
33.6	0
33.7	0
33.8	0
33.9	0
34	0
34.1	0
34.2	0
34.3	0
34.4	0
34.5	0
34.6	0
34.7	0
34.8	0
34.9	0
35	0
35.1	0
35.2	0
35.3	0
35.4	0
35.5	0
35.6	0
35.7	0
35.8	0
35.9	0
36	0
36.1	0
36.2	0
36.3	0
36.4	0
36.5	0
36.6	0
36.7	0
36.8	0
36.9	0
37	0
37.1	0
37.2	0
37.3	0
37.4	0
37.5	0
37.6	0
37.7	0
37.8	0
37.9	0
38	0
38.1	0
38.2	0
38.3	0
38.4	0
38.5	0
38.6	0
38.7	0
38.8	0
38.9	0
39	0
39.1	0
39.2	0
39.3	0
39.4	0
39.5	0
39.6	0
39.7	0
39.8	0
39.9	0
40	0
40.1	0
40.2	0
40.3	0
40.4	0
40.5	0
40.6	0
40.7	0
40.8	0
40.9	0
41	0
41.1	0
41.2	0
41.3	0
41.4	0
41.5	0
41.6	0
41.7	0
41.8	0
41.9	0
42	0
42.1	0
42.2	0
42.3	0
42.4	0
42.5	0
42.6	0
42.7	0
42.8	0
42.9	0
43	0
43.1	0
43.2	0
43.3	0
43.4	0
43.5	0
43.6	0
43.7	0
43.8	0
43.9	0
44	0
44.1	0
44.2	0
44.3	0
44.4	0
44.5	0
44.6	0
44.7	0
44.8	0
44.9	0
45	0
45.1	0
45.2	0
45.3	0
45.4	0
45.5	0
45.6	0
45.7	0
45.8	0
45.9	0
46	0
46.1	0
46.2	0
46.3	0
46.4	0
46.5	0
46.6	0
46.7	0
46.8	0
46.9	0
47	0
47.1	0
47.2	0
47.3	0
47.4	0
47.5	0
47.6	0
47.7	0
47.8	0
47.9	0
48	0
48.1	0
48.2	0
48.3	0
48.4	0
48.5	0
48.6	0
48.7	0
48.8	0
48.9	0
49	0
49.1	0
49.2	0
49.3	0
49.4	0
49.5	0
49.6	0
49.7	0
49.8	0
49.9	0
50	0
50.1	0
50.2	0
50.3	0
50.4	0
50.5	0
50.6	0
50.7	0
50.8	0
50.9	0
51	0
51.1	0
51.2	0
51.3	0
51.4	0
51.5	0
51.6	0
51.7	0
51.8	0
51.9	0
52	0
52.1	0
52.2	0
52.3	0
52.4	0
52.5	0
52.6	0
52.7	0
52.8	0
52.9	0
53	0
53.1	0
53.2	0
53.3	0
53.4	0
53.5	0
53.6	0
53.7	0
53.8	0
53.9	0
54	0
54.1	0
54.2	0
54.3	0
54.4	0
54.5	0
54.6	0
54.7	0
54.8	0
54.9	0
55	0
55.1	0
55.2	0
55.3	0
55.4	0
55.5	0
55.6	0
55.7	0
55.8	0
55.9	0
56	0
56.1	0
56.2	0
56.3	0
56.4	0
56.5	0
56.6	0
56.7	0
56.8	0
56.9	0
57	0
57.1	0
57.2	0
57.3	0
57.4	0
57.5	0
57.6	0
57.7	0
57.8	0
57.9	0
58	0
58.1	0
58.2	0
58.3	0
58.4	0
58.5	0
58.6	0
58.7	0
58.8	0
58.9	0
59	0
59.1	0
59.2	0
59.3	0
59.4	0
59.5	0
59.6	0
59.7	0
59.8	0
59.9	0
60	0
60.1	0
60.2	0
60.3	0
60.4	0
60.5	0
60.6	0
60.7	0
60.8	0
60.9	0
61	0
61.1	0
61.2	0
61.3	0
61.4	0
61.5	0
61.6	0
61.7	0
61.8	0
61.9	0
62	0
62.1	0
62.2	0
62.3	0
62.4	0
62.5	0
62.6	0
62.7	0
62.8	0
62.9	0
63	0
63.1	0
63.2	0
63.3	0
63.4	0
63.5	0
63.6	0
63.7	0
63.8	0
63.9	0
64	0
64.1	0
64.2	0
64.3	0
64.4	0
64.5	0
64.6	0
64.7	0
64.8	0
64.9	0
65	0
65.1	0
65.2	0
65.3	0
65.4	0
65.5	0
65.6	0
65.7	0
65.8	0
65.9	0
66	0
66.1	0
66.2	0
66.3	0
66.4	0
66.5	0
66.6	0
66.7	0
66.8	0
66.9	0
67	0
67.1	0
67.2	0
67.3	0
67.4	0
67.5	0
67.6	0
67.7	0
67.8	0
67.9	0
68	0
68.1	0
68.2	0
68.3	0
68.4	0
68.5	0
68.6	0
68.7	0
68.8	0
68.9	0
69	0
69.1	0
69.2	0
69.3	0
69.4	0
69.5	0
69.6	0
69.7	0
69.8	0
69.9	0
70	0
70.1	0
70.2	0
70.3	0
70.4	0
70.5	0
70.6	0
70.7	0
70.8	0
70.9	0
71	0
71.1	0
71.2	0
71.3	0
71.4	0
71.5	0
71.6	0
71.7	0
71.8	0
71.9	0
72	0
72.1	0
72.2	0
72.3	0
72.4	0
72.5	0
72.6	0
72.7	0
72.8	0
72.9	0
73	0
73.1	0
73.2	0
73.3	0
73.4	0
73.5	0
73.6	0
73.7	0
73.8	0
73.9	0
74	0
74.1	0
74.2	0
74.3	0
74.4	0
74.5	0
74.6	0
74.7	0
74.8	0
74.9	0
75	0
75.1	0
75.2	0
75.3	0
75.4	0
75.5	0
75.6	0
75.7	0
75.8	0
75.9	0
76	0
76.1	0
76.2	0
76.3	0
76.4	0
76.5	0
76.6	0
76.7	0
76.8	0
76.9	0
77	0
77.1	0
77.2	0
77.3	0
77.4	0
77.5	0
77.6	0
77.7	0
77.8	0
77.9	0
78	0
78.1	0
78.2	0
78.3	0
78.4	0
78.5	0
78.6	0
78.7	0
78.8	0
78.9	0
79	0
79.1	0
79.2	0
79.3	0
79.4	0
79.5	0
79.6	0
79.7	0
79.8	0
79.9	0
80	0
80.1	0
80.2	0
80.3	0
80.4	0
80.5	0
80.6	0
80.7	0
80.8	0
80.9	0
81	0
81.1	0
81.2	0
81.3	0
81.4	0
81.5	0
81.6	0
81.7	0
81.8	0
81.9	0
82	0
82.1	0
82.2	0
82.3	0
82.4	0
82.5	0
82.6	0
82.7	0
82.8	0
82.9	0
83	0
83.1	0
83.2	0
83.3	0
83.4	0
83.5	0
83.6	0
83.7	0
83.8	0
83.9	0
84	0
84.1	0
84.2	0
84.3	0
84.4	0
84.5	0
84.6	0
84.7	0
84.8	0
84.9	0
85	0
85.1	0
85.2	0
85.3	0
85.4	0
85.5	0
85.6	0
85.7	0
85.8	0
85.9	0
86	0
86.1	0
86.2	0
86.3	0
86.4	0
86.5	0
86.6	0
86.7	0
86.8	0
86.9	0
87	0
87.1	0
87.2	0
87.3	0
87.4	0
87.5	0
87.6	0
87.7	0
87.8	0
87.9	0
88	0
88.1	0
88.2	0
88.3	0
88.4	0
88.5	0
88.6	0
88.7	0
88.8	0
88.9	0
89	0
89.1	0
89.2	0
89.3	0
89.4	0
89.5	0
89.6	0
89.7	0
89.8	0
89.9	0
90	0
90.1	0
90.2	0
90.3	0
90.4	0
90.5	0
90.6	0
90.7	0
90.8	0
90.9	0
91	0
91.1	0
91.2	0
91.3	0
91.4	0
91.5	0
91.6	0
91.7	0
91.8	0
91.9	0
92	0
92.1	0
92.2	0
92.3	0
92.4	0
92.5	0
92.6	0
92.7	0
92.8	0
92.9	0
93	0
93.1	0
93.2	0
93.3	0
93.4	0
93.5	0
93.6	0
93.7	0
93.8	0
93.9	0
94	0
94.1	0
94.2	0
94.3	0
94.4	0
94.5	0
94.6	0
94.7	0
94.8	0
94.9	0
95	0
95.1	0
95.2	0
95.3	0
95.4	0
95.5	0
95.6	0
95.7	0
95.8	0
95.9	0
96	0
96.1	0
96.2	0
96.3	0
96.4	0
96.5	0
96.6	0
96.7	0
96.8	0
96.9	0
97	0
97.1	0
97.2	0
97.3	0
97.4	0
97.5	0
97.6	0
97.7	0
97.8	0
97.9	0
98	0
98.1	0
98.2	0
98.3	0
98.4	0
98.5	0
98.6	0
98.7	0
98.8	0
98.9	0
99	0
99.1	0
99.2	0
99.3	0
99.4	0
99.5	0
99.6	0
99.7	0
99.8	0
99.9	0
100	0
100.1	0
100.2	0
100.3	0
100.4	0
100.5	0
100.6	0
100.7	0
100.8	0
100.9	0
101	0
101.1	0
101.2	0
101.3	0
101.4	0
101.5	0
101.6	0
101.7	0
101.8	0
101.9	0
102	0
102.1	0
102.2	0
102.3	0
102.4	0
102.5	0
102.6	0
102.7	0
102.8	0.0001
102.9	0.0001
103	0.0002
103.1	0.0002
103.2	0.0002
103.3	0.0002
103.4	0.0002
103.5	0.0002
103.6	0.0002
103.7	0.0002
103.8	0.0002
103.9	0.0002
104	0.0002
104.1	0.0002
104.2	0.0002
104.3	0.0002
104.4	0.0002
104.5	0.0002
104.6	0.0003
104.7	0.0003
104.8	0.0003
104.9	0.0003
105	0.0003
105.1	0.0003
105.2	0.0003
105.3	0.0003
105.4	0.0003
105.5	0.0005
105.6	0.0005
105.7	0.0005
105.8	0.0005
105.9	0.0005
106	0.0005
106.1	0.0005
106.2	0.0005
106.3	0.0006
106.4	0.0006
106.5	0.0006
106.6	0.0006
106.7	0.0006
106.8	0.0006
106.9	0.0006
107	0.0006
107.1	0.0006
107.2	0.0006
107.3	0.0006
107.4	0.0006
107.5	0.0006
107.6	0.0006
107.7	0.0006
107.8	0.0006
107.9	0.0006
108	0.0006
108.1	0.0006
108.2	0.0006
108.3	0.0007
108.4	0.0007
108.5	0.0007
108.6	0.0007
108.7	0.0007
108.8	0.0007
108.9	0.0007
109	0.0007
109.1	0.0007
109.2	0.0008
109.3	0.0008
109.4	0.0008
109.5	0.0008
109.6	0.0008
109.7	0.0008
109.8	0.0008
109.9	0.0008
110	0.0008
110.1	0.0008
110.2	0.0008
110.3	0.0008
110.4	0.0008
110.5	0.0008
110.6	0.0008
110.7	0.0008
110.8	0.0008
110.9	0.0008
111	0.0008
111.1	0.0009
111.2	0.0009
111.3	0.0009
111.4	0.0009
111.5	0.0009
111.6	0.0009
111.7	0.0009
111.8	0.0009
111.9	0.0009
112	0.0009
112.1	0.0009
112.2	0.0009
112.3	0.0009
112.4	0.0009
112.5	0.0009
112.6	0.001
112.7	0.001
112.8	0.001
112.9	0.001
113	0.001
113.1	0.001
113.2	0.0011
113.3	0.0011
113.4	0.0011
113.5	0.0012
113.6	0.0012
113.7	0.0012
113.8	0.0012
113.9	0.0012
114	0.0012
114.1	0.0012
114.2	0.0012
114.3	0.0012
114.4	0.0012
114.5	0.0012
114.6	0.0012
114.7	0.0013
114.8	0.0013
114.9	0.0013
115	0.0013
115.1	0.0013
115.2	0.0013
115.3	0.0013
115.4	0.0013
115.5	0.0013
115.6	0.0014
115.7	0.0014
115.8	0.0014
115.9	0.0014
116	0.0014
116.1	0.0014
116.2	0.0014
116.3	0.0014
116.4	0.0015
116.5	0.0015
116.6	0.0015
116.7	0.0015
116.8	0.0015
116.9	0.0015
117	0.0015
117.1	0.0015
117.2	0.0015
117.3	0.0015
117.4	0.0015
117.5	0.0015
117.6	0.0015
117.7	0.0016
117.8	0.0017
117.9	0.0017
118	0.0017
118.1	0.0018
118.2	0.0018
118.3	0.0019
118.4	0.0019
118.5	0.0019
118.6	0.0019
118.7	0.0019
118.8	0.0019
118.9	0.0019
119	0.0019
119.1	0.0019
119.2	0.0019
119.3	0.0019
119.4	0.0019
119.5	0.0019
119.6	0.002
119.7	0.002
119.8	0.002
119.9	0.0022
120	0.0022
120.1	0.0022
120.2	0.0023
120.3	0.0023
120.4	0.0023
120.5	0.0023
120.6	0.0023
120.7	0.0024
120.8	0.0025
120.9	0.0025
121	0.0025
121.1	0.0025
121.2	0.0025
121.3	0.0025
121.4	0.0025
121.5	0.0026
121.6	0.0025
121.7	0.0026
121.8	0.0026
121.9	0.0026
122	0.0026
122.1	0.0026
122.2	0.0027
122.3	0.0027
122.4	0.0027
122.5	0.0028
122.6	0.0028
122.7	0.0028
122.8	0.0028
122.9	0.0028
123	0.003
123.1	0.003
123.2	0.003
123.3	0.003
123.4	0.003
123.5	0.0031
123.6	0.0031
123.7	0.0031
123.8	0.0031
123.9	0.0031
124	0.0031
124.1	0.0032
124.2	0.0032
124.3	0.0032
124.4	0.0033
124.5	0.0033
124.6	0.0033
124.7	0.0033
124.8	0.0033
124.9	0.0033
125	0.0033
125.1	0.0033
125.2	0.0033
125.3	0.0032
125.4	0.0032
125.5	0.0032
125.6	0.0032
125.7	0.0032
125.8	0.0032
125.9	0.0032
126	0.0032
126.1	0.0032
126.2	0.0032
126.3	0.0032
126.4	0.0032
126.5	0.0032
126.6	0.0032
126.7	0.0032
126.8	0.0032
126.9	0.0032
127	0.0032
127.1	0.0032
127.2	0.0032
127.3	0.0032
127.4	0.0032
127.5	0.0032
127.6	0.0032
127.7	0.0034
127.8	0.0035
127.9	0.0035
128	0.0034
128.1	0.0035
128.2	0.0035
128.3	0.0035
128.4	0.0035
128.5	0.0035
128.6	0.0035
128.7	0.0035
128.8	0.0035
128.9	0.0035
129	0.0036
129.1	0.0036
129.2	0.0036
129.3	0.0036
129.4	0.0037
129.5	0.0037
129.6	0.0037
129.7	0.0038
129.8	0.0037
129.9	0.0038
130	0.0037
130.1	0.0037
130.2	0.0037
130.3	0.0037
130.4	0.0037
130.5	0.0037
130.6	0.0037
130.7	0.0037
130.8	0.0037
130.9	0.0038
131	0.0038
131.1	0.0038
131.2	0.0038
131.3	0.0038
131.4	0.0038
131.5	0.0038
131.6	0.0038
131.7	0.0038
131.8	0.0038
131.9	0.0039
132	0.0039
132.1	0.0039
132.2	0.0039
132.3	0.0039
132.4	0.0039
132.5	0.004
132.6	0.004
132.7	0.004
132.8	0.0041
132.9	0.0041
133	0.004
133.1	0.004
133.2	0.0041
133.3	0.0041
133.4	0.0041
133.5	0.0041
133.6	0.0041
133.7	0.0041
133.8	0.0041
133.9	0.0041
134	0.0042
134.1	0.0042
134.2	0.0042
134.3	0.0042
134.4	0.0042
134.5	0.0043
134.6	0.0042
134.7	0.0042
134.8	0.0042
134.9	0.0042
135	0.0042
135.1	0.0042
135.2	0.0042
135.3	0.0042
135.4	0.0043
135.5	0.0043
135.6	0.0043
135.7	0.0045
135.8	0.0045
135.9	0.0045
136	0.0045
136.1	0.0044
136.2	0.0044
136.3	0.0044
136.4	0.0045
136.5	0.0045
136.6	0.0045
136.7	0.0045
136.8	0.0045
136.9	0.0045
137	0.0045
137.1	0.0045
137.2	0.0045
137.3	0.0045
137.4	0.0045
137.5	0.0046
137.6	0.0045
137.7	0.0045
137.8	0.0045
137.9	0.0045
138	0.0047
138.1	0.0047
138.2	0.0048
138.3	0.0048
138.4	0.0048
138.5	0.0049
138.6	0.0049
138.7	0.0049
138.8	0.0049
138.9	0.0049
139	0.0049
139.1	0.005
139.2	0.005
139.3	0.005
139.4	0.0051
139.5	0.0052
139.6	0.0052
139.7	0.0051
139.8	0.0051
139.9	0.0051
140	0.0051
140.1	0.0052
140.2	0.0052
140.3	0.0053
140.4	0.0053
140.5	0.0053
140.6	0.0054
140.7	0.0053
140.8	0.0054
140.9	0.0054
141	0.0054
141.1	0.0054
141.2	0.0054
141.3	0.0054
141.4	0.0054
141.5	0.0055
141.6	0.0057
141.7	0.0057
141.8	0.0056
141.9	0.0056
142	0.0056
142.1	0.0056
142.2	0.0056
142.3	0.0057
142.4	0.0057
142.5	0.0058
142.6	0.006
142.7	0.0061
142.8	0.0061
142.9	0.0062
143	0.0063
143.1	0.0064
143.2	0.0064
143.3	0.0065
143.4	0.0065
143.5	0.0066
143.6	0.0067
143.7	0.0068
143.8	0.0068
143.9	0.0069
144	0.0069
144.1	0.0069
144.2	0.007
144.3	0.007
144.4	0.007
144.5	0.007
144.6	0.007
144.7	0.0071
144.8	0.0071
144.9	0.0071
145	0.0073
145.1	0.0073
145.2	0.0073
145.3	0.0073
145.4	0.0073
145.5	0.0072
145.6	0.0073
145.7	0.0075
145.8	0.0075
145.9	0.0075
146	0.0075
146.1	0.0075
146.2	0.0075
146.3	0.0076
146.4	0.0076
146.5	0.0076
146.6	0.0076
146.7	0.0076
146.8	0.0076
146.9	0.0076
147	0.0076
147.1	0.0078
147.2	0.0078
147.3	0.0078
147.4	0.0078
147.5	0.0078
147.6	0.0078
147.7	0.0078
147.8	0.0078
147.9	0.0078
148	0.0078
148.1	0.0078
148.2	0.0079
148.3	0.008
148.4	0.008
148.5	0.008
148.6	0.008
148.7	0.008
148.8	0.008
148.9	0.008
149	0.008
149.1	0.008
149.2	0.008
149.3	0.008
149.4	0.008
149.5	0.008
149.6	0.0081
149.7	0.0082
149.8	0.0082
149.9	0.0082
150	0.0082
150.1	0.0082
150.2	0.0081
150.3	0.0081
150.4	0.008
150.5	0.008
150.6	0.0081
150.7	0.0081
150.8	0.0081
150.9	0.0082
151	0.0082
151.1	0.0082
151.2	0.0083
151.3	0.0083
151.4	0.0083
151.5	0.0083
151.6	0.0083
151.7	0.0083
151.8	0.0083
151.9	0.0083
152	0.0084
152.1	0.0085
152.2	0.0085
152.3	0.0085
152.4	0.0085
152.5	0.0084
152.6	0.0084
152.7	0.0084
152.8	0.0084
152.9	0.0084
153	0.0083
153.1	0.0083
153.2	0.0082
153.3	0.0082
153.4	0.0082
153.5	0.0081
153.6	0.0081
153.7	0.0081
153.8	0.0081
153.9	0.008
154	0.0081
154.1	0.008
154.2	0.008
154.3	0.0081
154.4	0.0082
154.5	0.0082
154.6	0.0082
154.7	0.0082
154.8	0.0082
154.9	0.0084
155	0.0084
155.1	0.0084
155.2	0.0084
155.3	0.0085
155.4	0.0086
155.5	0.0086
155.6	0.0087
155.7	0.0087
155.8	0.0088
155.9	0.0088
156	0.0089
156.1	0.0089
156.2	0.0089
156.3	0.0089
156.4	0.0089
156.5	0.009
156.6	0.0089
156.7	0.009
156.8	0.0092
156.9	0.0092
157	0.0092
157.1	0.0092
157.2	0.0093
157.3	0.0094
157.4	0.0094
157.5	0.0094
157.6	0.0094
157.7	0.0094
157.8	0.0094
157.9	0.0093
158	0.0093
158.1	0.0093
158.2	0.0093
158.3	0.0093
158.4	0.0093
158.5	0.0093
158.6	0.0093
158.7	0.0093
158.8	0.0093
158.9	0.0094
159	0.0094
159.1	0.0094
159.2	0.0094
159.3	0.0094
159.4	0.0094
159.5	0.0094
159.6	0.0094
159.7	0.0096
159.8	0.0096
159.9	0.0095
160	0.0095
160.1	0.0095
160.2	0.0095
160.3	0.0095
160.4	0.0095
160.5	0.0095
160.6	0.0095
160.7	0.0096
160.8	0.0096
160.9	0.0095
161	0.0096
161.1	0.0096
161.2	0.0097
161.3	0.0097
161.4	0.0097
161.5	0.0096
161.6	0.0096
161.7	0.0095
161.8	0.0095
161.9	0.0095
162	0.0095
162.1	0.0095
162.2	0.0096
162.3	0.0096
162.4	0.0095
162.5	0.0095
162.6	0.0096
162.7	0.0096
162.8	0.0096
162.9	0.0096
163	0.0096
163.1	0.0096
163.2	0.0095
163.3	0.0095
163.4	0.0095
163.5	0.0095
163.6	0.0096
163.7	0.0096
163.8	0.0097
163.9	0.0097
164	0.0097
164.1	0.0098
164.2	0.0098
164.3	0.0097
164.4	0.0097
164.5	0.0097
164.6	0.0097
164.7	0.0097
164.8	0.0097
164.9	0.0097
165	0.0097
165.1	0.0097
165.2	0.0097
165.3	0.0097
165.4	0.0097
165.5	0.0098
165.6	0.0098
165.7	0.0098
165.8	0.0098
165.9	0.0098
166	0.0098
166.1	0.0098
166.2	0.0098
166.3	0.0099
166.4	0.0099
166.5	0.0099
166.6	0.0099
166.7	0.0099
166.8	0.0099
166.9	0.0099
167	0.0099
167.1	0.01
167.2	0.01
167.3	0.01
167.4	0.01
167.5	0.01
167.6	0.01
167.7	0.01
167.8	0.01
167.9	0.01
168	0.0101
168.1	0.0101
168.2	0.0101
168.3	0.0101
168.4	0.0101
168.5	0.0101
168.6	0.0101
168.7	0.0101
168.8	0.0101
168.9	0.0101
169	0.0101
169.1	0.0101
169.2	0.0101
169.3	0.0101
169.4	0.0102
169.5	0.0103
169.6	0.0103
169.7	0.0104
169.8	0.0104
169.9	0.0104
170	0.0105
170.1	0.0106
170.2	0.0106
170.3	0.0106
170.4	0.0107
170.5	0.0108
170.6	0.0108
170.7	0.0108
170.8	0.0108
170.9	0.0108
171	0.0109
171.1	0.0109
171.2	0.0109
171.3	0.0109
171.4	0.0109
171.5	0.0109
171.6	0.0109
171.7	0.0109
171.8	0.0109
171.9	0.0108
172	0.0107
172.1	0.0108
172.2	0.0108
172.3	0.0108
172.4	0.0108
172.5	0.0108
172.6	0.0108
172.7	0.0108
172.8	0.0108
172.9	0.0109
173	0.0109
173.1	0.0109
173.2	0.0109
173.3	0.011
173.4	0.011
173.5	0.0111
173.6	0.0111
173.7	0.0109
173.8	0.0109
173.9	0.011
174	0.011
174.1	0.0111
174.2	0.0111
174.3	0.0111
174.4	0.0111
174.5	0.0111
174.6	0.0111
174.7	0.0111
174.8	0.0111
174.9	0.0111
175	0.0111
175.1	0.0111
175.2	0.0111
175.3	0.0112
175.4	0.0112
175.5	0.0112
175.6	0.0112
175.7	0.0112
175.8	0.0112
175.9	0.0113
176	0.0114
176.1	0.0114
176.2	0.0114
176.3	0.0114
176.4	0.0114
176.5	0.0113
176.6	0.0112
176.7	0.0113
176.8	0.0113
176.9	0.0113
177	0.0113
177.1	0.0112
177.2	0.0112
177.3	0.0111
177.4	0.0112
177.5	0.0112
177.6	0.0112
177.7	0.0112
177.8	0.0113
177.9	0.0113
178	0.0113
178.1	0.0113
178.2	0.0113
178.3	0.0113
178.4	0.0113
178.5	0.0113
178.6	0.0114
178.7	0.0114
178.8	0.0114
178.9	0.0114
179	0.0114
179.1	0.0114
179.2	0.0115
179.3	0.0114
179.4	0.0115
179.5	0.0115
179.6	0.0114
179.7	0.0114
179.8	0.0114
179.9	0.0114
180	0.0114
180.1	0.0111
180.2	0.0112
180.3	0.0112
180.4	0.0112
180.5	0.0112
180.6	0.0112
180.7	0.0112
180.8	0.0112
180.9	0.0112
181	0.0112
181.1	0.0112
181.2	0.0113
181.3	0.0113
181.4	0.0113
181.5	0.0111
181.6	0.0111
181.7	0.0111
181.8	0.0111
181.9	0.011
182	0.011
182.1	0.011
182.2	0.0111
182.3	0.0111
182.4	0.0111
182.5	0.0112
182.6	0.0113
182.7	0.0113
182.8	0.0113
182.9	0.0113
183	0.0114
183.1	0.0115
183.2	0.0115
183.3	0.0115
183.4	0.0115
183.5	0.0115
183.6	0.0115
183.7	0.0115
183.8	0.0115
183.9	0.0116
184	0.0116
184.1	0.0115
184.2	0.0116
184.3	0.0116
184.4	0.0117
184.5	0.0118
184.6	0.0119
184.7	0.0119
184.8	0.0119
184.9	0.0118
185	0.0119
185.1	0.0119
185.2	0.0119
185.3	0.0119
185.4	0.0119
185.5	0.0119
185.6	0.0119
185.7	0.0119
185.8	0.0121
185.9	0.0121
186	0.0122
186.1	0.0122
186.2	0.0122
186.3	0.0122
186.4	0.0123
186.5	0.0123
186.6	0.0124
186.7	0.0124
186.8	0.0124
186.9	0.0124
187	0.0124
187.1	0.0125
187.2	0.0125
187.3	0.0125
187.4	0.0126
187.5	0.0127
187.6	0.0127
187.7	0.0127
187.8	0.0127
187.9	0.0128
188	0.0128
188.1	0.0128
188.2	0.0128
188.3	0.0128
188.4	0.0127
188.5	0.0127
188.6	0.0127
188.7	0.0128
188.8	0.0129
188.9	0.0131
189	0.0131
189.1	0.0131
189.2	0.0131
189.3	0.013
189.4	0.0129
189.5	0.0129
189.6	0.013
189.7	0.0131
189.8	0.0131
189.9	0.0131
190	0.0131
190.1	0.0131
190.2	0.0132
190.3	0.0132
190.4	0.0132
190.5	0.0132
190.6	0.0132
190.7	0.0132
190.8	0.0132
190.9	0.0134
191	0.0134
191.1	0.0133
191.2	0.0133
191.3	0.0133
191.4	0.0135
191.5	0.0136
191.6	0.0137
191.7	0.0137
191.8	0.0136
191.9	0.0136
192	0.0137
192.1	0.0137
192.2	0.0137
192.3	0.0136
192.4	0.0136
192.5	0.0136
192.6	0.0136
192.7	0.0136
192.8	0.0138
192.9	0.0138
193	0.0138
193.1	0.0138
193.2	0.0138
193.3	0.0137
193.4	0.0138
193.5	0.014
193.6	0.0141
193.7	0.0141
193.8	0.0141
193.9	0.0141
194	0.0141
194.1	0.0141
194.2	0.0141
194.3	0.0141
194.4	0.0142
194.5	0.0141
194.6	0.014
194.7	0.014
194.8	0.014
194.9	0.014
195	0.014
195.1	0.014
195.2	0.014
195.3	0.0141
195.4	0.0141
195.5	0.0141
195.6	0.0141
195.7	0.0141
195.8	0.0142
195.9	0.0142
196	0.0141
196.1	0.0141
196.2	0.0141
196.3	0.0141
196.4	0.014
196.5	0.0141
196.6	0.0141
196.7	0.0142
196.8	0.0141
196.9	0.0141
197	0.0142
197.1	0.0142
197.2	0.0142
197.3	0.0141
197.4	0.0141
197.5	0.0141
197.6	0.0141
197.7	0.014
197.8	0.014
197.9	0.014
198	0.0142
198.1	0.0142
198.2	0.0142
198.3	0.0142
198.4	0.0141
198.5	0.0141
198.6	0.0141
198.7	0.014
198.8	0.0139
198.9	0.0139
199	0.0139
199.1	0.0139
199.2	0.0139
199.3	0.0139
199.4	0.0139
199.5	0.0139
199.6	0.0139
199.7	0.0139
199.8	0.0139
199.9	0.0139
200	0.0139
[truncated: 14,000 more rows]
