# Supplementary material for: Bayesian inference of kinetic schemes for ion channels by Kalman filtering
Source: eLife journal article supplement (doi:10.7554/elife.62714), 2022-05-04
Supplement: fig4-data11 [file 1_Sim_N_20000_Fluor_MW.xlsx]

## Sheet: Tabelle1
0.1	0
0.2	0
0.3	0
0.4	0
0.5	0
0.6	0
0.7	0
0.8	0
0.9	0
1	0
1.1	0
1.2	0
1.3	0
1.4	0
1.5	0
1.6	0
1.7	0
1.8	0
1.9	0
2	0
2.1	0
2.2	0
2.3	0
2.4	0
2.5	0
2.6	0
2.7	0
2.8	0
2.9	0
3	0
3.1	0
3.2	0
3.3	0
3.4	0
3.5	0
3.6	0
3.7	0
3.8	0
3.9	0
4	0
4.1	0
4.2	0
4.3	0
4.4	0
4.5	0
4.6	0
4.7	0
4.8	0
4.9	0
5	0
5.1	0
5.2	0
5.3	0
5.4	0
5.5	0
5.6	0
5.7	0
5.8	0
5.9	0
6	0
6.1	0
6.2	0
6.3	0
6.4	0
6.5	0
6.6	0
6.7	0
6.8	0
6.9	0
7	0
7.1	0
7.2	0
7.3	0
7.4	0
7.5	0
7.6	0
7.7	0
7.8	0
7.9	0
8	0
8.1	0
8.2	0
8.3	0
8.4	0
8.5	0
8.6	0
8.7	0
8.8	0
8.9	0
9	0
9.1	0
9.2	0
9.3	0
9.4	0
9.5	0
9.6	0
9.7	0
9.8	0
9.9	0
10	0
10.1	0
10.2	0
10.3	0
10.4	0
10.5	0
10.6	0
10.7	0
10.8	0
10.9	0
11	0
11.1	0
11.2	0
11.3	0
11.4	0
11.5	0
11.6	0
11.7	0
11.8	0
11.9	0
12	0
12.1	0
12.2	0
12.3	0
12.4	0
12.5	0
12.6	0
12.7	0
12.8	0
12.9	0
13	0
13.1	0
13.2	0
13.3	0
13.4	0
13.5	0
13.6	0
13.7	0
13.8	0
13.9	0
14	0
14.1	0
14.2	0
14.3	0
14.4	0
14.5	0
14.6	0
14.7	0
14.8	0
14.9	0
15	0
15.1	0
15.2	0
15.3	0
15.4	0
15.5	0
15.6	0
15.7	0
15.8	0
15.9	0
16	0
16.1	0
16.2	0
16.3	0
16.4	0
16.5	0
16.6	0
16.7	0
16.8	0
16.9	0
17	0
17.1	0
17.2	0
17.3	0
17.4	0
17.5	0
17.6	0
17.7	0
17.8	0
17.9	0
18	0
18.1	0
18.2	0
18.3	0
18.4	0
18.5	0
18.6	0
18.7	0
18.8	0
18.9	0
19	0
19.1	0
19.2	0
19.3	0
19.4	0
19.5	0
19.6	0
19.7	0
19.8	0
19.9	0
20	0
20.1	0
20.2	0
20.3	0
20.4	0
20.5	0
20.6	0
20.7	0
20.8	0
20.9	0
21	0
21.1	0
21.2	0
21.3	0
21.4	0
21.5	0
21.6	0
21.7	0
21.8	0
21.9	0
22	0
22.1	0
22.2	0
22.3	0
22.4	0
22.5	0
22.6	0
22.7	0
22.8	0
22.9	0
23	0
23.1	0
23.2	0
23.3	0
23.4	0
23.5	0
23.6	0
23.7	0
23.8	0
23.9	0
24	0
24.1	0
24.2	0
24.3	0
24.4	0
24.5	0
24.6	0
24.7	0
24.8	0
24.9	0
25	0
25.1	0
25.2	0
25.3	0
25.4	0
25.5	0
25.6	0
25.7	0
25.8	0
25.9	0
26	0
26.1	0
26.2	0
26.3	0
26.4	0
26.5	0
26.6	0
26.7	0
26.8	0
26.9	0
27	0
27.1	0
27.2	0
27.3	0
27.4	0
27.5	0
27.6	0
27.7	0
27.8	0
27.9	0
28	0
28.1	0
28.2	0
28.3	0
28.4	0
28.5	0
28.6	0
28.7	0
28.8	0
28.9	0
29	0
29.1	0
29.2	0
29.3	0
29.4	0
29.5	0
29.6	0
29.7	0
29.8	0
29.9	0
30	0
30.1	0
30.2	0
30.3	0
30.4	0
30.5	0
30.6	0
30.7	0
30.8	0
30.9	0
31	0
31.1	0
31.2	0
31.3	0
31.4	0
31.5	0
31.6	0
31.7	0
31.8	0
31.9	0
32	0
32.1	0
32.2	0
32.3	0
32.4	0
32.5	0
32.6	0
32.7	0
32.8	0
32.9	0
33	0
33.1	0
33.2	0
33.3	0
33.4	0
33.5	0
33.6	0
33.7	0
33.8	0
33.9	0
34	0
34.1	0
34.2	0
34.3	0
34.4	0
34.5	0
34.6	0
34.7	0
34.8	0
34.9	0
35	0
35.1	0
35.2	0
35.3	0
35.4	0
35.5	0
35.6	0
35.7	0
35.8	0
35.9	0
36	0
36.1	0
36.2	0
36.3	0
36.4	0
36.5	0
36.6	0
36.7	0
36.8	0
36.9	0
37	0
37.1	0
37.2	0
37.3	0
37.4	0
37.5	0
37.6	0
37.7	0
37.8	0
37.9	0
38	0
38.1	0
38.2	0
38.3	0
38.4	0
38.5	0
38.6	0
38.7	0
38.8	0
38.9	0
39	0
39.1	0
39.2	0
39.3	0
39.4	0
39.5	0
39.6	0
39.7	0
39.8	0
39.9	0
40	0
40.1	0
40.2	0
40.3	0
40.4	0
40.5	0
40.6	0
40.7	0
40.8	0
40.9	0
41	0
41.1	0
41.2	0
41.3	0
41.4	0
41.5	0
41.6	0
41.7	0
41.8	0
41.9	0
42	0
42.1	0
42.2	0
42.3	0
42.4	0
42.5	0
42.6	0
42.7	0
42.8	0
42.9	0
43	0
43.1	0
43.2	0
43.3	0
43.4	0
43.5	0
43.6	0
43.7	0
43.8	0
43.9	0
44	0
44.1	0
44.2	0
44.3	0
44.4	0
44.5	0
44.6	0
44.7	0
44.8	0
44.9	0
45	0
45.1	0
45.2	0
45.3	0
45.4	0
45.5	0
45.6	0
45.7	0
45.8	0
45.9	0
46	0
46.1	0
46.2	0
46.3	0
46.4	0
46.5	0
46.6	0
46.7	0
46.8	0
46.9	0
47	0
47.1	0
47.2	0
47.3	0
47.4	0
47.5	0
47.6	0
47.7	0
47.8	0
47.9	0
48	0
48.1	0
48.2	0
48.3	0
48.4	0
48.5	0
48.6	0
48.7	0
48.8	0
48.9	0
49	0
49.1	0
49.2	0
49.3	0
49.4	0
49.5	0
49.6	0
49.7	0
49.8	0
49.9	0
50	0
50.1	0
50.2	0
50.3	0
50.4	0
50.5	0
50.6	0
50.7	0
50.8	0
50.9	0
51	0
51.1	0
51.2	0
51.3	0
51.4	0
51.5	0
51.6	0
51.7	0
51.8	0
51.9	0
52	0
52.1	0
52.2	0
52.3	0
52.4	0
52.5	0
52.6	0
52.7	0
52.8	0
52.9	0
53	0
53.1	0
53.2	0
53.3	0
53.4	0
53.5	0
53.6	0
53.7	0
53.8	0
53.9	0
54	0
54.1	0
54.2	0
54.3	0
54.4	0
54.5	0
54.6	0
54.7	0
54.8	0
54.9	0
55	0
55.1	0
55.2	0
55.3	0
55.4	0
55.5	0
55.6	0
55.7	0
55.8	0
55.9	0
56	0
56.1	0
56.2	0
56.3	0
56.4	0
56.5	0
56.6	0
56.7	0
56.8	0
56.9	0
57	0
57.1	0
57.2	0
57.3	0
57.4	0
57.5	0
57.6	0
57.7	0
57.8	0
57.9	0
58	0
58.1	0
58.2	0
58.3	0
58.4	0
58.5	0
58.6	0
58.7	0
58.8	0
58.9	0
59	0
59.1	0
59.2	0
59.3	0
59.4	0
59.5	0
59.6	0
59.7	0
59.8	0
59.9	0
60	0
60.1	0
60.2	0
60.3	0
60.4	0
60.5	0
60.6	0
60.7	0
60.8	0
60.9	0
61	0
61.1	0
61.2	0
61.3	0
61.4	0
61.5	0
61.6	0
61.7	0
61.8	0
61.9	0
62	0
62.1	0
62.2	0
62.3	0
62.4	0
62.5	0
62.6	0
62.7	0
62.8	0
62.9	0
63	0
63.1	0
63.2	0
63.3	0
63.4	0
63.5	0
63.6	0
63.7	0
63.8	0
63.9	0
64	0
64.1	0
64.2	0
64.3	0
64.4	0
64.5	0
64.6	0
64.7	0
64.8	0
64.9	0
65	0
65.1	0
65.2	0
65.3	0
65.4	0
65.5	0
65.6	0
65.7	0
65.8	0
65.9	0
66	0
66.1	0
66.2	0
66.3	0
66.4	0
66.5	0
66.6	0
66.7	0
66.8	0
66.9	0
67	0
67.1	0
67.2	0
67.3	0
67.4	0
67.5	0
67.6	0
67.7	0
67.8	0
67.9	0
68	0
68.1	0
68.2	0
68.3	0
68.4	0
68.5	0
68.6	0
68.7	0
68.8	0
68.9	0
69	0
69.1	0
69.2	0
69.3	0
69.4	0
69.5	0
69.6	0
69.7	0
69.8	0
69.9	0
70	0
70.1	0
70.2	0
70.3	0
70.4	0
70.5	0
70.6	0
70.7	0
70.8	0
70.9	0
71	0
71.1	0
71.2	0
71.3	0
71.4	0
71.5	0
71.6	0
71.7	0
71.8	0
71.9	0
72	0
72.1	0
72.2	0
72.3	0
72.4	0
72.5	0
72.6	0
72.7	0
72.8	0
72.9	0
73	0
73.1	0
73.2	0
73.3	0
73.4	0
73.5	0
73.6	0
73.7	0
73.8	0
73.9	0
74	0
74.1	0
74.2	0
74.3	0
74.4	0
74.5	0
74.6	0
74.7	0
74.8	0
74.9	0
75	0
75.1	0
75.2	0
75.3	0
75.4	0
75.5	0
75.6	0
75.7	0
75.8	0
75.9	0
76	0
76.1	0
76.2	0
76.3	0
76.4	0
76.5	0
76.6	0
76.7	0
76.8	0
76.9	0
77	0
77.1	0
77.2	0
77.3	0
77.4	0
77.5	0
77.6	0
77.7	0
77.8	0
77.9	0
78	0
78.1	0
78.2	0
78.3	0
78.4	0
78.5	0
78.6	0
78.7	0
78.8	0
78.9	0
79	0
79.1	0
79.2	0
79.3	0
79.4	0
79.5	0
79.6	0
79.7	0
79.8	0
79.9	0
80	0
80.1	0
80.2	0
80.3	0
80.4	0
80.5	0
80.6	0
80.7	0
80.8	0
80.9	0
81	0
81.1	0
81.2	0
81.3	0
81.4	0
81.5	0
81.6	0
81.7	0
81.8	0
81.9	0
82	0
82.1	0
82.2	0
82.3	0
82.4	0
82.5	0
82.6	0
82.7	0
82.8	0
82.9	0
83	0
83.1	0
83.2	0
83.3	0
83.4	0
83.5	0
83.6	0
83.7	0
83.8	0
83.9	0
84	0
84.1	0
84.2	0
84.3	0
84.4	0
84.5	0
84.6	0
84.7	0
84.8	0
84.9	0
85	0
85.1	0
85.2	0
85.3	0
85.4	0
85.5	0
85.6	0
85.7	0
85.8	0
85.9	0
86	0
86.1	0
86.2	0
86.3	0
86.4	0
86.5	0
86.6	0
86.7	0
86.8	0
86.9	0
87	0
87.1	0
87.2	0
87.3	0
87.4	0
87.5	0
87.6	0
87.7	0
87.8	0
87.9	0
88	0
88.1	0
88.2	0
88.3	0
88.4	0
88.5	0
88.6	0
88.7	0
88.8	0
88.9	0
89	0
89.1	0
89.2	0
89.3	0
89.4	0
89.5	0
89.6	0
89.7	0
89.8	0
89.9	0
90	0
90.1	0
90.2	0
90.3	0
90.4	0
90.5	0
90.6	0
90.7	0
90.8	0
90.9	0
91	0
91.1	0
91.2	0
91.3	0
91.4	0
91.5	0
91.6	0
91.7	0
91.8	0
91.9	0
92	0
92.1	0
92.2	0
92.3	0
92.4	0
92.5	0
92.6	0
92.7	0
92.8	0
92.9	0
93	0
93.1	0
93.2	0
93.3	0
93.4	0
93.5	0
93.6	0
93.7	0
93.8	0
93.9	0
94	0
94.1	0
94.2	0
94.3	0
94.4	0
94.5	0
94.6	0
94.7	0
94.8	0
94.9	0
95	0
95.1	0
95.2	0
95.3	0
95.4	0
95.5	0
95.6	0
95.7	0
95.8	0
95.9	0
96	0
96.1	0
96.2	0
96.3	0
96.4	0
96.5	0
96.6	0
96.7	0
96.8	0
96.9	0
97	0
97.1	0
97.2	0
97.3	0
97.4	0
97.5	0
97.6	0
97.7	0
97.8	0
97.9	0
98	0
98.1	0
98.2	0
98.3	0
98.4	0
98.5	0
98.6	0
98.7	0
98.8	0
98.9	0
99	0
99.1	0
99.2	0
99.3	0
99.4	0
99.5	0
99.6	0
99.7	0
99.8	0
99.9	0
100	0
100.1	0.002125
100.2	0.003575
100.3	0.005575
100.4	0.007325
100.5	0.008775
100.6	0.010625
100.7	0.01185
100.8	0.0134
100.9	0.015075
101	0.01645
101.1	0.01805
101.2	0.02
101.3	0.021625
101.4	0.023225
101.5	0.024925
101.6	0.02635
101.7	0.02785
101.8	0.029575
101.9	0.0309
102	0.032575
102.1	0.03385
102.2	0.0353
102.3	0.036675
102.4	0.037975
102.5	0.039025
102.6	0.040825
102.7	0.041875
102.8	0.0427
102.9	0.044175
103	0.04535
103.1	0.046725
103.2	0.048175
103.3	0.049275
103.4	0.050475
103.5	0.05145
103.6	0.052525
103.7	0.05345
103.8	0.05555
103.9	0.056825
104	0.058025
104.1	0.05895
104.2	0.05985
104.3	0.06075
104.4	0.0618
104.5	0.062575
104.6	0.063525
104.7	0.064325
104.8	0.06505
104.9	0.066125
105	0.0676
105.1	0.06865
105.2	0.06945
105.3	0.070475
105.4	0.071525
105.5	0.072425
105.6	0.073175
105.7	0.0742
105.8	0.075
105.9	0.0761
106	0.07675
106.1	0.0776
106.2	0.07845
106.3	0.079325
106.4	0.080075
106.5	0.0807
106.6	0.0814
106.7	0.08245
106.8	0.083125
106.9	0.084
107	0.0849
107.1	0.0855
107.2	0.0863
107.3	0.086775
107.4	0.088025
107.5	0.088225
107.6	0.08895
107.7	0.089325
107.8	0.0898
107.9	0.090225
108	0.09125
108.1	0.091775
108.2	0.092775
108.3	0.093075
108.4	0.09405
108.5	0.094775
108.6	0.095325
108.7	0.096275
108.8	0.09665
108.9	0.0973
109	0.097575
109.1	0.0984
109.2	0.099125
109.3	0.099225
109.4	0.100275
109.5	0.100925
109.6	0.1015
109.7	0.101975
109.8	0.10245
109.9	0.1031
110	0.103475
110.1	0.104075
110.2	0.10435
110.3	0.104875
110.4	0.1052
110.5	0.10565
110.6	0.10585
110.7	0.10655
110.8	0.1069
110.9	0.107475
111	0.10775
111.1	0.1083
111.2	0.1093
111.3	0.10985
111.4	0.11005
111.5	0.110475
111.6	0.1111
111.7	0.111625
111.8	0.112175
111.9	0.1125
112	0.11305
112.1	0.113275
112.2	0.114125
112.3	0.114575
112.4	0.115275
112.5	0.11575
112.6	0.116
112.7	0.116475
112.8	0.11655
112.9	0.117425
113	0.117425
113.1	0.117725
113.2	0.118075
113.3	0.1183
113.4	0.1187
113.5	0.11885
113.6	0.119225
113.7	0.11955
113.8	0.120125
113.9	0.120275
114	0.120825
114.1	0.12125
114.2	0.12175
114.3	0.122075
114.4	0.12235
114.5	0.122575
114.6	0.122725
114.7	0.12315
114.8	0.123825
114.9	0.124275
115	0.12485
115.1	0.124875
115.2	0.125
115.3	0.125075
115.4	0.125325
115.5	0.125175
115.6	0.12575
115.7	0.1262
115.8	0.126475
115.9	0.126325
116	0.12655
116.1	0.1267
116.2	0.1271
116.3	0.1277
116.4	0.128175
116.5	0.128075
116.6	0.12835
116.7	0.12865
116.8	0.129175
116.9	0.129525
117	0.1297
117.1	0.13045
117.2	0.130775
117.3	0.130875
117.4	0.13095
117.5	0.131025
117.6	0.131325
117.7	0.13155
117.8	0.131975
117.9	0.132475
118	0.1328
118.1	0.13305
118.2	0.133175
118.3	0.133475
118.4	0.1342
118.5	0.134575
118.6	0.13475
118.7	0.135
118.8	0.134925
118.9	0.1352
119	0.13575
119.1	0.136425
119.2	0.1364
119.3	0.13665
119.4	0.136725
119.5	0.13675
119.6	0.1364
119.7	0.136075
119.8	0.135925
119.9	0.1363
120	0.13665
120.1	0.1368
120.2	0.136875
120.3	0.137275
120.4	0.1376
120.5	0.1377
120.6	0.13785
120.7	0.138175
120.8	0.137925
120.9	0.13815
121	0.138675
121.1	0.138625
121.2	0.138825
121.3	0.1391
121.4	0.1394
121.5	0.1392
121.6	0.13905
121.7	0.13905
121.8	0.138975
121.9	0.1389
122	0.139475
122.1	0.13975
122.2	0.140075
122.3	0.140175
122.4	0.14025
122.5	0.140575
122.6	0.140725
122.7	0.140825
122.8	0.1407
122.9	0.140525
123	0.140375
123.1	0.140225
123.2	0.1405
123.3	0.13985
123.4	0.139475
123.5	0.1395
123.6	0.139325
123.7	0.13905
123.8	0.1395
123.9	0.13915
124	0.13845
124.1	0.138625
124.2	0.1388
124.3	0.138825
124.4	0.138825
124.5	0.139175
124.6	0.138975
124.7	0.139225
124.8	0.139475
124.9	0.139625
125	0.140325
125.1	0.140175
125.2	0.14055
125.3	0.1403
125.4	0.140125
125.5	0.140575
125.6	0.140125
125.7	0.140225
125.8	0.140325
125.9	0.1401
126	0.140425
126.1	0.1403
126.2	0.140125
126.3	0.140425
126.4	0.14015
126.5	0.1403
126.6	0.14075
126.7	0.14105
126.8	0.141
126.9	0.140775
127	0.141
127.1	0.141275
127.2	0.141125
127.3	0.1412
127.4	0.140625
127.5	0.140525
127.6	0.1404
127.7	0.14045
127.8	0.140225
127.9	0.13995
128	0.13975
128.1	0.139875
128.2	0.140075
128.3	0.14005
128.4	0.139775
128.5	0.140225
128.6	0.14025
128.7	0.140375
128.8	0.14055
128.9	0.14075
129	0.141
129.1	0.14115
129.2	0.141575
129.3	0.1416
129.4	0.141175
129.5	0.141675
129.6	0.1418
129.7	0.141975
129.8	0.14225
129.9	0.14225
130	0.142225
130.1	0.141875
130.2	0.141925
130.3	0.141775
130.4	0.14215
130.5	0.141975
130.6	0.1419
130.7	0.1419
130.8	0.141525
130.9	0.141675
131	0.142075
131.1	0.142075
131.2	0.1424
131.3	0.1421
131.4	0.142025
131.5	0.14235
131.6	0.142475
131.7	0.14285
131.8	0.14255
131.9	0.142425
132	0.1429
132.1	0.14255
132.2	0.143025
132.3	0.142575
132.4	0.142475
132.5	0.14275
132.6	0.142975
132.7	0.1429
132.8	0.142775
132.9	0.142525
133	0.14275
133.1	0.142775
133.2	0.142825
133.3	0.14275
133.4	0.142875
133.5	0.1432
133.6	0.143325
133.7	0.1434
133.8	0.143425
133.9	0.14345
134	0.14305
134.1	0.143025
134.2	0.1437
134.3	0.14325
134.4	0.142975
134.5	0.143325
134.6	0.143175
134.7	0.1435
134.8	0.14375
134.9	0.143725
135	0.143925
135.1	0.143675
135.2	0.143275
135.3	0.143425
135.4	0.143275
135.5	0.1432
135.6	0.143025
135.7	0.142925
135.8	0.143225
135.9	0.143525
136	0.1438
136.1	0.143575
136.2	0.143575
136.3	0.1434
136.4	0.143225
136.5	0.1432
136.6	0.142675
136.7	0.14255
136.8	0.142525
136.9	0.142825
137	0.143225
137.1	0.142775
137.2	0.142625
137.3	0.1426
137.4	0.14285
137.5	0.14295
137.6	0.143175
137.7	0.14295
137.8	0.14295
137.9	0.143225
138	0.142975
138.1	0.1422
138.2	0.1416
138.3	0.14225
138.4	0.14255
138.5	0.14265
138.6	0.1429
138.7	0.143175
138.8	0.1429
138.9	0.14305
139	0.142825
139.1	0.142625
139.2	0.1426
139.3	0.142575
139.4	0.142075
139.5	0.142275
139.6	0.142675
139.7	0.1426
139.8	0.142125
139.9	0.14235
140	0.142725
140.1	0.142925
140.2	0.1423
140.3	0.142375
140.4	0.14215
140.5	0.1422
140.6	0.1422
140.7	0.14265
140.8	0.14275
140.9	0.1429
141	0.142975
141.1	0.1434
141.2	0.14355
141.3	0.143625
141.4	0.143375
141.5	0.143275
141.6	0.143075
141.7	0.14285
141.8	0.142825
141.9	0.14305
142	0.143025
142.1	0.1428
142.2	0.14285
142.3	0.1429
142.4	0.1427
142.5	0.143375
142.6	0.14385
142.7	0.1436
142.8	0.143375
142.9	0.14345
143	0.1433
143.1	0.1436
143.2	0.1435
143.3	0.143375
143.4	0.143175
143.5	0.143475
143.6	0.1434
143.7	0.143425
143.8	0.1435
143.9	0.143275
144	0.1431
144.1	0.1428
144.2	0.143
144.3	0.143
144.4	0.14295
144.5	0.143375
144.6	0.14345
144.7	0.1429
144.8	0.14305
144.9	0.143325
145	0.143875
145.1	0.14405
145.2	0.144475
145.3	0.144225
145.4	0.144775
145.5	0.1448
145.6	0.144725
145.7	0.144925
145.8	0.14485
145.9	0.144825
146	0.1451
146.1	0.145275
146.2	0.145175
146.3	0.14525
146.4	0.145425
146.5	0.14535
146.6	0.145625
146.7	0.14555
146.8	0.14535
146.9	0.1456
147	0.1456
147.1	0.145675
147.2	0.14545
147.3	0.14525
147.4	0.145325
147.5	0.14555
147.6	0.1459
147.7	0.1457
147.8	0.14555
147.9	0.145825
148	0.145625
148.1	0.145625
148.2	0.14525
148.3	0.1449
148.4	0.145375
148.5	0.145475
148.6	0.1462
148.7	0.146325
148.8	0.1464
148.9	0.1461
149	0.1464
149.1	0.1465
149.2	0.146375
149.3	0.1462
149.4	0.146375
149.5	0.146425
149.6	0.146325
149.7	0.146675
149.8	0.145925
149.9	0.14615
150	0.145975
150.1	0.1456
150.2	0.145525
150.3	0.145525
150.4	0.145425
150.5	0.14555
150.6	0.1459
150.7	0.146225
150.8	0.146675
150.9	0.14695
151	0.147575
151.1	0.147625
151.2	0.147975
151.3	0.147875
151.4	0.147325
151.5	0.146875
151.6	0.146675
151.7	0.146525
151.8	0.146825
151.9	0.146875
152	0.1467
152.1	0.146675
152.2	0.146925
152.3	0.1476
152.4	0.1479
152.5	0.1481
152.6	0.1481
152.7	0.148275
152.8	0.148
152.9	0.14785
153	0.1481
153.1	0.148075
153.2	0.14825
153.3	0.148425
153.4	0.14815
153.5	0.1477
153.6	0.1478
153.7	0.14755
153.8	0.148275
153.9	0.14805
154	0.14765
154.1	0.148
154.2	0.14815
154.3	0.1481
154.4	0.148175
154.5	0.148425
154.6	0.148175
154.7	0.148525
154.8	0.148225
154.9	0.148525
155	0.148325
155.1	0.14805
155.2	0.1482
155.3	0.14815
155.4	0.148825
155.5	0.148225
155.6	0.148575
155.7	0.1483
155.8	0.1485
155.9	0.14885
156	0.148675
156.1	0.149125
156.2	0.14925
156.3	0.149025
156.4	0.14885
156.5	0.1492
156.6	0.149375
156.7	0.1496
156.8	0.149675
156.9	0.149675
157	0.149475
157.1	0.14945
157.2	0.1488
157.3	0.148625
157.4	0.149125
157.5	0.148775
157.6	0.14865
157.7	0.14875
157.8	0.14875
157.9	0.14855
158	0.148775
158.1	0.148725
158.2	0.1488
158.3	0.149025
158.4	0.149275
158.5	0.14915
158.6	0.148875
158.7	0.14855
158.8	0.1485
158.9	0.148875
159	0.148625
159.1	0.14835
159.2	0.148525
159.3	0.148625
159.4	0.148025
159.5	0.147875
159.6	0.14775
159.7	0.147725
159.8	0.14785
159.9	0.147475
160	0.1478
160.1	0.14745
160.2	0.147525
160.3	0.14785
160.4	0.14805
160.5	0.1478
160.6	0.147575
160.7	0.147875
160.8	0.1478
160.9	0.147925
161	0.147475
161.1	0.147925
161.2	0.147875
161.3	0.148025
161.4	0.148225
161.5	0.14815
161.6	0.148025
161.7	0.1484
161.8	0.14795
161.9	0.147975
162	0.148125
162.1	0.148025
162.2	0.14785
162.3	0.1484
162.4	0.1483
162.5	0.14815
162.6	0.1478
162.7	0.148
162.8	0.148275
162.9	0.1478
163	0.1472
163.1	0.14735
163.2	0.147425
163.3	0.1469
163.4	0.1474
163.5	0.147575
163.6	0.1476
163.7	0.14715
163.8	0.1481
163.9	0.1482
164	0.14815
164.1	0.147875
164.2	0.1481
164.3	0.147625
164.4	0.147725
164.5	0.1481
164.6	0.1484
164.7	0.148275
164.8	0.148225
164.9	0.148375
165	0.148325
165.1	0.148475
165.2	0.1482
165.3	0.147925
165.4	0.147675
165.5	0.147625
165.6	0.14775
165.7	0.147825
165.8	0.1479
165.9	0.1477
166	0.14825
166.1	0.148175
166.2	0.148675
166.3	0.148275
166.4	0.14815
166.5	0.148225
166.6	0.148275
166.7	0.14855
166.8	0.14845
166.9	0.148975
167	0.148625
167.1	0.148175
167.2	0.147875
167.3	0.14735
167.4	0.1472
167.5	0.1475
167.6	0.147425
167.7	0.147425
167.8	0.147525
167.9	0.14775
168	0.147925
168.1	0.147975
168.2	0.147825
168.3	0.147625
168.4	0.14755
168.5	0.1477
168.6	0.147825
168.7	0.147675
168.8	0.147575
168.9	0.14785
169	0.1479
169.1	0.147925
169.2	0.14775
169.3	0.147825
169.4	0.14755
169.5	0.1475
169.6	0.14795
169.7	0.14805
169.8	0.14815
169.9	0.148
170	0.147675
170.1	0.147525
170.2	0.147425
170.3	0.147225
170.4	0.14755
170.5	0.147125
170.6	0.1469
170.7	0.146375
170.8	0.146475
170.9	0.146875
171	0.14685
171.1	0.14655
171.2	0.146875
171.3	0.147025
171.4	0.14665
171.5	0.146575
171.6	0.146925
171.7	0.147325
171.8	0.147175
171.9	0.147575
172	0.147775
172.1	0.147525
172.2	0.148075
172.3	0.1478
172.4	0.14765
172.5	0.147525
172.6	0.1479
172.7	0.147525
172.8	0.1476
172.9	0.1473
173	0.147
173.1	0.1469
173.2	0.1472
173.3	0.14695
173.4	0.1469
173.5	0.14755
173.6	0.14775
173.7	0.1479
173.8	0.147875
173.9	0.148225
174	0.1482
174.1	0.14815
174.2	0.14845
174.3	0.148825
174.4	0.149075
174.5	0.14895
174.6	0.148975
174.7	0.14905
174.8	0.1493
174.9	0.1498
175	0.14945
175.1	0.149225
175.2	0.14895
175.3	0.14945
175.4	0.15
175.5	0.14975
175.6	0.1505
175.7	0.150575
175.8	0.150125
175.9	0.1501
176	0.1498
176.1	0.149675
176.2	0.1496
176.3	0.14945
176.4	0.14955
176.5	0.149575
176.6	0.149725
176.7	0.149575
176.8	0.14925
176.9	0.149325
177	0.1494
177.1	0.149175
177.2	0.149175
177.3	0.149375
177.4	0.14925
177.5	0.149225
177.6	0.1491
177.7	0.1487
177.8	0.148975
177.9	0.1487
178	0.148825
178.1	0.148775
178.2	0.148925
178.3	0.149025
178.4	0.149375
178.5	0.148725
178.6	0.148725
178.7	0.14875
178.8	0.1486
178.9	0.148575
179	0.148825
179.1	0.14875
179.2	0.1489
179.3	0.149525
179.4	0.149225
179.5	0.148975
179.6	0.148525
179.7	0.14845
179.8	0.1484
179.9	0.147925
180	0.148
180.1	0.14755
180.2	0.147525
180.3	0.1472
180.4	0.1472
180.5	0.147425
180.6	0.147325
180.7	0.147275
180.8	0.147125
180.9	0.147125
181	0.14715
181.1	0.147225
181.2	0.1469
181.3	0.146825
181.4	0.146475
181.5	0.146625
181.6	0.146875
181.7	0.14685
181.8	0.147
181.9	0.14695
182	0.146525
182.1	0.146275
182.2	0.14645
182.3	0.1467
182.4	0.146825
182.5	0.146725
182.6	0.1465
182.7	0.14635
182.8	0.14615
182.9	0.1466
183	0.1466
183.1	0.1471
183.2	0.147025
183.3	0.14715
183.4	0.14685
183.5	0.1467
183.6	0.146275
183.7	0.146275
183.8	0.146375
183.9	0.146375
184	0.146375
184.1	0.146225
184.2	0.145925
184.3	0.145825
184.4	0.145675
184.5	0.145975
184.6	0.14625
184.7	0.14605
184.8	0.146125
184.9	0.146275
185	0.146225
185.1	0.146525
185.2	0.1466
185.3	0.146875
185.4	0.1467
185.5	0.1472
185.6	0.147025
185.7	0.14685
185.8	0.14665
185.9	0.146625
186	0.14665
186.1	0.1468
186.2	0.1467
186.3	0.146625
186.4	0.146925
186.5	0.1468
186.6	0.146725
186.7	0.146225
186.8	0.146
186.9	0.145575
187	0.145525
187.1	0.14515
187.2	0.1454
187.3	0.145925
187.4	0.145925
187.5	0.1459
187.6	0.146025
187.7	0.146325
187.8	0.146475
187.9	0.14655
188	0.146675
188.1	0.146425
188.2	0.146725
188.3	0.14675
188.4	0.146775
188.5	0.1468
188.6	0.147
188.7	0.146925
188.8	0.147025
188.9	0.1474
189	0.147325
189.1	0.1472
189.2	0.1472
189.3	0.1472
189.4	0.1476
189.5	0.147475
189.6	0.14745
189.7	0.14725
189.8	0.147625
189.9	0.1474
190	0.14715
190.1	0.147525
190.2	0.147325
190.3	0.1475
190.4	0.147775
190.5	0.147875
190.6	0.14745
190.7	0.14755
190.8	0.1478
190.9	0.14805
191	0.14835
191.1	0.148325
191.2	0.1481
191.3	0.1485
191.4	0.147725
191.5	0.147625
191.6	0.147825
191.7	0.14785
191.8	0.147725
191.9	0.14775
192	0.14775
192.1	0.1482
192.2	0.148025
192.3	0.147975
192.4	0.14815
192.5	0.1481
192.6	0.1482
192.7	0.1482
192.8	0.1482
192.9	0.148925
193	0.14915
193.1	0.14895
193.2	0.149
193.3	0.14905
193.4	0.1491
193.5	0.149
193.6	0.14905
193.7	0.1489
193.8	0.149375
193.9	0.1492
194	0.148725
194.1	0.148875
194.2	0.14955
194.3	0.149725
194.4	0.1495
194.5	0.149025
194.6	0.148875
194.7	0.148525
194.8	0.148325
194.9	0.1481
195	0.14805
195.1	0.148025
195.2	0.1479
195.3	0.147625
195.4	0.147775
195.5	0.147525
195.6	0.147625
195.7	0.147675
195.8	0.148375
195.9	0.148225
196	0.148375
196.1	0.1487
196.2	0.148375
196.3	0.1484
196.4	0.1486
196.5	0.148475
196.6	0.148675
196.7	0.148825
196.8	0.148375
196.9	0.148125
197	0.14795
197.1	0.1479
197.2	0.148
197.3	0.14775
197.4	0.147725
197.5	0.147625
197.6	0.14815
197.7	0.14815
197.8	0.14875
197.9	0.14895
198	0.1489
198.1	0.149125
198.2	0.1492
198.3	0.149475
198.4	0.1501
198.5	0.149875
198.6	0.149825
198.7	0.14955
198.8	0.149025
198.9	0.14875
199	0.1486
199.1	0.14865
199.2	0.14855
199.3	0.14875
199.4	0.14845
199.5	0.148
199.6	0.148575
199.7	0.1484
199.8	0.148225
199.9	0.14855
200	0.14835
[truncated: 14,000 more rows]
