# Supplementary material for: Bayesian inference of kinetic schemes for ion channels by Kalman filtering
Source: eLife journal article supplement (doi:10.7554/elife.62714), 2022-05-04
Supplement: fig4-data11 [file 1_Sim_N_20000_Strom_MW.xlsx]

## Sheet: Tabelle1
0.1	0
0.2	0
0.3	0
0.4	0
0.5	0
0.6	0
0.7	0
0.8	0
0.9	0
1	0
1.1	0
1.2	0
1.3	0
1.4	0
1.5	0
1.6	0
1.7	0
1.8	0
1.9	0
2	0
2.1	0
2.2	0
2.3	0
2.4	0
2.5	0
2.6	0
2.7	0
2.8	0
2.9	0
3	0
3.1	0
3.2	0
3.3	0
3.4	0
3.5	0
3.6	0
3.7	0
3.8	0
3.9	0
4	0
4.1	0
4.2	0
4.3	0
4.4	0
4.5	0
4.6	0
4.7	0
4.8	0
4.9	0
5	0
5.1	0
5.2	0
5.3	0
5.4	0
5.5	0
5.6	0
5.7	0
5.8	0
5.9	0
6	0
6.1	0
6.2	0
6.3	0
6.4	0
6.5	0
6.6	0
6.7	0
6.8	0
6.9	0
7	0
7.1	0
7.2	0
7.3	0
7.4	0
7.5	0
7.6	0
7.7	0
7.8	0
7.9	0
8	0
8.1	0
8.2	0
8.3	0
8.4	0
8.5	0
8.6	0
8.7	0
8.8	0
8.9	0
9	0
9.1	0
9.2	0
9.3	0
9.4	0
9.5	0
9.6	0
9.7	0
9.8	0
9.9	0
10	0
10.1	0
10.2	0
10.3	0
10.4	0
10.5	0
10.6	0
10.7	0
10.8	0
10.9	0
11	0
11.1	0
11.2	0
11.3	0
11.4	0
11.5	0
11.6	0
11.7	0
11.8	0
11.9	0
12	0
12.1	0
12.2	0
12.3	0
12.4	0
12.5	0
12.6	0
12.7	0
12.8	0
12.9	0
13	0
13.1	0
13.2	0
13.3	0
13.4	0
13.5	0
13.6	0
13.7	0
13.8	0
13.9	0
14	0
14.1	0
14.2	0
14.3	0
14.4	0
14.5	0
14.6	0
14.7	0
14.8	0
14.9	0
15	0
15.1	0
15.2	0
15.3	0
15.4	0
15.5	0
15.6	0
15.7	0
15.8	0
15.9	0
16	0
16.1	0
16.2	0
16.3	0
16.4	0
16.5	0
16.6	0
16.7	0
16.8	0
16.9	0
17	0
17.1	0
17.2	0
17.3	0
17.4	0
17.5	0
17.6	0
17.7	0
17.8	0
17.9	0
18	0
18.1	0
18.2	0
18.3	0
18.4	0
18.5	0
18.6	0
18.7	0
18.8	0
18.9	0
19	0
19.1	0
19.2	0
19.3	0
19.4	0
19.5	0
19.6	0
19.7	0
19.8	0
19.9	0
20	0
20.1	0
20.2	0
20.3	0
20.4	0
20.5	0
20.6	0
20.7	0
20.8	0
20.9	0
21	0
21.1	0
21.2	0
21.3	0
21.4	0
21.5	0
21.6	0
21.7	0
21.8	0
21.9	0
22	0
22.1	0
22.2	0
22.3	0
22.4	0
22.5	0
22.6	0
22.7	0
22.8	0
22.9	0
23	0
23.1	0
23.2	0
23.3	0
23.4	0
23.5	0
23.6	0
23.7	0
23.8	0
23.9	0
24	0
24.1	0
24.2	0
24.3	0
24.4	0
24.5	0
24.6	0
24.7	0
24.8	0
24.9	0
25	0
25.1	0
25.2	0
25.3	0
25.4	0
25.5	0
25.6	0
25.7	0
25.8	0
25.9	0
26	0
26.1	0
26.2	0
26.3	0
26.4	0
26.5	0
26.6	0
26.7	0
26.8	0
26.9	0
27	0
27.1	0
27.2	0
27.3	0
27.4	0
27.5	0
27.6	0
27.7	0
27.8	0
27.9	0
28	0
28.1	0
28.2	0
28.3	0
28.4	0
28.5	0
28.6	0
28.7	0
28.8	0
28.9	0
29	0
29.1	0
29.2	0
29.3	0
29.4	0
29.5	0
29.6	0
29.7	0
29.8	0
29.9	0
30	0
30.1	0
30.2	0
30.3	0
30.4	0
30.5	0
30.6	0
30.7	0
30.8	0
30.9	0
31	0
31.1	0
31.2	0
31.3	0
31.4	0
31.5	0
31.6	0
31.7	0
31.8	0
31.9	0
32	0
32.1	0
32.2	0
32.3	0
32.4	0
32.5	0
32.6	0
32.7	0
32.8	0
32.9	0
33	0
33.1	0
33.2	0
33.3	0
33.4	0
33.5	0
33.6	0
33.7	0
33.8	0
33.9	0
34	0
34.1	0
34.2	0
34.3	0
34.4	0
34.5	0
34.6	0
34.7	0
34.8	0
34.9	0
35	0
35.1	0
35.2	0
35.3	0
35.4	0
35.5	0
35.6	0
35.7	0
35.8	0
35.9	0
36	0
36.1	0
36.2	0
36.3	0
36.4	0
36.5	0
36.6	0
36.7	0
36.8	0
36.9	0
37	0
37.1	0
37.2	0
37.3	0
37.4	0
37.5	0
37.6	0
37.7	0
37.8	0
37.9	0
38	0
38.1	0
38.2	0
38.3	0
38.4	0
38.5	0
38.6	0
38.7	0
38.8	0
38.9	0
39	0
39.1	0
39.2	0
39.3	0
39.4	0
39.5	0
39.6	0
39.7	0
39.8	0
39.9	0
40	0
40.1	0
40.2	0
40.3	0
40.4	0
40.5	0
40.6	0
40.7	0
40.8	0
40.9	0
41	0
41.1	0
41.2	0
41.3	0
41.4	0
41.5	0
41.6	0
41.7	0
41.8	0
41.9	0
42	0
42.1	0
42.2	0
42.3	0
42.4	0
42.5	0
42.6	0
42.7	0
42.8	0
42.9	0
43	0
43.1	0
43.2	0
43.3	0
43.4	0
43.5	0
43.6	0
43.7	0
43.8	0
43.9	0
44	0
44.1	0
44.2	0
44.3	0
44.4	0
44.5	0
44.6	0
44.7	0
44.8	0
44.9	0
45	0
45.1	0
45.2	0
45.3	0
45.4	0
45.5	0
45.6	0
45.7	0
45.8	0
45.9	0
46	0
46.1	0
46.2	0
46.3	0
46.4	0
46.5	0
46.6	0
46.7	0
46.8	0
46.9	0
47	0
47.1	0
47.2	0
47.3	0
47.4	0
47.5	0
47.6	0
47.7	0
47.8	0
47.9	0
48	0
48.1	0
48.2	0
48.3	0
48.4	0
48.5	0
48.6	0
48.7	0
48.8	0
48.9	0
49	0
49.1	0
49.2	0
49.3	0
49.4	0
49.5	0
49.6	0
49.7	0
49.8	0
49.9	0
50	0
50.1	0
50.2	0
50.3	0
50.4	0
50.5	0
50.6	0
50.7	0
50.8	0
50.9	0
51	0
51.1	0
51.2	0
51.3	0
51.4	0
51.5	0
51.6	0
51.7	0
51.8	0
51.9	0
52	0
52.1	0
52.2	0
52.3	0
52.4	0
52.5	0
52.6	0
52.7	0
52.8	0
52.9	0
53	0
53.1	0
53.2	0
53.3	0
53.4	0
53.5	0
53.6	0
53.7	0
53.8	0
53.9	0
54	0
54.1	0
54.2	0
54.3	0
54.4	0
54.5	0
54.6	0
54.7	0
54.8	0
54.9	0
55	0
55.1	0
55.2	0
55.3	0
55.4	0
55.5	0
55.6	0
55.7	0
55.8	0
55.9	0
56	0
56.1	0
56.2	0
56.3	0
56.4	0
56.5	0
56.6	0
56.7	0
56.8	0
56.9	0
57	0
57.1	0
57.2	0
57.3	0
57.4	0
57.5	0
57.6	0
57.7	0
57.8	0
57.9	0
58	0
58.1	0
58.2	0
58.3	0
58.4	0
58.5	0
58.6	0
58.7	0
58.8	0
58.9	0
59	0
59.1	0
59.2	0
59.3	0
59.4	0
59.5	0
59.6	0
59.7	0
59.8	0
59.9	0
60	0
60.1	0
60.2	0
60.3	0
60.4	0
60.5	0
60.6	0
60.7	0
60.8	0
60.9	0
61	0
61.1	0
61.2	0
61.3	0
61.4	0
61.5	0
61.6	0
61.7	0
61.8	0
61.9	0
62	0
62.1	0
62.2	0
62.3	0
62.4	0
62.5	0
62.6	0
62.7	0
62.8	0
62.9	0
63	0
63.1	0
63.2	0
63.3	0
63.4	0
63.5	0
63.6	0
63.7	0
63.8	0
63.9	0
64	0
64.1	0
64.2	0
64.3	0
64.4	0
64.5	0
64.6	0
64.7	0
64.8	0
64.9	0
65	0
65.1	0
65.2	0
65.3	0
65.4	0
65.5	0
65.6	0
65.7	0
65.8	0
65.9	0
66	0
66.1	0
66.2	0
66.3	0
66.4	0
66.5	0
66.6	0
66.7	0
66.8	0
66.9	0
67	0
67.1	0
67.2	0
67.3	0
67.4	0
67.5	0
67.6	0
67.7	0
67.8	0
67.9	0
68	0
68.1	0
68.2	0
68.3	0
68.4	0
68.5	0
68.6	0
68.7	0
68.8	0
68.9	0
69	0
69.1	0
69.2	0
69.3	0
69.4	0
69.5	0
69.6	0
69.7	0
69.8	0
69.9	0
70	0
70.1	0
70.2	0
70.3	0
70.4	0
70.5	0
70.6	0
70.7	0
70.8	0
70.9	0
71	0
71.1	0
71.2	0
71.3	0
71.4	0
71.5	0
71.6	0
71.7	0
71.8	0
71.9	0
72	0
72.1	0
72.2	0
72.3	0
72.4	0
72.5	0
72.6	0
72.7	0
72.8	0
72.9	0
73	0
73.1	0
73.2	0
73.3	0
73.4	0
73.5	0
73.6	0
73.7	0
73.8	0
73.9	0
74	0
74.1	0
74.2	0
74.3	0
74.4	0
74.5	0
74.6	0
74.7	0
74.8	0
74.9	0
75	0
75.1	0
75.2	0
75.3	0
75.4	0
75.5	0
75.6	0
75.7	0
75.8	0
75.9	0
76	0
76.1	0
76.2	0
76.3	0
76.4	0
76.5	0
76.6	0
76.7	0
76.8	0
76.9	0
77	0
77.1	0
77.2	0
77.3	0
77.4	0
77.5	0
77.6	0
77.7	0
77.8	0
77.9	0
78	0
78.1	0
78.2	0
78.3	0
78.4	0
78.5	0
78.6	0
78.7	0
78.8	0
78.9	0
79	0
79.1	0
79.2	0
79.3	0
79.4	0
79.5	0
79.6	0
79.7	0
79.8	0
79.9	0
80	0
80.1	0
80.2	0
80.3	0
80.4	0
80.5	0
80.6	0
80.7	0
80.8	0
80.9	0
81	0
81.1	0
81.2	0
81.3	0
81.4	0
81.5	0
81.6	0
81.7	0
81.8	0
81.9	0
82	0
82.1	0
82.2	0
82.3	0
82.4	0
82.5	0
82.6	0
82.7	0
82.8	0
82.9	0
83	0
83.1	0
83.2	0
83.3	0
83.4	0
83.5	0
83.6	0
83.7	0
83.8	0
83.9	0
84	0
84.1	0
84.2	0
84.3	0
84.4	0
84.5	0
84.6	0
84.7	0
84.8	0
84.9	0
85	0
85.1	0
85.2	0
85.3	0
85.4	0
85.5	0
85.6	0
85.7	0
85.8	0
85.9	0
86	0
86.1	0
86.2	0
86.3	0
86.4	0
86.5	0
86.6	0
86.7	0
86.8	0
86.9	0
87	0
87.1	0
87.2	0
87.3	0
87.4	0
87.5	0
87.6	0
87.7	0
87.8	0
87.9	0
88	0
88.1	0
88.2	0
88.3	0
88.4	0
88.5	0
88.6	0
88.7	0
88.8	0
88.9	0
89	0
89.1	0
89.2	0
89.3	0
89.4	0
89.5	0
89.6	0
89.7	0
89.8	0
89.9	0
90	0
90.1	0
90.2	0
90.3	0
90.4	0
90.5	0
90.6	0
90.7	0
90.8	0
90.9	0
91	0
91.1	0
91.2	0
91.3	0
91.4	0
91.5	0
91.6	0
91.7	0
91.8	0
91.9	0
92	0
92.1	0
92.2	0
92.3	0
92.4	0
92.5	0
92.6	0
92.7	0
92.8	0
92.9	0
93	0
93.1	0
93.2	0
93.3	0
93.4	0
93.5	0
93.6	0
93.7	0
93.8	0
93.9	0
94	0
94.1	0
94.2	0
94.3	0
94.4	0
94.5	0
94.6	0
94.7	0
94.8	0
94.9	0
95	0
95.1	0
95.2	0
95.3	0
95.4	0
95.5	0
95.6	0
95.7	0
95.8	0
95.9	0
96	0
96.1	0
96.2	0
96.3	0
96.4	0
96.5	0
96.6	0
96.7	0
96.8	0
96.9	0
97	0
97.1	0
97.2	0
97.3	0
97.4	0
97.5	0
97.6	0
97.7	0
97.8	0
97.9	0
98	0
98.1	0
98.2	0
98.3	0
98.4	0
98.5	0
98.6	0
98.7	0
98.8	0
98.9	0
99	0
99.1	0
99.2	0
99.3	0
99.4	0
99.5	0
99.6	0
99.7	0
99.8	0
99.9	0
100	0
100.1	0
100.2	0
100.3	0
100.4	0
100.5	0
100.6	0
100.7	0
100.8	0
100.9	0
101	0
101.1	0
101.2	0
101.3	0
101.4	0
101.5	0
101.6	0
101.7	0
101.8	0
101.9	0
102	0
102.1	0
102.2	0
102.3	0
102.4	0
102.5	0
102.6	0
102.7	0
102.8	0
102.9	0
103	0
103.1	0
103.2	0
103.3	0
103.4	0
103.5	0
103.6	0
103.7	0
103.8	0
103.9	0
104	5e-05
104.1	5e-05
104.2	5e-05
104.3	5e-05
104.4	5e-05
104.5	5e-05
104.6	5e-05
104.7	0.0001
104.8	0.0001
104.9	0.00015
105	0.00015
105.1	0.00015
105.2	0.00015
105.3	0.00015
105.4	0.00015
105.5	0.00015
105.6	0.0002
105.7	0.00025
105.8	0.00025
105.9	0.0003
106	0.0003
106.1	0.0003
106.2	0.0003
106.3	0.00035
106.4	0.00035
106.5	0.00035
106.6	0.00035
106.7	0.00035
106.8	0.00035
106.9	0.00035
107	0.0004
107.1	0.0004
107.2	0.0004
107.3	0.0004
107.4	0.0004
107.5	0.0004
107.6	0.0004
107.7	0.0004
107.8	0.0004
107.9	0.0004
108	0.0004
108.1	0.0004
108.2	0.0004
108.3	0.0004
108.4	0.0004
108.5	0.0004
108.6	0.0004
108.7	0.0004
108.8	0.0004
108.9	0.0004
109	0.0004
109.1	0.0004
109.2	0.0004
109.3	0.0004
109.4	0.00045
109.5	0.00045
109.6	0.00045
109.7	0.00045
109.8	0.0005
109.9	0.0005
110	0.0005
110.1	0.0005
110.2	0.0005
110.3	0.0005
110.4	0.0005
110.5	0.0005
110.6	0.00055
110.7	0.00055
110.8	0.00055
110.9	0.00065
111	0.0007
111.1	0.0007
111.2	0.0007
111.3	0.00075
111.4	0.0008
111.5	0.0008
111.6	0.0008
111.7	0.00085
111.8	0.00095
111.9	0.00095
112	0.00095
112.1	0.001
112.2	0.001
112.3	0.001
112.4	0.001
112.5	0.00105
112.6	0.0011
112.7	0.0011
112.8	0.0011
112.9	0.00115
113	0.0012
113.1	0.0012
113.2	0.0012
113.3	0.0013
113.4	0.0013
113.5	0.0013
113.6	0.0013
113.7	0.00135
113.8	0.00135
113.9	0.00135
114	0.00135
114.1	0.0013
114.2	0.0013
114.3	0.0013
114.4	0.0013
114.5	0.0013
114.6	0.0013
114.7	0.0013
114.8	0.00135
114.9	0.00135
115	0.00135
115.1	0.00135
115.2	0.0014
115.3	0.0014
115.4	0.0014
115.5	0.00145
115.6	0.00145
115.7	0.0015
115.8	0.0015
115.9	0.0015
116	0.0015
116.1	0.0015
116.2	0.0015
116.3	0.0015
116.4	0.00155
116.5	0.00155
116.6	0.00155
116.7	0.0016
116.8	0.0016
116.9	0.0016
117	0.0016
117.1	0.0016
117.2	0.0016
117.3	0.00165
117.4	0.0017
117.5	0.0017
117.6	0.0017
117.7	0.0017
117.8	0.0017
117.9	0.0017
118	0.0017
118.1	0.00175
118.2	0.00175
118.3	0.0018
118.4	0.0018
118.5	0.00185
118.6	0.00185
118.7	0.00185
118.8	0.00185
118.9	0.00185
119	0.00185
119.1	0.00185
119.2	0.00185
119.3	0.00185
119.4	0.00185
119.5	0.00185
119.6	0.00185
119.7	0.0019
119.8	0.0019
119.9	0.0019
120	0.00195
120.1	0.002
120.2	0.00205
120.3	0.00205
120.4	0.00205
120.5	0.00205
120.6	0.0021
120.7	0.0021
120.8	0.0021
120.9	0.00205
121	0.0021
121.1	0.0021
121.2	0.0021
121.3	0.0021
121.4	0.0021
121.5	0.0021
121.6	0.00205
121.7	0.00205
121.8	0.0021
121.9	0.0021
122	0.00215
122.1	0.00215
122.2	0.00215
122.3	0.00215
122.4	0.00215
122.5	0.0022
122.6	0.0023
122.7	0.0023
122.8	0.00235
122.9	0.00235
123	0.0023
123.1	0.0023
123.2	0.0023
123.3	0.0023
123.4	0.00235
123.5	0.00235
123.6	0.0024
123.7	0.0024
123.8	0.0024
123.9	0.00245
124	0.0025
124.1	0.00255
124.2	0.00255
124.3	0.00255
124.4	0.0026
124.5	0.0026
124.6	0.00265
124.7	0.00265
124.8	0.00265
124.9	0.00265
125	0.00265
125.1	0.00275
125.2	0.00275
125.3	0.00275
125.4	0.0028
125.5	0.0028
125.6	0.0028
125.7	0.00285
125.8	0.0029
125.9	0.0029
126	0.0029
126.1	0.00295
126.2	0.0029
126.3	0.003
126.4	0.00305
126.5	0.00305
126.6	0.00305
126.7	0.00305
126.8	0.00305
126.9	0.00315
127	0.0032
127.1	0.0032
127.2	0.00325
127.3	0.00325
127.4	0.00325
127.5	0.00325
127.6	0.0032
127.7	0.00315
127.8	0.00315
127.9	0.0032
128	0.0032
128.1	0.0032
128.2	0.0032
128.3	0.0032
128.4	0.00325
128.5	0.00325
128.6	0.00325
128.7	0.00325
128.8	0.0033
128.9	0.00335
129	0.0034
129.1	0.0034
129.2	0.0034
129.3	0.0034
129.4	0.0034
129.5	0.0034
129.6	0.0035
129.7	0.00355
129.8	0.0036
129.9	0.0036
130	0.0036
130.1	0.00365
130.2	0.0036
130.3	0.0037
130.4	0.0037
130.5	0.0037
130.6	0.00375
130.7	0.0038
130.8	0.00385
130.9	0.00385
131	0.00385
131.1	0.00385
131.2	0.00385
131.3	0.00385
131.4	0.0039
131.5	0.0039
131.6	0.004
131.7	0.00405
131.8	0.0041
131.9	0.0041
132	0.00405
132.1	0.00405
132.2	0.00405
132.3	0.0041
132.4	0.0041
132.5	0.0041
132.6	0.0041
132.7	0.0041
132.8	0.0041
132.9	0.0041
133	0.0041
133.1	0.00425
133.2	0.0043
133.3	0.0043
133.4	0.00435
133.5	0.00435
133.6	0.0044
133.7	0.0044
133.8	0.00445
133.9	0.00445
134	0.00445
134.1	0.0045
134.2	0.0045
134.3	0.0045
134.4	0.00455
134.5	0.00455
134.6	0.0045
134.7	0.0045
134.8	0.0045
134.9	0.00455
135	0.00455
135.1	0.00455
135.2	0.00455
135.3	0.0046
135.4	0.0046
135.5	0.0047
135.6	0.0047
135.7	0.0047
135.8	0.00475
135.9	0.0048
136	0.00485
136.1	0.00485
136.2	0.00485
136.3	0.00485
136.4	0.00485
136.5	0.0049
136.6	0.0049
136.7	0.0049
136.8	0.00505
136.9	0.00505
137	0.00505
137.1	0.00505
137.2	0.00505
137.3	0.00505
137.4	0.0051
137.5	0.00515
137.6	0.0052
137.7	0.0052
137.8	0.0052
137.9	0.0052
138	0.0052
138.1	0.00515
138.2	0.00515
138.3	0.00515
138.4	0.0051
138.5	0.00505
138.6	0.00505
138.7	0.005
138.8	0.00495
138.9	0.00495
139	0.00495
139.1	0.00495
139.2	0.00495
139.3	0.00495
139.4	0.00495
139.5	0.00495
139.6	0.00495
139.7	0.00495
139.8	0.00495
139.9	0.00495
140	0.00495
140.1	0.00495
140.2	0.00495
140.3	0.00495
140.4	0.00495
140.5	0.0049
140.6	0.0049
140.7	0.0049
140.8	0.00495
140.9	0.00495
141	0.005
141.1	0.005
141.2	0.005
141.3	0.00505
141.4	0.00505
141.5	0.00505
141.6	0.00505
141.7	0.0051
141.8	0.00515
141.9	0.00515
142	0.00515
142.1	0.00515
142.2	0.00515
142.3	0.00525
142.4	0.00525
142.5	0.0053
142.6	0.0053
142.7	0.0053
142.8	0.0053
142.9	0.0053
143	0.0053
143.1	0.0053
143.2	0.0053
143.3	0.00535
143.4	0.0054
143.5	0.0054
143.6	0.00535
143.7	0.0054
143.8	0.0054
143.9	0.0054
144	0.0054
144.1	0.0054
144.2	0.0054
144.3	0.00545
144.4	0.0054
144.5	0.00555
144.6	0.00555
144.7	0.00555
144.8	0.00555
144.9	0.0055
145	0.00555
145.1	0.00555
145.2	0.00555
145.3	0.00555
145.4	0.00555
145.5	0.0056
145.6	0.00565
145.7	0.00565
145.8	0.00565
145.9	0.00565
146	0.0057
146.1	0.0057
146.2	0.0057
146.3	0.0058
146.4	0.00585
146.5	0.00585
146.6	0.00585
146.7	0.00585
146.8	0.00585
146.9	0.00585
147	0.00585
147.1	0.0059
147.2	0.00595
147.3	0.00585
147.4	0.0059
147.5	0.0059
147.6	0.00595
147.7	0.006
147.8	0.006
147.9	0.00605
148	0.00605
148.1	0.006
148.2	0.006
148.3	0.006
148.4	0.006
148.5	0.006
148.6	0.006
148.7	0.006
148.8	0.00605
148.9	0.0061
149	0.00605
149.1	0.00605
149.2	0.006
149.3	0.006
149.4	0.00605
149.5	0.00605
149.6	0.0061
149.7	0.0061
149.8	0.00615
149.9	0.00615
150	0.00615
150.1	0.0062
150.2	0.00625
150.3	0.0063
150.4	0.0063
150.5	0.0063
150.6	0.00635
150.7	0.0065
150.8	0.00655
150.9	0.00665
151	0.00665
151.1	0.0067
151.2	0.0067
151.3	0.0067
151.4	0.0068
151.5	0.0068
151.6	0.00685
151.7	0.00685
151.8	0.0068
151.9	0.0068
152	0.00675
152.1	0.0068
152.2	0.00685
152.3	0.0069
152.4	0.007
152.5	0.007
152.6	0.00705
152.7	0.00705
152.8	0.00715
152.9	0.0072
153	0.0072
153.1	0.00715
153.2	0.00715
153.3	0.00715
153.4	0.00715
153.5	0.00715
153.6	0.00715
153.7	0.00715
153.8	0.00715
153.9	0.0072
154	0.0072
154.1	0.0072
154.2	0.0072
154.3	0.00725
154.4	0.00735
154.5	0.00735
154.6	0.0073
154.7	0.00735
154.8	0.00735
154.9	0.00735
155	0.0073
155.1	0.0073
155.2	0.0073
155.3	0.0073
155.4	0.00725
155.5	0.00725
155.6	0.00725
155.7	0.0073
155.8	0.0074
155.9	0.00735
156	0.00735
156.1	0.00735
156.2	0.00735
156.3	0.0072
156.4	0.0072
156.5	0.0072
156.6	0.00715
156.7	0.00715
156.8	0.0072
156.9	0.0072
157	0.0073
157.1	0.0073
157.2	0.00735
157.3	0.0074
157.4	0.00745
157.5	0.00745
157.6	0.0075
157.7	0.00755
157.8	0.00755
157.9	0.00765
158	0.0076
158.1	0.0076
158.2	0.00765
158.3	0.00765
158.4	0.00765
158.5	0.0077
158.6	0.00775
158.7	0.0078
158.8	0.0078
158.9	0.0078
159	0.0078
159.1	0.00785
159.2	0.00785
159.3	0.0079
159.4	0.00795
159.5	0.00795
159.6	0.00795
159.7	0.008
159.8	0.0081
159.9	0.0081
160	0.0081
160.1	0.00815
160.2	0.0082
160.3	0.0082
160.4	0.0082
160.5	0.00825
160.6	0.00825
160.7	0.0083
160.8	0.0084
160.9	0.0084
161	0.0084
161.1	0.0084
161.2	0.0084
161.3	0.0084
161.4	0.0085
161.5	0.0085
161.6	0.0085
161.7	0.00845
161.8	0.0085
161.9	0.0085
162	0.00855
162.1	0.0086
162.2	0.00865
162.3	0.00865
162.4	0.00865
162.5	0.00865
162.6	0.00865
162.7	0.0087
162.8	0.0087
162.9	0.0087
163	0.0087
163.1	0.00875
163.2	0.00875
163.3	0.00875
163.4	0.00875
163.5	0.00875
163.6	0.00875
163.7	0.00875
163.8	0.0087
163.9	0.0087
164	0.00875
164.1	0.00875
164.2	0.0087
164.3	0.0087
164.4	0.0087
164.5	0.0087
164.6	0.0087
164.7	0.00875
164.8	0.0088
164.9	0.0088
165	0.00875
165.1	0.00875
165.2	0.00875
165.3	0.00885
165.4	0.00885
165.5	0.00885
165.6	0.00885
165.7	0.00885
165.8	0.00885
165.9	0.00885
166	0.0089
166.1	0.0089
166.2	0.0089
166.3	0.0089
166.4	0.00895
166.5	0.0091
166.6	0.0091
166.7	0.0091
166.8	0.00905
166.9	0.009
167	0.009
167.1	0.009
167.2	0.00905
167.3	0.0091
167.4	0.00915
167.5	0.0092
167.6	0.00925
167.7	0.00925
167.8	0.0092
167.9	0.00915
168	0.00915
168.1	0.0092
168.2	0.00925
168.3	0.0092
168.4	0.0092
168.5	0.0092
168.6	0.0091
168.7	0.0092
168.8	0.00925
168.9	0.00925
169	0.00925
169.1	0.0093
169.2	0.0093
169.3	0.0093
169.4	0.00935
169.5	0.00935
169.6	0.0094
169.7	0.0094
169.8	0.0095
169.9	0.0095
170	0.0095
170.1	0.00945
170.2	0.00945
170.3	0.00945
170.4	0.00945
170.5	0.00945
170.6	0.00945
170.7	0.0095
170.8	0.0095
170.9	0.0095
171	0.0095
171.1	0.0095
171.2	0.0095
171.3	0.0095
171.4	0.00945
171.5	0.00945
171.6	0.00945
171.7	0.00945
171.8	0.00945
171.9	0.00945
172	0.00945
172.1	0.00945
172.2	0.00945
172.3	0.0094
172.4	0.00935
172.5	0.00935
172.6	0.00935
172.7	0.0094
172.8	0.0094
172.9	0.0094
173	0.0094
173.1	0.0094
173.2	0.0093
173.3	0.0093
173.4	0.00935
173.5	0.00935
173.6	0.0094
173.7	0.0094
173.8	0.0094
173.9	0.00945
174	0.00945
174.1	0.0095
174.2	0.0095
174.3	0.0095
174.4	0.0095
174.5	0.0095
174.6	0.00945
174.7	0.0094
174.8	0.00945
174.9	0.00945
175	0.00945
175.1	0.00945
175.2	0.0095
175.3	0.00955
175.4	0.00955
175.5	0.0095
175.6	0.0095
175.7	0.0095
175.8	0.0095
175.9	0.0096
176	0.0096
176.1	0.00965
176.2	0.0096
176.3	0.0095
176.4	0.0095
176.5	0.0095
176.6	0.00955
176.7	0.0096
176.8	0.00965
176.9	0.00965
177	0.00965
177.1	0.00965
177.2	0.00975
177.3	0.00975
177.4	0.00975
177.5	0.00985
177.6	0.0099
177.7	0.00995
177.8	0.00995
177.9	0.01
178	0.0101
178.1	0.0101
178.2	0.01015
178.3	0.0102
178.4	0.0102
178.5	0.0102
178.6	0.01025
178.7	0.01025
178.8	0.01025
178.9	0.01025
179	0.01025
179.1	0.01025
179.2	0.0102
179.3	0.0102
179.4	0.01015
179.5	0.01015
179.6	0.0102
179.7	0.0102
179.8	0.0102
179.9	0.01025
180	0.01025
180.1	0.0102
180.2	0.0102
180.3	0.01025
180.4	0.01025
180.5	0.0102
180.6	0.01025
180.7	0.0103
180.8	0.01035
180.9	0.01035
181	0.01035
181.1	0.01035
181.2	0.01035
181.3	0.0104
181.4	0.01035
181.5	0.01045
181.6	0.0104
181.7	0.01045
181.8	0.01045
181.9	0.01045
182	0.01045
182.1	0.01045
182.2	0.01045
182.3	0.0105
182.4	0.0105
182.5	0.0105
182.6	0.01055
182.7	0.01055
182.8	0.01055
182.9	0.01055
183	0.01055
183.1	0.0106
183.2	0.01065
183.3	0.0107
183.4	0.01075
183.5	0.0108
183.6	0.01085
183.7	0.01085
183.8	0.01085
183.9	0.0108
184	0.0108
184.1	0.0108
184.2	0.0108
184.3	0.01085
184.4	0.01085
184.5	0.01085
184.6	0.01085
184.7	0.0109
184.8	0.01095
184.9	0.0109
185	0.0109
185.1	0.0109
185.2	0.01095
185.3	0.011
185.4	0.011
185.5	0.011
185.6	0.01095
185.7	0.01095
185.8	0.01095
185.9	0.01095
186	0.01095
186.1	0.01095
186.2	0.01095
186.3	0.01095
186.4	0.01095
186.5	0.011
186.6	0.011
186.7	0.011
186.8	0.011
186.9	0.01095
187	0.01095
187.1	0.01095
187.2	0.0109
187.3	0.01095
187.4	0.01095
187.5	0.01095
187.6	0.011
187.7	0.011
187.8	0.011
187.9	0.011
188	0.011
188.1	0.011
188.2	0.01105
188.3	0.0111
188.4	0.01105
188.5	0.01115
188.6	0.01115
188.7	0.01125
188.8	0.01125
188.9	0.01125
189	0.01125
189.1	0.01125
189.2	0.01125
189.3	0.0112
189.4	0.0112
189.5	0.0112
189.6	0.01115
189.7	0.0111
189.8	0.0111
189.9	0.0111
190	0.0111
190.1	0.01105
190.2	0.0111
190.3	0.01115
190.4	0.0112
190.5	0.01125
190.6	0.0113
190.7	0.0114
190.8	0.0114
190.9	0.0114
191	0.01135
191.1	0.01135
191.2	0.0114
191.3	0.0114
191.4	0.0114
191.5	0.0114
191.6	0.01135
191.7	0.01135
191.8	0.01135
191.9	0.01135
192	0.0113
192.1	0.0113
192.2	0.0113
192.3	0.0113
192.4	0.01135
192.5	0.0114
192.6	0.01135
192.7	0.01145
192.8	0.01145
192.9	0.0114
193	0.0115
193.1	0.0115
193.2	0.0114
193.3	0.0114
193.4	0.01145
193.5	0.01145
193.6	0.0115
193.7	0.0115
193.8	0.0115
193.9	0.01155
194	0.01155
194.1	0.0116
194.2	0.0116
194.3	0.0116
194.4	0.0116
194.5	0.0116
194.6	0.01155
194.7	0.01155
194.8	0.0115
194.9	0.01145
195	0.01155
195.1	0.01155
195.2	0.01155
195.3	0.01155
195.4	0.01155
195.5	0.0117
195.6	0.0117
195.7	0.0117
195.8	0.01175
195.9	0.01175
196	0.0119
196.1	0.01195
196.2	0.012
196.3	0.01195
196.4	0.0119
196.5	0.0119
196.6	0.0119
196.7	0.0119
196.8	0.0119
196.9	0.012
197	0.012
197.1	0.0121
197.2	0.01205
197.3	0.01205
197.4	0.01215
197.5	0.01215
197.6	0.01215
197.7	0.0122
197.8	0.0122
197.9	0.01225
198	0.01225
198.1	0.01225
198.2	0.01225
198.3	0.01225
198.4	0.01225
198.5	0.01235
198.6	0.01235
198.7	0.01235
198.8	0.01235
198.9	0.01245
199	0.01245
199.1	0.0124
199.2	0.01245
199.3	0.01245
199.4	0.01235
199.5	0.01235
199.6	0.0124
199.7	0.0124
199.8	0.0124
199.9	0.0124
200	0.01245
[truncated: 14,000 more rows]
