# Supplementary material for: Bayesian inference of kinetic schemes for ion channels by Kalman filtering
Source: eLife journal article supplement (doi:10.7554/elife.62714), 2022-05-04
Supplement: fig4-data11 [file 1_Sim_N_50000_Fluor_MW.xlsx]

## Sheet: 0.03125 M_2
0.1	0
0.2	0
0.3	0
0.4	0
0.5	0
0.6	0
0.7	0
0.8	0
0.9	0
1	0
1.1	0
1.2	0
1.3	0
1.4	0
1.5	0
1.6	0
1.7	0
1.8	0
1.9	0
2	0
2.1	0
2.2	0
2.3	0
2.4	0
2.5	0
2.6	0
2.7	0
2.8	0
2.9	0
3	0
3.1	0
3.2	0
3.3	0
3.4	0
3.5	0
3.6	0
3.7	0
3.8	0
3.9	0
4	0
4.1	0
4.2	0
4.3	0
4.4	0
4.5	0
4.6	0
4.7	0
4.8	0
4.9	0
5	0
5.1	0
5.2	0
5.3	0
5.4	0
5.5	0
5.6	0
5.7	0
5.8	0
5.9	0
6	0
6.1	0
6.2	0
6.3	0
6.4	0
6.5	0
6.6	0
6.7	0
6.8	0
6.9	0
7	0
7.1	0
7.2	0
7.3	0
7.4	0
7.5	0
7.6	0
7.7	0
7.8	0
7.9	0
8	0
8.1	0
8.2	0
8.3	0
8.4	0
8.5	0
8.6	0
8.7	0
8.8	0
8.9	0
9	0
9.1	0
9.2	0
9.3	0
9.4	0
9.5	0
9.6	0
9.7	0
9.8	0
9.9	0
10	0
10.1	0
10.2	0
10.3	0
10.4	0
10.5	0
10.6	0
10.7	0
10.8	0
10.9	0
11	0
11.1	0
11.2	0
11.3	0
11.4	0
11.5	0
11.6	0
11.7	0
11.8	0
11.9	0
12	0
12.1	0
12.2	0
12.3	0
12.4	0
12.5	0
12.6	0
12.7	0
12.8	0
12.9	0
13	0
13.1	0
13.2	0
13.3	0
13.4	0
13.5	0
13.6	0
13.7	0
13.8	0
13.9	0
14	0
14.1	0
14.2	0
14.3	0
14.4	0
14.5	0
14.6	0
14.7	0
14.8	0
14.9	0
15	0
15.1	0
15.2	0
15.3	0
15.4	0
15.5	0
15.6	0
15.7	0
15.8	0
15.9	0
16	0
16.1	0
16.2	0
16.3	0
16.4	0
16.5	0
16.6	0
16.7	0
16.8	0
16.9	0
17	0
17.1	0
17.2	0
17.3	0
17.4	0
17.5	0
17.6	0
17.7	0
17.8	0
17.9	0
18	0
18.1	0
18.2	0
18.3	0
18.4	0
18.5	0
18.6	0
18.7	0
18.8	0
18.9	0
19	0
19.1	0
19.2	0
19.3	0
19.4	0
19.5	0
19.6	0
19.7	0
19.8	0
19.9	0
20	0
20.1	0
20.2	0
20.3	0
20.4	0
20.5	0
20.6	0
20.7	0
20.8	0
20.9	0
21	0
21.1	0
21.2	0
21.3	0
21.4	0
21.5	0
21.6	0
21.7	0
21.8	0
21.9	0
22	0
22.1	0
22.2	0
22.3	0
22.4	0
22.5	0
22.6	0
22.7	0
22.8	0
22.9	0
23	0
23.1	0
23.2	0
23.3	0
23.4	0
23.5	0
23.6	0
23.7	0
23.8	0
23.9	0
24	0
24.1	0
24.2	0
24.3	0
24.4	0
24.5	0
24.6	0
24.7	0
24.8	0
24.9	0
25	0
25.1	0
25.2	0
25.3	0
25.4	0
25.5	0
25.6	0
25.7	0
25.8	0
25.9	0
26	0
26.1	0
26.2	0
26.3	0
26.4	0
26.5	0
26.6	0
26.7	0
26.8	0
26.9	0
27	0
27.1	0
27.2	0
27.3	0
27.4	0
27.5	0
27.6	0
27.7	0
27.8	0
27.9	0
28	0
28.1	0
28.2	0
28.3	0
28.4	0
28.5	0
28.6	0
28.7	0
28.8	0
28.9	0
29	0
29.1	0
29.2	0
29.3	0
29.4	0
29.5	0
29.6	0
29.7	0
29.8	0
29.9	0
30	0
30.1	0
30.2	0
30.3	0
30.4	0
30.5	0
30.6	0
30.7	0
30.8	0
30.9	0
31	0
31.1	0
31.2	0
31.3	0
31.4	0
31.5	0
31.6	0
31.7	0
31.8	0
31.9	0
32	0
32.1	0
32.2	0
32.3	0
32.4	0
32.5	0
32.6	0
32.7	0
32.8	0
32.9	0
33	0
33.1	0
33.2	0
33.3	0
33.4	0
33.5	0
33.6	0
33.7	0
33.8	0
33.9	0
34	0
34.1	0
34.2	0
34.3	0
34.4	0
34.5	0
34.6	0
34.7	0
34.8	0
34.9	0
35	0
35.1	0
35.2	0
35.3	0
35.4	0
35.5	0
35.6	0
35.7	0
35.8	0
35.9	0
36	0
36.1	0
36.2	0
36.3	0
36.4	0
36.5	0
36.6	0
36.7	0
36.8	0
36.9	0
37	0
37.1	0
37.2	0
37.3	0
37.4	0
37.5	0
37.6	0
37.7	0
37.8	0
37.9	0
38	0
38.1	0
38.2	0
38.3	0
38.4	0
38.5	0
38.6	0
38.7	0
38.8	0
38.9	0
39	0
39.1	0
39.2	0
39.3	0
39.4	0
39.5	0
39.6	0
39.7	0
39.8	0
39.9	0
40	0
40.1	0
40.2	0
40.3	0
40.4	0
40.5	0
40.6	0
40.7	0
40.8	0
40.9	0
41	0
41.1	0
41.2	0
41.3	0
41.4	0
41.5	0
41.6	0
41.7	0
41.8	0
41.9	0
42	0
42.1	0
42.2	0
42.3	0
42.4	0
42.5	0
42.6	0
42.7	0
42.8	0
42.9	0
43	0
43.1	0
43.2	0
43.3	0
43.4	0
43.5	0
43.6	0
43.7	0
43.8	0
43.9	0
44	0
44.1	0
44.2	0
44.3	0
44.4	0
44.5	0
44.6	0
44.7	0
44.8	0
44.9	0
45	0
45.1	0
45.2	0
45.3	0
45.4	0
45.5	0
45.6	0
45.7	0
45.8	0
45.9	0
46	0
46.1	0
46.2	0
46.3	0
46.4	0
46.5	0
46.6	0
46.7	0
46.8	0
46.9	0
47	0
47.1	0
47.2	0
47.3	0
47.4	0
47.5	0
47.6	0
47.7	0
47.8	0
47.9	0
48	0
48.1	0
48.2	0
48.3	0
48.4	0
48.5	0
48.6	0
48.7	0
48.8	0
48.9	0
49	0
49.1	0
49.2	0
49.3	0
49.4	0
49.5	0
49.6	0
49.7	0
49.8	0
49.9	0
50	0
50.1	0
50.2	0
50.3	0
50.4	0
50.5	0
50.6	0
50.7	0
50.8	0
50.9	0
51	0
51.1	0
51.2	0
51.3	0
51.4	0
51.5	0
51.6	0
51.7	0
51.8	0
51.9	0
52	0
52.1	0
52.2	0
52.3	0
52.4	0
52.5	0
52.6	0
52.7	0
52.8	0
52.9	0
53	0
53.1	0
53.2	0
53.3	0
53.4	0
53.5	0
53.6	0
53.7	0
53.8	0
53.9	0
54	0
54.1	0
54.2	0
54.3	0
54.4	0
54.5	0
54.6	0
54.7	0
54.8	0
54.9	0
55	0
55.1	0
55.2	0
55.3	0
55.4	0
55.5	0
55.6	0
55.7	0
55.8	0
55.9	0
56	0
56.1	0
56.2	0
56.3	0
56.4	0
56.5	0
56.6	0
56.7	0
56.8	0
56.9	0
57	0
57.1	0
57.2	0
57.3	0
57.4	0
57.5	0
57.6	0
57.7	0
57.8	0
57.9	0
58	0
58.1	0
58.2	0
58.3	0
58.4	0
58.5	0
58.6	0
58.7	0
58.8	0
58.9	0
59	0
59.1	0
59.2	0
59.3	0
59.4	0
59.5	0
59.6	0
59.7	0
59.8	0
59.9	0
60	0
60.1	0
60.2	0
60.3	0
60.4	0
60.5	0
60.6	0
60.7	0
60.8	0
60.9	0
61	0
61.1	0
61.2	0
61.3	0
61.4	0
61.5	0
61.6	0
61.7	0
61.8	0
61.9	0
62	0
62.1	0
62.2	0
62.3	0
62.4	0
62.5	0
62.6	0
62.7	0
62.8	0
62.9	0
63	0
63.1	0
63.2	0
63.3	0
63.4	0
63.5	0
63.6	0
63.7	0
63.8	0
63.9	0
64	0
64.1	0
64.2	0
64.3	0
64.4	0
64.5	0
64.6	0
64.7	0
64.8	0
64.9	0
65	0
65.1	0
65.2	0
65.3	0
65.4	0
65.5	0
65.6	0
65.7	0
65.8	0
65.9	0
66	0
66.1	0
66.2	0
66.3	0
66.4	0
66.5	0
66.6	0
66.7	0
66.8	0
66.9	0
67	0
67.1	0
67.2	0
67.3	0
67.4	0
67.5	0
67.6	0
67.7	0
67.8	0
67.9	0
68	0
68.1	0
68.2	0
68.3	0
68.4	0
68.5	0
68.6	0
68.7	0
68.8	0
68.9	0
69	0
69.1	0
69.2	0
69.3	0
69.4	0
69.5	0
69.6	0
69.7	0
69.8	0
69.9	0
70	0
70.1	0
70.2	0
70.3	0
70.4	0
70.5	0
70.6	0
70.7	0
70.8	0
70.9	0
71	0
71.1	0
71.2	0
71.3	0
71.4	0
71.5	0
71.6	0
71.7	0
71.8	0
71.9	0
72	0
72.1	0
72.2	0
72.3	0
72.4	0
72.5	0
72.6	0
72.7	0
72.8	0
72.9	0
73	0
73.1	0
73.2	0
73.3	0
73.4	0
73.5	0
73.6	0
73.7	0
73.8	0
73.9	0
74	0
74.1	0
74.2	0
74.3	0
74.4	0
74.5	0
74.6	0
74.7	0
74.8	0
74.9	0
75	0
75.1	0
75.2	0
75.3	0
75.4	0
75.5	0
75.6	0
75.7	0
75.8	0
75.9	0
76	0
76.1	0
76.2	0
76.3	0
76.4	0
76.5	0
76.6	0
76.7	0
76.8	0
76.9	0
77	0
77.1	0
77.2	0
77.3	0
77.4	0
77.5	0
77.6	0
77.7	0
77.8	0
77.9	0
78	0
78.1	0
78.2	0
78.3	0
78.4	0
78.5	0
78.6	0
78.7	0
78.8	0
78.9	0
79	0
79.1	0
79.2	0
79.3	0
79.4	0
79.5	0
79.6	0
79.7	0
79.8	0
79.9	0
80	0
80.1	0
80.2	0
80.3	0
80.4	0
80.5	0
80.6	0
80.7	0
80.8	0
80.9	0
81	0
81.1	0
81.2	0
81.3	0
81.4	0
81.5	0
81.6	0
81.7	0
81.8	0
81.9	0
82	0
82.1	0
82.2	0
82.3	0
82.4	0
82.5	0
82.6	0
82.7	0
82.8	0
82.9	0
83	0
83.1	0
83.2	0
83.3	0
83.4	0
83.5	0
83.6	0
83.7	0
83.8	0
83.9	0
84	0
84.1	0
84.2	0
84.3	0
84.4	0
84.5	0
84.6	0
84.7	0
84.8	0
84.9	0
85	0
85.1	0
85.2	0
85.3	0
85.4	0
85.5	0
85.6	0
85.7	0
85.8	0
85.9	0
86	0
86.1	0
86.2	0
86.3	0
86.4	0
86.5	0
86.6	0
86.7	0
86.8	0
86.9	0
87	0
87.1	0
87.2	0
87.3	0
87.4	0
87.5	0
87.6	0
87.7	0
87.8	0
87.9	0
88	0
88.1	0
88.2	0
88.3	0
88.4	0
88.5	0
88.6	0
88.7	0
88.8	0
88.9	0
89	0
89.1	0
89.2	0
89.3	0
89.4	0
89.5	0
89.6	0
89.7	0
89.8	0
89.9	0
90	0
90.1	0
90.2	0
90.3	0
90.4	0
90.5	0
90.6	0
90.7	0
90.8	0
90.9	0
91	0
91.1	0
91.2	0
91.3	0
91.4	0
91.5	0
91.6	0
91.7	0
91.8	0
91.9	0
92	0
92.1	0
92.2	0
92.3	0
92.4	0
92.5	0
92.6	0
92.7	0
92.8	0
92.9	0
93	0
93.1	0
93.2	0
93.3	0
93.4	0
93.5	0
93.6	0
93.7	0
93.8	0
93.9	0
94	0
94.1	0
94.2	0
94.3	0
94.4	0
94.5	0
94.6	0
94.7	0
94.8	0
94.9	0
95	0
95.1	0
95.2	0
95.3	0
95.4	0
95.5	0
95.6	0
95.7	0
95.8	0
95.9	0
96	0
96.1	0
96.2	0
96.3	0
96.4	0
96.5	0
96.6	0
96.7	0
96.8	0
96.9	0
97	0
97.1	0
97.2	0
97.3	0
97.4	0
97.5	0
97.6	0
97.7	0
97.8	0
97.9	0
98	0
98.1	0
98.2	0
98.3	0
98.4	0
98.5	0
98.6	0
98.7	0
98.8	0
98.9	0
99	0
99.1	0
99.2	0
99.3	0
99.4	0
99.5	0
99.6	0
99.7	0
99.8	0
99.9	0
100	0
100.1	0
100.2	0
100.3	0
100.4	0
100.5	0
100.6	0
100.7	0
100.8	0
100.9	0
101	0
101.1	0
101.2	0
101.3	0
101.4	0
101.5	0
101.6	0
101.7	0
101.8	0
101.9	0
102	0
102.1	0
102.2	0
102.3	0
102.4	0
102.5	0
102.6	0
102.7	0
102.8	0
102.9	0
103	0
103.1	0
103.2	0
103.3	0
103.4	0
103.5	0
103.6	0
103.7	0
103.8	0
103.9	0
104	0
104.1	0
104.2	0
104.3	0
104.4	0
104.5	0
104.6	0
104.7	0
104.8	0
104.9	0
105	0
105.1	0
105.2	0
105.3	0
105.4	0
105.5	0
105.6	0
105.7	0
105.8	0
105.9	0
106	0
106.1	0
106.2	0
106.3	0
106.4	0
106.5	0
106.6	0
106.7	0
106.8	0
106.9	0
107	0
107.1	0
107.2	0
107.3	0
107.4	0
107.5	0
107.6	0
107.7	0
107.8	0
107.9	0
108	0
108.1	0
108.2	0
108.3	0
108.4	0
108.5	0
108.6	0
108.7	0
108.8	0
108.9	0
109	0
109.1	0
109.2	0
109.3	0
109.4	0
109.5	0
109.6	0
109.7	0
109.8	0
109.9	0
110	0
110.1	0
110.2	0
110.3	0
110.4	0
110.5	0
110.6	0
110.7	0
110.8	0
110.9	0
111	0
111.1	0
111.2	0
111.3	0
111.4	0
111.5	0
111.6	0
111.7	0
111.8	0
111.9	0
112	0
112.1	0
112.2	0
112.3	0
112.4	0
112.5	0
112.6	0
112.7	0
112.8	0
112.9	0
113	0
113.1	0
113.2	0
113.3	0
113.4	0
113.5	0
113.6	0
113.7	0
113.8	0
113.9	0
114	0
114.1	0
114.2	0
114.3	0
114.4	0
114.5	0
114.6	0
114.7	0
114.8	0
114.9	0
115	0
115.1	0
115.2	0
115.3	0
115.4	0
115.5	0
115.6	0
115.7	0
115.8	0
115.9	0
116	0
116.1	0
116.2	0
116.3	0
116.4	0
116.5	0
116.6	0
116.7	0
116.8	0
116.9	0
117	0
117.1	0
117.2	0
117.3	0
117.4	0
117.5	0
117.6	0
117.7	0
117.8	0
117.9	0
118	0
118.1	0
118.2	0
118.3	0
118.4	0
118.5	0
118.6	0
118.7	0
118.8	0
118.9	0
119	0
119.1	0
119.2	0
119.3	0
119.4	0
119.5	0
119.6	0
119.7	0
119.8	0
119.9	0
120	0
120.1	0
120.2	0
120.3	0
120.4	0
120.5	0
120.6	0
120.7	0
120.8	0
120.9	0
121	0
121.1	0
121.2	0
121.3	0
121.4	0
121.5	0
121.6	0
121.7	0
121.8	0
121.9	0
122	0
122.1	0
122.2	0.005
122.3	0.005
122.4	0.005
122.5	0.005
122.6	0.005
122.7	0.005
122.8	0.005
122.9	0.005
123	0.005
123.1	0.005
123.2	0.005
123.3	0.005
123.4	0.005
123.5	0.005
123.6	0.005
123.7	0.005
123.8	0.005
123.9	0.005
124	0.005
124.1	0.005
124.2	0.005
124.3	0.005
124.4	0.005
124.5	0.005
124.6	0.005
124.7	0.005
124.8	0.005
124.9	0.005
125	0.005
125.1	0.005
125.2	0.005
125.3	0.005
125.4	0.005
125.5	0.005
125.6	0.005
125.7	0.005
125.8	0.005
125.9	0.005
126	0.005
126.1	0.005
126.2	0.005
126.3	0.005
126.4	0.005
126.5	0.005
126.6	0.005
126.7	0.005
126.8	0.005
126.9	0.005
127	0.005
127.1	0.005
127.2	0.005
127.3	0.005
127.4	0.005
127.5	0.005
127.6	0.005
127.7	0.005
127.8	0.005
127.9	0.005
128	0.005
128.1	0.005
128.2	0.005
128.3	0.005
128.4	0.005
128.5	0.005
128.6	0.005
128.7	0.005
128.8	0.005
128.9	0.005
129	0.005
129.1	0.005
129.2	0.005
129.3	0.005
129.4	0.005
129.5	0.005
129.6	0.005
129.7	0.005
129.8	0.005
129.9	0.005
130	0.005
130.1	0.005
130.2	0.005
130.3	0.005
130.4	0.005
130.5	0.005
130.6	0.005
130.7	0.005
130.8	0.005
130.9	0.005
131	0.005
131.1	0.005
131.2	0.005
131.3	0.005
131.4	0.005
131.5	0.005
131.6	0.005
131.7	0.005
131.8	0.005
131.9	0.005
132	0.005
132.1	0.005
132.2	0.005
132.3	0.005
132.4	0.005
132.5	0.005
132.6	0.005
132.7	0.005
132.8	0.005
132.9	0.005
133	0.005
133.1	0.005
133.2	0.005
133.3	0.005
133.4	0.005
133.5	0.005
133.6	0.005
133.7	0.005
133.8	0.005
133.9	0.005
134	0.005
134.1	0.005
134.2	0.005
134.3	0.005
134.4	0.005
134.5	0.005
134.6	0.005
134.7	0.005
134.8	0.005
134.9	0.005
135	0.005
135.1	0.005
135.2	0.005
135.3	0.005
135.4	0.005
135.5	0.005
135.6	0.005
135.7	0.005
135.8	0.005
135.9	0.005
136	0.005
136.1	0.005
136.2	0.005
136.3	0.005
136.4	0.005
136.5	0.005
136.6	0.005
136.7	0.005
136.8	0.005
136.9	0.005
137	0.005
137.1	0.005
137.2	0.005
137.3	0.005
137.4	0.005
137.5	0.005
137.6	0.005
137.7	0.005
137.8	0.005
137.9	0.005
138	0.005
138.1	0.005
138.2	0.005
138.3	0.005
138.4	0.01
138.5	0.01
138.6	0.01
138.7	0.01
138.8	0.01
138.9	0.01
139	0.01
139.1	0.01
139.2	0.01
139.3	0.01
139.4	0.01
139.5	0.01
139.6	0.01
139.7	0.01
139.8	0.01
139.9	0.01
140	0.01
140.1	0.01
140.2	0.01
140.3	0.01
140.4	0.01
140.5	0.01
140.6	0.01
140.7	0.01
140.8	0.01
140.9	0.01
141	0.01
141.1	0.01
141.2	0.01
141.3	0.01
141.4	0.01
141.5	0.01
141.6	0.01
141.7	0.01
141.8	0.01
141.9	0.01
142	0.01
142.1	0.01
142.2	0.01
142.3	0.01
142.4	0.01
142.5	0.01
142.6	0.01
142.7	0.01
142.8	0.01
142.9	0.01
143	0.01
143.1	0.01
143.2	0.01
143.3	0.01
143.4	0.01
143.5	0.01
143.6	0.01
143.7	0.01
143.8	0.01
143.9	0.01
144	0.01
144.1	0.01
144.2	0.01
144.3	0.01
144.4	0.01
144.5	0.01
144.6	0.01
144.7	0.01
144.8	0.01
144.9	0.01
145	0.01
145.1	0.01
145.2	0.01
145.3	0.01
145.4	0.01
145.5	0.01
145.6	0.01
145.7	0.01
145.8	0.01
145.9	0.01
146	0.01
146.1	0.01
146.2	0.01
146.3	0.01
146.4	0.01
146.5	0.01
146.6	0.01
146.7	0.01
146.8	0.01
146.9	0.01
147	0.01
147.1	0.01
147.2	0.01
147.3	0.01
147.4	0.01
147.5	0.01
147.6	0.01
147.7	0.01
147.8	0.01
147.9	0.01
148	0.01
148.1	0.01
148.2	0.01
148.3	0.01
148.4	0.01
148.5	0.01
148.6	0.01
148.7	0.01
148.8	0.01
148.9	0.01
149	0.01
149.1	0.01
149.2	0.01
149.3	0.01
149.4	0.01
149.5	0.01
149.6	0.01
149.7	0.01
149.8	0.01
149.9	0.01
150	0.01
150.1	0.01
150.2	0.01
150.3	0.01
150.4	0.01
150.5	0.01
150.6	0.01
150.7	0.01
150.8	0.01
150.9	0.01
151	0.01
151.1	0.01
151.2	0.01
151.3	0.01
151.4	0.01
151.5	0.01
151.6	0.01
151.7	0.01
151.8	0.01
151.9	0.01
152	0.01
152.1	0.01
152.2	0.01
152.3	0.01
152.4	0.01
152.5	0.005
152.6	0.005
152.7	0.005
152.8	0.005
152.9	0.005
153	0.005
153.1	0.005
153.2	0.005
153.3	0.005
153.4	0.005
153.5	0.005
153.6	0.005
153.7	0.005
153.8	0.005
153.9	0.005
154	0.005
154.1	0.005
154.2	0.005
154.3	0.005
154.4	0.005
154.5	0.005
154.6	0.005
154.7	0.005
154.8	0.005
154.9	0.005
155	0.005
155.1	0.005
155.2	0.005
155.3	0.005
155.4	0.005
155.5	0.005
155.6	0.005
155.7	0.005
155.8	0.005
155.9	0.005
156	0.005
156.1	0.005
156.2	0.005
156.3	0.01
156.4	0.01
156.5	0.01
156.6	0.01
156.7	0.01
156.8	0.01
156.9	0.01
157	0.01
157.1	0.01
157.2	0.015
157.3	0.015
157.4	0.015
157.5	0.015
157.6	0.015
157.7	0.015
157.8	0.015
157.9	0.015
158	0.015
158.1	0.015
158.2	0.015
158.3	0.015
158.4	0.015
158.5	0.015
158.6	0.015
158.7	0.015
158.8	0.015
158.9	0.015
159	0.015
159.1	0.015
159.2	0.015
159.3	0.015
159.4	0.015
159.5	0.015
159.6	0.015
159.7	0.015
159.8	0.015
159.9	0.015
160	0.015
160.1	0.015
160.2	0.015
160.3	0.015
160.4	0.015
160.5	0.015
160.6	0.015
160.7	0.015
160.8	0.015
160.9	0.015
161	0.015
161.1	0.015
161.2	0.015
161.3	0.015
161.4	0.015
161.5	0.015
161.6	0.015
161.7	0.015
161.8	0.015
161.9	0.015
162	0.015
162.1	0.015
162.2	0.015
162.3	0.015
162.4	0.015
162.5	0.015
162.6	0.015
162.7	0.015
162.8	0.015
162.9	0.015
163	0.015
163.1	0.015
163.2	0.015
163.3	0.015
163.4	0.015
163.5	0.015
163.6	0.015
163.7	0.015
163.8	0.01
163.9	0.01
164	0.01
164.1	0.01
164.2	0.01
164.3	0.01
164.4	0.01
164.5	0.01
164.6	0.01
164.7	0.01
164.8	0.01
164.9	0.01
165	0.01
165.1	0.01
165.2	0.01
165.3	0.015
165.4	0.015
165.5	0.015
165.6	0.015
165.7	0.015
165.8	0.015
165.9	0.015
166	0.015
166.1	0.015
166.2	0.015
166.3	0.015
166.4	0.015
166.5	0.015
166.6	0.015
166.7	0.015
166.8	0.015
166.9	0.015
167	0.015
167.1	0.015
167.2	0.015
167.3	0.015
167.4	0.015
167.5	0.015
167.6	0.015
167.7	0.015
167.8	0.015
167.9	0.015
168	0.015
168.1	0.015
168.2	0.015
168.3	0.015
168.4	0.015
168.5	0.015
168.6	0.015
168.7	0.015
168.8	0.015
168.9	0.015
169	0.015
169.1	0.015
169.2	0.015
169.3	0.015
169.4	0.015
169.5	0.015
169.6	0.015
169.7	0.015
169.8	0.015
169.9	0.015
170	0.015
170.1	0.015
170.2	0.015
170.3	0.015
170.4	0.015
170.5	0.015
170.6	0.015
170.7	0.015
170.8	0.01
170.9	0.01
171	0.01
171.1	0.01
171.2	0.01
171.3	0.01
171.4	0.01
171.5	0.01
171.6	0.01
171.7	0.01
171.8	0.01
171.9	0.01
172	0.01
172.1	0.01
172.2	0.01
172.3	0.01
172.4	0.01
172.5	0.01
172.6	0.01
172.7	0.01
172.8	0.01
172.9	0.01
173	0.01
173.1	0.01
173.2	0.01
173.3	0.01
173.4	0.01
173.5	0.01
173.6	0.01
173.7	0.01
173.8	0.01
173.9	0.01
174	0.01
174.1	0.01
174.2	0.01
174.3	0.01
174.4	0.01
174.5	0.01
174.6	0.01
174.7	0.01
174.8	0.01
174.9	0.01
175	0.01
175.1	0.01
175.2	0.01
175.3	0.01
175.4	0.01
175.5	0.01
175.6	0.01
175.7	0.01
175.8	0.01
175.9	0.01
176	0.01
176.1	0.01
176.2	0.01
176.3	0.01
176.4	0.01
176.5	0.01
176.6	0.01
176.7	0.01
176.8	0.01
176.9	0.01
177	0.01
177.1	0.01
177.2	0.01
177.3	0.01
177.4	0.01
177.5	0.01
177.6	0.01
177.7	0.01
177.8	0.01
177.9	0.01
178	0.01
178.1	0.01
178.2	0.01
178.3	0.01
178.4	0.01
178.5	0.01
178.6	0.01
178.7	0.01
178.8	0.01
178.9	0.01
179	0.01
179.1	0.01
179.2	0.01
179.3	0.01
179.4	0.01
179.5	0.01
179.6	0.01
179.7	0.01
179.8	0.01
179.9	0.01
180	0.01
180.1	0.01
180.2	0.01
180.3	0.01
180.4	0.01
180.5	0.01
180.6	0.01
180.7	0.01
180.8	0.01
180.9	0.01
181	0.01
181.1	0.01
181.2	0.01
181.3	0.01
181.4	0.01
181.5	0.01
181.6	0.01
181.7	0.01
181.8	0.01
181.9	0.01
182	0.01
182.1	0.01
182.2	0.01
182.3	0.01
182.4	0.01
182.5	0.01
182.6	0.01
182.7	0.01
182.8	0.01
182.9	0.01
183	0.01
183.1	0.01
183.2	0.01
183.3	0.01
183.4	0.01
183.5	0.01
183.6	0.01
183.7	0.01
183.8	0.01
183.9	0.01
184	0.01
184.1	0.01
184.2	0.01
184.3	0.01
184.4	0.01
184.5	0.01
184.6	0.01
184.7	0.01
184.8	0.01
184.9	0.01
185	0.01
185.1	0.01
185.2	0.01
185.3	0.01
185.4	0.01
185.5	0.01
185.6	0.01
185.7	0.01
185.8	0.01
185.9	0.01
186	0.01
186.1	0.01
186.2	0.01
186.3	0.01
186.4	0.01
186.5	0.01
186.6	0.01
186.7	0.01
186.8	0.01
186.9	0.01
187	0.01
187.1	0.01
187.2	0.01
187.3	0.01
187.4	0.01
187.5	0.01
187.6	0.01
187.7	0.01
187.8	0.01
187.9	0.01
188	0.01
188.1	0.01
188.2	0.01
188.3	0.01
188.4	0.01
188.5	0.01
188.6	0.01
188.7	0.01
188.8	0.01
188.9	0.01
189	0.01
189.1	0.01
189.2	0.01
189.3	0.01
189.4	0.01
189.5	0.01
189.6	0.01
189.7	0.01
189.8	0.01
189.9	0.01
190	0.01
190.1	0.01
190.2	0.015
190.3	0.015
190.4	0.015
190.5	0.015
190.6	0.015
190.7	0.015
190.8	0.015
190.9	0.015
191	0.015
191.1	0.015
191.2	0.015
191.3	0.015
191.4	0.015
191.5	0.015
191.6	0.015
191.7	0.015
191.8	0.015
191.9	0.015
192	0.015
192.1	0.015
192.2	0.015
192.3	0.015
192.4	0.015
192.5	0.015
192.6	0.015
192.7	0.015
192.8	0.015
192.9	0.015
193	0.015
193.1	0.015
193.2	0.015
193.3	0.015
193.4	0.015
193.5	0.015
193.6	0.015
193.7	0.015
193.8	0.015
193.9	0.015
194	0.015
194.1	0.015
194.2	0.015
194.3	0.015
194.4	0.015
194.5	0.015
194.6	0.015
194.7	0.015
194.8	0.015
194.9	0.015
195	0.015
195.1	0.015
195.2	0.015
195.3	0.015
195.4	0.015
195.5	0.015
195.6	0.015
195.7	0.015
195.8	0.015
195.9	0.015
196	0.015
196.1	0.015
196.2	0.015
196.3	0.015
196.4	0.015
196.5	0.015
196.6	0.015
196.7	0.015
196.8	0.015
196.9	0.015
197	0.015
197.1	0.015
197.2	0.015
197.3	0.015
197.4	0.015
197.5	0.015
197.6	0.015
197.7	0.015
197.8	0.015
197.9	0.015
198	0.015
198.1	0.015
198.2	0.015
198.3	0.01
198.4	0.01
198.5	0.01
198.6	0.01
198.7	0.01
198.8	0.01
198.9	0.01
199	0.01
199.1	0.01
199.2	0.01
199.3	0.01
199.4	0.01
199.5	0.01
199.6	0.01
199.7	0.01
199.8	0.01
199.9	0.01
200	0.01
[truncated: 14,000 more rows]
