# Supplementary material for: Bayesian inference of kinetic schemes for ion channels by Kalman filtering
Source: eLife journal article supplement (doi:10.7554/elife.62714), 2022-05-04
Supplement: fig4-data11 [file 1_Sim_N_50000_Strom_MW.xlsx]

## Sheet: 0.03125 M
0.1	0
0.2	0
0.3	0
0.4	0
0.5	0
0.6	0
0.7	0
0.8	0
0.9	0
1	0
1.1	0
1.2	0
1.3	0
1.4	0
1.5	0
1.6	0
1.7	0
1.8	0
1.9	0
2	0
2.1	0
2.2	0
2.3	0
2.4	0
2.5	0
2.6	0
2.7	0
2.8	0
2.9	0
3	0
3.1	0
3.2	0
3.3	0
3.4	0
3.5	0
3.6	0
3.7	0
3.8	0
3.9	0
4	0
4.1	0
4.2	0
4.3	0
4.4	0
4.5	0
4.6	0
4.7	0
4.8	0
4.9	0
5	0
5.1	0
5.2	0
5.3	0
5.4	0
5.5	0
5.6	0
5.7	0
5.8	0
5.9	0
6	0
6.1	0
6.2	0
6.3	0
6.4	0
6.5	0
6.6	0
6.7	0
6.8	0
6.9	0
7	0
7.1	0
7.2	0
7.3	0
7.4	0
7.5	0
7.6	0
7.7	0
7.8	0
7.9	0
8	0
8.1	0
8.2	0
8.3	0
8.4	0
8.5	0
8.6	0
8.7	0
8.8	0
8.9	0
9	0
9.1	0
9.2	0
9.3	0
9.4	0
9.5	0
9.6	0
9.7	0
9.8	0
9.9	0
10	0
10.1	0
10.2	0
10.3	0
10.4	0
10.5	0
10.6	0
10.7	0
10.8	0
10.9	0
11	0
11.1	0
11.2	0
11.3	0
11.4	0
11.5	0
11.6	0
11.7	0
11.8	0
11.9	0
12	0
12.1	0
12.2	0
12.3	0
12.4	0
12.5	0
12.6	0
12.7	0
12.8	0
12.9	0
13	0
13.1	0
13.2	0
13.3	0
13.4	0
13.5	0
13.6	0
13.7	0
13.8	0
13.9	0
14	0
14.1	0
14.2	0
14.3	0
14.4	0
14.5	0
14.6	0
14.7	0
14.8	0
14.9	0
15	0
15.1	0
15.2	0
15.3	0
15.4	0
15.5	0
15.6	0
15.7	0
15.8	0
15.9	0
16	0
16.1	0
16.2	0
16.3	0
16.4	0
16.5	0
16.6	0
16.7	0
16.8	0
16.9	0
17	0
17.1	0
17.2	0
17.3	0
17.4	0
17.5	0
17.6	0
17.7	0
17.8	0
17.9	0
18	0
18.1	0
18.2	0
18.3	0
18.4	0
18.5	0
18.6	0
18.7	0
18.8	0
18.9	0
19	0
19.1	0
19.2	0
19.3	0
19.4	0
19.5	0
19.6	0
19.7	0
19.8	0
19.9	0
20	0
20.1	0
20.2	0
20.3	0
20.4	0
20.5	0
20.6	0
20.7	0
20.8	0
20.9	0
21	0
21.1	0
21.2	0
21.3	0
21.4	0
21.5	0
21.6	0
21.7	0
21.8	0
21.9	0
22	0
22.1	0
22.2	0
22.3	0
22.4	0
22.5	0
22.6	0
22.7	0
22.8	0
22.9	0
23	0
23.1	0
23.2	0
23.3	0
23.4	0
23.5	0
23.6	0
23.7	0
23.8	0
23.9	0
24	0
24.1	0
24.2	0
24.3	0
24.4	0
24.5	0
24.6	0
24.7	0
24.8	0
24.9	0
25	0
25.1	0
25.2	0
25.3	0
25.4	0
25.5	0
25.6	0
25.7	0
25.8	0
25.9	0
26	0
26.1	0
26.2	0
26.3	0
26.4	0
26.5	0
26.6	0
26.7	0
26.8	0
26.9	0
27	0
27.1	0
27.2	0
27.3	0
27.4	0
27.5	0
27.6	0
27.7	0
27.8	0
27.9	0
28	0
28.1	0
28.2	0
28.3	0
28.4	0
28.5	0
28.6	0
28.7	0
28.8	0
28.9	0
29	0
29.1	0
29.2	0
29.3	0
29.4	0
29.5	0
29.6	0
29.7	0
29.8	0
29.9	0
30	0
30.1	0
30.2	0
30.3	0
30.4	0
30.5	0
30.6	0
30.7	0
30.8	0
30.9	0
31	0
31.1	0
31.2	0
31.3	0
31.4	0
31.5	0
31.6	0
31.7	0
31.8	0
31.9	0
32	0
32.1	0
32.2	0
32.3	0
32.4	0
32.5	0
32.6	0
32.7	0
32.8	0
32.9	0
33	0
33.1	0
33.2	0
33.3	0
33.4	0
33.5	0
33.6	0
33.7	0
33.8	0
33.9	0
34	0
34.1	0
34.2	0
34.3	0
34.4	0
34.5	0
34.6	0
34.7	0
34.8	0
34.9	0
35	0
35.1	0
35.2	0
35.3	0
35.4	0
35.5	0
35.6	0
35.7	0
35.8	0
35.9	0
36	0
36.1	0
36.2	0
36.3	0
36.4	0
36.5	0
36.6	0
36.7	0
36.8	0
36.9	0
37	0
37.1	0
37.2	0
37.3	0
37.4	0
37.5	0
37.6	0
37.7	0
37.8	0
37.9	0
38	0
38.1	0
38.2	0
38.3	0
38.4	0
38.5	0
38.6	0
38.7	0
38.8	0
38.9	0
39	0
39.1	0
39.2	0
39.3	0
39.4	0
39.5	0
39.6	0
39.7	0
39.8	0
39.9	0
40	0
40.1	0
40.2	0
40.3	0
40.4	0
40.5	0
40.6	0
40.7	0
40.8	0
40.9	0
41	0
41.1	0
41.2	0
41.3	0
41.4	0
41.5	0
41.6	0
41.7	0
41.8	0
41.9	0
42	0
42.1	0
42.2	0
42.3	0
42.4	0
42.5	0
42.6	0
42.7	0
42.8	0
42.9	0
43	0
43.1	0
43.2	0
43.3	0
43.4	0
43.5	0
43.6	0
43.7	0
43.8	0
43.9	0
44	0
44.1	0
44.2	0
44.3	0
44.4	0
44.5	0
44.6	0
44.7	0
44.8	0
44.9	0
45	0
45.1	0
45.2	0
45.3	0
45.4	0
45.5	0
45.6	0
45.7	0
45.8	0
45.9	0
46	0
46.1	0
46.2	0
46.3	0
46.4	0
46.5	0
46.6	0
46.7	0
46.8	0
46.9	0
47	0
47.1	0
47.2	0
47.3	0
47.4	0
47.5	0
47.6	0
47.7	0
47.8	0
47.9	0
48	0
48.1	0
48.2	0
48.3	0
48.4	0
48.5	0
48.6	0
48.7	0
48.8	0
48.9	0
49	0
49.1	0
49.2	0
49.3	0
49.4	0
49.5	0
49.6	0
49.7	0
49.8	0
49.9	0
50	0
50.1	0
50.2	0
50.3	0
50.4	0
50.5	0
50.6	0
50.7	0
50.8	0
50.9	0
51	0
51.1	0
51.2	0
51.3	0
51.4	0
51.5	0
51.6	0
51.7	0
51.8	0
51.9	0
52	0
52.1	0
52.2	0
52.3	0
52.4	0
52.5	0
52.6	0
52.7	0
52.8	0
52.9	0
53	0
53.1	0
53.2	0
53.3	0
53.4	0
53.5	0
53.6	0
53.7	0
53.8	0
53.9	0
54	0
54.1	0
54.2	0
54.3	0
54.4	0
54.5	0
54.6	0
54.7	0
54.8	0
54.9	0
55	0
55.1	0
55.2	0
55.3	0
55.4	0
55.5	0
55.6	0
55.7	0
55.8	0
55.9	0
56	0
56.1	0
56.2	0
56.3	0
56.4	0
56.5	0
56.6	0
56.7	0
56.8	0
56.9	0
57	0
57.1	0
57.2	0
57.3	0
57.4	0
57.5	0
57.6	0
57.7	0
57.8	0
57.9	0
58	0
58.1	0
58.2	0
58.3	0
58.4	0
58.5	0
58.6	0
58.7	0
58.8	0
58.9	0
59	0
59.1	0
59.2	0
59.3	0
59.4	0
59.5	0
59.6	0
59.7	0
59.8	0
59.9	0
60	0
60.1	0
60.2	0
60.3	0
60.4	0
60.5	0
60.6	0
60.7	0
60.8	0
60.9	0
61	0
61.1	0
61.2	0
61.3	0
61.4	0
61.5	0
61.6	0
61.7	0
61.8	0
61.9	0
62	0
62.1	0
62.2	0
62.3	0
62.4	0
62.5	0
62.6	0
62.7	0
62.8	0
62.9	0
63	0
63.1	0
63.2	0
63.3	0
63.4	0
63.5	0
63.6	0
63.7	0
63.8	0
63.9	0
64	0
64.1	0
64.2	0
64.3	0
64.4	0
64.5	0
64.6	0
64.7	0
64.8	0
64.9	0
65	0
65.1	0
65.2	0
65.3	0
65.4	0
65.5	0
65.6	0
65.7	0
65.8	0
65.9	0
66	0
66.1	0
66.2	0
66.3	0
66.4	0
66.5	0
66.6	0
66.7	0
66.8	0
66.9	0
67	0
67.1	0
67.2	0
67.3	0
67.4	0
67.5	0
67.6	0
67.7	0
67.8	0
67.9	0
68	0
68.1	0
68.2	0
68.3	0
68.4	0
68.5	0
68.6	0
68.7	0
68.8	0
68.9	0
69	0
69.1	0
69.2	0
69.3	0
69.4	0
69.5	0
69.6	0
69.7	0
69.8	0
69.9	0
70	0
70.1	0
70.2	0
70.3	0
70.4	0
70.5	0
70.6	0
70.7	0
70.8	0
70.9	0
71	0
71.1	0
71.2	0
71.3	0
71.4	0
71.5	0
71.6	0
71.7	0
71.8	0
71.9	0
72	0
72.1	0
72.2	0
72.3	0
72.4	0
72.5	0
72.6	0
72.7	0
72.8	0
72.9	0
73	0
73.1	0
73.2	0
73.3	0
73.4	0
73.5	0
73.6	0
73.7	0
73.8	0
73.9	0
74	0
74.1	0
74.2	0
74.3	0
74.4	0
74.5	0
74.6	0
74.7	0
74.8	0
74.9	0
75	0
75.1	0
75.2	0
75.3	0
75.4	0
75.5	0
75.6	0
75.7	0
75.8	0
75.9	0
76	0
76.1	0
76.2	0
76.3	0
76.4	0
76.5	0
76.6	0
76.7	0
76.8	0
76.9	0
77	0
77.1	0
77.2	0
77.3	0
77.4	0
77.5	0
77.6	0
77.7	0
77.8	0
77.9	0
78	0
78.1	0
78.2	0
78.3	0
78.4	0
78.5	0
78.6	0
78.7	0
78.8	0
78.9	0
79	0
79.1	0
79.2	0
79.3	0
79.4	0
79.5	0
79.6	0
79.7	0
79.8	0
79.9	0
80	0
80.1	0
80.2	0
80.3	0
80.4	0
80.5	0
80.6	0
80.7	0
80.8	0
80.9	0
81	0
81.1	0
81.2	0
81.3	0
81.4	0
81.5	0
81.6	0
81.7	0
81.8	0
81.9	0
82	0
82.1	0
82.2	0
82.3	0
82.4	0
82.5	0
82.6	0
82.7	0
82.8	0
82.9	0
83	0
83.1	0
83.2	0
83.3	0
83.4	0
83.5	0
83.6	0
83.7	0
83.8	0
83.9	0
84	0
84.1	0
84.2	0
84.3	0
84.4	0
84.5	0
84.6	0
84.7	0
84.8	0
84.9	0
85	0
85.1	0
85.2	0
85.3	0
85.4	0
85.5	0
85.6	0
85.7	0
85.8	0
85.9	0
86	0
86.1	0
86.2	0
86.3	0
86.4	0
86.5	0
86.6	0
86.7	0
86.8	0
86.9	0
87	0
87.1	0
87.2	0
87.3	0
87.4	0
87.5	0
87.6	0
87.7	0
87.8	0
87.9	0
88	0
88.1	0
88.2	0
88.3	0
88.4	0
88.5	0
88.6	0
88.7	0
88.8	0
88.9	0
89	0
89.1	0
89.2	0
89.3	0
89.4	0
89.5	0
89.6	0
89.7	0
89.8	0
89.9	0
90	0
90.1	0
90.2	0
90.3	0
90.4	0
90.5	0
90.6	0
90.7	0
90.8	0
90.9	0
91	0
91.1	0
91.2	0
91.3	0
91.4	0
91.5	0
91.6	0
91.7	0
91.8	0
91.9	0
92	0
92.1	0
92.2	0
92.3	0
92.4	0
92.5	0
92.6	0
92.7	0
92.8	0
92.9	0
93	0
93.1	0
93.2	0
93.3	0
93.4	0
93.5	0
93.6	0
93.7	0
93.8	0
93.9	0
94	0
94.1	0
94.2	0
94.3	0
94.4	0
94.5	0
94.6	0
94.7	0
94.8	0
94.9	0
95	0
95.1	0
95.2	0
95.3	0
95.4	0
95.5	0
95.6	0
95.7	0
95.8	0
95.9	0
96	0
96.1	0
96.2	0
96.3	0
96.4	0
96.5	0
96.6	0
96.7	0
96.8	0
96.9	0
97	0
97.1	0
97.2	0
97.3	0
97.4	0
97.5	0
97.6	0
97.7	0
97.8	0
97.9	0
98	0
98.1	0
98.2	0
98.3	0
98.4	0
98.5	0
98.6	0
98.7	0
98.8	0
98.9	0
99	0
99.1	0
99.2	0
99.3	0
99.4	0
99.5	0
99.6	0
99.7	0
99.8	0
99.9	0
100	0
100.1	0
100.2	0
100.3	0
100.4	0
100.5	0
100.6	0
100.7	0
100.8	0
100.9	0
101	0
101.1	0
101.2	0
101.3	0
101.4	0
101.5	0
101.6	0
101.7	0
101.8	0
101.9	0
102	0
102.1	2e-05
102.2	2e-05
102.3	2e-05
102.4	4e-05
102.5	4e-05
102.6	4e-05
102.7	4e-05
102.8	6e-05
102.9	6e-05
103	8e-05
103.1	8e-05
103.2	8e-05
103.3	8e-05
103.4	8e-05
103.5	8e-05
103.6	8e-05
103.7	8e-05
103.8	8e-05
103.9	8e-05
104	0.0001
104.1	0.0001
104.2	0.00012
104.3	0.00012
104.4	0.00012
104.5	0.00012
104.6	0.00014
104.7	0.00016
104.8	0.00016
104.9	0.00018
105	0.0002
105.1	0.0002
105.2	0.0002
105.3	0.0002
105.4	0.00022
105.5	0.00026
105.6	0.0003
105.7	0.00032
105.8	0.00034
105.9	0.00036
106	0.00036
106.1	0.00036
106.2	0.00036
106.3	0.0004
106.4	0.0004
106.5	0.0004
106.6	0.0004
106.7	0.0004
106.8	0.0004
106.9	0.0004
107	0.00044
107.1	0.00046
107.2	0.00048
107.3	0.00048
107.4	0.00048
107.5	0.00048
107.6	0.00048
107.7	0.00048
107.8	0.00052
107.9	0.00052
108	0.00052
108.1	0.00052
108.2	0.00052
108.3	0.00054
108.4	0.00054
108.5	0.00054
108.6	0.00056
108.7	0.00056
108.8	0.0006
108.9	0.0006
109	0.0006
109.1	0.0006
109.2	0.00062
109.3	0.00062
109.4	0.00064
109.5	0.00064
109.6	0.00064
109.7	0.00064
109.8	0.00066
109.9	0.00066
110	0.00066
110.1	0.00066
110.2	0.00066
110.3	0.00066
110.4	0.00066
110.5	0.00066
110.6	0.00068
110.7	0.00068
110.8	0.00068
110.9	0.00072
111	0.00074
111.1	0.00078
111.2	0.0008
111.3	0.00082
111.4	0.00084
111.5	0.00084
111.6	0.00084
111.7	0.00086
111.8	0.0009
111.9	0.0009
112	0.00092
112.1	0.00094
112.2	0.00094
112.3	0.00094
112.4	0.00094
112.5	0.00096
112.6	0.00102
112.7	0.00104
112.8	0.00104
112.9	0.00106
113	0.0011
113.1	0.0011
113.2	0.00114
113.3	0.00118
113.4	0.00118
113.5	0.00122
113.6	0.00122
113.7	0.00124
113.8	0.00126
113.9	0.00128
114	0.0013
114.1	0.00128
114.2	0.0013
114.3	0.00132
114.4	0.00134
114.5	0.00134
114.6	0.00134
114.7	0.00136
114.8	0.00138
114.9	0.00138
115	0.00138
115.1	0.0014
115.2	0.00142
115.3	0.00144
115.4	0.00144
115.5	0.00146
115.6	0.0015
115.7	0.00154
115.8	0.00154
115.9	0.00154
116	0.00156
116.1	0.00156
116.2	0.00156
116.3	0.00156
116.4	0.00162
116.5	0.00166
116.6	0.00166
116.7	0.00168
116.8	0.0017
116.9	0.00172
117	0.00172
117.1	0.00172
117.2	0.00172
117.3	0.0017
117.4	0.00172
117.5	0.00172
117.6	0.00172
117.7	0.00174
117.8	0.00176
117.9	0.00176
118	0.00178
118.1	0.00184
118.2	0.00184
118.3	0.00188
118.4	0.00188
118.5	0.0019
118.6	0.00192
118.7	0.00192
118.8	0.00192
118.9	0.00192
119	0.00192
119.1	0.00192
119.2	0.00192
119.3	0.00192
119.4	0.00194
119.5	0.00194
119.6	0.00196
119.7	0.00198
119.8	0.00198
119.9	0.00202
120	0.00204
120.1	0.00208
120.2	0.00212
120.3	0.00212
120.4	0.00212
120.5	0.00212
120.6	0.00216
120.7	0.00218
120.8	0.0022
120.9	0.0022
121	0.00222
121.1	0.00222
121.2	0.00222
121.3	0.00222
121.4	0.00222
121.5	0.00224
121.6	0.00224
121.7	0.00226
121.8	0.00232
121.9	0.00234
122	0.00236
122.1	0.0024
122.2	0.00244
122.3	0.00244
122.4	0.00242
122.5	0.00248
122.6	0.0025
122.7	0.0025
122.8	0.00254
122.9	0.00254
123	0.00256
123.1	0.00258
123.2	0.00258
123.3	0.0026
123.4	0.00264
123.5	0.00268
123.6	0.0027
123.7	0.0027
123.8	0.0027
123.9	0.00274
124	0.00278
124.1	0.00282
124.2	0.00282
124.3	0.0028
124.4	0.00284
124.5	0.00284
124.6	0.00284
124.7	0.00286
124.8	0.00286
124.9	0.00286
125	0.00286
125.1	0.00292
125.2	0.00292
125.3	0.00292
125.4	0.00298
125.5	0.00298
125.6	0.00298
125.7	0.003
125.8	0.003
125.9	0.003
126	0.003
126.1	0.00302
126.2	0.00302
126.3	0.00308
126.4	0.0031
126.5	0.0031
126.6	0.00312
126.7	0.00312
126.8	0.0031
126.9	0.00314
127	0.00314
127.1	0.00312
127.2	0.00314
127.3	0.00314
127.4	0.00314
127.5	0.00314
127.6	0.00314
127.7	0.00316
127.8	0.00318
127.9	0.0032
128	0.00318
128.1	0.0032
128.2	0.0032
128.3	0.00322
128.4	0.00326
128.5	0.00328
128.6	0.0033
128.7	0.0033
128.8	0.00332
128.9	0.00336
129	0.0034
129.1	0.0034
129.2	0.00344
129.3	0.00344
129.4	0.00346
129.5	0.00346
129.6	0.00352
129.7	0.00356
129.8	0.00356
129.9	0.0036
130	0.0036
130.1	0.00362
130.2	0.0036
130.3	0.00364
130.4	0.00364
130.5	0.00366
130.6	0.00372
130.7	0.00376
130.8	0.0038
130.9	0.00382
131	0.00384
131.1	0.00384
131.2	0.00384
131.3	0.00392
131.4	0.00398
131.5	0.00398
131.6	0.00404
131.7	0.00404
131.8	0.00408
131.9	0.00412
132	0.0041
132.1	0.0041
132.2	0.00408
132.3	0.0041
132.4	0.00412
132.5	0.00414
132.6	0.00414
132.7	0.00414
132.8	0.0042
132.9	0.0042
133	0.00418
133.1	0.00424
133.2	0.00428
133.3	0.00428
133.4	0.00432
133.5	0.00434
133.6	0.00438
133.7	0.0044
133.8	0.0044
133.9	0.00442
134	0.00444
134.1	0.00448
134.2	0.00448
134.3	0.0045
134.4	0.00452
134.5	0.00454
134.6	0.00456
134.7	0.00456
134.8	0.00456
134.9	0.00458
135	0.00458
135.1	0.00458
135.2	0.00458
135.3	0.00462
135.4	0.00464
135.5	0.0047
135.6	0.0047
135.7	0.00476
135.8	0.00478
135.9	0.00482
136	0.00484
136.1	0.00484
136.2	0.00484
136.3	0.00486
136.4	0.00488
136.5	0.0049
136.6	0.0049
136.7	0.0049
136.8	0.00496
136.9	0.00498
137	0.00498
137.1	0.005
137.2	0.00498
137.3	0.005
137.4	0.00502
137.5	0.00506
137.6	0.00506
137.7	0.00506
137.8	0.00504
137.9	0.00504
138	0.00508
138.1	0.00508
138.2	0.00512
138.3	0.0051
138.4	0.0051
138.5	0.0051
138.6	0.00516
138.7	0.00514
138.8	0.00512
138.9	0.00512
139	0.00512
139.1	0.00514
139.2	0.0051
139.3	0.00512
139.4	0.00514
139.5	0.00516
139.6	0.0052
139.7	0.00518
139.8	0.00518
139.9	0.00518
140	0.0052
140.1	0.00522
140.2	0.00522
140.3	0.00526
140.4	0.00528
140.5	0.00526
140.6	0.00528
140.7	0.00528
140.8	0.00532
140.9	0.00532
141	0.00534
141.1	0.00534
141.2	0.00534
141.3	0.00538
141.4	0.00538
141.5	0.00544
141.6	0.00546
141.7	0.00548
141.8	0.0055
141.9	0.0055
142	0.0055
142.1	0.0055
142.2	0.0055
142.3	0.00556
142.4	0.00556
142.5	0.00558
142.6	0.00562
142.7	0.00564
142.8	0.00564
142.9	0.00568
143	0.0057
143.1	0.00572
143.2	0.00572
143.3	0.00576
143.4	0.00578
143.5	0.0058
143.6	0.0058
143.7	0.00584
143.8	0.00586
143.9	0.00586
144	0.00586
144.1	0.00586
144.2	0.00588
144.3	0.0059
144.4	0.00588
144.5	0.00594
144.6	0.00596
144.7	0.00598
144.8	0.00598
144.9	0.00596
145	0.006
145.1	0.00602
145.2	0.00602
145.3	0.00602
145.4	0.00602
145.5	0.00602
145.6	0.00608
145.7	0.00612
145.8	0.00612
145.9	0.00612
146	0.00614
146.1	0.00614
146.2	0.00618
146.3	0.00626
146.4	0.00628
146.5	0.00628
146.6	0.00628
146.7	0.0063
146.8	0.0063
146.9	0.0063
147	0.00632
147.1	0.0064
147.2	0.0064
147.3	0.00638
147.4	0.0064
147.5	0.0064
147.6	0.00644
147.7	0.00646
147.8	0.00648
147.9	0.0065
148	0.00652
148.1	0.00652
148.2	0.00654
148.3	0.00656
148.4	0.00656
148.5	0.00658
148.6	0.00658
148.7	0.0066
148.8	0.00664
148.9	0.00666
149	0.00666
149.1	0.00668
149.2	0.00668
149.3	0.00668
149.4	0.00674
149.5	0.00674
149.6	0.00678
149.7	0.0068
149.8	0.00686
149.9	0.00686
150	0.00688
150.1	0.0069
150.2	0.0069
150.3	0.00694
150.4	0.0069
150.5	0.00692
150.6	0.00696
150.7	0.00702
150.8	0.00706
150.9	0.00714
151	0.00714
151.1	0.00716
151.2	0.00718
151.3	0.0072
151.4	0.00726
151.5	0.00726
151.6	0.00728
151.7	0.0073
151.8	0.00728
151.9	0.00728
152	0.00728
152.1	0.00732
152.2	0.00734
152.3	0.0074
152.4	0.00746
152.5	0.00742
152.6	0.00744
152.7	0.00748
152.8	0.00754
152.9	0.00758
153	0.00756
153.1	0.00754
153.2	0.00752
153.3	0.00754
153.4	0.00754
153.5	0.00754
153.6	0.00756
153.7	0.00756
153.8	0.00758
153.9	0.00758
154	0.00758
154.1	0.00756
154.2	0.00756
154.3	0.0076
154.4	0.00766
154.5	0.00766
154.6	0.00764
154.7	0.00764
154.8	0.00768
154.9	0.00774
155	0.00772
155.1	0.00772
155.2	0.00772
155.3	0.00776
155.4	0.00776
155.5	0.00774
155.6	0.00776
155.7	0.00778
155.8	0.00784
155.9	0.00782
156	0.00784
156.1	0.00784
156.2	0.00782
156.3	0.00778
156.4	0.00778
156.5	0.0078
156.6	0.0078
156.7	0.00782
156.8	0.00788
156.9	0.00792
157	0.008
157.1	0.008
157.2	0.00804
157.3	0.00808
157.4	0.0081
157.5	0.00814
157.6	0.00818
157.7	0.00822
157.8	0.00824
157.9	0.00828
158	0.00826
158.1	0.00824
158.2	0.00826
158.3	0.00826
158.4	0.00826
158.5	0.00828
158.6	0.00832
158.7	0.00836
158.8	0.00838
158.9	0.00842
159	0.00842
159.1	0.00844
159.2	0.00844
159.3	0.00846
159.4	0.0085
159.5	0.00852
159.6	0.00854
159.7	0.00866
159.8	0.0087
159.9	0.00872
160	0.00872
160.1	0.00876
160.2	0.00878
160.3	0.0088
160.4	0.00882
160.5	0.00884
160.6	0.00884
160.7	0.00888
160.8	0.00892
160.9	0.0089
161	0.00892
161.1	0.00892
161.2	0.00896
161.3	0.00894
161.4	0.009
161.5	0.009
161.6	0.009
161.7	0.00896
161.8	0.00898
161.9	0.00898
162	0.00902
162.1	0.00904
162.2	0.0091
162.3	0.0091
162.4	0.0091
162.5	0.0091
162.6	0.00912
162.7	0.00914
162.8	0.00914
162.9	0.00916
163	0.0092
163.1	0.00924
163.2	0.00922
163.3	0.00922
163.4	0.00924
163.5	0.00924
163.6	0.00926
163.7	0.00926
163.8	0.00924
163.9	0.00924
164	0.00928
164.1	0.0093
164.2	0.00928
164.3	0.00928
164.4	0.00928
164.5	0.00928
164.6	0.00934
164.7	0.00936
164.8	0.00936
164.9	0.00936
165	0.00936
165.1	0.00936
165.2	0.00936
165.3	0.00944
165.4	0.00946
165.5	0.00946
165.6	0.00946
165.7	0.00946
165.8	0.00948
165.9	0.00948
166	0.00952
166.1	0.00954
166.2	0.00954
166.3	0.00956
166.4	0.00962
166.5	0.0097
166.6	0.0097
166.7	0.0097
166.8	0.00968
166.9	0.00964
167	0.00966
167.1	0.00968
167.2	0.0097
167.3	0.00972
167.4	0.00978
167.5	0.0098
167.6	0.00984
167.7	0.00986
167.8	0.00986
167.9	0.00988
168	0.0099
168.1	0.00992
168.2	0.00996
168.3	0.00994
168.4	0.00992
168.5	0.0099
168.6	0.00986
168.7	0.00992
168.8	0.00994
168.9	0.00994
169	0.00998
169.1	0.01
169.2	0.01
169.3	0.01
169.4	0.01006
169.5	0.0101
169.6	0.01014
169.7	0.01016
169.8	0.01022
169.9	0.01022
170	0.0103
170.1	0.0103
170.2	0.01032
170.3	0.01032
170.4	0.01034
170.5	0.01036
170.6	0.01036
170.7	0.01038
170.8	0.01036
170.9	0.01036
171	0.0104
171.1	0.0104
171.2	0.01044
171.3	0.01044
171.4	0.01044
171.5	0.01044
171.6	0.01046
171.7	0.01048
171.8	0.01048
171.9	0.01048
172	0.01048
172.1	0.01048
172.2	0.01048
172.3	0.01048
172.4	0.01046
172.5	0.01046
172.6	0.01046
172.7	0.0105
172.8	0.0105
172.9	0.01052
173	0.0105
173.1	0.0105
173.2	0.01046
173.3	0.01048
173.4	0.01048
173.5	0.01052
173.6	0.01056
173.7	0.0105
173.8	0.0105
173.9	0.01054
174	0.01054
174.1	0.01064
174.2	0.01064
174.3	0.01066
174.4	0.01066
174.5	0.01064
174.6	0.01062
174.7	0.01058
174.8	0.0106
174.9	0.0106
175	0.01056
175.1	0.01056
175.2	0.0106
175.3	0.01062
175.4	0.01064
175.5	0.01062
175.6	0.01064
175.7	0.01064
175.8	0.01064
175.9	0.0107
176	0.01074
176.1	0.01078
176.2	0.01078
176.3	0.01076
176.4	0.01078
176.5	0.01076
176.6	0.01076
176.7	0.0108
176.8	0.01082
176.9	0.01082
177	0.01084
177.1	0.01084
177.2	0.0109
177.3	0.01088
177.4	0.01088
177.5	0.01092
177.6	0.01092
177.7	0.01092
177.8	0.01096
177.9	0.01098
178	0.01102
178.1	0.01104
178.2	0.01104
178.3	0.01108
178.4	0.0111
178.5	0.0111
178.6	0.01114
178.7	0.01118
178.8	0.01118
178.9	0.01118
179	0.0112
179.1	0.0112
179.2	0.0112
179.3	0.0112
179.4	0.0112
179.5	0.0112
179.6	0.01122
179.7	0.01122
179.8	0.01122
179.9	0.0113
180	0.0113
180.1	0.01126
180.2	0.01132
180.3	0.01134
180.4	0.01132
180.5	0.01132
180.6	0.01136
180.7	0.0114
180.8	0.0114
180.9	0.0114
181	0.01136
181.1	0.01138
181.2	0.0114
181.3	0.01142
181.4	0.01142
181.5	0.01142
181.6	0.0114
181.7	0.01144
181.8	0.01144
181.9	0.01142
182	0.01144
182.1	0.01146
182.2	0.01148
182.3	0.0115
182.4	0.01152
182.5	0.01154
182.6	0.01158
182.7	0.01158
182.8	0.01158
182.9	0.01158
183	0.01158
183.1	0.0116
183.2	0.01162
183.3	0.01168
183.4	0.0117
183.5	0.01172
183.6	0.01176
183.7	0.01176
183.8	0.0118
183.9	0.01178
184	0.01178
184.1	0.01176
184.2	0.01178
184.3	0.0118
184.4	0.01182
184.5	0.01186
184.6	0.01188
184.7	0.0119
184.8	0.01198
184.9	0.01194
185	0.01198
185.1	0.012
185.2	0.01204
185.3	0.01208
185.4	0.01208
185.5	0.01206
185.6	0.01204
185.7	0.01206
185.8	0.01212
185.9	0.01212
186	0.01214
186.1	0.01214
186.2	0.01214
186.3	0.01216
186.4	0.01218
186.5	0.0122
186.6	0.01222
186.7	0.01224
186.8	0.01224
186.9	0.01222
187	0.01222
187.1	0.01224
187.2	0.01222
187.3	0.01226
187.4	0.01228
187.5	0.0123
187.6	0.01232
187.7	0.01234
187.8	0.01234
187.9	0.01238
188	0.01238
188.1	0.01238
188.2	0.01242
188.3	0.01244
188.4	0.01238
188.5	0.01242
188.6	0.01242
188.7	0.01248
188.8	0.0125
188.9	0.01254
189	0.01254
189.1	0.01254
189.2	0.01254
189.3	0.01246
189.4	0.01248
189.5	0.01248
189.6	0.01246
189.7	0.01246
189.8	0.01248
189.9	0.01246
190	0.01246
190.1	0.01242
190.2	0.01248
190.3	0.0125
190.4	0.01254
190.5	0.01252
190.6	0.01254
190.7	0.01258
190.8	0.01258
190.9	0.01262
191	0.01266
191.1	0.01266
191.2	0.01268
191.3	0.01266
191.4	0.0127
191.5	0.01272
191.6	0.01272
191.7	0.01272
191.8	0.01268
191.9	0.0127
192	0.01268
192.1	0.01268
192.2	0.0127
192.3	0.0127
192.4	0.01272
192.5	0.01274
192.6	0.01274
192.7	0.01278
192.8	0.0128
192.9	0.0128
193	0.01286
193.1	0.01286
193.2	0.0128
193.3	0.01276
193.4	0.01282
193.5	0.01286
193.6	0.0129
193.7	0.0129
193.8	0.0129
193.9	0.01292
194	0.01292
194.1	0.01296
194.2	0.01296
194.3	0.01298
194.4	0.01302
194.5	0.01304
194.6	0.01304
194.7	0.01304
194.8	0.01304
194.9	0.01302
195	0.01304
195.1	0.01304
195.2	0.01302
195.3	0.01306
195.4	0.01306
195.5	0.01312
195.6	0.01312
195.7	0.01312
195.8	0.01316
195.9	0.01314
196	0.01318
196.1	0.01322
196.2	0.01324
196.3	0.01322
196.4	0.01318
196.5	0.01318
196.6	0.01316
196.7	0.01318
196.8	0.01312
196.9	0.01316
197	0.01316
197.1	0.0132
197.2	0.01318
197.3	0.01316
197.4	0.01322
197.5	0.01324
197.6	0.01326
197.7	0.01324
197.8	0.01326
197.9	0.0133
198	0.01338
198.1	0.01338
198.2	0.01338
198.3	0.01338
198.4	0.01338
198.5	0.01342
198.6	0.01342
198.7	0.0134
198.8	0.01334
198.9	0.0134
199	0.01342
199.1	0.01342
199.2	0.01344
199.3	0.01344
199.4	0.01346
199.5	0.01346
199.6	0.01348
199.7	0.01346
199.8	0.01346
199.9	0.01348
200	0.0135
[truncated: 14,000 more rows]
