# Supplementary material for: Bayesian inference of kinetic schemes for ion channels by Kalman filtering
Source: eLife journal article supplement (doi:10.7554/elife.62714), 2022-05-04
Supplement: fig4-data12 [file 1_Sim_N_80_Fluor_MW.xlsx]

## Sheet: 0.125 M
0.1	0
0.2	0
0.3	0
0.4	0
0.5	0
0.6	0
0.7	0
0.8	0
0.9	0
1	0
1.1	0
1.2	0
1.3	0
1.4	0
1.5	0
1.6	0
1.7	0
1.8	0
1.9	0
2	0
2.1	0
2.2	0
2.3	0
2.4	0
2.5	0
2.6	0
2.7	0
2.8	0
2.9	0
3	0
3.1	0
3.2	0
3.3	0
3.4	0
3.5	0
3.6	0
3.7	0
3.8	0
3.9	0
4	0
4.1	0
4.2	0
4.3	0
4.4	0
4.5	0
4.6	0
4.7	0
4.8	0
4.9	0
5	0
5.1	0
5.2	0
5.3	0
5.4	0
5.5	0
5.6	0
5.7	0
5.8	0
5.9	0
6	0
6.1	0
6.2	0
6.3	0
6.4	0
6.5	0
6.6	0
6.7	0
6.8	0
6.9	0
7	0
7.1	0
7.2	0
7.3	0
7.4	0
7.5	0
7.6	0
7.7	0
7.8	0
7.9	0
8	0
8.1	0
8.2	0
8.3	0
8.4	0
8.5	0
8.6	0
8.7	0
8.8	0
8.9	0
9	0
9.1	0
9.2	0
9.3	0
9.4	0
9.5	0
9.6	0
9.7	0
9.8	0
9.9	0
10	0
10.1	0
10.2	0
10.3	0
10.4	0
10.5	0
10.6	0
10.7	0
10.8	0
10.9	0
11	0
11.1	0
11.2	0
11.3	0
11.4	0
11.5	0
11.6	0
11.7	0
11.8	0
11.9	0
12	0
12.1	0
12.2	0
12.3	0
12.4	0
12.5	0
12.6	0
12.7	0
12.8	0
12.9	0
13	0
13.1	0
13.2	0
13.3	0
13.4	0
13.5	0
13.6	0
13.7	0
13.8	0
13.9	0
14	0
14.1	0
14.2	0
14.3	0
14.4	0
14.5	0
14.6	0
14.7	0
14.8	0
14.9	0
15	0
15.1	0
15.2	0
15.3	0
15.4	0
15.5	0
15.6	0
15.7	0
15.8	0
15.9	0
16	0
16.1	0
16.2	0
16.3	0
16.4	0
16.5	0
16.6	0
16.7	0
16.8	0
16.9	0
17	0
17.1	0
17.2	0
17.3	0
17.4	0
17.5	0
17.6	0
17.7	0
17.8	0
17.9	0
18	0
18.1	0
18.2	0
18.3	0
18.4	0
18.5	0
18.6	0
18.7	0
18.8	0
18.9	0
19	0
19.1	0
19.2	0
19.3	0
19.4	0
19.5	0
19.6	0
19.7	0
19.8	0
19.9	0
20	0
20.1	0
20.2	0
20.3	0
20.4	0
20.5	0
20.6	0
20.7	0
20.8	0
20.9	0
21	0
21.1	0
21.2	0
21.3	0
21.4	0
21.5	0
21.6	0
21.7	0
21.8	0
21.9	0
22	0
22.1	0
22.2	0
22.3	0
22.4	0
22.5	0
22.6	0
22.7	0
22.8	0
22.9	0
23	0
23.1	0
23.2	0
23.3	0
23.4	0
23.5	0
23.6	0
23.7	0
23.8	0
23.9	0
24	0
24.1	0
24.2	0
24.3	0
24.4	0
24.5	0
24.6	0
24.7	0
24.8	0
24.9	0
25	0
25.1	0
25.2	0
25.3	0
25.4	0
25.5	0
25.6	0
25.7	0
25.8	0
25.9	0
26	0
26.1	0
26.2	0
26.3	0
26.4	0
26.5	0
26.6	0
26.7	0
26.8	0
26.9	0
27	0
27.1	0
27.2	0
27.3	0
27.4	0
27.5	0
27.6	0
27.7	0
27.8	0
27.9	0
28	0
28.1	0
28.2	0
28.3	0
28.4	0
28.5	0
28.6	0
28.7	0
28.8	0
28.9	0
29	0
29.1	0
29.2	0
29.3	0
29.4	0
29.5	0
29.6	0
29.7	0
29.8	0
29.9	0
30	0
30.1	0
30.2	0
30.3	0
30.4	0
30.5	0
30.6	0
30.7	0
30.8	0
30.9	0
31	0
31.1	0
31.2	0
31.3	0
31.4	0
31.5	0
31.6	0
31.7	0
31.8	0
31.9	0
32	0
32.1	0
32.2	0
32.3	0
32.4	0
32.5	0
32.6	0
32.7	0
32.8	0
32.9	0
33	0
33.1	0
33.2	0
33.3	0
33.4	0
33.5	0
33.6	0
33.7	0
33.8	0
33.9	0
34	0
34.1	0
34.2	0
34.3	0
34.4	0
34.5	0
34.6	0
34.7	0
34.8	0
34.9	0
35	0
35.1	0
35.2	0
35.3	0
35.4	0
35.5	0
35.6	0
35.7	0
35.8	0
35.9	0
36	0
36.1	0
36.2	0
36.3	0
36.4	0
36.5	0
36.6	0
36.7	0
36.8	0
36.9	0
37	0
37.1	0
37.2	0
37.3	0
37.4	0
37.5	0
37.6	0
37.7	0
37.8	0
37.9	0
38	0
38.1	0
38.2	0
38.3	0
38.4	0
38.5	0
38.6	0
38.7	0
38.8	0
38.9	0
39	0
39.1	0
39.2	0
39.3	0
39.4	0
39.5	0
39.6	0
39.7	0
39.8	0
39.9	0
40	0
40.1	0
40.2	0
40.3	0
40.4	0
40.5	0
40.6	0
40.7	0
40.8	0
40.9	0
41	0
41.1	0
41.2	0
41.3	0
41.4	0
41.5	0
41.6	0
41.7	0
41.8	0
41.9	0
42	0
42.1	0
42.2	0
42.3	0
42.4	0
42.5	0
42.6	0
42.7	0
42.8	0
42.9	0
43	0
43.1	0
43.2	0
43.3	0
43.4	0
43.5	0
43.6	0
43.7	0
43.8	0
43.9	0
44	0
44.1	0
44.2	0
44.3	0
44.4	0
44.5	0
44.6	0
44.7	0
44.8	0
44.9	0
45	0
45.1	0
45.2	0
45.3	0
45.4	0
45.5	0
45.6	0
45.7	0
45.8	0
45.9	0
46	0
46.1	0
46.2	0
46.3	0
46.4	0
46.5	0
46.6	0
46.7	0
46.8	0
46.9	0
47	0
47.1	0
47.2	0
47.3	0
47.4	0
47.5	0
47.6	0
47.7	0
47.8	0
47.9	0
48	0
48.1	0
48.2	0
48.3	0
48.4	0
48.5	0
48.6	0
48.7	0
48.8	0
48.9	0
49	0
49.1	0
49.2	0
49.3	0
49.4	0
49.5	0
49.6	0
49.7	0
49.8	0
49.9	0
50	0
50.1	0
50.2	0
50.3	0
50.4	0
50.5	0
50.6	0
50.7	0
50.8	0
50.9	0
51	0
51.1	0
51.2	0
51.3	0
51.4	0
51.5	0
51.6	0
51.7	0
51.8	0
51.9	0
52	0
52.1	0
52.2	0
52.3	0
52.4	0
52.5	0
52.6	0
52.7	0
52.8	0
52.9	0
53	0
53.1	0
53.2	0
53.3	0
53.4	0
53.5	0
53.6	0
53.7	0
53.8	0
53.9	0
54	0
54.1	0
54.2	0
54.3	0
54.4	0
54.5	0
54.6	0
54.7	0
54.8	0
54.9	0
55	0
55.1	0
55.2	0
55.3	0
55.4	0
55.5	0
55.6	0
55.7	0
55.8	0
55.9	0
56	0
56.1	0
56.2	0
56.3	0
56.4	0
56.5	0
56.6	0
56.7	0
56.8	0
56.9	0
57	0
57.1	0
57.2	0
57.3	0
57.4	0
57.5	0
57.6	0
57.7	0
57.8	0
57.9	0
58	0
58.1	0
58.2	0
58.3	0
58.4	0
58.5	0
58.6	0
58.7	0
58.8	0
58.9	0
59	0
59.1	0
59.2	0
59.3	0
59.4	0
59.5	0
59.6	0
59.7	0
59.8	0
59.9	0
60	0
60.1	0
60.2	0
60.3	0
60.4	0
60.5	0
60.6	0
60.7	0
60.8	0
60.9	0
61	0
61.1	0
61.2	0
61.3	0
61.4	0
61.5	0
61.6	0
61.7	0
61.8	0
61.9	0
62	0
62.1	0
62.2	0
62.3	0
62.4	0
62.5	0
62.6	0
62.7	0
62.8	0
62.9	0
63	0
63.1	0
63.2	0
63.3	0
63.4	0
63.5	0
63.6	0
63.7	0
63.8	0
63.9	0
64	0
64.1	0
64.2	0
64.3	0
64.4	0
64.5	0
64.6	0
64.7	0
64.8	0
64.9	0
65	0
65.1	0
65.2	0
65.3	0
65.4	0
65.5	0
65.6	0
65.7	0
65.8	0
65.9	0
66	0
66.1	0
66.2	0
66.3	0
66.4	0
66.5	0
66.6	0
66.7	0
66.8	0
66.9	0
67	0
67.1	0
67.2	0
67.3	0
67.4	0
67.5	0
67.6	0
67.7	0
67.8	0
67.9	0
68	0
68.1	0
68.2	0
68.3	0
68.4	0
68.5	0
68.6	0
68.7	0
68.8	0
68.9	0
69	0
69.1	0
69.2	0
69.3	0
69.4	0
69.5	0
69.6	0
69.7	0
69.8	0
69.9	0
70	0
70.1	0
70.2	0
70.3	0
70.4	0
70.5	0
70.6	0
70.7	0
70.8	0
70.9	0
71	0
71.1	0
71.2	0
71.3	0
71.4	0
71.5	0
71.6	0
71.7	0
71.8	0
71.9	0
72	0
72.1	0
72.2	0
72.3	0
72.4	0
72.5	0
72.6	0
72.7	0
72.8	0
72.9	0
73	0
73.1	0
73.2	0
73.3	0
73.4	0
73.5	0
73.6	0
73.7	0
73.8	0
73.9	0
74	0
74.1	0
74.2	0
74.3	0
74.4	0
74.5	0
74.6	0
74.7	0
74.8	0
74.9	0
75	0
75.1	0
75.2	0
75.3	0
75.4	0
75.5	0
75.6	0
75.7	0
75.8	0
75.9	0
76	0
76.1	0
76.2	0
76.3	0
76.4	0
76.5	0
76.6	0
76.7	0
76.8	0
76.9	0
77	0
77.1	0
77.2	0
77.3	0
77.4	0
77.5	0
77.6	0
77.7	0
77.8	0
77.9	0
78	0
78.1	0
78.2	0
78.3	0
78.4	0
78.5	0
78.6	0
78.7	0
78.8	0
78.9	0
79	0
79.1	0
79.2	0
79.3	0
79.4	0
79.5	0
79.6	0
79.7	0
79.8	0
79.9	0
80	0
80.1	0
80.2	0
80.3	0
80.4	0
80.5	0
80.6	0
80.7	0
80.8	0
80.9	0
81	0
81.1	0
81.2	0
81.3	0
81.4	0
81.5	0
81.6	0
81.7	0
81.8	0
81.9	0
82	0
82.1	0
82.2	0
82.3	0
82.4	0
82.5	0
82.6	0
82.7	0
82.8	0
82.9	0
83	0
83.1	0
83.2	0
83.3	0
83.4	0
83.5	0
83.6	0
83.7	0
83.8	0
83.9	0
84	0
84.1	0
84.2	0
84.3	0
84.4	0
84.5	0
84.6	0
84.7	0
84.8	0
84.9	0
85	0
85.1	0
85.2	0
85.3	0
85.4	0
85.5	0
85.6	0
85.7	0
85.8	0
85.9	0
86	0
86.1	0
86.2	0
86.3	0
86.4	0
86.5	0
86.6	0
86.7	0
86.8	0
86.9	0
87	0
87.1	0
87.2	0
87.3	0
87.4	0
87.5	0
87.6	0
87.7	0
87.8	0
87.9	0
88	0
88.1	0
88.2	0
88.3	0
88.4	0
88.5	0
88.6	0
88.7	0
88.8	0
88.9	0
89	0
89.1	0
89.2	0
89.3	0
89.4	0
89.5	0
89.6	0
89.7	0
89.8	0
89.9	0
90	0
90.1	0
90.2	0
90.3	0
90.4	0
90.5	0
90.6	0
90.7	0
90.8	0
90.9	0
91	0
91.1	0
91.2	0
91.3	0
91.4	0
91.5	0
91.6	0
91.7	0
91.8	0
91.9	0
92	0
92.1	0
92.2	0
92.3	0
92.4	0
92.5	0
92.6	0
92.7	0
92.8	0
92.9	0
93	0
93.1	0
93.2	0
93.3	0
93.4	0
93.5	0
93.6	0
93.7	0
93.8	0
93.9	0
94	0
94.1	0
94.2	0
94.3	0
94.4	0
94.5	0
94.6	0
94.7	0
94.8	0
94.9	0
95	0
95.1	0
95.2	0
95.3	0
95.4	0
95.5	0
95.6	0
95.7	0
95.8	0
95.9	0
96	0
96.1	0
96.2	0
96.3	0
96.4	0
96.5	0
96.6	0
96.7	0
96.8	0
96.9	0
97	0
97.1	0
97.2	0
97.3	0
97.4	0
97.5	0
97.6	0
97.7	0
97.8	0
97.9	0
98	0
98.1	0
98.2	0
98.3	0
98.4	0
98.5	0
98.6	0
98.7	0
98.8	0
98.9	0
99	0
99.1	0
99.2	0
99.3	0
99.4	0
99.5	0
99.6	0
99.7	0
99.8	0
99.9	0
100	0
100.1	0
100.2	0
100.3	0.0125
100.4	0.0125
100.5	0.0125
100.6	0.01875
100.7	0.03125
100.8	0.0375
100.9	0.04375
101	0.05
101.1	0.06875
101.2	0.06875
101.3	0.0625
101.4	0.06875
101.5	0.08125
101.6	0.08125
101.7	0.0875
101.8	0.09375
101.9	0.09375
102	0.09375
102.1	0.10625
102.2	0.1125
102.3	0.11875
102.4	0.11875
102.5	0.125
102.6	0.125
102.7	0.13125
102.8	0.1375
102.9	0.14375
103	0.14375
103.1	0.15
103.2	0.14375
103.3	0.15
103.4	0.15625
103.5	0.15625
103.6	0.16875
103.7	0.18125
103.8	0.19375
103.9	0.2
104	0.20625
104.1	0.21875
104.2	0.2125
104.3	0.21875
104.4	0.21875
104.5	0.21875
104.6	0.225
104.7	0.225
104.8	0.225
104.9	0.21875
105	0.21875
105.1	0.21875
105.2	0.21875
105.3	0.2125
105.4	0.2
105.5	0.2
105.6	0.20625
105.7	0.20625
105.8	0.20625
105.9	0.20625
106	0.20625
106.1	0.2125
106.2	0.2125
106.3	0.2125
106.4	0.2125
106.5	0.2125
106.6	0.20625
106.7	0.2
106.8	0.2125
106.9	0.21875
107	0.21875
107.1	0.225
107.2	0.2375
107.3	0.23125
107.4	0.24375
107.5	0.25
107.6	0.25
107.7	0.24375
107.8	0.24375
107.9	0.25
108	0.24375
108.1	0.25625
108.2	0.25625
108.3	0.275
108.4	0.26875
108.5	0.26875
108.6	0.275
108.7	0.28125
108.8	0.2875
108.9	0.29375
109	0.29375
109.1	0.30625
109.2	0.3125
109.3	0.3125
109.4	0.30625
109.5	0.30625
109.6	0.31875
109.7	0.325
109.8	0.325
109.9	0.325
110	0.31875
110.1	0.31875
110.2	0.33125
110.3	0.325
110.4	0.3125
110.5	0.30625
110.6	0.3
110.7	0.29375
110.8	0.29375
110.9	0.29375
111	0.29375
111.1	0.29375
111.2	0.29375
111.3	0.29375
111.4	0.29375
111.5	0.29375
111.6	0.3
111.7	0.3
111.8	0.29375
111.9	0.3
112	0.29375
112.1	0.3
112.2	0.30625
112.3	0.3125
112.4	0.3
112.5	0.29375
112.6	0.3
112.7	0.29375
112.8	0.3
112.9	0.30625
113	0.3
113.1	0.3
113.2	0.29375
113.3	0.3
113.4	0.29375
113.5	0.29375
113.6	0.29375
113.7	0.3
113.8	0.3
113.9	0.3125
114	0.30625
114.1	0.3125
114.2	0.3125
114.3	0.31875
114.4	0.30625
114.5	0.30625
114.6	0.30625
114.7	0.30625
114.8	0.3125
114.9	0.31875
115	0.30625
115.1	0.3125
115.2	0.3125
115.3	0.3125
115.4	0.3125
115.5	0.3125
115.6	0.3125
115.7	0.3125
115.8	0.3
115.9	0.29375
116	0.3
116.1	0.29375
116.2	0.29375
116.3	0.2875
116.4	0.275
116.5	0.28125
116.6	0.275
116.7	0.2875
116.8	0.28125
116.9	0.28125
117	0.2875
117.1	0.2875
117.2	0.275
117.3	0.275
117.4	0.28125
117.5	0.28125
117.6	0.26875
117.7	0.26875
117.8	0.2625
117.9	0.2625
118	0.26875
118.1	0.26875
118.2	0.28125
118.3	0.2875
118.4	0.2875
118.5	0.3125
118.6	0.3125
118.7	0.3125
118.8	0.30625
118.9	0.3125
119	0.3125
119.1	0.31875
119.2	0.31875
119.3	0.3125
119.4	0.31875
119.5	0.3375
119.6	0.3375
119.7	0.34375
119.8	0.34375
119.9	0.34375
120	0.35625
120.1	0.35625
120.2	0.35
120.3	0.35625
120.4	0.35625
120.5	0.35
120.6	0.3375
120.7	0.3375
120.8	0.3375
120.9	0.3375
121	0.34375
121.1	0.3375
121.2	0.33125
121.3	0.33125
121.4	0.33125
121.5	0.33125
121.6	0.33125
121.7	0.33125
121.8	0.33125
121.9	0.3375
122	0.33125
122.1	0.33125
122.2	0.34375
122.3	0.3375
122.4	0.3375
122.5	0.3375
122.6	0.35
122.7	0.35
122.8	0.35625
122.9	0.35
123	0.35625
123.1	0.3625
123.2	0.36875
123.3	0.36875
123.4	0.35625
123.5	0.35625
123.6	0.3625
123.7	0.3625
123.8	0.35625
123.9	0.3625
124	0.3625
124.1	0.35625
124.2	0.35
124.3	0.34375
124.4	0.3375
124.5	0.33125
124.6	0.3375
124.7	0.33125
124.8	0.3375
124.9	0.325
125	0.33125
125.1	0.325
125.2	0.325
125.3	0.31875
125.4	0.325
125.5	0.325
125.6	0.325
125.7	0.325
125.8	0.325
125.9	0.325
126	0.325
126.1	0.325
126.2	0.33125
126.3	0.3375
126.4	0.3375
126.5	0.325
126.6	0.33125
126.7	0.33125
126.8	0.33125
126.9	0.33125
127	0.3375
127.1	0.34375
127.2	0.34375
127.3	0.34375
127.4	0.34375
127.5	0.34375
127.6	0.34375
127.7	0.35
127.8	0.35625
127.9	0.34375
128	0.34375
128.1	0.34375
128.2	0.34375
128.3	0.34375
128.4	0.34375
128.5	0.35
128.6	0.34375
128.7	0.34375
128.8	0.34375
128.9	0.35
129	0.35625
129.1	0.3625
129.2	0.3625
129.3	0.35625
129.4	0.35
129.5	0.35625
129.6	0.35625
129.7	0.35
129.8	0.35
129.9	0.35
130	0.34375
130.1	0.35625
130.2	0.34375
130.3	0.33125
130.4	0.33125
130.5	0.33125
130.6	0.33125
130.7	0.33125
130.8	0.325
130.9	0.325
131	0.325
131.1	0.3125
131.2	0.33125
131.3	0.33125
131.4	0.33125
131.5	0.325
131.6	0.325
131.7	0.33125
131.8	0.325
131.9	0.325
132	0.3125
132.1	0.3125
132.2	0.31875
132.3	0.325
132.4	0.33125
132.5	0.33125
132.6	0.31875
132.7	0.3125
132.8	0.3125
132.9	0.3125
133	0.325
133.1	0.33125
133.2	0.33125
133.3	0.33125
133.4	0.33125
133.5	0.33125
133.6	0.3375
133.7	0.33125
133.8	0.33125
133.9	0.33125
134	0.3375
134.1	0.35
134.2	0.3375
134.3	0.3375
134.4	0.34375
134.5	0.34375
134.6	0.34375
134.7	0.35
134.8	0.34375
134.9	0.35
135	0.35
135.1	0.34375
135.2	0.35625
135.3	0.3625
135.4	0.3625
135.5	0.3625
135.6	0.36875
135.7	0.36875
135.8	0.38125
135.9	0.36875
136	0.36875
136.1	0.36875
136.2	0.375
136.3	0.375
136.4	0.38125
136.5	0.375
136.6	0.38125
136.7	0.38125
136.8	0.38125
136.9	0.38125
137	0.38125
137.1	0.38125
137.2	0.375
137.3	0.36875
137.4	0.375
137.5	0.36875
137.6	0.36875
137.7	0.38125
137.8	0.38125
137.9	0.38125
138	0.3875
138.1	0.38125
138.2	0.375
138.3	0.38125
138.4	0.38125
138.5	0.38125
138.6	0.375
138.7	0.375
138.8	0.375
138.9	0.375
139	0.38125
139.1	0.3875
139.2	0.3875
139.3	0.38125
139.4	0.38125
139.5	0.3875
139.6	0.39375
139.7	0.4
139.8	0.4
139.9	0.39375
140	0.4
140.1	0.40625
140.2	0.3875
140.3	0.3875
140.4	0.38125
140.5	0.375
140.6	0.4
140.7	0.375
140.8	0.375
140.9	0.38125
141	0.375
141.1	0.3875
141.2	0.375
141.3	0.36875
141.4	0.36875
141.5	0.36875
141.6	0.36875
141.7	0.35625
141.8	0.35625
141.9	0.36875
142	0.36875
142.1	0.375
142.2	0.36875
142.3	0.3625
142.4	0.375
142.5	0.3875
142.6	0.3875
142.7	0.3875
142.8	0.3875
142.9	0.3875
143	0.3875
143.1	0.39375
143.2	0.4
143.3	0.39375
143.4	0.40625
143.5	0.41875
143.6	0.425
143.7	0.425
143.8	0.425
143.9	0.43125
144	0.43125
144.1	0.425
144.2	0.4375
144.3	0.44375
144.4	0.44375
144.5	0.45
144.6	0.45
144.7	0.45625
144.8	0.45
144.9	0.45
145	0.45
145.1	0.45625
145.2	0.45
145.3	0.45
145.4	0.4375
145.5	0.4375
145.6	0.4375
145.7	0.4375
145.8	0.4375
145.9	0.4375
146	0.43125
146.1	0.425
146.2	0.425
146.3	0.425
146.4	0.43125
146.5	0.4375
146.6	0.4375
146.7	0.4375
146.8	0.4375
146.9	0.43125
147	0.425
147.1	0.425
147.2	0.4125
147.3	0.4125
147.4	0.4125
147.5	0.41875
147.6	0.425
147.7	0.43125
147.8	0.425
147.9	0.43125
148	0.43125
148.1	0.43125
148.2	0.43125
148.3	0.44375
148.4	0.44375
148.5	0.4375
148.6	0.4375
148.7	0.43125
148.8	0.425
148.9	0.4125
149	0.40625
149.1	0.3875
149.2	0.3875
149.3	0.39375
149.4	0.39375
149.5	0.4
149.6	0.39375
149.7	0.40625
149.8	0.4
149.9	0.4
150	0.4
150.1	0.40625
150.2	0.40625
150.3	0.40625
150.4	0.4
150.5	0.4
150.6	0.4
150.7	0.4
150.8	0.4
150.9	0.40625
151	0.40625
151.1	0.40625
151.2	0.4125
151.3	0.4125
151.4	0.4125
151.5	0.4125
151.6	0.4375
151.7	0.4375
151.8	0.43125
151.9	0.425
152	0.425
152.1	0.4375
152.2	0.4375
152.3	0.4375
152.4	0.43125
152.5	0.4375
152.6	0.43125
152.7	0.4375
152.8	0.43125
152.9	0.44375
153	0.45
153.1	0.46875
153.2	0.4625
153.3	0.4625
153.4	0.45625
153.5	0.45625
153.6	0.45
153.7	0.45625
153.8	0.4625
153.9	0.46875
154	0.46875
154.1	0.48125
154.2	0.475
154.3	0.46875
154.4	0.46875
154.5	0.46875
154.6	0.4625
154.7	0.4625
154.8	0.45
154.9	0.4375
155	0.43125
155.1	0.43125
155.2	0.43125
155.3	0.4375
155.4	0.4375
155.5	0.4375
155.6	0.44375
155.7	0.4375
155.8	0.44375
155.9	0.45
156	0.45625
156.1	0.4625
156.2	0.45625
156.3	0.4625
156.4	0.4625
156.5	0.4625
156.6	0.46875
156.7	0.45625
156.8	0.45625
156.9	0.4625
157	0.4625
157.1	0.4625
157.2	0.4625
157.3	0.45625
157.4	0.45
157.5	0.45
157.6	0.45625
157.7	0.45625
157.8	0.45625
157.9	0.45
158	0.44375
158.1	0.4375
158.2	0.43125
158.3	0.43125
158.4	0.43125
158.5	0.43125
158.6	0.44375
158.7	0.45
158.8	0.45
158.9	0.45625
159	0.45
159.1	0.44375
159.2	0.44375
159.3	0.44375
159.4	0.45625
159.5	0.45625
159.6	0.45
159.7	0.45
159.8	0.45
159.9	0.44375
160	0.44375
160.1	0.4375
160.2	0.43125
160.3	0.43125
160.4	0.4375
160.5	0.43125
160.6	0.40625
160.7	0.40625
160.8	0.39375
160.9	0.39375
161	0.39375
161.1	0.3875
161.2	0.3875
161.3	0.3875
161.4	0.39375
161.5	0.40625
161.6	0.40625
161.7	0.41875
161.8	0.41875
161.9	0.41875
162	0.41875
162.1	0.425
162.2	0.41875
162.3	0.425
162.4	0.425
162.5	0.425
162.6	0.425
162.7	0.425
162.8	0.43125
162.9	0.425
163	0.41875
163.1	0.41875
163.2	0.425
163.3	0.425
163.4	0.425
163.5	0.43125
163.6	0.425
163.7	0.41875
163.8	0.41875
163.9	0.425
164	0.43125
164.1	0.41875
164.2	0.41875
164.3	0.41875
164.4	0.41875
164.5	0.4375
164.6	0.44375
164.7	0.44375
164.8	0.43125
164.9	0.4125
165	0.40625
165.1	0.4125
165.2	0.4125
165.3	0.425
165.4	0.425
165.5	0.41875
165.6	0.41875
165.7	0.41875
165.8	0.41875
165.9	0.425
166	0.43125
166.1	0.43125
166.2	0.43125
166.3	0.425
166.4	0.4125
166.5	0.4125
166.6	0.4125
166.7	0.40625
166.8	0.4
166.9	0.4
167	0.4
167.1	0.3875
167.2	0.39375
167.3	0.3875
167.4	0.3875
167.5	0.39375
167.6	0.40625
167.7	0.4
167.8	0.4
167.9	0.4
168	0.39375
168.1	0.39375
168.2	0.39375
168.3	0.4
168.4	0.40625
168.5	0.40625
168.6	0.4
168.7	0.4
168.8	0.40625
168.9	0.4
169	0.4
169.1	0.4
169.2	0.40625
169.3	0.41875
169.4	0.425
169.5	0.41875
169.6	0.40625
169.7	0.39375
169.8	0.4
169.9	0.4
170	0.40625
170.1	0.4
170.2	0.4
170.3	0.3875
170.4	0.3875
170.5	0.38125
170.6	0.38125
170.7	0.38125
170.8	0.375
170.9	0.375
171	0.38125
171.1	0.375
171.2	0.375
171.3	0.36875
171.4	0.375
171.5	0.375
171.6	0.38125
171.7	0.38125
171.8	0.38125
171.9	0.38125
172	0.3875
172.1	0.3875
172.2	0.39375
172.3	0.39375
172.4	0.4
172.5	0.39375
172.6	0.39375
172.7	0.38125
172.8	0.38125
172.9	0.3875
173	0.3875
173.1	0.4
173.2	0.39375
173.3	0.3875
173.4	0.38125
173.5	0.375
173.6	0.375
173.7	0.375
173.8	0.375
173.9	0.375
174	0.375
174.1	0.375
174.2	0.375
174.3	0.375
174.4	0.38125
174.5	0.38125
174.6	0.38125
174.7	0.3875
174.8	0.3875
174.9	0.38125
175	0.38125
175.1	0.36875
175.2	0.3625
175.3	0.35625
175.4	0.35625
175.5	0.35625
175.6	0.3625
175.7	0.3625
175.8	0.3625
175.9	0.3625
176	0.36875
176.1	0.3625
176.2	0.3625
176.3	0.3625
176.4	0.35625
176.5	0.34375
176.6	0.34375
176.7	0.34375
176.8	0.35
176.9	0.35
177	0.35
177.1	0.35625
177.2	0.35
177.3	0.35
177.4	0.35625
177.5	0.35625
177.6	0.35625
177.7	0.35625
177.8	0.35625
177.9	0.35625
178	0.3625
178.1	0.3625
178.2	0.3625
178.3	0.35625
178.4	0.35625
178.5	0.35
178.6	0.35
178.7	0.35
178.8	0.35625
178.9	0.3625
179	0.3625
179.1	0.3625
179.2	0.3625
179.3	0.3625
179.4	0.35625
179.5	0.3625
179.6	0.36875
179.7	0.375
179.8	0.375
179.9	0.375
180	0.36875
180.1	0.35625
180.2	0.35
180.3	0.34375
180.4	0.34375
180.5	0.34375
180.6	0.34375
180.7	0.34375
180.8	0.3375
180.9	0.3375
181	0.325
181.1	0.325
181.2	0.31875
181.3	0.30625
181.4	0.3
181.5	0.30625
181.6	0.3125
181.7	0.30625
181.8	0.30625
181.9	0.3
182	0.29375
182.1	0.2875
182.2	0.30625
182.3	0.30625
182.4	0.30625
182.5	0.3125
182.6	0.3125
182.7	0.31875
182.8	0.31875
182.9	0.31875
183	0.31875
183.1	0.325
183.2	0.31875
183.3	0.31875
183.4	0.31875
183.5	0.3125
183.6	0.3125
183.7	0.3125
183.8	0.3125
183.9	0.3
184	0.30625
184.1	0.3125
184.2	0.3125
184.3	0.31875
184.4	0.31875
184.5	0.30625
184.6	0.30625
184.7	0.31875
184.8	0.31875
184.9	0.325
185	0.325
185.1	0.3375
185.2	0.3375
185.3	0.34375
185.4	0.35625
185.5	0.35625
185.6	0.34375
185.7	0.35
185.8	0.35
185.9	0.3375
186	0.3375
186.1	0.3375
186.2	0.34375
186.3	0.33125
186.4	0.325
186.5	0.325
186.6	0.325
186.7	0.325
186.8	0.33125
186.9	0.3375
187	0.34375
187.1	0.35
187.2	0.35625
187.3	0.35
187.4	0.3375
187.5	0.33125
187.6	0.34375
187.7	0.31875
187.8	0.3125
187.9	0.3125
188	0.3125
188.1	0.31875
188.2	0.31875
188.3	0.33125
188.4	0.325
188.5	0.3125
188.6	0.30625
188.7	0.3
188.8	0.3
188.9	0.30625
189	0.2875
189.1	0.2875
189.2	0.2875
189.3	0.28125
189.4	0.28125
189.5	0.2875
189.6	0.2875
189.7	0.3
189.8	0.3
189.9	0.3
190	0.3
190.1	0.3
190.2	0.3
190.3	0.3
190.4	0.31875
190.5	0.31875
190.6	0.325
190.7	0.325
190.8	0.3375
190.9	0.34375
191	0.35
191.1	0.35625
191.2	0.3625
191.3	0.3625
191.4	0.3625
191.5	0.36875
191.6	0.36875
191.7	0.3625
191.8	0.36875
191.9	0.36875
192	0.36875
192.1	0.375
192.2	0.39375
192.3	0.3875
192.4	0.39375
192.5	0.39375
192.6	0.3875
192.7	0.3875
192.8	0.38125
192.9	0.375
193	0.36875
193.1	0.375
193.2	0.375
193.3	0.3625
193.4	0.36875
193.5	0.375
193.6	0.375
193.7	0.3875
193.8	0.39375
193.9	0.3875
194	0.39375
194.1	0.4
194.2	0.39375
194.3	0.39375
194.4	0.3875
194.5	0.39375
194.6	0.4
194.7	0.3875
194.8	0.38125
194.9	0.38125
195	0.375
195.1	0.38125
195.2	0.375
195.3	0.375
195.4	0.375
195.5	0.375
195.6	0.375
195.7	0.36875
195.8	0.375
195.9	0.375
196	0.375
196.1	0.38125
196.2	0.38125
196.3	0.3875
196.4	0.39375
196.5	0.4
196.6	0.40625
196.7	0.39375
196.8	0.39375
196.9	0.39375
197	0.39375
197.1	0.39375
197.2	0.3875
197.3	0.38125
197.4	0.38125
197.5	0.3875
197.6	0.39375
197.7	0.39375
197.8	0.3875
197.9	0.38125
198	0.375
198.1	0.375
198.2	0.375
198.3	0.36875
198.4	0.38125
198.5	0.39375
198.6	0.39375
198.7	0.39375
198.8	0.39375
198.9	0.3875
199	0.3875
199.1	0.38125
199.2	0.38125
199.3	0.3875
199.4	0.375
199.5	0.375
199.6	0.36875
199.7	0.3625
199.8	0.3625
199.9	0.36875
200	0.36875
[truncated: 14,000 more rows]
