# Supplementary material for: Bayesian inference of kinetic schemes for ion channels by Kalman filtering
Source: eLife journal article supplement (doi:10.7554/elife.62714), 2022-05-04
Supplement: fig4-data12 [file 1_Sim_N_80_Strom_MW.xlsx]

## Sheet: 0.125 M
0.1	0
0.2	0
0.3	0
0.4	0
0.5	0
0.6	0
0.7	0
0.8	0
0.9	0
1	0
1.1	0
1.2	0
1.3	0
1.4	0
1.5	0
1.6	0
1.7	0
1.8	0
1.9	0
2	0
2.1	0
2.2	0
2.3	0
2.4	0
2.5	0
2.6	0
2.7	0
2.8	0
2.9	0
3	0
3.1	0
3.2	0
3.3	0
3.4	0
3.5	0
3.6	0
3.7	0
3.8	0
3.9	0
4	0
4.1	0
4.2	0
4.3	0
4.4	0
4.5	0
4.6	0
4.7	0
4.8	0
4.9	0
5	0
5.1	0
5.2	0
5.3	0
5.4	0
5.5	0
5.6	0
5.7	0
5.8	0
5.9	0
6	0
6.1	0
6.2	0
6.3	0
6.4	0
6.5	0
6.6	0
6.7	0
6.8	0
6.9	0
7	0
7.1	0
7.2	0
7.3	0
7.4	0
7.5	0
7.6	0
7.7	0
7.8	0
7.9	0
8	0
8.1	0
8.2	0
8.3	0
8.4	0
8.5	0
8.6	0
8.7	0
8.8	0
8.9	0
9	0
9.1	0
9.2	0
9.3	0
9.4	0
9.5	0
9.6	0
9.7	0
9.8	0
9.9	0
10	0
10.1	0
10.2	0
10.3	0
10.4	0
10.5	0
10.6	0
10.7	0
10.8	0
10.9	0
11	0
11.1	0
11.2	0
11.3	0
11.4	0
11.5	0
11.6	0
11.7	0
11.8	0
11.9	0
12	0
12.1	0
12.2	0
12.3	0
12.4	0
12.5	0
12.6	0
12.7	0
12.8	0
12.9	0
13	0
13.1	0
13.2	0
13.3	0
13.4	0
13.5	0
13.6	0
13.7	0
13.8	0
13.9	0
14	0
14.1	0
14.2	0
14.3	0
14.4	0
14.5	0
14.6	0
14.7	0
14.8	0
14.9	0
15	0
15.1	0
15.2	0
15.3	0
15.4	0
15.5	0
15.6	0
15.7	0
15.8	0
15.9	0
16	0
16.1	0
16.2	0
16.3	0
16.4	0
16.5	0
16.6	0
16.7	0
16.8	0
16.9	0
17	0
17.1	0
17.2	0
17.3	0
17.4	0
17.5	0
17.6	0
17.7	0
17.8	0
17.9	0
18	0
18.1	0
18.2	0
18.3	0
18.4	0
18.5	0
18.6	0
18.7	0
18.8	0
18.9	0
19	0
19.1	0
19.2	0
19.3	0
19.4	0
19.5	0
19.6	0
19.7	0
19.8	0
19.9	0
20	0
20.1	0
20.2	0
20.3	0
20.4	0
20.5	0
20.6	0
20.7	0
20.8	0
20.9	0
21	0
21.1	0
21.2	0
21.3	0
21.4	0
21.5	0
21.6	0
21.7	0
21.8	0
21.9	0
22	0
22.1	0
22.2	0
22.3	0
22.4	0
22.5	0
22.6	0
22.7	0
22.8	0
22.9	0
23	0
23.1	0
23.2	0
23.3	0
23.4	0
23.5	0
23.6	0
23.7	0
23.8	0
23.9	0
24	0
24.1	0
24.2	0
24.3	0
24.4	0
24.5	0
24.6	0
24.7	0
24.8	0
24.9	0
25	0
25.1	0
25.2	0
25.3	0
25.4	0
25.5	0
25.6	0
25.7	0
25.8	0
25.9	0
26	0
26.1	0
26.2	0
26.3	0
26.4	0
26.5	0
26.6	0
26.7	0
26.8	0
26.9	0
27	0
27.1	0
27.2	0
27.3	0
27.4	0
27.5	0
27.6	0
27.7	0
27.8	0
27.9	0
28	0
28.1	0
28.2	0
28.3	0
28.4	0
28.5	0
28.6	0
28.7	0
28.8	0
28.9	0
29	0
29.1	0
29.2	0
29.3	0
29.4	0
29.5	0
29.6	0
29.7	0
29.8	0
29.9	0
30	0
30.1	0
30.2	0
30.3	0
30.4	0
30.5	0
30.6	0
30.7	0
30.8	0
30.9	0
31	0
31.1	0
31.2	0
31.3	0
31.4	0
31.5	0
31.6	0
31.7	0
31.8	0
31.9	0
32	0
32.1	0
32.2	0
32.3	0
32.4	0
32.5	0
32.6	0
32.7	0
32.8	0
32.9	0
33	0
33.1	0
33.2	0
33.3	0
33.4	0
33.5	0
33.6	0
33.7	0
33.8	0
33.9	0
34	0
34.1	0
34.2	0
34.3	0
34.4	0
34.5	0
34.6	0
34.7	0
34.8	0
34.9	0
35	0
35.1	0
35.2	0
35.3	0
35.4	0
35.5	0
35.6	0
35.7	0
35.8	0
35.9	0
36	0
36.1	0
36.2	0
36.3	0
36.4	0
36.5	0
36.6	0
36.7	0
36.8	0
36.9	0
37	0
37.1	0
37.2	0
37.3	0
37.4	0
37.5	0
37.6	0
37.7	0
37.8	0
37.9	0
38	0
38.1	0
38.2	0
38.3	0
38.4	0
38.5	0
38.6	0
38.7	0
38.8	0
38.9	0
39	0
39.1	0
39.2	0
39.3	0
39.4	0
39.5	0
39.6	0
39.7	0
39.8	0
39.9	0
40	0
40.1	0
40.2	0
40.3	0
40.4	0
40.5	0
40.6	0
40.7	0
40.8	0
40.9	0
41	0
41.1	0
41.2	0
41.3	0
41.4	0
41.5	0
41.6	0
41.7	0
41.8	0
41.9	0
42	0
42.1	0
42.2	0
42.3	0
42.4	0
42.5	0
42.6	0
42.7	0
42.8	0
42.9	0
43	0
43.1	0
43.2	0
43.3	0
43.4	0
43.5	0
43.6	0
43.7	0
43.8	0
43.9	0
44	0
44.1	0
44.2	0
44.3	0
44.4	0
44.5	0
44.6	0
44.7	0
44.8	0
44.9	0
45	0
45.1	0
45.2	0
45.3	0
45.4	0
45.5	0
45.6	0
45.7	0
45.8	0
45.9	0
46	0
46.1	0
46.2	0
46.3	0
46.4	0
46.5	0
46.6	0
46.7	0
46.8	0
46.9	0
47	0
47.1	0
47.2	0
47.3	0
47.4	0
47.5	0
47.6	0
47.7	0
47.8	0
47.9	0
48	0
48.1	0
48.2	0
48.3	0
48.4	0
48.5	0
48.6	0
48.7	0
48.8	0
48.9	0
49	0
49.1	0
49.2	0
49.3	0
49.4	0
49.5	0
49.6	0
49.7	0
49.8	0
49.9	0
50	0
50.1	0
50.2	0
50.3	0
50.4	0
50.5	0
50.6	0
50.7	0
50.8	0
50.9	0
51	0
51.1	0
51.2	0
51.3	0
51.4	0
51.5	0
51.6	0
51.7	0
51.8	0
51.9	0
52	0
52.1	0
52.2	0
52.3	0
52.4	0
52.5	0
52.6	0
52.7	0
52.8	0
52.9	0
53	0
53.1	0
53.2	0
53.3	0
53.4	0
53.5	0
53.6	0
53.7	0
53.8	0
53.9	0
54	0
54.1	0
54.2	0
54.3	0
54.4	0
54.5	0
54.6	0
54.7	0
54.8	0
54.9	0
55	0
55.1	0
55.2	0
55.3	0
55.4	0
55.5	0
55.6	0
55.7	0
55.8	0
55.9	0
56	0
56.1	0
56.2	0
56.3	0
56.4	0
56.5	0
56.6	0
56.7	0
56.8	0
56.9	0
57	0
57.1	0
57.2	0
57.3	0
57.4	0
57.5	0
57.6	0
57.7	0
57.8	0
57.9	0
58	0
58.1	0
58.2	0
58.3	0
58.4	0
58.5	0
58.6	0
58.7	0
58.8	0
58.9	0
59	0
59.1	0
59.2	0
59.3	0
59.4	0
59.5	0
59.6	0
59.7	0
59.8	0
59.9	0
60	0
60.1	0
60.2	0
60.3	0
60.4	0
60.5	0
60.6	0
60.7	0
60.8	0
60.9	0
61	0
61.1	0
61.2	0
61.3	0
61.4	0
61.5	0
61.6	0
61.7	0
61.8	0
61.9	0
62	0
62.1	0
62.2	0
62.3	0
62.4	0
62.5	0
62.6	0
62.7	0
62.8	0
62.9	0
63	0
63.1	0
63.2	0
63.3	0
63.4	0
63.5	0
63.6	0
63.7	0
63.8	0
63.9	0
64	0
64.1	0
64.2	0
64.3	0
64.4	0
64.5	0
64.6	0
64.7	0
64.8	0
64.9	0
65	0
65.1	0
65.2	0
65.3	0
65.4	0
65.5	0
65.6	0
65.7	0
65.8	0
65.9	0
66	0
66.1	0
66.2	0
66.3	0
66.4	0
66.5	0
66.6	0
66.7	0
66.8	0
66.9	0
67	0
67.1	0
67.2	0
67.3	0
67.4	0
67.5	0
67.6	0
67.7	0
67.8	0
67.9	0
68	0
68.1	0
68.2	0
68.3	0
68.4	0
68.5	0
68.6	0
68.7	0
68.8	0
68.9	0
69	0
69.1	0
69.2	0
69.3	0
69.4	0
69.5	0
69.6	0
69.7	0
69.8	0
69.9	0
70	0
70.1	0
70.2	0
70.3	0
70.4	0
70.5	0
70.6	0
70.7	0
70.8	0
70.9	0
71	0
71.1	0
71.2	0
71.3	0
71.4	0
71.5	0
71.6	0
71.7	0
71.8	0
71.9	0
72	0
72.1	0
72.2	0
72.3	0
72.4	0
72.5	0
72.6	0
72.7	0
72.8	0
72.9	0
73	0
73.1	0
73.2	0
73.3	0
73.4	0
73.5	0
73.6	0
73.7	0
73.8	0
73.9	0
74	0
74.1	0
74.2	0
74.3	0
74.4	0
74.5	0
74.6	0
74.7	0
74.8	0
74.9	0
75	0
75.1	0
75.2	0
75.3	0
75.4	0
75.5	0
75.6	0
75.7	0
75.8	0
75.9	0
76	0
76.1	0
76.2	0
76.3	0
76.4	0
76.5	0
76.6	0
76.7	0
76.8	0
76.9	0
77	0
77.1	0
77.2	0
77.3	0
77.4	0
77.5	0
77.6	0
77.7	0
77.8	0
77.9	0
78	0
78.1	0
78.2	0
78.3	0
78.4	0
78.5	0
78.6	0
78.7	0
78.8	0
78.9	0
79	0
79.1	0
79.2	0
79.3	0
79.4	0
79.5	0
79.6	0
79.7	0
79.8	0
79.9	0
80	0
80.1	0
80.2	0
80.3	0
80.4	0
80.5	0
80.6	0
80.7	0
80.8	0
80.9	0
81	0
81.1	0
81.2	0
81.3	0
81.4	0
81.5	0
81.6	0
81.7	0
81.8	0
81.9	0
82	0
82.1	0
82.2	0
82.3	0
82.4	0
82.5	0
82.6	0
82.7	0
82.8	0
82.9	0
83	0
83.1	0
83.2	0
83.3	0
83.4	0
83.5	0
83.6	0
83.7	0
83.8	0
83.9	0
84	0
84.1	0
84.2	0
84.3	0
84.4	0
84.5	0
84.6	0
84.7	0
84.8	0
84.9	0
85	0
85.1	0
85.2	0
85.3	0
85.4	0
85.5	0
85.6	0
85.7	0
85.8	0
85.9	0
86	0
86.1	0
86.2	0
86.3	0
86.4	0
86.5	0
86.6	0
86.7	0
86.8	0
86.9	0
87	0
87.1	0
87.2	0
87.3	0
87.4	0
87.5	0
87.6	0
87.7	0
87.8	0
87.9	0
88	0
88.1	0
88.2	0
88.3	0
88.4	0
88.5	0
88.6	0
88.7	0
88.8	0
88.9	0
89	0
89.1	0
89.2	0
89.3	0
89.4	0
89.5	0
89.6	0
89.7	0
89.8	0
89.9	0
90	0
90.1	0
90.2	0
90.3	0
90.4	0
90.5	0
90.6	0
90.7	0
90.8	0
90.9	0
91	0
91.1	0
91.2	0
91.3	0
91.4	0
91.5	0
91.6	0
91.7	0
91.8	0
91.9	0
92	0
92.1	0
92.2	0
92.3	0
92.4	0
92.5	0
92.6	0
92.7	0
92.8	0
92.9	0
93	0
93.1	0
93.2	0
93.3	0
93.4	0
93.5	0
93.6	0
93.7	0
93.8	0
93.9	0
94	0
94.1	0
94.2	0
94.3	0
94.4	0
94.5	0
94.6	0
94.7	0
94.8	0
94.9	0
95	0
95.1	0
95.2	0
95.3	0
95.4	0
95.5	0
95.6	0
95.7	0
95.8	0
95.9	0
96	0
96.1	0
96.2	0
96.3	0
96.4	0
96.5	0
96.6	0
96.7	0
96.8	0
96.9	0
97	0
97.1	0
97.2	0
97.3	0
97.4	0
97.5	0
97.6	0
97.7	0
97.8	0
97.9	0
98	0
98.1	0
98.2	0
98.3	0
98.4	0
98.5	0
98.6	0
98.7	0
98.8	0
98.9	0
99	0
99.1	0
99.2	0
99.3	0
99.4	0
99.5	0
99.6	0
99.7	0
99.8	0
99.9	0
100	0
100.1	0
100.2	0
100.3	0
100.4	0
100.5	0
100.6	0
100.7	0
100.8	0
100.9	0
101	0
101.1	0
101.2	0
101.3	0
101.4	0
101.5	0.0125
101.6	0.0125
101.7	0.0125
101.8	0.0125
101.9	0.0125
102	0.0125
102.1	0.0125
102.2	0.0125
102.3	0.0125
102.4	0.0125
102.5	0.0125
102.6	0.0125
102.7	0.0125
102.8	0.0125
102.9	0.0125
103	0.0125
103.1	0.0125
103.2	0.0125
103.3	0.0125
103.4	0.0125
103.5	0.0125
103.6	0.0125
103.7	0.0125
103.8	0.0125
103.9	0.0125
104	0.0125
104.1	0.0125
104.2	0.0125
104.3	0.0125
104.4	0.0125
104.5	0.0125
104.6	0.0125
104.7	0.0125
104.8	0.0125
104.9	0.0125
105	0.0125
105.1	0.0125
105.2	0.0125
105.3	0.0125
105.4	0.0125
105.5	0.0125
105.6	0.025
105.7	0.025
105.8	0.025
105.9	0.025
106	0.025
106.1	0.025
106.2	0.025
106.3	0.025
106.4	0.025
106.5	0.025
106.6	0.025
106.7	0.025
106.8	0.025
106.9	0.025
107	0.025
107.1	0.025
107.2	0.025
107.3	0.025
107.4	0.025
107.5	0.025
107.6	0.025
107.7	0.025
107.8	0.025
107.9	0.025
108	0.025
108.1	0.025
108.2	0.025
108.3	0.025
108.4	0.025
108.5	0.025
108.6	0.025
108.7	0.025
108.8	0.025
108.9	0.025
109	0.025
109.1	0.025
109.2	0.025
109.3	0.025
109.4	0.025
109.5	0.025
109.6	0.025
109.7	0.025
109.8	0.025
109.9	0.025
110	0.025
110.1	0.025
110.2	0.025
110.3	0.025
110.4	0.025
110.5	0.025
110.6	0.025
110.7	0.025
110.8	0.025
110.9	0.025
111	0.025
111.1	0.025
111.2	0.025
111.3	0.025
111.4	0.025
111.5	0.025
111.6	0.025
111.7	0.025
111.8	0.025
111.9	0.025
112	0.025
112.1	0.025
112.2	0.025
112.3	0.025
112.4	0.025
112.5	0.025
112.6	0.025
112.7	0.025
112.8	0.025
112.9	0.025
113	0.025
113.1	0.025
113.2	0.025
113.3	0.025
113.4	0.025
113.5	0.025
113.6	0.025
113.7	0.025
113.8	0.025
113.9	0.025
114	0.025
114.1	0.025
114.2	0.025
114.3	0.025
114.4	0.025
114.5	0.025
114.6	0.025
114.7	0.025
114.8	0.025
114.9	0.025
115	0.025
115.1	0.025
115.2	0.025
115.3	0.025
115.4	0.025
115.5	0.025
115.6	0.025
115.7	0.025
115.8	0.025
115.9	0.025
116	0.025
116.1	0.025
116.2	0.025
116.3	0.025
116.4	0.025
116.5	0.025
116.6	0.025
116.7	0.025
116.8	0.025
116.9	0.025
117	0.025
117.1	0.025
117.2	0.025
117.3	0.025
117.4	0.025
117.5	0.025
117.6	0.025
117.7	0.025
117.8	0.025
117.9	0.025
118	0.025
118.1	0.025
118.2	0.025
118.3	0.025
118.4	0.025
118.5	0.025
118.6	0.025
118.7	0.025
118.8	0.025
118.9	0.025
119	0.025
119.1	0.025
119.2	0.025
119.3	0.025
119.4	0.025
119.5	0.025
119.6	0.025
119.7	0.025
119.8	0.0375
119.9	0.0375
120	0.0375
120.1	0.0375
120.2	0.0375
120.3	0.0375
120.4	0.0375
120.5	0.0375
120.6	0.0375
120.7	0.0375
120.8	0.0375
120.9	0.0375
121	0.0375
121.1	0.0375
121.2	0.0375
121.3	0.0375
121.4	0.0375
121.5	0.0375
121.6	0.0375
121.7	0.0375
121.8	0.0375
121.9	0.0375
122	0.0375
122.1	0.0375
122.2	0.0375
122.3	0.0375
122.4	0.0375
122.5	0.0375
122.6	0.0375
122.7	0.0375
122.8	0.0375
122.9	0.0375
123	0.0375
123.1	0.0375
123.2	0.0375
123.3	0.0375
123.4	0.0375
123.5	0.0375
123.6	0.0375
123.7	0.0375
123.8	0.0375
123.9	0.0375
124	0.0375
124.1	0.0375
124.2	0.0375
124.3	0.0375
124.4	0.0375
124.5	0.0375
124.6	0.0375
124.7	0.0375
124.8	0.0375
124.9	0.0375
125	0.0375
125.1	0.0375
125.2	0.0375
125.3	0.0375
125.4	0.0375
125.5	0.0375
125.6	0.0375
125.7	0.0375
125.8	0.0375
125.9	0.0375
126	0.0375
126.1	0.0375
126.2	0.0375
126.3	0.0375
126.4	0.0375
126.5	0.0375
126.6	0.0375
126.7	0.0375
126.8	0.0375
126.9	0.0375
127	0.0375
127.1	0.0375
127.2	0.0375
127.3	0.0375
127.4	0.0375
127.5	0.0375
127.6	0.0375
127.7	0.0375
127.8	0.0375
127.9	0.0375
128	0.0375
128.1	0.0375
128.2	0.0375
128.3	0.0375
128.4	0.0375
128.5	0.0375
128.6	0.0375
128.7	0.0375
128.8	0.0375
128.9	0.0375
129	0.0375
129.1	0.05
129.2	0.05
129.3	0.05
129.4	0.05
129.5	0.05
129.6	0.05
129.7	0.05
129.8	0.05
129.9	0.05
130	0.05
130.1	0.05
130.2	0.05
130.3	0.0625
130.4	0.0625
130.5	0.0625
130.6	0.0625
130.7	0.0625
130.8	0.0625
130.9	0.0625
131	0.0625
131.1	0.0625
131.2	0.0625
131.3	0.0625
131.4	0.0625
131.5	0.0625
131.6	0.0625
131.7	0.0625
131.8	0.0625
131.9	0.0625
132	0.0625
132.1	0.0625
132.2	0.0625
132.3	0.0625
132.4	0.0625
132.5	0.0625
132.6	0.0625
132.7	0.0625
132.8	0.0625
132.9	0.0625
133	0.0625
133.1	0.0625
133.2	0.0625
133.3	0.0625
133.4	0.0625
133.5	0.0625
133.6	0.0625
133.7	0.0625
133.8	0.0625
133.9	0.0625
134	0.0625
134.1	0.0625
134.2	0.0625
134.3	0.0625
134.4	0.0625
134.5	0.0625
134.6	0.0625
134.7	0.0625
134.8	0.0625
134.9	0.075
135	0.075
135.1	0.075
135.2	0.075
135.3	0.075
135.4	0.075
135.5	0.075
135.6	0.075
135.7	0.075
135.8	0.075
135.9	0.075
136	0.075
136.1	0.075
136.2	0.075
136.3	0.075
136.4	0.075
136.5	0.075
136.6	0.075
136.7	0.075
136.8	0.075
136.9	0.075
137	0.075
137.1	0.075
137.2	0.075
137.3	0.075
137.4	0.075
137.5	0.075
137.6	0.075
137.7	0.075
137.8	0.075
137.9	0.075
138	0.075
138.1	0.075
138.2	0.075
138.3	0.0875
138.4	0.0875
138.5	0.0875
138.6	0.0875
138.7	0.0875
138.8	0.0875
138.9	0.0875
139	0.0875
139.1	0.0875
139.2	0.0875
139.3	0.0875
139.4	0.0875
139.5	0.0875
139.6	0.0875
139.7	0.075
139.8	0.075
139.9	0.075
140	0.075
140.1	0.075
140.2	0.075
140.3	0.075
140.4	0.075
140.5	0.075
140.6	0.075
140.7	0.075
140.8	0.075
140.9	0.075
141	0.075
141.1	0.075
141.2	0.075
141.3	0.075
141.4	0.075
141.5	0.075
141.6	0.075
141.7	0.075
141.8	0.075
141.9	0.075
142	0.075
142.1	0.075
142.2	0.075
142.3	0.075
142.4	0.075
142.5	0.075
142.6	0.075
142.7	0.075
142.8	0.075
142.9	0.075
143	0.075
143.1	0.075
143.2	0.075
143.3	0.075
143.4	0.075
143.5	0.075
143.6	0.075
143.7	0.075
143.8	0.075
143.9	0.075
144	0.075
144.1	0.075
144.2	0.075
144.3	0.075
144.4	0.075
144.5	0.075
144.6	0.075
144.7	0.075
144.8	0.075
144.9	0.075
145	0.075
145.1	0.075
145.2	0.075
145.3	0.075
145.4	0.075
145.5	0.075
145.6	0.075
145.7	0.075
145.8	0.075
145.9	0.075
146	0.075
146.1	0.075
146.2	0.075
146.3	0.075
146.4	0.075
146.5	0.075
146.6	0.075
146.7	0.075
146.8	0.075
146.9	0.075
147	0.075
147.1	0.075
147.2	0.075
147.3	0.075
147.4	0.075
147.5	0.075
147.6	0.075
147.7	0.075
147.8	0.075
147.9	0.0875
148	0.0875
148.1	0.1
148.2	0.1
148.3	0.1
148.4	0.1125
148.5	0.1125
148.6	0.125
148.7	0.125
148.8	0.125
148.9	0.1125
149	0.1125
149.1	0.1125
149.2	0.1125
149.3	0.1125
149.4	0.1125
149.5	0.1125
149.6	0.1125
149.7	0.1125
149.8	0.1125
149.9	0.1125
150	0.1125
150.1	0.1125
150.2	0.1125
150.3	0.1125
150.4	0.1125
150.5	0.1125
150.6	0.1125
150.7	0.1125
150.8	0.1125
150.9	0.1125
151	0.1125
151.1	0.1125
151.2	0.1125
151.3	0.1125
151.4	0.1125
151.5	0.1125
151.6	0.1125
151.7	0.1125
151.8	0.1125
151.9	0.1125
152	0.1125
152.1	0.1125
152.2	0.1125
152.3	0.1125
152.4	0.1125
152.5	0.1125
152.6	0.1125
152.7	0.1125
152.8	0.1125
152.9	0.1125
153	0.1125
153.1	0.1125
153.2	0.1125
153.3	0.1125
153.4	0.1125
153.5	0.1125
153.6	0.1125
153.7	0.1125
153.8	0.1125
153.9	0.1125
154	0.1125
154.1	0.1125
154.2	0.1125
154.3	0.1125
154.4	0.1125
154.5	0.1125
154.6	0.1125
154.7	0.1125
154.8	0.1125
154.9	0.1125
155	0.1125
155.1	0.1125
155.2	0.1125
155.3	0.1125
155.4	0.1125
155.5	0.1125
155.6	0.1125
155.7	0.1125
155.8	0.1125
155.9	0.1125
156	0.1125
156.1	0.1125
156.2	0.1125
156.3	0.1125
156.4	0.1125
156.5	0.1125
156.6	0.1125
156.7	0.1125
156.8	0.1125
156.9	0.1125
157	0.1125
157.1	0.1125
157.2	0.1125
157.3	0.1125
157.4	0.1125
157.5	0.1125
157.6	0.1125
157.7	0.1125
157.8	0.1125
157.9	0.1125
158	0.1
158.1	0.1
158.2	0.1
158.3	0.1
158.4	0.1
158.5	0.1
158.6	0.1
158.7	0.1
158.8	0.1
158.9	0.1
159	0.1
159.1	0.1
159.2	0.1
159.3	0.1
159.4	0.1
159.5	0.1
159.6	0.1
159.7	0.1
159.8	0.1
159.9	0.1
160	0.1
160.1	0.1
160.2	0.1
160.3	0.1
160.4	0.1
160.5	0.1
160.6	0.1
160.7	0.1
160.8	0.1
160.9	0.1
161	0.1
161.1	0.1
161.2	0.1
161.3	0.1
161.4	0.1
161.5	0.1
161.6	0.1
161.7	0.1
161.8	0.1
161.9	0.1
162	0.1
162.1	0.1
162.2	0.1
162.3	0.1
162.4	0.1
162.5	0.1
162.6	0.1
162.7	0.1
162.8	0.1
162.9	0.1
163	0.1
163.1	0.1
163.2	0.1
163.3	0.1
163.4	0.1
163.5	0.1
163.6	0.1
163.7	0.1
163.8	0.1
163.9	0.1
164	0.1
164.1	0.1
164.2	0.1125
164.3	0.1125
164.4	0.1125
164.5	0.1125
164.6	0.1125
164.7	0.1125
164.8	0.1125
164.9	0.1125
165	0.125
165.1	0.125
165.2	0.1125
165.3	0.1125
165.4	0.1125
165.5	0.1125
165.6	0.1125
165.7	0.1125
165.8	0.1125
165.9	0.1125
166	0.1125
166.1	0.1125
166.2	0.1125
166.3	0.1125
166.4	0.1125
166.5	0.1125
166.6	0.1125
166.7	0.1125
166.8	0.1125
166.9	0.1125
167	0.1125
167.1	0.1125
167.2	0.1125
167.3	0.1125
167.4	0.1125
167.5	0.1125
167.6	0.1125
167.7	0.1125
167.8	0.1125
167.9	0.1125
168	0.1125
168.1	0.1125
168.2	0.1125
168.3	0.1125
168.4	0.125
168.5	0.125
168.6	0.125
168.7	0.125
168.8	0.125
168.9	0.1125
169	0.1125
169.1	0.1125
169.2	0.1125
169.3	0.1125
169.4	0.1125
169.5	0.1125
169.6	0.1125
169.7	0.1125
169.8	0.1125
169.9	0.1125
170	0.1125
170.1	0.1125
170.2	0.1125
170.3	0.1125
170.4	0.1125
170.5	0.1125
170.6	0.1125
170.7	0.1125
170.8	0.1125
170.9	0.1125
171	0.1125
171.1	0.1125
171.2	0.1125
171.3	0.1125
171.4	0.1125
171.5	0.1125
171.6	0.1125
171.7	0.1125
171.8	0.1125
171.9	0.1125
172	0.1125
172.1	0.1125
172.2	0.1125
172.3	0.1125
172.4	0.1125
172.5	0.1125
172.6	0.1125
172.7	0.1125
172.8	0.1125
172.9	0.1125
173	0.1125
173.1	0.1125
173.2	0.1125
173.3	0.1125
173.4	0.1125
173.5	0.1125
173.6	0.1125
173.7	0.1
173.8	0.1
173.9	0.1
174	0.1
174.1	0.1
174.2	0.1
174.3	0.1
174.4	0.1
174.5	0.1
174.6	0.1
174.7	0.1
174.8	0.1
174.9	0.1
175	0.1
175.1	0.1
175.2	0.1
175.3	0.1
175.4	0.1
175.5	0.0875
175.6	0.0875
175.7	0.0875
175.8	0.1
175.9	0.1
176	0.1
176.1	0.1
176.2	0.1
176.3	0.1
176.4	0.1
176.5	0.0875
176.6	0.0875
176.7	0.0875
176.8	0.0875
176.9	0.0875
177	0.0875
177.1	0.0875
177.2	0.0875
177.3	0.0875
177.4	0.0875
177.5	0.0875
177.6	0.0875
177.7	0.0875
177.8	0.0875
177.9	0.0875
178	0.0875
178.1	0.0875
178.2	0.0875
178.3	0.0875
178.4	0.0875
178.5	0.0875
178.6	0.0875
178.7	0.0875
178.8	0.0875
178.9	0.0875
179	0.0875
179.1	0.0875
179.2	0.0875
179.3	0.0875
179.4	0.0875
179.5	0.0875
179.6	0.0875
179.7	0.0875
179.8	0.0875
179.9	0.0875
180	0.0875
180.1	0.0875
180.2	0.0875
180.3	0.0875
180.4	0.075
180.5	0.075
180.6	0.075
180.7	0.075
180.8	0.075
180.9	0.075
181	0.075
181.1	0.075
181.2	0.075
181.3	0.075
181.4	0.075
181.5	0.075
181.6	0.075
181.7	0.075
181.8	0.075
181.9	0.075
182	0.075
182.1	0.075
182.2	0.075
182.3	0.075
182.4	0.075
182.5	0.075
182.6	0.075
182.7	0.075
182.8	0.075
182.9	0.075
183	0.075
183.1	0.075
183.2	0.075
183.3	0.075
183.4	0.075
183.5	0.075
183.6	0.075
183.7	0.075
183.8	0.075
183.9	0.075
184	0.075
184.1	0.075
184.2	0.075
184.3	0.075
184.4	0.075
184.5	0.075
184.6	0.0875
184.7	0.0875
184.8	0.0875
184.9	0.0875
185	0.0875
185.1	0.0875
185.2	0.0875
185.3	0.0875
185.4	0.0875
185.5	0.0875
185.6	0.0875
185.7	0.0875
185.8	0.0875
185.9	0.0875
186	0.0875
186.1	0.0875
186.2	0.0875
186.3	0.0875
186.4	0.0875
186.5	0.0875
186.6	0.0875
186.7	0.0875
186.8	0.0875
186.9	0.0875
187	0.0875
187.1	0.0875
187.2	0.0875
187.3	0.0875
187.4	0.0875
187.5	0.0875
187.6	0.0875
187.7	0.0875
187.8	0.0875
187.9	0.0875
188	0.0875
188.1	0.0875
188.2	0.0875
188.3	0.0875
188.4	0.0875
188.5	0.0875
188.6	0.0875
188.7	0.0875
188.8	0.0875
188.9	0.0875
189	0.0875
189.1	0.0875
189.2	0.0875
189.3	0.0875
189.4	0.0875
189.5	0.0875
189.6	0.0875
189.7	0.0875
189.8	0.0875
189.9	0.0875
190	0.0875
190.1	0.0875
190.2	0.0875
190.3	0.0875
190.4	0.0875
190.5	0.0875
190.6	0.0875
190.7	0.0875
190.8	0.0875
190.9	0.0875
191	0.0875
191.1	0.0875
191.2	0.0875
191.3	0.0875
191.4	0.0875
191.5	0.0875
191.6	0.0875
191.7	0.0875
191.8	0.0875
191.9	0.0875
192	0.0875
192.1	0.0875
192.2	0.0875
192.3	0.0875
192.4	0.0875
192.5	0.0875
192.6	0.0875
192.7	0.0875
192.8	0.0875
192.9	0.0875
193	0.0875
193.1	0.0875
193.2	0.0875
193.3	0.0875
193.4	0.0875
193.5	0.0875
193.6	0.0875
193.7	0.0875
193.8	0.0875
193.9	0.0875
194	0.0875
194.1	0.0875
194.2	0.0875
194.3	0.0875
194.4	0.0875
194.5	0.0875
194.6	0.0875
194.7	0.0875
194.8	0.0875
194.9	0.0875
195	0.0875
195.1	0.0875
195.2	0.0875
195.3	0.0875
195.4	0.0875
195.5	0.0875
195.6	0.0875
195.7	0.0875
195.8	0.0875
195.9	0.0875
196	0.0875
196.1	0.0875
196.2	0.0875
196.3	0.0875
196.4	0.0875
196.5	0.0875
196.6	0.0875
196.7	0.0875
196.8	0.0875
196.9	0.0875
197	0.0875
197.1	0.0875
197.2	0.0875
197.3	0.0875
197.4	0.0875
197.5	0.0875
197.6	0.0875
197.7	0.0875
197.8	0.0875
197.9	0.0875
198	0.0875
198.1	0.0875
198.2	0.0875
198.3	0.0875
198.4	0.0875
198.5	0.0875
198.6	0.0875
198.7	0.0875
198.8	0.0875
198.9	0.0875
199	0.0875
199.1	0.0875
199.2	0.0875
199.3	0.0875
199.4	0.0875
199.5	0.0875
199.6	0.0875
199.7	0.0875
199.8	0.0875
199.9	0.0875
200	0.0875
[truncated: 14,000 more rows]
