# Supplementary material for: Bayesian inference of kinetic schemes for ion channels by Kalman filtering
Source: eLife journal article supplement (doi:10.7554/elife.62714), 2022-05-04
Supplement: fig4-data12 [file 1_Sim_N_100_Fluor_MW.xlsx]

## Sheet: Tabelle1
0.1	0
0.2	0
0.3	0
0.4	0
0.5	0
0.6	0
0.7	0
0.8	0
0.9	0
1	0
1.1	0
1.2	0
1.3	0
1.4	0
1.5	0
1.6	0
1.7	0
1.8	0
1.9	0
2	0
2.1	0
2.2	0
2.3	0
2.4	0
2.5	0
2.6	0
2.7	0
2.8	0
2.9	0
3	0
3.1	0
3.2	0
3.3	0
3.4	0
3.5	0
3.6	0
3.7	0
3.8	0
3.9	0
4	0
4.1	0
4.2	0
4.3	0
4.4	0
4.5	0
4.6	0
4.7	0
4.8	0
4.9	0
5	0
5.1	0
5.2	0
5.3	0
5.4	0
5.5	0
5.6	0
5.7	0
5.8	0
5.9	0
6	0
6.1	0
6.2	0
6.3	0
6.4	0
6.5	0
6.6	0
6.7	0
6.8	0
6.9	0
7	0
7.1	0
7.2	0
7.3	0
7.4	0
7.5	0
7.6	0
7.7	0
7.8	0
7.9	0
8	0
8.1	0
8.2	0
8.3	0
8.4	0
8.5	0
8.6	0
8.7	0
8.8	0
8.9	0
9	0
9.1	0
9.2	0
9.3	0
9.4	0
9.5	0
9.6	0
9.7	0
9.8	0
9.9	0
10	0
10.1	0
10.2	0
10.3	0
10.4	0
10.5	0
10.6	0
10.7	0
10.8	0
10.9	0
11	0
11.1	0
11.2	0
11.3	0
11.4	0
11.5	0
11.6	0
11.7	0
11.8	0
11.9	0
12	0
12.1	0
12.2	0
12.3	0
12.4	0
12.5	0
12.6	0
12.7	0
12.8	0
12.9	0
13	0
13.1	0
13.2	0
13.3	0
13.4	0
13.5	0
13.6	0
13.7	0
13.8	0
13.9	0
14	0
14.1	0
14.2	0
14.3	0
14.4	0
14.5	0
14.6	0
14.7	0
14.8	0
14.9	0
15	0
15.1	0
15.2	0
15.3	0
15.4	0
15.5	0
15.6	0
15.7	0
15.8	0
15.9	0
16	0
16.1	0
16.2	0
16.3	0
16.4	0
16.5	0
16.6	0
16.7	0
16.8	0
16.9	0
17	0
17.1	0
17.2	0
17.3	0
17.4	0
17.5	0
17.6	0
17.7	0
17.8	0
17.9	0
18	0
18.1	0
18.2	0
18.3	0
18.4	0
18.5	0
18.6	0
18.7	0
18.8	0
18.9	0
19	0
19.1	0
19.2	0
19.3	0
19.4	0
19.5	0
19.6	0
19.7	0
19.8	0
19.9	0
20	0
20.1	0
20.2	0
20.3	0
20.4	0
20.5	0
20.6	0
20.7	0
20.8	0
20.9	0
21	0
21.1	0
21.2	0
21.3	0
21.4	0
21.5	0
21.6	0
21.7	0
21.8	0
21.9	0
22	0
22.1	0
22.2	0
22.3	0
22.4	0
22.5	0
22.6	0
22.7	0
22.8	0
22.9	0
23	0
23.1	0
23.2	0
23.3	0
23.4	0
23.5	0
23.6	0
23.7	0
23.8	0
23.9	0
24	0
24.1	0
24.2	0
24.3	0
24.4	0
24.5	0
24.6	0
24.7	0
24.8	0
24.9	0
25	0
25.1	0
25.2	0
25.3	0
25.4	0
25.5	0
25.6	0
25.7	0
25.8	0
25.9	0
26	0
26.1	0
26.2	0
26.3	0
26.4	0
26.5	0
26.6	0
26.7	0
26.8	0
26.9	0
27	0
27.1	0
27.2	0
27.3	0
27.4	0
27.5	0
27.6	0
27.7	0
27.8	0
27.9	0
28	0
28.1	0
28.2	0
28.3	0
28.4	0
28.5	0
28.6	0
28.7	0
28.8	0
28.9	0
29	0
29.1	0
29.2	0
29.3	0
29.4	0
29.5	0
29.6	0
29.7	0
29.8	0
29.9	0
30	0
30.1	0
30.2	0
30.3	0
30.4	0
30.5	0
30.6	0
30.7	0
30.8	0
30.9	0
31	0
31.1	0
31.2	0
31.3	0
31.4	0
31.5	0
31.6	0
31.7	0
31.8	0
31.9	0
32	0
32.1	0
32.2	0
32.3	0
32.4	0
32.5	0
32.6	0
32.7	0
32.8	0
32.9	0
33	0
33.1	0
33.2	0
33.3	0
33.4	0
33.5	0
33.6	0
33.7	0
33.8	0
33.9	0
34	0
34.1	0
34.2	0
34.3	0
34.4	0
34.5	0
34.6	0
34.7	0
34.8	0
34.9	0
35	0
35.1	0
35.2	0
35.3	0
35.4	0
35.5	0
35.6	0
35.7	0
35.8	0
35.9	0
36	0
36.1	0
36.2	0
36.3	0
36.4	0
36.5	0
36.6	0
36.7	0
36.8	0
36.9	0
37	0
37.1	0
37.2	0
37.3	0
37.4	0
37.5	0
37.6	0
37.7	0
37.8	0
37.9	0
38	0
38.1	0
38.2	0
38.3	0
38.4	0
38.5	0
38.6	0
38.7	0
38.8	0
38.9	0
39	0
39.1	0
39.2	0
39.3	0
39.4	0
39.5	0
39.6	0
39.7	0
39.8	0
39.9	0
40	0
40.1	0
40.2	0
40.3	0
40.4	0
40.5	0
40.6	0
40.7	0
40.8	0
40.9	0
41	0
41.1	0
41.2	0
41.3	0
41.4	0
41.5	0
41.6	0
41.7	0
41.8	0
41.9	0
42	0
42.1	0
42.2	0
42.3	0
42.4	0
42.5	0
42.6	0
42.7	0
42.8	0
42.9	0
43	0
43.1	0
43.2	0
43.3	0
43.4	0
43.5	0
43.6	0
43.7	0
43.8	0
43.9	0
44	0
44.1	0
44.2	0
44.3	0
44.4	0
44.5	0
44.6	0
44.7	0
44.8	0
44.9	0
45	0
45.1	0
45.2	0
45.3	0
45.4	0
45.5	0
45.6	0
45.7	0
45.8	0
45.9	0
46	0
46.1	0
46.2	0
46.3	0
46.4	0
46.5	0
46.6	0
46.7	0
46.8	0
46.9	0
47	0
47.1	0
47.2	0
47.3	0
47.4	0
47.5	0
47.6	0
47.7	0
47.8	0
47.9	0
48	0
48.1	0
48.2	0
48.3	0
48.4	0
48.5	0
48.6	0
48.7	0
48.8	0
48.9	0
49	0
49.1	0
49.2	0
49.3	0
49.4	0
49.5	0
49.6	0
49.7	0
49.8	0
49.9	0
50	0
50.1	0
50.2	0
50.3	0
50.4	0
50.5	0
50.6	0
50.7	0
50.8	0
50.9	0
51	0
51.1	0
51.2	0
51.3	0
51.4	0
51.5	0
51.6	0
51.7	0
51.8	0
51.9	0
52	0
52.1	0
52.2	0
52.3	0
52.4	0
52.5	0
52.6	0
52.7	0
52.8	0
52.9	0
53	0
53.1	0
53.2	0
53.3	0
53.4	0
53.5	0
53.6	0
53.7	0
53.8	0
53.9	0
54	0
54.1	0
54.2	0
54.3	0
54.4	0
54.5	0
54.6	0
54.7	0
54.8	0
54.9	0
55	0
55.1	0
55.2	0
55.3	0
55.4	0
55.5	0
55.6	0
55.7	0
55.8	0
55.9	0
56	0
56.1	0
56.2	0
56.3	0
56.4	0
56.5	0
56.6	0
56.7	0
56.8	0
56.9	0
57	0
57.1	0
57.2	0
57.3	0
57.4	0
57.5	0
57.6	0
57.7	0
57.8	0
57.9	0
58	0
58.1	0
58.2	0
58.3	0
58.4	0
58.5	0
58.6	0
58.7	0
58.8	0
58.9	0
59	0
59.1	0
59.2	0
59.3	0
59.4	0
59.5	0
59.6	0
59.7	0
59.8	0
59.9	0
60	0
60.1	0
60.2	0
60.3	0
60.4	0
60.5	0
60.6	0
60.7	0
60.8	0
60.9	0
61	0
61.1	0
61.2	0
61.3	0
61.4	0
61.5	0
61.6	0
61.7	0
61.8	0
61.9	0
62	0
62.1	0
62.2	0
62.3	0
62.4	0
62.5	0
62.6	0
62.7	0
62.8	0
62.9	0
63	0
63.1	0
63.2	0
63.3	0
63.4	0
63.5	0
63.6	0
63.7	0
63.8	0
63.9	0
64	0
64.1	0
64.2	0
64.3	0
64.4	0
64.5	0
64.6	0
64.7	0
64.8	0
64.9	0
65	0
65.1	0
65.2	0
65.3	0
65.4	0
65.5	0
65.6	0
65.7	0
65.8	0
65.9	0
66	0
66.1	0
66.2	0
66.3	0
66.4	0
66.5	0
66.6	0
66.7	0
66.8	0
66.9	0
67	0
67.1	0
67.2	0
67.3	0
67.4	0
67.5	0
67.6	0
67.7	0
67.8	0
67.9	0
68	0
68.1	0
68.2	0
68.3	0
68.4	0
68.5	0
68.6	0
68.7	0
68.8	0
68.9	0
69	0
69.1	0
69.2	0
69.3	0
69.4	0
69.5	0
69.6	0
69.7	0
69.8	0
69.9	0
70	0
70.1	0
70.2	0
70.3	0
70.4	0
70.5	0
70.6	0
70.7	0
70.8	0
70.9	0
71	0
71.1	0
71.2	0
71.3	0
71.4	0
71.5	0
71.6	0
71.7	0
71.8	0
71.9	0
72	0
72.1	0
72.2	0
72.3	0
72.4	0
72.5	0
72.6	0
72.7	0
72.8	0
72.9	0
73	0
73.1	0
73.2	0
73.3	0
73.4	0
73.5	0
73.6	0
73.7	0
73.8	0
73.9	0
74	0
74.1	0
74.2	0
74.3	0
74.4	0
74.5	0
74.6	0
74.7	0
74.8	0
74.9	0
75	0
75.1	0
75.2	0
75.3	0
75.4	0
75.5	0
75.6	0
75.7	0
75.8	0
75.9	0
76	0
76.1	0
76.2	0
76.3	0
76.4	0
76.5	0
76.6	0
76.7	0
76.8	0
76.9	0
77	0
77.1	0
77.2	0
77.3	0
77.4	0
77.5	0
77.6	0
77.7	0
77.8	0
77.9	0
78	0
78.1	0
78.2	0
78.3	0
78.4	0
78.5	0
78.6	0
78.7	0
78.8	0
78.9	0
79	0
79.1	0
79.2	0
79.3	0
79.4	0
79.5	0
79.6	0
79.7	0
79.8	0
79.9	0
80	0
80.1	0
80.2	0
80.3	0
80.4	0
80.5	0
80.6	0
80.7	0
80.8	0
80.9	0
81	0
81.1	0
81.2	0
81.3	0
81.4	0
81.5	0
81.6	0
81.7	0
81.8	0
81.9	0
82	0
82.1	0
82.2	0
82.3	0
82.4	0
82.5	0
82.6	0
82.7	0
82.8	0
82.9	0
83	0
83.1	0
83.2	0
83.3	0
83.4	0
83.5	0
83.6	0
83.7	0
83.8	0
83.9	0
84	0
84.1	0
84.2	0
84.3	0
84.4	0
84.5	0
84.6	0
84.7	0
84.8	0
84.9	0
85	0
85.1	0
85.2	0
85.3	0
85.4	0
85.5	0
85.6	0
85.7	0
85.8	0
85.9	0
86	0
86.1	0
86.2	0
86.3	0
86.4	0
86.5	0
86.6	0
86.7	0
86.8	0
86.9	0
87	0
87.1	0
87.2	0
87.3	0
87.4	0
87.5	0
87.6	0
87.7	0
87.8	0
87.9	0
88	0
88.1	0
88.2	0
88.3	0
88.4	0
88.5	0
88.6	0
88.7	0
88.8	0
88.9	0
89	0
89.1	0
89.2	0
89.3	0
89.4	0
89.5	0
89.6	0
89.7	0
89.8	0
89.9	0
90	0
90.1	0
90.2	0
90.3	0
90.4	0
90.5	0
90.6	0
90.7	0
90.8	0
90.9	0
91	0
91.1	0
91.2	0
91.3	0
91.4	0
91.5	0
91.6	0
91.7	0
91.8	0
91.9	0
92	0
92.1	0
92.2	0
92.3	0
92.4	0
92.5	0
92.6	0
92.7	0
92.8	0
92.9	0
93	0
93.1	0
93.2	0
93.3	0
93.4	0
93.5	0
93.6	0
93.7	0
93.8	0
93.9	0
94	0
94.1	0
94.2	0
94.3	0
94.4	0
94.5	0
94.6	0
94.7	0
94.8	0
94.9	0
95	0
95.1	0
95.2	0
95.3	0
95.4	0
95.5	0
95.6	0
95.7	0
95.8	0
95.9	0
96	0
96.1	0
96.2	0
96.3	0
96.4	0
96.5	0
96.6	0
96.7	0
96.8	0
96.9	0
97	0
97.1	0
97.2	0
97.3	0
97.4	0
97.5	0
97.6	0
97.7	0
97.8	0
97.9	0
98	0
98.1	0
98.2	0
98.3	0
98.4	0
98.5	0
98.6	0
98.7	0
98.8	0
98.9	0
99	0
99.1	0
99.2	0
99.3	0
99.4	0
99.5	0
99.6	0
99.7	0
99.8	0
99.9	0
100	0
100.1	0
100.2	0.01
100.3	0.02
100.4	0.035
100.5	0.05
100.6	0.05
100.7	0.05
100.8	0.055
100.9	0.06
101	0.08
101.1	0.08
101.2	0.09
101.3	0.105
101.4	0.1
101.5	0.105
101.6	0.11
101.7	0.11
101.8	0.11
101.9	0.11
102	0.115
102.1	0.115
102.2	0.115
102.3	0.11
102.4	0.11
102.5	0.12
102.6	0.12
102.7	0.135
102.8	0.145
102.9	0.145
103	0.145
103.1	0.155
103.2	0.155
103.3	0.16
103.4	0.17
103.5	0.165
103.6	0.175
103.7	0.175
103.8	0.185
103.9	0.19
104	0.205
104.1	0.205
104.2	0.205
104.3	0.21
104.4	0.205
104.5	0.21
104.6	0.22
104.7	0.22
104.8	0.225
104.9	0.225
105	0.225
105.1	0.225
105.2	0.225
105.3	0.225
105.4	0.225
105.5	0.235
105.6	0.245
105.7	0.25
105.8	0.26
105.9	0.25
106	0.245
106.1	0.245
106.2	0.245
106.3	0.25
106.4	0.25
106.5	0.255
106.6	0.26
106.7	0.255
106.8	0.25
106.9	0.25
107	0.255
107.1	0.25
107.2	0.25
107.3	0.24
107.4	0.24
107.5	0.245
107.6	0.24
107.7	0.25
107.8	0.245
107.9	0.245
108	0.245
108.1	0.25
108.2	0.25
108.3	0.25
108.4	0.255
108.5	0.25
108.6	0.26
108.7	0.26
108.8	0.255
108.9	0.25
109	0.245
109.1	0.25
109.2	0.25
109.3	0.25
109.4	0.245
109.5	0.24
109.6	0.235
109.7	0.235
109.8	0.25
109.9	0.255
110	0.245
110.1	0.245
110.2	0.25
110.3	0.26
110.4	0.26
110.5	0.265
110.6	0.265
110.7	0.275
110.8	0.265
110.9	0.255
111	0.255
111.1	0.245
111.2	0.24
111.3	0.24
111.4	0.24
111.5	0.235
111.6	0.24
111.7	0.245
111.8	0.24
111.9	0.245
112	0.25
112.1	0.24
112.2	0.245
112.3	0.245
112.4	0.245
112.5	0.245
112.6	0.25
112.7	0.25
112.8	0.25
112.9	0.24
113	0.235
113.1	0.23
113.2	0.235
113.3	0.24
113.4	0.245
113.5	0.245
113.6	0.245
113.7	0.245
113.8	0.25
113.9	0.255
114	0.25
114.1	0.245
114.2	0.265
114.3	0.27
114.4	0.275
114.5	0.27
114.6	0.26
114.7	0.265
114.8	0.265
114.9	0.27
115	0.275
115.1	0.27
115.2	0.265
115.3	0.265
115.4	0.265
115.5	0.265
115.6	0.27
115.7	0.27
115.8	0.27
115.9	0.265
116	0.265
116.1	0.27
116.2	0.275
116.3	0.28
116.4	0.28
116.5	0.285
116.6	0.28
116.7	0.275
116.8	0.27
116.9	0.265
117	0.26
117.1	0.27
117.2	0.275
117.3	0.28
117.4	0.28
117.5	0.285
117.6	0.285
117.7	0.285
117.8	0.285
117.9	0.29
118	0.305
118.1	0.305
118.2	0.305
118.3	0.305
118.4	0.305
118.5	0.3
118.6	0.315
118.7	0.325
118.8	0.33
118.9	0.33
119	0.32
119.1	0.325
119.2	0.33
119.3	0.345
119.4	0.345
119.5	0.345
119.6	0.345
119.7	0.335
119.8	0.33
119.9	0.33
120	0.33
120.1	0.325
120.2	0.315
120.3	0.31
120.4	0.31
120.5	0.31
120.6	0.31
120.7	0.31
120.8	0.305
120.9	0.31
121	0.31
121.1	0.31
121.2	0.31
121.3	0.315
121.4	0.32
121.5	0.32
121.6	0.32
121.7	0.325
121.8	0.34
121.9	0.35
122	0.345
122.1	0.345
122.2	0.35
122.3	0.34
122.4	0.34
122.5	0.34
122.6	0.345
122.7	0.35
122.8	0.35
122.9	0.35
123	0.35
123.1	0.345
123.2	0.34
123.3	0.33
123.4	0.32
123.5	0.32
123.6	0.315
123.7	0.305
123.8	0.305
123.9	0.305
124	0.315
124.1	0.315
124.2	0.315
124.3	0.315
124.4	0.31
124.5	0.31
124.6	0.31
124.7	0.31
124.8	0.31
124.9	0.31
125	0.32
125.1	0.32
125.2	0.32
125.3	0.31
125.4	0.315
125.5	0.315
125.6	0.31
125.7	0.31
125.8	0.31
125.9	0.31
126	0.315
126.1	0.315
126.2	0.315
126.3	0.315
126.4	0.315
126.5	0.315
126.6	0.32
126.7	0.325
126.8	0.33
126.9	0.33
127	0.325
127.1	0.325
127.2	0.33
127.3	0.325
127.4	0.33
127.5	0.33
127.6	0.335
127.7	0.335
127.8	0.34
127.9	0.34
128	0.335
128.1	0.34
128.2	0.335
128.3	0.34
128.4	0.34
128.5	0.335
128.6	0.335
128.7	0.335
128.8	0.335
128.9	0.33
129	0.345
129.1	0.345
129.2	0.325
129.3	0.32
129.4	0.32
129.5	0.32
129.6	0.315
129.7	0.32
129.8	0.32
129.9	0.325
130	0.325
130.1	0.33
130.2	0.34
130.3	0.355
130.4	0.35
130.5	0.35
130.6	0.355
130.7	0.36
130.8	0.36
130.9	0.345
131	0.34
131.1	0.335
131.2	0.335
131.3	0.335
131.4	0.34
131.5	0.34
131.6	0.34
131.7	0.345
131.8	0.35
131.9	0.35
132	0.35
132.1	0.355
132.2	0.35
132.3	0.355
132.4	0.355
132.5	0.36
132.6	0.355
132.7	0.355
132.8	0.355
132.9	0.35
133	0.355
133.1	0.36
133.2	0.36
133.3	0.35
133.4	0.35
133.5	0.355
133.6	0.355
133.7	0.35
133.8	0.345
133.9	0.35
134	0.345
134.1	0.35
134.2	0.35
134.3	0.35
134.4	0.355
134.5	0.35
134.6	0.35
134.7	0.35
134.8	0.355
134.9	0.355
135	0.35
135.1	0.345
135.2	0.34
135.3	0.34
135.4	0.34
135.5	0.335
135.6	0.34
135.7	0.34
135.8	0.34
135.9	0.33
136	0.33
136.1	0.33
136.2	0.335
136.3	0.33
136.4	0.33
136.5	0.34
136.6	0.34
136.7	0.335
136.8	0.33
136.9	0.33
137	0.33
137.1	0.32
137.2	0.325
137.3	0.32
137.4	0.325
137.5	0.32
137.6	0.315
137.7	0.315
137.8	0.32
137.9	0.315
138	0.315
138.1	0.325
138.2	0.325
138.3	0.325
138.4	0.33
138.5	0.325
138.6	0.325
138.7	0.325
138.8	0.32
138.9	0.31
139	0.305
139.1	0.3
139.2	0.305
139.3	0.305
139.4	0.31
139.5	0.31
139.6	0.31
139.7	0.315
139.8	0.315
139.9	0.31
140	0.315
140.1	0.325
140.2	0.32
140.3	0.33
140.4	0.33
140.5	0.325
140.6	0.325
140.7	0.325
140.8	0.325
140.9	0.325
141	0.32
141.1	0.32
141.2	0.33
141.3	0.34
141.4	0.34
141.5	0.35
141.6	0.355
141.7	0.355
141.8	0.345
141.9	0.345
142	0.345
142.1	0.34
142.2	0.345
142.3	0.345
142.4	0.36
142.5	0.365
142.6	0.37
142.7	0.375
142.8	0.38
142.9	0.37
143	0.375
143.1	0.38
143.2	0.385
143.3	0.39
143.4	0.39
143.5	0.38
143.6	0.38
143.7	0.385
143.8	0.385
143.9	0.385
144	0.38
144.1	0.375
144.2	0.375
144.3	0.365
144.4	0.36
144.5	0.36
144.6	0.37
144.7	0.36
144.8	0.36
144.9	0.36
145	0.365
145.1	0.365
145.2	0.365
145.3	0.36
145.4	0.355
145.5	0.36
145.6	0.355
145.7	0.35
145.8	0.355
145.9	0.355
146	0.365
146.1	0.35
146.2	0.345
146.3	0.34
146.4	0.34
146.5	0.34
146.6	0.335
146.7	0.33
146.8	0.33
146.9	0.335
147	0.35
147.1	0.35
147.2	0.345
147.3	0.345
147.4	0.34
147.5	0.35
147.6	0.36
147.7	0.36
147.8	0.365
147.9	0.365
148	0.36
148.1	0.36
148.2	0.365
148.3	0.365
148.4	0.36
148.5	0.365
148.6	0.38
148.7	0.38
148.8	0.37
148.9	0.365
149	0.365
149.1	0.365
149.2	0.37
149.3	0.37
149.4	0.38
149.5	0.38
149.6	0.375
149.7	0.37
149.8	0.365
149.9	0.36
150	0.37
150.1	0.365
150.2	0.365
150.3	0.365
150.4	0.37
150.5	0.375
150.6	0.375
150.7	0.375
150.8	0.37
150.9	0.37
151	0.365
151.1	0.36
151.2	0.365
151.3	0.355
151.4	0.365
151.5	0.37
151.6	0.375
151.7	0.375
151.8	0.385
151.9	0.39
152	0.385
152.1	0.385
152.2	0.38
152.3	0.385
152.4	0.39
152.5	0.385
152.6	0.395
152.7	0.405
152.8	0.4
152.9	0.395
153	0.39
153.1	0.39
153.2	0.39
153.3	0.39
153.4	0.38
153.5	0.385
153.6	0.385
153.7	0.38
153.8	0.38
153.9	0.375
154	0.37
154.1	0.37
154.2	0.365
154.3	0.36
154.4	0.365
154.5	0.365
154.6	0.365
154.7	0.365
154.8	0.38
154.9	0.375
155	0.375
155.1	0.365
155.2	0.365
155.3	0.365
155.4	0.365
155.5	0.355
155.6	0.355
155.7	0.375
155.8	0.375
155.9	0.375
156	0.37
156.1	0.37
156.2	0.37
156.3	0.36
156.4	0.36
156.5	0.36
156.6	0.365
156.7	0.37
156.8	0.365
156.9	0.37
157	0.37
157.1	0.37
157.2	0.355
157.3	0.355
157.4	0.345
157.5	0.35
157.6	0.365
157.7	0.38
157.8	0.37
157.9	0.365
158	0.365
158.1	0.36
158.2	0.365
158.3	0.365
158.4	0.37
158.5	0.37
158.6	0.37
158.7	0.36
158.8	0.355
158.9	0.355
159	0.355
159.1	0.355
159.2	0.355
159.3	0.37
159.4	0.385
159.5	0.38
159.6	0.38
159.7	0.375
159.8	0.365
159.9	0.365
160	0.37
160.1	0.365
160.2	0.36
160.3	0.375
160.4	0.38
160.5	0.39
160.6	0.375
160.7	0.37
160.8	0.38
160.9	0.375
161	0.37
161.1	0.37
161.2	0.365
161.3	0.375
161.4	0.375
161.5	0.38
161.6	0.395
161.7	0.38
161.8	0.375
161.9	0.38
162	0.39
162.1	0.39
162.2	0.385
162.3	0.375
162.4	0.375
162.5	0.38
162.6	0.375
162.7	0.37
162.8	0.375
162.9	0.375
163	0.375
163.1	0.365
163.2	0.37
163.3	0.38
163.4	0.38
163.5	0.375
163.6	0.38
163.7	0.385
163.8	0.37
163.9	0.365
164	0.35
164.1	0.345
164.2	0.34
164.3	0.335
164.4	0.34
164.5	0.34
164.6	0.345
164.7	0.345
164.8	0.345
164.9	0.35
165	0.345
165.1	0.345
165.2	0.345
165.3	0.35
165.4	0.35
165.5	0.35
165.6	0.34
165.7	0.345
165.8	0.345
165.9	0.34
166	0.345
166.1	0.35
166.2	0.355
166.3	0.35
166.4	0.345
166.5	0.345
166.6	0.34
166.7	0.34
166.8	0.345
166.9	0.34
167	0.34
167.1	0.335
167.2	0.335
167.3	0.335
167.4	0.335
167.5	0.325
167.6	0.33
167.7	0.325
167.8	0.325
167.9	0.335
168	0.34
168.1	0.345
168.2	0.345
168.3	0.345
168.4	0.34
168.5	0.34
168.6	0.34
168.7	0.345
168.8	0.35
168.9	0.345
169	0.345
169.1	0.355
169.2	0.355
169.3	0.35
169.4	0.35
169.5	0.35
169.6	0.355
169.7	0.355
169.8	0.365
169.9	0.37
170	0.365
170.1	0.37
170.2	0.37
170.3	0.37
170.4	0.365
170.5	0.37
170.6	0.375
170.7	0.37
170.8	0.365
170.9	0.365
171	0.36
171.1	0.36
171.2	0.36
171.3	0.365
171.4	0.365
171.5	0.355
171.6	0.355
171.7	0.35
171.8	0.355
171.9	0.35
172	0.345
172.1	0.35
172.2	0.36
172.3	0.36
172.4	0.365
172.5	0.365
172.6	0.355
172.7	0.355
172.8	0.355
172.9	0.345
173	0.35
173.1	0.35
173.2	0.345
173.3	0.34
173.4	0.345
173.5	0.345
173.6	0.355
173.7	0.355
173.8	0.355
173.9	0.36
174	0.355
174.1	0.365
174.2	0.365
174.3	0.37
174.4	0.365
174.5	0.37
174.6	0.375
174.7	0.375
174.8	0.38
174.9	0.38
175	0.39
175.1	0.385
175.2	0.39
175.3	0.39
175.4	0.385
175.5	0.4
175.6	0.4
175.7	0.4
175.8	0.4
175.9	0.4
176	0.395
176.1	0.395
176.2	0.4
176.3	0.395
176.4	0.4
176.5	0.4
176.6	0.405
176.7	0.41
176.8	0.415
176.9	0.415
177	0.415
177.1	0.41
177.2	0.41
177.3	0.405
177.4	0.405
177.5	0.405
177.6	0.395
177.7	0.385
177.8	0.39
177.9	0.39
178	0.39
178.1	0.395
178.2	0.395
178.3	0.39
178.4	0.395
178.5	0.39
178.6	0.385
178.7	0.385
178.8	0.38
178.9	0.38
179	0.38
179.1	0.39
179.2	0.395
179.3	0.39
179.4	0.39
179.5	0.385
179.6	0.385
179.7	0.395
179.8	0.4
179.9	0.405
180	0.4
180.1	0.39
180.2	0.395
180.3	0.38
180.4	0.385
180.5	0.39
180.6	0.385
180.7	0.39
180.8	0.385
180.9	0.395
181	0.4
181.1	0.395
181.2	0.395
181.3	0.405
181.4	0.405
181.5	0.42
181.6	0.42
181.7	0.42
181.8	0.42
181.9	0.425
182	0.425
182.1	0.43
182.2	0.42
182.3	0.42
182.4	0.42
182.5	0.425
182.6	0.43
182.7	0.425
182.8	0.42
182.9	0.415
183	0.41
183.1	0.425
183.2	0.425
183.3	0.425
183.4	0.41
183.5	0.41
183.6	0.41
183.7	0.41
183.8	0.415
183.9	0.41
184	0.41
184.1	0.41
184.2	0.41
184.3	0.41
184.4	0.42
184.5	0.405
184.6	0.41
184.7	0.42
184.8	0.425
184.9	0.42
185	0.42
185.1	0.42
185.2	0.415
185.3	0.41
185.4	0.415
185.5	0.42
185.6	0.41
185.7	0.405
185.8	0.395
185.9	0.39
186	0.385
186.1	0.385
186.2	0.385
186.3	0.385
186.4	0.385
186.5	0.39
186.6	0.39
186.7	0.395
186.8	0.395
186.9	0.395
187	0.39
187.1	0.395
187.2	0.385
187.3	0.39
187.4	0.395
187.5	0.395
187.6	0.395
187.7	0.395
187.8	0.39
187.9	0.38
188	0.38
188.1	0.38
188.2	0.38
188.3	0.38
188.4	0.375
188.5	0.375
188.6	0.375
188.7	0.375
188.8	0.375
188.9	0.375
189	0.37
189.1	0.37
189.2	0.375
189.3	0.375
189.4	0.375
189.5	0.375
189.6	0.375
189.7	0.375
189.8	0.38
189.9	0.385
190	0.385
190.1	0.385
190.2	0.385
190.3	0.385
190.4	0.385
190.5	0.38
190.6	0.38
190.7	0.385
190.8	0.39
190.9	0.39
191	0.39
191.1	0.39
191.2	0.39
191.3	0.4
191.4	0.41
191.5	0.415
191.6	0.415
191.7	0.425
191.8	0.425
191.9	0.435
192	0.43
192.1	0.435
192.2	0.45
192.3	0.45
192.4	0.45
192.5	0.445
192.6	0.435
192.7	0.44
192.8	0.44
192.9	0.43
193	0.42
193.1	0.425
193.2	0.42
193.3	0.415
193.4	0.41
193.5	0.41
193.6	0.41
193.7	0.4
193.8	0.395
193.9	0.4
194	0.405
194.1	0.405
194.2	0.415
194.3	0.42
194.4	0.42
194.5	0.415
194.6	0.41
194.7	0.42
194.8	0.415
194.9	0.41
195	0.415
195.1	0.425
195.2	0.425
195.3	0.42
195.4	0.41
195.5	0.42
195.6	0.415
195.7	0.415
195.8	0.41
195.9	0.405
196	0.405
196.1	0.405
196.2	0.405
196.3	0.41
196.4	0.405
196.5	0.41
196.6	0.42
196.7	0.43
196.8	0.43
196.9	0.43
197	0.43
197.1	0.43
197.2	0.415
197.3	0.415
197.4	0.42
197.5	0.42
197.6	0.42
197.7	0.42
197.8	0.415
197.9	0.415
198	0.415
198.1	0.41
198.2	0.41
198.3	0.405
198.4	0.405
198.5	0.41
198.6	0.405
198.7	0.395
198.8	0.395
198.9	0.4
199	0.4
199.1	0.39
199.2	0.385
199.3	0.38
199.4	0.375
199.5	0.38
199.6	0.38
199.7	0.385
199.8	0.395
199.9	0.395
200	0.395
[truncated: 14,000 more rows]
