# Supplementary material for: Bayesian inference of kinetic schemes for ion channels by Kalman filtering
Source: eLife journal article supplement (doi:10.7554/elife.62714), 2022-05-04
Supplement: fig4-data12 [file 1_Sim_N_100_theor_Fluor_Werte.xlsx]

## Sheet: Tabelle1
0.1	0
0.2	0
0.3	0
0.4	0
0.5	0
0.6	0
0.7	0
0.8	0
0.9	0
1	0
1.1	0
1.2	0
1.3	0
1.4	0
1.5	0
1.6	0
1.7	0
1.8	0
1.9	0
2	0
2.1	0
2.2	0
2.3	0
2.4	0
2.5	0
2.6	0
2.7	0
2.8	0
2.9	0
3	0
3.1	0
3.2	0
3.3	0
3.4	0
3.5	0
3.6	0
3.7	0
3.8	0
3.9	0
4	0
4.1	0
4.2	0
4.3	0
4.4	0
4.5	0
4.6	0
4.7	0
4.8	0
4.9	0
5	0
5.1	0
5.2	0
5.3	0
5.4	0
5.5	0
5.6	0
5.7	0
5.8	0
5.9	0
6	0
6.1	0
6.2	0
6.3	0
6.4	0
6.5	0
6.6	0
6.7	0
6.8	0
6.9	0
7	0
7.1	0
7.2	0
7.3	0
7.4	0
7.5	0
7.6	0
7.7	0
7.8	0
7.9	0
8	0
8.1	0
8.2	0
8.3	0
8.4	0
8.5	0
8.6	0
8.7	0
8.8	0
8.9	0
9	0
9.1	0
9.2	0
9.3	0
9.4	0
9.5	0
9.6	0
9.7	0
9.8	0
9.9	0
10	0
10.1	0
10.2	0
10.3	0
10.4	0
10.5	0
10.6	0
10.7	0
10.8	0
10.9	0
11	0
11.1	0
11.2	0
11.3	0
11.4	0
11.5	0
11.6	0
11.7	0
11.8	0
11.9	0
12	0
12.1	0
12.2	0
12.3	0
12.4	0
12.5	0
12.6	0
12.7	0
12.8	0
12.9	0
13	0
13.1	0
13.2	0
13.3	0
13.4	0
13.5	0
13.6	0
13.7	0
13.8	0
13.9	0
14	0
14.1	0
14.2	0
14.3	0
14.4	0
14.5	0
14.6	0
14.7	0
14.8	0
14.9	0
15	0
15.1	0
15.2	0
15.3	0
15.4	0
15.5	0
15.6	0
15.7	0
15.8	0
15.9	0
16	0
16.1	0
16.2	0
16.3	0
16.4	0
16.5	0
16.6	0
16.7	0
16.8	0
16.9	0
17	0
17.1	0
17.2	0
17.3	0
17.4	0
17.5	0
17.6	0
17.7	0
17.8	0
17.9	0
18	0
18.1	0
18.2	0
18.3	0
18.4	0
18.5	0
18.6	0
18.7	0
18.8	0
18.9	0
19	0
19.1	0
19.2	0
19.3	0
19.4	0
19.5	0
19.6	0
19.7	0
19.8	0
19.9	0
20	0
20.1	0
20.2	0
20.3	0
20.4	0
20.5	0
20.6	0
20.7	0
20.8	0
20.9	0
21	0
21.1	0
21.2	0
21.3	0
21.4	0
21.5	0
21.6	0
21.7	0
21.8	0
21.9	0
22	0
22.1	0
22.2	0
22.3	0
22.4	0
22.5	0
22.6	0
22.7	0
22.8	0
22.9	0
23	0
23.1	0
23.2	0
23.3	0
23.4	0
23.5	0
23.6	0
23.7	0
23.8	0
23.9	0
24	0
24.1	0
24.2	0
24.3	0
24.4	0
24.5	0
24.6	0
24.7	0
24.8	0
24.9	0
25	0
25.1	0
25.2	0
25.3	0
25.4	0
25.5	0
25.6	0
25.7	0
25.8	0
25.9	0
26	0
26.1	0
26.2	0
26.3	0
26.4	0
26.5	0
26.6	0
26.7	0
26.8	0
26.9	0
27	0
27.1	0
27.2	0
27.3	0
27.4	0
27.5	0
27.6	0
27.7	0
27.8	0
27.9	0
28	0
28.1	0
28.2	0
28.3	0
28.4	0
28.5	0
28.6	0
28.7	0
28.8	0
28.9	0
29	0
29.1	0
29.2	0
29.3	0
29.4	0
29.5	0
29.6	0
29.7	0
29.8	0
29.9	0
30	0
30.1	0
30.2	0
30.3	0
30.4	0
30.5	0
30.6	0
30.7	0
30.8	0
30.9	0
31	0
31.1	0
31.2	0
31.3	0
31.4	0
31.5	0
31.6	0
31.7	0
31.8	0
31.9	0
32	0
32.1	0
32.2	0
32.3	0
32.4	0
32.5	0
32.6	0
32.7	0
32.8	0
32.9	0
33	0
33.1	0
33.2	0
33.3	0
33.4	0
33.5	0
33.6	0
33.7	0
33.8	0
33.9	0
34	0
34.1	0
34.2	0
34.3	0
34.4	0
34.5	0
34.6	0
34.7	0
34.8	0
34.9	0
35	0
35.1	0
35.2	0
35.3	0
35.4	0
35.5	0
35.6	0
35.7	0
35.8	0
35.9	0
36	0
36.1	0
36.2	0
36.3	0
36.4	0
36.5	0
36.6	0
36.7	0
36.8	0
36.9	0
37	0
37.1	0
37.2	0
37.3	0
37.4	0
37.5	0
37.6	0
37.7	0
37.8	0
37.9	0
38	0
38.1	0
38.2	0
38.3	0
38.4	0
38.5	0
38.6	0
38.7	0
38.8	0
38.9	0
39	0
39.1	0
39.2	0
39.3	0
39.4	0
39.5	0
39.6	0
39.7	0
39.8	0
39.9	0
40	0
40.1	0
40.2	0
40.3	0
40.4	0
40.5	0
40.6	0
40.7	0
40.8	0
40.9	0
41	0
41.1	0
41.2	0
41.3	0
41.4	0
41.5	0
41.6	0
41.7	0
41.8	0
41.9	0
42	0
42.1	0
42.2	0
42.3	0
42.4	0
42.5	0
42.6	0
42.7	0
42.8	0
42.9	0
43	0
43.1	0
43.2	0
43.3	0
43.4	0
43.5	0
43.6	0
43.7	0
43.8	0
43.9	0
44	0
44.1	0
44.2	0
44.3	0
44.4	0
44.5	0
44.6	0
44.7	0
44.8	0
44.9	0
45	0
45.1	0
45.2	0
45.3	0
45.4	0
45.5	0
45.6	0
45.7	0
45.8	0
45.9	0
46	0
46.1	0
46.2	0
46.3	0
46.4	0
46.5	0
46.6	0
46.7	0
46.8	0
46.9	0
47	0
47.1	0
47.2	0
47.3	0
47.4	0
47.5	0
47.6	0
47.7	0
47.8	0
47.9	0
48	0
48.1	0
48.2	0
48.3	0
48.4	0
48.5	0
48.6	0
48.7	0
48.8	0
48.9	0
49	0
49.1	0
49.2	0
49.3	0
49.4	0
49.5	0
49.6	0
49.7	0
49.8	0
49.9	0
50	0
50.1	0
50.2	0
50.3	0
50.4	0
50.5	0
50.6	0
50.7	0
50.8	0
50.9	0
51	0
51.1	0
51.2	0
51.3	0
51.4	0
51.5	0
51.6	0
51.7	0
51.8	0
51.9	0
52	0
52.1	0
52.2	0
52.3	0
52.4	0
52.5	0
52.6	0
52.7	0
52.8	0
52.9	0
53	0
53.1	0
53.2	0
53.3	0
53.4	0
53.5	0
53.6	0
53.7	0
53.8	0
53.9	0
54	0
54.1	0
54.2	0
54.3	0
54.4	0
54.5	0
54.6	0
54.7	0
54.8	0
54.9	0
55	0
55.1	0
55.2	0
55.3	0
55.4	0
55.5	0
55.6	0
55.7	0
55.8	0
55.9	0
56	0
56.1	0
56.2	0
56.3	0
56.4	0
56.5	0
56.6	0
56.7	0
56.8	0
56.9	0
57	0
57.1	0
57.2	0
57.3	0
57.4	0
57.5	0
57.6	0
57.7	0
57.8	0
57.9	0
58	0
58.1	0
58.2	0
58.3	0
58.4	0
58.5	0
58.6	0
58.7	0
58.8	0
58.9	0
59	0
59.1	0
59.2	0
59.3	0
59.4	0
59.5	0
59.6	0
59.7	0
59.8	0
59.9	0
60	0
60.1	0
60.2	0
60.3	0
60.4	0
60.5	0
60.6	0
60.7	0
60.8	0
60.9	0
61	0
61.1	0
61.2	0
61.3	0
61.4	0
61.5	0
61.6	0
61.7	0
61.8	0
61.9	0
62	0
62.1	0
62.2	0
62.3	0
62.4	0
62.5	0
62.6	0
62.7	0
62.8	0
62.9	0
63	0
63.1	0
63.2	0
63.3	0
63.4	0
63.5	0
63.6	0
63.7	0
63.8	0
63.9	0
64	0
64.1	0
64.2	0
64.3	0
64.4	0
64.5	0
64.6	0
64.7	0
64.8	0
64.9	0
65	0
65.1	0
65.2	0
65.3	0
65.4	0
65.5	0
65.6	0
65.7	0
65.8	0
65.9	0
66	0
66.1	0
66.2	0
66.3	0
66.4	0
66.5	0
66.6	0
66.7	0
66.8	0
66.9	0
67	0
67.1	0
67.2	0
67.3	0
67.4	0
67.5	0
67.6	0
67.7	0
67.8	0
67.9	0
68	0
68.1	0
68.2	0
68.3	0
68.4	0
68.5	0
68.6	0
68.7	0
68.8	0
68.9	0
69	0
69.1	0
69.2	0
69.3	0
69.4	0
69.5	0
69.6	0
69.7	0
69.8	0
69.9	0
70	0
70.1	0
70.2	0
70.3	0
70.4	0
70.5	0
70.6	0
70.7	0
70.8	0
70.9	0
71	0
71.1	0
71.2	0
71.3	0
71.4	0
71.5	0
71.6	0
71.7	0
71.8	0
71.9	0
72	0
72.1	0
72.2	0
72.3	0
72.4	0
72.5	0
72.6	0
72.7	0
72.8	0
72.9	0
73	0
73.1	0
73.2	0
73.3	0
73.4	0
73.5	0
73.6	0
73.7	0
73.8	0
73.9	0
74	0
74.1	0
74.2	0
74.3	0
74.4	0
74.5	0
74.6	0
74.7	0
74.8	0
74.9	0
75	0
75.1	0
75.2	0
75.3	0
75.4	0
75.5	0
75.6	0
75.7	0
75.8	0
75.9	0
76	0
76.1	0
76.2	0
76.3	0
76.4	0
76.5	0
76.6	0
76.7	0
76.8	0
76.9	0
77	0
77.1	0
77.2	0
77.3	0
77.4	0
77.5	0
77.6	0
77.7	0
77.8	0
77.9	0
78	0
78.1	0
78.2	0
78.3	0
78.4	0
78.5	0
78.6	0
78.7	0
78.8	0
78.9	0
79	0
79.1	0
79.2	0
79.3	0
79.4	0
79.5	0
79.6	0
79.7	0
79.8	0
79.9	0
80	0
80.1	0
80.2	0
80.3	0
80.4	0
80.5	0
80.6	0
80.7	0
80.8	0
80.9	0
81	0
81.1	0
81.2	0
81.3	0
81.4	0
81.5	0
81.6	0
81.7	0
81.8	0
81.9	0
82	0
82.1	0
82.2	0
82.3	0
82.4	0
82.5	0
82.6	0
82.7	0
82.8	0
82.9	0
83	0
83.1	0
83.2	0
83.3	0
83.4	0
83.5	0
83.6	0
83.7	0
83.8	0
83.9	0
84	0
84.1	0
84.2	0
84.3	0
84.4	0
84.5	0
84.6	0
84.7	0
84.8	0
84.9	0
85	0
85.1	0
85.2	0
85.3	0
85.4	0
85.5	0
85.6	0
85.7	0
85.8	0
85.9	0
86	0
86.1	0
86.2	0
86.3	0
86.4	0
86.5	0
86.6	0
86.7	0
86.8	0
86.9	0
87	0
87.1	0
87.2	0
87.3	0
87.4	0
87.5	0
87.6	0
87.7	0
87.8	0
87.9	0
88	0
88.1	0
88.2	0
88.3	0
88.4	0
88.5	0
88.6	0
88.7	0
88.8	0
88.9	0
89	0
89.1	0
89.2	0
89.3	0
89.4	0
89.5	0
89.6	0
89.7	0
89.8	0
89.9	0
90	0
90.1	0
90.2	0
90.3	0
90.4	0
90.5	0
90.6	0
90.7	0
90.8	0
90.9	0
91	0
91.1	0
91.2	0
91.3	0
91.4	0
91.5	0
91.6	0
91.7	0
91.8	0
91.9	0
92	0
92.1	0
92.2	0
92.3	0
92.4	0
92.5	0
92.6	0
92.7	0
92.8	0
92.9	0
93	0
93.1	0
93.2	0
93.3	0
93.4	0
93.5	0
93.6	0
93.7	0
93.8	0
93.9	0
94	0
94.1	0
94.2	0
94.3	0
94.4	0
94.5	0
94.6	0
94.7	0
94.8	0
94.9	0
95	0
95.1	0
95.2	0
95.3	0
95.4	0
95.5	0
95.6	0
95.7	0
95.8	0
95.9	0
96	0
96.1	0
96.2	0
96.3	0
96.4	0
96.5	0
96.6	0
96.7	0
96.8	0
96.9	0
97	0
97.1	0
97.2	0
97.3	0
97.4	0
97.5	0
97.6	0
97.7	0
97.8	0
97.9	0
98	0
98.1	0
98.2	0
98.3	0
98.4	0
98.5	0
98.6	0
98.7	0
98.8	0
98.9	0
99	0
99.1	0
99.2	0
99.3	0
99.4	0
99.5	0
99.6	0
99.7	0
99.8	0
99.9	0
100	0
100.1	0.00742077
100.2	0.0146849
100.3	0.0217952
100.4	0.0287543
100.5	0.035565
100.6	0.0422301
100.7	0.0487521
100.8	0.0551338
100.9	0.0613778
101	0.0674868
101.1	0.0734633
101.2	0.07931
101.3	0.0850293
101.4	0.0906239
101.5	0.0960962
101.6	0.101449
101.7	0.106684
101.8	0.111804
101.9	0.116811
102	0.121708
102.1	0.126497
102.2	0.13118
102.3	0.13576
102.4	0.140238
102.5	0.144617
102.6	0.148899
102.7	0.153085
102.8	0.157179
102.9	0.161182
103	0.165096
103.1	0.168922
103.2	0.172664
103.3	0.176322
103.4	0.179898
103.5	0.183395
103.6	0.186814
103.7	0.190157
103.8	0.193425
103.9	0.19662
104	0.199744
104.1	0.202799
104.2	0.205785
104.3	0.208704
104.4	0.211559
104.5	0.21435
104.6	0.217079
104.7	0.219747
104.8	0.222356
104.9	0.224906
105	0.2274
105.1	0.229839
105.2	0.232223
105.3	0.234554
105.4	0.236834
105.5	0.239063
105.6	0.241243
105.7	0.243374
105.8	0.245459
105.9	0.247497
106	0.249491
106.1	0.25144
106.2	0.253347
106.3	0.255211
106.4	0.257035
106.5	0.258819
106.6	0.260563
106.7	0.26227
106.8	0.263939
106.9	0.265572
107	0.267169
107.1	0.268731
107.2	0.27026
107.3	0.271755
107.4	0.273218
107.5	0.274649
107.6	0.27605
107.7	0.27742
107.8	0.278761
107.9	0.280073
108	0.281357
108.1	0.282613
108.2	0.283843
108.3	0.285046
108.4	0.286224
108.5	0.287377
108.6	0.288506
108.7	0.289611
108.8	0.290692
108.9	0.291751
109	0.292788
109.1	0.293803
109.2	0.294797
109.3	0.29577
109.4	0.296723
109.5	0.297657
109.6	0.298571
109.7	0.299466
109.8	0.300344
109.9	0.301203
110	0.302045
110.1	0.302869
110.2	0.303677
110.3	0.304469
110.4	0.305245
110.5	0.306005
110.6	0.30675
110.7	0.307481
110.8	0.308197
110.9	0.308898
111	0.309587
111.1	0.310261
111.2	0.310923
111.3	0.311571
111.4	0.312207
111.5	0.312831
111.6	0.313443
111.7	0.314043
111.8	0.314632
111.9	0.31521
112	0.315777
112.1	0.316333
112.2	0.316879
112.3	0.317414
112.4	0.31794
112.5	0.318456
112.6	0.318963
112.7	0.319461
112.8	0.319949
112.9	0.320429
113	0.320901
113.1	0.321363
113.2	0.321818
113.3	0.322265
113.4	0.322704
113.5	0.323135
113.6	0.323559
113.7	0.323976
113.8	0.324385
113.9	0.324788
114	0.325184
114.1	0.325573
114.2	0.325956
114.3	0.326332
114.4	0.326703
114.5	0.327067
114.6	0.327425
114.7	0.327778
114.8	0.328125
114.9	0.328467
115	0.328803
115.1	0.329134
115.2	0.32946
115.3	0.329781
115.4	0.330098
115.5	0.330409
115.6	0.330716
115.7	0.331018
115.8	0.331316
115.9	0.331609
116	0.331899
116.1	0.332184
116.2	0.332465
116.3	0.332742
116.4	0.333015
116.5	0.333285
116.6	0.333551
116.7	0.333813
116.8	0.334072
116.9	0.334327
117	0.334579
117.1	0.334828
117.2	0.335073
117.3	0.335316
117.4	0.335555
117.5	0.335791
117.6	0.336025
117.7	0.336255
117.8	0.336483
117.9	0.336708
118	0.336931
118.1	0.337151
118.2	0.337368
118.3	0.337583
118.4	0.337795
118.5	0.338005
118.6	0.338213
118.7	0.338419
118.8	0.338622
118.9	0.338823
119	0.339022
119.1	0.339219
119.2	0.339414
119.3	0.339607
119.4	0.339798
119.5	0.339987
119.6	0.340174
119.7	0.340359
119.8	0.340543
119.9	0.340725
120	0.340905
120.1	0.341084
120.2	0.341261
120.3	0.341436
120.4	0.34161
120.5	0.341782
120.6	0.341953
120.7	0.342123
120.8	0.342291
120.9	0.342457
121	0.342623
121.1	0.342787
121.2	0.342949
121.3	0.343111
121.4	0.343271
121.5	0.34343
121.6	0.343588
121.7	0.343744
121.8	0.3439
121.9	0.344054
122	0.344208
122.1	0.34436
122.2	0.344511
122.3	0.344661
122.4	0.34481
122.5	0.344958
122.6	0.345106
122.7	0.345252
122.8	0.345397
122.9	0.345542
123	0.345685
123.1	0.345828
123.2	0.34597
123.3	0.346111
123.4	0.346251
123.5	0.346391
123.6	0.346529
123.7	0.346667
123.8	0.346804
123.9	0.346941
124	0.347077
124.1	0.347212
124.2	0.347346
124.3	0.34748
124.4	0.347613
124.5	0.347745
124.6	0.347877
124.7	0.348008
124.8	0.348138
124.9	0.348268
125	0.348397
125.1	0.348526
125.2	0.348654
125.3	0.348782
125.4	0.348909
125.5	0.349035
125.6	0.349161
125.7	0.349287
125.8	0.349412
125.9	0.349536
126	0.34966
126.1	0.349784
126.2	0.349907
126.3	0.350029
126.4	0.350151
126.5	0.350273
126.6	0.350394
126.7	0.350515
126.8	0.350635
126.9	0.350755
127	0.350875
127.1	0.350994
127.2	0.351113
127.3	0.351231
127.4	0.351349
127.5	0.351467
127.6	0.351584
127.7	0.351701
127.8	0.351818
127.9	0.351934
128	0.35205
128.1	0.352165
128.2	0.35228
128.3	0.352395
128.4	0.35251
128.5	0.352624
128.6	0.352738
128.7	0.352851
128.8	0.352965
128.9	0.353078
129	0.35319
129.1	0.353303
129.2	0.353415
129.3	0.353527
129.4	0.353638
129.5	0.35375
129.6	0.353861
129.7	0.353971
129.8	0.354082
129.9	0.354192
130	0.354302
130.1	0.354412
130.2	0.354521
130.3	0.354631
130.4	0.35474
130.5	0.354848
130.6	0.354957
130.7	0.355065
130.8	0.355173
130.9	0.355281
131	0.355389
131.1	0.355496
131.2	0.355603
131.3	0.35571
131.4	0.355817
131.5	0.355923
131.6	0.35603
131.7	0.356136
131.8	0.356242
131.9	0.356347
132	0.356453
132.1	0.356558
132.2	0.356663
132.3	0.356768
132.4	0.356873
132.5	0.356978
132.6	0.357082
132.7	0.357186
132.8	0.35729
132.9	0.357394
133	0.357498
133.1	0.357601
133.2	0.357704
133.3	0.357807
133.4	0.35791
133.5	0.358013
133.6	0.358116
133.7	0.358218
133.8	0.35832
133.9	0.358422
134	0.358524
134.1	0.358626
134.2	0.358728
134.3	0.358829
134.4	0.358931
134.5	0.359032
134.6	0.359133
134.7	0.359233
134.8	0.359334
134.9	0.359435
135	0.359535
135.1	0.359635
135.2	0.359735
135.3	0.359835
135.4	0.359935
135.5	0.360035
135.6	0.360134
135.7	0.360233
135.8	0.360333
135.9	0.360432
136	0.360531
136.1	0.360629
136.2	0.360728
136.3	0.360827
136.4	0.360925
136.5	0.361023
136.6	0.361121
136.7	0.361219
136.8	0.361317
136.9	0.361415
137	0.361512
137.1	0.36161
137.2	0.361707
137.3	0.361804
137.4	0.361901
137.5	0.361998
137.6	0.362095
137.7	0.362192
137.8	0.362288
137.9	0.362384
138	0.362481
138.1	0.362577
138.2	0.362673
138.3	0.362769
138.4	0.362865
138.5	0.36296
138.6	0.363056
138.7	0.363151
138.8	0.363246
138.9	0.363342
139	0.363437
139.1	0.363532
139.2	0.363626
139.3	0.363721
139.4	0.363816
139.5	0.36391
139.6	0.364004
139.7	0.364099
139.8	0.364193
139.9	0.364287
140	0.364381
140.1	0.364474
140.2	0.364568
140.3	0.364661
140.4	0.364755
140.5	0.364848
140.6	0.364941
140.7	0.365034
140.8	0.365127
140.9	0.36522
141	0.365313
141.1	0.365406
141.2	0.365498
141.3	0.36559
141.4	0.365683
141.5	0.365775
141.6	0.365867
141.7	0.365959
141.8	0.366051
141.9	0.366143
142	0.366234
142.1	0.366326
142.2	0.366417
142.3	0.366508
142.4	0.3666
142.5	0.366691
142.6	0.366782
142.7	0.366873
142.8	0.366963
142.9	0.367054
143	0.367145
143.1	0.367235
143.2	0.367325
143.3	0.367416
143.4	0.367506
143.5	0.367596
143.6	0.367686
143.7	0.367776
143.8	0.367865
143.9	0.367955
144	0.368044
144.1	0.368134
144.2	0.368223
144.3	0.368312
144.4	0.368401
144.5	0.36849
144.6	0.368579
144.7	0.368668
144.8	0.368757
144.9	0.368845
145	0.368934
145.1	0.369022
145.2	0.369111
145.3	0.369199
145.4	0.369287
145.5	0.369375
145.6	0.369463
145.7	0.36955
145.8	0.369638
145.9	0.369726
146	0.369813
146.1	0.369901
146.2	0.369988
146.3	0.370075
146.4	0.370162
146.5	0.370249
146.6	0.370336
146.7	0.370423
146.8	0.37051
146.9	0.370596
147	0.370683
147.1	0.370769
147.2	0.370855
147.3	0.370942
147.4	0.371028
147.5	0.371114
147.6	0.3712
147.7	0.371285
147.8	0.371371
147.9	0.371457
148	0.371542
148.1	0.371628
148.2	0.371713
148.3	0.371798
148.4	0.371883
148.5	0.371968
148.6	0.372053
148.7	0.372138
148.8	0.372223
148.9	0.372308
149	0.372392
149.1	0.372477
149.2	0.372561
149.3	0.372645
149.4	0.37273
149.5	0.372814
149.6	0.372898
149.7	0.372982
149.8	0.373065
149.9	0.373149
150	0.373233
150.1	0.373316
150.2	0.3734
150.3	0.373483
150.4	0.373566
150.5	0.37365
150.6	0.373733
150.7	0.373816
150.8	0.373899
150.9	0.373981
151	0.374064
151.1	0.374147
151.2	0.374229
151.3	0.374312
151.4	0.374394
151.5	0.374476
151.6	0.374558
151.7	0.37464
151.8	0.374722
151.9	0.374804
152	0.374886
152.1	0.374968
152.2	0.375049
152.3	0.375131
152.4	0.375212
152.5	0.375294
152.6	0.375375
152.7	0.375456
152.8	0.375537
152.9	0.375618
153	0.375699
153.1	0.37578
153.2	0.37586
153.3	0.375941
153.4	0.376022
153.5	0.376102
153.6	0.376182
153.7	0.376263
153.8	0.376343
153.9	0.376423
154	0.376503
154.1	0.376583
154.2	0.376663
154.3	0.376742
154.4	0.376822
154.5	0.376901
154.6	0.376981
154.7	0.37706
154.8	0.37714
154.9	0.377219
155	0.377298
155.1	0.377377
155.2	0.377456
155.3	0.377535
155.4	0.377613
155.5	0.377692
155.6	0.377771
155.7	0.377849
155.8	0.377928
155.9	0.378006
156	0.378084
156.1	0.378162
156.2	0.37824
156.3	0.378318
156.4	0.378396
156.5	0.378474
156.6	0.378552
156.7	0.378629
156.8	0.378707
156.9	0.378784
157	0.378862
157.1	0.378939
157.2	0.379016
157.3	0.379093
157.4	0.37917
157.5	0.379247
157.6	0.379324
157.7	0.379401
157.8	0.379478
157.9	0.379554
158	0.379631
158.1	0.379707
158.2	0.379784
158.3	0.37986
158.4	0.379936
158.5	0.380012
158.6	0.380088
158.7	0.380164
158.8	0.38024
158.9	0.380316
159	0.380391
159.1	0.380467
159.2	0.380542
159.3	0.380618
159.4	0.380693
159.5	0.380768
159.6	0.380844
159.7	0.380919
159.8	0.380994
159.9	0.381069
160	0.381144
160.1	0.381218
160.2	0.381293
160.3	0.381368
160.4	0.381442
160.5	0.381517
160.6	0.381591
160.7	0.381665
160.8	0.381739
160.9	0.381813
161	0.381887
161.1	0.381961
161.2	0.382035
161.3	0.382109
161.4	0.382183
161.5	0.382256
161.6	0.38233
161.7	0.382403
161.8	0.382477
161.9	0.38255
162	0.382623
162.1	0.382696
162.2	0.382769
162.3	0.382842
162.4	0.382915
162.5	0.382988
162.6	0.383061
162.7	0.383133
162.8	0.383206
162.9	0.383278
163	0.383351
163.1	0.383423
163.2	0.383495
163.3	0.383568
163.4	0.38364
163.5	0.383712
163.6	0.383784
163.7	0.383855
163.8	0.383927
163.9	0.383999
164	0.38407
164.1	0.384142
164.2	0.384213
164.3	0.384285
164.4	0.384356
164.5	0.384427
164.6	0.384498
164.7	0.384569
164.8	0.38464
164.9	0.384711
165	0.384782
165.1	0.384853
165.2	0.384924
165.3	0.384994
165.4	0.385065
165.5	0.385135
165.6	0.385205
165.7	0.385276
165.8	0.385346
165.9	0.385416
166	0.385486
166.1	0.385556
166.2	0.385626
166.3	0.385696
166.4	0.385765
166.5	0.385835
166.6	0.385905
166.7	0.385974
166.8	0.386044
166.9	0.386113
167	0.386182
167.1	0.386251
167.2	0.386321
167.3	0.38639
167.4	0.386459
167.5	0.386527
167.6	0.386596
167.7	0.386665
167.8	0.386734
167.9	0.386802
168	0.386871
168.1	0.386939
168.2	0.387007
168.3	0.387076
168.4	0.387144
168.5	0.387212
168.6	0.38728
168.7	0.387348
168.8	0.387416
168.9	0.387484
169	0.387552
169.1	0.387619
169.2	0.387687
169.3	0.387754
169.4	0.387822
169.5	0.387889
169.6	0.387957
169.7	0.388024
169.8	0.388091
169.9	0.388158
170	0.388225
170.1	0.388292
170.2	0.388359
170.3	0.388426
170.4	0.388492
170.5	0.388559
170.6	0.388626
170.7	0.388692
170.8	0.388758
170.9	0.388825
171	0.388891
171.1	0.388957
171.2	0.389023
171.3	0.389089
171.4	0.389155
171.5	0.389221
171.6	0.389287
171.7	0.389353
171.8	0.389419
171.9	0.389484
172	0.38955
172.1	0.389615
172.2	0.389681
172.3	0.389746
172.4	0.389811
172.5	0.389876
172.6	0.389942
172.7	0.390007
172.8	0.390072
172.9	0.390136
173	0.390201
173.1	0.390266
173.2	0.390331
173.3	0.390395
173.4	0.39046
173.5	0.390524
173.6	0.390589
173.7	0.390653
173.8	0.390717
173.9	0.390782
174	0.390846
174.1	0.39091
174.2	0.390974
174.3	0.391038
174.4	0.391101
174.5	0.391165
174.6	0.391229
174.7	0.391292
174.8	0.391356
174.9	0.391419
175	0.391483
175.1	0.391546
175.2	0.391609
175.3	0.391673
175.4	0.391736
175.5	0.391799
175.6	0.391862
175.7	0.391925
175.8	0.391988
175.9	0.39205
176	0.392113
176.1	0.392176
176.2	0.392238
176.3	0.392301
176.4	0.392363
176.5	0.392426
176.6	0.392488
176.7	0.39255
176.8	0.392612
176.9	0.392674
177	0.392736
177.1	0.392798
177.2	0.39286
177.3	0.392922
177.4	0.392984
177.5	0.393045
177.6	0.393107
177.7	0.393169
177.8	0.39323
177.9	0.393292
178	0.393353
178.1	0.393414
178.2	0.393475
178.3	0.393536
178.4	0.393598
178.5	0.393659
178.6	0.393719
178.7	0.39378
178.8	0.393841
178.9	0.393902
179	0.393963
179.1	0.394023
179.2	0.394084
179.3	0.394144
179.4	0.394205
179.5	0.394265
179.6	0.394325
179.7	0.394385
179.8	0.394445
179.9	0.394505
180	0.394565
180.1	0.394625
180.2	0.394685
180.3	0.394745
180.4	0.394805
180.5	0.394864
180.6	0.394924
180.7	0.394984
180.8	0.395043
180.9	0.395102
181	0.395162
181.1	0.395221
181.2	0.39528
181.3	0.395339
181.4	0.395399
181.5	0.395458
181.6	0.395516
181.7	0.395575
181.8	0.395634
181.9	0.395693
182	0.395752
182.1	0.39581
182.2	0.395869
182.3	0.395927
182.4	0.395986
182.5	0.396044
182.6	0.396102
182.7	0.396161
182.8	0.396219
182.9	0.396277
183	0.396335
183.1	0.396393
183.2	0.396451
183.3	0.396509
183.4	0.396566
183.5	0.396624
183.6	0.396682
183.7	0.396739
183.8	0.396797
183.9	0.396854
184	0.396912
184.1	0.396969
184.2	0.397026
184.3	0.397084
184.4	0.397141
184.5	0.397198
184.6	0.397255
184.7	0.397312
184.8	0.397369
184.9	0.397426
185	0.397482
185.1	0.397539
185.2	0.397596
185.3	0.397652
185.4	0.397709
185.5	0.397765
185.6	0.397822
185.7	0.397878
185.8	0.397934
185.9	0.397991
186	0.398047
186.1	0.398103
186.2	0.398159
186.3	0.398215
186.4	0.398271
186.5	0.398326
186.6	0.398382
186.7	0.398438
186.8	0.398494
186.9	0.398549
187	0.398605
187.1	0.39866
187.2	0.398716
187.3	0.398771
187.4	0.398826
187.5	0.398881
187.6	0.398937
187.7	0.398992
187.8	0.399047
187.9	0.399102
188	0.399157
188.1	0.399212
188.2	0.399266
188.3	0.399321
188.4	0.399376
188.5	0.39943
188.6	0.399485
188.7	0.399539
188.8	0.399594
188.9	0.399648
189	0.399703
189.1	0.399757
189.2	0.399811
189.3	0.399865
189.4	0.399919
189.5	0.399973
189.6	0.400027
189.7	0.400081
189.8	0.400135
189.9	0.400189
190	0.400242
190.1	0.400296
190.2	0.40035
190.3	0.400403
190.4	0.400457
190.5	0.40051
190.6	0.400564
190.7	0.400617
190.8	0.40067
190.9	0.400723
191	0.400776
191.1	0.400829
191.2	0.400882
191.3	0.400935
191.4	0.400988
191.5	0.401041
191.6	0.401094
191.7	0.401147
191.8	0.401199
191.9	0.401252
192	0.401304
192.1	0.401357
192.2	0.401409
192.3	0.401462
192.4	0.401514
192.5	0.401566
192.6	0.401619
192.7	0.401671
192.8	0.401723
192.9	0.401775
193	0.401827
193.1	0.401879
193.2	0.401931
193.3	0.401982
193.4	0.402034
193.5	0.402086
193.6	0.402137
193.7	0.402189
193.8	0.40224
193.9	0.402292
194	0.402343
194.1	0.402395
194.2	0.402446
194.3	0.402497
194.4	0.402548
194.5	0.402599
194.6	0.40265
194.7	0.402701
194.8	0.402752
194.9	0.402803
195	0.402854
195.1	0.402905
195.2	0.402956
195.3	0.403006
195.4	0.403057
195.5	0.403107
195.6	0.403158
195.7	0.403208
195.8	0.403259
195.9	0.403309
196	0.403359
196.1	0.40341
196.2	0.40346
196.3	0.40351
196.4	0.40356
196.5	0.40361
196.6	0.40366
196.7	0.40371
196.8	0.40376
196.9	0.403809
197	0.403859
197.1	0.403909
197.2	0.403958
197.3	0.404008
197.4	0.404057
197.5	0.404107
197.6	0.404156
197.7	0.404206
197.8	0.404255
197.9	0.404304
198	0.404353
198.1	0.404402
198.2	0.404451
198.3	0.4045
198.4	0.404549
198.5	0.404598
198.6	0.404647
198.7	0.404696
198.8	0.404745
198.9	0.404793
199	0.404842
199.1	0.404891
199.2	0.404939
199.3	0.404988
199.4	0.405036
199.5	0.405084
199.6	0.405133
199.7	0.405181
199.8	0.405229
199.9	0.405277
200	0.405325
[truncated: 14,000 more rows]
