# Supplementary material for: Bayesian inference of kinetic schemes for ion channels by Kalman filtering
Source: eLife journal article supplement (doi:10.7554/elife.62714), 2022-05-04
Supplement: fig4-data12 [file 1_Sim_N_100_theor_Strom_Werte.xlsx]

## Sheet: Tabelle1
0.1	0
0.2	0
0.3	0
0.4	0
0.5	0
0.6	0
0.7	0
0.8	0
0.9	0
1	0
1.1	0
1.2	0
1.3	0
1.4	0
1.5	0
1.6	0
1.7	0
1.8	0
1.9	0
2	0
2.1	0
2.2	0
2.3	0
2.4	0
2.5	0
2.6	0
2.7	0
2.8	0
2.9	0
3	0
3.1	0
3.2	0
3.3	0
3.4	0
3.5	0
3.6	0
3.7	0
3.8	0
3.9	0
4	0
4.1	0
4.2	0
4.3	0
4.4	0
4.5	0
4.6	0
4.7	0
4.8	0
4.9	0
5	0
5.1	0
5.2	0
5.3	0
5.4	0
5.5	0
5.6	0
5.7	0
5.8	0
5.9	0
6	0
6.1	0
6.2	0
6.3	0
6.4	0
6.5	0
6.6	0
6.7	0
6.8	0
6.9	0
7	0
7.1	0
7.2	0
7.3	0
7.4	0
7.5	0
7.6	0
7.7	0
7.8	0
7.9	0
8	0
8.1	0
8.2	0
8.3	0
8.4	0
8.5	0
8.6	0
8.7	0
8.8	0
8.9	0
9	0
9.1	0
9.2	0
9.3	0
9.4	0
9.5	0
9.6	0
9.7	0
9.8	0
9.9	0
10	0
10.1	0
10.2	0
10.3	0
10.4	0
10.5	0
10.6	0
10.7	0
10.8	0
10.9	0
11	0
11.1	0
11.2	0
11.3	0
11.4	0
11.5	0
11.6	0
11.7	0
11.8	0
11.9	0
12	0
12.1	0
12.2	0
12.3	0
12.4	0
12.5	0
12.6	0
12.7	0
12.8	0
12.9	0
13	0
13.1	0
13.2	0
13.3	0
13.4	0
13.5	0
13.6	0
13.7	0
13.8	0
13.9	0
14	0
14.1	0
14.2	0
14.3	0
14.4	0
14.5	0
14.6	0
14.7	0
14.8	0
14.9	0
15	0
15.1	0
15.2	0
15.3	0
15.4	0
15.5	0
15.6	0
15.7	0
15.8	0
15.9	0
16	0
16.1	0
16.2	0
16.3	0
16.4	0
16.5	0
16.6	0
16.7	0
16.8	0
16.9	0
17	0
17.1	0
17.2	0
17.3	0
17.4	0
17.5	0
17.6	0
17.7	0
17.8	0
17.9	0
18	0
18.1	0
18.2	0
18.3	0
18.4	0
18.5	0
18.6	0
18.7	0
18.8	0
18.9	0
19	0
19.1	0
19.2	0
19.3	0
19.4	0
19.5	0
19.6	0
19.7	0
19.8	0
19.9	0
20	0
20.1	0
20.2	0
20.3	0
20.4	0
20.5	0
20.6	0
20.7	0
20.8	0
20.9	0
21	0
21.1	0
21.2	0
21.3	0
21.4	0
21.5	0
21.6	0
21.7	0
21.8	0
21.9	0
22	0
22.1	0
22.2	0
22.3	0
22.4	0
22.5	0
22.6	0
22.7	0
22.8	0
22.9	0
23	0
23.1	0
23.2	0
23.3	0
23.4	0
23.5	0
23.6	0
23.7	0
23.8	0
23.9	0
24	0
24.1	0
24.2	0
24.3	0
24.4	0
24.5	0
24.6	0
24.7	0
24.8	0
24.9	0
25	0
25.1	0
25.2	0
25.3	0
25.4	0
25.5	0
25.6	0
25.7	0
25.8	0
25.9	0
26	0
26.1	0
26.2	0
26.3	0
26.4	0
26.5	0
26.6	0
26.7	0
26.8	0
26.9	0
27	0
27.1	0
27.2	0
27.3	0
27.4	0
27.5	0
27.6	0
27.7	0
27.8	0
27.9	0
28	0
28.1	0
28.2	0
28.3	0
28.4	0
28.5	0
28.6	0
28.7	0
28.8	0
28.9	0
29	0
29.1	0
29.2	0
29.3	0
29.4	0
29.5	0
29.6	0
29.7	0
29.8	0
29.9	0
30	0
30.1	0
30.2	0
30.3	0
30.4	0
30.5	0
30.6	0
30.7	0
30.8	0
30.9	0
31	0
31.1	0
31.2	0
31.3	0
31.4	0
31.5	0
31.6	0
31.7	0
31.8	0
31.9	0
32	0
32.1	0
32.2	0
32.3	0
32.4	0
32.5	0
32.6	0
32.7	0
32.8	0
32.9	0
33	0
33.1	0
33.2	0
33.3	0
33.4	0
33.5	0
33.6	0
33.7	0
33.8	0
33.9	0
34	0
34.1	0
34.2	0
34.3	0
34.4	0
34.5	0
34.6	0
34.7	0
34.8	0
34.9	0
35	0
35.1	0
35.2	0
35.3	0
35.4	0
35.5	0
35.6	0
35.7	0
35.8	0
35.9	0
36	0
36.1	0
36.2	0
36.3	0
36.4	0
36.5	0
36.6	0
36.7	0
36.8	0
36.9	0
37	0
37.1	0
37.2	0
37.3	0
37.4	0
37.5	0
37.6	0
37.7	0
37.8	0
37.9	0
38	0
38.1	0
38.2	0
38.3	0
38.4	0
38.5	0
38.6	0
38.7	0
38.8	0
38.9	0
39	0
39.1	0
39.2	0
39.3	0
39.4	0
39.5	0
39.6	0
39.7	0
39.8	0
39.9	0
40	0
40.1	0
40.2	0
40.3	0
40.4	0
40.5	0
40.6	0
40.7	0
40.8	0
40.9	0
41	0
41.1	0
41.2	0
41.3	0
41.4	0
41.5	0
41.6	0
41.7	0
41.8	0
41.9	0
42	0
42.1	0
42.2	0
42.3	0
42.4	0
42.5	0
42.6	0
42.7	0
42.8	0
42.9	0
43	0
43.1	0
43.2	0
43.3	0
43.4	0
43.5	0
43.6	0
43.7	0
43.8	0
43.9	0
44	0
44.1	0
44.2	0
44.3	0
44.4	0
44.5	0
44.6	0
44.7	0
44.8	0
44.9	0
45	0
45.1	0
45.2	0
45.3	0
45.4	0
45.5	0
45.6	0
45.7	0
45.8	0
45.9	0
46	0
46.1	0
46.2	0
46.3	0
46.4	0
46.5	0
46.6	0
46.7	0
46.8	0
46.9	0
47	0
47.1	0
47.2	0
47.3	0
47.4	0
47.5	0
47.6	0
47.7	0
47.8	0
47.9	0
48	0
48.1	0
48.2	0
48.3	0
48.4	0
48.5	0
48.6	0
48.7	0
48.8	0
48.9	0
49	0
49.1	0
49.2	0
49.3	0
49.4	0
49.5	0
49.6	0
49.7	0
49.8	0
49.9	0
50	0
50.1	0
50.2	0
50.3	0
50.4	0
50.5	0
50.6	0
50.7	0
50.8	0
50.9	0
51	0
51.1	0
51.2	0
51.3	0
51.4	0
51.5	0
51.6	0
51.7	0
51.8	0
51.9	0
52	0
52.1	0
52.2	0
52.3	0
52.4	0
52.5	0
52.6	0
52.7	0
52.8	0
52.9	0
53	0
53.1	0
53.2	0
53.3	0
53.4	0
53.5	0
53.6	0
53.7	0
53.8	0
53.9	0
54	0
54.1	0
54.2	0
54.3	0
54.4	0
54.5	0
54.6	0
54.7	0
54.8	0
54.9	0
55	0
55.1	0
55.2	0
55.3	0
55.4	0
55.5	0
55.6	0
55.7	0
55.8	0
55.9	0
56	0
56.1	0
56.2	0
56.3	0
56.4	0
56.5	0
56.6	0
56.7	0
56.8	0
56.9	0
57	0
57.1	0
57.2	0
57.3	0
57.4	0
57.5	0
57.6	0
57.7	0
57.8	0
57.9	0
58	0
58.1	0
58.2	0
58.3	0
58.4	0
58.5	0
58.6	0
58.7	0
58.8	0
58.9	0
59	0
59.1	0
59.2	0
59.3	0
59.4	0
59.5	0
59.6	0
59.7	0
59.8	0
59.9	0
60	0
60.1	0
60.2	0
60.3	0
60.4	0
60.5	0
60.6	0
60.7	0
60.8	0
60.9	0
61	0
61.1	0
61.2	0
61.3	0
61.4	0
61.5	0
61.6	0
61.7	0
61.8	0
61.9	0
62	0
62.1	0
62.2	0
62.3	0
62.4	0
62.5	0
62.6	0
62.7	0
62.8	0
62.9	0
63	0
63.1	0
63.2	0
63.3	0
63.4	0
63.5	0
63.6	0
63.7	0
63.8	0
63.9	0
64	0
64.1	0
64.2	0
64.3	0
64.4	0
64.5	0
64.6	0
64.7	0
64.8	0
64.9	0
65	0
65.1	0
65.2	0
65.3	0
65.4	0
65.5	0
65.6	0
65.7	0
65.8	0
65.9	0
66	0
66.1	0
66.2	0
66.3	0
66.4	0
66.5	0
66.6	0
66.7	0
66.8	0
66.9	0
67	0
67.1	0
67.2	0
67.3	0
67.4	0
67.5	0
67.6	0
67.7	0
67.8	0
67.9	0
68	0
68.1	0
68.2	0
68.3	0
68.4	0
68.5	0
68.6	0
68.7	0
68.8	0
68.9	0
69	0
69.1	0
69.2	0
69.3	0
69.4	0
69.5	0
69.6	0
69.7	0
69.8	0
69.9	0
70	0
70.1	0
70.2	0
70.3	0
70.4	0
70.5	0
70.6	0
70.7	0
70.8	0
70.9	0
71	0
71.1	0
71.2	0
71.3	0
71.4	0
71.5	0
71.6	0
71.7	0
71.8	0
71.9	0
72	0
72.1	0
72.2	0
72.3	0
72.4	0
72.5	0
72.6	0
72.7	0
72.8	0
72.9	0
73	0
73.1	0
73.2	0
73.3	0
73.4	0
73.5	0
73.6	0
73.7	0
73.8	0
73.9	0
74	0
74.1	0
74.2	0
74.3	0
74.4	0
74.5	0
74.6	0
74.7	0
74.8	0
74.9	0
75	0
75.1	0
75.2	0
75.3	0
75.4	0
75.5	0
75.6	0
75.7	0
75.8	0
75.9	0
76	0
76.1	0
76.2	0
76.3	0
76.4	0
76.5	0
76.6	0
76.7	0
76.8	0
76.9	0
77	0
77.1	0
77.2	0
77.3	0
77.4	0
77.5	0
77.6	0
77.7	0
77.8	0
77.9	0
78	0
78.1	0
78.2	0
78.3	0
78.4	0
78.5	0
78.6	0
78.7	0
78.8	0
78.9	0
79	0
79.1	0
79.2	0
79.3	0
79.4	0
79.5	0
79.6	0
79.7	0
79.8	0
79.9	0
80	0
80.1	0
80.2	0
80.3	0
80.4	0
80.5	0
80.6	0
80.7	0
80.8	0
80.9	0
81	0
81.1	0
81.2	0
81.3	0
81.4	0
81.5	0
81.6	0
81.7	0
81.8	0
81.9	0
82	0
82.1	0
82.2	0
82.3	0
82.4	0
82.5	0
82.6	0
82.7	0
82.8	0
82.9	0
83	0
83.1	0
83.2	0
83.3	0
83.4	0
83.5	0
83.6	0
83.7	0
83.8	0
83.9	0
84	0
84.1	0
84.2	0
84.3	0
84.4	0
84.5	0
84.6	0
84.7	0
84.8	0
84.9	0
85	0
85.1	0
85.2	0
85.3	0
85.4	0
85.5	0
85.6	0
85.7	0
85.8	0
85.9	0
86	0
86.1	0
86.2	0
86.3	0
86.4	0
86.5	0
86.6	0
86.7	0
86.8	0
86.9	0
87	0
87.1	0
87.2	0
87.3	0
87.4	0
87.5	0
87.6	0
87.7	0
87.8	0
87.9	0
88	0
88.1	0
88.2	0
88.3	0
88.4	0
88.5	0
88.6	0
88.7	0
88.8	0
88.9	0
89	0
89.1	0
89.2	0
89.3	0
89.4	0
89.5	0
89.6	0
89.7	0
89.8	0
89.9	0
90	0
90.1	0
90.2	0
90.3	0
90.4	0
90.5	0
90.6	0
90.7	0
90.8	0
90.9	0
91	0
91.1	0
91.2	0
91.3	0
91.4	0
91.5	0
91.6	0
91.7	0
91.8	0
91.9	0
92	0
92.1	0
92.2	0
92.3	0
92.4	0
92.5	0
92.6	0
92.7	0
92.8	0
92.9	0
93	0
93.1	0
93.2	0
93.3	0
93.4	0
93.5	0
93.6	0
93.7	0
93.8	0
93.9	0
94	0
94.1	0
94.2	0
94.3	0
94.4	0
94.5	0
94.6	0
94.7	0
94.8	0
94.9	0
95	0
95.1	0
95.2	0
95.3	0
95.4	0
95.5	0
95.6	0
95.7	0
95.8	0
95.9	0
96	0
96.1	0
96.2	0
96.3	0
96.4	0
96.5	0
96.6	0
96.7	0
96.8	0
96.9	0
97	0
97.1	0
97.2	0
97.3	0
97.4	0
97.5	0
97.6	0
97.7	0
97.8	0
97.9	0
98	0
98.1	0
98.2	0
98.3	0
98.4	0
98.5	0
98.6	0
98.7	0
98.8	0
98.9	0
99	0
99.1	0
99.2	0
99.3	0
99.4	0
99.5	0
99.6	0
99.7	0
99.8	0
99.9	0
100	0
100.1	4.5895e-08
100.2	3.59525e-07
100.3	1.1883e-06
100.4	2.75878e-06
100.5	5.278e-06
100.6	8.93482e-06
100.7	1.3901e-05
100.8	2.03326e-05
100.9	2.83706e-05
101	3.81423e-05
101.1	4.97621e-05
101.2	6.33324e-05
101.3	7.89443e-05
101.4	9.66785e-05
101.5	0.000116606
101.6	0.000138789
101.7	0.000163281
101.8	0.000190128
101.9	0.000219369
102	0.000251035
102.1	0.000285153
102.2	0.000321742
102.3	0.000360817
102.4	0.000402388
102.5	0.00044646
102.6	0.000493034
102.7	0.000542109
102.8	0.000593676
102.9	0.000647728
103	0.000704251
103.1	0.000763231
103.2	0.00082465
103.3	0.000888488
103.4	0.000954724
103.5	0.00102333
103.6	0.00109429
103.7	0.00116757
103.8	0.00124314
103.9	0.00132098
104	0.00140105
104.1	0.00148333
104.2	0.00156777
104.3	0.00165435
104.4	0.00174304
104.5	0.00183379
104.6	0.00192658
104.7	0.00202138
104.8	0.00211813
104.9	0.00221683
105	0.00231741
105.1	0.00241986
105.2	0.00252413
105.3	0.00263019
105.4	0.00273801
105.5	0.00284755
105.6	0.00295877
105.7	0.00307164
105.8	0.00318613
105.9	0.0033022
106	0.00341982
106.1	0.00353895
106.2	0.00365956
106.3	0.00378162
106.4	0.00390509
106.5	0.00402995
106.6	0.00415616
106.7	0.00428369
106.8	0.0044125
106.9	0.00454258
107	0.00467388
107.1	0.00480639
107.2	0.00494006
107.3	0.00507487
107.4	0.0052108
107.5	0.00534781
107.6	0.00548587
107.7	0.00562497
107.8	0.00576507
107.9	0.00590615
108	0.00604819
108.1	0.00619115
108.2	0.00633501
108.3	0.00647975
108.4	0.00662535
108.5	0.00677178
108.6	0.00691902
108.7	0.00706704
108.8	0.00721583
108.9	0.00736537
109	0.00751562
109.1	0.00766658
109.2	0.00781822
109.3	0.00797052
109.4	0.00812347
109.5	0.00827703
109.6	0.0084312
109.7	0.00858596
109.8	0.00874129
109.9	0.00889717
110	0.00905358
110.1	0.00921052
110.2	0.00936795
110.3	0.00952587
110.4	0.00968426
110.5	0.0098431
110.6	0.0100024
110.7	0.0101621
110.8	0.0103222
110.9	0.0104827
111	0.0106436
111.1	0.0108049
111.2	0.0109665
111.3	0.0111285
111.4	0.0112908
111.5	0.0114534
111.6	0.0116163
111.7	0.0117795
111.8	0.011943
111.9	0.0121068
112	0.0122708
112.1	0.0124351
112.2	0.0125997
112.3	0.0127644
112.4	0.0129294
112.5	0.0130946
112.6	0.01326
112.7	0.0134256
112.8	0.0135914
112.9	0.0137573
113	0.0139234
113.1	0.0140897
113.2	0.0142561
113.3	0.0144227
113.4	0.0145894
113.5	0.0147562
113.6	0.0149231
113.7	0.0150902
113.8	0.0152573
113.9	0.0154246
114	0.0155919
114.1	0.0157594
114.2	0.0159269
114.3	0.0160945
114.4	0.0162621
114.5	0.0164298
114.6	0.0165976
114.7	0.0167654
114.8	0.0169332
114.9	0.0171011
115	0.017269
115.1	0.0174369
115.2	0.0176049
115.3	0.0177729
115.4	0.0179409
115.5	0.0181089
115.6	0.0182768
115.7	0.0184448
115.8	0.0186128
115.9	0.0187808
116	0.0189488
116.1	0.0191167
116.2	0.0192846
116.3	0.0194525
116.4	0.0196204
116.5	0.0197882
116.6	0.019956
116.7	0.0201238
116.8	0.0202915
116.9	0.0204591
117	0.0206267
117.1	0.0207943
117.2	0.0209618
117.3	0.0211292
117.4	0.0212966
117.5	0.0214639
117.6	0.0216311
117.7	0.0217983
117.8	0.0219654
117.9	0.0221324
118	0.0222993
118.1	0.0224662
118.2	0.022633
118.3	0.0227997
118.4	0.0229663
118.5	0.0231328
118.6	0.0232992
118.7	0.0234655
118.8	0.0236317
118.9	0.0237978
119	0.0239639
119.1	0.0241298
119.2	0.0242956
119.3	0.0244613
119.4	0.0246269
119.5	0.0247924
119.6	0.0249578
119.7	0.0251231
119.8	0.0252882
119.9	0.0254533
120	0.0256182
120.1	0.025783
120.2	0.0259477
120.3	0.0261122
120.4	0.0262767
120.5	0.026441
120.6	0.0266052
120.7	0.0267692
120.8	0.0269332
120.9	0.027097
121	0.0272607
121.1	0.0274242
121.2	0.0275876
121.3	0.0277509
121.4	0.0279141
121.5	0.0280771
121.6	0.0282399
121.7	0.0284027
121.8	0.0285653
121.9	0.0287278
122	0.0288901
122.1	0.0290523
122.2	0.0292143
122.3	0.0293762
122.4	0.029538
122.5	0.0296996
122.6	0.0298611
122.7	0.0300224
122.8	0.0301836
122.9	0.0303446
123	0.0305055
123.1	0.0306663
123.2	0.0308269
123.3	0.0309873
123.4	0.0311476
123.5	0.0313078
123.6	0.0314678
123.7	0.0316276
123.8	0.0317873
123.9	0.0319469
124	0.0321063
124.1	0.0322655
124.2	0.0324246
124.3	0.0325836
124.4	0.0327424
124.5	0.032901
124.6	0.0330595
124.7	0.0332178
124.8	0.033376
124.9	0.033534
125	0.0336919
125.1	0.0338496
125.2	0.0340071
125.3	0.0341645
125.4	0.0343218
125.5	0.0344789
125.6	0.0346358
125.7	0.0347926
125.8	0.0349492
125.9	0.0351056
126	0.0352619
126.1	0.0354181
126.2	0.0355741
126.3	0.0357299
126.4	0.0358856
126.5	0.0360411
126.6	0.0361964
126.7	0.0363516
126.8	0.0365067
126.9	0.0366615
127	0.0368162
127.1	0.0369708
127.2	0.0371252
127.3	0.0372794
127.4	0.0374335
127.5	0.0375874
127.6	0.0377412
127.7	0.0378948
127.8	0.0380482
127.9	0.0382015
128	0.0383546
128.1	0.0385076
128.2	0.0386604
128.3	0.038813
128.4	0.0389655
128.5	0.0391178
128.6	0.03927
128.7	0.039422
128.8	0.0395738
128.9	0.0397255
129	0.039877
129.1	0.0400284
129.2	0.0401796
129.3	0.0403306
129.4	0.0404815
129.5	0.0406322
129.6	0.0407828
129.7	0.0409332
129.8	0.0410834
129.9	0.0412335
130	0.0413834
130.1	0.0415332
130.2	0.0416828
130.3	0.0418322
130.4	0.0419815
130.5	0.0421306
130.6	0.0422796
130.7	0.0424284
130.8	0.042577
130.9	0.0427255
131	0.0428739
131.1	0.043022
131.2	0.04317
131.3	0.0433179
131.4	0.0434656
131.5	0.0436131
131.6	0.0437604
131.7	0.0439077
131.8	0.0440547
131.9	0.0442016
132	0.0443483
132.1	0.0444949
132.2	0.0446413
132.3	0.0447876
132.4	0.0449337
132.5	0.0450796
132.6	0.0452254
132.7	0.045371
132.8	0.0455165
132.9	0.0456618
133	0.0458069
133.1	0.0459519
133.2	0.0460968
133.3	0.0462415
133.4	0.046386
133.5	0.0465303
133.6	0.0466745
133.7	0.0468186
133.8	0.0469625
133.9	0.0471062
134	0.0472498
134.1	0.0473932
134.2	0.0475365
134.3	0.0476796
134.4	0.0478226
134.5	0.0479654
134.6	0.048108
134.7	0.0482505
134.8	0.0483928
134.9	0.048535
135	0.048677
135.1	0.0488189
135.2	0.0489606
135.3	0.0491022
135.4	0.0492436
135.5	0.0493848
135.6	0.0495259
135.7	0.0496668
135.8	0.0498076
135.9	0.0499482
136	0.0500887
136.1	0.050229
136.2	0.0503692
136.3	0.0505092
136.4	0.0506491
136.5	0.0507888
136.6	0.0509284
136.7	0.0510678
136.8	0.051207
136.9	0.0513461
137	0.051485
137.1	0.0516238
137.2	0.0517625
137.3	0.051901
137.4	0.0520393
137.5	0.0521775
137.6	0.0523155
137.7	0.0524534
137.8	0.0525911
137.9	0.0527287
138	0.0528661
138.1	0.0530034
138.2	0.0531405
138.3	0.0532775
138.4	0.0534143
138.5	0.053551
138.6	0.0536875
138.7	0.0538239
138.8	0.0539601
138.9	0.0540962
139	0.0542321
139.1	0.0543679
139.2	0.0545035
139.3	0.054639
139.4	0.0547743
139.5	0.0549095
139.6	0.0550445
139.7	0.0551794
139.8	0.0553141
139.9	0.0554487
140	0.0555831
140.1	0.0557174
140.2	0.0558515
140.3	0.0559855
140.4	0.0561194
140.5	0.0562531
140.6	0.0563866
140.7	0.05652
140.8	0.0566533
140.9	0.0567864
141	0.0569193
141.1	0.0570522
141.2	0.0571848
141.3	0.0573173
141.4	0.0574497
141.5	0.057582
141.6	0.057714
141.7	0.057846
141.8	0.0579778
141.9	0.0581094
142	0.0582409
142.1	0.0583723
142.2	0.0585035
142.3	0.0586346
142.4	0.0587655
142.5	0.0588963
142.6	0.0590269
142.7	0.0591574
142.8	0.0592877
142.9	0.0594179
143	0.059548
143.1	0.0596779
143.2	0.0598077
143.3	0.0599373
143.4	0.0600668
143.5	0.0601962
143.6	0.0603254
143.7	0.0604544
143.8	0.0605833
143.9	0.0607121
144	0.0608407
144.1	0.0609692
144.2	0.0610976
144.3	0.0612258
144.4	0.0613539
144.5	0.0614818
144.6	0.0616096
144.7	0.0617372
144.8	0.0618647
144.9	0.0619921
145	0.0621193
145.1	0.0622464
145.2	0.0623733
145.3	0.0625001
145.4	0.0626268
145.5	0.0627533
145.6	0.0628797
145.7	0.0630059
145.8	0.063132
145.9	0.063258
146	0.0633838
146.1	0.0635095
146.2	0.063635
146.3	0.0637605
146.4	0.0638857
146.5	0.0640109
146.6	0.0641358
146.7	0.0642607
146.8	0.0643854
146.9	0.06451
147	0.0646344
147.1	0.0647587
147.2	0.0648829
147.3	0.0650069
147.4	0.0651308
147.5	0.0652546
147.6	0.0653782
147.7	0.0655017
147.8	0.065625
147.9	0.0657483
148	0.0658713
148.1	0.0659943
148.2	0.0661171
148.3	0.0662397
148.4	0.0663623
148.5	0.0664847
148.6	0.0666069
148.7	0.0667291
148.8	0.066851
148.9	0.0669729
149	0.0670946
149.1	0.0672162
149.2	0.0673377
149.3	0.067459
149.4	0.0675802
149.5	0.0677012
149.6	0.0678221
149.7	0.0679429
149.8	0.0680636
149.9	0.0681841
150	0.0683045
150.1	0.0684247
150.2	0.0685449
150.3	0.0686648
150.4	0.0687847
150.5	0.0689044
150.6	0.069024
150.7	0.0691435
150.8	0.0692628
150.9	0.069382
151	0.0695011
151.1	0.06962
151.2	0.0697388
151.3	0.0698575
151.4	0.069976
151.5	0.0700944
151.6	0.0702127
151.7	0.0703308
151.8	0.0704488
151.9	0.0705667
152	0.0706845
152.1	0.0708021
152.2	0.0709196
152.3	0.071037
152.4	0.0711542
152.5	0.0712713
152.6	0.0713883
152.7	0.0715051
152.8	0.0716218
152.9	0.0717384
153	0.0718549
153.1	0.0719712
153.2	0.0720874
153.3	0.0722035
153.4	0.0723194
153.5	0.0724353
153.6	0.0725509
153.7	0.0726665
153.8	0.0727819
153.9	0.0728972
154	0.0730124
154.1	0.0731275
154.2	0.0732424
154.3	0.0733572
154.4	0.0734719
154.5	0.0735864
154.6	0.0737008
154.7	0.0738151
154.8	0.0739293
154.9	0.0740433
155	0.0741573
155.1	0.074271
155.2	0.0743847
155.3	0.0744982
155.4	0.0746117
155.5	0.0747249
155.6	0.0748381
155.7	0.0749511
155.8	0.0750641
155.9	0.0751768
156	0.0752895
156.1	0.075402
156.2	0.0755145
156.3	0.0756267
156.4	0.0757389
156.5	0.0758509
156.6	0.0759629
156.7	0.0760747
156.8	0.0761863
156.9	0.0762979
157	0.0764093
157.1	0.0765206
157.2	0.0766318
157.3	0.0767428
157.4	0.0768538
157.5	0.0769646
157.6	0.0770753
157.7	0.0771858
157.8	0.0772963
157.9	0.0774066
158	0.0775168
158.1	0.0776269
158.2	0.0777368
158.3	0.0778467
158.4	0.0779564
158.5	0.078066
158.6	0.0781754
158.7	0.0782848
158.8	0.078394
158.9	0.0785031
159	0.0786121
159.1	0.078721
159.2	0.0788297
159.3	0.0789384
159.4	0.0790469
159.5	0.0791552
159.6	0.0792635
159.7	0.0793717
159.8	0.0794797
159.9	0.0795876
160	0.0796954
160.1	0.0798031
160.2	0.0799106
160.3	0.080018
160.4	0.0801254
160.5	0.0802326
160.6	0.0803396
160.7	0.0804466
160.8	0.0805534
160.9	0.0806602
161	0.0807668
161.1	0.0808733
161.2	0.0809796
161.3	0.0810859
161.4	0.081192
161.5	0.081298
161.6	0.0814039
161.7	0.0815097
161.8	0.0816154
161.9	0.0817209
162	0.0818264
162.1	0.0819317
162.2	0.0820369
162.3	0.082142
162.4	0.0822469
162.5	0.0823518
162.6	0.0824565
162.7	0.0825611
162.8	0.0826656
162.9	0.08277
163	0.0828743
163.1	0.0829785
163.2	0.0830825
163.3	0.0831864
163.4	0.0832903
163.5	0.083394
163.6	0.0834975
163.7	0.083601
163.8	0.0837044
163.9	0.0838076
164	0.0839107
164.1	0.0840138
164.2	0.0841167
164.3	0.0842194
164.4	0.0843221
164.5	0.0844247
164.6	0.0845271
164.7	0.0846295
164.8	0.0847317
164.9	0.0848338
165	0.0849358
165.1	0.0850377
165.2	0.0851394
165.3	0.0852411
165.4	0.0853426
165.5	0.0854441
165.6	0.0855454
165.7	0.0856466
165.8	0.0857477
165.9	0.0858487
166	0.0859496
166.1	0.0860503
166.2	0.086151
166.3	0.0862515
166.4	0.0863519
166.5	0.0864523
166.6	0.0865525
166.7	0.0866526
166.8	0.0867525
166.9	0.0868524
167	0.0869522
167.1	0.0870518
167.2	0.0871514
167.3	0.0872508
167.4	0.0873501
167.5	0.0874494
167.6	0.0875485
167.7	0.0876475
167.8	0.0877464
167.9	0.0878451
168	0.0879438
168.1	0.0880424
168.2	0.0881408
168.3	0.0882391
168.4	0.0883374
168.5	0.0884355
168.6	0.0885335
168.7	0.0886314
168.8	0.0887292
168.9	0.0888269
169	0.0889245
169.1	0.089022
169.2	0.0891194
169.3	0.0892166
169.4	0.0893138
169.5	0.0894108
169.6	0.0895078
169.7	0.0896046
169.8	0.0897013
169.9	0.0897979
170	0.0898944
170.1	0.0899908
170.2	0.0900871
170.3	0.0901833
170.4	0.0902794
170.5	0.0903754
170.6	0.0904713
170.7	0.090567
170.8	0.0906627
170.9	0.0907583
171	0.0908537
171.1	0.0909491
171.2	0.0910443
171.3	0.0911394
171.4	0.0912345
171.5	0.0913294
171.6	0.0914242
171.7	0.0915189
171.8	0.0916135
171.9	0.091708
172	0.0918024
172.1	0.0918967
172.2	0.0919909
172.3	0.092085
172.4	0.092179
172.5	0.0922729
172.6	0.0923667
172.7	0.0924603
172.8	0.0925539
172.9	0.0926474
173	0.0927407
173.1	0.092834
173.2	0.0929271
173.3	0.0930202
173.4	0.0931132
173.5	0.093206
173.6	0.0932987
173.7	0.0933914
173.8	0.0934839
173.9	0.0935764
174	0.0936687
174.1	0.0937609
174.2	0.0938531
174.3	0.0939451
174.4	0.094037
174.5	0.0941289
174.6	0.0942206
174.7	0.0943122
174.8	0.0944037
174.9	0.0944952
175	0.0945865
175.1	0.0946777
175.2	0.0947688
175.3	0.0948599
175.4	0.0949508
175.5	0.0950416
175.6	0.0951323
175.7	0.0952229
175.8	0.0953134
175.9	0.0954039
176	0.0954942
176.1	0.0955844
176.2	0.0956745
176.3	0.0957645
176.4	0.0958545
176.5	0.0959443
176.6	0.096034
176.7	0.0961236
176.8	0.0962132
176.9	0.0963026
177	0.0963919
177.1	0.0964811
177.2	0.0965703
177.3	0.0966593
177.4	0.0967482
177.5	0.0968371
177.6	0.0969258
177.7	0.0970144
177.8	0.097103
177.9	0.0971914
178	0.0972798
178.1	0.097368
178.2	0.0974561
178.3	0.0975442
178.4	0.0976322
178.5	0.09772
178.6	0.0978078
178.7	0.0978954
178.8	0.097983
178.9	0.0980705
179	0.0981578
179.1	0.0982451
179.2	0.0983323
179.3	0.0984194
179.4	0.0985064
179.5	0.0985933
179.6	0.0986801
179.7	0.0987668
179.8	0.0988534
179.9	0.0989399
180	0.0990263
180.1	0.0991126
180.2	0.0991988
180.3	0.0992849
180.4	0.099371
180.5	0.0994569
180.6	0.0995428
180.7	0.0996285
180.8	0.0997142
180.9	0.0997997
181	0.0998852
181.1	0.0999705
181.2	0.100056
181.3	0.100141
181.4	0.100226
181.5	0.100311
181.6	0.100396
181.7	0.100481
181.8	0.100565
181.9	0.10065
182	0.100735
182.1	0.100819
182.2	0.100903
182.3	0.100988
182.4	0.101072
182.5	0.101156
182.6	0.10124
182.7	0.101324
182.8	0.101407
182.9	0.101491
183	0.101575
183.1	0.101658
183.2	0.101742
183.3	0.101825
183.4	0.101908
183.5	0.101991
183.6	0.102074
183.7	0.102157
183.8	0.10224
183.9	0.102323
184	0.102406
184.1	0.102488
184.2	0.102571
184.3	0.102653
184.4	0.102735
184.5	0.102818
184.6	0.1029
184.7	0.102982
184.8	0.103064
184.9	0.103146
185	0.103227
185.1	0.103309
185.2	0.103391
185.3	0.103472
185.4	0.103554
185.5	0.103635
185.6	0.103716
185.7	0.103797
185.8	0.103878
185.9	0.103959
186	0.10404
186.1	0.104121
186.2	0.104202
186.3	0.104282
186.4	0.104363
186.5	0.104443
186.6	0.104523
186.7	0.104604
186.8	0.104684
186.9	0.104764
187	0.104844
187.1	0.104924
187.2	0.105004
187.3	0.105083
187.4	0.105163
187.5	0.105242
187.6	0.105322
187.7	0.105401
187.8	0.105481
187.9	0.10556
188	0.105639
188.1	0.105718
188.2	0.105797
188.3	0.105876
188.4	0.105954
188.5	0.106033
188.6	0.106112
188.7	0.10619
188.8	0.106268
188.9	0.106347
189	0.106425
189.1	0.106503
189.2	0.106581
189.3	0.106659
189.4	0.106737
189.5	0.106815
189.6	0.106893
189.7	0.10697
189.8	0.107048
189.9	0.107125
190	0.107203
190.1	0.10728
190.2	0.107357
190.3	0.107434
190.4	0.107511
190.5	0.107588
190.6	0.107665
190.7	0.107742
190.8	0.107818
190.9	0.107895
191	0.107972
191.1	0.108048
191.2	0.108124
191.3	0.108201
191.4	0.108277
191.5	0.108353
191.6	0.108429
191.7	0.108505
191.8	0.108581
191.9	0.108656
192	0.108732
192.1	0.108808
192.2	0.108883
192.3	0.108959
192.4	0.109034
192.5	0.109109
192.6	0.109184
192.7	0.10926
192.8	0.109335
192.9	0.10941
193	0.109484
193.1	0.109559
193.2	0.109634
193.3	0.109708
193.4	0.109783
193.5	0.109857
193.6	0.109932
193.7	0.110006
193.8	0.11008
193.9	0.110154
194	0.110228
194.1	0.110302
194.2	0.110376
194.3	0.11045
194.4	0.110524
194.5	0.110597
194.6	0.110671
194.7	0.110744
194.8	0.110818
194.9	0.110891
195	0.110964
195.1	0.111037
195.2	0.11111
195.3	0.111183
195.4	0.111256
195.5	0.111329
195.6	0.111402
195.7	0.111474
195.8	0.111547
195.9	0.111619
196	0.111692
196.1	0.111764
196.2	0.111836
196.3	0.111908
196.4	0.111981
196.5	0.112053
196.6	0.112125
196.7	0.112196
196.8	0.112268
196.9	0.11234
197	0.112411
197.1	0.112483
197.2	0.112554
197.3	0.112626
197.4	0.112697
197.5	0.112768
197.6	0.112839
197.7	0.11291
197.8	0.112981
197.9	0.113052
198	0.113123
198.1	0.113194
198.2	0.113265
198.3	0.113335
198.4	0.113406
198.5	0.113476
198.6	0.113546
198.7	0.113617
198.8	0.113687
198.9	0.113757
199	0.113827
199.1	0.113897
199.2	0.113967
199.3	0.114037
199.4	0.114107
199.5	0.114176
199.6	0.114246
199.7	0.114315
199.8	0.114385
199.9	0.114454
200	0.114523
[truncated: 14,000 more rows]
