# Supplementary material for: Bayesian inference of kinetic schemes for ion channels by Kalman filtering
Source: eLife journal article supplement (doi:10.7554/elife.62714), 2022-05-04
Supplement: fig4-data12 [file 1_Sim_N_200_Fluor_MW_0.125M.xlsx]

## Sheet: 0.125 M
0.1	0
0.2	0
0.3	0
0.4	0
0.5	0
0.6	0
0.7	0
0.8	0
0.9	0
1	0
1.1	0
1.2	0
1.3	0
1.4	0
1.5	0
1.6	0
1.7	0
1.8	0
1.9	0
2	0
2.1	0
2.2	0
2.3	0
2.4	0
2.5	0
2.6	0
2.7	0
2.8	0
2.9	0
3	0
3.1	0
3.2	0
3.3	0
3.4	0
3.5	0
3.6	0
3.7	0
3.8	0
3.9	0
4	0
4.1	0
4.2	0
4.3	0
4.4	0
4.5	0
4.6	0
4.7	0
4.8	0
4.9	0
5	0
5.1	0
5.2	0
5.3	0
5.4	0
5.5	0
5.6	0
5.7	0
5.8	0
5.9	0
6	0
6.1	0
6.2	0
6.3	0
6.4	0
6.5	0
6.6	0
6.7	0
6.8	0
6.9	0
7	0
7.1	0
7.2	0
7.3	0
7.4	0
7.5	0
7.6	0
7.7	0
7.8	0
7.9	0
8	0
8.1	0
8.2	0
8.3	0
8.4	0
8.5	0
8.6	0
8.7	0
8.8	0
8.9	0
9	0
9.1	0
9.2	0
9.3	0
9.4	0
9.5	0
9.6	0
9.7	0
9.8	0
9.9	0
10	0
10.1	0
10.2	0
10.3	0
10.4	0
10.5	0
10.6	0
10.7	0
10.8	0
10.9	0
11	0
11.1	0
11.2	0
11.3	0
11.4	0
11.5	0
11.6	0
11.7	0
11.8	0
11.9	0
12	0
12.1	0
12.2	0
12.3	0
12.4	0
12.5	0
12.6	0
12.7	0
12.8	0
12.9	0
13	0
13.1	0
13.2	0
13.3	0
13.4	0
13.5	0
13.6	0
13.7	0
13.8	0
13.9	0
14	0
14.1	0
14.2	0
14.3	0
14.4	0
14.5	0
14.6	0
14.7	0
14.8	0
14.9	0
15	0
15.1	0
15.2	0
15.3	0
15.4	0
15.5	0
15.6	0
15.7	0
15.8	0
15.9	0
16	0
16.1	0
16.2	0
16.3	0
16.4	0
16.5	0
16.6	0
16.7	0
16.8	0
16.9	0
17	0
17.1	0
17.2	0
17.3	0
17.4	0
17.5	0
17.6	0
17.7	0
17.8	0
17.9	0
18	0
18.1	0
18.2	0
18.3	0
18.4	0
18.5	0
18.6	0
18.7	0
18.8	0
18.9	0
19	0
19.1	0
19.2	0
19.3	0
19.4	0
19.5	0
19.6	0
19.7	0
19.8	0
19.9	0
20	0
20.1	0
20.2	0
20.3	0
20.4	0
20.5	0
20.6	0
20.7	0
20.8	0
20.9	0
21	0
21.1	0
21.2	0
21.3	0
21.4	0
21.5	0
21.6	0
21.7	0
21.8	0
21.9	0
22	0
22.1	0
22.2	0
22.3	0
22.4	0
22.5	0
22.6	0
22.7	0
22.8	0
22.9	0
23	0
23.1	0
23.2	0
23.3	0
23.4	0
23.5	0
23.6	0
23.7	0
23.8	0
23.9	0
24	0
24.1	0
24.2	0
24.3	0
24.4	0
24.5	0
24.6	0
24.7	0
24.8	0
24.9	0
25	0
25.1	0
25.2	0
25.3	0
25.4	0
25.5	0
25.6	0
25.7	0
25.8	0
25.9	0
26	0
26.1	0
26.2	0
26.3	0
26.4	0
26.5	0
26.6	0
26.7	0
26.8	0
26.9	0
27	0
27.1	0
27.2	0
27.3	0
27.4	0
27.5	0
27.6	0
27.7	0
27.8	0
27.9	0
28	0
28.1	0
28.2	0
28.3	0
28.4	0
28.5	0
28.6	0
28.7	0
28.8	0
28.9	0
29	0
29.1	0
29.2	0
29.3	0
29.4	0
29.5	0
29.6	0
29.7	0
29.8	0
29.9	0
30	0
30.1	0
30.2	0
30.3	0
30.4	0
30.5	0
30.6	0
30.7	0
30.8	0
30.9	0
31	0
31.1	0
31.2	0
31.3	0
31.4	0
31.5	0
31.6	0
31.7	0
31.8	0
31.9	0
32	0
32.1	0
32.2	0
32.3	0
32.4	0
32.5	0
32.6	0
32.7	0
32.8	0
32.9	0
33	0
33.1	0
33.2	0
33.3	0
33.4	0
33.5	0
33.6	0
33.7	0
33.8	0
33.9	0
34	0
34.1	0
34.2	0
34.3	0
34.4	0
34.5	0
34.6	0
34.7	0
34.8	0
34.9	0
35	0
35.1	0
35.2	0
35.3	0
35.4	0
35.5	0
35.6	0
35.7	0
35.8	0
35.9	0
36	0
36.1	0
36.2	0
36.3	0
36.4	0
36.5	0
36.6	0
36.7	0
36.8	0
36.9	0
37	0
37.1	0
37.2	0
37.3	0
37.4	0
37.5	0
37.6	0
37.7	0
37.8	0
37.9	0
38	0
38.1	0
38.2	0
38.3	0
38.4	0
38.5	0
38.6	0
38.7	0
38.8	0
38.9	0
39	0
39.1	0
39.2	0
39.3	0
39.4	0
39.5	0
39.6	0
39.7	0
39.8	0
39.9	0
40	0
40.1	0
40.2	0
40.3	0
40.4	0
40.5	0
40.6	0
40.7	0
40.8	0
40.9	0
41	0
41.1	0
41.2	0
41.3	0
41.4	0
41.5	0
41.6	0
41.7	0
41.8	0
41.9	0
42	0
42.1	0
42.2	0
42.3	0
42.4	0
42.5	0
42.6	0
42.7	0
42.8	0
42.9	0
43	0
43.1	0
43.2	0
43.3	0
43.4	0
43.5	0
43.6	0
43.7	0
43.8	0
43.9	0
44	0
44.1	0
44.2	0
44.3	0
44.4	0
44.5	0
44.6	0
44.7	0
44.8	0
44.9	0
45	0
45.1	0
45.2	0
45.3	0
45.4	0
45.5	0
45.6	0
45.7	0
45.8	0
45.9	0
46	0
46.1	0
46.2	0
46.3	0
46.4	0
46.5	0
46.6	0
46.7	0
46.8	0
46.9	0
47	0
47.1	0
47.2	0
47.3	0
47.4	0
47.5	0
47.6	0
47.7	0
47.8	0
47.9	0
48	0
48.1	0
48.2	0
48.3	0
48.4	0
48.5	0
48.6	0
48.7	0
48.8	0
48.9	0
49	0
49.1	0
49.2	0
49.3	0
49.4	0
49.5	0
49.6	0
49.7	0
49.8	0
49.9	0
50	0
50.1	0
50.2	0
50.3	0
50.4	0
50.5	0
50.6	0
50.7	0
50.8	0
50.9	0
51	0
51.1	0
51.2	0
51.3	0
51.4	0
51.5	0
51.6	0
51.7	0
51.8	0
51.9	0
52	0
52.1	0
52.2	0
52.3	0
52.4	0
52.5	0
52.6	0
52.7	0
52.8	0
52.9	0
53	0
53.1	0
53.2	0
53.3	0
53.4	0
53.5	0
53.6	0
53.7	0
53.8	0
53.9	0
54	0
54.1	0
54.2	0
54.3	0
54.4	0
54.5	0
54.6	0
54.7	0
54.8	0
54.9	0
55	0
55.1	0
55.2	0
55.3	0
55.4	0
55.5	0
55.6	0
55.7	0
55.8	0
55.9	0
56	0
56.1	0
56.2	0
56.3	0
56.4	0
56.5	0
56.6	0
56.7	0
56.8	0
56.9	0
57	0
57.1	0
57.2	0
57.3	0
57.4	0
57.5	0
57.6	0
57.7	0
57.8	0
57.9	0
58	0
58.1	0
58.2	0
58.3	0
58.4	0
58.5	0
58.6	0
58.7	0
58.8	0
58.9	0
59	0
59.1	0
59.2	0
59.3	0
59.4	0
59.5	0
59.6	0
59.7	0
59.8	0
59.9	0
60	0
60.1	0
60.2	0
60.3	0
60.4	0
60.5	0
60.6	0
60.7	0
60.8	0
60.9	0
61	0
61.1	0
61.2	0
61.3	0
61.4	0
61.5	0
61.6	0
61.7	0
61.8	0
61.9	0
62	0
62.1	0
62.2	0
62.3	0
62.4	0
62.5	0
62.6	0
62.7	0
62.8	0
62.9	0
63	0
63.1	0
63.2	0
63.3	0
63.4	0
63.5	0
63.6	0
63.7	0
63.8	0
63.9	0
64	0
64.1	0
64.2	0
64.3	0
64.4	0
64.5	0
64.6	0
64.7	0
64.8	0
64.9	0
65	0
65.1	0
65.2	0
65.3	0
65.4	0
65.5	0
65.6	0
65.7	0
65.8	0
65.9	0
66	0
66.1	0
66.2	0
66.3	0
66.4	0
66.5	0
66.6	0
66.7	0
66.8	0
66.9	0
67	0
67.1	0
67.2	0
67.3	0
67.4	0
67.5	0
67.6	0
67.7	0
67.8	0
67.9	0
68	0
68.1	0
68.2	0
68.3	0
68.4	0
68.5	0
68.6	0
68.7	0
68.8	0
68.9	0
69	0
69.1	0
69.2	0
69.3	0
69.4	0
69.5	0
69.6	0
69.7	0
69.8	0
69.9	0
70	0
70.1	0
70.2	0
70.3	0
70.4	0
70.5	0
70.6	0
70.7	0
70.8	0
70.9	0
71	0
71.1	0
71.2	0
71.3	0
71.4	0
71.5	0
71.6	0
71.7	0
71.8	0
71.9	0
72	0
72.1	0
72.2	0
72.3	0
72.4	0
72.5	0
72.6	0
72.7	0
72.8	0
72.9	0
73	0
73.1	0
73.2	0
73.3	0
73.4	0
73.5	0
73.6	0
73.7	0
73.8	0
73.9	0
74	0
74.1	0
74.2	0
74.3	0
74.4	0
74.5	0
74.6	0
74.7	0
74.8	0
74.9	0
75	0
75.1	0
75.2	0
75.3	0
75.4	0
75.5	0
75.6	0
75.7	0
75.8	0
75.9	0
76	0
76.1	0
76.2	0
76.3	0
76.4	0
76.5	0
76.6	0
76.7	0
76.8	0
76.9	0
77	0
77.1	0
77.2	0
77.3	0
77.4	0
77.5	0
77.6	0
77.7	0
77.8	0
77.9	0
78	0
78.1	0
78.2	0
78.3	0
78.4	0
78.5	0
78.6	0
78.7	0
78.8	0
78.9	0
79	0
79.1	0
79.2	0
79.3	0
79.4	0
79.5	0
79.6	0
79.7	0
79.8	0
79.9	0
80	0
80.1	0
80.2	0
80.3	0
80.4	0
80.5	0
80.6	0
80.7	0
80.8	0
80.9	0
81	0
81.1	0
81.2	0
81.3	0
81.4	0
81.5	0
81.6	0
81.7	0
81.8	0
81.9	0
82	0
82.1	0
82.2	0
82.3	0
82.4	0
82.5	0
82.6	0
82.7	0
82.8	0
82.9	0
83	0
83.1	0
83.2	0
83.3	0
83.4	0
83.5	0
83.6	0
83.7	0
83.8	0
83.9	0
84	0
84.1	0
84.2	0
84.3	0
84.4	0
84.5	0
84.6	0
84.7	0
84.8	0
84.9	0
85	0
85.1	0
85.2	0
85.3	0
85.4	0
85.5	0
85.6	0
85.7	0
85.8	0
85.9	0
86	0
86.1	0
86.2	0
86.3	0
86.4	0
86.5	0
86.6	0
86.7	0
86.8	0
86.9	0
87	0
87.1	0
87.2	0
87.3	0
87.4	0
87.5	0
87.6	0
87.7	0
87.8	0
87.9	0
88	0
88.1	0
88.2	0
88.3	0
88.4	0
88.5	0
88.6	0
88.7	0
88.8	0
88.9	0
89	0
89.1	0
89.2	0
89.3	0
89.4	0
89.5	0
89.6	0
89.7	0
89.8	0
89.9	0
90	0
90.1	0
90.2	0
90.3	0
90.4	0
90.5	0
90.6	0
90.7	0
90.8	0
90.9	0
91	0
91.1	0
91.2	0
91.3	0
91.4	0
91.5	0
91.6	0
91.7	0
91.8	0
91.9	0
92	0
92.1	0
92.2	0
92.3	0
92.4	0
92.5	0
92.6	0
92.7	0
92.8	0
92.9	0
93	0
93.1	0
93.2	0
93.3	0
93.4	0
93.5	0
93.6	0
93.7	0
93.8	0
93.9	0
94	0
94.1	0
94.2	0
94.3	0
94.4	0
94.5	0
94.6	0
94.7	0
94.8	0
94.9	0
95	0
95.1	0
95.2	0
95.3	0
95.4	0
95.5	0
95.6	0
95.7	0
95.8	0
95.9	0
96	0
96.1	0
96.2	0
96.3	0
96.4	0
96.5	0
96.6	0
96.7	0
96.8	0
96.9	0
97	0
97.1	0
97.2	0
97.3	0
97.4	0
97.5	0
97.6	0
97.7	0
97.8	0
97.9	0
98	0
98.1	0
98.2	0
98.3	0
98.4	0
98.5	0
98.6	0
98.7	0
98.8	0
98.9	0
99	0
99.1	0
99.2	0
99.3	0
99.4	0
99.5	0
99.6	0
99.7	0
99.8	0
99.9	0
100	0
100.1	0
100.2	0
100.3	0.005
100.4	0.015
100.5	0.0225
100.6	0.035
100.7	0.04
100.8	0.045
100.9	0.0475
101	0.055
101.1	0.0675
101.2	0.0675
101.3	0.075
101.4	0.0775
101.5	0.0775
101.6	0.08
101.7	0.085
101.8	0.0925
101.9	0.11
102	0.1175
102.1	0.1275
102.2	0.13
102.3	0.1375
102.4	0.1475
102.5	0.16
102.6	0.16
102.7	0.17
102.8	0.175
102.9	0.175
103	0.19
103.1	0.2075
103.2	0.2075
103.3	0.2075
103.4	0.21
103.5	0.2025
103.6	0.205
103.7	0.2125
103.8	0.2175
103.9	0.225
104	0.225
104.1	0.2275
104.2	0.225
104.3	0.2275
104.4	0.2375
104.5	0.2425
104.6	0.245
104.7	0.25
104.8	0.255
104.9	0.26
105	0.2625
105.1	0.265
105.2	0.265
105.3	0.2725
105.4	0.275
105.5	0.2725
105.6	0.2775
105.7	0.275
105.8	0.275
105.9	0.2775
106	0.275
106.1	0.27
106.2	0.27
106.3	0.2725
106.4	0.2725
106.5	0.275
106.6	0.2775
106.7	0.275
106.8	0.2775
106.9	0.285
107	0.2875
107.1	0.2925
107.2	0.2875
107.3	0.285
107.4	0.285
107.5	0.28
107.6	0.275
107.7	0.2725
107.8	0.27
107.9	0.27
108	0.27
108.1	0.27
108.2	0.2675
108.3	0.265
108.4	0.2675
108.5	0.2725
108.6	0.2725
108.7	0.2775
108.8	0.28
108.9	0.28
109	0.285
109.1	0.2825
109.2	0.2825
109.3	0.2825
109.4	0.285
109.5	0.28
109.6	0.2775
109.7	0.2775
109.8	0.28
109.9	0.2775
110	0.2825
110.1	0.29
110.2	0.2925
110.3	0.2925
110.4	0.295
110.5	0.29
110.6	0.29
110.7	0.2875
110.8	0.2875
110.9	0.2875
111	0.2875
111.1	0.3
111.2	0.3025
111.3	0.2975
111.4	0.2975
111.5	0.3
111.6	0.2925
111.7	0.2925
111.8	0.295
111.9	0.2975
112	0.2975
112.1	0.3
112.2	0.3025
112.3	0.3025
112.4	0.3
112.5	0.305
112.6	0.305
112.7	0.3
112.8	0.3
112.9	0.3025
113	0.3025
113.1	0.305
113.2	0.3075
113.3	0.3075
113.4	0.3075
113.5	0.3125
113.6	0.3175
113.7	0.315
113.8	0.3125
113.9	0.315
114	0.3225
114.1	0.3225
114.2	0.3225
114.3	0.3225
114.4	0.32
114.5	0.3125
114.6	0.315
114.7	0.3125
114.8	0.315
114.9	0.32
115	0.3225
115.1	0.3325
115.2	0.3325
115.3	0.3375
115.4	0.335
115.5	0.3325
115.6	0.34
115.7	0.34
115.8	0.3425
115.9	0.3475
116	0.355
116.1	0.35
116.2	0.355
116.3	0.355
116.4	0.35
116.5	0.3525
116.6	0.35
116.7	0.355
116.8	0.355
116.9	0.3525
117	0.3475
117.1	0.3525
117.2	0.3525
117.3	0.3575
117.4	0.3575
117.5	0.3575
117.6	0.3575
117.7	0.36
117.8	0.3575
117.9	0.3575
118	0.355
118.1	0.3625
118.2	0.3625
118.3	0.3625
118.4	0.3675
118.5	0.365
118.6	0.365
118.7	0.3675
118.8	0.365
118.9	0.365
119	0.3675
119.1	0.3675
119.2	0.36
119.3	0.3625
119.4	0.355
119.5	0.3525
119.6	0.3475
119.7	0.3475
119.8	0.35
119.9	0.355
120	0.3575
120.1	0.3575
120.2	0.355
120.3	0.35
120.4	0.36
120.5	0.3625
120.6	0.3675
120.7	0.37
120.8	0.3775
120.9	0.3775
121	0.375
121.1	0.375
121.2	0.375
121.3	0.375
121.4	0.3725
121.5	0.3725
121.6	0.37
121.7	0.3625
121.8	0.36
121.9	0.3575
122	0.355
122.1	0.355
122.2	0.3625
122.3	0.3625
122.4	0.3525
122.5	0.3525
122.6	0.3425
122.7	0.3425
122.8	0.34
122.9	0.34
123	0.34
123.1	0.335
123.2	0.3325
123.3	0.335
123.4	0.335
123.5	0.335
123.6	0.335
123.7	0.3375
123.8	0.3375
123.9	0.335
124	0.33
124.1	0.33
124.2	0.3225
124.3	0.325
124.4	0.325
124.5	0.3175
124.6	0.3125
124.7	0.315
124.8	0.315
124.9	0.3125
125	0.3125
125.1	0.31
125.2	0.3075
125.3	0.3125
125.4	0.315
125.5	0.3175
125.6	0.3175
125.7	0.32
125.8	0.3175
125.9	0.3175
126	0.32
126.1	0.3175
126.2	0.3225
126.3	0.3275
126.4	0.325
126.5	0.33
126.6	0.3425
126.7	0.3375
126.8	0.34
126.9	0.34
127	0.335
127.1	0.3275
127.2	0.33
127.3	0.3375
127.4	0.3375
127.5	0.3425
127.6	0.3425
127.7	0.345
127.8	0.345
127.9	0.345
128	0.335
128.1	0.3375
128.2	0.34
128.3	0.3425
128.4	0.3425
128.5	0.345
128.6	0.35
128.7	0.355
128.8	0.3575
128.9	0.365
129	0.3575
129.1	0.3675
129.2	0.365
129.3	0.3625
129.4	0.3625
129.5	0.3575
129.6	0.3525
129.7	0.3525
129.8	0.35
129.9	0.345
130	0.345
130.1	0.3475
130.2	0.3425
130.3	0.34
130.4	0.33
130.5	0.335
130.6	0.34
130.7	0.335
130.8	0.33
130.9	0.3275
131	0.325
131.1	0.325
131.2	0.3225
131.3	0.33
131.4	0.33
131.5	0.32
131.6	0.3275
131.7	0.33
131.8	0.3325
131.9	0.325
132	0.3275
132.1	0.3225
132.2	0.3225
132.3	0.325
132.4	0.3375
132.5	0.3375
132.6	0.335
132.7	0.335
132.8	0.3325
132.9	0.3325
133	0.3275
133.1	0.33
133.2	0.33
133.3	0.3275
133.4	0.335
133.5	0.3375
133.6	0.335
133.7	0.33
133.8	0.3275
133.9	0.3325
134	0.34
134.1	0.34
134.2	0.335
134.3	0.335
134.4	0.335
134.5	0.335
134.6	0.3325
134.7	0.335
134.8	0.3375
134.9	0.34
135	0.34
135.1	0.345
135.2	0.355
135.3	0.36
135.4	0.36
135.5	0.3625
135.6	0.3675
135.7	0.3675
135.8	0.3625
135.9	0.3725
136	0.37
136.1	0.3725
136.2	0.3775
136.3	0.375
136.4	0.375
136.5	0.3725
136.6	0.3675
136.7	0.37
136.8	0.3775
136.9	0.38
137	0.3825
137.1	0.38
137.2	0.375
137.3	0.375
137.4	0.3775
137.5	0.38
137.6	0.3825
137.7	0.3875
137.8	0.3875
137.9	0.385
138	0.385
138.1	0.3875
138.2	0.38
138.3	0.375
138.4	0.38
138.5	0.3775
138.6	0.375
138.7	0.3725
138.8	0.37
138.9	0.37
139	0.37
139.1	0.3675
139.2	0.3625
139.3	0.3675
139.4	0.3625
139.5	0.36
139.6	0.3625
139.7	0.365
139.8	0.36
139.9	0.3675
140	0.375
140.1	0.37
140.2	0.375
140.3	0.38
140.4	0.3725
140.5	0.3725
140.6	0.3725
140.7	0.3725
140.8	0.37
140.9	0.375
141	0.3775
141.1	0.3775
141.2	0.38
141.3	0.3775
141.4	0.38
141.5	0.3775
141.6	0.385
141.7	0.3875
141.8	0.38
141.9	0.375
142	0.3725
142.1	0.3625
142.2	0.365
142.3	0.3625
142.4	0.365
142.5	0.365
142.6	0.37
142.7	0.3675
142.8	0.37
142.9	0.375
143	0.3725
143.1	0.3675
143.2	0.3725
143.3	0.375
143.4	0.37
143.5	0.3675
143.6	0.3725
143.7	0.3675
143.8	0.365
143.9	0.3725
144	0.375
144.1	0.3825
144.2	0.3775
144.3	0.385
144.4	0.385
144.5	0.38
144.6	0.38
144.7	0.37
144.8	0.3675
144.9	0.365
145	0.3725
145.1	0.375
145.2	0.37
145.3	0.3675
145.4	0.365
145.5	0.3675
145.6	0.3675
145.7	0.365
145.8	0.36
145.9	0.36
146	0.36
146.1	0.3625
146.2	0.3725
146.3	0.3725
146.4	0.37
146.5	0.375
146.6	0.375
146.7	0.3775
146.8	0.38
146.9	0.38
147	0.3825
147.1	0.3825
147.2	0.385
147.3	0.38
147.4	0.375
147.5	0.37
147.6	0.3675
147.7	0.3675
147.8	0.365
147.9	0.365
148	0.3625
148.1	0.3675
148.2	0.3725
148.3	0.37
148.4	0.37
148.5	0.37
148.6	0.37
148.7	0.3675
148.8	0.37
148.9	0.365
149	0.3625
149.1	0.365
149.2	0.345
149.3	0.35
149.4	0.3525
149.5	0.3575
149.6	0.3625
149.7	0.365
149.8	0.36
149.9	0.365
150	0.3675
150.1	0.365
150.2	0.365
150.3	0.37
150.4	0.3725
150.5	0.3725
150.6	0.375
150.7	0.3725
150.8	0.375
150.9	0.375
151	0.37
151.1	0.37
151.2	0.37
151.3	0.375
151.4	0.375
151.5	0.3725
151.6	0.3775
151.7	0.3775
151.8	0.375
151.9	0.375
152	0.3725
152.1	0.375
152.2	0.375
152.3	0.3725
152.4	0.375
152.5	0.38
152.6	0.3725
152.7	0.3775
152.8	0.3825
152.9	0.3825
153	0.375
153.1	0.3825
153.2	0.3775
153.3	0.38
153.4	0.3775
153.5	0.375
153.6	0.3775
153.7	0.38
153.8	0.38
153.9	0.3775
154	0.3775
154.1	0.375
154.2	0.3725
154.3	0.365
154.4	0.365
154.5	0.375
154.6	0.38
154.7	0.375
154.8	0.3775
154.9	0.3775
155	0.3725
155.1	0.365
155.2	0.36
155.3	0.3675
155.4	0.3675
155.5	0.3675
155.6	0.3725
155.7	0.3725
155.8	0.37
155.9	0.375
156	0.375
156.1	0.37
156.2	0.37
156.3	0.375
156.4	0.3775
156.5	0.375
156.6	0.3775
156.7	0.3775
156.8	0.3825
156.9	0.385
157	0.3775
157.1	0.3725
157.2	0.37
157.3	0.37
157.4	0.37
157.5	0.37
157.6	0.375
157.7	0.3775
157.8	0.3725
157.9	0.3725
158	0.3725
158.1	0.37
158.2	0.3725
158.3	0.365
158.4	0.3675
158.5	0.365
158.6	0.3675
158.7	0.3625
158.8	0.365
158.9	0.375
159	0.38
159.1	0.38
159.2	0.375
159.3	0.375
159.4	0.37
159.5	0.3675
159.6	0.3625
159.7	0.3625
159.8	0.3725
159.9	0.365
160	0.37
160.1	0.3625
160.2	0.3625
160.3	0.3575
160.4	0.355
160.5	0.355
160.6	0.3525
160.7	0.355
160.8	0.3525
160.9	0.345
161	0.3475
161.1	0.3475
161.2	0.35
161.3	0.35
161.4	0.3525
161.5	0.35
161.6	0.35
161.7	0.355
161.8	0.36
161.9	0.36
162	0.365
162.1	0.38
162.2	0.3825
162.3	0.385
162.4	0.385
162.5	0.3825
162.6	0.3825
162.7	0.3825
162.8	0.3825
162.9	0.3925
163	0.39
163.1	0.3875
163.2	0.3875
163.3	0.39
163.4	0.3925
163.5	0.395
163.6	0.3875
163.7	0.385
163.8	0.38
163.9	0.3825
164	0.39
164.1	0.385
164.2	0.385
164.3	0.3825
164.4	0.375
164.5	0.3725
164.6	0.38
164.7	0.3775
164.8	0.375
164.9	0.38
165	0.3825
165.1	0.3775
165.2	0.3775
165.3	0.38
165.4	0.38
165.5	0.3775
165.6	0.3775
165.7	0.3825
165.8	0.3825
165.9	0.38
166	0.3825
166.1	0.3775
166.2	0.3775
166.3	0.3775
166.4	0.3825
166.5	0.385
166.6	0.3875
166.7	0.385
166.8	0.3775
166.9	0.375
167	0.3675
167.1	0.3625
167.2	0.3625
167.3	0.37
167.4	0.37
167.5	0.365
167.6	0.3625
167.7	0.365
167.8	0.37
167.9	0.37
168	0.37
168.1	0.3675
168.2	0.3675
168.3	0.365
168.4	0.365
168.5	0.37
168.6	0.37
168.7	0.375
168.8	0.375
168.9	0.38
169	0.3875
169.1	0.3925
169.2	0.3925
169.3	0.39
169.4	0.3925
169.5	0.3925
169.6	0.3925
169.7	0.3925
169.8	0.395
169.9	0.3925
170	0.39
170.1	0.4
170.2	0.4025
170.3	0.4025
170.4	0.395
170.5	0.3975
170.6	0.4025
170.7	0.4
170.8	0.3975
170.9	0.4025
171	0.4025
171.1	0.405
171.2	0.4
171.3	0.4125
171.4	0.41
171.5	0.4125
171.6	0.41
171.7	0.41
171.8	0.41
171.9	0.41
172	0.4125
172.1	0.41
172.2	0.4075
172.3	0.4075
172.4	0.4125
172.5	0.4075
172.6	0.4075
172.7	0.4025
172.8	0.405
172.9	0.4025
173	0.4
173.1	0.4
173.2	0.3975
173.3	0.395
173.4	0.395
173.5	0.395
173.6	0.39
173.7	0.3825
173.8	0.3875
173.9	0.3875
174	0.38
174.1	0.375
174.2	0.3775
174.3	0.3775
174.4	0.38
174.5	0.3825
174.6	0.3825
174.7	0.3775
174.8	0.3775
174.9	0.38
175	0.375
175.1	0.38
175.2	0.38
175.3	0.3775
175.4	0.38
175.5	0.385
175.6	0.3875
175.7	0.3875
175.8	0.3925
175.9	0.39
176	0.385
176.1	0.3925
176.2	0.3875
176.3	0.39
176.4	0.3875
176.5	0.39
176.6	0.395
176.7	0.3975
176.8	0.4025
176.9	0.4075
177	0.41
177.1	0.41
177.2	0.4075
177.3	0.41
177.4	0.405
177.5	0.4
177.6	0.4
177.7	0.4
177.8	0.4
177.9	0.395
178	0.39
178.1	0.39
178.2	0.3925
178.3	0.395
178.4	0.3925
178.5	0.39
178.6	0.39
178.7	0.3925
178.8	0.395
178.9	0.39
179	0.395
179.1	0.3925
179.2	0.3925
179.3	0.3975
179.4	0.4025
179.5	0.405
179.6	0.405
179.7	0.4025
179.8	0.395
179.9	0.39
180	0.39
180.1	0.3875
180.2	0.3875
180.3	0.385
180.4	0.3925
180.5	0.39
180.6	0.3875
180.7	0.39
180.8	0.3875
180.9	0.3875
181	0.3925
181.1	0.39
181.2	0.39
181.3	0.395
181.4	0.3975
181.5	0.39
181.6	0.39
181.7	0.395
181.8	0.3925
181.9	0.3925
182	0.3875
182.1	0.39
182.2	0.39
182.3	0.3875
182.4	0.3875
182.5	0.3825
182.6	0.3825
182.7	0.3825
182.8	0.3825
182.9	0.385
183	0.3925
183.1	0.3925
183.2	0.3875
183.3	0.39
183.4	0.395
183.5	0.395
183.6	0.39
183.7	0.39
183.8	0.3925
183.9	0.4
184	0.4
184.1	0.3975
184.2	0.3925
184.3	0.395
184.4	0.3975
184.5	0.3925
184.6	0.3925
184.7	0.3975
184.8	0.4025
184.9	0.4025
185	0.405
185.1	0.4075
185.2	0.4075
185.3	0.4075
185.4	0.405
185.5	0.4025
185.6	0.4025
185.7	0.4075
185.8	0.4075
185.9	0.41
186	0.41
186.1	0.4075
186.2	0.405
186.3	0.41
186.4	0.4025
186.5	0.4
186.6	0.4025
186.7	0.4075
186.8	0.41
186.9	0.405
187	0.405
187.1	0.4
187.2	0.4025
187.3	0.405
187.4	0.4075
187.5	0.4075
187.6	0.4075
187.7	0.41
187.8	0.4175
187.9	0.4275
188	0.4375
188.1	0.4325
188.2	0.4325
188.3	0.435
188.4	0.4375
188.5	0.4325
188.6	0.4325
188.7	0.43
188.8	0.4275
188.9	0.425
189	0.42
189.1	0.415
189.2	0.41
189.3	0.41
189.4	0.4075
189.5	0.4025
189.6	0.405
189.7	0.4075
189.8	0.405
189.9	0.3975
190	0.3975
190.1	0.405
190.2	0.41
190.3	0.41
190.4	0.4075
190.5	0.41
190.6	0.4075
190.7	0.415
190.8	0.415
190.9	0.415
191	0.415
191.1	0.4175
191.2	0.4175
191.3	0.415
191.4	0.4175
191.5	0.4225
191.6	0.415
191.7	0.4125
191.8	0.4175
191.9	0.4175
192	0.4175
192.1	0.42
192.2	0.42
192.3	0.415
192.4	0.4175
192.5	0.4125
192.6	0.415
192.7	0.415
192.8	0.415
192.9	0.415
193	0.42
193.1	0.42
193.2	0.4275
193.3	0.4225
193.4	0.42
193.5	0.4225
193.6	0.4275
193.7	0.4275
193.8	0.43
193.9	0.4275
194	0.4275
194.1	0.435
194.2	0.435
194.3	0.4325
194.4	0.43
194.5	0.4325
194.6	0.43
194.7	0.4325
194.8	0.435
194.9	0.4325
195	0.43
195.1	0.435
195.2	0.43
195.3	0.435
195.4	0.435
195.5	0.435
195.6	0.4325
195.7	0.435
195.8	0.44
195.9	0.4425
196	0.44
196.1	0.4475
196.2	0.445
196.3	0.44
196.4	0.44
196.5	0.4375
196.6	0.4375
196.7	0.4375
196.8	0.4375
196.9	0.4325
197	0.43
197.1	0.43
197.2	0.43
197.3	0.425
197.4	0.425
197.5	0.4275
197.6	0.4225
197.7	0.425
197.8	0.4275
197.9	0.425
198	0.4225
198.1	0.425
198.2	0.425
198.3	0.43
198.4	0.425
198.5	0.42
198.6	0.415
198.7	0.4125
198.8	0.415
198.9	0.4175
199	0.4175
199.1	0.4125
199.2	0.4125
199.3	0.41
199.4	0.41
199.5	0.415
199.6	0.415
199.7	0.415
199.8	0.415
199.9	0.4125
200	0.4125
[truncated: 14,000 more rows]
