# Supplementary material for: Bayesian inference of kinetic schemes for ion channels by Kalman filtering
Source: eLife journal article supplement (doi:10.7554/elife.62714), 2022-05-04
Supplement: fig4-data12 [file 1_Sim_N_200_Strom_MW_0.125M.xlsx]

## Sheet: 0.125 M
0.1	0
0.2	0
0.3	0
0.4	0
0.5	0
0.6	0
0.7	0
0.8	0
0.9	0
1	0
1.1	0
1.2	0
1.3	0
1.4	0
1.5	0
1.6	0
1.7	0
1.8	0
1.9	0
2	0
2.1	0
2.2	0
2.3	0
2.4	0
2.5	0
2.6	0
2.7	0
2.8	0
2.9	0
3	0
3.1	0
3.2	0
3.3	0
3.4	0
3.5	0
3.6	0
3.7	0
3.8	0
3.9	0
4	0
4.1	0
4.2	0
4.3	0
4.4	0
4.5	0
4.6	0
4.7	0
4.8	0
4.9	0
5	0
5.1	0
5.2	0
5.3	0
5.4	0
5.5	0
5.6	0
5.7	0
5.8	0
5.9	0
6	0
6.1	0
6.2	0
6.3	0
6.4	0
6.5	0
6.6	0
6.7	0
6.8	0
6.9	0
7	0
7.1	0
7.2	0
7.3	0
7.4	0
7.5	0
7.6	0
7.7	0
7.8	0
7.9	0
8	0
8.1	0
8.2	0
8.3	0
8.4	0
8.5	0
8.6	0
8.7	0
8.8	0
8.9	0
9	0
9.1	0
9.2	0
9.3	0
9.4	0
9.5	0
9.6	0
9.7	0
9.8	0
9.9	0
10	0
10.1	0
10.2	0
10.3	0
10.4	0
10.5	0
10.6	0
10.7	0
10.8	0
10.9	0
11	0
11.1	0
11.2	0
11.3	0
11.4	0
11.5	0
11.6	0
11.7	0
11.8	0
11.9	0
12	0
12.1	0
12.2	0
12.3	0
12.4	0
12.5	0
12.6	0
12.7	0
12.8	0
12.9	0
13	0
13.1	0
13.2	0
13.3	0
13.4	0
13.5	0
13.6	0
13.7	0
13.8	0
13.9	0
14	0
14.1	0
14.2	0
14.3	0
14.4	0
14.5	0
14.6	0
14.7	0
14.8	0
14.9	0
15	0
15.1	0
15.2	0
15.3	0
15.4	0
15.5	0
15.6	0
15.7	0
15.8	0
15.9	0
16	0
16.1	0
16.2	0
16.3	0
16.4	0
16.5	0
16.6	0
16.7	0
16.8	0
16.9	0
17	0
17.1	0
17.2	0
17.3	0
17.4	0
17.5	0
17.6	0
17.7	0
17.8	0
17.9	0
18	0
18.1	0
18.2	0
18.3	0
18.4	0
18.5	0
18.6	0
18.7	0
18.8	0
18.9	0
19	0
19.1	0
19.2	0
19.3	0
19.4	0
19.5	0
19.6	0
19.7	0
19.8	0
19.9	0
20	0
20.1	0
20.2	0
20.3	0
20.4	0
20.5	0
20.6	0
20.7	0
20.8	0
20.9	0
21	0
21.1	0
21.2	0
21.3	0
21.4	0
21.5	0
21.6	0
21.7	0
21.8	0
21.9	0
22	0
22.1	0
22.2	0
22.3	0
22.4	0
22.5	0
22.6	0
22.7	0
22.8	0
22.9	0
23	0
23.1	0
23.2	0
23.3	0
23.4	0
23.5	0
23.6	0
23.7	0
23.8	0
23.9	0
24	0
24.1	0
24.2	0
24.3	0
24.4	0
24.5	0
24.6	0
24.7	0
24.8	0
24.9	0
25	0
25.1	0
25.2	0
25.3	0
25.4	0
25.5	0
25.6	0
25.7	0
25.8	0
25.9	0
26	0
26.1	0
26.2	0
26.3	0
26.4	0
26.5	0
26.6	0
26.7	0
26.8	0
26.9	0
27	0
27.1	0
27.2	0
27.3	0
27.4	0
27.5	0
27.6	0
27.7	0
27.8	0
27.9	0
28	0
28.1	0
28.2	0
28.3	0
28.4	0
28.5	0
28.6	0
28.7	0
28.8	0
28.9	0
29	0
29.1	0
29.2	0
29.3	0
29.4	0
29.5	0
29.6	0
29.7	0
29.8	0
29.9	0
30	0
30.1	0
30.2	0
30.3	0
30.4	0
30.5	0
30.6	0
30.7	0
30.8	0
30.9	0
31	0
31.1	0
31.2	0
31.3	0
31.4	0
31.5	0
31.6	0
31.7	0
31.8	0
31.9	0
32	0
32.1	0
32.2	0
32.3	0
32.4	0
32.5	0
32.6	0
32.7	0
32.8	0
32.9	0
33	0
33.1	0
33.2	0
33.3	0
33.4	0
33.5	0
33.6	0
33.7	0
33.8	0
33.9	0
34	0
34.1	0
34.2	0
34.3	0
34.4	0
34.5	0
34.6	0
34.7	0
34.8	0
34.9	0
35	0
35.1	0
35.2	0
35.3	0
35.4	0
35.5	0
35.6	0
35.7	0
35.8	0
35.9	0
36	0
36.1	0
36.2	0
36.3	0
36.4	0
36.5	0
36.6	0
36.7	0
36.8	0
36.9	0
37	0
37.1	0
37.2	0
37.3	0
37.4	0
37.5	0
37.6	0
37.7	0
37.8	0
37.9	0
38	0
38.1	0
38.2	0
38.3	0
38.4	0
38.5	0
38.6	0
38.7	0
38.8	0
38.9	0
39	0
39.1	0
39.2	0
39.3	0
39.4	0
39.5	0
39.6	0
39.7	0
39.8	0
39.9	0
40	0
40.1	0
40.2	0
40.3	0
40.4	0
40.5	0
40.6	0
40.7	0
40.8	0
40.9	0
41	0
41.1	0
41.2	0
41.3	0
41.4	0
41.5	0
41.6	0
41.7	0
41.8	0
41.9	0
42	0
42.1	0
42.2	0
42.3	0
42.4	0
42.5	0
42.6	0
42.7	0
42.8	0
42.9	0
43	0
43.1	0
43.2	0
43.3	0
43.4	0
43.5	0
43.6	0
43.7	0
43.8	0
43.9	0
44	0
44.1	0
44.2	0
44.3	0
44.4	0
44.5	0
44.6	0
44.7	0
44.8	0
44.9	0
45	0
45.1	0
45.2	0
45.3	0
45.4	0
45.5	0
45.6	0
45.7	0
45.8	0
45.9	0
46	0
46.1	0
46.2	0
46.3	0
46.4	0
46.5	0
46.6	0
46.7	0
46.8	0
46.9	0
47	0
47.1	0
47.2	0
47.3	0
47.4	0
47.5	0
47.6	0
47.7	0
47.8	0
47.9	0
48	0
48.1	0
48.2	0
48.3	0
48.4	0
48.5	0
48.6	0
48.7	0
48.8	0
48.9	0
49	0
49.1	0
49.2	0
49.3	0
49.4	0
49.5	0
49.6	0
49.7	0
49.8	0
49.9	0
50	0
50.1	0
50.2	0
50.3	0
50.4	0
50.5	0
50.6	0
50.7	0
50.8	0
50.9	0
51	0
51.1	0
51.2	0
51.3	0
51.4	0
51.5	0
51.6	0
51.7	0
51.8	0
51.9	0
52	0
52.1	0
52.2	0
52.3	0
52.4	0
52.5	0
52.6	0
52.7	0
52.8	0
52.9	0
53	0
53.1	0
53.2	0
53.3	0
53.4	0
53.5	0
53.6	0
53.7	0
53.8	0
53.9	0
54	0
54.1	0
54.2	0
54.3	0
54.4	0
54.5	0
54.6	0
54.7	0
54.8	0
54.9	0
55	0
55.1	0
55.2	0
55.3	0
55.4	0
55.5	0
55.6	0
55.7	0
55.8	0
55.9	0
56	0
56.1	0
56.2	0
56.3	0
56.4	0
56.5	0
56.6	0
56.7	0
56.8	0
56.9	0
57	0
57.1	0
57.2	0
57.3	0
57.4	0
57.5	0
57.6	0
57.7	0
57.8	0
57.9	0
58	0
58.1	0
58.2	0
58.3	0
58.4	0
58.5	0
58.6	0
58.7	0
58.8	0
58.9	0
59	0
59.1	0
59.2	0
59.3	0
59.4	0
59.5	0
59.6	0
59.7	0
59.8	0
59.9	0
60	0
60.1	0
60.2	0
60.3	0
60.4	0
60.5	0
60.6	0
60.7	0
60.8	0
60.9	0
61	0
61.1	0
61.2	0
61.3	0
61.4	0
61.5	0
61.6	0
61.7	0
61.8	0
61.9	0
62	0
62.1	0
62.2	0
62.3	0
62.4	0
62.5	0
62.6	0
62.7	0
62.8	0
62.9	0
63	0
63.1	0
63.2	0
63.3	0
63.4	0
63.5	0
63.6	0
63.7	0
63.8	0
63.9	0
64	0
64.1	0
64.2	0
64.3	0
64.4	0
64.5	0
64.6	0
64.7	0
64.8	0
64.9	0
65	0
65.1	0
65.2	0
65.3	0
65.4	0
65.5	0
65.6	0
65.7	0
65.8	0
65.9	0
66	0
66.1	0
66.2	0
66.3	0
66.4	0
66.5	0
66.6	0
66.7	0
66.8	0
66.9	0
67	0
67.1	0
67.2	0
67.3	0
67.4	0
67.5	0
67.6	0
67.7	0
67.8	0
67.9	0
68	0
68.1	0
68.2	0
68.3	0
68.4	0
68.5	0
68.6	0
68.7	0
68.8	0
68.9	0
69	0
69.1	0
69.2	0
69.3	0
69.4	0
69.5	0
69.6	0
69.7	0
69.8	0
69.9	0
70	0
70.1	0
70.2	0
70.3	0
70.4	0
70.5	0
70.6	0
70.7	0
70.8	0
70.9	0
71	0
71.1	0
71.2	0
71.3	0
71.4	0
71.5	0
71.6	0
71.7	0
71.8	0
71.9	0
72	0
72.1	0
72.2	0
72.3	0
72.4	0
72.5	0
72.6	0
72.7	0
72.8	0
72.9	0
73	0
73.1	0
73.2	0
73.3	0
73.4	0
73.5	0
73.6	0
73.7	0
73.8	0
73.9	0
74	0
74.1	0
74.2	0
74.3	0
74.4	0
74.5	0
74.6	0
74.7	0
74.8	0
74.9	0
75	0
75.1	0
75.2	0
75.3	0
75.4	0
75.5	0
75.6	0
75.7	0
75.8	0
75.9	0
76	0
76.1	0
76.2	0
76.3	0
76.4	0
76.5	0
76.6	0
76.7	0
76.8	0
76.9	0
77	0
77.1	0
77.2	0
77.3	0
77.4	0
77.5	0
77.6	0
77.7	0
77.8	0
77.9	0
78	0
78.1	0
78.2	0
78.3	0
78.4	0
78.5	0
78.6	0
78.7	0
78.8	0
78.9	0
79	0
79.1	0
79.2	0
79.3	0
79.4	0
79.5	0
79.6	0
79.7	0
79.8	0
79.9	0
80	0
80.1	0
80.2	0
80.3	0
80.4	0
80.5	0
80.6	0
80.7	0
80.8	0
80.9	0
81	0
81.1	0
81.2	0
81.3	0
81.4	0
81.5	0
81.6	0
81.7	0
81.8	0
81.9	0
82	0
82.1	0
82.2	0
82.3	0
82.4	0
82.5	0
82.6	0
82.7	0
82.8	0
82.9	0
83	0
83.1	0
83.2	0
83.3	0
83.4	0
83.5	0
83.6	0
83.7	0
83.8	0
83.9	0
84	0
84.1	0
84.2	0
84.3	0
84.4	0
84.5	0
84.6	0
84.7	0
84.8	0
84.9	0
85	0
85.1	0
85.2	0
85.3	0
85.4	0
85.5	0
85.6	0
85.7	0
85.8	0
85.9	0
86	0
86.1	0
86.2	0
86.3	0
86.4	0
86.5	0
86.6	0
86.7	0
86.8	0
86.9	0
87	0
87.1	0
87.2	0
87.3	0
87.4	0
87.5	0
87.6	0
87.7	0
87.8	0
87.9	0
88	0
88.1	0
88.2	0
88.3	0
88.4	0
88.5	0
88.6	0
88.7	0
88.8	0
88.9	0
89	0
89.1	0
89.2	0
89.3	0
89.4	0
89.5	0
89.6	0
89.7	0
89.8	0
89.9	0
90	0
90.1	0
90.2	0
90.3	0
90.4	0
90.5	0
90.6	0
90.7	0
90.8	0
90.9	0
91	0
91.1	0
91.2	0
91.3	0
91.4	0
91.5	0
91.6	0
91.7	0
91.8	0
91.9	0
92	0
92.1	0
92.2	0
92.3	0
92.4	0
92.5	0
92.6	0
92.7	0
92.8	0
92.9	0
93	0
93.1	0
93.2	0
93.3	0
93.4	0
93.5	0
93.6	0
93.7	0
93.8	0
93.9	0
94	0
94.1	0
94.2	0
94.3	0
94.4	0
94.5	0
94.6	0
94.7	0
94.8	0
94.9	0
95	0
95.1	0
95.2	0
95.3	0
95.4	0
95.5	0
95.6	0
95.7	0
95.8	0
95.9	0
96	0
96.1	0
96.2	0
96.3	0
96.4	0
96.5	0
96.6	0
96.7	0
96.8	0
96.9	0
97	0
97.1	0
97.2	0
97.3	0
97.4	0
97.5	0
97.6	0
97.7	0
97.8	0
97.9	0
98	0
98.1	0
98.2	0
98.3	0
98.4	0
98.5	0
98.6	0
98.7	0
98.8	0
98.9	0
99	0
99.1	0
99.2	0
99.3	0
99.4	0
99.5	0
99.6	0
99.7	0
99.8	0
99.9	0
100	0
100.1	0
100.2	0
100.3	0
100.4	0
100.5	0
100.6	0
100.7	0
100.8	0
100.9	0
101	0
101.1	0
101.2	0
101.3	0
101.4	0
101.5	0
101.6	0
101.7	0
101.8	0
101.9	0
102	0
102.1	0
102.2	0
102.3	0
102.4	0
102.5	0
102.6	0
102.7	0
102.8	0
102.9	0
103	0
103.1	0
103.2	0
103.3	0
103.4	0
103.5	0
103.6	0
103.7	0
103.8	0
103.9	0
104	0
104.1	0
104.2	0
104.3	0
104.4	0
104.5	0
104.6	0
104.7	0
104.8	0
104.9	0
105	0
105.1	0
105.2	0
105.3	0
105.4	0
105.5	0.005
105.6	0.005
105.7	0.01
105.8	0.01
105.9	0.01
106	0.01
106.1	0.01
106.2	0.01
106.3	0.01
106.4	0.01
106.5	0.01
106.6	0.01
106.7	0.01
106.8	0.01
106.9	0.01
107	0.01
107.1	0.01
107.2	0.01
107.3	0.01
107.4	0.01
107.5	0.01
107.6	0.01
107.7	0.01
107.8	0.01
107.9	0.01
108	0.01
108.1	0.01
108.2	0.01
108.3	0.01
108.4	0.01
108.5	0.01
108.6	0.01
108.7	0.01
108.8	0.01
108.9	0.01
109	0.01
109.1	0.01
109.2	0.01
109.3	0.01
109.4	0.01
109.5	0.01
109.6	0.01
109.7	0.01
109.8	0.01
109.9	0.01
110	0.01
110.1	0.005
110.2	0.005
110.3	0.005
110.4	0.005
110.5	0.005
110.6	0.005
110.7	0.005
110.8	0.01
110.9	0.01
111	0.01
111.1	0.01
111.2	0.01
111.3	0.01
111.4	0.01
111.5	0.01
111.6	0.01
111.7	0.01
111.8	0.01
111.9	0.01
112	0.01
112.1	0.01
112.2	0.01
112.3	0.01
112.4	0.01
112.5	0.01
112.6	0.01
112.7	0.01
112.8	0.01
112.9	0.01
113	0.01
113.1	0.01
113.2	0.01
113.3	0.01
113.4	0.01
113.5	0.01
113.6	0.01
113.7	0.01
113.8	0.015
113.9	0.015
114	0.015
114.1	0.015
114.2	0.015
114.3	0.015
114.4	0.015
114.5	0.015
114.6	0.015
114.7	0.015
114.8	0.015
114.9	0.015
115	0.015
115.1	0.015
115.2	0.015
115.3	0.015
115.4	0.015
115.5	0.015
115.6	0.015
115.7	0.015
115.8	0.015
115.9	0.015
116	0.015
116.1	0.015
116.2	0.015
116.3	0.015
116.4	0.015
116.5	0.015
116.6	0.015
116.7	0.015
116.8	0.015
116.9	0.015
117	0.015
117.1	0.015
117.2	0.015
117.3	0.015
117.4	0.015
117.5	0.015
117.6	0.015
117.7	0.015
117.8	0.015
117.9	0.015
118	0.015
118.1	0.015
118.2	0.015
118.3	0.015
118.4	0.015
118.5	0.015
118.6	0.015
118.7	0.015
118.8	0.015
118.9	0.015
119	0.015
119.1	0.015
119.2	0.015
119.3	0.015
119.4	0.015
119.5	0.015
119.6	0.015
119.7	0.015
119.8	0.015
119.9	0.015
120	0.015
120.1	0.015
120.2	0.02
120.3	0.02
120.4	0.025
120.5	0.025
120.6	0.025
120.7	0.025
120.8	0.025
120.9	0.025
121	0.025
121.1	0.025
121.2	0.025
121.3	0.025
121.4	0.025
121.5	0.025
121.6	0.025
121.7	0.025
121.8	0.03
121.9	0.03
122	0.03
122.1	0.03
122.2	0.03
122.3	0.03
122.4	0.03
122.5	0.03
122.6	0.03
122.7	0.03
122.8	0.03
122.9	0.03
123	0.03
123.1	0.03
123.2	0.03
123.3	0.03
123.4	0.03
123.5	0.03
123.6	0.03
123.7	0.03
123.8	0.03
123.9	0.03
124	0.03
124.1	0.03
124.2	0.03
124.3	0.03
124.4	0.03
124.5	0.03
124.6	0.03
124.7	0.03
124.8	0.03
124.9	0.03
125	0.03
125.1	0.03
125.2	0.03
125.3	0.03
125.4	0.03
125.5	0.03
125.6	0.03
125.7	0.03
125.8	0.03
125.9	0.03
126	0.03
126.1	0.03
126.2	0.03
126.3	0.03
126.4	0.03
126.5	0.03
126.6	0.03
126.7	0.03
126.8	0.03
126.9	0.03
127	0.03
127.1	0.03
127.2	0.03
127.3	0.03
127.4	0.03
127.5	0.03
127.6	0.03
127.7	0.03
127.8	0.03
127.9	0.03
128	0.03
128.1	0.03
128.2	0.03
128.3	0.03
128.4	0.03
128.5	0.03
128.6	0.03
128.7	0.03
128.8	0.03
128.9	0.03
129	0.035
129.1	0.035
129.2	0.035
129.3	0.035
129.4	0.035
129.5	0.035
129.6	0.035
129.7	0.035
129.8	0.035
129.9	0.035
130	0.04
130.1	0.04
130.2	0.04
130.3	0.04
130.4	0.04
130.5	0.04
130.6	0.04
130.7	0.04
130.8	0.04
130.9	0.04
131	0.04
131.1	0.04
131.2	0.04
131.3	0.04
131.4	0.045
131.5	0.045
131.6	0.045
131.7	0.045
131.8	0.045
131.9	0.045
132	0.045
132.1	0.045
132.2	0.045
132.3	0.045
132.4	0.045
132.5	0.045
132.6	0.045
132.7	0.045
132.8	0.045
132.9	0.045
133	0.045
133.1	0.045
133.2	0.045
133.3	0.045
133.4	0.045
133.5	0.045
133.6	0.045
133.7	0.045
133.8	0.045
133.9	0.045
134	0.045
134.1	0.045
134.2	0.045
134.3	0.045
134.4	0.045
134.5	0.045
134.6	0.045
134.7	0.045
134.8	0.045
134.9	0.045
135	0.045
135.1	0.045
135.2	0.045
135.3	0.045
135.4	0.045
135.5	0.045
135.6	0.05
135.7	0.05
135.8	0.05
135.9	0.05
136	0.05
136.1	0.05
136.2	0.05
136.3	0.05
136.4	0.05
136.5	0.05
136.6	0.05
136.7	0.05
136.8	0.05
136.9	0.05
137	0.05
137.1	0.05
137.2	0.05
137.3	0.05
137.4	0.05
137.5	0.05
137.6	0.05
137.7	0.05
137.8	0.05
137.9	0.05
138	0.05
138.1	0.05
138.2	0.05
138.3	0.05
138.4	0.05
138.5	0.05
138.6	0.05
138.7	0.05
138.8	0.05
138.9	0.05
139	0.05
139.1	0.05
139.2	0.05
139.3	0.05
139.4	0.05
139.5	0.05
139.6	0.05
139.7	0.055
139.8	0.055
139.9	0.055
140	0.055
140.1	0.055
140.2	0.055
140.3	0.055
140.4	0.055
140.5	0.055
140.6	0.055
140.7	0.055
140.8	0.055
140.9	0.055
141	0.055
141.1	0.055
141.2	0.055
141.3	0.055
141.4	0.055
141.5	0.055
141.6	0.06
141.7	0.06
141.8	0.06
141.9	0.06
142	0.06
142.1	0.06
142.2	0.06
142.3	0.06
142.4	0.06
142.5	0.06
142.6	0.06
142.7	0.06
142.8	0.06
142.9	0.06
143	0.06
143.1	0.06
143.2	0.06
143.3	0.06
143.4	0.06
143.5	0.06
143.6	0.06
143.7	0.06
143.8	0.06
143.9	0.06
144	0.06
144.1	0.06
144.2	0.06
144.3	0.06
144.4	0.06
144.5	0.06
144.6	0.06
144.7	0.06
144.8	0.06
144.9	0.06
145	0.06
145.1	0.06
145.2	0.06
145.3	0.06
145.4	0.06
145.5	0.06
145.6	0.06
145.7	0.06
145.8	0.06
145.9	0.06
146	0.06
146.1	0.06
146.2	0.06
146.3	0.06
146.4	0.06
146.5	0.06
146.6	0.06
146.7	0.06
146.8	0.06
146.9	0.06
147	0.06
147.1	0.06
147.2	0.06
147.3	0.06
147.4	0.06
147.5	0.06
147.6	0.06
147.7	0.06
147.8	0.06
147.9	0.06
148	0.06
148.1	0.06
148.2	0.06
148.3	0.06
148.4	0.06
148.5	0.06
148.6	0.06
148.7	0.06
148.8	0.06
148.9	0.06
149	0.06
149.1	0.06
149.2	0.06
149.3	0.06
149.4	0.06
149.5	0.06
149.6	0.06
149.7	0.06
149.8	0.06
149.9	0.06
150	0.06
150.1	0.06
150.2	0.06
150.3	0.06
150.4	0.06
150.5	0.06
150.6	0.06
150.7	0.06
150.8	0.06
150.9	0.06
151	0.06
151.1	0.06
151.2	0.06
151.3	0.06
151.4	0.06
151.5	0.06
151.6	0.06
151.7	0.06
151.8	0.06
151.9	0.06
152	0.06
152.1	0.06
152.2	0.06
152.3	0.06
152.4	0.06
152.5	0.06
152.6	0.06
152.7	0.06
152.8	0.06
152.9	0.06
153	0.06
153.1	0.06
153.2	0.06
153.3	0.06
153.4	0.06
153.5	0.06
153.6	0.06
153.7	0.06
153.8	0.06
153.9	0.06
154	0.06
154.1	0.06
154.2	0.06
154.3	0.06
154.4	0.06
154.5	0.06
154.6	0.06
154.7	0.06
154.8	0.06
154.9	0.06
155	0.06
155.1	0.06
155.2	0.06
155.3	0.06
155.4	0.06
155.5	0.06
155.6	0.06
155.7	0.06
155.8	0.06
155.9	0.06
156	0.06
156.1	0.06
156.2	0.06
156.3	0.06
156.4	0.06
156.5	0.06
156.6	0.06
156.7	0.06
156.8	0.06
156.9	0.06
157	0.06
157.1	0.06
157.2	0.065
157.3	0.065
157.4	0.065
157.5	0.065
157.6	0.065
157.7	0.065
157.8	0.065
157.9	0.065
158	0.065
158.1	0.065
158.2	0.065
158.3	0.065
158.4	0.065
158.5	0.065
158.6	0.065
158.7	0.065
158.8	0.065
158.9	0.065
159	0.065
159.1	0.065
159.2	0.065
159.3	0.065
159.4	0.065
159.5	0.065
159.6	0.065
159.7	0.065
159.8	0.065
159.9	0.065
160	0.065
160.1	0.065
160.2	0.07
160.3	0.07
160.4	0.07
160.5	0.07
160.6	0.075
160.7	0.075
160.8	0.075
160.9	0.075
161	0.075
161.1	0.075
161.2	0.075
161.3	0.075
161.4	0.075
161.5	0.075
161.6	0.075
161.7	0.075
161.8	0.075
161.9	0.075
162	0.08
162.1	0.08
162.2	0.08
162.3	0.08
162.4	0.08
162.5	0.08
162.6	0.08
162.7	0.08
162.8	0.08
162.9	0.08
163	0.08
163.1	0.08
163.2	0.08
163.3	0.08
163.4	0.08
163.5	0.08
163.6	0.08
163.7	0.08
163.8	0.08
163.9	0.08
164	0.08
164.1	0.08
164.2	0.08
164.3	0.08
164.4	0.08
164.5	0.08
164.6	0.08
164.7	0.08
164.8	0.08
164.9	0.08
165	0.08
165.1	0.08
165.2	0.08
165.3	0.08
165.4	0.08
165.5	0.08
165.6	0.08
165.7	0.08
165.8	0.08
165.9	0.08
166	0.08
166.1	0.08
166.2	0.08
166.3	0.08
166.4	0.08
166.5	0.08
166.6	0.08
166.7	0.08
166.8	0.08
166.9	0.08
167	0.08
167.1	0.08
167.2	0.08
167.3	0.08
167.4	0.08
167.5	0.08
167.6	0.08
167.7	0.08
167.8	0.08
167.9	0.08
168	0.08
168.1	0.08
168.2	0.08
168.3	0.08
168.4	0.08
168.5	0.08
168.6	0.08
168.7	0.08
168.8	0.08
168.9	0.08
169	0.08
169.1	0.08
169.2	0.08
169.3	0.08
169.4	0.08
169.5	0.08
169.6	0.08
169.7	0.08
169.8	0.08
169.9	0.08
170	0.08
170.1	0.08
170.2	0.08
170.3	0.08
170.4	0.08
170.5	0.08
170.6	0.08
170.7	0.08
170.8	0.08
170.9	0.08
171	0.08
171.1	0.08
171.2	0.08
171.3	0.08
171.4	0.08
171.5	0.08
171.6	0.085
171.7	0.085
171.8	0.085
171.9	0.085
172	0.085
172.1	0.085
172.2	0.085
172.3	0.085
172.4	0.085
172.5	0.085
172.6	0.085
172.7	0.085
172.8	0.085
172.9	0.085
173	0.085
173.1	0.085
173.2	0.085
173.3	0.085
173.4	0.085
173.5	0.085
173.6	0.085
173.7	0.085
173.8	0.085
173.9	0.085
174	0.085
174.1	0.085
174.2	0.085
174.3	0.085
174.4	0.085
174.5	0.085
174.6	0.085
174.7	0.085
174.8	0.085
174.9	0.085
175	0.085
175.1	0.085
175.2	0.085
175.3	0.085
175.4	0.085
175.5	0.085
175.6	0.085
175.7	0.085
175.8	0.085
175.9	0.085
176	0.085
176.1	0.085
176.2	0.085
176.3	0.085
176.4	0.085
176.5	0.085
176.6	0.085
176.7	0.085
176.8	0.085
176.9	0.085
177	0.085
177.1	0.085
177.2	0.085
177.3	0.085
177.4	0.085
177.5	0.085
177.6	0.09
177.7	0.09
177.8	0.09
177.9	0.09
178	0.09
178.1	0.09
178.2	0.09
178.3	0.095
178.4	0.095
178.5	0.095
178.6	0.095
178.7	0.095
178.8	0.095
178.9	0.095
179	0.105
179.1	0.105
179.2	0.105
179.3	0.105
179.4	0.105
179.5	0.105
179.6	0.105
179.7	0.105
179.8	0.105
179.9	0.105
180	0.105
180.1	0.105
180.2	0.105
180.3	0.105
180.4	0.105
180.5	0.105
180.6	0.105
180.7	0.105
180.8	0.105
180.9	0.105
181	0.1
181.1	0.1
181.2	0.1
181.3	0.1
181.4	0.1
181.5	0.1
181.6	0.1
181.7	0.1
181.8	0.1
181.9	0.1
182	0.1
182.1	0.105
182.2	0.105
182.3	0.105
182.4	0.105
182.5	0.105
182.6	0.105
182.7	0.105
182.8	0.105
182.9	0.105
183	0.105
183.1	0.105
183.2	0.105
183.3	0.11
183.4	0.11
183.5	0.11
183.6	0.11
183.7	0.11
183.8	0.11
183.9	0.105
184	0.1
184.1	0.1
184.2	0.105
184.3	0.105
184.4	0.105
184.5	0.105
184.6	0.105
184.7	0.105
184.8	0.105
184.9	0.105
185	0.105
185.1	0.105
185.2	0.105
185.3	0.105
185.4	0.105
185.5	0.105
185.6	0.105
185.7	0.105
185.8	0.105
185.9	0.105
186	0.105
186.1	0.105
186.2	0.105
186.3	0.105
186.4	0.105
186.5	0.105
186.6	0.105
186.7	0.105
186.8	0.105
186.9	0.105
187	0.105
187.1	0.105
187.2	0.105
187.3	0.105
187.4	0.105
187.5	0.105
187.6	0.105
187.7	0.11
187.8	0.11
187.9	0.11
188	0.11
188.1	0.11
188.2	0.11
188.3	0.11
188.4	0.11
188.5	0.11
188.6	0.115
188.7	0.115
188.8	0.115
188.9	0.115
189	0.115
189.1	0.115
189.2	0.115
189.3	0.115
189.4	0.115
189.5	0.115
189.6	0.115
189.7	0.115
189.8	0.115
189.9	0.115
190	0.115
190.1	0.115
190.2	0.115
190.3	0.115
190.4	0.115
190.5	0.115
190.6	0.115
190.7	0.115
190.8	0.115
190.9	0.115
191	0.115
191.1	0.115
191.2	0.115
191.3	0.115
191.4	0.115
191.5	0.12
191.6	0.12
191.7	0.12
191.8	0.12
191.9	0.12
192	0.12
192.1	0.12
192.2	0.12
192.3	0.12
192.4	0.12
192.5	0.12
192.6	0.12
192.7	0.12
192.8	0.12
192.9	0.12
193	0.12
193.1	0.12
193.2	0.12
193.3	0.12
193.4	0.12
193.5	0.12
193.6	0.125
193.7	0.125
193.8	0.125
193.9	0.125
194	0.125
194.1	0.12
194.2	0.12
194.3	0.125
194.4	0.13
194.5	0.135
194.6	0.13
194.7	0.13
194.8	0.13
194.9	0.13
195	0.13
195.1	0.13
195.2	0.13
195.3	0.13
195.4	0.13
195.5	0.13
195.6	0.13
195.7	0.13
195.8	0.13
195.9	0.13
196	0.13
196.1	0.13
196.2	0.13
196.3	0.13
196.4	0.13
196.5	0.13
196.6	0.13
196.7	0.13
196.8	0.13
196.9	0.13
197	0.13
197.1	0.13
197.2	0.13
197.3	0.13
197.4	0.13
197.5	0.13
197.6	0.13
197.7	0.13
197.8	0.13
197.9	0.13
198	0.13
198.1	0.13
198.2	0.135
198.3	0.135
198.4	0.135
198.5	0.135
198.6	0.135
198.7	0.135
198.8	0.135
198.9	0.135
199	0.135
199.1	0.135
199.2	0.135
199.3	0.135
199.4	0.135
199.5	0.135
199.6	0.135
199.7	0.135
199.8	0.135
199.9	0.135
200	0.135
[truncated: 14,000 more rows]
