# Supplementary material for: Bayesian inference of kinetic schemes for ion channels by Kalman filtering
Source: eLife journal article supplement (doi:10.7554/elife.62714), 2022-05-04
Supplement: fig4-data12 [file 1_Sim_N_400_Fluor_MW_0.125M.xlsx]

## Sheet: 0.125 M
0.1	0
0.2	0
0.3	0
0.4	0
0.5	0
0.6	0
0.7	0
0.8	0
0.9	0
1	0
1.1	0
1.2	0
1.3	0
1.4	0
1.5	0
1.6	0
1.7	0
1.8	0
1.9	0
2	0
2.1	0
2.2	0
2.3	0
2.4	0
2.5	0
2.6	0
2.7	0
2.8	0
2.9	0
3	0
3.1	0
3.2	0
3.3	0
3.4	0
3.5	0
3.6	0
3.7	0
3.8	0
3.9	0
4	0
4.1	0
4.2	0
4.3	0
4.4	0
4.5	0
4.6	0
4.7	0
4.8	0
4.9	0
5	0
5.1	0
5.2	0
5.3	0
5.4	0
5.5	0
5.6	0
5.7	0
5.8	0
5.9	0
6	0
6.1	0
6.2	0
6.3	0
6.4	0
6.5	0
6.6	0
6.7	0
6.8	0
6.9	0
7	0
7.1	0
7.2	0
7.3	0
7.4	0
7.5	0
7.6	0
7.7	0
7.8	0
7.9	0
8	0
8.1	0
8.2	0
8.3	0
8.4	0
8.5	0
8.6	0
8.7	0
8.8	0
8.9	0
9	0
9.1	0
9.2	0
9.3	0
9.4	0
9.5	0
9.6	0
9.7	0
9.8	0
9.9	0
10	0
10.1	0
10.2	0
10.3	0
10.4	0
10.5	0
10.6	0
10.7	0
10.8	0
10.9	0
11	0
11.1	0
11.2	0
11.3	0
11.4	0
11.5	0
11.6	0
11.7	0
11.8	0
11.9	0
12	0
12.1	0
12.2	0
12.3	0
12.4	0
12.5	0
12.6	0
12.7	0
12.8	0
12.9	0
13	0
13.1	0
13.2	0
13.3	0
13.4	0
13.5	0
13.6	0
13.7	0
13.8	0
13.9	0
14	0
14.1	0
14.2	0
14.3	0
14.4	0
14.5	0
14.6	0
14.7	0
14.8	0
14.9	0
15	0
15.1	0
15.2	0
15.3	0
15.4	0
15.5	0
15.6	0
15.7	0
15.8	0
15.9	0
16	0
16.1	0
16.2	0
16.3	0
16.4	0
16.5	0
16.6	0
16.7	0
16.8	0
16.9	0
17	0
17.1	0
17.2	0
17.3	0
17.4	0
17.5	0
17.6	0
17.7	0
17.8	0
17.9	0
18	0
18.1	0
18.2	0
18.3	0
18.4	0
18.5	0
18.6	0
18.7	0
18.8	0
18.9	0
19	0
19.1	0
19.2	0
19.3	0
19.4	0
19.5	0
19.6	0
19.7	0
19.8	0
19.9	0
20	0
20.1	0
20.2	0
20.3	0
20.4	0
20.5	0
20.6	0
20.7	0
20.8	0
20.9	0
21	0
21.1	0
21.2	0
21.3	0
21.4	0
21.5	0
21.6	0
21.7	0
21.8	0
21.9	0
22	0
22.1	0
22.2	0
22.3	0
22.4	0
22.5	0
22.6	0
22.7	0
22.8	0
22.9	0
23	0
23.1	0
23.2	0
23.3	0
23.4	0
23.5	0
23.6	0
23.7	0
23.8	0
23.9	0
24	0
24.1	0
24.2	0
24.3	0
24.4	0
24.5	0
24.6	0
24.7	0
24.8	0
24.9	0
25	0
25.1	0
25.2	0
25.3	0
25.4	0
25.5	0
25.6	0
25.7	0
25.8	0
25.9	0
26	0
26.1	0
26.2	0
26.3	0
26.4	0
26.5	0
26.6	0
26.7	0
26.8	0
26.9	0
27	0
27.1	0
27.2	0
27.3	0
27.4	0
27.5	0
27.6	0
27.7	0
27.8	0
27.9	0
28	0
28.1	0
28.2	0
28.3	0
28.4	0
28.5	0
28.6	0
28.7	0
28.8	0
28.9	0
29	0
29.1	0
29.2	0
29.3	0
29.4	0
29.5	0
29.6	0
29.7	0
29.8	0
29.9	0
30	0
30.1	0
30.2	0
30.3	0
30.4	0
30.5	0
30.6	0
30.7	0
30.8	0
30.9	0
31	0
31.1	0
31.2	0
31.3	0
31.4	0
31.5	0
31.6	0
31.7	0
31.8	0
31.9	0
32	0
32.1	0
32.2	0
32.3	0
32.4	0
32.5	0
32.6	0
32.7	0
32.8	0
32.9	0
33	0
33.1	0
33.2	0
33.3	0
33.4	0
33.5	0
33.6	0
33.7	0
33.8	0
33.9	0
34	0
34.1	0
34.2	0
34.3	0
34.4	0
34.5	0
34.6	0
34.7	0
34.8	0
34.9	0
35	0
35.1	0
35.2	0
35.3	0
35.4	0
35.5	0
35.6	0
35.7	0
35.8	0
35.9	0
36	0
36.1	0
36.2	0
36.3	0
36.4	0
36.5	0
36.6	0
36.7	0
36.8	0
36.9	0
37	0
37.1	0
37.2	0
37.3	0
37.4	0
37.5	0
37.6	0
37.7	0
37.8	0
37.9	0
38	0
38.1	0
38.2	0
38.3	0
38.4	0
38.5	0
38.6	0
38.7	0
38.8	0
38.9	0
39	0
39.1	0
39.2	0
39.3	0
39.4	0
39.5	0
39.6	0
39.7	0
39.8	0
39.9	0
40	0
40.1	0
40.2	0
40.3	0
40.4	0
40.5	0
40.6	0
40.7	0
40.8	0
40.9	0
41	0
41.1	0
41.2	0
41.3	0
41.4	0
41.5	0
41.6	0
41.7	0
41.8	0
41.9	0
42	0
42.1	0
42.2	0
42.3	0
42.4	0
42.5	0
42.6	0
42.7	0
42.8	0
42.9	0
43	0
43.1	0
43.2	0
43.3	0
43.4	0
43.5	0
43.6	0
43.7	0
43.8	0
43.9	0
44	0
44.1	0
44.2	0
44.3	0
44.4	0
44.5	0
44.6	0
44.7	0
44.8	0
44.9	0
45	0
45.1	0
45.2	0
45.3	0
45.4	0
45.5	0
45.6	0
45.7	0
45.8	0
45.9	0
46	0
46.1	0
46.2	0
46.3	0
46.4	0
46.5	0
46.6	0
46.7	0
46.8	0
46.9	0
47	0
47.1	0
47.2	0
47.3	0
47.4	0
47.5	0
47.6	0
47.7	0
47.8	0
47.9	0
48	0
48.1	0
48.2	0
48.3	0
48.4	0
48.5	0
48.6	0
48.7	0
48.8	0
48.9	0
49	0
49.1	0
49.2	0
49.3	0
49.4	0
49.5	0
49.6	0
49.7	0
49.8	0
49.9	0
50	0
50.1	0
50.2	0
50.3	0
50.4	0
50.5	0
50.6	0
50.7	0
50.8	0
50.9	0
51	0
51.1	0
51.2	0
51.3	0
51.4	0
51.5	0
51.6	0
51.7	0
51.8	0
51.9	0
52	0
52.1	0
52.2	0
52.3	0
52.4	0
52.5	0
52.6	0
52.7	0
52.8	0
52.9	0
53	0
53.1	0
53.2	0
53.3	0
53.4	0
53.5	0
53.6	0
53.7	0
53.8	0
53.9	0
54	0
54.1	0
54.2	0
54.3	0
54.4	0
54.5	0
54.6	0
54.7	0
54.8	0
54.9	0
55	0
55.1	0
55.2	0
55.3	0
55.4	0
55.5	0
55.6	0
55.7	0
55.8	0
55.9	0
56	0
56.1	0
56.2	0
56.3	0
56.4	0
56.5	0
56.6	0
56.7	0
56.8	0
56.9	0
57	0
57.1	0
57.2	0
57.3	0
57.4	0
57.5	0
57.6	0
57.7	0
57.8	0
57.9	0
58	0
58.1	0
58.2	0
58.3	0
58.4	0
58.5	0
58.6	0
58.7	0
58.8	0
58.9	0
59	0
59.1	0
59.2	0
59.3	0
59.4	0
59.5	0
59.6	0
59.7	0
59.8	0
59.9	0
60	0
60.1	0
60.2	0
60.3	0
60.4	0
60.5	0
60.6	0
60.7	0
60.8	0
60.9	0
61	0
61.1	0
61.2	0
61.3	0
61.4	0
61.5	0
61.6	0
61.7	0
61.8	0
61.9	0
62	0
62.1	0
62.2	0
62.3	0
62.4	0
62.5	0
62.6	0
62.7	0
62.8	0
62.9	0
63	0
63.1	0
63.2	0
63.3	0
63.4	0
63.5	0
63.6	0
63.7	0
63.8	0
63.9	0
64	0
64.1	0
64.2	0
64.3	0
64.4	0
64.5	0
64.6	0
64.7	0
64.8	0
64.9	0
65	0
65.1	0
65.2	0
65.3	0
65.4	0
65.5	0
65.6	0
65.7	0
65.8	0
65.9	0
66	0
66.1	0
66.2	0
66.3	0
66.4	0
66.5	0
66.6	0
66.7	0
66.8	0
66.9	0
67	0
67.1	0
67.2	0
67.3	0
67.4	0
67.5	0
67.6	0
67.7	0
67.8	0
67.9	0
68	0
68.1	0
68.2	0
68.3	0
68.4	0
68.5	0
68.6	0
68.7	0
68.8	0
68.9	0
69	0
69.1	0
69.2	0
69.3	0
69.4	0
69.5	0
69.6	0
69.7	0
69.8	0
69.9	0
70	0
70.1	0
70.2	0
70.3	0
70.4	0
70.5	0
70.6	0
70.7	0
70.8	0
70.9	0
71	0
71.1	0
71.2	0
71.3	0
71.4	0
71.5	0
71.6	0
71.7	0
71.8	0
71.9	0
72	0
72.1	0
72.2	0
72.3	0
72.4	0
72.5	0
72.6	0
72.7	0
72.8	0
72.9	0
73	0
73.1	0
73.2	0
73.3	0
73.4	0
73.5	0
73.6	0
73.7	0
73.8	0
73.9	0
74	0
74.1	0
74.2	0
74.3	0
74.4	0
74.5	0
74.6	0
74.7	0
74.8	0
74.9	0
75	0
75.1	0
75.2	0
75.3	0
75.4	0
75.5	0
75.6	0
75.7	0
75.8	0
75.9	0
76	0
76.1	0
76.2	0
76.3	0
76.4	0
76.5	0
76.6	0
76.7	0
76.8	0
76.9	0
77	0
77.1	0
77.2	0
77.3	0
77.4	0
77.5	0
77.6	0
77.7	0
77.8	0
77.9	0
78	0
78.1	0
78.2	0
78.3	0
78.4	0
78.5	0
78.6	0
78.7	0
78.8	0
78.9	0
79	0
79.1	0
79.2	0
79.3	0
79.4	0
79.5	0
79.6	0
79.7	0
79.8	0
79.9	0
80	0
80.1	0
80.2	0
80.3	0
80.4	0
80.5	0
80.6	0
80.7	0
80.8	0
80.9	0
81	0
81.1	0
81.2	0
81.3	0
81.4	0
81.5	0
81.6	0
81.7	0
81.8	0
81.9	0
82	0
82.1	0
82.2	0
82.3	0
82.4	0
82.5	0
82.6	0
82.7	0
82.8	0
82.9	0
83	0
83.1	0
83.2	0
83.3	0
83.4	0
83.5	0
83.6	0
83.7	0
83.8	0
83.9	0
84	0
84.1	0
84.2	0
84.3	0
84.4	0
84.5	0
84.6	0
84.7	0
84.8	0
84.9	0
85	0
85.1	0
85.2	0
85.3	0
85.4	0
85.5	0
85.6	0
85.7	0
85.8	0
85.9	0
86	0
86.1	0
86.2	0
86.3	0
86.4	0
86.5	0
86.6	0
86.7	0
86.8	0
86.9	0
87	0
87.1	0
87.2	0
87.3	0
87.4	0
87.5	0
87.6	0
87.7	0
87.8	0
87.9	0
88	0
88.1	0
88.2	0
88.3	0
88.4	0
88.5	0
88.6	0
88.7	0
88.8	0
88.9	0
89	0
89.1	0
89.2	0
89.3	0
89.4	0
89.5	0
89.6	0
89.7	0
89.8	0
89.9	0
90	0
90.1	0
90.2	0
90.3	0
90.4	0
90.5	0
90.6	0
90.7	0
90.8	0
90.9	0
91	0
91.1	0
91.2	0
91.3	0
91.4	0
91.5	0
91.6	0
91.7	0
91.8	0
91.9	0
92	0
92.1	0
92.2	0
92.3	0
92.4	0
92.5	0
92.6	0
92.7	0
92.8	0
92.9	0
93	0
93.1	0
93.2	0
93.3	0
93.4	0
93.5	0
93.6	0
93.7	0
93.8	0
93.9	0
94	0
94.1	0
94.2	0
94.3	0
94.4	0
94.5	0
94.6	0
94.7	0
94.8	0
94.9	0
95	0
95.1	0
95.2	0
95.3	0
95.4	0
95.5	0
95.6	0
95.7	0
95.8	0
95.9	0
96	0
96.1	0
96.2	0
96.3	0
96.4	0
96.5	0
96.6	0
96.7	0
96.8	0
96.9	0
97	0
97.1	0
97.2	0
97.3	0
97.4	0
97.5	0
97.6	0
97.7	0
97.8	0
97.9	0
98	0
98.1	0
98.2	0
98.3	0
98.4	0
98.5	0
98.6	0
98.7	0
98.8	0
98.9	0
99	0
99.1	0
99.2	0
99.3	0
99.4	0
99.5	0
99.6	0
99.7	0
99.8	0
99.9	0
100	0
100.1	0.00625
100.2	0.01875
100.3	0.02375
100.4	0.0275
100.5	0.0375
100.6	0.0425
100.7	0.04875
100.8	0.0525
100.9	0.05875
101	0.0625
101.1	0.07125
101.2	0.0775
101.3	0.08125
101.4	0.0875
101.5	0.095
101.6	0.095
101.7	0.10375
101.8	0.10875
101.9	0.1125
102	0.12
102.1	0.12125
102.2	0.12125
102.3	0.13125
102.4	0.13625
102.5	0.1425
102.6	0.14625
102.7	0.14875
102.8	0.16125
102.9	0.165
103	0.1725
103.1	0.1775
103.2	0.18125
103.3	0.17875
103.4	0.1825
103.5	0.1825
103.6	0.19
103.7	0.19625
103.8	0.1975
103.9	0.2075
104	0.205
104.1	0.2075
104.2	0.205
104.3	0.21
104.4	0.20875
104.5	0.20875
104.6	0.21625
104.7	0.22125
104.8	0.21375
104.9	0.215
105	0.21625
105.1	0.2175
105.2	0.215
105.3	0.21875
105.4	0.225
105.5	0.2275
105.6	0.22875
105.7	0.22875
105.8	0.2325
105.9	0.23375
106	0.23625
106.1	0.235
106.2	0.2375
106.3	0.23875
106.4	0.23875
106.5	0.24125
106.6	0.24125
106.7	0.24625
106.8	0.25
106.9	0.2425
107	0.24125
107.1	0.24875
107.2	0.2525
107.3	0.25875
107.4	0.25875
107.5	0.26375
107.6	0.26625
107.7	0.26625
107.8	0.2675
107.9	0.2675
108	0.27125
108.1	0.27625
108.2	0.275
108.3	0.275
108.4	0.2675
108.5	0.26875
108.6	0.27375
108.7	0.27375
108.8	0.27625
108.9	0.2775
109	0.27375
109.1	0.27625
109.2	0.275
109.3	0.27625
109.4	0.2775
109.5	0.28125
109.6	0.28125
109.7	0.28875
109.8	0.29
109.9	0.295
110	0.29125
110.1	0.29
110.2	0.295
110.3	0.3
110.4	0.30125
110.5	0.30125
110.6	0.3025
110.7	0.30875
110.8	0.30625
110.9	0.30375
111	0.29875
111.1	0.2975
111.2	0.29625
111.3	0.2975
111.4	0.29625
111.5	0.2925
111.6	0.2925
111.7	0.295
111.8	0.29875
111.9	0.295
112	0.29125
112.1	0.2925
112.2	0.29625
112.3	0.29625
112.4	0.2975
112.5	0.29875
112.6	0.3025
112.7	0.30625
112.8	0.305
112.9	0.31
113	0.3075
113.1	0.31125
113.2	0.3125
113.3	0.315
113.4	0.31625
113.5	0.31625
113.6	0.31375
113.7	0.30625
113.8	0.3075
113.9	0.3075
114	0.30875
114.1	0.31
114.2	0.31125
114.3	0.3075
114.4	0.3075
114.5	0.31
114.6	0.3125
114.7	0.3125
114.8	0.31375
114.9	0.315
115	0.3175
115.1	0.31375
115.2	0.31125
115.3	0.31375
115.4	0.31625
115.5	0.31375
115.6	0.31625
115.7	0.31875
115.8	0.31625
115.9	0.32
116	0.32
116.1	0.32625
116.2	0.33
116.3	0.33
116.4	0.33
116.5	0.335
116.6	0.34375
116.7	0.3375
116.8	0.33625
116.9	0.33625
117	0.3325
117.1	0.33125
117.2	0.3325
117.3	0.33
117.4	0.33125
117.5	0.3275
117.6	0.3275
117.7	0.33
117.8	0.33375
117.9	0.33625
118	0.34125
118.1	0.34375
118.2	0.3425
118.3	0.3425
118.4	0.345
118.5	0.34625
118.6	0.3525
118.7	0.3525
118.8	0.35375
118.9	0.3525
119	0.355
119.1	0.35625
119.2	0.35625
119.3	0.355
119.4	0.3575
119.5	0.3625
119.6	0.36125
119.7	0.36375
119.8	0.36625
119.9	0.3675
120	0.37375
120.1	0.375
120.2	0.3775
120.3	0.38
120.4	0.3775
120.5	0.37375
120.6	0.37625
120.7	0.37625
120.8	0.37125
120.9	0.3725
121	0.37375
121.1	0.37375
121.2	0.375
121.3	0.36875
121.4	0.37
121.5	0.36875
121.6	0.36875
121.7	0.365
121.8	0.36625
121.9	0.36125
122	0.35875
122.1	0.36125
122.2	0.35375
122.3	0.36
122.4	0.35875
122.5	0.36
122.6	0.36
122.7	0.3575
122.8	0.355
122.9	0.3525
123	0.35625
123.1	0.35875
123.2	0.35625
123.3	0.35625
123.4	0.3575
123.5	0.36125
123.6	0.3625
123.7	0.36375
123.8	0.365
123.9	0.3675
124	0.37375
124.1	0.3725
124.2	0.36875
124.3	0.36875
124.4	0.3625
124.5	0.36
124.6	0.35625
124.7	0.355
124.8	0.355
124.9	0.3525
125	0.3475
125.1	0.3525
125.2	0.35375
125.3	0.35125
125.4	0.35125
125.5	0.35
125.6	0.35
125.7	0.3475
125.8	0.3475
125.9	0.345
126	0.345
126.1	0.34
126.2	0.345
126.3	0.34375
126.4	0.34375
126.5	0.34125
126.6	0.34
126.7	0.3425
126.8	0.345
126.9	0.35125
127	0.35125
127.1	0.35
127.2	0.35
127.3	0.345
127.4	0.34125
127.5	0.34
127.6	0.3425
127.7	0.34125
127.8	0.3475
127.9	0.35
128	0.35125
128.1	0.35
128.2	0.36
128.3	0.36
128.4	0.36
128.5	0.36375
128.6	0.365
128.7	0.3625
128.8	0.3625
128.9	0.36125
129	0.36625
129.1	0.365
129.2	0.36375
129.3	0.3575
129.4	0.35625
129.5	0.35375
129.6	0.35125
129.7	0.345
129.8	0.3475
129.9	0.35
130	0.34625
130.1	0.34375
130.2	0.3425
130.3	0.345
130.4	0.34875
130.5	0.3475
130.6	0.345
130.7	0.34875
130.8	0.35375
130.9	0.35375
131	0.355
131.1	0.355
131.2	0.3525
131.3	0.3525
131.4	0.35125
131.5	0.35
131.6	0.35
131.7	0.34625
131.8	0.3475
131.9	0.34
132	0.3375
132.1	0.3325
132.2	0.33125
132.3	0.3275
132.4	0.32875
132.5	0.33375
132.6	0.3325
132.7	0.33375
132.8	0.3325
132.9	0.33375
133	0.33625
133.1	0.3375
133.2	0.335
133.3	0.33625
133.4	0.3375
133.5	0.335
133.6	0.33625
133.7	0.33625
133.8	0.33625
133.9	0.3425
134	0.34375
134.1	0.3375
134.2	0.34125
134.3	0.345
134.4	0.34625
134.5	0.34625
134.6	0.34875
134.7	0.3475
134.8	0.3475
134.9	0.3475
135	0.35125
135.1	0.35375
135.2	0.355
135.3	0.3575
135.4	0.35625
135.5	0.35875
135.6	0.35625
135.7	0.35875
135.8	0.35875
135.9	0.3625
136	0.36375
136.1	0.36125
136.2	0.37
136.3	0.36875
136.4	0.37
136.5	0.365
136.6	0.365
136.7	0.36125
136.8	0.35625
136.9	0.35625
137	0.35625
137.1	0.36375
137.2	0.36375
137.3	0.3675
137.4	0.36625
137.5	0.37
137.6	0.36625
137.7	0.3675
137.8	0.365
137.9	0.37
138	0.36875
138.1	0.37
138.2	0.37125
138.3	0.37
138.4	0.375
138.5	0.37375
138.6	0.37375
138.7	0.375
138.8	0.37625
138.9	0.37875
139	0.3775
139.1	0.3775
139.2	0.37625
139.3	0.37875
139.4	0.38
139.5	0.37375
139.6	0.37375
139.7	0.375
139.8	0.375
139.9	0.37375
140	0.3725
140.1	0.375
140.2	0.375
140.3	0.3775
140.4	0.37875
140.5	0.38
140.6	0.3825
140.7	0.3775
140.8	0.37625
140.9	0.37625
141	0.37375
141.1	0.37375
141.2	0.37625
141.3	0.375
141.4	0.37625
141.5	0.37375
141.6	0.37125
141.7	0.37
141.8	0.37
141.9	0.36875
142	0.3675
142.1	0.36875
142.2	0.3675
142.3	0.36375
142.4	0.3575
142.5	0.36
142.6	0.3625
142.7	0.36625
142.8	0.3675
142.9	0.36625
143	0.36625
143.1	0.36375
143.2	0.36125
143.3	0.36625
143.4	0.36625
143.5	0.36625
143.6	0.36625
143.7	0.37375
143.8	0.37375
143.9	0.375
144	0.3775
144.1	0.3775
144.2	0.37375
144.3	0.37125
144.4	0.375
144.5	0.37625
144.6	0.3775
144.7	0.3775
144.8	0.38125
144.9	0.37875
145	0.385
145.1	0.3825
145.2	0.3825
145.3	0.37875
145.4	0.37875
145.5	0.37375
145.6	0.375
145.7	0.37375
145.8	0.37125
145.9	0.37
146	0.3725
146.1	0.37625
146.2	0.375
146.3	0.37625
146.4	0.37875
146.5	0.38
146.6	0.38125
146.7	0.3825
146.8	0.375
146.9	0.37125
147	0.37125
147.1	0.37375
147.2	0.3725
147.3	0.375
147.4	0.37
147.5	0.37125
147.6	0.37
147.7	0.37
147.8	0.3675
147.9	0.36125
148	0.36375
148.1	0.3675
148.2	0.3675
148.3	0.3725
148.4	0.37625
148.5	0.37125
148.6	0.3775
148.7	0.37875
148.8	0.3775
148.9	0.3825
149	0.3825
149.1	0.38125
149.2	0.3825
149.3	0.38625
149.4	0.38625
149.5	0.38
149.6	0.38125
149.7	0.3775
149.8	0.3775
149.9	0.375
150	0.375
150.1	0.37875
150.2	0.3725
150.3	0.3725
150.4	0.37625
150.5	0.3775
150.6	0.37875
150.7	0.38125
150.8	0.3825
150.9	0.38
151	0.37375
151.1	0.37625
151.2	0.37625
151.3	0.37375
151.4	0.3725
151.5	0.37625
151.6	0.3775
151.7	0.37625
151.8	0.37125
151.9	0.37
152	0.365
152.1	0.37
152.2	0.36875
152.3	0.36875
152.4	0.3675
152.5	0.3675
152.6	0.36
152.7	0.36125
152.8	0.35625
152.9	0.3525
153	0.35375
153.1	0.3525
153.2	0.3525
153.3	0.35125
153.4	0.355
153.5	0.3575
153.6	0.36
153.7	0.3575
153.8	0.36125
153.9	0.3675
154	0.365
154.1	0.3675
154.2	0.3625
154.3	0.36375
154.4	0.365
154.5	0.36125
154.6	0.36125
154.7	0.36
154.8	0.36375
154.9	0.36625
155	0.36375
155.1	0.3625
155.2	0.35625
155.3	0.35875
155.4	0.3625
155.5	0.36
155.6	0.35875
155.7	0.3625
155.8	0.365
155.9	0.36625
156	0.3675
156.1	0.36875
156.2	0.36625
156.3	0.365
156.4	0.3675
156.5	0.3625
156.6	0.36125
156.7	0.36
156.8	0.3625
156.9	0.36375
157	0.3625
157.1	0.3625
157.2	0.36
157.3	0.3575
157.4	0.35375
157.5	0.35125
157.6	0.35
157.7	0.34625
157.8	0.345
157.9	0.34125
158	0.34375
158.1	0.34
158.2	0.33625
158.3	0.3375
158.4	0.34
158.5	0.3425
158.6	0.34625
158.7	0.3525
158.8	0.36
158.9	0.36375
159	0.36125
159.1	0.36
159.2	0.3625
159.3	0.36125
159.4	0.365
159.5	0.3675
159.6	0.36875
159.7	0.36625
159.8	0.36625
159.9	0.3675
160	0.36875
160.1	0.37
160.2	0.36875
160.3	0.37375
160.4	0.3725
160.5	0.37375
160.6	0.37875
160.7	0.38125
160.8	0.3825
160.9	0.38375
161	0.38625
161.1	0.38375
161.2	0.385
161.3	0.38125
161.4	0.3825
161.5	0.38375
161.6	0.3825
161.7	0.38125
161.8	0.3825
161.9	0.37875
162	0.3775
162.1	0.3725
162.2	0.375
162.3	0.36875
162.4	0.36625
162.5	0.36375
162.6	0.36375
162.7	0.36875
162.8	0.36625
162.9	0.3675
163	0.36375
163.1	0.36
163.2	0.35875
163.3	0.3575
163.4	0.35875
163.5	0.36125
163.6	0.36375
163.7	0.36125
163.8	0.36125
163.9	0.3625
164	0.35875
164.1	0.35875
164.2	0.36125
164.3	0.36
164.4	0.35625
164.5	0.365
164.6	0.3675
164.7	0.36625
164.8	0.36625
164.9	0.3675
165	0.36375
165.1	0.36625
165.2	0.36625
165.3	0.37375
165.4	0.3725
165.5	0.3775
165.6	0.38375
165.7	0.385
165.8	0.385
165.9	0.385
166	0.3825
166.1	0.38375
166.2	0.38625
166.3	0.385
166.4	0.385
166.5	0.3825
166.6	0.38375
166.7	0.3875
166.8	0.38875
166.9	0.3875
167	0.38875
167.1	0.38875
167.2	0.38625
167.3	0.38625
167.4	0.38375
167.5	0.3875
167.6	0.38875
167.7	0.39125
167.8	0.39125
167.9	0.39125
168	0.3925
168.1	0.3925
168.2	0.39
168.3	0.3925
168.4	0.3925
168.5	0.3975
168.6	0.39875
168.7	0.39625
168.8	0.39375
168.9	0.39625
169	0.39375
169.1	0.39625
169.2	0.39375
169.3	0.3925
169.4	0.395
169.5	0.3975
169.6	0.39875
169.7	0.4
169.8	0.3975
169.9	0.3975
170	0.40125
170.1	0.39875
170.2	0.39625
170.3	0.39375
170.4	0.395
170.5	0.3925
170.6	0.39375
170.7	0.4025
170.8	0.39875
170.9	0.3975
171	0.4025
171.1	0.40125
171.2	0.395
171.3	0.39125
171.4	0.3925
171.5	0.3975
171.6	0.39875
171.7	0.40375
171.8	0.40625
171.9	0.4075
172	0.40875
172.1	0.40875
172.2	0.4025
172.3	0.4025
172.4	0.405
172.5	0.40625
172.6	0.405
172.7	0.40625
172.8	0.4025
172.9	0.39875
173	0.4
173.1	0.39625
173.2	0.40125
173.3	0.40125
173.4	0.4025
173.5	0.40625
173.6	0.40875
173.7	0.40625
173.8	0.40875
173.9	0.4075
174	0.40625
174.1	0.4025
174.2	0.39875
174.3	0.4
174.4	0.4025
174.5	0.40125
174.6	0.3975
174.7	0.39875
174.8	0.39875
174.9	0.3975
175	0.39625
175.1	0.395
175.2	0.3925
175.3	0.39375
175.4	0.395
175.5	0.39625
175.6	0.39625
175.7	0.39625
175.8	0.39875
175.9	0.39875
176	0.40375
176.1	0.40125
176.2	0.40375
176.3	0.405
176.4	0.40875
176.5	0.4075
176.6	0.405
176.7	0.40625
176.8	0.3975
176.9	0.3975
177	0.3975
177.1	0.395
177.2	0.395
177.3	0.3925
177.4	0.3925
177.5	0.39125
177.6	0.38875
177.7	0.38875
177.8	0.39
177.9	0.3875
178	0.38375
178.1	0.37875
178.2	0.3775
178.3	0.38375
178.4	0.38625
178.5	0.38375
178.6	0.38375
178.7	0.38125
178.8	0.38125
178.9	0.38
179	0.37875
179.1	0.38125
179.2	0.38
179.3	0.38125
179.4	0.38
179.5	0.37875
179.6	0.3825
179.7	0.385
179.8	0.3875
179.9	0.38875
180	0.39
180.1	0.39
180.2	0.39375
180.3	0.395
180.4	0.3975
180.5	0.4
180.6	0.4075
180.7	0.40375
180.8	0.3975
180.9	0.3975
181	0.4025
181.1	0.40125
181.2	0.4
181.3	0.4
181.4	0.4025
181.5	0.39875
181.6	0.40125
181.7	0.4
181.8	0.4
181.9	0.40125
182	0.3975
182.1	0.40125
182.2	0.3975
182.3	0.39625
182.4	0.395
182.5	0.395
182.6	0.39625
182.7	0.39875
182.8	0.3925
182.9	0.395
183	0.39375
183.1	0.395
183.2	0.395
183.3	0.39625
183.4	0.39625
183.5	0.39625
183.6	0.4
183.7	0.4
183.8	0.4025
183.9	0.40375
184	0.405
184.1	0.39875
184.2	0.40125
184.3	0.405
184.4	0.40375
184.5	0.41
184.6	0.40625
184.7	0.40375
184.8	0.4025
184.9	0.4075
185	0.41125
185.1	0.4125
185.2	0.40625
185.3	0.41125
185.4	0.4125
185.5	0.415
185.6	0.42125
185.7	0.42375
185.8	0.4225
185.9	0.42875
186	0.42875
186.1	0.42625
186.2	0.425
186.3	0.43125
186.4	0.4325
186.5	0.435
186.6	0.435
186.7	0.4325
186.8	0.43625
186.9	0.4375
187	0.4375
187.1	0.43875
187.2	0.435
187.3	0.435
187.4	0.435
187.5	0.4325
187.6	0.4325
187.7	0.4325
187.8	0.43125
187.9	0.43375
188	0.42875
188.1	0.42625
188.2	0.42875
188.3	0.43125
188.4	0.43
188.5	0.43125
188.6	0.42875
188.7	0.435
188.8	0.43125
188.9	0.43
189	0.4325
189.1	0.43
189.2	0.42625
189.3	0.42625
189.4	0.4275
189.5	0.4225
189.6	0.4225
189.7	0.42375
189.8	0.41875
189.9	0.41625
190	0.41375
190.1	0.415
190.2	0.415
190.3	0.4175
190.4	0.41875
190.5	0.4175
190.6	0.41625
190.7	0.415
190.8	0.41125
190.9	0.40875
191	0.41625
191.1	0.4125
191.2	0.415
191.3	0.415
191.4	0.4125
191.5	0.40625
191.6	0.40875
191.7	0.4075
191.8	0.40625
191.9	0.40375
192	0.40375
192.1	0.40625
192.2	0.41
192.3	0.41125
192.4	0.415
192.5	0.4225
192.6	0.42
192.7	0.41875
192.8	0.4225
192.9	0.41875
193	0.4225
193.1	0.425
193.2	0.42625
193.3	0.425
193.4	0.4225
193.5	0.4175
193.6	0.42
193.7	0.4175
193.8	0.41625
193.9	0.4175
194	0.42125
194.1	0.42125
194.2	0.42
194.3	0.41875
194.4	0.4225
194.5	0.4225
194.6	0.42
194.7	0.4225
194.8	0.42125
194.9	0.42375
195	0.42375
195.1	0.4225
195.2	0.425
195.3	0.42875
195.4	0.425
195.5	0.425
195.6	0.42
195.7	0.4225
195.8	0.4275
195.9	0.43125
196	0.4275
196.1	0.42875
196.2	0.4275
196.3	0.42875
196.4	0.42625
196.5	0.42625
196.6	0.4225
196.7	0.4225
196.8	0.42625
196.9	0.425
197	0.425
197.1	0.42
197.2	0.42875
197.3	0.42875
197.4	0.4275
197.5	0.435
197.6	0.43375
197.7	0.43125
197.8	0.43125
197.9	0.43375
198	0.43375
198.1	0.43625
198.2	0.43625
198.3	0.4325
198.4	0.43
198.5	0.43125
198.6	0.4325
198.7	0.43375
198.8	0.43625
198.9	0.435
199	0.43625
199.1	0.42875
199.2	0.425
199.3	0.425
199.4	0.43125
199.5	0.43125
199.6	0.43375
199.7	0.435
199.8	0.43625
199.9	0.43375
200	0.4325
[truncated: 14,000 more rows]
