# Supplementary material for: Bayesian inference of kinetic schemes for ion channels by Kalman filtering
Source: eLife journal article supplement (doi:10.7554/elife.62714), 2022-05-04
Supplement: fig4-data12 [file 1_Sim_N_400_Strom_MW_0.125M.xlsx]

## Sheet: 0.125 M
0.1	0
0.2	0
0.3	0
0.4	0
0.5	0
0.6	0
0.7	0
0.8	0
0.9	0
1	0
1.1	0
1.2	0
1.3	0
1.4	0
1.5	0
1.6	0
1.7	0
1.8	0
1.9	0
2	0
2.1	0
2.2	0
2.3	0
2.4	0
2.5	0
2.6	0
2.7	0
2.8	0
2.9	0
3	0
3.1	0
3.2	0
3.3	0
3.4	0
3.5	0
3.6	0
3.7	0
3.8	0
3.9	0
4	0
4.1	0
4.2	0
4.3	0
4.4	0
4.5	0
4.6	0
4.7	0
4.8	0
4.9	0
5	0
5.1	0
5.2	0
5.3	0
5.4	0
5.5	0
5.6	0
5.7	0
5.8	0
5.9	0
6	0
6.1	0
6.2	0
6.3	0
6.4	0
6.5	0
6.6	0
6.7	0
6.8	0
6.9	0
7	0
7.1	0
7.2	0
7.3	0
7.4	0
7.5	0
7.6	0
7.7	0
7.8	0
7.9	0
8	0
8.1	0
8.2	0
8.3	0
8.4	0
8.5	0
8.6	0
8.7	0
8.8	0
8.9	0
9	0
9.1	0
9.2	0
9.3	0
9.4	0
9.5	0
9.6	0
9.7	0
9.8	0
9.9	0
10	0
10.1	0
10.2	0
10.3	0
10.4	0
10.5	0
10.6	0
10.7	0
10.8	0
10.9	0
11	0
11.1	0
11.2	0
11.3	0
11.4	0
11.5	0
11.6	0
11.7	0
11.8	0
11.9	0
12	0
12.1	0
12.2	0
12.3	0
12.4	0
12.5	0
12.6	0
12.7	0
12.8	0
12.9	0
13	0
13.1	0
13.2	0
13.3	0
13.4	0
13.5	0
13.6	0
13.7	0
13.8	0
13.9	0
14	0
14.1	0
14.2	0
14.3	0
14.4	0
14.5	0
14.6	0
14.7	0
14.8	0
14.9	0
15	0
15.1	0
15.2	0
15.3	0
15.4	0
15.5	0
15.6	0
15.7	0
15.8	0
15.9	0
16	0
16.1	0
16.2	0
16.3	0
16.4	0
16.5	0
16.6	0
16.7	0
16.8	0
16.9	0
17	0
17.1	0
17.2	0
17.3	0
17.4	0
17.5	0
17.6	0
17.7	0
17.8	0
17.9	0
18	0
18.1	0
18.2	0
18.3	0
18.4	0
18.5	0
18.6	0
18.7	0
18.8	0
18.9	0
19	0
19.1	0
19.2	0
19.3	0
19.4	0
19.5	0
19.6	0
19.7	0
19.8	0
19.9	0
20	0
20.1	0
20.2	0
20.3	0
20.4	0
20.5	0
20.6	0
20.7	0
20.8	0
20.9	0
21	0
21.1	0
21.2	0
21.3	0
21.4	0
21.5	0
21.6	0
21.7	0
21.8	0
21.9	0
22	0
22.1	0
22.2	0
22.3	0
22.4	0
22.5	0
22.6	0
22.7	0
22.8	0
22.9	0
23	0
23.1	0
23.2	0
23.3	0
23.4	0
23.5	0
23.6	0
23.7	0
23.8	0
23.9	0
24	0
24.1	0
24.2	0
24.3	0
24.4	0
24.5	0
24.6	0
24.7	0
24.8	0
24.9	0
25	0
25.1	0
25.2	0
25.3	0
25.4	0
25.5	0
25.6	0
25.7	0
25.8	0
25.9	0
26	0
26.1	0
26.2	0
26.3	0
26.4	0
26.5	0
26.6	0
26.7	0
26.8	0
26.9	0
27	0
27.1	0
27.2	0
27.3	0
27.4	0
27.5	0
27.6	0
27.7	0
27.8	0
27.9	0
28	0
28.1	0
28.2	0
28.3	0
28.4	0
28.5	0
28.6	0
28.7	0
28.8	0
28.9	0
29	0
29.1	0
29.2	0
29.3	0
29.4	0
29.5	0
29.6	0
29.7	0
29.8	0
29.9	0
30	0
30.1	0
30.2	0
30.3	0
30.4	0
30.5	0
30.6	0
30.7	0
30.8	0
30.9	0
31	0
31.1	0
31.2	0
31.3	0
31.4	0
31.5	0
31.6	0
31.7	0
31.8	0
31.9	0
32	0
32.1	0
32.2	0
32.3	0
32.4	0
32.5	0
32.6	0
32.7	0
32.8	0
32.9	0
33	0
33.1	0
33.2	0
33.3	0
33.4	0
33.5	0
33.6	0
33.7	0
33.8	0
33.9	0
34	0
34.1	0
34.2	0
34.3	0
34.4	0
34.5	0
34.6	0
34.7	0
34.8	0
34.9	0
35	0
35.1	0
35.2	0
35.3	0
35.4	0
35.5	0
35.6	0
35.7	0
35.8	0
35.9	0
36	0
36.1	0
36.2	0
36.3	0
36.4	0
36.5	0
36.6	0
36.7	0
36.8	0
36.9	0
37	0
37.1	0
37.2	0
37.3	0
37.4	0
37.5	0
37.6	0
37.7	0
37.8	0
37.9	0
38	0
38.1	0
38.2	0
38.3	0
38.4	0
38.5	0
38.6	0
38.7	0
38.8	0
38.9	0
39	0
39.1	0
39.2	0
39.3	0
39.4	0
39.5	0
39.6	0
39.7	0
39.8	0
39.9	0
40	0
40.1	0
40.2	0
40.3	0
40.4	0
40.5	0
40.6	0
40.7	0
40.8	0
40.9	0
41	0
41.1	0
41.2	0
41.3	0
41.4	0
41.5	0
41.6	0
41.7	0
41.8	0
41.9	0
42	0
42.1	0
42.2	0
42.3	0
42.4	0
42.5	0
42.6	0
42.7	0
42.8	0
42.9	0
43	0
43.1	0
43.2	0
43.3	0
43.4	0
43.5	0
43.6	0
43.7	0
43.8	0
43.9	0
44	0
44.1	0
44.2	0
44.3	0
44.4	0
44.5	0
44.6	0
44.7	0
44.8	0
44.9	0
45	0
45.1	0
45.2	0
45.3	0
45.4	0
45.5	0
45.6	0
45.7	0
45.8	0
45.9	0
46	0
46.1	0
46.2	0
46.3	0
46.4	0
46.5	0
46.6	0
46.7	0
46.8	0
46.9	0
47	0
47.1	0
47.2	0
47.3	0
47.4	0
47.5	0
47.6	0
47.7	0
47.8	0
47.9	0
48	0
48.1	0
48.2	0
48.3	0
48.4	0
48.5	0
48.6	0
48.7	0
48.8	0
48.9	0
49	0
49.1	0
49.2	0
49.3	0
49.4	0
49.5	0
49.6	0
49.7	0
49.8	0
49.9	0
50	0
50.1	0
50.2	0
50.3	0
50.4	0
50.5	0
50.6	0
50.7	0
50.8	0
50.9	0
51	0
51.1	0
51.2	0
51.3	0
51.4	0
51.5	0
51.6	0
51.7	0
51.8	0
51.9	0
52	0
52.1	0
52.2	0
52.3	0
52.4	0
52.5	0
52.6	0
52.7	0
52.8	0
52.9	0
53	0
53.1	0
53.2	0
53.3	0
53.4	0
53.5	0
53.6	0
53.7	0
53.8	0
53.9	0
54	0
54.1	0
54.2	0
54.3	0
54.4	0
54.5	0
54.6	0
54.7	0
54.8	0
54.9	0
55	0
55.1	0
55.2	0
55.3	0
55.4	0
55.5	0
55.6	0
55.7	0
55.8	0
55.9	0
56	0
56.1	0
56.2	0
56.3	0
56.4	0
56.5	0
56.6	0
56.7	0
56.8	0
56.9	0
57	0
57.1	0
57.2	0
57.3	0
57.4	0
57.5	0
57.6	0
57.7	0
57.8	0
57.9	0
58	0
58.1	0
58.2	0
58.3	0
58.4	0
58.5	0
58.6	0
58.7	0
58.8	0
58.9	0
59	0
59.1	0
59.2	0
59.3	0
59.4	0
59.5	0
59.6	0
59.7	0
59.8	0
59.9	0
60	0
60.1	0
60.2	0
60.3	0
60.4	0
60.5	0
60.6	0
60.7	0
60.8	0
60.9	0
61	0
61.1	0
61.2	0
61.3	0
61.4	0
61.5	0
61.6	0
61.7	0
61.8	0
61.9	0
62	0
62.1	0
62.2	0
62.3	0
62.4	0
62.5	0
62.6	0
62.7	0
62.8	0
62.9	0
63	0
63.1	0
63.2	0
63.3	0
63.4	0
63.5	0
63.6	0
63.7	0
63.8	0
63.9	0
64	0
64.1	0
64.2	0
64.3	0
64.4	0
64.5	0
64.6	0
64.7	0
64.8	0
64.9	0
65	0
65.1	0
65.2	0
65.3	0
65.4	0
65.5	0
65.6	0
65.7	0
65.8	0
65.9	0
66	0
66.1	0
66.2	0
66.3	0
66.4	0
66.5	0
66.6	0
66.7	0
66.8	0
66.9	0
67	0
67.1	0
67.2	0
67.3	0
67.4	0
67.5	0
67.6	0
67.7	0
67.8	0
67.9	0
68	0
68.1	0
68.2	0
68.3	0
68.4	0
68.5	0
68.6	0
68.7	0
68.8	0
68.9	0
69	0
69.1	0
69.2	0
69.3	0
69.4	0
69.5	0
69.6	0
69.7	0
69.8	0
69.9	0
70	0
70.1	0
70.2	0
70.3	0
70.4	0
70.5	0
70.6	0
70.7	0
70.8	0
70.9	0
71	0
71.1	0
71.2	0
71.3	0
71.4	0
71.5	0
71.6	0
71.7	0
71.8	0
71.9	0
72	0
72.1	0
72.2	0
72.3	0
72.4	0
72.5	0
72.6	0
72.7	0
72.8	0
72.9	0
73	0
73.1	0
73.2	0
73.3	0
73.4	0
73.5	0
73.6	0
73.7	0
73.8	0
73.9	0
74	0
74.1	0
74.2	0
74.3	0
74.4	0
74.5	0
74.6	0
74.7	0
74.8	0
74.9	0
75	0
75.1	0
75.2	0
75.3	0
75.4	0
75.5	0
75.6	0
75.7	0
75.8	0
75.9	0
76	0
76.1	0
76.2	0
76.3	0
76.4	0
76.5	0
76.6	0
76.7	0
76.8	0
76.9	0
77	0
77.1	0
77.2	0
77.3	0
77.4	0
77.5	0
77.6	0
77.7	0
77.8	0
77.9	0
78	0
78.1	0
78.2	0
78.3	0
78.4	0
78.5	0
78.6	0
78.7	0
78.8	0
78.9	0
79	0
79.1	0
79.2	0
79.3	0
79.4	0
79.5	0
79.6	0
79.7	0
79.8	0
79.9	0
80	0
80.1	0
80.2	0
80.3	0
80.4	0
80.5	0
80.6	0
80.7	0
80.8	0
80.9	0
81	0
81.1	0
81.2	0
81.3	0
81.4	0
81.5	0
81.6	0
81.7	0
81.8	0
81.9	0
82	0
82.1	0
82.2	0
82.3	0
82.4	0
82.5	0
82.6	0
82.7	0
82.8	0
82.9	0
83	0
83.1	0
83.2	0
83.3	0
83.4	0
83.5	0
83.6	0
83.7	0
83.8	0
83.9	0
84	0
84.1	0
84.2	0
84.3	0
84.4	0
84.5	0
84.6	0
84.7	0
84.8	0
84.9	0
85	0
85.1	0
85.2	0
85.3	0
85.4	0
85.5	0
85.6	0
85.7	0
85.8	0
85.9	0
86	0
86.1	0
86.2	0
86.3	0
86.4	0
86.5	0
86.6	0
86.7	0
86.8	0
86.9	0
87	0
87.1	0
87.2	0
87.3	0
87.4	0
87.5	0
87.6	0
87.7	0
87.8	0
87.9	0
88	0
88.1	0
88.2	0
88.3	0
88.4	0
88.5	0
88.6	0
88.7	0
88.8	0
88.9	0
89	0
89.1	0
89.2	0
89.3	0
89.4	0
89.5	0
89.6	0
89.7	0
89.8	0
89.9	0
90	0
90.1	0
90.2	0
90.3	0
90.4	0
90.5	0
90.6	0
90.7	0
90.8	0
90.9	0
91	0
91.1	0
91.2	0
91.3	0
91.4	0
91.5	0
91.6	0
91.7	0
91.8	0
91.9	0
92	0
92.1	0
92.2	0
92.3	0
92.4	0
92.5	0
92.6	0
92.7	0
92.8	0
92.9	0
93	0
93.1	0
93.2	0
93.3	0
93.4	0
93.5	0
93.6	0
93.7	0
93.8	0
93.9	0
94	0
94.1	0
94.2	0
94.3	0
94.4	0
94.5	0
94.6	0
94.7	0
94.8	0
94.9	0
95	0
95.1	0
95.2	0
95.3	0
95.4	0
95.5	0
95.6	0
95.7	0
95.8	0
95.9	0
96	0
96.1	0
96.2	0
96.3	0
96.4	0
96.5	0
96.6	0
96.7	0
96.8	0
96.9	0
97	0
97.1	0
97.2	0
97.3	0
97.4	0
97.5	0
97.6	0
97.7	0
97.8	0
97.9	0
98	0
98.1	0
98.2	0
98.3	0
98.4	0
98.5	0
98.6	0
98.7	0
98.8	0
98.9	0
99	0
99.1	0
99.2	0
99.3	0
99.4	0
99.5	0
99.6	0
99.7	0
99.8	0
99.9	0
100	0
100.1	0
100.2	0
100.3	0
100.4	0
100.5	0
100.6	0
100.7	0
100.8	0
100.9	0
101	0
101.1	0
101.2	0
101.3	0
101.4	0
101.5	0
101.6	0
101.7	0
101.8	0
101.9	0
102	0
102.1	0
102.2	0
102.3	0
102.4	0
102.5	0
102.6	0
102.7	0
102.8	0
102.9	0
103	0
103.1	0
103.2	0
103.3	0
103.4	0
103.5	0
103.6	0
103.7	0
103.8	0
103.9	0
104	0
104.1	0
104.2	0
104.3	0
104.4	0
104.5	0
104.6	0
104.7	0
104.8	0
104.9	0
105	0
105.1	0
105.2	0
105.3	0
105.4	0
105.5	0
105.6	0
105.7	0
105.8	0
105.9	0
106	0
106.1	0
106.2	0
106.3	0
106.4	0.0025
106.5	0.0025
106.6	0.0025
106.7	0.0025
106.8	0.0025
106.9	0.0025
107	0.0025
107.1	0.0025
107.2	0.0025
107.3	0.0025
107.4	0.0025
107.5	0.0025
107.6	0.0025
107.7	0.005
107.8	0.005
107.9	0.005
108	0.005
108.1	0.005
108.2	0.005
108.3	0.005
108.4	0.005
108.5	0.005
108.6	0.005
108.7	0.005
108.8	0.005
108.9	0.005
109	0.0075
109.1	0.0075
109.2	0.0075
109.3	0.0075
109.4	0.0075
109.5	0.0075
109.6	0.0075
109.7	0.0075
109.8	0.0075
109.9	0.0075
110	0.0075
110.1	0.0075
110.2	0.0075
110.3	0.0075
110.4	0.0075
110.5	0.0075
110.6	0.0075
110.7	0.0075
110.8	0.0075
110.9	0.0075
111	0.0075
111.1	0.0075
111.2	0.0075
111.3	0.0075
111.4	0.0075
111.5	0.0075
111.6	0.0075
111.7	0.0075
111.8	0.0075
111.9	0.0075
112	0.0075
112.1	0.0075
112.2	0.01
112.3	0.01
112.4	0.01
112.5	0.01
112.6	0.01
112.7	0.01
112.8	0.01
112.9	0.01
113	0.01
113.1	0.01
113.2	0.01
113.3	0.01
113.4	0.01
113.5	0.01
113.6	0.0125
113.7	0.0125
113.8	0.0125
113.9	0.0125
114	0.0125
114.1	0.0125
114.2	0.0125
114.3	0.0125
114.4	0.0125
114.5	0.015
114.6	0.0175
114.7	0.0175
114.8	0.0175
114.9	0.02
115	0.02
115.1	0.02
115.2	0.02
115.3	0.02
115.4	0.02
115.5	0.02
115.6	0.02
115.7	0.02
115.8	0.02
115.9	0.02
116	0.02
116.1	0.02
116.2	0.0225
116.3	0.0225
116.4	0.0225
116.5	0.0225
116.6	0.0225
116.7	0.0225
116.8	0.0225
116.9	0.0225
117	0.0225
117.1	0.0225
117.2	0.0225
117.3	0.025
117.4	0.025
117.5	0.0275
117.6	0.0275
117.7	0.0275
117.8	0.0275
117.9	0.0275
118	0.0275
118.1	0.0275
118.2	0.0275
118.3	0.0275
118.4	0.0275
118.5	0.0275
118.6	0.03
118.7	0.0275
118.8	0.0275
118.9	0.0275
119	0.0275
119.1	0.03
119.2	0.03
119.3	0.03
119.4	0.03
119.5	0.03
119.6	0.03
119.7	0.03
119.8	0.03
119.9	0.03
120	0.03
120.1	0.03
120.2	0.0325
120.3	0.0325
120.4	0.0325
120.5	0.0325
120.6	0.0325
120.7	0.0325
120.8	0.0325
120.9	0.0325
121	0.0325
121.1	0.0325
121.2	0.0325
121.3	0.0325
121.4	0.035
121.5	0.035
121.6	0.035
121.7	0.035
121.8	0.035
121.9	0.035
122	0.035
122.1	0.035
122.2	0.035
122.3	0.035
122.4	0.035
122.5	0.035
122.6	0.035
122.7	0.035
122.8	0.035
122.9	0.035
123	0.035
123.1	0.035
123.2	0.035
123.3	0.035
123.4	0.035
123.5	0.035
123.6	0.035
123.7	0.035
123.8	0.0375
123.9	0.0375
124	0.0375
124.1	0.0375
124.2	0.0375
124.3	0.0375
124.4	0.0375
124.5	0.0375
124.6	0.0375
124.7	0.0375
124.8	0.0375
124.9	0.0375
125	0.0375
125.1	0.0375
125.2	0.0375
125.3	0.0375
125.4	0.04
125.5	0.04
125.6	0.04
125.7	0.0425
125.8	0.0425
125.9	0.0425
126	0.0425
126.1	0.0425
126.2	0.0425
126.3	0.0425
126.4	0.0425
126.5	0.045
126.6	0.045
126.7	0.045
126.8	0.045
126.9	0.045
127	0.045
127.1	0.045
127.2	0.045
127.3	0.045
127.4	0.045
127.5	0.045
127.6	0.045
127.7	0.045
127.8	0.045
127.9	0.045
128	0.045
128.1	0.045
128.2	0.045
128.3	0.045
128.4	0.045
128.5	0.045
128.6	0.045
128.7	0.045
128.8	0.045
128.9	0.045
129	0.045
129.1	0.045
129.2	0.045
129.3	0.045
129.4	0.045
129.5	0.045
129.6	0.045
129.7	0.045
129.8	0.045
129.9	0.045
130	0.045
130.1	0.045
130.2	0.045
130.3	0.045
130.4	0.045
130.5	0.045
130.6	0.045
130.7	0.045
130.8	0.045
130.9	0.045
131	0.045
131.1	0.045
131.2	0.045
131.3	0.045
131.4	0.045
131.5	0.045
131.6	0.045
131.7	0.045
131.8	0.045
131.9	0.045
132	0.045
132.1	0.045
132.2	0.045
132.3	0.0475
132.4	0.0475
132.5	0.0475
132.6	0.0475
132.7	0.0475
132.8	0.0475
132.9	0.0475
133	0.0475
133.1	0.0475
133.2	0.0475
133.3	0.0475
133.4	0.0475
133.5	0.0475
133.6	0.0475
133.7	0.0475
133.8	0.045
133.9	0.045
134	0.045
134.1	0.045
134.2	0.045
134.3	0.045
134.4	0.045
134.5	0.045
134.6	0.0475
134.7	0.0475
134.8	0.0475
134.9	0.05
135	0.0525
135.1	0.0525
135.2	0.0525
135.3	0.0525
135.4	0.0525
135.5	0.0525
135.6	0.0525
135.7	0.0525
135.8	0.055
135.9	0.055
136	0.0575
136.1	0.0575
136.2	0.0575
136.3	0.0575
136.4	0.0575
136.5	0.0575
136.6	0.0575
136.7	0.0575
136.8	0.0575
136.9	0.0575
137	0.0575
137.1	0.0575
137.2	0.06
137.3	0.06
137.4	0.06
137.5	0.06
137.6	0.06
137.7	0.0575
137.8	0.0575
137.9	0.0575
138	0.0575
138.1	0.0575
138.2	0.0575
138.3	0.0575
138.4	0.0575
138.5	0.0575
138.6	0.0575
138.7	0.0575
138.8	0.0575
138.9	0.0575
139	0.0575
139.1	0.0575
139.2	0.0575
139.3	0.0575
139.4	0.0575
139.5	0.0575
139.6	0.0575
139.7	0.0575
139.8	0.0575
139.9	0.0575
140	0.0575
140.1	0.0575
140.2	0.0575
140.3	0.0575
140.4	0.0575
140.5	0.0575
140.6	0.0575
140.7	0.0575
140.8	0.0575
140.9	0.0575
141	0.0575
141.1	0.0575
141.2	0.0575
141.3	0.0575
141.4	0.0575
141.5	0.0575
141.6	0.06
141.7	0.06
141.8	0.06
141.9	0.06
142	0.06
142.1	0.06
142.2	0.06
142.3	0.06
142.4	0.06
142.5	0.06
142.6	0.06
142.7	0.06
142.8	0.06
142.9	0.06
143	0.06
143.1	0.0625
143.2	0.0625
143.3	0.0625
143.4	0.0625
143.5	0.0675
143.6	0.0675
143.7	0.0675
143.8	0.0675
143.9	0.0675
144	0.0675
144.1	0.0675
144.2	0.07
144.3	0.07
144.4	0.07
144.5	0.07
144.6	0.07
144.7	0.07
144.8	0.075
144.9	0.075
145	0.075
145.1	0.075
145.2	0.075
145.3	0.075
145.4	0.075
145.5	0.075
145.6	0.075
145.7	0.075
145.8	0.075
145.9	0.075
146	0.0725
146.1	0.0725
146.2	0.075
146.3	0.075
146.4	0.075
146.5	0.075
146.6	0.075
146.7	0.075
146.8	0.075
146.9	0.075
147	0.075
147.1	0.075
147.2	0.075
147.3	0.075
147.4	0.075
147.5	0.075
147.6	0.075
147.7	0.075
147.8	0.075
147.9	0.075
148	0.075
148.1	0.075
148.2	0.075
148.3	0.075
148.4	0.075
148.5	0.075
148.6	0.075
148.7	0.075
148.8	0.075
148.9	0.075
149	0.075
149.1	0.075
149.2	0.075
149.3	0.075
149.4	0.075
149.5	0.075
149.6	0.075
149.7	0.075
149.8	0.075
149.9	0.075
150	0.075
150.1	0.075
150.2	0.075
150.3	0.075
150.4	0.075
150.5	0.075
150.6	0.075
150.7	0.075
150.8	0.075
150.9	0.075
151	0.075
151.1	0.0725
151.2	0.0725
151.3	0.0725
151.4	0.0725
151.5	0.0725
151.6	0.0725
151.7	0.0725
151.8	0.0725
151.9	0.0725
152	0.0725
152.1	0.0725
152.2	0.0725
152.3	0.0725
152.4	0.0725
152.5	0.0725
152.6	0.0725
152.7	0.0725
152.8	0.0725
152.9	0.0725
153	0.0725
153.1	0.0725
153.2	0.0725
153.3	0.0725
153.4	0.0725
153.5	0.0725
153.6	0.0725
153.7	0.0725
153.8	0.0725
153.9	0.0725
154	0.07
154.1	0.07
154.2	0.07
154.3	0.07
154.4	0.07
154.5	0.07
154.6	0.07
154.7	0.0675
154.8	0.0675
154.9	0.0675
155	0.0675
155.1	0.0675
155.2	0.0675
155.3	0.0675
155.4	0.0675
155.5	0.0675
155.6	0.0675
155.7	0.0675
155.8	0.07
155.9	0.0725
156	0.0725
156.1	0.0725
156.2	0.0725
156.3	0.0725
156.4	0.0725
156.5	0.0725
156.6	0.0725
156.7	0.0725
156.8	0.0725
156.9	0.0725
157	0.0725
157.1	0.075
157.2	0.0775
157.3	0.075
157.4	0.075
157.5	0.075
157.6	0.075
157.7	0.075
157.8	0.075
157.9	0.075
158	0.075
158.1	0.075
158.2	0.075
158.3	0.075
158.4	0.075
158.5	0.075
158.6	0.075
158.7	0.075
158.8	0.075
158.9	0.075
159	0.075
159.1	0.0775
159.2	0.08
159.3	0.08
159.4	0.08
159.5	0.08
159.6	0.08
159.7	0.08
159.8	0.08
159.9	0.08
160	0.08
160.1	0.08
160.2	0.08
160.3	0.08
160.4	0.08
160.5	0.0825
160.6	0.0825
160.7	0.0825
160.8	0.0825
160.9	0.0825
161	0.0825
161.1	0.0825
161.2	0.0825
161.3	0.0825
161.4	0.0825
161.5	0.0825
161.6	0.0825
161.7	0.0825
161.8	0.0825
161.9	0.0825
162	0.0825
162.1	0.0825
162.2	0.085
162.3	0.085
162.4	0.085
162.5	0.085
162.6	0.085
162.7	0.085
162.8	0.085
162.9	0.085
163	0.085
163.1	0.085
163.2	0.085
163.3	0.085
163.4	0.085
163.5	0.085
163.6	0.085
163.7	0.085
163.8	0.085
163.9	0.0875
164	0.0875
164.1	0.0875
164.2	0.0875
164.3	0.0875
164.4	0.0875
164.5	0.0875
164.6	0.0875
164.7	0.0875
164.8	0.0875
164.9	0.0875
165	0.09
165.1	0.09
165.2	0.09
165.3	0.09
165.4	0.09
165.5	0.09
165.6	0.09
165.7	0.09
165.8	0.09
165.9	0.09
166	0.09
166.1	0.09
166.2	0.09
166.3	0.09
166.4	0.09
166.5	0.09
166.6	0.09
166.7	0.09
166.8	0.09
166.9	0.09
167	0.09
167.1	0.09
167.2	0.09
167.3	0.09
167.4	0.09
167.5	0.09
167.6	0.0925
167.7	0.0925
167.8	0.0925
167.9	0.0925
168	0.0925
168.1	0.0925
168.2	0.0925
168.3	0.0925
168.4	0.0925
168.5	0.09
168.6	0.09
168.7	0.09
168.8	0.09
168.9	0.09
169	0.09
169.1	0.09
169.2	0.09
169.3	0.09
169.4	0.09
169.5	0.0925
169.6	0.0925
169.7	0.09
169.8	0.09
169.9	0.09
170	0.09
170.1	0.09
170.2	0.09
170.3	0.09
170.4	0.09
170.5	0.09
170.6	0.09
170.7	0.09
170.8	0.09
170.9	0.09
171	0.09
171.1	0.09
171.2	0.09
171.3	0.09
171.4	0.09
171.5	0.09
171.6	0.09
171.7	0.09
171.8	0.09
171.9	0.09
172	0.09
172.1	0.09
172.2	0.09
172.3	0.09
172.4	0.09
172.5	0.09
172.6	0.09
172.7	0.09
172.8	0.09
172.9	0.09
173	0.09
173.1	0.09
173.2	0.09
173.3	0.09
173.4	0.09
173.5	0.09
173.6	0.09
173.7	0.09
173.8	0.09
173.9	0.09
174	0.09
174.1	0.09
174.2	0.09
174.3	0.09
174.4	0.09
174.5	0.09
174.6	0.09
174.7	0.09
174.8	0.0925
174.9	0.0925
175	0.0925
175.1	0.0925
175.2	0.0925
175.3	0.0925
175.4	0.0925
175.5	0.0925
175.6	0.0925
175.7	0.09
175.8	0.09
175.9	0.09
176	0.09
176.1	0.09
176.2	0.09
176.3	0.0925
176.4	0.0925
176.5	0.0925
176.6	0.0925
176.7	0.095
176.8	0.095
176.9	0.095
177	0.095
177.1	0.095
177.2	0.095
177.3	0.095
177.4	0.095
177.5	0.095
177.6	0.095
177.7	0.095
177.8	0.095
177.9	0.095
178	0.095
178.1	0.095
178.2	0.095
178.3	0.095
178.4	0.095
178.5	0.095
178.6	0.095
178.7	0.095
178.8	0.095
178.9	0.095
179	0.095
179.1	0.095
179.2	0.095
179.3	0.095
179.4	0.095
179.5	0.0975
179.6	0.0975
179.7	0.0975
179.8	0.0975
179.9	0.095
180	0.095
180.1	0.095
180.2	0.095
180.3	0.095
180.4	0.095
180.5	0.0925
180.6	0.0925
180.7	0.0925
180.8	0.0925
180.9	0.0925
181	0.0925
181.1	0.0925
181.2	0.0925
181.3	0.0925
181.4	0.0925
181.5	0.0925
181.6	0.0925
181.7	0.0925
181.8	0.0925
181.9	0.0925
182	0.0925
182.1	0.0925
182.2	0.0925
182.3	0.0925
182.4	0.0925
182.5	0.0925
182.6	0.0925
182.7	0.095
182.8	0.095
182.9	0.095
183	0.0975
183.1	0.0975
183.2	0.0975
183.3	0.0975
183.4	0.0975
183.5	0.0975
183.6	0.0975
183.7	0.095
183.8	0.095
183.9	0.0925
184	0.0925
184.1	0.095
184.2	0.095
184.3	0.095
184.4	0.095
184.5	0.095
184.6	0.095
184.7	0.0975
184.8	0.0975
184.9	0.0975
185	0.0975
185.1	0.0975
185.2	0.0975
185.3	0.0975
185.4	0.0975
185.5	0.0975
185.6	0.0975
185.7	0.0975
185.8	0.1
185.9	0.1
186	0.1
186.1	0.1
186.2	0.1
186.3	0.1
186.4	0.1
186.5	0.1
186.6	0.1
186.7	0.0975
186.8	0.0975
186.9	0.0975
187	0.0975
187.1	0.0975
187.2	0.1
187.3	0.1
187.4	0.1
187.5	0.1
187.6	0.1
187.7	0.1
187.8	0.1
187.9	0.1
188	0.1
188.1	0.1
188.2	0.1
188.3	0.1
188.4	0.1
188.5	0.1
188.6	0.1
188.7	0.1
188.8	0.1
188.9	0.1
189	0.1
189.1	0.1
189.2	0.1
189.3	0.1
189.4	0.1
189.5	0.0975
189.6	0.0975
189.7	0.0975
189.8	0.0975
189.9	0.0975
190	0.0975
190.1	0.0975
190.2	0.0975
190.3	0.0975
190.4	0.095
190.5	0.095
190.6	0.095
190.7	0.095
190.8	0.095
190.9	0.095
191	0.095
191.1	0.0975
191.2	0.1
191.3	0.1
191.4	0.1025
191.5	0.1025
191.6	0.1025
191.7	0.1025
191.8	0.1025
191.9	0.1025
192	0.1025
192.1	0.1025
192.2	0.1
192.3	0.1
192.4	0.1025
192.5	0.1025
192.6	0.1025
192.7	0.1025
192.8	0.105
192.9	0.105
193	0.105
193.1	0.105
193.2	0.105
193.3	0.105
193.4	0.105
193.5	0.105
193.6	0.105
193.7	0.105
193.8	0.105
193.9	0.105
194	0.105
194.1	0.1075
194.2	0.1075
194.3	0.105
194.4	0.1075
194.5	0.1075
194.6	0.1075
194.7	0.11
194.8	0.11
194.9	0.11
195	0.11
195.1	0.11
195.2	0.11
195.3	0.11
195.4	0.11
195.5	0.11
195.6	0.11
195.7	0.11
195.8	0.11
195.9	0.11
196	0.11
196.1	0.11
196.2	0.11
196.3	0.115
196.4	0.115
196.5	0.115
196.6	0.115
196.7	0.115
196.8	0.115
196.9	0.115
197	0.115
197.1	0.115
197.2	0.115
197.3	0.115
197.4	0.1175
197.5	0.1175
197.6	0.1175
197.7	0.1175
197.8	0.1175
197.9	0.1175
198	0.1175
198.1	0.1175
198.2	0.1175
198.3	0.1175
198.4	0.1175
198.5	0.1175
198.6	0.1175
198.7	0.1175
198.8	0.1175
198.9	0.1175
199	0.1175
199.1	0.1175
199.2	0.1175
199.3	0.1175
199.4	0.1175
199.5	0.1175
199.6	0.1175
199.7	0.1175
199.8	0.12
199.9	0.1225
200	0.1225
[truncated: 14,000 more rows]
