# Supplementary material for: Bayesian inference of kinetic schemes for ion channels by Kalman filtering
Source: eLife journal article supplement (doi:10.7554/elife.62714), 2022-05-04
Supplement: fig4-data12 [file 1_Sim_N_500_Fluor_MW.xlsx]

## Sheet: Tabelle1
0.1	0
0.2	0
0.3	0
0.4	0
0.5	0
0.6	0
0.7	0
0.8	0
0.9	0
1	0
1.1	0
1.2	0
1.3	0
1.4	0
1.5	0
1.6	0
1.7	0
1.8	0
1.9	0
2	0
2.1	0
2.2	0
2.3	0
2.4	0
2.5	0
2.6	0
2.7	0
2.8	0
2.9	0
3	0
3.1	0
3.2	0
3.3	0
3.4	0
3.5	0
3.6	0
3.7	0
3.8	0
3.9	0
4	0
4.1	0
4.2	0
4.3	0
4.4	0
4.5	0
4.6	0
4.7	0
4.8	0
4.9	0
5	0
5.1	0
5.2	0
5.3	0
5.4	0
5.5	0
5.6	0
5.7	0
5.8	0
5.9	0
6	0
6.1	0
6.2	0
6.3	0
6.4	0
6.5	0
6.6	0
6.7	0
6.8	0
6.9	0
7	0
7.1	0
7.2	0
7.3	0
7.4	0
7.5	0
7.6	0
7.7	0
7.8	0
7.9	0
8	0
8.1	0
8.2	0
8.3	0
8.4	0
8.5	0
8.6	0
8.7	0
8.8	0
8.9	0
9	0
9.1	0
9.2	0
9.3	0
9.4	0
9.5	0
9.6	0
9.7	0
9.8	0
9.9	0
10	0
10.1	0
10.2	0
10.3	0
10.4	0
10.5	0
10.6	0
10.7	0
10.8	0
10.9	0
11	0
11.1	0
11.2	0
11.3	0
11.4	0
11.5	0
11.6	0
11.7	0
11.8	0
11.9	0
12	0
12.1	0
12.2	0
12.3	0
12.4	0
12.5	0
12.6	0
12.7	0
12.8	0
12.9	0
13	0
13.1	0
13.2	0
13.3	0
13.4	0
13.5	0
13.6	0
13.7	0
13.8	0
13.9	0
14	0
14.1	0
14.2	0
14.3	0
14.4	0
14.5	0
14.6	0
14.7	0
14.8	0
14.9	0
15	0
15.1	0
15.2	0
15.3	0
15.4	0
15.5	0
15.6	0
15.7	0
15.8	0
15.9	0
16	0
16.1	0
16.2	0
16.3	0
16.4	0
16.5	0
16.6	0
16.7	0
16.8	0
16.9	0
17	0
17.1	0
17.2	0
17.3	0
17.4	0
17.5	0
17.6	0
17.7	0
17.8	0
17.9	0
18	0
18.1	0
18.2	0
18.3	0
18.4	0
18.5	0
18.6	0
18.7	0
18.8	0
18.9	0
19	0
19.1	0
19.2	0
19.3	0
19.4	0
19.5	0
19.6	0
19.7	0
19.8	0
19.9	0
20	0
20.1	0
20.2	0
20.3	0
20.4	0
20.5	0
20.6	0
20.7	0
20.8	0
20.9	0
21	0
21.1	0
21.2	0
21.3	0
21.4	0
21.5	0
21.6	0
21.7	0
21.8	0
21.9	0
22	0
22.1	0
22.2	0
22.3	0
22.4	0
22.5	0
22.6	0
22.7	0
22.8	0
22.9	0
23	0
23.1	0
23.2	0
23.3	0
23.4	0
23.5	0
23.6	0
23.7	0
23.8	0
23.9	0
24	0
24.1	0
24.2	0
24.3	0
24.4	0
24.5	0
24.6	0
24.7	0
24.8	0
24.9	0
25	0
25.1	0
25.2	0
25.3	0
25.4	0
25.5	0
25.6	0
25.7	0
25.8	0
25.9	0
26	0
26.1	0
26.2	0
26.3	0
26.4	0
26.5	0
26.6	0
26.7	0
26.8	0
26.9	0
27	0
27.1	0
27.2	0
27.3	0
27.4	0
27.5	0
27.6	0
27.7	0
27.8	0
27.9	0
28	0
28.1	0
28.2	0
28.3	0
28.4	0
28.5	0
28.6	0
28.7	0
28.8	0
28.9	0
29	0
29.1	0
29.2	0
29.3	0
29.4	0
29.5	0
29.6	0
29.7	0
29.8	0
29.9	0
30	0
30.1	0
30.2	0
30.3	0
30.4	0
30.5	0
30.6	0
30.7	0
30.8	0
30.9	0
31	0
31.1	0
31.2	0
31.3	0
31.4	0
31.5	0
31.6	0
31.7	0
31.8	0
31.9	0
32	0
32.1	0
32.2	0
32.3	0
32.4	0
32.5	0
32.6	0
32.7	0
32.8	0
32.9	0
33	0
33.1	0
33.2	0
33.3	0
33.4	0
33.5	0
33.6	0
33.7	0
33.8	0
33.9	0
34	0
34.1	0
34.2	0
34.3	0
34.4	0
34.5	0
34.6	0
34.7	0
34.8	0
34.9	0
35	0
35.1	0
35.2	0
35.3	0
35.4	0
35.5	0
35.6	0
35.7	0
35.8	0
35.9	0
36	0
36.1	0
36.2	0
36.3	0
36.4	0
36.5	0
36.6	0
36.7	0
36.8	0
36.9	0
37	0
37.1	0
37.2	0
37.3	0
37.4	0
37.5	0
37.6	0
37.7	0
37.8	0
37.9	0
38	0
38.1	0
38.2	0
38.3	0
38.4	0
38.5	0
38.6	0
38.7	0
38.8	0
38.9	0
39	0
39.1	0
39.2	0
39.3	0
39.4	0
39.5	0
39.6	0
39.7	0
39.8	0
39.9	0
40	0
40.1	0
40.2	0
40.3	0
40.4	0
40.5	0
40.6	0
40.7	0
40.8	0
40.9	0
41	0
41.1	0
41.2	0
41.3	0
41.4	0
41.5	0
41.6	0
41.7	0
41.8	0
41.9	0
42	0
42.1	0
42.2	0
42.3	0
42.4	0
42.5	0
42.6	0
42.7	0
42.8	0
42.9	0
43	0
43.1	0
43.2	0
43.3	0
43.4	0
43.5	0
43.6	0
43.7	0
43.8	0
43.9	0
44	0
44.1	0
44.2	0
44.3	0
44.4	0
44.5	0
44.6	0
44.7	0
44.8	0
44.9	0
45	0
45.1	0
45.2	0
45.3	0
45.4	0
45.5	0
45.6	0
45.7	0
45.8	0
45.9	0
46	0
46.1	0
46.2	0
46.3	0
46.4	0
46.5	0
46.6	0
46.7	0
46.8	0
46.9	0
47	0
47.1	0
47.2	0
47.3	0
47.4	0
47.5	0
47.6	0
47.7	0
47.8	0
47.9	0
48	0
48.1	0
48.2	0
48.3	0
48.4	0
48.5	0
48.6	0
48.7	0
48.8	0
48.9	0
49	0
49.1	0
49.2	0
49.3	0
49.4	0
49.5	0
49.6	0
49.7	0
49.8	0
49.9	0
50	0
50.1	0
50.2	0
50.3	0
50.4	0
50.5	0
50.6	0
50.7	0
50.8	0
50.9	0
51	0
51.1	0
51.2	0
51.3	0
51.4	0
51.5	0
51.6	0
51.7	0
51.8	0
51.9	0
52	0
52.1	0
52.2	0
52.3	0
52.4	0
52.5	0
52.6	0
52.7	0
52.8	0
52.9	0
53	0
53.1	0
53.2	0
53.3	0
53.4	0
53.5	0
53.6	0
53.7	0
53.8	0
53.9	0
54	0
54.1	0
54.2	0
54.3	0
54.4	0
54.5	0
54.6	0
54.7	0
54.8	0
54.9	0
55	0
55.1	0
55.2	0
55.3	0
55.4	0
55.5	0
55.6	0
55.7	0
55.8	0
55.9	0
56	0
56.1	0
56.2	0
56.3	0
56.4	0
56.5	0
56.6	0
56.7	0
56.8	0
56.9	0
57	0
57.1	0
57.2	0
57.3	0
57.4	0
57.5	0
57.6	0
57.7	0
57.8	0
57.9	0
58	0
58.1	0
58.2	0
58.3	0
58.4	0
58.5	0
58.6	0
58.7	0
58.8	0
58.9	0
59	0
59.1	0
59.2	0
59.3	0
59.4	0
59.5	0
59.6	0
59.7	0
59.8	0
59.9	0
60	0
60.1	0
60.2	0
60.3	0
60.4	0
60.5	0
60.6	0
60.7	0
60.8	0
60.9	0
61	0
61.1	0
61.2	0
61.3	0
61.4	0
61.5	0
61.6	0
61.7	0
61.8	0
61.9	0
62	0
62.1	0
62.2	0
62.3	0
62.4	0
62.5	0
62.6	0
62.7	0
62.8	0
62.9	0
63	0
63.1	0
63.2	0
63.3	0
63.4	0
63.5	0
63.6	0
63.7	0
63.8	0
63.9	0
64	0
64.1	0
64.2	0
64.3	0
64.4	0
64.5	0
64.6	0
64.7	0
64.8	0
64.9	0
65	0
65.1	0
65.2	0
65.3	0
65.4	0
65.5	0
65.6	0
65.7	0
65.8	0
65.9	0
66	0
66.1	0
66.2	0
66.3	0
66.4	0
66.5	0
66.6	0
66.7	0
66.8	0
66.9	0
67	0
67.1	0
67.2	0
67.3	0
67.4	0
67.5	0
67.6	0
67.7	0
67.8	0
67.9	0
68	0
68.1	0
68.2	0
68.3	0
68.4	0
68.5	0
68.6	0
68.7	0
68.8	0
68.9	0
69	0
69.1	0
69.2	0
69.3	0
69.4	0
69.5	0
69.6	0
69.7	0
69.8	0
69.9	0
70	0
70.1	0
70.2	0
70.3	0
70.4	0
70.5	0
70.6	0
70.7	0
70.8	0
70.9	0
71	0
71.1	0
71.2	0
71.3	0
71.4	0
71.5	0
71.6	0
71.7	0
71.8	0
71.9	0
72	0
72.1	0
72.2	0
72.3	0
72.4	0
72.5	0
72.6	0
72.7	0
72.8	0
72.9	0
73	0
73.1	0
73.2	0
73.3	0
73.4	0
73.5	0
73.6	0
73.7	0
73.8	0
73.9	0
74	0
74.1	0
74.2	0
74.3	0
74.4	0
74.5	0
74.6	0
74.7	0
74.8	0
74.9	0
75	0
75.1	0
75.2	0
75.3	0
75.4	0
75.5	0
75.6	0
75.7	0
75.8	0
75.9	0
76	0
76.1	0
76.2	0
76.3	0
76.4	0
76.5	0
76.6	0
76.7	0
76.8	0
76.9	0
77	0
77.1	0
77.2	0
77.3	0
77.4	0
77.5	0
77.6	0
77.7	0
77.8	0
77.9	0
78	0
78.1	0
78.2	0
78.3	0
78.4	0
78.5	0
78.6	0
78.7	0
78.8	0
78.9	0
79	0
79.1	0
79.2	0
79.3	0
79.4	0
79.5	0
79.6	0
79.7	0
79.8	0
79.9	0
80	0
80.1	0
80.2	0
80.3	0
80.4	0
80.5	0
80.6	0
80.7	0
80.8	0
80.9	0
81	0
81.1	0
81.2	0
81.3	0
81.4	0
81.5	0
81.6	0
81.7	0
81.8	0
81.9	0
82	0
82.1	0
82.2	0
82.3	0
82.4	0
82.5	0
82.6	0
82.7	0
82.8	0
82.9	0
83	0
83.1	0
83.2	0
83.3	0
83.4	0
83.5	0
83.6	0
83.7	0
83.8	0
83.9	0
84	0
84.1	0
84.2	0
84.3	0
84.4	0
84.5	0
84.6	0
84.7	0
84.8	0
84.9	0
85	0
85.1	0
85.2	0
85.3	0
85.4	0
85.5	0
85.6	0
85.7	0
85.8	0
85.9	0
86	0
86.1	0
86.2	0
86.3	0
86.4	0
86.5	0
86.6	0
86.7	0
86.8	0
86.9	0
87	0
87.1	0
87.2	0
87.3	0
87.4	0
87.5	0
87.6	0
87.7	0
87.8	0
87.9	0
88	0
88.1	0
88.2	0
88.3	0
88.4	0
88.5	0
88.6	0
88.7	0
88.8	0
88.9	0
89	0
89.1	0
89.2	0
89.3	0
89.4	0
89.5	0
89.6	0
89.7	0
89.8	0
89.9	0
90	0
90.1	0
90.2	0
90.3	0
90.4	0
90.5	0
90.6	0
90.7	0
90.8	0
90.9	0
91	0
91.1	0
91.2	0
91.3	0
91.4	0
91.5	0
91.6	0
91.7	0
91.8	0
91.9	0
92	0
92.1	0
92.2	0
92.3	0
92.4	0
92.5	0
92.6	0
92.7	0
92.8	0
92.9	0
93	0
93.1	0
93.2	0
93.3	0
93.4	0
93.5	0
93.6	0
93.7	0
93.8	0
93.9	0
94	0
94.1	0
94.2	0
94.3	0
94.4	0
94.5	0
94.6	0
94.7	0
94.8	0
94.9	0
95	0
95.1	0
95.2	0
95.3	0
95.4	0
95.5	0
95.6	0
95.7	0
95.8	0
95.9	0
96	0
96.1	0
96.2	0
96.3	0
96.4	0
96.5	0
96.6	0
96.7	0
96.8	0
96.9	0
97	0
97.1	0
97.2	0
97.3	0
97.4	0
97.5	0
97.6	0
97.7	0
97.8	0
97.9	0
98	0
98.1	0
98.2	0
98.3	0
98.4	0
98.5	0
98.6	0
98.7	0
98.8	0
98.9	0
99	0
99.1	0
99.2	0
99.3	0
99.4	0
99.5	0
99.6	0
99.7	0
99.8	0
99.9	0
100	0
100.1	0.015
100.2	0.021
100.3	0.029
100.4	0.037
100.5	0.04
100.6	0.042
100.7	0.051
100.8	0.056
100.9	0.063
101	0.071
101.1	0.082
101.2	0.091
101.3	0.093
101.4	0.095
101.5	0.097
101.6	0.103
101.7	0.106
101.8	0.112
101.9	0.118
102	0.125
102.1	0.13
102.2	0.134
102.3	0.139
102.4	0.143
102.5	0.15
102.6	0.157
102.7	0.158
102.8	0.162
102.9	0.165
103	0.171
103.1	0.179
103.2	0.183
103.3	0.184
103.4	0.185
103.5	0.188
103.6	0.194
103.7	0.198
103.8	0.196
103.9	0.201
104	0.212
104.1	0.215
104.2	0.219
104.3	0.22
104.4	0.222
104.5	0.228
104.6	0.236
104.7	0.239
104.8	0.24
104.9	0.243
105	0.244
105.1	0.245
105.2	0.246
105.3	0.247
105.4	0.248
105.5	0.251
105.6	0.254
105.7	0.25
105.8	0.253
105.9	0.253
106	0.256
106.1	0.26
106.2	0.267
106.3	0.273
106.4	0.271
106.5	0.271
106.6	0.278
106.7	0.28
106.8	0.28
106.9	0.28
107	0.282
107.1	0.277
107.2	0.285
107.3	0.289
107.4	0.293
107.5	0.293
107.6	0.289
107.7	0.293
107.8	0.292
107.9	0.291
108	0.293
108.1	0.294
108.2	0.296
108.3	0.296
108.4	0.3
108.5	0.298
108.6	0.296
108.7	0.296
108.8	0.298
108.9	0.303
109	0.303
109.1	0.306
109.2	0.305
109.3	0.309
109.4	0.31
109.5	0.307
109.6	0.308
109.7	0.315
109.8	0.316
109.9	0.319
110	0.321
110.1	0.319
110.2	0.323
110.3	0.324
110.4	0.327
110.5	0.328
110.6	0.326
110.7	0.327
110.8	0.331
110.9	0.329
111	0.328
111.1	0.325
111.2	0.32
111.3	0.319
111.4	0.32
111.5	0.322
111.6	0.327
111.7	0.328
111.8	0.328
111.9	0.326
112	0.329
112.1	0.325
112.2	0.322
112.3	0.323
112.4	0.32
112.5	0.324
112.6	0.324
112.7	0.321
112.8	0.322
112.9	0.324
113	0.327
113.1	0.335
113.2	0.337
113.3	0.338
113.4	0.337
113.5	0.345
113.6	0.346
113.7	0.344
113.8	0.344
113.9	0.346
114	0.346
114.1	0.347
114.2	0.348
114.3	0.345
114.4	0.348
114.5	0.355
114.6	0.354
114.7	0.353
114.8	0.35
114.9	0.352
115	0.353
115.1	0.353
115.2	0.353
115.3	0.347
115.4	0.347
115.5	0.349
115.6	0.347
115.7	0.345
115.8	0.347
115.9	0.352
116	0.353
116.1	0.355
116.2	0.351
116.3	0.347
116.4	0.348
116.5	0.353
116.6	0.354
116.7	0.358
116.8	0.358
116.9	0.358
117	0.356
117.1	0.358
117.2	0.366
117.3	0.363
117.4	0.359
117.5	0.354
117.6	0.354
117.7	0.351
117.8	0.347
117.9	0.345
118	0.344
118.1	0.35
118.2	0.348
118.3	0.351
118.4	0.35
118.5	0.352
118.6	0.351
118.7	0.35
118.8	0.35
118.9	0.348
119	0.35
119.1	0.352
119.2	0.352
119.3	0.355
119.4	0.358
119.5	0.361
119.6	0.36
119.7	0.358
119.8	0.353
119.9	0.354
120	0.356
120.1	0.357
120.2	0.353
120.3	0.353
120.4	0.349
120.5	0.349
120.6	0.35
120.7	0.353
120.8	0.349
120.9	0.348
121	0.351
121.1	0.348
121.2	0.348
121.3	0.352
121.4	0.356
121.5	0.357
121.6	0.359
121.7	0.358
121.8	0.361
121.9	0.359
122	0.358
122.1	0.36
122.2	0.361
122.3	0.36
122.4	0.361
122.5	0.361
122.6	0.357
122.7	0.353
122.8	0.355
122.9	0.35
123	0.351
123.1	0.354
123.2	0.355
123.3	0.352
123.4	0.351
123.5	0.352
123.6	0.35
123.7	0.355
123.8	0.355
123.9	0.35
124	0.353
124.1	0.352
124.2	0.354
124.3	0.353
124.4	0.352
124.5	0.348
124.6	0.352
124.7	0.355
124.8	0.354
124.9	0.36
125	0.361
125.1	0.361
125.2	0.364
125.3	0.364
125.4	0.358
125.5	0.357
125.6	0.36
125.7	0.357
125.8	0.354
125.9	0.355
126	0.353
126.1	0.357
126.2	0.36
126.3	0.358
126.4	0.36
126.5	0.363
126.6	0.364
126.7	0.368
126.8	0.37
126.9	0.371
127	0.372
127.1	0.376
127.2	0.374
127.3	0.375
127.4	0.371
127.5	0.37
127.6	0.371
127.7	0.371
127.8	0.373
127.9	0.372
128	0.371
128.1	0.372
128.2	0.375
128.3	0.375
128.4	0.378
128.5	0.376
128.6	0.373
128.7	0.372
128.8	0.375
128.9	0.369
129	0.366
129.1	0.368
129.2	0.367
129.3	0.367
129.4	0.363
129.5	0.366
129.6	0.371
129.7	0.372
129.8	0.368
129.9	0.367
130	0.367
130.1	0.369
130.2	0.374
130.3	0.375
130.4	0.377
130.5	0.379
130.6	0.381
130.7	0.381
130.8	0.384
130.9	0.383
131	0.384
131.1	0.387
131.2	0.389
131.3	0.388
131.4	0.385
131.5	0.383
131.6	0.389
131.7	0.384
131.8	0.385
131.9	0.384
132	0.382
132.1	0.377
132.2	0.374
132.3	0.372
132.4	0.37
132.5	0.367
132.6	0.365
132.7	0.365
132.8	0.365
132.9	0.369
133	0.37
133.1	0.372
133.2	0.376
133.3	0.372
133.4	0.373
133.5	0.376
133.6	0.382
133.7	0.379
133.8	0.379
133.9	0.38
134	0.381
134.1	0.389
134.2	0.387
134.3	0.386
134.4	0.387
134.5	0.387
134.6	0.386
134.7	0.384
134.8	0.387
134.9	0.39
135	0.388
135.1	0.384
135.2	0.387
135.3	0.389
135.4	0.39
135.5	0.391
135.6	0.394
135.7	0.397
135.8	0.395
135.9	0.396
136	0.396
136.1	0.392
136.2	0.396
136.3	0.394
136.4	0.397
136.5	0.395
136.6	0.392
136.7	0.39
136.8	0.391
136.9	0.389
137	0.387
137.1	0.387
137.2	0.383
137.3	0.379
137.4	0.377
137.5	0.371
137.6	0.366
137.7	0.363
137.8	0.363
137.9	0.364
138	0.364
138.1	0.369
138.2	0.368
138.3	0.376
138.4	0.374
138.5	0.374
138.6	0.376
138.7	0.374
138.8	0.376
138.9	0.374
139	0.374
139.1	0.375
139.2	0.371
139.3	0.367
139.4	0.36
139.5	0.357
139.6	0.356
139.7	0.356
139.8	0.357
139.9	0.358
140	0.356
140.1	0.357
140.2	0.358
140.3	0.36
140.4	0.363
140.5	0.363
140.6	0.364
140.7	0.364
140.8	0.362
140.9	0.362
141	0.362
141.1	0.358
141.2	0.356
141.3	0.355
141.4	0.355
141.5	0.356
141.6	0.356
141.7	0.359
141.8	0.356
141.9	0.363
142	0.36
142.1	0.357
142.2	0.355
142.3	0.352
142.4	0.355
142.5	0.356
142.6	0.359
142.7	0.362
142.8	0.359
142.9	0.358
143	0.358
143.1	0.358
143.2	0.356
143.3	0.352
143.4	0.351
143.5	0.348
143.6	0.347
143.7	0.351
143.8	0.351
143.9	0.352
144	0.353
144.1	0.35
144.2	0.35
144.3	0.353
144.4	0.349
144.5	0.343
144.6	0.351
144.7	0.353
144.8	0.351
144.9	0.355
145	0.352
145.1	0.353
145.2	0.353
145.3	0.353
145.4	0.349
145.5	0.348
145.6	0.346
145.7	0.35
145.8	0.357
145.9	0.357
146	0.357
146.1	0.358
146.2	0.36
146.3	0.356
146.4	0.354
146.5	0.353
146.6	0.359
146.7	0.359
146.8	0.359
146.9	0.36
147	0.358
147.1	0.359
147.2	0.358
147.3	0.361
147.4	0.361
147.5	0.36
147.6	0.36
147.7	0.362
147.8	0.366
147.9	0.365
148	0.363
148.1	0.365
148.2	0.368
148.3	0.371
148.4	0.372
148.5	0.371
148.6	0.372
148.7	0.373
148.8	0.372
148.9	0.374
149	0.375
149.1	0.38
149.2	0.386
149.3	0.385
149.4	0.384
149.5	0.387
149.6	0.389
149.7	0.386
149.8	0.385
149.9	0.382
150	0.383
150.1	0.379
150.2	0.379
150.3	0.377
150.4	0.376
150.5	0.375
150.6	0.376
150.7	0.38
150.8	0.378
150.9	0.375
151	0.374
151.1	0.376
151.2	0.375
151.3	0.372
151.4	0.373
151.5	0.376
151.6	0.372
151.7	0.371
151.8	0.368
151.9	0.371
152	0.372
152.1	0.376
152.2	0.378
152.3	0.379
152.4	0.382
152.5	0.379
152.6	0.38
152.7	0.384
152.8	0.386
152.9	0.386
153	0.387
153.1	0.389
153.2	0.389
153.3	0.389
153.4	0.393
153.5	0.395
153.6	0.392
153.7	0.392
153.8	0.387
153.9	0.39
154	0.39
154.1	0.39
154.2	0.392
154.3	0.388
154.4	0.393
154.5	0.395
154.6	0.395
154.7	0.394
154.8	0.394
154.9	0.39
155	0.391
155.1	0.392
155.2	0.39
155.3	0.385
155.4	0.384
155.5	0.385
155.6	0.386
155.7	0.389
155.8	0.394
155.9	0.393
156	0.394
156.1	0.396
156.2	0.402
156.3	0.397
156.4	0.393
156.5	0.393
156.6	0.395
156.7	0.393
156.8	0.39
156.9	0.39
157	0.394
157.1	0.395
157.2	0.394
157.3	0.39
157.4	0.388
157.5	0.383
157.6	0.38
157.7	0.381
157.8	0.381
157.9	0.381
158	0.38
158.1	0.382
158.2	0.38
158.3	0.379
158.4	0.379
158.5	0.38
158.6	0.38
158.7	0.375
158.8	0.375
158.9	0.376
159	0.372
159.1	0.377
159.2	0.377
159.3	0.377
159.4	0.38
159.5	0.382
159.6	0.38
159.7	0.381
159.8	0.38
159.9	0.387
160	0.387
160.1	0.389
160.2	0.391
160.3	0.386
160.4	0.388
160.5	0.39
160.6	0.39
160.7	0.392
160.8	0.392
160.9	0.391
161	0.389
161.1	0.39
161.2	0.388
161.3	0.392
161.4	0.388
161.5	0.39
161.6	0.391
161.7	0.39
161.8	0.389
161.9	0.387
162	0.387
162.1	0.388
162.2	0.381
162.3	0.383
162.4	0.385
162.5	0.387
162.6	0.382
162.7	0.385
162.8	0.382
162.9	0.385
163	0.389
163.1	0.391
163.2	0.394
163.3	0.392
163.4	0.394
163.5	0.396
163.6	0.39
163.7	0.388
163.8	0.387
163.9	0.387
164	0.391
164.1	0.393
164.2	0.397
164.3	0.397
164.4	0.395
164.5	0.392
164.6	0.391
164.7	0.388
164.8	0.384
164.9	0.38
165	0.381
165.1	0.382
165.2	0.379
165.3	0.38
165.4	0.387
165.5	0.39
165.6	0.388
165.7	0.387
165.8	0.386
165.9	0.385
166	0.385
166.1	0.387
166.2	0.391
166.3	0.394
166.4	0.39
166.5	0.394
166.6	0.393
166.7	0.392
166.8	0.391
166.9	0.391
167	0.389
167.1	0.39
167.2	0.388
167.3	0.39
167.4	0.395
167.5	0.396
167.6	0.398
167.7	0.405
167.8	0.405
167.9	0.405
168	0.401
168.1	0.398
168.2	0.399
168.3	0.397
168.4	0.396
168.5	0.396
168.6	0.396
168.7	0.399
168.8	0.4
168.9	0.401
169	0.405
169.1	0.402
169.2	0.401
169.3	0.405
169.4	0.402
169.5	0.4
169.6	0.398
169.7	0.397
169.8	0.397
169.9	0.392
170	0.393
170.1	0.391
170.2	0.394
170.3	0.395
170.4	0.398
170.5	0.395
170.6	0.398
170.7	0.395
170.8	0.396
170.9	0.397
171	0.402
171.1	0.4
171.2	0.4
171.3	0.396
171.4	0.397
171.5	0.397
171.6	0.396
171.7	0.394
171.8	0.396
171.9	0.398
172	0.398
172.1	0.398
172.2	0.399
172.3	0.397
172.4	0.393
172.5	0.392
172.6	0.396
172.7	0.397
172.8	0.397
172.9	0.396
173	0.397
173.1	0.393
173.2	0.392
173.3	0.395
173.4	0.39
173.5	0.394
173.6	0.389
173.7	0.388
173.8	0.388
173.9	0.388
174	0.39
174.1	0.391
174.2	0.387
174.3	0.388
174.4	0.39
174.5	0.39
174.6	0.389
174.7	0.389
174.8	0.395
174.9	0.392
175	0.393
175.1	0.39
175.2	0.391
175.3	0.39
175.4	0.392
175.5	0.392
175.6	0.391
175.7	0.392
175.8	0.39
175.9	0.392
176	0.391
176.1	0.395
176.2	0.397
176.3	0.396
176.4	0.395
176.5	0.396
176.6	0.397
176.7	0.394
176.8	0.392
176.9	0.386
177	0.384
177.1	0.386
177.2	0.386
177.3	0.381
177.4	0.382
177.5	0.384
177.6	0.387
177.7	0.389
177.8	0.392
177.9	0.391
178	0.39
178.1	0.388
178.2	0.385
178.3	0.385
178.4	0.384
178.5	0.382
178.6	0.382
178.7	0.381
178.8	0.379
178.9	0.385
179	0.386
179.1	0.385
179.2	0.383
179.3	0.378
179.4	0.383
179.5	0.383
179.6	0.385
179.7	0.384
179.8	0.381
179.9	0.384
180	0.384
180.1	0.381
180.2	0.384
180.3	0.384
180.4	0.385
180.5	0.386
180.6	0.385
180.7	0.384
180.8	0.385
180.9	0.382
181	0.382
181.1	0.387
181.2	0.385
181.3	0.389
181.4	0.391
181.5	0.393
181.6	0.393
181.7	0.387
181.8	0.389
181.9	0.389
182	0.39
182.1	0.39
182.2	0.392
182.3	0.39
182.4	0.387
182.5	0.385
182.6	0.387
182.7	0.387
182.8	0.39
182.9	0.385
183	0.388
183.1	0.388
183.2	0.387
183.3	0.386
183.4	0.39
183.5	0.394
183.6	0.395
183.7	0.4
183.8	0.403
183.9	0.403
184	0.405
184.1	0.408
184.2	0.41
184.3	0.409
184.4	0.41
184.5	0.406
184.6	0.405
184.7	0.406
184.8	0.408
184.9	0.411
185	0.412
185.1	0.413
185.2	0.416
185.3	0.418
185.4	0.416
185.5	0.417
185.6	0.416
185.7	0.418
185.8	0.416
185.9	0.416
186	0.422
186.1	0.422
186.2	0.422
186.3	0.419
186.4	0.414
186.5	0.41
186.6	0.408
186.7	0.405
186.8	0.407
186.9	0.411
187	0.411
187.1	0.41
187.2	0.411
187.3	0.414
187.4	0.413
187.5	0.411
187.6	0.41
187.7	0.41
187.8	0.408
187.9	0.404
188	0.403
188.1	0.4
188.2	0.398
188.3	0.395
188.4	0.397
188.5	0.397
188.6	0.399
188.7	0.401
188.8	0.402
188.9	0.408
189	0.404
189.1	0.402
189.2	0.405
189.3	0.405
189.4	0.402
189.5	0.402
189.6	0.401
189.7	0.4
189.8	0.396
189.9	0.393
190	0.395
190.1	0.394
190.2	0.39
190.3	0.389
190.4	0.387
190.5	0.382
190.6	0.381
190.7	0.386
190.8	0.39
190.9	0.387
191	0.382
191.1	0.388
191.2	0.39
191.3	0.39
191.4	0.39
191.5	0.389
191.6	0.389
191.7	0.387
191.8	0.387
191.9	0.388
192	0.388
192.1	0.385
192.2	0.387
192.3	0.391
192.4	0.394
192.5	0.402
192.6	0.4
192.7	0.404
192.8	0.409
192.9	0.405
193	0.409
193.1	0.414
193.2	0.412
193.3	0.412
193.4	0.414
193.5	0.41
193.6	0.408
193.7	0.405
193.8	0.404
193.9	0.405
194	0.406
194.1	0.407
194.2	0.405
194.3	0.407
194.4	0.405
194.5	0.404
194.6	0.403
194.7	0.404
194.8	0.404
194.9	0.4
195	0.399
195.1	0.399
195.2	0.401
195.3	0.4
195.4	0.404
195.5	0.402
195.6	0.409
195.7	0.414
195.8	0.414
195.9	0.416
196	0.418
196.1	0.417
196.2	0.416
196.3	0.417
196.4	0.415
196.5	0.418
196.6	0.42
196.7	0.424
196.8	0.429
196.9	0.428
197	0.427
197.1	0.427
197.2	0.424
197.3	0.419
197.4	0.419
197.5	0.42
197.6	0.422
197.7	0.423
197.8	0.424
197.9	0.424
198	0.426
198.1	0.421
198.2	0.416
198.3	0.418
198.4	0.421
198.5	0.422
198.6	0.424
198.7	0.423
198.8	0.425
198.9	0.426
199	0.426
199.1	0.427
199.2	0.43
199.3	0.429
199.4	0.428
199.5	0.429
199.6	0.43
199.7	0.426
199.8	0.423
199.9	0.426
200	0.423
[truncated: 14,000 more rows]
