# Supplementary material for: Bayesian inference of kinetic schemes for ion channels by Kalman filtering
Source: eLife journal article supplement (doi:10.7554/elife.62714), 2022-05-04
Supplement: fig4-data12 [file 1_Sim_N_500_Strom_MW.xlsx]

## Sheet: Tabelle1
0.1	0
0.2	0
0.3	0
0.4	0
0.5	0
0.6	0
0.7	0
0.8	0
0.9	0
1	0
1.1	0
1.2	0
1.3	0
1.4	0
1.5	0
1.6	0
1.7	0
1.8	0
1.9	0
2	0
2.1	0
2.2	0
2.3	0
2.4	0
2.5	0
2.6	0
2.7	0
2.8	0
2.9	0
3	0
3.1	0
3.2	0
3.3	0
3.4	0
3.5	0
3.6	0
3.7	0
3.8	0
3.9	0
4	0
4.1	0
4.2	0
4.3	0
4.4	0
4.5	0
4.6	0
4.7	0
4.8	0
4.9	0
5	0
5.1	0
5.2	0
5.3	0
5.4	0
5.5	0
5.6	0
5.7	0
5.8	0
5.9	0
6	0
6.1	0
6.2	0
6.3	0
6.4	0
6.5	0
6.6	0
6.7	0
6.8	0
6.9	0
7	0
7.1	0
7.2	0
7.3	0
7.4	0
7.5	0
7.6	0
7.7	0
7.8	0
7.9	0
8	0
8.1	0
8.2	0
8.3	0
8.4	0
8.5	0
8.6	0
8.7	0
8.8	0
8.9	0
9	0
9.1	0
9.2	0
9.3	0
9.4	0
9.5	0
9.6	0
9.7	0
9.8	0
9.9	0
10	0
10.1	0
10.2	0
10.3	0
10.4	0
10.5	0
10.6	0
10.7	0
10.8	0
10.9	0
11	0
11.1	0
11.2	0
11.3	0
11.4	0
11.5	0
11.6	0
11.7	0
11.8	0
11.9	0
12	0
12.1	0
12.2	0
12.3	0
12.4	0
12.5	0
12.6	0
12.7	0
12.8	0
12.9	0
13	0
13.1	0
13.2	0
13.3	0
13.4	0
13.5	0
13.6	0
13.7	0
13.8	0
13.9	0
14	0
14.1	0
14.2	0
14.3	0
14.4	0
14.5	0
14.6	0
14.7	0
14.8	0
14.9	0
15	0
15.1	0
15.2	0
15.3	0
15.4	0
15.5	0
15.6	0
15.7	0
15.8	0
15.9	0
16	0
16.1	0
16.2	0
16.3	0
16.4	0
16.5	0
16.6	0
16.7	0
16.8	0
16.9	0
17	0
17.1	0
17.2	0
17.3	0
17.4	0
17.5	0
17.6	0
17.7	0
17.8	0
17.9	0
18	0
18.1	0
18.2	0
18.3	0
18.4	0
18.5	0
18.6	0
18.7	0
18.8	0
18.9	0
19	0
19.1	0
19.2	0
19.3	0
19.4	0
19.5	0
19.6	0
19.7	0
19.8	0
19.9	0
20	0
20.1	0
20.2	0
20.3	0
20.4	0
20.5	0
20.6	0
20.7	0
20.8	0
20.9	0
21	0
21.1	0
21.2	0
21.3	0
21.4	0
21.5	0
21.6	0
21.7	0
21.8	0
21.9	0
22	0
22.1	0
22.2	0
22.3	0
22.4	0
22.5	0
22.6	0
22.7	0
22.8	0
22.9	0
23	0
23.1	0
23.2	0
23.3	0
23.4	0
23.5	0
23.6	0
23.7	0
23.8	0
23.9	0
24	0
24.1	0
24.2	0
24.3	0
24.4	0
24.5	0
24.6	0
24.7	0
24.8	0
24.9	0
25	0
25.1	0
25.2	0
25.3	0
25.4	0
25.5	0
25.6	0
25.7	0
25.8	0
25.9	0
26	0
26.1	0
26.2	0
26.3	0
26.4	0
26.5	0
26.6	0
26.7	0
26.8	0
26.9	0
27	0
27.1	0
27.2	0
27.3	0
27.4	0
27.5	0
27.6	0
27.7	0
27.8	0
27.9	0
28	0
28.1	0
28.2	0
28.3	0
28.4	0
28.5	0
28.6	0
28.7	0
28.8	0
28.9	0
29	0
29.1	0
29.2	0
29.3	0
29.4	0
29.5	0
29.6	0
29.7	0
29.8	0
29.9	0
30	0
30.1	0
30.2	0
30.3	0
30.4	0
30.5	0
30.6	0
30.7	0
30.8	0
30.9	0
31	0
31.1	0
31.2	0
31.3	0
31.4	0
31.5	0
31.6	0
31.7	0
31.8	0
31.9	0
32	0
32.1	0
32.2	0
32.3	0
32.4	0
32.5	0
32.6	0
32.7	0
32.8	0
32.9	0
33	0
33.1	0
33.2	0
33.3	0
33.4	0
33.5	0
33.6	0
33.7	0
33.8	0
33.9	0
34	0
34.1	0
34.2	0
34.3	0
34.4	0
34.5	0
34.6	0
34.7	0
34.8	0
34.9	0
35	0
35.1	0
35.2	0
35.3	0
35.4	0
35.5	0
35.6	0
35.7	0
35.8	0
35.9	0
36	0
36.1	0
36.2	0
36.3	0
36.4	0
36.5	0
36.6	0
36.7	0
36.8	0
36.9	0
37	0
37.1	0
37.2	0
37.3	0
37.4	0
37.5	0
37.6	0
37.7	0
37.8	0
37.9	0
38	0
38.1	0
38.2	0
38.3	0
38.4	0
38.5	0
38.6	0
38.7	0
38.8	0
38.9	0
39	0
39.1	0
39.2	0
39.3	0
39.4	0
39.5	0
39.6	0
39.7	0
39.8	0
39.9	0
40	0
40.1	0
40.2	0
40.3	0
40.4	0
40.5	0
40.6	0
40.7	0
40.8	0
40.9	0
41	0
41.1	0
41.2	0
41.3	0
41.4	0
41.5	0
41.6	0
41.7	0
41.8	0
41.9	0
42	0
42.1	0
42.2	0
42.3	0
42.4	0
42.5	0
42.6	0
42.7	0
42.8	0
42.9	0
43	0
43.1	0
43.2	0
43.3	0
43.4	0
43.5	0
43.6	0
43.7	0
43.8	0
43.9	0
44	0
44.1	0
44.2	0
44.3	0
44.4	0
44.5	0
44.6	0
44.7	0
44.8	0
44.9	0
45	0
45.1	0
45.2	0
45.3	0
45.4	0
45.5	0
45.6	0
45.7	0
45.8	0
45.9	0
46	0
46.1	0
46.2	0
46.3	0
46.4	0
46.5	0
46.6	0
46.7	0
46.8	0
46.9	0
47	0
47.1	0
47.2	0
47.3	0
47.4	0
47.5	0
47.6	0
47.7	0
47.8	0
47.9	0
48	0
48.1	0
48.2	0
48.3	0
48.4	0
48.5	0
48.6	0
48.7	0
48.8	0
48.9	0
49	0
49.1	0
49.2	0
49.3	0
49.4	0
49.5	0
49.6	0
49.7	0
49.8	0
49.9	0
50	0
50.1	0
50.2	0
50.3	0
50.4	0
50.5	0
50.6	0
50.7	0
50.8	0
50.9	0
51	0
51.1	0
51.2	0
51.3	0
51.4	0
51.5	0
51.6	0
51.7	0
51.8	0
51.9	0
52	0
52.1	0
52.2	0
52.3	0
52.4	0
52.5	0
52.6	0
52.7	0
52.8	0
52.9	0
53	0
53.1	0
53.2	0
53.3	0
53.4	0
53.5	0
53.6	0
53.7	0
53.8	0
53.9	0
54	0
54.1	0
54.2	0
54.3	0
54.4	0
54.5	0
54.6	0
54.7	0
54.8	0
54.9	0
55	0
55.1	0
55.2	0
55.3	0
55.4	0
55.5	0
55.6	0
55.7	0
55.8	0
55.9	0
56	0
56.1	0
56.2	0
56.3	0
56.4	0
56.5	0
56.6	0
56.7	0
56.8	0
56.9	0
57	0
57.1	0
57.2	0
57.3	0
57.4	0
57.5	0
57.6	0
57.7	0
57.8	0
57.9	0
58	0
58.1	0
58.2	0
58.3	0
58.4	0
58.5	0
58.6	0
58.7	0
58.8	0
58.9	0
59	0
59.1	0
59.2	0
59.3	0
59.4	0
59.5	0
59.6	0
59.7	0
59.8	0
59.9	0
60	0
60.1	0
60.2	0
60.3	0
60.4	0
60.5	0
60.6	0
60.7	0
60.8	0
60.9	0
61	0
61.1	0
61.2	0
61.3	0
61.4	0
61.5	0
61.6	0
61.7	0
61.8	0
61.9	0
62	0
62.1	0
62.2	0
62.3	0
62.4	0
62.5	0
62.6	0
62.7	0
62.8	0
62.9	0
63	0
63.1	0
63.2	0
63.3	0
63.4	0
63.5	0
63.6	0
63.7	0
63.8	0
63.9	0
64	0
64.1	0
64.2	0
64.3	0
64.4	0
64.5	0
64.6	0
64.7	0
64.8	0
64.9	0
65	0
65.1	0
65.2	0
65.3	0
65.4	0
65.5	0
65.6	0
65.7	0
65.8	0
65.9	0
66	0
66.1	0
66.2	0
66.3	0
66.4	0
66.5	0
66.6	0
66.7	0
66.8	0
66.9	0
67	0
67.1	0
67.2	0
67.3	0
67.4	0
67.5	0
67.6	0
67.7	0
67.8	0
67.9	0
68	0
68.1	0
68.2	0
68.3	0
68.4	0
68.5	0
68.6	0
68.7	0
68.8	0
68.9	0
69	0
69.1	0
69.2	0
69.3	0
69.4	0
69.5	0
69.6	0
69.7	0
69.8	0
69.9	0
70	0
70.1	0
70.2	0
70.3	0
70.4	0
70.5	0
70.6	0
70.7	0
70.8	0
70.9	0
71	0
71.1	0
71.2	0
71.3	0
71.4	0
71.5	0
71.6	0
71.7	0
71.8	0
71.9	0
72	0
72.1	0
72.2	0
72.3	0
72.4	0
72.5	0
72.6	0
72.7	0
72.8	0
72.9	0
73	0
73.1	0
73.2	0
73.3	0
73.4	0
73.5	0
73.6	0
73.7	0
73.8	0
73.9	0
74	0
74.1	0
74.2	0
74.3	0
74.4	0
74.5	0
74.6	0
74.7	0
74.8	0
74.9	0
75	0
75.1	0
75.2	0
75.3	0
75.4	0
75.5	0
75.6	0
75.7	0
75.8	0
75.9	0
76	0
76.1	0
76.2	0
76.3	0
76.4	0
76.5	0
76.6	0
76.7	0
76.8	0
76.9	0
77	0
77.1	0
77.2	0
77.3	0
77.4	0
77.5	0
77.6	0
77.7	0
77.8	0
77.9	0
78	0
78.1	0
78.2	0
78.3	0
78.4	0
78.5	0
78.6	0
78.7	0
78.8	0
78.9	0
79	0
79.1	0
79.2	0
79.3	0
79.4	0
79.5	0
79.6	0
79.7	0
79.8	0
79.9	0
80	0
80.1	0
80.2	0
80.3	0
80.4	0
80.5	0
80.6	0
80.7	0
80.8	0
80.9	0
81	0
81.1	0
81.2	0
81.3	0
81.4	0
81.5	0
81.6	0
81.7	0
81.8	0
81.9	0
82	0
82.1	0
82.2	0
82.3	0
82.4	0
82.5	0
82.6	0
82.7	0
82.8	0
82.9	0
83	0
83.1	0
83.2	0
83.3	0
83.4	0
83.5	0
83.6	0
83.7	0
83.8	0
83.9	0
84	0
84.1	0
84.2	0
84.3	0
84.4	0
84.5	0
84.6	0
84.7	0
84.8	0
84.9	0
85	0
85.1	0
85.2	0
85.3	0
85.4	0
85.5	0
85.6	0
85.7	0
85.8	0
85.9	0
86	0
86.1	0
86.2	0
86.3	0
86.4	0
86.5	0
86.6	0
86.7	0
86.8	0
86.9	0
87	0
87.1	0
87.2	0
87.3	0
87.4	0
87.5	0
87.6	0
87.7	0
87.8	0
87.9	0
88	0
88.1	0
88.2	0
88.3	0
88.4	0
88.5	0
88.6	0
88.7	0
88.8	0
88.9	0
89	0
89.1	0
89.2	0
89.3	0
89.4	0
89.5	0
89.6	0
89.7	0
89.8	0
89.9	0
90	0
90.1	0
90.2	0
90.3	0
90.4	0
90.5	0
90.6	0
90.7	0
90.8	0
90.9	0
91	0
91.1	0
91.2	0
91.3	0
91.4	0
91.5	0
91.6	0
91.7	0
91.8	0
91.9	0
92	0
92.1	0
92.2	0
92.3	0
92.4	0
92.5	0
92.6	0
92.7	0
92.8	0
92.9	0
93	0
93.1	0
93.2	0
93.3	0
93.4	0
93.5	0
93.6	0
93.7	0
93.8	0
93.9	0
94	0
94.1	0
94.2	0
94.3	0
94.4	0
94.5	0
94.6	0
94.7	0
94.8	0
94.9	0
95	0
95.1	0
95.2	0
95.3	0
95.4	0
95.5	0
95.6	0
95.7	0
95.8	0
95.9	0
96	0
96.1	0
96.2	0
96.3	0
96.4	0
96.5	0
96.6	0
96.7	0
96.8	0
96.9	0
97	0
97.1	0
97.2	0
97.3	0
97.4	0
97.5	0
97.6	0
97.7	0
97.8	0
97.9	0
98	0
98.1	0
98.2	0
98.3	0
98.4	0
98.5	0
98.6	0
98.7	0
98.8	0
98.9	0
99	0
99.1	0
99.2	0
99.3	0
99.4	0
99.5	0
99.6	0
99.7	0
99.8	0
99.9	0
100	0
100.1	0
100.2	0
100.3	0
100.4	0
100.5	0
100.6	0
100.7	0
100.8	0
100.9	0
101	0
101.1	0
101.2	0
101.3	0
101.4	0
101.5	0
101.6	0
101.7	0
101.8	0
101.9	0
102	0
102.1	0
102.2	0
102.3	0
102.4	0
102.5	0
102.6	0
102.7	0
102.8	0
102.9	0
103	0
103.1	0
103.2	0
103.3	0
103.4	0.002
103.5	0.002
103.6	0.002
103.7	0.002
103.8	0.002
103.9	0.002
104	0.002
104.1	0.002
104.2	0.002
104.3	0.002
104.4	0
104.5	0
104.6	0
104.7	0
104.8	0
104.9	0
105	0
105.1	0
105.2	0
105.3	0
105.4	0
105.5	0
105.6	0
105.7	0
105.8	0
105.9	0
106	0.002
106.1	0.002
106.2	0.002
106.3	0.004
106.4	0.004
106.5	0.004
106.6	0.004
106.7	0.004
106.8	0.004
106.9	0.004
107	0.004
107.1	0.004
107.2	0.004
107.3	0.004
107.4	0.004
107.5	0.004
107.6	0.004
107.7	0.004
107.8	0.004
107.9	0.004
108	0.004
108.1	0.004
108.2	0.004
108.3	0.004
108.4	0.004
108.5	0.004
108.6	0.004
108.7	0.004
108.8	0.004
108.9	0.004
109	0.004
109.1	0.004
109.2	0.004
109.3	0.004
109.4	0.004
109.5	0.004
109.6	0.004
109.7	0.004
109.8	0.004
109.9	0.004
110	0.004
110.1	0.004
110.2	0.004
110.3	0.004
110.4	0.004
110.5	0.004
110.6	0.004
110.7	0.004
110.8	0.004
110.9	0.004
111	0.004
111.1	0.004
111.2	0.004
111.3	0.004
111.4	0.004
111.5	0.004
111.6	0.004
111.7	0.004
111.8	0.004
111.9	0.004
112	0.004
112.1	0.004
112.2	0.004
112.3	0.004
112.4	0.004
112.5	0.004
112.6	0.004
112.7	0.004
112.8	0.004
112.9	0.004
113	0.006
113.1	0.006
113.2	0.006
113.3	0.006
113.4	0.006
113.5	0.006
113.6	0.01
113.7	0.012
113.8	0.012
113.9	0.012
114	0.012
114.1	0.012
114.2	0.012
114.3	0.012
114.4	0.014
114.5	0.014
114.6	0.014
114.7	0.014
114.8	0.016
114.9	0.016
115	0.016
115.1	0.016
115.2	0.016
115.3	0.016
115.4	0.018
115.5	0.018
115.6	0.018
115.7	0.018
115.8	0.018
115.9	0.018
116	0.018
116.1	0.02
116.2	0.02
116.3	0.02
116.4	0.02
116.5	0.022
116.6	0.022
116.7	0.022
116.8	0.022
116.9	0.022
117	0.022
117.1	0.022
117.2	0.022
117.3	0.022
117.4	0.022
117.5	0.022
117.6	0.022
117.7	0.022
117.8	0.022
117.9	0.022
118	0.022
118.1	0.022
118.2	0.022
118.3	0.022
118.4	0.022
118.5	0.024
118.6	0.024
118.7	0.024
118.8	0.026
118.9	0.026
119	0.026
119.1	0.026
119.2	0.026
119.3	0.028
119.4	0.028
119.5	0.028
119.6	0.028
119.7	0.028
119.8	0.028
119.9	0.028
120	0.028
120.1	0.028
120.2	0.028
120.3	0.028
120.4	0.028
120.5	0.028
120.6	0.028
120.7	0.028
120.8	0.028
120.9	0.028
121	0.028
121.1	0.03
121.2	0.03
121.3	0.03
121.4	0.03
121.5	0.03
121.6	0.03
121.7	0.03
121.8	0.03
121.9	0.03
122	0.03
122.1	0.03
122.2	0.03
122.3	0.03
122.4	0.032
122.5	0.034
122.6	0.034
122.7	0.034
122.8	0.034
122.9	0.034
123	0.036
123.1	0.036
123.2	0.036
123.3	0.036
123.4	0.038
123.5	0.038
123.6	0.038
123.7	0.04
123.8	0.04
123.9	0.042
124	0.042
124.1	0.044
124.2	0.044
124.3	0.046
124.4	0.046
124.5	0.046
124.6	0.046
124.7	0.046
124.8	0.046
124.9	0.046
125	0.046
125.1	0.046
125.2	0.046
125.3	0.046
125.4	0.046
125.5	0.046
125.6	0.046
125.7	0.046
125.8	0.046
125.9	0.048
126	0.048
126.1	0.048
126.2	0.05
126.3	0.05
126.4	0.054
126.5	0.056
126.6	0.056
126.7	0.056
126.8	0.056
126.9	0.056
127	0.056
127.1	0.056
127.2	0.056
127.3	0.056
127.4	0.056
127.5	0.056
127.6	0.058
127.7	0.058
127.8	0.058
127.9	0.058
128	0.06
128.1	0.06
128.2	0.06
128.3	0.06
128.4	0.06
128.5	0.06
128.6	0.06
128.7	0.06
128.8	0.06
128.9	0.06
129	0.06
129.1	0.062
129.2	0.062
129.3	0.062
129.4	0.062
129.5	0.062
129.6	0.062
129.7	0.062
129.8	0.062
129.9	0.062
130	0.062
130.1	0.062
130.2	0.062
130.3	0.062
130.4	0.062
130.5	0.062
130.6	0.06
130.7	0.06
130.8	0.06
130.9	0.06
131	0.06
131.1	0.06
131.2	0.06
131.3	0.06
131.4	0.058
131.5	0.058
131.6	0.058
131.7	0.058
131.8	0.058
131.9	0.058
132	0.06
132.1	0.06
132.2	0.06
132.3	0.06
132.4	0.06
132.5	0.06
132.6	0.06
132.7	0.06
132.8	0.062
132.9	0.062
133	0.062
133.1	0.062
133.2	0.064
133.3	0.064
133.4	0.064
133.5	0.064
133.6	0.064
133.7	0.064
133.8	0.064
133.9	0.064
134	0.064
134.1	0.064
134.2	0.064
134.3	0.064
134.4	0.064
134.5	0.064
134.6	0.064
134.7	0.064
134.8	0.064
134.9	0.064
135	0.064
135.1	0.064
135.2	0.064
135.3	0.064
135.4	0.064
135.5	0.064
135.6	0.064
135.7	0.064
135.8	0.064
135.9	0.064
136	0.064
136.1	0.066
136.2	0.066
136.3	0.066
136.4	0.066
136.5	0.066
136.6	0.066
136.7	0.066
136.8	0.066
136.9	0.066
137	0.066
137.1	0.066
137.2	0.066
137.3	0.066
137.4	0.066
137.5	0.068
137.6	0.068
137.7	0.068
137.8	0.068
137.9	0.07
138	0.07
138.1	0.072
138.2	0.072
138.3	0.072
138.4	0.072
138.5	0.072
138.6	0.074
138.7	0.074
138.8	0.074
138.9	0.074
139	0.074
139.1	0.076
139.2	0.076
139.3	0.078
139.4	0.078
139.5	0.078
139.6	0.078
139.7	0.078
139.8	0.078
139.9	0.078
140	0.078
140.1	0.078
140.2	0.078
140.3	0.078
140.4	0.078
140.5	0.078
140.6	0.078
140.7	0.08
140.8	0.08
140.9	0.08
141	0.08
141.1	0.08
141.2	0.08
141.3	0.08
141.4	0.08
141.5	0.08
141.6	0.078
141.7	0.078
141.8	0.076
141.9	0.076
142	0.076
142.1	0.076
142.2	0.076
142.3	0.078
142.4	0.078
142.5	0.078
142.6	0.078
142.7	0.078
142.8	0.078
142.9	0.078
143	0.078
143.1	0.078
143.2	0.078
143.3	0.08
143.4	0.08
143.5	0.08
143.6	0.08
143.7	0.08
143.8	0.08
143.9	0.08
144	0.08
144.1	0.08
144.2	0.08
144.3	0.078
144.4	0.078
144.5	0.078
144.6	0.08
144.7	0.08
144.8	0.08
144.9	0.08
145	0.082
145.1	0.082
145.2	0.082
145.3	0.082
145.4	0.082
145.5	0.082
145.6	0.082
145.7	0.082
145.8	0.082
145.9	0.082
146	0.082
146.1	0.082
146.2	0.082
146.3	0.082
146.4	0.082
146.5	0.082
146.6	0.082
146.7	0.082
146.8	0.082
146.9	0.082
147	0.082
147.1	0.082
147.2	0.082
147.3	0.082
147.4	0.082
147.5	0.082
147.6	0.082
147.7	0.082
147.8	0.082
147.9	0.082
148	0.082
148.1	0.082
148.2	0.082
148.3	0.082
148.4	0.084
148.5	0.084
148.6	0.084
148.7	0.084
148.8	0.084
148.9	0.084
149	0.084
149.1	0.084
149.2	0.084
149.3	0.086
149.4	0.086
149.5	0.086
149.6	0.086
149.7	0.086
149.8	0.086
149.9	0.088
150	0.088
150.1	0.088
150.2	0.088
150.3	0.088
150.4	0.088
150.5	0.088
150.6	0.088
150.7	0.088
150.8	0.088
150.9	0.09
151	0.09
151.1	0.088
151.2	0.088
151.3	0.088
151.4	0.088
151.5	0.088
151.6	0.088
151.7	0.088
151.8	0.09
151.9	0.09
152	0.09
152.1	0.09
152.2	0.09
152.3	0.09
152.4	0.09
152.5	0.09
152.6	0.09
152.7	0.09
152.8	0.088
152.9	0.088
153	0.086
153.1	0.086
153.2	0.086
153.3	0.086
153.4	0.086
153.5	0.086
153.6	0.086
153.7	0.086
153.8	0.086
153.9	0.086
154	0.086
154.1	0.086
154.2	0.086
154.3	0.086
154.4	0.086
154.5	0.086
154.6	0.086
154.7	0.086
154.8	0.086
154.9	0.086
155	0.086
155.1	0.086
155.2	0.088
155.3	0.088
155.4	0.088
155.5	0.088
155.6	0.088
155.7	0.088
155.8	0.088
155.9	0.088
156	0.088
156.1	0.088
156.2	0.088
156.3	0.088
156.4	0.088
156.5	0.088
156.6	0.088
156.7	0.088
156.8	0.088
156.9	0.088
157	0.088
157.1	0.088
157.2	0.088
157.3	0.088
157.4	0.088
157.5	0.088
157.6	0.09
157.7	0.09
157.8	0.09
157.9	0.09
158	0.09
158.1	0.09
158.2	0.09
158.3	0.09
158.4	0.09
158.5	0.092
158.6	0.092
158.7	0.092
158.8	0.092
158.9	0.092
159	0.092
159.1	0.094
159.2	0.094
159.3	0.094
159.4	0.094
159.5	0.094
159.6	0.094
159.7	0.094
159.8	0.094
159.9	0.094
160	0.094
160.1	0.096
160.2	0.096
160.3	0.096
160.4	0.096
160.5	0.096
160.6	0.096
160.7	0.096
160.8	0.096
160.9	0.096
161	0.096
161.1	0.096
161.2	0.096
161.3	0.096
161.4	0.096
161.5	0.096
161.6	0.096
161.7	0.096
161.8	0.096
161.9	0.094
162	0.094
162.1	0.094
162.2	0.094
162.3	0.094
162.4	0.094
162.5	0.094
162.6	0.094
162.7	0.094
162.8	0.096
162.9	0.096
163	0.096
163.1	0.096
163.2	0.096
163.3	0.096
163.4	0.096
163.5	0.096
163.6	0.096
163.7	0.096
163.8	0.096
163.9	0.096
164	0.096
164.1	0.098
164.2	0.098
164.3	0.098
164.4	0.098
164.5	0.1
164.6	0.1
164.7	0.1
164.8	0.1
164.9	0.1
165	0.104
165.1	0.104
165.2	0.104
165.3	0.104
165.4	0.104
165.5	0.104
165.6	0.104
165.7	0.104
165.8	0.102
165.9	0.102
166	0.102
166.1	0.102
166.2	0.102
166.3	0.102
166.4	0.104
166.5	0.104
166.6	0.104
166.7	0.104
166.8	0.104
166.9	0.104
167	0.104
167.1	0.104
167.2	0.104
167.3	0.102
167.4	0.102
167.5	0.102
167.6	0.102
167.7	0.102
167.8	0.102
167.9	0.102
168	0.102
168.1	0.102
168.2	0.102
168.3	0.102
168.4	0.102
168.5	0.102
168.6	0.102
168.7	0.102
168.8	0.102
168.9	0.102
169	0.1
169.1	0.1
169.2	0.1
169.3	0.1
169.4	0.1
169.5	0.098
169.6	0.098
169.7	0.098
169.8	0.098
169.9	0.1
170	0.1
170.1	0.1
170.2	0.1
170.3	0.1
170.4	0.1
170.5	0.1
170.6	0.1
170.7	0.1
170.8	0.1
170.9	0.1
171	0.1
171.1	0.1
171.2	0.1
171.3	0.1
171.4	0.1
171.5	0.1
171.6	0.1
171.7	0.1
171.8	0.1
171.9	0.102
172	0.102
172.1	0.102
172.2	0.102
172.3	0.102
172.4	0.102
172.5	0.102
172.6	0.102
172.7	0.102
172.8	0.102
172.9	0.102
173	0.102
173.1	0.102
173.2	0.102
173.3	0.102
173.4	0.102
173.5	0.102
173.6	0.102
173.7	0.102
173.8	0.102
173.9	0.102
174	0.102
174.1	0.102
174.2	0.102
174.3	0.102
174.4	0.102
174.5	0.102
174.6	0.102
174.7	0.102
174.8	0.104
174.9	0.104
175	0.104
175.1	0.104
175.2	0.104
175.3	0.104
175.4	0.104
175.5	0.104
175.6	0.104
175.7	0.104
175.8	0.104
175.9	0.104
176	0.104
176.1	0.104
176.2	0.104
176.3	0.104
176.4	0.104
176.5	0.104
176.6	0.102
176.7	0.102
176.8	0.102
176.9	0.104
177	0.104
177.1	0.104
177.2	0.104
177.3	0.104
177.4	0.104
177.5	0.106
177.6	0.106
177.7	0.106
177.8	0.108
177.9	0.108
178	0.108
178.1	0.108
178.2	0.108
178.3	0.108
178.4	0.108
178.5	0.108
178.6	0.108
178.7	0.108
178.8	0.108
178.9	0.106
179	0.106
179.1	0.106
179.2	0.106
179.3	0.106
179.4	0.106
179.5	0.106
179.6	0.106
179.7	0.106
179.8	0.106
179.9	0.106
180	0.108
180.1	0.108
180.2	0.108
180.3	0.108
180.4	0.108
180.5	0.108
180.6	0.108
180.7	0.108
180.8	0.108
180.9	0.108
181	0.11
181.1	0.11
181.2	0.112
181.3	0.112
181.4	0.114
181.5	0.114
181.6	0.114
181.7	0.114
181.8	0.114
181.9	0.114
182	0.114
182.1	0.114
182.2	0.114
182.3	0.114
182.4	0.116
182.5	0.116
182.6	0.116
182.7	0.116
182.8	0.116
182.9	0.118
183	0.118
183.1	0.118
183.2	0.12
183.3	0.12
183.4	0.12
183.5	0.12
183.6	0.12
183.7	0.12
183.8	0.12
183.9	0.118
184	0.118
184.1	0.118
184.2	0.118
184.3	0.118
184.4	0.118
184.5	0.118
184.6	0.118
184.7	0.118
184.8	0.118
184.9	0.12
185	0.12
185.1	0.12
185.2	0.12
185.3	0.12
185.4	0.12
185.5	0.118
185.6	0.118
185.7	0.118
185.8	0.118
185.9	0.118
186	0.118
186.1	0.118
186.2	0.118
186.3	0.118
186.4	0.118
186.5	0.118
186.6	0.118
186.7	0.118
186.8	0.118
186.9	0.118
187	0.118
187.1	0.118
187.2	0.118
187.3	0.118
187.4	0.118
187.5	0.118
187.6	0.12
187.7	0.12
187.8	0.12
187.9	0.12
188	0.118
188.1	0.118
188.2	0.118
188.3	0.118
188.4	0.118
188.5	0.118
188.6	0.118
188.7	0.118
188.8	0.118
188.9	0.118
189	0.118
189.1	0.118
189.2	0.118
189.3	0.118
189.4	0.12
189.5	0.118
189.6	0.118
189.7	0.116
189.8	0.116
189.9	0.116
190	0.116
190.1	0.116
190.2	0.116
190.3	0.116
190.4	0.116
190.5	0.116
190.6	0.114
190.7	0.114
190.8	0.114
190.9	0.114
191	0.114
191.1	0.114
191.2	0.114
191.3	0.114
191.4	0.116
191.5	0.116
191.6	0.116
191.7	0.116
191.8	0.116
191.9	0.116
192	0.116
192.1	0.116
192.2	0.116
192.3	0.116
192.4	0.116
192.5	0.118
192.6	0.12
192.7	0.12
192.8	0.12
192.9	0.118
193	0.118
193.1	0.118
193.2	0.118
193.3	0.116
193.4	0.114
193.5	0.114
193.6	0.114
193.7	0.112
193.8	0.112
193.9	0.112
194	0.112
194.1	0.112
194.2	0.112
194.3	0.114
194.4	0.114
194.5	0.114
194.6	0.114
194.7	0.116
194.8	0.116
194.9	0.116
195	0.116
195.1	0.116
195.2	0.118
195.3	0.118
195.4	0.118
195.5	0.122
195.6	0.122
195.7	0.122
195.8	0.122
195.9	0.122
196	0.122
196.1	0.122
196.2	0.122
196.3	0.124
196.4	0.124
196.5	0.126
196.6	0.128
196.7	0.13
196.8	0.13
196.9	0.13
197	0.13
197.1	0.13
197.2	0.13
197.3	0.13
197.4	0.13
197.5	0.13
197.6	0.13
197.7	0.13
197.8	0.13
197.9	0.132
198	0.132
198.1	0.132
198.2	0.13
198.3	0.128
198.4	0.128
198.5	0.128
198.6	0.128
198.7	0.128
198.8	0.128
198.9	0.128
199	0.128
199.1	0.128
199.2	0.126
199.3	0.126
199.4	0.126
199.5	0.126
199.6	0.128
199.7	0.126
199.8	0.126
199.9	0.126
200	0.126
[truncated: 14,000 more rows]
