# Supplementary material for: Bayesian inference of kinetic schemes for ion channels by Kalman filtering
Source: eLife journal article supplement (doi:10.7554/elife.62714), 2022-05-04
Supplement: fig4-data12 [file 1_Sim_N_800_Fluor_MW_0.125M.xlsx]

## Sheet: Tabelle1
0.1	0
0.2	0
0.3	0
0.4	0
0.5	0
0.6	0
0.7	0
0.8	0
0.9	0
1	0
1.1	0
1.2	0
1.3	0
1.4	0
1.5	0
1.6	0
1.7	0
1.8	0
1.9	0
2	0
2.1	0
2.2	0
2.3	0
2.4	0
2.5	0
2.6	0
2.7	0
2.8	0
2.9	0
3	0
3.1	0
3.2	0
3.3	0
3.4	0
3.5	0
3.6	0
3.7	0
3.8	0
3.9	0
4	0
4.1	0
4.2	0
4.3	0
4.4	0
4.5	0
4.6	0
4.7	0
4.8	0
4.9	0
5	0
5.1	0
5.2	0
5.3	0
5.4	0
5.5	0
5.6	0
5.7	0
5.8	0
5.9	0
6	0
6.1	0
6.2	0
6.3	0
6.4	0
6.5	0
6.6	0
6.7	0
6.8	0
6.9	0
7	0
7.1	0
7.2	0
7.3	0
7.4	0
7.5	0
7.6	0
7.7	0
7.8	0
7.9	0
8	0
8.1	0
8.2	0
8.3	0
8.4	0
8.5	0
8.6	0
8.7	0
8.8	0
8.9	0
9	0
9.1	0
9.2	0
9.3	0
9.4	0
9.5	0
9.6	0
9.7	0
9.8	0
9.9	0
10	0
10.1	0
10.2	0
10.3	0
10.4	0
10.5	0
10.6	0
10.7	0
10.8	0
10.9	0
11	0
11.1	0
11.2	0
11.3	0
11.4	0
11.5	0
11.6	0
11.7	0
11.8	0
11.9	0
12	0
12.1	0
12.2	0
12.3	0
12.4	0
12.5	0
12.6	0
12.7	0
12.8	0
12.9	0
13	0
13.1	0
13.2	0
13.3	0
13.4	0
13.5	0
13.6	0
13.7	0
13.8	0
13.9	0
14	0
14.1	0
14.2	0
14.3	0
14.4	0
14.5	0
14.6	0
14.7	0
14.8	0
14.9	0
15	0
15.1	0
15.2	0
15.3	0
15.4	0
15.5	0
15.6	0
15.7	0
15.8	0
15.9	0
16	0
16.1	0
16.2	0
16.3	0
16.4	0
16.5	0
16.6	0
16.7	0
16.8	0
16.9	0
17	0
17.1	0
17.2	0
17.3	0
17.4	0
17.5	0
17.6	0
17.7	0
17.8	0
17.9	0
18	0
18.1	0
18.2	0
18.3	0
18.4	0
18.5	0
18.6	0
18.7	0
18.8	0
18.9	0
19	0
19.1	0
19.2	0
19.3	0
19.4	0
19.5	0
19.6	0
19.7	0
19.8	0
19.9	0
20	0
20.1	0
20.2	0
20.3	0
20.4	0
20.5	0
20.6	0
20.7	0
20.8	0
20.9	0
21	0
21.1	0
21.2	0
21.3	0
21.4	0
21.5	0
21.6	0
21.7	0
21.8	0
21.9	0
22	0
22.1	0
22.2	0
22.3	0
22.4	0
22.5	0
22.6	0
22.7	0
22.8	0
22.9	0
23	0
23.1	0
23.2	0
23.3	0
23.4	0
23.5	0
23.6	0
23.7	0
23.8	0
23.9	0
24	0
24.1	0
24.2	0
24.3	0
24.4	0
24.5	0
24.6	0
24.7	0
24.8	0
24.9	0
25	0
25.1	0
25.2	0
25.3	0
25.4	0
25.5	0
25.6	0
25.7	0
25.8	0
25.9	0
26	0
26.1	0
26.2	0
26.3	0
26.4	0
26.5	0
26.6	0
26.7	0
26.8	0
26.9	0
27	0
27.1	0
27.2	0
27.3	0
27.4	0
27.5	0
27.6	0
27.7	0
27.8	0
27.9	0
28	0
28.1	0
28.2	0
28.3	0
28.4	0
28.5	0
28.6	0
28.7	0
28.8	0
28.9	0
29	0
29.1	0
29.2	0
29.3	0
29.4	0
29.5	0
29.6	0
29.7	0
29.8	0
29.9	0
30	0
30.1	0
30.2	0
30.3	0
30.4	0
30.5	0
30.6	0
30.7	0
30.8	0
30.9	0
31	0
31.1	0
31.2	0
31.3	0
31.4	0
31.5	0
31.6	0
31.7	0
31.8	0
31.9	0
32	0
32.1	0
32.2	0
32.3	0
32.4	0
32.5	0
32.6	0
32.7	0
32.8	0
32.9	0
33	0
33.1	0
33.2	0
33.3	0
33.4	0
33.5	0
33.6	0
33.7	0
33.8	0
33.9	0
34	0
34.1	0
34.2	0
34.3	0
34.4	0
34.5	0
34.6	0
34.7	0
34.8	0
34.9	0
35	0
35.1	0
35.2	0
35.3	0
35.4	0
35.5	0
35.6	0
35.7	0
35.8	0
35.9	0
36	0
36.1	0
36.2	0
36.3	0
36.4	0
36.5	0
36.6	0
36.7	0
36.8	0
36.9	0
37	0
37.1	0
37.2	0
37.3	0
37.4	0
37.5	0
37.6	0
37.7	0
37.8	0
37.9	0
38	0
38.1	0
38.2	0
38.3	0
38.4	0
38.5	0
38.6	0
38.7	0
38.8	0
38.9	0
39	0
39.1	0
39.2	0
39.3	0
39.4	0
39.5	0
39.6	0
39.7	0
39.8	0
39.9	0
40	0
40.1	0
40.2	0
40.3	0
40.4	0
40.5	0
40.6	0
40.7	0
40.8	0
40.9	0
41	0
41.1	0
41.2	0
41.3	0
41.4	0
41.5	0
41.6	0
41.7	0
41.8	0
41.9	0
42	0
42.1	0
42.2	0
42.3	0
42.4	0
42.5	0
42.6	0
42.7	0
42.8	0
42.9	0
43	0
43.1	0
43.2	0
43.3	0
43.4	0
43.5	0
43.6	0
43.7	0
43.8	0
43.9	0
44	0
44.1	0
44.2	0
44.3	0
44.4	0
44.5	0
44.6	0
44.7	0
44.8	0
44.9	0
45	0
45.1	0
45.2	0
45.3	0
45.4	0
45.5	0
45.6	0
45.7	0
45.8	0
45.9	0
46	0
46.1	0
46.2	0
46.3	0
46.4	0
46.5	0
46.6	0
46.7	0
46.8	0
46.9	0
47	0
47.1	0
47.2	0
47.3	0
47.4	0
47.5	0
47.6	0
47.7	0
47.8	0
47.9	0
48	0
48.1	0
48.2	0
48.3	0
48.4	0
48.5	0
48.6	0
48.7	0
48.8	0
48.9	0
49	0
49.1	0
49.2	0
49.3	0
49.4	0
49.5	0
49.6	0
49.7	0
49.8	0
49.9	0
50	0
50.1	0
50.2	0
50.3	0
50.4	0
50.5	0
50.6	0
50.7	0
50.8	0
50.9	0
51	0
51.1	0
51.2	0
51.3	0
51.4	0
51.5	0
51.6	0
51.7	0
51.8	0
51.9	0
52	0
52.1	0
52.2	0
52.3	0
52.4	0
52.5	0
52.6	0
52.7	0
52.8	0
52.9	0
53	0
53.1	0
53.2	0
53.3	0
53.4	0
53.5	0
53.6	0
53.7	0
53.8	0
53.9	0
54	0
54.1	0
54.2	0
54.3	0
54.4	0
54.5	0
54.6	0
54.7	0
54.8	0
54.9	0
55	0
55.1	0
55.2	0
55.3	0
55.4	0
55.5	0
55.6	0
55.7	0
55.8	0
55.9	0
56	0
56.1	0
56.2	0
56.3	0
56.4	0
56.5	0
56.6	0
56.7	0
56.8	0
56.9	0
57	0
57.1	0
57.2	0
57.3	0
57.4	0
57.5	0
57.6	0
57.7	0
57.8	0
57.9	0
58	0
58.1	0
58.2	0
58.3	0
58.4	0
58.5	0
58.6	0
58.7	0
58.8	0
58.9	0
59	0
59.1	0
59.2	0
59.3	0
59.4	0
59.5	0
59.6	0
59.7	0
59.8	0
59.9	0
60	0
60.1	0
60.2	0
60.3	0
60.4	0
60.5	0
60.6	0
60.7	0
60.8	0
60.9	0
61	0
61.1	0
61.2	0
61.3	0
61.4	0
61.5	0
61.6	0
61.7	0
61.8	0
61.9	0
62	0
62.1	0
62.2	0
62.3	0
62.4	0
62.5	0
62.6	0
62.7	0
62.8	0
62.9	0
63	0
63.1	0
63.2	0
63.3	0
63.4	0
63.5	0
63.6	0
63.7	0
63.8	0
63.9	0
64	0
64.1	0
64.2	0
64.3	0
64.4	0
64.5	0
64.6	0
64.7	0
64.8	0
64.9	0
65	0
65.1	0
65.2	0
65.3	0
65.4	0
65.5	0
65.6	0
65.7	0
65.8	0
65.9	0
66	0
66.1	0
66.2	0
66.3	0
66.4	0
66.5	0
66.6	0
66.7	0
66.8	0
66.9	0
67	0
67.1	0
67.2	0
67.3	0
67.4	0
67.5	0
67.6	0
67.7	0
67.8	0
67.9	0
68	0
68.1	0
68.2	0
68.3	0
68.4	0
68.5	0
68.6	0
68.7	0
68.8	0
68.9	0
69	0
69.1	0
69.2	0
69.3	0
69.4	0
69.5	0
69.6	0
69.7	0
69.8	0
69.9	0
70	0
70.1	0
70.2	0
70.3	0
70.4	0
70.5	0
70.6	0
70.7	0
70.8	0
70.9	0
71	0
71.1	0
71.2	0
71.3	0
71.4	0
71.5	0
71.6	0
71.7	0
71.8	0
71.9	0
72	0
72.1	0
72.2	0
72.3	0
72.4	0
72.5	0
72.6	0
72.7	0
72.8	0
72.9	0
73	0
73.1	0
73.2	0
73.3	0
73.4	0
73.5	0
73.6	0
73.7	0
73.8	0
73.9	0
74	0
74.1	0
74.2	0
74.3	0
74.4	0
74.5	0
74.6	0
74.7	0
74.8	0
74.9	0
75	0
75.1	0
75.2	0
75.3	0
75.4	0
75.5	0
75.6	0
75.7	0
75.8	0
75.9	0
76	0
76.1	0
76.2	0
76.3	0
76.4	0
76.5	0
76.6	0
76.7	0
76.8	0
76.9	0
77	0
77.1	0
77.2	0
77.3	0
77.4	0
77.5	0
77.6	0
77.7	0
77.8	0
77.9	0
78	0
78.1	0
78.2	0
78.3	0
78.4	0
78.5	0
78.6	0
78.7	0
78.8	0
78.9	0
79	0
79.1	0
79.2	0
79.3	0
79.4	0
79.5	0
79.6	0
79.7	0
79.8	0
79.9	0
80	0
80.1	0
80.2	0
80.3	0
80.4	0
80.5	0
80.6	0
80.7	0
80.8	0
80.9	0
81	0
81.1	0
81.2	0
81.3	0
81.4	0
81.5	0
81.6	0
81.7	0
81.8	0
81.9	0
82	0
82.1	0
82.2	0
82.3	0
82.4	0
82.5	0
82.6	0
82.7	0
82.8	0
82.9	0
83	0
83.1	0
83.2	0
83.3	0
83.4	0
83.5	0
83.6	0
83.7	0
83.8	0
83.9	0
84	0
84.1	0
84.2	0
84.3	0
84.4	0
84.5	0
84.6	0
84.7	0
84.8	0
84.9	0
85	0
85.1	0
85.2	0
85.3	0
85.4	0
85.5	0
85.6	0
85.7	0
85.8	0
85.9	0
86	0
86.1	0
86.2	0
86.3	0
86.4	0
86.5	0
86.6	0
86.7	0
86.8	0
86.9	0
87	0
87.1	0
87.2	0
87.3	0
87.4	0
87.5	0
87.6	0
87.7	0
87.8	0
87.9	0
88	0
88.1	0
88.2	0
88.3	0
88.4	0
88.5	0
88.6	0
88.7	0
88.8	0
88.9	0
89	0
89.1	0
89.2	0
89.3	0
89.4	0
89.5	0
89.6	0
89.7	0
89.8	0
89.9	0
90	0
90.1	0
90.2	0
90.3	0
90.4	0
90.5	0
90.6	0
90.7	0
90.8	0
90.9	0
91	0
91.1	0
91.2	0
91.3	0
91.4	0
91.5	0
91.6	0
91.7	0
91.8	0
91.9	0
92	0
92.1	0
92.2	0
92.3	0
92.4	0
92.5	0
92.6	0
92.7	0
92.8	0
92.9	0
93	0
93.1	0
93.2	0
93.3	0
93.4	0
93.5	0
93.6	0
93.7	0
93.8	0
93.9	0
94	0
94.1	0
94.2	0
94.3	0
94.4	0
94.5	0
94.6	0
94.7	0
94.8	0
94.9	0
95	0
95.1	0
95.2	0
95.3	0
95.4	0
95.5	0
95.6	0
95.7	0
95.8	0
95.9	0
96	0
96.1	0
96.2	0
96.3	0
96.4	0
96.5	0
96.6	0
96.7	0
96.8	0
96.9	0
97	0
97.1	0
97.2	0
97.3	0
97.4	0
97.5	0
97.6	0
97.7	0
97.8	0
97.9	0
98	0
98.1	0
98.2	0
98.3	0
98.4	0
98.5	0
98.6	0
98.7	0
98.8	0
98.9	0
99	0
99.1	0
99.2	0
99.3	0
99.4	0
99.5	0
99.6	0
99.7	0
99.8	0
99.9	0
100	0
100.1	0.009375
100.2	0.01375
100.3	0.016875
100.4	0.025625
100.5	0.029375
100.6	0.03375
100.7	0.04
100.8	0.045
100.9	0.053125
101	0.060625
101.1	0.07125
101.2	0.07875
101.3	0.084375
101.4	0.09
101.5	0.091875
101.6	0.098125
101.7	0.1025
101.8	0.106875
101.9	0.114375
102	0.119375
102.1	0.12
102.2	0.126875
102.3	0.13375
102.4	0.139375
102.5	0.143125
102.6	0.149375
102.7	0.150625
102.8	0.151875
102.9	0.155
103	0.15625
103.1	0.160625
103.2	0.164375
103.3	0.17
103.4	0.179375
103.5	0.18125
103.6	0.18125
103.7	0.18375
103.8	0.185
103.9	0.19
104	0.19125
104.1	0.194375
104.2	0.2
104.3	0.200625
104.4	0.205625
104.5	0.21
104.6	0.20875
104.7	0.208125
104.8	0.210625
104.9	0.215
105	0.21625
105.1	0.219375
105.2	0.2275
105.3	0.23125
105.4	0.23375
105.5	0.238125
105.6	0.239375
105.7	0.241875
105.8	0.24125
105.9	0.243125
106	0.250625
106.1	0.248125
106.2	0.249375
106.3	0.249375
106.4	0.25125
106.5	0.255625
106.6	0.25375
106.7	0.25375
106.8	0.255625
106.9	0.25375
107	0.251875
107.1	0.2525
107.2	0.253125
107.3	0.255625
107.4	0.25625
107.5	0.256875
107.6	0.259375
107.7	0.25875
107.8	0.25875
107.9	0.260625
108	0.261875
108.1	0.2625
108.2	0.26375
108.3	0.2625
108.4	0.266875
108.5	0.265625
108.6	0.269375
108.7	0.27125
108.8	0.2725
108.9	0.275
109	0.281875
109.1	0.284375
109.2	0.28625
109.3	0.285
109.4	0.28625
109.5	0.289375
109.6	0.29
109.7	0.29125
109.8	0.293125
109.9	0.293125
110	0.290625
110.1	0.293125
110.2	0.29625
110.3	0.29375
110.4	0.298125
110.5	0.3
110.6	0.30125
110.7	0.3025
110.8	0.305625
110.9	0.308125
111	0.31125
111.1	0.309375
111.2	0.309375
111.3	0.306875
111.4	0.309375
111.5	0.31
111.6	0.31
111.7	0.31125
111.8	0.31
111.9	0.308125
112	0.308125
112.1	0.3075
112.2	0.308125
112.3	0.3075
112.4	0.309375
112.5	0.31
112.6	0.309375
112.7	0.309375
112.8	0.314375
112.9	0.314375
113	0.31375
113.1	0.316875
113.2	0.31625
113.3	0.313125
113.4	0.315625
113.5	0.31875
113.6	0.318125
113.7	0.318125
113.8	0.324375
113.9	0.325625
114	0.325
114.1	0.325
114.2	0.325625
114.3	0.3275
114.4	0.325625
114.5	0.32625
114.6	0.328125
114.7	0.33
114.8	0.328125
114.9	0.33
115	0.333125
115.1	0.33375
115.2	0.333125
115.3	0.335625
115.4	0.33625
115.5	0.3375
115.6	0.340625
115.7	0.340625
115.8	0.3425
115.9	0.34125
116	0.336875
116.1	0.3375
116.2	0.34
116.3	0.34
116.4	0.339375
116.5	0.338125
116.6	0.336875
116.7	0.33625
116.8	0.335625
116.9	0.334375
117	0.338125
117.1	0.338125
117.2	0.34
117.3	0.338125
117.4	0.3375
117.5	0.341875
117.6	0.340625
117.7	0.341875
117.8	0.340625
117.9	0.3425
118	0.340625
118.1	0.34
118.2	0.34
118.3	0.340625
118.4	0.339375
118.5	0.34
118.6	0.34125
118.7	0.33625
118.8	0.33625
118.9	0.33875
119	0.33625
119.1	0.339375
119.2	0.34
119.3	0.3425
119.4	0.341875
119.5	0.3425
119.6	0.344375
119.7	0.345625
119.8	0.345625
119.9	0.345625
120	0.344375
120.1	0.3425
120.2	0.34
120.3	0.3425
120.4	0.343125
120.5	0.34
120.6	0.3425
120.7	0.34375
120.8	0.34625
120.9	0.346875
121	0.350625
121.1	0.354375
121.2	0.356875
121.3	0.36
121.4	0.360625
121.5	0.35625
121.6	0.356875
121.7	0.35875
121.8	0.358125
121.9	0.358125
122	0.358125
122.1	0.35875
122.2	0.359375
122.3	0.36125
122.4	0.361875
122.5	0.360625
122.6	0.360625
122.7	0.361875
122.8	0.3625
122.9	0.35875
123	0.3575
123.1	0.358125
123.2	0.35875
123.3	0.36
123.4	0.35875
123.5	0.35875
123.6	0.359375
123.7	0.360625
123.8	0.3625
123.9	0.36125
124	0.365
124.1	0.3625
124.2	0.363125
124.3	0.365625
124.4	0.3675
124.5	0.369375
124.6	0.365625
124.7	0.36875
124.8	0.37125
124.9	0.36875
125	0.369375
125.1	0.370625
125.2	0.3675
125.3	0.37
125.4	0.366875
125.5	0.365
125.6	0.365625
125.7	0.364375
125.8	0.363125
125.9	0.36375
126	0.36625
126.1	0.36875
126.2	0.368125
126.3	0.363125
126.4	0.363125
126.5	0.365
126.6	0.364375
126.7	0.3675
126.8	0.366875
126.9	0.36375
127	0.36625
127.1	0.365625
127.2	0.36375
127.3	0.36125
127.4	0.3625
127.5	0.36375
127.6	0.36625
127.7	0.365
127.8	0.363125
127.9	0.363125
128	0.363125
128.1	0.36625
128.2	0.371875
128.3	0.365
128.4	0.366875
128.5	0.36375
128.6	0.365
128.7	0.361875
128.8	0.361875
128.9	0.361875
129	0.359375
129.1	0.35875
129.2	0.359375
129.3	0.35875
129.4	0.36
129.5	0.360625
129.6	0.363125
129.7	0.35875
129.8	0.359375
129.9	0.358125
130	0.356875
130.1	0.35875
130.2	0.359375
130.3	0.359375
130.4	0.360625
130.5	0.3575
130.6	0.355625
130.7	0.35625
130.8	0.355
130.9	0.360625
131	0.3575
131.1	0.358125
131.2	0.36
131.3	0.36
131.4	0.36125
131.5	0.360625
131.6	0.36125
131.7	0.3625
131.8	0.36375
131.9	0.361875
132	0.363125
132.1	0.365
132.2	0.36875
132.3	0.3675
132.4	0.37
132.5	0.37
132.6	0.37125
132.7	0.369375
132.8	0.370625
132.9	0.37125
133	0.370625
133.1	0.370625
133.2	0.37125
133.3	0.3725
133.4	0.375
133.5	0.376875
133.6	0.378125
133.7	0.37875
133.8	0.376875
133.9	0.375
134	0.375625
134.1	0.375625
134.2	0.37625
134.3	0.376875
134.4	0.37875
134.5	0.37875
134.6	0.3825
134.7	0.37875
134.8	0.374375
134.9	0.373125
135	0.376875
135.1	0.374375
135.2	0.3725
135.3	0.373125
135.4	0.3725
135.5	0.375
135.6	0.373125
135.7	0.374375
135.8	0.379375
135.9	0.379375
136	0.38
136.1	0.378125
136.2	0.38375
136.3	0.385
136.4	0.384375
136.5	0.39
136.6	0.3875
136.7	0.385
136.8	0.384375
136.9	0.385
137	0.38625
137.1	0.3825
137.2	0.380625
137.3	0.37875
137.4	0.37625
137.5	0.378125
137.6	0.38
137.7	0.38
137.8	0.381875
137.9	0.38
138	0.381875
138.1	0.3825
138.2	0.385
138.3	0.388125
138.4	0.385
138.5	0.384375
138.6	0.38875
138.7	0.389375
138.8	0.38875
138.9	0.385
139	0.385
139.1	0.384375
139.2	0.383125
139.3	0.38125
139.4	0.38375
139.5	0.38625
139.6	0.385
139.7	0.38375
139.8	0.386875
139.9	0.38875
140	0.390625
140.1	0.395
140.2	0.393125
140.3	0.391875
140.4	0.391875
140.5	0.390625
140.6	0.389375
140.7	0.3925
140.8	0.3925
140.9	0.389375
141	0.3875
141.1	0.388125
141.2	0.388125
141.3	0.385
141.4	0.385
141.5	0.380625
141.6	0.379375
141.7	0.381875
141.8	0.379375
141.9	0.378125
142	0.380625
142.1	0.381875
142.2	0.383125
142.3	0.3825
142.4	0.381875
142.5	0.384375
142.6	0.385625
142.7	0.386875
142.8	0.385625
142.9	0.384375
143	0.38375
143.1	0.383125
143.2	0.38125
143.3	0.38125
143.4	0.37875
143.5	0.38125
143.6	0.3825
143.7	0.3825
143.8	0.3825
143.9	0.381875
144	0.3825
144.1	0.385
144.2	0.385
144.3	0.383125
144.4	0.380625
144.5	0.38125
144.6	0.3825
144.7	0.383125
144.8	0.383125
144.9	0.38375
145	0.386875
145.1	0.384375
145.2	0.380625
145.3	0.383125
145.4	0.385
145.5	0.385625
145.6	0.386875
145.7	0.386875
145.8	0.389375
145.9	0.389375
146	0.390625
146.1	0.39125
146.2	0.391875
146.3	0.390625
146.4	0.38875
146.5	0.390625
146.6	0.391875
146.7	0.393125
146.8	0.389375
146.9	0.384375
147	0.38625
147.1	0.38875
147.2	0.388125
147.3	0.39
147.4	0.388125
147.5	0.388125
147.6	0.3875
147.7	0.3875
147.8	0.38875
147.9	0.3875
148	0.3875
148.1	0.3875
148.2	0.3875
148.3	0.388125
148.4	0.386875
148.5	0.388125
148.6	0.39
148.7	0.386875
148.8	0.389375
148.9	0.3875
149	0.38625
149.1	0.38625
149.2	0.384375
149.3	0.384375
149.4	0.383125
149.5	0.385625
149.6	0.38875
149.7	0.38875
149.8	0.390625
149.9	0.39
150	0.390625
150.1	0.3875
150.2	0.386875
150.3	0.385
150.4	0.3875
150.5	0.3825
150.6	0.384375
150.7	0.381875
150.8	0.3825
150.9	0.3825
151	0.383125
151.1	0.38375
151.2	0.38375
151.3	0.38625
151.4	0.38625
151.5	0.39125
151.6	0.39125
151.7	0.39125
151.8	0.3925
151.9	0.394375
152	0.393125
152.1	0.3925
152.2	0.388125
152.3	0.390625
152.4	0.39375
152.5	0.391875
152.6	0.39125
152.7	0.38625
152.8	0.384375
152.9	0.385
153	0.3825
153.1	0.38125
153.2	0.38
153.3	0.38
153.4	0.3825
153.5	0.3825
153.6	0.384375
153.7	0.3875
153.8	0.38875
153.9	0.386875
154	0.38375
154.1	0.38375
154.2	0.38
154.3	0.383125
154.4	0.384375
154.5	0.385
154.6	0.3875
154.7	0.385
154.8	0.38375
154.9	0.38625
155	0.39
155.1	0.390625
155.2	0.393125
155.3	0.393125
155.4	0.393125
155.5	0.391875
155.6	0.391875
155.7	0.39375
155.8	0.391875
155.9	0.391875
156	0.393125
156.1	0.39375
156.2	0.395
156.3	0.393125
156.4	0.3925
156.5	0.39125
156.6	0.389375
156.7	0.389375
156.8	0.390625
156.9	0.389375
157	0.38875
157.1	0.388125
157.2	0.388125
157.3	0.38875
157.4	0.388125
157.5	0.39125
157.6	0.395
157.7	0.394375
157.8	0.391875
157.9	0.3925
158	0.391875
158.1	0.39375
158.2	0.3975
158.3	0.39625
158.4	0.39625
158.5	0.396875
158.6	0.396875
158.7	0.3975
158.8	0.3975
158.9	0.399375
159	0.400625
159.1	0.3975
159.2	0.396875
159.3	0.395
159.4	0.3925
159.5	0.394375
159.6	0.394375
159.7	0.39125
159.8	0.38875
159.9	0.390625
160	0.39125
160.1	0.393125
160.2	0.390625
160.3	0.39
160.4	0.386875
160.5	0.38625
160.6	0.39
160.7	0.391875
160.8	0.3925
160.9	0.3925
161	0.393125
161.1	0.395625
161.2	0.39875
161.3	0.396875
161.4	0.3925
161.5	0.391875
161.6	0.393125
161.7	0.394375
161.8	0.39625
161.9	0.3925
162	0.394375
162.1	0.395
162.2	0.396875
162.3	0.39875
162.4	0.4
162.5	0.4025
162.6	0.400625
162.7	0.4
162.8	0.3975
162.9	0.39625
163	0.3975
163.1	0.3975
163.2	0.400625
163.3	0.401875
163.4	0.40125
163.5	0.399375
163.6	0.400625
163.7	0.4025
163.8	0.400625
163.9	0.400625
164	0.403125
164.1	0.4025
164.2	0.404375
164.3	0.404375
164.4	0.403125
164.5	0.403125
164.6	0.40625
164.7	0.409375
164.8	0.406875
164.9	0.40625
165	0.404375
165.1	0.40625
165.2	0.405625
165.3	0.40125
165.4	0.404375
165.5	0.41
165.6	0.411875
165.7	0.4075
165.8	0.41
165.9	0.405625
166	0.404375
166.1	0.401875
166.2	0.4025
166.3	0.405
166.4	0.4075
166.5	0.4025
166.6	0.4025
166.7	0.400625
166.8	0.401875
166.9	0.4
167	0.400625
167.1	0.39875
167.2	0.39875
167.3	0.4
167.4	0.39875
167.5	0.4025
167.6	0.4025
167.7	0.401875
167.8	0.399375
167.9	0.396875
168	0.395
168.1	0.395
168.2	0.39625
168.3	0.395625
168.4	0.395
168.5	0.394375
168.6	0.391875
168.7	0.390625
168.8	0.391875
168.9	0.389375
169	0.386875
169.1	0.38625
169.2	0.3875
169.3	0.385
169.4	0.385
169.5	0.383125
169.6	0.38125
169.7	0.380625
169.8	0.38125
169.9	0.381875
170	0.381875
170.1	0.383125
170.2	0.383125
170.3	0.385
170.4	0.386875
170.5	0.3875
170.6	0.389375
170.7	0.3925
170.8	0.393125
170.9	0.39375
171	0.39625
171.1	0.395625
171.2	0.39625
171.3	0.39875
171.4	0.399375
171.5	0.399375
171.6	0.400625
171.7	0.4
171.8	0.4025
171.9	0.4025
172	0.40375
172.1	0.4025
172.2	0.403125
172.3	0.406875
172.4	0.408125
172.5	0.409375
172.6	0.408125
172.7	0.411875
172.8	0.411875
172.9	0.413125
173	0.409375
173.1	0.408125
173.2	0.4075
173.3	0.40625
173.4	0.405
173.5	0.41
173.6	0.409375
173.7	0.41
173.8	0.408125
173.9	0.404375
174	0.399375
174.1	0.398125
174.2	0.399375
174.3	0.399375
174.4	0.4
174.5	0.3975
174.6	0.3975
174.7	0.39625
174.8	0.39625
174.9	0.39875
175	0.39875
175.1	0.4
175.2	0.4
175.3	0.399375
175.4	0.396875
175.5	0.3925
175.6	0.395
175.7	0.39625
175.8	0.39625
175.9	0.399375
176	0.4025
176.1	0.400625
176.2	0.40375
176.3	0.400625
176.4	0.403125
176.5	0.404375
176.6	0.40375
176.7	0.40375
176.8	0.4025
176.9	0.4025
177	0.400625
177.1	0.40125
177.2	0.403125
177.3	0.4025
177.4	0.4
177.5	0.399375
177.6	0.401875
177.7	0.4
177.8	0.398125
177.9	0.3975
178	0.395625
178.1	0.39625
178.2	0.398125
178.3	0.400625
178.4	0.40375
178.5	0.409375
178.6	0.408125
178.7	0.408125
178.8	0.406875
178.9	0.41
179	0.40875
179.1	0.40875
179.2	0.406875
179.3	0.404375
179.4	0.405625
179.5	0.406875
179.6	0.405
179.7	0.40625
179.8	0.405
179.9	0.40375
180	0.404375
180.1	0.40625
180.2	0.409375
180.3	0.40625
180.4	0.405625
180.5	0.405625
180.6	0.40625
180.7	0.40625
180.8	0.405
180.9	0.4075
181	0.406875
181.1	0.41
181.2	0.406875
181.3	0.405625
181.4	0.405625
181.5	0.40375
181.6	0.40125
181.7	0.40125
181.8	0.4025
181.9	0.404375
182	0.400625
182.1	0.40125
182.2	0.4
182.3	0.4
182.4	0.39875
182.5	0.398125
182.6	0.39625
182.7	0.39625
182.8	0.396875
182.9	0.3975
183	0.39625
183.1	0.395625
183.2	0.399375
183.3	0.398125
183.4	0.398125
183.5	0.39625
183.6	0.395625
183.7	0.395
183.8	0.3975
183.9	0.394375
184	0.399375
184.1	0.39875
184.2	0.4025
184.3	0.4025
184.4	0.400625
184.5	0.399375
184.6	0.4025
184.7	0.403125
184.8	0.40375
184.9	0.403125
185	0.405
185.1	0.405
185.2	0.40625
185.3	0.4075
185.4	0.40625
185.5	0.404375
185.6	0.404375
185.7	0.403125
185.8	0.403125
185.9	0.406875
186	0.409375
186.1	0.415625
186.2	0.416875
186.3	0.418125
186.4	0.413125
186.5	0.41125
186.6	0.41125
186.7	0.4125
186.8	0.414375
186.9	0.413125
187	0.413125
187.1	0.413125
187.2	0.4125
187.3	0.413125
187.4	0.413125
187.5	0.41375
187.6	0.41375
187.7	0.4125
187.8	0.413125
187.9	0.41625
188	0.41875
188.1	0.42
188.2	0.41625
188.3	0.415625
188.4	0.419375
188.5	0.419375
188.6	0.41875
188.7	0.41875
188.8	0.41625
188.9	0.414375
189	0.4125
189.1	0.414375
189.2	0.41625
189.3	0.415625
189.4	0.415
189.5	0.416875
189.6	0.415625
189.7	0.418125
189.8	0.416875
189.9	0.41625
190	0.41375
190.1	0.410625
190.2	0.41375
190.3	0.411875
190.4	0.41375
190.5	0.4075
190.6	0.409375
190.7	0.409375
190.8	0.4075
190.9	0.408125
191	0.41
191.1	0.408125
191.2	0.410625
191.3	0.41125
191.4	0.411875
191.5	0.4125
191.6	0.415625
191.7	0.41625
191.8	0.416875
191.9	0.415
192	0.4175
192.1	0.415625
192.2	0.414375
192.3	0.41375
192.4	0.411875
192.5	0.410625
192.6	0.411875
192.7	0.411875
192.8	0.41
192.9	0.414375
193	0.4125
193.1	0.4075
193.2	0.405
193.3	0.40625
193.4	0.408125
193.5	0.408125
193.6	0.40875
193.7	0.408125
193.8	0.40875
193.9	0.409375
194	0.408125
194.1	0.408125
194.2	0.409375
194.3	0.410625
194.4	0.411875
194.5	0.4125
194.6	0.4125
194.7	0.41
194.8	0.406875
194.9	0.405
195	0.405625
195.1	0.404375
195.2	0.404375
195.3	0.404375
195.4	0.40125
195.5	0.400625
195.6	0.400625
195.7	0.403125
195.8	0.401875
195.9	0.400625
196	0.40125
196.1	0.399375
196.2	0.400625
196.3	0.4
196.4	0.40125
196.5	0.40375
196.6	0.40625
196.7	0.406875
196.8	0.406875
196.9	0.41
197	0.41
197.1	0.408125
197.2	0.409375
197.3	0.405
197.4	0.405625
197.5	0.40125
197.6	0.3975
197.7	0.396875
197.8	0.396875
197.9	0.395625
198	0.398125
198.1	0.39875
198.2	0.399375
198.3	0.398125
198.4	0.400625
198.5	0.39875
198.6	0.403125
198.7	0.405
198.8	0.403125
198.9	0.403125
199	0.400625
199.1	0.39875
199.2	0.396875
199.3	0.394375
199.4	0.393125
199.5	0.390625
199.6	0.39125
199.7	0.391875
199.8	0.395
199.9	0.398125
200	0.3975
[truncated: 14,000 more rows]
