# Supplementary material for: Bayesian inference of kinetic schemes for ion channels by Kalman filtering
Source: eLife journal article supplement (doi:10.7554/elife.62714), 2022-05-04
Supplement: fig4-data12 [file 1_Sim_N_800_Strom_MW_0.125M.xlsx]

## Sheet: Tabelle1
0.1	0
0.2	0
0.3	0
0.4	0
0.5	0
0.6	0
0.7	0
0.8	0
0.9	0
1	0
1.1	0
1.2	0
1.3	0
1.4	0
1.5	0
1.6	0
1.7	0
1.8	0
1.9	0
2	0
2.1	0
2.2	0
2.3	0
2.4	0
2.5	0
2.6	0
2.7	0
2.8	0
2.9	0
3	0
3.1	0
3.2	0
3.3	0
3.4	0
3.5	0
3.6	0
3.7	0
3.8	0
3.9	0
4	0
4.1	0
4.2	0
4.3	0
4.4	0
4.5	0
4.6	0
4.7	0
4.8	0
4.9	0
5	0
5.1	0
5.2	0
5.3	0
5.4	0
5.5	0
5.6	0
5.7	0
5.8	0
5.9	0
6	0
6.1	0
6.2	0
6.3	0
6.4	0
6.5	0
6.6	0
6.7	0
6.8	0
6.9	0
7	0
7.1	0
7.2	0
7.3	0
7.4	0
7.5	0
7.6	0
7.7	0
7.8	0
7.9	0
8	0
8.1	0
8.2	0
8.3	0
8.4	0
8.5	0
8.6	0
8.7	0
8.8	0
8.9	0
9	0
9.1	0
9.2	0
9.3	0
9.4	0
9.5	0
9.6	0
9.7	0
9.8	0
9.9	0
10	0
10.1	0
10.2	0
10.3	0
10.4	0
10.5	0
10.6	0
10.7	0
10.8	0
10.9	0
11	0
11.1	0
11.2	0
11.3	0
11.4	0
11.5	0
11.6	0
11.7	0
11.8	0
11.9	0
12	0
12.1	0
12.2	0
12.3	0
12.4	0
12.5	0
12.6	0
12.7	0
12.8	0
12.9	0
13	0
13.1	0
13.2	0
13.3	0
13.4	0
13.5	0
13.6	0
13.7	0
13.8	0
13.9	0
14	0
14.1	0
14.2	0
14.3	0
14.4	0
14.5	0
14.6	0
14.7	0
14.8	0
14.9	0
15	0
15.1	0
15.2	0
15.3	0
15.4	0
15.5	0
15.6	0
15.7	0
15.8	0
15.9	0
16	0
16.1	0
16.2	0
16.3	0
16.4	0
16.5	0
16.6	0
16.7	0
16.8	0
16.9	0
17	0
17.1	0
17.2	0
17.3	0
17.4	0
17.5	0
17.6	0
17.7	0
17.8	0
17.9	0
18	0
18.1	0
18.2	0
18.3	0
18.4	0
18.5	0
18.6	0
18.7	0
18.8	0
18.9	0
19	0
19.1	0
19.2	0
19.3	0
19.4	0
19.5	0
19.6	0
19.7	0
19.8	0
19.9	0
20	0
20.1	0
20.2	0
20.3	0
20.4	0
20.5	0
20.6	0
20.7	0
20.8	0
20.9	0
21	0
21.1	0
21.2	0
21.3	0
21.4	0
21.5	0
21.6	0
21.7	0
21.8	0
21.9	0
22	0
22.1	0
22.2	0
22.3	0
22.4	0
22.5	0
22.6	0
22.7	0
22.8	0
22.9	0
23	0
23.1	0
23.2	0
23.3	0
23.4	0
23.5	0
23.6	0
23.7	0
23.8	0
23.9	0
24	0
24.1	0
24.2	0
24.3	0
24.4	0
24.5	0
24.6	0
24.7	0
24.8	0
24.9	0
25	0
25.1	0
25.2	0
25.3	0
25.4	0
25.5	0
25.6	0
25.7	0
25.8	0
25.9	0
26	0
26.1	0
26.2	0
26.3	0
26.4	0
26.5	0
26.6	0
26.7	0
26.8	0
26.9	0
27	0
27.1	0
27.2	0
27.3	0
27.4	0
27.5	0
27.6	0
27.7	0
27.8	0
27.9	0
28	0
28.1	0
28.2	0
28.3	0
28.4	0
28.5	0
28.6	0
28.7	0
28.8	0
28.9	0
29	0
29.1	0
29.2	0
29.3	0
29.4	0
29.5	0
29.6	0
29.7	0
29.8	0
29.9	0
30	0
30.1	0
30.2	0
30.3	0
30.4	0
30.5	0
30.6	0
30.7	0
30.8	0
30.9	0
31	0
31.1	0
31.2	0
31.3	0
31.4	0
31.5	0
31.6	0
31.7	0
31.8	0
31.9	0
32	0
32.1	0
32.2	0
32.3	0
32.4	0
32.5	0
32.6	0
32.7	0
32.8	0
32.9	0
33	0
33.1	0
33.2	0
33.3	0
33.4	0
33.5	0
33.6	0
33.7	0
33.8	0
33.9	0
34	0
34.1	0
34.2	0
34.3	0
34.4	0
34.5	0
34.6	0
34.7	0
34.8	0
34.9	0
35	0
35.1	0
35.2	0
35.3	0
35.4	0
35.5	0
35.6	0
35.7	0
35.8	0
35.9	0
36	0
36.1	0
36.2	0
36.3	0
36.4	0
36.5	0
36.6	0
36.7	0
36.8	0
36.9	0
37	0
37.1	0
37.2	0
37.3	0
37.4	0
37.5	0
37.6	0
37.7	0
37.8	0
37.9	0
38	0
38.1	0
38.2	0
38.3	0
38.4	0
38.5	0
38.6	0
38.7	0
38.8	0
38.9	0
39	0
39.1	0
39.2	0
39.3	0
39.4	0
39.5	0
39.6	0
39.7	0
39.8	0
39.9	0
40	0
40.1	0
40.2	0
40.3	0
40.4	0
40.5	0
40.6	0
40.7	0
40.8	0
40.9	0
41	0
41.1	0
41.2	0
41.3	0
41.4	0
41.5	0
41.6	0
41.7	0
41.8	0
41.9	0
42	0
42.1	0
42.2	0
42.3	0
42.4	0
42.5	0
42.6	0
42.7	0
42.8	0
42.9	0
43	0
43.1	0
43.2	0
43.3	0
43.4	0
43.5	0
43.6	0
43.7	0
43.8	0
43.9	0
44	0
44.1	0
44.2	0
44.3	0
44.4	0
44.5	0
44.6	0
44.7	0
44.8	0
44.9	0
45	0
45.1	0
45.2	0
45.3	0
45.4	0
45.5	0
45.6	0
45.7	0
45.8	0
45.9	0
46	0
46.1	0
46.2	0
46.3	0
46.4	0
46.5	0
46.6	0
46.7	0
46.8	0
46.9	0
47	0
47.1	0
47.2	0
47.3	0
47.4	0
47.5	0
47.6	0
47.7	0
47.8	0
47.9	0
48	0
48.1	0
48.2	0
48.3	0
48.4	0
48.5	0
48.6	0
48.7	0
48.8	0
48.9	0
49	0
49.1	0
49.2	0
49.3	0
49.4	0
49.5	0
49.6	0
49.7	0
49.8	0
49.9	0
50	0
50.1	0
50.2	0
50.3	0
50.4	0
50.5	0
50.6	0
50.7	0
50.8	0
50.9	0
51	0
51.1	0
51.2	0
51.3	0
51.4	0
51.5	0
51.6	0
51.7	0
51.8	0
51.9	0
52	0
52.1	0
52.2	0
52.3	0
52.4	0
52.5	0
52.6	0
52.7	0
52.8	0
52.9	0
53	0
53.1	0
53.2	0
53.3	0
53.4	0
53.5	0
53.6	0
53.7	0
53.8	0
53.9	0
54	0
54.1	0
54.2	0
54.3	0
54.4	0
54.5	0
54.6	0
54.7	0
54.8	0
54.9	0
55	0
55.1	0
55.2	0
55.3	0
55.4	0
55.5	0
55.6	0
55.7	0
55.8	0
55.9	0
56	0
56.1	0
56.2	0
56.3	0
56.4	0
56.5	0
56.6	0
56.7	0
56.8	0
56.9	0
57	0
57.1	0
57.2	0
57.3	0
57.4	0
57.5	0
57.6	0
57.7	0
57.8	0
57.9	0
58	0
58.1	0
58.2	0
58.3	0
58.4	0
58.5	0
58.6	0
58.7	0
58.8	0
58.9	0
59	0
59.1	0
59.2	0
59.3	0
59.4	0
59.5	0
59.6	0
59.7	0
59.8	0
59.9	0
60	0
60.1	0
60.2	0
60.3	0
60.4	0
60.5	0
60.6	0
60.7	0
60.8	0
60.9	0
61	0
61.1	0
61.2	0
61.3	0
61.4	0
61.5	0
61.6	0
61.7	0
61.8	0
61.9	0
62	0
62.1	0
62.2	0
62.3	0
62.4	0
62.5	0
62.6	0
62.7	0
62.8	0
62.9	0
63	0
63.1	0
63.2	0
63.3	0
63.4	0
63.5	0
63.6	0
63.7	0
63.8	0
63.9	0
64	0
64.1	0
64.2	0
64.3	0
64.4	0
64.5	0
64.6	0
64.7	0
64.8	0
64.9	0
65	0
65.1	0
65.2	0
65.3	0
65.4	0
65.5	0
65.6	0
65.7	0
65.8	0
65.9	0
66	0
66.1	0
66.2	0
66.3	0
66.4	0
66.5	0
66.6	0
66.7	0
66.8	0
66.9	0
67	0
67.1	0
67.2	0
67.3	0
67.4	0
67.5	0
67.6	0
67.7	0
67.8	0
67.9	0
68	0
68.1	0
68.2	0
68.3	0
68.4	0
68.5	0
68.6	0
68.7	0
68.8	0
68.9	0
69	0
69.1	0
69.2	0
69.3	0
69.4	0
69.5	0
69.6	0
69.7	0
69.8	0
69.9	0
70	0
70.1	0
70.2	0
70.3	0
70.4	0
70.5	0
70.6	0
70.7	0
70.8	0
70.9	0
71	0
71.1	0
71.2	0
71.3	0
71.4	0
71.5	0
71.6	0
71.7	0
71.8	0
71.9	0
72	0
72.1	0
72.2	0
72.3	0
72.4	0
72.5	0
72.6	0
72.7	0
72.8	0
72.9	0
73	0
73.1	0
73.2	0
73.3	0
73.4	0
73.5	0
73.6	0
73.7	0
73.8	0
73.9	0
74	0
74.1	0
74.2	0
74.3	0
74.4	0
74.5	0
74.6	0
74.7	0
74.8	0
74.9	0
75	0
75.1	0
75.2	0
75.3	0
75.4	0
75.5	0
75.6	0
75.7	0
75.8	0
75.9	0
76	0
76.1	0
76.2	0
76.3	0
76.4	0
76.5	0
76.6	0
76.7	0
76.8	0
76.9	0
77	0
77.1	0
77.2	0
77.3	0
77.4	0
77.5	0
77.6	0
77.7	0
77.8	0
77.9	0
78	0
78.1	0
78.2	0
78.3	0
78.4	0
78.5	0
78.6	0
78.7	0
78.8	0
78.9	0
79	0
79.1	0
79.2	0
79.3	0
79.4	0
79.5	0
79.6	0
79.7	0
79.8	0
79.9	0
80	0
80.1	0
80.2	0
80.3	0
80.4	0
80.5	0
80.6	0
80.7	0
80.8	0
80.9	0
81	0
81.1	0
81.2	0
81.3	0
81.4	0
81.5	0
81.6	0
81.7	0
81.8	0
81.9	0
82	0
82.1	0
82.2	0
82.3	0
82.4	0
82.5	0
82.6	0
82.7	0
82.8	0
82.9	0
83	0
83.1	0
83.2	0
83.3	0
83.4	0
83.5	0
83.6	0
83.7	0
83.8	0
83.9	0
84	0
84.1	0
84.2	0
84.3	0
84.4	0
84.5	0
84.6	0
84.7	0
84.8	0
84.9	0
85	0
85.1	0
85.2	0
85.3	0
85.4	0
85.5	0
85.6	0
85.7	0
85.8	0
85.9	0
86	0
86.1	0
86.2	0
86.3	0
86.4	0
86.5	0
86.6	0
86.7	0
86.8	0
86.9	0
87	0
87.1	0
87.2	0
87.3	0
87.4	0
87.5	0
87.6	0
87.7	0
87.8	0
87.9	0
88	0
88.1	0
88.2	0
88.3	0
88.4	0
88.5	0
88.6	0
88.7	0
88.8	0
88.9	0
89	0
89.1	0
89.2	0
89.3	0
89.4	0
89.5	0
89.6	0
89.7	0
89.8	0
89.9	0
90	0
90.1	0
90.2	0
90.3	0
90.4	0
90.5	0
90.6	0
90.7	0
90.8	0
90.9	0
91	0
91.1	0
91.2	0
91.3	0
91.4	0
91.5	0
91.6	0
91.7	0
91.8	0
91.9	0
92	0
92.1	0
92.2	0
92.3	0
92.4	0
92.5	0
92.6	0
92.7	0
92.8	0
92.9	0
93	0
93.1	0
93.2	0
93.3	0
93.4	0
93.5	0
93.6	0
93.7	0
93.8	0
93.9	0
94	0
94.1	0
94.2	0
94.3	0
94.4	0
94.5	0
94.6	0
94.7	0
94.8	0
94.9	0
95	0
95.1	0
95.2	0
95.3	0
95.4	0
95.5	0
95.6	0
95.7	0
95.8	0
95.9	0
96	0
96.1	0
96.2	0
96.3	0
96.4	0
96.5	0
96.6	0
96.7	0
96.8	0
96.9	0
97	0
97.1	0
97.2	0
97.3	0
97.4	0
97.5	0
97.6	0
97.7	0
97.8	0
97.9	0
98	0
98.1	0
98.2	0
98.3	0
98.4	0
98.5	0
98.6	0
98.7	0
98.8	0
98.9	0
99	0
99.1	0
99.2	0
99.3	0
99.4	0
99.5	0
99.6	0
99.7	0
99.8	0
99.9	0
100	0
100.1	0
100.2	0
100.3	0
100.4	0
100.5	0
100.6	0
100.7	0
100.8	0
100.9	0
101	0
101.1	0
101.2	0
101.3	0
101.4	0
101.5	0
101.6	0
101.7	0
101.8	0
101.9	0
102	0.00125
102.1	0.00125
102.2	0.00125
102.3	0.00125
102.4	0.00125
102.5	0.00125
102.6	0.00125
102.7	0.00125
102.8	0.00125
102.9	0.00125
103	0.00125
103.1	0.00125
103.2	0.00125
103.3	0.00125
103.4	0.00125
103.5	0.0025
103.6	0.0025
103.7	0.0025
103.8	0.0025
103.9	0.0025
104	0.0025
104.1	0.0025
104.2	0.0025
104.3	0.0025
104.4	0.00375
104.5	0.00375
104.6	0.00375
104.7	0.00375
104.8	0.00375
104.9	0.00375
105	0.00375
105.1	0.00375
105.2	0.00375
105.3	0.00375
105.4	0.00375
105.5	0.00375
105.6	0.00375
105.7	0.00375
105.8	0.00375
105.9	0.00375
106	0.00375
106.1	0.00375
106.2	0.00375
106.3	0.00375
106.4	0.00375
106.5	0.00375
106.6	0.00375
106.7	0.00375
106.8	0.00375
106.9	0.00375
107	0.00375
107.1	0.00375
107.2	0.00375
107.3	0.00375
107.4	0.00375
107.5	0.00375
107.6	0.005
107.7	0.005
107.8	0.005
107.9	0.005
108	0.005
108.1	0.005
108.2	0.005
108.3	0.005
108.4	0.005
108.5	0.005
108.6	0.005
108.7	0.005
108.8	0.00625
108.9	0.00625
109	0.00625
109.1	0.00625
109.2	0.00625
109.3	0.00625
109.4	0.00625
109.5	0.00625
109.6	0.0075
109.7	0.0075
109.8	0.0075
109.9	0.00875
110	0.00875
110.1	0.00875
110.2	0.00875
110.3	0.00875
110.4	0.00875
110.5	0.01
110.6	0.01
110.7	0.01
110.8	0.01
110.9	0.01125
111	0.01125
111.1	0.01125
111.2	0.0125
111.3	0.0125
111.4	0.0125
111.5	0.0125
111.6	0.0125
111.7	0.0125
111.8	0.01375
111.9	0.015
112	0.015
112.1	0.01625
112.2	0.01625
112.3	0.01625
112.4	0.01625
112.5	0.01625
112.6	0.01625
112.7	0.01625
112.8	0.0175
112.9	0.02
113	0.02
113.1	0.02
113.2	0.02
113.3	0.02
113.4	0.02125
113.5	0.02125
113.6	0.02125
113.7	0.02125
113.8	0.0225
113.9	0.02125
114	0.02125
114.1	0.0225
114.2	0.0225
114.3	0.0225
114.4	0.0225
114.5	0.0225
114.6	0.0225
114.7	0.0225
114.8	0.0225
114.9	0.0225
115	0.0225
115.1	0.0225
115.2	0.0225
115.3	0.0225
115.4	0.0225
115.5	0.0225
115.6	0.0225
115.7	0.02375
115.8	0.02375
115.9	0.02375
116	0.02375
116.1	0.025
116.2	0.025
116.3	0.02625
116.4	0.02625
116.5	0.02625
116.6	0.02625
116.7	0.02625
116.8	0.0275
116.9	0.02875
117	0.03
117.1	0.03
117.2	0.03
117.3	0.03
117.4	0.03
117.5	0.03
117.6	0.03
117.7	0.03
117.8	0.03
117.9	0.03
118	0.03
118.1	0.03
118.2	0.03
118.3	0.03
118.4	0.03
118.5	0.03
118.6	0.03
118.7	0.03
118.8	0.03
118.9	0.03
119	0.03
119.1	0.03
119.2	0.03
119.3	0.03
119.4	0.03
119.5	0.03
119.6	0.03
119.7	0.03
119.8	0.03125
119.9	0.03125
120	0.03125
120.1	0.03125
120.2	0.03125
120.3	0.03125
120.4	0.03125
120.5	0.03125
120.6	0.03125
120.7	0.03125
120.8	0.03125
120.9	0.03125
121	0.0325
121.1	0.0325
121.2	0.03125
121.3	0.03125
121.4	0.03125
121.5	0.0325
121.6	0.0325
121.7	0.0325
121.8	0.03375
121.9	0.03375
122	0.03375
122.1	0.035
122.2	0.035
122.3	0.035
122.4	0.035
122.5	0.035
122.6	0.035
122.7	0.035
122.8	0.035
122.9	0.03625
123	0.03625
123.1	0.03625
123.2	0.0375
123.3	0.0375
123.4	0.0375
123.5	0.0375
123.6	0.0375
123.7	0.0375
123.8	0.0375
123.9	0.0375
124	0.0375
124.1	0.0375
124.2	0.0375
124.3	0.03875
124.4	0.04
124.5	0.04
124.6	0.04
124.7	0.04125
124.8	0.04125
124.9	0.04125
125	0.04125
125.1	0.04125
125.2	0.04125
125.3	0.04125
125.4	0.04125
125.5	0.04125
125.6	0.0425
125.7	0.0425
125.8	0.0425
125.9	0.0425
126	0.0425
126.1	0.0425
126.2	0.04375
126.3	0.04375
126.4	0.04375
126.5	0.04375
126.6	0.04375
126.7	0.045
126.8	0.04625
126.9	0.04625
127	0.0475
127.1	0.0475
127.2	0.04875
127.3	0.04875
127.4	0.04875
127.5	0.04875
127.6	0.04875
127.7	0.04875
127.8	0.04875
127.9	0.04875
128	0.04875
128.1	0.04875
128.2	0.04875
128.3	0.0475
128.4	0.0475
128.5	0.0475
128.6	0.0475
128.7	0.0475
128.8	0.0475
128.9	0.0475
129	0.0475
129.1	0.0475
129.2	0.0475
129.3	0.0475
129.4	0.0475
129.5	0.0475
129.6	0.0475
129.7	0.0475
129.8	0.0475
129.9	0.04875
130	0.04875
130.1	0.04875
130.2	0.04875
130.3	0.04875
130.4	0.04875
130.5	0.04875
130.6	0.04875
130.7	0.04875
130.8	0.04875
130.9	0.04875
131	0.04875
131.1	0.04875
131.2	0.04875
131.3	0.04875
131.4	0.05
131.5	0.05
131.6	0.05
131.7	0.05125
131.8	0.05125
131.9	0.05125
132	0.05125
132.1	0.05125
132.2	0.05125
132.3	0.05125
132.4	0.05125
132.5	0.05125
132.6	0.05125
132.7	0.05125
132.8	0.05125
132.9	0.0525
133	0.0525
133.1	0.0525
133.2	0.0525
133.3	0.0525
133.4	0.0525
133.5	0.0525
133.6	0.0525
133.7	0.0525
133.8	0.0525
133.9	0.0525
134	0.0525
134.1	0.0525
134.2	0.0525
134.3	0.0525
134.4	0.0525
134.5	0.0525
134.6	0.05375
134.7	0.055
134.8	0.055
134.9	0.055
135	0.055
135.1	0.05625
135.2	0.05625
135.3	0.05625
135.4	0.05625
135.5	0.05625
135.6	0.0575
135.7	0.0575
135.8	0.0575
135.9	0.0575
136	0.0575
136.1	0.05875
136.2	0.05875
136.3	0.06
136.4	0.06
136.5	0.06
136.6	0.06
136.7	0.06
136.8	0.06125
136.9	0.06125
137	0.06125
137.1	0.06125
137.2	0.06125
137.3	0.06125
137.4	0.06125
137.5	0.06125
137.6	0.06125
137.7	0.06125
137.8	0.06125
137.9	0.06125
138	0.06125
138.1	0.06125
138.2	0.06125
138.3	0.06125
138.4	0.0625
138.5	0.06375
138.6	0.06375
138.7	0.06625
138.8	0.0675
138.9	0.0675
139	0.0675
139.1	0.0675
139.2	0.0675
139.3	0.0675
139.4	0.06625
139.5	0.0675
139.6	0.0675
139.7	0.0675
139.8	0.0675
139.9	0.0675
140	0.0675
140.1	0.0675
140.2	0.06625
140.3	0.06625
140.4	0.0675
140.5	0.0675
140.6	0.0675
140.7	0.0675
140.8	0.0675
140.9	0.0675
141	0.0675
141.1	0.0675
141.2	0.0675
141.3	0.06875
141.4	0.07
141.5	0.07
141.6	0.07
141.7	0.07
141.8	0.07125
141.9	0.07125
142	0.07125
142.1	0.07125
142.2	0.07125
142.3	0.07125
142.4	0.07125
142.5	0.07125
142.6	0.07125
142.7	0.07125
142.8	0.07125
142.9	0.07125
143	0.07125
143.1	0.07125
143.2	0.07125
143.3	0.0725
143.4	0.07375
143.5	0.07375
143.6	0.07375
143.7	0.07375
143.8	0.07375
143.9	0.07375
144	0.07375
144.1	0.07375
144.2	0.07375
144.3	0.07375
144.4	0.07375
144.5	0.07375
144.6	0.07375
144.7	0.07375
144.8	0.07375
144.9	0.075
145	0.075
145.1	0.075
145.2	0.07625
145.3	0.07625
145.4	0.07625
145.5	0.07625
145.6	0.0775
145.7	0.0775
145.8	0.0775
145.9	0.07875
146	0.07875
146.1	0.07875
146.2	0.07875
146.3	0.07875
146.4	0.07875
146.5	0.07875
146.6	0.07875
146.7	0.07875
146.8	0.07875
146.9	0.07875
147	0.07875
147.1	0.07875
147.2	0.07875
147.3	0.07875
147.4	0.07875
147.5	0.07875
147.6	0.08
147.7	0.08
147.8	0.08
147.9	0.08
148	0.08
148.1	0.08
148.2	0.08
148.3	0.08
148.4	0.08
148.5	0.08
148.6	0.08
148.7	0.08125
148.8	0.08125
148.9	0.08125
149	0.08125
149.1	0.0825
149.2	0.08125
149.3	0.08125
149.4	0.08125
149.5	0.08125
149.6	0.08125
149.7	0.08125
149.8	0.08
149.9	0.08
150	0.07875
150.1	0.07625
150.2	0.07625
150.3	0.07625
150.4	0.07625
150.5	0.07625
150.6	0.07625
150.7	0.07625
150.8	0.07625
150.9	0.075
151	0.075
151.1	0.075
151.2	0.07625
151.3	0.07625
151.4	0.07625
151.5	0.07625
151.6	0.0775
151.7	0.0775
151.8	0.0775
151.9	0.08
152	0.08
152.1	0.08125
152.2	0.08125
152.3	0.08125
152.4	0.08125
152.5	0.08125
152.6	0.0825
152.7	0.08375
152.8	0.08375
152.9	0.08375
153	0.08375
153.1	0.08375
153.2	0.08375
153.3	0.085
153.4	0.085
153.5	0.085
153.6	0.085
153.7	0.085
153.8	0.085
153.9	0.085
154	0.085
154.1	0.085
154.2	0.085
154.3	0.085
154.4	0.08625
154.5	0.08625
154.6	0.08625
154.7	0.08625
154.8	0.08625
154.9	0.085
155	0.085
155.1	0.085
155.2	0.085
155.3	0.08375
155.4	0.08375
155.5	0.08375
155.6	0.08375
155.7	0.08375
155.8	0.08375
155.9	0.08375
156	0.085
156.1	0.085
156.2	0.08625
156.3	0.08625
156.4	0.08625
156.5	0.0875
156.6	0.08875
156.7	0.08875
156.8	0.08875
156.9	0.0875
157	0.0875
157.1	0.0875
157.2	0.0875
157.3	0.0875
157.4	0.0875
157.5	0.0875
157.6	0.0875
157.7	0.08875
157.8	0.08875
157.9	0.08875
158	0.09
158.1	0.09
158.2	0.09
158.3	0.09125
158.4	0.0925
158.5	0.0925
158.6	0.09375
158.7	0.09375
158.8	0.09375
158.9	0.095
159	0.095
159.1	0.095
159.2	0.095
159.3	0.095
159.4	0.095
159.5	0.095
159.6	0.09375
159.7	0.095
159.8	0.09625
159.9	0.09625
160	0.09625
160.1	0.0975
160.2	0.0975
160.3	0.0975
160.4	0.0975
160.5	0.0975
160.6	0.09875
160.7	0.09875
160.8	0.09875
160.9	0.1025
161	0.1025
161.1	0.1025
161.2	0.1025
161.3	0.10375
161.4	0.10375
161.5	0.10375
161.6	0.10375
161.7	0.10375
161.8	0.10375
161.9	0.1025
162	0.10125
162.1	0.10125
162.2	0.10125
162.3	0.10125
162.4	0.10125
162.5	0.10125
162.6	0.10125
162.7	0.10125
162.8	0.1
162.9	0.1
163	0.1
163.1	0.1
163.2	0.1
163.3	0.1
163.4	0.09875
163.5	0.09875
163.6	0.09875
163.7	0.09875
163.8	0.09875
163.9	0.09875
164	0.09875
164.1	0.09875
164.2	0.09875
164.3	0.09875
164.4	0.09875
164.5	0.09875
164.6	0.09875
164.7	0.09875
164.8	0.09875
164.9	0.09875
165	0.09875
165.1	0.09875
165.2	0.09875
165.3	0.09875
165.4	0.09875
165.5	0.09875
165.6	0.10125
165.7	0.10125
165.8	0.10125
165.9	0.10125
166	0.10125
166.1	0.10125
166.2	0.10125
166.3	0.1025
166.4	0.10375
166.5	0.10375
166.6	0.10375
166.7	0.10375
166.8	0.10375
166.9	0.105
167	0.105
167.1	0.10625
167.2	0.10625
167.3	0.1075
167.4	0.1075
167.5	0.1075
167.6	0.1075
167.7	0.1075
167.8	0.10625
167.9	0.10625
168	0.10625
168.1	0.10625
168.2	0.105
168.3	0.105
168.4	0.105
168.5	0.10625
168.6	0.10625
168.7	0.10625
168.8	0.10625
168.9	0.10625
169	0.105
169.1	0.105
169.2	0.105
169.3	0.105
169.4	0.105
169.5	0.105
169.6	0.105
169.7	0.105
169.8	0.105
169.9	0.105
170	0.105
170.1	0.10625
170.2	0.10625
170.3	0.1075
170.4	0.1075
170.5	0.1075
170.6	0.10625
170.7	0.10625
170.8	0.10625
170.9	0.10625
171	0.10625
171.1	0.105
171.2	0.105
171.3	0.105
171.4	0.105
171.5	0.105
171.6	0.105
171.7	0.105
171.8	0.105
171.9	0.105
172	0.105
172.1	0.105
172.2	0.10625
172.3	0.10625
172.4	0.105
172.5	0.105
172.6	0.105
172.7	0.105
172.8	0.105
172.9	0.105
173	0.105
173.1	0.105
173.2	0.105
173.3	0.105
173.4	0.105
173.5	0.10375
173.6	0.1025
173.7	0.1025
173.8	0.1025
173.9	0.1025
174	0.1025
174.1	0.1025
174.2	0.1025
174.3	0.1025
174.4	0.1025
174.5	0.10375
174.6	0.10375
174.7	0.10375
174.8	0.10375
174.9	0.10375
175	0.10375
175.1	0.105
175.2	0.105
175.3	0.105
175.4	0.105
175.5	0.105
175.6	0.105
175.7	0.105
175.8	0.105
175.9	0.105
176	0.105
176.1	0.10375
176.2	0.10375
176.3	0.10375
176.4	0.10375
176.5	0.1025
176.6	0.10375
176.7	0.10375
176.8	0.10375
176.9	0.1025
177	0.1025
177.1	0.1025
177.2	0.1025
177.3	0.1025
177.4	0.1025
177.5	0.10125
177.6	0.10125
177.7	0.10125
177.8	0.10125
177.9	0.10125
178	0.10125
178.1	0.10125
178.2	0.10125
178.3	0.10125
178.4	0.10125
178.5	0.10125
178.6	0.10125
178.7	0.1
178.8	0.1
178.9	0.1
179	0.1
179.1	0.1
179.2	0.10125
179.3	0.10125
179.4	0.10125
179.5	0.1
179.6	0.1
179.7	0.10125
179.8	0.10125
179.9	0.10125
180	0.1025
180.1	0.1025
180.2	0.1025
180.3	0.1025
180.4	0.1025
180.5	0.1025
180.6	0.1025
180.7	0.1025
180.8	0.1025
180.9	0.1025
181	0.1025
181.1	0.10375
181.2	0.10375
181.3	0.10375
181.4	0.10375
181.5	0.105
181.6	0.105
181.7	0.10625
181.8	0.10625
181.9	0.10625
182	0.10625
182.1	0.10625
182.2	0.10625
182.3	0.10625
182.4	0.10625
182.5	0.10625
182.6	0.10625
182.7	0.10625
182.8	0.10625
182.9	0.10625
183	0.10625
183.1	0.10625
183.2	0.10625
183.3	0.1075
183.4	0.10875
183.5	0.10875
183.6	0.10875
183.7	0.10875
183.8	0.10875
183.9	0.11
184	0.11
184.1	0.11
184.2	0.11
184.3	0.11
184.4	0.10875
184.5	0.10875
184.6	0.10875
184.7	0.10875
184.8	0.11
184.9	0.11
185	0.11
185.1	0.11
185.2	0.11
185.3	0.11
185.4	0.11
185.5	0.11
185.6	0.11
185.7	0.11
185.8	0.11
185.9	0.11
186	0.11
186.1	0.11
186.2	0.10875
186.3	0.10875
186.4	0.1075
186.5	0.1075
186.6	0.10875
186.7	0.10875
186.8	0.10875
186.9	0.10875
187	0.10875
187.1	0.10875
187.2	0.10875
187.3	0.10875
187.4	0.1075
187.5	0.1075
187.6	0.1075
187.7	0.1075
187.8	0.1075
187.9	0.1075
188	0.1075
188.1	0.1075
188.2	0.1075
188.3	0.1075
188.4	0.10875
188.5	0.10875
188.6	0.1075
188.7	0.1075
188.8	0.10875
188.9	0.10875
189	0.10875
189.1	0.10875
189.2	0.10875
189.3	0.10875
189.4	0.10875
189.5	0.10875
189.6	0.10875
189.7	0.11
189.8	0.11
189.9	0.11
190	0.11
190.1	0.10875
190.2	0.10875
190.3	0.10875
190.4	0.10875
190.5	0.10875
190.6	0.10875
190.7	0.10875
190.8	0.10875
190.9	0.10875
191	0.10875
191.1	0.10875
191.2	0.10875
191.3	0.10875
191.4	0.10875
191.5	0.10875
191.6	0.10875
191.7	0.1075
191.8	0.10625
191.9	0.10625
192	0.10625
192.1	0.10625
192.2	0.10625
192.3	0.10625
192.4	0.10625
192.5	0.10625
192.6	0.10625
192.7	0.10625
192.8	0.10625
192.9	0.10625
193	0.1075
193.1	0.10625
193.2	0.10625
193.3	0.10625
193.4	0.105
193.5	0.105
193.6	0.10625
193.7	0.10625
193.8	0.10625
193.9	0.10625
194	0.10625
194.1	0.10625
194.2	0.10625
194.3	0.10625
194.4	0.10625
194.5	0.10625
194.6	0.10625
194.7	0.10625
194.8	0.10625
194.9	0.105
195	0.105
195.1	0.105
195.2	0.105
195.3	0.105
195.4	0.10375
195.5	0.10375
195.6	0.10375
195.7	0.10375
195.8	0.105
195.9	0.105
196	0.105
196.1	0.10625
196.2	0.10625
196.3	0.10625
196.4	0.10625
196.5	0.10625
196.6	0.1075
196.7	0.1075
196.8	0.10625
196.9	0.10625
197	0.10625
197.1	0.10625
197.2	0.10625
197.3	0.10625
197.4	0.10625
197.5	0.10875
197.6	0.10875
197.7	0.10875
197.8	0.10875
197.9	0.10875
198	0.11
198.1	0.11
198.2	0.11
198.3	0.11
198.4	0.11
198.5	0.11125
198.6	0.11125
198.7	0.1125
198.8	0.1125
198.9	0.1125
199	0.11375
199.1	0.115
199.2	0.11625
199.3	0.11625
199.4	0.1175
199.5	0.115
199.6	0.115
199.7	0.115
199.8	0.115
199.9	0.115
200	0.115
[truncated: 14,000 more rows]
