# Supplementary material for: Bayesian inference of kinetic schemes for ion channels by Kalman filtering
Source: eLife journal article supplement (doi:10.7554/elife.62714), 2022-05-04
Supplement: fig4-data12 [file 1_Sim_N_1500_Fluor_MW_0.125M.xlsx]

## Sheet: Tabelle1
0.1	0
0.2	0
0.3	0
0.4	0
0.5	0
0.6	0
0.7	0
0.8	0
0.9	0
1	0
1.1	0
1.2	0
1.3	0
1.4	0
1.5	0
1.6	0
1.7	0
1.8	0
1.9	0
2	0
2.1	0
2.2	0
2.3	0
2.4	0
2.5	0
2.6	0
2.7	0
2.8	0
2.9	0
3	0
3.1	0
3.2	0
3.3	0
3.4	0
3.5	0
3.6	0
3.7	0
3.8	0
3.9	0
4	0
4.1	0
4.2	0
4.3	0
4.4	0
4.5	0
4.6	0
4.7	0
4.8	0
4.9	0
5	0
5.1	0
5.2	0
5.3	0
5.4	0
5.5	0
5.6	0
5.7	0
5.8	0
5.9	0
6	0
6.1	0
6.2	0
6.3	0
6.4	0
6.5	0
6.6	0
6.7	0
6.8	0
6.9	0
7	0
7.1	0
7.2	0
7.3	0
7.4	0
7.5	0
7.6	0
7.7	0
7.8	0
7.9	0
8	0
8.1	0
8.2	0
8.3	0
8.4	0
8.5	0
8.6	0
8.7	0
8.8	0
8.9	0
9	0
9.1	0
9.2	0
9.3	0
9.4	0
9.5	0
9.6	0
9.7	0
9.8	0
9.9	0
10	0
10.1	0
10.2	0
10.3	0
10.4	0
10.5	0
10.6	0
10.7	0
10.8	0
10.9	0
11	0
11.1	0
11.2	0
11.3	0
11.4	0
11.5	0
11.6	0
11.7	0
11.8	0
11.9	0
12	0
12.1	0
12.2	0
12.3	0
12.4	0
12.5	0
12.6	0
12.7	0
12.8	0
12.9	0
13	0
13.1	0
13.2	0
13.3	0
13.4	0
13.5	0
13.6	0
13.7	0
13.8	0
13.9	0
14	0
14.1	0
14.2	0
14.3	0
14.4	0
14.5	0
14.6	0
14.7	0
14.8	0
14.9	0
15	0
15.1	0
15.2	0
15.3	0
15.4	0
15.5	0
15.6	0
15.7	0
15.8	0
15.9	0
16	0
16.1	0
16.2	0
16.3	0
16.4	0
16.5	0
16.6	0
16.7	0
16.8	0
16.9	0
17	0
17.1	0
17.2	0
17.3	0
17.4	0
17.5	0
17.6	0
17.7	0
17.8	0
17.9	0
18	0
18.1	0
18.2	0
18.3	0
18.4	0
18.5	0
18.6	0
18.7	0
18.8	0
18.9	0
19	0
19.1	0
19.2	0
19.3	0
19.4	0
19.5	0
19.6	0
19.7	0
19.8	0
19.9	0
20	0
20.1	0
20.2	0
20.3	0
20.4	0
20.5	0
20.6	0
20.7	0
20.8	0
20.9	0
21	0
21.1	0
21.2	0
21.3	0
21.4	0
21.5	0
21.6	0
21.7	0
21.8	0
21.9	0
22	0
22.1	0
22.2	0
22.3	0
22.4	0
22.5	0
22.6	0
22.7	0
22.8	0
22.9	0
23	0
23.1	0
23.2	0
23.3	0
23.4	0
23.5	0
23.6	0
23.7	0
23.8	0
23.9	0
24	0
24.1	0
24.2	0
24.3	0
24.4	0
24.5	0
24.6	0
24.7	0
24.8	0
24.9	0
25	0
25.1	0
25.2	0
25.3	0
25.4	0
25.5	0
25.6	0
25.7	0
25.8	0
25.9	0
26	0
26.1	0
26.2	0
26.3	0
26.4	0
26.5	0
26.6	0
26.7	0
26.8	0
26.9	0
27	0
27.1	0
27.2	0
27.3	0
27.4	0
27.5	0
27.6	0
27.7	0
27.8	0
27.9	0
28	0
28.1	0
28.2	0
28.3	0
28.4	0
28.5	0
28.6	0
28.7	0
28.8	0
28.9	0
29	0
29.1	0
29.2	0
29.3	0
29.4	0
29.5	0
29.6	0
29.7	0
29.8	0
29.9	0
30	0
30.1	0
30.2	0
30.3	0
30.4	0
30.5	0
30.6	0
30.7	0
30.8	0
30.9	0
31	0
31.1	0
31.2	0
31.3	0
31.4	0
31.5	0
31.6	0
31.7	0
31.8	0
31.9	0
32	0
32.1	0
32.2	0
32.3	0
32.4	0
32.5	0
32.6	0
32.7	0
32.8	0
32.9	0
33	0
33.1	0
33.2	0
33.3	0
33.4	0
33.5	0
33.6	0
33.7	0
33.8	0
33.9	0
34	0
34.1	0
34.2	0
34.3	0
34.4	0
34.5	0
34.6	0
34.7	0
34.8	0
34.9	0
35	0
35.1	0
35.2	0
35.3	0
35.4	0
35.5	0
35.6	0
35.7	0
35.8	0
35.9	0
36	0
36.1	0
36.2	0
36.3	0
36.4	0
36.5	0
36.6	0
36.7	0
36.8	0
36.9	0
37	0
37.1	0
37.2	0
37.3	0
37.4	0
37.5	0
37.6	0
37.7	0
37.8	0
37.9	0
38	0
38.1	0
38.2	0
38.3	0
38.4	0
38.5	0
38.6	0
38.7	0
38.8	0
38.9	0
39	0
39.1	0
39.2	0
39.3	0
39.4	0
39.5	0
39.6	0
39.7	0
39.8	0
39.9	0
40	0
40.1	0
40.2	0
40.3	0
40.4	0
40.5	0
40.6	0
40.7	0
40.8	0
40.9	0
41	0
41.1	0
41.2	0
41.3	0
41.4	0
41.5	0
41.6	0
41.7	0
41.8	0
41.9	0
42	0
42.1	0
42.2	0
42.3	0
42.4	0
42.5	0
42.6	0
42.7	0
42.8	0
42.9	0
43	0
43.1	0
43.2	0
43.3	0
43.4	0
43.5	0
43.6	0
43.7	0
43.8	0
43.9	0
44	0
44.1	0
44.2	0
44.3	0
44.4	0
44.5	0
44.6	0
44.7	0
44.8	0
44.9	0
45	0
45.1	0
45.2	0
45.3	0
45.4	0
45.5	0
45.6	0
45.7	0
45.8	0
45.9	0
46	0
46.1	0
46.2	0
46.3	0
46.4	0
46.5	0
46.6	0
46.7	0
46.8	0
46.9	0
47	0
47.1	0
47.2	0
47.3	0
47.4	0
47.5	0
47.6	0
47.7	0
47.8	0
47.9	0
48	0
48.1	0
48.2	0
48.3	0
48.4	0
48.5	0
48.6	0
48.7	0
48.8	0
48.9	0
49	0
49.1	0
49.2	0
49.3	0
49.4	0
49.5	0
49.6	0
49.7	0
49.8	0
49.9	0
50	0
50.1	0
50.2	0
50.3	0
50.4	0
50.5	0
50.6	0
50.7	0
50.8	0
50.9	0
51	0
51.1	0
51.2	0
51.3	0
51.4	0
51.5	0
51.6	0
51.7	0
51.8	0
51.9	0
52	0
52.1	0
52.2	0
52.3	0
52.4	0
52.5	0
52.6	0
52.7	0
52.8	0
52.9	0
53	0
53.1	0
53.2	0
53.3	0
53.4	0
53.5	0
53.6	0
53.7	0
53.8	0
53.9	0
54	0
54.1	0
54.2	0
54.3	0
54.4	0
54.5	0
54.6	0
54.7	0
54.8	0
54.9	0
55	0
55.1	0
55.2	0
55.3	0
55.4	0
55.5	0
55.6	0
55.7	0
55.8	0
55.9	0
56	0
56.1	0
56.2	0
56.3	0
56.4	0
56.5	0
56.6	0
56.7	0
56.8	0
56.9	0
57	0
57.1	0
57.2	0
57.3	0
57.4	0
57.5	0
57.6	0
57.7	0
57.8	0
57.9	0
58	0
58.1	0
58.2	0
58.3	0
58.4	0
58.5	0
58.6	0
58.7	0
58.8	0
58.9	0
59	0
59.1	0
59.2	0
59.3	0
59.4	0
59.5	0
59.6	0
59.7	0
59.8	0
59.9	0
60	0
60.1	0
60.2	0
60.3	0
60.4	0
60.5	0
60.6	0
60.7	0
60.8	0
60.9	0
61	0
61.1	0
61.2	0
61.3	0
61.4	0
61.5	0
61.6	0
61.7	0
61.8	0
61.9	0
62	0
62.1	0
62.2	0
62.3	0
62.4	0
62.5	0
62.6	0
62.7	0
62.8	0
62.9	0
63	0
63.1	0
63.2	0
63.3	0
63.4	0
63.5	0
63.6	0
63.7	0
63.8	0
63.9	0
64	0
64.1	0
64.2	0
64.3	0
64.4	0
64.5	0
64.6	0
64.7	0
64.8	0
64.9	0
65	0
65.1	0
65.2	0
65.3	0
65.4	0
65.5	0
65.6	0
65.7	0
65.8	0
65.9	0
66	0
66.1	0
66.2	0
66.3	0
66.4	0
66.5	0
66.6	0
66.7	0
66.8	0
66.9	0
67	0
67.1	0
67.2	0
67.3	0
67.4	0
67.5	0
67.6	0
67.7	0
67.8	0
67.9	0
68	0
68.1	0
68.2	0
68.3	0
68.4	0
68.5	0
68.6	0
68.7	0
68.8	0
68.9	0
69	0
69.1	0
69.2	0
69.3	0
69.4	0
69.5	0
69.6	0
69.7	0
69.8	0
69.9	0
70	0
70.1	0
70.2	0
70.3	0
70.4	0
70.5	0
70.6	0
70.7	0
70.8	0
70.9	0
71	0
71.1	0
71.2	0
71.3	0
71.4	0
71.5	0
71.6	0
71.7	0
71.8	0
71.9	0
72	0
72.1	0
72.2	0
72.3	0
72.4	0
72.5	0
72.6	0
72.7	0
72.8	0
72.9	0
73	0
73.1	0
73.2	0
73.3	0
73.4	0
73.5	0
73.6	0
73.7	0
73.8	0
73.9	0
74	0
74.1	0
74.2	0
74.3	0
74.4	0
74.5	0
74.6	0
74.7	0
74.8	0
74.9	0
75	0
75.1	0
75.2	0
75.3	0
75.4	0
75.5	0
75.6	0
75.7	0
75.8	0
75.9	0
76	0
76.1	0
76.2	0
76.3	0
76.4	0
76.5	0
76.6	0
76.7	0
76.8	0
76.9	0
77	0
77.1	0
77.2	0
77.3	0
77.4	0
77.5	0
77.6	0
77.7	0
77.8	0
77.9	0
78	0
78.1	0
78.2	0
78.3	0
78.4	0
78.5	0
78.6	0
78.7	0
78.8	0
78.9	0
79	0
79.1	0
79.2	0
79.3	0
79.4	0
79.5	0
79.6	0
79.7	0
79.8	0
79.9	0
80	0
80.1	0
80.2	0
80.3	0
80.4	0
80.5	0
80.6	0
80.7	0
80.8	0
80.9	0
81	0
81.1	0
81.2	0
81.3	0
81.4	0
81.5	0
81.6	0
81.7	0
81.8	0
81.9	0
82	0
82.1	0
82.2	0
82.3	0
82.4	0
82.5	0
82.6	0
82.7	0
82.8	0
82.9	0
83	0
83.1	0
83.2	0
83.3	0
83.4	0
83.5	0
83.6	0
83.7	0
83.8	0
83.9	0
84	0
84.1	0
84.2	0
84.3	0
84.4	0
84.5	0
84.6	0
84.7	0
84.8	0
84.9	0
85	0
85.1	0
85.2	0
85.3	0
85.4	0
85.5	0
85.6	0
85.7	0
85.8	0
85.9	0
86	0
86.1	0
86.2	0
86.3	0
86.4	0
86.5	0
86.6	0
86.7	0
86.8	0
86.9	0
87	0
87.1	0
87.2	0
87.3	0
87.4	0
87.5	0
87.6	0
87.7	0
87.8	0
87.9	0
88	0
88.1	0
88.2	0
88.3	0
88.4	0
88.5	0
88.6	0
88.7	0
88.8	0
88.9	0
89	0
89.1	0
89.2	0
89.3	0
89.4	0
89.5	0
89.6	0
89.7	0
89.8	0
89.9	0
90	0
90.1	0
90.2	0
90.3	0
90.4	0
90.5	0
90.6	0
90.7	0
90.8	0
90.9	0
91	0
91.1	0
91.2	0
91.3	0
91.4	0
91.5	0
91.6	0
91.7	0
91.8	0
91.9	0
92	0
92.1	0
92.2	0
92.3	0
92.4	0
92.5	0
92.6	0
92.7	0
92.8	0
92.9	0
93	0
93.1	0
93.2	0
93.3	0
93.4	0
93.5	0
93.6	0
93.7	0
93.8	0
93.9	0
94	0
94.1	0
94.2	0
94.3	0
94.4	0
94.5	0
94.6	0
94.7	0
94.8	0
94.9	0
95	0
95.1	0
95.2	0
95.3	0
95.4	0
95.5	0
95.6	0
95.7	0
95.8	0
95.9	0
96	0
96.1	0
96.2	0
96.3	0
96.4	0
96.5	0
96.6	0
96.7	0
96.8	0
96.9	0
97	0
97.1	0
97.2	0
97.3	0
97.4	0
97.5	0
97.6	0
97.7	0
97.8	0
97.9	0
98	0
98.1	0
98.2	0
98.3	0
98.4	0
98.5	0
98.6	0
98.7	0
98.8	0
98.9	0
99	0
99.1	0
99.2	0
99.3	0
99.4	0
99.5	0
99.6	0
99.7	0
99.8	0
99.9	0
100	0
100.1	0.00933333
100.2	0.0183333
100.3	0.0263333
100.4	0.0336667
100.5	0.039
100.6	0.0466667
100.7	0.053
100.8	0.059
100.9	0.063
101	0.068
101.1	0.0743333
101.2	0.081
101.3	0.091
101.4	0.095
101.5	0.102
101.6	0.105333
101.7	0.111
101.8	0.115
101.9	0.122
102	0.126333
102.1	0.13
102.2	0.134333
102.3	0.139667
102.4	0.143
102.5	0.145667
102.6	0.149333
102.7	0.150333
102.8	0.155333
102.9	0.157333
103	0.162333
103.1	0.167667
103.2	0.171667
103.3	0.173333
103.4	0.175667
103.5	0.182333
103.6	0.187333
103.7	0.191
103.8	0.195333
103.9	0.195333
104	0.201333
104.1	0.206333
104.2	0.212333
104.3	0.216333
104.4	0.22
104.5	0.221333
104.6	0.224667
104.7	0.228
104.8	0.231
104.9	0.233333
105	0.233667
105.1	0.236667
105.2	0.240667
105.3	0.24
105.4	0.241
105.5	0.240667
105.6	0.243333
105.7	0.246667
105.8	0.247333
105.9	0.251667
106	0.256333
106.1	0.258333
106.2	0.258
106.3	0.262667
106.4	0.263333
106.5	0.264
106.6	0.265667
106.7	0.267333
106.8	0.272333
106.9	0.274667
107	0.275
107.1	0.275333
107.2	0.277333
107.3	0.282333
107.4	0.284333
107.5	0.284667
107.6	0.286
107.7	0.289667
107.8	0.286667
107.9	0.288333
108	0.288333
108.1	0.286333
108.2	0.289333
108.3	0.290667
108.4	0.293333
108.5	0.293
108.6	0.293333
108.7	0.292333
108.8	0.295667
108.9	0.298
109	0.303333
109.1	0.303
109.2	0.303333
109.3	0.304667
109.4	0.306
109.5	0.305
109.6	0.305667
109.7	0.307
109.8	0.306667
109.9	0.307667
110	0.308333
110.1	0.307
110.2	0.306333
110.3	0.308
110.4	0.310333
110.5	0.311333
110.6	0.311667
110.7	0.312333
110.8	0.313333
110.9	0.315
111	0.315
111.1	0.315
111.2	0.315333
111.3	0.317667
111.4	0.319
111.5	0.319333
111.6	0.318333
111.7	0.319
111.8	0.319
111.9	0.319333
112	0.318333
112.1	0.319333
112.2	0.317667
112.3	0.317667
112.4	0.320333
112.5	0.321333
112.6	0.319667
112.7	0.321
112.8	0.320667
112.9	0.319667
113	0.322
113.1	0.324
113.2	0.324333
113.3	0.323333
113.4	0.323
113.5	0.322
113.6	0.322333
113.7	0.322
113.8	0.323667
113.9	0.324667
114	0.324
114.1	0.324667
114.2	0.324667
114.3	0.324
114.4	0.322333
114.5	0.319
114.6	0.32
114.7	0.321
114.8	0.321667
114.9	0.324333
115	0.323
115.1	0.322333
115.2	0.321667
115.3	0.320667
115.4	0.320333
115.5	0.321
115.6	0.322333
115.7	0.323333
115.8	0.325
115.9	0.326333
116	0.328
116.1	0.330667
116.2	0.333
116.3	0.335
116.4	0.336
116.5	0.337333
116.6	0.337667
116.7	0.338
116.8	0.337667
116.9	0.338667
117	0.339
117.1	0.338333
117.2	0.337667
117.3	0.339667
117.4	0.341333
117.5	0.342333
117.6	0.340333
117.7	0.338
117.8	0.336667
117.9	0.340333
118	0.341667
118.1	0.342667
118.2	0.342
118.3	0.340333
118.4	0.34
118.5	0.339667
118.6	0.34
118.7	0.339667
118.8	0.343667
118.9	0.344
119	0.344667
119.1	0.343667
119.2	0.344667
119.3	0.343333
119.4	0.342
119.5	0.342
119.6	0.341667
119.7	0.342333
119.8	0.340667
119.9	0.340333
120	0.341333
120.1	0.340667
120.2	0.341
120.3	0.342667
120.4	0.341333
120.5	0.342333
120.6	0.341667
120.7	0.341
120.8	0.339333
120.9	0.339
121	0.339333
121.1	0.34
121.2	0.340333
121.3	0.340333
121.4	0.342333
121.5	0.338
121.6	0.339667
121.7	0.339333
121.8	0.341
121.9	0.341
122	0.343667
122.1	0.344
122.2	0.344
122.3	0.342333
122.4	0.343333
122.5	0.341667
122.6	0.342333
122.7	0.343333
122.8	0.340667
122.9	0.340667
123	0.340667
123.1	0.342
123.2	0.341
123.3	0.339667
123.4	0.338333
123.5	0.339667
123.6	0.341667
123.7	0.342667
123.8	0.342667
123.9	0.343333
124	0.343
124.1	0.344667
124.2	0.342667
124.3	0.344667
124.4	0.347333
124.5	0.349667
124.6	0.350667
124.7	0.349667
124.8	0.352667
124.9	0.348333
125	0.346333
125.1	0.346
125.2	0.344
125.3	0.342333
125.4	0.342333
125.5	0.345667
125.6	0.345333
125.7	0.345
125.8	0.345333
125.9	0.347
126	0.346667
126.1	0.346
126.2	0.345667
126.3	0.348
126.4	0.349333
126.5	0.345333
126.6	0.345667
126.7	0.347333
126.8	0.347333
126.9	0.349333
127	0.351667
127.1	0.351333
127.2	0.352
127.3	0.352667
127.4	0.355
127.5	0.357667
127.6	0.357667
127.7	0.354667
127.8	0.352667
127.9	0.355
128	0.355333
128.1	0.355333
128.2	0.355667
128.3	0.357667
128.4	0.357333
128.5	0.354667
128.6	0.351667
128.7	0.352667
128.8	0.352333
128.9	0.35
129	0.349667
129.1	0.350667
129.2	0.353
129.3	0.353
129.4	0.352333
129.5	0.351
129.6	0.348667
129.7	0.35
129.8	0.352
129.9	0.351
130	0.351333
130.1	0.350667
130.2	0.350333
130.3	0.352333
130.4	0.353333
130.5	0.351
130.6	0.349667
130.7	0.349667
130.8	0.349667
130.9	0.349
131	0.348667
131.1	0.346667
131.2	0.348667
131.3	0.347
131.4	0.345667
131.5	0.347333
131.6	0.349667
131.7	0.349
131.8	0.350667
131.9	0.352333
132	0.354333
132.1	0.352333
132.2	0.351333
132.3	0.351
132.4	0.351
132.5	0.351
132.6	0.352667
132.7	0.349333
132.8	0.348
132.9	0.347333
133	0.348667
133.1	0.348667
133.2	0.348333
133.3	0.347
133.4	0.344667
133.5	0.344
133.6	0.344333
133.7	0.342667
133.8	0.344
133.9	0.342
134	0.342333
134.1	0.341667
134.2	0.339667
134.3	0.341333
134.4	0.340333
134.5	0.337667
134.6	0.339333
134.7	0.337
134.8	0.336
134.9	0.335667
135	0.337333
135.1	0.337333
135.2	0.338333
135.3	0.337
135.4	0.338
135.5	0.338667
135.6	0.340667
135.7	0.339667
135.8	0.339
135.9	0.342333
136	0.343333
136.1	0.341333
136.2	0.340667
136.3	0.342
136.4	0.342667
136.5	0.347
136.6	0.344667
136.7	0.344
136.8	0.343
136.9	0.344333
137	0.342
137.1	0.342333
137.2	0.340667
137.3	0.343333
137.4	0.342333
137.5	0.343
137.6	0.342667
137.7	0.343
137.8	0.342333
137.9	0.344
138	0.343667
138.1	0.343
138.2	0.343667
138.3	0.343667
138.4	0.345333
138.5	0.346333
138.6	0.346
138.7	0.347667
138.8	0.349
138.9	0.346333
139	0.345333
139.1	0.345333
139.2	0.346
139.3	0.348
139.4	0.346667
139.5	0.347
139.6	0.348
139.7	0.349
139.8	0.348
139.9	0.346
140	0.343333
140.1	0.342667
140.2	0.342
140.3	0.343333
140.4	0.341667
140.5	0.34
140.6	0.340333
140.7	0.340333
140.8	0.342667
140.9	0.341333
141	0.341
141.1	0.338333
141.2	0.336
141.3	0.336333
141.4	0.336333
141.5	0.337
141.6	0.338667
141.7	0.339667
141.8	0.338
141.9	0.336333
142	0.336667
142.1	0.339333
142.2	0.339667
142.3	0.340667
142.4	0.340667
142.5	0.343333
142.6	0.346
142.7	0.347667
142.8	0.351333
142.9	0.354667
143	0.352667
143.1	0.351667
143.2	0.351333
143.3	0.353
143.4	0.350667
143.5	0.351
143.6	0.352333
143.7	0.353
143.8	0.353667
143.9	0.352667
144	0.351
144.1	0.35
144.2	0.348667
144.3	0.347667
144.4	0.346
144.5	0.346667
144.6	0.347
144.7	0.348
144.8	0.346667
144.9	0.347667
145	0.347
145.1	0.348
145.2	0.347333
145.3	0.349
145.4	0.351
145.5	0.350333
145.6	0.351
145.7	0.35
145.8	0.351
145.9	0.353
146	0.352
146.1	0.354
146.2	0.353
146.3	0.352333
146.4	0.354333
146.5	0.351667
146.6	0.353667
146.7	0.355667
146.8	0.357333
146.9	0.353667
147	0.353
147.1	0.353333
147.2	0.349333
147.3	0.350333
147.4	0.351
147.5	0.353667
147.6	0.353333
147.7	0.353333
147.8	0.353333
147.9	0.355333
148	0.354
148.1	0.351333
148.2	0.350667
148.3	0.350333
148.4	0.352
148.5	0.349667
148.6	0.352
148.7	0.352667
148.8	0.353667
148.9	0.352333
149	0.349
149.1	0.350333
149.2	0.352333
149.3	0.352
149.4	0.353
149.5	0.352667
149.6	0.352
149.7	0.35
149.8	0.350333
149.9	0.352667
150	0.353
150.1	0.352667
150.2	0.356333
150.3	0.354667
150.4	0.355
150.5	0.355
150.6	0.355
150.7	0.357333
150.8	0.358
150.9	0.358
151	0.359667
151.1	0.361667
151.2	0.361
151.3	0.362333
151.4	0.361667
151.5	0.363333
151.6	0.364
151.7	0.364667
151.8	0.364333
151.9	0.362667
152	0.364667
152.1	0.367
152.2	0.37
152.3	0.369
152.4	0.37
152.5	0.371667
152.6	0.370333
152.7	0.370667
152.8	0.370333
152.9	0.368667
153	0.369667
153.1	0.368667
153.2	0.369333
153.3	0.369333
153.4	0.370333
153.5	0.372333
153.6	0.372333
153.7	0.371667
153.8	0.371
153.9	0.373
154	0.373
154.1	0.374667
154.2	0.376
154.3	0.374667
154.4	0.374333
154.5	0.371667
154.6	0.372
154.7	0.371667
154.8	0.37
154.9	0.369333
155	0.366
155.1	0.365667
155.2	0.362667
155.3	0.363333
155.4	0.362
155.5	0.362
155.6	0.361667
155.7	0.361333
155.8	0.361333
155.9	0.361333
156	0.363333
156.1	0.366333
156.2	0.363667
156.3	0.363
156.4	0.363333
156.5	0.363333
156.6	0.363333
156.7	0.362
156.8	0.364667
156.9	0.365667
157	0.364333
157.1	0.362667
157.2	0.361667
157.3	0.362667
157.4	0.362
157.5	0.360333
157.6	0.359333
157.7	0.359667
157.8	0.362
157.9	0.365333
158	0.367
158.1	0.365667
158.2	0.364
158.3	0.365
158.4	0.364
158.5	0.366
158.6	0.366667
158.7	0.366667
158.8	0.368667
158.9	0.367667
159	0.365667
159.1	0.366333
159.2	0.367333
159.3	0.365667
159.4	0.365
159.5	0.366667
159.6	0.369333
159.7	0.368
159.8	0.368
159.9	0.370333
160	0.369333
160.1	0.368
160.2	0.367333
160.3	0.366667
160.4	0.367667
160.5	0.367667
160.6	0.368333
160.7	0.368333
160.8	0.368
160.9	0.371
161	0.370667
161.1	0.373
161.2	0.371
161.3	0.370667
161.4	0.369667
161.5	0.373333
161.6	0.374667
161.7	0.376
161.8	0.375667
161.9	0.374
162	0.375333
162.1	0.376
162.2	0.376
162.3	0.372667
162.4	0.371333
162.5	0.37
162.6	0.366333
162.7	0.367
162.8	0.370667
162.9	0.372333
163	0.37
163.1	0.370333
163.2	0.372
163.3	0.373667
163.4	0.374667
163.5	0.376
163.6	0.374667
163.7	0.374
163.8	0.375667
163.9	0.375667
164	0.374333
164.1	0.374667
164.2	0.372
164.3	0.372667
164.4	0.376
164.5	0.377667
164.6	0.378
164.7	0.378667
164.8	0.377333
164.9	0.377
165	0.378333
165.1	0.378333
165.2	0.376333
165.3	0.377
165.4	0.377333
165.5	0.378
165.6	0.375333
165.7	0.375333
165.8	0.375
165.9	0.375667
166	0.374333
166.1	0.371333
166.2	0.372667
166.3	0.372667
166.4	0.374667
166.5	0.376
166.6	0.376
166.7	0.375333
166.8	0.373
166.9	0.372667
167	0.371
167.1	0.373
167.2	0.373667
167.3	0.375
167.4	0.375333
167.5	0.376333
167.6	0.377333
167.7	0.377667
167.8	0.378667
167.9	0.377667
168	0.377667
168.1	0.378333
168.2	0.380667
168.3	0.378333
168.4	0.379333
168.5	0.377333
168.6	0.375667
168.7	0.373667
168.8	0.375667
168.9	0.376667
169	0.378333
169.1	0.377
169.2	0.379333
169.3	0.38
169.4	0.378667
169.5	0.382333
169.6	0.383667
169.7	0.383667
169.8	0.382
169.9	0.385
170	0.385333
170.1	0.384667
170.2	0.385667
170.3	0.386667
170.4	0.386333
170.5	0.386
170.6	0.385667
170.7	0.385667
170.8	0.385
170.9	0.386
171	0.386333
171.1	0.386333
171.2	0.386333
171.3	0.386667
171.4	0.386333
171.5	0.383333
171.6	0.382333
171.7	0.383
171.8	0.38
171.9	0.381667
172	0.381667
172.1	0.38
172.2	0.378333
172.3	0.376333
172.4	0.379667
172.5	0.379667
172.6	0.379333
172.7	0.380333
172.8	0.380667
172.9	0.382333
173	0.383
173.1	0.379333
173.2	0.379667
173.3	0.379667
173.4	0.380333
173.5	0.381
173.6	0.381667
173.7	0.381
173.8	0.381333
173.9	0.381333
174	0.380333
174.1	0.379333
174.2	0.378333
174.3	0.377
174.4	0.378667
174.5	0.382333
174.6	0.381667
174.7	0.38
174.8	0.379333
174.9	0.379667
175	0.38
175.1	0.380667
175.2	0.379333
175.3	0.381667
175.4	0.382
175.5	0.381333
175.6	0.381
175.7	0.383333
175.8	0.383667
175.9	0.385667
176	0.384333
176.1	0.388667
176.2	0.388667
176.3	0.388
176.4	0.387
176.5	0.387
176.6	0.387333
176.7	0.386667
176.8	0.387333
176.9	0.387333
177	0.386333
177.1	0.385
177.2	0.387333
177.3	0.384667
177.4	0.384
177.5	0.382
177.6	0.382
177.7	0.383
177.8	0.382
177.9	0.380333
178	0.382
178.1	0.380333
178.2	0.381
178.3	0.381667
178.4	0.380333
178.5	0.384
178.6	0.386
178.7	0.388
178.8	0.389333
178.9	0.388
179	0.387333
179.1	0.385
179.2	0.385333
179.3	0.388667
179.4	0.387
179.5	0.386333
179.6	0.384333
179.7	0.385333
179.8	0.384667
179.9	0.386667
180	0.387
180.1	0.384667
180.2	0.385667
180.3	0.383667
180.4	0.384333
180.5	0.380333
180.6	0.378667
180.7	0.379333
180.8	0.379
180.9	0.377667
181	0.379
181.1	0.377333
181.2	0.374667
181.3	0.376
181.4	0.376
181.5	0.376667
181.6	0.374333
181.7	0.375667
181.8	0.375333
181.9	0.373667
182	0.376333
182.1	0.377667
182.2	0.377667
182.3	0.377
182.4	0.373
182.5	0.371
182.6	0.372
182.7	0.373667
182.8	0.373333
182.9	0.375
183	0.372667
183.1	0.375333
183.2	0.377667
183.3	0.379333
183.4	0.379333
183.5	0.377667
183.6	0.379
183.7	0.381
183.8	0.38
183.9	0.382333
184	0.386
184.1	0.388667
184.2	0.389333
184.3	0.387
184.4	0.39
184.5	0.391
184.6	0.391667
184.7	0.39
184.8	0.389333
184.9	0.391667
185	0.392667
185.1	0.390667
185.2	0.390667
185.3	0.392333
185.4	0.392
185.5	0.394
185.6	0.394333
185.7	0.394333
185.8	0.394333
185.9	0.397
186	0.394333
186.1	0.395667
186.2	0.393667
186.3	0.391
186.4	0.389333
186.5	0.392667
186.6	0.389
186.7	0.388667
186.8	0.389
186.9	0.389667
187	0.388667
187.1	0.392333
187.2	0.393
187.3	0.393667
187.4	0.397
187.5	0.398
187.6	0.398333
187.7	0.399
187.8	0.399667
187.9	0.396667
188	0.395667
188.1	0.395333
188.2	0.396667
188.3	0.397333
188.4	0.4
188.5	0.399667
188.6	0.404
188.7	0.403
188.8	0.403667
188.9	0.402667
189	0.402333
189.1	0.399667
189.2	0.400333
189.3	0.401333
189.4	0.399333
189.5	0.397333
189.6	0.400333
189.7	0.400667
189.8	0.398
189.9	0.399333
190	0.398
190.1	0.395
190.2	0.396667
190.3	0.394333
190.4	0.393667
190.5	0.392333
190.6	0.392667
190.7	0.393667
190.8	0.392667
190.9	0.389667
191	0.390333
191.1	0.39
191.2	0.392
191.3	0.392
191.4	0.390333
191.5	0.392667
191.6	0.393667
191.7	0.391667
191.8	0.390667
191.9	0.392333
192	0.391667
192.1	0.392333
192.2	0.391
192.3	0.389333
192.4	0.391
192.5	0.388667
192.6	0.387667
192.7	0.391667
192.8	0.392667
192.9	0.393667
193	0.391667
193.1	0.390333
193.2	0.387667
193.3	0.389
193.4	0.388333
193.5	0.389
193.6	0.388
193.7	0.389
193.8	0.387
193.9	0.388
194	0.388333
194.1	0.386667
194.2	0.389667
194.3	0.39
194.4	0.388333
194.5	0.388
194.6	0.386333
194.7	0.389667
194.8	0.390667
194.9	0.390333
195	0.39
195.1	0.388667
195.2	0.388333
195.3	0.389667
195.4	0.392
195.5	0.392
195.6	0.392333
195.7	0.393333
195.8	0.391333
195.9	0.392
196	0.393
196.1	0.390667
196.2	0.391667
196.3	0.39
196.4	0.389333
196.5	0.388
196.6	0.387333
196.7	0.388333
196.8	0.389
196.9	0.388
197	0.386667
197.1	0.384333
197.2	0.386
197.3	0.386333
197.4	0.385667
197.5	0.386333
197.6	0.387667
197.7	0.39
197.8	0.389667
197.9	0.391
198	0.391333
198.1	0.391
198.2	0.391667
198.3	0.392333
198.4	0.391
198.5	0.392
198.6	0.391
198.7	0.391
198.8	0.390333
198.9	0.391667
199	0.394667
199.1	0.393667
199.2	0.393333
199.3	0.393667
199.4	0.394333
199.5	0.394667
199.6	0.398
199.7	0.399
199.8	0.397
199.9	0.398
200	0.397
[truncated: 14,000 more rows]
