# Supplementary material for: Bayesian inference of kinetic schemes for ion channels by Kalman filtering
Source: eLife journal article supplement (doi:10.7554/elife.62714), 2022-05-04
Supplement: fig4-data12 [file 1_Sim_N_1500_Strom_MW_0.125M.xlsx]

## Sheet: Tabelle1
0.1	0
0.2	0
0.3	0
0.4	0
0.5	0
0.6	0
0.7	0
0.8	0
0.9	0
1	0
1.1	0
1.2	0
1.3	0
1.4	0
1.5	0
1.6	0
1.7	0
1.8	0
1.9	0
2	0
2.1	0
2.2	0
2.3	0
2.4	0
2.5	0
2.6	0
2.7	0
2.8	0
2.9	0
3	0
3.1	0
3.2	0
3.3	0
3.4	0
3.5	0
3.6	0
3.7	0
3.8	0
3.9	0
4	0
4.1	0
4.2	0
4.3	0
4.4	0
4.5	0
4.6	0
4.7	0
4.8	0
4.9	0
5	0
5.1	0
5.2	0
5.3	0
5.4	0
5.5	0
5.6	0
5.7	0
5.8	0
5.9	0
6	0
6.1	0
6.2	0
6.3	0
6.4	0
6.5	0
6.6	0
6.7	0
6.8	0
6.9	0
7	0
7.1	0
7.2	0
7.3	0
7.4	0
7.5	0
7.6	0
7.7	0
7.8	0
7.9	0
8	0
8.1	0
8.2	0
8.3	0
8.4	0
8.5	0
8.6	0
8.7	0
8.8	0
8.9	0
9	0
9.1	0
9.2	0
9.3	0
9.4	0
9.5	0
9.6	0
9.7	0
9.8	0
9.9	0
10	0
10.1	0
10.2	0
10.3	0
10.4	0
10.5	0
10.6	0
10.7	0
10.8	0
10.9	0
11	0
11.1	0
11.2	0
11.3	0
11.4	0
11.5	0
11.6	0
11.7	0
11.8	0
11.9	0
12	0
12.1	0
12.2	0
12.3	0
12.4	0
12.5	0
12.6	0
12.7	0
12.8	0
12.9	0
13	0
13.1	0
13.2	0
13.3	0
13.4	0
13.5	0
13.6	0
13.7	0
13.8	0
13.9	0
14	0
14.1	0
14.2	0
14.3	0
14.4	0
14.5	0
14.6	0
14.7	0
14.8	0
14.9	0
15	0
15.1	0
15.2	0
15.3	0
15.4	0
15.5	0
15.6	0
15.7	0
15.8	0
15.9	0
16	0
16.1	0
16.2	0
16.3	0
16.4	0
16.5	0
16.6	0
16.7	0
16.8	0
16.9	0
17	0
17.1	0
17.2	0
17.3	0
17.4	0
17.5	0
17.6	0
17.7	0
17.8	0
17.9	0
18	0
18.1	0
18.2	0
18.3	0
18.4	0
18.5	0
18.6	0
18.7	0
18.8	0
18.9	0
19	0
19.1	0
19.2	0
19.3	0
19.4	0
19.5	0
19.6	0
19.7	0
19.8	0
19.9	0
20	0
20.1	0
20.2	0
20.3	0
20.4	0
20.5	0
20.6	0
20.7	0
20.8	0
20.9	0
21	0
21.1	0
21.2	0
21.3	0
21.4	0
21.5	0
21.6	0
21.7	0
21.8	0
21.9	0
22	0
22.1	0
22.2	0
22.3	0
22.4	0
22.5	0
22.6	0
22.7	0
22.8	0
22.9	0
23	0
23.1	0
23.2	0
23.3	0
23.4	0
23.5	0
23.6	0
23.7	0
23.8	0
23.9	0
24	0
24.1	0
24.2	0
24.3	0
24.4	0
24.5	0
24.6	0
24.7	0
24.8	0
24.9	0
25	0
25.1	0
25.2	0
25.3	0
25.4	0
25.5	0
25.6	0
25.7	0
25.8	0
25.9	0
26	0
26.1	0
26.2	0
26.3	0
26.4	0
26.5	0
26.6	0
26.7	0
26.8	0
26.9	0
27	0
27.1	0
27.2	0
27.3	0
27.4	0
27.5	0
27.6	0
27.7	0
27.8	0
27.9	0
28	0
28.1	0
28.2	0
28.3	0
28.4	0
28.5	0
28.6	0
28.7	0
28.8	0
28.9	0
29	0
29.1	0
29.2	0
29.3	0
29.4	0
29.5	0
29.6	0
29.7	0
29.8	0
29.9	0
30	0
30.1	0
30.2	0
30.3	0
30.4	0
30.5	0
30.6	0
30.7	0
30.8	0
30.9	0
31	0
31.1	0
31.2	0
31.3	0
31.4	0
31.5	0
31.6	0
31.7	0
31.8	0
31.9	0
32	0
32.1	0
32.2	0
32.3	0
32.4	0
32.5	0
32.6	0
32.7	0
32.8	0
32.9	0
33	0
33.1	0
33.2	0
33.3	0
33.4	0
33.5	0
33.6	0
33.7	0
33.8	0
33.9	0
34	0
34.1	0
34.2	0
34.3	0
34.4	0
34.5	0
34.6	0
34.7	0
34.8	0
34.9	0
35	0
35.1	0
35.2	0
35.3	0
35.4	0
35.5	0
35.6	0
35.7	0
35.8	0
35.9	0
36	0
36.1	0
36.2	0
36.3	0
36.4	0
36.5	0
36.6	0
36.7	0
36.8	0
36.9	0
37	0
37.1	0
37.2	0
37.3	0
37.4	0
37.5	0
37.6	0
37.7	0
37.8	0
37.9	0
38	0
38.1	0
38.2	0
38.3	0
38.4	0
38.5	0
38.6	0
38.7	0
38.8	0
38.9	0
39	0
39.1	0
39.2	0
39.3	0
39.4	0
39.5	0
39.6	0
39.7	0
39.8	0
39.9	0
40	0
40.1	0
40.2	0
40.3	0
40.4	0
40.5	0
40.6	0
40.7	0
40.8	0
40.9	0
41	0
41.1	0
41.2	0
41.3	0
41.4	0
41.5	0
41.6	0
41.7	0
41.8	0
41.9	0
42	0
42.1	0
42.2	0
42.3	0
42.4	0
42.5	0
42.6	0
42.7	0
42.8	0
42.9	0
43	0
43.1	0
43.2	0
43.3	0
43.4	0
43.5	0
43.6	0
43.7	0
43.8	0
43.9	0
44	0
44.1	0
44.2	0
44.3	0
44.4	0
44.5	0
44.6	0
44.7	0
44.8	0
44.9	0
45	0
45.1	0
45.2	0
45.3	0
45.4	0
45.5	0
45.6	0
45.7	0
45.8	0
45.9	0
46	0
46.1	0
46.2	0
46.3	0
46.4	0
46.5	0
46.6	0
46.7	0
46.8	0
46.9	0
47	0
47.1	0
47.2	0
47.3	0
47.4	0
47.5	0
47.6	0
47.7	0
47.8	0
47.9	0
48	0
48.1	0
48.2	0
48.3	0
48.4	0
48.5	0
48.6	0
48.7	0
48.8	0
48.9	0
49	0
49.1	0
49.2	0
49.3	0
49.4	0
49.5	0
49.6	0
49.7	0
49.8	0
49.9	0
50	0
50.1	0
50.2	0
50.3	0
50.4	0
50.5	0
50.6	0
50.7	0
50.8	0
50.9	0
51	0
51.1	0
51.2	0
51.3	0
51.4	0
51.5	0
51.6	0
51.7	0
51.8	0
51.9	0
52	0
52.1	0
52.2	0
52.3	0
52.4	0
52.5	0
52.6	0
52.7	0
52.8	0
52.9	0
53	0
53.1	0
53.2	0
53.3	0
53.4	0
53.5	0
53.6	0
53.7	0
53.8	0
53.9	0
54	0
54.1	0
54.2	0
54.3	0
54.4	0
54.5	0
54.6	0
54.7	0
54.8	0
54.9	0
55	0
55.1	0
55.2	0
55.3	0
55.4	0
55.5	0
55.6	0
55.7	0
55.8	0
55.9	0
56	0
56.1	0
56.2	0
56.3	0
56.4	0
56.5	0
56.6	0
56.7	0
56.8	0
56.9	0
57	0
57.1	0
57.2	0
57.3	0
57.4	0
57.5	0
57.6	0
57.7	0
57.8	0
57.9	0
58	0
58.1	0
58.2	0
58.3	0
58.4	0
58.5	0
58.6	0
58.7	0
58.8	0
58.9	0
59	0
59.1	0
59.2	0
59.3	0
59.4	0
59.5	0
59.6	0
59.7	0
59.8	0
59.9	0
60	0
60.1	0
60.2	0
60.3	0
60.4	0
60.5	0
60.6	0
60.7	0
60.8	0
60.9	0
61	0
61.1	0
61.2	0
61.3	0
61.4	0
61.5	0
61.6	0
61.7	0
61.8	0
61.9	0
62	0
62.1	0
62.2	0
62.3	0
62.4	0
62.5	0
62.6	0
62.7	0
62.8	0
62.9	0
63	0
63.1	0
63.2	0
63.3	0
63.4	0
63.5	0
63.6	0
63.7	0
63.8	0
63.9	0
64	0
64.1	0
64.2	0
64.3	0
64.4	0
64.5	0
64.6	0
64.7	0
64.8	0
64.9	0
65	0
65.1	0
65.2	0
65.3	0
65.4	0
65.5	0
65.6	0
65.7	0
65.8	0
65.9	0
66	0
66.1	0
66.2	0
66.3	0
66.4	0
66.5	0
66.6	0
66.7	0
66.8	0
66.9	0
67	0
67.1	0
67.2	0
67.3	0
67.4	0
67.5	0
67.6	0
67.7	0
67.8	0
67.9	0
68	0
68.1	0
68.2	0
68.3	0
68.4	0
68.5	0
68.6	0
68.7	0
68.8	0
68.9	0
69	0
69.1	0
69.2	0
69.3	0
69.4	0
69.5	0
69.6	0
69.7	0
69.8	0
69.9	0
70	0
70.1	0
70.2	0
70.3	0
70.4	0
70.5	0
70.6	0
70.7	0
70.8	0
70.9	0
71	0
71.1	0
71.2	0
71.3	0
71.4	0
71.5	0
71.6	0
71.7	0
71.8	0
71.9	0
72	0
72.1	0
72.2	0
72.3	0
72.4	0
72.5	0
72.6	0
72.7	0
72.8	0
72.9	0
73	0
73.1	0
73.2	0
73.3	0
73.4	0
73.5	0
73.6	0
73.7	0
73.8	0
73.9	0
74	0
74.1	0
74.2	0
74.3	0
74.4	0
74.5	0
74.6	0
74.7	0
74.8	0
74.9	0
75	0
75.1	0
75.2	0
75.3	0
75.4	0
75.5	0
75.6	0
75.7	0
75.8	0
75.9	0
76	0
76.1	0
76.2	0
76.3	0
76.4	0
76.5	0
76.6	0
76.7	0
76.8	0
76.9	0
77	0
77.1	0
77.2	0
77.3	0
77.4	0
77.5	0
77.6	0
77.7	0
77.8	0
77.9	0
78	0
78.1	0
78.2	0
78.3	0
78.4	0
78.5	0
78.6	0
78.7	0
78.8	0
78.9	0
79	0
79.1	0
79.2	0
79.3	0
79.4	0
79.5	0
79.6	0
79.7	0
79.8	0
79.9	0
80	0
80.1	0
80.2	0
80.3	0
80.4	0
80.5	0
80.6	0
80.7	0
80.8	0
80.9	0
81	0
81.1	0
81.2	0
81.3	0
81.4	0
81.5	0
81.6	0
81.7	0
81.8	0
81.9	0
82	0
82.1	0
82.2	0
82.3	0
82.4	0
82.5	0
82.6	0
82.7	0
82.8	0
82.9	0
83	0
83.1	0
83.2	0
83.3	0
83.4	0
83.5	0
83.6	0
83.7	0
83.8	0
83.9	0
84	0
84.1	0
84.2	0
84.3	0
84.4	0
84.5	0
84.6	0
84.7	0
84.8	0
84.9	0
85	0
85.1	0
85.2	0
85.3	0
85.4	0
85.5	0
85.6	0
85.7	0
85.8	0
85.9	0
86	0
86.1	0
86.2	0
86.3	0
86.4	0
86.5	0
86.6	0
86.7	0
86.8	0
86.9	0
87	0
87.1	0
87.2	0
87.3	0
87.4	0
87.5	0
87.6	0
87.7	0
87.8	0
87.9	0
88	0
88.1	0
88.2	0
88.3	0
88.4	0
88.5	0
88.6	0
88.7	0
88.8	0
88.9	0
89	0
89.1	0
89.2	0
89.3	0
89.4	0
89.5	0
89.6	0
89.7	0
89.8	0
89.9	0
90	0
90.1	0
90.2	0
90.3	0
90.4	0
90.5	0
90.6	0
90.7	0
90.8	0
90.9	0
91	0
91.1	0
91.2	0
91.3	0
91.4	0
91.5	0
91.6	0
91.7	0
91.8	0
91.9	0
92	0
92.1	0
92.2	0
92.3	0
92.4	0
92.5	0
92.6	0
92.7	0
92.8	0
92.9	0
93	0
93.1	0
93.2	0
93.3	0
93.4	0
93.5	0
93.6	0
93.7	0
93.8	0
93.9	0
94	0
94.1	0
94.2	0
94.3	0
94.4	0
94.5	0
94.6	0
94.7	0
94.8	0
94.9	0
95	0
95.1	0
95.2	0
95.3	0
95.4	0
95.5	0
95.6	0
95.7	0
95.8	0
95.9	0
96	0
96.1	0
96.2	0
96.3	0
96.4	0
96.5	0
96.6	0
96.7	0
96.8	0
96.9	0
97	0
97.1	0
97.2	0
97.3	0
97.4	0
97.5	0
97.6	0
97.7	0
97.8	0
97.9	0
98	0
98.1	0
98.2	0
98.3	0
98.4	0
98.5	0
98.6	0
98.7	0
98.8	0
98.9	0
99	0
99.1	0
99.2	0
99.3	0
99.4	0
99.5	0
99.6	0
99.7	0
99.8	0
99.9	0
100	0
100.1	0
100.2	0
100.3	0
100.4	0
100.5	0
100.6	0
100.7	0
100.8	0
100.9	0
101	0
101.1	0
101.2	0
101.3	0
101.4	0
101.5	0
101.6	0
101.7	0
101.8	0
101.9	0
102	0
102.1	0
102.2	0
102.3	0
102.4	0.000666667
102.5	0.000666667
102.6	0.000666667
102.7	0.000666667
102.8	0.000666667
102.9	0.000666667
103	0.000666667
103.1	0.000666667
103.2	0.00133333
103.3	0.00133333
103.4	0.00133333
103.5	0.00133333
103.6	0.00133333
103.7	0.002
103.8	0.002
103.9	0.002
104	0.002
104.1	0.002
104.2	0.002
104.3	0.00266667
104.4	0.00266667
104.5	0.00266667
104.6	0.00266667
104.7	0.00266667
104.8	0.00266667
104.9	0.00266667
105	0.00266667
105.1	0.00266667
105.2	0.00266667
105.3	0.00266667
105.4	0.00266667
105.5	0.00333333
105.6	0.00333333
105.7	0.00333333
105.8	0.00333333
105.9	0.00333333
106	0.00333333
106.1	0.00333333
106.2	0.00333333
106.3	0.00333333
106.4	0.004
106.5	0.004
106.6	0.004
106.7	0.004
106.8	0.004
106.9	0.004
107	0.004
107.1	0.004
107.2	0.004
107.3	0.00466667
107.4	0.00466667
107.5	0.00466667
107.6	0.00466667
107.7	0.00466667
107.8	0.00466667
107.9	0.00466667
108	0.00466667
108.1	0.00466667
108.2	0.00466667
108.3	0.00533333
108.4	0.00533333
108.5	0.00533333
108.6	0.00533333
108.7	0.00533333
108.8	0.00533333
108.9	0.00533333
109	0.00533333
109.1	0.00533333
109.2	0.00533333
109.3	0.006
109.4	0.00666667
109.5	0.00666667
109.6	0.00666667
109.7	0.00666667
109.8	0.00666667
109.9	0.00666667
110	0.00666667
110.1	0.006
110.2	0.006
110.3	0.006
110.4	0.006
110.5	0.006
110.6	0.006
110.7	0.006
110.8	0.006
110.9	0.00666667
111	0.00666667
111.1	0.00666667
111.2	0.00733333
111.3	0.008
111.4	0.008
111.5	0.008
111.6	0.008
111.7	0.008
111.8	0.00866667
111.9	0.00933333
112	0.00933333
112.1	0.00933333
112.2	0.01
112.3	0.01
112.4	0.01
112.5	0.01
112.6	0.01
112.7	0.01
112.8	0.01
112.9	0.01
113	0.01
113.1	0.0106667
113.2	0.0106667
113.3	0.0106667
113.4	0.0106667
113.5	0.0126667
113.6	0.0133333
113.7	0.014
113.8	0.014
113.9	0.014
114	0.014
114.1	0.014
114.2	0.014
114.3	0.0133333
114.4	0.0133333
114.5	0.014
114.6	0.014
114.7	0.014
114.8	0.014
114.9	0.014
115	0.014
115.1	0.0146667
115.2	0.0153333
115.3	0.0146667
115.4	0.0146667
115.5	0.0146667
115.6	0.0166667
115.7	0.016
115.8	0.016
115.9	0.016
116	0.016
116.1	0.016
116.2	0.016
116.3	0.016
116.4	0.0166667
116.5	0.0166667
116.6	0.0166667
116.7	0.0166667
116.8	0.0166667
116.9	0.0173333
117	0.0173333
117.1	0.0173333
117.2	0.0186667
117.3	0.02
117.4	0.02
117.5	0.02
117.6	0.02
117.7	0.02
117.8	0.02
117.9	0.02
118	0.02
118.1	0.0206667
118.2	0.0213333
118.3	0.0213333
118.4	0.0213333
118.5	0.0213333
118.6	0.0213333
118.7	0.0213333
118.8	0.0213333
118.9	0.0213333
119	0.022
119.1	0.022
119.2	0.022
119.3	0.022
119.4	0.022
119.5	0.022
119.6	0.022
119.7	0.0226667
119.8	0.0233333
119.9	0.0233333
120	0.0233333
120.1	0.0233333
120.2	0.0233333
120.3	0.0233333
120.4	0.024
120.5	0.024
120.6	0.0246667
120.7	0.0246667
120.8	0.0246667
120.9	0.0246667
121	0.0246667
121.1	0.0246667
121.2	0.024
121.3	0.024
121.4	0.0246667
121.5	0.0246667
121.6	0.0253333
121.7	0.0253333
121.8	0.0253333
121.9	0.0253333
122	0.0253333
122.1	0.0266667
122.2	0.0266667
122.3	0.0273333
122.4	0.0273333
122.5	0.0273333
122.6	0.0273333
122.7	0.0273333
122.8	0.028
122.9	0.028
123	0.028
123.1	0.028
123.2	0.028
123.3	0.028
123.4	0.028
123.5	0.028
123.6	0.028
123.7	0.0286667
123.8	0.0286667
123.9	0.0286667
124	0.028
124.1	0.028
124.2	0.028
124.3	0.028
124.4	0.0286667
124.5	0.0293333
124.6	0.0293333
124.7	0.0293333
124.8	0.0293333
124.9	0.03
125	0.03
125.1	0.03
125.2	0.0293333
125.3	0.0293333
125.4	0.0293333
125.5	0.0293333
125.6	0.0293333
125.7	0.03
125.8	0.03
125.9	0.03
126	0.0306667
126.1	0.0306667
126.2	0.0306667
126.3	0.0313333
126.4	0.0313333
126.5	0.0313333
126.6	0.032
126.7	0.032
126.8	0.032
126.9	0.032
127	0.032
127.1	0.0313333
127.2	0.0313333
127.3	0.0313333
127.4	0.032
127.5	0.0326667
127.6	0.032
127.7	0.032
127.8	0.032
127.9	0.0326667
128	0.0326667
128.1	0.0333333
128.2	0.0333333
128.3	0.0333333
128.4	0.0333333
128.5	0.0333333
128.6	0.034
128.7	0.034
128.8	0.0333333
128.9	0.0333333
129	0.034
129.1	0.034
129.2	0.034
129.3	0.034
129.4	0.034
129.5	0.0333333
129.6	0.0326667
129.7	0.0326667
129.8	0.0326667
129.9	0.0326667
130	0.0326667
130.1	0.0326667
130.2	0.0326667
130.3	0.0326667
130.4	0.0333333
130.5	0.0326667
130.6	0.0326667
130.7	0.0326667
130.8	0.0326667
130.9	0.0333333
131	0.0333333
131.1	0.0333333
131.2	0.0333333
131.3	0.034
131.4	0.0346667
131.5	0.0353333
131.6	0.034
131.7	0.034
131.8	0.0326667
131.9	0.0326667
132	0.0333333
132.1	0.0333333
132.2	0.034
132.3	0.034
132.4	0.034
132.5	0.034
132.6	0.0346667
132.7	0.0346667
132.8	0.0346667
132.9	0.0346667
133	0.0346667
133.1	0.0346667
133.2	0.0346667
133.3	0.036
133.4	0.036
133.5	0.036
133.6	0.0366667
133.7	0.0366667
133.8	0.0373333
133.9	0.0373333
134	0.0373333
134.1	0.0373333
134.2	0.0373333
134.3	0.0373333
134.4	0.0373333
134.5	0.0373333
134.6	0.038
134.7	0.038
134.8	0.038
134.9	0.038
135	0.0386667
135.1	0.0393333
135.2	0.0393333
135.3	0.0393333
135.4	0.0393333
135.5	0.0393333
135.6	0.0386667
135.7	0.038
135.8	0.0386667
135.9	0.04
136	0.04
136.1	0.04
136.2	0.0393333
136.3	0.04
136.4	0.0406667
136.5	0.0406667
136.6	0.0413333
136.7	0.0413333
136.8	0.0406667
136.9	0.0413333
137	0.042
137.1	0.042
137.2	0.0413333
137.3	0.042
137.4	0.042
137.5	0.0426667
137.6	0.0433333
137.7	0.0433333
137.8	0.0426667
137.9	0.042
138	0.042
138.1	0.042
138.2	0.042
138.3	0.042
138.4	0.042
138.5	0.042
138.6	0.042
138.7	0.042
138.8	0.042
138.9	0.0426667
139	0.0426667
139.1	0.0433333
139.2	0.0433333
139.3	0.0433333
139.4	0.0433333
139.5	0.0433333
139.6	0.0433333
139.7	0.0433333
139.8	0.0433333
139.9	0.0433333
140	0.0433333
140.1	0.0433333
140.2	0.0433333
140.3	0.0433333
140.4	0.044
140.5	0.044
140.6	0.0433333
140.7	0.044
140.8	0.044
140.9	0.0453333
141	0.0453333
141.1	0.0453333
141.2	0.0453333
141.3	0.0453333
141.4	0.046
141.5	0.046
141.6	0.046
141.7	0.046
141.8	0.046
141.9	0.046
142	0.046
142.1	0.046
142.2	0.046
142.3	0.0466667
142.4	0.0473333
142.5	0.048
142.6	0.048
142.7	0.048
142.8	0.048
142.9	0.0486667
143	0.0493333
143.1	0.0493333
143.2	0.0486667
143.3	0.0486667
143.4	0.0486667
143.5	0.0486667
143.6	0.0493333
143.7	0.0493333
143.8	0.0493333
143.9	0.0493333
144	0.0493333
144.1	0.0493333
144.2	0.0493333
144.3	0.0493333
144.4	0.0493333
144.5	0.05
144.6	0.05
144.7	0.05
144.8	0.05
144.9	0.05
145	0.05
145.1	0.05
145.2	0.05
145.3	0.05
145.4	0.05
145.5	0.0493333
145.6	0.05
145.7	0.05
145.8	0.05
145.9	0.05
146	0.0493333
146.1	0.0493333
146.2	0.0493333
146.3	0.05
146.4	0.0506667
146.5	0.05
146.6	0.05
146.7	0.05
146.8	0.05
146.9	0.05
147	0.05
147.1	0.0493333
147.2	0.0493333
147.3	0.0493333
147.4	0.0493333
147.5	0.0486667
147.6	0.0486667
147.7	0.0493333
147.8	0.0493333
147.9	0.0493333
148	0.0506667
148.1	0.0513333
148.2	0.052
148.3	0.052
148.4	0.0526667
148.5	0.0526667
148.6	0.0533333
148.7	0.0533333
148.8	0.0533333
148.9	0.0546667
149	0.0553333
149.1	0.056
149.2	0.0566667
149.3	0.0566667
149.4	0.056
149.5	0.056
149.6	0.0566667
149.7	0.0566667
149.8	0.0566667
149.9	0.0566667
150	0.0566667
150.1	0.0566667
150.2	0.0566667
150.3	0.0566667
150.4	0.0566667
150.5	0.0566667
150.6	0.0566667
150.7	0.0566667
150.8	0.0566667
150.9	0.0566667
151	0.0566667
151.1	0.0566667
151.2	0.0566667
151.3	0.0566667
151.4	0.0573333
151.5	0.0573333
151.6	0.0573333
151.7	0.0573333
151.8	0.0566667
151.9	0.0566667
152	0.0566667
152.1	0.0566667
152.2	0.0566667
152.3	0.0566667
152.4	0.0573333
152.5	0.0573333
152.6	0.0573333
152.7	0.0566667
152.8	0.0573333
152.9	0.0573333
153	0.0573333
153.1	0.0573333
153.2	0.0573333
153.3	0.058
153.4	0.0573333
153.5	0.0573333
153.6	0.0573333
153.7	0.0573333
153.8	0.0573333
153.9	0.0573333
154	0.058
154.1	0.058
154.2	0.058
154.3	0.058
154.4	0.058
154.5	0.058
154.6	0.0586667
154.7	0.0586667
154.8	0.0586667
154.9	0.0586667
155	0.058
155.1	0.0586667
155.2	0.0593333
155.3	0.0593333
155.4	0.06
155.5	0.06
155.6	0.06
155.7	0.06
155.8	0.06
155.9	0.06
156	0.0606667
156.1	0.0606667
156.2	0.0606667
156.3	0.0606667
156.4	0.0606667
156.5	0.0606667
156.6	0.0606667
156.7	0.0613333
156.8	0.0613333
156.9	0.0613333
157	0.0613333
157.1	0.0613333
157.2	0.0613333
157.3	0.0613333
157.4	0.0613333
157.5	0.0613333
157.6	0.0613333
157.7	0.0613333
157.8	0.0613333
157.9	0.0613333
158	0.0613333
158.1	0.062
158.2	0.062
158.3	0.0626667
158.4	0.0633333
158.5	0.064
158.6	0.064
158.7	0.064
158.8	0.064
158.9	0.064
159	0.0626667
159.1	0.062
159.2	0.062
159.3	0.0626667
159.4	0.0633333
159.5	0.0633333
159.6	0.0633333
159.7	0.064
159.8	0.064
159.9	0.064
160	0.064
160.1	0.0646667
160.2	0.0653333
160.3	0.0653333
160.4	0.0653333
160.5	0.0653333
160.6	0.0653333
160.7	0.066
160.8	0.066
160.9	0.066
161	0.066
161.1	0.066
161.2	0.0666667
161.3	0.0666667
161.4	0.066
161.5	0.066
161.6	0.066
161.7	0.066
161.8	0.066
161.9	0.0653333
162	0.0653333
162.1	0.0653333
162.2	0.0653333
162.3	0.066
162.4	0.0666667
162.5	0.068
162.6	0.068
162.7	0.068
162.8	0.068
162.9	0.068
163	0.0686667
163.1	0.0686667
163.2	0.0686667
163.3	0.0693333
163.4	0.0693333
163.5	0.07
163.6	0.0706667
163.7	0.0713333
163.8	0.0713333
163.9	0.0713333
164	0.0713333
164.1	0.072
164.2	0.072
164.3	0.072
164.4	0.072
164.5	0.072
164.6	0.0726667
164.7	0.0726667
164.8	0.0726667
164.9	0.0726667
165	0.0726667
165.1	0.0733333
165.2	0.0733333
165.3	0.0733333
165.4	0.0733333
165.5	0.0726667
165.6	0.0726667
165.7	0.0726667
165.8	0.0726667
165.9	0.0726667
166	0.0726667
166.1	0.0726667
166.2	0.0726667
166.3	0.0733333
166.4	0.0726667
166.5	0.0726667
166.6	0.0726667
166.7	0.0733333
166.8	0.0733333
166.9	0.0733333
167	0.0733333
167.1	0.0733333
167.2	0.0733333
167.3	0.074
167.4	0.074
167.5	0.074
167.6	0.074
167.7	0.0733333
167.8	0.0733333
167.9	0.074
168	0.0746667
168.1	0.0753333
168.2	0.076
168.3	0.076
168.4	0.076
168.5	0.076
168.6	0.076
168.7	0.076
168.8	0.076
168.9	0.076
169	0.0766667
169.1	0.0766667
169.2	0.0766667
169.3	0.0766667
169.4	0.0766667
169.5	0.0766667
169.6	0.0766667
169.7	0.0766667
169.8	0.0766667
169.9	0.0773333
170	0.0773333
170.1	0.0773333
170.2	0.0773333
170.3	0.0773333
170.4	0.0773333
170.5	0.0773333
170.6	0.0773333
170.7	0.0773333
170.8	0.0773333
170.9	0.0773333
171	0.0773333
171.1	0.078
171.2	0.078
171.3	0.078
171.4	0.078
171.5	0.078
171.6	0.0773333
171.7	0.0773333
171.8	0.0773333
171.9	0.0773333
172	0.0773333
172.1	0.0793333
172.2	0.0793333
172.3	0.0793333
172.4	0.0793333
172.5	0.0786667
172.6	0.0786667
172.7	0.0786667
172.8	0.0786667
172.9	0.0786667
173	0.0786667
173.1	0.0786667
173.2	0.078
173.3	0.078
173.4	0.078
173.5	0.078
173.6	0.078
173.7	0.078
173.8	0.078
173.9	0.0786667
174	0.0786667
174.1	0.0786667
174.2	0.0786667
174.3	0.0793333
174.4	0.0793333
174.5	0.08
174.6	0.08
174.7	0.0806667
174.8	0.0806667
174.9	0.0806667
175	0.0813333
175.1	0.0813333
175.2	0.0813333
175.3	0.082
175.4	0.082
175.5	0.082
175.6	0.082
175.7	0.082
175.8	0.082
175.9	0.0813333
176	0.08
176.1	0.08
176.2	0.08
176.3	0.0793333
176.4	0.0793333
176.5	0.0793333
176.6	0.0793333
176.7	0.0793333
176.8	0.0793333
176.9	0.0786667
177	0.0786667
177.1	0.0786667
177.2	0.0786667
177.3	0.0786667
177.4	0.0786667
177.5	0.0786667
177.6	0.0786667
177.7	0.0786667
177.8	0.0786667
177.9	0.078
178	0.078
178.1	0.0793333
178.2	0.0793333
178.3	0.0786667
178.4	0.0786667
178.5	0.0786667
178.6	0.0786667
178.7	0.0786667
178.8	0.0786667
178.9	0.0786667
179	0.0793333
179.1	0.0793333
179.2	0.0786667
179.3	0.0786667
179.4	0.0786667
179.5	0.0786667
179.6	0.0793333
179.7	0.0793333
179.8	0.08
179.9	0.082
180	0.082
180.1	0.082
180.2	0.082
180.3	0.082
180.4	0.0813333
180.5	0.0806667
180.6	0.0806667
180.7	0.0813333
180.8	0.082
180.9	0.082
181	0.0813333
181.1	0.082
181.2	0.0826667
181.3	0.0826667
181.4	0.0833333
181.5	0.0833333
181.6	0.0833333
181.7	0.0833333
181.8	0.0833333
181.9	0.0846667
182	0.0853333
182.1	0.0853333
182.2	0.0853333
182.3	0.0853333
182.4	0.0853333
182.5	0.0853333
182.6	0.0853333
182.7	0.0853333
182.8	0.0853333
182.9	0.0853333
183	0.086
183.1	0.086
183.2	0.0853333
183.3	0.0853333
183.4	0.0866667
183.5	0.086
183.6	0.0866667
183.7	0.086
183.8	0.086
183.9	0.086
184	0.086
184.1	0.086
184.2	0.0866667
184.3	0.0866667
184.4	0.0873333
184.5	0.0873333
184.6	0.0873333
184.7	0.0873333
184.8	0.0873333
184.9	0.0873333
185	0.0873333
185.1	0.0873333
185.2	0.0873333
185.3	0.0873333
185.4	0.088
185.5	0.088
185.6	0.088
185.7	0.088
185.8	0.088
185.9	0.088
186	0.088
186.1	0.088
186.2	0.0873333
186.3	0.0873333
186.4	0.0866667
186.5	0.0866667
186.6	0.0866667
186.7	0.0873333
186.8	0.0873333
186.9	0.0873333
187	0.0873333
187.1	0.0873333
187.2	0.0873333
187.3	0.0873333
187.4	0.0873333
187.5	0.0873333
187.6	0.088
187.7	0.0873333
187.8	0.0873333
187.9	0.088
188	0.088
188.1	0.088
188.2	0.088
188.3	0.0873333
188.4	0.086
188.5	0.086
188.6	0.0866667
188.7	0.0866667
188.8	0.0866667
188.9	0.0866667
189	0.0866667
189.1	0.0866667
189.2	0.0866667
189.3	0.0866667
189.4	0.0873333
189.5	0.0873333
189.6	0.0873333
189.7	0.0866667
189.8	0.0866667
189.9	0.0866667
190	0.0866667
190.1	0.0873333
190.2	0.0873333
190.3	0.0866667
190.4	0.0866667
190.5	0.0866667
190.6	0.0866667
190.7	0.0873333
190.8	0.0873333
190.9	0.0866667
191	0.0866667
191.1	0.088
191.2	0.0886667
191.3	0.088
191.4	0.088
191.5	0.088
191.6	0.088
191.7	0.088
191.8	0.088
191.9	0.0886667
192	0.0886667
192.1	0.0886667
192.2	0.0886667
192.3	0.0886667
192.4	0.0886667
192.5	0.0886667
192.6	0.088
192.7	0.088
192.8	0.088
192.9	0.0886667
193	0.0886667
193.1	0.0886667
193.2	0.0886667
193.3	0.0886667
193.4	0.0886667
193.5	0.088
193.6	0.088
193.7	0.088
193.8	0.088
193.9	0.0886667
194	0.0886667
194.1	0.0886667
194.2	0.09
194.3	0.09
194.4	0.09
194.5	0.0906667
194.6	0.0906667
194.7	0.0906667
194.8	0.0926667
194.9	0.0926667
195	0.0933333
195.1	0.0933333
195.2	0.0933333
195.3	0.094
195.4	0.0946667
195.5	0.0946667
195.6	0.0946667
195.7	0.0946667
195.8	0.0946667
195.9	0.0946667
196	0.0946667
196.1	0.0946667
196.2	0.0946667
196.3	0.094
196.4	0.094
196.5	0.094
196.6	0.094
196.7	0.0946667
196.8	0.0946667
196.9	0.0953333
197	0.0953333
197.1	0.0953333
197.2	0.0946667
197.3	0.0946667
197.4	0.0953333
197.5	0.096
197.6	0.0953333
197.7	0.0953333
197.8	0.0953333
197.9	0.0953333
198	0.0946667
198.1	0.0946667
198.2	0.094
198.3	0.094
198.4	0.0933333
198.5	0.0933333
198.6	0.0926667
198.7	0.0926667
198.8	0.0933333
198.9	0.094
199	0.094
199.1	0.094
199.2	0.0933333
199.3	0.0933333
199.4	0.0933333
199.5	0.094
199.6	0.094
199.7	0.094
199.8	0.094
199.9	0.094
200	0.096
[truncated: 14,000 more rows]
