# Supplementary material for: Bayesian inference of kinetic schemes for ion channels by Kalman filtering
Source: eLife journal article supplement (doi:10.7554/elife.62714), 2022-05-04
Supplement: fig4-data12 [file 1_Sim_N_2000_Fluor_MW.xlsx]

## Sheet: Tabelle1
0.1	0
0.2	0
0.3	0
0.4	0
0.5	0
0.6	0
0.7	0
0.8	0
0.9	0
1	0
1.1	0
1.2	0
1.3	0
1.4	0
1.5	0
1.6	0
1.7	0
1.8	0
1.9	0
2	0
2.1	0
2.2	0
2.3	0
2.4	0
2.5	0
2.6	0
2.7	0
2.8	0
2.9	0
3	0
3.1	0
3.2	0
3.3	0
3.4	0
3.5	0
3.6	0
3.7	0
3.8	0
3.9	0
4	0
4.1	0
4.2	0
4.3	0
4.4	0
4.5	0
4.6	0
4.7	0
4.8	0
4.9	0
5	0
5.1	0
5.2	0
5.3	0
5.4	0
5.5	0
5.6	0
5.7	0
5.8	0
5.9	0
6	0
6.1	0
6.2	0
6.3	0
6.4	0
6.5	0
6.6	0
6.7	0
6.8	0
6.9	0
7	0
7.1	0
7.2	0
7.3	0
7.4	0
7.5	0
7.6	0
7.7	0
7.8	0
7.9	0
8	0
8.1	0
8.2	0
8.3	0
8.4	0
8.5	0
8.6	0
8.7	0
8.8	0
8.9	0
9	0
9.1	0
9.2	0
9.3	0
9.4	0
9.5	0
9.6	0
9.7	0
9.8	0
9.9	0
10	0
10.1	0
10.2	0
10.3	0
10.4	0
10.5	0
10.6	0
10.7	0
10.8	0
10.9	0
11	0
11.1	0
11.2	0
11.3	0
11.4	0
11.5	0
11.6	0
11.7	0
11.8	0
11.9	0
12	0
12.1	0
12.2	0
12.3	0
12.4	0
12.5	0
12.6	0
12.7	0
12.8	0
12.9	0
13	0
13.1	0
13.2	0
13.3	0
13.4	0
13.5	0
13.6	0
13.7	0
13.8	0
13.9	0
14	0
14.1	0
14.2	0
14.3	0
14.4	0
14.5	0
14.6	0
14.7	0
14.8	0
14.9	0
15	0
15.1	0
15.2	0
15.3	0
15.4	0
15.5	0
15.6	0
15.7	0
15.8	0
15.9	0
16	0
16.1	0
16.2	0
16.3	0
16.4	0
16.5	0
16.6	0
16.7	0
16.8	0
16.9	0
17	0
17.1	0
17.2	0
17.3	0
17.4	0
17.5	0
17.6	0
17.7	0
17.8	0
17.9	0
18	0
18.1	0
18.2	0
18.3	0
18.4	0
18.5	0
18.6	0
18.7	0
18.8	0
18.9	0
19	0
19.1	0
19.2	0
19.3	0
19.4	0
19.5	0
19.6	0
19.7	0
19.8	0
19.9	0
20	0
20.1	0
20.2	0
20.3	0
20.4	0
20.5	0
20.6	0
20.7	0
20.8	0
20.9	0
21	0
21.1	0
21.2	0
21.3	0
21.4	0
21.5	0
21.6	0
21.7	0
21.8	0
21.9	0
22	0
22.1	0
22.2	0
22.3	0
22.4	0
22.5	0
22.6	0
22.7	0
22.8	0
22.9	0
23	0
23.1	0
23.2	0
23.3	0
23.4	0
23.5	0
23.6	0
23.7	0
23.8	0
23.9	0
24	0
24.1	0
24.2	0
24.3	0
24.4	0
24.5	0
24.6	0
24.7	0
24.8	0
24.9	0
25	0
25.1	0
25.2	0
25.3	0
25.4	0
25.5	0
25.6	0
25.7	0
25.8	0
25.9	0
26	0
26.1	0
26.2	0
26.3	0
26.4	0
26.5	0
26.6	0
26.7	0
26.8	0
26.9	0
27	0
27.1	0
27.2	0
27.3	0
27.4	0
27.5	0
27.6	0
27.7	0
27.8	0
27.9	0
28	0
28.1	0
28.2	0
28.3	0
28.4	0
28.5	0
28.6	0
28.7	0
28.8	0
28.9	0
29	0
29.1	0
29.2	0
29.3	0
29.4	0
29.5	0
29.6	0
29.7	0
29.8	0
29.9	0
30	0
30.1	0
30.2	0
30.3	0
30.4	0
30.5	0
30.6	0
30.7	0
30.8	0
30.9	0
31	0
31.1	0
31.2	0
31.3	0
31.4	0
31.5	0
31.6	0
31.7	0
31.8	0
31.9	0
32	0
32.1	0
32.2	0
32.3	0
32.4	0
32.5	0
32.6	0
32.7	0
32.8	0
32.9	0
33	0
33.1	0
33.2	0
33.3	0
33.4	0
33.5	0
33.6	0
33.7	0
33.8	0
33.9	0
34	0
34.1	0
34.2	0
34.3	0
34.4	0
34.5	0
34.6	0
34.7	0
34.8	0
34.9	0
35	0
35.1	0
35.2	0
35.3	0
35.4	0
35.5	0
35.6	0
35.7	0
35.8	0
35.9	0
36	0
36.1	0
36.2	0
36.3	0
36.4	0
36.5	0
36.6	0
36.7	0
36.8	0
36.9	0
37	0
37.1	0
37.2	0
37.3	0
37.4	0
37.5	0
37.6	0
37.7	0
37.8	0
37.9	0
38	0
38.1	0
38.2	0
38.3	0
38.4	0
38.5	0
38.6	0
38.7	0
38.8	0
38.9	0
39	0
39.1	0
39.2	0
39.3	0
39.4	0
39.5	0
39.6	0
39.7	0
39.8	0
39.9	0
40	0
40.1	0
40.2	0
40.3	0
40.4	0
40.5	0
40.6	0
40.7	0
40.8	0
40.9	0
41	0
41.1	0
41.2	0
41.3	0
41.4	0
41.5	0
41.6	0
41.7	0
41.8	0
41.9	0
42	0
42.1	0
42.2	0
42.3	0
42.4	0
42.5	0
42.6	0
42.7	0
42.8	0
42.9	0
43	0
43.1	0
43.2	0
43.3	0
43.4	0
43.5	0
43.6	0
43.7	0
43.8	0
43.9	0
44	0
44.1	0
44.2	0
44.3	0
44.4	0
44.5	0
44.6	0
44.7	0
44.8	0
44.9	0
45	0
45.1	0
45.2	0
45.3	0
45.4	0
45.5	0
45.6	0
45.7	0
45.8	0
45.9	0
46	0
46.1	0
46.2	0
46.3	0
46.4	0
46.5	0
46.6	0
46.7	0
46.8	0
46.9	0
47	0
47.1	0
47.2	0
47.3	0
47.4	0
47.5	0
47.6	0
47.7	0
47.8	0
47.9	0
48	0
48.1	0
48.2	0
48.3	0
48.4	0
48.5	0
48.6	0
48.7	0
48.8	0
48.9	0
49	0
49.1	0
49.2	0
49.3	0
49.4	0
49.5	0
49.6	0
49.7	0
49.8	0
49.9	0
50	0
50.1	0
50.2	0
50.3	0
50.4	0
50.5	0
50.6	0
50.7	0
50.8	0
50.9	0
51	0
51.1	0
51.2	0
51.3	0
51.4	0
51.5	0
51.6	0
51.7	0
51.8	0
51.9	0
52	0
52.1	0
52.2	0
52.3	0
52.4	0
52.5	0
52.6	0
52.7	0
52.8	0
52.9	0
53	0
53.1	0
53.2	0
53.3	0
53.4	0
53.5	0
53.6	0
53.7	0
53.8	0
53.9	0
54	0
54.1	0
54.2	0
54.3	0
54.4	0
54.5	0
54.6	0
54.7	0
54.8	0
54.9	0
55	0
55.1	0
55.2	0
55.3	0
55.4	0
55.5	0
55.6	0
55.7	0
55.8	0
55.9	0
56	0
56.1	0
56.2	0
56.3	0
56.4	0
56.5	0
56.6	0
56.7	0
56.8	0
56.9	0
57	0
57.1	0
57.2	0
57.3	0
57.4	0
57.5	0
57.6	0
57.7	0
57.8	0
57.9	0
58	0
58.1	0
58.2	0
58.3	0
58.4	0
58.5	0
58.6	0
58.7	0
58.8	0
58.9	0
59	0
59.1	0
59.2	0
59.3	0
59.4	0
59.5	0
59.6	0
59.7	0
59.8	0
59.9	0
60	0
60.1	0
60.2	0
60.3	0
60.4	0
60.5	0
60.6	0
60.7	0
60.8	0
60.9	0
61	0
61.1	0
61.2	0
61.3	0
61.4	0
61.5	0
61.6	0
61.7	0
61.8	0
61.9	0
62	0
62.1	0
62.2	0
62.3	0
62.4	0
62.5	0
62.6	0
62.7	0
62.8	0
62.9	0
63	0
63.1	0
63.2	0
63.3	0
63.4	0
63.5	0
63.6	0
63.7	0
63.8	0
63.9	0
64	0
64.1	0
64.2	0
64.3	0
64.4	0
64.5	0
64.6	0
64.7	0
64.8	0
64.9	0
65	0
65.1	0
65.2	0
65.3	0
65.4	0
65.5	0
65.6	0
65.7	0
65.8	0
65.9	0
66	0
66.1	0
66.2	0
66.3	0
66.4	0
66.5	0
66.6	0
66.7	0
66.8	0
66.9	0
67	0
67.1	0
67.2	0
67.3	0
67.4	0
67.5	0
67.6	0
67.7	0
67.8	0
67.9	0
68	0
68.1	0
68.2	0
68.3	0
68.4	0
68.5	0
68.6	0
68.7	0
68.8	0
68.9	0
69	0
69.1	0
69.2	0
69.3	0
69.4	0
69.5	0
69.6	0
69.7	0
69.8	0
69.9	0
70	0
70.1	0
70.2	0
70.3	0
70.4	0
70.5	0
70.6	0
70.7	0
70.8	0
70.9	0
71	0
71.1	0
71.2	0
71.3	0
71.4	0
71.5	0
71.6	0
71.7	0
71.8	0
71.9	0
72	0
72.1	0
72.2	0
72.3	0
72.4	0
72.5	0
72.6	0
72.7	0
72.8	0
72.9	0
73	0
73.1	0
73.2	0
73.3	0
73.4	0
73.5	0
73.6	0
73.7	0
73.8	0
73.9	0
74	0
74.1	0
74.2	0
74.3	0
74.4	0
74.5	0
74.6	0
74.7	0
74.8	0
74.9	0
75	0
75.1	0
75.2	0
75.3	0
75.4	0
75.5	0
75.6	0
75.7	0
75.8	0
75.9	0
76	0
76.1	0
76.2	0
76.3	0
76.4	0
76.5	0
76.6	0
76.7	0
76.8	0
76.9	0
77	0
77.1	0
77.2	0
77.3	0
77.4	0
77.5	0
77.6	0
77.7	0
77.8	0
77.9	0
78	0
78.1	0
78.2	0
78.3	0
78.4	0
78.5	0
78.6	0
78.7	0
78.8	0
78.9	0
79	0
79.1	0
79.2	0
79.3	0
79.4	0
79.5	0
79.6	0
79.7	0
79.8	0
79.9	0
80	0
80.1	0
80.2	0
80.3	0
80.4	0
80.5	0
80.6	0
80.7	0
80.8	0
80.9	0
81	0
81.1	0
81.2	0
81.3	0
81.4	0
81.5	0
81.6	0
81.7	0
81.8	0
81.9	0
82	0
82.1	0
82.2	0
82.3	0
82.4	0
82.5	0
82.6	0
82.7	0
82.8	0
82.9	0
83	0
83.1	0
83.2	0
83.3	0
83.4	0
83.5	0
83.6	0
83.7	0
83.8	0
83.9	0
84	0
84.1	0
84.2	0
84.3	0
84.4	0
84.5	0
84.6	0
84.7	0
84.8	0
84.9	0
85	0
85.1	0
85.2	0
85.3	0
85.4	0
85.5	0
85.6	0
85.7	0
85.8	0
85.9	0
86	0
86.1	0
86.2	0
86.3	0
86.4	0
86.5	0
86.6	0
86.7	0
86.8	0
86.9	0
87	0
87.1	0
87.2	0
87.3	0
87.4	0
87.5	0
87.6	0
87.7	0
87.8	0
87.9	0
88	0
88.1	0
88.2	0
88.3	0
88.4	0
88.5	0
88.6	0
88.7	0
88.8	0
88.9	0
89	0
89.1	0
89.2	0
89.3	0
89.4	0
89.5	0
89.6	0
89.7	0
89.8	0
89.9	0
90	0
90.1	0
90.2	0
90.3	0
90.4	0
90.5	0
90.6	0
90.7	0
90.8	0
90.9	0
91	0
91.1	0
91.2	0
91.3	0
91.4	0
91.5	0
91.6	0
91.7	0
91.8	0
91.9	0
92	0
92.1	0
92.2	0
92.3	0
92.4	0
92.5	0
92.6	0
92.7	0
92.8	0
92.9	0
93	0
93.1	0
93.2	0
93.3	0
93.4	0
93.5	0
93.6	0
93.7	0
93.8	0
93.9	0
94	0
94.1	0
94.2	0
94.3	0
94.4	0
94.5	0
94.6	0
94.7	0
94.8	0
94.9	0
95	0
95.1	0
95.2	0
95.3	0
95.4	0
95.5	0
95.6	0
95.7	0
95.8	0
95.9	0
96	0
96.1	0
96.2	0
96.3	0
96.4	0
96.5	0
96.6	0
96.7	0
96.8	0
96.9	0
97	0
97.1	0
97.2	0
97.3	0
97.4	0
97.5	0
97.6	0
97.7	0
97.8	0
97.9	0
98	0
98.1	0
98.2	0
98.3	0
98.4	0
98.5	0
98.6	0
98.7	0
98.8	0
98.9	0
99	0
99.1	0
99.2	0
99.3	0
99.4	0
99.5	0
99.6	0
99.7	0
99.8	0
99.9	0
100	0
100.1	0.00775
100.2	0.01525
100.3	0.0225
100.4	0.0295
100.5	0.03525
100.6	0.04075
100.7	0.04575
100.8	0.05225
100.9	0.05825
101	0.0625
101.1	0.068
101.2	0.0755
101.3	0.08
101.4	0.08675
101.5	0.0915
101.6	0.09525
101.7	0.1015
101.8	0.10575
101.9	0.11
102	0.11575
102.1	0.12025
102.2	0.12425
102.3	0.12625
102.4	0.1325
102.5	0.135
102.6	0.13825
102.7	0.143
102.8	0.1475
102.9	0.1515
103	0.155
103.1	0.15825
103.2	0.16275
103.3	0.16775
103.4	0.17275
103.5	0.175
103.6	0.18075
103.7	0.18625
103.8	0.18875
103.9	0.19275
104	0.19725
104.1	0.20275
104.2	0.2075
104.3	0.21275
104.4	0.2155
104.5	0.21825
104.6	0.2205
104.7	0.224
104.8	0.22675
104.9	0.23
105	0.2335
105.1	0.234
105.2	0.2345
105.3	0.235
105.4	0.23825
105.5	0.243
105.6	0.2445
105.7	0.24775
105.8	0.24825
105.9	0.25175
106	0.25375
106.1	0.257
106.2	0.2605
106.3	0.259
106.4	0.261
106.5	0.26525
106.6	0.26575
106.7	0.267
106.8	0.2685
106.9	0.27
107	0.271
107.1	0.26975
107.2	0.27175
107.3	0.273
107.4	0.275
107.5	0.278
107.6	0.2775
107.7	0.2785
107.8	0.28075
107.9	0.2785
108	0.281
108.1	0.2815
108.2	0.28325
108.3	0.285
108.4	0.2865
108.5	0.28875
108.6	0.29075
108.7	0.2905
108.8	0.2905
108.9	0.29025
109	0.2925
109.1	0.29525
109.2	0.2965
109.3	0.29925
109.4	0.29925
109.5	0.30225
109.6	0.30225
109.7	0.30375
109.8	0.30575
109.9	0.30475
110	0.30575
110.1	0.307
110.2	0.30625
110.3	0.30475
110.4	0.304
110.5	0.30575
110.6	0.30775
110.7	0.3095
110.8	0.312
110.9	0.313
111	0.313
111.1	0.31225
111.2	0.3115
111.3	0.31175
111.4	0.314
111.5	0.315
111.6	0.315
111.7	0.3155
111.8	0.3175
111.9	0.31575
112	0.31575
112.1	0.31475
112.2	0.316
112.3	0.31925
112.4	0.32025
112.5	0.31925
112.6	0.3205
112.7	0.31875
112.8	0.319
112.9	0.31875
113	0.3195
113.1	0.32325
113.2	0.3255
113.3	0.3245
113.4	0.32625
113.5	0.32875
113.6	0.328
113.7	0.3275
113.8	0.32825
113.9	0.3285
114	0.329
114.1	0.3305
114.2	0.333
114.3	0.3335
114.4	0.331
114.5	0.33075
114.6	0.332
114.7	0.3325
114.8	0.3325
114.9	0.33475
115	0.33575
115.1	0.33525
115.2	0.3345
115.3	0.334
115.4	0.3345
115.5	0.33475
115.6	0.336
115.7	0.336
115.8	0.3355
115.9	0.3345
116	0.334
116.1	0.336
116.2	0.335
116.3	0.33425
116.4	0.33575
116.5	0.334
116.6	0.33475
116.7	0.33575
116.8	0.33575
116.9	0.335
117	0.334
117.1	0.33375
117.2	0.33375
117.3	0.336
117.4	0.3355
117.5	0.337
117.6	0.339
117.7	0.3375
117.8	0.33875
117.9	0.33925
118	0.338
118.1	0.338
118.2	0.34025
118.3	0.33975
118.4	0.34
118.5	0.3415
118.6	0.341
118.7	0.34225
118.8	0.34475
118.9	0.3435
119	0.34125
119.1	0.3415
119.2	0.34025
119.3	0.342
119.4	0.34425
119.5	0.346
119.6	0.34325
119.7	0.34225
119.8	0.342
119.9	0.3415
120	0.34175
120.1	0.34275
120.2	0.34475
120.3	0.34675
120.4	0.34475
120.5	0.3445
120.6	0.344
120.7	0.34575
120.8	0.34625
120.9	0.3445
121	0.34725
121.1	0.34675
121.2	0.34875
121.3	0.34725
121.4	0.34675
121.5	0.346
121.6	0.345
121.7	0.34625
121.8	0.3445
121.9	0.344
122	0.345
122.1	0.34325
122.2	0.34175
122.3	0.3425
122.4	0.34325
122.5	0.34375
122.6	0.343
122.7	0.34325
122.8	0.34375
122.9	0.344
123	0.34375
123.1	0.3455
123.2	0.3465
123.3	0.346
123.4	0.3475
123.5	0.34725
123.6	0.34725
123.7	0.34675
123.8	0.347
123.9	0.34775
124	0.34825
124.1	0.35075
124.2	0.34975
124.3	0.348
124.4	0.3465
124.5	0.3475
124.6	0.349
124.7	0.35025
124.8	0.34975
124.9	0.3495
125	0.3495
125.1	0.34825
125.2	0.34725
125.3	0.34825
125.4	0.3485
125.5	0.3485
125.6	0.3465
125.7	0.34425
125.8	0.3425
125.9	0.345
126	0.345
126.1	0.34425
126.2	0.3455
126.3	0.34375
126.4	0.3445
126.5	0.344
126.6	0.34425
126.7	0.346
126.8	0.345
126.9	0.34575
127	0.34575
127.1	0.34475
127.2	0.34375
127.3	0.3445
127.4	0.34575
127.5	0.34575
127.6	0.346
127.7	0.34275
127.8	0.341
127.9	0.3405
128	0.3425
128.1	0.34125
128.2	0.34
128.3	0.3405
128.4	0.34075
128.5	0.34275
128.6	0.3435
128.7	0.3445
128.8	0.34325
128.9	0.3415
129	0.3425
129.1	0.34375
129.2	0.3435
129.3	0.34325
129.4	0.34375
129.5	0.34475
129.6	0.3475
129.7	0.34825
129.8	0.346
129.9	0.348
130	0.349
130.1	0.349
130.2	0.349
130.3	0.35025
130.4	0.3495
130.5	0.3515
130.6	0.3545
130.7	0.35425
130.8	0.35725
130.9	0.35925
131	0.3605
131.1	0.36025
131.2	0.36275
131.3	0.36375
131.4	0.36525
131.5	0.36625
131.6	0.3665
131.7	0.366
131.8	0.366
131.9	0.36725
132	0.366
132.1	0.36575
132.2	0.3655
132.3	0.36625
132.4	0.3695
132.5	0.3695
132.6	0.36825
132.7	0.3695
132.8	0.36975
132.9	0.37025
133	0.367
133.1	0.3685
133.2	0.36775
133.3	0.36825
133.4	0.36825
133.5	0.369
133.6	0.36625
133.7	0.36675
133.8	0.367
133.9	0.365
134	0.365
134.1	0.366
134.2	0.368
134.3	0.36775
134.4	0.367
134.5	0.36675
134.6	0.36625
134.7	0.367
134.8	0.365
134.9	0.3655
135	0.366
135.1	0.3655
135.2	0.36575
135.3	0.36475
135.4	0.36275
135.5	0.36425
135.6	0.363
135.7	0.36375
135.8	0.36475
135.9	0.3655
136	0.3655
136.1	0.3665
136.2	0.3685
136.3	0.36975
136.4	0.367
136.5	0.366
136.6	0.3655
136.7	0.368
136.8	0.3675
136.9	0.36925
137	0.3705
137.1	0.36975
137.2	0.37075
137.3	0.36875
137.4	0.3705
137.5	0.371
137.6	0.37175
137.7	0.37325
137.8	0.37275
137.9	0.37425
138	0.3745
138.1	0.3725
138.2	0.37025
138.3	0.37025
138.4	0.37025
138.5	0.37225
138.6	0.37025
138.7	0.369
138.8	0.36925
138.9	0.36825
139	0.3685
139.1	0.3695
139.2	0.369
139.3	0.37025
139.4	0.372
139.5	0.3725
139.6	0.3725
139.7	0.37275
139.8	0.3715
139.9	0.37225
140	0.37225
140.1	0.373
140.2	0.377
140.3	0.37625
140.4	0.37575
140.5	0.37375
140.6	0.3735
140.7	0.375
140.8	0.37825
140.9	0.37775
141	0.379
141.1	0.378
141.2	0.37775
141.3	0.376
141.4	0.37725
141.5	0.379
141.6	0.3795
141.7	0.37925
141.8	0.37625
141.9	0.3775
142	0.3775
142.1	0.37425
142.2	0.3745
142.3	0.37525
142.4	0.3765
142.5	0.37675
142.6	0.3735
142.7	0.3745
142.8	0.377
142.9	0.37675
143	0.3755
143.1	0.377
143.2	0.375
143.3	0.3735
143.4	0.375
143.5	0.3735
143.6	0.37325
143.7	0.37425
143.8	0.37425
143.9	0.37575
144	0.3765
144.1	0.3765
144.2	0.37775
144.3	0.3775
144.4	0.3765
144.5	0.377
144.6	0.37675
144.7	0.37725
144.8	0.377
144.9	0.3775
145	0.37575
145.1	0.376
145.2	0.3745
145.3	0.37425
145.4	0.3715
145.5	0.37075
145.6	0.372
145.7	0.371
145.8	0.371
145.9	0.37075
146	0.37225
146.1	0.372
146.2	0.373
146.3	0.37225
146.4	0.3735
146.5	0.3705
146.6	0.36975
146.7	0.37025
146.8	0.3675
146.9	0.36775
147	0.3685
147.1	0.3675
147.2	0.3665
147.3	0.36825
147.4	0.3665
147.5	0.36875
147.6	0.3705
147.7	0.36975
147.8	0.371
147.9	0.3725
148	0.373
148.1	0.372
148.2	0.37325
148.3	0.3735
148.4	0.37325
148.5	0.3735
148.6	0.3745
148.7	0.37325
148.8	0.37425
148.9	0.374
149	0.37325
149.1	0.37275
149.2	0.37325
149.3	0.375
149.4	0.37575
149.5	0.3745
149.6	0.37425
149.7	0.3745
149.8	0.375
149.9	0.37475
150	0.376
150.1	0.37775
150.2	0.37975
150.3	0.37975
150.4	0.3795
150.5	0.381
150.6	0.3795
150.7	0.381
150.8	0.38275
150.9	0.3815
151	0.3805
151.1	0.38275
151.2	0.3805
151.3	0.37925
151.4	0.37725
151.5	0.37775
151.6	0.3785
151.7	0.3785
151.8	0.379
151.9	0.377
152	0.37525
152.1	0.37575
152.2	0.376
152.3	0.3755
152.4	0.375
152.5	0.3755
152.6	0.3755
152.7	0.37575
152.8	0.37625
152.9	0.37625
153	0.37725
153.1	0.37825
153.2	0.3765
153.3	0.37725
153.4	0.3775
153.5	0.376
153.6	0.3775
153.7	0.37925
153.8	0.37925
153.9	0.379
154	0.37825
154.1	0.3805
154.2	0.38025
154.3	0.37775
154.4	0.377
154.5	0.378
154.6	0.3775
154.7	0.37775
154.8	0.37625
154.9	0.37625
155	0.37675
155.1	0.37675
155.2	0.37825
155.3	0.38025
155.4	0.38125
155.5	0.38025
155.6	0.38
155.7	0.38025
155.8	0.38125
155.9	0.3825
156	0.383
156.1	0.381
156.2	0.38125
156.3	0.38075
156.4	0.379
156.5	0.3765
156.6	0.376
156.7	0.375
156.8	0.37775
156.9	0.38025
157	0.38175
157.1	0.37975
157.2	0.37925
157.3	0.379
157.4	0.37625
157.5	0.37525
157.6	0.37725
157.7	0.378
157.8	0.3785
157.9	0.3805
158	0.38125
158.1	0.38175
158.2	0.38175
158.3	0.38475
158.4	0.3855
158.5	0.38525
158.6	0.387
158.7	0.3885
158.8	0.38925
158.9	0.38725
159	0.3855
159.1	0.3865
159.2	0.3845
159.3	0.38475
159.4	0.38425
159.5	0.3845
159.6	0.3855
159.7	0.38525
159.8	0.38425
159.9	0.382
160	0.3825
160.1	0.38325
160.2	0.382
160.3	0.38275
160.4	0.38425
160.5	0.38525
160.6	0.3845
160.7	0.38375
160.8	0.38325
160.9	0.383
161	0.38225
161.1	0.38325
161.2	0.382
161.3	0.38375
161.4	0.38425
161.5	0.386
161.6	0.38275
161.7	0.38325
161.8	0.3825
161.9	0.3835
162	0.384
162.1	0.384
162.2	0.38425
162.3	0.38425
162.4	0.3845
162.5	0.3875
162.6	0.38625
162.7	0.38325
162.8	0.38275
162.9	0.38325
163	0.3825
163.1	0.385
163.2	0.3845
163.3	0.38475
163.4	0.38525
163.5	0.3855
163.6	0.38575
163.7	0.38575
163.8	0.38475
163.9	0.386
164	0.38575
164.1	0.3865
164.2	0.3865
164.3	0.38625
164.4	0.386
164.5	0.383
164.6	0.38475
164.7	0.38675
164.8	0.3865
164.9	0.386
165	0.3865
165.1	0.386
165.2	0.386
165.3	0.3885
165.4	0.3875
165.5	0.38975
165.6	0.388
165.7	0.38825
165.8	0.38775
165.9	0.3865
166	0.38675
166.1	0.38625
166.2	0.3855
166.3	0.38325
166.4	0.38325
166.5	0.3835
166.6	0.38475
166.7	0.386
166.8	0.3885
166.9	0.3885
167	0.38925
167.1	0.39125
167.2	0.389
167.3	0.38975
167.4	0.3885
167.5	0.38825
167.6	0.38925
167.7	0.38925
167.8	0.3915
167.9	0.39325
168	0.3925
168.1	0.3915
168.2	0.39025
168.3	0.3895
168.4	0.3895
168.5	0.38925
168.6	0.38975
168.7	0.38875
168.8	0.39175
168.9	0.39025
169	0.39075
169.1	0.39275
169.2	0.393
169.3	0.39225
169.4	0.39225
169.5	0.39225
169.6	0.394
169.7	0.39525
169.8	0.39425
169.9	0.39675
170	0.397
170.1	0.39825
170.2	0.39575
170.3	0.3945
170.4	0.392
170.5	0.39175
170.6	0.392
170.7	0.39475
170.8	0.3945
170.9	0.3955
171	0.396
171.1	0.39675
171.2	0.39825
171.3	0.40125
171.4	0.40125
171.5	0.4005
171.6	0.39925
171.7	0.3995
171.8	0.4005
171.9	0.39875
172	0.39925
172.1	0.40125
172.2	0.40025
172.3	0.4005
172.4	0.399
172.5	0.39775
172.6	0.399
172.7	0.398
172.8	0.3975
172.9	0.3965
173	0.3965
173.1	0.39925
173.2	0.39875
173.3	0.39925
173.4	0.40125
173.5	0.40125
173.6	0.40125
173.7	0.401
173.8	0.3995
173.9	0.40025
174	0.40125
174.1	0.40125
174.2	0.39875
174.3	0.39825
174.4	0.40125
174.5	0.40025
174.6	0.40325
174.7	0.405
174.8	0.4055
174.9	0.40525
175	0.405
175.1	0.4045
175.2	0.4065
175.3	0.40425
175.4	0.40125
175.5	0.4015
175.6	0.4005
175.7	0.404
175.8	0.40425
175.9	0.4055
176	0.40675
176.1	0.40575
176.2	0.407
176.3	0.40625
176.4	0.409
176.5	0.409
176.6	0.41025
176.7	0.408
176.8	0.407
176.9	0.4055
177	0.406
177.1	0.40675
177.2	0.404
177.3	0.4035
177.4	0.4025
177.5	0.402
177.6	0.40125
177.7	0.40225
177.8	0.40275
177.9	0.401
178	0.401
178.1	0.40025
178.2	0.4005
178.3	0.4015
178.4	0.40025
178.5	0.3995
178.6	0.4015
178.7	0.40175
178.8	0.40125
178.9	0.4015
179	0.401
179.1	0.4
179.2	0.3985
179.3	0.3985
179.4	0.39775
179.5	0.39725
179.6	0.39725
179.7	0.39975
179.8	0.40075
179.9	0.4015
180	0.39975
180.1	0.3995
180.2	0.401
180.3	0.4
180.4	0.40025
180.5	0.3985
180.6	0.39875
180.7	0.39825
180.8	0.39825
180.9	0.39725
181	0.396
181.1	0.39825
181.2	0.39775
181.3	0.39675
181.4	0.39775
181.5	0.39775
181.6	0.3975
181.7	0.3975
181.8	0.3985
181.9	0.397
182	0.39675
182.1	0.39825
182.2	0.4005
182.3	0.40125
182.4	0.40225
182.5	0.39975
182.6	0.398
182.7	0.3985
182.8	0.39925
182.9	0.39975
183	0.39875
183.1	0.39975
183.2	0.40025
183.3	0.401
183.4	0.4015
183.5	0.40175
183.6	0.39875
183.7	0.4
183.8	0.3995
183.9	0.40075
184	0.4005
184.1	0.40025
184.2	0.4
184.3	0.40225
184.4	0.40225
184.5	0.40125
184.6	0.40225
184.7	0.403
184.8	0.40175
184.9	0.399
185	0.4
185.1	0.40325
185.2	0.40225
185.3	0.4025
185.4	0.402
185.5	0.4025
185.6	0.402
185.7	0.4025
185.8	0.40275
185.9	0.40325
186	0.403
186.1	0.4035
186.2	0.404
186.3	0.404
186.4	0.4015
186.5	0.40075
186.6	0.401
186.7	0.40175
186.8	0.40325
186.9	0.404
187	0.404
187.1	0.403
187.2	0.40225
187.3	0.404
187.4	0.40375
187.5	0.40225
187.6	0.4
187.7	0.39975
187.8	0.39875
187.9	0.398
188	0.4005
188.1	0.40175
188.2	0.403
188.3	0.4035
188.4	0.40425
188.5	0.4015
188.6	0.40225
188.7	0.4035
188.8	0.4035
188.9	0.40225
189	0.403
189.1	0.4015
189.2	0.4015
189.3	0.40075
189.4	0.4035
189.5	0.40325
189.6	0.402
189.7	0.3995
189.8	0.39925
189.9	0.397
190	0.39725
190.1	0.3985
190.2	0.3975
190.3	0.3965
190.4	0.39625
190.5	0.39625
190.6	0.3965
190.7	0.398
190.8	0.39775
190.9	0.4005
191	0.40175
191.1	0.402
191.2	0.4015
191.3	0.4
191.4	0.4
191.5	0.4
191.6	0.40075
191.7	0.40125
191.8	0.40225
191.9	0.40425
192	0.40275
192.1	0.3995
192.2	0.39975
192.3	0.401
192.4	0.40025
192.5	0.3985
192.6	0.39775
192.7	0.3985
192.8	0.39925
192.9	0.401
193	0.40175
193.1	0.4015
193.2	0.40125
193.3	0.40025
193.4	0.40325
193.5	0.4045
193.6	0.4035
193.7	0.4015
193.8	0.40175
193.9	0.40125
194	0.40275
194.1	0.4025
194.2	0.4025
194.3	0.40325
194.4	0.40475
194.5	0.40575
194.6	0.40325
194.7	0.40375
194.8	0.40275
194.9	0.403
195	0.40325
195.1	0.40575
195.2	0.40525
195.3	0.40675
195.4	0.40975
195.5	0.4105
195.6	0.408
195.7	0.4075
195.8	0.4105
195.9	0.4095
196	0.40925
196.1	0.4105
196.2	0.40925
196.3	0.40775
196.4	0.40725
196.5	0.40625
196.6	0.407
196.7	0.4045
196.8	0.405
196.9	0.4045
197	0.4055
197.1	0.40275
197.2	0.40375
197.3	0.40425
197.4	0.40325
197.5	0.40375
197.6	0.40525
197.7	0.40275
197.8	0.4025
197.9	0.4045
198	0.407
198.1	0.4045
198.2	0.40575
198.3	0.407
198.4	0.40825
198.5	0.40675
198.6	0.403
198.7	0.40225
198.8	0.40025
198.9	0.40175
199	0.402
199.1	0.4025
199.2	0.405
199.3	0.40725
199.4	0.40875
199.5	0.41025
199.6	0.41225
199.7	0.41425
199.8	0.416
199.9	0.416
200	0.416
[truncated: 14,000 more rows]
