# Supplementary material for: Bayesian inference of kinetic schemes for ion channels by Kalman filtering
Source: eLife journal article supplement (doi:10.7554/elife.62714), 2022-05-04
Supplement: fig4-data12 [file 1_Sim_N_2000_Strom_MW.xlsx]

## Sheet: Tabelle1
0.1	0
0.2	0
0.3	0
0.4	0
0.5	0
0.6	0
0.7	0
0.8	0
0.9	0
1	0
1.1	0
1.2	0
1.3	0
1.4	0
1.5	0
1.6	0
1.7	0
1.8	0
1.9	0
2	0
2.1	0
2.2	0
2.3	0
2.4	0
2.5	0
2.6	0
2.7	0
2.8	0
2.9	0
3	0
3.1	0
3.2	0
3.3	0
3.4	0
3.5	0
3.6	0
3.7	0
3.8	0
3.9	0
4	0
4.1	0
4.2	0
4.3	0
4.4	0
4.5	0
4.6	0
4.7	0
4.8	0
4.9	0
5	0
5.1	0
5.2	0
5.3	0
5.4	0
5.5	0
5.6	0
5.7	0
5.8	0
5.9	0
6	0
6.1	0
6.2	0
6.3	0
6.4	0
6.5	0
6.6	0
6.7	0
6.8	0
6.9	0
7	0
7.1	0
7.2	0
7.3	0
7.4	0
7.5	0
7.6	0
7.7	0
7.8	0
7.9	0
8	0
8.1	0
8.2	0
8.3	0
8.4	0
8.5	0
8.6	0
8.7	0
8.8	0
8.9	0
9	0
9.1	0
9.2	0
9.3	0
9.4	0
9.5	0
9.6	0
9.7	0
9.8	0
9.9	0
10	0
10.1	0
10.2	0
10.3	0
10.4	0
10.5	0
10.6	0
10.7	0
10.8	0
10.9	0
11	0
11.1	0
11.2	0
11.3	0
11.4	0
11.5	0
11.6	0
11.7	0
11.8	0
11.9	0
12	0
12.1	0
12.2	0
12.3	0
12.4	0
12.5	0
12.6	0
12.7	0
12.8	0
12.9	0
13	0
13.1	0
13.2	0
13.3	0
13.4	0
13.5	0
13.6	0
13.7	0
13.8	0
13.9	0
14	0
14.1	0
14.2	0
14.3	0
14.4	0
14.5	0
14.6	0
14.7	0
14.8	0
14.9	0
15	0
15.1	0
15.2	0
15.3	0
15.4	0
15.5	0
15.6	0
15.7	0
15.8	0
15.9	0
16	0
16.1	0
16.2	0
16.3	0
16.4	0
16.5	0
16.6	0
16.7	0
16.8	0
16.9	0
17	0
17.1	0
17.2	0
17.3	0
17.4	0
17.5	0
17.6	0
17.7	0
17.8	0
17.9	0
18	0
18.1	0
18.2	0
18.3	0
18.4	0
18.5	0
18.6	0
18.7	0
18.8	0
18.9	0
19	0
19.1	0
19.2	0
19.3	0
19.4	0
19.5	0
19.6	0
19.7	0
19.8	0
19.9	0
20	0
20.1	0
20.2	0
20.3	0
20.4	0
20.5	0
20.6	0
20.7	0
20.8	0
20.9	0
21	0
21.1	0
21.2	0
21.3	0
21.4	0
21.5	0
21.6	0
21.7	0
21.8	0
21.9	0
22	0
22.1	0
22.2	0
22.3	0
22.4	0
22.5	0
22.6	0
22.7	0
22.8	0
22.9	0
23	0
23.1	0
23.2	0
23.3	0
23.4	0
23.5	0
23.6	0
23.7	0
23.8	0
23.9	0
24	0
24.1	0
24.2	0
24.3	0
24.4	0
24.5	0
24.6	0
24.7	0
24.8	0
24.9	0
25	0
25.1	0
25.2	0
25.3	0
25.4	0
25.5	0
25.6	0
25.7	0
25.8	0
25.9	0
26	0
26.1	0
26.2	0
26.3	0
26.4	0
26.5	0
26.6	0
26.7	0
26.8	0
26.9	0
27	0
27.1	0
27.2	0
27.3	0
27.4	0
27.5	0
27.6	0
27.7	0
27.8	0
27.9	0
28	0
28.1	0
28.2	0
28.3	0
28.4	0
28.5	0
28.6	0
28.7	0
28.8	0
28.9	0
29	0
29.1	0
29.2	0
29.3	0
29.4	0
29.5	0
29.6	0
29.7	0
29.8	0
29.9	0
30	0
30.1	0
30.2	0
30.3	0
30.4	0
30.5	0
30.6	0
30.7	0
30.8	0
30.9	0
31	0
31.1	0
31.2	0
31.3	0
31.4	0
31.5	0
31.6	0
31.7	0
31.8	0
31.9	0
32	0
32.1	0
32.2	0
32.3	0
32.4	0
32.5	0
32.6	0
32.7	0
32.8	0
32.9	0
33	0
33.1	0
33.2	0
33.3	0
33.4	0
33.5	0
33.6	0
33.7	0
33.8	0
33.9	0
34	0
34.1	0
34.2	0
34.3	0
34.4	0
34.5	0
34.6	0
34.7	0
34.8	0
34.9	0
35	0
35.1	0
35.2	0
35.3	0
35.4	0
35.5	0
35.6	0
35.7	0
35.8	0
35.9	0
36	0
36.1	0
36.2	0
36.3	0
36.4	0
36.5	0
36.6	0
36.7	0
36.8	0
36.9	0
37	0
37.1	0
37.2	0
37.3	0
37.4	0
37.5	0
37.6	0
37.7	0
37.8	0
37.9	0
38	0
38.1	0
38.2	0
38.3	0
38.4	0
38.5	0
38.6	0
38.7	0
38.8	0
38.9	0
39	0
39.1	0
39.2	0
39.3	0
39.4	0
39.5	0
39.6	0
39.7	0
39.8	0
39.9	0
40	0
40.1	0
40.2	0
40.3	0
40.4	0
40.5	0
40.6	0
40.7	0
40.8	0
40.9	0
41	0
41.1	0
41.2	0
41.3	0
41.4	0
41.5	0
41.6	0
41.7	0
41.8	0
41.9	0
42	0
42.1	0
42.2	0
42.3	0
42.4	0
42.5	0
42.6	0
42.7	0
42.8	0
42.9	0
43	0
43.1	0
43.2	0
43.3	0
43.4	0
43.5	0
43.6	0
43.7	0
43.8	0
43.9	0
44	0
44.1	0
44.2	0
44.3	0
44.4	0
44.5	0
44.6	0
44.7	0
44.8	0
44.9	0
45	0
45.1	0
45.2	0
45.3	0
45.4	0
45.5	0
45.6	0
45.7	0
45.8	0
45.9	0
46	0
46.1	0
46.2	0
46.3	0
46.4	0
46.5	0
46.6	0
46.7	0
46.8	0
46.9	0
47	0
47.1	0
47.2	0
47.3	0
47.4	0
47.5	0
47.6	0
47.7	0
47.8	0
47.9	0
48	0
48.1	0
48.2	0
48.3	0
48.4	0
48.5	0
48.6	0
48.7	0
48.8	0
48.9	0
49	0
49.1	0
49.2	0
49.3	0
49.4	0
49.5	0
49.6	0
49.7	0
49.8	0
49.9	0
50	0
50.1	0
50.2	0
50.3	0
50.4	0
50.5	0
50.6	0
50.7	0
50.8	0
50.9	0
51	0
51.1	0
51.2	0
51.3	0
51.4	0
51.5	0
51.6	0
51.7	0
51.8	0
51.9	0
52	0
52.1	0
52.2	0
52.3	0
52.4	0
52.5	0
52.6	0
52.7	0
52.8	0
52.9	0
53	0
53.1	0
53.2	0
53.3	0
53.4	0
53.5	0
53.6	0
53.7	0
53.8	0
53.9	0
54	0
54.1	0
54.2	0
54.3	0
54.4	0
54.5	0
54.6	0
54.7	0
54.8	0
54.9	0
55	0
55.1	0
55.2	0
55.3	0
55.4	0
55.5	0
55.6	0
55.7	0
55.8	0
55.9	0
56	0
56.1	0
56.2	0
56.3	0
56.4	0
56.5	0
56.6	0
56.7	0
56.8	0
56.9	0
57	0
57.1	0
57.2	0
57.3	0
57.4	0
57.5	0
57.6	0
57.7	0
57.8	0
57.9	0
58	0
58.1	0
58.2	0
58.3	0
58.4	0
58.5	0
58.6	0
58.7	0
58.8	0
58.9	0
59	0
59.1	0
59.2	0
59.3	0
59.4	0
59.5	0
59.6	0
59.7	0
59.8	0
59.9	0
60	0
60.1	0
60.2	0
60.3	0
60.4	0
60.5	0
60.6	0
60.7	0
60.8	0
60.9	0
61	0
61.1	0
61.2	0
61.3	0
61.4	0
61.5	0
61.6	0
61.7	0
61.8	0
61.9	0
62	0
62.1	0
62.2	0
62.3	0
62.4	0
62.5	0
62.6	0
62.7	0
62.8	0
62.9	0
63	0
63.1	0
63.2	0
63.3	0
63.4	0
63.5	0
63.6	0
63.7	0
63.8	0
63.9	0
64	0
64.1	0
64.2	0
64.3	0
64.4	0
64.5	0
64.6	0
64.7	0
64.8	0
64.9	0
65	0
65.1	0
65.2	0
65.3	0
65.4	0
65.5	0
65.6	0
65.7	0
65.8	0
65.9	0
66	0
66.1	0
66.2	0
66.3	0
66.4	0
66.5	0
66.6	0
66.7	0
66.8	0
66.9	0
67	0
67.1	0
67.2	0
67.3	0
67.4	0
67.5	0
67.6	0
67.7	0
67.8	0
67.9	0
68	0
68.1	0
68.2	0
68.3	0
68.4	0
68.5	0
68.6	0
68.7	0
68.8	0
68.9	0
69	0
69.1	0
69.2	0
69.3	0
69.4	0
69.5	0
69.6	0
69.7	0
69.8	0
69.9	0
70	0
70.1	0
70.2	0
70.3	0
70.4	0
70.5	0
70.6	0
70.7	0
70.8	0
70.9	0
71	0
71.1	0
71.2	0
71.3	0
71.4	0
71.5	0
71.6	0
71.7	0
71.8	0
71.9	0
72	0
72.1	0
72.2	0
72.3	0
72.4	0
72.5	0
72.6	0
72.7	0
72.8	0
72.9	0
73	0
73.1	0
73.2	0
73.3	0
73.4	0
73.5	0
73.6	0
73.7	0
73.8	0
73.9	0
74	0
74.1	0
74.2	0
74.3	0
74.4	0
74.5	0
74.6	0
74.7	0
74.8	0
74.9	0
75	0
75.1	0
75.2	0
75.3	0
75.4	0
75.5	0
75.6	0
75.7	0
75.8	0
75.9	0
76	0
76.1	0
76.2	0
76.3	0
76.4	0
76.5	0
76.6	0
76.7	0
76.8	0
76.9	0
77	0
77.1	0
77.2	0
77.3	0
77.4	0
77.5	0
77.6	0
77.7	0
77.8	0
77.9	0
78	0
78.1	0
78.2	0
78.3	0
78.4	0
78.5	0
78.6	0
78.7	0
78.8	0
78.9	0
79	0
79.1	0
79.2	0
79.3	0
79.4	0
79.5	0
79.6	0
79.7	0
79.8	0
79.9	0
80	0
80.1	0
80.2	0
80.3	0
80.4	0
80.5	0
80.6	0
80.7	0
80.8	0
80.9	0
81	0
81.1	0
81.2	0
81.3	0
81.4	0
81.5	0
81.6	0
81.7	0
81.8	0
81.9	0
82	0
82.1	0
82.2	0
82.3	0
82.4	0
82.5	0
82.6	0
82.7	0
82.8	0
82.9	0
83	0
83.1	0
83.2	0
83.3	0
83.4	0
83.5	0
83.6	0
83.7	0
83.8	0
83.9	0
84	0
84.1	0
84.2	0
84.3	0
84.4	0
84.5	0
84.6	0
84.7	0
84.8	0
84.9	0
85	0
85.1	0
85.2	0
85.3	0
85.4	0
85.5	0
85.6	0
85.7	0
85.8	0
85.9	0
86	0
86.1	0
86.2	0
86.3	0
86.4	0
86.5	0
86.6	0
86.7	0
86.8	0
86.9	0
87	0
87.1	0
87.2	0
87.3	0
87.4	0
87.5	0
87.6	0
87.7	0
87.8	0
87.9	0
88	0
88.1	0
88.2	0
88.3	0
88.4	0
88.5	0
88.6	0
88.7	0
88.8	0
88.9	0
89	0
89.1	0
89.2	0
89.3	0
89.4	0
89.5	0
89.6	0
89.7	0
89.8	0
89.9	0
90	0
90.1	0
90.2	0
90.3	0
90.4	0
90.5	0
90.6	0
90.7	0
90.8	0
90.9	0
91	0
91.1	0
91.2	0
91.3	0
91.4	0
91.5	0
91.6	0
91.7	0
91.8	0
91.9	0
92	0
92.1	0
92.2	0
92.3	0
92.4	0
92.5	0
92.6	0
92.7	0
92.8	0
92.9	0
93	0
93.1	0
93.2	0
93.3	0
93.4	0
93.5	0
93.6	0
93.7	0
93.8	0
93.9	0
94	0
94.1	0
94.2	0
94.3	0
94.4	0
94.5	0
94.6	0
94.7	0
94.8	0
94.9	0
95	0
95.1	0
95.2	0
95.3	0
95.4	0
95.5	0
95.6	0
95.7	0
95.8	0
95.9	0
96	0
96.1	0
96.2	0
96.3	0
96.4	0
96.5	0
96.6	0
96.7	0
96.8	0
96.9	0
97	0
97.1	0
97.2	0
97.3	0
97.4	0
97.5	0
97.6	0
97.7	0
97.8	0
97.9	0
98	0
98.1	0
98.2	0
98.3	0
98.4	0
98.5	0
98.6	0
98.7	0
98.8	0
98.9	0
99	0
99.1	0
99.2	0
99.3	0
99.4	0
99.5	0
99.6	0
99.7	0
99.8	0
99.9	0
100	0
100.1	0
100.2	0
100.3	0
100.4	0
100.5	0
100.6	0
100.7	0
100.8	0
100.9	0
101	0
101.1	0
101.2	0
101.3	0
101.4	0
101.5	0.0005
101.6	0.0005
101.7	0.0005
101.8	0.0005
101.9	0.0005
102	0.0005
102.1	0.0005
102.2	0.0005
102.3	0.0005
102.4	0.0005
102.5	0.0005
102.6	0.0015
102.7	0.0015
102.8	0.0015
102.9	0.0015
103	0.0015
103.1	0.0015
103.2	0.0015
103.3	0.002
103.4	0.002
103.5	0.002
103.6	0.002
103.7	0.002
103.8	0.002
103.9	0.002
104	0.002
104.1	0.002
104.2	0.002
104.3	0.002
104.4	0.002
104.5	0.002
104.6	0.002
104.7	0.002
104.8	0.002
104.9	0.002
105	0.002
105.1	0.002
105.2	0.002
105.3	0.002
105.4	0.002
105.5	0.002
105.6	0.002
105.7	0.002
105.8	0.002
105.9	0.002
106	0.002
106.1	0.002
106.2	0.002
106.3	0.002
106.4	0.002
106.5	0.0025
106.6	0.0025
106.7	0.0025
106.8	0.0025
106.9	0.0025
107	0.0025
107.1	0.0025
107.2	0.0025
107.3	0.0025
107.4	0.0025
107.5	0.003
107.6	0.003
107.7	0.004
107.8	0.004
107.9	0.004
108	0.005
108.1	0.005
108.2	0.005
108.3	0.0055
108.4	0.0055
108.5	0.0055
108.6	0.0055
108.7	0.0055
108.8	0.006
108.9	0.006
109	0.006
109.1	0.0065
109.2	0.0065
109.3	0.0065
109.4	0.0065
109.5	0.0065
109.6	0.0065
109.7	0.0065
109.8	0.0065
109.9	0.0065
110	0.007
110.1	0.0075
110.2	0.0085
110.3	0.009
110.4	0.009
110.5	0.009
110.6	0.009
110.7	0.009
110.8	0.009
110.9	0.009
111	0.0095
111.1	0.0095
111.2	0.0095
111.3	0.0095
111.4	0.0095
111.5	0.01
111.6	0.01
111.7	0.01
111.8	0.0105
111.9	0.0105
112	0.0105
112.1	0.0105
112.2	0.0105
112.3	0.0105
112.4	0.011
112.5	0.011
112.6	0.011
112.7	0.011
112.8	0.011
112.9	0.011
113	0.011
113.1	0.011
113.2	0.011
113.3	0.011
113.4	0.011
113.5	0.011
113.6	0.0115
113.7	0.0115
113.8	0.011
113.9	0.011
114	0.011
114.1	0.0105
114.2	0.011
114.3	0.011
114.4	0.011
114.5	0.011
114.6	0.012
114.7	0.012
114.8	0.012
114.9	0.012
115	0.012
115.1	0.012
115.2	0.012
115.3	0.012
115.4	0.0125
115.5	0.0125
115.6	0.0125
115.7	0.013
115.8	0.013
115.9	0.013
116	0.013
116.1	0.013
116.2	0.0135
116.3	0.0135
116.4	0.014
116.5	0.014
116.6	0.014
116.7	0.014
116.8	0.014
116.9	0.014
117	0.0145
117.1	0.015
117.2	0.015
117.3	0.015
117.4	0.0155
117.5	0.0155
117.6	0.016
117.7	0.016
117.8	0.016
117.9	0.0165
118	0.0165
118.1	0.0165
118.2	0.017
118.3	0.017
118.4	0.017
118.5	0.017
118.6	0.0175
118.7	0.0175
118.8	0.0175
118.9	0.0175
119	0.0175
119.1	0.018
119.2	0.0185
119.3	0.0185
119.4	0.0185
119.5	0.0185
119.6	0.0185
119.7	0.0185
119.8	0.019
119.9	0.0195
120	0.02
120.1	0.0205
120.2	0.0205
120.3	0.0215
120.4	0.022
120.5	0.022
120.6	0.022
120.7	0.022
120.8	0.022
120.9	0.0225
121	0.0225
121.1	0.0225
121.2	0.023
121.3	0.023
121.4	0.023
121.5	0.0235
121.6	0.024
121.7	0.025
121.8	0.025
121.9	0.025
122	0.0255
122.1	0.026
122.2	0.026
122.3	0.0265
122.4	0.0265
122.5	0.0265
122.6	0.0265
122.7	0.0265
122.8	0.027
122.9	0.027
123	0.027
123.1	0.027
123.2	0.027
123.3	0.0275
123.4	0.028
123.5	0.028
123.6	0.028
123.7	0.028
123.8	0.0285
123.9	0.029
124	0.03
124.1	0.03
124.2	0.03
124.3	0.03
124.4	0.03
124.5	0.03
124.6	0.03
124.7	0.03
124.8	0.03
124.9	0.0305
125	0.0305
125.1	0.031
125.2	0.031
125.3	0.031
125.4	0.031
125.5	0.0315
125.6	0.0315
125.7	0.0315
125.8	0.0315
125.9	0.0315
126	0.0315
126.1	0.032
126.2	0.0315
126.3	0.031
126.4	0.0315
126.5	0.0315
126.6	0.0315
126.7	0.0325
126.8	0.0325
126.9	0.033
127	0.033
127.1	0.0335
127.2	0.0335
127.3	0.034
127.4	0.034
127.5	0.0345
127.6	0.0355
127.7	0.0355
127.8	0.0365
127.9	0.037
128	0.0375
128.1	0.0375
128.2	0.0375
128.3	0.0375
128.4	0.0375
128.5	0.038
128.6	0.038
128.7	0.039
128.8	0.039
128.9	0.0385
129	0.039
129.1	0.0385
129.2	0.0385
129.3	0.0385
129.4	0.039
129.5	0.039
129.6	0.039
129.7	0.039
129.8	0.039
129.9	0.039
130	0.039
130.1	0.039
130.2	0.039
130.3	0.039
130.4	0.039
130.5	0.0385
130.6	0.039
130.7	0.039
130.8	0.039
130.9	0.0395
131	0.04
131.1	0.0405
131.2	0.0405
131.3	0.041
131.4	0.043
131.5	0.043
131.6	0.043
131.7	0.044
131.8	0.044
131.9	0.044
132	0.044
132.1	0.044
132.2	0.045
132.3	0.046
132.4	0.0465
132.5	0.0465
132.6	0.0465
132.7	0.0465
132.8	0.0465
132.9	0.047
133	0.047
133.1	0.047
133.2	0.047
133.3	0.047
133.4	0.0475
133.5	0.0475
133.6	0.0475
133.7	0.048
133.8	0.0485
133.9	0.0485
134	0.0485
134.1	0.0485
134.2	0.049
134.3	0.049
134.4	0.0495
134.5	0.05
134.6	0.05
134.7	0.05
134.8	0.05
134.9	0.0505
135	0.0505
135.1	0.0505
135.2	0.0505
135.3	0.0505
135.4	0.0505
135.5	0.051
135.6	0.051
135.7	0.051
135.8	0.051
135.9	0.051
136	0.0515
136.1	0.051
136.2	0.051
136.3	0.051
136.4	0.0515
136.5	0.0515
136.6	0.0515
136.7	0.051
136.8	0.051
136.9	0.0505
137	0.051
137.1	0.051
137.2	0.051
137.3	0.051
137.4	0.051
137.5	0.051
137.6	0.051
137.7	0.051
137.8	0.051
137.9	0.0515
138	0.052
138.1	0.052
138.2	0.052
138.3	0.053
138.4	0.053
138.5	0.0535
138.6	0.054
138.7	0.0545
138.8	0.055
138.9	0.0555
139	0.0555
139.1	0.056
139.2	0.0555
139.3	0.0555
139.4	0.0555
139.5	0.055
139.6	0.056
139.7	0.056
139.8	0.057
139.9	0.057
140	0.057
140.1	0.0565
140.2	0.0565
140.3	0.0565
140.4	0.0565
140.5	0.0575
140.6	0.0575
140.7	0.0575
140.8	0.058
140.9	0.058
141	0.058
141.1	0.0585
141.2	0.0585
141.3	0.0585
141.4	0.0585
141.5	0.0585
141.6	0.0595
141.7	0.059
141.8	0.059
141.9	0.06
142	0.0605
142.1	0.061
142.2	0.0615
142.3	0.0615
142.4	0.0615
142.5	0.0625
142.6	0.0625
142.7	0.0625
142.8	0.062
142.9	0.062
143	0.062
143.1	0.063
143.2	0.063
143.3	0.063
143.4	0.064
143.5	0.064
143.6	0.064
143.7	0.0645
143.8	0.0645
143.9	0.0645
144	0.0645
144.1	0.064
144.2	0.064
144.3	0.064
144.4	0.064
144.5	0.0645
144.6	0.0645
144.7	0.0645
144.8	0.0645
144.9	0.0645
145	0.0645
145.1	0.0645
145.2	0.0645
145.3	0.065
145.4	0.0655
145.5	0.066
145.6	0.0665
145.7	0.0665
145.8	0.0665
145.9	0.067
146	0.067
146.1	0.0675
146.2	0.0675
146.3	0.067
146.4	0.067
146.5	0.067
146.6	0.067
146.7	0.067
146.8	0.0675
146.9	0.0675
147	0.068
147.1	0.0685
147.2	0.0695
147.3	0.0695
147.4	0.0695
147.5	0.0695
147.6	0.07
147.7	0.07
147.8	0.0705
147.9	0.0715
148	0.072
148.1	0.072
148.2	0.072
148.3	0.0735
148.4	0.074
148.5	0.074
148.6	0.075
148.7	0.076
148.8	0.076
148.9	0.076
149	0.0765
149.1	0.0765
149.2	0.0765
149.3	0.077
149.4	0.0775
149.5	0.078
149.6	0.078
149.7	0.078
149.8	0.078
149.9	0.0775
150	0.0775
150.1	0.0775
150.2	0.0775
150.3	0.077
150.4	0.077
150.5	0.078
150.6	0.078
150.7	0.078
150.8	0.078
150.9	0.0785
151	0.0785
151.1	0.079
151.2	0.079
151.3	0.0795
151.4	0.0795
151.5	0.0795
151.6	0.079
151.7	0.079
151.8	0.079
151.9	0.079
152	0.0795
152.1	0.0795
152.2	0.0795
152.3	0.0795
152.4	0.0795
152.5	0.08
152.6	0.0805
152.7	0.0805
152.8	0.0805
152.9	0.0815
153	0.0825
153.1	0.0835
153.2	0.083
153.3	0.083
153.4	0.083
153.5	0.0835
153.6	0.0835
153.7	0.0835
153.8	0.0835
153.9	0.085
154	0.085
154.1	0.085
154.2	0.085
154.3	0.086
154.4	0.0865
154.5	0.0865
154.6	0.087
154.7	0.0865
154.8	0.0865
154.9	0.0865
155	0.0865
155.1	0.087
155.2	0.087
155.3	0.0875
155.4	0.0875
155.5	0.0875
155.6	0.0875
155.7	0.0875
155.8	0.088
155.9	0.0885
156	0.088
156.1	0.088
156.2	0.088
156.3	0.0885
156.4	0.0895
156.5	0.0895
156.6	0.09
156.7	0.0905
156.8	0.0905
156.9	0.0905
157	0.0905
157.1	0.0905
157.2	0.0905
157.3	0.0905
157.4	0.0895
157.5	0.0895
157.6	0.09
157.7	0.09
157.8	0.0895
157.9	0.09
158	0.09
158.1	0.0905
158.2	0.0905
158.3	0.091
158.4	0.091
158.5	0.091
158.6	0.0905
158.7	0.0905
158.8	0.0915
158.9	0.092
159	0.0925
159.1	0.0925
159.2	0.0925
159.3	0.092
159.4	0.0925
159.5	0.0925
159.6	0.0925
159.7	0.0925
159.8	0.0925
159.9	0.0925
160	0.093
160.1	0.0935
160.2	0.094
160.3	0.094
160.4	0.094
160.5	0.094
160.6	0.094
160.7	0.094
160.8	0.094
160.9	0.094
161	0.094
161.1	0.094
161.2	0.094
161.3	0.0945
161.4	0.0945
161.5	0.0945
161.6	0.0945
161.7	0.095
161.8	0.095
161.9	0.095
162	0.095
162.1	0.096
162.2	0.096
162.3	0.096
162.4	0.096
162.5	0.0965
162.6	0.096
162.7	0.0955
162.8	0.096
162.9	0.096
163	0.096
163.1	0.0965
163.2	0.0965
163.3	0.0965
163.4	0.0965
163.5	0.0965
163.6	0.0965
163.7	0.0965
163.8	0.0965
163.9	0.0965
164	0.096
164.1	0.096
164.2	0.096
164.3	0.096
164.4	0.0965
164.5	0.0965
164.6	0.0965
164.7	0.0975
164.8	0.0975
164.9	0.0975
165	0.098
165.1	0.0985
165.2	0.0985
165.3	0.0985
165.4	0.0985
165.5	0.0985
165.6	0.099
165.7	0.099
165.8	0.099
165.9	0.099
166	0.0985
166.1	0.0985
166.2	0.0985
166.3	0.099
166.4	0.099
166.5	0.0995
166.6	0.0995
166.7	0.0995
166.8	0.1
166.9	0.1
167	0.1
167.1	0.1
167.2	0.1
167.3	0.1
167.4	0.0995
167.5	0.0995
167.6	0.0995
167.7	0.1
167.8	0.1
167.9	0.099
168	0.099
168.1	0.1
168.2	0.1
168.3	0.1
168.4	0.1
168.5	0.1
168.6	0.1
168.7	0.1
168.8	0.1005
168.9	0.1005
169	0.1005
169.1	0.1005
169.2	0.1005
169.3	0.101
169.4	0.1015
169.5	0.1015
169.6	0.1005
169.7	0.1005
169.8	0.1005
169.9	0.1005
170	0.1005
170.1	0.1005
170.2	0.1
170.3	0.1
170.4	0.1005
170.5	0.1015
170.6	0.1025
170.7	0.1025
170.8	0.1025
170.9	0.1025
171	0.1025
171.1	0.1025
171.2	0.102
171.3	0.102
171.4	0.102
171.5	0.102
171.6	0.102
171.7	0.1015
171.8	0.1015
171.9	0.1005
172	0.1005
172.1	0.1005
172.2	0.1005
172.3	0.1005
172.4	0.1
172.5	0.0995
172.6	0.1
172.7	0.1
172.8	0.1
172.9	0.1
173	0.1005
173.1	0.1005
173.2	0.1015
173.3	0.1005
173.4	0.1005
173.5	0.101
173.6	0.1005
173.7	0.1005
173.8	0.0995
173.9	0.0995
174	0.0995
174.1	0.0995
174.2	0.0995
174.3	0.0995
174.4	0.099
174.5	0.099
174.6	0.099
174.7	0.0995
174.8	0.099
174.9	0.099
175	0.1
175.1	0.1005
175.2	0.101
175.3	0.101
175.4	0.101
175.5	0.101
175.6	0.101
175.7	0.1005
175.8	0.1005
175.9	0.101
176	0.101
176.1	0.1005
176.2	0.101
176.3	0.101
176.4	0.1015
176.5	0.102
176.6	0.102
176.7	0.1015
176.8	0.101
176.9	0.1015
177	0.101
177.1	0.101
177.2	0.101
177.3	0.102
177.4	0.102
177.5	0.102
177.6	0.1025
177.7	0.1025
177.8	0.1025
177.9	0.1025
178	0.1025
178.1	0.1025
178.2	0.102
178.3	0.102
178.4	0.102
178.5	0.102
178.6	0.1015
178.7	0.1015
178.8	0.102
178.9	0.102
179	0.1015
179.1	0.101
179.2	0.101
179.3	0.101
179.4	0.1005
179.5	0.1005
179.6	0.1015
179.7	0.102
179.8	0.102
179.9	0.102
180	0.102
180.1	0.1025
180.2	0.1025
180.3	0.1025
180.4	0.1025
180.5	0.103
180.6	0.104
180.7	0.104
180.8	0.104
180.9	0.104
181	0.1035
181.1	0.104
181.2	0.104
181.3	0.104
181.4	0.104
181.5	0.104
181.6	0.104
181.7	0.104
181.8	0.104
181.9	0.1035
182	0.1035
182.1	0.1035
182.2	0.1035
182.3	0.104
182.4	0.104
182.5	0.1045
182.6	0.1045
182.7	0.1045
182.8	0.105
182.9	0.105
183	0.105
183.1	0.105
183.2	0.1055
183.3	0.1055
183.4	0.1055
183.5	0.105
183.6	0.105
183.7	0.1045
183.8	0.105
183.9	0.105
184	0.105
184.1	0.105
184.2	0.1055
184.3	0.1055
184.4	0.1055
184.5	0.106
184.6	0.106
184.7	0.1065
184.8	0.1065
184.9	0.1065
185	0.107
185.1	0.107
185.2	0.1065
185.3	0.1065
185.4	0.106
185.5	0.106
185.6	0.106
185.7	0.1065
185.8	0.1065
185.9	0.1065
186	0.1065
186.1	0.1065
186.2	0.107
186.3	0.108
186.4	0.1085
186.5	0.1085
186.6	0.1085
186.7	0.1085
186.8	0.109
186.9	0.1095
187	0.1095
187.1	0.11
187.2	0.1105
187.3	0.1105
187.4	0.111
187.5	0.111
187.6	0.111
187.7	0.111
187.8	0.1105
187.9	0.111
188	0.112
188.1	0.1115
188.2	0.1115
188.3	0.112
188.4	0.1125
188.5	0.113
188.6	0.1135
188.7	0.1135
188.8	0.114
188.9	0.114
189	0.114
189.1	0.114
189.2	0.114
189.3	0.114
189.4	0.114
189.5	0.1145
189.6	0.1145
189.7	0.114
189.8	0.114
189.9	0.114
190	0.114
190.1	0.114
190.2	0.114
190.3	0.114
190.4	0.114
190.5	0.114
190.6	0.114
190.7	0.114
190.8	0.114
190.9	0.114
191	0.114
191.1	0.114
191.2	0.114
191.3	0.114
191.4	0.114
191.5	0.114
191.6	0.114
191.7	0.1135
191.8	0.1135
191.9	0.1135
192	0.114
192.1	0.114
192.2	0.1135
192.3	0.1135
192.4	0.114
192.5	0.1145
192.6	0.115
192.7	0.115
192.8	0.115
192.9	0.1155
193	0.1155
193.1	0.115
193.2	0.115
193.3	0.1145
193.4	0.1145
193.5	0.115
193.6	0.115
193.7	0.1155
193.8	0.116
193.9	0.1155
194	0.116
194.1	0.116
194.2	0.116
194.3	0.1165
194.4	0.117
194.5	0.117
194.6	0.117
194.7	0.117
194.8	0.117
194.9	0.1175
195	0.1175
195.1	0.1175
195.2	0.1175
195.3	0.1175
195.4	0.118
195.5	0.118
195.6	0.118
195.7	0.1175
195.8	0.118
195.9	0.118
196	0.118
196.1	0.1185
196.2	0.118
196.3	0.118
196.4	0.118
196.5	0.1185
196.6	0.1185
196.7	0.119
196.8	0.119
196.9	0.119
197	0.119
197.1	0.119
197.2	0.119
197.3	0.119
197.4	0.1195
197.5	0.12
197.6	0.12
197.7	0.1195
197.8	0.12
197.9	0.1195
198	0.1195
198.1	0.1205
198.2	0.1205
198.3	0.121
198.4	0.121
198.5	0.1205
198.6	0.1205
198.7	0.1215
198.8	0.1215
198.9	0.1215
199	0.122
199.1	0.122
199.2	0.122
199.3	0.122
199.4	0.122
199.5	0.1215
199.6	0.121
199.7	0.121
199.8	0.121
199.9	0.121
200	0.1215
[truncated: 14,000 more rows]
