# Supplementary material for: Bayesian inference of kinetic schemes for ion channels by Kalman filtering
Source: eLife journal article supplement (doi:10.7554/elife.62714), 2022-05-04
Supplement: fig4-data12 [file 1_Sim_N_3000_Fluor_MW_0.125M.xlsx]

## Sheet: Tabelle1
0.1	0
0.2	0
0.3	0
0.4	0
0.5	0
0.6	0
0.7	0
0.8	0
0.9	0
1	0
1.1	0
1.2	0
1.3	0
1.4	0
1.5	0
1.6	0
1.7	0
1.8	0
1.9	0
2	0
2.1	0
2.2	0
2.3	0
2.4	0
2.5	0
2.6	0
2.7	0
2.8	0
2.9	0
3	0
3.1	0
3.2	0
3.3	0
3.4	0
3.5	0
3.6	0
3.7	0
3.8	0
3.9	0
4	0
4.1	0
4.2	0
4.3	0
4.4	0
4.5	0
4.6	0
4.7	0
4.8	0
4.9	0
5	0
5.1	0
5.2	0
5.3	0
5.4	0
5.5	0
5.6	0
5.7	0
5.8	0
5.9	0
6	0
6.1	0
6.2	0
6.3	0
6.4	0
6.5	0
6.6	0
6.7	0
6.8	0
6.9	0
7	0
7.1	0
7.2	0
7.3	0
7.4	0
7.5	0
7.6	0
7.7	0
7.8	0
7.9	0
8	0
8.1	0
8.2	0
8.3	0
8.4	0
8.5	0
8.6	0
8.7	0
8.8	0
8.9	0
9	0
9.1	0
9.2	0
9.3	0
9.4	0
9.5	0
9.6	0
9.7	0
9.8	0
9.9	0
10	0
10.1	0
10.2	0
10.3	0
10.4	0
10.5	0
10.6	0
10.7	0
10.8	0
10.9	0
11	0
11.1	0
11.2	0
11.3	0
11.4	0
11.5	0
11.6	0
11.7	0
11.8	0
11.9	0
12	0
12.1	0
12.2	0
12.3	0
12.4	0
12.5	0
12.6	0
12.7	0
12.8	0
12.9	0
13	0
13.1	0
13.2	0
13.3	0
13.4	0
13.5	0
13.6	0
13.7	0
13.8	0
13.9	0
14	0
14.1	0
14.2	0
14.3	0
14.4	0
14.5	0
14.6	0
14.7	0
14.8	0
14.9	0
15	0
15.1	0
15.2	0
15.3	0
15.4	0
15.5	0
15.6	0
15.7	0
15.8	0
15.9	0
16	0
16.1	0
16.2	0
16.3	0
16.4	0
16.5	0
16.6	0
16.7	0
16.8	0
16.9	0
17	0
17.1	0
17.2	0
17.3	0
17.4	0
17.5	0
17.6	0
17.7	0
17.8	0
17.9	0
18	0
18.1	0
18.2	0
18.3	0
18.4	0
18.5	0
18.6	0
18.7	0
18.8	0
18.9	0
19	0
19.1	0
19.2	0
19.3	0
19.4	0
19.5	0
19.6	0
19.7	0
19.8	0
19.9	0
20	0
20.1	0
20.2	0
20.3	0
20.4	0
20.5	0
20.6	0
20.7	0
20.8	0
20.9	0
21	0
21.1	0
21.2	0
21.3	0
21.4	0
21.5	0
21.6	0
21.7	0
21.8	0
21.9	0
22	0
22.1	0
22.2	0
22.3	0
22.4	0
22.5	0
22.6	0
22.7	0
22.8	0
22.9	0
23	0
23.1	0
23.2	0
23.3	0
23.4	0
23.5	0
23.6	0
23.7	0
23.8	0
23.9	0
24	0
24.1	0
24.2	0
24.3	0
24.4	0
24.5	0
24.6	0
24.7	0
24.8	0
24.9	0
25	0
25.1	0
25.2	0
25.3	0
25.4	0
25.5	0
25.6	0
25.7	0
25.8	0
25.9	0
26	0
26.1	0
26.2	0
26.3	0
26.4	0
26.5	0
26.6	0
26.7	0
26.8	0
26.9	0
27	0
27.1	0
27.2	0
27.3	0
27.4	0
27.5	0
27.6	0
27.7	0
27.8	0
27.9	0
28	0
28.1	0
28.2	0
28.3	0
28.4	0
28.5	0
28.6	0
28.7	0
28.8	0
28.9	0
29	0
29.1	0
29.2	0
29.3	0
29.4	0
29.5	0
29.6	0
29.7	0
29.8	0
29.9	0
30	0
30.1	0
30.2	0
30.3	0
30.4	0
30.5	0
30.6	0
30.7	0
30.8	0
30.9	0
31	0
31.1	0
31.2	0
31.3	0
31.4	0
31.5	0
31.6	0
31.7	0
31.8	0
31.9	0
32	0
32.1	0
32.2	0
32.3	0
32.4	0
32.5	0
32.6	0
32.7	0
32.8	0
32.9	0
33	0
33.1	0
33.2	0
33.3	0
33.4	0
33.5	0
33.6	0
33.7	0
33.8	0
33.9	0
34	0
34.1	0
34.2	0
34.3	0
34.4	0
34.5	0
34.6	0
34.7	0
34.8	0
34.9	0
35	0
35.1	0
35.2	0
35.3	0
35.4	0
35.5	0
35.6	0
35.7	0
35.8	0
35.9	0
36	0
36.1	0
36.2	0
36.3	0
36.4	0
36.5	0
36.6	0
36.7	0
36.8	0
36.9	0
37	0
37.1	0
37.2	0
37.3	0
37.4	0
37.5	0
37.6	0
37.7	0
37.8	0
37.9	0
38	0
38.1	0
38.2	0
38.3	0
38.4	0
38.5	0
38.6	0
38.7	0
38.8	0
38.9	0
39	0
39.1	0
39.2	0
39.3	0
39.4	0
39.5	0
39.6	0
39.7	0
39.8	0
39.9	0
40	0
40.1	0
40.2	0
40.3	0
40.4	0
40.5	0
40.6	0
40.7	0
40.8	0
40.9	0
41	0
41.1	0
41.2	0
41.3	0
41.4	0
41.5	0
41.6	0
41.7	0
41.8	0
41.9	0
42	0
42.1	0
42.2	0
42.3	0
42.4	0
42.5	0
42.6	0
42.7	0
42.8	0
42.9	0
43	0
43.1	0
43.2	0
43.3	0
43.4	0
43.5	0
43.6	0
43.7	0
43.8	0
43.9	0
44	0
44.1	0
44.2	0
44.3	0
44.4	0
44.5	0
44.6	0
44.7	0
44.8	0
44.9	0
45	0
45.1	0
45.2	0
45.3	0
45.4	0
45.5	0
45.6	0
45.7	0
45.8	0
45.9	0
46	0
46.1	0
46.2	0
46.3	0
46.4	0
46.5	0
46.6	0
46.7	0
46.8	0
46.9	0
47	0
47.1	0
47.2	0
47.3	0
47.4	0
47.5	0
47.6	0
47.7	0
47.8	0
47.9	0
48	0
48.1	0
48.2	0
48.3	0
48.4	0
48.5	0
48.6	0
48.7	0
48.8	0
48.9	0
49	0
49.1	0
49.2	0
49.3	0
49.4	0
49.5	0
49.6	0
49.7	0
49.8	0
49.9	0
50	0
50.1	0
50.2	0
50.3	0
50.4	0
50.5	0
50.6	0
50.7	0
50.8	0
50.9	0
51	0
51.1	0
51.2	0
51.3	0
51.4	0
51.5	0
51.6	0
51.7	0
51.8	0
51.9	0
52	0
52.1	0
52.2	0
52.3	0
52.4	0
52.5	0
52.6	0
52.7	0
52.8	0
52.9	0
53	0
53.1	0
53.2	0
53.3	0
53.4	0
53.5	0
53.6	0
53.7	0
53.8	0
53.9	0
54	0
54.1	0
54.2	0
54.3	0
54.4	0
54.5	0
54.6	0
54.7	0
54.8	0
54.9	0
55	0
55.1	0
55.2	0
55.3	0
55.4	0
55.5	0
55.6	0
55.7	0
55.8	0
55.9	0
56	0
56.1	0
56.2	0
56.3	0
56.4	0
56.5	0
56.6	0
56.7	0
56.8	0
56.9	0
57	0
57.1	0
57.2	0
57.3	0
57.4	0
57.5	0
57.6	0
57.7	0
57.8	0
57.9	0
58	0
58.1	0
58.2	0
58.3	0
58.4	0
58.5	0
58.6	0
58.7	0
58.8	0
58.9	0
59	0
59.1	0
59.2	0
59.3	0
59.4	0
59.5	0
59.6	0
59.7	0
59.8	0
59.9	0
60	0
60.1	0
60.2	0
60.3	0
60.4	0
60.5	0
60.6	0
60.7	0
60.8	0
60.9	0
61	0
61.1	0
61.2	0
61.3	0
61.4	0
61.5	0
61.6	0
61.7	0
61.8	0
61.9	0
62	0
62.1	0
62.2	0
62.3	0
62.4	0
62.5	0
62.6	0
62.7	0
62.8	0
62.9	0
63	0
63.1	0
63.2	0
63.3	0
63.4	0
63.5	0
63.6	0
63.7	0
63.8	0
63.9	0
64	0
64.1	0
64.2	0
64.3	0
64.4	0
64.5	0
64.6	0
64.7	0
64.8	0
64.9	0
65	0
65.1	0
65.2	0
65.3	0
65.4	0
65.5	0
65.6	0
65.7	0
65.8	0
65.9	0
66	0
66.1	0
66.2	0
66.3	0
66.4	0
66.5	0
66.6	0
66.7	0
66.8	0
66.9	0
67	0
67.1	0
67.2	0
67.3	0
67.4	0
67.5	0
67.6	0
67.7	0
67.8	0
67.9	0
68	0
68.1	0
68.2	0
68.3	0
68.4	0
68.5	0
68.6	0
68.7	0
68.8	0
68.9	0
69	0
69.1	0
69.2	0
69.3	0
69.4	0
69.5	0
69.6	0
69.7	0
69.8	0
69.9	0
70	0
70.1	0
70.2	0
70.3	0
70.4	0
70.5	0
70.6	0
70.7	0
70.8	0
70.9	0
71	0
71.1	0
71.2	0
71.3	0
71.4	0
71.5	0
71.6	0
71.7	0
71.8	0
71.9	0
72	0
72.1	0
72.2	0
72.3	0
72.4	0
72.5	0
72.6	0
72.7	0
72.8	0
72.9	0
73	0
73.1	0
73.2	0
73.3	0
73.4	0
73.5	0
73.6	0
73.7	0
73.8	0
73.9	0
74	0
74.1	0
74.2	0
74.3	0
74.4	0
74.5	0
74.6	0
74.7	0
74.8	0
74.9	0
75	0
75.1	0
75.2	0
75.3	0
75.4	0
75.5	0
75.6	0
75.7	0
75.8	0
75.9	0
76	0
76.1	0
76.2	0
76.3	0
76.4	0
76.5	0
76.6	0
76.7	0
76.8	0
76.9	0
77	0
77.1	0
77.2	0
77.3	0
77.4	0
77.5	0
77.6	0
77.7	0
77.8	0
77.9	0
78	0
78.1	0
78.2	0
78.3	0
78.4	0
78.5	0
78.6	0
78.7	0
78.8	0
78.9	0
79	0
79.1	0
79.2	0
79.3	0
79.4	0
79.5	0
79.6	0
79.7	0
79.8	0
79.9	0
80	0
80.1	0
80.2	0
80.3	0
80.4	0
80.5	0
80.6	0
80.7	0
80.8	0
80.9	0
81	0
81.1	0
81.2	0
81.3	0
81.4	0
81.5	0
81.6	0
81.7	0
81.8	0
81.9	0
82	0
82.1	0
82.2	0
82.3	0
82.4	0
82.5	0
82.6	0
82.7	0
82.8	0
82.9	0
83	0
83.1	0
83.2	0
83.3	0
83.4	0
83.5	0
83.6	0
83.7	0
83.8	0
83.9	0
84	0
84.1	0
84.2	0
84.3	0
84.4	0
84.5	0
84.6	0
84.7	0
84.8	0
84.9	0
85	0
85.1	0
85.2	0
85.3	0
85.4	0
85.5	0
85.6	0
85.7	0
85.8	0
85.9	0
86	0
86.1	0
86.2	0
86.3	0
86.4	0
86.5	0
86.6	0
86.7	0
86.8	0
86.9	0
87	0
87.1	0
87.2	0
87.3	0
87.4	0
87.5	0
87.6	0
87.7	0
87.8	0
87.9	0
88	0
88.1	0
88.2	0
88.3	0
88.4	0
88.5	0
88.6	0
88.7	0
88.8	0
88.9	0
89	0
89.1	0
89.2	0
89.3	0
89.4	0
89.5	0
89.6	0
89.7	0
89.8	0
89.9	0
90	0
90.1	0
90.2	0
90.3	0
90.4	0
90.5	0
90.6	0
90.7	0
90.8	0
90.9	0
91	0
91.1	0
91.2	0
91.3	0
91.4	0
91.5	0
91.6	0
91.7	0
91.8	0
91.9	0
92	0
92.1	0
92.2	0
92.3	0
92.4	0
92.5	0
92.6	0
92.7	0
92.8	0
92.9	0
93	0
93.1	0
93.2	0
93.3	0
93.4	0
93.5	0
93.6	0
93.7	0
93.8	0
93.9	0
94	0
94.1	0
94.2	0
94.3	0
94.4	0
94.5	0
94.6	0
94.7	0
94.8	0
94.9	0
95	0
95.1	0
95.2	0
95.3	0
95.4	0
95.5	0
95.6	0
95.7	0
95.8	0
95.9	0
96	0
96.1	0
96.2	0
96.3	0
96.4	0
96.5	0
96.6	0
96.7	0
96.8	0
96.9	0
97	0
97.1	0
97.2	0
97.3	0
97.4	0
97.5	0
97.6	0
97.7	0
97.8	0
97.9	0
98	0
98.1	0
98.2	0
98.3	0
98.4	0
98.5	0
98.6	0
98.7	0
98.8	0
98.9	0
99	0
99.1	0
99.2	0
99.3	0
99.4	0
99.5	0
99.6	0
99.7	0
99.8	0
99.9	0
100	0
100.1	0.00666667
100.2	0.0133333
100.3	0.02
100.4	0.0266667
100.5	0.0331667
100.6	0.041
100.7	0.048
100.8	0.0545
100.9	0.0605
101	0.0663333
101.1	0.0706667
101.2	0.0771667
101.3	0.0841667
101.4	0.0911667
101.5	0.0958333
101.6	0.102167
101.7	0.108167
101.8	0.112333
101.9	0.115667
102	0.119833
102.1	0.123333
102.2	0.128167
102.3	0.132833
102.4	0.135667
102.5	0.140833
102.6	0.143333
102.7	0.148833
102.8	0.1525
102.9	0.1565
103	0.1605
103.1	0.164833
103.2	0.168
103.3	0.171
103.4	0.1735
103.5	0.178667
103.6	0.182
103.7	0.187333
103.8	0.190833
103.9	0.195
104	0.198667
104.1	0.201833
104.2	0.204833
104.3	0.208167
104.4	0.2125
104.5	0.2155
104.6	0.216
104.7	0.217167
104.8	0.216167
104.9	0.220333
105	0.224
105.1	0.228
105.2	0.232167
105.3	0.234833
105.4	0.2355
105.5	0.236833
105.6	0.239667
105.7	0.240833
105.8	0.243667
105.9	0.2475
106	0.249333
106.1	0.251667
106.2	0.254333
106.3	0.256
106.4	0.2575
106.5	0.258667
106.6	0.260667
106.7	0.260833
106.8	0.262667
106.9	0.266167
107	0.269
107.1	0.268833
107.2	0.270667
107.3	0.2725
107.4	0.271333
107.5	0.273833
107.6	0.2735
107.7	0.274667
107.8	0.2775
107.9	0.278667
108	0.279667
108.1	0.281833
108.2	0.283
108.3	0.286
108.4	0.288667
108.5	0.2895
108.6	0.289833
108.7	0.291667
108.8	0.292667
108.9	0.294167
109	0.295167
109.1	0.297
109.2	0.297667
109.3	0.2995
109.4	0.301
109.5	0.3
109.6	0.300167
109.7	0.301167
109.8	0.302667
109.9	0.304167
110	0.303833
110.1	0.304167
110.2	0.3065
110.3	0.307667
110.4	0.309833
110.5	0.309833
110.6	0.312667
110.7	0.314
110.8	0.314333
110.9	0.314
111	0.314
111.1	0.313333
111.2	0.315
111.3	0.315167
111.4	0.314333
111.5	0.314333
111.6	0.313667
111.7	0.315333
111.8	0.313667
111.9	0.314667
112	0.3155
112.1	0.317167
112.2	0.3175
112.3	0.317333
112.4	0.318333
112.5	0.3175
112.6	0.3185
112.7	0.319167
112.8	0.319167
112.9	0.319
113	0.320167
113.1	0.319667
113.2	0.319333
113.3	0.3165
113.4	0.3175
113.5	0.316333
113.6	0.315833
113.7	0.316833
113.8	0.316667
113.9	0.316833
114	0.319833
114.1	0.3225
114.2	0.321833
114.3	0.323667
114.4	0.3255
114.5	0.326333
114.6	0.328
114.7	0.327667
114.8	0.328833
114.9	0.328833
115	0.3295
115.1	0.328167
115.2	0.329833
115.3	0.328667
115.4	0.329
115.5	0.330833
115.6	0.332667
115.7	0.332167
115.8	0.332667
115.9	0.329667
116	0.330667
116.1	0.330833
116.2	0.332333
116.3	0.331667
116.4	0.330167
116.5	0.331
116.6	0.3305
116.7	0.3295
116.8	0.327833
116.9	0.330167
117	0.3325
117.1	0.3315
117.2	0.331333
117.3	0.333
117.4	0.334
117.5	0.333167
117.6	0.333833
117.7	0.332833
117.8	0.334333
117.9	0.3335
118	0.333
118.1	0.333167
118.2	0.334833
118.3	0.3375
118.4	0.336667
118.5	0.336667
118.6	0.336167
118.7	0.336667
118.8	0.337667
118.9	0.337667
119	0.338833
119.1	0.339167
119.2	0.339167
119.3	0.338
119.4	0.338
119.5	0.3375
119.6	0.339667
119.7	0.339
119.8	0.341167
119.9	0.3405
120	0.3415
120.1	0.343167
120.2	0.342667
120.3	0.343667
120.4	0.343667
120.5	0.344667
120.6	0.345833
120.7	0.345667
120.8	0.347
120.9	0.346167
121	0.3465
121.1	0.3475
121.2	0.347333
121.3	0.348667
121.4	0.346833
121.5	0.348167
121.6	0.347
121.7	0.348
121.8	0.35
121.9	0.351
122	0.3505
122.1	0.350333
122.2	0.3505
122.3	0.350833
122.4	0.352
122.5	0.351667
122.6	0.3525
122.7	0.353333
122.8	0.353
122.9	0.354
123	0.3555
123.1	0.355667
123.2	0.356333
123.3	0.355833
123.4	0.354333
123.5	0.353833
123.6	0.355667
123.7	0.354667
123.8	0.355167
123.9	0.353833
124	0.3525
124.1	0.351833
124.2	0.3535
124.3	0.352167
124.4	0.3505
124.5	0.349167
124.6	0.349
124.7	0.346833
124.8	0.347
124.9	0.345833
125	0.345833
125.1	0.3465
125.2	0.345833
125.3	0.3465
125.4	0.3455
125.5	0.346
125.6	0.347167
125.7	0.347167
125.8	0.347
125.9	0.346333
126	0.3465
126.1	0.347
126.2	0.347667
126.3	0.3485
126.4	0.348
126.5	0.350667
126.6	0.351167
126.7	0.351333
126.8	0.351167
126.9	0.352667
127	0.353
127.1	0.354167
127.2	0.354
127.3	0.353833
127.4	0.353167
127.5	0.352833
127.6	0.351667
127.7	0.3515
127.8	0.351333
127.9	0.351833
128	0.351333
128.1	0.351
128.2	0.350833
128.3	0.350167
128.4	0.349833
128.5	0.350667
128.6	0.3525
128.7	0.353167
128.8	0.354
128.9	0.356
129	0.3575
129.1	0.3585
129.2	0.358333
129.3	0.36
129.4	0.359333
129.5	0.3585
129.6	0.360333
129.7	0.361
129.8	0.362
129.9	0.362
130	0.361
130.1	0.360167
130.2	0.361833
130.3	0.3625
130.4	0.361667
130.5	0.36
130.6	0.359833
130.7	0.357667
130.8	0.359
130.9	0.358667
131	0.360167
131.1	0.361667
131.2	0.362833
131.3	0.3615
131.4	0.361
131.5	0.358
131.6	0.3565
131.7	0.357833
131.8	0.357667
131.9	0.356167
132	0.3575
132.1	0.356833
132.2	0.3575
132.3	0.357667
132.4	0.358167
132.5	0.3585
132.6	0.3585
132.7	0.358667
132.8	0.357833
132.9	0.356167
133	0.357167
133.1	0.356667
133.2	0.355833
133.3	0.356167
133.4	0.356
133.5	0.356
133.6	0.354667
133.7	0.3535
133.8	0.354
133.9	0.3555
134	0.355667
134.1	0.359333
134.2	0.360333
134.3	0.360833
134.4	0.361333
134.5	0.363167
134.6	0.362833
134.7	0.362833
134.8	0.364
134.9	0.365167
135	0.364667
135.1	0.365167
135.2	0.365333
135.3	0.364167
135.4	0.363833
135.5	0.364667
135.6	0.366333
135.7	0.365833
135.8	0.366167
135.9	0.3655
136	0.3655
136.1	0.367167
136.2	0.3655
136.3	0.3665
136.4	0.366667
136.5	0.3685
136.6	0.370833
136.7	0.3685
136.8	0.3665
136.9	0.367333
137	0.366
137.1	0.367333
137.2	0.366333
137.3	0.3675
137.4	0.369
137.5	0.3705
137.6	0.371167
137.7	0.370333
137.8	0.369833
137.9	0.37
138	0.369
138.1	0.368333
138.2	0.366667
138.3	0.367167
138.4	0.367333
138.5	0.366833
138.6	0.367333
138.7	0.369
138.8	0.367667
138.9	0.367167
139	0.368167
139.1	0.368333
139.2	0.3685
139.3	0.368667
139.4	0.37
139.5	0.369167
139.6	0.369333
139.7	0.369333
139.8	0.37
139.9	0.370167
140	0.3705
140.1	0.372167
140.2	0.371833
140.3	0.370833
140.4	0.372333
140.5	0.373333
140.6	0.374333
140.7	0.3745
140.8	0.375167
140.9	0.376
141	0.375
141.1	0.375
141.2	0.3765
141.3	0.3765
141.4	0.374667
141.5	0.373667
141.6	0.373833
141.7	0.373
141.8	0.371333
141.9	0.371833
142	0.3715
142.1	0.371
142.2	0.370333
142.3	0.371167
142.4	0.371333
142.5	0.37
142.6	0.3715
142.7	0.371
142.8	0.373
142.9	0.3725
143	0.373833
143.1	0.375333
143.2	0.375167
143.3	0.375667
143.4	0.375333
143.5	0.375667
143.6	0.375333
143.7	0.377333
143.8	0.38
143.9	0.378167
144	0.377667
144.1	0.377833
144.2	0.3775
144.3	0.377333
144.4	0.3775
144.5	0.375833
144.6	0.377167
144.7	0.375833
144.8	0.375
144.9	0.375833
145	0.376833
145.1	0.377
145.2	0.376333
145.3	0.375833
145.4	0.374833
145.5	0.374
145.6	0.372667
145.7	0.3715
145.8	0.372
145.9	0.372167
146	0.371667
146.1	0.372833
146.2	0.373333
146.3	0.37
146.4	0.368833
146.5	0.367833
146.6	0.3675
146.7	0.368833
146.8	0.368833
146.9	0.369
147	0.367833
147.1	0.3685
147.2	0.367833
147.3	0.367
147.4	0.366833
147.5	0.367167
147.6	0.368333
147.7	0.369667
147.8	0.3705
147.9	0.368667
148	0.370333
148.1	0.368667
148.2	0.369833
148.3	0.366
148.4	0.368833
148.5	0.370333
148.6	0.371167
148.7	0.3715
148.8	0.371333
148.9	0.370667
149	0.371
149.1	0.372667
149.2	0.373167
149.3	0.371833
149.4	0.374333
149.5	0.3745
149.6	0.373833
149.7	0.3735
149.8	0.372167
149.9	0.372
150	0.373
150.1	0.373167
150.2	0.374167
150.3	0.374167
150.4	0.374
150.5	0.374667
150.6	0.374167
150.7	0.373667
150.8	0.373667
150.9	0.373833
151	0.373333
151.1	0.372
151.2	0.372833
151.3	0.373333
151.4	0.372333
151.5	0.372833
151.6	0.374
151.7	0.373833
151.8	0.374167
151.9	0.375167
152	0.376667
152.1	0.378833
152.2	0.377833
152.3	0.377
152.4	0.377833
152.5	0.3775
152.6	0.376667
152.7	0.375667
152.8	0.375167
152.9	0.373167
153	0.3735
153.1	0.374
153.2	0.374667
153.3	0.374167
153.4	0.374
153.5	0.3735
153.6	0.371833
153.7	0.3715
153.8	0.373
153.9	0.371833
154	0.372833
154.1	0.371833
154.2	0.372333
154.3	0.371667
154.4	0.372167
154.5	0.3755
154.6	0.376333
154.7	0.377
154.8	0.378333
154.9	0.378
155	0.376333
155.1	0.3755
155.2	0.375667
155.3	0.375833
155.4	0.375167
155.5	0.376
155.6	0.375333
155.7	0.3765
155.8	0.376667
155.9	0.376
156	0.3755
156.1	0.374833
156.2	0.373667
156.3	0.3735
156.4	0.372333
156.5	0.371333
156.6	0.373
156.7	0.372667
156.8	0.372667
156.9	0.3745
157	0.375
157.1	0.375833
157.2	0.3755
157.3	0.377
157.4	0.379
157.5	0.378667
157.6	0.379
157.7	0.379333
157.8	0.380167
157.9	0.378333
158	0.378667
158.1	0.377833
158.2	0.3785
158.3	0.379
158.4	0.379667
158.5	0.378333
158.6	0.379833
158.7	0.3805
158.8	0.379667
158.9	0.378667
159	0.3785
159.1	0.378167
159.2	0.3775
159.3	0.377667
159.4	0.378667
159.5	0.378
159.6	0.3785
159.7	0.377333
159.8	0.378333
159.9	0.380667
160	0.380333
160.1	0.381333
160.2	0.3815
160.3	0.383167
160.4	0.3835
160.5	0.384167
160.6	0.383167
160.7	0.382667
160.8	0.383167
160.9	0.383167
161	0.384
161.1	0.383167
161.2	0.3845
161.3	0.385667
161.4	0.385167
161.5	0.3855
161.6	0.387167
161.7	0.388
161.8	0.389167
161.9	0.389333
162	0.391333
162.1	0.392667
162.2	0.392167
162.3	0.391
162.4	0.391667
162.5	0.392833
162.6	0.3945
162.7	0.394
162.8	0.393
162.9	0.394167
163	0.392167
163.1	0.39
163.2	0.389667
163.3	0.389833
163.4	0.3905
163.5	0.393167
163.6	0.3935
163.7	0.394667
163.8	0.393167
163.9	0.393
164	0.393167
164.1	0.392167
164.2	0.392667
164.3	0.390667
164.4	0.389
164.5	0.39
164.6	0.388333
164.7	0.387667
164.8	0.389333
164.9	0.387833
165	0.387667
165.1	0.388667
165.2	0.389
165.3	0.389667
165.4	0.391167
165.5	0.389833
165.6	0.391333
165.7	0.390833
165.8	0.391333
165.9	0.391667
166	0.393667
166.1	0.394
166.2	0.393167
166.3	0.394333
166.4	0.3915
166.5	0.391333
166.6	0.392167
166.7	0.3935
166.8	0.3935
166.9	0.393667
167	0.393167
167.1	0.393
167.2	0.394667
167.3	0.395167
167.4	0.3945
167.5	0.394833
167.6	0.394667
167.7	0.393333
167.8	0.394333
167.9	0.394333
168	0.393167
168.1	0.393333
168.2	0.394
168.3	0.394167
168.4	0.393167
168.5	0.394
168.6	0.394
168.7	0.394167
168.8	0.3955
168.9	0.396333
169	0.397833
169.1	0.397
169.2	0.397667
169.3	0.397667
169.4	0.396667
169.5	0.396333
169.6	0.394667
169.7	0.394833
169.8	0.394333
169.9	0.395833
170	0.394167
170.1	0.393167
170.2	0.392833
170.3	0.393333
170.4	0.393333
170.5	0.394
170.6	0.393167
170.7	0.391667
170.8	0.391167
170.9	0.3905
171	0.3915
171.1	0.3925
171.2	0.393
171.3	0.391833
171.4	0.393333
171.5	0.393667
171.6	0.394
171.7	0.394167
171.8	0.394333
171.9	0.394167
172	0.393667
172.1	0.394667
172.2	0.394
172.3	0.394333
172.4	0.393833
172.5	0.3925
172.6	0.393
172.7	0.392167
172.8	0.3905
172.9	0.3905
173	0.389
173.1	0.389667
173.2	0.391333
173.3	0.392
173.4	0.393
173.5	0.392333
173.6	0.391
173.7	0.391167
173.8	0.391
173.9	0.392667
174	0.392167
174.1	0.390167
174.2	0.389667
174.3	0.389333
174.4	0.3895
174.5	0.389667
174.6	0.390833
174.7	0.389833
174.8	0.39
174.9	0.390667
175	0.391667
175.1	0.392167
175.2	0.391
175.3	0.390333
175.4	0.389833
175.5	0.389
175.6	0.389167
175.7	0.389667
175.8	0.3895
175.9	0.3895
176	0.389833
176.1	0.388333
176.2	0.39
176.3	0.390167
176.4	0.388167
176.5	0.387667
176.6	0.387
176.7	0.3865
176.8	0.386667
176.9	0.384833
177	0.384
177.1	0.385333
177.2	0.384
177.3	0.384333
177.4	0.382833
177.5	0.381667
177.6	0.382
177.7	0.381
177.8	0.381667
177.9	0.382333
178	0.383667
178.1	0.384167
178.2	0.385667
178.3	0.386167
178.4	0.386667
178.5	0.385333
178.6	0.385
178.7	0.386
178.8	0.385833
178.9	0.384833
179	0.384667
179.1	0.384333
179.2	0.386167
179.3	0.385833
179.4	0.386333
179.5	0.387833
179.6	0.386667
179.7	0.386333
179.8	0.387
179.9	0.387833
180	0.387
180.1	0.387833
180.2	0.388167
180.3	0.387833
180.4	0.386
180.5	0.386667
180.6	0.387333
180.7	0.387
180.8	0.387167
180.9	0.386667
181	0.387167
181.1	0.389333
181.2	0.389667
181.3	0.390333
181.4	0.389167
181.5	0.388833
181.6	0.39
181.7	0.3905
181.8	0.388833
181.9	0.3885
182	0.388333
182.1	0.3885
182.2	0.387833
182.3	0.388
182.4	0.388
182.5	0.387167
182.6	0.387167
182.7	0.387167
182.8	0.386833
182.9	0.387333
183	0.385667
183.1	0.387333
183.2	0.388333
183.3	0.388167
183.4	0.387333
183.5	0.388
183.6	0.387333
183.7	0.3865
183.8	0.387
183.9	0.3875
184	0.386667
184.1	0.387
184.2	0.3875
184.3	0.388833
184.4	0.388167
184.5	0.387833
184.6	0.387333
184.7	0.386333
184.8	0.388
184.9	0.387833
185	0.387667
185.1	0.3885
185.2	0.3875
185.3	0.388333
185.4	0.388833
185.5	0.387333
185.6	0.388833
185.7	0.388667
185.8	0.39
185.9	0.390333
186	0.391
186.1	0.390167
186.2	0.391333
186.3	0.390667
186.4	0.392167
186.5	0.3915
186.6	0.391667
186.7	0.3925
186.8	0.3925
186.9	0.3915
187	0.391
187.1	0.3925
187.2	0.393
187.3	0.394667
187.4	0.396333
187.5	0.396
187.6	0.396
187.7	0.3965
187.8	0.395667
187.9	0.395667
188	0.395333
188.1	0.397167
188.2	0.399167
188.3	0.399167
188.4	0.3985
188.5	0.399833
188.6	0.400833
188.7	0.399
188.8	0.4005
188.9	0.399333
189	0.398167
189.1	0.399
189.2	0.397667
189.3	0.395833
189.4	0.394833
189.5	0.393833
189.6	0.394333
189.7	0.393667
189.8	0.392333
189.9	0.391333
190	0.390833
190.1	0.391667
190.2	0.392333
190.3	0.392833
190.4	0.3935
190.5	0.393
190.6	0.391667
190.7	0.392
190.8	0.391
190.9	0.391667
191	0.389833
191.1	0.3905
191.2	0.3935
191.3	0.392167
191.4	0.392
191.5	0.392
191.6	0.390667
191.7	0.389667
191.8	0.389333
191.9	0.390167
192	0.3925
192.1	0.391167
192.2	0.393333
192.3	0.392833
192.4	0.391833
192.5	0.3925
192.6	0.392333
192.7	0.393
192.8	0.393667
192.9	0.393333
193	0.393667
193.1	0.392167
193.2	0.393
193.3	0.3945
193.4	0.396333
193.5	0.3955
193.6	0.395667
193.7	0.394667
193.8	0.392333
193.9	0.392833
194	0.394667
194.1	0.3945
194.2	0.395333
194.3	0.395333
194.4	0.396833
194.5	0.398
194.6	0.397667
194.7	0.3975
194.8	0.3965
194.9	0.3965
195	0.3955
195.1	0.395333
195.2	0.3925
195.3	0.392167
195.4	0.391667
195.5	0.391667
195.6	0.393333
195.7	0.393667
195.8	0.393167
195.9	0.394
196	0.395
196.1	0.395667
196.2	0.394333
196.3	0.394333
196.4	0.3955
196.5	0.394167
196.6	0.394167
196.7	0.3945
196.8	0.395167
196.9	0.394833
197	0.393167
197.1	0.393333
197.2	0.395833
197.3	0.397167
197.4	0.398
197.5	0.398333
197.6	0.397667
197.7	0.398167
197.8	0.3985
197.9	0.397667
198	0.397
198.1	0.3965
198.2	0.397333
198.3	0.396667
198.4	0.3955
198.5	0.396167
198.6	0.397833
198.7	0.398
198.8	0.398667
198.9	0.398
199	0.397667
199.1	0.397333
199.2	0.397333
199.3	0.3965
199.4	0.397333
199.5	0.397667
199.6	0.3975
199.7	0.3975
199.8	0.396333
199.9	0.394667
200	0.393833
[truncated: 14,000 more rows]
