# Supplementary material for: Bayesian inference of kinetic schemes for ion channels by Kalman filtering
Source: eLife journal article supplement (doi:10.7554/elife.62714), 2022-05-04
Supplement: fig4-data12 [file 1_Sim_N_3000_Strom_MW_0.125M.xlsx]

## Sheet: Tabelle1
0.1	0
0.2	0
0.3	0
0.4	0
0.5	0
0.6	0
0.7	0
0.8	0
0.9	0
1	0
1.1	0
1.2	0
1.3	0
1.4	0
1.5	0
1.6	0
1.7	0
1.8	0
1.9	0
2	0
2.1	0
2.2	0
2.3	0
2.4	0
2.5	0
2.6	0
2.7	0
2.8	0
2.9	0
3	0
3.1	0
3.2	0
3.3	0
3.4	0
3.5	0
3.6	0
3.7	0
3.8	0
3.9	0
4	0
4.1	0
4.2	0
4.3	0
4.4	0
4.5	0
4.6	0
4.7	0
4.8	0
4.9	0
5	0
5.1	0
5.2	0
5.3	0
5.4	0
5.5	0
5.6	0
5.7	0
5.8	0
5.9	0
6	0
6.1	0
6.2	0
6.3	0
6.4	0
6.5	0
6.6	0
6.7	0
6.8	0
6.9	0
7	0
7.1	0
7.2	0
7.3	0
7.4	0
7.5	0
7.6	0
7.7	0
7.8	0
7.9	0
8	0
8.1	0
8.2	0
8.3	0
8.4	0
8.5	0
8.6	0
8.7	0
8.8	0
8.9	0
9	0
9.1	0
9.2	0
9.3	0
9.4	0
9.5	0
9.6	0
9.7	0
9.8	0
9.9	0
10	0
10.1	0
10.2	0
10.3	0
10.4	0
10.5	0
10.6	0
10.7	0
10.8	0
10.9	0
11	0
11.1	0
11.2	0
11.3	0
11.4	0
11.5	0
11.6	0
11.7	0
11.8	0
11.9	0
12	0
12.1	0
12.2	0
12.3	0
12.4	0
12.5	0
12.6	0
12.7	0
12.8	0
12.9	0
13	0
13.1	0
13.2	0
13.3	0
13.4	0
13.5	0
13.6	0
13.7	0
13.8	0
13.9	0
14	0
14.1	0
14.2	0
14.3	0
14.4	0
14.5	0
14.6	0
14.7	0
14.8	0
14.9	0
15	0
15.1	0
15.2	0
15.3	0
15.4	0
15.5	0
15.6	0
15.7	0
15.8	0
15.9	0
16	0
16.1	0
16.2	0
16.3	0
16.4	0
16.5	0
16.6	0
16.7	0
16.8	0
16.9	0
17	0
17.1	0
17.2	0
17.3	0
17.4	0
17.5	0
17.6	0
17.7	0
17.8	0
17.9	0
18	0
18.1	0
18.2	0
18.3	0
18.4	0
18.5	0
18.6	0
18.7	0
18.8	0
18.9	0
19	0
19.1	0
19.2	0
19.3	0
19.4	0
19.5	0
19.6	0
19.7	0
19.8	0
19.9	0
20	0
20.1	0
20.2	0
20.3	0
20.4	0
20.5	0
20.6	0
20.7	0
20.8	0
20.9	0
21	0
21.1	0
21.2	0
21.3	0
21.4	0
21.5	0
21.6	0
21.7	0
21.8	0
21.9	0
22	0
22.1	0
22.2	0
22.3	0
22.4	0
22.5	0
22.6	0
22.7	0
22.8	0
22.9	0
23	0
23.1	0
23.2	0
23.3	0
23.4	0
23.5	0
23.6	0
23.7	0
23.8	0
23.9	0
24	0
24.1	0
24.2	0
24.3	0
24.4	0
24.5	0
24.6	0
24.7	0
24.8	0
24.9	0
25	0
25.1	0
25.2	0
25.3	0
25.4	0
25.5	0
25.6	0
25.7	0
25.8	0
25.9	0
26	0
26.1	0
26.2	0
26.3	0
26.4	0
26.5	0
26.6	0
26.7	0
26.8	0
26.9	0
27	0
27.1	0
27.2	0
27.3	0
27.4	0
27.5	0
27.6	0
27.7	0
27.8	0
27.9	0
28	0
28.1	0
28.2	0
28.3	0
28.4	0
28.5	0
28.6	0
28.7	0
28.8	0
28.9	0
29	0
29.1	0
29.2	0
29.3	0
29.4	0
29.5	0
29.6	0
29.7	0
29.8	0
29.9	0
30	0
30.1	0
30.2	0
30.3	0
30.4	0
30.5	0
30.6	0
30.7	0
30.8	0
30.9	0
31	0
31.1	0
31.2	0
31.3	0
31.4	0
31.5	0
31.6	0
31.7	0
31.8	0
31.9	0
32	0
32.1	0
32.2	0
32.3	0
32.4	0
32.5	0
32.6	0
32.7	0
32.8	0
32.9	0
33	0
33.1	0
33.2	0
33.3	0
33.4	0
33.5	0
33.6	0
33.7	0
33.8	0
33.9	0
34	0
34.1	0
34.2	0
34.3	0
34.4	0
34.5	0
34.6	0
34.7	0
34.8	0
34.9	0
35	0
35.1	0
35.2	0
35.3	0
35.4	0
35.5	0
35.6	0
35.7	0
35.8	0
35.9	0
36	0
36.1	0
36.2	0
36.3	0
36.4	0
36.5	0
36.6	0
36.7	0
36.8	0
36.9	0
37	0
37.1	0
37.2	0
37.3	0
37.4	0
37.5	0
37.6	0
37.7	0
37.8	0
37.9	0
38	0
38.1	0
38.2	0
38.3	0
38.4	0
38.5	0
38.6	0
38.7	0
38.8	0
38.9	0
39	0
39.1	0
39.2	0
39.3	0
39.4	0
39.5	0
39.6	0
39.7	0
39.8	0
39.9	0
40	0
40.1	0
40.2	0
40.3	0
40.4	0
40.5	0
40.6	0
40.7	0
40.8	0
40.9	0
41	0
41.1	0
41.2	0
41.3	0
41.4	0
41.5	0
41.6	0
41.7	0
41.8	0
41.9	0
42	0
42.1	0
42.2	0
42.3	0
42.4	0
42.5	0
42.6	0
42.7	0
42.8	0
42.9	0
43	0
43.1	0
43.2	0
43.3	0
43.4	0
43.5	0
43.6	0
43.7	0
43.8	0
43.9	0
44	0
44.1	0
44.2	0
44.3	0
44.4	0
44.5	0
44.6	0
44.7	0
44.8	0
44.9	0
45	0
45.1	0
45.2	0
45.3	0
45.4	0
45.5	0
45.6	0
45.7	0
45.8	0
45.9	0
46	0
46.1	0
46.2	0
46.3	0
46.4	0
46.5	0
46.6	0
46.7	0
46.8	0
46.9	0
47	0
47.1	0
47.2	0
47.3	0
47.4	0
47.5	0
47.6	0
47.7	0
47.8	0
47.9	0
48	0
48.1	0
48.2	0
48.3	0
48.4	0
48.5	0
48.6	0
48.7	0
48.8	0
48.9	0
49	0
49.1	0
49.2	0
49.3	0
49.4	0
49.5	0
49.6	0
49.7	0
49.8	0
49.9	0
50	0
50.1	0
50.2	0
50.3	0
50.4	0
50.5	0
50.6	0
50.7	0
50.8	0
50.9	0
51	0
51.1	0
51.2	0
51.3	0
51.4	0
51.5	0
51.6	0
51.7	0
51.8	0
51.9	0
52	0
52.1	0
52.2	0
52.3	0
52.4	0
52.5	0
52.6	0
52.7	0
52.8	0
52.9	0
53	0
53.1	0
53.2	0
53.3	0
53.4	0
53.5	0
53.6	0
53.7	0
53.8	0
53.9	0
54	0
54.1	0
54.2	0
54.3	0
54.4	0
54.5	0
54.6	0
54.7	0
54.8	0
54.9	0
55	0
55.1	0
55.2	0
55.3	0
55.4	0
55.5	0
55.6	0
55.7	0
55.8	0
55.9	0
56	0
56.1	0
56.2	0
56.3	0
56.4	0
56.5	0
56.6	0
56.7	0
56.8	0
56.9	0
57	0
57.1	0
57.2	0
57.3	0
57.4	0
57.5	0
57.6	0
57.7	0
57.8	0
57.9	0
58	0
58.1	0
58.2	0
58.3	0
58.4	0
58.5	0
58.6	0
58.7	0
58.8	0
58.9	0
59	0
59.1	0
59.2	0
59.3	0
59.4	0
59.5	0
59.6	0
59.7	0
59.8	0
59.9	0
60	0
60.1	0
60.2	0
60.3	0
60.4	0
60.5	0
60.6	0
60.7	0
60.8	0
60.9	0
61	0
61.1	0
61.2	0
61.3	0
61.4	0
61.5	0
61.6	0
61.7	0
61.8	0
61.9	0
62	0
62.1	0
62.2	0
62.3	0
62.4	0
62.5	0
62.6	0
62.7	0
62.8	0
62.9	0
63	0
63.1	0
63.2	0
63.3	0
63.4	0
63.5	0
63.6	0
63.7	0
63.8	0
63.9	0
64	0
64.1	0
64.2	0
64.3	0
64.4	0
64.5	0
64.6	0
64.7	0
64.8	0
64.9	0
65	0
65.1	0
65.2	0
65.3	0
65.4	0
65.5	0
65.6	0
65.7	0
65.8	0
65.9	0
66	0
66.1	0
66.2	0
66.3	0
66.4	0
66.5	0
66.6	0
66.7	0
66.8	0
66.9	0
67	0
67.1	0
67.2	0
67.3	0
67.4	0
67.5	0
67.6	0
67.7	0
67.8	0
67.9	0
68	0
68.1	0
68.2	0
68.3	0
68.4	0
68.5	0
68.6	0
68.7	0
68.8	0
68.9	0
69	0
69.1	0
69.2	0
69.3	0
69.4	0
69.5	0
69.6	0
69.7	0
69.8	0
69.9	0
70	0
70.1	0
70.2	0
70.3	0
70.4	0
70.5	0
70.6	0
70.7	0
70.8	0
70.9	0
71	0
71.1	0
71.2	0
71.3	0
71.4	0
71.5	0
71.6	0
71.7	0
71.8	0
71.9	0
72	0
72.1	0
72.2	0
72.3	0
72.4	0
72.5	0
72.6	0
72.7	0
72.8	0
72.9	0
73	0
73.1	0
73.2	0
73.3	0
73.4	0
73.5	0
73.6	0
73.7	0
73.8	0
73.9	0
74	0
74.1	0
74.2	0
74.3	0
74.4	0
74.5	0
74.6	0
74.7	0
74.8	0
74.9	0
75	0
75.1	0
75.2	0
75.3	0
75.4	0
75.5	0
75.6	0
75.7	0
75.8	0
75.9	0
76	0
76.1	0
76.2	0
76.3	0
76.4	0
76.5	0
76.6	0
76.7	0
76.8	0
76.9	0
77	0
77.1	0
77.2	0
77.3	0
77.4	0
77.5	0
77.6	0
77.7	0
77.8	0
77.9	0
78	0
78.1	0
78.2	0
78.3	0
78.4	0
78.5	0
78.6	0
78.7	0
78.8	0
78.9	0
79	0
79.1	0
79.2	0
79.3	0
79.4	0
79.5	0
79.6	0
79.7	0
79.8	0
79.9	0
80	0
80.1	0
80.2	0
80.3	0
80.4	0
80.5	0
80.6	0
80.7	0
80.8	0
80.9	0
81	0
81.1	0
81.2	0
81.3	0
81.4	0
81.5	0
81.6	0
81.7	0
81.8	0
81.9	0
82	0
82.1	0
82.2	0
82.3	0
82.4	0
82.5	0
82.6	0
82.7	0
82.8	0
82.9	0
83	0
83.1	0
83.2	0
83.3	0
83.4	0
83.5	0
83.6	0
83.7	0
83.8	0
83.9	0
84	0
84.1	0
84.2	0
84.3	0
84.4	0
84.5	0
84.6	0
84.7	0
84.8	0
84.9	0
85	0
85.1	0
85.2	0
85.3	0
85.4	0
85.5	0
85.6	0
85.7	0
85.8	0
85.9	0
86	0
86.1	0
86.2	0
86.3	0
86.4	0
86.5	0
86.6	0
86.7	0
86.8	0
86.9	0
87	0
87.1	0
87.2	0
87.3	0
87.4	0
87.5	0
87.6	0
87.7	0
87.8	0
87.9	0
88	0
88.1	0
88.2	0
88.3	0
88.4	0
88.5	0
88.6	0
88.7	0
88.8	0
88.9	0
89	0
89.1	0
89.2	0
89.3	0
89.4	0
89.5	0
89.6	0
89.7	0
89.8	0
89.9	0
90	0
90.1	0
90.2	0
90.3	0
90.4	0
90.5	0
90.6	0
90.7	0
90.8	0
90.9	0
91	0
91.1	0
91.2	0
91.3	0
91.4	0
91.5	0
91.6	0
91.7	0
91.8	0
91.9	0
92	0
92.1	0
92.2	0
92.3	0
92.4	0
92.5	0
92.6	0
92.7	0
92.8	0
92.9	0
93	0
93.1	0
93.2	0
93.3	0
93.4	0
93.5	0
93.6	0
93.7	0
93.8	0
93.9	0
94	0
94.1	0
94.2	0
94.3	0
94.4	0
94.5	0
94.6	0
94.7	0
94.8	0
94.9	0
95	0
95.1	0
95.2	0
95.3	0
95.4	0
95.5	0
95.6	0
95.7	0
95.8	0
95.9	0
96	0
96.1	0
96.2	0
96.3	0
96.4	0
96.5	0
96.6	0
96.7	0
96.8	0
96.9	0
97	0
97.1	0
97.2	0
97.3	0
97.4	0
97.5	0
97.6	0
97.7	0
97.8	0
97.9	0
98	0
98.1	0
98.2	0
98.3	0
98.4	0
98.5	0
98.6	0
98.7	0
98.8	0
98.9	0
99	0
99.1	0
99.2	0
99.3	0
99.4	0
99.5	0
99.6	0
99.7	0
99.8	0
99.9	0
100	0
100.1	0
100.2	0
100.3	0
100.4	0
100.5	0
100.6	0
100.7	0
100.8	0
100.9	0
101	0
101.1	0
101.2	0
101.3	0
101.4	0
101.5	0
101.6	0
101.7	0
101.8	0
101.9	0
102	0
102.1	0
102.2	0
102.3	0
102.4	0
102.5	0
102.6	0.000333333
102.7	0.000333333
102.8	0.000333333
102.9	0.000333333
103	0.000666667
103.1	0.000666667
103.2	0.000666667
103.3	0.001
103.4	0.001
103.5	0.00166667
103.6	0.00166667
103.7	0.00133333
103.8	0.00133333
103.9	0.00133333
104	0.00133333
104.1	0.00133333
104.2	0.00133333
104.3	0.00133333
104.4	0.00166667
104.5	0.00166667
104.6	0.002
104.7	0.002
104.8	0.002
104.9	0.002
105	0.00233333
105.1	0.00233333
105.2	0.00233333
105.3	0.00266667
105.4	0.00266667
105.5	0.00266667
105.6	0.00266667
105.7	0.00266667
105.8	0.00266667
105.9	0.00266667
106	0.003
106.1	0.003
106.2	0.003
106.3	0.00333333
106.4	0.00366667
106.5	0.004
106.6	0.00433333
106.7	0.00433333
106.8	0.00433333
106.9	0.00433333
107	0.00466667
107.1	0.005
107.2	0.00533333
107.3	0.00533333
107.4	0.006
107.5	0.00633333
107.6	0.00633333
107.7	0.00633333
107.8	0.00666667
107.9	0.007
108	0.007
108.1	0.007
108.2	0.00733333
108.3	0.00733333
108.4	0.00766667
108.5	0.00766667
108.6	0.008
108.7	0.008
108.8	0.00833333
108.9	0.00833333
109	0.00866667
109.1	0.00866667
109.2	0.00866667
109.3	0.009
109.4	0.009
109.5	0.009
109.6	0.009
109.7	0.00966667
109.8	0.00966667
109.9	0.00966667
110	0.00966667
110.1	0.01
110.2	0.01
110.3	0.0103333
110.4	0.0106667
110.5	0.0106667
110.6	0.0106667
110.7	0.0106667
110.8	0.0106667
110.9	0.0106667
111	0.0106667
111.1	0.0106667
111.2	0.0106667
111.3	0.0106667
111.4	0.011
111.5	0.011
111.6	0.011
111.7	0.011
111.8	0.0113333
111.9	0.0116667
112	0.0116667
112.1	0.0116667
112.2	0.0116667
112.3	0.012
112.4	0.012
112.5	0.012
112.6	0.0123333
112.7	0.0123333
112.8	0.0126667
112.9	0.0126667
113	0.013
113.1	0.013
113.2	0.0133333
113.3	0.014
113.4	0.014
113.5	0.0143333
113.6	0.0143333
113.7	0.0143333
113.8	0.0143333
113.9	0.0146667
114	0.0146667
114.1	0.015
114.2	0.0153333
114.3	0.0153333
114.4	0.0156667
114.5	0.0156667
114.6	0.0156667
114.7	0.0156667
114.8	0.0156667
114.9	0.0156667
115	0.0156667
115.1	0.0156667
115.2	0.016
115.3	0.016
115.4	0.0163333
115.5	0.0166667
115.6	0.017
115.7	0.0166667
115.8	0.0166667
115.9	0.0173333
116	0.0173333
116.1	0.0176667
116.2	0.018
116.3	0.018
116.4	0.018
116.5	0.018
116.6	0.018
116.7	0.018
116.8	0.018
116.9	0.018
117	0.018
117.1	0.0186667
117.2	0.0186667
117.3	0.0186667
117.4	0.0186667
117.5	0.019
117.6	0.019
117.7	0.019
117.8	0.0193333
117.9	0.02
118	0.0203333
118.1	0.0203333
118.2	0.0203333
118.3	0.0206667
118.4	0.021
118.5	0.021
118.6	0.0216667
118.7	0.022
118.8	0.022
118.9	0.022
119	0.0223333
119.1	0.0223333
119.2	0.0223333
119.3	0.023
119.4	0.023
119.5	0.023
119.6	0.0233333
119.7	0.0233333
119.8	0.0236667
119.9	0.0236667
120	0.024
120.1	0.024
120.2	0.024
120.3	0.024
120.4	0.0246667
120.5	0.025
120.6	0.0253333
120.7	0.0253333
120.8	0.0256667
120.9	0.0256667
121	0.026
121.1	0.026
121.2	0.026
121.3	0.0266667
121.4	0.027
121.5	0.027
121.6	0.027
121.7	0.0273333
121.8	0.0283333
121.9	0.0283333
122	0.029
122.1	0.029
122.2	0.0286667
122.3	0.0286667
122.4	0.0286667
122.5	0.0286667
122.6	0.0286667
122.7	0.0283333
122.8	0.029
122.9	0.029
123	0.029
123.1	0.0296667
123.2	0.0296667
123.3	0.0303333
123.4	0.0303333
123.5	0.0303333
123.6	0.0303333
123.7	0.0303333
123.8	0.0303333
123.9	0.0303333
124	0.031
124.1	0.0313333
124.2	0.0313333
124.3	0.0313333
124.4	0.0313333
124.5	0.0313333
124.6	0.031
124.7	0.031
124.8	0.031
124.9	0.031
125	0.031
125.1	0.032
125.2	0.0323333
125.3	0.0326667
125.4	0.0333333
125.5	0.0333333
125.6	0.0336667
125.7	0.0336667
125.8	0.034
125.9	0.034
126	0.034
126.1	0.034
126.2	0.034
126.3	0.0336667
126.4	0.0336667
126.5	0.034
126.6	0.0343333
126.7	0.034
126.8	0.034
126.9	0.0343333
127	0.035
127.1	0.035
127.2	0.035
127.3	0.035
127.4	0.0353333
127.5	0.0353333
127.6	0.036
127.7	0.0363333
127.8	0.0366667
127.9	0.0363333
128	0.0373333
128.1	0.0373333
128.2	0.0373333
128.3	0.0373333
128.4	0.0376667
128.5	0.038
128.6	0.038
128.7	0.039
128.8	0.039
128.9	0.039
129	0.039
129.1	0.039
129.2	0.0393333
129.3	0.0393333
129.4	0.0396667
129.5	0.04
129.6	0.04
129.7	0.04
129.8	0.0403333
129.9	0.041
130	0.041
130.1	0.0413333
130.2	0.0413333
130.3	0.0413333
130.4	0.0413333
130.5	0.0413333
130.6	0.0413333
130.7	0.042
130.8	0.042
130.9	0.042
131	0.0423333
131.1	0.0423333
131.2	0.0426667
131.3	0.0426667
131.4	0.0426667
131.5	0.0426667
131.6	0.0426667
131.7	0.0433333
131.8	0.0433333
131.9	0.0436667
132	0.044
132.1	0.044
132.2	0.0443333
132.3	0.0443333
132.4	0.0446667
132.5	0.0446667
132.6	0.0446667
132.7	0.0446667
132.8	0.0443333
132.9	0.0446667
133	0.0446667
133.1	0.045
133.2	0.0456667
133.3	0.046
133.4	0.046
133.5	0.0463333
133.6	0.0466667
133.7	0.0476667
133.8	0.0476667
133.9	0.048
134	0.048
134.1	0.0483333
134.2	0.0483333
134.3	0.0486667
134.4	0.0486667
134.5	0.0486667
134.6	0.0483333
134.7	0.0483333
134.8	0.0486667
134.9	0.0486667
135	0.0483333
135.1	0.0483333
135.2	0.0483333
135.3	0.0483333
135.4	0.0486667
135.5	0.049
135.6	0.049
135.7	0.0493333
135.8	0.0493333
135.9	0.0496667
136	0.0496667
136.1	0.0496667
136.2	0.0496667
136.3	0.05
136.4	0.05
136.5	0.05
136.6	0.05
136.7	0.05
136.8	0.05
136.9	0.0503333
137	0.0496667
137.1	0.0493333
137.2	0.05
137.3	0.0503333
137.4	0.0503333
137.5	0.051
137.6	0.0513333
137.7	0.0513333
137.8	0.0516667
137.9	0.0516667
138	0.0516667
138.1	0.052
138.2	0.053
138.3	0.053
138.4	0.0533333
138.5	0.0536667
138.6	0.054
138.7	0.0543333
138.8	0.0543333
138.9	0.0546667
139	0.0546667
139.1	0.055
139.2	0.055
139.3	0.055
139.4	0.0553333
139.5	0.056
139.6	0.0563333
139.7	0.0566667
139.8	0.057
139.9	0.057
140	0.057
140.1	0.0566667
140.2	0.057
140.3	0.057
140.4	0.0573333
140.5	0.057
140.6	0.057
140.7	0.057
140.8	0.0576667
140.9	0.0576667
141	0.058
141.1	0.0583333
141.2	0.0583333
141.3	0.059
141.4	0.0593333
141.5	0.0596667
141.6	0.0596667
141.7	0.0596667
141.8	0.0596667
141.9	0.0596667
142	0.06
142.1	0.0603333
142.2	0.0603333
142.3	0.0606667
142.4	0.0606667
142.5	0.0606667
142.6	0.0606667
142.7	0.0606667
142.8	0.061
142.9	0.0613333
143	0.062
143.1	0.0623333
143.2	0.0626667
143.3	0.0626667
143.4	0.0626667
143.5	0.063
143.6	0.063
143.7	0.0633333
143.8	0.0636667
143.9	0.0643333
144	0.0643333
144.1	0.0643333
144.2	0.0643333
144.3	0.064
144.4	0.0636667
144.5	0.0636667
144.6	0.064
144.7	0.064
144.8	0.064
144.9	0.064
145	0.064
145.1	0.0646667
145.2	0.065
145.3	0.0646667
145.4	0.0643333
145.5	0.0646667
145.6	0.0646667
145.7	0.065
145.8	0.065
145.9	0.065
146	0.065
146.1	0.065
146.2	0.0646667
146.3	0.0653333
146.4	0.065
146.5	0.065
146.6	0.0646667
146.7	0.0643333
146.8	0.0646667
146.9	0.065
147	0.065
147.1	0.065
147.2	0.065
147.3	0.065
147.4	0.065
147.5	0.0653333
147.6	0.0656667
147.7	0.0656667
147.8	0.0656667
147.9	0.0656667
148	0.0653333
148.1	0.0653333
148.2	0.0653333
148.3	0.0653333
148.4	0.066
148.5	0.066
148.6	0.0656667
148.7	0.0656667
148.8	0.066
148.9	0.066
149	0.0656667
149.1	0.0656667
149.2	0.0663333
149.3	0.0663333
149.4	0.0663333
149.5	0.0663333
149.6	0.067
149.7	0.067
149.8	0.0673333
149.9	0.0673333
150	0.0673333
150.1	0.068
150.2	0.0686667
150.3	0.0686667
150.4	0.069
150.5	0.069
150.6	0.069
150.7	0.069
150.8	0.0686667
150.9	0.069
151	0.0693333
151.1	0.0703333
151.2	0.0703333
151.3	0.0716667
151.4	0.0713333
151.5	0.0716667
151.6	0.071
151.7	0.071
151.8	0.0706667
151.9	0.071
152	0.071
152.1	0.0713333
152.2	0.0713333
152.3	0.0716667
152.4	0.0716667
152.5	0.0706667
152.6	0.071
152.7	0.071
152.8	0.07
152.9	0.07
153	0.0703333
153.1	0.0706667
153.2	0.0706667
153.3	0.071
153.4	0.071
153.5	0.0716667
153.6	0.0716667
153.7	0.072
153.8	0.072
153.9	0.072
154	0.0716667
154.1	0.0716667
154.2	0.072
154.3	0.0723333
154.4	0.0723333
154.5	0.0723333
154.6	0.0726667
154.7	0.073
154.8	0.073
154.9	0.073
155	0.073
155.1	0.0726667
155.2	0.0726667
155.3	0.0723333
155.4	0.0723333
155.5	0.0726667
155.6	0.0726667
155.7	0.0726667
155.8	0.073
155.9	0.0726667
156	0.0726667
156.1	0.0733333
156.2	0.0736667
156.3	0.0736667
156.4	0.073
156.5	0.073
156.6	0.073
156.7	0.0733333
156.8	0.073
156.9	0.074
157	0.074
157.1	0.074
157.2	0.0743333
157.3	0.0743333
157.4	0.0743333
157.5	0.0743333
157.6	0.0743333
157.7	0.0743333
157.8	0.074
157.9	0.0746667
158	0.0746667
158.1	0.0743333
158.2	0.0743333
158.3	0.0743333
158.4	0.0743333
158.5	0.0753333
158.6	0.0753333
158.7	0.0746667
158.8	0.0753333
158.9	0.0756667
159	0.0756667
159.1	0.0756667
159.2	0.076
159.3	0.0763333
159.4	0.0763333
159.5	0.077
159.6	0.077
159.7	0.077
159.8	0.077
159.9	0.0773333
160	0.0773333
160.1	0.0773333
160.2	0.0776667
160.3	0.0776667
160.4	0.0776667
160.5	0.0783333
160.6	0.0786667
160.7	0.0783333
160.8	0.0783333
160.9	0.0783333
161	0.0786667
161.1	0.079
161.2	0.079
161.3	0.0796667
161.4	0.08
161.5	0.08
161.6	0.08
161.7	0.08
161.8	0.0796667
161.9	0.0796667
162	0.08
162.1	0.0803333
162.2	0.0803333
162.3	0.0806667
162.4	0.0806667
162.5	0.0806667
162.6	0.0806667
162.7	0.0806667
162.8	0.081
162.9	0.081
163	0.081
163.1	0.0813333
163.2	0.081
163.3	0.0813333
163.4	0.0813333
163.5	0.0813333
163.6	0.081
163.7	0.081
163.8	0.081
163.9	0.081
164	0.0816667
164.1	0.0816667
164.2	0.0816667
164.3	0.0816667
164.4	0.0813333
164.5	0.0813333
164.6	0.0816667
164.7	0.0816667
164.8	0.0816667
164.9	0.0823333
165	0.0826667
165.1	0.0826667
165.2	0.0826667
165.3	0.0826667
165.4	0.0826667
165.5	0.0826667
165.6	0.0826667
165.7	0.0826667
165.8	0.0833333
165.9	0.0833333
166	0.0833333
166.1	0.0833333
166.2	0.084
166.3	0.084
166.4	0.084
166.5	0.0843333
166.6	0.0836667
166.7	0.0843333
166.8	0.0846667
166.9	0.0846667
167	0.085
167.1	0.0853333
167.2	0.0856667
167.3	0.0853333
167.4	0.086
167.5	0.0853333
167.6	0.0853333
167.7	0.085
167.8	0.0853333
167.9	0.0853333
168	0.0856667
168.1	0.0856667
168.2	0.086
168.3	0.086
168.4	0.087
168.5	0.087
168.6	0.087
168.7	0.087
168.8	0.0873333
168.9	0.0873333
169	0.0873333
169.1	0.0873333
169.2	0.0876667
169.3	0.0876667
169.4	0.088
169.5	0.088
169.6	0.0883333
169.7	0.088
169.8	0.088
169.9	0.088
170	0.088
170.1	0.0876667
170.2	0.0876667
170.3	0.088
170.4	0.0876667
170.5	0.0876667
170.6	0.0876667
170.7	0.088
170.8	0.0883333
170.9	0.0886667
171	0.0886667
171.1	0.089
171.2	0.089
171.3	0.089
171.4	0.089
171.5	0.0883333
171.6	0.0883333
171.7	0.0883333
171.8	0.0886667
171.9	0.0886667
172	0.0886667
172.1	0.0886667
172.2	0.0886667
172.3	0.0886667
172.4	0.0893333
172.5	0.0896667
172.6	0.0896667
172.7	0.0893333
172.8	0.089
172.9	0.089
173	0.0893333
173.1	0.089
173.2	0.089
173.3	0.089
173.4	0.089
173.5	0.089
173.6	0.089
173.7	0.089
173.8	0.0893333
173.9	0.0893333
174	0.0893333
174.1	0.089
174.2	0.0893333
174.3	0.0893333
174.4	0.0893333
174.5	0.0893333
174.6	0.0896667
174.7	0.0896667
174.8	0.0896667
174.9	0.0896667
175	0.0896667
175.1	0.0896667
175.2	0.0896667
175.3	0.0896667
175.4	0.0896667
175.5	0.0896667
175.6	0.0896667
175.7	0.09
175.8	0.0903333
175.9	0.091
176	0.0903333
176.1	0.0903333
176.2	0.09
176.3	0.0893333
176.4	0.089
176.5	0.089
176.6	0.0896667
176.7	0.0903333
176.8	0.0903333
176.9	0.0903333
177	0.0906667
177.1	0.0906667
177.2	0.0906667
177.3	0.091
177.4	0.091
177.5	0.0916667
177.6	0.0916667
177.7	0.0916667
177.8	0.0916667
177.9	0.0916667
178	0.0913333
178.1	0.0913333
178.2	0.0916667
178.3	0.0916667
178.4	0.0916667
178.5	0.0916667
178.6	0.092
178.7	0.092
178.8	0.092
178.9	0.092
179	0.0923333
179.1	0.0923333
179.2	0.092
179.3	0.0916667
179.4	0.0913333
179.5	0.0916667
179.6	0.0916667
179.7	0.0916667
179.8	0.0913333
179.9	0.0913333
180	0.0906667
180.1	0.091
180.2	0.0913333
180.3	0.0913333
180.4	0.092
180.5	0.092
180.6	0.0913333
180.7	0.0916667
180.8	0.0913333
180.9	0.0913333
181	0.0923333
181.1	0.0926667
181.2	0.0923333
181.3	0.0923333
181.4	0.0923333
181.5	0.0923333
181.6	0.0923333
181.7	0.0923333
181.8	0.0923333
181.9	0.0933333
182	0.0936667
182.1	0.0936667
182.2	0.0936667
182.3	0.0943333
182.4	0.094
182.5	0.0943333
182.6	0.0943333
182.7	0.0943333
182.8	0.094
182.9	0.094
183	0.094
183.1	0.094
183.2	0.0943333
183.3	0.0943333
183.4	0.0943333
183.5	0.0946667
183.6	0.0943333
183.7	0.0943333
183.8	0.0943333
183.9	0.0943333
184	0.0943333
184.1	0.0943333
184.2	0.0946667
184.3	0.095
184.4	0.0946667
184.5	0.0943333
184.6	0.095
184.7	0.095
184.8	0.0946667
184.9	0.0956667
185	0.0966667
185.1	0.0966667
185.2	0.0966667
185.3	0.0963333
185.4	0.0963333
185.5	0.0963333
185.6	0.0963333
185.7	0.0963333
185.8	0.0963333
185.9	0.0966667
186	0.0966667
186.1	0.096
186.2	0.096
186.3	0.0966667
186.4	0.0966667
186.5	0.0966667
186.6	0.097
186.7	0.097
186.8	0.0966667
186.9	0.0963333
187	0.0963333
187.1	0.0963333
187.2	0.0966667
187.3	0.0963333
187.4	0.0966667
187.5	0.0966667
187.6	0.0966667
187.7	0.097
187.8	0.097
187.9	0.0973333
188	0.0973333
188.1	0.0973333
188.2	0.097
188.3	0.0966667
188.4	0.097
188.5	0.097
188.6	0.0966667
188.7	0.0966667
188.8	0.0973333
188.9	0.0973333
189	0.0973333
189.1	0.0976667
189.2	0.0976667
189.3	0.098
189.4	0.0983333
189.5	0.0996667
189.6	0.0996667
189.7	0.0986667
189.8	0.0983333
189.9	0.0983333
190	0.0983333
190.1	0.098
190.2	0.098
190.3	0.0983333
190.4	0.0986667
190.5	0.0986667
190.6	0.0986667
190.7	0.099
190.8	0.0993333
190.9	0.100333
191	0.100333
191.1	0.100333
191.2	0.101
191.3	0.101
191.4	0.101333
191.5	0.101333
191.6	0.101333
191.7	0.101333
191.8	0.101667
191.9	0.101333
192	0.101333
192.1	0.101667
192.2	0.101667
192.3	0.101667
192.4	0.101667
192.5	0.101667
192.6	0.101667
192.7	0.102
192.8	0.102
192.9	0.102
193	0.101667
193.1	0.102
193.2	0.101667
193.3	0.101667
193.4	0.102
193.5	0.102333
193.6	0.102333
193.7	0.102667
193.8	0.103
193.9	0.103333
194	0.103667
194.1	0.103667
194.2	0.103333
194.3	0.103667
194.4	0.104333
194.5	0.104333
194.6	0.104333
194.7	0.104333
194.8	0.104667
194.9	0.105
195	0.105
195.1	0.105667
195.2	0.106333
195.3	0.106333
195.4	0.106333
195.5	0.106667
195.6	0.106667
195.7	0.106667
195.8	0.107
195.9	0.107667
196	0.107667
196.1	0.107667
196.2	0.107667
196.3	0.107667
196.4	0.107333
196.5	0.107333
196.6	0.107333
196.7	0.107333
196.8	0.107
196.9	0.107
197	0.107
197.1	0.106667
197.2	0.106667
197.3	0.107333
197.4	0.107
197.5	0.107
197.6	0.107667
197.7	0.108
197.8	0.108
197.9	0.108
198	0.107667
198.1	0.107667
198.2	0.107667
198.3	0.107667
198.4	0.108
198.5	0.108
198.6	0.108
198.7	0.108333
198.8	0.109
198.9	0.109
199	0.109
199.1	0.108667
199.2	0.108333
199.3	0.108333
199.4	0.108333
199.5	0.108333
199.6	0.108333
199.7	0.108333
199.8	0.108
199.9	0.108
200	0.108
[truncated: 14,000 more rows]
