# Supplementary material for: Bayesian inference of kinetic schemes for ion channels by Kalman filtering
Source: eLife journal article supplement (doi:10.7554/elife.62714), 2022-05-04
Supplement: fig4-data12 [file 1_Sim_N_4000_Fluor_MW_0.125M.xlsx]

## Sheet: Tabelle1
0.1	0
0.2	0
0.3	0
0.4	0
0.5	0
0.6	0
0.7	0
0.8	0
0.9	0
1	0
1.1	0
1.2	0
1.3	0
1.4	0
1.5	0
1.6	0
1.7	0
1.8	0
1.9	0
2	0
2.1	0
2.2	0
2.3	0
2.4	0
2.5	0
2.6	0
2.7	0
2.8	0
2.9	0
3	0
3.1	0
3.2	0
3.3	0
3.4	0
3.5	0
3.6	0
3.7	0
3.8	0
3.9	0
4	0
4.1	0
4.2	0
4.3	0
4.4	0
4.5	0
4.6	0
4.7	0
4.8	0
4.9	0
5	0
5.1	0
5.2	0
5.3	0
5.4	0
5.5	0
5.6	0
5.7	0
5.8	0
5.9	0
6	0
6.1	0
6.2	0
6.3	0
6.4	0
6.5	0
6.6	0
6.7	0
6.8	0
6.9	0
7	0
7.1	0
7.2	0
7.3	0
7.4	0
7.5	0
7.6	0
7.7	0
7.8	0
7.9	0
8	0
8.1	0
8.2	0
8.3	0
8.4	0
8.5	0
8.6	0
8.7	0
8.8	0
8.9	0
9	0
9.1	0
9.2	0
9.3	0
9.4	0
9.5	0
9.6	0
9.7	0
9.8	0
9.9	0
10	0
10.1	0
10.2	0
10.3	0
10.4	0
10.5	0
10.6	0
10.7	0
10.8	0
10.9	0
11	0
11.1	0
11.2	0
11.3	0
11.4	0
11.5	0
11.6	0
11.7	0
11.8	0
11.9	0
12	0
12.1	0
12.2	0
12.3	0
12.4	0
12.5	0
12.6	0
12.7	0
12.8	0
12.9	0
13	0
13.1	0
13.2	0
13.3	0
13.4	0
13.5	0
13.6	0
13.7	0
13.8	0
13.9	0
14	0
14.1	0
14.2	0
14.3	0
14.4	0
14.5	0
14.6	0
14.7	0
14.8	0
14.9	0
15	0
15.1	0
15.2	0
15.3	0
15.4	0
15.5	0
15.6	0
15.7	0
15.8	0
15.9	0
16	0
16.1	0
16.2	0
16.3	0
16.4	0
16.5	0
16.6	0
16.7	0
16.8	0
16.9	0
17	0
17.1	0
17.2	0
17.3	0
17.4	0
17.5	0
17.6	0
17.7	0
17.8	0
17.9	0
18	0
18.1	0
18.2	0
18.3	0
18.4	0
18.5	0
18.6	0
18.7	0
18.8	0
18.9	0
19	0
19.1	0
19.2	0
19.3	0
19.4	0
19.5	0
19.6	0
19.7	0
19.8	0
19.9	0
20	0
20.1	0
20.2	0
20.3	0
20.4	0
20.5	0
20.6	0
20.7	0
20.8	0
20.9	0
21	0
21.1	0
21.2	0
21.3	0
21.4	0
21.5	0
21.6	0
21.7	0
21.8	0
21.9	0
22	0
22.1	0
22.2	0
22.3	0
22.4	0
22.5	0
22.6	0
22.7	0
22.8	0
22.9	0
23	0
23.1	0
23.2	0
23.3	0
23.4	0
23.5	0
23.6	0
23.7	0
23.8	0
23.9	0
24	0
24.1	0
24.2	0
24.3	0
24.4	0
24.5	0
24.6	0
24.7	0
24.8	0
24.9	0
25	0
25.1	0
25.2	0
25.3	0
25.4	0
25.5	0
25.6	0
25.7	0
25.8	0
25.9	0
26	0
26.1	0
26.2	0
26.3	0
26.4	0
26.5	0
26.6	0
26.7	0
26.8	0
26.9	0
27	0
27.1	0
27.2	0
27.3	0
27.4	0
27.5	0
27.6	0
27.7	0
27.8	0
27.9	0
28	0
28.1	0
28.2	0
28.3	0
28.4	0
28.5	0
28.6	0
28.7	0
28.8	0
28.9	0
29	0
29.1	0
29.2	0
29.3	0
29.4	0
29.5	0
29.6	0
29.7	0
29.8	0
29.9	0
30	0
30.1	0
30.2	0
30.3	0
30.4	0
30.5	0
30.6	0
30.7	0
30.8	0
30.9	0
31	0
31.1	0
31.2	0
31.3	0
31.4	0
31.5	0
31.6	0
31.7	0
31.8	0
31.9	0
32	0
32.1	0
32.2	0
32.3	0
32.4	0
32.5	0
32.6	0
32.7	0
32.8	0
32.9	0
33	0
33.1	0
33.2	0
33.3	0
33.4	0
33.5	0
33.6	0
33.7	0
33.8	0
33.9	0
34	0
34.1	0
34.2	0
34.3	0
34.4	0
34.5	0
34.6	0
34.7	0
34.8	0
34.9	0
35	0
35.1	0
35.2	0
35.3	0
35.4	0
35.5	0
35.6	0
35.7	0
35.8	0
35.9	0
36	0
36.1	0
36.2	0
36.3	0
36.4	0
36.5	0
36.6	0
36.7	0
36.8	0
36.9	0
37	0
37.1	0
37.2	0
37.3	0
37.4	0
37.5	0
37.6	0
37.7	0
37.8	0
37.9	0
38	0
38.1	0
38.2	0
38.3	0
38.4	0
38.5	0
38.6	0
38.7	0
38.8	0
38.9	0
39	0
39.1	0
39.2	0
39.3	0
39.4	0
39.5	0
39.6	0
39.7	0
39.8	0
39.9	0
40	0
40.1	0
40.2	0
40.3	0
40.4	0
40.5	0
40.6	0
40.7	0
40.8	0
40.9	0
41	0
41.1	0
41.2	0
41.3	0
41.4	0
41.5	0
41.6	0
41.7	0
41.8	0
41.9	0
42	0
42.1	0
42.2	0
42.3	0
42.4	0
42.5	0
42.6	0
42.7	0
42.8	0
42.9	0
43	0
43.1	0
43.2	0
43.3	0
43.4	0
43.5	0
43.6	0
43.7	0
43.8	0
43.9	0
44	0
44.1	0
44.2	0
44.3	0
44.4	0
44.5	0
44.6	0
44.7	0
44.8	0
44.9	0
45	0
45.1	0
45.2	0
45.3	0
45.4	0
45.5	0
45.6	0
45.7	0
45.8	0
45.9	0
46	0
46.1	0
46.2	0
46.3	0
46.4	0
46.5	0
46.6	0
46.7	0
46.8	0
46.9	0
47	0
47.1	0
47.2	0
47.3	0
47.4	0
47.5	0
47.6	0
47.7	0
47.8	0
47.9	0
48	0
48.1	0
48.2	0
48.3	0
48.4	0
48.5	0
48.6	0
48.7	0
48.8	0
48.9	0
49	0
49.1	0
49.2	0
49.3	0
49.4	0
49.5	0
49.6	0
49.7	0
49.8	0
49.9	0
50	0
50.1	0
50.2	0
50.3	0
50.4	0
50.5	0
50.6	0
50.7	0
50.8	0
50.9	0
51	0
51.1	0
51.2	0
51.3	0
51.4	0
51.5	0
51.6	0
51.7	0
51.8	0
51.9	0
52	0
52.1	0
52.2	0
52.3	0
52.4	0
52.5	0
52.6	0
52.7	0
52.8	0
52.9	0
53	0
53.1	0
53.2	0
53.3	0
53.4	0
53.5	0
53.6	0
53.7	0
53.8	0
53.9	0
54	0
54.1	0
54.2	0
54.3	0
54.4	0
54.5	0
54.6	0
54.7	0
54.8	0
54.9	0
55	0
55.1	0
55.2	0
55.3	0
55.4	0
55.5	0
55.6	0
55.7	0
55.8	0
55.9	0
56	0
56.1	0
56.2	0
56.3	0
56.4	0
56.5	0
56.6	0
56.7	0
56.8	0
56.9	0
57	0
57.1	0
57.2	0
57.3	0
57.4	0
57.5	0
57.6	0
57.7	0
57.8	0
57.9	0
58	0
58.1	0
58.2	0
58.3	0
58.4	0
58.5	0
58.6	0
58.7	0
58.8	0
58.9	0
59	0
59.1	0
59.2	0
59.3	0
59.4	0
59.5	0
59.6	0
59.7	0
59.8	0
59.9	0
60	0
60.1	0
60.2	0
60.3	0
60.4	0
60.5	0
60.6	0
60.7	0
60.8	0
60.9	0
61	0
61.1	0
61.2	0
61.3	0
61.4	0
61.5	0
61.6	0
61.7	0
61.8	0
61.9	0
62	0
62.1	0
62.2	0
62.3	0
62.4	0
62.5	0
62.6	0
62.7	0
62.8	0
62.9	0
63	0
63.1	0
63.2	0
63.3	0
63.4	0
63.5	0
63.6	0
63.7	0
63.8	0
63.9	0
64	0
64.1	0
64.2	0
64.3	0
64.4	0
64.5	0
64.6	0
64.7	0
64.8	0
64.9	0
65	0
65.1	0
65.2	0
65.3	0
65.4	0
65.5	0
65.6	0
65.7	0
65.8	0
65.9	0
66	0
66.1	0
66.2	0
66.3	0
66.4	0
66.5	0
66.6	0
66.7	0
66.8	0
66.9	0
67	0
67.1	0
67.2	0
67.3	0
67.4	0
67.5	0
67.6	0
67.7	0
67.8	0
67.9	0
68	0
68.1	0
68.2	0
68.3	0
68.4	0
68.5	0
68.6	0
68.7	0
68.8	0
68.9	0
69	0
69.1	0
69.2	0
69.3	0
69.4	0
69.5	0
69.6	0
69.7	0
69.8	0
69.9	0
70	0
70.1	0
70.2	0
70.3	0
70.4	0
70.5	0
70.6	0
70.7	0
70.8	0
70.9	0
71	0
71.1	0
71.2	0
71.3	0
71.4	0
71.5	0
71.6	0
71.7	0
71.8	0
71.9	0
72	0
72.1	0
72.2	0
72.3	0
72.4	0
72.5	0
72.6	0
72.7	0
72.8	0
72.9	0
73	0
73.1	0
73.2	0
73.3	0
73.4	0
73.5	0
73.6	0
73.7	0
73.8	0
73.9	0
74	0
74.1	0
74.2	0
74.3	0
74.4	0
74.5	0
74.6	0
74.7	0
74.8	0
74.9	0
75	0
75.1	0
75.2	0
75.3	0
75.4	0
75.5	0
75.6	0
75.7	0
75.8	0
75.9	0
76	0
76.1	0
76.2	0
76.3	0
76.4	0
76.5	0
76.6	0
76.7	0
76.8	0
76.9	0
77	0
77.1	0
77.2	0
77.3	0
77.4	0
77.5	0
77.6	0
77.7	0
77.8	0
77.9	0
78	0
78.1	0
78.2	0
78.3	0
78.4	0
78.5	0
78.6	0
78.7	0
78.8	0
78.9	0
79	0
79.1	0
79.2	0
79.3	0
79.4	0
79.5	0
79.6	0
79.7	0
79.8	0
79.9	0
80	0
80.1	0
80.2	0
80.3	0
80.4	0
80.5	0
80.6	0
80.7	0
80.8	0
80.9	0
81	0
81.1	0
81.2	0
81.3	0
81.4	0
81.5	0
81.6	0
81.7	0
81.8	0
81.9	0
82	0
82.1	0
82.2	0
82.3	0
82.4	0
82.5	0
82.6	0
82.7	0
82.8	0
82.9	0
83	0
83.1	0
83.2	0
83.3	0
83.4	0
83.5	0
83.6	0
83.7	0
83.8	0
83.9	0
84	0
84.1	0
84.2	0
84.3	0
84.4	0
84.5	0
84.6	0
84.7	0
84.8	0
84.9	0
85	0
85.1	0
85.2	0
85.3	0
85.4	0
85.5	0
85.6	0
85.7	0
85.8	0
85.9	0
86	0
86.1	0
86.2	0
86.3	0
86.4	0
86.5	0
86.6	0
86.7	0
86.8	0
86.9	0
87	0
87.1	0
87.2	0
87.3	0
87.4	0
87.5	0
87.6	0
87.7	0
87.8	0
87.9	0
88	0
88.1	0
88.2	0
88.3	0
88.4	0
88.5	0
88.6	0
88.7	0
88.8	0
88.9	0
89	0
89.1	0
89.2	0
89.3	0
89.4	0
89.5	0
89.6	0
89.7	0
89.8	0
89.9	0
90	0
90.1	0
90.2	0
90.3	0
90.4	0
90.5	0
90.6	0
90.7	0
90.8	0
90.9	0
91	0
91.1	0
91.2	0
91.3	0
91.4	0
91.5	0
91.6	0
91.7	0
91.8	0
91.9	0
92	0
92.1	0
92.2	0
92.3	0
92.4	0
92.5	0
92.6	0
92.7	0
92.8	0
92.9	0
93	0
93.1	0
93.2	0
93.3	0
93.4	0
93.5	0
93.6	0
93.7	0
93.8	0
93.9	0
94	0
94.1	0
94.2	0
94.3	0
94.4	0
94.5	0
94.6	0
94.7	0
94.8	0
94.9	0
95	0
95.1	0
95.2	0
95.3	0
95.4	0
95.5	0
95.6	0
95.7	0
95.8	0
95.9	0
96	0
96.1	0
96.2	0
96.3	0
96.4	0
96.5	0
96.6	0
96.7	0
96.8	0
96.9	0
97	0
97.1	0
97.2	0
97.3	0
97.4	0
97.5	0
97.6	0
97.7	0
97.8	0
97.9	0
98	0
98.1	0
98.2	0
98.3	0
98.4	0
98.5	0
98.6	0
98.7	0
98.8	0
98.9	0
99	0
99.1	0
99.2	0
99.3	0
99.4	0
99.5	0
99.6	0
99.7	0
99.8	0
99.9	0
100	0
100.1	0.0075
100.2	0.014375
100.3	0.023
100.4	0.030875
100.5	0.035875
100.6	0.043125
100.7	0.04925
100.8	0.05575
100.9	0.06075
101	0.067375
101.1	0.07375
101.2	0.07825
101.3	0.08375
101.4	0.088625
101.5	0.094125
101.6	0.099625
101.7	0.106625
101.8	0.1115
101.9	0.11625
102	0.120625
102.1	0.12625
102.2	0.131625
102.3	0.136125
102.4	0.1395
102.5	0.144375
102.6	0.14775
102.7	0.15225
102.8	0.157625
102.9	0.161125
103	0.165
103.1	0.1695
103.2	0.173
103.3	0.178125
103.4	0.1805
103.5	0.185125
103.6	0.190125
103.7	0.192375
103.8	0.196875
103.9	0.200875
104	0.202125
104.1	0.2035
104.2	0.2055
104.3	0.20975
104.4	0.21425
104.5	0.2165
104.6	0.21775
104.7	0.21975
104.8	0.223
104.9	0.2255
105	0.227375
105.1	0.228625
105.2	0.23
105.3	0.233375
105.4	0.235625
105.5	0.23675
105.6	0.23725
105.7	0.240125
105.8	0.24375
105.9	0.246
106	0.247375
106.1	0.24925
106.2	0.251375
106.3	0.253625
106.4	0.2565
106.5	0.258375
106.6	0.259125
106.7	0.26025
106.8	0.262375
106.9	0.26525
107	0.2675
107.1	0.269875
107.2	0.2705
107.3	0.274
107.4	0.276375
107.5	0.278875
107.6	0.2785
107.7	0.278375
107.8	0.278125
107.9	0.28175
108	0.28275
108.1	0.283
108.2	0.2845
108.3	0.285375
108.4	0.287625
108.5	0.28725
108.6	0.288125
108.7	0.288875
108.8	0.291125
108.9	0.2925
109	0.293625
109.1	0.294
109.2	0.294
109.3	0.2955
109.4	0.296375
109.5	0.295875
109.6	0.29725
109.7	0.2985
109.8	0.299
109.9	0.30075
110	0.302125
110.1	0.30375
110.2	0.306
110.3	0.3065
110.4	0.307875
110.5	0.30975
110.6	0.3095
110.7	0.310125
110.8	0.31
110.9	0.309875
111	0.3105
111.1	0.310625
111.2	0.31175
111.3	0.31375
111.4	0.31325
111.5	0.31425
111.6	0.312375
111.7	0.314375
111.8	0.312625
111.9	0.312375
112	0.3125
112.1	0.312875
112.2	0.31425
112.3	0.31575
112.4	0.316375
112.5	0.315875
112.6	0.3165
112.7	0.3175
112.8	0.318375
112.9	0.317125
113	0.3185
113.1	0.31925
113.2	0.319625
113.3	0.321875
113.4	0.321375
113.5	0.3225
113.6	0.323
113.7	0.322375
113.8	0.32175
113.9	0.32175
114	0.32325
114.1	0.324
114.2	0.326625
114.3	0.327625
114.4	0.328125
114.5	0.328625
114.6	0.32925
114.7	0.32925
114.8	0.33
114.9	0.330875
115	0.332375
115.1	0.333
115.2	0.33325
115.3	0.33375
115.4	0.334125
115.5	0.33525
115.6	0.335625
115.7	0.334375
115.8	0.334625
115.9	0.33525
116	0.335625
116.1	0.3375
116.2	0.338
116.3	0.33925
116.4	0.339875
116.5	0.3395
116.6	0.34
116.7	0.340625
116.8	0.338875
116.9	0.34
117	0.342125
117.1	0.342375
117.2	0.342
117.3	0.341875
117.4	0.340625
117.5	0.340875
117.6	0.340875
117.7	0.339375
117.8	0.33875
117.9	0.34025
118	0.341125
118.1	0.34225
118.2	0.34225
118.3	0.34175
118.4	0.34325
118.5	0.3445
118.6	0.3435
118.7	0.343625
118.8	0.34325
118.9	0.345
119	0.34675
119.1	0.3455
119.2	0.3455
119.3	0.34475
119.4	0.344375
119.5	0.343875
119.6	0.344
119.7	0.342125
119.8	0.342
119.9	0.340875
120	0.34125
120.1	0.340875
120.2	0.338875
120.3	0.3355
120.4	0.334125
120.5	0.333875
120.6	0.3325
120.7	0.333
120.8	0.332875
120.9	0.33425
121	0.335125
121.1	0.333875
121.2	0.336125
121.3	0.336625
121.4	0.33725
121.5	0.33675
121.6	0.338125
121.7	0.33775
121.8	0.34
121.9	0.339625
122	0.337625
122.1	0.337875
122.2	0.33975
122.3	0.3375
122.4	0.33725
122.5	0.337625
122.6	0.337875
122.7	0.338375
122.8	0.339375
122.9	0.3395
123	0.33925
123.1	0.34075
123.2	0.340625
123.3	0.340625
123.4	0.33975
123.5	0.34
123.6	0.34175
123.7	0.341875
123.8	0.343375
123.9	0.3425
124	0.342875
124.1	0.3435
124.2	0.343875
124.3	0.34275
124.4	0.343375
124.5	0.342875
124.6	0.344125
124.7	0.345625
124.8	0.347
124.9	0.34675
125	0.349375
125.1	0.348625
125.2	0.35125
125.3	0.352125
125.4	0.351875
125.5	0.352875
125.6	0.352
125.7	0.351625
125.8	0.35075
125.9	0.35175
126	0.351875
126.1	0.349625
126.2	0.35125
126.3	0.351
126.4	0.351
126.5	0.35075
126.6	0.3515
126.7	0.3515
126.8	0.35125
126.9	0.353125
127	0.353
127.1	0.35375
127.2	0.354375
127.3	0.35625
127.4	0.358125
127.5	0.35725
127.6	0.359375
127.7	0.36
127.8	0.360125
127.9	0.361125
128	0.3615
128.1	0.361125
128.2	0.362
128.3	0.360625
128.4	0.36175
128.5	0.362875
128.6	0.36175
128.7	0.362625
128.8	0.360875
128.9	0.361375
129	0.361625
129.1	0.36
129.2	0.36
129.3	0.3595
129.4	0.358
129.5	0.356
129.6	0.356125
129.7	0.355625
129.8	0.355875
129.9	0.35625
130	0.3565
130.1	0.356125
130.2	0.35625
130.3	0.3575
130.4	0.357
130.5	0.35725
130.6	0.35725
130.7	0.356125
130.8	0.356375
130.9	0.356625
131	0.35775
131.1	0.3575
131.2	0.35775
131.3	0.358875
131.4	0.36075
131.5	0.360375
131.6	0.360375
131.7	0.359625
131.8	0.361875
131.9	0.361
132	0.362
132.1	0.361125
132.2	0.3615
132.3	0.361625
132.4	0.36125
132.5	0.359875
132.6	0.359125
132.7	0.3605
132.8	0.36025
132.9	0.362375
133	0.363625
133.1	0.364
133.2	0.364
133.3	0.363875
133.4	0.364125
133.5	0.363125
133.6	0.362875
133.7	0.362875
133.8	0.362625
133.9	0.363875
134	0.361625
134.1	0.360875
134.2	0.362625
134.3	0.363625
134.4	0.364125
134.5	0.363875
134.6	0.364375
134.7	0.364
134.8	0.36575
134.9	0.3645
135	0.363875
135.1	0.365
135.2	0.364625
135.3	0.363875
135.4	0.36475
135.5	0.364125
135.6	0.36525
135.7	0.364875
135.8	0.36525
135.9	0.363875
136	0.365125
136.1	0.36425
136.2	0.36475
136.3	0.3655
136.4	0.364625
136.5	0.365375
136.6	0.365
136.7	0.365125
136.8	0.36425
136.9	0.363875
137	0.3635
137.1	0.36475
137.2	0.364875
137.3	0.365875
137.4	0.3645
137.5	0.364375
137.6	0.364375
137.7	0.3635
137.8	0.363625
137.9	0.364
138	0.364625
138.1	0.3655
138.2	0.365375
138.3	0.36575
138.4	0.365625
138.5	0.36425
138.6	0.3635
138.7	0.363875
138.8	0.364375
138.9	0.36475
139	0.36525
139.1	0.36425
139.2	0.364625
139.3	0.364875
139.4	0.36475
139.5	0.367125
139.6	0.36775
139.7	0.36775
139.8	0.3695
139.9	0.370125
140	0.36975
140.1	0.37025
140.2	0.368875
140.3	0.368125
140.4	0.3675
140.5	0.368125
140.6	0.36925
140.7	0.36775
140.8	0.367625
140.9	0.36675
141	0.366625
141.1	0.36575
141.2	0.366
141.3	0.3675
141.4	0.368125
141.5	0.368
141.6	0.367625
141.7	0.36675
141.8	0.3665
141.9	0.3675
142	0.368625
142.1	0.367125
142.2	0.36775
142.3	0.36725
142.4	0.366375
142.5	0.365875
142.6	0.3655
142.7	0.365875
142.8	0.365875
142.9	0.3665
143	0.36775
143.1	0.36775
143.2	0.368
143.3	0.366875
143.4	0.36825
143.5	0.368
143.6	0.367125
143.7	0.36575
143.8	0.365625
143.9	0.365625
144	0.3645
144.1	0.362875
144.2	0.363
144.3	0.360875
144.4	0.361
144.5	0.361125
144.6	0.362125
144.7	0.3615
144.8	0.362375
144.9	0.362
145	0.363125
145.1	0.361875
145.2	0.362875
145.3	0.362375
145.4	0.362125
145.5	0.363625
145.6	0.364625
145.7	0.36475
145.8	0.36475
145.9	0.366625
146	0.3665
146.1	0.366625
146.2	0.36675
146.3	0.365875
146.4	0.36575
146.5	0.366125
146.6	0.36675
146.7	0.367125
146.8	0.36725
146.9	0.36775
147	0.367375
147.1	0.3685
147.2	0.368125
147.3	0.36975
147.4	0.369625
147.5	0.36875
147.6	0.371
147.7	0.3705
147.8	0.3705
147.9	0.37025
148	0.371625
148.1	0.37075
148.2	0.370375
148.3	0.36925
148.4	0.369125
148.5	0.369875
148.6	0.3695
148.7	0.37075
148.8	0.3715
148.9	0.372625
149	0.373125
149.1	0.372375
149.2	0.3725
149.3	0.374125
149.4	0.371875
149.5	0.3725
149.6	0.3725
149.7	0.372
149.8	0.371
149.9	0.371375
150	0.37075
150.1	0.369875
150.2	0.369625
150.3	0.368875
150.4	0.369625
150.5	0.36975
150.6	0.368625
150.7	0.369
150.8	0.369625
150.9	0.369125
151	0.368625
151.1	0.3695
151.2	0.369625
151.3	0.368375
151.4	0.369
151.5	0.36825
151.6	0.3675
151.7	0.369
151.8	0.369875
151.9	0.369625
152	0.3705
152.1	0.369875
152.2	0.3705
152.3	0.3715
152.4	0.371125
152.5	0.37275
152.6	0.3715
152.7	0.37325
152.8	0.37475
152.9	0.373375
153	0.373125
153.1	0.37175
153.2	0.37125
153.3	0.370875
153.4	0.37175
153.5	0.371375
153.6	0.371375
153.7	0.371875
153.8	0.372125
153.9	0.3705
154	0.37075
154.1	0.370875
154.2	0.36975
154.3	0.36875
154.4	0.369125
154.5	0.370375
154.6	0.370375
154.7	0.369625
154.8	0.3725
154.9	0.37325
155	0.373875
155.1	0.373875
155.2	0.372875
155.3	0.375125
155.4	0.375125
155.5	0.375125
155.6	0.377
155.7	0.378
155.8	0.3765
155.9	0.376375
156	0.376625
156.1	0.377125
156.2	0.37775
156.3	0.377
156.4	0.378375
156.5	0.376875
156.6	0.378125
156.7	0.3785
156.8	0.378875
156.9	0.3785
157	0.377875
157.1	0.378875
157.2	0.38
157.3	0.381
157.4	0.380625
157.5	0.379125
157.6	0.377625
157.7	0.37875
157.8	0.378375
157.9	0.37875
158	0.377375
158.1	0.37775
158.2	0.379125
158.3	0.3785
158.4	0.37775
158.5	0.37775
158.6	0.378625
158.7	0.3775
158.8	0.37825
158.9	0.378875
159	0.378375
159.1	0.377625
159.2	0.377
159.3	0.377
159.4	0.378
159.5	0.38
159.6	0.38075
159.7	0.38
159.8	0.378
159.9	0.378625
160	0.379
160.1	0.38025
160.2	0.379625
160.3	0.380625
160.4	0.38125
160.5	0.381375
160.6	0.38275
160.7	0.38125
160.8	0.38275
160.9	0.3825
161	0.382875
161.1	0.385125
161.2	0.38225
161.3	0.381
161.4	0.37975
161.5	0.378375
161.6	0.376875
161.7	0.376375
161.8	0.374875
161.9	0.3745
162	0.374875
162.1	0.376
162.2	0.376
162.3	0.37675
162.4	0.377375
162.5	0.377375
162.6	0.377375
162.7	0.37825
162.8	0.37675
162.9	0.378
163	0.37975
163.1	0.37975
163.2	0.379
163.3	0.380375
163.4	0.37925
163.5	0.37825
163.6	0.378625
163.7	0.379875
163.8	0.3795
163.9	0.37925
164	0.379125
164.1	0.378375
164.2	0.37975
164.3	0.3785
164.4	0.37975
164.5	0.380625
164.6	0.37925
164.7	0.378125
164.8	0.37775
164.9	0.3775
165	0.377
165.1	0.377375
165.2	0.378625
165.3	0.37825
165.4	0.377125
165.5	0.379625
165.6	0.3795
165.7	0.379625
165.8	0.379625
165.9	0.38
166	0.3805
166.1	0.3815
166.2	0.38075
166.3	0.380375
166.4	0.380625
166.5	0.380625
166.6	0.379125
166.7	0.3795
166.8	0.37975
166.9	0.379625
167	0.3805
167.1	0.37925
167.2	0.380125
167.3	0.38025
167.4	0.381
167.5	0.382875
167.6	0.38175
167.7	0.382125
167.8	0.38175
167.9	0.381875
168	0.3825
168.1	0.38225
168.2	0.38125
168.3	0.381625
168.4	0.382
168.5	0.381375
168.6	0.381875
168.7	0.382375
168.8	0.38325
168.9	0.38425
169	0.38325
169.1	0.38425
169.2	0.3855
169.3	0.38425
169.4	0.384125
169.5	0.384625
169.6	0.38425
169.7	0.384375
169.8	0.384125
169.9	0.385875
170	0.38475
170.1	0.385375
170.2	0.383625
170.3	0.384375
170.4	0.38475
170.5	0.383625
170.6	0.3835
170.7	0.383875
170.8	0.384375
170.9	0.383875
171	0.38425
171.1	0.384625
171.2	0.38475
171.3	0.3845
171.4	0.38375
171.5	0.383625
171.6	0.385125
171.7	0.38525
171.8	0.385125
171.9	0.3845
172	0.38475
172.1	0.38525
172.2	0.385375
172.3	0.38575
172.4	0.3865
172.5	0.38675
172.6	0.387625
172.7	0.38875
172.8	0.388
172.9	0.387625
173	0.388375
173.1	0.390125
173.2	0.3895
173.3	0.38825
173.4	0.388875
173.5	0.39075
173.6	0.389125
173.7	0.38875
173.8	0.388875
173.9	0.387875
174	0.3865
174.1	0.3855
174.2	0.3865
174.3	0.38675
174.4	0.387
174.5	0.38675
174.6	0.388875
174.7	0.3895
174.8	0.39025
174.9	0.391
175	0.391
175.1	0.39125
175.2	0.389625
175.3	0.39225
175.4	0.39275
175.5	0.392
175.6	0.391375
175.7	0.391
175.8	0.39125
175.9	0.38975
176	0.389875
176.1	0.390125
176.2	0.39025
176.3	0.390625
176.4	0.38975
176.5	0.38875
176.6	0.389
176.7	0.389
176.8	0.38975
176.9	0.389375
177	0.38975
177.1	0.389375
177.2	0.38925
177.3	0.388
177.4	0.389125
177.5	0.388125
177.6	0.386625
177.7	0.38625
177.8	0.387
177.9	0.387625
178	0.388125
178.1	0.3865
178.2	0.386375
178.3	0.38425
178.4	0.3845
178.5	0.38475
178.6	0.38525
178.7	0.386125
178.8	0.386375
178.9	0.38725
179	0.3875
179.1	0.387375
179.2	0.387875
179.3	0.38875
179.4	0.388
179.5	0.387625
179.6	0.387875
179.7	0.387875
179.8	0.388375
179.9	0.388375
180	0.386875
180.1	0.388
180.2	0.38775
180.3	0.386625
180.4	0.38625
180.5	0.38675
180.6	0.387625
180.7	0.388875
180.8	0.3905
180.9	0.390375
181	0.391375
181.1	0.39225
181.2	0.393375
181.3	0.391625
181.4	0.391125
181.5	0.390625
181.6	0.39125
181.7	0.391125
181.8	0.391875
181.9	0.392
182	0.3915
182.1	0.3925
182.2	0.3925
182.3	0.393375
182.4	0.394625
182.5	0.393125
182.6	0.395
182.7	0.397
182.8	0.396875
182.9	0.3955
183	0.3975
183.1	0.39725
183.2	0.397125
183.3	0.397625
183.4	0.39625
183.5	0.397125
183.6	0.397
183.7	0.397875
183.8	0.398125
183.9	0.39875
184	0.398375
184.1	0.396875
184.2	0.396125
184.3	0.395
184.4	0.395125
184.5	0.39525
184.6	0.395
184.7	0.39475
184.8	0.393375
184.9	0.394125
185	0.396375
185.1	0.398625
185.2	0.39975
185.3	0.397625
185.4	0.397375
185.5	0.3975
185.6	0.397375
185.7	0.398
185.8	0.3975
185.9	0.399
186	0.40025
186.1	0.40025
186.2	0.4025
186.3	0.40225
186.4	0.40175
186.5	0.40275
186.6	0.404
186.7	0.4055
186.8	0.40475
186.9	0.405
187	0.40325
187.1	0.403125
187.2	0.40475
187.3	0.405
187.4	0.40625
187.5	0.40575
187.6	0.406875
187.7	0.407625
187.8	0.407375
187.9	0.40725
188	0.406
188.1	0.406875
188.2	0.40625
188.3	0.406
188.4	0.407125
188.5	0.406125
188.6	0.40475
188.7	0.40375
188.8	0.403625
188.9	0.401875
189	0.40175
189.1	0.403125
189.2	0.402125
189.3	0.402625
189.4	0.40325
189.5	0.4045
189.6	0.404375
189.7	0.40425
189.8	0.404
189.9	0.4035
190	0.4025
190.1	0.40225
190.2	0.402125
190.3	0.401
190.4	0.40175
190.5	0.401125
190.6	0.399875
190.7	0.400375
190.8	0.400625
190.9	0.400625
191	0.400625
191.1	0.399125
191.2	0.399375
191.3	0.400875
191.4	0.40125
191.5	0.401
191.6	0.40225
191.7	0.40175
191.8	0.403875
191.9	0.403
192	0.403125
192.1	0.4025
192.2	0.4035
192.3	0.403
192.4	0.4035
192.5	0.402875
192.6	0.404
192.7	0.405125
192.8	0.404875
192.9	0.404125
193	0.404
193.1	0.4045
193.2	0.405125
193.3	0.405125
193.4	0.405375
193.5	0.40575
193.6	0.406875
193.7	0.406375
193.8	0.40475
193.9	0.404
194	0.405875
194.1	0.40575
194.2	0.40775
194.3	0.406875
194.4	0.406
194.5	0.406125
194.6	0.405875
194.7	0.407125
194.8	0.406375
194.9	0.40675
195	0.408125
195.1	0.4075
195.2	0.4095
195.3	0.41
195.4	0.40925
195.5	0.4105
195.6	0.410125
195.7	0.41
195.8	0.40975
195.9	0.410125
196	0.41025
196.1	0.410875
196.2	0.409875
196.3	0.410875
196.4	0.41325
196.5	0.413
196.6	0.412375
196.7	0.41075
196.8	0.41
196.9	0.410625
197	0.409125
197.1	0.4085
197.2	0.408625
197.3	0.407875
197.4	0.408375
197.5	0.408125
197.6	0.408625
197.7	0.409375
197.8	0.408625
197.9	0.40725
198	0.4065
198.1	0.406875
198.2	0.40575
198.3	0.404625
198.4	0.40375
198.5	0.40375
198.6	0.404625
198.7	0.40475
198.8	0.40675
198.9	0.405375
199	0.4055
199.1	0.40575
199.2	0.40475
199.3	0.405625
199.4	0.405375
199.5	0.405125
199.6	0.405375
199.7	0.405125
199.8	0.405375
199.9	0.405875
200	0.405125
[truncated: 14,000 more rows]
