# Supplementary material for: Bayesian inference of kinetic schemes for ion channels by Kalman filtering
Source: eLife journal article supplement (doi:10.7554/elife.62714), 2022-05-04
Supplement: fig4-data12 [file 1_Sim_N_4000_Strom_MW_0.125M.xlsx]

## Sheet: Tabelle1
0.1	0
0.2	0
0.3	0
0.4	0
0.5	0
0.6	0
0.7	0
0.8	0
0.9	0
1	0
1.1	0
1.2	0
1.3	0
1.4	0
1.5	0
1.6	0
1.7	0
1.8	0
1.9	0
2	0
2.1	0
2.2	0
2.3	0
2.4	0
2.5	0
2.6	0
2.7	0
2.8	0
2.9	0
3	0
3.1	0
3.2	0
3.3	0
3.4	0
3.5	0
3.6	0
3.7	0
3.8	0
3.9	0
4	0
4.1	0
4.2	0
4.3	0
4.4	0
4.5	0
4.6	0
4.7	0
4.8	0
4.9	0
5	0
5.1	0
5.2	0
5.3	0
5.4	0
5.5	0
5.6	0
5.7	0
5.8	0
5.9	0
6	0
6.1	0
6.2	0
6.3	0
6.4	0
6.5	0
6.6	0
6.7	0
6.8	0
6.9	0
7	0
7.1	0
7.2	0
7.3	0
7.4	0
7.5	0
7.6	0
7.7	0
7.8	0
7.9	0
8	0
8.1	0
8.2	0
8.3	0
8.4	0
8.5	0
8.6	0
8.7	0
8.8	0
8.9	0
9	0
9.1	0
9.2	0
9.3	0
9.4	0
9.5	0
9.6	0
9.7	0
9.8	0
9.9	0
10	0
10.1	0
10.2	0
10.3	0
10.4	0
10.5	0
10.6	0
10.7	0
10.8	0
10.9	0
11	0
11.1	0
11.2	0
11.3	0
11.4	0
11.5	0
11.6	0
11.7	0
11.8	0
11.9	0
12	0
12.1	0
12.2	0
12.3	0
12.4	0
12.5	0
12.6	0
12.7	0
12.8	0
12.9	0
13	0
13.1	0
13.2	0
13.3	0
13.4	0
13.5	0
13.6	0
13.7	0
13.8	0
13.9	0
14	0
14.1	0
14.2	0
14.3	0
14.4	0
14.5	0
14.6	0
14.7	0
14.8	0
14.9	0
15	0
15.1	0
15.2	0
15.3	0
15.4	0
15.5	0
15.6	0
15.7	0
15.8	0
15.9	0
16	0
16.1	0
16.2	0
16.3	0
16.4	0
16.5	0
16.6	0
16.7	0
16.8	0
16.9	0
17	0
17.1	0
17.2	0
17.3	0
17.4	0
17.5	0
17.6	0
17.7	0
17.8	0
17.9	0
18	0
18.1	0
18.2	0
18.3	0
18.4	0
18.5	0
18.6	0
18.7	0
18.8	0
18.9	0
19	0
19.1	0
19.2	0
19.3	0
19.4	0
19.5	0
19.6	0
19.7	0
19.8	0
19.9	0
20	0
20.1	0
20.2	0
20.3	0
20.4	0
20.5	0
20.6	0
20.7	0
20.8	0
20.9	0
21	0
21.1	0
21.2	0
21.3	0
21.4	0
21.5	0
21.6	0
21.7	0
21.8	0
21.9	0
22	0
22.1	0
22.2	0
22.3	0
22.4	0
22.5	0
22.6	0
22.7	0
22.8	0
22.9	0
23	0
23.1	0
23.2	0
23.3	0
23.4	0
23.5	0
23.6	0
23.7	0
23.8	0
23.9	0
24	0
24.1	0
24.2	0
24.3	0
24.4	0
24.5	0
24.6	0
24.7	0
24.8	0
24.9	0
25	0
25.1	0
25.2	0
25.3	0
25.4	0
25.5	0
25.6	0
25.7	0
25.8	0
25.9	0
26	0
26.1	0
26.2	0
26.3	0
26.4	0
26.5	0
26.6	0
26.7	0
26.8	0
26.9	0
27	0
27.1	0
27.2	0
27.3	0
27.4	0
27.5	0
27.6	0
27.7	0
27.8	0
27.9	0
28	0
28.1	0
28.2	0
28.3	0
28.4	0
28.5	0
28.6	0
28.7	0
28.8	0
28.9	0
29	0
29.1	0
29.2	0
29.3	0
29.4	0
29.5	0
29.6	0
29.7	0
29.8	0
29.9	0
30	0
30.1	0
30.2	0
30.3	0
30.4	0
30.5	0
30.6	0
30.7	0
30.8	0
30.9	0
31	0
31.1	0
31.2	0
31.3	0
31.4	0
31.5	0
31.6	0
31.7	0
31.8	0
31.9	0
32	0
32.1	0
32.2	0
32.3	0
32.4	0
32.5	0
32.6	0
32.7	0
32.8	0
32.9	0
33	0
33.1	0
33.2	0
33.3	0
33.4	0
33.5	0
33.6	0
33.7	0
33.8	0
33.9	0
34	0
34.1	0
34.2	0
34.3	0
34.4	0
34.5	0
34.6	0
34.7	0
34.8	0
34.9	0
35	0
35.1	0
35.2	0
35.3	0
35.4	0
35.5	0
35.6	0
35.7	0
35.8	0
35.9	0
36	0
36.1	0
36.2	0
36.3	0
36.4	0
36.5	0
36.6	0
36.7	0
36.8	0
36.9	0
37	0
37.1	0
37.2	0
37.3	0
37.4	0
37.5	0
37.6	0
37.7	0
37.8	0
37.9	0
38	0
38.1	0
38.2	0
38.3	0
38.4	0
38.5	0
38.6	0
38.7	0
38.8	0
38.9	0
39	0
39.1	0
39.2	0
39.3	0
39.4	0
39.5	0
39.6	0
39.7	0
39.8	0
39.9	0
40	0
40.1	0
40.2	0
40.3	0
40.4	0
40.5	0
40.6	0
40.7	0
40.8	0
40.9	0
41	0
41.1	0
41.2	0
41.3	0
41.4	0
41.5	0
41.6	0
41.7	0
41.8	0
41.9	0
42	0
42.1	0
42.2	0
42.3	0
42.4	0
42.5	0
42.6	0
42.7	0
42.8	0
42.9	0
43	0
43.1	0
43.2	0
43.3	0
43.4	0
43.5	0
43.6	0
43.7	0
43.8	0
43.9	0
44	0
44.1	0
44.2	0
44.3	0
44.4	0
44.5	0
44.6	0
44.7	0
44.8	0
44.9	0
45	0
45.1	0
45.2	0
45.3	0
45.4	0
45.5	0
45.6	0
45.7	0
45.8	0
45.9	0
46	0
46.1	0
46.2	0
46.3	0
46.4	0
46.5	0
46.6	0
46.7	0
46.8	0
46.9	0
47	0
47.1	0
47.2	0
47.3	0
47.4	0
47.5	0
47.6	0
47.7	0
47.8	0
47.9	0
48	0
48.1	0
48.2	0
48.3	0
48.4	0
48.5	0
48.6	0
48.7	0
48.8	0
48.9	0
49	0
49.1	0
49.2	0
49.3	0
49.4	0
49.5	0
49.6	0
49.7	0
49.8	0
49.9	0
50	0
50.1	0
50.2	0
50.3	0
50.4	0
50.5	0
50.6	0
50.7	0
50.8	0
50.9	0
51	0
51.1	0
51.2	0
51.3	0
51.4	0
51.5	0
51.6	0
51.7	0
51.8	0
51.9	0
52	0
52.1	0
52.2	0
52.3	0
52.4	0
52.5	0
52.6	0
52.7	0
52.8	0
52.9	0
53	0
53.1	0
53.2	0
53.3	0
53.4	0
53.5	0
53.6	0
53.7	0
53.8	0
53.9	0
54	0
54.1	0
54.2	0
54.3	0
54.4	0
54.5	0
54.6	0
54.7	0
54.8	0
54.9	0
55	0
55.1	0
55.2	0
55.3	0
55.4	0
55.5	0
55.6	0
55.7	0
55.8	0
55.9	0
56	0
56.1	0
56.2	0
56.3	0
56.4	0
56.5	0
56.6	0
56.7	0
56.8	0
56.9	0
57	0
57.1	0
57.2	0
57.3	0
57.4	0
57.5	0
57.6	0
57.7	0
57.8	0
57.9	0
58	0
58.1	0
58.2	0
58.3	0
58.4	0
58.5	0
58.6	0
58.7	0
58.8	0
58.9	0
59	0
59.1	0
59.2	0
59.3	0
59.4	0
59.5	0
59.6	0
59.7	0
59.8	0
59.9	0
60	0
60.1	0
60.2	0
60.3	0
60.4	0
60.5	0
60.6	0
60.7	0
60.8	0
60.9	0
61	0
61.1	0
61.2	0
61.3	0
61.4	0
61.5	0
61.6	0
61.7	0
61.8	0
61.9	0
62	0
62.1	0
62.2	0
62.3	0
62.4	0
62.5	0
62.6	0
62.7	0
62.8	0
62.9	0
63	0
63.1	0
63.2	0
63.3	0
63.4	0
63.5	0
63.6	0
63.7	0
63.8	0
63.9	0
64	0
64.1	0
64.2	0
64.3	0
64.4	0
64.5	0
64.6	0
64.7	0
64.8	0
64.9	0
65	0
65.1	0
65.2	0
65.3	0
65.4	0
65.5	0
65.6	0
65.7	0
65.8	0
65.9	0
66	0
66.1	0
66.2	0
66.3	0
66.4	0
66.5	0
66.6	0
66.7	0
66.8	0
66.9	0
67	0
67.1	0
67.2	0
67.3	0
67.4	0
67.5	0
67.6	0
67.7	0
67.8	0
67.9	0
68	0
68.1	0
68.2	0
68.3	0
68.4	0
68.5	0
68.6	0
68.7	0
68.8	0
68.9	0
69	0
69.1	0
69.2	0
69.3	0
69.4	0
69.5	0
69.6	0
69.7	0
69.8	0
69.9	0
70	0
70.1	0
70.2	0
70.3	0
70.4	0
70.5	0
70.6	0
70.7	0
70.8	0
70.9	0
71	0
71.1	0
71.2	0
71.3	0
71.4	0
71.5	0
71.6	0
71.7	0
71.8	0
71.9	0
72	0
72.1	0
72.2	0
72.3	0
72.4	0
72.5	0
72.6	0
72.7	0
72.8	0
72.9	0
73	0
73.1	0
73.2	0
73.3	0
73.4	0
73.5	0
73.6	0
73.7	0
73.8	0
73.9	0
74	0
74.1	0
74.2	0
74.3	0
74.4	0
74.5	0
74.6	0
74.7	0
74.8	0
74.9	0
75	0
75.1	0
75.2	0
75.3	0
75.4	0
75.5	0
75.6	0
75.7	0
75.8	0
75.9	0
76	0
76.1	0
76.2	0
76.3	0
76.4	0
76.5	0
76.6	0
76.7	0
76.8	0
76.9	0
77	0
77.1	0
77.2	0
77.3	0
77.4	0
77.5	0
77.6	0
77.7	0
77.8	0
77.9	0
78	0
78.1	0
78.2	0
78.3	0
78.4	0
78.5	0
78.6	0
78.7	0
78.8	0
78.9	0
79	0
79.1	0
79.2	0
79.3	0
79.4	0
79.5	0
79.6	0
79.7	0
79.8	0
79.9	0
80	0
80.1	0
80.2	0
80.3	0
80.4	0
80.5	0
80.6	0
80.7	0
80.8	0
80.9	0
81	0
81.1	0
81.2	0
81.3	0
81.4	0
81.5	0
81.6	0
81.7	0
81.8	0
81.9	0
82	0
82.1	0
82.2	0
82.3	0
82.4	0
82.5	0
82.6	0
82.7	0
82.8	0
82.9	0
83	0
83.1	0
83.2	0
83.3	0
83.4	0
83.5	0
83.6	0
83.7	0
83.8	0
83.9	0
84	0
84.1	0
84.2	0
84.3	0
84.4	0
84.5	0
84.6	0
84.7	0
84.8	0
84.9	0
85	0
85.1	0
85.2	0
85.3	0
85.4	0
85.5	0
85.6	0
85.7	0
85.8	0
85.9	0
86	0
86.1	0
86.2	0
86.3	0
86.4	0
86.5	0
86.6	0
86.7	0
86.8	0
86.9	0
87	0
87.1	0
87.2	0
87.3	0
87.4	0
87.5	0
87.6	0
87.7	0
87.8	0
87.9	0
88	0
88.1	0
88.2	0
88.3	0
88.4	0
88.5	0
88.6	0
88.7	0
88.8	0
88.9	0
89	0
89.1	0
89.2	0
89.3	0
89.4	0
89.5	0
89.6	0
89.7	0
89.8	0
89.9	0
90	0
90.1	0
90.2	0
90.3	0
90.4	0
90.5	0
90.6	0
90.7	0
90.8	0
90.9	0
91	0
91.1	0
91.2	0
91.3	0
91.4	0
91.5	0
91.6	0
91.7	0
91.8	0
91.9	0
92	0
92.1	0
92.2	0
92.3	0
92.4	0
92.5	0
92.6	0
92.7	0
92.8	0
92.9	0
93	0
93.1	0
93.2	0
93.3	0
93.4	0
93.5	0
93.6	0
93.7	0
93.8	0
93.9	0
94	0
94.1	0
94.2	0
94.3	0
94.4	0
94.5	0
94.6	0
94.7	0
94.8	0
94.9	0
95	0
95.1	0
95.2	0
95.3	0
95.4	0
95.5	0
95.6	0
95.7	0
95.8	0
95.9	0
96	0
96.1	0
96.2	0
96.3	0
96.4	0
96.5	0
96.6	0
96.7	0
96.8	0
96.9	0
97	0
97.1	0
97.2	0
97.3	0
97.4	0
97.5	0
97.6	0
97.7	0
97.8	0
97.9	0
98	0
98.1	0
98.2	0
98.3	0
98.4	0
98.5	0
98.6	0
98.7	0
98.8	0
98.9	0
99	0
99.1	0
99.2	0
99.3	0
99.4	0
99.5	0
99.6	0
99.7	0
99.8	0
99.9	0
100	0
100.1	0
100.2	0
100.3	0
100.4	0
100.5	0
100.6	0
100.7	0
100.8	0
100.9	0
101	0
101.1	0
101.2	0
101.3	0
101.4	0
101.5	0
101.6	0
101.7	0
101.8	0
101.9	0.00025
102	0.00025
102.1	0.00025
102.2	0.00025
102.3	0.00025
102.4	0.00025
102.5	0.00025
102.6	0.0005
102.7	0.0005
102.8	0.0005
102.9	0.0005
103	0.00075
103.1	0.00075
103.2	0.00075
103.3	0.00075
103.4	0.001
103.5	0.00125
103.6	0.0015
103.7	0.0015
103.8	0.0015
103.9	0.0015
104	0.0015
104.1	0.0015
104.2	0.0015
104.3	0.0015
104.4	0.0015
104.5	0.00175
104.6	0.00175
104.7	0.002
104.8	0.00225
104.9	0.00225
105	0.00225
105.1	0.00225
105.2	0.00225
105.3	0.00225
105.4	0.00225
105.5	0.00225
105.6	0.00225
105.7	0.0025
105.8	0.0025
105.9	0.0025
106	0.0025
106.1	0.0025
106.2	0.0025
106.3	0.0025
106.4	0.00275
106.5	0.00275
106.6	0.003
106.7	0.003
106.8	0.003
106.9	0.003
107	0.003
107.1	0.003
107.2	0.00325
107.3	0.0035
107.4	0.004
107.5	0.00425
107.6	0.00425
107.7	0.0045
107.8	0.00475
107.9	0.005
108	0.005
108.1	0.005
108.2	0.00525
108.3	0.00525
108.4	0.00525
108.5	0.00525
108.6	0.0055
108.7	0.006
108.8	0.006
108.9	0.006
109	0.006
109.1	0.0065
109.2	0.0065
109.3	0.0065
109.4	0.007
109.5	0.0075
109.6	0.00775
109.7	0.00775
109.8	0.008
109.9	0.008
110	0.00825
110.1	0.0085
110.2	0.00875
110.3	0.009
110.4	0.009
110.5	0.009
110.6	0.00925
110.7	0.0095
110.8	0.0095
110.9	0.0095
111	0.01
111.1	0.01
111.2	0.01025
111.3	0.01025
111.4	0.01025
111.5	0.0105
111.6	0.0105
111.7	0.01075
111.8	0.01075
111.9	0.01125
112	0.01175
112.1	0.01175
112.2	0.012
112.3	0.01225
112.4	0.0125
112.5	0.01275
112.6	0.01275
112.7	0.0125
112.8	0.0125
112.9	0.0125
113	0.0125
113.1	0.01275
113.2	0.01275
113.3	0.013
113.4	0.013
113.5	0.01325
113.6	0.0135
113.7	0.01375
113.8	0.014
113.9	0.01425
114	0.0145
114.1	0.015
114.2	0.01525
114.3	0.01575
114.4	0.01625
114.5	0.01675
114.6	0.0165
114.7	0.01675
114.8	0.0165
114.9	0.01675
115	0.01725
115.1	0.0175
115.2	0.01775
115.3	0.01775
115.4	0.01775
115.5	0.018
115.6	0.01825
115.7	0.01875
115.8	0.01875
115.9	0.019
116	0.019
116.1	0.019
116.2	0.019
116.3	0.019
116.4	0.019
116.5	0.01925
116.6	0.0195
116.7	0.01975
116.8	0.01975
116.9	0.01975
117	0.02
117.1	0.02025
117.2	0.02025
117.3	0.02025
117.4	0.02025
117.5	0.02025
117.6	0.02
117.7	0.0205
117.8	0.0205
117.9	0.0205
118	0.02075
118.1	0.021
118.2	0.0215
118.3	0.0215
118.4	0.022
118.5	0.022
118.6	0.02225
118.7	0.02275
118.8	0.02325
118.9	0.02325
119	0.02325
119.1	0.02325
119.2	0.0235
119.3	0.024
119.4	0.02425
119.5	0.0245
119.6	0.0245
119.7	0.0245
119.8	0.025
119.9	0.02475
120	0.02475
120.1	0.02525
120.2	0.02575
120.3	0.02575
120.4	0.0255
120.5	0.02575
120.6	0.026
120.7	0.02675
120.8	0.02675
120.9	0.02675
121	0.02675
121.1	0.027
121.2	0.02725
121.3	0.0275
121.4	0.028
121.5	0.0285
121.6	0.02875
121.7	0.029
121.8	0.029
121.9	0.029
122	0.029
122.1	0.029
122.2	0.02925
122.3	0.0295
122.4	0.03
122.5	0.03
122.6	0.0305
122.7	0.03075
122.8	0.03125
122.9	0.03125
123	0.03125
123.1	0.0315
123.2	0.0315
123.3	0.032
123.4	0.032
123.5	0.032
123.6	0.0325
123.7	0.033
123.8	0.03325
123.9	0.03325
124	0.0335
124.1	0.03375
124.2	0.03475
124.3	0.03475
124.4	0.03525
124.5	0.0355
124.6	0.03575
124.7	0.036
124.8	0.036
124.9	0.03625
125	0.03675
125.1	0.03725
125.2	0.0375
125.3	0.038
125.4	0.03775
125.5	0.03775
125.6	0.03775
125.7	0.038
125.8	0.038
125.9	0.0385
126	0.03875
126.1	0.039
126.2	0.03975
126.3	0.04
126.4	0.04025
126.5	0.04025
126.6	0.0405
126.7	0.0405
126.8	0.0405
126.9	0.04075
127	0.04125
127.1	0.04175
127.2	0.042
127.3	0.04275
127.4	0.043
127.5	0.043
127.6	0.043
127.7	0.043
127.8	0.04325
127.9	0.044
128	0.0445
128.1	0.04475
128.2	0.0455
128.3	0.0455
128.4	0.0455
128.5	0.0455
128.6	0.04575
128.7	0.046
128.8	0.046
128.9	0.046
129	0.046
129.1	0.04625
129.2	0.0465
129.3	0.04675
129.4	0.047
129.5	0.04725
129.6	0.04725
129.7	0.047
129.8	0.0475
129.9	0.04725
130	0.04725
130.1	0.0475
130.2	0.0485
130.3	0.04875
130.4	0.049
130.5	0.049
130.6	0.049
130.7	0.049
130.8	0.04925
130.9	0.04925
131	0.04925
131.1	0.04925
131.2	0.04925
131.3	0.04925
131.4	0.04925
131.5	0.0495
131.6	0.04975
131.7	0.04975
131.8	0.05025
131.9	0.05
132	0.05
132.1	0.05
132.2	0.05
132.3	0.05
132.4	0.05
132.5	0.05025
132.6	0.0505
132.7	0.0505
132.8	0.05075
132.9	0.05075
133	0.05125
133.1	0.05125
133.2	0.05125
133.3	0.0515
133.4	0.05225
133.5	0.0525
133.6	0.053
133.7	0.053
133.8	0.0535
133.9	0.05375
134	0.054
134.1	0.05425
134.2	0.054
134.3	0.05425
134.4	0.05425
134.5	0.0545
134.6	0.0545
134.7	0.05475
134.8	0.05475
134.9	0.055
135	0.0555
135.1	0.0555
135.2	0.05525
135.3	0.05525
135.4	0.05525
135.5	0.05525
135.6	0.0555
135.7	0.0555
135.8	0.05575
135.9	0.056
136	0.056
136.1	0.05625
136.2	0.05625
136.3	0.057
136.4	0.05675
136.5	0.0565
136.6	0.0565
136.7	0.05675
136.8	0.05675
136.9	0.0565
137	0.057
137.1	0.05725
137.2	0.0575
137.3	0.0575
137.4	0.0575
137.5	0.0575
137.6	0.05775
137.7	0.05825
137.8	0.05875
137.9	0.05875
138	0.05875
138.1	0.05875
138.2	0.05875
138.3	0.05875
138.4	0.059
138.5	0.059
138.6	0.059
138.7	0.05925
138.8	0.05875
138.9	0.059
139	0.059
139.1	0.05875
139.2	0.059
139.3	0.059
139.4	0.059
139.5	0.05875
139.6	0.059
139.7	0.059
139.8	0.059
139.9	0.05925
140	0.05925
140.1	0.05975
140.2	0.06
140.3	0.0605
140.4	0.0605
140.5	0.06075
140.6	0.061
140.7	0.06125
140.8	0.06125
140.9	0.0615
141	0.062
141.1	0.0625
141.2	0.06225
141.3	0.062
141.4	0.06225
141.5	0.06275
141.6	0.06325
141.7	0.06325
141.8	0.06325
141.9	0.06325
142	0.0635
142.1	0.0635
142.2	0.0635
142.3	0.0635
142.4	0.06325
142.5	0.06325
142.6	0.06375
142.7	0.064
142.8	0.064
142.9	0.06425
143	0.06425
143.1	0.06425
143.2	0.0645
143.3	0.06475
143.4	0.0645
143.5	0.0645
143.6	0.0645
143.7	0.06475
143.8	0.06475
143.9	0.06475
144	0.0645
144.1	0.06475
144.2	0.0645
144.3	0.06475
144.4	0.0645
144.5	0.0645
144.6	0.0645
144.7	0.0645
144.8	0.06475
144.9	0.06475
145	0.06475
145.1	0.065
145.2	0.065
145.3	0.0655
145.4	0.06575
145.5	0.06575
145.6	0.06575
145.7	0.06575
145.8	0.06575
145.9	0.06625
146	0.06575
146.1	0.06625
146.2	0.06625
146.3	0.0665
146.4	0.0665
146.5	0.066
146.6	0.06625
146.7	0.06675
146.8	0.06675
146.9	0.06675
147	0.067
147.1	0.067
147.2	0.06675
147.3	0.06725
147.4	0.0675
147.5	0.0675
147.6	0.0675
147.7	0.0675
147.8	0.06775
147.9	0.06775
148	0.068
148.1	0.068
148.2	0.06825
148.3	0.06825
148.4	0.06825
148.5	0.0685
148.6	0.0685
148.7	0.0685
148.8	0.0685
148.9	0.06875
149	0.06825
149.1	0.06825
149.2	0.069
149.3	0.069
149.4	0.069
149.5	0.06975
149.6	0.0695
149.7	0.06925
149.8	0.0695
149.9	0.06975
150	0.06975
150.1	0.06975
150.2	0.07
150.3	0.07
150.4	0.07025
150.5	0.0705
150.6	0.071
150.7	0.07075
150.8	0.07075
150.9	0.07125
151	0.07125
151.1	0.07125
151.2	0.07125
151.3	0.07175
151.4	0.07175
151.5	0.07175
151.6	0.07175
151.7	0.07175
151.8	0.07175
151.9	0.07225
152	0.07225
152.1	0.0725
152.2	0.07225
152.3	0.0725
152.4	0.0725
152.5	0.073
152.6	0.07325
152.7	0.0735
152.8	0.0735
152.9	0.07325
153	0.073
153.1	0.073
153.2	0.0735
153.3	0.07325
153.4	0.07325
153.5	0.0735
153.6	0.0735
153.7	0.07375
153.8	0.07425
153.9	0.07425
154	0.074
154.1	0.074
154.2	0.0735
154.3	0.07425
154.4	0.0745
154.5	0.0745
154.6	0.07425
154.7	0.0745
154.8	0.0745
154.9	0.075
155	0.0755
155.1	0.07575
155.2	0.076
155.3	0.0765
155.4	0.0765
155.5	0.07625
155.6	0.07625
155.7	0.07625
155.8	0.0765
155.9	0.07675
156	0.077
156.1	0.0775
156.2	0.07775
156.3	0.078
156.4	0.07775
156.5	0.07775
156.6	0.07775
156.7	0.0775
156.8	0.07775
156.9	0.078
157	0.07775
157.1	0.07775
157.2	0.07775
157.3	0.078
157.4	0.078
157.5	0.07825
157.6	0.07825
157.7	0.07825
157.8	0.07825
157.9	0.0785
158	0.0785
158.1	0.0785
158.2	0.07875
158.3	0.07875
158.4	0.07875
158.5	0.0795
158.6	0.07975
158.7	0.08
158.8	0.08
158.9	0.08
159	0.0805
159.1	0.08025
159.2	0.08025
159.3	0.0805
159.4	0.0805
159.5	0.08075
159.6	0.0805
159.7	0.0805
159.8	0.08025
159.9	0.08
160	0.08025
160.1	0.08025
160.2	0.08025
160.3	0.08025
160.4	0.0805
160.5	0.08075
160.6	0.08125
160.7	0.0815
160.8	0.08175
160.9	0.0815
161	0.08125
161.1	0.08125
161.2	0.08125
161.3	0.0815
161.4	0.0815
161.5	0.08125
161.6	0.08125
161.7	0.0815
161.8	0.08125
161.9	0.08125
162	0.08125
162.1	0.0815
162.2	0.0815
162.3	0.08125
162.4	0.08125
162.5	0.08125
162.6	0.08125
162.7	0.08175
162.8	0.0815
162.9	0.08175
163	0.082
163.1	0.082
163.2	0.082
163.3	0.082
163.4	0.08225
163.5	0.08225
163.6	0.08225
163.7	0.082
163.8	0.08225
163.9	0.08225
164	0.08225
164.1	0.08225
164.2	0.08225
164.3	0.08225
164.4	0.0825
164.5	0.08275
164.6	0.083
164.7	0.08325
164.8	0.08375
164.9	0.08325
165	0.08375
165.1	0.084
165.2	0.084
165.3	0.08375
165.4	0.084
165.5	0.08475
165.6	0.08475
165.7	0.08475
165.8	0.085
165.9	0.085
166	0.085
166.1	0.08525
166.2	0.085
166.3	0.086
166.4	0.086
166.5	0.086
166.6	0.086
166.7	0.08625
166.8	0.0865
166.9	0.08625
167	0.08625
167.1	0.0865
167.2	0.08625
167.3	0.08625
167.4	0.086
167.5	0.0865
167.6	0.08675
167.7	0.08675
167.8	0.08725
167.9	0.0875
168	0.08775
168.1	0.0875
168.2	0.0875
168.3	0.08775
168.4	0.08775
168.5	0.0875
168.6	0.0875
168.7	0.0875
168.8	0.0875
168.9	0.0875
169	0.0875
169.1	0.08775
169.2	0.08775
169.3	0.088
169.4	0.08775
169.5	0.08775
169.6	0.0875
169.7	0.0875
169.8	0.0875
169.9	0.08775
170	0.08775
170.1	0.088
170.2	0.08825
170.3	0.0885
170.4	0.0875
170.5	0.0875
170.6	0.08775
170.7	0.08775
170.8	0.08775
170.9	0.0885
171	0.08875
171.1	0.08875
171.2	0.089
171.3	0.089
171.4	0.0895
171.5	0.0895
171.6	0.08975
171.7	0.08975
171.8	0.08975
171.9	0.09
172	0.09
172.1	0.09
172.2	0.09025
172.3	0.0905
172.4	0.09075
172.5	0.09075
172.6	0.09075
172.7	0.09075
172.8	0.09075
172.9	0.091
173	0.09075
173.1	0.09075
173.2	0.09125
173.3	0.09125
173.4	0.09125
173.5	0.0915
173.6	0.09175
173.7	0.09175
173.8	0.09175
173.9	0.092
174	0.092
174.1	0.0915
174.2	0.09175
174.3	0.09175
174.4	0.09225
174.5	0.09225
174.6	0.093
174.7	0.09275
174.8	0.09275
174.9	0.093
175	0.0935
175.1	0.09375
175.2	0.094
175.3	0.094
175.4	0.094
175.5	0.09425
175.6	0.09425
175.7	0.0945
175.8	0.09475
175.9	0.09475
176	0.09475
176.1	0.0945
176.2	0.09475
176.3	0.09475
176.4	0.095
176.5	0.09475
176.6	0.095
176.7	0.09525
176.8	0.09525
176.9	0.0955
177	0.0955
177.1	0.0955
177.2	0.09525
177.3	0.0955
177.4	0.0955
177.5	0.09575
177.6	0.09575
177.7	0.09575
177.8	0.096
177.9	0.0965
178	0.09675
178.1	0.09675
178.2	0.09675
178.3	0.09675
178.4	0.0975
178.5	0.0975
178.6	0.09775
178.7	0.09775
178.8	0.09775
178.9	0.09775
179	0.09775
179.1	0.0985
179.2	0.09875
179.3	0.09875
179.4	0.09875
179.5	0.099
179.6	0.09925
179.7	0.09925
179.8	0.09925
179.9	0.0995
180	0.0995
180.1	0.09975
180.2	0.10025
180.3	0.1005
180.4	0.10125
180.5	0.1015
180.6	0.1015
180.7	0.1015
180.8	0.1015
180.9	0.102
181	0.102
181.1	0.10225
181.2	0.10225
181.3	0.1025
181.4	0.10275
181.5	0.104
181.6	0.104
181.7	0.10425
181.8	0.10425
181.9	0.1035
182	0.10325
182.1	0.103
182.2	0.10325
182.3	0.1035
182.4	0.10375
182.5	0.10375
182.6	0.10375
182.7	0.104
182.8	0.104
182.9	0.10425
183	0.10425
183.1	0.10425
183.2	0.104
183.3	0.10425
183.4	0.104
183.5	0.1045
183.6	0.10525
183.7	0.10575
183.8	0.10575
183.9	0.106
184	0.106
184.1	0.1065
184.2	0.10625
184.3	0.1065
184.4	0.1065
184.5	0.1065
184.6	0.1065
184.7	0.1065
184.8	0.10675
184.9	0.10675
185	0.10725
185.1	0.10675
185.2	0.10725
185.3	0.10725
185.4	0.107
185.5	0.10675
185.6	0.1065
185.7	0.10625
185.8	0.10575
185.9	0.10575
186	0.10575
186.1	0.10575
186.2	0.1055
186.3	0.1055
186.4	0.10675
186.5	0.1065
186.6	0.10675
186.7	0.10675
186.8	0.10675
186.9	0.107
187	0.1075
187.1	0.10725
187.2	0.10725
187.3	0.107
187.4	0.10725
187.5	0.10725
187.6	0.10675
187.7	0.10625
187.8	0.10625
187.9	0.10625
188	0.106
188.1	0.10625
188.2	0.106
188.3	0.10575
188.4	0.10625
188.5	0.10575
188.6	0.1055
188.7	0.106
188.8	0.106
188.9	0.1055
189	0.10575
189.1	0.106
189.2	0.10625
189.3	0.10625
189.4	0.10675
189.5	0.10725
189.6	0.1075
189.7	0.108
189.8	0.108
189.9	0.1085
190	0.10825
190.1	0.10825
190.2	0.1085
190.3	0.1085
190.4	0.1085
190.5	0.10825
190.6	0.108
190.7	0.10825
190.8	0.1085
190.9	0.10925
191	0.1095
191.1	0.1095
191.2	0.1095
191.3	0.1095
191.4	0.1095
191.5	0.1095
191.6	0.1095
191.7	0.1095
191.8	0.10975
191.9	0.10925
192	0.1095
192.1	0.1095
192.2	0.11
192.3	0.11
192.4	0.11
192.5	0.11025
192.6	0.11
192.7	0.10975
192.8	0.10975
192.9	0.10975
193	0.111
193.1	0.111
193.2	0.111
193.3	0.11075
193.4	0.11075
193.5	0.11075
193.6	0.111
193.7	0.111
193.8	0.11075
193.9	0.111
194	0.111
194.1	0.11075
194.2	0.11075
194.3	0.111
194.4	0.11075
194.5	0.11075
194.6	0.111
194.7	0.11125
194.8	0.11175
194.9	0.11225
195	0.11225
195.1	0.11275
195.2	0.11275
195.3	0.11325
195.4	0.11325
195.5	0.1135
195.6	0.11375
195.7	0.11375
195.8	0.11375
195.9	0.11375
196	0.11375
196.1	0.1135
196.2	0.1135
196.3	0.1135
196.4	0.1135
196.5	0.1135
196.6	0.11325
196.7	0.11275
196.8	0.11325
196.9	0.1135
197	0.11325
197.1	0.11325
197.2	0.1135
197.3	0.11375
197.4	0.11475
197.5	0.11525
197.6	0.1155
197.7	0.1155
197.8	0.11575
197.9	0.116
198	0.11525
198.1	0.11525
198.2	0.11525
198.3	0.115
198.4	0.11525
198.5	0.11475
198.6	0.114
198.7	0.114
198.8	0.11425
198.9	0.11475
199	0.115
199.1	0.115
199.2	0.11475
199.3	0.11475
199.4	0.115
199.5	0.115
199.6	0.1155
199.7	0.1155
199.8	0.116
199.9	0.11625
200	0.1165
[truncated: 14,000 more rows]
