# Supplementary material for: Bayesian inference of kinetic schemes for ion channels by Kalman filtering
Source: eLife journal article supplement (doi:10.7554/elife.62714), 2022-05-04
Supplement: fig4-data12 [file 1_Sim_N_5000_Fluor_MW.xlsx]

## Sheet: Tabelle1
0.1	0
0.2	0
0.3	0
0.4	0
0.5	0
0.6	0
0.7	0
0.8	0
0.9	0
1	0
1.1	0
1.2	0
1.3	0
1.4	0
1.5	0
1.6	0
1.7	0
1.8	0
1.9	0
2	0
2.1	0
2.2	0
2.3	0
2.4	0
2.5	0
2.6	0
2.7	0
2.8	0
2.9	0
3	0
3.1	0
3.2	0
3.3	0
3.4	0
3.5	0
3.6	0
3.7	0
3.8	0
3.9	0
4	0
4.1	0
4.2	0
4.3	0
4.4	0
4.5	0
4.6	0
4.7	0
4.8	0
4.9	0
5	0
5.1	0
5.2	0
5.3	0
5.4	0
5.5	0
5.6	0
5.7	0
5.8	0
5.9	0
6	0
6.1	0
6.2	0
6.3	0
6.4	0
6.5	0
6.6	0
6.7	0
6.8	0
6.9	0
7	0
7.1	0
7.2	0
7.3	0
7.4	0
7.5	0
7.6	0
7.7	0
7.8	0
7.9	0
8	0
8.1	0
8.2	0
8.3	0
8.4	0
8.5	0
8.6	0
8.7	0
8.8	0
8.9	0
9	0
9.1	0
9.2	0
9.3	0
9.4	0
9.5	0
9.6	0
9.7	0
9.8	0
9.9	0
10	0
10.1	0
10.2	0
10.3	0
10.4	0
10.5	0
10.6	0
10.7	0
10.8	0
10.9	0
11	0
11.1	0
11.2	0
11.3	0
11.4	0
11.5	0
11.6	0
11.7	0
11.8	0
11.9	0
12	0
12.1	0
12.2	0
12.3	0
12.4	0
12.5	0
12.6	0
12.7	0
12.8	0
12.9	0
13	0
13.1	0
13.2	0
13.3	0
13.4	0
13.5	0
13.6	0
13.7	0
13.8	0
13.9	0
14	0
14.1	0
14.2	0
14.3	0
14.4	0
14.5	0
14.6	0
14.7	0
14.8	0
14.9	0
15	0
15.1	0
15.2	0
15.3	0
15.4	0
15.5	0
15.6	0
15.7	0
15.8	0
15.9	0
16	0
16.1	0
16.2	0
16.3	0
16.4	0
16.5	0
16.6	0
16.7	0
16.8	0
16.9	0
17	0
17.1	0
17.2	0
17.3	0
17.4	0
17.5	0
17.6	0
17.7	0
17.8	0
17.9	0
18	0
18.1	0
18.2	0
18.3	0
18.4	0
18.5	0
18.6	0
18.7	0
18.8	0
18.9	0
19	0
19.1	0
19.2	0
19.3	0
19.4	0
19.5	0
19.6	0
19.7	0
19.8	0
19.9	0
20	0
20.1	0
20.2	0
20.3	0
20.4	0
20.5	0
20.6	0
20.7	0
20.8	0
20.9	0
21	0
21.1	0
21.2	0
21.3	0
21.4	0
21.5	0
21.6	0
21.7	0
21.8	0
21.9	0
22	0
22.1	0
22.2	0
22.3	0
22.4	0
22.5	0
22.6	0
22.7	0
22.8	0
22.9	0
23	0
23.1	0
23.2	0
23.3	0
23.4	0
23.5	0
23.6	0
23.7	0
23.8	0
23.9	0
24	0
24.1	0
24.2	0
24.3	0
24.4	0
24.5	0
24.6	0
24.7	0
24.8	0
24.9	0
25	0
25.1	0
25.2	0
25.3	0
25.4	0
25.5	0
25.6	0
25.7	0
25.8	0
25.9	0
26	0
26.1	0
26.2	0
26.3	0
26.4	0
26.5	0
26.6	0
26.7	0
26.8	0
26.9	0
27	0
27.1	0
27.2	0
27.3	0
27.4	0
27.5	0
27.6	0
27.7	0
27.8	0
27.9	0
28	0
28.1	0
28.2	0
28.3	0
28.4	0
28.5	0
28.6	0
28.7	0
28.8	0
28.9	0
29	0
29.1	0
29.2	0
29.3	0
29.4	0
29.5	0
29.6	0
29.7	0
29.8	0
29.9	0
30	0
30.1	0
30.2	0
30.3	0
30.4	0
30.5	0
30.6	0
30.7	0
30.8	0
30.9	0
31	0
31.1	0
31.2	0
31.3	0
31.4	0
31.5	0
31.6	0
31.7	0
31.8	0
31.9	0
32	0
32.1	0
32.2	0
32.3	0
32.4	0
32.5	0
32.6	0
32.7	0
32.8	0
32.9	0
33	0
33.1	0
33.2	0
33.3	0
33.4	0
33.5	0
33.6	0
33.7	0
33.8	0
33.9	0
34	0
34.1	0
34.2	0
34.3	0
34.4	0
34.5	0
34.6	0
34.7	0
34.8	0
34.9	0
35	0
35.1	0
35.2	0
35.3	0
35.4	0
35.5	0
35.6	0
35.7	0
35.8	0
35.9	0
36	0
36.1	0
36.2	0
36.3	0
36.4	0
36.5	0
36.6	0
36.7	0
36.8	0
36.9	0
37	0
37.1	0
37.2	0
37.3	0
37.4	0
37.5	0
37.6	0
37.7	0
37.8	0
37.9	0
38	0
38.1	0
38.2	0
38.3	0
38.4	0
38.5	0
38.6	0
38.7	0
38.8	0
38.9	0
39	0
39.1	0
39.2	0
39.3	0
39.4	0
39.5	0
39.6	0
39.7	0
39.8	0
39.9	0
40	0
40.1	0
40.2	0
40.3	0
40.4	0
40.5	0
40.6	0
40.7	0
40.8	0
40.9	0
41	0
41.1	0
41.2	0
41.3	0
41.4	0
41.5	0
41.6	0
41.7	0
41.8	0
41.9	0
42	0
42.1	0
42.2	0
42.3	0
42.4	0
42.5	0
42.6	0
42.7	0
42.8	0
42.9	0
43	0
43.1	0
43.2	0
43.3	0
43.4	0
43.5	0
43.6	0
43.7	0
43.8	0
43.9	0
44	0
44.1	0
44.2	0
44.3	0
44.4	0
44.5	0
44.6	0
44.7	0
44.8	0
44.9	0
45	0
45.1	0
45.2	0
45.3	0
45.4	0
45.5	0
45.6	0
45.7	0
45.8	0
45.9	0
46	0
46.1	0
46.2	0
46.3	0
46.4	0
46.5	0
46.6	0
46.7	0
46.8	0
46.9	0
47	0
47.1	0
47.2	0
47.3	0
47.4	0
47.5	0
47.6	0
47.7	0
47.8	0
47.9	0
48	0
48.1	0
48.2	0
48.3	0
48.4	0
48.5	0
48.6	0
48.7	0
48.8	0
48.9	0
49	0
49.1	0
49.2	0
49.3	0
49.4	0
49.5	0
49.6	0
49.7	0
49.8	0
49.9	0
50	0
50.1	0
50.2	0
50.3	0
50.4	0
50.5	0
50.6	0
50.7	0
50.8	0
50.9	0
51	0
51.1	0
51.2	0
51.3	0
51.4	0
51.5	0
51.6	0
51.7	0
51.8	0
51.9	0
52	0
52.1	0
52.2	0
52.3	0
52.4	0
52.5	0
52.6	0
52.7	0
52.8	0
52.9	0
53	0
53.1	0
53.2	0
53.3	0
53.4	0
53.5	0
53.6	0
53.7	0
53.8	0
53.9	0
54	0
54.1	0
54.2	0
54.3	0
54.4	0
54.5	0
54.6	0
54.7	0
54.8	0
54.9	0
55	0
55.1	0
55.2	0
55.3	0
55.4	0
55.5	0
55.6	0
55.7	0
55.8	0
55.9	0
56	0
56.1	0
56.2	0
56.3	0
56.4	0
56.5	0
56.6	0
56.7	0
56.8	0
56.9	0
57	0
57.1	0
57.2	0
57.3	0
57.4	0
57.5	0
57.6	0
57.7	0
57.8	0
57.9	0
58	0
58.1	0
58.2	0
58.3	0
58.4	0
58.5	0
58.6	0
58.7	0
58.8	0
58.9	0
59	0
59.1	0
59.2	0
59.3	0
59.4	0
59.5	0
59.6	0
59.7	0
59.8	0
59.9	0
60	0
60.1	0
60.2	0
60.3	0
60.4	0
60.5	0
60.6	0
60.7	0
60.8	0
60.9	0
61	0
61.1	0
61.2	0
61.3	0
61.4	0
61.5	0
61.6	0
61.7	0
61.8	0
61.9	0
62	0
62.1	0
62.2	0
62.3	0
62.4	0
62.5	0
62.6	0
62.7	0
62.8	0
62.9	0
63	0
63.1	0
63.2	0
63.3	0
63.4	0
63.5	0
63.6	0
63.7	0
63.8	0
63.9	0
64	0
64.1	0
64.2	0
64.3	0
64.4	0
64.5	0
64.6	0
64.7	0
64.8	0
64.9	0
65	0
65.1	0
65.2	0
65.3	0
65.4	0
65.5	0
65.6	0
65.7	0
65.8	0
65.9	0
66	0
66.1	0
66.2	0
66.3	0
66.4	0
66.5	0
66.6	0
66.7	0
66.8	0
66.9	0
67	0
67.1	0
67.2	0
67.3	0
67.4	0
67.5	0
67.6	0
67.7	0
67.8	0
67.9	0
68	0
68.1	0
68.2	0
68.3	0
68.4	0
68.5	0
68.6	0
68.7	0
68.8	0
68.9	0
69	0
69.1	0
69.2	0
69.3	0
69.4	0
69.5	0
69.6	0
69.7	0
69.8	0
69.9	0
70	0
70.1	0
70.2	0
70.3	0
70.4	0
70.5	0
70.6	0
70.7	0
70.8	0
70.9	0
71	0
71.1	0
71.2	0
71.3	0
71.4	0
71.5	0
71.6	0
71.7	0
71.8	0
71.9	0
72	0
72.1	0
72.2	0
72.3	0
72.4	0
72.5	0
72.6	0
72.7	0
72.8	0
72.9	0
73	0
73.1	0
73.2	0
73.3	0
73.4	0
73.5	0
73.6	0
73.7	0
73.8	0
73.9	0
74	0
74.1	0
74.2	0
74.3	0
74.4	0
74.5	0
74.6	0
74.7	0
74.8	0
74.9	0
75	0
75.1	0
75.2	0
75.3	0
75.4	0
75.5	0
75.6	0
75.7	0
75.8	0
75.9	0
76	0
76.1	0
76.2	0
76.3	0
76.4	0
76.5	0
76.6	0
76.7	0
76.8	0
76.9	0
77	0
77.1	0
77.2	0
77.3	0
77.4	0
77.5	0
77.6	0
77.7	0
77.8	0
77.9	0
78	0
78.1	0
78.2	0
78.3	0
78.4	0
78.5	0
78.6	0
78.7	0
78.8	0
78.9	0
79	0
79.1	0
79.2	0
79.3	0
79.4	0
79.5	0
79.6	0
79.7	0
79.8	0
79.9	0
80	0
80.1	0
80.2	0
80.3	0
80.4	0
80.5	0
80.6	0
80.7	0
80.8	0
80.9	0
81	0
81.1	0
81.2	0
81.3	0
81.4	0
81.5	0
81.6	0
81.7	0
81.8	0
81.9	0
82	0
82.1	0
82.2	0
82.3	0
82.4	0
82.5	0
82.6	0
82.7	0
82.8	0
82.9	0
83	0
83.1	0
83.2	0
83.3	0
83.4	0
83.5	0
83.6	0
83.7	0
83.8	0
83.9	0
84	0
84.1	0
84.2	0
84.3	0
84.4	0
84.5	0
84.6	0
84.7	0
84.8	0
84.9	0
85	0
85.1	0
85.2	0
85.3	0
85.4	0
85.5	0
85.6	0
85.7	0
85.8	0
85.9	0
86	0
86.1	0
86.2	0
86.3	0
86.4	0
86.5	0
86.6	0
86.7	0
86.8	0
86.9	0
87	0
87.1	0
87.2	0
87.3	0
87.4	0
87.5	0
87.6	0
87.7	0
87.8	0
87.9	0
88	0
88.1	0
88.2	0
88.3	0
88.4	0
88.5	0
88.6	0
88.7	0
88.8	0
88.9	0
89	0
89.1	0
89.2	0
89.3	0
89.4	0
89.5	0
89.6	0
89.7	0
89.8	0
89.9	0
90	0
90.1	0
90.2	0
90.3	0
90.4	0
90.5	0
90.6	0
90.7	0
90.8	0
90.9	0
91	0
91.1	0
91.2	0
91.3	0
91.4	0
91.5	0
91.6	0
91.7	0
91.8	0
91.9	0
92	0
92.1	0
92.2	0
92.3	0
92.4	0
92.5	0
92.6	0
92.7	0
92.8	0
92.9	0
93	0
93.1	0
93.2	0
93.3	0
93.4	0
93.5	0
93.6	0
93.7	0
93.8	0
93.9	0
94	0
94.1	0
94.2	0
94.3	0
94.4	0
94.5	0
94.6	0
94.7	0
94.8	0
94.9	0
95	0
95.1	0
95.2	0
95.3	0
95.4	0
95.5	0
95.6	0
95.7	0
95.8	0
95.9	0
96	0
96.1	0
96.2	0
96.3	0
96.4	0
96.5	0
96.6	0
96.7	0
96.8	0
96.9	0
97	0
97.1	0
97.2	0
97.3	0
97.4	0
97.5	0
97.6	0
97.7	0
97.8	0
97.9	0
98	0
98.1	0
98.2	0
98.3	0
98.4	0
98.5	0
98.6	0
98.7	0
98.8	0
98.9	0
99	0
99.1	0
99.2	0
99.3	0
99.4	0
99.5	0
99.6	0
99.7	0
99.8	0
99.9	0
100	0
100.1	0.0062
100.2	0.0127
100.3	0.0193
100.4	0.0266
100.5	0.0342
100.6	0.0412
100.7	0.0472
100.8	0.0526
100.9	0.0591
101	0.065
101.1	0.0724
101.2	0.0797
101.3	0.0848
101.4	0.0886
101.5	0.0937
101.6	0.0992
101.7	0.105
101.8	0.1118
101.9	0.1162
102	0.1224
102.1	0.1288
102.2	0.1334
102.3	0.1379
102.4	0.1425
102.5	0.1483
102.6	0.1528
102.7	0.1572
102.8	0.1611
102.9	0.1659
103	0.1696
103.1	0.1742
103.2	0.178
103.3	0.1808
103.4	0.185
103.5	0.1889
103.6	0.1927
103.7	0.1947
103.8	0.1981
103.9	0.2021
104	0.2053
104.1	0.2081
104.2	0.2119
104.3	0.2143
104.4	0.2168
104.5	0.2195
104.6	0.2217
104.7	0.2254
104.8	0.2261
104.9	0.2279
105	0.2308
105.1	0.2328
105.2	0.2347
105.3	0.2367
105.4	0.2401
105.5	0.2417
105.6	0.2444
105.7	0.2467
105.8	0.2482
105.9	0.2498
106	0.2524
106.1	0.255
106.2	0.2547
106.3	0.2585
106.4	0.2606
106.5	0.2628
106.6	0.265
106.7	0.2663
106.8	0.2688
106.9	0.2708
107	0.2729
107.1	0.2748
107.2	0.2749
107.3	0.2765
107.4	0.2773
107.5	0.2784
107.6	0.2797
107.7	0.2806
107.8	0.2826
107.9	0.2855
108	0.2868
108.1	0.2879
108.2	0.2885
108.3	0.2887
108.4	0.2898
108.5	0.2904
108.6	0.2917
108.7	0.2926
108.8	0.294
108.9	0.2959
109	0.2979
109.1	0.2995
109.2	0.3
109.3	0.302
109.4	0.3029
109.5	0.304
109.6	0.3041
109.7	0.3047
109.8	0.3053
109.9	0.3061
110	0.3076
110.1	0.3081
110.2	0.3089
110.3	0.311
110.4	0.3106
110.5	0.3118
110.6	0.3099
110.7	0.3109
110.8	0.3114
110.9	0.312
111	0.3127
111.1	0.3132
111.2	0.3127
111.3	0.3127
111.4	0.3142
111.5	0.3162
111.6	0.3165
111.7	0.3165
111.8	0.318
111.9	0.3204
112	0.3205
112.1	0.3202
112.2	0.3194
112.3	0.3183
112.4	0.3192
112.5	0.3196
112.6	0.3201
112.7	0.3212
112.8	0.3206
112.9	0.3199
113	0.3189
113.1	0.3204
113.2	0.3226
113.3	0.3224
113.4	0.3219
113.5	0.3223
113.6	0.3216
113.7	0.3221
113.8	0.3234
113.9	0.3229
114	0.3229
114.1	0.3216
114.2	0.3214
114.3	0.3226
114.4	0.3238
114.5	0.3247
114.6	0.3255
114.7	0.3257
114.8	0.3256
114.9	0.3263
115	0.3264
115.1	0.326
115.2	0.3264
115.3	0.3267
115.4	0.3276
115.5	0.3275
115.6	0.3279
115.7	0.3285
115.8	0.3278
115.9	0.3294
116	0.328
116.1	0.3287
116.2	0.3294
116.3	0.3298
116.4	0.3306
116.5	0.3296
116.6	0.3287
116.7	0.328
116.8	0.328
116.9	0.3288
117	0.3283
117.1	0.3284
117.2	0.3275
117.3	0.3286
117.4	0.3291
117.5	0.3294
117.6	0.3293
117.7	0.33
117.8	0.3316
117.9	0.3323
118	0.3329
118.1	0.3329
118.2	0.3333
118.3	0.3329
118.4	0.3327
118.5	0.3348
118.6	0.3352
118.7	0.3362
118.8	0.3356
118.9	0.3359
119	0.3356
119.1	0.335
119.2	0.3351
119.3	0.3351
119.4	0.3356
119.5	0.3357
119.6	0.3344
119.7	0.3352
119.8	0.3353
119.9	0.3353
120	0.3346
120.1	0.3349
120.2	0.3347
120.3	0.3343
120.4	0.3341
120.5	0.3339
120.6	0.3329
120.7	0.3334
120.8	0.3338
120.9	0.3343
121	0.3352
121.1	0.3361
121.2	0.3364
121.3	0.3362
121.4	0.3365
121.5	0.3371
121.6	0.3368
121.7	0.3358
121.8	0.3363
121.9	0.3375
122	0.3378
122.1	0.3378
122.2	0.3375
122.3	0.3369
122.4	0.3362
122.5	0.3353
122.6	0.3357
122.7	0.3364
122.8	0.337
122.9	0.3388
123	0.3394
123.1	0.3401
123.2	0.3412
123.3	0.3432
123.4	0.3434
123.5	0.3428
123.6	0.3442
123.7	0.344
123.8	0.343
123.9	0.3433
124	0.3441
124.1	0.345
124.2	0.3455
124.3	0.3452
124.4	0.3442
124.5	0.3445
124.6	0.3446
124.7	0.3455
124.8	0.3452
124.9	0.3447
125	0.3445
125.1	0.3445
125.2	0.344
125.3	0.3441
125.4	0.3443
125.5	0.3452
125.6	0.346
125.7	0.346
125.8	0.3449
125.9	0.3452
126	0.3473
126.1	0.3476
126.2	0.3463
126.3	0.347
126.4	0.3482
126.5	0.3474
126.6	0.3475
126.7	0.3479
126.8	0.3488
126.9	0.3505
127	0.3522
127.1	0.3529
127.2	0.352
127.3	0.3523
127.4	0.3532
127.5	0.3537
127.6	0.3554
127.7	0.3549
127.8	0.354
127.9	0.3534
128	0.3547
128.1	0.3549
128.2	0.3534
128.3	0.3529
128.4	0.3541
128.5	0.3544
128.6	0.3544
128.7	0.3549
128.8	0.3549
128.9	0.355
129	0.3547
129.1	0.3544
129.2	0.3559
129.3	0.3553
129.4	0.3554
129.5	0.3561
129.6	0.3547
129.7	0.3548
129.8	0.3542
129.9	0.3563
130	0.356
130.1	0.3563
130.2	0.3559
130.3	0.3553
130.4	0.356
130.5	0.3557
130.6	0.3554
130.7	0.3555
130.8	0.3568
130.9	0.3571
131	0.3582
131.1	0.358
131.2	0.3579
131.3	0.3577
131.4	0.3587
131.5	0.3591
131.6	0.3598
131.7	0.3592
131.8	0.3582
131.9	0.3578
132	0.3582
132.1	0.3582
132.2	0.3573
132.3	0.3591
132.4	0.3591
132.5	0.3592
132.6	0.3584
132.7	0.3583
132.8	0.3587
132.9	0.3587
133	0.3581
133.1	0.357
133.2	0.3565
133.3	0.3563
133.4	0.3564
133.5	0.3577
133.6	0.3579
133.7	0.3574
133.8	0.3583
133.9	0.3574
134	0.3575
134.1	0.3578
134.2	0.3575
134.3	0.3584
134.4	0.3569
134.5	0.3569
134.6	0.3572
134.7	0.3574
134.8	0.3558
134.9	0.3572
135	0.3569
135.1	0.3584
135.2	0.3608
135.3	0.3596
135.4	0.3599
135.5	0.3602
135.6	0.3622
135.7	0.3621
135.8	0.3629
135.9	0.3641
136	0.3635
136.1	0.3621
136.2	0.3629
136.3	0.3627
136.4	0.3622
136.5	0.3621
136.6	0.3628
136.7	0.3634
136.8	0.3635
136.9	0.3636
137	0.3646
137.1	0.3645
137.2	0.364
137.3	0.3635
137.4	0.3643
137.5	0.3645
137.6	0.3647
137.7	0.3651
137.8	0.3657
137.9	0.3658
138	0.3667
138.1	0.3662
138.2	0.3647
138.3	0.3655
138.4	0.3668
138.5	0.3665
138.6	0.3667
138.7	0.3669
138.8	0.3665
138.9	0.3681
139	0.3676
139.1	0.3666
139.2	0.3663
139.3	0.3645
139.4	0.3644
139.5	0.3658
139.6	0.3667
139.7	0.3648
139.8	0.364
139.9	0.3634
140	0.364
140.1	0.3628
140.2	0.363
140.3	0.3641
140.4	0.3636
140.5	0.3634
140.6	0.363
140.7	0.3638
140.8	0.3624
140.9	0.3629
141	0.364
141.1	0.3636
141.2	0.3636
141.3	0.3639
141.4	0.3632
141.5	0.3631
141.6	0.3631
141.7	0.3627
141.8	0.3626
141.9	0.3628
142	0.3638
142.1	0.3638
142.2	0.3637
142.3	0.3634
142.4	0.3635
142.5	0.3642
142.6	0.3651
142.7	0.3653
142.8	0.3652
142.9	0.3648
143	0.3647
143.1	0.3651
143.2	0.3653
143.3	0.3667
143.4	0.3662
143.5	0.3671
143.6	0.3677
143.7	0.3684
143.8	0.3703
143.9	0.3704
144	0.3691
144.1	0.37
144.2	0.3682
144.3	0.3685
144.4	0.3679
144.5	0.3672
144.6	0.3682
144.7	0.3676
144.8	0.3677
144.9	0.3686
145	0.3692
145.1	0.3713
145.2	0.3721
145.3	0.3729
145.4	0.3738
145.5	0.3733
145.6	0.3721
145.7	0.3723
145.8	0.3708
145.9	0.3712
146	0.3721
146.1	0.3724
146.2	0.3724
146.3	0.3725
146.4	0.3718
146.5	0.3728
146.6	0.3731
146.7	0.3761
146.8	0.3767
146.9	0.3768
147	0.3766
147.1	0.3757
147.2	0.375
147.3	0.3744
147.4	0.3742
147.5	0.3745
147.6	0.3741
147.7	0.3738
147.8	0.3747
147.9	0.374
148	0.3736
148.1	0.3741
148.2	0.374
148.3	0.3741
148.4	0.3739
148.5	0.3728
148.6	0.3714
148.7	0.3736
148.8	0.3727
148.9	0.3726
149	0.3711
149.1	0.3704
149.2	0.3703
149.3	0.3699
149.4	0.3698
149.5	0.3692
149.6	0.3698
149.7	0.3698
149.8	0.3699
149.9	0.3687
150	0.37
150.1	0.3699
150.2	0.371
150.3	0.3715
150.4	0.3712
150.5	0.3724
150.6	0.3714
150.7	0.3713
150.8	0.3708
150.9	0.3714
151	0.3716
151.1	0.3722
151.2	0.3726
151.3	0.3728
151.4	0.3726
151.5	0.373
151.6	0.3736
151.7	0.3726
151.8	0.3728
151.9	0.3743
152	0.3736
152.1	0.3725
152.2	0.3713
152.3	0.3714
152.4	0.3716
152.5	0.37
152.6	0.3711
152.7	0.3718
152.8	0.3725
152.9	0.3735
153	0.3736
153.1	0.3748
153.2	0.3731
153.3	0.3751
153.4	0.3754
153.5	0.3763
153.6	0.3754
153.7	0.3759
153.8	0.3772
153.9	0.3777
154	0.3782
154.1	0.3778
154.2	0.3778
154.3	0.3774
154.4	0.3777
154.5	0.3784
154.6	0.3778
154.7	0.3766
154.8	0.3771
154.9	0.3766
155	0.3755
155.1	0.3763
155.2	0.3757
155.3	0.3753
155.4	0.3751
155.5	0.3745
155.6	0.3748
155.7	0.3736
155.8	0.373
155.9	0.3741
156	0.3747
156.1	0.3756
156.2	0.3761
156.3	0.3752
156.4	0.3781
156.5	0.3777
156.6	0.378
156.7	0.3775
156.8	0.3785
156.9	0.3782
157	0.3771
157.1	0.3768
157.2	0.377
157.3	0.3767
157.4	0.3772
157.5	0.3783
157.6	0.3778
157.7	0.3779
157.8	0.3763
157.9	0.377
158	0.3765
158.1	0.3763
158.2	0.3775
158.3	0.3768
158.4	0.3775
158.5	0.3781
158.6	0.3777
158.7	0.3769
158.8	0.3768
158.9	0.3773
159	0.378
159.1	0.3795
159.2	0.3803
159.3	0.3794
159.4	0.3786
159.5	0.3791
159.6	0.3793
159.7	0.3798
159.8	0.3797
159.9	0.3808
160	0.3802
160.1	0.3796
160.2	0.3795
160.3	0.379
160.4	0.3798
160.5	0.3801
160.6	0.381
160.7	0.3807
160.8	0.381
160.9	0.3799
161	0.3799
161.1	0.3798
161.2	0.3815
161.3	0.3811
161.4	0.38
161.5	0.3793
161.6	0.3801
161.7	0.3805
161.8	0.3816
161.9	0.3816
162	0.3818
162.1	0.3816
162.2	0.3819
162.3	0.3824
162.4	0.3834
162.5	0.3846
162.6	0.3852
162.7	0.385
162.8	0.3849
162.9	0.3873
163	0.3875
163.1	0.3882
163.2	0.3882
163.3	0.3886
163.4	0.3898
163.5	0.3893
163.6	0.3886
163.7	0.3903
163.8	0.3899
163.9	0.3909
164	0.3893
164.1	0.3895
164.2	0.3898
164.3	0.3908
164.4	0.3906
164.5	0.391
164.6	0.3904
164.7	0.3907
164.8	0.3891
164.9	0.3896
165	0.3894
165.1	0.391
165.2	0.3915
165.3	0.393
165.4	0.3925
165.5	0.3927
165.6	0.3916
165.7	0.3908
165.8	0.3906
165.9	0.3909
166	0.391
166.1	0.3914
166.2	0.3908
166.3	0.3927
166.4	0.3928
166.5	0.394
166.6	0.3941
166.7	0.3934
166.8	0.3948
166.9	0.3958
167	0.3945
167.1	0.3932
167.2	0.3922
167.3	0.3925
167.4	0.3914
167.5	0.3906
167.6	0.3897
167.7	0.3899
167.8	0.3894
167.9	0.3898
168	0.3903
168.1	0.3899
168.2	0.3909
168.3	0.3914
168.4	0.3893
168.5	0.3901
168.6	0.3912
168.7	0.3897
168.8	0.3899
168.9	0.3908
169	0.3917
169.1	0.3914
169.2	0.3905
169.3	0.3914
169.4	0.3904
169.5	0.3907
169.6	0.3893
169.7	0.3895
169.8	0.3882
169.9	0.3887
170	0.3888
170.1	0.3904
170.2	0.3898
170.3	0.3893
170.4	0.3903
170.5	0.3903
170.6	0.3896
170.7	0.3897
170.8	0.3896
170.9	0.3897
171	0.3889
171.1	0.3886
171.2	0.3876
171.3	0.3872
171.4	0.3877
171.5	0.39
171.6	0.3911
171.7	0.3905
171.8	0.3895
171.9	0.3884
172	0.3894
172.1	0.39
172.2	0.3908
172.3	0.3897
172.4	0.3892
172.5	0.3892
172.6	0.3899
172.7	0.3882
172.8	0.3873
172.9	0.3878
173	0.3884
173.1	0.3882
173.2	0.3874
173.3	0.3874
173.4	0.3877
173.5	0.3875
173.6	0.3881
173.7	0.3885
173.8	0.3873
173.9	0.388
174	0.3896
174.1	0.3888
174.2	0.3893
174.3	0.3894
174.4	0.3877
174.5	0.3888
174.6	0.3883
174.7	0.3884
174.8	0.3881
174.9	0.3879
175	0.3885
175.1	0.3886
175.2	0.388
175.3	0.3869
175.4	0.3885
175.5	0.3886
175.6	0.3891
175.7	0.3898
175.8	0.39
175.9	0.3908
176	0.3904
176.1	0.3904
176.2	0.3915
176.3	0.3912
176.4	0.3914
176.5	0.3906
176.6	0.3913
176.7	0.3897
176.8	0.3891
176.9	0.3883
177	0.3884
177.1	0.388
177.2	0.3879
177.3	0.3882
177.4	0.3877
177.5	0.3869
177.6	0.3862
177.7	0.3859
177.8	0.3866
177.9	0.3867
178	0.3864
178.1	0.3846
178.2	0.3856
178.3	0.3861
178.4	0.3858
178.5	0.3861
178.6	0.3872
178.7	0.388
178.8	0.3875
178.9	0.3875
179	0.3877
179.1	0.3881
179.2	0.3888
179.3	0.3889
179.4	0.3908
179.5	0.3903
179.6	0.3913
179.7	0.3911
179.8	0.3913
179.9	0.3914
180	0.3905
180.1	0.3919
180.2	0.3912
180.3	0.3912
180.4	0.3892
180.5	0.3891
180.6	0.3898
180.7	0.3899
180.8	0.3896
180.9	0.3914
181	0.3916
181.1	0.3899
181.2	0.3903
181.3	0.3893
181.4	0.3869
181.5	0.3861
181.6	0.3877
181.7	0.3872
181.8	0.3876
181.9	0.3873
182	0.3858
182.1	0.3876
182.2	0.3879
182.3	0.3867
182.4	0.3874
182.5	0.3874
182.6	0.3882
182.7	0.3888
182.8	0.3879
182.9	0.3874
183	0.3858
183.1	0.386
183.2	0.3858
183.3	0.3859
183.4	0.3854
183.5	0.3864
183.6	0.3867
183.7	0.3868
183.8	0.387
183.9	0.3865
184	0.3873
184.1	0.3883
184.2	0.3884
184.3	0.3893
184.4	0.3895
184.5	0.39
184.6	0.3906
184.7	0.3902
184.8	0.3898
184.9	0.3896
185	0.3908
185.1	0.3897
185.2	0.3883
185.3	0.3899
185.4	0.3894
185.5	0.3905
185.6	0.3911
185.7	0.3913
185.8	0.3897
185.9	0.3903
186	0.3909
186.1	0.3918
186.2	0.3914
186.3	0.3909
186.4	0.3913
186.5	0.3913
186.6	0.3918
186.7	0.3922
186.8	0.3912
186.9	0.3904
187	0.3893
187.1	0.3905
187.2	0.3896
187.3	0.3895
187.4	0.3909
187.5	0.3904
187.6	0.3908
187.7	0.3905
187.8	0.3906
187.9	0.3904
188	0.3911
188.1	0.3921
188.2	0.3925
188.3	0.3923
188.4	0.393
188.5	0.394
188.6	0.3929
188.7	0.3932
188.8	0.3931
188.9	0.3938
189	0.3935
189.1	0.393
189.2	0.3927
189.3	0.3931
189.4	0.3926
189.5	0.3936
189.6	0.3927
189.7	0.394
189.8	0.3944
189.9	0.3953
190	0.3962
190.1	0.3953
190.2	0.3962
190.3	0.3949
190.4	0.3949
190.5	0.3947
190.6	0.3948
190.7	0.3949
190.8	0.3944
190.9	0.3946
191	0.394
191.1	0.3935
191.2	0.3933
191.3	0.3919
191.4	0.3917
191.5	0.3911
191.6	0.3915
191.7	0.3931
191.8	0.3912
191.9	0.3927
192	0.393
192.1	0.3938
192.2	0.3935
192.3	0.3935
192.4	0.3927
192.5	0.3938
192.6	0.3921
192.7	0.3923
192.8	0.3923
192.9	0.3923
193	0.3926
193.1	0.3921
193.2	0.392
193.3	0.3921
193.4	0.3916
193.5	0.3926
193.6	0.3917
193.7	0.3931
193.8	0.3942
193.9	0.3933
194	0.3929
194.1	0.3932
194.2	0.3928
194.3	0.3938
194.4	0.3944
194.5	0.3923
194.6	0.3929
194.7	0.3931
194.8	0.3944
194.9	0.3949
195	0.3955
195.1	0.3949
195.2	0.3958
195.3	0.3953
195.4	0.3936
195.5	0.393
195.6	0.3938
195.7	0.3937
195.8	0.3951
195.9	0.3952
196	0.3949
196.1	0.3952
196.2	0.3966
196.3	0.3962
196.4	0.3956
196.5	0.3962
196.6	0.3957
196.7	0.3954
196.8	0.397
196.9	0.3968
197	0.3975
197.1	0.3974
197.2	0.3992
197.3	0.3992
197.4	0.3989
197.5	0.3992
197.6	0.3995
197.7	0.3995
197.8	0.4003
197.9	0.4006
198	0.4003
198.1	0.4009
198.2	0.4007
198.3	0.4017
198.4	0.4004
198.5	0.4012
198.6	0.4016
198.7	0.4006
198.8	0.401
198.9	0.4
199	0.3995
199.1	0.3983
199.2	0.3988
199.3	0.3991
199.4	0.3992
199.5	0.399
199.6	0.3983
199.7	0.3978
199.8	0.3978
199.9	0.3975
200	0.3973
[truncated: 14,000 more rows]
