# Supplementary material for: Bayesian inference of kinetic schemes for ion channels by Kalman filtering
Source: eLife journal article supplement (doi:10.7554/elife.62714), 2022-05-04
Supplement: fig4-data12 [file 1_Sim_N_5000_Strom_MW.xlsx]

## Sheet: Tabelle1
0.1	0
0.2	0
0.3	0
0.4	0
0.5	0
0.6	0
0.7	0
0.8	0
0.9	0
1	0
1.1	0
1.2	0
1.3	0
1.4	0
1.5	0
1.6	0
1.7	0
1.8	0
1.9	0
2	0
2.1	0
2.2	0
2.3	0
2.4	0
2.5	0
2.6	0
2.7	0
2.8	0
2.9	0
3	0
3.1	0
3.2	0
3.3	0
3.4	0
3.5	0
3.6	0
3.7	0
3.8	0
3.9	0
4	0
4.1	0
4.2	0
4.3	0
4.4	0
4.5	0
4.6	0
4.7	0
4.8	0
4.9	0
5	0
5.1	0
5.2	0
5.3	0
5.4	0
5.5	0
5.6	0
5.7	0
5.8	0
5.9	0
6	0
6.1	0
6.2	0
6.3	0
6.4	0
6.5	0
6.6	0
6.7	0
6.8	0
6.9	0
7	0
7.1	0
7.2	0
7.3	0
7.4	0
7.5	0
7.6	0
7.7	0
7.8	0
7.9	0
8	0
8.1	0
8.2	0
8.3	0
8.4	0
8.5	0
8.6	0
8.7	0
8.8	0
8.9	0
9	0
9.1	0
9.2	0
9.3	0
9.4	0
9.5	0
9.6	0
9.7	0
9.8	0
9.9	0
10	0
10.1	0
10.2	0
10.3	0
10.4	0
10.5	0
10.6	0
10.7	0
10.8	0
10.9	0
11	0
11.1	0
11.2	0
11.3	0
11.4	0
11.5	0
11.6	0
11.7	0
11.8	0
11.9	0
12	0
12.1	0
12.2	0
12.3	0
12.4	0
12.5	0
12.6	0
12.7	0
12.8	0
12.9	0
13	0
13.1	0
13.2	0
13.3	0
13.4	0
13.5	0
13.6	0
13.7	0
13.8	0
13.9	0
14	0
14.1	0
14.2	0
14.3	0
14.4	0
14.5	0
14.6	0
14.7	0
14.8	0
14.9	0
15	0
15.1	0
15.2	0
15.3	0
15.4	0
15.5	0
15.6	0
15.7	0
15.8	0
15.9	0
16	0
16.1	0
16.2	0
16.3	0
16.4	0
16.5	0
16.6	0
16.7	0
16.8	0
16.9	0
17	0
17.1	0
17.2	0
17.3	0
17.4	0
17.5	0
17.6	0
17.7	0
17.8	0
17.9	0
18	0
18.1	0
18.2	0
18.3	0
18.4	0
18.5	0
18.6	0
18.7	0
18.8	0
18.9	0
19	0
19.1	0
19.2	0
19.3	0
19.4	0
19.5	0
19.6	0
19.7	0
19.8	0
19.9	0
20	0
20.1	0
20.2	0
20.3	0
20.4	0
20.5	0
20.6	0
20.7	0
20.8	0
20.9	0
21	0
21.1	0
21.2	0
21.3	0
21.4	0
21.5	0
21.6	0
21.7	0
21.8	0
21.9	0
22	0
22.1	0
22.2	0
22.3	0
22.4	0
22.5	0
22.6	0
22.7	0
22.8	0
22.9	0
23	0
23.1	0
23.2	0
23.3	0
23.4	0
23.5	0
23.6	0
23.7	0
23.8	0
23.9	0
24	0
24.1	0
24.2	0
24.3	0
24.4	0
24.5	0
24.6	0
24.7	0
24.8	0
24.9	0
25	0
25.1	0
25.2	0
25.3	0
25.4	0
25.5	0
25.6	0
25.7	0
25.8	0
25.9	0
26	0
26.1	0
26.2	0
26.3	0
26.4	0
26.5	0
26.6	0
26.7	0
26.8	0
26.9	0
27	0
27.1	0
27.2	0
27.3	0
27.4	0
27.5	0
27.6	0
27.7	0
27.8	0
27.9	0
28	0
28.1	0
28.2	0
28.3	0
28.4	0
28.5	0
28.6	0
28.7	0
28.8	0
28.9	0
29	0
29.1	0
29.2	0
29.3	0
29.4	0
29.5	0
29.6	0
29.7	0
29.8	0
29.9	0
30	0
30.1	0
30.2	0
30.3	0
30.4	0
30.5	0
30.6	0
30.7	0
30.8	0
30.9	0
31	0
31.1	0
31.2	0
31.3	0
31.4	0
31.5	0
31.6	0
31.7	0
31.8	0
31.9	0
32	0
32.1	0
32.2	0
32.3	0
32.4	0
32.5	0
32.6	0
32.7	0
32.8	0
32.9	0
33	0
33.1	0
33.2	0
33.3	0
33.4	0
33.5	0
33.6	0
33.7	0
33.8	0
33.9	0
34	0
34.1	0
34.2	0
34.3	0
34.4	0
34.5	0
34.6	0
34.7	0
34.8	0
34.9	0
35	0
35.1	0
35.2	0
35.3	0
35.4	0
35.5	0
35.6	0
35.7	0
35.8	0
35.9	0
36	0
36.1	0
36.2	0
36.3	0
36.4	0
36.5	0
36.6	0
36.7	0
36.8	0
36.9	0
37	0
37.1	0
37.2	0
37.3	0
37.4	0
37.5	0
37.6	0
37.7	0
37.8	0
37.9	0
38	0
38.1	0
38.2	0
38.3	0
38.4	0
38.5	0
38.6	0
38.7	0
38.8	0
38.9	0
39	0
39.1	0
39.2	0
39.3	0
39.4	0
39.5	0
39.6	0
39.7	0
39.8	0
39.9	0
40	0
40.1	0
40.2	0
40.3	0
40.4	0
40.5	0
40.6	0
40.7	0
40.8	0
40.9	0
41	0
41.1	0
41.2	0
41.3	0
41.4	0
41.5	0
41.6	0
41.7	0
41.8	0
41.9	0
42	0
42.1	0
42.2	0
42.3	0
42.4	0
42.5	0
42.6	0
42.7	0
42.8	0
42.9	0
43	0
43.1	0
43.2	0
43.3	0
43.4	0
43.5	0
43.6	0
43.7	0
43.8	0
43.9	0
44	0
44.1	0
44.2	0
44.3	0
44.4	0
44.5	0
44.6	0
44.7	0
44.8	0
44.9	0
45	0
45.1	0
45.2	0
45.3	0
45.4	0
45.5	0
45.6	0
45.7	0
45.8	0
45.9	0
46	0
46.1	0
46.2	0
46.3	0
46.4	0
46.5	0
46.6	0
46.7	0
46.8	0
46.9	0
47	0
47.1	0
47.2	0
47.3	0
47.4	0
47.5	0
47.6	0
47.7	0
47.8	0
47.9	0
48	0
48.1	0
48.2	0
48.3	0
48.4	0
48.5	0
48.6	0
48.7	0
48.8	0
48.9	0
49	0
49.1	0
49.2	0
49.3	0
49.4	0
49.5	0
49.6	0
49.7	0
49.8	0
49.9	0
50	0
50.1	0
50.2	0
50.3	0
50.4	0
50.5	0
50.6	0
50.7	0
50.8	0
50.9	0
51	0
51.1	0
51.2	0
51.3	0
51.4	0
51.5	0
51.6	0
51.7	0
51.8	0
51.9	0
52	0
52.1	0
52.2	0
52.3	0
52.4	0
52.5	0
52.6	0
52.7	0
52.8	0
52.9	0
53	0
53.1	0
53.2	0
53.3	0
53.4	0
53.5	0
53.6	0
53.7	0
53.8	0
53.9	0
54	0
54.1	0
54.2	0
54.3	0
54.4	0
54.5	0
54.6	0
54.7	0
54.8	0
54.9	0
55	0
55.1	0
55.2	0
55.3	0
55.4	0
55.5	0
55.6	0
55.7	0
55.8	0
55.9	0
56	0
56.1	0
56.2	0
56.3	0
56.4	0
56.5	0
56.6	0
56.7	0
56.8	0
56.9	0
57	0
57.1	0
57.2	0
57.3	0
57.4	0
57.5	0
57.6	0
57.7	0
57.8	0
57.9	0
58	0
58.1	0
58.2	0
58.3	0
58.4	0
58.5	0
58.6	0
58.7	0
58.8	0
58.9	0
59	0
59.1	0
59.2	0
59.3	0
59.4	0
59.5	0
59.6	0
59.7	0
59.8	0
59.9	0
60	0
60.1	0
60.2	0
60.3	0
60.4	0
60.5	0
60.6	0
60.7	0
60.8	0
60.9	0
61	0
61.1	0
61.2	0
61.3	0
61.4	0
61.5	0
61.6	0
61.7	0
61.8	0
61.9	0
62	0
62.1	0
62.2	0
62.3	0
62.4	0
62.5	0
62.6	0
62.7	0
62.8	0
62.9	0
63	0
63.1	0
63.2	0
63.3	0
63.4	0
63.5	0
63.6	0
63.7	0
63.8	0
63.9	0
64	0
64.1	0
64.2	0
64.3	0
64.4	0
64.5	0
64.6	0
64.7	0
64.8	0
64.9	0
65	0
65.1	0
65.2	0
65.3	0
65.4	0
65.5	0
65.6	0
65.7	0
65.8	0
65.9	0
66	0
66.1	0
66.2	0
66.3	0
66.4	0
66.5	0
66.6	0
66.7	0
66.8	0
66.9	0
67	0
67.1	0
67.2	0
67.3	0
67.4	0
67.5	0
67.6	0
67.7	0
67.8	0
67.9	0
68	0
68.1	0
68.2	0
68.3	0
68.4	0
68.5	0
68.6	0
68.7	0
68.8	0
68.9	0
69	0
69.1	0
69.2	0
69.3	0
69.4	0
69.5	0
69.6	0
69.7	0
69.8	0
69.9	0
70	0
70.1	0
70.2	0
70.3	0
70.4	0
70.5	0
70.6	0
70.7	0
70.8	0
70.9	0
71	0
71.1	0
71.2	0
71.3	0
71.4	0
71.5	0
71.6	0
71.7	0
71.8	0
71.9	0
72	0
72.1	0
72.2	0
72.3	0
72.4	0
72.5	0
72.6	0
72.7	0
72.8	0
72.9	0
73	0
73.1	0
73.2	0
73.3	0
73.4	0
73.5	0
73.6	0
73.7	0
73.8	0
73.9	0
74	0
74.1	0
74.2	0
74.3	0
74.4	0
74.5	0
74.6	0
74.7	0
74.8	0
74.9	0
75	0
75.1	0
75.2	0
75.3	0
75.4	0
75.5	0
75.6	0
75.7	0
75.8	0
75.9	0
76	0
76.1	0
76.2	0
76.3	0
76.4	0
76.5	0
76.6	0
76.7	0
76.8	0
76.9	0
77	0
77.1	0
77.2	0
77.3	0
77.4	0
77.5	0
77.6	0
77.7	0
77.8	0
77.9	0
78	0
78.1	0
78.2	0
78.3	0
78.4	0
78.5	0
78.6	0
78.7	0
78.8	0
78.9	0
79	0
79.1	0
79.2	0
79.3	0
79.4	0
79.5	0
79.6	0
79.7	0
79.8	0
79.9	0
80	0
80.1	0
80.2	0
80.3	0
80.4	0
80.5	0
80.6	0
80.7	0
80.8	0
80.9	0
81	0
81.1	0
81.2	0
81.3	0
81.4	0
81.5	0
81.6	0
81.7	0
81.8	0
81.9	0
82	0
82.1	0
82.2	0
82.3	0
82.4	0
82.5	0
82.6	0
82.7	0
82.8	0
82.9	0
83	0
83.1	0
83.2	0
83.3	0
83.4	0
83.5	0
83.6	0
83.7	0
83.8	0
83.9	0
84	0
84.1	0
84.2	0
84.3	0
84.4	0
84.5	0
84.6	0
84.7	0
84.8	0
84.9	0
85	0
85.1	0
85.2	0
85.3	0
85.4	0
85.5	0
85.6	0
85.7	0
85.8	0
85.9	0
86	0
86.1	0
86.2	0
86.3	0
86.4	0
86.5	0
86.6	0
86.7	0
86.8	0
86.9	0
87	0
87.1	0
87.2	0
87.3	0
87.4	0
87.5	0
87.6	0
87.7	0
87.8	0
87.9	0
88	0
88.1	0
88.2	0
88.3	0
88.4	0
88.5	0
88.6	0
88.7	0
88.8	0
88.9	0
89	0
89.1	0
89.2	0
89.3	0
89.4	0
89.5	0
89.6	0
89.7	0
89.8	0
89.9	0
90	0
90.1	0
90.2	0
90.3	0
90.4	0
90.5	0
90.6	0
90.7	0
90.8	0
90.9	0
91	0
91.1	0
91.2	0
91.3	0
91.4	0
91.5	0
91.6	0
91.7	0
91.8	0
91.9	0
92	0
92.1	0
92.2	0
92.3	0
92.4	0
92.5	0
92.6	0
92.7	0
92.8	0
92.9	0
93	0
93.1	0
93.2	0
93.3	0
93.4	0
93.5	0
93.6	0
93.7	0
93.8	0
93.9	0
94	0
94.1	0
94.2	0
94.3	0
94.4	0
94.5	0
94.6	0
94.7	0
94.8	0
94.9	0
95	0
95.1	0
95.2	0
95.3	0
95.4	0
95.5	0
95.6	0
95.7	0
95.8	0
95.9	0
96	0
96.1	0
96.2	0
96.3	0
96.4	0
96.5	0
96.6	0
96.7	0
96.8	0
96.9	0
97	0
97.1	0
97.2	0
97.3	0
97.4	0
97.5	0
97.6	0
97.7	0
97.8	0
97.9	0
98	0
98.1	0
98.2	0
98.3	0
98.4	0
98.5	0
98.6	0
98.7	0
98.8	0
98.9	0
99	0
99.1	0
99.2	0
99.3	0
99.4	0
99.5	0
99.6	0
99.7	0
99.8	0
99.9	0
100	0
100.1	0
100.2	0
100.3	0
100.4	0
100.5	0
100.6	0
100.7	0
100.8	0
100.9	0
101	0
101.1	0
101.2	0
101.3	0
101.4	0
101.5	0
101.6	0
101.7	0
101.8	0
101.9	0
102	0
102.1	0.0004
102.2	0.0006
102.3	0.0008
102.4	0.0008
102.5	0.0008
102.6	0.0008
102.7	0.0008
102.8	0.0008
102.9	0.001
103	0.001
103.1	0.001
103.2	0.001
103.3	0.0012
103.4	0.0012
103.5	0.0012
103.6	0.0012
103.7	0.0014
103.8	0.0014
103.9	0.0016
104	0.0016
104.1	0.002
104.2	0.002
104.3	0.002
104.4	0.002
104.5	0.002
104.6	0.0022
104.7	0.0026
104.8	0.0026
104.9	0.0026
105	0.0028
105.1	0.0032
105.2	0.0034
105.3	0.0034
105.4	0.0034
105.5	0.0038
105.6	0.0044
105.7	0.0044
105.8	0.0046
105.9	0.0044
106	0.005
106.1	0.005
106.2	0.005
106.3	0.0058
106.4	0.0058
106.5	0.0062
106.6	0.0066
106.7	0.0068
106.8	0.0068
106.9	0.007
107	0.007
107.1	0.007
107.2	0.007
107.3	0.0074
107.4	0.0076
107.5	0.0076
107.6	0.0076
107.7	0.0078
107.8	0.008
107.9	0.0084
108	0.0086
108.1	0.0086
108.2	0.0086
108.3	0.0086
108.4	0.0088
108.5	0.0088
108.6	0.0088
108.7	0.009
108.8	0.009
108.9	0.009
109	0.0092
109.1	0.0092
109.2	0.0094
109.3	0.0098
109.4	0.0102
109.5	0.0104
109.6	0.0108
109.7	0.0108
109.8	0.0106
109.9	0.011
110	0.011
110.1	0.0112
110.2	0.0112
110.3	0.0112
110.4	0.0112
110.5	0.0112
110.6	0.0116
110.7	0.0118
110.8	0.012
110.9	0.0122
111	0.0124
111.1	0.0124
111.2	0.0126
111.3	0.0128
111.4	0.013
111.5	0.013
111.6	0.0132
111.7	0.0134
111.8	0.0134
111.9	0.0134
112	0.0134
112.1	0.0134
112.2	0.0134
112.3	0.0134
112.4	0.0134
112.5	0.0134
112.6	0.0136
112.7	0.0136
112.8	0.0136
112.9	0.0138
113	0.0138
113.1	0.014
113.2	0.0142
113.3	0.0142
113.4	0.0144
113.5	0.0146
113.6	0.0148
113.7	0.015
113.8	0.015
113.9	0.015
114	0.0156
114.1	0.0158
114.2	0.016
114.3	0.016
114.4	0.0164
114.5	0.017
114.6	0.017
114.7	0.0168
114.8	0.0174
114.9	0.0178
115	0.0178
115.1	0.018
115.2	0.018
115.3	0.0186
115.4	0.0188
115.5	0.0192
115.6	0.0194
115.7	0.0198
115.8	0.0202
115.9	0.0206
116	0.0208
116.1	0.0214
116.2	0.0214
116.3	0.0212
116.4	0.021
116.5	0.021
116.6	0.021
116.7	0.0212
116.8	0.0212
116.9	0.0212
117	0.0214
117.1	0.0216
117.2	0.022
117.3	0.0222
117.4	0.0222
117.5	0.0224
117.6	0.0224
117.7	0.0226
117.8	0.0232
117.9	0.0232
118	0.0232
118.1	0.0236
118.2	0.0238
118.3	0.024
118.4	0.024
118.5	0.0246
118.6	0.0248
118.7	0.025
118.8	0.0252
118.9	0.0254
119	0.0254
119.1	0.0254
119.2	0.0254
119.3	0.0256
119.4	0.0256
119.5	0.0258
119.6	0.0262
119.7	0.0266
119.8	0.0268
119.9	0.0268
120	0.0268
120.1	0.027
120.2	0.027
120.3	0.0272
120.4	0.0274
120.5	0.0276
120.6	0.028
120.7	0.028
120.8	0.028
120.9	0.0282
121	0.0286
121.1	0.0288
121.2	0.0288
121.3	0.0288
121.4	0.0292
121.5	0.0294
121.6	0.0294
121.7	0.0294
121.8	0.0294
121.9	0.0296
122	0.0296
122.1	0.0298
122.2	0.0298
122.3	0.0298
122.4	0.0298
122.5	0.03
122.6	0.0304
122.7	0.0308
122.8	0.031
122.9	0.0314
123	0.0314
123.1	0.0314
123.2	0.0314
123.3	0.0314
123.4	0.0318
123.5	0.0322
123.6	0.0322
123.7	0.032
123.8	0.032
123.9	0.0318
124	0.0318
124.1	0.0322
124.2	0.0324
124.3	0.0328
124.4	0.033
124.5	0.033
124.6	0.033
124.7	0.0332
124.8	0.0332
124.9	0.0336
125	0.0338
125.1	0.0338
125.2	0.0342
125.3	0.0346
125.4	0.0348
125.5	0.035
125.6	0.0352
125.7	0.0354
125.8	0.0356
125.9	0.0356
126	0.0354
126.1	0.0358
126.2	0.0358
126.3	0.0358
126.4	0.036
126.5	0.0362
126.6	0.0362
126.7	0.036
126.8	0.0364
126.9	0.0364
127	0.0364
127.1	0.0362
127.2	0.036
127.3	0.0362
127.4	0.0362
127.5	0.0364
127.6	0.0364
127.7	0.0364
127.8	0.0364
127.9	0.0368
128	0.0376
128.1	0.0376
128.2	0.0378
128.3	0.0378
128.4	0.0378
128.5	0.0378
128.6	0.038
128.7	0.0382
128.8	0.039
128.9	0.039
129	0.0392
129.1	0.0394
129.2	0.0396
129.3	0.0394
129.4	0.0404
129.5	0.0414
129.6	0.0416
129.7	0.0418
129.8	0.0418
129.9	0.0416
130	0.0416
130.1	0.0416
130.2	0.0416
130.3	0.0418
130.4	0.0422
130.5	0.0422
130.6	0.0422
130.7	0.0422
130.8	0.0428
130.9	0.0432
131	0.0432
131.1	0.0436
131.2	0.0436
131.3	0.044
131.4	0.0442
131.5	0.0444
131.6	0.0446
131.7	0.0446
131.8	0.0446
131.9	0.0446
132	0.0448
132.1	0.0448
132.2	0.0448
132.3	0.0448
132.4	0.0448
132.5	0.0448
132.6	0.0448
132.7	0.045
132.8	0.045
132.9	0.045
133	0.045
133.1	0.0452
133.2	0.0454
133.3	0.0454
133.4	0.0456
133.5	0.0458
133.6	0.046
133.7	0.0462
133.8	0.0466
133.9	0.0468
134	0.0468
134.1	0.0468
134.2	0.0468
134.3	0.0468
134.4	0.047
134.5	0.047
134.6	0.047
134.7	0.0472
134.8	0.0476
134.9	0.0478
135	0.0488
135.1	0.0488
135.2	0.0488
135.3	0.0488
135.4	0.0486
135.5	0.0486
135.6	0.049
135.7	0.0492
135.8	0.0496
135.9	0.0496
136	0.05
136.1	0.05
136.2	0.05
136.3	0.05
136.4	0.0502
136.5	0.0504
136.6	0.0506
136.7	0.0508
136.8	0.051
136.9	0.051
137	0.0514
137.1	0.0514
137.2	0.0514
137.3	0.0512
137.4	0.0516
137.5	0.0518
137.6	0.0522
137.7	0.0522
137.8	0.0522
137.9	0.0526
138	0.0526
138.1	0.0526
138.2	0.0526
138.3	0.0528
138.4	0.053
138.5	0.053
138.6	0.0532
138.7	0.0534
138.8	0.0538
138.9	0.054
139	0.0538
139.1	0.054
139.2	0.054
139.3	0.0542
139.4	0.0546
139.5	0.0546
139.6	0.055
139.7	0.0552
139.8	0.0556
139.9	0.0558
140	0.0558
140.1	0.0558
140.2	0.0564
140.3	0.0562
140.4	0.0562
140.5	0.0566
140.6	0.0566
140.7	0.057
140.8	0.057
140.9	0.0572
141	0.058
141.1	0.0582
141.2	0.0582
141.3	0.0582
141.4	0.0584
141.5	0.0586
141.6	0.0588
141.7	0.0588
141.8	0.059
141.9	0.0592
142	0.0594
142.1	0.0594
142.2	0.0594
142.3	0.0596
142.4	0.0598
142.5	0.06
142.6	0.06
142.7	0.0602
142.8	0.0602
142.9	0.0604
143	0.0606
143.1	0.0608
143.2	0.061
143.3	0.061
143.4	0.0616
143.5	0.0614
143.6	0.0616
143.7	0.0618
143.8	0.0622
143.9	0.0628
144	0.0632
144.1	0.0632
144.2	0.0632
144.3	0.0632
144.4	0.063
144.5	0.0636
144.6	0.0634
144.7	0.0634
144.8	0.0636
144.9	0.0636
145	0.0636
145.1	0.0638
145.2	0.0636
145.3	0.0638
145.4	0.0638
145.5	0.0638
145.6	0.0638
145.7	0.0638
145.8	0.0644
145.9	0.064
146	0.0642
146.1	0.0642
146.2	0.0644
146.3	0.0642
146.4	0.0642
146.5	0.0642
146.6	0.0644
146.7	0.0644
146.8	0.0644
146.9	0.0646
147	0.0648
147.1	0.0648
147.2	0.065
147.3	0.0652
147.4	0.0658
147.5	0.0658
147.6	0.066
147.7	0.066
147.8	0.0662
147.9	0.0662
148	0.0666
148.1	0.0668
148.2	0.067
148.3	0.0672
148.4	0.0676
148.5	0.0678
148.6	0.068
148.7	0.068
148.8	0.0684
148.9	0.0684
149	0.0684
149.1	0.0686
149.2	0.0682
149.3	0.0684
149.4	0.0684
149.5	0.0686
149.6	0.0686
149.7	0.0686
149.8	0.069
149.9	0.0692
150	0.0694
150.1	0.0694
150.2	0.0694
150.3	0.0698
150.4	0.07
150.5	0.07
150.6	0.0698
150.7	0.07
150.8	0.07
150.9	0.0702
151	0.0704
151.1	0.0704
151.2	0.0704
151.3	0.0704
151.4	0.0706
151.5	0.0708
151.6	0.0712
151.7	0.071
151.8	0.071
151.9	0.0708
152	0.071
152.1	0.0712
152.2	0.071
152.3	0.071
152.4	0.0712
152.5	0.0712
152.6	0.071
152.7	0.0716
152.8	0.0718
152.9	0.072
153	0.0716
153.1	0.0718
153.2	0.0722
153.3	0.0722
153.4	0.0724
153.5	0.0726
153.6	0.0726
153.7	0.0726
153.8	0.0728
153.9	0.0734
154	0.0738
154.1	0.0742
154.2	0.074
154.3	0.0744
154.4	0.0746
154.5	0.0744
154.6	0.0744
154.7	0.0746
154.8	0.0746
154.9	0.0752
155	0.0752
155.1	0.0752
155.2	0.0752
155.3	0.0752
155.4	0.0754
155.5	0.0756
155.6	0.0754
155.7	0.0758
155.8	0.0758
155.9	0.0764
156	0.0766
156.1	0.0764
156.2	0.0768
156.3	0.0768
156.4	0.0772
156.5	0.0772
156.6	0.077
156.7	0.0772
156.8	0.0778
156.9	0.0778
157	0.0778
157.1	0.0782
157.2	0.0782
157.3	0.0784
157.4	0.0784
157.5	0.0786
157.6	0.0786
157.7	0.0788
157.8	0.0788
157.9	0.0788
158	0.0786
158.1	0.079
158.2	0.0792
158.3	0.0792
158.4	0.0792
158.5	0.079
158.6	0.0794
158.7	0.0794
158.8	0.0798
158.9	0.08
159	0.0802
159.1	0.0808
159.2	0.0806
159.3	0.0808
159.4	0.0812
159.5	0.0814
159.6	0.0816
159.7	0.082
159.8	0.082
159.9	0.0826
160	0.0826
160.1	0.0828
160.2	0.0828
160.3	0.0828
160.4	0.0828
160.5	0.0828
160.6	0.0828
160.7	0.0832
160.8	0.0832
160.9	0.0834
161	0.0838
161.1	0.084
161.2	0.0842
161.3	0.0844
161.4	0.0846
161.5	0.0848
161.6	0.0852
161.7	0.0854
161.8	0.0852
161.9	0.0852
162	0.0852
162.1	0.0848
162.2	0.0846
162.3	0.0844
162.4	0.0844
162.5	0.0844
162.6	0.0848
162.7	0.085
162.8	0.0852
162.9	0.0858
163	0.0858
163.1	0.0862
163.2	0.0864
163.3	0.0862
163.4	0.0864
163.5	0.0862
163.6	0.086
163.7	0.086
163.8	0.086
163.9	0.0866
164	0.0866
164.1	0.0864
164.2	0.0864
164.3	0.0864
164.4	0.0864
164.5	0.0864
164.6	0.0868
164.7	0.0868
164.8	0.0868
164.9	0.0868
165	0.0864
165.1	0.0864
165.2	0.0864
165.3	0.0866
165.4	0.087
165.5	0.087
165.6	0.087
165.7	0.0866
165.8	0.0868
165.9	0.0868
166	0.087
166.1	0.0874
166.2	0.0874
166.3	0.0872
166.4	0.0872
166.5	0.0874
166.6	0.0874
166.7	0.087
166.8	0.0872
166.9	0.0872
167	0.0872
167.1	0.0874
167.2	0.0874
167.3	0.088
167.4	0.0882
167.5	0.0882
167.6	0.0882
167.7	0.0884
167.8	0.088
167.9	0.088
168	0.0882
168.1	0.0886
168.2	0.0886
168.3	0.089
168.4	0.089
168.5	0.089
168.6	0.089
168.7	0.0894
168.8	0.0896
168.9	0.0898
169	0.09
169.1	0.0902
169.2	0.0904
169.3	0.0904
169.4	0.0906
169.5	0.0902
169.6	0.0908
169.7	0.0908
169.8	0.0904
169.9	0.0904
170	0.09
170.1	0.09
170.2	0.09
170.3	0.0902
170.4	0.0906
170.5	0.091
170.6	0.0914
170.7	0.091
170.8	0.091
170.9	0.0908
171	0.091
171.1	0.091
171.2	0.0916
171.3	0.0918
171.4	0.0922
171.5	0.092
171.6	0.0922
171.7	0.092
171.8	0.0918
171.9	0.092
172	0.0922
172.1	0.0922
172.2	0.0922
172.3	0.0924
172.4	0.0926
172.5	0.0926
172.6	0.0918
172.7	0.0918
172.8	0.0918
172.9	0.0918
173	0.092
173.1	0.092
173.2	0.092
173.3	0.0922
173.4	0.0924
173.5	0.0922
173.6	0.092
173.7	0.0918
173.8	0.0916
173.9	0.0916
174	0.092
174.1	0.0918
174.2	0.0922
174.3	0.0924
174.4	0.0922
174.5	0.0924
174.6	0.0926
174.7	0.0926
174.8	0.0926
174.9	0.0928
175	0.0928
175.1	0.0926
175.2	0.0928
175.3	0.093
175.4	0.0928
175.5	0.093
175.6	0.0928
175.7	0.0932
175.8	0.0928
175.9	0.093
176	0.0932
176.1	0.093
176.2	0.0932
176.3	0.0934
176.4	0.0934
176.5	0.0934
176.6	0.0934
176.7	0.0934
176.8	0.0936
176.9	0.0938
177	0.094
177.1	0.0946
177.2	0.0946
177.3	0.0948
177.4	0.0948
177.5	0.0946
177.6	0.0946
177.7	0.0948
177.8	0.0952
177.9	0.0952
178	0.0954
178.1	0.095
178.2	0.0952
178.3	0.0952
178.4	0.0956
178.5	0.0954
178.6	0.0954
178.7	0.0952
178.8	0.0954
178.9	0.0954
179	0.0956
179.1	0.0956
179.2	0.0958
179.3	0.0958
179.4	0.0958
179.5	0.0958
179.6	0.0954
179.7	0.0956
179.8	0.0956
179.9	0.0958
180	0.0962
180.1	0.0958
180.2	0.0958
180.3	0.096
180.4	0.0958
180.5	0.0958
180.6	0.0956
180.7	0.0954
180.8	0.0954
180.9	0.0954
181	0.0954
181.1	0.0954
181.2	0.0952
181.3	0.0954
181.4	0.0954
181.5	0.0962
181.6	0.0962
181.7	0.0962
181.8	0.0966
181.9	0.0966
182	0.0966
182.1	0.0964
182.2	0.097
182.3	0.0972
182.4	0.0974
182.5	0.0976
182.6	0.0976
182.7	0.0978
182.8	0.0978
182.9	0.0976
183	0.0978
183.1	0.0978
183.2	0.0978
183.3	0.098
183.4	0.0988
183.5	0.099
183.6	0.0992
183.7	0.0992
183.8	0.0994
183.9	0.0994
184	0.0998
184.1	0.1
184.2	0.0998
184.3	0.0996
184.4	0.1
184.5	0.1002
184.6	0.1
184.7	0.1
184.8	0.1
184.9	0.1002
185	0.1002
185.1	0.1002
185.2	0.1004
185.3	0.1004
185.4	0.1004
185.5	0.1006
185.6	0.1008
185.7	0.1008
185.8	0.1016
185.9	0.1014
186	0.1016
186.1	0.1014
186.2	0.1018
186.3	0.1016
186.4	0.1014
186.5	0.1014
186.6	0.1014
186.7	0.1016
186.8	0.1012
186.9	0.1012
187	0.1014
187.1	0.1016
187.2	0.1012
187.3	0.1014
187.4	0.1014
187.5	0.1018
187.6	0.102
187.7	0.102
187.8	0.102
187.9	0.1022
188	0.1024
188.1	0.1024
188.2	0.1024
188.3	0.1022
188.4	0.1022
188.5	0.1022
188.6	0.1024
188.7	0.1024
188.8	0.1026
188.9	0.103
189	0.103
189.1	0.1032
189.2	0.103
189.3	0.1034
189.4	0.1034
189.5	0.1034
189.6	0.1036
189.7	0.1034
189.8	0.1034
189.9	0.1034
190	0.1034
190.1	0.1036
190.2	0.1036
190.3	0.1036
190.4	0.1038
190.5	0.1038
190.6	0.1038
190.7	0.1038
190.8	0.1036
190.9	0.1042
191	0.1042
191.1	0.1042
191.2	0.104
191.3	0.104
191.4	0.1042
191.5	0.1042
191.6	0.1044
191.7	0.1046
191.8	0.1052
191.9	0.105
192	0.1054
192.1	0.1056
192.2	0.1058
192.3	0.106
192.4	0.106
192.5	0.106
192.6	0.1058
192.7	0.1056
192.8	0.1056
192.9	0.1062
193	0.1066
193.1	0.107
193.2	0.1068
193.3	0.1068
193.4	0.1066
193.5	0.1064
193.6	0.1064
193.7	0.1064
193.8	0.1064
193.9	0.1064
194	0.1064
194.1	0.1062
194.2	0.1064
194.3	0.1064
194.4	0.1066
194.5	0.1066
194.6	0.1066
194.7	0.1062
194.8	0.1064
194.9	0.1066
195	0.1062
195.1	0.1064
195.2	0.1068
195.3	0.1068
195.4	0.1066
195.5	0.1062
195.6	0.1062
195.7	0.1064
195.8	0.1064
195.9	0.1066
196	0.1068
196.1	0.1068
196.2	0.107
196.3	0.1068
196.4	0.1068
196.5	0.1066
196.6	0.1066
196.7	0.1066
196.8	0.1068
196.9	0.1072
197	0.1078
197.1	0.1086
197.2	0.1084
197.3	0.1084
197.4	0.1084
197.5	0.1082
197.6	0.108
197.7	0.108
197.8	0.108
197.9	0.108
198	0.1076
198.1	0.1076
198.2	0.108
198.3	0.108
198.4	0.1078
198.5	0.108
198.6	0.1078
198.7	0.108
198.8	0.1088
198.9	0.1088
199	0.1092
199.1	0.109
199.2	0.1088
199.3	0.109
199.4	0.109
199.5	0.1094
199.6	0.1094
199.7	0.1102
199.8	0.11
199.9	0.1102
200	0.11
[truncated: 14,000 more rows]
