# Supplementary material for: Bayesian inference of kinetic schemes for ion channels by Kalman filtering
Source: eLife journal article supplement (doi:10.7554/elife.62714), 2022-05-04
Supplement: fig4-data12 [file 1_Sim_N_6000_Fluor_MW_0.125M.xlsx]

## Sheet: Tabelle1
0.1	0
0.2	0
0.3	0
0.4	0
0.5	0
0.6	0
0.7	0
0.8	0
0.9	0
1	0
1.1	0
1.2	0
1.3	0
1.4	0
1.5	0
1.6	0
1.7	0
1.8	0
1.9	0
2	0
2.1	0
2.2	0
2.3	0
2.4	0
2.5	0
2.6	0
2.7	0
2.8	0
2.9	0
3	0
3.1	0
3.2	0
3.3	0
3.4	0
3.5	0
3.6	0
3.7	0
3.8	0
3.9	0
4	0
4.1	0
4.2	0
4.3	0
4.4	0
4.5	0
4.6	0
4.7	0
4.8	0
4.9	0
5	0
5.1	0
5.2	0
5.3	0
5.4	0
5.5	0
5.6	0
5.7	0
5.8	0
5.9	0
6	0
6.1	0
6.2	0
6.3	0
6.4	0
6.5	0
6.6	0
6.7	0
6.8	0
6.9	0
7	0
7.1	0
7.2	0
7.3	0
7.4	0
7.5	0
7.6	0
7.7	0
7.8	0
7.9	0
8	0
8.1	0
8.2	0
8.3	0
8.4	0
8.5	0
8.6	0
8.7	0
8.8	0
8.9	0
9	0
9.1	0
9.2	0
9.3	0
9.4	0
9.5	0
9.6	0
9.7	0
9.8	0
9.9	0
10	0
10.1	0
10.2	0
10.3	0
10.4	0
10.5	0
10.6	0
10.7	0
10.8	0
10.9	0
11	0
11.1	0
11.2	0
11.3	0
11.4	0
11.5	0
11.6	0
11.7	0
11.8	0
11.9	0
12	0
12.1	0
12.2	0
12.3	0
12.4	0
12.5	0
12.6	0
12.7	0
12.8	0
12.9	0
13	0
13.1	0
13.2	0
13.3	0
13.4	0
13.5	0
13.6	0
13.7	0
13.8	0
13.9	0
14	0
14.1	0
14.2	0
14.3	0
14.4	0
14.5	0
14.6	0
14.7	0
14.8	0
14.9	0
15	0
15.1	0
15.2	0
15.3	0
15.4	0
15.5	0
15.6	0
15.7	0
15.8	0
15.9	0
16	0
16.1	0
16.2	0
16.3	0
16.4	0
16.5	0
16.6	0
16.7	0
16.8	0
16.9	0
17	0
17.1	0
17.2	0
17.3	0
17.4	0
17.5	0
17.6	0
17.7	0
17.8	0
17.9	0
18	0
18.1	0
18.2	0
18.3	0
18.4	0
18.5	0
18.6	0
18.7	0
18.8	0
18.9	0
19	0
19.1	0
19.2	0
19.3	0
19.4	0
19.5	0
19.6	0
19.7	0
19.8	0
19.9	0
20	0
20.1	0
20.2	0
20.3	0
20.4	0
20.5	0
20.6	0
20.7	0
20.8	0
20.9	0
21	0
21.1	0
21.2	0
21.3	0
21.4	0
21.5	0
21.6	0
21.7	0
21.8	0
21.9	0
22	0
22.1	0
22.2	0
22.3	0
22.4	0
22.5	0
22.6	0
22.7	0
22.8	0
22.9	0
23	0
23.1	0
23.2	0
23.3	0
23.4	0
23.5	0
23.6	0
23.7	0
23.8	0
23.9	0
24	0
24.1	0
24.2	0
24.3	0
24.4	0
24.5	0
24.6	0
24.7	0
24.8	0
24.9	0
25	0
25.1	0
25.2	0
25.3	0
25.4	0
25.5	0
25.6	0
25.7	0
25.8	0
25.9	0
26	0
26.1	0
26.2	0
26.3	0
26.4	0
26.5	0
26.6	0
26.7	0
26.8	0
26.9	0
27	0
27.1	0
27.2	0
27.3	0
27.4	0
27.5	0
27.6	0
27.7	0
27.8	0
27.9	0
28	0
28.1	0
28.2	0
28.3	0
28.4	0
28.5	0
28.6	0
28.7	0
28.8	0
28.9	0
29	0
29.1	0
29.2	0
29.3	0
29.4	0
29.5	0
29.6	0
29.7	0
29.8	0
29.9	0
30	0
30.1	0
30.2	0
30.3	0
30.4	0
30.5	0
30.6	0
30.7	0
30.8	0
30.9	0
31	0
31.1	0
31.2	0
31.3	0
31.4	0
31.5	0
31.6	0
31.7	0
31.8	0
31.9	0
32	0
32.1	0
32.2	0
32.3	0
32.4	0
32.5	0
32.6	0
32.7	0
32.8	0
32.9	0
33	0
33.1	0
33.2	0
33.3	0
33.4	0
33.5	0
33.6	0
33.7	0
33.8	0
33.9	0
34	0
34.1	0
34.2	0
34.3	0
34.4	0
34.5	0
34.6	0
34.7	0
34.8	0
34.9	0
35	0
35.1	0
35.2	0
35.3	0
35.4	0
35.5	0
35.6	0
35.7	0
35.8	0
35.9	0
36	0
36.1	0
36.2	0
36.3	0
36.4	0
36.5	0
36.6	0
36.7	0
36.8	0
36.9	0
37	0
37.1	0
37.2	0
37.3	0
37.4	0
37.5	0
37.6	0
37.7	0
37.8	0
37.9	0
38	0
38.1	0
38.2	0
38.3	0
38.4	0
38.5	0
38.6	0
38.7	0
38.8	0
38.9	0
39	0
39.1	0
39.2	0
39.3	0
39.4	0
39.5	0
39.6	0
39.7	0
39.8	0
39.9	0
40	0
40.1	0
40.2	0
40.3	0
40.4	0
40.5	0
40.6	0
40.7	0
40.8	0
40.9	0
41	0
41.1	0
41.2	0
41.3	0
41.4	0
41.5	0
41.6	0
41.7	0
41.8	0
41.9	0
42	0
42.1	0
42.2	0
42.3	0
42.4	0
42.5	0
42.6	0
42.7	0
42.8	0
42.9	0
43	0
43.1	0
43.2	0
43.3	0
43.4	0
43.5	0
43.6	0
43.7	0
43.8	0
43.9	0
44	0
44.1	0
44.2	0
44.3	0
44.4	0
44.5	0
44.6	0
44.7	0
44.8	0
44.9	0
45	0
45.1	0
45.2	0
45.3	0
45.4	0
45.5	0
45.6	0
45.7	0
45.8	0
45.9	0
46	0
46.1	0
46.2	0
46.3	0
46.4	0
46.5	0
46.6	0
46.7	0
46.8	0
46.9	0
47	0
47.1	0
47.2	0
47.3	0
47.4	0
47.5	0
47.6	0
47.7	0
47.8	0
47.9	0
48	0
48.1	0
48.2	0
48.3	0
48.4	0
48.5	0
48.6	0
48.7	0
48.8	0
48.9	0
49	0
49.1	0
49.2	0
49.3	0
49.4	0
49.5	0
49.6	0
49.7	0
49.8	0
49.9	0
50	0
50.1	0
50.2	0
50.3	0
50.4	0
50.5	0
50.6	0
50.7	0
50.8	0
50.9	0
51	0
51.1	0
51.2	0
51.3	0
51.4	0
51.5	0
51.6	0
51.7	0
51.8	0
51.9	0
52	0
52.1	0
52.2	0
52.3	0
52.4	0
52.5	0
52.6	0
52.7	0
52.8	0
52.9	0
53	0
53.1	0
53.2	0
53.3	0
53.4	0
53.5	0
53.6	0
53.7	0
53.8	0
53.9	0
54	0
54.1	0
54.2	0
54.3	0
54.4	0
54.5	0
54.6	0
54.7	0
54.8	0
54.9	0
55	0
55.1	0
55.2	0
55.3	0
55.4	0
55.5	0
55.6	0
55.7	0
55.8	0
55.9	0
56	0
56.1	0
56.2	0
56.3	0
56.4	0
56.5	0
56.6	0
56.7	0
56.8	0
56.9	0
57	0
57.1	0
57.2	0
57.3	0
57.4	0
57.5	0
57.6	0
57.7	0
57.8	0
57.9	0
58	0
58.1	0
58.2	0
58.3	0
58.4	0
58.5	0
58.6	0
58.7	0
58.8	0
58.9	0
59	0
59.1	0
59.2	0
59.3	0
59.4	0
59.5	0
59.6	0
59.7	0
59.8	0
59.9	0
60	0
60.1	0
60.2	0
60.3	0
60.4	0
60.5	0
60.6	0
60.7	0
60.8	0
60.9	0
61	0
61.1	0
61.2	0
61.3	0
61.4	0
61.5	0
61.6	0
61.7	0
61.8	0
61.9	0
62	0
62.1	0
62.2	0
62.3	0
62.4	0
62.5	0
62.6	0
62.7	0
62.8	0
62.9	0
63	0
63.1	0
63.2	0
63.3	0
63.4	0
63.5	0
63.6	0
63.7	0
63.8	0
63.9	0
64	0
64.1	0
64.2	0
64.3	0
64.4	0
64.5	0
64.6	0
64.7	0
64.8	0
64.9	0
65	0
65.1	0
65.2	0
65.3	0
65.4	0
65.5	0
65.6	0
65.7	0
65.8	0
65.9	0
66	0
66.1	0
66.2	0
66.3	0
66.4	0
66.5	0
66.6	0
66.7	0
66.8	0
66.9	0
67	0
67.1	0
67.2	0
67.3	0
67.4	0
67.5	0
67.6	0
67.7	0
67.8	0
67.9	0
68	0
68.1	0
68.2	0
68.3	0
68.4	0
68.5	0
68.6	0
68.7	0
68.8	0
68.9	0
69	0
69.1	0
69.2	0
69.3	0
69.4	0
69.5	0
69.6	0
69.7	0
69.8	0
69.9	0
70	0
70.1	0
70.2	0
70.3	0
70.4	0
70.5	0
70.6	0
70.7	0
70.8	0
70.9	0
71	0
71.1	0
71.2	0
71.3	0
71.4	0
71.5	0
71.6	0
71.7	0
71.8	0
71.9	0
72	0
72.1	0
72.2	0
72.3	0
72.4	0
72.5	0
72.6	0
72.7	0
72.8	0
72.9	0
73	0
73.1	0
73.2	0
73.3	0
73.4	0
73.5	0
73.6	0
73.7	0
73.8	0
73.9	0
74	0
74.1	0
74.2	0
74.3	0
74.4	0
74.5	0
74.6	0
74.7	0
74.8	0
74.9	0
75	0
75.1	0
75.2	0
75.3	0
75.4	0
75.5	0
75.6	0
75.7	0
75.8	0
75.9	0
76	0
76.1	0
76.2	0
76.3	0
76.4	0
76.5	0
76.6	0
76.7	0
76.8	0
76.9	0
77	0
77.1	0
77.2	0
77.3	0
77.4	0
77.5	0
77.6	0
77.7	0
77.8	0
77.9	0
78	0
78.1	0
78.2	0
78.3	0
78.4	0
78.5	0
78.6	0
78.7	0
78.8	0
78.9	0
79	0
79.1	0
79.2	0
79.3	0
79.4	0
79.5	0
79.6	0
79.7	0
79.8	0
79.9	0
80	0
80.1	0
80.2	0
80.3	0
80.4	0
80.5	0
80.6	0
80.7	0
80.8	0
80.9	0
81	0
81.1	0
81.2	0
81.3	0
81.4	0
81.5	0
81.6	0
81.7	0
81.8	0
81.9	0
82	0
82.1	0
82.2	0
82.3	0
82.4	0
82.5	0
82.6	0
82.7	0
82.8	0
82.9	0
83	0
83.1	0
83.2	0
83.3	0
83.4	0
83.5	0
83.6	0
83.7	0
83.8	0
83.9	0
84	0
84.1	0
84.2	0
84.3	0
84.4	0
84.5	0
84.6	0
84.7	0
84.8	0
84.9	0
85	0
85.1	0
85.2	0
85.3	0
85.4	0
85.5	0
85.6	0
85.7	0
85.8	0
85.9	0
86	0
86.1	0
86.2	0
86.3	0
86.4	0
86.5	0
86.6	0
86.7	0
86.8	0
86.9	0
87	0
87.1	0
87.2	0
87.3	0
87.4	0
87.5	0
87.6	0
87.7	0
87.8	0
87.9	0
88	0
88.1	0
88.2	0
88.3	0
88.4	0
88.5	0
88.6	0
88.7	0
88.8	0
88.9	0
89	0
89.1	0
89.2	0
89.3	0
89.4	0
89.5	0
89.6	0
89.7	0
89.8	0
89.9	0
90	0
90.1	0
90.2	0
90.3	0
90.4	0
90.5	0
90.6	0
90.7	0
90.8	0
90.9	0
91	0
91.1	0
91.2	0
91.3	0
91.4	0
91.5	0
91.6	0
91.7	0
91.8	0
91.9	0
92	0
92.1	0
92.2	0
92.3	0
92.4	0
92.5	0
92.6	0
92.7	0
92.8	0
92.9	0
93	0
93.1	0
93.2	0
93.3	0
93.4	0
93.5	0
93.6	0
93.7	0
93.8	0
93.9	0
94	0
94.1	0
94.2	0
94.3	0
94.4	0
94.5	0
94.6	0
94.7	0
94.8	0
94.9	0
95	0
95.1	0
95.2	0
95.3	0
95.4	0
95.5	0
95.6	0
95.7	0
95.8	0
95.9	0
96	0
96.1	0
96.2	0
96.3	0
96.4	0
96.5	0
96.6	0
96.7	0
96.8	0
96.9	0
97	0
97.1	0
97.2	0
97.3	0
97.4	0
97.5	0
97.6	0
97.7	0
97.8	0
97.9	0
98	0
98.1	0
98.2	0
98.3	0
98.4	0
98.5	0
98.6	0
98.7	0
98.8	0
98.9	0
99	0
99.1	0
99.2	0
99.3	0
99.4	0
99.5	0
99.6	0
99.7	0
99.8	0
99.9	0
100	0
100.1	0.00775
100.2	0.0149167
100.3	0.0223333
100.4	0.0293333
100.5	0.03675
100.6	0.0434167
100.7	0.0503333
100.8	0.0563333
100.9	0.06175
101	0.0671667
101.1	0.0723333
101.2	0.0788333
101.3	0.0846667
101.4	0.0915833
101.5	0.0969167
101.6	0.102167
101.7	0.108417
101.8	0.113333
101.9	0.117583
102	0.12325
102.1	0.128667
102.2	0.135
102.3	0.1395
102.4	0.144667
102.5	0.14975
102.6	0.153917
102.7	0.15825
102.8	0.162833
102.9	0.16775
103	0.172667
103.1	0.177
103.2	0.180167
103.3	0.181917
103.4	0.187417
103.5	0.189917
103.6	0.193083
103.7	0.1975
103.8	0.200417
103.9	0.202583
104	0.206667
104.1	0.21075
104.2	0.214167
104.3	0.217667
104.4	0.221667
104.5	0.224417
104.6	0.226417
104.7	0.227083
104.8	0.2285
104.9	0.230667
105	0.232833
105.1	0.23525
105.2	0.236583
105.3	0.238583
105.4	0.240083
105.5	0.242583
105.6	0.243917
105.7	0.246083
105.8	0.247833
105.9	0.25
106	0.253167
106.1	0.255917
106.2	0.2565
106.3	0.25775
106.4	0.259667
106.5	0.261667
106.6	0.26325
106.7	0.265
106.8	0.26725
106.9	0.268417
107	0.271167
107.1	0.272167
107.2	0.273333
107.3	0.273917
107.4	0.275417
107.5	0.277083
107.6	0.279
107.7	0.279583
107.8	0.28125
107.9	0.284083
108	0.28525
108.1	0.285083
108.2	0.286917
108.3	0.288333
108.4	0.287917
108.5	0.28875
108.6	0.28925
108.7	0.29075
108.8	0.291
108.9	0.2925
109	0.29425
109.1	0.295333
109.2	0.296833
109.3	0.296917
109.4	0.296583
109.5	0.296167
109.6	0.2975
109.7	0.299583
109.8	0.3
109.9	0.30025
110	0.3
110.1	0.301667
110.2	0.302167
110.3	0.303083
110.4	0.302583
110.5	0.30375
110.6	0.303667
110.7	0.306333
110.8	0.306917
110.9	0.305833
111	0.30575
111.1	0.306167
111.2	0.3065
111.3	0.306083
111.4	0.306333
111.5	0.30675
111.6	0.3065
111.7	0.307917
111.8	0.30825
111.9	0.3095
112	0.310083
112.1	0.311583
112.2	0.310667
112.3	0.310583
112.4	0.310917
112.5	0.312167
112.6	0.31275
112.7	0.314083
112.8	0.313333
112.9	0.313
113	0.312917
113.1	0.313917
113.2	0.314583
113.3	0.3145
113.4	0.31625
113.5	0.317083
113.6	0.31925
113.7	0.31875
113.8	0.318167
113.9	0.318333
114	0.317833
114.1	0.319417
114.2	0.319
114.3	0.319917
114.4	0.32075
114.5	0.321917
114.6	0.324333
114.7	0.325833
114.8	0.32525
114.9	0.325667
115	0.325917
115.1	0.326167
115.2	0.325917
115.3	0.327333
115.4	0.326
115.5	0.327417
115.6	0.328
115.7	0.328083
115.8	0.329
115.9	0.328583
116	0.32975
116.1	0.329
116.2	0.32725
116.3	0.328
116.4	0.32875
116.5	0.329417
116.6	0.328583
116.7	0.328917
116.8	0.330917
116.9	0.332583
117	0.333333
117.1	0.3345
117.2	0.334667
117.3	0.335333
117.4	0.335333
117.5	0.33575
117.6	0.335917
117.7	0.337333
117.8	0.338917
117.9	0.340083
118	0.3405
118.1	0.34225
118.2	0.342833
118.3	0.34275
118.4	0.342417
118.5	0.3425
118.6	0.341667
118.7	0.341
118.8	0.341
118.9	0.339333
119	0.33925
119.1	0.339667
119.2	0.34025
119.3	0.340667
119.4	0.340083
119.5	0.34125
119.6	0.3425
119.7	0.344167
119.8	0.34475
119.9	0.343917
120	0.342917
120.1	0.344667
120.2	0.344333
120.3	0.34425
120.4	0.343917
120.5	0.34325
120.6	0.34425
120.7	0.345167
120.8	0.345667
120.9	0.34625
121	0.346
121.1	0.346333
121.2	0.345917
121.3	0.346083
121.4	0.34675
121.5	0.345
121.6	0.346083
121.7	0.347
121.8	0.3475
121.9	0.348167
122	0.347417
122.1	0.346583
122.2	0.346333
122.3	0.345083
122.4	0.345
122.5	0.3455
122.6	0.343917
122.7	0.342417
122.8	0.342667
122.9	0.342333
123	0.343083
123.1	0.343417
123.2	0.344917
123.3	0.344083
123.4	0.343417
123.5	0.34375
123.6	0.343667
123.7	0.34425
123.8	0.34475
123.9	0.346917
124	0.347
124.1	0.347083
124.2	0.346083
124.3	0.346083
124.4	0.347333
124.5	0.346667
124.6	0.346417
124.7	0.346167
124.8	0.347
124.9	0.346417
125	0.3455
125.1	0.345167
125.2	0.34525
125.3	0.345583
125.4	0.344417
125.5	0.344833
125.6	0.344583
125.7	0.345167
125.8	0.345583
125.9	0.346083
126	0.346167
126.1	0.34575
126.2	0.344917
126.3	0.344917
126.4	0.346167
126.5	0.34725
126.6	0.347417
126.7	0.349083
126.8	0.3495
126.9	0.34775
127	0.348667
127.1	0.349167
127.2	0.349167
127.3	0.349667
127.4	0.350167
127.5	0.350583
127.6	0.350083
127.7	0.349833
127.8	0.350083
127.9	0.35075
128	0.350417
128.1	0.351333
128.2	0.3525
128.3	0.352167
128.4	0.353083
128.5	0.35175
128.6	0.351667
128.7	0.353083
128.8	0.35375
128.9	0.354083
129	0.3535
129.1	0.3535
129.2	0.35275
129.3	0.35325
129.4	0.353
129.5	0.353583
129.6	0.353083
129.7	0.353667
129.8	0.353917
129.9	0.35525
130	0.35675
130.1	0.356167
130.2	0.355417
130.3	0.356333
130.4	0.35725
130.5	0.356417
130.6	0.35625
130.7	0.356167
130.8	0.357083
130.9	0.357917
131	0.357083
131.1	0.357583
131.2	0.356583
131.3	0.356333
131.4	0.35675
131.5	0.357667
131.6	0.356583
131.7	0.357333
131.8	0.3565
131.9	0.35575
132	0.355417
132.1	0.355083
132.2	0.354417
132.3	0.355083
132.4	0.355417
132.5	0.357417
132.6	0.357583
132.7	0.358
132.8	0.35725
132.9	0.35825
133	0.35875
133.1	0.36075
133.2	0.360917
133.3	0.361083
133.4	0.362917
133.5	0.363083
133.6	0.363083
133.7	0.361333
133.8	0.36175
133.9	0.362333
134	0.363083
134.1	0.363333
134.2	0.363833
134.3	0.363333
134.4	0.363333
134.5	0.3655
134.6	0.366167
134.7	0.366583
134.8	0.366083
134.9	0.36625
135	0.366583
135.1	0.365833
135.2	0.3655
135.3	0.36675
135.4	0.36625
135.5	0.366
135.6	0.366667
135.7	0.36675
135.8	0.36625
135.9	0.36675
136	0.3655
136.1	0.3665
136.2	0.365917
136.3	0.368083
136.4	0.367583
136.5	0.366083
136.6	0.366
136.7	0.365833
136.8	0.365583
136.9	0.365417
137	0.3645
137.1	0.364167
137.2	0.36375
137.3	0.362833
137.4	0.364
137.5	0.364917
137.6	0.3635
137.7	0.364583
137.8	0.363917
137.9	0.364667
138	0.364917
138.1	0.3655
138.2	0.365667
138.3	0.365583
138.4	0.364083
138.5	0.364833
138.6	0.366417
138.7	0.3655
138.8	0.365167
138.9	0.3655
139	0.365417
139.1	0.364417
139.2	0.365583
139.3	0.366583
139.4	0.367667
139.5	0.366917
139.6	0.366417
139.7	0.366167
139.8	0.365583
139.9	0.36625
140	0.366917
140.1	0.366583
140.2	0.366083
140.3	0.366417
140.4	0.365417
140.5	0.367417
140.6	0.367167
140.7	0.3665
140.8	0.3665
140.9	0.366667
141	0.366417
141.1	0.369417
141.2	0.369167
141.3	0.368
141.4	0.368333
141.5	0.368417
141.6	0.36825
141.7	0.368083
141.8	0.368083
141.9	0.369167
142	0.36975
142.1	0.369583
142.2	0.369417
142.3	0.36925
142.4	0.367583
142.5	0.367333
142.6	0.368417
142.7	0.368
142.8	0.36725
142.9	0.36625
143	0.36725
143.1	0.368
143.2	0.368167
143.3	0.368083
143.4	0.368833
143.5	0.369333
143.6	0.368583
143.7	0.36825
143.8	0.368583
143.9	0.369833
144	0.370583
144.1	0.37075
144.2	0.371417
144.3	0.37125
144.4	0.371167
144.5	0.37
144.6	0.371083
144.7	0.371167
144.8	0.371667
144.9	0.371333
145	0.371
145.1	0.37225
145.2	0.370667
145.3	0.370583
145.4	0.370917
145.5	0.371667
145.6	0.371833
145.7	0.371917
145.8	0.372083
145.9	0.372833
146	0.374583
146.1	0.374917
146.2	0.375583
146.3	0.37525
146.4	0.37625
146.5	0.377167
146.6	0.3775
146.7	0.37775
146.8	0.37675
146.9	0.377833
147	0.377167
147.1	0.376667
147.2	0.379
147.3	0.38025
147.4	0.380833
147.5	0.382167
147.6	0.38225
147.7	0.382917
147.8	0.38325
147.9	0.384917
148	0.384417
148.1	0.384917
148.2	0.384417
148.3	0.384667
148.4	0.38375
148.5	0.384
148.6	0.383667
148.7	0.38325
148.8	0.383333
148.9	0.384
149	0.384
149.1	0.384917
149.2	0.385
149.3	0.386833
149.4	0.38625
149.5	0.38825
149.6	0.38675
149.7	0.385833
149.8	0.3855
149.9	0.385167
150	0.386417
150.1	0.38675
150.2	0.38625
150.3	0.38625
150.4	0.386667
150.5	0.38625
150.6	0.38675
150.7	0.3865
150.8	0.385667
150.9	0.38625
151	0.387083
151.1	0.386917
151.2	0.386917
151.3	0.386667
151.4	0.386917
151.5	0.386417
151.6	0.386
151.7	0.387083
151.8	0.385333
151.9	0.385667
152	0.384833
152.1	0.3845
152.2	0.383917
152.3	0.384917
152.4	0.385333
152.5	0.3845
152.6	0.385167
152.7	0.38425
152.8	0.3825
152.9	0.381167
153	0.382417
153.1	0.3825
153.2	0.384083
153.3	0.384417
153.4	0.384583
153.5	0.38525
153.6	0.386083
153.7	0.385833
153.8	0.385333
153.9	0.38475
154	0.383667
154.1	0.384917
154.2	0.3845
154.3	0.3845
154.4	0.385833
154.5	0.385
154.6	0.384083
154.7	0.3835
154.8	0.3835
154.9	0.384917
155	0.385
155.1	0.384667
155.2	0.3845
155.3	0.382583
155.4	0.382083
155.5	0.3825
155.6	0.382083
155.7	0.382833
155.8	0.382917
155.9	0.381583
156	0.380917
156.1	0.38125
156.2	0.38175
156.3	0.382167
156.4	0.382083
156.5	0.383417
156.6	0.384667
156.7	0.385
156.8	0.385667
156.9	0.385417
157	0.385333
157.1	0.385667
157.2	0.387083
157.3	0.388
157.4	0.386583
157.5	0.386583
157.6	0.3855
157.7	0.3855
157.8	0.387167
157.9	0.387083
158	0.3865
158.1	0.3855
158.2	0.386833
158.3	0.388083
158.4	0.387
158.5	0.386417
158.6	0.386333
158.7	0.386417
158.8	0.3845
158.9	0.384417
159	0.384333
159.1	0.384
159.2	0.383667
159.3	0.382917
159.4	0.38275
159.5	0.38125
159.6	0.38125
159.7	0.380417
159.8	0.379417
159.9	0.378083
160	0.378417
160.1	0.37925
160.2	0.379333
160.3	0.379667
160.4	0.379
160.5	0.379167
160.6	0.379833
160.7	0.381417
160.8	0.38275
160.9	0.3825
161	0.382333
161.1	0.382583
161.2	0.383833
161.3	0.382833
161.4	0.383333
161.5	0.383333
161.6	0.382167
161.7	0.38225
161.8	0.382833
161.9	0.3825
162	0.38225
162.1	0.382833
162.2	0.383167
162.3	0.38325
162.4	0.383417
162.5	0.383333
162.6	0.383583
162.7	0.384917
162.8	0.385333
162.9	0.385833
163	0.386083
163.1	0.38575
163.2	0.386667
163.3	0.387667
163.4	0.389333
163.5	0.388667
163.6	0.38825
163.7	0.389
163.8	0.389333
163.9	0.389667
164	0.390167
164.1	0.39125
164.2	0.390833
164.3	0.391417
164.4	0.391083
164.5	0.39125
164.6	0.39175
164.7	0.388917
164.8	0.388917
164.9	0.38875
165	0.3885
165.1	0.38825
165.2	0.389333
165.3	0.389417
165.4	0.3905
165.5	0.391083
165.6	0.391417
165.7	0.391
165.8	0.391
165.9	0.39075
166	0.390417
166.1	0.390417
166.2	0.391333
166.3	0.391083
166.4	0.390167
166.5	0.389417
166.6	0.38975
166.7	0.389667
166.8	0.38975
166.9	0.390083
167	0.39025
167.1	0.390667
167.2	0.390167
167.3	0.391
167.4	0.391583
167.5	0.39225
167.6	0.393083
167.7	0.394
167.8	0.393167
167.9	0.3935
168	0.392833
168.1	0.393
168.2	0.393167
168.3	0.392917
168.4	0.394083
168.5	0.394667
168.6	0.395667
168.7	0.3955
168.8	0.395833
168.9	0.395833
169	0.395583
169.1	0.395667
169.2	0.396167
169.3	0.395167
169.4	0.395167
169.5	0.39575
169.6	0.39525
169.7	0.395667
169.8	0.394833
169.9	0.394583
170	0.393167
170.1	0.393083
170.2	0.392583
170.3	0.39275
170.4	0.392
170.5	0.391
170.6	0.391333
170.7	0.391
170.8	0.390917
170.9	0.391583
171	0.392333
171.1	0.392583
171.2	0.39275
171.3	0.393417
171.4	0.395167
171.5	0.394917
171.6	0.3945
171.7	0.3935
171.8	0.393667
171.9	0.39375
172	0.394833
172.1	0.395417
172.2	0.396
172.3	0.395583
172.4	0.39625
172.5	0.3955
172.6	0.397917
172.7	0.398917
172.8	0.398917
172.9	0.400333
173	0.401
173.1	0.401333
173.2	0.402
173.3	0.402417
173.4	0.40225
173.5	0.40275
173.6	0.40175
173.7	0.40125
173.8	0.40175
173.9	0.400417
174	0.399833
174.1	0.398667
174.2	0.399833
174.3	0.399917
174.4	0.399417
174.5	0.397917
174.6	0.3985
174.7	0.398083
174.8	0.398917
174.9	0.399583
175	0.39925
175.1	0.39975
175.2	0.399833
175.3	0.399333
175.4	0.4
175.5	0.39925
175.6	0.399333
175.7	0.39875
175.8	0.3995
175.9	0.39875
176	0.398417
176.1	0.399083
176.2	0.399083
176.3	0.401
176.4	0.40125
176.5	0.401583
176.6	0.40175
176.7	0.40075
176.8	0.400583
176.9	0.401667
177	0.401917
177.1	0.402417
177.2	0.403
177.3	0.402417
177.4	0.402833
177.5	0.4025
177.6	0.402833
177.7	0.40375
177.8	0.403667
177.9	0.404333
178	0.40325
178.1	0.403417
178.2	0.403167
178.3	0.404667
178.4	0.404333
178.5	0.404167
178.6	0.40425
178.7	0.4055
178.8	0.4055
178.9	0.406667
179	0.406417
179.1	0.4065
179.2	0.4065
179.3	0.407083
179.4	0.40725
179.5	0.407417
179.6	0.405667
179.7	0.405833
179.8	0.406167
179.9	0.4065
180	0.405667
180.1	0.40675
180.2	0.406
180.3	0.406
180.4	0.406417
180.5	0.40675
180.6	0.406
180.7	0.405583
180.8	0.405833
180.9	0.406417
181	0.4065
181.1	0.407083
181.2	0.408583
181.3	0.408333
181.4	0.408583
181.5	0.4095
181.6	0.409833
181.7	0.409917
181.8	0.410167
181.9	0.410583
182	0.409667
182.1	0.408333
182.2	0.408
182.3	0.407417
182.4	0.40775
182.5	0.40925
182.6	0.40875
182.7	0.408917
182.8	0.410083
182.9	0.40975
183	0.408583
183.1	0.408167
183.2	0.408167
183.3	0.407833
183.4	0.40825
183.5	0.408917
183.6	0.408833
183.7	0.409917
183.8	0.410167
183.9	0.409333
184	0.408917
184.1	0.40925
184.2	0.408583
184.3	0.408167
184.4	0.408333
184.5	0.407917
184.6	0.407667
184.7	0.407667
184.8	0.407583
184.9	0.407083
185	0.409
185.1	0.408917
185.2	0.410167
185.3	0.410083
185.4	0.41
185.5	0.409167
185.6	0.40975
185.7	0.409083
185.8	0.409333
185.9	0.409333
186	0.408417
186.1	0.40975
186.2	0.408917
186.3	0.409
186.4	0.408167
186.5	0.4075
186.6	0.407083
186.7	0.409
186.8	0.4075
186.9	0.40575
187	0.405583
187.1	0.40425
187.2	0.40375
187.3	0.403583
187.4	0.404583
187.5	0.4045
187.6	0.404667
187.7	0.40525
187.8	0.405417
187.9	0.406083
188	0.4065
188.1	0.405833
188.2	0.406
188.3	0.4045
188.4	0.4035
188.5	0.402917
188.6	0.402167
188.7	0.401917
188.8	0.4025
188.9	0.4025
189	0.402167
189.1	0.402083
189.2	0.402167
189.3	0.402
189.4	0.401583
189.5	0.40225
189.6	0.402833
189.7	0.402583
189.8	0.404
189.9	0.403917
190	0.403583
190.1	0.40375
190.2	0.403917
190.3	0.404417
190.4	0.40425
190.5	0.404
190.6	0.4035
190.7	0.403583
190.8	0.403417
190.9	0.403
191	0.402333
191.1	0.402917
191.2	0.402
191.3	0.402667
191.4	0.402
191.5	0.402917
191.6	0.40375
191.7	0.402417
191.8	0.403167
191.9	0.402333
192	0.402583
192.1	0.403083
192.2	0.402583
192.3	0.401917
192.4	0.40075
192.5	0.40125
192.6	0.4
192.7	0.399917
192.8	0.399833
192.9	0.398667
193	0.398833
193.1	0.39875
193.2	0.398167
193.3	0.39925
193.4	0.399583
193.5	0.3995
193.6	0.399917
193.7	0.400833
193.8	0.401917
193.9	0.402333
194	0.402417
194.1	0.40125
194.2	0.402833
194.3	0.402917
194.4	0.402833
194.5	0.403583
194.6	0.403083
194.7	0.40325
194.8	0.404417
194.9	0.40525
195	0.4045
195.1	0.404667
195.2	0.405167
195.3	0.406083
195.4	0.4065
195.5	0.406833
195.6	0.406417
195.7	0.407667
195.8	0.407667
195.9	0.408583
196	0.409417
196.1	0.407667
196.2	0.407917
196.3	0.407917
196.4	0.407583
196.5	0.406917
196.6	0.40725
196.7	0.408667
196.8	0.409417
196.9	0.409583
197	0.409583
197.1	0.409917
197.2	0.409083
197.3	0.407583
197.4	0.407917
197.5	0.407917
197.6	0.409
197.7	0.410417
197.8	0.408833
197.9	0.410083
198	0.409667
198.1	0.410167
198.2	0.410333
198.3	0.412333
198.4	0.413333
198.5	0.4125
198.6	0.413167
198.7	0.41375
198.8	0.413833
198.9	0.41475
199	0.416167
199.1	0.416417
199.2	0.41625
199.3	0.415833
199.4	0.41625
199.5	0.416833
199.6	0.416667
199.7	0.417417
199.8	0.4165
199.9	0.41675
200	0.417583
[truncated: 14,000 more rows]
