# Supplementary material for: Bayesian inference of kinetic schemes for ion channels by Kalman filtering
Source: eLife journal article supplement (doi:10.7554/elife.62714), 2022-05-04
Supplement: fig4-data12 [file 1_Sim_N_6000_Strom_MW_0.125M.xlsx]

## Sheet: Tabelle1
0.1	0
0.2	0
0.3	0
0.4	0
0.5	0
0.6	0
0.7	0
0.8	0
0.9	0
1	0
1.1	0
1.2	0
1.3	0
1.4	0
1.5	0
1.6	0
1.7	0
1.8	0
1.9	0
2	0
2.1	0
2.2	0
2.3	0
2.4	0
2.5	0
2.6	0
2.7	0
2.8	0
2.9	0
3	0
3.1	0
3.2	0
3.3	0
3.4	0
3.5	0
3.6	0
3.7	0
3.8	0
3.9	0
4	0
4.1	0
4.2	0
4.3	0
4.4	0
4.5	0
4.6	0
4.7	0
4.8	0
4.9	0
5	0
5.1	0
5.2	0
5.3	0
5.4	0
5.5	0
5.6	0
5.7	0
5.8	0
5.9	0
6	0
6.1	0
6.2	0
6.3	0
6.4	0
6.5	0
6.6	0
6.7	0
6.8	0
6.9	0
7	0
7.1	0
7.2	0
7.3	0
7.4	0
7.5	0
7.6	0
7.7	0
7.8	0
7.9	0
8	0
8.1	0
8.2	0
8.3	0
8.4	0
8.5	0
8.6	0
8.7	0
8.8	0
8.9	0
9	0
9.1	0
9.2	0
9.3	0
9.4	0
9.5	0
9.6	0
9.7	0
9.8	0
9.9	0
10	0
10.1	0
10.2	0
10.3	0
10.4	0
10.5	0
10.6	0
10.7	0
10.8	0
10.9	0
11	0
11.1	0
11.2	0
11.3	0
11.4	0
11.5	0
11.6	0
11.7	0
11.8	0
11.9	0
12	0
12.1	0
12.2	0
12.3	0
12.4	0
12.5	0
12.6	0
12.7	0
12.8	0
12.9	0
13	0
13.1	0
13.2	0
13.3	0
13.4	0
13.5	0
13.6	0
13.7	0
13.8	0
13.9	0
14	0
14.1	0
14.2	0
14.3	0
14.4	0
14.5	0
14.6	0
14.7	0
14.8	0
14.9	0
15	0
15.1	0
15.2	0
15.3	0
15.4	0
15.5	0
15.6	0
15.7	0
15.8	0
15.9	0
16	0
16.1	0
16.2	0
16.3	0
16.4	0
16.5	0
16.6	0
16.7	0
16.8	0
16.9	0
17	0
17.1	0
17.2	0
17.3	0
17.4	0
17.5	0
17.6	0
17.7	0
17.8	0
17.9	0
18	0
18.1	0
18.2	0
18.3	0
18.4	0
18.5	0
18.6	0
18.7	0
18.8	0
18.9	0
19	0
19.1	0
19.2	0
19.3	0
19.4	0
19.5	0
19.6	0
19.7	0
19.8	0
19.9	0
20	0
20.1	0
20.2	0
20.3	0
20.4	0
20.5	0
20.6	0
20.7	0
20.8	0
20.9	0
21	0
21.1	0
21.2	0
21.3	0
21.4	0
21.5	0
21.6	0
21.7	0
21.8	0
21.9	0
22	0
22.1	0
22.2	0
22.3	0
22.4	0
22.5	0
22.6	0
22.7	0
22.8	0
22.9	0
23	0
23.1	0
23.2	0
23.3	0
23.4	0
23.5	0
23.6	0
23.7	0
23.8	0
23.9	0
24	0
24.1	0
24.2	0
24.3	0
24.4	0
24.5	0
24.6	0
24.7	0
24.8	0
24.9	0
25	0
25.1	0
25.2	0
25.3	0
25.4	0
25.5	0
25.6	0
25.7	0
25.8	0
25.9	0
26	0
26.1	0
26.2	0
26.3	0
26.4	0
26.5	0
26.6	0
26.7	0
26.8	0
26.9	0
27	0
27.1	0
27.2	0
27.3	0
27.4	0
27.5	0
27.6	0
27.7	0
27.8	0
27.9	0
28	0
28.1	0
28.2	0
28.3	0
28.4	0
28.5	0
28.6	0
28.7	0
28.8	0
28.9	0
29	0
29.1	0
29.2	0
29.3	0
29.4	0
29.5	0
29.6	0
29.7	0
29.8	0
29.9	0
30	0
30.1	0
30.2	0
30.3	0
30.4	0
30.5	0
30.6	0
30.7	0
30.8	0
30.9	0
31	0
31.1	0
31.2	0
31.3	0
31.4	0
31.5	0
31.6	0
31.7	0
31.8	0
31.9	0
32	0
32.1	0
32.2	0
32.3	0
32.4	0
32.5	0
32.6	0
32.7	0
32.8	0
32.9	0
33	0
33.1	0
33.2	0
33.3	0
33.4	0
33.5	0
33.6	0
33.7	0
33.8	0
33.9	0
34	0
34.1	0
34.2	0
34.3	0
34.4	0
34.5	0
34.6	0
34.7	0
34.8	0
34.9	0
35	0
35.1	0
35.2	0
35.3	0
35.4	0
35.5	0
35.6	0
35.7	0
35.8	0
35.9	0
36	0
36.1	0
36.2	0
36.3	0
36.4	0
36.5	0
36.6	0
36.7	0
36.8	0
36.9	0
37	0
37.1	0
37.2	0
37.3	0
37.4	0
37.5	0
37.6	0
37.7	0
37.8	0
37.9	0
38	0
38.1	0
38.2	0
38.3	0
38.4	0
38.5	0
38.6	0
38.7	0
38.8	0
38.9	0
39	0
39.1	0
39.2	0
39.3	0
39.4	0
39.5	0
39.6	0
39.7	0
39.8	0
39.9	0
40	0
40.1	0
40.2	0
40.3	0
40.4	0
40.5	0
40.6	0
40.7	0
40.8	0
40.9	0
41	0
41.1	0
41.2	0
41.3	0
41.4	0
41.5	0
41.6	0
41.7	0
41.8	0
41.9	0
42	0
42.1	0
42.2	0
42.3	0
42.4	0
42.5	0
42.6	0
42.7	0
42.8	0
42.9	0
43	0
43.1	0
43.2	0
43.3	0
43.4	0
43.5	0
43.6	0
43.7	0
43.8	0
43.9	0
44	0
44.1	0
44.2	0
44.3	0
44.4	0
44.5	0
44.6	0
44.7	0
44.8	0
44.9	0
45	0
45.1	0
45.2	0
45.3	0
45.4	0
45.5	0
45.6	0
45.7	0
45.8	0
45.9	0
46	0
46.1	0
46.2	0
46.3	0
46.4	0
46.5	0
46.6	0
46.7	0
46.8	0
46.9	0
47	0
47.1	0
47.2	0
47.3	0
47.4	0
47.5	0
47.6	0
47.7	0
47.8	0
47.9	0
48	0
48.1	0
48.2	0
48.3	0
48.4	0
48.5	0
48.6	0
48.7	0
48.8	0
48.9	0
49	0
49.1	0
49.2	0
49.3	0
49.4	0
49.5	0
49.6	0
49.7	0
49.8	0
49.9	0
50	0
50.1	0
50.2	0
50.3	0
50.4	0
50.5	0
50.6	0
50.7	0
50.8	0
50.9	0
51	0
51.1	0
51.2	0
51.3	0
51.4	0
51.5	0
51.6	0
51.7	0
51.8	0
51.9	0
52	0
52.1	0
52.2	0
52.3	0
52.4	0
52.5	0
52.6	0
52.7	0
52.8	0
52.9	0
53	0
53.1	0
53.2	0
53.3	0
53.4	0
53.5	0
53.6	0
53.7	0
53.8	0
53.9	0
54	0
54.1	0
54.2	0
54.3	0
54.4	0
54.5	0
54.6	0
54.7	0
54.8	0
54.9	0
55	0
55.1	0
55.2	0
55.3	0
55.4	0
55.5	0
55.6	0
55.7	0
55.8	0
55.9	0
56	0
56.1	0
56.2	0
56.3	0
56.4	0
56.5	0
56.6	0
56.7	0
56.8	0
56.9	0
57	0
57.1	0
57.2	0
57.3	0
57.4	0
57.5	0
57.6	0
57.7	0
57.8	0
57.9	0
58	0
58.1	0
58.2	0
58.3	0
58.4	0
58.5	0
58.6	0
58.7	0
58.8	0
58.9	0
59	0
59.1	0
59.2	0
59.3	0
59.4	0
59.5	0
59.6	0
59.7	0
59.8	0
59.9	0
60	0
60.1	0
60.2	0
60.3	0
60.4	0
60.5	0
60.6	0
60.7	0
60.8	0
60.9	0
61	0
61.1	0
61.2	0
61.3	0
61.4	0
61.5	0
61.6	0
61.7	0
61.8	0
61.9	0
62	0
62.1	0
62.2	0
62.3	0
62.4	0
62.5	0
62.6	0
62.7	0
62.8	0
62.9	0
63	0
63.1	0
63.2	0
63.3	0
63.4	0
63.5	0
63.6	0
63.7	0
63.8	0
63.9	0
64	0
64.1	0
64.2	0
64.3	0
64.4	0
64.5	0
64.6	0
64.7	0
64.8	0
64.9	0
65	0
65.1	0
65.2	0
65.3	0
65.4	0
65.5	0
65.6	0
65.7	0
65.8	0
65.9	0
66	0
66.1	0
66.2	0
66.3	0
66.4	0
66.5	0
66.6	0
66.7	0
66.8	0
66.9	0
67	0
67.1	0
67.2	0
67.3	0
67.4	0
67.5	0
67.6	0
67.7	0
67.8	0
67.9	0
68	0
68.1	0
68.2	0
68.3	0
68.4	0
68.5	0
68.6	0
68.7	0
68.8	0
68.9	0
69	0
69.1	0
69.2	0
69.3	0
69.4	0
69.5	0
69.6	0
69.7	0
69.8	0
69.9	0
70	0
70.1	0
70.2	0
70.3	0
70.4	0
70.5	0
70.6	0
70.7	0
70.8	0
70.9	0
71	0
71.1	0
71.2	0
71.3	0
71.4	0
71.5	0
71.6	0
71.7	0
71.8	0
71.9	0
72	0
72.1	0
72.2	0
72.3	0
72.4	0
72.5	0
72.6	0
72.7	0
72.8	0
72.9	0
73	0
73.1	0
73.2	0
73.3	0
73.4	0
73.5	0
73.6	0
73.7	0
73.8	0
73.9	0
74	0
74.1	0
74.2	0
74.3	0
74.4	0
74.5	0
74.6	0
74.7	0
74.8	0
74.9	0
75	0
75.1	0
75.2	0
75.3	0
75.4	0
75.5	0
75.6	0
75.7	0
75.8	0
75.9	0
76	0
76.1	0
76.2	0
76.3	0
76.4	0
76.5	0
76.6	0
76.7	0
76.8	0
76.9	0
77	0
77.1	0
77.2	0
77.3	0
77.4	0
77.5	0
77.6	0
77.7	0
77.8	0
77.9	0
78	0
78.1	0
78.2	0
78.3	0
78.4	0
78.5	0
78.6	0
78.7	0
78.8	0
78.9	0
79	0
79.1	0
79.2	0
79.3	0
79.4	0
79.5	0
79.6	0
79.7	0
79.8	0
79.9	0
80	0
80.1	0
80.2	0
80.3	0
80.4	0
80.5	0
80.6	0
80.7	0
80.8	0
80.9	0
81	0
81.1	0
81.2	0
81.3	0
81.4	0
81.5	0
81.6	0
81.7	0
81.8	0
81.9	0
82	0
82.1	0
82.2	0
82.3	0
82.4	0
82.5	0
82.6	0
82.7	0
82.8	0
82.9	0
83	0
83.1	0
83.2	0
83.3	0
83.4	0
83.5	0
83.6	0
83.7	0
83.8	0
83.9	0
84	0
84.1	0
84.2	0
84.3	0
84.4	0
84.5	0
84.6	0
84.7	0
84.8	0
84.9	0
85	0
85.1	0
85.2	0
85.3	0
85.4	0
85.5	0
85.6	0
85.7	0
85.8	0
85.9	0
86	0
86.1	0
86.2	0
86.3	0
86.4	0
86.5	0
86.6	0
86.7	0
86.8	0
86.9	0
87	0
87.1	0
87.2	0
87.3	0
87.4	0
87.5	0
87.6	0
87.7	0
87.8	0
87.9	0
88	0
88.1	0
88.2	0
88.3	0
88.4	0
88.5	0
88.6	0
88.7	0
88.8	0
88.9	0
89	0
89.1	0
89.2	0
89.3	0
89.4	0
89.5	0
89.6	0
89.7	0
89.8	0
89.9	0
90	0
90.1	0
90.2	0
90.3	0
90.4	0
90.5	0
90.6	0
90.7	0
90.8	0
90.9	0
91	0
91.1	0
91.2	0
91.3	0
91.4	0
91.5	0
91.6	0
91.7	0
91.8	0
91.9	0
92	0
92.1	0
92.2	0
92.3	0
92.4	0
92.5	0
92.6	0
92.7	0
92.8	0
92.9	0
93	0
93.1	0
93.2	0
93.3	0
93.4	0
93.5	0
93.6	0
93.7	0
93.8	0
93.9	0
94	0
94.1	0
94.2	0
94.3	0
94.4	0
94.5	0
94.6	0
94.7	0
94.8	0
94.9	0
95	0
95.1	0
95.2	0
95.3	0
95.4	0
95.5	0
95.6	0
95.7	0
95.8	0
95.9	0
96	0
96.1	0
96.2	0
96.3	0
96.4	0
96.5	0
96.6	0
96.7	0
96.8	0
96.9	0
97	0
97.1	0
97.2	0
97.3	0
97.4	0
97.5	0
97.6	0
97.7	0
97.8	0
97.9	0
98	0
98.1	0
98.2	0
98.3	0
98.4	0
98.5	0
98.6	0
98.7	0
98.8	0
98.9	0
99	0
99.1	0
99.2	0
99.3	0
99.4	0
99.5	0
99.6	0
99.7	0
99.8	0
99.9	0
100	0
100.1	0
100.2	0
100.3	0
100.4	0
100.5	0
100.6	0.000166667
100.7	0.000166667
100.8	0.000166667
100.9	0.000166667
101	0.000166667
101.1	0.000166667
101.2	0.000166667
101.3	0.000166667
101.4	0.000166667
101.5	0.000166667
101.6	0.000166667
101.7	0.000166667
101.8	0.000166667
101.9	0.000166667
102	0.000166667
102.1	0.000333333
102.2	0.000333333
102.3	0.0005
102.4	0.0005
102.5	0.000833333
102.6	0.000833333
102.7	0.000833333
102.8	0.001
102.9	0.001
103	0.001
103.1	0.001
103.2	0.00133333
103.3	0.0015
103.4	0.00166667
103.5	0.00183333
103.6	0.00183333
103.7	0.002
103.8	0.00216667
103.9	0.0025
104	0.0025
104.1	0.00283333
104.2	0.00333333
104.3	0.00333333
104.4	0.00333333
104.5	0.0035
104.6	0.0035
104.7	0.0035
104.8	0.0035
104.9	0.00366667
105	0.00366667
105.1	0.00383333
105.2	0.00416667
105.3	0.00433333
105.4	0.00433333
105.5	0.0045
105.6	0.0045
105.7	0.0045
105.8	0.0045
105.9	0.00466667
106	0.005
106.1	0.005
106.2	0.005
106.3	0.005
106.4	0.005
106.5	0.005
106.6	0.00516667
106.7	0.00516667
106.8	0.00533333
106.9	0.0055
107	0.00566667
107.1	0.00566667
107.2	0.00583333
107.3	0.00616667
107.4	0.00666667
107.5	0.00666667
107.6	0.00666667
107.7	0.00683333
107.8	0.007
107.9	0.007
108	0.00733333
108.1	0.00766667
108.2	0.00766667
108.3	0.00766667
108.4	0.008
108.5	0.00816667
108.6	0.00816667
108.7	0.00816667
108.8	0.00816667
108.9	0.00816667
109	0.00833333
109.1	0.00866667
109.2	0.00883333
109.3	0.00883333
109.4	0.009
109.5	0.009
109.6	0.0095
109.7	0.00983333
109.8	0.00966667
109.9	0.00966667
110	0.00966667
110.1	0.01
110.2	0.01
110.3	0.01
110.4	0.01
110.5	0.0101667
110.6	0.0103333
110.7	0.0105
110.8	0.0106667
110.9	0.0108333
111	0.0111667
111.1	0.0113333
111.2	0.0115
111.3	0.0118333
111.4	0.0121667
111.5	0.0123333
111.6	0.0126667
111.7	0.0125
111.8	0.0125
111.9	0.0125
112	0.0125
112.1	0.0126667
112.2	0.0128333
112.3	0.0128333
112.4	0.0133333
112.5	0.0135
112.6	0.0135
112.7	0.0136667
112.8	0.0138333
112.9	0.0138333
113	0.0138333
113.1	0.0138333
113.2	0.014
113.3	0.0141667
113.4	0.0145
113.5	0.0146667
113.6	0.0148333
113.7	0.0148333
113.8	0.0148333
113.9	0.0148333
114	0.0151667
114.1	0.0151667
114.2	0.0153333
114.3	0.0155
114.4	0.0155
114.5	0.0158333
114.6	0.0163333
114.7	0.0165
114.8	0.0165
114.9	0.017
115	0.0175
115.1	0.0176667
115.2	0.0178333
115.3	0.0178333
115.4	0.018
115.5	0.018
115.6	0.0183333
115.7	0.0181667
115.8	0.0183333
115.9	0.0186667
116	0.0188333
116.1	0.0188333
116.2	0.0186667
116.3	0.0186667
116.4	0.0186667
116.5	0.0186667
116.6	0.0186667
116.7	0.0188333
116.8	0.0188333
116.9	0.0188333
117	0.0188333
117.1	0.0188333
117.2	0.0191667
117.3	0.0193333
117.4	0.0193333
117.5	0.0195
117.6	0.0196667
117.7	0.0198333
117.8	0.02
117.9	0.02
118	0.0201667
118.1	0.0203333
118.2	0.0203333
118.3	0.0205
118.4	0.0206667
118.5	0.021
118.6	0.0213333
118.7	0.0215
118.8	0.0215
118.9	0.0215
119	0.0216667
119.1	0.0223333
119.2	0.0221667
119.3	0.0221667
119.4	0.0221667
119.5	0.0221667
119.6	0.0221667
119.7	0.022
119.8	0.0223333
119.9	0.0226667
120	0.0228333
120.1	0.0233333
120.2	0.0235
120.3	0.0235
120.4	0.0235
120.5	0.0235
120.6	0.0236667
120.7	0.024
120.8	0.0241667
120.9	0.0241667
121	0.024
121.1	0.024
121.2	0.024
121.3	0.0241667
121.4	0.0241667
121.5	0.0245
121.6	0.0248333
121.7	0.0248333
121.8	0.0253333
121.9	0.0258333
122	0.0261667
122.1	0.0263333
122.2	0.0265
122.3	0.0265
122.4	0.0268333
122.5	0.0266667
122.6	0.0268333
122.7	0.0268333
122.8	0.0271667
122.9	0.0273333
123	0.0273333
123.1	0.0275
123.2	0.0275
123.3	0.0276667
123.4	0.0276667
123.5	0.0278333
123.6	0.028
123.7	0.0283333
123.8	0.0285
123.9	0.0288333
124	0.0291667
124.1	0.0293333
124.2	0.0296667
124.3	0.0296667
124.4	0.03
124.5	0.0303333
124.6	0.0303333
124.7	0.0306667
124.8	0.0306667
124.9	0.0308333
125	0.0308333
125.1	0.031
125.2	0.031
125.3	0.0313333
125.4	0.0313333
125.5	0.0315
125.6	0.0315
125.7	0.0318333
125.8	0.0318333
125.9	0.0318333
126	0.032
126.1	0.0323333
126.2	0.0326667
126.3	0.0328333
126.4	0.0328333
126.5	0.033
126.6	0.033
126.7	0.033
126.8	0.033
126.9	0.033
127	0.0333333
127.1	0.0336667
127.2	0.034
127.3	0.034
127.4	0.0343333
127.5	0.0345
127.6	0.0346667
127.7	0.0346667
127.8	0.035
127.9	0.0353333
128	0.0355
128.1	0.0358333
128.2	0.0358333
128.3	0.0361667
128.4	0.0368333
128.5	0.0366667
128.6	0.0368333
128.7	0.0376667
128.8	0.0378333
128.9	0.0381667
129	0.0385
129.1	0.039
129.2	0.0395
129.3	0.0398333
129.4	0.04
129.5	0.04
129.6	0.04
129.7	0.0403333
129.8	0.0406667
129.9	0.0406667
130	0.0413333
130.1	0.0415
130.2	0.0413333
130.3	0.0418333
130.4	0.042
130.5	0.0421667
130.6	0.0428333
130.7	0.0428333
130.8	0.043
130.9	0.043
131	0.043
131.1	0.0431667
131.2	0.0433333
131.3	0.0433333
131.4	0.0435
131.5	0.0441667
131.6	0.044
131.7	0.0441667
131.8	0.0441667
131.9	0.044
132	0.0438333
132.1	0.0441667
132.2	0.0448333
132.3	0.0448333
132.4	0.0451667
132.5	0.0458333
132.6	0.0463333
132.7	0.0466667
132.8	0.0468333
132.9	0.0475
133	0.0476667
133.1	0.0476667
133.2	0.0478333
133.3	0.0478333
133.4	0.0481667
133.5	0.0486667
133.6	0.0486667
133.7	0.0485
133.8	0.0485
133.9	0.0483333
134	0.0481667
134.1	0.0481667
134.2	0.0478333
134.3	0.0481667
134.4	0.0483333
134.5	0.0483333
134.6	0.0485
134.7	0.0486667
134.8	0.0488333
134.9	0.049
135	0.0493333
135.1	0.0493333
135.2	0.0503333
135.3	0.0508333
135.4	0.051
135.5	0.051
135.6	0.0511667
135.7	0.0511667
135.8	0.0511667
135.9	0.0511667
136	0.0516667
136.1	0.0516667
136.2	0.0516667
136.3	0.0516667
136.4	0.0521667
136.5	0.052
136.6	0.0518333
136.7	0.0523333
136.8	0.0521667
136.9	0.052
137	0.052
137.1	0.052
137.2	0.052
137.3	0.0521667
137.4	0.0521667
137.5	0.0523333
137.6	0.0526667
137.7	0.0526667
137.8	0.0531667
137.9	0.053
138	0.053
138.1	0.0533333
138.2	0.0535
138.3	0.0535
138.4	0.0536667
138.5	0.054
138.6	0.055
138.7	0.0555
138.8	0.0556667
138.9	0.0556667
139	0.0558333
139.1	0.0561667
139.2	0.0563333
139.3	0.0563333
139.4	0.0563333
139.5	0.0565
139.6	0.0565
139.7	0.0566667
139.8	0.0566667
139.9	0.057
140	0.057
140.1	0.0571667
140.2	0.0573333
140.3	0.0571667
140.4	0.0573333
140.5	0.0573333
140.6	0.0571667
140.7	0.0578333
140.8	0.058
140.9	0.0585
141	0.0583333
141.1	0.0585
141.2	0.0588333
141.3	0.0588333
141.4	0.059
141.5	0.0591667
141.6	0.0593333
141.7	0.0593333
141.8	0.0595
141.9	0.0598333
142	0.0598333
142.1	0.06
142.2	0.06
142.3	0.0598333
142.4	0.0598333
142.5	0.0603333
142.6	0.0606667
142.7	0.0603333
142.8	0.0603333
142.9	0.0603333
143	0.0606667
143.1	0.0608333
143.2	0.061
143.3	0.0611667
143.4	0.0613333
143.5	0.0621667
143.6	0.062
143.7	0.0623333
143.8	0.0623333
143.9	0.0625
144	0.0626667
144.1	0.0625
144.2	0.0626667
144.3	0.063
144.4	0.0628333
144.5	0.0628333
144.6	0.063
144.7	0.063
144.8	0.0635
144.9	0.0638333
145	0.0641667
145.1	0.0643333
145.2	0.0645
145.3	0.0645
145.4	0.0646667
145.5	0.0648333
145.6	0.0651667
145.7	0.0653333
145.8	0.0655
145.9	0.0655
146	0.066
146.1	0.0663333
146.2	0.067
146.3	0.0673333
146.4	0.0673333
146.5	0.0678333
146.6	0.0681667
146.7	0.0686667
146.8	0.0688333
146.9	0.0688333
147	0.069
147.1	0.0691667
147.2	0.0695
147.3	0.0696667
147.4	0.0706667
147.5	0.071
147.6	0.0711667
147.7	0.0711667
147.8	0.0715
147.9	0.0716667
148	0.0718333
148.1	0.0718333
148.2	0.0716667
148.3	0.0716667
148.4	0.0716667
148.5	0.072
148.6	0.0721667
148.7	0.0721667
148.8	0.0721667
148.9	0.0721667
149	0.0726667
149.1	0.0726667
149.2	0.0725
149.3	0.0728333
149.4	0.073
149.5	0.0731667
149.6	0.0731667
149.7	0.0731667
149.8	0.0736667
149.9	0.0736667
150	0.074
150.1	0.0745
150.2	0.0743333
150.3	0.0745
150.4	0.0743333
150.5	0.075
150.6	0.075
150.7	0.0751667
150.8	0.0753333
150.9	0.0753333
151	0.0753333
151.1	0.0758333
151.2	0.0756667
151.3	0.0756667
151.4	0.076
151.5	0.0758333
151.6	0.076
151.7	0.0758333
151.8	0.076
151.9	0.0761667
152	0.0765
152.1	0.0763333
152.2	0.0765
152.3	0.0763333
152.4	0.0763333
152.5	0.076
152.6	0.0763333
152.7	0.0765
152.8	0.0765
152.9	0.0768333
153	0.0768333
153.1	0.0768333
153.2	0.077
153.3	0.0771667
153.4	0.0776667
153.5	0.078
153.6	0.0778333
153.7	0.0776667
153.8	0.0775
153.9	0.0775
154	0.0775
154.1	0.0771667
154.2	0.0775
154.3	0.0775
154.4	0.0773333
154.5	0.0776667
154.6	0.0778333
154.7	0.078
154.8	0.0778333
154.9	0.0776667
155	0.078
155.1	0.0781667
155.2	0.0781667
155.3	0.0783333
155.4	0.0783333
155.5	0.0783333
155.6	0.0785
155.7	0.0785
155.8	0.0786667
155.9	0.0786667
156	0.079
156.1	0.0791667
156.2	0.0793333
156.3	0.0795
156.4	0.0798333
156.5	0.08
156.6	0.0801667
156.7	0.0806667
156.8	0.0808333
156.9	0.0808333
157	0.081
157.1	0.0808333
157.2	0.0816667
157.3	0.0816667
157.4	0.0818333
157.5	0.0816667
157.6	0.0818333
157.7	0.082
157.8	0.082
157.9	0.082
158	0.082
158.1	0.0821667
158.2	0.0825
158.3	0.0826667
158.4	0.0828333
158.5	0.0831667
158.6	0.0831667
158.7	0.0838333
158.8	0.0841667
158.9	0.0843333
159	0.0843333
159.1	0.0843333
159.2	0.0843333
159.3	0.0848333
159.4	0.0848333
159.5	0.0853333
159.6	0.0855
159.7	0.0855
159.8	0.086
159.9	0.0865
160	0.0865
160.1	0.0865
160.2	0.087
160.3	0.0873333
160.4	0.0873333
160.5	0.088
160.6	0.0878333
160.7	0.088
160.8	0.0878333
160.9	0.088
161	0.088
161.1	0.0878333
161.2	0.0876667
161.3	0.0876667
161.4	0.0878333
161.5	0.0878333
161.6	0.0878333
161.7	0.0878333
161.8	0.0883333
161.9	0.0888333
162	0.089
162.1	0.0886667
162.2	0.0891667
162.3	0.0891667
162.4	0.0891667
162.5	0.089
162.6	0.0893333
162.7	0.0898333
162.8	0.09
162.9	0.09
163	0.09
163.1	0.0901667
163.2	0.0901667
163.3	0.09
163.4	0.0898333
163.5	0.0905
163.6	0.0903333
163.7	0.0903333
163.8	0.0903333
163.9	0.0906667
164	0.0911667
164.1	0.0916667
164.2	0.0916667
164.3	0.092
164.4	0.0918333
164.5	0.092
164.6	0.0916667
164.7	0.0915
164.8	0.0915
164.9	0.0915
165	0.0916667
165.1	0.0921667
165.2	0.0921667
165.3	0.0925
165.4	0.0928333
165.5	0.093
165.6	0.0931667
165.7	0.0933333
165.8	0.0933333
165.9	0.0938333
166	0.094
166.1	0.094
166.2	0.094
166.3	0.094
166.4	0.094
166.5	0.094
166.6	0.0941667
166.7	0.0943333
166.8	0.0946667
166.9	0.0946667
167	0.095
167.1	0.0948333
167.2	0.095
167.3	0.095
167.4	0.0951667
167.5	0.0953333
167.6	0.0955
167.7	0.0956667
167.8	0.0956667
167.9	0.0956667
168	0.0956667
168.1	0.0955
168.2	0.0955
168.3	0.0951667
168.4	0.0948333
168.5	0.0948333
168.6	0.0951667
168.7	0.0956667
168.8	0.0958333
168.9	0.096
169	0.096
169.1	0.0958333
169.2	0.096
169.3	0.0966667
169.4	0.0968333
169.5	0.0966667
169.6	0.0968333
169.7	0.0966667
169.8	0.0966667
169.9	0.0968333
170	0.0966667
170.1	0.0968333
170.2	0.0968333
170.3	0.097
170.4	0.097
170.5	0.097
170.6	0.097
170.7	0.097
170.8	0.0971667
170.9	0.0971667
171	0.0975
171.1	0.0975
171.2	0.0976667
171.3	0.0978333
171.4	0.0978333
171.5	0.0981667
171.6	0.0985
171.7	0.0988333
171.8	0.0988333
171.9	0.099
172	0.0988333
172.1	0.0991667
172.2	0.0991667
172.3	0.0991667
172.4	0.099
172.5	0.0991667
172.6	0.0991667
172.7	0.0991667
172.8	0.0993333
172.9	0.0991667
173	0.0991667
173.1	0.099
173.2	0.099
173.3	0.0991667
173.4	0.0993333
173.5	0.0996667
173.6	0.0998333
173.7	0.1
173.8	0.100333
173.9	0.1005
174	0.100667
174.1	0.100333
174.2	0.1005
174.3	0.100833
174.4	0.100667
174.5	0.100833
174.6	0.100833
174.7	0.100833
174.8	0.101
174.9	0.101
175	0.101
175.1	0.101
175.2	0.101333
175.3	0.1015
175.4	0.101667
175.5	0.101667
175.6	0.101833
175.7	0.101833
175.8	0.1025
175.9	0.102667
176	0.103
176.1	0.103167
176.2	0.103167
176.3	0.103167
176.4	0.103667
176.5	0.1035
176.6	0.103667
176.7	0.103667
176.8	0.103667
176.9	0.103833
177	0.103833
177.1	0.104333
177.2	0.104667
177.3	0.105
177.4	0.1055
177.5	0.105833
177.6	0.105667
177.7	0.105667
177.8	0.105667
177.9	0.105667
178	0.105667
178.1	0.105667
178.2	0.105667
178.3	0.105833
178.4	0.105833
178.5	0.1055
178.6	0.105667
178.7	0.105833
178.8	0.105833
178.9	0.105833
179	0.105833
179.1	0.106
179.2	0.106
179.3	0.106
179.4	0.106
179.5	0.106
179.6	0.1065
179.7	0.1065
179.8	0.106333
179.9	0.1065
180	0.1065
180.1	0.1065
180.2	0.106667
180.3	0.1065
180.4	0.107
180.5	0.107167
180.6	0.107167
180.7	0.107
180.8	0.107
180.9	0.107
181	0.1075
181.1	0.107833
181.2	0.108
181.3	0.108333
181.4	0.108333
181.5	0.108167
181.6	0.108167
181.7	0.1085
181.8	0.1085
181.9	0.1085
182	0.108833
182.1	0.108667
182.2	0.108833
182.3	0.108833
182.4	0.109167
182.5	0.109333
182.6	0.109833
182.7	0.109667
182.8	0.109667
182.9	0.1095
183	0.109667
183.1	0.109833
183.2	0.109833
183.3	0.11
183.4	0.109833
183.5	0.109833
183.6	0.110333
183.7	0.110333
183.8	0.110833
183.9	0.110833
184	0.111333
184.1	0.111
184.2	0.110833
184.3	0.110833
184.4	0.1105
184.5	0.110667
184.6	0.110667
184.7	0.110667
184.8	0.110667
184.9	0.111
185	0.111167
185.1	0.111167
185.2	0.1115
185.3	0.1115
185.4	0.111333
185.5	0.1115
185.6	0.111833
185.7	0.112167
185.8	0.112167
185.9	0.111667
186	0.1115
186.1	0.1115
186.2	0.1115
186.3	0.111667
186.4	0.111667
186.5	0.111833
186.6	0.111833
186.7	0.111833
186.8	0.112
186.9	0.111833
187	0.111667
187.1	0.111667
187.2	0.111667
187.3	0.111667
187.4	0.111667
187.5	0.1115
187.6	0.1115
187.7	0.1115
187.8	0.111333
187.9	0.111333
188	0.111333
188.1	0.1115
188.2	0.112
188.3	0.112167
188.4	0.112
188.5	0.111833
188.6	0.112167
188.7	0.112333
188.8	0.112167
188.9	0.112167
189	0.112
189.1	0.112
189.2	0.112167
189.3	0.112333
189.4	0.112167
189.5	0.1125
189.6	0.1125
189.7	0.1125
189.8	0.112667
189.9	0.113167
190	0.113333
190.1	0.113667
190.2	0.113667
190.3	0.1135
190.4	0.113833
190.5	0.113667
190.6	0.1135
190.7	0.113333
190.8	0.113167
190.9	0.113333
191	0.1135
191.1	0.1135
191.2	0.1135
191.3	0.113333
191.4	0.113333
191.5	0.113
191.6	0.113333
191.7	0.113333
191.8	0.113667
191.9	0.113833
192	0.114
192.1	0.114167
192.2	0.114167
192.3	0.114333
192.4	0.114667
192.5	0.114833
192.6	0.114833
192.7	0.114833
192.8	0.115
192.9	0.115
193	0.114833
193.1	0.115167
193.2	0.115167
193.3	0.115
193.4	0.115167
193.5	0.115167
193.6	0.115333
193.7	0.115167
193.8	0.115167
193.9	0.1155
194	0.115667
194.1	0.115833
194.2	0.116167
194.3	0.116167
194.4	0.116
194.5	0.1165
194.6	0.116833
194.7	0.117
194.8	0.117333
194.9	0.117333
195	0.1175
195.1	0.117333
195.2	0.1175
195.3	0.117833
195.4	0.118333
195.5	0.118333
195.6	0.1185
195.7	0.119
195.8	0.119
195.9	0.119
196	0.1195
196.1	0.119833
196.2	0.120167
196.3	0.120333
196.4	0.12
196.5	0.119833
196.6	0.12
196.7	0.119833
196.8	0.119833
196.9	0.1205
197	0.1205
197.1	0.120833
197.2	0.120667
197.3	0.120833
197.4	0.120833
197.5	0.121
197.6	0.121
197.7	0.121167
197.8	0.121333
197.9	0.121333
198	0.121167
198.1	0.121333
198.2	0.1215
198.3	0.1215
198.4	0.121167
198.5	0.1215
198.6	0.1215
198.7	0.122167
198.8	0.122
198.9	0.122333
199	0.122667
199.1	0.122667
199.2	0.122667
199.3	0.122833
199.4	0.122667
199.5	0.122667
199.6	0.122833
199.7	0.122833
199.8	0.122667
199.9	0.122667
200	0.122833
[truncated: 14,000 more rows]
