# Supplementary material for: Bayesian inference of kinetic schemes for ion channels by Kalman filtering
Source: eLife journal article supplement (doi:10.7554/elife.62714), 2022-05-04
Supplement: fig4-data12 [file 1_Sim_N_7000_Fluor_MW_0.125M.xlsx]

## Sheet: Tabelle1
0.1	0
0.2	0
0.3	0
0.4	0
0.5	0
0.6	0
0.7	0
0.8	0
0.9	0
1	0
1.1	0
1.2	0
1.3	0
1.4	0
1.5	0
1.6	0
1.7	0
1.8	0
1.9	0
2	0
2.1	0
2.2	0
2.3	0
2.4	0
2.5	0
2.6	0
2.7	0
2.8	0
2.9	0
3	0
3.1	0
3.2	0
3.3	0
3.4	0
3.5	0
3.6	0
3.7	0
3.8	0
3.9	0
4	0
4.1	0
4.2	0
4.3	0
4.4	0
4.5	0
4.6	0
4.7	0
4.8	0
4.9	0
5	0
5.1	0
5.2	0
5.3	0
5.4	0
5.5	0
5.6	0
5.7	0
5.8	0
5.9	0
6	0
6.1	0
6.2	0
6.3	0
6.4	0
6.5	0
6.6	0
6.7	0
6.8	0
6.9	0
7	0
7.1	0
7.2	0
7.3	0
7.4	0
7.5	0
7.6	0
7.7	0
7.8	0
7.9	0
8	0
8.1	0
8.2	0
8.3	0
8.4	0
8.5	0
8.6	0
8.7	0
8.8	0
8.9	0
9	0
9.1	0
9.2	0
9.3	0
9.4	0
9.5	0
9.6	0
9.7	0
9.8	0
9.9	0
10	0
10.1	0
10.2	0
10.3	0
10.4	0
10.5	0
10.6	0
10.7	0
10.8	0
10.9	0
11	0
11.1	0
11.2	0
11.3	0
11.4	0
11.5	0
11.6	0
11.7	0
11.8	0
11.9	0
12	0
12.1	0
12.2	0
12.3	0
12.4	0
12.5	0
12.6	0
12.7	0
12.8	0
12.9	0
13	0
13.1	0
13.2	0
13.3	0
13.4	0
13.5	0
13.6	0
13.7	0
13.8	0
13.9	0
14	0
14.1	0
14.2	0
14.3	0
14.4	0
14.5	0
14.6	0
14.7	0
14.8	0
14.9	0
15	0
15.1	0
15.2	0
15.3	0
15.4	0
15.5	0
15.6	0
15.7	0
15.8	0
15.9	0
16	0
16.1	0
16.2	0
16.3	0
16.4	0
16.5	0
16.6	0
16.7	0
16.8	0
16.9	0
17	0
17.1	0
17.2	0
17.3	0
17.4	0
17.5	0
17.6	0
17.7	0
17.8	0
17.9	0
18	0
18.1	0
18.2	0
18.3	0
18.4	0
18.5	0
18.6	0
18.7	0
18.8	0
18.9	0
19	0
19.1	0
19.2	0
19.3	0
19.4	0
19.5	0
19.6	0
19.7	0
19.8	0
19.9	0
20	0
20.1	0
20.2	0
20.3	0
20.4	0
20.5	0
20.6	0
20.7	0
20.8	0
20.9	0
21	0
21.1	0
21.2	0
21.3	0
21.4	0
21.5	0
21.6	0
21.7	0
21.8	0
21.9	0
22	0
22.1	0
22.2	0
22.3	0
22.4	0
22.5	0
22.6	0
22.7	0
22.8	0
22.9	0
23	0
23.1	0
23.2	0
23.3	0
23.4	0
23.5	0
23.6	0
23.7	0
23.8	0
23.9	0
24	0
24.1	0
24.2	0
24.3	0
24.4	0
24.5	0
24.6	0
24.7	0
24.8	0
24.9	0
25	0
25.1	0
25.2	0
25.3	0
25.4	0
25.5	0
25.6	0
25.7	0
25.8	0
25.9	0
26	0
26.1	0
26.2	0
26.3	0
26.4	0
26.5	0
26.6	0
26.7	0
26.8	0
26.9	0
27	0
27.1	0
27.2	0
27.3	0
27.4	0
27.5	0
27.6	0
27.7	0
27.8	0
27.9	0
28	0
28.1	0
28.2	0
28.3	0
28.4	0
28.5	0
28.6	0
28.7	0
28.8	0
28.9	0
29	0
29.1	0
29.2	0
29.3	0
29.4	0
29.5	0
29.6	0
29.7	0
29.8	0
29.9	0
30	0
30.1	0
30.2	0
30.3	0
30.4	0
30.5	0
30.6	0
30.7	0
30.8	0
30.9	0
31	0
31.1	0
31.2	0
31.3	0
31.4	0
31.5	0
31.6	0
31.7	0
31.8	0
31.9	0
32	0
32.1	0
32.2	0
32.3	0
32.4	0
32.5	0
32.6	0
32.7	0
32.8	0
32.9	0
33	0
33.1	0
33.2	0
33.3	0
33.4	0
33.5	0
33.6	0
33.7	0
33.8	0
33.9	0
34	0
34.1	0
34.2	0
34.3	0
34.4	0
34.5	0
34.6	0
34.7	0
34.8	0
34.9	0
35	0
35.1	0
35.2	0
35.3	0
35.4	0
35.5	0
35.6	0
35.7	0
35.8	0
35.9	0
36	0
36.1	0
36.2	0
36.3	0
36.4	0
36.5	0
36.6	0
36.7	0
36.8	0
36.9	0
37	0
37.1	0
37.2	0
37.3	0
37.4	0
37.5	0
37.6	0
37.7	0
37.8	0
37.9	0
38	0
38.1	0
38.2	0
38.3	0
38.4	0
38.5	0
38.6	0
38.7	0
38.8	0
38.9	0
39	0
39.1	0
39.2	0
39.3	0
39.4	0
39.5	0
39.6	0
39.7	0
39.8	0
39.9	0
40	0
40.1	0
40.2	0
40.3	0
40.4	0
40.5	0
40.6	0
40.7	0
40.8	0
40.9	0
41	0
41.1	0
41.2	0
41.3	0
41.4	0
41.5	0
41.6	0
41.7	0
41.8	0
41.9	0
42	0
42.1	0
42.2	0
42.3	0
42.4	0
42.5	0
42.6	0
42.7	0
42.8	0
42.9	0
43	0
43.1	0
43.2	0
43.3	0
43.4	0
43.5	0
43.6	0
43.7	0
43.8	0
43.9	0
44	0
44.1	0
44.2	0
44.3	0
44.4	0
44.5	0
44.6	0
44.7	0
44.8	0
44.9	0
45	0
45.1	0
45.2	0
45.3	0
45.4	0
45.5	0
45.6	0
45.7	0
45.8	0
45.9	0
46	0
46.1	0
46.2	0
46.3	0
46.4	0
46.5	0
46.6	0
46.7	0
46.8	0
46.9	0
47	0
47.1	0
47.2	0
47.3	0
47.4	0
47.5	0
47.6	0
47.7	0
47.8	0
47.9	0
48	0
48.1	0
48.2	0
48.3	0
48.4	0
48.5	0
48.6	0
48.7	0
48.8	0
48.9	0
49	0
49.1	0
49.2	0
49.3	0
49.4	0
49.5	0
49.6	0
49.7	0
49.8	0
49.9	0
50	0
50.1	0
50.2	0
50.3	0
50.4	0
50.5	0
50.6	0
50.7	0
50.8	0
50.9	0
51	0
51.1	0
51.2	0
51.3	0
51.4	0
51.5	0
51.6	0
51.7	0
51.8	0
51.9	0
52	0
52.1	0
52.2	0
52.3	0
52.4	0
52.5	0
52.6	0
52.7	0
52.8	0
52.9	0
53	0
53.1	0
53.2	0
53.3	0
53.4	0
53.5	0
53.6	0
53.7	0
53.8	0
53.9	0
54	0
54.1	0
54.2	0
54.3	0
54.4	0
54.5	0
54.6	0
54.7	0
54.8	0
54.9	0
55	0
55.1	0
55.2	0
55.3	0
55.4	0
55.5	0
55.6	0
55.7	0
55.8	0
55.9	0
56	0
56.1	0
56.2	0
56.3	0
56.4	0
56.5	0
56.6	0
56.7	0
56.8	0
56.9	0
57	0
57.1	0
57.2	0
57.3	0
57.4	0
57.5	0
57.6	0
57.7	0
57.8	0
57.9	0
58	0
58.1	0
58.2	0
58.3	0
58.4	0
58.5	0
58.6	0
58.7	0
58.8	0
58.9	0
59	0
59.1	0
59.2	0
59.3	0
59.4	0
59.5	0
59.6	0
59.7	0
59.8	0
59.9	0
60	0
60.1	0
60.2	0
60.3	0
60.4	0
60.5	0
60.6	0
60.7	0
60.8	0
60.9	0
61	0
61.1	0
61.2	0
61.3	0
61.4	0
61.5	0
61.6	0
61.7	0
61.8	0
61.9	0
62	0
62.1	0
62.2	0
62.3	0
62.4	0
62.5	0
62.6	0
62.7	0
62.8	0
62.9	0
63	0
63.1	0
63.2	0
63.3	0
63.4	0
63.5	0
63.6	0
63.7	0
63.8	0
63.9	0
64	0
64.1	0
64.2	0
64.3	0
64.4	0
64.5	0
64.6	0
64.7	0
64.8	0
64.9	0
65	0
65.1	0
65.2	0
65.3	0
65.4	0
65.5	0
65.6	0
65.7	0
65.8	0
65.9	0
66	0
66.1	0
66.2	0
66.3	0
66.4	0
66.5	0
66.6	0
66.7	0
66.8	0
66.9	0
67	0
67.1	0
67.2	0
67.3	0
67.4	0
67.5	0
67.6	0
67.7	0
67.8	0
67.9	0
68	0
68.1	0
68.2	0
68.3	0
68.4	0
68.5	0
68.6	0
68.7	0
68.8	0
68.9	0
69	0
69.1	0
69.2	0
69.3	0
69.4	0
69.5	0
69.6	0
69.7	0
69.8	0
69.9	0
70	0
70.1	0
70.2	0
70.3	0
70.4	0
70.5	0
70.6	0
70.7	0
70.8	0
70.9	0
71	0
71.1	0
71.2	0
71.3	0
71.4	0
71.5	0
71.6	0
71.7	0
71.8	0
71.9	0
72	0
72.1	0
72.2	0
72.3	0
72.4	0
72.5	0
72.6	0
72.7	0
72.8	0
72.9	0
73	0
73.1	0
73.2	0
73.3	0
73.4	0
73.5	0
73.6	0
73.7	0
73.8	0
73.9	0
74	0
74.1	0
74.2	0
74.3	0
74.4	0
74.5	0
74.6	0
74.7	0
74.8	0
74.9	0
75	0
75.1	0
75.2	0
75.3	0
75.4	0
75.5	0
75.6	0
75.7	0
75.8	0
75.9	0
76	0
76.1	0
76.2	0
76.3	0
76.4	0
76.5	0
76.6	0
76.7	0
76.8	0
76.9	0
77	0
77.1	0
77.2	0
77.3	0
77.4	0
77.5	0
77.6	0
77.7	0
77.8	0
77.9	0
78	0
78.1	0
78.2	0
78.3	0
78.4	0
78.5	0
78.6	0
78.7	0
78.8	0
78.9	0
79	0
79.1	0
79.2	0
79.3	0
79.4	0
79.5	0
79.6	0
79.7	0
79.8	0
79.9	0
80	0
80.1	0
80.2	0
80.3	0
80.4	0
80.5	0
80.6	0
80.7	0
80.8	0
80.9	0
81	0
81.1	0
81.2	0
81.3	0
81.4	0
81.5	0
81.6	0
81.7	0
81.8	0
81.9	0
82	0
82.1	0
82.2	0
82.3	0
82.4	0
82.5	0
82.6	0
82.7	0
82.8	0
82.9	0
83	0
83.1	0
83.2	0
83.3	0
83.4	0
83.5	0
83.6	0
83.7	0
83.8	0
83.9	0
84	0
84.1	0
84.2	0
84.3	0
84.4	0
84.5	0
84.6	0
84.7	0
84.8	0
84.9	0
85	0
85.1	0
85.2	0
85.3	0
85.4	0
85.5	0
85.6	0
85.7	0
85.8	0
85.9	0
86	0
86.1	0
86.2	0
86.3	0
86.4	0
86.5	0
86.6	0
86.7	0
86.8	0
86.9	0
87	0
87.1	0
87.2	0
87.3	0
87.4	0
87.5	0
87.6	0
87.7	0
87.8	0
87.9	0
88	0
88.1	0
88.2	0
88.3	0
88.4	0
88.5	0
88.6	0
88.7	0
88.8	0
88.9	0
89	0
89.1	0
89.2	0
89.3	0
89.4	0
89.5	0
89.6	0
89.7	0
89.8	0
89.9	0
90	0
90.1	0
90.2	0
90.3	0
90.4	0
90.5	0
90.6	0
90.7	0
90.8	0
90.9	0
91	0
91.1	0
91.2	0
91.3	0
91.4	0
91.5	0
91.6	0
91.7	0
91.8	0
91.9	0
92	0
92.1	0
92.2	0
92.3	0
92.4	0
92.5	0
92.6	0
92.7	0
92.8	0
92.9	0
93	0
93.1	0
93.2	0
93.3	0
93.4	0
93.5	0
93.6	0
93.7	0
93.8	0
93.9	0
94	0
94.1	0
94.2	0
94.3	0
94.4	0
94.5	0
94.6	0
94.7	0
94.8	0
94.9	0
95	0
95.1	0
95.2	0
95.3	0
95.4	0
95.5	0
95.6	0
95.7	0
95.8	0
95.9	0
96	0
96.1	0
96.2	0
96.3	0
96.4	0
96.5	0
96.6	0
96.7	0
96.8	0
96.9	0
97	0
97.1	0
97.2	0
97.3	0
97.4	0
97.5	0
97.6	0
97.7	0
97.8	0
97.9	0
98	0
98.1	0
98.2	0
98.3	0
98.4	0
98.5	0
98.6	0
98.7	0
98.8	0
98.9	0
99	0
99.1	0
99.2	0
99.3	0
99.4	0
99.5	0
99.6	0
99.7	0
99.8	0
99.9	0
100	0
100.1	0.00764286
100.2	0.0152143
100.3	0.0220714
100.4	0.0284286
100.5	0.0347857
100.6	0.0418571
100.7	0.0488571
100.8	0.0558571
100.9	0.0615714
101	0.0673571
101.1	0.0725714
101.2	0.0787143
101.3	0.0846429
101.4	0.0887143
101.5	0.0937143
101.6	0.0987857
101.7	0.105071
101.8	0.110714
101.9	0.115929
102	0.120857
102.1	0.125071
102.2	0.130143
102.3	0.136714
102.4	0.142714
102.5	0.146357
102.6	0.151
102.7	0.154857
102.8	0.159286
102.9	0.164357
103	0.1675
103.1	0.171857
103.2	0.175429
103.3	0.179071
103.4	0.183571
103.5	0.186929
103.6	0.1915
103.7	0.194071
103.8	0.197214
103.9	0.201
104	0.205071
104.1	0.208714
104.2	0.211786
104.3	0.2135
104.4	0.217214
104.5	0.22
104.6	0.222429
104.7	0.225929
104.8	0.227
104.9	0.230143
105	0.231357
105.1	0.233929
105.2	0.236571
105.3	0.237643
105.4	0.240357
105.5	0.242929
105.6	0.244929
105.7	0.246786
105.8	0.2485
105.9	0.251
106	0.252643
106.1	0.254714
106.2	0.256214
106.3	0.258571
106.4	0.259571
106.5	0.260857
106.6	0.261857
106.7	0.262786
106.8	0.264214
106.9	0.266214
107	0.268071
107.1	0.271929
107.2	0.273214
107.3	0.274857
107.4	0.277429
107.5	0.278214
107.6	0.279429
107.7	0.280286
107.8	0.280929
107.9	0.282286
108	0.282643
108.1	0.283143
108.2	0.284
108.3	0.283643
108.4	0.285429
108.5	0.286571
108.6	0.288429
108.7	0.288714
108.8	0.2895
108.9	0.290143
109	0.291214
109.1	0.293429
109.2	0.293714
109.3	0.294357
109.4	0.295143
109.5	0.296286
109.6	0.297857
109.7	0.298786
109.8	0.300929
109.9	0.301786
110	0.302571
110.1	0.302714
110.2	0.302714
110.3	0.303714
110.4	0.304643
110.5	0.305714
110.6	0.306429
110.7	0.308643
110.8	0.309857
110.9	0.311143
111	0.311143
111.1	0.311357
111.2	0.313
111.3	0.314286
111.4	0.314214
111.5	0.315357
111.6	0.316643
111.7	0.316714
111.8	0.317143
111.9	0.318214
112	0.318357
112.1	0.318071
112.2	0.318429
112.3	0.319857
112.4	0.320429
112.5	0.321214
112.6	0.321571
112.7	0.3215
112.8	0.321714
112.9	0.322143
113	0.322429
113.1	0.323
113.2	0.323857
113.3	0.3235
113.4	0.324
113.5	0.325429
113.6	0.326143
113.7	0.325357
113.8	0.327
113.9	0.327786
114	0.328571
114.1	0.329857
114.2	0.332
114.3	0.3335
114.4	0.332714
114.5	0.333214
114.6	0.332571
114.7	0.332286
114.8	0.331214
114.9	0.331429
115	0.331143
115.1	0.330857
115.2	0.332071
115.3	0.332643
115.4	0.332929
115.5	0.332714
115.6	0.331929
115.7	0.333214
115.8	0.333071
115.9	0.333714
116	0.333143
116.1	0.333929
116.2	0.333857
116.3	0.3345
116.4	0.335786
116.5	0.336786
116.6	0.336786
116.7	0.337143
116.8	0.337929
116.9	0.3385
117	0.339786
117.1	0.339786
117.2	0.340214
117.3	0.340429
117.4	0.339429
117.5	0.3405
117.6	0.34
117.7	0.341429
117.8	0.341786
117.9	0.342571
118	0.342214
118.1	0.342286
118.2	0.342429
118.3	0.342286
118.4	0.3435
118.5	0.342643
118.6	0.343286
118.7	0.342357
118.8	0.3425
118.9	0.342143
119	0.342357
119.1	0.3415
119.2	0.342071
119.3	0.343071
119.4	0.342929
119.5	0.343643
119.6	0.343643
119.7	0.345286
119.8	0.346786
119.9	0.345214
120	0.345286
120.1	0.345214
120.2	0.345286
120.3	0.345786
120.4	0.345214
120.5	0.344857
120.6	0.344857
120.7	0.344857
120.8	0.344714
120.9	0.344071
121	0.344071
121.1	0.3435
121.2	0.3425
121.3	0.343643
121.4	0.344429
121.5	0.345714
121.6	0.347071
121.7	0.347357
121.8	0.347714
121.9	0.347286
122	0.347071
122.1	0.346929
122.2	0.3465
122.3	0.346214
122.4	0.347143
122.5	0.347929
122.6	0.347643
122.7	0.347857
122.8	0.347214
122.9	0.347571
123	0.346929
123.1	0.345643
123.2	0.347214
123.3	0.347143
123.4	0.346571
123.5	0.3465
123.6	0.345714
123.7	0.346571
123.8	0.346857
123.9	0.345929
124	0.347
124.1	0.347286
124.2	0.347143
124.3	0.348643
124.4	0.348714
124.5	0.349571
124.6	0.350857
124.7	0.351143
124.8	0.350571
124.9	0.3505
125	0.349929
125.1	0.350929
125.2	0.350857
125.3	0.3515
125.4	0.350714
125.5	0.350357
125.6	0.349929
125.7	0.35
125.8	0.349929
125.9	0.349857
126	0.3495
126.1	0.348786
126.2	0.350286
126.3	0.3505
126.4	0.350143
126.5	0.350071
126.6	0.350429
126.7	0.350571
126.8	0.3505
126.9	0.350357
127	0.349857
127.1	0.349929
127.2	0.350857
127.3	0.350714
127.4	0.3505
127.5	0.350643
127.6	0.350929
127.7	0.350143
127.8	0.349786
127.9	0.350143
128	0.349143
128.1	0.348571
128.2	0.348857
128.3	0.349571
128.4	0.349357
128.5	0.348643
128.6	0.347857
128.7	0.347571
128.8	0.346857
128.9	0.346786
129	0.3475
129.1	0.347
129.2	0.347214
129.3	0.348
129.4	0.349929
129.5	0.350571
129.6	0.350929
129.7	0.351571
129.8	0.351143
129.9	0.350857
130	0.3515
130.1	0.353357
130.2	0.3525
130.3	0.351929
130.4	0.351571
130.5	0.351286
130.6	0.350714
130.7	0.351071
130.8	0.352286
130.9	0.353714
131	0.353786
131.1	0.353643
131.2	0.353286
131.3	0.353929
131.4	0.353143
131.5	0.352571
131.6	0.353071
131.7	0.352929
131.8	0.352714
131.9	0.352929
132	0.352714
132.1	0.352214
132.2	0.3525
132.3	0.352786
132.4	0.353571
132.5	0.354071
132.6	0.354643
132.7	0.353071
132.8	0.353714
132.9	0.353857
133	0.354
133.1	0.355286
133.2	0.3555
133.3	0.355143
133.4	0.355
133.5	0.354357
133.6	0.354
133.7	0.353571
133.8	0.353214
133.9	0.3525
134	0.352643
134.1	0.354
134.2	0.354571
134.3	0.354286
134.4	0.355357
134.5	0.355643
134.6	0.356214
134.7	0.355929
134.8	0.356071
134.9	0.356429
135	0.356643
135.1	0.356214
135.2	0.356929
135.3	0.357786
135.4	0.357643
135.5	0.357643
135.6	0.357643
135.7	0.357071
135.8	0.357
135.9	0.358429
136	0.357929
136.1	0.356571
136.2	0.356714
136.3	0.357357
136.4	0.357643
136.5	0.358
136.6	0.357929
136.7	0.358571
136.8	0.3575
136.9	0.357643
137	0.357143
137.1	0.357143
137.2	0.357714
137.3	0.357
137.4	0.357571
137.5	0.3565
137.6	0.3565
137.7	0.356143
137.8	0.356714
137.9	0.357357
138	0.357857
138.1	0.357571
138.2	0.358929
138.3	0.360571
138.4	0.359643
138.5	0.36
138.6	0.359143
138.7	0.360214
138.8	0.359643
138.9	0.360643
139	0.359429
139.1	0.360143
139.2	0.360143
139.3	0.361071
139.4	0.362214
139.5	0.361286
139.6	0.363143
139.7	0.364714
139.8	0.364929
139.9	0.364357
140	0.364357
140.1	0.364643
140.2	0.365929
140.3	0.367143
140.4	0.367714
140.5	0.367643
140.6	0.367
140.7	0.3675
140.8	0.368643
140.9	0.368071
141	0.366429
141.1	0.366071
141.2	0.366643
141.3	0.3665
141.4	0.366857
141.5	0.367857
141.6	0.367714
141.7	0.3685
141.8	0.367929
141.9	0.367786
142	0.368071
142.1	0.366571
142.2	0.366429
142.3	0.3655
142.4	0.364929
142.5	0.364857
142.6	0.364929
142.7	0.365786
142.8	0.365571
142.9	0.3655
143	0.365214
143.1	0.364929
143.2	0.365643
143.3	0.364929
143.4	0.3645
143.5	0.366286
143.6	0.366429
143.7	0.366643
143.8	0.367357
143.9	0.366571
144	0.365786
144.1	0.365929
144.2	0.365857
144.3	0.365214
144.4	0.366
144.5	0.365214
144.6	0.365857
144.7	0.366571
144.8	0.365643
144.9	0.365571
145	0.365857
145.1	0.363214
145.2	0.362929
145.3	0.362
145.4	0.360143
145.5	0.360786
145.6	0.361786
145.7	0.361857
145.8	0.362286
145.9	0.363357
146	0.3635
146.1	0.362643
146.2	0.363286
146.3	0.363071
146.4	0.363786
146.5	0.363571
146.6	0.364286
146.7	0.363786
146.8	0.362786
146.9	0.361429
147	0.360071
147.1	0.359643
147.2	0.359929
147.3	0.360286
147.4	0.361143
147.5	0.360214
147.6	0.360214
147.7	0.36
147.8	0.359786
147.9	0.360786
148	0.361143
148.1	0.361429
148.2	0.362571
148.3	0.363214
148.4	0.362714
148.5	0.3615
148.6	0.362214
148.7	0.363786
148.8	0.364429
148.9	0.363643
149	0.363571
149.1	0.364357
149.2	0.365
149.3	0.364143
149.4	0.364071
149.5	0.3635
149.6	0.363929
149.7	0.363857
149.8	0.3645
149.9	0.363929
150	0.364286
150.1	0.364214
150.2	0.363929
150.3	0.364714
150.4	0.365214
150.5	0.365643
150.6	0.365857
150.7	0.365929
150.8	0.365643
150.9	0.366643
151	0.367214
151.1	0.368714
151.2	0.368429
151.3	0.368357
151.4	0.368643
151.5	0.368929
151.6	0.369357
151.7	0.369143
151.8	0.368929
151.9	0.368786
152	0.368571
152.1	0.368714
152.2	0.369429
152.3	0.369786
152.4	0.370714
152.5	0.371857
152.6	0.372214
152.7	0.373143
152.8	0.372429
152.9	0.373143
153	0.372714
153.1	0.372643
153.2	0.371786
153.3	0.372071
153.4	0.372429
153.5	0.373214
153.6	0.372786
153.7	0.372714
153.8	0.373286
153.9	0.372929
154	0.373071
154.1	0.3725
154.2	0.3725
154.3	0.372357
154.4	0.371786
154.5	0.372357
154.6	0.372214
154.7	0.372
154.8	0.372071
154.9	0.372571
155	0.372143
155.1	0.372643
155.2	0.372571
155.3	0.3725
155.4	0.372357
155.5	0.372929
155.6	0.373929
155.7	0.373571
155.8	0.373571
155.9	0.373429
156	0.373357
156.1	0.372071
156.2	0.372214
156.3	0.372214
156.4	0.370714
156.5	0.370071
156.6	0.370429
156.7	0.369786
156.8	0.368857
156.9	0.369357
157	0.370786
157.1	0.370357
157.2	0.370286
157.3	0.371214
157.4	0.371143
157.5	0.371714
157.6	0.372143
157.7	0.373286
157.8	0.373
157.9	0.372571
158	0.372714
158.1	0.373214
158.2	0.373143
158.3	0.373714
158.4	0.374786
158.5	0.374214
158.6	0.3745
158.7	0.374
158.8	0.374071
158.9	0.374429
159	0.376214
159.1	0.376143
159.2	0.376643
159.3	0.376857
159.4	0.375857
159.5	0.375857
159.6	0.375
159.7	0.376
159.8	0.375
159.9	0.374929
160	0.376214
160.1	0.375286
160.2	0.375643
160.3	0.375857
160.4	0.376286
160.5	0.375571
160.6	0.376143
160.7	0.376714
160.8	0.376571
160.9	0.376571
161	0.376357
161.1	0.377071
161.2	0.378
161.3	0.378
161.4	0.378214
161.5	0.377
161.6	0.377143
161.7	0.378643
161.8	0.38
161.9	0.379
162	0.378786
162.1	0.379071
162.2	0.3795
162.3	0.378357
162.4	0.378357
162.5	0.377929
162.6	0.378
162.7	0.3795
162.8	0.379643
162.9	0.380143
163	0.380786
163.1	0.381357
163.2	0.381
163.3	0.381143
163.4	0.381143
163.5	0.3815
163.6	0.380714
163.7	0.380357
163.8	0.380214
163.9	0.379571
164	0.379357
164.1	0.380429
164.2	0.380357
164.3	0.380357
164.4	0.380857
164.5	0.381643
164.6	0.382286
164.7	0.381571
164.8	0.381857
164.9	0.3815
165	0.383071
165.1	0.383571
165.2	0.382786
165.3	0.383214
165.4	0.3855
165.5	0.3845
165.6	0.384786
165.7	0.384
165.8	0.383929
165.9	0.383714
166	0.382571
166.1	0.382714
166.2	0.383929
166.3	0.3835
166.4	0.382786
166.5	0.381714
166.6	0.382571
166.7	0.382429
166.8	0.382286
166.9	0.382571
167	0.382286
167.1	0.381571
167.2	0.382071
167.3	0.381357
167.4	0.382143
167.5	0.3815
167.6	0.381286
167.7	0.380714
167.8	0.380857
167.9	0.380429
168	0.381571
168.1	0.381571
168.2	0.381786
168.3	0.382286
168.4	0.382357
168.5	0.382714
168.6	0.383214
168.7	0.382786
168.8	0.383429
168.9	0.384429
169	0.384857
169.1	0.385071
169.2	0.386214
169.3	0.386857
169.4	0.387429
169.5	0.3865
169.6	0.386857
169.7	0.388071
169.8	0.387714
169.9	0.387571
170	0.386429
170.1	0.386714
170.2	0.385929
170.3	0.385643
170.4	0.386643
170.5	0.387071
170.6	0.387
170.7	0.388429
170.8	0.389286
170.9	0.389929
171	0.389357
171.1	0.389643
171.2	0.389857
171.3	0.390357
171.4	0.389643
171.5	0.389429
171.6	0.388643
171.7	0.388357
171.8	0.389
171.9	0.389429
172	0.389571
172.1	0.389071
172.2	0.389071
172.3	0.388786
172.4	0.388929
172.5	0.388143
172.6	0.388143
172.7	0.389071
172.8	0.389214
172.9	0.389143
173	0.388857
173.1	0.389
173.2	0.389
173.3	0.388857
173.4	0.3895
173.5	0.389571
173.6	0.389857
173.7	0.390214
173.8	0.389786
173.9	0.390429
174	0.390857
174.1	0.390357
174.2	0.3905
174.3	0.391357
174.4	0.391714
174.5	0.393071
174.6	0.392286
174.7	0.392857
174.8	0.393786
174.9	0.3935
175	0.394071
175.1	0.395286
175.2	0.396143
175.3	0.396786
175.4	0.395
175.5	0.394429
175.6	0.394357
175.7	0.3945
175.8	0.393571
175.9	0.392714
176	0.393071
176.1	0.393714
176.2	0.393071
176.3	0.391929
176.4	0.389857
176.5	0.390357
176.6	0.389786
176.7	0.390571
176.8	0.390571
176.9	0.389929
177	0.39
177.1	0.389286
177.2	0.389286
177.3	0.389929
177.4	0.389714
177.5	0.389571
177.6	0.389214
177.7	0.390429
177.8	0.392
177.9	0.393286
178	0.394071
178.1	0.393786
178.2	0.394571
178.3	0.394
178.4	0.392929
178.5	0.394071
178.6	0.394786
178.7	0.395214
178.8	0.396857
178.9	0.396643
179	0.396786
179.1	0.397071
179.2	0.397643
179.3	0.397286
179.4	0.398
179.5	0.398143
179.6	0.399286
179.7	0.398929
179.8	0.399071
179.9	0.399286
180	0.399786
180.1	0.399286
180.2	0.399929
180.3	0.398
180.4	0.397071
180.5	0.397714
180.6	0.397643
180.7	0.397286
180.8	0.396214
180.9	0.397214
181	0.396071
181.1	0.395357
181.2	0.395214
181.3	0.394714
181.4	0.396286
181.5	0.396214
181.6	0.396786
181.7	0.395786
181.8	0.395357
181.9	0.3955
182	0.394929
182.1	0.395071
182.2	0.395214
182.3	0.396286
182.4	0.396786
182.5	0.397929
182.6	0.398643
182.7	0.399143
182.8	0.398214
182.9	0.397786
183	0.397714
183.1	0.397143
183.2	0.397071
183.3	0.397286
183.4	0.397214
183.5	0.397786
183.6	0.399286
183.7	0.398786
183.8	0.397429
183.9	0.397071
184	0.397857
184.1	0.397929
184.2	0.397429
184.3	0.396857
184.4	0.396643
184.5	0.396571
184.6	0.397
184.7	0.397071
184.8	0.396143
184.9	0.3955
185	0.395929
185.1	0.396143
185.2	0.396429
185.3	0.397214
185.4	0.396571
185.5	0.396
185.6	0.396786
185.7	0.396357
185.8	0.396429
185.9	0.396429
186	0.394714
186.1	0.394357
186.2	0.394214
186.3	0.394643
186.4	0.394286
186.5	0.394214
186.6	0.393786
186.7	0.393429
186.8	0.394357
186.9	0.395071
187	0.395929
187.1	0.396571
187.2	0.396286
187.3	0.397357
187.4	0.397571
187.5	0.3975
187.6	0.397071
187.7	0.398929
187.8	0.3985
187.9	0.398571
188	0.399429
188.1	0.398571
188.2	0.397429
188.3	0.397286
188.4	0.396071
188.5	0.397357
188.6	0.396429
188.7	0.396857
188.8	0.396857
188.9	0.398214
189	0.398071
189.1	0.399286
189.2	0.398786
189.3	0.399071
189.4	0.399
189.5	0.398786
189.6	0.399786
189.7	0.400929
189.8	0.402214
189.9	0.402429
190	0.403214
190.1	0.403214
190.2	0.402571
190.3	0.402214
190.4	0.401286
190.5	0.400857
190.6	0.399857
190.7	0.399929
190.8	0.401143
190.9	0.400357
191	0.401
191.1	0.400643
191.2	0.401143
191.3	0.401571
191.4	0.401429
191.5	0.402571
191.6	0.402286
191.7	0.4025
191.8	0.403643
191.9	0.4045
192	0.405357
192.1	0.405286
192.2	0.404571
192.3	0.405286
192.4	0.405714
192.5	0.404714
192.6	0.403571
192.7	0.401429
192.8	0.401214
192.9	0.402429
193	0.402929
193.1	0.402571
193.2	0.403
193.3	0.402857
193.4	0.402214
193.5	0.401714
193.6	0.4015
193.7	0.401429
193.8	0.401857
193.9	0.401357
194	0.400429
194.1	0.400429
194.2	0.4
194.3	0.398857
194.4	0.399643
194.5	0.399214
194.6	0.398286
194.7	0.398286
194.8	0.397786
194.9	0.398
195	0.398143
195.1	0.397643
195.2	0.3985
195.3	0.398857
195.4	0.398929
195.5	0.400071
195.6	0.399643
195.7	0.400071
195.8	0.4
195.9	0.398929
196	0.398857
196.1	0.399786
196.2	0.399929
196.3	0.400571
196.4	0.400429
196.5	0.399929
196.6	0.400071
196.7	0.402071
196.8	0.402143
196.9	0.402357
197	0.402429
197.1	0.402571
197.2	0.401857
197.3	0.402357
197.4	0.401643
197.5	0.401929
197.6	0.401429
197.7	0.401786
197.8	0.401857
197.9	0.401643
198	0.401643
198.1	0.402571
198.2	0.403286
198.3	0.403714
198.4	0.403143
198.5	0.402643
198.6	0.402714
198.7	0.402929
198.8	0.402643
198.9	0.401
199	0.401214
199.1	0.401
199.2	0.400357
199.3	0.4015
199.4	0.400357
199.5	0.401571
199.6	0.401071
199.7	0.401
199.8	0.401643
199.9	0.401357
200	0.401143
[truncated: 14,000 more rows]
