# Supplementary material for: Bayesian inference of kinetic schemes for ion channels by Kalman filtering
Source: eLife journal article supplement (doi:10.7554/elife.62714), 2022-05-04
Supplement: fig4-data12 [file 1_Sim_N_7000_Strom_MW_0.125M.xlsx]

## Sheet: Tabelle1
0.1	0
0.2	0
0.3	0
0.4	0
0.5	0
0.6	0
0.7	0
0.8	0
0.9	0
1	0
1.1	0
1.2	0
1.3	0
1.4	0
1.5	0
1.6	0
1.7	0
1.8	0
1.9	0
2	0
2.1	0
2.2	0
2.3	0
2.4	0
2.5	0
2.6	0
2.7	0
2.8	0
2.9	0
3	0
3.1	0
3.2	0
3.3	0
3.4	0
3.5	0
3.6	0
3.7	0
3.8	0
3.9	0
4	0
4.1	0
4.2	0
4.3	0
4.4	0
4.5	0
4.6	0
4.7	0
4.8	0
4.9	0
5	0
5.1	0
5.2	0
5.3	0
5.4	0
5.5	0
5.6	0
5.7	0
5.8	0
5.9	0
6	0
6.1	0
6.2	0
6.3	0
6.4	0
6.5	0
6.6	0
6.7	0
6.8	0
6.9	0
7	0
7.1	0
7.2	0
7.3	0
7.4	0
7.5	0
7.6	0
7.7	0
7.8	0
7.9	0
8	0
8.1	0
8.2	0
8.3	0
8.4	0
8.5	0
8.6	0
8.7	0
8.8	0
8.9	0
9	0
9.1	0
9.2	0
9.3	0
9.4	0
9.5	0
9.6	0
9.7	0
9.8	0
9.9	0
10	0
10.1	0
10.2	0
10.3	0
10.4	0
10.5	0
10.6	0
10.7	0
10.8	0
10.9	0
11	0
11.1	0
11.2	0
11.3	0
11.4	0
11.5	0
11.6	0
11.7	0
11.8	0
11.9	0
12	0
12.1	0
12.2	0
12.3	0
12.4	0
12.5	0
12.6	0
12.7	0
12.8	0
12.9	0
13	0
13.1	0
13.2	0
13.3	0
13.4	0
13.5	0
13.6	0
13.7	0
13.8	0
13.9	0
14	0
14.1	0
14.2	0
14.3	0
14.4	0
14.5	0
14.6	0
14.7	0
14.8	0
14.9	0
15	0
15.1	0
15.2	0
15.3	0
15.4	0
15.5	0
15.6	0
15.7	0
15.8	0
15.9	0
16	0
16.1	0
16.2	0
16.3	0
16.4	0
16.5	0
16.6	0
16.7	0
16.8	0
16.9	0
17	0
17.1	0
17.2	0
17.3	0
17.4	0
17.5	0
17.6	0
17.7	0
17.8	0
17.9	0
18	0
18.1	0
18.2	0
18.3	0
18.4	0
18.5	0
18.6	0
18.7	0
18.8	0
18.9	0
19	0
19.1	0
19.2	0
19.3	0
19.4	0
19.5	0
19.6	0
19.7	0
19.8	0
19.9	0
20	0
20.1	0
20.2	0
20.3	0
20.4	0
20.5	0
20.6	0
20.7	0
20.8	0
20.9	0
21	0
21.1	0
21.2	0
21.3	0
21.4	0
21.5	0
21.6	0
21.7	0
21.8	0
21.9	0
22	0
22.1	0
22.2	0
22.3	0
22.4	0
22.5	0
22.6	0
22.7	0
22.8	0
22.9	0
23	0
23.1	0
23.2	0
23.3	0
23.4	0
23.5	0
23.6	0
23.7	0
23.8	0
23.9	0
24	0
24.1	0
24.2	0
24.3	0
24.4	0
24.5	0
24.6	0
24.7	0
24.8	0
24.9	0
25	0
25.1	0
25.2	0
25.3	0
25.4	0
25.5	0
25.6	0
25.7	0
25.8	0
25.9	0
26	0
26.1	0
26.2	0
26.3	0
26.4	0
26.5	0
26.6	0
26.7	0
26.8	0
26.9	0
27	0
27.1	0
27.2	0
27.3	0
27.4	0
27.5	0
27.6	0
27.7	0
27.8	0
27.9	0
28	0
28.1	0
28.2	0
28.3	0
28.4	0
28.5	0
28.6	0
28.7	0
28.8	0
28.9	0
29	0
29.1	0
29.2	0
29.3	0
29.4	0
29.5	0
29.6	0
29.7	0
29.8	0
29.9	0
30	0
30.1	0
30.2	0
30.3	0
30.4	0
30.5	0
30.6	0
30.7	0
30.8	0
30.9	0
31	0
31.1	0
31.2	0
31.3	0
31.4	0
31.5	0
31.6	0
31.7	0
31.8	0
31.9	0
32	0
32.1	0
32.2	0
32.3	0
32.4	0
32.5	0
32.6	0
32.7	0
32.8	0
32.9	0
33	0
33.1	0
33.2	0
33.3	0
33.4	0
33.5	0
33.6	0
33.7	0
33.8	0
33.9	0
34	0
34.1	0
34.2	0
34.3	0
34.4	0
34.5	0
34.6	0
34.7	0
34.8	0
34.9	0
35	0
35.1	0
35.2	0
35.3	0
35.4	0
35.5	0
35.6	0
35.7	0
35.8	0
35.9	0
36	0
36.1	0
36.2	0
36.3	0
36.4	0
36.5	0
36.6	0
36.7	0
36.8	0
36.9	0
37	0
37.1	0
37.2	0
37.3	0
37.4	0
37.5	0
37.6	0
37.7	0
37.8	0
37.9	0
38	0
38.1	0
38.2	0
38.3	0
38.4	0
38.5	0
38.6	0
38.7	0
38.8	0
38.9	0
39	0
39.1	0
39.2	0
39.3	0
39.4	0
39.5	0
39.6	0
39.7	0
39.8	0
39.9	0
40	0
40.1	0
40.2	0
40.3	0
40.4	0
40.5	0
40.6	0
40.7	0
40.8	0
40.9	0
41	0
41.1	0
41.2	0
41.3	0
41.4	0
41.5	0
41.6	0
41.7	0
41.8	0
41.9	0
42	0
42.1	0
42.2	0
42.3	0
42.4	0
42.5	0
42.6	0
42.7	0
42.8	0
42.9	0
43	0
43.1	0
43.2	0
43.3	0
43.4	0
43.5	0
43.6	0
43.7	0
43.8	0
43.9	0
44	0
44.1	0
44.2	0
44.3	0
44.4	0
44.5	0
44.6	0
44.7	0
44.8	0
44.9	0
45	0
45.1	0
45.2	0
45.3	0
45.4	0
45.5	0
45.6	0
45.7	0
45.8	0
45.9	0
46	0
46.1	0
46.2	0
46.3	0
46.4	0
46.5	0
46.6	0
46.7	0
46.8	0
46.9	0
47	0
47.1	0
47.2	0
47.3	0
47.4	0
47.5	0
47.6	0
47.7	0
47.8	0
47.9	0
48	0
48.1	0
48.2	0
48.3	0
48.4	0
48.5	0
48.6	0
48.7	0
48.8	0
48.9	0
49	0
49.1	0
49.2	0
49.3	0
49.4	0
49.5	0
49.6	0
49.7	0
49.8	0
49.9	0
50	0
50.1	0
50.2	0
50.3	0
50.4	0
50.5	0
50.6	0
50.7	0
50.8	0
50.9	0
51	0
51.1	0
51.2	0
51.3	0
51.4	0
51.5	0
51.6	0
51.7	0
51.8	0
51.9	0
52	0
52.1	0
52.2	0
52.3	0
52.4	0
52.5	0
52.6	0
52.7	0
52.8	0
52.9	0
53	0
53.1	0
53.2	0
53.3	0
53.4	0
53.5	0
53.6	0
53.7	0
53.8	0
53.9	0
54	0
54.1	0
54.2	0
54.3	0
54.4	0
54.5	0
54.6	0
54.7	0
54.8	0
54.9	0
55	0
55.1	0
55.2	0
55.3	0
55.4	0
55.5	0
55.6	0
55.7	0
55.8	0
55.9	0
56	0
56.1	0
56.2	0
56.3	0
56.4	0
56.5	0
56.6	0
56.7	0
56.8	0
56.9	0
57	0
57.1	0
57.2	0
57.3	0
57.4	0
57.5	0
57.6	0
57.7	0
57.8	0
57.9	0
58	0
58.1	0
58.2	0
58.3	0
58.4	0
58.5	0
58.6	0
58.7	0
58.8	0
58.9	0
59	0
59.1	0
59.2	0
59.3	0
59.4	0
59.5	0
59.6	0
59.7	0
59.8	0
59.9	0
60	0
60.1	0
60.2	0
60.3	0
60.4	0
60.5	0
60.6	0
60.7	0
60.8	0
60.9	0
61	0
61.1	0
61.2	0
61.3	0
61.4	0
61.5	0
61.6	0
61.7	0
61.8	0
61.9	0
62	0
62.1	0
62.2	0
62.3	0
62.4	0
62.5	0
62.6	0
62.7	0
62.8	0
62.9	0
63	0
63.1	0
63.2	0
63.3	0
63.4	0
63.5	0
63.6	0
63.7	0
63.8	0
63.9	0
64	0
64.1	0
64.2	0
64.3	0
64.4	0
64.5	0
64.6	0
64.7	0
64.8	0
64.9	0
65	0
65.1	0
65.2	0
65.3	0
65.4	0
65.5	0
65.6	0
65.7	0
65.8	0
65.9	0
66	0
66.1	0
66.2	0
66.3	0
66.4	0
66.5	0
66.6	0
66.7	0
66.8	0
66.9	0
67	0
67.1	0
67.2	0
67.3	0
67.4	0
67.5	0
67.6	0
67.7	0
67.8	0
67.9	0
68	0
68.1	0
68.2	0
68.3	0
68.4	0
68.5	0
68.6	0
68.7	0
68.8	0
68.9	0
69	0
69.1	0
69.2	0
69.3	0
69.4	0
69.5	0
69.6	0
69.7	0
69.8	0
69.9	0
70	0
70.1	0
70.2	0
70.3	0
70.4	0
70.5	0
70.6	0
70.7	0
70.8	0
70.9	0
71	0
71.1	0
71.2	0
71.3	0
71.4	0
71.5	0
71.6	0
71.7	0
71.8	0
71.9	0
72	0
72.1	0
72.2	0
72.3	0
72.4	0
72.5	0
72.6	0
72.7	0
72.8	0
72.9	0
73	0
73.1	0
73.2	0
73.3	0
73.4	0
73.5	0
73.6	0
73.7	0
73.8	0
73.9	0
74	0
74.1	0
74.2	0
74.3	0
74.4	0
74.5	0
74.6	0
74.7	0
74.8	0
74.9	0
75	0
75.1	0
75.2	0
75.3	0
75.4	0
75.5	0
75.6	0
75.7	0
75.8	0
75.9	0
76	0
76.1	0
76.2	0
76.3	0
76.4	0
76.5	0
76.6	0
76.7	0
76.8	0
76.9	0
77	0
77.1	0
77.2	0
77.3	0
77.4	0
77.5	0
77.6	0
77.7	0
77.8	0
77.9	0
78	0
78.1	0
78.2	0
78.3	0
78.4	0
78.5	0
78.6	0
78.7	0
78.8	0
78.9	0
79	0
79.1	0
79.2	0
79.3	0
79.4	0
79.5	0
79.6	0
79.7	0
79.8	0
79.9	0
80	0
80.1	0
80.2	0
80.3	0
80.4	0
80.5	0
80.6	0
80.7	0
80.8	0
80.9	0
81	0
81.1	0
81.2	0
81.3	0
81.4	0
81.5	0
81.6	0
81.7	0
81.8	0
81.9	0
82	0
82.1	0
82.2	0
82.3	0
82.4	0
82.5	0
82.6	0
82.7	0
82.8	0
82.9	0
83	0
83.1	0
83.2	0
83.3	0
83.4	0
83.5	0
83.6	0
83.7	0
83.8	0
83.9	0
84	0
84.1	0
84.2	0
84.3	0
84.4	0
84.5	0
84.6	0
84.7	0
84.8	0
84.9	0
85	0
85.1	0
85.2	0
85.3	0
85.4	0
85.5	0
85.6	0
85.7	0
85.8	0
85.9	0
86	0
86.1	0
86.2	0
86.3	0
86.4	0
86.5	0
86.6	0
86.7	0
86.8	0
86.9	0
87	0
87.1	0
87.2	0
87.3	0
87.4	0
87.5	0
87.6	0
87.7	0
87.8	0
87.9	0
88	0
88.1	0
88.2	0
88.3	0
88.4	0
88.5	0
88.6	0
88.7	0
88.8	0
88.9	0
89	0
89.1	0
89.2	0
89.3	0
89.4	0
89.5	0
89.6	0
89.7	0
89.8	0
89.9	0
90	0
90.1	0
90.2	0
90.3	0
90.4	0
90.5	0
90.6	0
90.7	0
90.8	0
90.9	0
91	0
91.1	0
91.2	0
91.3	0
91.4	0
91.5	0
91.6	0
91.7	0
91.8	0
91.9	0
92	0
92.1	0
92.2	0
92.3	0
92.4	0
92.5	0
92.6	0
92.7	0
92.8	0
92.9	0
93	0
93.1	0
93.2	0
93.3	0
93.4	0
93.5	0
93.6	0
93.7	0
93.8	0
93.9	0
94	0
94.1	0
94.2	0
94.3	0
94.4	0
94.5	0
94.6	0
94.7	0
94.8	0
94.9	0
95	0
95.1	0
95.2	0
95.3	0
95.4	0
95.5	0
95.6	0
95.7	0
95.8	0
95.9	0
96	0
96.1	0
96.2	0
96.3	0
96.4	0
96.5	0
96.6	0
96.7	0
96.8	0
96.9	0
97	0
97.1	0
97.2	0
97.3	0
97.4	0
97.5	0
97.6	0
97.7	0
97.8	0
97.9	0
98	0
98.1	0
98.2	0
98.3	0
98.4	0
98.5	0
98.6	0
98.7	0
98.8	0
98.9	0
99	0
99.1	0
99.2	0
99.3	0
99.4	0
99.5	0
99.6	0
99.7	0
99.8	0
99.9	0
100	0
100.1	0
100.2	0
100.3	0
100.4	0
100.5	0
100.6	0
100.7	0
100.8	0
100.9	0.000142857
101	0.000142857
101.1	0.000142857
101.2	0.000142857
101.3	0.000142857
101.4	0.000142857
101.5	0.000142857
101.6	0.000142857
101.7	0.000142857
101.8	0.000142857
101.9	0.000142857
102	0.000142857
102.1	0.000285714
102.2	0.000285714
102.3	0.000285714
102.4	0.000285714
102.5	0.000428571
102.6	0.000571429
102.7	0.000571429
102.8	0.000714286
102.9	0.000714286
103	0.000857143
103.1	0.000857143
103.2	0.001
103.3	0.001
103.4	0.00114286
103.5	0.00114286
103.6	0.00114286
103.7	0.00128571
103.8	0.00128571
103.9	0.00142857
104	0.00142857
104.1	0.00157143
104.2	0.002
104.3	0.002
104.4	0.002
104.5	0.00214286
104.6	0.00228571
104.7	0.00242857
104.8	0.00242857
104.9	0.00242857
105	0.00257143
105.1	0.00257143
105.2	0.00271429
105.3	0.00271429
105.4	0.00285714
105.5	0.00285714
105.6	0.003
105.7	0.00314286
105.8	0.00328571
105.9	0.00357143
106	0.00357143
106.1	0.00357143
106.2	0.00385714
106.3	0.004
106.4	0.00414286
106.5	0.00471429
106.6	0.005
106.7	0.00528571
106.8	0.00542857
106.9	0.00542857
107	0.00557143
107.1	0.00557143
107.2	0.00557143
107.3	0.00557143
107.4	0.006
107.5	0.006
107.6	0.00628571
107.7	0.00657143
107.8	0.00657143
107.9	0.00671429
108	0.00685714
108.1	0.007
108.2	0.00714286
108.3	0.00742857
108.4	0.00785714
108.5	0.008
108.6	0.00814286
108.7	0.00828571
108.8	0.00857143
108.9	0.00857143
109	0.00871429
109.1	0.009
109.2	0.00885714
109.3	0.00885714
109.4	0.009
109.5	0.00914286
109.6	0.00957143
109.7	0.00971429
109.8	0.00985714
109.9	0.00985714
110	0.0101429
110.1	0.0101429
110.2	0.0102857
110.3	0.0104286
110.4	0.0104286
110.5	0.0105714
110.6	0.0105714
110.7	0.0108571
110.8	0.011
110.9	0.0112857
111	0.0114286
111.1	0.0115714
111.2	0.0115714
111.3	0.0115714
111.4	0.0115714
111.5	0.0117143
111.6	0.0115714
111.7	0.0115714
111.8	0.0117143
111.9	0.0115714
112	0.0118571
112.1	0.0124286
112.2	0.0124286
112.3	0.0127143
112.4	0.0131429
112.5	0.013
112.6	0.0134286
112.7	0.0135714
112.8	0.0134286
112.9	0.0137143
113	0.014
113.1	0.014
113.2	0.0141429
113.3	0.0142857
113.4	0.0142857
113.5	0.0145714
113.6	0.0148571
113.7	0.0152857
113.8	0.0154286
113.9	0.0155714
114	0.0157143
114.1	0.0157143
114.2	0.0158571
114.3	0.0158571
114.4	0.0158571
114.5	0.0158571
114.6	0.0157143
114.7	0.0157143
114.8	0.0161429
114.9	0.0162857
115	0.017
115.1	0.0172857
115.2	0.0172857
115.3	0.0178571
115.4	0.018
115.5	0.018
115.6	0.0181429
115.7	0.0182857
115.8	0.0185714
115.9	0.0188571
116	0.019
116.1	0.0191429
116.2	0.0192857
116.3	0.0194286
116.4	0.0197143
116.5	0.0197143
116.6	0.0198571
116.7	0.0201429
116.8	0.0208571
116.9	0.0211429
117	0.0212857
117.1	0.0214286
117.2	0.0214286
117.3	0.0217143
117.4	0.0221429
117.5	0.0227143
117.6	0.023
117.7	0.0231429
117.8	0.0231429
117.9	0.0231429
118	0.0234286
118.1	0.0235714
118.2	0.0234286
118.3	0.0235714
118.4	0.0235714
118.5	0.0235714
118.6	0.0234286
118.7	0.0237143
118.8	0.0238571
118.9	0.024
119	0.0241429
119.1	0.0244286
119.2	0.0247143
119.3	0.025
119.4	0.0252857
119.5	0.0252857
119.6	0.0255714
119.7	0.0255714
119.8	0.0255714
119.9	0.0257143
120	0.0257143
120.1	0.0258571
120.2	0.0261429
120.3	0.0261429
120.4	0.0262857
120.5	0.0264286
120.6	0.0264286
120.7	0.0265714
120.8	0.0268571
120.9	0.027
121	0.0274286
121.1	0.0275714
121.2	0.0275714
121.3	0.0278571
121.4	0.0278571
121.5	0.0282857
121.6	0.0282857
121.7	0.0287143
121.8	0.0288571
121.9	0.0291429
122	0.0292857
122.1	0.0292857
122.2	0.0294286
122.3	0.0297143
122.4	0.0297143
122.5	0.0297143
122.6	0.0298571
122.7	0.03
122.8	0.0301429
122.9	0.0305714
123	0.031
123.1	0.031
123.2	0.031
123.3	0.0311429
123.4	0.0312857
123.5	0.0311429
123.6	0.0315714
123.7	0.0315714
123.8	0.0315714
123.9	0.0317143
124	0.0318571
124.1	0.032
124.2	0.0321429
124.3	0.0324286
124.4	0.0325714
124.5	0.0325714
124.6	0.0325714
124.7	0.0327143
124.8	0.0327143
124.9	0.0328571
125	0.033
125.1	0.033
125.2	0.0337143
125.3	0.0337143
125.4	0.0338571
125.5	0.0338571
125.6	0.0341429
125.7	0.034
125.8	0.034
125.9	0.034
126	0.034
126.1	0.034
126.2	0.0342857
126.3	0.0342857
126.4	0.0342857
126.5	0.0342857
126.6	0.0342857
126.7	0.0345714
126.8	0.0345714
126.9	0.0345714
127	0.0345714
127.1	0.0348571
127.2	0.035
127.3	0.035
127.4	0.0351429
127.5	0.0354286
127.6	0.0352857
127.7	0.0357143
127.8	0.0357143
127.9	0.0357143
128	0.0357143
128.1	0.0358571
128.2	0.0358571
128.3	0.0358571
128.4	0.036
128.5	0.0362857
128.6	0.0362857
128.7	0.0362857
128.8	0.0361429
128.9	0.036
129	0.0362857
129.1	0.0362857
129.2	0.0361429
129.3	0.0361429
129.4	0.0364286
129.5	0.0364286
129.6	0.0364286
129.7	0.0368571
129.8	0.0368571
129.9	0.0374286
130	0.0377143
130.1	0.0377143
130.2	0.0378571
130.3	0.0385714
130.4	0.0385714
130.5	0.0384286
130.6	0.0382857
130.7	0.0381429
130.8	0.0382857
130.9	0.0382857
131	0.0384286
131.1	0.0384286
131.2	0.0384286
131.3	0.0388571
131.4	0.0394286
131.5	0.0398571
131.6	0.0398571
131.7	0.0401429
131.8	0.0405714
131.9	0.041
132	0.0411429
132.1	0.0411429
132.2	0.0414286
132.3	0.0415714
132.4	0.0418571
132.5	0.0418571
132.6	0.0422857
132.7	0.0424286
132.8	0.0424286
132.9	0.0424286
133	0.0424286
133.1	0.0424286
133.2	0.0425714
133.3	0.043
133.4	0.043
133.5	0.0435714
133.6	0.0438571
133.7	0.044
133.8	0.044
133.9	0.044
134	0.0438571
134.1	0.0437143
134.2	0.0437143
134.3	0.0437143
134.4	0.0438571
134.5	0.0438571
134.6	0.0441429
134.7	0.044
134.8	0.044
134.9	0.0442857
135	0.0445714
135.1	0.0445714
135.2	0.0445714
135.3	0.0444286
135.4	0.0447143
135.5	0.0447143
135.6	0.045
135.7	0.045
135.8	0.0452857
135.9	0.0454286
136	0.0457143
136.1	0.0454286
136.2	0.0451429
136.3	0.0455714
136.4	0.0458571
136.5	0.0458571
136.6	0.0462857
136.7	0.0464286
136.8	0.047
136.9	0.0472857
137	0.0477143
137.1	0.0477143
137.2	0.0474286
137.3	0.0474286
137.4	0.0474286
137.5	0.0475714
137.6	0.0475714
137.7	0.0478571
137.8	0.0481429
137.9	0.0481429
138	0.0484286
138.1	0.0487143
138.2	0.049
138.3	0.0491429
138.4	0.0491429
138.5	0.0494286
138.6	0.05
138.7	0.05
138.8	0.0498571
138.9	0.05
139	0.0498571
139.1	0.0498571
139.2	0.05
139.3	0.0501429
139.4	0.0502857
139.5	0.0504286
139.6	0.0508571
139.7	0.0507143
139.8	0.0508571
139.9	0.0508571
140	0.0508571
140.1	0.0505714
140.2	0.0504286
140.3	0.0505714
140.4	0.0508571
140.5	0.051
140.6	0.051
140.7	0.051
140.8	0.0514286
140.9	0.0514286
141	0.0517143
141.1	0.0518571
141.2	0.052
141.3	0.052
141.4	0.0521429
141.5	0.0522857
141.6	0.0524286
141.7	0.0524286
141.8	0.0527143
141.9	0.0527143
142	0.0525714
142.1	0.0528571
142.2	0.053
142.3	0.0535714
142.4	0.0535714
142.5	0.0534286
142.6	0.0537143
142.7	0.0541429
142.8	0.0542857
142.9	0.0541429
143	0.0541429
143.1	0.0541429
143.2	0.0542857
143.3	0.0544286
143.4	0.055
143.5	0.055
143.6	0.0552857
143.7	0.0552857
143.8	0.0557143
143.9	0.0557143
144	0.0555714
144.1	0.0558571
144.2	0.0558571
144.3	0.0562857
144.4	0.0562857
144.5	0.0564286
144.6	0.0567143
144.7	0.0568571
144.8	0.0571429
144.9	0.0574286
145	0.0574286
145.1	0.0577143
145.2	0.058
145.3	0.058
145.4	0.058
145.5	0.058
145.6	0.0584286
145.7	0.0584286
145.8	0.0585714
145.9	0.0587143
146	0.0587143
146.1	0.0587143
146.2	0.0591429
146.3	0.0591429
146.4	0.0594286
146.5	0.0595714
146.6	0.0595714
146.7	0.0594286
146.8	0.0594286
146.9	0.0597143
147	0.0598571
147.1	0.0597143
147.2	0.0597143
147.3	0.0595714
147.4	0.0595714
147.5	0.0602857
147.6	0.0602857
147.7	0.0605714
147.8	0.0605714
147.9	0.0607143
148	0.061
148.1	0.061
148.2	0.061
148.3	0.0611429
148.4	0.0612857
148.5	0.0612857
148.6	0.0614286
148.7	0.0617143
148.8	0.0617143
148.9	0.062
149	0.062
149.1	0.0622857
149.2	0.0628571
149.3	0.0628571
149.4	0.0631429
149.5	0.0631429
149.6	0.0631429
149.7	0.0634286
149.8	0.063
149.9	0.063
150	0.0632857
150.1	0.0634286
150.2	0.0637143
150.3	0.0638571
150.4	0.0642857
150.5	0.0642857
150.6	0.0642857
150.7	0.0647143
150.8	0.0647143
150.9	0.065
151	0.0654286
151.1	0.0652857
151.2	0.0652857
151.3	0.0655714
151.4	0.0654286
151.5	0.0655714
151.6	0.0658571
151.7	0.066
151.8	0.066
151.9	0.0662857
152	0.0664286
152.1	0.067
152.2	0.0672857
152.3	0.0675714
152.4	0.0678571
152.5	0.068
152.6	0.0681429
152.7	0.0682857
152.8	0.0682857
152.9	0.0682857
153	0.0682857
153.1	0.0684286
153.2	0.0685714
153.3	0.0684286
153.4	0.0684286
153.5	0.0684286
153.6	0.0685714
153.7	0.0685714
153.8	0.0685714
153.9	0.0685714
154	0.0688571
154.1	0.0688571
154.2	0.0692857
154.3	0.0695714
154.4	0.0694286
154.5	0.0697143
154.6	0.0697143
154.7	0.0695714
154.8	0.0698571
154.9	0.0698571
155	0.0701429
155.1	0.0701429
155.2	0.0702857
155.3	0.0705714
155.4	0.0708571
155.5	0.0712857
155.6	0.0714286
155.7	0.0718571
155.8	0.0718571
155.9	0.0718571
156	0.0718571
156.1	0.0718571
156.2	0.0718571
156.3	0.0721429
156.4	0.0722857
156.5	0.0722857
156.6	0.0725714
156.7	0.0727143
156.8	0.0728571
156.9	0.073
157	0.0731429
157.1	0.0737143
157.2	0.0734286
157.3	0.0732857
157.4	0.0734286
157.5	0.0732857
157.6	0.0732857
157.7	0.0735714
157.8	0.0734286
157.9	0.0738571
158	0.0741429
158.1	0.0744286
158.2	0.0742857
158.3	0.0744286
158.4	0.0744286
158.5	0.075
158.6	0.075
158.7	0.0752857
158.8	0.0757143
158.9	0.0758571
159	0.0761429
159.1	0.0761429
159.2	0.0761429
159.3	0.0761429
159.4	0.0764286
159.5	0.0764286
159.6	0.0768571
159.7	0.0772857
159.8	0.0774286
159.9	0.0777143
160	0.078
160.1	0.0778571
160.2	0.078
160.3	0.078
160.4	0.078
160.5	0.078
160.6	0.0781429
160.7	0.0781429
160.8	0.0781429
160.9	0.0781429
161	0.0781429
161.1	0.0782857
161.2	0.0784286
161.3	0.0784286
161.4	0.0788571
161.5	0.0788571
161.6	0.0787143
161.7	0.0785714
161.8	0.0788571
161.9	0.0791429
162	0.0792857
162.1	0.0791429
162.2	0.0792857
162.3	0.0792857
162.4	0.0792857
162.5	0.0795714
162.6	0.0795714
162.7	0.0801429
162.8	0.0804286
162.9	0.0804286
163	0.0807143
163.1	0.0805714
163.2	0.0805714
163.3	0.0808571
163.4	0.081
163.5	0.0807143
163.6	0.0811429
163.7	0.0812857
163.8	0.0812857
163.9	0.0817143
164	0.0815714
164.1	0.0815714
164.2	0.0815714
164.3	0.0821429
164.4	0.082
164.5	0.0824286
164.6	0.0824286
164.7	0.0822857
164.8	0.0821429
164.9	0.0824286
165	0.0824286
165.1	0.0822857
165.2	0.0822857
165.3	0.0822857
165.4	0.0822857
165.5	0.0822857
165.6	0.0822857
165.7	0.0822857
165.8	0.0827143
165.9	0.0827143
166	0.0825714
166.1	0.0827143
166.2	0.0828571
166.3	0.0827143
166.4	0.0825714
166.5	0.083
166.6	0.0831429
166.7	0.0832857
166.8	0.0835714
166.9	0.0837143
167	0.0841429
167.1	0.0841429
167.2	0.0841429
167.3	0.0841429
167.4	0.0844286
167.5	0.0844286
167.6	0.0847143
167.7	0.0847143
167.8	0.0848571
167.9	0.0851429
168	0.0851429
168.1	0.0852857
168.2	0.0852857
168.3	0.0854286
168.4	0.0855714
168.5	0.0858571
168.6	0.086
168.7	0.0862857
168.8	0.086
168.9	0.0862857
169	0.0865714
169.1	0.0868571
169.2	0.087
169.3	0.0868571
169.4	0.0871429
169.5	0.0872857
169.6	0.0874286
169.7	0.0874286
169.8	0.0872857
169.9	0.0874286
170	0.0877143
170.1	0.0881429
170.2	0.0884286
170.3	0.0888571
170.4	0.089
170.5	0.0891429
170.6	0.0892857
170.7	0.0897143
170.8	0.0897143
170.9	0.0898571
171	0.09
171.1	0.0901429
171.2	0.0904286
171.3	0.0908571
171.4	0.0912857
171.5	0.0912857
171.6	0.0912857
171.7	0.0915714
171.8	0.0914286
171.9	0.0917143
172	0.0918571
172.1	0.092
172.2	0.0918571
172.3	0.092
172.4	0.092
172.5	0.092
172.6	0.0918571
172.7	0.092
172.8	0.0921429
172.9	0.0922857
173	0.092
173.1	0.092
173.2	0.0918571
173.3	0.092
173.4	0.092
173.5	0.0924286
173.6	0.0921429
173.7	0.0924286
173.8	0.0925714
173.9	0.0927143
174	0.093
174.1	0.0931429
174.2	0.0932857
174.3	0.0931429
174.4	0.0934286
174.5	0.0934286
174.6	0.0935714
174.7	0.0941429
174.8	0.0941429
174.9	0.0947143
175	0.0945714
175.1	0.0948571
175.2	0.0951429
175.3	0.0952857
175.4	0.0954286
175.5	0.0952857
175.6	0.0952857
175.7	0.0951429
175.8	0.095
175.9	0.0951429
176	0.0954286
176.1	0.0954286
176.2	0.0952857
176.3	0.0952857
176.4	0.0951429
176.5	0.0954286
176.6	0.0957143
176.7	0.0957143
176.8	0.0954286
176.9	0.0954286
177	0.0952857
177.1	0.0955714
177.2	0.0954286
177.3	0.0957143
177.4	0.0958571
177.5	0.096
177.6	0.0962857
177.7	0.0962857
177.8	0.0962857
177.9	0.0964286
178	0.0967143
178.1	0.0967143
178.2	0.0967143
178.3	0.0968571
178.4	0.0968571
178.5	0.0968571
178.6	0.0971429
178.7	0.0971429
178.8	0.097
178.9	0.0968571
179	0.097
179.1	0.097
179.2	0.0972857
179.3	0.0974286
179.4	0.0977143
179.5	0.0977143
179.6	0.0977143
179.7	0.0977143
179.8	0.0981429
179.9	0.0981429
180	0.0981429
180.1	0.098
180.2	0.098
180.3	0.0984286
180.4	0.0984286
180.5	0.0984286
180.6	0.0985714
180.7	0.0985714
180.8	0.0988571
180.9	0.099
181	0.0992857
181.1	0.0991429
181.2	0.099
181.3	0.0994286
181.4	0.0995714
181.5	0.0998571
181.6	0.100143
181.7	0.0997143
181.8	0.1
181.9	0.1
182	0.0998571
182.1	0.0995714
182.2	0.0995714
182.3	0.0997143
182.4	0.0995714
182.5	0.0998571
182.6	0.0997143
182.7	0.0992857
182.8	0.0991429
182.9	0.0991429
183	0.0994286
183.1	0.0994286
183.2	0.0995714
183.3	0.0997143
183.4	0.100286
183.5	0.100429
183.6	0.100571
183.7	0.100857
183.8	0.101
183.9	0.100857
184	0.100714
184.1	0.100571
184.2	0.100571
184.3	0.101143
184.4	0.100857
184.5	0.100714
184.6	0.100857
184.7	0.101
184.8	0.101286
184.9	0.101571
185	0.101571
185.1	0.101571
185.2	0.101286
185.3	0.101429
185.4	0.101571
185.5	0.101429
185.6	0.101429
185.7	0.101571
185.8	0.101714
185.9	0.101857
186	0.102
186.1	0.102
186.2	0.101857
186.3	0.102
186.4	0.102286
186.5	0.102286
186.6	0.102571
186.7	0.102857
186.8	0.102714
186.9	0.102857
187	0.103
187.1	0.102714
187.2	0.102429
187.3	0.102571
187.4	0.102571
187.5	0.102571
187.6	0.102857
187.7	0.102857
187.8	0.103143
187.9	0.103
188	0.103
188.1	0.103
188.2	0.103
188.3	0.103
188.4	0.103
188.5	0.103
188.6	0.103
188.7	0.103
188.8	0.103143
188.9	0.103429
189	0.103571
189.1	0.103714
189.2	0.103714
189.3	0.103571
189.4	0.103714
189.5	0.103857
189.6	0.104143
189.7	0.104429
189.8	0.104429
189.9	0.104429
190	0.104286
190.1	0.104571
190.2	0.104286
190.3	0.104143
190.4	0.104143
190.5	0.104143
190.6	0.104
190.7	0.104286
190.8	0.104143
190.9	0.104429
191	0.104571
191.1	0.105
191.2	0.105
191.3	0.105
191.4	0.104857
191.5	0.104714
191.6	0.104714
191.7	0.104857
191.8	0.105429
191.9	0.105714
192	0.105714
192.1	0.105571
192.2	0.105714
192.3	0.106
192.4	0.106
192.5	0.106286
192.6	0.106571
192.7	0.106571
192.8	0.106571
192.9	0.106857
193	0.106429
193.1	0.106286
193.2	0.106143
193.3	0.106143
193.4	0.106143
193.5	0.106429
193.6	0.106571
193.7	0.106571
193.8	0.106571
193.9	0.107
194	0.107286
194.1	0.107429
194.2	0.107286
194.3	0.107286
194.4	0.107
194.5	0.107286
194.6	0.107571
194.7	0.107571
194.8	0.107714
194.9	0.108
195	0.108286
195.1	0.108429
195.2	0.108429
195.3	0.108571
195.4	0.108714
195.5	0.108857
195.6	0.108857
195.7	0.108857
195.8	0.108857
195.9	0.109143
196	0.109143
196.1	0.109143
196.2	0.109429
196.3	0.109714
196.4	0.109714
196.5	0.110143
196.6	0.110143
196.7	0.110143
196.8	0.11
196.9	0.110143
197	0.110143
197.1	0.110143
197.2	0.110143
197.3	0.110143
197.4	0.110286
197.5	0.110571
197.6	0.110571
197.7	0.110429
197.8	0.110286
197.9	0.110143
198	0.110286
198.1	0.110429
198.2	0.110571
198.3	0.110714
198.4	0.110714
198.5	0.110857
198.6	0.110857
198.7	0.111
198.8	0.111
198.9	0.111143
199	0.111286
199.1	0.111429
199.2	0.111714
199.3	0.111429
199.4	0.111714
199.5	0.111571
199.6	0.111714
199.7	0.112
199.8	0.112
199.9	0.111857
200	0.111857
[truncated: 14,000 more rows]
