# Supplementary material for: Bayesian inference of kinetic schemes for ion channels by Kalman filtering
Source: eLife journal article supplement (doi:10.7554/elife.62714), 2022-05-04
Supplement: fig4-data12 [file 1_Sim_N_10000_Fluor_MW.xlsx]

## Sheet: Tabelle1
0.1	0
0.2	0
0.3	0
0.4	0
0.5	0
0.6	0
0.7	0
0.8	0
0.9	0
1	0
1.1	0
1.2	0
1.3	0
1.4	0
1.5	0
1.6	0
1.7	0
1.8	0
1.9	0
2	0
2.1	0
2.2	0
2.3	0
2.4	0
2.5	0
2.6	0
2.7	0
2.8	0
2.9	0
3	0
3.1	0
3.2	0
3.3	0
3.4	0
3.5	0
3.6	0
3.7	0
3.8	0
3.9	0
4	0
4.1	0
4.2	0
4.3	0
4.4	0
4.5	0
4.6	0
4.7	0
4.8	0
4.9	0
5	0
5.1	0
5.2	0
5.3	0
5.4	0
5.5	0
5.6	0
5.7	0
5.8	0
5.9	0
6	0
6.1	0
6.2	0
6.3	0
6.4	0
6.5	0
6.6	0
6.7	0
6.8	0
6.9	0
7	0
7.1	0
7.2	0
7.3	0
7.4	0
7.5	0
7.6	0
7.7	0
7.8	0
7.9	0
8	0
8.1	0
8.2	0
8.3	0
8.4	0
8.5	0
8.6	0
8.7	0
8.8	0
8.9	0
9	0
9.1	0
9.2	0
9.3	0
9.4	0
9.5	0
9.6	0
9.7	0
9.8	0
9.9	0
10	0
10.1	0
10.2	0
10.3	0
10.4	0
10.5	0
10.6	0
10.7	0
10.8	0
10.9	0
11	0
11.1	0
11.2	0
11.3	0
11.4	0
11.5	0
11.6	0
11.7	0
11.8	0
11.9	0
12	0
12.1	0
12.2	0
12.3	0
12.4	0
12.5	0
12.6	0
12.7	0
12.8	0
12.9	0
13	0
13.1	0
13.2	0
13.3	0
13.4	0
13.5	0
13.6	0
13.7	0
13.8	0
13.9	0
14	0
14.1	0
14.2	0
14.3	0
14.4	0
14.5	0
14.6	0
14.7	0
14.8	0
14.9	0
15	0
15.1	0
15.2	0
15.3	0
15.4	0
15.5	0
15.6	0
15.7	0
15.8	0
15.9	0
16	0
16.1	0
16.2	0
16.3	0
16.4	0
16.5	0
16.6	0
16.7	0
16.8	0
16.9	0
17	0
17.1	0
17.2	0
17.3	0
17.4	0
17.5	0
17.6	0
17.7	0
17.8	0
17.9	0
18	0
18.1	0
18.2	0
18.3	0
18.4	0
18.5	0
18.6	0
18.7	0
18.8	0
18.9	0
19	0
19.1	0
19.2	0
19.3	0
19.4	0
19.5	0
19.6	0
19.7	0
19.8	0
19.9	0
20	0
20.1	0
20.2	0
20.3	0
20.4	0
20.5	0
20.6	0
20.7	0
20.8	0
20.9	0
21	0
21.1	0
21.2	0
21.3	0
21.4	0
21.5	0
21.6	0
21.7	0
21.8	0
21.9	0
22	0
22.1	0
22.2	0
22.3	0
22.4	0
22.5	0
22.6	0
22.7	0
22.8	0
22.9	0
23	0
23.1	0
23.2	0
23.3	0
23.4	0
23.5	0
23.6	0
23.7	0
23.8	0
23.9	0
24	0
24.1	0
24.2	0
24.3	0
24.4	0
24.5	0
24.6	0
24.7	0
24.8	0
24.9	0
25	0
25.1	0
25.2	0
25.3	0
25.4	0
25.5	0
25.6	0
25.7	0
25.8	0
25.9	0
26	0
26.1	0
26.2	0
26.3	0
26.4	0
26.5	0
26.6	0
26.7	0
26.8	0
26.9	0
27	0
27.1	0
27.2	0
27.3	0
27.4	0
27.5	0
27.6	0
27.7	0
27.8	0
27.9	0
28	0
28.1	0
28.2	0
28.3	0
28.4	0
28.5	0
28.6	0
28.7	0
28.8	0
28.9	0
29	0
29.1	0
29.2	0
29.3	0
29.4	0
29.5	0
29.6	0
29.7	0
29.8	0
29.9	0
30	0
30.1	0
30.2	0
30.3	0
30.4	0
30.5	0
30.6	0
30.7	0
30.8	0
30.9	0
31	0
31.1	0
31.2	0
31.3	0
31.4	0
31.5	0
31.6	0
31.7	0
31.8	0
31.9	0
32	0
32.1	0
32.2	0
32.3	0
32.4	0
32.5	0
32.6	0
32.7	0
32.8	0
32.9	0
33	0
33.1	0
33.2	0
33.3	0
33.4	0
33.5	0
33.6	0
33.7	0
33.8	0
33.9	0
34	0
34.1	0
34.2	0
34.3	0
34.4	0
34.5	0
34.6	0
34.7	0
34.8	0
34.9	0
35	0
35.1	0
35.2	0
35.3	0
35.4	0
35.5	0
35.6	0
35.7	0
35.8	0
35.9	0
36	0
36.1	0
36.2	0
36.3	0
36.4	0
36.5	0
36.6	0
36.7	0
36.8	0
36.9	0
37	0
37.1	0
37.2	0
37.3	0
37.4	0
37.5	0
37.6	0
37.7	0
37.8	0
37.9	0
38	0
38.1	0
38.2	0
38.3	0
38.4	0
38.5	0
38.6	0
38.7	0
38.8	0
38.9	0
39	0
39.1	0
39.2	0
39.3	0
39.4	0
39.5	0
39.6	0
39.7	0
39.8	0
39.9	0
40	0
40.1	0
40.2	0
40.3	0
40.4	0
40.5	0
40.6	0
40.7	0
40.8	0
40.9	0
41	0
41.1	0
41.2	0
41.3	0
41.4	0
41.5	0
41.6	0
41.7	0
41.8	0
41.9	0
42	0
42.1	0
42.2	0
42.3	0
42.4	0
42.5	0
42.6	0
42.7	0
42.8	0
42.9	0
43	0
43.1	0
43.2	0
43.3	0
43.4	0
43.5	0
43.6	0
43.7	0
43.8	0
43.9	0
44	0
44.1	0
44.2	0
44.3	0
44.4	0
44.5	0
44.6	0
44.7	0
44.8	0
44.9	0
45	0
45.1	0
45.2	0
45.3	0
45.4	0
45.5	0
45.6	0
45.7	0
45.8	0
45.9	0
46	0
46.1	0
46.2	0
46.3	0
46.4	0
46.5	0
46.6	0
46.7	0
46.8	0
46.9	0
47	0
47.1	0
47.2	0
47.3	0
47.4	0
47.5	0
47.6	0
47.7	0
47.8	0
47.9	0
48	0
48.1	0
48.2	0
48.3	0
48.4	0
48.5	0
48.6	0
48.7	0
48.8	0
48.9	0
49	0
49.1	0
49.2	0
49.3	0
49.4	0
49.5	0
49.6	0
49.7	0
49.8	0
49.9	0
50	0
50.1	0
50.2	0
50.3	0
50.4	0
50.5	0
50.6	0
50.7	0
50.8	0
50.9	0
51	0
51.1	0
51.2	0
51.3	0
51.4	0
51.5	0
51.6	0
51.7	0
51.8	0
51.9	0
52	0
52.1	0
52.2	0
52.3	0
52.4	0
52.5	0
52.6	0
52.7	0
52.8	0
52.9	0
53	0
53.1	0
53.2	0
53.3	0
53.4	0
53.5	0
53.6	0
53.7	0
53.8	0
53.9	0
54	0
54.1	0
54.2	0
54.3	0
54.4	0
54.5	0
54.6	0
54.7	0
54.8	0
54.9	0
55	0
55.1	0
55.2	0
55.3	0
55.4	0
55.5	0
55.6	0
55.7	0
55.8	0
55.9	0
56	0
56.1	0
56.2	0
56.3	0
56.4	0
56.5	0
56.6	0
56.7	0
56.8	0
56.9	0
57	0
57.1	0
57.2	0
57.3	0
57.4	0
57.5	0
57.6	0
57.7	0
57.8	0
57.9	0
58	0
58.1	0
58.2	0
58.3	0
58.4	0
58.5	0
58.6	0
58.7	0
58.8	0
58.9	0
59	0
59.1	0
59.2	0
59.3	0
59.4	0
59.5	0
59.6	0
59.7	0
59.8	0
59.9	0
60	0
60.1	0
60.2	0
60.3	0
60.4	0
60.5	0
60.6	0
60.7	0
60.8	0
60.9	0
61	0
61.1	0
61.2	0
61.3	0
61.4	0
61.5	0
61.6	0
61.7	0
61.8	0
61.9	0
62	0
62.1	0
62.2	0
62.3	0
62.4	0
62.5	0
62.6	0
62.7	0
62.8	0
62.9	0
63	0
63.1	0
63.2	0
63.3	0
63.4	0
63.5	0
63.6	0
63.7	0
63.8	0
63.9	0
64	0
64.1	0
64.2	0
64.3	0
64.4	0
64.5	0
64.6	0
64.7	0
64.8	0
64.9	0
65	0
65.1	0
65.2	0
65.3	0
65.4	0
65.5	0
65.6	0
65.7	0
65.8	0
65.9	0
66	0
66.1	0
66.2	0
66.3	0
66.4	0
66.5	0
66.6	0
66.7	0
66.8	0
66.9	0
67	0
67.1	0
67.2	0
67.3	0
67.4	0
67.5	0
67.6	0
67.7	0
67.8	0
67.9	0
68	0
68.1	0
68.2	0
68.3	0
68.4	0
68.5	0
68.6	0
68.7	0
68.8	0
68.9	0
69	0
69.1	0
69.2	0
69.3	0
69.4	0
69.5	0
69.6	0
69.7	0
69.8	0
69.9	0
70	0
70.1	0
70.2	0
70.3	0
70.4	0
70.5	0
70.6	0
70.7	0
70.8	0
70.9	0
71	0
71.1	0
71.2	0
71.3	0
71.4	0
71.5	0
71.6	0
71.7	0
71.8	0
71.9	0
72	0
72.1	0
72.2	0
72.3	0
72.4	0
72.5	0
72.6	0
72.7	0
72.8	0
72.9	0
73	0
73.1	0
73.2	0
73.3	0
73.4	0
73.5	0
73.6	0
73.7	0
73.8	0
73.9	0
74	0
74.1	0
74.2	0
74.3	0
74.4	0
74.5	0
74.6	0
74.7	0
74.8	0
74.9	0
75	0
75.1	0
75.2	0
75.3	0
75.4	0
75.5	0
75.6	0
75.7	0
75.8	0
75.9	0
76	0
76.1	0
76.2	0
76.3	0
76.4	0
76.5	0
76.6	0
76.7	0
76.8	0
76.9	0
77	0
77.1	0
77.2	0
77.3	0
77.4	0
77.5	0
77.6	0
77.7	0
77.8	0
77.9	0
78	0
78.1	0
78.2	0
78.3	0
78.4	0
78.5	0
78.6	0
78.7	0
78.8	0
78.9	0
79	0
79.1	0
79.2	0
79.3	0
79.4	0
79.5	0
79.6	0
79.7	0
79.8	0
79.9	0
80	0
80.1	0
80.2	0
80.3	0
80.4	0
80.5	0
80.6	0
80.7	0
80.8	0
80.9	0
81	0
81.1	0
81.2	0
81.3	0
81.4	0
81.5	0
81.6	0
81.7	0
81.8	0
81.9	0
82	0
82.1	0
82.2	0
82.3	0
82.4	0
82.5	0
82.6	0
82.7	0
82.8	0
82.9	0
83	0
83.1	0
83.2	0
83.3	0
83.4	0
83.5	0
83.6	0
83.7	0
83.8	0
83.9	0
84	0
84.1	0
84.2	0
84.3	0
84.4	0
84.5	0
84.6	0
84.7	0
84.8	0
84.9	0
85	0
85.1	0
85.2	0
85.3	0
85.4	0
85.5	0
85.6	0
85.7	0
85.8	0
85.9	0
86	0
86.1	0
86.2	0
86.3	0
86.4	0
86.5	0
86.6	0
86.7	0
86.8	0
86.9	0
87	0
87.1	0
87.2	0
87.3	0
87.4	0
87.5	0
87.6	0
87.7	0
87.8	0
87.9	0
88	0
88.1	0
88.2	0
88.3	0
88.4	0
88.5	0
88.6	0
88.7	0
88.8	0
88.9	0
89	0
89.1	0
89.2	0
89.3	0
89.4	0
89.5	0
89.6	0
89.7	0
89.8	0
89.9	0
90	0
90.1	0
90.2	0
90.3	0
90.4	0
90.5	0
90.6	0
90.7	0
90.8	0
90.9	0
91	0
91.1	0
91.2	0
91.3	0
91.4	0
91.5	0
91.6	0
91.7	0
91.8	0
91.9	0
92	0
92.1	0
92.2	0
92.3	0
92.4	0
92.5	0
92.6	0
92.7	0
92.8	0
92.9	0
93	0
93.1	0
93.2	0
93.3	0
93.4	0
93.5	0
93.6	0
93.7	0
93.8	0
93.9	0
94	0
94.1	0
94.2	0
94.3	0
94.4	0
94.5	0
94.6	0
94.7	0
94.8	0
94.9	0
95	0
95.1	0
95.2	0
95.3	0
95.4	0
95.5	0
95.6	0
95.7	0
95.8	0
95.9	0
96	0
96.1	0
96.2	0
96.3	0
96.4	0
96.5	0
96.6	0
96.7	0
96.8	0
96.9	0
97	0
97.1	0
97.2	0
97.3	0
97.4	0
97.5	0
97.6	0
97.7	0
97.8	0
97.9	0
98	0
98.1	0
98.2	0
98.3	0
98.4	0
98.5	0
98.6	0
98.7	0
98.8	0
98.9	0
99	0
99.1	0
99.2	0
99.3	0
99.4	0
99.5	0
99.6	0
99.7	0
99.8	0
99.9	0
100	0
100.1	0.00685
100.2	0.0142
100.3	0.0209
100.4	0.02835
100.5	0.0357
100.6	0.0423
100.7	0.04925
100.8	0.05455
100.9	0.06075
101	0.0668
101.1	0.07375
101.2	0.0803
101.3	0.08545
101.4	0.09045
101.5	0.096
101.6	0.1015
101.7	0.107
101.8	0.113
101.9	0.11775
102	0.1232
102.1	0.12845
102.2	0.13285
102.3	0.13675
102.4	0.14135
102.5	0.14665
102.6	0.15125
102.7	0.15555
102.8	0.15985
102.9	0.1642
103	0.16725
103.1	0.1717
103.2	0.17495
103.3	0.17815
103.4	0.1821
103.5	0.1856
103.6	0.1899
103.7	0.1928
103.8	0.19585
103.9	0.1994
104	0.2025
104.1	0.20605
104.2	0.20955
104.3	0.2127
104.4	0.2162
104.5	0.21915
104.6	0.22125
104.7	0.2235
104.8	0.2246
104.9	0.22715
105	0.23015
105.1	0.2322
105.2	0.2338
105.3	0.2362
105.4	0.23875
105.5	0.241
105.6	0.24395
105.7	0.2457
105.8	0.2473
105.9	0.24905
106	0.25125
106.1	0.2536
106.2	0.25455
106.3	0.25725
106.4	0.25995
106.5	0.26185
106.6	0.26415
106.7	0.26555
106.8	0.2677
106.9	0.2692
107	0.27105
107.1	0.2735
107.2	0.27405
107.3	0.27475
107.4	0.2758
107.5	0.2769
107.6	0.27785
107.7	0.2779
107.8	0.28035
107.9	0.28245
108	0.28265
108.1	0.28385
108.2	0.2852
108.3	0.2854
108.4	0.2872
108.5	0.2885
108.6	0.28935
108.7	0.29035
108.8	0.2924
108.9	0.29385
109	0.29495
109.1	0.29675
109.2	0.2975
109.3	0.29865
109.4	0.2992
109.5	0.30065
109.6	0.3004
109.7	0.30095
109.8	0.30215
109.9	0.30215
110	0.3035
110.1	0.30405
110.2	0.3045
110.3	0.3062
110.4	0.3059
110.5	0.30765
110.6	0.30795
110.7	0.3091
110.8	0.3099
110.9	0.31005
111	0.31055
111.1	0.3111
111.2	0.31065
111.3	0.311
111.4	0.3125
111.5	0.3147
111.6	0.3148
111.7	0.3156
111.8	0.3164
111.9	0.31805
112	0.318
112.1	0.3186
112.2	0.31835
112.3	0.31885
112.4	0.31975
112.5	0.32055
112.6	0.32035
112.7	0.32165
112.8	0.32245
112.9	0.323
113	0.322
113.1	0.32305
113.2	0.32405
113.3	0.3243
113.4	0.3245
113.5	0.32465
113.6	0.324
113.7	0.32415
113.8	0.3242
113.9	0.3237
114	0.32385
114.1	0.3236
114.2	0.32395
114.3	0.32475
114.4	0.32515
114.5	0.32585
114.6	0.3257
114.7	0.32635
114.8	0.32645
114.9	0.32695
115	0.3278
115.1	0.32835
115.2	0.3285
115.3	0.3293
115.4	0.3301
115.5	0.33005
115.6	0.3307
115.7	0.3307
115.8	0.3308
115.9	0.33105
116	0.33055
116.1	0.33055
116.2	0.3312
116.3	0.3313
116.4	0.33145
116.5	0.33065
116.6	0.3298
116.7	0.3295
116.8	0.32925
116.9	0.32935
117	0.3291
117.1	0.3289
117.2	0.3289
117.3	0.33015
117.4	0.33145
117.5	0.33185
117.6	0.33205
117.7	0.33285
117.8	0.33365
117.9	0.33435
118	0.3344
118.1	0.3344
118.2	0.33545
118.3	0.3348
118.4	0.33545
118.5	0.3367
118.6	0.3367
118.7	0.33795
118.8	0.338
118.9	0.3383
119	0.3379
119.1	0.33785
119.2	0.3381
119.3	0.3378
119.4	0.3382
119.5	0.3382
119.6	0.33705
119.7	0.33755
119.8	0.33765
119.9	0.3386
120	0.33835
120.1	0.33825
120.2	0.3382
120.3	0.3386
120.4	0.3385
120.5	0.339
120.6	0.33775
120.7	0.33795
120.8	0.33825
120.9	0.33855
121	0.33895
121.1	0.33945
121.2	0.33935
121.3	0.33935
121.4	0.3387
121.5	0.33835
121.6	0.3387
121.7	0.33765
121.8	0.3374
121.9	0.33775
122	0.3372
122.1	0.3375
122.2	0.33805
122.3	0.3385
122.4	0.33815
122.5	0.3378
122.6	0.3378
122.7	0.3384
122.8	0.33815
122.9	0.33995
123	0.34055
123.1	0.34025
123.2	0.34145
123.3	0.34235
123.4	0.34225
123.5	0.34165
123.6	0.3428
123.7	0.3432
123.8	0.34255
123.9	0.34295
124	0.34325
124.1	0.34405
124.2	0.3443
124.3	0.3436
124.4	0.3434
124.5	0.34335
124.6	0.3436
124.7	0.34405
124.8	0.34335
124.9	0.34335
125	0.34355
125.1	0.34315
125.2	0.3424
125.3	0.34315
125.4	0.34335
125.5	0.34375
125.6	0.34445
125.7	0.3451
125.8	0.3441
125.9	0.34405
126	0.3457
126.1	0.34685
126.2	0.34705
126.3	0.3471
126.4	0.34785
126.5	0.34795
126.6	0.3477
126.7	0.34775
126.8	0.3486
126.9	0.3492
127	0.3504
127.1	0.35105
127.2	0.35065
127.3	0.35045
127.4	0.35075
127.5	0.352
127.6	0.35265
127.7	0.35275
127.8	0.35205
127.9	0.35155
128	0.35145
128.1	0.3522
128.2	0.351
128.3	0.3513
128.4	0.3515
128.5	0.3524
128.6	0.3527
128.7	0.35275
128.8	0.35245
128.9	0.3525
129	0.35235
129.1	0.35225
129.2	0.35285
129.3	0.35325
129.4	0.35415
129.5	0.35465
129.6	0.354
129.7	0.3535
129.8	0.35275
129.9	0.35435
130	0.3542
130.1	0.35365
130.2	0.35335
130.3	0.35345
130.4	0.3536
130.5	0.35365
130.6	0.3536
130.7	0.3535
130.8	0.35405
130.9	0.35395
131	0.3546
131.1	0.35405
131.2	0.35385
131.3	0.3543
131.4	0.35535
131.5	0.35595
131.6	0.35595
131.7	0.3553
131.8	0.3557
131.9	0.3551
132	0.3553
132.1	0.35535
132.2	0.35535
132.3	0.35655
132.4	0.3561
132.5	0.3563
132.6	0.3564
132.7	0.35595
132.8	0.35535
132.9	0.3554
133	0.3542
133.1	0.3543
133.2	0.3547
133.3	0.3555
133.4	0.3553
133.5	0.35575
133.6	0.3559
133.7	0.3561
133.8	0.3564
133.9	0.35585
134	0.3567
134.1	0.3565
134.2	0.3562
134.3	0.35685
134.4	0.3559
134.5	0.3558
134.6	0.3561
134.7	0.3564
134.8	0.3553
134.9	0.35585
135	0.35575
135.1	0.35595
135.2	0.3569
135.3	0.3569
135.4	0.35695
135.5	0.3579
135.6	0.35935
135.7	0.3589
135.8	0.3598
135.9	0.36015
136	0.36075
136.1	0.35995
136.2	0.36055
136.3	0.36005
136.4	0.35995
136.5	0.35925
136.6	0.35965
136.7	0.3607
136.8	0.36085
136.9	0.3605
137	0.36055
137.1	0.3606
137.2	0.3611
137.3	0.36155
137.4	0.3622
137.5	0.3624
137.6	0.36245
137.7	0.36205
137.8	0.3618
137.9	0.3616
138	0.36175
138.1	0.36135
138.2	0.36125
138.3	0.36185
138.4	0.3632
138.5	0.36315
138.6	0.36325
138.7	0.36335
138.8	0.3622
138.9	0.3634
139	0.36245
139.1	0.3617
139.2	0.3616
139.3	0.36135
139.4	0.36005
139.5	0.36115
139.6	0.36135
139.7	0.36035
139.8	0.35955
139.9	0.3585
140	0.3591
140.1	0.3587
140.2	0.3597
140.3	0.36005
140.4	0.3591
140.5	0.3582
140.6	0.3578
140.7	0.3585
140.8	0.35725
140.9	0.35755
141	0.35825
141.1	0.3581
141.2	0.3591
141.3	0.3596
141.4	0.35965
141.5	0.3599
141.6	0.35935
141.7	0.3594
141.8	0.3599
141.9	0.36045
142	0.36165
142.1	0.36205
142.2	0.36225
142.3	0.3615
142.4	0.3615
142.5	0.3621
142.6	0.36235
142.7	0.3628
142.8	0.36305
142.9	0.363
143	0.36285
143.1	0.3632
143.2	0.3634
143.3	0.36455
143.4	0.36505
143.5	0.3656
143.6	0.36545
143.7	0.366
143.8	0.36725
143.9	0.3678
144	0.3671
144.1	0.36835
144.2	0.3676
144.3	0.368
144.4	0.3675
144.5	0.36725
144.6	0.3671
144.7	0.36655
144.8	0.36675
144.9	0.36745
145	0.3679
145.1	0.3692
145.2	0.37055
145.3	0.3709
145.4	0.37115
145.5	0.3708
145.6	0.3712
145.7	0.37095
145.8	0.3702
145.9	0.3707
146	0.37055
146.1	0.37125
146.2	0.3711
146.3	0.37155
146.4	0.37195
146.5	0.37225
146.6	0.3721
146.7	0.3736
146.8	0.3741
146.9	0.375
147	0.37505
147.1	0.3745
147.2	0.3742
147.3	0.37365
147.4	0.3729
147.5	0.37375
147.6	0.37345
147.7	0.37405
147.8	0.37465
147.9	0.37405
148	0.37415
148.1	0.37405
148.2	0.37385
148.3	0.3737
148.4	0.37375
148.5	0.37275
148.6	0.3713
148.7	0.37265
148.8	0.37265
148.9	0.37195
149	0.3719
149.1	0.37145
149.2	0.371
149.3	0.3712
149.4	0.3715
149.5	0.37135
149.6	0.37125
149.7	0.37145
149.8	0.37135
149.9	0.37055
150	0.37055
150.1	0.37055
150.2	0.3707
150.3	0.3712
150.4	0.37085
150.5	0.37165
150.6	0.3711
150.7	0.37145
150.8	0.37085
150.9	0.37095
151	0.37135
151.1	0.37095
151.2	0.37115
151.3	0.3708
151.4	0.3711
151.5	0.37015
151.6	0.3705
151.7	0.3707
151.8	0.37045
151.9	0.37075
152	0.3701
152.1	0.3698
152.2	0.3702
152.3	0.37145
152.4	0.37145
152.5	0.3705
152.6	0.37125
152.7	0.37155
152.8	0.3718
152.9	0.3729
153	0.37345
153.1	0.3742
153.2	0.37325
153.3	0.37435
153.4	0.37405
153.5	0.37515
153.6	0.3751
153.7	0.3762
153.8	0.377
153.9	0.37705
154	0.37845
154.1	0.3778
154.2	0.37705
154.3	0.37655
154.4	0.37595
154.5	0.3765
154.6	0.3759
154.7	0.37505
154.8	0.37485
154.9	0.3748
155	0.37455
155.1	0.37435
155.2	0.37435
155.3	0.3736
155.4	0.37305
155.5	0.3744
155.6	0.3746
155.7	0.3738
155.8	0.3739
155.9	0.37445
156	0.37495
156.1	0.3751
156.2	0.37565
156.3	0.3755
156.4	0.3777
156.5	0.37785
156.6	0.37785
156.7	0.37765
156.8	0.37835
156.9	0.37805
157	0.3775
157.1	0.37745
157.2	0.37715
157.3	0.3765
157.4	0.37735
157.5	0.37765
157.6	0.3782
157.7	0.3783
157.8	0.3781
157.9	0.37905
158	0.3792
158.1	0.37945
158.2	0.38
158.3	0.37945
158.4	0.3794
158.5	0.3795
158.6	0.3797
158.7	0.3791
158.8	0.3784
158.9	0.37855
159	0.3786
159.1	0.37935
159.2	0.38035
159.3	0.3798
159.4	0.37885
159.5	0.37885
159.6	0.3784
159.7	0.3776
159.8	0.3781
159.9	0.37865
160	0.3788
160.1	0.379
160.2	0.3791
160.3	0.37875
160.4	0.3792
160.5	0.3788
160.6	0.3795
160.7	0.37925
160.8	0.37975
160.9	0.37905
161	0.37915
161.1	0.3792
161.2	0.38045
161.3	0.3804
161.4	0.3798
161.5	0.37915
161.6	0.3794
161.7	0.37915
161.8	0.3802
161.9	0.37915
162	0.37955
162.1	0.37915
162.2	0.3796
162.3	0.3803
162.4	0.37995
162.5	0.38
162.6	0.38095
162.7	0.3813
162.8	0.38165
162.9	0.38315
163	0.38385
163.1	0.38435
163.2	0.38445
163.3	0.38435
163.4	0.3848
163.5	0.38475
163.6	0.3839
163.7	0.3843
163.8	0.3837
163.9	0.3845
164	0.3839
164.1	0.38365
164.2	0.38395
164.3	0.38425
164.4	0.38475
164.5	0.3851
164.6	0.3846
164.7	0.3844
164.8	0.3843
164.9	0.38485
165	0.38505
165.1	0.3853
165.2	0.3857
165.3	0.3864
165.4	0.3855
165.5	0.3856
165.6	0.3855
165.7	0.3847
165.8	0.38545
165.9	0.3859
166	0.3863
166.1	0.3854
166.2	0.38565
166.3	0.38695
166.4	0.38675
166.5	0.38765
166.6	0.3867
166.7	0.3871
166.8	0.3885
166.9	0.3892
167	0.38845
167.1	0.38735
167.2	0.38695
167.3	0.38665
167.4	0.38685
167.5	0.38685
167.6	0.38685
167.7	0.3869
167.8	0.3866
167.9	0.3872
168	0.38705
168.1	0.3877
168.2	0.3878
168.3	0.38845
168.4	0.38785
168.5	0.3892
168.6	0.3899
168.7	0.3885
168.8	0.38875
168.9	0.38845
169	0.38995
169.1	0.3897
169.2	0.3894
169.3	0.3902
169.4	0.38955
169.5	0.3896
169.6	0.38995
169.7	0.39035
169.8	0.3895
169.9	0.3901
170	0.3904
170.1	0.39145
170.2	0.39095
170.3	0.39055
170.4	0.3905
170.5	0.39065
170.6	0.3894
170.7	0.38965
170.8	0.3893
170.9	0.38915
171	0.3882
171.1	0.388
171.2	0.38755
171.3	0.3867
171.4	0.3872
171.5	0.38795
171.6	0.3882
171.7	0.3881
171.8	0.3877
171.9	0.38705
172	0.3867
172.1	0.38715
172.2	0.3873
172.3	0.38725
172.4	0.38745
172.5	0.38735
172.6	0.3866
172.7	0.386
172.8	0.38615
172.9	0.38695
173	0.38775
173.1	0.387
173.2	0.3867
173.3	0.38695
173.4	0.3876
173.5	0.3881
173.6	0.38875
173.7	0.38825
173.8	0.3882
173.9	0.3882
174	0.3882
174.1	0.38785
174.2	0.38855
174.3	0.38895
174.4	0.38795
174.5	0.3885
174.6	0.3881
174.7	0.3874
174.8	0.38745
174.9	0.38735
175	0.3877
175.1	0.38755
175.2	0.38785
175.3	0.38745
175.4	0.3885
175.5	0.38865
175.6	0.3887
175.7	0.3889
175.8	0.3898
175.9	0.3905
176	0.39035
176.1	0.391
176.2	0.3912
176.3	0.39085
176.4	0.39055
176.5	0.39
176.6	0.39025
176.7	0.3899
176.8	0.38935
176.9	0.38815
177	0.3886
177.1	0.3881
177.2	0.38835
177.3	0.38815
177.4	0.38815
177.5	0.38745
177.6	0.38665
177.7	0.38625
177.8	0.3866
177.9	0.38675
178	0.3868
178.1	0.38625
178.2	0.387
178.3	0.3875
178.4	0.3871
178.5	0.38655
178.6	0.3872
178.7	0.3882
178.8	0.38725
178.9	0.3882
179	0.38845
179.1	0.38905
179.2	0.389
179.3	0.3888
179.4	0.3899
179.5	0.3894
179.6	0.3903
179.7	0.3902
179.8	0.39045
179.9	0.39095
180	0.3904
180.1	0.39185
180.2	0.39165
180.3	0.3914
180.4	0.39075
180.5	0.3908
180.6	0.391
180.7	0.3914
180.8	0.3918
180.9	0.39215
181	0.3921
181.1	0.3908
181.2	0.391
181.3	0.39055
181.4	0.38945
181.5	0.38965
181.6	0.3907
181.7	0.3906
181.8	0.3901
181.9	0.39015
182	0.38985
182.1	0.3904
182.2	0.3905
182.3	0.3899
182.4	0.39025
182.5	0.3908
182.6	0.39125
182.7	0.39135
182.8	0.39125
182.9	0.39075
183	0.3898
183.1	0.38975
183.2	0.3892
183.3	0.3896
183.4	0.3891
183.5	0.3906
183.6	0.3915
183.7	0.39145
183.8	0.3921
183.9	0.392
184	0.3922
184.1	0.39275
184.2	0.39285
184.3	0.39365
184.4	0.39425
184.5	0.395
184.6	0.3955
184.7	0.39425
184.8	0.3947
184.9	0.39515
185	0.39595
185.1	0.3952
185.2	0.3947
185.3	0.3951
185.4	0.39445
185.5	0.3954
185.6	0.39575
185.7	0.3965
185.8	0.3951
185.9	0.3946
186	0.3955
186.1	0.39605
186.2	0.3958
186.3	0.39565
186.4	0.39615
186.5	0.39685
186.6	0.39745
186.7	0.3971
186.8	0.39655
186.9	0.39595
187	0.39545
187.1	0.39595
187.2	0.39555
187.3	0.39665
187.4	0.39685
187.5	0.3961
187.6	0.39635
187.7	0.3964
187.8	0.3954
187.9	0.39525
188	0.39545
188.1	0.3964
188.2	0.39615
188.3	0.39625
188.4	0.39625
188.5	0.397
188.6	0.3959
188.7	0.3961
188.8	0.3963
188.9	0.3967
189	0.39675
189.1	0.3966
189.2	0.397
189.3	0.39845
189.4	0.39795
189.5	0.3981
189.6	0.39735
189.7	0.3983
189.8	0.3991
189.9	0.3991
190	0.3997
190.1	0.39985
190.2	0.40055
190.3	0.3997
190.4	0.40025
190.5	0.40005
190.6	0.40015
190.7	0.40055
190.8	0.40095
190.9	0.4007
191	0.4008
191.1	0.40065
191.2	0.4007
191.3	0.39995
191.4	0.39975
191.5	0.39915
191.6	0.3991
191.7	0.4003
191.8	0.3994
191.9	0.39955
192	0.3992
192.1	0.39915
192.2	0.39905
192.3	0.3985
192.4	0.39775
192.5	0.39835
192.6	0.3976
192.7	0.3974
192.8	0.398
192.9	0.3976
193	0.3978
193.1	0.39745
193.2	0.39675
193.3	0.39665
193.4	0.39705
193.5	0.39745
193.6	0.3969
193.7	0.3978
193.8	0.39875
193.9	0.39835
194	0.39765
194.1	0.3977
194.2	0.39755
194.3	0.3982
194.4	0.3981
194.5	0.39675
194.6	0.3975
194.7	0.39765
194.8	0.3979
194.9	0.3978
195	0.39855
195.1	0.3985
195.2	0.39945
195.3	0.3993
195.4	0.39825
195.5	0.39845
195.6	0.3993
195.7	0.3992
195.8	0.40005
195.9	0.4004
196	0.4006
196.1	0.4004
196.2	0.4015
196.3	0.4011
196.4	0.40015
196.5	0.40035
196.6	0.4002
196.7	0.4002
196.8	0.40095
196.9	0.4
197	0.39945
197.1	0.39955
197.2	0.4001
197.3	0.39995
197.4	0.39995
197.5	0.40035
197.6	0.3999
197.7	0.3992
197.8	0.39925
197.9	0.3994
198	0.3996
198.1	0.4
198.2	0.39945
198.3	0.4
198.4	0.3996
198.5	0.40085
198.6	0.40155
198.7	0.40155
198.8	0.40165
198.9	0.4012
199	0.40065
199.1	0.3998
199.2	0.39995
199.3	0.40025
199.4	0.4003
199.5	0.4
199.6	0.3998
199.7	0.39915
199.8	0.39935
199.9	0.39905
200	0.3992
[truncated: 14,000 more rows]
