# Supplementary material for: Bayesian inference of kinetic schemes for ion channels by Kalman filtering
Source: eLife journal article supplement (doi:10.7554/elife.62714), 2022-05-04
Supplement: fig4-data12 [file 1_Sim_N_10000_Strom_MW.xlsx]

## Sheet: Tabelle1
0.1	0
0.2	0
0.3	0
0.4	0
0.5	0
0.6	0
0.7	0
0.8	0
0.9	0
1	0
1.1	0
1.2	0
1.3	0
1.4	0
1.5	0
1.6	0
1.7	0
1.8	0
1.9	0
2	0
2.1	0
2.2	0
2.3	0
2.4	0
2.5	0
2.6	0
2.7	0
2.8	0
2.9	0
3	0
3.1	0
3.2	0
3.3	0
3.4	0
3.5	0
3.6	0
3.7	0
3.8	0
3.9	0
4	0
4.1	0
4.2	0
4.3	0
4.4	0
4.5	0
4.6	0
4.7	0
4.8	0
4.9	0
5	0
5.1	0
5.2	0
5.3	0
5.4	0
5.5	0
5.6	0
5.7	0
5.8	0
5.9	0
6	0
6.1	0
6.2	0
6.3	0
6.4	0
6.5	0
6.6	0
6.7	0
6.8	0
6.9	0
7	0
7.1	0
7.2	0
7.3	0
7.4	0
7.5	0
7.6	0
7.7	0
7.8	0
7.9	0
8	0
8.1	0
8.2	0
8.3	0
8.4	0
8.5	0
8.6	0
8.7	0
8.8	0
8.9	0
9	0
9.1	0
9.2	0
9.3	0
9.4	0
9.5	0
9.6	0
9.7	0
9.8	0
9.9	0
10	0
10.1	0
10.2	0
10.3	0
10.4	0
10.5	0
10.6	0
10.7	0
10.8	0
10.9	0
11	0
11.1	0
11.2	0
11.3	0
11.4	0
11.5	0
11.6	0
11.7	0
11.8	0
11.9	0
12	0
12.1	0
12.2	0
12.3	0
12.4	0
12.5	0
12.6	0
12.7	0
12.8	0
12.9	0
13	0
13.1	0
13.2	0
13.3	0
13.4	0
13.5	0
13.6	0
13.7	0
13.8	0
13.9	0
14	0
14.1	0
14.2	0
14.3	0
14.4	0
14.5	0
14.6	0
14.7	0
14.8	0
14.9	0
15	0
15.1	0
15.2	0
15.3	0
15.4	0
15.5	0
15.6	0
15.7	0
15.8	0
15.9	0
16	0
16.1	0
16.2	0
16.3	0
16.4	0
16.5	0
16.6	0
16.7	0
16.8	0
16.9	0
17	0
17.1	0
17.2	0
17.3	0
17.4	0
17.5	0
17.6	0
17.7	0
17.8	0
17.9	0
18	0
18.1	0
18.2	0
18.3	0
18.4	0
18.5	0
18.6	0
18.7	0
18.8	0
18.9	0
19	0
19.1	0
19.2	0
19.3	0
19.4	0
19.5	0
19.6	0
19.7	0
19.8	0
19.9	0
20	0
20.1	0
20.2	0
20.3	0
20.4	0
20.5	0
20.6	0
20.7	0
20.8	0
20.9	0
21	0
21.1	0
21.2	0
21.3	0
21.4	0
21.5	0
21.6	0
21.7	0
21.8	0
21.9	0
22	0
22.1	0
22.2	0
22.3	0
22.4	0
22.5	0
22.6	0
22.7	0
22.8	0
22.9	0
23	0
23.1	0
23.2	0
23.3	0
23.4	0
23.5	0
23.6	0
23.7	0
23.8	0
23.9	0
24	0
24.1	0
24.2	0
24.3	0
24.4	0
24.5	0
24.6	0
24.7	0
24.8	0
24.9	0
25	0
25.1	0
25.2	0
25.3	0
25.4	0
25.5	0
25.6	0
25.7	0
25.8	0
25.9	0
26	0
26.1	0
26.2	0
26.3	0
26.4	0
26.5	0
26.6	0
26.7	0
26.8	0
26.9	0
27	0
27.1	0
27.2	0
27.3	0
27.4	0
27.5	0
27.6	0
27.7	0
27.8	0
27.9	0
28	0
28.1	0
28.2	0
28.3	0
28.4	0
28.5	0
28.6	0
28.7	0
28.8	0
28.9	0
29	0
29.1	0
29.2	0
29.3	0
29.4	0
29.5	0
29.6	0
29.7	0
29.8	0
29.9	0
30	0
30.1	0
30.2	0
30.3	0
30.4	0
30.5	0
30.6	0
30.7	0
30.8	0
30.9	0
31	0
31.1	0
31.2	0
31.3	0
31.4	0
31.5	0
31.6	0
31.7	0
31.8	0
31.9	0
32	0
32.1	0
32.2	0
32.3	0
32.4	0
32.5	0
32.6	0
32.7	0
32.8	0
32.9	0
33	0
33.1	0
33.2	0
33.3	0
33.4	0
33.5	0
33.6	0
33.7	0
33.8	0
33.9	0
34	0
34.1	0
34.2	0
34.3	0
34.4	0
34.5	0
34.6	0
34.7	0
34.8	0
34.9	0
35	0
35.1	0
35.2	0
35.3	0
35.4	0
35.5	0
35.6	0
35.7	0
35.8	0
35.9	0
36	0
36.1	0
36.2	0
36.3	0
36.4	0
36.5	0
36.6	0
36.7	0
36.8	0
36.9	0
37	0
37.1	0
37.2	0
37.3	0
37.4	0
37.5	0
37.6	0
37.7	0
37.8	0
37.9	0
38	0
38.1	0
38.2	0
38.3	0
38.4	0
38.5	0
38.6	0
38.7	0
38.8	0
38.9	0
39	0
39.1	0
39.2	0
39.3	0
39.4	0
39.5	0
39.6	0
39.7	0
39.8	0
39.9	0
40	0
40.1	0
40.2	0
40.3	0
40.4	0
40.5	0
40.6	0
40.7	0
40.8	0
40.9	0
41	0
41.1	0
41.2	0
41.3	0
41.4	0
41.5	0
41.6	0
41.7	0
41.8	0
41.9	0
42	0
42.1	0
42.2	0
42.3	0
42.4	0
42.5	0
42.6	0
42.7	0
42.8	0
42.9	0
43	0
43.1	0
43.2	0
43.3	0
43.4	0
43.5	0
43.6	0
43.7	0
43.8	0
43.9	0
44	0
44.1	0
44.2	0
44.3	0
44.4	0
44.5	0
44.6	0
44.7	0
44.8	0
44.9	0
45	0
45.1	0
45.2	0
45.3	0
45.4	0
45.5	0
45.6	0
45.7	0
45.8	0
45.9	0
46	0
46.1	0
46.2	0
46.3	0
46.4	0
46.5	0
46.6	0
46.7	0
46.8	0
46.9	0
47	0
47.1	0
47.2	0
47.3	0
47.4	0
47.5	0
47.6	0
47.7	0
47.8	0
47.9	0
48	0
48.1	0
48.2	0
48.3	0
48.4	0
48.5	0
48.6	0
48.7	0
48.8	0
48.9	0
49	0
49.1	0
49.2	0
49.3	0
49.4	0
49.5	0
49.6	0
49.7	0
49.8	0
49.9	0
50	0
50.1	0
50.2	0
50.3	0
50.4	0
50.5	0
50.6	0
50.7	0
50.8	0
50.9	0
51	0
51.1	0
51.2	0
51.3	0
51.4	0
51.5	0
51.6	0
51.7	0
51.8	0
51.9	0
52	0
52.1	0
52.2	0
52.3	0
52.4	0
52.5	0
52.6	0
52.7	0
52.8	0
52.9	0
53	0
53.1	0
53.2	0
53.3	0
53.4	0
53.5	0
53.6	0
53.7	0
53.8	0
53.9	0
54	0
54.1	0
54.2	0
54.3	0
54.4	0
54.5	0
54.6	0
54.7	0
54.8	0
54.9	0
55	0
55.1	0
55.2	0
55.3	0
55.4	0
55.5	0
55.6	0
55.7	0
55.8	0
55.9	0
56	0
56.1	0
56.2	0
56.3	0
56.4	0
56.5	0
56.6	0
56.7	0
56.8	0
56.9	0
57	0
57.1	0
57.2	0
57.3	0
57.4	0
57.5	0
57.6	0
57.7	0
57.8	0
57.9	0
58	0
58.1	0
58.2	0
58.3	0
58.4	0
58.5	0
58.6	0
58.7	0
58.8	0
58.9	0
59	0
59.1	0
59.2	0
59.3	0
59.4	0
59.5	0
59.6	0
59.7	0
59.8	0
59.9	0
60	0
60.1	0
60.2	0
60.3	0
60.4	0
60.5	0
60.6	0
60.7	0
60.8	0
60.9	0
61	0
61.1	0
61.2	0
61.3	0
61.4	0
61.5	0
61.6	0
61.7	0
61.8	0
61.9	0
62	0
62.1	0
62.2	0
62.3	0
62.4	0
62.5	0
62.6	0
62.7	0
62.8	0
62.9	0
63	0
63.1	0
63.2	0
63.3	0
63.4	0
63.5	0
63.6	0
63.7	0
63.8	0
63.9	0
64	0
64.1	0
64.2	0
64.3	0
64.4	0
64.5	0
64.6	0
64.7	0
64.8	0
64.9	0
65	0
65.1	0
65.2	0
65.3	0
65.4	0
65.5	0
65.6	0
65.7	0
65.8	0
65.9	0
66	0
66.1	0
66.2	0
66.3	0
66.4	0
66.5	0
66.6	0
66.7	0
66.8	0
66.9	0
67	0
67.1	0
67.2	0
67.3	0
67.4	0
67.5	0
67.6	0
67.7	0
67.8	0
67.9	0
68	0
68.1	0
68.2	0
68.3	0
68.4	0
68.5	0
68.6	0
68.7	0
68.8	0
68.9	0
69	0
69.1	0
69.2	0
69.3	0
69.4	0
69.5	0
69.6	0
69.7	0
69.8	0
69.9	0
70	0
70.1	0
70.2	0
70.3	0
70.4	0
70.5	0
70.6	0
70.7	0
70.8	0
70.9	0
71	0
71.1	0
71.2	0
71.3	0
71.4	0
71.5	0
71.6	0
71.7	0
71.8	0
71.9	0
72	0
72.1	0
72.2	0
72.3	0
72.4	0
72.5	0
72.6	0
72.7	0
72.8	0
72.9	0
73	0
73.1	0
73.2	0
73.3	0
73.4	0
73.5	0
73.6	0
73.7	0
73.8	0
73.9	0
74	0
74.1	0
74.2	0
74.3	0
74.4	0
74.5	0
74.6	0
74.7	0
74.8	0
74.9	0
75	0
75.1	0
75.2	0
75.3	0
75.4	0
75.5	0
75.6	0
75.7	0
75.8	0
75.9	0
76	0
76.1	0
76.2	0
76.3	0
76.4	0
76.5	0
76.6	0
76.7	0
76.8	0
76.9	0
77	0
77.1	0
77.2	0
77.3	0
77.4	0
77.5	0
77.6	0
77.7	0
77.8	0
77.9	0
78	0
78.1	0
78.2	0
78.3	0
78.4	0
78.5	0
78.6	0
78.7	0
78.8	0
78.9	0
79	0
79.1	0
79.2	0
79.3	0
79.4	0
79.5	0
79.6	0
79.7	0
79.8	0
79.9	0
80	0
80.1	0
80.2	0
80.3	0
80.4	0
80.5	0
80.6	0
80.7	0
80.8	0
80.9	0
81	0
81.1	0
81.2	0
81.3	0
81.4	0
81.5	0
81.6	0
81.7	0
81.8	0
81.9	0
82	0
82.1	0
82.2	0
82.3	0
82.4	0
82.5	0
82.6	0
82.7	0
82.8	0
82.9	0
83	0
83.1	0
83.2	0
83.3	0
83.4	0
83.5	0
83.6	0
83.7	0
83.8	0
83.9	0
84	0
84.1	0
84.2	0
84.3	0
84.4	0
84.5	0
84.6	0
84.7	0
84.8	0
84.9	0
85	0
85.1	0
85.2	0
85.3	0
85.4	0
85.5	0
85.6	0
85.7	0
85.8	0
85.9	0
86	0
86.1	0
86.2	0
86.3	0
86.4	0
86.5	0
86.6	0
86.7	0
86.8	0
86.9	0
87	0
87.1	0
87.2	0
87.3	0
87.4	0
87.5	0
87.6	0
87.7	0
87.8	0
87.9	0
88	0
88.1	0
88.2	0
88.3	0
88.4	0
88.5	0
88.6	0
88.7	0
88.8	0
88.9	0
89	0
89.1	0
89.2	0
89.3	0
89.4	0
89.5	0
89.6	0
89.7	0
89.8	0
89.9	0
90	0
90.1	0
90.2	0
90.3	0
90.4	0
90.5	0
90.6	0
90.7	0
90.8	0
90.9	0
91	0
91.1	0
91.2	0
91.3	0
91.4	0
91.5	0
91.6	0
91.7	0
91.8	0
91.9	0
92	0
92.1	0
92.2	0
92.3	0
92.4	0
92.5	0
92.6	0
92.7	0
92.8	0
92.9	0
93	0
93.1	0
93.2	0
93.3	0
93.4	0
93.5	0
93.6	0
93.7	0
93.8	0
93.9	0
94	0
94.1	0
94.2	0
94.3	0
94.4	0
94.5	0
94.6	0
94.7	0
94.8	0
94.9	0
95	0
95.1	0
95.2	0
95.3	0
95.4	0
95.5	0
95.6	0
95.7	0
95.8	0
95.9	0
96	0
96.1	0
96.2	0
96.3	0
96.4	0
96.5	0
96.6	0
96.7	0
96.8	0
96.9	0
97	0
97.1	0
97.2	0
97.3	0
97.4	0
97.5	0
97.6	0
97.7	0
97.8	0
97.9	0
98	0
98.1	0
98.2	0
98.3	0
98.4	0
98.5	0
98.6	0
98.7	0
98.8	0
98.9	0
99	0
99.1	0
99.2	0
99.3	0
99.4	0
99.5	0
99.6	0
99.7	0
99.8	0
99.9	0
100	0
100.1	0
100.2	0
100.3	0
100.4	0
100.5	0
100.6	0
100.7	0
100.8	0
100.9	0
101	0
101.1	0
101.2	0
101.3	0
101.4	0
101.5	0.0001
101.6	0.0001
101.7	0.0001
101.8	0.0001
101.9	0.0001
102	0.0001
102.1	0.0004
102.2	0.0005
102.3	0.0006
102.4	0.0006
102.5	0.0006
102.6	0.0006
102.7	0.0006
102.8	0.0006
102.9	0.0007
103	0.0007
103.1	0.0007
103.2	0.0009
103.3	0.001
103.4	0.001
103.5	0.001
103.6	0.001
103.7	0.0012
103.8	0.0012
103.9	0.0014
104	0.0014
104.1	0.0016
104.2	0.0016
104.3	0.0018
104.4	0.0018
104.5	0.0018
104.6	0.0019
104.7	0.0021
104.8	0.0022
104.9	0.0023
105	0.0024
105.1	0.0026
105.2	0.0028
105.3	0.0028
105.4	0.0029
105.5	0.0032
105.6	0.0035
105.7	0.0037
105.8	0.0038
105.9	0.0037
106	0.004
106.1	0.0041
106.2	0.0041
106.3	0.0045
106.4	0.0045
106.5	0.0047
106.6	0.0049
106.7	0.0051
106.8	0.0051
106.9	0.0054
107	0.0055
107.1	0.0056
107.2	0.0056
107.3	0.0059
107.4	0.006
107.5	0.0063
107.6	0.0063
107.7	0.0064
107.8	0.0065
107.9	0.0067
108	0.0069
108.1	0.0069
108.2	0.0069
108.3	0.0071
108.4	0.0073
108.5	0.0073
108.6	0.0074
108.7	0.0076
108.8	0.0076
108.9	0.0076
109	0.0077
109.1	0.0077
109.2	0.0081
109.3	0.0083
109.4	0.0085
109.5	0.0086
109.6	0.0089
109.7	0.0089
109.8	0.0091
109.9	0.0093
110	0.0094
110.1	0.0095
110.2	0.0095
110.3	0.0095
110.4	0.0095
110.5	0.0096
110.6	0.0099
110.7	0.0102
110.8	0.0104
110.9	0.0105
111	0.0108
111.1	0.0108
111.2	0.011
111.3	0.011
111.4	0.0111
111.5	0.0113
111.6	0.0114
111.7	0.0115
111.8	0.0115
111.9	0.0115
112	0.0115
112.1	0.0115
112.2	0.0114
112.3	0.0114
112.4	0.0116
112.5	0.0116
112.6	0.0119
112.7	0.012
112.8	0.0122
112.9	0.0124
113	0.0125
113.1	0.0126
113.2	0.0129
113.3	0.013
113.4	0.0131
113.5	0.0134
113.6	0.0137
113.7	0.0139
113.8	0.0142
113.9	0.0143
114	0.0146
114.1	0.0149
114.2	0.0152
114.3	0.0153
114.4	0.0155
114.5	0.0159
114.6	0.0159
114.7	0.016
114.8	0.0162
114.9	0.0165
115	0.0167
115.1	0.0169
115.2	0.017
115.3	0.0173
115.4	0.0175
115.5	0.0178
115.6	0.0179
115.7	0.0182
115.8	0.0185
115.9	0.0188
116	0.0189
116.1	0.0192
116.2	0.0192
116.3	0.0192
116.4	0.0192
116.5	0.0192
116.6	0.0192
116.7	0.0194
116.8	0.0194
116.9	0.0195
117	0.0197
117.1	0.0201
117.2	0.0204
117.3	0.0206
117.4	0.0207
117.5	0.0208
117.6	0.0211
117.7	0.0214
117.8	0.0215
117.9	0.0219
118	0.022
118.1	0.0223
118.2	0.0224
118.3	0.0224
118.4	0.0224
118.5	0.0227
118.6	0.023
118.7	0.0232
118.8	0.0234
118.9	0.0236
119	0.0238
119.1	0.0239
119.2	0.0241
119.3	0.0243
119.4	0.0243
119.5	0.0246
119.6	0.0249
119.7	0.0252
119.8	0.0254
119.9	0.0255
120	0.0255
120.1	0.0258
120.2	0.0258
120.3	0.0259
120.4	0.026
120.5	0.0262
120.6	0.0264
120.7	0.0264
120.8	0.0265
120.9	0.0266
121	0.0269
121.1	0.0269
121.2	0.0271
121.3	0.0271
121.4	0.0273
121.5	0.0275
121.6	0.0276
121.7	0.0277
121.8	0.0278
121.9	0.0279
122	0.0279
122.1	0.028
122.2	0.0281
122.3	0.0281
122.4	0.0282
122.5	0.0287
122.6	0.029
122.7	0.0293
122.8	0.0295
122.9	0.0298
123	0.0298
123.1	0.0298
123.2	0.0298
123.3	0.03
123.4	0.0303
123.5	0.0305
123.6	0.0305
123.7	0.0305
123.8	0.0306
123.9	0.0306
124	0.0307
124.1	0.0308
124.2	0.0309
124.3	0.0313
124.4	0.0316
124.5	0.0316
124.6	0.0317
124.7	0.0318
124.8	0.032
124.9	0.0322
125	0.0323
125.1	0.0324
125.2	0.033
125.3	0.0333
125.4	0.0338
125.5	0.0339
125.6	0.034
125.7	0.0341
125.8	0.0344
125.9	0.0344
126	0.0344
126.1	0.0349
126.2	0.035
126.3	0.0351
126.4	0.0353
126.5	0.0356
126.6	0.0357
126.7	0.0357
126.8	0.0358
126.9	0.0358
127	0.0359
127.1	0.0359
127.2	0.036
127.3	0.036
127.4	0.036
127.5	0.0361
127.6	0.0363
127.7	0.0363
127.8	0.0363
127.9	0.0367
128	0.0373
128.1	0.0375
128.2	0.0377
128.3	0.0378
128.4	0.038
128.5	0.0381
128.6	0.0384
128.7	0.0388
128.8	0.0393
128.9	0.0395
129	0.0396
129.1	0.0399
129.2	0.04
129.3	0.0399
129.4	0.0405
129.5	0.041
129.6	0.0411
129.7	0.0412
129.8	0.0412
129.9	0.0411
130	0.0412
130.1	0.0413
130.2	0.0413
130.3	0.0416
130.4	0.0418
130.5	0.0419
130.6	0.042
130.7	0.0418
130.8	0.0421
130.9	0.0422
131	0.0422
131.1	0.0423
131.2	0.0423
131.3	0.0425
131.4	0.0426
131.5	0.0427
131.6	0.0429
131.7	0.0429
131.8	0.0433
131.9	0.0433
132	0.0435
132.1	0.0435
132.2	0.0435
132.3	0.0435
132.4	0.0436
132.5	0.0436
132.6	0.0436
132.7	0.0439
132.8	0.0439
132.9	0.044
133	0.044
133.1	0.0441
133.2	0.0442
133.3	0.0444
133.4	0.0447
133.5	0.0449
133.6	0.0449
133.7	0.0449
133.8	0.0452
133.9	0.0452
134	0.0452
134.1	0.0454
134.2	0.0454
134.3	0.0454
134.4	0.0455
134.5	0.0455
134.6	0.0454
134.7	0.0458
134.8	0.0462
134.9	0.0464
135	0.0472
135.1	0.0476
135.2	0.0476
135.3	0.0478
135.4	0.0477
135.5	0.0479
135.6	0.0483
135.7	0.0484
135.8	0.0488
135.9	0.0487
136	0.0489
136.1	0.0489
136.2	0.0489
136.3	0.049
136.4	0.0491
136.5	0.0494
136.6	0.0497
136.7	0.0499
136.8	0.05
136.9	0.0499
137	0.0502
137.1	0.0502
137.2	0.0501
137.3	0.05
137.4	0.0502
137.5	0.0504
137.6	0.0509
137.7	0.051
137.8	0.0509
137.9	0.051
138	0.051
138.1	0.051
138.2	0.051
138.3	0.0512
138.4	0.0513
138.5	0.0513
138.6	0.0514
138.7	0.0515
138.8	0.0517
138.9	0.0518
139	0.0518
139.1	0.0518
139.2	0.0519
139.3	0.0523
139.4	0.0526
139.5	0.0527
139.6	0.053
139.7	0.0533
139.8	0.0535
139.9	0.0537
140	0.0538
140.1	0.0541
140.2	0.0544
140.3	0.0543
140.4	0.0544
140.5	0.0545
140.6	0.0545
140.7	0.0547
140.8	0.0547
140.9	0.0548
141	0.0553
141.1	0.0554
141.2	0.0555
141.3	0.0556
141.4	0.0559
141.5	0.0561
141.6	0.0562
141.7	0.0562
141.8	0.0564
141.9	0.0564
142	0.0565
142.1	0.0567
142.2	0.0567
142.3	0.0569
142.4	0.0573
142.5	0.0576
142.6	0.0576
142.7	0.0577
142.8	0.0579
142.9	0.0581
143	0.0582
143.1	0.0587
143.2	0.0588
143.3	0.0588
143.4	0.0591
143.5	0.059
143.6	0.0591
143.7	0.0593
143.8	0.0596
143.9	0.0599
144	0.0605
144.1	0.0605
144.2	0.0605
144.3	0.0605
144.4	0.0604
144.5	0.0606
144.6	0.0606
144.7	0.0606
144.8	0.0608
144.9	0.0608
145	0.061
145.1	0.0611
145.2	0.0611
145.3	0.0612
145.4	0.0615
145.5	0.0617
145.6	0.0619
145.7	0.062
145.8	0.0624
145.9	0.062
146	0.0622
146.1	0.0623
146.2	0.0624
146.3	0.0624
146.4	0.0624
146.5	0.0625
146.6	0.0627
146.7	0.0629
146.8	0.0628
146.9	0.063
147	0.0635
147.1	0.0635
147.2	0.0637
147.3	0.0638
147.4	0.0642
147.5	0.0642
147.6	0.0643
147.7	0.0644
147.8	0.0646
147.9	0.0646
148	0.0648
148.1	0.065
148.2	0.0652
148.3	0.0654
148.4	0.0658
148.5	0.0659
148.6	0.0661
148.7	0.0661
148.8	0.0664
148.9	0.0663
149	0.0665
149.1	0.0668
149.2	0.0667
149.3	0.0668
149.4	0.0667
149.5	0.0668
149.6	0.0668
149.7	0.067
149.8	0.0671
149.9	0.0674
150	0.0678
150.1	0.068
150.2	0.068
150.3	0.0685
150.4	0.0688
150.5	0.0688
150.6	0.0687
150.7	0.0688
150.8	0.069
150.9	0.0693
151	0.0696
151.1	0.0696
151.2	0.0695
151.3	0.0696
151.4	0.0699
151.5	0.07
151.6	0.0703
151.7	0.0701
151.8	0.0701
151.9	0.07
152	0.0702
152.1	0.0703
152.2	0.0703
152.3	0.0702
152.4	0.0704
152.5	0.0705
152.6	0.0705
152.7	0.0708
152.8	0.0712
152.9	0.0715
153	0.0713
153.1	0.0714
153.2	0.0718
153.3	0.0717
153.4	0.0719
153.5	0.0723
153.6	0.0724
153.7	0.0725
153.8	0.0724
153.9	0.0726
154	0.0729
154.1	0.0732
154.2	0.0733
154.3	0.0737
154.4	0.0739
154.5	0.0738
154.6	0.0739
154.7	0.0741
154.8	0.0743
154.9	0.0746
155	0.0747
155.1	0.0747
155.2	0.0748
155.3	0.0753
155.4	0.0756
155.5	0.0757
155.6	0.0755
155.7	0.0757
155.8	0.0757
155.9	0.0761
156	0.0762
156.1	0.076
156.2	0.0762
156.3	0.076
156.4	0.0762
156.5	0.0763
156.6	0.0761
156.7	0.0759
156.8	0.0763
156.9	0.0763
157	0.0764
157.1	0.0766
157.2	0.0767
157.3	0.0769
157.4	0.0771
157.5	0.0772
157.6	0.0771
157.7	0.0771
157.8	0.0771
157.9	0.0769
158	0.0767
158.1	0.0772
158.2	0.0775
158.3	0.0774
158.4	0.0775
158.5	0.0774
158.6	0.0777
158.7	0.0779
158.8	0.0781
158.9	0.0784
159	0.0788
159.1	0.0791
159.2	0.0792
159.3	0.0793
159.4	0.0795
159.5	0.0795
159.6	0.0798
159.7	0.08
159.8	0.0802
159.9	0.0805
160	0.0804
160.1	0.0805
160.2	0.0804
160.3	0.0806
160.4	0.0806
160.5	0.0807
160.6	0.0807
160.7	0.081
160.8	0.0811
160.9	0.0813
161	0.0815
161.1	0.0815
161.2	0.0817
161.3	0.0818
161.4	0.0819
161.5	0.0819
161.6	0.082
161.7	0.082
161.8	0.0821
161.9	0.0821
162	0.0821
162.1	0.0819
162.2	0.0819
162.3	0.0819
162.4	0.082
162.5	0.0821
162.6	0.0823
162.7	0.0825
162.8	0.0826
162.9	0.083
163	0.083
163.1	0.0832
163.2	0.0833
163.3	0.0831
163.4	0.0833
163.5	0.0834
163.6	0.0835
163.7	0.0835
163.8	0.0836
163.9	0.0839
164	0.084
164.1	0.0839
164.2	0.0838
164.3	0.0838
164.4	0.0838
164.5	0.0838
164.6	0.0842
164.7	0.0843
164.8	0.0843
164.9	0.0843
165	0.084
165.1	0.0842
165.2	0.0843
165.3	0.0844
165.4	0.0846
165.5	0.0847
165.6	0.0846
165.7	0.0845
165.8	0.0846
165.9	0.0846
166	0.0848
166.1	0.0849
166.2	0.085
166.3	0.0847
166.4	0.0846
166.5	0.0847
166.6	0.0846
166.7	0.0844
166.8	0.0845
166.9	0.0844
167	0.0844
167.1	0.0845
167.2	0.0849
167.3	0.085
167.4	0.0852
167.5	0.0852
167.6	0.0854
167.7	0.0856
167.8	0.0855
167.9	0.0856
168	0.0857
168.1	0.086
168.2	0.086
168.3	0.0863
168.4	0.0865
168.5	0.0867
168.6	0.0866
168.7	0.0867
168.8	0.0867
168.9	0.0868
169	0.0869
169.1	0.087
169.2	0.0871
169.3	0.0871
169.4	0.0871
169.5	0.087
169.6	0.0876
169.7	0.0876
169.8	0.0875
169.9	0.0874
170	0.0872
170.1	0.0875
170.2	0.0876
170.3	0.0876
170.4	0.0879
170.5	0.0883
170.6	0.0885
170.7	0.0886
170.8	0.0889
170.9	0.0891
171	0.0892
171.1	0.0892
171.2	0.0896
171.3	0.0897
171.4	0.0898
171.5	0.0898
171.6	0.0899
171.7	0.0898
171.8	0.0898
171.9	0.0899
172	0.09
172.1	0.09
172.2	0.0902
172.3	0.0903
172.4	0.0905
172.5	0.0904
172.6	0.0902
172.7	0.0902
172.8	0.0904
172.9	0.0905
173	0.0906
173.1	0.0906
173.2	0.0906
173.3	0.0908
173.4	0.091
173.5	0.091
173.6	0.0909
173.7	0.0907
173.8	0.0908
173.9	0.0911
174	0.0916
174.1	0.0915
174.2	0.0916
174.3	0.0917
174.4	0.0916
174.5	0.0917
174.6	0.0916
174.7	0.0917
174.8	0.0918
174.9	0.092
175	0.0921
175.1	0.0921
175.2	0.0922
175.3	0.0926
175.4	0.0923
175.5	0.0924
175.6	0.0923
175.7	0.0927
175.8	0.0925
175.9	0.0925
176	0.0927
176.1	0.0926
176.2	0.0927
176.3	0.093
176.4	0.0931
176.5	0.093
176.6	0.093
176.7	0.0932
176.8	0.0933
176.9	0.0935
177	0.0938
177.1	0.0942
177.2	0.0942
177.3	0.0945
177.4	0.0945
177.5	0.0944
177.6	0.0944
177.7	0.0945
177.8	0.0948
177.9	0.0948
178	0.095
178.1	0.0948
178.2	0.0949
178.3	0.0948
178.4	0.0953
178.5	0.0953
178.6	0.0954
178.7	0.0954
178.8	0.0956
178.9	0.0958
179	0.096
179.1	0.096
179.2	0.096
179.3	0.0963
179.4	0.0963
179.5	0.0965
179.6	0.0963
179.7	0.0964
179.8	0.0965
179.9	0.0967
180	0.0969
180.1	0.0968
180.2	0.0968
180.3	0.097
180.4	0.0968
180.5	0.0969
180.6	0.0967
180.7	0.0967
180.8	0.0967
180.9	0.0967
181	0.0967
181.1	0.0966
181.2	0.0966
181.3	0.0966
181.4	0.0965
181.5	0.0969
181.6	0.0971
181.7	0.097
181.8	0.0975
181.9	0.0977
182	0.0974
182.1	0.0976
182.2	0.0977
182.3	0.098
182.4	0.0979
182.5	0.0981
182.6	0.0981
182.7	0.0983
182.8	0.0985
182.9	0.0986
183	0.0987
183.1	0.0989
183.2	0.0988
183.3	0.0991
183.4	0.0997
183.5	0.0999
183.6	0.1
183.7	0.1
183.8	0.0999
183.9	0.0999
184	0.1002
184.1	0.1003
184.2	0.1004
184.3	0.1004
184.4	0.1006
184.5	0.1008
184.6	0.1011
184.7	0.1011
184.8	0.1013
184.9	0.1015
185	0.1015
185.1	0.1015
185.2	0.1016
185.3	0.1017
185.4	0.1017
185.5	0.102
185.6	0.1021
185.7	0.1021
185.8	0.1028
185.9	0.1028
186	0.1029
186.1	0.1028
186.2	0.1029
186.3	0.1029
186.4	0.1027
186.5	0.1029
186.6	0.103
186.7	0.1031
186.8	0.103
186.9	0.103
187	0.1032
187.1	0.1033
187.2	0.1033
187.3	0.1033
187.4	0.1033
187.5	0.1035
187.6	0.1036
187.7	0.1036
187.8	0.1037
187.9	0.1039
188	0.1039
188.1	0.1037
188.2	0.1038
188.3	0.1039
188.4	0.104
188.5	0.1041
188.6	0.1042
188.7	0.1042
188.8	0.1042
188.9	0.1046
189	0.1046
189.1	0.1049
189.2	0.1048
189.3	0.1051
189.4	0.1051
189.5	0.1052
189.6	0.1053
189.7	0.1053
189.8	0.1053
189.9	0.1051
190	0.1053
190.1	0.1055
190.2	0.1054
190.3	0.1055
190.4	0.1057
190.5	0.1057
190.6	0.1056
190.7	0.1056
190.8	0.1054
190.9	0.1057
191	0.1056
191.1	0.1057
191.2	0.1055
191.3	0.1055
191.4	0.1058
191.5	0.1058
191.6	0.1058
191.7	0.1059
191.8	0.1063
191.9	0.1061
192	0.1064
192.1	0.1066
192.2	0.1068
192.3	0.1069
192.4	0.1071
192.5	0.1072
192.6	0.1071
192.7	0.107
192.8	0.1072
192.9	0.1074
193	0.1076
193.1	0.1078
193.2	0.1074
193.3	0.1073
193.4	0.1074
193.5	0.1073
193.6	0.1074
193.7	0.1073
193.8	0.1075
193.9	0.1075
194	0.1074
194.1	0.1075
194.2	0.1075
194.3	0.1077
194.4	0.1077
194.5	0.1076
194.6	0.1077
194.7	0.1074
194.8	0.1074
194.9	0.1075
195	0.1077
195.1	0.108
195.2	0.1084
195.3	0.1087
195.4	0.1086
195.5	0.1084
195.6	0.1084
195.7	0.1083
195.8	0.1083
195.9	0.1088
196	0.1089
196.1	0.109
196.2	0.1092
196.3	0.1091
196.4	0.1091
196.5	0.109
196.6	0.1091
196.7	0.1088
196.8	0.1089
196.9	0.109
197	0.1094
197.1	0.1099
197.2	0.1097
197.3	0.1097
197.4	0.1097
197.5	0.1099
197.6	0.1097
197.7	0.1097
197.8	0.1099
197.9	0.11
198	0.1098
198.1	0.1098
198.2	0.11
198.3	0.1102
198.4	0.1102
198.5	0.1104
198.6	0.1102
198.7	0.1104
198.8	0.1109
198.9	0.1113
199	0.1116
199.1	0.1118
199.2	0.1118
199.3	0.1119
199.4	0.1121
199.5	0.1123
199.6	0.1122
199.7	0.1125
199.8	0.1126
199.9	0.1126
200	0.1124
[truncated: 14,000 more rows]
