# Supplementary material for: Bayesian inference of kinetic schemes for ion channels by Kalman filtering
Source: eLife journal article supplement (doi:10.7554/elife.62714), 2022-05-04
Supplement: fig4-data12 [file 1_Sim_N_20000_Fluor_MW_0.125M.xlsx]

## Sheet: Tabelle1
0.1	0
0.2	0
0.3	0
0.4	0
0.5	0
0.6	0
0.7	0
0.8	0
0.9	0
1	0
1.1	0
1.2	0
1.3	0
1.4	0
1.5	0
1.6	0
1.7	0
1.8	0
1.9	0
2	0
2.1	0
2.2	0
2.3	0
2.4	0
2.5	0
2.6	0
2.7	0
2.8	0
2.9	0
3	0
3.1	0
3.2	0
3.3	0
3.4	0
3.5	0
3.6	0
3.7	0
3.8	0
3.9	0
4	0
4.1	0
4.2	0
4.3	0
4.4	0
4.5	0
4.6	0
4.7	0
4.8	0
4.9	0
5	0
5.1	0
5.2	0
5.3	0
5.4	0
5.5	0
5.6	0
5.7	0
5.8	0
5.9	0
6	0
6.1	0
6.2	0
6.3	0
6.4	0
6.5	0
6.6	0
6.7	0
6.8	0
6.9	0
7	0
7.1	0
7.2	0
7.3	0
7.4	0
7.5	0
7.6	0
7.7	0
7.8	0
7.9	0
8	0
8.1	0
8.2	0
8.3	0
8.4	0
8.5	0
8.6	0
8.7	0
8.8	0
8.9	0
9	0
9.1	0
9.2	0
9.3	0
9.4	0
9.5	0
9.6	0
9.7	0
9.8	0
9.9	0
10	0
10.1	0
10.2	0
10.3	0
10.4	0
10.5	0
10.6	0
10.7	0
10.8	0
10.9	0
11	0
11.1	0
11.2	0
11.3	0
11.4	0
11.5	0
11.6	0
11.7	0
11.8	0
11.9	0
12	0
12.1	0
12.2	0
12.3	0
12.4	0
12.5	0
12.6	0
12.7	0
12.8	0
12.9	0
13	0
13.1	0
13.2	0
13.3	0
13.4	0
13.5	0
13.6	0
13.7	0
13.8	0
13.9	0
14	0
14.1	0
14.2	0
14.3	0
14.4	0
14.5	0
14.6	0
14.7	0
14.8	0
14.9	0
15	0
15.1	0
15.2	0
15.3	0
15.4	0
15.5	0
15.6	0
15.7	0
15.8	0
15.9	0
16	0
16.1	0
16.2	0
16.3	0
16.4	0
16.5	0
16.6	0
16.7	0
16.8	0
16.9	0
17	0
17.1	0
17.2	0
17.3	0
17.4	0
17.5	0
17.6	0
17.7	0
17.8	0
17.9	0
18	0
18.1	0
18.2	0
18.3	0
18.4	0
18.5	0
18.6	0
18.7	0
18.8	0
18.9	0
19	0
19.1	0
19.2	0
19.3	0
19.4	0
19.5	0
19.6	0
19.7	0
19.8	0
19.9	0
20	0
20.1	0
20.2	0
20.3	0
20.4	0
20.5	0
20.6	0
20.7	0
20.8	0
20.9	0
21	0
21.1	0
21.2	0
21.3	0
21.4	0
21.5	0
21.6	0
21.7	0
21.8	0
21.9	0
22	0
22.1	0
22.2	0
22.3	0
22.4	0
22.5	0
22.6	0
22.7	0
22.8	0
22.9	0
23	0
23.1	0
23.2	0
23.3	0
23.4	0
23.5	0
23.6	0
23.7	0
23.8	0
23.9	0
24	0
24.1	0
24.2	0
24.3	0
24.4	0
24.5	0
24.6	0
24.7	0
24.8	0
24.9	0
25	0
25.1	0
25.2	0
25.3	0
25.4	0
25.5	0
25.6	0
25.7	0
25.8	0
25.9	0
26	0
26.1	0
26.2	0
26.3	0
26.4	0
26.5	0
26.6	0
26.7	0
26.8	0
26.9	0
27	0
27.1	0
27.2	0
27.3	0
27.4	0
27.5	0
27.6	0
27.7	0
27.8	0
27.9	0
28	0
28.1	0
28.2	0
28.3	0
28.4	0
28.5	0
28.6	0
28.7	0
28.8	0
28.9	0
29	0
29.1	0
29.2	0
29.3	0
29.4	0
29.5	0
29.6	0
29.7	0
29.8	0
29.9	0
30	0
30.1	0
30.2	0
30.3	0
30.4	0
30.5	0
30.6	0
30.7	0
30.8	0
30.9	0
31	0
31.1	0
31.2	0
31.3	0
31.4	0
31.5	0
31.6	0
31.7	0
31.8	0
31.9	0
32	0
32.1	0
32.2	0
32.3	0
32.4	0
32.5	0
32.6	0
32.7	0
32.8	0
32.9	0
33	0
33.1	0
33.2	0
33.3	0
33.4	0
33.5	0
33.6	0
33.7	0
33.8	0
33.9	0
34	0
34.1	0
34.2	0
34.3	0
34.4	0
34.5	0
34.6	0
34.7	0
34.8	0
34.9	0
35	0
35.1	0
35.2	0
35.3	0
35.4	0
35.5	0
35.6	0
35.7	0
35.8	0
35.9	0
36	0
36.1	0
36.2	0
36.3	0
36.4	0
36.5	0
36.6	0
36.7	0
36.8	0
36.9	0
37	0
37.1	0
37.2	0
37.3	0
37.4	0
37.5	0
37.6	0
37.7	0
37.8	0
37.9	0
38	0
38.1	0
38.2	0
38.3	0
38.4	0
38.5	0
38.6	0
38.7	0
38.8	0
38.9	0
39	0
39.1	0
39.2	0
39.3	0
39.4	0
39.5	0
39.6	0
39.7	0
39.8	0
39.9	0
40	0
40.1	0
40.2	0
40.3	0
40.4	0
40.5	0
40.6	0
40.7	0
40.8	0
40.9	0
41	0
41.1	0
41.2	0
41.3	0
41.4	0
41.5	0
41.6	0
41.7	0
41.8	0
41.9	0
42	0
42.1	0
42.2	0
42.3	0
42.4	0
42.5	0
42.6	0
42.7	0
42.8	0
42.9	0
43	0
43.1	0
43.2	0
43.3	0
43.4	0
43.5	0
43.6	0
43.7	0
43.8	0
43.9	0
44	0
44.1	0
44.2	0
44.3	0
44.4	0
44.5	0
44.6	0
44.7	0
44.8	0
44.9	0
45	0
45.1	0
45.2	0
45.3	0
45.4	0
45.5	0
45.6	0
45.7	0
45.8	0
45.9	0
46	0
46.1	0
46.2	0
46.3	0
46.4	0
46.5	0
46.6	0
46.7	0
46.8	0
46.9	0
47	0
47.1	0
47.2	0
47.3	0
47.4	0
47.5	0
47.6	0
47.7	0
47.8	0
47.9	0
48	0
48.1	0
48.2	0
48.3	0
48.4	0
48.5	0
48.6	0
48.7	0
48.8	0
48.9	0
49	0
49.1	0
49.2	0
49.3	0
49.4	0
49.5	0
49.6	0
49.7	0
49.8	0
49.9	0
50	0
50.1	0
50.2	0
50.3	0
50.4	0
50.5	0
50.6	0
50.7	0
50.8	0
50.9	0
51	0
51.1	0
51.2	0
51.3	0
51.4	0
51.5	0
51.6	0
51.7	0
51.8	0
51.9	0
52	0
52.1	0
52.2	0
52.3	0
52.4	0
52.5	0
52.6	0
52.7	0
52.8	0
52.9	0
53	0
53.1	0
53.2	0
53.3	0
53.4	0
53.5	0
53.6	0
53.7	0
53.8	0
53.9	0
54	0
54.1	0
54.2	0
54.3	0
54.4	0
54.5	0
54.6	0
54.7	0
54.8	0
54.9	0
55	0
55.1	0
55.2	0
55.3	0
55.4	0
55.5	0
55.6	0
55.7	0
55.8	0
55.9	0
56	0
56.1	0
56.2	0
56.3	0
56.4	0
56.5	0
56.6	0
56.7	0
56.8	0
56.9	0
57	0
57.1	0
57.2	0
57.3	0
57.4	0
57.5	0
57.6	0
57.7	0
57.8	0
57.9	0
58	0
58.1	0
58.2	0
58.3	0
58.4	0
58.5	0
58.6	0
58.7	0
58.8	0
58.9	0
59	0
59.1	0
59.2	0
59.3	0
59.4	0
59.5	0
59.6	0
59.7	0
59.8	0
59.9	0
60	0
60.1	0
60.2	0
60.3	0
60.4	0
60.5	0
60.6	0
60.7	0
60.8	0
60.9	0
61	0
61.1	0
61.2	0
61.3	0
61.4	0
61.5	0
61.6	0
61.7	0
61.8	0
61.9	0
62	0
62.1	0
62.2	0
62.3	0
62.4	0
62.5	0
62.6	0
62.7	0
62.8	0
62.9	0
63	0
63.1	0
63.2	0
63.3	0
63.4	0
63.5	0
63.6	0
63.7	0
63.8	0
63.9	0
64	0
64.1	0
64.2	0
64.3	0
64.4	0
64.5	0
64.6	0
64.7	0
64.8	0
64.9	0
65	0
65.1	0
65.2	0
65.3	0
65.4	0
65.5	0
65.6	0
65.7	0
65.8	0
65.9	0
66	0
66.1	0
66.2	0
66.3	0
66.4	0
66.5	0
66.6	0
66.7	0
66.8	0
66.9	0
67	0
67.1	0
67.2	0
67.3	0
67.4	0
67.5	0
67.6	0
67.7	0
67.8	0
67.9	0
68	0
68.1	0
68.2	0
68.3	0
68.4	0
68.5	0
68.6	0
68.7	0
68.8	0
68.9	0
69	0
69.1	0
69.2	0
69.3	0
69.4	0
69.5	0
69.6	0
69.7	0
69.8	0
69.9	0
70	0
70.1	0
70.2	0
70.3	0
70.4	0
70.5	0
70.6	0
70.7	0
70.8	0
70.9	0
71	0
71.1	0
71.2	0
71.3	0
71.4	0
71.5	0
71.6	0
71.7	0
71.8	0
71.9	0
72	0
72.1	0
72.2	0
72.3	0
72.4	0
72.5	0
72.6	0
72.7	0
72.8	0
72.9	0
73	0
73.1	0
73.2	0
73.3	0
73.4	0
73.5	0
73.6	0
73.7	0
73.8	0
73.9	0
74	0
74.1	0
74.2	0
74.3	0
74.4	0
74.5	0
74.6	0
74.7	0
74.8	0
74.9	0
75	0
75.1	0
75.2	0
75.3	0
75.4	0
75.5	0
75.6	0
75.7	0
75.8	0
75.9	0
76	0
76.1	0
76.2	0
76.3	0
76.4	0
76.5	0
76.6	0
76.7	0
76.8	0
76.9	0
77	0
77.1	0
77.2	0
77.3	0
77.4	0
77.5	0
77.6	0
77.7	0
77.8	0
77.9	0
78	0
78.1	0
78.2	0
78.3	0
78.4	0
78.5	0
78.6	0
78.7	0
78.8	0
78.9	0
79	0
79.1	0
79.2	0
79.3	0
79.4	0
79.5	0
79.6	0
79.7	0
79.8	0
79.9	0
80	0
80.1	0
80.2	0
80.3	0
80.4	0
80.5	0
80.6	0
80.7	0
80.8	0
80.9	0
81	0
81.1	0
81.2	0
81.3	0
81.4	0
81.5	0
81.6	0
81.7	0
81.8	0
81.9	0
82	0
82.1	0
82.2	0
82.3	0
82.4	0
82.5	0
82.6	0
82.7	0
82.8	0
82.9	0
83	0
83.1	0
83.2	0
83.3	0
83.4	0
83.5	0
83.6	0
83.7	0
83.8	0
83.9	0
84	0
84.1	0
84.2	0
84.3	0
84.4	0
84.5	0
84.6	0
84.7	0
84.8	0
84.9	0
85	0
85.1	0
85.2	0
85.3	0
85.4	0
85.5	0
85.6	0
85.7	0
85.8	0
85.9	0
86	0
86.1	0
86.2	0
86.3	0
86.4	0
86.5	0
86.6	0
86.7	0
86.8	0
86.9	0
87	0
87.1	0
87.2	0
87.3	0
87.4	0
87.5	0
87.6	0
87.7	0
87.8	0
87.9	0
88	0
88.1	0
88.2	0
88.3	0
88.4	0
88.5	0
88.6	0
88.7	0
88.8	0
88.9	0
89	0
89.1	0
89.2	0
89.3	0
89.4	0
89.5	0
89.6	0
89.7	0
89.8	0
89.9	0
90	0
90.1	0
90.2	0
90.3	0
90.4	0
90.5	0
90.6	0
90.7	0
90.8	0
90.9	0
91	0
91.1	0
91.2	0
91.3	0
91.4	0
91.5	0
91.6	0
91.7	0
91.8	0
91.9	0
92	0
92.1	0
92.2	0
92.3	0
92.4	0
92.5	0
92.6	0
92.7	0
92.8	0
92.9	0
93	0
93.1	0
93.2	0
93.3	0
93.4	0
93.5	0
93.6	0
93.7	0
93.8	0
93.9	0
94	0
94.1	0
94.2	0
94.3	0
94.4	0
94.5	0
94.6	0
94.7	0
94.8	0
94.9	0
95	0
95.1	0
95.2	0
95.3	0
95.4	0
95.5	0
95.6	0
95.7	0
95.8	0
95.9	0
96	0
96.1	0
96.2	0
96.3	0
96.4	0
96.5	0
96.6	0
96.7	0
96.8	0
96.9	0
97	0
97.1	0
97.2	0
97.3	0
97.4	0
97.5	0
97.6	0
97.7	0
97.8	0
97.9	0
98	0
98.1	0
98.2	0
98.3	0
98.4	0
98.5	0
98.6	0
98.7	0
98.8	0
98.9	0
99	0
99.1	0
99.2	0
99.3	0
99.4	0
99.5	0
99.6	0
99.7	0
99.8	0
99.9	0
100	0
100.1	0.007525
100.2	0.01435
100.3	0.020525
100.4	0.0268
100.5	0.033375
100.6	0.04035
100.7	0.04685
100.8	0.052575
100.9	0.0592
101	0.065125
101.1	0.07135
101.2	0.07735
101.3	0.082375
101.4	0.087525
101.5	0.093175
101.6	0.0985
101.7	0.103825
101.8	0.1089
101.9	0.113525
102	0.11905
102.1	0.1242
102.2	0.1291
102.3	0.133875
102.4	0.137825
102.5	0.141975
102.6	0.146125
102.7	0.14995
102.8	0.1538
102.9	0.158175
103	0.1631
103.1	0.1673
103.2	0.171575
103.3	0.1753
103.4	0.179475
103.5	0.18285
103.6	0.1862
103.7	0.189575
103.8	0.1925
103.9	0.195525
104	0.1988
104.1	0.2022
104.2	0.204925
104.3	0.207925
104.4	0.21055
104.5	0.213875
104.6	0.21695
104.7	0.22
104.8	0.22215
104.9	0.224475
105	0.227225
105.1	0.23
105.2	0.2328
105.3	0.2349
105.4	0.238
105.5	0.240275
105.6	0.2415
105.7	0.244
105.8	0.24625
105.9	0.249075
106	0.250725
106.1	0.252425
106.2	0.2544
106.3	0.25575
106.4	0.2572
106.5	0.2583
106.6	0.260225
106.7	0.262125
106.8	0.26415
106.9	0.26515
107	0.2669
107.1	0.2686
107.2	0.27
107.3	0.271975
107.4	0.27325
107.5	0.2749
107.6	0.27625
107.7	0.27795
107.8	0.27915
107.9	0.27935
108	0.27985
108.1	0.281475
108.2	0.282125
108.3	0.283225
108.4	0.284325
108.5	0.285675
108.6	0.286425
108.7	0.28785
108.8	0.28905
108.9	0.289675
109	0.290275
109.1	0.29075
109.2	0.291875
109.3	0.2924
109.4	0.293375
109.5	0.294425
109.6	0.296125
109.7	0.296625
109.8	0.2978
109.9	0.298525
110	0.299725
110.1	0.30015
110.2	0.300475
110.3	0.300875
110.4	0.301775
110.5	0.3022
110.6	0.30285
110.7	0.303225
110.8	0.3041
110.9	0.3043
111	0.305575
111.1	0.306275
111.2	0.3069
111.3	0.3074
111.4	0.308725
111.5	0.308775
111.6	0.309425
111.7	0.31035
111.8	0.311125
111.9	0.312075
112	0.312175
112.1	0.313175
112.2	0.314475
112.3	0.31475
112.4	0.31525
112.5	0.315925
112.6	0.31695
112.7	0.3169
112.8	0.316975
112.9	0.317725
113	0.31845
113.1	0.3184
113.2	0.3187
113.3	0.319225
113.4	0.3196
113.5	0.32005
113.6	0.319625
113.7	0.319775
113.8	0.320175
113.9	0.321075
114	0.321275
114.1	0.321925
114.2	0.322475
114.3	0.322925
114.4	0.323025
114.5	0.323
114.6	0.323525
114.7	0.3244
114.8	0.3245
114.9	0.3256
115	0.32655
115.1	0.326625
115.2	0.326575
115.3	0.3274
115.4	0.3286
115.5	0.328475
115.6	0.3288
115.7	0.32985
115.8	0.330375
115.9	0.331375
116	0.332475
116.1	0.333025
116.2	0.333825
116.3	0.33405
116.4	0.33405
116.5	0.3345
116.6	0.335225
116.7	0.3358
116.8	0.334925
116.9	0.33555
117	0.3354
117.1	0.335875
117.2	0.335975
117.3	0.336275
117.4	0.33635
117.5	0.3364
117.6	0.336825
117.7	0.337175
117.8	0.3379
117.9	0.337575
118	0.337925
118.1	0.33865
118.2	0.338875
118.3	0.3393
118.4	0.339825
118.5	0.339675
118.6	0.339
118.7	0.3393
118.8	0.339225
118.9	0.339725
119	0.339425
119.1	0.340175
119.2	0.340175
119.3	0.340525
119.4	0.340925
119.5	0.3408
119.6	0.34155
119.7	0.3414
119.8	0.3415
119.9	0.3415
120	0.341775
120.1	0.342075
120.2	0.341975
120.3	0.34215
120.4	0.341225
120.5	0.341725
120.6	0.34215
120.7	0.342675
120.8	0.343075
120.9	0.342875
121	0.3428
121.1	0.34235
121.2	0.342875
121.3	0.342925
121.4	0.34315
121.5	0.3426
121.6	0.34365
121.7	0.343625
121.8	0.344
121.9	0.3439
122	0.34395
122.1	0.34445
122.2	0.344325
122.3	0.344225
122.4	0.34425
122.5	0.3443
122.6	0.3442
122.7	0.344775
122.8	0.34415
122.9	0.344
123	0.343925
123.1	0.344475
123.2	0.3443
123.3	0.344475
123.4	0.3455
123.5	0.345975
123.6	0.346775
123.7	0.3462
123.8	0.34635
123.9	0.34565
124	0.345275
124.1	0.3459
124.2	0.34575
124.3	0.346225
124.4	0.34665
124.5	0.347
124.6	0.347725
124.7	0.3481
124.8	0.34805
124.9	0.348675
125	0.348375
125.1	0.34855
125.2	0.3481
125.3	0.34765
125.4	0.34805
125.5	0.347625
125.6	0.34795
125.7	0.34805
125.8	0.3481
125.9	0.348125
126	0.3487
126.1	0.34925
126.2	0.34875
126.3	0.3483
126.4	0.348775
126.5	0.349075
126.6	0.3491
126.7	0.3487
126.8	0.34835
126.9	0.348875
127	0.3485
127.1	0.349225
127.2	0.3494
127.3	0.34965
127.4	0.34975
127.5	0.3492
127.6	0.349
127.7	0.3494
127.8	0.349475
127.9	0.350175
128	0.350275
128.1	0.350575
128.2	0.350525
128.3	0.350325
128.4	0.3509
128.5	0.35115
128.6	0.350775
128.7	0.350525
128.8	0.350975
128.9	0.350625
129	0.35095
129.1	0.351275
129.2	0.3517
129.3	0.35135
129.4	0.351075
129.5	0.350925
129.6	0.35095
129.7	0.3513
129.8	0.351175
129.9	0.35175
130	0.351675
130.1	0.352625
130.2	0.353525
130.3	0.3534
130.4	0.3537
130.5	0.3536
130.6	0.354075
130.7	0.354325
130.8	0.35465
130.9	0.35425
131	0.354875
131.1	0.35505
131.2	0.35495
131.3	0.35415
131.4	0.3548
131.5	0.355375
131.6	0.355675
131.7	0.355525
131.8	0.35525
131.9	0.3557
132	0.355975
132.1	0.356075
132.2	0.356175
132.3	0.3567
132.4	0.355925
132.5	0.355925
132.6	0.356275
132.7	0.35705
132.8	0.35745
132.9	0.358075
133	0.358875
133.1	0.358475
133.2	0.3583
133.3	0.358125
133.4	0.357825
133.5	0.358425
133.6	0.358175
133.7	0.35805
133.8	0.358375
133.9	0.358525
134	0.358525
134.1	0.358075
134.2	0.35865
134.3	0.35835
134.4	0.358775
134.5	0.3589
134.6	0.359075
134.7	0.359475
134.8	0.3591
134.9	0.35925
135	0.359725
135.1	0.360475
135.2	0.3612
135.3	0.360725
135.4	0.361925
135.5	0.36185
135.6	0.36155
135.7	0.362725
135.8	0.3623
135.9	0.3625
136	0.361975
136.1	0.36215
136.2	0.361975
136.3	0.36155
136.4	0.361775
136.5	0.361875
136.6	0.362025
136.7	0.362825
136.8	0.3625
136.9	0.3633
137	0.36425
137.1	0.363925
137.2	0.3636
137.3	0.363925
137.4	0.364225
137.5	0.36445
137.6	0.363975
137.7	0.364025
137.8	0.364325
137.9	0.36375
138	0.3633
138.1	0.36385
138.2	0.364475
138.3	0.365175
138.4	0.36435
138.5	0.364675
138.6	0.3641
138.7	0.363975
138.8	0.363925
138.9	0.364075
139	0.3645
139.1	0.364425
139.2	0.364425
139.3	0.364725
139.4	0.3646
139.5	0.3641
139.6	0.3645
139.7	0.36515
139.8	0.3658
139.9	0.36585
140	0.366075
140.1	0.366225
140.2	0.366325
140.3	0.365875
140.4	0.366325
140.5	0.366425
140.6	0.367175
140.7	0.3673
140.8	0.3672
140.9	0.36705
141	0.366475
141.1	0.366425
141.2	0.36615
141.3	0.366225
141.4	0.365725
141.5	0.36655
141.6	0.3672
141.7	0.367975
141.8	0.3674
141.9	0.36775
142	0.368475
142.1	0.36875
142.2	0.3684
142.3	0.368575
142.4	0.369
142.5	0.369825
142.6	0.37005
142.7	0.3696
142.8	0.369325
142.9	0.3688
143	0.368225
143.1	0.3682
143.2	0.367225
143.3	0.36725
143.4	0.36705
143.5	0.367975
143.6	0.3677
143.7	0.368
143.8	0.368275
143.9	0.36745
144	0.3671
144.1	0.367425
144.2	0.367675
144.3	0.367975
144.4	0.36755
144.5	0.36785
144.6	0.367675
144.7	0.36735
144.8	0.36745
144.9	0.366725
145	0.366875
145.1	0.366875
145.2	0.3671
145.3	0.3678
145.4	0.3678
145.5	0.36855
145.6	0.368175
145.7	0.368375
145.8	0.36815
145.9	0.367825
146	0.368
146.1	0.368475
146.2	0.369025
146.3	0.36955
146.4	0.369725
146.5	0.37025
146.6	0.37065
146.7	0.37115
146.8	0.371475
146.9	0.3716
147	0.372275
147.1	0.372775
147.2	0.372475
147.3	0.37285
147.4	0.372825
147.5	0.372375
147.6	0.3723
147.7	0.3724
147.8	0.37165
147.9	0.37165
148	0.3718
148.1	0.371875
148.2	0.37215
148.3	0.373175
148.4	0.3733
148.5	0.3739
148.6	0.374525
148.7	0.374375
148.8	0.373425
148.9	0.374425
149	0.374525
149.1	0.373925
149.2	0.37365
149.3	0.3733
149.4	0.373275
149.5	0.3734
149.6	0.3733
149.7	0.3738
149.8	0.373375
149.9	0.373775
150	0.3737
150.1	0.37315
150.2	0.373375
150.3	0.37355
150.4	0.374375
150.5	0.37495
150.6	0.3747
150.7	0.374825
150.8	0.375025
150.9	0.375775
151	0.375675
151.1	0.37605
151.2	0.37665
151.3	0.376875
151.4	0.37735
151.5	0.37755
151.6	0.3779
151.7	0.378325
151.8	0.378525
151.9	0.379425
152	0.3797
152.1	0.3792
152.2	0.379225
152.3	0.37925
152.4	0.379125
152.5	0.3798
152.6	0.37995
152.7	0.3798
152.8	0.37975
152.9	0.38075
153	0.38065
153.1	0.380625
153.2	0.38085
153.3	0.380675
153.4	0.3806
153.5	0.38115
153.6	0.380325
153.7	0.38035
153.8	0.3804
153.9	0.379875
154	0.37955
154.1	0.379725
154.2	0.379925
154.3	0.379225
154.4	0.378975
154.5	0.37965
154.6	0.380125
154.7	0.380375
154.8	0.3806
154.9	0.380375
155	0.379825
155.1	0.380675
155.2	0.38055
155.3	0.38035
155.4	0.38045
155.5	0.3808
155.6	0.38065
155.7	0.380675
155.8	0.381125
155.9	0.38145
156	0.38185
156.1	0.381725
156.2	0.3821
156.3	0.382225
156.4	0.381975
156.5	0.3824
156.6	0.3819
156.7	0.381775
156.8	0.381225
156.9	0.38175
157	0.381525
157.1	0.381325
157.2	0.3809
157.3	0.38055
157.4	0.380875
157.5	0.38155
157.6	0.38105
157.7	0.381275
157.8	0.381125
157.9	0.38185
158	0.3823
158.1	0.3822
158.2	0.3831
158.3	0.38315
158.4	0.383525
158.5	0.38355
158.6	0.384125
158.7	0.38385
158.8	0.38415
158.9	0.384075
159	0.383925
159.1	0.3836
159.2	0.38375
159.3	0.383875
159.4	0.384025
159.5	0.38385
159.6	0.38395
159.7	0.384525
159.8	0.38445
159.9	0.384275
160	0.383725
160.1	0.383575
160.2	0.3836
160.3	0.383675
160.4	0.383325
160.5	0.38375
160.6	0.383875
160.7	0.384125
160.8	0.383725
160.9	0.3848
161	0.384575
161.1	0.38405
161.2	0.384675
161.3	0.38475
161.4	0.384975
161.5	0.3847
161.6	0.385575
161.7	0.385475
161.8	0.384525
161.9	0.384125
162	0.3839
162.1	0.384025
162.2	0.3832
162.3	0.3829
162.4	0.38305
162.5	0.3831
162.6	0.382675
162.7	0.382925
162.8	0.383175
162.9	0.38345
163	0.38395
163.1	0.383575
163.2	0.384175
163.3	0.3846
163.4	0.3838
163.5	0.384
163.6	0.383875
163.7	0.38355
163.8	0.38375
163.9	0.383575
164	0.38375
164.1	0.3832
164.2	0.38375
164.3	0.3836
164.4	0.384375
164.5	0.38415
164.6	0.383675
164.7	0.384075
164.8	0.384225
164.9	0.383375
165	0.383
165.1	0.38305
165.2	0.383525
165.3	0.384
165.4	0.38345
165.5	0.383575
165.6	0.384125
165.7	0.38435
165.8	0.3843
165.9	0.38495
166	0.384475
166.1	0.3841
166.2	0.384175
166.3	0.38445
166.4	0.38415
166.5	0.384125
166.6	0.384225
166.7	0.38405
166.8	0.384375
166.9	0.384625
167	0.38455
167.1	0.38455
167.2	0.3842
167.3	0.384875
167.4	0.38505
167.5	0.385925
167.6	0.3867
167.7	0.385825
167.8	0.38555
167.9	0.3856
168	0.386275
168.1	0.3865
168.2	0.387
168.3	0.387
168.4	0.38755
168.5	0.3871
168.6	0.386475
168.7	0.386625
168.8	0.386725
168.9	0.3862
169	0.3864
169.1	0.387275
169.2	0.387825
169.3	0.387375
169.4	0.38815
169.5	0.38785
169.6	0.388225
169.7	0.3877
169.8	0.3871
169.9	0.387625
170	0.38865
170.1	0.389075
170.2	0.389225
170.3	0.388775
170.4	0.3891
170.5	0.38895
170.6	0.388975
170.7	0.388925
170.8	0.388475
170.9	0.3885
171	0.387975
171.1	0.3885
171.2	0.388425
171.3	0.3887
171.4	0.389125
171.5	0.389625
171.6	0.390425
171.7	0.389875
171.8	0.3897
171.9	0.3901
172	0.39005
172.1	0.3899
172.2	0.390325
172.3	0.390475
172.4	0.391
172.5	0.39145
172.6	0.390725
172.7	0.391
172.8	0.39095
172.9	0.3908
173	0.391225
173.1	0.391425
173.2	0.39105
173.3	0.3915
173.4	0.391125
173.5	0.391025
173.6	0.3907
173.7	0.39065
173.8	0.390875
173.9	0.390575
174	0.390125
174.1	0.3905
174.2	0.3905
174.3	0.39095
174.4	0.391075
174.5	0.391475
174.6	0.3911
174.7	0.3907
174.8	0.390525
174.9	0.3896
175	0.390475
175.1	0.3904
175.2	0.38985
175.3	0.390375
175.4	0.39035
175.5	0.3901
175.6	0.3896
175.7	0.390925
175.8	0.39155
175.9	0.39155
176	0.39135
176.1	0.39135
176.2	0.39145
176.3	0.391725
176.4	0.3921
176.5	0.391475
176.6	0.391975
176.7	0.39205
176.8	0.39215
176.9	0.392675
177	0.393025
177.1	0.393525
177.2	0.393525
177.3	0.393325
177.4	0.392925
177.5	0.39365
177.6	0.394025
177.7	0.393925
177.8	0.394
177.9	0.3939
178	0.393825
178.1	0.394025
178.2	0.394375
178.3	0.393975
178.4	0.393975
178.5	0.3939
178.6	0.3934
178.7	0.393025
178.8	0.3926
178.9	0.392625
179	0.392575
179.1	0.393
179.2	0.393
179.3	0.39365
179.4	0.39365
179.5	0.3932
179.6	0.393625
179.7	0.3938
179.8	0.393675
179.9	0.3942
180	0.394275
180.1	0.39405
180.2	0.394775
180.3	0.394625
180.4	0.39495
180.5	0.39525
180.6	0.395575
180.7	0.395625
180.8	0.395825
180.9	0.3956
181	0.395575
181.1	0.3959
181.2	0.3958
181.3	0.39525
181.4	0.39605
181.5	0.39595
181.6	0.395925
181.7	0.395875
181.8	0.394875
181.9	0.395525
182	0.395375
182.1	0.395575
182.2	0.39515
182.3	0.394875
182.4	0.394625
182.5	0.3944
182.6	0.39475
182.7	0.3948
182.8	0.39505
182.9	0.3954
183	0.3959
183.1	0.396275
183.2	0.3958
183.3	0.395925
183.4	0.3959
183.5	0.396075
183.6	0.396425
183.7	0.396775
183.8	0.3974
183.9	0.3973
184	0.397325
184.1	0.39755
184.2	0.397675
184.3	0.397225
184.4	0.39735
184.5	0.397025
184.6	0.397375
184.7	0.3982
184.8	0.39825
184.9	0.398025
185	0.397975
185.1	0.398125
185.2	0.39865
185.3	0.398525
185.4	0.3983
185.5	0.398475
185.6	0.39835
185.7	0.398375
185.8	0.39815
185.9	0.397975
186	0.3972
186.1	0.39625
186.2	0.39635
186.3	0.39605
186.4	0.396125
186.5	0.396475
186.6	0.39695
186.7	0.39705
186.8	0.397325
186.9	0.39745
187	0.39815
187.1	0.39775
187.2	0.398475
187.3	0.398225
187.4	0.39825
187.5	0.39885
187.6	0.3985
187.7	0.3989
187.8	0.3989
187.9	0.398925
188	0.398775
188.1	0.3982
188.2	0.3983
188.3	0.398375
188.4	0.39805
188.5	0.3986
188.6	0.39945
188.7	0.40055
188.8	0.400325
188.9	0.399825
189	0.3995
189.1	0.399275
189.2	0.399025
189.3	0.39975
189.4	0.400475
189.5	0.400175
189.6	0.4008
189.7	0.4009
189.8	0.4007
189.9	0.400825
190	0.401125
190.1	0.401375
190.2	0.401925
190.3	0.402125
190.4	0.402475
190.5	0.402425
190.6	0.4031
190.7	0.402475
190.8	0.40265
190.9	0.40235
191	0.4031
191.1	0.402825
191.2	0.4019
191.3	0.4027
191.4	0.40245
191.5	0.402475
191.6	0.403475
191.7	0.403675
191.8	0.4036
191.9	0.4038
192	0.403775
192.1	0.403425
192.2	0.403925
192.3	0.4037
192.4	0.40345
192.5	0.403225
192.6	0.40345
192.7	0.403325
192.8	0.403775
192.9	0.4046
193	0.40535
193.1	0.4051
193.2	0.405575
193.3	0.4058
193.4	0.4056
193.5	0.4056
193.6	0.406
193.7	0.4056
193.8	0.405275
193.9	0.4049
194	0.405575
194.1	0.406
194.2	0.40575
194.3	0.405525
194.4	0.406025
194.5	0.4052
194.6	0.4058
194.7	0.405225
194.8	0.40475
194.9	0.4046
195	0.404625
195.1	0.4047
195.2	0.405925
195.3	0.40635
195.4	0.40625
195.5	0.406075
195.6	0.40635
195.7	0.4067
195.8	0.407025
195.9	0.4066
196	0.406725
196.1	0.4067
196.2	0.40655
196.3	0.406275
196.4	0.405625
196.5	0.4061
196.6	0.406
196.7	0.40615
196.8	0.40605
196.9	0.405875
197	0.405975
197.1	0.4054
197.2	0.4056
197.3	0.405275
197.4	0.40565
197.5	0.4053
197.6	0.4054
197.7	0.40555
197.8	0.40625
197.9	0.4062
198	0.40625
198.1	0.406
198.2	0.405425
198.3	0.40615
198.4	0.40585
198.5	0.4058
198.6	0.406225
198.7	0.407025
198.8	0.407025
198.9	0.40745
199	0.407
199.1	0.4067
199.2	0.407025
199.3	0.407375
199.4	0.40725
199.5	0.4066
199.6	0.40645
199.7	0.406625
199.8	0.4063
199.9	0.405775
200	0.405775
[truncated: 14,000 more rows]
