# Supplementary material for: Bayesian inference of kinetic schemes for ion channels by Kalman filtering
Source: eLife journal article supplement (doi:10.7554/elife.62714), 2022-05-04
Supplement: fig4-data12 [file 1_Sim_N_20000_Strom_MW_0.125M.xlsx]

## Sheet: Tabelle1
0.1	0
0.2	0
0.3	0
0.4	0
0.5	0
0.6	0
0.7	0
0.8	0
0.9	0
1	0
1.1	0
1.2	0
1.3	0
1.4	0
1.5	0
1.6	0
1.7	0
1.8	0
1.9	0
2	0
2.1	0
2.2	0
2.3	0
2.4	0
2.5	0
2.6	0
2.7	0
2.8	0
2.9	0
3	0
3.1	0
3.2	0
3.3	0
3.4	0
3.5	0
3.6	0
3.7	0
3.8	0
3.9	0
4	0
4.1	0
4.2	0
4.3	0
4.4	0
4.5	0
4.6	0
4.7	0
4.8	0
4.9	0
5	0
5.1	0
5.2	0
5.3	0
5.4	0
5.5	0
5.6	0
5.7	0
5.8	0
5.9	0
6	0
6.1	0
6.2	0
6.3	0
6.4	0
6.5	0
6.6	0
6.7	0
6.8	0
6.9	0
7	0
7.1	0
7.2	0
7.3	0
7.4	0
7.5	0
7.6	0
7.7	0
7.8	0
7.9	0
8	0
8.1	0
8.2	0
8.3	0
8.4	0
8.5	0
8.6	0
8.7	0
8.8	0
8.9	0
9	0
9.1	0
9.2	0
9.3	0
9.4	0
9.5	0
9.6	0
9.7	0
9.8	0
9.9	0
10	0
10.1	0
10.2	0
10.3	0
10.4	0
10.5	0
10.6	0
10.7	0
10.8	0
10.9	0
11	0
11.1	0
11.2	0
11.3	0
11.4	0
11.5	0
11.6	0
11.7	0
11.8	0
11.9	0
12	0
12.1	0
12.2	0
12.3	0
12.4	0
12.5	0
12.6	0
12.7	0
12.8	0
12.9	0
13	0
13.1	0
13.2	0
13.3	0
13.4	0
13.5	0
13.6	0
13.7	0
13.8	0
13.9	0
14	0
14.1	0
14.2	0
14.3	0
14.4	0
14.5	0
14.6	0
14.7	0
14.8	0
14.9	0
15	0
15.1	0
15.2	0
15.3	0
15.4	0
15.5	0
15.6	0
15.7	0
15.8	0
15.9	0
16	0
16.1	0
16.2	0
16.3	0
16.4	0
16.5	0
16.6	0
16.7	0
16.8	0
16.9	0
17	0
17.1	0
17.2	0
17.3	0
17.4	0
17.5	0
17.6	0
17.7	0
17.8	0
17.9	0
18	0
18.1	0
18.2	0
18.3	0
18.4	0
18.5	0
18.6	0
18.7	0
18.8	0
18.9	0
19	0
19.1	0
19.2	0
19.3	0
19.4	0
19.5	0
19.6	0
19.7	0
19.8	0
19.9	0
20	0
20.1	0
20.2	0
20.3	0
20.4	0
20.5	0
20.6	0
20.7	0
20.8	0
20.9	0
21	0
21.1	0
21.2	0
21.3	0
21.4	0
21.5	0
21.6	0
21.7	0
21.8	0
21.9	0
22	0
22.1	0
22.2	0
22.3	0
22.4	0
22.5	0
22.6	0
22.7	0
22.8	0
22.9	0
23	0
23.1	0
23.2	0
23.3	0
23.4	0
23.5	0
23.6	0
23.7	0
23.8	0
23.9	0
24	0
24.1	0
24.2	0
24.3	0
24.4	0
24.5	0
24.6	0
24.7	0
24.8	0
24.9	0
25	0
25.1	0
25.2	0
25.3	0
25.4	0
25.5	0
25.6	0
25.7	0
25.8	0
25.9	0
26	0
26.1	0
26.2	0
26.3	0
26.4	0
26.5	0
26.6	0
26.7	0
26.8	0
26.9	0
27	0
27.1	0
27.2	0
27.3	0
27.4	0
27.5	0
27.6	0
27.7	0
27.8	0
27.9	0
28	0
28.1	0
28.2	0
28.3	0
28.4	0
28.5	0
28.6	0
28.7	0
28.8	0
28.9	0
29	0
29.1	0
29.2	0
29.3	0
29.4	0
29.5	0
29.6	0
29.7	0
29.8	0
29.9	0
30	0
30.1	0
30.2	0
30.3	0
30.4	0
30.5	0
30.6	0
30.7	0
30.8	0
30.9	0
31	0
31.1	0
31.2	0
31.3	0
31.4	0
31.5	0
31.6	0
31.7	0
31.8	0
31.9	0
32	0
32.1	0
32.2	0
32.3	0
32.4	0
32.5	0
32.6	0
32.7	0
32.8	0
32.9	0
33	0
33.1	0
33.2	0
33.3	0
33.4	0
33.5	0
33.6	0
33.7	0
33.8	0
33.9	0
34	0
34.1	0
34.2	0
34.3	0
34.4	0
34.5	0
34.6	0
34.7	0
34.8	0
34.9	0
35	0
35.1	0
35.2	0
35.3	0
35.4	0
35.5	0
35.6	0
35.7	0
35.8	0
35.9	0
36	0
36.1	0
36.2	0
36.3	0
36.4	0
36.5	0
36.6	0
36.7	0
36.8	0
36.9	0
37	0
37.1	0
37.2	0
37.3	0
37.4	0
37.5	0
37.6	0
37.7	0
37.8	0
37.9	0
38	0
38.1	0
38.2	0
38.3	0
38.4	0
38.5	0
38.6	0
38.7	0
38.8	0
38.9	0
39	0
39.1	0
39.2	0
39.3	0
39.4	0
39.5	0
39.6	0
39.7	0
39.8	0
39.9	0
40	0
40.1	0
40.2	0
40.3	0
40.4	0
40.5	0
40.6	0
40.7	0
40.8	0
40.9	0
41	0
41.1	0
41.2	0
41.3	0
41.4	0
41.5	0
41.6	0
41.7	0
41.8	0
41.9	0
42	0
42.1	0
42.2	0
42.3	0
42.4	0
42.5	0
42.6	0
42.7	0
42.8	0
42.9	0
43	0
43.1	0
43.2	0
43.3	0
43.4	0
43.5	0
43.6	0
43.7	0
43.8	0
43.9	0
44	0
44.1	0
44.2	0
44.3	0
44.4	0
44.5	0
44.6	0
44.7	0
44.8	0
44.9	0
45	0
45.1	0
45.2	0
45.3	0
45.4	0
45.5	0
45.6	0
45.7	0
45.8	0
45.9	0
46	0
46.1	0
46.2	0
46.3	0
46.4	0
46.5	0
46.6	0
46.7	0
46.8	0
46.9	0
47	0
47.1	0
47.2	0
47.3	0
47.4	0
47.5	0
47.6	0
47.7	0
47.8	0
47.9	0
48	0
48.1	0
48.2	0
48.3	0
48.4	0
48.5	0
48.6	0
48.7	0
48.8	0
48.9	0
49	0
49.1	0
49.2	0
49.3	0
49.4	0
49.5	0
49.6	0
49.7	0
49.8	0
49.9	0
50	0
50.1	0
50.2	0
50.3	0
50.4	0
50.5	0
50.6	0
50.7	0
50.8	0
50.9	0
51	0
51.1	0
51.2	0
51.3	0
51.4	0
51.5	0
51.6	0
51.7	0
51.8	0
51.9	0
52	0
52.1	0
52.2	0
52.3	0
52.4	0
52.5	0
52.6	0
52.7	0
52.8	0
52.9	0
53	0
53.1	0
53.2	0
53.3	0
53.4	0
53.5	0
53.6	0
53.7	0
53.8	0
53.9	0
54	0
54.1	0
54.2	0
54.3	0
54.4	0
54.5	0
54.6	0
54.7	0
54.8	0
54.9	0
55	0
55.1	0
55.2	0
55.3	0
55.4	0
55.5	0
55.6	0
55.7	0
55.8	0
55.9	0
56	0
56.1	0
56.2	0
56.3	0
56.4	0
56.5	0
56.6	0
56.7	0
56.8	0
56.9	0
57	0
57.1	0
57.2	0
57.3	0
57.4	0
57.5	0
57.6	0
57.7	0
57.8	0
57.9	0
58	0
58.1	0
58.2	0
58.3	0
58.4	0
58.5	0
58.6	0
58.7	0
58.8	0
58.9	0
59	0
59.1	0
59.2	0
59.3	0
59.4	0
59.5	0
59.6	0
59.7	0
59.8	0
59.9	0
60	0
60.1	0
60.2	0
60.3	0
60.4	0
60.5	0
60.6	0
60.7	0
60.8	0
60.9	0
61	0
61.1	0
61.2	0
61.3	0
61.4	0
61.5	0
61.6	0
61.7	0
61.8	0
61.9	0
62	0
62.1	0
62.2	0
62.3	0
62.4	0
62.5	0
62.6	0
62.7	0
62.8	0
62.9	0
63	0
63.1	0
63.2	0
63.3	0
63.4	0
63.5	0
63.6	0
63.7	0
63.8	0
63.9	0
64	0
64.1	0
64.2	0
64.3	0
64.4	0
64.5	0
64.6	0
64.7	0
64.8	0
64.9	0
65	0
65.1	0
65.2	0
65.3	0
65.4	0
65.5	0
65.6	0
65.7	0
65.8	0
65.9	0
66	0
66.1	0
66.2	0
66.3	0
66.4	0
66.5	0
66.6	0
66.7	0
66.8	0
66.9	0
67	0
67.1	0
67.2	0
67.3	0
67.4	0
67.5	0
67.6	0
67.7	0
67.8	0
67.9	0
68	0
68.1	0
68.2	0
68.3	0
68.4	0
68.5	0
68.6	0
68.7	0
68.8	0
68.9	0
69	0
69.1	0
69.2	0
69.3	0
69.4	0
69.5	0
69.6	0
69.7	0
69.8	0
69.9	0
70	0
70.1	0
70.2	0
70.3	0
70.4	0
70.5	0
70.6	0
70.7	0
70.8	0
70.9	0
71	0
71.1	0
71.2	0
71.3	0
71.4	0
71.5	0
71.6	0
71.7	0
71.8	0
71.9	0
72	0
72.1	0
72.2	0
72.3	0
72.4	0
72.5	0
72.6	0
72.7	0
72.8	0
72.9	0
73	0
73.1	0
73.2	0
73.3	0
73.4	0
73.5	0
73.6	0
73.7	0
73.8	0
73.9	0
74	0
74.1	0
74.2	0
74.3	0
74.4	0
74.5	0
74.6	0
74.7	0
74.8	0
74.9	0
75	0
75.1	0
75.2	0
75.3	0
75.4	0
75.5	0
75.6	0
75.7	0
75.8	0
75.9	0
76	0
76.1	0
76.2	0
76.3	0
76.4	0
76.5	0
76.6	0
76.7	0
76.8	0
76.9	0
77	0
77.1	0
77.2	0
77.3	0
77.4	0
77.5	0
77.6	0
77.7	0
77.8	0
77.9	0
78	0
78.1	0
78.2	0
78.3	0
78.4	0
78.5	0
78.6	0
78.7	0
78.8	0
78.9	0
79	0
79.1	0
79.2	0
79.3	0
79.4	0
79.5	0
79.6	0
79.7	0
79.8	0
79.9	0
80	0
80.1	0
80.2	0
80.3	0
80.4	0
80.5	0
80.6	0
80.7	0
80.8	0
80.9	0
81	0
81.1	0
81.2	0
81.3	0
81.4	0
81.5	0
81.6	0
81.7	0
81.8	0
81.9	0
82	0
82.1	0
82.2	0
82.3	0
82.4	0
82.5	0
82.6	0
82.7	0
82.8	0
82.9	0
83	0
83.1	0
83.2	0
83.3	0
83.4	0
83.5	0
83.6	0
83.7	0
83.8	0
83.9	0
84	0
84.1	0
84.2	0
84.3	0
84.4	0
84.5	0
84.6	0
84.7	0
84.8	0
84.9	0
85	0
85.1	0
85.2	0
85.3	0
85.4	0
85.5	0
85.6	0
85.7	0
85.8	0
85.9	0
86	0
86.1	0
86.2	0
86.3	0
86.4	0
86.5	0
86.6	0
86.7	0
86.8	0
86.9	0
87	0
87.1	0
87.2	0
87.3	0
87.4	0
87.5	0
87.6	0
87.7	0
87.8	0
87.9	0
88	0
88.1	0
88.2	0
88.3	0
88.4	0
88.5	0
88.6	0
88.7	0
88.8	0
88.9	0
89	0
89.1	0
89.2	0
89.3	0
89.4	0
89.5	0
89.6	0
89.7	0
89.8	0
89.9	0
90	0
90.1	0
90.2	0
90.3	0
90.4	0
90.5	0
90.6	0
90.7	0
90.8	0
90.9	0
91	0
91.1	0
91.2	0
91.3	0
91.4	0
91.5	0
91.6	0
91.7	0
91.8	0
91.9	0
92	0
92.1	0
92.2	0
92.3	0
92.4	0
92.5	0
92.6	0
92.7	0
92.8	0
92.9	0
93	0
93.1	0
93.2	0
93.3	0
93.4	0
93.5	0
93.6	0
93.7	0
93.8	0
93.9	0
94	0
94.1	0
94.2	0
94.3	0
94.4	0
94.5	0
94.6	0
94.7	0
94.8	0
94.9	0
95	0
95.1	0
95.2	0
95.3	0
95.4	0
95.5	0
95.6	0
95.7	0
95.8	0
95.9	0
96	0
96.1	0
96.2	0
96.3	0
96.4	0
96.5	0
96.6	0
96.7	0
96.8	0
96.9	0
97	0
97.1	0
97.2	0
97.3	0
97.4	0
97.5	0
97.6	0
97.7	0
97.8	0
97.9	0
98	0
98.1	0
98.2	0
98.3	0
98.4	0
98.5	0
98.6	0
98.7	0
98.8	0
98.9	0
99	0
99.1	0
99.2	0
99.3	0
99.4	0
99.5	0
99.6	0
99.7	0
99.8	0
99.9	0
100	0
100.1	0
100.2	0
100.3	0
100.4	0
100.5	0
100.6	0
100.7	0
100.8	5e-05
100.9	5e-05
101	5e-05
101.1	5e-05
101.2	5e-05
101.3	5e-05
101.4	5e-05
101.5	5e-05
101.6	0.0001
101.7	0.00015
101.8	0.00015
101.9	0.00015
102	0.0002
102.1	0.00025
102.2	0.00035
102.3	0.00035
102.4	0.0004
102.5	0.0004
102.6	0.0005
102.7	0.0006
102.8	0.0008
102.9	0.0009
103	0.001
103.1	0.00105
103.2	0.0012
103.3	0.00125
103.4	0.00125
103.5	0.00145
103.6	0.0015
103.7	0.00155
103.8	0.00155
103.9	0.00165
104	0.0017
104.1	0.00175
104.2	0.00185
104.3	0.0019
104.4	0.00205
104.5	0.0022
104.6	0.0023
104.7	0.0023
104.8	0.0024
104.9	0.0025
105	0.00255
105.1	0.0027
105.2	0.00275
105.3	0.003
105.4	0.00315
105.5	0.00325
105.6	0.0035
105.7	0.00365
105.8	0.0037
105.9	0.0037
106	0.00375
106.1	0.0038
106.2	0.00395
106.3	0.004
106.4	0.0041
106.5	0.0042
106.6	0.0044
106.7	0.00445
106.8	0.0045
106.9	0.0046
107	0.0047
107.1	0.0048
107.2	0.00495
107.3	0.0052
107.4	0.00535
107.5	0.00545
107.6	0.0055
107.7	0.0057
107.8	0.00585
107.9	0.006
108	0.00625
108.1	0.0063
108.2	0.0064
108.3	0.0065
108.4	0.00675
108.5	0.0069
108.6	0.007
108.7	0.0071
108.8	0.00735
108.9	0.00745
109	0.0076
109.1	0.00775
109.2	0.00775
109.3	0.00815
109.4	0.00825
109.5	0.00835
109.6	0.0085
109.7	0.00865
109.8	0.00875
109.9	0.00885
110	0.009
110.1	0.00905
110.2	0.0092
110.3	0.0093
110.4	0.00955
110.5	0.00965
110.6	0.00985
110.7	0.00995
110.8	0.0102
110.9	0.0106
111	0.01065
111.1	0.0107
111.2	0.01075
111.3	0.01075
111.4	0.0109
111.5	0.0109
111.6	0.0109
111.7	0.01105
111.8	0.0114
111.9	0.0115
112	0.0116
112.1	0.0117
112.2	0.01185
112.3	0.012
112.4	0.01205
112.5	0.01215
112.6	0.0124
112.7	0.01265
112.8	0.0128
112.9	0.01275
113	0.0128
113.1	0.01305
113.2	0.01335
113.3	0.01355
113.4	0.01355
113.5	0.0136
113.6	0.0137
113.7	0.01405
113.8	0.01415
113.9	0.0143
114	0.0144
114.1	0.01455
114.2	0.01475
114.3	0.01515
114.4	0.01535
114.5	0.01555
114.6	0.01565
114.7	0.0157
114.8	0.0157
114.9	0.0162
115	0.0162
115.1	0.01655
115.2	0.01665
115.3	0.0168
115.4	0.01695
115.5	0.01715
115.6	0.0173
115.7	0.0176
115.8	0.0177
115.9	0.0179
116	0.0183
116.1	0.0183
116.2	0.01845
116.3	0.01865
116.4	0.01865
116.5	0.0189
116.6	0.01915
116.7	0.0194
116.8	0.01955
116.9	0.01975
117	0.0198
117.1	0.01995
117.2	0.02005
117.3	0.02025
117.4	0.02045
117.5	0.0207
117.6	0.0209
117.7	0.0211
117.8	0.02145
117.9	0.02155
118	0.0217
118.1	0.0217
118.2	0.02215
118.3	0.0224
118.4	0.0225
118.5	0.02265
118.6	0.02295
118.7	0.02315
118.8	0.0234
118.9	0.02355
119	0.0237
119.1	0.0238
119.2	0.0241
119.3	0.0242
119.4	0.02425
119.5	0.02435
119.6	0.0244
119.7	0.0246
119.8	0.0247
119.9	0.02485
120	0.02495
120.1	0.02505
120.2	0.02525
120.3	0.02535
120.4	0.02545
120.5	0.0257
120.6	0.02585
120.7	0.02605
120.8	0.0263
120.9	0.0266
121	0.0268
121.1	0.027
121.2	0.0271
121.3	0.02735
121.4	0.0275
121.5	0.0276
121.6	0.02755
121.7	0.0277
121.8	0.02785
121.9	0.028
122	0.02825
122.1	0.02835
122.2	0.02865
122.3	0.02895
122.4	0.029
122.5	0.0291
122.6	0.02915
122.7	0.0292
122.8	0.02925
122.9	0.02955
123	0.0298
123.1	0.02985
123.2	0.02995
123.3	0.02995
123.4	0.03
123.5	0.0301
123.6	0.0303
123.7	0.0304
123.8	0.0307
123.9	0.03095
124	0.03125
124.1	0.0313
124.2	0.03145
124.3	0.0316
124.4	0.03165
124.5	0.032
124.6	0.0321
124.7	0.0322
124.8	0.03235
124.9	0.0325
125	0.03255
125.1	0.03275
125.2	0.033
125.3	0.033
125.4	0.03325
125.5	0.03325
125.6	0.03335
125.7	0.0335
125.8	0.03345
125.9	0.03375
126	0.0339
126.1	0.03405
126.2	0.03425
126.3	0.0345
126.4	0.0348
126.5	0.03505
126.6	0.0354
126.7	0.0356
126.8	0.03575
126.9	0.0358
127	0.0361
127.1	0.0364
127.2	0.03655
127.3	0.0368
127.4	0.03695
127.5	0.0371
127.6	0.0372
127.7	0.03735
127.8	0.0376
127.9	0.03775
128	0.03785
128.1	0.0381
128.2	0.03825
128.3	0.0384
128.4	0.0386
128.5	0.0387
128.6	0.03905
128.7	0.0392
128.8	0.0393
128.9	0.03945
129	0.03975
129.1	0.0398
129.2	0.03985
129.3	0.0399
129.4	0.03995
129.5	0.04025
129.6	0.04055
129.7	0.0407
129.8	0.04085
129.9	0.041
130	0.041
130.1	0.041
130.2	0.04125
130.3	0.04145
130.4	0.0416
130.5	0.0417
130.6	0.04175
130.7	0.04185
130.8	0.04205
130.9	0.04215
131	0.0425
131.1	0.04275
131.2	0.04295
131.3	0.0432
131.4	0.04325
131.5	0.0433
131.6	0.04345
131.7	0.0436
131.8	0.0438
131.9	0.044
132	0.04415
132.1	0.0443
132.2	0.0444
132.3	0.04455
132.4	0.04475
132.5	0.04495
132.6	0.0452
132.7	0.0453
132.8	0.04565
132.9	0.04595
133	0.04625
133.1	0.0464
133.2	0.0465
133.3	0.0465
133.4	0.047
133.5	0.04705
133.6	0.04715
133.7	0.04745
133.8	0.04765
133.9	0.0477
134	0.0477
134.1	0.0479
134.2	0.04835
134.3	0.0485
134.4	0.0486
134.5	0.04865
134.6	0.0488
134.7	0.04895
134.8	0.0492
134.9	0.0493
135	0.0493
135.1	0.0494
135.2	0.0495
135.3	0.04975
135.4	0.04995
135.5	0.04995
135.6	0.05005
135.7	0.05015
135.8	0.0503
135.9	0.05055
136	0.0509
136.1	0.051
136.2	0.0512
136.3	0.05145
136.4	0.05165
136.5	0.0519
136.6	0.0519
136.7	0.052
136.8	0.05205
136.9	0.05235
137	0.0524
137.1	0.0526
137.2	0.0528
137.3	0.05295
137.4	0.053
137.5	0.0532
137.6	0.0533
137.7	0.0534
137.8	0.05355
137.9	0.05365
138	0.05375
138.1	0.05395
138.2	0.05405
138.3	0.05405
138.4	0.05415
138.5	0.0542
138.6	0.0544
138.7	0.0547
138.8	0.0548
138.9	0.05475
139	0.05485
139.1	0.05485
139.2	0.0549
139.3	0.055
139.4	0.05535
139.5	0.0555
139.6	0.0558
139.7	0.0561
139.8	0.0561
139.9	0.0563
140	0.0564
140.1	0.0564
140.2	0.05635
140.3	0.0565
140.4	0.0565
140.5	0.05665
140.6	0.0567
140.7	0.05685
140.8	0.0571
140.9	0.0573
141	0.0574
141.1	0.0575
141.2	0.05795
141.3	0.0582
141.4	0.05835
141.5	0.0585
141.6	0.0586
141.7	0.05885
141.8	0.05915
141.9	0.05925
142	0.05955
142.1	0.05955
142.2	0.05975
142.3	0.05985
142.4	0.0601
142.5	0.0602
142.6	0.06035
142.7	0.06045
142.8	0.0606
142.9	0.0606
143	0.0607
143.1	0.0607
143.2	0.0611
143.3	0.06135
143.4	0.0614
143.5	0.0614
143.6	0.06135
143.7	0.0615
143.8	0.06155
143.9	0.0617
144	0.06185
144.1	0.062
144.2	0.0623
144.3	0.0624
144.4	0.06265
144.5	0.06285
144.6	0.06305
144.7	0.06315
144.8	0.0632
144.9	0.063
145	0.06325
145.1	0.06345
145.2	0.06365
145.3	0.06375
145.4	0.0639
145.5	0.06405
145.6	0.06405
145.7	0.064
145.8	0.06415
145.9	0.06415
146	0.06425
146.1	0.06425
146.2	0.0644
146.3	0.0643
146.4	0.06445
146.5	0.06445
146.6	0.06465
146.7	0.0648
146.8	0.06475
146.9	0.0647
147	0.0649
147.1	0.065
147.2	0.06495
147.3	0.065
147.4	0.06505
147.5	0.06505
147.6	0.0653
147.7	0.0653
147.8	0.0655
147.9	0.0655
148	0.06555
148.1	0.0657
148.2	0.06585
148.3	0.06605
148.4	0.06625
148.5	0.0665
148.6	0.06665
148.7	0.06685
148.8	0.06705
148.9	0.0671
149	0.0673
149.1	0.0675
149.2	0.0678
149.3	0.0681
149.4	0.06805
149.5	0.06825
149.6	0.06835
149.7	0.06845
149.8	0.0686
149.9	0.0686
150	0.06875
150.1	0.06895
150.2	0.069
150.3	0.0692
150.4	0.0693
150.5	0.06955
150.6	0.06955
150.7	0.0697
150.8	0.06965
150.9	0.07
151	0.07015
151.1	0.07
151.2	0.07005
151.3	0.07025
151.4	0.07045
151.5	0.0706
151.6	0.07065
151.7	0.0707
151.8	0.0709
151.9	0.07095
152	0.0709
152.1	0.0711
152.2	0.0711
152.3	0.0714
152.4	0.07155
152.5	0.0716
152.6	0.07185
152.7	0.07175
152.8	0.07165
152.9	0.07175
153	0.07195
153.1	0.07205
153.2	0.0724
153.3	0.07235
153.4	0.0725
153.5	0.0726
153.6	0.07265
153.7	0.07265
153.8	0.07255
153.9	0.0728
154	0.07275
154.1	0.0728
154.2	0.0731
154.3	0.0733
154.4	0.0734
154.5	0.0734
154.6	0.07355
154.7	0.0736
154.8	0.0738
154.9	0.074
155	0.0741
155.1	0.07405
155.2	0.07405
155.3	0.0741
155.4	0.07435
155.5	0.0744
155.6	0.0746
155.7	0.0746
155.8	0.0747
155.9	0.0749
156	0.07505
156.1	0.0751
156.2	0.0754
156.3	0.0755
156.4	0.07545
156.5	0.0756
156.6	0.0757
156.7	0.07585
156.8	0.07605
156.9	0.07625
157	0.07625
157.1	0.07645
157.2	0.0768
157.3	0.0769
157.4	0.07685
157.5	0.077
157.6	0.077
157.7	0.0772
157.8	0.07735
157.9	0.0775
158	0.0777
158.1	0.078
158.2	0.07815
158.3	0.0786
158.4	0.07885
158.5	0.07895
158.6	0.07895
158.7	0.07895
158.8	0.0791
158.9	0.07935
159	0.0796
159.1	0.07975
159.2	0.0798
159.3	0.08005
159.4	0.08015
159.5	0.08035
159.6	0.0804
159.7	0.08035
159.8	0.0805
159.9	0.0805
160	0.08065
160.1	0.08065
160.2	0.0807
160.3	0.0809
160.4	0.081
160.5	0.0811
160.6	0.08115
160.7	0.08115
160.8	0.0814
160.9	0.0817
161	0.0819
161.1	0.08185
161.2	0.0819
161.3	0.08195
161.4	0.0821
161.5	0.08215
161.6	0.08215
161.7	0.0824
161.8	0.0822
161.9	0.0821
162	0.0822
162.1	0.08225
162.2	0.0823
162.3	0.08245
162.4	0.08275
162.5	0.08285
162.6	0.083
162.7	0.08305
162.8	0.08315
162.9	0.0834
163	0.08345
163.1	0.08335
163.2	0.0835
163.3	0.0835
163.4	0.08355
163.5	0.08355
163.6	0.0837
163.7	0.084
163.8	0.08415
163.9	0.0844
164	0.0845
164.1	0.08465
164.2	0.0846
164.3	0.08465
164.4	0.0848
164.5	0.0848
164.6	0.08485
164.7	0.0849
164.8	0.08505
164.9	0.0853
165	0.0856
165.1	0.08565
165.2	0.08565
165.3	0.0857
165.4	0.08585
165.5	0.08605
165.6	0.0863
165.7	0.0865
165.8	0.0865
165.9	0.0864
166	0.0865
166.1	0.0868
166.2	0.0871
166.3	0.0872
166.4	0.08745
166.5	0.0875
166.6	0.0874
166.7	0.08745
166.8	0.08765
166.9	0.0877
167	0.0879
167.1	0.0879
167.2	0.0881
167.3	0.08825
167.4	0.08835
167.5	0.08865
167.6	0.0888
167.7	0.0889
167.8	0.0891
167.9	0.0893
168	0.0894
168.1	0.08955
168.2	0.0895
168.3	0.08955
168.4	0.08985
168.5	0.0899
168.6	0.09
168.7	0.0901
168.8	0.09025
168.9	0.0903
169	0.0903
169.1	0.0906
169.2	0.09055
169.3	0.0906
169.4	0.0909
169.5	0.0911
169.6	0.0912
169.7	0.0913
169.8	0.09135
169.9	0.09145
170	0.09135
170.1	0.0915
170.2	0.09185
170.3	0.0918
170.4	0.09205
170.5	0.0921
170.6	0.09195
170.7	0.09195
170.8	0.092
170.9	0.09215
171	0.0922
171.1	0.09245
171.2	0.09265
171.3	0.0926
171.4	0.0926
171.5	0.09255
171.6	0.0926
171.7	0.09275
171.8	0.09265
171.9	0.09275
172	0.09315
172.1	0.09325
172.2	0.09335
172.3	0.0935
172.4	0.0937
172.5	0.09375
172.6	0.09385
172.7	0.09385
172.8	0.09385
172.9	0.09385
173	0.0941
173.1	0.0942
173.2	0.0943
173.3	0.0944
173.4	0.09465
173.5	0.0947
173.6	0.0947
173.7	0.0949
173.8	0.0948
173.9	0.095
174	0.09495
174.1	0.09505
174.2	0.09525
174.3	0.0954
174.4	0.09545
174.5	0.0955
174.6	0.0954
174.7	0.0954
174.8	0.0955
174.9	0.09555
175	0.0957
175.1	0.0958
175.2	0.0959
175.3	0.09595
175.4	0.0961
175.5	0.0963
175.6	0.0964
175.7	0.09645
175.8	0.09645
175.9	0.0968
176	0.097
176.1	0.09715
176.2	0.097
176.3	0.09725
176.4	0.09725
176.5	0.09715
176.6	0.0973
176.7	0.0974
176.8	0.0974
176.9	0.09725
177	0.0973
177.1	0.09745
177.2	0.09775
177.3	0.0977
177.4	0.0976
177.5	0.0975
177.6	0.0977
177.7	0.09765
177.8	0.0977
177.9	0.09765
178	0.0978
178.1	0.0979
178.2	0.09795
178.3	0.09795
178.4	0.09815
178.5	0.0985
178.6	0.09865
178.7	0.0987
178.8	0.0987
178.9	0.09875
179	0.09875
179.1	0.09875
179.2	0.099
179.3	0.09905
179.4	0.0992
179.5	0.09935
179.6	0.09955
179.7	0.09975
179.8	0.09985
179.9	0.1002
180	0.10015
180.1	0.09995
180.2	0.1001
180.3	0.1001
180.4	0.1001
180.5	0.1001
180.6	0.10015
180.7	0.1004
180.8	0.10045
180.9	0.10045
181	0.10045
181.1	0.10045
181.2	0.10065
181.3	0.1007
181.4	0.10085
181.5	0.101
181.6	0.10085
181.7	0.1006
181.8	0.10055
181.9	0.10085
182	0.1011
182.1	0.1011
182.2	0.1012
182.3	0.1013
182.4	0.10135
182.5	0.1014
182.6	0.10145
182.7	0.1015
182.8	0.10165
182.9	0.10175
183	0.10165
183.1	0.10165
183.2	0.1017
183.3	0.10175
183.4	0.1019
183.5	0.102
183.6	0.10215
183.7	0.1022
183.8	0.1022
183.9	0.10215
184	0.1021
184.1	0.10215
184.2	0.10225
184.3	0.1024
184.4	0.10245
184.5	0.10265
184.6	0.1028
184.7	0.1029
184.8	0.10305
184.9	0.103
185	0.10305
185.1	0.103
185.2	0.10295
185.3	0.10315
185.4	0.10345
185.5	0.10355
185.6	0.1036
185.7	0.10375
185.8	0.1039
185.9	0.10395
186	0.1041
186.1	0.1042
186.2	0.10435
186.3	0.10435
186.4	0.1044
186.5	0.1045
186.6	0.1047
186.7	0.1047
186.8	0.105
186.9	0.105
187	0.10525
187.1	0.1053
187.2	0.10525
187.3	0.1054
187.4	0.10535
187.5	0.10545
187.6	0.10545
187.7	0.1054
187.8	0.10535
187.9	0.10545
188	0.1057
188.1	0.10585
188.2	0.10595
188.3	0.10605
188.4	0.10605
188.5	0.10615
188.6	0.1063
188.7	0.1064
188.8	0.10655
188.9	0.1066
189	0.10675
189.1	0.1069
189.2	0.1068
189.3	0.1069
189.4	0.1069
189.5	0.107
189.6	0.1072
189.7	0.1072
189.8	0.1073
189.9	0.10725
190	0.1073
190.1	0.1072
190.2	0.10735
190.3	0.1075
190.4	0.10775
190.5	0.1079
190.6	0.1079
190.7	0.108
190.8	0.1082
190.9	0.10835
191	0.10835
191.1	0.10855
191.2	0.1085
191.3	0.10865
191.4	0.1086
191.5	0.109
191.6	0.10925
191.7	0.1094
191.8	0.1096
191.9	0.1097
192	0.10985
192.1	0.1101
192.2	0.11015
192.3	0.11015
192.4	0.10995
192.5	0.11005
192.6	0.11015
192.7	0.11035
192.8	0.1103
192.9	0.1105
193	0.11035
193.1	0.11025
193.2	0.11025
193.3	0.1104
193.4	0.11045
193.5	0.11065
193.6	0.111
193.7	0.11115
193.8	0.11115
193.9	0.11105
194	0.111
194.1	0.1111
194.2	0.11115
194.3	0.1113
194.4	0.1114
194.5	0.11145
194.6	0.1115
194.7	0.1116
194.8	0.1115
194.9	0.11155
195	0.11165
195.1	0.1117
195.2	0.11165
195.3	0.11225
195.4	0.1123
195.5	0.11245
195.6	0.11245
195.7	0.1126
195.8	0.1126
195.9	0.11275
196	0.11265
196.1	0.1126
196.2	0.1127
196.3	0.11285
196.4	0.1129
196.5	0.11275
196.6	0.1127
196.7	0.1127
196.8	0.1126
196.9	0.11285
197	0.1131
197.1	0.1133
197.2	0.11335
197.3	0.1133
197.4	0.11335
197.5	0.1135
197.6	0.1135
197.7	0.1136
197.8	0.1137
197.9	0.1138
198	0.1138
198.1	0.11405
198.2	0.11405
198.3	0.11395
198.4	0.11405
198.5	0.11405
198.6	0.1139
198.7	0.1141
198.8	0.1142
198.9	0.1145
199	0.1145
199.1	0.11475
199.2	0.11495
199.3	0.1149
199.4	0.115
199.5	0.115
199.6	0.11525
199.7	0.11545
199.8	0.11555
199.9	0.11565
200	0.1159
[truncated: 14,000 more rows]
