# Supplementary material for: Bayesian inference of kinetic schemes for ion channels by Kalman filtering
Source: eLife journal article supplement (doi:10.7554/elife.62714), 2022-05-04
Supplement: fig4-data12 [file 1_Sim_N_50000_Fluor_MW_0.125M.xlsx]

## Sheet: 0.125 M
0.1	0
0.2	0
0.3	0
0.4	0
0.5	0
0.6	0
0.7	0
0.8	0
0.9	0
1	0
1.1	0
1.2	0
1.3	0
1.4	0
1.5	0
1.6	0
1.7	0
1.8	0
1.9	0
2	0
2.1	0
2.2	0
2.3	0
2.4	0
2.5	0
2.6	0
2.7	0
2.8	0
2.9	0
3	0
3.1	0
3.2	0
3.3	0
3.4	0
3.5	0
3.6	0
3.7	0
3.8	0
3.9	0
4	0
4.1	0
4.2	0
4.3	0
4.4	0
4.5	0
4.6	0
4.7	0
4.8	0
4.9	0
5	0
5.1	0
5.2	0
5.3	0
5.4	0
5.5	0
5.6	0
5.7	0
5.8	0
5.9	0
6	0
6.1	0
6.2	0
6.3	0
6.4	0
6.5	0
6.6	0
6.7	0
6.8	0
6.9	0
7	0
7.1	0
7.2	0
7.3	0
7.4	0
7.5	0
7.6	0
7.7	0
7.8	0
7.9	0
8	0
8.1	0
8.2	0
8.3	0
8.4	0
8.5	0
8.6	0
8.7	0
8.8	0
8.9	0
9	0
9.1	0
9.2	0
9.3	0
9.4	0
9.5	0
9.6	0
9.7	0
9.8	0
9.9	0
10	0
10.1	0
10.2	0
10.3	0
10.4	0
10.5	0
10.6	0
10.7	0
10.8	0
10.9	0
11	0
11.1	0
11.2	0
11.3	0
11.4	0
11.5	0
11.6	0
11.7	0
11.8	0
11.9	0
12	0
12.1	0
12.2	0
12.3	0
12.4	0
12.5	0
12.6	0
12.7	0
12.8	0
12.9	0
13	0
13.1	0
13.2	0
13.3	0
13.4	0
13.5	0
13.6	0
13.7	0
13.8	0
13.9	0
14	0
14.1	0
14.2	0
14.3	0
14.4	0
14.5	0
14.6	0
14.7	0
14.8	0
14.9	0
15	0
15.1	0
15.2	0
15.3	0
15.4	0
15.5	0
15.6	0
15.7	0
15.8	0
15.9	0
16	0
16.1	0
16.2	0
16.3	0
16.4	0
16.5	0
16.6	0
16.7	0
16.8	0
16.9	0
17	0
17.1	0
17.2	0
17.3	0
17.4	0
17.5	0
17.6	0
17.7	0
17.8	0
17.9	0
18	0
18.1	0
18.2	0
18.3	0
18.4	0
18.5	0
18.6	0
18.7	0
18.8	0
18.9	0
19	0
19.1	0
19.2	0
19.3	0
19.4	0
19.5	0
19.6	0
19.7	0
19.8	0
19.9	0
20	0
20.1	0
20.2	0
20.3	0
20.4	0
20.5	0
20.6	0
20.7	0
20.8	0
20.9	0
21	0
21.1	0
21.2	0
21.3	0
21.4	0
21.5	0
21.6	0
21.7	0
21.8	0
21.9	0
22	0
22.1	0
22.2	0
22.3	0
22.4	0
22.5	0
22.6	0
22.7	0
22.8	0
22.9	0
23	0
23.1	0
23.2	0
23.3	0
23.4	0
23.5	0
23.6	0
23.7	0
23.8	0
23.9	0
24	0
24.1	0
24.2	0
24.3	0
24.4	0
24.5	0
24.6	0
24.7	0
24.8	0
24.9	0
25	0
25.1	0
25.2	0
25.3	0
25.4	0
25.5	0
25.6	0
25.7	0
25.8	0
25.9	0
26	0
26.1	0
26.2	0
26.3	0
26.4	0
26.5	0
26.6	0
26.7	0
26.8	0
26.9	0
27	0
27.1	0
27.2	0
27.3	0
27.4	0
27.5	0
27.6	0
27.7	0
27.8	0
27.9	0
28	0
28.1	0
28.2	0
28.3	0
28.4	0
28.5	0
28.6	0
28.7	0
28.8	0
28.9	0
29	0
29.1	0
29.2	0
29.3	0
29.4	0
29.5	0
29.6	0
29.7	0
29.8	0
29.9	0
30	0
30.1	0
30.2	0
30.3	0
30.4	0
30.5	0
30.6	0
30.7	0
30.8	0
30.9	0
31	0
31.1	0
31.2	0
31.3	0
31.4	0
31.5	0
31.6	0
31.7	0
31.8	0
31.9	0
32	0
32.1	0
32.2	0
32.3	0
32.4	0
32.5	0
32.6	0
32.7	0
32.8	0
32.9	0
33	0
33.1	0
33.2	0
33.3	0
33.4	0
33.5	0
33.6	0
33.7	0
33.8	0
33.9	0
34	0
34.1	0
34.2	0
34.3	0
34.4	0
34.5	0
34.6	0
34.7	0
34.8	0
34.9	0
35	0
35.1	0
35.2	0
35.3	0
35.4	0
35.5	0
35.6	0
35.7	0
35.8	0
35.9	0
36	0
36.1	0
36.2	0
36.3	0
36.4	0
36.5	0
36.6	0
36.7	0
36.8	0
36.9	0
37	0
37.1	0
37.2	0
37.3	0
37.4	0
37.5	0
37.6	0
37.7	0
37.8	0
37.9	0
38	0
38.1	0
38.2	0
38.3	0
38.4	0
38.5	0
38.6	0
38.7	0
38.8	0
38.9	0
39	0
39.1	0
39.2	0
39.3	0
39.4	0
39.5	0
39.6	0
39.7	0
39.8	0
39.9	0
40	0
40.1	0
40.2	0
40.3	0
40.4	0
40.5	0
40.6	0
40.7	0
40.8	0
40.9	0
41	0
41.1	0
41.2	0
41.3	0
41.4	0
41.5	0
41.6	0
41.7	0
41.8	0
41.9	0
42	0
42.1	0
42.2	0
42.3	0
42.4	0
42.5	0
42.6	0
42.7	0
42.8	0
42.9	0
43	0
43.1	0
43.2	0
43.3	0
43.4	0
43.5	0
43.6	0
43.7	0
43.8	0
43.9	0
44	0
44.1	0
44.2	0
44.3	0
44.4	0
44.5	0
44.6	0
44.7	0
44.8	0
44.9	0
45	0
45.1	0
45.2	0
45.3	0
45.4	0
45.5	0
45.6	0
45.7	0
45.8	0
45.9	0
46	0
46.1	0
46.2	0
46.3	0
46.4	0
46.5	0
46.6	0
46.7	0
46.8	0
46.9	0
47	0
47.1	0
47.2	0
47.3	0
47.4	0
47.5	0
47.6	0
47.7	0
47.8	0
47.9	0
48	0
48.1	0
48.2	0
48.3	0
48.4	0
48.5	0
48.6	0
48.7	0
48.8	0
48.9	0
49	0
49.1	0
49.2	0
49.3	0
49.4	0
49.5	0
49.6	0
49.7	0
49.8	0
49.9	0
50	0
50.1	0
50.2	0
50.3	0
50.4	0
50.5	0
50.6	0
50.7	0
50.8	0
50.9	0
51	0
51.1	0
51.2	0
51.3	0
51.4	0
51.5	0
51.6	0
51.7	0
51.8	0
51.9	0
52	0
52.1	0
52.2	0
52.3	0
52.4	0
52.5	0
52.6	0
52.7	0
52.8	0
52.9	0
53	0
53.1	0
53.2	0
53.3	0
53.4	0
53.5	0
53.6	0
53.7	0
53.8	0
53.9	0
54	0
54.1	0
54.2	0
54.3	0
54.4	0
54.5	0
54.6	0
54.7	0
54.8	0
54.9	0
55	0
55.1	0
55.2	0
55.3	0
55.4	0
55.5	0
55.6	0
55.7	0
55.8	0
55.9	0
56	0
56.1	0
56.2	0
56.3	0
56.4	0
56.5	0
56.6	0
56.7	0
56.8	0
56.9	0
57	0
57.1	0
57.2	0
57.3	0
57.4	0
57.5	0
57.6	0
57.7	0
57.8	0
57.9	0
58	0
58.1	0
58.2	0
58.3	0
58.4	0
58.5	0
58.6	0
58.7	0
58.8	0
58.9	0
59	0
59.1	0
59.2	0
59.3	0
59.4	0
59.5	0
59.6	0
59.7	0
59.8	0
59.9	0
60	0
60.1	0
60.2	0
60.3	0
60.4	0
60.5	0
60.6	0
60.7	0
60.8	0
60.9	0
61	0
61.1	0
61.2	0
61.3	0
61.4	0
61.5	0
61.6	0
61.7	0
61.8	0
61.9	0
62	0
62.1	0
62.2	0
62.3	0
62.4	0
62.5	0
62.6	0
62.7	0
62.8	0
62.9	0
63	0
63.1	0
63.2	0
63.3	0
63.4	0
63.5	0
63.6	0
63.7	0
63.8	0
63.9	0
64	0
64.1	0
64.2	0
64.3	0
64.4	0
64.5	0
64.6	0
64.7	0
64.8	0
64.9	0
65	0
65.1	0
65.2	0
65.3	0
65.4	0
65.5	0
65.6	0
65.7	0
65.8	0
65.9	0
66	0
66.1	0
66.2	0
66.3	0
66.4	0
66.5	0
66.6	0
66.7	0
66.8	0
66.9	0
67	0
67.1	0
67.2	0
67.3	0
67.4	0
67.5	0
67.6	0
67.7	0
67.8	0
67.9	0
68	0
68.1	0
68.2	0
68.3	0
68.4	0
68.5	0
68.6	0
68.7	0
68.8	0
68.9	0
69	0
69.1	0
69.2	0
69.3	0
69.4	0
69.5	0
69.6	0
69.7	0
69.8	0
69.9	0
70	0
70.1	0
70.2	0
70.3	0
70.4	0
70.5	0
70.6	0
70.7	0
70.8	0
70.9	0
71	0
71.1	0
71.2	0
71.3	0
71.4	0
71.5	0
71.6	0
71.7	0
71.8	0
71.9	0
72	0
72.1	0
72.2	0
72.3	0
72.4	0
72.5	0
72.6	0
72.7	0
72.8	0
72.9	0
73	0
73.1	0
73.2	0
73.3	0
73.4	0
73.5	0
73.6	0
73.7	0
73.8	0
73.9	0
74	0
74.1	0
74.2	0
74.3	0
74.4	0
74.5	0
74.6	0
74.7	0
74.8	0
74.9	0
75	0
75.1	0
75.2	0
75.3	0
75.4	0
75.5	0
75.6	0
75.7	0
75.8	0
75.9	0
76	0
76.1	0
76.2	0
76.3	0
76.4	0
76.5	0
76.6	0
76.7	0
76.8	0
76.9	0
77	0
77.1	0
77.2	0
77.3	0
77.4	0
77.5	0
77.6	0
77.7	0
77.8	0
77.9	0
78	0
78.1	0
78.2	0
78.3	0
78.4	0
78.5	0
78.6	0
78.7	0
78.8	0
78.9	0
79	0
79.1	0
79.2	0
79.3	0
79.4	0
79.5	0
79.6	0
79.7	0
79.8	0
79.9	0
80	0
80.1	0
80.2	0
80.3	0
80.4	0
80.5	0
80.6	0
80.7	0
80.8	0
80.9	0
81	0
81.1	0
81.2	0
81.3	0
81.4	0
81.5	0
81.6	0
81.7	0
81.8	0
81.9	0
82	0
82.1	0
82.2	0
82.3	0
82.4	0
82.5	0
82.6	0
82.7	0
82.8	0
82.9	0
83	0
83.1	0
83.2	0
83.3	0
83.4	0
83.5	0
83.6	0
83.7	0
83.8	0
83.9	0
84	0
84.1	0
84.2	0
84.3	0
84.4	0
84.5	0
84.6	0
84.7	0
84.8	0
84.9	0
85	0
85.1	0
85.2	0
85.3	0
85.4	0
85.5	0
85.6	0
85.7	0
85.8	0
85.9	0
86	0
86.1	0
86.2	0
86.3	0
86.4	0
86.5	0
86.6	0
86.7	0
86.8	0
86.9	0
87	0
87.1	0
87.2	0
87.3	0
87.4	0
87.5	0
87.6	0
87.7	0
87.8	0
87.9	0
88	0
88.1	0
88.2	0
88.3	0
88.4	0
88.5	0
88.6	0
88.7	0
88.8	0
88.9	0
89	0
89.1	0
89.2	0
89.3	0
89.4	0
89.5	0
89.6	0
89.7	0
89.8	0
89.9	0
90	0
90.1	0
90.2	0
90.3	0
90.4	0
90.5	0
90.6	0
90.7	0
90.8	0
90.9	0
91	0
91.1	0
91.2	0
91.3	0
91.4	0
91.5	0
91.6	0
91.7	0
91.8	0
91.9	0
92	0
92.1	0
92.2	0
92.3	0
92.4	0
92.5	0
92.6	0
92.7	0
92.8	0
92.9	0
93	0
93.1	0
93.2	0
93.3	0
93.4	0
93.5	0
93.6	0
93.7	0
93.8	0
93.9	0
94	0
94.1	0
94.2	0
94.3	0
94.4	0
94.5	0
94.6	0
94.7	0
94.8	0
94.9	0
95	0
95.1	0
95.2	0
95.3	0
95.4	0
95.5	0
95.6	0
95.7	0
95.8	0
95.9	0
96	0
96.1	0
96.2	0
96.3	0
96.4	0
96.5	0
96.6	0
96.7	0
96.8	0
96.9	0
97	0
97.1	0
97.2	0
97.3	0
97.4	0
97.5	0
97.6	0
97.7	0
97.8	0
97.9	0
98	0
98.1	0
98.2	0
98.3	0
98.4	0
98.5	0
98.6	0
98.7	0
98.8	0
98.9	0
99	0
99.1	0
99.2	0
99.3	0
99.4	0
99.5	0
99.6	0
99.7	0
99.8	0
99.9	0
100	0
100.1	0.00748
100.2	0.01445
100.3	0.02118
100.4	0.02799
100.5	0.0347
100.6	0.04138
100.7	0.04772
100.8	0.0539
100.9	0.06008
101	0.06614
101.1	0.07217
101.2	0.07772
101.3	0.08336
101.4	0.08914
101.5	0.09496
101.6	0.09989
101.7	0.10536
101.8	0.11087
101.9	0.11537
102	0.12064
102.1	0.12585
102.2	0.13096
102.3	0.13505
102.4	0.13949
102.5	0.14363
102.6	0.14753
102.7	0.15187
102.8	0.15593
102.9	0.1599
103	0.16453
103.1	0.1687
103.2	0.17256
103.3	0.17609
103.4	0.17972
103.5	0.18338
103.6	0.18688
103.7	0.19046
103.8	0.19344
103.9	0.19644
104	0.19928
104.1	0.20248
104.2	0.20542
104.3	0.20792
104.4	0.21054
104.5	0.2135
104.6	0.21598
104.7	0.21877
104.8	0.22145
104.9	0.22397
105	0.22653
105.1	0.22887
105.2	0.23188
105.3	0.23448
105.4	0.23704
105.5	0.23976
105.6	0.24161
105.7	0.24407
105.8	0.24616
105.9	0.24846
106	0.25035
106.1	0.25216
106.2	0.25404
106.3	0.25608
106.4	0.25756
106.5	0.2589
106.6	0.26063
106.7	0.26229
106.8	0.26407
106.9	0.26522
107	0.26709
107.1	0.26903
107.2	0.2703
107.3	0.27225
107.4	0.27364
107.5	0.27508
107.6	0.27669
107.7	0.2785
107.8	0.27987
107.9	0.28129
108	0.28268
108.1	0.28382
108.2	0.28469
108.3	0.28587
108.4	0.28759
108.5	0.28901
108.6	0.28984
108.7	0.29106
108.8	0.29232
108.9	0.29303
109	0.29352
109.1	0.29452
109.2	0.29557
109.3	0.29646
109.4	0.29737
109.5	0.29834
109.6	0.29997
109.7	0.30081
109.8	0.30184
109.9	0.30263
110	0.30344
110.1	0.30426
110.2	0.30456
110.3	0.30512
110.4	0.30582
110.5	0.30632
110.6	0.30702
110.7	0.30826
110.8	0.30893
110.9	0.30934
111	0.31025
111.1	0.31062
111.2	0.31174
111.3	0.31238
111.4	0.31347
111.5	0.31388
111.6	0.31454
111.7	0.31542
111.8	0.31616
111.9	0.31632
112	0.3162
112.1	0.31685
112.2	0.31769
112.3	0.31786
112.4	0.31852
112.5	0.31904
112.6	0.31956
112.7	0.31978
112.8	0.32005
112.9	0.32054
113	0.32099
113.1	0.32153
113.2	0.32201
113.3	0.32275
113.4	0.32316
113.5	0.3239
113.6	0.32421
113.7	0.32443
113.8	0.32468
113.9	0.32518
114	0.32549
114.1	0.32587
114.2	0.32637
114.3	0.3266
114.4	0.32681
114.5	0.3269
114.6	0.32712
114.7	0.32748
114.8	0.32759
114.9	0.32857
115	0.32912
115.1	0.32918
115.2	0.32948
115.3	0.33036
115.4	0.33145
115.5	0.33152
115.6	0.33206
115.7	0.33284
115.8	0.33321
115.9	0.33335
116	0.33418
116.1	0.33426
116.2	0.33439
116.3	0.33468
116.4	0.33466
116.5	0.33478
116.6	0.33529
116.7	0.33534
116.8	0.33518
116.9	0.3352
117	0.33535
117.1	0.33571
117.2	0.33602
117.3	0.33595
117.4	0.33586
117.5	0.33621
117.6	0.33635
117.7	0.33703
117.8	0.33695
117.9	0.33714
118	0.33739
118.1	0.33748
118.2	0.33748
118.3	0.33782
118.4	0.33813
118.5	0.33835
118.6	0.33839
118.7	0.33907
118.8	0.33949
118.9	0.33964
119	0.33968
119.1	0.33945
119.2	0.33931
119.3	0.3399
119.4	0.34005
119.5	0.34018
119.6	0.34055
119.7	0.34044
119.8	0.34065
119.9	0.34094
120	0.34121
120.1	0.34157
120.2	0.3418
120.3	0.34182
120.4	0.34119
120.5	0.34125
120.6	0.34184
120.7	0.34216
120.8	0.34249
120.9	0.34242
121	0.3424
121.1	0.34263
121.2	0.34265
121.3	0.34283
121.4	0.34289
121.5	0.34291
121.6	0.34327
121.7	0.34342
121.8	0.34402
121.9	0.34388
122	0.34434
122.1	0.34448
122.2	0.34439
122.3	0.34467
122.4	0.34462
122.5	0.34477
122.6	0.34475
122.7	0.34496
122.8	0.34461
122.9	0.34475
123	0.34456
123.1	0.34469
123.2	0.34482
123.3	0.3448
123.4	0.34529
123.5	0.34555
123.6	0.346
123.7	0.34572
123.8	0.34562
123.9	0.34548
124	0.34515
124.1	0.34541
124.2	0.34502
124.3	0.34539
124.4	0.34558
124.5	0.34611
124.6	0.34642
124.7	0.34673
124.8	0.34694
124.9	0.34727
125	0.34723
125.1	0.34693
125.2	0.34637
125.3	0.34628
125.4	0.34647
125.5	0.34667
125.6	0.34683
125.7	0.34707
125.8	0.3474
125.9	0.3475
126	0.34799
126.1	0.34824
126.2	0.34826
126.3	0.34805
126.4	0.34845
126.5	0.34863
126.6	0.34903
126.7	0.349
126.8	0.34859
126.9	0.34909
127	0.34919
127.1	0.34947
127.2	0.34946
127.3	0.34978
127.4	0.34999
127.5	0.34971
127.6	0.34951
127.7	0.34984
127.8	0.34984
127.9	0.34997
128	0.35022
128.1	0.35061
128.2	0.35083
128.3	0.35068
128.4	0.35113
128.5	0.35141
128.6	0.35172
128.7	0.3514
128.8	0.35159
128.9	0.35153
129	0.35207
129.1	0.35226
129.2	0.35234
129.3	0.35238
129.4	0.35234
129.5	0.3521
129.6	0.3519
129.7	0.35219
129.8	0.35226
129.9	0.35261
130	0.35276
130.1	0.35275
130.2	0.35312
130.3	0.35324
130.4	0.35362
130.5	0.35421
130.6	0.3546
130.7	0.35466
130.8	0.355
130.9	0.3551
131	0.35497
131.1	0.35506
131.2	0.35526
131.3	0.35519
131.4	0.35548
131.5	0.3562
131.6	0.35674
131.7	0.35626
131.8	0.35622
131.9	0.35657
132	0.35691
132.1	0.35678
132.2	0.35742
132.3	0.35765
132.4	0.3575
132.5	0.35758
132.6	0.35785
132.7	0.35806
132.8	0.35856
132.9	0.35899
133	0.35936
133.1	0.35915
133.2	0.35926
133.3	0.35866
133.4	0.35874
133.5	0.35909
133.6	0.35863
133.7	0.35884
133.8	0.35901
133.9	0.35903
134	0.35908
134.1	0.35851
134.2	0.35858
134.3	0.35831
134.4	0.35838
134.5	0.35816
134.6	0.35854
134.7	0.35908
134.8	0.35879
134.9	0.35854
135	0.35845
135.1	0.35889
135.2	0.3591
135.3	0.35894
135.4	0.35928
135.5	0.35915
135.6	0.35919
135.7	0.35958
135.8	0.3596
135.9	0.35961
136	0.35929
136.1	0.35987
136.2	0.35992
136.3	0.36022
136.4	0.36031
136.5	0.36054
136.6	0.36103
136.7	0.36113
136.8	0.36084
136.9	0.36102
137	0.36092
137.1	0.36101
137.2	0.36109
137.3	0.36106
137.4	0.36108
137.5	0.36165
137.6	0.36125
137.7	0.36157
137.8	0.36149
137.9	0.36131
138	0.36144
138.1	0.36165
138.2	0.36222
138.3	0.36259
138.4	0.36311
138.5	0.36293
138.6	0.36271
138.7	0.36257
138.8	0.36284
138.9	0.36298
139	0.36338
139.1	0.36339
139.2	0.36345
139.3	0.36361
139.4	0.36372
139.5	0.36367
139.6	0.36399
139.7	0.36426
139.8	0.36452
139.9	0.36503
140	0.36536
140.1	0.36542
140.2	0.36574
140.3	0.36592
140.4	0.36637
140.5	0.36647
140.6	0.36619
140.7	0.36616
140.8	0.3658
140.9	0.36583
141	0.36535
141.1	0.36552
141.2	0.3658
141.3	0.36533
141.4	0.36522
141.5	0.36542
141.6	0.36539
141.7	0.36588
141.8	0.36589
141.9	0.36609
142	0.36706
142.1	0.36726
142.2	0.36732
142.3	0.36758
142.4	0.36758
142.5	0.36797
142.6	0.36826
142.7	0.36845
142.8	0.36815
142.9	0.36824
143	0.36805
143.1	0.36785
143.2	0.36745
143.3	0.36718
143.4	0.36705
143.5	0.36722
143.6	0.36724
143.7	0.36761
143.8	0.36774
143.9	0.36775
144	0.36745
144.1	0.36749
144.2	0.36788
144.3	0.36778
144.4	0.36784
144.5	0.36798
144.6	0.36805
144.7	0.36776
144.8	0.36796
144.9	0.36816
145	0.36824
145.1	0.3684
145.2	0.36866
145.3	0.36916
145.4	0.36944
145.5	0.37
145.6	0.36987
145.7	0.37039
145.8	0.37046
145.9	0.37039
146	0.37036
146.1	0.37064
146.2	0.37089
146.3	0.37093
146.4	0.37154
146.5	0.3715
146.6	0.37189
146.7	0.37216
146.8	0.37217
146.9	0.37207
147	0.37218
147.1	0.3718
147.2	0.37154
147.3	0.37176
147.4	0.37202
147.5	0.37197
147.6	0.37221
147.7	0.37243
147.8	0.37172
147.9	0.37186
148	0.37165
148.1	0.3716
148.2	0.37141
148.3	0.37177
148.4	0.37182
148.5	0.37231
148.6	0.37267
148.7	0.37254
148.8	0.37244
148.9	0.37295
149	0.37336
149.1	0.37334
149.2	0.37327
149.3	0.37355
149.4	0.37326
149.5	0.37349
149.6	0.37357
149.7	0.37399
149.8	0.37375
149.9	0.3743
150	0.37389
150.1	0.3739
150.2	0.374
150.3	0.37402
150.4	0.37409
150.5	0.37432
150.6	0.37429
150.7	0.37455
150.8	0.37402
150.9	0.37441
151	0.37448
151.1	0.37447
151.2	0.37494
151.3	0.37501
151.4	0.37524
151.5	0.37537
151.6	0.37579
151.7	0.37595
151.8	0.37576
151.9	0.37598
152	0.37578
152.1	0.37562
152.2	0.37586
152.3	0.3761
152.4	0.3756
152.5	0.37566
152.6	0.37587
152.7	0.37598
152.8	0.37616
152.9	0.37683
153	0.37702
153.1	0.3773
153.2	0.37773
153.3	0.37746
153.4	0.37781
153.5	0.37775
153.6	0.37739
153.7	0.37734
153.8	0.3779
153.9	0.37768
154	0.37771
154.1	0.37723
154.2	0.37744
154.3	0.37722
154.4	0.37753
154.5	0.37782
154.6	0.37804
154.7	0.37838
154.8	0.37874
154.9	0.37843
155	0.37849
155.1	0.37912
155.2	0.37923
155.3	0.37918
155.4	0.37947
155.5	0.37932
155.6	0.37969
155.7	0.37945
155.8	0.37963
155.9	0.37967
156	0.37984
156.1	0.38014
156.2	0.38045
156.3	0.38098
156.4	0.38071
156.5	0.38082
156.6	0.38068
156.7	0.38111
156.8	0.38081
156.9	0.38117
157	0.38113
157.1	0.38091
157.2	0.3807
157.3	0.38065
157.4	0.38062
157.5	0.38112
157.6	0.3811
157.7	0.38082
157.8	0.3806
157.9	0.38134
158	0.3816
158.1	0.38141
158.2	0.3818
158.3	0.38178
158.4	0.38181
158.5	0.38174
158.6	0.3818
158.7	0.382
158.8	0.38201
158.9	0.38178
159	0.38184
159.1	0.38214
159.2	0.38196
159.3	0.38257
159.4	0.38267
159.5	0.38237
159.6	0.38215
159.7	0.38194
159.8	0.38192
159.9	0.38231
160	0.38205
160.1	0.38205
160.2	0.38205
160.3	0.38204
160.4	0.38183
160.5	0.38184
160.6	0.3818
160.7	0.3819
160.8	0.38158
160.9	0.38174
161	0.38132
161.1	0.3812
161.2	0.38148
161.3	0.38178
161.4	0.38187
161.5	0.38164
161.6	0.38199
161.7	0.38206
161.8	0.38179
161.9	0.38171
162	0.38177
162.1	0.38164
162.2	0.38198
162.3	0.38171
162.4	0.38157
162.5	0.38131
162.6	0.38175
162.7	0.38217
162.8	0.38269
162.9	0.38273
163	0.383
163.1	0.3835
163.2	0.38377
163.3	0.38361
163.4	0.38322
163.5	0.38321
163.6	0.38338
163.7	0.3836
163.8	0.38419
163.9	0.38418
164	0.38413
164.1	0.38434
164.2	0.38491
164.3	0.38493
164.4	0.38549
164.5	0.38561
164.6	0.38534
164.7	0.38528
164.8	0.38511
164.9	0.38457
165	0.38452
165.1	0.38467
165.2	0.38502
165.3	0.38547
165.4	0.38512
165.5	0.38532
165.6	0.38563
165.7	0.38565
165.8	0.3854
165.9	0.38561
166	0.38536
166.1	0.38532
166.2	0.38534
166.3	0.38572
166.4	0.38566
166.5	0.38596
166.6	0.38593
166.7	0.3858
166.8	0.38611
166.9	0.38638
167	0.38611
167.1	0.38628
167.2	0.38626
167.3	0.38645
167.4	0.3866
167.5	0.38688
167.6	0.38713
167.7	0.38676
167.8	0.38671
167.9	0.38687
168	0.38729
168.1	0.38759
168.2	0.38769
168.3	0.38761
168.4	0.38781
168.5	0.38782
168.6	0.38783
168.7	0.38772
168.8	0.3879
168.9	0.38762
169	0.38762
169.1	0.38821
169.2	0.3886
169.3	0.38824
169.4	0.3885
169.5	0.38823
169.6	0.38841
169.7	0.38848
169.8	0.38864
169.9	0.38883
170	0.38922
170.1	0.38943
170.2	0.38954
170.3	0.38909
170.4	0.38946
170.5	0.38956
170.6	0.38946
170.7	0.38929
170.8	0.38898
170.9	0.38917
171	0.38908
171.1	0.38936
171.2	0.38954
171.3	0.39006
171.4	0.39039
171.5	0.39056
171.6	0.39081
171.7	0.39071
171.8	0.39102
171.9	0.39125
172	0.39125
172.1	0.39093
172.2	0.39078
172.3	0.39107
172.4	0.39103
172.5	0.39174
172.6	0.3915
172.7	0.39174
172.8	0.39169
172.9	0.39116
173	0.39132
173.1	0.39126
173.2	0.39087
173.3	0.39098
173.4	0.391
173.5	0.39073
173.6	0.39067
173.7	0.39103
173.8	0.39102
173.9	0.39068
174	0.39077
174.1	0.39075
174.2	0.39084
174.3	0.39105
174.4	0.3915
174.5	0.3918
174.6	0.39169
174.7	0.39127
174.8	0.3912
174.9	0.39095
175	0.3911
175.1	0.39082
175.2	0.39081
175.3	0.39125
175.4	0.39139
175.5	0.39119
175.6	0.39082
175.7	0.39127
175.8	0.39147
175.9	0.39142
176	0.39107
176.1	0.39109
176.2	0.39117
176.3	0.39088
176.4	0.39069
176.5	0.39092
176.6	0.39139
176.7	0.39146
176.8	0.39156
176.9	0.39162
177	0.39202
177.1	0.39223
177.2	0.3919
177.3	0.39177
177.4	0.39137
177.5	0.39154
177.6	0.39194
177.7	0.39219
177.8	0.39243
177.9	0.39234
178	0.3921
178.1	0.39209
178.2	0.39219
178.3	0.39222
178.4	0.39239
178.5	0.39222
178.6	0.39281
178.7	0.39263
178.8	0.39268
178.9	0.39249
179	0.39278
179.1	0.39323
179.2	0.39313
179.3	0.39329
179.4	0.39365
179.5	0.39355
179.6	0.39382
179.7	0.39403
179.8	0.39401
179.9	0.39403
180	0.39465
180.1	0.39474
180.2	0.3951
180.3	0.39473
180.4	0.39498
180.5	0.39531
180.6	0.39559
180.7	0.39521
180.8	0.39488
180.9	0.39476
181	0.39515
181.1	0.39534
181.2	0.3954
181.3	0.39538
181.4	0.39574
181.5	0.39546
181.6	0.39538
181.7	0.39561
181.8	0.39541
181.9	0.39598
182	0.39618
182.1	0.39628
182.2	0.39628
182.3	0.39634
182.4	0.39627
182.5	0.39632
182.6	0.39679
182.7	0.39706
182.8	0.39703
182.9	0.39752
183	0.39787
183.1	0.39749
183.2	0.39757
183.3	0.39765
183.4	0.39766
183.5	0.39816
183.6	0.39797
183.7	0.39823
183.8	0.39865
183.9	0.3987
184	0.39863
184.1	0.39854
184.2	0.3985
184.3	0.39837
184.4	0.3985
184.5	0.39847
184.6	0.39856
184.7	0.39862
184.8	0.39876
184.9	0.39843
185	0.39841
185.1	0.39846
185.2	0.39841
185.3	0.3988
185.4	0.39854
185.5	0.39881
185.6	0.39875
185.7	0.39849
185.8	0.39827
185.9	0.39827
186	0.39817
186.1	0.39796
186.2	0.39812
186.3	0.39811
186.4	0.39789
186.5	0.39819
186.6	0.39833
186.7	0.39848
186.8	0.3982
186.9	0.3981
187	0.39798
187.1	0.39772
187.2	0.39836
187.3	0.39826
187.4	0.39824
187.5	0.39843
187.6	0.39839
187.7	0.39841
187.8	0.39881
187.9	0.39918
188	0.39921
188.1	0.3989
188.2	0.39898
188.3	0.39882
188.4	0.39904
188.5	0.39941
188.6	0.39996
188.7	0.40028
188.8	0.40028
188.9	0.40029
189	0.3999
189.1	0.4001
189.2	0.40055
189.3	0.40059
189.4	0.40088
189.5	0.40096
189.6	0.40115
189.7	0.4008
189.8	0.40086
189.9	0.40085
190	0.40135
190.1	0.40161
190.2	0.40189
190.3	0.40184
190.4	0.40206
190.5	0.40179
190.6	0.40196
190.7	0.40221
190.8	0.40204
190.9	0.40187
191	0.40203
191.1	0.40208
191.2	0.40153
191.3	0.40232
191.4	0.402
191.5	0.40225
191.6	0.40249
191.7	0.40247
191.8	0.40274
191.9	0.40282
192	0.40308
192.1	0.40314
192.2	0.40339
192.3	0.40317
192.4	0.40326
192.5	0.40321
192.6	0.40308
192.7	0.40292
192.8	0.40307
192.9	0.40336
193	0.40327
193.1	0.4031
193.2	0.40343
193.3	0.40336
193.4	0.4034
193.5	0.40337
193.6	0.40369
193.7	0.40358
193.8	0.4034
193.9	0.40327
194	0.40367
194.1	0.40365
194.2	0.40349
194.3	0.40327
194.4	0.4033
194.5	0.40295
194.6	0.40319
194.7	0.40338
194.8	0.40351
194.9	0.4036
195	0.4037
195.1	0.40378
195.2	0.40409
195.3	0.4042
195.4	0.40376
195.5	0.40374
195.6	0.40364
195.7	0.40427
195.8	0.40442
195.9	0.40392
196	0.40397
196.1	0.40414
196.2	0.40418
196.3	0.40419
196.4	0.40388
196.5	0.40387
196.6	0.40398
196.7	0.40397
196.8	0.40398
196.9	0.40373
197	0.40387
197.1	0.404
197.2	0.40432
197.3	0.40444
197.4	0.4048
197.5	0.40487
197.6	0.4049
197.7	0.40502
197.8	0.40516
197.9	0.40476
198	0.40482
198.1	0.40472
198.2	0.40406
198.3	0.40449
198.4	0.40476
198.5	0.40494
198.6	0.40514
198.7	0.40542
198.8	0.40571
198.9	0.40566
199	0.40523
199.1	0.40521
199.2	0.40557
199.3	0.40576
199.4	0.40561
199.5	0.40562
199.6	0.40541
199.7	0.40536
199.8	0.40544
199.9	0.40518
200	0.40519
[truncated: 14,000 more rows]
