# Supplementary material for: Bayesian inference of kinetic schemes for ion channels by Kalman filtering
Source: eLife journal article supplement (doi:10.7554/elife.62714), 2022-05-04
Supplement: fig4-data12 [file 1_Sim_N_50000_Strom_MW_0.125M.xlsx]

## Sheet: 0.125 M
0.1	0
0.2	0
0.3	0
0.4	0
0.5	0
0.6	0
0.7	0
0.8	0
0.9	0
1	0
1.1	0
1.2	0
1.3	0
1.4	0
1.5	0
1.6	0
1.7	0
1.8	0
1.9	0
2	0
2.1	0
2.2	0
2.3	0
2.4	0
2.5	0
2.6	0
2.7	0
2.8	0
2.9	0
3	0
3.1	0
3.2	0
3.3	0
3.4	0
3.5	0
3.6	0
3.7	0
3.8	0
3.9	0
4	0
4.1	0
4.2	0
4.3	0
4.4	0
4.5	0
4.6	0
4.7	0
4.8	0
4.9	0
5	0
5.1	0
5.2	0
5.3	0
5.4	0
5.5	0
5.6	0
5.7	0
5.8	0
5.9	0
6	0
6.1	0
6.2	0
6.3	0
6.4	0
6.5	0
6.6	0
6.7	0
6.8	0
6.9	0
7	0
7.1	0
7.2	0
7.3	0
7.4	0
7.5	0
7.6	0
7.7	0
7.8	0
7.9	0
8	0
8.1	0
8.2	0
8.3	0
8.4	0
8.5	0
8.6	0
8.7	0
8.8	0
8.9	0
9	0
9.1	0
9.2	0
9.3	0
9.4	0
9.5	0
9.6	0
9.7	0
9.8	0
9.9	0
10	0
10.1	0
10.2	0
10.3	0
10.4	0
10.5	0
10.6	0
10.7	0
10.8	0
10.9	0
11	0
11.1	0
11.2	0
11.3	0
11.4	0
11.5	0
11.6	0
11.7	0
11.8	0
11.9	0
12	0
12.1	0
12.2	0
12.3	0
12.4	0
12.5	0
12.6	0
12.7	0
12.8	0
12.9	0
13	0
13.1	0
13.2	0
13.3	0
13.4	0
13.5	0
13.6	0
13.7	0
13.8	0
13.9	0
14	0
14.1	0
14.2	0
14.3	0
14.4	0
14.5	0
14.6	0
14.7	0
14.8	0
14.9	0
15	0
15.1	0
15.2	0
15.3	0
15.4	0
15.5	0
15.6	0
15.7	0
15.8	0
15.9	0
16	0
16.1	0
16.2	0
16.3	0
16.4	0
16.5	0
16.6	0
16.7	0
16.8	0
16.9	0
17	0
17.1	0
17.2	0
17.3	0
17.4	0
17.5	0
17.6	0
17.7	0
17.8	0
17.9	0
18	0
18.1	0
18.2	0
18.3	0
18.4	0
18.5	0
18.6	0
18.7	0
18.8	0
18.9	0
19	0
19.1	0
19.2	0
19.3	0
19.4	0
19.5	0
19.6	0
19.7	0
19.8	0
19.9	0
20	0
20.1	0
20.2	0
20.3	0
20.4	0
20.5	0
20.6	0
20.7	0
20.8	0
20.9	0
21	0
21.1	0
21.2	0
21.3	0
21.4	0
21.5	0
21.6	0
21.7	0
21.8	0
21.9	0
22	0
22.1	0
22.2	0
22.3	0
22.4	0
22.5	0
22.6	0
22.7	0
22.8	0
22.9	0
23	0
23.1	0
23.2	0
23.3	0
23.4	0
23.5	0
23.6	0
23.7	0
23.8	0
23.9	0
24	0
24.1	0
24.2	0
24.3	0
24.4	0
24.5	0
24.6	0
24.7	0
24.8	0
24.9	0
25	0
25.1	0
25.2	0
25.3	0
25.4	0
25.5	0
25.6	0
25.7	0
25.8	0
25.9	0
26	0
26.1	0
26.2	0
26.3	0
26.4	0
26.5	0
26.6	0
26.7	0
26.8	0
26.9	0
27	0
27.1	0
27.2	0
27.3	0
27.4	0
27.5	0
27.6	0
27.7	0
27.8	0
27.9	0
28	0
28.1	0
28.2	0
28.3	0
28.4	0
28.5	0
28.6	0
28.7	0
28.8	0
28.9	0
29	0
29.1	0
29.2	0
29.3	0
29.4	0
29.5	0
29.6	0
29.7	0
29.8	0
29.9	0
30	0
30.1	0
30.2	0
30.3	0
30.4	0
30.5	0
30.6	0
30.7	0
30.8	0
30.9	0
31	0
31.1	0
31.2	0
31.3	0
31.4	0
31.5	0
31.6	0
31.7	0
31.8	0
31.9	0
32	0
32.1	0
32.2	0
32.3	0
32.4	0
32.5	0
32.6	0
32.7	0
32.8	0
32.9	0
33	0
33.1	0
33.2	0
33.3	0
33.4	0
33.5	0
33.6	0
33.7	0
33.8	0
33.9	0
34	0
34.1	0
34.2	0
34.3	0
34.4	0
34.5	0
34.6	0
34.7	0
34.8	0
34.9	0
35	0
35.1	0
35.2	0
35.3	0
35.4	0
35.5	0
35.6	0
35.7	0
35.8	0
35.9	0
36	0
36.1	0
36.2	0
36.3	0
36.4	0
36.5	0
36.6	0
36.7	0
36.8	0
36.9	0
37	0
37.1	0
37.2	0
37.3	0
37.4	0
37.5	0
37.6	0
37.7	0
37.8	0
37.9	0
38	0
38.1	0
38.2	0
38.3	0
38.4	0
38.5	0
38.6	0
38.7	0
38.8	0
38.9	0
39	0
39.1	0
39.2	0
39.3	0
39.4	0
39.5	0
39.6	0
39.7	0
39.8	0
39.9	0
40	0
40.1	0
40.2	0
40.3	0
40.4	0
40.5	0
40.6	0
40.7	0
40.8	0
40.9	0
41	0
41.1	0
41.2	0
41.3	0
41.4	0
41.5	0
41.6	0
41.7	0
41.8	0
41.9	0
42	0
42.1	0
42.2	0
42.3	0
42.4	0
42.5	0
42.6	0
42.7	0
42.8	0
42.9	0
43	0
43.1	0
43.2	0
43.3	0
43.4	0
43.5	0
43.6	0
43.7	0
43.8	0
43.9	0
44	0
44.1	0
44.2	0
44.3	0
44.4	0
44.5	0
44.6	0
44.7	0
44.8	0
44.9	0
45	0
45.1	0
45.2	0
45.3	0
45.4	0
45.5	0
45.6	0
45.7	0
45.8	0
45.9	0
46	0
46.1	0
46.2	0
46.3	0
46.4	0
46.5	0
46.6	0
46.7	0
46.8	0
46.9	0
47	0
47.1	0
47.2	0
47.3	0
47.4	0
47.5	0
47.6	0
47.7	0
47.8	0
47.9	0
48	0
48.1	0
48.2	0
48.3	0
48.4	0
48.5	0
48.6	0
48.7	0
48.8	0
48.9	0
49	0
49.1	0
49.2	0
49.3	0
49.4	0
49.5	0
49.6	0
49.7	0
49.8	0
49.9	0
50	0
50.1	0
50.2	0
50.3	0
50.4	0
50.5	0
50.6	0
50.7	0
50.8	0
50.9	0
51	0
51.1	0
51.2	0
51.3	0
51.4	0
51.5	0
51.6	0
51.7	0
51.8	0
51.9	0
52	0
52.1	0
52.2	0
52.3	0
52.4	0
52.5	0
52.6	0
52.7	0
52.8	0
52.9	0
53	0
53.1	0
53.2	0
53.3	0
53.4	0
53.5	0
53.6	0
53.7	0
53.8	0
53.9	0
54	0
54.1	0
54.2	0
54.3	0
54.4	0
54.5	0
54.6	0
54.7	0
54.8	0
54.9	0
55	0
55.1	0
55.2	0
55.3	0
55.4	0
55.5	0
55.6	0
55.7	0
55.8	0
55.9	0
56	0
56.1	0
56.2	0
56.3	0
56.4	0
56.5	0
56.6	0
56.7	0
56.8	0
56.9	0
57	0
57.1	0
57.2	0
57.3	0
57.4	0
57.5	0
57.6	0
57.7	0
57.8	0
57.9	0
58	0
58.1	0
58.2	0
58.3	0
58.4	0
58.5	0
58.6	0
58.7	0
58.8	0
58.9	0
59	0
59.1	0
59.2	0
59.3	0
59.4	0
59.5	0
59.6	0
59.7	0
59.8	0
59.9	0
60	0
60.1	0
60.2	0
60.3	0
60.4	0
60.5	0
60.6	0
60.7	0
60.8	0
60.9	0
61	0
61.1	0
61.2	0
61.3	0
61.4	0
61.5	0
61.6	0
61.7	0
61.8	0
61.9	0
62	0
62.1	0
62.2	0
62.3	0
62.4	0
62.5	0
62.6	0
62.7	0
62.8	0
62.9	0
63	0
63.1	0
63.2	0
63.3	0
63.4	0
63.5	0
63.6	0
63.7	0
63.8	0
63.9	0
64	0
64.1	0
64.2	0
64.3	0
64.4	0
64.5	0
64.6	0
64.7	0
64.8	0
64.9	0
65	0
65.1	0
65.2	0
65.3	0
65.4	0
65.5	0
65.6	0
65.7	0
65.8	0
65.9	0
66	0
66.1	0
66.2	0
66.3	0
66.4	0
66.5	0
66.6	0
66.7	0
66.8	0
66.9	0
67	0
67.1	0
67.2	0
67.3	0
67.4	0
67.5	0
67.6	0
67.7	0
67.8	0
67.9	0
68	0
68.1	0
68.2	0
68.3	0
68.4	0
68.5	0
68.6	0
68.7	0
68.8	0
68.9	0
69	0
69.1	0
69.2	0
69.3	0
69.4	0
69.5	0
69.6	0
69.7	0
69.8	0
69.9	0
70	0
70.1	0
70.2	0
70.3	0
70.4	0
70.5	0
70.6	0
70.7	0
70.8	0
70.9	0
71	0
71.1	0
71.2	0
71.3	0
71.4	0
71.5	0
71.6	0
71.7	0
71.8	0
71.9	0
72	0
72.1	0
72.2	0
72.3	0
72.4	0
72.5	0
72.6	0
72.7	0
72.8	0
72.9	0
73	0
73.1	0
73.2	0
73.3	0
73.4	0
73.5	0
73.6	0
73.7	0
73.8	0
73.9	0
74	0
74.1	0
74.2	0
74.3	0
74.4	0
74.5	0
74.6	0
74.7	0
74.8	0
74.9	0
75	0
75.1	0
75.2	0
75.3	0
75.4	0
75.5	0
75.6	0
75.7	0
75.8	0
75.9	0
76	0
76.1	0
76.2	0
76.3	0
76.4	0
76.5	0
76.6	0
76.7	0
76.8	0
76.9	0
77	0
77.1	0
77.2	0
77.3	0
77.4	0
77.5	0
77.6	0
77.7	0
77.8	0
77.9	0
78	0
78.1	0
78.2	0
78.3	0
78.4	0
78.5	0
78.6	0
78.7	0
78.8	0
78.9	0
79	0
79.1	0
79.2	0
79.3	0
79.4	0
79.5	0
79.6	0
79.7	0
79.8	0
79.9	0
80	0
80.1	0
80.2	0
80.3	0
80.4	0
80.5	0
80.6	0
80.7	0
80.8	0
80.9	0
81	0
81.1	0
81.2	0
81.3	0
81.4	0
81.5	0
81.6	0
81.7	0
81.8	0
81.9	0
82	0
82.1	0
82.2	0
82.3	0
82.4	0
82.5	0
82.6	0
82.7	0
82.8	0
82.9	0
83	0
83.1	0
83.2	0
83.3	0
83.4	0
83.5	0
83.6	0
83.7	0
83.8	0
83.9	0
84	0
84.1	0
84.2	0
84.3	0
84.4	0
84.5	0
84.6	0
84.7	0
84.8	0
84.9	0
85	0
85.1	0
85.2	0
85.3	0
85.4	0
85.5	0
85.6	0
85.7	0
85.8	0
85.9	0
86	0
86.1	0
86.2	0
86.3	0
86.4	0
86.5	0
86.6	0
86.7	0
86.8	0
86.9	0
87	0
87.1	0
87.2	0
87.3	0
87.4	0
87.5	0
87.6	0
87.7	0
87.8	0
87.9	0
88	0
88.1	0
88.2	0
88.3	0
88.4	0
88.5	0
88.6	0
88.7	0
88.8	0
88.9	0
89	0
89.1	0
89.2	0
89.3	0
89.4	0
89.5	0
89.6	0
89.7	0
89.8	0
89.9	0
90	0
90.1	0
90.2	0
90.3	0
90.4	0
90.5	0
90.6	0
90.7	0
90.8	0
90.9	0
91	0
91.1	0
91.2	0
91.3	0
91.4	0
91.5	0
91.6	0
91.7	0
91.8	0
91.9	0
92	0
92.1	0
92.2	0
92.3	0
92.4	0
92.5	0
92.6	0
92.7	0
92.8	0
92.9	0
93	0
93.1	0
93.2	0
93.3	0
93.4	0
93.5	0
93.6	0
93.7	0
93.8	0
93.9	0
94	0
94.1	0
94.2	0
94.3	0
94.4	0
94.5	0
94.6	0
94.7	0
94.8	0
94.9	0
95	0
95.1	0
95.2	0
95.3	0
95.4	0
95.5	0
95.6	0
95.7	0
95.8	0
95.9	0
96	0
96.1	0
96.2	0
96.3	0
96.4	0
96.5	0
96.6	0
96.7	0
96.8	0
96.9	0
97	0
97.1	0
97.2	0
97.3	0
97.4	0
97.5	0
97.6	0
97.7	0
97.8	0
97.9	0
98	0
98.1	0
98.2	0
98.3	0
98.4	0
98.5	0
98.6	0
98.7	0
98.8	0
98.9	0
99	0
99.1	0
99.2	0
99.3	0
99.4	0
99.5	0
99.6	0
99.7	0
99.8	0
99.9	0
100	0
100.1	0
100.2	0
100.3	0
100.4	0
100.5	0
100.6	2e-05
100.7	2e-05
100.8	4e-05
100.9	4e-05
101	4e-05
101.1	6e-05
101.2	6e-05
101.3	8e-05
101.4	8e-05
101.5	8e-05
101.6	0.0001
101.7	0.00016
101.8	0.0002
101.9	0.00022
102	0.00026
102.1	0.0003
102.2	0.00036
102.3	0.00046
102.4	0.00048
102.5	0.00054
102.6	0.00058
102.7	0.00064
102.8	0.00068
102.9	0.00076
103	0.0008
103.1	0.00084
103.2	0.00094
103.3	0.00106
103.4	0.00108
103.5	0.00126
103.6	0.00132
103.7	0.00142
103.8	0.00148
103.9	0.00154
104	0.00158
104.1	0.00162
104.2	0.00176
104.3	0.0019
104.4	0.00202
104.5	0.00214
104.6	0.00226
104.7	0.00236
104.8	0.00246
104.9	0.00252
105	0.0026
105.1	0.0027
105.2	0.00282
105.3	0.00296
105.4	0.00318
105.5	0.00326
105.6	0.00342
105.7	0.00356
105.8	0.00364
105.9	0.00372
106	0.00376
106.1	0.0038
106.2	0.00402
106.3	0.00412
106.4	0.00428
106.5	0.00444
106.6	0.00458
106.7	0.00464
106.8	0.00472
106.9	0.00486
107	0.00496
107.1	0.00502
107.2	0.00514
107.3	0.0053
107.4	0.00552
107.5	0.00566
107.6	0.00576
107.7	0.0059
107.8	0.00606
107.9	0.00624
108	0.00648
108.1	0.00662
108.2	0.0068
108.3	0.00684
108.4	0.007
108.5	0.00718
108.6	0.0073
108.7	0.00748
108.8	0.0076
108.9	0.00778
109	0.00792
109.1	0.00812
109.2	0.00824
109.3	0.0085
109.4	0.00864
109.5	0.0088
109.6	0.00896
109.7	0.0091
109.8	0.00918
109.9	0.0093
110	0.00938
110.1	0.00954
110.2	0.00966
110.3	0.00978
110.4	0.01002
110.5	0.01016
110.6	0.01026
110.7	0.0104
110.8	0.01058
110.9	0.01084
111	0.01094
111.1	0.01102
111.2	0.01116
111.3	0.0112
111.4	0.0114
111.5	0.01146
111.6	0.0116
111.7	0.01166
111.8	0.01194
111.9	0.0121
112	0.0123
112.1	0.01242
112.2	0.01258
112.3	0.01268
112.4	0.01288
112.5	0.013
112.6	0.01322
112.7	0.0134
112.8	0.0136
112.9	0.01376
113	0.0139
113.1	0.01404
113.2	0.01436
113.3	0.01448
113.4	0.01458
113.5	0.01484
113.6	0.01494
113.7	0.01512
113.8	0.01518
113.9	0.01536
114	0.01554
114.1	0.01566
114.2	0.0158
114.3	0.01606
114.4	0.01622
114.5	0.01646
114.6	0.01662
114.7	0.01682
114.8	0.01692
114.9	0.01712
115	0.01716
115.1	0.01746
115.2	0.01772
115.3	0.01786
115.4	0.01806
115.5	0.01818
115.6	0.01834
115.7	0.01864
115.8	0.01882
115.9	0.01898
116	0.01914
116.1	0.0193
116.2	0.01948
116.3	0.01972
116.4	0.01978
116.5	0.02002
116.6	0.02022
116.7	0.02038
116.8	0.02052
116.9	0.0208
117	0.02092
117.1	0.02104
117.2	0.02118
117.3	0.0213
117.4	0.0215
117.5	0.02168
117.6	0.0219
117.7	0.0221
117.8	0.02232
117.9	0.02254
118	0.02264
118.1	0.02276
118.2	0.023
118.3	0.02322
118.4	0.0234
118.5	0.02352
118.6	0.02366
118.7	0.02382
118.8	0.02396
118.9	0.0241
119	0.02414
119.1	0.02426
119.2	0.02452
119.3	0.02464
119.4	0.0248
119.5	0.02494
119.6	0.02504
119.7	0.02516
119.8	0.02538
119.9	0.02552
120	0.02566
120.1	0.02584
120.2	0.02598
120.3	0.02612
120.4	0.02632
120.5	0.02664
120.6	0.02672
120.7	0.02692
120.8	0.02718
120.9	0.02734
121	0.02756
121.1	0.02778
121.2	0.02794
121.3	0.0282
121.4	0.02832
121.5	0.02834
121.6	0.0285
121.7	0.02868
121.8	0.02884
121.9	0.02902
122	0.02912
122.1	0.02918
122.2	0.02938
122.3	0.0296
122.4	0.02964
122.5	0.02992
122.6	0.03002
122.7	0.03014
122.8	0.0303
122.9	0.03052
123	0.03066
123.1	0.03078
123.2	0.03086
123.3	0.03102
123.4	0.03114
123.5	0.03132
123.6	0.03156
123.7	0.03162
123.8	0.03184
123.9	0.032
124	0.03206
124.1	0.0323
124.2	0.0325
124.3	0.03264
124.4	0.03278
124.5	0.03302
124.6	0.03314
124.7	0.0332
124.8	0.03328
124.9	0.03348
125	0.03352
125.1	0.0336
125.2	0.03374
125.3	0.03378
125.4	0.03398
125.5	0.03406
125.6	0.03414
125.7	0.03428
125.8	0.03438
125.9	0.03456
126	0.03486
126.1	0.03502
126.2	0.03522
126.3	0.03546
126.4	0.03574
126.5	0.03588
126.6	0.0361
126.7	0.0363
126.8	0.03634
126.9	0.03638
127	0.03666
127.1	0.03682
127.2	0.03692
127.3	0.0371
127.4	0.03726
127.5	0.03746
127.6	0.0376
127.7	0.03774
127.8	0.03796
127.9	0.03802
128	0.03832
128.1	0.03844
128.2	0.03862
128.3	0.03882
128.4	0.03904
128.5	0.03916
128.6	0.03948
128.7	0.03974
128.8	0.0399
128.9	0.04006
129	0.0402
129.1	0.0403
129.2	0.04044
129.3	0.04056
129.4	0.04066
129.5	0.04096
129.6	0.04112
129.7	0.04116
129.8	0.04132
129.9	0.04154
130	0.0417
130.1	0.0417
130.2	0.04186
130.3	0.04194
130.4	0.04208
130.5	0.04218
130.6	0.04224
130.7	0.04238
130.8	0.04256
130.9	0.04268
131	0.043
131.1	0.04314
131.2	0.0433
131.3	0.04354
131.4	0.04356
131.5	0.04374
131.6	0.04392
131.7	0.04414
131.8	0.04434
131.9	0.04454
132	0.0446
132.1	0.04472
132.2	0.04478
132.3	0.04494
132.4	0.04504
132.5	0.04512
132.6	0.0454
132.7	0.0455
132.8	0.04572
132.9	0.04588
133	0.0461
133.1	0.04618
133.2	0.04628
133.3	0.0464
133.4	0.04668
133.5	0.04676
133.6	0.04694
133.7	0.0472
133.8	0.04744
133.9	0.04748
134	0.0475
134.1	0.0477
134.2	0.0479
134.3	0.04808
134.4	0.0482
134.5	0.0483
134.6	0.04838
134.7	0.04846
134.8	0.04854
134.9	0.04858
135	0.04866
135.1	0.04874
135.2	0.04894
135.3	0.04908
135.4	0.04932
135.5	0.04938
135.6	0.04954
135.7	0.04978
135.8	0.04988
135.9	0.0501
136	0.05026
136.1	0.05038
136.2	0.05046
136.3	0.05062
136.4	0.05078
136.5	0.05094
136.6	0.05096
136.7	0.05112
136.8	0.05128
136.9	0.05122
137	0.05136
137.1	0.05154
137.2	0.05172
137.3	0.05184
137.4	0.05198
137.5	0.05224
137.6	0.0524
137.7	0.05256
137.8	0.05266
137.9	0.0527
138	0.05276
138.1	0.05284
138.2	0.05294
138.3	0.05298
138.4	0.05304
138.5	0.05316
138.6	0.0534
138.7	0.05364
138.8	0.05366
138.9	0.05378
139	0.05388
139.1	0.05406
139.2	0.05418
139.3	0.05416
139.4	0.05428
139.5	0.05444
139.6	0.05468
139.7	0.05476
139.8	0.05488
139.9	0.05504
140	0.05524
140.1	0.05532
140.2	0.05536
140.3	0.0556
140.4	0.05558
140.5	0.05572
140.6	0.05588
140.7	0.05606
140.8	0.05612
140.9	0.05618
141	0.05628
141.1	0.05648
141.2	0.05666
141.3	0.05686
141.4	0.05694
141.5	0.05708
141.6	0.0572
141.7	0.05736
141.8	0.05748
141.9	0.05762
142	0.0578
142.1	0.0579
142.2	0.05808
142.3	0.05824
142.4	0.0585
142.5	0.05866
142.6	0.05874
142.7	0.05882
142.8	0.05898
142.9	0.05906
143	0.05924
143.1	0.05936
143.2	0.05956
143.3	0.05978
143.4	0.05992
143.5	0.06006
143.6	0.06004
143.7	0.0602
143.8	0.06028
143.9	0.0604
144	0.06054
144.1	0.06064
144.2	0.06078
144.3	0.0609
144.4	0.06102
144.5	0.06118
144.6	0.06136
144.7	0.06144
144.8	0.06164
144.9	0.06174
145	0.06194
145.1	0.06206
145.2	0.0622
145.3	0.06226
145.4	0.06232
145.5	0.06246
145.6	0.06258
145.7	0.06262
145.8	0.06264
145.9	0.06272
146	0.0628
146.1	0.06278
146.2	0.0629
146.3	0.06286
146.4	0.06298
146.5	0.06306
146.6	0.06328
146.7	0.06342
146.8	0.06352
146.9	0.06358
147	0.06378
147.1	0.06392
147.2	0.064
147.3	0.06406
147.4	0.0643
147.5	0.06438
147.6	0.0646
147.7	0.0647
147.8	0.0648
147.9	0.06488
148	0.06496
148.1	0.06514
148.2	0.06524
148.3	0.06532
148.4	0.06546
148.5	0.06548
148.6	0.06566
148.7	0.06582
148.8	0.06604
148.9	0.06622
149	0.06642
149.1	0.06656
149.2	0.06666
149.3	0.06694
149.4	0.06706
149.5	0.0672
149.6	0.06726
149.7	0.06742
149.8	0.06766
149.9	0.06768
150	0.06778
150.1	0.06792
150.2	0.0681
150.3	0.06828
150.4	0.06842
150.5	0.06866
150.6	0.06874
150.7	0.069
150.8	0.069
150.9	0.06924
151	0.06936
151.1	0.06948
151.2	0.06956
151.3	0.06966
151.4	0.06978
151.5	0.06994
151.6	0.07
151.7	0.07
151.8	0.07016
151.9	0.07024
152	0.07026
152.1	0.07038
152.2	0.07044
152.3	0.07062
152.4	0.07074
152.5	0.07072
152.6	0.07094
152.7	0.0709
152.8	0.071
152.9	0.07126
153	0.07136
153.1	0.07148
153.2	0.07174
153.3	0.07188
153.4	0.07212
153.5	0.07232
153.6	0.07244
153.7	0.07254
153.8	0.07266
153.9	0.07286
154	0.07286
154.1	0.073
154.2	0.07322
154.3	0.07342
154.4	0.07354
154.5	0.07362
154.6	0.07378
154.7	0.07388
154.8	0.07402
154.9	0.07422
155	0.07426
155.1	0.07436
155.2	0.07442
155.3	0.07438
155.4	0.07456
155.5	0.07476
155.6	0.07488
155.7	0.07502
155.8	0.07524
155.9	0.07536
156	0.0755
156.1	0.07566
156.2	0.07584
156.3	0.07596
156.4	0.07598
156.5	0.07612
156.6	0.07626
156.7	0.0764
156.8	0.07658
156.9	0.07672
157	0.07678
157.1	0.0769
157.2	0.07706
157.3	0.07712
157.4	0.07726
157.5	0.07732
157.6	0.07732
157.7	0.0775
157.8	0.07744
157.9	0.07756
158	0.0777
158.1	0.07794
158.2	0.078
158.3	0.07818
158.4	0.07832
158.5	0.07834
158.6	0.07836
158.7	0.0784
158.8	0.07862
158.9	0.07884
159	0.07888
159.1	0.07908
159.2	0.0791
159.3	0.07922
159.4	0.0793
159.5	0.07932
159.6	0.07942
159.7	0.07944
159.8	0.07962
159.9	0.07964
160	0.07972
160.1	0.07976
160.2	0.0799
160.3	0.07992
160.4	0.08014
160.5	0.0802
160.6	0.08046
160.7	0.08062
160.8	0.08078
160.9	0.08098
161	0.08108
161.1	0.0811
161.2	0.08112
161.3	0.08108
161.4	0.08114
161.5	0.0813
161.6	0.08136
161.7	0.08138
161.8	0.08138
161.9	0.08144
162	0.08154
162.1	0.08166
162.2	0.08174
162.3	0.08186
162.4	0.08202
162.5	0.08204
162.6	0.08214
162.7	0.08228
162.8	0.08246
162.9	0.08262
163	0.08274
163.1	0.08268
163.2	0.08284
163.3	0.0829
163.4	0.0829
163.5	0.083
163.6	0.08322
163.7	0.08338
163.8	0.08354
163.9	0.0837
164	0.0838
164.1	0.08404
164.2	0.08422
164.3	0.08426
164.4	0.0844
164.5	0.08456
164.6	0.0847
164.7	0.0848
164.8	0.08486
164.9	0.08504
165	0.08522
165.1	0.08534
165.2	0.08546
165.3	0.08544
165.4	0.08568
165.5	0.08588
165.6	0.08604
165.7	0.08626
165.8	0.0864
165.9	0.08644
166	0.08656
166.1	0.08676
166.2	0.08698
166.3	0.08694
166.4	0.08714
166.5	0.0872
166.6	0.08736
166.7	0.08736
166.8	0.08752
166.9	0.08762
167	0.08772
167.1	0.08778
167.2	0.08798
167.3	0.08804
167.4	0.088
167.5	0.08818
167.6	0.08826
167.7	0.08834
167.8	0.08852
167.9	0.08862
168	0.0888
168.1	0.08892
168.2	0.08896
168.3	0.08898
168.4	0.08906
168.5	0.08924
168.6	0.08938
168.7	0.08942
168.8	0.08954
168.9	0.08962
169	0.08966
169.1	0.08986
169.2	0.08996
169.3	0.09008
169.4	0.09016
169.5	0.09024
169.6	0.09048
169.7	0.09054
169.8	0.09078
169.9	0.09076
170	0.09088
170.1	0.09102
170.2	0.09122
170.3	0.09126
170.4	0.09132
170.5	0.09134
170.6	0.09126
170.7	0.09136
170.8	0.09146
170.9	0.09156
171	0.09164
171.1	0.09174
171.2	0.09186
171.3	0.09196
171.4	0.09206
171.5	0.09212
171.6	0.0923
171.7	0.09246
171.8	0.0925
171.9	0.09266
172	0.09288
172.1	0.09294
172.2	0.09304
172.3	0.09306
172.4	0.0932
172.5	0.09336
172.6	0.09346
172.7	0.0937
172.8	0.0938
172.9	0.0939
173	0.09404
173.1	0.09404
173.2	0.09414
173.3	0.09422
173.4	0.09432
173.5	0.09428
173.6	0.09436
173.7	0.09452
173.8	0.09458
173.9	0.09476
174	0.09476
174.1	0.09478
174.2	0.0948
174.3	0.09486
174.4	0.09486
174.5	0.09496
174.6	0.09498
174.7	0.09502
174.8	0.09496
174.9	0.09496
175	0.09492
175.1	0.09492
175.2	0.09504
175.3	0.09516
175.4	0.09524
175.5	0.09544
175.6	0.09562
175.7	0.09574
175.8	0.09584
175.9	0.09602
176	0.09604
176.1	0.09616
176.2	0.09612
176.3	0.09628
176.4	0.0964
176.5	0.09642
176.6	0.09652
176.7	0.09664
176.8	0.0967
176.9	0.09674
177	0.09688
177.1	0.09702
177.2	0.09726
177.3	0.09722
177.4	0.09732
177.5	0.09732
177.6	0.0976
177.7	0.09772
177.8	0.09792
177.9	0.09798
178	0.09806
178.1	0.09806
178.2	0.09816
178.3	0.09818
178.4	0.09836
178.5	0.09854
178.6	0.09864
178.7	0.09874
178.8	0.09876
178.9	0.0988
179	0.09882
179.1	0.09896
179.2	0.09912
179.3	0.09934
179.4	0.09946
179.5	0.09946
179.6	0.09962
179.7	0.09974
179.8	0.0999
179.9	0.10014
180	0.10018
180.1	0.10008
180.2	0.1003
180.3	0.10038
180.4	0.10056
180.5	0.10066
180.6	0.10076
180.7	0.10082
180.8	0.10088
180.9	0.1009
181	0.101
181.1	0.10106
181.2	0.10114
181.3	0.10118
181.4	0.10138
181.5	0.10152
181.6	0.10148
181.7	0.1014
181.8	0.10142
181.9	0.10168
182	0.1018
182.1	0.1019
182.2	0.102
182.3	0.10206
182.4	0.10204
182.5	0.1021
182.6	0.10224
182.7	0.10228
182.8	0.10232
182.9	0.10242
183	0.10244
183.1	0.10246
183.2	0.10268
183.3	0.10274
183.4	0.10282
183.5	0.10288
183.6	0.10288
183.7	0.10304
183.8	0.10306
183.9	0.10304
184	0.10308
184.1	0.10314
184.2	0.10328
184.3	0.10328
184.4	0.10334
184.5	0.10348
184.6	0.10366
184.7	0.10368
184.8	0.10368
184.9	0.1037
185	0.10386
185.1	0.1039
185.2	0.1039
185.3	0.10404
185.4	0.10422
185.5	0.1044
185.6	0.10452
185.7	0.10474
185.8	0.10486
185.9	0.10492
186	0.10508
186.1	0.10518
186.2	0.10532
186.3	0.1053
186.4	0.10532
186.5	0.10546
186.6	0.10568
186.7	0.1057
186.8	0.10588
186.9	0.10586
187	0.10604
187.1	0.10606
187.2	0.10606
187.3	0.10614
187.4	0.10616
187.5	0.1062
187.6	0.10626
187.7	0.10632
187.8	0.10642
187.9	0.10654
188	0.10668
188.1	0.1069
188.2	0.10702
188.3	0.10702
188.4	0.10708
188.5	0.10712
188.6	0.10728
188.7	0.10724
188.8	0.10748
188.9	0.10734
189	0.10746
189.1	0.1076
189.2	0.1076
189.3	0.1076
189.4	0.10774
189.5	0.1078
189.6	0.10788
189.7	0.10798
189.8	0.10808
189.9	0.10822
190	0.10824
190.1	0.1083
190.2	0.10844
190.3	0.10844
190.4	0.10858
190.5	0.10864
190.6	0.10868
190.7	0.10878
190.8	0.10882
190.9	0.10894
191	0.10898
191.1	0.1091
191.2	0.10914
191.3	0.1092
191.4	0.1093
191.5	0.10952
191.6	0.1097
191.7	0.10988
191.8	0.11
191.9	0.11004
192	0.11016
192.1	0.11028
192.2	0.11036
192.3	0.11038
192.4	0.11044
192.5	0.11054
192.6	0.1106
192.7	0.1107
192.8	0.1108
192.9	0.11092
193	0.11088
193.1	0.11096
193.2	0.11086
193.3	0.11094
193.4	0.111
193.5	0.11108
193.6	0.11112
193.7	0.11126
193.8	0.11124
193.9	0.11126
194	0.11124
194.1	0.11122
194.2	0.1112
194.3	0.1113
194.4	0.11136
194.5	0.1115
194.6	0.11168
194.7	0.1118
194.8	0.11188
194.9	0.11194
195	0.112
195.1	0.11212
195.2	0.11216
195.3	0.11234
195.4	0.11238
195.5	0.11256
195.6	0.1127
195.7	0.11278
195.8	0.11272
195.9	0.11288
196	0.1129
196.1	0.11286
196.2	0.1129
196.3	0.11292
196.4	0.113
196.5	0.11296
196.6	0.113
196.7	0.1131
196.8	0.1131
196.9	0.11342
197	0.11362
197.1	0.11378
197.2	0.11386
197.3	0.1139
197.4	0.11408
197.5	0.11412
197.6	0.11422
197.7	0.11424
197.8	0.1143
197.9	0.11432
198	0.1143
198.1	0.11446
198.2	0.11458
198.3	0.11468
198.4	0.11464
198.5	0.11468
198.6	0.11468
198.7	0.11482
198.8	0.11496
198.9	0.11516
199	0.11526
199.1	0.1154
199.2	0.11558
199.3	0.11562
199.4	0.11568
199.5	0.11572
199.6	0.11588
199.7	0.1161
199.8	0.11604
199.9	0.1162
200	0.11638
[truncated: 14,000 more rows]
